# Supplementary material for: Gene Signature–Based Approach Identified MEK1/2 as a Potential Target Associated With Relapse After Anti-TNFα Treatment for Crohn’s Disease
Source: PubMed Central journal article supplement — Inflamm Bowel Dis. 2018 Apr 13;24(6):1251–65. doi: 10.1093/ibd/izy079 (PMC6176896; doi:10.1093/ibd/izy079), 2018-04-13
Supplement: izy079_suppl_supplementary_file.pdf [file izy079_suppl_supplementary_file.pdf]

| ID          | GenBank   | Ac Gene.Symbo            | Entrez.Gene | Batch.1 | Ex Batch.1 | Ex Batch.1 | Ex Batch.1 | Ex Batch.1 | Bi |
|-------------|-----------|--------------------------|-------------|---------|------------|------------|------------|------------|----|
| 1007_s_at   | U48705    | DDR1 /// MII780 /// 1006 |             | 274.6   | 249.2      | 241.9      | 250.7      | 195.0      |    |
| 1053_at     | M87338    | RFC2                     | 5982        | 147.4   | 84.8       | 138.5      | 91.5       | 118.9      |    |
| 117_at      | X51757    | HSPA6                    | 3310        | 12.9    | 9.1        | 6.1        | 10.9       | 10.0       |    |
| 121_at      | X69699    | PAX8                     | 7849        | 144.1   | 87.6       | 126.2      | 109.2      | 66.7       |    |
| 1255_g_at   | L36861    | GUCA1A                   | 2978        | 3.2     | 0.7        | 2.2        | 2.1        | 0.3        |    |
| 1294_at     | L13852    | MIR5193 /// 7318 /// 100 |             | 19.8    | 12.0       | 16.1       | 14.8       | 11.0       |    |
| 1316_at     | X55005    | THRA                     | 7067        | 10.8    | 5.8        | 18.7       | 10.6       | 6.6        |    |
| 1320_at     | X79510    | PTPN21                   | 11099       | 3.2     | 1.8        | 2.4        | 2.2        | 1.0        |    |
| 1405_i_at   | M21121    | CCL5                     | 6352        | 0.3     | 0.1        | 0.8        | 0.2        | 0.3        |    |
| 1431_at     | J02843    | CYP2E1                   | 1571        | 5.0     | 6.3        | 4.9        | 8.8        | 6.0        |    |
| 1438_at     | X75208    | EPHB3                    | 2049        | 43.1    | 51.5       | 46.0       | 47.4       | 34.2       |    |
| 1487_at     | L38487    | ESRRA                    | 2101        | 147.1   | 121.3      | 156.1      | 130.5      | 126.1      |    |
| 1494_f_at   | M33318    | CYP2A6                   | 1548        | 29.7    | 15.8       | 15.8       | 13.0       | 13.2       |    |
| 1598_g_at   | L13720    | GAS6                     | 2621        | 98.3    | 65.6       | 73.7       | 77.1       | 51.5       |    |
| 160020_at   | Z48481    | MMP14                    | 4323        | 31.7    | 34.4       | 32.6       | 21.3       | 31.3       |    |
| 1729_at     | L41690    | TRADD                    | 8717        | 43.8    | 48.3       | 44.0       | 58.2       | 46.0       |    |
| 177_at      | U38545    | PLD1                     | 5337        | 8.9     | 7.0        | 4.1        | 0.9        | 4.2        |    |
| 1773_at     | L00635    | CHURC1-FNT2342 /// 100   |             | 43.1    | 39.3       | 38.3       | 35.1       | 32.1       |    |
| 179_at      | U38980    | DTX2P1-UPK441263         |             | 90.7    | 66.8       | 149.3      | 72.1       | 52.9       |    |
| 1861_at     | U66879    | BAD                      | 572         | 71.5    | 73.2       | 70.7       | 83.8       | 66.2       |    |
| 200000_s_at | NM_006445 | PRPF8                    | 10594       | 612.7   | 552.5      | 577.6      | 583.0      | 511.3      |    |
| 200001_at   | NM_001749 | CAPNS1                   | 826         | 1443.1  | 1277.4     | 1400.1     | 1520.2     | 1264.4     |    |
| 200002_at   | NM_007209 | RPL35                    | 11224       | 3296.2  | 2911.9     | 3266.3     | 3155.8     | 2982.4     |    |
| 200003_s_at | NM_000991 | MIR6805 /// 6158 /// 102 |             | 3642.6  | 3300.2     | 3834.6     | 3526.6     | 3391.7     |    |
| 200004_at   | NM_001418 | EIF4G2                   | 1982        | 1960.6  | 1509.4     | 2029.1     | 1631.9     | 1586.6     |    |
| 200005_at   | NM_003753 | EIF3D                    | 8664        | 808.3   | 794.8      | 880.3      | 812.7      | 774.9      |    |
| 200006_at   | NM_007262 | PARK7                    | 11315       | 2339.4  | 2140.9     | 2461.3     | 2208.0     | 2012.4     |    |
| 200007_at   | NM_003134 | SRP14                    | 6727        | 1302.7  | 1124.7     | 1355.5     | 1305.1     | 1147.6     |    |
| 200008_s_at | D13988    | GDI2                     | 2665        | 791.0   | 785.0      | 855.8      | 701.1      | 607.7      |    |
| 200009_at   | NM_001494 | GDI2                     | 2665        | 1003.0  | 1034.6     | 1131.3     | 974.9      | 1003.1     |    |
| 200010_at   | NM_000975 | RPL11                    | 6135        | 1806.5  | 1539.8     | 1862.6     | 1617.4     | 1384.0     |    |
| 200011_s_at | NM_001659 | ARF3                     | 377         | 553.4   | 523.8      | 566.6      | 570.7      | 426.0      |    |
| 200012_x_at | NM_000982 | RPL21 /// RP6144 /// 267 |             | 2287.8  | 1885.8     | 2367.2     | 2124.5     | 2084.1     |    |
| 200013_at   | NM_000986 | RPL24                    | 6152        | 3314.0  | 3115.9     | 3701.5     | 3281.4     | 3207.7     |    |
| 200014_s_at | NM_004500 | HNRNPC                   | 3183        | 646.7   | 586.1      | 747.9      | 600.0      | 571.2      |    |
| 200015_s_at | NM_004404 | SEPT2                    | 4735        | 502.9   | 366.7      | 443.2      | 410.6      | 345.2      |    |
| 200016_x_at | NM_002136 | HNRNPA1 ///,3178 /// 664 |             | 2805.2  | 2465.7     | 2878.5     | 2490.7     | 2322.4     |    |
| 200017_at   | NM_002954 | RPS27A                   | 6233        | 2394.0  | 1869.0     | 2442.5     | 2243.5     | 1850.8     |    |
| 200018_at   | NM_001017 | LOC10050846207 /// 853   |             | 3535.7  | 2934.8     | 3454.3     | 3081.9     | 3085.8     |    |
| 200019_s_at | NM_001997 | FAU                      | 2197        | 2798.0  | 2515.7     | 2886.3     | 2681.1     | 2575.9     |    |
| 200020_at   | NM_007375 | TARDBP                   | 23435       | 366.3   | 341.3      | 401.4      | 348.4      | 334.4      |    |
| 200021_at   | NM_005507 | CFL1                     | 1072        | 3072.8  | 2519.1     | 2980.2     | 2828.7     | 2617.4     |    |
| 200022_at   | NM_000979 | RPL18                    | 6141        | 2971.7  | 2466.8     | 2922.9     | 2907.7     | 2674.3     |    |
| 200023_s_at | NM_003754 | EIF3F                    | 8665        | 1542.2  | 1456.7     | 1653.8     | 1688.2     | 1340.0     |    |
| 200024_at   | NM_001009 | RPS5                     | 6193        | 2974.7  | 2426.9     | 3005.6     | 2825.5     | 2684.7     |    |
| 200025_s_at | NM_000988 | RPL27                    | 6155        | 3746.0  | 2863.6     | 3310.4     | 3124.7     | 2904.4     |    |
| 200026_at   | NM_000995 | RPL34                    | 6164        | 2466.0  | 2063.8     | 2615.5     | 2729.7     | 2276.4     |    |
| 200027_at   | NM_004539 | NARS                     | 4677        | 812.1   | 743.4      | 864.8      | 666.4      | 701.4      |    |
| 200028_s_at | NM_020151 | STARD7                   | 56910       | 526.6   | 429.4      | 563.4      | 447.3      | 479.1      |    |
| 200029_at   | NM_000981 | RPL19                    | 6143        | 3062.7  | 2929.8     | 3137.7     | 3077.9     | 2808.2     |    |
| 200030_s_at | NM_002635 | SLC25A3                  | 5250        | 2338.0  | 2106.7     | 2355.7     | 2152.5     | 2034.8     |    |
| 200031_s_at | NM_001015 | RPS11 /// SN6205 /// 845 |             | 3992.7  | 3421.0     | 4159.5     | 3932.6     | 3634.3     |    |

|             |           |                           |       |        |        |        |        |        |
|-------------|-----------|---------------------------|-------|--------|--------|--------|--------|--------|
| 200032_s_at | NM_000661 | RPL9                      | 6133  | 4078.4 | 3287.8 | 3968.5 | 3671.5 | 3600.8 |
| 200033_at   | NM_004396 | DDX5 /// MIF1655 /// 100  |       | 1305.9 | 978.1  | 1227.5 | 1213.1 | 1086.3 |
| 200034_s_at | NM_000970 | RPL6                      | 6128  | 2646.4 | 2059.1 | 2413.3 | 2322.2 | 2104.2 |
| 200035_at   | NM_015343 | CTDNEP1                   | 23399 | 202.7  | 225.6  | 289.1  | 115.6  | 116.0  |
| 200036_s_at | NM_007104 | RPL10A                    | 4736  | 1879.4 | 2120.0 | 2064.8 | 2050.2 | 1742.3 |
| 200037_s_at | NM_016587 | CBX3                      | 11335 | 743.9  | 474.9  | 898.8  | 601.8  | 553.4  |
| 200038_s_at | NM_000985 | C18orf32 /// 6139 /// 267 |       | 3142.9 | 2912.2 | 3475.9 | 2940.3 | 2922.1 |
| 200039_s_at | NM_002794 | PSMB2                     | 5690  | 1037.4 | 982.1  | 1169.9 | 1005.1 | 864.0  |
| 200040_at   | NM_006559 | KHDRBS1                   | 10657 | 558.8  | 523.7  | 673.9  | 571.3  | 506.2  |
| 200041_s_at | NM_004640 | ATP6V1G2-D 7919 /// 692   |       | 1134.1 | 1061.8 | 1199.2 | 1066.4 | 944.2  |
| 200042_at   | NM_014306 | RTCB                      | 51493 | 257.0  | 299.5  | 302.7  | 281.0  | 243.6  |
| 200043_at   | NM_004450 | ERH                       | 2079  | 1675.0 | 1426.6 | 1874.4 | 1633.6 | 1458.8 |
| 200044_at   | NM_003769 | GATC /// SRS8683 /// 283  |       | 1001.8 | 1086.5 | 1131.2 | 960.5  | 906.5  |
| 200045_at   | NM_001090 | ABCF1                     | 23    | 206.0  | 165.0  | 199.3  | 170.4  | 171.9  |
| 200046_at   | NM_001344 | DAD1                      | 1603  | 951.2  | 976.4  | 1080.8 | 1038.6 | 841.3  |
| 200047_s_at | NM_003403 | YY1                       | 7528  | 513.4  | 409.7  | 570.3  | 436.3  | 409.4  |
| 200048_s_at | NM_006694 | JTB                       | 10899 | 1172.6 | 996.3  | 1175.8 | 1008.3 | 924.5  |
| 200049_at   | NM_007067 | KAT7                      | 11143 | 132.8  | 144.4  | 127.1  | 118.9  | 109.8  |
| 200050_at   | NM_007145 | ZNF146                    | 7705  | 195.6  | 151.3  | 261.4  | 200.8  | 204.8  |
| 200051_at   | NM_005146 | SART1                     | 9092  | 94.0   | 82.6   | 81.7   | 85.0   | 83.6   |
| 200052_s_at | NM_004515 | ILF2                      | 3608  | 911.6  | 814.3  | 987.2  | 890.4  | 767.9  |
| 200053_at   | NM_004890 | SPAG7                     | 9552  | 189.1  | 185.0  | 193.0  | 183.2  | 124.3  |
| 200054_at   | NM_003904 | ZPR1                      | 8882  | 74.3   | 71.4   | 97.4   | 78.1   | 79.8   |
| 200055_at   | NM_006284 | TAF10                     | 6881  | 873.2  | 932.7  | 1035.5 | 986.5  | 769.8  |
| 200056_s_at | NM_006333 | C1D                       | 10438 | 72.2   | 47.0   | 83.4   | 55.6   | 53.0   |
| 200057_s_at | NM_007363 | NONO                      | 4841  | 1717.8 | 1528.9 | 1659.9 | 1618.3 | 1408.9 |
| 200058_s_at | BC001417  | LOC1019292.23020 /// 10   |       | 519.7  | 485.5  | 502.7  | 481.7  | 418.2  |
| 200059_s_at | BC001360  | RHOA                      | 387   | 1964.2 | 1826.7 | 1888.3 | 1809.7 | 1507.3 |
| 200060_s_at | BC001659  | RNPS1                     | 10921 | 1024.8 | 783.2  | 1020.8 | 830.5  | 843.4  |
| 200061_s_at | BC000523  | RPS24                     | 6229  | 2878.5 | 2517.7 | 2994.2 | 2692.9 | 2444.3 |
| 200062_s_at | L05095    | RPL30                     | 6156  | 3640.6 | 2992.9 | 3782.2 | 3497.0 | 3115.7 |
| 200063_s_at | BC002398  | NPM1                      | 4869  | 2445.1 | 2057.9 | 2715.7 | 2241.1 | 2231.2 |
| 200064_at   | AF275719  | HSP90AB1                  | 3326  | 2114.9 | 1912.5 | 2230.6 | 2047.5 | 1940.3 |
| 200065_s_at | AF052179  | ARF1 /// MIR375 /// 1005  |       | 1413.4 | 1715.1 | 1787.8 | 1618.1 | 1472.9 |
| 200066_at   | AF182645  | IK                        | 3550  | 290.4  | 243.9  | 263.8  | 256.7  | 240.5  |
| 200067_x_at | AL078596  | SNX3                      | 8724  | 278.4  | 253.9  | 285.3  | 261.4  | 213.5  |
| 200068_s_at | M94859    | CANX                      | 821   | 558.9  | 577.8  | 547.3  | 620.6  | 527.7  |
| 200069_at   | AI656011  | SART3                     | 9733  | 54.4   | 44.6   | 46.1   | 44.7   | 44.2   |
| 200070_at   | BC001393  | CNPPD1                    | 27013 | 82.8   | 95.3   | 80.6   | 79.9   | 74.1   |
| 200071_at   | BF224259  | SMNDC1                    | 10285 | 303.1  | 287.4  | 336.3  | 302.3  | 279.5  |
| 200072_s_at | AF061832  | HNRNPM                    | 4670  | 789.8  | 675.9  | 831.3  | 729.0  | 704.7  |
| 200073_s_at | M94630    | HNRNPD                    | 3184  | 1163.8 | 965.0  | 1343.0 | 1045.2 | 1120.4 |
| 200074_s_at | U16738    | RPL14                     | 9045  | 2247.4 | 1940.6 | 2225.8 | 1996.3 | 1784.2 |
| 200075_s_at | BC006249  | GUK1                      | 2987  | 566.0  | 645.0  | 696.4  | 596.4  | 585.5  |
| 200076_s_at | BC006479  | KXD1                      | 79036 | 211.0  | 225.0  | 270.3  | 248.0  | 238.4  |
| 200077_s_at | D87914    | OAZ1                      | 4946  | 2922.3 | 2635.8 | 2926.6 | 2730.5 | 2610.3 |
| 200078_s_at | BC005876  | ATP6V0B                   | 533   | 988.8  | 951.5  | 1238.5 | 1047.3 | 1032.6 |
| 200079_s_at | AF285758  | KARS                      | 3735  | 974.6  | 919.4  | 1102.4 | 931.9  | 837.3  |
| 200080_s_at | AI955655  | H3F3A /// H33020 /// 302  |       | 2278.3 | 2095.3 | 2728.0 | 2301.2 | 2416.6 |
| 200081_s_at | BE741754  | RPS6                      | 6194  | 3448.3 | 3409.7 | 3617.6 | 3446.1 | 3271.9 |
| 200082_s_at | AI805587  | RPS7                      | 6201  | 2304.7 | 2075.9 | 2453.8 | 2183.0 | 2182.2 |
| 200083_at   | AA621731  | USP22                     | 23326 | 585.7  | 539.1  | 614.9  | 642.6  | 509.1  |
| 200084_at   | BE748698  | C11orf58                  | 10944 | 522.2  | 432.4  | 553.7  | 471.6  | 374.7  |

|             |           |                            |       |        |        |        |        |        |
|-------------|-----------|----------------------------|-------|--------|--------|--------|--------|--------|
| 200085_s_at | NM_007108 | TCEB2                      | 6923  | 1077.0 | 1100.8 | 1206.4 | 1232.9 | 1019.4 |
| 200086_s_at | AA854966  | COX4I1                     | 1327  | 1168.1 | 1188.4 | 1343.8 | 1254.9 | 1039.8 |
| 200087_s_at | AK024976  | TMED2                      | 10959 | 1118.8 | 1123.9 | 1318.5 | 1161.5 | 1117.3 |
| 200088_x_at | AK026491  | NBEAL1 /// R6136 /// 650   |       | 3220.2 | 3100.0 | 3158.7 | 3020.6 | 2812.6 |
| 200089_s_at | AI953886  | RPL4 /// SNC6124 /// 595   |       | 2981.5 | 2318.9 | 2932.3 | 2698.4 | 2615.4 |
| 200090_at   | BG168896  | FNTA                       | 2339  | 427.1  | 398.8  | 496.4  | 339.8  | 310.4  |
| 200091_s_at | AA888388  | RPS25                      | 6230  | 2008.2 | 1607.3 | 2087.2 | 1862.4 | 1740.8 |
| 200092_s_at | BF216701  | RPL37                      | 6167  | 3518.6 | 3489.3 | 3871.2 | 3552.0 | 3370.2 |
| 200093_s_at | N32864    | HINT1                      | 3094  | 1411.9 | 1197.8 | 1660.3 | 1447.3 | 1198.6 |
| 200094_s_at | AI004246  | EEF2                       | 1938  | 3229.5 | 2844.4 | 3383.2 | 3204.6 | 2995.3 |
| 200095_x_at | AA320764  | RPS10                      | 6204  | 4429.6 | 4096.4 | 4431.7 | 4114.2 | 3999.3 |
| 200096_s_at | AI862255  | ATP6V0E1                   | 8992  | 704.6  | 701.1  | 810.5  | 709.0  | 603.7  |
| 200097_s_at | AI701949  | HNRNPK                     | 3190  | 741.6  | 710.7  | 885.4  | 707.8  | 682.4  |
| 200098_s_at | T33068    | ANAPC5                     | 51433 | 757.8  | 678.6  | 764.7  | 659.3  | 655.2  |
| 200099_s_at | AL356115  | RPS3A /// SN6189 /// 894   |       | 3971.8 | 3405.9 | 4043.4 | 3779.8 | 3722.4 |
| 200593_s_at | BC003621  | HNRNPU                     | 3192  | 529.4  | 467.2  | 619.3  | 498.5  | 592.5  |
| 200594_x_at | NM_004501 | HNRNPU                     | 3192  | 1101.8 | 1042.7 | 1240.3 | 1026.0 | 1027.0 |
| 200595_s_at | NM_003750 | EIF3A                      | 8661  | 460.8  | 383.2  | 477.6  | 392.1  | 410.6  |
| 200596_s_at | BE614908  | EIF3A                      | 8661  | 205.6  | 138.9  | 212.1  | 177.1  | 216.3  |
| 200597_at   | AI123320  | EIF3A                      | 8661  | 46.3   | 36.1   | 50.2   | 40.0   | 31.0   |
| 200598_s_at | AI582238  | HSP90B1 /// 7184 /// 100   |       | 426.4  | 379.8  | 439.9  | 421.5  | 373.9  |
| 200599_s_at | NM_003299 | HSP90B1 /// 7184 /// 100   |       | 841.1  | 838.3  | 950.1  | 836.2  | 834.6  |
| 200600_at   | NM_002444 | MSN                        | 4478  | 91.6   | 108.5  | 97.4   | 99.8   | 80.4   |
| 200601_at   | U48734    | ACTN4                      | 81    | 327.8  | 268.3  | 253.1  | 232.1  | 237.0  |
| 200602_at   | NM_000484 | APP                        | 351   | 85.3   | 77.5   | 83.4   | 90.9   | 51.8   |
| 200603_at   | AL050038  | PRKAR1A                    | 5573  | 453.7  | 366.9  | 472.1  | 381.9  | 336.7  |
| 200604_s_at | M18468    | PRKAR1A                    | 5573  | 198.5  | 171.0  | 172.4  | 189.0  | 143.8  |
| 200605_s_at | NM_002734 | PRKAR1A                    | 5573  | 352.7  | 336.7  | 378.0  | 347.7  | 303.7  |
| 200606_at   | NM_004415 | DSP                        | 1832  | 211.6  | 215.8  | 209.4  | 226.8  | 176.4  |
| 200607_s_at | BG289967  | RAD21                      | 5885  | 216.6  | 135.9  | 231.0  | 167.3  | 149.5  |
| 200608_s_at | NM_006265 | RAD21                      | 5885  | 518.2  | 397.3  | 596.4  | 440.2  | 447.9  |
| 200609_s_at | NM_017491 | WDR1                       | 9948  | 282.7  | 330.9  | 307.3  | 291.5  | 272.0  |
| 200610_s_at | NM_005381 | NCL                        | 4691  | 1619.1 | 1329.7 | 1907.4 | 1453.0 | 1616.7 |
| 200611_s_at | AB010427  | WDR1                       | 9948  | 400.3  | 391.8  | 464.8  | 422.2  | 360.4  |
| 200612_s_at | NM_001282 | AP2B1                      | 163   | 258.8  | 261.1  | 286.6  | 285.8  | 225.1  |
| 200613_at   | NM_004068 | AP2M1                      | 1173  | 599.3  | 466.7  | 505.0  | 530.3  | 407.4  |
| 200614_at   | NM_004859 | CLTC                       | 1213  | 1370.3 | 1234.9 | 1327.3 | 1272.8 | 1151.1 |
| 200615_s_at | AL567295  | AP2B1                      | 163   | 258.8  | 273.4  | 284.4  | 285.3  | 213.7  |
| 200616_s_at | BC000371  | MLEC                       | 9761  | 215.7  | 223.2  | 228.8  | 213.4  | 208.0  |
| 200617_at   | NM_014730 | MLEC                       | 9761  | 293.0  | 241.9  | 303.2  | 280.9  | 281.2  |
| 200618_at   | NM_006148 | LASP1                      | 3927  | 353.3  | 307.5  | 302.6  | 363.9  | 223.2  |
| 200619_at   | NM_006842 | SF3B2                      | 10992 | 476.4  | 400.1  | 551.3  | 499.7  | 467.1  |
| 200620_at   | NM_004872 | TMEM59                     | 9528  | 512.2  | 493.7  | 451.8  | 492.4  | 366.5  |
| 200621_at   | NM_004078 | CSRP1                      | 1465  | 648.1  | 584.9  | 665.0  | 620.3  | 515.3  |
| 200622_x_at | AV685208  | CALM1 /// C,801 /// 805 /  |       | 250.4  | 269.5  | 271.8  | 245.2  | 186.6  |
| 200623_s_at | NM_005184 | CALM1 /// C,801 /// 805 /  |       | 228.8  | 262.5  | 302.3  | 282.4  | 219.5  |
| 200624_s_at | AA577695  | MATR3 /// SI9782 /// 724   |       | 538.4  | 499.5  | 578.2  | 519.6  | 440.4  |
| 200625_s_at | NM_006367 | CAP1                       | 10487 | 351.4  | 320.6  | 369.6  | 342.3  | 299.9  |
| 200626_s_at | NM_018834 | MATR3 /// SI9782 /// 724   |       | 603.6  | 500.9  | 619.6  | 497.6  | 441.1  |
| 200627_at   | BC003005  | PTGES3                     | 10728 | 2185.8 | 1968.9 | 2288.5 | 1928.4 | 2139.0 |
| 200628_s_at | M61715    | WARS                       | 7453  | 133.5  | 153.6  | 151.5  | 138.4  | 110.2  |
| 200629_at   | NM_004184 | WARS                       | 7453  | 226.4  | 252.4  | 250.1  | 258.3  | 215.9  |
| 200630_x_at | AV702810  | SET /// SETSI 6418 /// 646 |       | 1060.2 | 1075.8 | 1221.1 | 1024.6 | 1022.3 |

|             |           |                            |        |        |        |        |        |
|-------------|-----------|----------------------------|--------|--------|--------|--------|--------|
| 200631_s_at | NM_003011 | SET /// SETSI 6418 /// 646 | 676.6  | 608.2  | 705.2  | 671.5  | 597.1  |
| 200632_s_at | NM_006096 | NDRG1 10397                | 72.8   | 82.6   | 70.8   | 84.0   | 77.9   |
| 200633_at   | NM_018955 | UBB 7314                   | 3514.1 | 3254.5 | 3488.8 | 3376.6 | 3084.7 |
| 200634_at   | NM_005022 | PFN1 5216                  | 2326.6 | 2137.8 | 2633.0 | 2239.6 | 2084.0 |
| 200635_s_at | AU145351  | PTPRF 5792                 | 134.7  | 158.6  | 141.1  | 154.3  | 106.0  |
| 200636_s_at | NM_002840 | PTPRF 5792                 | 429.6  | 373.5  | 367.8  | 422.0  | 305.3  |
| 200637_s_at | AI762627  | PTPRF 5792                 | 109.8  | 125.5  | 100.4  | 122.3  | 103.3  |
| 200638_s_at | BC003623  | YWHAZ 7534                 | 947.3  | 820.9  | 991.0  | 851.2  | 729.6  |
| 200639_s_at | NM_003406 | YWHAZ 7534                 | 1050.9 | 796.3  | 912.2  | 1099.8 | 779.1  |
| 200640_at   | NM_003406 | YWHAZ 7534                 | 721.5  | 689.4  | 754.5  | 772.0  | 602.4  |
| 200641_s_at | U28964    | YWHAZ 7534                 | 713.8  | 702.2  | 789.6  | 687.3  | 609.1  |
| 200642_at   | NM_000454 | SOD1 6647                  | 1761.4 | 1547.6 | 1714.9 | 1727.6 | 1379.9 |
| 200643_at   | NM_005336 | HDLBP 3069                 | 230.4  | 234.7  | 248.9  | 254.5  | 185.4  |
| 200644_at   | NM_023009 | MARCKSL1 65108             | 1918.8 | 1744.3 | 1954.4 | 1808.6 | 1697.1 |
| 200645_at   | NM_007278 | GABARAP 11337              | 1797.3 | 1810.8 | 1898.6 | 1761.6 | 1576.4 |
| 200646_s_at | NM_006184 | NUCB1 4924                 | 30.4   | 38.6   | 35.3   | 41.2   | 27.0   |
| 200647_x_at | NM_003752 | EIF3C /// EIF:8663 /// 728 | 445.6  | 561.9  | 510.3  | 430.9  | 459.2  |
| 200648_s_at | NM_002065 | GLUL 2752                  | 133.2  | 132.2  | 141.8  | 131.2  | 105.3  |
| 200649_at   | BC002356  | NUCB1 4924                 | 52.3   | 70.3   | 61.6   | 71.7   | 43.0   |
| 200650_s_at | NM_005566 | LDHA 3939                  | 2328.5 | 2008.3 | 2592.4 | 2149.2 | 2237.6 |
| 200651_at   | NM_006098 | GNB2L1 /// S10399 /// 61   | 3598.2 | 3133.3 | 3598.4 | 3287.0 | 3147.0 |
| 200652_at   | NM_003145 | SSR2 6746                  | 671.6  | 788.7  | 699.4  | 689.0  | 584.5  |
| 200653_s_at | M27319    | CALM1 /// C,801 /// 805 /  | 543.8  | 418.4  | 605.1  | 485.3  | 451.2  |
| 200654_at   | J02783    | P4HB 5034                  | 1538.9 | 1489.6 | 1612.7 | 1624.8 | 1349.9 |
| 200655_s_at | NM_006888 | CALM1 /// C,801 /// 805 /  | 841.9  | 718.2  | 965.2  | 753.2  | 721.0  |
| 200656_s_at | NM_000918 | P4HB 5034                  | 794.8  | 783.2  | 978.1  | 867.3  | 718.4  |
| 200657_at   | NM_001152 | SLC25A5 292                | 2516.0 | 2299.1 | 2665.2 | 2424.8 | 2355.6 |
| 200658_s_at | AL560017  | PHB 5245                   | 545.1  | 543.7  | 640.0  | 592.7  | 618.1  |
| 200659_s_at | NM_002634 | PHB 5245                   | 156.5  | 163.6  | 214.9  | 160.8  | 186.5  |
| 200660_at   | NM_005620 | S100A11 6282               | 660.6  | 374.0  | 621.0  | 643.2  | 454.1  |
| 200661_at   | NM_000308 | CTSA 5476                  | 76.7   | 84.6   | 81.8   | 86.3   | 69.5   |
| 200662_s_at | NM_014765 | TOMM20 9804                | 678.6  | 563.8  | 702.4  | 588.6  | 589.2  |
| 200663_at   | NM_001780 | CD63 967                   | 912.8  | 892.3  | 923.6  | 964.3  | 735.0  |
| 200664_s_at | BG537255  | DNAJB1 3337                | 202.5  | 182.1  | 243.8  | 201.5  | 214.7  |
| 200665_s_at | NM_003118 | SPARC 6678                 | 2.2    | 4.5    | 4.2    | 0.7    | 1.1    |
| 200666_s_at | NM_006145 | DNAJB1 3337                | 332.6  | 305.3  | 342.7  | 308.7  | 315.0  |
| 200667_at   | BF448062  | UBE2D3 7323                | 288.4  | 269.5  | 290.4  | 301.9  | 229.9  |
| 200668_s_at | BC003395  | UBE2D3 7323                | 1224.4 | 1041.7 | 1310.5 | 1075.0 | 973.3  |
| 200669_s_at | NM_003340 | UBE2D3 7323                | 730.1  | 734.2  | 835.8  | 730.5  | 641.9  |
| 200670_at   | NM_005080 | XBP1 7494                  | 421.9  | 395.1  | 408.4  | 406.3  | 326.6  |
| 200671_s_at | N92501    | SPTBN1 6711                | 0.5    | 1.5    | 0.9    | 0.4    | 0.2    |
| 200672_x_at | NM_003128 | SPTBN1 6711                | 14.2   | 11.3   | 3.0    | 7.4    | 2.0    |
| 200673_at   | NM_014713 | LAPTM4A 9741               | 659.9  | 629.0  | 716.5  | 689.7  | 596.0  |
| 200674_s_at | NM_000994 | RPL32 6161                 | 3380.1 | 2921.0 | 3408.1 | 3056.2 | 3055.5 |
| 200675_at   | NM_004356 | CD81 975                   | 1383.8 | 1165.9 | 1416.2 | 1377.9 | 1103.1 |
| 200676_s_at | NM_003347 | UBE2L3 7332                | 33.3   | 26.2   | 33.5   | 29.4   | 25.4   |
| 200677_at   | NM_004339 | PTTG1IP 754                | 423.4  | 422.1  | 443.0  | 400.2  | 327.3  |
| 200678_x_at | NM_002087 | GRN 2896                   | 126.7  | 169.3  | 137.1  | 138.0  | 99.2   |
| 200679_x_at | BE311760  | HMGB1 3146                 | 529.0  | 453.0  | 604.1  | 474.0  | 455.7  |
| 200680_x_at | NM_002128 | HMGB1 3146                 | 1506.6 | 1339.2 | 1567.8 | 1372.6 | 1232.4 |
| 200681_at   | NM_006708 | GLO1 2739                  | 1226.3 | 1133.2 | 1419.4 | 1251.8 | 1212.7 |
| 200682_s_at | BG531983  | UBE2L3 7332                | 1194.9 | 978.9  | 1217.6 | 1073.3 | 984.1  |
| 200683_s_at | BE964689  | UBE2L3 7332                | 231.7  | 227.3  | 290.5  | 260.0  | 229.5  |

|             |           |                           |       |        |        |        |        |        |
|-------------|-----------|---------------------------|-------|--------|--------|--------|--------|--------|
| 200684_s_at | AI819709  | UBE2L3                    | 7332  | 93.1   | 84.0   | 114.0  | 88.6   | 67.2   |
| 200685_at   | AU146237  | SRSF11                    | 9295  | 15.6   | 3.7    | 10.9   | 4.9    | 9.0    |
| 200686_s_at | NM_004768 | SRSF11                    | 9295  | 578.2  | 621.6  | 577.3  | 562.3  | 539.2  |
| 200687_s_at | NM_012426 | SF3B3                     | 23450 | 367.2  | 343.6  | 425.9  | 366.5  | 327.5  |
| 200688_at   | D13642    | SF3B3                     | 23450 | 47.2   | 45.0   | 53.3   | 51.1   | 41.1   |
| 200689_x_at | NM_001404 | EEF1G /// MI1937 /// 100  |       | 3146.2 | 2990.1 | 3211.2 | 3048.2 | 2956.5 |
| 200690_at   | AA927701  | HSPA9                     | 3313  | 67.5   | 66.1   | 65.6   | 62.3   | 58.0   |
| 200691_s_at | BC000478  | HSPA9                     | 3313  | 598.4  | 555.4  | 673.9  | 626.0  | 502.1  |
| 200692_s_at | NM_004134 | HSPA9                     | 3313  | 369.8  | 361.2  | 415.6  | 360.4  | 352.1  |
| 200693_at   | NM_006826 | YWHAQ                     | 10971 | 1435.8 | 1181.2 | 1363.9 | 1211.0 | 1161.1 |
| 200694_s_at | NM_020414 | DDX24                     | 57062 | 570.7  | 488.4  | 571.3  | 505.6  | 470.6  |
| 200695_at   | NM_014225 | PPP2R1A                   | 5518  | 339.1  | 283.6  | 251.1  | 288.1  | 246.1  |
| 200696_s_at | NM_000177 | GSN                       | 2934  | 13.6   | 18.5   | 17.4   | 18.6   | 11.7   |
| 200697_at   | NM_000188 | HK1                       | 3098  | 283.1  | 316.1  | 322.0  | 270.4  | 259.7  |
| 200698_at   | AL542253  | KDELR2                    | 11014 | 746.0  | 562.4  | 805.9  | 610.7  | 616.2  |
| 200699_at   | BE962456  | KDELR2                    | 11014 | 195.1  | 184.3  | 230.4  | 157.0  | 148.5  |
| 200700_s_at | NM_006854 | KDELR2                    | 11014 | 936.8  | 893.8  | 1030.0 | 942.2  | 864.8  |
| 200701_at   | NM_006432 | NPC2                      | 10577 | 268.2  | 295.0  | 287.1  | 299.0  | 218.1  |
| 200702_s_at | BG421209  | DDX24                     | 57062 | 131.5  | 110.2  | 119.9  | 87.3   | 107.8  |
| 200703_at   | NM_003746 | DYNLL1                    | 8655  | 1743.6 | 1410.1 | 1691.1 | 1455.7 | 1189.6 |
| 200704_at   | AB034747  | LITAF                     | 9516  | 379.3  | 356.7  | 420.5  | 391.9  | 336.1  |
| 200705_s_at | NM_001959 | EEF1B2 /// SI1933 /// 619 |       | 2021.7 | 1746.0 | 2038.0 | 1939.1 | 1630.6 |
| 200706_s_at | NM_004862 | LITAF                     | 9516  | 254.1  | 248.5  | 234.1  | 244.3  | 196.1  |
| 200707_at   | NM_002743 | PRKCSH                    | 5589  | 186.8  | 221.6  | 225.4  | 308.5  | 210.6  |
| 200708_at   | NM_002080 | GOT2                      | 2806  | 993.4  | 767.3  | 885.8  | 823.7  | 728.6  |
| 200709_at   | NM_000801 | FKBP1A /// L2280 /// 101  |       | 412.9  | 373.8  | 449.1  | 417.7  | 341.6  |
| 200710_at   | NM_000018 | ACADVL                    | 37    | 430.9  | 419.2  | 437.7  | 452.0  | 358.1  |
| 200711_s_at | NM_003197 | SKP1                      | 6500  | 369.7  | 353.6  | 370.3  | 357.2  | 306.5  |
| 200712_s_at | AI633566  | MAPRE1                    | 22919 | 278.0  | 207.4  | 293.5  | 207.3  | 202.1  |
| 200713_s_at | NM_012325 | MAPRE1                    | 22919 | 494.3  | 431.0  | 549.2  | 406.7  | 436.7  |
| 200714_x_at | NM_006812 | OS9                       | 10956 | 300.8  | 260.0  | 267.7  | 296.5  | 209.7  |
| 200715_x_at | BC000514  | RPL13A /// S23521 /// 26  |       | 3197.3 | 3101.6 | 3130.6 | 3131.3 | 2944.7 |
| 200716_x_at | NM_012423 | RPL13A /// R23521 /// 26  |       | 4509.6 | 4205.7 | 4250.2 | 4100.3 | 4076.5 |
| 200717_x_at | NM_000971 | RPL7                      | 6129  | 3375.6 | 3062.2 | 3504.7 | 3147.9 | 2986.3 |
| 200718_s_at | AA927664  | SKP1                      | 6500  | 1977.4 | 1695.8 | 1971.8 | 1721.8 | 1512.9 |
| 200719_at   | BE964043  | SKP1                      | 6500  | 64.2   | 49.1   | 70.7   | 63.9   | 55.5   |
| 200720_s_at | AL532341  | ACTR1A                    | 10121 | 137.7  | 158.3  | 188.0  | 184.5  | 169.1  |
| 200721_s_at | NM_005736 | ACTR1A                    | 10121 | 227.5  | 235.7  | 212.2  | 235.5  | 223.7  |
| 200722_s_at | BG258784  | CAPRIN1                   | 4076  | 607.5  | 421.9  | 551.0  | 458.5  | 409.0  |
| 200723_s_at | NM_005898 | CAPRIN1                   | 4076  | 1489.4 | 997.0  | 1495.2 | 1262.9 | 958.6  |
| 200724_at   | BC003358  | RPL10 /// SN6134 /// 267  |       | 17.7   | 3.4    | 8.7    | 7.1    | 8.1    |
| 200725_x_at | NM_006013 | RPL10 /// SN6134 /// 267  |       | 2171.0 | 2143.1 | 2270.0 | 2235.4 | 2011.4 |
| 200726_at   | NM_002710 | PPP1CC                    | 5501  | 967.2  | 770.9  | 1038.4 | 888.8  | 853.8  |
| 200727_s_at | AA699583  | ACTR2                     | 10097 | 88.8   | 98.2   | 76.8   | 75.9   | 70.5   |
| 200728_at   | BE566290  | ACTR2                     | 10097 | 175.5  | 130.5  | 142.6  | 138.6  | 129.8  |
| 200729_s_at | NM_005722 | ACTR2                     | 10097 | 151.9  | 148.2  | 169.7  | 156.9  | 137.6  |
| 200730_s_at | BF576710  | PTP4A1                    | 7803  | 194.8  | 150.3  | 218.4  | 161.1  | 164.3  |
| 200731_s_at | AW165960  | PTP4A1                    | 7803  | 117.9  | 90.1   | 139.8  | 90.5   | 91.2   |
| 200732_s_at | AL578310  | PTP4A1                    | 7803  | 209.0  | 141.1  | 194.1  | 165.1  | 123.5  |
| 200733_s_at | U48296    | PTP4A1                    | 7803  | 318.5  | 253.5  | 385.1  | 259.2  | 320.6  |
| 200734_s_at | BG341906  | ARF3                      | 377   | 502.6  | 631.1  | 531.5  | 577.2  | 466.0  |
| 200735_x_at | NM_005594 | NACA                      | 4666  | 3188.5 | 3009.6 | 3340.0 | 3236.8 | 3025.7 |
| 200736_s_at | NM_000581 | GPX1                      | 2876  | 1511.5 | 1565.2 | 1747.0 | 1689.4 | 1502.2 |

|             |           |                           |       |        |        |        |        |        |
|-------------|-----------|---------------------------|-------|--------|--------|--------|--------|--------|
| 200737_at   | NM_000291 | PGK1                      | 5230  | 736.5  | 555.3  | 652.1  | 692.4  | 542.5  |
| 200738_s_at | NM_000291 | PGK1                      | 5230  | 1981.9 | 1687.3 | 2156.1 | 1909.5 | 1768.3 |
| 200739_s_at | BG338532  | SUMO3                     | 6612  | 220.4  | 239.8  | 254.6  | 247.6  | 222.9  |
| 200740_s_at | NM_006936 | SUMO3                     | 6612  | 767.0  | 729.0  | 828.5  | 686.3  | 646.5  |
| 200741_s_at | NM_001030 | RPS27                     | 6232  | 3395.3 | 2877.9 | 3332.2 | 2994.7 | 2734.4 |
| 200742_s_at | BG231932  | TPP1                      | 1200  | 142.9  | 194.0  | 150.8  | 180.6  | 125.6  |
| 200743_s_at | NM_000391 | TPP1                      | 1200  | 137.7  | 146.7  | 133.7  | 154.3  | 99.6   |
| 200744_s_at | AI741124  | GNB1                      | 2782  | 601.8  | 603.2  | 584.5  | 698.9  | 530.0  |
| 200745_s_at | AF070603  | GNB1                      | 2782  | 551.1  | 549.7  | 536.8  | 591.9  | 439.0  |
| 200746_s_at | NM_002074 | GNB1                      | 2782  | 580.7  | 637.1  | 564.4  | 607.8  | 479.5  |
| 200747_s_at | NM_006185 | NUMA1                     | 4926  | 127.1  | 131.7  | 138.9  | 136.5  | 107.5  |
| 200748_s_at | NM_002032 | FTH1                      | 2495  | 2198.6 | 2436.9 | 2202.5 | 2592.6 | 1946.8 |
| 200749_at   | BF112006  | RAN                       | 5901  | 304.9  | 246.9  | 324.8  | 271.7  | 250.3  |
| 200750_s_at | AF054183  | RAN                       | 5901  | 1941.6 | 1700.2 | 2249.9 | 1836.7 | 1823.2 |
| 200751_s_at | BE898861  | HNRNPC                    | 3183  | 815.5  | 738.5  | 996.2  | 843.2  | 807.1  |
| 200752_s_at | NM_005186 | CAPN1                     | 823   | 63.9   | 92.1   | 62.5   | 96.2   | 60.2   |
| 200753_x_at | BE866585  | MIR636 /// S 6427 /// 693 |       | 565.4  | 391.7  | 497.7  | 374.0  | 409.2  |
| 200754_x_at | NM_003016 | MIR636 /// S 6427 /// 693 |       | 1117.1 | 971.7  | 1160.1 | 886.3  | 979.9  |
| 200755_s_at | BF939365  | CALU                      | 813   | 83.8   | 78.4   | 99.1   | 85.9   | 82.7   |
| 200756_x_at | U67280    | CALU                      | 813   | 85.6   | 62.8   | 79.4   | 79.8   | 74.5   |
| 200757_s_at | NM_001219 | CALU                      | 813   | 163.6  | 155.1  | 176.5  | 153.3  | 145.4  |
| 200758_s_at | AI361227  | NFE2L1                    | 4779  | 170.3  | 161.1  | 164.5  | 206.8  | 127.8  |
| 200759_x_at | NM_003204 | NFE2L1                    | 4779  | 206.7  | 195.5  | 166.2  | 186.3  | 163.7  |
| 200760_s_at | N92494    | ARL6IP5                   | 10550 | 550.7  | 609.2  | 541.9  | 562.8  | 459.8  |
| 200761_s_at | NM_006407 | ARL6IP5                   | 10550 | 935.7  | 941.1  | 820.8  | 915.3  | 610.6  |
| 200762_at   | NM_001386 | DPYSL2                    | 1808  | 82.7   | 90.7   | 74.3   | 85.5   | 57.0   |
| 200763_s_at | NM_001003 | RPLP1                     | 6176  | 4246.1 | 3458.3 | 3854.3 | 3621.1 | 3352.2 |
| 200764_s_at | AI826881  | CTNNA1                    | 1495  | 277.6  | 279.4  | 287.2  | 271.2  | 219.5  |
| 200765_x_at | NM_001903 | CTNNA1                    | 1495  | 370.3  | 387.1  | 360.9  | 365.5  | 303.0  |
| 200766_at   | NM_001909 | CTSD                      | 1509  | 87.9   | 95.0   | 76.0   | 88.3   | 63.6   |
| 200767_s_at | NM_014612 | FAM120A                   | 23196 | 56.1   | 42.5   | 44.9   | 36.1   | 46.6   |
| 200768_s_at | BC001686  | MAT2A                     | 4144  | 350.3  | 319.8  | 417.9  | 308.1  | 379.7  |
| 200769_s_at | NM_005911 | MAT2A                     | 4144  | 106.5  | 87.7   | 98.6   | 102.9  | 79.7   |
| 200770_s_at | J03202    | LAMC1                     | 3915  | 110.5  | 90.2   | 132.4  | 99.6   | 103.3  |
| 200771_at   | NM_002293 | LAMC1                     | 3915  | 114.8  | 115.1  | 128.3  | 105.7  | 85.2   |
| 200772_x_at | BF686442  | LOC1005062.5757 /// 728   |       | 1887.3 | 1727.2 | 2079.5 | 1809.7 | 1842.9 |
| 200773_x_at | NM_002823 | PTMA                      | 5757  | 1911.8 | 1630.7 | 2092.6 | 1896.4 | 1758.0 |
| 200774_at   | BE963765  | FAM120A                   | 23196 | 878.8  | 826.3  | 945.3  | 789.4  | 792.9  |
| 200775_s_at | BC000355  | HNRNPK                    | 3190  | 1497.2 | 1272.4 | 1492.6 | 1360.8 | 1194.8 |
| 200776_s_at | AL518328  | BZW1                      | 9689  | 513.5  | 444.8  | 533.2  | 447.7  | 429.5  |
| 200777_s_at | NM_014670 | BZW1                      | 9689  | 467.4  | 321.1  | 440.9  | 382.8  | 355.5  |
| 200778_s_at | AI191427  | SEPT2                     | 4735  | 476.2  | 476.5  | 525.0  | 448.8  | 445.9  |
| 200779_at   | NM_001675 | ATF4                      | 468   | 996.5  | 1428.1 | 1043.2 | 1335.6 | 855.5  |
| 200780_x_at | NM_000516 | GNAS                      | 2778  | 2432.9 | 2626.3 | 2511.1 | 2533.3 | 2129.3 |
| 200781_s_at | NM_001019 | RPS15A                    | 6210  | 2744.3 | 2457.3 | 2747.7 | 2610.7 | 2663.2 |
| 200782_at   | NM_001154 | ANXA5                     | 308   | 488.9  | 493.9  | 534.5  | 479.2  | 422.8  |
| 200783_s_at | NM_005563 | STMN1                     | 3925  | 156.2  | 92.7   | 142.5  | 110.2  | 109.6  |
| 200784_s_at | BF304759  | LRP1                      | 4035  | 3.0    | 1.4    | 2.2    | 3.4    | 1.7    |
| 200785_s_at | NM_002332 | LRP1                      | 4035  | 36.7   | 25.8   | 12.8   | 20.4   | 13.8   |
| 200786_at   | NM_002799 | PSMB7                     | 5695  | 671.4  | 654.9  | 758.5  | 681.7  | 593.8  |
| 200787_s_at | BC002426  | PEA15                     | 8682  | 277.3  | 264.2  | 323.3  | 281.6  | 267.4  |
| 200788_s_at | NM_003768 | PEA15                     | 8682  | 309.2  | 333.5  | 380.0  | 287.5  | 292.9  |
| 200789_at   | NM_001398 | ECH1                      | 1891  | 588.0  | 708.0  | 594.0  | 725.6  | 497.2  |

|             |           |                           |       |        |        |        |        |        |
|-------------|-----------|---------------------------|-------|--------|--------|--------|--------|--------|
| 200790_at   | NM_002539 | ODC1                      | 4953  | 2282.3 | 1992.6 | 2402.2 | 2126.2 | 2046.5 |
| 200791_s_at | NM_003870 | IQGAP1                    | 8826  | 45.6   | 43.0   | 34.6   | 40.1   | 40.9   |
| 200792_at   | NM_001469 | XRCC6                     | 2547  | 1469.6 | 1341.4 | 1693.2 | 1351.9 | 1315.3 |
| 200793_s_at | NM_001098 | ACO2                      | 50    | 404.7  | 444.3  | 420.9  | 386.6  | 338.8  |
| 200794_x_at | NM_014764 | DAZAP2                    | 9802  | 685.0  | 624.4  | 699.1  | 675.0  | 539.4  |
| 200795_at   | NM_004684 | SPARCL1                   | 8404  | 9.3    | 7.8    | 6.6    | 4.1    | 4.7    |
| 200796_s_at | BF594446  | MCL1                      | 4170  | 69.0   | 56.4   | 63.2   | 59.5   | 56.4   |
| 200797_s_at | AI275690  | MCL1                      | 4170  | 407.6  | 390.7  | 431.0  | 411.4  | 369.5  |
| 200798_x_at | NM_021960 | MCL1                      | 4170  | 288.7  | 269.3  | 298.6  | 251.9  | 218.8  |
| 200799_at   | NM_005345 | HSPA1A /// f 3303 /// 330 |       | 1.8    | 2.8    | 3.5    | 1.5    | 0.1    |
| 200800_s_at | NM_005345 | HSPA1A /// f 3303 /// 330 |       | 311.4  | 274.6  | 405.9  | 342.0  | 354.1  |
| 200801_x_at | NM_001101 | ACTB                      | 60    | 3816.3 | 4100.0 | 4127.5 | 3758.4 | 3584.3 |
| 200802_at   | NM_006513 | SARS                      | 6301  | 524.3  | 621.5  | 576.2  | 619.2  | 459.9  |
| 200803_s_at | AF033095  | TMBIM6                    | 7009  | 1275.9 | 1267.7 | 1278.0 | 1253.5 | 1054.3 |
| 200804_at   | NM_003217 | TMBIM6                    | 7009  | 917.6  | 980.0  | 938.2  | 953.4  | 811.5  |
| 200805_at   | NM_006816 | LMAN2                     | 10960 | 171.7  | 171.7  | 170.7  | 163.3  | 130.9  |
| 200806_s_at | BE256479  | HSPD1                     | 3329  | 1866.2 | 1714.8 | 2020.2 | 1642.0 | 1687.2 |
| 200807_s_at | NM_002156 | HSPD1                     | 3329  | 3034.8 | 2615.6 | 3014.9 | 2728.5 | 2636.4 |
| 200808_s_at | NM_003461 | ZYX                       | 7791  | 52.4   | 61.9   | 60.4   | 71.3   | 49.4   |
| 200809_x_at | NM_000976 | RPL12                     | 6136  | 2921.6 | 3063.5 | 3124.7 | 3050.9 | 2710.5 |
| 200810_s_at | NM_001280 | CIRBP                     | 1153  | 561.5  | 534.6  | 566.6  | 580.0  | 462.1  |
| 200811_at   | NM_001280 | CIRBP                     | 1153  | 463.0  | 542.7  | 520.9  | 547.2  | 399.1  |
| 200812_at   | NM_006429 | CCT7                      | 10574 | 431.5  | 425.4  | 472.1  | 469.7  | 401.5  |
| 200813_s_at | BE256969  | PAFAH1B1                  | 5048  | 67.8   | 34.9   | 58.9   | 47.5   | 40.1   |
| 200814_at   | NM_006263 | PSME1                     | 5720  | 469.5  | 604.1  | 583.8  | 598.3  | 404.0  |
| 200815_s_at | L13386    | PAFAH1B1                  | 5048  | 126.3  | 112.3  | 126.9  | 119.0  | 97.6   |
| 200816_s_at | NM_000430 | PAFAH1B1                  | 5048  | 79.3   | 62.2   | 77.6   | 72.2   | 63.1   |
| 200817_x_at | NM_001014 | RPS10                     | 6204  | 4720.1 | 4483.6 | 4746.5 | 4182.4 | 4333.1 |
| 200818_at   | NM_001697 | ATP5O                     | 539   | 1089.2 | 959.6  | 1110.1 | 1034.2 | 878.0  |
| 200819_s_at | NM_001018 | RPS15                     | 6209  | 3821.9 | 3561.3 | 3912.9 | 3797.3 | 3610.0 |
| 200820_at   | NM_002812 | PSMD8                     | 5714  | 893.7  | 889.1  | 983.2  | 960.9  | 802.8  |
| 200821_at   | NM_013995 | LAMP2                     | 3920  | 155.9  | 125.7  | 168.0  | 147.6  | 128.8  |
| 200822_x_at | NM_000365 | TP11                      | 7167  | 2180.7 | 2071.2 | 2388.0 | 2170.1 | 1996.0 |
| 200823_x_at | NM_000992 | RPL29                     | 6159  | 2925.9 | 2575.1 | 2767.9 | 2952.7 | 2447.7 |
| 200824_at   | NM_000852 | GSTP1                     | 2950  | 35.7   | 19.9   | 17.7   | 21.0   | 15.2   |
| 200825_s_at | NM_006389 | HYOU1                     | 10525 | 319.0  | 424.7  | 354.5  | 408.4  | 302.3  |
| 200826_at   | NM_004597 | SNRPD2                    | 6633  | 1367.9 | 1336.3 | 1467.2 | 1522.6 | 1251.0 |
| 200827_at   | NM_000302 | PLOD1                     | 5351  | 111.9  | 132.1  | 123.0  | 121.0  | 108.7  |
| 200828_s_at | BE871379  | ZNF207                    | 7756  | 974.5  | 950.5  | 1020.4 | 912.6  | 832.5  |
| 200829_x_at | NM_003457 | ZNF207                    | 7756  | 544.6  | 457.9  | 547.1  | 453.7  | 433.9  |
| 200830_at   | NM_002808 | PSMD2                     | 5708  | 673.6  | 679.9  | 712.7  | 676.4  | 640.7  |
| 200831_s_at | AA678241  | SCD                       | 6319  | 245.7  | 197.8  | 236.4  | 208.1  | 187.3  |
| 200832_s_at | AB032261  | SCD                       | 6319  | 542.2  | 428.7  | 627.0  | 504.7  | 489.2  |
| 200833_s_at | NM_015646 | RAP1B                     | 5908  | 208.8  | 177.8  | 235.3  | 199.9  | 165.5  |
| 200834_s_at | NM_001024 | RPS21                     | 6227  | 3690.7 | 3483.7 | 3882.9 | 3523.4 | 3338.6 |
| 200835_s_at | AI553791  | MAP4                      | 4134  | 9.6    | 19.9   | 12.2   | 16.8   | 19.8   |
| 200836_s_at | NM_002375 | MAP4                      | 4134  | 131.8  | 99.7   | 120.1  | 120.4  | 91.7   |
| 200837_at   | NM_005745 | BCAP31                    | 10134 | 758.2  | 820.8  | 897.1  | 759.3  | 660.0  |
| 200838_at   | NM_001908 | CTSB                      | 1508  | 237.7  | 209.4  | 216.2  | 236.7  | 159.8  |
| 200839_s_at | NM_001908 | CTSB                      | 1508  | 263.9  | 254.2  | 238.4  | 280.4  | 205.9  |
| 200840_at   | NM_005548 | KARS                      | 3735  | 1609.8 | 1389.4 | 1622.6 | 1454.0 | 1318.7 |
| 200841_s_at | AI142677  | EPRS                      | 2058  | 164.4  | 176.8  | 184.2  | 191.8  | 183.7  |
| 200842_s_at | AI475965  | EPRS                      | 2058  | 381.8  | 335.8  | 357.9  | 330.2  | 294.6  |

|             |           |                           |       |        |        |        |        |        |
|-------------|-----------|---------------------------|-------|--------|--------|--------|--------|--------|
| 200843_s_at | NM_004446 | EPRS                      | 2058  | 422.0  | 399.0  | 441.9  | 386.6  | 343.1  |
| 200844_s_at | BE869583  | PRDX6                     | 9588  | 1349.3 | 1403.5 | 1558.2 | 1425.3 | 1384.5 |
| 200845_s_at | NM_004905 | PRDX6                     | 9588  | 1125.9 | 965.4  | 1262.3 | 1056.7 | 1055.6 |
| 200846_s_at | NM_002708 | PPP1CA                    | 5499  | 477.9  | 576.4  | 567.6  | 545.0  | 460.9  |
| 200847_s_at | NM_016127 | SARAF                     | 51669 | 571.8  | 454.2  | 597.5  | 465.8  | 480.7  |
| 200848_at   | AA479488  | AHCYL1                    | 10768 | 106.7  | 73.6   | 103.7  | 97.0   | 60.1   |
| 200849_s_at | AI589266  | AHCYL1                    | 10768 | 179.3  | 173.6  | 177.8  | 139.5  | 116.3  |
| 200850_s_at | NM_006621 | AHCYL1                    | 10768 | 373.7  | 328.9  | 349.6  | 361.4  | 296.1  |
| 200851_s_at | NM_014761 | IST1                      | 9798  | 243.6  | 254.7  | 257.2  | 237.5  | 177.0  |
| 200852_x_at | NM_005273 | GNB2                      | 2783  | 611.4  | 555.2  | 588.2  | 556.0  | 452.3  |
| 200853_at   | NM_002106 | H2AFZ                     | 3015  | 2314.9 | 1973.6 | 2392.7 | 2002.6 | 2015.4 |
| 200854_at   | AB028970  | NCOR1                     | 9611  | 109.7  | 129.6  | 116.6  | 119.5  | 107.8  |
| 200855_at   | AW771910  | NCOR1                     | 9611  | 19.4   | 16.4   | 21.9   | 15.2   | 16.8   |
| 200856_x_at | BF437948  | NCOR1                     | 9611  | 20.0   | 21.0   | 33.2   | 19.9   | 11.9   |
| 200857_s_at | NM_006311 | NCOR1                     | 9611  | 77.6   | 83.6   | 78.9   | 70.7   | 54.6   |
| 200858_s_at | NM_001012 | RPS8 /// SNC6202 /// 268  |       | 3186.0 | 3016.0 | 3184.8 | 2999.6 | 3001.9 |
| 200859_x_at | NM_001456 | FLNA                      | 2316  | 121.1  | 138.5  | 125.4  | 152.1  | 97.0   |
| 200860_s_at | BC000779  | CNOT1                     | 23019 | 361.1  | 333.3  | 365.2  | 326.7  | 286.3  |
| 200861_at   | NM_016284 | CNOT1                     | 23019 | 145.8  | 126.3  | 122.6  | 120.3  | 102.1  |
| 200862_at   | NM_014762 | DHCR24                    | 1718  | 658.2  | 623.6  | 864.6  | 638.7  | 797.9  |
| 200863_s_at | AI215102  | RAB11A                    | 8766  | 833.8  | 720.2  | 875.8  | 740.7  | 704.7  |
| 200864_s_at | NM_004663 | RAB11A                    | 8766  | 171.1  | 130.5  | 188.7  | 142.4  | 131.9  |
| 200865_at   | AI001896  | EIF3F                     | 8665  | 4.6    | 3.2    | 5.7    | 0.1    | 0.5    |
| 200866_s_at | M32221    | PSAP                      | 5660  | 500.7  | 460.3  | 487.9  | 515.0  | 328.0  |
| 200867_at   | AL031685  | RNF114                    | 55905 | 147.3  | 99.8   | 130.6  | 130.8  | 101.0  |
| 200868_s_at | NM_018683 | RNF114                    | 55905 | 210.7  | 224.5  | 252.6  | 242.7  | 190.8  |
| 200869_at   | NM_000980 | RPL18A /// S 6142 /// 267 |       | 4219.3 | 3806.0 | 4374.7 | 4048.7 | 3722.8 |
| 200870_at   | NM_007178 | STRAP                     | 11171 | 923.2  | 864.7  | 968.8  | 836.6  | 727.8  |
| 200871_s_at | NM_002778 | PSAP                      | 5660  | 793.3  | 940.4  | 859.0  | 868.8  | 710.2  |
| 200872_at   | NM_002966 | S100A10                   | 6281  | 15.8   | 32.3   | 28.3   | 26.4   | 17.9   |
| 200873_s_at | NM_006585 | CCT8                      | 10694 | 1368.7 | 1136.3 | 1430.0 | 1209.1 | 1008.3 |
| 200874_s_at | BE796327  | MIR1292 /// 10528 /// 26  |       | 103.6  | 93.8   | 121.2  | 98.2   | 104.7  |
| 200875_s_at | NM_006392 | MIR1292 /// 10528 /// 26  |       | 520.3  | 402.7  | 602.5  | 443.6  | 496.7  |
| 200876_s_at | NM_002793 | PSMB1                     | 5689  | 972.3  | 979.1  | 1065.7 | 1076.8 | 837.7  |
| 200877_at   | NM_006430 | CCT4                      | 10575 | 1228.7 | 1033.1 | 1224.2 | 965.1  | 901.2  |
| 200878_at   | AF052094  | EPAS1                     | 2034  | 10.3   | 2.0    | 9.5    | 7.1    | 5.7    |
| 200879_s_at | NM_001430 | EPAS1                     | 2034  | 1.2    | 3.7    | 1.5    | 0.6    | 2.3    |
| 200880_at   | AL534104  | DNAJA1                    | 3301  | 415.5  | 312.8  | 376.3  | 341.5  | 306.4  |
| 200881_s_at | NM_001539 | DNAJA1                    | 3301  | 830.5  | 624.8  | 833.9  | 658.0  | 710.2  |
| 200882_s_at | NM_002810 | PSMD4                     | 5710  | 480.1  | 496.9  | 502.0  | 509.7  | 437.8  |
| 200883_at   | NM_003366 | UQCRC2                    | 7385  | 604.8  | 666.5  | 644.0  | 607.8  | 530.0  |
| 200884_at   | NM_001823 | CKB                       | 1152  | 1236.5 | 1183.2 | 1374.0 | 1334.5 | 1236.5 |
| 200885_at   | NM_005167 | RHOC                      | 389   | 940.7  | 724.2  | 788.2  | 771.5  | 611.4  |
| 200886_s_at | NM_002629 | PGAM1                     | 5223  | 1922.0 | 1699.1 | 2016.1 | 1837.9 | 1741.8 |
| 200887_s_at | NM_007315 | STAT1                     | 6772  | 113.5  | 125.5  | 132.5  | 116.1  | 102.5  |
| 200888_s_at | NM_000978 | RPL23 /// SN 9349 /// 619 |       | 2143.3 | 2192.0 | 2570.7 | 2456.3 | 2213.9 |
| 200889_s_at | AI016620  | SSR1                      | 6745  | 373.8  | 307.0  | 404.2  | 346.9  | 339.3  |
| 200890_s_at | AW006345  | SSR1                      | 6745  | 212.7  | 201.1  | 248.1  | 216.1  | 230.8  |
| 200891_s_at | NM_003144 | SSR1                      | 6745  | 789.6  | 499.9  | 650.2  | 605.4  | 598.3  |
| 200892_s_at | BC000451  | TRA2B                     | 6434  | 465.6  | 359.5  | 530.1  | 396.3  | 404.2  |
| 200893_at   | NM_004593 | TRA2B                     | 6434  | 769.1  | 650.3  | 902.4  | 702.8  | 718.2  |
| 200894_s_at | AA894574  | FKBP4                     | 2288  | 397.5  | 315.1  | 427.5  | 329.0  | 361.9  |
| 200895_s_at | NM_002014 | FKBP4                     | 2288  | 955.5  | 833.0  | 1127.9 | 993.5  | 946.6  |



|             |           |                           |       |        |        |        |        |        |
|-------------|-----------|---------------------------|-------|--------|--------|--------|--------|--------|
| 200896_x_at | NM_004494 | HDGF                      | 3068  | 777.3  | 863.7  | 971.5  | 868.9  | 792.5  |
| 200897_s_at | NM_016081 | PALLD                     | 23022 | 79.7   | 89.1   | 122.1  | 97.2   | 95.5   |
| 200898_s_at | AK002091  | MGEA5                     | 10724 | 149.4  | 186.1  | 181.6  | 206.8  | 150.8  |
| 200899_s_at | NM_012215 | MGEA5                     | 10724 | 85.5   | 94.2   | 89.2   | 111.7  | 90.7   |
| 200900_s_at | AI583537  | M6PR                      | 4074  | 140.0  | 121.3  | 133.4  | 131.7  | 110.4  |
| 200901_s_at | NM_002355 | M6PR /// PH 1911 /// 407  |       | 229.9  | 148.8  | 220.5  | 185.0  | 198.9  |
| 200902_at   | NM_004261 | SEP15                     | 9403  | 413.9  | 377.8  | 492.8  | 427.6  | 362.3  |
| 200903_s_at | NM_000687 | AHCY                      | 191   | 1133.0 | 1126.8 | 1127.6 | 1066.3 | 948.4  |
| 200904_at   | X56841    | HLA-E                     | 3133  | 16.1   | 10.4   | 2.3    | 5.4    | 2.5    |
| 200905_x_at | NM_005516 | HLA-E                     | 3133  | 69.9   | 69.3   | 79.7   | 75.7   | 51.5   |
| 200906_s_at | AK025843  | PALLD                     | 23022 | 13.5   | 14.7   | 17.2   | 17.2   | 15.1   |
| 200907_s_at | AU157932  | PALLD                     | 23022 | 78.1   | 58.8   | 71.0   | 75.6   | 48.3   |
| 200908_s_at | BC005354  | RPLP2                     | 6181  | 12.2   | 15.5   | 22.9   | 23.4   | 16.2   |
| 200909_s_at | NM_001004 | RPLP2 /// SN 6181 /// 619 |       | 3790.9 | 3559.2 | 3935.9 | 3832.0 | 3565.9 |
| 200910_at   | NM_005998 | CCT3 /// LOC 7203 /// 101 |       | 1492.9 | 1229.5 | 1636.6 | 1367.9 | 1290.5 |
| 200911_s_at | NM_006283 | TACC1                     | 6867  | 194.9  | 158.1  | 194.9  | 164.0  | 156.8  |
| 200912_s_at | NM_001967 | EIF4A2 /// M 1974 /// 604 |       | 740.9  | 737.1  | 740.5  | 894.2  | 559.2  |
| 200913_at   | NM_002707 | PPM1G                     | 5496  | 197.8  | 161.2  | 238.3  | 167.9  | 169.2  |
| 200914_x_at | BF589024  | KTN1                      | 3895  | 166.5  | 120.7  | 210.1  | 161.6  | 134.3  |
| 200915_x_at | NM_004986 | KTN1                      | 3895  | 286.4  | 252.4  | 370.8  | 263.8  | 263.3  |
| 200916_at   | NM_003564 | TAGLN2                    | 8407  | 403.7  | 347.2  | 352.5  | 301.9  | 323.9  |
| 200917_s_at | BG474541  | SRPR                      | 6734  | 65.1   | 86.7   | 89.1   | 86.5   | 75.9   |
| 200918_s_at | NM_003139 | SRPR                      | 6734  | 352.6  | 306.3  | 349.9  | 335.5  | 271.6  |
| 200919_at   | NM_004427 | PHC2                      | 1912  | 191.0  | 174.9  | 194.8  | 159.4  | 143.4  |
| 200920_s_at | AL535380  | BTG1                      | 694   | 323.1  | 350.9  | 417.9  | 375.9  | 357.5  |
| 200921_s_at | NM_001731 | BTG1                      | 694   | 406.9  | 390.1  | 472.3  | 410.2  | 360.3  |
| 200922_at   | NM_006801 | KDELR1                    | 10945 | 162.1  | 170.4  | 163.6  | 163.0  | 149.1  |
| 200923_at   | NM_005567 | LGALS3BP                  | 3959  | 27.9   | 33.0   | 23.8   | 27.7   | 21.2   |
| 200924_s_at | NM_002394 | SLC3A2                    | 6520  | 184.9  | 181.5  | 182.6  | 179.5  | 161.5  |
| 200925_at   | NM_004373 | COX6A1                    | 1337  | 1872.6 | 2188.7 | 2167.7 | 2155.0 | 1709.6 |
| 200926_at   | NM_001025 | RPS23                     | 6228  | 4321.6 | 4136.7 | 4596.0 | 4153.0 | 4156.2 |
| 200927_s_at | AA919115  | RAB14                     | 51552 | 170.2  | 142.9  | 178.6  | 132.3  | 133.8  |
| 200928_s_at | AL162081  | RAB14                     | 51552 | 6.1    | 6.4    | 2.3    | 3.9    | 3.9    |
| 200929_at   | NM_006827 | TMED10                    | 10972 | 698.4  | 674.2  | 694.7  | 667.2  | 594.5  |
| 200930_s_at | AA156675  | VCL                       | 7414  | 5.6    | 6.2    | 3.3    | 1.4    | 8.5    |
| 200931_s_at | NM_014000 | VCL                       | 7414  | 295.2  | 252.8  | 282.1  | 261.4  | 236.0  |
| 200932_s_at | NM_006400 | DCTN2                     | 10540 | 325.7  | 366.8  | 335.5  | 346.4  | 253.9  |
| 200933_x_at | NM_001007 | RPS4X                     | 6191  | 3359.1 | 3016.4 | 3447.3 | 3112.0 | 2961.9 |
| 200934_at   | NM_003472 | DEK                       | 7913  | 457.2  | 258.4  | 513.1  | 381.4  | 377.2  |
| 200935_at   | NM_004343 | CALR                      | 811   | 189.4  | 214.7  | 256.3  | 230.7  | 200.1  |
| 200936_at   | NM_000973 | RPL8                      | 6132  | 3777.1 | 3735.2 | 4113.6 | 3947.0 | 3798.7 |
| 200937_s_at | NM_000969 | RPL5 /// SNC 6083 /// 612 |       | 2011.7 | 1609.8 | 2041.4 | 1761.2 | 1672.9 |
| 200938_s_at | AI920976  | RERE                      | 473   | 6.4    | 5.6    | 0.7    | 0.8    | 0.2    |
| 200939_s_at | NM_012102 | RERE                      | 473   | 0.6    | 1.1    | 1.2    | 1.2    | 0.3    |
| 200940_s_at | AB036737  | RERE                      | 473   | 40.1   | 23.9   | 42.9   | 32.5   | 15.7   |
| 200941_at   | AK026575  | HSBP1                     | 3281  | 182.9  | 132.1  | 172.2  | 157.9  | 123.3  |
| 200942_s_at | NM_001537 | HSBP1                     | 3281  | 579.9  | 584.6  | 619.7  | 635.6  | 557.2  |
| 200943_at   | NM_004965 | HMGN1                     | 3150  | 1008.5 | 897.7  | 893.7  | 960.4  | 654.5  |
| 200944_s_at | NM_004965 | HMGN1 /// L 3150 /// 101  |       | 1064.4 | 919.4  | 1104.8 | 851.4  | 834.3  |
| 200945_s_at | NM_014933 | SEC31A                    | 22872 | 351.2  | 339.9  | 333.3  | 341.1  | 270.0  |
| 200946_x_at | AI339331  | GLUD1                     | 2746  | 169.2  | 179.6  | 199.2  | 186.3  | 165.0  |
| 200947_s_at | NM_005271 | GLUD1                     | 2746  | 143.7  | 140.8  | 160.4  | 138.4  | 140.3  |
| 200948_at   | NM_005439 | MLF2                      | 8079  | 866.9  | 877.7  | 973.5  | 899.4  | 719.4  |

|             |           |            |       |         |     |     |        |        |        |        |        |
|-------------|-----------|------------|-------|---------|-----|-----|--------|--------|--------|--------|--------|
| 200949_x_at | NM_001023 | RPS20      | ///   | SN 6224 | /// | 267 | 2456.2 | 2370.6 | 2591.2 | 2455.2 | 2166.1 |
| 200950_at   | NM_006409 | ARPC1A     |       | 10552   |     |     | 672.7  | 698.7  | 729.0  | 735.4  | 597.2  |
| 200951_s_at | AW026491  | CCND2      |       | 894     |     |     | 1.5    | 3.1    | 1.2    | 0.4    | 3.2    |
| 200952_s_at | AI635187  | CCND2      |       | 894     |     |     | 6.2    | 1.0    | 6.8    | 3.6    | 8.2    |
| 200953_s_at | NM_001759 | CCND2      |       | 894     |     |     | 1.6    | 8.7    | 3.2    | 1.7    | 5.1    |
| 200954_at   | NM_001694 | ATP6VOC    |       | 527     |     |     | 577.7  | 423.3  | 511.8  | 494.5  | 399.2  |
| 200955_at   | NM_006839 | IMMT       |       | 10989   |     |     | 255.2  | 244.3  | 285.4  | 295.2  | 218.3  |
| 200956_s_at | BE795648  | SSRP1      |       | 6749    |     |     | 285.6  | 259.8  | 318.3  | 291.8  | 253.9  |
| 200957_s_at | NM_003146 | SSRP1      |       | 6749    |     |     | 292.6  | 279.4  | 335.7  | 300.1  | 294.9  |
| 200958_s_at | NM_005625 | SDCBP      |       | 6386    |     |     | 398.9  | 334.2  | 418.2  | 351.5  | 339.8  |
| 200959_at   | NM_004960 | FUS        |       | 2521    |     |     | 410.9  | 356.8  | 412.3  | 345.3  | 365.5  |
| 200960_x_at | NM_007096 | CLTA       |       | 1211    |     |     | 842.6  | 860.2  | 966.3  | 874.5  | 758.6  |
| 200961_at   | NM_012248 | SEPHS2     |       | 22928   |     |     | 280.9  | 211.2  | 274.0  | 238.5  | 208.5  |
| 200962_at   | AI348010  | RPL31      |       | 6160    |     |     | 73.0   | 62.1   | 64.4   | 76.8   | 47.8   |
| 200963_x_at | NM_000993 | RPL31      |       | 6160    |     |     | 3162.3 | 2626.3 | 3082.7 | 2883.1 | 2653.9 |
| 200964_at   | NM_003334 | UBA1       |       | 7317    |     |     | 852.4  | 988.8  | 996.5  | 1003.4 | 828.0  |
| 200965_s_at | NM_006720 | ABLIM1     |       | 3983    |     |     | 115.0  | 93.5   | 128.2  | 103.1  | 93.3   |
| 200966_x_at | NM_000034 | ALDOA      |       | 226     |     |     | 2691.5 | 2368.2 | 2732.8 | 2594.2 | 2450.7 |
| 200967_at   | NM_000942 | PPIB       |       | 5479    |     |     | 2088.3 | 1925.4 | 2050.7 | 1949.9 | 1729.0 |
| 200968_s_at | NM_000942 | PPIB       |       | 5479    |     |     | 1670.0 | 1776.7 | 1888.7 | 1891.6 | 1586.2 |
| 200969_at   | BG107676  | LOC1019280 | 27230 | ///     | 10  |     | 222.9  | 187.1  | 210.7  | 191.9  | 175.8  |
| 200970_s_at | AL136807  | SERP1      |       | 27230   |     |     | 333.1  | 305.2  | 350.7  | 384.9  | 307.3  |
| 200971_s_at | NM_014445 | LOC1019280 | 27230 | ///     | 10  |     | 1049.3 | 1198.2 | 1279.0 | 1282.6 | 1080.2 |
| 200972_at   | BC000704  | TSPAN3     |       | 10099   |     |     | 425.1  | 392.0  | 419.2  | 383.6  | 262.6  |
| 200973_s_at | NM_005724 | TSPAN3     |       | 10099   |     |     | 218.3  | 223.5  | 195.5  | 183.4  | 150.9  |
| 200974_at   | NM_001613 | ACTA2      |       | 59      |     |     | 38.1   | 42.8   | 53.9   | 44.1   | 34.3   |
| 200975_at   | NM_000310 | PPT1       |       | 5538    |     |     | 500.3  | 408.8  | 512.7  | 446.8  | 412.9  |
| 200976_s_at | NM_006024 | TAX1BP1    |       | 8887    |     |     | 263.5  | 194.6  | 224.7  | 240.8  | 137.2  |
| 200977_s_at | AF090891  | TAX1BP1    |       | 8887    |     |     | 250.3  | 255.9  | 284.0  | 261.6  | 203.4  |
| 200978_at   | NM_005917 | MDH1       |       | 4190    |     |     | 533.9  | 441.4  | 571.0  | 453.4  | 407.5  |
| 200979_at   | BF739979  | PDHA1      |       | 5160    |     |     | 50.3   | 43.9   | 44.9   | 36.7   | 35.4   |
| 200980_s_at | NM_000284 | PDHA1      |       | 5160    |     |     | 254.7  | 301.5  | 305.8  | 264.6  | 278.8  |
| 200981_x_at | NM_016592 | GNAS       |       | 2778    |     |     | 2323.3 | 2426.4 | 2333.2 | 2436.6 | 2040.9 |
| 200982_s_at | NM_001155 | ANXA6      |       | 309     |     |     | 178.1  | 249.6  | 173.8  | 232.6  | 160.9  |
| 200983_x_at | BF983379  | CD59       |       | 966     |     |     | 171.4  | 199.9  | 181.8  | 198.3  | 152.1  |
| 200984_s_at | X16447    | CD59       |       | 966     |     |     | 161.8  | 137.7  | 143.9  | 122.0  | 103.3  |
| 200985_s_at | NM_000611 | CD59       |       | 966     |     |     | 124.1  | 127.9  | 117.9  | 127.3  | 85.8   |
| 200986_at   | NM_000062 | SERPING1   |       | 710     |     |     | 3.5    | 0.6    | 1.6    | 0.4    | 1.0    |
| 200987_x_at | AA758755  | PSME3      |       | 10197   |     |     | 320.5  | 276.8  | 375.0  | 257.4  | 286.8  |
| 200988_s_at | NM_005789 | PSME3      |       | 10197   |     |     | 91.7   | 92.8   | 88.9   | 91.2   | 71.6   |
| 200989_at   | NM_001530 | HIF1A      |       | 3091    |     |     | 356.4  | 312.1  | 397.4  | 312.7  | 330.2  |
| 200990_at   | NM_005762 | TRIM28     |       | 10155   |     |     | 958.7  | 1005.9 | 1116.2 | 1012.2 | 861.6  |
| 200991_s_at | NM_014748 | SNX17      |       | 9784    |     |     | 232.7  | 223.4  | 239.0  | 238.3  | 227.9  |
| 200992_at   | AL137335  | IPO7       |       | 10527   |     |     | 421.3  | 342.9  | 472.4  | 347.9  | 357.0  |
| 200993_at   | AA939270  | IPO7       |       | 10527   |     |     | 351.6  | 282.1  | 402.9  | 318.9  | 300.9  |
| 200994_at   | BG291787  | IPO7       |       | 10527   |     |     | 256.8  | 201.8  | 293.0  | 236.4  | 230.6  |
| 200995_at   | AI741392  | IPO7       |       | 10527   |     |     | 49.6   | 45.6   | 63.1   | 40.4   | 44.7   |
| 200996_at   | NM_005721 | ACTR3      |       | 10096   |     |     | 464.1  | 451.5  | 570.5  | 399.1  | 477.8  |
| 200997_at   | NM_002896 | RBM14-RBM  | 5936  | ///     | 100 |     | 430.7  | 498.2  | 449.0  | 465.0  | 369.6  |
| 200998_s_at | AW029619  | CKAP4      |       | 10970   |     |     | 96.0   | 85.5   | 121.3  | 104.5  | 99.5   |
| 200999_s_at | NM_006825 | CKAP4      |       | 10970   |     |     | 273.6  | 249.1  | 286.3  | 305.3  | 299.1  |
| 201000_at   | NM_001605 | AARS       |       | 16      |     |     | 891.2  | 1050.1 | 917.0  | 1042.5 | 872.4  |
| 201001_s_at | BG164064  | TMEM189    | ///   | 7335    | /// | 733 | 301.2  | 250.1  | 312.8  | 287.5  | 252.3  |

|             |           |         |            |         |        |        |        |        |        |
|-------------|-----------|---------|------------|---------|--------|--------|--------|--------|--------|
| 201002_s_at | U39361    | TMEM189 | /// 7335   | /// 733 | 452.2  | 474.9  | 556.9  | 526.4  | 410.2  |
| 201003_x_at | NM_003349 | TMEM189 | /// 7335   | /// 733 | 396.6  | 439.1  | 398.7  | 424.7  | 318.1  |
| 201004_at   | NM_006280 | SSR4    | 6748       |         | 1227.3 | 1498.6 | 1625.7 | 1421.3 | 1291.2 |
| 201005_at   | NM_001769 | CD9     | 928        |         | 1443.6 | 1320.2 | 1498.7 | 1523.4 | 1175.4 |
| 201006_at   | NM_005809 | PRDX2   | 7001       |         | 39.5   | 34.8   | 19.3   | 34.7   | 39.3   |
| 201007_at   | NM_000183 | HADHB   | 3032       |         | 456.6  | 422.5  | 479.6  | 432.1  | 329.1  |
| 201008_s_at | AA812232  | TXNIP   | 10628      |         | 231.9  | 321.8  | 245.4  | 293.9  | 216.0  |
| 201009_s_at | AI439556  | TXNIP   | 10628      |         | 257.8  | 336.0  | 276.6  | 337.5  | 213.7  |
| 201010_s_at | NM_006472 | TXNIP   | 10628      |         | 368.4  | 506.3  | 397.9  | 468.0  | 336.8  |
| 201011_at   | NM_002950 | RPN1    | 6184       |         | 607.7  | 502.5  | 583.2  | 571.6  | 499.4  |
| 201012_at   | NM_000700 | ANXA1   | 301        |         | 1.7    | 5.7    | 3.0    | 1.5    | 1.1    |
| 201013_s_at | AA902652  | PAICS   | 10606      |         | 1087.0 | 861.9  | 1083.9 | 889.7  | 878.2  |
| 201014_s_at | NM_006452 | PAICS   | 10606      |         | 664.1  | 609.9  | 791.3  | 628.3  | 597.3  |
| 201015_s_at | NM_021991 | JUP     | 3728       |         | 631.2  | 643.9  | 713.7  | 678.9  | 527.0  |
| 201016_at   | BE542684  | EIF1AX  | 1964       |         | 301.9  | 212.8  | 336.6  | 226.1  | 241.9  |
| 201017_at   | BG149698  | EIF1AX  | 1964       |         | 133.4  | 117.8  | 143.9  | 104.8  | 103.7  |
| 201018_at   | AL079283  | EIF1AX  | 1964       |         | 104.0  | 59.3   | 89.0   | 68.5   | 72.1   |
| 201019_s_at | NM_001412 | EIF1AX  | 1964       |         | 417.6  | 295.5  | 472.9  | 338.3  | 328.4  |
| 201020_at   | NM_003405 | YWHAH   | 7533       |         | 132.8  | 94.9   | 169.3  | 112.8  | 127.6  |
| 201021_s_at | BF697964  | DSTN    | 11034      |         | 1334.3 | 1117.5 | 1323.7 | 1291.1 | 1038.0 |
| 201022_s_at | NM_006870 | DSTN    | 11034      |         | 963.2  | 906.7  | 936.3  | 940.1  | 749.5  |
| 201023_at   | NM_005642 | TAF7    | 6879       |         | 494.6  | 434.9  | 522.7  | 483.7  | 399.5  |
| 201024_x_at | BG261322  | EIF5B   | 9669       |         | 109.7  | 89.0   | 152.5  | 110.0  | 106.5  |
| 201025_at   | AB018284  | EIF5B   | 9669       |         | 42.7   | 35.9   | 37.9   | 26.8   | 44.1   |
| 201026_at   | AB018284  | EIF5B   | 9669       |         | 25.1   | 18.5   | 31.3   | 22.7   | 22.4   |
| 201027_s_at | NM_015904 | EIF5B   | 9669       |         | 73.4   | 72.3   | 81.9   | 67.8   | 70.6   |
| 201028_s_at | U82164    | CD99    | 4267       |         | 496.1  | 596.9  | 659.7  | 633.4  | 538.4  |
| 201029_s_at | NM_002414 | CD99    | 4267       |         | 976.3  | 981.2  | 1070.2 | 1044.9 | 841.6  |
| 201030_x_at | NM_002300 | LDHB    | 3945       |         | 1619.5 | 1713.5 | 1908.9 | 1675.6 | 1660.0 |
| 201031_s_at | NM_005520 | HNRNPH1 | 3187       |         | 841.2  | 768.4  | 772.5  | 816.5  | 700.6  |
| 201032_at   | NM_006698 | BLCAP   | 10904      |         | 182.7  | 181.1  | 195.8  | 183.7  | 149.9  |
| 201033_x_at | NM_001002 | RPLP0   | 6175       |         | 3833.2 | 3505.0 | 3749.0 | 3621.9 | 3457.4 |
| 201034_at   | BE545756  | ADD3    | 120        |         | 145.8  | 138.0  | 134.9  | 112.5  | 95.2   |
| 201035_s_at | BC000306  | HADH    | 3033       |         | 155.8  | 159.9  | 164.5  | 171.2  | 134.4  |
| 201036_s_at | NM_005327 | HADH    | 3033       |         | 340.1  | 369.7  | 532.4  | 460.3  | 319.2  |
| 201037_at   | NM_002627 | PFKP    | 5214       |         | 229.9  | 166.1  | 242.1  | 208.5  | 198.2  |
| 201038_s_at | T67821    | ANP32A  | 8125       |         | 162.4  | 124.2  | 156.2  | 138.2  | 121.7  |
| 201039_s_at | BF572938  | RAD23A  | 5886       |         | 315.8  | 276.8  | 338.2  | 309.4  | 262.3  |
| 201040_at   | NM_002070 | GNAI2   | 2771       |         | 37.7   | 29.6   | 38.2   | 40.6   | 28.2   |
| 201041_s_at | NM_004417 | DUSP1   | 1843       |         | 213.6  | 207.6  | 216.4  | 215.9  | 139.1  |
| 201042_at   | AL031651  | TGM2    | 7052       |         | 7.1    | 1.5    | 1.1    | 3.5    | 6.6    |
| 201043_s_at | NM_006305 | ANP32A  | 8125       |         | 216.0  | 241.8  | 234.2  | 200.5  | 208.1  |
| 201044_x_at | AA530892  | DUSP1   | 1843       |         | 15.7   | 11.8   | 12.9   | 22.5   | 19.1   |
| 201045_s_at | BF513857  | RAB6A   | /// W 5870 | /// 150 | 4.7    | 4.0    | 8.4    | 4.5    | 3.5    |
| 201046_s_at | NM_005053 | RAD23A  | 5886       |         | 316.1  | 366.3  | 350.4  | 330.9  | 282.0  |
| 201047_x_at | BC003617  | RAB6A   | /// W 5870 | /// 150 | 218.1  | 245.3  | 230.5  | 211.5  | 188.0  |
| 201048_x_at | NM_002869 | RAB6A   | /// W 5870 | /// 150 | 35.1   | 31.5   | 30.2   | 41.7   | 35.4   |
| 201049_s_at | NM_022551 | RPS18   | 6222       |         | 3781.1 | 3342.0 | 3521.9 | 3392.1 | 3422.6 |
| 201050_at   | NM_012268 | PLD3    | 23646      |         | 102.4  | 95.1   | 123.5  | 99.0   | 96.9   |
| 201051_at   | BE560202  | ANP32A  | 8125       |         | 522.7  | 531.4  | 567.4  | 509.2  | 467.6  |
| 201052_s_at | BG029917  | PSMF1   | 9491       |         | 305.9  | 355.6  | 393.8  | 364.2  | 299.3  |
| 201053_s_at | NM_006814 | PSMF1   | 9491       |         | 154.7  | 153.3  | 185.5  | 150.3  | 130.4  |
| 201054_at   | BE966599  | HNRNPA0 | 10949      |         | 532.6  | 495.2  | 539.6  | 516.4  | 463.9  |

|             |           |              |       |        |        |        |        |        |
|-------------|-----------|--------------|-------|--------|--------|--------|--------|--------|
| 201055_s_at | NM_006805 | HNRNPA0      | 10949 | 244.8  | 209.2  | 254.9  | 207.0  | 210.3  |
| 201056_at   | N53479    | GOLGB1       | 2804  | 30.5   | 23.7   | 32.3   | 28.6   | 17.5   |
| 201057_s_at | NM_004487 | GOLGB1       | 2804  | 73.1   | 68.7   | 88.1   | 77.8   | 63.9   |
| 201058_s_at | NM_006097 | MYL9         | 10398 | 0.8    | 0.5    | 0.9    | 0.4    | 0.3    |
| 201059_at   | NM_005231 | CTTN         | 2017  | 133.4  | 136.4  | 131.3  | 145.6  | 129.2  |
| 201060_x_at | AI537887  | STOM         | 2040  | 13.8   | 9.2    | 9.6    | 14.7   | 14.2   |
| 201061_s_at | M81635    | STOM         | 2040  | 1.2    | 7.9    | 9.2    | 14.9   | 7.5    |
| 201062_at   | M81635    | STOM         | 2040  | 0.3    | 0.6    | 0.2    | 0.4    | 0.2    |
| 201063_at   | NM_002901 | RCN1         | 5954  | 233.3  | 200.3  | 247.5  | 215.2  | 214.6  |
| 201064_s_at | NM_003819 | LOC100996618 | 8761  | 663.1  | 548.8  | 620.4  | 569.2  | 521.6  |
| 201065_s_at | NM_001518 | GTF2I        | 2969  | 312.7  | 296.8  | 284.3  | 310.4  | 213.2  |
| 201066_at   | NM_001916 | CYC1         | 1537  | 1441.1 | 1429.0 | 1565.2 | 1469.9 | 1359.6 |
| 201067_at   | BF215487  | PSMC2        | 5701  | 40.0   | 38.6   | 54.6   | 48.1   | 42.2   |
| 201068_s_at | NM_002803 | PSMC2        | 5701  | 432.5  | 418.1  | 428.3  | 370.5  | 360.8  |
| 201069_at   | NM_004530 | MMP2         | 4313  | 10.9   | 7.4    | 9.3    | 10.7   | 4.7    |
| 201070_x_at | AI739389  | SF3B1        | 23451 | 82.4   | 63.6   | 55.8   | 61.1   | 56.1   |
| 201071_x_at | NM_012433 | SF3B1        | 23451 | 423.7  | 388.5  | 448.3  | 401.4  | 358.1  |
| 201072_s_at | AW152160  | SMARCC1      | 6599  | 32.5   | 26.3   | 28.3   | 28.1   | 16.9   |
| 201073_s_at | AL040633  | SMARCC1      | 6599  | 69.7   | 70.8   | 75.8   | 61.3   | 62.7   |
| 201074_at   | AA593983  | SMARCC1      | 6599  | 153.1  | 101.5  | 130.7  | 125.1  | 123.7  |
| 201075_s_at | NM_003074 | SMARCC1      | 6599  | 72.8   | 69.1   | 89.1   | 80.7   | 68.0   |
| 201076_at   | NM_005008 | NHP2L1       | 4809  | 257.9  | 202.5  | 263.9  | 197.5  | 259.9  |
| 201077_s_at | AF155235  | ANXA2        | 302   | 930.5  | 917.7  | 1110.0 | 934.2  | 898.5  |
| 201078_at   | NM_004800 | TM9SF2       | 9375  | 450.5  | 407.4  | 457.9  | 425.3  | 353.8  |
| 201079_at   | NM_004710 | SYNGR2       | 9144  | 1220.7 | 1215.9 | 1408.9 | 1203.6 | 1152.9 |
| 201080_at   | BF338509  | PIP4K2B      | 8396  | 69.7   | 43.5   | 52.1   | 56.0   | 45.0   |
| 201081_s_at | NM_003559 | PIP4K2B      | 8396  | 47.1   | 41.8   | 41.4   | 42.8   | 41.3   |
| 201082_s_at | NM_004082 | DCTN1        | 1639  | 60.6   | 63.9   | 67.2   | 70.3   | 53.8   |
| 201083_s_at | AA740754  | BCLAF1       | 9774  | 73.7   | 38.3   | 58.3   | 49.8   | 46.0   |
| 201084_s_at | NM_014739 | BCLAF1       | 9774  | 463.2  | 420.5  | 478.7  | 432.4  | 381.5  |
| 201085_s_at | AA664291  | SON          | 6651  | 70.0   | 51.5   | 65.1   | 64.4   | 54.7   |
| 201086_x_at | NM_003103 | SON          | 6651  | 244.6  | 189.5  | 202.8  | 225.8  | 187.8  |
| 201087_at   | NM_002859 | PXN          | 5829  | 106.7  | 68.6   | 52.8   | 63.4   | 38.3   |
| 201088_at   | NM_002266 | KPNA2        | 3838  | 1228.8 | 796.9  | 1139.8 | 877.8  | 953.7  |
| 201089_at   | NM_001693 | ATP6V1B2     | 526   | 287.3  | 291.6  | 329.7  | 308.6  | 267.8  |
| 201090_x_at | NM_006082 | TUBA1B       | 10376 | 3001.6 | 3055.4 | 3261.5 | 2971.8 | 2842.4 |
| 201091_s_at | BE748755  | CBX3         | 11335 | 438.4  | 256.9  | 461.9  | 312.2  | 290.1  |
| 201092_at   | NM_002893 | RBBP7        | 5931  | 547.3  | 426.3  | 566.7  | 451.3  | 453.0  |
| 201093_x_at | NM_004168 | SDHA         | 6389  | 220.2  | 195.5  | 254.3  | 208.5  | 191.7  |
| 201094_at   | NM_001032 | RPS29        | 6235  | 3437.6 | 3183.9 | 3661.0 | 3396.0 | 3242.1 |
| 201095_at   | NM_004394 | DAP          | 1611  | 266.9  | 344.7  | 325.5  | 309.7  | 284.4  |
| 201096_s_at | AL537042  | ARF4         | 378   | 854.0  | 824.5  | 913.5  | 840.9  | 757.9  |
| 201097_s_at | NM_001660 | ARF4         | 378   | 1297.4 | 1049.3 | 1314.2 | 1140.9 | 1025.9 |
| 201098_at   | NM_004766 | COPB2        | 9276  | 228.3  | 178.2  | 225.8  | 163.5  | 159.5  |
| 201099_at   | AA824386  | USP9X        | 8239  | 81.9   | 78.4   | 91.0   | 65.6   | 62.4   |
| 201100_s_at | NM_004652 | USP9X        | 8239  | 130.1  | 115.5  | 139.1  | 145.7  | 122.5  |
| 201101_s_at | BE963370  | BCLAF1       | 9774  | 140.4  | 115.6  | 143.7  | 123.3  | 109.8  |
| 201102_s_at | NM_002626 | PFKL         | 5211  | 145.0  | 147.5  | 164.2  | 156.2  | 164.9  |
| 201103_x_at | BE299495  | NBPF10       | 25832 | 340.1  | 334.9  | 358.4  | 345.8  | 258.8  |
| 201104_x_at | NM_015383 | NBPF10       | 25832 | 225.9  | 181.0  | 198.6  | 190.9  | 150.7  |
| 201105_at   | NM_002305 | LGALS1       | 3956  | 1.5    | 1.8    | 1.7    | 0.7    | 1.2    |
| 201106_at   | NM_002085 | GPX4         | 2879  | 1087.2 | 1129.5 | 1257.3 | 1291.8 | 998.6  |
| 201107_s_at | AI812030  | THBS1        | 7057  | 1.2    | 0.9    | 1.0    | 1.3    | 0.5    |

|             |           |          |       |        |        |        |        |        |
|-------------|-----------|----------|-------|--------|--------|--------|--------|--------|
| 201108_s_at | BF055462  | THBS1    | 7057  | 13.0   | 9.6    | 17.0   | 9.5    | 7.8    |
| 201109_s_at | AV726673  | THBS1    | 7057  | 0.9    | 7.5    | 1.5    | 0.9    | 1.0    |
| 201110_s_at | NM_003246 | THBS1    | 7057  | 5.6    | 0.2    | 0.4    | 5.4    | 2.0    |
| 201111_at   | AF053641  | CSE1L    | 1434  | 250.6  | 188.1  | 317.8  | 206.5  | 245.4  |
| 201112_s_at | NM_001316 | CSE1L    | 1434  | 754.7  | 538.7  | 809.0  | 598.6  | 672.5  |
| 201113_at   | NM_003321 | TUFM     | 7284  | 1225.2 | 1241.1 | 1331.7 | 1223.2 | 1061.7 |
| 201114_x_at | NM_002792 | PSMA7    | 5688  | 906.0  | 853.4  | 1008.7 | 978.4  | 1042.9 |
| 201115_at   | NM_006230 | POLD2    | 5425  | 687.8  | 620.2  | 770.1  | 625.6  | 612.9  |
| 201116_s_at | AI922855  | CPE      | 1363  | 91.2   | 97.9   | 94.7   | 93.5   | 78.0   |
| 201117_s_at | NM_001873 | CPE      | 1363  | 130.0  | 106.7  | 110.7  | 108.8  | 91.8   |
| 201118_at   | NM_002631 | PGD      | 5226  | 438.0  | 487.6  | 561.9  | 510.4  | 444.9  |
| 201119_s_at | NM_004074 | COX8A    | 1351  | 1899.4 | 1919.7 | 2106.2 | 1998.9 | 1742.5 |
| 201120_s_at | AL547946  | PGRMC1   | 10857 | 313.0  | 297.9  | 360.3  | 278.3  | 293.6  |
| 201121_s_at | NM_006667 | PGRMC1   | 10857 | 531.3  | 402.5  | 586.3  | 458.9  | 440.2  |
| 201122_x_at | BC000751  | EIF5A    | 1984  | 811.0  | 683.8  | 807.9  | 675.4  | 635.8  |
| 201123_s_at | NM_001970 | EIF5A    | 1984  | 1617.0 | 1626.6 | 1832.4 | 1749.7 | 1556.1 |
| 201124_at   | AL048423  | ITGB5    | 3693  | 13.7   | 1.8    | 5.9    | 12.9   | 5.8    |
| 201125_s_at | NM_002213 | ITGB5    | 3693  | 54.6   | 45.4   | 43.7   | 53.9   | 55.5   |
| 201126_s_at | NM_002406 | MGAT1    | 4245  | 97.2   | 91.3   | 74.5   | 71.2   | 68.9   |
| 201127_s_at | AI971281  | ACLY     | 47    | 243.4  | 251.9  | 316.0  | 290.7  | 297.7  |
| 201128_s_at | NM_001096 | ACLY     | 47    | 941.6  | 854.1  | 1067.1 | 912.1  | 875.5  |
| 201129_at   | NM_006276 | SRSF7    | 6432  | 192.1  | 182.4  | 198.3  | 171.7  | 182.5  |
| 201130_s_at | L08599    | CDH1     | 999   | 102.7  | 127.8  | 113.2  | 136.4  | 92.2   |
| 201131_s_at | NM_004360 | CDH1     | 999   | 747.8  | 728.4  | 744.5  | 739.9  | 613.9  |
| 201132_at   | NM_019597 | HNRNPH2  | 3188  | 320.7  | 250.3  | 316.7  | 278.6  | 228.0  |
| 201133_s_at | AA142966  | PJA2     | 9867  | 103.2  | 113.0  | 106.5  | 105.9  | 92.4   |
| 201134_x_at | NM_001867 | COX7C    | 1350  | 1525.7 | 1514.2 | 1559.1 | 1557.7 | 1268.8 |
| 201135_at   | NM_004092 | ECHS1    | 1892  | 1258.0 | 1363.7 | 1501.9 | 1436.8 | 1256.6 |
| 201136_at   | NM_002668 | PLP2     | 5355  | 69.7   | 64.8   | 69.4   | 79.5   | 47.2   |
| 201137_s_at | NM_002121 | HLA-DPB1 | 3115  | 1.2    | 1.7    | 2.8    | 4.2    | 6.2    |
| 201138_s_at | BG532929  | SSB      | 6741  | 243.3  | 155.4  | 224.6  | 163.3  | 163.3  |
| 201139_s_at | NM_003142 | SSB      | 6741  | 244.8  | 178.8  | 261.7  | 206.0  | 206.9  |
| 201140_s_at | NM_004583 | RAB5C    | 5878  | 318.2  | 325.5  | 349.1  | 320.4  | 312.6  |
| 201141_at   | NM_002510 | GPNMB    | 10457 | 16.0   | 21.5   | 16.9   | 15.6   | 7.4    |
| 201142_at   | AA577698  | EIF2S1   | 1965  | 168.4  | 150.9  | 203.1  | 136.4  | 180.4  |
| 201143_s_at | BC002513  | EIF2S1   | 1965  | 99.5   | 85.4   | 106.4  | 75.7   | 82.1   |
| 201144_s_at | NM_004094 | EIF2S1   | 1965  | 627.7  | 475.2  | 731.4  | 561.5  | 602.6  |
| 201145_at   | NM_006118 | HAX1     | 10456 | 956.9  | 1028.9 | 1091.2 | 1099.6 | 879.3  |
| 201146_at   | NM_006164 | NFE2L2   | 4780  | 184.1  | 157.6  | 200.0  | 146.2  | 143.0  |
| 201147_s_at | BF347089  | TIMP3    | 7078  | 1.4    | 4.0    | 1.4    | 1.5    | 1.0    |
| 201148_s_at | AW338933  | TIMP3    | 7078  | 6.5    | 4.8    | 9.3    | 7.4    | 1.1    |
| 201149_s_at | U67195    | TIMP3    | 7078  | 11.9   | 9.0    | 10.4   | 5.5    | 6.1    |
| 201150_s_at | NM_000362 | TIMP3    | 7078  | 5.2    | 3.6    | 2.7    | 3.3    | 4.8    |
| 201151_s_at | BF512200  | MBNL1    | 4154  | 45.6   | 33.8   | 45.4   | 30.8   | 34.4   |
| 201152_s_at | N31913    | MBNL1    | 4154  | 101.3  | 85.3   | 110.4  | 64.7   | 84.8   |
| 201153_s_at | NM_021038 | MBNL1    | 4154  | 72.0   | 61.7   | 88.9   | 66.1   | 78.0   |
| 201154_x_at | NM_000968 | RPL4     | 6124  | 2931.9 | 2991.3 | 3080.6 | 2942.8 | 2835.3 |
| 201155_s_at | NM_014874 | MFN2     | 9927  | 258.0  | 283.2  | 348.3  | 316.2  | 281.2  |
| 201156_s_at | AF141304  | RAB5C    | 5878  | 240.6  | 197.0  | 240.4  | 197.1  | 211.1  |
| 201157_s_at | AF020500  | NMT1     | 4836  | 107.6  | 106.1  | 133.3  | 94.1   | 97.9   |
| 201158_at   | AI570834  | NMT1     | 4836  | 36.2   | 31.7   | 38.5   | 33.1   | 41.9   |
| 201159_s_at | NM_021079 | NMT1     | 4836  | 7.6    | 10.1   | 6.9    | 8.4    | 2.8    |
| 201160_s_at | AL556190  | YBX3     | 8531  | 987.3  | 795.2  | 1045.8 | 842.2  | 853.2  |

|             |           |          |       |        |       |        |        |        |
|-------------|-----------|----------|-------|--------|-------|--------|--------|--------|
| 201161_s_at | NM_003651 | YBX3     | 8531  | 544.4  | 393.3 | 465.7  | 423.0  | 435.7  |
| 201162_at   | NM_001553 | IGFBP7   | 3490  | 1.0    | 0.8   | 1.0    | 0.7    | 0.5    |
| 201163_s_at | NM_001553 | IGFBP7   | 3490  | 1.9    | 0.5   | 0.5    | 0.4    | 1.3    |
| 201164_s_at | BG474429  | PUM1     | 9698  | 187.0  | 176.0 | 197.2  | 171.1  | 173.4  |
| 201165_s_at | BE670915  | PUM1     | 9698  | 261.2  | 207.8 | 256.8  | 241.3  | 182.3  |
| 201166_s_at | NM_014676 | PUM1     | 9698  | 362.9  | 326.9 | 376.5  | 312.0  | 312.8  |
| 201167_x_at | D13989    | ARHGDI A | 396   | 146.4  | 156.1 | 180.5  | 167.7  | 144.8  |
| 201168_x_at | NM_004309 | ARHGDI A | 396   | 512.6  | 384.5 | 441.6  | 436.3  | 331.4  |
| 201169_s_at | BG326045  | BHLHE40  | 8553  | 10.2   | 1.9   | 11.7   | 4.9    | 8.3    |
| 201170_s_at | NM_003670 | BHLHE40  | 8553  | 69.1   | 32.1  | 68.4   | 55.0   | 53.0   |
| 201171_at   | NM_003945 | ATP6V0E1 | 8992  | 19.7   | 15.9  | 18.8   | 18.9   | 15.8   |
| 201172_x_at | NM_003945 | ATP6V0E1 | 8992  | 789.9  | 764.8 | 855.8  | 757.5  | 720.9  |
| 201173_x_at | NM_006600 | NUDC     | 10726 | 524.0  | 409.9 | 550.1  | 410.2  | 458.3  |
| 201174_s_at | NM_018975 | TERF2IP  | 54386 | 215.7  | 230.8 | 256.0  | 237.4  | 203.2  |
| 201175_at   | NM_015959 | TMX2     | 51075 | 846.9  | 803.0 | 962.6  | 812.3  | 738.0  |
| 201176_s_at | NM_001655 | ARCN1    | 372   | 328.1  | 300.3 | 354.3  | 328.6  | 275.5  |
| 201177_s_at | NM_005499 | UBA2     | 10054 | 276.9  | 204.7 | 283.6  | 214.8  | 237.1  |
| 201178_at   | NM_012179 | FBXO7    | 25793 | 230.3  | 269.1 | 237.7  | 229.0  | 182.1  |
| 201179_s_at | J03005    | GNAI3    | 2773  | 119.5  | 106.2 | 128.4  | 126.9  | 111.8  |
| 201180_s_at | J03198    | GNAI3    | 2773  | 322.3  | 316.3 | 363.1  | 282.8  | 264.4  |
| 201181_at   | NM_006496 | GNAI3    | 2773  | 18.6   | 14.7  | 21.6   | 17.9   | 20.1   |
| 201182_s_at | AI761771  | CHD4     | 1108  | 48.4   | 37.4  | 43.9   | 39.8   | 40.6   |
| 201183_s_at | AI613273  | CHD4     | 1108  | 106.6  | 102.9 | 111.3  | 97.0   | 84.1   |
| 201184_s_at | NM_001273 | CHD4     | 1108  | 168.3  | 147.0 | 169.2  | 141.4  | 118.9  |
| 201185_at   | NM_002775 | HTRA1    | 5654  | 15.9   | 17.3  | 18.3   | 18.0   | 8.6    |
| 201186_at   | NM_002337 | LRPAP1   | 4043  | 180.0  | 189.2 | 187.4  | 171.0  | 182.0  |
| 201187_s_at | BF001241  | ITPR3    | 3710  | 2.1    | 7.5   | 3.6    | 8.7    | 5.4    |
| 201188_s_at | D26351    | ITPR3    | 3710  | 23.6   | 12.9  | 30.4   | 27.0   | 13.8   |
| 201189_s_at | NM_002224 | ITPR3    | 3710  | 67.4   | 54.4  | 46.6   | 54.5   | 42.6   |
| 201190_s_at | H15647    | PITPNA   | 5306  | 154.9  | 155.7 | 187.9  | 174.5  | 158.8  |
| 201191_at   | H15647    | PITPNA   | 5306  | 134.7  | 127.5 | 148.9  | 141.1  | 122.2  |
| 201192_s_at | NM_006224 | PITPNA   | 5306  | 187.6  | 187.7 | 242.4  | 197.6  | 174.2  |
| 201193_at   | NM_005896 | IDH1     | 3417  | 735.5  | 780.1 | 856.3  | 699.6  | 683.0  |
| 201194_at   | NM_003009 | SEPW1    | 6415  | 438.4  | 448.1 | 444.8  | 459.8  | 339.6  |
| 201195_s_at | AB018009  | SLC7A5   | 8140  | 29.2   | 30.1  | 28.5   | 37.2   | 25.3   |
| 201196_s_at | M21154    | AMD1     | 262   | 1331.4 | 999.5 | 1373.1 | 1116.1 | 1140.1 |
| 201197_at   | NM_001634 | AMD1     | 262   | 1044.9 | 795.3 | 1144.0 | 906.9  | 899.6  |
| 201198_s_at | AI860431  | PSMD1    | 5707  | 228.4  | 270.1 | 288.0  | 232.0  | 236.1  |
| 201199_s_at | NM_002807 | PSMD1    | 5707  | 231.0  | 227.7 | 267.2  | 211.0  | 216.9  |
| 201200_at   | NM_003851 | CREG1    | 8804  | 261.7  | 239.3 | 267.2  | 272.9  | 205.0  |
| 201201_at   | NM_000100 | CSTB     | 1476  | 846.6  | 873.9 | 943.2  | 878.8  | 788.3  |
| 201202_at   | NM_002592 | PCNA     | 5111  | 825.0  | 560.1 | 968.2  | 615.7  | 792.3  |
| 201203_s_at | AI921320  | RRBP1    | 6238  | 13.5   | 12.3  | 9.2    | 13.4   | 13.1   |
| 201204_s_at | AA706065  | RRBP1    | 6238  | 88.6   | 79.2  | 94.2   | 88.5   | 72.6   |
| 201205_at   | AF006751  | -        | -     | 15.7   | 8.1   | 8.5    | 13.0   | 9.3    |
| 201206_s_at | NM_004587 | RRBP1    | 6238  | 8.1    | 8.6   | 3.9    | 16.0   | 6.4    |
| 201207_at   | NM_021137 | TNFAIP1  | 7126  | 100.4  | 90.8  | 96.6   | 100.6  | 72.6   |
| 201208_s_at | BC001643  | TNFAIP1  | 7126  | 36.1   | 36.6  | 32.8   | 26.6   | 28.8   |
| 201209_at   | NM_004964 | HDAC1    | 3065  | 835.6  | 681.8 | 828.2  | 775.1  | 663.2  |
| 201210_at   | NM_001356 | DDX3X    | 1654  | 781.8  | 639.9 | 859.8  | 695.0  | 683.9  |
| 201211_s_at | AF061337  | DDX3X    | 1654  | 90.7   | 78.1  | 99.1   | 84.4   | 93.6   |
| 201212_at   | D55696    | LGMN     | 5641  | 158.9  | 115.3 | 131.4  | 128.1  | 116.8  |
| 201213_at   | AI090331  | PPP1R7   | 5510  | 23.5   | 27.9  | 34.0   | 38.6   | 30.6   |

|             |           |                          |       |        |        |        |        |        |
|-------------|-----------|--------------------------|-------|--------|--------|--------|--------|--------|
| 201214_s_at | NM_002712 | PPP1R7                   | 5510  | 165.4  | 191.0  | 208.6  | 187.9  | 185.6  |
| 201215_at   | NM_005032 | PLS3                     | 5358  | 215.2  | 204.0  | 224.1  | 211.4  | 179.8  |
| 201216_at   | NM_006817 | ERP29                    | 10961 | 635.3  | 792.6  | 752.4  | 760.0  | 614.5  |
| 201217_x_at | NM_000967 | RNU86 /// R16122 /// 116 | 6122  | 4053.5 | 3900.2 | 4069.4 | 3874.7 | 3731.0 |
| 201218_at   | N23018    | CTBP2                    | 1488  | 273.3  | 228.7  | 282.8  | 256.8  | 203.3  |
| 201219_at   | AW269836  | CTBP2                    | 1488  | 52.1   | 50.5   | 61.3   | 49.8   | 45.4   |
| 201220_x_at | NM_001329 | CTBP2                    | 1488  | 245.0  | 228.0  | 245.3  | 243.1  | 204.8  |
| 201221_s_at | NM_003089 | SNRNP70                  | 6625  | 286.8  | 219.4  | 291.5  | 278.3  | 234.3  |
| 201222_s_at | AL527365  | RAD23B                   | 5887  | 982.8  | 839.3  | 1013.1 | 883.5  | 787.5  |
| 201223_s_at | NM_002874 | RAD23B                   | 5887  | 298.8  | 254.0  | 335.1  | 335.8  | 259.6  |
| 201224_s_at | AU147713  | SRRM1                    | 10250 | 75.8   | 66.1   | 96.5   | 71.0   | 83.0   |
| 201225_s_at | NM_005839 | SRRM1                    | 10250 | 318.0  | 352.9  | 382.9  | 334.2  | 320.5  |
| 201226_at   | NM_005004 | NDUFB8                   | 4714  | 274.2  | 354.4  | 293.4  | 337.1  | 282.2  |
| 201227_s_at | NM_005004 | NDUFB8                   | 4714  | 410.2  | 348.5  | 380.0  | 382.4  | 301.3  |
| 201228_s_at | AW074830  | ARIH2                    | 10425 | 43.5   | 27.3   | 29.7   | 38.4   | 37.3   |
| 201229_s_at | BC000422  | ARIH2                    | 10425 | 105.3  | 76.2   | 117.8  | 88.0   | 84.1   |
| 201230_s_at | NM_006321 | ARIH2                    | 10425 | 76.3   | 58.1   | 70.8   | 62.1   | 55.2   |
| 201231_s_at | NM_001428 | ENO1                     | 2023  | 2474.8 | 2069.2 | 2609.2 | 2220.7 | 2264.5 |
| 201232_s_at | NM_002817 | PSMD13                   | 5719  | 257.3  | 275.7  | 333.5  | 284.4  | 277.5  |
| 201233_at   | NM_002817 | PSMD13                   | 5719  | 95.8   | 111.4  | 130.5  | 96.2   | 100.0  |
| 201234_at   | NM_004517 | ILK                      | 3611  | 216.1  | 148.6  | 178.0  | 165.0  | 109.4  |
| 201235_s_at | BG339064  | BTG2                     | 7832  | 29.2   | 37.3   | 29.8   | 37.5   | 33.5   |
| 201236_s_at | NM_006763 | BTG2                     | 7832  | 101.2  | 92.0   | 98.0   | 124.2  | 72.7   |
| 201237_at   | AV685920  | CAPZA2                   | 830   | 136.7  | 95.6   | 129.6  | 111.5  | 96.3   |
| 201238_s_at | BC005338  | CAPZA2                   | 830   | 335.2  | 292.2  | 363.0  | 349.5  | 253.6  |
| 201239_s_at | BF530535  | SPCS2                    | 9789  | 582.4  | 577.3  | 644.4  | 525.8  | 540.5  |
| 201240_s_at | NM_014752 | SPCS2                    | 9789  | 578.3  | 583.4  | 647.3  | 616.0  | 544.8  |
| 201241_at   | NM_004939 | DDX1                     | 1653  | 251.5  | 253.6  | 265.8  | 213.2  | 235.6  |
| 201242_s_at | BC000006  | ATP1B1                   | 481   | 598.5  | 373.2  | 402.1  | 390.9  | 421.7  |
| 201243_s_at | NM_001677 | ATP1B1                   | 481   | 826.4  | 592.8  | 659.9  | 614.6  | 630.0  |
| 201244_s_at | NM_002880 | RAF1                     | 5894  | 246.6  | 204.8  | 256.4  | 214.5  | 186.1  |
| 201245_s_at | AL523776  | LOC1019276:55611 /// 10  | 55611 | 263.0  | 271.0  | 307.7  | 300.6  | 215.4  |
| 201246_s_at | NM_017670 | LOC1019276:55611 /// 10  | 55611 | 89.9   | 121.5  | 146.4  | 116.6  | 96.3   |
| 201247_at   | BE513151  | SREBF2                   | 6721  | 121.4  | 115.0  | 116.7  | 94.9   | 99.7   |
| 201248_s_at | NM_004599 | SREBF2                   | 6721  | 85.6   | 74.3   | 91.6   | 82.8   | 73.0   |
| 201249_at   | AI091047  | SLC2A1                   | 6513  | 2.2    | 9.6    | 12.6   | 2.1    | 6.4    |
| 201250_s_at | NM_006516 | SLC2A1                   | 6513  | 90.4   | 60.6   | 70.5   | 61.3   | 54.4   |
| 201251_at   | NM_002654 | PKM                      | 5315  | 1312.8 | 1390.1 | 1532.1 | 1453.7 | 1247.8 |
| 201252_at   | NM_006503 | PSMC4                    | 5704  | 353.8  | 381.7  | 383.7  | 338.1  | 380.1  |
| 201253_s_at | NM_006319 | CDIPT                    | 10423 | 480.4  | 400.1  | 557.1  | 478.6  | 416.0  |
| 201254_x_at | NM_001010 | RPS6                     | 6194  | 4513.2 | 4019.0 | 4531.7 | 4237.1 | 3913.9 |
| 201255_x_at | NM_004639 | BAG6                     | 7917  | 318.1  | 363.8  | 330.6  | 359.7  | 292.9  |
| 201256_at   | NM_004718 | COX7A2L                  | 9167  | 402.9  | 461.9  | 491.2  | 466.3  | 366.2  |
| 201257_x_at | NM_001006 | RPS3A /// SN6189 /// 894 | 6189  | 4695.3 | 4237.8 | 4725.1 | 4460.9 | 4440.0 |
| 201258_at   | NM_001020 | RPS16                    | 6217  | 3154.5 | 2658.5 | 3150.7 | 2879.9 | 2619.9 |
| 201259_s_at | AI768845  | SYPL1                    | 6856  | 456.6  | 467.1  | 506.6  | 371.5  | 397.3  |
| 201260_s_at | NM_006754 | SYPL1                    | 6856  | 404.6  | 308.5  | 446.7  | 392.4  | 356.1  |
| 201261_x_at | BC002416  | BGN                      | 633   | 7.6    | 8.2    | 6.1    | 2.7    | 2.0    |
| 201262_s_at | NM_001711 | BGN                      | 633   | 0.5    | 0.6    | 0.6    | 1.2    | 0.8    |
| 201263_at   | NM_003191 | TARS                     | 6897  | 530.1  | 445.5  | 528.5  | 479.9  | 472.2  |
| 201264_at   | NM_007263 | COPE                     | 11316 | 727.4  | 782.0  | 762.7  | 804.8  | 611.6  |
| 201265_at   | AF119897  | -                        | -     | 6.4    | 2.4    | 11.9   | 6.4    | 7.4    |
| 201266_at   | NM_003330 | TXNRD1                   | 7296  | 590.8  | 502.3  | 574.8  | 488.9  | 486.9  |

|             |           |                          |              |        |        |        |        |        |
|-------------|-----------|--------------------------|--------------|--------|--------|--------|--------|--------|
| 201267_s_at | AL545523  | PSMC3                    | 5702         | 433.7  | 454.1  | 527.3  | 471.7  | 416.9  |
| 201268_at   | NM_002512 | NME1-NME2                | 4831 /// 654 | 1464.7 | 1528.9 | 1642.7 | 1582.6 | 1421.5 |
| 201269_s_at | AB028991  | NUDCD3                   | 23386        | 11.7   | 8.1    | 20.9   | 18.7   | 8.6    |
| 201270_x_at | NM_015332 | NUDCD3                   | 23386        | 132.6  | 133.3  | 146.3  | 132.6  | 111.1  |
| 201271_s_at | NM_016732 | RALY                     | 22913        | 173.1  | 143.2  | 173.3  | 162.2  | 140.1  |
| 201272_at   | NM_001628 | AKR1B1                   | 231          | 1.1    | 8.4    | 11.7   | 7.4    | 1.9    |
| 201273_s_at | NM_003133 | SRP9                     | 6726         | 1208.5 | 982.9  | 1226.7 | 1064.9 | 945.6  |
| 201274_at   | NM_002790 | PSMA5                    | 5686         | 421.6  | 391.7  | 465.4  | 409.8  | 393.9  |
| 201275_at   | NM_002004 | FDPS                     | 2224         | 380.1  | 376.8  | 505.2  | 415.5  | 426.2  |
| 201276_at   | AF267863  | RAB5B                    | 5869         | 166.4  | 150.3  | 128.9  | 140.0  | 100.7  |
| 201277_s_at | NM_004499 | HNRNPAB                  | 3182         | 696.3  | 681.0  | 859.5  | 619.4  | 720.9  |
| 201278_at   | N21202    | DAB2 /// LOC1601 /// 101 |              | 3.5    | 4.8    | 11.6   | 3.6    | 2.5    |
| 201279_s_at | BC003064  | DAB2 /// LOC1601 /// 101 |              | 0.8    | 1.6    | 1.3    | 1.2    | 0.4    |
| 201280_s_at | NM_001343 | DAB2 /// LOC1601 /// 101 |              | 0.8    | 0.3    | 1.1    | 0.7    | 0.4    |
| 201281_at   | NM_007002 | ADRM1                    | 11047        | 435.1  | 446.2  | 533.3  | 424.4  | 439.5  |
| 201282_at   | NM_002541 | OGDH                     | 4967         | 175.0  | 197.5  | 212.8  | 173.9  | 140.8  |
| 201283_s_at | J03068    | TRAK1                    | 22906        | 3.5    | 4.7    | 5.6    | 4.2    | 7.1    |
| 201284_s_at | NM_001640 | APEH                     | 327          | 635.2  | 559.4  | 729.7  | 626.5  | 572.7  |
| 201285_at   | NM_013446 | MKRN1                    | 23608        | 214.1  | 177.2  | 198.8  | 180.8  | 142.9  |
| 201286_at   | Z48199    | SDC1                     | 6382         | 45.2   | 45.1   | 47.8   | 60.8   | 35.6   |
| 201287_s_at | NM_002997 | SDC1                     | 6382         | 144.7  | 189.1  | 183.4  | 171.9  | 138.8  |
| 201288_at   | NM_001175 | ARHGDI                   | 397          | 0.8    | 0.9    | 0.6    | 1.0    | 0.3    |
| 201289_at   | NM_001554 | CYR61                    | 3491         | 40.8   | 33.9   | 46.1   | 41.8   | 35.2   |
| 201290_at   | NM_014300 | SEC11A                   | 23478        | 429.5  | 409.4  | 480.7  | 438.8  | 347.4  |
| 201291_s_at | AU159942  | TOP2A                    | 7153         | 184.2  | 171.1  | 231.3  | 168.1  | 179.1  |
| 201292_at   | AL561834  | TOP2A                    | 7153         | 263.1  | 170.0  | 244.6  | 180.1  | 220.2  |
| 201293_x_at | NM_021130 | LOC1010603               | 5478 /// 101 | 3957.3 | 3914.2 | 4054.2 | 3860.5 | 3788.5 |
| 201294_s_at | N24643    | WSB1                     | 26118        | 14.4   | 6.8    | 5.8    | 11.1   | 13.3   |
| 201295_s_at | BF111821  | WSB1                     | 26118        | 6.6    | 5.2    | 9.1    | 5.0    | 3.2    |
| 201296_s_at | NM_015626 | WSB1                     | 26118        | 81.7   | 110.9  | 137.8  | 110.6  | 97.1   |
| 201297_s_at | AK023321  | MOB1A                    | 55233        | 16.3   | 11.8   | 21.3   | 12.1   | 13.3   |
| 201298_s_at | BC003398  | MOB1A                    | 55233        | 45.0   | 44.8   | 48.7   | 40.1   | 40.4   |
| 201299_s_at | NM_018221 | MOB1A                    | 55233        | 16.3   | 13.6   | 25.1   | 14.6   | 10.8   |
| 201300_s_at | NM_000311 | PRNP                     | 5621         | 384.6  | 300.4  | 453.5  | 322.3  | 324.2  |
| 201301_s_at | BC000182  | ANXA4                    | 307          | 128.3  | 120.3  | 161.0  | 125.7  | 128.6  |
| 201302_at   | NM_001153 | ANXA4                    | 307          | 76.7   | 63.9   | 92.1   | 77.9   | 65.9   |
| 201303_at   | NM_014740 | EIF4A3                   | 9775         | 735.2  | 619.8  | 821.2  | 754.7  | 690.9  |
| 201304_at   | NM_005000 | NDUFA5                   | 4698         | 267.2  | 222.4  | 288.7  | 221.6  | 241.8  |
| 201305_x_at | AV712577  | ANP32B                   | 10541        | 717.2  | 579.5  | 698.1  | 536.8  | 601.8  |
| 201306_s_at | NM_006401 | ANP32B                   | 10541        | 1043.8 | 1081.5 | 1120.7 | 978.6  | 909.7  |
| 201307_at   | AL534972  | SEPT11                   | 55752        | 284.5  | 253.1  | 258.4  | 246.7  | 223.3  |
| 201308_s_at | NM_018243 | SEPT11                   | 55752        | 71.0   | 65.3   | 76.8   | 60.5   | 56.9   |
| 201309_x_at | U36189    | NREP                     | 9315         | 108.6  | 96.4   | 108.5  | 117.3  | 90.7   |
| 201310_s_at | NM_004772 | NREP                     | 9315         | 312.1  | 333.9  | 299.4  | 297.2  | 220.1  |
| 201311_s_at | AL515318  | SH3BGRL                  | 6451         | 34.2   | 37.9   | 36.5   | 34.2   | 26.5   |
| 201312_s_at | NM_003022 | SH3BGRL                  | 6451         | 94.2   | 91.2   | 111.8  | 102.5  | 82.3   |
| 201313_at   | NM_001975 | ENO2                     | 2026         | 40.2   | 67.1   | 34.8   | 55.5   | 31.9   |
| 201314_at   | NM_006374 | STK25                    | 10494        | 108.9  | 111.2  | 126.2  | 110.6  | 102.3  |
| 201315_x_at | NM_006435 | IFITM2                   | 10581        | 246.2  | 271.2  | 275.9  | 270.8  | 221.1  |
| 201316_at   | AL523904  | PSMA2                    | 5683         | 44.5   | 56.8   | 59.5   | 47.9   | 51.7   |
| 201317_s_at | NM_002787 | PSMA2                    | 5683         | 980.4  | 778.9  | 1030.3 | 837.7  | 734.6  |
| 201318_s_at | NM_006471 | MYL12A /// 10627 /// 10  |              | 805.0  | 827.0  | 916.1  | 871.3  | 790.5  |
| 201319_at   | NM_006471 | MYL12A                   | 10627        | 156.8  | 236.2  | 174.4  | 164.3  | 173.9  |



|             |           |                          |       |        |        |        |        |        |
|-------------|-----------|--------------------------|-------|--------|--------|--------|--------|--------|
| 201320_at   | BF663402  | SMARCC2                  | 6601  | 54.7   | 62.1   | 57.7   | 45.5   | 39.9   |
| 201321_s_at | NM_003075 | SMARCC2                  | 6601  | 88.1   | 88.4   | 94.9   | 82.6   | 67.9   |
| 201322_at   | NM_001686 | ATP5B                    | 506   | 2709.3 | 2536.4 | 2741.8 | 2617.6 | 2373.8 |
| 201323_at   | NM_006824 | EBNA1BP2 // 10969 /// 10 |       | 136.5  | 95.4   | 143.1  | 101.5  | 101.3  |
| 201324_at   | NM_001423 | EMP1                     | 2012  | 0.2    | 0.2    | 4.7    | 1.8    | 3.5    |
| 201325_s_at | NM_001423 | EMP1                     | 2012  | 1.2    | 0.9    | 1.8    | 0.6    | 0.5    |
| 201326_at   | BE737030  | CCT6A                    | 908   | 347.0  | 292.9  | 430.0  | 323.2  | 366.0  |
| 201327_s_at | NM_001762 | CCT6A                    | 908   | 581.3  | 458.2  | 683.4  | 485.3  | 559.7  |
| 201328_at   | AL575509  | ETS2                     | 2114  | 1.5    | 5.9    | 0.8    | 6.1    | 4.9    |
| 201329_s_at | NM_005239 | ETS2                     | 2114  | 12.8   | 13.2   | 16.8   | 10.3   | 9.0    |
| 201330_at   | NM_002887 | RARS                     | 5917  | 213.2  | 271.9  | 273.9  | 314.6  | 302.5  |
| 201331_s_at | BC004973  | STAT6                    | 6778  | 6.0    | 4.9    | 5.1    | 6.0    | 5.1    |
| 201332_s_at | NM_003153 | STAT6                    | 6778  | 1.0    | 5.6    | 1.6    | 1.5    | 3.3    |
| 201333_s_at | AI807672  | ARHGEF12                 | 23365 | 32.2   | 21.0   | 30.2   | 28.6   | 15.7   |
| 201334_s_at | AB002380  | ARHGEF12                 | 23365 | 136.0  | 127.5  | 141.3  | 170.2  | 104.5  |
| 201335_s_at | NM_015313 | ARHGEF12                 | 23365 | 5.7    | 3.1    | 2.5    | 4.5    | 1.8    |
| 201336_at   | BC003570  | VAMP3                    | 9341  | 373.7  | 314.5  | 372.6  | 327.5  | 296.6  |
| 201337_s_at | NM_004781 | VAMP3                    | 9341  | 230.5  | 251.5  | 302.3  | 254.1  | 165.6  |
| 201338_x_at | NM_002097 | GTF3A                    | 2971  | 694.8  | 576.8  | 735.7  | 586.1  | 613.6  |
| 201339_s_at | NM_002979 | SCP2                     | 6342  | 396.5  | 350.4  | 381.1  | 354.3  | 302.0  |
| 201340_s_at | AF010314  | ENC1                     | 8507  | 24.4   | 32.4   | 32.9   | 24.1   | 16.2   |
| 201341_at   | NM_003633 | ENC1                     | 8507  | 70.5   | 71.6   | 81.5   | 71.5   | 55.5   |
| 201342_at   | NM_003093 | SNRPC                    | 6631  | 294.8  | 299.6  | 349.1  | 318.2  | 300.4  |
| 201343_at   | BE621259  | UBE2D2                   | 7322  | 350.8  | 280.6  | 386.2  | 330.5  | 287.6  |
| 201344_at   | BF196642  | UBE2D2                   | 7322  | 26.1   | 19.1   | 20.4   | 26.2   | 14.7   |
| 201345_s_at | NM_003339 | UBE2D2                   | 7322  | 345.0  | 324.8  | 333.6  | 294.0  | 275.6  |
| 201346_at   | NM_024551 | ADIPOR2                  | 79602 | 144.2  | 120.9  | 135.4  | 124.8  | 111.6  |
| 201347_x_at | NM_012203 | GRHPR                    | 9380  | 317.1  | 293.4  | 321.7  | 309.7  | 287.4  |
| 201348_at   | NM_002084 | GPX3                     | 2878  | 6.3    | 9.9    | 6.0    | 1.5    | 4.7    |
| 201349_at   | NM_004252 | SLC9A3R1                 | 9368  | 295.3  | 200.9  | 272.6  | 260.8  | 209.4  |
| 201350_at   | NM_004475 | FLOT2                    | 2319  | 219.0  | 245.2  | 243.3  | 279.0  | 194.8  |
| 201351_s_at | AF070656  | YME1L1                   | 10730 | 205.2  | 200.1  | 232.7  | 204.4  | 193.6  |
| 201352_at   | NM_014263 | YME1L1                   | 10730 | 167.5  | 113.2  | 50.8   | 111.4  | 127.4  |
| 201353_s_at | AI653126  | BAZ2A                    | 11176 | 42.0   | 42.8   | 40.3   | 40.3   | 33.9   |
| 201354_s_at | AA788652  | BAZ2A                    | 11176 | 19.8   | 17.6   | 21.3   | 25.1   | 14.3   |
| 201355_s_at | NM_013449 | BAZ2A                    | 11176 | 32.1   | 27.6   | 29.3   | 21.7   | 16.8   |
| 201356_at   | BF129339  | SF3A1                    | 10291 | 279.1  | 252.0  | 311.8  | 256.2  | 222.7  |
| 201357_s_at | NM_005877 | SF3A1                    | 10291 | 101.6  | 94.5   | 101.7  | 100.1  | 91.1   |
| 201358_s_at | NM_016451 | COPB1                    | 1315  | 757.4  | 677.0  | 768.1  | 697.5  | 554.6  |
| 201359_at   | NM_016451 | COPB1                    | 1315  | 418.6  | 420.5  | 447.2  | 394.7  | 368.5  |
| 201360_at   | NM_000099 | CST3                     | 1471  | 566.1  | 510.5  | 572.7  | 596.7  | 447.8  |
| 201361_at   | NM_024092 | TMEM109                  | 79073 | 323.4  | 246.1  | 407.8  | 272.2  | 350.0  |
| 201362_at   | AF205218  | IVNS1ABP                 | 10625 | 21.9   | 19.4   | 23.2   | 14.6   | 19.9   |
| 201363_s_at | AB020657  | IVNS1ABP                 | 10625 | 27.7   | 22.2   | 26.4   | 20.5   | 23.9   |
| 201364_s_at | AF242521  | OAZ2                     | 4947  | 473.7  | 455.2  | 451.2  | 488.3  | 360.6  |
| 201365_at   | NM_002537 | OAZ2                     | 4947  | 231.5  | 221.0  | 230.2  | 228.3  | 171.1  |
| 201366_at   | NM_004034 | ANXA7                    | 310   | 433.8  | 341.3  | 453.3  | 380.1  | 347.0  |
| 201367_s_at | AI356398  | ZFP36L2                  | 678   | 7.3    | 7.1    | 6.4    | 8.8    | 5.3    |
| 201368_at   | U07802    | ZFP36L2                  | 678   | 67.7   | 54.9   | 79.0   | 59.3   | 61.6   |
| 201369_s_at | NM_006887 | ZFP36L2                  | 678   | 12.6   | 12.6   | 20.6   | 14.1   | 12.5   |
| 201370_s_at | AU145232  | CUL3                     | 8452  | 22.9   | 22.1   | 25.7   | 18.7   | 20.2   |
| 201371_s_at | AF062537  | CUL3                     | 8452  | 273.2  | 244.9  | 276.5  | 250.9  | 206.6  |
| 201372_s_at | NM_003590 | CUL3                     | 8452  | 3.3    | 0.3    | 0.4    | 2.1    | 1.6    |

|             |           |                            |       |        |        |        |        |        |
|-------------|-----------|----------------------------|-------|--------|--------|--------|--------|--------|
| 201373_at   | NM_000445 | PLEC                       | 5339  | 6.3    | 29.6   | 18.8   | 28.2   | 26.9   |
| 201374_x_at | AI379894  | PPP2CB                     | 5516  | 0.6    | 0.8    | 5.1    | 0.6    | 2.9    |
| 201375_s_at | NM_004156 | PPP2CB                     | 5516  | 530.9  | 448.9  | 548.5  | 504.2  | 391.6  |
| 201376_s_at | AI591354  | HNRNPF                     | 3185  | 407.7  | 365.4  | 483.5  | 339.5  | 428.4  |
| 201377_at   | NM_014847 | UBAP2L                     | 9898  | 275.5  | 216.9  | 293.9  | 260.9  | 254.5  |
| 201378_s_at | NM_014847 | UBAP2L                     | 9898  | 393.2  | 336.3  | 414.7  | 330.9  | 317.2  |
| 201379_s_at | NM_003288 | TPD52L2                    | 7165  | 111.2  | 134.1  | 136.1  | 132.1  | 141.1  |
| 201380_at   | NM_006371 | CRTAP                      | 10491 | 84.3   | 91.5   | 96.2   | 82.4   | 65.8   |
| 201381_x_at | AF057356  | CACYBP                     | 27101 | 693.2  | 479.3  | 746.2  | 601.8  | 572.4  |
| 201382_at   | NM_014412 | CACYBP                     | 27101 | 14.7   | 17.5   | 18.6   | 17.1   | 12.8   |
| 201383_s_at | AL044170  | NBR1                       | 4077  | 99.8   | 81.3   | 81.8   | 84.8   | 69.0   |
| 201384_s_at | NM_005899 | NBR1                       | 4077  | 189.6  | 186.0  | 160.7  | 193.0  | 133.5  |
| 201385_at   | NM_001358 | DHX15                      | 1665  | 816.1  | 809.7  | 976.2  | 774.9  | 847.6  |
| 201386_s_at | AF279891  | DHX15                      | 1665  | 613.7  | 477.9  | 680.8  | 476.0  | 583.2  |
| 201387_s_at | NM_004181 | UCHL1                      | 7345  | 12.7   | 4.6    | 17.0   | 1.9    | 4.7    |
| 201388_at   | NM_002809 | PSMD3                      | 5709  | 408.7  | 460.8  | 578.9  | 462.4  | 431.1  |
| 201389_at   | NM_002205 | ITGA5                      | 3678  | 49.7   | 36.8   | 34.8   | 40.7   | 24.5   |
| 201390_s_at | NM_001320 | CSNK2B                     | 1460  | 720.4  | 802.8  | 792.3  | 844.0  | 687.8  |
| 201391_at   | NM_016292 | TRAP1                      | 10131 | 463.7  | 582.6  | 530.1  | 553.0  | 532.2  |
| 201392_s_at | BG031974  | IGF2R                      | 3482  | 129.5  | 137.1  | 131.6  | 145.9  | 126.0  |
| 201393_s_at | NM_000876 | IGF2R                      | 3482  | 267.6  | 276.3  | 265.4  | 297.1  | 199.5  |
| 201394_s_at | U23946    | RBM5                       | 10181 | 90.7   | 87.3   | 103.4  | 92.2   | 68.0   |
| 201395_at   | NM_005778 | RBM5                       | 10181 | 110.5  | 109.6  | 102.6  | 99.3   | 78.5   |
| 201396_s_at | NM_003021 | SGTA                       | 6449  | 83.6   | 127.3  | 124.6  | 104.7  | 97.4   |
| 201397_at   | NM_006623 | PHGDH                      | 26227 | 1166.7 | 1215.5 | 1132.2 | 1286.3 | 882.4  |
| 201398_s_at | BC000687  | TRAM1                      | 23471 | 281.2  | 230.4  | 286.2  | 259.0  | 230.0  |
| 201399_s_at | NM_014294 | TRAM1                      | 23471 | 280.2  | 324.5  | 296.5  | 290.4  | 257.0  |
| 201400_at   | NM_002795 | PSMB3                      | 5691  | 1414.1 | 1458.2 | 1579.0 | 1503.7 | 1275.0 |
| 201401_s_at | M80776    | ADRBK1                     | 156   | 59.2   | 50.2   | 77.8   | 78.7   | 64.9   |
| 201402_at   | NM_001619 | ADRBK1                     | 156   | 3.3    | 5.6    | 2.4    | 1.3    | 1.8    |
| 201403_s_at | NM_004528 | MGST3                      | 4259  | 215.4  | 223.3  | 225.9  | 256.5  | 176.1  |
| 201404_x_at | BC000268  | PSMB2                      | 5690  | 178.2  | 131.3  | 196.6  | 134.6  | 136.8  |
| 201405_s_at | NM_006833 | COPS6                      | 10980 | 601.6  | 584.4  | 654.5  | 625.0  | 523.3  |
| 201406_at   | NM_021029 | RPL36A /// R6173 /// 100   |       | 3315.1 | 2898.6 | 3367.8 | 3201.7 | 2712.4 |
| 201407_s_at | AI186712  | PPP1CB                     | 5500  | 210.9  | 138.9  | 251.7  | 188.2  | 159.1  |
| 201408_at   | W67887    | PPP1CB                     | 5500  | 54.7   | 43.4   | 61.1   | 48.2   | 19.5   |
| 201409_s_at | NM_002709 | PPP1CB                     | 5500  | 128.1  | 121.4  | 146.5  | 137.4  | 127.4  |
| 201410_at   | AI983043  | PLEKHB2                    | 55041 | 233.9  | 203.1  | 281.9  | 213.9  | 220.5  |
| 201411_s_at | NM_017958 | PLEKHB2                    | 55041 | 104.2  | 49.6   | 125.5  | 86.1   | 95.8   |
| 201412_at   | NM_014045 | LRP10                      | 26020 | 274.7  | 268.2  | 245.9  | 261.6  | 171.6  |
| 201413_at   | NM_000414 | HSD17B4                    | 3295  | 512.2  | 509.8  | 611.6  | 483.2  | 552.2  |
| 201414_s_at | NM_005969 | NAP1L4                     | 4676  | 129.2  | 108.1  | 131.4  | 142.6  | 114.8  |
| 201415_at   | NM_000178 | GSS                        | 2937  | 365.3  | 428.3  | 444.4  | 429.7  | 366.9  |
| 201416_at   | BG528420  | SOX4                       | 6659  | 126.4  | 98.7   | 97.0   | 119.3  | 63.7   |
| 201417_at   | AL136179  | SOX4                       | 6659  | 425.3  | 427.0  | 418.5  | 432.9  | 273.0  |
| 201418_s_at | NM_003107 | SOX4                       | 6659  | 81.0   | 70.0   | 72.2   | 85.8   | 58.8   |
| 201419_at   | NM_004656 | BAP1                       | 8314  | 110.1  | 74.0   | 112.7  | 90.3   | 92.7   |
| 201420_s_at | BF975273  | WDR77                      | 79084 | 226.6  | 207.5  | 267.5  | 213.8  | 183.7  |
| 201421_s_at | NM_024102 | WDR77                      | 79084 | 131.3  | 86.9   | 121.2  | 64.0   | 109.4  |
| 201422_at   | NM_006332 | IFI30 /// PIK35296 /// 104 |       | 14.5   | 14.6   | 8.7    | 9.6    | 1.9    |
| 201423_s_at | AL037208  | CUL4A                      | 8451  | 138.0  | 119.4  | 150.3  | 138.7  | 118.7  |
| 201424_s_at | NM_003589 | CUL4A                      | 8451  | 111.5  | 109.5  | 141.1  | 100.7  | 105.5  |
| 201425_at   | NM_000690 | ALDH2                      | 217   | 216.9  | 208.2  | 207.9  | 232.6  | 155.7  |

|             |           |                           |       |        |        |        |        |        |
|-------------|-----------|---------------------------|-------|--------|--------|--------|--------|--------|
| 201426_s_at | AI922599  | VIM                       | 7431  | 21.5   | 18.7   | 23.4   | 17.3   | 11.2   |
| 201427_s_at | NM_005410 | SEPP1                     | 6414  | 317.2  | 241.7  | 376.3  | 272.3  | 287.0  |
| 201428_at   | NM_001305 | CLDN4                     | 1364  | 164.7  | 155.1  | 193.5  | 170.6  | 156.8  |
| 201429_s_at | NM_000998 | RPL37A                    | 6168  | 4865.9 | 4299.2 | 4809.4 | 4542.4 | 4336.9 |
| 201430_s_at | W72516    | DPYSL3                    | 1809  | 2.6    | 9.9    | 7.5    | 5.4    | 0.8    |
| 201431_s_at | NM_001387 | DPYSL3                    | 1809  | 7.3    | 0.7    | 6.7    | 3.7    | 2.2    |
| 201432_at   | NM_001752 | CAT                       | 847   | 672.9  | 629.1  | 626.4  | 616.2  | 491.1  |
| 201433_s_at | NM_014754 | PTDSS1                    | 9791  | 483.6  | 458.9  | 640.1  | 468.5  | 497.8  |
| 201434_at   | NM_003314 | TTC1                      | 7265  | 99.8   | 110.5  | 114.7  | 110.7  | 88.4   |
| 201435_s_at | AW268640  | EIF4E                     | 1977  | 427.0  | 333.9  | 461.7  | 348.5  | 351.0  |
| 201436_at   | AI742789  | EIF4E                     | 1977  | 69.1   | 46.0   | 78.2   | 57.5   | 61.2   |
| 201437_s_at | NM_001968 | EIF4E                     | 1977  | 257.9  | 198.3  | 280.1  | 242.7  | 235.5  |
| 201438_at   | NM_004369 | COL6A3                    | 1293  | 0.6    | 1.0    | 10.4   | 2.1    | 0.7    |
| 201439_at   | NM_004193 | GBF1                      | 8729  | 89.3   | 72.3   | 85.0   | 84.6   | 74.1   |
| 201440_at   | NM_004818 | DDX23                     | 9416  | 158.0  | 115.9  | 162.3  | 139.6  | 134.8  |
| 201441_at   | NM_001863 | COX6B1                    | 1340  | 1096.3 | 1069.0 | 1146.1 | 1128.0 | 913.0  |
| 201442_s_at | AF248966  | ATP6AP2                   | 10159 | 5.3    | 7.5    | 6.6    | 2.7    | 3.3    |
| 201443_s_at | AF248966  | ATP6AP2                   | 10159 | 499.3  | 395.0  | 421.6  | 419.8  | 362.9  |
| 201444_s_at | NM_005765 | ATP6AP2                   | 10159 | 220.7  | 213.8  | 207.7  | 214.5  | 152.3  |
| 201445_at   | NM_001839 | CNN3                      | 1266  | 3.7    | 1.3    | 1.5    | 5.1    | 0.3    |
| 201446_s_at | BF692742  | TIA1                      | 7072  | 99.8   | 64.5   | 99.7   | 70.6   | 70.5   |
| 201447_at   | H96549    | TIA1                      | 7072  | 31.2   | 27.0   | 19.5   | 25.7   | 22.9   |
| 201448_at   | AL046419  | TIA1                      | 7072  | 48.6   | 33.6   | 47.1   | 43.1   | 29.5   |
| 201449_at   | AL567227  | TIA1                      | 7072  | 7.5    | 9.1    | 14.5   | 8.8    | 3.0    |
| 201450_s_at | NM_022037 | TIA1                      | 7072  | 45.4   | 37.3   | 49.1   | 37.7   | 38.3   |
| 201451_x_at | D78132    | RHEB                      | 6009  | 0.9    | 8.1    | 1.1    | 1.4    | 1.6    |
| 201452_at   | AW138374  | RHEB                      | 6009  | 20.4   | 9.8    | 26.0   | 13.6   | 13.2   |
| 201453_x_at | NM_005614 | RHEB                      | 6009  | 476.2  | 480.4  | 607.4  | 465.4  | 461.0  |
| 201454_s_at | AW055008  | NPEPPS                    | 9520  | 127.4  | 142.2  | 135.5  | 137.4  | 114.7  |
| 201455_s_at | AJ132583  | NPEPPS                    | 9520  | 166.5  | 177.4  | 163.7  | 160.5  | 144.5  |
| 201456_s_at | AU160695  | BUB3                      | 9184  | 156.9  | 129.7  | 174.5  | 131.2  | 116.9  |
| 201457_x_at | AF081496  | BUB3                      | 9184  | 705.7  | 621.0  | 810.4  | 609.4  | 597.1  |
| 201458_s_at | NM_004725 | BUB3                      | 9184  | 231.2  | 172.7  | 263.6  | 203.2  | 192.5  |
| 201459_at   | NM_006666 | RUVBL2                    | 10856 | 347.3  | 301.8  | 368.6  | 326.7  | 308.5  |
| 201460_at   | AI141802  | MAPKAPK2                  | 9261  | 92.8   | 91.7   | 82.3   | 83.4   | 72.0   |
| 201461_s_at | NM_004759 | MAPKAPK2                  | 9261  | 39.1   | 27.5   | 36.0   | 31.3   | 21.7   |
| 201462_at   | NM_014766 | SCRN1                     | 9805  | 1.5    | 9.6    | 1.0    | 3.1    | 3.9    |
| 201463_s_at | NM_006755 | TALDO1                    | 6888  | 999.3  | 1012.2 | 1103.7 | 1066.6 | 925.5  |
| 201464_x_at | BG491844  | JUN                       | 3725  | 179.7  | 136.4  | 144.2  | 122.8  | 115.7  |
| 201465_s_at | BC002646  | JUN                       | 3725  | 22.8   | 24.5   | 29.0   | 20.6   | 19.0   |
| 201466_s_at | NM_002228 | JUN                       | 3725  | 28.6   | 25.7   | 28.2   | 23.1   | 18.5   |
| 201467_s_at | AI039874  | NQO1                      | 1728  | 164.4  | 158.8  | 152.9  | 181.7  | 113.3  |
| 201468_s_at | NM_000903 | NQO1                      | 1728  | 208.6  | 164.9  | 183.9  | 174.5  | 128.9  |
| 201469_s_at | AI809967  | SHC1                      | 6464  | 129.3  | 148.6  | 161.1  | 147.1  | 118.3  |
| 201470_at   | NM_004832 | GSTO1                     | 9446  | 512.8  | 508.6  | 635.7  | 584.4  | 524.7  |
| 201471_s_at | NM_003900 | SQSTM1                    | 8878  | 409.4  | 471.5  | 373.0  | 409.3  | 354.2  |
| 201472_at   | NM_003372 | VBP1                      | 7411  | 526.1  | 460.2  | 556.3  | 479.3  | 422.5  |
| 201473_at   | NM_002229 | JUNB                      | 3726  | 85.6   | 77.2   | 82.3   | 92.6   | 89.4   |
| 201474_s_at | NM_002204 | ITGA3                     | 3675  | 4.1    | 6.6    | 7.2    | 13.5   | 2.0    |
| 201475_x_at | NM_004990 | MARS /// MI 4141 /// 102  |       | 461.9  | 462.7  | 486.8  | 478.4  | 411.7  |
| 201476_s_at | AI692974  | RRM1                      | 6240  | 342.8  | 313.6  | 396.9  | 285.2  | 298.5  |
| 201477_s_at | NM_001033 | RRM1                      | 6240  | 629.0  | 442.1  | 690.8  | 509.4  | 514.1  |
| 201478_s_at | U59151    | DKC1 /// MIF 1736 /// 677 |       | 314.7  | 254.8  | 333.5  | 309.3  | 276.2  |

|             |           |                           |        |        |        |        |        |
|-------------|-----------|---------------------------|--------|--------|--------|--------|--------|
| 201479_at   | NM_001363 | DKC1 /// MIF1736 /// 677  | 631.6  | 501.3  | 628.6  | 512.3  | 569.2  |
| 201480_s_at | NM_003169 | SUPT5H 6829               | 114.0  | 117.7  | 145.7  | 131.0  | 101.5  |
| 201481_s_at | NM_002862 | PYGB 5834                 | 112.5  | 149.1  | 96.6   | 146.4  | 89.8   |
| 201482_at   | NM_002826 | QSOX1 5768                | 105.3  | 100.1  | 92.1   | 108.0  | 78.5   |
| 201483_s_at | BC002802  | SUPT4H1 6827              | 240.9  | 224.0  | 269.6  | 280.4  | 193.9  |
| 201484_at   | NM_003168 | SUPT4H1 6827              | 132.7  | 140.6  | 140.3  | 117.8  | 119.7  |
| 201485_s_at | BC004892  | RCN2 5955                 | 337.0  | 353.4  | 400.8  | 343.0  | 302.1  |
| 201486_at   | NM_002902 | RCN2 5955                 | 620.7  | 484.0  | 676.4  | 570.3  | 506.3  |
| 201487_at   | NM_001814 | CTSC 1075                 | 13.3   | 9.6    | 8.4    | 5.5    | 15.1   |
| 201488_x_at | BC000717  | KHDRBS1 10657             | 373.6  | 306.7  | 377.9  | 340.7  | 291.6  |
| 201489_at   | BC005020  | PPIF 10105                | 922.3  | 812.0  | 1141.3 | 878.0  | 816.9  |
| 201490_s_at | NM_005729 | PPIF 10105                | 580.5  | 537.4  | 734.3  | 570.7  | 669.7  |
| 201491_at   | NM_012111 | AHSA1 10598               | 567.3  | 479.9  | 615.6  | 501.2  | 515.9  |
| 201492_s_at | NM_021104 | RPL41 6171                | 4464.4 | 3860.6 | 4392.6 | 4230.8 | 4149.1 |
| 201493_s_at | BE778078  | PUM2 23369                | 121.9  | 108.6  | 129.3  | 121.5  | 96.9   |
| 201494_at   | NM_005040 | PRCP 5547                 | 161.2  | 147.3  | 156.5  | 161.0  | 121.0  |
| 201495_x_at | AI889739  | MYH11 4629                | 0.9    | 0.9    | 1.0    | 0.9    | 1.1    |
| 201496_x_at | S67238    | MYH11 4629                | 3.4    | 6.3    | 6.0    | 1.8    | 4.7    |
| 201497_x_at | NM_022844 | MYH11 4629                | 1.5    | 1.4    | 3.3    | 1.6    | 2.3    |
| 201498_at   | AI160440  | USP7 7874                 | 149.9  | 129.8  | 147.2  | 139.2  | 127.2  |
| 201499_s_at | NM_003470 | USP7 7874                 | 367.0  | 314.6  | 334.3  | 231.6  | 262.1  |
| 201500_s_at | NM_021959 | PPP1R11 6992              | 274.1  | 275.1  | 263.7  | 354.4  | 240.4  |
| 201501_s_at | NM_002092 | GRSF1 2926                | 142.5  | 133.4  | 157.3  | 138.7  | 131.2  |
| 201502_s_at | AI078167  | NFKBIA 4792               | 177.8  | 210.8  | 217.0  | 219.1  | 176.0  |
| 201503_at   | BG500067  | G3BP1 10146               | 543.8  | 479.2  | 594.8  | 538.2  | 516.2  |
| 201504_s_at | AI435302  | TSN 7247                  | 83.4   | 79.4   | 84.2   | 70.1   | 77.3   |
| 201505_at   | NM_002291 | LAMB1 3912                | 6.2    | 5.7    | 6.0    | 4.8    | 4.6    |
| 201506_at   | NM_000358 | TGFBI 7045                | 1.8    | 2.2    | 2.8    | 1.3    | 2.1    |
| 201507_at   | NM_002622 | PFDN1 5201                | 194.8  | 176.4  | 198.7  | 156.8  | 179.9  |
| 201508_at   | NM_001552 | IGFBP4 3487               | 9.0    | 3.5    | 5.8    | 2.1    | 3.7    |
| 201509_at   | NM_006899 | IDH3B 3420                | 82.3   | 103.7  | 98.7   | 106.8  | 100.9  |
| 201510_at   | AF017307  | ELF3 1999                 | 16.7   | 12.7   | 13.1   | 16.0   | 7.5    |
| 201511_at   | NM_001087 | AAMP 14                   | 141.4  | 108.5  | 136.9  | 122.8  | 129.0  |
| 201512_s_at | BC003633  | TOMM70A 9868              | 203.5  | 158.0  | 215.3  | 168.6  | 173.1  |
| 201513_at   | AI659180  | TSN 7247                  | 25.4   | 20.8   | 28.4   | 21.2   | 24.4   |
| 201514_s_at | NM_005754 | G3BP1 10146               | 152.2  | 138.4  | 152.7  | 138.7  | 145.0  |
| 201515_s_at | NM_004622 | TSN 7247                  | 250.1  | 208.4  | 286.6  | 205.5  | 216.9  |
| 201516_at   | NM_003132 | SRM 6723                  | 815.8  | 662.8  | 890.7  | 718.5  | 765.7  |
| 201517_at   | BC001255  | NCBP2 22916               | 177.3  | 138.0  | 157.2  | 144.8  | 125.2  |
| 201518_at   | NM_006807 | CBX1 10951                | 425.7  | 380.6  | 469.4  | 408.0  | 342.0  |
| 201519_at   | NM_014820 | TOMM70A 9868              | 333.3  | 279.9  | 405.0  | 300.2  | 296.8  |
| 201520_s_at | BF034561  | GRSF1 2926                | 460.3  | 476.1  | 549.7  | 447.3  | 445.5  |
| 201521_s_at | NM_007362 | NCBP2 22916               | 83.6   | 104.4  | 137.1  | 101.6  | 102.0  |
| 201522_x_at | NM_003097 | SNRPN /// SM6638 /// 892  | 1379.5 | 1264.5 | 1401.3 | 1286.6 | 1119.0 |
| 201523_x_at | BE262760  | UBE2N 7334                | 312.4  | 274.7  | 309.8  | 287.6  | 253.0  |
| 201524_x_at | NM_003348 | UBE2N 7334                | 601.5  | 574.1  | 744.8  | 560.3  | 567.5  |
| 201525_at   | NM_001647 | APOD 347                  | 54.3   | 77.9   | 73.7   | 75.7   | 57.0   |
| 201526_at   | NM_001662 | ARF5 381                  | 302.1  | 270.9  | 291.7  | 267.4  | 223.9  |
| 201527_at   | NM_004231 | ATP6V1F /// 9296 /// 101  | 741.3  | 639.4  | 697.1  | 683.9  | 548.1  |
| 201528_at   | BG398414  | RPA1 6117                 | 461.8  | 391.5  | 460.2  | 408.1  | 352.8  |
| 201529_s_at | NM_002945 | RPA1 6117                 | 395.3  | 331.5  | 448.5  | 353.6  | 334.7  |
| 201530_x_at | NM_001416 | EIF4A1 /// LC1973 /// 267 | 3165.1 | 2770.7 | 3559.6 | 3120.8 | 2917.7 |
| 201531_at   | NM_003407 | ZFP36 7538                | 41.1   | 33.8   | 50.8   | 51.8   | 38.9   |

|             |           |                           |       |        |        |        |        |        |
|-------------|-----------|---------------------------|-------|--------|--------|--------|--------|--------|
| 201532_at   | NM_002788 | PSMA3                     | 5684  | 529.3  | 426.6  | 565.7  | 501.1  | 419.2  |
| 201533_at   | NM_001904 | CTNNB1                    | 1499  | 758.9  | 744.0  | 811.1  | 730.4  | 571.7  |
| 201534_s_at | AF044221  | UBL3                      | 5412  | 54.6   | 52.4   | 47.2   | 46.6   | 50.7   |
| 201535_at   | NM_007106 | UBL3                      | 5412  | 53.8   | 52.7   | 47.8   | 49.1   | 37.4   |
| 201536_at   | AL048503  | DUSP3                     | 1845  | 176.6  | 126.7  | 144.1  | 139.9  | 125.7  |
| 201537_s_at | BC002682  | DUSP3                     | 1845  | 89.4   | 92.7   | 104.4  | 113.4  | 86.8   |
| 201538_s_at | NM_004090 | DUSP3                     | 1845  | 69.3   | 64.4   | 71.1   | 62.0   | 56.5   |
| 201539_s_at | U29538    | FHL1                      | 2273  | 13.6   | 0.9    | 1.0    | 4.0    | 1.7    |
| 201540_at   | NM_001449 | FHL1                      | 2273  | 6.1    | 7.3    | 8.4    | 6.0    | 5.4    |
| 201541_s_at | NM_006349 | ZNHIT1                    | 10467 | 205.2  | 188.4  | 237.9  | 245.2  | 195.5  |
| 201542_at   | AY008268  | SAR1A                     | 56681 | 163.2  | 110.3  | 157.4  | 129.2  | 121.1  |
| 201543_s_at | NM_020150 | SAR1A                     | 56681 | 267.2  | 269.9  | 333.9  | 307.9  | 264.0  |
| 201544_x_at | BF675004  | BCL2L2 /// B1599 /// 8106 |       | 412.4  | 400.6  | 481.7  | 445.5  | 381.1  |
| 201545_s_at | NM_004643 | BCL2L2-PABF 8106 /// 100  |       | 86.3   | 97.0   | 115.3  | 100.9  | 75.7   |
| 201546_at   | NM_004238 | TRIP12                    | 9320  | 143.1  | 128.5  | 134.9  | 149.9  | 119.8  |
| 201547_at   | AA729218  | KDM5B                     | 10765 | 0.8    | 5.7    | 0.8    | 4.2    | 4.9    |
| 201548_s_at | W02593    | KDM5B                     | 10765 | 86.1   | 90.8   | 78.3   | 101.9  | 55.4   |
| 201549_x_at | NM_006618 | KDM5B                     | 10765 | 88.3   | 115.4  | 80.7   | 103.2  | 64.7   |
| 201550_x_at | NM_001614 | ACTB /// ACT160 /// 71    |       | 2854.0 | 2802.9 | 2907.4 | 2784.6 | 2591.5 |
| 201551_s_at | J03263    | LAMP1                     | 3916  | 141.7  | 137.4  | 116.2  | 102.1  | 96.0   |
| 201552_at   | NM_005561 | LAMP1                     | 3916  | 244.7  | 252.5  | 261.3  | 249.7  | 203.6  |
| 201553_s_at | NM_005561 | LAMP1                     | 3916  | 684.1  | 735.9  | 739.1  | 721.7  | 597.7  |
| 201554_x_at | NM_004130 | GYG1                      | 2992  | 424.2  | 440.0  | 490.4  | 479.6  | 375.7  |
| 201555_at   | NM_002388 | MCM3                      | 4172  | 281.3  | 200.1  | 327.6  | 203.4  | 236.2  |
| 201556_s_at | BC002737  | VAMP2                     | 6844  | 27.6   | 38.3   | 36.6   | 40.2   | 17.9   |
| 201557_at   | NM_014232 | VAMP2                     | 6844  | 43.9   | 55.4   | 42.7   | 36.7   | 29.1   |
| 201558_at   | NM_003610 | RAE1                      | 8480  | 194.4  | 184.3  | 209.1  | 165.9  | 172.1  |
| 201559_s_at | AF109196  | CLIC4                     | 25932 | 56.8   | 75.0   | 72.8   | 65.6   | 52.8   |
| 201560_at   | NM_013943 | CLIC4                     | 25932 | 165.6  | 127.4  | 124.0  | 142.0  | 131.2  |
| 201561_s_at | NM_014944 | CLSTN1                    | 22883 | 206.9  | 224.7  | 234.8  | 258.1  | 173.2  |
| 201562_s_at | NM_003104 | SORD                      | 6652  | 696.1  | 557.6  | 821.4  | 576.6  | 693.1  |
| 201563_at   | L29008    | SORD                      | 6652  | 1617.9 | 1424.3 | 1964.2 | 1513.6 | 1656.6 |
| 201564_s_at | NM_003088 | FSCN1                     | 6624  | 3.6    | 10.5   | 5.5    | 11.9   | 7.8    |
| 201565_s_at | NM_002166 | ID2                       | 3398  | 119.8  | 104.5  | 107.6  | 105.6  | 78.3   |
| 201566_x_at | D13891    | ID2                       | 3398  | 23.3   | 23.8   | 26.6   | 34.8   | 21.7   |
| 201567_s_at | NM_002078 | GOLGA4                    | 2803  | 86.4   | 66.0   | 71.3   | 54.1   | 40.8   |
| 201568_at   | NM_014402 | UQCRQ                     | 27089 | 2215.6 | 2125.8 | 2384.8 | 2280.2 | 1929.9 |
| 201569_s_at | NM_015380 | SAMM50                    | 25813 | 205.1  | 197.3  | 236.4  | 199.6  | 191.8  |
| 201570_at   | NM_015380 | SAMM50                    | 25813 | 351.5  | 284.8  | 345.7  | 272.4  | 285.1  |
| 201571_s_at | AI656493  | DCTD                      | 1635  | 141.0  | 132.3  | 157.0  | 150.3  | 117.1  |
| 201572_x_at | NM_001921 | DCTD                      | 1635  | 197.4  | 218.1  | 207.4  | 216.6  | 173.2  |
| 201573_s_at | M75715    | ETF1                      | 2107  | 349.9  | 266.5  | 370.8  | 281.5  | 315.6  |
| 201574_at   | NM_004730 | ETF1                      | 2107  | 341.9  | 301.7  | 357.0  | 309.8  | 307.8  |
| 201575_at   | NM_012245 | SNW1                      | 22938 | 248.9  | 216.7  | 294.8  | 219.1  | 204.8  |
| 201576_s_at | NM_000404 | GLB1 /// TMI2720 /// 643  |       | 188.0  | 184.1  | 183.5  | 205.6  | 144.1  |
| 201577_at   | NM_000269 | NME1                      | 4830  | 2031.9 | 2077.2 | 2213.4 | 1983.0 | 1741.1 |
| 201578_at   | NM_005397 | PODXL                     | 5420  | 51.6   | 47.5   | 58.6   | 58.9   | 46.3   |
| 201579_at   | NM_005245 | FAT1                      | 2195  | 75.1   | 49.6   | 66.1   | 65.6   | 55.6   |
| 201580_s_at | AL544094  | TMX4                      | 56255 | 101.4  | 94.7   | 127.3  | 103.1  | 122.0  |
| 201581_at   | BF572868  | TMX4                      | 56255 | 141.9  | 104.0  | 135.8  | 109.2  | 102.1  |
| 201582_at   | AL121900  | SEC23B                    | 10483 | 71.8   | 61.7   | 74.7   | 51.7   | 57.2   |
| 201583_s_at | NM_006363 | SEC23B                    | 10483 | 402.1  | 424.5  | 425.7  | 394.4  | 381.6  |
| 201584_s_at | NM_005804 | DDX39A                    | 10212 | 715.8  | 617.4  | 855.1  | 624.3  | 698.1  |

|             |           |                        |       |        |        |        |        |        |
|-------------|-----------|------------------------|-------|--------|--------|--------|--------|--------|
| 201585_s_at | BG035151  | SFPQ                   | 6421  | 239.7  | 232.6  | 297.4  | 219.2  | 235.6  |
| 201586_s_at | NM_005066 | SFPQ                   | 6421  | 755.9  | 632.7  | 849.8  | 678.7  | 672.6  |
| 201587_s_at | NM_001569 | IRAK1                  | 3654  | 876.8  | 754.3  | 882.3  | 809.4  | 686.3  |
| 201588_at   | NM_004786 | TXNL1                  | 9352  | 562.2  | 560.7  | 616.2  | 520.2  | 488.4  |
| 201589_at   | D80000    | SMC1A                  | 8243  | 371.1  | 289.1  | 381.9  | 321.9  | 302.6  |
| 201590_x_at | NM_004039 | ANXA2                  | 302   | 35.1   | 27.8   | 30.1   | 17.9   | 28.6   |
| 201591_s_at | NM_007184 | NISCH                  | 11188 | 143.7  | 135.3  | 129.8  | 147.8  | 96.1   |
| 201592_at   | NM_003756 | EIF3H                  | 8667  | 822.6  | 766.0  | 867.2  | 770.5  | 732.0  |
| 201593_s_at | AV716798  | ZC3H15                 | 55854 | 214.0  | 184.8  | 252.2  | 172.8  | 193.9  |
| 201594_s_at | NM_005134 | PPP4R1                 | 9989  | 124.6  | 108.6  | 117.0  | 124.8  | 118.6  |
| 201595_s_at | NM_018471 | ZC3H15                 | 55854 | 160.0  | 125.8  | 193.0  | 143.1  | 139.0  |
| 201596_x_at | NM_000224 | KRT18                  | 3875  | 1714.0 | 1679.4 | 1854.9 | 1659.3 | 1542.7 |
| 201597_at   | NM_001865 | COX7A2                 | 1347  | 1131.9 | 1167.2 | 1300.8 | 1113.7 | 970.3  |
| 201598_s_at | NM_001567 | INPPL1                 | 3636  | 42.5   | 46.3   | 46.8   | 50.9   | 31.9   |
| 201599_at   | NM_000274 | OAT                    | 4942  | 18.9   | 20.3   | 25.0   | 23.7   | 21.6   |
| 201600_at   | NM_007273 | PHB2                   | 11331 | 2021.7 | 1791.0 | 2132.7 | 1979.4 | 1734.6 |
| 201601_x_at | NM_003641 | IFITM1 /// IF 8519 /// | 105   | 22.9   | 29.8   | 32.7   | 41.9   | 19.1   |
| 201602_s_at | BE737620  | PPP1R12A               | 4659  | 45.6   | 60.0   | 55.0   | 63.4   | 57.3   |
| 201603_at   | AI817061  | PPP1R12A               | 4659  | 85.2   | 84.7   | 86.7   | 91.5   | 81.3   |
| 201604_s_at | NM_002480 | PPP1R12A               | 4659  | 60.6   | 52.0   | 55.0   | 54.4   | 43.4   |
| 201605_x_at | NM_004368 | CNN2                   | 1265  | 57.8   | 48.5   | 56.9   | 40.6   | 38.4   |
| 201606_s_at | BE796924  | PWP1                   | 11137 | 296.9  | 308.7  | 321.8  | 279.8  | 291.8  |
| 201607_at   | AI694451  | PWP1                   | 11137 | 63.7   | 55.9   | 58.9   | 52.5   | 34.4   |
| 201608_s_at | NM_007062 | PWP1                   | 11137 | 209.2  | 204.0  | 231.0  | 199.9  | 217.0  |
| 201609_x_at | AL578502  | ICMT                   | 23463 | 233.1  | 169.0  | 232.1  | 180.9  | 200.4  |
| 201610_at   | AF064084  | ICMT                   | 23463 | 1.2    | 2.1    | 3.8    | 3.0    | 0.2    |
| 201611_s_at | NM_012405 | ICMT                   | 23463 | 85.9   | 87.6   | 142.6  | 97.8   | 92.4   |
| 201612_at   | NM_000696 | ALDH9A1                | 223   | 628.8  | 644.4  | 641.8  | 626.2  | 516.6  |
| 201613_s_at | BC000519  | AP1G2                  | 8906  | 103.4  | 91.7   | 81.2   | 74.5   | 66.1   |
| 201614_s_at | NM_003707 | RUVBL1                 | 8607  | 476.2  | 321.3  | 494.2  | 359.4  | 344.7  |
| 201615_x_at | AI685060  | CALD1                  | 800   | 38.3   | 38.5   | 39.0   | 33.2   | 25.4   |
| 201616_s_at | AL577531  | CALD1                  | 800   | 287.0  | 246.3  | 278.4  | 290.5  | 213.6  |
| 201617_x_at | NM_004342 | CALD1                  | 800   | 381.0  | 307.8  | 380.4  | 357.3  | 246.8  |
| 201618_x_at | NM_003801 | GPAA1                  | 8733  | 262.3  | 357.0  | 333.1  | 320.0  | 260.2  |
| 201619_at   | NM_006793 | PRDX3                  | 10935 | 897.2  | 846.5  | 993.5  | 866.9  | 785.6  |
| 201620_at   | NM_003791 | MBTPS1                 | 8720  | 101.9  | 76.5   | 110.1  | 81.0   | 91.7   |
| 201621_at   | NM_005380 | NBL1                   | 4681  | 2.1    | 1.4    | 1.9    | 2.1    | 1.0    |
| 201622_at   | NM_014390 | SND1                   | 27044 | 257.5  | 304.2  | 333.7  | 340.4  | 288.0  |
| 201623_s_at | BC000629  | DARS                   | 1615  | 192.2  | 179.1  | 213.5  | 163.3  | 152.9  |
| 201624_at   | NM_001349 | DARS                   | 1615  | 205.7  | 176.8  | 231.4  | 175.6  | 164.5  |
| 201625_s_at | BE300521  | INSIG1                 | 3638  | 87.0   | 86.5   | 119.0  | 77.2   | 106.5  |
| 201626_at   | BG292233  | INSIG1                 | 3638  | 207.8  | 127.5  | 237.9  | 147.2  | 215.8  |
| 201627_s_at | NM_005542 | INSIG1                 | 3638  | 217.3  | 129.7  | 202.0  | 145.4  | 161.4  |
| 201628_s_at | NM_006570 | RRAGA                  | 10670 | 698.5  | 567.4  | 670.0  | 641.6  | 539.0  |
| 201629_s_at | BE872974  | ACP1                   | 52    | 146.0  | 115.4  | 145.4  | 134.7  | 112.4  |
| 201630_s_at | NM_004300 | ACP1                   | 52    | 157.7  | 134.3  | 166.5  | 146.6  | 117.8  |
| 201631_s_at | NM_003897 | IER3                   | 8870  | 11.8   | 12.8   | 13.5   | 9.1    | 8.4    |
| 201632_at   | NM_001414 | EIF2B1                 | 1967  | 307.1  | 224.8  | 302.1  | 267.9  | 223.4  |
| 201633_s_at | AW235051  | CYB5B                  | 80777 | 200.1  | 142.9  | 214.4  | 179.1  | 155.5  |
| 201634_s_at | NM_030579 | CYB5B                  | 80777 | 155.7  | 111.2  | 199.0  | 170.4  | 141.1  |
| 201635_s_at | AI990766  | FXR1                   | 8087  | 143.2  | 143.4  | 207.5  | 155.2  | 148.6  |
| 201636_at   | BG025078  | FXR1                   | 8087  | 108.6  | 103.5  | 119.5  | 95.3   | 82.0   |
| 201637_s_at | NM_005087 | FXR1                   | 8087  | 199.9  | 186.2  | 209.6  | 175.3  | 147.5  |

|             |           |              |              |        |        |        |        |        |
|-------------|-----------|--------------|--------------|--------|--------|--------|--------|--------|
| 201638_s_at | BE676642  | CPSF1        | 29894        | 9.8    | 10.1   | 10.9   | 17.2   | 18.5   |
| 201639_s_at | NM_013291 | CPSF1 /// MI | 29894 /// 10 | 74.1   | 79.4   | 92.6   | 110.1  | 62.1   |
| 201640_x_at | NM_001294 | CLPTM1       | 1209         | 2.1    | 5.3    | 3.5    | 1.5    | 6.1    |
| 201641_at   | NM_004335 | BST2         | 684          | 1.1    | 1.1    | 0.6    | 0.5    | 0.4    |
| 201642_at   | NM_005534 | IFNGR2       | 3460         | 183.4  | 177.5  | 147.4  | 204.5  | 109.0  |
| 201643_x_at | NM_016604 | KDM3B        | 51780        | 127.5  | 105.5  | 135.9  | 107.3  | 98.9   |
| 201644_at   | NM_003313 | TSTA3        | 7264         | 272.7  | 233.1  | 260.3  | 251.6  | 213.3  |
| 201645_at   | NM_002160 | TNC          | 3371         | 2.1    | 0.4    | 1.0    | 0.6    | 2.2    |
| 201646_at   | AA885297  | SCARB2       | 950          | 181.8  | 168.5  | 166.4  | 171.8  | 130.7  |
| 201647_s_at | NM_005506 | SCARB2       | 950          | 115.5  | 103.9  | 113.3  | 112.5  | 102.9  |
| 201648_at   | AL039831  | JAK1         | 3716         | 6.8    | 10.6   | 9.7    | 8.2    | 1.1    |
| 201649_at   | NM_004223 | UBE2L6       | 9246         | 22.3   | 24.1   | 24.4   | 26.6   | 14.1   |
| 201650_at   | NM_002276 | KRT19        | 3880         | 0.4    | 0.3    | 0.4    | 3.7    | 1.4    |
| 201651_s_at | NM_007229 | PACSIN2      | 11252        | 346.9  | 343.2  | 330.0  | 359.1  | 270.9  |
| 201652_at   | NM_006837 | COP55        | 10987        | 309.8  | 264.8  | 324.3  | 303.4  | 288.8  |
| 201653_at   | NM_005776 | CNIH1        | 10175        | 821.6  | 776.9  | 930.1  | 728.2  | 710.5  |
| 201654_s_at | AI991033  | HSPG2        | 3339         | 0.5    | 0.9    | 0.6    | 1.4    | 3.8    |
| 201655_s_at | M85289    | HSPG2        | 3339         | 3.0    | 0.7    | 1.2    | 1.4    | 1.7    |
| 201656_at   | NM_000210 | ITGA6        | 3655         | 54.1   | 25.0   | 38.5   | 33.3   | 22.7   |
| 201657_at   | BE890745  | ARL1         | 400          | 107.9  | 81.7   | 111.5  | 87.0   | 90.2   |
| 201658_at   | AU151560  | ARL1         | 400          | 145.2  | 143.3  | 152.4  | 141.2  | 128.5  |
| 201659_s_at | NM_001177 | ARL1         | 400          | 226.6  | 204.1  | 236.4  | 215.7  | 154.6  |
| 201660_at   | AL525798  | ACSL3        | 2181         | 64.5   | 58.3   | 80.2   | 61.8   | 63.4   |
| 201661_s_at | NM_004457 | ACSL3        | 2181         | 61.8   | 55.2   | 67.1   | 58.0   | 62.7   |
| 201662_s_at | D89053    | ACSL3        | 2181         | 189.2  | 170.5  | 257.8  | 180.7  | 243.6  |
| 201663_s_at | NM_005496 | SMC4         | 10051        | 140.7  | 116.0  | 166.6  | 119.8  | 132.8  |
| 201664_at   | AL136877  | SMC4         | 10051        | 237.0  | 167.1  | 224.6  | 171.0  | 161.6  |
| 201665_x_at | NM_001021 | RPS17        | 6218         | 3088.2 | 2851.7 | 3114.5 | 2904.6 | 2826.1 |
| 201666_at   | NM_003254 | TIMP1        | 7076         | 13.8   | 4.7    | 11.9   | 1.2    | 3.2    |
| 201667_at   | NM_000165 | GJA1         | 2697         | 0.1    | 4.2    | 0.4    | 1.8    | 1.3    |
| 201668_x_at | AW163148  | MARCKS       | 4082         | 46.3   | 54.8   | 46.9   | 47.9   | 46.3   |
| 201669_s_at | NM_002356 | MARCKS       | 4082         | 422.8  | 337.5  | 457.9  | 395.5  | 343.5  |
| 201670_s_at | M68956    | MARCKS       | 4082         | 112.5  | 74.5   | 116.5  | 108.2  | 98.6   |
| 201671_x_at | BC003556  | USP14        | 9097         | 99.4   | 97.8   | 118.6  | 87.1   | 88.4   |
| 201672_s_at | NM_005151 | USP14        | 9097         | 858.3  | 695.4  | 861.3  | 737.9  | 720.1  |
| 201673_s_at | NM_002103 | GYS1         | 2997         | 160.0  | 159.3  | 170.9  | 170.3  | 136.8  |
| 201674_s_at | BC000729  | AKAP1        | 8165         | 159.0  | 122.2  | 171.6  | 146.4  | 157.5  |
| 201675_at   | NM_003488 | AKAP1        | 8165         | 231.0  | 262.3  | 317.0  | 252.6  | 303.4  |
| 201676_x_at | NM_002786 | PSMA1        | 5682         | 1425.2 | 1174.2 | 1093.5 | 971.5  | 820.1  |
| 201677_at   | AI937543  | HMCES        | 56941        | 25.8   | 18.0   | 24.5   | 25.0   | 21.4   |
| 201678_s_at | NM_020187 | HMCES        | 56941        | 128.2  | 129.7  | 164.9  | 127.8  | 124.5  |
| 201679_at   | BE646076  | SRRT         | 51593        | 65.2   | 64.5   | 67.6   | 76.2   | 66.6   |
| 201680_x_at | NM_015908 | SRRT         | 51593        | 276.7  | 336.1  | 333.8  | 247.1  | 227.8  |
| 201681_s_at | AB011155  | DLG5         | 9231         | 125.0  | 155.9  | 139.4  | 136.9  | 109.1  |
| 201682_at   | NM_004279 | PMPCB        | 9512         | 444.2  | 432.1  | 478.2  | 487.7  | 332.4  |
| 201683_x_at | BE783632  | TOX4         | 9878         | 80.9   | 85.2   | 107.0  | 70.0   | 78.4   |
| 201684_s_at | BF001668  | TOX4         | 9878         | 180.9  | 165.0  | 165.3  | 197.0  | 144.2  |
| 201685_s_at | NM_014828 | TOX4         | 9878         | 53.5   | 44.1   | 42.9   | 58.4   | 27.3   |
| 201686_x_at | AF229254  | API5         | 8539         | 88.7   | 56.2   | 71.3   | 64.2   | 48.0   |
| 201687_s_at | NM_006595 | API5         | 8539         | 171.3  | 138.8  | 189.0  | 148.6  | 160.0  |
| 201688_s_at | BG389015  | TPD52        | 7163         | 333.5  | 352.0  | 412.0  | 328.7  | 314.0  |
| 201689_s_at | BE974098  | TPD52        | 7163         | 529.3  | 388.0  | 552.2  | 438.8  | 384.5  |
| 201690_s_at | AA524023  | TPD52        | 7163         | 750.9  | 652.9  | 829.7  | 696.8  | 662.3  |

|             |           |                          |       |       |       |       |       |       |
|-------------|-----------|--------------------------|-------|-------|-------|-------|-------|-------|
| 201691_s_at | NM_005079 | TPD52                    | 7163  | 17.8  | 17.0  | 22.1  | 13.9  | 10.9  |
| 201692_at   | NM_005866 | SIGMAR1                  | 10280 | 310.1 | 181.6 | 285.1 | 209.8 | 205.6 |
| 201693_s_at | AV733950  | EGR1                     | 1958  | 17.1  | 13.1  | 16.8  | 7.7   | 9.8   |
| 201694_s_at | NM_001964 | EGR1                     | 1958  | 4.0   | 5.3   | 3.3   | 11.2  | 5.9   |
| 201695_s_at | NM_000270 | PNP                      | 4860  | 215.1 | 180.4 | 265.6 | 202.4 | 217.7 |
| 201696_at   | NM_005626 | SRSF4                    | 6429  | 190.7 | 128.4 | 194.7 | 137.9 | 161.1 |
| 201697_s_at | NM_001379 | DNMT1                    | 1786  | 305.0 | 227.3 | 339.1 | 232.5 | 258.4 |
| 201698_s_at | NM_003769 | GATC /// SRS8683 /// 283 |       | 879.9 | 739.6 | 888.6 | 824.9 | 702.8 |
| 201699_at   | NM_002806 | PSMC6                    | 5706  | 254.2 | 225.9 | 304.7 | 255.0 | 230.9 |
| 201700_at   | NM_001760 | CCND3                    | 896   | 275.9 | 253.0 | 325.0 | 258.2 | 285.5 |
| 201701_s_at | NM_006320 | PGRMC2                   | 10424 | 128.5 | 82.1  | 130.2 | 108.2 | 80.5  |
| 201702_s_at | AI492873  | PPP1R10                  | 5514  | 64.6  | 62.6  | 65.8  | 60.9  | 48.8  |
| 201703_s_at | NM_002714 | PPP1R10                  | 5514  | 244.8 | 209.1 | 250.1 | 231.7 | 196.4 |
| 201704_at   | NM_001247 | ENTPD6                   | 955   | 129.8 | 135.4 | 171.5 | 164.6 | 135.6 |
| 201705_at   | NM_002811 | PSMD7                    | 5713  | 297.2 | 356.2 | 372.9 | 350.0 | 309.9 |
| 201706_s_at | BC000496  | PEX19                    | 5824  | 214.8 | 237.2 | 236.9 | 260.7 | 107.5 |
| 201707_at   | NM_002857 | PEX19                    | 5824  | 150.4 | 140.4 | 148.0 | 135.0 | 105.5 |
| 201708_s_at | AW083371  | NIPSNAP1                 | 8508  | 251.4 | 302.7 | 325.7 | 314.9 | 258.4 |
| 201709_s_at | NM_003634 | NIPSNAP1                 | 8508  | 430.6 | 431.1 | 467.5 | 426.9 | 376.9 |
| 201710_at   | NM_002466 | MYBL2                    | 4605  | 150.9 | 152.6 | 216.2 | 155.7 | 181.0 |
| 201711_x_at | AI681120  | RANBP2                   | 5903  | 80.0  | 64.3  | 84.4  | 79.8  | 63.7  |
| 201712_s_at | NM_006267 | RANBP2                   | 5903  | 45.4  | 31.4  | 48.1  | 41.0  | 33.1  |
| 201713_s_at | D42063    | RANBP2                   | 5903  | 123.0 | 119.7 | 147.1 | 173.3 | 110.9 |
| 201714_at   | NM_001070 | TUBG1                    | 7283  | 687.2 | 617.0 | 796.3 | 614.7 | 645.2 |
| 201715_s_at | NM_014977 | ACIN1                    | 22985 | 69.2  | 71.6  | 89.6  | 90.1  | 79.1  |
| 201716_at   | NM_003099 | SNX1                     | 6642  | 265.4 | 233.1 | 225.3 | 248.2 | 183.5 |
| 201717_at   | NM_004927 | MRPL49                   | 740   | 749.8 | 784.3 | 865.5 | 775.3 | 682.7 |
| 201718_s_at | BF511685  | EPB41L2                  | 2037  | 15.3  | 11.2  | 16.9  | 11.6  | 5.5   |
| 201719_s_at | NM_001431 | EPB41L2                  | 2037  | 24.9  | 10.0  | 10.5  | 2.8   | 5.6   |
| 201720_s_at | AI589086  | LAPTM5                   | 7805  | 2.6   | 2.3   | 2.5   | 8.6   | 1.7   |
| 201721_s_at | NM_006762 | LAPTM5                   | 7805  | 15.1  | 10.2  | 15.5  | 17.6  | 9.0   |
| 201722_s_at | AV692127  | GALNT1                   | 2589  | 221.3 | 194.9 | 224.4 | 205.4 | 173.7 |
| 201723_s_at | U41514    | GALNT1                   | 2589  | 150.6 | 112.4 | 129.5 | 115.0 | 89.1  |
| 201724_s_at | NM_020474 | GALNT1                   | 2589  | 81.3  | 71.0  | 80.0  | 68.8  | 63.6  |
| 201725_at   | NM_006023 | CDC123                   | 8872  | 399.2 | 335.6 | 430.6 | 365.7 | 363.1 |
| 201726_at   | BC003376  | ELAVL1                   | 1994  | 935.0 | 899.8 | 970.8 | 879.6 | 753.0 |
| 201727_s_at | NM_001419 | ELAVL1                   | 1994  | 272.1 | 203.7 | 235.4 | 211.2 | 203.0 |
| 201728_s_at | AA904674  | KIAA0100                 | 9703  | 62.8  | 56.2  | 71.9  | 59.1  | 49.9  |
| 201729_s_at | NM_014680 | KIAA0100                 | 9703  | 404.8 | 380.2 | 414.1 | 386.3 | 357.9 |
| 201730_s_at | BF110993  | TPR                      | 7175  | 65.4  | 44.3  | 58.5  | 41.2  | 47.4  |
| 201731_s_at | NM_003292 | TPR                      | 7175  | 157.0 | 105.0 | 124.9 | 108.3 | 103.0 |
| 201732_s_at | AF029346  | CLCN3                    | 1182  | 78.3  | 66.3  | 70.2  | 63.9  | 56.6  |
| 201733_at   | AA902971  | CLCN3                    | 1182  | 52.5  | 42.1  | 60.7  | 47.9  | 36.8  |
| 201734_at   | AI760629  | CLCN3                    | 1182  | 183.4 | 182.0 | 205.2 | 167.9 | 143.4 |
| 201735_s_at | NM_001829 | CLCN3                    | 1182  | 228.8 | 239.5 | 245.2 | 230.2 | 182.4 |
| 201736_s_at | BF000409  | MARCH6                   | 10299 | 161.6 | 162.8 | 186.8 | 154.1 | 147.3 |
| 201737_s_at | NM_005885 | MARCH6                   | 10299 | 97.0  | 66.2  | 85.6  | 75.8  | 78.8  |
| 201738_at   | NM_005875 | EIF1B                    | 10289 | 512.6 | 383.0 | 532.4 | 414.6 | 372.5 |
| 201739_at   | NM_005627 | SGK1                     | 6446  | 11.8  | 8.1   | 14.0  | 9.3   | 9.0   |
| 201740_at   | NM_004551 | NDUFS3                   | 4722  | 607.6 | 594.2 | 667.5 | 659.1 | 548.7 |
| 201741_x_at | M69040    | SRSF1                    | 6426  | 11.7  | 18.5  | 14.1  | 14.2  | 14.7  |
| 201742_x_at | NM_006924 | SRSF1                    | 6426  | 742.0 | 639.0 | 791.5 | 608.9 | 656.9 |
| 201743_at   | NM_000591 | CD14                     | 929   | 0.6   | 0.5   | 1.1   | 3.2   | 0.5   |



|             |           |                          |        |        |        |        |        |       |
|-------------|-----------|--------------------------|--------|--------|--------|--------|--------|-------|
| 201744_s_at | NM_002345 | LUM                      | 4060   | 0.3    | 0.2    | 2.3    | 0.1    | 0.2   |
| 201745_at   | NM_002822 | TWF1                     | 5756   | 287.5  | 202.0  | 302.6  | 244.2  | 212.6 |
| 201746_at   | NM_000546 | TP53                     | 7157   | 472.9  | 511.5  | 514.8  | 523.7  | 413.3 |
| 201747_s_at | AI769566  | SAFB                     | 6294   | 47.1   | 39.5   | 47.9   | 38.3   | 48.6  |
| 201748_s_at | NM_002967 | SAFB                     | 6294   | 118.2  | 108.6  | 123.9  | 112.6  | 113.9 |
| 201749_at   | BF969352  | ECE1                     | 1889   | 28.2   | 18.9   | 18.1   | 13.4   | 17.1  |
| 201750_s_at | NM_001397 | ECE1                     | 1889   | 5.5    | 4.7    | 13.0   | 3.3    | 2.8   |
| 201751_at   | NM_014876 | JOSD1                    | 9929   | 97.8   | 75.2   | 98.7   | 83.7   | 89.9  |
| 201752_s_at | AI763123  | ADD3                     | 120    | 103.3  | 67.1   | 68.6   | 82.8   | 60.5  |
| 201753_s_at | NM_019903 | ADD3                     | 120    | 116.3  | 83.0   | 83.2   | 83.9   | 65.9  |
| 201754_at   | NM_004374 | COX6C                    | 1345   | 1037.6 | 995.5  | 1077.8 | 1130.4 | 838.9 |
| 201755_at   | NM_006739 | MCM5                     | 4174   | 135.5  | 96.8   | 158.4  | 123.9  | 145.4 |
| 201756_at   | NM_002946 | RPA2                     | 6118   | 377.9  | 363.8  | 481.8  | 310.8  | 330.1 |
| 201757_at   | NM_004552 | NDUFS5 /// F4725 /// 613 | 1389.0 | 1578.5 | 1463.7 | 1457.5 | 1186.4 |       |
| 201758_at   | NM_006292 | TSG101                   | 7251   | 399.9  | 327.3  | 381.7  | 330.6  | 290.4 |
| 201759_at   | AW247323  | TBCD                     | 6904   | 22.4   | 6.3    | 34.7   | 21.3   | 16.7  |
| 201760_s_at | NM_018639 | WSB2                     | 55884  | 946.3  | 865.5  | 1039.2 | 898.0  | 815.0 |
| 201761_at   | NM_006636 | MTHFD2                   | 10797  | 540.8  | 509.2  | 573.9  | 478.5  | 477.1 |
| 201762_s_at | NM_002818 | MIR7703 /// 5721 /// 102 | 481.1  | 520.6  | 531.3  | 538.2  | 473.3  |       |
| 201763_s_at | NM_001350 | DAXX                     | 1616   | 68.0   | 48.5   | 52.3   | 64.0   | 40.8  |
| 201764_at   | NM_024056 | TMEM106C                 | 79022  | 544.0  | 690.0  | 713.5  | 586.1  | 577.0 |
| 201765_s_at | AL523158  | HEXA                     | 3073   | 111.6  | 123.9  | 90.5   | 113.1  | 92.1  |
| 201766_at   | AF304370  | ELAC2                    | 60528  | 8.3    | 5.5    | 12.5   | 6.0    | 7.7   |
| 201767_s_at | NM_018127 | ELAC2                    | 60528  | 140.2  | 137.4  | 179.1  | 164.2  | 166.9 |
| 201768_s_at | BC004467  | CLINT1                   | 9685   | 85.8   | 78.5   | 92.7   | 80.7   | 84.6  |
| 201769_at   | NM_014666 | CLINT1                   | 9685   | 114.1  | 94.5   | 115.3  | 95.7   | 89.0  |
| 201770_at   | NM_004596 | SNRPA                    | 6626   | 348.9  | 340.4  | 388.3  | 337.8  | 310.7 |
| 201771_at   | NM_005698 | SCAMP3                   | 10067  | 356.9  | 327.6  | 368.3  | 326.9  | 317.0 |
| 201772_at   | NM_015878 | AZIN1                    | 51582  | 298.9  | 227.3  | 291.5  | 278.0  | 229.5 |
| 201773_at   | NM_015339 | ADNP                     | 23394  | 352.9  | 361.8  | 373.6  | 327.8  | 317.7 |
| 201774_s_at | AK022511  | NCAPD2                   | 9918   | 217.9  | 196.6  | 246.5  | 204.5  | 232.9 |
| 201775_s_at | AA676790  | EFCAB14                  | 9813   | 77.3   | 62.4   | 89.9   | 55.8   | 59.0  |
| 201776_s_at | AK001487  | EFCAB14                  | 9813   | 111.0  | 84.8   | 93.8   | 84.1   | 77.4  |
| 201777_s_at | BC002525  | EFCAB14                  | 9813   | 68.3   | 63.3   | 66.3   | 64.8   | 55.7  |
| 201778_s_at | NM_014774 | EFCAB14                  | 9813   | 150.1  | 137.3  | 137.0  | 154.9  | 123.7 |
| 201779_s_at | AF070558  | RNF13                    | 11342  | 107.4  | 102.4  | 118.9  | 94.6   | 101.4 |
| 201780_s_at | NM_007282 | RNF13                    | 11342  | 67.7   | 50.7   | 74.7   | 54.6   | 46.3  |
| 201781_s_at | AL558532  | AIP                      | 9049   | 141.1  | 123.8  | 136.8  | 130.6  | 105.4 |
| 201782_s_at | NM_003977 | AIP                      | 9049   | 273.1  | 223.2  | 229.2  | 264.7  | 182.5 |
| 201783_s_at | NM_021975 | RELA                     | 5970   | 243.3  | 234.3  | 237.7  | 243.3  | 201.1 |
| 201784_s_at | NM_014267 | C11orf58                 | 10944  | 614.8  | 409.1  | 631.6  | 574.0  | 527.0 |
| 201785_at   | NM_002933 | RNASE1                   | 6035   | 2.3    | 3.5    | 20.2   | 7.9    | 6.5   |
| 201786_s_at | NM_001111 | ADAR                     | 103    | 340.4  | 339.9  | 348.7  | 340.5  | 289.9 |
| 201787_at   | NM_001996 | FBLN1                    | 2192   | 1.7    | 0.7    | 0.9    | 1.3    | 1.3   |
| 201788_at   | NM_007372 | DDX42                    | 11325  | 156.9  | 140.0  | 189.5  | 166.0  | 120.8 |
| 201789_at   | BC000637  | PCNXL4                   | 64430  | 7.1    | 4.9    | 5.6    | 7.0    | 3.4   |
| 201790_s_at | AW150953  | DHCR7                    | 1717   | 210.1  | 160.7  | 213.8  | 187.4  | 185.3 |
| 201791_s_at | NM_001360 | DHCR7                    | 1717   | 184.3  | 169.3  | 199.4  | 132.5  | 189.6 |
| 201792_at   | NM_001129 | AEBP1                    | 165    | 2.3    | 6.7    | 2.6    | 2.9    | 2.7   |
| 201793_x_at | BF509099  | SMG7                     | 9887   | 20.9   | 16.5   | 14.9   | 10.7   | 14.8  |
| 201794_s_at | NM_014837 | SMG7                     | 9887   | 103.5  | 101.9  | 126.4  | 111.2  | 86.9  |
| 201795_at   | NM_002296 | LBR                      | 3930   | 323.5  | 230.9  | 335.5  | 225.2  | 223.0 |
| 201796_s_at | BE790854  | VAR5                     | 7407   | 66.9   | 61.3   | 97.7   | 71.4   | 58.6  |

|             |           |                           |       |        |        |        |        |        |
|-------------|-----------|---------------------------|-------|--------|--------|--------|--------|--------|
| 201797_s_at | NM_006295 | VAR5                      | 7407  | 257.8  | 254.0  | 308.4  | 284.0  | 244.4  |
| 201798_s_at | NM_013451 | MYOF                      | 26509 | 10.9   | 1.3    | 3.8    | 1.3    | 1.2    |
| 201799_s_at | AI927993  | OSBP                      | 5007  | 99.6   | 96.6   | 123.2  | 101.6  | 92.0   |
| 201800_s_at | AF185696  | OSBP                      | 5007  | 153.3  | 153.2  | 156.0  | 164.8  | 130.6  |
| 201801_s_at | AF079117  | SLC29A1                   | 2030  | 63.3   | 42.2   | 69.7   | 43.4   | 67.1   |
| 201802_at   | NM_004955 | SLC29A1                   | 2030  | 62.2   | 40.8   | 78.3   | 41.7   | 65.9   |
| 201803_at   | NM_000938 | POLR2B                    | 5431  | 417.5  | 343.3  | 469.4  | 352.4  | 350.2  |
| 201804_x_at | NM_001281 | TBCB                      | 1155  | 292.7  | 356.5  | 339.2  | 340.6  | 288.1  |
| 201805_at   | NM_002733 | PRKAG1                    | 5571  | 231.5  | 251.1  | 246.2  | 259.1  | 228.6  |
| 201806_s_at | NM_007245 | ATXN2L                    | 11273 | 22.1   | 27.1   | 27.9   | 16.9   | 18.6   |
| 201807_at   | NM_004896 | VPS26A                    | 9559  | 369.9  | 339.1  | 369.4  | 332.5  | 327.9  |
| 201808_s_at | BE732652  | ENG                       | 2022  | 3.5    | 14.5   | 4.3    | 2.4    | 1.6    |
| 201809_s_at | NM_000118 | ENG                       | 2022  | 9.3    | 9.7    | 1.9    | 6.4    | 7.6    |
| 201810_s_at | AL562152  | SH3BP5                    | 9467  | 16.9   | 24.4   | 21.8   | 19.8   | 8.6    |
| 201811_x_at | NM_004844 | SH3BP5                    | 9467  | 49.9   | 42.1   | 44.8   | 44.5   | 24.3   |
| 201812_s_at | NM_019059 | C4orf46 /// T54543 /// 20 |       | 1512.5 | 1301.7 | 1568.5 | 1386.5 | 1242.0 |
| 201813_s_at | AI654161  | TBC1D5                    | 9779  | 70.8   | 78.6   | 67.7   | 92.7   | 63.8   |
| 201814_at   | AI300084  | TBC1D5                    | 9779  | 89.4   | 76.6   | 85.5   | 99.8   | 76.5   |
| 201815_s_at | NM_014744 | TBC1D5                    | 9779  | 32.8   | 37.6   | 27.2   | 28.4   | 21.2   |
| 201816_s_at | NM_001483 | GBAS                      | 2631  | 492.7  | 428.2  | 504.0  | 451.5  | 373.3  |
| 201817_at   | NM_014671 | UBE3C                     | 9690  | 158.6  | 114.3  | 163.3  | 130.9  | 131.2  |
| 201818_at   | NM_024830 | LPCAT1                    | 79888 | 134.7  | 123.7  | 138.4  | 128.7  | 114.5  |
| 201819_at   | NM_005505 | SCARB1                    | 949   | 147.3  | 102.5  | 154.4  | 120.1  | 135.8  |
| 201820_at   | NM_000424 | KRT5                      | 3852  | 1.8    | 3.2    | 3.4    | 2.3    | 0.5    |
| 201821_s_at | BC004439  | TIMM17A                   | 10440 | 419.9  | 297.9  | 437.4  | 351.6  | 349.9  |
| 201822_at   | NM_006335 | TIMM17A                   | 10440 | 7.6    | 10.3   | 9.2    | 10.8   | 9.5    |
| 201823_s_at | NM_004290 | RNF14                     | 9604  | 152.8  | 135.2  | 170.6  | 135.5  | 135.0  |
| 201824_at   | AB022663  | RNF14                     | 9604  | 141.4  | 72.0   | 114.6  | 87.7   | 81.4   |
| 201825_s_at | AL572542  | SCCPDH                    | 51097 | 142.3  | 118.9  | 141.0  | 136.3  | 126.8  |
| 201826_s_at | NM_016002 | SCCPDH                    | 51097 | 39.2   | 40.4   | 43.0   | 41.3   | 27.8   |
| 201827_at   | AF113019  | SMARCD2                   | 6603  | 268.9  | 244.5  | 284.6  | 261.4  | 222.9  |
| 201828_x_at | NM_003928 | FAM127A                   | 8933  | 338.6  | 376.3  | 429.6  | 360.0  | 322.9  |
| 201829_at   | AW263232  | NET1                      | 10276 | 97.4   | 94.4   | 118.7  | 103.6  | 78.6   |
| 201830_s_at | NM_005863 | NET1                      | 10276 | 130.6  | 126.2  | 138.1  | 124.3  | 106.9  |
| 201831_s_at | BE875592  | USO1                      | 8615  | 79.7   | 86.2   | 99.7   | 90.2   | 83.6   |
| 201832_s_at | NM_003715 | USO1                      | 8615  | 163.5  | 168.9  | 164.4  | 157.1  | 142.9  |
| 201833_at   | NM_001527 | HDAC2                     | 3066  | 480.1  | 315.4  | 475.7  | 363.3  | 359.1  |
| 201834_at   | BC001007  | PRKAB1                    | 5564  | 29.5   | 28.9   | 22.6   | 29.9   | 20.6   |
| 201835_s_at | NM_006253 | PRKAB1                    | 5564  | 42.1   | 25.7   | 34.7   | 30.5   | 27.5   |
| 201836_s_at | AU154740  | SUPT7L                    | 9913  | 21.2   | 25.1   | 22.9   | 24.6   | 15.3   |
| 201837_s_at | AF197954  | SUPT7L                    | 9913  | 91.5   | 79.8   | 95.0   | 94.1   | 71.8   |
| 201838_s_at | NM_014860 | SUPT7L                    | 9913  | 18.2   | 7.7    | 14.0   | 12.8   | 15.8   |
| 201839_s_at | NM_002354 | EPCAM                     | 4072  | 445.2  | 334.0  | 449.0  | 353.7  | 319.5  |
| 201840_at   | NM_006156 | NEDD8                     | 4738  | 873.6  | 844.4  | 960.3  | 899.4  | 728.5  |
| 201841_s_at | NM_001540 | HSPB1                     | 3315  | 1506.6 | 1487.1 | 1668.2 | 1588.3 | 1371.1 |
| 201842_s_at | AI826799  | EFEMP1                    | 2202  | 7.2    | 0.1    | 4.5    | 6.2    | 3.8    |
| 201843_s_at | NM_004105 | EFEMP1                    | 2202  | 0.2    | 3.9    | 3.3    | 0.2    | 3.0    |
| 201844_s_at | W84482    | RYBP                      | 23429 | 93.9   | 91.8   | 84.5   | 88.3   | 88.1   |
| 201845_s_at | AB029551  | RYBP                      | 23429 | 131.3  | 120.2  | 144.7  | 133.7  | 113.7  |
| 201846_s_at | NM_012234 | RYBP                      | 23429 | 70.2   | 81.3   | 82.5   | 57.6   | 57.3   |
| 201847_at   | NM_000235 | LIPA                      | 3988  | 213.2  | 186.1  | 224.7  | 178.6  | 196.0  |
| 201848_s_at | U15174    | BNIP3                     | 664   | 302.0  | 273.4  | 352.3  | 321.2  | 332.2  |
| 201849_at   | NM_004052 | BNIP3                     | 664   | 389.3  | 325.6  | 441.2  | 391.1  | 348.1  |

|             |           |         |       |        |        |        |        |        |
|-------------|-----------|---------|-------|--------|--------|--------|--------|--------|
| 201850_at   | NM_001747 | CAPG    | 822   | 6.1    | 8.1    | 5.6    | 3.8    | 8.9    |
| 201851_at   | NM_003025 | SH3GL1  | 6455  | 211.7  | 192.7  | 202.8  | 178.1  | 176.4  |
| 201852_x_at | AI813758  | COL3A1  | 1281  | 3.4    | 7.4    | 12.7   | 7.1    | 12.7   |
| 201853_s_at | NM_021873 | CDC25B  | 994   | 225.0  | 163.6  | 235.8  | 207.6  | 170.6  |
| 201854_s_at | AI744148  | ATMIN   | 23300 | 105.6  | 94.5   | 102.4  | 90.1   | 98.1   |
| 201855_s_at | NM_015251 | ATMIN   | 23300 | 89.2   | 68.7   | 93.8   | 81.7   | 70.8   |
| 201856_s_at | BC000376  | ZFR     | 51663 | 72.9   | 82.5   | 88.0   | 66.2   | 62.4   |
| 201857_at   | NM_016107 | ZFR     | 51663 | 250.5  | 208.8  | 244.4  | 217.2  | 206.5  |
| 201858_s_at | J03223    | SRGN    | 5552  | 1.5    | 1.0    | 1.2    | 0.3    | 1.3    |
| 201859_at   | NM_002727 | SRGN    | 5552  | 1.3    | 4.2    | 1.2    | 1.6    | 3.5    |
| 201860_s_at | NM_000930 | PLAT    | 5327  | 1.3    | 0.7    | 5.3    | 0.4    | 0.1    |
| 201861_s_at | BF965566  | LRRFIP1 | 9208  | 86.2   | 73.8   | 97.2   | 89.5   | 84.2   |
| 201862_s_at | NM_004735 | LRRFIP1 | 9208  | 205.1  | 161.8  | 182.2  | 156.2  | 145.1  |
| 201863_at   | NM_014077 | FAM32A  | 26017 | 194.7  | 156.1  | 192.5  | 174.1  | 169.8  |
| 201864_at   | NM_001493 | GDI1    | 2664  | 426.5  | 461.3  | 496.2  | 496.5  | 392.4  |
| 201865_x_at | AI432196  | NR3C1   | 2908  | 5.0    | 0.7    | 5.5    | 1.8    | 5.0    |
| 201866_s_at | NM_000176 | NR3C1   | 2908  | 12.6   | 1.9    | 8.3    | 6.5    | 6.5    |
| 201867_s_at | AW968555  | TBL1X   | 6907  | 73.4   | 70.9   | 77.9   | 76.9   | 78.9   |
| 201868_s_at | AI082187  | TBL1X   | 6907  | 30.0   | 30.4   | 33.4   | 31.3   | 26.5   |
| 201869_s_at | BF593932  | TBL1X   | 6907  | 49.9   | 45.8   | 51.9   | 50.6   | 48.1   |
| 201870_at   | NM_006809 | TOMM34  | 10953 | 179.1  | 159.6  | 194.2  | 181.2  | 162.7  |
| 201871_s_at | NM_015853 | UBXN1   | 51035 | 98.8   | 129.1  | 134.9  | 156.1  | 113.9  |
| 201872_s_at | AI002002  | ABCE1   | 6059  | 321.3  | 253.2  | 345.1  | 254.2  | 288.9  |
| 201873_s_at | NM_002940 | ABCE1   | 6059  | 243.6  | 168.9  | 215.5  | 159.6  | 176.0  |
| 201874_at   | BF978611  | MPZL1   | 9019  | 232.9  | 190.0  | 199.9  | 194.7  | 178.8  |
| 201875_s_at | NM_024569 | MPZL1   | 9019  | 103.4  | 93.1   | 119.8  | 104.5  | 96.2   |
| 201876_at   | NM_000305 | PON2    | 5445  | 270.0  | 247.2  | 253.7  | 240.9  | 183.6  |
| 201877_s_at | NM_002719 | PPP2R5C | 5527  | 114.8  | 102.5  | 106.3  | 106.1  | 95.5   |
| 201878_at   | N25546    | ARIH1   | 25820 | 61.0   | 57.1   | 67.1   | 65.6   | 53.7   |
| 201879_at   | AI694332  | ARIH1   | 25820 | 62.8   | 60.8   | 60.4   | 61.5   | 52.8   |
| 201880_at   | AL040708  | ARIH1   | 25820 | 102.5  | 90.6   | 103.2  | 92.6   | 85.4   |
| 201881_s_at | NM_005744 | ARIH1   | 25820 | 73.6   | 74.3   | 81.7   | 79.2   | 72.9   |
| 201882_x_at | AI492393  | B4GALT1 | 2683  | 11.1   | 4.0    | 8.9    | 8.0    | 3.8    |
| 201883_s_at | D29805    | B4GALT1 | 2683  | 109.8  | 124.7  | 123.4  | 144.8  | 149.7  |
| 201884_at   | NM_004363 | CEACAM5 | 1048  | 5.5    | 8.3    | 8.1    | 7.1    | 5.1    |
| 201885_s_at | NM_000398 | CYB5R3  | 1727  | 376.5  | 379.6  | 433.3  | 457.8  | 381.3  |
| 201886_at   | NM_025230 | DCAF11  | 80344 | 145.7  | 180.0  | 162.8  | 170.8  | 147.0  |
| 201887_at   | NM_001560 | IL13RA1 | 3597  | 55.5   | 51.2   | 38.7   | 37.4   | 36.3   |
| 201888_s_at | U81379    | IL13RA1 | 3597  | 29.4   | 21.3   | 30.1   | 18.5   | 22.0   |
| 201889_at   | NM_014888 | FAM3C   | 10447 | 167.2  | 153.0  | 170.5  | 152.4  | 126.9  |
| 201890_at   | BE966236  | RRM2    | 6241  | 579.4  | 453.6  | 739.5  | 489.0  | 609.8  |
| 201891_s_at | NM_004048 | B2M     | 567   | 954.4  | 851.1  | 1127.7 | 889.8  | 799.5  |
| 201892_s_at | NM_000884 | IMPDH2  | 3615  | 1696.7 | 1674.2 | 1858.8 | 1763.1 | 1609.4 |
| 201893_x_at | AF138300  | DCN     | 1634  | 14.6   | 4.9    | 17.3   | 16.2   | 9.0    |
| 201894_s_at | NM_001920 | SSR1    | 6745  | 312.9  | 323.4  | 323.3  | 291.3  | 297.0  |
| 201895_at   | NM_001654 | ARAF    | 369   | 125.8  | 133.6  | 131.5  | 119.8  | 104.6  |
| 201896_s_at | BC001425  | PSRC1   | 84722 | 215.1  | 146.4  | 261.0  | 166.2  | 185.8  |
| 201897_s_at | NM_001826 | CKS1B   | 1163  | 316.4  | 287.6  | 405.2  | 313.5  | 330.0  |
| 201898_s_at | AI126625  | UBE2A   | 7319  | 339.1  | 270.0  | 305.5  | 304.1  | 252.3  |
| 201899_s_at | NM_003336 | UBE2A   | 7319  | 347.1  | 272.5  | 331.6  | 335.3  | 240.4  |
| 201900_s_at | NM_006066 | AKR1A1  | 10327 | 886.0  | 865.9  | 925.6  | 878.7  | 774.6  |
| 201901_s_at | Z14077    | YY1     | 7528  | 279.2  | 174.2  | 219.7  | 219.4  | 188.6  |
| 201902_s_at | BG390664  | YY1     | 7528  | 1.8    | 2.2    | 3.0    | 10.0   | 4.9    |

|             |           |          |       |        |        |        |        |        |
|-------------|-----------|----------|-------|--------|--------|--------|--------|--------|
| 201903_at   | NM_003365 | UQCRC1   | 7384  | 994.2  | 1072.1 | 1095.1 | 1104.8 | 920.1  |
| 201904_s_at | BF031714  | CTDSPL   | 10217 | 126.5  | 122.2  | 109.5  | 116.1  | 78.5   |
| 201905_s_at | BF590317  | CTDSPL   | 10217 | 83.0   | 83.6   | 86.2   | 86.4   | 75.4   |
| 201906_s_at | NM_005808 | CTDSPL   | 10217 | 82.8   | 86.1   | 88.9   | 81.8   | 69.9   |
| 201907_x_at | U49262    | DVL3     | 1857  | 12.5   | 15.4   | 28.5   | 25.5   | 15.4   |
| 201908_at   | NM_004423 | DVL3     | 1857  | 122.6  | 102.9  | 102.5  | 118.1  | 82.5   |
| 201909_at   | NM_001008 | RPS4Y1   | 6192  | 1529.6 | 1536.4 | 1614.3 | 1524.6 | 1206.0 |
| 201910_at   | BF213279  | FARP1    | 10160 | 17.1   | 4.6    | 14.2   | 11.0   | 2.5    |
| 201911_s_at | NM_005766 | FARP1    | 10160 | 21.5   | 7.9    | 13.9   | 9.9    | 15.4   |
| 201912_s_at | NM_002094 | GSPT1    | 2935  | 760.4  | 696.6  | 836.3  | 741.8  | 793.2  |
| 201913_s_at | NM_025233 | COASY    | 80347 | 225.9  | 195.4  | 281.1  | 194.4  | 208.8  |
| 201914_s_at | AK001465  | SEC63    | 11231 | 90.9   | 77.7   | 85.5   | 89.0   | 83.4   |
| 201915_at   | AI806665  | SEC63    | 11231 | 22.5   | 16.3   | 17.3   | 21.1   | 13.7   |
| 201916_s_at | NM_007214 | SEC63    | 11231 | 191.1  | 178.8  | 206.4  | 188.3  | 158.4  |
| 201917_s_at | AI694452  | SLC25A36 | 55186 | 47.3   | 51.3   | 56.3   | 55.1   | 42.6   |
| 201918_at   | AI927944  | SLC25A36 | 55186 | 43.9   | 38.2   | 45.8   | 46.0   | 37.9   |
| 201919_at   | AL049246  | SLC25A36 | 55186 | 115.2  | 94.4   | 110.2  | 106.7  | 83.8   |
| 201920_at   | NM_005415 | SLC20A1  | 6574  | 172.6  | 151.0  | 173.3  | 144.3  | 155.6  |
| 201921_at   | NM_004125 | GNG10    | 2790  | 351.3  | 227.6  | 325.1  | 274.5  | 206.5  |
| 201922_at   | NM_014886 | NSA2     | 10412 | 547.3  | 517.7  | 604.4  | 548.0  | 503.8  |
| 201923_at   | NM_006406 | PRDX4    | 10549 | 1151.1 | 968.8  | 1125.5 | 1046.9 | 932.6  |
| 201924_at   | NM_005935 | AFF1     | 4299  | 174.5  | 163.2  | 180.6  | 171.9  | 140.5  |
| 201925_s_at | NM_000574 | CD55     | 1604  | 0.6    | 0.5    | 0.4    | 2.0    | 0.3    |
| 201926_s_at | BC001288  | CD55     | 1604  | 4.5    | 7.4    | 2.6    | 1.0    | 2.3    |
| 201927_s_at | BG292559  | PKP4     | 8502  | 60.9   | 52.2   | 67.8   | 52.7   | 51.3   |
| 201928_at   | AA194254  | PKP4     | 8502  | 91.2   | 77.4   | 98.9   | 92.1   | 71.0   |
| 201929_s_at | NM_003628 | PKP4     | 8502  | 61.9   | 53.2   | 59.3   | 51.7   | 45.4   |
| 201930_at   | NM_005915 | MCM6     | 4175  | 508.1  | 403.6  | 551.8  | 388.8  | 439.2  |
| 201931_at   | NM_000126 | ETFA     | 2108  | 820.6  | 767.4  | 798.1  | 776.6  | 622.3  |
| 201932_at   | NM_006369 | LRRC41   | 10489 | 218.1  | 261.2  | 226.6  | 216.8  | 174.7  |
| 201933_at   | NM_002768 | CHMP1A   | 5119  | 138.6  | 124.5  | 142.2  | 125.6  | 110.4  |
| 201934_at   | N92524    | WDR82    | 80335 | 390.5  | 334.8  | 420.0  | 374.7  | 344.5  |
| 201935_s_at | AI768122  | EIF4G3   | 8672  | 42.7   | 38.3   | 43.8   | 38.1   | 34.2   |
| 201936_s_at | NM_003760 | EIF4G3   | 8672  | 37.9   | 26.5   | 32.5   | 30.2   | 16.0   |
| 201937_s_at | NM_012100 | DNPEP    | 23549 | 91.9   | 113.7  | 99.9   | 99.2   | 94.5   |
| 201938_at   | NM_004642 | CDK2AP1  | 8099  | 1032.9 | 873.1  | 1122.5 | 940.4  | 894.3  |
| 201939_at   | NM_006622 | PLK2     | 10769 | 43.9   | 36.0   | 29.1   | 43.0   | 37.5   |
| 201940_at   | AA897514  | CPD      | 1362  | 54.8   | 41.3   | 52.9   | 55.8   | 35.6   |
| 201941_at   | BE349147  | CPD      | 1362  | 80.7   | 80.3   | 85.9   | 84.7   | 65.9   |
| 201942_s_at | D85390    | CPD      | 1362  | 32.8   | 37.7   | 31.5   | 40.4   | 31.8   |
| 201943_s_at | NM_001304 | CPD      | 1362  | 89.1   | 66.8   | 73.0   | 67.9   | 56.2   |
| 201944_at   | NM_000521 | HEXB     | 3074  | 297.1  | 242.4  | 302.4  | 273.6  | 241.9  |
| 201945_at   | NM_002569 | FURIN    | 5045  | 6.4    | 15.9   | 15.7   | 19.0   | 11.4   |
| 201946_s_at | AL545982  | CCT2     | 10576 | 1030.2 | 885.1  | 1072.1 | 841.5  | 876.6  |
| 201947_s_at | NM_006431 | CCT2     | 10576 | 1763.6 | 1443.8 | 1710.4 | 1529.4 | 1460.8 |
| 201948_at   | NM_013285 | GNL2     | 29889 | 254.4  | 156.7  | 262.0  | 192.6  | 206.3  |
| 201949_x_at | AL572341  | CAPZB    | 832   | 220.2  | 221.1  | 286.6  | 249.0  | 190.6  |
| 201950_x_at | NM_004930 | CAPZB    | 832   | 307.0  | 282.7  | 306.9  | 288.5  | 227.4  |
| 201951_at   | BF242905  | ALCAM    | 214   | 57.7   | 58.6   | 84.6   | 62.9   | 47.9   |
| 201952_at   | AA156721  | ALCAM    | 214   | 132.9  | 122.8  | 122.4  | 104.1  | 81.9   |
| 201953_at   | NM_006384 | CIB1     | 10519 | 341.1  | 352.7  | 439.6  | 422.8  | 300.6  |
| 201954_at   | NM_005720 | ARPC1B   | 10095 | 229.4  | 143.2  | 166.8  | 164.2  | 163.4  |
| 201955_at   | AL137784  | CCNC     | 892   | 366.9  | 266.6  | 382.2  | 262.4  | 261.8  |

|             |           |                           |       |        |        |        |        |        |
|-------------|-----------|---------------------------|-------|--------|--------|--------|--------|--------|
| 201956_s_at | NM_014236 | GNPAT                     | 8443  | 111.0  | 106.1  | 110.0  | 109.0  | 89.8   |
| 201957_at   | AF324888  | PPP1R12B                  | 4660  | 23.3   | 18.4   | 28.4   | 16.4   | 22.9   |
| 201958_s_at | NM_002481 | PPP1R12B                  | 4660  | 0.6    | 0.8    | 2.1    | 0.7    | 0.7    |
| 201959_s_at | AA488899  | MYCBP2                    | 23077 | 120.5  | 123.9  | 147.9  | 116.7  | 132.2  |
| 201960_s_at | NM_015057 | MYCBP2                    | 23077 | 265.1  | 224.0  | 311.8  | 220.2  | 210.4  |
| 201961_s_at | AL583171  | RNF41                     | 10193 | 104.9  | 125.0  | 129.3  | 157.7  | 110.5  |
| 201962_s_at | NM_005785 | RNF41                     | 10193 | 110.8  | 128.9  | 145.2  | 154.3  | 101.5  |
| 201963_at   | NM_021122 | ACSL1                     | 2180  | 512.4  | 425.0  | 502.3  | 421.4  | 392.9  |
| 201964_at   | N64643    | SETX                      | 23064 | 32.8   | 31.8   | 28.4   | 30.8   | 26.1   |
| 201965_s_at | NM_015046 | SETX                      | 23064 | 18.7   | 17.5   | 13.6   | 15.1   | 15.5   |
| 201966_at   | NM_004550 | NDUFS2                    | 4720  | 775.9  | 758.8  | 919.1  | 820.9  | 679.1  |
| 201967_at   | NM_005777 | RBM6                      | 10180 | 50.1   | 48.2   | 55.5   | 51.4   | 43.2   |
| 201968_s_at | NM_002633 | PGM1                      | 5236  | 302.8  | 279.3  | 314.0  | 373.2  | 272.0  |
| 201969_at   | AW003362  | NASP                      | 4678  | 32.1   | 25.7   | 38.2   | 36.1   | 30.1   |
| 201970_s_at | NM_002482 | NASP                      | 4678  | 290.0  | 243.0  | 397.5  | 249.4  | 312.4  |
| 201971_s_at | NM_001690 | ATP6V1A                   | 523   | 175.7  | 195.7  | 192.1  | 182.7  | 181.1  |
| 201972_at   | AF113129  | ATP6V1A                   | 523   | 509.5  | 476.0  | 522.2  | 502.4  | 428.8  |
| 201973_s_at | AL550875  | CCZ1 /// CCZ 51622 /// 22 |       | 680.5  | 622.1  | 648.3  | 607.4  | 494.6  |
| 201974_s_at | NM_015622 | CCZ1                      | 51622 | 8.1    | 12.4   | 4.6    | 7.4    | 12.9   |
| 201975_at   | NM_002956 | CLIP1                     | 6249  | 80.7   | 47.7   | 65.0   | 70.8   | 52.7   |
| 201976_s_at | NM_012334 | MYO10                     | 4651  | 47.0   | 37.9   | 40.9   | 39.7   | 36.3   |
| 201977_s_at | AI539425  | KIAA0141                  | 9812  | 43.7   | 38.0   | 35.6   | 48.1   | 33.0   |
| 201978_s_at | NM_014773 | KIAA0141                  | 9812  | 33.0   | 43.3   | 42.8   | 70.9   | 43.7   |
| 201979_s_at | NM_006247 | PPP5C                     | 5536  | 90.6   | 100.9  | 101.1  | 98.4   | 99.4   |
| 201980_s_at | NM_012425 | RSU1                      | 6251  | 121.5  | 106.6  | 116.5  | 118.0  | 105.0  |
| 201981_at   | AA148534  | PAPPA                     | 5069  | 4.4    | 6.7    | 3.9    | 0.4    | 0.4    |
| 201982_s_at | NM_002581 | PAPPA                     | 5069  | 15.2   | 11.4   | 14.2   | 0.9    | 6.7    |
| 201983_s_at | AW157070  | EGFR                      | 1956  | 23.2   | 11.1   | 19.2   | 16.5   | 15.6   |
| 201984_s_at | NM_005228 | EGFR                      | 1956  | 30.8   | 15.7   | 29.0   | 23.7   | 26.2   |
| 201985_at   | NM_014846 | KIAA0196                  | 9897  | 101.1  | 77.3   | 82.9   | 88.2   | 86.5   |
| 201986_at   | AB011165  | MED13                     | 9969  | 70.8   | 49.3   | 62.6   | 60.5   | 39.8   |
| 201987_at   | AI984051  | MED13                     | 9969  | 70.4   | 63.5   | 74.7   | 70.1   | 50.0   |
| 201988_s_at | BF438056  | CREBL2                    | 1389  | 96.4   | 106.0  | 120.0  | 109.6  | 100.1  |
| 201989_s_at | AL529409  | CREBL2                    | 1389  | 217.6  | 196.9  | 204.9  | 185.2  | 157.3  |
| 201990_s_at | NM_001310 | CREBL2                    | 1389  | 101.4  | 90.5   | 87.0   | 102.5  | 75.7   |
| 201991_s_at | BF223224  | KIF5B                     | 3799  | 655.2  | 579.8  | 640.1  | 609.1  | 497.4  |
| 201992_s_at | NM_004521 | KIF5B                     | 3799  | 116.7  | 121.9  | 103.2  | 107.2  | 79.5   |
| 201993_x_at | NM_005463 | HNRNPDL                   | 9987  | 333.8  | 246.5  | 368.9  | 309.1  | 315.3  |
| 201994_at   | NM_012286 | MORF4L2                   | 9643  | 1904.0 | 1668.6 | 1988.5 | 1823.4 | 1628.0 |
| 201995_at   | NM_000127 | EXT1                      | 2131  | 16.4   | 19.3   | 24.8   | 21.8   | 20.8   |
| 201996_s_at | AL524033  | SPEN                      | 23013 | 13.9   | 16.5   | 13.3   | 20.0   | 18.1   |
| 201997_s_at | NM_015001 | SPEN                      | 23013 | 77.6   | 62.7   | 77.1   | 68.8   | 54.7   |
| 201998_at   | AI743792  | ST6GAL1                   | 6480  | 21.1   | 14.9   | 15.5   | 25.2   | 14.9   |
| 201999_s_at | NM_006519 | DYNLT1                    | 6993  | 360.0  | 315.4  | 362.3  | 380.1  | 280.4  |
| 202000_at   | BC002772  | NDUFA6                    | 4700  | 91.8   | 82.4   | 117.5  | 98.3   | 87.2   |
| 202001_s_at | NM_002490 | NDUFA6                    | 4700  | 624.5  | 557.4  | 681.9  | 638.7  | 553.9  |
| 202002_at   | AW072302  | ACAA2                     | 10449 | 9.2    | 2.5    | 6.9    | 10.2   | 1.7    |
| 202003_s_at | NM_006111 | ACAA2                     | 10449 | 11.8   | 32.8   | 33.2   | 38.1   | 3.7    |
| 202004_x_at | NM_003001 | SDHC                      | 6391  | 444.6  | 373.4  | 365.1  | 312.3  | 304.8  |
| 202005_at   | NM_021978 | ST14                      | 6768  | 89.0   | 126.5  | 121.1  | 100.3  | 98.5   |
| 202006_at   | NM_002835 | PTPN12                    | 5782  | 65.8   | 54.5   | 78.5   | 51.4   | 62.4   |
| 202007_at   | BF940043  | NID1                      | 4811  | 0.2    | 0.4    | 0.3    | 0.4    | 0.4    |
| 202008_s_at | NM_002508 | NID1                      | 4811  | 3.1    | 10.8   | 4.3    | 5.8    | 8.5    |

|             |           |                          |       |        |        |        |        |        |
|-------------|-----------|--------------------------|-------|--------|--------|--------|--------|--------|
| 202009_at   | NM_007284 | TWF2                     | 11344 | 61.7   | 52.9   | 50.8   | 67.9   | 57.2   |
| 202010_s_at | NM_021188 | PTGR2 /// ZN57862 /// 14 |       | 129.6  | 113.6  | 137.9  | 125.3  | 93.4   |
| 202011_at   | NM_003257 | TJP1                     | 7082  | 370.6  | 314.7  | 410.6  | 328.5  | 325.8  |
| 202012_s_at | AA196245  | EXT2                     | 2132  | 137.6  | 113.2  | 124.8  | 113.7  | 109.0  |
| 202013_s_at | NM_000401 | EXT2                     | 2132  | 53.3   | 43.1   | 49.0   | 44.9   | 44.7   |
| 202014_at   | NM_014330 | PPP1R15A                 | 23645 | 0.6    | 1.9    | 2.1    | 0.5    | 0.7    |
| 202015_x_at | NM_006838 | -                        | -     | 1.5    | 3.0    | 2.9    | 5.4    | 3.4    |
| 202016_at   | NM_002402 | MEST                     | 4232  | 193.5  | 134.9  | 190.7  | 158.5  | 142.5  |
| 202017_at   | NM_000120 | EPHX1                    | 2052  | 767.2  | 910.0  | 804.8  | 937.2  | 545.2  |
| 202018_s_at | NM_002343 | LTF                      | 4057  | 2.7    | 17.6   | 1.7    | 8.3    | 7.0    |
| 202019_s_at | AI935255  | LANCL1                   | 10314 | 59.2   | 63.3   | 57.2   | 55.0   | 48.4   |
| 202020_s_at | NM_006055 | LANCL1                   | 10314 | 88.2   | 119.7  | 104.7  | 119.3  | 61.7   |
| 202021_x_at | AF083441  | EIF1                     | 10209 | 1921.1 | 2107.3 | 1960.0 | 1687.5 | 1800.9 |
| 202022_at   | NM_005165 | ALDOC                    | 230   | 234.8  | 243.4  | 279.7  | 224.1  | 238.9  |
| 202023_at   | NM_004428 | EFNA1                    | 1942  | 104.3  | 121.9  | 136.1  | 152.8  | 102.3  |
| 202024_at   | NM_004317 | ASNA1                    | 439   | 355.3  | 411.4  | 404.2  | 389.2  | 325.1  |
| 202025_x_at | NM_001607 | ACAA1                    | 30    | 107.8  | 107.6  | 162.3  | 125.4  | 144.8  |
| 202026_at   | NM_003002 | SDHD                     | 6392  | 429.2  | 282.8  | 415.7  | 304.4  | 348.6  |
| 202027_at   | NM_012264 | TMEM184B                 | 25829 | 82.4   | 64.8   | 101.9  | 80.6   | 46.4   |
| 202028_s_at | BC000603  | RPL38                    | 6169  | 209.6  | 162.0  | 213.7  | 149.1  | 154.9  |
| 202029_x_at | NM_000999 | RPL38                    | 6169  | 3500.3 | 3408.2 | 3639.2 | 3561.9 | 3360.1 |
| 202030_at   | NM_005881 | BCKDK                    | 10295 | 93.3   | 120.5  | 130.6  | 132.5  | 107.1  |
| 202031_s_at | NM_015610 | WIPI2                    | 26100 | 160.7  | 142.3  | 123.9  | 143.7  | 151.3  |
| 202032_s_at | NM_006122 | MAN2A2                   | 4122  | 51.4   | 44.9   | 42.7   | 55.9   | 36.7   |
| 202033_s_at | BG402105  | RB1CC1                   | 9821  | 88.3   | 95.9   | 103.8  | 95.1   | 82.4   |
| 202034_x_at | NM_014781 | RB1CC1                   | 9821  | 28.3   | 24.3   | 30.6   | 21.3   | 26.0   |
| 202035_s_at | AI332407  | SFRP1                    | 6422  | 1.1    | 4.8    | 5.1    | 4.7    | 3.5    |
| 202036_s_at | AF017987  | SFRP1                    | 6422  | 1.6    | 1.0    | 0.8    | 0.7    | 1.0    |
| 202037_s_at | NM_003012 | SFRP1                    | 6422  | 11.6   | 7.1    | 9.7    | 3.3    | 6.4    |
| 202038_at   | NM_004788 | UBE4A                    | 9354  | 402.0  | 336.7  | 410.0  | 386.6  | 329.2  |
| 202039_at   | NM_004740 | MYO18A /// 9220 /// 399  |       | 48.6   | 34.9   | 39.1   | 44.9   | 34.7   |
| 202040_s_at | NM_005056 | KDM5A                    | 5927  | 29.1   | 30.3   | 31.2   | 34.3   | 22.5   |
| 202041_s_at | NM_004214 | FIBP                     | 9158  | 893.6  | 862.2  | 933.3  | 917.9  | 732.4  |
| 202042_at   | NM_002109 | HARS /// LOC3035 /// 101 |       | 320.6  | 366.8  | 363.9  | 325.5  | 330.8  |
| 202043_s_at | NM_004595 | SMS                      | 6611  | 362.9  | 318.6  | 456.5  | 373.3  | 366.7  |
| 202044_at   | AU159484  | ARHGAP35                 | 2909  | 9.9    | 8.7    | 9.0    | 6.8    | 12.8   |
| 202045_s_at | AI670100  | ARHGAP35                 | 2909  | 27.9   | 27.7   | 21.9   | 28.6   | 14.4   |
| 202046_s_at | NM_004491 | ARHGAP35                 | 2909  | 18.6   | 9.8    | 17.7   | 16.0   | 16.4   |
| 202047_s_at | AI458128  | CBX6                     | 23466 | 408.6  | 281.0  | 340.4  | 297.5  | 254.4  |
| 202048_s_at | NM_014292 | CBX6                     | 23466 | 159.2  | 102.4  | 102.7  | 122.6  | 82.9   |
| 202049_s_at | AA521508  | ZMYM4                    | 9202  | 107.4  | 81.9   | 82.5   | 80.2   | 83.5   |
| 202050_s_at | AI650586  | ZMYM4                    | 9202  | 62.7   | 65.0   | 67.3   | 70.6   | 55.8   |
| 202051_s_at | NM_005095 | ZMYM4                    | 9202  | 64.1   | 55.0   | 62.1   | 58.2   | 46.5   |
| 202052_s_at | NM_015577 | RAI14                    | 26064 | 49.6   | 36.1   | 40.7   | 34.1   | 36.6   |
| 202053_s_at | L47162    | ALDH3A2                  | 224   | 216.9  | 254.9  | 238.3  | 250.3  | 191.4  |
| 202054_s_at | NM_000382 | ALDH3A2                  | 224   | 63.7   | 91.1   | 80.6   | 97.3   | 68.8   |
| 202055_at   | AA652173  | KPNA1                    | 3836  | 85.7   | 79.9   | 89.4   | 80.9   | 71.4   |
| 202056_at   | AW051311  | KPNA1                    | 3836  | 35.9   | 32.0   | 43.6   | 30.7   | 40.2   |
| 202057_at   | BC002374  | KPNA1                    | 3836  | 14.5   | 6.9    | 9.0    | 10.3   | 8.8    |
| 202058_s_at | BC002374  | KPNA1                    | 3836  | 83.8   | 71.8   | 93.7   | 70.8   | 75.6   |
| 202059_s_at | NM_002264 | KPNA1                    | 3836  | 103.1  | 71.6   | 112.7  | 93.3   | 87.9   |
| 202060_at   | NM_014633 | CTR9                     | 9646  | 266.1  | 233.2  | 311.5  | 257.8  | 246.2  |
| 202061_s_at | AI927770  | SEL1L                    | 6400  | 93.4   | 112.9  | 100.7  | 109.6  | 94.5   |

|             |           |            |              |        |        |        |        |        |
|-------------|-----------|------------|--------------|--------|--------|--------|--------|--------|
| 202062_s_at | NM_005065 | SEL1L      | 6400         | 23.1   | 17.0   | 23.4   | 15.8   | 23.3   |
| 202063_s_at | AB020335  | SEL1L      | 6400         | 8.9    | 5.7    | 0.4    | 2.5    | 3.8    |
| 202064_s_at | AF052059  | SEL1L      | 6400         | 48.7   | 35.5   | 40.8   | 27.0   | 33.0   |
| 202065_s_at | BG033593  | PPFIA1     | 8500         | 25.1   | 19.7   | 25.6   | 26.8   | 23.5   |
| 202066_at   | AA195259  | PPFIA1     | 8500         | 91.5   | 74.6   | 102.5  | 95.5   | 77.1   |
| 202067_s_at | AI861942  | LDLR       | 3949         | 22.2   | 16.3   | 27.3   | 27.1   | 32.0   |
| 202068_s_at | NM_000527 | LDLR       | 3949         | 122.3  | 96.2   | 146.7  | 101.7  | 104.1  |
| 202069_s_at | AI826060  | IDH3A      | 3419         | 232.4  | 175.2  | 258.3  | 180.2  | 226.8  |
| 202070_s_at | NM_005530 | IDH3A      | 3419         | 65.5   | 64.7   | 87.7   | 54.6   | 73.3   |
| 202071_at   | NM_002999 | SDC4       | 6385         | 145.3  | 115.6  | 118.4  | 132.4  | 103.8  |
| 202072_at   | NM_001533 | HNRNPL     | 3191         | 541.9  | 544.3  | 585.8  | 559.0  | 465.7  |
| 202073_at   | AV757675  | OPTN       | 10133        | 4.0    | 10.1   | 9.0    | 6.0    | 6.0    |
| 202074_s_at | NM_021980 | OPTN       | 10133        | 15.7   | 10.5   | 5.2    | 13.0   | 13.1   |
| 202075_s_at | NM_006227 | PLTP       | 5360         | 0.7    | 1.4    | 0.6    | 0.3    | 1.3    |
| 202076_at   | NM_001166 | BIRC2      | 329          | 105.2  | 122.2  | 113.2  | 115.0  | 92.8   |
| 202077_at   | NM_005003 | NDUFAB1    | 4706         | 1610.0 | 1430.0 | 1639.9 | 1520.2 | 1297.7 |
| 202078_at   | NM_003653 | COPS3      | 8533         | 382.4  | 288.7  | 424.2  | 323.2  | 333.7  |
| 202079_s_at | AI633774  | TRAK1      | 22906        | 29.6   | 22.6   | 36.3   | 27.8   | 24.8   |
| 202080_s_at | NM_014965 | TRAK1      | 22906        | 45.2   | 35.4   | 38.7   | 32.0   | 26.6   |
| 202081_at   | NM_004907 | IER2       | 9592         | 483.1  | 421.6  | 501.1  | 490.3  | 368.7  |
| 202082_s_at | AV748469  | SEC14L1    | 6397         | 26.6   | 21.2   | 23.5   | 23.7   | 23.9   |
| 202083_s_at | AI017770  | SEC14L1    | 6397         | 17.4   | 16.5   | 14.2   | 15.8   | 7.2    |
| 202084_s_at | NM_003003 | SEC14L1    | 6397         | 81.0   | 76.8   | 92.2   | 74.1   | 58.2   |
| 202085_at   | NM_004817 | TJP2       | 9414         | 64.4   | 82.9   | 71.6   | 63.4   | 58.1   |
| 202086_at   | NM_002462 | MX1        | 4599         | 12.6   | 10.8   | 14.0   | 15.4   | 3.3    |
| 202087_s_at | NM_001912 | CTSL       | 1514         | 145.7  | 147.1  | 164.8  | 137.7  | 142.6  |
| 202088_at   | AI635449  | SLC39A6    | 25800        | 424.2  | 373.5  | 502.9  | 404.2  | 431.0  |
| 202089_s_at | NM_012319 | SLC39A6    | 25800        | 273.0  | 247.4  | 357.9  | 299.4  | 273.0  |
| 202090_s_at | NM_006830 | UQCR11     | 10975        | 1386.1 | 1195.5 | 1539.4 | 1392.2 | 1240.2 |
| 202091_at   | BC003087  | -          | -            | 11.8   | 9.8    | 9.9    | 9.2    | 7.1    |
| 202092_s_at | BF244411  | ARL2BP     | 23568        | 160.5  | 137.3  | 167.1  | 129.8  | 130.8  |
| 202093_s_at | NM_019088 | PAF1       | 54623        | 97.5   | 85.8   | 105.2  | 86.7   | 76.4   |
| 202094_at   | AA648913  | BIRC5      | 332          | 124.7  | 108.9  | 142.9  | 109.8  | 119.3  |
| 202095_s_at | NM_001168 | BIRC5      | 332          | 468.1  | 429.0  | 644.0  | 459.4  | 481.1  |
| 202096_s_at | NM_000714 | TSPO       | 706          | 453.5  | 497.4  | 578.1  | 548.9  | 468.5  |
| 202097_at   | NM_005124 | NUP153     | 9972         | 214.2  | 140.2  | 231.5  | 182.4  | 173.4  |
| 202098_s_at | NM_001535 | PRMT2      | 3275         | 72.8   | 65.4   | 51.2   | 57.3   | 41.1   |
| 202099_s_at | H42875    | DGCR2      | 9993         | 20.6   | 17.1   | 44.7   | 19.0   | 14.3   |
| 202100_at   | BG169673  | RALB       | 5899         | 137.2  | 133.4  | 95.2   | 119.6  | 78.9   |
| 202101_s_at | NM_002881 | RALB       | 5899         | 81.5   | 85.2   | 66.7   | 80.0   | 56.9   |
| 202102_s_at | BF718610  | BRD4       | 23476        | 186.7  | 155.9  | 200.4  | 180.5  | 152.6  |
| 202103_at   | AI991631  | BRD4       | 23476        | 33.2   | 27.6   | 38.3   | 28.1   | 27.1   |
| 202104_s_at | NM_003119 | LOC1019301 | 6687 /// 101 | 67.6   | 89.7   | 104.1  | 91.5   | 67.9   |
| 202105_at   | NM_001551 | IGBP1      | 3476         | 194.5  | 136.1  | 125.4  | 120.1  | 78.8   |
| 202106_at   | NM_005895 | GOLGA3     | 2802         | 57.7   | 77.1   | 76.4   | 52.8   | 52.3   |
| 202107_s_at | NM_004526 | MCM2       | 4171         | 821.2  | 657.3  | 887.0  | 645.7  | 764.9  |
| 202108_at   | NM_000285 | PEPD       | 5184         | 102.4  | 130.7  | 112.1  | 124.6  | 86.7   |
| 202109_at   | NM_012402 | ARFIP2     | 23647        | 283.5  | 200.1  | 258.6  | 255.4  | 193.5  |
| 202110_at   | NM_001866 | COX7B      | 1349         | 847.9  | 702.4  | 901.5  | 832.5  | 656.1  |
| 202111_at   | NM_003040 | SLC4A2     | 6522         | 48.1   | 70.4   | 46.7   | 83.4   | 62.7   |
| 202112_at   | NM_000552 | VWF        | 7450         | 73.9   | 77.6   | 78.6   | 64.0   | 54.4   |
| 202113_s_at | AF043453  | SNX2       | 6643         | 124.3  | 105.2  | 130.9  | 115.2  | 113.9  |
| 202114_at   | NM_003100 | SNX2       | 6643         | 85.1   | 42.7   | 56.6   | 57.0   | 50.0   |

|             |           |         |       |        |        |        |        |        |
|-------------|-----------|---------|-------|--------|--------|--------|--------|--------|
| 202115_s_at | NM_015658 | NOC2L   | 26155 | 166.6  | 166.9  | 219.5  | 164.7  | 160.4  |
| 202116_at   | NM_006268 | DPF2    | 5977  | 105.7  | 95.9   | 105.9  | 98.4   | 91.6   |
| 202117_at   | BG468434  | ARHGAP1 | 392   | 271.6  | 244.8  | 304.0  | 254.2  | 231.5  |
| 202118_s_at | AA541758  | CPNE3   | 8895  | 673.0  | 658.9  | 740.9  | 638.3  | 560.0  |
| 202119_s_at | NM_003909 | CPNE3   | 8895  | 1316.3 | 914.5  | 1070.4 | 1134.0 | 860.1  |
| 202120_x_at | NM_004069 | AP2S1   | 1175  | 438.3  | 448.0  | 521.2  | 481.0  | 461.6  |
| 202121_s_at | NM_014453 | CHMP2A  | 27243 | 633.1  | 733.4  | 674.0  | 763.1  | 570.7  |
| 202122_s_at | NM_005817 | PLIN3   | 10226 | 215.9  | 210.3  | 227.3  | 203.2  | 161.5  |
| 202123_s_at | NM_005157 | ABL1    | 25    | 101.6  | 121.6  | 106.5  | 117.8  | 97.7   |
| 202124_s_at | AV705253  | TRAK2   | 66008 | 66.6   | 54.2   | 86.7   | 57.8   | 69.5   |
| 202125_s_at | NM_015049 | TRAK2   | 66008 | 50.8   | 48.6   | 52.7   | 59.1   | 36.3   |
| 202126_at   | AA156948  | PRPF4B  | 8899  | 171.1  | 111.4  | 158.0  | 144.4  | 120.9  |
| 202127_at   | AB011108  | PRPF4B  | 8899  | 23.4   | 18.5   | 21.9   | 22.9   | 17.5   |
| 202128_at   | NM_014821 | AREL1   | 9870  | 76.6   | 77.5   | 80.1   | 74.0   | 68.4   |
| 202129_s_at | AW006290  | RIOK3   | 8780  | 71.6   | 63.4   | 63.9   | 72.1   | 55.2   |
| 202130_at   | AA725102  | RIOK3   | 8780  | 89.8   | 82.5   | 81.6   | 91.3   | 69.3   |
| 202131_s_at | NM_003831 | RIOK3   | 8780  | 47.6   | 28.9   | 31.4   | 25.9   | 33.6   |
| 202132_at   | AA081084  | WWTR1   | 25937 | 6.1    | 1.2    | 2.1    | 7.7    | 3.5    |
| 202133_at   | BF674349  | WWTR1   | 25937 | 0.1    | 1.0    | 0.7    | 3.8    | 0.2    |
| 202134_s_at | NM_015472 | WWTR1   | 25937 | 2.3    | 2.7    | 2.2    | 3.0    | 2.1    |
| 202135_s_at | NM_005735 | ACTR1B  | 10120 | 214.2  | 242.7  | 237.5  | 228.6  | 202.3  |
| 202136_at   | BE250417  | ZMYND11 | 10771 | 268.3  | 212.1  | 254.6  | 237.0  | 189.8  |
| 202137_s_at | NM_006624 | ZMYND11 | 10771 | 52.1   | 68.5   | 68.2   | 64.1   | 36.9   |
| 202138_x_at | NM_006303 | AIMP2   | 7965  | 582.4  | 566.2  | 608.4  | 552.3  | 497.2  |
| 202139_at   | NM_003689 | AKR7A2  | 8574  | 174.8  | 214.1  | 220.6  | 198.3  | 176.2  |
| 202140_s_at | NM_003992 | CLK3    | 1198  | 65.4   | 75.9   | 64.8   | 78.9   | 59.7   |
| 202141_s_at | BC003090  | COPS8   | 10920 | 274.2  | 266.6  | 294.4  | 263.4  | 219.4  |
| 202142_at   | BC003090  | COPS8   | 10920 | 191.5  | 107.7  | 158.0  | 138.6  | 95.8   |
| 202143_s_at | NM_006710 | COPS8   | 10920 | 174.8  | 186.2  | 177.9  | 189.2  | 158.8  |
| 202144_s_at | NM_000026 | ADSL    | 158   | 478.7  | 415.2  | 543.1  | 501.9  | 466.8  |
| 202145_at   | NM_002346 | LY6E    | 4061  | 110.8  | 99.5   | 111.9  | 110.2  | 95.9   |
| 202146_at   | AA747426  | IFRD1   | 3475  | 50.2   | 41.3   | 39.0   | 48.7   | 33.5   |
| 202147_s_at | NM_001550 | IFRD1   | 3475  | 27.4   | 34.9   | 34.0   | 31.6   | 27.8   |
| 202148_s_at | NM_006907 | PYCR1   | 5831  | 398.4  | 372.5  | 430.7  | 405.8  | 344.4  |
| 202149_at   | AL136139  | NEDD9   | 4739  | 19.7   | 18.0   | 13.2   | 12.4   | 12.2   |
| 202150_s_at | U64317    | NEDD9   | 4739  | 27.9   | 19.5   | 16.2   | 25.0   | 8.9    |
| 202151_s_at | NM_016172 | UBAC1   | 10422 | 154.7  | 131.7  | 145.6  | 151.5  | 118.3  |
| 202152_x_at | NM_003367 | USF2    | 7392  | 102.9  | 97.2   | 100.0  | 111.2  | 100.4  |
| 202153_s_at | NM_016553 | NUP62   | 23636 | 216.2  | 163.2  | 250.5  | 166.3  | 215.5  |
| 202154_x_at | NM_006086 | TUBB3   | 10381 | 1038.8 | 1039.5 | 1207.4 | 976.3  | 1107.3 |
| 202155_s_at | NM_005085 | NUP214  | 8021  | 69.0   | 55.7   | 68.2   | 61.9   | 64.1   |
| 202156_s_at | N36839    | CELF2   | 10659 | 0.2    | 0.4    | 3.4    | 0.6    | 2.0    |
| 202157_s_at | U69546    | CELF2   | 10659 | 8.9    | 6.2    | 4.7    | 5.6    | 11.2   |
| 202158_s_at | NM_006561 | CELF2   | 10659 | 0.9    | 0.3    | 4.8    | 2.3    | 4.0    |
| 202159_at   | NM_004461 | FARSA   | 2193  | 322.4  | 308.3  | 380.1  | 351.7  | 329.9  |
| 202160_at   | NM_004380 | CREBBP  | 1387  | 110.9  | 95.2   | 101.8  | 101.4  | 63.8   |
| 202161_at   | NM_002741 | PKN1    | 5585  | 90.8   | 142.0  | 137.4  | 101.7  | 112.4  |
| 202162_s_at | AI769416  | CNOT8   | 9337  | 122.3  | 96.1   | 130.5  | 100.3  | 84.9   |
| 202163_s_at | NM_004779 | CNOT8   | 9337  | 77.8   | 32.3   | 69.2   | 47.6   | 54.2   |
| 202164_s_at | AF180476  | CNOT8   | 9337  | 117.2  | 100.0  | 106.0  | 103.9  | 80.6   |
| 202165_at   | BF966540  | PPP1R2  | 5504  | 44.3   | 35.4   | 47.8   | 50.0   | 34.2   |
| 202166_s_at | NM_006241 | PPP1R2  | 5504  | 179.4  | 142.4  | 147.6  | 139.8  | 113.9  |
| 202167_s_at | NM_022362 | MMS19   | 64210 | 70.0   | 80.9   | 94.6   | 61.8   | 90.7   |



|             |           |                          |       |       |       |       |       |
|-------------|-----------|--------------------------|-------|-------|-------|-------|-------|
| 202168_at   | NM_003187 | AK6 /// TAF96880 /// 102 | 324.1 | 284.8 | 389.1 | 309.0 | 278.4 |
| 202169_s_at | AF302110  | AASDHPPT 60496           | 232.0 | 212.3 | 269.6 | 210.5 | 220.4 |
| 202170_s_at | AF151057  | AASDHPPT 60496           | 128.5 | 129.0 | 135.7 | 104.2 | 113.3 |
| 202171_at   | AU146275  | VEZF1 7716               | 87.2  | 87.0  | 96.7  | 96.7  | 81.7  |
| 202172_at   | BG035116  | VEZF1 7716               | 67.6  | 58.1  | 57.6  | 53.7  | 52.4  |
| 202173_s_at | NM_007146 | VEZF1 7716               | 85.5  | 54.5  | 74.0  | 59.6  | 52.8  |
| 202174_s_at | NM_006197 | PCM1 5108                | 128.7 | 92.3  | 103.0 | 90.8  | 97.5  |
| 202175_at   | NM_024536 | CHPF 79586               | 77.1  | 77.7  | 46.5  | 69.0  | 50.6  |
| 202176_at   | NM_000122 | ERCC3 2071               | 79.6  | 72.4  | 83.4  | 88.1  | 73.6  |
| 202177_at   | NM_000820 | GAS6 2621                | 16.3  | 8.3   | 12.7  | 21.2  | 15.4  |
| 202178_at   | NM_002744 | PRKCZ 5590               | 94.8  | 115.4 | 87.9  | 117.8 | 78.3  |
| 202179_at   | NM_000386 | BLMH 642                 | 63.6  | 62.2  | 93.5  | 62.8  | 73.0  |
| 202180_s_at | NM_017458 | MVP 9961                 | 3.0   | 13.3  | 6.2   | 13.5  | 12.7  |
| 202181_at   | NM_014734 | KIAA0247 9766            | 103.3 | 97.7  | 107.7 | 99.0  | 63.0  |
| 202182_at   | NM_021078 | KAT2A 2648               | 137.1 | 139.7 | 171.3 | 118.0 | 142.3 |
| 202183_s_at | NM_007317 | KIF22 3835               | 156.1 | 154.9 | 175.5 | 157.5 | 156.0 |
| 202184_s_at | NM_018230 | NUP133 55746             | 201.2 | 174.5 | 232.1 | 180.1 | 174.8 |
| 202185_at   | NM_001084 | PLOD3 8985               | 141.7 | 105.7 | 102.1 | 83.4  | 89.2  |
| 202186_x_at | AI803525  | PPP2R5A 5525             | 0.9   | 4.7   | 3.1   | 0.5   | 0.7   |
| 202187_s_at | NM_006243 | PPP2R5A 5525             | 68.6  | 54.2  | 59.1  | 59.1  | 45.3  |
| 202188_at   | NM_014669 | NUP93 9688               | 808.2 | 876.3 | 850.7 | 878.4 | 649.6 |
| 202189_x_at | NM_002819 | MIR4745 /// 5725 /// 100 | 843.5 | 763.0 | 878.3 | 701.3 | 730.7 |
| 202190_at   | NM_001324 | CSTF1 1477               | 88.6  | 69.0  | 97.4  | 76.9  | 60.2  |
| 202191_s_at | BE439987  | GAS7 8522                | 9.3   | 3.0   | 2.4   | 7.5   | 1.1   |
| 202192_s_at | NM_005890 | GAS7 8522                | 33.8  | 8.1   | 21.2  | 7.8   | 19.0  |
| 202193_at   | NM_005569 | LIMK2 3985               | 72.7  | 64.3  | 74.8  | 62.3  | 54.4  |
| 202194_at   | AL117354  | TMED5 50999              | 216.7 | 156.9 | 254.4 | 178.4 | 188.1 |
| 202195_s_at | NM_016040 | TMED5 50999              | 64.7  | 65.0  | 74.8  | 56.4  | 55.1  |
| 202196_s_at | NM_013253 | DKK3 27122               | 0.4   | 0.3   | 0.4   | 0.7   | 0.2   |
| 202197_at   | NM_021090 | MTMR3 8897               | 77.5  | 60.4  | 64.8  | 58.0  | 36.2  |
| 202198_s_at | AF233438  | MTMR3 8897               | 18.9  | 12.4  | 15.7  | 11.8  | 11.8  |
| 202199_s_at | AW082913  | SRPK1 6732               | 99.9  | 80.9  | 101.7 | 79.6  | 83.6  |
| 202200_s_at | NM_003137 | SRPK1 6732               | 198.9 | 134.6 | 204.9 | 154.4 | 169.8 |
| 202201_at   | NM_000713 | BLVRB 645                | 541.3 | 507.5 | 545.3 | 516.1 | 452.9 |
| 202202_s_at | NM_002290 | LAMA4 3910               | 5.4   | 10.8  | 3.3   | 3.4   | 4.7   |
| 202203_s_at | NM_001144 | AMFR 267                 | 111.8 | 104.2 | 120.7 | 110.3 | 87.3  |
| 202204_s_at | AF124145  | AMFR 267                 | 113.0 | 108.5 | 104.8 | 97.3  | 71.0  |
| 202205_at   | NM_003370 | VASP 7408                | 136.3 | 101.0 | 71.1  | 104.8 | 65.4  |
| 202206_at   | AW450363  | ARL4C 10123              | 2.1   | 7.6   | 5.6   | 3.8   | 4.9   |
| 202207_at   | BG435404  | ARL4C 10123              | 2.9   | 4.6   | 3.2   | 1.0   | 1.2   |
| 202208_s_at | BC001051  | ARL4C 10123              | 3.4   | 2.4   | 3.3   | 2.4   | 7.4   |
| 202209_at   | NM_014463 | LSM3 27258               | 433.3 | 368.2 | 507.5 | 407.0 | 365.1 |
| 202210_x_at | NM_019884 | GSK3A 2931               | 12.8  | 18.0  | 28.0  | 8.8   | 6.0   |
| 202211_at   | BC005122  | ARFGAP3 26286            | 122.8 | 173.8 | 156.1 | 156.4 | 100.8 |
| 202212_at   | NM_014303 | PES1 23481               | 144.9 | 133.8 | 166.9 | 131.1 | 145.6 |
| 202213_s_at | AI650819  | CUL4B 8450               | 129.7 | 109.2 | 159.8 | 112.6 | 108.0 |
| 202214_s_at | NM_003588 | CUL4B 8450               | 108.6 | 109.6 | 135.2 | 100.0 | 111.4 |
| 202215_s_at | NM_014223 | NFYC 4802                | 96.1  | 120.8 | 112.2 | 111.3 | 105.9 |
| 202216_x_at | BC005003  | NFYC 4802                | 96.4  | 110.5 | 115.3 | 110.3 | 90.7  |
| 202217_at   | NM_004649 | C21orf33 8209            | 610.6 | 679.6 | 637.2 | 652.8 | 514.2 |
| 202218_s_at | NM_004265 | FADS2 9415               | 361.8 | 304.1 | 357.6 | 293.7 | 315.9 |
| 202219_at   | NM_005629 | SLC6A8 6535              | 286.1 | 277.5 | 344.1 | 301.3 | 263.1 |
| 202220_at   | NM_014949 | KIAA0907 22889           | 96.7  | 93.0  | 101.2 | 89.0  | 85.3  |

|             |           |                          |       |        |        |        |        |        |
|-------------|-----------|--------------------------|-------|--------|--------|--------|--------|--------|
| 202221_s_at | AV727101  | EP300                    | 2033  | 67.8   | 31.5   | 47.8   | 47.4   | 39.2   |
| 202222_s_at | NM_001927 | DES                      | 1674  | 4.9    | 1.9    | 3.4    | 8.5    | 4.1    |
| 202223_at   | NM_002219 | STT3A                    | 3703  | 353.0  | 381.2  | 423.2  | 392.9  | 302.5  |
| 202224_at   | BF304695  | CRK                      | 1398  | 116.0  | 92.9   | 96.9   | 113.1  | 93.2   |
| 202225_at   | AW612311  | CRK                      | 1398  | 133.8  | 119.1  | 143.7  | 134.0  | 115.5  |
| 202226_s_at | NM_016823 | CRK                      | 1398  | 97.7   | 76.1   | 89.5   | 65.4   | 83.6   |
| 202227_s_at | NM_006696 | BRD8                     | 10902 | 173.9  | 157.8  | 182.0  | 164.0  | 132.4  |
| 202228_s_at | NM_017455 | NPTN                     | 27020 | 397.9  | 404.3  | 359.4  | 383.3  | 250.8  |
| 202229_s_at | AI372979  | CHERP                    | 10523 | 27.1   | 5.9    | 2.3    | 14.5   | 10.6   |
| 202230_s_at | NM_006387 | CHERP                    | 10523 | 276.3  | 227.8  | 294.0  | 235.8  | 233.5  |
| 202231_at   | NM_006360 | EIF3M                    | 10480 | 1019.9 | 726.6  | 1084.8 | 888.2  | 849.3  |
| 202232_s_at | NM_006360 | EIF3M                    | 10480 | 950.5  | 658.5  | 952.6  | 812.0  | 769.0  |
| 202233_s_at | NM_006004 | UQCRH /// U7388 /// 440  |       | 1752.7 | 1414.3 | 1820.6 | 1603.6 | 1409.7 |
| 202234_s_at | BF511091  | SLC16A1                  | 6566  | 19.2   | 13.5   | 16.8   | 14.4   | 17.3   |
| 202235_at   | BF511091  | SLC16A1                  | 6566  | 10.3   | 9.1    | 11.4   | 12.6   | 8.3    |
| 202236_s_at | NM_003051 | SLC16A1                  | 6566  | 264.5  | 217.5  | 235.4  | 203.7  | 215.3  |
| 202237_at   | NM_006169 | LOC1019289 4837 /// 101  |       | 1.0    | 2.2    | 10.3   | 10.9   | 4.4    |
| 202238_s_at | NM_006169 | LOC1019289 4837 /// 101  |       | 1.4    | 3.1    | 1.3    | 1.0    | 1.6    |
| 202239_at   | NM_006437 | PARP4                    | 143   | 117.0  | 105.3  | 107.1  | 121.5  | 84.5   |
| 202240_at   | NM_005030 | PLK1                     | 5347  | 230.1  | 140.0  | 306.4  | 203.6  | 198.1  |
| 202241_at   | NM_025195 | TRIB1                    | 10221 | 72.2   | 64.3   | 80.9   | 77.3   | 67.9   |
| 202242_at   | NM_004615 | TSPAN7                   | 7102  | 8.6    | 5.7    | 7.1    | 4.9    | 6.3    |
| 202243_s_at | NM_002796 | PSMB4                    | 5692  | 817.6  | 872.6  | 889.9  | 843.7  | 704.5  |
| 202244_at   | NM_002796 | PSMB4                    | 5692  | 1114.9 | 1020.2 | 1059.0 | 1054.3 | 922.2  |
| 202245_at   | AW084510  | LSS                      | 4047  | 150.2  | 108.1  | 162.3  | 130.7  | 137.8  |
| 202246_s_at | NM_000075 | CDK4                     | 1019  | 993.6  | 817.9  | 1125.9 | 913.0  | 883.1  |
| 202247_s_at | BE561596  | MTA1                     | 9112  | 30.8   | 33.5   | 31.0   | 38.7   | 24.5   |
| 202248_at   | BC000110  | E2F4                     | 1874  | 17.5   | 15.3   | 25.3   | 24.8   | 23.7   |
| 202249_s_at | AU146233  | DCAF8                    | 50717 | 47.7   | 58.7   | 57.1   | 50.3   | 43.7   |
| 202250_s_at | NM_015726 | DCAF8                    | 50717 | 51.0   | 55.6   | 62.7   | 66.5   | 56.2   |
| 202251_at   | NM_004698 | PRPF3                    | 9129  | 57.6   | 57.7   | 70.8   | 70.7   | 50.8   |
| 202252_at   | NM_002870 | RAB13                    | 5872  | 343.1  | 433.7  | 317.9  | 334.4  | 269.1  |
| 202253_s_at | NM_004945 | DNM2                     | 1785  | 68.2   | 70.8   | 76.0   | 73.7   | 62.8   |
| 202254_at   | AB007900  | SIPA1L1                  | 26037 | 13.0   | 5.3    | 12.3   | 6.9    | 1.3    |
| 202255_s_at | NM_015556 | SIPA1L1                  | 26037 | 37.3   | 32.8   | 30.2   | 29.8   | 18.6   |
| 202256_at   | BF793888  | CD2BP2                   | 10421 | 49.9   | 62.3   | 58.0   | 63.3   | 39.9   |
| 202257_s_at | NM_006110 | CD2BP2                   | 10421 | 98.7   | 84.2   | 97.7   | 97.6   | 88.9   |
| 202258_s_at | U50532    | N4BP2L2                  | 10443 | 55.7   | 64.7   | 59.0   | 65.1   | 55.5   |
| 202259_s_at | NM_014887 | N4BP2L2                  | 10443 | 23.8   | 16.4   | 20.4   | 17.1   | 18.5   |
| 202260_s_at | NM_003165 | STXBP1                   | 6812  | 108.5  | 125.3  | 115.3  | 116.8  | 74.3   |
| 202261_at   | NM_005997 | VPS72                    | 6944  | 231.6  | 206.3  | 273.6  | 220.9  | 201.1  |
| 202262_x_at | NM_013974 | DDAH2                    | 23564 | 53.1   | 55.6   | 58.7   | 54.4   | 39.6   |
| 202263_at   | NM_016243 | CYB5R1                   | 51706 | 184.4  | 204.6  | 195.5  | 180.4  | 127.2  |
| 202264_s_at | NM_006114 | TOMM40                   | 10452 | 162.2  | 130.2  | 185.1  | 151.7  | 164.2  |
| 202265_at   | NM_005180 | BMI1 /// COI648 /// 1005 |       | 94.8   | 75.0   | 95.5   | 80.8   | 71.9   |
| 202266_at   | NM_016614 | TDP2                     | 51567 | 114.6  | 102.7  | 115.4  | 93.5   | 78.3   |
| 202267_at   | NM_005562 | LAMC2                    | 3918  | 7.6    | 3.6    | 6.3    | 10.9   | 2.1    |
| 202268_s_at | NM_003905 | NAE1                     | 8883  | 488.7  | 398.1  | 538.7  | 411.7  | 403.7  |
| 202269_x_at | BC002666  | GBP1                     | 2633  | 0.3    | 1.5    | 0.6    | 5.5    | 4.3    |
| 202270_at   | NM_002053 | GBP1                     | 2633  | 1.6    | 0.3    | 4.7    | 0.3    | 0.2    |
| 202271_at   | AB007952  | FBXO28                   | 23219 | 139.8  | 108.1  | 150.3  | 125.2  | 129.5  |
| 202272_s_at | NM_015176 | FBXO28                   | 23219 | 250.9  | 216.2  | 276.8  | 224.2  | 223.1  |
| 202273_at   | NM_002609 | PDGFRB                   | 5159  | 8.9    | 3.6    | 2.7    | 6.2    | 2.0    |

|             |           |             |              |        |        |        |        |        |
|-------------|-----------|-------------|--------------|--------|--------|--------|--------|--------|
| 202274_at   | NM_001615 | ACTG2       | 72           | 9.5    | 7.8    | 17.7   | 13.7   | 9.7    |
| 202275_at   | NM_000402 | G6PD        | 2539         | 167.9  | 129.2  | 125.6  | 142.0  | 100.0  |
| 202276_at   | NM_006304 | SHFM1       | 7979         | 447.5  | 400.7  | 498.4  | 435.5  | 323.7  |
| 202277_at   | AL568804  | SPTLC1      | 10558        | 235.3  | 227.1  | 274.7  | 227.8  | 200.8  |
| 202278_s_at | NM_006415 | SPTLC1      | 10558        | 71.1   | 47.0   | 48.5   | 42.3   | 38.6   |
| 202279_at   | NM_004894 | C14orf2     | 9556         | 324.5  | 279.7  | 340.8  | 296.9  | 262.8  |
| 202280_at   | D88435    | -           | -            | 0.5    | 1.2    | 1.7    | 0.6    | 0.5    |
| 202281_at   | NM_005255 | GAK         | 2580         | 72.8   | 76.8   | 77.7   | 91.6   | 65.9   |
| 202282_at   | NM_004493 | HSD17B10    | 3028         | 778.5  | 860.8  | 843.7  | 891.9  | 754.0  |
| 202283_at   | NM_002615 | SERPINF1    | 5176         | 2.3    | 1.5    | 4.7    | 2.0    | 1.8    |
| 202284_s_at | NM_000389 | CDKN1A      | 1026         | 227.5  | 174.2  | 194.6  | 191.2  | 122.4  |
| 202285_s_at | AI627697  | TACSTD2     | 4070         | 7.7    | 3.1    | 4.9    | 8.4    | 2.8    |
| 202286_s_at | J04152    | TACSTD2     | 4070         | 12.9   | 13.7   | 20.5   | 16.1   | 10.9   |
| 202287_s_at | NM_002353 | TACSTD2     | 4070         | 1.2    | 2.5    | 4.1    | 2.3    | 2.1    |
| 202288_at   | U88966    | MTOR        | 2475         | 23.3   | 17.3   | 29.7   | 20.4   | 23.9   |
| 202289_s_at | NM_006997 | TACC2       | 10579        | 93.0   | 71.5   | 67.6   | 80.9   | 53.2   |
| 202290_at   | NM_014891 | PDAP1       | 11333        | 277.5  | 244.1  | 280.8  | 265.6  | 249.5  |
| 202291_s_at | NM_000900 | MGP         | 4256         | 1.8    | 0.2    | 0.9    | 0.8    | 0.2    |
| 202292_x_at | NM_007260 | LYPLA2      | 11313        | 146.2  | 110.8  | 129.4  | 140.2  | 90.2   |
| 202293_at   | AW168948  | STAG1       | 10274        | 43.9   | 26.8   | 46.1   | 33.5   | 34.5   |
| 202294_at   | AI126490  | STAG1       | 10274        | 24.0   | 12.4   | 20.9   | 22.7   | 22.5   |
| 202295_s_at | NM_004390 | CTSH        | 1512         | 787.3  | 697.8  | 731.4  | 784.2  | 671.1  |
| 202296_s_at | NM_007033 | RER1        | 11079        | 625.2  | 650.1  | 741.9  | 648.0  | 574.2  |
| 202297_s_at | AF157324  | RER1        | 11079        | 535.8  | 453.0  | 587.7  | 430.8  | 439.9  |
| 202298_at   | NM_004541 | NDUFA1      | 4694         | 1338.1 | 1464.8 | 1560.9 | 1572.5 | 1135.0 |
| 202299_s_at | NM_006402 | LAMTOR5     | 10542        | 404.2  | 381.2  | 459.4  | 452.0  | 390.7  |
| 202300_at   | NM_006402 | LAMTOR5     | 10542        | 645.4  | 563.2  | 636.8  | 552.1  | 509.0  |
| 202301_s_at | BE396879  | RSRC2       | 65117        | 106.7  | 81.0   | 88.7   | 66.8   | 57.7   |
| 202302_s_at | NM_023012 | RSRC2       | 65117        | 300.3  | 266.8  | 287.3  | 241.0  | 239.0  |
| 202303_x_at | NM_003601 | SMARCA5     | 8467         | 118.7  | 115.7  | 126.8  | 104.7  | 118.5  |
| 202304_at   | NM_014923 | FNDC3A      | 22862        | 51.7   | 71.9   | 61.1   | 51.0   | 46.4   |
| 202305_s_at | AI685892  | FEZ2        | 9637         | 49.6   | 58.4   | 60.7   | 59.8   | 56.0   |
| 202306_at   | NM_002696 | POLR2G      | 5436         | 654.6  | 526.3  | 647.5  | 547.1  | 538.6  |
| 202307_s_at | NM_000593 | TAP1        | 6890         | 44.0   | 53.5   | 53.0   | 51.6   | 32.1   |
| 202308_at   | NM_004176 | SREBF1      | 6720         | 290.8  | 241.7  | 277.4  | 303.1  | 250.1  |
| 202309_at   | NM_005956 | MTHFD1      | 4522         | 666.3  | 622.1  | 835.7  | 581.4  | 643.3  |
| 202310_s_at | K01228    | COL1A1      | 1277         | 15.0   | 23.2   | 21.3   | 27.5   | 14.3   |
| 202311_s_at | AI743621  | COL1A1      | 1277         | 9.4    | 3.2    | 0.4    | 5.9    | 1.9    |
| 202312_s_at | NM_000088 | COL1A1      | 1277         | 6.8    | 12.1   | 2.9    | 9.5    | 2.3    |
| 202313_at   | NM_002717 | PPP2R2A     | 5520         | 762.7  | 744.4  | 749.7  | 675.0  | 515.5  |
| 202314_at   | NM_000786 | CYP51A1 /// | 1595 /// 401 | 142.5  | 88.6   | 153.2  | 105.6  | 103.5  |
| 202315_s_at | NM_004327 | BCR         | 613          | 106.2  | 102.4  | 114.3  | 105.9  | 89.6   |
| 202316_x_at | AW241715  | UBE4B       | 10277        | 52.5   | 71.3   | 53.5   | 83.6   | 65.8   |
| 202317_s_at | NM_006048 | UBE4B       | 10277        | 103.2  | 82.9   | 97.4   | 84.5   | 88.6   |
| 202318_s_at | AF306508  | SENP6       | 26054        | 105.9  | 80.0   | 96.4   | 78.8   | 75.2   |
| 202319_at   | NM_015571 | SENP6       | 26054        | 11.0   | 4.7    | 8.8    | 9.5    | 5.6    |
| 202320_at   | NM_001520 | GTF3C1      | 2975         | 148.7  | 157.0  | 164.9  | 167.3  | 141.2  |
| 202321_at   | AW299507  | GGPS1       | 9453         | 38.2   | 37.8   | 49.7   | 39.2   | 29.5   |
| 202322_s_at | NM_004837 | GGPS1       | 9453         | 146.1  | 174.2  | 160.7  | 135.9  | 128.6  |
| 202323_s_at | AI636775  | ACBD3       | 64746        | 62.9   | 44.4   | 53.3   | 49.3   | 29.1   |
| 202324_s_at | NM_022735 | ACBD3       | 64746        | 94.3   | 97.3   | 114.4  | 89.7   | 98.9   |
| 202325_s_at | NM_001685 | ATP5J       | 522          | 1093.7 | 898.2  | 1126.3 | 1013.6 | 905.2  |
| 202326_at   | NM_006709 | EHMT2       | 10919        | 63.8   | 67.6   | 60.9   | 84.1   | 63.9   |

|             |           |            |        |       |     |       |       |       |       |       |      |
|-------------|-----------|------------|--------|-------|-----|-------|-------|-------|-------|-------|------|
| 202327_s_at | AA020938  | LOC1019300 | 5310   | ///   | 101 | 10.6  | 9.1   | 13.8  | 7.0   | 1.3   |      |
| 202328_s_at | NM_000296 | LOC1019300 | 5310   | ///   | 101 | 22.8  | 21.7  | 26.3  | 25.1  | 11.2  |      |
| 202329_at   | NM_004383 | CSK        | 1445   |       |     | 192.8 | 179.5 | 160.2 | 166.8 | 122.6 |      |
| 202330_s_at | NM_003362 | UNG        | 7374   |       |     | 332.5 | 252.1 | 440.1 | 312.6 | 330.8 |      |
| 202331_at   | NM_000709 | BCKDHA     | 593    |       |     | 62.1  | 59.2  | 64.7  | 78.2  | 52.3  |      |
| 202332_at   | NM_001894 | CSNK1E     | ///    | C1454 | /// | 102   | 28.7  | 29.9  | 37.0  | 30.9  | 37.7 |
| 202333_s_at | AA877765  | UBE2B      | 7320   |       |     | 185.7 | 145.2 | 210.4 | 166.8 | 151.6 |      |
| 202334_s_at | AI768723  | UBE2B      | 7320   |       |     | 102.0 | 83.7  | 101.4 | 76.3  | 91.8  |      |
| 202335_s_at | NM_003337 | UBE2B      | 7320   |       |     | 5.2   | 6.5   | 5.9   | 4.0   | 2.3   |      |
| 202336_s_at | NM_000919 | PAM        | 5066   |       |     | 1.4   | 3.2   | 4.1   | 4.4   | 5.6   |      |
| 202337_at   | NM_007221 | PMF1       | 11243  |       |     | 132.5 | 135.3 | 174.8 | 166.9 | 148.7 |      |
| 202338_at   | NM_003258 | TK1        | 7083   |       |     | 387.8 | 296.2 | 391.5 | 328.8 | 373.5 |      |
| 202339_at   | NM_004819 | SYMPK      | 8189   |       |     | 8.9   | 8.2   | 11.9  | 12.5  | 7.6   |      |
| 202340_x_at | NM_002135 | NR4A1      | 3164   |       |     | 13.3  | 15.9  | 24.7  | 21.8  | 15.4  |      |
| 202341_s_at | AA149745  | TRIM2      | 23321  |       |     | 8.4   | 1.6   | 2.2   | 4.0   | 5.2   |      |
| 202342_s_at | NM_015271 | TRIM2      | 23321  |       |     | 2.1   | 2.4   | 4.3   | 2.4   | 1.9   |      |
| 202343_x_at | NM_001862 | COX5B      | 1329   |       |     | 828.7 | 942.9 | 957.3 | 958.0 | 775.1 |      |
| 202344_at   | NM_005526 | HSF1       | 3297   |       |     | 110.7 | 92.5  | 125.1 | 103.5 | 107.2 |      |
| 202345_s_at | NM_001444 | FABP5      | 2171   |       |     | 2.2   | 0.2   | 0.9   | 1.2   | 0.8   |      |
| 202346_at   | NM_005339 | UBE2K      | 3093   |       |     | 269.2 | 228.6 | 278.6 | 222.8 | 225.2 |      |
| 202347_s_at | AB022435  | UBE2K      | 3093   |       |     | 403.5 | 375.8 | 446.1 | 394.2 | 363.4 |      |
| 202348_s_at | BC000674  | TOR1A      | 1861   |       |     | 148.6 | 105.5 | 155.6 | 117.8 | 130.7 |      |
| 202349_at   | NM_000113 | TOR1A      | 1861   |       |     | 129.5 | 138.0 | 141.8 | 134.6 | 112.8 |      |
| 202350_s_at | NM_002380 | LOC1005065 | 4147   | ///   | 100 | 10.9  | 6.9   | 7.6   | 11.3  | 4.1   |      |
| 202351_at   | AI093579  | ITGAV      | 3685   |       |     | 96.6  | 66.5  | 93.7  | 82.1  | 76.3  |      |
| 202352_s_at | AI446530  | PSMD12     | 5718   |       |     | 363.1 | 269.7 | 356.5 | 286.7 | 292.8 |      |
| 202353_s_at | NM_002816 | PSMD12     | 5718   |       |     | 88.9  | 83.1  | 89.0  | 81.4  | 74.2  |      |
| 202354_s_at | AW190445  | GTF2F1     | 2962   |       |     | 96.9  | 116.1 | 114.7 | 106.5 | 94.6  |      |
| 202355_s_at | BC000120  | GTF2F1     | 2962   |       |     | 141.8 | 160.7 | 160.9 | 170.9 | 132.6 |      |
| 202356_s_at | NM_002096 | GTF2F1     | 2962   |       |     | 129.3 | 153.4 | 120.8 | 121.7 | 107.5 |      |
| 202357_s_at | NM_001710 | CFB        | 629    |       |     | 9.1   | 1.0   | 3.6   | 1.3   | 3.1   |      |
| 202358_s_at | BG434168  | SNX19      | 399979 |       |     | 97.7  | 101.4 | 108.2 | 98.9  | 84.0  |      |
| 202359_s_at | NM_014758 | SNX19      | 399979 |       |     | 61.7  | 59.1  | 57.2  | 56.7  | 39.0  |      |
| 202360_at   | NM_014757 | MAML1      | 9794   |       |     | 119.7 | 113.3 | 127.9 | 111.0 | 88.4  |      |
| 202361_at   | NM_004922 | SEC24C     | 9632   |       |     | 157.0 | 149.4 | 179.4 | 152.7 | 147.1 |      |
| 202362_at   | NM_002884 | RAP1A      | 5906   |       |     | 295.5 | 235.2 | 311.4 | 245.6 | 213.9 |      |
| 202363_at   | AF231124  | SPOCK1     | 6695   |       |     | 9.0   | 1.3   | 12.4  | 12.1  | 6.1   |      |
| 202364_at   | NM_005962 | MXI1       | 4601   |       |     | 180.5 | 189.9 | 163.0 | 169.1 | 117.3 |      |
| 202365_at   | BC004815  | UNC119B    | 84747  |       |     | 211.8 | 187.9 | 193.5 | 169.2 | 162.6 |      |
| 202366_at   | NM_000017 | ACADS      | 35     |       |     | 51.4  | 51.4  | 66.7  | 70.3  | 53.0  |      |
| 202367_at   | NM_001913 | CUX1       | 1523   |       |     | 28.0  | 37.4  | 33.2  | 36.2  | 32.6  |      |
| 202368_s_at | AI986461  | TRAM2      | 9697   |       |     | 25.2  | 21.5  | 16.2  | 11.8  | 11.0  |      |
| 202369_s_at | NM_012288 | TRAM2      | 9697   |       |     | 33.1  | 34.1  | 33.3  | 22.5  | 27.3  |      |
| 202370_s_at | NM_001755 | CBFB       | 865    |       |     | 162.1 | 138.7 | 186.2 | 148.9 | 149.9 |      |
| 202371_at   | NM_024863 | TCEAL4     | 79921  |       |     | 340.3 | 298.7 | 316.1 | 294.7 | 251.7 |      |
| 202372_at   | BF240652  | AURKAPS1   | //     | 6791  | /// | 257   | 82.5  | 46.2  | 49.1  | 37.7  | 42.3 |
| 202373_s_at | AF255648  | AURKAPS1   | //     | 6791  | /// | 257   | 118.2 | 107.7 | 96.6  | 91.8  | 70.7 |
| 202374_s_at | NM_012414 | AURKAPS1   | //     | 6791  | /// | 257   | 52.1  | 56.5  | 51.2  | 50.6  | 37.1 |
| 202375_at   | NM_014822 | SEC24D     | 9871   |       |     | 40.3  | 41.8  | 48.8  | 49.2  | 33.2  |      |
| 202376_at   | NM_001085 | SERPINA3   | 12     |       |     | 2.7   | 2.0   | 2.4   | 1.9   | 1.5   |      |
| 202377_at   | AW026535  | LEPROT     | 54741  |       |     | 101.0 | 129.7 | 104.8 | 116.2 | 69.2  |      |
| 202378_s_at | NM_017526 | LEPROT     | 54741  |       |     | 64.5  | 68.2  | 55.6  | 48.3  | 38.3  |      |
| 202379_s_at | AI361805  | NKTR       | 4820   |       |     | 71.8  | 50.4  | 62.6  | 47.2  | 35.6  |      |

|             |           |                    |           |        |        |        |        |        |       |
|-------------|-----------|--------------------|-----------|--------|--------|--------|--------|--------|-------|
| 202380_s_at | NM_005385 | NKTR               | 4820      | 38.3   | 22.5   | 27.6   | 22.9   | 26.9   |       |
| 202381_at   | NM_003816 | ADAM9              | 8754      | 340.7  | 286.1  | 410.7  | 302.2  | 302.5  |       |
| 202382_s_at | NM_005471 | GNPDA1             | 10007     | 140.3  | 165.0  | 155.7  | 161.7  | 130.3  |       |
| 202383_at   | NM_004187 | KDM5C              | 8242      | 45.7   | 58.8   | 78.3   | 69.8   | 55.3   |       |
| 202384_s_at | AW167713  | TCOF1              | 6949      | 38.7   | 30.2   | 53.9   | 40.4   | 40.5   |       |
| 202385_s_at | NM_000356 | TCOF1              | 6949      | 76.2   | 56.4   | 78.8   | 54.4   | 72.5   |       |
| 202386_s_at | NM_019081 | KIAA0430           | 9665      | 38.1   | 50.8   | 46.6   | 59.6   | 42.1   |       |
| 202387_at   | NM_004323 | BAG1               | 573       | 78.8   | 78.0   | 98.1   | 87.7   | 71.8   |       |
| 202388_at   | NM_002923 | RGS2               | 5997      | 1.7    | 1.5    | 8.0    | 7.6    | 1.0    |       |
| 202389_s_at | L12392    | HTT                | 3064      | 29.6   | 46.3   | 35.1   | 29.4   | 21.4   |       |
| 202390_s_at | NM_002111 | HTT                | 3064      | 8.8    | 24.6   | 26.3   | 27.3   | 25.8   |       |
| 202391_at   | NM_006317 | BASP1              | 10409     | 4.3    | 6.0    | 9.3    | 4.7    | 4.8    |       |
| 202392_s_at | NM_014338 | MIR7109 ///        | 23761 /// | 10     | 41.1   | 35.9   | 46.6   | 41.2   | 28.3  |
| 202393_s_at | NM_005655 | KLF10              | 7071      | 120.0  | 111.6  | 119.5  | 103.7  | 79.7   |       |
| 202394_s_at | NM_018358 | ABCF3              | 55324     | 102.0  | 96.0   | 102.1  | 92.9   | 82.6   |       |
| 202395_at   | NM_006178 | LOC10193034905 /// | 101       | 239.8  | 241.4  | 253.5  | 269.7  | 178.3  |       |
| 202396_at   | NM_006706 | TCERG1             | 10915     | 142.3  | 88.0   | 155.8  | 102.3  | 138.5  |       |
| 202397_at   | NM_005796 | NUTF2 /// NI       | 10204 /// | 12     | 1043.2 | 1086.5 | 1254.5 | 1104.1 | 944.8 |
| 202398_at   | BC002785  | AP3S2 /// C1       | 10239 /// | 10     | 27.9   | 31.2   | 38.1   | 38.5   | 22.9  |
| 202399_s_at | NM_005829 | AP3S2 /// C1       | 10239 /// | 10     | 512.5  | 520.6  | 543.6  | 521.6  | 443.5 |
| 202400_s_at | AI188786  | SRF                | 6722      | 21.9   | 27.6   | 24.4   | 12.4   | 19.3   |       |
| 202401_s_at | NM_003131 | SRF                | 6722      | 23.8   | 19.1   | 26.8   | 24.8   | 26.2   |       |
| 202402_s_at | NM_001751 | CARS               | 833       | 88.3   | 109.3  | 106.7  | 111.0  | 91.6   |       |
| 202403_s_at | AA788711  | COL1A2             | 1278      | 1.2    | 1.6    | 9.7    | 10.4   | 7.8    |       |
| 202404_s_at | NM_000089 | COL1A2             | 1278      | 5.4    | 0.8    | 2.9    | 3.6    | 3.0    |       |
| 202405_at   | BF432532  | TIAL1              | 7073      | 39.1   | 42.8   | 63.6   | 46.5   | 41.7   |       |
| 202406_s_at | NM_003252 | TIAL1              | 7073      | 233.2  | 207.1  | 279.7  | 233.3  | 203.4  |       |
| 202407_s_at | BF342707  | PRPF31             | 26121     | 60.1   | 72.6   | 61.5   | 71.8   | 62.9   |       |
| 202408_s_at | NM_015629 | PRPF31             | 26121     | 179.5  | 146.3  | 203.6  | 167.7  | 165.5  |       |
| 202409_at   | X07868    | IGF2 /// INS-      | 3481 ///  | 723    | 4.7    | 1.4    | 3.7    | 0.4    | 4.9   |
| 202410_x_at | NM_000612 | IGF2 /// INS-      | 3481 ///  | 723    | 1.1    | 0.8    | 1.2    | 0.5    | 0.8   |
| 202411_at   | NM_005532 | IFI27              | 3429      | 8.4    | 7.6    | 1.1    | 1.1    | 1.0    |       |
| 202412_s_at | AW499935  | USP1               | 7398      | 105.4  | 71.1   | 116.7  | 80.4   | 98.7   |       |
| 202413_s_at | NM_003368 | USP1               | 7398      | 227.2  | 179.4  | 266.2  | 167.9  | 197.7  |       |
| 202414_at   | NM_000123 | ERCC5              | 2073      | 30.7   | 24.5   | 30.5   | 30.1   | 26.2   |       |
| 202415_s_at | NM_012267 | HSPBP1             | 23640     | 104.1  | 114.5  | 127.5  | 109.2  | 85.3   |       |
| 202416_at   | NM_003315 | DNAJC7             | 7266      | 203.6  | 214.4  | 215.7  | 200.8  | 202.2  |       |
| 202417_at   | NM_012289 | KEAP1              | 9817      | 202.2  | 224.1  | 268.1  | 251.6  | 228.6  |       |
| 202418_at   | NM_020470 | YIF1A              | 10897     | 473.9  | 383.7  | 444.7  | 426.2  | 387.7  |       |
| 202419_at   | NM_002035 | KDSR               | 2531      | 80.6   | 44.3   | 77.4   | 65.5   | 68.4   |       |
| 202420_s_at | NM_001357 | DHX9               | 1660      | 213.2  | 205.8  | 246.4  | 259.7  | 209.5  |       |
| 202421_at   | AB007935  | IGSF3              | 3321      | 28.1   | 27.4   | 30.5   | 31.5   | 16.2   |       |
| 202422_s_at | NM_022977 | ACSL4              | 2182      | 3.8    | 2.5    | 3.9    | 1.1    | 3.8    |       |
| 202423_at   | NM_006766 | KAT6A              | 7994      | 105.6  | 75.4   | 75.8   | 66.4   | 64.6   |       |
| 202424_at   | NM_030662 | MAP2K2             | 5605      | 523.3  | 546.9  | 550.4  | 546.8  | 435.4  |       |
| 202425_x_at | NM_000944 | PPP3CA             | 5530      | 451.7  | 307.1  | 460.7  | 374.6  | 413.1  |       |
| 202426_s_at | BE675800  | RXRA               | 6256      | 25.2   | 26.3   | 32.3   | 32.0   | 21.5   |       |
| 202427_s_at | NM_015415 | MPC2               | 25874     | 1412.4 | 1174.5 | 1584.8 | 1100.7 | 1288.3 |       |
| 202428_x_at | NM_020548 | DBI                | 1622      | 907.8  | 724.2  | 1119.7 | 804.4  | 880.0  |       |
| 202429_s_at | AL353950  | PPP3CA             | 5530      | 1015.0 | 884.8  | 1056.4 | 1014.1 | 896.6  |       |
| 202430_s_at | NM_021105 | PLSCR1             | 5359      | 3.8    | 0.1    | 1.7    | 3.8    | 2.1    |       |
| 202431_s_at | NM_002467 | MYC                | 4609      | 611.8  | 545.6  | 656.5  | 559.1  | 600.3  |       |
| 202432_at   | NM_021132 | PPP3CB             | 5532      | 125.0  | 118.0  | 131.0  | 119.4  | 125.1  |       |

|             |           |         |       |        |        |        |        |        |
|-------------|-----------|---------|-------|--------|--------|--------|--------|--------|
| 202433_at   | NM_005827 | SLC35B1 | 10237 | 296.7  | 323.2  | 372.0  | 339.7  | 290.2  |
| 202434_s_at | N21019    | CYP1B1  | 1545  | 0.4    | 1.8    | 0.8    | 3.0    | 0.5    |
| 202435_s_at | AU154504  | CYP1B1  | 1545  | 7.3    | 5.1    | 6.2    | 3.0    | 1.0    |
| 202436_s_at | AU144855  | CYP1B1  | 1545  | 10.9   | 6.6    | 8.7    | 4.2    | 1.2    |
| 202437_s_at | NM_000104 | CYP1B1  | 1545  | 0.6    | 1.9    | 0.1    | 1.8    | 0.1    |
| 202438_x_at | BF346014  | IDS     | 3423  | 8.8    | 7.6    | 7.6    | 7.1    | 7.5    |
| 202439_s_at | NM_000202 | IDS     | 3423  | 29.2   | 40.7   | 37.6   | 44.6   | 28.7   |
| 202440_s_at | NM_005418 | ST5     | 6764  | 38.9   | 32.5   | 30.6   | 45.5   | 23.1   |
| 202441_at   | AL568449  | ERLIN1  | 10613 | 91.4   | 84.3   | 128.9  | 81.3   | 83.1   |
| 202442_at   | NM_001284 | AP3S1   | 1176  | 174.2  | 147.4  | 170.8  | 137.1  | 114.8  |
| 202443_x_at | AA291203  | NOTCH2  | 4853  | 99.6   | 96.3   | 94.1   | 90.6   | 60.5   |
| 202444_s_at | NM_006459 | ERLIN1  | 10613 | 56.1   | 42.6   | 53.6   | 39.4   | 46.9   |
| 202445_s_at | NM_024408 | NOTCH2  | 4853  | 11.8   | 12.4   | 13.4   | 12.5   | 8.4    |
| 202446_s_at | AI825926  | PLSCR1  | 5359  | 11.7   | 6.6    | 11.1   | 7.1    | 11.0   |
| 202447_at   | NM_001359 | DECR1   | 1666  | 182.1  | 207.5  | 183.7  | 205.8  | 141.3  |
| 202448_s_at | BE675849  | ZER1    | 10444 | 31.3   | 32.2   | 25.2   | 34.0   | 26.1   |
| 202449_s_at | NM_002957 | RXRA    | 6256  | 199.2  | 168.8  | 197.2  | 187.5  | 119.2  |
| 202450_s_at | NM_000396 | CTSK    | 1513  | 27.1   | 25.1   | 22.3   | 20.3   | 16.1   |
| 202451_at   | BC000365  | GTF2H1  | 2965  | 72.2   | 73.6   | 86.7   | 80.6   | 74.6   |
| 202452_at   | AI991574  | ZER1    | 10444 | 57.0   | 36.8   | 50.0   | 51.1   | 47.7   |
| 202453_s_at | NM_005316 | GTF2H1  | 2965  | 57.8   | 56.0   | 69.0   | 60.5   | 49.7   |
| 202454_s_at | NM_001982 | ERBB3   | 2065  | 199.0  | 196.5  | 181.3  | 189.6  | 122.4  |
| 202455_at   | NM_005474 | HDAC5   | 10014 | 38.5   | 23.6   | 19.8   | 26.4   | 19.6   |
| 202456_s_at | NM_006336 | ZER1    | 10444 | 14.5   | 15.9   | 13.5   | 10.4   | 8.9    |
| 202457_s_at | AA911231  | PPP3CA  | 5530  | 960.9  | 848.4  | 1032.6 | 1040.2 | 800.1  |
| 202458_at   | NM_007173 | PRSS23  | 11098 | 22.1   | 21.1   | 24.0   | 20.2   | 18.3   |
| 202459_s_at | U55968    | LPIN2   | 9663  | 63.7   | 69.9   | 93.7   | 76.5   | 59.3   |
| 202460_s_at | NM_014646 | LPIN2   | 9663  | 85.7   | 39.5   | 48.3   | 74.4   | 51.2   |
| 202461_at   | NM_014239 | EIF2B2  | 8892  | 168.5  | 150.5  | 188.7  | 156.9  | 142.3  |
| 202462_s_at | NM_014829 | DDX46   | 9879  | 165.4  | 155.0  | 218.6  | 184.5  | 182.8  |
| 202463_s_at | NM_003926 | MBD3    | 53615 | 68.9   | 67.8   | 55.2   | 55.8   | 44.7   |
| 202464_s_at | NM_004566 | PFKFB3  | 5209  | 35.6   | 21.0   | 23.6   | 22.3   | 26.4   |
| 202465_at   | NM_002593 | PCOLCE  | 5118  | 4.2    | 3.2    | 6.5    | 3.0    | 3.4    |
| 202466_at   | NM_006999 | PAPD7   | 11044 | 92.1   | 81.7   | 107.4  | 84.6   | 80.3   |
| 202467_s_at | NM_004236 | COPS2   | 9318  | 315.0  | 245.9  | 346.8  | 278.7  | 286.6  |
| 202468_s_at | NM_003798 | CTNNA1  | 8727  | 195.1  | 169.8  | 220.2  | 172.4  | 145.6  |
| 202469_s_at | AU149367  | CPSF6   | 11052 | 395.0  | 358.7  | 409.2  | 378.5  | 367.3  |
| 202470_s_at | NM_007007 | CPSF6   | 11052 | 32.4   | 32.4   | 26.0   | 23.7   | 23.4   |
| 202471_s_at | NM_004135 | IDH3G   | 3421  | 297.0  | 341.7  | 331.1  | 338.8  | 265.1  |
| 202472_at   | NM_002435 | MPI     | 4351  | 141.4  | 151.7  | 176.7  | 166.1  | 167.1  |
| 202473_x_at | AA703045  | HCFC1   | 3054  | 1.2    | 3.2    | 4.9    | 1.6    | 2.8    |
| 202474_s_at | NM_005334 | HCFC1   | 3054  | 112.4  | 74.2   | 107.4  | 118.7  | 77.8   |
| 202475_at   | NM_006326 | TMEM147 | 10430 | 590.4  | 601.5  | 677.7  | 659.1  | 584.7  |
| 202476_s_at | BF002130  | TUBGCP2 | 10844 | 52.2   | 43.5   | 52.6   | 49.7   | 42.9   |
| 202477_s_at | NM_006659 | TUBGCP2 | 10844 | 147.2  | 176.3  | 196.3  | 172.5  | 150.1  |
| 202478_at   | NM_021643 | TRIB2   | 28951 | 1.7    | 0.9    | 1.9    | 0.9    | 0.3    |
| 202479_s_at | BC002637  | TRIB2   | 28951 | 1.1    | 0.7    | 1.4    | 8.5    | 2.9    |
| 202480_s_at | NM_004216 | DEDD    | 9191  | 36.7   | 45.6   | 57.7   | 52.1   | 37.7   |
| 202481_at   | NM_004753 | DHRS3   | 9249  | 43.8   | 40.7   | 32.1   | 53.4   | 28.2   |
| 202482_x_at | AI862473  | RANBP1  | 5902  | 20.3   | 23.8   | 35.4   | 26.1   | 28.4   |
| 202483_s_at | NM_002882 | RANBP1  | 5902  | 1232.0 | 1030.3 | 1315.1 | 1273.8 | 1119.4 |
| 202484_s_at | AF072242  | MBD2    | 8932  | 231.0  | 201.8  | 246.0  | 202.6  | 195.1  |
| 202485_s_at | NM_003927 | MBD2    | 8932  | 10.6   | 12.2   | 7.3    | 4.9    | 6.2    |

|             |           |                          |       |       |       |        |       |       |
|-------------|-----------|--------------------------|-------|-------|-------|--------|-------|-------|
| 202486_at   | NM_006796 | AFG3L2                   | 10939 | 165.1 | 136.9 | 158.5  | 114.8 | 127.8 |
| 202487_s_at | NM_012412 | H2AFV                    | 94239 | 605.7 | 554.8 | 638.4  | 584.4 | 511.0 |
| 202488_s_at | NM_005971 | FXYD3                    | 5349  | 80.2  | 54.6  | 62.5   | 44.9  | 40.4  |
| 202489_s_at | BC005238  | FXYD3                    | 5349  | 179.3 | 166.5 | 223.0  | 212.3 | 160.2 |
| 202490_at   | AF153419  | IKBKAP                   | 8518  | 6.2   | 4.1   | 7.8    | 4.1   | 3.2   |
| 202491_s_at | NM_003640 | IKBKAP                   | 8518  | 109.0 | 89.6  | 92.5   | 83.6  | 75.5  |
| 202492_at   | NM_024085 | ATG9A                    | 79065 | 72.5  | 93.7  | 106.7  | 108.1 | 80.8  |
| 202493_x_at | NM_001317 | CSH1 /// CSH1442 /// 144 |       | 0.9   | 1.1   | 0.4    | 1.2   | 0.3   |
| 202494_at   | NM_006112 | PPIE                     | 10450 | 100.2 | 81.3  | 87.7   | 82.9  | 70.1  |
| 202495_at   | NM_003192 | TBCC                     | 6903  | 122.1 | 84.3  | 108.7  | 124.2 | 87.0  |
| 202496_at   | NM_014329 | EDC4                     | 23644 | 53.5  | 56.9  | 60.8   | 57.9  | 51.2  |
| 202497_x_at | AI631159  | SLC2A3                   | 6515  | 2.4   | 2.1   | 1.7    | 1.6   | 2.3   |
| 202498_s_at | BE550486  | SLC2A3                   | 6515  | 1.5   | 2.5   | 1.3    | 5.9   | 2.6   |
| 202499_s_at | NM_006931 | SLC2A3                   | 6515  | 0.4   | 3.4   | 0.9    | 0.5   | 0.4   |
| 202500_at   | NM_006736 | DNAJB2                   | 3300  | 44.3  | 49.2  | 44.2   | 43.2  | 34.1  |
| 202501_at   | NM_014268 | MAPRE2                   | 10982 | 68.3  | 56.9  | 65.7   | 58.3  | 48.7  |
| 202502_at   | NM_000016 | ACADM                    | 34    | 335.0 | 284.5 | 360.7  | 286.6 | 276.9 |
| 202503_s_at | NM_014736 | KIAA0101                 | 9768  | 875.4 | 808.2 | 1025.4 | 821.8 | 766.1 |
| 202504_at   | NM_012101 | TRIM29                   | 23650 | 18.7  | 18.3  | 11.8   | 10.5  | 6.7   |
| 202505_at   | NM_003092 | SNRPB2                   | 6629  | 334.1 | 351.1 | 399.1  | 349.2 | 284.7 |
| 202506_at   | NM_006751 | SSFA2                    | 6744  | 90.7  | 77.8  | 95.6   | 73.5  | 66.4  |
| 202507_s_at | L19760    | SNAP25                   | 6616  | 18.6  | 17.6  | 19.3   | 10.1  | 9.9   |
| 202508_s_at | NM_003081 | SNAP25                   | 6616  | 0.4   | 3.0   | 3.7    | 0.8   | 0.2   |
| 202509_s_at | AI862445  | TNFAIP2                  | 7127  | 0.9   | 0.6   | 2.0    | 1.2   | 0.3   |
| 202510_s_at | NM_006291 | TNFAIP2                  | 7127  | 15.0  | 5.5   | 5.8    | 3.9   | 4.1   |
| 202511_s_at | AK001899  | ATG5                     | 9474  | 162.5 | 141.8 | 173.0  | 145.1 | 124.8 |
| 202512_s_at | NM_004849 | ATG5                     | 9474  | 8.8   | 12.9  | 12.4   | 9.0   | 5.2   |
| 202513_s_at | NM_006245 | PPP2R5D                  | 5528  | 179.0 | 85.1  | 116.5  | 93.5  | 107.3 |
| 202514_at   | AW139131  | DLG1                     | 1739  | 74.4  | 60.8  | 57.0   | 60.0  | 54.9  |
| 202515_at   | BG251175  | DLG1                     | 1739  | 102.7 | 101.2 | 111.8  | 94.8  | 102.2 |
| 202516_s_at | NM_004087 | DLG1                     | 1739  | 26.3  | 19.5  | 26.7   | 28.6  | 18.3  |
| 202517_at   | NM_001313 | CRMP1                    | 1400  | 23.5  | 13.1  | 3.3    | 10.6  | 10.0  |
| 202518_at   | NM_001707 | BCL7B                    | 9275  | 86.9  | 74.6  | 119.8  | 81.4  | 84.5  |
| 202519_at   | NM_014938 | MLXIP                    | 22877 | 80.9  | 80.4  | 58.2   | 86.5  | 68.7  |
| 202520_s_at | NM_000249 | MLH1                     | 4292  | 555.6 | 447.9 | 562.0  | 468.1 | 414.9 |
| 202521_at   | NM_006565 | CTCF                     | 10664 | 200.0 | 164.5 | 170.7  | 138.7 | 125.7 |
| 202522_at   | AL031591  | PITPNB                   | 23760 | 230.0 | 160.8 | 212.6  | 153.9 | 157.0 |
| 202523_s_at | AI952009  | SPOCK2                   | 9806  | 20.5  | 9.4   | 22.4   | 14.9  | 10.8  |
| 202524_s_at | NM_014767 | SPOCK2                   | 9806  | 13.0  | 13.4  | 25.0   | 12.1  | 11.8  |
| 202525_at   | NM_002773 | PRSS8                    | 5652  | 159.2 | 205.2 | 144.5  | 226.7 | 127.8 |
| 202526_at   | U44378    | SMAD4                    | 4089  | 10.0  | 4.8   | 12.9   | 6.2   | 7.5   |
| 202527_s_at | NM_005359 | SMAD4                    | 4089  | 150.2 | 134.6 | 173.3  | 136.9 | 127.6 |
| 202528_at   | NM_000403 | GALE                     | 2582  | 71.0  | 85.3  | 123.6  | 84.4  | 83.9  |
| 202529_at   | NM_002766 | PRPSAP1                  | 5635  | 255.4 | 220.2 | 271.8  | 202.0 | 186.6 |
| 202530_at   | NM_001315 | MAPK14                   | 1432  | 72.5  | 70.7  | 78.6   | 69.8  | 54.4  |
| 202531_at   | NM_002198 | IRF1                     | 3659  | 32.5  | 25.5  | 21.0   | 18.7  | 16.6  |
| 202532_s_at | BC000192  | DHFR                     | 1719  | 308.0 | 213.4 | 366.9  | 250.4 | 299.0 |
| 202533_s_at | BC003584  | DHFR                     | 1719  | 247.8 | 250.2 | 314.6  | 262.4 | 287.3 |
| 202534_x_at | NM_000791 | DHFR                     | 1719  | 658.6 | 490.8 | 793.3  | 592.1 | 598.7 |
| 202535_at   | NM_003824 | FADD                     | 8772  | 113.5 | 127.5 | 133.6  | 109.8 | 128.2 |
| 202536_at   | AK002165  | CHMP2B                   | 25978 | 160.8 | 146.9 | 183.1  | 163.6 | 148.1 |
| 202537_s_at | AF151842  | CHMP2B                   | 25978 | 136.6 | 107.5 | 150.0  | 114.3 | 103.1 |
| 202538_s_at | NM_014043 | CHMP2B                   | 25978 | 93.8  | 82.9  | 110.4  | 90.5  | 83.6  |

|             |           |                          |       |        |        |        |        |        |
|-------------|-----------|--------------------------|-------|--------|--------|--------|--------|--------|
| 202539_s_at | AL518627  | HMGCR                    | 3156  | 112.8  | 86.4   | 131.9  | 97.2   | 111.5  |
| 202540_s_at | NM_000859 | HMGCR                    | 3156  | 101.0  | 71.7   | 91.8   | 82.3   | 76.7   |
| 202541_at   | BF589679  | AIMP1                    | 9255  | 98.9   | 57.2   | 90.6   | 69.9   | 72.8   |
| 202542_s_at | NM_004757 | AIMP1                    | 9255  | 216.0  | 177.8  | 254.4  | 198.8  | 190.4  |
| 202543_s_at | BC005359  | GMFB                     | 2764  | 149.4  | 143.7  | 158.0  | 132.9  | 128.2  |
| 202544_at   | NM_004124 | GMFB                     | 2764  | 199.5  | 157.0  | 215.8  | 185.6  | 143.8  |
| 202545_at   | NM_006254 | PRKCD                    | 5580  | 78.4   | 76.9   | 56.3   | 56.0   | 55.8   |
| 202546_at   | NM_003761 | VAMP8                    | 8673  | 371.4  | 363.4  | 408.3  | 359.5  | 302.9  |
| 202547_s_at | AA778936  | ARHGEF7                  | 8874  | 23.7   | 16.9   | 15.2   | 21.3   | 19.4   |
| 202548_s_at | NM_003899 | ARHGEF7                  | 8874  | 43.2   | 47.8   | 47.0   | 46.1   | 38.3   |
| 202549_at   | AK025720  | VAPB                     | 9217  | 1.2    | 2.7    | 11.6   | 5.5    | 8.1    |
| 202550_s_at | NM_004738 | VAPB                     | 9217  | 217.8  | 199.1  | 253.0  | 223.1  | 186.7  |
| 202551_s_at | BG546884  | CRIM1 /// LC51232 /// 10 |       | 5.7    | 6.2    | 8.0    | 2.9    | 3.5    |
| 202552_s_at | NM_016441 | CRIM1 /// LC51232 /// 10 |       | 0.6    | 4.6    | 0.5    | 0.7    | 3.3    |
| 202553_s_at | NM_015484 | SYF2                     | 25949 | 47.6   | 41.2   | 35.5   | 46.1   | 20.7   |
| 202554_s_at | AL527430  | GSTM3                    | 2947  | 797.7  | 679.7  | 693.1  | 879.4  | 556.6  |
| 202555_s_at | NM_005965 | MYLK                     | 4638  | 2.9    | 4.3    | 1.4    | 11.8   | 0.4    |
| 202556_s_at | NM_006337 | MCRS1                    | 10445 | 134.2  | 140.0  | 167.8  | 167.5  | 121.2  |
| 202557_at   | AI718418  | HSPA13                   | 6782  | 51.9   | 47.1   | 49.7   | 53.1   | 34.7   |
| 202558_s_at | NM_006948 | HSPA13                   | 6782  | 55.3   | 42.8   | 46.0   | 50.1   | 42.5   |
| 202559_x_at | AW005776  | CHTOP                    | 26097 | 175.1  | 113.9  | 135.8  | 123.4  | 115.8  |
| 202560_s_at | NM_015607 | CHTOP                    | 26097 | 289.5  | 257.7  | 304.2  | 286.0  | 251.8  |
| 202561_at   | AF070613  | TNKS                     | 8658  | 28.1   | 30.5   | 22.0   | 31.1   | 24.0   |
| 202562_s_at | AL136658  | C14orf1                  | 11161 | 224.5  | 244.5  | 291.3  | 250.5  | 213.6  |
| 202563_at   | NM_007176 | C14orf1                  | 11161 | 1.7    | 5.4    | 8.0    | 5.5    | 0.3    |
| 202564_x_at | NM_001667 | ARL2                     | 402   | 324.9  | 368.5  | 322.7  | 308.7  | 250.0  |
| 202565_s_at | NM_003174 | SVIL                     | 6840  | 34.8   | 24.3   | 22.5   | 27.5   | 14.7   |
| 202566_s_at | AF051851  | SVIL                     | 6840  | 10.7   | 12.3   | 8.5    | 9.0    | 11.1   |
| 202567_at   | NM_004175 | SNRPD3                   | 6634  | 854.8  | 757.6  | 828.5  | 758.3  | 700.0  |
| 202568_s_at | AI745639  | MARK3                    | 4140  | 83.9   | 82.4   | 82.7   | 85.5   | 61.0   |
| 202569_s_at | NM_002376 | MARK3                    | 4140  | 64.5   | 45.9   | 51.3   | 48.4   | 46.5   |
| 202570_s_at | BF346592  | DLGAP4                   | 22839 | 22.7   | 25.4   | 16.7   | 16.0   | 8.5    |
| 202571_s_at | BE550798  | DLGAP4                   | 22839 | 10.8   | 21.0   | 24.2   | 10.4   | 5.5    |
| 202572_s_at | NM_014902 | DLGAP4                   | 22839 | 36.2   | 33.4   | 35.9   | 36.3   | 27.3   |
| 202573_at   | AL530441  | CSNK1G2                  | 1455  | 154.7  | 152.3  | 172.5  | 154.4  | 147.7  |
| 202574_s_at | NM_001319 | CSNK1G2                  | 1455  | 72.5   | 59.3   | 73.3   | 64.5   | 61.5   |
| 202575_at   | NM_001878 | CRABP2                   | 1382  | 26.0   | 15.9   | 11.1   | 10.6   | 16.3   |
| 202576_s_at | AL553254  | DDX19A /// t11269 /// 55 |       | 94.7   | 79.3   | 111.1  | 86.3   | 81.2   |
| 202577_s_at | BC005162  | DDX19A                   | 55308 | 68.4   | 74.4   | 90.1   | 61.9   | 85.0   |
| 202578_s_at | NM_018332 | DDX19A                   | 55308 | 68.5   | 64.6   | 77.7   | 67.7   | 63.9   |
| 202579_x_at | NM_006353 | HMGNA4                   | 10473 | 162.9  | 160.6  | 183.9  | 171.9  | 140.7  |
| 202580_x_at | NM_021953 | FOXN1                    | 2305  | 218.6  | 171.0  | 193.9  | 158.5  | 166.6  |
| 202581_at   | NM_005346 | HSPA1A /// t3303 /// 330 |       | 798.7  | 705.7  | 924.6  | 773.1  | 775.6  |
| 202582_s_at | AF306510  | RANBP9                   | 10048 | 279.2  | 249.8  | 266.2  | 222.6  | 229.1  |
| 202583_s_at | NM_005493 | RANBP9                   | 10048 | 114.7  | 105.6  | 85.0   | 88.3   | 78.6   |
| 202584_at   | AW291398  | NFX1                     | 4799  | 94.7   | 78.0   | 82.3   | 74.6   | 63.4   |
| 202585_s_at | NM_002504 | NFX1                     | 4799  | 31.3   | 38.3   | 47.8   | 41.7   | 27.8   |
| 202586_at   | AA772747  | POLR2L                   | 5441  | 43.8   | 58.7   | 37.6   | 48.3   | 49.8   |
| 202587_s_at | BC001116  | AK1                      | 203   | 357.3  | 322.4  | 346.1  | 351.8  | 278.7  |
| 202588_at   | NM_000476 | AK1                      | 203   | 33.7   | 20.0   | 6.7    | 24.5   | 9.1    |
| 202589_at   | NM_001071 | TYMS                     | 7298  | 1528.3 | 1364.1 | 1779.7 | 1382.9 | 1567.4 |
| 202590_s_at | AL574319  | PDK2                     | 5164  | 57.2   | 67.5   | 37.6   | 47.9   | 37.2   |
| 202591_s_at | NM_003143 | SSBP1                    | 6742  | 1068.4 | 972.2  | 1155.3 | 1010.7 | 910.7  |



|             |           |              |              |       |       |       |       |       |
|-------------|-----------|--------------|--------------|-------|-------|-------|-------|-------|
| 202592_at   | NM_001487 | BLOC1S1      | 2647         | 254.6 | 304.3 | 277.9 | 335.8 | 234.9 |
| 202593_s_at | NM_016641 | GDE1         | 51573        | 304.3 | 291.5 | 310.9 | 308.7 | 234.7 |
| 202594_at   | NM_015344 | LEPROTL1     | 23484        | 121.7 | 118.1 | 129.4 | 107.6 | 88.0  |
| 202595_s_at | AF161461  | LEPROTL1     | 23484        | 234.1 | 206.7 | 265.1 | 229.3 | 221.2 |
| 202596_at   | BC000436  | ENSA         | 2029         | 560.2 | 652.8 | 680.2 | 610.2 | 537.5 |
| 202597_at   | AU144284  | IRF6         | 3664         | 144.7 | 139.4 | 135.6 | 136.8 | 90.8  |
| 202598_at   | NM_005979 | S100A13      | 6284         | 124.3 | 121.4 | 117.9 | 128.0 | 99.4  |
| 202599_s_at | NM_003489 | NRIP1        | 8204         | 138.6 | 127.2 | 137.9 | 140.3 | 110.6 |
| 202600_s_at | AI824012  | NRIP1        | 8204         | 107.3 | 88.9  | 88.3  | 99.3  | 82.9  |
| 202601_s_at | AI373539  | HTATSF1      | 27336        | 24.3  | 11.2  | 18.2  | 20.5  | 10.8  |
| 202602_s_at | NM_014500 | HTATSF1      | 27336        | 183.1 | 122.4 | 186.2 | 149.5 | 131.6 |
| 202603_at   | N51370    | ADAM10       | 102          | 239.3 | 212.8 | 211.4 | 220.4 | 170.8 |
| 202604_x_at | NM_001110 | ADAM10       | 102          | 46.7  | 35.9  | 29.0  | 27.8  | 29.9  |
| 202605_at   | NM_000181 | GUSB         | 2990         | 252.9 | 279.7 | 267.2 | 293.2 | 225.0 |
| 202606_s_at | NM_012290 | TLK1         | 9874         | 114.1 | 94.2  | 96.3  | 86.4  | 84.5  |
| 202607_at   | AL526632  | NDST1        | 3340         | 51.4  | 62.5  | 50.3  | 46.8  | 50.1  |
| 202608_s_at | NM_001543 | NDST1        | 3340         | 17.6  | 13.1  | 11.8  | 14.0  | 10.2  |
| 202609_at   | NM_004447 | EPS8         | 2059         | 42.4  | 39.1  | 45.1  | 41.2  | 37.1  |
| 202610_s_at | AF135802  | MED14        | 9282         | 50.0  | 49.2  | 66.9  | 63.9  | 36.5  |
| 202611_s_at | AI971089  | MED14        | 9282         | 12.8  | 7.8   | 14.7  | 11.4  | 11.6  |
| 202612_s_at | NM_004229 | MED14        | 9282         | 5.8   | 0.8   | 5.0   | 4.5   | 2.4   |
| 202613_at   | NM_001905 | CTPS1        | 1503         | 203.2 | 158.9 | 236.2 | 169.7 | 239.3 |
| 202614_at   | NM_006345 | SLC30A9      | 10463        | 284.1 | 230.8 | 266.8 | 229.0 | 201.3 |
| 202615_at   | BF222895  | GNAQ         | 2776         | 26.8  | 20.5  | 24.9  | 20.7  | 13.6  |
| 202616_s_at | AI631140  | MECP2        | 4204         | 23.0  | 19.6  | 31.2  | 22.5  | 15.3  |
| 202617_s_at | NM_004992 | MECP2        | 4204         | 26.0  | 32.6  | 27.5  | 29.3  | 21.6  |
| 202618_s_at | L37298    | MECP2        | 4204         | 34.8  | 36.2  | 39.4  | 42.2  | 25.6  |
| 202619_s_at | AI754404  | PLOD2        | 5352         | 5.7   | 5.3   | 1.2   | 4.7   | 1.6   |
| 202620_s_at | NM_000935 | PLOD2        | 5352         | 2.0   | 1.5   | 2.2   | 0.2   | 1.7   |
| 202621_at   | NM_001571 | IRF3         | 3661         | 148.6 | 147.6 | 158.4 | 134.6 | 103.3 |
| 202622_s_at | NM_002973 | ATXN2        | 6311         | 86.7  | 76.0  | 82.6  | 92.3  | 66.9  |
| 202623_at   | NM_018453 | EAPP         | 55837        | 183.1 | 188.1 | 187.4 | 193.4 | 141.3 |
| 202624_s_at | NM_012295 | CABIN1       | 23523        | 50.0  | 62.6  | 59.7  | 68.2  | 51.0  |
| 202625_at   | AI356412  | LYN          | 4067         | 74.8  | 61.2  | 70.1  | 56.3  | 50.9  |
| 202626_s_at | NM_002350 | LYN          | 4067         | 47.4  | 36.0  | 48.9  | 49.2  | 39.4  |
| 202627_s_at | AL574210  | SERPINE1     | 5054         | 1.7   | 3.6   | 7.8   | 0.9   | 1.1   |
| 202628_s_at | NM_000602 | SERPINE1     | 5054         | 3.5   | 1.3   | 1.6   | 1.4   | 1.6   |
| 202629_at   | AV681579  | APPBP2       | 10513        | 88.5  | 74.7  | 87.3  | 81.8  | 76.0  |
| 202630_at   | AA046411  | APPBP2       | 10513        | 29.7  | 21.8  | 27.0  | 35.9  | 22.8  |
| 202631_s_at | NM_006380 | APPBP2       | 10513        | 55.9  | 45.4  | 60.0  | 57.6  | 42.6  |
| 202632_at   | NM_001383 | DPH1 /// OVI | 1801 /// 124 | 268.0 | 298.3 | 333.5 | 257.0 | 256.5 |
| 202633_at   | NM_007027 | TOPBP1       | 11073        | 91.3  | 74.4  | 107.1 | 77.2  | 92.0  |
| 202634_at   | AL558030  | POLR2K       | 5440         | 125.9 | 93.2  | 127.8 | 117.7 | 85.5  |
| 202635_s_at | NM_005034 | POLR2K       | 5440         | 213.7 | 192.8 | 221.6 | 204.7 | 171.0 |
| 202636_at   | NM_005667 | RNF103       | 7844         | 127.7 | 122.9 | 112.2 | 106.7 | 94.7  |
| 202637_s_at | AI608725  | ICAM1        | 3383         | 2.4   | 17.0  | 3.9   | 13.0  | 1.8   |
| 202638_s_at | NM_000201 | ICAM1        | 3383         | 3.8   | 3.3   | 10.7  | 3.8   | 8.9   |
| 202639_s_at | AI689052  | RANBP3       | 8498         | 54.3  | 62.8  | 64.0  | 55.6  | 48.4  |
| 202640_s_at | NM_003624 | RANBP3       | 8498         | 59.3  | 45.1  | 57.6  | 57.2  | 54.9  |
| 202641_at   | NM_004311 | ARL3         | 403          | 198.5 | 180.1 | 194.3 | 220.6 | 172.3 |
| 202642_s_at | NM_003496 | TRRAP        | 8295         | 53.9  | 62.2  | 63.3  | 66.1  | 63.2  |
| 202643_s_at | AI738896  | TNFAIP3      | 7128         | 10.2  | 1.7   | 14.6  | 1.0   | 8.9   |
| 202644_s_at | NM_006290 | TNFAIP3      | 7128         | 16.6  | 13.4  | 13.3  | 11.1  | 9.3   |

|             |           |                           |       |        |        |        |        |        |
|-------------|-----------|---------------------------|-------|--------|--------|--------|--------|--------|
| 202645_s_at | NM_000244 | MEN1                      | 4221  | 121.4  | 105.0  | 128.4  | 109.2  | 103.0  |
| 202646_s_at | AA167775  | CSDE1                     | 7812  | 322.0  | 270.8  | 371.5  | 303.1  | 282.7  |
| 202647_s_at | NM_002524 | NRAS                      | 4893  | 133.6  | 114.9  | 133.7  | 119.7  | 106.9  |
| 202648_at   | BC000023  | TCF3                      | 6929  | 3.1    | 2.0    | 4.5    | 2.2    | 6.0    |
| 202649_x_at | NM_001022 | RPS19                     | 6223  | 2486.6 | 2451.6 | 2628.4 | 2593.3 | 2275.8 |
| 202650_s_at | NM_014738 | KIAA0195 /// 9772 /// 102 |       | 41.1   | 35.5   | 42.2   | 36.0   | 25.6   |
| 202651_at   | NM_014873 | LPGAT1                    | 9926  | 53.6   | 45.8   | 51.2   | 49.9   | 36.6   |
| 202652_at   | NM_001164 | APBB1                     | 322   | 6.0    | 14.3   | 12.6   | 13.8   | 4.5    |
| 202653_s_at | BC003404  | MARCH7                    | 64844 | 111.6  | 73.5   | 103.8  | 73.7   | 72.1   |
| 202654_x_at | NM_022826 | MARCH7                    | 64844 | 103.7  | 80.5   | 88.5   | 88.0   | 59.8   |
| 202655_at   | NM_006010 | MANF                      | 7873  | 416.3  | 423.5  | 431.6  | 403.5  | 374.2  |
| 202656_s_at | BG107456  | SERTAD2                   | 9792  | 16.3   | 14.5   | 15.3   | 13.2   | 13.5   |
| 202657_s_at | NM_014755 | SERTAD2                   | 9792  | 22.7   | 16.6   | 21.6   | 25.3   | 16.7   |
| 202658_at   | NM_003846 | PEX11B                    | 8799  | 123.1  | 133.5  | 134.7  | 128.9  | 119.0  |
| 202659_at   | NM_002801 | PSMB10                    | 5699  | 67.7   | 80.3   | 95.8   | 81.6   | 78.2   |
| 202660_at   | AA834576  | ITPR2                     | 3709  | 6.0    | 0.3    | 2.2    | 4.8    | 2.0    |
| 202661_at   | AI963873  | ITPR2                     | 3709  | 0.3    | 0.5    | 0.7    | 1.8    | 0.2    |
| 202662_s_at | NM_002223 | ITPR2                     | 3709  | 6.9    | 4.8    | 1.9    | 7.5    | 5.7    |
| 202663_at   | AI005043  | WIPF1                     | 7456  | 3.5    | 3.4    | 0.3    | 2.8    | 0.2    |
| 202664_at   | AW058622  | WIPF1                     | 7456  | 2.6    | 0.2    | 0.4    | 3.0    | 0.2    |
| 202665_s_at | NM_003387 | WIPF1                     | 7456  | 12.9   | 9.9    | 12.3   | 1.5    | 13.8   |
| 202666_s_at | NM_004301 | ACTL6A                    | 86    | 313.0  | 197.5  | 340.3  | 236.6  | 273.3  |
| 202667_s_at | NM_006979 | SLC39A7                   | 7922  | 107.7  | 134.6  | 140.9  | 133.1  | 114.5  |
| 202668_at   | BF001670  | EFNB2                     | 1948  | 64.4   | 41.5   | 57.0   | 41.9   | 57.0   |
| 202669_s_at | U16797    | EFNB2                     | 1948  | 24.5   | 16.0   | 26.4   | 18.6   | 17.4   |
| 202670_at   | AI571419  | MAP2K1                    | 5604  | 345.4  | 364.1  | 311.1  | 304.6  | 236.5  |
| 202671_s_at | NM_003681 | PDXK                      | 8566  | 120.7  | 134.2  | 148.2  | 128.8  | 139.6  |
| 202672_s_at | NM_001674 | ATF3                      | 467   | 135.2  | 148.4  | 130.2  | 159.2  | 109.7  |
| 202673_at   | NM_003859 | DPM1                      | 8813  | 400.9  | 270.6  | 415.1  | 312.7  | 278.2  |
| 202674_s_at | NM_005358 | LMO7                      | 4008  | 5.4    | 2.6    | 3.5    | 0.3    | 2.1    |
| 202675_at   | NM_003000 | SDHB                      | 6390  | 197.1  | 193.3  | 197.5  | 192.4  | 153.3  |
| 202676_x_at | NM_006712 | FASTK                     | 10922 | 147.4  | 142.4  | 181.0  | 157.7  | 144.6  |
| 202677_at   | NM_002890 | RASA1                     | 5921  | 125.8  | 118.2  | 123.4  | 109.6  | 95.9   |
| 202678_at   | NM_004492 | GTF2A2                    | 2958  | 565.3  | 527.8  | 615.4  | 524.4  | 486.9  |
| 202679_at   | NM_000271 | NPC1                      | 4864  | 48.0   | 51.8   | 60.9   | 51.4   | 49.7   |
| 202680_at   | NM_002095 | GTF2E2                    | 2961  | 232.0  | 224.5  | 289.1  | 227.3  | 179.6  |
| 202681_at   | AI346043  | C3orf62 /// N7375 /// 375 |       | 71.3   | 91.1   | 83.0   | 85.7   | 74.2   |
| 202682_s_at | NM_003363 | USP4                      | 7375  | 85.2   | 82.9   | 87.9   | 82.1   | 62.6   |
| 202683_s_at | NM_003799 | RNMT                      | 8731  | 59.5   | 47.7   | 52.6   | 51.2   | 36.7   |
| 202684_s_at | AB020966  | RNMT                      | 8731  | 9.7    | 8.2    | 10.0   | 8.8    | 11.6   |
| 202685_s_at | AI467916  | AXL                       | 558   | 6.0    | 4.4    | 7.8    | 2.5    | 2.7    |
| 202686_s_at | NM_021913 | AXL                       | 558   | 5.1    | 7.1    | 6.3    | 3.1    | 1.7    |
| 202687_s_at | U57059    | TNFSF10                   | 8743  | 3.4    | 0.6    | 4.3    | 1.2    | 3.6    |
| 202688_at   | NM_003810 | TNFSF10                   | 8743  | 0.2    | 3.2    | 2.7    | 5.0    | 0.1    |
| 202689_at   | NM_013286 | RBM15B                    | 29890 | 131.2  | 91.8   | 147.3  | 112.3  | 76.1   |
| 202690_s_at | BC001721  | SNRPD1                    | 6632  | 556.4  | 423.8  | 701.1  | 540.3  | 518.0  |
| 202691_at   | NM_006938 | SNRPD1                    | 6632  | 92.7   | 59.2   | 82.1   | 63.7   | 77.5   |
| 202692_s_at | NM_014233 | UBTF                      | 7343  | 62.2   | 63.4   | 66.8   | 54.8   | 55.9   |
| 202693_s_at | AW194730  | STK17A                    | 9263  | 54.5   | 23.8   | 39.6   | 29.4   | 31.7   |
| 202694_at   | AW183478  | STK17A                    | 9263  | 5.1    | 4.8    | 1.9    | 7.3    | 0.7    |
| 202695_s_at | NM_004760 | STK17A                    | 9263  | 15.7   | 11.9   | 13.2   | 10.2   | 12.8   |
| 202696_at   | NM_005109 | OXSR1                     | 9943  | 77.5   | 82.1   | 100.4  | 92.9   | 75.0   |
| 202697_at   | NM_007006 | NUDT21                    | 11051 | 329.4  | 324.4  | 340.6  | 298.9  | 278.1  |

|             |           |              |              |        |        |        |        |        |
|-------------|-----------|--------------|--------------|--------|--------|--------|--------|--------|
| 202698_x_at | NM_001861 | COX4I1       | 1327         | 1657.8 | 1728.5 | 1811.6 | 1776.1 | 1466.2 |
| 202699_s_at | AW510783  | TMEM63A      | 9725         | 24.8   | 13.9   | 14.3   | 18.8   | 15.9   |
| 202700_s_at | NM_014698 | TMEM63A      | 9725         | 11.7   | 7.9    | 15.5   | 13.9   | 7.3    |
| 202701_at   | NM_006129 | BMP1         | 649          | 15.9   | 19.6   | 14.0   | 19.5   | 12.4   |
| 202702_at   | NM_003449 | TRIM26       | 7726         | 118.8  | 96.0   | 116.8  | 78.8   | 76.2   |
| 202703_at   | NM_003584 | DUSP11       | 8446         | 71.6   | 51.3   | 75.4   | 57.2   | 57.3   |
| 202704_at   | AA675892  | TOB1         | 10140        | 548.9  | 394.8  | 510.9  | 486.8  | 416.2  |
| 202705_at   | NM_004701 | CCNB2        | 9133         | 486.9  | 352.4  | 477.8  | 368.1  | 398.1  |
| 202706_s_at | D86227    | UMPS         | 7372         | 155.5  | 123.1  | 175.9  | 132.2  | 131.7  |
| 202707_at   | NM_000373 | UMPS         | 7372         | 23.1   | 21.2   | 19.6   | 12.4   | 16.1   |
| 202708_s_at | NM_003528 | HIST2H2BE    | 8349         | 349.7  | 418.4  | 324.3  | 378.5  | 238.6  |
| 202709_at   | NM_002023 | FMOD         | 2331         | 14.2   | 17.4   | 16.3   | 12.3   | 10.8   |
| 202710_at   | BC000899  | BET1         | 10282        | 78.6   | 62.5   | 88.1   | 71.6   | 57.5   |
| 202711_at   | NM_004429 | EFNB1        | 1947         | 5.8    | 3.8    | 9.4    | 1.9    | 7.4    |
| 202712_s_at | NM_020990 | CKMT1A ///   | 1159 /// 548 | 265.0  | 318.2  | 333.2  | 322.2  | 264.7  |
| 202713_s_at | AA129755  | KIAA0391 /// | 5687 /// 969 | 208.1  | 191.4  | 195.4  | 179.4  | 160.7  |
| 202714_s_at | NM_014672 | KIAA0391     | 9692         | 8.0    | 18.8   | 17.9   | 7.3    | 0.9    |
| 202715_at   | NM_004341 | CAD          | 790          | 128.0  | 94.1   | 127.1  | 123.0  | 114.4  |
| 202716_at   | NM_002827 | PTPN1        | 5770         | 63.6   | 41.7   | 51.4   | 32.5   | 33.0   |
| 202717_s_at | NM_003903 | CDC16        | 8881         | 93.2   | 73.5   | 88.7   | 83.7   | 65.7   |
| 202718_at   | NM_000597 | IGFBP2       | 3485         | 349.9  | 328.5  | 327.7  | 413.5  | 306.0  |
| 202719_s_at | BC001451  | TES          | 26136        | 80.3   | 60.0   | 54.6   | 72.8   | 35.4   |
| 202720_at   | NM_015641 | TES          | 26136        | 181.0  | 239.1  | 213.5  | 189.6  | 139.7  |
| 202721_s_at | BE645771  | GFPT1        | 2673         | 95.6   | 95.4   | 79.7   | 90.9   | 75.1   |
| 202722_s_at | NM_002056 | GFPT1        | 2673         | 161.9  | 166.1  | 179.3  | 158.9  | 123.3  |
| 202723_s_at | AW117498  | FOXO1        | 2308         | 2.0    | 4.6    | 0.9    | 3.8    | 3.0    |
| 202724_s_at | NM_002015 | FOXO1        | 2308         | 14.4   | 11.4   | 17.9   | 5.6    | 8.3    |
| 202725_at   | NM_000937 | POLR2A       | 5430         | 69.0   | 68.6   | 93.7   | 79.8   | 58.4   |
| 202726_at   | NM_000234 | LIG1         | 3978         | 67.9   | 37.7   | 59.4   | 42.8   | 50.6   |
| 202727_s_at | NM_000416 | IFNGR1       | 3459         | 74.7   | 64.4   | 77.1   | 59.6   | 52.1   |
| 202728_s_at | AI986120  | LTBP1        | 4052         | 1.6    | 0.9    | 1.3    | 1.2    | 1.2    |
| 202729_s_at | NM_000627 | LTBP1        | 4052         | 22.2   | 22.7   | 14.1   | 11.2   | 12.0   |
| 202730_s_at | NM_014456 | MIR4680 ///  | 27250 /// 10 | 100.1  | 100.4  | 111.7  | 105.3  | 79.4   |
| 202731_at   | NM_014456 | MIR4680 ///  | 27250 /// 10 | 253.1  | 238.7  | 264.1  | 247.1  | 197.3  |
| 202732_at   | NM_007066 | PKIG         | 11142        | 125.0  | 152.9  | 123.8  | 159.1  | 101.9  |
| 202733_at   | NM_004199 | LOC10192771  | 8974 /// 101 | 56.2   | 50.2   | 52.7   | 53.6   | 48.6   |
| 202734_at   | NM_004240 | TRIP10       | 9322         | 44.3   | 27.4   | 39.7   | 39.9   | 32.3   |
| 202735_at   | NM_006579 | EBP          | 10682        | 211.0  | 134.4  | 266.3  | 190.9  | 224.7  |
| 202736_s_at | AA112507  | LSM4         | 25804        | 808.8  | 992.3  | 1089.7 | 1045.1 | 944.4  |
| 202737_s_at | NM_012321 | LSM4         | 25804        | 1085.4 | 1080.9 | 1303.4 | 1102.0 | 1022.8 |
| 202738_s_at | BG149218  | PHKB         | 5257         | 184.9  | 165.6  | 188.6  | 179.2  | 158.2  |
| 202739_s_at | NM_000293 | PHKB         | 5257         | 94.2   | 69.9   | 88.1   | 70.4   | 65.3   |
| 202740_at   | NM_000666 | ABHD14A-AC95 | /// 10052    | 578.4  | 733.7  | 750.3  | 685.1  | 613.4  |
| 202741_at   | AA130247  | PRKACB       | 5567         | 1166.0 | 1044.7 | 1179.6 | 1103.0 | 943.4  |
| 202742_s_at | NM_002731 | PRKACB       | 5567         | 683.5  | 488.8  | 585.6  | 506.4  | 404.3  |
| 202743_at   | BE622627  | PIK3R3       | 8503         | 351.4  | 396.9  | 315.0  | 383.3  | 217.8  |
| 202744_at   | NM_006749 | SLC20A2      | 6575         | 22.1   | 28.1   | 21.6   | 28.0   | 15.1   |
| 202745_at   | NM_005154 | USP8         | 9101         | 43.9   | 46.3   | 48.0   | 40.5   | 31.4   |
| 202746_at   | AL021786  | ITM2A        | 9452         | 2.5    | 0.5    | 2.4    | 0.1    | 0.3    |
| 202747_s_at | NM_004867 | ITM2A        | 9452         | 2.9    | 1.9    | 2.7    | 2.0    | 1.4    |
| 202748_at   | NM_004120 | GBP2         | 2634         | 8.4    | 4.8    | 4.7    | 8.7    | 8.2    |
| 202749_at   | NM_004627 | WRB          | 7485         | 405.5  | 440.2  | 419.5  | 387.9  | 316.0  |
| 202750_s_at | AL080147  | TFIP11       | 24144        | 41.8   | 51.4   | 44.4   | 51.6   | 35.5   |

|             |           |                          |       |        |        |        |        |        |
|-------------|-----------|--------------------------|-------|--------|--------|--------|--------|--------|
| 202751_at   | NM_012143 | TFIP11                   | 24144 | 2.5    | 7.9    | 16.0   | 7.9    | 5.1    |
| 202752_x_at | NM_012244 | SLC7A8                   | 23428 | 117.5  | 81.2   | 97.5   | 96.6   | 75.1   |
| 202753_at   | NM_014814 | PSMD6                    | 9861  | 565.0  | 579.5  | 602.6  | 542.1  | 509.0  |
| 202754_at   | NM_015361 | R3HDM1                   | 23518 | 159.8  | 137.3  | 169.9  | 135.7  | 120.1  |
| 202755_s_at | AI354864  | GPC1                     | 2817  | 5.4    | 6.7    | 13.3   | 5.0    | 9.9    |
| 202756_s_at | NM_002081 | GPC1                     | 2817  | 9.7    | 39.4   | 5.1    | 24.0   | 20.8   |
| 202757_at   | NM_015456 | NELFB                    | 25920 | 146.0  | 154.6  | 185.5  | 159.9  | 153.3  |
| 202758_s_at | NM_003721 | RFXANK                   | 8625  | 167.6  | 204.7  | 217.0  | 201.4  | 167.9  |
| 202759_s_at | BE879367  | AKAP2 /// P#11217 /// 44 |       | 7.7    | 0.5    | 13.0   | 11.6   | 2.0    |
| 202760_s_at | NM_007203 | AKAP2 /// P#11217 /// 44 |       | 6.6    | 4.2    | 0.6    | 7.3    | 4.0    |
| 202761_s_at | NM_015180 | SYNE2                    | 23224 | 89.0   | 85.6   | 79.9   | 89.6   | 62.2   |
| 202762_at   | AL049383  | ROCK2                    | 9475  | 20.0   | 19.8   | 26.5   | 19.1   | 15.9   |
| 202763_at   | NM_004346 | CASP3                    | 836   | 43.7   | 38.1   | 47.1   | 34.5   | 40.3   |
| 202764_at   | NM_003156 | STIM1                    | 6786  | 40.9   | 35.2   | 39.8   | 51.4   | 37.9   |
| 202765_s_at | AI264196  | FBN1                     | 2200  | 0.9    | 0.8    | 2.2    | 0.9    | 0.8    |
| 202766_s_at | NM_000138 | FBN1                     | 2200  | 6.8    | 0.6    | 2.2    | 2.1    | 0.2    |
| 202767_at   | NM_001610 | ACP2                     | 53    | 109.1  | 86.7   | 106.3  | 89.6   | 74.5   |
| 202768_at   | NM_006732 | FOSB                     | 2354  | 2.2    | 1.7    | 0.8    | 1.0    | 1.0    |
| 202769_at   | AW134535  | CCNG2                    | 901   | 303.5  | 321.5  | 292.4  | 301.9  | 232.6  |
| 202770_s_at | NM_004354 | CCNG2                    | 901   | 259.9  | 221.6  | 192.2  | 202.0  | 132.6  |
| 202771_at   | NM_014745 | PIEZO1                   | 9780  | 145.8  | 112.4  | 135.8  | 117.3  | 119.1  |
| 202772_at   | NM_000191 | HMGCL                    | 3155  | 111.7  | 116.0  | 103.2  | 113.1  | 82.2   |
| 202773_s_at | AI023864  | SFSWAP                   | 6433  | 22.6   | 22.8   | 22.8   | 22.8   | 30.1   |
| 202774_s_at | AI871457  | SFSWAP                   | 6433  | 83.3   | 53.3   | 97.7   | 79.7   | 58.6   |
| 202775_s_at | NM_004592 | SFSWAP                   | 6433  | 34.4   | 34.6   | 53.0   | 39.6   | 33.6   |
| 202776_at   | NM_014597 | DNTTIP2                  | 30836 | 185.5  | 150.4  | 192.1  | 138.5  | 156.7  |
| 202777_at   | NM_007373 | SHOC2                    | 8036  | 157.8  | 144.6  | 143.3  | 132.0  | 124.5  |
| 202778_s_at | NM_003453 | ZMYM2                    | 7750  | 95.2   | 94.2   | 92.3   | 94.6   | 75.3   |
| 202779_s_at | NM_014501 | UBE2S                    | 27338 | 1593.9 | 1557.2 | 1687.2 | 1491.8 | 1404.4 |
| 202780_at   | NM_000436 | OXCT1                    | 5019  | 198.7  | 233.1  | 228.5  | 191.2  | 199.1  |
| 202781_s_at | AI806031  | INPP5K                   | 51763 | 57.7   | 56.2   | 49.5   | 54.7   | 38.3   |
| 202782_s_at | NM_016532 | INPP5K                   | 51763 | 53.4   | 63.0   | 35.7   | 38.7   | 25.3   |
| 202783_at   | U40490    | NNT                      | 23530 | 0.3    | 0.1    | 1.5    | 0.9    | 0.1    |
| 202784_s_at | NM_012343 | NNT                      | 23530 | 0.7    | 0.7    | 2.2    | 4.6    | 3.9    |
| 202785_at   | NM_005001 | NDUFA7                   | 4701  | 437.8  | 557.9  | 613.8  | 603.6  | 542.0  |
| 202786_at   | NM_013233 | STK39                    | 27347 | 118.0  | 90.9   | 185.6  | 106.8  | 137.9  |
| 202787_s_at | U43784    | MAPKAPK3                 | 7867  | 122.8  | 129.6  | 148.1  | 137.5  | 126.9  |
| 202788_at   | NM_004635 | MAPKAPK3                 | 7867  | 215.4  | 168.3  | 209.9  | 193.5  | 146.9  |
| 202789_at   | AL022394  | PLCG1                    | 5335  | 52.6   | 45.8   | 60.6   | 47.2   | 54.0   |
| 202790_at   | NM_001307 | CLDN7                    | 1366  | 745.5  | 717.2  | 767.1  | 689.9  | 621.6  |
| 202791_s_at | AK022669  | PPP6R2                   | 9701  | 37.2   | 35.2   | 34.6   | 32.1   | 31.4   |
| 202792_s_at | NM_014678 | PPP6R2                   | 9701  | 7.2    | 12.2   | 12.5   | 16.1   | 11.4   |
| 202793_at   | NM_005768 | LPCAT3                   | 10162 | 107.9  | 113.6  | 115.8  | 98.5   | 79.1   |
| 202794_at   | NM_002194 | INPP1                    | 3628  | 7.3    | 5.5    | 6.0    | 7.6    | 8.4    |
| 202795_x_at | NM_007032 | TRIOBP                   | 11078 | 70.5   | 68.2   | 67.9   | 69.9   | 49.5   |
| 202796_at   | NM_007286 | SYNPO                    | 11346 | 1.5    | 5.6    | 2.8    | 9.6    | 1.7    |
| 202797_at   | NM_014016 | SACM1L                   | 22908 | 178.9  | 136.0  | 181.8  | 156.0  | 123.6  |
| 202798_at   | NM_006323 | SEC24B                   | 10427 | 144.3  | 150.0  | 139.6  | 139.4  | 131.2  |
| 202799_at   | NM_006012 | CLPP                     | 8192  | 276.2  | 291.6  | 326.7  | 289.1  | 273.2  |
| 2028_s_at   | M96577    | E2F1                     | 1869  | 53.2   | 43.0   | 61.3   | 42.2   | 44.1   |
| 202800_at   | NM_004172 | SLC1A3                   | 6507  | 1.0    | 1.9    | 5.7    | 0.9    | 5.4    |
| 202801_at   | NM_002730 | PRKACA                   | 5566  | 103.7  | 99.0   | 111.3  | 123.0  | 79.7   |
| 202802_at   | NM_001930 | DHPS                     | 1725  | 127.6  | 129.4  | 136.8  | 145.2  | 109.7  |

|             |           |          |          |         |       |       |       |       |     |
|-------------|-----------|----------|----------|---------|-------|-------|-------|-------|-----|
| 202803_s_at | NM_000211 | ITGB2    | 3689     | 1.6     | 4.8   | 1.3   | 6.1   | 1.1   |     |
| 202804_at   | AI539710  | ABCC1    | 4363     | 128.1   | 116.2 | 124.6 | 111.4 | 96.2  |     |
| 202805_s_at | NM_004996 | ABCC1    | 4363     | 55.9    | 59.1  | 58.0  | 64.8  | 57.9  |     |
| 202806_at   | NM_004395 | DBN1     | 1627     | 165.6   | 187.2 | 188.4 | 216.2 | 131.3 |     |
| 202807_s_at | NM_005488 | TOM1     | 10043    | 28.6    | 35.0  | 42.4  | 44.5  | 28.8  |     |
| 202808_at   | AK000161  | WBP1L    | 54838    | 125.7   | 128.8 | 115.2 | 121.0 | 85.5  |     |
| 202809_s_at | NM_023015 | INTS3    | 65123    | 139.6   | 130.5 | 142.0 | 157.4 | 121.7 |     |
| 202810_at   | NM_004147 | DRG1     | 4733     | 573.4   | 557.6 | 633.4 | 583.4 | 511.9 |     |
| 202811_at   | NM_006463 | STAMBP   | 10617    | 139.1   | 127.9 | 130.2 | 133.0 | 114.1 |     |
| 202812_at   | NM_000152 | GAA      | 2548     | 110.6   | 83.9  | 109.4 | 102.4 | 63.0  |     |
| 202813_at   | NM_005646 | TARBP1   | 6894     | 34.0    | 22.4  | 34.8  | 29.7  | 29.4  |     |
| 202814_s_at | AW193511  | HEXIM1   | 10614    | 134.3   | 115.3 | 132.4 | 125.9 | 110.5 |     |
| 202815_s_at | NM_006460 | HEXIM1   | 10614    | 21.0    | 11.6  | 16.7  | 13.9  | 10.2  |     |
| 202816_s_at | AW292882  | SS18     | 6760     | 57.6    | 53.2  | 53.8  | 47.1  | 44.0  |     |
| 202817_s_at | NM_005637 | SS18     | 6760     | 53.2    | 56.1  | 52.0  | 54.0  | 40.9  |     |
| 202818_s_at | AI344128  | TCEB3    | 6924     | 77.9    | 52.0  | 56.5  | 50.1  | 47.6  |     |
| 202819_s_at | NM_003198 | TCEB3    | 6924     | 105.2   | 66.7  | 92.2  | 69.3  | 84.2  |     |
| 202820_at   | NM_001621 | AHR      | 196      | 0.8     | 3.7   | 2.6   | 4.4   | 3.4   |     |
| 202821_s_at | AL044018  | LPP      | 4026     | 28.2    | 36.8  | 21.7  | 24.0  | 16.2  |     |
| 202822_at   | BF221852  | LPP      | 4026     | 84.7    | 90.4  | 72.1  | 106.6 | 62.4  |     |
| 202823_at   | N89607    | TCEB1    | 6921     | 125.1   | 79.3  | 127.8 | 99.2  | 91.9  |     |
| 202824_s_at | NM_005648 | TCEB1    | 6921     | 827.8   | 636.3 | 881.9 | 659.2 | 604.2 |     |
| 202825_at   | NM_001151 | SLC25A4  | 291      | 201.7   | 204.9 | 197.6 | 197.8 | 157.4 |     |
| 202826_at   | NM_003710 | SPINT1   | 6692     | 318.4   | 337.0 | 309.8 | 335.9 | 277.1 |     |
| 202827_s_at | AU149305  | MMP14    | 4323     | 1.6     | 2.8   | 2.4   | 1.7   | 2.2   |     |
| 202828_s_at | NM_004995 | MMP14    | 4323     | 1.1     | 1.7   | 1.8   | 1.1   | 1.0   |     |
| 202829_s_at | NM_005638 | VAMP7    | 6845     | 248.6   | 238.0 | 287.6 | 236.3 | 197.8 |     |
| 202830_s_at | NM_001467 | SLC37A4  | 2542     | 149.3   | 100.6 | 158.8 | 113.8 | 127.4 |     |
| 202831_at   | NM_002083 | GPX2     | 2877     | 17.3    | 1.6   | 2.2   | 2.0   | 6.8   |     |
| 202832_at   | NM_014635 | GCC2     | 9648     | 44.2    | 51.2  | 45.7  | 48.6  | 39.0  |     |
| 202833_s_at | NM_000295 | SERPINA1 | 5265     | 0.7     | 0.5   | 1.0   | 2.3   | 1.2   |     |
| 202834_at   | NM_000029 | AGT      | 183      | 14.1    | 9.9   | 12.6  | 11.4  | 8.6   |     |
| 202835_at   | BC001046  | TXNL4A   | 10907    | 16.2    | 15.5  | 27.2  | 22.0  | 22.1  |     |
| 202836_s_at | NM_006701 | TXNL4A   | 10907    | 760.4   | 817.4 | 927.6 | 825.4 | 829.5 |     |
| 202837_at   | NM_006700 | TRAFD1   | 10906    | 23.2    | 22.7  | 28.1  | 28.6  | 27.4  |     |
| 202838_at   | NM_000147 | FUCA1    | 2517     | 99.6    | 102.3 | 93.2  | 108.3 | 64.1  |     |
| 202839_s_at | NM_004146 | NDUFB7   | 4713     | 186.2   | 185.2 | 260.9 | 221.4 | 190.0 |     |
| 202840_at   | NM_003487 | TAF15    | 8148     | 154.6   | 143.1 | 162.1 | 140.2 | 144.7 |     |
| 202841_x_at | NM_007346 | OGFR     | 11054    | 73.4    | 80.5  | 84.4  | 76.2  | 64.8  |     |
| 202842_s_at | AL080081  | DNAJB9   | 4189     | 84.8    | 92.7  | 86.6  | 96.4  | 65.2  |     |
| 202843_at   | NM_012328 | DNAJB9   | 4189     | 20.2    | 24.7  | 21.9  | 17.6  | 16.2  |     |
| 202844_s_at | AW025261  | RALBP1   | 10928    | 54.5    | 46.1  | 35.7  | 39.0  | 48.5  |     |
| 202845_s_at | NM_006788 | RALBP1   | 10928    | 91.0    | 60.0  | 85.3  | 75.9  | 76.5  |     |
| 202846_s_at | NM_002642 | PIGC     | 5279     | 101.0   | 103.9 | 140.2 | 123.7 | 95.6  |     |
| 202847_at   | NM_004563 | PCK2     | 5106     | 408.4   | 570.4 | 446.1 | 544.2 | 388.5 |     |
| 202848_s_at | BG423052  | GRK6     | 2870     | 68.8    | 48.6  | 57.8  | 45.7  | 43.5  |     |
| 202849_x_at | NM_002082 | GRK6     | 2870     | 52.3    | 62.4  | 105.3 | 70.5  | 83.2  |     |
| 202850_at   | NM_002858 | ABCD3    | 5825     | 209.0   | 197.1 | 217.2 | 186.9 | 187.9 |     |
| 202851_at   | AL136715  | AAGAB    | 79719    | 14.8    | 17.5  | 13.3  | 16.1  | 21.8  |     |
| 202852_s_at | NM_024666 | AAGAB    | 79719    | 124.5   | 136.1 | 133.0 | 129.0 | 121.2 |     |
| 202853_s_at | NM_002958 | RYK      | 6259     | 101.9   | 68.9  | 108.6 | 91.5  | 86.4  |     |
| 202854_at   | NM_000194 | HPRT1    | 3251     | 327.5   | 260.9 | 393.2 | 304.8 | 303.9 |     |
| 202855_s_at | AL513917  | MIR6787  | /// 9123 | /// 102 | 8.7   | 1.7   | 0.6   | 2.0   | 3.8 |

|             |           |          |     |        |     |     |       |       |       |        |       |
|-------------|-----------|----------|-----|--------|-----|-----|-------|-------|-------|--------|-------|
| 202856_s_at | NM_004207 | MIR6787  | /// | 9123   | /// | 102 | 12.1  | 9.6   | 1.2   | 3.6    | 0.6   |
| 202857_at   | NM_014255 | CNPY2    |     | 10330  |     |     | 488.0 | 406.1 | 521.7 | 439.2  | 384.6 |
| 202858_at   | NM_006758 | U2AF1    |     | 7307   |     |     | 443.3 | 452.4 | 621.0 | 484.1  | 430.4 |
| 202859_x_at | NM_000584 | CXCL8    |     | 3576   |     |     | 6.6   | 6.0   | 2.9   | 3.8    | 7.4   |
| 202860_at   | NM_014856 | DENND4B  |     | 9909   |     |     | 52.1  | 32.9  | 52.9  | 48.7   | 37.7  |
| 202861_at   | NM_002616 | MIR6883  | /// | 5187   | /// | 102 | 5.0   | 6.2   | 1.8   | 3.9    | 3.7   |
| 202862_at   | NM_000137 | FAH      |     | 2184   |     |     | 182.6 | 183.8 | 178.2 | 169.2  | 158.6 |
| 202863_at   | NM_003113 | SP100    |     | 6672   |     |     | 18.8  | 18.1  | 8.3   | 17.1   | 18.9  |
| 202864_s_at | NM_003113 | SP100    |     | 6672   |     |     | 15.3  | 10.9  | 14.2  | 10.6   | 9.2   |
| 202865_at   | AI695173  | DNAJB12  |     | 54788  |     |     | 40.3  | 33.8  | 41.8  | 47.1   | 29.8  |
| 202866_at   | BG283782  | DNAJB12  |     | 54788  |     |     | 142.9 | 113.8 | 131.9 | 108.6  | 112.5 |
| 202867_s_at | NM_017626 | DNAJB12  |     | 54788  |     |     | 141.1 | 130.9 | 147.4 | 153.9  | 112.0 |
| 202868_s_at | NM_006627 | POP4     |     | 10775  |     |     | 310.5 | 380.5 | 373.3 | 329.5  | 306.8 |
| 202869_at   | NM_016816 | OAS1     |     | 4938   |     |     | 5.4   | 1.3   | 4.3   | 5.4    | 6.3   |
| 202870_s_at | NM_001255 | CDC20    |     | 991    |     |     | 505.4 | 432.9 | 601.2 | 438.7  | 502.1 |
| 202871_at   | NM_004295 | TRAF4    |     | 9618   |     |     | 297.7 | 215.7 | 304.8 | 224.3  | 247.7 |
| 202872_at   | AW024925  | ATP6V1C1 |     | 528    |     |     | 75.3  | 51.7  | 91.3  | 59.8   | 56.7  |
| 202873_at   | BF034973  | ATP6V1C1 |     | 528    |     |     | 21.7  | 14.2  | 22.1  | 17.3   | 14.1  |
| 202874_s_at | NM_001695 | ATP6V1C1 |     | 528    |     |     | 113.5 | 116.0 | 108.0 | 82.0   | 88.9  |
| 202875_s_at | BE397715  | PBX2     |     | 5089   |     |     | 21.5  | 18.5  | 31.7  | 24.5   | 20.0  |
| 202876_s_at | NM_002586 | PBX2     |     | 5089   |     |     | 34.1  | 36.1  | 29.0  | 40.4   | 21.9  |
| 202877_s_at | W72082    | CD93     |     | 22918  |     |     | 12.8  | 1.3   | 1.7   | 3.8    | 0.8   |
| 202878_s_at | NM_012072 | CD93     |     | 22918  |     |     | 4.1   | 1.6   | 7.7   | 3.3    | 8.7   |
| 202879_s_at | AI798823  | CYTH1    |     | 9267   |     |     | 3.0   | 2.5   | 3.2   | 3.4    | 2.3   |
| 202880_s_at | NM_004762 | CYTH1    |     | 9267   |     |     | 19.9  | 29.7  | 33.7  | 25.1   | 22.4  |
| 202881_x_at | AF172066  | -        |     | -      |     |     | 6.0   | 6.8   | 10.7  | 13.6   | 4.4   |
| 202882_x_at | NM_016167 | NOL7     |     | 51406  |     |     | 425.0 | 269.8 | 467.2 | 377.4  | 337.3 |
| 202883_s_at | T79584    | PPP2R1B  |     | 5519   |     |     | 96.2  | 85.6  | 101.8 | 79.9   | 75.5  |
| 202884_s_at | NM_002716 | PPP2R1B  |     | 5519   |     |     | 68.2  | 54.0  | 72.2  | 60.4   | 64.6  |
| 202885_s_at | AF163473  | PPP2R1B  |     | 5519   |     |     | 2.9   | 14.9  | 12.6  | 11.5   | 8.4   |
| 202886_s_at | M65254    | PPP2R1B  |     | 5519   |     |     | 110.1 | 105.1 | 120.8 | 104.9  | 90.3  |
| 202887_s_at | NM_019058 | DDIT4    |     | 54541  |     |     | 829.4 | 876.3 | 650.0 | 1096.1 | 614.6 |
| 202888_s_at | NM_001150 | ANPEP    |     | 290    |     |     | 1.0   | 1.2   | 1.1   | 0.8    | 0.9   |
| 202889_x_at | T62571    | MAP7     |     | 9053   |     |     | 75.0  | 62.1  | 66.6  | 76.9   | 58.0  |
| 202890_at   | AW242297  | MAP7     |     | 9053   |     |     | 176.1 | 166.7 | 201.5 | 142.6  | 142.4 |
| 202891_at   | NM_005600 | NIT1     |     | 4817   |     |     | 210.0 | 191.0 | 198.3 | 198.2  | 160.0 |
| 202892_at   | NM_004661 | CDC23    |     | 8697   |     |     | 207.6 | 159.0 | 207.3 | 173.8  | 186.9 |
| 202893_at   | NM_006377 | UNC13B   |     | 10497  |     |     | 103.0 | 83.6  | 86.6  | 102.8  | 86.8  |
| 202894_at   | NM_004444 | EPHB4    |     | 2050   |     |     | 63.2  | 56.3  | 56.3  | 68.1   | 41.8  |
| 202895_s_at | D86043    | SIRPA    |     | 140885 |     |     | 9.6   | 11.3  | 16.6  | 9.0    | 6.8   |
| 202896_s_at | NM_004648 | SIRPA    |     | 140885 |     |     | 21.2  | 2.0   | 18.2  | 12.6   | 7.6   |
| 202897_at   | AB023430  | SIRPA    |     | 140885 |     |     | 2.6   | 3.7   | 1.8   | 0.4    | 5.9   |
| 202898_at   | NM_014654 | SDC3     |     | 9672   |     |     | 46.7  | 49.1  | 43.9  | 45.3   | 35.4  |
| 202899_s_at | NM_003017 | SRSF3    |     | 6428   |     |     | 672.5 | 643.0 | 834.2 | 655.5  | 654.3 |
| 202900_s_at | NM_002532 | NUP88    |     | 4927   |     |     | 422.3 | 328.0 | 503.9 | 421.7  | 426.7 |
| 202901_x_at | BC002642  | CTSS     |     | 1520   |     |     | 0.2   | 3.3   | 0.1   | 1.1    | 1.6   |
| 202902_s_at | NM_004079 | CTSS     |     | 1520   |     |     | 1.1   | 0.7   | 2.1   | 1.8    | 7.4   |
| 202903_at   | AU153477  | LSM5     |     | 23658  |     |     | 43.7  | 28.5  | 40.0  | 32.7   | 34.7  |
| 202904_s_at | NM_012322 | LSM5     |     | 23658  |     |     | 86.7  | 48.8  | 79.1  | 56.0   | 61.7  |
| 202905_x_at | AI796269  | NBN      |     | 4683   |     |     | 67.4  | 46.1  | 60.1  | 61.8   | 54.3  |
| 202906_s_at | AF049895  | NBN      |     | 4683   |     |     | 65.7  | 50.2  | 84.8  | 63.1   | 59.1  |
| 202907_s_at | NM_002485 | NBN      |     | 4683   |     |     | 158.5 | 122.6 | 163.1 | 153.5  | 133.9 |
| 202908_at   | NM_006005 | WFS1     |     | 7466   |     |     | 94.8  | 88.3  | 88.7  | 98.8   | 79.5  |

|             |           |            |       |        |        |        |        |        |
|-------------|-----------|------------|-------|--------|--------|--------|--------|--------|
| 202909_at   | NM_014805 | EPM2AIP1   | 9852  | 180.0  | 179.4  | 226.4  | 176.1  | 171.1  |
| 202910_s_at | NM_001784 | CD97       | 976   | 22.7   | 15.7   | 25.4   | 17.3   | 18.0   |
| 202911_at   | NM_000179 | MSH6       | 2956  | 172.1  | 143.6  | 186.4  | 152.5  | 161.9  |
| 202912_at   | NM_001124 | ADM        | 133   | 14.2   | 6.1    | 19.8   | 11.8   | 8.4    |
| 202913_at   | AI090007  | ARHGEF11   | 9826  | 34.3   | 26.3   | 36.1   | 34.5   | 32.3   |
| 202914_s_at | NM_014784 | ARHGEF11   | 9826  | 20.0   | 18.6   | 18.8   | 18.6   | 14.3   |
| 202915_s_at | BF115776  | FAM20B     | 9917  | 71.4   | 61.8   | 68.2   | 66.7   | 63.3   |
| 202916_s_at | NM_014864 | FAM20B     | 9917  | 38.6   | 36.6   | 52.4   | 40.0   | 42.8   |
| 202917_s_at | NM_002964 | S100A8     | 6279  | 7.3    | 5.7    | 1.1    | 4.6    | 0.5    |
| 202918_s_at | AF151853  | HSPE1-MOB4 | 25843 | 222.5  | 182.3  | 238.3  | 177.1  | 155.2  |
| 202919_at   | NM_015387 | MOB4       | 25843 | 108.3  | 76.5   | 131.0  | 95.6   | 91.0   |
| 202920_at   | BF726212  | ANK2       | 287   | 2.3    | 0.2    | 0.3    | 2.6    | 3.5    |
| 202921_s_at | NM_001148 | ANK2       | 287   | 6.6    | 6.2    | 1.2    | 3.9    | 6.0    |
| 202922_at   | BF676980  | GCLC       | 2729  | 27.8   | 23.5   | 29.6   | 25.9   | 24.7   |
| 202923_s_at | NM_001498 | GCLC       | 2729  | 36.1   | 31.4   | 45.3   | 42.4   | 33.4   |
| 202924_s_at | AL562280  | PLAGL2     | 5326  | 31.2   | 21.5   | 26.6   | 30.1   | 18.5   |
| 202925_s_at | NM_002657 | PLAGL2     | 5326  | 53.7   | 47.9   | 51.9   | 46.7   | 35.5   |
| 202926_at   | NM_015909 | NBAS       | 51594 | 51.5   | 36.1   | 35.9   | 42.0   | 36.9   |
| 202927_at   | NM_006221 | PIN1       | 5300  | 137.0  | 141.6  | 144.6  | 163.2  | 125.1  |
| 202928_s_at | NM_024165 | PHF1       | 5252  | 9.2    | 8.5    | 2.2    | 8.8    | 7.6    |
| 202929_s_at | NM_001355 | DDT        | 1652  | 318.3  | 310.7  | 386.8  | 360.7  | 340.7  |
| 202930_s_at | NM_003850 | SUCLA2     | 8803  | 125.1  | 99.4   | 132.6  | 103.8  | 97.0   |
| 202931_x_at | NM_004305 | BIN1       | 274   | 72.5   | 66.6   | 84.1   | 58.4   | 59.1   |
| 202932_at   | NM_005433 | YES1       | 7525  | 119.9  | 109.4  | 135.9  | 109.1  | 102.5  |
| 202933_s_at | NM_005433 | YES1       | 7525  | 173.8  | 142.8  | 223.6  | 190.0  | 144.2  |
| 202934_at   | AI761561  | HK2        | 3099  | 52.8   | 45.5   | 71.4   | 52.2   | 71.6   |
| 202935_s_at | AI382146  | SOX9       | 6662  | 10.6   | 8.3    | 12.7   | 7.0    | 6.8    |
| 202936_s_at | NM_000346 | SOX9       | 6662  | 16.9   | 11.1   | 15.7   | 11.6   | 8.2    |
| 202937_x_at | AL022316  | RRP7A      | 27341 | 81.2   | 77.1   | 106.4  | 85.1   | 104.6  |
| 202938_x_at | NM_015703 | RRP7A      | 27341 | 31.6   | 38.8   | 33.6   | 32.9   | 23.8   |
| 202939_at   | NM_005857 | ZMPSTE24   | 10269 | 364.9  | 359.2  | 398.6  | 360.8  | 293.6  |
| 202940_at   | NM_014823 | WNK1       | 65125 | 3.9    | 8.2    | 9.8    | 2.6    | 6.3    |
| 202941_at   | NM_021074 | NDUFV2     | 4729  | 1193.8 | 1047.3 | 1312.8 | 1212.2 | 1044.5 |
| 202942_at   | NM_001985 | ETFB       | 2109  | 600.5  | 609.1  | 594.0  | 624.8  | 503.2  |
| 202943_s_at | M38083    | NAGA       | 4668  | 119.2  | 124.0  | 148.8  | 116.6  | 120.7  |
| 202944_at   | NM_000262 | NAGA       | 4668  | 56.4   | 56.6   | 72.9   | 47.2   | 58.2   |
| 202945_at   | NM_004957 | FPGS       | 2356  | 171.7  | 158.8  | 188.2  | 154.0  | 165.6  |
| 202946_s_at | NM_014962 | BTBD3      | 22903 | 50.3   | 43.8   | 56.4   | 45.7   | 43.8   |
| 202947_s_at | NM_002101 | GYPC       | 2995  | 5.0    | 2.8    | 7.1    | 4.2    | 2.0    |
| 202948_at   | NM_000877 | IL1R1      | 3554  | 49.4   | 40.8   | 49.1   | 41.3   | 51.2   |
| 202949_s_at | NM_001450 | FHL2       | 2274  | 1.9    | 1.8    | 1.6    | 1.6    | 1.3    |
| 202950_at   | NM_001889 | CRYZ       | 1429  | 92.6   | 73.7   | 84.8   | 64.2   | 60.1   |
| 202951_at   | BE048506  | STK38      | 11329 | 81.9   | 78.3   | 84.9   | 98.1   | 76.0   |
| 202952_s_at | NM_003474 | ADAM12     | 8038  | 4.0    | 0.7    | 6.8    | 1.1    | 1.6    |
| 202953_at   | NM_000491 | C1QB       | 713   | 9.5    | 2.3    | 4.7    | 2.6    | 3.5    |
| 202954_at   | NM_007019 | UBE2C      | 11065 | 745.9  | 608.9  | 840.5  | 632.3  | 682.8  |
| 202955_s_at | AF084520  | ARFGEF1    | 10565 | 53.3   | 34.8   | 46.1   | 46.1   | 35.6   |
| 202956_at   | NM_006421 | ARFGEF1    | 10565 | 43.4   | 43.8   | 53.0   | 42.6   | 44.5   |
| 202957_at   | NM_005335 | HCLS1      | 3059  | 7.9    | 5.1    | 3.7    | 5.2    | 4.0    |
| 202958_at   | NM_002833 | PTPN9      | 5780  | 48.2   | 41.9   | 52.7   | 41.4   | 39.0   |
| 202959_at   | AI433712  | MUT        | 4594  | 42.1   | 34.8   | 38.3   | 38.6   | 25.4   |
| 202960_s_at | NM_000255 | MUT        | 4594  | 81.9   | 93.6   | 109.3  | 127.3  | 87.5   |
| 202961_s_at | NM_004889 | ARMC2-AS1  | 9551  | 1488.9 | 1476.8 | 1633.1 | 1600.6 | 1428.4 |

|             |           |              |              |        |        |        |        |        |
|-------------|-----------|--------------|--------------|--------|--------|--------|--------|--------|
| 202962_at   | NM_015254 | KIF13B       | 23303        | 21.2   | 18.1   | 27.4   | 14.0   | 21.9   |
| 202963_at   | AW027312  | RFX5         | 5993         | 202.8  | 215.2  | 192.1  | 197.7  | 135.9  |
| 202964_s_at | NM_000449 | RFX5         | 5993         | 140.7  | 157.1  | 111.8  | 196.5  | 113.2  |
| 202965_s_at | NM_014289 | CAPN6        | 827          | 0.8    | 0.7    | 0.4    | 2.1    | 0.7    |
| 202966_at   | NM_014289 | CAPN6        | 827          | 5.3    | 4.7    | 3.4    | 3.9    | 2.9    |
| 202967_at   | NM_001512 | GSTA4        | 2941         | 146.8  | 127.8  | 125.9  | 134.0  | 93.0   |
| 202968_s_at | Y09216    | DYRK2        | 8445         | 19.1   | 9.9    | 12.3   | 22.0   | 10.0   |
| 202969_at   | AI216690  | DYRK2        | 8445         | 12.5   | 10.2   | 12.9   | 9.8    | 9.5    |
| 202970_at   | AI192838  | DYRK2        | 8445         | 0.3    | 3.6    | 10.8   | 0.7    | 7.8    |
| 202971_s_at | NM_006482 | DYRK2        | 8445         | 7.5    | 6.2    | 1.8    | 3.3    | 4.9    |
| 202972_s_at | AW450403  | FAM13A       | 10144        | 41.1   | 44.3   | 43.7   | 38.4   | 35.8   |
| 202973_x_at | NM_014883 | FAM13A       | 10144        | 113.4  | 101.0  | 108.7  | 109.1  | 86.2   |
| 202974_at   | NM_002436 | MPP1         | 4354         | 19.2   | 11.4   | 22.2   | 9.9    | 15.1   |
| 202975_s_at | N21138    | RHOBTB3      | 22836        | 21.1   | 19.2   | 18.6   | 16.3   | 17.0   |
| 202976_s_at | NM_014899 | RHOBTB3      | 22836        | 12.9   | 6.2    | 14.3   | 8.9    | 11.6   |
| 202977_s_at | AI206560  | CREBZF       | 58487        | 2.4    | 1.4    | 9.8    | 1.6    | 0.8    |
| 202978_s_at | AW204564  | CREBZF       | 58487        | 48.4   | 34.1   | 57.0   | 31.7   | 38.4   |
| 202979_s_at | NM_021212 | CREBZF       | 58487        | 69.1   | 46.4   | 64.3   | 57.9   | 42.0   |
| 202980_s_at | AI953523  | SIAH1        | 6477         | 51.4   | 57.0   | 48.9   | 55.5   | 51.9   |
| 202981_x_at | NM_003031 | SIAH1        | 6477         | 203.2  | 219.0  | 219.4  | 211.2  | 149.6  |
| 202982_s_at | NM_006821 | ACOT1 /// AC | 10965 /// 64 | 233.0  | 137.2  | 152.3  | 168.4  | 137.3  |
| 202983_at   | AI760760  | HMTF         | 6596         | 317.4  | 267.8  | 345.8  | 288.3  | 294.7  |
| 202984_s_at | AA457021  | BAG5         | 9529         | 58.0   | 35.5   | 46.4   | 38.3   | 45.5   |
| 202985_s_at | NM_004873 | BAG5         | 9529         | 176.2  | 163.8  | 196.2  | 164.5  | 156.9  |
| 202986_at   | NM_014862 | ARNT2        | 9915         | 18.3   | 20.3   | 20.6   | 14.9   | 11.7   |
| 202987_at   | AW296296  | TRAF3IP2     | 10758        | 4.8    | 4.3    | 4.2    | 6.6    | 2.5    |
| 202988_s_at | NM_002922 | RGS1         | 5996         | 0.3    | 2.1    | 2.1    | 0.4    | 1.0    |
| 202989_at   | NM_002922 | RGS1         | 5996         | 0.2    | 0.1    | 0.5    | 1.1    | 0.1    |
| 202990_at   | NM_002863 | PYGL         | 5836         | 14.9   | 10.6   | 13.9   | 7.5    | 9.2    |
| 202991_at   | NM_006804 | STARD3       | 10948        | 54.8   | 34.1   | 45.1   | 45.1   | 21.8   |
| 202992_at   | NM_000587 | C7           | 730          | 1.4    | 4.5    | 9.8    | 6.5    | 1.3    |
| 202993_at   | NM_006844 | ILVBL        | 10994        | 94.5   | 142.6  | 136.7  | 124.0  | 115.0  |
| 202994_s_at | Z95331    | FBLN1        | 2192         | 1.8    | 1.4    | 1.6    | 0.5    | 1.4    |
| 202995_s_at | NM_006486 | FBLN1        | 2192         | 6.5    | 8.7    | 1.1    | 3.6    | 4.0    |
| 202996_at   | NM_021173 | POLD4        | 57804        | 85.4   | 80.0   | 70.8   | 70.9   | 73.7   |
| 202997_s_at | BE251211  | LOXL2        | 4017         | 0.6    | 0.8    | 1.6    | 0.5    | 0.7    |
| 202998_s_at | NM_002318 | LOXL2        | 4017         | 3.4    | 6.4    | 2.8    | 1.7    | 4.8    |
| 202999_s_at | AF117949  | LOXL2        | 4017         | 4.2    | 6.3    | 1.9    | 2.0    | 1.5    |
| 203000_at   | BF967657  | STMN2        | 11075        | 0.7    | 3.8    | 0.3    | 1.1    | 0.5    |
| 203001_s_at | NM_007029 | STMN2        | 11075        | 1.3    | 0.7    | 3.5    | 0.9    | 3.4    |
| 203002_at   | NM_016201 | AMOTL2       | 51421        | 24.6   | 19.8   | 27.1   | 20.0   | 18.9   |
| 203003_at   | AL530331  | MEF2D        | 4209         | 1.1    | 10.2   | 7.5    | 3.3    | 8.3    |
| 203004_s_at | NM_005920 | MEF2D        | 4209         | 14.4   | 10.7   | 13.8   | 14.5   | 4.5    |
| 203005_at   | NM_002342 | LTBR         | 4055         | 153.6  | 124.5  | 134.6  | 112.1  | 103.0  |
| 203006_at   | NM_005539 | INPP5A       | 3632         | 237.5  | 244.5  | 225.8  | 246.3  | 185.8  |
| 203007_x_at | AF077198  | LYPLA1       | 10434        | 314.3  | 250.2  | 317.9  | 265.7  | 270.3  |
| 203008_x_at | NM_005783 | TXNDC9       | 10190        | 102.6  | 87.6   | 115.1  | 75.7   | 80.8   |
| 203009_at   | NM_005581 | BCAM         | 4059         | 13.0   | 8.8    | 12.8   | 13.9   | 9.6    |
| 203010_at   | NM_003152 | STAT5A       | 6776         | 27.4   | 16.0   | 14.9   | 15.2   | 16.5   |
| 203011_at   | NM_005536 | IMPA1        | 3612         | 199.6  | 146.5  | 234.9  | 167.6  | 178.4  |
| 203012_x_at | NM_000984 | RPL23A       | 6147         | 4052.3 | 3977.5 | 4197.7 | 3895.3 | 3792.5 |
| 203013_at   | NM_007265 | ECD          | 11319        | 132.9  | 129.4  | 138.3  | 125.0  | 110.5  |
| 203014_x_at | NM_015705 | SGSM3        | 27352        | 54.9   | 80.6   | 72.9   | 73.2   | 59.0   |



|             |           |              |              |        |        |        |        |        |
|-------------|-----------|--------------|--------------|--------|--------|--------|--------|--------|
| 203015_s_at | AW136988  | SSX2IP       | 117178       | 81.8   | 45.9   | 81.7   | 57.4   | 53.5   |
| 203016_s_at | AK001710  | SSX2IP       | 117178       | 121.5  | 104.6  | 114.1  | 110.5  | 99.2   |
| 203017_s_at | R52678    | SSX2IP       | 117178       | 95.4   | 85.1   | 109.1  | 93.4   | 72.0   |
| 203018_s_at | AU152583  | SSX2IP       | 117178       | 47.6   | 43.3   | 76.1   | 51.2   | 47.3   |
| 203019_x_at | NM_014021 | SSX2IP       | 117178       | 22.5   | 17.3   | 23.5   | 22.1   | 21.5   |
| 203020_at   | NM_014857 | RABGAP1L     | 9910         | 17.5   | 21.5   | 23.2   | 23.3   | 19.2   |
| 203021_at   | NM_003064 | SLPI         | 6590         | 81.2   | 69.3   | 69.3   | 72.5   | 56.7   |
| 203022_at   | NM_006397 | RNASEH2A     | 10535        | 540.1  | 457.0  | 604.7  | 506.7  | 524.7  |
| 203023_at   | NM_016391 | NOP16        | 51491        | 189.9  | 114.4  | 176.9  | 134.9  | 148.4  |
| 203024_s_at | NM_020199 | C5orf15      | 56951        | 372.7  | 339.2  | 402.0  | 413.4  | 320.2  |
| 203025_at   | NM_003491 | NAA10        | 8260         | 196.0  | 184.8  | 238.5  | 234.8  | 210.1  |
| 203026_at   | NM_014872 | ZBTB5        | 9925         | 121.6  | 94.6   | 124.6  | 98.6   | 74.0   |
| 203027_s_at | AI189359  | MVD          | 4597         | 7.5    | 13.9   | 11.0   | 2.7    | 14.7   |
| 203028_s_at | NM_000101 | CYBA         | 1535         | 3.8    | 2.7    | 1.8    | 2.4    | 1.6    |
| 203029_s_at | NM_002847 | PTPRN2       | 5799         | 1.4    | 0.8    | 1.0    | 0.7    | 0.6    |
| 203030_s_at | AF007555  | PTPRN2       | 5799         | 0.5    | 0.4    | 0.7    | 0.5    | 0.3    |
| 203031_s_at | NM_000375 | UROS         | 7390         | 130.9  | 131.8  | 140.8  | 151.2  | 123.9  |
| 203032_s_at | AI363836  | FH           | 2271         | 254.4  | 197.8  | 252.9  | 229.7  | 202.3  |
| 203033_x_at | NM_000143 | FH           | 2271         | 961.3  | 924.4  | 1023.3 | 936.4  | 870.1  |
| 203034_s_at | NM_000990 | RPL27A /// S | 6157 /// 619 | 4473.8 | 3619.5 | 4335.5 | 4082.0 | 3917.5 |
| 203035_s_at | NM_006099 | PIAS3        | 10401        | 48.2   | 49.8   | 65.1   | 50.8   | 35.8   |
| 203036_s_at | AI027678  | MTSS1        | 9788         | 1.2    | 1.9    | 2.4    | 5.7    | 0.8    |
| 203037_s_at | NM_014751 | MTSS1        | 9788         | 12.5   | 6.9    | 5.5    | 8.1    | 1.7    |
| 203038_at   | NM_002844 | PTPRK        | 5796         | 23.1   | 21.0   | 11.1   | 23.3   | 11.9   |
| 203039_s_at | NM_005006 | NDUFS1       | 4719         | 321.1  | 313.9  | 318.2  | 302.7  | 269.6  |
| 203040_s_at | NM_000190 | HMBS         | 3145         | 376.0  | 340.8  | 401.9  | 382.2  | 334.9  |
| 203041_s_at | J04183    | LAMP2        | 3920         | 217.7  | 265.8  | 197.3  | 196.6  | 157.9  |
| 203042_at   | NM_002294 | LAMP2        | 3920         | 77.6   | 73.3   | 70.6   | 86.0   | 63.9   |
| 203043_at   | NM_004729 | ZBED1        | 9189         | 92.2   | 95.5   | 116.1  | 109.5  | 97.8   |
| 203044_at   | NM_014918 | CHSY1        | 22856        | 97.8   | 85.4   | 99.7   | 95.9   | 81.7   |
| 203045_at   | NM_004148 | NINJ1        | 4814         | 199.5  | 205.0  | 192.0  | 199.8  | 178.7  |
| 203046_s_at | NM_003920 | TIMELESS     | 8914         | 255.4  | 187.9  | 253.4  | 184.2  | 188.8  |
| 203047_at   | NM_005990 | STK10        | 6793         | 2.6    | 9.5    | 0.9    | 2.7    | 5.9    |
| 203048_s_at | BE566023  | TTC37        | 9652         | 35.9   | 23.9   | 38.2   | 35.8   | 32.4   |
| 203049_s_at | NM_014639 | TTC37        | 9652         | 52.9   | 39.1   | 44.9   | 44.0   | 32.1   |
| 203050_at   | NM_005657 | TP53BP1      | 7158         | 74.6   | 55.3   | 60.4   | 53.8   | 48.5   |
| 203051_at   | NM_014952 | BAHD1        | 22893        | 28.6   | 27.5   | 24.8   | 12.2   | 10.9   |
| 203052_at   | NM_000063 | C2           | 717          | 3.2    | 9.8    | 7.2    | 11.7   | 3.6    |
| 203053_at   | NM_005872 | BCAS2        | 10286        | 187.6  | 168.1  | 215.2  | 184.0  | 177.8  |
| 203054_s_at | NM_022171 | TCTA         | 6988         | 131.2  | 135.6  | 141.8  | 149.5  | 100.6  |
| 203055_s_at | NM_004706 | ARHGEF1 ///  | 9138 /// 100 | 28.3   | 25.1   | 33.4   | 24.2   | 18.6   |
| 203056_s_at | AI681013  | PRDM2        | 7799         | 18.1   | 23.1   | 19.7   | 17.3   | 18.1   |
| 203057_s_at | AV724783  | PRDM2        | 7799         | 62.5   | 69.7   | 67.9   | 72.1   | 81.3   |
| 203058_s_at | AW299958  | PAPSS2       | 9060         | 0.4    | 2.4    | 2.7    | 3.6    | 1.1    |
| 203059_s_at | NM_004670 | PAPSS2       | 9060         | 4.4    | 3.1    | 7.7    | 7.9    | 6.3    |
| 203060_s_at | AF074331  | PAPSS2       | 9060         | 5.0    | 0.8    | 0.4    | 2.8    | 2.3    |
| 203061_s_at | AI673553  | MDC1         | 9656         | 36.3   | 41.2   | 53.2   | 36.2   | 65.0   |
| 203062_s_at | NM_014641 | MDC1         | 9656         | 89.4   | 74.1   | 102.5  | 74.3   | 89.0   |
| 203063_at   | NM_014634 | PPM1F        | 9647         | 4.7    | 23.1   | 15.0   | 28.0   | 27.8   |
| 203064_s_at | NM_004514 | FOXK2        | 3607         | 160.8  | 119.7  | 114.2  | 84.7   | 98.7   |
| 203065_s_at | NM_001753 | CAV1         | 857          | 0.8    | 2.0    | 0.6    | 0.6    | 0.2    |
| 203066_at   | NM_014863 | CHST15       | 51363        | 9.1    | 11.6   | 7.5    | 9.3    | 9.9    |
| 203067_at   | NM_003477 | PDHX         | 8050         | 319.0  | 268.2  | 325.3  | 256.5  | 265.3  |

|             |           |              |              |        |        |        |        |        |
|-------------|-----------|--------------|--------------|--------|--------|--------|--------|--------|
| 203068_at   | NM_014851 | KLHL21       | 9903         | 70.7   | 83.0   | 87.3   | 73.7   | 88.3   |
| 203069_at   | NM_014849 | SV2A         | 9900         | 1.2    | 1.4    | 2.1    | 1.1    | 1.0    |
| 203070_at   | NM_004636 | SEMA3B       | 7869         | 1.8    | 4.2    | 3.5    | 0.6    | 1.2    |
| 203071_at   | NM_004636 | MIR6872 ///  | 7869 /// 102 | 10.2   | 6.4    | 2.1    | 2.7    | 1.3    |
| 203072_at   | NM_004998 | MYO1E        | 4643         | 19.0   | 18.2   | 15.5   | 12.7   | 9.0    |
| 203073_at   | NM_007357 | COG2         | 22796        | 119.4  | 85.4   | 109.9  | 107.3  | 86.0   |
| 203074_at   | NM_001630 | ANXA8 /// AI | 653145 /// 7 | 43.9   | 25.6   | 26.1   | 20.0   | 11.1   |
| 203075_at   | AW151617  | SMAD2        | 4087         | 131.2  | 113.4  | 127.9  | 114.7  | 96.2   |
| 203076_s_at | U65019    | SMAD2        | 4087         | 112.5  | 104.1  | 116.1  | 105.0  | 93.4   |
| 203077_s_at | NM_005901 | SMAD2        | 4087         | 62.8   | 44.9   | 58.4   | 56.3   | 49.1   |
| 203078_at   | U83410    | CUL2         | 8453         | 22.8   | 15.0   | 17.5   | 19.0   | 17.0   |
| 203079_s_at | NM_003591 | CUL2         | 8453         | 76.1   | 70.9   | 96.1   | 75.0   | 83.2   |
| 203080_s_at | NM_013450 | BAZ2B        | 29994        | 13.4   | 13.7   | 10.2   | 11.0   | 4.0    |
| 203081_at   | NM_020248 | CTNNBIP1     | 56998        | 42.7   | 53.7   | 37.6   | 49.4   | 35.5   |
| 203082_at   | NM_014753 | BMS1         | 9790         | 68.6   | 67.5   | 76.4   | 71.9   | 69.0   |
| 203083_at   | NM_003247 | THBS2        | 7058         | 8.3    | 6.9    | 9.9    | 9.5    | 4.2    |
| 203084_at   | NM_000660 | TGFB1        | 7040         | 1.8    | 1.4    | 2.0    | 1.5    | 4.9    |
| 203085_s_at | BC000125  | TGFB1        | 7040         | 1.3    | 0.7    | 2.0    | 3.3    | 0.6    |
| 203086_at   | BE872563  | KIF2A        | 3796         | 36.7   | 35.1   | 32.7   | 35.6   | 26.9   |
| 203087_s_at | NM_004520 | KIF2A        | 3796         | 120.9  | 96.4   | 129.9  | 112.8  | 97.9   |
| 203088_at   | NM_006329 | FBLN5        | 10516        | 1.4    | 1.8    | 1.2    | 2.0    | 0.5    |
| 203089_s_at | NM_013247 | HTRA2        | 27429        | 106.9  | 88.8   | 128.7  | 115.1  | 122.3  |
| 203090_at   | NM_006923 | SDF2         | 6388         | 114.4  | 129.6  | 136.0  | 121.0  | 101.8  |
| 203091_at   | NM_003902 | FUBP1        | 8880         | 139.1  | 119.0  | 144.8  | 119.3  | 102.0  |
| 203092_at   | AF026030  | TIMM44       | 10469        | 94.1   | 81.5   | 104.6  | 110.7  | 99.7   |
| 203093_s_at | NM_006351 | TIMM44       | 10469        | 136.0  | 141.2  | 151.2  | 157.4  | 158.7  |
| 203094_at   | NM_014628 | MAD2L1BP     | 9587         | 76.5   | 66.8   | 82.5   | 64.0   | 66.1   |
| 203095_at   | NM_002453 | MTIF2        | 4528         | 97.1   | 79.9   | 103.0  | 90.8   | 69.4   |
| 203096_s_at | BF439282  | RAPGEF2      | 9693         | 13.4   | 12.0   | 13.5   | 13.4   | 6.5    |
| 203097_s_at | NM_014247 | RAPGEF2      | 9693         | 49.1   | 58.4   | 57.4   | 55.5   | 41.2   |
| 203098_at   | AL050164  | CDYL         | 9425         | 60.1   | 61.8   | 76.4   | 57.7   | 59.0   |
| 203099_s_at | AF081258  | CDYL         | 9425         | 47.8   | 24.6   | 36.2   | 29.4   | 39.3   |
| 203100_s_at | NM_004824 | CDYL         | 9425         | 58.4   | 48.3   | 57.5   | 51.8   | 55.4   |
| 203101_s_at | AW103265  | MGAT2        | 4247         | 11.5   | 12.4   | 8.1    | 12.4   | 8.5    |
| 203102_s_at | NM_002408 | MGAT2        | 4247         | 236.4  | 203.6  | 274.0  | 215.3  | 235.3  |
| 203103_s_at | NM_014502 | PRPF19       | 27339        | 515.3  | 617.0  | 708.6  | 606.3  | 586.1  |
| 203104_at   | NM_005211 | CSF1R        | 1436         | 15.3   | 4.1    | 8.8    | 1.5    | 10.5   |
| 203105_s_at | NM_012062 | DNM1L        | 10059        | 97.5   | 89.3   | 108.3  | 100.0  | 84.8   |
| 203106_s_at | NM_014396 | VPS41        | 27072        | 17.2   | 10.1   | 14.7   | 16.6   | 10.4   |
| 203107_x_at | NM_002952 | RPS2 /// SNC | 6187 /// 267 | 4247.3 | 3815.3 | 4150.6 | 3825.5 | 3863.8 |
| 203108_at   | NM_003979 | GPRC5A       | 9052         | 1.6    | 2.2    | 3.3    | 1.0    | 1.7    |
| 203109_at   | NM_003969 | UBE2M        | 9040         | 523.2  | 499.7  | 735.9  | 647.5  | 531.1  |
| 203110_at   | U43522    | PTK2B        | 2185         | 49.5   | 58.4   | 47.8   | 62.0   | 36.4   |
| 203111_s_at | NM_004103 | PTK2B        | 2185         | 12.1   | 11.7   | 14.2   | 9.6    | 3.1    |
| 203112_s_at | NM_005663 | MIR943 /// N | 7469 /// 100 | 94.1   | 75.6   | 114.5  | 101.7  | 106.3  |
| 203113_s_at | NM_001960 | EEF1D        | 1936         | 1535.6 | 1623.8 | 1634.4 | 1571.2 | 1422.5 |
| 203114_at   | NM_006396 | SSSCA1       | 10534        | 96.9   | 93.6   | 131.7  | 124.4  | 106.4  |
| 203115_at   | AU152635  | FECH         | 2235         | 127.3  | 100.6  | 119.7  | 107.2  | 97.1   |
| 203116_s_at | NM_000140 | FECH         | 2235         | 440.9  | 378.8  | 485.2  | 436.5  | 411.3  |
| 203117_s_at | NM_014871 | PAN2         | 9924         | 40.6   | 40.7   | 41.7   | 38.8   | 35.6   |
| 203118_at   | NM_004716 | PCSK7        | 9159         | 40.6   | 16.3   | 33.1   | 15.7   | 39.0   |
| 203119_at   | NM_024098 | CCDC86       | 79080        | 336.8  | 263.4  | 440.6  | 292.4  | 362.6  |
| 203120_at   | NM_005426 | TP53BP2      | 7159         | 51.1   | 44.7   | 50.6   | 38.4   | 43.9   |

|             |           |          |       |        |        |        |        |        |
|-------------|-----------|----------|-------|--------|--------|--------|--------|--------|
| 203122_at   | NM_016030 | TRAPPC12 | 51112 | 20.6   | 24.1   | 20.3   | 34.4   | 21.9   |
| 203123_s_at | AU154469  | SLC11A2  | 4891  | 129.4  | 118.9  | 134.1  | 111.0  | 106.9  |
| 203124_s_at | NM_000617 | SLC11A2  | 4891  | 156.1  | 156.9  | 180.3  | 159.0  | 160.4  |
| 203125_x_at | AF046997  | SLC11A2  | 4891  | 58.9   | 52.0   | 62.7   | 53.7   | 53.2   |
| 203126_at   | NM_014214 | IMPA2    | 3613  | 171.5  | 159.0  | 216.1  | 190.8  | 172.3  |
| 203127_s_at | BC005123  | SPTLC2   | 9517  | 75.4   | 53.3   | 74.6   | 57.7   | 55.6   |
| 203128_at   | NM_004863 | SPTLC2   | 9517  | 12.2   | 16.4   | 16.7   | 19.6   | 18.6   |
| 203129_s_at | BF059313  | KIF5C    | 3800  | 6.8    | 2.5    | 3.1    | 16.7   | 11.7   |
| 203130_s_at | NM_004522 | KIF5C    | 3800  | 51.5   | 42.2   | 50.1   | 43.8   | 36.5   |
| 203131_at   | NM_006206 | PDGFRA   | 5156  | 0.7    | 0.4    | 0.3    | 4.6    | 0.9    |
| 203132_at   | NM_000321 | RB1      | 5925  | 106.2  | 74.6   | 101.9  | 87.0   | 84.5   |
| 203133_at   | NM_006808 | SEC61B   | 10952 | 1462.8 | 1278.1 | 1302.5 | 1368.2 | 1056.1 |
| 203134_at   | NM_007166 | PICALM   | 8301  | 17.3   | 15.2   | 8.0    | 26.4   | 13.5   |
| 203135_at   | NM_003194 | TBP      | 6908  | 52.0   | 48.5   | 58.8   | 55.1   | 49.5   |
| 203136_at   | NM_006423 | RABAC1   | 10567 | 123.0  | 146.7  | 131.1  | 135.2  | 101.7  |
| 203137_at   | NM_004906 | WTAP     | 9589  | 379.6  | 337.5  | 423.4  | 368.8  | 319.7  |
| 203138_at   | NM_003642 | HAT1     | 8520  | 246.4  | 188.0  | 275.1  | 179.1  | 208.8  |
| 203139_at   | NM_004938 | DAPK1    | 1612  | 12.2   | 9.8    | 10.5   | 9.1    | 3.8    |
| 203140_at   | NM_001706 | BCL6     | 604   | 105.8  | 106.7  | 107.5  | 96.8   | 106.4  |
| 203141_s_at | AW058575  | AP3B1    | 8546  | 18.0   | 22.3   | 25.2   | 17.4   | 18.9   |
| 203142_s_at | NM_003664 | AP3B1    | 8546  | 41.8   | 50.7   | 47.2   | 45.1   | 37.5   |
| 203143_s_at | T79953    | KIAA0040 | 9674  | 18.0   | 12.8   | 15.9   | 9.5    | 10.0   |
| 203144_s_at | NM_014656 | KIAA0040 | 9674  | 9.3    | 1.7    | 3.2    | 3.0    | 2.2    |
| 203145_at   | NM_006461 | SPAG5    | 10615 | 215.7  | 177.6  | 231.4  | 178.5  | 188.9  |
| 203146_s_at | NM_001470 | GABBR1   | 2550  | 13.7   | 14.1   | 10.2   | 11.7   | 2.0    |
| 203147_s_at | BE962483  | TRIM14   | 9830  | 36.2   | 22.5   | 34.3   | 37.9   | 28.5   |
| 203148_s_at | NM_014788 | TRIM14   | 9830  | 89.0   | 82.1   | 93.3   | 74.4   | 82.4   |
| 203149_at   | NM_002856 | PVRL2    | 5819  | 52.5   | 46.6   | 42.5   | 49.8   | 35.3   |
| 203150_at   | NM_005833 | RABEPK   | 10244 | 161.7  | 174.3  | 188.0  | 187.7  | 139.7  |
| 203151_at   | AW296788  | MAP1A    | 4130  | 23.9   | 22.2   | 21.0   | 13.8   | 13.8   |
| 203152_at   | NM_003776 | MRPL40   | 64976 | 342.5  | 327.2  | 365.5  | 370.2  | 303.4  |
| 203153_at   | NM_001548 | IFIT1    | 3434  | 16.9   | 16.1   | 16.7   | 16.0   | 16.4   |
| 203154_s_at | NM_005884 | PAK4     | 10298 | 369.9  | 328.9  | 320.7  | 344.2  | 265.9  |
| 203155_at   | NM_012432 | SETDB1   | 9869  | 94.1   | 99.9   | 107.2  | 107.0  | 73.7   |
| 203156_at   | NM_016248 | AKAP11   | 11215 | 83.5   | 76.6   | 68.0   | 59.7   | 57.6   |
| 203157_s_at | AB020645  | GLS      | 2744  | 14.2   | 20.3   | 24.6   | 13.5   | 14.8   |
| 203158_s_at | AF097493  | GLS      | 2744  | 21.2   | 12.3   | 13.5   | 16.8   | 13.4   |
| 203159_at   | NM_014905 | GLS      | 2744  | 47.0   | 40.9   | 42.8   | 41.6   | 36.9   |
| 203160_s_at | AK022075  | RNF8     | 9025  | 61.8   | 58.5   | 70.1   | 60.1   | 56.8   |
| 203161_s_at | NM_003958 | RNF8     | 9025  | 0.6    | 0.7    | 0.5    | 1.3    | 0.7    |
| 203162_s_at | NM_005886 | KATNB1   | 10300 | 230.3  | 216.6  | 199.1  | 215.3  | 159.1  |
| 203163_at   | NM_005886 | KATNB1   | 10300 | 44.4   | 43.5   | 55.3   | 40.9   | 46.5   |
| 203164_at   | BE464756  | SLC33A1  | 9197  | 109.3  | 121.4  | 111.9  | 125.5  | 88.8   |
| 203165_s_at | NM_004733 | SLC33A1  | 9197  | 73.9   | 64.5   | 70.4   | 67.6   | 59.5   |
| 203166_at   | NM_006324 | CFDP1    | 10428 | 137.7  | 92.3   | 111.1  | 121.0  | 95.2   |
| 203167_at   | NM_003255 | TIMP2    | 7077  | 40.7   | 44.8   | 25.8   | 37.0   | 21.6   |
| 203168_at   | NM_004381 | ATF6B    | 1388  | 14.3   | 22.1   | 12.1   | 9.0    | 11.9   |
| 203169_at   | NM_014785 | RGP1     | 9827  | 63.4   | 68.6   | 77.6   | 64.5   | 44.7   |
| 203170_at   | AB007869  | RRP8     | 23378 | 8.7    | 2.9    | 7.0    | 3.6    | 1.6    |
| 203171_s_at | NM_015324 | RRP8     | 23378 | 75.3   | 77.1   | 96.5   | 88.3   | 82.4   |
| 203172_at   | NM_004860 | FXR2     | 9513  | 59.5   | 89.3   | 85.8   | 92.5   | 67.9   |
| 203173_s_at | AW080196  | C16orf62 | 57020 | 126.7  | 132.7  | 112.7  | 129.4  | 95.2   |
| 203174_s_at | NM_003224 | ARFRP1   | 10139 | 43.6   | 49.7   | 35.0   | 39.7   | 36.4   |

|             |           |                          |       |        |       |        |       |       |
|-------------|-----------|--------------------------|-------|--------|-------|--------|-------|-------|
| 203175_at   | NM_001665 | RHOG                     | 391   | 110.8  | 100.8 | 123.7  | 112.9 | 101.6 |
| 203176_s_at | BE552470  | TFAM                     | 7019  | 150.8  | 91.6  | 154.2  | 103.0 | 136.4 |
| 203177_x_at | NM_003201 | TFAM                     | 7019  | 196.3  | 158.9 | 224.1  | 160.2 | 173.7 |
| 203178_at   | NM_001482 | GATM                     | 2628  | 4.6    | 4.8   | 3.4    | 4.8   | 3.8   |
| 203179_at   | NM_000155 | GALT                     | 2592  | 78.4   | 77.5  | 88.2   | 80.3  | 70.6  |
| 203180_at   | NM_000693 | ALDH1A3                  | 220   | 40.3   | 36.3  | 42.1   | 40.8  | 44.7  |
| 203181_x_at | AW149364  | SRPK2                    | 6733  | 89.1   | 85.1  | 76.3   | 76.1  | 78.4  |
| 203182_s_at | NM_003138 | SRPK2                    | 6733  | 158.2  | 163.8 | 185.5  | 175.0 | 132.4 |
| 203183_s_at | NM_003076 | SMARCD1                  | 6602  | 28.1   | 18.9  | 28.7   | 29.7  | 24.1  |
| 203184_at   | NM_001999 | FBN2                     | 2201  | 4.1    | 3.6   | 8.4    | 4.3   | 2.5   |
| 203185_at   | NM_014737 | RASSF2                   | 9770  | 13.0   | 9.9   | 4.8    | 6.5   | 6.4   |
| 203186_s_at | NM_002961 | S100A4                   | 6275  | 10.6   | 1.1   | 3.8    | 4.1   | 2.1   |
| 203187_at   | NM_001380 | DOCK1                    | 1793  | 30.7   | 31.6  | 24.9   | 25.1  | 28.9  |
| 203188_at   | NM_006876 | B3GNT1                   | 11041 | 108.6  | 100.5 | 133.3  | 116.1 | 88.4  |
| 203189_s_at | NM_002496 | MIR4691 /// 4728 /// 100 |       | 300.2  | 371.0 | 402.0  | 397.0 | 324.9 |
| 203190_at   | NM_002496 | MIR4691 /// 4728 /// 100 |       | 947.9  | 894.0 | 992.4  | 961.3 | 823.3 |
| 203191_at   | AF308472  | ABCB6                    | 10058 | 0.8    | 1.0   | 2.6    | 3.2   | 1.1   |
| 203192_at   | NM_005689 | ABCB6                    | 10058 | 112.4  | 113.9 | 120.1  | 118.1 | 108.1 |
| 203193_at   | NM_004451 | ESRRA                    | 2101  | 30.0   | 18.5  | 50.1   | 48.0  | 28.2  |
| 203194_s_at | AA527238  | NUP98                    | 4928  | 123.5  | 118.0 | 133.4  | 107.9 | 115.7 |
| 203195_s_at | NM_005387 | NUP98                    | 4928  | 48.1   | 35.1  | 52.4   | 52.1  | 38.8  |
| 203196_at   | AI948503  | ABCC4                    | 10257 | 119.9  | 88.4  | 170.0  | 102.1 | 154.7 |
| 203197_s_at | AW157077  | C1orf123                 | 54987 | 130.1  | 121.7 | 135.1  | 135.2 | 89.1  |
| 203198_at   | NM_001261 | CDK9                     | 1025  | 63.5   | 96.3  | 103.0  | 93.7  | 68.0  |
| 203199_s_at | N29717    | MTRR                     | 4552  | 32.3   | 30.1  | 44.0   | 32.9  | 23.6  |
| 203200_s_at | NM_024010 | MTRR                     | 4552  | 98.9   | 83.4  | 89.1   | 83.6  | 77.5  |
| 203201_at   | NM_000303 | PMM2                     | 5373  | 85.4   | 63.1  | 95.1   | 62.7  | 88.1  |
| 203202_at   | AI950314  | KRR1                     | 11103 | 85.7   | 78.5  | 88.5   | 76.2  | 63.5  |
| 203203_s_at | NM_007043 | KRR1                     | 11103 | 122.1  | 78.2  | 120.1  | 89.4  | 97.1  |
| 203204_s_at | BC002558  | KDM4A                    | 9682  | 41.1   | 38.3  | 31.8   | 43.9  | 25.2  |
| 203205_at   | NM_014663 | KDM4A                    | 9682  | 54.9   | 49.4  | 53.4   | 42.6  | 30.6  |
| 203206_at   | NM_014661 | FAM53B                   | 9679  | 56.3   | 51.3  | 51.2   | 44.5  | 29.7  |
| 203207_s_at | BF214329  | MTFR1                    | 9650  | 220.2  | 212.7 | 242.9  | 218.8 | 201.9 |
| 203208_s_at | NM_014637 | MTFR1                    | 9650  | 290.4  | 239.7 | 292.1  | 230.2 | 213.7 |
| 203209_at   | BC001866  | RFC5                     | 5985  | 221.6  | 181.5 | 269.2  | 191.0 | 230.1 |
| 203210_s_at | NM_007370 | RFC5                     | 5985  | 157.5  | 115.8 | 159.9  | 131.1 | 139.1 |
| 203211_s_at | AK027038  | MTMR2                    | 8898  | 165.4  | 153.1 | 183.1  | 163.2 | 139.8 |
| 203212_s_at | NM_016156 | MTMR2                    | 8898  | 50.0   | 45.4  | 39.8   | 40.3  | 29.4  |
| 203213_at   | AL524035  | CDK1                     | 983   | 1024.3 | 735.6 | 1184.1 | 782.7 | 899.3 |
| 203214_x_at | NM_001786 | CDK1                     | 983   | 410.2  | 301.1 | 470.3  | 283.6 | 340.2 |
| 203215_s_at | AA877789  | MYO6                     | 4646  | 619.6  | 656.2 | 655.7  | 547.8 | 578.5 |
| 203216_s_at | NM_004999 | MYO6                     | 4646  | 1055.1 | 875.3 | 1058.3 | 910.1 | 874.7 |
| 203217_s_at | NM_003896 | ST3GAL5                  | 8869  | 18.6   | 21.4  | 24.0   | 8.4   | 7.4   |
| 203218_at   | W37431    | MAPK9                    | 5601  | 142.2  | 147.6 | 170.7  | 152.7 | 125.4 |
| 203219_s_at | NM_000485 | APRT                     | 353   | 530.4  | 594.8 | 622.4  | 668.8 | 518.0 |
| 203220_s_at | AI951720  | TLE1                     | 7088  | 30.3   | 19.0  | 29.0   | 19.5  | 13.6  |
| 203221_at   | AI758763  | TLE1                     | 7088  | 47.7   | 57.7  | 46.8   | 49.8  | 19.4  |
| 203222_s_at | NM_005077 | TLE1                     | 7088  | 20.7   | 18.1  | 16.5   | 16.1  | 12.8  |
| 203223_at   | NM_004703 | RABEP1                   | 9135  | 35.5   | 18.7  | 42.3   | 26.1  | 24.9  |
| 203224_at   | BF340123  | RFK                      | 55312 | 149.5  | 138.9 | 180.2  | 125.8 | 171.7 |
| 203225_s_at | NM_018339 | RFK                      | 55312 | 107.0  | 97.7  | 145.4  | 122.8 | 119.6 |
| 203226_s_at | AL514076  | TSPAN31                  | 6302  | 77.5   | 61.8  | 54.4   | 66.6  | 34.0  |
| 203227_s_at | NM_005981 | TSPAN31                  | 6302  | 67.8   | 71.6  | 56.9   | 76.7  | 48.1  |

|             |           |                           |        |       |       |       |       |       |
|-------------|-----------|---------------------------|--------|-------|-------|-------|-------|-------|
| 203228_at   | NM_002573 | PAFAH1B3                  | 5050   | 190.2 | 243.3 | 240.2 | 234.7 | 190.3 |
| 203229_s_at | NM_003993 | CLK2                      | 1196   | 121.3 | 109.5 | 151.1 | 137.5 | 139.3 |
| 203230_at   | AF006011  | DVL1                      | 1855   | 130.1 | 94.9  | 145.4 | 87.8  | 109.5 |
| 203231_s_at | AW235612  | ATXN1                     | 6310   | 8.5   | 5.8   | 5.5   | 4.5   | 3.8   |
| 203232_s_at | NM_000332 | ATXN1                     | 6310   | 19.9  | 22.8  | 14.3  | 20.4  | 13.3  |
| 203233_at   | NM_000418 | IL4R                      | 3566   | 5.5   | 2.2   | 4.1   | 7.4   | 6.2   |
| 203234_at   | NM_003364 | UPP1                      | 7378   | 5.7   | 7.1   | 8.2   | 7.5   | 9.7   |
| 203235_at   | NM_003249 | THOP1                     | 7064   | 159.7 | 129.3 | 126.3 | 128.2 | 131.7 |
| 203236_s_at | NM_009587 | LGALS9                    | 3965   | 3.5   | 3.5   | 2.5   | 2.4   | 3.0   |
| 203237_s_at | AW139152  | NOTCH3                    | 4854   | 4.1   | 2.1   | 2.3   | 2.0   | 2.0   |
| 203238_s_at | NM_000435 | NOTCH3                    | 4854   | 33.3  | 32.7  | 25.5  | 35.0  | 22.5  |
| 203239_s_at | NM_014516 | CNOT3                     | 4849   | 115.4 | 93.1  | 112.9 | 136.1 | 97.2  |
| 203240_at   | NM_003890 | FCGBP                     | 8857   | 2.5   | 6.3   | 1.6   | 2.5   | 6.7   |
| 203241_at   | NM_003369 | UVRAG                     | 7405   | 19.1  | 21.2  | 25.9  | 17.5  | 21.0  |
| 203242_s_at | BG054550  | PDLIM5                    | 10611  | 34.7  | 38.6  | 42.9  | 31.3  | 27.6  |
| 203243_s_at | NM_006457 | PDLIM5                    | 10611  | 99.0  | 93.3  | 115.5 | 95.8  | 81.4  |
| 203244_at   | NM_000319 | PEX5                      | 5830   | 162.6 | 189.1 | 155.0 | 179.6 | 166.1 |
| 203245_s_at | BC002791  | LINC00094                 | 266655 | 107.8 | 114.3 | 105.4 | 119.5 | 77.5  |
| 203246_s_at | NM_006545 | NPRL2                     | 10641  | 362.7 | 339.0 | 439.6 | 349.6 | 334.4 |
| 203247_s_at | BC003566  | ZNF24                     | 7572   | 172.2 | 125.6 | 140.3 | 138.8 | 114.6 |
| 203248_at   | NM_006965 | ZNF24                     | 7572   | 55.7  | 51.9  | 52.2  | 49.9  | 35.3  |
| 203249_at   | AB002386  | EZH1                      | 2145   | 8.2   | 16.5  | 13.4  | 17.3  | 9.7   |
| 203250_at   | NM_014892 | SCAF8                     | 22828  | 159.6 | 147.2 | 153.2 | 143.9 | 127.1 |
| 203252_at   | NM_005851 | CDK2AP2                   | 10263  | 233.9 | 268.0 | 281.5 | 280.0 | 224.1 |
| 203253_s_at | NM_015216 | PPIP5K2                   | 23262  | 30.8  | 27.4  | 36.3  | 37.1  | 30.9  |
| 203254_s_at | NM_006289 | TLN1                      | 7094   | 31.5  | 40.6  | 33.4  | 36.2  | 19.2  |
| 203255_at   | NM_018693 | FBXO11                    | 80204  | 44.7  | 32.1  | 44.4  | 41.2  | 51.8  |
| 203256_at   | NM_001793 | CDH3                      | 1001   | 1.4   | 3.2   | 0.8   | 3.2   | 2.3   |
| 203257_s_at | NM_024113 | C11orf49                  | 79096  | 107.8 | 112.3 | 90.7  | 107.9 | 61.9  |
| 203258_at   | NM_006442 | DRAP1                     | 10589  | 176.6 | 198.7 | 212.4 | 225.0 | 196.6 |
| 203259_s_at | BC001671  | HDDC2                     | 51020  | 312.2 | 288.3 | 307.3 | 318.4 | 232.8 |
| 203260_at   | NM_016063 | HDDC2                     | 51020  | 19.3  | 20.0  | 22.8  | 22.0  | 15.2  |
| 203261_at   | NM_006571 | DCTN6                     | 10671  | 226.2 | 215.9 | 244.2 | 205.5 | 198.5 |
| 203262_s_at | NM_004699 | FAM50A                    | 9130   | 140.3 | 140.2 | 173.2 | 166.5 | 141.1 |
| 203263_s_at | AI625739  | ARHGEF9                   | 23229  | 42.6  | 34.5  | 40.2  | 33.9  | 36.4  |
| 203264_s_at | NM_015185 | ARHGEF9                   | 23229  | 49.7  | 29.4  | 29.4  | 34.8  | 29.6  |
| 203265_s_at | AA810268  | MAP2K4                    | 6416   | 72.9  | 41.8  | 56.4  | 49.0  | 49.5  |
| 203266_s_at | NM_003010 | MAP2K4                    | 6416   | 72.4  | 67.6  | 91.9  | 81.3  | 72.6  |
| 203267_s_at | BF223206  | DRG2                      | 1819   | 122.2 | 133.1 | 143.8 | 147.3 | 113.2 |
| 203268_s_at | NM_001388 | DRG2                      | 1819   | 92.4  | 63.7  | 75.7  | 81.4  | 53.3  |
| 203269_at   | NM_003580 | NSMAF                     | 8439   | 126.8 | 123.3 | 139.1 | 93.1  | 98.3  |
| 203270_at   | NM_012145 | DTYMK                     | 1841   | 109.8 | 99.9  | 132.6 | 108.9 | 117.8 |
| 203271_s_at | NM_005148 | UNC119                    | 9094   | 34.8  | 44.8  | 38.3  | 50.6  | 27.6  |
| 203272_s_at | BF308548  | TUSC2                     | 11334  | 248.3 | 180.2 | 284.1 | 215.2 | 189.1 |
| 203273_s_at | NM_007275 | TUSC2                     | 11334  | 70.4  | 48.0  | 85.6  | 68.4  | 51.8  |
| 203274_at   | NM_012151 | F8A1 /// F8A 8263 /// 474 |        | 319.2 | 357.6 | 393.1 | 345.8 | 275.5 |
| 203275_at   | NM_002199 | IRF2                      | 3660   | 31.0  | 24.4  | 19.9  | 19.9  | 23.6  |
| 203276_at   | NM_005573 | LMNB1                     | 4001   | 397.9 | 251.7 | 413.8 | 323.5 | 286.1 |
| 203277_at   | NM_004401 | DFFA                      | 1676   | 87.8  | 86.0  | 119.7 | 89.6  | 103.1 |
| 203278_s_at | NM_016621 | PHF21A                    | 51317  | 27.6  | 47.0  | 43.2  | 36.0  | 33.3  |
| 203279_at   | NM_014674 | EDEM1                     | 9695   | 65.9  | 55.2  | 52.0  | 50.0  | 43.0  |
| 203280_at   | NM_014649 | SAFB2                     | 9667   | 27.1  | 23.4  | 25.5  | 26.6  | 23.9  |
| 203281_s_at | NM_003335 | MIR5193 /// 7318 /// 100  |        | 6.2   | 8.0   | 3.7   | 3.5   | 3.4   |

|             |           |          |       |        |        |        |        |        |
|-------------|-----------|----------|-------|--------|--------|--------|--------|--------|
| 203282_at   | NM_000158 | GBE1     | 2632  | 116.7  | 124.8  | 160.6  | 123.5  | 120.1  |
| 203283_s_at | AK023260  | HS2ST1   | 9653  | 19.7   | 17.2   | 21.2   | 21.3   | 14.5   |
| 203284_s_at | AW151887  | HS2ST1   | 9653  | 49.9   | 47.5   | 51.0   | 44.9   | 38.2   |
| 203285_s_at | NM_012262 | HS2ST1   | 9653  | 8.1    | 9.6    | 8.0    | 10.8   | 9.4    |
| 203286_at   | NM_014901 | RNF44    | 22838 | 106.1  | 103.7  | 101.4  | 91.3   | 78.6   |
| 203287_at   | NM_005558 | LAD1     | 3898  | 242.1  | 194.7  | 274.7  | 203.7  | 231.3  |
| 203288_at   | NM_014686 | KIAA0355 | 9710  | 32.5   | 28.7   | 38.9   | 33.2   | 26.6   |
| 203289_s_at | BE791629  | NPRL3    | 8131  | 67.0   | 58.2   | 78.2   | 57.3   | 47.8   |
| 203290_at   | NM_002122 | HLA-DQA1 | 3117  | 0.8    | 1.9    | 1.1    | 2.7    | 2.2    |
| 203291_at   | NM_013316 | CNOT4    | 4850  | 70.9   | 54.1   | 67.9   | 53.6   | 49.2   |
| 203292_s_at | NM_021729 | VPS11    | 55823 | 56.6   | 43.7   | 47.1   | 62.4   | 36.8   |
| 203293_s_at | NM_005570 | LMAN1    | 3998  | 50.7   | 47.6   | 74.7   | 56.4   | 63.6   |
| 203294_s_at | U09716    | LMAN1    | 3998  | 35.7   | 17.1   | 41.4   | 35.9   | 27.3   |
| 203295_s_at | AW440492  | ATP1A2   | 477   | 7.6    | 9.0    | 0.6    | 1.1    | 0.2    |
| 203296_s_at | NM_000702 | ATP1A2   | 477   | 0.6    | 3.1    | 4.7    | 0.4    | 0.5    |
| 203297_s_at | BG029530  | JARID2   | 3720  | 75.1   | 80.0   | 81.2   | 84.8   | 59.0   |
| 203298_s_at | NM_004973 | JARID2   | 3720  | 34.5   | 40.6   | 31.1   | 29.5   | 21.4   |
| 203299_s_at | AF251295  | AP1S2    | 8905  | 6.8    | 0.5    | 2.1    | 2.0    | 0.5    |
| 203300_x_at | NM_003916 | AP1S2    | 8905  | 24.3   | 15.7   | 20.9   | 11.5   | 13.2   |
| 203301_s_at | NM_021145 | DMTF1    | 9988  | 58.4   | 51.9   | 54.7   | 39.3   | 39.3   |
| 203302_at   | NM_000788 | DCK      | 1633  | 146.7  | 119.6  | 148.0  | 125.0  | 139.7  |
| 203303_at   | NM_006520 | DYNLT3   | 6990  | 152.9  | 139.9  | 148.3  | 151.4  | 101.9  |
| 203304_at   | NM_012342 | BAMBI    | 25805 | 270.1  | 139.6  | 160.8  | 165.8  | 276.0  |
| 203305_at   | NM_000129 | F13A1    | 2162  | 11.7   | 1.6    | 7.7    | 1.5    | 6.9    |
| 203306_s_at | NM_006416 | SLC35A1  | 10559 | 27.1   | 28.5   | 27.2   | 16.9   | 20.9   |
| 203307_at   | NM_005275 | GNL1     | 2794  | 35.5   | 33.5   | 38.0   | 30.6   | 34.9   |
| 203308_x_at | AI185798  | HPS1     | 3257  | 27.7   | 20.6   | 32.5   | 25.5   | 19.9   |
| 203309_s_at | NM_000195 | HPS1     | 3257  | 8.2    | 19.6   | 17.9   | 11.0   | 14.8   |
| 203310_at   | NM_007269 | STXBP3   | 6814  | 135.7  | 90.5   | 128.1  | 100.7  | 86.6   |
| 203311_s_at | M57763    | ARF6     | 382   | 191.9  | 223.7  | 317.4  | 248.9  | 211.9  |
| 203312_x_at | NM_001663 | ARF6     | 382   | 465.9  | 420.5  | 548.0  | 540.9  | 419.6  |
| 203313_s_at | NM_003244 | TGIF1    | 7050  | 118.5  | 117.8  | 128.6  | 112.2  | 95.5   |
| 203314_at   | NM_012227 | GTPBP6   | 8225  | 170.1  | 162.9  | 185.2  | 202.2  | 143.8  |
| 203315_at   | BC000103  | NCK2     | 8440  | 68.9   | 61.2   | 71.6   | 65.3   | 54.0   |
| 203316_s_at | NM_003094 | SNRPE    | 6635  | 1371.7 | 1172.5 | 1443.9 | 1300.5 | 1199.3 |
| 203317_at   | NM_012455 | PSD4     | 23550 | 41.6   | 42.4   | 34.9   | 39.6   | 26.8   |
| 203318_s_at | NM_021964 | ZNF148   | 7707  | 65.7   | 54.1   | 65.9   | 44.6   | 46.6   |
| 203319_s_at | L04282    | ZNF148   | 7707  | 54.2   | 44.7   | 47.5   | 43.5   | 51.3   |
| 203320_at   | NM_005475 | SH2B3    | 10019 | 42.9   | 49.7   | 49.3   | 40.6   | 38.6   |
| 203321_s_at | AK022688  | ADNP2    | 22850 | 83.2   | 68.7   | 75.2   | 63.4   | 61.7   |
| 203322_at   | AU145934  | ADNP2    | 22850 | 95.3   | 95.7   | 104.7  | 89.9   | 86.7   |
| 203323_at   | BF197655  | CAV2     | 858   | 2.3    | 5.4    | 6.2    | 7.4    | 8.8    |
| 203324_s_at | NM_001233 | CAV2     | 858   | 1.3    | 0.2    | 0.1    | 1.2    | 0.2    |
| 203325_s_at | AI130969  | COL5A1   | 1289  | 0.5    | 1.0    | 2.7    | 3.4    | 4.6    |
| 203326_x_at | M76729    | -        | -     | 2.6    | 1.3    | 1.1    | 1.1    | 1.3    |
| 203327_at   | N22903    | IDE      | 3416  | 85.3   | 79.6   | 82.8   | 81.9   | 69.3   |
| 203328_x_at | NM_004969 | IDE      | 3416  | 94.8   | 82.9   | 92.4   | 77.5   | 70.3   |
| 203329_at   | NM_002845 | PTPRM    | 5797  | 22.6   | 31.9   | 26.6   | 27.8   | 26.1   |
| 203330_s_at | NM_003164 | STX5     | 6811  | 66.0   | 58.9   | 63.9   | 81.2   | 51.5   |
| 203331_s_at | U53470    | INPP5D   | 3635  | 1.4    | 0.6    | 0.4    | 0.5    | 0.4    |
| 203332_s_at | NM_005541 | INPP5D   | 3635  | 13.0   | 11.6   | 6.4    | 3.1    | 8.7    |
| 203333_at   | NM_014970 | KIFAP3   | 22920 | 99.0   | 60.8   | 73.5   | 70.3   | 69.3   |
| 203334_at   | NM_004941 | DHX8     | 1659  | 47.5   | 45.3   | 50.1   | 51.0   | 50.7   |

|             |           |                        |       |       |       |       |       |       |
|-------------|-----------|------------------------|-------|-------|-------|-------|-------|-------|
| 203335_at   | NM_006214 | PHYH                   | 5264  | 232.2 | 259.9 | 217.5 | 273.0 | 168.0 |
| 203336_s_at | AL548363  | ITGB1BP1               | 9270  | 85.4  | 89.5  | 89.8  | 73.5  | 80.3  |
| 203337_x_at | NM_004763 | ITGB1BP1               | 9270  | 53.1  | 67.9  | 58.5  | 51.9  | 31.1  |
| 203338_at   | NM_006246 | PPP2R5E                | 5529  | 181.1 | 152.2 | 199.6 | 184.6 | 151.0 |
| 203339_at   | AI887457  | SLC25A12               | 8604  | 18.2  | 14.4  | 19.7  | 12.5  | 13.6  |
| 203340_s_at | NM_003705 | SLC25A12               | 8604  | 49.7  | 26.8  | 54.0  | 33.6  | 29.9  |
| 203341_at   | NM_005760 | CEBPZ                  | 10153 | 59.4  | 36.2  | 82.6  | 42.2  | 61.4  |
| 203342_at   | NM_005834 | TIMM17B                | 10245 | 193.0 | 280.8 | 298.3 | 267.9 | 203.7 |
| 203343_at   | NM_003359 | UGDH                   | 7358  | 109.8 | 101.0 | 123.1 | 94.2  | 101.0 |
| 203344_s_at | NM_002894 | RBBP8                  | 5932  | 103.0 | 79.1  | 121.2 | 79.0  | 81.5  |
| 203345_s_at | AI566096  | MTF2                   | 22823 | 81.2  | 63.1  | 67.4  | 64.6  | 65.7  |
| 203346_s_at | AF072814  | MTF2                   | 22823 | 25.2  | 22.0  | 36.9  | 23.1  | 19.7  |
| 203347_s_at | NM_007358 | MTF2                   | 22823 | 32.3  | 10.9  | 26.3  | 17.8  | 14.4  |
| 203348_s_at | BF060791  | ETV5                   | 2119  | 1.4   | 5.2   | 10.0  | 10.5  | 7.7   |
| 203349_s_at | NM_004454 | ETV5                   | 2119  | 2.6   | 1.6   | 9.1   | 9.2   | 1.7   |
| 203350_at   | NM_001128 | AP1G1                  | 164   | 184.3 | 155.9 | 184.0 | 182.3 | 159.7 |
| 203351_s_at | AF047598  | ORC4                   | 5000  | 127.9 | 131.0 | 136.1 | 130.6 | 106.5 |
| 203352_at   | NM_002552 | ORC4                   | 5000  | 18.2  | 20.7  | 19.2  | 16.1  | 11.9  |
| 203353_s_at | NM_015846 | MBD1                   | 4152  | 89.9  | 90.3  | 66.4  | 79.6  | 59.6  |
| 203354_s_at | AW117368  | PSD3                   | 23362 | 8.1   | 12.9  | 3.5   | 12.2  | 13.6  |
| 203355_s_at | NM_015310 | PSD3                   | 23362 | 27.8  | 24.1  | 36.7  | 26.1  | 33.5  |
| 203356_at   | BE349584  | CAPN7                  | 23473 | 94.2  | 78.4  | 77.5  | 76.3  | 74.0  |
| 203357_s_at | NM_014296 | CAPN7                  | 23473 | 73.8  | 78.4  | 63.1  | 81.0  | 60.0  |
| 203358_s_at | NM_004456 | EZH2                   | 2146  | 137.6 | 92.5  | 173.2 | 101.0 | 105.0 |
| 203359_s_at | AL525412  | GJA9-MYCBP 26292 ///   | 10    | 184.9 | 151.9 | 220.5 | 159.8 | 150.2 |
| 203360_s_at | D50692    | GJA9 /// GJA 26292 /// | 81    | 147.6 | 114.2 | 138.1 | 116.4 | 105.1 |
| 203361_s_at | NM_012333 | GJA9-MYCBP 26292 ///   | 10    | 54.3  | 28.6  | 46.3  | 45.2  | 39.1  |
| 203362_s_at | NM_002358 | MAD2L1                 | 4085  | 604.2 | 333.6 | 679.9 | 400.0 | 478.7 |
| 203363_s_at | AU153525  | ATG13                  | 9776  | 119.8 | 118.7 | 127.6 | 137.0 | 73.5  |
| 203364_s_at | NM_014741 | ATG13                  | 9776  | 78.9  | 78.6  | 74.3  | 59.3  | 63.1  |
| 203365_s_at | NM_002428 | MMP15                  | 4324  | 25.2  | 31.4  | 29.2  | 38.9  | 26.3  |
| 203366_at   | NM_002693 | POLG                   | 5428  | 50.8  | 50.6  | 53.2  | 45.3  | 48.0  |
| 203367_at   | NM_007026 | DUSP14                 | 11072 | 151.1 | 132.5 | 168.1 | 131.3 | 132.5 |
| 203368_at   | NM_015513 | CRELD1                 | 78987 | 33.5  | 50.9  | 34.1  | 38.4  | 43.6  |
| 203369_x_at | AI825846  | PDLIM7                 | 9260  | 6.7   | 2.5   | 10.6  | 11.3  | 9.3   |
| 203370_s_at | NM_005451 | PDLIM7                 | 9260  | 47.9  | 37.4  | 28.9  | 33.9  | 23.0  |
| 203371_s_at | NM_002491 | NDUFB3                 | 4709  | 231.6 | 210.5 | 214.1 | 209.5 | 179.7 |
| 203372_s_at | AB004903  | SOCS2                  | 8835  | 7.1   | 12.6  | 14.0  | 8.2   | 5.7   |
| 203373_at   | NM_003877 | SOCS2                  | 8835  | 18.6  | 22.6  | 16.5  | 25.1  | 17.1  |
| 203374_s_at | AW612376  | TPP2                   | 7174  | 45.0  | 47.0  | 59.5  | 45.8  | 37.7  |
| 203375_s_at | NM_003291 | TPP2                   | 7174  | 45.4  | 36.4  | 47.3  | 41.8  | 38.4  |
| 203376_at   | BG528818  | CDC40                  | 51362 | 79.5  | 50.4  | 82.6  | 73.5  | 78.3  |
| 203377_s_at | NM_015891 | CDC40                  | 51362 | 31.0  | 24.3  | 28.7  | 23.1  | 26.5  |
| 203378_at   | AB020631  | PCF11                  | 51585 | 34.2  | 30.5  | 37.1  | 21.9  | 24.5  |
| 203379_at   | NM_002953 | RPS6KA1                | 6195  | 95.0  | 91.0  | 106.2 | 107.6 | 78.3  |
| 203380_x_at | NM_006925 | SRSF5                  | 6430  | 209.1 | 194.6 | 201.2 | 174.2 | 153.3 |
| 203381_s_at | N33009    | APOE                   | 348   | 4.1   | 1.1   | 7.5   | 5.9   | 2.0   |
| 203382_s_at | NM_000041 | APOE                   | 348   | 2.0   | 0.6   | 1.1   | 1.2   | 0.6   |
| 203383_s_at | BG111661  | GOLGA1                 | 2800  | 83.8  | 72.1  | 79.9  | 75.1  | 65.8  |
| 203384_s_at | NM_002077 | GOLGA1                 | 2800  | 34.1  | 33.7  | 35.8  | 38.4  | 30.8  |
| 203385_at   | NM_001345 | DGKA                   | 1606  | 34.8  | 31.4  | 37.6  | 25.5  | 25.9  |
| 203386_at   | AI650848  | TBC1D4                 | 9882  | 38.9  | 50.0  | 60.3  | 56.7  | 31.9  |
| 203387_s_at | NM_014832 | TBC1D4                 | 9882  | 45.8  | 55.4  | 41.7  | 49.8  | 35.9  |

|             |           |                           |       |       |       |       |       |       |
|-------------|-----------|---------------------------|-------|-------|-------|-------|-------|-------|
| 203388_at   | NM_004313 | ARRB2                     | 409   | 81.2  | 108.0 | 106.8 | 115.3 | 71.5  |
| 203389_at   | AF035621  | KIF3C                     | 3797  | 26.8  | 11.8  | 14.4  | 14.3  | 11.4  |
| 203390_s_at | NM_002254 | KIF3C                     | 3797  | 42.9  | 37.5  | 32.0  | 42.1  | 19.6  |
| 203391_at   | NM_004470 | FKBP2                     | 2286  | 88.2  | 158.8 | 123.6 | 121.9 | 110.2 |
| 203392_s_at | NM_001328 | CTBP1                     | 1487  | 520.9 | 505.4 | 604.8 | 523.0 | 428.0 |
| 203393_at   | BE973687  | HES1                      | 3280  | 1.8   | 1.5   | 0.6   | 1.4   | 0.3   |
| 203394_s_at | BE973687  | HES1                      | 3280  | 16.3  | 12.3  | 14.9  | 15.0  | 14.7  |
| 203395_s_at | NM_005524 | HES1                      | 3280  | 17.6  | 11.9  | 16.6  | 13.1  | 14.9  |
| 203396_at   | NM_002789 | PSMA4                     | 5685  | 744.0 | 604.8 | 826.3 | 691.3 | 623.5 |
| 203397_s_at | BF063271  | GALNT3                    | 2591  | 129.4 | 141.4 | 211.2 | 149.9 | 117.6 |
| 203398_s_at | NM_004482 | GALNT3                    | 2591  | 6.3   | 8.2   | 4.2   | 8.1   | 1.1   |
| 203399_x_at | NM_021016 | PSG11 /// PS 5671 /// 568 |       | 1.5   | 5.8   | 0.6   | 1.1   | 5.4   |
| 203400_s_at | NM_001063 | TF                        | 7018  | 0.4   | 0.7   | 0.9   | 0.6   | 1.7   |
| 203401_at   | NM_002765 | PRPS2                     | 5634  | 94.4  | 78.1  | 105.3 | 71.7  | 90.7  |
| 203402_at   | AL520102  | KCNAB2                    | 8514  | 31.2  | 35.5  | 33.4  | 37.9  | 33.8  |
| 203403_s_at | NM_005977 | RNF6                      | 6049  | 234.2 | 217.0 | 256.0 | 217.7 | 172.4 |
| 203404_at   | NM_014782 | ARMCX2                    | 9823  | 8.0   | 0.6   | 0.8   | 4.9   | 0.6   |
| 203405_at   | NM_003720 | PSMG1                     | 8624  | 394.5 | 273.3 | 434.3 | 291.8 | 318.9 |
| 203406_at   | NM_005926 | MFAP1                     | 4236  | 256.0 | 228.2 | 297.6 | 231.0 | 241.6 |
| 203407_at   | NM_002705 | PPL                       | 5493  | 11.6  | 8.9   | 13.6  | 8.6   | 13.4  |
| 203408_s_at | NM_002971 | SATB1                     | 6304  | 1.6   | 1.1   | 1.4   | 0.6   | 0.5   |
| 203409_at   | NM_000107 | DDB2                      | 1643  | 151.5 | 137.0 | 181.3 | 155.8 | 154.0 |
| 203410_at   | NM_006803 | AP3M2                     | 10947 | 59.4  | 57.0  | 65.5  | 59.5  | 48.5  |
| 203411_s_at | NM_005572 | LMNA                      | 4000  | 124.9 | 140.2 | 142.3 | 145.5 | 111.2 |
| 203412_at   | NM_006767 | LZTR1                     | 8216  | 47.9  | 35.5  | 43.9  | 49.0  | 43.5  |
| 203413_at   | NM_006159 | NELL2                     | 4753  | 13.1  | 7.6   | 5.9   | 12.8  | 4.8   |
| 203414_at   | NM_012329 | MMD                       | 23531 | 97.6  | 80.6  | 91.8  | 83.8  | 83.4  |
| 203415_at   | NM_013232 | PDCD6                     | 10016 | 289.5 | 225.4 | 337.4 | 255.0 | 246.2 |
| 203416_at   | NM_000560 | CD53                      | 963   | 18.9  | 18.4  | 19.0  | 24.0  | 20.7  |
| 203417_at   | NM_017459 | MFAP2                     | 4237  | 2.3   | 2.3   | 1.9   | 1.4   | 3.3   |
| 203418_at   | NM_001237 | CCNA2                     | 890   | 173.6 | 148.9 | 217.1 | 149.4 | 207.8 |
| 203419_at   | NM_014727 | KMT2B                     | 9757  | 25.9  | 27.9  | 29.9  | 36.5  | 23.4  |
| 203420_at   | NM_016255 | FAM8A1                    | 51439 | 139.4 | 128.7 | 135.2 | 123.0 | 96.4  |
| 203421_at   | NM_006034 | TP53I11                   | 9537  | 10.7  | 18.9  | 13.8  | 16.2  | 16.5  |
| 203422_at   | NM_002691 | POLD1                     | 5424  | 109.5 | 75.0  | 152.5 | 87.5  | 108.7 |
| 203423_at   | NM_002899 | RBP1                      | 5947  | 4.7   | 6.5   | 2.2   | 1.5   | 7.1   |
| 203424_s_at | AW157548  | IGFBP5                    | 3488  | 0.8   | 0.5   | 1.4   | 1.1   | 2.2   |
| 203425_s_at | NM_000599 | IGFBP5                    | 3488  | 2.1   | 1.2   | 8.1   | 5.7   | 6.3   |
| 203426_s_at | M65062    | IGFBP5                    | 3488  | 5.7   | 4.2   | 6.5   | 3.1   | 3.4   |
| 203427_at   | NM_014034 | ASF1A                     | 25842 | 132.6 | 94.6  | 135.7 | 104.5 | 92.7  |
| 203428_s_at | AB028628  | ASF1A                     | 25842 | 162.0 | 126.8 | 177.9 | 133.8 | 136.9 |
| 203429_s_at | NM_016227 | SUCO                      | 51430 | 120.8 | 88.8  | 120.8 | 95.2  | 80.4  |
| 203430_at   | NM_014320 | HEBP2                     | 23593 | 601.1 | 597.3 | 856.2 | 601.5 | 656.4 |
| 203431_s_at | NM_014715 | ARHGAP32                  | 9743  | 27.4  | 36.3  | 32.3  | 26.0  | 20.0  |
| 203432_at   | AW272611  | TMPO                      | 7112  | 292.1 | 249.5 | 338.2 | 243.7 | 256.2 |
| 203433_at   | NM_006441 | MTHFS /// S110588 /// 10  |       | 102.8 | 176.1 | 196.1 | 111.9 | 126.1 |
| 203434_s_at | AI433463  | MME                       | 4311  | 458.7 | 454.2 | 399.1 | 400.5 | 300.1 |
| 203435_s_at | NM_007287 | MME                       | 4311  | 110.1 | 78.7  | 101.0 | 87.7  | 75.2  |
| 203436_at   | NM_006413 | RPP30                     | 10556 | 160.4 | 139.3 | 173.7 | 149.6 | 155.6 |
| 203437_at   | NM_003876 | TMEM11                    | 8834  | 117.1 | 102.1 | 126.4 | 101.3 | 118.5 |
| 203438_at   | AI435828  | STC2                      | 8614  | 17.7  | 21.9  | 25.8  | 24.1  | 12.6  |
| 203439_s_at | BC000658  | STC2                      | 8614  | 44.8  | 48.2  | 50.3  | 40.1  | 34.0  |
| 203440_at   | M34064    | CDH2                      | 1000  | 1.2   | 3.2   | 3.5   | 0.2   | 3.5   |



|             |           |                          |        |        |        |        |        |       |
|-------------|-----------|--------------------------|--------|--------|--------|--------|--------|-------|
| 203441_s_at | NM_001792 | CDH2                     | 1000   | 11.4   | 10.9   | 14.9   | 10.9   | 9.4   |
| 203442_x_at | AA478965  | EML3                     | 256364 | 54.8   | 48.2   | 50.7   | 56.0   | 52.3  |
| 203443_at   | AB012922  | EML3                     | 256364 | 2.9    | 2.7    | 4.9    | 1.3    | 1.6   |
| 203444_s_at | NM_004739 | MTA2                     | 9219   | 34.9   | 42.7   | 49.3   | 46.4   | 36.5  |
| 203445_s_at | NM_005730 | CTDSP2                   | 10106  | 174.5  | 161.8  | 158.6  | 155.4  | 121.2 |
| 203446_s_at | NM_000276 | OCRL                     | 4952   | 89.6   | 80.7   | 89.4   | 76.1   | 68.9  |
| 203447_at   | AU157008  | PSMD5                    | 5711   | 68.3   | 60.4   | 73.7   | 60.9   | 60.3  |
| 203448_s_at | AI347136  | TERF1                    | 7013   | 70.8   | 63.1   | 78.3   | 64.3   | 56.9  |
| 203449_s_at | NM_017489 | TERF1                    | 7013   | 65.9   | 60.0   | 70.3   | 68.5   | 47.0  |
| 203450_at   | NM_015373 | CBY1                     | 25776  | 201.5  | 202.5  | 251.0  | 206.0  | 207.4 |
| 203451_at   | NM_003893 | LDB1                     | 8861   | 53.0   | 41.8   | 49.3   | 37.7   | 42.9  |
| 203452_at   | NM_012200 | B3GAT3                   | 26229  | 48.6   | 68.9   | 54.0   | 56.5   | 39.6  |
| 203453_at   | NM_001038 | SCNN1A                   | 6337   | 241.7  | 247.7  | 253.5  | 271.3  | 197.0 |
| 203454_s_at | NM_004045 | ATOX1                    | 475    | 508.3  | 455.4  | 547.6  | 567.0  | 478.9 |
| 203455_s_at | NM_002970 | SAT1                     | 6303   | 308.6  | 301.4  | 376.9  | 299.2  | 294.8 |
| 203456_at   | NM_007213 | PRAF2                    | 11230  | 103.4  | 124.7  | 99.1   | 101.5  | 61.0  |
| 203457_at   | NM_003569 | STX7                     | 8417   | 17.5   | 6.8    | 10.5   | 14.5   | 9.0   |
| 203458_at   | AI951454  | SPR                      | 6697   | 144.3  | 131.1  | 142.6  | 118.3  | 100.8 |
| 203459_s_at | NM_022575 | VPS16                    | 64601  | 78.2   | 82.3   | 81.0   | 88.0   | 67.0  |
| 203460_s_at | NM_007318 | PSEN1                    | 5663   | 121.7  | 121.6  | 134.4  | 122.5  | 91.2  |
| 203461_at   | NM_001271 | CHD2                     | 1106   | 9.6    | 3.1    | 7.3    | 8.5    | 6.0   |
| 203462_x_at | NM_003751 | EIF3B                    | 8662   | 698.9  | 609.9  | 778.0  | 628.8  | 658.6 |
| 203463_s_at | H05668    | EPN2 /// EPN22905 /// 10 |        | 14.0   | 8.7    | 7.2    | 14.5   | 6.3   |
| 203464_s_at | NM_014964 | EPN2 /// EPN22905 /// 10 |        | 44.5   | 37.9   | 42.8   | 42.2   | 34.6  |
| 203465_at   | NM_014763 | MRPL19                   | 9801   | 228.9  | 167.0  | 270.7  | 202.4  | 200.4 |
| 203466_at   | NM_002437 | MPV17                    | 4358   | 153.3  | 140.8  | 181.8  | 157.9  | 137.9 |
| 203467_at   | NM_002676 | PMM1                     | 5372   | 65.7   | 76.0   | 76.4   | 82.8   | 69.9  |
| 203468_at   | NM_003674 | CDK10                    | 8558   | 36.6   | 36.2   | 39.1   | 41.0   | 38.0  |
| 203469_s_at | NM_003674 | CDK10                    | 8558   | 25.1   | 33.4   | 55.7   | 45.6   | 49.3  |
| 203470_s_at | AI433595  | PLEK                     | 5341   | 3.6    | 2.6    | 3.0    | 3.0    | 1.9   |
| 203471_s_at | NM_002664 | PLEK                     | 5341   | 11.2   | 6.7    | 10.6   | 9.9    | 8.4   |
| 203472_s_at | AB026256  | SLCO2B1                  | 11309  | 5.6    | 0.9    | 3.2    | 1.3    | 0.4   |
| 203473_at   | NM_007256 | SLCO2B1                  | 11309  | 11.2   | 3.5    | 6.3    | 7.6    | 5.9   |
| 203474_at   | NM_006633 | IQGAP2                   | 10788  | 31.6   | 25.5   | 39.7   | 19.6   | 32.8  |
| 203475_at   | NM_000103 | CYP19A1                  | 1588   | 6.5    | 1.2    | 5.4    | 1.2    | 1.0   |
| 203476_at   | NM_006670 | TPBG                     | 7162   | 7.5    | 3.3    | 5.5    | 5.1    | 2.5   |
| 203477_at   | NM_001855 | COL15A1                  | 1306   | 4.6    | 1.0    | 1.7    | 2.9    | 2.2   |
| 203478_at   | NM_002494 | NDUFC1                   | 4717   | 1077.2 | 1001.9 | 1156.7 | 1070.5 | 903.7 |
| 203479_s_at | T79216    | OTUD4                    | 54726  | 9.3    | 4.1    | 4.1    | 4.8    | 4.3   |
| 203480_s_at | NM_014928 | OTUD4                    | 54726  | 90.6   | 50.3   | 64.8   | 53.7   | 66.5  |
| 203481_at   | AI655902  | FAM178A                  | 55719  | 27.2   | 15.3   | 24.8   | 15.3   | 10.4  |
| 203482_at   | AL133215  | FAM178A                  | 55719  | 5.4    | 4.2    | 7.5    | 5.1    | 11.8  |
| 203483_at   | NM_018121 | SEMA4G                   | 57715  | 2.0    | 1.7    | 1.4    | 1.4    | 5.4   |
| 203484_at   | NM_014302 | SEC61G                   | 23480  | 919.4  | 806.2  | 1032.8 | 952.1  | 764.9 |
| 203485_at   | NM_021136 | RTN1                     | 6252   | 32.7   | 24.6   | 33.5   | 30.0   | 22.3  |
| 203486_s_at | BF195973  | ARMC8                    | 25852  | 51.2   | 46.2   | 41.8   | 37.5   | 43.7  |
| 203487_s_at | NM_015396 | ARMC8                    | 25852  | 15.5   | 12.2   | 19.4   | 9.9    | 8.7   |
| 203488_at   | NM_014921 | LPHN1                    | 22859  | 57.0   | 61.8   | 59.5   | 71.9   | 51.5  |
| 203489_at   | NM_006427 | SIVA1                    | 10572  | 200.0  | 201.0  | 295.2  | 225.1  | 232.9 |
| 203490_at   | NM_001421 | ELF4                     | 2000   | 2.7    | 1.6    | 2.5    | 2.3    | 1.4   |
| 203491_s_at | AI123527  | CEP57                    | 9702   | 35.0   | 30.2   | 30.0   | 28.3   | 26.2  |
| 203492_x_at | AA918224  | CEP57                    | 9702   | 50.3   | 55.7   | 65.8   | 49.3   | 41.1  |
| 203493_s_at | AL525206  | CEP57                    | 9702   | 62.1   | 42.3   | 60.7   | 47.1   | 40.9  |

|             |           |                          |       |       |       |       |       |       |
|-------------|-----------|--------------------------|-------|-------|-------|-------|-------|-------|
| 203494_s_at | NM_014679 | CEP57                    | 9702  | 65.8  | 51.8  | 63.7  | 55.8  | 53.9  |
| 203495_at   | NM_014665 | LRRC14                   | 9684  | 12.9  | 13.3  | 24.2  | 28.4  | 19.4  |
| 203496_s_at | AF055994  | MED1                     | 5469  | 23.3  | 14.0  | 24.0  | 16.3  | 21.2  |
| 203497_at   | NM_004774 | MED1                     | 5469  | 99.6  | 76.8  | 104.3 | 93.8  | 83.0  |
| 203498_at   | NM_005822 | RCAN2                    | 10231 | 6.5   | 4.2   | 8.9   | 8.5   | 7.0   |
| 203499_at   | NM_004431 | EPHA2                    | 1969  | 20.7  | 15.8  | 12.3  | 13.8  | 10.3  |
| 203500_at   | NM_000159 | GCDH                     | 2639  | 82.0  | 81.7  | 86.0  | 86.9  | 65.9  |
| 203501_at   | NM_006102 | CPQ                      | 10404 | 34.9  | 20.7  | 27.3  | 30.9  | 23.7  |
| 203502_at   | NM_001724 | BPGM                     | 669   | 46.6  | 33.9  | 47.6  | 45.1  | 40.5  |
| 203503_s_at | NM_004565 | PEX14                    | 5195  | 39.8  | 40.7  | 49.7  | 51.0  | 52.0  |
| 203504_s_at | NM_005502 | ABCA1                    | 19    | 18.9  | 12.2  | 17.9  | 9.2   | 7.7   |
| 203505_at   | AF285167  | ABCA1                    | 19    | 2.6   | 4.1   | 8.1   | 7.0   | 3.8   |
| 203506_s_at | NM_005120 | MED12                    | 9968  | 33.3  | 39.0  | 40.8  | 41.1  | 32.3  |
| 203507_at   | NM_001251 | CD68 /// LOC968 /// 2678 |       | 2.2   | 5.2   | 7.8   | 1.8   | 1.1   |
| 203508_at   | NM_001066 | TNFRSF1B                 | 7133  | 1.1   | 1.0   | 4.9   | 0.3   | 1.5   |
| 203509_at   | NM_003105 | SORL1                    | 6653  | 66.1  | 53.0  | 57.4  | 51.1  | 41.7  |
| 203510_at   | BG170541  | MET                      | 4233  | 3.3   | 0.7   | 0.4   | 6.0   | 0.9   |
| 203511_s_at | AF041432  | TRAPPC3                  | 27095 | 332.1 | 319.9 | 339.9 | 317.5 | 320.6 |
| 203512_at   | NM_014408 | TRAPPC3                  | 27095 | 155.5 | 121.0 | 136.4 | 107.8 | 94.9  |
| 203513_at   | NM_025137 | SPG11                    | 80208 | 189.8 | 166.6 | 172.7 | 169.9 | 132.8 |
| 203514_at   | BF971923  | MAP3K3                   | 4215  | 36.3  | 30.0  | 31.6  | 35.0  | 28.9  |
| 203515_s_at | NM_006556 | PMVK                     | 10654 | 237.0 | 235.8 | 267.6 | 242.0 | 237.9 |
| 203516_at   | NM_003098 | SNTA1                    | 6640  | 92.0  | 103.2 | 112.8 | 120.8 | 86.8  |
| 203517_at   | NM_006554 | MTX2                     | 10651 | 116.9 | 86.3  | 150.4 | 103.6 | 99.8  |
| 203518_at   | NM_000081 | LYST                     | 1130  | 8.2   | 9.7   | 7.4   | 9.7   | 6.4   |
| 203519_s_at | NM_015542 | UPF2                     | 26019 | 45.7  | 41.0  | 56.7  | 45.1  | 38.9  |
| 203520_s_at | AW613549  | ZNF318                   | 24149 | 20.8  | 14.5  | 20.7  | 19.0  | 11.5  |
| 203521_s_at | NM_014345 | ZNF318                   | 24149 | 26.2  | 25.8  | 25.4  | 27.7  | 19.1  |
| 203522_at   | NM_005125 | CCS                      | 9973  | 78.8  | 85.0  | 96.3  | 74.5  | 59.1  |
| 203523_at   | NM_002339 | LSP1                     | 4046  | 1.6   | 1.8   | 1.2   | 0.8   | 1.7   |
| 203524_s_at | NM_021126 | MPST                     | 4357  | 141.9 | 142.1 | 185.4 | 159.3 | 148.3 |
| 203525_s_at | AI375486  | APC                      | 324   | 39.8  | 24.0  | 28.0  | 29.6  | 21.6  |
| 203526_s_at | M74088    | APC                      | 324   | 18.6  | 16.8  | 12.1  | 10.6  | 9.8   |
| 203527_s_at | NM_000038 | APC                      | 324   | 3.3   | 1.9   | 8.8   | 11.6  | 4.3   |
| 203528_at   | NM_006378 | SEMA4D                   | 10507 | 34.9  | 23.6  | 30.2  | 33.7  | 25.3  |
| 203529_at   | NM_016294 | PPP6C                    | 5537  | 458.2 | 435.5 | 468.5 | 459.0 | 346.1 |
| 203530_s_at | NM_004604 | STX4                     | 6810  | 61.3  | 48.8  | 42.5  | 52.3  | 33.2  |
| 203531_at   | BF435809  | CUL5                     | 8065  | 137.5 | 132.2 | 165.4 | 136.9 | 120.4 |
| 203532_x_at | AF017061  | CUL5                     | 8065  | 27.7  | 16.2  | 18.4  | 16.3  | 16.1  |
| 203533_s_at | NM_003478 | CUL5                     | 8065  | 44.5  | 21.2  | 28.7  | 22.9  | 24.6  |
| 203534_at   | NM_014462 | LSM1                     | 27257 | 229.8 | 220.9 | 211.8 | 235.9 | 163.0 |
| 203535_at   | NM_002965 | S100A9                   | 6280  | 1.1   | 1.1   | 2.1   | 1.6   | 1.0   |
| 203536_s_at | NM_004804 | CIAO1                    | 9391  | 93.5  | 78.5  | 102.0 | 94.4  | 79.0  |
| 203537_at   | NM_002767 | PRPSAP2                  | 5636  | 167.9 | 148.1 | 217.8 | 159.8 | 133.2 |
| 203538_at   | NM_001745 | CAMLG                    | 819   | 83.7  | 88.1  | 108.0 | 93.0  | 69.6  |
| 203539_s_at | J04569    | -                        | -     | 1.4   | 0.4   | 1.0   | 0.7   | 0.8   |
| 203540_at   | NM_002055 | GFAP                     | 2670  | 0.9   | 0.9   | 1.6   | 0.7   | 0.7   |
| 203541_s_at | BF438302  | KLF9                     | 687   | 8.1   | 9.4   | 6.4   | 9.2   | 5.9   |
| 203542_s_at | AI690205  | KLF9                     | 687   | 55.3  | 41.5  | 52.9  | 46.6  | 38.6  |
| 203543_s_at | NM_001206 | KLF9                     | 687   | 58.4  | 34.4  | 63.1  | 48.8  | 39.0  |
| 203544_s_at | NM_003473 | STAM                     | 8027  | 172.8 | 145.6 | 159.0 | 118.9 | 113.4 |
| 203545_at   | NM_024079 | ALG8                     | 79053 | 295.4 | 254.1 | 344.2 | 268.8 | 275.7 |
| 203546_at   | NM_014652 | IPO13                    | 9670  | 94.3  | 76.0  | 86.7  | 77.3  | 59.6  |

|             |           |                      |       |        |        |        |        |       |
|-------------|-----------|----------------------|-------|--------|--------|--------|--------|-------|
| 203547_at   | U47924    | CD4                  | 920   | 9.9    | 17.0   | 7.4    | 3.8    | 11.6  |
| 203548_s_at | BF672975  | LPL                  | 4023  | 1.2    | 1.0    | 0.9    | 0.7    | 0.6   |
| 203549_s_at | NM_000237 | LPL                  | 4023  | 7.9    | 7.9    | 7.3    | 5.2    | 0.6   |
| 203550_s_at | NM_006589 | FAM189B              | 10712 | 205.7  | 168.7  | 211.1  | 182.4  | 137.5 |
| 203551_s_at | NM_004375 | COX11                | 1353  | 24.7   | 23.6   | 29.4   | 22.8   | 30.8  |
| 203552_at   | AW298170  | MAP4K5               | 11183 | 24.9   | 22.9   | 29.4   | 22.1   | 22.2  |
| 203553_s_at | NM_006575 | MAP4K5               | 11183 | 33.7   | 22.5   | 31.1   | 28.2   | 19.1  |
| 203554_x_at | NM_004219 | PTTG1                | 9232  | 1076.2 | 1030.0 | 1094.0 | 1042.8 | 913.0 |
| 203555_at   | NM_014369 | PTPN18               | 26469 | 95.3   | 57.1   | 77.4   | 75.5   | 63.3  |
| 203556_at   | NM_014943 | ZHX2                 | 22882 | 62.0   | 62.4   | 57.1   | 55.9   | 65.9  |
| 203557_s_at | NM_000281 | PCBD1                | 5092  | 364.5  | 388.2  | 385.5  | 423.6  | 316.0 |
| 203558_at   | NM_014780 | CUL7                 | 9820  | 9.1    | 19.2   | 10.9   | 24.0   | 4.7   |
| 203559_s_at | NM_001091 | AOC1                 | 26    | 6.2    | 3.3    | 5.5    | 4.4    | 1.8   |
| 203560_at   | NM_003878 | GGH                  | 8836  | 135.3  | 100.1  | 153.1  | 127.5  | 97.7  |
| 203561_at   | NM_021642 | FCGR2A               | 2212  | 0.8    | 4.7    | 6.1    | 4.7    | 4.4   |
| 203562_at   | NM_005103 | FEZ1                 | 9638  | 7.3    | 4.2    | 6.1    | 2.1    | 3.0   |
| 203563_at   | NM_021638 | AFAP1                | 60312 | 7.6    | 3.7    | 6.6    | 5.8    | 5.6   |
| 203564_at   | NM_004629 | FANCG                | 2189  | 282.1  | 187.9  | 274.1  | 213.0  | 202.9 |
| 203565_s_at | NM_002431 | MNAT1                | 4331  | 29.7   | 27.0   | 32.0   | 36.4   | 27.1  |
| 203566_s_at | NM_000645 | AGL                  | 178   | 76.2   | 59.7   | 63.3   | 60.7   | 54.5  |
| 203567_s_at | AU157590  | TRIM38               | 10475 | 47.8   | 51.0   | 48.6   | 48.3   | 38.4  |
| 203568_s_at | NM_006355 | TRIM38               | 10475 | 21.7   | 15.2   | 22.9   | 18.4   | 18.1  |
| 203569_s_at | NM_003611 | OFD1                 | 8481  | 18.4   | 15.4   | 13.6   | 16.4   | 11.4  |
| 203570_at   | NM_005576 | LOXL1                | 4016  | 38.3   | 39.6   | 38.8   | 41.7   | 43.5  |
| 203571_s_at | NM_006829 | ADIRF                | 10974 | 0.7    | 0.7    | 0.5    | 0.5    | 0.4   |
| 203572_s_at | NM_005641 | TAF6                 | 6878  | 168.6  | 185.6  | 166.4  | 194.7  | 122.3 |
| 203573_s_at | NM_004581 | RABGGTA              | 5875  | 86.0   | 111.7  | 122.6  | 113.9  | 97.3  |
| 203574_at   | NM_005384 | NFIL3                | 4783  | 72.5   | 76.8   | 77.2   | 77.2   | 56.5  |
| 203575_at   | NM_001896 | CSNK2A2              | 1459  | 71.4   | 71.4   | 79.1   | 73.8   | 56.7  |
| 203576_at   | NM_001190 | BCAT2                | 587   | 209.9  | 212.5  | 249.9  | 183.1  | 195.0 |
| 203577_at   | NM_001517 | GTF2H4               | 2968  | 47.5   | 36.6   | 45.1   | 34.0   | 34.8  |
| 203578_s_at | BG230586  | SLC7A6               | 9057  | 15.3   | 15.9   | 20.7   | 13.9   | 15.1  |
| 203579_s_at | AI660619  | SLC7A6               | 9057  | 32.2   | 27.3   | 33.1   | 21.4   | 28.2  |
| 203580_s_at | NM_003983 | SLC7A6               | 9057  | 73.2   | 54.0   | 53.5   | 47.6   | 28.3  |
| 203581_at   | BC002438  | RAB4A /// SF5867 /// | 106   | 221.5  | 185.3  | 248.0  | 229.1  | 209.2 |
| 203582_s_at | NM_004578 | RAB4A /// SF5867 /// | 106   | 194.3  | 183.1  | 203.0  | 208.0  | 187.7 |
| 203583_at   | NM_014044 | UNC50                | 25972 | 118.8  | 114.4  | 135.0  | 119.3  | 101.2 |
| 203584_at   | NM_014673 | EMC2                 | 9694  | 116.3  | 92.4   | 129.6  | 97.3   | 85.0  |
| 203585_at   | NM_007150 | ZNF185               | 7739  | 20.4   | 24.4   | 19.6   | 13.0   | 16.0  |
| 203586_s_at | NM_001661 | ARL4D                | 379   | 27.9   | 21.4   | 22.7   | 19.2   | 20.1  |
| 203587_at   | U25771    | ARL4D                | 379   | 2.8    | 0.5    | 4.4    | 1.4    | 0.7   |
| 203588_s_at | BG034328  | TFDP2                | 7029  | 87.4   | 120.1  | 137.0  | 102.7  | 92.8  |
| 203589_s_at | NM_006286 | TFDP2                | 7029  | 18.0   | 23.0   | 25.8   | 24.2   | 17.2  |
| 203590_at   | NM_006141 | DYNC1LI2             | 1783  | 58.1   | 36.0   | 72.4   | 61.3   | 34.8  |
| 203591_s_at | NM_000760 | CSF3R                | 1441  | 4.1    | 1.3    | 4.9    | 7.5    | 2.4   |
| 203592_s_at | NM_005860 | FSTL3                | 10272 | 21.9   | 26.6   | 21.2   | 13.8   | 13.6  |
| 203593_at   | NM_012120 | CD2AP                | 23607 | 61.2   | 46.3   | 76.6   | 57.1   | 58.3  |
| 203594_at   | NM_003729 | RTCA                 | 8634  | 300.9  | 292.7  | 332.9  | 290.8  | 262.5 |
| 203595_s_at | N47725    | IFIT5                | 24138 | 20.7   | 9.8    | 21.0   | 22.3   | 20.0  |
| 203596_s_at | NM_012420 | IFIT5                | 24138 | 12.9   | 13.1   | 11.0   | 11.8   | 10.1  |
| 203597_s_at | AI734228  | WBP4                 | 11193 | 18.6   | 16.3   | 22.8   | 14.3   | 23.2  |
| 203598_s_at | AK000979  | WBP4                 | 11193 | 35.3   | 23.4   | 30.7   | 26.0   | 23.4  |
| 203599_s_at | NM_007187 | WBP4                 | 11193 | 38.5   | 23.6   | 36.3   | 28.9   | 22.5  |

|             |           |                          |       |       |       |       |       |       |
|-------------|-----------|--------------------------|-------|-------|-------|-------|-------|-------|
| 203600_s_at | NM_003704 | FAM193A                  | 8603  | 107.1 | 119.9 | 120.6 | 118.1 | 79.4  |
| 203601_s_at | AW574837  | ZBTB17                   | 7709  | 24.7  | 4.6   | 6.7   | 7.7   | 3.8   |
| 203602_s_at | NM_003443 | ZBTB17                   | 7709  | 39.4  | 42.4  | 29.3  | 26.1  | 25.7  |
| 203603_s_at | NM_014795 | ZEB2                     | 9839  | 0.4   | 1.5   | 0.1   | 0.1   | 0.1   |
| 203604_at   | N38750    | ZNF516                   | 9658  | 6.2   | 5.7   | 5.0   | 9.5   | 6.0   |
| 203605_at   | NM_003136 | SRP54                    | 6729  | 189.1 | 184.6 | 211.1 | 195.5 | 164.0 |
| 203606_at   | NM_004553 | NDUFS6                   | 4726  | 739.1 | 723.2 | 876.4 | 818.7 | 736.4 |
| 203607_at   | NM_014937 | INPP5F                   | 22876 | 24.9  | 17.4  | 24.1  | 20.1  | 18.7  |
| 203608_at   | AL031230  | ALDH5A1                  | 7915  | 19.5  | 15.4  | 17.5  | 22.2  | 16.6  |
| 203609_s_at | NM_001080 | ALDH5A1                  | 7915  | 0.9   | 1.2   | 1.3   | 1.3   | 3.4   |
| 203610_s_at | AI363270  | TRIM38                   | 10475 | 39.5  | 31.0  | 36.6  | 38.1  | 32.5  |
| 203611_at   | NM_005652 | TERF2                    | 7014  | 128.4 | 132.9 | 122.8 | 124.2 | 105.0 |
| 203612_at   | NM_004053 | BYSL                     | 705   | 130.0 | 94.5  | 159.2 | 138.5 | 119.7 |
| 203613_s_at | NM_002493 | NDUFB6                   | 4712  | 590.7 | 488.7 | 542.7 | 455.0 | 467.6 |
| 203614_at   | NM_021645 | ALG11 /// U19724 /// 440 | 6817  | 63.1  | 59.2  | 70.6  | 71.2  | 45.6  |
| 203615_x_at | NM_001055 | SULT1A1                  | 6817  | 180.9 | 197.2 | 178.6 | 210.4 | 138.8 |
| 203616_at   | NM_002690 | POLB                     | 5423  | 199.3 | 170.4 | 209.3 | 147.4 | 145.9 |
| 203617_x_at | NM_005229 | ELK1                     | 2002  | 148.3 | 99.0  | 121.0 | 88.8  | 92.6  |
| 203618_at   | AB023167  | FAIM2                    | 23017 | 8.6   | 12.1  | 11.1  | 13.1  | 9.4   |
| 203619_s_at | NM_012306 | FAIM2                    | 23017 | 0.9   | 1.1   | 0.6   | 1.3   | 1.1   |
| 203620_s_at | NM_014824 | FCHSD2                   | 9873  | 11.5  | 6.3   | 8.2   | 9.8   | 1.3   |
| 203621_at   | NM_002492 | NDUFB5                   | 4711  | 547.0 | 463.1 | 573.7 | 502.9 | 434.2 |
| 203622_s_at | NM_020143 | PNO1                     | 56902 | 195.2 | 132.1 | 214.2 | 127.1 | 160.3 |
| 203623_at   | AI675453  | PLXNA3                   | 55558 | 17.1  | 7.8   | 16.3  | 14.0  | 9.5   |
| 203624_at   | NM_005088 | AKAP17A                  | 8227  | 60.5  | 59.0  | 68.7  | 59.7  | 49.2  |
| 203625_x_at | BG105365  | SKP2                     | 6502  | 172.8 | 113.4 | 206.9 | 129.2 | 151.1 |
| 203626_s_at | NM_005983 | SKP2                     | 6502  | 46.5  | 52.3  | 56.7  | 42.0  | 51.7  |
| 203627_at   | AI830698  | IGF1R                    | 3480  | 14.7  | 16.8  | 17.8  | 10.2  | 9.5   |
| 203628_at   | H05812    | IGF1R                    | 3480  | 9.6   | 3.2   | 12.8  | 1.0   | 4.7   |
| 203629_s_at | AU152134  | COG5                     | 10466 | 49.8  | 43.4  | 55.8  | 45.1  | 39.4  |
| 203630_s_at | NM_006348 | COG5                     | 10466 | 86.7  | 76.8  | 83.3  | 82.6  | 70.0  |
| 203631_s_at | AF202640  | GPRC5B                   | 51704 | 13.7  | 5.2   | 5.2   | 11.3  | 5.3   |
| 203632_s_at | NM_016235 | GPRC5B                   | 51704 | 16.1  | 13.8  | 13.7  | 6.2   | 7.5   |
| 203633_at   | BF001714  | CPT1A                    | 1374  | 288.3 | 306.8 | 300.8 | 315.7 | 274.2 |
| 203634_s_at | NM_001876 | CPT1A                    | 1374  | 50.0  | 49.2  | 45.6  | 51.2  | 36.5  |
| 203635_at   | NM_006052 | DSCR3                    | 10311 | 80.4  | 48.8  | 54.1  | 49.9  | 62.1  |
| 203636_at   | BE967532  | MID1                     | 4281  | 7.1   | 10.4  | 7.7   | 12.3  | 10.4  |
| 203637_s_at | NM_000381 | MID1                     | 4281  | 13.5  | 9.7   | 8.9   | 9.3   | 7.5   |
| 203638_s_at | NM_022969 | FGFR2                    | 2263  | 0.8   | 2.6   | 1.5   | 0.7   | 0.5   |
| 203639_s_at | M80634    | FGFR2                    | 2263  | 0.9   | 1.2   | 0.9   | 0.5   | 5.6   |
| 203640_at   | BE328496  | MBNL2                    | 10150 | 6.6   | 9.7   | 7.7   | 5.5   | 6.5   |
| 203641_s_at | BF002844  | COBLL1                   | 22837 | 63.3  | 79.1  | 62.9  | 68.4  | 45.9  |
| 203642_s_at | NM_014900 | COBLL1                   | 22837 | 163.1 | 124.3 | 129.5 | 139.9 | 90.4  |
| 203643_at   | NM_006494 | ERF                      | 2077  | 37.6  | 27.6  | 49.2  | 43.7  | 31.2  |
| 203644_s_at | AI629033  | MON1B                    | 22879 | 18.7  | 13.8  | 29.8  | 31.0  | 19.5  |
| 203645_s_at | NM_004244 | CD163                    | 9332  | 5.9   | 2.7   | 9.4   | 5.3   | 5.2   |
| 203646_at   | NM_004109 | FDX1                     | 2230  | 221.6 | 152.4 | 255.0 | 224.8 | 185.0 |
| 203647_s_at | M18003    | FDX1                     | 2230  | 393.3 | 329.8 | 386.9 | 382.1 | 313.7 |
| 203648_at   | NM_014760 | TATDN2                   | 9797  | 162.0 | 114.6 | 130.9 | 130.7 | 113.0 |
| 203649_s_at | NM_000300 | PLA2G2A                  | 5320  | 75.9  | 66.5  | 47.0  | 70.1  | 37.5  |
| 203650_at   | NM_006404 | PROCR                    | 10544 | 13.3  | 16.2  | 14.2  | 14.2  | 12.4  |
| 203651_at   | NM_014733 | ZFYVE16                  | 9765  | 32.8  | 29.1  | 38.5  | 31.4  | 28.8  |
| 203652_at   | NM_002419 | MAP3K11                  | 4296  | 90.3  | 85.4  | 94.9  | 92.4  | 67.7  |

|             |           |                          |       |        |        |        |        |        |
|-------------|-----------|--------------------------|-------|--------|--------|--------|--------|--------|
| 203653_s_at | BG391060  | COIL                     | 8161  | 43.1   | 40.0   | 50.6   | 44.5   | 47.6   |
| 203654_s_at | NM_004645 | COIL                     | 8161  | 123.1  | 87.5   | 134.9  | 77.6   | 94.3   |
| 203655_at   | NM_006297 | XRCC1                    | 7515  | 22.9   | 25.1   | 26.3   | 28.3   | 19.7   |
| 203656_at   | NM_014845 | FIG4                     | 9896  | 43.3   | 52.9   | 48.1   | 54.3   | 31.4   |
| 203657_s_at | NM_003793 | CTSF                     | 8722  | 34.8   | 55.7   | 51.5   | 53.7   | 41.1   |
| 203658_at   | BC001689  | SLC25A20                 | 788   | 83.2   | 73.4   | 91.1   | 78.3   | 66.4   |
| 203659_s_at | NM_005798 | TRIM13                   | 10206 | 49.1   | 48.3   | 44.8   | 51.3   | 37.2   |
| 203660_s_at | NM_006031 | PCNT                     | 5116  | 41.3   | 30.9   | 52.2   | 34.0   | 33.1   |
| 203661_s_at | BC002660  | TMOD1                    | 7111  | 24.5   | 12.1   | 17.4   | 22.0   | 14.1   |
| 203662_s_at | NM_003275 | TMOD1                    | 7111  | 2.8    | 9.5    | 8.6    | 4.2    | 8.8    |
| 203663_s_at | NM_004255 | COX5A                    | 9377  | 1982.9 | 1624.7 | 1931.7 | 1724.1 | 1567.3 |
| 203664_s_at | NM_004805 | POLR2D                   | 5433  | 84.5   | 69.2   | 92.4   | 73.6   | 77.0   |
| 203665_at   | NM_002133 | HMOX1                    | 3162  | 28.2   | 23.9   | 21.8   | 31.2   | 22.7   |
| 203666_at   | NM_000609 | CXCL12                   | 6387  | 18.2   | 9.5    | 12.7   | 18.6   | 6.4    |
| 203667_at   | NM_004607 | TBCA                     | 6902  | 1402.9 | 1309.5 | 1371.8 | 1233.5 | 1013.1 |
| 203668_at   | NM_006715 | MAN2C1                   | 4123  | 41.2   | 43.6   | 48.3   | 45.0   | 31.4   |
| 203669_s_at | NM_012079 | DGAT1                    | 8694  | 40.5   | 45.2   | 45.3   | 49.6   | 42.1   |
| 203670_at   | NM_015644 | ARPC4 /// AF10093 /// 26 |       | 2.1    | 10.5   | 11.2   | 2.5    | 3.0    |
| 203671_at   | BF196891  | TPMT                     | 7172  | 13.7   | 12.2   | 17.9   | 15.6   | 11.5   |
| 203672_x_at | U12387    | TPMT                     | 7172  | 97.4   | 81.1   | 99.2   | 78.5   | 74.2   |
| 203673_at   | NM_003235 | TG                       | 7038  | 18.0   | 12.8   | 14.9   | 15.8   | 17.1   |
| 203674_at   | NM_014877 | HELZ                     | 9931  | 61.1   | 57.6   | 56.0   | 59.2   | 48.7   |
| 203675_at   | NM_005013 | NUCB2                    | 4925  | 108.4  | 115.1  | 87.4   | 120.4  | 63.1   |
| 203676_at   | NM_002076 | GNS                      | 2799  | 50.6   | 65.2   | 81.1   | 58.1   | 42.8   |
| 203677_s_at | NM_004178 | TARBP2                   | 6895  | 114.4  | 132.5  | 164.5  | 145.8  | 122.9  |
| 203678_at   | NM_014967 | FAN1                     | 22909 | 72.1   | 56.7   | 73.1   | 62.8   | 54.9   |
| 203679_at   | NM_006858 | TMED1                    | 11018 | 96.5   | 98.8   | 115.5  | 103.2  | 95.6   |
| 203680_at   | NM_002736 | PRKAR2B                  | 5577  | 105.0  | 99.0   | 101.2  | 91.5   | 73.2   |
| 203681_at   | M34192    | IVD                      | 3712  | 0.5    | 0.8    | 0.8    | 0.3    | 0.6    |
| 203682_s_at | NM_002225 | IVD                      | 3712  | 93.5   | 84.2   | 93.1   | 95.0   | 78.7   |
| 203683_s_at | NM_003377 | VEGFB                    | 7423  | 11.0   | 14.4   | 19.5   | 11.0   | 15.6   |
| 203684_s_at | M13994    | BCL2                     | 596   | 0.8    | 1.2    | 0.9    | 0.7    | 2.8    |
| 203685_at   | NM_000633 | BCL2                     | 596   | 15.6   | 11.7   | 7.0    | 10.0   | 10.9   |
| 203686_at   | NM_002434 | MPG                      | 4350  | 127.1  | 163.8  | 158.2  | 177.3  | 135.3  |
| 203687_at   | NM_002996 | CX3CL1                   | 6376  | 2.5    | 6.6    | 1.2    | 0.9    | 2.1    |
| 203688_at   | NM_000297 | PKD2                     | 5311  | 29.5   | 21.2   | 33.4   | 35.5   | 19.9   |
| 203689_s_at | AI743037  | FMR1                     | 2332  | 69.4   | 66.1   | 84.9   | 83.4   | 60.3   |
| 203690_at   | NM_006322 | TUBGCP3                  | 10426 | 70.3   | 63.3   | 90.0   | 67.5   | 68.2   |
| 203691_at   | NM_002638 | PI3                      | 5266  | 0.7    | 0.5    | 0.6    | 3.8    | 3.9    |
| 203692_s_at | AI640363  | E2F3                     | 1871  | 40.8   | 34.5   | 39.4   | 45.5   | 37.6   |
| 203693_s_at | NM_001949 | E2F3                     | 1871  | 67.6   | 46.2   | 45.2   | 44.4   | 51.1   |
| 203694_s_at | NM_003587 | DHX16                    | 8449  | 128.2  | 122.4  | 153.2  | 117.2  | 125.5  |
| 203695_s_at | NM_004403 | DFNA5                    | 1687  | 14.1   | 19.2   | 14.4   | 24.4   | 4.8    |
| 203696_s_at | NM_002914 | RFC2                     | 5982  | 235.8  | 156.7  | 236.3  | 169.9  | 169.8  |
| 203697_at   | U91903    | FRZB                     | 2487  | 3.8    | 4.9    | 5.2    | 3.3    | 1.9    |
| 203698_s_at | NM_001463 | FRZB                     | 2487  | 0.4    | 0.3    | 0.4    | 1.0    | 0.2    |
| 203699_s_at | U53506    | DIO2                     | 1734  | 6.0    | 2.2    | 4.5    | 1.2    | 4.2    |
| 203700_s_at | NM_013989 | DIO2                     | 1734  | 5.8    | 4.7    | 7.6    | 11.4   | 6.7    |
| 203701_s_at | NM_017722 | TRMT1                    | 55621 | 65.9   | 69.1   | 80.0   | 74.1   | 66.6   |
| 203702_s_at | AL043927  | TLL4                     | 9654  | 16.4   | 11.5   | 21.7   | 16.7   | 9.1    |
| 203703_s_at | NM_014640 | TLL4                     | 9654  | 8.1    | 10.1   | 16.6   | 11.0   | 12.1   |
| 203704_s_at | AW118862  | RREB1                    | 6239  | 97.6   | 116.7  | 117.1  | 106.7  | 78.3   |
| 203705_s_at | AI333651  | FZD7                     | 8324  | 9.0    | 20.2   | 12.9   | 7.5    | 7.3    |

|             |           |                           |       |       |       |       |       |       |
|-------------|-----------|---------------------------|-------|-------|-------|-------|-------|-------|
| 203706_s_at | NM_003507 | FZD7                      | 8324  | 8.7   | 7.7   | 9.8   | 10.4  | 8.1   |
| 203707_at   | NM_005741 | LINC00921 //,10127 /// 28 |       | 80.4  | 81.7  | 89.5  | 76.0  | 68.5  |
| 203708_at   | NM_002600 | PDE4B                     | 5142  | 1.0   | 0.9   | 1.0   | 0.9   | 0.9   |
| 203709_at   | NM_000294 | PHKG2                     | 5261  | 55.9  | 63.9  | 90.7  | 66.9  | 79.1  |
| 203710_at   | NM_002222 | ITPR1                     | 3708  | 15.3  | 20.0  | 18.3  | 21.8  | 10.0  |
| 203711_s_at | NM_014362 | HIBCH                     | 26275 | 32.1  | 30.8  | 36.5  | 30.6  | 23.3  |
| 203712_at   | NM_014878 | KIAA0020                  | 9933  | 52.0  | 44.3  | 63.8  | 48.9  | 53.5  |
| 203713_s_at | NM_004524 | LLGL2                     | 3993  | 38.8  | 46.5  | 39.8  | 35.3  | 32.2  |
| 203714_s_at | NM_003193 | TBCE                      | 6905  | 145.9 | 133.1 | 164.7 | 133.9 | 118.7 |
| 203715_at   | NM_003193 | TBCE                      | 6905  | 45.2  | 51.8  | 55.0  | 43.6  | 43.2  |
| 203716_s_at | M80536    | DPP4                      | 1803  | 1.2   | 0.8   | 0.7   | 1.0   | 0.4   |
| 203717_at   | NM_001935 | DPP4                      | 1803  | 5.6   | 0.9   | 4.8   | 0.9   | 6.7   |
| 203718_at   | NM_006702 | PNPLA6                    | 10908 | 75.3  | 56.9  | 69.8  | 69.8  | 48.7  |
| 203719_at   | NM_001983 | ERCC1                     | 2067  | 87.1  | 102.2 | 83.0  | 102.8 | 87.5  |
| 203720_s_at | NM_001983 | ERCC1                     | 2067  | 102.4 | 120.9 | 101.7 | 131.1 | 76.9  |
| 203721_s_at | NM_016001 | UTP18                     | 51096 | 361.7 | 289.2 | 389.9 | 311.0 | 299.1 |
| 203722_at   | NM_003748 | ALDH4A1                   | 8659  | 49.0  | 70.1  | 68.0  | 55.6  | 65.3  |
| 203723_at   | NM_002221 | ITPKB                     | 3707  | 31.8  | 46.7  | 33.1  | 33.2  | 31.3  |
| 203724_s_at | NM_014961 | RUFY3                     | 22902 | 1.6   | 6.4   | 1.1   | 4.5   | 5.4   |
| 203725_at   | NM_001924 | GADD45A                   | 1647  | 31.2  | 41.1  | 39.3  | 28.6  | 21.1  |
| 203726_s_at | NM_000227 | LAMA3                     | 3909  | 31.3  | 27.8  | 29.1  | 33.5  | 27.0  |
| 203727_at   | NM_006929 | SKIV2L                    | 6499  | 80.8  | 102.7 | 106.0 | 82.6  | 93.1  |
| 203728_at   | NM_001188 | BAK1                      | 578   | 56.5  | 63.7  | 57.3  | 67.5  | 53.2  |
| 203729_at   | NM_001425 | EMP3                      | 2014  | 3.5   | 1.2   | 0.9   | 2.6   | 1.3   |
| 203730_s_at | BF196931  | ZKSCAN5                   | 23660 | 37.0  | 36.0  | 37.2  | 25.1  | 28.2  |
| 203731_s_at | NM_014569 | ZKSCAN5                   | 23660 | 20.5  | 25.5  | 26.7  | 25.1  | 17.8  |
| 203732_at   | NM_016213 | TRIP4                     | 9325  | 61.0  | 60.3  | 69.8  | 66.4  | 50.7  |
| 203733_at   | NM_014015 | DEXI                      | 28955 | 168.8 | 120.5 | 159.6 | 154.4 | 134.4 |
| 203734_at   | NM_018416 | FOXJ2                     | 55810 | 64.5  | 61.8  | 68.6  | 68.5  | 54.7  |
| 203735_x_at | N35896    | PPFIBP1                   | 8496  | 68.6  | 41.7  | 48.3  | 44.9  | 35.4  |
| 203736_s_at | NM_003622 | PPFIBP1                   | 8496  | 8.2   | 7.5   | 11.7  | 12.5  | 10.8  |
| 203737_s_at | NM_015062 | PPRC1                     | 23082 | 59.8  | 56.0  | 83.1  | 72.8  | 74.1  |
| 203738_at   | AI421192  | C5orf22                   | 55322 | 132.1 | 111.8 | 132.7 | 132.2 | 133.4 |
| 203739_at   | NM_006526 | ZNF217                    | 7764  | 180.3 | 136.4 | 140.4 | 165.5 | 118.8 |
| 203740_at   | NM_005792 | MPHOSPH6                  | 10200 | 348.7 | 268.6 | 344.6 | 292.5 | 286.7 |
| 203741_s_at | NM_001114 | ADCY7                     | 113   | 0.6   | 3.5   | 4.2   | 2.3   | 2.7   |
| 203742_s_at | BF674842  | LOC732360 / 6996 /// 732  |       | 58.1  | 30.0  | 43.7  | 30.6  | 37.0  |
| 203743_s_at | NM_003211 | TDG                       | 6996  | 252.4 | 194.5 | 281.3 | 198.7 | 222.9 |
| 203744_at   | NM_005342 | HMGB3                     | 3149  | 194.5 | 169.0 | 194.4 | 203.8 | 152.6 |
| 203745_at   | AI801013  | HCCS                      | 3052  | 78.7  | 66.7  | 76.7  | 62.5  | 59.9  |
| 203746_s_at | NM_005333 | HCCS                      | 3052  | 167.6 | 130.8 | 183.0 | 151.3 | 127.0 |
| 203747_at   | NM_004925 | AQP3                      | 360   | 23.1  | 9.6   | 13.8  | 15.2  | 14.6  |
| 203748_x_at | NM_016839 | RBMS1                     | 5937  | 1.4   | 0.5   | 0.8   | 0.5   | 1.4   |
| 203749_s_at | AI806984  | RARA                      | 5914  | 25.8  | 28.2  | 21.4  | 23.9  | 22.6  |
| 203750_s_at | NM_000964 | RARA                      | 5914  | 6.3   | 5.6   | 9.1   | 5.7   | 6.7   |
| 203751_x_at | AI762296  | JUND                      | 3727  | 59.6  | 34.0  | 58.2  | 44.5  | 37.4  |
| 203752_s_at | NM_005354 | JUND                      | 3727  | 855.1 | 748.7 | 936.0 | 773.7 | 696.1 |
| 203753_at   | NM_003199 | TCF4                      | 6925  | 7.4   | 7.3   | 6.9   | 5.3   | 6.6   |
| 203754_s_at | NM_001519 | BRF1                      | 2972  | 29.8  | 16.2  | 18.4  | 16.0  | 23.5  |
| 203755_at   | NM_001211 | BUB1B                     | 701   | 351.9 | 215.0 | 386.4 | 264.2 | 311.4 |
| 203756_at   | NM_014786 | ARHGEF17                  | 9828  | 26.8  | 26.2  | 24.3  | 18.6  | 15.4  |
| 203757_s_at | BC005008  | CEACAM6                   | 4680  | 2.5   | 0.3   | 0.6   | 1.8   | 0.9   |
| 203758_at   | AV729484  | CTSO                      | 1519  | 41.2  | 31.3  | 34.6  | 37.2  | 27.2  |

|             |           |                           |       |       |       |       |       |       |
|-------------|-----------|---------------------------|-------|-------|-------|-------|-------|-------|
| 203759_at   | NM_006278 | ST3GAL4                   | 6484  | 15.9  | 15.0  | 26.7  | 15.4  | 15.1  |
| 203760_s_at | U44403    | SLA                       | 6503  | 2.6   | 1.0   | 1.5   | 0.6   | 2.1   |
| 203761_at   | NM_006748 | SLA                       | 6503  | 13.4  | 8.3   | 11.1  | 2.0   | 9.2   |
| 203762_s_at | NM_016008 | DYNC2L1                   | 51626 | 13.9  | 9.4   | 7.6   | 9.7   | 7.3   |
| 203763_at   | NM_016008 | DYNC2L1                   | 51626 | 15.5  | 9.0   | 16.5  | 6.1   | 4.9   |
| 203764_at   | NM_014750 | DLGAP5                    | 9787  | 192.4 | 165.9 | 231.6 | 152.5 | 172.9 |
| 203765_at   | NM_012198 | GCA                       | 25801 | 47.6  | 31.9  | 48.3  | 47.5  | 29.7  |
| 203766_s_at | NM_012134 | LMOD1                     | 25802 | 0.7   | 1.8   | 2.0   | 0.8   | 0.7   |
| 203767_s_at | AI122754  | STS                       | 412   | 26.9  | 20.1  | 28.7  | 21.9  | 23.0  |
| 203768_s_at | AU138166  | STS                       | 412   | 15.1  | 9.9   | 11.9  | 10.1  | 12.7  |
| 203769_s_at | NM_000351 | STS                       | 412   | 1.5   | 6.0   | 6.5   | 6.4   | 5.0   |
| 203770_s_at | J04964    | STS                       | 412   | 0.5   | 0.9   | 4.6   | 0.7   | 1.4   |
| 203771_s_at | AA740186  | BLVRA                     | 644   | 94.7  | 75.6  | 95.2  | 75.6  | 81.3  |
| 203772_at   | U34877    | BLVRA                     | 644   | 0.5   | 1.1   | 1.3   | 0.5   | 2.2   |
| 203773_x_at | NM_000712 | BLVRA                     | 644   | 314.8 | 370.7 | 306.0 | 269.6 | 222.5 |
| 203774_at   | NM_000254 | MTR                       | 4548  | 75.6  | 74.7  | 99.4  | 73.7  | 66.6  |
| 203775_at   | NM_014251 | SLC25A13                  | 10165 | 128.6 | 103.7 | 171.5 | 105.6 | 128.5 |
| 203776_at   | NM_015698 | GPKOW                     | 27238 | 80.8  | 83.9  | 96.6  | 88.1  | 83.1  |
| 203777_s_at | NM_003952 | RPS6KB2                   | 6199  | 108.5 | 117.0 | 151.4 | 119.9 | 121.7 |
| 203778_at   | NM_005908 | MANBA                     | 4126  | 52.6  | 38.2  | 48.3  | 30.6  | 38.4  |
| 203779_s_at | NM_005797 | MPZL2                     | 10205 | 12.9  | 9.6   | 16.6  | 12.2  | 12.0  |
| 203780_at   | AF275945  | MPZL2                     | 10205 | 48.0  | 22.2  | 46.1  | 32.2  | 41.3  |
| 203781_at   | NM_004891 | MRPL33                    | 9553  | 596.3 | 463.1 | 566.4 | 373.7 | 355.3 |
| 203782_s_at | NM_005035 | POLRMT                    | 5442  | 151.3 | 108.4 | 138.7 | 116.7 | 126.4 |
| 203783_x_at | BF057617  | POLRMT                    | 5442  | 13.7  | 11.6  | 15.5  | 12.5  | 9.3   |
| 203784_s_at | BG477502  | DDX28                     | 55794 | 22.7  | 16.1  | 14.9  | 15.3  | 16.1  |
| 203785_s_at | NM_018380 | DDX28                     | 55794 | 101.5 | 100.6 | 136.7 | 123.0 | 101.7 |
| 203786_s_at | NM_003287 | TPD52L1                   | 7164  | 434.7 | 375.9 | 334.7 | 352.2 | 278.3 |
| 203787_at   | NM_012446 | SSBP2                     | 23635 | 111.0 | 94.3  | 89.8  | 118.4 | 58.3  |
| 203788_s_at | AI962897  | SEMA3C                    | 10512 | 17.5  | 9.6   | 20.5  | 16.4  | 11.1  |
| 203789_s_at | NM_006379 | SEMA3C                    | 10512 | 38.1  | 28.4  | 32.0  | 37.4  | 29.5  |
| 203790_s_at | N54448    | HRSP12                    | 10247 | 64.0  | 59.2  | 68.0  | 64.6  | 53.3  |
| 203791_at   | NM_005509 | DMXL1                     | 1657  | 102.6 | 78.1  | 77.6  | 98.4  | 74.9  |
| 203792_x_at | BC004858  | PCGF2                     | 7703  | 67.8  | 81.0  | 86.8  | 86.2  | 49.0  |
| 203793_x_at | NM_007144 | PCGF2                     | 7703  | 40.1  | 35.2  | 28.3  | 39.9  | 25.6  |
| 203794_at   | NM_014826 | CDC42BPA                  | 8476  | 40.4  | 34.1  | 47.0  | 44.7  | 22.5  |
| 203795_s_at | NM_020993 | BCL7A                     | 605   | 41.9  | 37.0  | 50.4  | 43.2  | 30.3  |
| 203796_s_at | AI950380  | BCL7A                     | 605   | 15.5  | 21.0  | 24.4  | 19.8  | 11.1  |
| 203797_at   | AF039555  | VSNL1                     | 7447  | 18.0  | 1.5   | 14.4  | 14.8  | 8.5   |
| 203798_s_at | NM_003385 | VSNL1                     | 7447  | 0.5   | 0.5   | 0.3   | 0.3   | 0.3   |
| 203799_at   | NM_014880 | CD302 /// LY 4065 /// 993 |       | 12.0  | 10.4  | 21.5  | 15.1  | 12.9  |
| 203800_s_at | BG254653  | MRPS14                    | 63931 | 268.0 | 248.8 | 277.3 | 318.2 | 201.6 |
| 203801_at   | AA013164  | MRPS14                    | 63931 | 28.9  | 31.6  | 32.3  | 35.3  | 26.7  |
| 203802_x_at | NM_018044 | NSUN5                     | 55695 | 118.4 | 117.3 | 153.1 | 121.0 | 99.4  |
| 203803_at   | N45309    | PCYOX1                    | 51449 | 28.8  | 19.5  | 23.4  | 25.4  | 20.3  |
| 203804_s_at | NM_006107 | LUC7L3                    | 51747 | 213.0 | 120.4 | 204.8 | 170.0 | 147.3 |
| 203805_s_at | AW083279  | FANCA                     | 2175  | 41.7  | 31.8  | 43.1  | 39.2  | 35.9  |
| 203806_s_at | NM_000135 | FANCA                     | 2175  | 12.0  | 11.0  | 20.8  | 13.7  | 17.3  |
| 203807_x_at | NM_020991 | CSH1 /// CSH 1442 /// 144 |       | 0.5   | 1.0   | 0.7   | 0.9   | 0.3   |
| 203808_at   | M95936    | -                         | -     | 7.7   | 5.0   | 5.3   | 7.8   | 2.0   |
| 203809_s_at | AA769075  | AKT2                      | 208   | 48.5  | 30.1  | 44.2  | 33.4  | 25.1  |
| 203810_at   | BG252490  | DNAJB4                    | 11080 | 30.9  | 18.5  | 35.2  | 24.0  | 19.9  |
| 203811_s_at | NM_007034 | DNAJB4                    | 11080 | 23.9  | 17.8  | 22.4  | 12.2  | 19.2  |

|             |           |                          |       |       |       |       |       |       |
|-------------|-----------|--------------------------|-------|-------|-------|-------|-------|-------|
| 203812_at   | AB011538  | SLIT3                    | 6586  | 8.1   | 11.0  | 16.5  | 13.4  | 9.1   |
| 203813_s_at | NM_003062 | SLIT3                    | 6586  | 1.5   | 1.4   | 0.7   | 1.0   | 1.4   |
| 203814_s_at | NM_000904 | NQO2                     | 4835  | 197.6 | 186.5 | 195.4 | 196.2 | 172.9 |
| 203815_at   | NM_000853 | GSTT1                    | 2952  | 62.7  | 76.9  | 61.4  | 69.7  | 40.0  |
| 203816_at   | NM_001929 | DGUOK                    | 1716  | 96.3  | 95.5  | 89.6  | 91.9  | 90.7  |
| 203817_at   | W93728    | GUCY1B3                  | 2983  | 4.8   | 4.0   | 5.2   | 6.1   | 5.5   |
| 203818_s_at | NM_006802 | SF3A3                    | 10946 | 100.0 | 107.2 | 130.1 | 95.8  | 127.6 |
| 203819_s_at | AU160004  | IGF2BP3                  | 10643 | 9.1   | 16.0  | 14.3  | 18.3  | 13.9  |
| 203820_s_at | NM_006547 | IGF2BP3                  | 10643 | 23.5  | 23.8  | 26.1  | 19.1  | 16.5  |
| 203821_at   | NM_001945 | HBEGF                    | 1839  | 38.6  | 28.3  | 27.6  | 28.7  | 25.9  |
| 203822_s_at | NM_006874 | ELF2                     | 1998  | 76.9  | 64.7  | 74.2  | 64.2  | 51.2  |
| 203823_at   | NM_021106 | RGS3                     | 5998  | 57.0  | 61.6  | 70.1  | 65.7  | 66.6  |
| 203824_at   | NM_004616 | TSPAN8                   | 7103  | 9.6   | 3.0   | 9.9   | 7.7   | 3.5   |
| 203825_at   | NM_007371 | BRD3                     | 8019  | 260.9 | 221.2 | 266.1 | 255.9 | 174.1 |
| 203826_s_at | NM_004910 | PITPNM1                  | 9600  | 27.2  | 33.6  | 23.4  | 28.2  | 27.8  |
| 203827_at   | NM_017983 | WIPI1                    | 55062 | 9.5   | 12.1  | 16.7  | 10.5  | 12.5  |
| 203828_s_at | NM_004221 | IL32                     | 9235  | 0.7   | 0.7   | 0.8   | 1.3   | 0.6   |
| 203829_at   | NM_019040 | ELP4                     | 26610 | 42.8  | 42.8  | 45.0  | 50.8  | 34.8  |
| 203830_at   | NM_022344 | C17orf75                 | 64149 | 47.7  | 49.8  | 85.2  | 67.7  | 60.4  |
| 203831_at   | NM_014925 | R3HDM2                   | 22864 | 90.4  | 102.0 | 96.1  | 115.3 | 70.9  |
| 203832_at   | NM_003095 | SNRPF                    | 6636  | 906.7 | 562.6 | 854.6 | 758.1 | 511.7 |
| 203833_s_at | BF061845  | TGOLN2                   | 10618 | 43.8  | 40.1  | 41.5  | 37.2  | 20.2  |
| 203834_s_at | NM_006464 | TGOLN2                   | 10618 | 42.2  | 53.0  | 54.7  | 50.3  | 36.8  |
| 203835_at   | NM_005512 | LRRC32                   | 2615  | 1.0   | 0.5   | 1.8   | 0.5   | 0.3   |
| 203836_s_at | D84476    | MAP3K5                   | 4217  | 34.1  | 22.0  | 25.2  | 23.6  | 31.4  |
| 203837_at   | NM_005923 | MAP3K5                   | 4217  | 66.0  | 37.8  | 52.3  | 42.4  | 38.4  |
| 203838_s_at | AI146308  | TNK2                     | 10188 | 15.6  | 4.0   | 10.0  | 3.7   | 8.7   |
| 203839_s_at | NM_005781 | TNK2                     | 10188 | 26.6  | 25.4  | 23.6  | 32.6  | 27.7  |
| 203840_at   | NM_003666 | BLZF1                    | 8548  | 35.9  | 25.6  | 43.4  | 34.7  | 31.1  |
| 203841_x_at | BG222594  | MAPRE3                   | 22924 | 14.7  | 10.2  | 12.2  | 15.0  | 0.8   |
| 203842_s_at | NM_012326 | MAPRE3                   | 22924 | 6.1   | 3.6   | 8.5   | 7.6   | 1.0   |
| 203843_at   | AA906056  | RPS6KA3                  | 6197  | 40.2  | 37.0  | 59.8  | 48.7  | 54.9  |
| 203844_at   | NM_000551 | VHL                      | 7428  | 9.7   | 4.2   | 2.5   | 3.1   | 2.0   |
| 203845_at   | AV727449  | KAT2B                    | 8850  | 34.9  | 22.9  | 22.7  | 20.1  | 20.1  |
| 203846_at   | BC003154  | TRIM32                   | 22954 | 138.0 | 117.5 | 115.2 | 118.1 | 90.9  |
| 203847_s_at | AW341501  | AKAP8                    | 10270 | 107.7 | 70.1  | 92.8  | 69.7  | 66.9  |
| 203848_at   | AL050160  | AKAP8                    | 10270 | 52.0  | 55.3  | 67.2  | 46.1  | 44.7  |
| 203849_s_at | BG473130  | KIF1A                    | 547   | 11.5  | 16.7  | 24.5  | 19.0  | 12.3  |
| 203850_s_at | NM_004321 | KIF1A                    | 547   | 2.4   | 3.1   | 4.7   | 4.1   | 0.1   |
| 203851_at   | NM_002178 | IGFBP6                   | 3489  | 2.3   | 5.8   | 6.0   | 1.3   | 1.1   |
| 203852_s_at | NM_000344 | SMN1 /// SM 6606 /// 660 |       | 214.6 | 132.4 | 224.0 | 184.4 | 161.8 |
| 203853_s_at | NM_012296 | GAB2                     | 9846  | 3.0   | 10.3  | 2.8   | 3.2   | 10.3  |
| 203854_at   | NM_000204 | CFI                      | 3426  | 9.1   | 3.6   | 8.6   | 2.2   | 2.1   |
| 203855_at   | NM_014969 | WDR47                    | 22911 | 29.1  | 20.3  | 30.4  | 27.6  | 22.9  |
| 203856_at   | NM_003384 | VRK1                     | 7443  | 143.5 | 107.3 | 187.6 | 122.3 | 166.1 |
| 203857_s_at | NM_006810 | MIR7110 /// 10954 /// 10 |       | 159.6 | 154.8 | 166.0 | 133.5 | 153.0 |
| 203858_s_at | NM_001303 | COX10                    | 1352  | 128.4 | 92.3  | 91.0  | 91.8  | 70.9  |
| 203859_s_at | NM_002579 | PALM                     | 5064  | 15.5  | 8.6   | 16.0  | 7.6   | 3.0   |
| 203860_at   | NM_000282 | PCCA                     | 5095  | 40.7  | 44.7  | 33.5  | 49.6  | 46.8  |
| 203861_s_at | AU146889  | ACTN2                    | 88    | 1.4   | 1.2   | 1.3   | 1.1   | 0.8   |
| 203862_s_at | H16245    | ACTN2                    | 88    | 0.9   | 0.1   | 4.2   | 0.6   | 3.3   |
| 203863_at   | W63731    | ACTN2                    | 88    | 2.4   | 1.8   | 0.6   | 0.7   | 0.7   |
| 203864_s_at | NM_001103 | ACTN2                    | 88    | 15.5  | 16.5  | 13.9  | 15.1  | 9.7   |



|             |           |                          |           |       |       |       |       |       |
|-------------|-----------|--------------------------|-----------|-------|-------|-------|-------|-------|
| 203865_s_at | NM_015833 | ADARB1                   | 104       | 15.7  | 13.8  | 21.2  | 11.1  | 11.6  |
| 203866_at   | AJ005257  | NLE1                     | 54475     | 37.5  | 39.0  | 35.4  | 29.7  | 27.7  |
| 203867_s_at | NM_018096 | NLE1                     | 54475     | 158.7 | 119.5 | 166.6 | 137.0 | 145.9 |
| 203868_s_at | NM_001078 | VCAM1                    | 7412      | 5.5   | 0.2   | 5.9   | 5.6   | 2.9   |
| 203869_at   | AK024318  | USP46                    | 64854     | 90.3  | 71.9  | 79.5  | 68.3  | 63.3  |
| 203870_at   | BE856374  | USP46                    | 64854     | 99.5  | 67.0  | 89.8  | 70.1  | 60.9  |
| 203871_at   | NM_015670 | SENP3                    | 26168     | 199.2 | 163.5 | 174.3 | 183.9 | 200.1 |
| 203872_at   | NM_001100 | ACTA1                    | 58        | 3.4   | 4.8   | 5.9   | 7.4   | 4.8   |
| 203873_at   | M88163    | SMARCA1                  | 6594      | 7.2   | 8.1   | 2.7   | 3.0   | 6.0   |
| 203874_s_at | NM_003069 | SMARCA1                  | 6594      | 2.4   | 7.0   | 5.5   | 7.0   | 5.4   |
| 203875_at   | NM_003069 | SMARCA1                  | 6594      | 3.1   | 0.3   | 3.1   | 1.6   | 3.2   |
| 203876_s_at | AI761713  | MMP11                    | 4320      | 6.4   | 2.0   | 8.6   | 13.6  | 8.0   |
| 203877_at   | NM_005940 | -                        | -         | 2.8   | 0.6   | 1.6   | 1.2   | 1.6   |
| 203878_s_at | NM_005940 | MMP11                    | 4320      | 34.3  | 44.7  | 38.0  | 27.8  | 25.1  |
| 203879_at   | U86453    | PIK3CD                   | 5293      | 168.1 | 208.5 | 171.1 | 199.3 | 150.6 |
| 203880_at   | NM_005694 | COX17 /// PC10063 /// 64 |           | 630.3 | 556.7 | 694.9 | 664.3 | 544.7 |
| 203881_s_at | NM_004010 | DMD                      | 1756      | 4.2   | 4.3   | 2.2   | 0.4   | 2.7   |
| 203882_at   | NM_006084 | IRF9                     | 10379     | 18.7  | 22.7  | 15.0  | 18.9  | 14.0  |
| 203883_s_at | BG249608  | RAB11FIP2                | 22841     | 34.9  | 30.4  | 36.5  | 34.5  | 28.7  |
| 203884_s_at | NM_014904 | RAB11FIP2                | 22841     | 29.7  | 22.6  | 27.2  | 27.0  | 25.8  |
| 203885_at   | NM_014999 | RAB21                    | 23011     | 127.8 | 114.4 | 120.1 | 100.2 | 90.0  |
| 203886_s_at | NM_001998 | FBLN2                    | 2199      | 0.9   | 7.0   | 1.1   | 0.7   | 1.0   |
| 203887_s_at | NM_000361 | THBD                     | 7056      | 5.0   | 2.5   | 6.3   | 3.4   | 4.6   |
| 203888_at   | NM_000361 | THBD                     | 7056      | 1.3   | 2.3   | 8.7   | 1.4   | 1.0   |
| 203889_at   | NM_003020 | SCG5                     | 6447      | 4.0   | 1.7   | 1.0   | 3.2   | 0.6   |
| 203890_s_at | BF686824  | DAPK3 /// M1613 /// 693  |           | 72.6  | 58.5  | 69.9  | 74.2  | 53.4  |
| 203891_s_at | NM_001348 | DAPK3 /// M1613 /// 693  |           | 38.7  | 39.1  | 46.8  | 32.6  | 35.2  |
| 203892_at   | NM_006103 | WFDC2                    | 10406     | 10.2  | 18.1  | 9.9   | 4.5   | 9.2   |
| 203893_at   | NM_016283 | AK6                      | 102157402 | 161.7 | 117.4 | 192.1 | 133.4 | 135.8 |
| 203894_at   | NM_016437 | TUBG2                    | 27175     | 40.4  | 42.8  | 33.6  | 37.8  | 37.9  |
| 203895_at   | AL535113  | PLCB4                    | 5332      | 186.7 | 163.3 | 174.1 | 171.7 | 126.6 |
| 203896_s_at | NM_000933 | PLCB4                    | 5332      | 78.7  | 82.8  | 78.7  | 75.9  | 59.6  |
| 203897_at   | BE963444  | LYRM1                    | 57149     | 186.2 | 179.2 | 181.7 | 186.6 | 150.5 |
| 203898_at   | AU154853  | CRCP                     | 27297     | 54.8  | 45.0  | 61.6  | 47.6  | 50.8  |
| 203899_s_at | NM_014478 | CRCP                     | 27297     | 43.9  | 30.6  | 35.2  | 39.6  | 27.8  |
| 203900_at   | NM_024547 | SZT2                     | 23334     | 6.3   | 8.7   | 10.6  | 9.1   | 8.2   |
| 203901_at   | NM_006116 | TAB1                     | 10454     | 36.9  | 24.1  | 39.8  | 35.4  | 31.2  |
| 203902_at   | AU148222  | HEPH                     | 9843      | 6.7   | 0.4   | 0.5   | 7.9   | 4.3   |
| 203903_s_at | NM_014799 | HEPH                     | 9843      | 9.9   | 2.0   | 4.0   | 5.9   | 2.3   |
| 203904_x_at | NM_002231 | CD82                     | 3732      | 29.8  | 36.2  | 18.9  | 33.0  | 26.1  |
| 203905_at   | NM_002582 | PARN                     | 5073      | 115.5 | 87.3  | 113.8 | 104.2 | 112.0 |
| 203906_at   | AI652645  | IQSEC1                   | 9922      | 29.7  | 22.1  | 20.3  | 16.1  | 20.6  |
| 203907_s_at | NM_014869 | IQSEC1                   | 9922      | 43.7  | 39.6  | 48.0  | 34.9  | 39.6  |
| 203908_at   | NM_003759 | SLC4A4                   | 8671      | 133.8 | 97.8  | 126.2 | 86.3  | 114.8 |
| 203909_at   | NM_006359 | SLC9A6                   | 10479     | 71.1  | 58.1  | 60.7  | 58.1  | 51.7  |
| 203910_at   | NM_004815 | ARHGAP29                 | 9411      | 165.5 | 168.2 | 162.2 | 153.3 | 115.7 |
| 203911_at   | NM_002885 | RAP1GAP                  | 5909      | 46.5  | 41.5  | 41.6  | 37.3  | 45.0  |
| 203912_s_at | NM_006730 | DNASE1L1                 | 1774      | 99.0  | 77.1  | 97.2  | 78.1  | 83.7  |
| 203913_s_at | AL574184  | HPGD                     | 3248      | 1.7   | 4.0   | 11.5  | 0.2   | 9.8   |
| 203914_x_at | NM_000860 | HPGD                     | 3248      | 2.6   | 1.1   | 6.0   | 6.7   | 9.6   |
| 203915_at   | NM_002416 | CXCL9                    | 4283      | 15.7  | 8.5   | 10.0  | 8.4   | 2.1   |
| 203916_at   | NM_003635 | NDST2                    | 8509      | 11.9  | 42.9  | 30.7  | 36.6  | 33.9  |
| 203917_at   | NM_001338 | CXADR                    | 1525      | 135.9 | 155.9 | 177.3 | 131.5 | 144.7 |

|             |           |           |       |       |       |       |       |       |
|-------------|-----------|-----------|-------|-------|-------|-------|-------|-------|
| 203918_at   | NM_002587 | PCDH1     | 5097  | 21.8  | 15.3  | 11.8  | 20.6  | 17.9  |
| 203919_at   | NM_003195 | TCEA2     | 6919  | 44.0  | 87.1  | 62.8  | 87.2  | 56.3  |
| 203920_at   | NM_005693 | NR1H3     | 10062 | 88.2  | 89.9  | 104.3 | 105.4 | 76.0  |
| 203921_at   | NM_004267 | CHST2     | 9435  | 4.4   | 8.8   | 5.5   | 4.9   | 8.7   |
| 203922_s_at | AI308863  | CYBB      | 1536  | 9.5   | 8.4   | 7.3   | 8.0   | 3.5   |
| 203923_s_at | NM_000397 | CYBB      | 1536  | 6.7   | 6.9   | 0.6   | 3.6   | 6.1   |
| 203924_at   | NM_000846 | GSTA1     | 2938  | 38.2  | 41.3  | 44.5  | 40.5  | 31.4  |
| 203925_at   | NM_002061 | GCLM      | 2730  | 162.5 | 149.1 | 177.7 | 148.5 | 142.8 |
| 203926_x_at | NM_001687 | ATP5D     | 513   | 303.4 | 330.3 | 381.7 | 379.5 | 329.6 |
| 203927_at   | NM_004556 | NFKBIE    | 4794  | 25.2  | 18.6  | 15.6  | 21.6  | 15.8  |
| 203928_x_at | AI870749  | MAPT      | 4137  | 42.5  | 41.9  | 50.2  | 47.2  | 38.4  |
| 203929_s_at | AI056359  | MAPT      | 4137  | 28.5  | 24.1  | 29.8  | 32.5  | 19.1  |
| 203930_s_at | NM_016835 | MAPT      | 4137  | 7.2   | 7.5   | 7.0   | 7.5   | 4.0   |
| 203931_s_at | NM_002949 | MRPL12    | 6182  | 409.1 | 417.4 | 516.4 | 438.3 | 400.4 |
| 203932_at   | NM_002118 | HLA-DMB   | 3109  | 75.4  | 89.5  | 118.7 | 104.8 | 88.0  |
| 203933_at   | NM_014700 | RAB11FIP3 | 9727  | 52.1  | 62.3  | 57.0  | 76.7  | 42.9  |
| 203934_at   | NM_002253 | KDR       | 3791  | 6.1   | 4.5   | 4.9   | 4.1   | 1.9   |
| 203935_at   | NM_001105 | ACVR1     | 90    | 72.9  | 57.4  | 52.2  | 68.9  | 52.8  |
| 203936_s_at | NM_004994 | MMP9      | 4318  | 27.7  | 15.5  | 21.3  | 19.3  | 12.5  |
| 203937_s_at | AW015313  | TAF1C     | 9013  | 7.1   | 6.3   | 4.4   | 8.3   | 4.9   |
| 203938_s_at | NM_005679 | TAF1C     | 9013  | 16.8  | 8.2   | 24.0  | 22.1  | 16.7  |
| 203939_at   | NM_002526 | NT5E      | 4907  | 3.9   | 0.6   | 3.2   | 2.9   | 0.4   |
| 203940_s_at | NM_014909 | VASH1     | 22846 | 1.8   | 6.0   | 7.7   | 5.0   | 1.3   |
| 203941_at   | NM_018250 | INTS9     | 55756 | 71.0  | 76.3  | 91.0  | 73.9  | 60.4  |
| 203942_s_at | NM_017490 | MARK2     | 2011  | 17.5  | 22.3  | 29.4  | 21.5  | 25.4  |
| 203943_at   | NM_004798 | KIF3B     | 9371  | 104.5 | 113.2 | 106.9 | 110.4 | 75.7  |
| 203944_x_at | NM_007049 | BTN2A1    | 11120 | 42.2  | 48.0  | 42.8  | 38.1  | 35.7  |
| 203945_at   | NM_001172 | ARG2      | 384   | 95.8  | 84.1  | 109.0 | 88.0  | 94.9  |
| 203946_s_at | U75667    | ARG2      | 384   | 685.5 | 766.5 | 971.2 | 838.6 | 776.1 |
| 203947_at   | NM_001326 | CSTF3     | 1479  | 209.3 | 145.8 | 185.0 | 133.6 | 135.4 |
| 203948_s_at | J02694    | MPO       | 4353  | 0.4   | 0.3   | 0.5   | 0.9   | 0.3   |
| 203949_at   | NM_000250 | MPO       | 4353  | 8.3   | 6.6   | 7.6   | 5.5   | 3.9   |
| 203950_s_at | NM_001286 | CLCN6     | 1185  | 15.2  | 7.9   | 8.6   | 2.8   | 4.1   |
| 203951_at   | NM_001299 | CNN1      | 1264  | 5.9   | 1.5   | 4.5   | 0.9   | 1.6   |
| 203952_at   | NM_007348 | ATF6      | 22926 | 61.3  | 40.9  | 59.4  | 42.5  | 26.5  |
| 203953_s_at | BE791251  | CLDN3     | 1365  | 160.5 | 167.6 | 188.0 | 169.8 | 157.4 |
| 203954_x_at | NM_001306 | CLDN3     | 1365  | 102.3 | 133.6 | 157.8 | 142.0 | 128.9 |
| 203955_at   | NM_014811 | PPP1R26   | 9858  | 43.4  | 31.4  | 27.9  | 29.7  | 24.3  |
| 203956_at   | NM_014941 | MORC2     | 22880 | 189.0 | 146.9 | 160.2 | 166.2 | 139.9 |
| 203957_at   | NM_001952 | E2F6      | 1876  | 55.1  | 38.0  | 59.9  | 41.6  | 38.6  |
| 203958_s_at | AI557467  | ZBTB40    | 9923  | 19.9  | 11.8  | 18.7  | 14.9  | 11.7  |
| 203959_s_at | NM_014870 | ZBTB40    | 9923  | 33.2  | 34.0  | 47.4  | 33.2  | 22.2  |
| 203960_s_at | NM_016126 | HSPB11    | 51668 | 136.0 | 114.2 | 145.5 | 131.1 | 107.3 |
| 203961_at   | AL157398  | NEBL      | 10529 | 27.1  | 34.6  | 26.4  | 33.8  | 20.6  |
| 203962_s_at | NM_006393 | NEBL      | 10529 | 54.7  | 52.3  | 36.6  | 45.7  | 25.2  |
| 203963_at   | NM_001218 | CA12      | 771   | 66.6  | 46.1  | 58.8  | 60.6  | 40.4  |
| 203964_at   | NM_004688 | NMI       | 9111  | 3.6   | 0.6   | 1.0   | 5.7   | 1.5   |
| 203965_at   | NM_006676 | USP20     | 10868 | 43.1  | 27.2  | 33.1  | 21.4  | 26.6  |
| 203966_s_at | NM_021003 | PPM1A     | 5494  | 145.7 | 171.0 | 186.2 | 147.3 | 148.4 |
| 203967_at   | U77949    | CDC6      | 990   | 173.2 | 135.5 | 236.8 | 135.8 | 187.4 |
| 203968_s_at | NM_001254 | CDC6      | 990   | 211.5 | 146.7 | 246.5 | 166.9 | 206.7 |
| 203969_at   | AU157140  | PEX3      | 8504  | 13.0  | 8.3   | 4.6   | 11.6  | 5.9   |
| 203970_s_at | NM_003630 | PEX3      | 8504  | 58.6  | 36.5  | 50.4  | 42.8  | 41.2  |

|             |           |                           |       |       |       |       |       |       |
|-------------|-----------|---------------------------|-------|-------|-------|-------|-------|-------|
| 203971_at   | NM_001859 | SLC31A1                   | 1317  | 93.1  | 87.8  | 106.2 | 119.1 | 122.3 |
| 203972_s_at | AB035307  | PEX3                      | 8504  | 138.6 | 102.7 | 155.5 | 121.8 | 121.5 |
| 203973_s_at | NM_005195 | CEBPD                     | 1052  | 115.8 | 112.2 | 164.5 | 151.2 | 101.8 |
| 203974_at   | NM_012080 | HDHD1                     | 8226  | 94.1  | 75.7  | 80.9  | 70.4  | 64.1  |
| 203975_s_at | BF000239  | CHAF1A                    | 10036 | 70.1  | 58.9  | 88.7  | 59.3  | 58.5  |
| 203976_s_at | NM_005483 | CHAF1A                    | 10036 | 67.3  | 57.3  | 89.5  | 61.3  | 68.8  |
| 203977_at   | NM_000116 | TAZ                       | 6901  | 2.9   | 1.0   | 2.9   | 2.5   | 1.5   |
| 203978_at   | NM_002484 | NUBP1                     | 4682  | 84.5  | 77.9  | 89.0  | 80.4  | 79.0  |
| 203979_at   | NM_000784 | CYP27A1                   | 1593  | 2.1   | 5.3   | 2.4   | 4.6   | 3.2   |
| 203980_at   | NM_001442 | FABP4                     | 2167  | 7.3   | 1.8   | 0.5   | 3.0   | 1.9   |
| 203981_s_at | AL574660  | ABCD4                     | 5826  | 36.9  | 44.1  | 29.6  | 37.7  | 31.9  |
| 203982_s_at | NM_005050 | ABCD4                     | 5826  | 9.6   | 1.2   | 2.1   | 9.1   | 8.3   |
| 203983_at   | NM_005999 | TSNAX                     | 7257  | 230.4 | 240.4 | 300.4 | 267.8 | 198.2 |
| 203984_s_at | U60521    | CASP9                     | 842   | 58.6  | 50.2  | 43.9  | 52.4  | 39.4  |
| 203985_at   | NM_012256 | ZNF212                    | 7988  | 50.1  | 55.6  | 54.1  | 59.9  | 49.7  |
| 203986_at   | NM_003943 | FAM47E /// F8987 /// 100  |       | 29.3  | 19.3  | 22.4  | 25.5  | 19.7  |
| 203987_at   | NM_003506 | FZD6                      | 8323  | 106.8 | 83.2  | 94.4  | 80.2  | 65.2  |
| 203988_s_at | NM_004480 | FUT8                      | 2530  | 31.8  | 35.9  | 34.2  | 35.4  | 21.6  |
| 203989_x_at | NM_001992 | F2R                       | 2149  | 39.4  | 32.2  | 40.3  | 31.6  | 20.1  |
| 203990_s_at | AI140752  | KDM6A                     | 7403  | 178.4 | 204.8 | 165.2 | 174.3 | 134.9 |
| 203991_s_at | NM_021140 | KDM6A                     | 7403  | 134.9 | 114.9 | 116.2 | 113.3 | 85.6  |
| 203992_s_at | AF000992  | KDM6A                     | 7403  | 382.7 | 309.5 | 314.2 | 341.9 | 225.7 |
| 203993_x_at | U84569    | AP001062.7 ,755           |       | 1.4   | 1.4   | 1.0   | 0.7   | 0.7   |
| 203994_s_at | U84569    | C21orf2                   | 755   | 12.6  | 12.7  | 7.0   | 20.5  | 21.9  |
| 203995_at   | NM_004928 | C21orf2                   | 755   | 12.0  | 4.5   | 1.1   | 3.4   | 6.3   |
| 203996_s_at | NM_004928 | C21orf2                   | 755   | 11.7  | 8.1   | 7.5   | 4.6   | 3.4   |
| 203997_at   | NM_002829 | PTPN3                     | 5774  | 88.7  | 74.6  | 87.2  | 80.1  | 70.7  |
| 203998_s_at | AV723167  | SYT1                      | 6857  | 0.4   | 2.5   | 3.0   | 3.8   | 0.4   |
| 203999_at   | AV731490  | SYT1                      | 6857  | 9.9   | 6.1   | 11.9  | 7.2   | 11.8  |
| 204000_at   | NM_016194 | GNB5                      | 10681 | 25.7  | 21.7  | 31.9  | 30.4  | 25.1  |
| 204001_at   | NM_003084 | SNAPC3                    | 6619  | 87.6  | 52.0  | 74.1  | 75.8  | 70.2  |
| 204002_s_at | NM_022307 | ICA1                      | 3382  | 30.4  | 19.4  | 28.5  | 17.2  | 23.2  |
| 204003_s_at | NM_007342 | NUPL2                     | 11097 | 50.2  | 37.4  | 53.1  | 43.7  | 47.3  |
| 204004_at   | AI336206  | PAWR                      | 5074  | 89.4  | 78.9  | 87.6  | 78.6  | 66.2  |
| 204005_s_at | NM_002583 | PAWR                      | 5074  | 90.8  | 80.3  | 110.4 | 78.1  | 80.7  |
| 204006_s_at | NM_000570 | FCGR3A /// F2214 /// 221  |       | 0.5   | 0.9   | 0.5   | 0.9   | 0.5   |
| 204007_at   | J04162    | FCGR3B                    | 2215  | 11.1  | 7.8   | 6.6   | 5.3   | 6.3   |
| 204008_at   | NM_005740 | DNAL4                     | 10126 | 28.7  | 42.1  | 46.9  | 48.0  | 51.9  |
| 204009_s_at | W80678    | KRAS                      | 3845  | 236.4 | 225.1 | 228.4 | 197.3 | 186.6 |
| 204010_s_at | NM_004985 | KRAS                      | 3845  | 16.5  | 13.6  | 18.5  | 13.8  | 12.3  |
| 204011_at   | NM_005842 | SPRY2                     | 10253 | 5.7   | 3.3   | 5.5   | 0.7   | 4.8   |
| 204012_s_at | AL529189  | LCMT2                     | 9836  | 242.1 | 210.4 | 256.0 | 189.6 | 205.9 |
| 204013_s_at | NM_014793 | LCMT2                     | 9836  | 0.9   | 0.7   | 0.2   | 0.9   | 0.8   |
| 204014_at   | NM_001394 | DUSP4                     | 1846  | 10.2  | 4.4   | 8.7   | 9.5   | 11.4  |
| 204015_s_at | BC002671  | DUSP4                     | 1846  | 24.6  | 23.7  | 28.9  | 26.1  | 36.9  |
| 204016_at   | NM_015340 | LARS2                     | 23395 | 87.3  | 71.9  | 89.3  | 79.0  | 69.0  |
| 204017_at   | NM_006855 | KDEL3                     | 11015 | 21.0  | 20.9  | 21.6  | 21.4  | 19.2  |
| 204018_x_at | NM_000558 | HBA1 /// HB, 3039 /// 304 |       | 3.9   | 2.6   | 6.0   | 3.7   | 1.8   |
| 204019_s_at | NM_015677 | SH3YL1                    | 26751 | 28.0  | 34.0  | 26.8  | 30.8  | 23.5  |
| 204020_at   | BF739943  | PURA                      | 5813  | 251.3 | 191.6 | 222.3 | 212.2 | 179.6 |
| 204021_s_at | NM_005859 | PURA                      | 5813  | 106.3 | 91.8  | 102.7 | 111.6 | 108.8 |
| 204022_at   | AI668780  | WWP2                      | 11060 | 117.5 | 126.5 | 134.3 | 139.3 | 99.5  |
| 204023_at   | NM_002916 | RFC4                      | 5984  | 281.0 | 201.2 | 303.5 | 210.1 | 253.2 |

|             |           |                          |              |        |        |        |        |        |
|-------------|-----------|--------------------------|--------------|--------|--------|--------|--------|--------|
| 204024_at   | NM_004337 | OSGIN2                   | 734          | 16.5   | 8.5    | 14.1   | 16.1   | 11.7   |
| 204025_s_at | NM_002598 | PDCD2                    | 5134         | 72.2   | 40.5   | 52.6   | 53.9   | 54.7   |
| 204026_s_at | NM_007057 | ZWINT                    | 11130        | 721.0  | 574.2  | 872.1  | 633.8  | 654.0  |
| 204027_s_at | NM_005371 | METTL1                   | 4234         | 101.7  | 75.3   | 95.0   | 73.5   | 80.1   |
| 204028_s_at | NM_012197 | RABGAP1                  | 23637        | 77.2   | 76.6   | 71.5   | 78.3   | 70.1   |
| 204029_at   | NM_001408 | CELSR2                   | 1952         | 46.4   | 45.0   | 34.2   | 39.6   | 30.3   |
| 204030_s_at | NM_014575 | IQCJ-SCHIP1              | 29970 /// 10 | 2.0    | 1.0    | 2.0    | 4.4    | 1.3    |
| 204031_s_at | NM_005016 | PCBP2                    | 5094         | 1791.5 | 1809.1 | 1966.7 | 1898.0 | 1473.1 |
| 204032_at   | NM_003567 | BCAR3                    | 8412         | 14.0   | 14.9   | 17.3   | 13.0   | 12.6   |
| 204033_at   | NM_004237 | TRIP13                   | 9319         | 304.2  | 221.1  | 353.6  | 247.5  | 252.0  |
| 204034_at   | NM_014297 | ETHE1                    | 23474        | 136.1  | 127.6  | 100.4  | 108.9  | 107.2  |
| 204035_at   | NM_003469 | SCG2                     | 7857         | 5.0    | 2.0    | 4.3    | 6.0    | 4.0    |
| 204036_at   | AW269335  | LPAR1                    | 1902         | 2.6    | 5.3    | 6.3    | 1.2    | 4.9    |
| 204037_at   | BF055366  | LPAR1                    | 1902         | 13.0   | 7.4    | 7.3    | 3.5    | 5.3    |
| 204038_s_at | NM_001401 | LPAR1                    | 1902         | 26.7   | 10.2   | 29.1   | 14.0   | 14.0   |
| 204039_at   | NM_004364 | CEBPA                    | 1050         | 110.5  | 95.6   | 98.3   | 105.4  | 87.4   |
| 204040_at   | NM_014746 | RNF144A                  | 9781         | 24.4   | 31.9   | 25.8   | 31.8   | 26.7   |
| 204041_at   | NM_000898 | MAOB                     | 4129         | 1.2    | 1.8    | 1.8    | 1.7    | 1.1    |
| 204042_at   | AB020707  | WASF3                    | 10810        | 129.2  | 106.3  | 123.2  | 121.7  | 110.4  |
| 204043_at   | NM_000355 | TCN2                     | 6948         | 6.3    | 9.9    | 13.6   | 3.1    | 1.6    |
| 204044_at   | NM_014298 | QPRT                     | 23475        | 0.6    | 4.9    | 1.9    | 0.5    | 0.9    |
| 204045_at   | NM_004780 | TCEAL1                   | 9338         | 189.5  | 144.4  | 189.1  | 178.8  | 142.6  |
| 204046_at   | NM_004573 | PLCB2                    | 5330         | 3.6    | 3.8    | 4.1    | 4.2    | 7.3    |
| 204047_s_at | AW295193  | PHACTR2                  | 9749         | 11.1   | 6.8    | 8.7    | 9.9    | 10.3   |
| 204048_s_at | AA551142  | PHACTR2                  | 9749         | 32.4   | 37.4   | 35.7   | 32.3   | 24.1   |
| 204049_s_at | NM_014721 | PHACTR2                  | 9749         | 27.7   | 23.5   | 31.7   | 29.5   | 28.8   |
| 204050_s_at | NM_001833 | CLTA                     | 1211         | 582.3  | 487.8  | 603.0  | 535.5  | 491.7  |
| 204051_s_at | AW089415  | SFRP4                    | 6424         | 7.8    | 8.5    | 9.9    | 11.5   | 4.3    |
| 204052_s_at | NM_003014 | SFRP4                    | 6424         | 2.8    | 3.3    | 4.5    | 2.7    | 2.0    |
| 204053_x_at | U96180    | PTEN                     | 5728         | 72.4   | 56.4   | 69.2   | 68.5   | 48.5   |
| 204054_at   | NM_000314 | PTEN                     | 5728         | 34.9   | 38.0   | 38.5   | 28.4   | 29.2   |
| 204055_s_at | NM_005930 | CTAGE5                   | 4253         | 1.9    | 1.7    | 0.5    | 0.6    | 0.1    |
| 204056_s_at | NM_000431 | MVK                      | 4598         | 41.8   | 37.6   | 26.4   | 47.7   | 37.0   |
| 204057_at   | AI073984  | IRF8                     | 3394         | 16.4   | 3.2    | 1.2    | 11.4   | 2.4    |
| 204058_at   | AL049699  | ME1                      | 4199         | 93.6   | 89.3   | 104.6  | 98.8   | 83.2   |
| 204059_s_at | NM_002395 | ME1                      | 4199         | 310.6  | 310.7  | 319.6  | 283.8  | 226.2  |
| 204060_s_at | NM_005044 | PRKX /// PRK5613 /// 561 | 5613         | 39.5   | 36.5   | 35.2   | 36.8   | 27.9   |
| 204061_at   | NM_005044 | PRKX                     | 5613         | 17.8   | 18.5   | 23.1   | 14.4   | 19.5   |
| 204062_s_at | BG526973  | ULK2                     | 9706         | 37.5   | 34.1   | 39.7   | 40.8   | 26.8   |
| 204063_s_at | NM_014683 | ULK2                     | 9706         | 8.7    | 10.9   | 12.6   | 13.4   | 11.0   |
| 204064_at   | NM_005131 | THOC1                    | 9984         | 82.1   | 89.0   | 112.6  | 75.7   | 81.9   |
| 204065_at   | NM_004854 | CHST10                   | 9486         | 61.2   | 38.6   | 38.5   | 42.8   | 25.0   |
| 204066_s_at | NM_014914 | AGAP1                    | 116987       | 32.5   | 28.9   | 38.5   | 31.9   | 23.6   |
| 204067_at   | AA129776  | SUOX                     | 6821         | 146.0  | 142.1  | 142.2  | 142.3  | 155.0  |
| 204068_at   | NM_006281 | STK3                     | 6788         | 118.5  | 90.9   | 96.2   | 101.5  | 71.3   |
| 204069_at   | NM_002398 | MEIS1                    | 4211         | 14.4   | 15.0   | 20.7   | 13.5   | 15.9   |
| 204070_at   | NM_004585 | RARRES3                  | 5920         | 22.5   | 16.6   | 17.2   | 14.5   | 15.5   |
| 204071_s_at | NM_005802 | TOPORS                   | 10210        | 61.0   | 51.4   | 51.5   | 55.8   | 34.4   |
| 204072_s_at | NM_023037 | FRY                      | 10129        | 11.7   | 11.0   | 10.1   | 11.5   | 6.7    |
| 204073_s_at | NM_013279 | MYRF                     | 745          | 4.8    | 8.1    | 12.6   | 6.9    | 1.0    |
| 204074_s_at | AI936976  | CEP104                   | 9731         | 56.3   | 53.7   | 49.9   | 44.8   | 53.0   |
| 204075_s_at | NM_014704 | CEP104                   | 9731         | 24.1   | 20.8   | 42.1   | 27.3   | 29.8   |
| 204076_at   | AB002390  | ENTPD4                   | 9583         | 30.4   | 57.4   | 57.5   | 39.7   | 31.6   |

|             |           |         |        |        |        |        |        |        |
|-------------|-----------|---------|--------|--------|--------|--------|--------|--------|
| 204077_x_at | NM_004901 | ENTPD4  | 9583   | 24.9   | 24.9   | 40.7   | 31.7   | 22.8   |
| 204078_at   | NM_006455 | LEPREL4 | 10609  | 71.0   | 84.8   | 91.5   | 77.8   | 70.9   |
| 204079_at   | NM_003595 | TPST2   | 8459   | 42.5   | 34.1   | 43.4   | 49.0   | 33.8   |
| 204080_at   | NM_025077 | TOE1    | 114034 | 89.9   | 63.4   | 95.6   | 74.2   | 65.6   |
| 204081_at   | NM_006176 | NRGN    | 4900   | 38.5   | 41.7   | 45.6   | 37.0   | 36.4   |
| 204082_at   | NM_006195 | PBX3    | 5090   | 39.2   | 30.5   | 35.0   | 38.6   | 26.2   |
| 204083_s_at | NM_003289 | TPM2    | 7169   | 0.6    | 0.5    | 0.6    | 0.9    | 0.5    |
| 204084_s_at | AI911687  | CLN5    | 1203   | 125.6  | 120.5  | 175.3  | 118.1  | 128.3  |
| 204085_s_at | NM_006493 | CLN5    | 1203   | 28.2   | 26.7   | 34.8   | 33.7   | 20.1   |
| 204086_at   | NM_006115 | PRAME   | 23532  | 221.5  | 235.3  | 225.4  | 215.0  | 201.3  |
| 204087_s_at | NM_021095 | SLC5A6  | 8884   | 63.7   | 53.5   | 67.3   | 58.7   | 60.4   |
| 204088_at   | NM_002560 | P2RX4   | 5025   | 90.6   | 75.1   | 70.0   | 107.0  | 52.1   |
| 204089_x_at | NM_006724 | MAP3K4  | 4216   | 54.9   | 45.4   | 52.7   | 53.2   | 46.9   |
| 204090_at   | NM_004197 | STK19   | 8859   | 39.8   | 49.5   | 65.3   | 62.0   | 50.6   |
| 204091_at   | NM_002601 | PDE6D   | 5147   | 54.4   | 56.2   | 41.4   | 54.3   | 36.3   |
| 204092_s_at | NM_003600 | AURKA   | 6790   | 327.1  | 211.7  | 304.0  | 194.7  | 257.2  |
| 204093_at   | NM_001239 | CCNH    | 902    | 481.6  | 345.1  | 564.2  | 388.1  | 424.1  |
| 204094_s_at | NM_014779 | TSC22D2 | 9819   | 75.6   | 58.4   | 87.8   | 64.3   | 57.1   |
| 204095_s_at | AL521391  | ELL     | 8178   | 18.0   | 12.2   | 18.7   | 24.5   | 14.7   |
| 204096_s_at | AL136771  | ELL     | 8178   | 31.2   | 20.7   | 28.7   | 27.7   | 17.6   |
| 204097_s_at | AF078865  | RBMX2   | 51634  | 104.1  | 86.6   | 91.1   | 72.3   | 65.3   |
| 204098_at   | NM_016024 | RBMX2   | 51634  | 62.3   | 60.5   | 63.7   | 64.9   | 48.8   |
| 204099_at   | NM_003078 | SMARCD3 | 6604   | 50.6   | 59.4   | 48.8   | 49.4   | 46.2   |
| 204100_at   | NM_003250 | THRA    | 7067   | 2.1    | 7.7    | 7.1    | 2.8    | 10.8   |
| 204101_at   | NM_000252 | MTM1    | 4534   | 16.2   | 10.4   | 11.3   | 8.8    | 8.0    |
| 204102_s_at | NM_001961 | EEF2    | 1938   | 3158.2 | 2640.9 | 2875.4 | 2677.2 | 2532.5 |
| 204103_at   | NM_002984 | CCL4    | 6351   | 1.0    | 1.8    | 1.8    | 1.2    | 1.1    |
| 204104_at   | NM_003083 | SNAPC2  | 6618   | 70.9   | 37.0   | 48.5   | 50.4   | 42.3   |
| 204105_s_at | NM_005010 | NRCAM   | 4897   | 6.3    | 3.1    | 0.7    | 1.1    | 0.3    |
| 204106_at   | NM_006285 | TESK1   | 7016   | 54.1   | 34.7   | 39.8   | 49.1   | 44.6   |
| 204107_at   | BF445142  | NFYA    | 4800   | 40.1   | 39.5   | 40.2   | 39.5   | 28.8   |
| 204108_at   | AL031778  | NFYA    | 4800   | 45.7   | 49.5   | 49.3   | 52.5   | 32.8   |
| 204109_s_at | NM_002505 | NFYA    | 4800   | 46.2   | 31.9   | 49.1   | 41.6   | 37.8   |
| 204110_at   | U08092    | HNMT    | 3176   | 5.4    | 1.8    | 11.3   | 6.6    | 2.8    |
| 204111_at   | N40285    | HNMT    | 3176   | 0.6    | 0.3    | 1.2    | 2.4    | 2.3    |
| 204112_s_at | NM_006895 | HNMT    | 3176   | 0.4    | 1.2    | 4.8    | 3.9    | 2.9    |
| 204113_at   | NM_006560 | CELF1   | 10658  | 87.8   | 52.3   | 63.7   | 56.0   | 47.2   |
| 204114_at   | NM_007361 | NID2    | 22795  | 6.3    | 6.0    | 7.0    | 3.7    | 4.1    |
| 204115_at   | NM_004126 | GNG11   | 2791   | 2.2    | 0.3    | 0.6    | 2.5    | 1.7    |
| 204116_at   | NM_000206 | IL2RG   | 3561   | 26.3   | 21.8   | 12.4   | 18.2   | 6.3    |
| 204117_at   | NM_002726 | PREP    | 5550   | 63.6   | 56.1   | 67.5   | 53.8   | 42.0   |
| 204118_at   | NM_001778 | CD48    | 962    | 16.7   | 8.5    | 9.8    | 9.9    | 5.0    |
| 204119_s_at | U90339    | ADK     | 132    | 307.4  | 297.5  | 349.3  | 317.8  | 277.4  |
| 204120_s_at | NM_001123 | ADK     | 132    | 117.5  | 73.9   | 118.8  | 100.2  | 89.1   |
| 204121_at   | NM_006705 | GADD45G | 10912  | 40.4   | 35.6   | 27.5   | 30.5   | 21.1   |
| 204122_at   | NM_003332 | TYROBP  | 7305   | 5.7    | 2.5    | 4.7    | 1.5    | 0.8    |
| 204123_at   | NM_013975 | LIG3    | 3980   | 44.0   | 48.0   | 46.1   | 43.1   | 48.4   |
| 204124_at   | AF146796  | SLC34A2 | 10568  | 5.5    | 5.3    | 0.8    | 6.3    | 5.0    |
| 204125_at   | NM_016013 | NDUFAF1 | 51103  | 166.2  | 148.5  | 139.7  | 170.8  | 141.7  |
| 204126_s_at | NM_003504 | CDC45   | 8318   | 82.6   | 85.6   | 121.3  | 98.8   | 104.5  |
| 204127_at   | BC000149  | RFC3    | 5983   | 195.9  | 156.6  | 225.5  | 162.7  | 172.2  |
| 204128_s_at | NM_002915 | RFC3    | 5983   | 111.5  | 102.1  | 123.9  | 86.5   | 85.9   |
| 204129_at   | NM_004326 | BCL9    | 607    | 43.0   | 29.2   | 37.5   | 38.0   | 26.6   |

|             |           |              |              |        |       |        |       |       |
|-------------|-----------|--------------|--------------|--------|-------|--------|-------|-------|
| 204130_at   | NM_000196 | HSD11B2      | 3291         | 67.1   | 63.2  | 69.3   | 62.0  | 55.0  |
| 204131_s_at | N25732    | FOXO3        | 2309         | 102.2  | 121.1 | 95.4   | 114.1 | 87.2  |
| 204132_s_at | NM_001455 | FOXO3 /// FC | 2309 /// 231 | 110.7  | 102.0 | 82.4   | 96.3  | 71.8  |
| 204133_at   | NM_004704 | RRP9         | 9136         | 120.3  | 96.4  | 160.0  | 110.2 | 144.2 |
| 204134_at   | NM_002599 | PDE2A        | 5138         | 2.0    | 5.5   | 2.5    | 2.6   | 1.7   |
| 204135_at   | NM_014890 | FILIP1L      | 11259        | 3.0    | 2.8   | 5.6    | 5.2   | 7.0   |
| 204136_at   | NM_000094 | COL7A1       | 1294         | 1.1    | 6.0   | 3.1    | 13.1  | 9.8   |
| 204137_at   | NM_003272 | GPR137B      | 7107         | 50.0   | 38.9  | 48.8   | 52.6  | 28.1  |
| 204138_s_at | AI762174  | MZF1         | 7593         | 15.1   | 4.1   | 19.8   | 5.1   | 10.8  |
| 204139_x_at | NM_003422 | MZF1         | 7593         | 60.3   | 56.6  | 73.5   | 73.6  | 44.1  |
| 204140_at   | NM_003596 | TPST1        | 8460         | 36.8   | 35.6  | 35.2   | 37.0  | 30.4  |
| 204141_at   | NM_001069 | TUBB2A       | 7280         | 245.0  | 217.5 | 281.6  | 190.4 | 236.5 |
| 204142_at   | NM_017512 | ENOSF1       | 55556        | 87.2   | 60.2  | 80.1   | 76.4  | 71.6  |
| 204143_s_at | NM_017512 | ENOSF1       | 55556        | 131.9  | 124.1 | 128.3  | 131.3 | 107.7 |
| 204144_s_at | NM_004204 | PIGQ         | 9091         | 25.9   | 26.8  | 25.0   | 27.6  | 27.9  |
| 204145_at   | NM_004477 | FRG1 /// LOC | 2483 /// 100 | 88.7   | 94.2  | 106.0  | 81.7  | 92.6  |
| 204146_at   | BE966146  | RAD51AP1     | 10635        | 173.5  | 94.1  | 194.9  | 112.1 | 140.3 |
| 204147_s_at | NM_007111 | TFDP1        | 7027         | 41.3   | 41.4  | 38.4   | 24.1  | 27.4  |
| 204148_s_at | NM_012230 | POMZP3 ///   | 7784 /// 229 | 227.2  | 254.2 | 248.3  | 271.6 | 221.0 |
| 204149_s_at | NM_000850 | GSTM4        | 2948         | 0.7    | 1.1   | 1.1    | 0.4   | 2.7   |
| 204150_at   | NM_015136 | STAB1        | 23166        | 3.6    | 1.9   | 12.5   | 10.6  | 5.2   |
| 204151_x_at | NM_001353 | AKR1C1       | 1645         | 20.2   | 12.5  | 7.1    | 15.7  | 16.2  |
| 204152_s_at | AI738965  | MFNG         | 4242         | 4.8    | 0.9   | 1.9    | 10.4  | 0.9   |
| 204153_s_at | NM_002405 | MFNG         | 4242         | 2.0    | 3.7   | 6.0    | 5.5   | 6.5   |
| 204154_at   | NM_001801 | CDO1         | 1036         | 6.7    | 9.5   | 12.5   | 10.9  | 7.2   |
| 204155_s_at | AA044154  | SIK3         | 23387        | 13.5   | 14.6  | 18.6   | 15.5  | 8.9   |
| 204156_at   | AA044154  | SIK3         | 23387        | 10.5   | 8.9   | 6.4    | 7.6   | 5.1   |
| 204157_s_at | NM_025164 | SIK3         | 23387        | 21.9   | 13.2  | 22.2   | 24.5  | 14.9  |
| 204158_s_at | NM_006019 | TCIRG1       | 10312        | 24.5   | 23.9  | 30.5   | 24.3  | 21.4  |
| 204159_at   | NM_001262 | CDKN2C       | 1031         | 188.4  | 161.6 | 207.3  | 172.6 | 163.4 |
| 204160_s_at | AW194947  | ENPP4        | 22875        | 38.8   | 42.9  | 33.3   | 30.8  | 25.0  |
| 204161_s_at | NM_014936 | ENPP4        | 22875        | 14.8   | 12.8  | 15.3   | 17.0  | 12.7  |
| 204162_at   | NM_006101 | NDC80        | 10403        | 218.0  | 184.2 | 300.7  | 174.7 | 195.6 |
| 204163_at   | NM_007046 | EMILIN1      | 11117        | 0.7    | 0.8   | 2.7    | 0.9   | 1.1   |
| 204164_at   | NM_006747 | SIPA1        | 6494         | 32.3   | 32.8  | 23.7   | 31.0  | 25.8  |
| 204165_at   | NM_003931 | WASF1        | 8936         | 45.0   | 26.8  | 34.3   | 41.9  | 34.4  |
| 204166_at   | NM_014963 | SBNO2        | 22904        | 62.9   | 52.6  | 63.3   | 64.8  | 52.8  |
| 204167_at   | NM_000060 | BTD          | 686          | 65.1   | 77.3  | 80.4   | 74.9  | 51.6  |
| 204168_at   | NM_002413 | MGST2        | 4258         | 490.5  | 484.0 | 535.0  | 487.4 | 418.5 |
| 204169_at   | NM_000883 | IMPDH1       | 3614         | 96.8   | 83.2  | 108.7  | 78.1  | 72.6  |
| 204170_s_at | NM_001827 | CKS2         | 1164         | 1152.1 | 880.4 | 1179.0 | 880.6 | 970.7 |
| 204171_at   | NM_003161 | RPS6KB1      | 6198         | 44.8   | 25.5  | 56.4   | 42.3  | 41.5  |
| 204172_at   | NM_000097 | CPOX         | 1371         | 76.0   | 55.4  | 90.2   | 54.4  | 81.5  |
| 204173_at   | NM_002475 | MYL6B        | 140465       | 281.6  | 210.3 | 258.4  | 248.8 | 170.1 |
| 204174_at   | NM_001629 | ALOX5AP      | 241          | 15.4   | 16.1  | 2.7    | 6.8   | 8.3   |
| 204175_at   | NM_015871 | ZNF593       | 51042        | 102.2  | 93.9  | 126.5  | 110.0 | 96.6  |
| 204176_at   | AA808694  | KLHL20       | 27252        | 60.5   | 37.1  | 52.5   | 46.0  | 39.4  |
| 204177_s_at | NM_014458 | KLHL20       | 27252        | 55.0   | 49.9  | 44.5   | 49.1  | 51.8  |
| 204178_s_at | NM_006328 | RBM14        | 10432        | 162.9  | 164.1 | 183.9  | 166.5 | 149.6 |
| 204179_at   | NM_005368 | MB           | 4151         | 308.1  | 472.3 | 417.2  | 477.4 | 289.0 |
| 204180_s_at | AI745225  | ZBTB43       | 23099        | 29.2   | 34.8  | 31.1   | 30.2  | 23.2  |
| 204181_s_at | T90308    | ZBTB43       | 23099        | 66.0   | 59.4  | 51.0   | 59.4  | 46.9  |
| 204182_s_at | NM_014007 | ZBTB43       | 23099        | 26.3   | 20.7  | 6.2    | 27.0  | 8.2   |

|             |           |          |       |       |       |       |       |       |
|-------------|-----------|----------|-------|-------|-------|-------|-------|-------|
| 204183_s_at | AI478542  | ADRBK2   | 157   | 22.5  | 20.6  | 20.0  | 10.6  | 8.3   |
| 204184_s_at | NM_005160 | ADRBK2   | 157   | 10.2  | 14.3  | 16.9  | 16.2  | 14.0  |
| 204185_x_at | NM_005038 | PPID     | 5481  | 238.9 | 206.9 | 262.1 | 205.0 | 206.4 |
| 204186_s_at | AI014573  | PPID     | 5481  | 146.6 | 113.8 | 149.0 | 102.3 | 123.4 |
| 204187_at   | NM_006877 | GMPR     | 2766  | 6.6   | 13.5  | 11.6  | 14.0  | 6.1   |
| 204188_s_at | M57707    | RARG     | 5916  | 43.0  | 32.6  | 40.3  | 36.2  | 29.2  |
| 204189_at   | NM_000966 | RARG     | 5916  | 33.4  | 21.9  | 19.8  | 20.9  | 17.2  |
| 204190_at   | NM_005800 | USPL1    | 10208 | 33.2  | 25.0  | 40.1  | 25.9  | 28.6  |
| 204191_at   | NM_000629 | IFNAR1   | 3454  | 14.5  | 14.9  | 19.5  | 4.7   | 7.6   |
| 204192_at   | NM_001774 | CD37     | 951   | 4.2   | 3.6   | 3.9   | 1.7   | 3.5   |
| 204193_at   | NM_005198 | CHKB     | 1120  | 48.3  | 39.9  | 44.4  | 45.5  | 34.3  |
| 204194_at   | NM_001186 | BACH1    | 571   | 30.3  | 24.4  | 20.7  | 30.6  | 18.8  |
| 204195_s_at | AL570914  | PKNOX1   | 5316  | 18.0  | 18.0  | 11.2  | 20.5  | 17.7  |
| 204196_x_at | NM_004571 | PKNOX1   | 5316  | 8.4   | 9.5   | 7.1   | 9.2   | 7.8   |
| 204197_s_at | NM_004350 | RUNX3    | 864   | 6.5   | 1.0   | 8.4   | 6.2   | 2.1   |
| 204198_s_at | AA541630  | RUNX3    | 864   | 2.4   | 4.1   | 2.7   | 0.4   | 0.7   |
| 204199_at   | NM_014636 | RALGPS1  | 9649  | 17.6  | 9.4   | 13.0  | 16.7  | 9.1   |
| 204200_s_at | NM_002608 | PDGFB    | 5155  | 15.4  | 9.3   | 9.6   | 7.1   | 5.1   |
| 204201_s_at | NM_006264 | PTPN13   | 5783  | 52.1  | 47.5  | 57.7  | 52.7  | 38.6  |
| 204202_at   | NM_017604 | IQCE     | 23288 | 68.0  | 60.5  | 77.0  | 69.2  | 61.7  |
| 204203_at   | NM_001806 | CEBPG    | 1054  | 141.5 | 120.1 | 131.0 | 123.6 | 105.9 |
| 204204_at   | NM_001860 | SLC31A2  | 1318  | 43.8  | 18.4  | 23.9  | 27.4  | 18.6  |
| 204205_at   | NM_021822 | APOBEC3G | 60489 | 0.6   | 3.3   | 6.4   | 1.6   | 1.5   |
| 204206_at   | NM_020310 | MNT      | 4335  | 110.7 | 101.7 | 86.9  | 84.4  | 80.9  |
| 204207_s_at | AB012142  | RNGTT    | 8732  | 39.4  | 30.0  | 31.7  | 22.2  | 31.4  |
| 204208_at   | NM_003800 | RNGTT    | 8732  | 17.9  | 16.4  | 13.5  | 14.9  | 15.8  |
| 204209_at   | AI638771  | PCYT1A   | 5130  | 36.0  | 45.5  | 59.9  | 45.9  | 38.1  |
| 204210_s_at | NM_005017 | PCYT1A   | 5130  | 12.8  | 21.5  | 18.9  | 15.2  | 11.2  |
| 204211_x_at | NM_002759 | EIF2AK2  | 5610  | 54.3  | 32.1  | 40.2  | 32.7  | 35.7  |
| 204212_at   | NM_005469 | ACOT8    | 10005 | 92.5  | 66.1  | 67.0  | 83.6  | 47.7  |
| 204213_at   | NM_002644 | PIGR     | 5284  | 33.8  | 21.7  | 26.9  | 24.3  | 19.2  |
| 204214_s_at | NM_006834 | RAB32    | 10981 | 94.5  | 70.6  | 90.3  | 85.1  | 87.4  |
| 204215_at   | NM_024315 | TMEM243  | 79161 | 47.5  | 31.8  | 36.1  | 25.9  | 23.3  |
| 204216_s_at | NM_024824 | ZC3H14   | 79882 | 136.0 | 113.2 | 138.3 | 107.5 | 104.9 |
| 204217_s_at | NM_005619 | RTN2     | 6253  | 6.0   | 4.6   | 4.8   | 8.1   | 0.9   |
| 204218_at   | NM_014042 | ANAPC15  | 25906 | 103.6 | 107.2 | 105.3 | 91.5  | 80.2  |
| 204219_s_at | NM_002802 | PSMC1    | 5700  | 532.3 | 554.1 | 621.9 | 516.4 | 496.4 |
| 204220_at   | NM_004877 | GMFG     | 9535  | 0.7   | 1.5   | 2.7   | 2.3   | 0.4   |
| 204221_x_at | U16307    | GLIPR1   | 11010 | 10.9  | 8.7   | 8.1   | 1.6   | 1.4   |
| 204222_s_at | NM_006851 | GLIPR1   | 11010 | 1.5   | 1.7   | 3.7   | 4.3   | 0.8   |
| 204223_at   | NM_002725 | PRELP    | 5549  | 2.7   | 1.7   | 2.4   | 1.6   | 1.1   |
| 204224_s_at | NM_000161 | GCH1     | 2643  | 105.9 | 74.5  | 94.5  | 75.8  | 69.6  |
| 204225_at   | NM_006037 | HDAC4    | 9759  | 20.4  | 19.6  | 24.8  | 17.3  | 18.2  |
| 204226_at   | NM_014393 | STAU2    | 27067 | 27.3  | 38.1  | 30.3  | 34.7  | 22.9  |
| 204227_s_at | NM_004614 | TK2      | 7084  | 53.9  | 51.5  | 63.1  | 50.9  | 40.2  |
| 204228_at   | NM_006347 | PPIH     | 10465 | 198.5 | 185.5 | 230.2 | 192.2 | 192.7 |
| 204229_at   | H40895    | SLC17A7  | 57030 | 16.1  | 1.5   | 9.6   | 2.0   | 2.1   |
| 204230_s_at | NM_020309 | SLC17A7  | 57030 | 11.1  | 15.6  | 17.5  | 7.8   | 2.0   |
| 204231_s_at | NM_001441 | FAAH     | 2166  | 107.3 | 108.8 | 121.3 | 109.5 | 88.5  |
| 204232_at   | NM_004106 | FCER1G   | 2207  | 14.7  | 8.0   | 12.1  | 5.4   | 10.6  |
| 204233_s_at | AI991328  | CHKA     | 1119  | 39.4  | 56.3  | 69.1  | 54.3  | 43.1  |
| 204234_s_at | AI476267  | ZNF195   | 7748  | 75.4  | 52.1  | 74.6  | 62.4  | 50.9  |
| 204235_s_at | AF200715  | GULP1    | 51454 | 458.6 | 423.7 | 458.4 | 455.1 | 338.3 |

|             |           |         |       |       |       |       |       |       |
|-------------|-----------|---------|-------|-------|-------|-------|-------|-------|
| 204236_at   | NM_002017 | FLI1    | 2313  | 3.1   | 0.9   | 0.9   | 0.3   | 0.3   |
| 204237_at   | NM_016315 | GULP1   | 51454 | 824.5 | 904.7 | 848.9 | 816.3 | 688.4 |
| 204238_s_at | NM_006443 | DNPH1   | 10591 | 145.1 | 192.4 | 152.8 | 136.4 | 129.3 |
| 204239_s_at | NM_005386 | NNAT    | 4826  | 15.6  | 3.2   | 9.1   | 4.9   | 10.2  |
| 204240_s_at | NM_006444 | SMC2    | 10592 | 113.4 | 82.1  | 114.5 | 78.2  | 90.9  |
| 204241_at   | BF055171  | ACOX3   | 8310  | 27.5  | 17.0  | 29.4  | 17.9  | 16.3  |
| 204242_s_at | NM_003501 | ACOX3   | 8310  | 21.3  | 20.8  | 11.3  | 22.8  | 8.6   |
| 204243_at   | NM_012421 | RLF     | 6018  | 29.6  | 16.5  | 25.4  | 18.4  | 19.3  |
| 204244_s_at | NM_006716 | DBF4    | 10926 | 127.0 | 69.5  | 134.1 | 66.1  | 90.0  |
| 204245_s_at | AW242755  | RPP14   | 11102 | 94.5  | 73.9  | 88.1  | 65.0  | 75.8  |
| 204246_s_at | NM_007234 | DCTN3   | 11258 | 740.9 | 755.1 | 793.4 | 785.3 | 596.3 |
| 204247_s_at | NM_004935 | CDK5    | 1020  | 129.3 | 221.0 | 155.2 | 202.4 | 158.3 |
| 204248_at   | NM_002067 | GNA11   | 2767  | 110.9 | 121.6 | 148.2 | 143.2 | 107.4 |
| 204249_s_at | NM_005574 | LMO2    | 4005  | 4.6   | 1.6   | 4.9   | 2.3   | 1.2   |
| 204250_s_at | AI655714  | CEP164  | 22897 | 5.3   | 3.8   | 1.4   | 10.2  | 7.8   |
| 204251_s_at | NM_014956 | CEP164  | 22897 | 32.3  | 29.1  | 29.2  | 29.9  | 20.4  |
| 204252_at   | M68520    | CDK2    | 1017  | 276.7 | 174.3 | 318.2 | 186.0 | 249.8 |
| 204253_s_at | AA454701  | VDR     | 7421  | 23.2  | 15.0  | 19.4  | 7.8   | 14.0  |
| 204254_s_at | NM_000376 | VDR     | 7421  | 85.1  | 56.1  | 66.2  | 54.1  | 69.3  |
| 204255_s_at | AA772285  | VDR     | 7421  | 32.1  | 23.3  | 39.1  | 28.9  | 30.2  |
| 204256_at   | NM_024090 | ELOVL6  | 79071 | 89.8  | 99.8  | 122.8 | 82.4  | 93.5  |
| 204257_at   | NM_021727 | FADS3   | 3995  | 42.4  | 30.7  | 35.5  | 40.2  | 33.1  |
| 204258_at   | NM_001270 | CHD1    | 1105  | 39.9  | 32.2  | 44.5  | 37.5  | 38.4  |
| 204259_at   | NM_002423 | MMP7    | 4316  | 12.0  | 8.5   | 13.8  | 4.8   | 14.1  |
| 204260_at   | NM_001819 | CHGB    | 1114  | 2.5   | 4.0   | 5.5   | 0.3   | 0.7   |
| 204261_s_at | AA716657  | PSEN2   | 5664  | 17.4  | 21.8  | 13.1  | 20.3  | 16.6  |
| 204262_s_at | NM_000447 | PSEN2   | 5664  | 60.6  | 45.8  | 62.2  | 44.8  | 42.8  |
| 204263_s_at | M58581    | CPT2    | 1376  | 106.5 | 83.6  | 90.3  | 101.2 | 80.3  |
| 204264_at   | NM_000098 | CPT2    | 1376  | 145.6 | 129.3 | 149.8 | 133.7 | 114.8 |
| 204265_s_at | NM_022107 | GPSM3   | 63940 | 2.4   | 7.9   | 21.0  | 0.8   | 9.3   |
| 204266_s_at | NM_001277 | CHKA    | 1119  | 44.5  | 37.4  | 57.1  | 53.0  | 46.4  |
| 204267_x_at | NM_004203 | PKMYT1  | 9088  | 141.9 | 107.8 | 162.1 | 103.4 | 130.9 |
| 204268_at   | NM_005978 | S100A2  | 6273  | 1.3   | 9.0   | 1.6   | 10.5  | 3.7   |
| 204269_at   | NM_006875 | PIM2    | 11040 | 44.7  | 37.7  | 48.9  | 40.9  | 32.8  |
| 204270_at   | AI568728  | SKI     | 6497  | 20.4  | 17.3  | 17.0  | 15.7  | 10.2  |
| 204271_s_at | M74921    | EDNRB   | 1910  | 8.7   | 9.4   | 8.5   | 6.5   | 5.3   |
| 204272_at   | NM_006149 | LGALS4  | 3960  | 13.7  | 4.7   | 4.7   | 6.9   | 3.6   |
| 204273_at   | NM_000115 | EDNRB   | 1910  | 0.1   | 0.1   | 3.3   | 0.1   | 0.1   |
| 204274_at   | AA812215  | EBAG9   | 9166  | 187.0 | 185.2 | 207.5 | 188.1 | 172.3 |
| 204275_at   | AI796687  | CAPN15  | 6650  | 48.1  | 40.9  | 59.5  | 41.8  | 46.7  |
| 204276_at   | BE895437  | TK2     | 7084  | 45.6  | 52.1  | 55.5  | 47.1  | 35.8  |
| 204277_s_at | BE895437  | TK2     | 7084  | 19.6  | 17.6  | 22.1  | 15.7  | 10.0  |
| 204278_s_at | NM_004215 | EBAG9   | 9166  | 74.2  | 64.1  | 81.1  | 82.7  | 64.4  |
| 204279_at   | NM_002800 | PSMB9   | 5698  | 12.7  | 6.8   | 9.4   | 8.5   | 8.8   |
| 204280_at   | NM_006480 | RGS14   | 10636 | 16.6  | 24.5  | 26.0  | 19.9  | 15.9  |
| 204281_at   | NM_003213 | TEAD4   | 7004  | 98.4  | 69.1  | 105.7 | 87.4  | 74.8  |
| 204282_s_at | NM_006567 | FARS2   | 10667 | 44.0  | 49.8  | 62.3  | 56.3  | 46.2  |
| 204283_at   | NM_006567 | FARS2   | 10667 | 92.4  | 75.7  | 90.9  | 93.9  | 62.3  |
| 204284_at   | N26005    | PPP1R3C | 5507  | 8.0   | 2.2   | 8.3   | 4.3   | 5.3   |
| 204285_s_at | AI857639  | PMAIP1  | 5366  | 79.1  | 95.4  | 106.1 | 82.6  | 69.5  |
| 204286_s_at | NM_021127 | PMAIP1  | 5366  | 28.8  | 36.0  | 44.9  | 33.6  | 24.8  |
| 204287_at   | NM_004711 | SYNGR1  | 9145  | 28.0  | 16.3  | 12.1  | 16.1  | 6.7   |
| 204288_s_at | NM_021069 | SORBS2  | 8470  | 30.8  | 20.6  | 38.3  | 17.0  | 20.3  |



|             |           |                     |              |        |        |        |        |       |
|-------------|-----------|---------------------|--------------|--------|--------|--------|--------|-------|
| 204289_at   | BG399778  | ALDH6A1             | 4329         | 2.3    | 4.0    | 2.4    | 4.1    | 4.4   |
| 204290_s_at | NM_005589 | ALDH6A1             | 4329         | 221.1  | 240.0  | 269.3  | 246.8  | 189.6 |
| 204291_at   | NM_014803 | ZNF518A             | 9849         | 19.5   | 13.4   | 18.4   | 14.2   | 15.2  |
| 204292_x_at | NM_000455 | STK11               | 6794         | 7.3    | 11.5   | 15.4   | 22.3   | 11.8  |
| 204293_at   | NM_000199 | SGSH                | 6448         | 28.0   | 14.4   | 1.8    | 2.2    | 9.6   |
| 204294_at   | NM_000481 | AMT                 | 275          | 22.0   | 14.0   | 16.1   | 21.9   | 15.2  |
| 204295_at   | NM_003172 | SURF1               | 6834         | 542.3  | 648.4  | 597.1  | 642.9  | 498.4 |
| 204296_at   | NM_021196 | SLC4A5              | 57835        | 1.5    | 3.8    | 1.8    | 1.1    | 9.7   |
| 204297_at   | NM_002647 | PIK3C3              | 5289         | 91.9   | 97.6   | 100.2  | 97.8   | 76.2  |
| 204298_s_at | NM_002317 | LOX                 | 4015         | 3.3    | 4.8    | 6.8    | 1.2    | 6.3   |
| 204299_at   | NM_021993 | SRSF10              | 10772        | 66.0   | 41.1   | 63.4   | 50.1   | 45.2  |
| 204300_at   | NM_004564 | PET112              | 5188         | 44.7   | 38.8   | 44.2   | 36.9   | 30.7  |
| 204301_at   | NM_014867 | KBTBD11             | 9920         | 19.4   | 12.0   | 10.5   | 14.8   | 10.8  |
| 204302_s_at | U55962    | CTIF                | 9811         | 19.7   | 2.0    | 14.4   | 12.3   | 6.7   |
| 204303_s_at | NM_014772 | CTIF                | 9811         | 5.1    | 10.0   | 1.6    | 15.3   | 1.2   |
| 204304_s_at | NM_006017 | PROM1               | 8842         | 6.4    | 0.5    | 0.6    | 3.7    | 1.6   |
| 204305_at   | NM_005932 | MIPEP               | 4285         | 148.8  | 113.5  | 134.8  | 93.5   | 87.9  |
| 204306_s_at | NM_004357 | CD151               | 977          | 143.6  | 127.9  | 140.7  | 142.5  | 115.8 |
| 204307_at   | AB002295  | TECPR2              | 9895         | 3.0    | 1.2    | 1.6    | 8.2    | 5.1   |
| 204308_s_at | NM_014844 | TECPR2              | 9895         | 23.5   | 18.1   | 16.7   | 23.9   | 16.3  |
| 204309_at   | NM_000781 | CYP11A1             | 1583         | 0.5    | 0.3    | 6.8    | 6.6    | 9.0   |
| 204310_s_at | NM_003995 | NPR2                | 4882         | 1.5    | 1.1    | 1.8    | 3.4    | 1.0   |
| 204311_at   | NM_001678 | ATP1B2              | 482          | 4.2    | 7.0    | 3.3    | 10.2   | 2.2   |
| 204312_x_at | AI655737  | CREB1               | 1385         | 57.6   | 59.1   | 59.6   | 53.4   | 48.6  |
| 204313_s_at | AA161486  | CREB1               | 1385         | 76.7   | 93.0   | 81.1   | 66.7   | 64.2  |
| 204314_s_at | NM_004379 | CREB1               | 1385         | 63.7   | 44.7   | 60.2   | 49.2   | 42.5  |
| 204315_s_at | AI340239  | GTSE1               | 51512        | 37.2   | 28.3   | 44.4   | 38.1   | 35.2  |
| 204316_at   | W19676    | RGS10               | 6001         | 17.0   | 14.1   | 12.6   | 16.6   | 7.5   |
| 204317_at   | BF305380  | GTSE1 /// TR        | 51512 /// 55 | 28.0   | 16.6   | 24.3   | 27.1   | 22.6  |
| 204318_s_at | NM_016426 | GTSE1               | 51512        | 84.9   | 78.5   | 105.1  | 84.3   | 69.0  |
| 204319_s_at | NM_002925 | RGS10               | 6001         | 111.4  | 132.4  | 112.4  | 126.4  | 87.0  |
| 204320_at   | NM_001854 | COL11A1             | 1301         | 0.7    | 1.7    | 5.1    | 2.1    | 3.7   |
| 204321_at   | NM_002499 | NEO1                | 4756         | 46.4   | 50.4   | 49.5   | 60.3   | 38.2  |
| 204322_at   | BF002254  | GOLIM4              | 27333        | 1.2    | 0.6    | 0.7    | 0.6    | 0.6   |
| 204323_x_at | M61213    | LOC1019301.4763 /// | 101          | 7.9    | 10.0   | 9.2    | 7.1    | 7.0   |
| 204324_s_at | NM_014498 | GOLIM4              | 27333        | 11.0   | 11.3   | 12.3   | 13.1   | 11.6  |
| 204325_s_at | NM_000267 | LOC1019301.4763 /// | 101          | 17.7   | 8.8    | 12.8   | 10.2   | 7.6   |
| 204326_x_at | NM_002450 | MT1X                | 4501         | 1126.8 | 1091.0 | 1254.6 | 1165.1 | 969.5 |
| 204327_s_at | N91520    | ZNF202              | 7753         | 48.2   | 38.0   | 47.2   | 40.4   | 35.3  |
| 204328_at   | NM_007267 | TMC6                | 11322        | 69.1   | 53.0   | 46.8   | 52.6   | 46.6  |
| 204329_s_at | N46430    | ZNF202              | 7753         | 4.9    | 2.3    | 11.5   | 8.3    | 5.5   |
| 204330_s_at | AA587905  | MRPS12              | 6183         | 33.1   | 23.7   | 37.3   | 32.6   | 31.3  |
| 204331_s_at | NM_021107 | MRPS12              | 6183         | 681.5  | 592.3  | 804.4  | 652.0  | 667.9 |
| 204332_s_at | M64073    | AGA                 | 175          | 163.0  | 189.1  | 157.3  | 185.4  | 140.1 |
| 204333_s_at | NM_000027 | AGA                 | 175          | 59.3   | 60.4   | 61.3   | 66.5   | 44.7  |
| 204334_at   | AA488672  | KLF7                | 8609         | 15.3   | 13.2   | 13.1   | 9.4    | 6.2   |
| 204335_at   | NM_018074 | CCDC94              | 55702        | 47.5   | 42.4   | 50.2   | 56.3   | 47.6  |
| 204336_s_at | NM_005873 | RGS19               | 10287        | 41.4   | 45.5   | 39.4   | 41.0   | 33.4  |
| 204337_at   | AL514445  | RGS4                | 5999         | 1.8    | 3.6    | 4.8    | 4.6    | 1.2   |
| 204338_s_at | NM_005613 | RGS4                | 5999         | 0.9    | 0.4    | 0.3    | 0.8    | 0.4   |
| 204339_s_at | BC000737  | RGS4                | 5999         | 4.9    | 2.7    | 2.4    | 2.0    | 2.1   |
| 204340_at   | NM_003492 | TMEM187             | 8269         | 130.4  | 137.6  | 158.2  | 127.6  | 118.1 |
| 204341_at   | NM_006470 | TRIM16              | 10626        | 140.7  | 169.2  | 154.1  | 148.3  | 97.1  |

|             |           |                             |       |        |        |        |        |       |
|-------------|-----------|-----------------------------|-------|--------|--------|--------|--------|-------|
| 204342_at   | NM_013386 | SLC25A24                    | 29957 | 82.3   | 44.7   | 62.8   | 64.1   | 62.1  |
| 204343_at   | NM_001089 | ABCA3                       | 21    | 43.4   | 37.7   | 39.2   | 40.1   | 34.9  |
| 204344_s_at | NM_006364 | SEC23A                      | 10484 | 71.1   | 68.9   | 81.4   | 75.4   | 64.7  |
| 204345_at   | NM_001856 | COL16A1                     | 1307  | 4.0    | 9.3    | 12.5   | 2.2    | 1.5   |
| 204346_s_at | NM_007182 | RASSF1                      | 11186 | 60.9   | 56.0   | 70.6   | 64.6   | 57.7  |
| 204347_at   | AI653169  | AK4 /// LOC1205 /// 1005    |       | 41.2   | 41.0   | 60.6   | 59.7   | 43.8  |
| 204348_s_at | NM_013410 | AK4 /// LOC1205 /// 1005    |       | 316.9  | 217.8  | 311.3  | 254.6  | 250.2 |
| 204349_at   | BC005250  | MED7                        | 9443  | 81.0   | 33.1   | 54.8   | 41.3   | 44.5  |
| 204350_s_at | NM_004270 | MED7                        | 9443  | 82.3   | 66.0   | 89.7   | 71.1   | 76.0  |
| 204351_at   | NM_005980 | S100P                       | 6286  | 36.1   | 66.8   | 60.6   | 50.5   | 26.1  |
| 204352_at   | NM_004619 | TRAF5                       | 7188  | 1.7    | 5.6    | 7.0    | 5.5    | 4.5   |
| 204353_s_at | BC002923  | POT1                        | 25913 | 72.6   | 82.2   | 95.3   | 88.4   | 89.7  |
| 204354_at   | NM_015450 | POT1                        | 25913 | 98.5   | 86.2   | 111.5  | 83.8   | 83.1  |
| 204355_at   | NM_014966 | DHX30                       | 22907 | 133.2  | 114.9  | 150.7  | 122.5  | 109.3 |
| 204356_at   | D26309    | LIMK1                       | 3984  | 1.8    | 1.0    | 1.4    | 1.1    | 1.3   |
| 204357_s_at | NM_002314 | LIMK1                       | 3984  | 18.4   | 22.7   | 7.8    | 19.9   | 8.4   |
| 204358_s_at | AF169676  | FLRT2 /// LOC23768 /// 10   |       | 2.9    | 3.3    | 2.0    | 5.8    | 5.3   |
| 204359_at   | NM_013231 | FLRT2 /// LOC23768 /// 10   |       | 1.2    | 2.0    | 0.3    | 2.7    | 0.8   |
| 204360_s_at | NM_000263 | NAGLU                       | 4669  | 70.2   | 69.0   | 81.0   | 79.6   | 73.6  |
| 204361_s_at | AB014486  | SKAP2                       | 8935  | 40.8   | 40.6   | 52.3   | 50.8   | 33.9  |
| 204362_at   | NM_003930 | SKAP2                       | 8935  | 79.2   | 80.7   | 91.9   | 79.3   | 72.6  |
| 204363_at   | NM_001993 | F3                          | 2152  | 0.9    | 1.0    | 0.4    | 0.7    | 1.2   |
| 204364_s_at | BE535746  | REEP1                       | 65055 | 14.6   | 13.2   | 12.9   | 22.2   | 12.2  |
| 204365_s_at | NM_022912 | REEP1                       | 65055 | 18.6   | 23.9   | 17.0   | 14.7   | 17.1  |
| 204366_s_at | NM_001521 | GTF3C2                      | 2976  | 196.4  | 165.6  | 202.2  | 165.7  | 125.7 |
| 204367_at   | D28588    | SP2                         | 6668  | 121.0  | 97.6   | 97.7   | 101.4  | 92.9  |
| 204368_at   | NM_005630 | SLCO2A1                     | 6578  | 14.0   | 9.1    | 17.1   | 17.7   | 13.5  |
| 204369_at   | NM_006218 | PIK3CA                      | 5290  | 17.0   | 11.9   | 17.8   | 17.5   | 14.2  |
| 204370_at   | NM_006831 | CLP1                        | 10978 | 95.4   | 59.6   | 87.5   | 71.7   | 69.4  |
| 204371_s_at | AI933301  | KHSRP                       | 8570  | 31.7   | 25.7   | 37.8   | 32.5   | 25.3  |
| 204372_s_at | NM_003685 | KHSRP                       | 8570  | 319.7  | 306.2  | 406.0  | 331.3  | 309.5 |
| 204373_s_at | NM_014810 | CEP350                      | 9857  | 29.3   | 25.0   | 25.1   | 25.4   | 17.6  |
| 204374_s_at | BG474736  | GALK1                       | 2584  | 21.4   | 16.7   | 25.1   | 18.7   | 17.4  |
| 204375_at   | NM_014718 | CLSTN3                      | 9746  | 24.3   | 22.0   | 0.9    | 18.8   | 9.0   |
| 204376_at   | NM_014703 | VPRBP                       | 9730  | 2.9    | 0.3    | 3.6    | 4.8    | 1.4   |
| 204377_s_at | NM_014703 | VPRBP                       | 9730  | 8.6    | 4.2    | 6.2    | 4.9    | 6.3   |
| 204378_at   | NM_003657 | BCAS1                       | 8537  | 9.1    | 7.2    | 8.1    | 12.0   | 8.4   |
| 204379_s_at | NM_000142 | FGFR3                       | 2261  | 7.0    | 1.3    | 7.9    | 7.0    | 9.1   |
| 204380_s_at | M58051    | FGFR3                       | 2261  | 8.4    | 0.7    | 9.2    | 7.5    | 0.6   |
| 204381_at   | NM_002333 | LRP3                        | 4037  | 92.8   | 80.3   | 69.8   | 64.3   | 71.3  |
| 204382_at   | NM_015654 | NAT9                        | 26151 | 50.6   | 51.6   | 46.8   | 48.7   | 48.4  |
| 204383_at   | NM_022719 | DGCR14 /// LOC18220 /// 236 |       | 40.2   | 24.3   | 39.5   | 32.4   | 22.7  |
| 204384_at   | NM_004486 | GOLGA2                      | 2801  | 8.9    | 17.6   | 9.5    | 11.7   | 13.1  |
| 204385_at   | NM_003937 | KYNU                        | 8942  | 33.4   | 12.9   | 2.9    | 29.2   | 8.8   |
| 204386_s_at | BF303597  | MRPL57                      | 78988 | 1162.6 | 1068.3 | 1257.0 | 1135.7 | 958.8 |
| 204387_x_at | NM_024026 | MRPL57                      | 78988 | 98.1   | 79.4   | 91.2   | 75.7   | 76.6  |
| 204388_s_at | NM_000240 | MAOA                        | 4128  | 493.0  | 412.6  | 621.6  | 483.4  | 544.0 |
| 204389_at   | NM_000240 | MAOA                        | 4128  | 497.5  | 452.3  | 573.8  | 460.6  | 522.9 |
| 204390_at   | AF009353  | -                           | -     | 1.4    | 0.4    | 0.3    | 0.7    | 0.7   |
| 204391_x_at | NM_015905 | TRIM24                      | 8805  | 61.2   | 60.1   | 51.8   | 55.0   | 56.9  |
| 204392_at   | NM_003656 | CAMK1                       | 8536  | 71.3   | 55.2   | 68.3   | 66.5   | 51.6  |
| 204393_s_at | NM_001099 | ACPP                        | 55    | 294.8  | 256.0  | 231.6  | 269.7  | 163.0 |
| 204394_at   | NM_003627 | SLC43A1                     | 8501  | 111.7  | 87.9   | 117.4  | 100.5  | 97.5  |

|             |           |             |             |       |       |       |       |       |      |
|-------------|-----------|-------------|-------------|-------|-------|-------|-------|-------|------|
| 204395_s_at | AI338653  | GRK5        | 2869        | 3.9   | 2.4   | 18.3  | 19.6  | 12.8  |      |
| 204396_s_at | NM_005308 | GRK5        | 2869        | 2.0   | 7.2   | 7.3   | 8.6   | 4.3   |      |
| 204397_at   | AF103939  | EML2        | 24139       | 21.5  | 2.3   | 6.6   | 3.8   | 11.0  |      |
| 204398_s_at | NM_012155 | EML2        | 24139       | 20.4  | 32.4  | 27.9  | 32.2  | 20.3  |      |
| 204399_s_at | AI582285  | EML2        | 24139       | 7.6   | 2.9   | 3.9   | 1.7   | 7.7   |      |
| 204400_at   | NM_005864 | EFS         | 10278       | 205.3 | 166.2 | 199.2 | 209.8 | 153.0 |      |
| 204401_at   | NM_002250 | KCNN4       | 3783        | 1.3   | 1.1   | 2.8   | 1.1   | 5.5   |      |
| 204402_at   | NM_012265 | RHBDD3      | 25807       | 44.2  | 71.3  | 64.1  | 79.0  | 61.0  |      |
| 204403_x_at | NM_014719 | FAM115A /// | 9747 ///    | 100   | 78.8  | 83.8  | 83.1  | 84.7  | 67.1 |
| 204404_at   | NM_001046 | SLC12A2     | 6558        | 120.4 | 74.2  | 83.1  | 63.4  | 50.1  |      |
| 204405_x_at | NM_014473 | DIMT1       | 27292       | 489.6 | 448.0 | 513.8 | 401.0 | 381.6 |      |
| 204406_at   | NM_002019 | FLT1        | 2321        | 2.4   | 2.1   | 1.4   | 7.2   | 0.6   |      |
| 204407_at   | AF080255  | TTF2        | 8458        | 131.9 | 60.8  | 146.4 | 60.4  | 60.9  |      |
| 204408_at   | NM_014481 | APEX2       | 27301       | 82.8  | 73.6  | 113.8 | 109.4 | 101.5 |      |
| 204409_s_at | BC005248  | EIF1AY      | 9086        | 217.2 | 177.1 | 236.6 | 190.6 | 185.4 |      |
| 204410_at   | NM_004681 | EIF1AY      | 9086        | 30.4  | 39.7  | 40.9  | 36.7  | 30.9  |      |
| 204411_at   | NM_017596 | KIF21B      | 23046       | 1.4   | 3.2   | 1.3   | 1.4   | 1.3   |      |
| 204412_s_at | NM_021076 | NEFH        | 4744        | 1.7   | 1.8   | 1.4   | 1.4   | 8.0   |      |
| 204413_at   | NM_021138 | TRAF2       | 7186        | 11.6  | 13.2  | 22.7  | 15.8  | 25.5  |      |
| 204414_at   | NM_004737 | LARGE       | 9215        | 5.1   | 2.8   | 1.3   | 0.4   | 0.4   |      |
| 204415_at   | NM_022873 | IFI6        | 2537        | 40.0  | 58.0  | 54.3  | 38.8  | 43.2  |      |
| 204416_x_at | NM_001645 | APOC1       | 341         | 13.9  | 2.5   | 3.1   | 2.0   | 1.1   |      |
| 204417_at   | NM_000153 | GALC        | 2581        | 1.0   | 5.9   | 6.0   | 4.7   | 2.4   |      |
| 204418_x_at | NM_000848 | GSTM2       | 2946        | 17.1  | 22.9  | 14.4  | 24.4  | 15.4  |      |
| 204419_x_at | NM_000184 | HBG1 ///    | HB 3047 /// | 304   | 10.2  | 1.8   | 10.8  | 13.5  | 11.8 |
| 204420_at   | BG251266  | FOSL1       | 8061        | 1.6   | 4.1   | 1.3   | 4.4   | 1.3   |      |
| 204421_s_at | M27968    | FGF2        | 2247        | 8.1   | 0.4   | 1.3   | 6.9   | 3.7   |      |
| 204422_s_at | NM_002006 | FGF2        | 2247        | 3.3   | 1.8   | 3.8   | 0.6   | 0.5   |      |
| 204423_at   | NM_013255 | MKLN1       | 4289        | 105.8 | 79.0  | 98.6  | 80.6  | 85.8  |      |
| 204424_s_at | AL050152  | LMO3        | 55885       | 7.7   | 1.0   | 1.1   | 5.3   | 7.0   |      |
| 204425_at   | NM_001666 | ARHGAP4     | 393         | 2.6   | 8.8   | 6.0   | 1.3   | 2.8   |      |
| 204426_at   | NM_006815 | TMED2       | 10959       | 498.9 | 382.2 | 435.7 | 380.6 | 372.9 |      |
| 204427_s_at | NM_006815 | TMED2       | 10959       | 431.7 | 399.9 | 470.9 | 425.9 | 413.7 |      |
| 204428_s_at | NM_000229 | LCAT        | 3931        | 0.5   | 0.6   | 0.6   | 0.4   | 0.5   |      |
| 204429_s_at | BE560461  | SLC2A5      | 6518        | 20.8  | 23.8  | 30.7  | 21.0  | 17.2  |      |
| 204430_s_at | NM_003039 | SLC2A5      | 6518        | 1.3   | 10.2  | 1.0   | 1.1   | 1.3   |      |
| 204431_at   | NM_003260 | TLE2        | 7089        | 32.9  | 24.4  | 26.9  | 29.6  | 18.7  |      |
| 204432_at   | NM_006943 | SOX12       | 6666        | 66.4  | 58.2  | 70.8  | 62.9  | 56.8  |      |
| 204433_s_at | U28164    | SPATA2      | 9825        | 44.4  | 30.5  | 41.3  | 33.3  | 23.0  |      |
| 204434_at   | NM_006038 | SPATA2      | 9825        | 34.0  | 35.1  | 22.6  | 31.0  | 31.5  |      |
| 204435_at   | NM_014778 | NUPL1       | 9818        | 58.8  | 46.4  | 65.6  | 43.3  | 53.6  |      |
| 204436_at   | NM_025201 | PLEKHO2     | 80301       | 36.2  | 24.0  | 20.0  | 25.7  | 19.0  |      |
| 204437_s_at | NM_016725 | FOLR1       | 2348        | 31.2  | 20.1  | 22.4  | 18.0  | 13.8  |      |
| 204438_at   | NM_002438 | MRC1        | 4360        | 1.6   | 4.4   | 3.7   | 6.4   | 0.8   |      |
| 204439_at   | NM_006820 | IFI44L      | 10964       | 6.5   | 0.5   | 0.8   | 5.3   | 0.3   |      |
| 204440_at   | NM_004233 | CD83        | 9308        | 24.2  | 24.9  | 26.1  | 30.2  | 18.1  |      |
| 204441_s_at | NM_002689 | POLA2       | 23649       | 129.5 | 110.8 | 148.7 | 102.5 | 126.4 |      |
| 204442_x_at | NM_003573 | LTBP4       | 8425        | 10.6  | 16.8  | 11.1  | 8.8   | 19.2  |      |
| 204443_at   | NM_000487 | ARSA        | 410         | 11.2  | 24.4  | 17.4  | 21.2  | 20.3  |      |
| 204444_at   | NM_004523 | KIF11       | 3832        | 67.8  | 39.8  | 68.9  | 45.1  | 47.1  |      |
| 204445_s_at | AI361850  | ALOX5       | 240         | 11.5  | 0.8   | 5.9   | 7.7   | 1.7   |      |
| 204446_s_at | NM_000698 | ALOX5       | 240         | 3.3   | 3.2   | 3.2   | 0.4   | 2.1   |      |
| 204447_at   | NM_014731 | LZTS3       | 9762        | 18.4  | 25.8  | 16.3  | 16.0  | 16.3  |      |

|             |           |                          |       |       |       |       |       |       |
|-------------|-----------|--------------------------|-------|-------|-------|-------|-------|-------|
| 204448_s_at | AF031463  | PDCL                     | 5082  | 52.3  | 41.7  | 41.9  | 43.0  | 37.8  |
| 204449_at   | NM_005388 | PDCL                     | 5082  | 23.2  | 26.5  | 19.0  | 30.4  | 24.9  |
| 204450_x_at | NM_000039 | APOA1                    | 335   | 9.5   | 2.4   | 9.8   | 6.2   | 7.4   |
| 204451_at   | NM_003505 | FZD1                     | 8321  | 34.4  | 32.7  | 41.9  | 32.9  | 37.5  |
| 204452_s_at | AF072872  | FZD1                     | 8321  | 16.9  | 9.5   | 12.9  | 11.3  | 11.6  |
| 204453_at   | NM_003428 | ZNF84                    | 7637  | 64.1  | 44.5  | 48.1  | 48.2  | 46.0  |
| 204454_at   | NM_012317 | LDOC1                    | 23641 | 436.1 | 420.3 | 450.2 | 454.9 | 306.4 |
| 204455_at   | NM_001723 | DST                      | 667   | 4.5   | 0.7   | 1.3   | 4.7   | 2.6   |
| 204456_s_at | AW611727  | GAS1                     | 2619  | 1.1   | 0.3   | 0.4   | 0.3   | 0.3   |
| 204457_s_at | NM_002048 | GAS1                     | 2619  | 0.7   | 0.4   | 0.5   | 0.7   | 0.2   |
| 204458_at   | AL110209  | PLA2G15                  | 23659 | 35.5  | 26.3  | 37.2  | 22.6  | 25.1  |
| 204459_at   | NM_001325 | CSTF2                    | 1478  | 131.6 | 118.9 | 119.9 | 104.8 | 109.3 |
| 204460_s_at | AF074717  | RAD1                     | 5810  | 84.6  | 85.8  | 76.1  | 69.7  | 68.8  |
| 204461_x_at | NM_002853 | RAD1                     | 5810  | 159.9 | 99.5  | 165.7 | 120.1 | 122.9 |
| 204462_s_at | NM_006517 | SLC16A2                  | 6567  | 18.6  | 22.1  | 14.0  | 15.2  | 14.9  |
| 204463_s_at | AU118882  | EDNRA                    | 1909  | 0.2   | 0.3   | 0.2   | 0.2   | 0.2   |
| 204464_s_at | NM_001957 | EDNRA                    | 1909  | 4.0   | 0.8   | 4.4   | 4.9   | 6.9   |
| 204465_s_at | NM_004692 | INA                      | 9118  | 8.4   | 7.6   | 7.2   | 8.8   | 4.0   |
| 204466_s_at | BG260394  | SNCA                     | 6622  | 5.3   | 5.5   | 10.3  | 8.1   | 0.9   |
| 204467_s_at | NM_000345 | SNCA                     | 6622  | 5.9   | 6.6   | 2.2   | 5.4   | 4.0   |
| 204468_s_at | NM_005424 | TIE1                     | 7075  | 0.7   | 0.7   | 0.3   | 0.2   | 0.2   |
| 204469_at   | NM_002851 | PTPRZ1                   | 5803  | 3.4   | 0.4   | 3.0   | 0.2   | 2.0   |
| 204470_at   | NM_001511 | CXCL1                    | 2919  | 3.8   | 6.9   | 0.4   | 3.1   | 0.5   |
| 204471_at   | NM_002045 | GAP43                    | 2596  | 0.5   | 0.5   | 0.9   | 3.3   | 0.5   |
| 204472_at   | NM_005261 | GEM                      | 2669  | 0.8   | 8.8   | 9.9   | 7.3   | 4.5   |
| 204473_s_at | NM_014630 | ZNF592                   | 9640  | 46.4  | 44.6  | 52.7  | 48.5  | 28.2  |
| 204474_at   | NM_005081 | ZNF142                   | 7701  | 38.0  | 43.7  | 44.7  | 34.9  | 30.8  |
| 204475_at   | NM_002421 | MMP1                     | 4312  | 3.8   | 0.5   | 2.0   | 0.6   | 0.2   |
| 204476_s_at | NM_022172 | PC                       | 5091  | 27.8  | 49.9  | 63.7  | 59.0  | 47.8  |
| 204477_at   | U74324    | RABIF                    | 5877  | 23.5  | 15.9  | 24.0  | 29.0  | 24.2  |
| 204478_s_at | NM_002871 | RABIF                    | 5877  | 84.4  | 76.7  | 99.5  | 128.6 | 84.5  |
| 204479_at   | NM_012383 | OSTF1                    | 26578 | 65.9  | 82.4  | 85.5  | 75.8  | 66.4  |
| 204480_s_at | NM_024112 | C9orf16                  | 79095 | 232.0 | 253.7 | 262.7 | 274.6 | 181.6 |
| 204481_at   | NM_004634 | BRPF1                    | 7862  | 54.2  | 24.3  | 47.4  | 35.4  | 26.3  |
| 204482_at   | NM_003277 | CLDN5                    | 7122  | 3.1   | 3.6   | 2.8   | 2.8   | 1.4   |
| 204483_at   | NM_001976 | ENO3                     | 2027  | 46.9  | 32.2  | 41.2  | 41.8  | 25.7  |
| 204484_at   | NM_002646 | PIK3C2B                  | 5287  | 109.5 | 96.4  | 95.2  | 59.9  | 87.5  |
| 204485_s_at | NM_005486 | TOM1L1                   | 10040 | 150.9 | 159.4 | 170.5 | 169.7 | 148.9 |
| 204486_at   | U89364    | KCNQ1OT1 / ,10984 /// 10 |       | 4.1   | 0.9   | 3.5   | 8.0   | 1.0   |
| 204487_s_at | NM_000218 | KCNQ1                    | 3784  | 16.7  | 10.9  | 1.1   | 12.5  | 2.4   |
| 204488_at   | NM_014908 | DOLK                     | 22845 | 154.2 | 144.4 | 180.9 | 151.2 | 142.4 |
| 204489_s_at | NM_000610 | CD44                     | 960   | 14.5  | 6.5   | 1.6   | 5.7   | 1.3   |
| 204490_s_at | M24915    | CD44                     | 960   | 4.4   | 5.6   | 10.6  | 5.0   | 4.2   |
| 204491_at   | R40917    | PDE4D                    | 5144  | 23.7  | 17.1  | 19.5  | 11.9  | 14.9  |
| 204492_at   | NM_014783 | ARHGAP11A                | 9824  | 10.8  | 14.7  | 11.9  | 6.4   | 15.0  |
| 204493_at   | NM_001196 | BID                      | 637   | 65.5  | 46.0  | 60.9  | 67.9  | 48.3  |
| 204494_s_at | AW516789  | C15orf39                 | 56905 | 48.7  | 36.3  | 40.3  | 36.0  | 28.3  |
| 204495_s_at | NM_015492 | C15orf39                 | 56905 | 38.8  | 30.9  | 38.2  | 43.1  | 36.6  |
| 204496_at   | NM_014574 | STRN3                    | 29966 | 127.5 | 82.3  | 125.5 | 105.3 | 75.9  |
| 204497_at   | AB011092  | ADCY9                    | 115   | 24.9  | 26.1  | 31.9  | 36.8  | 31.9  |
| 204498_s_at | NM_001116 | ADCY9                    | 115   | 9.6   | 9.5   | 13.3  | 16.8  | 11.4  |
| 204499_at   | AB028958  | AGTPBP1                  | 23287 | 4.8   | 1.6   | 7.2   | 3.1   | 1.3   |
| 204500_s_at | NM_015239 | AGTPBP1                  | 23287 | 59.8  | 51.4  | 76.6  | 41.3  | 58.7  |

|             |           |            |        |        |        |        |        |        |
|-------------|-----------|------------|--------|--------|--------|--------|--------|--------|
| 204501_at   | NM_002514 | NOV        | 4856   | 17.1   | 16.1   | 11.3   | 11.3   | 16.0   |
| 204502_at   | NM_015474 | SAMHD1     | 25939  | 53.9   | 42.4   | 40.0   | 41.2   | 41.0   |
| 204503_at   | NM_001988 | EVPL       | 2125   | 27.4   | 22.4   | 27.8   | 30.4   | 19.0   |
| 204504_s_at | NM_003609 | HIRIP3     | 8479   | 148.9  | 152.8  | 185.4  | 144.5  | 140.6  |
| 204505_s_at | NM_001978 | DMTN       | 2039   | 68.0   | 72.2   | 56.5   | 59.4   | 58.5   |
| 204506_at   | AL544951  | PPP3R1     | 5534   | 64.9   | 54.3   | 64.8   | 67.6   | 47.5   |
| 204507_s_at | NM_000945 | PPP3R1     | 5534   | 79.5   | 56.4   | 72.2   | 58.2   | 58.2   |
| 204508_s_at | BC001012  | CA12       | 771    | 10.8   | 20.5   | 13.1   | 20.7   | 8.0    |
| 204509_at   | NM_017689 | CA12       | 771    | 6.2    | 10.1   | 3.6    | 1.0    | 2.4    |
| 204510_at   | NM_003503 | CDC7       | 8317   | 121.6  | 96.2   | 139.6  | 107.4  | 120.4  |
| 204511_at   | NM_014808 | FARP2      | 9855   | 26.6   | 18.5   | 27.2   | 17.7   | 14.1   |
| 204512_at   | NM_002114 | HIVEP1     | 3096   | 30.0   | 33.9   | 34.3   | 37.3   | 20.5   |
| 204513_s_at | NM_014800 | ELMO1      | 9844   | 0.8    | 0.4    | 6.0    | 2.2    | 5.0    |
| 204514_at   | NM_001384 | DPH2       | 1802   | 91.3   | 43.7   | 79.2   | 60.4   | 84.7   |
| 204515_at   | NM_000862 | HSD3B1     | 3283   | 0.4    | 5.0    | 3.8    | 3.3    | 4.3    |
| 204516_at   | BG390306  | ATXN7      | 6314   | 26.0   | 18.7   | 24.0   | 23.3   | 22.8   |
| 204517_at   | BE962749  | PPIC       | 5480   | 20.9   | 19.6   | 24.3   | 13.5   | 14.7   |
| 204518_s_at | NM_000943 | PPIC       | 5480   | 12.0   | 7.7    | 6.7    | 4.1    | 10.8   |
| 204519_s_at | NM_015993 | PLL        | 51090  | 36.1   | 44.8   | 33.4   | 45.7   | 39.0   |
| 204520_x_at | NM_014577 | BRD1       | 23774  | 52.7   | 48.0   | 52.4   | 59.4   | 45.6   |
| 204521_at   | NM_013300 | FAM216A    | 29902  | 185.3  | 124.5  | 193.8  | 152.2  | 161.5  |
| 204522_at   | NM_005510 | DXO        | 1797   | 36.6   | 34.1   | 37.5   | 35.1   | 35.9   |
| 204523_at   | NM_003440 | ZNF140     | 7699   | 101.1  | 71.1   | 88.4   | 75.5   | 73.2   |
| 204524_at   | NM_002613 | LOC1010607 | 5170   | 42.3   | 37.4   | 35.6   | 26.9   | 27.5   |
| 204525_at   | NM_014660 | PHF14      | 9678   | 7.1    | 7.3    | 10.6   | 8.2    | 6.1    |
| 204526_s_at | NM_007063 | TBC1D8     | 11138  | 44.4   | 29.3   | 31.4   | 28.7   | 17.5   |
| 204527_at   | NM_000259 | MYO5A      | 4644   | 52.6   | 50.3   | 42.7   | 45.7   | 28.4   |
| 204528_s_at | NM_004537 | NAP1L1     | 4673   | 311.0  | 234.5  | 276.9  | 239.7  | 277.3  |
| 204529_s_at | AI961231  | TOX        | 9760   | 4.8    | 2.4    | 2.8    | 0.2    | 2.1    |
| 204530_s_at | NM_014729 | TOX        | 9760   | 2.1    | 2.4    | 4.5    | 2.2    | 1.1    |
| 204531_s_at | NM_007295 | BRCA1      | 672    | 87.9   | 55.9   | 94.4   | 58.3   | 72.1   |
| 204532_x_at | NM_021027 | UGT1A1     | 154575 | 23.5   | 21.6   | 26.9   | 23.6   | 16.2   |
| 204533_at   | NM_001565 | CXCL10     | 3627   | 14.3   | 2.2    | 9.4    | 6.8    | 1.9    |
| 204534_at   | NM_000638 | SEBOX      | 7448   | 2.9    | 1.5    | 0.9    | 0.4    | 1.4    |
| 204535_s_at | AI978576  | REST       | 5978   | 6.3    | 5.2    | 11.3   | 10.7   | 3.1    |
| 204536_s_at | NM_005612 | -          | -      | 1.4    | 2.4    | 5.7    | 0.9    | 0.9    |
| 204537_s_at | NM_004961 | GABRE      | 2564   | 0.5    | 1.1    | 6.5    | 8.0    | 2.3    |
| 204538_x_at | NM_006985 | NP1A1      | 9284   | 106.4  | 89.8   | 68.0   | 88.2   | 50.6   |
| 204539_s_at | NM_014246 | CELSR1     | 9620   | 4.0    | 1.3    | 2.5    | 0.6    | 0.9    |
| 204540_at   | NM_001958 | EEF1A2     | 1917   | 2957.3 | 3128.8 | 3308.5 | 3435.3 | 2832.9 |
| 204541_at   | NM_012429 | SEC14L2    | 23541  | 10.7   | 10.6   | 13.9   | 5.8    | 8.1    |
| 204542_at   | NM_006456 | ST6GALNAC2 | 10610  | 3.3    | 1.5    | 2.2    | 8.3    | 2.3    |
| 204543_at   | NM_005312 | RAPGEF1    | 2889   | 1.0    | 1.8    | 2.1    | 5.6    | 6.3    |
| 204544_at   | NM_007216 | HPS5       | 11234  | 68.1   | 69.6   | 95.1   | 68.5   | 60.6   |
| 204545_at   | NM_000287 | PEX6       | 5190   | 4.9    | 0.8    | 2.7    | 6.9    | 1.2    |
| 204546_at   | NM_014732 | KIAA0513   | 9764   | 24.9   | 17.6   | 20.7   | 18.4   | 16.5   |
| 204547_at   | NM_006822 | RAB40B     | 10966  | 136.9  | 126.9  | 102.8  | 125.8  | 98.2   |
| 204548_at   | NM_000349 | STAR       | 6770   | 0.9    | 1.0    | 0.8    | 1.1    | 3.5    |
| 204549_at   | NM_014002 | IKBKE      | 9641   | 17.2   | 11.8   | 18.3   | 9.7    | 7.7    |
| 204550_x_at | NM_000561 | GSTM1      | 2944   | 18.0   | 13.9   | 15.1   | 15.6   | 11.7   |
| 204551_s_at | NM_001622 | AHSG       | 197    | 6.4    | 0.9    | 5.2    | 3.4    | 3.8    |
| 204552_at   | AA355179  | INPP4A     | 3631   | 11.6   | 17.1   | 14.6   | 7.1    | 11.3   |
| 204553_x_at | NM_004027 | INPP4A     | 3631   | 10.2   | 7.4    | 13.1   | 18.0   | 12.5   |

|             |           |                           |       |       |       |        |       |        |
|-------------|-----------|---------------------------|-------|-------|-------|--------|-------|--------|
| 204554_at   | AL109928  | PPP1R3D                   | 5509  | 62.3  | 46.3  | 59.5   | 45.6  | 38.9   |
| 204555_s_at | NM_006242 | PPP1R3D                   | 5509  | 14.0  | 16.2  | 15.8   | 16.6  | 19.9   |
| 204556_s_at | AL568422  | DZIP1                     | 22873 | 10.5  | 7.2   | 5.4    | 5.1   | 5.8    |
| 204557_s_at | NM_014934 | DZIP1                     | 22873 | 0.1   | 0.1   | 1.8    | 0.1   | 0.2    |
| 204558_at   | NM_003579 | RAD54L                    | 8438  | 88.3  | 63.9  | 88.1   | 59.9  | 64.2   |
| 204559_s_at | NM_016199 | LSM7                      | 51690 | 484.1 | 463.7 | 542.2  | 424.9 | 380.9  |
| 204560_at   | NM_004117 | FKBP5                     | 2289  | 30.8  | 23.4  | 32.5   | 28.1  | 37.5   |
| 204561_x_at | NM_000483 | APOC2 /// AI344 /// 346 / |       | 2.0   | 2.9   | 2.4    | 1.4   | 1.5    |
| 204562_at   | NM_002460 | IRF4                      | 3662  | 12.5  | 6.9   | 12.0   | 11.6  | 5.4    |
| 204563_at   | NM_000655 | SELL                      | 6402  | 13.3  | 13.5  | 14.3   | 8.8   | 9.4    |
| 204564_at   | NM_006315 | PCGF3                     | 10336 | 44.8  | 34.4  | 53.0   | 46.8  | 44.6   |
| 204565_at   | NM_018473 | ACOT13                    | 55856 | 136.7 | 144.1 | 153.5  | 183.2 | 127.5  |
| 204566_at   | NM_003620 | PPM1D                     | 8493  | 54.1  | 50.5  | 60.8   | 53.5  | 52.1   |
| 204567_s_at | NM_004915 | ABCG1                     | 9619  | 55.5  | 40.1  | 48.6   | 54.8  | 26.7   |
| 204568_at   | NM_014924 | ATG14                     | 22863 | 32.5  | 45.9  | 49.7   | 48.3  | 44.7   |
| 204569_at   | NM_014920 | ICK                       | 22858 | 49.2  | 33.8  | 60.3   | 43.6  | 35.7   |
| 204570_at   | NM_001864 | COX7A1                    | 1346  | 0.7   | 0.9   | 0.7    | 1.1   | 1.0    |
| 204571_x_at | BE797213  | PIN4                      | 5303  | 174.6 | 171.8 | 205.6  | 165.3 | 135.8  |
| 204572_s_at | NM_006223 | PIN4                      | 5303  | 24.5  | 16.1  | 19.1   | 22.2  | 14.7   |
| 204573_at   | NM_021151 | CROT                      | 54677 | 48.7  | 23.5  | 33.2   | 23.7  | 30.6   |
| 204574_s_at | NM_002429 | MMP19                     | 4327  | 3.8   | 2.2   | 1.4    | 3.0   | 4.6    |
| 204575_s_at | U38321    | MMP19                     | 4327  | 4.5   | 0.5   | 1.1    | 0.9   | 0.5    |
| 204576_s_at | AA207013  | CLUAP1                    | 23059 | 74.6  | 75.5  | 58.3   | 61.3  | 56.3   |
| 204577_s_at | NM_024793 | CLUAP1                    | 23059 | 17.5  | 12.3  | 14.1   | 16.1  | 24.6   |
| 204578_at   | NM_014659 | PPIP5K1                   | 9677  | 25.5  | 24.1  | 24.9   | 35.6  | 23.4   |
| 204579_at   | NM_002011 | FGFR4                     | 2264  | 6.1   | 8.3   | 14.0   | 5.0   | 8.1    |
| 204580_at   | NM_002426 | MMP12                     | 4321  | 4.4   | 3.9   | 11.7   | 5.9   | 4.8    |
| 204581_at   | NM_001771 | CD22                      | 933   | 0.8   | 0.8   | 1.3    | 2.3   | 1.2    |
| 204582_s_at | NM_001648 | KLK3                      | 354   | 560.4 | 527.2 | 1320.0 | 710.4 | 1343.6 |
| 204583_x_at | U17040    | KLK3                      | 354   | 616.5 | 518.9 | 1351.4 | 722.9 | 1324.3 |
| 204584_at   | AI653981  | L1CAM                     | 3897  | 8.4   | 1.0   | 4.0    | 8.3   | 5.2    |
| 204585_s_at | NM_000425 | L1CAM                     | 3897  | 1.0   | 0.7   | 1.1    | 1.0   | 0.5    |
| 204586_at   | NM_003458 | BSN                       | 8927  | 2.5   | 1.2   | 1.3    | 1.6   | 3.1    |
| 204587_at   | NM_003951 | SLC25A14                  | 9016  | 54.5  | 69.8  | 70.5   | 63.7  | 53.8   |
| 204588_s_at | NM_003982 | SLC7A7                    | 9056  | 12.3  | 11.7  | 2.7    | 16.2  | 4.2    |
| 204589_at   | NM_014840 | NUAK1                     | 9891  | 14.8  | 14.0  | 9.3    | 10.1  | 10.6   |
| 204590_x_at | NM_022916 | VPS33A                    | 65082 | 42.4  | 25.8  | 37.7   | 37.7  | 29.7   |
| 204591_at   | NM_006614 | CHL1                      | 10752 | 2.0   | 0.4   | 0.2    | 2.1   | 2.7    |
| 204592_at   | NM_001365 | DLG4                      | 1742  | 9.3   | 8.0   | 9.9    | 0.9   | 4.4    |
| 204593_s_at | AA046752  | MIEF1                     | 54471 | 119.4 | 91.7  | 133.8  | 93.0  | 89.8   |
| 204594_s_at | NM_013298 | MIEF1                     | 54471 | 100.4 | 81.4  | 94.7   | 81.4  | 79.1   |
| 204595_s_at | AI300520  | STC1                      | 6781  | 14.7  | 15.1  | 19.6   | 10.9  | 6.9    |
| 204596_s_at | U46768    | STC1                      | 6781  | 12.5  | 1.5   | 9.2    | 7.2   | 7.4    |
| 204597_x_at | NM_003155 | STC1                      | 6781  | 1.5   | 3.2   | 2.1    | 3.5   | 6.2    |
| 204598_at   | NM_014948 | UBOX5                     | 22888 | 18.0  | 21.8  | 13.8   | 27.3  | 13.6   |
| 204599_s_at | NM_006428 | MRPL28                    | 10573 | 201.6 | 153.5 | 175.9  | 180.8 | 163.2  |
| 204600_at   | NM_004443 | EPHB3                     | 2049  | 51.0  | 39.7  | 31.8   | 41.0  | 31.7   |
| 204601_at   | NM_014664 | N4BP1                     | 9683  | 28.8  | 18.1  | 20.7   | 16.3  | 14.8   |
| 204602_at   | NM_012242 | DKK1                      | 22943 | 10.8  | 8.5   | 13.2   | 10.5  | 10.9   |
| 204603_at   | NM_003686 | EXO1                      | 9156  | 67.3  | 71.8  | 101.6  | 60.2  | 78.4   |
| 204604_at   | NM_012395 | CDK14                     | 5218  | 97.2  | 90.0  | 84.5   | 85.9  | 59.3   |
| 204605_at   | NM_006568 | CGRRF1                    | 10668 | 49.2  | 51.6  | 62.6   | 42.6  | 48.0   |
| 204606_at   | NM_002989 | CCL21                     | 6366  | 1.6   | 2.2   | 5.5    | 3.9   | 0.9    |

|             |           |             |              |       |       |       |       |       |
|-------------|-----------|-------------|--------------|-------|-------|-------|-------|-------|
| 204607_at   | NM_005518 | HMGCS2      | 3158         | 34.4  | 72.5  | 38.9  | 61.9  | 20.1  |
| 204608_at   | NM_000048 | ASL         | 435          | 136.5 | 102.6 | 173.9 | 151.8 | 125.7 |
| 204609_at   | AI583181  | CCDC85B     | 11007        | 0.5   | 0.4   | 0.4   | 0.4   | 0.3   |
| 204610_s_at | NM_006848 | CCDC85B     | 11007        | 468.1 | 393.6 | 431.9 | 386.4 | 416.3 |
| 204611_s_at | NM_006244 | PPP2R5B     | 5526         | 35.9  | 18.4  | 29.2  | 28.1  | 19.5  |
| 204612_at   | NM_006823 | PKIA        | 5569         | 1.0   | 5.7   | 4.1   | 5.9   | 3.2   |
| 204613_at   | NM_002661 | PLCG2       | 5336         | 9.5   | 15.8  | 11.2  | 11.3  | 10.7  |
| 204614_at   | NM_002575 | SERPINB2    | 5055         | 1.0   | 3.1   | 4.0   | 5.2   | 0.7   |
| 204615_x_at | NM_004508 | IDI1        | 3422         | 148.1 | 149.4 | 180.0 | 131.5 | 149.0 |
| 204616_at   | NM_006002 | UCHL3       | 7347         | 236.3 | 224.7 | 272.4 | 257.0 | 237.9 |
| 204617_s_at | NM_022914 | ACD         | 65057        | 65.6  | 72.7  | 90.6  | 68.6  | 77.0  |
| 204618_s_at | NM_005254 | GABPB1      | 2553         | 64.5  | 48.8  | 83.9  | 59.9  | 43.3  |
| 204619_s_at | BF590263  | VCAN        | 1462         | 3.2   | 2.4   | 0.1   | 2.2   | 1.0   |
| 204620_s_at | NM_004385 | VCAN        | 1462         | 13.5  | 7.4   | 6.6   | 7.6   | 7.3   |
| 204621_s_at | AI935096  | NR4A2       | 4929         | 3.1   | 0.9   | 7.3   | 0.8   | 0.8   |
| 204622_x_at | NM_006186 | NR4A2       | 4929         | 5.9   | 2.0   | 3.9   | 4.1   | 2.4   |
| 204623_at   | NM_003226 | TFF3        | 7033         | 17.6  | 21.0  | 27.1  | 23.8  | 10.9  |
| 204624_at   | NM_000053 | ATP7B       | 540          | 15.7  | 17.2  | 16.3  | 20.1  | 14.9  |
| 204625_s_at | BF115658  | ITGB3       | 3690         | 1.3   | 2.3   | 1.0   | 2.4   | 0.8   |
| 204626_s_at | J02703    | ITGB3       | 3690         | 17.6  | 2.6   | 10.0  | 4.4   | 11.6  |
| 204627_s_at | M35999    | ITGB3       | 3690         | 4.2   | 3.2   | 4.5   | 5.0   | 3.3   |
| 204628_s_at | NM_000212 | ITGB3       | 3690         | 15.7  | 16.2  | 6.6   | 15.2  | 14.1  |
| 204629_at   | NM_013327 | PARVB       | 29780        | 154.2 | 142.8 | 168.0 | 171.6 | 129.4 |
| 204630_s_at | NM_004871 | GOSR1       | 9527         | 185.5 | 136.9 | 182.8 | 162.0 | 117.4 |
| 204631_at   | NM_017534 | MYH2        | 4620         | 6.6   | 3.1   | 5.4   | 10.8  | 6.8   |
| 204632_at   | NM_003942 | RPS6KA4     | 8986         | 83.1  | 44.4  | 71.7  | 47.4  | 50.6  |
| 204633_s_at | AF074393  | RPS6KA5     | 9252         | 47.0  | 44.2  | 49.7  | 44.7  | 33.8  |
| 204634_at   | NM_003157 | NEK4        | 6787         | 121.8 | 96.5  | 128.4 | 108.6 | 95.8  |
| 204635_at   | NM_004755 | RPS6KA5     | 9252         | 50.5  | 32.6  | 49.4  | 43.2  | 32.6  |
| 204636_at   | NM_000494 | COL17A1     | 1308         | 0.6   | 0.7   | 1.1   | 0.5   | 1.4   |
| 204637_at   | NM_000735 | CGA         | 1081         | 2.6   | 2.7   | 2.4   | 1.2   | 1.8   |
| 204638_at   | NM_001611 | ACP5        | 54           | 2.0   | 1.7   | 4.3   | 1.4   | 1.3   |
| 204639_at   | NM_000022 | ADA         | 100          | 63.6  | 57.6  | 76.6  | 66.5  | 52.5  |
| 204640_s_at | NM_003563 | SPOP        | 8405         | 161.4 | 142.4 | 179.5 | 144.8 | 121.7 |
| 204641_at   | NM_002497 | NEK2        | 4751         | 202.3 | 141.9 | 226.9 | 174.8 | 143.8 |
| 204642_at   | NM_001400 | S1PR1       | 1901         | 0.2   | 1.0   | 2.7   | 1.8   | 0.2   |
| 204643_s_at | NM_006375 | ENOX2       | 10495        | 43.3  | 44.4  | 37.0  | 38.3  | 43.3  |
| 204644_at   | AF207881  | ENOX2       | 10495        | 13.2  | 5.6   | 1.8   | 3.9   | 5.8   |
| 204645_at   | NM_001241 | CCNT2       | 905          | 31.7  | 29.7  | 39.9  | 28.2  | 33.1  |
| 204646_at   | NM_000110 | DPYD        | 1806         | 1.6   | 0.7   | 2.1   | 2.7   | 0.7   |
| 204647_at   | NM_004838 | HOMER3      | 9454         | 61.0  | 61.9  | 68.9  | 68.7  | 47.4  |
| 204648_at   | NM_000906 | NPR1        | 4881         | 1.9   | 6.9   | 1.5   | 1.2   | 2.0   |
| 204649_at   | NM_005480 | TROAP       | 10024        | 131.5 | 71.1  | 84.7  | 71.8  | 63.0  |
| 204650_s_at | NM_006051 | APBB3 /// M | 10307 /// 10 | 44.1  | 25.2  | 27.9  | 31.7  | 27.4  |
| 204651_at   | AW003022  | NRF1        | 4899         | 32.1  | 30.1  | 37.0  | 41.5  | 28.2  |
| 204652_s_at | NM_005011 | NRF1        | 4899         | 40.0  | 39.4  | 29.5  | 47.0  | 29.5  |
| 204653_at   | BF343007  | TFAP2A      | 7020         | 29.8  | 26.0  | 34.2  | 29.3  | 18.3  |
| 204654_s_at | NM_003220 | TFAP2A      | 7020         | 14.7  | 8.0   | 11.1  | 5.5   | 6.7   |
| 204655_at   | NM_002985 | CCL5        | 6352         | 5.5   | 6.3   | 1.6   | 4.3   | 1.9   |
| 204656_at   | AL138752  | SHB         | 6461         | 26.3  | 23.4  | 17.8  | 19.0  | 17.5  |
| 204657_s_at | NM_003028 | SHB         | 6461         | 35.3  | 32.3  | 42.4  | 28.8  | 18.5  |
| 204658_at   | NM_013293 | TRA2A       | 29896        | 224.4 | 186.0 | 250.9 | 223.6 | 190.3 |
| 204659_s_at | AF124604  | GFER        | 2671         | 107.3 | 53.8  | 79.7  | 80.5  | 77.3  |

|             |           |                          |       |       |       |       |       |       |
|-------------|-----------|--------------------------|-------|-------|-------|-------|-------|-------|
| 204660_at   | NM_005262 | GFER                     | 2671  | 3.2   | 2.3   | 10.1  | 4.2   | 3.2   |
| 204661_at   | NM_001803 | CD52                     | 1043  | 1.1   | 2.6   | 1.4   | 1.0   | 0.7   |
| 204662_at   | NM_014711 | CCP110                   | 9738  | 36.9  | 25.9  | 38.9  | 34.0  | 31.6  |
| 204663_at   | NM_006680 | ME3                      | 10873 | 8.1   | 0.7   | 4.0   | 6.9   | 0.5   |
| 204664_at   | NM_001632 | ALPP                     | 250   | 0.6   | 0.6   | 0.5   | 0.4   | 0.3   |
| 204665_at   | NM_025073 | SIKE1                    | 80143 | 7.1   | 5.5   | 7.5   | 6.7   | 4.3   |
| 204666_s_at | NM_025073 | SIKE1                    | 80143 | 29.4  | 14.0  | 22.5  | 19.5  | 19.0  |
| 204667_at   | NM_004496 | FOXA1                    | 3169  | 392.3 | 329.4 | 398.4 | 395.2 | 312.9 |
| 204668_at   | AL031670  | RNF24                    | 11237 | 29.6  | 14.0  | 15.5  | 17.8  | 15.2  |
| 204669_s_at | NM_007219 | RNF24                    | 11237 | 18.5  | 16.4  | 19.8  | 17.2  | 15.1  |
| 204670_x_at | NM_002125 | HLA-DRB1 //,3123 /// 312 |       | 31.2  | 21.6  | 19.8  | 18.2  | 18.0  |
| 204671_s_at | BE677131  | ANKRD6                   | 22881 | 5.3   | 10.6  | 6.7   | 8.8   | 6.3   |
| 204672_s_at | NM_014942 | ANKRD6                   | 22881 | 7.0   | 4.3   | 5.8   | 3.3   | 3.6   |
| 204673_at   | NM_002457 | MUC2                     | 4583  | 9.3   | 9.5   | 1.9   | 2.4   | 1.4   |
| 204674_at   | NM_006152 | LRMP                     | 4033  | 2.3   | 1.8   | 1.4   | 5.4   | 0.6   |
| 204675_at   | NM_001047 | SRD5A1                   | 6715  | 77.0  | 68.5  | 72.4  | 78.9  | 52.4  |
| 204676_at   | NM_015421 | TMEM186                  | 25880 | 130.5 | 133.8 | 163.6 | 139.2 | 130.8 |
| 204677_at   | NM_001795 | CDH5                     | 1003  | 2.9   | 0.1   | 1.2   | 0.2   | 0.9   |
| 204678_s_at | U90065    | KCNK1                    | 3775  | 15.5  | 10.0  | 17.8  | 14.4  | 12.0  |
| 204679_at   | NM_002245 | KCNK1                    | 3775  | 44.9  | 22.4  | 40.6  | 44.9  | 32.2  |
| 204680_s_at | AI263837  | RAPGEF5                  | 9771  | 20.8  | 10.5  | 13.3  | 15.3  | 12.1  |
| 204681_s_at | NM_012294 | RAPGEF5                  | 9771  | 17.8  | 11.6  | 12.0  | 8.4   | 12.0  |
| 204682_at   | NM_000428 | LTBP2                    | 4053  | 7.1   | 9.1   | 11.7  | 15.2  | 10.3  |
| 204683_at   | NM_000873 | ICAM2                    | 3384  | 11.5  | 6.4   | 12.3  | 13.6  | 5.4   |
| 204684_at   | NM_002522 | NPTX1                    | 4884  | 7.2   | 10.9  | 5.6   | 7.2   | 10.0  |
| 204685_s_at | R52647    | ATP2B2                   | 491   | 2.1   | 1.9   | 8.5   | 10.6  | 5.7   |
| 204686_at   | NM_005544 | IRS1                     | 3667  | 0.8   | 2.1   | 0.8   | 2.3   | 3.9   |
| 204687_at   | NM_015393 | PARM1                    | 25849 | 33.5  | 13.7  | 20.8  | 6.3   | 8.6   |
| 204688_at   | NM_003919 | SGCE                     | 8910  | 8.0   | 0.4   | 3.7   | 4.7   | 4.4   |
| 204689_at   | NM_001529 | HHEX                     | 3087  | 8.0   | 9.3   | 5.9   | 6.2   | 2.8   |
| 204690_at   | NM_004853 | STX8                     | 9482  | 125.8 | 122.8 | 123.2 | 128.6 | 102.0 |
| 204691_x_at | NM_003560 | PLA2G6                   | 8398  | 84.8  | 74.9  | 77.3  | 63.6  | 47.3  |
| 204692_at   | NM_002319 | LRCH4 /// SA4034 /// 100 |       | 29.1  | 20.6  | 28.6  | 17.6  | 22.5  |
| 204693_at   | NM_007061 | CDC42EP1                 | 11135 | 13.5  | 6.7   | 13.9  | 8.7   | 9.5   |
| 204694_at   | NM_001134 | AFP                      | 174   | 1.5   | 4.2   | 3.2   | 4.7   | 4.2   |
| 204695_at   | AI343459  | CDC25A                   | 993   | 70.8  | 69.3  | 97.9  | 65.3  | 104.1 |
| 204696_s_at | NM_001789 | CDC25A                   | 993   | 42.5  | 24.4  | 29.3  | 20.9  | 32.3  |
| 204697_s_at | NM_001275 | CHGA                     | 1113  | 6.7   | 6.8   | 11.2  | 2.7   | 3.6   |
| 204698_at   | NM_002201 | ISG20                    | 3669  | 3.6   | 15.5  | 3.4   | 20.4  | 9.0   |
| 204699_s_at | N30910    | DIEXF                    | 27042 | 67.2  | 46.7  | 57.2  | 37.0  | 45.8  |
| 204700_x_at | NM_014388 | DIEXF                    | 27042 | 68.4  | 54.1  | 79.5  | 60.0  | 65.8  |
| 204701_s_at | NM_004809 | STOML1                   | 9399  | 45.2  | 40.8  | 44.5  | 48.8  | 36.9  |
| 204702_s_at | NM_004289 | NFE2L3                   | 9603  | 29.7  | 19.3  | 25.6  | 16.7  | 20.2  |
| 204703_at   | NM_006531 | IFT88                    | 8100  | 49.4  | 49.7  | 39.3  | 51.4  | 35.0  |
| 204704_s_at | BF195998  | ALDOB                    | 229   | 0.1   | 0.9   | 0.5   | 0.4   | 0.2   |
| 204705_x_at | NM_000035 | ALDOB                    | 229   | 2.1   | 0.8   | 1.4   | 2.4   | 1.2   |
| 204706_at   | NM_019892 | INPP5E                   | 56623 | 52.1  | 49.6  | 60.6  | 55.5  | 46.9  |
| 204707_s_at | BF115223  | MAPK4                    | 5596  | 9.9   | 4.2   | 1.1   | 1.5   | 5.2   |
| 204708_at   | NM_002747 | MAPK4                    | 5596  | 1.8   | 1.0   | 1.9   | 1.3   | 2.7   |
| 204709_s_at | NM_004856 | KIF23                    | 9493  | 51.2  | 33.4  | 50.9  | 38.5  | 53.9  |
| 204710_s_at | NM_016003 | WIPI2                    | 26100 | 192.2 | 161.8 | 212.0 | 208.3 | 177.0 |
| 204711_at   | NM_014804 | KIAA0753                 | 9851  | 51.9  | 41.7  | 45.2  | 40.6  | 28.1  |
| 204712_at   | NM_007191 | WIF1                     | 11197 | 3.4   | 2.1   | 3.8   | 0.7   | 3.7   |



|             |           |                           |       |        |        |        |        |       |
|-------------|-----------|---------------------------|-------|--------|--------|--------|--------|-------|
| 204713_s_at | AA910306  | F5                        | 2153  | 2.6    | 0.9    | 4.3    | 0.9    | 7.4   |
| 204714_s_at | NM_000130 | F5                        | 2153  | 10.6   | 6.3    | 18.4   | 12.5   | 15.6  |
| 204715_at   | NM_015368 | PANX1                     | 24145 | 52.2   | 39.7   | 58.5   | 47.3   | 41.8  |
| 204716_at   | NM_005436 | CCDC6                     | 8030  | 74.7   | 60.8   | 67.0   | 62.6   | 59.8  |
| 204717_s_at | AF034102  | SLC29A2                   | 3177  | 46.2   | 48.1   | 74.5   | 43.2   | 69.2  |
| 204718_at   | NM_004445 | EPHB6                     | 2051  | 9.2    | 8.5    | 13.5   | 15.7   | 11.7  |
| 204719_at   | NM_007168 | ABCA8                     | 10351 | 0.1    | 1.3    | 4.5    | 0.5    | 1.0   |
| 204720_s_at | AV729634  | DNAJC6                    | 9829  | 6.6    | 9.6    | 5.8    | 5.5    | 3.9   |
| 204721_s_at | NM_014787 | DNAJC6                    | 9829  | 2.8    | 1.1    | 2.0    | 1.3    | 4.9   |
| 204722_at   | AW007335  | SCN3B                     | 55800 | 0.4    | 0.4    | 0.5    | 0.6    | 0.3   |
| 204723_at   | AB032984  | SCN3B                     | 55800 | 0.8    | 0.5    | 2.7    | 0.5    | 0.4   |
| 204724_s_at | NM_001853 | COL9A3                    | 1299  | 3.2    | 7.6    | 1.1    | 10.7   | 5.1   |
| 204725_s_at | NM_006153 | NCK1                      | 4690  | 81.1   | 84.3   | 92.8   | 70.5   | 69.1  |
| 204726_at   | NM_001257 | CDH13                     | 1012  | 1.3    | 0.3    | 0.5    | 0.5    | 0.9   |
| 204727_at   | AW772140  | WDHD1                     | 11169 | 15.9   | 9.7    | 28.6   | 9.8    | 14.6  |
| 204728_s_at | NM_007086 | WDHD1                     | 11169 | 25.0   | 18.0   | 22.7   | 18.1   | 20.3  |
| 204729_s_at | NM_004603 | STX1A                     | 6804  | 8.8    | 4.4    | 11.8   | 2.4    | 8.2   |
| 204730_at   | NM_014747 | RIMS3                     | 9783  | 11.4   | 9.4    | 3.3    | 13.0   | 6.7   |
| 204731_at   | NM_003243 | TGFBR3                    | 7049  | 22.0   | 11.3   | 26.0   | 14.2   | 15.4  |
| 204732_s_at | AI021991  | TRIM23                    | 373   | 29.0   | 23.3   | 28.6   | 24.2   | 28.2  |
| 204733_at   | NM_002774 | KLK6                      | 5653  | 13.6   | 12.9   | 8.9    | 8.7    | 10.5  |
| 204734_at   | NM_002275 | KRT15                     | 3866  | 1.8    | 0.9    | 4.5    | 0.4    | 0.8   |
| 204735_at   | NM_006202 | PDE4A                     | 5141  | 9.0    | 7.9    | 8.8    | 9.5    | 4.7   |
| 204736_s_at | NM_001897 | CSPG4                     | 1464  | 1.8    | 0.5    | 0.6    | 0.3    | 0.4   |
| 204737_s_at | NM_000257 | MYH6 /// M\4624 /// 462   | 4624  | 3.0    | 0.4    | 0.3    | 0.4    | 0.4   |
| 204738_s_at | NM_004912 | KRIT1                     | 889   | 26.1   | 18.0   | 30.2   | 22.6   | 13.0  |
| 204739_at   | NM_001812 | CENPC                     | 1060  | 22.0   | 10.2   | 17.1   | 10.3   | 16.5  |
| 204740_at   | NM_006314 | CNKSRI                    | 10256 | 32.8   | 36.3   | 35.3   | 35.1   | 26.9  |
| 204741_at   | NM_001714 | BICD1                     | 636   | 19.6   | 5.4    | 9.6    | 4.5    | 3.0   |
| 204742_s_at | NM_015032 | PDS5B                     | 23047 | 18.4   | 17.4   | 19.2   | 18.7   | 18.5  |
| 204743_at   | NM_013259 | TAGLN3                    | 29114 | 13.5   | 14.7   | 10.9   | 9.8    | 7.1   |
| 204744_s_at | NM_013417 | IARS                      | 3376  | 1021.3 | 1013.1 | 1078.9 | 1020.8 | 916.6 |
| 204745_x_at | NM_005950 | MT1G                      | 4495  | 616.2  | 740.3  | 707.6  | 686.1  | 553.3 |
| 204746_s_at | NM_012407 | PICK1                     | 9463  | 26.1   | 37.2   | 33.6   | 21.6   | 23.6  |
| 204747_at   | NM_001549 | IFIT3                     | 3437  | 19.5   | 9.9    | 10.6   | 11.6   | 3.3   |
| 204748_at   | NM_000963 | PTGS2                     | 5743  | 3.9    | 0.3    | 3.0    | 2.7    | 3.6   |
| 204749_at   | NM_004538 | NAP1L3                    | 4675  | 15.5   | 18.6   | 17.5   | 18.3   | 11.5  |
| 204750_s_at | BF196457  | DSC2                      | 1824  | 35.5   | 15.1   | 33.9   | 25.8   | 29.9  |
| 204751_x_at | NM_004949 | DSC2                      | 1824  | 127.3  | 97.7   | 140.3  | 101.6  | 108.4 |
| 204752_x_at | NM_005484 | PARP2                     | 10038 | 319.0  | 273.0  | 311.9  | 223.5  | 233.0 |
| 204753_s_at | AI810712  | HLF                       | 3131  | 24.5   | 21.0   | 25.1   | 23.3   | 30.1  |
| 204754_at   | W60800    | HLF                       | 3131  | 4.2    | 3.6    | 5.4    | 1.8    | 6.8   |
| 204755_x_at | M95585    | HLF                       | 3131  | 25.5   | 10.0   | 18.8   | 13.9   | 12.5  |
| 204756_at   | NM_002757 | MAP2K5                    | 5607  | 24.0   | 15.0   | 22.3   | 19.2   | 20.7  |
| 204757_s_at | R61539    | C2CD2L                    | 9854  | 49.7   | 34.0   | 47.8   | 41.7   | 31.4  |
| 204758_s_at | NM_014807 | C2CD2L                    | 9854  | 0.6    | 0.8    | 3.5    | 0.7    | 0.8   |
| 204759_at   | NM_001268 | RCBTB2                    | 1102  | 15.5   | 10.5   | 12.5   | 7.6    | 8.5   |
| 204760_s_at | NM_021724 | NR1D1 /// T\7067 /// 957  | 7067  | 6.3    | 2.1    | 4.3    | 5.0    | 2.2   |
| 204761_at   | NM_014688 | USP6NL /// L\9712 /// 100 | 9712  | 33.5   | 20.1   | 28.4   | 26.4   | 15.1  |
| 204762_s_at | BE670563  | GNAO1                     | 2775  | 11.0   | 6.0    | 11.4   | 7.0    | 6.7   |
| 204763_s_at | NM_020988 | GNAO1                     | 2775  | 1.1    | 2.8    | 5.9    | 2.9    | 3.4   |
| 204764_at   | NM_002028 | CHURC1-FNT2342 /// 100    | 2342  | 50.3   | 29.4   | 36.1   | 37.3   | 34.5  |
| 204765_at   | NM_005435 | ARHGEF5                   | 7984  | 66.0   | 68.0   | 67.0   | 59.1   | 60.4  |

|             |           |          |       |       |       |       |       |       |
|-------------|-----------|----------|-------|-------|-------|-------|-------|-------|
| 204766_s_at | NM_002452 | NUDT1    | 4521  | 81.2  | 87.6  | 85.3  | 79.5  | 78.5  |
| 204767_s_at | BC000323  | FEN1     | 2237  | 319.8 | 261.9 | 403.8 | 272.1 | 372.0 |
| 204768_s_at | NM_004111 | FEN1     | 2237  | 273.8 | 195.0 | 349.1 | 240.8 | 305.2 |
| 204769_s_at | M74447    | TAP2     | 6891  | 45.9  | 44.1  | 35.6  | 39.1  | 42.1  |
| 204770_at   | NM_000544 | TAP2     | 6891  | 14.5  | 5.5   | 1.0   | 11.5  | 12.1  |
| 204771_s_at | AI632304  | TTF1     | 7270  | 46.7  | 33.7  | 52.0  | 41.8  | 34.5  |
| 204772_s_at | NM_007344 | TTF1     | 7270  | 32.9  | 32.7  | 44.0  | 35.1  | 27.0  |
| 204773_at   | NM_004512 | IL11RA   | 3590  | 20.1  | 21.3  | 23.3  | 18.1  | 14.4  |
| 204774_at   | NM_014210 | EVI2A    | 2123  | 3.1   | 4.3   | 6.0   | 2.4   | 1.7   |
| 204775_at   | NM_005441 | CHAF1B   | 8208  | 58.5  | 58.4  | 65.5  | 52.4  | 62.8  |
| 204776_at   | NM_003248 | THBS4    | 7060  | 19.2  | 14.7  | 10.3  | 16.2  | 10.2  |
| 204777_s_at | NM_002371 | MAL      | 4118  | 9.7   | 8.5   | 7.2   | 7.3   | 5.4   |
| 204778_x_at | AW102783  | HOXB7    | 3217  | 13.2  | 12.7  | 15.9  | 10.4  | 6.7   |
| 204779_s_at | NM_004502 | HOXB7    | 3217  | 5.7   | 8.6   | 7.3   | 3.3   | 1.0   |
| 204780_s_at | AA164751  | FAS      | 355   | 29.3  | 18.9  | 25.9  | 22.8  | 25.4  |
| 204781_s_at | NM_000043 | FAS      | 355   | 18.1  | 16.2  | 28.3  | 16.5  | 19.9  |
| 204782_at   | NM_022443 | -        | -     | 4.7   | 1.2   | 1.2   | 1.1   | 1.1   |
| 204783_at   | AI911434  | MLF1     | 4291  | 28.1  | 22.3  | 24.3  | 27.3  | 24.7  |
| 204784_s_at | NM_022443 | MLF1     | 4291  | 47.8  | 44.4  | 50.7  | 47.8  | 39.6  |
| 204785_x_at | NM_000874 | IFNAR2   | 3455  | 56.6  | 45.9  | 50.2  | 48.7  | 34.6  |
| 204786_s_at | L41944    | IFNAR2   | 3455  | 3.8   | 5.9   | 9.9   | 10.9  | 6.4   |
| 204787_at   | NM_007268 | VSIG4    | 11326 | 4.4   | 1.3   | 6.4   | 1.6   | 1.2   |
| 204788_s_at | NM_000309 | PPOX     | 5498  | 75.7  | 67.9  | 75.6  | 83.7  | 66.8  |
| 204789_at   | NM_005892 | FMNL1    | 752   | 3.3   | 2.6   | 3.3   | 5.0   | 1.1   |
| 204790_at   | NM_005904 | SMAD7    | 4092  | 44.4  | 47.8  | 55.7  | 44.2  | 33.1  |
| 204791_at   | NM_003297 | NR2C1    | 7181  | 43.7  | 33.7  | 42.9  | 35.6  | 26.6  |
| 204792_s_at | NM_014714 | IFT140   | 9742  | 15.9  | 13.0  | 12.4  | 11.9  | 12.5  |
| 204793_at   | NM_014710 | GPRASP1  | 9737  | 5.3   | 6.4   | 10.1  | 6.1   | 3.9   |
| 204794_at   | NM_004418 | DUSP2    | 1844  | 66.8  | 35.4  | 69.9  | 59.7  | 53.3  |
| 204795_at   | NM_025263 | PRR3     | 80742 | 53.9  | 54.3  | 54.7  | 56.7  | 44.1  |
| 204796_at   | AI825937  | EML1     | 2009  | 17.0  | 18.5  | 10.4  | 8.8   | 8.7   |
| 204797_s_at | NM_004434 | EML1     | 2009  | 47.5  | 29.4  | 42.1  | 40.0  | 26.3  |
| 204798_at   | NM_005375 | MYB      | 4602  | 37.1  | 26.4  | 21.5  | 24.4  | 19.8  |
| 204799_at   | NM_014838 | ZBED4    | 9889  | 42.3  | 35.4  | 46.9  | 41.6  | 31.5  |
| 204800_s_at | AW194384  | DHRS12   | 79758 | 24.8  | 21.2  | 28.3  | 34.3  | 24.0  |
| 204801_s_at | NM_024705 | DHRS12   | 79758 | 2.2   | 6.7   | 10.8  | 2.3   | 9.2   |
| 204802_at   | NM_004165 | RRAD     | 6236  | 0.6   | 1.3   | 0.7   | 0.9   | 0.8   |
| 204803_s_at | NM_004165 | RRAD     | 6236  | 1.9   | 0.6   | 0.6   | 0.6   | 0.4   |
| 204804_at   | NM_003141 | TRIM21   | 6737  | 85.3  | 67.2  | 77.3  | 78.6  | 50.9  |
| 204805_s_at | NM_006026 | H1FX     | 8971  | 659.9 | 611.2 | 720.5 | 654.0 | 550.6 |
| 204806_x_at | NM_018950 | HLA-F    | 3134  | 58.4  | 73.9  | 77.9  | 60.1  | 58.0  |
| 204807_at   | BF224146  | TMEM5    | 10329 | 65.0  | 49.5  | 75.4  | 54.4  | 57.4  |
| 204808_s_at | NM_014254 | TMEM5    | 10329 | 225.1 | 187.2 | 261.1 | 199.9 | 200.2 |
| 204809_at   | NM_006660 | CLPX     | 10845 | 132.5 | 111.5 | 137.4 | 113.1 | 108.1 |
| 204810_s_at | NM_001824 | CKM      | 1158  | 1.3   | 0.5   | 1.1   | 0.6   | 1.7   |
| 204811_s_at | NM_006030 | CACNA2D2 | 9254  | 7.7   | 14.0  | 13.4  | 15.6  | 6.5   |
| 204812_at   | NM_004724 | ZW10     | 9183  | 131.3 | 66.4  | 92.7  | 68.4  | 75.0  |
| 204813_at   | NM_002753 | MAPK10   | 5602  | 9.7   | 9.9   | 16.0  | 11.6  | 10.8  |
| 204814_at   | NM_003716 | CADPS    | 8618  | 2.3   | 1.2   | 2.1   | 0.9   | 1.1   |
| 204815_s_at | AI924903  | DHX34    | 9704  | 18.5  | 9.6   | 18.3  | 10.5  | 13.2  |
| 204816_s_at | NM_014681 | DHX34    | 9704  | 5.6   | 0.9   | 2.2   | 3.6   | 4.8   |
| 204817_at   | NM_012291 | ESPL1    | 9700  | 87.4  | 68.2  | 80.8  | 79.1  | 64.7  |
| 204818_at   | NM_002153 | HSD17B2  | 3294  | 0.7   | 0.6   | 0.6   | 0.4   | 0.4   |

|             |           |          |       |       |       |       |       |       |
|-------------|-----------|----------|-------|-------|-------|-------|-------|-------|
| 204819_at   | NM_004463 | FGD1     | 2245  | 38.7  | 44.3  | 30.0  | 28.8  | 23.5  |
| 204820_s_at | NM_006994 | BTN3A2   | 10384 | 67.8  | 82.4  | 91.2  | 68.9  | 72.9  |
| 204821_at   | NM_006994 | BTN3A3   | 10384 | 26.4  | 28.3  | 34.8  | 35.5  | 32.0  |
| 204822_at   | NM_003318 | TTK      | 7272  | 55.2  | 49.3  | 69.3  | 38.6  | 47.2  |
| 204823_at   | NM_014903 | NAV3     | 89795 | 11.2  | 7.7   | 18.8  | 14.9  | 16.6  |
| 204824_at   | NM_004435 | ENDOG    | 2021  | 139.8 | 127.3 | 171.9 | 150.0 | 155.4 |
| 204825_at   | NM_014791 | MELK     | 9833  | 337.5 | 258.8 | 390.1 | 251.2 | 322.4 |
| 204826_at   | NM_001761 | CCNF     | 899   | 137.2 | 126.4 | 114.2 | 97.7  | 118.9 |
| 204827_s_at | U17105    | CCNF     | 899   | 55.3  | 39.4  | 65.5  | 43.3  | 47.9  |
| 204828_at   | NM_004584 | RAD9A    | 5883  | 45.0  | 42.0  | 51.4  | 33.3  | 39.3  |
| 204829_s_at | NM_000803 | FOLR2    | 2350  | 4.8   | 4.7   | 4.4   | 6.6   | 1.4   |
| 204830_x_at | NM_002781 | PSG5     | 5673  | 1.1   | 1.1   | 7.4   | 4.8   | 1.7   |
| 204831_at   | R59697    | CDK8     | 1024  | 211.3 | 189.1 | 199.4 | 182.4 | 129.2 |
| 204832_s_at | NM_004329 | BMPR1A   | 657   | 48.6  | 28.9  | 47.8  | 44.6  | 35.6  |
| 204833_at   | NM_004707 | ATG12    | 9140  | 26.6  | 27.1  | 29.0  | 29.6  | 28.1  |
| 204834_at   | NM_006682 | FGL2     | 10875 | 5.1   | 4.1   | 4.8   | 2.9   | 4.5   |
| 204835_at   | NM_016937 | POLA1    | 5422  | 65.0  | 45.1  | 62.6  | 51.3  | 66.3  |
| 204836_at   | NM_000170 | GLDC     | 2731  | 39.5  | 60.9  | 52.2  | 61.4  | 40.6  |
| 204837_at   | AL080178  | MTMR9    | 66036 | 43.7  | 41.1  | 40.7  | 36.5  | 25.9  |
| 204838_s_at | NM_014381 | MLH3     | 27030 | 33.5  | 34.3  | 40.3  | 31.2  | 22.5  |
| 204839_at   | NM_015918 | POP5     | 51367 | 441.4 | 397.7 | 466.0 | 365.2 | 341.8 |
| 204840_s_at | AI916242  | EEA1     | 8411  | 3.5   | 2.7   | 2.0   | 2.8   | 1.4   |
| 204841_s_at | NM_003566 | EEA1     | 8411  | 13.7  | 6.9   | 11.5  | 10.8  | 12.6  |
| 204842_x_at | BC002763  | PRKAR2A  | 5576  | 205.1 | 160.6 | 200.7 | 159.9 | 136.6 |
| 204843_s_at | NM_004157 | PRKAR2A  | 5576  | 30.2  | 27.8  | 33.4  | 24.4  | 24.4  |
| 204844_at   | L12468    | ENPEP    | 2028  | 0.2   | 3.1   | 1.3   | 2.1   | 0.8   |
| 204845_s_at | NM_001977 | ENPEP    | 2028  | 0.9   | 0.2   | 4.2   | 5.1   | 1.5   |
| 204846_at   | NM_000096 | CP       | 1356  | 1.8   | 2.1   | 1.3   | 8.0   | 2.2   |
| 204847_at   | NM_014415 | ZBTB11   | 27107 | 71.1  | 51.1  | 63.0  | 55.4  | 54.2  |
| 204848_x_at | NM_000559 | HBG1     | 3047  | 2.9   | 4.8   | 11.6  | 1.2   | 1.2   |
| 204849_at   | NM_006602 | TCFL5    | 10732 | 107.9 | 108.1 | 110.3 | 112.7 | 83.6  |
| 204850_s_at | NM_000555 | DCX      | 1641  | 5.4   | 3.2   | 6.4   | 6.1   | 1.2   |
| 204851_s_at | AF040254  | DCX      | 1641  | 0.3   | 0.4   | 0.3   | 0.6   | 0.2   |
| 204852_s_at | NM_002832 | PTPN7    | 5778  | 16.0  | 3.0   | 7.8   | 2.1   | 3.6   |
| 204853_at   | NM_006190 | ORC2     | 4999  | 81.0  | 62.7  | 89.6  | 72.4  | 71.1  |
| 204854_at   | NM_014262 | LEPREL2  | 10536 | 1.2   | 2.9   | 0.5   | 0.9   | 0.6   |
| 204855_at   | NM_002639 | SERPINB5 | 5268  | 31.8  | 32.7  | 31.3  | 21.3  | 14.3  |
| 204856_at   | NM_014256 | B3GNT3   | 10331 | 4.3   | 5.9   | 12.2  | 2.9   | 11.4  |
| 204857_at   | NM_003550 | MAD1L1   | 8379  | 69.6  | 65.3  | 65.9  | 76.0  | 59.8  |
| 204858_s_at | NM_001953 | TYMP     | 1890  | 43.1  | 41.5  | 35.5  | 41.8  | 17.1  |
| 204859_s_at | NM_013229 | APAF1    | 317   | 8.9   | 6.8   | 10.4  | 10.1  | 8.8   |
| 204860_s_at | AI817801  | NAIP     | 4671  | 42.1  | 22.8  | 25.5  | 26.3  | 14.5  |
| 204861_s_at | NM_004536 | NAIP     | 4671  | 18.8  | 12.8  | 12.8  | 14.7  | 4.5   |
| 204862_s_at | NM_002513 | NME3     | 4832  | 224.1 | 244.0 | 264.1 | 246.6 | 219.1 |
| 204863_s_at | BE856546  | IL6ST    | 3572  | 19.3  | 12.8  | 17.6  | 16.2  | 9.0   |
| 204864_s_at | NM_002184 | IL6ST    | 3572  | 16.9  | 10.7  | 10.4  | 11.9  | 10.6  |
| 204865_at   | NM_005181 | CA3      | 761   | 2.8   | 2.1   | 0.3   | 2.5   | 2.2   |
| 204866_at   | NM_014735 | JADE3    | 9767  | 60.9  | 44.5  | 54.4  | 46.8  | 40.7  |
| 204867_at   | NM_005258 | GCHFR    | 2644  | 128.7 | 160.1 | 132.8 | 173.9 | 131.6 |
| 204868_at   | NM_001545 | ICT1     | 3396  | 430.9 | 420.5 | 490.0 | 440.1 | 384.1 |
| 204869_at   | AL031664  | PCSK2    | 5126  | 4.9   | 3.1   | 3.3   | 2.0   | 5.1   |
| 204870_s_at | NM_002594 | PCSK2    | 5126  | 0.6   | 0.4   | 0.4   | 1.4   | 0.7   |
| 204871_at   | NM_006980 | MTERF1   | 7978  | 21.2  | 16.5  | 14.2  | 16.4  | 21.5  |

|             |           |                          |       |        |        |        |        |        |
|-------------|-----------|--------------------------|-------|--------|--------|--------|--------|--------|
| 204872_at   | NM_007005 | TLE4                     | 7091  | 0.9    | 0.6    | 4.0    | 4.3    | 3.7    |
| 204873_at   | NM_000466 | PEX1                     | 5189  | 15.7   | 16.6   | 23.8   | 11.6   | 15.4   |
| 204874_x_at | NM_003933 | BAIAP3                   | 8938  | 3.3    | 2.1    | 2.2    | 2.0    | 2.4    |
| 204875_s_at | NM_001500 | GMDS                     | 2762  | 74.1   | 78.5   | 88.2   | 85.5   | 69.6   |
| 204876_at   | NM_014699 | ZNF646                   | 9726  | 11.8   | 6.4    | 10.4   | 11.9   | 4.0    |
| 204877_s_at | AW007163  | TAOK2                    | 9344  | 33.4   | 32.5   | 34.7   | 22.3   | 23.9   |
| 204878_s_at | NM_004783 | TAOK2                    | 9344  | 27.8   | 19.5   | 13.0   | 22.4   | 26.2   |
| 204879_at   | NM_006474 | PDPN                     | 10630 | 0.5    | 0.8    | 0.4    | 0.3    | 0.2    |
| 204880_at   | NM_002412 | MGMT                     | 4255  | 96.1   | 127.8  | 95.4   | 148.2  | 102.9  |
| 204881_s_at | NM_003358 | UGCG                     | 7357  | 34.9   | 31.9   | 47.6   | 35.0   | 35.7   |
| 204882_at   | NM_014882 | ARHGAP25                 | 9938  | 0.8    | 1.4    | 1.1    | 2.5    | 1.3    |
| 204883_s_at | AI968626  | HUS1                     | 3364  | 75.0   | 59.9   | 101.3  | 66.0   | 69.6   |
| 204884_s_at | NM_004507 | HUS1                     | 3364  | 9.2    | 4.2    | 8.9    | 7.9    | 9.7    |
| 204885_s_at | NM_005823 | MSLN                     | 10232 | 0.2    | 0.6    | 7.0    | 0.5    | 0.5    |
| 204886_at   | AL043646  | PLK4                     | 10733 | 21.8   | 9.8    | 25.0   | 5.2    | 21.1   |
| 204887_s_at | NM_014264 | PLK4                     | 10733 | 61.4   | 41.7   | 64.6   | 39.5   | 52.6   |
| 204888_s_at | AA772093  | NEURL1                   | 9148  | 9.4    | 10.2   | 3.4    | 7.2    | 1.9    |
| 204889_s_at | AF029729  | NEURL1                   | 9148  | 14.8   | 5.0    | 13.0   | 12.2   | 0.6    |
| 204890_s_at | U07236    | LCK                      | 3932  | 5.9    | 1.4    | 1.8    | 3.2    | 0.7    |
| 204891_s_at | NM_005356 | LCK                      | 3932  | 1.3    | 0.9    | 0.9    | 1.1    | 3.2    |
| 204892_x_at | NM_001402 | EEF1A1                   | 1915  | 3896.4 | 3832.4 | 4025.9 | 3795.4 | 3721.9 |
| 204893_s_at | NM_004799 | ZFYVE9                   | 9372  | 53.9   | 38.7   | 46.8   | 47.0   | 29.5   |
| 204894_s_at | NM_003734 | AOC3                     | 8639  | 17.8   | 6.5    | 14.1   | 13.9   | 11.4   |
| 204895_x_at | NM_004532 | MUC4                     | 4585  | 9.2    | 7.5    | 7.5    | 1.5    | 2.6    |
| 204896_s_at | AI675173  | PTGER4                   | 5734  | 2.1    | 1.3    | 1.6    | 1.5    | 0.5    |
| 204897_at   | AA897516  | PTGER4                   | 5734  | 5.1    | 3.5    | 9.3    | 1.1    | 7.2    |
| 204898_at   | AF055993  | SAP30                    | 8819  | 13.8   | 10.1   | 8.3    | 10.0   | 0.9    |
| 204899_s_at | BF247098  | SAP30                    | 8819  | 17.3   | 18.4   | 25.6   | 15.5   | 17.3   |
| 204900_x_at | NM_003864 | SAP30                    | 8819  | 67.2   | 52.6   | 90.6   | 47.7   | 62.4   |
| 204901_at   | AA824369  | BTRC                     | 8945  | 8.0    | 12.0   | 19.9   | 9.1    | 9.3    |
| 204902_s_at | NM_013325 | ATG4B                    | 23192 | 16.6   | 12.2   | 20.4   | 11.0   | 16.2   |
| 204903_x_at | AL080168  | ATG4B                    | 23192 | 105.1  | 107.5  | 106.7  | 100.1  | 97.8   |
| 204904_at   | NM_002060 | GJA4                     | 2701  | 2.0    | 2.7    | 2.0    | 3.1    | 3.1    |
| 204905_s_at | NM_004280 | EEF1E1                   | 9521  | 227.8  | 170.2  | 279.0  | 202.1  | 199.8  |
| 204906_at   | BC002363  | RPS6KA2                  | 6196  | 55.2   | 41.8   | 51.9   | 46.5   | 41.8   |
| 204907_s_at | AI829875  | BCL3 /// MIR602 /// 1024 |       | 16.4   | 6.4    | 18.1   | 13.3   | 10.7   |
| 204908_s_at | NM_005178 | BCL3 /// MIR602 /// 1024 |       | 19.4   | 32.6   | 23.4   | 23.0   | 20.7   |
| 204909_at   | NM_004397 | DDX6                     | 1656  | 17.3   | 15.4   | 17.0   | 13.1   | 8.9    |
| 204910_s_at | AI419307  | TRIM3                    | 10612 | 2.0    | 1.8    | 8.8    | 1.9    | 0.9    |
| 204911_s_at | NM_006458 | TRIM3                    | 10612 | 24.2   | 20.0   | 25.3   | 29.8   | 25.3   |
| 204912_at   | NM_001558 | IL10RA                   | 3587  | 6.3    | 10.3   | 11.0   | 10.4   | 5.8    |
| 204913_s_at | AI360875  | SOX11                    | 6664  | 3.3    | 2.3    | 3.6    | 0.6    | 4.2    |
| 204914_s_at | AW157202  | SOX11                    | 6664  | 3.6    | 0.9    | 2.9    | 0.5    | 1.5    |
| 204915_s_at | AB028641  | SOX11                    | 6664  | 5.1    | 6.3    | 10.8   | 5.6    | 2.1    |
| 204916_at   | NM_005855 | RAMP1                    | 10267 | 188.5  | 173.3  | 220.4  | 212.2  | 190.7  |
| 204917_s_at | AV756536  | MLLT3                    | 4300  | 16.1   | 24.0   | 23.3   | 31.0   | 22.6   |
| 204918_s_at | NM_004529 | MLLT3                    | 4300  | 15.4   | 9.7    | 14.6   | 9.6    | 7.0    |
| 204919_at   | NM_007244 | PRH1-PRR4 / 11272 /// 10 |       | 13.5   | 8.1    | 17.0   | 8.3    | 11.9   |
| 204920_at   | AF154830  | CPS1                     | 1373  | 36.8   | 28.5   | 35.8   | 35.7   | 21.9   |
| 204921_at   | NM_001481 | GAS8                     | 2622  | 9.5    | 20.2   | 24.6   | 35.9   | 32.5   |
| 204922_at   | NM_024650 | C11orf80                 | 79703 | 24.3   | 36.8   | 32.4   | 24.7   | 24.3   |
| 204923_at   | AL023653  | SASH3                    | 54440 | 16.3   | 9.4    | 18.1   | 13.9   | 9.2    |
| 204924_at   | NM_003264 | TLR2                     | 7097  | 10.6   | 3.9    | 4.8    | 5.1    | 5.1    |

|             |           |                          |       |       |       |       |       |       |
|-------------|-----------|--------------------------|-------|-------|-------|-------|-------|-------|
| 204925_at   | NM_004937 | CTNS                     | 1497  | 40.2  | 23.9  | 27.0  | 23.8  | 27.0  |
| 204926_at   | NM_002192 | INHBA                    | 3624  | 3.9   | 2.1   | 3.2   | 0.9   | 4.0   |
| 204927_at   | NM_003475 | RASSF7                   | 8045  | 79.6  | 45.7  | 98.7  | 57.6  | 54.8  |
| 204928_s_at | NM_019848 | SLC10A3                  | 8273  | 34.2  | 32.4  | 69.0  | 54.5  | 47.3  |
| 204929_s_at | NM_006634 | VAMP5                    | 10791 | 10.4  | 1.2   | 4.1   | 4.3   | 9.0   |
| 204930_s_at | NM_013979 | BNIP1                    | 662   | 37.2  | 29.5  | 40.2  | 30.7  | 34.5  |
| 204931_at   | NM_003206 | TCF21                    | 6943  | 0.9   | 3.2   | 2.6   | 0.3   | 0.6   |
| 204932_at   | BF433902  | TNFRSF11B                | 4982  | 4.3   | 3.4   | 4.5   | 3.1   | 1.6   |
| 204933_s_at | NM_002546 | TNFRSF11B                | 4982  | 1.3   | 1.3   | 0.4   | 1.4   | 0.6   |
| 204934_s_at | NM_002151 | HPN                      | 3249  | 150.8 | 179.1 | 167.4 | 183.2 | 140.0 |
| 204935_at   | NM_002828 | PTPN2                    | 5771  | 5.5   | 2.1   | 7.2   | 6.2   | 5.0   |
| 204936_at   | NM_004579 | MAP4K2                   | 5871  | 2.7   | 8.2   | 2.6   | 13.0  | 8.8   |
| 204937_s_at | NM_016325 | ZNF274                   | 10782 | 137.6 | 118.5 | 138.0 | 113.6 | 118.4 |
| 204938_s_at | M60411    | PLN                      | 5350  | 0.7   | 0.4   | 4.9   | 0.5   | 0.7   |
| 204939_s_at | NM_002667 | PLN                      | 5350  | 2.9   | 6.7   | 0.5   | 0.9   | 0.3   |
| 204940_at   | NM_002667 | PLN                      | 5350  | 1.3   | 0.1   | 1.0   | 2.2   | 0.3   |
| 204941_s_at | AA071510  | ALDH3B2                  | 222   | 38.6  | 30.9  | 37.8  | 32.0  | 24.6  |
| 204942_s_at | NM_000695 | ALDH3B2                  | 222   | 97.3  | 123.6 | 123.7 | 107.2 | 74.9  |
| 204943_at   | NM_021641 | ADAM12                   | 8038  | 10.8  | 14.1  | 13.9  | 2.6   | 2.6   |
| 204944_at   | NM_002841 | PTPRG                    | 5793  | 19.3  | 23.6  | 20.2  | 28.8  | 13.7  |
| 204945_at   | NM_002846 | PTPRN                    | 5798  | 25.3  | 13.1  | 17.9  | 15.0  | 15.1  |
| 204946_s_at | NM_004618 | TOP3A                    | 7156  | 35.8  | 28.0  | 50.2  | 46.6  | 41.1  |
| 204947_at   | NM_005225 | E2F1                     | 1869  | 73.8  | 63.2  | 99.6  | 62.5  | 54.5  |
| 204948_s_at | NM_013409 | FST                      | 10468 | 21.7  | 9.7   | 24.3  | 13.0  | 11.1  |
| 204949_at   | NM_002162 | ICAM3                    | 3385  | 117.8 | 100.9 | 146.2 | 120.7 | 128.1 |
| 204950_at   | NM_014959 | CARD8                    | 22900 | 21.0  | 19.6  | 14.8  | 14.7  | 7.0   |
| 204951_at   | NM_004310 | RHOH                     | 399   | 19.1  | 12.3  | 17.0  | 15.1  | 6.4   |
| 204952_at   | NM_014400 | LYPD3                    | 27076 | 6.4   | 10.0  | 13.3  | 7.0   | 12.0  |
| 204953_at   | NM_014841 | SNAP91                   | 9892  | 0.6   | 0.7   | 0.8   | 0.6   | 1.8   |
| 204954_s_at | NM_004714 | DYRK1B                   | 9149  | 11.5  | 28.2  | 11.8  | 27.2  | 9.9   |
| 204955_at   | NM_006307 | SRPX                     | 8406  | 7.1   | 6.9   | 11.2  | 9.3   | 3.8   |
| 204956_at   | NM_002451 | MTAP                     | 4507  | 19.7  | 13.2  | 25.5  | 14.6  | 16.2  |
| 204957_at   | NM_002553 | ORC5                     | 5001  | 122.5 | 106.8 | 144.8 | 123.4 | 134.1 |
| 204958_at   | NM_004073 | PLK3                     | 1263  | 17.9  | 13.0  | 14.6  | 17.8  | 9.7   |
| 204959_at   | NM_002432 | MNDA                     | 4332  | 0.6   | 0.1   | 1.7   | 0.2   | 0.1   |
| 204960_at   | NM_005608 | PTPRCAP                  | 5790  | 0.9   | 1.1   | 7.4   | 1.6   | 0.5   |
| 204961_s_at | NM_000265 | NCF1 /// NCF653361 /// 6 |       | 0.9   | 1.6   | 0.8   | 1.1   | 1.1   |
| 204962_s_at | NM_001809 | CENPA /// SL1058 /// 549 |       | 173.1 | 131.8 | 177.4 | 141.7 | 154.3 |
| 204963_at   | AL136756  | SSPN                     | 8082  | 0.7   | 3.3   | 6.4   | 3.2   | 4.8   |
| 204964_s_at | NM_005086 | SSPN                     | 8082  | 6.9   | 0.5   | 5.6   | 2.5   | 1.5   |
| 204965_at   | NM_000583 | GC                       | 2638  | 1.2   | 0.7   | 0.8   | 0.6   | 0.2   |
| 204966_at   | NM_001703 | BAI2                     | 576   | 21.2  | 17.5  | 21.1  | 17.4  | 15.5  |
| 204967_at   | NM_001649 | SHROOM2                  | 357   | 64.0  | 58.1  | 59.1  | 60.6  | 46.7  |
| 204968_at   | NM_021184 | C6orf47                  | 57827 | 30.4  | 23.5  | 42.6  | 20.6  | 21.3  |
| 204969_s_at | NM_002906 | RDX                      | 5962  | 50.8  | 33.1  | 49.3  | 31.9  | 26.4  |
| 204970_s_at | NM_002359 | MAFG                     | 4097  | 14.9  | 22.8  | 21.8  | 26.2  | 21.5  |
| 204971_at   | NM_005213 | CSTA                     | 1475  | 13.4  | 13.2  | 14.9  | 20.5  | 7.8   |
| 204972_at   | NM_016817 | OAS2                     | 4939  | 13.8  | 7.8   | 11.4  | 8.1   | 13.0  |
| 204973_at   | NM_000166 | GJB1                     | 2705  | 9.3   | 25.4  | 24.4  | 18.2  | 16.3  |
| 204974_at   | AA988241  | RAB3A                    | 5864  | 85.1  | 66.8  | 86.7  | 72.7  | 83.3  |
| 204975_at   | NM_001424 | EMP2                     | 2013  | 76.6  | 65.1  | 91.9  | 74.5  | 77.8  |
| 204976_s_at | AK023637  | AMMECR1                  | 9949  | 120.8 | 110.3 | 129.7 | 103.9 | 116.8 |
| 204977_at   | NM_004398 | DDX10                    | 1662  | 142.3 | 113.6 | 161.6 | 119.3 | 131.1 |

|             |           |                         |       |       |       |       |       |       |
|-------------|-----------|-------------------------|-------|-------|-------|-------|-------|-------|
| 204978_at   | NM_007056 | CLASRP                  | 11129 | 53.5  | 51.9  | 53.2  | 47.0  | 27.4  |
| 204979_s_at | NM_007341 | SH3BGR                  | 6450  | 15.8  | 10.4  | 10.2  | 15.1  | 10.6  |
| 204980_at   | NM_004898 | CLOCK                   | 9575  | 34.8  | 39.8  | 39.4  | 46.5  | 35.0  |
| 204981_at   | NM_002555 | SLC22A18                | 5002  | 45.2  | 67.5  | 63.0  | 58.7  | 49.7  |
| 204982_at   | NM_014776 | GIT2                    | 9815  | 1.4   | 1.1   | 3.4   | 1.4   | 1.1   |
| 204983_s_at | AF064826  | GPC4                    | 2239  | 21.2  | 23.5  | 28.8  | 26.9  | 22.2  |
| 204984_at   | NM_001448 | GPC4                    | 2239  | 18.8  | 17.4  | 19.5  | 13.9  | 14.1  |
| 204985_s_at | NM_024108 | TRAPPC6A                | 79090 | 72.8  | 94.7  | 76.7  | 86.2  | 75.0  |
| 204986_s_at | NM_016151 | TAOK2                   | 9344  | 38.4  | 27.2  | 37.6  | 40.8  | 20.7  |
| 204987_at   | NM_002216 | ITIH2                   | 3698  | 17.2  | 7.2   | 11.9  | 9.8   | 10.8  |
| 204988_at   | NM_005141 | FGB                     | 2244  | 5.3   | 4.9   | 0.8   | 2.2   | 2.6   |
| 204989_s_at | BF305661  | ITGB4                   | 3691  | 6.5   | 0.9   | 4.1   | 1.9   | 1.3   |
| 204990_s_at | NM_000213 | ITGB4                   | 3691  | 8.2   | 2.5   | 2.4   | 7.7   | 0.7   |
| 204991_s_at | NM_000268 | NF2                     | 4771  | 18.8  | 13.2  | 16.4  | 16.4  | 13.3  |
| 204992_s_at | NM_002628 | PFN2                    | 5217  | 566.1 | 542.5 | 583.6 | 571.6 | 460.7 |
| 204993_at   | NM_002073 | GNAZ                    | 2781  | 27.3  | 25.9  | 26.5  | 24.1  | 16.4  |
| 204994_at   | NM_002463 | MX2                     | 4600  | 9.1   | 4.0   | 11.4  | 8.3   | 5.1   |
| 204995_at   | AL567411  | CDK5R1                  | 8851  | 26.9  | 20.6  | 22.5  | 21.9  | 16.9  |
| 204996_s_at | NM_003885 | CDK5R1                  | 8851  | 1.9   | 1.4   | 1.1   | 1.5   | 0.6   |
| 204997_at   | NM_005276 | GPD1                    | 2819  | 1.4   | 2.1   | 1.5   | 1.2   | 2.0   |
| 204998_s_at | NM_012068 | ATF5                    | 22809 | 98.6  | 78.2  | 91.6  | 106.6 | 73.8  |
| 204999_s_at | BC005174  | ATF5                    | 22809 | 32.8  | 37.6  | 48.1  | 36.0  | 23.6  |
| 205000_at   | NM_004660 | DDX3Y                   | 8653  | 89.2  | 61.1  | 97.5  | 61.4  | 82.1  |
| 205001_s_at | AF000985  | DDX3Y                   | 8653  | 55.4  | 31.0  | 46.1  | 31.3  | 41.2  |
| 205002_at   | NM_015699 | AHDC1                   | 27245 | 21.2  | 8.5   | 23.0  | 24.2  | 14.0  |
| 205003_at   | NM_014705 | DOCK4                   | 9732  | 18.6  | 15.0  | 17.9  | 12.2  | 8.5   |
| 205004_at   | NM_017544 | NKRF                    | 55922 | 78.4  | 50.0  | 75.2  | 53.3  | 60.9  |
| 205005_s_at | AW293531  | NMT2                    | 9397  | 42.0  | 40.0  | 40.2  | 39.6  | 31.4  |
| 205006_s_at | NM_004808 | NMT2                    | 9397  | 23.5  | 27.3  | 27.3  | 24.4  | 20.4  |
| 205007_s_at | AI478592  | CIB2                    | 10518 | 6.9   | 5.4   | 2.1   | 2.0   | 2.1   |
| 205008_s_at | NM_006383 | CIB2                    | 10518 | 7.1   | 6.9   | 15.4  | 4.2   | 9.7   |
| 205009_at   | NM_003225 | TFF1                    | 7031  | 35.3  | 31.6  | 35.5  | 36.2  | 21.6  |
| 205010_at   | NM_019067 | GNL3L                   | 54552 | 93.3  | 67.5  | 75.4  | 81.1  | 71.5  |
| 205011_at   | NM_014622 | VWA5A                   | 4013  | 16.6  | 12.8  | 7.5   | 11.0  | 7.9   |
| 205012_s_at | NM_005326 | HAGH                    | 3029  | 152.1 | 159.8 | 164.4 | 154.4 | 144.0 |
| 205013_s_at | NM_000675 | ADORA2A //,135 /// 1017 |       | 8.5   | 15.0  | 15.1  | 11.3  | 12.5  |
| 205014_at   | NM_005130 | FGFBP1                  | 9982  | 24.9  | 14.2  | 17.4  | 11.4  | 9.7   |
| 205015_s_at | M31172    | TGFA                    | 7039  | 0.9   | 0.7   | 1.0   | 0.8   | 0.6   |
| 205016_at   | NM_003236 | TGFA                    | 7039  | 17.1  | 16.5  | 17.9  | 18.8  | 7.1   |
| 205017_s_at | AI088145  | MBNL2                   | 10150 | 15.3  | 9.2   | 9.0   | 6.9   | 1.0   |
| 205018_s_at | NM_005757 | MBNL2                   | 10150 | 10.8  | 1.1   | 4.6   | 6.4   | 5.7   |
| 205019_s_at | NM_004624 | VIPR1                   | 7433  | 36.0  | 31.9  | 49.0  | 55.5  | 44.2  |
| 205020_s_at | NM_005738 | ARL4A                   | 10124 | 13.8  | 5.7   | 18.0  | 12.4  | 6.6   |
| 205021_s_at | AA860806  | FOXN3                   | 1112  | 38.9  | 36.3  | 39.0  | 32.7  | 29.1  |
| 205022_s_at | NM_005197 | FOXN3                   | 1112  | 52.8  | 84.7  | 50.8  | 64.5  | 42.8  |
| 205023_at   | D14134    | RAD51                   | 5888  | 4.8   | 3.5   | 7.4   | 0.3   | 7.1   |
| 205024_s_at | NM_002875 | RAD51                   | 5888  | 104.7 | 77.5  | 148.7 | 95.1  | 105.0 |
| 205025_at   | NM_005341 | ZBTB48                  | 3104  | 43.0  | 34.3  | 38.1  | 42.5  | 24.4  |
| 205026_at   | NM_012448 | STAT5B                  | 6777  | 37.1  | 36.3  | 40.4  | 39.9  | 29.9  |
| 205027_s_at | NM_005204 | MAP3K8                  | 1326  | 9.5   | 7.8   | 4.9   | 6.8   | 7.4   |
| 205028_at   | NM_016157 | TRO                     | 7216  | 0.9   | 3.3   | 1.3   | 2.9   | 2.2   |
| 205029_s_at | NM_001446 | FABP7                   | 2173  | 0.2   | 0.4   | 4.6   | 2.2   | 1.6   |
| 205030_at   | NM_001446 | FABP7                   | 2173  | 3.7   | 7.4   | 8.6   | 4.0   | 4.7   |

|             |           |                          |       |        |        |       |        |       |
|-------------|-----------|--------------------------|-------|--------|--------|-------|--------|-------|
| 205031_at   | NM_001406 | EFNB3                    | 1949  | 3.9    | 3.3    | 3.1   | 3.5    | 2.1   |
| 205032_at   | NM_002203 | ITGA2                    | 3673  | 7.0    | 5.4    | 7.3   | 6.6    | 7.8   |
| 205033_s_at | NM_004084 | DEFA1 /// DE1667 /// 166 |       | 7.0    | 8.8    | 7.6   | 6.6    | 3.6   |
| 205034_at   | NM_004702 | CCNE2                    | 9134  | 111.2  | 81.0   | 155.3 | 92.0   | 98.2  |
| 205035_at   | NM_004715 | CTDP1                    | 9150  | 28.7   | 10.7   | 25.7  | 15.1   | 22.4  |
| 205036_at   | NM_007080 | LSM6                     | 11157 | 188.1  | 139.0  | 213.4 | 155.0  | 155.3 |
| 205037_at   | NM_006860 | IFT27                    | 11020 | 165.0  | 166.2  | 187.2 | 182.1  | 141.9 |
| 205038_at   | BG540504  | IKZF1                    | 10320 | 3.2    | 0.5    | 3.2   | 6.7    | 3.1   |
| 205039_s_at | NM_006060 | IKZF1                    | 10320 | 25.4   | 19.9   | 22.0  | 2.5    | 4.4   |
| 205040_at   | NM_000607 | ORM1                     | 5004  | 3.8    | 3.7    | 9.4   | 1.1    | 5.9   |
| 205041_s_at | NM_000607 | ORM1 /// OR5004 /// 500  |       | 2.4    | 1.2    | 9.9   | 2.6    | 7.4   |
| 205042_at   | NM_005476 | GNE                      | 10020 | 7.5    | 7.4    | 5.0   | 6.8    | 4.2   |
| 205043_at   | NM_000492 | CFTR                     | 1080  | 0.6    | 1.1    | 1.6   | 0.6    | 1.2   |
| 205044_at   | NM_014211 | GABRP                    | 2568  | 0.9    | 1.3    | 0.9   | 6.3    | 3.6   |
| 205045_at   | NM_007202 | AKAP10                   | 11216 | 20.3   | 16.2   | 15.0  | 17.1   | 26.6  |
| 205046_at   | NM_001813 | CENPE                    | 1062  | 53.8   | 23.6   | 51.5  | 29.7   | 34.9  |
| 205047_s_at | NM_001673 | ASNS                     | 440   | 1024.9 | 1167.4 | 963.1 | 1143.0 | 798.6 |
| 205048_s_at | NM_003832 | PSPH                     | 5723  | 440.7  | 378.3  | 452.1 | 444.6  | 373.0 |
| 205049_s_at | NM_001783 | CD79A                    | 973   | 16.4   | 2.2    | 8.5   | 2.9    | 1.0   |
| 205050_s_at | NM_012324 | MAPK8IP2                 | 23542 | 30.0   | 36.2   | 30.3  | 25.7   | 21.1  |
| 205051_s_at | NM_000222 | KIT                      | 3815  | 1.7    | 1.1    | 1.2   | 5.0    | 0.8   |
| 205052_at   | NM_001698 | AUH                      | 549   | 120.2  | 108.5  | 112.6 | 129.5  | 104.6 |
| 205053_at   | NM_000946 | PRIM1                    | 5557  | 161.5  | 126.0  | 176.3 | 105.7  | 123.7 |
| 205054_at   | NM_004543 | NEB                      | 4703  | 10.1   | 4.7    | 6.2   | 4.8    | 1.1   |
| 205055_at   | NM_002208 | ITGAE                    | 3682  | 489.3  | 449.7  | 538.9 | 462.9  | 404.5 |
| 205056_s_at | NM_019858 | GPR162                   | 27239 | 1.6    | 2.0    | 2.6   | 1.3    | 0.9   |
| 205057_s_at | AI762782  | IDUA                     | 3425  | 0.9    | 0.7    | 1.6   | 2.2    | 0.9   |
| 205058_at   | M74715    | SLC26A1                  | 10861 | 10.0   | 8.2    | 10.5  | 11.5   | 5.2   |
| 205059_s_at | NM_000203 | IDUA                     | 3425  | 35.1   | 23.2   | 24.0  | 30.2   | 20.7  |
| 205060_at   | NM_003631 | PARG                     | 8505  | 79.9   | 41.7   | 83.4  | 76.4   | 36.9  |
| 205061_s_at | NM_005033 | EXOSC9                   | 5393  | 138.6  | 91.8   | 144.4 | 105.7  | 129.6 |
| 205062_x_at | NM_002892 | ARID4A                   | 5926  | 14.7   | 9.9    | 20.1  | 18.4   | 10.3  |
| 205063_at   | NM_003616 | GEMIN2                   | 8487  | 82.5   | 43.8   | 74.9  | 49.6   | 44.0  |
| 205064_at   | NM_003125 | SPRR1B                   | 6699  | 6.1    | 0.6    | 10.5  | 0.7    | 1.8   |
| 205065_at   | AU130282  | ENPP1                    | 5167  | 7.4    | 3.7    | 6.3   | 0.6    | 0.8   |
| 205066_s_at | NM_006208 | ENPP1                    | 5167  | 24.2   | 18.4   | 33.0  | 23.4   | 29.5  |
| 205067_at   | NM_000576 | IL1B                     | 3553  | 10.2   | 17.9   | 16.2  | 3.4    | 15.9  |
| 205068_s_at | BE671084  | ARHGAP26                 | 23092 | 18.5   | 20.7   | 17.2  | 15.0   | 16.6  |
| 205069_s_at | NM_015071 | ARHGAP26                 | 23092 | 5.1    | 1.2    | 3.0   | 0.9    | 2.7   |
| 205070_at   | NM_019071 | ING3                     | 54556 | 48.4   | 43.8   | 43.7  | 42.0   | 37.6  |
| 205071_x_at | AB017445  | XRCC4                    | 7518  | 1.7    | 9.8    | 1.2   | 4.3    | 1.0   |
| 205072_s_at | NM_022406 | XRCC4                    | 7518  | 10.2   | 6.6    | 9.4   | 6.5    | 7.4   |
| 205073_at   | NM_000775 | CYP2J2                   | 1573  | 23.8   | 20.4   | 27.7  | 23.7   | 13.1  |
| 205074_at   | NM_003060 | SLC22A5                  | 6584  | 86.0   | 62.5   | 72.0  | 64.4   | 57.0  |
| 205075_at   | NM_000934 | SERPINF2                 | 5345  | 9.6    | 5.9    | 8.3   | 6.1    | 6.6   |
| 205076_s_at | NM_006697 | MTMR11                   | 10903 | 14.3   | 17.7   | 12.4  | 8.1    | 12.0  |
| 205077_s_at | NM_002643 | PIGF                     | 5281  | 151.8  | 120.8  | 141.7 | 133.3  | 106.7 |
| 205078_at   | NM_002643 | PIGF                     | 5281  | 104.2  | 96.7   | 108.4 | 96.2   | 75.5  |
| 205079_s_at | NM_003829 | MPDZ                     | 8777  | 25.9   | 22.8   | 27.0  | 24.7   | 23.9  |
| 205080_at   | NM_000965 | RARB                     | 5915  | 21.8   | 20.0   | 23.3  | 11.5   | 12.7  |
| 205081_at   | NM_001311 | CRIP1                    | 1396  | 1.0    | 1.3    | 0.5   | 2.2    | 1.0   |
| 205082_s_at | AB046692  | AOX1                     | 316   | 6.2    | 3.4    | 12.1  | 4.2    | 6.6   |
| 205083_at   | NM_001159 | AOX1                     | 316   | 1.4    | 4.9    | 2.3   | 1.2    | 5.1   |

|             |           |                       |       |        |       |        |       |       |
|-------------|-----------|-----------------------|-------|--------|-------|--------|-------|-------|
| 205084_at   | NM_018844 | BCAP29                | 55973 | 70.4   | 49.9  | 72.3   | 65.1  | 55.8  |
| 205085_at   | NM_004153 | ORC1                  | 4998  | 65.8   | 39.2  | 66.2   | 39.8  | 52.2  |
| 205086_s_at | NM_014551 | NCAPH2                | 29781 | 22.7   | 34.7  | 41.2   | 35.7  | 32.5  |
| 205087_at   | NM_015485 | RWDD3                 | 25950 | 57.2   | 34.8  | 46.2   | 43.6  | 25.1  |
| 205088_at   | NM_005491 | MAMLD1                | 10046 | 10.3   | 8.3   | 5.7    | 8.4   | 2.4   |
| 205089_at   | NM_003416 | ZNF7                  | 7553  | 61.9   | 40.6  | 56.0   | 44.3  | 40.3  |
| 205090_s_at | NM_016256 | NAGPA                 | 51172 | 38.0   | 37.8  | 43.5   | 41.6  | 41.5  |
| 205091_x_at | NM_002907 | RECQL                 | 5965  | 50.1   | 28.2  | 43.5   | 33.2  | 38.7  |
| 205092_x_at | NM_014950 | ZBTB1                 | 22890 | 1.8    | 2.3   | 0.2    | 1.3   | 1.1   |
| 205093_at   | NM_014935 | PLEKHA6               | 22874 | 6.1    | 4.9   | 3.8    | 9.0   | 6.7   |
| 205094_at   | NM_000286 | PEX12                 | 5193  | 95.4   | 77.4  | 92.5   | 84.1  | 69.3  |
| 205095_s_at | NM_005177 | ATP6V0A1              | 535   | 27.4   | 20.4  | 33.0   | 26.7  | 23.8  |
| 205096_at   | NM_014833 | POM121                | 9883  | 12.2   | 10.2  | 8.0    | 8.1   | 9.6   |
| 205097_at   | AI025519  | SLC26A2               | 1836  | 38.2   | 38.0  | 31.1   | 29.9  | 25.7  |
| 205098_at   | AI421071  | CCR1                  | 1230  | 3.0    | 8.5   | 11.0   | 6.3   | 9.9   |
| 205099_s_at | NM_001295 | CCR1                  | 1230  | 7.4    | 4.2   | 3.0    | 0.9   | 0.4   |
| 205100_at   | NM_005110 | GFPT2                 | 9945  | 4.9    | 10.0  | 8.1    | 5.5   | 1.9   |
| 205101_at   | NM_000246 | CIITA                 | 4261  | 14.1   | 0.8   | 3.6    | 1.1   | 3.7   |
| 205102_at   | NM_005656 | TMPRSS2               | 7113  | 39.4   | 29.8  | 32.7   | 26.6  | 30.1  |
| 205103_at   | NM_006365 | C1orf61               | 10485 | 22.1   | 13.0  | 16.7   | 9.6   | 11.2  |
| 205104_at   | NM_014723 | SNPH                  | 9751  | 3.0    | 0.7   | 2.5    | 2.6   | 1.1   |
| 205105_at   | NM_002372 | MAN2A1                | 4124  | 18.8   | 24.4  | 26.1   | 26.7  | 17.6  |
| 205106_at   | NM_014221 | CMC4 /// M14515 ///   | 100   | 13.5   | 8.7   | 11.4   | 17.3  | 12.3  |
| 205107_s_at | NM_005227 | EFNA4                 | 1945  | 86.8   | 77.6  | 77.1   | 88.9  | 55.6  |
| 205108_s_at | NM_000384 | APOB                  | 338   | 3.6    | 3.7   | 4.9    | 7.4   | 1.6   |
| 205109_s_at | NM_015320 | ARHGEF4 /// 50649 /// | 10    | 11.2   | 7.0   | 4.9    | 11.6  | 4.4   |
| 205110_s_at | NM_004114 | FGF13                 | 2258  | 75.8   | 98.3  | 64.0   | 87.9  | 44.0  |
| 205111_s_at | NM_016341 | PLCE1                 | 51196 | 3.0    | 2.6   | 4.6    | 4.1   | 2.3   |
| 205112_at   | NM_016341 | PLCE1                 | 51196 | 4.9    | 4.1   | 1.4    | 3.9   | 0.2   |
| 205113_at   | NM_005382 | NEFM                  | 4741  | 0.3    | 0.6   | 1.3    | 1.2   | 0.7   |
| 205114_s_at | NM_002983 | CCL3 /// CCL.6348 /// | 634   | 1.7    | 0.8   | 0.9    | 3.3   | 3.4   |
| 205115_s_at | NM_016196 | RBM19                 | 9904  | 20.3   | 20.5  | 27.1   | 17.1  | 20.6  |
| 205116_at   | NM_000426 | LAMA2                 | 3908  | 8.0    | 1.2   | 4.3    | 0.7   | 4.5   |
| 205117_at   | X59065    | FGF1                  | 2246  | 1.9    | 2.3   | 8.4    | 1.1   | 0.5   |
| 205118_at   | M60626    | FPR1                  | 2357  | 0.9    | 1.1   | 0.9    | 0.5   | 0.7   |
| 205119_s_at | NM_002029 | FPR1                  | 2357  | 8.4    | 0.9   | 5.6    | 0.9   | 1.9   |
| 205120_s_at | U29586    | SGCB                  | 6443  | 67.1   | 81.5  | 78.5   | 81.1  | 75.3  |
| 205121_at   | NM_000232 | SGCB                  | 6443  | 13.9   | 13.3  | 10.1   | 11.1  | 8.1   |
| 205122_at   | BF439316  | MSANTD3-T18577 ///    | 100   | 0.3    | 5.3   | 0.1    | 3.4   | 1.9   |
| 205123_s_at | NM_003692 | MSANTD3-T18577 ///    | 100   | 4.8    | 0.2   | 4.2    | 2.2   | 0.3   |
| 205124_at   | NM_005919 | MEF2B /// M4207 ///   | 729   | 0.4    | 2.6   | 1.3    | 4.9   | 3.6   |
| 205125_at   | NM_006225 | PLCD1                 | 5333  | 87.2   | 47.4  | 42.9   | 56.4  | 45.0  |
| 205126_at   | NM_006296 | VRK2                  | 7444  | 60.2   | 48.2  | 63.2   | 52.8  | 48.7  |
| 205127_at   | NM_000962 | PTGS1                 | 5742  | 1.7    | 1.2   | 1.2    | 1.1   | 0.7   |
| 205128_x_at | NM_000962 | PTGS1                 | 5742  | 11.6   | 16.6  | 12.9   | 14.8  | 11.0  |
| 205129_at   | NM_006993 | NPM3                  | 10360 | 275.5  | 185.0 | 301.2  | 207.8 | 208.8 |
| 205130_at   | NM_014226 | MOK                   | 5891  | 25.0   | 16.7  | 21.9   | 15.3  | 22.8  |
| 205131_x_at | NM_002975 | CLEC11A               | 6320  | 32.6   | 52.0  | 50.3   | 37.8  | 39.7  |
| 205132_at   | NM_005159 | ACTC1                 | 70    | 19.8   | 28.4  | 15.9   | 21.0  | 15.1  |
| 205133_s_at | NM_002157 | HSPE1                 | 3336  | 1048.3 | 896.4 | 1267.6 | 943.1 | 940.8 |
| 205134_s_at | AW593143  | NUFIP1                | 26747 | 37.0   | 33.7  | 42.0   | 34.7  | 37.9  |
| 205135_s_at | AL049842  | NUFIP1                | 26747 | 44.1   | 36.1  | 58.6   | 42.4  | 43.2  |
| 205136_s_at | NM_012345 | NUFIP1                | 26747 | 23.2   | 16.3  | 27.3   | 22.3  | 16.3  |



|             |           |                           |       |       |       |       |       |       |
|-------------|-----------|---------------------------|-------|-------|-------|-------|-------|-------|
| 205137_x_at | NM_005709 | USH1C                     | 10083 | 5.9   | 1.6   | 4.3   | 5.5   | 2.6   |
| 205138_s_at | AW418882  | UST                       | 10090 | 1.2   | 0.7   | 0.6   | 0.4   | 0.2   |
| 205139_s_at | NM_005715 | UST                       | 10090 | 11.6  | 9.7   | 10.2  | 4.4   | 5.6   |
| 205140_at   | NM_003838 | FPGT                      | 8790  | 46.6  | 37.6  | 51.7  | 45.3  | 45.2  |
| 205141_at   | NM_001145 | ANG                       | 283   | 49.9  | 35.7  | 43.4  | 45.8  | 26.3  |
| 205142_x_at | NM_000033 | ABCD1                     | 215   | 157.4 | 94.0  | 122.9 | 99.4  | 118.4 |
| 205143_at   | NM_004386 | NCAN                      | 1463  | 10.5  | 3.1   | 6.9   | 5.8   | 3.8   |
| 205144_at   | L03785    | MFSD7                     | 84179 | 20.2  | 12.5  | 28.5  | 12.7  | 9.1   |
| 205145_s_at | NM_002477 | MYL5                      | 4636  | 72.3  | 88.7  | 80.3  | 93.7  | 59.7  |
| 205146_x_at | NM_004886 | APBA3                     | 9546  | 19.3  | 15.4  | 11.9  | 24.6  | 5.7   |
| 205147_x_at | NM_000631 | NCF4                      | 4689  | 8.2   | 7.6   | 2.1   | 6.4   | 7.0   |
| 205148_s_at | AA071195  | CLCN4                     | 1183  | 19.3  | 21.8  | 16.2  | 11.6  | 17.0  |
| 205149_s_at | NM_001830 | CLCN4                     | 1183  | 2.2   | 9.2   | 2.8   | 1.5   | 0.9   |
| 205150_s_at | AV724192  | TRIL                      | 9865  | 0.8   | 4.2   | 6.2   | 2.3   | 1.5   |
| 205151_s_at | NM_014817 | TRIL                      | 9865  | 2.2   | 4.7   | 6.4   | 4.9   | 4.3   |
| 205152_at   | AI003579  | SLC6A1                    | 6529  | 1.8   | 4.2   | 5.2   | 6.8   | 5.5   |
| 205153_s_at | NM_001250 | CD40                      | 958   | 3.4   | 11.3  | 2.6   | 0.9   | 1.4   |
| 205154_at   | NM_006338 | LRRN2                     | 10446 | 1.3   | 1.3   | 2.0   | 1.5   | 0.9   |
| 205155_s_at | NM_006946 | SPTBN2                    | 6712  | 26.3  | 39.4  | 37.7  | 38.5  | 26.0  |
| 205156_s_at | NM_020039 | ASIC1                     | 41    | 14.5  | 2.2   | 21.4  | 19.3  | 17.3  |
| 205157_s_at | NM_000422 | JUP /// KRT1 3728 /// 387 |       | 10.7  | 8.6   | 8.1   | 0.3   | 1.6   |
| 205158_at   | NM_002937 | RNASE4                    | 6038  | 28.1  | 19.1  | 26.5  | 19.7  | 14.5  |
| 205159_at   | AV756141  | CSF2RB                    | 1439  | 6.8   | 5.6   | 7.3   | 5.2   | 2.1   |
| 205160_at   | AL360141  | PEX11A                    | 8800  | 27.9  | 34.9  | 32.5  | 35.3  | 22.3  |
| 205161_s_at | NM_003847 | PEX11A                    | 8800  | 41.6  | 21.2  | 32.5  | 35.4  | 20.8  |
| 205162_at   | NM_000082 | ERCC8                     | 1161  | 24.3  | 24.4  | 17.7  | 24.9  | 16.1  |
| 205163_at   | NM_013292 | MYLPF                     | 29895 | 10.7  | 6.7   | 12.5  | 1.7   | 2.7   |
| 205164_at   | NM_014291 | GCAT                      | 23464 | 156.4 | 199.8 | 213.5 | 216.5 | 199.8 |
| 205165_at   | NM_001407 | CELSR3                    | 1951  | 0.7   | 3.7   | 3.0   | 3.1   | 0.5   |
| 205166_at   | NM_004055 | CAPN5                     | 726   | 22.6  | 17.6  | 17.4  | 15.9  | 19.7  |
| 205167_s_at | NM_001790 | CDC25C                    | 995   | 85.3  | 71.9  | 95.9  | 82.6  | 77.7  |
| 205168_at   | NM_006182 | DDR2                      | 4921  | 4.5   | 8.3   | 2.6   | 3.1   | 3.9   |
| 205169_at   | NM_005057 | RBBP5                     | 5929  | 34.3  | 24.3  | 27.8  | 31.0  | 30.9  |
| 205170_at   | NM_005419 | STAT2                     | 6773  | 18.2  | 30.5  | 26.0  | 22.3  | 20.6  |
| 205171_at   | NM_002830 | PTPN4                     | 5775  | 27.7  | 24.6  | 29.5  | 20.7  | 12.0  |
| 205172_x_at | NM_007097 | CLTB                      | 1212  | 115.9 | 165.0 | 158.3 | 160.4 | 124.5 |
| 205173_x_at | NM_001779 | CD58                      | 965   | 38.2  | 33.1  | 35.9  | 38.2  | 28.7  |
| 205174_s_at | NM_012413 | QPCT                      | 25797 | 0.6   | 0.2   | 2.6   | 1.3   | 0.2   |
| 205175_s_at | NM_000221 | KHK                       | 3795  | 1.0   | 0.9   | 1.6   | 0.8   | 0.7   |
| 205176_s_at | NM_014288 | ITGB3BP                   | 23421 | 132.3 | 108.6 | 141.0 | 121.1 | 100.7 |
| 205177_at   | NM_003281 | TNNI1                     | 7135  | 0.7   | 0.7   | 0.6   | 1.2   | 1.1   |
| 205178_s_at | NM_006910 | RBBP6                     | 5930  | 29.7  | 28.5  | 29.9  | 27.2  | 25.2  |
| 205179_s_at | AI814527  | ADAM8                     | 101   | 5.7   | 6.2   | 7.5   | 1.6   | 7.4   |
| 205180_s_at | NM_001109 | ADAM8                     | 101   | 8.0   | 9.0   | 9.0   | 7.0   | 6.7   |
| 205181_at   | NM_006299 | ZSCAN9                    | 7746  | 19.2  | 20.6  | 22.7  | 20.7  | 17.4  |
| 205182_s_at | NM_014347 | ZNF324                    | 25799 | 6.2   | 12.2  | 1.9   | 7.9   | 4.5   |
| 205183_at   | NM_002138 | -                         | -     | 0.6   | 1.1   | 0.4   | 3.6   | 2.2   |
| 205184_at   | NM_004485 | GNG4                      | 2786  | 22.2  | 19.2  | 12.7  | 16.1  | 10.2  |
| 205185_at   | NM_006846 | SPINK5                    | 11005 | 1.5   | 9.9   | 2.1   | 1.3   | 1.8   |
| 205186_at   | NM_003462 | DNALI1                    | 7802  | 2.1   | 1.9   | 0.9   | 1.1   | 0.8   |
| 205187_at   | AF010601  | SMAD5                     | 4090  | 26.1  | 22.4  | 22.9  | 28.5  | 21.6  |
| 205188_s_at | NM_005903 | SMAD5                     | 4090  | 21.2  | 19.0  | 19.4  | 15.3  | 23.7  |
| 205189_s_at | NM_000136 | FANCC                     | 2176  | 58.9  | 44.3  | 69.4  | 42.5  | 48.8  |

|             |           |                           |       |       |       |       |       |       |
|-------------|-----------|---------------------------|-------|-------|-------|-------|-------|-------|
| 205190_at   | NM_002670 | PLS1                      | 5357  | 40.1  | 34.9  | 37.4  | 27.1  | 22.0  |
| 205191_at   | NM_006915 | RP2                       | 6102  | 39.6  | 25.7  | 40.3  | 36.4  | 32.8  |
| 205192_at   | NM_003954 | MAP3K14                   | 9020  | 16.8  | 10.8  | 14.4  | 13.1  | 11.9  |
| 205193_at   | NM_012323 | MAFF                      | 23764 | 13.1  | 3.0   | 13.6  | 12.0  | 9.9   |
| 205194_at   | NM_004577 | PSPH                      | 5723  | 226.5 | 175.0 | 242.4 | 204.8 | 161.7 |
| 205195_at   | NM_001283 | AP1S1                     | 1174  | 200.2 | 187.6 | 185.8 | 228.9 | 168.3 |
| 205196_s_at | NM_001283 | AP1S1                     | 1174  | 260.0 | 226.0 | 208.1 | 213.5 | 213.9 |
| 205197_s_at | BE567813  | ATP7A                     | 538   | 26.4  | 20.6  | 24.8  | 19.3  | 22.2  |
| 205198_s_at | NM_000052 | ATP7A                     | 538   | 13.6  | 13.6  | 20.0  | 14.0  | 11.2  |
| 205199_at   | NM_001216 | CA9                       | 768   | 13.4  | 6.4   | 7.2   | 11.9  | 13.7  |
| 205200_at   | NM_003278 | CLEC3B /// E:7123 /// 230 |       | 2.4   | 2.4   | 5.6   | 6.1   | 2.9   |
| 205201_at   | NM_000168 | GLI3                      | 2737  | 16.4  | 15.8  | 15.9  | 20.6  | 11.2  |
| 205202_at   | NM_005389 | PCMT1                     | 5110  | 121.7 | 120.2 | 138.5 | 140.9 | 114.2 |
| 205203_at   | NM_002662 | PLD1                      | 5337  | 16.2  | 9.3   | 13.9  | 8.5   | 9.2   |
| 205204_at   | NM_021077 | NMB                       | 4828  | 31.2  | 30.9  | 35.2  | 31.5  | 13.8  |
| 205205_at   | NM_006509 | RELB                      | 5971  | 9.8   | 6.8   | 8.9   | 12.9  | 7.6   |
| 205206_at   | NM_000216 | KAL1                      | 3730  | 10.1  | 0.7   | 13.2  | 0.6   | 6.1   |
| 205207_at   | NM_000600 | IL6                       | 3569  | 9.9   | 6.1   | 7.5   | 9.4   | 8.7   |
| 205208_at   | NM_012190 | ALDH1L1                   | 10840 | 1.8   | 1.6   | 10.2  | 2.5   | 5.6   |
| 205209_at   | BC000254  | ACVR1B                    | 91    | 33.7  | 24.0  | 37.7  | 29.9  | 26.3  |
| 205210_at   | NM_004257 | TGFBRAP1                  | 9392  | 13.1  | 10.9  | 4.5   | 9.2   | 11.4  |
| 205211_s_at | NM_004292 | RIN1                      | 9610  | 30.3  | 16.1  | 29.4  | 14.3  | 10.9  |
| 205212_s_at | NM_014716 | ACAP1                     | 9744  | 4.5   | 4.1   | 2.6   | 7.3   | 2.3   |
| 205213_at   | NM_014716 | ACAP1                     | 9744  | 1.8   | 0.9   | 1.5   | 0.9   | 0.5   |
| 205214_at   | NM_004226 | STK17B                    | 9262  | 18.4  | 5.3   | 17.3  | 9.2   | 9.7   |
| 205215_at   | NM_007212 | RNF2                      | 6045  | 7.4   | 5.9   | 4.6   | 12.4  | 1.6   |
| 205216_s_at | NM_000042 | APOH                      | 350   | 4.0   | 6.6   | 10.9  | 7.2   | 4.0   |
| 205217_at   | NM_004085 | TIMM8A                    | 1678  | 57.8  | 37.0  | 78.2  | 51.8  | 63.6  |
| 205218_at   | NM_006466 | POLR3F                    | 10621 | 40.3  | 35.2  | 64.6  | 37.4  | 36.7  |
| 205219_s_at | NM_002044 | GALK2                     | 2585  | 79.9  | 72.0  | 81.6  | 73.6  | 81.1  |
| 205220_at   | NM_006018 | HCAR3                     | 8843  | 2.1   | 8.7   | 0.8   | 0.7   | 4.2   |
| 205221_at   | NM_000187 | HGD                       | 3081  | 10.0  | 6.6   | 2.1   | 5.4   | 9.8   |
| 205222_at   | NM_001966 | EHHADH                    | 1962  | 14.5  | 20.7  | 20.0  | 8.8   | 8.0   |
| 205223_at   | NM_014662 | DEPDC5                    | 9681  | 11.8  | 7.8   | 14.1  | 22.0  | 8.6   |
| 205224_at   | NM_017503 | SURF2                     | 6835  | 38.1  | 48.7  | 63.1  | 57.5  | 57.0  |
| 205225_at   | NM_000125 | ESR1                      | 2099  | 4.1   | 1.7   | 5.8   | 8.7   | 3.1   |
| 205226_at   | NM_006207 | PDGFRL                    | 5157  | 19.3  | 15.3  | 16.2  | 15.0  | 2.2   |
| 205227_at   | NM_002182 | IL1RAP                    | 3556  | 25.4  | 20.0  | 23.4  | 22.2  | 8.7   |
| 205228_at   | NM_002898 | RBMS2                     | 5939  | 8.4   | 18.4  | 2.9   | 10.9  | 2.9   |
| 205229_s_at | AA669336  | COCH                      | 1690  | 8.3   | 3.1   | 1.2   | 0.6   | 1.1   |
| 205230_at   | NM_014954 | RPH3A                     | 22895 | 14.9  | 8.6   | 10.2  | 5.4   | 10.4  |
| 205231_s_at | NM_005670 | EPM2A                     | 7957  | 27.9  | 19.4  | 24.8  | 29.7  | 19.2  |
| 205232_s_at | U89386    | PAFAH2                    | 5051  | 21.9  | 22.3  | 24.4  | 20.5  | 20.3  |
| 205233_s_at | NM_000437 | PAFAH2                    | 5051  | 11.2  | 15.8  | 11.9  | 8.6   | 7.9   |
| 205234_at   | NM_004696 | SLC16A4                   | 9122  | 0.4   | 0.2   | 0.3   | 0.1   | 0.2   |
| 205235_s_at | NM_016195 | KIF20B                    | 9585  | 34.4  | 29.1  | 42.2  | 17.2  | 45.5  |
| 205236_x_at | NM_003102 | SOD3                      | 6649  | 20.8  | 28.7  | 20.8  | 24.6  | 23.4  |
| 205237_at   | NM_002003 | FCN1                      | 2219  | 2.3   | 6.1   | 9.5   | 4.7   | 1.1   |
| 205238_at   | NM_024917 | TRMT2B                    | 79979 | 75.1  | 76.1  | 73.5  | 75.3  | 62.7  |
| 205239_at   | NM_001657 | AREG                      | 374   | 2.8   | 3.5   | 3.2   | 4.7   | 1.2   |
| 205240_at   | NM_013296 | GPSM2                     | 29899 | 38.2  | 31.1  | 46.1  | 38.1  | 35.4  |
| 205241_at   | NM_005138 | SCO2                      | 9997  | 253.0 | 187.4 | 245.7 | 212.9 | 219.2 |
| 205242_at   | NM_006419 | CXCL13                    | 10563 | 0.6   | 0.2   | 0.9   | 1.0   | 0.4   |

|             |           |              |              |        |       |        |        |        |
|-------------|-----------|--------------|--------------|--------|-------|--------|--------|--------|
| 205243_at   | AW466889  | SLC13A3      | 64849        | 2.2    | 2.1   | 3.0    | 2.5    | 1.4    |
| 205244_s_at | NM_022829 | SLC13A3      | 64849        | 1.4    | 1.0   | 1.4    | 1.0    | 1.1    |
| 205245_at   | NM_016948 | PARD6A       | 50855        | 58.9   | 81.9  | 81.0   | 52.8   | 57.4   |
| 205246_at   | NM_002618 | PEX13        | 5194         | 64.1   | 49.7  | 49.4   | 58.2   | 47.1   |
| 205247_at   | AI743713  | NOTCH4       | 4855         | 13.8   | 13.2  | 16.0   | 15.9   | 8.8    |
| 205248_at   | NM_005128 | DOPEY2       | 9980         | 47.6   | 51.4  | 44.1   | 46.7   | 38.2   |
| 205249_at   | NM_000399 | EGR2         | 1959         | 1.1    | 0.5   | 0.9    | 3.9    | 0.8    |
| 205250_s_at | NM_014684 | CEP290       | 80184        | 16.1   | 9.2   | 11.3   | 12.6   | 9.1    |
| 205251_at   | NM_022817 | PER2         | 8864         | 51.6   | 54.1  | 50.7   | 45.4   | 30.8   |
| 205252_at   | NM_003450 | ZNF174       | 7727         | 37.8   | 34.6  | 44.2   | 32.0   | 29.0   |
| 205253_at   | NM_002585 | PBX1         | 5087         | 20.4   | 27.4  | 18.4   | 30.1   | 12.5   |
| 205254_x_at | AW027359  | TCF7         | 6932         | 6.4    | 1.5   | 2.9    | 1.3    | 1.6    |
| 205255_x_at | NM_003202 | TCF7         | 6932         | 44.4   | 30.5  | 28.2   | 35.1   | 11.7   |
| 205256_at   | NM_014830 | ZBTB39       | 9880         | 32.2   | 22.3  | 25.6   | 23.6   | 18.8   |
| 205257_s_at | NM_001635 | AMPH         | 273          | 12.5   | 13.1  | 6.5    | 5.1    | 7.1    |
| 205258_at   | NM_002193 | INHBB        | 3625         | 41.3   | 44.2  | 34.8   | 38.2   | 30.6   |
| 205259_at   | NM_000901 | NR3C2        | 4306         | 15.0   | 9.9   | 20.5   | 13.9   | 9.7    |
| 205260_s_at | NM_001107 | ACYP1        | 97           | 34.4   | 28.8  | 24.3   | 32.9   | 32.7   |
| 205261_at   | NM_002630 | PGC          | 5225         | 23.2   | 11.5  | 33.5   | 14.3   | 18.2   |
| 205262_at   | NM_000238 | KCNH2        | 3757         | 3.8    | 2.0   | 0.9    | 1.5    | 0.6    |
| 205263_at   | AF082283  | BCL10        | 8915         | 130.1  | 109.5 | 134.7  | 112.4  | 91.3   |
| 205264_at   | NM_012099 | CD3EAP       | 10849        | 90.2   | 48.2  | 99.1   | 60.7   | 68.9   |
| 205265_s_at | NM_005876 | LOC10099661  | 10290 /// 10 | 2.8    | 5.3   | 2.4    | 1.9    | 2.1    |
| 205266_at   | NM_002309 | LIF          | 3976         | 1.1    | 7.0   | 6.2    | 8.0    | 2.7    |
| 205267_at   | NM_006235 | LOC1019286   | 5450 /// 101 | 1.5    | 4.7   | 3.5    | 2.4    | 0.4    |
| 205268_s_at | NM_017488 | ADD2         | 119          | 6.4    | 1.7   | 2.3    | 7.8    | 1.2    |
| 205269_at   | AI123251  | LCP2         | 3937         | 1.3    | 3.5   | 3.1    | 0.1    | 2.9    |
| 205270_s_at | NM_005565 | LCP2         | 3937         | 3.9    | 1.4   | 1.2    | 0.8    | 0.4    |
| 205271_s_at | NM_012119 | CDK20        | 23552        | 43.9   | 43.1  | 39.0   | 48.7   | 30.1   |
| 205272_s_at | NM_006250 | PRH1 /// PRF | 5554 /// 555 | 1.0    | 0.8   | 0.7    | 1.0    | 0.4    |
| 205273_s_at | NM_014968 | PITRM1       | 10531        | 257.2  | 210.3 | 236.8  | 216.3  | 197.5  |
| 205274_at   | U87964    | GTPBP1       | 9567         | 1.6    | 1.1   | 1.6    | 1.0    | 1.8    |
| 205275_at   | BE866976  | GTPBP1       | 9567         | 6.4    | 2.3   | 5.0    | 2.0    | 8.0    |
| 205276_s_at | NM_004286 | GTPBP1       | 9567         | 12.2   | 12.7  | 17.7   | 11.5   | 15.6   |
| 205277_at   | NM_012231 | PRDM2        | 7799         | 19.3   | 22.2  | 27.3   | 18.9   | 12.5   |
| 205278_at   | NM_000817 | GAD1         | 2571         | 0.5    | 0.8   | 2.8    | 0.1    | 2.3    |
| 205279_s_at | AF094754  | GLRB         | 2743         | 11.7   | 8.8   | 11.7   | 4.8    | 5.3    |
| 205280_at   | NM_000824 | GLRB         | 2743         | 3.9    | 0.4   | 0.1    | 0.2    | 0.3    |
| 205281_s_at | NM_002641 | PIGA         | 5277         | 48.5   | 32.9  | 39.9   | 25.5   | 25.2   |
| 205282_at   | NM_004631 | LRP8         | 7804         | 47.0   | 35.4  | 67.9   | 39.4   | 47.9   |
| 205283_at   | NM_006731 | FKTN         | 2218         | 44.3   | 29.0  | 34.3   | 26.7   | 23.7   |
| 205284_at   | NM_014777 | URB2         | 9816         | 30.0   | 23.4  | 40.5   | 34.2   | 30.6   |
| 205285_s_at | AI633888  | FYB          | 2533         | 2.1    | 3.1   | 2.0    | 5.0    | 7.3    |
| 205286_at   | U85658    | TFAP2C       | 7022         | 97.9   | 91.4  | 110.9  | 95.9   | 81.8   |
| 205287_s_at | NM_003222 | TFAP2C       | 7022         | 19.5   | 14.0  | 18.0   | 13.4   | 15.6   |
| 205288_at   | NM_003672 | CDC14A       | 8556         | 6.9    | 5.7   | 9.6    | 7.6    | 5.1    |
| 205289_at   | AA583044  | BMP2         | 650          | 4.6    | 0.1   | 4.7    | 2.0    | 3.3    |
| 205290_s_at | NM_001200 | BMP2         | 650          | 9.6    | 0.5   | 2.6    | 0.4    | 2.9    |
| 205291_at   | NM_000878 | IL2RB        | 3560         | 22.6   | 25.9  | 10.6   | 7.3    | 5.8    |
| 205292_s_at | NM_002137 | HNRNPA2B1    | 3181         | 1328.6 | 985.2 | 1366.3 | 1109.7 | 1059.6 |
| 205293_x_at | AB017120  | BAIAP2       | 10458        | 11.4   | 29.1  | 7.1    | 26.2   | 32.0   |
| 205294_at   | NM_017450 | BAIAP2       | 10458        | 39.5   | 36.7  | 25.8   | 40.8   | 29.6   |
| 205295_at   | NM_001825 | CKMT2        | 1160         | 15.4   | 12.6  | 13.0   | 9.4    | 2.5    |

|             |           |         |       |        |        |       |        |       |
|-------------|-----------|---------|-------|--------|--------|-------|--------|-------|
| 205296_at   | AL365505  | RBL1    | 5933  | 29.7   | 18.3   | 22.1  | 18.2   | 15.9  |
| 205297_s_at | NM_000626 | CD79B   | 974   | 10.1   | 1.8    | 1.8   | 7.9    | 5.7   |
| 205298_s_at | W58757    | BTN2A2  | 10385 | 47.7   | 45.7   | 38.6  | 43.4   | 34.7  |
| 205299_s_at | NM_006995 | BTN2A2  | 10385 | 4.8    | 4.9    | 6.6   | 7.8    | 7.1   |
| 205300_s_at | NM_022717 | SNRNP35 | 11066 | 73.3   | 75.9   | 111.8 | 55.5   | 76.6  |
| 205301_s_at | NM_016820 | OGG1    | 4968  | 45.9   | 36.9   | 60.0  | 39.8   | 43.7  |
| 205302_at   | NM_000596 | IGFBP1  | 3484  | 1.5    | 4.2    | 1.3   | 1.7    | 1.3   |
| 205303_at   | BF514158  | KCNJ8   | 3764  | 2.3    | 6.3    | 2.0   | 2.1    | 0.7   |
| 205304_s_at | NM_004982 | KCNJ8   | 3764  | 3.9    | 1.1    | 0.8   | 0.9    | 1.6   |
| 205305_at   | NM_004467 | FGL1    | 2267  | 21.5   | 11.4   | 9.1   | 18.2   | 10.3  |
| 205306_x_at | AI074145  | KMO     | 8564  | 7.1    | 0.9    | 1.6   | 0.9    | 2.1   |
| 205307_s_at | NM_003679 | KMO     | 8564  | 5.8    | 2.3    | 4.7   | 5.0    | 6.5   |
| 205308_at   | NM_016010 | ZC2HC1A | 51101 | 24.0   | 29.2   | 23.3  | 19.6   | 27.2  |
| 205309_at   | NM_014474 | SMPDL3B | 27293 | 44.5   | 47.6   | 54.2  | 54.8   | 49.7  |
| 205310_at   | NM_012066 | FBXO46  | 23403 | 65.6   | 70.7   | 59.7  | 61.4   | 43.3  |
| 205311_at   | NM_000790 | DDC     | 1644  | 1047.7 | 1285.3 | 999.9 | 1217.1 | 729.1 |
| 205312_at   | NM_003120 | SPI1    | 6688  | 2.5    | 1.1    | 1.5   | 1.9    | 0.9   |
| 205313_at   | NM_000458 | HNF1B   | 6928  | 59.0   | 44.8   | 47.2  | 48.2   | 37.1  |
| 205314_x_at | U40572    | SNTB2   | 6645  | 0.7    | 0.4    | 0.4   | 1.1    | 0.2   |
| 205315_s_at | NM_006750 | SNTB2   | 6645  | 77.6   | 57.7   | 72.2  | 68.6   | 59.0  |
| 205316_at   | BF223679  | SLC15A2 | 6565  | 7.8    | 4.1    | 8.4   | 1.1    | 5.8   |
| 205317_s_at | NM_021082 | SLC15A2 | 6565  | 13.6   | 8.4    | 10.4  | 6.2    | 7.6   |
| 205318_at   | NM_004984 | KIF5A   | 3798  | 11.6   | 6.4    | 15.7  | 1.3    | 1.8   |
| 205319_at   | NM_005672 | PSCA    | 8000  | 10.5   | 11.9   | 7.6   | 9.9    | 9.0   |
| 205320_at   | NM_005883 | APC2    | 10297 | 7.4    | 7.5    | 17.0  | 0.9    | 8.7   |
| 205321_at   | NM_001415 | EIF2S3  | 1968  | 487.8  | 474.4  | 464.5 | 408.9  | 397.9 |
| 205322_s_at | AW182367  | MTF1    | 4520  | 42.5   | 28.3   | 34.6  | 25.0   | 19.7  |
| 205323_s_at | NM_005955 | MTF1    | 4520  | 37.1   | 23.1   | 30.4  | 27.1   | 27.6  |
| 205324_s_at | NM_012280 | FTSJ1   | 24140 | 293.4  | 249.4  | 335.2 | 262.4  | 256.6 |
| 205325_at   | NM_014759 | PHYHIP  | 9796  | 1.7    | 2.1    | 2.7   | 1.6    | 1.1   |
| 205326_at   | NM_005856 | RAMP3   | 10268 | 15.3   | 2.7    | 6.8   | 3.3    | 14.9  |
| 205327_s_at | NM_001616 | ACVR2A  | 92    | 46.5   | 51.8   | 55.8  | 47.4   | 41.7  |
| 205328_at   | NM_006984 | CLDN10  | 9071  | 15.1   | 8.6    | 10.5  | 3.0    | 5.8   |
| 205329_s_at | NM_003794 | SNX4    | 8723  | 49.4   | 46.2   | 55.8  | 49.6   | 45.4  |
| 205330_at   | NM_002430 | MN1     | 4330  | 5.5    | 7.4    | 5.5   | 7.3    | 4.8   |
| 205331_s_at | NM_016606 | REEP2   | 51308 | 5.8    | 5.3    | 2.6   | 2.3    | 2.5   |
| 205332_at   | AF121951  | RCE1    | 9986  | 5.3    | 10.2   | 5.2   | 1.5    | 1.3   |
| 205333_s_at | NM_005133 | RCE1    | 9986  | 33.8   | 32.0   | 53.7  | 21.1   | 45.4  |
| 205334_at   | NM_006271 | S100A1  | 6271  | 4.0    | 5.8    | 5.7   | 7.9    | 4.5   |
| 205335_s_at | NM_003135 | SRP19   | 6728  | 412.5  | 345.6  | 456.2 | 378.6  | 338.1 |
| 205336_at   | NM_002854 | PVALB   | 5816  | 0.9    | 3.4    | 10.6  | 9.9    | 0.7   |
| 205337_at   | AL139318  | DCT     | 1638  | 2.7    | 0.7    | 0.5   | 0.6    | 3.2   |
| 205338_s_at | NM_001922 | DCT     | 1638  | 16.9   | 9.3    | 16.5  | 17.0   | 12.3  |
| 205339_at   | NM_003035 | STIL    | 6491  | 102.9  | 69.1   | 108.2 | 76.7   | 89.9  |
| 205340_at   | NM_014797 | ZBTB24  | 9841  | 48.1   | 42.5   | 39.6  | 33.2   | 30.2  |
| 205341_at   | NM_014601 | EHD2    | 30846 | 9.0    | 1.2    | 7.5   | 5.5    | 6.8   |
| 205342_s_at | AF026303  | SULT1C2 | 6819  | 6.2    | 4.5    | 3.4   | 3.5    | 0.5   |
| 205343_at   | NM_001056 | SULT1C2 | 6819  | 13.4   | 2.6    | 4.0   | 1.7    | 2.7   |
| 205344_at   | NM_006574 | CSPG5   | 10675 | 19.4   | 21.7   | 26.5  | 30.6   | 25.0  |
| 205345_at   | NM_000465 | BARD1   | 580   | 179.9  | 186.5  | 219.4 | 178.6  | 202.2 |
| 205346_at   | NM_006927 | ST3GAL2 | 6483  | 1.3    | 1.4    | 5.2   | 8.0    | 2.8   |
| 205347_s_at | NM_021992 | TMSB15A | 11013 | 203.3  | 171.3  | 222.6 | 184.0  | 150.3 |
| 205348_s_at | NM_004411 | DYNC1I1 | 1780  | 20.2   | 8.8    | 11.5  | 9.5    | 11.9  |

|             |           |                           |       |       |       |       |       |       |
|-------------|-----------|---------------------------|-------|-------|-------|-------|-------|-------|
| 205349_at   | NM_002068 | GNA15                     | 2769  | 0.8   | 0.9   | 2.0   | 1.5   | 2.6   |
| 205350_at   | NM_004378 | CRABP1                    | 1381  | 4.6   | 0.6   | 1.0   | 4.7   | 1.4   |
| 205351_at   | NM_000821 | GGCX                      | 2677  | 43.9  | 54.1  | 43.7  | 46.3  | 36.1  |
| 205352_at   | NM_005025 | SERPINI1                  | 5274  | 33.4  | 35.1  | 30.5  | 37.3  | 25.6  |
| 205353_s_at | NM_002567 | PEBP1                     | 5037  | 869.4 | 824.6 | 979.1 | 983.9 | 766.3 |
| 205354_at   | NM_000156 | GAMT                      | 2593  | 271.2 | 263.2 | 322.4 | 285.6 | 290.4 |
| 205355_at   | NM_001609 | ACADSB                    | 36    | 65.8  | 48.7  | 103.7 | 84.0  | 41.7  |
| 205356_at   | NM_003940 | USP13                     | 8975  | 143.2 | 92.5  | 117.7 | 89.1  | 105.0 |
| 205357_s_at | NM_000685 | AGTR1                     | 185   | 6.5   | 3.4   | 6.6   | 5.2   | 5.9   |
| 205358_at   | NM_000826 | GRIA2                     | 2891  | 0.5   | 0.3   | 0.3   | 0.3   | 0.3   |
| 205359_at   | NM_004274 | AKAP6                     | 9472  | 11.0  | 1.0   | 11.5  | 5.5   | 2.8   |
| 205360_at   | AI718295  | PFDN4                     | 5203  | 9.6   | 6.1   | 15.6  | 3.0   | 1.8   |
| 205361_s_at | AI718295  | PFDN4                     | 5203  | 246.7 | 190.9 | 266.9 | 209.5 | 188.8 |
| 205362_s_at | NM_002623 | PFDN4                     | 5203  | 31.5  | 17.9  | 38.0  | 21.5  | 18.8  |
| 205363_at   | NM_003986 | BBOX1                     | 8424  | 0.8   | 3.4   | 0.9   | 0.9   | 1.7   |
| 205364_at   | NM_003500 | ACOX2                     | 8309  | 3.0   | 11.7  | 6.0   | 1.2   | 0.5   |
| 205365_at   | AA527340  | HOXB6                     | 3216  | 2.1   | 3.1   | 6.1   | 4.9   | 5.0   |
| 205366_s_at | NM_018952 | HOXB6                     | 3216  | 14.8  | 12.2  | 15.1  | 14.0  | 13.0  |
| 205367_at   | NM_020979 | SH2B2                     | 10603 | 73.6  | 65.2  | 69.6  | 62.9  | 47.0  |
| 205368_at   | NM_014690 | FAM131B                   | 9715  | 1.8   | 0.9   | 0.4   | 5.5   | 4.2   |
| 205369_x_at | J03208    | DBT                       | 1629  | 123.9 | 100.5 | 113.5 | 106.9 | 94.6  |
| 205370_x_at | NM_001918 | DBT                       | 1629  | 250.9 | 229.5 | 281.8 | 282.5 | 273.9 |
| 205371_s_at | M27093    | DBT                       | 1629  | 63.2  | 48.1  | 66.1  | 51.2  | 58.8  |
| 205372_at   | NM_002655 | PLAG1                     | 5324  | 0.5   | 4.0   | 4.1   | 0.6   | 0.5   |
| 205373_at   | NM_004389 | CTNNA2                    | 1496  | 2.0   | 2.8   | 2.6   | 4.2   | 1.0   |
| 205374_at   | NM_003063 | SLN                       | 6588  | 14.9  | 10.4  | 8.9   | 8.1   | 1.2   |
| 205375_at   | NM_005586 | MDFI                      | 4188  | 10.1  | 8.9   | 4.1   | 8.2   | 7.7   |
| 205376_at   | NM_003866 | INPP4B                    | 8821  | 8.5   | 10.9  | 16.3  | 3.2   | 14.9  |
| 205377_s_at | AI190022  | ACHE                      | 43    | 2.1   | 1.2   | 1.6   | 0.7   | 0.7   |
| 205378_s_at | NM_015831 | ACHE                      | 43    | 3.2   | 1.1   | 4.3   | 5.0   | 0.8   |
| 205379_at   | NM_001236 | CBR3                      | 874   | 45.1  | 44.6  | 55.3  | 44.0  | 28.9  |
| 205380_at   | NM_002614 | PDZK1                     | 5174  | 0.5   | 0.4   | 3.6   | 0.5   | 1.7   |
| 205381_at   | NM_005824 | LRRC17                    | 10234 | 5.4   | 2.1   | 1.1   | 6.7   | 5.5   |
| 205382_s_at | NM_001928 | CFD                       | 1675  | 10.4  | 19.4  | 19.8  | 15.7  | 12.8  |
| 205383_s_at | NM_015642 | ZBTB20                    | 26137 | 12.6  | 20.1  | 7.4   | 13.3  | 8.8   |
| 205384_at   | NM_005031 | FXYD1                     | 5348  | 1.3   | 0.6   | 8.7   | 2.1   | 5.1   |
| 205385_at   | M92424    | MDM2                      | 4193  | 4.1   | 0.9   | 0.5   | 5.4   | 0.7   |
| 205386_s_at | NM_002392 | MDM2                      | 4193  | 12.5  | 9.6   | 12.4  | 12.2  | 8.7   |
| 205387_s_at | NM_000737 | CGB /// CGB: 1082 /// 936 |       | 1.3   | 0.9   | 4.8   | 1.5   | 1.1   |
| 205388_at   | NM_003279 | TNNC2                     | 7125  | 1.4   | 4.1   | 1.9   | 6.1   | 1.2   |
| 205389_s_at | AI659683  | ANK1                      | 286   | 1.7   | 3.4   | 2.6   | 1.3   | 0.4   |
| 205390_s_at | NM_000037 | ANK1                      | 286   | 1.3   | 2.8   | 1.5   | 1.3   | 1.0   |
| 205391_x_at | M28880    | ANK1                      | 286   | 1.4   | 0.6   | 1.0   | 0.6   | 0.4   |
| 205392_s_at | NM_004166 | CCL14 /// CC 6358 /// 348 |       | 2.6   | 1.7   | 1.9   | 0.7   | 0.8   |
| 205393_s_at | NM_001274 | CHEK1                     | 1111  | 106.3 | 63.4  | 119.3 | 71.6  | 91.2  |
| 205394_at   | NM_001274 | CHEK1                     | 1111  | 104.6 | 89.8  | 125.1 | 89.0  | 103.6 |
| 205395_s_at | NM_005590 | MRE11A                    | 4361  | 48.5  | 33.0  | 61.8  | 41.6  | 45.9  |
| 205396_at   | BF971416  | SMAD3                     | 4088  | 13.1  | 3.9   | 9.9   | 19.7  | 10.1  |
| 205397_x_at | U76622    | SMAD3                     | 4088  | 2.9   | 3.8   | 4.6   | 3.5   | 1.1   |
| 205398_s_at | NM_005902 | SMAD3                     | 4088  | 18.7  | 18.0  | 8.2   | 16.7  | 7.4   |
| 205399_at   | NM_004734 | DCLK1                     | 9201  | 3.4   | 0.4   | 1.9   | 2.3   | 3.7   |
| 205400_at   | NM_000377 | WAS                       | 7454  | 1.8   | 4.3   | 9.1   | 8.3   | 9.5   |
| 205401_at   | NM_003659 | AGPS                      | 8540  | 32.5  | 38.2  | 41.4  | 45.3  | 37.0  |

|             |           |            |              |        |        |        |        |        |
|-------------|-----------|------------|--------------|--------|--------|--------|--------|--------|
| 205402_x_at | NM_002770 | PRSS2      | 5645         | 10.4   | 6.4    | 8.6    | 6.3    | 7.1    |
| 205403_at   | NM_004633 | IL1R2      | 7850         | 5.2    | 1.0    | 0.5    | 1.3    | 0.2    |
| 205404_at   | NM_005525 | HSD11B1    | 3290         | 3.8    | 5.1    | 7.9    | 7.8    | 6.8    |
| 205405_at   | NM_003966 | SEMA5A     | 9037         | 1.4    | 2.1    | 2.5    | 0.8    | 1.3    |
| 205406_s_at | NM_017425 | SPA17      | 53340        | 89.3   | 80.1   | 90.4   | 87.1   | 65.5   |
| 205407_at   | NM_021111 | RECK       | 8434         | 7.4    | 0.4    | 4.2    | 7.1    | 4.5    |
| 205408_at   | NM_004641 | MLLT10     | 8028         | 31.1   | 21.8   | 27.9   | 23.7   | 18.4   |
| 205409_at   | NM_005253 | FOSL2      | 2355         | 16.6   | 10.3   | 9.2    | 9.9    | 11.1   |
| 205410_s_at | NM_001684 | ATP2B4     | 493          | 9.5    | 7.3    | 15.7   | 13.2   | 6.8    |
| 205411_at   | NM_006282 | STK4       | 6789         | 13.2   | 12.1   | 17.2   | 15.7   | 11.7   |
| 205412_at   | NM_000019 | ACAT1      | 38           | 407.9  | 447.0  | 410.3  | 440.9  | 341.3  |
| 205413_at   | NM_001584 | MPPED2     | 744          | 0.2    | 2.6    | 3.7    | 1.2    | 1.8    |
| 205414_s_at | NM_014859 | ARHGAP44   | 9912         | 23.1   | 26.9   | 21.7   | 32.1   | 20.4   |
| 205415_s_at | AI888099  | ATXN3      | 4287         | 24.6   | 22.9   | 22.6   | 17.6   | 18.9   |
| 205416_s_at | NM_004993 | ATXN3      | 4287         | 17.4   | 15.0   | 11.1   | 17.6   | 12.9   |
| 205417_s_at | NM_004393 | DAG1       | 1605         | 323.4  | 270.1  | 299.8  | 290.9  | 251.5  |
| 205418_at   | NM_002005 | FES        | 2242         | 1.0    | 0.3    | 0.4    | 0.6    | 0.3    |
| 205419_at   | NM_004951 | GPR183     | 1880         | 4.3    | 2.4    | 2.8    | 0.4    | 1.3    |
| 205420_at   | NM_000288 | PEX7       | 5191         | 41.8   | 50.5   | 49.3   | 59.4   | 34.1   |
| 205421_at   | NM_021977 | SLC22A3    | 6581         | 307.0  | 236.6  | 261.6  | 269.8  | 180.4  |
| 205422_s_at | NM_004791 | ITGBL1     | 9358         | 0.1    | 0.5    | 1.0    | 0.3    | 0.7    |
| 205423_at   | NM_001127 | AP1B1      | 162          | 110.1  | 125.5  | 120.7  | 125.6  | 114.9  |
| 205424_at   | NM_014726 | TBKBP1     | 9755         | 14.8   | 1.3    | 10.9   | 16.3   | 15.5   |
| 205425_at   | NM_005338 | HIP1       | 3092         | 41.5   | 26.7   | 35.4   | 33.2   | 25.9   |
| 205426_s_at | U79734    | HIP1       | 3092         | 14.8   | 12.3   | 15.9   | 22.6   | 12.1   |
| 205427_at   | NM_005649 | ZNF354A    | 6940         | 30.6   | 28.4   | 38.1   | 34.4   | 22.3   |
| 205428_s_at | NM_001740 | CALB2      | 794          | 14.6   | 8.6    | 15.0   | 9.2    | 5.3    |
| 205429_s_at | NM_016447 | MPP6       | 51678        | 58.0   | 39.4   | 66.4   | 40.9   | 42.5   |
| 205430_at   | AL133386  | BMP5       | 653          | 0.8    | 0.5    | 1.3    | 1.4    | 0.3    |
| 205431_s_at | NM_021073 | BMP5       | 653          | 7.5    | 5.3    | 8.8    | 0.6    | 3.8    |
| 205432_at   | NM_002557 | OVGP1      | 5016         | 29.6   | 25.8   | 30.3   | 18.0   | 29.3   |
| 205433_at   | NM_000055 | BCHE       | 590          | 114.7  | 97.1   | 102.2  | 120.2  | 70.0   |
| 205434_s_at | AW451954  | AAK1       | 22848        | 34.8   | 44.5   | 50.4   | 52.9   | 37.2   |
| 205435_s_at | NM_014911 | AAK1       | 22848        | 10.7   | 9.7    | 12.9   | 7.8    | 3.4    |
| 205436_s_at | NM_002105 | H2AFX      | 3014         | 1978.6 | 1587.0 | 2215.1 | 1705.5 | 1887.6 |
| 205437_at   | NM_006385 | ZNF211     | 10520        | 25.5   | 23.6   | 23.2   | 29.6   | 19.4   |
| 205438_at   | NM_007039 | PTPN21     | 11099        | 3.4    | 3.3    | 1.2    | 1.4    | 1.0    |
| 205439_at   | NM_000854 | GSTT2      | 2953         | 16.4   | 32.4   | 16.7   | 25.5   | 17.8   |
| 205440_s_at | NM_000909 | NPY1R      | 4886         | 2.1    | 0.8    | 0.5    | 2.1    | 2.2    |
| 205441_at   | NM_024578 | OCEL1      | 79629        | 53.2   | 73.4   | 79.0   | 71.0   | 51.7   |
| 205442_at   | NM_021647 | LOC1019281 | 9848 /// 101 | 11.7   | 11.1   | 16.3   | 19.2   | 12.9   |
| 205443_at   | NM_003082 | SNAPC1     | 6617         | 38.0   | 31.2   | 45.8   | 33.5   | 30.6   |
| 205444_at   | NM_004320 | ATP2A1     | 487          | 16.6   | 10.2   | 7.2    | 10.2   | 1.9    |
| 205445_at   | NM_000948 | PRL        | 5617         | 12.7   | 12.4   | 17.2   | 4.9    | 8.1    |
| 205446_s_at | NM_001880 | ATF2       | 1386         | 33.8   | 19.7   | 34.7   | 24.0   | 24.1   |
| 205447_s_at | BE222201  | MAP3K12    | 7786         | 3.1    | 3.6    | 2.2    | 2.1    | 11.1   |
| 205448_s_at | NM_006301 | MAP3K12    | 7786         | 28.1   | 26.3   | 24.8   | 28.8   | 20.1   |
| 205449_at   | NM_013299 | SAC3D1     | 29901        | 403.4  | 375.3  | 643.6  | 461.4  | 501.7  |
| 205450_at   | NM_002637 | PHKA1      | 5255         | 50.8   | 44.5   | 54.2   | 49.6   | 42.8   |
| 205451_at   | NM_005938 | FOXO4      | 4303         | 2.3    | 3.1    | 12.7   | 16.1   | 7.6    |
| 205452_at   | NM_004855 | PIGB       | 9488         | 92.1   | 83.2   | 98.8   | 95.2   | 81.7   |
| 205453_at   | NM_002145 | HOXB2      | 3212         | 3.8    | 2.9    | 5.0    | 1.2    | 1.0    |
| 205454_at   | BC001777  | HPCA       | 3208         | 6.6    | 1.3    | 8.6    | 9.2    | 4.2    |

|             |           |          |       |       |       |       |       |       |
|-------------|-----------|----------|-------|-------|-------|-------|-------|-------|
| 205455_at   | NM_002447 | MST1R    | 4486  | 20.7  | 9.9   | 7.0   | 11.4  | 6.7   |
| 205456_at   | NM_000733 | CD3E     | 916   | 19.5  | 7.7   | 14.5  | 13.1  | 8.7   |
| 205457_at   | NM_024294 | C6orf106 | 64771 | 30.6  | 21.7  | 32.3  | 27.4  | 21.3  |
| 205458_at   | BG034972  | MC1R     | 4157  | 11.3  | 6.9   | 18.3  | 8.7   | 8.2   |
| 205459_s_at | NM_002518 | NPAS2    | 4862  | 16.8  | 7.8   | 13.0  | 3.6   | 8.5   |
| 205460_at   | NM_002518 | NPAS2    | 4862  | 0.4   | 0.8   | 0.6   | 0.3   | 0.2   |
| 205461_at   | NM_006861 | RAB35    | 11021 | 51.8  | 42.7  | 59.7  | 43.0  | 44.9  |
| 205462_s_at | NM_002149 | HPCAL1   | 3241  | 50.3  | 57.0  | 58.0  | 70.8  | 45.0  |
| 205463_s_at | NM_002607 | PDGFA    | 5154  | 14.2  | 11.7  | 9.6   | 12.6  | 9.5   |
| 205464_at   | NM_000336 | SCNN1B   | 6338  | 1.4   | 0.8   | 2.9   | 5.6   | 6.5   |
| 205465_x_at | BF000296  | HS3ST1   | 9957  | 3.5   | 3.1   | 0.8   | 3.2   | 0.7   |
| 205466_s_at | NM_005114 | HS3ST1   | 9957  | 18.8  | 14.8  | 23.7  | 15.5  | 15.4  |
| 205467_at   | NM_001230 | CASP10   | 843   | 6.7   | 1.1   | 2.4   | 13.6  | 1.7   |
| 205468_s_at | AI028035  | IRF5     | 3663  | 13.0  | 10.3  | 3.7   | 13.1  | 1.0   |
| 205469_s_at | NM_002200 | IRF5     | 3663  | 44.8  | 29.9  | 41.3  | 34.6  | 30.4  |
| 205470_s_at | NM_006853 | KLK11    | 11012 | 5.4   | 0.5   | 5.2   | 2.5   | 1.2   |
| 205471_s_at | AW772082  | DACH1    | 1602  | 1.1   | 0.3   | 5.2   | 5.8   | 2.0   |
| 205472_s_at | NM_004392 | DACH1    | 1602  | 0.2   | 0.4   | 4.7   | 0.6   | 2.7   |
| 205473_at   | NM_001692 | ATP6V1B1 | 525   | 5.7   | 6.1   | 7.0   | 5.7   | 4.2   |
| 205474_at   | NM_015986 | CRLF3    | 51379 | 49.0  | 42.5  | 69.4  | 45.6  | 51.5  |
| 205475_at   | NM_007281 | SCRG1    | 11341 | 15.1  | 13.1  | 5.4   | 7.7   | 5.5   |
| 205476_at   | NM_004591 | CCL20    | 6364  | 0.9   | 0.5   | 0.7   | 1.4   | 0.4   |
| 205477_s_at | NM_001633 | AMBP     | 259   | 0.6   | 0.5   | 0.5   | 1.1   | 1.0   |
| 205478_at   | NM_006741 | PPP1R1A  | 5502  | 0.5   | 0.4   | 9.5   | 0.5   | 0.7   |
| 205479_s_at | NM_002658 | PLAU     | 5328  | 2.7   | 7.7   | 2.2   | 6.8   | 1.2   |
| 205480_s_at | NM_006759 | UGP2     | 7360  | 170.4 | 151.8 | 163.5 | 161.1 | 133.4 |
| 205481_at   | NM_000674 | ADORA1   | 134   | 11.8  | 11.9  | 12.2  | 6.7   | 10.3  |
| 205482_x_at | NM_013306 | SNX15    | 29907 | 76.5  | 88.9  | 87.6  | 94.4  | 62.2  |
| 205483_s_at | NM_005101 | ISG15    | 9636  | 429.2 | 577.9 | 570.5 | 661.6 | 503.0 |
| 205484_at   | NM_014450 | SIT1     | 27240 | 4.6   | 4.8   | 2.9   | 7.9   | 2.2   |
| 205485_at   | NM_000540 | RYR1     | 6261  | 1.0   | 0.7   | 1.9   | 2.1   | 0.6   |
| 205486_at   | NM_007170 | TESK2    | 10420 | 47.9  | 41.5  | 38.5  | 41.5  | 34.2  |
| 205487_s_at | NM_016267 | VGLL1    | 51442 | 5.5   | 0.7   | 1.4   | 6.6   | 1.0   |
| 205488_at   | NM_006144 | GZMA     | 3001  | 4.8   | 5.5   | 4.6   | 6.6   | 7.0   |
| 205489_at   | NM_001888 | CRYM     | 1428  | 36.8  | 11.2  | 34.6  | 19.1  | 18.0  |
| 205490_x_at | BF060667  | GJB3     | 2707  | 18.0  | 2.6   | 3.3   | 2.2   | 1.7   |
| 205491_s_at | NM_024009 | GJB3     | 2707  | 1.2   | 1.2   | 0.8   | 2.3   | 2.2   |
| 205492_s_at | AW090187  | DPYSL4   | 10570 | 0.8   | 10.4  | 11.8  | 12.4  | 6.4   |
| 205493_s_at | NM_006426 | DPYSL4   | 10570 | 16.7  | 20.1  | 23.5  | 17.5  | 11.9  |
| 205494_at   | NM_017530 | ZNF821   | 55565 | 22.1  | 15.7  | 13.2  | 19.7  | 17.0  |
| 205495_s_at | NM_006433 | GNLY     | 10578 | 3.1   | 1.2   | 1.3   | 0.7   | 0.7   |
| 205496_at   | NM_014702 | KIAA0408 | 9729  | 0.6   | 0.5   | 0.5   | 0.3   | 0.2   |
| 205497_at   | NM_007147 | ZNF175   | 7728  | 29.4  | 9.7   | 18.8  | 23.9  | 19.8  |
| 205498_at   | NM_000163 | GHR      | 2690  | 48.6  | 31.3  | 74.3  | 53.8  | 55.5  |
| 205499_at   | NM_014467 | SRPX2    | 27286 | 1.8   | 3.8   | 1.9   | 1.9   | 0.7   |
| 205500_at   | NM_001735 | C5       | 727   | 4.2   | 3.6   | 9.0   | 5.1   | 2.2   |
| 205501_at   | AI143879  | PDE10A   | 10846 | 24.2  | 22.7  | 25.5  | 29.3  | 21.2  |
| 205502_at   | NM_000102 | CYP17A1  | 1586  | 3.1   | 1.5   | 10.3  | 6.5   | 5.8   |
| 205503_at   | NM_005401 | PTPN14   | 5784  | 6.6   | 4.8   | 9.6   | 5.7   | 4.6   |
| 205504_at   | NM_000061 | BTK      | 695   | 5.9   | 1.3   | 1.4   | 5.9   | 1.2   |
| 205505_at   | NM_001490 | GCNT1    | 2650  | 31.7  | 21.0  | 27.7  | 26.4  | 28.9  |
| 205506_at   | NM_007127 | VIL1     | 7429  | 2.3   | 6.2   | 2.8   | 6.5   | 0.9   |
| 205507_at   | NM_014958 | ARHGEF15 | 22899 | 23.5  | 7.6   | 17.6  | 11.0  | 10.1  |

|             |           |                             |       |        |        |        |        |        |
|-------------|-----------|-----------------------------|-------|--------|--------|--------|--------|--------|
| 205508_at   | NM_001037 | SCN1B                       | 6324  | 12.4   | 11.6   | 17.6   | 8.7    | 3.1    |
| 205509_at   | NM_001871 | CPB1                        | 1360  | 2.1    | 5.2    | 2.2    | 7.0    | 6.9    |
| 205510_s_at | NM_017976 | FLJ10038                    | 55056 | 35.5   | 34.3   | 35.7   | 39.9   | 30.4   |
| 205511_at   | NM_017976 | FLJ10038                    | 55056 | 3.6    | 3.7    | 0.7    | 3.0    | 1.5    |
| 205512_s_at | NM_004208 | AIFM1                       | 9131  | 204.2  | 239.6  | 248.7  | 230.5  | 210.1  |
| 205513_at   | NM_001062 | TCN1                        | 6947  | 3.7    | 11.5   | 7.8    | 9.9    | 6.9    |
| 205514_at   | NM_018355 | ZNF415                      | 55786 | 33.4   | 29.6   | 30.8   | 34.1   | 27.2   |
| 205515_at   | NM_003619 | PRSS12                      | 8492  | 4.7    | 4.1    | 6.8    | 7.0    | 3.6    |
| 205516_x_at | NM_012127 | CIZ1                        | 25792 | 115.1  | 99.1   | 91.6   | 107.9  | 82.6   |
| 205517_at   | AV700724  | GATA4                       | 2626  | 2.6    | 3.1    | 2.7    | 1.3    | 0.9    |
| 205518_s_at | NM_003570 | CMAHP                       | 8418  | 5.6    | 1.1    | 0.5    | 3.4    | 2.9    |
| 205519_at   | NM_024908 | WDR76                       | 79968 | 28.0   | 23.4   | 31.2   | 24.9   | 23.0   |
| 205520_at   | NM_003162 | STRN                        | 6801  | 8.3    | 4.9    | 11.9   | 8.8    | 6.0    |
| 205521_at   | BF511976  | EXOG                        | 9941  | 42.6   | 47.5   | 46.9   | 34.9   | 44.2   |
| 205522_at   | NM_014621 | -                           | -     | 9.0    | 9.3    | 9.1    | 8.1    | 5.7    |
| 205523_at   | U43328    | HAPLN1                      | 1404  | 2.9    | 3.4    | 2.4    | 2.1    | 0.4    |
| 205524_s_at | NM_001884 | HAPLN1                      | 1404  | 3.2    | 3.0    | 2.6    | 1.5    | 1.6    |
| 205525_at   | NM_018495 | CALD1                       | 800   | 11.5   | 10.6   | 17.8   | 12.5   | 8.6    |
| 205526_s_at | NM_007044 | KATNA1                      | 11104 | 66.6   | 48.1   | 58.0   | 47.6   | 49.4   |
| 205527_s_at | NM_015487 | GEMIN4                      | 50628 | 139.2  | 105.6  | 167.0  | 122.9  | 136.2  |
| 205528_s_at | X79990    | RUNX1T1                     | 862   | 3.8    | 0.7    | 5.4    | 0.6    | 0.2    |
| 205529_s_at | NM_004349 | RUNX1T1                     | 862   | 0.8    | 1.2    | 0.9    | 0.8    | 0.5    |
| 205530_at   | NM_004453 | ETFDH                       | 2110  | 92.0   | 76.2   | 79.6   | 93.1   | 57.0   |
| 205531_s_at | NM_013267 | GLS2                        | 27165 | 27.9   | 36.0   | 44.3   | 44.6   | 39.7   |
| 205532_s_at | AU151483  | CDH6                        | 1004  | 4.4    | 3.5    | 4.0    | 5.1    | 2.7    |
| 205533_s_at | NM_004932 | CDH6                        | 1004  | 4.2    | 1.5    | 2.3    | 0.2    | 0.7    |
| 205534_at   | NM_002589 | PCDH7                       | 5099  | 0.9    | 1.1    | 4.6    | 4.0    | 4.1    |
| 205535_s_at | NM_002589 | PCDH7                       | 5099  | 0.5    | 0.1    | 2.9    | 1.2    | 0.4    |
| 205536_at   | NM_003371 | VAV2                        | 7410  | 12.4   | 10.7   | 15.2   | 20.4   | 11.5   |
| 205537_s_at | NM_003371 | VAV2                        | 7410  | 1.1    | 0.8    | 2.1    | 2.2    | 0.7    |
| 205538_at   | NM_003389 | CORO2A                      | 7464  | 25.8   | 21.0   | 26.2   | 24.0   | 26.4   |
| 205539_at   | NM_006576 | AVIL                        | 10677 | 9.9    | 2.4    | 2.0    | 5.8    | 4.0    |
| 205540_s_at | NM_016656 | RRAGB                       | 10325 | 19.4   | 18.8   | 18.1   | 18.4   | 20.2   |
| 205541_s_at | NM_018094 | GSPT2                       | 23708 | 53.5   | 62.3   | 69.0   | 50.5   | 48.2   |
| 205542_at   | NM_012449 | STEAP1                      | 26872 | 1411.2 | 1374.2 | 1332.7 | 1364.8 | 1015.3 |
| 205543_at   | NM_014278 | HSPA4L                      | 22824 | 43.1   | 38.3   | 65.5   | 39.8   | 39.7   |
| 205544_s_at | NM_001877 | CR2                         | 1380  | 0.4    | 0.4    | 0.6    | 0.7    | 0.9    |
| 205545_x_at | NM_014280 | DNAJC8                      | 22826 | 216.4  | 196.6  | 221.8  | 200.7  | 162.5  |
| 205546_s_at | NM_003331 | TYK2                        | 7297  | 74.3   | 60.3   | 65.4   | 84.1   | 54.6   |
| 205547_s_at | NM_003186 | TAGLN                       | 6876  | 11.0   | 7.9    | 9.5    | 13.1   | 12.5   |
| 205548_s_at | NM_006806 | BTG3                        | 10950 | 134.9  | 62.2   | 154.6  | 112.2  | 117.4  |
| 205549_at   | NM_006198 | PCP4                        | 5121  | 1.7    | 0.7    | 1.1    | 3.7    | 4.8    |
| 205550_s_at | NM_004899 | BRE                         | 9577  | 168.7  | 185.5  | 172.9  | 175.2  | 158.1  |
| 205551_at   | NM_014848 | SV2B                        | 9899  | 1.2    | 1.9    | 0.8    | 1.1    | 0.5    |
| 205552_s_at | NM_002534 | OAS1                        | 4938  | 4.7    | 1.6    | 3.3    | 3.6    | 2.7    |
| 205553_s_at | NM_003476 | CSRP3                       | 8048  | 0.7    | 0.7    | 0.5    | 0.6    | 1.0    |
| 205554_s_at | NM_004944 | DNASE1L3                    | 1776  | 10.1   | 6.1    | 5.6    | 2.9    | 6.3    |
| 205555_s_at | D31771    | MSX2                        | 4488  | 9.7    | 8.0    | 9.0    | 6.6    | 4.9    |
| 205556_at   | NM_002449 | MSX2                        | 4488  | 6.8    | 5.4    | 0.6    | 0.8    | 3.4    |
| 205557_at   | NM_001725 | BPI /// LOC1471671 /// 1496 |       | 3.9    | 1.2    | 3.4    | 2.4    | 1.7    |
| 205558_at   | NM_004620 | TRAF6                       | 7189  | 27.0   | 21.6   | 21.0   | 23.6   | 18.0   |
| 205559_s_at | NM_006200 | PCSK5                       | 5125  | 0.3    | 0.6    | 0.3    | 0.6    | 2.9    |
| 205560_at   | NM_006200 | PCSK5                       | 5125  | 3.2    | 0.9    | 0.7    | 1.1    | 2.8    |



|             |           |             |              |       |       |       |       |       |
|-------------|-----------|-------------|--------------|-------|-------|-------|-------|-------|
| 205561_at   | NM_024681 | KCTD17      | 79734        | 2.5   | 9.9   | 2.0   | 1.6   | 0.8   |
| 205562_at   | NM_006414 | RPP38       | 10557        | 121.2 | 119.3 | 136.7 | 113.3 | 106.2 |
| 205563_at   | NM_002256 | KISS1       | 3814         | 1.6   | 1.4   | 1.4   | 1.1   | 1.4   |
| 205564_at   | NM_007003 | PAGE4       | 9506         | 8.5   | 10.7  | 6.3   | 5.8   | 6.4   |
| 205565_s_at | NM_000144 | FXN         | 2395         | 116.1 | 87.5  | 135.3 | 102.2 | 95.5  |
| 205566_at   | NM_007011 | ABHD2       | 11057        | 132.6 | 106.9 | 156.6 | 117.5 | 138.7 |
| 205567_at   | NM_003654 | CHST1       | 8534         | 4.7   | 3.5   | 7.1   | 1.0   | 1.2   |
| 205568_at   | NM_020980 | AQP9        | 366          | 1.0   | 0.6   | 0.6   | 0.5   | 0.6   |
| 205569_at   | NM_014398 | LAMP3       | 27074        | 4.8   | 2.5   | 2.0   | 1.9   | 1.3   |
| 205570_at   | NM_005028 | PIP4K2A     | 5305         | 18.1  | 13.9  | 17.4  | 13.8  | 8.4   |
| 205571_at   | NM_015929 | LIPT1       | 51601        | 23.8  | 16.1  | 28.5  | 19.9  | 18.5  |
| 205572_at   | NM_001147 | ANGPT2      | 285          | 0.7   | 0.7   | 1.1   | 2.7   | 0.2   |
| 205573_s_at | NM_015976 | SNX7        | 51375        | 92.2  | 75.5  | 94.8  | 98.8  | 76.1  |
| 205574_x_at | NM_001199 | BMP1        | 649          | 20.3  | 16.6  | 11.5  | 15.3  | 10.6  |
| 205575_at   | NM_006688 | C1QL1       | 10882        | 23.4  | 13.9  | 26.0  | 16.0  | 10.8  |
| 205576_at   | NM_000185 | SERPIND1    | 3053         | 1.2   | 1.5   | 6.1   | 0.5   | 0.9   |
| 205577_at   | NM_005609 | PYGM        | 5837         | 2.3   | 4.7   | 3.0   | 6.7   | 5.8   |
| 205578_at   | NM_004560 | ROR2        | 4920         | 0.4   | 3.7   | 2.2   | 1.8   | 0.2   |
| 205579_at   | NM_000861 | HRH1        | 3269         | 5.6   | 5.0   | 2.1   | 2.0   | 2.3   |
| 205580_s_at | D28481    | HRH1        | 3269         | 2.5   | 1.0   | 1.4   | 9.0   | 2.0   |
| 205581_s_at | NM_000603 | NOS3        | 4846         | 0.6   | 4.1   | 5.6   | 1.1   | 0.4   |
| 205582_s_at | NM_004121 | GGT5        | 2687         | 1.0   | 1.0   | 0.6   | 0.7   | 0.5   |
| 205583_s_at | NM_024810 | ALG13       | 79868        | 34.9  | 22.1  | 31.8  | 38.3  | 30.0  |
| 205584_at   | NM_024810 | ALG13       | 79868        | 24.3  | 15.7  | 15.2  | 11.5  | 16.1  |
| 205585_at   | NM_001987 | ETV6        | 2120         | 9.8   | 8.0   | 12.4  | 8.3   | 14.1  |
| 205586_x_at | NM_003378 | VGF         | 7425         | 10.0  | 7.5   | 11.7  | 10.8  | 12.0  |
| 205587_at   | NM_007045 | FGFR1OP     | 11116        | 0.9   | 0.4   | 0.9   | 1.1   | 0.5   |
| 205588_s_at | NM_007045 | FGFR1OP     | 11116        | 55.5  | 56.9  | 85.6  | 69.6  | 68.6  |
| 205589_at   | NM_000258 | MYL3        | 4634         | 16.7  | 7.8   | 12.7  | 15.4  | 8.4   |
| 205590_at   | NM_005739 | RASGRP1     | 10125        | 1.3   | 3.9   | 1.8   | 0.3   | 0.4   |
| 205591_at   | NM_006334 | OLFM1       | 10439        | 1.3   | 0.9   | 1.2   | 0.8   | 1.5   |
| 205592_at   | X77737    | SLC4A1      | 6521         | 20.4  | 2.0   | 6.0   | 2.4   | 5.2   |
| 205593_s_at | NM_002606 | PDE9A       | 5152         | 27.5  | 44.9  | 37.9  | 48.3  | 45.2  |
| 205594_at   | NM_014897 | ZNF652      | 22834        | 80.0  | 71.5  | 102.4 | 82.8  | 65.6  |
| 205595_at   | NM_001944 | DSG3        | 1830         | 8.3   | 7.2   | 7.4   | 6.9   | 1.2   |
| 205596_s_at | AY014180  | SMURF2      | 64750        | 74.7  | 52.5  | 84.7  | 66.5  | 60.4  |
| 205597_at   | NM_025257 | SLC44A4     | 80736        | 62.4  | 87.9  | 74.6  | 94.7  | 53.8  |
| 205598_at   | NM_005879 | TRAIP       | 10293        | 21.6  | 15.5  | 23.7  | 19.1  | 21.2  |
| 205599_at   | NM_005658 | TRAF1       | 7185         | 10.1  | 1.7   | 12.5  | 8.4   | 6.9   |
| 205600_x_at | AI052747  | HOXB5       | 3215         | 32.5  | 21.0  | 26.7  | 25.9  | 23.8  |
| 205601_s_at | NM_002147 | HOXB5       | 3215         | 21.7  | 20.8  | 25.4  | 15.9  | 12.8  |
| 205602_x_at | NM_002783 | PSG7        | 5676         | 2.6   | 3.0   | 4.0   | 1.8   | 1.2   |
| 205603_s_at | NM_007309 | DIAPH2      | 1730         | 13.2  | 11.0  | 14.8  | 17.3  | 15.5  |
| 205604_at   | AI432470  | HOXD9       | 3235         | 11.1  | 11.6  | 5.7   | 6.3   | 6.4   |
| 205605_at   | NM_014213 | HOXD9       | 3235         | 1.0   | 1.1   | 1.0   | 1.1   | 3.6   |
| 205606_at   | NM_002336 | LRP6        | 4040         | 3.9   | 3.1   | 5.5   | 5.2   | 2.8   |
| 205607_s_at | NM_020423 | SCYL3       | 57147        | 9.4   | 18.6  | 29.0  | 18.1  | 19.4  |
| 205608_s_at | U83508    | ANGPT1      | 284          | 8.6   | 4.5   | 9.3   | 7.9   | 7.5   |
| 205609_at   | NM_001146 | ANGPT1      | 284          | 2.0   | 2.3   | 2.5   | 2.8   | 0.9   |
| 205610_at   | NM_003803 | MYOM1       | 8736         | 0.6   | 3.5   | 1.2   | 4.1   | 0.7   |
| 205611_at   | NM_003809 | TNFSF12 /// | 8742 /// 407 | 1.0   | 0.6   | 1.6   | 0.8   | 1.1   |
| 205612_at   | NM_007351 | MMRN1       | 22915        | 0.5   | 0.1   | 2.1   | 0.7   | 1.8   |
| 205613_at   | NM_016524 | SYT17       | 51760        | 1.7   | 2.2   | 1.4   | 2.6   | 2.2   |

|             |           |                          |        |       |       |       |       |       |
|-------------|-----------|--------------------------|--------|-------|-------|-------|-------|-------|
| 205614_x_at | NM_020998 | MST1                     | 4485   | 22.0  | 2.9   | 7.6   | 4.3   | 3.0   |
| 205615_at   | NM_001868 | CPA1                     | 1357   | 3.2   | 1.6   | 1.3   | 0.8   | 1.2   |
| 205616_at   | AW134812  | GALNT8 /// k3742 /// 262 |        | 11.6  | 1.3   | 9.6   | 3.7   | 1.3   |
| 205617_at   | NM_000951 | PRRG2                    | 5639   | 42.4  | 46.0  | 46.4  | 52.5  | 37.2  |
| 205618_at   | NM_000950 | PRRG1                    | 5638   | 104.9 | 118.0 | 123.6 | 104.6 | 93.3  |
| 205619_s_at | NM_004527 | MEOX1                    | 4222   | 4.9   | 4.4   | 2.1   | 3.4   | 2.6   |
| 205620_at   | NM_000504 | F10                      | 2159   | 1.0   | 3.8   | 1.2   | 3.8   | 3.5   |
| 205621_at   | NM_006020 | ALKBH1                   | 8846   | 103.0 | 80.2  | 101.8 | 103.3 | 86.5  |
| 205622_at   | NM_003080 | SMPD2                    | 6610   | 42.6  | 38.2  | 41.8  | 39.5  | 35.5  |
| 205623_at   | NM_000691 | ALDH3A1                  | 218    | 1.2   | 0.5   | 5.4   | 0.8   | 0.7   |
| 205624_at   | NM_001870 | CPA3                     | 1359   | 5.3   | 4.2   | 10.2  | 6.9   | 0.5   |
| 205625_s_at | AW014927  | CALB1                    | 793    | 1.1   | 0.8   | 1.7   | 0.7   | 0.8   |
| 205626_s_at | NM_004929 | CALB1                    | 793    | 3.7   | 5.1   | 9.4   | 2.3   | 3.9   |
| 205627_at   | NM_001785 | CDA                      | 978    | 1.1   | 0.5   | 0.5   | 0.9   | 0.4   |
| 205628_at   | NM_000947 | PRIM2                    | 5558   | 66.6  | 48.8  | 78.0  | 59.8  | 59.0  |
| 205629_s_at | BC002599  | CRH                      | 1392   | 0.5   | 0.8   | 1.5   | 1.7   | 0.6   |
| 205630_at   | NM_000756 | CRH                      | 1392   | 5.4   | 1.5   | 3.4   | 3.8   | 6.7   |
| 205631_at   | NM_014749 | KIAA0586                 | 9786   | 30.6  | 30.8  | 36.8  | 31.0  | 29.7  |
| 205632_s_at | NM_003558 | PIP5K1B                  | 8395   | 7.2   | 8.4   | 3.6   | 6.2   | 7.1   |
| 205633_s_at | NM_000688 | ALAS1                    | 211    | 285.6 | 255.7 | 277.8 | 286.3 | 214.4 |
| 205634_x_at | NM_024298 | ZDHHC24                  | 254359 | 167.2 | 151.2 | 140.8 | 180.5 | 109.4 |
| 205635_at   | NM_003947 | KALRN                    | 8997   | 1.4   | 6.9   | 3.6   | 3.2   | 2.9   |
| 205636_at   | AF036269  | SH3GL3                   | 6457   | 18.4  | 8.0   | 21.2  | 7.4   | 4.2   |
| 205637_s_at | NM_003027 | SH3GL3                   | 6457   | 19.3  | 21.9  | 14.6  | 12.5  | 19.3  |
| 205638_at   | NM_001704 | BAI3                     | 577    | 3.1   | 2.2   | 1.0   | 2.7   | 1.9   |
| 205639_at   | NM_001637 | AOAH                     | 313    | 1.9   | 0.7   | 6.2   | 4.6   | 1.4   |
| 205640_at   | NM_000694 | ALDH3B1                  | 221    | 1.8   | 1.8   | 1.6   | 1.7   | 0.7   |
| 205641_s_at | NM_003789 | TRADD                    | 8717   | 67.6  | 55.2  | 60.0  | 62.5  | 54.3  |
| 205642_at   | NM_007018 | CNTRL                    | 11064  | 5.1   | 11.8  | 13.1  | 5.6   | 5.3   |
| 205643_s_at | NM_004576 | PPP2R2B                  | 5521   | 11.1  | 5.5   | 7.4   | 1.3   | 8.8   |
| 205644_s_at | NM_003096 | SNRPG                    | 6637   | 780.1 | 658.4 | 904.0 | 737.2 | 626.1 |
| 205645_at   | NM_004726 | REPS2                    | 9185   | 29.3  | 24.1  | 30.9  | 25.5  | 31.6  |
| 205646_s_at | NM_000280 | PAX6                     | 5080   | 3.0   | 1.1   | 2.8   | 2.2   | 6.9   |
| 205647_at   | NM_002879 | RAD52                    | 5893   | 6.1   | 16.5  | 14.5  | 8.8   | 11.6  |
| 205648_at   | NM_003391 | WNT2                     | 7472   | 1.5   | 2.2   | 1.7   | 2.2   | 4.1   |
| 205649_s_at | NM_000508 | FGA                      | 2243   | 0.5   | 0.4   | 0.8   | 0.9   | 4.0   |
| 205650_s_at | NM_021871 | FGA                      | 2243   | 17.2  | 7.7   | 8.2   | 10.3  | 6.9   |
| 205651_x_at | NM_007023 | RAPGEF4                  | 11069  | 4.1   | 3.0   | 2.9   | 1.2   | 2.3   |
| 205652_s_at | NM_012263 | TTLL1                    | 25809  | 42.1  | 45.6  | 34.9  | 49.0  | 35.6  |
| 205653_at   | NM_001911 | CTSG                     | 1511   | 5.6   | 4.8   | 2.7   | 6.2   | 6.3   |
| 205654_at   | NM_000715 | C4BPA                    | 722    | 6.4   | 3.0   | 15.9  | 8.1   | 12.3  |
| 205655_at   | NM_002393 | MDM4                     | 4194   | 19.5  | 20.2  | 17.3  | 19.7  | 18.3  |
| 205656_at   | NM_014459 | PCDH17                   | 27253  | 14.0  | 7.7   | 9.2   | 10.6  | 7.6   |
| 205657_at   | NM_012205 | HAAO                     | 23498  | 14.0  | 5.3   | 18.3  | 7.9   | 4.0   |
| 205658_s_at | NM_003086 | SNAPC4                   | 6621   | 49.8  | 36.6  | 41.5  | 37.7  | 39.0  |
| 205659_at   | NM_014707 | HDAC9                    | 9734   | 11.0  | 0.8   | 4.3   | 7.4   | 4.2   |
| 205660_at   | NM_003733 | OASL                     | 8638   | 27.0  | 18.4  | 7.9   | 20.0  | 18.0  |
| 205661_s_at | NM_025207 | FLAD1                    | 80308  | 178.1 | 142.1 | 187.7 | 148.3 | 149.0 |
| 205662_at   | NM_015681 | B9D1                     | 27077  | 34.7  | 30.4  | 28.1  | 35.3  | 23.0  |
| 205663_at   | NM_020528 | PCBP3                    | 54039  | 1.6   | 6.0   | 14.5  | 3.8   | 10.9  |
| 205664_at   | NM_012311 | KIN                      | 22944  | 28.7  | 26.1  | 40.1  | 25.0  | 25.4  |
| 205665_at   | NM_006675 | TSPAN9                   | 10867  | 18.8  | 20.2  | 5.4   | 21.3  | 9.2   |
| 205666_at   | NM_002021 | FMO1                     | 2326   | 3.6   | 1.2   | 10.9  | 1.3   | 5.5   |

|             |           |                      |        |       |        |        |       |       |
|-------------|-----------|----------------------|--------|-------|--------|--------|-------|-------|
| 205667_at   | NM_000553 | WRN                  | 7486   | 38.1  | 26.5   | 38.6   | 36.6  | 28.0  |
| 205668_at   | NM_002349 | LY75                 | 4065   | 1.9   | 0.6    | 0.5    | 3.7   | 0.1   |
| 205669_at   | NM_004540 | NCAM2                | 4685   | 76.8  | 64.6   | 62.0   | 53.0  | 53.6  |
| 205670_at   | NM_004861 | GAL3ST1              | 9514   | 0.6   | 0.5    | 1.9    | 0.5   | 0.8   |
| 205671_s_at | NM_002120 | HLA-DOB              | 3112   | 1.8   | 3.4    | 0.9    | 0.8   | 1.3   |
| 205672_at   | NM_000380 | XPA                  | 7507   | 45.4  | 51.3   | 41.4   | 52.9  | 49.3  |
| 205673_s_at | NM_024087 | ASB9                 | 140462 | 6.5   | 4.3    | 4.7    | 2.4   | 2.7   |
| 205674_x_at | NM_001680 | FXVD2                | 486    | 11.6  | 6.2    | 8.9    | 4.7   | 8.8   |
| 205675_at   | AI623321  | MTPP                 | 4547   | 1.0   | 2.3    | 4.6    | 1.0   | 3.6   |
| 205676_at   | NM_000785 | CYP27B1              | 1594   | 18.2  | 10.0   | 10.4   | 12.0  | 5.4   |
| 205677_s_at | NM_005887 | DLEU1                | 10301  | 192.2 | 155.1  | 222.7  | 173.6 | 178.0 |
| 205678_at   | NM_004644 | AP3B2                | 8120   | 0.8   | 1.1    | 6.0    | 5.6   | 3.9   |
| 205679_x_at | NM_013227 | ACAN                 | 176    | 25.3  | 13.0   | 19.0   | 7.9   | 8.4   |
| 205680_at   | NM_002425 | MMP10                | 4319   | 8.3   | 0.8    | 7.4    | 4.0   | 1.7   |
| 205681_at   | NM_004049 | BCL2A1               | 597    | 4.4   | 0.2    | 0.6    | 4.0   | 3.0   |
| 205682_x_at | NM_019101 | APOM                 | 55937  | 33.8  | 33.5   | 32.7   | 24.6  | 18.6  |
| 205683_x_at | NM_003294 | TPSAB1               | 7177   | 2.6   | 0.9    | 9.3    | 1.6   | 1.4   |
| 205684_s_at | NM_017925 | DENND4C              | 55667  | 39.4  | 37.3   | 46.7   | 34.1  | 34.7  |
| 205685_at   | BG236280  | CD86                 | 942    | 7.9   | 1.5    | 13.6   | 8.3   | 8.4   |
| 205686_s_at | NM_006889 | CD86                 | 942    | 1.4   | 1.3    | 0.7    | 0.5   | 0.8   |
| 205687_at   | NM_019116 | UBFD1                | 56061  | 140.6 | 128.9  | 145.7  | 137.8 | 121.0 |
| 205688_at   | NM_003223 | TFAP4                | 7023   | 11.0  | 7.2    | 16.6   | 14.9  | 7.6   |
| 205689_at   | NM_014801 | PCNXL2               | 80003  | 20.7  | 10.0   | 24.2   | 17.0  | 7.7   |
| 205690_s_at | NM_003910 | BUD31                | 8896   | 310.2 | 308.5  | 349.2  | 332.4 | 284.3 |
| 205691_at   | NM_004209 | SYNGR3               | 9143   | 9.5   | 15.4   | 3.3    | 17.3  | 12.9  |
| 205692_s_at | NM_001775 | CD38                 | 952    | 2.2   | 1.3    | 5.7    | 1.3   | 6.7   |
| 205693_at   | NM_006757 | TNNT3                | 7140   | 14.6  | 8.4    | 9.8    | 5.8   | 9.8   |
| 205694_at   | NM_000550 | TYRP1                | 7306   | 4.1   | 7.7    | 3.9    | 4.5   | 4.3   |
| 205695_at   | NM_006843 | SDS                  | 10993  | 9.1   | 6.8    | 9.4    | 12.8  | 5.2   |
| 205696_s_at | NM_005264 | GFRA1                | 2674   | 10.0  | 0.5    | 3.6    | 1.6   | 3.9   |
| 205697_at   | NM_006998 | SCGN                 | 10590  | 1.8   | 4.8    | 2.4    | 6.9   | 3.0   |
| 205698_s_at | NM_002758 | MAP2K6               | 5608   | 49.9  | 51.0   | 66.1   | 41.7  | 43.0  |
| 205699_at   | U39657    | MAP2K6               | 5608   | 8.6   | 3.1    | 1.9    | 5.2   | 0.8   |
| 205700_at   | NM_003725 | HSD17B6              | 8630   | 2.1   | 0.7    | 15.7   | 8.9   | 0.8   |
| 205701_at   | NM_006390 | IPO8                 | 10526  | 32.5  | 33.5   | 33.1   | 32.6  | 28.5  |
| 205702_at   | NM_006608 | PHTF1                | 10745  | 18.2  | 5.6    | 6.3    | 8.6   | 8.0   |
| 205703_at   | AF112972  | -                    | -      | 1.8   | 0.6    | 1.2    | 1.5   | 0.6   |
| 205704_s_at | NM_012463 | ATP6V0A2             | 23545  | 37.0  | 44.8   | 50.4   | 33.6  | 36.9  |
| 205705_at   | AL137351  | ANKRD26              | 22852  | 10.1  | 3.6    | 6.3    | 9.6   | 6.9   |
| 205706_s_at | NM_014915 | ANKRD26              | 22852  | 1.0   | 6.7    | 12.0   | 6.7   | 8.9   |
| 205707_at   | NM_014339 | IL17RA               | 23765  | 49.0  | 35.0   | 35.9   | 33.6  | 24.2  |
| 205708_s_at | AI051254  | TRPM2                | 7226   | 138.4 | 139.3  | 208.3  | 185.8 | 182.0 |
| 205709_s_at | NM_001263 | CDS1                 | 1040   | 87.0  | 59.7   | 90.6   | 69.1  | 63.0  |
| 205710_at   | NM_004525 | LRP2                 | 4036   | 10.6  | 10.0   | 6.9    | 7.2   | 6.7   |
| 205711_x_at | NM_005174 | ATP5C1               | 509    | 985.6 | 1006.8 | 1023.9 | 964.5 | 805.1 |
| 205712_at   | NM_002839 | PTPRD                | 5789   | 1.1   | 5.3    | 5.1    | 3.7   | 0.8   |
| 205713_s_at | NM_000095 | COMP                 | 1311   | 4.9   | 2.2    | 5.6    | 7.7   | 5.1   |
| 205714_s_at | NM_015896 | ZMYND10              | 51364  | 15.8  | 19.1   | 3.1    | 9.9   | 1.5   |
| 205715_at   | NM_004334 | BST1                 | 683    | 0.4   | 0.3    | 2.1    | 0.9   | 0.6   |
| 205716_at   | NM_018843 | SLC25A40             | 55972  | 42.1  | 41.9   | 43.7   | 49.8  | 49.0  |
| 205717_x_at | NM_002588 | PCDHGA1 ///,5098 /// | 864    | 77.8  | 80.8   | 71.4   | 83.0  | 41.0  |
| 205718_at   | NM_000889 | ITGB7                | 3695   | 1.4   | 2.1    | 2.9    | 0.8   | 3.0   |
| 205719_s_at | NM_000277 | LOC1019290.5053 ///  | 101    | 3.2   | 0.3    | 4.7    | 0.3   | 0.8   |

|             |           |         |       |       |       |       |       |       |
|-------------|-----------|---------|-------|-------|-------|-------|-------|-------|
| 205720_at   | NM_000939 | POMC    | 5443  | 5.5   | 1.7   | 0.9   | 0.9   | 0.7   |
| 205721_at   | U97145    | GFRA2   | 2675  | 2.3   | 0.6   | 4.2   | 0.8   | 0.7   |
| 205722_s_at | NM_001495 | GFRA2   | 2675  | 1.3   | 1.4   | 0.9   | 1.1   | 0.9   |
| 205723_at   | NM_001842 | CNTFR   | 1271  | 20.4  | 15.9  | 21.8  | 13.2  | 8.5   |
| 205724_at   | NM_000299 | PKP1    | 5317  | 3.2   | 3.7   | 0.8   | 1.3   | 1.1   |
| 205725_at   | NM_003357 | SCGB1A1 | 7356  | 0.9   | 0.6   | 1.5   | 3.8   | 2.1   |
| 205726_at   | NM_006729 | DIAPH2  | 1730  | 14.6  | 12.7  | 11.7  | 10.7  | 10.8  |
| 205727_at   | NM_007110 | TEP1    | 7011  | 1.9   | 0.6   | 1.1   | 2.8   | 0.6   |
| 205728_at   | AL022718  | TENM1   | 10178 | 0.9   | 0.5   | 2.1   | 4.4   | 3.4   |
| 205729_at   | NM_003999 | OSMR    | 9180  | 9.8   | 10.5  | 11.6  | 10.4  | 8.5   |
| 205730_s_at | NM_014945 | ABLIM3  | 22885 | 2.7   | 3.4   | 1.8   | 2.0   | 4.7   |
| 205731_s_at | AW027474  | NCOA2   | 10499 | 18.2  | 13.5  | 20.5  | 21.9  | 10.7  |
| 205732_s_at | NM_006540 | NCOA2   | 10499 | 28.5  | 30.5  | 23.4  | 23.0  | 19.7  |
| 205733_at   | NM_000057 | BLM     | 641   | 30.4  | 36.4  | 45.7  | 30.0  | 29.9  |
| 205734_s_at | AI990465  | AFF3    | 3899  | 0.6   | 0.4   | 0.4   | 0.3   | 0.3   |
| 205735_s_at | NM_002285 | AFF3    | 3899  | 0.6   | 0.9   | 1.5   | 1.4   | 0.4   |
| 205736_at   | NM_000290 | PGAM2   | 5224  | 5.8   | 1.0   | 0.8   | 1.6   | 1.3   |
| 205737_at   | NM_004518 | KCNQ2   | 3785  | 8.2   | 4.4   | 8.5   | 8.5   | 2.9   |
| 205738_s_at | NM_004102 | FABP3   | 2170  | 6.7   | 5.6   | 10.1  | 1.1   | 0.8   |
| 205739_x_at | NM_016220 | ZNF107  | 51427 | 37.6  | 30.4  | 41.9  | 33.5  | 31.6  |
| 205740_s_at | NM_024321 | RBM42   | 79171 | 187.2 | 189.6 | 234.3 | 218.0 | 165.4 |
| 205741_s_at | NM_001392 | DTNA    | 1837  | 9.3   | 8.6   | 11.1  | 6.1   | 8.0   |
| 205742_at   | NM_000363 | TNNI3   | 7137  | 11.8  | 6.2   | 5.4   | 5.8   | 6.1   |
| 205743_at   | NM_003149 | STAC    | 6769  | 12.8  | 16.5  | 9.3   | 14.6  | 10.2  |
| 205744_at   | NM_003586 | DOC2A   | 8448  | 17.4  | 11.3  | 11.8  | 2.6   | 8.7   |
| 205745_x_at | NM_003183 | ADAM17  | 6868  | 22.2  | 22.5  | 23.2  | 22.0  | 23.9  |
| 205746_s_at | U86755    | ADAM17  | 6868  | 13.1  | 13.8  | 12.9  | 15.7  | 16.5  |
| 205747_at   | NM_004352 | CBLN1   | 869   | 7.3   | 3.6   | 3.8   | 6.0   | 2.1   |
| 205748_s_at | NM_017876 | RNF126  | 55658 | 189.8 | 145.5 | 214.1 | 156.8 | 156.4 |
| 205749_at   | NM_000499 | CYP1A1  | 1543  | 1.3   | 3.5   | 4.3   | 7.3   | 1.3   |
| 205750_at   | NM_004332 | BPHL    | 670   | 94.4  | 94.1  | 91.5  | 94.3  | 75.8  |
| 205751_at   | NM_003026 | SH3GL2  | 6456  | 6.0   | 2.0   | 8.2   | 1.9   | 2.3   |
| 205752_s_at | NM_000851 | GSTM5   | 2949  | 18.8  | 10.1  | 18.6  | 20.2  | 15.9  |
| 205753_at   | NM_000567 | CRP     | 1401  | 1.7   | 1.1   | 0.5   | 1.2   | 0.8   |
| 205754_at   | NM_000506 | F2      | 2147  | 8.3   | 4.2   | 9.3   | 0.9   | 7.2   |
| 205755_at   | NM_002217 | ITIH3   | 3699  | 10.0  | 3.8   | 1.3   | 1.3   | 3.8   |
| 205756_s_at | NM_000132 | F8      | 2157  | 93.5  | 81.1  | 80.8  | 79.7  | 58.9  |
| 205757_at   | NM_001249 | ENTPD5  | 957   | 31.2  | 19.8  | 36.9  | 48.1  | 12.1  |
| 205758_at   | AW006735  | CD8A    | 925   | 7.9   | 2.5   | 2.3   | 0.6   | 1.6   |
| 205759_s_at | NM_004605 | SULT2B1 | 6820  | 31.7  | 37.6  | 39.2  | 42.0  | 30.5  |
| 205760_s_at | NM_016821 | OGG1    | 4968  | 28.6  | 23.9  | 18.5  | 29.7  | 19.5  |
| 205761_s_at | AW242981  | DUS4L   | 11062 | 44.6  | 47.6  | 38.4  | 38.2  | 40.9  |
| 205762_s_at | NM_007016 | DUS4L   | 11062 | 10.8  | 9.6   | 16.6  | 11.1  | 7.0   |
| 205763_s_at | NM_006773 | DDX18   | 8886  | 78.5  | 73.7  | 85.9  | 60.7  | 61.9  |
| 205764_at   | NM_002932 | CSNK1A1 | 1452  | 1.0   | 0.5   | 6.0   | 1.0   | 3.1   |
| 205765_at   | NM_000777 | CYP3A5  | 1577  | 2.1   | 1.3   | 0.9   | 6.9   | 0.9   |
| 205766_at   | NM_003673 | TCAP    | 8557  | 5.5   | 13.2  | 9.2   | 1.3   | 7.7   |
| 205767_at   | NM_001432 | EREG    | 2069  | 2.8   | 0.7   | 1.4   | 0.5   | 0.2   |
| 205768_s_at | NM_003645 | SLC27A2 | 11001 | 76.8  | 61.3  | 90.9  | 68.5  | 69.9  |
| 205769_at   | NM_003645 | SLC27A2 | 11001 | 99.1  | 81.8  | 105.6 | 76.7  | 92.2  |
| 205770_at   | NM_000637 | GSR     | 2936  | 236.8 | 206.0 | 274.3 | 226.6 | 239.0 |
| 205771_s_at | AL137063  | AKAP7   | 9465  | 35.3  | 30.0  | 43.9  | 30.9  | 26.4  |
| 205772_s_at | NM_004842 | -       | -     | 4.0   | 3.4   | 6.7   | 0.3   | 2.6   |

|             |           |                          |       |       |       |       |       |       |
|-------------|-----------|--------------------------|-------|-------|-------|-------|-------|-------|
| 205773_at   | NM_014912 | CPEB3                    | 22849 | 5.4   | 4.9   | 10.4  | 5.2   | 5.4   |
| 205774_at   | NM_000505 | F12                      | 2161  | 207.9 | 206.4 | 263.6 | 232.7 | 205.4 |
| 205775_at   | NM_012135 | FAM50B                   | 26240 | 38.4  | 33.5  | 35.8  | 32.3  | 28.1  |
| 205776_at   | NM_001461 | FMO5                     | 2330  | 10.9  | 9.5   | 13.1  | 9.0   | 11.1  |
| 205777_at   | NM_001395 | DUSP9                    | 1852  | 22.3  | 24.3  | 17.4  | 15.9  | 21.8  |
| 205778_at   | NM_005046 | KLK7                     | 5650  | 1.3   | 0.4   | 0.7   | 0.5   | 2.0   |
| 205779_at   | NM_005854 | RAMP2                    | 10266 | 11.6  | 1.5   | 2.2   | 1.3   | 1.8   |
| 205780_at   | NM_001197 | BIK                      | 638   | 92.5  | 74.2  | 90.5  | 81.6  | 73.2  |
| 205781_at   | NM_004913 | VPS9D1                   | 9605  | 7.0   | 9.5   | 7.5   | 8.3   | 8.6   |
| 205782_at   | NM_002009 | FGF7                     | 2252  | 4.5   | 2.6   | 4.9   | 0.3   | 3.5   |
| 205783_at   | NM_015596 | KLK13                    | 26085 | 7.9   | 10.1  | 14.3  | 9.2   | 8.6   |
| 205784_x_at | NM_001670 | ARVCF                    | 421   | 4.4   | 14.2  | 8.6   | 5.1   | 2.1   |
| 205785_at   | J03925    | -                        | -     | 18.3  | 5.1   | 7.3   | 8.7   | 12.9  |
| 205786_s_at | NM_000632 | ITGAM                    | 3684  | 1.5   | 1.0   | 3.7   | 3.7   | 3.9   |
| 205787_x_at | AI803216  | LOC441155 / 9877 /// 441 |       | 19.0  | 34.1  | 27.3  | 22.9  | 16.6  |
| 205788_s_at | NM_014827 | LOC441155 / 9877 /// 441 |       | 199.7 | 170.5 | 173.1 | 168.0 | 146.1 |
| 205789_at   | NM_001766 | CD1D                     | 912   | 0.4   | 3.4   | 5.0   | 4.2   | 2.2   |
| 205790_at   | NM_003726 | SKAP1                    | 8631  | 2.2   | 7.0   | 2.8   | 7.7   | 8.9   |
| 205791_x_at | NM_006300 | ZNF230                   | 7773  | 9.3   | 5.8   | 7.3   | 5.2   | 5.3   |
| 205792_at   | NM_003881 | WISP2                    | 8839  | 1.5   | 1.9   | 2.3   | 1.7   | 2.1   |
| 205793_x_at | NM_003985 | TNK1                     | 8711  | 26.7  | 29.0  | 31.8  | 38.8  | 29.4  |
| 205794_s_at | NM_002515 | NOVA1                    | 4857  | 27.6  | 20.2  | 20.9  | 21.2  | 18.8  |
| 205795_at   | NM_004796 | NRXN3                    | 9369  | 0.4   | 0.7   | 0.3   | 0.3   | 0.5   |
| 205796_at   | NM_018393 | TCP11L1                  | 55346 | 21.6  | 16.7  | 18.3  | 15.6  | 11.5  |
| 205797_s_at | NM_018393 | TCP11L1                  | 55346 | 14.9  | 11.9  | 3.8   | 5.9   | 2.3   |
| 205798_at   | NM_002185 | IL7R                     | 3575  | 4.3   | 5.4   | 10.0  | 2.5   | 1.6   |
| 205799_s_at | M95548    | SLC3A1                   | 6519  | 7.6   | 2.3   | 3.6   | 6.8   | 4.3   |
| 205800_at   | NM_000341 | -                        | -     | 0.6   | 0.4   | 0.3   | 0.3   | 0.2   |
| 205801_s_at | NM_015376 | RASGRP3                  | 25780 | 1.1   | 0.7   | 0.7   | 0.4   | 0.5   |
| 205802_at   | NM_003304 | TRPC1                    | 7220  | 0.4   | 0.7   | 0.5   | 3.2   | 1.8   |
| 205803_s_at | NM_003304 | TRPC1                    | 7220  | 6.6   | 0.9   | 0.5   | 0.3   | 5.1   |
| 205804_s_at | NM_025228 | TRAF3IP3                 | 80342 | 1.0   | 1.3   | 1.1   | 1.0   | 3.8   |
| 205805_s_at | NM_005012 | ROR1                     | 4919  | 13.7  | 13.0  | 9.8   | 17.4  | 8.9   |
| 205806_at   | NM_000327 | ROM1                     | 6094  | 8.7   | 8.9   | 13.8  | 8.9   | 8.4   |
| 205807_s_at | NM_020127 | TUFT1                    | 7286  | 134.9 | 124.2 | 130.1 | 120.7 | 93.2  |
| 205808_at   | NM_004318 | ASPH                     | 444   | 8.6   | 5.3   | 3.7   | 10.6  | 3.0   |
| 205809_s_at | BE504979  | WASL                     | 8976  | 20.8  | 15.5  | 18.2  | 14.2  | 12.2  |
| 205810_s_at | NM_003941 | WASL                     | 8976  | 1.9   | 7.8   | 16.9  | 4.8   | 8.1   |
| 205811_at   | NM_007215 | POLG2                    | 11232 | 29.8  | 26.5  | 27.7  | 31.2  | 29.6  |
| 205812_s_at | NM_006588 | TMED9                    | 54732 | 599.2 | 480.8 | 606.9 | 442.8 | 475.0 |
| 205813_s_at | NM_000429 | MAT1A                    | 4143  | 1.6   | 0.8   | 1.6   | 0.9   | 1.4   |
| 205814_at   | NM_000840 | GRM3                     | 2913  | 4.5   | 1.0   | 1.1   | 0.6   | 4.1   |
| 205815_at   | NM_002580 | REG3A                    | 5068  | 9.0   | 8.6   | 7.9   | 7.5   | 6.6   |
| 205816_at   | NM_002214 | ITGB8                    | 3696  | 1.8   | 0.2   | 0.7   | 0.3   | 0.1   |
| 205817_at   | NM_005982 | SIX1                     | 6495  | 2.6   | 2.4   | 1.3   | 3.2   | 2.3   |
| 205818_at   | NM_014618 | BRINP1                   | 1620  | 6.2   | 0.4   | 11.1  | 6.2   | 5.4   |
| 205819_at   | NM_006770 | MARCO                    | 8685  | 1.5   | 2.0   | 3.1   | 1.8   | 1.0   |
| 205820_s_at | NM_000040 | APOC3                    | 345   | 1.4   | 0.9   | 2.0   | 1.2   | 1.4   |
| 205821_at   | NM_007360 | KLRC4-KLRK122914 /// 10  |       | 1.7   | 2.1   | 3.2   | 5.8   | 1.6   |
| 205822_s_at | NM_002130 | HMGCS1                   | 3157  | 68.7  | 46.6  | 59.0  | 34.4  | 42.5  |
| 205823_at   | AI824113  | RGS12                    | 6002  | 13.2  | 12.3  | 12.6  | 10.3  | 11.6  |
| 205824_at   | NM_001541 | HSPB2                    | 3316  | 0.8   | 1.2   | 0.7   | 1.1   | 1.0   |
| 205825_at   | NM_000439 | PCSK1                    | 5122  | 1.0   | 1.7   | 0.4   | 3.3   | 0.2   |

|             |           |                            |       |        |        |        |        |        |
|-------------|-----------|----------------------------|-------|--------|--------|--------|--------|--------|
| 205826_at   | NM_003970 | MYOM2                      | 9172  | 3.6    | 5.3    | 1.3    | 6.8    | 5.2    |
| 205827_at   | NM_000729 | CCK                        | 885   | 1.0    | 0.4    | 2.2    | 0.5    | 0.5    |
| 205828_at   | NM_002422 | MMP3                       | 4314  | 1.0    | 2.7    | 10.4   | 4.0    | 1.2    |
| 205829_at   | NM_000413 | HSD17B1                    | 3292  | 43.7   | 31.6   | 42.1   | 49.4   | 29.2   |
| 205830_at   | NM_004362 | CLGN                       | 1047  | 135.6  | 81.4   | 114.0  | 78.5   | 97.0   |
| 205831_at   | NM_001767 | CD2                        | 914   | 12.1   | 2.6    | 7.1    | 6.9    | 8.2    |
| 205832_at   | NM_016352 | CPA4                       | 51200 | 30.7   | 18.9   | 26.5   | 17.2   | 17.9   |
| 205833_s_at | AI770098  | PART1                      | 25859 | 17.8   | 11.9   | 10.4   | 9.6    | 22.9   |
| 205834_s_at | NM_016590 | PART1                      | 25859 | 15.2   | 12.2   | 5.3    | 2.7    | 8.0    |
| 205835_s_at | AW975818  | YTHDC2                     | 64848 | 14.8   | 15.0   | 23.7   | 18.0   | 11.3   |
| 205836_s_at | NM_022828 | YTHDC2                     | 64848 | 34.1   | 33.2   | 48.5   | 33.1   | 32.6   |
| 205837_s_at | BC005319  | GYP A                      | 2993  | 1.2    | 0.3    | 0.6    | 0.1    | 0.5    |
| 205838_at   | NM_002099 | GYP A                      | 2993  | 1.0    | 0.7    | 1.5    | 0.8    | 1.0    |
| 205839_s_at | NM_004758 | BZRAP1                     | 9256  | 1.8    | 8.4    | 12.4   | 4.6    | 7.9    |
| 205840_x_at | NM_000515 | GH1                        | 2688  | 12.0   | 6.4    | 3.4    | 4.1    | 5.1    |
| 205841_at   | NM_004972 | JAK2                       | 3717  | 4.7    | 6.7    | 3.8    | 8.3    | 2.3    |
| 205842_s_at | AF001362  | JAK2                       | 3717  | 28.4   | 23.8   | 22.0   | 34.8   | 25.6   |
| 205843_x_at | NM_000755 | CRAT                       | 1384  | 30.6   | 33.1   | 23.8   | 36.6   | 19.4   |
| 205844_at   | NM_004666 | VNN1                       | 8876  | 0.6    | 0.6    | 3.2    | 0.2    | 0.1    |
| 205845_at   | NM_021098 | CACNA1H                    | 8912  | 2.8    | 1.8    | 3.7    | 1.0    | 3.3    |
| 205846_at   | NM_002837 | PTPRB                      | 5787  | 0.8    | 0.3    | 5.6    | 5.1    | 3.5    |
| 205847_at   | NM_022119 | PRSS22                     | 64063 | 30.1   | 14.4   | 16.7   | 15.8   | 16.5   |
| 205848_at   | NM_005256 | GAS2                       | 2620  | 4.8    | 0.2    | 7.8    | 4.8    | 3.5    |
| 205849_s_at | NM_006294 | UQCRB                      | 7381  | 1086.8 | 1028.4 | 1218.4 | 1121.8 | 932.4  |
| 205850_s_at | NM_000814 | GABRB3                     | 2562  | 32.4   | 35.2   | 37.5   | 33.5   | 36.6   |
| 205851_at   | BC001808  | NME6                       | 10201 | 35.3   | 26.0   | 36.9   | 32.0   | 30.4   |
| 205852_at   | R51311    | CDK5R2                     | 8941  | 0.6    | 0.7    | 3.1    | 4.0    | 1.0    |
| 205853_at   | NM_015872 | ZBTB7B                     | 51043 | 5.4    | 9.2    | 5.4    | 8.7    | 0.9    |
| 205854_at   | AK024246  | TULP3                      | 7289  | 29.0   | 36.7   | 38.9   | 36.5   | 26.9   |
| 205855_at   | NM_006991 | ZNF197                     | 10168 | 13.6   | 16.9   | 12.9   | 15.7   | 18.0   |
| 205856_at   | NM_015865 | SLC14A1                    | 6563  | 3.7    | 2.4    | 1.6    | 2.1    | 1.6    |
| 205857_at   | AI269290  | SLC18A2                    | 6571  | 9.1    | 0.5    | 15.2   | 6.1    | 6.4    |
| 205858_at   | NM_002507 | NGFR                       | 4804  | 0.7    | 0.5    | 0.6    | 0.7    | 0.8    |
| 205859_at   | NM_004271 | LY86                       | 9450  | 16.2   | 2.7    | 18.8   | 2.6    | 10.0   |
| 205860_x_at | NM_004476 | FOLH1 /// FC 2346 /// 219  |       | 1452.6 | 1524.0 | 1315.1 | 1457.3 | 1068.8 |
| 205861_at   | NM_003121 | SPIB                       | 6689  | 3.2    | 2.4    | 2.3    | 1.8    | 2.7    |
| 205862_at   | NM_014668 | GREB1                      | 9687  | 5.7    | 10.4   | 11.2   | 10.8   | 8.6    |
| 205863_at   | NM_005621 | S100A12                    | 6283  | 6.0    | 2.5    | 5.0    | 3.8    | 0.2    |
| 205864_at   | NM_004173 | SLC7A4                     | 6545  | 20.1   | 8.9    | 15.2   | 12.0   | 6.1    |
| 205865_at   | NM_005224 | ARID3A                     | 1820  | 21.0   | 7.4    | 11.4   | 20.4   | 13.5   |
| 205866_at   | NM_003665 | FCN3                       | 8547  | 6.3    | 0.6    | 0.8    | 1.8    | 0.7    |
| 205867_at   | NM_002834 | PTPN11                     | 5781  | 12.7   | 12.3   | 18.0   | 15.7   | 12.2   |
| 205868_s_at | L07527    | PTPN11                     | 5781  | 25.0   | 19.0   | 27.0   | 25.3   | 19.2   |
| 205869_at   | NM_002769 | PRSS1 /// PR 5644 /// 564  |       | 8.5    | 9.7    | 6.6    | 0.6    | 1.0    |
| 205870_at   | NM_000623 | BDKRB2                     | 624   | 6.4    | 6.0    | 5.8    | 5.5    | 6.4    |
| 205871_at   | BC005379  | PLGLB1 /// P 5342 /// 534  |       | 5.8    | 0.2    | 0.4    | 4.1    | 1.0    |
| 205872_x_at | NM_022359 | PDE4DIP                    | 9659  | 2.4    | 4.2    | 2.9    | 11.3   | 1.6    |
| 205873_at   | NM_004278 | PIGL                       | 9487  | 30.5   | 26.0   | 30.6   | 25.7   | 22.1   |
| 205874_at   | NM_002220 | ITPKA                      | 3706  | 0.9    | 0.6    | 0.9    | 0.6    | 0.3    |
| 205875_s_at | NM_016381 | ATRIP /// TRI 11277 /// 84 |       | 151.6  | 185.5  | 220.1  | 168.7  | 154.9  |
| 205876_at   | NM_002310 | LIFR                       | 3977  | 11.0   | 9.3    | 10.8   | 2.6    | 4.6    |
| 205877_s_at | NM_017590 | ZC3H7B                     | 23264 | 26.3   | 5.0    | 14.3   | 25.7   | 12.5   |
| 205878_at   | NM_002702 | POU6F1                     | 5463  | 7.2    | 4.9    | 1.5    | 6.9    | 3.9    |

|             |           |                          |           |       |       |       |       |       |
|-------------|-----------|--------------------------|-----------|-------|-------|-------|-------|-------|
| 205879_x_at | BC004257  | RET                      | 5979      | 17.1  | 10.9  | 15.2  | 14.4  | 22.7  |
| 205880_at   | NM_002742 | PRKD1                    | 5587      | 570.2 | 482.2 | 538.7 | 582.5 | 429.0 |
| 205881_at   | NM_003426 | ZNF74                    | 7625      | 28.3  | 23.6  | 19.6  | 30.1  | 29.5  |
| 205882_x_at | AI818488  | ADD3                     | 120       | 113.5 | 87.0  | 93.4  | 91.3  | 80.0  |
| 205883_at   | NM_006006 | ZBTB16                   | 7704      | 31.0  | 36.5  | 48.7  | 44.8  | 48.6  |
| 205884_at   | NM_000885 | ITGA4                    | 3676      | 0.5   | 0.2   | 4.7   | 0.1   | 0.5   |
| 205885_s_at | L12002    | ITGA4                    | 3676      | 0.3   | 1.4   | 1.1   | 2.5   | 2.2   |
| 205886_at   | NM_006507 | REG1B                    | 5968      | 10.4  | 1.8   | 2.3   | 6.1   | 5.0   |
| 205887_x_at | NM_002439 | MSH3                     | 4437      | 35.2  | 28.4  | 34.3  | 31.0  | 24.7  |
| 205888_s_at | AI962693  | JAKMIP2                  | 9832      | 7.5   | 4.1   | 7.5   | 7.8   | 1.2   |
| 205889_s_at | NM_014790 | JAKMIP2                  | 9832      | 2.5   | 4.9   | 2.1   | 2.6   | 0.4   |
| 205890_s_at | NM_006398 | GABBR1 /// (2550 /// 105 |           | 1.9   | 1.7   | 1.6   | 0.5   | 0.7   |
| 205891_at   | NM_000676 | ADORA2B                  | 136       | 72.0  | 64.3  | 81.3  | 63.3  | 55.2  |
| 205892_s_at | NM_001443 | FABP1                    | 2168      | 0.6   | 0.2   | 0.6   | 0.6   | 0.4   |
| 205893_at   | NM_014932 | NLGN1                    | 22871     | 5.8   | 4.3   | 2.9   | 2.9   | 2.4   |
| 205894_at   | NM_000047 | ARSE                     | 415       | 13.7  | 10.9  | 15.3  | 6.9   | 8.6   |
| 205895_s_at | NM_004741 | NOLC1                    | 9221      | 269.4 | 229.7 | 345.8 | 224.7 | 265.3 |
| 205896_at   | NM_003059 | SLC22A4                  | 6583      | 8.1   | 12.3  | 12.0  | 11.1  | 7.2   |
| 205897_at   | NM_004554 | NFATC4                   | 4776      | 15.1  | 2.4   | 5.7   | 5.3   | 7.1   |
| 205898_at   | U20350    | CX3CR1                   | 1524      | 3.8   | 4.1   | 4.2   | 4.4   | 2.7   |
| 205899_at   | NM_003914 | CCNA1                    | 8900      | 1.4   | 4.1   | 8.1   | 1.0   | 4.1   |
| 205900_at   | NM_006121 | KRT1                     | 3848      | 6.8   | 2.8   | 6.1   | 0.9   | 9.1   |
| 205901_at   | NM_006228 | PNOC                     | 5368      | 2.6   | 4.9   | 0.8   | 1.1   | 3.9   |
| 205902_at   | AJ251016  | KCNN3                    | 3782      | 0.6   | 0.5   | 0.5   | 0.6   | 0.5   |
| 205903_s_at | NM_002249 | KCNN3                    | 3782      | 0.4   | 0.3   | 0.3   | 1.0   | 0.4   |
| 205904_at   | NM_000247 | MICA                     | 100507436 | 44.8  | 35.1  | 54.2  | 43.7  | 39.7  |
| 205905_s_at | NM_000247 | MICA /// MIC4277 /// 100 |           | 44.8  | 52.7  | 46.8  | 36.7  | 23.4  |
| 205906_at   | NM_001454 | FOXJ1                    | 2302      | 0.9   | 5.3   | 0.8   | 1.1   | 5.0   |
| 205907_s_at | AI765819  | OMD                      | 4958      | 1.0   | 4.8   | 4.1   | 5.1   | 0.2   |
| 205908_s_at | NM_005014 | OMD                      | 4958      | 0.9   | 0.5   | 4.9   | 1.3   | 1.2   |
| 205909_at   | NM_002692 | POLE2                    | 5427      | 83.6  | 67.5  | 104.5 | 66.8  | 80.9  |
| 205910_s_at | NM_001807 | CEL                      | 1056      | 4.1   | 7.2   | 16.6  | 22.2  | 14.0  |
| 205911_at   | NM_000316 | PTH1R                    | 5745      | 13.4  | 14.7  | 10.4  | 7.7   | 9.1   |
| 205912_at   | NM_000936 | PNLIP                    | 5406      | 3.3   | 0.9   | 7.0   | 3.5   | 7.9   |
| 205913_at   | NM_002666 | PLIN1                    | 5346      | 2.1   | 1.7   | 1.4   | 1.5   | 1.5   |
| 205914_s_at | NM_007327 | GRIN1                    | 2902      | 1.0   | 0.6   | 0.6   | 0.8   | 0.3   |
| 205915_x_at | D13515    | GRIN1                    | 2902      | 3.7   | 7.0   | 1.8   | 2.2   | 1.1   |
| 205916_at   | NM_002963 | S100A7                   | 6278      | 2.1   | 0.6   | 1.1   | 1.1   | 1.0   |
| 205917_at   | NM_003417 | ZNF264                   | 9422      | 58.1  | 48.0  | 42.8  | 51.6  | 37.2  |
| 205918_at   | NM_005070 | SLC4A3                   | 6508      | 1.1   | 0.8   | 0.8   | 0.8   | 0.7   |
| 205919_at   | NM_005330 | HBE1                     | 3046      | 2.3   | 3.8   | 4.0   | 11.8  | 2.6   |
| 205920_at   | NM_003043 | SLC6A6                   | 6533      | 1.0   | 0.9   | 1.0   | 0.8   | 0.5   |
| 205921_s_at | U16120    | SLC6A6                   | 6533      | 0.7   | 0.6   | 5.7   | 0.6   | 2.0   |
| 205922_at   | NM_004665 | VNN2                     | 8875      | 0.5   | 0.4   | 0.7   | 0.7   | 0.4   |
| 205923_at   | NM_005045 | RELN                     | 5649      | 15.7  | 20.8  | 16.0  | 15.8  | 16.1  |
| 205924_at   | BC005035  | RAB3B                    | 5865      | 21.9  | 24.5  | 29.7  | 29.7  | 22.4  |
| 205925_s_at | NM_002867 | RAB3B                    | 5865      | 19.9  | 18.0  | 37.3  | 18.3  | 28.3  |
| 205926_at   | NM_004843 | IL27RA                   | 9466      | 5.8   | 13.4  | 18.2  | 18.2  | 12.4  |
| 205927_s_at | NM_001910 | CTSE                     | 1510      | 12.9  | 10.5  | 13.2  | 11.4  | 8.6   |
| 205928_at   | NM_005815 | ZNF443                   | 10224     | 61.2  | 47.8  | 71.6  | 51.4  | 49.9  |
| 205929_at   | NM_005814 | GPA33                    | 10223     | 4.7   | 6.9   | 2.3   | 7.5   | 10.8  |
| 205930_at   | NM_005513 | GTF2E1                   | 2960      | 190.1 | 233.5 | 226.8 | 187.3 | 195.7 |
| 205931_s_at | NM_004904 | CREB5 /// LO9586 /// 401 |           | 9.8   | 5.3   | 7.1   | 1.1   | 6.1   |

|             |           |                           |       |       |       |       |       |       |
|-------------|-----------|---------------------------|-------|-------|-------|-------|-------|-------|
| 205932_s_at | NM_002448 | MSX1                      | 4487  | 41.8  | 56.1  | 61.3  | 48.7  | 41.8  |
| 205933_at   | NM_015559 | SETBP1                    | 26040 | 24.3  | 27.2  | 26.7  | 31.8  | 20.2  |
| 205934_at   | NM_006226 | PLCL1                     | 5334  | 3.8   | 2.1   | 2.0   | 0.2   | 0.3   |
| 205935_at   | NM_001451 | FOXF1                     | 2294  | 5.0   | 1.8   | 2.2   | 7.5   | 4.0   |
| 205936_s_at | NM_002115 | HK3                       | 3101  | 2.8   | 1.7   | 1.7   | 1.3   | 0.7   |
| 205937_at   | NM_006569 | CGREF1                    | 10669 | 26.6  | 27.9  | 29.3  | 36.2  | 22.3  |
| 205938_at   | NM_014906 | PPM1E                     | 22843 | 16.4  | 13.5  | 5.9   | 17.5  | 12.8  |
| 205939_at   | NM_000765 | CYP3A7 /// C 1551 /// 100 |       | 3.3   | 3.2   | 6.4   | 6.1   | 4.7   |
| 205940_at   | NM_002470 | MYH3                      | 4621  | 1.6   | 0.4   | 0.7   | 4.7   | 1.2   |
| 205941_s_at | AI376003  | COL10A1                   | 1300  | 7.1   | 0.9   | 4.8   | 3.4   | 6.8   |
| 205942_s_at | NM_005622 | ACSM3                     | 6296  | 36.5  | 39.4  | 46.2  | 45.7  | 41.7  |
| 205943_at   | NM_005651 | TDO2                      | 6999  | 3.8   | 5.5   | 2.2   | 0.5   | 2.1   |
| 205944_s_at | NM_007098 | CLTCL1                    | 8218  | 25.4  | 10.1  | 24.5  | 14.6  | 20.7  |
| 205945_at   | NM_000565 | IL6R                      | 3570  | 30.5  | 27.4  | 47.6  | 37.6  | 34.9  |
| 205946_at   | X95097    | VIPR2                     | 7434  | 2.6   | 2.7   | 2.4   | 3.1   | 1.5   |
| 205947_s_at | NM_003382 | VIPR2                     | 7434  | 0.7   | 1.3   | 1.7   | 0.4   | 0.6   |
| 205948_at   | NM_007050 | PTPRT                     | 11122 | 1.2   | 1.3   | 6.4   | 0.9   | 0.9   |
| 205949_at   | M33987    | CA1                       | 759   | 9.4   | 5.8   | 8.8   | 8.7   | 7.9   |
| 205950_s_at | NM_001738 | CA1                       | 759   | 10.1  | 14.3  | 3.2   | 10.6  | 13.0  |
| 205951_at   | NM_005963 | MYH1                      | 4619  | 2.6   | 0.1   | 1.9   | 1.2   | 0.1   |
| 205952_at   | NM_002246 | KCNK3                     | 3777  | 1.5   | 1.4   | 0.4   | 0.4   | 0.2   |
| 205953_at   | NM_014813 | LRIG2                     | 9860  | 25.8  | 38.5  | 31.1  | 31.5  | 27.6  |
| 205954_at   | NM_006917 | RXRG                      | 6258  | 5.7   | 4.8   | 10.3  | 7.1   | 3.6   |
| 205955_at   | NM_018336 | -                         | -     | 35.2  | 22.7  | 16.2  | 12.1  | 7.5   |
| 205956_x_at | NM_013290 | PSMC3IP                   | 29893 | 97.3  | 49.8  | 90.4  | 59.1  | 51.7  |
| 205957_at   | NM_005393 | PLXNB3                    | 5365  | 9.8   | 14.8  | 14.6  | 18.1  | 9.4   |
| 205958_x_at | NM_022579 | CSHL1                     | 1444  | 1.7   | 1.4   | 1.7   | 1.8   | 1.3   |
| 205959_at   | NM_002427 | MMP13                     | 4322  | 1.6   | 0.6   | 4.3   | 0.3   | 2.0   |
| 205960_at   | NM_002612 | PDK4                      | 5166  | 4.4   | 5.3   | 9.3   | 4.8   | 0.3   |
| 205961_s_at | NM_004682 | PSIP1                     | 11168 | 115.5 | 103.6 | 112.8 | 109.2 | 80.2  |
| 205962_at   | NM_002577 | PAK2                      | 5062  | 2.9   | 3.4   | 1.9   | 1.4   | 1.2   |
| 205963_s_at | NM_005147 | DNAJA3                    | 9093  | 309.4 | 323.2 | 407.1 | 309.7 | 319.2 |
| 205964_at   | NM_024106 | ZNF426                    | 79088 | 40.0  | 37.9  | 38.4  | 35.0  | 35.1  |
| 205965_at   | NM_006399 | BATF                      | 10538 | 6.8   | 4.8   | 6.7   | 3.0   | 5.3   |
| 205966_at   | NM_005645 | TAF13                     | 6884  | 10.4  | 13.7  | 15.4  | 9.4   | 9.7   |
| 205967_at   | NM_003542 | HIST1H4A ///,8294 /// 835 |       | 345.5 | 348.1 | 486.4 | 355.0 | 422.3 |
| 205968_at   | NM_002252 | KCNS3                     | 3790  | 24.4  | 24.4  | 29.0  | 24.0  | 24.0  |
| 205969_at   | NM_001086 | AADAC                     | 13    | 0.6   | 1.0   | 1.2   | 0.9   | 2.0   |
| 205970_at   | NM_005954 | MT3                       | 4504  | 24.7  | 25.3  | 33.0  | 34.2  | 20.0  |
| 205971_s_at | NM_001906 | CTRB1 /// CT 1504 /// 440 |       | 7.3   | 2.3   | 1.4   | 1.2   | 3.9   |
| 205972_at   | NM_006841 | SLC38A3                   | 10991 | 7.7   | 4.2   | 8.4   | 1.8   | 3.7   |
| 205973_at   | NM_022549 | FEZ1                      | 9638  | 6.3   | 7.5   | 9.7   | 8.1   | 4.5   |
| 205974_at   | AI168371  | HOXD1                     | 3231  | 0.8   | 1.0   | 2.0   | 1.7   | 0.3   |
| 205975_s_at | NM_024501 | HOXD1                     | 3231  | 3.2   | 10.3  | 9.2   | 9.6   | 9.4   |
| 205976_at   | NM_014929 | FASTKD2                   | 22868 | 0.7   | 0.3   | 7.5   | 2.2   | 0.9   |
| 205977_s_at | NM_005232 | EPHA1                     | 2041  | 33.9  | 30.5  | 28.5  | 36.4  | 25.7  |
| 205978_at   | NM_004795 | KL                        | 9365  | 1.4   | 1.6   | 2.7   | 2.2   | 1.6   |
| 205979_at   | NM_002407 | SCGB2A1                   | 4246  | 0.5   | 0.2   | 0.2   | 0.3   | 0.3   |
| 205980_s_at | NM_015366 | ARHGAP8 ///,23779 /// 55  |       | 115.7 | 77.4  | 91.3  | 81.4  | 60.9  |
| 205981_s_at | NM_001564 | ING2                      | 3622  | 22.3  | 29.5  | 36.4  | 18.2  | 17.5  |
| 205982_x_at | NM_003018 | SFTPC                     | 6440  | 1.3   | 1.0   | 1.3   | 0.9   | 0.7   |
| 205983_at   | NM_004413 | DPEP1                     | 1800  | 2.8   | 4.0   | 8.9   | 5.1   | 8.7   |
| 205984_at   | NM_001882 | CRHBP                     | 1393  | 2.2   | 1.5   | 1.7   | 0.9   | 1.1   |



|             |           |                       |       |       |       |       |       |       |
|-------------|-----------|-----------------------|-------|-------|-------|-------|-------|-------|
| 205985_x_at | NM_000085 | CLCNKB                | 1188  | 1.7   | 2.5   | 3.3   | 1.2   | 1.9   |
| 205986_at   | NM_004920 | AATK                  | 9625  | 42.0  | 36.5  | 36.3  | 32.7  | 24.8  |
| 205987_at   | NM_001765 | CD1C                  | 911   | 2.2   | 1.4   | 1.3   | 2.3   | 0.5   |
| 205988_at   | NM_003874 | CD84                  | 8832  | 14.8  | 10.2  | 15.5  | 9.0   | 8.4   |
| 205989_s_at | NM_002433 | MOG                   | 4340  | 2.2   | 0.7   | 4.0   | 0.3   | 1.5   |
| 205990_s_at | NM_003392 | WNT5A                 | 7474  | 33.6  | 21.7  | 25.4  | 17.5  | 10.2  |
| 205991_s_at | NM_006902 | PRRX1                 | 5396  | 13.9  | 5.8   | 9.5   | 7.3   | 6.4   |
| 205992_s_at | NM_000585 | IL15                  | 3600  | 0.9   | 4.6   | 4.4   | 4.4   | 3.3   |
| 205993_s_at | NM_005994 | TBX2                  | 6909  | 4.6   | 5.6   | 5.8   | 3.4   | 5.2   |
| 205994_at   | NM_001973 | ELK4                  | 2005  | 9.4   | 10.0  | 17.3  | 10.2  | 12.4  |
| 205995_x_at | NM_014642 | IQCB1                 | 9657  | 67.8  | 51.4  | 66.4  | 60.3  | 58.6  |
| 205996_s_at | NM_013411 | AK2                   | 204   | 59.9  | 55.0  | 72.6  | 56.0  | 48.7  |
| 205997_at   | NM_021778 | ADAM28                | 10863 | 1.3   | 0.3   | 0.6   | 0.2   | 2.2   |
| 205998_x_at | NM_017460 | CYP3A4                | 1576  | 30.0  | 19.0  | 28.4  | 20.6  | 13.5  |
| 205999_x_at | AF182273  | CYP3A4                | 1576  | 2.0   | 11.4  | 7.6   | 0.6   | 1.4   |
| 206000_at   | NM_005588 | MEP1A                 | 4224  | 1.3   | 1.2   | 4.1   | 0.8   | 2.0   |
| 206001_at   | NM_000905 | NPY                   | 4852  | 1.8   | 5.2   | 12.5  | 8.4   | 13.5  |
| 206002_at   | NM_005756 | GPR64                 | 10149 | 7.9   | 0.5   | 2.5   | 6.2   | 2.9   |
| 206003_at   | NM_014645 | CEP135                | 9662  | 14.0  | 13.9  | 16.9  | 10.1  | 14.0  |
| 206004_at   | NM_003245 | TGM3                  | 7053  | 21.1  | 21.3  | 21.2  | 23.5  | 18.5  |
| 206005_s_at | AK023613  | CEP162                | 22832 | 0.4   | 0.3   | 1.0   | 6.8   | 4.7   |
| 206006_s_at | NM_014895 | CEP162                | 22832 | 8.6   | 6.4   | 11.2  | 9.6   | 0.6   |
| 206007_at   | NM_005807 | PRG4                  | 10216 | 3.0   | 0.5   | 0.5   | 3.5   | 2.2   |
| 206008_at   | NM_000359 | TGM1                  | 7051  | 3.2   | 5.9   | 2.6   | 1.3   | 1.6   |
| 206009_at   | NM_002207 | ITGA9                 | 3680  | 8.2   | 5.9   | 7.1   | 8.9   | 5.4   |
| 206010_at   | NM_004132 | HABP2                 | 3026  | 19.3  | 12.1  | 14.2  | 7.8   | 8.7   |
| 206011_at   | AI719655  | CASP1                 | 834   | 1.5   | 0.8   | 6.6   | 0.4   | 4.5   |
| 206012_at   | NM_003240 | LEFTY1 /// LE7044 /// | 106   | 12.4  | 9.7   | 9.9   | 1.5   | 14.4  |
| 206013_s_at | NM_016188 | ACTL6B                | 51412 | 0.5   | 0.4   | 0.6   | 0.3   | 0.2   |
| 206014_at   | NM_016188 | ACTL6B                | 51412 | 1.4   | 1.3   | 1.6   | 1.1   | 0.8   |
| 206015_s_at | NM_014947 | FOXJ3                 | 22887 | 90.0  | 106.3 | 121.4 | 105.0 | 91.4  |
| 206016_at   | NM_014008 | CCDC22                | 28952 | 77.3  | 90.3  | 86.5  | 77.4  | 78.7  |
| 206017_at   | NM_014809 | KIAA0319              | 9856  | 4.6   | 0.9   | 0.8   | 0.7   | 0.8   |
| 206018_at   | NM_005249 | FOXG1                 | 2290  | 0.8   | 0.3   | 0.6   | 0.4   | 0.6   |
| 206019_at   | NM_014852 | RBM19                 | 9904  | 3.1   | 1.3   | 2.0   | 5.6   | 0.7   |
| 206020_at   | NM_016387 | SOCS6                 | 9306  | 21.4  | 14.5  | 25.1  | 18.4  | 17.7  |
| 206021_at   | NM_022050 | SCAND2P               | 54581 | 8.9   | 7.1   | 9.6   | 8.4   | 7.4   |
| 206022_at   | NM_000266 | NDP                   | 4693  | 5.7   | 2.9   | 6.0   | 8.5   | 4.8   |
| 206023_at   | NM_006681 | NMU                   | 10874 | 148.8 | 127.5 | 158.8 | 140.0 | 118.8 |
| 206024_at   | NM_002150 | HPD                   | 3242  | 1.1   | 0.9   | 1.0   | 0.9   | 0.8   |
| 206025_s_at | AW188198  | TNFAIP6               | 7130  | 2.9   | 0.9   | 4.3   | 4.8   | 2.7   |
| 206026_s_at | NM_007115 | TNFAIP6               | 7130  | 4.1   | 6.8   | 1.0   | 3.8   | 3.1   |
| 206027_at   | NM_002960 | S100A3                | 6274  | 1.0   | 8.7   | 3.9   | 3.8   | 5.1   |
| 206028_s_at | NM_006343 | MERTK                 | 10461 | 16.8  | 11.9  | 20.3  | 15.0  | 15.0  |
| 206029_at   | NM_014391 | ANKRD1                | 27063 | 8.6   | 3.3   | 4.5   | 0.4   | 3.0   |
| 206030_at   | NM_000049 | ASPA                  | 443   | 1.1   | 0.4   | 1.2   | 0.5   | 0.4   |
| 206031_s_at | NM_003481 | USP5                  | 8078  | 81.5  | 120.4 | 103.7 | 105.2 | 79.3  |
| 206032_at   | AI797281  | DSC3                  | 1825  | 5.7   | 6.0   | 8.0   | 7.0   | 5.6   |
| 206033_s_at | NM_001941 | DSC3                  | 1825  | 7.0   | 2.0   | 3.3   | 4.4   | 2.2   |
| 206034_at   | NM_002640 | SERPINB8              | 5271  | 13.1  | 11.5  | 9.3   | 16.5  | 14.5  |
| 206035_at   | NM_002908 | REL                   | 5966  | 10.3  | 4.7   | 9.1   | 8.0   | 3.0   |
| 206036_s_at | NM_002908 | REL                   | 5966  | 9.3   | 12.8  | 7.2   | 9.5   | 9.0   |
| 206037_at   | NM_004059 | CCBL1                 | 883   | 45.3  | 42.8  | 32.4  | 38.6  | 14.4  |

|             |           |                           |        |       |       |       |       |       |
|-------------|-----------|---------------------------|--------|-------|-------|-------|-------|-------|
| 206038_s_at | NM_003298 | NR2C2                     | 7182   | 13.0  | 17.0  | 22.4  | 18.2  | 19.6  |
| 206039_at   | NM_004794 | RAB33A                    | 9363   | 8.1   | 5.2   | 9.6   | 9.7   | 3.9   |
| 206040_s_at | NM_002751 | MAPK11                    | 5600   | 0.8   | 0.6   | 0.7   | 0.7   | 0.9   |
| 206042_x_at | NM_022804 | SNRPN /// SM6638 /// 892  |        | 883.6 | 965.8 | 974.5 | 987.7 | 748.8 |
| 206043_s_at | NM_014861 | ATP2C2                    | 9914   | 59.2  | 55.3  | 52.2  | 64.3  | 30.3  |
| 206044_s_at | NM_004333 | BRAF /// KIA.673 /// 5767 |        | 39.0  | 32.3  | 33.9  | 35.1  | 29.8  |
| 206045_s_at | NM_003787 | NOL4                      | 8715   | 5.8   | 0.2   | 0.6   | 0.2   | 1.0   |
| 206046_at   | NM_003812 | ADAM23                    | 8745   | 16.9  | 6.6   | 12.3  | 10.7  | 18.7  |
| 206047_at   | NM_002075 | GNB3                      | 2784   | 3.7   | 10.4  | 19.3  | 15.4  | 6.5   |
| 206048_at   | NM_021220 | OVOL2                     | 58495  | 11.4  | 6.3   | 10.3  | 13.3  | 7.0   |
| 206049_at   | NM_003005 | SELP                      | 6403   | 19.6  | 10.9  | 17.0  | 12.6  | 10.3  |
| 206050_s_at | NM_002939 | RNH1                      | 6050   | 328.6 | 350.8 | 343.2 | 362.9 | 264.2 |
| 206051_at   | NM_021952 | ELAVL4                    | 1996   | 3.6   | 3.3   | 3.0   | 9.4   | 1.0   |
| 206052_s_at | NM_006527 | SLBP                      | 7884   | 465.2 | 347.5 | 562.6 | 376.8 | 430.9 |
| 206053_at   | NM_014930 | ZNF510                    | 22869  | 25.4  | 25.0  | 29.2  | 27.7  | 25.7  |
| 206054_at   | NM_000893 | KNG1                      | 3827   | 3.7   | 1.0   | 1.9   | 0.2   | 1.3   |
| 206055_s_at | NM_003090 | SNRPA1                    | 6627   | 450.8 | 266.3 | 436.2 | 312.1 | 345.7 |
| 206056_x_at | X52075    | LOC1019298:6693 /// 101   |        | 26.3  | 27.1  | 24.4  | 18.3  | 21.6  |
| 206057_x_at | NM_003123 | LOC1019298:6693 /// 101   |        | 11.4  | 6.3   | 15.7  | 18.7  | 3.9   |
| 206058_at   | U27699    | SLC6A12                   | 6539   | 9.9   | 6.2   | 10.6  | 16.6  | 3.6   |
| 206059_at   | NM_003430 | ZNF91                     | 7644   | 138.8 | 108.2 | 121.4 | 109.2 | 101.6 |
| 206060_s_at | NM_015967 | PTPN22                    | 26191  | 6.2   | 0.3   | 1.1   | 0.9   | 4.5   |
| 206061_s_at | NM_030621 | DICER1                    | 23405  | 39.5  | 27.0  | 37.4  | 26.7  | 21.5  |
| 206062_at   | L36861    | GUCA1A                    | 2978   | 7.4   | 5.7   | 9.4   | 5.8   | 4.2   |
| 206063_x_at | BF001594  | PPIL2                     | 23759  | 18.7  | 13.3  | 17.2  | 8.1   | 27.9  |
| 206064_s_at | NM_014337 | PPIL2                     | 23759  | 20.1  | 21.4  | 14.0  | 22.4  | 4.6   |
| 206065_s_at | NM_001385 | DPYS                      | 1807   | 4.5   | 0.9   | 6.1   | 0.8   | 5.8   |
| 206066_s_at | NM_002876 | RAD51C                    | 5889   | 169.6 | 149.4 | 193.3 | 155.6 | 157.9 |
| 206067_s_at | NM_024426 | WT1                       | 7490   | 0.9   | 2.9   | 0.7   | 3.3   | 0.7   |
| 206068_s_at | AI367275  | ACADL                     | 33     | 1.0   | 0.6   | 5.1   | 2.9   | 0.2   |
| 206069_s_at | NM_001608 | ACADL                     | 33     | 6.0   | 0.8   | 0.7   | 1.5   | 0.7   |
| 206070_s_at | AF213459  | EPHA3                     | 2042   | 28.4  | 24.3  | 39.1  | 29.1  | 27.2  |
| 206071_s_at | NM_005233 | EPHA3                     | 2042   | 11.4  | 13.2  | 11.7  | 4.7   | 9.7   |
| 206072_at   | NM_003353 | UCN                       | 7349   | 2.7   | 2.5   | 7.9   | 1.5   | 5.9   |
| 206073_at   | AF057036  | COLQ                      | 8292   | 4.4   | 1.1   | 6.9   | 7.9   | 3.4   |
| 206074_s_at | NM_002131 | HMGA1                     | 3159   | 353.4 | 250.5 | 291.2 | 286.3 | 220.3 |
| 206075_s_at | NM_001895 | CSNK2A1                   | 1457   | 224.4 | 213.5 | 253.9 | 227.1 | 184.6 |
| 206076_at   | NM_006992 | LRRC23                    | 10233  | 21.3  | 31.2  | 26.7  | 30.4  | 24.0  |
| 206077_at   | NM_000420 | KEL                       | 3792   | 2.8   | 1.7   | 9.5   | 2.0   | 1.3   |
| 206078_at   | NM_007064 | KALRN                     | 8997   | 11.8  | 12.3  | 9.0   | 7.4   | 8.7   |
| 206079_at   | NM_001821 | CHML                      | 1122   | 14.3  | 12.0  | 14.4  | 14.1  | 16.6  |
| 206080_at   | NM_014638 | PLCH2                     | 9651   | 3.8   | 6.3   | 11.6  | 6.0   | 7.0   |
| 206081_at   | NM_004727 | SLC24A1                   | 9187   | 9.7   | 15.0  | 16.1  | 21.8  | 20.8  |
| 206082_at   | NM_006674 | HCP5                      | 10866  | 1.1   | 0.6   | 5.0   | 3.9   | 1.5   |
| 206083_at   | NM_001702 | BAI1                      | 575    | 2.2   | 4.6   | 3.3   | 2.1   | 1.8   |
| 206084_at   | NM_002849 | PTPRR                     | 5801   | 40.8  | 37.1  | 38.6  | 53.1  | 24.9  |
| 206085_s_at | NM_001902 | CTH                       | 1491   | 31.2  | 38.7  | 35.1  | 33.7  | 29.5  |
| 206086_x_at | AF115265  | HFE                       | 3077   | 25.9  | 15.4  | 14.7  | 26.0  | 17.5  |
| 206087_x_at | NM_000410 | HFE                       | 3077   | 35.8  | 23.5  | 23.3  | 25.5  | 18.6  |
| 206088_at   | NM_014834 | LRRC37A3                  | 374819 | 11.7  | 13.5  | 15.3  | 10.6  | 10.3  |
| 206089_at   | NM_006157 | NELL1                     | 4745   | 0.8   | 1.0   | 0.6   | 0.5   | 1.0   |
| 206090_s_at | NM_018662 | DISC1 /// TSP27185 /// 10 |        | 7.0   | 0.4   | 0.6   | 5.4   | 4.7   |
| 206091_at   | NM_002381 | MATN3                     | 4148   | 1.2   | 0.3   | 2.4   | 2.1   | 0.1   |

|             |           |                           |       |       |       |       |       |       |
|-------------|-----------|---------------------------|-------|-------|-------|-------|-------|-------|
| 206092_x_at | NM_016434 | RTEL1                     | 51750 | 23.0  | 21.5  | 24.1  | 32.6  | 17.9  |
| 206093_x_at | NM_007116 | TNXA /// TN>7146 /// 714  |       | 12.4  | 6.8   | 2.5   | 2.7   | 1.8   |
| 206094_x_at | NM_001072 | UGT1A1 /// (54575 /// 54  |       | 23.0  | 12.7  | 11.6  | 11.2  | 13.3  |
| 206095_s_at | NM_006625 | SRSF10                    | 10772 | 169.6 | 133.5 | 203.1 | 127.6 | 155.0 |
| 206096_at   | AI809774  | ZNF35                     | 7584  | 40.6  | 59.0  | 47.1  | 52.3  | 38.8  |
| 206097_at   | NM_007105 | SLC22A18AS                | 5003  | 15.3  | 7.7   | 16.9  | 5.8   | 4.3   |
| 206098_at   | NM_006626 | ZBTB6                     | 10773 | 33.2  | 19.6  | 26.8  | 22.0  | 18.2  |
| 206099_at   | NM_006255 | PRKCH                     | 5583  | 20.6  | 18.9  | 19.3  | 20.5  | 21.5  |
| 206100_at   | NM_001874 | CPM                       | 1368  | 3.0   | 3.2   | 0.7   | 0.8   | 4.1   |
| 206101_at   | NM_001393 | ECM2                      | 1842  | 4.1   | 0.5   | 0.5   | 0.7   | 0.4   |
| 206102_at   | NM_021067 | GINS1                     | 9837  | 392.9 | 277.8 | 409.6 | 306.3 | 370.9 |
| 206103_at   | NM_005052 | RAC3                      | 5881  | 71.1  | 42.1  | 64.5  | 58.6  | 42.4  |
| 206104_at   | NM_002202 | ISL1                      | 3670  | 4.2   | 5.0   | 3.6   | 3.9   | 4.5   |
| 206105_at   | NM_002025 | AFF2                      | 2334  | 10.8  | 12.2  | 14.9  | 18.9  | 12.4  |
| 206106_at   | AL022328  | MAPK12                    | 6300  | 58.7  | 59.2  | 65.5  | 73.4  | 46.7  |
| 206107_at   | NM_003834 | RGS11                     | 8786  | 0.7   | 3.9   | 2.8   | 6.3   | 0.6   |
| 206108_s_at | NM_006275 | SRSF6                     | 6431  | 609.6 | 553.7 | 716.1 | 628.0 | 537.4 |
| 206109_at   | NM_000148 | FUT1                      | 2523  | 27.7  | 27.0  | 26.9  | 25.1  | 17.8  |
| 206110_at   | NM_003536 | HIST1H3A ///,8350 /// 835 |       | 326.6 | 283.5 | 339.3 | 296.3 | 248.4 |
| 206111_at   | NM_002934 | RNASE2                    | 6036  | 8.4   | 6.2   | 6.2   | 5.8   | 6.7   |
| 206112_at   | NM_019644 | ANKRD7                    | 56311 | 0.4   | 0.1   | 2.3   | 2.7   | 1.4   |
| 206113_s_at | NM_004162 | RAB5A                     | 5868  | 72.7  | 75.1  | 83.0  | 76.5  | 60.3  |
| 206114_at   | NM_004438 | EPHA4                     | 2043  | 1.1   | 1.3   | 1.2   | 0.5   | 0.7   |
| 206115_at   | NM_004430 | EGR3                      | 1960  | 7.7   | 4.2   | 5.2   | 7.6   | 2.8   |
| 206116_s_at | NM_000366 | TPM1                      | 7168  | 98.9  | 119.5 | 125.7 | 130.9 | 128.9 |
| 206117_at   | NM_000366 | TPM1                      | 7168  | 12.4  | 12.3  | 17.2  | 12.9  | 10.8  |
| 206118_at   | NM_003151 | STAT4                     | 6775  | 9.3   | 10.2  | 11.3  | 4.9   | 5.4   |
| 206119_at   | NM_001713 | BHMT                      | 635   | 2.9   | 3.9   | 11.8  | 5.8   | 10.2  |
| 206120_at   | NM_001772 | CD33                      | 945   | 2.9   | 0.7   | 0.8   | 1.3   | 0.6   |
| 206121_at   | NM_000036 | AMPD1                     | 270   | 5.5   | 7.3   | 8.2   | 4.8   | 4.4   |
| 206122_at   | NM_006942 | SOX15                     | 6665  | 1.7   | 1.2   | 1.5   | 1.1   | 0.8   |
| 206123_at   | D50550    | LLGL1                     | 3996  | 25.6  | 9.9   | 18.9  | 14.7  | 9.0   |
| 206124_s_at | NM_004140 | LLGL1                     | 3996  | 14.6  | 9.5   | 13.7  | 12.6  | 2.3   |
| 206125_s_at | NM_007196 | KLK8                      | 11202 | 14.3  | 7.0   | 13.3  | 2.2   | 9.1   |
| 206126_at   | NM_001716 | CXCR5                     | 643   | 1.6   | 1.3   | 1.4   | 7.2   | 2.6   |
| 206127_at   | NM_005230 | ELK3                      | 2004  | 2.4   | 0.8   | 1.6   | 1.9   | 3.1   |
| 206128_at   | AI264306  | ADRA2C                    | 152   | 0.8   | 9.0   | 14.2  | 11.8  | 11.7  |
| 206129_s_at | NM_000046 | ARSB                      | 411   | 10.3  | 11.5  | 11.8  | 9.6   | 7.8   |
| 206130_s_at | NM_001181 | ASGR2                     | 433   | 2.8   | 1.0   | 1.7   | 2.9   | 1.7   |
| 206131_at   | NM_001832 | CLPS                      | 1208  | 14.1  | 8.0   | 10.8  | 9.7   | 8.0   |
| 206132_at   | NM_002387 | MCC                       | 4163  | 27.6  | 17.3  | 30.3  | 23.2  | 19.5  |
| 206133_at   | NM_017523 | XAF1                      | 54739 | 2.4   | 5.7   | 1.0   | 2.6   | 3.0   |
| 206134_at   | NM_014479 | ADAMDEC1                  | 27299 | 4.5   | 6.9   | 3.0   | 5.4   | 2.2   |
| 206135_at   | NM_014682 | ST18                      | 9705  | 0.2   | 0.1   | 1.5   | 0.2   | 0.3   |
| 206136_at   | NM_003468 | FZD5                      | 7855  | 3.0   | 2.3   | 3.1   | 2.3   | 1.9   |
| 206137_at   | NM_014677 | RIMS2                     | 9699  | 14.5  | 10.4  | 9.7   | 7.5   | 6.4   |
| 206138_s_at | NM_002651 | PI4KB                     | 5298  | 249.9 | 206.9 | 304.2 | 233.2 | 207.7 |
| 206139_at   | NM_002651 | PI4KB                     | 5298  | 50.9  | 32.7  | 69.5  | 50.1  | 49.5  |
| 206140_at   | NM_004789 | LHX2                      | 9355  | 13.8  | 20.6  | 20.7  | 13.3  | 16.8  |
| 206141_at   | NM_014484 | MOCS3                     | 27304 | 62.6  | 38.5  | 42.2  | 37.5  | 36.2  |
| 206142_at   | NM_003436 | ZNF135                    | 7694  | 2.6   | 3.8   | 1.0   | 1.4   | 2.4   |
| 206143_at   | NM_000111 | SLC26A3                   | 1811  | 1.7   | 0.3   | 2.3   | 0.5   | 0.2   |
| 206144_at   | NM_004742 | MAGI1                     | 9223  | 8.0   | 5.1   | 8.2   | 4.3   | 7.1   |

|             |           |                           |        |       |       |        |       |       |
|-------------|-----------|---------------------------|--------|-------|-------|--------|-------|-------|
| 206145_at   | NM_000324 | RHAG                      | 6005   | 3.4   | 0.2   | 2.8    | 1.9   | 1.7   |
| 206146_s_at | AF178841  | RHAG                      | 6005   | 1.0   | 1.9   | 1.3    | 7.7   | 1.8   |
| 206147_x_at | NM_006089 | SCML2                     | 10389  | 119.3 | 74.9  | 112.5  | 85.9  | 69.9  |
| 206148_at   | NM_002183 | IL3RA                     | 3563   | 1.9   | 1.8   | 1.0    | 0.9   | 1.4   |
| 206149_at   | NM_022097 | CHP2                      | 63928  | 2.6   | 0.8   | 1.2    | 1.4   | 1.1   |
| 206150_at   | NM_001242 | CD27                      | 939    | 10.1  | 11.6  | 6.8    | 2.2   | 1.1   |
| 206151_x_at | NM_007352 | CELA3B                    | 23436  | 1.9   | 0.8   | 3.5    | 1.7   | 1.4   |
| 206152_at   | NM_014770 | AGAP2                     | 116986 | 3.5   | 2.6   | 3.1    | 3.8   | 0.8   |
| 206153_at   | NM_021187 | CYP4F11                   | 57834  | 9.4   | 7.0   | 10.2   | 11.3  | 1.9   |
| 206154_at   | NM_000326 | RLBP1                     | 6017   | 14.1  | 1.9   | 2.4    | 3.7   | 3.8   |
| 206155_at   | NM_000392 | ABCC2                     | 1244   | 0.8   | 0.5   | 1.6    | 1.8   | 0.4   |
| 206156_at   | NM_005268 | GJB5                      | 2709   | 0.7   | 3.8   | 1.7    | 0.8   | 0.5   |
| 206157_at   | NM_002852 | PTX3                      | 5806   | 0.4   | 0.4   | 1.2    | 2.0   | 3.2   |
| 206158_s_at | NM_003418 | CNBP                      | 7555   | 961.3 | 686.5 | 1002.4 | 811.2 | 843.7 |
| 206159_at   | NM_004962 | GDF10                     | 2662   | 1.3   | 1.2   | 4.2    | 4.9   | 1.0   |
| 206160_at   | NM_006789 | APOBEC2                   | 10930  | 19.5  | 6.9   | 14.8   | 14.7  | 11.8  |
| 206161_s_at | AI659957  | SYT5                      | 6861   | 8.3   | 4.8   | 11.3   | 7.0   | 5.3   |
| 206162_x_at | NM_003180 | SYT5                      | 6861   | 1.1   | 0.4   | 0.5    | 0.8   | 1.0   |
| 206163_at   | NM_005584 | MAB21L1 /// 4081 /// 100  |        | 0.7   | 5.9   | 0.9    | 0.7   | 2.9   |
| 206164_at   | NM_006536 | CLCA2                     | 9635   | 3.1   | 3.6   | 0.7    | 1.2   | 3.0   |
| 206165_s_at | NM_006536 | CLCA2                     | 9635   | 3.3   | 1.0   | 2.5    | 0.3   | 0.4   |
| 206166_s_at | AF043977  | CLCA2                     | 9635   | 5.0   | 4.1   | 4.3    | 1.1   | 3.9   |
| 206167_s_at | NM_001174 | ARHGAP6                   | 395    | 101.4 | 84.6  | 135.4  | 112.3 | 92.1  |
| 206168_at   | NM_025013 | ZC3H7B                    | 23264  | 6.6   | 4.7   | 8.6    | 4.9   | 4.1   |
| 206169_x_at | NM_025013 | ZC3H7B                    | 23264  | 25.1  | 18.6  | 16.4   | 27.1  | 20.4  |
| 206170_at   | NM_000024 | ADRB2                     | 154    | 86.2  | 84.4  | 113.1  | 94.1  | 103.1 |
| 206171_at   | NM_000677 | ADORA3                    | 140    | 11.4  | 3.6   | 14.0   | 1.1   | 8.4   |
| 206172_at   | NM_000640 | IL13RA2                   | 3598   | 0.4   | 0.5   | 0.3    | 2.1   | 3.7   |
| 206173_x_at | NM_002041 | GABPB1                    | 2553   | 51.3  | 35.6  | 57.6   | 49.4  | 44.4  |
| 206174_s_at | NM_002721 | PPP6C                     | 5537   | 321.0 | 277.6 | 307.7  | 274.7 | 199.6 |
| 206175_x_at | NM_013360 | ZNF222                    | 7673   | 1.9   | 4.5   | 2.5    | 0.9   | 4.2   |
| 206176_at   | NM_001718 | BMP6                      | 654    | 15.1  | 7.1   | 12.7   | 11.9  | 9.2   |
| 206177_s_at | NM_000045 | ARG1                      | 383    | 10.6  | 4.4   | 6.6    | 8.2   | 9.0   |
| 206178_at   | NM_000929 | PLA2G5                    | 5322   | 12.9  | 11.0  | 18.8   | 15.9  | 6.6   |
| 206179_s_at | NM_007030 | TPPP                      | 11076  | 7.5   | 6.8   | 2.3    | 8.6   | 5.6   |
| 206180_x_at | NM_023931 | ZNF747                    | 65988  | 96.4  | 87.1  | 119.2  | 95.8  | 58.5  |
| 206181_at   | NM_003037 | SLAMF1                    | 6504   | 11.4  | 5.5   | 6.5    | 7.4   | 7.8   |
| 206182_at   | NM_003435 | ZNF134                    | 7693   | 62.4  | 43.0  | 47.2   | 52.8  | 43.6  |
| 206183_s_at | NM_014606 | HERC3 /// LC 8916 /// 101 |        | 22.2  | 21.9  | 33.2   | 29.4  | 23.3  |
| 206184_at   | NM_005207 | CRKL                      | 1399   | 45.2  | 28.6  | 50.3   | 27.0  | 33.5  |
| 206185_at   | NM_001887 | CRYBB1                    | 1414   | 0.8   | 0.9   | 1.0    | 1.0   | 0.5   |
| 206186_at   | NM_001932 | MPP3                      | 4356   | 13.1  | 16.2  | 20.5   | 8.5   | 9.0   |
| 206187_at   | NM_000960 | PTGIR                     | 5739   | 5.2   | 2.3   | 3.2    | 10.7  | 1.7   |
| 206188_at   | NM_014789 | ZNF623                    | 9831   | 35.8  | 22.9  | 30.9   | 30.9  | 19.5  |
| 206189_at   | NM_003728 | UNC5C                     | 8633   | 0.8   | 0.4   | 1.7    | 0.8   | 2.5   |
| 206190_at   | NM_005291 | GPR17                     | 2840   | 0.8   | 0.4   | 0.5    | 0.4   | 2.6   |
| 206191_at   | NM_001248 | ENTPD3                    | 956    | 23.7  | 18.2  | 9.1    | 18.5  | 7.4   |
| 206192_at   | L20815    | CDSN                      | 1041   | 4.2   | 1.7   | 1.7    | 1.4   | 1.8   |
| 206193_s_at | NM_001264 | CDSN                      | 1041   | 0.5   | 0.9   | 1.2    | 1.1   | 1.0   |
| 206194_at   | AW299598  | HOXC4                     | 3221   | 28.0  | 29.6  | 21.6   | 23.6  | 20.4  |
| 206195_x_at | NM_022557 | GH2                       | 2689   | 4.8   | 1.5   | 2.1    | 1.2   | 0.8   |
| 206196_s_at | NM_006695 | RUNDC3A                   | 10900  | 12.6  | 6.2   | 5.4    | 9.3   | 11.3  |
| 206197_at   | NM_003551 | NME5                      | 8382   | 51.4  | 33.6  | 41.0   | 37.5  | 35.5  |

|             |           |           |       |       |       |       |       |       |
|-------------|-----------|-----------|-------|-------|-------|-------|-------|-------|
| 206198_s_at | L31792    | CEACAM7   | 1087  | 3.7   | 1.3   | 0.1   | 1.1   | 0.1   |
| 206199_at   | NM_006890 | CEACAM7   | 1087  | 13.2  | 5.8   | 8.7   | 5.0   | 1.1   |
| 206200_s_at | NM_001157 | ANXA11    | 311   | 325.6 | 348.5 | 350.5 | 409.3 | 299.1 |
| 206201_s_at | NM_005924 | MEOX2     | 4223  | 0.1   | 0.2   | 1.0   | 1.5   | 0.1   |
| 206202_at   | NM_005924 | MEOX2     | 4223  | 0.1   | 0.2   | 0.2   | 0.1   | 0.1   |
| 206203_at   | NM_002903 | RCVRN     | 5957  | 4.2   | 2.2   | 1.5   | 1.1   | 1.2   |
| 206204_at   | NM_004490 | GRB14     | 2888  | 10.4  | 9.9   | 8.9   | 9.7   | 4.3   |
| 206205_at   | NM_022782 | MPHOSPH9  | 10198 | 77.5  | 44.9  | 98.9  | 70.4  | 60.1  |
| 206206_at   | NM_005582 | CD180     | 4064  | 2.7   | 1.0   | 1.5   | 0.9   | 1.0   |
| 206207_at   | NM_001828 | CLC       | 1178  | 5.4   | 1.9   | 2.1   | 5.5   | 1.8   |
| 206208_at   | NM_000717 | CA4       | 762   | 2.3   | 4.0   | 8.9   | 3.5   | 3.3   |
| 206209_s_at | NM_000717 | CA4       | 762   | 15.0  | 7.6   | 10.0  | 6.9   | 9.1   |
| 206210_s_at | NM_000078 | CETP      | 1071  | 0.7   | 2.9   | 0.7   | 0.5   | 0.5   |
| 206211_at   | NM_000450 | SELE      | 6401  | 0.3   | 0.4   | 0.4   | 0.3   | 1.2   |
| 206212_at   | NM_001869 | CPA2      | 1358  | 24.7  | 14.4  | 18.9  | 14.3  | 12.5  |
| 206213_at   | NM_003394 | WNT10B    | 7480  | 34.8  | 30.1  | 44.1  | 31.0  | 35.2  |
| 206214_at   | NM_005084 | PLA2G7    | 7941  | 7.1   | 3.0   | 13.5  | 5.1   | 5.1   |
| 206215_at   | NM_002545 | OPCML     | 4978  | 3.7   | 1.2   | 11.0  | 3.4   | 1.6   |
| 206216_at   | NM_014370 | SRPK3     | 26576 | 5.3   | 2.5   | 4.4   | 1.9   | 3.3   |
| 206217_at   | NM_001399 | EDA       | 1896  | 31.6  | 27.6  | 34.8  | 33.1  | 26.1  |
| 206218_at   | NM_002364 | MAGEB2    | 4113  | 6.8   | 10.8  | 9.5   | 3.3   | 2.5   |
| 206219_s_at | NM_005428 | VAV1      | 7409  | 1.7   | 0.6   | 0.7   | 6.1   | 1.8   |
| 206220_s_at | NM_007368 | RASA3     | 22821 | 18.3  | 17.2  | 21.7  | 20.4  | 14.4  |
| 206221_at   | NM_007368 | RASA3     | 22821 | 0.5   | 0.3   | 0.3   | 0.7   | 0.2   |
| 206222_at   | NM_003841 | TNFRSF10C | 8794  | 11.9  | 9.5   | 13.1  | 8.9   | 12.6  |
| 206223_at   | NM_014916 | LMTK2     | 22853 | 6.3   | 3.1   | 1.0   | 5.9   | 5.6   |
| 206224_at   | NM_001898 | CST1      | 1469  | 0.5   | 1.0   | 0.4   | 0.6   | 0.9   |
| 206225_at   | NM_014910 | ZNF507    | 22847 | 17.7  | 7.5   | 13.6  | 8.8   | 8.6   |
| 206226_at   | NM_000412 | HRG       | 3273  | 2.7   | 4.7   | 7.1   | 9.0   | 1.0   |
| 206227_at   | NM_003613 | CILP      | 8483  | 12.4  | 7.0   | 13.1  | 4.4   | 9.3   |
| 206228_at   | AW769732  | PAX2      | 5076  | 5.4   | 4.5   | 6.6   | 1.1   | 4.9   |
| 206229_x_at | NM_003988 | PAX2      | 5076  | 8.6   | 6.0   | 9.2   | 16.5  | 8.9   |
| 206230_at   | NM_005568 | LHX1      | 3975  | 2.7   | 0.5   | 2.1   | 4.0   | 1.0   |
| 206231_at   | NM_002248 | KCNN1     | 3780  | 23.4  | 16.3  | 30.3  | 11.2  | 8.1   |
| 206232_s_at | NM_004775 | B4GALT6   | 9331  | 1.8   | 8.2   | 1.5   | 1.5   | 0.6   |
| 206233_at   | AF097159  | B4GALT6   | 9331  | 8.3   | 7.8   | 14.8  | 10.1  | 9.8   |
| 206234_s_at | NM_016155 | MMP17     | 4326  | 1.8   | 1.7   | 0.8   | 0.8   | 4.4   |
| 206235_at   | NM_002312 | LIG4      | 3981  | 16.5  | 19.2  | 14.4  | 18.2  | 16.6  |
| 206236_at   | NM_005282 | GPR4      | 2828  | 7.8   | 1.2   | 1.4   | 1.8   | 6.6   |
| 206237_s_at | NM_013957 | NRG1      | 3084  | 1.2   | 1.4   | 0.7   | 0.8   | 1.3   |
| 206238_s_at | NM_005748 | YAF2      | 10138 | 34.2  | 30.6  | 32.0  | 26.0  | 25.5  |
| 206239_s_at | NM_003122 | SPINK1    | 6690  | 4.9   | 2.5   | 7.2   | 3.9   | 4.5   |
| 206240_s_at | NM_003437 | ZNF136    | 7695  | 28.9  | 24.0  | 25.6  | 25.8  | 17.0  |
| 206241_at   | NM_002269 | KPNA5     | 3841  | 8.4   | 9.7   | 5.5   | 8.1   | 10.2  |
| 206242_at   | NM_003963 | TM4SF5    | 9032  | 4.5   | 8.2   | 2.4   | 7.5   | 5.6   |
| 206243_at   | NM_003256 | TIMP4     | 7079  | 0.4   | 3.3   | 0.7   | 0.4   | 0.7   |
| 206244_at   | NM_000573 | CR1       | 1378  | 2.0   | 2.7   | 4.1   | 5.5   | 2.6   |
| 206245_s_at | NM_006469 | IVNS1ABP  | 10625 | 74.3  | 68.1  | 82.7  | 78.1  | 68.9  |
| 206246_at   | NM_004567 | PFKFB4    | 5210  | 3.2   | 2.9   | 3.8   | 3.6   | 2.7   |
| 206247_at   | NM_005931 | MICB      | 4277  | 2.8   | 3.4   | 3.1   | 0.5   | 0.2   |
| 206248_at   | NM_005400 | PRKCE     | 5581  | 8.7   | 7.7   | 2.9   | 4.5   | 1.6   |
| 206249_at   | NM_004721 | MAP3K13   | 9175  | 13.0  | 14.6  | 16.6  | 17.9  | 8.4   |
| 206250_x_at | AI005066  | AVPR1A    | 552   | 3.2   | 1.7   | 1.3   | 5.9   | 1.0   |

|             |           |                           |       |       |       |       |       |       |
|-------------|-----------|---------------------------|-------|-------|-------|-------|-------|-------|
| 206251_s_at | NM_000706 | AVPR1A                    | 552   | 1.3   | 5.2   | 1.6   | 2.6   | 2.3   |
| 206252_s_at | AF030625  | AVPR1A                    | 552   | 6.3   | 0.8   | 2.1   | 0.8   | 0.4   |
| 206253_at   | NM_001364 | DLG2                      | 1740  | 0.8   | 5.2   | 7.6   | 5.0   | 1.4   |
| 206254_at   | NM_001963 | EGF                       | 1950  | 11.2  | 13.3  | 17.2  | 10.8  | 6.3   |
| 206255_at   | NM_001715 | BLK                       | 640   | 1.3   | 0.3   | 0.6   | 0.4   | 0.3   |
| 206256_at   | NM_001308 | CPN1                      | 1369  | 10.5  | 9.2   | 8.6   | 9.6   | 6.4   |
| 206257_at   | NM_015603 | CCDC9                     | 26093 | 34.8  | 30.1  | 34.4  | 23.1  | 19.4  |
| 206258_at   | NM_013305 | ST8SIA5                   | 29906 | 1.6   | 0.7   | 1.4   | 0.5   | 0.5   |
| 206259_at   | NM_000312 | PROC                      | 5624  | 2.3   | 0.7   | 1.7   | 0.5   | 0.7   |
| 206260_at   | NM_003241 | TGM4                      | 7047  | 7.9   | 0.4   | 1.6   | 10.8  | 5.3   |
| 206261_at   | NM_005674 | ZNF239                    | 8187  | 82.6  | 55.9  | 87.8  | 59.4  | 67.5  |
| 206262_at   | NM_000669 | ADH1C                     | 126   | 0.8   | 3.8   | 4.9   | 0.9   | 5.3   |
| 206263_at   | NM_002022 | FMO4                      | 2329  | 13.8  | 29.4  | 27.1  | 16.3  | 21.6  |
| 206264_at   | L11702    | GPLD1                     | 2822  | 6.8   | 8.9   | 3.0   | 11.6  | 3.7   |
| 206265_s_at | NM_001503 | GPLD1                     | 2822  | 0.8   | 0.2   | 0.3   | 0.5   | 0.7   |
| 206266_at   | NM_001503 | GPLD1                     | 2822  | 0.6   | 0.8   | 0.9   | 0.5   | 1.1   |
| 206267_s_at | NM_002378 | MATK                      | 4145  | 1.1   | 6.1   | 4.3   | 1.2   | 4.8   |
| 206268_at   | NM_020997 | LEFTY1                    | 10637 | 1.5   | 2.6   | 3.0   | 8.4   | 7.0   |
| 206269_at   | AB026493  | GCM1                      | 8521  | 1.9   | 1.8   | 4.2   | 1.3   | 1.9   |
| 206270_at   | NM_002739 | PRKCG                     | 5582  | 1.3   | 0.5   | 0.9   | 0.6   | 1.4   |
| 206271_at   | NM_003265 | TLR3                      | 7098  | 3.4   | 8.4   | 3.1   | 6.1   | 7.2   |
| 206272_at   | NM_006542 | RAB4A /// SF 5867 /// 106 |       | 75.1  | 67.4  | 68.8  | 60.0  | 63.9  |
| 206273_at   | NM_006553 | SLMO1                     | 10650 | 15.6  | 9.9   | 12.7  | 9.7   | 1.5   |
| 206274_s_at | NM_014675 | CROCC                     | 9696  | 12.1  | 3.9   | 1.7   | 11.7  | 8.2   |
| 206275_s_at | NM_014632 | MICAL2                    | 9645  | 7.2   | 9.3   | 12.4  | 8.7   | 9.5   |
| 206276_at   | NM_003695 | LY6D                      | 8581  | 1.1   | 1.1   | 1.4   | 1.1   | 1.2   |
| 206277_at   | NM_002564 | P2RY2                     | 5029  | 1.5   | 1.0   | 1.3   | 2.6   | 0.9   |
| 206278_at   | D10202    | PTAFR                     | 5724  | 1.9   | 1.5   | 1.5   | 0.9   | 4.6   |
| 206279_at   | NM_002760 | PRKY                      | 5616  | 11.6  | 7.2   | 6.6   | 13.7  | 10.1  |
| 206280_at   | NM_004934 | CDH18                     | 1016  | 4.1   | 4.4   | 2.3   | 8.5   | 1.0   |
| 206281_at   | NM_001117 | ADCYAP1                   | 116   | 1.8   | 0.9   | 8.5   | 6.0   | 7.6   |
| 206282_at   | NM_002500 | NEUROD1                   | 4760  | 0.7   | 0.5   | 2.9   | 0.8   | 2.9   |
| 206283_s_at | NM_003189 | TAL1                      | 6886  | 6.3   | 2.2   | 3.6   | 3.2   | 6.5   |
| 206284_x_at | NM_001834 | CLTB                      | 1212  | 196.7 | 213.0 | 205.5 | 200.5 | 203.7 |
| 206285_at   | NM_000272 | NPHP1                     | 4867  | 8.1   | 0.3   | 8.4   | 6.7   | 4.9   |
| 206286_s_at | NM_003212 | TDGF1 /// TC 6997 /// 699 |       | 1.9   | 0.8   | 2.9   | 2.0   | 0.7   |
| 206287_s_at | NM_002218 | ITIH4                     | 3700  | 1.5   | 1.0   | 1.8   | 1.5   | 0.6   |
| 206288_at   | NM_005023 | PGGT1B                    | 5229  | 39.8  | 18.4  | 38.2  | 31.6  | 27.9  |
| 206289_at   | NM_002141 | HOXA4                     | 3201  | 8.1   | 8.3   | 15.0  | 4.7   | 8.1   |
| 206290_s_at | NM_002924 | RGS7                      | 6000  | 3.4   | 3.2   | 9.9   | 3.7   | 1.6   |
| 206291_at   | NM_006183 | NTS                       | 4922  | 6.8   | 9.9   | 3.4   | 5.1   | 0.5   |
| 206292_s_at | NM_003167 | SULT2A1                   | 6822  | 6.9   | 4.5   | 5.6   | 4.1   | 7.7   |
| 206293_at   | U08024    | SULT2A1                   | 6822  | 0.4   | 0.5   | 1.8   | 0.5   | 2.4   |
| 206294_at   | NM_000198 | HSD3B2                    | 3284  | 5.5   | 0.8   | 1.3   | 1.4   | 0.7   |
| 206295_at   | NM_001562 | IL18                      | 3606  | 0.5   | 0.1   | 0.3   | 0.3   | 0.1   |
| 206296_x_at | NM_007181 | MAP4K1                    | 11184 | 11.1  | 3.0   | 1.8   | 2.3   | 2.8   |
| 206297_at   | NM_007272 | CTRC                      | 11330 | 13.4  | 10.8  | 10.1  | 9.5   | 6.1   |
| 206298_at   | NM_021226 | ARHGAP22                  | 58504 | 0.6   | 0.4   | 0.7   | 1.2   | 0.3   |
| 206299_at   | NM_015686 | FAM155B                   | 27112 | 66.0  | 70.5  | 77.7  | 91.9  | 65.6  |
| 206300_s_at | NM_002820 | PTHLH                     | 5744  | 4.4   | 4.0   | 3.9   | 0.3   | 1.9   |
| 206301_at   | NM_003215 | TEC                       | 7006  | 2.0   | 0.6   | 0.9   | 0.9   | 1.2   |
| 206302_s_at | NM_019094 | NUDT4 /// N 11163 /// 17  |       | 224.2 | 192.4 | 223.8 | 192.4 | 160.0 |
| 206303_s_at | AF191653  | NUDT4 /// N 11163 /// 17  |       | 152.6 | 59.6  | 78.8  | 98.6  | 69.9  |

|             |           |                           |       |       |       |       |       |       |
|-------------|-----------|---------------------------|-------|-------|-------|-------|-------|-------|
| 206304_at   | NM_004997 | MYBPH                     | 4608  | 1.8   | 1.6   | 1.9   | 0.7   | 5.0   |
| 206305_s_at | NM_000562 | C8A                       | 731   | 6.4   | 1.0   | 1.3   | 4.1   | 0.7   |
| 206306_at   | NM_001036 | RYR3                      | 6263  | 2.3   | 3.7   | 9.7   | 3.3   | 4.1   |
| 206307_s_at | NM_004472 | FOXD1                     | 2297  | 12.6  | 9.6   | 18.6  | 16.2  | 10.8  |
| 206308_at   | AJ223333  | TRDMT1                    | 1787  | 11.8  | 9.3   | 17.0  | 14.8  | 9.5   |
| 206309_at   | NM_007015 | LECT1                     | 11061 | 17.4  | 12.6  | 12.0  | 11.4  | 5.8   |
| 206310_at   | NM_021114 | SPINK2                    | 6691  | 4.4   | 7.9   | 2.2   | 1.4   | 0.5   |
| 206311_s_at | NM_000928 | PLA2G1B                   | 5319  | 1.0   | 3.3   | 0.5   | 2.8   | 4.5   |
| 206312_at   | NM_004963 | GUCY2C                    | 2984  | 5.8   | 5.0   | 3.3   | 6.7   | 2.4   |
| 206313_at   | NM_002119 | HLA-DOA                   | 3111  | 17.2  | 9.9   | 6.8   | 3.9   | 1.5   |
| 206314_at   | NM_018651 | ZKSCAN7                   | 55888 | 0.4   | 0.7   | 0.3   | 3.1   | 0.6   |
| 206315_at   | NM_004750 | CRLF1                     | 9244  | 1.3   | 0.7   | 2.0   | 1.5   | 1.2   |
| 206316_s_at | NM_014708 | KNTC1                     | 9735  | 68.9  | 46.7  | 65.0  | 54.1  | 57.2  |
| 206317_s_at | NM_007188 | ABCB8                     | 11194 | 39.0  | 27.4  | 32.3  | 17.8  | 31.1  |
| 206318_at   | NM_020398 | EPPIN /// EPI57119 /// 10 |       | 5.0   | 5.6   | 4.3   | 2.3   | 0.3   |
| 206319_s_at | AF286368  | EPPIN /// EPI57119 /// 10 |       | 7.4   | 8.3   | 8.0   | 4.4   | 1.1   |
| 206320_s_at | NM_005905 | SMAD9                     | 4093  | 1.7   | 5.6   | 1.6   | 2.3   | 1.1   |
| 206321_at   | NM_002918 | RFX1                      | 5989  | 0.7   | 0.4   | 0.5   | 0.6   | 0.7   |
| 206322_at   | NM_003490 | SYN3                      | 8224  | 1.5   | 1.5   | 6.0   | 4.8   | 1.0   |
| 206323_x_at | NM_002547 | OPHN1                     | 4983  | 344.8 | 438.7 | 468.0 | 467.3 | 439.9 |
| 206324_s_at | NM_014326 | DAPK2                     | 23604 | 10.6  | 7.1   | 7.2   | 9.6   | 2.3   |
| 206325_at   | NM_001756 | SERPINA6                  | 866   | 13.7  | 2.0   | 2.9   | 4.7   | 4.2   |
| 206326_at   | NM_002091 | GRP                       | 2922  | 1.3   | 1.5   | 1.0   | 1.6   | 0.4   |
| 206327_s_at | NM_004933 | CDH15                     | 1013  | 15.7  | 16.8  | 17.3  | 10.3  | 12.6  |
| 206328_at   | NM_004933 | CDH15                     | 1013  | 0.6   | 1.1   | 0.9   | 0.7   | 0.5   |
| 206329_at   | NM_004455 | EXTL1                     | 2134  | 0.5   | 3.3   | 0.8   | 0.5   | 3.9   |
| 206330_s_at | NM_016848 | SHC3                      | 53358 | 1.1   | 1.1   | 1.6   | 1.5   | 1.1   |
| 206331_at   | NM_005795 | CALCRL                    | 10203 | 1.1   | 0.7   | 1.5   | 1.9   | 0.7   |
| 206332_s_at | NM_005531 | IFI16                     | 3428  | 1.9   | 4.4   | 0.3   | 0.3   | 0.4   |
| 206333_at   | NM_002442 | MSI1                      | 4440  | 1.1   | 0.7   | 1.8   | 0.7   | 0.9   |
| 206334_at   | NM_004190 | LIPF                      | 8513  | 3.3   | 1.7   | 3.9   | 3.6   | 3.9   |
| 206335_at   | NM_000512 | GALNS                     | 2588  | 54.7  | 49.1  | 48.5  | 62.0  | 39.6  |
| 206336_at   | NM_002993 | CXCL6                     | 6372  | 4.7   | 3.2   | 1.3   | 2.2   | 1.7   |
| 206337_at   | NM_001838 | CCR7                      | 1236  | 1.3   | 6.4   | 6.4   | 1.2   | 0.7   |
| 206338_at   | NM_001420 | ELAVL3                    | 1995  | 0.9   | 1.4   | 1.2   | 4.4   | 0.9   |
| 206339_at   | NM_004291 | CARTPT                    | 9607  | 2.0   | 2.0   | 1.5   | 7.6   | 6.8   |
| 206340_at   | NM_005123 | NR1H4                     | 9971  | 10.1  | 5.7   | 4.0   | 1.5   | 0.9   |
| 206341_at   | NM_000417 | IL2RA                     | 3559  | 1.8   | 2.8   | 4.1   | 3.7   | 1.6   |
| 206342_x_at | NM_006123 | IDS                       | 3423  | 45.0  | 49.1  | 39.2  | 59.6  | 31.2  |
| 206343_s_at | NM_013959 | NRG1                      | 3084  | 2.4   | 1.0   | 1.3   | 0.5   | 0.9   |
| 206344_at   | U53784    | PON1                      | 5444  | 7.9   | 3.1   | 3.6   | 1.9   | 4.6   |
| 206345_s_at | NM_000446 | PON1                      | 5444  | 15.9  | 10.8  | 12.0  | 5.1   | 6.3   |
| 206346_at   | NM_000949 | PRLR                      | 5618  | 4.6   | 0.8   | 3.0   | 2.2   | 0.1   |
| 206347_at   | NM_005391 | PDK3                      | 5165  | 36.4  | 20.0  | 33.9  | 22.3  | 23.4  |
| 206348_s_at | NM_005391 | PDK3                      | 5165  | 48.3  | 44.0  | 50.5  | 46.8  | 41.6  |
| 206349_at   | NM_005097 | LGI1                      | 9211  | 0.7   | 0.4   | 0.5   | 0.3   | 0.3   |
| 206350_at   | NM_001639 | APCS                      | 325   | 14.2  | 10.1  | 11.7  | 9.4   | 3.7   |
| 206351_s_at | NM_002617 | PEX10                     | 5192  | 116.3 | 126.0 | 170.6 | 106.6 | 166.1 |
| 206352_s_at | AB013818  | PEX10                     | 5192  | 128.4 | 106.9 | 179.3 | 118.8 | 155.2 |
| 206353_at   | NM_005205 | COX6A2                    | 1339  | 15.1  | 7.9   | 8.0   | 4.7   | 10.8  |
| 206354_at   | NM_019844 | SLCO1B3                   | 28234 | 1.3   | 0.3   | 1.0   | 0.5   | 0.7   |
| 206355_at   | R20102    | GNAL                      | 2774  | 1.9   | 3.3   | 5.2   | 3.6   | 2.7   |
| 206356_s_at | NM_002071 | GNAL                      | 2774  | 4.6   | 1.6   | 3.1   | 0.3   | 1.1   |

|             |           |                           |       |       |       |       |       |       |
|-------------|-----------|---------------------------|-------|-------|-------|-------|-------|-------|
| 206357_at   | NM_025136 | OPA3                      | 80207 | 19.0  | 5.7   | 11.5  | 7.5   | 10.5  |
| 206358_at   | NM_002761 | PRM1                      | 5619  | 4.5   | 1.2   | 4.5   | 0.6   | 3.6   |
| 206359_at   | BG035761  | SOCS3                     | 9021  | 1.0   | 3.2   | 1.1   | 0.5   | 4.3   |
| 206360_s_at | NM_003955 | SOCS3                     | 9021  | 20.9  | 11.7  | 20.6  | 13.6  | 17.2  |
| 206361_at   | NM_004778 | PTGDR2                    | 11251 | 8.5   | 8.7   | 7.0   | 6.6   | 8.3   |
| 206362_x_at | NM_002446 | MAP3K10                   | 4294  | 4.0   | 2.5   | 2.8   | 3.1   | 2.2   |
| 206363_at   | NM_005360 | MAF                       | 4094  | 1.5   | 0.9   | 1.9   | 1.1   | 1.1   |
| 206364_at   | NM_014875 | KIF14                     | 9928  | 49.1  | 50.9  | 48.0  | 49.7  | 46.2  |
| 206365_at   | NM_002995 | XCL1                      | 6375  | 5.2   | 6.7   | 3.1   | 0.6   | 1.4   |
| 206366_x_at | U23772    | XCL1                      | 6375  | 0.9   | 1.3   | 1.2   | 1.2   | 1.5   |
| 206367_at   | NM_000537 | REN                       | 5972  | 2.9   | 1.6   | 3.0   | 3.5   | 0.9   |
| 206368_at   | NM_006650 | CPLX2                     | 10814 | 0.9   | 6.6   | 9.8   | 6.8   | 3.1   |
| 206369_s_at | AF327656  | PIK3CG                    | 5294  | 0.4   | 0.8   | 1.1   | 0.7   | 0.2   |
| 206370_at   | NM_002649 | PIK3CG                    | 5294  | 3.0   | 1.9   | 2.0   | 2.1   | 0.4   |
| 206371_at   | NM_000804 | FOLR3                     | 2352  | 1.2   | 8.8   | 9.6   | 7.7   | 10.6  |
| 206372_at   | NM_002469 | MYF6                      | 4618  | 6.4   | 2.3   | 10.9  | 10.7  | 12.4  |
| 206373_at   | NM_003412 | ZIC1                      | 7545  | 0.4   | 0.5   | 0.4   | 0.7   | 0.8   |
| 206374_at   | NM_004420 | DUSP8 /// LC 1850 /// 101 |       | 39.1  | 30.7  | 37.6  | 47.8  | 28.4  |
| 206375_s_at | NM_006308 | HSPB3                     | 8988  | 1.4   | 0.8   | 0.8   | 1.3   | 0.6   |
| 206376_at   | NM_018057 | SLC6A15                   | 55117 | 0.4   | 0.4   | 0.5   | 0.5   | 0.4   |
| 206377_at   | NM_001452 | FOXF2                     | 2295  | 7.8   | 5.0   | 3.1   | 2.0   | 0.1   |
| 206378_at   | NM_002411 | SCGB2A2                   | 4250  | 0.1   | 5.1   | 3.9   | 1.9   | 2.5   |
| 206379_at   | NM_001990 | EYA3                      | 2140  | 7.6   | 2.6   | 1.6   | 1.3   | 6.2   |
| 206380_s_at | NM_002621 | CFP                       | 5199  | 0.3   | 0.3   | 0.3   | 0.4   | 0.2   |
| 206381_at   | NM_021007 | SCN2A                     | 6326  | 5.8   | 3.8   | 3.9   | 1.4   | 1.2   |
| 206382_s_at | NM_001709 | BDNF                      | 627   | 0.7   | 0.3   | 0.4   | 0.9   | 0.4   |
| 206383_s_at | NM_012297 | G3BP2                     | 9908  | 79.9  | 54.1  | 94.3  | 77.5  | 77.7  |
| 206384_at   | NM_006539 | CACNG3                    | 10368 | 1.8   | 0.9   | 1.0   | 1.7   | 1.8   |
| 206385_s_at | NM_020987 | ANK3                      | 288   | 413.3 | 461.9 | 432.1 | 451.4 | 310.4 |
| 206386_at   | NM_000354 | SERPINA7                  | 6906  | 0.8   | 0.8   | 5.0   | 1.7   | 4.3   |
| 206387_at   | U51096    | CDX2                      | 1045  | 1.4   | 1.2   | 0.9   | 1.3   | 0.6   |
| 206388_at   | U36798    | PDE3A                     | 5139  | 6.6   | 12.6  | 10.6  | 16.1  | 10.5  |
| 206389_s_at | NM_000921 | PDE3A                     | 5139  | 0.8   | 0.3   | 0.7   | 0.7   | 0.4   |
| 206390_x_at | NM_002619 | PF4                       | 5196  | 9.1   | 3.8   | 13.7  | 8.2   | 4.8   |
| 206391_at   | NM_002888 | RARRES1                   | 5918  | 0.8   | 0.5   | 1.8   | 0.4   | 0.4   |
| 206392_s_at | NM_002888 | RARRES1                   | 5918  | 0.3   | 0.7   | 0.3   | 0.2   | 0.4   |
| 206393_at   | NM_003282 | TNNI2                     | 7136  | 0.7   | 0.5   | 0.5   | 0.7   | 0.4   |
| 206394_at   | NM_004533 | MYBPC2                    | 4606  | 0.7   | 1.1   | 1.6   | 2.1   | 0.9   |
| 206395_at   | NM_001346 | DGKG                      | 1608  | 1.5   | 1.6   | 2.1   | 1.2   | 0.8   |
| 206396_at   | NM_004170 | SLC1A1                    | 6505  | 16.6  | 5.5   | 3.9   | 11.7  | 2.1   |
| 206397_x_at | NM_001492 | CERS1 /// GC 2657 /// 107 |       | 46.2  | 48.3  | 48.0  | 52.5  | 41.9  |
| 206398_s_at | NM_001770 | CD19                      | 930   | 6.7   | 8.0   | 3.8   | 9.0   | 7.0   |
| 206399_x_at | NM_023035 | CACNA1A //, 773 /// 1005  |       | 1.8   | 15.5  | 3.7   | 3.4   | 4.1   |
| 206400_at   | NM_002307 | LGALS7 /// L3963 /// 653  |       | 1.5   | 6.9   | 2.1   | 0.8   | 4.1   |
| 206401_s_at | J03778    | MAPT                      | 4137  | 34.2  | 29.1  | 37.4  | 38.1  | 39.2  |
| 206402_s_at | NM_003717 | NPFF                      | 8620  | 1.1   | 1.2   | 2.3   | 1.3   | 0.9   |
| 206403_at   | NM_014717 | ZNF536                    | 9745  | 3.9   | 3.7   | 1.3   | 5.5   | 4.4   |
| 206404_at   | NM_002010 | FGF9                      | 2254  | 1.7   | 1.5   | 1.0   | 3.0   | 1.1   |
| 206405_x_at | NM_004505 | USP32 /// US9098 /// 846  |       | 51.2  | 48.9  | 56.5  | 35.4  | 20.5  |
| 206406_at   | NM_030663 | SMCP                      | 4184  | 1.9   | 1.5   | 1.6   | 0.8   | 1.0   |
| 206407_s_at | NM_005408 | CCL13                     | 6357  | 2.1   | 0.5   | 0.9   | 11.2  | 5.6   |
| 206408_at   | NM_015564 | LRRTM2                    | 26045 | 0.3   | 0.3   | 4.9   | 0.2   | 0.3   |
| 206409_at   | NM_003253 | TIAM1                     | 7074  | 1.7   | 1.0   | 2.7   | 3.1   | 2.3   |



|             |           |                          |       |        |        |        |        |        |
|-------------|-----------|--------------------------|-------|--------|--------|--------|--------|--------|
| 206410_at   | NM_021969 | NROB2                    | 8431  | 8.9    | 14.3   | 9.9    | 9.4    | 7.2    |
| 206411_s_at | NM_007314 | ABL2                     | 27    | 21.6   | 14.0   | 17.0   | 13.4   | 13.5   |
| 206412_at   | NM_005246 | FER                      | 2241  | 10.0   | 1.6    | 16.7   | 9.5    | 6.7    |
| 206413_s_at | NM_004918 | TCL1B                    | 9623  | 2.3    | 4.0    | 2.6    | 1.9    | 2.0    |
| 206414_s_at | NM_003887 | ASAP2                    | 8853  | 99.7   | 92.0   | 108.0  | 111.6  | 66.8   |
| 206415_at   | AI769310  | TLL1                     | 7092  | 0.3    | 0.1    | 2.1    | 1.9    | 0.2    |
| 206416_at   | NM_003456 | ZNF205                   | 7755  | 3.4    | 13.2   | 11.1   | 11.4   | 11.7   |
| 206417_at   | NM_000087 | CNGA1                    | 1259  | 13.6   | 4.9    | 4.1    | 11.7   | 7.6    |
| 206418_at   | NM_007052 | NOX1                     | 27035 | 3.0    | 1.4    | 4.8    | 4.3    | 0.5    |
| 206419_at   | NM_005060 | RORC                     | 6097  | 30.4   | 26.2   | 14.2   | 28.3   | 15.3   |
| 206420_at   | NM_005849 | IGSF6                    | 10261 | 2.9    | 4.5    | 4.4    | 2.7    | 1.4    |
| 206421_s_at | NM_003784 | SERPINB7                 | 8710  | 1.2    | 1.4    | 0.6    | 0.8    | 1.2    |
| 206422_at   | NM_002054 | GCG                      | 2641  | 20.5   | 16.5   | 14.9   | 13.5   | 6.9    |
| 206423_at   | NM_021146 | ANGPTL7                  | 10218 | 0.8    | 1.3    | 1.1    | 0.7    | 0.6    |
| 206424_at   | NM_000783 | CYP26A1                  | 1592  | 4.7    | 1.9    | 2.2    | 3.4    | 1.3    |
| 206425_s_at | NM_003305 | TRPC3                    | 7222  | 5.6    | 1.3    | 10.2   | 6.8    | 2.8    |
| 206426_at   | NM_005511 | MLANA                    | 2315  | 0.9    | 4.6    | 3.7    | 0.2    | 4.5    |
| 206427_s_at | U06654    | MLANA                    | 2315  | 0.4    | 0.9    | 1.1    | 1.3    | 0.3    |
| 206428_s_at | NM_003442 | -                        | -     | 0.7    | 0.6    | 0.6    | 0.3    | 0.5    |
| 206429_at   | NM_005242 | F2RL1                    | 2150  | 51.9   | 56.8   | 61.7   | 39.8   | 44.0   |
| 206430_at   | NM_001804 | CDX1                     | 1044  | 1.8    | 1.5    | 1.2    | 1.3    | 1.0    |
| 206431_x_at | NM_015043 | TBC1D9B                  | 23061 | 104.0  | 67.5   | 86.3   | 89.5   | 78.9   |
| 206432_at   | NM_005328 | HAS2                     | 3037  | 0.3    | 4.1    | 0.5    | 5.1    | 7.1    |
| 206433_s_at | BC000460  | SPOCK3                   | 50859 | 3.0    | 0.1    | 3.1    | 0.4    | 0.4    |
| 206434_at   | NM_016950 | SPOCK3                   | 50859 | 0.8    | 1.4    | 2.2    | 1.3    | 0.2    |
| 206435_at   | NM_001478 | B4GALNT1                 | 2583  | 20.4   | 15.9   | 20.3   | 13.9   | 11.0   |
| 206436_at   | NM_001585 | MPPED1                   | 758   | 2.6    | 5.8    | 12.4   | 4.9    | 7.5    |
| 206437_at   | NM_003775 | S1PR4                    | 8698  | 5.9    | 9.2    | 4.2    | 9.6    | 3.4    |
| 206438_x_at | NM_024809 | TCTN2                    | 79867 | 80.3   | 58.2   | 68.3   | 59.9   | 67.2   |
| 206439_at   | NM_004950 | EPYC                     | 1833  | 3.5    | 0.2    | 0.3    | 2.8    | 3.3    |
| 206440_at   | NM_004664 | LIN7A                    | 8825  | 17.1   | 12.8   | 11.1   | 11.0   | 10.7   |
| 206441_s_at | NM_017828 | COMMD4                   | 54939 | 233.1  | 212.7  | 263.0  | 236.7  | 187.9  |
| 206442_at   | NM_003007 | SEMG1                    | 6406  | 0.5    | 0.4    | 0.4    | 1.3    | 0.8    |
| 206443_at   | NM_006914 | RORB                     | 6096  | 0.6    | 0.8    | 0.9    | 0.6    | 0.5    |
| 206444_at   | NM_000924 | PDE1B                    | 5153  | 2.2    | 1.3    | 1.7    | 7.1    | 6.3    |
| 206445_s_at | NM_001536 | PRMT1                    | 3276  | 1178.2 | 1171.1 | 1450.1 | 1086.7 | 1196.8 |
| 206446_s_at | NM_001971 | CELA2A /// C51032 /// 63 |       | 3.8    | 1.2    | 4.9    | 0.6    | 2.0    |
| 206447_at   | NM_001971 | CELA2A /// C51032 /// 63 |       | 4.0    | 0.3    | 1.0    | 0.4    | 0.4    |
| 206448_at   | NM_014951 | ZNF365                   | 22891 | 19.6   | 20.4   | 20.1   | 15.9   | 13.5   |
| 206449_s_at | NM_001879 | MASP1                    | 5648  | 3.2    | 2.6    | 1.5    | 4.6    | 6.4    |
| 206450_at   | NM_000787 | DBH                      | 1621  | 1.9    | 0.8    | 1.1    | 0.7    | 2.5    |
| 206451_at   | NM_018138 | TBCCD1                   | 55171 | 71.2   | 45.6   | 69.3   | 54.9   | 59.1   |
| 206452_x_at | NM_021131 | PPP2R4                   | 5524  | 261.6  | 276.4  | 262.9  | 248.5  | 245.7  |
| 206453_s_at | NM_016250 | NDRG2                    | 57447 | 143.2  | 163.2  | 128.4  | 125.3  | 105.5  |
| 206454_s_at | AA058836  | RHO                      | 6010  | 4.4    | 1.2    | 1.3    | 4.2    | 2.3    |
| 206455_s_at | NM_000539 | RHO                      | 6010  | 20.4   | 3.3    | 3.3    | 2.6    | 6.5    |
| 206456_at   | NM_000810 | GABRA5                   | 2558  | 1.4    | 0.1    | 0.7    | 0.3    | 3.2    |
| 206457_s_at | NM_000792 | DIO1                     | 1733  | 24.1   | 22.0   | 25.8   | 26.8   | 14.4   |
| 206458_s_at | NM_024494 | WNT2B                    | 7482  | 6.1    | 7.2    | 1.7    | 0.3    | 0.2    |
| 206459_s_at | AB045117  | WNT2B                    | 7482  | 4.4    | 0.7    | 8.3    | 6.8    | 6.8    |
| 206460_at   | NM_018836 | AJAP1                    | 55966 | 6.0    | 3.1    | 7.1    | 0.7    | 2.9    |
| 206461_x_at | NM_005951 | MT1H                     | 4496  | 690.5  | 693.0  | 788.7  | 773.4  | 625.3  |
| 206462_s_at | NM_002530 | NTRK3                    | 4916  | 1.0    | 1.9    | 2.8    | 3.2    | 5.6    |

|             |           |                 |       |       |       |       |       |       |
|-------------|-----------|-----------------|-------|-------|-------|-------|-------|-------|
| 206463_s_at | NM_005794 | DHRS2           | 10202 | 22.3  | 28.0  | 33.9  | 28.2  | 29.6  |
| 206464_at   | NM_001721 | BMX             | 660   | 17.1  | 12.9  | 13.4  | 12.4  | 7.9   |
| 206465_at   | BE856376  | ACSBG1          | 23205 | 0.9   | 1.0   | 5.0   | 1.1   | 1.1   |
| 206466_at   | AB014531  | ACSBG1          | 23205 | 1.0   | 5.1   | 0.6   | 1.1   | 3.6   |
| 206467_x_at | NM_003823 | RTSL1-TNFRS8771 | 100   | 18.3  | 14.2  | 17.4  | 15.7  | 11.3  |
| 206468_s_at | NM_015935 | METTL13         | 51603 | 90.2  | 80.0  | 94.1  | 75.0  | 89.1  |
| 206469_x_at | NM_012067 | AKR7A3          | 22977 | 75.3  | 75.3  | 68.6  | 60.5  | 50.8  |
| 206470_at   | NM_005761 | PLXNC1          | 10154 | 0.3   | 0.4   | 0.3   | 0.5   | 0.2   |
| 206471_s_at | NM_005761 | PLXNC1          | 10154 | 4.8   | 1.2   | 4.3   | 0.2   | 1.9   |
| 206472_s_at | NM_005078 | TLE3            | 7090  | 120.7 | 106.9 | 113.5 | 100.6 | 94.6  |
| 206473_at   | NM_015884 | MBTPS2          | 51360 | 69.4  | 44.9  | 60.3  | 44.9  | 31.3  |
| 206474_at   | NM_002595 | CDK17           | 5128  | 6.8   | 6.3   | 8.3   | 6.1   | 6.3   |
| 206475_x_at | NM_022640 | CSH1            | 1442  | 3.3   | 1.2   | 1.0   | 1.3   | 1.4   |
| 206476_s_at | AI040329  | NOVA2           | 4858  | 0.6   | 0.8   | 0.9   | 1.0   | 2.0   |
| 206477_s_at | NM_002516 | NOVA2           | 4858  | 6.9   | 2.0   | 4.8   | 16.3  | 1.5   |
| 206478_at   | NM_014792 | KIAA0125        | 9834  | 11.6  | 8.4   | 13.6  | 7.4   | 10.1  |
| 206479_at   | NM_002420 | TRPM1           | 4308  | 2.1   | 0.3   | 1.7   | 0.1   | 0.3   |
| 206480_at   | NM_000897 | LTC4S           | 4056  | 1.0   | 2.8   | 4.8   | 2.6   | 0.8   |
| 206481_s_at | NM_001290 | LDB2            | 9079  | 0.4   | 0.7   | 0.6   | 0.6   | 0.2   |
| 206482_at   | NM_005975 | PTK6            | 5753  | 9.9   | 11.6  | 4.9   | 8.0   | 4.5   |
| 206483_at   | NM_012472 | LRRC6           | 23639 | 17.3  | 12.2  | 15.8  | 11.9  | 12.9  |
| 206484_s_at | NM_003399 | XPNPEP2         | 7512  | 3.1   | 1.9   | 2.0   | 7.6   | 3.9   |
| 206485_at   | NM_014207 | CD5             | 921   | 6.4   | 11.3  | 19.9  | 14.6  | 3.7   |
| 206486_at   | NM_002286 | LAG3            | 3902  | 6.3   | 1.0   | 4.8   | 2.1   | 1.6   |
| 206487_at   | NM_025154 | SUN1            | 23353 | 2.4   | 1.0   | 1.3   | 1.8   | 1.9   |
| 206488_s_at | NM_000072 | CD36            | 948   | 1.7   | 1.2   | 1.5   | 0.9   | 0.7   |
| 206489_s_at | NM_004746 | DLGAP1          | 9229  | 1.7   | 2.0   | 2.8   | 2.1   | 4.4   |
| 206490_at   | NM_004746 | DLGAP1          | 9229  | 6.2   | 2.8   | 8.5   | 2.2   | 7.6   |
| 206491_s_at | NM_003827 | NAPA            | 8775  | 219.6 | 202.6 | 200.9 | 217.3 | 164.7 |
| 206492_at   | NM_002012 | FHIT            | 2272  | 11.3  | 4.9   | 2.4   | 7.6   | 3.3   |
| 206493_at   | NM_000419 | ITGA2B          | 3674  | 25.0  | 13.8  | 18.7  | 13.4  | 12.8  |
| 206494_s_at | NM_000419 | ITGA2B          | 3674  | 1.7   | 0.3   | 1.2   | 0.6   | 0.5   |
| 206495_s_at | NM_015517 | HINFP           | 25988 | 40.4  | 33.8  | 37.5  | 39.3  | 27.5  |
| 206496_at   | NM_006894 | FMO3            | 2328  | 0.9   | 0.6   | 0.7   | 1.4   | 2.2   |
| 206497_at   | NM_018224 | COA1            | 55744 | 11.2  | 12.2  | 13.4  | 8.5   | 14.3  |
| 206498_at   | NM_000275 | OCA2            | 4948  | 10.0  | 6.1   | 11.7  | 4.0   | 3.9   |
| 206499_s_at | NM_001269 | RCC1            | 1104  | 336.2 | 245.2 | 399.4 | 297.9 | 299.7 |
| 206500_s_at | NM_018353 | MIS18BP1        | 55320 | 3.3   | 2.9   | 6.1   | 6.8   | 2.7   |
| 206501_x_at | NM_004956 | ETV1            | 2115  | 109.6 | 116.8 | 127.5 | 116.2 | 108.6 |
| 206502_s_at | NM_002196 | INSM1           | 3642  | 0.4   | 0.3   | 2.9   | 3.0   | 0.2   |
| 206503_x_at | NM_002675 | PML             | 5371  | 3.1   | 9.9   | 14.1  | 9.8   | 8.1   |
| 206504_at   | NM_000782 | CYP24A1         | 1591  | 4.9   | 1.9   | 0.9   | 2.5   | 4.5   |
| 206505_at   | NM_021139 | UGT2B4          | 7363  | 3.6   | 4.3   | 1.9   | 3.5   | 3.3   |
| 206506_s_at | NM_003599 | SUPT3H          | 8464  | 14.5  | 22.8  | 23.7  | 24.1  | 14.4  |
| 206507_at   | NM_014724 | ZSCAN12         | 9753  | 28.8  | 20.7  | 18.9  | 29.0  | 15.6  |
| 206508_at   | NM_001252 | CD70            | 970   | 3.1   | 6.9   | 5.2   | 7.4   | 11.2  |
| 206509_at   | NM_002652 | PIP             | 5304  | 14.0  | 2.3   | 11.4  | 7.9   | 7.7   |
| 206510_at   | AF332197  | SIX2            | 10736 | 7.5   | 7.4   | 4.2   | 5.6   | 9.7   |
| 206511_s_at | NM_016932 | SIX2            | 10736 | 10.4  | 4.8   | 5.3   | 7.0   | 6.4   |
| 206512_at   | NM_005083 | SRP19           | 731   | 2.0   | 0.9   | 1.0   | 1.5   | 0.9   |
| 206513_at   | NM_004833 | AIM2            | 9447  | 2.0   | 6.1   | 1.4   | 1.2   | 5.6   |
| 206514_s_at | D12620    | CYP4F2          | 852   | 0.8   | 1.1   | 1.4   | 1.1   | 0.6   |
| 206515_at   | NM_000896 | CYP4F3          | 4051  | 0.7   | 3.8   | 3.7   | 2.8   | 3.2   |

|             |           |                         |        |        |        |        |        |
|-------------|-----------|-------------------------|--------|--------|--------|--------|--------|
| 206516_at   | NM_000479 | AMH /// MIR268 /// 1004 | 5.6    | 10.7   | 8.9    | 6.3    | 4.6    |
| 206517_at   | NM_004062 | CDH16 1014              | 2.0    | 0.8    | 2.3    | 1.3    | 1.7    |
| 206518_s_at | NM_003835 | RGS9 8787               | 3.2    | 2.3    | 4.0    | 4.5    | 0.2    |
| 206519_x_at | D86358    | SIGLEC6 946             | 0.3    | 1.8    | 2.4    | 1.2    | 0.1    |
| 206520_x_at | NM_001245 | SIGLEC6 946             | 33.5   | 19.7   | 24.6   | 11.1   | 11.0   |
| 206521_s_at | NM_015859 | GTF2A1 2957             | 19.5   | 9.1    | 19.8   | 16.4   | 12.1   |
| 206522_at   | NM_004668 | MGAM 8972               | 0.2    | 0.7    | 0.8    | 0.5    | 0.4    |
| 206523_at   | NM_004227 | CYTH3 9265              | 19.3   | 17.6   | 26.2   | 14.2   | 14.9   |
| 206524_at   | NM_003181 | T 6862                  | 2.9    | 17.6   | 19.4   | 13.8   | 2.9    |
| 206525_at   | NM_002042 | GABRR1 2569             | 5.3    | 2.4    | 7.9    | 5.3    | 3.1    |
| 206526_at   | NM_015653 | RIBC2 26150             | 1.0    | 0.5    | 0.5    | 0.4    | 0.4    |
| 206527_at   | NM_000663 | ABAT 18                 | 26.6   | 36.8   | 26.3   | 31.2   | 23.4   |
| 206528_at   | NM_004621 | TRPC6 7225              | 0.5    | 0.6    | 6.7    | 0.2    | 3.3    |
| 206529_x_at | NM_000441 | SLC26A4 5172            | 3.7    | 1.8    | 2.9    | 3.5    | 2.7    |
| 206530_at   | NM_014488 | RAB30 27314             | 16.1   | 12.4   | 15.0   | 11.5   | 5.5    |
| 206531_at   | NM_004647 | DPF1 8193               | 4.2    | 5.6    | 5.6    | 3.1    | 5.4    |
| 206532_at   | NM_003073 | - -                     | 6.0    | 6.8    | 7.7    | 6.4    | 3.5    |
| 206533_at   | NM_000745 | CHRNA5 1138             | 36.0   | 27.7   | 32.9   | 28.8   | 30.9   |
| 206534_at   | NM_000833 | GRIN2A 2903             | 14.7   | 12.3   | 11.3   | 15.4   | 2.2    |
| 206535_at   | NM_000340 | SLC2A2 6514             | 0.1    | 0.4    | 0.4    | 0.5    | 0.2    |
| 206536_s_at | U32974    | XIAP 331                | 17.3   | 10.1   | 16.6   | 9.2    | 10.7   |
| 206537_at   | NM_001167 | XIAP 331                | 10.1   | 15.9   | 14.8   | 5.9    | 10.5   |
| 206538_at   | NM_012219 | MRAS 22808              | 2.6    | 0.7    | 10.3   | 1.0    | 5.0    |
| 206539_s_at | NM_023944 | CYP4F12 66002           | 3.9    | 3.1    | 2.8    | 5.2    | 4.3    |
| 206540_at   | NM_024506 | GLB1L 79411             | 27.1   | 19.9   | 22.7   | 14.5   | 17.2   |
| 206541_at   | NM_000892 | KLKB1 3818              | 1.4    | 6.6    | 4.9    | 6.6    | 6.5    |
| 206542_s_at | AV725365  | SMARCA2 6595            | 88.9   | 55.7   | 87.2   | 63.4   | 58.1   |
| 206543_at   | NM_003070 | SMARCA2 6595            | 8.7    | 9.4    | 3.3    | 7.1    | 5.5    |
| 206544_x_at | NM_003070 | SMARCA2 6595            | 26.9   | 30.2   | 38.9   | 38.4   | 28.0   |
| 206545_at   | NM_006139 | CD28 940                | 4.8    | 3.0    | 7.1    | 2.6    | 2.4    |
| 206546_at   | NM_014258 | SYCP2 10388             | 4.9    | 0.5    | 0.4    | 0.2    | 2.7    |
| 206547_s_at | NM_006240 | PPEF1 5475              | 6.0    | 2.1    | 9.7    | 0.6    | 7.3    |
| 206548_at   | NM_024880 | - -                     | 1.5    | 3.7    | 4.1    | 0.2    | 0.2    |
| 206549_at   | NM_002195 | INSL4 3641              | 3.8    | 5.3    | 2.2    | 5.3    | 9.5    |
| 206550_s_at | NM_004298 | NUP155 9631             | 115.0  | 98.2   | 126.1  | 105.3  | 101.4  |
| 206551_x_at | NM_017644 | KLHL24 54800            | 11.1   | 15.3   | 19.6   | 20.3   | 19.6   |
| 206552_s_at | NM_003182 | TAC1 6863               | 0.3    | 2.5    | 2.1    | 0.1    | 0.2    |
| 206553_at   | NM_002535 | OAS2 4939               | 5.0    | 9.7    | 5.0    | 1.7    | 1.7    |
| 206554_x_at | NM_006515 | SETMAR 6419             | 86.5   | 63.2   | 78.6   | 70.4   | 72.4   |
| 206555_s_at | NM_017736 | THUMPD1 55623           | 129.5  | 95.7   | 137.9  | 107.8  | 112.4  |
| 206556_at   | NM_014410 | CLUL1 27098             | 11.9   | 10.1   | 8.2    | 7.9    | 6.5    |
| 206557_at   | NM_024924 | ZNF702P 79986           | 19.5   | 14.2   | 15.2   | 16.0   | 14.0   |
| 206558_at   | NM_005069 | SIM2 6493               | 24.9   | 25.4   | 19.1   | 22.3   | 14.4   |
| 206559_x_at | NM_001403 | - -                     | 3990.2 | 3853.5 | 3993.8 | 3711.5 | 3657.1 |
| 206560_s_at | NM_006533 | MIA 8190                | 3.8    | 7.7    | 3.5    | 8.8    | 6.8    |
| 206561_s_at | NM_020299 | AKR1B10 57016           | 1.9    | 11.8   | 8.8    | 5.0    | 4.5    |
| 206562_s_at | NM_001892 | CSNK1A1 1452            | 344.8  | 287.5  | 381.7  | 329.1  | 305.6  |
| 206563_s_at | AF348323  | OPRL1 4987              | 7.3    | 5.7    | 2.3    | 2.3    | 3.6    |
| 206564_at   | NM_000913 | OPRL1 4987              | 2.2    | 3.8    | 10.7   | 5.0    | 5.1    |
| 206565_x_at | NM_006780 | SMA4 11039              | 194.3  | 160.9  | 173.6  | 152.9  | 107.9  |
| 206566_at   | NM_003045 | SLC7A1 6541             | 12.3   | 17.9   | 14.7   | 21.0   | 14.2   |
| 206567_s_at | NM_016436 | PHF20 51230             | 73.5   | 36.0   | 51.0   | 47.4   | 41.8   |
| 206568_at   | NM_003284 | TNP1 7141               | 10.5   | 1.5    | 16.8   | 6.0    | 1.4    |

|             |           |                          |       |        |        |        |        |       |
|-------------|-----------|--------------------------|-------|--------|--------|--------|--------|-------|
| 206569_at   | NM_006850 | IL24                     | 11009 | 1.1    | 3.8    | 3.3    | 9.9    | 2.7   |
| 206570_s_at | NM_002785 | PSG11                    | 5680  | 11.4   | 1.6    | 9.3    | 13.4   | 6.9   |
| 206571_s_at | NM_004834 | MAP4K4                   | 9448  | 51.3   | 63.9   | 53.9   | 49.4   | 42.2  |
| 206572_x_at | NM_003429 | ZNF85                    | 7639  | 58.5   | 46.0   | 71.7   | 49.1   | 56.2  |
| 206573_at   | NM_004519 | KCNQ3                    | 3786  | 10.0   | 10.1   | 11.0   | 8.6    | 11.2  |
| 206574_s_at | NM_007079 | PTP4A3                   | 11156 | 16.9   | 19.6   | 20.4   | 19.8   | 14.3  |
| 206575_at   | NM_003159 | CDKL5                    | 6792  | 3.0    | 0.8    | 1.0    | 0.8    | 0.3   |
| 206576_s_at | NM_001712 | CEACAM1                  | 634   | 8.8    | 7.1    | 14.8   | 5.7    | 1.9   |
| 206577_at   | NM_003381 | VIP                      | 7432  | 0.4    | 0.4    | 3.8    | 2.0    | 2.6   |
| 206578_at   | NM_004387 | NKX2-5                   | 1482  | 1.9    | 11.7   | 2.6    | 9.6    | 1.0   |
| 206579_at   | NM_006298 | ZKSCAN8                  | 7745  | 7.7    | 3.8    | 5.9    | 7.0    | 2.6   |
| 206580_s_at | NM_016938 | EFEMP2                   | 30008 | 6.8    | 8.4    | 17.3   | 13.5   | 14.3  |
| 206581_at   | NM_001717 | BNC1                     | 646   | 2.3    | 0.3    | 0.2    | 0.9    | 2.4   |
| 206582_s_at | NM_005682 | GPR56                    | 9289  | 30.6   | 21.4   | 29.2   | 31.1   | 22.3  |
| 206583_at   | NM_017776 | KRBOX4                   | 55634 | 20.3   | 11.1   | 12.5   | 8.2    | 4.4   |
| 206584_at   | NM_015364 | LY96                     | 23643 | 1.0    | 0.1    | 3.9    | 0.6    | 1.5   |
| 206585_at   | NM_005664 | MKRN3                    | 7681  | 3.7    | 4.2    | 5.9    | 5.6    | 1.0   |
| 206586_at   | NM_001841 | CNR2                     | 1269  | 22.8   | 15.5   | 16.3   | 11.5   | 8.9   |
| 206587_at   | NM_006584 | CCT6B                    | 10693 | 30.5   | 53.5   | 40.3   | 51.2   | 33.3  |
| 206588_at   | NM_001351 | DAZL                     | 1618  | 0.4    | 4.2    | 0.9    | 3.9    | 4.7   |
| 206589_at   | NM_005263 | GFI1                     | 2672  | 1.5    | 1.6    | 0.5    | 0.5    | 0.7   |
| 206590_x_at | NM_000795 | DRD2                     | 1813  | 23.9   | 20.3   | 26.8   | 17.8   | 13.1  |
| 206591_at   | NM_000448 | RAG1                     | 5896  | 0.8    | 5.0    | 1.5    | 0.4    | 0.6   |
| 206592_s_at | NM_003938 | AP3D1                    | 8943  | 289.2  | 274.4  | 312.0  | 303.4  | 286.4 |
| 206593_s_at | NM_006752 | MED22                    | 6837  | 90.7   | 58.2   | 70.5   | 56.7   | 60.7  |
| 206594_at   | NM_015148 | PASK                     | 23178 | 25.2   | 12.3   | 19.1   | 16.3   | 1.8   |
| 206595_at   | NM_001323 | CST6                     | 1474  | 4.0    | 2.1    | 1.8    | 4.0    | 0.8   |
| 206596_s_at | M81840    | NRL                      | 4901  | 20.5   | 12.3   | 18.3   | 16.6   | 18.1  |
| 206597_at   | NM_006177 | NRL                      | 4901  | 3.6    | 5.3    | 7.5    | 1.4    | 7.6   |
| 206598_at   | NM_000207 | INS                      | 3630  | 1.2    | 0.5    | 0.4    | 0.8    | 0.3   |
| 206599_at   | NM_004695 | SLC16A5                  | 9121  | 1.7    | 1.0    | 1.2    | 3.0    | 6.7   |
| 206600_s_at | NM_004695 | SLC16A5                  | 9121  | 1.1    | 0.9    | 0.7    | 0.9    | 0.4   |
| 206601_s_at | BC005124  | HOXD3 /// H 3232 /// 323 |       | 2.7    | 0.4    | 1.2    | 3.7    | 0.9   |
| 206602_s_at | NM_006898 | HOXD3 /// H 3232 /// 323 |       | 0.5    | 3.4    | 4.0    | 0.1    | 0.1   |
| 206603_at   | NM_001042 | SLC2A4                   | 6517  | 2.2    | 0.7    | 1.4    | 0.9    | 5.9   |
| 206604_at   | NM_004561 | OVOL1                    | 5017  | 11.3   | 7.3    | 8.2    | 10.6   | 1.7   |
| 206605_at   | NM_006025 | ENDOU                    | 8909  | 6.0    | 11.1   | 4.0    | 1.0    | 0.6   |
| 206606_at   | NM_000236 | LIPC                     | 3990  | 0.4    | 0.3    | 0.6    | 0.7    | 0.4   |
| 206607_at   | NM_005188 | CBL                      | 867   | 7.0    | 2.1    | 14.1   | 11.9   | 4.8   |
| 206608_s_at | NM_020366 | RPGRIP1                  | 57096 | 8.3    | 9.0    | 12.9   | 15.1   | 4.9   |
| 206609_at   | NM_005462 | MAGEC1                   | 9947  | 9.9    | 5.7    | 11.1   | 8.3    | 13.3  |
| 206610_s_at | NM_000128 | F11                      | 2160  | 9.5    | 11.6   | 14.0   | 8.2    | 8.7   |
| 206611_at   | NM_013310 | C2orf27A                 | 29798 | 52.1   | 33.8   | 45.8   | 37.2   | 35.8  |
| 206612_at   | NM_000727 | CACNG1                   | 786   | 1.2    | 3.3    | 4.4    | 7.2    | 2.2   |
| 206613_s_at | NM_005681 | TAF1A                    | 9015  | 19.6   | 16.1   | 18.8   | 16.1   | 17.4  |
| 206614_at   | NM_000557 | GDF5                     | 8200  | 11.1   | 3.6    | 1.6    | 5.8    | 6.2   |
| 206615_s_at | NM_021723 | ADAM22                   | 53616 | 11.5   | 5.8    | 6.2    | 6.9    | 5.7   |
| 206616_s_at | AF155382  | ADAM22                   | 53616 | 1.6    | 2.8    | 7.5    | 7.7    | 0.9   |
| 206617_s_at | NM_002910 | RENBP                    | 5973  | 3.1    | 0.8    | 2.9    | 2.4    | 1.7   |
| 206618_at   | NM_003855 | IL18R1                   | 8809  | 3.2    | 0.7    | 1.0    | 0.3    | 1.0   |
| 206619_at   | NM_014420 | DKK4                     | 27121 | 1.2    | 6.5    | 1.0    | 5.7    | 0.4   |
| 206620_at   | NM_006613 | GRAP                     | 10750 | 4.8    | 1.7    | 10.3   | 10.7   | 7.1   |
| 206621_s_at | NM_022170 | EIF4H                    | 7458  | 1102.9 | 1074.2 | 1114.7 | 1055.7 | 996.2 |

|             |           |                          |       |        |        |        |       |       |
|-------------|-----------|--------------------------|-------|--------|--------|--------|-------|-------|
| 206622_at   | NM_007117 | TRH                      | 7200  | 4.1    | 2.2    | 1.7    | 1.4   | 1.0   |
| 206623_at   | NM_000440 | PDE6A                    | 5145  | 7.4    | 6.5    | 1.0    | 10.7  | 1.3   |
| 206624_at   | NM_004654 | USP9Y                    | 8287  | 85.0   | 77.0   | 79.2   | 89.3  | 60.1  |
| 206625_at   | NM_000322 | PRPH2                    | 5961  | 20.4   | 12.9   | 11.9   | 10.6  | 4.7   |
| 206626_x_at | BC001003  | SSX1                     | 6756  | 13.9   | 18.6   | 21.8   | 6.6   | 15.4  |
| 206627_s_at | NM_005635 | SSX1                     | 6756  | 3.7    | 0.5    | 2.2    | 4.0   | 3.6   |
| 206628_at   | NM_000343 | SLC5A1                   | 6523  | 3.8    | 12.3   | 9.3    | 6.2   | 5.3   |
| 206629_at   | NM_014694 | ADAMTSL2                 | 9719  | 0.6    | 0.7    | 0.6    | 0.7   | 0.8   |
| 206630_at   | NM_000372 | TYR                      | 7299  | 13.9   | 2.3    | 12.5   | 9.4   | 14.8  |
| 206631_at   | NM_000956 | PTGER2                   | 5732  | 1.2    | 1.5    | 0.9    | 1.6   | 0.2   |
| 206632_s_at | NM_004900 | APOBEC3B                 | 9582  | 266.4  | 220.2  | 295.2  | 241.9 | 195.2 |
| 206633_at   | NM_000079 | CHRNA1                   | 1134  | 7.4    | 8.3    | 8.1    | 9.1   | 6.6   |
| 206634_at   | NM_005413 | SIX3                     | 6496  | 3.5    | 4.7    | 7.9    | 4.4   | 4.4   |
| 206635_at   | NM_000748 | CHRN2                    | 1141  | 22.3   | 19.3   | 14.2   | 16.9  | 5.4   |
| 206636_at   | NM_006506 | RASA2                    | 5922  | 10.8   | 3.9    | 7.7    | 7.9   | 9.6   |
| 206637_at   | NM_014879 | P2RY14                   | 9934  | 0.3    | 1.6    | 0.1    | 2.4   | 0.7   |
| 206638_at   | NM_000867 | HTR2B                    | 3357  | 0.3    | 0.3    | 0.3    | 0.2   | 0.8   |
| 206639_x_at | NM_002159 | HTN1                     | 3346  | 4.0    | 1.6    | 5.1    | 2.8   | 2.5   |
| 206640_x_at | NM_001477 | GAGE12B /// 2574 /// 257 |       | 1023.6 | 1095.6 | 1082.5 | 997.6 | 871.3 |
| 206641_at   | NM_001192 | TNFRSF17                 | 608   | 0.9    | 0.4    | 0.2    | 0.2   | 0.7   |
| 206642_at   | NM_001942 | DSG1                     | 1828  | 2.3    | 3.5    | 0.9    | 0.3   | 0.6   |
| 206643_at   | NM_002108 | HAL                      | 3034  | 1.0    | 1.9    | 0.4    | 2.6   | 3.6   |
| 206644_at   | NM_000475 | NR0B1                    | 190   | 7.1    | 3.7    | 1.7    | 2.5   | 3.7   |
| 206645_s_at | NM_000475 | NR0B1                    | 190   | 3.1    | 2.1    | 3.5    | 6.8   | 3.0   |
| 206646_at   | NM_005269 | GLI1                     | 2735  | 0.9    | 1.9    | 9.8    | 4.4   | 11.4  |
| 206647_at   | NM_005332 | HBZ                      | 3050  | 0.6    | 2.5    | 0.6    | 1.0   | 0.4   |
| 206648_at   | NM_016536 | ZNF571                   | 51276 | 18.0   | 13.2   | 18.6   | 17.8  | 11.8  |
| 206649_s_at | NM_006521 | TFE3                     | 7030  | 72.2   | 49.6   | 54.2   | 61.3  | 37.4  |
| 206650_at   | NM_018134 | IQCC                     | 55721 | 13.0   | 12.4   | 27.7   | 12.8  | 19.4  |
| 206651_s_at | NM_016413 | CPB2                     | 1361  | 5.7    | 0.8    | 1.4    | 4.9   | 0.4   |
| 206652_at   | NM_016384 | ZMYM5                    | 9205  | 3.2    | 3.4    | 6.8    | 2.4   | 3.6   |
| 206653_at   | BF062139  | POLR3G                   | 10622 | 26.2   | 17.6   | 23.7   | 20.6  | 23.3  |
| 206654_s_at | NM_006467 | POLR3G                   | 10622 | 13.0   | 5.7    | 14.8   | 10.0  | 11.1  |
| 206655_s_at | NM_000407 | GP1BB /// SE2812 /// 541 |       | 4.3    | 2.1    | 2.0    | 6.6   | 4.8   |
| 206656_s_at | BC000353  | APMAP                    | 57136 | 455.0  | 396.7  | 495.0  | 417.6 | 379.1 |
| 206657_s_at | NM_002478 | MYOD1                    | 4654  | 2.8    | 2.0    | 0.8    | 2.5   | 1.6   |
| 206658_at   | NM_030570 | UPK3B                    | 80761 | 8.6    | 2.7    | 12.5   | 2.8   | 7.9   |
| 206659_at   | NM_025024 | AC009237.8,-             |       | 30.6   | 24.2   | 22.6   | 29.8  | 18.5  |
| 206660_at   | NM_020070 | IGLL1                    | 3543  | 5.1    | 0.8    | 8.3    | 1.6   | 0.3   |
| 206661_at   | NM_025104 | DBF4B                    | 80174 | 4.1    | 6.6    | 9.7    | 3.0   | 6.0   |
| 206662_at   | NM_002064 | GLRX                     | 2745  | 54.8   | 54.0   | 41.6   | 59.8  | 43.1  |
| 206663_at   | NM_003112 | SP4                      | 6671  | 2.7    | 10.8   | 4.5    | 8.1   | 1.6   |
| 206664_at   | NM_001041 | SI                       | 6476  | 14.6   | 9.4    | 6.9    | 13.6  | 5.2   |
| 206665_s_at | NM_001191 | BCL2L1                   | 598   | 42.5   | 46.5   | 38.8   | 57.9  | 38.7  |
| 206666_at   | NM_002104 | GZMK                     | 3003  | 1.7    | 8.1    | 2.1    | 6.7   | 2.6   |
| 206667_s_at | AF005037  | SCAMP1                   | 9522  | 89.5   | 86.3   | 94.6   | 83.5  | 81.9  |
| 206668_s_at | NM_004866 | SCAMP1                   | 9522  | 83.9   | 69.6   | 67.5   | 78.3  | 64.6  |
| 206669_at   | NM_013445 | GAD1                     | 2571  | 3.4    | 1.2    | 2.6    | 5.4   | 4.1   |
| 206670_s_at | NM_013445 | GAD1                     | 2571  | 1.7    | 1.7    | 1.9    | 5.2   | 0.4   |
| 206671_at   | NM_000541 | SAG                      | 6295  | 3.9    | 14.8   | 3.1    | 8.2   | 2.2   |
| 206672_at   | NM_000486 | AQP2                     | 359   | 18.3   | 17.8   | 22.0   | 9.7   | 11.5  |
| 206673_at   | NM_007223 | GPR176                   | 11245 | 17.3   | 13.3   | 15.4   | 12.7  | 11.8  |
| 206674_at   | NM_004119 | FLT3                     | 2322  | 11.5   | 7.7    | 4.5    | 8.0   | 1.3   |

|             |           |          |       |       |       |       |       |       |
|-------------|-----------|----------|-------|-------|-------|-------|-------|-------|
| 206675_s_at | NM_005414 | SKIL     | 6498  | 5.2   | 2.6   | 3.9   | 5.2   | 3.5   |
| 206676_at   | M33326    | CEACAM8  | 1088  | 0.6   | 0.7   | 4.0   | 0.3   | 0.3   |
| 206677_at   | NM_002277 | KRT31    | 3881  | 7.5   | 1.7   | 2.9   | 8.7   | 7.7   |
| 206678_at   | NM_000806 | GABRA1   | 2554  | 7.6   | 2.0   | 1.7   | 1.2   | 0.6   |
| 206679_at   | NM_001163 | APBA1    | 320   | 11.7  | 10.2  | 10.6  | 2.7   | 2.3   |
| 206680_at   | NM_005894 | CD5L     | 922   | 6.2   | 4.6   | 6.6   | 1.0   | 5.5   |
| 206681_x_at | NM_001502 | GP2      | 2813  | 5.7   | 1.6   | 0.7   | 6.6   | 2.6   |
| 206682_at   | NM_006344 | CLEC10A  | 10462 | 0.6   | 2.4   | 2.1   | 7.1   | 3.5   |
| 206683_at   | NM_003447 | ZNF165   | 7718  | 9.2   | 11.3  | 14.3  | 12.5  | 10.0  |
| 206684_s_at | NM_006856 | ATF7     | 11016 | 9.3   | 6.1   | 16.6  | 12.4  | 4.8   |
| 206685_at   | NM_018985 | HCG4     | 54435 | 9.8   | 15.2  | 10.6  | 12.2  | 11.2  |
| 206686_at   | NM_002610 | PDK1     | 5163  | 34.6  | 30.1  | 49.5  | 28.4  | 23.4  |
| 206687_s_at | NM_002831 | PTPN6    | 5777  | 68.3  | 81.2  | 80.1  | 73.2  | 54.1  |
| 206688_s_at | NM_006693 | CPSF4    | 10898 | 234.7 | 167.0 | 198.9 | 173.0 | 162.5 |
| 206689_x_at | NM_006388 | KAT5     | 10524 | 112.1 | 101.0 | 135.5 | 151.3 | 93.9  |
| 206690_at   | NM_001094 | ASIC2    | 40    | 2.2   | 2.2   | 4.2   | 3.7   | 2.2   |
| 206691_s_at | NM_006849 | PDIA2    | 64714 | 9.3   | 10.7  | 5.0   | 3.7   | 1.0   |
| 206692_at   | NM_002241 | KCNJ10   | 3766  | 1.5   | 1.7   | 3.3   | 2.6   | 3.1   |
| 206693_at   | NM_000880 | IL7      | 3574  | 2.7   | 0.5   | 3.7   | 0.5   | 0.4   |
| 206694_at   | NM_006229 | PNLIPRP1 | 5407  | 3.8   | 5.8   | 1.6   | 5.0   | 2.0   |
| 206695_x_at | NM_003423 | ZNF43    | 7594  | 104.5 | 60.7  | 105.5 | 84.7  | 72.9  |
| 206696_at   | NM_000273 | GPR143   | 4935  | 4.1   | 1.6   | 2.0   | 6.7   | 3.9   |
| 206697_s_at | NM_005143 | HP       | 3240  | 29.2  | 27.1  | 18.3  | 11.2  | 27.0  |
| 206698_at   | NM_021083 | XK       | 7504  | 2.1   | 2.2   | 6.1   | 0.3   | 1.3   |
| 206699_x_at | NM_002517 | NPAS1    | 4861  | 2.0   | 1.1   | 1.3   | 1.3   | 1.4   |
| 206700_s_at | NM_004653 | KDM5D    | 8284  | 111.0 | 85.6  | 118.3 | 98.0  | 85.3  |
| 206701_x_at | NM_003991 | EDNRB    | 1910  | 3.9   | 1.3   | 3.5   | 0.4   | 2.8   |
| 206702_at   | NM_000459 | TEK      | 7010  | 0.9   | 0.7   | 1.4   | 2.0   | 0.3   |
| 206703_at   | NM_000747 | CHRNA1   | 1140  | 7.8   | 10.4  | 9.7   | 12.8  | 6.0   |
| 206704_at   | NM_000084 | CLCN5    | 1184  | 24.9  | 18.1  | 18.2  | 10.8  | 7.7   |
| 206705_at   | NM_003322 | TULP1    | 7287  | 3.8   | 1.8   | 2.0   | 4.8   | 1.5   |
| 206706_at   | NM_002527 | NTF3     | 4908  | 8.5   | 1.5   | 3.2   | 1.5   | 6.4   |
| 206707_x_at | NM_015864 | FAM65B   | 9750  | 36.4  | 22.6  | 33.4  | 36.2  | 36.5  |
| 206708_at   | NM_002158 | FOXN2    | 3344  | 8.8   | 7.3   | 6.8   | 4.3   | 12.0  |
| 206709_x_at | NM_005309 | GPT      | 2875  | 12.6  | 4.6   | 10.5  | 12.6  | 5.9   |
| 206710_s_at | NM_012307 | EPB41L3  | 23136 | 0.5   | 0.4   | 0.3   | 1.0   | 0.2   |
| 206711_at   | NM_004709 | TMEM257  | 9142  | 1.2   | 0.4   | 1.1   | 3.9   | 0.4   |
| 206712_at   | NM_024719 | GRTP1    | 79774 | 1.0   | 1.1   | 2.2   | 0.7   | 0.6   |
| 206713_at   | NM_014917 | NTNG1    | 22854 | 9.1   | 3.3   | 13.9  | 10.9  | 4.8   |
| 206714_at   | NM_001141 | ALOX15B  | 247   | 11.2  | 9.6   | 2.2   | 7.4   | 1.5   |
| 206715_at   | NM_012252 | TFEC     | 22797 | 0.2   | 2.9   | 4.6   | 0.8   | 0.3   |
| 206716_at   | NM_003361 | UMOD     | 7369  | 0.9   | 9.3   | 1.6   | 0.9   | 1.4   |
| 206717_at   | NM_002472 | MYH8     | 4626  | 7.2   | 0.5   | 3.6   | 5.7   | 3.0   |
| 206718_at   | NM_002315 | LMO1     | 4004  | 1.7   | 6.7   | 9.0   | 4.7   | 1.8   |
| 206719_at   | NM_012451 | SYNGR4   | 23546 | 18.8  | 15.4  | 13.7  | 13.9  | 3.7   |
| 206720_at   | NM_002410 | MGAT5    | 4249  | 7.7   | 1.0   | 0.8   | 1.0   | 3.0   |
| 206721_at   | NM_021179 | CCDC181  | 57821 | 3.7   | 2.7   | 5.9   | 1.3   | 1.9   |
| 206722_s_at | NM_004720 | LPAR2    | 9170  | 48.5  | 53.8  | 54.4  | 48.8  | 44.4  |
| 206723_s_at | AF011466  | LPAR2    | 9170  | 57.7  | 65.3  | 83.1  | 45.7  | 52.5  |
| 206724_at   | NM_003655 | CBX4     | 8535  | 168.7 | 139.1 | 143.8 | 151.9 | 99.5  |
| 206725_x_at | NM_006128 | BMP1     | 649   | 1.5   | 1.0   | 1.6   | 2.7   | 2.1   |
| 206726_at   | NM_014485 | HPGDS    | 27306 | 7.4   | 0.5   | 1.4   | 2.7   | 5.7   |
| 206727_at   | K02766    | C9       | 735   | 0.3   | 0.2   | 0.5   | 1.3   | 2.6   |

|             |           |                            |       |       |       |       |       |      |
|-------------|-----------|----------------------------|-------|-------|-------|-------|-------|------|
| 206728_at   | NM_014693 | ECE2                       | 9718  | 1.4   | 8.5   | 1.3   | 1.9   | 6.9  |
| 206729_at   | NM_001243 | TNFRSF8                    | 943   | 15.4  | 9.1   | 8.4   | 3.8   | 6.6  |
| 206730_at   | NM_007325 | GRIA3                      | 2892  | 0.4   | 0.5   | 0.8   | 0.2   | 0.5  |
| 206731_at   | NM_014927 | CNKSR2                     | 22866 | 0.7   | 3.9   | 4.7   | 0.9   | 4.6  |
| 206732_at   | NM_014926 | SLITRK3                    | 22865 | 32.0  | 25.4  | 29.4  | 23.5  | 24.6 |
| 206733_at   | NM_003323 | TULP2                      | 7288  | 5.3   | 2.6   | 1.7   | 4.5   | 5.2  |
| 206734_at   | NM_003772 | JRKL                       | 8690  | 29.6  | 14.7  | 29.3  | 19.7  | 16.0 |
| 206735_at   | NM_000744 | CHRNA4                     | 1137  | 4.7   | 2.3   | 2.9   | 2.2   | 3.8  |
| 206736_x_at | L35901    | CHRNA4                     | 1137  | 0.7   | 1.3   | 0.6   | 3.9   | 0.9  |
| 206737_at   | NM_004626 | WNT11                      | 7481  | 0.9   | 1.1   | 0.8   | 1.6   | 0.6  |
| 206738_at   | NM_001646 | APOC2 /// AI344 /// 346 /  |       | 22.7  | 12.5  | 20.7  | 15.2  | 7.2  |
| 206739_at   | NM_018953 | HOXC5                      | 3222  | 8.6   | 20.6  | 16.0  | 5.8   | 2.1  |
| 206740_x_at | NM_003176 | SYCP1                      | 6847  | 7.4   | 7.1   | 6.7   | 6.6   | 0.4  |
| 206741_at   | NM_015931 | SSUH2                      | 51066 | 1.4   | 3.5   | 2.8   | 2.5   | 2.2  |
| 206742_at   | NM_004469 | FIGF /// PIR-I2277 /// 100 |       | 8.0   | 6.4   | 2.1   | 0.8   | 1.5  |
| 206743_s_at | NM_001671 | ASGR1                      | 432   | 0.4   | 0.9   | 0.4   | 0.5   | 0.8  |
| 206744_s_at | NM_014242 | ZMYM5                      | 9205  | 11.5  | 7.6   | 12.2  | 8.6   | 4.2  |
| 206745_at   | NM_014212 | HOXC11                     | 3227  | 16.0  | 10.7  | 18.2  | 11.6  | 10.2 |
| 206746_at   | NM_001195 | BFSP1                      | 631   | 9.5   | 1.6   | 1.5   | 1.5   | 1.3  |
| 206747_at   | NM_014696 | GPRIN2                     | 9721  | 62.2  | 63.5  | 54.9  | 61.9  | 36.4 |
| 206748_s_at | NM_003971 | SPAG9                      | 9043  | 26.7  | 14.8  | 16.7  | 18.6  | 22.8 |
| 206749_at   | NM_001764 | CD1B                       | 910   | 2.0   | 0.8   | 4.0   | 1.6   | 2.4  |
| 206750_at   | NM_002360 | MAFK                       | 7975  | 10.3  | 11.5  | 15.3  | 7.7   | 11.7 |
| 206751_s_at | NM_004845 | PCYT1B                     | 9468  | 0.8   | 0.6   | 0.2   | 3.2   | 2.2  |
| 206752_s_at | NM_004402 | DFFB                       | 1677  | 38.5  | 31.1  | 52.7  | 28.7  | 39.6 |
| 206753_at   | AF086735  | RDH16                      | 8608  | 2.6   | 2.0   | 2.4   | 1.7   | 6.3  |
| 206754_s_at | NM_000767 | CYP2B6 /// C1555 /// 155   |       | 0.8   | 0.7   | 4.7   | 1.1   | 1.4  |
| 206755_at   | NM_000767 | CYP2B6                     | 1555  | 1.6   | 6.0   | 16.7  | 6.9   | 6.3  |
| 206756_at   | NM_019886 | CHST7                      | 56548 | 1.5   | 0.6   | 2.0   | 5.7   | 1.5  |
| 206757_at   | NM_001083 | PDE5A                      | 8654  | 3.9   | 1.8   | 7.5   | 0.8   | 1.3  |
| 206758_at   | NM_001956 | EDN2                       | 1907  | 15.5  | 7.8   | 19.4  | 16.3  | 1.0  |
| 206759_at   | NM_002002 | FCER2                      | 2208  | 0.9   | 0.5   | 1.4   | 0.8   | 3.1  |
| 206760_s_at | NM_002002 | FCER2                      | 2208  | 0.8   | 0.6   | 0.6   | 0.5   | 0.5  |
| 206761_at   | NM_005816 | CD96                       | 10225 | 2.0   | 1.3   | 0.8   | 0.6   | 1.7  |
| 206762_at   | NM_002234 | KCNA5                      | 3741  | 0.5   | 1.0   | 1.7   | 1.1   | 0.6  |
| 206763_at   | NM_003602 | FKBP6                      | 8468  | 6.7   | 5.9   | 7.8   | 4.8   | 7.9  |
| 206764_x_at | NM_023075 | MPPE1                      | 65258 | 24.4  | 26.8  | 22.0  | 30.9  | 19.1 |
| 206765_at   | AF153820  | KCNJ2                      | 3759  | 7.4   | 7.5   | 4.9   | 7.2   | 5.3  |
| 206766_at   | AF112345  | ITGA10                     | 8515  | 22.8  | 12.3  | 11.8  | 19.4  | 9.7  |
| 206767_at   | NM_014483 | RBMS3                      | 27303 | 23.6  | 12.9  | 14.4  | 7.2   | 7.1  |
| 206768_at   | NM_005061 | RPL3L                      | 6123  | 5.2   | 1.2   | 0.8   | 5.4   | 6.0  |
| 206769_at   | NM_004202 | TMSB4Y                     | 9087  | 2.7   | 1.4   | 1.8   | 1.7   | 7.2  |
| 206770_s_at | NM_012243 | SLC35A3                    | 23443 | 119.2 | 106.8 | 143.8 | 113.3 | 95.3 |
| 206771_at   | NM_006953 | UPK3A                      | 7380  | 17.1  | 29.0  | 20.8  | 27.0  | 17.7 |
| 206772_at   | NM_005048 | PTH2R                      | 5746  | 1.3   | 8.4   | 2.6   | 0.5   | 2.6  |
| 206773_at   | NM_002347 | LY6H                       | 4062  | 4.6   | 8.6   | 8.0   | 9.1   | 3.3  |
| 206774_at   | NM_014907 | FRMPD1                     | 22844 | 12.9  | 13.2  | 14.5  | 14.7  | 7.4  |
| 206775_at   | NM_001081 | CUBN                       | 8029  | 1.9   | 0.6   | 4.4   | 0.9   | 1.4  |
| 206776_x_at | NM_001612 | ACRV1                      | 56    | 14.6  | 11.4  | 17.4  | 10.8  | 9.6  |
| 206777_s_at | NM_000496 | CRYBB2 /// C1415 /// 141   |       | 30.5  | 18.3  | 30.9  | 29.5  | 20.5 |
| 206778_at   | NM_000496 | CRYBB2                     | 1415  | 3.4   | 2.6   | 2.6   | 1.3   | 0.9  |
| 206779_s_at | NM_004043 | ASMT                       | 438   | 0.5   | 1.5   | 4.1   | 1.4   | 4.0  |
| 206780_at   | NM_000818 | GAD2                       | 2572  | 7.3   | 5.9   | 10.2  | 10.9  | 3.2  |

|             |           |                           |       |        |        |        |        |        |
|-------------|-----------|---------------------------|-------|--------|--------|--------|--------|--------|
| 206781_at   | NM_005528 | DNAJC4                    | 3338  | 13.9   | 16.0   | 11.4   | 6.8    | 1.7    |
| 206782_s_at | NM_005528 | DNAJC4                    | 3338  | 60.1   | 64.6   | 56.9   | 66.8   | 50.4   |
| 206783_at   | BF510715  | FGF4                      | 2249  | 17.0   | 6.4    | 15.5   | 16.9   | 0.8    |
| 206784_at   | NM_001169 | AQP8                      | 343   | 10.9   | 5.0    | 3.2    | 4.6    | 2.1    |
| 206785_s_at | NM_002260 | KLRC1 /// KLI3821 /// 382 |       | 0.5    | 0.2    | 0.4    | 2.5    | 0.8    |
| 206786_at   | NM_000200 | HTN3                      | 3347  | 0.8    | 0.4    | 0.4    | 0.2    | 0.3    |
| 206787_at   | NM_001726 | BRDT                      | 676   | 11.8   | 5.3    | 9.5    | 7.5    | 5.2    |
| 206788_s_at | AF294326  | CBFB                      | 865   | 85.1   | 75.9   | 88.3   | 68.9   | 67.8   |
| 206789_s_at | NM_002697 | POU2F1                    | 5451  | 40.4   | 37.0   | 37.2   | 32.9   | 25.5   |
| 206790_s_at | NM_004545 | NDUFB1                    | 4707  | 1432.6 | 1295.2 | 1470.1 | 1400.7 | 1153.9 |
| 206791_s_at | BF511742  | LOC729966 / 5143 /// 729  |       | 19.9   | 13.5   | 13.1   | 14.9   | 18.5   |
| 206792_x_at | NM_000923 | LOC729966 / 5143 /// 729  |       | 159.4  | 106.5  | 130.3  | 123.8  | 99.1   |
| 206793_at   | NM_002686 | PNMT                      | 5409  | 14.8   | 16.5   | 7.2    | 20.2   | 6.8    |
| 206794_at   | NM_005235 | ERBB4                     | 2066  | 5.3    | 3.9    | 4.6    | 3.7    | 3.7    |
| 206795_at   | NM_004101 | F2RL2                     | 2151  | 0.3    | 9.0    | 0.5    | 0.8    | 0.6    |
| 206796_at   | NM_003882 | WISP1                     | 8840  | 1.1    | 0.8    | 4.7    | 1.6    | 3.3    |
| 206797_at   | NM_000015 | NAT2                      | 10    | 8.1    | 0.9    | 2.7    | 1.5    | 3.1    |
| 206798_x_at | NM_005106 | DLEC1                     | 9940  | 14.3   | 2.5    | 24.8   | 2.3    | 6.8    |
| 206799_at   | NM_006551 | SCGB1D2                   | 10647 | 0.8    | 0.9    | 0.7    | 0.7    | 0.6    |
| 206800_at   | NM_005957 | MTHFR                     | 4524  | 5.4    | 3.8    | 3.3    | 5.9    | 5.1    |
| 206801_at   | NM_002521 | NPPB                      | 4879  | 1.7    | 0.4    | 1.9    | 7.7    | 3.7    |
| 206802_at   | NM_016734 | PAX5                      | 5079  | 2.9    | 1.1    | 2.2    | 0.7    | 0.7    |
| 206803_at   | NM_024411 | PDYN                      | 5173  | 1.8    | 1.1    | 0.5    | 1.7    | 0.8    |
| 206804_at   | NM_000073 | CD3G                      | 917   | 2.4    | 0.9    | 2.2    | 3.5    | 0.8    |
| 206805_at   | NM_006080 | SEMA3A                    | 10371 | 11.3   | 2.7    | 7.4    | 2.3    | 5.4    |
| 206806_at   | NM_004717 | DGKI                      | 9162  | 4.6    | 2.5    | 7.3    | 3.8    | 6.0    |
| 206807_s_at | NM_017482 | ADD2                      | 119   | 29.9   | 2.5    | 3.9    | 10.6   | 6.1    |
| 206808_at   | NM_005758 | HNRNPA3P1                 | 10151 | 8.0    | 3.0    | 6.4    | 4.1    | 3.8    |
| 206809_s_at | NM_005758 | HNRNPA3 //, 10151 /// 22  |       | 111.3  | 78.6   | 119.2  | 97.7   | 82.9   |
| 206810_at   | NM_016264 | LOC1010601:51710 /// 10   |       | 4.6    | 7.3    | 0.7    | 1.8    | 5.2    |
| 206811_at   | NM_001115 | ADCY8                     | 114   | 6.5    | 1.2    | 6.0    | 1.3    | 1.4    |
| 206812_at   | NM_000025 | ADRB3                     | 155   | 1.2    | 0.9    | 0.9    | 1.8    | 2.3    |
| 206813_at   | NM_001330 | CTF1                      | 1489  | 8.5    | 1.8    | 2.0    | 2.4    | 5.2    |
| 206814_at   | NM_002506 | NGF                       | 4803  | 2.0    | 1.3    | 2.0    | 1.6    | 1.0    |
| 206815_at   | NM_012436 | SPAG8                     | 26206 | 1.4    | 0.7    | 1.0    | 1.3    | 1.0    |
| 206816_s_at | NM_012436 | SPAG8                     | 26206 | 8.2    | 6.5    | 9.7    | 6.3    | 5.9    |
| 206817_x_at | NM_007185 | CELF3                     | 11189 | 2.4    | 2.1    | 1.8    | 1.4    | 3.0    |
| 206818_s_at | NM_017649 | CNNM2                     | 54805 | 40.4   | 30.3   | 26.1   | 30.3   | 28.2   |
| 206819_at   | NM_014549 | POM121L9P                 | 29774 | 10.2   | 6.7    | 8.9    | 2.6    | 6.8    |
| 206820_at   | AF015042  | AGFG2                     | 3268  | 1.0    | 1.6    | 1.2    | 1.2    | 1.8    |
| 206821_x_at | NM_006076 | AGFG2                     | 3268  | 19.6   | 22.6   | 24.5   | 18.5   | 22.3   |
| 206822_s_at | NM_015478 | L3MBTL1                   | 26013 | 1.1    | 0.8    | 1.2    | 0.3    | 1.1    |
| 206823_at   | NM_015478 | L3MBTL1                   | 26013 | 1.4    | 2.0    | 3.3    | 2.2    | 3.4    |
| 206824_at   | NM_016280 | CES1P1                    | 51716 | 5.6    | 1.5    | 1.4    | 0.5    | 1.7    |
| 206825_at   | NM_000916 | OXTR                      | 5021  | 14.8   | 2.9    | 10.3   | 10.8   | 4.3    |
| 206826_at   | NM_002677 | PMP2                      | 5375  | 2.4    | 1.5    | 6.0    | 4.4    | 2.5    |
| 206827_s_at | NM_014274 | TRPV6                     | 55503 | 23.5   | 27.7   | 20.0   | 28.8   | 24.1   |
| 206828_at   | NM_003328 | TXK                       | 7294  | 3.8    | 0.4    | 3.9    | 5.0    | 0.6    |
| 206829_x_at | NM_025189 | ZNF430                    | 80264 | 66.8   | 37.0   | 57.5   | 43.4   | 57.2   |
| 206830_at   | NM_022058 | SLC4A10                   | 57282 | 3.4    | 2.6    | 3.8    | 3.4    | 0.3    |
| 206831_s_at | NM_001669 | ARSD                      | 414   | 16.6   | 20.0   | 22.2   | 24.4   | 14.5   |
| 206832_s_at | NM_004186 | SEMA3F                    | 6405  | 3.9    | 6.6    | 7.8    | 10.4   | 5.9    |
| 206833_s_at | NM_001108 | ACYP2 /// LC98 /// 10192  |       | 89.4   | 84.8   | 78.2   | 84.9   | 62.6   |



|             |           |          |        |       |       |       |       |       |
|-------------|-----------|----------|--------|-------|-------|-------|-------|-------|
| 206834_at   | NM_000519 | HBD      | 3045   | 12.8  | 14.4  | 13.7  | 3.2   | 10.6  |
| 206835_at   | NM_003154 | STATH    | 6779   | 0.5   | 0.6   | 0.4   | 4.5   | 3.2   |
| 206836_at   | NM_001044 | SLC6A3   | 6531   | 7.3   | 1.6   | 1.6   | 14.4  | 1.6   |
| 206837_at   | NM_006982 | ALX1     | 8092   | 1.6   | 1.2   | 0.8   | 1.5   | 1.3   |
| 206838_at   | NM_005149 | TBX19    | 9095   | 5.3   | 2.8   | 9.2   | 2.5   | 5.3   |
| 206839_at   | NM_015370 | C22orf31 | 25770  | 7.6   | 3.1   | 9.9   | 6.6   | 7.9   |
| 206840_at   | NM_001133 | AFM      | 173    | 7.0   | 1.3   | 5.5   | 2.3   | 1.0   |
| 206841_at   | NM_006205 | PDE6H    | 5149   | 0.6   | 0.2   | 2.1   | 1.2   | 0.5   |
| 206842_at   | NM_004979 | KCND1    | 3750   | 0.9   | 1.0   | 2.2   | 0.8   | 0.8   |
| 206843_at   | NM_001886 | CRYBA4   | 1413   | 0.9   | 1.1   | 0.8   | 0.8   | 1.2   |
| 206844_at   | NM_003837 | FBP2     | 8789   | 1.3   | 0.4   | 0.6   | 0.4   | 0.3   |
| 206845_s_at | NM_014771 | RNF40    | 9810   | 134.9 | 103.6 | 127.3 | 113.2 | 117.0 |
| 206846_s_at | NM_006044 | HDAC6    | 10013  | 101.5 | 97.0  | 80.3  | 90.0  | 66.6  |
| 206847_s_at | AF026397  | HOXA7    | 3204   | 9.0   | 3.2   | 1.3   | 1.1   | 1.4   |
| 206848_at   | NM_006896 | COX20    | 116228 | 34.5  | 25.8  | 34.7  | 22.9  | 26.1  |
| 206849_at   | NM_000816 | GABRG2   | 2566   | 3.2   | 3.3   | 11.9  | 8.4   | 4.1   |
| 206850_at   | NM_006477 | RASL10A  | 10633  | 2.4   | 3.8   | 2.5   | 2.6   | 2.4   |
| 206851_at   | NM_002935 | RNASE3   | 6037   | 2.3   | 0.8   | 1.2   | 1.4   | 1.1   |
| 206852_at   | NM_004440 | EPHA7    | 2045   | 3.0   | 6.4   | 12.6  | 12.6  | 5.1   |
| 206853_s_at | AL121964  | MAP3K7   | 6885   | 4.8   | 11.1  | 12.6  | 11.2  | 10.6  |
| 206854_s_at | NM_003188 | MAP3K7   | 6885   | 28.6  | 24.5  | 32.5  | 26.7  | 22.9  |
| 206855_s_at | NM_003773 | HYAL2    | 8692   | 183.4 | 143.2 | 170.6 | 160.0 | 133.0 |
| 206856_at   | NM_006840 | LILRB5   | 10990  | 0.7   | 2.6   | 2.9   | 1.9   | 4.1   |
| 206857_s_at | NM_004116 | FKBP1B   | 2281   | 0.8   | 2.2   | 2.2   | 1.0   | 2.3   |
| 206858_s_at | NM_004503 | HOXC6    | 3223   | 287.0 | 229.5 | 274.5 | 223.1 | 182.0 |
| 206859_s_at | NM_002571 | PAEP     | 5047   | 1.3   | 1.2   | 1.5   | 0.9   | 1.2   |
| 206860_s_at | NM_019005 | MIOS     | 54468  | 78.0  | 72.6  | 101.1 | 82.9  | 67.6  |
| 206861_s_at | NM_003663 | CGGBP1   | 8545   | 204.8 | 143.3 | 228.5 | 188.0 | 150.1 |
| 206862_at   | NM_004876 | ZNF254   | 9534   | 15.3  | 6.4   | 16.2  | 9.5   | 10.3  |
| 206863_x_at | U76376    | -        | -      | 5.9   | 1.2   | 5.9   | 3.9   | 2.0   |
| 206864_s_at | NM_003806 | HRK      | 8739   | 1.1   | 5.4   | 0.9   | 0.3   | 0.2   |
| 206865_at   | U76376    | HRK      | 8739   | 0.8   | 0.8   | 0.9   | 0.7   | 3.7   |
| 206866_at   | NM_001794 | CDH4     | 1002   | 0.6   | 4.7   | 1.0   | 0.8   | 1.0   |
| 206867_at   | NM_001486 | GCKR     | 2646   | 3.7   | 1.8   | 2.9   | 4.3   | 1.8   |
| 206868_at   | NM_014725 | STARD8   | 9754   | 18.7  | 2.7   | 12.9  | 14.9  | 3.9   |
| 206869_at   | NM_001267 | CHAD     | 1101   | 0.9   | 0.7   | 2.9   | 2.0   | 1.3   |
| 206870_at   | NM_005036 | PPARA    | 5465   | 8.1   | 6.7   | 4.2   | 0.4   | 8.0   |
| 206871_at   | NM_001972 | ELANE    | 1991   | 0.3   | 3.3   | 0.9   | 0.8   | 0.6   |
| 206872_at   | NM_005074 | SLC17A1  | 6568   | 10.0  | 8.2   | 0.6   | 2.5   | 5.9   |
| 206873_at   | NM_001215 | CA6      | 765    | 14.5  | 2.1   | 1.6   | 3.6   | 9.6   |
| 206874_s_at | AL138761  | SLK      | 9748   | 29.0  | 24.3  | 20.9  | 18.9  | 15.6  |
| 206875_s_at | NM_014720 | SLK      | 9748   | 72.1  | 61.5  | 91.2  | 59.6  | 67.8  |
| 206876_at   | AL121948  | SIM1     | 6492   | 4.8   | 0.8   | 8.1   | 0.3   | 2.1   |
| 206877_at   | NM_002357 | MXD1     | 4084   | 0.5   | 1.0   | 4.6   | 2.3   | 0.7   |
| 206878_at   | NM_001917 | DAO      | 1610   | 14.4  | 11.6  | 15.0  | 7.3   | 11.0  |
| 206879_s_at | NM_013982 | NRG2     | 9542   | 1.6   | 2.6   | 7.0   | 2.3   | 1.5   |
| 206880_at   | NM_005446 | P2RX6    | 9127   | 18.3  | 5.1   | 19.2  | 8.8   | 2.0   |
| 206881_s_at | NM_006865 | LILRA3   | 11026  | 0.6   | 1.2   | 1.8   | 1.2   | 0.4   |
| 206882_at   | NM_005071 | SLC1A6   | 6511   | 4.8   | 2.5   | 1.8   | 2.0   | 1.0   |
| 206883_x_at | NM_000174 | GP9      | 2815   | 7.7   | 1.7   | 2.8   | 2.4   | 2.5   |
| 206884_s_at | NM_003843 | SCEL     | 8796   | 0.3   | 0.5   | 2.7   | 0.7   | 0.1   |
| 206885_x_at | NM_022559 | GH1      | 2688   | 4.6   | 8.6   | 8.1   | 1.6   | 10.0  |
| 206886_x_at | NM_022560 | GH1      | 2688   | 1.1   | 1.1   | 5.7   | 1.2   | 5.4   |

|             |           |                          |       |       |       |       |       |       |
|-------------|-----------|--------------------------|-------|-------|-------|-------|-------|-------|
| 206887_at   | NM_001296 | ACKR2                    | 1238  | 13.8  | 10.7  | 10.4  | 6.5   | 4.7   |
| 206888_s_at | U82532    | ARHGDIG                  | 398   | 16.8  | 18.1  | 17.2  | 22.6  | 16.5  |
| 206889_at   | NM_001176 | PDIA2                    | 64714 | 0.8   | 1.2   | 0.9   | 2.7   | 1.3   |
| 206890_at   | NM_005535 | IL12RB1                  | 3594  | 16.8  | 11.5  | 9.7   | 9.5   | 6.7   |
| 206891_at   | NM_001104 | ACTN3                    | 89    | 8.3   | 3.8   | 7.4   | 7.5   | 6.2   |
| 206892_at   | NM_020547 | AMHR2                    | 269   | 1.0   | 4.0   | 3.2   | 4.8   | 1.3   |
| 206893_at   | NM_002968 | SALL1                    | 6299  | 0.1   | 1.5   | 1.3   | 0.2   | 2.2   |
| 206894_at   | NM_000482 | APOA4                    | 337   | 1.8   | 1.8   | 2.9   | 8.6   | 1.1   |
| 206895_at   | NM_002711 | PPP1R3A                  | 5506  | 0.5   | 0.7   | 3.9   | 0.3   | 0.2   |
| 206896_s_at | NM_005145 | GNG7                     | 2788  | 19.1  | 10.0  | 24.5  | 33.5  | 20.3  |
| 206897_at   | NM_003785 | PAGE1                    | 8712  | 11.5  | 7.7   | 9.0   | 10.6  | 11.2  |
| 206898_at   | NM_021153 | CDH19                    | 28513 | 2.3   | 0.2   | 3.3   | 0.8   | 1.1   |
| 206899_at   | NM_012344 | NTSR2                    | 23620 | 0.6   | 0.4   | 0.4   | 0.4   | 0.3   |
| 206900_x_at | NM_021047 | ZNF253                   | 56242 | 59.5  | 30.7  | 60.2  | 47.0  | 43.4  |
| 206901_at   | NM_024323 | C19orf57                 | 79173 | 26.4  | 8.1   | 3.1   | 12.5  | 14.4  |
| 206902_s_at | NM_005728 | EXOG                     | 9941  | 13.8  | 9.7   | 22.2  | 15.3  | 14.8  |
| 206903_at   | NM_005728 | EXOG                     | 9941  | 1.4   | 1.5   | 1.1   | 3.9   | 1.9   |
| 206904_at   | M55683    | MATN1                    | 4146  | 8.6   | 1.3   | 2.5   | 3.2   | 1.6   |
| 206905_s_at | NM_002379 | MATN1                    | 4146  | 1.7   | 4.9   | 1.8   | 3.3   | 2.6   |
| 206906_at   | NM_003259 | ICAM5                    | 7087  | 0.5   | 0.3   | 3.7   | 1.2   | 3.7   |
| 206907_at   | NM_003811 | TNFSF9                   | 8744  | 18.8  | 17.2  | 37.0  | 19.7  | 17.9  |
| 206908_s_at | NM_005602 | CLDN11                   | 5010  | 18.5  | 8.0   | 9.6   | 8.2   | 8.1   |
| 206909_at   | AF068863  | -                        | -     | 1.9   | 1.0   | 4.5   | 0.4   | 0.3   |
| 206910_x_at | NM_005666 | CFHR2                    | 3080  | 4.4   | 8.1   | 5.3   | 6.0   | 3.0   |
| 206911_at   | NM_005082 | TRIM25                   | 7706  | 40.3  | 35.5  | 46.8  | 36.5  | 28.6  |
| 206912_at   | NM_004473 | FOXE1                    | 2304  | 7.1   | 0.5   | 2.2   | 0.8   | 0.4   |
| 206913_at   | NM_001701 | BAAT                     | 570   | 6.7   | 4.1   | 16.4  | 8.4   | 3.4   |
| 206914_at   | NM_019604 | CRTAM                    | 56253 | 0.4   | 1.9   | 5.2   | 0.3   | 0.5   |
| 206915_at   | NM_002509 | NKX2-2                   | 4821  | 2.6   | 6.2   | 5.5   | 1.0   | 0.2   |
| 206916_x_at | NM_000353 | TAT                      | 6898  | 8.2   | 5.7   | 4.0   | 15.2  | 7.8   |
| 206917_at   | NM_006572 | GNA13                    | 10672 | 27.5  | 27.0  | 24.7  | 27.1  | 25.9  |
| 206918_s_at | NM_003915 | CPNE1                    | 8904  | 227.0 | 207.3 | 199.7 | 228.9 | 181.3 |
| 206919_at   | NM_021795 | ELK4                     | 2005  | 17.4  | 10.6  | 10.6  | 14.0  | 14.2  |
| 206920_s_at | NM_001499 | GLE1                     | 2733  | 115.0 | 89.9  | 103.9 | 95.8  | 93.5  |
| 206921_at   | NM_001499 | GLE1                     | 2733  | 9.5   | 9.5   | 9.9   | 11.1  | 7.8   |
| 206922_at   | NM_004679 | VCY /// VCY19084 /// 353 |       | 80.8  | 42.8  | 58.9  | 41.3  | 41.1  |
| 206923_at   | NM_002737 | PRKCA                    | 5578  | 0.6   | 1.7   | 1.6   | 3.8   | 3.6   |
| 206924_at   | NM_000641 | IL11                     | 3589  | 1.3   | 0.3   | 2.1   | 2.2   | 1.5   |
| 206925_at   | NM_005668 | ST8SIA4                  | 7903  | 6.1   | 1.2   | 1.3   | 0.9   | 3.7   |
| 206926_s_at | M57765    | IL11                     | 3589  | 3.9   | 2.4   | 2.4   | 4.0   | 2.0   |
| 206927_s_at | NM_000855 | GUCY1A2                  | 2977  | 1.4   | 1.5   | 7.5   | 0.8   | 1.5   |
| 206928_at   | NM_003431 | ZNF124                   | 7678  | 46.8  | 33.0  | 57.4  | 39.5  | 41.8  |
| 206929_s_at | NM_005597 | NFIC                     | 4782  | 62.5  | 40.3  | 72.6  | 56.7  | 49.1  |
| 206930_at   | NM_005838 | GLYAT                    | 10249 | 12.2  | 4.7   | 8.3   | 8.6   | 2.5   |
| 206931_at   | NM_003441 | ZNF141                   | 7700  | 5.0   | 8.9   | 10.2  | 5.7   | 8.8   |
| 206932_at   | NM_003956 | CH25H                    | 9023  | 7.3   | 5.8   | 7.5   | 7.3   | 5.6   |
| 206933_s_at | NM_004285 | H6PD                     | 9563  | 7.4   | 5.7   | 10.1  | 7.6   | 2.7   |
| 206934_at   | NM_006065 | SIRPB1                   | 10326 | 3.1   | 5.4   | 4.9   | 6.8   | 2.8   |
| 206935_at   | NM_002590 | PCDH8                    | 5100  | 0.4   | 2.1   | 0.1   | 0.2   | 0.8   |
| 206936_x_at | NM_022335 | -                        | -     | 78.5  | 63.2  | 92.9  | 74.0  | 59.5  |
| 206937_at   | NM_003126 | SPTA1                    | 6708  | 6.6   | 4.2   | 7.0   | 6.9   | 4.4   |
| 206938_at   | NM_000348 | SRD5A2                   | 6716  | 7.3   | 6.4   | 3.3   | 1.7   | 4.0   |
| 206939_at   | NM_005215 | DCC                      | 1630  | 8.7   | 4.4   | 8.0   | 3.4   | 2.9   |

|             |           |              |        |       |       |       |       |       |
|-------------|-----------|--------------|--------|-------|-------|-------|-------|-------|
| 206940_s_at | NM_006237 | POU4F1       | 5457   | 7.4   | 7.6   | 12.0  | 6.7   | 4.9   |
| 206941_x_at | NM_012431 | SEMA3E       | 9723   | 0.8   | 2.4   | 0.3   | 2.0   | 0.2   |
| 206942_s_at | NM_002674 | PMCH         | 5367   | 11.5  | 8.2   | 16.1  | 8.9   | 10.7  |
| 206943_at   | NM_004612 | TGFBR1       | 7046   | 17.1  | 6.4   | 9.2   | 2.1   | 8.0   |
| 206944_at   | AF007141  | HTR6         | 3362   | 12.9  | 16.1  | 24.8  | 10.4  | 14.7  |
| 206945_at   | NM_002299 | LCT          | 3938   | 17.3  | 10.8  | 7.9   | 11.0  | 7.1   |
| 206946_at   | NM_005477 | HCN4         | 10021  | 8.9   | 3.8   | 9.1   | 7.5   | 0.6   |
| 206947_at   | NM_006057 | B3GALT5      | 10317  | 11.8  | 6.5   | 2.2   | 1.1   | 4.0   |
| 206948_at   | NM_006656 | NEU3         | 10825  | 19.2  | 13.3  | 27.9  | 10.3  | 5.6   |
| 206949_s_at | NM_014328 | RUSC1        | 23623  | 205.9 | 177.6 | 214.2 | 185.2 | 155.9 |
| 206950_at   | NM_002977 | SCN9A        | 6335   | 0.3   | 1.0   | 0.4   | 0.8   | 4.2   |
| 206951_at   | NM_003545 | HIST1H4E     | 8367   | 14.9  | 18.2  | 17.6  | 19.2  | 16.6  |
| 206952_at   | NM_000151 | G6PC         | 2538   | 0.7   | 0.3   | 0.3   | 0.3   | 0.3   |
| 206953_s_at | NM_012302 | LOC1019274.2 | 23266  | 2.3   | 3.4   | 5.3   | 0.6   | 2.3   |
| 206954_at   | NM_015855 | WT1-AS       | 51352  | 6.8   | 4.2   | 8.6   | 6.4   | 0.4   |
| 206955_at   | NM_001170 | AQP7         | 1005   | 3.4   | 1.3   | 2.7   | 1.1   | 4.0   |
| 206956_at   | NM_000711 | BGLAP        | 1124   | 46.3  | 33.2  | 29.5  | 31.8  | 27.7  |
| 206957_at   | NM_016236 | AGXT         | 189    | 1.5   | 1.1   | 4.6   | 6.3   | 2.3   |
| 206958_s_at | AF318575  | UPF3A        | 65110  | 60.2  | 55.4  | 59.8  | 51.0  | 45.6  |
| 206959_s_at | NM_023011 | UPF3A        | 65110  | 6.2   | 11.0  | 15.4  | 12.2  | 7.9   |
| 206960_at   | NM_005296 | LPAR4        | 2846   | 3.5   | 3.9   | 6.3   | 3.9   | 3.9   |
| 206961_s_at | NM_004275 | MED20        | 9477   | 31.7  | 22.3  | 29.6  | 22.6  | 19.1  |
| 206962_x_at | NM_014120 | -            | -      | 5.7   | 1.4   | 8.8   | 2.3   | 2.4   |
| 206963_s_at | NM_016347 | NAT8         | 514    | 1.3   | 1.9   | 2.7   | 0.7   | 5.1   |
| 206964_at   | NM_016347 | NAT8B        | 51471  | 0.5   | 0.7   | 0.5   | 0.5   | 1.0   |
| 206965_at   | NM_016285 | KLF12        | 11278  | 2.2   | 0.3   | 0.2   | 0.2   | 3.5   |
| 206966_s_at | NM_016285 | KLF12        | 11278  | 20.5  | 11.8  | 6.6   | 6.8   | 10.1  |
| 206967_at   | NM_001240 | CCNT1        | 904    | 11.3  | 9.8   | 5.3   | 19.4  | 13.8  |
| 206968_s_at | NM_006165 | NFRKB        | 4798   | 71.9  | 67.4  | 73.1  | 69.4  | 54.7  |
| 206969_at   | NM_021013 | KRT34        | 100    | 0.5   | 0.6   | 0.9   | 0.8   | 0.8   |
| 206970_at   | NM_005076 | CNTN2        | 6900   | 4.3   | 1.2   | 1.2   | 0.8   | 1.0   |
| 206971_at   | NM_007369 | GPR161       | 23432  | 15.6  | 10.3  | 12.4  | 9.5   | 2.5   |
| 206972_s_at | NM_007369 | GPR161       | 23432  | 5.5   | 7.2   | 11.7  | 9.8   | 4.6   |
| 206973_at   | NM_003625 | PPFIA2       | 8499   | 59.4  | 56.0  | 56.8  | 53.0  | 52.9  |
| 206974_at   | NM_006564 | CXCR6        | 10663  | 4.7   | 5.8   | 8.1   | 2.5   | 1.0   |
| 206975_at   | NM_000595 | LTA          | 4049   | 1.5   | 1.2   | 2.0   | 1.3   | 0.9   |
| 206976_s_at | NM_006644 | HSPH1        | 10808  | 291.9 | 238.8 | 312.5 | 251.2 | 284.9 |
| 206977_at   | NM_000315 | PTH          | 5741   | 0.4   | 0.8   | 0.3   | 2.0   | 0.4   |
| 206978_at   | NM_000647 | CCR2         | 729230 | 1.3   | 0.9   | 1.4   | 5.3   | 0.7   |
| 206979_at   | NM_000066 | C8B          | 732    | 2.4   | 9.9   | 10.7  | 4.6   | 9.9   |
| 206980_s_at | NM_001459 | FLT3LG       | 2323   | 1.8   | 1.3   | 1.7   | 1.0   | 0.4   |
| 206981_at   | NM_000334 | SCN4A        | 6329   | 1.9   | 1.4   | 3.3   | 1.7   | 0.9   |
| 206982_at   | NM_005208 | CRYBA1       | 1411   | 0.4   | 1.7   | 0.3   | 0.2   | 0.5   |
| 206983_at   | NM_004367 | CCR6         | 1235   | 3.0   | 0.9   | 3.4   | 3.6   | 2.6   |
| 206984_s_at | NM_002930 | RIT2         | 6014   | 1.9   | 3.0   | 3.9   | 0.3   | 1.9   |
| 206985_at   | NM_000197 | HSD17B3      | 3293   | 2.1   | 7.4   | 4.8   | 8.6   | 1.6   |
| 206986_at   | AB007422  | FGF18        | 8817   | 4.9   | 5.3   | 0.5   | 9.2   | 0.3   |
| 206987_x_at | NM_003862 | FGF18        | 8817   | 2.2   | 0.7   | 1.0   | 0.4   | 4.6   |
| 206988_at   | NM_005624 | CCL25        | 6370   | 1.5   | 5.3   | 3.4   | 4.6   | 1.7   |
| 206989_s_at | NM_004719 | SCAF11       | 9169   | 147.6 | 92.7  | 121.1 | 119.0 | 111.2 |
| 206990_at   | NM_003285 | TNR          | 7143   | 7.3   | 4.5   | 7.5   | 5.2   | 7.4   |
| 206991_s_at | NM_000579 | CCR5         | 1234   | 5.6   | 13.7  | 5.9   | 2.7   | 2.4   |
| 206992_s_at | NM_015684 | ATP5S        | 27109  | 116.6 | 121.0 | 141.9 | 142.2 | 91.4  |

|             |           |                          |       |       |       |       |       |       |
|-------------|-----------|--------------------------|-------|-------|-------|-------|-------|-------|
| 206993_at   | NM_015684 | ATP5S                    | 27109 | 36.8  | 38.0  | 43.0  | 25.7  | 29.3  |
| 206994_at   | NM_001899 | CST4                     | 1472  | 25.7  | 17.5  | 20.4  | 15.5  | 14.6  |
| 206995_x_at | NM_003693 | SCARF1                   | 8578  | 6.0   | 5.0   | 8.5   | 3.5   | 0.6   |
| 206996_x_at | NM_000723 | CACNB1                   | 782   | 4.0   | 6.8   | 9.6   | 8.2   | 5.8   |
| 206997_s_at | NM_004807 | HS6ST1                   | 9394  | 9.0   | 15.3  | 17.9  | 11.1  | 12.6  |
| 206998_x_at | NM_006249 | PRB3                     | 5544  | 4.7   | 1.3   | 4.0   | 2.2   | 2.8   |
| 206999_at   | NM_001559 | IL12RB2                  | 3595  | 5.0   | 4.9   | 6.2   | 1.1   | 5.6   |
| 207000_s_at | NM_005605 | PPP3CC                   | 5533  | 41.4  | 31.9  | 53.5  | 47.5  | 40.6  |
| 207001_x_at | NM_004089 | TSC22D3                  | 1831  | 26.4  | 19.1  | 7.9   | 24.3  | 15.8  |
| 207002_s_at | NM_002656 | PLAGL1                   | 5325  | 4.5   | 3.4   | 3.3   | 1.4   | 2.6   |
| 207003_at   | NM_002098 | GUCA2A                   | 2980  | 14.0  | 2.9   | 2.9   | 11.6  | 5.2   |
| 207004_at   | NM_000657 | BCL2                     | 596   | 14.5  | 8.3   | 2.0   | 1.8   | 9.4   |
| 207005_s_at | NM_000657 | BCL2                     | 596   | 0.7   | 5.9   | 1.0   | 2.3   | 3.0   |
| 207006_s_at | NM_013301 | CCDC106                  | 29903 | 40.1  | 36.8  | 34.0  | 59.5  | 35.1  |
| 207007_at   | NM_005122 | NR1I3                    | 9970  | 6.7   | 4.5   | 8.5   | 5.7   | 5.8   |
| 207008_at   | NM_001557 | CXCR2                    | 3579  | 0.7   | 4.2   | 8.1   | 3.4   | 4.2   |
| 207009_at   | NM_003924 | PHOX2B                   | 8929  | 7.0   | 0.7   | 6.3   | 2.3   | 0.5   |
| 207010_at   | NM_000812 | GABRB1                   | 2560  | 5.9   | 1.4   | 1.2   | 0.9   | 0.6   |
| 207011_s_at | NM_002821 | PTK7                     | 5754  | 29.6  | 27.7  | 36.5  | 37.7  | 28.9  |
| 207012_at   | U79292    | MMP16                    | 4325  | 52.5  | 36.9  | 31.8  | 33.1  | 21.8  |
| 207013_s_at | AB009303  | MMP16                    | 4325  | 28.7  | 18.5  | 28.3  | 17.5  | 17.2  |
| 207014_at   | NM_000807 | GABRA2                   | 2555  | 0.5   | 0.9   | 0.7   | 2.8   | 1.7   |
| 207015_s_at | NM_003888 | ALDH1A2                  | 8854  | 2.1   | 2.1   | 1.9   | 2.1   | 1.0   |
| 207016_s_at | AB015228  | ALDH1A2 /// 8854 /// 101 |       | 2.1   | 6.9   | 2.1   | 0.8   | 1.1   |
| 207017_at   | NM_004163 | RAB27B                   | 5874  | 1.5   | 0.5   | 12.4  | 0.8   | 5.3   |
| 207018_s_at | NM_004163 | RAB27B                   | 5874  | 11.6  | 8.2   | 10.1  | 9.2   | 9.6   |
| 207019_s_at | NM_003886 | AKAP4                    | 8852  | 7.2   | 3.2   | 1.0   | 3.5   | 2.5   |
| 207020_at   | NM_007031 | HSF2BP                   | 11077 | 1.1   | 8.6   | 6.3   | 15.5  | 1.2   |
| 207021_at   | NM_007009 | ZBPB                     | 11055 | 11.5  | 1.6   | 2.4   | 3.2   | 4.0   |
| 207022_s_at | NM_002301 | LDHC                     | 3948  | 19.0  | 4.0   | 15.8  | 8.6   | 8.1   |
| 207023_x_at | NM_000421 | KRT10                    | 3858  | 421.8 | 337.3 | 451.3 | 391.6 | 338.0 |
| 207024_at   | NM_000751 | CHRND                    | 1144  | 2.6   | 1.4   | 1.9   | 1.7   | 0.6   |
| 207025_at   | NM_020435 | GJC2                     | 57165 | 4.7   | 1.9   | 2.9   | 4.3   | 11.4  |
| 207026_s_at | NM_021949 | ATP2B3                   | 492   | 1.6   | 3.3   | 1.9   | 0.9   | 4.8   |
| 207027_at   | NM_001528 | HGFAC                    | 3083  | 1.3   | 2.4   | 1.7   | 1.2   | 0.5   |
| 207028_at   | NM_006316 | MYCNOS                   | 10408 | 1.5   | 2.2   | 1.2   | 1.1   | 1.0   |
| 207029_at   | NM_000899 | KITLG                    | 4254  | 3.8   | 5.3   | 7.0   | 3.7   | 4.5   |
| 207030_s_at | NM_001321 | CSRP2                    | 1466  | 4.0   | 0.5   | 5.3   | 1.6   | 0.2   |
| 207031_at   | NM_001189 | NKX3-2                   | 579   | 3.5   | 12.0  | 9.4   | 5.6   | 5.8   |
| 207032_s_at | NM_001131 | CRISP1                   | 167   | 7.3   | 3.1   | 2.6   | 2.1   | 4.1   |
| 207033_at   | NM_005142 | GIF                      | 2694  | 6.7   | 2.9   | 4.9   | 4.4   | 3.3   |
| 207034_s_at | NM_030379 | GLI2                     | 2736  | 5.2   | 6.7   | 5.6   | 2.8   | 1.3   |
| 207035_at   | NM_003459 | SLC30A3                  | 7781  | 4.1   | 1.6   | 1.8   | 2.1   | 1.2   |
| 207036_x_at | NM_000836 | GRIN2D                   | 2906  | 6.6   | 3.2   | 1.1   | 2.7   | 2.1   |
| 207037_at   | NM_003839 | TNFRSF11A                | 8792  | 8.1   | 6.8   | 6.0   | 9.6   | 1.1   |
| 207038_at   | NM_004694 | SLC16A6                  | 9120  | 25.6  | 16.3  | 25.0  | 15.9  | 22.0  |
| 207039_at   | NM_000077 | CDKN2A                   | 1029  | 48.2  | 35.2  | 41.9  | 45.7  | 36.1  |
| 207040_s_at | NM_003932 | ST13                     | 6767  | 894.8 | 846.0 | 913.6 | 890.8 | 751.0 |
| 207041_at   | NM_006610 | MASP2                    | 10747 | 9.4   | 7.2   | 15.2  | 12.2  | 10.2  |
| 207042_at   | NM_004091 | E2F2                     | 1870  | 7.6   | 7.8   | 10.2  | 7.2   | 9.3   |
| 207043_s_at | NM_006934 | SLC6A9                   | 6536  | 21.5  | 18.2  | 19.4  | 22.5  | 11.8  |
| 207044_at   | NM_000461 | THR3                     | 7068  | 17.6  | 8.6   | 20.1  | 12.2  | 15.7  |
| 207045_at   | NM_017667 | CCDC132                  | 55610 | 7.8   | 9.0   | 6.4   | 1.8   | 8.2   |

|             |           |              |             |         |         |        |        |        |       |     |
|-------------|-----------|--------------|-------------|---------|---------|--------|--------|--------|-------|-----|
| 207046_at   | NM_003548 | HIST1H4A     | ///,8294    | /// 835 | 44.8    | 35.8   | 40.5   | 46.4   | 42.6  |     |
| 207047_s_at | NM_004070 | CLCNKA       | /// C       | 1187    | /// 118 | 6.7    | 2.9    | 6.6    | 4.3   | 1.5 |
| 207048_at   | NM_014229 | SLC6A11      | 6538        |         | 18.8    | 21.3   | 11.6   | 22.8   | 14.7  |     |
| 207049_at   | NM_014191 | SCN8A        | 6334        |         | 1.2     | 1.3    | 1.2    | 2.4    | 0.5   |     |
| 207050_at   | NM_000722 | CACNA2D1     | 781         |         | 2.6     | 6.5    | 6.0    | 2.8    | 0.9   |     |
| 207051_at   | NM_005495 | SLC17A4      | 10050       |         | 17.7    | 5.1    | 5.8    | 6.4    | 1.1   |     |
| 207052_at   | NM_012206 | HAVCR1       | 26762       |         | 7.9     | 2.4    | 6.5    | 7.5    | 4.8   |     |
| 207053_at   | NM_021097 | SLC8A1       | 6546        |         | 0.9     | 0.6    | 1.0    | 0.6    | 1.1   |     |
| 207054_at   | NM_001563 | IMPG1        | 3617        |         | 0.4     | 0.3    | 3.5    | 0.5    | 0.4   |     |
| 207055_at   | NM_004767 | GPR37L1      | 9283        |         | 1.1     | 0.6    | 0.9    | 1.7    | 3.2   |     |
| 207056_s_at | NM_004858 | SLC4A8       | 9498        |         | 0.9     | 1.3    | 0.7    | 4.3    | 2.5   |     |
| 207057_at   | NM_004731 | SLC16A7      | 9194        |         | 6.2     | 7.2    | 13.6   | 16.5   | 6.0   |     |
| 207058_s_at | NM_004562 | PARK2        | 5071        |         | 8.6     | 4.5    | 4.2    | 3.6    | 1.1   |     |
| 207059_at   | NM_006194 | PAX9         | 5083        |         | 18.6    | 14.5   | 25.1   | 17.5   | 16.0  |     |
| 207060_at   | NM_001427 | EN2          | 2020        |         | 18.8    | 14.8   | 11.4   | 6.7    | 4.9   |     |
| 207061_at   | NM_001433 | ERN1         | 2081        |         | 23.2    | 17.0   | 9.8    | 11.5   | 13.7  |     |
| 207062_at   | NM_000415 | IAPP         | 3375        |         | 0.6     | 0.5    | 0.8    | 0.3    | 0.1   |     |
| 207063_at   | NM_018542 | NCRNA00185   | 55410       | /// 83  | 1.8     | 0.9    | 1.5    | 0.8    | 1.0   |     |
| 207064_s_at | NM_009590 | AOC2         | 314         |         | 24.6    | 20.3   | 19.8   | 13.7   | 11.5  |     |
| 207065_at   | NM_004693 | KRT75        | 9119        |         | 19.4    | 6.4    | 8.4    | 10.4   | 9.1   |     |
| 207066_at   | NM_002152 | HRC          | 3270        |         | 1.9     | 6.2    | 1.4    | 1.1    | 1.2   |     |
| 207067_s_at | NM_002112 | HDC          | 3067        |         | 14.2    | 6.7    | 11.6   | 1.9    | 12.2  |     |
| 207068_at   | NM_003408 | ZFP37        | 7539        |         | 11.1    | 10.5   | 10.6   | 7.7    | 10.9  |     |
| 207069_s_at | NM_005585 | SMAD6        | 4091        |         | 36.8    | 36.1   | 41.5   | 42.2   | 31.1  |     |
| 207070_at   | NM_002921 | RGR          | 5995        |         | 1.7     | 1.1    | 7.4    | 6.2    | 5.4   |     |
| 207071_s_at | NM_002197 | ACO1         | 48          |         | 117.5   | 138.4  | 144.0  | 136.9  | 105.7 |     |
| 207072_at   | NM_003853 | IL18RAP      | 8807        |         | 11.3    | 1.3    | 3.8    | 2.2    | 6.9   |     |
| 207073_at   | NM_003948 | CDKL2        | 8999        |         | 1.3     | 0.9    | 2.2    | 1.0    | 1.6   |     |
| 207074_s_at | NM_003053 | SLC18A1      | 6570        |         | 8.6     | 4.2    | 6.5    | 1.0    | 4.2   |     |
| 207075_at   | NM_004895 | NLRP3        | 114548      |         | 1.9     | 1.2    | 1.1    | 0.5    | 0.8   |     |
| 207076_s_at | NM_000050 | ASS1         | 445         |         | 273.5   | 324.2  | 282.4  | 336.1  | 227.8 |     |
| 207077_at   | NM_015849 | CELA2B       | 51032       |         | 0.8     | 0.6    | 1.7    | 1.1    | 0.7   |     |
| 207078_at   | NM_005466 | MED6         | 10001       |         | 4.6     | 4.3    | 5.9    | 2.2    | 1.1   |     |
| 207079_s_at | NM_005466 | MED6         | 10001       |         | 106.9   | 97.0   | 116.3  | 94.7   | 97.0  |     |
| 207080_s_at | NM_004160 | PYY          | 5697        |         | 3.4     | 0.5    | 0.9    | 4.4    | 0.4   |     |
| 207081_s_at | NM_002650 | PI4KA        | 5297        |         | 73.7    | 73.3   | 80.3   | 84.5   | 59.9  |     |
| 207082_at   | NM_000757 | CSF1         | 1435        |         | 3.4     | 4.8    | 0.7    | 0.9    | 0.5   |     |
| 207083_s_at | NM_017721 | CC2D1A       | 54862       |         | 10.0    | 9.9    | 15.6   | 12.9   | 15.3  |     |
| 207084_at   | NM_005604 | POU3F2       | 5454        |         | 1.7     | 1.0    | 1.1    | 1.3    | 2.1   |     |
| 207085_x_at | NM_006140 | CSF2RA       | 1438        |         | 0.8     | 1.3    | 1.3    | 1.1    | 1.0   |     |
| 207086_x_at | NM_001474 | GAGE1        | /// G, 2543 | /// 257 | 988.7   | 1060.4 | 1030.4 | 1056.3 | 861.2 |     |
| 207087_x_at | NM_020478 | ANK1         | 286         |         | 2.1     | 0.5    | 1.3    | 0.8    | 1.5   |     |
| 207088_s_at | NM_003562 | SLC25A11     | 8402        |         | 496.7   | 544.0  | 590.1  | 542.8  | 524.0 |     |
| 207089_at   | AF005213  | NRAP         | 4892        |         | 6.2     | 1.7    | 0.6    | 0.3    | 2.2   |     |
| 207090_x_at | NM_014898 | ZFP30        | 22835       |         | 45.1    | 49.0   | 56.7   | 44.3   | 40.8  |     |
| 207091_at   | NM_002562 | P2RX7        | 5027        |         | 5.3     | 1.5    | 5.4    | 2.3    | 0.8   |     |
| 207092_at   | NM_000230 | LEP          | 3952        |         | 0.5     | 0.4    | 0.7    | 1.5    | 2.0   |     |
| 207093_s_at | NM_002544 | LOC1019270.4 | 974         | /// 101 | 18.4    | 8.7    | 8.8    | 11.1   | 13.7  |     |
| 207094_at   | NM_000634 | CXCR1        | 3577        |         | 2.7     | 0.7    | 3.1    | 1.1    | 6.7   |     |
| 207095_at   | NM_000452 | SLC10A2      | 6555        |         | 8.8     | 5.1    | 9.7    | 3.4    | 4.6   |     |
| 207096_at   | NM_006512 | SAA2-SAA4    | / 6291      | /// 100 | 22.1    | 17.9   | 17.5   | 7.3    | 9.1   |     |
| 207097_s_at | NM_005835 | SLC17A2      | 10246       |         | 1.2     | 0.7    | 0.8    | 1.5    | 0.5   |     |
| 207098_s_at | NM_017927 | MFN1         | 55669       |         | 107.0   | 90.8   | 125.3  | 102.9  | 92.9  |     |

|             |           |                           |       |       |       |       |       |       |
|-------------|-----------|---------------------------|-------|-------|-------|-------|-------|-------|
| 207099_s_at | NM_000390 | CHM                       | 1121  | 3.2   | 10.2  | 5.7   | 12.5  | 1.3   |
| 207100_s_at | NM_016830 | VAMP1                     | 6843  | 4.5   | 1.9   | 7.0   | 1.3   | 4.3   |
| 207101_at   | NM_016830 | VAMP1                     | 6843  | 7.6   | 11.6  | 1.4   | 10.0  | 5.5   |
| 207102_at   | NM_005989 | AKR1D1                    | 6718  | 6.6   | 2.6   | 4.1   | 1.6   | 0.4   |
| 207103_at   | NM_012281 | KCND2                     | 3751  | 0.3   | 1.7   | 2.0   | 3.7   | 1.0   |
| 207104_x_at | NM_006669 | LILRB1                    | 10859 | 1.0   | 1.0   | 1.1   | 1.5   | 0.6   |
| 207105_s_at | NM_005027 | PIK3R2                    | 5296  | 51.8  | 52.3  | 51.9  | 52.8  | 50.2  |
| 207106_s_at | NM_002344 | LTK                       | 4058  | 12.0  | 4.7   | 0.8   | 10.1  | 5.9   |
| 207107_at   | NM_000329 | RPE65                     | 6121  | 5.9   | 1.8   | 0.8   | 0.2   | 3.2   |
| 207108_s_at | NM_015384 | NIPBL                     | 25836 | 20.0  | 12.4  | 26.0  | 27.0  | 17.4  |
| 207109_at   | NM_014352 | POU2F3                    | 25833 | 8.5   | 5.2   | 3.8   | 5.7   | 3.8   |
| 207110_at   | NM_021012 | KCNJ12 /// K 3768 /// 100 |       | 3.3   | 0.6   | 0.6   | 0.7   | 0.3   |
| 207111_at   | NM_001974 | EMR1                      | 2015  | 18.0  | 9.6   | 7.9   | 4.3   | 8.0   |
| 207112_s_at | NM_002039 | GAB1                      | 2549  | 12.2  | 12.5  | 7.6   | 11.0  | 7.7   |
| 207113_s_at | NM_000594 | TNF                       | 7124  | 6.1   | 14.2  | 7.6   | 12.0  | 1.3   |
| 207114_at   | NM_025261 | LY6G6C                    | 80740 | 11.1  | 15.2  | 3.1   | 8.1   | 8.6   |
| 207115_x_at | NM_017643 | MBTD1                     | 54799 | 9.4   | 7.2   | 1.5   | 0.9   | 7.7   |
| 207116_s_at | NM_014364 | GAPDHS                    | 26330 | 2.7   | 3.1   | 1.4   | 8.6   | 1.3   |
| 207117_at   | NM_015852 | ZNF117                    | 51351 | 7.5   | 4.4   | 3.8   | 3.4   | 3.1   |
| 207118_s_at | NM_004659 | MMP23A /// 8510 /// 851   |       | 0.5   | 0.6   | 0.9   | 0.5   | 0.5   |
| 207119_at   | NM_006258 | PRKG1                     | 5592  | 0.3   | 0.7   | 0.1   | 0.4   | 0.1   |
| 207120_at   | NM_022103 | ZNF667                    | 63934 | 8.0   | 7.1   | 16.1  | 9.5   | 8.2   |
| 207121_s_at | NM_002748 | MAPK6                     | 5597  | 301.3 | 266.2 | 332.9 | 292.1 | 265.4 |
| 207122_x_at | NM_001054 | SULT1A2                   | 6799  | 97.4  | 97.2  | 95.8  | 89.2  | 71.5  |
| 207123_s_at | NM_003833 | MATN4                     | 8785  | 12.4  | 10.1  | 10.2  | 7.7   | 6.7   |
| 207124_s_at | NM_006578 | GNB5                      | 10681 | 24.3  | 30.8  | 34.5  | 44.3  | 29.5  |
| 207125_at   | NM_013362 | ZNF225                    | 7768  | 5.3   | 3.1   | 3.0   | 4.2   | 4.7   |
| 207126_x_at | NM_000463 | UGT1A1 /// 54575 /// 54   |       | 16.3  | 15.0  | 17.3  | 20.2  | 15.8  |
| 207127_s_at | NM_021644 | HNRNPH3                   | 3189  | 106.4 | 104.0 | 119.7 | 108.1 | 100.8 |
| 207128_s_at | NM_013361 | ZNF223                    | 7766  | 12.5  | 9.1   | 8.4   | 9.1   | 8.6   |
| 207129_at   | NM_007220 | CA5B                      | 11238 | 1.8   | 1.4   | 0.8   | 3.2   | 1.4   |
| 207130_at   | NM_018634 | ZMYND8                    | 23613 | 4.0   | 6.7   | 9.9   | 6.7   | 7.0   |
| 207131_x_at | NM_013430 | GGT1 /// GG 2678 /// 912  |       | 35.7  | 44.9  | 40.0  | 43.3  | 34.3  |
| 207132_x_at | NM_002624 | PFDN5                     | 5204  | 716.8 | 786.2 | 809.7 | 848.2 | 660.7 |
| 207133_x_at | NM_025144 | ALPK1                     | 80216 | 19.3  | 13.5  | 16.8  | 20.9  | 11.8  |
| 207134_x_at | NM_024164 | TPSB2                     | 64499 | 2.4   | 1.0   | 1.1   | 0.6   | 0.6   |
| 207135_at   | NM_000621 | HTR2A                     | 3356  | 8.9   | 4.9   | 8.2   | 7.1   | 4.5   |
| 207136_at   | NM_004312 | ARR3                      | 407   | 13.1  | 12.8  | 18.1  | 4.8   | 10.7  |
| 207137_at   | NM_013432 | TONSL                     | 4796  | 5.4   | 1.0   | 0.8   | 6.2   | 3.6   |
| 207138_at   | NM_005392 | PHF2                      | 5253  | 1.1   | 7.3   | 5.2   | 7.1   | 8.3   |
| 207139_at   | NM_000704 | ATP4A                     | 495   | 1.5   | 0.7   | 7.3   | 2.4   | 5.1   |
| 207140_at   | NM_001631 | ALPI                      | 248   | 0.5   | 0.5   | 0.5   | 0.4   | 0.3   |
| 207141_s_at | U39196    | KCNJ3                     | 3760  | 10.4  | 5.8   | 11.6  | 8.3   | 3.1   |
| 207142_at   | NM_002239 | KCNJ3                     | 3760  | 0.9   | 0.5   | 3.4   | 4.1   | 1.4   |
| 207143_at   | NM_001259 | CDK6                      | 1021  | 3.3   | 2.6   | 4.4   | 2.4   | 5.3   |
| 207144_s_at | NM_004143 | CITED1                    | 4435  | 2.5   | 14.3  | 10.1  | 5.7   | 7.9   |
| 207145_at   | NM_005259 | MSTN                      | 2660  | 0.1   | 0.1   | 0.5   | 0.3   | 1.3   |
| 207146_at   | NM_002278 | KRT32                     | 3882  | 12.2  | 2.0   | 8.2   | 1.0   | 5.7   |
| 207147_at   | NM_004405 | DLX2                      | 1746  | 5.5   | 1.4   | 13.7  | 2.5   | 9.0   |
| 207148_x_at | NM_016599 | MYOZ2                     | 51778 | 0.3   | 0.8   | 0.4   | 0.3   | 0.3   |
| 207149_at   | L33477    | CDH12                     | 1010  | 0.3   | 0.9   | 0.1   | 0.6   | 0.3   |
| 207150_at   | NM_003055 | SLC18A3                   | 6572  | 3.9   | 4.6   | 9.3   | 10.0  | 2.6   |
| 207151_at   | NM_001118 | ADCYAP1R1                 | 117   | 6.6   | 2.5   | 4.7   | 13.9  | 5.0   |

|             |           |                            |       |        |        |        |        |        |
|-------------|-----------|----------------------------|-------|--------|--------|--------|--------|--------|
| 207152_at   | NM_006180 | NTRK2                      | 4915  | 14.1   | 11.2   | 13.6   | 14.9   | 10.9   |
| 207153_s_at | NM_007070 | GLMN                       | 11146 | 76.0   | 62.8   | 79.7   | 65.2   | 64.6   |
| 207154_at   | NM_001362 | DIO3                       | 1735  | 13.9   | 8.6    | 11.7   | 12.7   | 5.6    |
| 207155_at   | NM_000192 | TBX5                       | 6910  | 8.3    | 3.4    | 5.7    | 3.4    | 4.4    |
| 207156_at   | NM_021064 | HIST1H2AG /8329 /// 833    |       | 54.5   | 54.6   | 68.4   | 54.6   | 54.5   |
| 207157_s_at | NM_005274 | GNG5                       | 2787  | 1831.4 | 1624.7 | 1922.5 | 1886.4 | 1497.3 |
| 207158_at   | NM_001644 | APOBEC1                    | 339   | 7.4    | 8.7    | 8.1    | 6.4    | 5.8    |
| 207159_x_at | NM_025021 | CRTC1                      | 23373 | 51.2   | 46.4   | 49.4   | 45.1   | 39.2   |
| 207160_at   | NM_000882 | IL12A                      | 3592  | 1.3    | 0.6    | 3.1    | 3.2    | 5.5    |
| 207161_at   | NM_014769 | KIAA0087                   | 9808  | 0.6    | 0.3    | 0.4    | 0.5    | 2.0    |
| 207162_s_at | NM_000718 | CACNA1B                    | 774   | 1.1    | 0.9    | 0.7    | 0.5    | 0.4    |
| 207163_s_at | NM_005163 | AKT1                       | 207   | 207.1  | 218.3  | 235.5  | 217.5  | 165.5  |
| 207164_s_at | NM_006352 | ZBTB18                     | 10472 | 5.6    | 4.6    | 6.0    | 7.1    | 6.8    |
| 207165_at   | NM_012485 | HMMR                       | 3161  | 318.4  | 208.2  | 369.2  | 250.2  | 248.5  |
| 207166_at   | NM_021955 | GNGT1                      | 2792  | 0.7    | 0.4    | 0.6    | 2.6    | 0.1    |
| 207167_at   | NM_004258 | CD101                      | 9398  | 4.4    | 3.8    | 2.6    | 1.8    | 1.8    |
| 207168_s_at | NM_004893 | H2AFY                      | 9555  | 1618.0 | 1423.4 | 1728.7 | 1547.5 | 1395.9 |
| 207169_x_at | NM_001954 | DDR1 /// MII 780 /// 1006  |       | 160.2  | 192.7  | 192.1  | 193.5  | 125.0  |
| 207170_s_at | NM_015416 | LETMD1                     | 25875 | 122.8  | 130.3  | 129.8  | 143.9  | 97.6   |
| 207172_s_at | NM_001797 | CDH11                      | 1009  | 5.5    | 0.7    | 1.4    | 1.5    | 1.3    |
| 207173_x_at | D21254    | CDH11                      | 1009  | 3.2    | 3.2    | 0.5    | 4.3    | 3.5    |
| 207174_at   | NM_004466 | GPC5                       | 2262  | 0.6    | 3.1    | 0.3    | 0.7    | 0.2    |
| 207175_at   | NM_004797 | ADIPOQ                     | 9370  | 4.0    | 2.9    | 8.3    | 5.7    | 4.0    |
| 207176_s_at | NM_005191 | CD80                       | 941   | 24.9   | 10.8   | 20.3   | 18.7   | 10.0   |
| 207177_at   | NM_000959 | PTGFR                      | 5737  | 39.1   | 40.3   | 65.9   | 31.5   | 51.0   |
| 207178_s_at | NM_002031 | FRK                        | 2444  | 6.6    | 1.8    | 8.6    | 3.2    | 5.8    |
| 207179_at   | NM_005521 | TLX1                       | 3195  | 1.5    | 1.6    | 2.0    | 1.0    | 1.3    |
| 207180_s_at | NM_006410 | HTATIP2                    | 10553 | 8.3    | 2.2    | 5.0    | 4.1    | 7.5    |
| 207181_s_at | NM_001227 | CASP7                      | 840   | 102.6  | 79.4   | 94.9   | 71.7   | 75.2   |
| 207182_at   | NM_000811 | GABRA6                     | 2559  | 0.2    | 0.4    | 0.8    | 0.2    | 0.4    |
| 207183_at   | NM_006143 | GPR19                      | 2842  | 17.5   | 17.5   | 21.8   | 14.9   | 12.9   |
| 207184_at   | NM_016615 | SLC6A13                    | 6540  | 19.9   | 15.7   | 23.3   | 14.0   | 13.0   |
| 207185_at   | NM_003049 | SLC10A1                    | 6554  | 17.8   | 1.5    | 15.5   | 11.5   | 14.0   |
| 207186_s_at | NM_004459 | BPTF                       | 2186  | 39.8   | 30.0   | 37.1   | 32.2   | 34.4   |
| 207187_at   | NM_000215 | JAK3                       | 3718  | 30.8   | 27.3   | 31.5   | 12.5   | 14.7   |
| 207188_at   | NM_001258 | CDK3 /// TEN 1018 /// 100  |       | 9.4    | 3.0    | 11.6   | 11.7   | 4.2    |
| 207189_s_at | NM_015113 | ZZEF1                      | 23140 | 7.5    | 9.7    | 14.4   | 14.1   | 9.1    |
| 207190_at   | NM_015113 | ZZEF1                      | 23140 | 0.9    | 0.7    | 1.2    | 0.9    | 1.1    |
| 207191_s_at | NM_005545 | ISLR                       | 3671  | 0.8    | 3.8    | 2.3    | 4.5    | 1.2    |
| 207192_at   | NM_001374 | DNASE1L2                   | 1775  | 2.7    | 1.6    | 7.5    | 3.3    | 9.6    |
| 207193_at   | NM_001138 | AGRP                       | 181   | 17.4   | 5.2    | 3.8    | 2.4    | 5.8    |
| 207194_s_at | NM_001544 | ICAM4                      | 3386  | 3.7    | 5.3    | 1.2    | 2.9    | 2.5    |
| 207195_at   | NM_014461 | CNTN6                      | 27255 | 10.4   | 0.8    | 0.9    | 0.7    | 3.1    |
| 207196_s_at | NM_006058 | TNIP1                      | 10318 | 89.4   | 81.0   | 75.7   | 87.0   | 86.8   |
| 207197_at   | NM_003413 | ZIC3                       | 7547  | 4.2    | 1.8    | 3.1    | 2.7    | 0.7    |
| 207198_s_at | NM_004987 | LIMS1 /// LIM 3987 /// 100 |       | 67.6   | 46.4   | 71.5   | 56.5   | 49.0   |
| 207199_at   | NM_003219 | TERT                       | 7015  | 8.3    | 2.3    | 10.5   | 9.5    | 7.1    |
| 207200_at   | NM_000531 | OTC                        | 5009  | 1.3    | 0.4    | 0.9    | 0.5    | 2.0    |
| 207201_s_at | NM_003057 | SLC22A1                    | 6580  | 2.4    | 8.7    | 14.3   | 6.1    | 2.2    |
| 207202_s_at | NM_003889 | NR1I2                      | 8856  | 1.2    | 1.4    | 1.3    | 1.8    | 0.3    |
| 207203_s_at | AF061056  | NR1I2                      | 8856  | 13.4   | 2.8    | 12.6   | 7.9    | 3.9    |
| 207204_at   | NM_012418 | FSCN2                      | 25794 | 0.7    | 0.3    | 0.3    | 0.3    | 0.2    |
| 207205_at   | NM_001817 | CEACAM4                    | 1089  | 22.7   | 14.5   | 19.1   | 11.3   | 9.7    |

|             |           |               |               |        |        |        |        |        |
|-------------|-----------|---------------|---------------|--------|--------|--------|--------|--------|
| 207206_s_at | NM_000697 | ALOX12        | 239           | 1.7    | 1.6    | 11.8   | 7.5    | 6.1    |
| 207207_at   | AF069682  | RBMXL2        | 27288         | 0.9    | 6.6    | 6.8    | 0.4    | 3.6    |
| 207208_at   | NM_014469 | RBMXL2        | 27288         | 1.2    | 0.4    | 0.9    | 4.4    | 0.7    |
| 207209_at   | NM_004066 | CETN1         | 1068          | 14.3   | 12.7   | 29.5   | 7.0    | 17.7   |
| 207210_at   | NM_000808 | GABRA3        | 2556          | 1.6    | 0.3    | 0.4    | 2.1    | 3.4    |
| 207211_at   | AF079564  | USP2          | 9099          | 2.6    | 2.6    | 5.6    | 1.1    | 1.9    |
| 207212_at   | NM_004174 | SLC9A3        | 6550          | 0.8    | 1.6    | 1.0    | 0.8    | 0.6    |
| 207213_s_at | NM_004205 | USP2          | 9099          | 1.4    | 1.1    | 6.9    | 1.0    | 3.5    |
| 207214_at   | NM_014471 | SPINK4        | 27290         | 2.7    | 4.2    | 7.6    | 7.7    | 7.2    |
| 207215_at   | NM_015371 | GSTTP1        | 25774         | 1.2    | 1.6    | 2.2    | 1.3    | 1.2    |
| 207216_at   | NM_001244 | TNFSF8        | 944           | 16.9   | 9.8    | 8.1    | 1.6    | 8.3    |
| 207217_s_at | NM_013955 | NOX1          | 27035         | 4.0    | 12.0   | 12.4   | 3.0    | 2.7    |
| 207218_at   | NM_000133 | F9            | 2158          | 0.5    | 1.1    | 7.0    | 6.3    | 3.3    |
| 207219_at   | NM_023070 | ZFP69B        | 65243         | 16.3   | 14.2   | 22.4   | 16.2   | 14.7   |
| 207220_at   | NM_021071 | ART4          | 420           | 3.0    | 3.7    | 6.6    | 4.7    | 4.9    |
| 207221_at   | NM_003950 | F2RL3         | 9002          | 3.4    | 3.4    | 4.6    | 0.5    | 2.2    |
| 207222_at   | NM_003561 | LOC1006527    | 8399 /// 100  | 2.1    | 1.6    | 1.3    | 1.1    | 0.6    |
| 207223_s_at | NM_005156 | PTBP3         | 9991          | 24.0   | 14.4   | 18.9   | 14.3   | 17.7   |
| 207224_s_at | NM_016543 | SIGLEC7       | 27036         | 13.2   | 9.6    | 5.5    | 10.0   | 12.3   |
| 207225_at   | NM_001088 | AANAT         | 15            | 1.0    | 0.3    | 1.1    | 0.9    | 0.4    |
| 207226_at   | NM_003520 | HIST1H2BN     | 8341          | 9.9    | 9.6    | 10.4   | 8.2    | 12.2   |
| 207227_x_at | NM_006605 | RFPL2         | 10739         | 5.8    | 4.1    | 29.2   | 7.8    | 13.1   |
| 207228_at   | NM_002732 | PRKACG        | 5568          | 5.6    | 5.3    | 4.3    | 10.0   | 8.3    |
| 207229_at   | NM_006611 | KLRAP1        | 10748         | 4.2    | 2.1    | 1.3    | 4.1    | 3.0    |
| 207230_at   | NM_016952 | CDON          | 50937         | 2.0    | 1.4    | 1.8    | 1.1    | 1.5    |
| 207231_at   | NM_014648 | DZIP3         | 9666          | 12.1   | 10.7   | 11.3   | 9.7    | 10.0   |
| 207232_s_at | NM_014648 | DZIP3         | 9666          | 2.4    | 7.7    | 2.2    | 14.6   | 10.9   |
| 207233_s_at | NM_000248 | MITF          | 4286          | 24.5   | 17.6   | 20.6   | 20.7   | 18.6   |
| 207234_at   | NM_002919 | RFX3          | 5991          | 14.7   | 13.4   | 12.3   | 12.9   | 9.4    |
| 207235_s_at | NM_000842 | GRM5          | 2915          | 1.5    | 0.3    | 0.5    | 1.0    | 0.6    |
| 207236_at   | NM_003419 | ZNF345        | 25850         | 11.9   | 6.9    | 6.4    | 5.2    | 8.3    |
| 207237_at   | NM_002232 | KCNA3         | 3738          | 1.3    | 0.3    | 1.4    | 3.3    | 0.2    |
| 207238_s_at | NM_002838 | PTPRC         | 5788          | 1.1    | 1.1    | 0.7    | 2.5    | 0.9    |
| 207239_s_at | NM_006201 | CDK16         | 5127          | 140.2  | 162.6  | 146.4  | 142.2  | 103.9  |
| 207240_s_at | NM_000233 | LHCGR         | 3973          | 0.5    | 0.3    | 0.2    | 1.5    | 0.3    |
| 207241_at   | NM_005750 | C4orf6        | 10141         | 2.5    | 0.9    | 3.6    | 3.8    | 4.7    |
| 207242_s_at | NM_000830 | GRIK1         | 2897          | 8.0    | 9.3    | 9.2    | 11.1   | 4.3    |
| 207243_s_at | NM_001743 | CALM1 /// C   | 801 /// 805 / | 1865.3 | 1668.0 | 1937.0 | 1742.4 | 1727.9 |
| 207244_x_at | NM_000762 | CYP2A6        | 1548          | 4.7    | 6.8    | 4.9    | 13.4   | 1.9    |
| 207245_at   | NM_001077 | UGT2B17       | 7367          | 353.3  | 330.5  | 333.8  | 403.6  | 261.0  |
| 207246_at   | NM_003411 | ZFY           | 7544          | 17.6   | 14.5   | 19.1   | 15.4   | 14.9   |
| 207247_s_at | NM_003411 | ZFX /// ZFY   | 7543 /// 754  | 16.0   | 14.0   | 20.1   | 13.6   | 11.6   |
| 207248_at   | NM_002233 | KCNA4         | 3739          | 5.7    | 4.9    | 3.5    | 3.5    | 1.4    |
| 207249_s_at | NM_004212 | SLC28A2       | 9153          | 0.8    | 1.1    | 0.6    | 1.1    | 0.7    |
| 207250_at   | NM_007374 | SIX6          | 4990          | 2.4    | 1.5    | 7.1    | 1.2    | 1.1    |
| 207251_at   | NM_005925 | MEP1B         | 4225          | 8.9    | 3.9    | 1.7    | 8.7    | 6.1    |
| 207252_at   | NM_003669 | INE1          | 8552          | 1.3    | 4.3    | 8.8    | 8.8    | 17.6   |
| 207253_s_at | NM_016936 | UBN1          | 29855         | 62.5   | 49.7   | 50.5   | 59.3   | 50.4   |
| 207254_at   | NM_005073 | SLC15A1       | 6564          | 1.5    | 2.4    | 1.0    | 3.1    | 4.4    |
| 207255_at   | NM_002303 | LEPR /// LEPI | 3953 /// 547  | 8.2    | 7.8    | 5.5    | 9.0    | 0.3    |
| 207256_at   | NM_000242 | MBL2          | 4153          | 0.2    | 4.7    | 2.4    | 0.6    | 3.3    |
| 207257_at   | NM_000799 | EPO           | 2056          | 1.2    | 2.0    | 0.4    | 0.5    | 0.6    |
| 207258_at   | NM_005867 | DSCR4         | 10281         | 1.8    | 1.0    | 1.2    | 1.0    | 1.0    |



|             |           |             |              |       |       |       |       |       |
|-------------|-----------|-------------|--------------|-------|-------|-------|-------|-------|
| 207259_at   | NM_017928 | LINC00483   | 55018        | 0.2   | 0.7   | 0.2   | 1.1   | 0.3   |
| 207260_at   | NM_017521 | FEV         | 54738        | 1.7   | 2.3   | 2.2   | 8.4   | 2.1   |
| 207261_at   | NM_001298 | CNGA3       | 1261         | 0.4   | 0.2   | 0.2   | 0.2   | 0.3   |
| 207262_at   | NM_001638 | APOF        | 319          | 3.8   | 5.2   | 7.0   | 5.3   | 3.9   |
| 207263_x_at | NM_017599 | VEZT        | 55591        | 1.0   | 10.2  | 8.2   | 7.2   | 8.6   |
| 207264_at   | NM_016657 | KDELR3      | 11015        | 5.7   | 1.1   | 0.9   | 8.9   | 4.1   |
| 207265_s_at | NM_016657 | KDELR3      | 11015        | 44.7  | 34.8  | 42.9  | 25.6  | 21.9  |
| 207266_x_at | NM_016837 | RBMS1       | 5937         | 1.1   | 0.4   | 0.8   | 0.8   | 0.4   |
| 207267_s_at | NM_018962 | RIPPLY3     | 53820        | 1.6   | 7.7   | 6.1   | 4.3   | 8.6   |
| 207268_x_at | NM_005759 | ABI2        | 10152        | 48.2  | 33.7  | 43.5  | 38.4  | 37.6  |
| 207269_at   | NM_001925 | DEFA4       | 1669         | 4.2   | 12.0  | 19.1  | 3.3   | 5.9   |
| 207270_x_at | NM_006678 | CD300C      | 10871        | 7.5   | 9.2   | 14.4  | 7.0   | 10.0  |
| 207271_x_at | NM_016512 | SPAG11A /// | 10407 /// 65 | 0.5   | 0.4   | 0.4   | 0.6   | 2.6   |
| 207272_at   | NM_007136 | ZNF80       | 7634         | 1.3   | 0.5   | 0.2   | 0.2   | 0.3   |
| 207273_at   | NM_015858 | -           | -            | 2.9   | 1.6   | 2.7   | 2.9   | 4.0   |
| 207274_at   | NM_000080 | CHRNE       | 1145         | 4.2   | 5.9   | 2.4   | 1.5   | 0.9   |
| 207275_s_at | NM_001995 | ACSL1       | 2180         | 313.3 | 280.4 | 279.1 | 282.2 | 254.3 |
| 207276_at   | NM_004065 | CDR1        | 1038         | 0.2   | 0.2   | 0.2   | 0.2   | 0.8   |
| 207277_at   | AF290886  | CD209       | 30835        | 9.6   | 6.3   | 11.9  | 7.3   | 4.2   |
| 207278_s_at | NM_021155 | CD209       | 30835        | 16.8  | 6.8   | 6.1   | 13.8  | 6.2   |
| 207279_s_at | NM_016365 | NEBL        | 10529        | 23.6  | 26.5  | 9.8   | 16.9  | 20.7  |
| 207280_at   | NM_005162 | RNF185-AS1  | 100852405    | 0.6   | 1.3   | 0.7   | 0.9   | 0.9   |
| 207281_x_at | NM_016378 | VCX2        | 51480        | 41.0  | 38.5  | 37.0  | 48.8  | 31.3  |
| 207282_s_at | NM_002479 | MYOG        | 4656         | 1.8   | 1.8   | 1.3   | 1.7   | 1.1   |
| 207283_at   | NM_020217 | RPL23AP32   | 56969        | 46.4  | 19.9  | 31.3  | 26.0  | 20.8  |
| 207284_s_at | NM_020164 | ASPH        | 444          | 1.5   | 4.3   | 1.7   | 1.3   | 4.5   |
| 207285_x_at | NM_001318 | CSHL1       | 1444         | 2.2   | 1.8   | 1.4   | 1.1   | 0.7   |
| 207286_at   | NM_025009 | CEP135      | 9662         | 1.2   | 1.4   | 1.6   | 2.7   | 3.7   |
| 207287_at   | NM_025026 | BIN3-IT1    | 80094        | 10.3  | 8.5   | 9.1   | 12.0  | 7.5   |
| 207288_at   | NM_025091 | ASMTL-AS1   | 80161        | 0.7   | 0.5   | 0.7   | 1.3   | 3.0   |
| 207289_at   | NM_004142 | MMP25       | 64386        | 21.4  | 12.4  | 20.3  | 17.9  | 13.5  |
| 207290_at   | NM_025179 | PLXNA2      | 5362         | 2.5   | 4.1   | 5.2   | 4.5   | 0.7   |
| 207291_at   | NM_024081 | PRRG4       | 79056        | 41.7  | 42.2  | 59.9  | 42.6  | 42.0  |
| 207292_s_at | NM_002749 | MAPK7       | 5598         | 13.6  | 15.8  | 22.4  | 31.8  | 21.9  |
| 207293_s_at | U16957    | AGTR2       | 186          | 7.4   | 1.2   | 0.5   | 3.9   | 0.9   |
| 207294_at   | NM_000686 | AGTR2       | 186          | 0.2   | 0.2   | 0.7   | 0.4   | 0.1   |
| 207295_at   | NM_001039 | SCNN1G      | 6340         | 3.5   | 6.2   | 16.8  | 12.5  | 11.3  |
| 207296_at   | NM_024325 | ZNF343      | 79175        | 9.6   | 4.9   | 7.3   | 13.9  | 6.2   |
| 207298_at   | NM_006632 | SLC17A3     | 10786        | 2.1   | 2.8   | 8.2   | 1.5   | 0.7   |
| 207299_s_at | NM_000838 | GRM1        | 2911         | 1.3   | 0.6   | 0.3   | 0.3   | 0.3   |
| 207300_s_at | NM_000131 | F7          | 2155         | 2.0   | 1.3   | 9.0   | 4.5   | 4.2   |
| 207301_at   | NM_001962 | EFNA5       | 1946         | 22.2  | 47.8  | 39.1  | 34.2  | 20.8  |
| 207302_at   | NM_000231 | SGCG        | 6445         | 2.3   | 0.9   | 3.2   | 1.0   | 1.2   |
| 207303_at   | NM_005020 | PDE1C       | 5137         | 8.3   | 4.9   | 7.0   | 4.1   | 6.5   |
| 207304_at   | NM_003425 | ZNF45       | 7596         | 15.5  | 12.0  | 17.6  | 16.6  | 9.3   |
| 207305_s_at | NM_014939 | TRAPPC8     | 22878        | 115.1 | 88.6  | 103.3 | 98.6  | 87.7  |
| 207306_at   | NM_004609 | TCF15       | 6939         | 2.8   | 1.5   | 1.3   | 1.5   | 2.4   |
| 207307_at   | NM_000868 | HTR2C       | 3358         | 15.5  | 17.6  | 16.4  | 14.5  | 7.7   |
| 207308_at   | NM_021094 | SLCO1A2     | 6579         | 0.5   | 5.0   | 2.0   | 2.2   | 5.3   |
| 207309_at   | NM_000620 | NOS1        | 4842         | 18.8  | 10.3  | 18.6  | 13.6  | 14.0  |
| 207310_s_at | U31466    | NOS1        | 4842         | 1.2   | 2.1   | 3.0   | 1.3   | 1.5   |
| 207311_at   | NM_003585 | DOC2B       | 8447         | 2.4   | 1.1   | 3.2   | 7.2   | 5.0   |
| 207312_at   | NM_006213 | PHKG1       | 5260         | 11.6  | 11.9  | 10.6  | 4.4   | 6.1   |

|             |           |         |     |       |     |     |       |       |       |       |       |
|-------------|-----------|---------|-----|-------|-----|-----|-------|-------|-------|-------|-------|
| 207313_x_at | L76666    | KIR3DL1 | /// | 13811 | /// | 381 | 12.9  | 1.6   | 12.7  | 8.5   | 5.0   |
| 207314_x_at | NM_006737 | KIR3DL1 | /// | 13811 | /// | 381 | 6.2   | 0.9   | 4.1   | 6.7   | 4.9   |
| 207315_at   | NM_006566 | CD226   |     | 10666 |     |     | 2.3   | 3.5   | 0.6   | 4.1   | 0.4   |
| 207316_at   | NM_001523 | HAS1    |     | 3036  |     |     | 0.5   | 2.3   | 2.8   | 0.9   | 2.1   |
| 207317_s_at | NM_001232 | CASQ2   |     | 845   |     |     | 2.0   | 1.1   | 2.5   | 6.3   | 2.4   |
| 207318_s_at | AJ297710  | CDK13   |     | 8621  |     |     | 62.8  | 48.6  | 64.3  | 51.3  | 34.3  |
| 207319_s_at | NM_003718 | CDK13   |     | 8621  |     |     | 18.3  | 16.1  | 23.5  | 24.4  | 13.1  |
| 207320_x_at | NM_004602 | STAU1   |     | 6780  |     |     | 372.1 | 431.6 | 407.4 | 396.9 | 362.0 |
| 207321_s_at | NM_019625 | ABC9    |     | 23457 |     |     | 19.0  | 5.1   | 12.9  | 9.7   | 15.6  |
| 207322_at   | NM_003024 | ITSN1   |     | 6453  |     |     | 3.4   | 2.4   | 4.1   | 3.0   | 0.8   |
| 207323_s_at | NM_002385 | MBP     |     | 4155  |     |     | 16.5  | 18.6  | 2.5   | 15.8  | 10.1  |
| 207324_s_at | NM_004948 | DSC1    |     | 1823  |     |     | 1.2   | 1.4   | 3.8   | 0.7   | 3.8   |
| 207325_x_at | NM_004988 | MAGEA1  |     | 4100  |     |     | 56.1  | 54.4  | 56.2  | 38.3  | 63.2  |
| 207326_at   | NM_001729 | BTC     |     | 685   |     |     | 0.3   | 3.3   | 7.1   | 2.9   | 1.9   |
| 207327_at   | NM_004100 | EYA4    |     | 2070  |     |     | 4.6   | 2.4   | 0.9   | 4.9   | 2.4   |
| 207328_at   | NM_001140 | ALOX15  |     | 246   |     |     | 127.1 | 103.9 | 144.7 | 113.4 | 68.7  |
| 207329_at   | NM_002424 | MMP8    |     | 4317  |     |     | 1.3   | 7.1   | 13.7  | 6.0   | 0.6   |
| 207330_at   | NM_002864 | PZP     |     | 5858  |     |     | 13.1  | 5.8   | 8.6   | 9.9   | 6.5   |
| 207331_at   | NM_016343 | CENPF   |     | 1063  |     |     | 3.5   | 2.2   | 2.1   | 1.9   | 0.4   |
| 207332_s_at | NM_003234 | TFRC    |     | 7037  |     |     | 688.1 | 546.1 | 740.5 | 549.8 | 649.6 |
| 207333_at   | NM_002511 | NMBR    |     | 4829  |     |     | 0.5   | 2.8   | 2.0   | 0.7   | 0.6   |
| 207334_s_at | NM_003242 | TGFBR2  |     | 7048  |     |     | 2.2   | 0.4   | 4.2   | 2.4   | 0.4   |
| 207335_x_at | NM_007100 | ATP5I   |     | 521   |     |     | 502.1 | 465.9 | 596.6 | 545.9 | 504.9 |
| 207336_at   | NM_006940 | SOX5    |     | 6660  |     |     | 1.2   | 0.5   | 0.3   | 0.6   | 0.2   |
| 207337_at   | NM_020994 | CTAG2   |     | 30848 |     |     | 4.3   | 0.9   | 2.3   | 2.9   | 2.2   |
| 207338_s_at | NM_003454 | ZNF200  |     | 7752  |     |     | 95.6  | 64.0  | 82.4  | 62.2  | 52.2  |
| 207339_s_at | NM_002341 | LTB     |     | 4050  |     |     | 5.9   | 3.9   | 5.2   | 7.6   | 9.0   |
| 207341_at   | NM_002777 | PRTN3   |     | 5657  |     |     | 7.7   | 0.4   | 4.8   | 1.1   | 3.1   |
| 207342_at   | NM_001297 | CNGB1   |     | 1258  |     |     | 0.9   | 3.6   | 6.1   | 6.7   | 2.6   |
| 207343_at   | NM_020426 | LYZL6   |     | 57151 |     |     | 21.2  | 7.7   | 20.3  | 9.0   | 11.7  |
| 207344_at   | NM_006422 | AKAP3   |     | 10566 |     |     | 1.7   | 2.2   | 0.8   | 1.6   | 0.6   |
| 207345_at   | NM_006350 | FST     |     | 10468 |     |     | 18.3  | 7.1   | 3.4   | 16.5  | 3.0   |
| 207346_at   | NM_001980 | STX2    |     | 2054  |     |     | 9.3   | 5.8   | 8.1   | 11.0  | 4.3   |
| 207347_at   | NM_000124 | ERCC6   |     | 2074  |     |     | 18.8  | 16.4  | 20.6  | 12.5  | 11.2  |
| 207348_s_at | NM_002311 | LIG3    |     | 3980  |     |     | 38.7  | 47.6  | 41.5  | 37.4  | 36.3  |
| 207349_s_at | NM_022803 | UCP3    |     | 7352  |     |     | 8.1   | 3.7   | 5.3   | 7.7   | 1.5   |
| 207350_s_at | NM_003762 | VAMP4   |     | 8674  |     |     | 31.5  | 23.5  | 33.5  | 30.3  | 24.2  |
| 207351_s_at | NM_003975 | SH2D2A  |     | 9047  |     |     | 24.5  | 11.2  | 9.2   | 6.6   | 9.1   |
| 207352_s_at | NM_021911 | GABRB2  |     | 2561  |     |     | 13.9  | 3.6   | 13.4  | 3.0   | 2.2   |
| 207353_s_at | NM_018942 | HMX1    |     | 3166  |     |     | 2.7   | 1.8   | 2.7   | 3.3   | 2.0   |
| 207354_at   | NM_004590 | CCL16   |     | 6360  |     |     | 0.5   | 4.2   | 0.6   | 2.0   | 0.8   |
| 207355_at   | NM_006671 | SLC1A7  |     | 6512  |     |     | 2.6   | 3.3   | 9.7   | 2.8   | 12.9  |
| 207356_at   | NM_004942 | DEFB4A  | /// | 1673  | /// | 100 | 2.0   | 4.8   | 2.5   | 3.9   | 7.3   |
| 207357_s_at | NM_017540 | GALNT10 |     | 55568 |     |     | 36.6  | 46.1  | 40.1  | 28.6  | 31.5  |
| 207358_x_at | NM_012090 | MACF1   |     | 23499 |     |     | 56.3  | 55.3  | 61.5  | 48.0  | 40.2  |
| 207359_at   | NM_006549 | CAMKK2  |     | 10645 |     |     | 1.6   | 3.7   | 3.5   | 1.3   | 5.1   |
| 207360_s_at | NM_002531 | NTSR1   |     | 4923  |     |     | 3.4   | 1.6   | 5.9   | 1.7   | 1.5   |
| 207361_at   | NM_012257 | HBP1    |     | 26959 |     |     | 2.8   | 2.4   | 3.0   | 5.0   | 5.2   |
| 207362_at   | NM_013309 | SLC30A4 |     | 7782  |     |     | 113.3 | 113.1 | 124.7 | 121.0 | 87.4  |
| 207363_at   | NM_000330 | RS1     |     | 6247  |     |     | 2.9   | 1.1   | 5.1   | 5.0   | 9.8   |
| 207364_at   | NM_001586 | TEX28   |     | 1527  |     |     | 1.5   | 0.8   | 1.0   | 0.7   | 0.6   |
| 207365_x_at | NM_014709 | USP34   |     | 9736  |     |     | 68.4  | 54.0  | 80.7  | 69.2  | 55.2  |
| 207366_at   | NM_002251 | KCNS1   |     | 3787  |     |     | 19.1  | 27.2  | 29.8  | 19.6  | 16.6  |

|             |           |                           |              |       |       |       |       |       |
|-------------|-----------|---------------------------|--------------|-------|-------|-------|-------|-------|
| 207367_at   | NM_001676 | ATP12A                    | 479          | 9.2   | 7.9   | 5.0   | 11.0  | 8.2   |
| 207368_at   | NM_000864 | HTR1D                     | 3352         | 0.9   | 0.8   | 0.7   | 1.0   | 1.1   |
| 207369_at   | Z97632    | BRS3                      | 680          | 7.7   | 5.6   | 8.8   | 7.9   | 4.1   |
| 207370_at   | NM_004967 | IBSP                      | 3381         | 0.9   | 1.4   | 4.3   | 1.0   | 6.9   |
| 207371_at   | NM_017513 | -                         | -            | 2.0   | 3.6   | 0.4   | 0.2   | 0.3   |
| 207372_s_at | NM_001246 | ENTPD2                    | 954          | 2.5   | 0.8   | 1.9   | 0.6   | 0.9   |
| 207373_at   | NM_002148 | HOXD10                    | 3236         | 0.4   | 0.5   | 0.5   | 0.7   | 0.3   |
| 207374_at   | NM_020359 | PLSCR2                    | 57047        | 7.1   | 3.8   | 3.2   | 1.3   | 0.7   |
| 207375_s_at | NM_002189 | IL15RA                    | 3601         | 23.8  | 18.6  | 14.5  | 15.5  | 9.5   |
| 207376_at   | NM_014468 | VENTX                     | 27287        | 2.8   | 2.0   | 2.1   | 3.9   | 2.8   |
| 207377_at   | NM_025210 | PPP1R2P9                  | 80316        | 0.6   | 0.6   | 0.4   | 0.5   | 0.5   |
| 207378_at   | NM_007180 | TREH                      | 11181        | 0.4   | 0.4   | 0.3   | 0.4   | 0.2   |
| 207379_at   | NM_005711 | EDIL3                     | 10085        | 4.4   | 4.2   | 2.3   | 1.3   | 1.4   |
| 207380_x_at | NM_013954 | NOX1                      | 27035        | 7.4   | 1.4   | 1.4   | 2.2   | 5.9   |
| 207381_at   | NM_001139 | ALOX12B                   | 242          | 1.1   | 1.3   | 1.4   | 2.3   | 2.3   |
| 207382_at   | NM_003722 | TP63                      | 8626         | 12.9  | 8.8   | 6.3   | 2.2   | 9.7   |
| 207383_s_at | NM_003961 | RHBDL1                    | 9028         | 1.0   | 0.4   | 0.8   | 1.0   | 0.4   |
| 207384_at   | NM_005091 | PGLYRP1                   | 8993         | 2.3   | 13.8  | 1.5   | 1.2   | 0.7   |
| 207385_at   | NM_016521 | TFDP3                     | 51270        | 1.2   | 0.9   | 0.8   | 1.8   | 0.5   |
| 207386_at   | NM_004820 | CYP7B1                    | 9420         | 2.7   | 1.5   | 4.1   | 0.3   | 0.8   |
| 207387_s_at | NM_000167 | GK                        | 2710         | 14.6  | 11.4  | 21.1  | 18.5  | 15.1  |
| 207388_s_at | NM_004878 | PTGES                     | 9536         | 18.3  | 9.6   | 10.2  | 5.0   | 2.2   |
| 207389_at   | NM_000173 | GP1BA                     | 2811         | 29.0  | 14.8  | 15.5  | 19.2  | 16.3  |
| 207390_s_at | NM_006932 | SMTN                      | 6525         | 65.8  | 62.6  | 76.4  | 73.1  | 54.1  |
| 207391_s_at | NM_003557 | PIP5K1A                   | 8394         | 91.3  | 80.3  | 55.0  | 56.3  | 55.1  |
| 207392_x_at | NM_001076 | UGT2B15                   | 7366         | 635.4 | 600.8 | 466.3 | 610.5 | 365.4 |
| 207393_at   | NM_001526 | HCRT2                     | 3062         | 6.3   | 1.1   | 1.0   | 0.3   | 0.8   |
| 207394_at   | NM_003438 | ZNF137P                   | 7696         | 8.5   | 6.8   | 9.3   | 11.2  | 5.4   |
| 207395_at   | NM_001732 | BTN1A1                    | 696          | 4.2   | 1.0   | 0.9   | 1.1   | 4.4   |
| 207396_s_at | NM_005787 | ALG3                      | 10195        | 328.4 | 308.5 | 366.9 | 336.8 | 293.3 |
| 207397_s_at | NM_000523 | HOXD13                    | 3239         | 1.1   | 0.3   | 0.4   | 2.6   | 0.2   |
| 207398_at   | NM_000523 | HOXD13                    | 3239         | 1.7   | 1.3   | 1.4   | 0.9   | 0.4   |
| 207399_at   | NM_003571 | BFSP2                     | 8419         | 1.2   | 0.7   | 1.0   | 1.2   | 1.1   |
| 207400_at   | NM_006174 | NPY5R                     | 4889         | 12.6  | 1.1   | 8.7   | 8.0   | 2.8   |
| 207401_at   | NM_002763 | PROX1                     | 5629         | 4.8   | 5.6   | 2.8   | 8.9   | 2.6   |
| 207402_at   | NM_003433 | ZNF132                    | 7691         | 33.6  | 19.6  | 21.0  | 22.2  | 17.7  |
| 207403_at   | NM_003604 | IRS4                      | 8471         | 16.7  | 11.8  | 14.3  | 7.0   | 7.6   |
| 207404_s_at | NM_000865 | HTR1E                     | 3354         | 2.2   | 8.7   | 8.5   | 5.7   | 2.2   |
| 207405_s_at | NM_002873 | RAD17                     | 5884         | 81.8  | 55.8  | 78.8  | 72.4  | 64.1  |
| 207406_at   | NM_000780 | CYP7A1                    | 1581         | 1.6   | 0.6   | 1.9   | 3.5   | 0.3   |
| 207407_x_at | NM_000778 | CYP4A11                   | 1579         | 10.4  | 8.1   | 2.4   | 1.2   | 1.9   |
| 207408_at   | NM_004803 | SLC22A14                  | 9389         | 12.6  | 21.3  | 18.0  | 17.2  | 8.2   |
| 207409_at   | NM_002302 | LECT2                     | 3950         | 1.4   | 0.9   | 0.2   | 1.0   | 0.3   |
| 207410_s_at | NM_016170 | TLX2                      | 3196         | 0.9   | 0.8   | 0.2   | 0.3   | 0.2   |
| 207412_x_at | NM_001808 | CELP                      | 1057         | 2.4   | 5.9   | 0.7   | 5.9   | 0.4   |
| 207413_s_at | NM_000335 | SCN5A                     | 6331         | 19.7  | 8.4   | 4.8   | 6.5   | 7.3   |
| 207414_s_at | NM_002570 | LOC1005074                | 5046 /// 100 | 60.8  | 59.7  | 62.3  | 57.7  | 52.1  |
| 207415_at   | NM_007366 | PLA2R1                    | 22925        | 1.8   | 2.2   | 3.0   | 3.3   | 2.5   |
| 207416_s_at | NM_004555 | NFATC3                    | 4775         | 16.1  | 19.1  | 24.5  | 18.4  | 10.9  |
| 207417_s_at | NM_003451 | ZNF177 /// Z 7730 /// 100 |              | 17.6  | 13.0  | 10.5  | 16.6  | 7.8   |
| 207418_s_at | NM_003649 | DDO                       | 8528         | 7.2   | 8.2   | 1.0   | 3.8   | 4.9   |
| 207419_s_at | NM_002872 | RAC2                      | 5880         | 1.1   | 1.4   | 1.0   | 1.5   | 1.9   |
| 207420_at   | NM_006438 | COLEC10                   | 10584        | 12.2  | 4.8   | 10.8  | 5.7   | 1.2   |

|             |           |                           |       |       |       |       |       |       |
|-------------|-----------|---------------------------|-------|-------|-------|-------|-------|-------|
| 207421_at   | NM_001739 | CA5A                      | 763   | 2.5   | 1.5   | 4.7   | 4.0   | 0.6   |
| 207422_at   | NM_003814 | ADAM20                    | 8748  | 1.1   | 1.5   | 7.0   | 7.9   | 4.7   |
| 207423_s_at | AF029899  | ADAM20                    | 8748  | 17.7  | 11.1  | 11.0  | 3.3   | 10.0  |
| 207424_at   | NM_005593 | MYF5                      | 4617  | 2.9   | 2.1   | 0.5   | 3.9   | 1.6   |
| 207425_s_at | NM_006640 | SEPT9                     | 10801 | 20.9  | 25.1  | 29.9  | 42.9  | 20.9  |
| 207426_s_at | NM_003326 | TNFSF4                    | 7292  | 18.8  | 14.2  | 15.2  | 11.7  | 11.2  |
| 207427_at   | NM_001097 | ACR                       | 49    | 1.4   | 1.4   | 4.2   | 2.1   | 0.9   |
| 207428_x_at | NM_001787 | CDK11A /// C984 /// 7286  |       | 50.6  | 52.0  | 40.8  | 42.6  | 42.5  |
| 207429_at   | NM_003058 | SLC22A2                   | 6582  | 11.2  | 3.6   | 2.6   | 1.1   | 0.5   |
| 207430_s_at | NM_002443 | MSMB                      | 4477  | 5.7   | 0.2   | 5.4   | 0.9   | 4.0   |
| 207431_s_at | NM_003676 | DEGS1                     | 8560  | 445.5 | 406.0 | 696.6 | 441.8 | 549.7 |
| 207432_at   | NM_017682 | BEST2                     | 54831 | 2.0   | 2.3   | 6.7   | 0.7   | 1.4   |
| 207433_at   | NM_000572 | IL10                      | 3586  | 5.0   | 2.4   | 1.0   | 3.4   | 2.2   |
| 207434_s_at | NM_021603 | FXD2 /// FX 486 /// 1005  |       | 4.9   | 5.9   | 4.7   | 7.1   | 1.0   |
| 207435_s_at | NM_016333 | SRRM2                     | 23524 | 153.2 | 135.6 | 171.3 | 158.3 | 116.2 |
| 207436_x_at | NM_014896 | SORBS1                    | 10580 | 93.4  | 55.3  | 82.6  | 63.9  | 74.4  |
| 207437_at   | NM_006491 | NOVA1                     | 4857  | 0.4   | 3.4   | 5.4   | 1.4   | 6.0   |
| 207438_s_at | NM_005701 | SNUPN                     | 10073 | 217.7 | 181.5 | 259.6 | 213.4 | 224.6 |
| 207439_s_at | NM_005660 | SLC35A2                   | 7355  | 43.0  | 38.5  | 51.9  | 48.2  | 40.9  |
| 207440_at   | NM_005660 | SLC35A2                   | 7355  | 11.4  | 3.2   | 14.1  | 13.9  | 9.3   |
| 207441_at   | NM_006685 | SMR3B                     | 10879 | 1.1   | 1.1   | 5.5   | 0.3   | 0.4   |
| 207442_at   | NM_000759 | CSF3                      | 1440  | 1.1   | 1.8   | 6.1   | 1.1   | 0.8   |
| 207443_at   | AF220532  | NR2E1                     | 7101  | 0.9   | 0.7   | 1.0   | 0.7   | 0.3   |
| 207444_at   | NM_004256 | SLC22A13                  | 9390  | 0.9   | 1.1   | 1.5   | 1.4   | 0.5   |
| 207445_s_at | AF145439  | CCR9                      | 10803 | 6.9   | 6.7   | 7.0   | 3.6   | 3.6   |
| 207446_at   | NM_006068 | TLR6                      | 10333 | 5.6   | 1.6   | 2.4   | 4.4   | 4.4   |
| 207447_s_at | NM_013244 | MGAT4C                    | 25834 | 1.0   | 0.0   | 3.2   | 1.3   | 2.1   |
| 207448_at   | NM_015227 | POFUT2                    | 23275 | 1.0   | 1.0   | 0.9   | 1.4   | 0.6   |
| 207449_s_at | NM_015227 | POFUT2                    | 23275 | 15.2  | 9.1   | 9.2   | 11.2  | 8.8   |
| 207450_s_at | NM_007252 | POU6F2                    | 11281 | 0.5   | 0.9   | 0.5   | 2.1   | 4.1   |
| 207451_at   | NM_014360 | NKX2-8                    | 26257 | 2.3   | 3.6   | 9.2   | 3.3   | 1.3   |
| 207452_s_at | NM_014361 | CNTN5                     | 53942 | 1.7   | 3.6   | 0.7   | 0.2   | 2.1   |
| 207453_s_at | NM_012266 | DNAJB5                    | 25822 | 0.6   | 0.6   | 3.3   | 2.3   | 0.4   |
| 207454_at   | NM_000831 | GRIK3                     | 2899  | 0.8   | 0.6   | 1.7   | 0.6   | 0.6   |
| 207455_at   | NM_002563 | P2RY1                     | 5028  | 1.4   | 5.4   | 0.9   | 0.6   | 2.5   |
| 207456_at   | NM_004133 | HNF4G                     | 3174  | 4.2   | 1.3   | 0.8   | 0.5   | 0.9   |
| 207457_s_at | NM_021246 | LY6G6D /// L 58530 /// 25 |       | 2.4   | 6.0   | 3.4   | 2.9   | 8.0   |
| 207458_at   | NM_024035 | RHPN1-AS1                 | 78998 | 35.2  | 34.1  | 40.0  | 42.6  | 29.0  |
| 207459_x_at | NM_002100 | GYPB                      | 2994  | 5.5   | 13.3  | 3.5   | 7.2   | 6.2   |
| 207460_at   | NM_005317 | GZMM                      | 3004  | 2.6   | 2.2   | 0.4   | 4.0   | 4.6   |
| 207461_at   | NM_001272 | -                         | -     | 2.3   | 2.7   | 2.5   | 0.3   | 3.3   |
| 207462_at   | NM_002063 | GLRA2                     | 2742  | 0.8   | 2.8   | 20.6  | 8.3   | 13.3  |
| 207463_x_at | NM_002771 | PRSS3                     | 5646  | 14.1  | 8.4   | 9.4   | 16.6  | 8.3   |
| 207464_at   | NM_014121 | AHCYL1                    | 10768 | 8.3   | 5.0   | 4.9   | 5.5   | 8.0   |
| 207465_at   | NM_014134 | LOC1001278:100127886      |       | 3.4   | 1.2   | 1.6   | 0.0   | 0.7   |
| 207466_at   | NM_015973 | GAL                       | 51083 | 9.1   | 10.4  | 16.1  | 11.0  | 10.0  |
| 207467_x_at | NM_001750 | CAST                      | 831   | 210.7 | 214.1 | 237.5 | 196.1 | 166.8 |
| 207468_s_at | NM_003015 | SFRP5                     | 6425  | 1.6   | 1.0   | 0.9   | 1.1   | 1.4   |
| 207469_s_at | NM_003662 | PIR                       | 8544  | 220.3 | 174.9 | 211.9 | 179.3 | 164.8 |
| 207470_at   | NM_017535 | BC113958                  | -     | 3.0   | 2.0   | 5.1   | 0.1   | 0.8   |
| 207471_at   | AF118086  | -                         | -     | 1.6   | 0.3   | 1.2   | 3.2   | 0.5   |
| 207472_at   | NM_014107 | RARS2                     | 57038 | 2.5   | 0.4   | 2.9   | 0.6   | 3.1   |
| 207473_at   | NM_002418 | MLN                       | 4295  | 17.9  | 11.9  | 13.6  | 13.3  | 7.3   |

|             |           |            |           |        |        |        |        |        |
|-------------|-----------|------------|-----------|--------|--------|--------|--------|--------|
| 207474_at   | NM_017719 | SNRK       | 54861     | 5.6    | 1.6    | 2.2    | 5.7    | 2.8    |
| 207475_at   | NM_000134 | FABP2      | 2169      | 1.7    | 7.5    | 11.9   | 1.6    | 7.3    |
| 207476_at   | NM_018512 | LOC1005076 | 100507630 | 7.3    | 0.6    | 3.8    | 7.6    | 0.9    |
| 207477_at   | AF119909  | -          | -         | 0.8    | 0.6    | 0.7    | 0.5    | 0.4    |
| 207478_at   | NM_018546 | PRO2958    | 100128329 | 5.0    | 2.0    | 6.1    | 0.7    | 0.4    |
| 207479_at   | NM_018613 | -          | -         | 0.3    | 2.0    | 6.3    | 2.0    | 0.8    |
| 207480_s_at | NM_020149 | MEIS2      | 4212      | 3.0    | 2.9    | 6.2    | 2.8    | 0.7    |
| 207481_at   | NM_018541 | -          | -         | 4.1    | 2.1    | 2.9    | 0.1    | 0.3    |
| 207482_at   | NM_014477 | TP53TG5    | 27296     | 14.5   | 9.8    | 10.2   | 2.2    | 1.7    |
| 207483_s_at | NM_018448 | CAND1      | 55832     | 276.0  | 234.4  | 296.9  | 258.5  | 211.7  |
| 207484_s_at | NM_025256 | EHMT2      | 10919     | 16.9   | 11.7   | 10.1   | 18.8   | 7.0    |
| 207485_x_at | NM_007048 | BTN3A1     | 11119     | 1.0    | 6.4    | 10.8   | 1.6    | 4.9    |
| 207486_x_at | NM_004067 | CHN2       | 1124      | 21.2   | 10.3   | 17.8   | 8.4    | 13.6   |
| 207487_at   | NM_024976 | -          | -         | 0.6    | 0.6    | 0.2    | 0.6    | 1.1    |
| 207488_at   | NM_024999 | -          | -         | 0.9    | 1.2    | 0.7    | 1.4    | 0.7    |
| 207489_at   | NM_024986 | RPS2P45    | 80052     | 0.2    | 1.2    | 2.8    | 1.2    | 3.2    |
| 207490_at   | NM_025019 | TUBA4B     | 80086     | 43.1   | 23.3   | 37.6   | 44.0   | 59.8   |
| 207491_at   | NM_025098 | MOGAT2     | 80168     | 3.3    | 7.7    | 19.6   | 6.4    | 1.3    |
| 207492_at   | NM_025105 | NGLY1      | 55768     | 9.1    | 1.2    | 14.3   | 5.2    | 6.1    |
| 207493_x_at | NM_003147 | SSX2       | 6757      | 16.0   | 11.6   | 11.2   | 9.3    | 9.5    |
| 207494_s_at | NM_003427 | ZNF76      | 7629      | 33.3   | 28.3   | 35.6   | 28.8   | 41.3   |
| 207495_at   | NM_004249 | RAB28      | 9364      | 21.8   | 18.8   | 21.1   | 13.7   | 12.9   |
| 207496_at   | NM_000139 | MS4A2      | 2206      | 5.8    | 6.1    | 2.2    | 4.5    | 0.7    |
| 207497_s_at | D10583    | MS4A2      | 2206      | 2.1    | 5.4    | 1.8    | 0.9    | 3.1    |
| 207498_s_at | NM_000106 | CYP2D6     | 1564      | 10.5   | 10.8   | 6.1    | 8.8    | 2.1    |
| 207499_x_at | NM_017979 | UNC45A     | 55898     | 123.9  | 136.7  | 151.2  | 115.0  | 107.5  |
| 207500_at   | NM_004347 | CASP5      | 838       | 5.3    | 2.3    | 3.5    | 1.7    | 4.2    |
| 207501_s_at | NM_004113 | FGF12      | 2257      | 4.6    | 4.7    | 1.9    | 2.1    | 3.5    |
| 207502_at   | NM_007102 | GUCA2B     | 2981      | 1.1    | 0.6    | 0.8    | 1.0    | 3.1    |
| 207503_at   | NM_004610 | TCP10      | 6953      | 2.3    | 1.5    | 6.5    | 13.0   | 8.2    |
| 207504_at   | NM_005182 | CA7        | 766       | 17.6   | 14.1   | 11.9   | 17.7   | 7.1    |
| 207505_at   | NM_006259 | PRKG2      | 5593      | 7.1    | 16.8   | 4.5    | 7.6    | 2.1    |
| 207506_at   | NM_006541 | GLRX3      | 10539     | 12.3   | 4.8    | 14.5   | 7.3    | 7.6    |
| 207507_s_at | NM_001689 | ATP5G3     | 518       | 1789.5 | 1541.6 | 1858.0 | 1617.2 | 1583.0 |
| 207508_at   | NM_001689 | ATP5G3     | 518       | 1625.3 | 1504.8 | 1849.9 | 1589.8 | 1499.3 |
| 207509_s_at | NM_002288 | LAIR2      | 3904      | 9.7    | 6.8    | 1.4    | 5.7    | 8.4    |
| 207510_at   | NM_000710 | BDKRB1     | 623       | 13.5   | 6.8    | 7.7    | 8.9    | 11.7   |
| 207511_s_at | NM_015680 | CNPPD1     | 27013     | 4.7    | 13.5   | 14.9   | 16.6   | 9.1    |
| 207513_s_at | NM_003452 | ZNF189     | 7743      | 65.3   | 53.0   | 64.7   | 68.6   | 44.3   |
| 207514_s_at | NM_000172 | GNAT1      | 2779      | 1.3    | 0.9    | 0.6    | 1.0    | 0.5    |
| 207515_s_at | NM_004875 | POLR1C     | 9533      | 105.3  | 96.4   | 105.6  | 94.3   | 98.5   |
| 207516_at   | NM_000750 | CHRN4      | 1143      | 1.0    | 2.9    | 3.8    | 0.5    | 0.2    |
| 207517_at   | NM_018891 | LAMC2      | 3918      | 1.8    | 0.6    | 10.2   | 2.3    | 3.3    |
| 207518_at   | NM_003647 | DGKE       | 8526      | 4.2    | 7.3    | 14.2   | 6.1    | 7.3    |
| 207519_at   | NM_001045 | SLC6A4     | 6532      | 4.2    | 11.0   | 12.1   | 0.9    | 5.2    |
| 207520_at   | BG494940  | TROVE2     | 6738      | 13.3   | 13.1   | 12.6   | 5.7    | 10.2   |
| 207521_s_at | AF068220  | ATP2A3     | 489       | 0.8    | 1.9    | 1.3    | 0.5    | 0.7    |
| 207522_s_at | NM_005173 | ATP2A3     | 489       | 0.7    | 0.7    | 0.8    | 0.6    | 0.5    |
| 207523_at   | NM_006781 | C6orf10    | 10665     | 3.7    | 0.3    | 2.3    | 2.3    | 2.9    |
| 207524_at   | NM_021908 | MIR6132    | 7982      | 55.3   | 50.4   | 65.9   | 46.2   | 42.3   |
| 207525_s_at | NM_005716 | GIPC1      | 10755     | 139.4  | 155.6  | 225.8  | 170.9  | 151.4  |
| 207526_s_at | NM_003856 | IL1RL1     | 9173      | 3.4    | 6.8    | 6.6    | 3.9    | 4.5    |
| 207527_at   | NM_004983 | KCNJ9      | 3765      | 8.7    | 5.5    | 1.9    | 3.6    | 1.4    |

|             |           |                 |        |        |        |        |        |        |
|-------------|-----------|-----------------|--------|--------|--------|--------|--------|--------|
| 207528_s_at | NM_014331 | SLC7A11         | 23657  | 58.6   | 60.7   | 58.7   | 62.8   | 43.9   |
| 207529_at   | NM_021010 | DEFA5           | 1670   | 4.0    | 8.6    | 7.2    | 12.3   | 6.5    |
| 207530_s_at | NM_004936 | CDKN2B          | 1030   | 4.0    | 4.1    | 0.4    | 1.2    | 0.9    |
| 207531_at   | NM_020989 | CRYGC           | 1420   | 5.1    | 3.5    | 1.4    | 0.5    | 1.5    |
| 207532_at   | NM_006891 | CRYGD           | 1421   | 11.6   | 6.4    | 8.7    | 2.3    | 2.1    |
| 207533_at   | NM_002981 | CCL1            | 6346   | 0.6    | 0.8    | 0.8    | 0.4    | 0.5    |
| 207534_at   | NM_002363 | MAGEB1          | 4112   | 0.2    | 0.4    | 3.8    | 2.1    | 0.3    |
| 207535_s_at | NM_002502 | NFKB2           | 4791   | 34.2   | 35.5   | 53.7   | 31.5   | 43.9   |
| 207536_s_at | NM_001561 | TNFRSF9         | 3604   | 8.3    | 1.5    | 6.2    | 3.1    | 1.2    |
| 207537_at   | NM_002625 | PFKFB1          | 5207   | 5.8    | 2.2    | 12.3   | 8.8    | 1.9    |
| 207538_at   | NM_000589 | IL4             | 3565   | 0.4    | 1.2    | 1.6    | 0.2    | 0.5    |
| 207539_s_at | NM_000589 | IL4             | 3565   | 3.6    | 0.4    | 1.8    | 1.2    | 0.8    |
| 207540_s_at | NM_003177 | SYK             | 6850   | 0.7    | 1.1    | 0.9    | 0.8    | 0.3    |
| 207541_s_at | NM_002685 | EXOSC10         | 5394   | 94.4   | 96.0   | 105.1  | 91.8   | 112.7  |
| 207542_s_at | NM_000385 | AQP1            | 358    | 4.7    | 1.9    | 11.2   | 10.9   | 13.8   |
| 207543_s_at | NM_000917 | P4HA1           | 5033   | 134.7  | 150.8  | 167.4  | 133.9  | 114.9  |
| 207544_s_at | NM_000672 | ADH6            | 130    | 4.1    | 3.6    | 0.2    | 3.9    | 2.8    |
| 207545_s_at | NM_003744 | LOC1019281.8650 | 101    | 23.7   | 15.6   | 26.2   | 31.1   | 20.2   |
| 207546_at   | NM_000705 | ATP4B           | 496    | 0.7    | 4.8    | 4.6    | 9.5    | 1.7    |
| 207547_s_at | NM_007177 | FAM107A         | 11170  | 7.3    | 10.3   | 8.5    | 13.0   | 5.4    |
| 207548_at   | NM_000844 | GRM7            | 100    | 0.7    | 0.8    | 0.8    | 1.7    | 1.0    |
| 207549_x_at | NM_002389 | CD46            | 4179   | 189.6  | 146.7  | 189.3  | 150.5  | 147.6  |
| 207550_at   | NM_005373 | MPL             | 4352   | 4.6    | 5.4    | 5.5    | 2.2    | 1.7    |
| 207551_s_at | NM_006800 | MSL3            | 10943  | 68.8   | 57.8   | 88.3   | 63.5   | 49.2   |
| 207552_at   | NM_005176 | ATP5G2          | 517    | 8.8    | 1.5    | 7.8    | 1.1    | 2.5    |
| 207553_at   | NM_000912 | OPRK1           | 4986   | 29.3   | 37.9   | 24.7   | 38.7   | 13.3   |
| 207554_x_at | NM_001060 | TBXA2R          | 6915   | 25.5   | 5.1    | 19.9   | 32.6   | 19.8   |
| 207555_s_at | U27325    | TBXA2R          | 6915   | 9.6    | 7.0    | 16.9   | 7.7    | 3.1    |
| 207556_s_at | NM_003646 | DGKZ            | 8525   | 72.3   | 61.7   | 71.3   | 59.5   | 52.5   |
| 207557_s_at | NM_001035 | RYR2            | 6262   | 2.2    | 5.6    | 1.6    | 4.7    | 2.3    |
| 207558_s_at | NM_000325 | PITX2           | 5308   | 3.7    | 2.7    | 2.4    | 2.9    | 0.3    |
| 207559_s_at | NM_005096 | ZMYM3           | 9203   | 24.5   | 19.9   | 28.0   | 19.8   | 16.7   |
| 207560_at   | U62966    | SLC28A1         | 9154   | 17.3   | 13.7   | 19.8   | 13.4   | 10.0   |
| 207561_s_at | NM_020322 | ABC8            | 111    | 7.9    | 5.5    | 4.0    | 6.8    | 6.6    |
| 207562_at   | NM_001347 | DGKQ            | 1609   | 1.7    | 2.0    | 2.4    | 4.7    | 9.5    |
| 207563_s_at | U77413    | OGT             | 8473   | 83.9   | 88.4   | 105.7  | 95.9   | 61.3   |
| 207564_x_at | NM_003605 | OGT             | 8473   | 67.5   | 75.7   | 76.7   | 66.3   | 58.8   |
| 207565_s_at | NM_001531 | MR1             | 3140   | 16.2   | 10.7   | 16.8   | 17.9   | 13.2   |
| 207566_at   | NM_001531 | MR1             | 3140   | 4.0    | 11.3   | 1.9    | 6.0    | 2.2    |
| 207567_at   | NM_003984 | SLC13A2         | 9058   | 3.3    | 1.2    | 5.1    | 0.9    | 1.7    |
| 207568_at   | NM_004198 | CHRNA6          | 8973   | 8.9    | 9.4    | 5.3    | 7.4    | 1.5    |
| 207569_at   | NM_002944 | ROS1            | 6098   | 8.6    | 6.4    | 8.1    | 2.8    | 0.6    |
| 207570_at   | NM_000451 | SHOX            | 6473   | 2.1    | 1.3    | 1.0    | 1.8    | 1.6    |
| 207571_x_at | NM_004848 | THEMIS2         | 9473   | 3.3    | 0.5    | 8.4    | 3.7    | 1.0    |
| 207572_at   | NM_024716 | EFCAB2          | 84288  | 3.6    | 4.3    | 3.3    | 6.1    | 4.8    |
| 207573_x_at | NM_006476 | ATP5L           | 10632  | 1204.7 | 1246.0 | 1405.8 | 1293.0 | 1091.4 |
| 207574_s_at | NM_015675 | GADD45B         | 4616   | 16.6   | 14.5   | 13.7   | 19.7   | 16.0   |
| 207575_at   | NM_018652 | GOLGA6A         | 342096 | 1.1    | 1.1    | 0.8    | 0.4    | 0.8    |
| 207576_x_at | NM_000915 | OXT             | 5020   | 4.7    | 2.4    | 4.2    | 2.3    | 1.3    |
| 207577_at   | AJ131724  | HTR4            | 3360   | 1.4    | 5.5    | 4.8    | 0.4    | 1.2    |
| 207578_s_at | NM_000870 | HTR4            | 3360   | 23.2   | 9.6    | 5.5    | 12.3   | 23.0   |
| 207579_at   | NM_002365 | MAGEB3          | 4114   | 5.2    | 0.7    | 1.1    | 0.6    | 0.3    |
| 207580_at   | NM_002367 | MAGEB4          | 4115   | 0.7    | 1.3    | 0.2    | 0.2    | 0.3    |

|             |           |           |        |        |        |        |        |        |
|-------------|-----------|-----------|--------|--------|--------|--------|--------|--------|
| 207581_s_at | NM_002367 | MAGEB4    | 4115   | 0.8    | 0.3    | 0.7    | 0.3    | 1.1    |
| 207582_at   | NM_006222 | PIN1P1    | 5301   | 8.8    | 14.3   | 11.3   | 11.0   | 4.0    |
| 207583_at   | NM_005164 | ABCD2     | 225    | 1.1    | 2.3    | 2.3    | 1.0    | 3.1    |
| 207584_at   | NM_005577 | LPA       | 4018   | 3.3    | 2.8    | 1.0    | 4.5    | 2.9    |
| 207585_s_at | NM_001001 | RPL36AL   | 6166   | 1274.6 | 1197.3 | 1448.6 | 1357.2 | 1218.6 |
| 207586_at   | NM_000193 | SHH       | 6469   | 1.8    | 1.1    | 0.8    | 0.8    | 1.5    |
| 207587_at   | NM_014617 | CRYGA     | 1418   | 7.6    | 2.0    | 12.4   | 1.4    | 8.2    |
| 207588_at   | NM_003871 | -         | -      | 1.8    | 0.5    | 1.1    | 2.8    | 0.2    |
| 207589_at   | NM_000679 | ADRA1B    | 147    | 0.9    | 1.9    | 2.8    | 2.0    | 0.8    |
| 207590_s_at | NM_006733 | CENPI     | 2491   | 25.7   | 27.5   | 35.5   | 21.4   | 22.0   |
| 207591_s_at | NM_006015 | ARID1A    | 8289   | 5.3    | 9.3    | 10.4   | 13.3   | 6.5    |
| 207592_s_at | NM_001194 | HCN2      | 610    | 8.5    | 7.6    | 5.2    | 2.9    | 6.9    |
| 207593_at   | NM_022169 | ABCG4     | 64137  | 14.9   | 8.6    | 10.8   | 13.7   | 7.4    |
| 207594_s_at | NM_003895 | SYNJ1     | 8867   | 13.4   | 12.8   | 11.4   | 8.5    | 8.4    |
| 207595_s_at | NM_006132 | BMP1      | 649    | 20.9   | 11.3   | 10.3   | 19.6   | 16.3   |
| 207596_at   | NM_018515 | SLCO4C1   | 353189 | 5.0    | 5.2    | 3.3    | 3.5    | 2.6    |
| 207597_at   | NM_014237 | ADAM18    | 8749   | 12.2   | 11.3   | 12.4   | 5.7    | 5.2    |
| 207598_x_at | NM_005431 | XRCC2     | 7516   | 34.0   | 21.2   | 25.9   | 37.2   | 17.8   |
| 207599_at   | NM_004771 | MMP20     | 9313   | 0.5    | 0.3    | 0.3    | 3.2    | 0.2    |
| 207600_at   | NM_004977 | KCNC3     | 3748   | 5.4    | 1.9    | 1.1    | 1.7    | 1.1    |
| 207601_at   | NM_014465 | SULT1B1   | 27284  | 24.1   | 7.2    | 23.9   | 9.7    | 9.0    |
| 207602_at   | NM_004262 | TMPRSS11D | 9407   | 16.4   | 11.7   | 6.4    | 11.5   | 6.3    |
| 207603_at   | NM_003615 | SLC4A7    | 9497   | 1.3    | 0.3    | 5.7    | 2.8    | 1.3    |
| 207604_s_at | NM_003615 | SLC4A7    | 9497   | 14.2   | 13.8   | 17.2   | 13.6   | 15.5   |
| 207605_x_at | NM_024498 | ZNF117    | 51351  | 21.8   | 17.9   | 29.8   | 22.3   | 19.8   |
| 207606_s_at | NM_018287 | ARHGAP12  | 94134  | 20.5   | 17.0   | 24.6   | 24.0   | 13.1   |
| 207607_at   | NM_005170 | ASCL2     | 430    | 0.2    | 0.3    | 0.1    | 0.1    | 0.1    |
| 207608_x_at | NM_000761 | CYP1A2    | 1544   | 54.3   | 29.2   | 44.7   | 31.1   | 26.9   |
| 207609_s_at | AF182274  | CYP1A2    | 1544   | 1.9    | 4.6    | 5.2    | 1.6    | 1.2    |
| 207610_s_at | NM_013447 | EMR2      | 30817  | 0.8    | 0.5    | 4.2    | 0.5    | 3.9    |
| 207611_at   | NM_003519 | HIST1H2BL | 8340   | 9.1    | 0.9    | 15.8   | 3.0    | 6.0    |
| 207612_at   | NM_003393 | WNT8B     | 7479   | 1.0    | 0.7    | 2.9    | 0.7    | 0.6    |
| 207613_s_at | NM_015981 | CAMK2A    | 815    | 0.8    | 1.9    | 0.4    | 0.6    | 0.8    |
| 207614_s_at | NM_003592 | CUL1      | 8454   | 140.1  | 107.3  | 150.0  | 112.5  | 113.4  |
| 207615_s_at | NM_001214 | C16orf3   | 750    | 1.8    | 7.1    | 6.7    | 1.0    | 7.4    |
| 207616_s_at | NM_004180 | TANK      | 10010  | 84.8   | 81.2   | 65.5   | 73.3   | 59.1   |
| 207617_at   | NM_024005 | DDX3X     | 1654   | 0.7    | 0.9    | 1.2    | 1.1    | 0.4    |
| 207618_s_at | NM_004328 | BCS1L     | 617    | 194.2  | 146.1  | 182.7  | 174.9  | 166.1  |
| 207619_at   | NM_001525 | HCRTR1    | 3061   | 3.9    | 5.0    | 1.3    | 1.6    | 5.0    |
| 207620_s_at | NM_003688 | CASK      | 8573   | 25.2   | 21.5   | 23.3   | 22.5   | 23.5   |
| 207621_s_at | NM_007169 | PEMT      | 10400  | 143.0  | 172.8  | 174.4  | 170.1  | 133.8  |
| 207622_s_at | NM_005692 | ABCF2     | 10061  | 159.2  | 151.0  | 194.0  | 158.0  | 162.2  |
| 207623_at   | NM_005692 | ABCF2     | 10061  | 1.6    | 1.0    | 2.4    | 0.7    | 1.1    |
| 207624_s_at | NM_000328 | RPGR      | 6103   | 8.6    | 6.9    | 7.3    | 8.7    | 7.8    |
| 207625_s_at | NM_005093 | CBFA2T2   | 9139   | 76.9   | 65.0   | 64.7   | 70.0   | 47.0   |
| 207626_s_at | NM_003046 | SLC7A2    | 6542   | 1.3    | 1.2    | 1.7    | 4.2    | 2.0    |
| 207627_s_at | NM_005653 | TFCP2     | 7024   | 4.8    | 0.7    | 1.2    | 3.0    | 2.6    |
| 207628_s_at | NM_017528 | WBSCR22   | 114049 | 430.7  | 375.4  | 435.2  | 393.1  | 368.7  |
| 207629_s_at | NM_004723 | ARHGEF2   | 9181   | 34.3   | 30.3   | 31.8   | 29.4   | 16.5   |
| 207630_s_at | NM_001881 | CREM      | 1390   | 31.6   | 33.3   | 33.7   | 29.1   | 23.7   |
| 207631_at   | NM_005821 | NBR2      | 10230  | 2.3    | 8.7    | 7.6    | 16.4   | 5.9    |
| 207632_at   | NM_005592 | MUSK      | 4593   | 1.0    | 3.1    | 1.2    | 1.1    | 0.9    |
| 207633_s_at | NM_005592 | MUSK      | 4593   | 8.5    | 2.7    | 3.6    | 1.7    | 0.3    |

|             |           |                          |       |       |       |       |       |       |
|-------------|-----------|--------------------------|-------|-------|-------|-------|-------|-------|
| 207634_at   | NM_005018 | PDCD1                    | 5133  | 2.0   | 5.0   | 1.4   | 7.5   | 1.0   |
| 207635_s_at | NM_002238 | KCNH1                    | 3756  | 0.4   | 0.5   | 6.1   | 0.7   | 3.0   |
| 207636_at   | NM_006217 | SERPINI2                 | 5276  | 8.9   | 6.9   | 5.0   | 5.9   | 3.4   |
| 207637_at   | NM_014653 | WSCD2                    | 9671  | 1.1   | 1.6   | 1.7   | 1.5   | 1.1   |
| 207638_at   | NM_002772 | TMPRSS15                 | 5651  | 3.7   | 2.4   | 4.6   | 3.5   | 0.8   |
| 207639_at   | NM_003508 | FZD9                     | 8326  | 2.1   | 6.4   | 9.3   | 15.7  | 2.3   |
| 207640_x_at | NM_006181 | NTN3                     | 4917  | 0.9   | 0.5   | 1.4   | 2.7   | 1.1   |
| 207641_at   | NM_012452 | TNFRSF13B                | 23495 | 24.6  | 22.8  | 16.0  | 10.2  | 11.6  |
| 207642_at   | NM_001524 | HCRT                     | 3060  | 15.4  | 4.7   | 4.1   | 2.5   | 6.3   |
| 207643_s_at | NM_001065 | TNFRSF1A                 | 7132  | 130.5 | 139.9 | 156.0 | 159.1 | 136.0 |
| 207644_at   | NM_003923 | FOXH1                    | 8928  | 4.1   | 5.3   | 4.4   | 2.8   | 3.1   |
| 207645_s_at | NM_004284 | CHD1L                    | 9557  | 26.0  | 26.3  | 21.2  | 25.2  | 25.1  |
| 207646_s_at | AF080597  | CDY1 /// CDY9085 /// 942 |       | 3.0   | 13.3  | 9.0   | 7.3   | 1.3   |
| 207647_at   | NM_004680 | CDY1                     | 9085  | 0.5   | 0.7   | 0.2   | 0.1   | 2.7   |
| 207648_at   | NM_001939 | DRP2                     | 1821  | 5.0   | 3.6   | 8.3   | 10.5  | 2.0   |
| 207649_at   | NM_003770 | KRT37                    | 8688  | 9.5   | 3.8   | 8.4   | 6.0   | 5.2   |
| 207650_x_at | NM_000955 | PTGER1                   | 5731  | 0.8   | 1.2   | 1.5   | 1.6   | 1.3   |
| 207651_at   | NM_013308 | GPR171                   | 29909 | 0.4   | 1.1   | 0.9   | 0.7   | 0.4   |
| 207652_s_at | NM_004072 | CMKLR1                   | 1240  | 3.2   | 11.3  | 2.0   | 15.4  | 9.3   |
| 207653_at   | NM_004474 | FOXD2                    | 2306  | 0.5   | 1.0   | 1.7   | 2.2   | 5.9   |
| 207654_x_at | NM_001938 | DR1                      | 1810  | 140.7 | 146.2 | 189.1 | 149.1 | 149.2 |
| 207655_s_at | NM_013314 | BLNK                     | 29760 | 47.3  | 46.0  | 44.2  | 39.7  | 28.0  |
| 207656_s_at | NM_004035 | ACOX1                    | 51    | 0.9   | 1.4   | 0.8   | 0.4   | 0.3   |
| 207657_x_at | NM_002270 | TNPO1                    | 3842  | 214.7 | 189.1 | 211.1 | 186.2 | 169.5 |
| 207658_s_at | NM_004471 | FOXG1                    | 2290  | 1.3   | 1.7   | 3.7   | 2.7   | 1.0   |
| 207659_s_at | NM_006501 | MOBP                     | 4336  | 8.9   | 5.4   | 6.2   | 1.5   | 1.1   |
| 207660_at   | NM_004019 | DMD                      | 1756  | 7.3   | 4.3   | 5.3   | 7.9   | 3.6   |
| 207661_s_at | NM_014631 | SH3PXD2A                 | 9644  | 0.5   | 0.6   | 3.3   | 0.2   | 0.8   |
| 207662_at   | NM_005992 | TBX1                     | 6899  | 5.8   | 3.6   | 1.8   | 6.6   | 4.8   |
| 207663_x_at | NM_001473 | GAGE3                    | 2575  | 410.3 | 518.2 | 443.0 | 478.0 | 379.1 |
| 207664_at   | NM_001464 | ADAM2                    | 2515  | 8.7   | 6.2   | 9.4   | 11.3  | 9.1   |
| 207665_at   | NM_003813 | ADAM21                   | 8747  | 10.8  | 9.4   | 7.4   | 7.9   | 7.9   |
| 207666_x_at | NM_021014 | SSX3                     | 10214 | 15.3  | 23.4  | 19.7  | 3.4   | 3.8   |
| 207667_s_at | NM_002756 | LOC1009967:5606 /// 100  |       | 120.9 | 125.9 | 137.5 | 129.9 | 106.8 |
| 207668_x_at | NM_005742 | PDIA6                    | 10130 | 727.2 | 720.7 | 817.4 | 688.5 | 584.5 |
| 207669_at   | NM_002282 | KRT83                    | 3889  | 2.0   | 1.1   | 1.6   | 1.8   | 0.7   |
| 207670_at   | NM_002283 | KRT85                    | 3891  | 16.1  | 12.7  | 16.2  | 2.3   | 9.0   |
| 207671_s_at | NM_004183 | BEST1                    | 7439  | 5.8   | 6.1   | 9.4   | 8.8   | 6.4   |
| 207672_at   | NM_002920 | RFX4                     | 5992  | 3.6   | 0.6   | 0.6   | 2.2   | 0.3   |
| 207673_at   | NM_004646 | NPHS1                    | 4868  | 1.6   | 0.5   | 1.9   | 0.4   | 0.3   |
| 207674_at   | NM_002000 | FCAR                     | 2204  | 3.6   | 0.8   | 3.7   | 2.6   | 3.7   |
| 207675_x_at | NM_003976 | ARTN                     | 9048  | 46.1  | 32.7  | 38.5  | 36.1  | 32.3  |
| 207676_at   | NM_004852 | ONECUT2                  | 9480  | 10.3  | 11.2  | 7.7   | 15.0  | 6.0   |
| 207677_s_at | NM_013416 | NCF4                     | 4689  | 0.8   | 0.5   | 0.9   | 1.0   | 1.0   |
| 207678_s_at | NM_007017 | SOX30                    | 11063 | 3.9   | 1.1   | 2.3   | 2.7   | 0.1   |
| 207679_at   | NM_000438 | PAX3                     | 5077  | 5.4   | 5.6   | 2.0   | 1.7   | 3.8   |
| 207680_x_at | NM_013942 | PAX3                     | 5077  | 1.9   | 0.7   | 1.4   | 1.0   | 4.2   |
| 207681_at   | NM_001504 | CXCR3                    | 2833  | 2.8   | 2.1   | 1.1   | 2.7   | 0.7   |
| 207682_s_at | NM_005355 | KIF25                    | 3834  | 4.3   | 0.5   | 4.9   | 1.3   | 0.4   |
| 207683_at   | NM_003593 | FOXN1                    | 8456  | 1.6   | 0.7   | 2.4   | 0.8   | 2.5   |
| 207684_at   | NM_004608 | TBX6                     | 6911  | 10.0  | 11.1  | 16.6  | 19.4  | 11.9  |
| 207685_at   | NM_004076 | CRYBB3                   | 1417  | 1.3   | 0.7   | 0.9   | 0.9   | 0.6   |
| 207686_s_at | NM_001228 | CASP8                    | 841   | 18.7  | 2.5   | 17.5  | 19.2  | 11.2  |



|             |           |                           |        |        |        |        |        |        |
|-------------|-----------|---------------------------|--------|--------|--------|--------|--------|--------|
| 207687_at   | NM_005538 | INHBC                     | 3626   | 27.3   | 12.7   | 16.9   | 16.0   | 9.0    |
| 207688_s_at | NM_005538 | -                         | -      | 99.5   | 69.0   | 99.5   | 91.1   | 73.2   |
| 207689_at   | NM_005995 | TBX10                     | 347853 | 10.5   | 12.4   | 8.1    | 10.8   | 8.2    |
| 207690_at   | NM_006492 | ALX3                      | 257    | 1.7    | 1.2    | 4.2    | 2.0    | 5.4    |
| 207691_x_at | NM_001776 | ENTPD1                    | 953    | 9.2    | 0.3    | 8.9    | 6.0    | 4.9    |
| 207692_s_at | NM_001135 | ACAN                      | 176    | 19.4   | 7.9    | 17.4   | 10.0   | 8.4    |
| 207693_at   | NM_000726 | CACNB4                    | 785    | 1.1    | 1.0    | 2.1    | 0.9    | 1.0    |
| 207694_at   | NM_000307 | POU3F4                    | 5456   | 13.0   | 7.6    | 9.2    | 3.1    | 6.2    |
| 207695_s_at | NM_001555 | IGSF1                     | 3547   | 2.0    | 2.6    | 1.8    | 5.5    | 6.4    |
| 207696_at   | NM_006581 | FUT9                      | 10690  | 0.1    | 0.1    | 0.1    | 0.3    | 0.2    |
| 207697_x_at | NM_005874 | LILRB2                    | 10288  | 2.1    | 1.9    | 0.6    | 0.6    | 0.6    |
| 207698_at   | NM_014356 | C6orf123                  | 26238  | 1.4    | 1.0    | 1.1    | 4.7    | 1.5    |
| 207699_at   | NM_014894 | ZFHX2                     | 85446  | 18.5   | 15.1   | 6.0    | 7.3    | 12.7   |
| 207700_s_at | NM_006534 | NCOA3                     | 8202   | 26.4   | 25.1   | 19.3   | 25.7   | 20.6   |
| 207701_at   | NM_015372 | C22orf24                  | 25775  | 20.4   | 9.5    | 11.4   | 15.9   | 3.8    |
| 207702_s_at | NM_012301 | MAGI2                     | 9863   | 1.9    | 0.8    | 0.7    | 0.8    | 2.0    |
| 207703_at   | NM_014893 | NLGN4Y                    | 22829  | 10.4   | 7.8    | 8.7    | 3.8    | 7.1    |
| 207704_s_at | NM_003644 | GAS7                      | 8522   | 2.8    | 1.1    | 2.1    | 0.8    | 3.4    |
| 207705_s_at | NM_025176 | NINL                      | 22981  | 15.0   | 16.4   | 9.7    | 11.1   | 8.0    |
| 207706_at   | NM_007123 | USH2A                     | 7399   | 6.1    | 0.9    | 0.2    | 0.2    | 0.3    |
| 207707_s_at | NM_030673 | SEC13                     | 6396   | 270.4  | 291.3  | 326.4  | 305.4  | 302.1  |
| 207708_at   | NM_021628 | ALOXE3                    | 59344  | 23.0   | 19.2   | 26.6   | 6.7    | 11.2   |
| 207709_at   | NM_006252 | PRKAA2                    | 5563   | 10.6   | 6.7    | 10.4   | 6.3    | 7.0    |
| 207710_at   | NM_014357 | LCE2B                     | 26239  | 0.8    | 3.8    | 0.7    | 0.8    | 2.5    |
| 207711_at   | NM_015377 | SOGA1                     | 140710 | 12.6   | 18.0   | 20.6   | 12.8   | 14.7   |
| 207712_at   | NM_001187 | BAGE                      | 574    | 10.1   | 9.4    | 12.4   | 9.7    | 7.9    |
| 207713_s_at | NM_006462 | RBCK1                     | 10616  | 67.4   | 60.7   | 76.6   | 80.5   | 65.9   |
| 207714_s_at | NM_004353 | SERPINH1                  | 871    | 1.3    | 0.8    | 1.0    | 1.0    | 1.0    |
| 207715_at   | NM_005210 | CRYGB                     | 1419   | 6.7    | 7.2    | 0.7    | 4.8    | 1.2    |
| 207716_at   | NM_006771 | KRT38                     | 8687   | 16.0   | 8.3    | 15.1   | 14.8   | 8.8    |
| 207717_s_at | NM_004572 | PKP2                      | 5318   | 8.9    | 8.3    | 9.7    | 9.7    | 10.4   |
| 207718_x_at | NM_000764 | CYP2A7                    | 1549   | 4.6    | 8.9    | 10.7   | 2.6    | 2.6    |
| 207719_x_at | NM_014812 | CEP170 /// C 9859 /// 645 |        | 49.0   | 44.2   | 49.5   | 41.4   | 35.0   |
| 207720_at   | NM_000427 | LOR                       | 4014   | 0.5    | 1.5    | 1.5    | 0.8    | 1.5    |
| 207721_x_at | NM_005340 | HINT1                     | 3094   | 1497.7 | 1675.3 | 1761.2 | 1670.5 | 1436.6 |
| 207722_s_at | NM_017797 | BTBD2                     | 55643  | 143.8  | 194.7  | 180.3  | 199.6  | 143.6  |
| 207723_s_at | NM_002261 | KLRC3                     | 3823   | 3.0    | 0.5    | 6.2    | 0.9    | 0.7    |
| 207724_s_at | NM_014946 | SPAST                     | 6683   | 30.1   | 23.3   | 29.0   | 17.8   | 18.8   |
| 207725_at   | NM_004575 | POU4F2                    | 5458   | 4.8    | 4.1    | 0.6    | 3.2    | 4.2    |
| 207726_at   | NM_004452 | ESRRB                     | 2103   | 0.8    | 0.6    | 0.7    | 0.7    | 0.5    |
| 207727_s_at | NM_012222 | MUTYH                     | 4595   | 141.7  | 174.2  | 202.3  | 140.8  | 118.5  |
| 207728_at   | NM_018005 | ATF7IP                    | 55729  | 1.7    | 4.2    | 4.9    | 7.3    | 3.2    |
| 207729_at   | NM_016279 | CDH9                      | 1007   | 3.1    | 4.9    | 1.3    | 1.6    | 4.9    |
| 207730_x_at | NM_017932 | -                         | -      | 70.8   | 71.0   | 68.4   | 54.9   | 69.9   |
| 207731_at   | NM_020118 | -                         | -      | 4.5    | 0.4    | 4.0    | 2.3    | 3.6    |
| 207732_s_at | NM_021120 | DLG3                      | 1741   | 47.7   | 43.7   | 43.3   | 36.8   | 35.3   |
| 207733_x_at | NM_002784 | PSG9                      | 5678   | 5.8    | 6.7    | 14.1   | 4.7    | 12.4   |
| 207734_at   | NM_017773 | LAX1                      | 54900  | 11.8   | 10.4   | 11.4   | 10.4   | 7.3    |
| 207735_at   | NM_017831 | RNF125                    | 54941  | 16.7   | 8.4    | 12.3   | 14.6   | 10.0   |
| 207736_s_at | NM_005425 | TNP2                      | 7142   | 0.3    | 0.8    | 0.3    | 0.2    | 0.2    |
| 207737_at   | NM_021981 | -                         | -      | 0.5    | 0.2    | 1.1    | 2.6    | 2.2    |
| 207738_s_at | NM_013436 | NCKAP1                    | 10787  | 303.3  | 214.0  | 311.8  | 356.3  | 245.3  |
| 207739_s_at | NM_001472 | GAGE1 /// G, 2543 /// 257 |        | 964.5  | 908.0  | 1055.0 | 1065.1 | 843.7  |

|             |           |               |              |        |        |        |        |        |
|-------------|-----------|---------------|--------------|--------|--------|--------|--------|--------|
| 207740_s_at | NM_012346 | NUP62         | 23636        | 84.7   | 65.4   | 114.6  | 88.3   | 97.7   |
| 207741_x_at | NM_003293 | TPSAB1        | 7177         | 5.5    | 1.7    | 1.7    | 4.5    | 3.0    |
| 207742_s_at | NM_001489 | NR6A1         | 2649         | 2.3    | 3.9    | 3.3    | 2.0    | 6.4    |
| 207743_at   | NM_014104 | -             | -            | 1.4    | 1.4    | 0.9    | 1.3    | 0.9    |
| 207744_at   | NM_014124 | -             | -            | 0.9    | 1.3    | 1.5    | 2.0    | 1.5    |
| 207745_at   | NM_016366 | CABP2         | 51475        | 9.2    | 0.9    | 0.7    | 0.8    | 4.6    |
| 207746_at   | NM_014125 | POLQ          | 10721        | 12.0   | 15.3   | 11.6   | 12.2   | 9.2    |
| 207747_s_at | NM_018110 | DOK4          | 55715        | 12.4   | 2.0    | 7.4    | 15.8   | 7.6    |
| 207748_at   | NM_014122 | DUTP1 /// D   | -            | 10.9   | 2.4    | 11.1   | 8.2    | 10.7   |
| 207749_s_at | NM_002718 | PPP2R3A       | 5523         | 37.9   | 30.7   | 26.9   | 23.9   | 19.2   |
| 207750_at   | NM_018510 | EPS15P1 ///   | -            | 0.3    | 2.8    | 0.9    | 0.9    | 0.3    |
| 207751_at   | NM_018544 | PRO2949       | 55412        | 6.1    | 7.5    | 7.6    | 5.5    | 7.2    |
| 207752_x_at | NM_005039 | PRB1          | 5542         | 8.0    | 12.2   | 10.5   | 3.4    | 16.9   |
| 207753_at   | NM_020657 | ZNF304        | 57343        | 42.6   | 43.0   | 47.6   | 40.7   | 31.4   |
| 207754_at   | NM_007211 | RASSF8        | 11228        | 4.9    | 9.7    | 10.7   | 2.5    | 4.8    |
| 207755_at   | NM_025017 | -             | -            | 9.2    | 5.5    | 6.1    | 7.1    | 4.6    |
| 207756_at   | NM_025028 | -             | -            | 0.9    | 1.0    | 1.3    | 0.5    | 0.4    |
| 207757_at   | NM_030613 | ZFP2          | 80108        | 10.1   | 1.0    | 0.7    | 0.4    | 0.3    |
| 207758_at   | NM_025056 | -             | -            | 10.9   | 4.1    | 9.6    | 11.7   | 8.1    |
| 207759_s_at | NM_025068 | DISC1 /// TSM | 27185 /// 10 | 4.8    | 6.2    | 5.9    | 5.4    | 4.8    |
| 207760_s_at | NM_006312 | NCOR2         | 9612         | 166.4  | 159.5  | 176.0  | 173.0  | 132.5  |
| 207761_s_at | NM_014033 | METTL7A       | 25840        | 235.3  | 210.4  | 258.2  | 210.3  | 183.9  |
| 207762_at   | NM_024492 | LPAL2         | 80350        | 1.1    | 0.7    | 0.7    | 4.3    | 0.6    |
| 207763_at   | NM_002962 | S100A5        | 6276         | 1.6    | 0.6    | 9.1    | 2.0    | 1.3    |
| 207764_s_at | NM_005734 | HIPK3         | 10114        | 6.4    | 7.4    | 8.1    | 8.9    | 5.7    |
| 207765_s_at | NM_025182 | FAM214B       | 80256        | 24.0   | 43.0   | 37.3   | 41.7   | 20.8   |
| 207766_at   | NM_004196 | CDKL1         | 8814         | 4.4    | 0.7    | 0.4    | 0.5    | 0.9    |
| 207767_s_at | NM_001965 | EGR4          | 1961         | 20.1   | 21.2   | 11.0   | 11.8   | 10.0   |
| 207768_at   | NM_001965 | EGR4          | 1961         | 0.1    | 0.3    | 0.8    | 0.2    | 3.4    |
| 207769_s_at | NM_005710 | PQBP1         | 10084        | 255.7  | 258.4  | 288.0  | 248.8  | 264.6  |
| 207770_x_at | NM_022644 | CSH1 /// CSH  | 1442 /// 144 | 24.2   | 12.7   | 23.1   | 17.9   | 1.8    |
| 207771_at   | NM_003041 | SLC5A2        | 6524         | 3.4    | 17.8   | 15.9   | 19.0   | 18.6   |
| 207772_s_at | NM_019854 | PRMT8         | 56341        | 0.8    | 5.0    | 2.1    | 3.6    | 0.7    |
| 207773_x_at | NM_022820 | CYP3A43       | 64816        | 2.3    | 0.4    | 0.2    | 0.4    | 1.2    |
| 207774_at   | NM_025020 | ATG10         | 83734        | 5.1    | 6.4    | 11.4   | 12.0   | 9.1    |
| 207775_at   | NM_024304 | MGC4859       | 79150        | 2.5    | 1.2    | 4.5    | 1.2    | 0.5    |
| 207776_s_at | NM_000724 | CACNB2        | 783          | 9.9    | 7.0    | 9.4    | 9.3    | 4.0    |
| 207777_s_at | NM_007237 | LOC1019287    | 11262 /// 10 | 0.3    | 5.4    | 8.3    | 1.4    | 0.3    |
| 207778_at   | NM_006508 | REG1P         | 5969         | 2.0    | 0.9    | 1.1    | 0.9    | 2.3    |
| 207779_at   | NM_016344 | -             | -            | 6.3    | 5.6    | 7.5    | 4.7    | 5.2    |
| 207780_at   | NM_001340 | CYLC2         | 1539         | 5.7    | 3.2    | 5.3    | 7.3    | 7.1    |
| 207781_s_at | NM_021998 | ZNF711        | 7552         | 0.5    | 0.3    | 2.4    | 1.1    | 0.2    |
| 207782_s_at | NM_007319 | PSEN1         | 5663         | 91.5   | 89.0   | 107.1  | 96.5   | 73.8   |
| 207783_x_at | NM_017627 | HUWE1         | 10075        | 3516.6 | 3309.2 | 3588.3 | 3364.7 | 3199.9 |
| 207784_at   | NM_009589 | ARSD          | 414          | 0.8    | 2.0    | 1.0    | 1.3    | 1.4    |
| 207785_s_at | NM_015874 | RBPJ          | 3516         | 136.3  | 123.9  | 145.2  | 130.3  | 104.2  |
| 207786_at   | NM_024514 | CYP2R1        | 120227       | 20.8   | 15.6   | 19.3   | 13.4   | 13.2   |
| 207787_at   | NM_002279 | KRT33B        | 3884         | 1.5    | 0.8    | 1.2    | 1.1    | 1.5    |
| 207788_s_at | NM_005775 | SORBS3        | 10174        | 34.0   | 41.7   | 41.6   | 56.9   | 34.8   |
| 207789_s_at | NM_001936 | DPP6          | 1804         | 12.2   | 7.9    | 8.9    | 4.7    | 1.8    |
| 207790_at   | NM_025168 | LRRC1         | 55227        | 8.8    | 8.0    | 8.5    | 9.1    | 5.0    |
| 207791_s_at | NM_004161 | RAB1A         | 5861         | 175.6  | 154.6  | 194.2  | 181.1  | 156.5  |
| 207792_at   | NM_000911 | OPRD1         | 4985         | 11.3   | 0.7    | 1.0    | 1.5    | 3.8    |

|             |           |             |              |       |       |        |       |       |
|-------------|-----------|-------------|--------------|-------|-------|--------|-------|-------|
| 207793_s_at | NM_004437 | EPB41       | 2035         | 16.4  | 11.2  | 13.1   | 16.1  | 8.0   |
| 207794_at   | NM_000648 | CCR2        | 729230       | 1.5   | 2.9   | 0.5    | 4.4   | 2.1   |
| 207795_s_at | AB009597  | KLRD1       | 3824         | 8.4   | 6.1   | 9.9    | 0.9   | 7.7   |
| 207796_x_at | NM_007334 | KLRD1       | 3824         | 4.7   | 3.8   | 5.4    | 5.2   | 7.8   |
| 207797_s_at | NM_018409 | LRP2BP      | 55805        | 7.1   | 0.8   | 6.2    | 3.9   | 1.6   |
| 207798_s_at | NM_017492 | ATXN2L      | 11273        | 10.2  | 14.0  | 11.4   | 10.5  | 7.5   |
| 207799_x_at | NM_015437 | ARMCX4      | 100131755    | 1.0   | 1.7   | 1.1    | 0.8   | 2.6   |
| 207800_at   | NM_004857 | AKAP5       | 9495         | 10.4  | 1.0   | 4.2    | 8.4   | 6.7   |
| 207801_s_at | NM_014868 | RNF10       | 9921         | 339.9 | 370.0 | 349.9  | 374.7 | 321.8 |
| 207802_at   | NM_006061 | CRISP3      | 10321        | 0.9   | 0.4   | 0.9    | 4.4   | 0.5   |
| 207803_s_at | NM_005212 | CSN3        | 1448         | 1.4   | 1.0   | 1.0    | 1.7   | 4.5   |
| 207804_s_at | NM_004108 | FCN2        | 2220         | 7.0   | 1.4   | 1.4    | 3.2   | 0.8   |
| 207805_s_at | NM_002813 | PSMD9       | 5715         | 303.3 | 295.7 | 356.5  | 302.6 | 264.0 |
| 207808_s_at | NM_000313 | PROS1       | 5627         | 11.7  | 6.3   | 7.0    | 10.9  | 7.1   |
| 207809_s_at | NM_001183 | ATP6AP1     | 537          | 498.0 | 454.8 | 471.5  | 518.2 | 310.8 |
| 207810_at   | NM_001994 | F13B        | 2165         | 0.3   | 1.2   | 0.2    | 2.3   | 0.2   |
| 207811_at   | NM_000223 | KRT12       | 3859         | 0.3   | 0.7   | 1.0    | 0.3   | 0.7   |
| 207812_s_at | NM_015530 | GORASP2     | 26003        | 219.9 | 195.4 | 218.7  | 199.1 | 179.2 |
| 207813_s_at | NM_004110 | FDXR        | 2232         | 97.0  | 115.3 | 99.9   | 109.9 | 91.2  |
| 207814_at   | NM_001926 | DEFA6       | 1671         | 2.6   | 1.1   | 1.3    | 0.6   | 0.5   |
| 207815_at   | NM_002620 | PF4V1       | 5197         | 2.3   | 3.3   | 2.3    | 1.1   | 4.4   |
| 207816_at   | NM_002289 | LALBA       | 3906         | 5.7   | 2.1   | 1.6    | 0.7   | 3.3   |
| 207817_at   | NM_002177 | IFNW1       | 3467         | 1.2   | 0.6   | 1.6    | 1.3   | 0.3   |
| 207818_s_at | NM_000872 | HTR7        | 3363         | 0.4   | 0.3   | 2.7    | 8.5   | 3.4   |
| 207819_s_at | NM_000443 | ABCB4       | 5244         | 8.6   | 0.6   | 4.8    | 0.8   | 4.8   |
| 207820_at   | NM_000667 | ADH1A       | 124          | 7.4   | 4.3   | 3.4    | 6.7   | 3.5   |
| 207821_s_at | NM_005607 | PTK2        | 5747         | 91.3  | 75.6  | 75.8   | 78.7  | 70.7  |
| 207822_at   | NM_023107 | FGFR1       | 2260         | 16.0  | 7.8   | 8.2    | 8.5   | 6.6   |
| 207823_s_at | NM_004847 | AIF1        | 199          | 11.1  | 11.9  | 3.0    | 2.0   | 11.4  |
| 207824_s_at | NM_002383 | MAZ         | 4150         | 242.6 | 224.6 | 288.9  | 264.8 | 223.1 |
| 207825_s_at | NM_000823 | GHRHR       | 2692         | 3.9   | 1.2   | 5.5    | 1.8   | 1.8   |
| 207826_s_at | NM_002167 | ID3         | 3399         | 220.8 | 229.8 | 328.0  | 286.9 | 209.9 |
| 207827_x_at | L36675    | SNCA        | 6622         | 10.0  | 10.2  | 14.9   | 7.2   | 8.7   |
| 207828_s_at | NM_005196 | CENPF       | 1063         | 92.5  | 75.0  | 89.9   | 68.5  | 90.4  |
| 207829_s_at | NM_013978 | BNIP1       | 662          | 61.8  | 66.8  | 59.5   | 60.9  | 56.7  |
| 207830_s_at | NM_002713 | PPP1R8      | 5511         | 174.7 | 163.0 | 199.3  | 165.5 | 151.0 |
| 207831_x_at | NM_013407 | DHPS        | 1725         | 162.4 | 207.9 | 170.8  | 216.3 | 158.9 |
| 207832_at   | NM_017451 | BAIAP2      | 10458        | 1.1   | 1.1   | 0.9    | 0.4   | 0.6   |
| 207833_s_at | NM_000411 | HLCS        | 3141         | 14.2  | 29.2  | 25.2   | 17.6  | 19.3  |
| 207834_at   | NM_006485 | FBLN1       | 2192         | 14.6  | 2.8   | 14.3   | 2.5   | 4.5   |
| 207835_at   | NM_006487 | FBLN1       | 2192         | 9.7   | 10.8  | 8.5    | 3.1   | 8.5   |
| 207836_s_at | NM_006867 | RBPMS       | 11030        | 29.0  | 29.4  | 29.0   | 23.8  | 20.8  |
| 207837_at   | NM_006867 | RBPMS       | 11030        | 3.2   | 0.6   | 0.5    | 5.1   | 0.4   |
| 207838_x_at | NM_020524 | PBXIP1      | 57326        | 1.4   | 1.9   | 0.9    | 0.8   | 0.7   |
| 207839_s_at | NM_016446 | TMEM8B      | 51754        | 39.4  | 36.6  | 46.8   | 39.3  | 32.0  |
| 207840_at   | NM_007053 | CD160       | 11126        | 1.2   | 6.7   | 8.0    | 3.0   | 2.4   |
| 207841_at   | NM_019003 | SPIN2A      | 54466        | 1.3   | 1.3   | 0.5    | 0.9   | 3.5   |
| 207842_s_at | NM_007359 | CASC3 /// M | 22794 /// 10 | 160.9 | 180.4 | 192.2  | 207.7 | 151.0 |
| 207843_x_at | NM_001914 | CYB5A       | 1528         | 999.3 | 845.1 | 1127.3 | 884.9 | 844.8 |
| 207844_at   | NM_002188 | IL13        | 3596         | 14.1  | 7.8   | 12.5   | 1.6   | 6.6   |
| 207845_s_at | NM_014885 | ANAPC10     | 10393        | 47.5  | 32.8  | 44.7   | 31.3  | 34.7  |
| 207846_at   | NM_000306 | POU1F1      | 5449         | 1.9   | 4.7   | 2.1    | 0.1   | 1.1   |
| 207847_s_at | NM_002456 | MUC1        | 4582         | 14.1  | 6.3   | 9.7    | 12.4  | 8.2   |

|             |           |                   |              |         |       |       |       |       |       |
|-------------|-----------|-------------------|--------------|---------|-------|-------|-------|-------|-------|
| 207848_at   | NM_000490 | AVP               | 551          | 0.9     | 7.3   | 2.9   | 2.4   | 0.6   |       |
| 207849_at   | NM_000586 | IL2               | 3558         | 3.0     | 0.2   | 0.3   | 1.0   | 0.5   |       |
| 207850_at   | NM_002090 | CXCL3             | 2921         | 0.5     | 3.4   | 3.9   | 0.4   | 3.3   |       |
| 207851_s_at | NM_000208 | INSR              | 3643         | 9.6     | 9.0   | 5.9   | 8.2   | 5.8   |       |
| 207852_at   | NM_002994 | CXCL5             | 6374         | 0.2     | 0.2   | 0.4   | 3.7   | 1.1   |       |
| 207853_s_at | NM_003085 | SNCB              | 6620         | 1.2     | 0.9   | 2.5   | 2.0   | 0.5   |       |
| 207854_at   | NM_002102 | GYPE              | 2996         | 0.4     | 4.1   | 4.5   | 4.8   | 1.6   |       |
| 207855_s_at | NM_015127 | CLCC1             | 23155        | 82.7    | 65.0  | 76.7  | 61.6  | 63.9  |       |
| 207856_s_at | NM_017951 | LOC150776 / 55627 | /// 15       | 83.6    | 102.2 | 129.6 | 111.0 | 103.6 |       |
| 207857_at   | NM_006866 | LILRA2            | 11027        | 8.5     | 2.0   | 3.0   | 3.5   | 0.9   |       |
| 207858_s_at | NM_000298 | PKLR              | 5313         | 1.2     | 1.1   | 0.9   | 0.6   | 0.5   |       |
| 207859_s_at | NM_000749 | CHRN3             | 1142         | 9.9     | 9.2   | 17.5  | 7.3   | 8.0   |       |
| 207860_at   | NM_004829 | NCR1              | 9437         | 2.2     | 0.5   | 1.8   | 0.4   | 0.8   |       |
| 207861_at   | NM_002990 | CCL22             | 6367         | 1.2     | 1.3   | 1.6   | 1.6   | 1.2   |       |
| 207862_at   | NM_006760 | UPK2              | 7379         | 11.0    | 0.8   | 11.9  | 8.8   | 8.7   |       |
| 207863_at   | NM_001125 | ADPRH             | 141          | 2.1     | 0.9   | 4.9   | 1.1   | 1.1   |       |
| 207864_at   | NM_002976 | SCN7A             | 6332         | 0.2     | 2.6   | 0.2   | 0.1   | 2.0   |       |
| 207865_s_at | NM_001720 | BMP8B             | 656          | 4.8     | 0.4   | 8.4   | 0.5   | 2.3   |       |
| 207866_at   | NM_001720 | BMP8A             | 353500       | 2.3     | 0.8   | 3.9   | 3.6   | 1.0   |       |
| 207867_at   | NM_006193 | PAX4              | 5078         | 4.7     | 4.8   | 2.9   | 4.8   | 3.9   |       |
| 207868_at   | NM_000742 | CHRNA2            | 1135         | 20.3    | 17.7  | 22.2  | 15.9  | 14.0  |       |
| 207869_s_at | NM_018896 | CACNA1G           | 8913         | 3.9     | 0.2   | 0.6   | 1.8   | 0.1   |       |
| 207870_at   | NM_005751 | AKAP9             | 10142        | 1.0     | 0.7   | 7.9   | 5.8   | 3.5   |       |
| 207871_s_at | NM_018412 | MIR6132           | /// 7982     | /// 936 | 431.7 | 377.1 | 433.0 | 420.9 | 324.9 |
| 207872_s_at | NM_006863 | LILRA1            | 11024        | 1.9     | 6.7   | 4.5   | 0.4   | 4.0   |       |
| 207873_x_at | NM_021115 | SEZ6L             | 23544        | 16.2    | 2.9   | 21.0  | 4.1   | 6.6   |       |
| 207874_s_at | NM_006684 | CFHR4             | 10877        | 2.3     | 1.1   | 3.1   | 2.3   | 0.6   |       |
| 207875_at   | NM_015882 | -                 | -            | 2.5     | 0.1   | 0.5   | 0.4   | 0.6   |       |
| 207876_s_at | NM_001458 | FLNC              | 2318         | 15.5    | 8.9   | 16.4  | 5.4   | 7.5   |       |
| 207877_s_at | NM_002533 | NVL               | 4931         | 71.4    | 54.1  | 82.6  | 61.0  | 82.5  |       |
| 207878_at   | NM_015848 | KRT76             | 51350        | 1.2     | 0.7   | 1.4   | 0.7   | 1.3   |       |
| 207879_at   | NM_001691 | -                 | -            | 0.3     | 1.2   | 0.2   | 2.0   | 2.3   |       |
| 207880_at   | NM_002390 | ADAM11            | 4185         | 4.7     | 1.9   | 3.2   | 4.4   | 2.6   |       |
| 207881_at   | NM_015887 | -                 | -            | 3.8     | 1.8   | 4.0   | 4.5   | 3.1   |       |
| 207882_at   | NM_017532 | -                 | -            | 19.5    | 12.7  | 11.4  | 10.6  | 4.5   |       |
| 207883_s_at | NM_003227 | TFR2              | 7036         | 5.7     | 5.7   | 6.2   | 10.3  | 5.8   |       |
| 207884_at   | NM_000180 | GUCY2D            | 3000         | 13.0    | 1.6   | 7.8   | 2.3   | 13.2  |       |
| 207885_at   | NM_004057 | S100G             | 795          | 0.5     | 1.0   | 0.7   | 0.8   | 0.4   |       |
| 207886_s_at | NM_001742 | CALCR             | 799          | 0.3     | 5.4   | 0.3   | 0.7   | 0.5   |       |
| 207887_s_at | AB022177  | CALCR             | 799          | 5.0     | 1.5   | 1.7   | 1.9   | 1.1   |       |
| 207888_at   | NM_004940 | -                 | -            | 0.2     | 0.4   | 0.5   | 3.2   | 2.4   |       |
| 207889_at   | NM_007101 | SARDH             | 1757         | 1.1     | 0.5   | 1.0   | 1.9   | 0.7   |       |
| 207890_s_at | NM_022718 | MMP25             | 64386        | 7.2     | 17.6  | 13.8  | 9.6   | 12.4  |       |
| 207891_s_at | NM_017518 | HAUS7             | /// TF 11219 | /// 55  | 65.8  | 46.0  | 60.2  | 37.5  | 49.8  |
| 207892_at   | NM_000074 | CD40LG            | 959          | 1.0     | 1.6   | 0.8   | 1.4   | 1.0   |       |
| 207893_at   | NM_003140 | SRY               | 6736         | 2.3     | 2.3   | 1.2   | 0.9   | 0.8   |       |
| 207894_s_at | NM_020552 | TCL6              | 27004        | 8.8     | 8.4   | 11.7  | 4.5   | 7.3   |       |
| 207895_at   | NM_005468 | NAALADL1          | 10004        | 3.6     | 0.9   | 1.4   | 2.0   | 1.9   |       |
| 207896_s_at | NM_007337 | DLEC1             | 9940         | 1.8     | 0.7   | 1.1   | 0.5   | 0.7   |       |
| 207897_at   | NM_001883 | CRHR2             | 1395         | 16.0    | 2.9   | 8.3   | 9.5   | 4.8   |       |
| 207899_at   | NM_004123 | GIP               | 2695         | 2.1     | 1.1   | 1.5   | 1.5   | 1.3   |       |
| 207900_at   | NM_002987 | CCL17             | 6361         | 8.1     | 1.9   | 4.5   | 6.0   | 4.4   |       |
| 207901_at   | NM_002187 | IL12B             | 3593         | 5.5     | 4.6   | 3.0   | 3.6   | 4.3   |       |

|             |           |                                |       |       |       |       |       |       |
|-------------|-----------|--------------------------------|-------|-------|-------|-------|-------|-------|
| 207902_at   | NM_000564 | IL5RA                          | 3568  | 7.1   | 14.9  | 4.3   | 4.2   | 0.5   |
| 207904_s_at | NM_005575 | LNPEP                          | 4012  | 13.4  | 13.5  | 18.7  | 11.0  | 14.6  |
| 207906_at   | NM_000588 | IL3                            | 3562  | 1.6   | 0.5   | 1.4   | 0.4   | 2.6   |
| 207907_at   | NM_003807 | TNFSF14                        | 8740  | 0.5   | 0.4   | 0.4   | 0.3   | 0.4   |
| 207908_at   | NM_000423 | KRT2                           | 3849  | 12.0  | 7.2   | 7.2   | 8.4   | 1.6   |
| 207909_x_at | U21663    | DAZ1 /// DAZ1 1617 /// 570     |       | 6.3   | 2.7   | 0.8   | 0.6   | 4.0   |
| 207910_at   | NM_006552 | SCGB1D1                        | 10648 | 3.7   | 0.8   | 4.2   | 3.7   | 1.7   |
| 207911_s_at | NM_004245 | TGM5                           | 9333  | 28.3  | 4.0   | 5.7   | 4.8   | 3.4   |
| 207912_s_at | NM_004081 | DAZ1 /// DAZ1 1617 /// 570     |       | 0.2   | 0.1   | 0.2   | 1.1   | 0.5   |
| 207913_at   | NM_000774 | CYP2F1                         | 1572  | 4.0   | 1.2   | 4.0   | 4.8   | 1.0   |
| 207914_x_at | NM_001989 | EVX1                           | 2128  | 1.7   | 1.1   | 2.1   | 3.0   | 2.6   |
| 207915_at   | NM_005377 | MYCLP1 /// P-                  |       | 10.8  | 3.1   | 6.0   | 2.1   | 5.9   |
| 207916_at   | NM_005405 | AC009947.3,-                   |       | 6.4   | 5.5   | 11.7  | 5.3   | 1.6   |
| 207917_at   | NM_015901 | -                              |       | 19.3  | 16.7  | 13.2  | 14.6  | 14.7  |
| 207918_s_at | NM_003308 | TSPY1 /// TSPY1 7258 /// 728   |       | 56.0  | 64.1  | 50.4  | 51.3  | 43.1  |
| 207919_at   | NM_004314 | ART1                           | 417   | 13.3  | 13.5  | 14.7  | 12.4  | 10.0  |
| 207920_x_at | NM_003410 | ZFX                            | 7543  | 22.9  | 32.0  | 33.4  | 16.6  | 20.2  |
| 207921_x_at | NM_013952 | PAX8                           | 7849  | 18.9  | 1.8   | 1.1   | 8.4   | 2.9   |
| 207922_s_at | NM_005882 | LOC101928610296 /// 10         |       | 330.9 | 214.5 | 358.8 | 324.5 | 268.4 |
| 207923_x_at | NM_013953 | PAX8                           | 7849  | 1.4   | 0.7   | 6.2   | 0.4   | 8.1   |
| 207924_x_at | NM_013992 | PAX8                           | 7849  | 0.6   | 1.1   | 2.2   | 1.1   | 6.8   |
| 207925_at   | NM_001900 | CST5                           | 1473  | 10.7  | 11.2  | 5.8   | 13.4  | 0.5   |
| 207926_at   | NM_004488 | GP5                            | 2814  | 5.3   | 0.8   | 4.1   | 2.5   | 0.3   |
| 207927_at   | NM_019859 | HTR7                           | 3363  | 0.8   | 0.9   | 0.7   | 1.1   | 0.6   |
| 207928_s_at | NM_006529 | GLRA3                          | 8001  | 1.7   | 0.0   | 0.2   | 0.1   | 0.1   |
| 207929_at   | NM_005314 | GRPR                           | 2925  | 39.0  | 18.0  | 23.2  | 17.6  | 4.3   |
| 207930_at   | NM_002297 | LCN1                           | 3933  | 2.7   | 1.5   | 1.7   | 3.7   | 0.9   |
| 207931_s_at | NM_006212 | PFKFB2                         | 5208  | 4.5   | 5.4   | 19.4  | 6.5   | 3.8   |
| 207932_at   | NM_002170 | IFNA8                          | 3445  | 0.4   | 0.3   | 1.2   | 0.5   | 0.1   |
| 207933_at   | NM_003460 | ZP2                            | 7783  | 1.0   | 0.8   | 0.5   | 1.0   | 0.6   |
| 207934_at   | NM_021026 | RFPL1                          | 5988  | 0.3   | 1.5   | 0.4   | 0.2   | 0.2   |
| 207935_s_at | NM_002274 | KRT13                          | 3860  | 1.1   | 1.1   | 2.5   | 4.7   | 4.0   |
| 207936_x_at | NM_006604 | RFPL3                          | 10738 | 18.5  | 20.1  | 28.8  | 12.0  | 17.1  |
| 207937_x_at | NM_023110 | FGFR1                          | 2260  | 27.8  | 7.6   | 23.0  | 20.1  | 16.3  |
| 207938_at   | NM_015886 | PI15                           | 51050 | 8.9   | 10.7  | 7.2   | 10.1  | 4.8   |
| 207939_x_at | NM_006711 | RNPS1                          | 10921 | 241.3 | 334.9 | 318.7 | 294.5 | 209.3 |
| 207940_x_at | NM_001840 | CNR1                           | 1268  | 1.9   | 2.4   | 2.8   | 2.3   | 1.3   |
| 207941_s_at | NM_004902 | RBM39                          | 9584  | 358.9 | 263.3 | 334.4 | 285.2 | 265.1 |
| 207943_x_at | NM_006718 | PLAGL1                         | 5325  | 6.0   | 6.7   | 7.9   | 2.1   | 0.6   |
| 207944_at   | NM_006188 | OCM2                           | 4951  | 1.6   | 5.8   | 1.5   | 6.8   | 6.0   |
| 207945_s_at | NM_001893 | CSNK1D                         | 1453  | 221.9 | 205.1 | 243.5 | 221.9 | 174.7 |
| 207946_at   | NM_005878 | MAML3                          | 55534 | 1.4   | 3.0   | 4.3   | 1.1   | 3.1   |
| 207949_s_at | NM_004968 | ICA1                           | 3382  | 82.0  | 83.1  | 93.0  | 85.7  | 69.6  |
| 207950_s_at | NM_001149 | ANK3                           | 288   | 44.7  | 36.8  | 33.5  | 41.9  | 37.2  |
| 207951_at   | NM_001891 | CSN2                           | 1447  | 8.0   | 3.6   | 7.7   | 15.6  | 1.0   |
| 207952_at   | NM_000879 | IL5                            | 3567  | 0.3   | 2.9   | 2.6   | 0.8   | 1.3   |
| 207953_at   | AF010144  | -                              |       | 3.2   | 7.0   | 5.0   | 2.0   | 1.9   |
| 207954_at   | NM_002050 | GATA2                          | 2624  | 32.8  | 24.1  | 37.2  | 31.4  | 26.4  |
| 207955_at   | NM_006664 | CCL27                          | 10850 | 9.1   | 2.2   | 5.5   | 3.3   | 5.4   |
| 207956_x_at | NM_015928 | PDS5B                          | 23047 | 68.5  | 65.3  | 101.6 | 65.2  | 60.5  |
| 207957_s_at | NM_002738 | PRKCB                          | 5579  | 0.4   | 0.8   | 2.6   | 1.1   | 0.9   |
| 207958_at   | NM_006798 | UGT2A1 /// UGT2A1 10941 /// 57 |       | 4.5   | 6.3   | 2.4   | 3.6   | 3.5   |
| 207959_s_at | NM_004662 | DNAH9                          | 1770  | 0.9   | 0.4   | 0.6   | 0.5   | 0.6   |

|             |           |                          |        |       |       |       |       |
|-------------|-----------|--------------------------|--------|-------|-------|-------|-------|
| 207960_at   | NM_012277 | -                        | 33.9   | 13.0  | 19.9  | 11.0  | 12.5  |
| 207961_x_at | NM_022870 | MYH11 4629               | 2.4    | 1.0   | 2.2   | 9.9   | 2.2   |
| 207962_at   | NM_007058 | CAPN11 11131             | 3.1    | 4.5   | 1.0   | 4.1   | 5.5   |
| 207963_at   | NM_014354 | KIF25-AS1 100505879      | 2.3    | 6.3   | 9.1   | 5.2   | 4.2   |
| 207964_x_at | NM_021068 | IFNA4 3441               | 2.0    | 6.8   | 4.8   | 0.5   | 6.0   |
| 207965_at   | NM_020999 | NEUROG3 50674            | 0.9    | 0.9   | 0.5   | 3.0   | 1.3   |
| 207966_s_at | NM_012201 | GLG1 2734                | 72.6   | 90.1  | 57.8  | 66.5  | 45.8  |
| 207967_at   | NM_007258 | VPS45 11311              | 9.7    | 3.3   | 7.6   | 2.0   | 2.0   |
| 207968_s_at | NM_002397 | MEF2C 4208               | 0.7    | 0.9   | 1.7   | 6.9   | 1.2   |
| 207969_x_at | NM_020109 | ACRV1 56                 | 15.7   | 14.9  | 15.0  | 13.0  | 12.2  |
| 207971_s_at | NM_015147 | CEP68 23177              | 19.7   | 16.4  | 20.4  | 22.3  | 9.5   |
| 207972_at   | NM_000171 | GLRA1 2741               | 1.5    | 6.8   | 4.5   | 6.7   | 2.2   |
| 207973_x_at | NM_020110 | ACRV1 56                 | 18.1   | 12.5  | 14.4  | 14.7  | 12.3  |
| 207974_s_at | NM_006930 | SKP1 6500                | 1092.1 | 895.8 | 974.7 | 964.5 | 835.0 |
| 207976_at   | NM_025010 | KLHL18 23276             | 3.4    | 11.3  | 7.9   | 7.4   | 11.2  |
| 207977_s_at | NM_001937 | DPT 1805                 | 0.9    | 0.8   | 1.0   | 6.7   | 3.1   |
| 207978_s_at | NM_006981 | NR4A3 8013               | 12.4   | 4.5   | 5.3   | 3.6   | 4.7   |
| 207979_s_at | NM_004931 | CD8B /// LOC926 /// 1009 | 4.8    | 8.7   | 3.8   | 1.6   | 1.5   |
| 207980_s_at | NM_006079 | CITED2 10370             | 114.7  | 115.6 | 107.0 | 143.0 | 97.1  |
| 207981_s_at | NM_001438 | ESRRG 2104               | 5.2    | 4.8   | 1.6   | 2.6   | 2.3   |
| 207982_at   | NM_005323 | HIST1H1T 3010            | 6.9    | 4.7   | 5.7   | 1.4   | 9.9   |
| 207983_s_at | NM_006603 | STAG2 10735              | 101.9  | 99.7  | 90.9  | 115.6 | 100.9 |
| 207984_s_at | NM_005374 | MPP2 4355                | 145.5  | 132.8 | 163.0 | 136.0 | 117.6 |
| 207985_at   | NM_014355 | -                        | 1.3    | 0.7   | 2.4   | 2.9   | 1.6   |
| 207986_x_at | NM_001915 | CYB561 1534              | 151.8  | 222.2 | 277.8 | 287.4 | 192.7 |
| 207987_s_at | NM_000825 | GNRH1 2796               | 1.4    | 1.7   | 2.7   | 0.3   | 1.0   |
| 207988_s_at | NM_005731 | ARPC2 10109              | 263.7  | 231.1 | 264.4 | 257.5 | 227.6 |
| 207989_at   | NM_000914 | OPRM1 4988               | 4.4    | 0.7   | 0.7   | 0.3   | 1.3   |
| 207990_x_at | NM_020114 | ACRV1 56                 | 17.5   | 16.8  | 19.1  | 18.2  | 10.2  |
| 207991_x_at | NM_020113 | ACRV1 56                 | 15.6   | 14.5  | 15.9  | 7.8   | 11.3  |
| 207992_s_at | NM_000480 | AMPD3 272                | 9.8    | 6.5   | 6.3   | 2.4   | 7.4   |
| 207993_s_at | NM_007236 | CHP1 11261               | 85.3   | 79.0  | 73.7  | 69.8  | 70.9  |
| 207994_s_at | L29301    | OPRM1 4988               | 0.4    | 0.4   | 0.7   | 0.9   | 0.8   |
| 207995_s_at | NM_014257 | CLEC4M 10332             | 10.5   | 12.9  | 5.0   | 7.8   | 6.8   |
| 207996_s_at | NM_004338 | LDLRAD4 753              | 0.0    | 0.8   | 2.7   | 2.0   | 0.1   |
| 207998_s_at | NM_000720 | CACNA1D 776              | 5.9    | 6.8   | 1.5   | 2.9   | 1.6   |
| 207999_s_at | NM_001112 | ADARB1 104               | 20.1   | 14.8  | 9.5   | 12.4  | 10.6  |
| 208000_at   | NM_002066 | GML 2765                 | 2.1    | 5.1   | 8.5   | 5.7   | 9.2   |
| 208002_s_at | NM_007274 | ACOT7 11332              | 317.7  | 317.9 | 378.0 | 326.4 | 301.8 |
| 208003_s_at | NM_006599 | NFAT5 10725              | 45.1   | 54.4  | 35.6  | 35.4  | 27.7  |
| 208004_at   | NM_021225 | PROL1 58503              | 11.5   | 5.9   | 9.4   | 11.2  | 8.8   |
| 208005_at   | NM_004822 | NTN1 9423                | 12.2   | 1.9   | 5.6   | 0.6   | 0.8   |
| 208006_at   | NM_012188 | FOXI1 2299               | 11.1   | 9.8   | 9.6   | 7.0   | 3.8   |
| 208007_at   | NM_012122 | -                        | 2.1    | 1.6   | 0.7   | 12.8  | 5.9   |
| 208008_at   | NM_015594 | TBC1D29 26083            | 5.5    | 9.2   | 9.5   | 6.7   | 2.3   |
| 208009_s_at | NM_014448 | ARHGEF16 27237           | 66.7   | 50.0  | 80.6  | 80.3  | 49.6  |
| 208010_s_at | NM_012411 | PTPN22 26191             | 0.2    | 0.1   | 0.1   | 0.1   | 0.2   |
| 208011_at   | NM_012411 | PTPN22 26191             | 0.3    | 3.1   | 0.3   | 0.4   | 0.9   |
| 208012_x_at | NM_004509 | SP110 3431               | 50.1   | 38.6  | 44.9  | 43.5  | 40.3  |
| 208013_s_at | NM_020115 | ACRV1 56                 | 7.7    | 10.5  | 23.1  | 6.6   | 12.4  |
| 208014_x_at | NM_014486 | -                        | 16.8   | 16.6  | 19.4  | 9.3   | 17.1  |
| 208015_at   | NM_015583 | BC069804 ///,4086        | 5.3    | 8.6   | 9.8   | 7.6   | 2.7   |
| 208016_s_at | NM_004835 | AGTR1 185                | 5.9    | 4.6   | 2.7   | 3.7   | 3.6   |

|             |           |                           |       |       |       |       |       |       |
|-------------|-----------|---------------------------|-------|-------|-------|-------|-------|-------|
| 208017_s_at | NM_005369 | MCF2                      | 4168  | 1.6   | 2.2   | 6.0   | 3.1   | 0.7   |
| 208018_s_at | NM_002110 | HCK                       | 3055  | 8.4   | 1.7   | 1.0   | 3.9   | 1.1   |
| 208019_at   | NM_003446 | ZNF157                    | 7712  | 0.4   | 2.5   | 0.4   | 0.8   | 0.4   |
| 208020_s_at | NM_000719 | CACNA1C                   | 775   | 0.8   | 4.0   | 3.1   | 12.1  | 5.4   |
| 208021_s_at | NM_002913 | RFC1                      | 5981  | 68.4  | 57.4  | 58.2  | 56.1  | 64.1  |
| 208022_s_at | NM_003671 | CDC14B                    | 8555  | 12.0  | 10.2  | 15.8  | 10.6  | 11.7  |
| 208023_at   | NM_003327 | TNFRSF4                   | 7293  | 9.8   | 7.5   | 0.7   | 0.6   | 0.4   |
| 208024_s_at | NM_005675 | DGCR6 /// D18214 /// 853  |       | 268.7 | 288.0 | 285.4 | 336.6 | 264.8 |
| 208025_s_at | NM_003483 | HMGA2                     | 8091  | 4.3   | 3.5   | 8.2   | 5.0   | 3.9   |
| 208026_at   | NM_003540 | HIST1H4F /// 8361 /// 836 |       | 2.7   | 8.2   | 0.4   | 1.2   | 1.6   |
| 208027_s_at | NM_012465 | TLL2                      | 7093  | 0.4   | 2.4   | 2.0   | 4.6   | 0.8   |
| 208028_s_at | NM_003996 | GPX5                      | 2880  | 3.2   | 1.2   | 5.4   | 1.0   | 6.2   |
| 208029_s_at | NM_018407 | LAPTM4B                   | 55353 | 153.9 | 220.6 | 147.0 | 240.0 | 158.6 |
| 208030_s_at | NM_001119 | ADD1                      | 118   | 126.3 | 127.9 | 123.1 | 141.0 | 101.4 |
| 208031_s_at | NM_000635 | RFX2                      | 5990  | 10.8  | 4.2   | 14.2  | 10.8  | 9.9   |
| 208032_s_at | NM_000828 | GRIA3                     | 2892  | 1.6   | 0.8   | 1.5   | 1.3   | 1.7   |
| 208033_s_at | NM_006885 | ZFH3                      | 463   | 24.2  | 22.7  | 25.6  | 21.5  | 19.4  |
| 208034_s_at | NM_003891 | PROZ                      | 8858  | 4.5   | 5.8   | 5.8   | 4.4   | 2.2   |
| 208035_at   | NM_000843 | GRM6                      | 2916  | 11.1  | 12.4  | 9.5   | 13.0  | 14.1  |
| 208036_at   | NM_001708 | OPN1SW                    | 611   | 2.5   | 1.7   | 2.0   | 0.9   | 0.9   |
| 208037_s_at | NM_007164 | MADCAM1                   | 8174  | 18.0  | 10.6  | 10.6  | 4.3   | 11.0  |
| 208038_at   | NM_003854 | IL1RL2                    | 8808  | 9.3   | 1.5   | 11.3  | 3.7   | 4.3   |
| 208039_at   | NM_003048 | -                         | -     | 15.2  | 12.2  | 10.9  | 12.4  | 9.3   |
| 208040_s_at | NM_000256 | MYBPC3                    | 4607  | 4.5   | 3.3   | 4.7   | 2.7   | 5.5   |
| 208041_at   | NM_002929 | GRK1                      | 6011  | 15.2  | 3.1   | 9.7   | 14.4  | 8.3   |
| 208042_at   | NM_013303 | AGGF1                     | 55109 | 37.9  | 24.2  | 39.0  | 30.4  | 28.9  |
| 208043_at   | NM_020484 | -                         | -     | 2.6   | 1.5   | 1.7   | 5.9   | 0.8   |
| 208044_s_at | NM_006238 | PPARD                     | 5467  | 16.0  | 24.4  | 15.1  | 17.9  | 20.3  |
| 208045_at   | NM_005129 | -                         | -     | 4.1   | 1.8   | 5.4   | 0.2   | 4.3   |
| 208046_at   | NM_003538 | HIST1H4A                  | 8359  | 10.2  | 5.9   | 10.3  | 6.6   | 4.8   |
| 208047_s_at | NM_005966 | NAB1                      | 4664  | 1.9   | 3.9   | 3.6   | 4.1   | 3.9   |
| 208048_at   | NM_015727 | TACR1                     | 6869  | 0.9   | 3.8   | 4.8   | 6.1   | 5.0   |
| 208049_s_at | NM_015727 | TACR1                     | 6869  | 9.6   | 3.5   | 0.9   | 4.9   | 0.9   |
| 208050_s_at | NM_001224 | CASP2                     | 835   | 60.4  | 45.4  | 48.9  | 45.6  | 46.1  |
| 208051_s_at | NM_006451 | PAIP1                     | 10605 | 140.6 | 133.5 | 123.5 | 139.4 | 98.8  |
| 208052_x_at | NM_001815 | CEACAM3                   | 1084  | 19.4  | 26.0  | 21.9  | 17.2  | 14.0  |
| 208053_at   | NM_001522 | GUCY2F                    | 2986  | 0.5   | 0.6   | 0.7   | 0.6   | 0.8   |
| 208054_at   | NM_015601 | HERC4                     | 26091 | 0.1   | 1.9   | 2.3   | 0.4   | 2.3   |
| 208055_s_at | NM_015601 | HERC4                     | 26091 | 11.8  | 11.5  | 19.3  | 15.3  | 9.0   |
| 208056_s_at | NM_005187 | CBFA2T3                   | 863   | 8.6   | 4.2   | 10.4  | 1.6   | 1.5   |
| 208057_s_at | D14827    | GLI2                      | 2736  | 4.3   | 4.8   | 2.7   | 2.2   | 3.4   |
| 208058_s_at | NM_002409 | MGAT3                     | 4248  | 2.5   | 0.9   | 1.8   | 1.0   | 1.4   |
| 208059_at   | NM_005201 | CCR8                      | 1237  | 1.7   | 1.4   | 1.1   | 1.3   | 1.0   |
| 208060_at   | NM_002584 | PAX7                      | 5081  | 1.1   | 1.2   | 5.0   | 3.6   | 2.9   |
| 208061_at   | NM_015877 | -                         | -     | 2.5   | 0.5   | 1.5   | 0.5   | 1.7   |
| 208062_s_at | NM_013984 | NRG2                      | 9542  | 0.8   | 1.0   | 0.5   | 0.4   | 0.7   |
| 208063_s_at | NM_006615 | CAPN9                     | 10753 | 9.2   | 1.6   | 2.5   | 2.9   | 1.9   |
| 208064_s_at | NM_015879 | ST8SIA3                   | 51046 | 3.0   | 1.4   | 10.2  | 2.4   | 4.8   |
| 208065_at   | NM_015879 | ST8SIA3                   | 51046 | 5.3   | 3.1   | 1.8   | 0.2   | 0.4   |
| 208066_s_at | NM_001514 | GTF2B                     | 2959  | 105.7 | 93.3  | 105.1 | 97.4  | 82.3  |
| 208067_x_at | NM_007125 | UTY                       | 7404  | 99.5  | 45.4  | 72.6  | 82.5  | 41.9  |
| 208068_x_at | NM_022562 | CSH1 /// CSH1442 /// 144  |       | 3.9   | 4.9   | 11.9  | 1.7   | 1.3   |
| 208069_x_at | NM_022561 | CSH1 /// CSH1442 /// 144  |       | 1.7   | 1.1   | 2.0   | 1.6   | 0.5   |

|             |           |                           |        |        |        |        |        |        |
|-------------|-----------|---------------------------|--------|--------|--------|--------|--------|--------|
| 208070_s_at | NM_002912 | REV3L                     | 5980   | 40.7   | 24.3   | 25.9   | 36.4   | 21.9   |
| 208071_s_at | NM_021708 | LAIR1                     | 3903   | 1.1    | 1.6    | 1.2    | 1.0    | 1.1    |
| 208072_s_at | NM_003648 | DGKD                      | 8527   | 37.6   | 28.7   | 42.2   | 27.7   | 30.5   |
| 208073_x_at | NM_003316 | TTC3 /// TTC:7267 /// 286 |        | 233.2  | 230.4  | 223.5  | 198.4  | 185.7  |
| 208074_s_at | NM_021575 | AP2S1                     | 1175   | 881.8  | 979.5  | 1085.5 | 995.4  | 831.7  |
| 208075_s_at | NM_006273 | CCL7                      | 6354   | 3.8    | 2.4    | 6.0    | 1.5    | 1.1    |
| 208076_at   | NM_003539 | HIST1H4D                  | 8360   | 11.9   | 6.2    | 7.4    | 11.9   | 8.5    |
| 208077_at   | NM_014126 | C9orf38                   | 29044  | 2.2    | 5.1    | 0.5    | 4.1    | 1.9    |
| 208078_s_at | NM_030751 | SIK1                      | 150094 | 41.4   | 38.3   | 40.2   | 37.1   | 31.5   |
| 208079_s_at | NM_003158 | AURKA                     | 6790   | 194.3  | 175.7  | 246.6  | 170.9  | 186.6  |
| 208080_at   | NM_003158 | AURKA                     | 6790   | 16.9   | 9.3    | 17.5   | 6.8    | 11.7   |
| 208081_s_at | NM_030824 | ZNF442                    | 79973  | 10.5   | 5.7    | 4.9    | 8.1    | 1.0    |
| 208082_x_at | NM_030757 | MKRN4P /// -              |        | 84.9   | 51.6   | 69.6   | 57.2   | 49.3   |
| 208083_s_at | NM_000888 | ITGB6 /// LO:3694 /// 100 |        | 3.2    | 4.0    | 0.4    | 2.9    | 0.1    |
| 208084_at   | NM_000888 | ITGB6 /// LO:3694 /// 100 |        | 1.0    | 1.0    | 1.3    | 0.3    | 0.9    |
| 208085_s_at | NM_006125 | ARHGAP6                   | 395    | 1.4    | 0.6    | 2.8    | 0.7    | 1.4    |
| 208086_s_at | M92650    | DMD                       | 1756   | 3.2    | 1.8    | 2.9    | 3.4    | 2.3    |
| 208087_s_at | NM_030776 | ZBP1                      | 81030  | 0.7    | 1.0    | 2.9    | 2.0    | 1.5    |
| 208088_s_at | NM_030787 | CFHR5                     | 81494  | 0.3    | 0.2    | 0.3    | 0.2    | 0.2    |
| 208089_s_at | NM_030794 | TDRD3                     | 81550  | 22.4   | 20.3   | 32.6   | 23.9   | 26.0   |
| 208090_s_at | NM_000658 | AIRE                      | 326    | 8.7    | 4.8    | 11.9   | 4.0    | 7.3    |
| 208091_s_at | NM_030796 | VOPP1                     | 81552  | 166.1  | 181.5  | 143.2  | 174.5  | 126.9  |
| 208092_s_at | NM_030797 | FAM49A                    | 81553  | 21.3   | 15.2   | 15.8   | 14.5   | 12.5   |
| 208093_s_at | NM_030808 | NDEL1                     | 81565  | 105.1  | 94.1   | 98.7   | 98.9   | 83.2   |
| 208094_s_at | NM_030818 | CCDC130                   | 81576  | 20.5   | 26.4   | 35.2   | 28.1   | 24.1   |
| 208095_s_at | NM_001222 | SRP72                     | 6731   | 462.5  | 400.5  | 482.0  | 447.2  | 410.5  |
| 208096_s_at | NM_030820 | COL21A1                   | 81578  | 0.2    | 0.7    | 0.5    | 0.9    | 0.6    |
| 208097_s_at | NM_030755 | TMX1                      | 81542  | 104.4  | 95.0   | 119.7  | 89.6   | 96.0   |
| 208098_at   | NM_030876 | OR12D3 /// (81696 /// 81  |        | 1.4    | 1.2    | 2.3    | 2.4    | 1.2    |
| 208099_x_at | NM_015072 | TTLL5                     | 23093  | 12.2   | 6.0    | 12.8   | 9.4    | 5.9    |
| 208100_x_at | NM_030913 | SEMA6C                    | 10500  | 1.2    | 2.5    | 6.2    | 2.8    | 3.0    |
| 208101_s_at | NM_030914 | URM1                      | 81605  | 177.1  | 146.8  | 154.4  | 158.9  | 145.2  |
| 208102_s_at | NM_002779 | PSD                       | 5662   | 3.7    | 5.5    | 1.4    | 2.5    | 2.1    |
| 208103_s_at | NM_030920 | ANP32E                    | 81611  | 97.4   | 52.7   | 83.6   | 66.2   | 53.4   |
| 208104_s_at | NM_030935 | TSC22D4                   | 81628  | 40.6   | 40.5   | 31.8   | 32.9   | 22.0   |
| 208105_at   | NM_000164 | GIPR                      | 2696   | 0.9    | 2.7    | 1.0    | 2.7    | 0.7    |
| 208106_x_at | NM_002782 | PSG6                      | 5675   | 24.6   | 2.8    | 26.2   | 25.4   | 12.0   |
| 208107_s_at | NM_030941 | LOC81691                  | 81691  | 71.9   | 69.5   | 86.2   | 73.0   | 61.2   |
| 208108_s_at | AF030626  | AVPR2                     | 554    | 2.6    | 2.3    | 2.9    | 1.4    | 2.0    |
| 208109_s_at | NM_030944 | LINC00597                 | 81698  | 2.1    | 2.4    | 0.4    | 0.3    | 0.6    |
| 208110_x_at | NM_030973 | MED25                     | 81857  | 3.6    | 5.6    | 1.2    | 2.9    | 4.7    |
| 208111_at   | NM_000054 | AVPR2                     | 554    | 0.6    | 1.0    | 0.7    | 0.7    | 0.8    |
| 208112_x_at | NM_006795 | EHD1                      | 10938  | 24.5   | 26.9   | 15.4   | 26.0   | 18.3   |
| 208113_x_at | NM_030979 | PABPC3                    | 5042   | 2590.0 | 2102.1 | 2634.8 | 2354.7 | 2087.1 |
| 208114_s_at | NM_030980 | ISG20L2                   | 81875  | 202.3  | 167.8  | 255.6  | 197.4  | 207.0  |
| 208115_x_at | NM_030897 | EDRF1                     | 26098  | 9.7    | 7.2    | 8.9    | 12.4   | 1.4    |
| 208116_s_at | NM_005907 | MAN1A1                    | 4121   | 6.1    | 8.7    | 7.4    | 5.9    | 8.8    |
| 208117_s_at | NM_031206 | LAS1L                     | 81887  | 156.5  | 121.9  | 152.0  | 133.7  | 129.7  |
| 208118_x_at | NM_031211 | LOC1010606:81893 /// 38   |        | 32.3   | 24.3   | 35.8   | 37.8   | 23.8   |
| 208119_s_at | NM_031218 | ZNF93                     | 81931  | 39.7   | 25.5   | 34.5   | 16.8   | 27.9   |
| 208120_x_at | NM_031221 | FKSG49                    | 400949 | 81.8   | 65.2   | 76.3   | 65.0   | 59.8   |
| 208121_s_at | NM_002848 | PTPRO                     | 5800   | 2.1    | 6.0    | 6.5    | 4.5    | 5.4    |
| 208122_x_at | NM_012313 | KIR2DS3                   | 3808   | 4.0    | 10.7   | 2.6    | 1.6    | 1.4    |



|             |           |               |        |       |        |       |       |       |
|-------------|-----------|---------------|--------|-------|--------|-------|-------|-------|
| 208123_at   | AF338730  | KCNB2         | 9312   | 1.0   | 3.0    | 4.2   | 3.0   | 3.7   |
| 208124_s_at | NM_004263 | SEMA4F        | 10505  | 12.4  | 13.6   | 13.2  | 16.8  | 12.5  |
| 208126_s_at | NM_000772 | CYP2C18       | 1562   | 10.2  | 2.4    | 2.0   | 3.9   | 2.2   |
| 208127_s_at | NM_014011 | SOCS5         | 9655   | 27.3  | 22.1   | 25.7  | 18.8  | 18.4  |
| 208128_x_at | NM_030615 | KIF25         | 3834   | 11.9  | 2.4    | 8.7   | 3.9   | 3.7   |
| 208129_x_at | NM_001754 | LOC1005064861 | 861    | 4.8   | 4.4    | 8.5   | 6.5   | 7.7   |
| 208130_s_at | NM_030984 | TBXAS1        | 6916   | 7.3   | 0.6    | 1.4   | 8.7   | 7.3   |
| 208131_s_at | NM_000961 | PTGIS         | 5740   | 2.5   | 8.6    | 5.7   | 5.6   | 2.9   |
| 208132_x_at | NM_004638 | PRRC2A        | 7916   | 124.1 | 114.6  | 123.2 | 120.0 | 87.0  |
| 208133_at   | NM_006081 | -             | -      | 0.6   | 0.9    | 0.6   | 0.9   | 0.4   |
| 208134_x_at | NM_031246 | PSG2          | 5670   | 8.5   | 0.8    | 4.5   | 7.0   | 0.9   |
| 208135_at   | NM_006481 | HNF1B         | 6928   | 2.4   | 2.0    | 1.6   | 2.9   | 1.0   |
| 208136_s_at | NM_030970 | ZNF205-AS1    | 81854  | 22.4  | 19.2   | 18.8  | 30.9  | 19.7  |
| 208137_x_at | NM_030972 | ZNF611        | 81856  | 62.7  | 36.6   | 47.2  | 45.5  | 43.5  |
| 208138_at   | NM_000805 | GAST          | 2520   | 21.6  | 7.0    | 9.8   | 11.5  | 9.6   |
| 208139_s_at | NM_031269 | -             | -      | 4.7   | 1.0    | 1.4   | 4.7   | 4.3   |
| 208140_s_at | NM_031294 | LRRC48        | 83450  | 26.1  | 12.9   | 21.7  | 18.1  | 13.0  |
| 208141_s_at | NM_031304 | DOHH          | 83475  | 56.7  | 77.1   | 86.1  | 80.7  | 78.2  |
| 208142_at   | NM_006683 | EDDM3A        | 10876  | 0.4   | 0.3    | 1.0   | 0.7   | 1.0   |
| 208143_s_at | NM_006683 | EDDM3A        | 10876  | 0.2   | 3.2    | 2.3   | 4.2   | 3.1   |
| 208144_s_at | NM_031245 | -             | -      | 12.5  | 3.8    | 6.8   | 10.9  | 4.9   |
| 208145_at   | NM_017959 | -             | -      | 0.9   | 1.2    | 0.8   | 0.9   | 0.9   |
| 208146_s_at | NM_031311 | CPVL          | 54504  | 8.1   | 3.3    | 0.6   | 0.6   | 5.5   |
| 208147_s_at | NM_030878 | CYP2C8        | 1558   | 5.1   | 5.6    | 1.3   | 5.9   | 0.5   |
| 208148_at   | NM_017533 | MYH4          | 4622   | 0.4   | 0.2    | 0.3   | 3.9   | 0.2   |
| 208149_x_at | NM_030653 | DDX11         | 1663   | 106.2 | 65.0   | 89.3  | 71.5  | 49.5  |
| 208151_x_at | NM_030881 | DDX17         | 10521  | 38.6  | 38.2   | 42.1  | 27.5  | 27.2  |
| 208152_s_at | NM_004728 | DDX21         | 9188   | 431.3 | 344.9  | 504.2 | 364.5 | 443.6 |
| 208153_s_at | NM_001447 | FAT2          | 2196   | 12.1  | 6.8    | 8.5   | 10.0  | 6.9   |
| 208154_at   | NM_016646 | -             | -      | 9.2   | 2.7    | 3.4   | 1.3   | 5.1   |
| 208155_x_at | NM_001476 | GAGE1         | 2543   | 915.0 | 1025.0 | 907.1 | 957.0 | 777.3 |
| 208156_x_at | NM_031308 | EPPK1         | 83481  | 95.6  | 92.0   | 82.6  | 90.9  | 47.9  |
| 208157_at   | NM_009586 | SIM2          | 6493   | 1.3   | 2.5    | 1.6   | 2.4   | 1.1   |
| 208158_s_at | NM_018030 | OSBPL1A       | 114876 | 50.2  | 49.3   | 71.4  | 59.1  | 44.3  |
| 208159_x_at | NM_004399 | DDX11         | 1663   | 63.8  | 55.3   | 68.9  | 49.0  | 60.7  |
| 208160_at   | NM_018033 | -             | -      | 1.7   | 1.2    | 1.7   | 1.1   | 1.2   |
| 208161_s_at | NM_020037 | ABCC3         | 8714   | 12.5  | 1.3    | 1.5   | 1.8   | 1.1   |
| 208162_s_at | NM_018033 | -             | -      | 2.0   | 7.3    | 1.5   | 3.6   | 1.2   |
| 208163_s_at | NM_017731 | OSBPL7        | 114881 | 7.4   | 2.3    | 4.5   | 1.8   | 1.2   |
| 208164_s_at | NM_002186 | IL9R          | 3581   | 1.8   | 2.5    | 8.4   | 1.9   | 5.1   |
| 208165_s_at | NM_005865 | PRSS16        | 10279  | 24.5  | 23.1   | 26.1  | 32.3  | 18.3  |
| 208166_at   | NM_022564 | MMP16         | 4325   | 11.7  | 11.1   | 12.1  | 17.6  | 9.2   |
| 208167_s_at | NM_022564 | MMP16         | 4325   | 32.7  | 40.8   | 40.1  | 35.7  | 29.3  |
| 208168_s_at | NM_003465 | CHIT1         | 1118   | 1.0   | 0.5    | 1.4   | 1.5   | 1.3   |
| 208169_s_at | NM_000957 | PTGER3        | 5733   | 1.9   | 5.3    | 7.1   | 2.9   | 0.5   |
| 208170_s_at | NM_007028 | TRIM31        | 11074  | 9.4   | 0.4    | 3.2   | 1.3   | 0.3   |
| 208172_s_at | NM_004770 | KCNB2         | 9312   | 10.0  | 7.2    | 6.7   | 5.5   | 13.7  |
| 208173_at   | NM_002176 | IFNB1         | 3456   | 1.1   | 1.1    | 1.0   | 0.6   | 0.5   |
| 208174_x_at | NM_005089 | ZRSR2         | 8233   | 31.2  | 26.1   | 28.1  | 24.2  | 25.0  |
| 208175_s_at | NM_004407 | DMP1          | 1758   | 0.7   | 2.6    | 0.5   | 0.3   | 0.3   |
| 208176_at   | NM_012146 | DUX1          | 26584  | 7.7   | 8.1    | 2.5   | 1.3   | 0.7   |
| 208177_at   | NM_003052 | SLC34A1       | 6569   | 3.4   | 5.7    | 2.9   | 3.0   | 7.6   |
| 208178_x_at | NM_007118 | TRIO          | 7204   | 4.6   | 12.4   | 3.0   | 3.6   | 7.5   |

|             |           |            |                     |       |       |       |       |       |
|-------------|-----------|------------|---------------------|-------|-------|-------|-------|-------|
| 208179_x_at | AF022048  | KIR2DL3    | 3804                | 4.1   | 12.0  | 16.2  | 9.0   | 3.0   |
| 208180_s_at | NM_003543 | HIST1H4H   | 8365                | 120.5 | 124.7 | 121.9 | 123.9 | 97.8  |
| 208181_at   | NM_003543 | HIST1H4A   | ///,8294 /// 835    | 7.9   | 6.0   | 14.6  | 7.9   | 7.4   |
| 208182_x_at | NM_002172 | IFNA14     | 3448                | 5.7   | 10.8  | 5.7   | 7.3   | 1.7   |
| 208183_at   | NM_001059 | TACR3      | 6870                | 1.3   | 0.5   | 0.4   | 0.9   | 0.7   |
| 208184_s_at | NM_003274 | LOC1027242 | 7109 /// 102        | 19.0  | 17.7  | 22.3  | 20.0  | 20.6  |
| 208185_x_at | NM_016415 | -          | -                   | 23.3  | 21.7  | 12.6  | 22.2  | 15.9  |
| 208186_s_at | NM_005357 | LIPE       | 3991                | 9.4   | 2.9   | 7.1   | 2.7   | 3.7   |
| 208187_s_at | NM_016415 | -          | -                   | 7.3   | 6.9   | 4.8   | 0.9   | 1.5   |
| 208188_at   | NM_000226 | KRT9       | 3857                | 19.4  | 11.3  | 12.2  | 11.1  | 17.7  |
| 208189_s_at | NM_000260 | MYO7A      | 4647                | 1.6   | 2.0   | 1.3   | 3.0   | 0.9   |
| 208190_s_at | NM_015925 | LSR        | 51599               | 178.0 | 223.4 | 212.5 | 226.4 | 151.6 |
| 208191_x_at | NM_002780 | PSG4       | 5672                | 15.9  | 12.1  | 15.7  | 15.4  | 13.2  |
| 208192_at   | NM_006679 | -          | -                   | 0.2   | 3.3   | 0.4   | 0.2   | 1.9   |
| 208193_at   | NM_000590 | IL9        | 3578                | 0.9   | 0.6   | 2.5   | 4.3   | 1.9   |
| 208194_s_at | NM_005843 | STAM2      | 10254               | 10.4  | 3.7   | 12.1  | 1.6   | 1.4   |
| 208195_at   | NM_003319 | TTN        | 7273                | 9.5   | 1.3   | 7.0   | 4.0   | 5.2   |
| 208196_x_at | NM_006162 | NFATC1     | 4772                | 11.9  | 3.0   | 9.5   | 4.6   | 1.5   |
| 208198_x_at | NM_014512 | KIR2DS1    | 3806                | 22.8  | 4.2   | 17.7  | 16.3  | 3.4   |
| 208199_s_at | NM_003409 | ZBTB14     | 7541                | 17.5  | 14.3  | 23.6  | 15.2  | 11.7  |
| 208200_at   | NM_000575 | IL1A       | 3552                | 7.9   | 5.8   | 7.9   | 7.3   | 7.7   |
| 208201_at   | NM_012147 | DBET       | /// DU>22947 /// 26 | 2.3   | 1.3   | 9.6   | 2.9   | 3.6   |
| 208202_s_at | NM_015288 | JADE2      | 23338               | 1.5   | 9.2   | 4.9   | 5.5   | 0.5   |
| 208203_x_at | NM_014513 | KIR2DS5    | 3810                | 2.3   | 2.6   | 2.6   | 1.5   | 1.9   |
| 208204_s_at | NM_001234 | CAV3       | 859                 | 10.5  | 2.4   | 2.3   | 2.3   | 4.1   |
| 208205_at   | NM_014005 | PCDHA9     | 9752                | 19.1  | 12.8  | 9.8   | 19.2  | 10.7  |
| 208206_s_at | NM_005825 | RASGRP2    | 10235               | 2.3   | 1.1   | 0.9   | 7.1   | 1.3   |
| 208207_at   | NM_003163 | -          | -                   | 2.4   | 0.4   | 0.9   | 0.7   | 4.1   |
| 208208_at   | NM_003802 | MYH13      | 8735                | 4.4   | 1.1   | 1.3   | 7.0   | 4.2   |
| 208209_s_at | NM_000716 | C4BPB      | 725                 | 3.2   | 1.9   | 4.7   | 2.0   | 1.3   |
| 208210_at   | NM_002377 | MAS1       | 4142                | 5.3   | 6.0   | 18.2  | 8.1   | 4.3   |
| 208211_s_at | U66559    | ALK        | 238                 | 11.5  | 10.8  | 7.6   | 9.0   | 1.7   |
| 208212_s_at | NM_004304 | ALK        | 238                 | 8.0   | 6.2   | 1.3   | 10.6  | 0.8   |
| 208213_s_at | NM_003471 | KCNAB1     | 7881                | 0.9   | 2.1   | 7.0   | 2.1   | 3.1   |
| 208214_at   | NM_000684 | ADRB1      | 153                 | 1.7   | 0.3   | 1.4   | 0.4   | 0.5   |
| 208215_x_at | NM_000797 | DRD4       | 1815                | 1.1   | 0.6   | 0.5   | 0.5   | 0.5   |
| 208216_at   | NM_001934 | DLX4       | 1748                | 12.3  | 1.1   | 9.7   | 2.8   | 4.3   |
| 208217_at   | NM_002043 | GABRR2     | 2570                | 14.7  | 10.7  | 22.4  | 6.2   | 10.8  |
| 208218_s_at | NM_020328 | ACVR1B     | 91                  | 9.0   | 9.2   | 11.3  | 4.4   | 7.9   |
| 208219_at   | NM_020328 | ACVR1B     | 91                  | 1.5   | 4.0   | 2.2   | 7.2   | 1.0   |
| 208220_x_at | NM_001143 | AMELY      | 266                 | 12.5  | 6.4   | 10.6  | 2.9   | 6.8   |
| 208221_s_at | NM_003061 | SLIT1      | 6585                | 4.1   | 1.6   | 9.6   | 8.5   | 3.4   |
| 208222_at   | NM_020327 | ACVR1B     | 91                  | 1.3   | 3.6   | 6.8   | 6.9   | 1.2   |
| 208223_s_at | NM_020327 | ACVR1B     | 91                  | 9.8   | 8.5   | 10.5  | 7.0   | 3.7   |
| 208224_at   | NM_002144 | HOXB1      | 3211                | 11.4  | 2.2   | 7.2   | 1.3   | 4.8   |
| 208225_at   | NM_022971 | FGFR2      | 2263                | 1.0   | 0.4   | 1.7   | 2.6   | 1.9   |
| 208226_x_at | NM_004194 | ADAM22     | 53616               | 7.9   | 2.5   | 4.2   | 10.9  | 1.1   |
| 208227_x_at | NM_021721 | ADAM22     | 53616               | 15.8  | 15.7  | 13.2  | 20.8  | 8.3   |
| 208228_s_at | M87771    | FGFR2      | 2263                | 3.2   | 8.4   | 3.6   | 5.9   | 3.9   |
| 208229_at   | NM_022975 | FGFR2      | 2263                | 18.4  | 17.5  | 12.9  | 15.6  | 12.6  |
| 208230_s_at | NM_013960 | NRG1       | 3084                | 3.2   | 3.0   | 1.6   | 2.0   | 1.4   |
| 208231_at   | NM_013960 | NRG1       | 3084                | 1.5   | 0.8   | 4.9   | 2.2   | 0.9   |
| 208232_x_at | L12260    | NRG1       | 3084                | 1.5   | 1.3   | 6.7   | 7.3   | 2.8   |

|             |           |                            |           |       |       |       |       |       |
|-------------|-----------|----------------------------|-----------|-------|-------|-------|-------|-------|
| 208233_at   | NM_013317 | PDPN                       | 10630     | 5.0   | 1.7   | 3.6   | 4.5   | 4.0   |
| 208234_x_at | NM_022976 | FGFR2                      | 2263      | 1.3   | 1.5   | 1.0   | 0.8   | 0.6   |
| 208235_x_at | NM_021123 | GAGE12B /// 2576 /// 257   |           | 871.8 | 918.5 | 917.6 | 884.7 | 729.2 |
| 208237_x_at | AF155381  | ADAM22                     | 53616     | 16.7  | 8.2   | 12.2  | 8.0   | 12.7  |
| 208238_x_at | NM_013344 | -                          | -         | 37.5  | 49.5  | 49.2  | 32.2  | 43.6  |
| 208239_at   | NM_012185 | FOXE1                      | 2304      | 0.6   | 1.0   | 0.9   | 0.4   | 0.6   |
| 208240_s_at | NM_013394 | FGF1                       | 2246      | 6.4   | 10.1  | 2.5   | 2.0   | 6.1   |
| 208241_at   | NM_004495 | NRG1                       | 3084      | 9.1   | 7.8   | 1.1   | 6.4   | 10.1  |
| 208242_at   | NM_013435 | RAX                        | 30062     | 1.1   | 1.5   | 1.5   | 0.7   | 0.7   |
| 208243_s_at | NM_016083 | CNR1                       | 1268      | 0.6   | 0.6   | 1.4   | 1.4   | 0.5   |
| 208244_at   | NM_001201 | BMP3                       | 651       | 0.8   | 6.5   | 0.8   | 1.5   | 0.6   |
| 208245_at   | NM_004250 | RAB9BP1                    | 9366      | 3.6   | 0.4   | 2.1   | 0.1   | 0.2   |
| 208246_x_at | NM_017618 | RP11-403P17-               |           | 57.1  | 45.2  | 50.0  | 50.7  | 42.8  |
| 208247_at   | NM_001213 | ERC2-IT1                   | 711       | 3.7   | 3.9   | 7.5   | 5.5   | 4.8   |
| 208248_x_at | NM_001642 | APLP2                      | 334       | 366.5 | 365.4 | 360.9 | 365.4 | 264.7 |
| 208249_s_at | NM_014305 | TGDS                       | 23483     | 32.2  | 29.6  | 38.2  | 27.2  | 28.6  |
| 208250_s_at | NM_004406 | DMBT1                      | 1755      | 32.7  | 20.6  | 31.0  | 24.2  | 7.0   |
| 208251_at   | NM_004978 | KCNC4                      | 3749      | 1.7   | 1.9   | 1.3   | 4.7   | 2.8   |
| 208252_s_at | NM_004273 | CHST3                      | 9469      | 2.5   | 1.3   | 4.8   | 4.4   | 0.8   |
| 208253_at   | NM_014442 | SIGLEC8                    | 27181     | 5.5   | 1.2   | 6.2   | 1.1   | 8.1   |
| 208254_at   | NM_004908 | -                          | -         | 1.7   | 1.3   | 0.8   | 1.2   | 0.8   |
| 208255_s_at | NM_012181 | FKBP8                      | 23770     | 69.5  | 63.1  | 73.3  | 66.4  | 40.7  |
| 208256_at   | NM_001405 | EFNA2                      | 1943      | 4.4   | 1.6   | 2.2   | 1.0   | 8.5   |
| 208257_x_at | NM_006905 | PSG1                       | 5669      | 2.8   | 4.6   | 0.9   | 2.6   | 1.1   |
| 208258_s_at | NM_006478 | GAS2L1                     | 10634     | 9.9   | 3.5   | 27.6  | 23.9  | 2.9   |
| 208259_x_at | NM_021057 | IFNA7                      | 3444      | 2.8   | 4.9   | 4.4   | 4.4   | 4.3   |
| 208260_at   | NM_000707 | AVPR1B                     | 553       | 6.8   | 1.7   | 0.9   | 3.1   | 3.2   |
| 208261_x_at | NM_002171 | IFNA10                     | 3446      | 7.9   | 6.3   | 2.3   | 3.6   | 2.3   |
| 208262_x_at | NM_000243 | MEFV                       | 4210      | 15.1  | 21.8  | 26.1  | 29.3  | 27.8  |
| 208263_at   | NM_018581 | SRP72                      | 6731      | 3.7   | 2.6   | 3.3   | 3.9   | 5.2   |
| 208264_s_at | NM_003758 | EIF3J                      | 8669      | 104.4 | 72.8  | 114.4 | 75.2  | 76.6  |
| 208265_at   | NM_020161 | C2orf83                    | 56918     | 4.6   | 0.7   | 1.0   | 3.3   | 0.6   |
| 208266_at   | NM_020237 | C8orf17                    | 100507249 | 1.0   | 1.7   | 1.5   | 2.6   | 2.3   |
| 208267_at   | NM_019841 | TRPV5                      | 56302     | 11.6  | 19.0  | 12.2  | 14.3  | 6.6   |
| 208268_at   | NM_021777 | ADAM28                     | 10863     | 0.9   | 0.9   | 5.9   | 3.1   | 2.9   |
| 208269_s_at | NM_021777 | ADAM28                     | 10863     | 2.7   | 6.3   | 2.2   | 2.2   | 1.2   |
| 208270_s_at | NM_020216 | RNPEP                      | 6051      | 428.7 | 419.1 | 451.9 | 440.0 | 368.2 |
| 208271_at   | NM_020144 | PAPOLB                     | 56903     | 6.5   | 1.0   | 1.2   | 2.4   | 1.2   |
| 208272_at   | NM_007321 | RANBP3                     | 8498      | 3.6   | 6.8   | 10.0  | 7.5   | 5.4   |
| 208273_at   | NM_020394 | ZNF670 /// Z 57116 /// 93  |           | 15.2  | 6.8   | 8.2   | 6.5   | 9.4   |
| 208274_at   | NM_022375 | OCLM                       | 10896     | 9.3   | 7.1   | 15.2  | 0.8   | 6.1   |
| 208275_x_at | NM_003577 | UTF1                       | 8433      | 5.3   | 9.3   | 5.8   | 6.4   | 2.2   |
| 208276_at   | NM_016420 | -                          | -         | 10.6  | 9.8   | 9.3   | 8.9   | 6.7   |
| 208277_at   | NM_005029 | PITX3                      | 5309      | 2.3   | 1.6   | 1.3   | 1.6   | 1.3   |
| 208278_s_at | NM_016420 | -                          | -         | 0.5   | 1.4   | 1.3   | 0.8   | 0.5   |
| 208279_s_at | NM_006382 | CDRT1                      | 374286    | 1.9   | 1.9   | 1.6   | 1.4   | 0.8   |
| 208280_at   | NM_006382 | CDRT1                      | 374286    | 1.4   | 0.9   | 7.1   | 3.0   | 4.8   |
| 208281_x_at | NM_020364 | DAZ1 /// DAZ1 1617 /// 570 |           | 9.9   | 10.1  | 8.5   | 5.6   | 9.3   |
| 208282_x_at | NM_020363 | DAZ1 /// DAZ1 1617 /// 570 |           | 0.6   | 4.9   | 5.1   | 1.8   | 0.3   |
| 208283_at   | NM_001468 | GAGE1                      | 2543      | 1.1   | 0.9   | 0.6   | 0.7   | 3.4   |
| 208284_x_at | NM_013421 | GGT1 /// GG 2678 /// 912   |           | 45.1  | 37.7  | 44.8  | 34.0  | 34.1  |
| 208285_at   | NM_017506 | OR7A5                      | 26659     | 2.2   | 1.7   | 1.9   | 1.4   | 1.2   |
| 208286_x_at | NM_002701 | POU5F1 /// F 5460 /// 546  |           | 4.1   | 2.2   | 2.2   | 7.7   | 3.6   |

|             |           |                     |              |        |        |        |        |        |
|-------------|-----------|---------------------|--------------|--------|--------|--------|--------|--------|
| 208287_at   | NM_005844 | HCG9                | 10255        | 9.9    | 9.1    | 2.0    | 5.1    | 5.2    |
| 208288_at   | NM_003742 | ABCB11              | 8647         | 1.0    | 0.7    | 5.7    | 1.7    | 1.8    |
| 208289_s_at | NM_004879 | EI24                | 9538         | 298.9  | 234.8  | 338.1  | 266.0  | 214.8  |
| 208290_s_at | NM_001969 | EIF5                | 1983         | 281.2  | 242.7  | 317.1  | 249.7  | 249.2  |
| 208291_s_at | NM_000360 | TH                  | 7054         | 0.6    | 0.7    | 2.3    | 5.4    | 0.4    |
| 208292_at   | NM_014482 | BMP10               | 27302        | 10.7   | 5.1    | 5.5    | 4.1    | 3.7    |
| 208293_x_at | NM_022581 | CSHL1               | 1444         | 8.4    | 1.0    | 6.3    | 8.0    | 4.1    |
| 208294_x_at | NM_022578 | CSHL1               | 1444         | 1.0    | 0.6    | 0.8    | 0.8    | 0.5    |
| 208295_x_at | NM_022580 | CSHL1               | 1444         | 1.9    | 0.8    | 1.4    | 1.7    | 0.8    |
| 208296_x_at | NM_014350 | TNFAIP8             | 25816        | 80.0   | 68.7   | 100.5  | 77.3   | 68.3   |
| 208297_s_at | NM_005665 | EVI5                | 7813         | 8.7    | 10.8   | 10.5   | 1.2    | 5.8    |
| 208298_at   | NM_005665 | EVI5                | 7813         | 0.3    | 0.9    | 0.5    | 3.1    | 0.9    |
| 208299_at   | NM_021096 | CACNA1I             | 8911         | 11.5   | 4.6    | 12.0   | 13.9   | 7.8    |
| 208300_at   | NM_002842 | PTPRH               | 5794         | 1.7    | 4.8    | 5.4    | 3.8    | 3.4    |
| 208301_at   | NM_025033 | AC007292.3          | -            | 16.9   | 12.2   | 10.7   | 10.1   | 15.1   |
| 208302_at   | NM_021182 | HMHB1               | 57824        | 9.9    | 4.0    | 3.2    | 7.3    | 3.3    |
| 208303_s_at | NM_022148 | CRLF2               | 64109        | 2.5    | 1.7    | 1.7    | 1.1    | 1.3    |
| 208304_at   | NM_001837 | CCR3                | 1232         | 1.9    | 1.1    | 6.0    | 0.9    | 6.3    |
| 208305_at   | NM_000926 | PGR                 | 5241         | 4.2    | 1.3    | 0.2    | 0.8    | 0.7    |
| 208306_x_at | NM_021983 | HLA-DRB1 ///        | 3123         | 12.4   | 21.5   | 10.0   | 8.5    | 9.5    |
| 208307_at   | NM_005058 | RBM1A1 ///          | 5940 /// 159 | 1.6    | 2.8    | 0.5    | 2.1    | 1.1    |
| 208308_s_at | NM_000175 | GPI                 | 2821         | 1544.8 | 1529.9 | 1658.4 | 1660.4 | 1424.2 |
| 208309_s_at | NM_006785 | MALT1               | 10892        | 20.7   | 24.8   | 25.2   | 23.9   | 21.1   |
| 208310_s_at | NM_007085 | CCZ1 /// CCZ        | 51622 /// 22 | 266.1  | 237.7  | 243.2  | 201.9  | 190.2  |
| 208311_at   | NM_004224 | GPR50               | 9248         | 1.0    | 1.5    | 4.1    | 1.5    | 0.7    |
| 208312_s_at | NM_023013 | PRAMEF1 ///         | 65121 /// 65 | 7.8    | 3.8    | 6.6    | 3.7    | 7.7    |
| 208313_s_at | NM_004630 | SF1                 | 7536         | 427.2  | 386.2  | 467.9  | 457.4  | 436.7  |
| 208314_at   | NM_006583 | RRH                 | 10692        | 5.7    | 10.7   | 8.3    | 7.3    | 12.2   |
| 208315_x_at | NM_003300 | TRAF3               | 7187         | 38.7   | 37.9   | 38.5   | 25.8   | 26.2   |
| 208316_s_at | M88162    | OCRL                | 4952         | 62.6   | 66.6   | 56.0   | 63.6   | 47.7   |
| 208317_at   | NM_005108 | XYLB                | 9942         | 2.2    | 0.6    | 0.3    | 1.1    | 0.4    |
| 208318_s_at | NM_005108 | XYLB                | 9942         | 1.1    | 7.8    | 5.2    | 10.2   | 8.2    |
| 208319_s_at | NM_006743 | RBM3                | 5935         | 502.5  | 388.3  | 495.2  | 464.1  | 396.9  |
| 208320_at   | NM_004276 | CABP1               | 9478         | 0.5    | 0.5    | 0.4    | 0.5    | 0.5    |
| 208321_s_at | NM_004276 | CABP1               | 9478         | 1.2    | 0.8    | 3.8    | 1.5    | 1.2    |
| 208322_s_at | NM_003033 | ST3GAL1             | 6482         | 111.4  | 113.0  | 109.4  | 141.6  | 102.7  |
| 208323_s_at | NM_004306 | ANXA13              | 312          | 1.8    | 6.0    | 1.5    | 0.5    | 4.1    |
| 208324_at   | NM_006738 | -                   | -            | 0.5    | 2.4    | 2.1    | 2.1    | 3.5    |
| 208325_s_at | NM_006738 | AKAP13              | 11214        | 4.4    | 6.3    | 8.6    | 6.2    | 1.7    |
| 208327_at   | NM_000766 | CYP2A13             | 1553         | 6.5    | 4.4    | 1.2    | 3.5    | 1.2    |
| 208328_s_at | NM_005587 | MEF2A               | 4205         | 14.7   | 11.2   | 9.9    | 8.9    | 7.7    |
| 208329_at   | NM_021635 | PBOV1               | 59351        | 0.5    | 0.8    | 3.0    | 0.7    | 0.2    |
| 208330_at   | NM_021926 | ALX4                | 60529        | 7.4    | 0.4    | 5.7    | 7.7    | 1.3    |
| 208331_at   | NM_004678 | BPY2                | 9083         | 1.2    | 0.3    | 1.8    | 0.5    | 0.4    |
| 208332_at   | NM_004676 | LOC1005096.9081 /// | 442          | 5.6    | 12.2   | 8.4    | 14.2   | 11.6   |
| 208333_at   | NM_022363 | LHX5                | 64211        | 0.6    | 1.2    | 0.9    | 1.3    | 0.7    |
| 208334_at   | NM_022569 | NDST4               | 64579        | 1.0    | 0.6    | 9.0    | 0.9    | 0.9    |
| 208335_s_at | NM_002036 | ACKR1               | 2532         | 0.8    | 4.6    | 1.5    | 2.2    | 1.0    |
| 208336_s_at | NM_004868 | TECR                | 9524         | 485.5  | 518.8  | 487.7  | 543.0  | 393.5  |
| 208337_s_at | NM_003822 | NR5A2               | 2494         | 1.4    | 1.5    | 3.3    | 0.5    | 3.8    |
| 208338_at   | NM_002559 | P2RX3               | 5024         | 8.5    | 1.3    | 1.4    | 3.8    | 4.7    |
| 208339_at   | NM_004677 | XKRY /// XKR        | 9082 /// 353 | 6.1    | 1.4    | 2.8    | 0.1    | 0.4    |
| 208340_at   | NM_003723 | LOC643733           | 643733       | 1.7    | 0.7    | 0.7    | 0.6    | 3.2    |

|             |           |                           |       |       |       |       |       |
|-------------|-----------|---------------------------|-------|-------|-------|-------|-------|
| 208341_x_at | NM_022646 | CSH1 /// CSH1442 /// 144  | 2.7   | 1.5   | 2.2   | 1.3   | 0.8   |
| 208342_x_at | NM_022645 | CSH1 /// CSH1442 /// 144  | 2.0   | 1.9   | 1.3   | 2.1   | 0.9   |
| 208343_s_at | AF146343  | NR5A2 2494                | 0.3   | 0.1   | 2.2   | 0.1   | 0.3   |
| 208344_x_at | NM_006900 | IFNA1 /// IFN3439 /// 344 | 5.2   | 6.9   | 9.1   | 3.3   | 7.4   |
| 208345_s_at | NM_002699 | POU3F1 5453               | 1.4   | 0.7   | 1.2   | 2.7   | 0.9   |
| 208346_at   | NM_006692 | PPBPP2 10895              | 0.7   | 0.4   | 1.3   | 0.7   | 0.2   |
| 208347_at   | NM_021024 | HMG2P9 //-                | 5.5   | 19.1  | 22.1  | 23.3  | 13.7  |
| 208348_s_at | NM_004351 | CBLB 868                  | 2.2   | 2.9   | 1.0   | 0.3   | 1.9   |
| 208349_at   | NM_007332 | TRPA1 8989                | 6.2   | 11.3  | 14.8  | 0.9   | 5.0   |
| 208350_at   | NM_001890 | CSN1S1 1446               | 1.8   | 0.4   | 0.3   | 3.9   | 1.0   |
| 208351_s_at | NM_002745 | MAPK1 5594                | 57.5  | 60.4  | 90.6  | 68.9  | 62.3  |
| 208352_x_at | NM_020479 | ANK1 286                  | 2.1   | 0.8   | 3.5   | 0.6   | 0.5   |
| 208353_x_at | NM_020480 | ANK1 286                  | 5.2   | 6.6   | 4.1   | 3.7   | 5.9   |
| 208354_s_at | NM_000339 | SLC12A3 6559              | 1.0   | 0.4   | 0.5   | 1.0   | 0.8   |
| 208356_x_at | NM_022642 | CSH1 /// CSH1442 /// 144  | 0.8   | 0.8   | 0.8   | 0.8   | 0.8   |
| 208357_x_at | NM_022641 | CSH1 1442                 | 1.4   | 1.2   | 1.6   | 0.8   | 1.8   |
| 208358_s_at | NM_003360 | UGT8 7368                 | 1.9   | 1.2   | 6.4   | 1.1   | 2.2   |
| 208359_s_at | NM_004981 | KCNJ4 3761                | 0.5   | 4.5   | 1.5   | 5.9   | 0.7   |
| 208360_s_at | NM_015870 | ERVH-4 51359              | 18.1  | 9.4   | 10.8  | 10.4  | 9.8   |
| 208361_s_at | NM_001722 | POLR3D 661                | 63.0  | 50.6  | 64.0  | 57.3  | 53.1  |
| 208363_s_at | NM_001566 | INPP4A 3631               | 10.1  | 11.1  | 16.3  | 11.3  | 8.0   |
| 208364_at   | NM_001566 | INPP4A 3631               | 1.6   | 1.0   | 2.7   | 4.0   | 3.8   |
| 208365_s_at | NM_005307 | GRK4 2868                 | 5.3   | 12.1  | 7.8   | 3.9   | 5.1   |
| 208366_at   | NM_014522 | PCDH11X 27328             | 7.8   | 5.4   | 6.4   | 7.3   | 2.1   |
| 208367_x_at | NM_000776 | CYP3A4 1576               | 0.9   | 0.9   | 1.8   | 1.3   | 1.4   |
| 208368_s_at | NM_000059 | BRCA2 675                 | 22.0  | 9.0   | 17.7  | 9.9   | 17.4  |
| 208369_s_at | NM_013976 | GCDH 2639                 | 66.5  | 63.2  | 82.0  | 69.7  | 63.0  |
| 208370_s_at | NM_004414 | RCAN1 1827                | 34.6  | 24.8  | 34.0  | 33.0  | 31.6  |
| 208371_s_at | NM_002931 | RING1 6015                | 75.3  | 62.2  | 65.2  | 64.7  | 55.4  |
| 208372_s_at | AF134379  | LIMK1 3984                | 15.8  | 18.2  | 22.1  | 18.5  | 13.9  |
| 208373_s_at | NM_004154 | P2RY6 5031                | 3.4   | 0.6   | 1.7   | 2.5   | 5.5   |
| 208374_s_at | NM_006135 | CAPZA1 829                | 804.7 | 629.7 | 925.4 | 724.4 | 747.7 |
| 208375_at   | NM_024013 | IFNA1 3439                | 0.9   | 0.2   | 0.4   | 0.2   | 1.8   |
| 208376_at   | NM_005508 | CCR4 1233                 | 3.9   | 1.4   | 3.8   | 0.6   | 6.8   |
| 208377_s_at | NM_005183 | CACNA1F 778               | 1.1   | 1.6   | 1.4   | 1.3   | 1.8   |
| 208378_x_at | NM_004464 | FGF5 2250                 | 1.4   | 1.5   | 1.0   | 2.8   | 0.7   |
| 208379_x_at | NM_000910 | NPY2R 4887                | 2.3   | 3.8   | 6.0   | 6.4   | 5.1   |
| 208380_at   | NM_006562 | LBX1 10660                | 0.4   | 0.9   | 0.3   | 0.5   | 0.3   |
| 208381_s_at | NM_003901 | SGPL1 8879                | 18.7  | 8.2   | 12.1  | 17.7  | 8.1   |
| 208382_s_at | D63882    | DMC1 11144                | 1.9   | 1.9   | 3.2   | 5.7   | 2.7   |
| 208383_s_at | NM_002591 | PCK1 5105                 | 0.3   | 0.7   | 0.3   | 0.5   | 0.8   |
| 208384_s_at | NM_012216 | MID2 11043                | 78.0  | 73.7  | 77.4  | 77.0  | 73.6  |
| 208385_at   | NM_016346 | NR2E3 10002               | 2.0   | 0.4   | 1.5   | 1.3   | 1.7   |
| 208386_x_at | NM_007068 | DMC1 11144                | 1.7   | 4.1   | 6.5   | 2.1   | 1.7   |
| 208387_s_at | NM_006690 | MMP24 10893               | 10.4  | 5.4   | 3.7   | 4.6   | 0.9   |
| 208388_at   | NM_014249 | NR2E3 10002               | 3.9   | 2.5   | 4.5   | 4.7   | 1.2   |
| 208389_s_at | NM_004171 | SLC1A2 6506               | 7.6   | 8.6   | 5.4   | 4.2   | 4.2   |
| 208390_s_at | U01104    | GLP1R 2740                | 21.3  | 18.4  | 26.5  | 17.0  | 19.7  |
| 208391_s_at | NM_002062 | GLP1R 2740                | 0.7   | 0.5   | 1.9   | 0.6   | 0.4   |
| 208392_x_at | NM_004510 | SP110 3431                | 2.7   | 3.4   | 1.2   | 8.9   | 10.0  |
| 208393_s_at | NM_005732 | RAD50 10111               | 42.2  | 36.1  | 49.7  | 41.4  | 35.8  |
| 208394_x_at | NM_007036 | ESM1 11082                | 1.9   | 4.1   | 4.2   | 2.3   | 2.6   |
| 208395_s_at | NM_014825 | URB1 9875                 | 6.9   | 2.3   | 9.4   | 4.3   | 5.1   |

|             |           |             |       |       |       |       |       |       |
|-------------|-----------|-------------|-------|-------|-------|-------|-------|-------|
| 208396_s_at | NM_005019 | PDE1A       | 5136  | 5.2   | 2.8   | 0.6   | 4.7   | 0.5   |
| 208397_x_at | U39195    | KCNJ5       | 3762  | 2.0   | 1.7   | 1.4   | 1.2   | 1.0   |
| 208398_s_at | NM_004865 | TBPL1       | 9519  | 160.2 | 159.1 | 162.8 | 146.5 | 124.4 |
| 208399_s_at | NM_000114 | EDN3        | 1908  | 0.9   | 3.3   | 2.1   | 0.5   | 0.5   |
| 208400_at   | U01157    | GLP1R       | 2740  | 4.9   | 2.8   | 6.8   | 1.0   | 6.0   |
| 208401_s_at | U01157    | GLP1R       | 2740  | 3.5   | 7.3   | 7.3   | 7.2   | 1.5   |
| 208402_at   | NM_002190 | IL17A       | 3605  | 8.4   | 0.7   | 6.5   | 7.8   | 5.4   |
| 208403_x_at | NM_002382 | MAX         | 4149  | 39.5  | 38.5  | 44.1  | 45.6  | 46.5  |
| 208404_x_at | NM_000890 | KCNJ5       | 3762  | 6.1   | 8.7   | 13.4  | 15.3  | 1.8   |
| 208405_s_at | NM_006016 | CD164       | 8763  | 511.6 | 455.4 | 508.9 | 472.7 | 415.5 |
| 208406_s_at | NM_004810 | GRAP2       | 9402  | 1.2   | 1.1   | 0.9   | 1.9   | 1.0   |
| 208407_s_at | NM_001331 | CTNND1      | 1500  | 48.4  | 44.2  | 51.6  | 53.8  | 36.2  |
| 208408_at   | NM_002825 | PTN         | 5764  | 5.9   | 2.4   | 10.3  | 10.7  | 1.5   |
| 208409_at   | NM_007163 | LOC10193061 | 8170  | 1.1   | 3.1   | 6.1   | 1.1   | 0.7   |
| 208410_x_at | NM_001142 | AMELX       | 265   | 6.4   | 5.1   | 8.3   | 2.2   | 7.8   |
| 208411_x_at | NM_006239 | PPEF2       | 5470  | 0.2   | 0.7   | 0.6   | 0.2   | 2.3   |
| 208412_s_at | NM_015854 | RARB        | 5915  | 3.9   | 4.3   | 7.7   | 3.7   | 1.2   |
| 208413_at   | NM_015854 | RARB        | 5915  | 0.4   | 0.4   | 1.1   | 0.2   | 0.1   |
| 208414_s_at | NM_002146 | HOXB3       | 3213  | 3.0   | 2.3   | 2.6   | 3.5   | 1.4   |
| 208415_x_at | NM_005537 | ING1        | 3621  | 22.5  | 40.1  | 39.7  | 25.1  | 25.5  |
| 208416_s_at | NM_000347 | SPTB        | 6710  | 3.4   | 1.3   | 2.1   | 15.2  | 11.0  |
| 208417_at   | NM_020996 | FGF6        | 2251  | 22.8  | 4.6   | 20.2  | 9.7   | 14.8  |
| 208420_x_at | NM_003170 | SUPT6H      | 6830  | 91.0  | 92.2  | 100.2 | 81.2  | 76.0  |
| 208421_at   | NM_015880 | -           | -     | 4.9   | 4.6   | 5.4   | 4.7   | 4.5   |
| 208422_at   | NM_002445 | MSR1        | 4481  | 0.3   | 1.3   | 1.0   | 1.4   | 0.9   |
| 208423_s_at | NM_002445 | MSR1        | 4481  | 4.5   | 5.3   | 1.0   | 2.4   | 7.0   |
| 208424_s_at | NM_020313 | CIAPIN1     | 57019 | 139.3 | 131.7 | 162.0 | 146.8 | 139.2 |
| 208425_s_at | NM_015623 | TANC2       | 26115 | 1.8   | 0.9   | 1.6   | 6.2   | 1.0   |
| 208426_x_at | NM_002255 | KIR2DL4     | 3805  | 8.9   | 8.3   | 1.9   | 6.2   | 3.1   |
| 208427_s_at | NM_004432 | ELAVL2      | 1993  | 4.9   | 0.3   | 6.6   | 3.3   | 4.1   |
| 208428_at   | NM_018833 | TAP2        | 6891  | 6.2   | 0.3   | 0.4   | 0.7   | 2.7   |
| 208429_x_at | NM_000457 | HNF4A       | 3172  | 19.5  | 14.3  | 17.9  | 12.5  | 12.1  |
| 208430_s_at | NM_001390 | DTNA        | 1837  | 1.2   | 5.1   | 5.6   | 2.6   | 2.3   |
| 208431_s_at | NM_003320 | TUB         | 7275  | 15.4  | 3.7   | 11.6  | 5.3   | 9.8   |
| 208432_s_at | NM_000721 | CACNA1E     | 777   | 1.4   | 0.6   | 1.2   | 1.1   | 0.9   |
| 208433_s_at | NM_017522 | LRP8        | 7804  | 39.6  | 33.0  | 41.7  | 29.4  | 34.5  |
| 208434_at   | NM_004991 | MECOM       | 2122  | 0.6   | 0.5   | 0.5   | 1.3   | 0.4   |
| 208435_s_at | NM_001652 | AQP6        | 363   | 1.0   | 0.7   | 0.6   | 0.7   | 0.3   |
| 208436_s_at | NM_004030 | IRF7        | 3665  | 56.1  | 57.0  | 60.4  | 50.0  | 42.2  |
| 208437_at   | NM_000083 | CLCN1       | 1180  | 3.3   | 1.9   | 2.7   | 0.6   | 0.5   |
| 208438_s_at | NM_005248 | FGR         | 2268  | 10.8  | 7.4   | 7.9   | 1.9   | 1.5   |
| 208439_s_at | NM_015839 | FCN2        | 2220  | 3.7   | 14.4  | 5.3   | 9.0   | 4.9   |
| 208440_at   | NM_007354 | C3orf27     | 23434 | 1.0   | 1.0   | 0.8   | 1.1   | 1.3   |
| 208441_at   | NM_015883 | IGF1R       | 3480  | 6.8   | 7.4   | 6.1   | 5.6   | 2.9   |
| 208442_s_at | NM_000051 | ATM         | 472   | 10.2  | 9.7   | 6.5   | 7.5   | 13.5  |
| 208443_x_at | NM_006884 | SHOX2       | 6474  | 10.1  | 10.0  | 2.7   | 10.1  | 6.9   |
| 208445_s_at | NM_023005 | BAZ1B       | 9031  | 105.3 | 124.8 | 141.1 | 139.6 | 109.5 |
| 208446_s_at | NM_007323 | ZFYVE9      | 9372  | 11.3  | 15.8  | 12.3  | 21.6  | 6.9   |
| 208447_s_at | NM_002764 | PRPS1       | 5631  | 262.4 | 251.4 | 325.3 | 275.8 | 271.2 |
| 208448_x_at | NM_002173 | IFNA16      | 3449  | 8.6   | 5.3   | 4.6   | 7.6   | 2.0   |
| 208449_s_at | NM_006119 | FGF8        | 2253  | 0.5   | 0.3   | 1.1   | 0.3   | 0.5   |
| 208450_at   | NM_006498 | LGALS2      | 3957  | 0.8   | 0.9   | 0.8   | 0.9   | 0.5   |
| 208451_s_at | NM_000592 | C4A         | 720   | 8.8   | 14.4  | 14.4  | 6.9   | 9.5   |

|             |           |                            |       |       |       |       |       |       |
|-------------|-----------|----------------------------|-------|-------|-------|-------|-------|-------|
| 208452_x_at | NM_004145 | MYO9B                      | 4650  | 27.6  | 19.0  | 18.1  | 16.5  | 9.3   |
| 208453_s_at | NM_006523 | XPNPEP1                    | 7511  | 154.6 | 148.6 | 157.7 | 144.1 | 133.6 |
| 208454_s_at | NM_016134 | CPQ                        | 10404 | 26.1  | 23.8  | 22.3  | 25.0  | 19.2  |
| 208455_at   | NM_002855 | PVRL1                      | 5818  | 3.8   | 5.4   | 9.3   | 1.2   | 5.6   |
| 208456_s_at | NM_012250 | RRAS2                      | 22800 | 62.3  | 52.0  | 75.0  | 50.1  | 48.2  |
| 208457_at   | NM_000815 | GABRD                      | 2563  | 2.9   | 10.7  | 1.2   | 17.4  | 5.4   |
| 208458_at   | NM_002978 | SCNN1D                     | 6339  | 1.7   | 1.2   | 6.1   | 1.9   | 0.8   |
| 208459_s_at | NM_015024 | XPO7                       | 23039 | 122.9 | 96.3  | 95.5  | 92.2  | 88.1  |
| 208460_at   | NM_005497 | GJC1                       | 10052 | 16.7  | 7.2   | 7.0   | 3.2   | 4.5   |
| 208461_at   | NM_006497 | HIC1                       | 3090  | 0.6   | 0.5   | 0.4   | 0.4   | 0.3   |
| 208462_s_at | NM_005691 | ABCC9                      | 10060 | 1.3   | 2.9   | 3.7   | 9.7   | 4.9   |
| 208463_at   | NM_000809 | GABRA4                     | 2557  | 11.9  | 1.3   | 5.6   | 4.5   | 4.8   |
| 208464_at   | NM_000829 | GRIA4                      | 2893  | 3.5   | 3.1   | 9.9   | 2.3   | 1.1   |
| 208465_at   | NM_000839 | GRM2                       | 2912  | 11.5  | 5.9   | 16.0  | 1.8   | 1.4   |
| 208466_at   | NM_004283 | RAB3D                      | 9545  | 42.4  | 34.4  | 33.7  | 37.6  | 28.1  |
| 208467_at   | NM_007249 | KLF12                      | 11278 | 12.7  | 11.6  | 9.4   | 4.6   | 1.8   |
| 208468_at   | NM_007084 | SOX21                      | 11166 | 1.7   | 2.2   | 2.9   | 1.3   | 1.3   |
| 208469_s_at | NM_030652 | EGFL8 /// PP' 9374 /// 808 |       | 1.9   | 0.5   | 6.9   | 4.3   | 3.9   |
| 208470_s_at | NM_020995 | HP /// HPR 3240 /// 325    |       | 35.8  | 29.7  | 30.2  | 28.4  | 21.6  |
| 208471_at   | NM_020995 | HPR                        | 3250  | 52.7  | 37.0  | 46.7  | 38.6  | 40.3  |
| 208472_at   | NM_022465 | IKZF4                      | 64375 | 15.2  | 8.3   | 14.5  | 13.3  | 13.0  |
| 208473_s_at | NM_016295 | GP2                        | 2813  | 2.0   | 5.3   | 4.8   | 0.5   | 0.6   |
| 208474_at   | NM_021195 | CLDN6                      | 9074  | 14.4  | 2.9   | 8.5   | 9.8   | 7.7   |
| 208475_at   | NM_018027 | FRMD4A                     | 55691 | 10.7  | 2.8   | 3.6   | 3.1   | 6.1   |
| 208476_s_at | NM_018027 | FRMD4A                     | 55691 | 0.5   | 4.5   | 2.0   | 0.4   | 0.5   |
| 208477_at   | NM_004976 | KCNC1                      | 3746  | 1.6   | 1.0   | 0.8   | 4.5   | 0.7   |
| 208478_s_at | NM_004324 | BAX                        | 581   | 64.1  | 44.8  | 64.7  | 60.0  | 49.6  |
| 208479_at   | NM_000217 | KCNA1                      | 3736  | 6.5   | 10.6  | 11.2  | 3.5   | 1.9   |
| 208480_s_at | NM_001171 | ABCC6 /// LC 368 /// 1019  |       | 1.3   | 4.0   | 0.9   | 1.3   | 4.6   |
| 208481_at   | NM_016116 | ASB4                       | 51666 | 3.0   | 0.5   | 3.1   | 6.6   | 0.4   |
| 208482_at   | NM_001049 | SSTR1                      | 6751  | 1.1   | 0.9   | 1.2   | 0.4   | 1.3   |
| 208483_x_at | NM_004138 | KRT33A                     | 3883  | 0.4   | 0.8   | 0.6   | 1.8   | 1.1   |
| 208484_at   | NM_005325 | HIST1H1A                   | 3024  | 0.9   | 5.7   | 1.8   | 1.3   | 0.8   |
| 208485_x_at | NM_003879 | CFLAR                      | 8837  | 18.8  | 14.8  | 14.8  | 17.1  | 13.9  |
| 208486_at   | NM_000798 | DRD5                       | 1816  | 15.4  | 11.4  | 14.4  | 10.7  | 10.3  |
| 208487_at   | NM_002316 | LMX1B                      | 4010  | 1.3   | 5.1   | 0.6   | 0.4   | 0.3   |
| 208488_s_at | NM_000651 | CR1                        | 1378  | 9.0   | 6.8   | 11.1  | 11.6  | 2.7   |
| 208489_at   | NM_005267 | GJA8                       | 2703  | 1.0   | 5.3   | 13.1  | 0.7   | 1.5   |
| 208490_x_at | NM_003522 | HIST1H2BC / 8339 /// 834   |       | 265.5 | 229.9 | 315.3 | 252.8 | 236.8 |
| 208491_s_at | NM_021965 | PGM5                       | 5239  | 1.2   | 0.9   | 1.4   | 1.2   | 0.7   |
| 208492_at   | NM_000538 | RFXAP                      | 5994  | 8.1   | 7.0   | 14.6  | 8.3   | 9.3   |
| 208493_at   | NM_005523 | HOXA11                     | 3207  | 0.7   | 0.5   | 0.9   | 0.9   | 0.3   |
| 208494_at   | NM_014228 | SLC6A7                     | 6534  | 1.0   | 1.1   | 0.7   | 0.6   | 0.7   |
| 208495_at   | NM_021025 | TLX3                       | 30012 | 3.8   | 5.1   | 1.4   | 0.5   | 0.3   |
| 208496_x_at | NM_003534 | HIST1H3G                   | 8355  | 18.0  | 24.9  | 14.4  | 12.7  | 26.7  |
| 208497_x_at | NM_006161 | NEUROG1                    | 4762  | 0.8   | 0.3   | 7.5   | 3.8   | 0.8   |
| 208498_s_at | NM_004038 | ACTG1P4 /// 276 /// 277 /  |       | 0.7   | 0.3   | 0.1   | 0.2   | 2.2   |
| 208499_s_at | NM_006260 | DNAJC3                     | 5611  | 9.6   | 7.5   | 16.1  | 10.0  | 14.7  |
| 208500_x_at | NM_012183 | FOXD3                      | 27022 | 1.0   | 1.1   | 0.3   | 0.7   | 0.5   |
| 208501_at   | NM_004188 | GFI1B                      | 8328  | 6.0   | 1.0   | 7.8   | 2.4   | 2.4   |
| 208502_s_at | NM_002653 | PITX1                      | 5307  | 103.5 | 99.8  | 133.4 | 108.4 | 101.1 |
| 208503_s_at | NM_021167 | GATAD1                     | 57798 | 83.8  | 56.2  | 62.8  | 59.4  | 47.8  |
| 208504_x_at | NM_018931 | PCDHB11                    | 56125 | 1.8   | 2.2   | 5.3   | 1.8   | 0.9   |

|             |           |                            |        |        |        |        |        |        |
|-------------|-----------|----------------------------|--------|--------|--------|--------|--------|--------|
| 208505_s_at | NM_000511 | FUT2                       | 2524   | 2.9    | 7.0    | 6.9    | 3.2    | 8.8    |
| 208506_at   | NM_021018 | HIST1H3F                   | 8968   | 10.6   | 6.5    | 7.0    | 6.0    | 4.0    |
| 208507_at   | NM_012377 | OR7C2                      | 26658  | 1.2    | 1.2    | 1.1    | 1.0    | 0.8    |
| 208508_s_at | NM_030905 | OR2J2                      | 26707  | 0.2    | 1.9    | 0.3    | 0.2    | 2.4    |
| 208509_s_at | NM_030901 | OR7A17                     | 26333  | 7.7    | 3.9    | 7.0    | 8.5    | 1.1    |
| 208510_s_at | NM_015869 | PPARG                      | 5468   | 4.7    | 2.8    | 5.8    | 15.5   | 6.3    |
| 208511_at   | NM_021000 | PTTG3P                     | 26255  | 91.6   | 50.2   | 77.2   | 60.2   | 53.2   |
| 208512_s_at | NM_005936 | MLLT4                      | 4301   | 1.1    | 0.3    | 1.7    | 1.3    | 0.4    |
| 208513_at   | NM_012182 | FOXB1                      | 27023  | 1.4    | 0.8    | 0.6    | 0.8    | 1.1    |
| 208514_at   | NM_000219 | KCNE1                      | 3753   | 9.2    | 8.8    | 7.3    | 2.0    | 6.2    |
| 208515_at   | NM_003521 | HIST1H2BM                  | 8342   | 10.7   | 9.7    | 20.1   | 13.4   | 12.2   |
| 208516_at   | NM_005959 | MTNR1B                     | 4544   | 2.0    | 1.2    | 1.4    | 1.0    | 0.5    |
| 208517_x_at | NM_001207 | BTF3                       | 689    | 1986.1 | 1860.7 | 1986.9 | 1819.5 | 1639.6 |
| 208518_s_at | NM_003894 | PER2                       | 8864   | 2.3    | 6.6    | 9.5    | 7.6    | 1.5    |
| 208519_x_at | NM_001501 | GNRH2                      | 2797   | 20.6   | 3.3    | 8.4    | 1.5    | 10.5   |
| 208520_at   | NM_013938 | OR10H3                     | 26532  | 17.4   | 14.7   | 12.9   | 6.7    | 10.4   |
| 208521_at   | NM_006637 | OR5I1                      | 10798  | 4.3    | 1.1    | 3.9    | 3.0    | 1.2    |
| 208522_s_at | NM_000264 | PTCH1                      | 5727   | 0.8    | 1.9    | 2.2    | 8.1    | 1.3    |
| 208523_x_at | NM_003525 | HIST1H2BC / 8339 /// 834   | 8344   | 75.5   | 87.3   | 98.3   | 89.3   | 101.6  |
| 208524_at   | NM_005290 | GPR15                      | 2838   | 5.4    | 3.3    | 3.1    | 0.7    | 2.1    |
| 208525_s_at | NM_012369 | OR2F1 /// OF 26211 /// 13  | 26211  | 0.9    | 6.0    | 5.0    | 0.7    | 0.4    |
| 208526_at   | NM_012369 | OR2F1                      | 26211  | 11.5   | 7.5    | 12.1   | 10.8   | 5.9    |
| 208527_x_at | NM_003523 | HIST1H2BE                  | 8344   | 388.0  | 248.1  | 331.0  | 260.7  | 224.5  |
| 208528_x_at | NM_021015 | SSX3 /// SSX5 6758 /// 102 | 8344   | 1.1    | 1.9    | 1.2    | 6.3    | 0.7    |
| 208529_at   | NM_001208 | BTF3P11                    | 690    | 0.2    | 0.3    | 3.4    | 3.8    | 1.2    |
| 208530_s_at | NM_016152 | RARB                       | 5915   | 10.0   | 1.3    | 1.3    | 6.3    | 6.5    |
| 208531_at   | NM_006220 | SERPINA2                   | 390502 | 1.3    | 6.8    | 0.8    | 2.0    | 1.7    |
| 208532_x_at | NM_021046 | KRTAP5-8                   | 57830  | 4.4    | 4.0    | 4.8    | 1.9    | 4.7    |
| 208533_at   | NM_005986 | SOX1                       | 6656   | 0.3    | 0.2    | 0.3    | 0.4    | 0.5    |
| 208534_s_at | NM_006989 | LOC10272511 10156 /// 40   | 10156  | 1.6    | 1.5    | 2.3    | 4.0    | 2.4    |
| 208535_x_at | NM_005203 | COL13A1                    | 1305   | 5.1    | 3.6    | 16.1   | 1.2    | 3.1    |
| 208536_s_at | NM_006538 | BCL2L11                    | 10018  | 8.4    | 6.9    | 7.0    | 8.3    | 7.6    |
| 208537_at   | NM_004230 | S1PR2                      | 9294   | 0.6    | 0.5    | 0.8    | 1.2    | 0.4    |
| 208538_at   | NM_012403 | ANP32C                     | 23520  | 8.6    | 0.9    | 14.6   | 1.7    | 1.1    |
| 208539_x_at | NM_006945 | SPRR2B                     | 6701   | 6.2    | 0.7    | 1.1    | 7.0    | 0.8    |
| 208540_x_at | NM_021039 | S100A11P1 /-               | 6701   | 652.7  | 321.6  | 484.8  | 698.7  | 536.7  |
| 208541_x_at | NM_012251 | TFAM                       | 7019   | 68.0   | 55.4   | 84.4   | 60.8   | 62.7   |
| 208542_x_at | NM_007153 | ZNF208 /// Z 7757 /// 152  | 7019   | 1.6    | 8.2    | 12.3   | 1.0    | 1.5    |
| 208543_at   | NM_013939 | OR10H2                     | 26538  | 1.3    | 0.8    | 0.9    | 0.8    | 1.1    |
| 208544_at   | NM_000682 | ADRA2B                     | 151    | 4.8    | 10.7   | 7.4    | 9.3    | 10.8   |
| 208545_x_at | NM_003185 | TAF4                       | 6874   | 1.5    | 2.4    | 0.9    | 0.5    | 1.0    |
| 208546_x_at | NM_003524 | HIST1H2BH                  | 8345   | 183.1  | 139.8  | 189.3  | 182.4  | 182.8  |
| 208547_at   | NM_021062 | HIST1H2BB                  | 3018   | 20.2   | 10.4   | 16.0   | 10.5   | 14.4   |
| 208548_at   | NM_021002 | IFNA5 /// IFN 3442 /// 344 | 3018   | 0.6    | 3.6    | 3.8    | 1.0    | 4.0    |
| 208549_x_at | NM_016171 | PTMA                       | 5757   | 685.9  | 480.7  | 751.3  | 501.5  | 589.1  |
| 208550_x_at | NM_012283 | KCNG2                      | 26251  | 1.6    | 0.8    | 0.8    | 1.5    | 0.3    |
| 208551_at   | NM_003547 | HIST1H4G                   | 8369   | 2.6    | 3.7    | 6.9    | 6.0    | 1.6    |
| 208552_at   | NM_014619 | GRIK4                      | 2900   | 0.8    | 0.6    | 0.4    | 2.4    | 0.9    |
| 208553_at   | NM_005321 | HIST1H1E                   | 3008   | 17.4   | 7.8    | 14.8   | 15.9   | 15.1   |
| 208554_at   | NM_002700 | POU4F3                     | 5459   | 0.5    | 0.7    | 2.2    | 0.3    | 2.0    |
| 208555_x_at | NM_001322 | CST2                       | 1470   | 6.6    | 4.8    | 10.9   | 11.1   | 5.1    |
| 208556_at   | NM_005299 | GPR31                      | 2853   | 1.0    | 0.6    | 0.9    | 1.3    | 0.8    |
| 208557_at   | NM_024014 | HOXA6                      | 3203   | 8.6    | 4.3    | 6.9    | 6.9    | 4.5    |



|             |           |            |               |         |        |        |        |        |      |
|-------------|-----------|------------|---------------|---------|--------|--------|--------|--------|------|
| 208558_at   | NM_013940 | OR10H1     | 26539         | 5.4     | 7.9    | 9.6    | 1.8    | 11.0   |      |
| 208559_at   | NM_013311 | PDX1       | 3651          | 0.8     | 1.8    | 1.0    | 1.1    | 2.0    |      |
| 208560_at   | NM_005549 | KCNA10     | 3744          | 1.0     | 1.0    | 1.8    | 1.7    | 4.5    |      |
| 208561_at   | NM_020297 | ABCC9      | 10060         | 0.2     | 0.5    | 6.8    | 0.1    | 3.7    |      |
| 208562_s_at | NM_020297 | ABCC9      | 10060         | 2.4     | 1.3    | 5.2    | 2.4    | 0.5    |      |
| 208563_x_at | NM_006236 | POU3F3     | 5455          | 0.6     | 0.3    | 2.0    | 0.6    | 0.2    |      |
| 208564_at   | NM_004974 | KCNA2      | 3737          | 10.0    | 4.8    | 12.5   | 2.1    | 0.5    |      |
| 208565_at   | NM_005913 | MC5R       | 4161          | 8.6     | 3.0    | 6.4    | 3.2    | 8.4    |      |
| 208566_at   | NM_002244 | LOC1009968 | 100996843     | 0.1     | 1.1    | 0.2    | 0.3    | 0.1    |      |
| 208567_s_at | NM_002244 | KCNJ12     | /// K 3768    | /// 100 | 0.4    | 0.4    | 1.4    | 4.3    | 0.5  |
| 208568_at   | NM_000529 | MC2R       | 4158          | 3.4     | 12.4   | 14.7   | 7.4    | 4.8    |      |
| 208569_at   | NM_003513 | HIST1H2AB  | 8335          | 1.6     | 8.2    | 8.3    | 10.4   | 6.7    |      |
| 208570_at   | NM_005430 | WNT1       | 7471          | 0.8     | 1.2    | 1.1    | 1.0    | 4.2    |      |
| 208571_at   | NM_012404 | ANP32D     | 23519         | 1.8     | 0.8    | 0.5    | 2.1    | 3.3    |      |
| 208572_at   | NM_003493 | HIST3H3    | 8290          | 2.3     | 0.3    | 3.7    | 0.6    | 4.9    |      |
| 208573_s_at | NM_007160 | OR2H2      | 7932          | 10.1    | 2.4    | 11.7   | 8.7    | 10.4   |      |
| 208574_at   | NM_004189 | SOX14      | 8403          | 0.7     | 2.5    | 9.6    | 1.1    | 6.5    |      |
| 208575_at   | NM_003529 | HIST1H3A   | 8350          | 7.3     | 8.2    | 3.3    | 7.8    | 4.5    |      |
| 208576_s_at | NM_003537 | HIST1H3B   | 8358          | 5.4     | 10.0   | 11.8   | 8.2    | 6.8    |      |
| 208577_at   | NM_003531 | HIST1H3C   | 8352          | 1.4     | 1.1    | 1.4    | 0.8    | 1.1    |      |
| 208578_at   | NM_006514 | SCN10A     | 6336          | 14.9    | 13.7   | 13.5   | 5.3    | 6.2    |      |
| 208579_x_at | NM_017445 | H2BFS      | 54145         | 838.0   | 842.5  | 944.4  | 925.6  | 883.8  |      |
| 208580_x_at | NM_021968 | HIST1H4A   | ///,8294      | /// 835 | 47.9   | 34.0   | 52.7   | 58.1   | 54.7 |
| 208581_x_at | NM_005952 | MT1X       | 4501          | 1173.2  | 1299.1 | 1257.5 | 1175.1 | 1032.0 |      |
| 208582_s_at | NM_012148 | DUX1       | /// DU 26581  | /// 26  | 0.6    | 1.8    | 6.0    | 0.3    | 1.6  |
| 208583_x_at | NM_021066 | HIST1H2AJ  | 8331          | 101.4   | 92.6   | 134.6  | 83.6   | 90.3   |      |
| 208584_at   | NM_016432 | SNCG       | 6623          | 1.3     | 1.7    | 2.4    | 1.5    | 1.1    |      |
| 208585_at   | NM_024018 | BTN2A3P    | 54718         | 13.3    | 6.6    | 9.9    | 5.3    | 6.6    |      |
| 208586_s_at | NM_005636 | SSX4       | /// SSX, 6759 | /// 548 | 4.3    | 2.5    | 0.5    | 0.2    | 0.3  |
| 208587_s_at | NM_003554 | OR1E1      | /// OF 8387   | /// 838 | 10.3   | 6.7    | 13.7   | 20.1   | 16.0 |
| 208588_at   | NM_021631 | TPT1P8     | 59347         | 11.1    | 7.1    | 12.3   | 7.4    | 8.1    |      |
| 208589_at   | NM_020389 | TRPC7      | 57113         | 1.2     | 1.3    | 1.5    | 0.5    | 2.5    |      |
| 208590_x_at | NM_021954 | GJA3       | 2700          | 1.2     | 0.6    | 0.6    | 0.7    | 0.9    |      |
| 208591_s_at | NM_000922 | PDE3B      | 5140          | 35.2    | 15.6   | 26.5   | 19.9   | 21.2   |      |
| 208592_s_at | NM_030893 | CD1E       | 913           | 3.0     | 1.8    | 5.4    | 1.1    | 1.1    |      |
| 208593_x_at | NM_004382 | CRHR1      | 1394          | 11.8    | 3.4    | 11.7   | 11.0   | 2.8    |      |
| 208594_x_at | NM_024318 | LILRA6     | 79168         | 2.6     | 2.1    | 4.5    | 3.1    | 13.5   |      |
| 208595_s_at | NM_015845 | MBD1       | 4152          | 12.0    | 34.5   | 46.4   | 34.5   | 33.3   |      |
| 208596_s_at | NM_019093 | UGT1A1     | /// (54575    | /// 54  | 11.1   | 12.4   | 8.1    | 11.2   | 3.6  |
| 208597_at   | NM_000614 | CNTF       | 1270          | 4.8     | 1.1    | 1.2    | 4.0    | 4.2    |      |
| 208598_s_at | NM_005703 | HUWE1      | 10075         | 263.8   | 250.6  | 243.2  | 275.2  | 201.3  |      |
| 208599_at   | NM_005703 | HUWE1      | 10075         | 3.7     | 1.5    | 3.3    | 7.6    | 4.0    |      |
| 208600_s_at | NM_001508 | GPR39      | 2863          | 1.0     | 0.3    | 0.6    | 0.4    | 0.6    |      |
| 208601_s_at | NM_030773 | TUBB1      | 81027         | 4.5     | 9.5    | 10.5   | 2.5    | 12.3   |      |
| 208602_x_at | NM_006725 | CD6        | 923           | 1.2     | 1.6    | 1.3    | 0.6    | 0.5    |      |
| 208603_s_at | NM_016431 | MAPK8IP2   | 23542         | 2.2     | 1.5    | 4.4    | 3.9    | 3.5    |      |
| 208604_s_at | NM_030661 | HOX A3     | 3200          | 4.5     | 0.9    | 1.6    | 2.2    | 1.0    |      |
| 208605_s_at | NM_002529 | NTRK1      | 4914          | 0.4     | 0.6    | 0.3    | 0.2    | 0.4    |      |
| 208606_s_at | NM_030761 | WNT4       | 54361         | 1.0     | 0.6    | 0.6    | 3.9    | 0.3    |      |
| 208607_s_at | NM_030754 | SAA1       | /// SAA, 6288 | /// 628 | 0.5    | 3.5    | 2.2    | 0.8    | 2.1  |
| 208608_s_at | NM_021021 | SNTB1      | 6641          | 1.3     | 0.3    | 0.4    | 0.3    | 0.3    |      |
| 208609_s_at | NM_019105 | TNXA       | /// TN, 7146  | /// 714 | 9.9    | 1.9    | 3.3    | 1.4    | 2.3  |
| 208610_s_at | AI655799  | SRRM2      | 23524         | 81.1    | 84.9   | 75.5   | 73.1   | 65.6   |      |

|             |          |                           |           |        |        |        |        |        |
|-------------|----------|---------------------------|-----------|--------|--------|--------|--------|--------|
| 208611_s_at | U83867   | SPTAN1                    | 6709      | 133.3  | 117.9  | 91.5   | 103.0  | 55.2   |
| 208612_at   | D83485   | PDIA3                     | 2923      | 1028.3 | 870.3  | 942.4  | 882.4  | 794.0  |
| 208613_s_at | AV712733 | FLNB                      | 2317      | 71.5   | 86.4   | 87.4   | 101.8  | 95.7   |
| 208614_s_at | M62994   | FLNB                      | 2317      | 69.8   | 70.0   | 70.2   | 98.5   | 69.3   |
| 208615_s_at | BF795101 | PTP4A2                    | 8073      | 80.3   | 68.9   | 84.2   | 75.6   | 67.6   |
| 208616_s_at | U48297   | PTP4A2                    | 8073      | 785.5  | 637.4  | 812.2  | 708.1  | 631.2  |
| 208617_s_at | AF208850 | PTP4A2                    | 8073      | 154.3  | 164.5  | 155.2  | 137.5  | 128.5  |
| 208619_at   | L40326   | DDB1                      | 1642      | 246.8  | 218.7  | 206.9  | 239.1  | 165.3  |
| 208620_at   | U24223   | PCBP1                     | 5093      | 784.6  | 546.6  | 671.9  | 574.7  | 598.3  |
| 208621_s_at | BF663141 | EZR                       | 7430      | 40.4   | 34.8   | 45.6   | 43.7   | 29.4   |
| 208622_s_at | AA670344 | EZR                       | 7430      | 27.0   | 29.2   | 36.6   | 30.2   | 40.3   |
| 208623_s_at | J05021   | EZR                       | 7430      | 101.9  | 83.7   | 108.2  | 110.6  | 97.4   |
| 208624_s_at | BE966878 | EIF4G1                    | 1981      | 181.5  | 121.5  | 154.2  | 133.1  | 99.0   |
| 208625_s_at | AF104913 | EIF4G1                    | 1981      | 769.0  | 665.3  | 867.5  | 739.3  | 759.1  |
| 208626_s_at | BC001913 | VAT1                      | 10493     | 174.6  | 169.2  | 169.7  | 197.4  | 107.2  |
| 208627_s_at | BE966374 | YBX1                      | 4904      | 1870.6 | 1714.1 | 1893.6 | 1836.8 | 1687.1 |
| 208628_s_at | BC002411 | YBX1                      | 4904      | 2504.3 | 2193.5 | 2600.1 | 2381.5 | 2204.7 |
| 208629_s_at | BG472176 | HADHA                     | 3030      | 160.1  | 196.5  | 191.7  | 168.2  | 112.2  |
| 208630_at   | AI972144 | HADHA                     | 3030      | 129.9  | 121.4  | 140.0  | 135.8  | 100.8  |
| 208631_s_at | U04627   | HADHA                     | 3030      | 285.4  | 306.5  | 267.3  | 318.0  | 237.8  |
| 208632_at   | AL578551 | RNF10                     | 9921      | 40.9   | 40.5   | 43.5   | 47.7   | 34.3   |
| 208633_s_at | W61052   | MACF1                     | 23499     | 27.9   | 33.2   | 29.6   | 39.4   | 25.5   |
| 208634_s_at | AB029290 | MACF1                     | 23499     | 72.2   | 80.1   | 68.0   | 81.2   | 63.3   |
| 208635_x_at | BF976260 | NACA                      | 4666      | 3464.2 | 3317.3 | 3633.4 | 3496.6 | 3187.9 |
| 208636_at   | AI082078 | ACTN1                     | 87        | 311.6  | 329.8  | 392.4  | 344.0  | 306.4  |
| 208637_x_at | BC003576 | ACTN1                     | 87        | 140.1  | 137.6  | 146.8  | 127.0  | 107.5  |
| 208638_at   | BE910010 | PDIA6                     | 10130     | 403.1  | 356.2  | 407.0  | 367.8  | 349.6  |
| 208639_x_at | BC001312 | PDIA6                     | 10130     | 732.6  | 775.6  | 809.2  | 679.7  | 635.3  |
| 208640_at   | BG292367 | RAC1                      | 5879      | 853.3  | 853.9  | 937.3  | 870.7  | 776.1  |
| 208641_s_at | BC004247 | RAC1                      | 5879      | 440.3  | 462.6  | 463.7  | 457.8  | 411.1  |
| 208642_s_at | AA205834 | XRCC5                     | 7520      | 1031.8 | 883.3  | 1165.9 | 959.3  | 908.6  |
| 208643_s_at | J04977   | XRCC5                     | 7520      | 502.5  | 494.5  | 553.5  | 452.6  | 456.2  |
| 208644_at   | M32721   | PARP1                     | 142       | 641.4  | 548.6  | 882.3  | 659.9  | 750.7  |
| 208645_s_at | AF116710 | RPS14                     | 6208      | 3857.3 | 3345.7 | 3617.9 | 3520.9 | 3488.2 |
| 208646_at   | AF116710 | -                         | -         | 1811.6 | 1351.6 | 2114.8 | 1571.6 | 1804.2 |
| 208647_at   | AA872727 | FDFT1                     | 2222      | 712.4  | 625.8  | 916.3  | 642.1  | 738.2  |
| 208648_at   | W60953   | VCP                       | 7415      | 306.0  | 203.3  | 283.4  | 231.6  | 182.7  |
| 208649_s_at | AF100752 | VCP                       | 7415      | 841.5  | 753.5  | 776.5  | 772.3  | 601.3  |
| 208650_s_at | BG327863 | CD24                      | 100133941 | 7.1    | 6.3    | 8.4    | 8.3    | 4.7    |
| 208651_x_at | M58664   | CD24                      | 100133941 | 7.7    | 10.7   | 5.4    | 10.1   | 5.8    |
| 208652_at   | BC000400 | PPP2CA                    | 5515      | 471.5  | 401.6  | 482.1  | 418.6  | 373.8  |
| 208653_s_at | AF263279 | CD164                     | 8763      | 278.2  | 230.8  | 267.4  | 228.1  | 219.0  |
| 208654_s_at | BF669455 | CD164                     | 8763      | 416.2  | 384.4  | 412.3  | 368.5  | 301.3  |
| 208655_at   | BG530368 | CCNI                      | 10983     | 1411.9 | 1273.3 | 1360.8 | 1367.7 | 1103.8 |
| 208656_s_at | AF135162 | CCNI                      | 10983     | 1702.5 | 1606.0 | 1628.0 | 1754.7 | 1304.4 |
| 208657_s_at | AF142408 | SEPT9                     | 10801     | 53.0   | 107.1  | 79.2   | 83.6   | 58.4   |
| 208658_at   | BC000425 | PDIA4                     | 9601      | 82.8   | 89.6   | 98.3   | 96.1   | 91.5   |
| 208659_at   | AF034607 | CLIC1                     | 1192      | 693.4  | 816.5  | 753.1  | 839.0  | 694.5  |
| 208660_at   | BC000105 | CS                        | 1431      | 1081.3 | 1058.8 | 1275.1 | 1173.7 | 1110.0 |
| 208661_s_at | AW510696 | TTC3 /// TTC.7267 /// 286 |           | 116.2  | 115.1  | 114.1  | 119.6  | 88.1   |
| 208662_s_at | AI885338 | TTC3 /// TTC.7267 /// 286 |           | 316.6  | 312.9  | 277.6  | 326.3  | 232.5  |
| 208663_s_at | AI652848 | TTC3 /// TTC.7267 /// 286 |           | 58.7   | 74.3   | 54.7   | 73.2   | 59.7   |
| 208664_s_at | AU131711 | TTC3 /// TTC.7267 /// 286 |           | 28.9   | 30.3   | 31.5   | 32.7   | 23.8   |

|                      |                          |       |        |        |        |        |        |
|----------------------|--------------------------|-------|--------|--------|--------|--------|--------|
| 208666_s_at BE866412 | ST13                     | 6767  | 208.8  | 182.7  | 194.1  | 184.2  | 150.6  |
| 208667_s_at U17714   | ST13                     | 6767  | 312.2  | 298.4  | 315.7  | 288.3  | 245.1  |
| 208668_x_at BC003689 | HMG2N2                   | 3151  | 2080.0 | 1778.8 | 2186.0 | 2011.3 | 1796.9 |
| 208669_s_at AF109873 | EID1                     | 23741 | 922.5  | 759.2  | 1035.1 | 888.9  | 841.8  |
| 208670_s_at AF274951 | EID1                     | 23741 | 210.9  | 160.0  | 217.5  | 228.1  | 184.7  |
| 208671_at AF164794   | SERINC1                  | 57515 | 227.0  | 184.9  | 205.6  | 185.8  | 146.7  |
| 208672_s_at BC000914 | SRSF3                    | 6428  | 1233.7 | 937.6  | 1480.0 | 1115.1 | 1126.6 |
| 208673_s_at AF107405 | SRSF3                    | 6428  | 298.5  | 225.9  | 314.8  | 247.4  | 231.8  |
| 208674_x_at BC002594 | DDOST                    | 1650  | 293.3  | 248.8  | 284.9  | 277.5  | 197.8  |
| 208675_s_at D29643   | DDOST                    | 1650  | 467.7  | 500.8  | 533.0  | 583.6  | 434.5  |
| 208676_s_at U87954   | PA2G4                    | 5036  | 623.7  | 490.0  | 792.3  | 695.5  | 725.9  |
| 208677_s_at AL550657 | BSG                      | 682   | 630.8  | 639.3  | 678.8  | 678.0  | 538.4  |
| 208678_at BC004443   | ATP6V1E1                 | 529   | 183.0  | 175.0  | 214.4  | 197.0  | 158.7  |
| 208679_s_at AF279893 | ARPC2                    | 10109 | 461.8  | 493.2  | 484.6  | 410.5  | 357.4  |
| 208680_at L19184     | PRDX1                    | 5052  | 2134.2 | 2066.6 | 2228.6 | 2105.9 | 1905.9 |
| 208682_s_at AF126181 | MAGED2                   | 10916 | 154.1  | 128.5  | 155.8  | 149.4  | 133.1  |
| 208683_at M23254     | CAPN2                    | 824   | 132.0  | 139.0  | 141.5  | 133.7  | 121.6  |
| 208684_at U24105     | COPA                     | 1314  | 286.1  | 268.2  | 256.3  | 194.2  | 204.4  |
| 208685_x_at AA902767 | BRD2                     | 6046  | 276.5  | 231.6  | 263.4  | 215.0  | 191.7  |
| 208686_s_at D42040   | BRD2                     | 6046  | 124.5  | 143.0  | 159.0  | 148.6  | 132.3  |
| 208687_x_at AF352832 | HSPA8 /// SM3312 /// 853 |       | 2989.6 | 2987.6 | 3690.3 | 2886.6 | 3070.4 |
| 208688_x_at U78525   | EIF3B                    | 8662  | 764.8  | 703.4  | 888.6  | 735.6  | 769.4  |
| 208689_s_at BC003560 | RPN2                     | 6185  | 801.6  | 787.3  | 856.7  | 859.9  | 693.0  |
| 208690_s_at BC000915 | PDLIM1                   | 9124  | 225.3  | 185.8  | 201.2  | 203.6  | 139.0  |
| 208691_at BC001188   | TFRC                     | 7037  | 1036.3 | 874.0  | 1153.2 | 909.5  | 988.5  |
| 208692_at U14990     | RPS3                     | 6188  | 3444.8 | 3070.8 | 3513.4 | 3331.4 | 3178.5 |
| 208693_s_at D30658   | GARS                     | 2617  | 788.5  | 792.3  | 792.3  | 795.5  | 662.5  |
| 208694_at U47077     | PRKDC                    | 5591  | 182.1  | 158.8  | 176.5  | 172.5  | 145.4  |
| 208695_s_at BC001019 | RPL39                    | 6170  | 3486.4 | 3416.8 | 3704.6 | 3639.8 | 3352.4 |
| 208696_at AF275798   | CCT5                     | 22948 | 833.0  | 885.1  | 1075.8 | 896.3  | 831.9  |
| 208697_s_at BC000734 | EIF3E                    | 3646  | 1106.7 | 922.0  | 1182.4 | 1014.0 | 888.6  |
| 208698_s_at L14599   | NONO                     | 4841  | 945.0  | 859.7  | 973.6  | 909.8  | 800.3  |
| 208699_x_at BF696840 | TKT                      | 7086  | 1160.8 | 997.6  | 1136.2 | 1083.6 | 940.6  |
| 208700_s_at L12711   | TKT                      | 7086  | 1846.1 | 1753.0 | 2017.6 | 1829.7 | 1723.7 |
| 208701_at BC000373   | APLP2                    | 334   | 19.4   | 11.8   | 14.3   | 15.7   | 7.0    |
| 208702_x_at AI525212 | APLP2                    | 334   | 256.6  | 351.5  | 332.1  | 384.8  | 266.2  |
| 208703_s_at BG427393 | APLP2                    | 334   | 190.6  | 165.7  | 203.4  | 185.5  | 142.0  |
| 208704_x_at BC000373 | APLP2                    | 334   | 306.4  | 266.1  | 289.7  | 255.5  | 227.3  |
| 208705_s_at BG481972 | EIF5                     | 1983  | 484.4  | 387.6  | 498.7  | 399.4  | 388.5  |
| 208706_s_at AK026933 | EIF5                     | 1983  | 282.7  | 226.7  | 282.9  | 224.4  | 198.8  |
| 208707_at BE552334   | EIF5                     | 1983  | 16.3   | 6.2    | 14.7   | 7.7    | 9.9    |
| 208708_x_at AL080102 | EIF5                     | 1983  | 353.8  | 314.8  | 414.8  | 364.3  | 335.5  |
| 208709_s_at U64898   | NRD1                     | 4898  | 159.4  | 151.7  | 163.5  | 131.1  | 113.6  |
| 208710_s_at AI424923 | AP3D1                    | 8943  | 40.9   | 50.4   | 61.5   | 64.2   | 53.6   |
| 208711_s_at BC000076 | CCND1                    | 595   | 97.5   | 132.2  | 135.7  | 114.9  | 131.2  |
| 208712_at M73554     | CCND1                    | 595   | 176.3  | 144.2  | 213.6  | 181.5  | 152.3  |
| 208713_at BF724216   | HNRNPUL1                 | 11100 | 154.6  | 175.5  | 190.2  | 187.9  | 168.0  |
| 208714_at AF092131   | NDUFV1                   | 4723  | 622.5  | 699.8  | 694.5  | 719.4  | 590.2  |
| 208715_at BF002031   | TMCO1                    | 54499 | 47.0   | 62.5   | 62.1   | 55.9   | 36.9   |
| 208716_s_at AB020980 | TMCO1                    | 54499 | 339.7  | 360.2  | 445.4  | 381.9  | 362.6  |
| 208717_at BC001669   | OXA1L                    | 5018  | 508.8  | 442.9  | 517.6  | 465.4  | 377.4  |
| 208718_at Z97056     | DDX17                    | 10521 | 575.3  | 589.1  | 655.6  | 674.8  | 537.9  |
| 208719_s_at U59321   | DDX17                    | 10521 | 17.1   | 17.2   | 17.0   | 7.8    | 13.6   |

|             |           |                          |       |        |        |        |        |        |
|-------------|-----------|--------------------------|-------|--------|--------|--------|--------|--------|
| 208720_s_at | AI890947  | RBM39                    | 9584  | 415.0  | 415.6  | 511.7  | 444.0  | 391.7  |
| 208721_s_at | BF967271  | ANAPC5                   | 51433 | 234.8  | 263.9  | 337.1  | 273.8  | 253.5  |
| 208722_s_at | BC001081  | ANAPC5                   | 51433 | 400.8  | 415.9  | 476.5  | 437.8  | 370.3  |
| 208723_at   | BC000350  | USP11                    | 8237  | 115.9  | 131.7  | 92.0   | 125.6  | 83.8   |
| 208724_s_at | BC000905  | RAB1A                    | 5861  | 700.6  | 637.9  | 733.8  | 662.6  | 581.5  |
| 208725_at   | AL031668  | EIF2S2                   | 8894  | 2.8    | 1.9    | 1.9    | 1.3    | 1.3    |
| 208726_s_at | BC000461  | EIF2S2                   | 8894  | 600.5  | 559.4  | 624.9  | 549.1  | 486.2  |
| 208727_s_at | BC002711  | CDC42                    | 998   | 139.8  | 164.4  | 183.5  | 171.3  | 166.2  |
| 208728_s_at | BC003682  | CDC42                    | 998   | 137.4  | 107.4  | 133.6  | 124.3  | 108.2  |
| 208729_x_at | D83043    | HLA-B                    | 3106  | 80.7   | 95.2   | 106.8  | 83.9   | 62.9   |
| 208730_x_at | AA535244  | RAB2A                    | 5862  | 49.8   | 60.3   | 70.1   | 39.4   | 45.2   |
| 208731_at   | AU158062  | RAB2A                    | 5862  | 270.2  | 258.5  | 303.9  | 266.4  | 240.1  |
| 208732_at   | AI743756  | RAB2A                    | 5862  | 91.8   | 86.1   | 96.6   | 79.0   | 67.9   |
| 208733_at   | AW301641  | RAB2A                    | 5862  | 4.0    | 4.5    | 5.1    | 6.9    | 3.1    |
| 208734_x_at | M28213    | RAB2A                    | 5862  | 214.9  | 205.1  | 242.4  | 213.6  | 202.9  |
| 208735_s_at | AF022231  | CTDSP2                   | 10106 | 73.3   | 55.1   | 63.7   | 54.3   | 46.8   |
| 208736_at   | AF004561  | ARPC3                    | 10094 | 543.0  | 466.6  | 569.4  | 517.2  | 420.7  |
| 208737_at   | BC003564  | ATP6V1G1                 | 9550  | 435.4  | 328.2  | 455.3  | 374.6  | 348.9  |
| 208738_x_at | AK024823  | LOC1019290:6612 /// 661  |       | 1400.2 | 811.8  | 1560.8 | 1212.5 | 1216.0 |
| 208739_x_at | L76416    | LOC1019290:6612 /// 661  |       | 1095.7 | 862.8  | 983.8  | 967.7  | 788.4  |
| 208740_at   | BF593650  | SAP18                    | 10284 | 55.4   | 58.4   | 55.4   | 47.7   | 46.0   |
| 208741_at   | AW274856  | SAP18                    | 10284 | 22.3   | 21.7   | 19.5   | 22.9   | 12.5   |
| 208742_s_at | U78303    | SAP18                    | 10284 | 922.8  | 898.9  | 992.5  | 930.2  | 825.4  |
| 208743_s_at | BC001359  | YWHAB                    | 7529  | 523.3  | 453.5  | 572.9  | 504.8  | 415.3  |
| 208744_x_at | BG403660  | HSPH1                    | 10808 | 139.5  | 100.9  | 167.6  | 139.4  | 148.7  |
| 208745_at   | AA917672  | ATP5L                    | 10632 | 111.8  | 90.7   | 83.9   | 100.6  | 88.4   |
| 208746_x_at | AF070655  | ATP5L                    | 10632 | 1433.2 | 1518.0 | 1543.7 | 1546.1 | 1324.9 |
| 208747_s_at | M18767    | C1S                      | 716   | 1.2    | 1.5    | 3.9    | 2.8    | 1.5    |
| 208748_s_at | AA507012  | FLOT1                    | 10211 | 52.4   | 37.8   | 47.2   | 44.7   | 39.7   |
| 208749_x_at | AF085357  | FLOT1                    | 10211 | 407.2  | 410.4  | 396.4  | 413.8  | 328.8  |
| 208750_s_at | AA580004  | ARF1 /// MIR375 /// 1005 |       | 516.3  | 523.4  | 592.7  | 524.8  | 531.5  |
| 208751_at   | BC001165  | NAPA                     | 8775  | 86.7   | 132.4  | 135.4  | 126.4  | 109.2  |
| 208752_x_at | AI888672  | NAP1L1                   | 4673  | 1519.9 | 1433.7 | 1710.0 | 1537.0 | 1365.7 |
| 208753_s_at | BC002387  | NAP1L1                   | 4673  | 347.0  | 282.2  | 347.8  | 308.6  | 308.5  |
| 208754_s_at | AL162068  | NAP1L1                   | 4673  | 263.8  | 206.4  | 293.6  | 249.6  | 231.2  |
| 208755_x_at | BF312331  | H3F3A /// H33020 /// 302 |       | 1961.5 | 2209.7 | 2097.9 | 2038.6 | 1722.6 |
| 208756_at   | U36764    | EIF3I                    | 8668  | 1011.1 | 906.4  | 1072.5 | 924.0  | 932.6  |
| 208757_at   | BC001123  | TMED9                    | 54732 | 266.7  | 261.4  | 432.9  | 276.6  | 361.8  |
| 208758_at   | D89976    | ATIC                     | 471   | 918.1  | 891.5  | 1000.6 | 889.7  | 737.8  |
| 208759_at   | AF240468  | NCSTN                    | 23385 | 103.5  | 133.1  | 112.8  | 119.5  | 93.0   |
| 208760_at   | AL031714  | UBE2I                    | 7329  | 29.1   | 20.5   | 25.5   | 28.1   | 26.8   |
| 208761_s_at | U67122    | SUMO1                    | 7341  | 250.5  | 210.3  | 293.4  | 260.0  | 206.6  |
| 208762_at   | U83117    | SUMO1                    | 7341  | 23.4   | 10.3   | 17.3   | 12.8   | 8.4    |
| 208763_s_at | AL110191  | TSC22D3                  | 1831  | 131.8  | 139.3  | 89.7   | 139.5  | 93.1   |
| 208764_s_at | D13119    | ATP5G2                   | 517   | 1671.0 | 1714.2 | 1793.7 | 1801.7 | 1632.3 |
| 208765_s_at | NM_005826 | HNRNPR                   | 10236 | 164.4  | 159.5  | 133.8  | 129.9  | 113.6  |
| 208766_s_at | BC001449  | HNRNPR                   | 10236 | 608.7  | 422.5  | 594.9  | 507.2  | 478.1  |
| 208767_s_at | AW149681  | LAPTM4B                  | 55353 | 232.2  | 202.8  | 213.2  | 204.7  | 147.5  |
| 208768_x_at | D17652    | RPL22                    | 6146  | 1592.2 | 1555.7 | 1729.9 | 1509.6 | 1422.9 |
| 208769_at   | AW500473  | EIF4EBP2                 | 1979  | 51.4   | 42.7   | 45.2   | 29.8   | 38.2   |
| 208770_s_at | BC005057  | EIF4EBP2                 | 1979  | 171.6  | 144.9  | 166.4  | 168.1  | 142.5  |
| 208771_s_at | J02959    | LOC1019288:4048 /// 101  |       | 268.3  | 328.6  | 272.9  | 306.4  | 250.9  |
| 208772_at   | AU160676  | ANKHD1 /// .54882 /// 40 |       | 73.5   | 81.0   | 92.4   | 84.4   | 69.3   |

|             |          |          |     |        |       |     |        |        |        |        |        |        |
|-------------|----------|----------|-----|--------|-------|-----|--------|--------|--------|--------|--------|--------|
| 208773_s_at | AL136943 | ANKHD1   | /// | 54882  | ///   | 40  | 156.6  | 154.4  | 172.6  | 156.6  | 123.7  |        |
| 208774_at   | AV700224 | CSNK1D   |     | 1453   |       |     | 208.4  | 209.4  | 177.0  | 214.7  | 145.9  |        |
| 208775_at   | D89729   | XPO1     |     | 7514   |       |     | 435.0  | 278.7  | 408.7  | 300.6  | 296.5  |        |
| 208776_at   | BF432873 | PSMD11   |     | 5717   |       |     | 2.4    | 2.0    | 2.5    | 6.2    | 7.3    |        |
| 208777_s_at | AF001212 | PSMD11   |     | 5717   |       |     | 440.4  | 420.6  | 520.0  | 449.3  | 464.8  |        |
| 208778_s_at | BC000665 | SNORA29  | /// | 6950   | ///   | 677 | 1613.8 | 1425.5 | 1705.4 | 1507.2 | 1482.5 |        |
| 208779_x_at | L20817   | DDR1     | /// | MII    | 780   | /// | 1006   | 216.3  | 253.2  | 208.9  | 256.0  | 161.1  |
| 208780_x_at | AF154847 | VAPA     |     | 9218   |       |     | 658.4  | 589.4  | 655.2  | 566.8  | 556.3  |        |
| 208781_x_at | AF062483 | SNX3     |     | 8724   |       |     | 338.5  | 221.8  | 260.1  | 242.4  | 222.3  |        |
| 208782_at   | BC000055 | FSTL1    |     | 11167  |       |     | 53.9   | 85.9   | 50.7   | 66.4   | 45.1   |        |
| 208783_s_at | AL570661 | CD46     |     | 4179   |       |     | 246.7  | 162.7  | 259.2  | 181.5  | 181.0  |        |
| 208784_s_at | BC001793 | KLHDC3   |     | 116138 |       |     | 157.5  | 150.9  | 188.7  | 166.5  | 156.1  |        |
| 208785_s_at | BE893893 | MAP1LC3B |     | 81631  |       |     | 141.3  | 149.2  | 145.3  | 141.4  | 108.8  |        |
| 208786_s_at | AF183417 | MAP1LC3B |     | 81631  |       |     | 118.2  | 139.6  | 110.7  | 124.2  | 75.7   |        |
| 208787_at   | BC003375 | MRPL3    |     | 11222  |       |     | 1113.1 | 883.6  | 1172.8 | 954.1  | 945.0  |        |
| 208788_at   | AL136939 | ELOVL5   |     | 60481  |       |     | 570.0  | 533.0  | 822.1  | 489.9  | 797.2  |        |
| 208789_at   | BC004295 | PTRF     |     | 284119 |       |     | 2.7    | 3.4    | 7.3    | 8.0    | 8.3    |        |
| 208790_s_at | AF312393 | PTRF     |     | 284119 |       |     | 6.3    | 5.1    | 2.7    | 3.6    | 5.7    |        |
| 208791_at   | M25915   | CLU      |     | 1191   |       |     | 80.7   | 63.5   | 52.6   | 76.3   | 39.4   |        |
| 208792_s_at | M25915   | CLU      |     | 1191   |       |     | 46.0   | 55.8   | 45.4   | 46.6   | 31.6   |        |
| 208793_x_at | AI744900 | SMARCA4  |     | 6597   |       |     | 68.3   | 63.3   | 77.2   | 72.0   | 61.8   |        |
| 208794_s_at | D26156   | SMARCA4  |     | 6597   |       |     | 331.1  | 321.0  | 335.4  | 322.3  | 282.7  |        |
| 208795_s_at | D55716   | MCM7     |     | 4176   |       |     | 476.0  | 400.0  | 572.2  | 401.1  | 507.5  |        |
| 208796_s_at | BC000196 | CCNG1    |     | 900    |       |     | 1053.3 | 914.7  | 1014.0 | 981.4  | 826.6  |        |
| 208797_s_at | AI829170 | GOLGA8A  |     | 23015  |       |     | 7.2    | 6.0    | 11.6   | 3.8    | 6.9    |        |
| 208798_x_at | AF204231 | GOLGA8A  |     | 23015  |       |     | 24.4   | 15.9   | 21.1   | 16.6   | 12.5   |        |
| 208799_at   | BC004146 | PSMB5    |     | 5693   |       |     | 1088.3 | 1015.9 | 1256.2 | 1111.8 | 1037.3 |        |
| 208800_at   | AV702627 | SRP72    |     | 6731   |       |     | 279.9  | 252.2  | 289.2  | 243.3  | 215.7  |        |
| 208801_at   | BE856385 | SRP72    |     | 6731   |       |     | 603.7  | 545.2  | 628.1  | 575.8  | 499.8  |        |
| 208802_at   | AI493872 | SRP72    |     | 6731   |       |     | 177.2  | 140.9  | 189.4  | 167.4  | 148.0  |        |
| 208803_s_at | AF069765 | SRP72    |     | 6731   |       |     | 107.3  | 107.4  | 114.4  | 106.2  | 86.5   |        |
| 208804_s_at | AL031681 | SRSF6    |     | 6431   |       |     | 248.2  | 231.0  | 251.6  | 222.2  | 219.2  |        |
| 208805_at   | BC002979 | KIAA0391 | /// | 5687   | ///   | 969 | 889.2  | 918.5  | 1021.4 | 827.7  | 817.4  |        |
| 208806_at   | BE379542 | CHD3     |     | 1107   |       |     | 25.3   | 23.1   | 26.8   | 29.2   | 27.8   |        |
| 208807_s_at | U91543   | CHD3     |     | 1107   |       |     | 148.9  | 138.7  | 121.4  | 122.1  | 88.5   |        |
| 208808_s_at | BC000903 | HMGB2    |     | 3148   |       |     | 562.3  | 439.6  | 718.5  | 446.9  | 531.2  |        |
| 208809_s_at | AL136632 | C6orf62  |     | 81688  |       |     | 270.7  | 203.8  | 302.6  | 251.1  | 216.1  |        |
| 208810_at   | AF080569 | DNAJB6   | /// | T      | 10049 | /// | 65     | 160.9  | 109.3  | 171.6  | 130.0  | 120.9  |
| 208811_s_at | AF080569 | DNAJB6   | /// | T      | 10049 | /// | 65     | 112.1  | 87.6   | 130.7  | 96.0   | 95.4   |
| 208812_x_at | BC004489 | HLA-C    |     | 3107   |       |     | 313.9  | 388.3  | 333.6  | 417.6  | 272.4  |        |
| 208813_at   | BC000498 | GOT1     |     | 2805   |       |     | 337.8  | 308.2  | 403.4  | 350.5  | 313.6  |        |
| 208814_at   | AA043348 | HSPA4    |     | 3308   |       |     | 24.1   | 29.5   | 27.0   | 28.7   | 23.0   |        |
| 208815_x_at | AB023420 | HSPA4    |     | 3308   |       |     | 396.5  | 340.9  | 426.4  | 345.8  | 357.9  |        |
| 208816_x_at | M62898   | ANXA2P2  |     | 304    |       |     | 6.9    | 13.1   | 17.1   | 8.7    | 10.1   |        |
| 208817_at   | BC000419 | COMT     |     | 1312   |       |     | 500.8  | 419.5  | 502.3  | 447.0  | 429.5  |        |
| 208818_s_at | BC000419 | COMT     |     | 1312   |       |     | 1105.7 | 1084.3 | 1230.1 | 1047.3 | 1017.5 |        |
| 208819_at   | BC002977 | RAB8A    |     | 4218   |       |     | 402.2  | 204.9  | 453.9  | 356.0  | 212.1  |        |
| 208820_at   | AL037339 | PTK2     |     | 5747   |       |     | 110.7  | 95.9   | 131.7  | 106.2  | 85.5   |        |
| 208821_at   | J04564   | SNRPB    |     | 6628   |       |     | 1096.2 | 882.3  | 1095.9 | 966.7  | 971.2  |        |
| 208822_s_at | U18321   | DAP3     |     | 7818   |       |     | 554.9  | 496.9  | 539.3  | 533.1  | 513.2  |        |
| 208823_s_at | BE787860 | CDK16    |     | 5127   |       |     | 96.7   | 60.2   | 80.4   | 71.9   | 61.5   |        |
| 208824_x_at | BC001048 | CDK16    |     | 5127   |       |     | 203.1  | 255.3  | 182.0  | 184.7  | 155.5  |        |
| 208825_x_at | U43701   | RPL23A   | /// | S      | 6147  | /// | 268    | 4909.8 | 4533.8 | 4958.2 | 4698.1 | 4683.3 |

|             |          |              |              |        |        |        |        |        |
|-------------|----------|--------------|--------------|--------|--------|--------|--------|--------|
| 208826_x_at | U27143   | HINT1        | 3094         | 1471.3 | 1605.4 | 1789.4 | 1626.6 | 1443.5 |
| 208827_at   | BC000835 | PSMB6        | 5694         | 835.5  | 741.6  | 889.0  | 873.7  | 693.9  |
| 208828_at   | BC004170 | POLE3        | 54107        | 557.1  | 356.2  | 567.1  | 426.6  | 467.2  |
| 208829_at   | AF029750 | TAPBP        | 6892         | 91.0   | 89.1   | 68.6   | 98.3   | 61.9   |
| 208830_s_at | AI494567 | SUPT6H       | 6830         | 56.3   | 53.3   | 66.4   | 70.4   | 52.3   |
| 208831_x_at | D79984   | SUPT6H       | 6830         | 60.3   | 72.2   | 69.3   | 69.9   | 62.6   |
| 208832_at   | AW241832 | ATXN10       | 25814        | 64.0   | 53.3   | 72.0   | 53.6   | 49.8   |
| 208833_s_at | AF119662 | ATXN10       | 25814        | 939.0  | 847.9  | 940.1  | 922.2  | 795.0  |
| 208834_x_at | BC001865 | RPL23A /// S | 6147 /// 268 | 4997.1 | 4852.2 | 4956.9 | 4800.7 | 4698.1 |
| 208835_s_at | AW089673 | LUC7L3       | 51747        | 83.2   | 59.8   | 88.0   | 70.2   | 65.9   |
| 208836_at   | U51478   | ATP1B3       | 483          | 1062.2 | 1005.9 | 1300.9 | 1061.8 | 1037.8 |
| 208837_at   | BC000027 | TMED3        | 23423        | 454.8  | 476.8  | 576.2  | 502.8  | 459.2  |
| 208838_at   | AB020636 | CAND1        | 55832        | 165.3  | 140.2  | 166.9  | 152.0  | 135.5  |
| 208839_s_at | AL136810 | CAND1        | 55832        | 156.4  | 135.9  | 141.6  | 160.5  | 123.4  |
| 208840_s_at | AU149503 | G3BP2        | 9908         | 193.6  | 175.4  | 244.3  | 174.5  | 179.7  |
| 208841_s_at | AB014560 | G3BP2        | 9908         | 353.0  | 262.1  | 362.8  | 290.8  | 293.6  |
| 208842_s_at | W93787   | GORASP2      | 26003        | 260.4  | 235.9  | 281.7  | 232.6  | 203.9  |
| 208843_s_at | BC001408 | GORASP2      | 26003        | 147.7  | 135.3  | 166.6  | 145.9  | 117.1  |
| 208844_at   | BC002456 | VDAC3        | 7419         | 21.0   | 18.1   | 16.7   | 19.9   | 13.2   |
| 208845_at   | BC002456 | VDAC3        | 7419         | 1172.9 | 1013.3 | 1290.4 | 1065.0 | 1020.7 |
| 208846_s_at | U90943   | VDAC3        | 7419         | 417.2  | 361.9  | 470.9  | 384.4  | 360.3  |
| 208847_s_at | M29872   | ADH5         | 128          | 194.6  | 223.0  | 265.9  | 225.5  | 249.1  |
| 208848_at   | M30471   | ADH5         | 128          | 97.3   | 90.8   | 94.0   | 80.5   | 75.3   |
| 208849_at   | AF118091 | -            | -            | 7.2    | 5.2    | 6.2    | 8.0    | 2.9    |
| 208850_s_at | AL558479 | THY1         | 7070         | 11.5   | 13.6   | 16.2   | 5.3    | 10.0   |
| 208851_s_at | AL161958 | THY1         | 7070         | 15.6   | 12.3   | 9.6    | 10.3   | 7.1    |
| 208852_s_at | AI761759 | CANX         | 821          | 424.1  | 432.3  | 466.9  | 433.9  | 361.5  |
| 208853_s_at | L18887   | CANX         | 821          | 337.8  | 221.6  | 246.8  | 276.0  | 195.1  |
| 208854_s_at | AA586774 | STK24        | 8428         | 134.2  | 130.6  | 152.5  | 131.3  | 123.3  |
| 208855_s_at | AF083420 | STK24        | 8428         | 321.6  | 346.9  | 386.2  | 351.3  | 307.4  |
| 208856_x_at | BC003655 | RPLP0        | 6175         | 3905.0 | 3638.0 | 3859.6 | 3702.4 | 3491.6 |
| 208857_s_at | M93008   | PCMT1        | 5110         | 152.5  | 138.8  | 161.9  | 156.9  | 124.1  |
| 208858_s_at | BC004998 | ESYT1        | 23344        | 162.8  | 173.1  | 174.8  | 184.0  | 140.9  |
| 208859_s_at | AI650257 | ATRX         | 546          | 11.7   | 23.3   | 19.5   | 23.1   | 20.1   |
| 208860_s_at | U09820   | ATRX         | 546          | 46.8   | 44.8   | 46.7   | 45.5   | 42.7   |
| 208861_s_at | U72937   | ATRX         | 546          | 107.3  | 99.3   | 110.4  | 103.4  | 74.8   |
| 208862_s_at | AW073672 | CTNND1 ///   | 1500 /// 100 | 171.7  | 150.5  | 159.8  | 166.3  | 110.8  |
| 208863_s_at | M72709   | SRSF1        | 6426         | 233.4  | 242.8  | 274.0  | 284.3  | 286.5  |
| 208864_s_at | AF313911 | TXN          | 7295         | 862.5  | 747.8  | 911.1  | 831.3  | 740.3  |
| 208865_at   | BG534245 | CSNK1A1      | 1452         | 529.9  | 502.8  | 595.8  | 522.3  | 475.6  |
| 208866_at   | BF510713 | CSNK1A1      | 1452         | 44.3   | 36.6   | 37.5   | 44.1   | 29.6   |
| 208867_s_at | AF119911 | CSNK1A1      | 1452         | 161.8  | 170.7  | 174.5  | 149.4  | 135.0  |
| 208868_s_at | BF125756 | GABARAPL1    | 23710        | 38.1   | 41.3   | 32.0   | 35.8   | 19.3   |
| 208869_s_at | AF087847 | GABARAPL1    | 23710        | 30.4   | 32.4   | 44.7   | 42.5   | 23.7   |
| 208870_x_at | BC000931 | ATP5C1       | 509          | 1178.2 | 1107.2 | 1219.7 | 1108.8 | 942.0  |
| 208871_at   | D31840   | ATN1         | 1822         | 25.0   | 18.3   | 23.5   | 31.7   | 16.5   |
| 208872_s_at | AA814140 | REEP5        | 7905         | 506.5  | 487.2  | 616.2  | 560.6  | 415.7  |
| 208873_s_at | BC000232 | REEP5        | 7905         | 223.7  | 194.4  | 237.3  | 194.0  | 193.9  |
| 208874_x_at | BC002545 | PPP2R4       | 5524         | 378.6  | 367.2  | 399.9  | 420.1  | 334.0  |
| 208875_s_at | BF796470 | PAK2         | 5062         | 169.7  | 163.3  | 157.9  | 167.3  | 111.3  |
| 208876_s_at | AI076186 | PAK2         | 5062         | 62.2   | 52.5   | 60.1   | 59.0   | 42.8   |
| 208877_at   | W74494   | PAK2         | 5062         | 114.0  | 102.0  | 104.8  | 105.9  | 72.8   |
| 208878_s_at | AF092132 | PAK2         | 5062         | 132.7  | 124.0  | 114.2  | 126.2  | 79.4   |

|             |          |                           |       |        |        |        |        |        |
|-------------|----------|---------------------------|-------|--------|--------|--------|--------|--------|
| 208879_x_at | BG469030 | PRPF6                     | 24148 | 86.0   | 105.8  | 99.3   | 103.7  | 78.5   |
| 208880_s_at | AB019219 | PRPF6                     | 24148 | 189.8  | 214.1  | 254.2  | 215.5  | 232.9  |
| 208881_x_at | BC005247 | IDI1                      | 3422  | 130.8  | 126.5  | 185.5  | 132.4  | 192.6  |
| 208882_s_at | U69567   | UBR5                      | 51366 | 94.7   | 77.8   | 89.0   | 79.7   | 54.2   |
| 208883_at   | BF515424 | UBR5                      | 51366 | 26.4   | 35.7   | 25.4   | 33.8   | 23.3   |
| 208884_s_at | AF006010 | UBR5                      | 51366 | 172.8  | 161.6  | 172.1  | 171.1  | 119.3  |
| 208885_at   | J02923   | LCP1                      | 3936  | 168.1  | 150.5  | 213.2  | 176.6  | 168.6  |
| 208886_at   | BC000145 | H1FO                      | 3005  | 164.5  | 167.9  | 241.9  | 177.7  | 225.8  |
| 208887_at   | BC000733 | EIF3G                     | 8666  | 568.1  | 592.6  | 657.2  | 668.2  | 568.7  |
| 208888_s_at | AI499095 | NCOR2                     | 9612  | 3.6    | 2.1    | 0.8    | 9.2    | 0.7    |
| 208889_s_at | AI373205 | NCOR2                     | 9612  | 15.8   | 8.5    | 2.7    | 2.3    | 10.2   |
| 208890_s_at | BC004542 | PLXNB2                    | 23654 | 174.4  | 180.7  | 160.6  | 174.3  | 150.1  |
| 208891_at   | BC003143 | DUSP6                     | 1848  | 0.7    | 2.5    | 2.9    | 3.5    | 0.2    |
| 208892_s_at | BC003143 | DUSP6                     | 1848  | 3.2    | 3.5    | 4.0    | 2.8    | 2.0    |
| 208893_s_at | BC005047 | DUSP6                     | 1848  | 0.9    | 0.6    | 0.7    | 0.8    | 0.3    |
| 208894_at   | M60334   | HLA-DRA                   | 3122  | 2.5    | 1.2    | 11.0   | 0.9    | 6.2    |
| 208895_s_at | BG530850 | DDX18                     | 8886  | 172.0  | 114.4  | 206.8  | 160.1  | 141.0  |
| 208896_at   | X98743   | DDX18                     | 8886  | 86.1   | 76.1   | 102.2  | 86.7   | 74.9   |
| 208897_s_at | BC003360 | DDX18                     | 8886  | 146.6  | 137.9  | 179.6  | 131.9  | 138.2  |
| 208898_at   | AF077614 | ATP6V1D                   | 51382 | 191.9  | 169.7  | 227.2  | 172.9  | 161.2  |
| 208899_x_at | AF100741 | ATP6V1D                   | 51382 | 183.2  | 183.8  | 235.9  | 175.2  | 168.3  |
| 208900_s_at | AW025108 | TOP1                      | 7150  | 66.4   | 79.8   | 84.2   | 61.8   | 60.8   |
| 208901_s_at | J03250   | TOP1                      | 7150  | 443.7  | 370.0  | 434.1  | 343.0  | 325.2  |
| 208902_s_at | BF431363 | RPS28                     | 6234  | 9.6    | 9.0    | 19.1   | 19.2   | 8.8    |
| 208903_at   | BF431363 | RPS28                     | 6234  | 68.9   | 59.8   | 65.7   | 60.0   | 49.5   |
| 208904_s_at | BC000354 | RPS28                     | 6234  | 3476.8 | 2883.2 | 3337.0 | 3117.7 | 3101.2 |
| 208905_at   | BC005299 | CYCS                      | 54205 | 1973.8 | 1588.2 | 2169.4 | 1741.5 | 1700.6 |
| 208906_at   | BC004911 | BSCL2 /// HN26580 /// 10  |       | 353.8  | 493.3  | 432.6  | 474.6  | 435.0  |
| 208907_s_at | BC005373 | MRPS18B                   | 28973 | 157.0  | 180.1  | 180.7  | 198.6  | 191.9  |
| 208908_s_at | AF327443 | CAST                      | 831   | 133.3  | 132.8  | 110.5  | 125.8  | 105.9  |
| 208909_at   | BC000649 | UQCRRFS1                  | 7386  | 1744.1 | 1615.0 | 1964.9 | 1731.0 | 1588.2 |
| 208910_s_at | L04636   | C1QBP                     | 708   | 1619.4 | 1219.2 | 1522.8 | 1288.4 | 1161.0 |
| 208911_s_at | M34055   | PDHB                      | 5162  | 288.0  | 259.8  | 337.5  | 281.6  | 261.5  |
| 208912_s_at | BC001362 | CNP                       | 1267  | 263.9  | 154.5  | 182.8  | 189.4  | 202.6  |
| 208913_at   | AA868560 | GGA2                      | 23062 | 54.2   | 67.7   | 83.5   | 61.9   | 42.6   |
| 208914_at   | BE646414 | GGA2                      | 23062 | 50.8   | 57.4   | 53.7   | 42.8   | 32.0   |
| 208915_s_at | AF190863 | GGA2                      | 23062 | 70.8   | 75.6   | 93.1   | 70.0   | 59.2   |
| 208916_at   | AF105230 | SLC1A5                    | 6510  | 206.6  | 165.9  | 195.7  | 174.7  | 162.3  |
| 208917_x_at | BE674658 | NADK                      | 65220 | 42.0   | 51.0   | 59.1   | 41.7   | 31.1   |
| 208918_s_at | AI334128 | NADK                      | 65220 | 216.6  | 180.4  | 243.2  | 236.6  | 191.3  |
| 208919_s_at | BC001709 | NADK                      | 65220 | 148.3  | 114.4  | 165.1  | 142.5  | 118.6  |
| 208920_at   | AV752215 | SRI                       | 6717  | 15.6   | 14.8   | 13.1   | 16.0   | 13.3   |
| 208921_s_at | L12387   | SRI                       | 6717  | 311.4  | 359.2  | 369.7  | 371.5  | 333.5  |
| 208922_s_at | BC004904 | NXF1                      | 10482 | 164.9  | 136.0  | 164.5  | 137.3  | 130.7  |
| 208923_at   | BC005097 | CYFIP1                    | 23191 | 280.1  | 308.6  | 277.7  | 287.7  | 220.6  |
| 208924_at   | AB024703 | RNF11                     | 26994 | 482.7  | 379.6  | 480.6  | 373.7  | 340.3  |
| 208925_at   | AF161522 | CLDND1                    | 56650 | 131.9  | 91.7   | 137.2  | 116.6  | 100.3  |
| 208926_at   | U84246   | NEU1                      | 4758  | 80.5   | 94.7   | 85.0   | 85.6   | 55.1   |
| 208927_at   | BF673888 | SPOP                      | 8405  | 125.1  | 119.8  | 161.2  | 135.5  | 106.1  |
| 208928_at   | AF258341 | POR                       | 5447  | 100.8  | 81.6   | 95.1   | 101.3  | 92.1   |
| 208929_x_at | BC004954 | RPL13 /// SN 6137 /// 606 |       | 3017.6 | 2658.8 | 3090.6 | 3039.2 | 2763.8 |
| 208930_s_at | BG032366 | ILF3                      | 3609  | 99.8   | 98.1   | 118.5  | 95.5   | 94.3   |
| 208931_s_at | AF147209 | ILF3                      | 3609  | 339.6  | 305.7  | 404.4  | 339.4  | 339.4  |

|             |           |                          |       |        |        |        |        |        |
|-------------|-----------|--------------------------|-------|--------|--------|--------|--------|--------|
| 208932_at   | BC001416  | PPP4C                    | 5531  | 313.9  | 282.5  | 359.1  | 272.0  | 278.3  |
| 208933_s_at | AI659005  | LGALS8                   | 3964  | 42.5   | 33.6   | 37.4   | 30.8   | 32.3   |
| 208934_s_at | AF342815  | LGALS8                   | 3964  | 70.2   | 73.2   | 67.6   | 80.9   | 60.4   |
| 208935_s_at | L78132    | LGALS8                   | 3964  | 20.0   | 11.6   | 20.5   | 22.4   | 13.9   |
| 208936_x_at | AF074000  | LGALS8                   | 3964  | 39.7   | 43.1   | 31.3   | 49.2   | 24.8   |
| 208937_s_at | D13889    | ID1                      | 3397  | 230.8  | 251.6  | 243.1  | 272.2  | 162.1  |
| 208938_at   | BC004913  | PRCC                     | 5546  | 135.0  | 118.8  | 150.4  | 132.1  | 126.2  |
| 208939_at   | AV682679  | SEPHS1                   | 22929 | 162.7  | 152.8  | 172.8  | 143.0  | 128.8  |
| 208940_at   | AI885670  | SEPHS1                   | 22929 | 61.7   | 40.3   | 40.0   | 42.9   | 36.3   |
| 208941_s_at | BC000941  | SEPHS1                   | 22929 | 203.6  | 200.4  | 225.0  | 221.5  | 191.6  |
| 208942_s_at | BE866511  | SEC62                    | 7095  | 125.2  | 121.8  | 140.6  | 121.9  | 108.4  |
| 208943_s_at | U93239    | SEC62                    | 7095  | 233.9  | 203.7  | 228.4  | 200.5  | 168.2  |
| 208944_at   | D50683    | TGFBR2                   | 7048  | 6.6    | 12.2   | 8.4    | 13.0   | 9.4    |
| 208945_s_at | NM_003766 | BECN1                    | 8678  | 85.0   | 108.6  | 102.7  | 101.0  | 107.0  |
| 208946_s_at | AF139131  | BECN1                    | 8678  | 192.9  | 159.0  | 213.4  | 171.5  | 156.0  |
| 208947_s_at | U59323    | UPF1                     | 5976  | 32.5   | 27.1   | 33.6   | 28.6   | 29.4   |
| 208948_s_at | BC000830  | STAU1                    | 6780  | 353.3  | 340.4  | 370.1  | 391.7  | 301.7  |
| 208949_s_at | BC001120  | LGALS3                   | 3958  | 16.0   | 5.8    | 10.9   | 7.0    | 6.7    |
| 208950_s_at | BC002515  | ALDH7A1                  | 501   | 1.7    | 0.5    | 2.0    | 2.7    | 2.1    |
| 208951_at   | BC002515  | ALDH7A1                  | 501   | 9.0    | 6.4    | 5.1    | 5.1    | 7.5    |
| 208952_s_at | AA811923  | LARP4B                   | 23185 | 107.6  | 93.3   | 112.7  | 107.2  | 92.7   |
| 208953_at   | AU154358  | LARP4B                   | 23185 | 79.3   | 89.6   | 81.2   | 89.2   | 89.9   |
| 208954_s_at | BC003381  | LARP4B                   | 23185 | 63.0   | 54.7   | 61.7   | 50.1   | 53.7   |
| 208955_at   | AB049113  | DUT                      | 1854  | 50.7   | 42.3   | 67.8   | 36.2   | 32.8   |
| 208956_x_at | U62891    | DUT                      | 1854  | 868.8  | 765.5  | 1042.6 | 814.7  | 798.4  |
| 208957_at   | BF439241  | ERP44                    | 23071 | 37.3   | 30.3   | 27.8   | 32.4   | 20.0   |
| 208958_at   | AI827677  | ERP44                    | 23071 | 8.1    | 0.7    | 2.0    | 2.2    | 4.2    |
| 208959_s_at | BC005374  | ERP44                    | 23071 | 249.9  | 206.7  | 264.2  | 254.5  | 223.4  |
| 208960_s_at | BE675435  | KLF6                     | 1316  | 4.7    | 3.7    | 5.0    | 6.3    | 0.8    |
| 208961_s_at | AB017493  | KLF6                     | 1316  | 5.2    | 1.8    | 6.3    | 4.8    | 3.0    |
| 208962_s_at | BE540552  | FADS1 /// MI3992 /// 100 |       | 241.0  | 220.4  | 317.4  | 226.6  | 277.8  |
| 208963_x_at | BG165833  | FADS1 /// MI3992 /// 100 |       | 124.5  | 136.3  | 189.0  | 186.4  | 173.6  |
| 208964_s_at | AL512760  | FADS1 /// MI3992 /// 100 |       | 305.0  | 229.2  | 317.6  | 243.1  | 258.3  |
| 208965_s_at | BG256677  | IFI16                    | 3428  | 1.0    | 2.0    | 0.4    | 1.0    | 1.0    |
| 208966_x_at | AF208043  | IFI16                    | 3428  | 2.4    | 4.5    | 5.7    | 1.0    | 2.8    |
| 208967_s_at | U39945    | AK2                      | 204   | 653.6  | 549.6  | 667.2  | 580.8  | 578.0  |
| 208968_s_at | BC002568  | CIAPIN1                  | 57019 | 383.0  | 383.4  | 475.0  | 362.4  | 341.9  |
| 208969_at   | AF050641  | NDUFA9                   | 4704  | 461.3  | 381.0  | 517.8  | 424.2  | 373.5  |
| 208970_s_at | M14016    | UROD                     | 7389  | 225.6  | 227.6  | 243.4  | 255.6  | 211.8  |
| 208971_at   | M14016    | UROD                     | 7389  | 75.3   | 111.4  | 91.0   | 101.8  | 82.9   |
| 208972_s_at | AL080089  | ATP5G1                   | 516   | 426.3  | 388.3  | 493.9  | 434.9  | 390.6  |
| 208973_at   | BC001072  | ERI3                     | 79033 | 167.1  | 182.9  | 221.6  | 185.1  | 189.7  |
| 208974_x_at | BC003572  | KPNB1                    | 3837  | 759.8  | 751.7  | 883.0  | 721.7  | 681.6  |
| 208975_s_at | L38951    | KPNB1                    | 3837  | 309.2  | 292.7  | 380.4  | 303.5  | 271.1  |
| 208977_x_at | BC004188  | TUBB4B                   | 10383 | 2128.0 | 2016.1 | 2324.2 | 1966.4 | 1931.4 |
| 208978_at   | U36190    | CRIP2                    | 1397  | 23.4   | 16.6   | 17.0   | 21.3   | 16.3   |
| 208979_at   | AF128458  | NCOA6                    | 23054 | 89.1   | 93.4   | 99.2   | 103.2  | 84.1   |
| 208980_s_at | M26880    | UBC                      | 7316  | 2599.4 | 2457.5 | 2845.9 | 2566.0 | 2528.1 |
| 208981_at   | AA702701  | PECAM1                   | 5175  | 8.1    | 1.5    | 5.1    | 3.8    | 6.6    |
| 208982_at   | AW574504  | PECAM1                   | 5175  | 9.3    | 9.5    | 10.4   | 4.5    | 4.2    |
| 208983_s_at | M37780    | PECAM1                   | 5175  | 0.9    | 1.5    | 0.8    | 0.9    | 2.3    |
| 208984_x_at | BC004181  | RBM10                    | 8241  | 174.2  | 184.6  | 201.0  | 195.1  | 176.2  |
| 208985_s_at | BC002719  | EIF3J                    | 8669  | 319.8  | 236.0  | 319.7  | 279.3  | 303.2  |



|             |           |                      |        |        |        |        |        |        |
|-------------|-----------|----------------------|--------|--------|--------|--------|--------|--------|
| 208986_at   | AL559478  | TCF12                | 6938   | 74.9   | 58.3   | 73.7   | 64.1   | 45.2   |
| 208987_s_at | AK024505  | KDM2A                | 22992  | 87.7   | 51.2   | 71.3   | 75.5   | 56.2   |
| 208988_at   | BE675843  | KDM2A                | 22992  | 93.6   | 88.7   | 102.9  | 81.7   | 62.7   |
| 208989_s_at | AF179221  | KDM2A                | 22992  | 28.8   | 29.3   | 24.1   | 33.3   | 19.3   |
| 208990_s_at | AF132362  | HNRNPH3              | 3189   | 132.3  | 127.7  | 137.9  | 126.1  | 114.1  |
| 208991_at   | AA634272  | STAT3                | 6774   | 341.6  | 362.5  | 378.2  | 389.4  | 320.3  |
| 208992_s_at | BC000627  | STAT3                | 6774   | 122.5  | 154.4  | 154.8  | 167.4  | 137.6  |
| 208993_s_at | AW340788  | PPIG                 | 9360   | 70.8   | 49.7   | 78.0   | 55.5   | 48.6   |
| 208994_s_at | AI638762  | PPIG                 | 9360   | 73.6   | 44.9   | 76.3   | 52.5   | 48.5   |
| 208995_s_at | U40763    | PPIG                 | 9360   | 54.8   | 22.5   | 30.8   | 22.4   | 24.0   |
| 208996_s_at | BC000409  | POLR2C               | 5432   | 247.9  | 221.3  | 234.5  | 217.6  | 187.0  |
| 208997_s_at | U82819    | UCP2                 | 7351   | 32.8   | 13.7   | 18.9   | 13.6   | 12.5   |
| 208998_at   | U94592    | UCP2                 | 7351   | 0.7    | 0.8    | 0.7    | 0.6    | 0.7    |
| 208999_at   | D86957    | SEPT8                | 23176  | 123.8  | 110.5  | 99.1   | 107.8  | 83.9   |
| 209000_s_at | BC001329  | SEPT8                | 23176  | 31.8   | 28.0   | 36.4   | 39.8   | 36.1   |
| 209001_s_at | BC005398  | ANAPC13              | 25847  | 667.3  | 558.6  | 734.8  | 595.5  | 574.4  |
| 209002_s_at | BC003177  | CALCOCO1             | 57658  | 45.7   | 48.3   | 35.4   | 37.0   | 25.3   |
| 209003_at   | AF070548  | SLC25A11             | 8402   | 608.7  | 494.9  | 644.5  | 538.9  | 489.7  |
| 209004_s_at | AF142481  | FBXL5                | 26234  | 245.1  | 213.2  | 267.7  | 234.0  | 197.7  |
| 209005_at   | AF157323  | FBXL5                | 26234  | 22.1   | 23.1   | 27.0   | 19.0   | 24.1   |
| 209006_s_at | AF247168  | LOC1019281:57035 /// | 10     | 9.8    | 8.1    | 8.9    | 8.7    | 6.3    |
| 209007_s_at | AF267856  | LOC1019281:57035 /// | 10     | 29.2   | 25.5   | 25.7   | 25.0   | 29.0   |
| 209008_x_at | U76549    | KRT8                 | 3856   | 366.3  | 416.3  | 430.4  | 433.4  | 348.6  |
| 209009_at   | BC001169  | ESD                  | 2098   | 790.0  | 699.1  | 789.1  | 728.4  | 630.7  |
| 209010_s_at | AI797657  | TRIO                 | 7204   | 0.4    | 1.1    | 0.4    | 1.6    | 0.3    |
| 209011_at   | BF223718  | TRIO                 | 7204   | 35.7   | 28.5   | 34.7   | 28.2   | 17.7   |
| 209012_at   | AV718192  | TRIO                 | 7204   | 18.4   | 18.1   | 17.2   | 9.7    | 12.0   |
| 209013_x_at | AF091395  | TRIO                 | 7204   | 1.7    | 3.9    | 3.8    | 3.0    | 1.7    |
| 209014_at   | AF217963  | MAGED1               | 9500   | 635.5  | 706.9  | 675.6  | 706.6  | 516.4  |
| 209015_s_at | BC002446  | DNAJB6               | 10049  | 21.7   | 20.1   | 16.2   | 16.6   | 13.3   |
| 209016_s_at | BC002700  | KRT7                 | 3855   | 0.8    | 1.4    | 1.8    | 2.4    | 4.2    |
| 209017_s_at | U02389    | LONP1                | 9361   | 325.4  | 349.9  | 332.8  | 349.2  | 294.7  |
| 209018_s_at | BF432478  | PINK1                | 65018  | 69.5   | 55.8   | 45.8   | 46.6   | 35.2   |
| 209019_s_at | AF316873  | PINK1                | 65018  | 71.8   | 53.8   | 56.9   | 55.7   | 53.4   |
| 209020_at   | AF217514  | OSER1                | 51526  | 124.8  | 82.4   | 112.9  | 107.0  | 95.7   |
| 209021_x_at | BC001331  | ATG13                | 9776   | 107.9  | 73.8   | 134.2  | 129.3  | 106.5  |
| 209022_at   | AK026678  | STAG2                | 10735  | 205.8  | 168.3  | 224.1  | 186.5  | 157.7  |
| 209023_s_at | BC001765  | STAG2                | 10735  | 110.8  | 84.8   | 96.3   | 96.0   | 83.5   |
| 209024_s_at | AI472757  | SYNCRIP              | 10492  | 395.9  | 311.9  | 457.2  | 317.3  | 375.3  |
| 209025_s_at | AF037448  | SYNCRIP              | 10492  | 188.2  | 146.3  | 197.7  | 161.7  | 156.9  |
| 209026_x_at | AF141349  | TUBB                 | 203068 | 2836.6 | 2862.6 | 3306.6 | 2732.8 | 2833.2 |
| 209027_s_at | BF673013  | ABI1                 | 10006  | 145.9  | 105.4  | 137.7  | 121.6  | 88.6   |
| 209028_s_at | AF006516  | ABI1                 | 10006  | 32.6   | 28.7   | 29.9   | 34.0   | 26.9   |
| 209029_at   | AF193844  | COPS7A               | 50813  | 279.4  | 295.0  | 310.6  | 292.8  | 232.9  |
| 209030_s_at | NM_014333 | CADM1                | 23705  | 26.3   | 19.5   | 21.2   | 15.5   | 14.9   |
| 209031_at   | AL519710  | CADM1                | 23705  | 6.9    | 10.2   | 9.6    | 5.4    | 4.0    |
| 209032_s_at | AF132811  | CADM1                | 23705  | 3.1    | 8.8    | 5.8    | 10.1   | 7.7    |
| 209033_s_at | D86550    | DYRK1A               | 1859   | 111.6  | 105.9  | 104.8  | 115.6  | 93.3   |
| 209034_at   | AF279899  | PNRC1                | 10957  | 82.7   | 125.6  | 78.6   | 148.7  | 35.2   |
| 209035_at   | M69148    | MDK                  | 4192   | 34.4   | 42.3   | 45.1   | 43.7   | 32.3   |
| 209036_s_at | BC001917  | MDH2                 | 4191   | 1968.6 | 1561.1 | 1819.0 | 1742.7 | 1446.5 |
| 209037_s_at | AW182860  | EHD1                 | 10938  | 16.5   | 18.8   | 22.3   | 19.0   | 9.8    |
| 209038_s_at | AL579035  | EHD1                 | 10938  | 10.4   | 3.1    | 13.1   | 2.7    | 4.0    |

|                       |                          |       |        |        |        |        |        |
|-----------------------|--------------------------|-------|--------|--------|--------|--------|--------|
| 209039_x_at AF001434  | EHD1                     | 10938 | 52.0   | 49.0   | 47.2   | 47.1   | 42.9   |
| 209040_s_at U17496    | PSMB8                    | 5696  | 0.9    | 0.3    | 1.2    | 0.4    | 0.9    |
| 209041_s_at BG395660  | UBE2G2                   | 7327  | 65.9   | 48.6   | 76.8   | 53.7   | 57.7   |
| 209042_s_at BC001738  | UBE2G2                   | 7327  | 78.2   | 65.0   | 88.2   | 67.4   | 75.4   |
| 209043_at AF033026    | PAPSS1                   | 9061  | 353.3  | 290.2  | 295.2  | 303.6  | 193.3  |
| 209044_x_at BC004273  | SF3B4                    | 10262 | 412.3  | 350.6  | 471.6  | 390.1  | 347.8  |
| 209045_at AF195530    | XPNPEP1                  | 7511  | 224.5  | 198.5  | 241.8  | 218.2  | 207.2  |
| 209046_s_at AB030710  | GABARAPL2                | 11345 | 718.4  | 751.1  | 671.9  | 606.2  | 526.5  |
| 209047_at AL518391    | AQP1                     | 358   | 2.5    | 8.6    | 7.7    | 1.0    | 5.2    |
| 209048_s_at AB032951  | ZMYND8                   | 23613 | 75.1   | 72.1   | 69.8   | 71.5   | 55.7   |
| 209049_s_at BC001004  | ZMYND8                   | 23613 | 92.5   | 86.5   | 92.1   | 105.0  | 70.0   |
| 209050_s_at AI421559  | RALGDS                   | 5900  | 108.8  | 79.9   | 133.6  | 97.8   | 65.5   |
| 209051_s_at AF295773  | RALGDS                   | 5900  | 65.0   | 62.8   | 61.1   | 68.7   | 57.8   |
| 209052_s_at BF111870  | WHSC1                    | 7468  | 50.4   | 47.7   | 63.8   | 46.9   | 40.9   |
| 209053_s_at BE793789  | WHSC1                    | 7468  | 84.4   | 99.7   | 111.3  | 109.9  | 77.7   |
| 209054_s_at AF083389  | WHSC1                    | 7468  | 83.0   | 58.1   | 82.5   | 78.2   | 63.9   |
| 209055_s_at AW268817  | CDC5L                    | 988   | 75.6   | 55.8   | 76.1   | 63.5   | 54.9   |
| 209056_s_at NM_001253 | CDC5L                    | 988   | 88.4   | 80.5   | 122.9  | 90.7   | 86.7   |
| 209057_x_at AB007892  | CDC5L                    | 988   | 78.6   | 52.7   | 78.5   | 56.8   | 59.2   |
| 209058_at AB002282    | EDF1                     | 8721  | 593.1  | 624.1  | 630.3  | 667.0  | 609.5  |
| 209059_s_at AB002282  | EDF1                     | 8721  | 473.4  | 489.4  | 499.4  | 525.5  | 445.1  |
| 209060_x_at AI438999  | NCOA3                    | 8202  | 27.0   | 15.2   | 14.5   | 17.9   | 18.1   |
| 209061_at AI761748    | NCOA3                    | 8202  | 30.0   | 16.5   | 26.1   | 23.5   | 21.0   |
| 209062_x_at AF010227  | NCOA3                    | 8202  | 19.4   | 16.4   | 19.4   | 10.6   | 15.1   |
| 209063_x_at BF248165  | PAIP1                    | 10605 | 347.1  | 266.6  | 339.4  | 289.5  | 220.3  |
| 209064_x_at AL136920  | PAIP1                    | 10605 | 176.6  | 153.4  | 164.9  | 173.4  | 110.7  |
| 209065_at BC005230    | UQCRB                    | 7381  | 46.0   | 36.6   | 45.0   | 52.4   | 37.8   |
| 209066_x_at M26700    | UQCRB                    | 7381  | 927.8  | 911.4  | 1107.3 | 1071.6 | 740.8  |
| 209067_s_at D89092    | HNRNPDL                  | 9987  | 344.8  | 248.3  | 381.0  | 285.6  | 343.0  |
| 209068_at D89678      | HNRNPDL                  | 9987  | 38.4   | 28.6   | 34.4   | 29.8   | 33.4   |
| 209069_s_at BC001124  | H3F3A /// H33020 /// 302 |       | 1177.1 | 1028.9 | 1303.1 | 1246.4 | 1137.1 |
| 209070_s_at AI183997  | RGS5                     | 8490  | 2.5    | 0.8    | 4.1    | 2.4    | 0.8    |
| 209071_s_at AF159570  | RGS5                     | 8490  | 2.1    | 6.5    | 2.0    | 2.2    | 0.9    |
| 209072_at M13577      | MBP                      | 4155  | 1.9    | 1.0    | 6.3    | 1.1    | 1.4    |
| 209073_s_at AF015040  | LOC1019281.8650 /// 101  |       | 70.3   | 55.3   | 67.0   | 58.7   | 57.0   |
| 209074_s_at AL050264  | FAM107A                  | 11170 | 1.9    | 3.2    | 2.7    | 2.2    | 1.2    |
| 209075_s_at AY009128  | ISCU                     | 23479 | 609.2  | 579.1  | 607.0  | 517.4  | 424.6  |
| 209076_s_at BC000974  | WDR45B                   | 56270 | 368.9  | 305.9  | 381.3  | 346.8  | 305.1  |
| 209077_at AL022313    | TXN2                     | 25828 | 264.6  | 287.1  | 436.9  | 288.4  | 294.3  |
| 209078_s_at AF276920  | TXN2                     | 25828 | 274.0  | 237.4  | 294.4  | 270.4  | 235.8  |
| 209079_x_at AF152318  | PCDHGA1 /// 5098 /// 864 |       | 83.6   | 119.7  | 85.9   | 115.8  | 77.6   |
| 209080_x_at AF118652  | GLRX3                    | 10539 | 426.9  | 389.1  | 504.0  | 367.5  | 403.0  |
| 209081_s_at NM_030582 | COL18A1                  | 80781 | 8.3    | 2.5    | 10.4   | 7.8    | 9.3    |
| 209082_s_at AF018081  | COL18A1                  | 80781 | 23.2   | 9.4    | 18.0   | 15.1   | 17.7   |
| 209083_at U34690      | CORO1A                   | 11151 | 7.3    | 12.7   | 5.6    | 7.6    | 10.0   |
| 209084_s_at BE504689  | RAB28                    | 9364  | 28.7   | 11.6   | 18.8   | 19.0   | 17.5   |
| 209085_x_at L14922    | RFC1                     | 5981  | 126.9  | 89.1   | 120.5  | 94.5   | 114.1  |
| 209086_x_at BE964361  | MCAM /// M4162 /// 102   |       | 19.1   | 3.9    | 6.6    | 13.7   | 5.7    |
| 209087_x_at AF089868  | MCAM                     | 4162  | 11.6   | 18.0   | 10.6   | 13.1   | 9.3    |
| 209088_s_at T70262    | UBN1                     | 29855 | 65.3   | 59.8   | 74.1   | 48.3   | 55.0   |
| 209089_at BC001267    | RAB5A                    | 5868  | 156.4  | 152.7  | 159.6  | 162.0  | 128.6  |
| 209090_s_at AL049597  | SH3GLB1                  | 51100 | 17.4   | 12.6   | 9.9    | 11.7   | 12.6   |
| 209091_s_at AF263293  | SH3GLB1                  | 51100 | 94.9   | 107.3  | 107.1  | 113.0  | 80.7   |

|             |          |         |              |         |        |        |        |        |       |
|-------------|----------|---------|--------------|---------|--------|--------|--------|--------|-------|
| 209092_s_at | AF061730 | GLOD4   | 51031        | 290.1   | 293.3  | 347.9  | 293.0  | 271.0  |       |
| 209093_s_at | K02920   | GBA     | /// GBA 2629 | /// 263 | 129.2  | 134.4  | 130.5  | 136.5  | 100.6 |
| 209094_at   | AL078459 | DDAH1   | 23576        | 335.8   | 292.3  | 316.8  | 284.6  | 243.9  |       |
| 209095_at   | J03620   | DLD     | 1738         | 624.0   | 519.9  | 637.0  | 559.0  | 473.1  |       |
| 209096_at   | U62136   | UBE2V2  | 7336         | 259.2   | 207.5  | 294.4  | 236.4  | 251.1  |       |
| 209097_s_at | BF056748 | JAG1    | 182          | 1.7     | 5.8    | 3.3    | 4.3    | 1.7    |       |
| 209098_s_at | U61276   | JAG1    | 182          | 49.9    | 45.3   | 58.0   | 48.7   | 39.0   |       |
| 209099_x_at | U73936   | JAG1    | 182          | 214.7   | 270.0  | 264.0  | 265.7  | 154.2  |       |
| 209100_at   | BC001327 | IFRD2   | 7866         | 388.7   | 349.4  | 386.2  | 324.0  | 326.7  |       |
| 209101_at   | M92934   | CTGF    | 1490         | 0.8     | 0.3    | 0.2    | 0.2    | 0.1    |       |
| 209102_s_at | AF019214 | HBP1    | 26959        | 85.0    | 78.9   | 79.2   | 84.3   | 51.3   |       |
| 209103_s_at | BC001049 | UFD1L   | 7353         | 359.2   | 369.0  | 353.8  | 335.3  | 302.1  |       |
| 209104_s_at | BC000009 | NHP2    | 55651        | 1410.6  | 1207.7 | 1326.2 | 1236.2 | 1114.1 |       |
| 209105_at   | AI672428 | NCOA1   | 8648         | 46.2    | 54.6   | 48.7   | 45.7   | 35.0   |       |
| 209106_at   | BF576458 | NCOA1   | 8648         | 86.7    | 83.1   | 108.1  | 88.6   | 72.4   |       |
| 209107_x_at | U19179   | NCOA1   | 8648         | 128.0   | 94.0   | 98.2   | 99.8   | 96.2   |       |
| 209108_at   | AF053453 | TSPAN6  | 7105         | 50.8    | 44.6   | 43.9   | 43.8   | 39.5   |       |
| 209109_s_at | U84895   | TSPAN6  | 7105         | 67.8    | 72.5   | 57.8   | 51.1   | 57.2   |       |
| 209110_s_at | AL050259 | RGL2    | 5863         | 119.0   | 106.7  | 109.4  | 108.1  | 102.4  |       |
| 209111_at   | BC004155 | RNF5    | /// RNF6048  | /// 286 | 269.5  | 278.3  | 312.5  | 288.9  | 267.3 |
| 209112_at   | BC001971 | CDKN1B  | 1027         | 354.5   | 270.6  | 335.5  | 294.2  | 217.0  |       |
| 209113_s_at | AF288679 | HMG20B  | 10362        | 142.9   | 155.4  | 181.3  | 170.3  | 160.0  |       |
| 209114_at   | AF133425 | TSPAN1  | 10103        | 76.8    | 87.2   | 94.7   | 86.5   | 77.5   |       |
| 209115_at   | AL117566 | UBA3    | 9039         | 359.4   | 258.1  | 345.3  | 266.5  | 232.8  |       |
| 209116_x_at | M25079   | HBB     | 3043         | 1.8     | 2.7    | 1.0    | 1.2    | 1.6    |       |
| 209117_at   | U79458   | WBP2    | 23558        | 224.8   | 214.1  | 209.6  | 209.7  | 160.7  |       |
| 209118_s_at | AF141347 | TUBA1A  | 7846         | 167.2   | 212.2  | 126.2  | 238.0  | 75.5   |       |
| 209119_x_at | AV703465 | NR2F2   | 7026         | 18.7    | 13.5   | 13.0   | 12.2   | 11.7   |       |
| 209120_at   | AL037401 | NR2F2   | 7026         | 209.2   | 162.5  | 223.6  | 183.5  | 151.3  |       |
| 209121_x_at | M64497   | NR2F2   | 7026         | 144.5   | 112.8  | 145.5  | 108.8  | 113.6  |       |
| 209122_at   | BC005127 | PLIN2   | 123          | 5.9     | 12.4   | 4.2    | 1.2    | 0.9    |       |
| 209123_at   | BC000576 | QDPR    | 5860         | 203.5   | 192.2  | 215.3  | 238.7  | 162.7  |       |
| 209124_at   | U70451   | MYD88   | 4615         | 275.2   | 264.5  | 307.4  | 275.9  | 224.9  |       |
| 209125_at   | J00269   | KRT6A   | 3853         | 7.0     | 3.6    | 5.1    | 5.7    | 3.4    |       |
| 209126_x_at | L42612   | KRT6B   | 3854         | 3.9     | 11.7   | 10.0   | 2.5    | 6.6    |       |
| 209127_s_at | AW173076 | SART3   | 9733         | 90.9    | 79.5   | 84.4   | 87.7   | 80.3   |       |
| 209128_s_at | D63879   | SART3   | 9733         | 169.8   | 152.4  | 210.6  | 175.6  | 141.5  |       |
| 209129_at   | AF000974 | TRIP6   | 7205         | 7.4     | 16.6   | 15.6   | 13.4   | 6.4    |       |
| 209130_at   | BC003686 | SNAP23  | 8773         | 183.0   | 165.7  | 210.9  | 195.6  | 171.2  |       |
| 209131_s_at | U55936   | SNAP23  | 8773         | 35.0    | 31.1   | 32.2   | 28.7   | 22.9   |       |
| 209132_s_at | BE313890 | COMMD4  | 54939        | 254.1   | 235.6  | 274.0  | 255.8  | 202.9  |       |
| 209133_s_at | AL136872 | COMMD4  | 54939        | 17.3    | 11.1   | 15.6   | 20.0   | 19.1   |       |
| 209134_s_at | BC000524 | RPS6    | 6194         | 3497.0  | 3283.4 | 3636.0 | 3404.3 | 3276.1 |       |
| 209135_at   | AF289489 | ASPH    | 444          | 145.7   | 85.2   | 165.5  | 124.2  | 95.3   |       |
| 209136_s_at | BG390445 | USP10   | 9100         | 101.3   | 92.2   | 125.5  | 88.3   | 75.0   |       |
| 209137_s_at | BC000263 | USP10   | 9100         | 130.4   | 100.6  | 155.7  | 111.5  | 108.8  |       |
| 209138_x_at | M87790   | IGLC1   | 3537         | 1.6     | 4.7    | 1.2    | 1.7    | 3.1    |       |
| 209139_s_at | AF083033 | PRKRA   | 8575         | 130.3   | 111.7  | 137.3  | 126.5  | 108.7  |       |
| 209140_x_at | L42024   | HLA-B   | 3106         | 209.6   | 227.0  | 260.1  | 209.5  | 185.3  |       |
| 209141_at   | AW299555 | UBE2G1  | 7326         | 330.0   | 303.0  | 329.1  | 313.8  | 265.6  |       |
| 209142_s_at | BC002775 | UBE2G1  | 7326         | 330.1   | 287.4  | 347.8  | 311.9  | 268.3  |       |
| 209143_s_at | AF005422 | CLNS1A  | 1207         | 320.2   | 259.9  | 360.9  | 279.7  | 241.3  |       |
| 209144_s_at | AI810484 | CBFA2T2 | 9139         | 32.4    | 32.6   | 27.4   | 36.4   | 14.6   |       |

|             |          |              |              |       |       |       |       |       |
|-------------|----------|--------------|--------------|-------|-------|-------|-------|-------|
| 209145_s_at | AF068266 | CBFA2T2      | 9139         | 40.6  | 28.1  | 26.0  | 21.6  | 17.2  |
| 209146_at   | AV704962 | MSMO1        | 6307         | 236.2 | 149.7 | 250.5 | 177.6 | 197.8 |
| 209147_s_at | AB000888 | PPAP2A       | 8611         | 403.8 | 358.0 | 507.9 | 394.2 | 446.7 |
| 209148_at   | BC001167 | RXRB         | 6257         | 92.4  | 85.5  | 91.8  | 104.9 | 71.1  |
| 209149_s_at | BE899402 | TM9SF1       | 10548        | 165.6 | 154.9 | 161.4 | 150.8 | 132.8 |
| 209150_s_at | U94831   | IPO4 /// TMC | 10548 /// 79 | 272.7 | 284.9 | 305.0 | 251.3 | 213.8 |
| 209151_x_at | AA768906 | TCF3         | 6929         | 28.1  | 20.5  | 20.1  | 16.0  | 19.1  |
| 209152_s_at | AI655986 | TCF3         | 6929         | 47.6  | 41.5  | 37.8  | 50.0  | 26.6  |
| 209153_s_at | M31523   | TCF3         | 6929         | 61.6  | 58.5  | 71.8  | 57.6  | 51.8  |
| 209154_at   | AF234997 | P2RX5-TAX1F  | 30851 /// 10 | 520.8 | 480.1 | 558.5 | 493.5 | 396.5 |
| 209155_s_at | BC001595 | NT5C2        | 22978        | 239.9 | 136.5 | 203.4 | 186.0 | 166.2 |
| 209156_s_at | AY029208 | COL6A2       | 1292         | 12.6  | 17.5  | 14.1  | 15.9  | 10.4  |
| 209157_at   | AF011793 | DNAJA2       | 10294        | 474.8 | 298.3 | 439.9 | 378.2 | 300.9 |
| 209158_s_at | BC004361 | CYTH2        | 9266         | 60.2  | 60.0  | 62.6  | 58.0  | 44.9  |
| 209159_s_at | AV724216 | NDRG4        | 65009        | 3.8   | 1.2   | 8.7   | 5.7   | 0.4   |
| 209160_at   | AB018580 | AKR1C3       | 8644         | 1.1   | 0.2   | 0.5   | 3.0   | 0.3   |
| 209161_at   | AI184802 | PRPF4        | 9128         | 161.0 | 124.6 | 182.4 | 138.3 | 145.5 |
| 209162_s_at | U82756   | PRPF4        | 9128         | 137.8 | 125.4 | 161.1 | 126.3 | 132.4 |
| 209163_at   | AL514271 | CYB561       | 1534         | 297.1 | 319.8 | 376.8 | 344.0 | 272.1 |
| 209164_s_at | BC002976 | CYB561       | 1534         | 203.8 | 208.6 | 238.4 | 234.8 | 179.4 |
| 209165_at   | AF083208 | AATF         | 26574        | 167.3 | 145.4 | 210.0 | 174.6 | 173.7 |
| 209166_s_at | U68567   | MAN2B1       | 4125         | 107.6 | 130.5 | 115.1 | 172.4 | 142.2 |
| 209167_at   | AI419030 | GPM6B        | 2824         | 0.8   | 1.3   | 1.6   | 1.4   | 3.3   |
| 209168_at   | AW148844 | GPM6B        | 2824         | 11.2  | 13.4  | 12.7  | 11.0  | 10.4  |
| 209169_at   | N63576   | GPM6B        | 2824         | 5.1   | 4.1   | 6.6   | 6.6   | 3.9   |
| 209170_s_at | AF016004 | GPM6B        | 2824         | 0.8   | 0.4   | 5.1   | 1.0   | 2.0   |
| 209171_at   | AF219116 | ITPA         | 3704         | 181.9 | 152.6 | 169.1 | 166.1 | 153.1 |
| 209172_s_at | U30872   | CENPF        | 1063         | 38.9  | 24.1  | 37.4  | 19.0  | 29.3  |
| 209173_at   | AF088867 | AGR2         | 10551        | 19.4  | 22.0  | 27.6  | 30.6  | 20.0  |
| 209174_s_at | BC000978 | QRICH1       | 54870        | 140.5 | 116.7 | 88.8  | 130.5 | 72.4  |
| 209175_at   | AK001135 | SEC23IP      | 11196        | 151.8 | 109.7 | 156.1 | 127.7 | 121.7 |
| 209176_at   | AI332962 | SEC23IP      | 11196        | 31.4  | 16.1  | 5.3   | 31.0  | 38.6  |
| 209177_at   | BC002873 | NDUFAF3      | 25915        | 478.6 | 505.4 | 542.7 | 522.3 | 449.6 |
| 209178_at   | AF038391 | DHX38        | 9785         | 39.1  | 35.7  | 56.2  | 40.0  | 38.8  |
| 209179_s_at | BC003164 | MBOAT7       | 79143        | 287.3 | 277.0 | 283.5 | 310.6 | 217.0 |
| 209180_at   | U49245   | RABGGTB      | 5876         | 175.5 | 151.0 | 156.8 | 149.8 | 156.1 |
| 209181_s_at | U49245   | RABGGTB ///  | 5876 /// 268 | 455.6 | 310.6 | 409.9 | 348.2 | 357.8 |
| 209182_s_at | AI302100 | C10orf10     | 11067        | 5.3   | 3.1   | 4.0   | 3.5   | 1.0   |
| 209183_s_at | AL136653 | C10orf10     | 11067        | 2.4   | 2.4   | 3.0   | 1.6   | 2.2   |
| 209184_s_at | BF700086 | IRS2         | 8660         | 12.3  | 13.3  | 13.9  | 10.8  | 8.8   |
| 209185_s_at | AF073310 | IRS2         | 8660         | 3.6   | 14.0  | 11.1  | 3.1   | 17.3  |
| 209186_at   | M23114   | ATP2A2       | 488          | 759.8 | 707.4 | 787.0 | 752.4 | 637.2 |
| 209187_at   | AW516932 | DR1          | 1810         | 216.6 | 181.1 | 250.4 | 175.8 | 177.7 |
| 209188_x_at | BC002809 | DR1          | 1810         | 145.5 | 138.2 | 176.1 | 133.9 | 139.5 |
| 209189_at   | BC004490 | FOS          | 2353         | 0.9   | 1.8   | 0.9   | 1.1   | 0.5   |
| 209190_s_at | AF051782 | DIAPH1       | 1729         | 253.0 | 224.2 | 296.6 | 222.5 | 236.2 |
| 209191_at   | BC002654 | TUBB6        | 84617        | 16.9  | 19.0  | 17.9  | 15.9  | 16.4  |
| 209192_x_at | BC000166 | KAT5         | 10524        | 84.0  | 111.7 | 109.4 | 97.9  | 79.6  |
| 209193_at   | M24779   | PIM1         | 5292         | 35.6  | 25.0  | 31.3  | 22.5  | 20.7  |
| 209194_at   | BC005334 | CETN2        | 1069         | 244.9 | 250.7 | 256.8 | 263.2 | 211.7 |
| 209195_s_at | AF250226 | ADCY6        | 112          | 37.4  | 36.9  | 26.4  | 35.4  | 27.5  |
| 209196_at   | BC000388 | WDR46        | 9277         | 36.9  | 46.4  | 66.0  | 55.3  | 40.1  |
| 209197_at   | AA626780 | SYT11        | 23208        | 11.8  | 7.1   | 10.1  | 9.1   | 8.0   |

|             |          |            |                  |       |        |        |       |       |
|-------------|----------|------------|------------------|-------|--------|--------|-------|-------|
| 209198_s_at | BC004291 | SYT11      | 23208            | 5.2   | 1.2    | 0.5    | 4.6   | 1.7   |
| 209199_s_at | N22468   | MEF2C      | 4208             | 5.0   | 0.7    | 2.6    | 3.2   | 3.6   |
| 209200_at   | AL536517 | MEF2C      | 4208             | 0.5   | 0.7    | 0.3    | 0.2   | 0.2   |
| 209201_x_at | L01639   | CXCR4      | 7852             | 2.4   | 2.5    | 3.2    | 12.2  | 18.9  |
| 209202_s_at | AF001690 | EXTL3      | 2137             | 20.1  | 14.9   | 15.3   | 5.8   | 15.7  |
| 209203_s_at | BC002327 | BICD2      | 23299            | 10.9  | 12.1   | 15.1   | 12.4  | 11.3  |
| 209204_at   | AI824831 | LMO4       | 8543             | 22.7  | 20.6   | 26.7   | 16.0  | 16.9  |
| 209205_s_at | BC003600 | LMO4       | 8543             | 96.0  | 78.6   | 91.3   | 79.9  | 81.2  |
| 209206_at   | AV701283 | LOC1027243 | 9554 /// 102     | 93.9  | 85.8   | 102.1  | 115.9 | 81.8  |
| 209207_s_at | BC001364 | LOC1009965 | 9554 /// 100     | 162.9 | 163.7  | 148.5  | 145.2 | 138.9 |
| 209208_at   | AF059752 | MPDU1      | 9526             | 577.3 | 447.9  | 533.9  | 494.6 | 438.0 |
| 209209_s_at | AW469573 | FERMT2     | 10979            | 14.7  | 12.7   | 10.0   | 18.7  | 13.9  |
| 209210_s_at | Z24725   | FERMT2     | 10979            | 27.6  | 24.4   | 26.2   | 27.6  | 17.0  |
| 209211_at   | AF132818 | KLF5       | 688              | 10.3  | 9.6    | 10.6   | 5.1   | 11.4  |
| 209212_s_at | AB030824 | KLF5       | 688              | 11.5  | 8.4    | 20.3   | 9.8   | 9.7   |
| 209213_at   | BC002511 | CBR1       | 873              | 55.6  | 71.2   | 76.8   | 71.9  | 64.7  |
| 209214_s_at | BC004817 | EWSR1      | 2130             | 531.9 | 411.2  | 566.7  | 511.7 | 415.3 |
| 209215_at   | L11669   | MFSD10     | 10227            | 42.5  | 36.1   | 42.7   | 46.2  | 28.3  |
| 209216_at   | BC000464 | WDR45      | 11152            | 141.3 | 162.1  | 161.8  | 171.3 | 121.8 |
| 209217_s_at | BC000464 | WDR45      | 11152            | 88.4  | 110.9  | 91.7   | 108.4 | 75.4  |
| 209218_at   | AF098865 | SQLE       | 6713             | 176.5 | 156.0  | 205.5  | 155.2 | 166.2 |
| 209219_at   | L03411   | MIR1236    | /// 7936 /// 100 | 231.6 | 246.7  | 307.8  | 279.1 | 259.2 |
| 209220_at   | L47125   | GPC3       | 2719             | 11.1  | 11.1   | 14.9   | 11.0  | 8.2   |
| 209221_s_at | AI753638 | OSBPL2     | 9885             | 31.7  | 33.4   | 32.8   | 33.8  | 27.6  |
| 209222_s_at | BC000296 | OSBPL2     | 9885             | 35.5  | 41.2   | 40.2   | 41.7  | 39.6  |
| 209223_at   | BF434335 | NDUFA2     | 4695             | 12.6  | 9.0    | 15.7   | 8.9   | 6.4   |
| 209224_s_at | BC003674 | NDUFA2     | 4695             | 624.4 | 641.2  | 719.2  | 692.0 | 518.0 |
| 209225_x_at | AI653355 | TNPO1      | 3842             | 188.3 | 171.3  | 198.5  | 163.5 | 160.1 |
| 209226_s_at | U72069   | TNPO1      | 3842             | 206.2 | 168.9  | 208.8  | 188.9 | 195.5 |
| 209227_at   | AU158251 | TUSC3      | 7991             | 22.4  | 23.7   | 16.6   | 18.8  | 13.4  |
| 209228_x_at | U42349   | TUSC3      | 7991             | 112.7 | 92.3   | 132.6  | 102.1 | 75.8  |
| 209229_s_at | BC002799 | PPP6R1     | 22870            | 101.7 | 65.1   | 103.8  | 80.5  | 69.2  |
| 209230_s_at | AF135266 | NUPR1      | 26471            | 445.0 | 631.1  | 512.5  | 616.5 | 424.3 |
| 209231_s_at | AI038068 | DCTN5      | 84516            | 97.4  | 101.0  | 114.6  | 91.3  | 95.8  |
| 209232_s_at | BC004191 | DCTN5      | 84516            | 81.0  | 95.7   | 113.5  | 105.9 | 92.0  |
| 209233_at   | U72514   | EMG1       | 10436            | 449.2 | 388.7  | 521.3  | 423.1 | 390.0 |
| 209234_at   | BF939474 | KIF1B      | 23095            | 174.7 | 116.2  | 119.3  | 104.1 | 114.2 |
| 209235_at   | AL031600 | CLCN7      | 1186             | 9.0   | 22.3   | 6.0    | 16.5  | 3.5   |
| 209236_at   | AL389886 | SLC23A2    | 9962             | 26.9  | 21.5   | 16.1   | 16.6  | 18.7  |
| 209237_s_at | AF164142 | SLC23A2    | 9962             | 2.4   | 9.3    | 12.2   | 6.7   | 8.8   |
| 209238_at   | BE966922 | STX3       | 6809             | 95.9  | 97.0   | 125.8  | 96.1  | 94.6  |
| 209239_at   | M55643   | NFKB1      | 4790             | 143.4 | 90.4   | 101.9  | 87.8  | 82.5  |
| 209240_at   | AF070560 | OGT        | 8473             | 197.6 | 194.7  | 191.5  | 164.0 | 151.9 |
| 209241_x_at | AB041926 | MINK1      | 50488            | 25.3  | 26.2   | 25.1   | 29.9  | 18.0  |
| 209242_at   | AL042588 | PEG3       | 5178             | 697.4 | 573.8  | 785.6  | 648.1 | 587.1 |
| 209243_s_at | AF208967 | PEG3       | 5178             | 161.0 | 138.3  | 214.2  | 159.2 | 169.9 |
| 209244_s_at | BE885926 | KIF1C      | 10749            | 38.3  | 37.1   | 56.7   | 52.3  | 34.8  |
| 209245_s_at | AB014606 | -          | -                | 0.6   | 0.8    | 0.9    | 1.9   | 0.2   |
| 209246_at   | AF261091 | ABCF2      | 10061            | 29.2  | 17.9   | 31.2   | 25.8  | 25.3  |
| 209247_s_at | BC001661 | ABCF2      | 10061            | 217.0 | 164.0  | 219.4  | 190.7 | 186.3 |
| 209248_at   | AL136713 | GHITM      | 27069            | 752.0 | 647.8  | 812.0  | 767.1 | 605.2 |
| 209249_s_at | AF131820 | GHITM      | 27069            | 873.3 | 1035.2 | 1000.6 | 966.2 | 821.7 |
| 209250_at   | BC000961 | DEGS1      | 8560             | 364.1 | 302.8  | 472.5  | 325.3 | 441.2 |

|             |          |           |       |        |        |        |        |        |
|-------------|----------|-----------|-------|--------|--------|--------|--------|--------|
| 209251_x_at | BC004949 | TUBA1C    | 84790 | 3112.5 | 2966.6 | 3271.8 | 3011.9 | 2945.7 |
| 209252_at   | U18937   | HARS2     | 23438 | 94.4   | 120.6  | 116.2  | 123.5  | 97.9   |
| 209253_at   | AF037261 | SORBS3    | 10174 | 42.5   | 25.0   | 47.3   | 40.0   | 34.4   |
| 209254_at   | AI808625 | KLHDC10   | 23008 | 59.1   | 55.1   | 48.9   | 54.3   | 41.8   |
| 209255_at   | D87454   | KLHDC10   | 23008 | 46.4   | 44.2   | 47.9   | 51.8   | 31.9   |
| 209256_s_at | AF277177 | KLHDC10   | 23008 | 43.8   | 51.9   | 36.1   | 66.1   | 39.7   |
| 209257_s_at | BF795297 | SMC3      | 9126  | 72.5   | 66.3   | 90.3   | 65.2   | 69.9   |
| 209258_s_at | AI373676 | SMC3      | 9126  | 31.5   | 24.1   | 37.2   | 23.3   | 29.1   |
| 209259_s_at | AF020043 | SMC3      | 9126  | 135.9  | 89.2   | 168.9  | 122.8  | 117.3  |
| 209260_at   | BC000329 | SFN       | 2810  | 3.3    | 4.6    | 2.6    | 2.5    | 8.0    |
| 209261_s_at | BF000629 | NR2F6     | 2063  | 28.0   | 37.6   | 48.9   | 36.6   | 31.1   |
| 209262_s_at | BC002669 | NR2F6     | 2063  | 141.1  | 142.7  | 151.2  | 161.4  | 155.7  |
| 209263_x_at | BC000389 | TSPAN4    | 7106  | 61.0   | 56.5   | 61.8   | 62.4   | 47.1   |
| 209264_s_at | AF054841 | TSPAN4    | 7106  | 44.8   | 37.2   | 47.1   | 34.4   | 27.6   |
| 209265_s_at | BC001650 | METTL3    | 56339 | 257.5  | 195.7  | 281.9  | 217.7  | 216.5  |
| 209266_s_at | AW134794 | SLC39A8   | 64116 | 2.1    | 2.4    | 8.7    | 8.0    | 5.9    |
| 209267_s_at | AB040120 | SLC39A8   | 64116 | 130.6  | 77.9   | 112.7  | 79.0   | 99.2   |
| 209268_at   | AF165513 | VPS45     | 11311 | 73.0   | 71.1   | 74.0   | 65.9   | 50.3   |
| 209269_s_at | AW450910 | SYK       | 6850  | 0.7    | 0.6    | 0.4    | 0.9    | 0.9    |
| 209270_at   | L25541   | LAMB3     | 3914  | 3.5    | 2.2    | 1.2    | 1.8    | 0.6    |
| 209271_at   | AB032251 | BPTF      | 2186  | 50.8   | 51.5   | 55.0   | 52.8   | 25.8   |
| 209272_at   | AF045451 | NAB1      | 4664  | 10.4   | 11.5   | 11.6   | 14.6   | 7.5    |
| 209273_s_at | BG387555 | ISCA1     | 81689 | 143.1  | 104.1  | 196.0  | 112.6  | 135.4  |
| 209274_s_at | BC002675 | ISCA1     | 81689 | 266.9  | 220.2  | 278.8  | 229.2  | 181.8  |
| 209275_s_at | AF015593 | CLN3      | 1201  | 110.9  | 70.9   | 98.6   | 110.2  | 73.4   |
| 209276_s_at | AF162769 | GLRX      | 2745  | 41.5   | 39.3   | 39.6   | 49.2   | 22.2   |
| 209277_at   | AL574096 | TFPI2     | 7980  | 0.8    | 0.2    | 0.5    | 1.6    | 1.9    |
| 209278_s_at | L27624   | TFPI2     | 7980  | 0.4    | 0.2    | 1.0    | 0.2    | 0.2    |
| 209279_s_at | BC000245 | NSDHL     | 50814 | 75.5   | 76.4   | 80.8   | 77.7   | 72.4   |
| 209280_at   | U58856   | MRC2      | 9902  | 1.3    | 7.0    | 8.0    | 7.3    | 4.5    |
| 209281_s_at | M95541   | ATP2B1    | 490   | 86.8   | 79.9   | 91.3   | 76.8   | 58.1   |
| 209282_at   | AF309082 | PRKD2     | 25865 | 40.6   | 42.1   | 37.4   | 35.8   | 26.7   |
| 209283_at   | AF007162 | CRYAB     | 1410  | 20.1   | 13.5   | 6.4    | 15.7   | 14.6   |
| 209284_s_at | AI922509 | FAM208A   | 23272 | 58.1   | 38.8   | 49.5   | 42.7   | 34.8   |
| 209285_s_at | N38985   | FAM208A   | 23272 | 3.7    | 1.9    | 0.8    | 6.6    | 3.6    |
| 209286_at   | AI754416 | CDC42EP3  | 10602 | 12.0   | 15.1   | 22.5   | 14.6   | 13.8   |
| 209287_s_at | AF104857 | CDC42EP3  | 10602 | 19.2   | 11.6   | 13.1   | 10.1   | 8.4    |
| 209288_s_at | AL136842 | CDC42EP3  | 10602 | 21.1   | 19.9   | 31.0   | 31.9   | 17.0   |
| 209289_at   | AI700518 | NFIB      | 4781  | 73.5   | 59.7   | 77.9   | 67.0   | 64.5   |
| 209290_s_at | BC001283 | NFIB      | 4781  | 62.2   | 42.0   | 58.0   | 55.5   | 46.2   |
| 209291_at   | AW157094 | ID4       | 3400  | 1.3    | 3.1    | 3.0    | 3.5    | 2.1    |
| 209292_at   | AL022726 | ID4       | 3400  | 1.8    | 1.8    | 2.8    | 2.1    | 2.8    |
| 209293_x_at | U16153   | ID4       | 3400  | 12.1   | 6.4    | 11.4   | 6.1    | 3.6    |
| 209294_x_at | BC001281 | TNFRSF10B | 8795  | 87.6   | 63.0   | 69.2   | 64.7   | 69.8   |
| 209295_at   | AF016266 | TNFRSF10B | 8795  | 236.2  | 230.8  | 248.0  | 239.5  | 212.7  |
| 209296_at   | AF136972 | PPM1B     | 5495  | 61.9   | 59.6   | 75.6   | 56.6   | 45.4   |
| 209297_at   | AF114488 | ITSN1     | 6453  | 27.8   | 37.0   | 30.4   | 30.6   | 34.6   |
| 209298_s_at | AF114488 | ITSN1     | 6453  | 15.7   | 17.4   | 19.1   | 14.9   | 15.4   |
| 209299_x_at | BC000022 | PPIL2     | 23759 | 1.9    | 37.3   | 21.7   | 23.8   | 17.2   |
| 209300_s_at | BC002888 | NECAP1    | 25977 | 354.8  | 304.4  | 402.0  | 293.2  | 305.6  |
| 209301_at   | M36532   | CA2       | 760   | 0.5    | 0.6    | 1.4    | 0.3    | 5.5    |
| 209302_at   | U37689   | POLR2H    | 5437  | 520.8  | 439.3  | 552.5  | 448.0  | 465.2  |
| 209303_at   | BC005270 | NDUFS4    | 4724  | 192.4  | 186.5  | 192.4  | 184.9  | 158.1  |

|             |          |                          |        |       |       |       |       |       |
|-------------|----------|--------------------------|--------|-------|-------|-------|-------|-------|
| 209304_x_at | AF087853 | GADD45B                  | 4616   | 10.8  | 15.1  | 16.9  | 10.4  | 3.3   |
| 209305_s_at | AF078077 | GADD45B                  | 4616   | 15.6  | 10.7  | 6.8   | 11.6  | 10.3  |
| 209306_s_at | AI139569 | SWAP70                   | 23075  | 57.4  | 54.7  | 52.4  | 53.1  | 48.3  |
| 209307_at   | AB014540 | SWAP70                   | 23075  | 27.1  | 25.7  | 22.0  | 22.2  | 24.7  |
| 209308_s_at | BC002461 | BNIP2                    | 663    | 101.3 | 74.7  | 116.8 | 92.7  | 68.8  |
| 209309_at   | D90427   | AZGP1                    | 563    | 67.0  | 58.0  | 104.6 | 65.1  | 80.7  |
| 209310_s_at | U25804   | CASP4                    | 837    | 20.5  | 41.4  | 28.2  | 27.1  | 24.7  |
| 209311_at   | D87461   | BCL2L2                   | 599    | 64.7  | 69.7  | 79.0  | 70.3  | 55.0  |
| 209312_x_at | U65585   | HLA-DQB1 // 3119 /// 312 |        | 28.1  | 13.8  | 11.2  | 18.2  | 15.8  |
| 209313_at   | AB044661 | GPN1                     | 11321  | 150.8 | 156.2 | 146.4 | 157.6 | 135.5 |
| 209314_s_at | AK024258 | HBS1L                    | 10767  | 71.1  | 65.7  | 86.9  | 79.2  | 54.7  |
| 209315_at   | AW297143 | HBS1L                    | 10767  | 5.7   | 1.2   | 1.1   | 1.0   | 0.8   |
| 209316_s_at | BC001465 | HBS1L                    | 10767  | 247.3 | 208.1 | 237.5 | 213.4 | 186.0 |
| 209317_at   | AF008442 | POLR1C                   | 9533   | 113.1 | 89.0  | 123.7 | 96.2  | 102.3 |
| 209318_x_at | BG547855 | PLAGL1                   | 5325   | 7.5   | 2.9   | 7.1   | 3.0   | 3.4   |
| 209320_at   | AF033861 | ADCY3                    | 109    | 14.1  | 16.6  | 21.1  | 19.3  | 15.4  |
| 209321_s_at | AF033861 | ADCY3                    | 109    | 22.4  | 19.6  | 20.1  | 19.8  | 18.8  |
| 209322_s_at | AF227968 | SH2B1                    | 25970  | 5.6   | 24.2  | 21.0  | 24.1  | 2.1   |
| 209323_at   | AF081567 | PRKRIR                   | 5612   | 120.4 | 91.5  | 136.4 | 98.9  | 110.4 |
| 209324_s_at | BF304996 | RGS16                    | 6004   | 8.0   | 6.6   | 0.7   | 3.6   | 3.5   |
| 209325_s_at | U94829   | RGS16                    | 6004   | 11.7  | 9.0   | 17.9  | 5.2   | 0.9   |
| 209326_at   | D84454   | SLC35A2                  | 7355   | 123.7 | 121.4 | 147.3 | 152.3 | 137.1 |
| 209327_s_at | BC000587 | NOP16                    | 51491  | 2.5   | 7.6   | 1.8   | 0.7   | 4.1   |
| 209328_x_at | AA243508 | HIGD2A                   | 192286 | 32.0  | 38.6  | 46.7  | 37.7  | 29.9  |
| 209329_x_at | BC000587 | HIGD2A                   | 192286 | 886.0 | 794.4 | 937.7 | 894.4 | 712.1 |
| 209330_s_at | D55674   | HNRNPD                   | 3184   | 848.4 | 631.2 | 850.5 | 665.1 | 677.7 |
| 209331_s_at | AA723514 | MAX                      | 4149   | 132.5 | 110.6 | 130.5 | 139.5 | 109.3 |
| 209332_s_at | BC003525 | MAX                      | 4149   | 243.4 | 235.4 | 264.4 | 217.0 | 203.4 |
| 209333_at   | AB018265 | ULK1                     | 8408   | 27.0  | 29.3  | 28.4  | 33.3  | 15.5  |
| 209334_s_at | BC002383 | PSMD9                    | 5715   | 1.0   | 7.5   | 7.5   | 2.8   | 5.5   |
| 209335_at   | AI281593 | DCN                      | 1634   | 3.6   | 3.2   | 0.1   | 5.3   | 3.3   |
| 209336_at   | U56085   | PWP2                     | 5822   | 65.1  | 54.1  | 77.1  | 46.0  | 57.4  |
| 209337_at   | AF063020 | PSIP1                    | 11168  | 123.5 | 145.3 | 134.5 | 100.4 | 94.1  |
| 209338_at   | U03494   | TFCP2                    | 7024   | 1.0   | 11.5  | 11.3  | 12.7  | 7.0   |
| 209339_at   | U76248   | SIAH2                    | 6478   | 103.8 | 96.1  | 127.9 | 81.7  | 76.8  |
| 209340_at   | S73498   | UAP1                     | 6675   | 463.2 | 492.4 | 637.1 | 465.9 | 585.5 |
| 209341_s_at | AU153366 | IKBKB                    | 3551   | 22.8  | 23.8  | 23.7  | 29.8  | 17.3  |
| 209342_s_at | AF080158 | IKBKB                    | 3551   | 16.4  | 17.7  | 17.4  | 12.1  | 9.6   |
| 209343_at   | BC002449 | EFHD1                    | 80303  | 10.9  | 8.3   | 13.6  | 6.9   | 8.2   |
| 209344_at   | BC002827 | TPM4                     | 7171   | 46.2  | 59.1  | 58.0  | 46.9  | 50.6  |
| 209345_s_at | AL561930 | PI4K2A                   | 55361  | 104.7 | 92.7  | 98.1  | 101.7 | 90.9  |
| 209346_s_at | BC003167 | PI4K2A                   | 55361  | 18.2  | 23.7  | 7.8   | 23.3  | 21.4  |
| 209347_s_at | BF508646 | MAF                      | 4094   | 0.8   | 3.7   | 0.9   | 0.4   | 1.0   |
| 209348_s_at | AF055376 | MAF                      | 4094   | 8.1   | 9.4   | 8.6   | 10.1  | 3.3   |
| 209349_at   | U63139   | RAD50                    | 10111  | 16.9  | 14.5  | 17.6  | 16.3  | 16.7  |
| 209350_s_at | AL157493 | GPS2                     | 2874   | 75.6  | 67.8  | 80.3  | 86.8  | 67.1  |
| 209351_at   | BC002690 | KRT14                    | 3861   | 4.9   | 0.3   | 1.0   | 0.8   | 2.7   |
| 209352_s_at | AB014600 | SIN3B                    | 23309  | 30.5  | 34.7  | 25.6  | 26.8  | 21.5  |
| 209353_s_at | BC001205 | -                        | -      | 1.4   | 3.5   | 1.0   | 3.8   | 6.1   |
| 209354_at   | BC002794 | TNFRSF14                 | 8764   | 4.1   | 6.5   | 7.7   | 6.6   | 1.8   |
| 209355_s_at | AB000889 | PPAP2B                   | 8613   | 22.2  | 11.0  | 29.6  | 11.5  | 18.1  |
| 209356_x_at | AB030655 | EFEMP2                   | 30008  | 1.9   | 4.4   | 0.6   | 0.7   | 3.5   |
| 209357_at   | AF109161 | CITED2                   | 10370  | 186.3 | 148.7 | 146.9 | 167.6 | 107.6 |

|             |          |            |                    |        |       |        |       |       |
|-------------|----------|------------|--------------------|--------|-------|--------|-------|-------|
| 209358_at   | AF118094 | TAF11      | 6882               | 129.7  | 133.9 | 144.2  | 150.4 | 123.8 |
| 209359_x_at | L34598   | LOC1005064 | 861 /// 1005       | 4.2    | 1.3   | 0.5    | 1.4   | 3.4   |
| 209360_s_at | D43968   | LOC1005064 | 861 /// 1005       | 20.6   | 3.2   | 7.4    | 2.4   | 1.8   |
| 209361_s_at | BC004153 | PCBP4      | 57060              | 68.2   | 85.1  | 72.4   | 88.6  | 63.0  |
| 209362_at   | AI688580 | LOC1019286 | 9412 /// 101       | 148.2  | 125.9 | 142.8  | 127.1 | 108.6 |
| 209363_s_at | U46837   | LOC1019286 | 9412 /// 101       | 114.9  | 92.6  | 112.0  | 100.8 | 83.9  |
| 209364_at   | U66879   | BAD        | 572                | 143.6  | 134.5 | 131.9  | 158.0 | 124.7 |
| 209365_s_at | U65932   | ECM1       | 1893               | 14.1   | 19.1  | 18.5   | 19.3  | 17.8  |
| 209366_x_at | M22865   | CYB5A      | 1528               | 1116.0 | 867.7 | 1191.1 | 999.7 | 913.4 |
| 209367_at   | AB002559 | STXBP2     | 6813               | 88.5   | 110.7 | 101.8  | 130.3 | 95.3  |
| 209368_at   | AF233336 | EPHX2      | 2053               | 69.6   | 89.2  | 94.2   | 99.3  | 75.1  |
| 209369_at   | M63310   | ANXA3      | 306                | 2.0    | 2.4   | 2.7    | 1.7   | 1.0   |
| 209370_s_at | BE502377 | SH3BP2     | 6452               | 27.0   | 49.7  | 25.6   | 50.1  | 29.6  |
| 209371_s_at | AB000462 | SH3BP2     | 6452               | 11.8   | 3.2   | 15.4   | 14.1  | 11.6  |
| 209372_x_at | BF971587 | TUBB2A     | /// 17280 /// 347  | 88.8   | 71.0  | 103.6  | 77.2  | 99.3  |
| 209373_at   | BC003179 | MALL       | 7851               | 60.4   | 33.8  | 59.4   | 48.9  | 46.5  |
| 209374_s_at | BC001872 | IGHM       | 3507               | 8.3    | 3.0   | 1.9    | 2.5   | 1.7   |
| 209375_at   | D21089   | XPC        | 7508               | 112.7  | 68.3  | 72.9   | 75.4  | 70.5  |
| 209376_x_at | AW084759 | SCAF11     | 9169               | 73.8   | 60.6  | 74.1   | 52.1  | 53.0  |
| 209377_s_at | AF274949 | HMG3       | 9324               | 521.5  | 437.1 | 487.0  | 413.6 | 373.3 |
| 209378_s_at | AI478879 | CCSER2     | 54462              | 23.2   | 17.1  | 14.4   | 11.5  | 24.2  |
| 209379_s_at | AF241785 | CCSER2     | 54462              | 15.8   | 15.1  | 17.1   | 13.2  | 9.8   |
| 209380_s_at | AF146074 | ABCC5      | 10057              | 56.5   | 53.1  | 61.3   | 47.8  | 46.5  |
| 209381_x_at | BC004434 | SF3A2      | 8175               | 105.5  | 71.8  | 106.1  | 87.8  | 74.7  |
| 209382_at   | U93867   | POLR3C     | 10623              | 89.9   | 68.1  | 72.6   | 78.2  | 51.1  |
| 209383_at   | BC003637 | DDIT3      | 1649               | 40.5   | 62.7  | 35.2   | 49.8  | 16.4  |
| 209384_at   | AA176833 | PROSC      | 11212              | 85.9   | 71.6  | 87.3   | 69.4  | 55.3  |
| 209385_s_at | AL136616 | PROSC      | 11212              | 54.3   | 63.9  | 62.4   | 46.0  | 57.8  |
| 209386_at   | AI346835 | TM4SF1     | 4071               | 17.7   | 23.6  | 47.0   | 15.6  | 25.6  |
| 209387_s_at | M90657   | TM4SF1     | 4071               | 14.3   | 6.2   | 34.1   | 8.9   | 23.2  |
| 209388_at   | BC000927 | PAPOLA     | 10914              | 145.4  | 84.4  | 150.5  | 120.1 | 94.3  |
| 209389_x_at | M15887   | DBI        | 1622               | 437.7  | 346.7 | 495.7  | 362.7 | 406.7 |
| 209390_at   | AF013168 | TSC1       | 7248               | 55.5   | 50.6  | 57.3   | 50.2  | 42.6  |
| 209391_at   | AF061729 | DPM2       | 8818               | 131.4  | 114.3 | 122.8  | 115.2 | 106.2 |
| 209392_at   | L35594   | ENPP2      | 5168               | 2.0    | 1.1   | 0.3    | 1.4   | 3.6   |
| 209393_s_at | AF047695 | EIF4E2     | 9470               | 221.1  | 169.1 | 222.0  | 170.3 | 152.9 |
| 209394_at   | BC002508 | ASMTL      | 8623               | 134.1  | 158.7 | 143.7  | 195.3 | 142.3 |
| 209395_at   | M80927   | CHI3L1     | 1116               | 0.3    | 0.3   | 0.7    | 0.8   | 0.6   |
| 209396_s_at | M80927   | CHI3L1     | 1116               | 0.4    | 0.3   | 3.4    | 3.9   | 2.3   |
| 209397_at   | BC000147 | ME2        | 4200               | 267.4  | 240.2 | 240.5  | 259.2 | 200.2 |
| 209398_at   | BC002649 | HIST1H1C   | 3006               | 783.1  | 774.7 | 753.5  | 719.0 | 609.1 |
| 209399_at   | D87328   | HLCS       | 3141               | 25.3   | 15.9  | 23.0   | 23.7  | 19.9  |
| 209400_at   | U55054   | SLC12A4    | 6560               | 2.8    | 2.5   | 5.1    | 2.7   | 4.8   |
| 209401_s_at | AI817690 | SLC12A4    | 6560               | 0.9    | 6.2   | 9.2    | 0.5   | 0.6   |
| 209402_s_at | AF047338 | SLC12A4    | 6560               | 5.3    | 2.3   | 2.6    | 11.7  | 3.2   |
| 209403_at   | AL136860 | LOC1010603 | 84218 /// 41       | 18.4   | 28.9  | 22.2   | 21.5  | 12.0  |
| 209404_s_at | AF151867 | TMED7      | /// TI51014 /// 10 | 147.2  | 115.9 | 173.7  | 134.9 | 136.4 |
| 209405_s_at | BC002934 | FAM3A      | 60343              | 45.9   | 41.8  | 40.4   | 37.6  | 33.0  |
| 209406_at   | AF095192 | BAG2       | 9532               | 38.1   | 34.3  | 47.4   | 39.3  | 38.6  |
| 209407_s_at | AF068892 | DEAF1      | 10522              | 139.5  | 217.3 | 183.2  | 213.7 | 106.0 |
| 209408_at   | U63743   | KIF2C      | 11004              | 215.3  | 169.9 | 213.0  | 168.9 | 177.8 |
| 209409_at   | D86962   | GRB10      | 2887               | 704.5  | 766.4 | 590.4  | 706.0 | 403.6 |
| 209410_s_at | AF000017 | GRB10      | 2887               | 286.7  | 276.2 | 258.0  | 294.3 | 177.4 |



|             |          |              |              |       |       |       |       |       |
|-------------|----------|--------------|--------------|-------|-------|-------|-------|-------|
| 209411_s_at | AW008018 | GGA3         | 23163        | 31.2  | 32.5  | 43.4  | 23.1  | 30.5  |
| 209412_at   | U61500   | LOC10272421  | 7109 /// 102 | 28.0  | 22.8  | 21.4  | 19.1  | 17.4  |
| 209413_at   | BC002431 | B4GALT2      | 8704         | 181.7 | 108.4 | 168.4 | 143.0 | 162.9 |
| 209414_at   | AI732960 | FZR1         | 51343        | 20.6  | 18.8  | 22.3  | 18.6  | 20.4  |
| 209415_at   | AA905473 | FZR1         | 51343        | 21.8  | 23.1  | 15.4  | 13.6  | 19.2  |
| 209416_s_at | AF083810 | FZR1         | 51343        | 56.5  | 57.5  | 66.6  | 52.3  | 48.0  |
| 209417_s_at | BC001356 | IFI35        | 3430         | 28.1  | 61.8  | 41.3  | 60.9  | 41.1  |
| 209418_s_at | BC003615 | THOC5        | 8563         | 121.4 | 117.7 | 124.1 | 127.8 | 99.1  |
| 209419_at   | AB023200 | THOC5        | 8563         | 5.1   | 2.5   | 4.1   | 2.6   | 5.1   |
| 209420_s_at | M59916   | SMPD1        | 6609         | 112.2 | 107.1 | 112.1 | 121.5 | 86.4  |
| 209421_at   | U04045   | MSH2         | 4436         | 0.8   | 0.2   | 0.9   | 0.2   | 0.5   |
| 209422_at   | AL109965 | PHF20        | 51230        | 105.9 | 104.3 | 116.0 | 104.9 | 97.5  |
| 209423_s_at | AY027523 | PHF20        | 51230        | 28.1  | 11.8  | 19.6  | 15.4  | 13.7  |
| 209424_s_at | AI796120 | AMACR /// C  | 23600 /// 10 | 108.9 | 94.8  | 126.3 | 99.4  | 83.8  |
| 209425_at   | AA888589 | AMACR /// C  | 23600 /// 10 | 32.5  | 30.0  | 37.1  | 26.6  | 31.1  |
| 209426_s_at | AF047020 | AMACR /// C  | 23600 /// 10 | 101.8 | 87.2  | 114.6 | 97.1  | 74.0  |
| 209427_at   | AF064238 | SMTN         | 6525         | 72.6  | 51.9  | 76.3  | 60.9  | 45.7  |
| 209428_s_at | BG420865 | ZFPL1        | 7542         | 80.7  | 99.1  | 82.9  | 80.1  | 57.7  |
| 209429_x_at | AF112207 | EIF2B4       | 8890         | 205.6 | 172.9 | 190.3 | 166.8 | 159.3 |
| 209430_at   | AJ001017 | BTAF1        | 9044         | 44.6  | 49.9  | 52.7  | 48.3  | 46.8  |
| 209431_s_at | AF254083 | PATZ1        | 23598        | 65.1  | 69.2  | 63.4  | 90.7  | 57.5  |
| 209432_s_at | AF029674 | CREB3        | 10488        | 112.4 | 146.3 | 118.3 | 141.0 | 92.3  |
| 209433_s_at | AI457120 | PPAT         | 5471         | 127.9 | 109.1 | 153.3 | 115.2 | 135.2 |
| 209434_s_at | U00238   | PPAT         | 5471         | 118.9 | 100.5 | 115.7 | 128.3 | 116.3 |
| 209435_s_at | BC000265 | ARHGEF2      | 9181         | 98.2  | 119.9 | 95.0  | 115.2 | 62.9  |
| 209436_at   | AB018305 | SPON1        | 10418        | 20.9  | 22.6  | 17.0  | 21.8  | 17.7  |
| 209437_s_at | AB051390 | SPON1        | 10418        | 4.2   | 1.8   | 1.3   | 1.4   | 7.6   |
| 209438_at   | AL096700 | PHKA2        | 5256         | 24.0  | 20.4  | 10.6  | 10.8  | 14.8  |
| 209439_s_at | D38616   | PHKA2        | 5256         | 34.0  | 41.0  | 40.9  | 36.4  | 29.6  |
| 209440_at   | BC001605 | PRPS1        | 5631         | 522.4 | 480.3 | 615.8 | 466.4 | 507.1 |
| 209441_at   | AY009093 | RHOBTB2      | 23221        | 2.6   | 8.6   | 3.3   | 1.1   | 2.1   |
| 209442_x_at | AL136710 | ANK3         | 288          | 87.4  | 114.0 | 86.9  | 121.7 | 83.2  |
| 209443_at   | J02639   | SERPINA5     | 5104         | 2.3   | 1.1   | 1.4   | 2.4   | 1.1   |
| 209444_at   | BC001851 | RAP1GDS1     | 5910         | 152.9 | 148.2 | 151.8 | 150.2 | 117.5 |
| 209445_x_at | AI765280 | COA1         | 55744        | 83.5  | 77.9  | 88.5  | 83.7  | 75.1  |
| 209446_s_at | BC001743 | -            | -            | 13.1  | 14.4  | 15.2  | 11.7  | 10.3  |
| 209447_at   | AF043290 | SYNE1        | 23345        | 0.4   | 0.3   | 0.6   | 0.2   | 0.7   |
| 209448_at   | BC002439 | HTATIP2      | 10553        | 9.2   | 4.0   | 4.8   | 2.2   | 0.3   |
| 209449_at   | AF196468 | LSM2         | 57819        | 301.7 | 267.5 | 368.3 | 292.3 | 314.2 |
| 209450_at   | AB050442 | OSGEP        | 55644        | 56.2  | 58.3  | 62.8  | 47.9  | 38.2  |
| 209451_at   | U59863   | TANK         | 10010        | 51.0  | 25.2  | 46.4  | 40.1  | 30.2  |
| 209452_s_at | AF035824 | VTI1B        | 10490        | 344.0 | 460.9 | 382.4 | 396.7 | 324.7 |
| 209453_at   | M81768   | SLC9A1       | 6548         | 48.5  | 48.3  | 43.8  | 53.3  | 45.9  |
| 209454_s_at | AF142482 | TEAD3        | 7005         | 31.1  | 32.4  | 22.9  | 22.7  | 21.5  |
| 209455_at   | BE963245 | FBXW11       | 23291        | 143.0 | 146.8 | 170.3 | 152.9 | 128.7 |
| 209456_s_at | AB033281 | FBXW11       | 23291        | 66.5  | 46.3  | 58.1  | 66.8  | 44.0  |
| 209457_at   | U16996   | DUSP5        | 1847         | 21.9  | 20.2  | 13.3  | 14.7  | 14.8  |
| 209458_x_at | AF105974 | HBA1 /// HB, | 3039 /// 304 | 12.2  | 1.2   | 6.4   | 2.9   | 6.1   |
| 209459_s_at | AF237813 | ABAT         | 18           | 64.0  | 67.8  | 63.8  | 70.8  | 54.5  |
| 209460_at   | AF237813 | ABAT         | 18           | 41.0  | 56.3  | 43.0  | 64.5  | 37.7  |
| 209461_x_at | BC001648 | WDR18        | 57418        | 175.2 | 163.0 | 171.3 | 174.4 | 140.6 |
| 209462_at   | U48437   | APLP1        | 333          | 74.0  | 77.4  | 71.0  | 115.6 | 51.4  |
| 209463_s_at | D50544   | TAF12        | 6883         | 79.0  | 67.0  | 80.8  | 68.1  | 67.1  |

|             |          |                           |        |        |        |        |        |       |
|-------------|----------|---------------------------|--------|--------|--------|--------|--------|-------|
| 209464_at   | AB011446 | AURKB                     | 9212   | 134.1  | 104.5  | 188.5  | 118.4  | 157.3 |
| 209465_x_at | AL565812 | PTN                       | 5764   | 1.9    | 3.9    | 2.3    | 0.9    | 0.6   |
| 209466_x_at | M57399   | PTN                       | 5764   | 22.5   | 19.4   | 22.9   | 22.4   | 20.2  |
| 209467_s_at | BC002755 | MKNK1                     | 8569   | 90.5   | 85.4   | 123.5  | 80.7   | 89.2  |
| 209468_at   | AB017498 | LRP5                      | 4041   | 50.9   | 43.3   | 49.8   | 46.3   | 43.7  |
| 209469_at   | BF939489 | GPM6A                     | 2823   | 3.8    | 1.8    | 1.8    | 0.8    | 0.4   |
| 209470_s_at | D49958   | GPM6A                     | 2823   | 1.4    | 3.3    | 1.6    | 2.1    | 1.8   |
| 209471_s_at | L00634   | FNTA                      | 2339   | 188.5  | 208.2  | 215.0  | 208.4  | 178.1 |
| 209472_at   | BC000819 | CCBL2                     | 56267  | 77.4   | 73.0   | 94.2   | 87.1   | 65.2  |
| 209473_at   | AV717590 | ENTPD1                    | 953    | 10.1   | 10.0   | 6.3    | 0.8    | 2.9   |
| 209474_s_at | U87967   | ENTPD1                    | 953    | 1.0    | 1.7    | 5.1    | 2.0    | 0.8   |
| 209475_at   | AF106069 | MIR6125 /// 9958 /// 102  |        | 31.2   | 27.3   | 32.2   | 33.4   | 30.7  |
| 209476_at   | AL080080 | TMX1                      | 81542  | 271.4  | 202.4  | 307.6  | 218.5  | 218.4 |
| 209477_at   | BC000738 | EMD                       | 2010   | 155.9  | 124.8  | 137.4  | 143.6  | 108.5 |
| 209478_at   | U95006   | STRA13                    | 201254 | 417.3  | 419.7  | 562.8  | 459.1  | 463.5 |
| 209479_at   | BC000758 | CCDC28A                   | 25901  | 56.2   | 45.4   | 52.0   | 56.3   | 50.0  |
| 209480_at   | M16276   | HLA-DQB1                  | 3119   | 7.0    | 16.5   | 7.1    | 12.8   | 6.6   |
| 209481_at   | AF226044 | SNRK                      | 54861  | 101.4  | 90.8   | 80.8   | 87.0   | 63.3  |
| 209482_at   | BC001430 | POP7                      | 10248  | 253.2  | 255.1  | 346.5  | 259.6  | 262.3 |
| 209483_s_at | AF255793 | NSL1                      | 25936  | 5.8    | 6.3    | 6.3    | 3.6    | 5.5   |
| 209484_s_at | AF201941 | NSL1                      | 25936  | 321.7  | 184.7  | 310.5  | 217.9  | 238.5 |
| 209485_s_at | W19983   | OSBPL1A                   | 114876 | 38.5   | 37.8   | 37.3   | 41.1   | 31.0  |
| 209486_at   | BC004546 | UTP3                      | 57050  | 163.1  | 118.2  | 157.1  | 113.6  | 106.0 |
| 209487_at   | D84109   | RBPMS                     | 11030  | 79.2   | 66.0   | 58.9   | 61.3   | 42.5  |
| 209488_s_at | D84109   | RBPMS                     | 11030  | 68.6   | 77.8   | 73.5   | 75.8   | 62.8  |
| 209489_at   | N25915   | CELF1                     | 10658  | 141.4  | 164.6  | 172.5  | 165.2  | 154.8 |
| 209490_s_at | AF020543 | EGFL8 /// PP 9374 /// 808 |        | 25.4   | 28.6   | 17.6   | 22.3   | 19.2  |
| 209491_s_at | AA919119 | AMPD3 /// C 272 /// 1001  |        | 2.4    | 0.4    | 1.2    | 1.3    | 1.4   |
| 209492_x_at | BC003679 | ATP5I                     | 521    | 1278.9 | 1004.1 | 1047.1 | 1056.5 | 886.8 |
| 209493_at   | AF338650 | PDZD2                     | 23037  | 6.0    | 4.6    | 6.9    | 2.6    | 1.8   |
| 209494_s_at | AI807017 | PATZ1                     | 23598  | 84.9   | 82.6   | 87.0   | 85.2   | 54.7  |
| 209495_at   | AF022655 | CEP250                    | 11190  | 54.0   | 31.0   | 29.4   | 34.3   | 32.5  |
| 209496_at   | BC000069 | RARRES2                   | 5919   | 2.3    | 1.7    | 3.1    | 1.2    | 1.9   |
| 209497_s_at | BC003503 | RBM4B                     | 83759  | 20.5   | 20.0   | 34.4   | 23.9   | 22.4  |
| 209498_at   | X16354   | CEACAM1                   | 634    | 0.4    | 0.7    | 0.4    | 1.3    | 1.6   |
| 209499_x_at | BF448647 | TNFSF12-TNF8741 /// 407   |        | 54.9   | 86.6   | 58.4   | 72.5   | 55.1  |
| 209500_x_at | AF114012 | TNFSF12-TNF8741 /// 407   |        | 87.1   | 111.6  | 83.2   | 122.5  | 79.7  |
| 209501_at   | AL582414 | CDR2 /// LOC1039 /// 101  |        | 46.5   | 28.5   | 50.6   | 34.2   | 41.2  |
| 209502_s_at | BC002495 | BAIAP2                    | 10458  | 65.8   | 105.1  | 84.7   | 89.9   | 64.9  |
| 209503_s_at | AF035309 | PSMC5                     | 5705   | 670.9  | 581.1  | 698.2  | 625.0  | 558.4 |
| 209504_s_at | AF081583 | PLEKHB1                   | 58473  | 406.3  | 473.0  | 441.0  | 509.5  | 341.8 |
| 209505_at   | AI951185 | NR2F1                     | 7025   | 4.2    | 4.3    | 7.1    | 5.0    | 5.3   |
| 209506_s_at | BC004154 | NR2F1 /// NF 7025 /// 702 |        | 10.7   | 11.5   | 10.2   | 9.0    | 5.4   |
| 209507_at   | BC005264 | RPA3                      | 6119   | 608.5  | 543.5  | 689.3  | 567.0  | 556.2 |
| 209508_x_at | AF005774 | CFLAR                     | 8837   | 16.6   | 7.3    | 13.1   | 10.3   | 8.0   |
| 209509_s_at | BC000325 | DPAGT1                    | 1798   | 138.3  | 135.5  | 161.7  | 132.8  | 125.0 |
| 209510_at   | AF064801 | RNF139                    | 11236  | 95.8   | 79.8   | 119.5  | 110.2  | 90.8  |
| 209511_at   | BC003582 | POLR2F                    | 5435   | 469.0  | 388.1  | 342.9  | 491.2  | 332.1 |
| 209512_at   | BC004331 | HSDL2                     | 84263  | 47.5   | 39.1   | 66.0   | 51.5   | 43.3  |
| 209513_s_at | BC004331 | HSDL2                     | 84263  | 60.8   | 55.1   | 71.0   | 68.7   | 54.0  |
| 209514_s_at | BE502030 | RAB27A                    | 5873   | 68.0   | 56.4   | 72.2   | 53.6   | 49.4  |
| 209515_s_at | U38654   | RAB27A                    | 5873   | 18.3   | 20.4   | 30.0   | 19.7   | 21.7  |
| 209516_at   | U50383   | SMYD5                     | 10322  | 34.4   | 16.4   | 35.3   | 23.9   | 25.9  |

|             |           |                            |        |       |       |       |       |       |
|-------------|-----------|----------------------------|--------|-------|-------|-------|-------|-------|
| 209517_s_at | AB020982  | ASH2L                      | 9070   | 187.9 | 161.4 | 185.6 | 165.2 | 165.2 |
| 209518_at   | AI869240  | SMARCD1                    | 6602   | 57.2  | 34.5  | 53.3  | 48.4  | 34.6  |
| 209519_at   | BG108193  | NCBP1                      | 4686   | 10.7  | 6.1   | 9.3   | 2.7   | 8.6   |
| 209520_s_at | BC001450  | NCBP1                      | 4686   | 95.4  | 75.8  | 115.4 | 86.4  | 95.5  |
| 209521_s_at | AF286598  | AMOT                       | 154796 | 5.0   | 4.9   | 7.0   | 3.9   | 0.2   |
| 209522_s_at | BC000723  | CRAT                       | 1384   | 112.3 | 135.2 | 109.9 | 144.8 | 81.2  |
| 209523_at   | AK001618  | TAF2                       | 6873   | 59.2  | 74.1  | 77.0  | 68.0  | 61.5  |
| 209524_at   | AK001280  | HDGFRP3                    | 50810  | 73.1  | 58.9  | 76.2  | 64.6  | 54.4  |
| 209525_at   | BG285017  | HDGFRP3                    | 50810  | 7.1   | 2.5   | 6.6   | 5.4   | 2.8   |
| 209526_s_at | AB029156  | HDGFRP3                    | 50810  | 90.9  | 73.3  | 95.4  | 81.4  | 63.6  |
| 209527_at   | BC000747  | EXOSC2                     | 23404  | 101.3 | 85.6  | 101.2 | 82.7  | 89.8  |
| 209528_s_at | AL137394  | TELO2                      | 9894   | 30.7  | 17.8  | 26.6  | 17.1  | 19.0  |
| 209529_at   | AF047760  | PPAP2C                     | 8612   | 101.6 | 111.9 | 100.9 | 111.1 | 73.8  |
| 209530_at   | U07139    | CACNB3                     | 784    | 27.6  | 35.3  | 42.6  | 30.6  | 32.2  |
| 209531_at   | BC001453  | GSTZ1                      | 2954   | 191.5 | 204.3 | 179.2 | 197.8 | 150.3 |
| 209532_at   | AF083395  | PLAA                       | 9373   | 5.7   | 14.8  | 10.3  | 5.3   | 8.7   |
| 209533_s_at | AF145020  | PLAA                       | 9373   | 96.8  | 73.8  | 84.7  | 74.8  | 84.8  |
| 209534_x_at | BF222823  | AKAP13                     | 11214  | 17.7  | 22.4  | 35.1  | 24.0  | 9.7   |
| 209535_s_at | AF127481  | -                          | -      | 8.8   | 1.7   | 7.8   | 7.5   | 7.8   |
| 209536_s_at | AF320070  | EHD4                       | 30844  | 145.9 | 139.9 | 146.1 | 161.8 | 133.9 |
| 209537_at   | AF000416  | EXTL2                      | 2135   | 54.4  | 41.2  | 61.5  | 46.4  | 45.0  |
| 209538_at   | U69645    | ZNF32                      | 7580   | 175.5 | 155.7 | 184.0 | 193.7 | 140.7 |
| 209539_at   | D25304    | ARHGEF6                    | 9459   | 3.5   | 4.7   | 10.5  | 13.9  | 8.5   |
| 209540_at   | AU144912  | IGF1                       | 3479   | 12.0  | 2.0   | 2.0   | 8.0   | 3.8   |
| 209541_at   | AI972496  | IGF1                       | 3479   | 7.3   | 7.3   | 7.7   | 9.9   | 9.5   |
| 209542_x_at | M29644    | IGF1                       | 3479   | 2.7   | 1.7   | 3.4   | 1.5   | 7.4   |
| 209543_s_at | M81104    | CD34                       | 947    | 12.9  | 9.9   | 12.4  | 7.6   | 10.3  |
| 209544_at   | AF027706  | RIPK2                      | 8767   | 28.1  | 15.6  | 19.3  | 17.2  | 17.2  |
| 209545_s_at | AF064824  | RIPK2                      | 8767   | 136.2 | 138.4 | 152.0 | 122.5 | 119.7 |
| 209546_s_at | AF323540  | APOL1                      | 8542   | 2.4   | 2.0   | 5.6   | 1.4   | 2.5   |
| 209547_s_at | BC001043  | SUGP1                      | 57794  | 6.1   | 4.6   | 2.4   | 4.6   | 2.7   |
| 209549_s_at | BC001121  | DGUOK                      | 1716   | 237.3 | 186.1 | 191.9 | 218.4 | 166.7 |
| 209550_at   | U35139    | NDN                        | 4692   | 232.3 | 219.1 | 254.5 | 190.4 | 196.8 |
| 209551_at   | BC004875  | YIPF4                      | 84272  | 43.1  | 18.1  | 34.4  | 20.7  | 21.7  |
| 209552_at   | BC001060  | PAX8                       | 7849   | 1.6   | 3.4   | 11.2  | 4.1   | 2.9   |
| 209553_at   | BC001001  | VPS8                       | 23355  | 46.2  | 41.3  | 27.1  | 40.0  | 23.0  |
| 209554_at   | BE968792  | CD36                       | 948    | 0.6   | 1.0   | 1.0   | 1.7   | 0.5   |
| 209555_s_at | M98399    | CD36                       | 948    | 0.4   | 0.6   | 0.9   | 0.9   | 0.3   |
| 209556_at   | AB011179  | NCDN                       | 23154  | 56.2  | 44.6  | 52.3  | 59.3  | 31.5  |
| 209557_s_at | AB018740  | NCDN                       | 23154  | 4.3   | 12.6  | 11.5  | 10.1  | 7.7   |
| 209558_s_at | AB013384  | HIP1R                      | 9026   | 31.5  | 36.3  | 31.8  | 31.6  | 28.3  |
| 209559_at   | AB013384  | HIP1R                      | 9026   | 1.7   | 12.3  | 3.4   | 8.6   | 2.8   |
| 209560_s_at | U15979    | DLK1                       | 8788   | 11.4  | 14.5  | 17.3  | 8.3   | 7.1   |
| 209561_at   | L38969    | THBS3                      | 7059   | 15.6  | 6.3   | 19.8  | 5.5   | 10.1  |
| 209563_x_at | BC000454  | CALM1 /// C, 801 /// 805 / |        | 939.7 | 804.3 | 995.0 | 854.2 | 715.9 |
| 209565_at   | BC000832  | RNF113A                    | 7737   | 121.1 | 112.6 | 123.7 | 104.5 | 116.3 |
| 209566_at   | AL080184  | INSIG2                     | 51141  | 50.1  | 42.6  | 50.7  | 48.6  | 34.3  |
| 209567_at   | BC001811  | RRS1                       | 23212  | 219.1 | 182.3 | 233.3 | 199.0 | 239.4 |
| 209568_s_at | AF186779  | RGL1                       | 23179  | 31.3  | 21.8  | 35.7  | 42.1  | 21.3  |
| 209569_x_at | NM_014392 | NSG1                       | 27065  | 18.5  | 12.9  | 12.7  | 12.0  | 8.3   |
| 209570_s_at | BC001745  | NSG1                       | 27065  | 6.8   | 6.6   | 4.4   | 9.9   | 9.6   |
| 209571_at   | U03644    | CIR1                       | 9541   | 22.2  | 17.1  | 22.8  | 15.6  | 17.6  |
| 209572_s_at | AF080227  | EED                        | 8726   | 161.5 | 127.5 | 173.9 | 146.5 | 146.7 |

|             |          |                           |       |        |       |        |       |       |
|-------------|----------|---------------------------|-------|--------|-------|--------|-------|-------|
| 209573_s_at | AW008505 | LDLRAD4                   | 753   | 2.8    | 1.2   | 2.9    | 8.0   | 1.1   |
| 209574_s_at | AI349506 | LDLRAD4                   | 753   | 6.1    | 9.7   | 5.6    | 4.2   | 5.5   |
| 209575_at   | BC001903 | IL10RB                    | 3588  | 42.6   | 36.5  | 37.6   | 37.2  | 34.3  |
| 209576_at   | AL049933 | GNAI1                     | 2770  | 34.1   | 24.4  | 59.5   | 37.6  | 30.8  |
| 209577_at   | BC000351 | PCYT2                     | 5833  | 89.9   | 82.2  | 119.0  | 69.7  | 100.6 |
| 209578_s_at | BC000626 | POFUT2                    | 23275 | 45.0   | 39.3  | 42.8   | 47.2  | 29.3  |
| 209579_s_at | AL556619 | MBD4                      | 8930  | 102.6  | 108.5 | 130.5  | 103.8 | 102.9 |
| 209580_s_at | AF114784 | MBD4                      | 8930  | 114.8  | 77.3  | 122.0  | 91.2  | 95.6  |
| 209581_at   | BC001387 | PLA2G16                   | 11145 | 121.6  | 115.3 | 109.1  | 96.8  | 84.9  |
| 209582_s_at | H23979   | CD200                     | 4345  | 5.2    | 2.8   | 7.3    | 0.3   | 2.7   |
| 209583_s_at | AF063591 | CD200                     | 4345  | 5.5    | 1.8   | 5.9    | 1.1   | 3.2   |
| 209584_x_at | AF165520 | APOBEC3C                  | 27350 | 3.1    | 12.3  | 7.5    | 6.2   | 10.9  |
| 209585_s_at | AF084943 | MINPP1                    | 9562  | 65.4   | 51.5  | 71.1   | 56.6  | 52.1  |
| 209586_s_at | AF123539 | PRUNE                     | 58497 | 145.2  | 168.5 | 191.3  | 167.9 | 143.3 |
| 209587_at   | U70370   | PITX1                     | 5307  | 48.6   | 30.7  | 33.0   | 35.1  | 26.6  |
| 209588_at   | AL530874 | EPHB2                     | 2048  | 12.9   | 14.6  | 13.3   | 11.7  | 9.3   |
| 209589_s_at | AF025304 | EPHB2                     | 2048  | 6.1    | 10.8  | 15.1   | 13.9  | 11.9  |
| 209590_at   | AL157414 | BMP7                      | 655   | 6.3    | 4.5   | 15.9   | 4.8   | 3.1   |
| 209591_s_at | M60316   | BMP7                      | 655   | 5.2    | 2.3   | 5.2    | 3.7   | 3.9   |
| 209592_s_at | BC001264 | DCAF7                     | 10238 | 144.8  | 127.9 | 140.3  | 110.1 | 114.8 |
| 209593_s_at | AF317129 | TOR1B                     | 27348 | 68.8   | 51.4  | 78.3   | 66.8  | 57.8  |
| 209594_x_at | M34421   | PSG9                      | 5678  | 15.2   | 19.3  | 16.5   | 13.4  | 9.4   |
| 209595_at   | BC001771 | GTF2F2                    | 2963  | 61.2   | 45.4  | 69.1   | 70.8  | 58.6  |
| 209596_at   | AF245505 | MXRA5                     | 25878 | 10.5   | 7.3   | 6.4    | 4.9   | 6.0   |
| 209597_s_at | AF286487 | PNMA2                     | 10687 | 1.0    | 1.0   | 0.6    | 0.8   | 0.8   |
| 209598_at   | AB020690 | PNMA2                     | 10687 | 8.1    | 5.3   | 6.8    | 2.4   | 4.2   |
| 209599_s_at | AI762105 | PRUNE                     | 58497 | 42.3   | 36.7  | 40.4   | 35.1  | 32.1  |
| 209600_s_at | S69189   | ACOX1                     | 51    | 96.0   | 92.7  | 91.8   | 88.2  | 73.2  |
| 209601_at   | S69189   | ACOX1                     | 51    | 1.7    | 0.6   | 0.7    | 1.3   | 3.2   |
| 209602_s_at | AI796169 | GATA3                     | 2625  | 0.2    | 0.1   | 0.2    | 0.2   | 0.2   |
| 209603_at   | AI796169 | GATA3                     | 2625  | 0.8    | 0.8   | 1.1    | 1.0   | 0.9   |
| 209604_s_at | BC003070 | GATA3                     | 2625  | 14.0   | 10.7  | 13.8   | 2.2   | 6.1   |
| 209605_at   | D87292   | TST                       | 7263  | 186.9  | 243.0 | 251.6  | 256.5 | 224.3 |
| 209606_at   | L06633   | CYTIP                     | 9595  | 0.5    | 5.5   | 6.0    | 2.8   | 0.5   |
| 209607_x_at | U08032   | LOC1019298.6818 /// 445   |       | 95.3   | 100.2 | 96.0   | 104.5 | 83.1  |
| 209608_s_at | BC000408 | ACAT2                     | 39    | 241.3  | 183.9 | 231.6  | 175.4 | 179.9 |
| 209609_s_at | BC004517 | MRPL9                     | 65005 | 347.9  | 324.6 | 375.2  | 321.4 | 320.1 |
| 209610_s_at | BF340083 | SLC1A4                    | 6509  | 53.5   | 62.6  | 60.9   | 45.1  | 39.3  |
| 209611_s_at | AB026689 | SLC1A4                    | 6509  | 22.4   | 23.3  | 26.1   | 11.5  | 8.0   |
| 209612_s_at | M24317   | ADH1B                     | 125   | 1.0    | 7.1   | 5.7    | 3.3   | 0.9   |
| 209613_s_at | M21692   | ADH1B                     | 125   | 2.6    | 0.1   | 2.1    | 0.2   | 0.2   |
| 209614_at   | AF153821 | ADH1B                     | 125   | 7.2    | 4.2   | 1.2    | 3.2   | 3.1   |
| 209615_s_at | U51120   | PAK1                      | 5058  | 12.4   | 10.2  | 13.9   | 12.8  | 1.4   |
| 209616_s_at | S73751   | CES1 /// LOC 1066 /// 100 |       | 5.4    | 4.0   | 9.8    | 7.2   | 4.2   |
| 209617_s_at | AF035302 | CTNND2                    | 1501  | 4.4    | 0.7   | 5.3    | 4.3   | 3.4   |
| 209618_at   | U96136   | CTNND2                    | 1501  | 0.5    | 0.2   | 0.4    | 1.0   | 1.2   |
| 209619_at   | K01144   | CD74                      | 972   | 3.3    | 7.8   | 9.6    | 11.7  | 9.9   |
| 209620_s_at | AB005289 | ABCB7                     | 22    | 56.6   | 70.5  | 74.9   | 80.4  | 57.6  |
| 209621_s_at | AF002280 | PDLIM3                    | 27295 | 2.0    | 4.1   | 1.0    | 1.7   | 1.1   |
| 209622_at   | AB020739 | STK16                     | 8576  | 60.8   | 55.7  | 46.9   | 58.3  | 45.9  |
| 209623_at   | AW439494 | MCCC2                     | 64087 | 1030.7 | 928.2 | 1221.8 | 969.4 | 984.0 |
| 209624_s_at | AB050049 | MCCC2                     | 64087 | 535.3  | 680.0 | 903.7  | 702.8 | 848.9 |
| 209625_at   | BC004100 | PIGH                      | 5283  | 85.0   | 83.4  | 113.5  | 99.9  | 89.2  |

|             |           |                           |       |       |       |       |       |       |
|-------------|-----------|---------------------------|-------|-------|-------|-------|-------|-------|
| 209626_s_at | AI202969  | OSBPL3                    | 26031 | 11.5  | 13.1  | 22.1  | 8.8   | 14.8  |
| 209627_s_at | AY008372  | OSBPL3                    | 26031 | 13.8  | 12.1  | 11.7  | 10.7  | 11.7  |
| 209628_at   | AK023289  | NXT2                      | 55916 | 79.7  | 71.0  | 92.2  | 82.2  | 61.8  |
| 209629_s_at | AF201942  | NXT2                      | 55916 | 46.8  | 26.8  | 45.5  | 28.9  | 29.0  |
| 209630_s_at | AL043967  | FBXW2                     | 26190 | 87.0  | 76.1  | 77.0  | 78.8  | 70.2  |
| 209631_s_at | U87460    | GPR37 /// SE 2861 /// 803 |       | 3.1   | 6.1   | 10.4  | 8.5   | 7.3   |
| 209632_at   | AI760130  | PPP2R3A                   | 5523  | 23.0  | 6.6   | 18.0  | 11.6  | 13.7  |
| 209633_at   | AL389975  | PPP2R3A                   | 5523  | 24.6  | 24.2  | 40.9  | 30.4  | 15.9  |
| 209635_at   | BC003561  | AP1S1                     | 1174  | 395.7 | 325.8 | 330.8 | 372.8 | 309.2 |
| 209636_at   | BC002844  | NFKB2                     | 4791  | 12.1  | 6.8   | 20.4  | 12.3  | 15.1  |
| 209637_s_at | AA887475  | RGS12                     | 6002  | 5.8   | 14.2  | 17.4  | 13.8  | 9.3   |
| 209638_x_at | AF030110  | RGS12                     | 6002  | 1.7   | 0.8   | 6.8   | 2.6   | 3.7   |
| 209639_s_at | AF030111  | RGS12                     | 6002  | 9.5   | 7.7   | 8.9   | 5.0   | 8.8   |
| 209640_at   | M79462    | PML                       | 5371  | 19.5  | 15.4  | 10.7  | 17.3  | 11.7  |
| 209641_s_at | AF009670  | ABCC3                     | 8714  | 2.1   | 6.4   | 1.3   | 1.2   | 1.7   |
| 209642_at   | AF043294  | BUB1                      | 699   | 114.3 | 95.3  | 112.5 | 85.0  | 103.2 |
| 209643_s_at | AF033850  | PLD2                      | 5338  | 48.9  | 49.1  | 47.3  | 45.0  | 27.1  |
| 209644_x_at | U38945    | CDKN2A                    | 1029  | 129.2 | 141.7 | 142.1 | 147.8 | 123.7 |
| 209645_s_at | NM_000692 | ALDH1B1                   | 219   | 94.8  | 103.2 | 125.1 | 104.5 | 105.9 |
| 209646_x_at | BC001619  | ALDH1B1                   | 219   | 71.8  | 65.6  | 89.5  | 75.2  | 89.0  |
| 209647_s_at | AW664421  | SOCS5                     | 9655  | 32.2  | 34.4  | 31.4  | 23.2  | 23.4  |
| 209648_x_at | AL136896  | SOCS5                     | 9655  | 14.1  | 14.8  | 15.6  | 18.7  | 13.5  |
| 209649_at   | AL133600  | STAM2                     | 10254 | 32.4  | 20.9  | 27.1  | 28.9  | 29.3  |
| 209650_s_at | BC001292  | TBC1D22A                  | 25771 | 12.7  | 9.0   | 6.1   | 22.3  | 12.2  |
| 209651_at   | BC001830  | TGFB111                   | 7041  | 0.8   | 0.9   | 0.8   | 3.9   | 1.0   |
| 209652_s_at | BC001422  | PGF                       | 5228  | 0.8   | 0.6   | 1.7   | 0.9   | 1.0   |
| 209653_at   | U93240    | KPNA4                     | 3840  | 68.1  | 53.4  | 76.7  | 64.8  | 42.4  |
| 209654_at   | BC004902  | ICE1                      | 23379 | 53.4  | 42.0  | 47.1  | 40.7  | 41.4  |
| 209655_s_at | AI803181  | TMEM47                    | 83604 | 11.3  | 9.6   | 13.3  | 13.6  | 13.9  |
| 209656_s_at | AL136550  | TMEM47                    | 83604 | 53.6  | 40.1  | 58.7  | 37.0  | 44.0  |
| 209657_s_at | M65217    | HSF2                      | 3298  | 63.6  | 44.7  | 66.8  | 45.9  | 39.2  |
| 209658_at   | AF164598  | CDC16                     | 8881  | 56.4  | 56.9  | 39.7  | 72.7  | 48.5  |
| 209659_s_at | AF164598  | CDC16                     | 8881  | 87.4  | 64.6  | 72.6  | 76.9  | 72.6  |
| 209660_at   | AF162690  | TTR                       | 7276  | 17.5  | 14.3  | 22.1  | 3.3   | 15.3  |
| 209661_at   | BC001211  | KIFC3                     | 3801  | 1.5   | 10.4  | 0.9   | 4.5   | 0.8   |
| 209662_at   | BC005383  | CETN3                     | 1070  | 291.5 | 226.7 | 311.1 | 263.3 | 244.0 |
| 209663_s_at | AF072132  | ITGA7                     | 3679  | 11.7  | 1.9   | 1.0   | 3.4   | 3.7   |
| 209664_x_at | AW027545  | NFATC1                    | 4772  | 0.7   | 2.1   | 6.0   | 1.0   | 0.4   |
| 209665_at   | AF040704  | CYB561D2                  | 11068 | 172.1 | 161.1 | 187.2 | 166.8 | 149.2 |
| 209666_s_at | AF080157  | CHUK                      | 1147  | 41.0  | 25.1  | 49.0  | 35.1  | 40.1  |
| 209667_at   | BF033242  | CES2                      | 8824  | 73.9  | 50.7  | 69.6  | 64.8  | 52.5  |
| 209668_x_at | D50579    | CES2                      | 8824  | 69.6  | 67.5  | 99.5  | 78.3  | 68.2  |
| 209669_s_at | BC003049  | SERBP1                    | 26135 | 439.5 | 384.1 | 536.7 | 403.1 | 450.0 |
| 209670_at   | M12959    | TRAC                      | 28755 | 9.7   | 15.1  | 12.1  | 2.2   | 1.7   |
| 209671_x_at | M12423    | TRAC                      | 28755 | 4.1   | 3.9   | 2.0   | 2.2   | 6.5   |
| 209672_s_at | AL136892  | MIOS                      | 54468 | 6.5   | 3.5   | 9.9   | 7.7   | 7.8   |
| 209674_at   | D83702    | CRY1                      | 1407  | 110.7 | 87.5  | 115.4 | 81.7  | 83.6  |
| 209675_s_at | BC004242  | HNRNPUL1                  | 11100 | 71.5  | 76.7  | 101.2 | 73.0  | 58.2  |
| 209676_at   | J03225    | TFPI                      | 7035  | 57.0  | 46.2  | 80.2  | 49.2  | 49.6  |
| 209677_at   | L18964    | PRKCI                     | 5584  | 17.2  | 17.6  | 17.6  | 26.6  | 13.3  |
| 209678_s_at | L18964    | PRKCI                     | 5584  | 151.1 | 123.1 | 137.4 | 119.3 | 127.6 |
| 209679_s_at | BC003379  | SMAGP                     | 57228 | 27.2  | 27.9  | 36.7  | 27.9  | 29.3  |
| 209680_s_at | BC000712  | KIFC1                     | 3833  | 145.3 | 99.5  | 99.6  | 121.7 | 68.7  |

|             |          |                           |       |       |       |       |       |       |
|-------------|----------|---------------------------|-------|-------|-------|-------|-------|-------|
| 209681_at   | AF153330 | SLC19A2                   | 10560 | 152.6 | 101.8 | 161.6 | 106.6 | 146.6 |
| 209682_at   | U26710   | CBLB                      | 868   | 29.5  | 35.2  | 38.4  | 44.6  | 24.1  |
| 209683_at   | AA243659 | FAM49A                    | 81553 | 0.3   | 0.5   | 0.3   | 3.5   | 2.7   |
| 209684_at   | AL136924 | RIN2                      | 54453 | 15.0  | 15.9  | 12.8  | 14.4  | 13.5  |
| 209685_s_at | M13975   | PRKCB                     | 5579  | 13.7  | 6.8   | 12.2  | 5.2   | 4.6   |
| 209686_at   | BC001766 | S100B                     | 6285  | 0.5   | 0.6   | 0.5   | 0.3   | 0.2   |
| 209687_at   | U19495   | CXCL12                    | 6387  | 1.5   | 2.7   | 3.2   | 0.7   | 0.7   |
| 209688_s_at | BC005078 | CCDC93                    | 54520 | 22.4  | 25.1  | 16.2  | 19.3  | 16.6  |
| 209689_at   | BC005078 | CCDC93                    | 54520 | 16.7  | 6.1   | 7.8   | 4.5   | 8.2   |
| 209690_s_at | BF591163 | DOK4                      | 55715 | 2.0   | 3.0   | 4.3   | 2.1   | 0.9   |
| 209691_s_at | BC003541 | DOK4                      | 55715 | 5.8   | 12.3  | 1.0   | 6.0   | 1.2   |
| 209692_at   | U71207   | EYA2                      | 2139  | 6.3   | 13.6  | 7.7   | 9.0   | 1.2   |
| 209693_at   | AF116574 | ASTN2                     | 23245 | 31.2  | 28.6  | 48.2  | 26.7  | 23.3  |
| 209694_at   | M97655   | PTS                       | 5805  | 315.4 | 240.6 | 334.6 | 324.1 | 249.0 |
| 209695_at   | BC003105 | PTP4A3                    | 11156 | 37.3  | 26.0  | 21.4  | 24.3  | 17.3  |
| 209696_at   | D26054   | FBP1                      | 2203  | 11.9  | 8.8   | 5.5   | 8.0   | 8.9   |
| 209697_at   | BC004864 | AK125860 //,-             |       | 1.1   | 0.5   | 3.9   | 5.8   | 6.6   |
| 209698_at   | AF216493 | CCHCR1                    | 54535 | 58.1  | 43.9  | 57.1  | 38.1  | 44.9  |
| 209699_x_at | U05598   | AKR1C2 /// L 1646 /// 101 |       | 8.0   | 2.9   | 3.0   | 1.7   | 4.6   |
| 209700_x_at | AB042555 | PDE4DIP                   | 9659  | 2.2   | 0.1   | 0.9   | 3.2   | 0.1   |
| 209701_at   | D16217   | ERAP1                     | 51752 | 22.5  | 9.8   | 14.6  | 12.6  | 7.3   |
| 209702_at   | U79260   | FTO                       | 79068 | 171.6 | 176.9 | 159.5 | 199.7 | 134.7 |
| 209703_x_at | BC004492 | METTL7A                   | 25840 | 32.6  | 42.8  | 37.3  | 57.5  | 24.3  |
| 209704_at   | AL523380 | MTF2                      | 22823 | 21.1  | 13.6  | 20.1  | 15.3  | 15.6  |
| 209705_at   | BG033764 | MTF2                      | 22823 | 27.7  | 31.4  | 42.7  | 28.1  | 31.1  |
| 209706_at   | AF247704 | NKX3-1                    | 4824  | 152.7 | 203.6 | 279.2 | 226.6 | 376.4 |
| 209707_at   | AF022913 | PIGK                      | 10026 | 91.0  | 68.1  | 90.2  | 66.5  | 64.8  |
| 209708_at   | AY007239 | MOXD1                     | 26002 | 6.3   | 6.9   | 5.8   | 2.4   | 4.5   |
| 209709_s_at | U29343   | HMMR                      | 3161  | 210.5 | 163.3 | 271.4 | 164.2 | 185.4 |
| 209710_at   | AL563460 | GATA2                     | 2624  | 253.3 | 184.1 | 238.5 | 219.9 | 180.5 |
| 209711_at   | N80922   | SLC35D1                   | 23169 | 7.9   | 3.1   | 2.2   | 1.0   | 0.3   |
| 209712_at   | AI769637 | SLC35D1                   | 23169 | 1.6   | 2.4   | 1.2   | 0.9   | 1.1   |
| 209713_s_at | AB044343 | SLC35D1                   | 23169 | 2.9   | 0.9   | 1.8   | 2.8   | 0.3   |
| 209714_s_at | AF213033 | CDKN3                     | 1033  | 270.4 | 218.0 | 296.1 | 221.8 | 218.8 |
| 209715_at   | L07515   | CBX5                      | 23468 | 72.3  | 57.3  | 70.5  | 75.3  | 58.9  |
| 209716_at   | M37435   | CSF1                      | 1435  | 15.8  | 10.7  | 14.0  | 8.9   | 3.0   |
| 209717_at   | AF008915 | EVI5                      | 7813  | 36.8  | 24.3  | 29.2  | 13.3  | 29.6  |
| 209718_at   | BC001298 | NCAPH2                    | 29781 | 16.4  | 16.4  | 7.3   | 11.0  | 17.3  |
| 209719_x_at | U19556   | SERPINB3                  | 6317  | 5.7   | 11.3  | 15.0  | 13.9  | 1.0   |
| 209720_s_at | BC005224 | SERPINB3                  | 6317  | 0.1   | 0.1   | 0.5   | 1.9   | 0.1   |
| 209721_s_at | BC002857 | IFFO1                     | 25900 | 2.2   | 1.4   | 9.0   | 2.4   | 3.2   |
| 209722_s_at | L40378   | SERPINB9                  | 5272  | 0.8   | 0.3   | 3.3   | 0.5   | 0.6   |
| 209723_at   | BC002538 | SERPINB9                  | 5272  | 1.0   | 4.1   | 5.0   | 3.0   | 0.9   |
| 209724_s_at | AL534416 | ZBTB14                    | 7541  | 32.7  | 21.1  | 27.6  | 24.2  | 23.9  |
| 209725_at   | AF072718 | UTP20                     | 27340 | 62.4  | 55.2  | 62.7  | 45.3  | 54.0  |
| 209726_at   | AB018195 | CA11                      | 770   | 18.2  | 21.3  | 24.2  | 20.9  | 16.7  |
| 209727_at   | M76477   | GM2A                      | 2760  | 73.4  | 74.7  | 57.2  | 75.0  | 51.4  |
| 209728_at   | BC005312 | HLA-DRB4                  | 3126  | 1.0   | 0.4   | 1.8   | 1.0   | 1.0   |
| 209729_at   | BC001782 | GAS2L1                    | 10634 | 50.3  | 68.6  | 75.9  | 70.4  | 69.4  |
| 209730_at   | U38276   | SEMA3F                    | 6405  | 13.4  | 14.9  | 2.5   | 8.1   | 5.8   |
| 209731_at   | U79718   | NTHL1                     | 4913  | 84.9  | 80.6  | 97.9  | 79.4  | 88.2  |
| 209732_at   | BC005254 | CLEC2B                    | 9976  | 4.7   | 1.1   | 1.1   | 1.1   | 2.4   |
| 209733_at   | AL034399 | MID2                      | 11043 | 21.0  | 22.4  | 14.5  | 13.3  | 11.1  |

|             |          |                          |           |       |       |       |       |       |
|-------------|----------|--------------------------|-----------|-------|-------|-------|-------|-------|
| 209734_at   | BC001604 | NCKAP1L                  | 3071      | 14.0  | 16.3  | 16.9  | 8.2   | 8.4   |
| 209735_at   | AF098951 | ABCG2                    | 9429      | 15.3  | 12.7  | 12.0  | 8.0   | 9.6   |
| 209736_at   | AF116571 | SOX13                    | 9580      | 19.9  | 19.7  | 16.4  | 17.1  | 12.5  |
| 209737_at   | AB014605 | MAGI2                    | 9863      | 15.2  | 16.8  | 15.5  | 13.4  | 12.3  |
| 209738_x_at | M31125   | PSG6                     | 5675      | 12.0  | 7.3   | 17.8  | 5.0   | 11.2  |
| 209739_s_at | AI814551 | PNPLA4                   | 8228      | 232.1 | 250.0 | 262.2 | 315.4 | 198.0 |
| 209740_s_at | U03886   | PNPLA4                   | 8228      | 47.1  | 35.5  | 34.3  | 40.0  | 31.3  |
| 209741_x_at | AF119814 | SCAPER                   | 49855     | 23.9  | 19.5  | 20.7  | 23.6  | 20.9  |
| 209742_s_at | AF020768 | MYL2                     | 4633      | 2.5   | 3.0   | 2.3   | 0.8   | 5.4   |
| 209743_s_at | AI989677 | ITCH                     | 83737     | 35.9  | 30.4  | 25.1  | 22.1  | 31.4  |
| 209744_x_at | AB056663 | ITCH                     | 83737     | 66.8  | 52.3  | 53.4  | 45.3  | 51.3  |
| 209745_at   | AK024291 | COQ7                     | 10229     | 24.6  | 20.0  | 27.3  | 24.2  | 17.4  |
| 209746_s_at | AF032900 | COQ7                     | 10229     | 82.4  | 79.6  | 98.0  | 77.4  | 73.6  |
| 209747_at   | J03241   | TGFB3                    | 7043      | 18.3  | 16.2  | 16.8  | 20.0  | 12.6  |
| 209748_at   | AB029006 | SPAST                    | 6683      | 30.7  | 20.1  | 36.0  | 20.4  | 23.0  |
| 209749_s_at | AI623989 | ACE                      | 1636      | 1.2   | 0.4   | 1.5   | 2.3   | 1.3   |
| 209750_at   | N32859   | NR1D2                    | 9975      | 19.1  | 20.4  | 18.2  | 25.0  | 15.0  |
| 209751_s_at | AF291676 | TRAPPC2 /// 6399 /// 105 |           | 88.7  | 83.4  | 86.2  | 83.4  | 64.4  |
| 209752_at   | AF172331 | REG1A                    | 5967      | 1.2   | 0.8   | 2.1   | 2.0   | 3.0   |
| 209753_s_at | BG391171 | TMPO                     | 7112      | 151.4 | 112.8 | 207.8 | 116.4 | 154.3 |
| 209754_s_at | AF113682 | TMPO                     | 7112      | 189.2 | 136.6 | 210.3 | 143.0 | 178.3 |
| 209755_at   | AF288395 | NMNAT2                   | 23057     | 2.7   | 10.8  | 2.7   | 12.3  | 5.5   |
| 209756_s_at | AI871354 | MYCN                     | 4613      | 2.3   | 4.1   | 3.2   | 3.9   | 2.5   |
| 209757_s_at | BC002712 | MYCN                     | 4613      | 1.0   | 9.8   | 1.0   | 0.6   | 2.3   |
| 209758_s_at | U37283   | MFAP5                    | 8076      | 14.6  | 6.6   | 9.4   | 5.8   | 7.5   |
| 209759_s_at | BC002746 | ECI1                     | 1632      | 390.3 | 457.3 | 490.8 | 471.7 | 431.8 |
| 209760_at   | AL136932 | KIAA0922                 | 23240     | 48.8  | 36.2  | 46.4  | 39.6  | 25.2  |
| 209761_s_at | AA969194 | SP110                    | 3431      | 45.8  | 38.6  | 47.8  | 45.6  | 39.8  |
| 209762_x_at | AF280094 | SP110                    | 3431      | 47.7  | 38.7  | 41.3  | 30.4  | 37.8  |
| 209763_at   | AL049176 | CHRD1                    | 91851     | 7.6   | 7.7   | 8.6   | 7.3   | 0.4   |
| 209764_at   | AL022312 | MGAT3                    | 4248      | 4.8   | 10.3  | 3.6   | 7.8   | 4.3   |
| 209765_at   | Y13786   | ADAM19                   | 8728      | 19.9  | 14.9  | 19.7  | 15.4  | 9.5   |
| 209766_at   | AF118073 | PRDX3                    | 10935     | 16.8  | 8.3   | 17.1  | 15.6  | 9.7   |
| 209767_s_at | AA702163 | GP1BB /// SE2812 /// 541 |           | 22.8  | 25.1  | 20.9  | 30.5  | 20.8  |
| 209768_s_at | AI860917 | SEPT5-GP1B1 100526833    |           | 2.0   | 4.9   | 1.3   | 8.1   | 0.7   |
| 209769_s_at | L20860   | SEPT5-GP1B1 100526833    |           | 1.9   | 1.4   | 1.4   | 1.3   | 1.1   |
| 209770_at   | U90552   | BTN3A1                   | 11119     | 31.8  | 30.0  | 26.6  | 21.2  | 21.6  |
| 209771_x_at | AA761181 | CD24                     | 100133941 | 19.6  | 11.5  | 18.2  | 24.1  | 9.4   |
| 209772_s_at | X69397   | CD24                     | 100133941 | 1.4   | 0.7   | 1.6   | 1.2   | 1.7   |
| 209773_s_at | BC001886 | RRM2                     | 6241      | 724.6 | 537.4 | 837.0 | 560.1 | 706.2 |
| 209774_x_at | M57731   | CXCL2                    | 2920      | 1.0   | 0.8   | 0.8   | 0.4   | 1.9   |
| 209775_x_at | AI917627 | SLC19A1                  | 6573      | 3.0   | 7.1   | 7.0   | 9.0   | 8.4   |
| 209776_s_at | U15939   | LOC1019287 6573 /// 101  |           | 41.8  | 34.2  | 55.1  | 34.1  | 38.2  |
| 209777_s_at | AF004354 | LOC1019287 6573 /// 101  |           | 66.2  | 39.3  | 38.3  | 48.1  | 47.5  |
| 209778_at   | AF007217 | TRIP11                   | 9321      | 21.6  | 26.7  | 27.5  | 37.3  | 21.9  |
| 209779_at   | AF255792 | LLPH                     | 84298     | 7.8   | 4.7   | 4.5   | 1.2   | 2.6   |
| 209780_at   | AL136883 | PHTF2                    | 57157     | 139.2 | 110.1 | 157.0 | 120.8 | 124.4 |
| 209781_s_at | AF069681 | KHDRBS3                  | 10656     | 35.4  | 39.6  | 39.4  | 21.8  | 35.9  |
| 209782_s_at | U79283   | DBP                      | 1628      | 40.4  | 27.3  | 45.3  | 28.0  | 36.6  |
| 209783_at   | D28468   | DBP                      | 1628      | 12.0  | 1.3   | 4.3   | 6.2   | 7.7   |
| 209784_s_at | AF029778 | JAG2                     | 3714      | 96.4  | 101.4 | 102.9 | 112.7 | 92.7  |
| 209785_s_at | AF065214 | PLA2G4C                  | 8605      | 4.8   | 4.3   | 8.9   | 0.9   | 3.2   |
| 209786_at   | BC001282 | HMGNA4                   | 10473     | 152.9 | 141.9 | 143.5 | 135.1 | 126.1 |

|             |           |                           |       |        |        |        |        |        |
|-------------|-----------|---------------------------|-------|--------|--------|--------|--------|--------|
| 209787_s_at | BC001282  | HMGNA4                    | 10473 | 116.5  | 110.0  | 118.5  | 97.4   | 86.2   |
| 209788_s_at | AF183569  | ERAP1                     | 51752 | 18.5   | 15.5   | 18.2   | 20.4   | 11.4   |
| 209789_at   | BF939649  | CORO2B                    | 10391 | 1.7    | 3.3    | 1.8    | 3.5    | 0.6    |
| 209790_s_at | BC000305  | CASP6                     | 839   | 41.0   | 35.5   | 37.8   | 41.0   | 29.3   |
| 209791_at   | AL049569  | PADI2                     | 11240 | 25.4   | 13.4   | 20.8   | 22.4   | 13.9   |
| 209792_s_at | BC002710  | KLK10                     | 5655  | 1.5    | 1.3    | 1.4    | 1.0    | 1.1    |
| 209793_at   | AL567302  | GRIA1                     | 2890  | 6.8    | 0.6    | 4.2    | 0.9    | 0.8    |
| 209794_at   | AB007871  | SRGAP3                    | 9901  | 16.8   | 15.9   | 20.5   | 12.8   | 16.1   |
| 209795_at   | L07555    | CD69                      | 969   | 0.4    | 0.7    | 3.7    | 2.1    | 0.2    |
| 209796_s_at | BC001027  | CNPY2                     | 10330 | 272.3  | 224.5  | 295.1  | 251.4  | 212.8  |
| 209797_at   | BC001027  | CNPY2                     | 10330 | 125.2  | 104.8  | 137.7  | 107.3  | 116.6  |
| 209798_at   | D83243    | NPAT                      | 4863  | 40.6   | 29.7   | 56.1   | 19.6   | 34.0   |
| 209799_at   | AF100763  | PRKAA1                    | 5562  | 109.1  | 96.6   | 102.1  | 102.7  | 80.2   |
| 209800_at   | AF061812  | KRT16                     | 3868  | 0.5    | 1.6    | 0.6    | 8.4    | 0.7    |
| 209802_at   | BC005034  | PHLDA2                    | 7262  | 14.1   | 10.7   | 1.1    | 16.2   | 8.5    |
| 209803_s_at | AF001294  | PHLDA2                    | 7262  | 451.2  | 298.5  | 487.8  | 368.6  | 329.2  |
| 209804_at   | D42045    | DCLRE1A                   | 9937  | 56.3   | 34.7   | 53.5   | 37.5   | 47.9   |
| 209805_at   | U14658    | PMS2 /// PM5395 /// 441   |       | 51.4   | 40.4   | 44.7   | 42.8   | 42.8   |
| 209806_at   | BC000893  | HIST1H2BK                 | 85236 | 1987.0 | 1579.6 | 1967.7 | 1588.3 | 1592.8 |
| 209807_s_at | U18759    | NFIX                      | 4784  | 34.3   | 25.7   | 33.2   | 28.0   | 22.0   |
| 209808_x_at | AW193656  | ING1                      | 3621  | 14.8   | 11.3   | 26.1   | 18.9   | 18.4   |
| 209810_at   | J02761    | SFTPB                     | 6439  | 12.0   | 9.7    | 6.8    | 2.2    | 5.2    |
| 209811_at   | BC002427  | CASP2                     | 835   | 43.2   | 34.8   | 40.7   | 34.3   | 30.9   |
| 209812_x_at | U13021    | CASP2                     | 835   | 9.0    | 7.1    | 10.3   | 9.5    | 6.6    |
| 209813_x_at | M16768    | TARP /// TRC6967 /// 698  |       | 12.4   | 9.3    | 54.2   | 12.0   | 42.2   |
| 209814_at   | BC004421  | ZNF330                    | 27309 | 107.5  | 105.7  | 119.9  | 89.1   | 106.6  |
| 209815_at   | BG054916  | PTCH1                     | 5727  | 28.5   | 30.5   | 28.1   | 42.4   | 28.2   |
| 209816_at   | AL044175  | PTCH1                     | 5727  | 7.7    | 9.3    | 8.7    | 4.3    | 3.3    |
| 209817_at   | M29550    | PPP3CB                    | 5532  | 156.8  | 140.9  | 165.4  | 128.9  | 115.6  |
| 209818_s_at | AF241831  | HABP4                     | 22927 | 5.7    | 5.0    | 9.4    | 15.7   | 5.8    |
| 209819_at   | AF241831  | HABP4                     | 22927 | 0.7    | 5.7    | 6.5    | 4.1    | 2.8    |
| 209820_s_at | BC002361  | TBL3                      | 10607 | 75.4   | 78.2   | 80.0   | 80.4   | 70.6   |
| 209821_at   | AB024518  | IL33                      | 90865 | 0.2    | 2.4    | 1.4    | 0.1    | 1.6    |
| 209822_s_at | L22431    | VLDLR                     | 7436  | 32.3   | 29.9   | 20.5   | 23.5   | 22.7   |
| 209823_x_at | M17955    | HLA-DQB1 // 3119 /// 101  |       | 3.2    | 10.9   | 3.8    | 2.3    | 1.8    |
| 209824_s_at | AB000812  | ARNTL                     | 406   | 30.0   | 30.4   | 35.9   | 28.4   | 12.2   |
| 209825_s_at | BC002906  | MIR3658 /// 7371 /// 100  |       | 253.4  | 202.7  | 287.2  | 222.4  | 236.2  |
| 209826_at   | AF020544  | EGFL8 /// PP 9374 /// 808 |       | 15.1   | 10.1   | 1.1    | 9.1    | 12.1   |
| 209827_s_at | NM_004513 | IL16                      | 3603  | 23.8   | 14.7   | 11.1   | 14.9   | 10.2   |
| 209828_s_at | M90391    | IL16                      | 3603  | 1.7    | 1.7    | 1.9    | 3.6    | 1.3    |
| 209829_at   | AB002384  | FAM65B                    | 9750  | 44.9   | 47.6   | 65.6   | 48.4   | 52.2   |
| 209830_s_at | AF035771  | SLC9A3R2                  | 9351  | 8.3    | 3.9    | 12.6   | 6.7    | 7.6    |
| 209831_x_at | AB004574  | DNASE2                    | 1777  | 198.1  | 164.3  | 154.4  | 174.1  | 116.2  |
| 209832_s_at | AF321125  | CDT1                      | 81620 | 129.1  | 69.3   | 112.4  | 73.9   | 82.4   |
| 209833_at   | U79115    | CRADD                     | 8738  | 83.0   | 62.5   | 87.3   | 72.5   | 62.3   |
| 209834_at   | AB017915  | CHST3                     | 9469  | 22.2   | 17.3   | 1.6    | 15.1   | 2.1    |
| 209835_x_at | BC004372  | CD44                      | 960   | 1.6    | 9.2    | 6.0    | 8.3    | 4.5    |
| 209836_x_at | AF060511  | BOLA2 /// BC552900 /// 6  |       | 285.1  | 249.7  | 284.8  | 286.3  | 224.7  |
| 209837_at   | AF155158  | AP4M1                     | 9179  | 49.5   | 30.7   | 49.9   | 54.2   | 34.9   |
| 209838_at   | AA496247  | COPS2                     | 9318  | 39.7   | 19.1   | 28.3   | 18.5   | 21.3   |
| 209839_at   | AL136712  | DNM3                      | 26052 | 5.6    | 2.5    | 7.0    | 4.1    | 4.9    |
| 209840_s_at | AI221950  | LRRN3                     | 54674 | 1.7    | 0.8    | 7.8    | 5.2    | 0.3    |
| 209841_s_at | AL442092  | LRRN3                     | 54674 | 10.5   | 2.2    | 9.5    | 7.3    | 5.2    |



|             |          |                           |        |       |       |       |       |       |
|-------------|----------|---------------------------|--------|-------|-------|-------|-------|-------|
| 209842_at   | AI367319 | SOX10                     | 6663   | 7.4   | 4.4   | 3.7   | 1.7   | 2.0   |
| 209843_s_at | BC002824 | SOX10                     | 6663   | 3.8   | 1.9   | 1.7   | 1.6   | 1.0   |
| 209844_at   | U57052   | HOXB13                    | 10481  | 519.1 | 636.2 | 560.2 | 656.1 | 476.7 |
| 209845_at   | AF117233 | MKRN1                     | 23608  | 67.9  | 50.1  | 57.9  | 68.5  | 45.4  |
| 209846_s_at | BC002832 | BTN3A2                    | 11118  | 23.3  | 14.3  | 22.8  | 18.1  | 18.7  |
| 209847_at   | U07969   | CDH17                     | 1015   | 5.3   | 1.9   | 2.1   | 4.1   | 4.3   |
| 209848_s_at | U01874   | PMEL                      | 6490   | 11.3  | 23.3  | 19.5  | 17.7  | 11.3  |
| 209849_s_at | AF029669 | RAD51C                    | 5889   | 175.3 | 144.9 | 198.4 | 146.3 | 176.9 |
| 209850_s_at | BC005406 | CDC42EP2                  | 10435  | 26.8  | 30.6  | 40.0  | 35.4  | 24.7  |
| 209851_at   | AL136745 | ZC3H13                    | 23091  | 14.0  | 6.5   | 21.4  | 10.1  | 6.8   |
| 209852_x_at | BC001423 | PSME3                     | 10197  | 569.1 | 549.0 | 627.1 | 546.7 | 484.0 |
| 209853_s_at | BC002684 | PSME3                     | 10197  | 207.6 | 223.2 | 232.6 | 191.9 | 212.8 |
| 209854_s_at | AA595465 | KLK2                      | 3817   | 32.7  | 39.1  | 122.0 | 48.1  | 173.6 |
| 209855_s_at | AF188747 | KLK2                      | 3817   | 2.2   | 2.0   | 2.2   | 1.7   | 1.4   |
| 209856_x_at | U31089   | ABI2                      | 10152  | 30.1  | 19.3  | 22.5  | 18.5  | 6.1   |
| 209857_s_at | AF245447 | SPHK2                     | 56848  | 23.7  | 17.4  | 19.1  | 15.1  | 18.9  |
| 209858_x_at | BC002877 | MPPE1                     | 65258  | 50.9  | 44.9  | 51.9  | 40.3  | 51.0  |
| 209859_at   | AF220036 | TRIM9                     | 114088 | 0.3   | 6.6   | 5.0   | 3.5   | 4.1   |
| 209860_s_at | J04543   | ANXA7                     | 310    | 530.9 | 505.9 | 602.6 | 528.3 | 471.6 |
| 209861_s_at | U13261   | METAP2                    | 10988  | 244.2 | 157.0 | 240.2 | 199.7 | 170.3 |
| 209862_s_at | BC001233 | CEP57                     | 9702   | 36.3  | 34.8  | 44.4  | 39.2  | 38.5  |
| 209863_s_at | AF091627 | TP63                      | 8626   | 7.0   | 8.7   | 10.1  | 6.4   | 9.0   |
| 209864_at   | AB045118 | FRAT2                     | 23401  | 159.1 | 121.7 | 132.8 | 120.4 | 111.7 |
| 209865_at   | BC005136 | SLC35A3                   | 23443  | 48.5  | 30.2  | 61.3  | 40.1  | 51.2  |
| 209866_s_at | R50822   | LPHN3                     | 23284  | 1.1   | 1.3   | 1.1   | 0.2   | 2.2   |
| 209867_s_at | AF307080 | LPHN3                     | 23284  | 0.9   | 0.9   | 0.9   | 1.2   | 0.9   |
| 209868_s_at | D28482   | RBMS1                     | 5937   | 0.7   | 8.0   | 3.5   | 8.1   | 0.4   |
| 209869_at   | AF284095 | ADRA2A                    | 150    | 108.0 | 167.0 | 102.4 | 171.4 | 68.2  |
| 209870_s_at | AW571582 | APBA2                     | 321    | 66.9  | 65.7  | 61.0  | 67.7  | 52.7  |
| 209871_s_at | AB014719 | APBA2                     | 321    | 7.4   | 16.1  | 11.7  | 10.0  | 16.5  |
| 209872_s_at | BF001503 | PKP3                      | 11187  | 69.9  | 69.1  | 93.1  | 89.6  | 80.1  |
| 209873_s_at | AF053719 | PKP3                      | 11187  | 278.6 | 225.0 | 277.6 | 241.7 | 230.2 |
| 209874_x_at | AF216962 | CNNM2                     | 54805  | 40.8  | 38.1  | 33.3  | 40.7  | 30.9  |
| 209875_s_at | M83248   | SPP1                      | 6696   | 1.2   | 3.1   | 4.0   | 4.1   | 0.8   |
| 209876_at   | AF124491 | GIT2                      | 9815   | 36.3  | 16.1  | 32.6  | 28.4  | 26.2  |
| 209877_at   | AF010126 | SNCG                      | 6623   | 7.7   | 2.0   | 1.7   | 0.5   | 1.1   |
| 209878_s_at | M62399   | RELA                      | 5970   | 86.5  | 82.2  | 81.5  | 87.1  | 63.9  |
| 209879_at   | AI741056 | SELPLG                    | 6404   | 3.1   | 1.3   | 2.8   | 8.7   | 3.7   |
| 209880_s_at | U02297   | SELPLG                    | 6404   | 3.8   | 1.4   | 2.2   | 1.9   | 2.0   |
| 209881_s_at | AF036905 | LAT                       | 27040  | 2.6   | 2.7   | 4.7   | 5.8   | 5.2   |
| 209882_at   | AF084462 | RIT1                      | 6016   | 38.8  | 30.4  | 40.8  | 29.9  | 28.6  |
| 209883_at   | AF288389 | COLGALT2                  | 23127  | 10.3  | 6.4   | 8.3   | 7.3   | 5.0   |
| 209884_s_at | AF047033 | SLC4A7                    | 9497   | 52.8  | 30.6  | 56.0  | 36.4  | 38.7  |
| 209885_at   | BC001338 | RHOD                      | 29984  | 138.4 | 112.7 | 127.4 | 107.6 | 88.3  |
| 209886_s_at | AI628464 | SMAD6                     | 4091   | 12.9  | 10.8  | 14.3  | 17.3  | 12.2  |
| 209887_at   | AF035528 | SMAD6                     | 4091   | 9.7   | 0.4   | 3.0   | 4.1   | 3.8   |
| 209888_s_at | M20643   | MYL1                      | 4632   | 2.2   | 1.7   | 10.7  | 2.1   | 1.1   |
| 209889_at   | AF274863 | SEC31B                    | 25956  | 2.5   | 1.9   | 3.0   | 1.4   | 2.1   |
| 209890_at   | AF065389 | TSPAN5                    | 10098  | 16.7  | 6.5   | 9.4   | 7.9   | 7.9   |
| 209891_at   | AF225416 | SPC25                     | 57405  | 87.9  | 66.5  | 121.9 | 73.7  | 82.8  |
| 209892_at   | AF305083 | FUT4                      | 2526   | 3.6   | 10.6  | 5.2   | 4.7   | 4.9   |
| 209893_s_at | M58596   | FUT4                      | 2526   | 5.1   | 1.6   | 3.3   | 2.5   | 5.1   |
| 209894_at   | U50748   | LEPR /// LEPI3953 /// 547 |        | 1.8   | 2.4   | 3.3   | 0.2   | 0.9   |

|             |          |                           |           |        |        |        |        |        |
|-------------|----------|---------------------------|-----------|--------|--------|--------|--------|--------|
| 209895_at   | AF119855 | PTPN11                    | 5781      | 82.2   | 66.3   | 89.6   | 68.9   | 65.2   |
| 209896_s_at | AF119855 | PTPN11                    | 5781      | 135.3  | 132.3  | 143.0  | 113.1  | 121.5  |
| 209897_s_at | AF055585 | SLIT2                     | 9353      | 8.1    | 10.1   | 1.8    | 3.6    | 5.2    |
| 209898_x_at | U61167   | ITSN2                     | 50618     | 26.4   | 30.1   | 37.6   | 33.6   | 38.5   |
| 209899_s_at | AF217197 | PUF60                     | 22827     | 660.0  | 517.9  | 679.1  | 583.3  | 639.1  |
| 209900_s_at | AL162079 | SLC16A1                   | 6566      | 39.8   | 26.1   | 41.6   | 37.0   | 39.5   |
| 209901_x_at | U19713   | AIF1                      | 199       | 2.6    | 1.1    | 1.5    | 1.1    | 0.8    |
| 209902_at   | U49844   | ATR                       | 545       | 23.6   | 23.7   | 26.1   | 22.9   | 25.5   |
| 209903_s_at | U49844   | ATR                       | 545       | 74.3   | 59.9   | 81.0   | 58.3   | 64.5   |
| 209904_at   | AF020769 | TNNC1                     | 7134      | 2.3    | 2.0    | 2.9    | 1.9    | 3.9    |
| 209905_at   | AI246769 | HOXA10-HO)3205 /// 442    |           | 0.5    | 0.7    | 0.5    | 0.6    | 0.6    |
| 209906_at   | U62027   | C3AR1                     | 719       | 6.6    | 1.3    | 4.3    | 0.9    | 5.5    |
| 209907_s_at | AF182198 | ITSN2                     | 50618     | 18.4   | 23.5   | 28.5   | 25.5   | 26.9   |
| 209908_s_at | BF061658 | TGFB2                     | 7042      | 1.5    | 0.4    | 3.0    | 3.1    | 0.1    |
| 209909_s_at | M19154   | TGFB2                     | 7042      | 0.3    | 2.1    | 5.3    | 0.8    | 0.1    |
| 209910_at   | M31659   | SLC25A16                  | 8034      | 33.2   | 17.6   | 24.8   | 25.4   | 22.4   |
| 209911_x_at | BC002842 | HIST1H2BD                 | 3017      | 295.0  | 269.5  | 281.8  | 292.4  | 222.0  |
| 209912_s_at | AI373854 | AP5Z1 /// MI9907 /// 100  |           | 7.3    | 13.5   | 4.8    | 10.3   | 10.8   |
| 209913_x_at | AB007875 | AP5Z1 /// MI9907 /// 100  |           | 18.9   | 13.6   | 13.2   | 2.9    | 15.1   |
| 209914_s_at | AW149405 | NRXN1                     | 9378      | 0.6    | 1.2    | 6.9    | 3.6    | 4.8    |
| 209915_s_at | AB035356 | NRXN1                     | 9378      | 0.7    | 0.9    | 5.8    | 1.4    | 1.1    |
| 209916_at   | BC002477 | DHTKD1                    | 55526     | 20.9   | 19.0   | 19.9   | 27.6   | 14.6   |
| 209917_s_at | BC002709 | TP53TG1                   | 11257     | 105.0  | 99.2   | 137.7  | 122.8  | 105.2  |
| 209918_at   | J05235   | GGTLC2                    | 91227     | 3.4    | 9.0    | 3.5    | 3.0    | 7.3    |
| 209919_x_at | L20490   | GGT1 /// GG 2678 /// 912  |           | 43.4   | 40.6   | 51.4   | 49.8   | 35.8   |
| 209920_at   | U20165   | BMPR2                     | 659       | 33.4   | 27.4   | 38.2   | 32.0   | 23.4   |
| 209921_at   | AB040875 | SLC7A11                   | 23657     | 136.8  | 162.0  | 142.3  | 138.6  | 105.6  |
| 209922_at   | AF035620 | BRAP                      | 8315      | 26.9   | 18.2   | 21.0   | 27.0   | 16.9   |
| 209923_s_at | AF035620 | BRAP                      | 8315      | 20.0   | 35.5   | 29.4   | 29.4   | 27.6   |
| 209924_at   | AB000221 | CCL18                     | 6362      | 5.6    | 1.9    | 8.7    | 4.1    | 5.0    |
| 209925_at   | U53823   | OCLN                      | 100506658 | 112.8  | 85.5   | 88.1   | 108.5  | 73.4   |
| 209926_at   | BC004449 | MEF2BNB                   | 729991    | 36.6   | 27.3   | 44.6   | 33.7   | 24.7   |
| 209927_s_at | AF261137 | CHTOP                     | 26097     | 47.4   | 37.4   | 51.8   | 52.8   | 61.3   |
| 209928_s_at | AF060154 | MSC                       | 9242      | 6.0    | 5.3    | 0.5    | 6.7    | 3.0    |
| 209929_s_at | AF091453 | IKBKG                     | 8517      | 49.6   | 50.7   | 61.0   | 55.4   | 47.2   |
| 209930_s_at | L13974   | NFE2                      | 4778      | 0.4    | 0.5    | 0.6    | 0.8    | 0.3    |
| 209931_s_at | AF322070 | FKBP1B /// M 2281 /// 388 |           | 15.6   | 11.3   | 16.8   | 9.7    | 2.6    |
| 209932_s_at | U90223   | DUT                       | 1854      | 493.5  | 479.2  | 606.3  | 449.7  | 474.0  |
| 209933_s_at | AF020314 | CD300A                    | 11314     | 1.2    | 1.0    | 1.2    | 5.5    | 0.8    |
| 209934_s_at | AF225981 | ATP2C1                    | 27032     | 31.5   | 29.0   | 30.0   | 33.0   | 28.0   |
| 209935_at   | AF225981 | ATP2C1                    | 27032     | 22.9   | 16.4   | 13.3   | 20.6   | 14.2   |
| 209936_at   | AF107493 | RBM5                      | 10181     | 4.2    | 7.1    | 4.1    | 10.0   | 5.4    |
| 209937_at   | BC001386 | TM4SF4                    | 7104      | 2.7    | 1.9    | 1.7    | 2.9    | 1.4    |
| 209938_at   | AF064094 | TADA2A                    | 6871      | 34.8   | 21.5   | 36.0   | 25.7   | 21.3   |
| 209939_x_at | AF005775 | CFLAR                     | 8837      | 59.1   | 53.0   | 56.7   | 63.4   | 49.1   |
| 209940_at   | AF083068 | PARP3                     | 10039     | 20.7   | 34.3   | 26.7   | 28.0   | 10.3   |
| 209941_at   | U50062   | RIPK1                     | 8737      | 20.0   | 13.0   | 12.6   | 16.0   | 17.0   |
| 209942_x_at | BC000340 | MAGEA3 /// 4102 /// 410   |           | 1247.7 | 1091.9 | 1312.3 | 1139.6 | 1071.1 |
| 209943_at   | AF176699 | FBXL4                     | 26235     | 30.2   | 29.6   | 27.4   | 34.5   | 24.2   |
| 209944_at   | BC000330 | PTGR2 /// ZN 57862 /// 14 |           | 323.5  | 314.1  | 343.2  | 317.9  | 264.8  |
| 209945_s_at | BC000251 | GSK3B                     | 2932      | 118.8  | 114.9  | 111.0  | 121.4  | 122.6  |
| 209946_at   | U58111   | VEGFC                     | 7424      | 0.9    | 3.4    | 4.8    | 4.3    | 3.1    |
| 209947_at   | BC003170 | UBAP2L                    | 9898      | 114.5  | 78.9   | 113.7  | 103.6  | 90.4   |

|             |          |                     |              |       |       |       |       |       |
|-------------|----------|---------------------|--------------|-------|-------|-------|-------|-------|
| 209948_at   | U61536   | KCNMB1              | 3779         | 14.0  | 7.4   | 17.8  | 12.2  | 11.5  |
| 209949_at   | BC001606 | NCF2                | 4688         | 0.5   | 0.3   | 2.3   | 1.0   | 0.5   |
| 209950_s_at | BC004300 | VILL                | 50853        | 4.9   | 1.5   | 2.0   | 1.9   | 0.9   |
| 209951_s_at | AW007458 | MAP2K7              | 5609         | 12.3  | 10.4  | 17.8  | 12.4  | 7.5   |
| 209952_s_at | AF006689 | MAP2K7              | 5609         | 7.7   | 7.6   | 10.6  | 13.1  | 11.2  |
| 209953_s_at | U63131   | CDC37               | 11140        | 175.5 | 173.9 | 221.4 | 201.9 | 198.9 |
| 209954_x_at | AF343880 | SS18                | 6760         | 37.9  | 39.0  | 36.6  | 33.4  | 17.3  |
| 209955_s_at | U76833   | FAP                 | 2191         | 1.6   | 1.0   | 2.9   | 1.3   | 1.3   |
| 209956_s_at | U23460   | CAMK2B              | 816          | 18.1  | 23.3  | 21.0  | 23.1  | 19.3  |
| 209957_s_at | M30262   | NPPA                | 4878         | 16.9  | 13.6  | 25.4  | 19.2  | 9.6   |
| 209958_s_at | AF095771 | BBS9                | 27241        | 20.6  | 15.7  | 19.4  | 30.4  | 11.2  |
| 209959_at   | U12767   | NR4A3               | 8013         | 2.1   | 2.3   | 1.4   | 1.7   | 1.6   |
| 209960_at   | X16323   | HGF                 | 3082         | 0.2   | 0.2   | 0.3   | 2.2   | 0.2   |
| 209961_s_at | M60718   | HGF                 | 3082         | 13.8  | 11.4  | 8.8   | 12.7  | 18.2  |
| 209962_at   | M34986   | EPOR                | 2057         | 22.6  | 24.1  | 34.6  | 34.2  | 26.6  |
| 209963_s_at | M34986   | EPOR                | 2057         | 21.2  | 18.9  | 22.8  | 22.3  | 17.2  |
| 209964_s_at | AF032105 | ATXN7               | 6314         | 24.2  | 15.8  | 21.0  | 14.5  | 14.0  |
| 209965_s_at | AB016223 | RAD51D              | 5892         | 34.1  | 32.7  | 35.8  | 31.5  | 25.6  |
| 209966_x_at | AF094518 | ESRRG               | 2104         | 5.2   | 7.1   | 10.7  | 5.4   | 0.8   |
| 209967_s_at | D14826   | CREM                | 1390         | 10.8  | 12.0  | 9.6   | 14.4  | 12.9  |
| 209968_s_at | U63041   | NCAM1               | 4684         | 11.4  | 0.6   | 2.7   | 2.7   | 2.7   |
| 209969_s_at | BC002704 | STAT1               | 6772         | 26.3  | 18.2  | 28.1  | 21.0  | 19.3  |
| 209970_x_at | M87507   | CASP1               | 834          | 18.4  | 18.0  | 15.7  | 16.7  | 12.1  |
| 209971_x_at | AI928526 | AIMP2               | 7965         | 728.8 | 668.8 | 719.1 | 678.9 | 609.6 |
| 209972_s_at | AF116615 | AIMP2               | 7965         | 22.8  | 17.3  | 19.4  | 10.4  | 16.8  |
| 209973_at   | AF097419 | NFKBIL1             | 4795         | 31.9  | 26.8  | 33.8  | 44.2  | 20.8  |
| 209974_s_at | AF047473 | BUB3                | 9184         | 511.3 | 406.4 | 575.6 | 452.3 | 420.5 |
| 209975_at   | AF182276 | CYP2E1              | 1571         | 19.0  | 11.5  | 17.6  | 19.4  | 11.7  |
| 209976_s_at | AF182276 | CYP2E1              | 1571         | 5.6   | 0.7   | 5.2   | 6.1   | 3.3   |
| 209977_at   | M74220   | PLG                 | 5340         | 2.5   | 5.9   | 1.2   | 1.3   | 0.8   |
| 209978_s_at | M74220   | LPA /// PLG         | 4018 /// 534 | 1.5   | 5.5   | 1.1   | 1.3   | 4.0   |
| 209979_at   | AF001042 | ADARB1              | 104          | 1.2   | 1.0   | 1.6   | 0.9   | 1.5   |
| 209980_s_at | L23928   | MIR6778 ///         | 6470 /// 102 | 127.9 | 140.3 | 143.9 | 109.6 | 111.9 |
| 209981_at   | AL023553 | CSDC2               | 27254        | 3.1   | 0.8   | 1.7   | 7.2   | 1.0   |
| 209982_s_at | AA608820 | NRXN2               | 9379         | 4.1   | 4.6   | 6.1   | 1.9   | 1.1   |
| 209983_s_at | AB035266 | NRXN2               | 9379         | 1.7   | 1.1   | 0.8   | 1.0   | 1.0   |
| 209984_at   | AB037901 | KDM4C               | 23081        | 39.1  | 36.3  | 36.6  | 33.0  | 27.2  |
| 209985_s_at | BE797438 | ASCL1               | 429          | 2.7   | 0.7   | 4.3   | 2.3   | 3.6   |
| 209986_at   | BC002341 | LOC1019290.5053 /// | 101          | 1.3   | 0.8   | 0.6   | 1.6   | 1.1   |
| 209987_s_at | BC002341 | ASCL1               | 429          | 0.5   | 0.2   | 2.5   | 0.2   | 0.5   |
| 209988_s_at | BC001638 | ASCL1               | 429          | 4.9   | 4.8   | 1.0   | 1.0   | 2.5   |
| 209989_at   | AF317549 | ZNF268              | 10795        | 27.8  | 20.0  | 25.0  | 22.0  | 17.8  |
| 209990_s_at | AF056085 | GABBR2              | 9568         | 0.5   | 6.2   | 3.6   | 0.6   | 1.8   |
| 209991_x_at | AF069755 | GABBR2              | 9568         | 11.2  | 9.7   | 10.0  | 6.9   | 13.0  |
| 209992_at   | AB044805 | PFKFB2              | 5208         | 22.7  | 18.1  | 25.8  | 24.2  | 23.6  |
| 209993_at   | AF016535 | ABCB1               | 5243         | 2.6   | 4.9   | 3.4   | 6.3   | 1.6   |
| 209994_s_at | AF016535 | ABCB1 /// AE        | 5243 /// 524 | 3.3   | 4.2   | 0.7   | 0.8   | 0.3   |
| 209995_s_at | BC003574 | TCL1A               | 8115         | 12.8  | 7.7   | 3.4   | 3.5   | 3.5   |
| 209996_x_at | AA931266 | PCM1                | 5108         | 0.8   | 1.6   | 1.0   | 1.5   | 1.5   |
| 209997_x_at | BC000453 | PCM1                | 5108         | 20.3  | 8.8   | 22.8  | 16.4  | 16.6  |
| 209998_at   | BC001030 | PIGO                | 84720        | 154.5 | 151.9 | 136.3 | 126.3 | 111.6 |
| 209999_x_at | AI056051 | SOCS1               | 8651         | 2.0   | 2.5   | 2.1   | 2.6   | 1.3   |
| 210000_s_at | U88326   | SOCS1               | 8651         | 0.6   | 4.4   | 6.2   | 2.6   | 3.3   |

|             |          |                           |       |        |       |        |        |       |
|-------------|----------|---------------------------|-------|--------|-------|--------|--------|-------|
| 210001_s_at | AB005043 | SOCS1                     | 8651  | 4.1    | 4.9   | 11.9   | 4.4    | 3.5   |
| 210002_at   | D87811   | GATA6                     | 2627  | 20.5   | 22.4  | 32.6   | 25.5   | 20.7  |
| 210004_at   | AF035776 | OLR1                      | 4973  | 3.7    | 2.0   | 4.0    | 3.9    | 3.0   |
| 210005_at   | D32051   | GART                      | 2618  | 63.6   | 40.3  | 69.3   | 41.5   | 50.2  |
| 210006_at   | BC002571 | ABHD14A ///95 /// 25864   |       | 163.4  | 146.3 | 152.6  | 139.9  | 126.9 |
| 210007_s_at | U36310   | GPD2                      | 2820  | 22.5   | 12.9  | 17.3   | 13.1   | 20.0  |
| 210008_s_at | AA513737 | MRPS12                    | 6183  | 50.1   | 33.7  | 71.3   | 34.5   | 60.6  |
| 210009_s_at | AF229796 | GOSR2                     | 9570  | 35.9   | 30.6  | 39.1   | 36.0   | 26.0  |
| 210010_s_at | U25147   | SLC25A1                   | 6576  | 362.4  | 354.1 | 436.5  | 371.7  | 324.1 |
| 210011_s_at | BC000527 | EWSR1                     | 2130  | 150.4  | 144.6 | 175.9  | 159.5  | 150.1 |
| 210012_s_at | BC000527 | EWSR1                     | 2130  | 1.5    | 0.8   | 1.1    | 4.7    | 2.4   |
| 210013_at   | BC005395 | HPX                       | 3263  | 1.6    | 1.3   | 1.2    | 2.1    | 1.4   |
| 210014_x_at | AF023266 | IDH3B                     | 3420  | 367.5  | 251.2 | 341.2  | 232.6  | 212.8 |
| 210015_s_at | U89330   | MAP2                      | 4133  | 8.7    | 5.1   | 7.9    | 9.3    | 5.3   |
| 210016_at   | BF223003 | MYT1L                     | 23040 | 5.6    | 1.3   | 3.2    | 6.3    | 1.8   |
| 210017_at   | AF070528 | MALT1                     | 10892 | 18.1   | 12.9  | 14.1   | 16.4   | 13.3  |
| 210018_x_at | AB026118 | MALT1                     | 10892 | 29.2   | 28.8  | 27.4   | 27.6   | 23.8  |
| 210019_at   | M36707   | CALML3                    | 810   | 1.9    | 1.2   | 5.6    | 1.6    | 4.3   |
| 210020_x_at | M58026   | CALML3                    | 810   | 17.2   | 5.2   | 13.1   | 10.1   | 7.0   |
| 210021_s_at | BC004877 | CCNO                      | 10309 | 7.2    | 13.6  | 12.0   | 6.2    | 10.0  |
| 210022_at   | BC004952 | PCGF1                     | 84759 | 10.5   | 15.2  | 16.6   | 31.7   | 14.2  |
| 210023_s_at | BC004952 | PCGF1                     | 84759 | 75.4   | 60.3  | 83.1   | 78.6   | 63.5  |
| 210024_s_at | AB017644 | UBE2E3                    | 10477 | 437.6  | 348.1 | 414.1  | 340.4  | 272.6 |
| 210025_s_at | AW205153 | CARD10                    | 29775 | 1.6    | 1.4   | 1.7    | 1.0    | 1.5   |
| 210026_s_at | AY028896 | CARD10                    | 29775 | 12.5   | 8.7   | 23.8   | 8.3    | 11.3  |
| 210027_s_at | M80261   | APEX1                     | 328   | 1013.9 | 919.5 | 1102.5 | 1051.8 | 983.2 |
| 210028_s_at | AF125507 | ORC3                      | 23595 | 39.4   | 36.3  | 42.0   | 28.4   | 31.3  |
| 210029_at   | M34455   | IDO1                      | 3620  | 33.4   | 5.4   | 20.0   | 15.3   | 9.0   |
| 210030_at   | BC002817 | -                         | -     | 4.4    | 4.6   | 9.8    | 4.0    | 1.0   |
| 210031_at   | J04132   | CD247                     | 919   | 1.1    | 2.5   | 1.1    | 2.0    | 0.8   |
| 210032_s_at | AI651156 | SPAG6                     | 9576  | 6.6    | 2.3   | 5.6    | 4.3    | 1.2   |
| 210033_s_at | AF079363 | SPAG6                     | 9576  | 0.4    | 3.9   | 2.5    | 1.9    | 0.9   |
| 210034_s_at | AA582460 | RPL5 /// SNC 6083 /// 612 |       | 7.4    | 5.8   | 7.4    | 6.4    | 5.6   |
| 210035_s_at | U66589   | RPL5 /// SNC 6083 /// 612 |       | 1.4    | 0.4   | 2.8    | 0.5    | 0.3   |
| 210036_s_at | AB044806 | KCNH2                     | 3757  | 23.0   | 18.8  | 19.2   | 16.9   | 16.8  |
| 210037_s_at | L24553   | NOS2                      | 4843  | 2.3    | 4.5   | 2.1    | 2.9    | 0.9   |
| 210038_at   | AL137145 | PRKCQ                     | 5588  | 6.8    | 3.7   | 8.3    | 2.4    | 6.3   |
| 210039_s_at | L01087   | PRKCQ                     | 5588  | 18.6   | 9.4   | 9.5    | 9.6    | 9.8   |
| 210040_at   | AF208159 | SLC12A5                   | 57468 | 8.3    | 3.7   | 8.9    | 1.3    | 0.7   |
| 210041_s_at | BC001258 | PGM3                      | 5238  | 56.6   | 60.4  | 72.9   | 59.8   | 63.5  |
| 210042_s_at | AF073890 | CTSZ                      | 1522  | 61.0   | 34.7  | 55.4   | 60.7   | 43.4  |
| 210043_at   | AF334946 | FRMD8                     | 83786 | 16.9   | 10.7  | 20.1   | 19.4   | 10.2  |
| 210044_s_at | BC002796 | LYL1                      | 4066  | 2.3    | 0.8   | 2.2    | 1.7    | 0.9   |
| 210045_at   | AU151428 | IDH2                      | 3418  | 71.0   | 57.2  | 64.8   | 42.9   | 48.9  |
| 210046_s_at | U52144   | IDH2                      | 3418  | 548.1  | 560.9 | 571.3  | 638.8  | 480.4 |
| 210047_at   | AF064484 | SLC11A2                   | 4891  | 7.1    | 1.7   | 7.1    | 8.6    | 10.4  |
| 210048_at   | BC001889 | NAPG                      | 8774  | 55.8   | 50.7  | 58.4   | 58.5   | 52.6  |
| 210049_at   | D29832   | SERPINC1                  | 462   | 0.6    | 0.8   | 0.6    | 0.9    | 0.5   |
| 210050_at   | M10036   | TPI1                      | 7167  | 29.7   | 32.3  | 30.1   | 35.1   | 17.9  |
| 210051_at   | U78168   | RAPGEF3                   | 10411 | 1.7    | 0.9   | 1.7    | 2.1    | 0.8   |
| 210052_s_at | AF098158 | TPX2                      | 22974 | 469.2  | 384.7 | 504.5  | 342.2  | 408.4 |
| 210053_at   | AW138827 | TAF5                      | 6877  | 75.0   | 52.8  | 71.4   | 59.6   | 57.6  |
| 210054_at   | BC003648 | HAUS3                     | 79441 | 31.3   | 20.9  | 39.1   | 24.4   | 26.1  |

|             |           |                          |       |       |       |       |       |       |
|-------------|-----------|--------------------------|-------|-------|-------|-------|-------|-------|
| 210055_at   | BE045816  | TSHR                     | 7253  | 0.5   | 0.4   | 1.6   | 0.8   | 0.8   |
| 210056_at   | U69563    | RND1                     | 27289 | 7.8   | 7.0   | 1.8   | 7.0   | 2.1   |
| 210057_at   | U32581    | BOLA2 /// LC23049 /// 55 |       | 4.6   | 2.7   | 4.7   | 5.2   | 4.1   |
| 210058_at   | BC000433  | MAPK13                   | 5603  | 53.3  | 53.5  | 55.4  | 54.8  | 41.2  |
| 210059_s_at | BC000433  | MAPK13                   | 5603  | 53.4  | 52.1  | 43.3  | 42.3  | 33.8  |
| 210060_at   | M36476    | PDE6G                    | 5148  | 4.2   | 3.5   | 4.2   | 4.0   | 3.2   |
| 210061_at   | AF114817  | ZNF589                   | 51385 | 18.2  | 14.6  | 22.8  | 7.9   | 10.8  |
| 210062_s_at | AF114817  | ZNF589                   | 51385 | 24.5  | 16.8  | 20.1  | 19.6  | 16.7  |
| 210063_at   | AF162428  | SARDH                    | 1757  | 8.9   | 1.0   | 1.7   | 9.4   | 5.8   |
| 210064_s_at | NM_006952 | UPK1B                    | 7348  | 13.0  | 8.9   | 8.6   | 7.7   | 7.2   |
| 210065_s_at | AB002155  | UPK1B                    | 7348  | 1.3   | 7.8   | 7.6   | 1.1   | 2.0   |
| 210066_s_at | D63412    | AQP4                     | 361   | 0.1   | 0.1   | 0.1   | 0.8   | 0.1   |
| 210067_at   | D63412    | AQP4                     | 361   | 0.2   | 1.8   | 0.2   | 0.1   | 0.2   |
| 210068_s_at | U63622    | AQP4                     | 361   | 1.4   | 4.0   | 0.9   | 0.9   | 0.9   |
| 210069_at   | U62733    | CHKB-CPT1B 1375 /// 386  |       | 8.9   | 7.6   | 7.2   | 7.7   | 7.1   |
| 210070_s_at | U62733    | CHKB-CPT1B 1375 /// 386  |       | 16.7  | 12.8  | 12.3  | 11.7  | 6.0   |
| 210072_at   | U88321    | CCL19                    | 6363  | 1.8   | 7.0   | 5.8   | 2.3   | 0.5   |
| 210073_at   | L32867    | ST8SIA1                  | 6489  | 0.6   | 0.1   | 1.5   | 0.3   | 1.6   |
| 210074_at   | AF070448  | CTSV                     | 1515  | 114.1 | 96.2  | 116.5 | 108.6 | 88.2  |
| 210075_at   | AF151074  | MARCH2                   | 51257 | 85.5  | 98.1  | 95.2  | 94.2  | 77.1  |
| 210076_x_at | AF151813  | SERBP1                   | 26135 | 356.1 | 128.2 | 318.3 | 225.1 | 183.6 |
| 210077_s_at | U30884    | SRSF5                    | 6430  | 13.8  | 8.7   | 6.7   | 3.4   | 7.1   |
| 210078_s_at | L39833    | KCNAB1                   | 7881  | 3.4   | 6.9   | 4.3   | 0.9   | 3.1   |
| 210079_x_at | U16953    | KCNAB1                   | 7881  | 4.3   | 1.1   | 0.6   | 1.0   | 0.8   |
| 210080_x_at | D00306    | CELA3A                   | 10136 | 0.6   | 4.8   | 3.5   | 4.4   | 4.3   |
| 210081_at   | AB036432  | AGER                     | 177   | 7.0   | 1.3   | 6.0   | 7.4   | 0.3   |
| 210082_at   | U88667    | ABCA4                    | 24    | 3.1   | 4.0   | 1.9   | 2.2   | 1.9   |
| 210083_at   | AF071542  | SEMA7A                   | 8482  | 13.3  | 11.7  | 12.0  | 10.7  | 7.1   |
| 210084_x_at | AF206665  | TPSAB1                   | 7177  | 1.3   | 3.0   | 2.0   | 5.3   | 4.2   |
| 210085_s_at | AF230929  | ANXA9                    | 8416  | 22.9  | 32.8  | 27.6  | 25.1  | 17.1  |
| 210086_at   | AF039196  | HR                       | 55806 | 1.4   | 1.3   | 1.2   | 1.2   | 1.8   |
| 210087_s_at | AF095727  | MPZL1                    | 9019  | 140.9 | 142.0 | 183.6 | 139.4 | 140.1 |
| 210088_x_at | M36172    | MYL4                     | 4635  | 23.1  | 23.7  | 27.1  | 17.0  | 13.9  |
| 210089_s_at | BC004241  | LAMA4                    | 3910  | 2.4   | 1.1   | 1.4   | 1.0   | 1.6   |
| 210090_at   | AF193421  | ARC                      | 23237 | 0.7   | 1.5   | 2.1   | 0.3   | 0.4   |
| 210091_s_at | U46745    | DTNA                     | 1837  | 0.6   | 1.1   | 4.0   | 0.7   | 1.5   |
| 210092_at   | AF067173  | MAGOH /// I4116 /// 551  |       | 125.6 | 87.6  | 168.8 | 89.3  | 125.7 |
| 210093_s_at | AF067173  | MAGOH /// I4116 /// 551  |       | 79.9  | 55.2  | 96.6  | 71.1  | 83.8  |
| 210094_s_at | AF196186  | PARD3                    | 56288 | 4.3   | 7.3   | 7.9   | 4.9   | 6.4   |
| 210095_s_at | M31159    | IGFBP3                   | 3486  | 25.4  | 33.9  | 22.2  | 35.8  | 20.7  |
| 210096_at   | J02871    | CYP4B1                   | 1580  | 5.7   | 0.7   | 5.5   | 3.2   | 0.4   |
| 210097_s_at | AF130102  | NOL7                     | 51406 | 395.1 | 293.8 | 426.3 | 336.6 | 324.6 |
| 210098_s_at | AF130102  | -                        | -     | 12.5  | 10.0  | 12.3  | 10.2  | 10.3  |
| 210099_at   | AF327657  | ABCA2                    | 20    | 1.3   | 0.5   | 1.6   | 1.0   | 0.6   |
| 210100_s_at | AF327657  | ABCA2                    | 20    | 20.5  | 19.3  | 27.7  | 32.6  | 21.3  |
| 210101_x_at | AF257318  | SH3GLB1                  | 51100 | 109.6 | 107.2 | 123.0 | 121.2 | 74.3  |
| 210102_at   | BC001234  | VWA5A                    | 4013  | 44.1  | 39.9  | 37.8  | 37.6  | 24.1  |
| 210103_s_at | AB028021  | FOXA2                    | 3170  | 1.2   | 0.8   | 1.2   | 1.0   | 0.5   |
| 210104_at   | AF074723  | MED6                     | 10001 | 113.7 | 87.1  | 103.3 | 80.4  | 71.1  |
| 210105_s_at | M14333    | FYN                      | 2534  | 7.8   | 16.6  | 9.9   | 8.4   | 7.5   |
| 210106_at   | U43559    | BLOC1S1-RD 5959 /// 100  |       | 4.6   | 4.0   | 2.8   | 3.5   | 1.9   |
| 210107_at   | AF127036  | CLCA1                    | 1179  | 1.7   | 1.5   | 10.8  | 6.9   | 6.9   |
| 210108_at   | BE550599  | CACNA1D                  | 776   | 5.0   | 0.9   | 4.3   | 1.8   | 2.9   |

|             |          |                           |        |        |        |        |        |        |
|-------------|----------|---------------------------|--------|--------|--------|--------|--------|--------|
| 210109_at   | AF191492 | SND1-IT1                  | 27099  | 9.8    | 5.8    | 1.5    | 2.3    | 1.1    |
| 210110_x_at | AF132363 | HNRNPH3                   | 3189   | 69.5   | 115.3  | 116.1  | 109.1  | 77.4   |
| 210111_s_at | AF277175 | KLHDC10                   | 23008  | 149.0  | 136.2  | 161.6  | 140.2  | 122.5  |
| 210112_at   | U96721   | HPS1                      | 3257   | 36.6   | 18.8   | 29.8   | 24.3   | 14.5   |
| 210113_s_at | AF310105 | NLRP1                     | 22861  | 0.9    | 0.5    | 0.6    | 0.5    | 0.4    |
| 210114_at   | AF039217 | INVS                      | 27130  | 34.6   | 22.0   | 28.4   | 33.0   | 22.6   |
| 210115_at   | L05096   | RPL39L                    | 116832 | 2.7    | 0.5    | 2.6    | 1.9    | 0.2    |
| 210116_at   | AF072930 | SH2D1A                    | 4068   | 0.3    | 0.6    | 0.8    | 0.2    | 0.8    |
| 210117_at   | AF311312 | SPAG1                     | 6674   | 31.4   | 20.1   | 32.2   | 36.1   | 21.8   |
| 210118_s_at | M15329   | IL1A                      | 3552   | 2.9    | 4.4    | 1.1    | 1.6    | 2.6    |
| 210119_at   | U73191   | KCNJ15                    | 3772   | 2.5    | 0.6    | 0.7    | 0.7    | 0.2    |
| 210120_s_at | BC004349 | RANBP3                    | 8498   | 82.0   | 58.7   | 57.0   | 58.2   | 42.1   |
| 210121_at   | AF288390 | B3GALT2                   | 8707   | 0.6    | 0.0    | 0.1    | 0.1    | 0.1    |
| 210122_at   | BC005303 | PRM2                      | 5620   | 0.8    | 0.6    | 0.6    | 0.8    | 0.5    |
| 210123_s_at | U62436   | CHRFAM7A / 1139 /// 898   |        | 2.4    | 1.6    | 2.2    | 1.1    | 8.2    |
| 210124_x_at | AL136552 | SEMA4F                    | 10505  | 33.7   | 43.0   | 30.2   | 30.1   | 26.7   |
| 210125_s_at | AF044773 | BANF1                     | 8815   | 917.7  | 908.1  | 1022.9 | 927.8  | 883.9  |
| 210126_at   | M94890   | PSG9                      | 5678   | 1.3    | 2.5    | 1.9    | 0.9    | 1.5    |
| 210127_at   | BC002510 | RAB6B                     | 51560  | 77.9   | 60.8   | 46.4   | 52.2   | 64.8   |
| 210128_s_at | U41070   | LTB4R                     | 1241   | 8.0    | 7.6    | 7.8    | 5.7    | 9.0    |
| 210129_s_at | AF078842 | ARPC4 /// AF 10093 /// 26 |        | 7.7    | 7.1    | 2.0    | 2.3    | 2.5    |
| 210130_s_at | AF096304 | TM7SF2                    | 7108   | 502.3  | 612.4  | 511.8  | 609.4  | 431.3  |
| 210131_x_at | D49737   | SDHC                      | 6391   | 526.2  | 456.8  | 468.1  | 512.8  | 357.4  |
| 210132_at   | AW189015 | EFNA3                     | 1944   | 102.7  | 88.0   | 115.9  | 142.9  | 110.5  |
| 210133_at   | D49372   | CCL11                     | 6356   | 2.4    | 1.2    | 7.7    | 7.5    | 7.3    |
| 210134_x_at | AI816713 | SHOX2                     | 6474   | 5.3    | 1.3    | 1.2    | 2.9    | 0.7    |
| 210135_s_at | AF022654 | SHOX2                     | 6474   | 5.3    | 0.8    | 9.6    | 6.9    | 7.8    |
| 210136_at   | AW070431 | MBP                       | 4155   | 44.4   | 42.1   | 45.6   | 51.0   | 27.9   |
| 210137_s_at | BC001286 | DCTD                      | 1635   | 221.7  | 205.9  | 200.2  | 199.2  | 173.1  |
| 210138_at   | AF074979 | RGS20                     | 8601   | 4.3    | 1.6    | 2.1    | 0.4    | 0.2    |
| 210139_s_at | L03203   | PMP22                     | 5376   | 1.5    | 3.9    | 7.5    | 4.2    | 0.8    |
| 210140_at   | AF031824 | CST7                      | 8530   | 1.5    | 2.3    | 2.4    | 1.4    | 1.9    |
| 210141_s_at | M13981   | INHA                      | 3623   | 9.5    | 10.7   | 1.9    | 4.9    | 2.9    |
| 210142_x_at | AF117234 | FLOT1                     | 10211  | 346.6  | 353.2  | 321.3  | 356.2  | 278.7  |
| 210143_at   | AF196478 | ANXA10                    | 11199  | 1.4    | 3.6    | 2.7    | 1.0    | 5.5    |
| 210144_at   | AK000851 | TBC1D22A                  | 25771  | 12.3   | 13.0   | 15.8   | 4.1    | 11.0   |
| 210145_at   | M68874   | PLA2G4A                   | 5321   | 0.2    | 1.5    | 0.4    | 2.3    | 1.5    |
| 210146_x_at | AF004231 | LILRB2                    | 10288  | 0.2    | 0.1    | 0.5    | 3.4    | 0.1    |
| 210147_at   | U47054   | ART3                      | 419    | 3.9    | 4.7    | 3.5    | 4.3    | 5.2    |
| 210148_at   | AF305239 | HIPK3                     | 10114  | 23.2   | 19.5   | 19.5   | 14.2   | 15.2   |
| 210149_s_at | AF061735 | ATP5H                     | 10476  | 1858.5 | 1647.5 | 1917.6 | 1875.0 | 1615.2 |
| 210150_s_at | BC003355 | LAMA5                     | 3911   | 33.0   | 40.2   | 45.5   | 52.9   | 22.1   |
| 210151_s_at | AF186773 | DYRK3                     | 8444   | 5.5    | 5.3    | 8.2    | 10.6   | 9.1    |
| 210152_at   | U82979   | LILRB4                    | 11006  | 8.7    | 7.9    | 11.0   | 10.2   | 5.7    |
| 210153_s_at | M55905   | ME2                       | 4200   | 158.0  | 182.4  | 164.8  | 166.8  | 118.1  |
| 210154_at   | M55905   | ME2                       | 4200   | 134.4  | 123.2  | 125.2  | 142.4  | 91.5   |
| 210155_at   | D88214   | MYOC                      | 4653   | 22.2   | 12.7   | 17.1   | 10.5   | 4.8    |
| 210156_s_at | D25547   | PCMT1                     | 5110   | 248.5  | 182.4  | 298.0  | 228.4  | 207.7  |
| 210157_at   | AW003989 | URI1                      | 8725   | 9.0    | 1.9    | 13.5   | 4.6    | 11.7   |
| 210158_at   | U64315   | ERCC4                     | 2072   | 31.4   | 18.7   | 29.4   | 21.8   | 19.5   |
| 210159_s_at | AF230386 | TRIM31                    | 11074  | 1.6    | 7.4    | 1.3    | 1.6    | 3.7    |
| 210160_at   | BC000398 | PAFAH1B2                  | 5049   | 32.1   | 29.5   | 43.7   | 24.5   | 22.5   |
| 210161_at   | U08015   | -                         | -      | 7.9    | 8.1    | 7.0    | 5.1    | 6.9    |

|             |          |                           |           |        |        |        |        |        |
|-------------|----------|---------------------------|-----------|--------|--------|--------|--------|--------|
| 210162_s_at | U08015   | NFATC1                    | 4772      | 28.8   | 31.3   | 28.5   | 29.4   | 22.1   |
| 210163_at   | AF030514 | CXCL11                    | 6373      | 3.8    | 0.2    | 0.3    | 2.6    | 0.2    |
| 210164_at   | J03189   | GZMB                      | 3002      | 2.7    | 3.9    | 8.5    | 3.4    | 1.3    |
| 210165_at   | M55983   | DNASE1                    | 1773      | 1.5    | 3.4    | 1.0    | 7.3    | 7.4    |
| 210166_at   | AF051151 | TLR5                      | 7100      | 14.2   | 11.4   | 7.4    | 14.0   | 10.0   |
| 210167_s_at | U06935   | TEF                       | 7008      | 4.5    | 1.8    | 1.9    | 1.2    | 2.5    |
| 210168_at   | J05064   | C6                        | 729       | 8.3    | 11.1   | 12.0   | 13.0   | 5.6    |
| 210169_at   | AB007880 | SEC14L5                   | 9717      | 10.9   | 14.9   | 13.6   | 11.4   | 8.8    |
| 210170_at   | BC001017 | PDLIM3                    | 27295     | 5.0    | 3.4    | 2.2    | 2.8    | 0.5    |
| 210171_s_at | S68134   | CREM                      | 1390      | 0.6    | 0.5    | 3.3    | 0.8    | 0.6    |
| 210172_at   | D26121   | SF1                       | 7536      | 9.0    | 8.5    | 14.6   | 8.6    | 10.4   |
| 210173_at   | D37781   | PTPRJ                     | 5795      | 2.9    | 4.8    | 2.8    | 6.4    | 3.8    |
| 210174_at   | AF228413 | NR5A2                     | 2494      | 5.1    | 0.8    | 1.1    | 5.9    | 3.0    |
| 210175_at   | BC000853 | GCFC2                     | 6936      | 39.9   | 22.0   | 38.5   | 28.9   | 26.3   |
| 210176_at   | AL050262 | TLR1                      | 7096      | 2.3    | 5.3    | 4.5    | 4.7    | 2.3    |
| 210177_at   | U34249   | TRIM15                    | 89870     | 2.6    | 2.0    | 1.0    | 1.1    | 1.4    |
| 210178_x_at | AF047448 | SRSF10                    | 10772     | 134.8  | 98.6   | 127.6  | 101.5  | 99.3   |
| 210179_at   | AJ007557 | KCNJ13                    | 3769      | 1.5    | 1.0    | 1.0    | 2.1    | 0.4    |
| 210180_s_at | U87836   | TRA2B                     | 6434      | 48.3   | 36.7   | 48.0   | 40.5   | 35.0   |
| 210181_s_at | AF169148 | CABP1                     | 9478      | 6.4    | 0.9    | 1.6    | 4.7    | 0.5    |
| 210182_at   | AB000263 | CORT                      | 1325      | 29.4   | 9.4    | 28.1   | 23.2   | 23.1   |
| 210183_x_at | AF112222 | PNN                       | 5411      | 820.9  | 1304.3 | 1059.7 | 1198.9 | 912.7  |
| 210184_at   | M81695   | ITGAX                     | 3687      | 2.3    | 2.6    | 3.5    | 1.2    | 1.3    |
| 210185_at   | AB054985 | CACNB1                    | 782       | 10.2   | 11.3   | 13.3   | 11.1   | 1.4    |
| 210186_s_at | BC005147 | FKBP1A /// L 2280 /// 101 |           | 158.1  | 177.6  | 208.6  | 230.9  | 161.2  |
| 210187_at   | BC005147 | FKBP1A /// L 2280 /// 101 |           | 55.5   | 62.9   | 79.7   | 62.6   | 53.9   |
| 210188_at   | D13318   | GABPA                     | 2551      | 35.9   | 19.6   | 24.7   | 22.6   | 24.3   |
| 210189_at   | D85730   | HSPA1L                    | 3305      | 20.1   | 19.3   | 17.6   | 12.6   | 7.7    |
| 210190_at   | AF071504 | STX11                     | 8676      | 0.9    | 0.4    | 0.4    | 0.4    | 1.1    |
| 210191_s_at | BC002447 | PHTF1                     | 10745     | 5.4    | 5.7    | 4.8    | 6.6    | 4.8    |
| 210192_at   | AB013452 | ATP8A1                    | 10396     | 4.1    | 2.8    | 1.8    | 6.1    | 1.0    |
| 210193_at   | D28114   | MOBP                      | 4336      | 4.9    | 5.7    | 10.2   | 5.8    | 2.8    |
| 210194_at   | U17033   | PLA2R1                    | 22925     | 0.6    | 0.4    | 1.5    | 0.2    | 0.9    |
| 210195_s_at | M34715   | PSG1                      | 5669      | 6.7    | 10.5   | 7.7    | 9.1    | 3.3    |
| 210196_s_at | M33663   | PSG1                      | 5669      | 4.3    | 1.4    | 2.8    | 3.8    | 0.5    |
| 210197_at   | BC003622 | ITPK1                     | 3705      | 12.3   | 9.2    | 17.2   | 17.2   | 9.0    |
| 210198_s_at | BC002665 | PLP1                      | 5354      | 4.2    | 0.7    | 1.0    | 1.5    | 0.9    |
| 210199_at   | U66584   | CRYAA                     | 1409      | 6.9    | 3.9    | 9.3    | 4.7    | 3.8    |
| 210200_at   | BC000108 | WWP2                      | 11060     | 25.2   | 22.6   | 13.6   | 19.0   | 19.0   |
| 210201_x_at | AF001383 | BIN1                      | 274       | 96.7   | 89.4   | 92.2   | 93.2   | 70.0   |
| 210202_s_at | U87558   | BIN1                      | 274       | 49.7   | 71.9   | 71.8   | 77.7   | 52.3   |
| 210203_at   | R64001   | CNOT4                     | 4850      | 7.1    | 3.3    | 10.0   | 1.0    | 3.6    |
| 210204_s_at | U71268   | CNOT4                     | 4850      | 2.9    | 7.7    | 6.7    | 4.9    | 5.5    |
| 210205_at   | AB026730 | B3GALT4                   | 8705      | 6.4    | 16.9   | 13.2   | 12.1   | 9.5    |
| 210206_s_at | U33833   | DDX11                     | 1663      | 10.5   | 6.2    | 21.7   | 16.8   | 14.3   |
| 210208_x_at | BC003133 | BAG6                      | 7917      | 399.6  | 449.1  | 416.7  | 403.3  | 323.0  |
| 210210_at   | AF181660 | MPZL1                     | 9019      | 9.3    | 15.1   | 11.9   | 10.5   | 14.5   |
| 210211_s_at | AF028832 | HSP90AA1                  | 3320      | 1993.0 | 1501.8 | 2038.2 | 1593.4 | 1619.4 |
| 210212_x_at | BC002600 | CMC4                      | 100272147 | 57.8   | 38.3   | 48.7   | 49.2   | 46.2   |
| 210213_s_at | AF022229 | EIF6                      | 3692      | 333.7  | 354.4  | 400.0  | 383.4  | 357.1  |
| 210214_s_at | U25110   | BMPR2                     | 659       | 41.4   | 34.8   | 32.2   | 36.7   | 29.3   |
| 210215_at   | AF067864 | TFR2                      | 7036      | 2.1    | 2.4    | 1.5    | 5.0    | 1.3    |
| 210216_x_at | AF084513 | RAD1                      | 5810      | 162.8  | 106.0  | 153.2  | 116.9  | 135.3  |

|             |          |          |        |       |       |        |       |       |
|-------------|----------|----------|--------|-------|-------|--------|-------|-------|
| 210218_s_at | U36501   | SP100    | 6672   | 0.5   | 3.5   | 1.9    | 4.2   | 0.8   |
| 210219_at   | U36501   | SP100    | 6672   | 6.2   | 1.5   | 3.8    | 1.6   | 3.4   |
| 210220_at   | L37882   | FZD2     | 2535   | 9.6   | 7.5   | 5.8    | 11.8  | 10.5  |
| 210221_at   | BC000513 | CHRNA3   | 1136   | 10.8  | 5.8   | 8.6    | 3.5   | 2.7   |
| 210222_s_at | BC000314 | RTN1     | 6252   | 22.0  | 25.1  | 22.6   | 29.3  | 19.5  |
| 210223_s_at | AF010446 | MR1      | 3140   | 27.9  | 37.0  | 32.3   | 40.1  | 27.9  |
| 210224_at   | AF031469 | MR1      | 3140   | 25.8  | 24.8  | 26.0   | 32.0  | 13.8  |
| 210225_x_at | AF009635 | LILRB3   | 11025  | 3.3   | 2.9   | 4.3    | 3.2   | 1.8   |
| 210226_at   | D85245   | NR4A1    | 3164   | 3.9   | 12.0  | 3.9    | 21.8  | 9.4   |
| 210227_at   | AF119817 | DLGAP2   | 9228   | 8.4   | 3.0   | 3.8    | 2.8   | 2.5   |
| 210228_at   | M11734   | CSF2     | 1437   | 1.6   | 3.2   | 2.7    | 5.4   | 4.4   |
| 210229_s_at | M11734   | CSF2     | 1437   | 2.2   | 1.8   | 2.0    | 1.2   | 1.8   |
| 210230_at   | BC003629 | -        | -      | 42.5  | 32.0  | 38.5   | 31.7  | 35.5  |
| 210231_x_at | D45198   | SET      | 6418   | 975.4 | 999.8 | 1226.2 | 988.2 | 935.1 |
| 210232_at   | M35543   | CDC42    | 998    | 15.3  | 8.3   | 10.4   | 10.2  | 12.4  |
| 210233_at   | AF167343 | IL1RAP   | 3556   | 2.8   | 3.6   | 5.0    | 1.1   | 4.6   |
| 210234_at   | U92457   | GRM4     | 2914   | 18.1  | 9.9   | 19.2   | 9.1   | 1.2   |
| 210235_s_at | U22815   | PPFIA1   | 8500   | 31.4  | 28.6  | 35.4   | 33.5  | 25.9  |
| 210236_at   | U22815   | PPFIA1   | 8500   | 23.1  | 12.6  | 18.7   | 13.0  | 16.5  |
| 210237_at   | AF120274 | ARTN     | 9048   | 22.3  | 12.1  | 39.6   | 17.0  | 16.9  |
| 210239_at   | U90304   | IRX5     | 10265  | 18.7  | 24.0  | 19.2   | 19.6  | 13.8  |
| 210240_s_at | U20498   | CDKN2D   | 1032   | 18.1  | 12.8  | 24.9   | 20.4  | 24.6  |
| 210241_s_at | AB007458 | TP53TG1  | 11257  | 63.6  | 74.1  | 83.1   | 72.0  | 72.0  |
| 210242_x_at | AF249277 | ST20     | 400410 | 65.8  | 61.0  | 67.2   | 49.7  | 52.5  |
| 210243_s_at | AF038661 | B4GALT3  | 8703   | 189.2 | 161.1 | 198.4  | 172.5 | 154.2 |
| 210244_at   | U19970   | CAMP     | 820    | 2.5   | 1.1   | 1.8    | 1.2   | 0.6   |
| 210245_at   | L78207   | ABCC8    | 6833   | 0.6   | 0.8   | 0.9    | 0.9   | 1.1   |
| 210246_s_at | AF087138 | ABCC8    | 6833   | 3.7   | 3.9   | 1.9    | 2.5   | 2.1   |
| 210247_at   | AW139618 | SYN2     | 6854   | 25.2  | 15.0  | 16.8   | 16.7  | 9.3   |
| 210248_at   | D83175   | WNT7A    | 7476   | 2.1   | 4.9   | 9.2    | 7.9   | 8.3   |
| 210249_s_at | U59302   | NCOA1    | 8648   | 70.2  | 72.6  | 57.1   | 52.3  | 58.6  |
| 210250_x_at | AF067854 | ADSL     | 158    | 447.8 | 327.0 | 444.1  | 386.3 | 371.4 |
| 210251_s_at | AF112221 | RUFY3    | 22902  | 24.2  | 25.5  | 25.8   | 24.6  | 21.1  |
| 210252_s_at | AB002356 | MADD     | 8567   | 57.6  | 55.0  | 50.7   | 59.2  | 52.8  |
| 210253_at   | AF092095 | HTATIP2  | 10553  | 7.9   | 5.6   | 3.8    | 5.4   | 3.8   |
| 210254_at   | L35848   | MS4A3    | 932    | 0.5   | 0.5   | 0.5    | 0.9   | 1.8   |
| 210255_at   | U84138   | RAD51B   | 5890   | 18.5  | 13.1  | 18.3   | 17.2  | 13.4  |
| 210256_s_at | U78576   | PIP5K1A  | 8394   | 17.9  | 15.9  | 3.8    | 15.2  | 14.6  |
| 210257_x_at | AF212995 | CUL4B    | 8450   | 76.1  | 58.8  | 74.1   | 66.5  | 60.4  |
| 210258_at   | AF030107 | RGS13    | 6003   | 1.1   | 0.2   | 2.2    | 0.0   | 0.1   |
| 210259_s_at | AF254115 | DLX4     | 1748   | 7.8   | 0.6   | 1.3    | 1.7   | 5.0   |
| 210260_s_at | BC005352 | TNFAIP8  | 25816  | 61.7  | 53.5  | 85.2   | 61.3  | 49.0  |
| 210261_at   | AF004711 | KCNK2    | 3776   | 0.7   | 0.5   | 9.8    | 1.2   | 0.4   |
| 210262_at   | M25532   | CRISP2   | 7180   | 0.8   | 0.2   | 0.4    | 0.3   | 0.3   |
| 210263_at   | AF029780 | KCNF1    | 3754   | 6.0   | 9.8   | 6.1    | 2.3   | 4.5   |
| 210264_at   | AF089087 | GPR35    | 2859   | 9.3   | 5.7   | 5.8    | 5.8   | 6.7   |
| 210265_x_at | AF268617 | POU5F1P3 | 642559 | 4.7   | 1.8   | 1.5    | 1.0   | 1.3   |
| 210266_s_at | AF220137 | TRIM33   | 51592  | 56.5  | 36.4  | 64.0   | 46.9  | 40.6  |
| 210267_at   | BC001265 | NIPAL3   | 57185  | 5.3   | 2.4   | 4.7    | 6.9   | 3.4   |
| 210268_at   | AF332009 | NFX1     | 4799   | 9.2   | 5.8   | 3.8    | 8.0   | 5.0   |
| 210269_s_at | M99578   | AKAP17A  | 8227   | 11.7  | 23.1  | 8.3    | 15.2  | 9.7   |
| 210270_at   | AF156932 | RGS6     | 9628   | 1.0   | 1.0   | 1.4    | 0.8   | 1.5   |
| 210271_at   | AB021742 | NEUROD2  | 4761   | 0.8   | 8.8   | 10.8   | 5.0   | 5.2   |



|             |          |                           |       |       |       |        |       |       |
|-------------|----------|---------------------------|-------|-------|-------|--------|-------|-------|
| 210272_at   | M29873   | CYP2B7P                   | 1556  | 7.4   | 5.3   | 9.5    | 4.5   | 7.6   |
| 210273_at   | AB006757 | PCDH7                     | 5099  | 11.1  | 4.7   | 6.0    | 11.7  | 4.5   |
| 210274_at   | BC002455 | MAGEA8                    | 4107  | 5.6   | 0.7   | 4.6    | 0.5   | 3.1   |
| 210275_s_at | AF062347 | ZFAND5                    | 7763  | 409.9 | 385.2 | 451.1  | 385.4 | 367.4 |
| 210276_s_at | AF281030 | NOL12 /// TR11078 /// 79  |       | 75.0  | 79.5  | 86.5   | 82.6  | 72.3  |
| 210277_at   | AF155159 | AP4S1                     | 11154 | 10.2  | 10.1  | 15.3   | 15.4  | 13.3  |
| 210278_s_at | AF155159 | AP4S1                     | 11154 | 13.6  | 9.4   | 8.5    | 11.3  | 10.5  |
| 210279_at   | AF261135 | GPR18                     | 2841  | 2.7   | 2.4   | 3.6    | 5.3   | 1.8   |
| 210280_at   | D10537   | MPZ                       | 4359  | 7.6   | 9.8   | 4.0    | 6.8   | 7.8   |
| 210281_s_at | AL136621 | ZMYM2                     | 7750  | 9.6   | 13.9  | 13.9   | 10.0  | 9.5   |
| 210282_at   | AL136621 | ZMYM2                     | 7750  | 3.6   | 2.4   | 4.3    | 3.1   | 1.9   |
| 210283_x_at | BC005295 | PAIP1                     | 10605 | 311.0 | 252.4 | 279.3  | 257.3 | 195.8 |
| 210284_s_at | AF241230 | TAB2                      | 23118 | 68.2  | 54.3  | 72.5   | 57.8  | 44.6  |
| 210285_x_at | BC000383 | WTAP                      | 9589  | 196.0 | 182.5 | 229.2  | 181.2 | 154.7 |
| 210286_s_at | AF053755 | SLC4A7                    | 9497  | 25.6  | 16.3  | 21.6   | 10.8  | 18.7  |
| 210287_s_at | U01134   | FLT1                      | 2321  | 1.6   | 0.6   | 3.9    | 1.4   | 1.2   |
| 210288_at   | AF081675 | KLRG1                     | 10219 | 25.3  | 13.5  | 13.5   | 18.7  | 9.9   |
| 210289_at   | AB013094 | NAT8 /// NA` 9027 /// 514 |       | 1.3   | 0.5   | 6.8    | 1.8   | 0.5   |
| 210290_at   | BC001161 | ZNF174                    | 7727  | 21.8  | 20.1  | 21.5   | 19.3  | 16.2  |
| 210291_s_at | BC001161 | ZNF174                    | 7727  | 16.7  | 10.4  | 17.5   | 9.8   | 17.4  |
| 210292_s_at | AF332218 | PCDH11X /// 27328 /// 83  |       | 6.1   | 8.4   | 4.8    | 6.5   | 5.4   |
| 210293_s_at | BC005032 | SEC23B                    | 10483 | 645.7 | 557.8 | 696.6  | 508.5 | 563.0 |
| 210294_at   | AF067286 | TAPBP                     | 6892  | 6.8   | 2.7   | 2.1    | 2.7   | 1.5   |
| 210295_at   | BC004105 | MAGEA10                   | 4109  | 127.9 | 109.7 | 125.2  | 123.9 | 98.7  |
| 210296_s_at | BC005375 | PEX2                      | 5828  | 195.7 | 187.7 | 209.0  | 177.8 | 147.8 |
| 210297_s_at | U22178   | MSMB                      | 4477  | 5.3   | 0.7   | 8.8    | 2.5   | 7.7   |
| 210298_x_at | AF098518 | FHL1                      | 2273  | 1.9   | 1.3   | 0.8    | 1.2   | 1.3   |
| 210299_s_at | AF063002 | FHL1                      | 2273  | 0.8   | 1.0   | 0.4    | 0.7   | 0.5   |
| 210300_at   | AF152863 | REM1                      | 28954 | 2.7   | 7.8   | 11.5   | 6.9   | 5.4   |
| 210301_at   | U06117   | XDH                       | 7498  | 24.1  | 25.7  | 18.1   | 18.5  | 19.3  |
| 210302_s_at | AF262032 | MAB21L2                   | 10586 | 8.9   | 3.9   | 4.9    | 0.3   | 3.6   |
| 210303_at   | AF262032 | MAB21L2                   | 10586 | 3.1   | 3.8   | 1.8    | 0.5   | 0.4   |
| 210304_at   | BC000249 | PDE6B                     | 5158  | 2.7   | 2.9   | 2.4    | 1.5   | 11.4  |
| 210305_at   | AB042557 | PDE4DIP                   | 9659  | 0.5   | 5.2   | 1.8    | 0.6   | 1.6   |
| 210306_at   | U89358   | L3MBTL1                   | 26013 | 4.3   | 4.9   | 7.3    | 4.8   | 2.1   |
| 210307_s_at | AL136796 | KLHL25                    | 64410 | 6.5   | 24.9  | 28.2   | 27.5  | 22.0  |
| 210309_at   | AB042823 | RECQL5                    | 9400  | 1.1   | 1.5   | 1.1    | 1.5   | 0.5   |
| 210310_s_at | AB016517 | FGF5                      | 2250  | 0.6   | 0.5   | 0.2    | 1.3   | 1.3   |
| 210311_at   | AF171928 | FGF5                      | 2250  | 8.9   | 8.0   | 8.3    | 6.8   | 9.9   |
| 210312_s_at | BC002640 | IFT20                     | 90410 | 102.5 | 108.9 | 105.1  | 99.1  | 96.8  |
| 210313_at   | AF041261 | LILRA4                    | 23547 | 14.2  | 2.0   | 14.0   | 10.1  | 16.2  |
| 210314_x_at | AF114013 | TNFSF13                   | 8741  | 86.4  | 102.5 | 75.8   | 100.0 | 65.8  |
| 210315_at   | AF077737 | SYN2                      | 6854  | 5.9   | 9.3   | 7.5    | 5.2   | 4.0   |
| 210316_at   | U43143   | FLT4                      | 2324  | 10.1  | 11.9  | 2.1    | 13.4  | 12.3  |
| 210317_s_at | U28936   | YWHAE                     | 7531  | 833.9 | 794.0 | 1042.6 | 897.6 | 765.2 |
| 210318_at   | J03912   | RBP3                      | 5949  | 12.0  | 6.5   | 3.1    | 11.6  | 1.4   |
| 210319_x_at | D89377   | MSX2                      | 4488  | 19.6  | 10.5  | 20.4   | 18.1  | 13.3  |
| 210320_s_at | AF077033 | DDX52                     | 11056 | 53.6  | 45.5  | 57.3   | 42.5  | 48.7  |
| 210321_at   | M36118   | GZMH                      | 2999  | 4.5   | 2.1   | 1.4    | 1.0   | 1.5   |
| 210322_x_at | AF000995 | UTY                       | 7404  | 20.4  | 8.0   | 8.8    | 5.9   | 11.1  |
| 210323_at   | AB033823 | TEKT2                     | 27285 | 5.2   | 4.1   | 1.4    | 9.0   | 5.0   |
| 210324_at   | M17263   | C8G                       | 733   | 0.8   | 0.8   | 0.5    | 0.3   | 0.5   |
| 210325_at   | M28825   | CD1A                      | 909   | 18.7  | 5.8   | 17.4   | 5.4   | 3.1   |

|             |          |                          |        |        |        |        |        |        |
|-------------|----------|--------------------------|--------|--------|--------|--------|--------|--------|
| 210326_at   | D13368   | AGXT                     | 189    | 3.8    | 3.7    | 2.1    | 1.0    | 2.3    |
| 210327_s_at | D13368   | AGXT                     | 189    | 5.1    | 0.7    | 3.5    | 1.3    | 1.6    |
| 210328_at   | AF101477 | GNMT                     | 27232  | 29.5   | 30.7   | 55.9   | 31.4   | 35.9   |
| 210329_s_at | U58331   | SGCD                     | 6444   | 5.8    | 5.4    | 1.5    | 5.6    | 5.4    |
| 210330_at   | U58331   | SGCD                     | 6444   | 1.2    | 2.8    | 3.7    | 3.0    | 0.9    |
| 210331_at   | AB048365 | HECW1                    | 23072  | 7.6    | 5.8    | 14.4   | 7.6    | 6.5    |
| 210332_at   | M55040   | ACHE                     | 43     | 1.8    | 5.9    | 4.7    | 2.1    | 1.2    |
| 210333_at   | U76388   | NR5A1                    | 2516   | 2.7    | 1.3    | 1.1    | 3.0    | 4.8    |
| 210334_x_at | AB028869 | BIRC5                    | 332    | 189.0  | 183.3  | 244.3  | 191.4  | 197.7  |
| 210335_at   | AF056209 | RASSF9                   | 9182   | 4.5    | 3.4    | 5.1    | 4.9    | 4.0    |
| 210336_x_at | AF055078 | MZF1                     | 7593   | 72.2   | 68.8   | 57.3   | 61.6   | 53.4   |
| 210337_s_at | U18197   | ACLY                     | 47     | 462.5  | 456.0  | 553.9  | 466.9  | 479.2  |
| 210338_s_at | AB034951 | HSPA8 /// SM3312 /// 853 |        | 3303.3 | 2955.7 | 3444.2 | 3032.2 | 3059.4 |
| 210339_s_at | BC005196 | KLK2                     | 3817   | 80.0   | 56.0   | 123.7  | 82.2   | 128.2  |
| 210340_s_at | BC002635 | CSF2RA                   | 1438   | 5.4    | 1.2    | 0.7    | 1.4    | 1.6    |
| 210341_at   | AB020642 | MYT1                     | 4661   | 7.6    | 9.1    | 16.2   | 11.6   | 16.2   |
| 210342_s_at | M17755   | TPO                      | 7173   | 0.5    | 0.3    | 1.0    | 2.1    | 0.3    |
| 210343_s_at | AF124373 | SLC22A6                  | 9356   | 7.1    | 3.4    | 2.2    | 7.7    | 2.7    |
| 210344_at   | AF323729 | OSBPL7                   | 114881 | 0.6    | 0.7    | 0.6    | 0.8    | 0.4    |
| 210345_s_at | AF257737 | DNAH9                    | 1770   | 16.5   | 0.5    | 1.3    | 1.4    | 2.3    |
| 210346_s_at | AF212224 | CLK4                     | 57396  | 23.2   | 20.3   | 18.6   | 21.3   | 19.6   |
| 210347_s_at | AF080216 | BCL11A                   | 53335  | 14.0   | 13.4   | 15.6   | 10.6   | 10.3   |
| 210348_at   | AF176379 | SEPT4                    | 5414   | 2.9    | 2.2    | 2.1    | 6.3    | 0.9    |
| 210349_at   | L24959   | CAMK4                    | 814    | 11.6   | 0.2    | 7.7    | 2.6    | 1.3    |
| 210350_x_at | AF044076 | ING1                     | 3621   | 0.4    | 3.2    | 5.1    | 5.9    | 4.8    |
| 210352_at   | AL136823 | BRD8                     | 10902  | 9.3    | 6.2    | 7.8    | 1.1    | 2.9    |
| 210353_s_at | M65105   | SLC6A2                   | 6530   | 1.9    | 0.7    | 1.1    | 0.3    | 1.1    |
| 210354_at   | M29383   | IFNG                     | 3458   | 6.8    | 0.7    | 9.1    | 4.8    | 3.8    |
| 210355_at   | J03580   | PTHLH                    | 5744   | 2.1    | 5.1    | 5.0    | 0.6    | 1.5    |
| 210356_x_at | BC002807 | MS4A1                    | 931    | 3.1    | 10.8   | 7.8    | 2.0    | 3.4    |
| 210357_s_at | BC000669 | SMOX                     | 54498  | 18.7   | 16.3   | 5.9    | 12.6   | 9.3    |
| 210358_x_at | BC002557 | GATA2                    | 2624   | 93.8   | 69.3   | 98.3   | 99.7   | 83.2   |
| 210359_at   | AF116674 | MTSS1                    | 9788   | 6.8    | 5.6    | 4.5    | 2.9    | 1.0    |
| 210360_s_at | AF116674 | MTSS1                    | 9788   | 8.0    | 3.9    | 7.5    | 3.1    | 3.1    |
| 210361_s_at | AF256223 | ELF2                     | 1998   | 43.6   | 22.4   | 43.9   | 28.8   | 27.6   |
| 210362_x_at | AF230409 | PML                      | 5371   | 5.9    | 11.2   | 14.3   | 25.0   | 12.5   |
| 210363_s_at | AF107028 | SCN2B                    | 6327   | 1.4    | 0.7    | 1.2    | 0.4    | 0.6    |
| 210364_at   | U87555   | SCN2B                    | 6327   | 1.6    | 1.6    | 1.2    | 0.7    | 11.0   |
| 210365_at   | D43967   | LOC1005064861 /// 1005   |        | 3.5    | 5.1    | 4.4    | 8.4    | 1.2    |
| 210366_at   | AB026257 | SLCO1B1                  | 10599  | 7.3    | 1.8    | 4.0    | 2.9    | 5.4    |
| 210367_s_at | AF010316 | PTGES                    | 9536   | 14.5   | 13.7   | 5.8    | 4.1    | 12.8   |
| 210368_at   | AB002325 | PCDHGA8                  | 9708   | 0.9    | 2.5    | 0.5    | 1.2    | 1.6    |
| 210369_at   | BC000134 | SWAP70                   | 23075  | 11.6   | 14.0   | 13.9   | 8.7    | 6.4    |
| 210370_s_at | AF244129 | LY9                      | 4063   | 1.5    | 1.7    | 1.7    | 1.3    | 0.9    |
| 210371_s_at | BC003092 | RBBP4                    | 5928   | 705.9  | 651.5  | 778.4  | 694.9  | 590.2  |
| 210372_s_at | AF208012 | TPD52L1                  | 7164   | 144.9  | 140.8  | 134.6  | 130.9  | 109.0  |
| 210373_at   | AF040708 | NPRL2                    | 10641  | 3.0    | 2.2    | 1.8    | 1.2    | 7.1    |
| 210374_x_at | D38300   | PTGER3                   | 5733   | 7.2    | 4.7    | 5.1    | 5.3    | 3.6    |
| 210375_at   | X83858   | PTGER3                   | 5733   | 0.1    | 3.0    | 0.4    | 2.1    | 1.5    |
| 210376_x_at | M25269   | ELK1                     | 2002   | 72.0   | 73.9   | 111.4  | 79.9   | 58.1   |
| 210377_at   | D16350   | ACSM3                    | 6296   | 37.4   | 35.2   | 35.3   | 35.6   | 29.0   |
| 210378_s_at | BC004118 | SSNA1                    | 8636   | 173.8  | 174.2  | 230.8  | 249.2  | 198.8  |
| 210379_s_at | AF162666 | TLK1                     | 9874   | 28.1   | 18.4   | 24.9   | 20.7   | 19.8   |

|             |          |                  |               |         |       |       |       |       |       |
|-------------|----------|------------------|---------------|---------|-------|-------|-------|-------|-------|
| 210380_s_at | AF126966 | CACNA1G          | 8913          | 7.5     | 4.3   | 6.9   | 6.3   | 1.3   |       |
| 210381_s_at | BC000740 | CCKBR            | 887           | 1.6     | 13.0  | 8.1   | 2.4   | 10.9  |       |
| 210382_at   | U13989   | SCTR             | 6344          | 0.8     | 0.8   | 1.3   | 0.6   | 0.4   |       |
| 210383_at   | AF225985 | SCN1A            | 6323          | 0.8     | 2.4   | 0.3   | 2.4   | 0.4   |       |
| 210384_at   | U79286   | PRMT2            | 3275          | 4.4     | 0.8   | 0.9   | 0.6   | 0.7   |       |
| 210385_s_at | AF106037 | ERAP1            | 51752         | 15.3    | 12.6  | 12.9  | 18.4  | 15.4  |       |
| 210386_s_at | BC001906 | MTX1             | 4580          | 355.5   | 378.2 | 419.2 | 388.5 | 334.5 |       |
| 210387_at   | BC001131 | HIST1H2BG / 8339 | /// 897       | 46.5    | 44.4  | 37.8  | 48.3  | 32.5  |       |
| 210388_at   | BC000939 | PLCB2            | 5330          | 1.3     | 0.6   | 2.1   | 1.5   | 1.5   |       |
| 210389_x_at | BC000258 | TUBD1            | 51174         | 44.3    | 26.2  | 45.0  | 33.5  | 35.5  |       |
| 210390_s_at | AF031587 | CCL15            | /// CC 6359   | /// 348 | 3.4   | 0.4   | 0.2   | 2.4   | 0.2   |
| 210391_at   | X99975   | NR6A1            | 2649          | 1.7     | 1.4   | 2.2   | 2.1   | 0.9   |       |
| 210392_x_at | U80802   | NR6A1            | 2649          | 1.0     | 15.1  | 6.6   | 8.3   | 3.7   |       |
| 210393_at   | AF062006 | LGR5             | 8549          | 0.9     | 0.7   | 1.6   | 1.0   | 0.8   |       |
| 210394_x_at | BC005325 | SSX4             | /// SSX4 6759 | /// 548 | 17.0  | 15.6  | 16.4  | 14.0  | 3.1   |
| 210395_x_at | AF116676 | MYL4             | 4635          | 25.5    | 27.6  | 26.8  | 20.8  | 18.3  |       |
| 210396_s_at | AF271775 | BOLA2            | /// SM 440354 | /// 5   | 294.4 | 242.7 | 317.4 | 251.7 | 244.2 |
| 210397_at   | U73945   | DEFB1            | 1672          | 1.0     | 2.1   | 3.9   | 0.9   | 5.0   |       |
| 210398_x_at | M98825   | FUT6             | 2528          | 0.9     | 0.4   | 2.0   | 1.2   | 0.7   |       |
| 210399_x_at | U27336   | FUT6             | 2528          | 3.8     | 20.4  | 13.3  | 15.1  | 11.9  |       |
| 210400_at   | L76224   | GRIN2C           | 2905          | 1.1     | 1.1   | 1.2   | 0.8   | 0.9   |       |
| 210401_at   | U45448   | P2RX1            | 5023          | 8.4     | 7.7   | 10.3  | 9.2   | 6.1   |       |
| 210402_at   | U03884   | KCNJ1            | 3758          | 0.4     | 0.3   | 0.9   | 0.6   | 2.5   |       |
| 210403_s_at | U12543   | KCNJ1            | 3758          | 0.9     | 1.0   | 3.1   | 0.3   | 3.3   |       |
| 210404_x_at | AF078803 | CAMK2B           | 816           | 19.5    | 24.8  | 28.1  | 28.7  | 18.0  |       |
| 210405_x_at | AF153687 | TNFRSF10B        | 8795          | 77.4    | 70.4  | 74.7  | 68.0  | 66.9  |       |
| 210406_s_at | AL136727 | RAB6A            | /// R/ 5870   | /// 840 | 268.3 | 234.6 | 301.4 | 293.8 | 190.1 |
| 210407_at   | AF070670 | PPM1A            | 5494          | 26.1    | 14.5  | 24.5  | 15.1  | 21.7  |       |
| 210408_s_at | AB009288 | CPNE6            | 9362          | 0.9     | 1.0   | 1.2   | 0.6   | 0.8   |       |
| 210409_at   | AB016898 | MLLT4-AS1        | 653483        | 3.8     | 3.0   | 5.9   | 4.4   | 3.9   |       |
| 210410_s_at | AF034759 | MSH5             | /// MS 4439   | /// 401 | 12.2  | 17.7  | 26.5  | 22.8  | 16.8  |
| 210411_s_at | U90278   | GRIN2B           | 2904          | 2.0     | 0.6   | 1.4   | 2.0   | 3.5   |       |
| 210412_at   | U11287   | GRIN2B           | 2904          | 8.8     | 7.1   | 7.9   | 5.6   | 3.5   |       |
| 210413_x_at | U19557   | SERPINB3         | /// 6317      | /// 631 | 7.1   | 7.3   | 9.8   | 5.1   | 7.1   |
| 210414_at   | AF169675 | FLRT1            | 23769         | 9.3     | 14.2  | 6.3   | 11.5  | 7.2   |       |
| 210415_s_at | AF053970 | ODF2             | 4957          | 20.6    | 26.6  | 25.2  | 20.9  | 17.6  |       |
| 210416_s_at | BC004207 | CHEK2            | 11200         | 73.4    | 56.6  | 84.0  | 47.5  | 66.1  |       |
| 210417_s_at | U81802   | PI4KB            | 5298          | 156.7   | 136.2 | 161.5 | 146.5 | 120.3 |       |
| 210418_s_at | AF023265 | IDH3B            | 3420          | 269.2   | 297.6 | 344.4 | 255.7 | 213.9 |       |
| 210419_at   | AF031924 | BARX2            | 8538          | 10.7    | 2.1   | 2.2   | 8.0   | 4.3   |       |
| 210420_at   | AB014602 | SLC24A1          | 9187          | 12.3    | 6.9   | 1.9   | 4.8   | 1.2   |       |
| 210421_s_at | AB014602 | SLC24A1          | 9187          | 1.0     | 0.6   | 1.4   | 8.9   | 1.2   |       |
| 210422_x_at | D50402   | SLC11A1          | 6556          | 60.4    | 20.8  | 5.9   | 21.2  | 27.2  |       |
| 210423_s_at | L32185   | SLC11A1          | 6556          | 18.5    | 7.9   | 12.9  | 1.9   | 8.9   |       |
| 210424_s_at | AF163441 | GOLGA8A          | ///, 23015    | /// 44  | 10.9  | 1.4   | 4.6   | 12.0  | 11.7  |
| 210425_x_at | AF164622 | GOLGA8A          | ///, 23015    | /// 44  | 44.9  | 28.1  | 27.7  | 17.7  | 14.8  |
| 210426_x_at | U04897   | RORA             | 6095          | 5.7     | 5.7   | 0.8   | 6.7   | 1.9   |       |
| 210427_x_at | BC001388 | ANXA2            | 302           | 31.8    | 22.0  | 25.9  | 35.2  | 16.0  |       |
| 210428_s_at | AF260566 | HGS              | 9146          | 182.9   | 170.7 | 194.2 | 187.9 | 168.1 |       |
| 210429_at   | X63097   | RHD              | 6007          | 0.6     | 0.7   | 4.6   | 3.9   | 0.4   |       |
| 210430_x_at | L08429   | RHD              | 6007          | 2.6     | 1.6   | 2.4   | 4.0   | 1.5   |       |
| 210431_at   | J04948   | ALPPL2           | 251           | 3.0     | 1.9   | 3.0   | 1.1   | 0.9   |       |
| 210432_s_at | AF225986 | SCN3A            | 6328          | 0.4     | 0.7   | 0.5   | 0.2   | 2.1   |       |

|             |          |                          |        |        |        |        |        |        |
|-------------|----------|--------------------------|--------|--------|--------|--------|--------|--------|
| 210433_at   | BC000582 | POFUT1                   | 23509  | 1.2    | 0.9    | 13.2   | 8.6    | 0.5    |
| 210434_x_at | AF151056 | JTB                      | 10899  | 1353.8 | 1278.1 | 1430.2 | 1255.0 | 1141.8 |
| 210435_at   | BC000924 | ARL17A /// A51326 /// 10 |        | 5.5    | 1.5    | 1.7    | 4.1    | 5.1    |
| 210436_at   | BC005220 | CCT8                     | 10694  | 6.7    | 7.3    | 6.1    | 4.8    | 3.9    |
| 210437_at   | BC002351 | MAGEA9 /// 4108 /// 728  |        | 5.0    | 0.9    | 4.5    | 6.9    | 7.3    |
| 210438_x_at | M25077   | TROVE2                   | 6738   | 99.1   | 111.2  | 130.0  | 110.5  | 98.7   |
| 210439_at   | AB023135 | ICOS                     | 29851  | 1.0    | 0.5    | 0.3    | 0.3    | 0.2    |
| 210440_s_at | AF064102 | CDC14A                   | 8556   | 5.8    | 9.5    | 11.5   | 4.1    | 5.0    |
| 210441_at   | AF064102 | CDC14A                   | 8556   | 2.2    | 0.6    | 1.5    | 0.6    | 1.8    |
| 210442_at   | AB012701 | IL1RL1                   | 9173   | 4.3    | 2.5    | 2.9    | 3.0    | 2.7    |
| 210443_x_at | AF172452 | OGFR                     | 11054  | 80.0   | 66.2   | 52.9   | 60.2   | 53.5   |
| 210444_at   | U59431   | NPY6R                    | 4888   | 6.9    | 7.6    | 12.7   | 8.2    | 4.2    |
| 210445_at   | U19869   | FABP6                    | 2172   | 0.5    | 3.4    | 1.3    | 0.8    | 1.5    |
| 210446_at   | M30601   | GATA1                    | 2623   | 1.8    | 2.6    | 0.6    | 2.3    | 7.3    |
| 210447_at   | BC005111 | GLUD2                    | 2747   | 2.2    | 2.7    | 1.2    | 4.1    | 2.5    |
| 210448_s_at | U49396   | P2RX5                    | 5026   | 49.3   | 51.2   | 73.8   | 48.2   | 41.7   |
| 210449_x_at | AF100544 | MAPK14                   | 1432   | 42.5   | 53.3   | 63.2   | 42.3   | 44.0   |
| 210450_at   | BC002792 | IGHV5-78                 | 28387  | 0.8    | 4.8    | 3.4    | 0.6    | 0.7    |
| 210451_at   | M15465   | PKLR                     | 5313   | 0.9    | 0.6    | 1.3    | 0.8    | 0.5    |
| 210452_x_at | D26480   | CYP4F2                   | 8529   | 2.2    | 1.2    | 2.4    | 1.2    | 1.2    |
| 210453_x_at | AL050277 | ATP5L                    | 10632  | 1443.1 | 1477.3 | 1585.6 | 1549.1 | 1304.9 |
| 210454_s_at | U24660   | KCNJ6                    | 3763   | 2.7    | 7.1    | 2.1    | 0.8    | 4.4    |
| 210455_at   | AF050198 | R3HCC1L                  | 27291  | 10.1   | 7.5    | 9.4    | 9.0    | 13.1   |
| 210456_at   | AF148464 | PCYT1B                   | 9468   | 7.8    | 4.6    | 8.0    | 2.6    | 11.9   |
| 210457_x_at | AF176039 | HMGA1                    | 3159   | 30.5   | 30.1   | 39.9   | 19.4   | 25.8   |
| 210458_s_at | BC003388 | TANK                     | 10010  | 12.2   | 8.8    | 13.3   | 10.9   | 12.5   |
| 210459_at   | AB033605 | PSMD4                    | 5710   | 8.1    | 1.5    | 3.5    | 2.1    | 4.4    |
| 210460_s_at | AB033605 | PSMD4                    | 5710   | 400.0  | 420.1  | 394.7  | 427.3  | 336.5  |
| 210461_s_at | BC002448 | ABLIM1                   | 3983   | 27.2   | 26.3   | 25.0   | 17.9   | 14.8   |
| 210462_at   | AF288161 | BLZF1                    | 8548   | 5.6    | 0.2    | 0.8    | 0.3    | 0.4    |
| 210463_x_at | BC002492 | TRMT1                    | 55621  | 45.1   | 60.1   | 82.2   | 68.8   | 63.1   |
| 210464_at   | AL080200 | LINC00588                | 26138  | 3.7    | 1.0    | 1.8    | 7.1    | 0.4    |
| 210465_s_at | U71300   | SNAPC3                   | 6619   | 67.0   | 59.1   | 65.3   | 70.9   | 45.5   |
| 210466_s_at | BC002488 | SERBP1                   | 26135  | 874.6  | 902.0  | 1251.5 | 947.4  | 1071.0 |
| 210467_x_at | BC003408 | MAGEA12                  | 4111   | 720.0  | 667.5  | 781.4  | 623.8  | 546.2  |
| 210469_at   | BC002915 | DLG5                     | 9231   | 12.4   | 5.7    | 8.1    | 2.3    | 2.6    |
| 210470_x_at | BC003129 | NONO                     | 4841   | 1070.6 | 1049.9 | 1091.0 | 1159.9 | 940.2  |
| 210471_s_at | U33428   | KCNAB1                   | 7881   | 1.6    | 7.7    | 6.6    | 11.4   | 0.4    |
| 210472_at   | BC005311 | MT1G                     | 4495   | 4.5    | 5.4    | 5.2    | 1.8    | 1.6    |
| 210473_s_at | M37712   | GPR125                   | 166647 | 45.6   | 42.5   | 53.4   | 41.7   | 56.4   |
| 210474_s_at | U04819   | CDK11A /// C984 /// 7286 |        | 20.3   | 24.6   | 19.9   | 21.6   | 16.3   |
| 210475_at   | L26494   | POU3F1                   | 5453   | 11.1   | 8.8    | 3.4    | 9.0    | 3.6    |
| 210476_s_at | AF166329 | PRLR                     | 5618   | 8.5    | 1.3    | 2.0    | 4.2    | 2.5    |
| 210477_x_at | U34822   | MAPK8                    | 5599   | 20.8   | 18.9   | 10.4   | 17.5   | 17.7   |
| 210479_s_at | L14611   | RORA                     | 6095   | 6.7    | 2.4    | 5.7    | 2.0    | 0.1    |
| 210480_s_at | U90236   | MYO6                     | 4646   | 478.3  | 469.4  | 510.8  | 442.6  | 389.8  |
| 210481_s_at | AF245219 | CLEC4M                   | 10332  | 1.8    | 1.6    | 1.9    | 0.9    | 0.9    |
| 210482_x_at | U71087   | MAP2K5                   | 5607   | 34.6   | 51.3   | 39.9   | 28.2   | 23.2   |
| 210483_at   | BC005043 | LOC254896 / 8794 /// 254 |        | 28.9   | 31.1   | 29.5   | 26.2   | 26.3   |
| 210484_s_at | BC005043 | LOC254896 / 8794 /// 254 |        | 19.9   | 18.0   | 18.6   | 18.3   | 14.9   |
| 210486_at   | AL136618 | ANKMY1                   | 51281  | 6.8    | 0.8    | 1.1    | 1.4    | 3.0    |
| 210487_at   | M11722   | DNTT                     | 1791   | 1.9    | 1.7    | 0.6    | 0.8    | 1.1    |
| 210491_at   | AF119888 | -                        | -      | 3.2    | 2.6    | 4.5    | 5.4    | 4.1    |

|             |          |            |              |         |        |        |        |        |        |
|-------------|----------|------------|--------------|---------|--------|--------|--------|--------|--------|
| 210492_at   | BC001279 | LOC1019281 | 9848         | /// 101 | 5.8    | 1.0    | 18.4   | 5.4    | 5.3    |
| 210493_s_at | BC001279 | LOC1019281 | 9848         | /// 101 | 12.6   | 14.1   | 23.6   | 12.2   | 13.8   |
| 210495_x_at | AF130095 | FN1        | 2335         |         | 163.7  | 176.4  | 125.7  | 145.7  | 141.0  |
| 210496_at   | AF210651 | NAG18      | 57051        |         | 6.7    | 4.4    | 6.7    | 3.8    | 4.3    |
| 210497_x_at | BC002818 | SSX2       | /// SSX:6757 | /// 727 | 16.2   | 19.4   | 18.4   | 25.7   | 25.8   |
| 210498_at   | AF130062 | CLTC       | 1213         |         | 0.3    | 5.0    | 3.4    | 4.4    | 3.9    |
| 210499_s_at | AB041834 | PQBP1      | 10084        |         | 20.3   | 16.2   | 12.0   | 14.4   | 16.0   |
| 210500_at   | BC001957 | -          | -            |         | 2.6    | 0.3    | 5.6    | 0.9    | 0.9    |
| 210501_x_at | AF119846 | EIF3K      | 27335        |         | 860.0  | 855.4  | 908.6  | 866.1  | 748.2  |
| 210502_s_at | AF042386 | PPIE       | 10450        |         | 164.5  | 162.3  | 182.0  | 183.4  | 154.8  |
| 210503_at   | BC004479 | MAGEA11    | 4110         |         | 0.5    | 0.3    | 5.4    | 0.3    | 0.3    |
| 210504_at   | U65404   | KLF1       | 10661        |         | 7.1    | 13.3   | 9.0    | 6.9    | 7.1    |
| 210505_at   | U07821   | ADH7       | 131          |         | 8.5    | 9.0    | 10.6   | 10.1   | 7.7    |
| 210506_at   | U11282   | FUT7       | 2529         |         | 1.1    | 3.1    | 2.4    | 1.0    | 0.9    |
| 210507_s_at | BC004134 | AVIL       | 10677        |         | 1.1    | 1.9    | 1.2    | 1.2    | 0.9    |
| 210508_s_at | D82346   | KCNQ2      | 3785         |         | 0.9    | 5.3    | 8.3    | 7.5    | 2.6    |
| 210510_s_at | AF145712 | NRP1       | 8829         |         | 54.6   | 60.8   | 64.7   | 65.9   | 55.8   |
| 210511_s_at | M13436   | INHBA      | 3624         |         | 0.8    | 0.5    | 0.5    | 0.5    | 0.8    |
| 210512_s_at | AF022375 | VEGFA      | 7422         |         | 94.8   | 101.7  | 106.7  | 100.4  | 65.4   |
| 210513_s_at | AF091352 | VEGFA      | 7422         |         | 48.2   | 27.2   | 39.0   | 43.5   | 29.6   |
| 210514_x_at | AF226990 | HLA-G      | 3135         |         | 44.0   | 31.2   | 35.2   | 29.7   | 26.4   |
| 210515_at   | M57732   | HNF1A      | 6927         |         | 21.3   | 20.9   | 18.3   | 15.1   | 11.8   |
| 210516_at   | AF214738 | FAM120A    | 23196        |         | 2.7    | 2.2    | 1.9    | 4.1    | 2.5    |
| 210517_s_at | AB003476 | AKAP12     | 9590         |         | 5.9    | 4.6    | 1.7    | 4.8    | 1.3    |
| 210518_at   | AB035305 | CDH8       | 1006         |         | 6.8    | 11.3   | 5.6    | 3.5    | 2.6    |
| 210519_s_at | BC000906 | NQO1       | 1728         |         | 670.1  | 680.5  | 621.2  | 721.3  | 519.2  |
| 210520_at   | AB017551 | -          | -            |         | 1.8    | 1.1    | 0.8    | 0.8    | 0.8    |
| 210521_s_at | AB017551 | FETUB      | 26998        |         | 0.8    | 3.9    | 0.4    | 0.4    | 1.3    |
| 210523_at   | D89675   | BMPR1B     | 658          |         | 7.5    | 4.3    | 11.5   | 1.4    | 1.7    |
| 210524_x_at | AF078844 | -          | -            |         | 152.0  | 174.3  | 149.1  | 173.2  | 137.2  |
| 210525_x_at | BC001787 | EFCAB11    | 90141        |         | 11.0   | 7.3    | 14.3   | 12.3   | 5.1    |
| 210527_x_at | L11645   | TUBA3C     | /// 17278    | /// 113 | 140.1  | 80.0   | 129.4  | 84.8   | 160.4  |
| 210528_at   | AF010447 | MR1        | 3140         |         | 3.5    | 3.9    | 0.3    | 2.1    | 1.1    |
| 210529_s_at | BC000609 | FAM115A    | /// 9747     | /// 100 | 98.3   | 78.9   | 89.8   | 81.3   | 63.0   |
| 210530_s_at | M21985   | NR2C1      | 7181         |         | 8.3    | 5.9    | 2.5    | 8.5    | 1.6    |
| 210531_at   | M21985   | NR2C1      | 7181         |         | 14.0   | 9.7    | 10.8   | 8.3    | 5.6    |
| 210532_s_at | AF116639 | C14orf2    | 9556         |         | 1412.6 | 1239.3 | 1753.9 | 1453.3 | 1165.9 |
| 210533_at   | AF104243 | MSH4       | 4438         |         | 5.7    | 0.6    | 5.4    | 6.2    | 0.2    |
| 210534_s_at | BC002944 | B9D1       | 27077        |         | 42.8   | 52.4   | 53.1   | 55.0   | 41.6   |
| 210535_at   | BC002944 | B9D1       | 27077        |         | 1.9    | 1.7    | 10.8   | 1.2    | 6.7    |
| 210536_s_at | S67798   | SPAM1      | 6677         |         | 6.3    | 1.7    | 11.1   | 9.9    | 4.2    |
| 210537_s_at | BC001172 | TADA2A     | 6871         |         | 4.0    | 4.2    | 13.7   | 17.5   | 21.0   |
| 210538_s_at | U37546   | BIRC3      | 330          |         | 7.8    | 5.4    | 7.4    | 6.2    | 4.9    |
| 210539_at   | AK024259 | TLL5       | 23093        |         | 1.3    | 2.1    | 12.2   | 1.9    | 1.7    |
| 210540_s_at | BC004523 | B4GALT4    | 8702         |         | 47.8   | 44.0   | 45.8   | 45.8   | 31.9   |
| 210541_s_at | AF230394 | TRIM27     | 5987         |         | 215.4  | 220.3  | 262.0  | 227.9  | 192.5  |
| 210542_s_at | BC000585 | SLCO3A1    | 28232        |         | 6.9    | 1.8    | 2.5    | 1.2    | 5.6    |
| 210543_s_at | U34994   | PRKDC      | 5591         |         | 113.0  | 95.6   | 107.1  | 102.4  | 94.5   |
| 210544_s_at | BC002430 | ALDH3A2    | 224          |         | 53.0   | 80.7   | 64.1   | 67.5   | 45.4   |
| 210545_at   | AF182199 | ITSN2      | 50618        |         | 3.3    | 11.0   | 10.1   | 11.7   | 16.1   |
| 210546_x_at | U87459   | CTAG1A     | /// 1485     | /// 246 | 0.9    | 0.8    | 0.7    | 0.5    | 1.1    |
| 210547_x_at | L21181   | ICA1       | 3382         |         | 105.5  | 116.1  | 100.2  | 102.7  | 81.9   |
| 210548_at   | U58913   | CCL23      | 6368         |         | 3.1    | 0.4    | 0.3    | 0.5    | 0.2    |

|                      |                           |              |       |       |       |       |       |
|----------------------|---------------------------|--------------|-------|-------|-------|-------|-------|
| 210549_s_at U58913   | CCL23                     | 6368         | 1.0   | 1.4   | 3.7   | 1.0   | 2.2   |
| 210550_s_at L26584   | RASGRF1                   | 5923         | 0.9   | 1.1   | 1.3   | 0.9   | 1.6   |
| 210551_s_at BC001620 | ASMT                      | 438          | 2.3   | 5.9   | 7.7   | 0.4   | 1.1   |
| 210552_s_at AF221098 | RALGPS1                   | 9649         | 9.6   | 7.0   | 8.0   | 5.4   | 3.1   |
| 210553_x_at D28514   | LOC1005074                | 5046 /// 100 | 9.1   | 14.3  | 12.9  | 23.8  | 10.2  |
| 210554_s_at BC002486 | CTBP2                     | 1488         | 348.0 | 293.1 | 335.1 | 363.3 | 278.8 |
| 210555_s_at U85430   | NFATC3                    | 4775         | 25.1  | 29.7  | 35.2  | 27.1  | 25.2  |
| 210556_at U85430     | NFATC3                    | 4775         | 2.7   | 0.5   | 2.6   | 0.8   | 0.8   |
| 210557_x_at M76453   | CSF1                      | 1435         | 3.7   | 0.9   | 1.1   | 2.1   | 3.5   |
| 210558_at AB045829   | AKR1C4                    | 1109         | 0.8   | 0.5   | 2.6   | 0.6   | 3.1   |
| 210559_s_at D88357   | CDK1                      | 983          | 565.7 | 367.5 | 529.0 | 409.6 | 460.4 |
| 210560_at AF118452   | GBX2                      | 2637         | 1.4   | 0.4   | 1.9   | 0.8   | 0.5   |
| 210561_s_at AL110243 | WSB1                      | 26118        | 112.7 | 135.1 | 178.7 | 126.6 | 124.2 |
| 210562_at AF245389   | GREB1                     | 9687         | 0.6   | 1.7   | 1.1   | 0.5   | 1.8   |
| 210563_x_at U97075   | CFLAR                     | 8837         | 46.7  | 41.8  | 60.5  | 50.6  | 37.9  |
| 210564_x_at AF009619 | CFLAR                     | 8837         | 13.3  | 8.3   | 18.9  | 18.7  | 14.4  |
| 210565_at U03469     | GCGR                      | 2642         | 4.9   | 0.6   | 1.6   | 6.8   | 1.0   |
| 210567_s_at BC001441 | SKP2                      | 6502         | 72.7  | 48.2  | 77.0  | 45.9  | 57.5  |
| 210568_s_at BC001052 | RECQL                     | 5965         | 39.3  | 37.2  | 39.0  | 33.4  | 38.2  |
| 210569_s_at AF247180 | SIGLEC9                   | 27180        | 2.3   | 1.4   | 1.8   | 1.0   | 0.9   |
| 210570_x_at U35002   | MAPK9                     | 5601         | 65.3  | 67.7  | 90.7  | 68.1  | 61.4  |
| 210571_s_at AF074480 | CMAHP                     | 8418         | 2.4   | 0.9   | 3.4   | 1.1   | 3.9   |
| 210572_at BC003126   | PCDHA2 /// 156145 /// 56  |              | 4.5   | 1.0   | 0.7   | 6.9   | 0.6   |
| 210573_s_at BC004424 | POLR3C                    | 10623        | 68.4  | 63.5  | 58.0  | 51.4  | 42.4  |
| 210574_s_at AF241788 | NUDC                      | 10726        | 409.3 | 376.2 | 500.6 | 393.7 | 402.4 |
| 210575_at AF241788   | NUDC                      | 10726        | 2.4   | 4.4   | 0.8   | 1.2   | 1.1   |
| 210576_at AF133298   | CYP4F8                    | 11283        | 0.9   | 0.6   | 0.7   | 0.7   | 0.6   |
| 210577_at U20760     | CASR                      | 846          | 6.8   | 8.7   | 6.9   | 9.7   | 5.9   |
| 210578_at AF220122   | TRIM10                    | 10107        | 5.9   | 6.6   | 9.1   | 1.5   | 6.4   |
| 210579_s_at AF220122 | TRIM10                    | 10107        | 7.6   | 4.7   | 0.7   | 8.8   | 0.4   |
| 210580_x_at L25275   | LOC1019298                | 6818 /// 445 | 103.9 | 95.7  | 102.5 | 105.6 | 76.8  |
| 210581_x_at AF254088 | PATZ1                     | 23598        | 35.7  | 35.0  | 27.9  | 39.0  | 28.3  |
| 210582_s_at AL117466 | LIMK2                     | 3985         | 68.7  | 69.6  | 72.0  | 57.3  | 53.7  |
| 210583_at AB055760   | POLDIP3                   | 84271        | 11.5  | 9.4   | 8.7   | 7.8   | 8.9   |
| 210584_s_at AB055760 | POLDIP3 /// 84271 /// 91  |              | 7.6   | 6.8   | 9.3   | 3.7   | 5.5   |
| 210585_s_at AF007748 | TNPO2                     | 30000        | 27.4  | 33.4  | 39.4  | 31.3  | 26.9  |
| 210586_x_at AF312679 | RHD                       | 6007         | 3.9   | 1.7   | 3.8   | 1.4   | 3.0   |
| 210587_at BC005161   | INHBE                     | 83729        | 4.6   | 9.2   | 4.4   | 4.4   | 3.5   |
| 210588_x_at L32610   | HNRNPH3                   | 3189         | 88.3  | 105.1 | 105.4 | 87.5  | 85.5  |
| 210589_s_at D13287   | GBAP1                     | 2630         | 100.8 | 65.8  | 112.7 | 98.6  | 79.4  |
| 210592_s_at M55580   | SAT1                      | 6303         | 314.7 | 294.2 | 368.1 | 274.5 | 316.1 |
| 210593_at M55580     | SAT1 /// ZSW 6303 /// 230 |              | 12.9  | 7.0   | 2.2   | 12.0  | 4.7   |
| 210594_x_at AF239756 | MPZL1                     | 9019         | 158.9 | 145.5 | 179.2 | 147.5 | 149.8 |
| 210595_at BC002663   | ZNF235                    | 9310         | 0.8   | 1.6   | 0.9   | 0.8   | 0.7   |
| 210596_at AF130104   | MAGT1                     | 84061        | 55.7  | 63.7  | 68.3  | 48.4  | 52.5  |
| 210597_x_at K03206   | PRB1                      | 5542         | 10.5  | 17.5  | 15.0  | 11.9  | 10.7  |
| 210598_at AF130051   | -                         | -            | 8.2   | 10.6  | 8.6   | 9.8   | 5.9   |
| 210599_at BC004930   | ZNF614                    | 80110        | 7.0   | 3.7   | 5.7   | 0.4   | 5.9   |
| 210600_s_at U33054   | GRK4                      | 2868         | 1.7   | 0.6   | 0.2   | 0.3   | 0.2   |
| 210601_at BC000019   | CDH6                      | 1004         | 14.3  | 12.8  | 8.1   | 7.2   | 4.3   |
| 210602_s_at BC000019 | CDH6                      | 1004         | 6.0   | 3.8   | 6.2   | 3.5   | 2.5   |
| 210603_at BC004552   | NAA11                     | 84779        | 12.3  | 5.2   | 14.7  | 6.1   | 4.3   |
| 210604_at BC000233   | GNAT2                     | 2780         | 1.5   | 0.8   | 0.6   | 1.9   | 1.7   |

|                      |                            |       |        |        |        |        |        |
|----------------------|----------------------------|-------|--------|--------|--------|--------|--------|
| 210605_s_at BC003610 | MFGE8                      | 4240  | 18.2   | 20.5   | 13.2   | 10.2   | 9.9    |
| 210606_x_at U30610   | KLRD1                      | 3824  | 2.6    | 1.7    | 3.8    | 2.0    | 1.0    |
| 210607_at U03858     | FLT3LG                     | 2323  | 1.3    | 0.9    | 9.6    | 1.2    | 0.7    |
| 210608_s_at BC001899 | FUT2                       | 2524  | 22.3   | 14.2   | 16.0   | 10.8   | 14.2   |
| 210609_s_at BC000474 | TP53I3                     | 9540  | 30.2   | 22.9   | 30.2   | 37.3   | 27.7   |
| 210610_at M69176     | CEACAM1                    | 634   | 11.4   | 1.8    | 15.6   | 1.5    | 9.1    |
| 210611_s_at U26744   | DTNA                       | 1837  | 3.3    | 0.4    | 5.7    | 3.2    | 1.4    |
| 210612_s_at AF318616 | SYNJ2                      | 8871  | 0.9    | 0.8    | 0.3    | 0.3    | 0.4    |
| 210613_s_at BC000731 | SYNGR1                     | 9145  | 63.1   | 57.4   | 49.0   | 52.5   | 31.2   |
| 210614_at U21938     | TTPA                       | 7274  | 3.1    | 2.5    | 9.3    | 6.1    | 2.3    |
| 210615_at AF280547   | NRP1                       | 8829  | 11.1   | 9.2    | 1.8    | 1.5    | 5.0    |
| 210616_s_at AB020712 | SEC31A                     | 22872 | 227.2  | 213.0  | 195.3  | 201.5  | 169.1  |
| 210617_at U87284     | PHEX                       | 5251  | 18.3   | 10.6   | 10.9   | 4.0    | 7.9    |
| 210618_at AB007943   | RAP1GAP                    | 5909  | 4.1    | 2.0    | 1.8    | 2.1    | 3.9    |
| 210619_s_at AF173154 | HYAL1                      | 3373  | 1.8    | 2.1    | 2.9    | 1.1    | 0.7    |
| 210620_s_at BC000212 | GTF3C2                     | 2976  | 58.5   | 47.7   | 63.7   | 49.5   | 48.6   |
| 210621_s_at M23612   | RASA1                      | 5921  | 71.2   | 64.8   | 76.0   | 66.8   | 51.7   |
| 210622_x_at AF153430 | CDK10                      | 8558  | 82.5   | 75.4   | 109.9  | 78.7   | 78.8   |
| 210623_at BC001372   | UBXN1                      | 51035 | 9.2    | 5.3    | 7.4    | 3.3    | 5.5    |
| 210624_s_at BC000109 | ILVBL                      | 10994 | 141.3  | 118.2  | 125.5  | 111.8  | 89.3   |
| 210625_s_at U34074   | AKAP1                      | 8165  | 77.6   | 61.9   | 86.0   | 75.5   | 85.6   |
| 210626_at U34074     | AKAP1                      | 8165  | 1.4    | 3.7    | 6.1    | 5.0    | 0.9    |
| 210627_s_at BC002804 | MOGS                       | 7841  | 36.3   | 27.7   | 36.5   | 36.9   | 33.9   |
| 210628_x_at AF051344 | LTBP4                      | 8425  | 15.1   | 15.0   | 18.0   | 9.9    | 10.2   |
| 210629_x_at AF000425 | LST1                       | 7940  | 5.3    | 1.2    | 2.5    | 1.9    | 0.5    |
| 210630_s_at AF125949 | RAD52                      | 5893  | 11.6   | 9.4    | 17.0   | 6.6    | 7.9    |
| 210631_at D42072     | LOC1019301.4763 /// 101    |       | 2.6    | 1.3    | 4.5    | 0.7    | 1.8    |
| 210632_s_at L35853   | SGCA                       | 6442  | 0.6    | 0.5    | 0.3    | 0.6    | 0.3    |
| 210633_x_at M19156   | KRT10                      | 3858  | 618.8  | 705.7  | 776.5  | 590.1  | 572.1  |
| 210634_at BC005253   | KLHL20                     | 27252 | 0.9    | 3.7    | 1.3    | 2.4    | 6.0    |
| 210635_s_at BC005253 | KLHL20                     | 27252 | 36.2   | 27.5   | 36.3   | 37.5   | 30.1   |
| 210636_at BC002715   | PPARD                      | 5467  | 0.6    | 0.3    | 2.9    | 10.6   | 2.7    |
| 210637_at M81797     | TACR1                      | 6869  | 1.4    | 1.5    | 1.3    | 0.8    | 1.2    |
| 210638_s_at AF176704 | FBXO9                      | 26268 | 419.7  | 405.0  | 418.1  | 421.7  | 324.6  |
| 210639_s_at AF293841 | ATG5                       | 9474  | 80.3   | 66.4   | 92.8   | 72.9   | 59.2   |
| 210640_s_at U63917   | GPER1                      | 2852  | 53.3   | 60.3   | 29.4   | 50.9   | 29.0   |
| 210641_at AB038463   | CAPN9                      | 10753 | 10.2   | 7.6    | 8.8    | 9.6    | 7.8    |
| 210642_at AF333334   | CCIN                       | 881   | 0.6    | 0.8    | 1.3    | 1.1    | 0.8    |
| 210643_at AF053712   | TNFSF11                    | 8600  | 2.4    | 3.8    | 3.5    | 2.0    | 2.5    |
| 210644_s_at AF109683 | LAIR1                      | 3903  | 13.5   | 6.7    | 20.8   | 9.6    | 11.8   |
| 210645_s_at D83077   | TTC3 /// TTC: 7267 /// 286 |       | 206.2  | 210.1  | 202.5  | 200.3  | 147.1  |
| 210646_x_at BC001675 | RPL13A /// R 23521 /// 26  |       | 5007.0 | 4590.5 | 4938.2 | 4942.6 | 4572.4 |
| 210647_x_at AF102988 | PLA2G6                     | 8398  | 88.8   | 84.8   | 79.3   | 77.2   | 53.1   |
| 210648_x_at AB047360 | SNX3                       | 8724  | 682.3  | 654.9  | 753.9  | 655.0  | 579.7  |
| 210649_s_at AF231056 | ARID1A                     | 8289  | 79.7   | 59.1   | 91.5   | 70.5   | 48.5   |
| 210650_s_at BC001304 | PCLO                       | 27445 | 1.7    | 4.0    | 3.6    | 3.5    | 0.5    |
| 210651_s_at L41939   | EPHB2                      | 2048  | 15.9   | 28.3   | 18.8   | 17.5   | 17.5   |
| 210652_s_at BC004399 | TTC39A                     | 22996 | 47.8   | 60.5   | 47.9   | 52.8   | 32.8   |
| 210653_s_at M55575   | BCKDHB                     | 594   | 35.8   | 23.1   | 34.3   | 39.5   | 25.7   |
| 210654_at AF021233   | TNFRSF10D                  | 8793  | 15.8   | 15.2   | 10.6   | 9.6    | 15.3   |
| 210655_s_at AF041336 | FOXO3 /// FC 2309 /// 231  |       | 40.4   | 55.2   | 44.5   | 60.3   | 37.6   |
| 210656_at AF099032   | EED                        | 8726  | 13.3   | 9.0    | 14.3   | 7.6    | 12.9   |
| 210657_s_at U88870   | SEPT4                      | 5414  | 2.8    | 5.5    | 0.4    | 6.2    | 1.2    |

|             |          |                          |        |       |       |       |       |       |
|-------------|----------|--------------------------|--------|-------|-------|-------|-------|-------|
| 210658_s_at | BC000284 | GGA2                     | 23062  | 74.0  | 49.2  | 80.9  | 65.3  | 53.7  |
| 210659_at   | U79526   | CMKLR1                   | 1240   | 15.8  | 10.7  | 5.9   | 8.2   | 4.2   |
| 210660_at   | AF025529 | LILRA1                   | 11024  | 1.2   | 1.3   | 9.1   | 6.5   | 1.0   |
| 210661_at   | U93917   | GLRA3                    | 8001   | 2.2   | 0.8   | 3.9   | 0.7   | 2.3   |
| 210662_at   | BC000879 | KYNU                     | 8942   | 0.3   | 2.4   | 0.9   | 0.2   | 0.2   |
| 210663_s_at | BC000879 | KYNU                     | 8942   | 1.0   | 1.1   | 4.4   | 4.8   | 0.4   |
| 210664_s_at | AF021834 | TFPI                     | 7035   | 120.4 | 109.4 | 202.5 | 118.1 | 145.3 |
| 210665_at   | AF021834 | TFPI                     | 7035   | 95.3  | 59.6  | 139.0 | 78.6  | 93.7  |
| 210666_at   | AF050145 | IDS                      | 3423   | 2.1   | 0.8   | 6.1   | 1.3   | 1.3   |
| 210667_s_at | D86062   | C21orf33                 | 8209   | 242.8 | 228.4 | 226.4 | 225.6 | 207.8 |
| 210669_at   | M61156   | TFAP2A                   | 7020   | 1.2   | 1.3   | 1.4   | 5.0   | 0.5   |
| 210670_at   | M15788   | PPY                      | 5539   | 12.1  | 6.4   | 9.5   | 4.6   | 3.0   |
| 210671_x_at | U35004   | MAPK8                    | 5599   | 31.1  | 18.3  | 30.2  | 23.0  | 19.9  |
| 210672_s_at | BC004185 | NPRL3                    | 8131   | 106.2 | 77.1  | 98.2  | 75.3  | 98.4  |
| 210673_x_at | D50740   | NKX2-1                   | 7080   | 0.5   | 4.0   | 3.9   | 0.4   | 0.5   |
| 210674_s_at | AF152308 | PCDHA1 /// I9752 /// 561 |        | 2.4   | 0.7   | 5.6   | 2.8   | 0.5   |
| 210675_s_at | U77917   | PTPRR                    | 5801   | 39.1  | 68.8  | 43.1  | 78.7  | 45.0  |
| 210676_x_at | U64675   | RGPD3 /// R84220 /// 28  |        | 38.1  | 21.9  | 35.9  | 31.5  | 22.6  |
| 210677_at   | AF059203 | SOAT2                    | 8435   | 1.1   | 2.1   | 1.2   | 1.0   | 0.5   |
| 210678_s_at | U56418   | AGPAT2                   | 10555  | 23.5  | 19.5  | 21.1  | 22.9  | 20.8  |
| 210679_x_at | BC002629 | -                        | -      | 38.2  | 28.4  | 36.8  | 25.0  | 24.2  |
| 210680_s_at | D17525   | MASP1                    | 5648   | 11.4  | 9.1   | 13.5  | 15.2  | 6.9   |
| 210681_s_at | AF153604 | MIR6125 /// 9958 /// 102 |        | 114.2 | 102.5 | 149.5 | 106.6 | 100.5 |
| 210682_at   | U39573   | LPO                      | 4025   | 2.2   | 2.0   | 2.0   | 1.5   | 0.5   |
| 210683_at   | AL161995 | NRTN                     | 4902   | 1.2   | 5.7   | 4.3   | 1.3   | 1.4   |
| 210684_s_at | AF028825 | DLG4                     | 1742   | 2.1   | 2.0   | 1.2   | 8.9   | 4.2   |
| 210685_s_at | AB028839 | UBE4B                    | 10277  | 79.6  | 78.5  | 88.7  | 91.9  | 78.8  |
| 210686_x_at | BC001407 | SLC25A16                 | 8034   | 106.1 | 119.1 | 72.2  | 103.8 | 65.2  |
| 210687_at   | BC000185 | CPT1A                    | 1374   | 24.1  | 17.2  | 22.6  | 20.3  | 21.3  |
| 210688_s_at | BC000185 | CPT1A                    | 1374   | 68.3  | 69.8  | 69.0  | 64.8  | 60.5  |
| 210689_at   | AF314090 | CLDN14                   | 23562  | 8.5   | 4.8   | 8.3   | 5.5   | 5.3   |
| 210690_at   | U96845   | KLRC4                    | 8302   | 2.3   | 0.2   | 3.2   | 0.9   | 0.3   |
| 210691_s_at | AF275803 | CACYBP                   | 27101  | 426.9 | 305.3 | 429.5 | 356.1 | 361.2 |
| 210692_s_at | BC003163 | SLC43A3                  | 29015  | 2.6   | 3.4   | 1.5   | 0.7   | 3.6   |
| 210693_at   | BC001788 | SPPL2B                   | 56928  | 1.2   | 1.0   | 0.6   | 1.3   | 1.1   |
| 210694_s_at | AF041209 | MID1                     | 4281   | 4.7   | 11.3  | 9.8   | 7.6   | 9.4   |
| 210695_s_at | U13395   | WWOX                     | 51741  | 63.8  | 49.8  | 52.5  | 48.2  | 43.2  |
| 210697_at   | AF070651 | ZNF257                   | 113835 | 2.8   | 0.7   | 1.1   | 0.6   | 2.2   |
| 210698_at   | AF090895 | -                        | -      | 0.4   | 6.3   | 1.0   | 0.6   | 0.4   |
| 210699_at   | AF116679 | -                        | -      | 3.9   | 5.0   | 4.1   | 2.3   | 5.6   |
| 210701_at   | D85939   | CFDP1                    | 10428  | 7.2   | 6.1   | 5.9   | 6.6   | 8.9   |
| 210702_s_at | D38145   | PTGIS                    | 5740   | 0.4   | 2.1   | 1.0   | 1.1   | 0.9   |
| 210703_at   | AF132204 | -                        | -      | 2.2   | 2.8   | 2.7   | 1.0   | 2.3   |
| 210704_at   | L17328   | FEZ2                     | 9637   | 7.6   | 9.0   | 6.3   | 9.2   | 5.3   |
| 210705_s_at | AF220028 | TRIM5                    | 85363  | 42.1  | 33.1  | 44.7  | 41.3  | 28.8  |
| 210706_s_at | BC000213 | RNF24                    | 11237  | 42.5  | 48.9  | 51.6  | 48.9  | 33.7  |
| 210707_x_at | U38980   | DTX2P1-UPK 441263        |        | 159.6 | 252.1 | 224.8 | 217.0 | 145.7 |
| 210708_x_at | AF111344 | CASP10                   | 843    | 9.4   | 8.4   | 8.8   | 4.4   | 4.1   |
| 210709_at   | AF119892 | ZC3H15                   | 55854  | 1.2   | 0.9   | 0.9   | 2.8   | 6.6   |
| 210710_at   | BC002828 | AGGF1                    | 55109  | 26.3  | 36.4  | 38.7  | 37.5  | 26.8  |
| 210711_at   | BC000988 | LINC00260                | 84719  | 4.5   | 1.7   | 1.5   | 4.8   | 0.8   |
| 210712_at   | AY009108 | LDHAL6B                  | 92483  | 5.7   | 6.4   | 5.7   | 0.4   | 3.9   |
| 210713_at   | U61166   | ITSN1                    | 6453   | 12.1  | 1.5   | 10.2  | 1.2   | 2.1   |



|             |          |                          |        |       |       |        |        |       |
|-------------|----------|--------------------------|--------|-------|-------|--------|--------|-------|
| 210714_at   | BC001217 | R3HDM1                   | 23518  | 4.9   | 1.9   | 4.3    | 3.3    | 4.4   |
| 210715_s_at | AF027205 | SPINT2                   | 10653  | 817.6 | 799.1 | 840.1  | 866.8  | 710.9 |
| 210716_s_at | M97501   | CLIP1                    | 6249   | 49.3  | 30.0  | 55.4   | 40.4   | 45.4  |
| 210717_at   | AF116659 | -                        | -      | 6.2   | 0.3   | 3.6    | 4.3    | 6.1   |
| 210718_s_at | AF119889 | ARL17A /// A51326 /// 10 |        | 5.8   | 8.2   | 18.9   | 5.3    | 8.7   |
| 210719_s_at | BC002552 | HMG20B                   | 10362  | 298.3 | 273.4 | 337.4  | 285.6  | 274.9 |
| 210720_s_at | AB039947 | NECAB3                   | 63941  | 132.6 | 138.0 | 141.7  | 149.9  | 110.4 |
| 210721_s_at | AB040812 | PAK7                     | 57144  | 0.4   | 1.7   | 0.7    | 2.8    | 0.2   |
| 210722_at   | BC005233 | PNLIPRP1                 | 5407   | 1.4   | 4.1   | 1.2    | 1.7    | 0.7   |
| 210723_x_at | BC004917 | BC069004                 | -      | 15.1  | 12.4  | 18.3   | 19.3   | 12.4  |
| 210724_at   | AF239764 | EMR3                     | 84658  | 7.1   | 1.2   | 3.2    | 2.4    | 0.5   |
| 210726_at   | J04449   | CYP3A4                   | 1576   | 2.9   | 1.8   | 2.2    | 0.8    | 4.3   |
| 210727_at   | M26095   | CALCA                    | 796    | 7.4   | 8.3   | 6.1    | 4.4    | 8.3   |
| 210728_s_at | M26095   | CALCA                    | 796    | 1.6   | 0.7   | 0.6    | 0.3    | 0.4   |
| 210729_at   | U32500   | NPY2R                    | 4887   | 0.2   | 0.1   | 0.4    | 0.1    | 1.5   |
| 210730_s_at | U36269   | NPY2R                    | 4887   | 1.4   | 10.8  | 9.0    | 3.5    | 4.3   |
| 210731_s_at | AL136105 | LGALS8                   | 3964   | 3.8   | 6.7   | 6.4    | 6.0    | 8.9   |
| 210732_s_at | AF342816 | LGALS8                   | 3964   | 20.9  | 31.1  | 28.7   | 19.4   | 21.1  |
| 210733_at   | AF130055 | TRAM1                    | 23471  | 48.3  | 29.0  | 49.2   | 43.6   | 38.9  |
| 210734_x_at | M64240   | MAX                      | 4149   | 89.1  | 74.7  | 81.6   | 87.9   | 88.9  |
| 210735_s_at | BC000278 | CA12                     | 771    | 51.3  | 39.8  | 51.9   | 56.2   | 34.7  |
| 210736_x_at | U46746   | DTNA                     | 1837   | 22.4  | 16.5  | 13.0   | 10.4   | 12.5  |
| 210737_at   | U82467   | TUB                      | 7275   | 7.9   | 4.1   | 3.1    | 0.9    | 1.4   |
| 210738_s_at | AF011390 | SLC4A4                   | 8671   | 32.2  | 21.0  | 33.4   | 24.3   | 28.9  |
| 210739_x_at | AF069510 | SLC4A4                   | 8671   | 57.0  | 22.7  | 43.9   | 36.1   | 30.9  |
| 210740_s_at | AF279372 | ITPK1                    | 3705   | 187.0 | 168.6 | 166.2  | 175.9  | 160.9 |
| 210741_at   | AF119898 | ARHGEF12                 | 23365  | 4.3   | 6.2   | 2.4    | 2.8    | 4.2   |
| 210742_at   | AF064103 | CDC14A                   | 8556   | 0.8   | 6.5   | 3.6    | 6.0    | 0.7   |
| 210743_s_at | AF064103 | CDC14A                   | 8556   | 6.0   | 5.9   | 6.1    | 5.4    | 3.4   |
| 210744_s_at | M75914   | IL5RA                    | 3568   | 0.7   | 0.8   | 0.6    | 0.8    | 0.8   |
| 210745_at   | U96173   | ONECUT1                  | 3175   | 1.5   | 7.5   | 3.0    | 0.3    | 0.8   |
| 210746_s_at | M30646   | EPB42                    | 2038   | 4.9   | 4.4   | 1.1    | 1.2    | 0.9   |
| 210747_at   | M24364   | HLA-DQB1                 | 3119   | 1.0   | 3.2   | 1.5    | 0.7    | 0.5   |
| 210748_at   | AF116696 | -                        | -      | 5.5   | 5.2   | 4.6    | 4.0    | 6.2   |
| 210749_x_at | L11315   | DDR1 /// MIF780 /// 1006 |        | 261.6 | 255.6 | 209.0  | 243.5  | 166.8 |
| 210750_s_at | AB000277 | DLGAP1                   | 9229   | 1.2   | 7.7   | 2.9    | 0.9    | 5.5   |
| 210751_s_at | D31815   | RGN                      | 9104   | 3.1   | 1.2   | 4.6    | 1.3    | 0.6   |
| 210752_s_at | AF213666 | MLX                      | 6945   | 36.1  | 11.9  | 21.6   | 21.5   | 16.5  |
| 210753_s_at | AF037334 | EPHB1                    | 2047   | 5.1   | 3.1   | 7.5    | 7.3    | 7.4   |
| 210754_s_at | M79321   | LYN                      | 4067   | 71.9  | 57.4  | 65.1   | 62.1   | 58.8  |
| 210755_at   | U46010   | HGF                      | 3082   | 5.5   | 4.4   | 2.4    | 3.5    | 3.6   |
| 210756_s_at | AF308601 | NOTCH2                   | 4853   | 32.1  | 37.8  | 37.3   | 44.6   | 28.4  |
| 210757_x_at | AF188298 | DAB2 /// LOC1601 /// 101 |        | 1.7   | 0.8   | 2.8    | 2.3    | 1.4   |
| 210758_at   | AF098482 | PSIP1                    | 11168  | 53.4  | 34.6  | 34.0   | 36.6   | 32.0  |
| 210759_s_at | M64992   | PSMA1                    | 5682   | 974.4 | 970.1 | 1125.0 | 1034.2 | 898.8 |
| 210760_x_at | BC002656 | TRIP11                   | 9321   | 17.4  | 14.4  | 14.2   | 7.5    | 11.9  |
| 210761_s_at | AB008790 | GRB7                     | 2886   | 32.6  | 28.6  | 15.1   | 19.7   | 18.2  |
| 210762_s_at | AF026219 | DLC1                     | 10395  | 2.6   | 2.4   | 10.9   | 7.5    | 8.4   |
| 210763_x_at | AF031137 | NCR3                     | 259197 | 7.9   | 11.3  | 6.4    | 6.8    | 5.1   |
| 210764_s_at | AF003114 | CYR61                    | 3491   | 31.1  | 27.9  | 36.7   | 25.8   | 20.4  |
| 210765_at   | AF053640 | CSE1L                    | 1434   | 9.0   | 2.5   | 22.2   | 11.6   | 10.5  |
| 210766_s_at | AF053640 | CSE1L                    | 1434   | 318.9 | 262.1 | 389.7  | 278.7  | 334.7 |
| 210767_at   | BC003112 | NF2                      | 4771   | 6.2   | 2.6   | 10.0   | 5.2    | 4.4   |

|             |          |                          |       |        |       |       |       |       |
|-------------|----------|--------------------------|-------|--------|-------|-------|-------|-------|
| 210768_x_at | AF274935 | TMCO1                    | 54499 | 210.1  | 176.8 | 227.6 | 185.7 | 163.5 |
| 210769_at   | U18945   | CNGB1                    | 1258  | 9.5    | 1.3   | 1.8   | 1.6   | 1.0   |
| 210770_s_at | AF004884 | CACNA1A ///,773 /// 1005 |       | 2.8    | 0.6   | 2.0   | 0.8   | 0.4   |
| 210771_at   | BC000052 | PPARA                    | 5465  | 5.7    | 5.6   | 8.2   | 5.3   | 5.2   |
| 210772_at   | M88107   | FPR2                     | 2358  | 0.4    | 4.9   | 0.7   | 0.2   | 2.4   |
| 210773_s_at | U81501   | FPR2                     | 2358  | 8.4    | 5.5   | 6.5   | 0.3   | 5.9   |
| 210774_s_at | AL162047 | NCOA4                    | 8031  | 445.0  | 391.6 | 489.1 | 515.3 | 448.2 |
| 210775_x_at | AB015653 | CASP9                    | 842   | 53.6   | 53.2  | 56.3  | 48.2  | 41.5  |
| 210776_x_at | M31222   | TCF3                     | 6929  | 72.3   | 67.8  | 69.2  | 68.8  | 67.8  |
| 210778_s_at | BC002713 | MIR4800 /// 10608 /// 10 |       | 36.2   | 55.0  | 43.2  | 53.3  | 23.5  |
| 210779_x_at | AB037701 | GEMIN2                   | 8487  | 57.4   | 60.0  | 70.6  | 54.2  | 49.6  |
| 210780_at   | AB006589 | ESR2                     | 2100  | 5.9    | 8.4   | 9.6   | 3.4   | 1.1   |
| 210781_x_at | AF015731 | GRIN1                    | 2902  | 3.2    | 1.8   | 2.1   | 1.9   | 1.3   |
| 210782_x_at | L05666   | GRIN1                    | 2902  | 13.8   | 16.9  | 6.3   | 16.8  | 13.6  |
| 210783_x_at | D86586   | CLEC11A                  | 6320  | 24.3   | 24.7  | 29.4  | 27.6  | 29.2  |
| 210784_x_at | AF009634 | LILRB3                   | 11025 | 3.8    | 3.1   | 2.3   | 3.1   | 6.6   |
| 210785_s_at | AB035482 | THEMIS2                  | 9473  | 13.3   | 3.1   | 9.2   | 5.7   | 0.8   |
| 210786_s_at | M93255   | FLI1                     | 2313  | 5.6    | 4.9   | 6.0   | 6.1   | 5.5   |
| 210787_s_at | AF140507 | CAMKK2                   | 10645 | 28.1   | 19.6  | 36.6  | 32.5  | 18.3  |
| 210788_s_at | AF126782 | DHRS7                    | 51635 | 1009.2 | 860.4 | 980.9 | 913.3 | 789.6 |
| 210789_x_at | L00692   | CEACAM3                  | 1084  | 18.9   | 12.3  | 12.1  | 14.9  | 11.6  |
| 210790_s_at | BC003658 | SAR1A                    | 56681 | 35.2   | 36.2  | 46.5  | 22.6  | 33.4  |
| 210791_s_at | BC000277 | ARHGAP32                 | 9743  | 22.2   | 14.3  | 25.8  | 27.5  | 20.6  |
| 210792_x_at | AF033111 | SIVA1                    | 10572 | 324.1  | 374.0 | 468.7 | 379.8 | 415.4 |
| 210793_s_at | U41815   | NUP98                    | 4928  | 74.6   | 52.9  | 82.4  | 64.4  | 58.3  |
| 210794_s_at | AF119863 | MEG3                     | 55384 | 0.8    | 0.9   | 2.3   | 2.3   | 4.5   |
| 210795_s_at | AF119863 | -                        | -     | 3.5    | 2.5   | 2.9   | 2.0   | 5.7   |
| 210796_x_at | D86359   | SIGLEC6                  | 946   | 23.6   | 18.5  | 14.3  | 16.5  | 11.0  |
| 210797_s_at | AF063612 | OASL                     | 8638  | 31.8   | 23.0  | 35.0  | 19.4  | 19.1  |
| 210798_x_at | AB008047 | MASP2                    | 10747 | 1.7    | 1.5   | 1.5   | 2.1   | 0.9   |
| 210799_at   | M81590   | HTR1B                    | 3351  | 17.5   | 12.3  | 9.5   | 5.9   | 8.5   |
| 210800_at   | BC005236 | TIMM8A                   | 1678  | 0.4    | 2.9   | 0.4   | 3.3   | 2.6   |
| 210801_at   | BC002841 | DIMT1                    | 27292 | 5.6    | 4.1   | 3.8   | 4.7   | 2.9   |
| 210802_s_at | BC002841 | DIMT1                    | 27292 | 224.7  | 184.5 | 223.5 | 182.1 | 170.8 |
| 210803_at   | AF201385 | TXNRD2                   | 10587 | 12.5   | 11.4  | 11.1  | 5.7   | 6.7   |
| 210804_x_at | AF128524 | SLC8A1                   | 6546  | 8.8    | 3.6   | 17.8  | 15.4  | 4.9   |
| 210805_x_at | U19601   | LOC1005064861 /// 1005   |       | 0.5    | 0.4   | 0.9   | 0.6   | 0.4   |
| 210806_at   | AL136808 | TTLL5                    | 23093 | 0.6    | 0.8   | 0.8   | 0.8   | 5.6   |
| 210807_s_at | AF049608 | SLC16A7                  | 9194  | 13.6   | 10.8  | 13.3  | 8.3   | 6.4   |
| 210808_s_at | AF166327 | NOX1                     | 27035 | 5.3    | 2.4   | 9.2   | 1.5   | 1.5   |
| 210809_s_at | D13665   | POSTN                    | 10631 | 2.3    | 3.7   | 3.0   | 4.2   | 3.2   |
| 210810_s_at | AF142501 | SLC6A5                   | 9152  | 0.9    | 0.8   | 1.7   | 1.9   | 0.9   |
| 210811_s_at | BC000979 | DDX49                    | 54555 | 71.4   | 71.9  | 74.2  | 72.5  | 71.7  |
| 210812_at   | BC005259 | XRCC4                    | 7518  | 3.8    | 1.2   | 1.5   | 0.5   | 5.6   |
| 210813_s_at | BC005259 | XRCC4                    | 7518  | 16.1   | 15.1  | 20.6  | 17.0  | 13.0  |
| 210814_at   | U47050   | TRPC3                    | 7222  | 1.8    | 1.1   | 0.4   | 0.1   | 0.6   |
| 210815_s_at | U17473   | CALCRL                   | 10203 | 0.9    | 0.9   | 1.3   | 5.1   | 3.9   |
| 210816_s_at | BC000021 | CYB561                   | 1534  | 69.9   | 68.7  | 75.6  | 67.3  | 62.7  |
| 210817_s_at | BC004130 | CALCOCO2                 | 10241 | 232.7  | 185.6 | 200.1 | 167.9 | 140.6 |
| 210818_s_at | AF026199 | BACH1 /// GI571 /// 1003 |       | 8.4    | 11.5  | 11.7  | 7.4   | 6.8   |
| 210819_x_at | AB041844 | DIO2                     | 1734  | 13.3   | 12.1  | 12.8  | 9.3   | 8.6   |
| 210820_x_at | AL136647 | COQ7                     | 10229 | 72.8   | 76.0  | 83.7  | 64.8  | 66.1  |
| 210821_x_at | BC002703 | CENPA                    | 1058  | 82.0   | 65.3  | 95.3  | 46.4  | 83.0  |

|             |          |            |             |         |        |        |        |        |        |
|-------------|----------|------------|-------------|---------|--------|--------|--------|--------|--------|
| 210822_at   | U72513   | LRRC23     | /// R 10233 | /// 28  | 16.7   | 10.1   | 20.2   | 4.9    | 13.0   |
| 210823_s_at | U40317   | PTPRS      | 5802        |         | 12.2   | 12.5   | 14.4   | 16.2   | 6.5    |
| 210824_at   | AF130103 | -          | -           |         | 3.2    | 0.8    | 3.5    | 1.3    | 1.4    |
| 210825_s_at | AF130103 | PEBP1      | 5037        |         | 1638.8 | 1290.2 | 1615.1 | 1553.4 | 1320.8 |
| 210826_x_at | AF098533 | RAD17      | 5884        |         | 69.7   | 62.3   | 67.0   | 78.3   | 55.4   |
| 210827_s_at | U73844   | ELF3       | 1999        |         | 84.8   | 73.9   | 86.0   | 73.5   | 66.7   |
| 210828_s_at | AF001307 | ARNT       | 405         |         | 24.4   | 18.8   | 25.3   | 17.2   | 18.4   |
| 210829_s_at | AF077048 | SSBP2      | 23635       |         | 85.8   | 92.4   | 83.1   | 84.9   | 44.3   |
| 210830_s_at | AF001602 | PON2       | 5445        |         | 229.3  | 226.3  | 241.4  | 234.5  | 184.9  |
| 210831_s_at | L27489   | PTGER3     | 5733        |         | 2.3    | 0.5    | 2.4    | 1.0    | 2.0    |
| 210832_x_at | D38298   | PTGER3     | 5733        |         | 6.3    | 1.3    | 8.7    | 1.0    | 0.6    |
| 210833_at   | AL031429 | PTGER3     | 5733        |         | 0.5    | 0.8    | 0.4    | 2.9    | 2.5    |
| 210834_s_at | D38299   | PTGER3     | 5733        |         | 4.2    | 1.5    | 4.2    | 0.4    | 5.4    |
| 210835_s_at | AF222711 | CTBP2      | 1488        |         | 264.3  | 213.4  | 289.9  | 297.4  | 196.5  |
| 210836_x_at | AF012073 | PDE4D      | 5144        |         | 7.9    | 7.8    | 6.1    | 6.0    | 4.9    |
| 210837_s_at | AF012074 | PDE4D      | 5144        |         | 4.2    | 6.9    | 7.7    | 2.0    | 3.3    |
| 210838_s_at | L17075   | ACVRL1     | 94          |         | 1.4    | 1.1    | 8.8    | 2.4    | 4.7    |
| 210839_s_at | D45421   | ENPP2      | 5168        |         | 5.8    | 5.9    | 5.6    | 8.8    | 5.0    |
| 210840_s_at | D29640   | IQGAP1     | 8826        |         | 69.5   | 76.8   | 53.9   | 61.5   | 39.8   |
| 210841_s_at | AF280546 | NRP2       | 8828        |         | 5.2    | 7.9    | 4.8    | 2.1    | 2.0    |
| 210842_at   | AF280546 | NRP2       | 8828        |         | 0.4    | 0.4    | 0.3    | 0.3    | 0.2    |
| 210843_s_at | AF327560 | LOC1019281 | 9848        | /// 101 | 13.5   | 3.9    | 5.2    | 10.8   | 8.2    |
| 210844_x_at | D14705   | CTNNA1     | 1495        |         | 465.2  | 489.3  | 481.2  | 480.2  | 392.3  |
| 210845_s_at | U08839   | PLAUR      | 5329        |         | 24.8   | 15.4   | 14.8   | 17.1   | 11.4   |
| 210846_x_at | AF220130 | TRIM14     | 9830        |         | 23.2   | 16.0   | 20.3   | 16.5   | 12.3   |
| 210847_x_at | AF026071 | TNFRSF25   | 8718        |         | 1.0    | 0.5    | 2.6    | 0.6    | 0.3    |
| 210848_at   | AF187554 | -          | -           |         | 5.6    | 3.9    | 1.5    | 5.9    | 3.9    |
| 210849_s_at | AF135593 | VPS41      | 27072       |         | 91.5   | 88.8   | 92.6   | 90.6   | 72.7   |
| 210850_s_at | AF000672 | ELK1       | 2002        |         | 14.1   | 6.8    | 11.3   | 6.6    | 4.5    |
| 210852_s_at | AF229180 | AASS       | 10157       |         | 1.3    | 5.1    | 1.3    | 7.7    | 4.9    |
| 210853_at   | AF150882 | SCN11A     | 11280       |         | 0.6    | 0.5    | 4.8    | 3.2    | 2.0    |
| 210854_x_at | U17986   | SLC6A8     | 6535        |         | 228.7  | 215.2  | 233.3  | 223.2  | 206.0  |
| 210855_at   | AF245390 | GREB1      | 9687        |         | 9.3    | 0.8    | 1.6    | 1.3    | 7.3    |
| 210858_x_at | U26455   | ATM        | 472         |         | 21.3   | 19.6   | 18.4   | 13.4   | 13.6   |
| 210859_x_at | AF077973 | CLN3       | 1201        |         | 86.3   | 104.8  | 119.3  | 83.6   | 83.0   |
| 210861_s_at | AF143679 | WISP3      | 8838        |         | 0.8    | 1.2    | 1.7    | 6.6    | 2.9    |
| 210862_s_at | AF047190 | SARDH      | 1757        |         | 1.6    | 4.4    | 0.9    | 1.6    | 0.7    |
| 210864_x_at | AF144240 | HFE        | 3077        |         | 27.7   | 18.7   | 19.8   | 21.5   | 19.4   |
| 210865_at   | D38122   | FASLG      | 356         |         | 7.1    | 3.1    | 5.4    | 1.7    | 0.4    |
| 210866_s_at | AF180475 | CNOT4      | 4850        |         | 26.8   | 19.8   | 26.1   | 13.2   | 21.7   |
| 210867_at   | AF180475 | CNOT4      | 4850        |         | 1.1    | 7.6    | 1.9    | 4.1    | 3.6    |
| 210868_s_at | BC001305 | ELOVL6     | 79071       |         | 41.0   | 30.7   | 47.9   | 34.9   | 37.9   |
| 210869_s_at | M29277   | MCAM       | /// M4162   | /// 102 | 6.6    | 12.7   | 3.0    | 6.0    | 3.3    |
| 210870_s_at | BC005286 | EPM2A      | 7957        |         | 28.4   | 15.7   | 25.5   | 19.7   | 15.6   |
| 210871_x_at | AL133046 | SSX2IP     | 117178      |         | 25.3   | 23.9   | 23.4   | 30.2   | 22.0   |
| 210872_x_at | BC001152 | GAS7       | 8522        |         | 9.8    | 2.2    | 5.0    | 0.8    | 8.9    |
| 210873_x_at | U03891   | APOBEC3A   | /, 200315   | /// 1   | 16.3   | 7.9    | 22.6   | 6.1    | 7.6    |
| 210874_s_at | BC004483 | NAT6       | 24142       |         | 31.3   | 20.3   | 32.0   | 37.3   | 23.1   |
| 210875_s_at | U12170   | LOC1009966 | 6935        | /// 100 | 0.3    | 0.9    | 3.0    | 0.6    | 2.1    |
| 210876_at   | M62896   | ANXA2P1    | 303         |         | 1.2    | 3.0    | 1.1    | 2.2    | 3.8    |
| 210878_s_at | BC001202 | KDM3B      | 51780       |         | 120.7  | 123.2  | 126.1  | 122.0  | 99.4   |
| 210879_s_at | AF334812 | RAB11FIP5  | 26056       |         | 40.3   | 41.6   | 39.0   | 55.0   | 41.0   |
| 210880_s_at | AB001467 | EFS        | 10278       |         | 74.9   | 89.2   | 70.1   | 79.6   | 47.7   |

|                      |                            |  |        |        |        |        |        |
|----------------------|----------------------------|--|--------|--------|--------|--------|--------|
| 210881_s_at M17863   | IGF2 /// INS- 3481 /// 723 |  | 1.6    | 0.7    | 0.6    | 0.5    | 0.5    |
| 210882_s_at U04811   | TRO 7216                   |  | 1.7    | 3.8    | 3.1    | 4.5    | 2.7    |
| 210883_x_at U57001   | EFNB3 1949                 |  | 15.7   | 13.1   | 24.2   | 12.2   | 6.9    |
| 210884_s_at AF168619 | SPAG11A 653423             |  | 8.2    | 1.2    | 7.1    | 6.3    | 0.9    |
| 210885_s_at AF220133 | TRIM15 89870               |  | 1.1    | 1.4    | 0.4    | 0.9    | 2.9    |
| 210886_x_at AB007457 | TP53TG1 11257              |  | 158.8  | 121.6  | 153.7  | 142.9  | 126.9  |
| 210887_s_at AF216185 | EVC 2121                   |  | 5.2    | 5.1    | 6.5    | 1.7    | 2.7    |
| 210888_s_at AF116713 | ITIH1 3697                 |  | 1.1    | 1.6    | 1.0    | 2.0    | 0.9    |
| 210889_s_at M31933   | FCGR2B 2213                |  | 0.5    | 4.1    | 4.8    | 2.2    | 2.4    |
| 210890_x_at U24078   | KIR2DL1 3802               |  | 2.3    | 1.1    | 1.3    | 1.8    | 1.0    |
| 210891_s_at AF035737 | GTF2I /// GTI2969 /// 297  |  | 569.7  | 485.5  | 498.5  | 545.3  | 347.3  |
| 210892_s_at BC004472 | GTF2I 2969                 |  | 89.9   | 65.4   | 85.6   | 61.6   | 61.7   |
| 210893_at AF118064   | - -                        |  | 3.9    | 0.2    | 0.6    | 1.9    | 2.4    |
| 210894_s_at BC001433 | CEP250 11190               |  | 4.5    | 9.7    | 5.1    | 7.8    | 6.9    |
| 210895_s_at L25259   | CD86 942                   |  | 3.9    | 4.4    | 6.7    | 0.6    | 8.5    |
| 210896_s_at AF306765 | ASPH 444                   |  | 115.5  | 84.2   | 148.9  | 114.3  | 103.4  |
| 210904_s_at U81380   | IL13RA1 3597               |  | 33.5   | 30.1   | 33.1   | 32.1   | 32.5   |
| 210905_x_at AF268613 | POU5F1P4 645682            |  | 5.1    | 1.9    | 5.5    | 2.6    | 1.7    |
| 210906_x_at U34846   | AQP4 361                   |  | 1.7    | 4.0    | 1.0    | 3.3    | 1.8    |
| 210907_s_at BC002506 | PDCD10 11235               |  | 324.1  | 295.8  | 396.5  | 217.0  | 257.2  |
| 210908_s_at AB055804 | PFDN5 5204                 |  | 738.7  | 752.1  | 757.4  | 789.4  | 650.4  |
| 210909_x_at U19518   | LPAL2 80350                |  | 5.4    | 7.2    | 1.6    | 5.0    | 8.0    |
| 210910_s_at BC000487 | POMZP3 22932               |  | 262.0  | 267.9  | 297.5  | 275.7  | 217.9  |
| 210911_at M96843     | ID2B 84099                 |  | 2.1    | 1.2    | 5.7    | 0.9    | 2.5    |
| 210912_x_at M99422   | GSTM4 2948                 |  | 9.8    | 6.6    | 17.8   | 14.7   | 7.9    |
| 210913_at AF217289   | CDH20 28316                |  | 1.4    | 0.5    | 0.7    | 0.4    | 0.6    |
| 210914_at AF130071   | - -                        |  | 0.9    | 0.2    | 4.9    | 0.6    | 0.6    |
| 210915_x_at M15564   | TRBC1 28639                |  | 1.3    | 1.7    | 15.7   | 1.6    | 4.9    |
| 210916_s_at AF098641 | CD44 960                   |  | 2.3    | 4.1    | 5.5    | 0.7    | 0.2    |
| 210917_at AF119914   | YES1 7525                  |  | 2.4    | 0.9    | 0.6    | 1.0    | 1.8    |
| 210918_at AF130075   | - -                        |  | 13.3   | 6.8    | 8.2    | 3.6    | 7.3    |
| 210919_at AF130097   | PHLPP1 23239               |  | 0.2    | 0.3    | 0.1    | 1.0    | 0.0    |
| 210920_x_at BC003528 | - -                        |  | 2.2    | 10.1   | 8.9    | 3.1    | 6.5    |
| 210921_at BC002821   | LOC1019290 101929078       |  | 0.9    | 0.4    | 0.5    | 0.9    | 0.4    |
| 210922_at BC000772   | CTB-102L5.7 -              |  | 0.7    | 0.7    | 0.6    | 0.6    | 0.7    |
| 210923_at BC000651   | SLC1A7 6512                |  | 19.5   | 13.8   | 13.0   | 12.2   | 10.9   |
| 210924_at BC000189   | OLFM1 10439                |  | 5.9    | 2.3    | 3.9    | 2.7    | 9.6    |
| 210925_at U18288     | CIITA 4261                 |  | 14.6   | 18.4   | 16.4   | 8.8    | 17.8   |
| 210926_at AY014272   | POTEKP 440915              |  | 78.8   | 52.8   | 75.4   | 62.5   | 67.3   |
| 210927_x_at BC004239 | JTB 10899                  |  | 1329.4 | 1161.9 | 1293.7 | 1098.6 | 1102.9 |
| 210928_at AF130057   | - -                        |  | 1.0    | 0.4    | 2.4    | 0.6    | 0.9    |
| 210929_s_at AF130057 | AHSG 197                   |  | 3.5    | 1.8    | 6.4    | 6.8    | 6.5    |
| 210930_s_at AF177761 | ERBB2 2064                 |  | 8.2    | 18.4   | 18.2   | 19.2   | 14.7   |
| 210931_at AF293342   | RNF6 6049                  |  | 2.3    | 2.8    | 0.8    | 0.4    | 0.3    |
| 210932_s_at AF293342 | RNF6 6049                  |  | 16.8   | 10.6   | 11.9   | 19.1   | 9.7    |
| 210933_s_at BC004908 | FSCN1 6624                 |  | 19.2   | 9.5    | 12.5   | 18.0   | 12.4   |
| 210934_at BC004473   | BLK 640                    |  | 9.9    | 8.9    | 11.2   | 5.5    | 6.4    |
| 210935_s_at AF274954 | WDR1 9948                  |  | 134.5  | 100.9  | 122.5  | 124.6  | 112.7  |
| 210936_at AF274954   | WDR1 9948                  |  | 14.2   | 6.4    | 7.9    | 8.5    | 8.4    |
| 210937_s_at U35632   | PDX1 3651                  |  | 3.8    | 2.0    | 0.9    | 6.1    | 3.8    |
| 210938_at U30329     | PDX1 3651                  |  | 0.6    | 1.0    | 4.7    | 1.0    | 1.3    |
| 210939_s_at L76631   | GRM1 2911                  |  | 4.8    | 16.5   | 8.6    | 1.7    | 5.8    |
| 210940_s_at U31216   | GRM1 2911                  |  | 0.6    | 0.9    | 7.1    | 0.7    | 6.1    |

|             |          |                            |        |       |       |        |       |       |
|-------------|----------|----------------------------|--------|-------|-------|--------|-------|-------|
| 210941_at   | AB006756 | PCDH7                      | 5099   | 0.2   | 3.8   | 2.1    | 3.0   | 0.9   |
| 210942_s_at | AB022918 | ST3GAL6                    | 10402  | 0.2   | 0.4   | 0.7    | 0.6   | 0.2   |
| 210943_s_at | U84744   | LYST                       | 1130   | 30.2  | 10.6  | 25.2   | 13.4  | 14.1  |
| 210944_s_at | BC003169 | CAPN3                      | 825    | 11.1  | 4.0   | 9.6    | 7.9   | 3.3   |
| 210945_at   | BC005305 | COL4A6                     | 1288   | 0.9   | 7.0   | 0.5    | 0.9   | 0.7   |
| 210946_at   | AF014403 | PPAP2A                     | 8611   | 577.0 | 427.2 | 718.6  | 555.4 | 566.5 |
| 210947_s_at | J04810   | MSH3                       | 4437   | 54.9  | 43.1  | 59.5   | 56.4  | 43.2  |
| 210948_s_at | AF294627 | LEF1                       | 51176  | 1.3   | 1.0   | 3.5    | 0.4   | 3.4   |
| 210949_s_at | BC000533 | EIF3C /// EIF:8663 /// 728 |        | 740.5 | 696.6 | 699.7  | 745.0 | 614.1 |
| 210950_s_at | BC003573 | FDFT1                      | 2222   | 911.0 | 822.9 | 1147.6 | 808.0 | 990.2 |
| 210951_x_at | AF125393 | RAB27A                     | 5873   | 75.7  | 47.3  | 84.1   | 53.9  | 67.6  |
| 210952_at   | BC001259 | AP4S1                      | 11154  | 7.5   | 5.7   | 7.7    | 4.1   | 4.5   |
| 210953_at   | AF201292 | TSC22D2                    | 9819   | 0.7   | 0.2   | 2.8    | 5.3   | 0.7   |
| 210954_s_at | AF201292 | TSC22D2                    | 9819   | 6.4   | 1.1   | 8.7    | 6.1   | 5.7   |
| 210955_at   | U86214   | CASP10                     | 843    | 13.4  | 9.8   | 13.3   | 2.6   | 9.7   |
| 210956_at   | U42387   | LOC1009967.5540 /// 100    |        | 5.5   | 6.2   | 6.5    | 12.5  | 1.2   |
| 210957_s_at | L76569   | AFF2                       | 2334   | 0.7   | 7.7   | 1.1    | 1.3   | 0.5   |
| 210958_s_at | BC003646 | MAST4                      | 375449 | 29.5  | 36.4  | 23.3   | 28.7  | 16.2  |
| 210959_s_at | AF113128 | SRD5A1                     | 6715   | 47.0  | 46.4  | 41.9   | 48.8  | 30.0  |
| 210960_at   | M76446   | ADRA1D                     | 146    | 0.9   | 1.0   | 2.1    | 0.4   | 1.0   |
| 210961_s_at | M76446   | ADRA1D                     | 146    | 6.0   | 4.1   | 4.2    | 1.0   | 1.2   |
| 210962_s_at | AB019691 | AKAP9                      | 10142  | 55.5  | 39.1  | 49.7   | 38.4  | 48.2  |
| 210963_s_at | U94363   | GYG2                       | 8908   | 28.8  | 28.3  | 27.6   | 31.3  | 17.4  |
| 210964_s_at | U94364   | GYG2                       | 8908   | 24.6  | 31.0  | 28.2   | 40.2  | 13.9  |
| 210965_x_at | BC001274 | CDK13                      | 8621   | 3.1   | 2.2   | 3.7    | 0.3   | 1.0   |
| 210966_x_at | BC001460 | LARP1                      | 23367  | 134.2 | 95.8  | 112.5  | 111.6 | 97.6  |
| 210967_x_at | M92301   | CACNB1                     | 782    | 9.5   | 3.3   | 9.2    | 10.9  | 2.6   |
| 210968_s_at | AF333336 | RTN4                       | 57142  | 583.7 | 581.8 | 588.0  | 557.8 | 502.8 |
| 210969_at   | AF118089 | PKN2                       | 5586   | 7.9   | 4.1   | 8.2    | 4.4   | 4.9   |
| 210970_s_at | AF235049 | IBTK                       | 25998  | 95.0  | 69.1  | 107.0  | 83.4  | 91.9  |
| 210971_s_at | AB000815 | ARNTL                      | 406    | 14.2  | 14.5  | 15.4   | 18.1  | 16.0  |
| 210972_x_at | M15565   | TRAC /// TRA 28517 /// 28  |        | 20.7  | 14.8  | 21.4   | 9.4   | 5.6   |
| 210973_s_at | M63889   | FGFR1                      | 2260   | 23.2  | 20.1  | 15.6   | 11.4  | 15.0  |
| 210974_s_at | AF130042 | AP3D1                      | 8943   | 33.1  | 29.9  | 45.7   | 35.6  | 34.8  |
| 210975_x_at | BC000377 | FASTK                      | 10922  | 127.3 | 169.2 | 175.7  | 144.9 | 130.2 |
| 210976_s_at | U24183   | PFKM                       | 5213   | 477.8 | 442.7 | 479.1  | 499.0 | 398.3 |
| 210977_s_at | AB029348 | HSF4                       | 3299   | 4.1   | 3.2   | 3.2    | 2.3   | 3.5   |
| 210978_s_at | BC002616 | TAGLN2                     | 8407   | 383.0 | 246.2 | 329.9  | 350.5 | 262.0 |
| 210979_at   | U47674   | ASAH1                      | 427    | 7.6   | 4.5   | 9.0    | 7.5   | 9.9   |
| 210980_s_at | U47674   | ASAH1                      | 427    | 278.1 | 212.3 | 277.0  | 196.6 | 174.6 |
| 210981_s_at | AF040751 | GRK6                       | 2870   | 104.3 | 81.9  | 111.3  | 91.1  | 83.1  |
| 210982_s_at | M60333   | HLA-DRA                    | 3122   | 0.9   | 0.7   | 0.8    | 0.5   | 0.4   |
| 210983_s_at | AF279900 | MCM7                       | 4176   | 584.0 | 471.2 | 782.6  | 482.9 | 560.9 |
| 210984_x_at | U95089   | EGFR                       | 1956   | 1.3   | 2.9   | 1.0    | 1.3   | 1.2   |
| 210985_s_at | AF056322 | SP100                      | 6672   | 6.1   | 4.1   | 2.6    | 1.2   | 3.8   |
| 210986_s_at | Z24727   | TPM1                       | 7168   | 315.6 | 285.6 | 314.0  | 313.0 | 238.9 |
| 210987_x_at | M19267   | TPM1                       | 7168   | 310.9 | 314.5 | 302.0  | 297.8 | 215.8 |
| 210988_s_at | AF123538 | PRUNE                      | 58497  | 75.8  | 69.6  | 73.0   | 63.3  | 55.9  |
| 210989_at   | U77706   | LAMA4                      | 3910   | 6.9   | 3.7   | 2.7    | 3.1   | 3.0   |
| 210990_s_at | U77706   | LAMA4                      | 3910   | 1.8   | 1.4   | 2.0    | 1.0   | 1.3   |
| 210991_s_at | BC003103 | RIMS3                      | 9783   | 8.5   | 10.4  | 2.8    | 8.4   | 1.1   |
| 210992_x_at | U90939   | FCGR2C                     | 9103   | 2.0   | 1.7   | 1.6    | 2.1   | 1.8   |
| 210993_s_at | U54826   | SMAD1                      | 4086   | 63.8  | 87.4  | 77.9   | 78.6  | 52.6  |

|                      |                        |        |        |        |        |        |        |
|----------------------|------------------------|--------|--------|--------|--------|--------|--------|
| 210994_x_at AF230398 | TRIM23                 | 373    | 31.4   | 21.5   | 28.1   | 23.9   | 18.9   |
| 210995_s_at AF230399 | TRIM23                 | 373    | 30.1   | 38.4   | 31.2   | 24.2   | 19.5   |
| 210996_s_at U43430   | YWHAЕ                  | 7531   | 1678.3 | 1349.8 | 1837.8 | 1569.3 | 1481.5 |
| 210997_at M77227     | HGF                    | 3082   | 0.2    | 4.2    | 0.2    | 0.2    | 0.3    |
| 210998_s_at M77227   | HGF                    | 3082   | 1.0    | 0.3    | 1.4    | 1.2    | 0.4    |
| 210999_s_at U66065   | GRB10                  | 2887   | 434.6  | 446.5  | 369.8  | 472.9  | 284.6  |
| 211000_s_at AB015706 | IL6ST                  | 3572   | 16.1   | 11.2   | 16.0   | 17.5   | 9.4    |
| 211001_at AF230389   | TRIM29                 | 23650  | 12.9   | 11.7   | 7.2    | 6.7    | 5.8    |
| 211002_s_at AF230389 | TRIM29                 | 23650  | 2.0    | 9.7    | 11.5   | 17.3   | 5.8    |
| 211003_x_at BC003551 | TGM2                   | 7052   | 1.9    | 0.6    | 1.2    | 0.8    | 0.9    |
| 211004_s_at BC002553 | ALDH3B1                | 221    | 24.2   | 14.2   | 15.6   | 14.9   | 11.0   |
| 211005_at AF036906   | LAT                    | 27040  | 8.4    | 5.7    | 5.5    | 6.4    | 2.0    |
| 211006_s_at L02840   | KCNB1                  | 3745   | 12.5   | 4.9    | 15.8   | 8.3    | 4.6    |
| 211008_s_at BC000744 | UBE2I                  | 7329   | 13.6   | 12.0   | 2.1    | 12.0   | 3.2    |
| 211009_s_at AF159567 | ZNF271                 | 10778  | 59.7   | 59.3   | 60.1   | 54.8   | 53.5   |
| 211010_s_at AF031138 | NCR3                   | 259197 | 2.8    | 1.9    | 5.1    | 2.6    | 0.9    |
| 211011_at D38163     | COL19A1                | 1310   | 5.4    | 0.6    | 4.9    | 3.8    | 7.6    |
| 211012_s_at BC000080 | PML                    | 5371   | 3.6    | 6.0    | 2.3    | 1.4    | 14.3   |
| 211013_x_at AF230411 | PML                    | 5371   | 7.9    | 20.3   | 17.6   | 19.5   | 13.3   |
| 211014_s_at AF230410 | PML                    | 5371   | 43.5   | 30.6   | 32.3   | 29.7   | 23.5   |
| 211015_s_at L12723   | HSPA4                  | 3308   | 424.7  | 361.1  | 454.4  | 364.2  | 373.2  |
| 211016_x_at BC002526 | HSPA4                  | 3308   | 204.3  | 168.6  | 228.8  | 138.7  | 152.9  |
| 211017_s_at AF123570 | NF2                    | 4771   | 25.5   | 19.3   | 13.9   | 23.3   | 22.4   |
| 211018_at D63807     | LSS                    | 4047   | 7.1    | 6.4    | 10.3   | 0.6    | 6.8    |
| 211019_s_at D63807   | LSS                    | 4047   | 30.4   | 20.1   | 23.5   | 16.8   | 14.4   |
| 211020_at L19659     | GCNT2                  | 2651   | 11.3   | 10.6   | 10.7   | 10.1   | 0.5    |
| 211021_s_at AF037194 | RGS14                  | 10636  | 1.3    | 4.8    | 3.8    | 6.1    | 3.1    |
| 211022_s_at BC002521 | ATRX                   | 546    | 11.6   | 5.6    | 9.2    | 6.5    | 6.3    |
| 211023_at AL117618   | PDHB                   | 5162   | 600.8  | 510.0  | 609.2  | 538.9  | 473.4  |
| 211024_s_at BC006221 | NKX2-1                 | 7080   | 2.3    | 5.1    | 1.4    | 1.2    | 1.1    |
| 211025_x_at BC006229 | COX5B                  | 1329   | 685.4  | 803.4  | 846.8  | 916.8  | 706.7  |
| 211026_s_at BC006230 | MGLL                   | 11343  | 58.5   | 58.1   | 58.7   | 58.2   | 58.5   |
| 211027_s_at BC006231 | IKBKB                  | 3551   | 21.2   | 15.7   | 12.6   | 13.8   | 12.5   |
| 211028_s_at BC006233 | KHK                    | 3795   | 25.7   | 29.3   | 35.4   | 33.0   | 42.0   |
| 211029_x_at BC006245 | FGF18                  | 8817   | 1.5    | 3.0    | 7.1    | 3.7    | 0.8    |
| 211030_s_at BC006252 | SLC6A6                 | 6533   | 0.5    | 1.1    | 0.9    | 0.7    | 0.7    |
| 211031_s_at BC006259 | CLIP2                  | 7461   | 0.8    | 0.8    | 1.0    | 1.3    | 1.3    |
| 211032_at BC006264   | COBLL1                 | 22837  | 2.3    | 3.1    | 0.9    | 1.5    | 2.9    |
| 211033_s_at BC006268 | PEX7                   | 5191   | 80.5   | 76.6   | 79.1   | 61.9   | 48.2   |
| 211034_s_at BC006270 | HECTD4                 | 283450 | 32.0   | 34.9   | 32.5   | 39.8   | 26.8   |
| 211036_x_at BC006301 | ANAPC5                 | 51433  | 668.0  | 625.0  | 726.0  | 637.2  | 579.1  |
| 211037_s_at BC006309 | MBOAT7                 | 79143  | 24.2   | 20.5   | 16.1   | 15.4   | 12.4   |
| 211038_s_at BC006312 | CROCCP2                | 84809  | 25.8   | 32.6   | 21.2   | 24.1   | 14.8   |
| 211039_at BC006314   | CHRNA1                 | 1134   | 7.4    | 0.8    | 5.0    | 2.8    | 2.3    |
| 211040_x_at BC006325 | GTSE1                  | 51512  | 119.7  | 122.0  | 132.6  | 127.8  | 132.9  |
| 211042_x_at BC006329 | MCAM /// M4162 /// 102 |        | 138.1  | 82.3   | 128.8  | 94.1   | 100.9  |
| 211043_s_at BC006332 | CLTB                   | 1212   | 248.8  | 280.0  | 314.3  | 286.3  | 229.9  |
| 211044_at BC006333   | TRIM14                 | 9830   | 10.3   | 8.2    | 8.5    | 12.4   | 6.9    |
| 211045_s_at BC006334 | KCNH6                  | 81033  | 0.8    | 1.1    | 2.8    | 0.5    | 1.0    |
| 211046_at BC006334   | KCNH6                  | 81033  | 0.8    | 5.6    | 3.2    | 1.0    | 4.2    |
| 211047_x_at BC006337 | AP2S1                  | 1175   | 1234.6 | 1322.2 | 1551.7 | 1419.0 | 1208.1 |
| 211048_s_at BC006344 | PDIA4                  | 9601   | 233.6  | 261.0  | 285.4  | 242.3  | 216.0  |
| 211049_at BC006356   | TLX2                   | 3196   | 2.1    | 0.6    | 1.7    | 0.7    | 5.3    |

|                      |                          |        |        |        |        |        |        |
|----------------------|--------------------------|--------|--------|--------|--------|--------|--------|
| 211050_x_at BC006361 | LOC1001348:100134822 /   |        | 20.0   | 21.0   | 19.4   | 9.0    | 12.8   |
| 211051_s_at BC006363 | EXTL3                    | 2137   | 21.7   | 14.9   | 20.1   | 11.3   | 10.6   |
| 211052_s_at BC006364 | TBCD                     | 6904   | 129.2  | 164.6  | 164.6  | 155.4  | 150.1  |
| 211053_at BC006367   | KCNG1                    | 3755   | 0.8    | 1.3    | 1.4    | 1.5    | 2.2    |
| 211054_at BC006370   | INVS                     | 27130  | 4.2    | 1.7    | 3.7    | 0.1    | 2.7    |
| 211055_s_at BC006370 | INVS                     | 27130  | 5.2    | 1.9    | 0.5    | 3.0    | 3.3    |
| 211056_s_at BC006373 | SRD5A1                   | 6715   | 45.7   | 35.8   | 62.6   | 60.5   | 32.4   |
| 211057_at BC006374   | ROR1                     | 4919   | 3.0    | 4.1    | 0.8    | 1.8    | 3.5    |
| 211058_x_at BC006379 | TUBA1B                   | 10376  | 3277.0 | 3413.1 | 3506.5 | 3196.6 | 3297.8 |
| 211059_s_at BC006381 | GOLGA2                   | 2801   | 27.6   | 18.7   | 27.0   | 17.0   | 25.4   |
| 211060_x_at BC006383 | GPAA1                    | 8733   | 312.6  | 360.2  | 326.4  | 342.0  | 296.4  |
| 211061_s_at BC006390 | MGAT2                    | 4247   | 148.1  | 130.8  | 184.1  | 129.3  | 143.7  |
| 211062_s_at BC006393 | CPZ /// GPR78532 /// 272 |        | 1.9    | 0.8    | 2.4    | 2.6    | 1.1    |
| 211063_s_at BC006403 | NCK1                     | 4690   | 84.2   | 77.7   | 108.0  | 92.7   | 82.0   |
| 211064_at BC006408   | ZNF493                   | 284443 | 4.5    | 5.4    | 4.9    | 4.6    | 6.5    |
| 211065_x_at BC006422 | PFKL                     | 5211   | 182.7  | 167.4  | 182.3  | 181.5  | 144.0  |
| 211066_x_at BC006439 | PCDHGA1 ///,5098 /// 864 |        | 111.1  | 140.7  | 114.2  | 130.6  | 77.3   |
| 211067_s_at BC006454 | GAS7                     | 8522   | 9.3    | 4.6    | 1.1    | 8.4    | 5.6    |
| 211068_x_at BC006456 | FAM21C /// 1253725 /// 1 |        | 112.9  | 127.7  | 124.2  | 96.4   | 99.3   |
| 211069_s_at BC006462 | SUMO1                    | 7341   | 288.4  | 277.0  | 311.2  | 276.4  | 258.6  |
| 211070_x_at BC006466 | DBI                      | 1622   | 681.4  | 511.3  | 813.7  | 591.8  | 653.9  |
| 211071_s_at BC006471 | MLLT11                   | 10962  | 52.2   | 51.8   | 65.1   | 48.0   | 46.0   |
| 211072_x_at BC006481 | TUBA1B                   | 10376  | 3282.5 | 3071.8 | 3381.3 | 3140.0 | 3105.3 |
| 211073_x_at BC006483 | RNU86 /// R16122 /// 116 |        | 3838.2 | 3724.0 | 3931.3 | 3763.0 | 3595.3 |
| 211074_at AF000381   | -                        | -      | 208.5  | 149.4  | 215.2  | 160.9  | 155.2  |
| 211075_s_at Z25521   | CD47                     | 961    | 234.2  | 214.5  | 280.7  | 206.3  | 225.1  |
| 211076_x_at Z22814   | ATN1                     | 1822   | 15.1   | 6.8    | 11.5   | 10.3   | 8.8    |
| 211077_s_at Z25421   | TLK1                     | 9874   | 18.2   | 17.4   | 8.7    | 9.6    | 13.9   |
| 211078_s_at Z25422   | STK3                     | 6788   | 21.3   | 15.2   | 22.0   | 23.4   | 11.1   |
| 211079_s_at Z25423   | DYRK1A                   | 1859   | 10.0   | 7.6    | 15.8   | 10.6   | 1.5    |
| 211080_s_at Z25425   | NEK2                     | 4751   | 64.8   | 56.6   | 81.3   | 63.9   | 62.5   |
| 211081_s_at Z25426   | MAP4K5                   | 11183  | 14.5   | 5.5    | 10.0   | 9.4    | 4.9    |
| 211082_x_at Z25427   | MARK2                    | 2011   | 18.1   | 9.0    | 13.1   | 13.4   | 11.9   |
| 211083_s_at Z25428   | MAP3K13                  | 9175   | 1.2    | 4.9    | 0.8    | 6.6    | 2.3    |
| 211084_x_at Z25429   | PRKD3                    | 23683  | 18.4   | 18.8   | 19.4   | 17.8   | 16.2   |
| 211085_s_at Z25430   | STK4                     | 6789   | 6.2    | 3.1    | 7.7    | 5.5    | 6.9    |
| 211086_x_at Z25431   | NEK1                     | 4750   | 0.8    | 0.6    | 1.1    | 0.5    | 0.7    |
| 211087_x_at Z25432   | MAPK14                   | 1432   | 6.9    | 7.5    | 5.0    | 6.5    | 7.7    |
| 211088_s_at Z25433   | PLK4                     | 10733  | 17.1   | 8.1    | 19.4   | 16.3   | 13.6   |
| 211089_s_at Z25434   | NEK3                     | 4752   | 10.6   | 6.5    | 6.7    | 8.1    | 7.1    |
| 211090_s_at Z25435   | PRPF4B                   | 8899   | 126.0  | 96.2   | 138.5  | 105.5  | 102.7  |
| 211091_s_at AF122828 | NF2                      | 4771   | 20.7   | 19.8   | 19.7   | 23.2   | 18.1   |
| 211092_s_at AF122827 | NF2                      | 4771   | 13.4   | 12.0   | 18.2   | 18.3   | 12.1   |
| 211093_at U31973     | PDE6C                    | 5146   | 0.2    | 0.1    | 0.3    | 0.3    | 0.2    |
| 211094_s_at D12625   | LOC1019301:4763 /// 101  |        | 8.0    | 4.3    | 10.9   | 9.0    | 8.9    |
| 211095_at D12625     | NF1                      | 4763   | 4.5    | 7.1    | 4.3    | 3.9    | 5.4    |
| 211096_at BC003111   | PBX2                     | 5089   | 13.5   | 16.1   | 20.6   | 9.4    | 10.7   |
| 211097_s_at BC003111 | PBX2                     | 5089   | 30.9   | 15.3   | 24.4   | 27.5   | 20.0   |
| 211098_x_at AF277194 | TMCO1                    | 54499  | 162.5  | 177.6  | 143.1  | 160.9  | 134.9  |
| 211099_s_at U58837   | CNGB1                    | 1258   | 0.8    | 1.3    | 0.8    | 0.2    | 0.5    |
| 211100_x_at U82278   | LILRA2                   | 11027  | 10.8   | 6.7    | 6.5    | 9.4    | 5.8    |
| 211101_x_at U82276   | LILRA2                   | 11027  | 2.7    | 1.2    | 2.6    | 2.1    | 2.3    |
| 211102_s_at U82277   | LILRA2                   | 11027  | 0.9    | 0.5    | 0.5    | 0.3    | 0.5    |

|             |          |                          |           |       |       |       |       |       |
|-------------|----------|--------------------------|-----------|-------|-------|-------|-------|-------|
| 211103_at   | U55209   | MYO7A                    | 4647      | 1.9   | 0.6   | 0.5   | 0.7   | 0.8   |
| 211104_s_at | U55209   | MYO7A                    | 4647      | 0.4   | 0.9   | 0.7   | 0.5   | 0.4   |
| 211105_s_at | U80918   | NFATC1                   | 4772      | 22.9  | 15.5  | 21.5  | 24.0  | 11.1  |
| 211106_at   | AF064804 | SUPT3H                   | 8464      | 13.3  | 12.9  | 11.7  | 9.9   | 6.2   |
| 211107_s_at | AB017332 | AURKC                    | 6795      | 2.9   | 10.6  | 6.4   | 1.6   | 3.0   |
| 211108_s_at | U31601   | JAK3                     | 3718      | 1.5   | 0.8   | 1.4   | 1.2   | 0.4   |
| 211109_at   | U31601   | JAK3                     | 3718      | 2.1   | 1.3   | 0.5   | 1.9   | 0.4   |
| 211110_s_at | AF162704 | AR                       | 367       | 119.6 | 144.3 | 141.9 | 153.9 | 114.3 |
| 211111_at   | AB016902 | HGC6.3                   | 100128124 | 1.7   | 3.2   | 8.1   | 1.0   | 1.0   |
| 211112_at   | AF054506 | SLC12A4                  | 6560      | 1.5   | 15.2  | 8.0   | 17.0  | 14.4  |
| 211113_s_at | U34919   | ABCG1                    | 9619      | 30.5  | 33.1  | 23.6  | 28.1  | 25.2  |
| 211114_x_at | AB037702 | GEMIN2                   | 8487      | 68.5  | 59.7  | 86.7  | 75.8  | 51.7  |
| 211115_x_at | AB037703 | GEMIN2                   | 8487      | 108.3 | 77.7  | 106.2 | 83.9  | 71.6  |
| 211116_at   | AF073299 | SLC9A2                   | 6549      | 12.7  | 10.0  | 11.4  | 7.2   | 12.4  |
| 211117_x_at | AF124790 | ESR2                     | 2100      | 0.5   | 3.8   | 5.4   | 0.8   | 2.5   |
| 211118_x_at | AF051428 | ESR2                     | 2100      | 1.2   | 1.4   | 1.1   | 1.6   | 0.7   |
| 211119_at   | AF060555 | ESR2                     | 2100      | 1.7   | 2.4   | 0.9   | 0.4   | 0.9   |
| 211120_x_at | AB006590 | ESR2                     | 2100      | 0.7   | 1.2   | 2.1   | 1.4   | 0.6   |
| 211121_s_at | AF180527 | DOK1                     | 1796      | 13.4  | 10.0  | 9.1   | 9.8   | 1.1   |
| 211122_s_at | AF002985 | CXCL11                   | 6373      | 1.7   | 0.3   | 2.2   | 4.7   | 2.4   |
| 211123_at   | D87920   | SLC5A5                   | 6528      | 23.1  | 11.3  | 19.1  | 26.6  | 16.9  |
| 211124_s_at | AF119835 | KITLG                    | 4254      | 2.3   | 1.0   | 3.3   | 2.7   | 0.5   |
| 211125_x_at | AF015730 | GRIN1                    | 2902      | 17.9  | 4.7   | 1.0   | 1.0   | 2.6   |
| 211126_s_at | U46006   | CSRP2                    | 1466      | 2.5   | 1.3   | 8.0   | 2.8   | 5.2   |
| 211127_x_at | AF061194 | EDA                      | 1896      | 9.6   | 2.8   | 0.8   | 4.2   | 0.8   |
| 211128_at   | AF061191 | EDA                      | 1896      | 6.7   | 1.7   | 4.5   | 3.4   | 1.4   |
| 211129_x_at | AF061192 | EDA                      | 1896      | 10.4  | 7.5   | 2.0   | 11.5  | 9.7   |
| 211130_x_at | AF061190 | EDA                      | 1896      | 12.0  | 8.5   | 11.6  | 12.6  | 9.9   |
| 211131_s_at | AF061193 | EDA                      | 1896      | 7.2   | 4.5   | 2.0   | 5.1   | 2.7   |
| 211132_at   | AF130066 | INTS3                    | 65123     | 2.1   | 4.9   | 1.4   | 1.3   | 3.1   |
| 211133_x_at | AF009643 | LILRB3                   | 11025     | 13.6  | 3.2   | 16.7  | 12.3  | 10.8  |
| 211135_x_at | AF009644 | LILRB3                   | 11025     | 2.3   | 9.7   | 2.3   | 3.8   | 3.2   |
| 211136_s_at | BC004865 | CLPTM1                   | 1209      | 7.0   | 0.5   | 6.8   | 2.3   | 0.7   |
| 211137_s_at | AF189723 | ATP2C1                   | 27032     | 51.8  | 40.8  | 52.0  | 51.9  | 37.8  |
| 211138_s_at | BC005297 | KMO                      | 8564      | 2.2   | 4.7   | 10.4  | 2.9   | 4.4   |
| 211139_s_at | AF045452 | NAB1                     | 4664      | 19.4  | 9.7   | 16.1  | 8.2   | 6.7   |
| 211140_s_at | AF314174 | CASP2                    | 835       | 23.0  | 21.6  | 30.3  | 25.4  | 18.2  |
| 211141_s_at | AF180474 | CNOT3                    | 4849      | 11.9  | 14.0  | 28.8  | 18.1  | 16.2  |
| 211142_x_at | M38056   | HLA-DOA                  | 3111      | 3.9   | 1.8   | 6.3   | 3.4   | 1.6   |
| 211143_x_at | D49728   | NR4A1                    | 3164      | 9.1   | 13.9  | 3.9   | 8.4   | 6.2   |
| 211144_x_at | M30894   | TARP /// TRC6967 /// 698 |           | 22.5  | 5.5   | 47.5  | 16.5  | 63.1  |
| 211145_x_at | M12350   | IFNA21                   | 3452      | 1.5   | 5.3   | 0.7   | 0.8   | 3.7   |
| 211146_at   | U96291   | IGKC                     | 3514      | 0.6   | 0.4   | 0.9   | 1.0   | 0.5   |
| 211147_s_at | AF065385 | P2RX6                    | 9127      | 1.0   | 1.0   | 1.0   | 2.1   | 0.7   |
| 211148_s_at | AF187858 | ANGPT2                   | 285       | 1.6   | 0.8   | 2.5   | 0.4   | 0.3   |
| 211149_at   | AF000994 | UTY                      | 7404      | 7.2   | 1.9   | 8.3   | 8.0   | 6.8   |
| 211150_s_at | J03866   | DLAT                     | 1737      | 301.3 | 261.6 | 315.6 | 267.6 | 269.6 |
| 211151_x_at | AF185611 | GH1                      | 2688      | 1.2   | 0.9   | 4.3   | 2.7   | 4.0   |
| 211152_s_at | AF184911 | HTRA2                    | 27429     | 34.9  | 46.3  | 43.9  | 44.2  | 48.2  |
| 211153_s_at | AB037599 | TNFSF11                  | 8600      | 1.5   | 5.0   | 2.1   | 2.0   | 1.2   |
| 211154_at   | D32047   | THPO                     | 7066      | 5.3   | 3.5   | 1.1   | 0.4   | 2.3   |
| 211155_s_at | D32047   | THPO                     | 7066      | 1.0   | 1.1   | 1.7   | 2.2   | 3.3   |
| 211156_at   | AF115544 | CDKN2A                   | 1029      | 1.1   | 6.4   | 5.9   | 1.7   | 1.1   |



|             |          |                        |        |       |       |       |       |       |
|-------------|----------|------------------------|--------|-------|-------|-------|-------|-------|
| 211157_at   | AF119878 | -                      | -      | 2.7   | 1.5   | 11.7  | 1.7   | 1.3   |
| 211159_s_at | AB000635 | PPP2R5D                | 5528   | 83.7  | 73.1  | 79.0  | 80.7  | 68.7  |
| 211160_x_at | M95178   | ACTN1                  | 87     | 59.5  | 70.1  | 95.8  | 73.8  | 84.7  |
| 211161_s_at | AF130082 | COL3A1                 | 1281   | 0.1   | 0.7   | 1.3   | 2.5   | 2.6   |
| 211162_x_at | AF116616 | SCD                    | 6319   | 111.6 | 109.5 | 145.6 | 124.7 | 83.5  |
| 211163_s_at | AF012536 | TNFRSF10C              | 8794   | 0.9   | 5.6   | 0.7   | 1.0   | 6.1   |
| 211164_at   | AF213460 | EPHA3                  | 2042   | 1.2   | 1.6   | 0.8   | 2.3   | 2.6   |
| 211165_x_at | D31661   | EPHB2                  | 2048   | 1.4   | 2.3   | 0.9   | 0.6   | 2.1   |
| 211166_at   | AF155097 | FAM153A                | 285596 | 11.1  | 3.6   | 11.9  | 5.0   | 5.8   |
| 211167_s_at | M69051   | GCK                    | 2645   | 1.2   | 0.8   | 0.7   | 2.1   | 1.4   |
| 211168_s_at | D86988   | UPF1                   | 5976   | 59.3  | 65.3  | 89.8  | 76.0  | 69.1  |
| 211169_s_at | AF024579 | PPP1R3A                | 5506   | 0.3   | 0.2   | 1.6   | 0.7   | 0.3   |
| 211170_s_at | AF127480 | PDE10A                 | 10846  | 7.9   | 8.3   | 9.3   | 6.7   | 7.8   |
| 211171_s_at | AB026816 | PDE10A                 | 10846  | 22.3  | 14.8  | 21.8  | 17.1  | 9.8   |
| 211172_x_at | AF161075 | AKAP7                  | 9465   | 9.4   | 11.5  | 20.3  | 16.7  | 10.7  |
| 211173_at   | D85606   | CCKAR                  | 886    | 7.8   | 4.6   | 14.7  | 9.1   | 2.4   |
| 211174_s_at | L13605   | CCKAR                  | 886    | 11.2  | 11.5  | 2.2   | 2.4   | 8.4   |
| 211175_at   | U92642   | GPR45                  | 11250  | 8.6   | 3.7   | 2.5   | 1.4   | 3.3   |
| 211176_s_at | AB008913 | PAX4                   | 5078   | 9.3   | 10.6  | 7.7   | 0.9   | 11.2  |
| 211177_s_at | AB019695 | TXNRD2                 | 10587  | 220.5 | 208.5 | 184.8 | 219.6 | 124.0 |
| 211178_s_at | AF038602 | PSTPIP1                | 9051   | 11.6  | 7.1   | 5.2   | 5.7   | 6.0   |
| 211179_at   | AY004251 | LOC1005064861 /// 1005 |        | 0.2   | 0.2   | 1.4   | 0.3   | 0.9   |
| 211180_x_at | D89788   | LOC1005064861 /// 1005 |        | 5.3   | 1.3   | 2.5   | 0.9   | 0.9   |
| 211181_x_at | AF312386 | LOC1005064861 /// 1005 |        | 2.6   | 1.2   | 2.1   | 4.8   | 6.7   |
| 211182_x_at | AF312387 | LOC1005064861 /// 1005 |        | 1.4   | 0.9   | 4.8   | 0.6   | 0.9   |
| 211184_s_at | AB006955 | USH1C                  | 10083  | 3.5   | 10.2  | 10.8  | 1.5   | 4.0   |
| 211185_s_at | AF130099 | SF3B1                  | 23451  | 428.7 | 351.8 | 432.7 | 402.5 | 351.6 |
| 211186_s_at | BC002695 | AAK1                   | 22848  | 1.0   | 0.8   | 0.9   | 0.7   | 0.6   |
| 211187_at   | AF118079 | -                      | -      | 0.2   | 0.1   | 1.2   | 0.3   | 1.5   |
| 211188_at   | U96627   | CD84                   | 8832   | 0.9   | 1.4   | 1.5   | 0.4   | 1.1   |
| 211189_x_at | AF054816 | CD84                   | 8832   | 14.1  | 8.0   | 8.0   | 6.3   | 2.0   |
| 211190_x_at | AF054817 | CD84                   | 8832   | 2.9   | 6.9   | 1.2   | 1.3   | 0.6   |
| 211191_at   | AF054818 | CD84                   | 8832   | 0.5   | 0.3   | 0.7   | 0.3   | 0.3   |
| 211192_s_at | AF054818 | CD84                   | 8832   | 1.4   | 0.4   | 0.4   | 0.2   | 0.5   |
| 211193_at   | AF061512 | TP63                   | 8626   | 7.8   | 6.9   | 9.1   | 8.1   | 6.9   |
| 211194_s_at | AB010153 | TP63                   | 8626   | 7.9   | 0.7   | 4.6   | 0.6   | 1.0   |
| 211195_s_at | AF116771 | TP63                   | 8626   | 17.2  | 12.6  | 12.2  | 4.0   | 7.1   |
| 211196_at   | M19301   | DBT                    | 1629   | 6.9   | 4.6   | 1.0   | 0.5   | 4.8   |
| 211197_s_at | AL355690 | ICOSLG                 | 23308  | 10.8  | 2.3   | 2.6   | 11.0  | 6.5   |
| 211198_s_at | AF289028 | ICOSLG                 | 23308  | 0.8   | 4.6   | 2.4   | 6.4   | 2.1   |
| 211199_s_at | AF199028 | ICOSLG                 | 23308  | 1.0   | 2.9   | 1.2   | 0.8   | 0.5   |
| 211200_s_at | BC002836 | EFCAB2                 | 84288  | 12.1  | 8.7   | 4.0   | 8.4   | 11.9  |
| 211201_at   | M95489   | FSHR                   | 2492   | 1.3   | 2.6   | 1.0   | 3.7   | 1.8   |
| 211202_s_at | AF087481 | KDM5B                  | 10765  | 90.9  | 129.4 | 87.2  | 101.3 | 60.7  |
| 211203_s_at | U07820   | CNTN1                  | 1272   | 14.0  | 6.6   | 17.7  | 17.4  | 1.8   |
| 211204_at   | L34035   | ME1                    | 4199   | 11.3  | 8.4   | 1.5   | 4.6   | 1.4   |
| 211205_x_at | U78577   | PIP5K1A                | 8394   | 41.1  | 32.2  | 45.3  | 32.3  | 31.4  |
| 211207_s_at | AF129166 | ACSL6                  | 23305  | 7.2   | 7.3   | 5.9   | 2.0   | 4.1   |
| 211208_s_at | AB039327 | CASK                   | 8573   | 74.0  | 83.2  | 87.1  | 88.6  | 58.2  |
| 211209_x_at | AF100540 | SH2D1A                 | 4068   | 1.2   | 1.6   | 1.1   | 1.8   | 0.8   |
| 211210_x_at | AF100539 | SH2D1A                 | 4068   | 3.6   | 1.4   | 1.1   | 2.1   | 1.3   |
| 211211_x_at | AF100542 | SH2D1A                 | 4068   | 2.6   | 8.2   | 1.3   | 0.8   | 2.1   |
| 211212_s_at | AF081459 | ORC5                   | 5001   | 60.6  | 43.4  | 79.5  | 50.2  | 71.4  |

|             |          |                          |        |        |       |       |       |       |
|-------------|----------|--------------------------|--------|--------|-------|-------|-------|-------|
| 211213_at   | AF081459 | ORC5                     | 5001   | 2.4    | 0.2   | 8.0   | 4.5   | 1.2   |
| 211214_s_at | BC003614 | DAPK1                    | 1612   | 1.8    | 5.6   | 3.9   | 4.8   | 0.5   |
| 211215_x_at | AB041843 | DIO2                     | 1734   | 4.8    | 3.9   | 3.8   | 1.0   | 3.7   |
| 211217_s_at | AF051426 | KCNQ1                    | 3784   | 4.9    | 1.9   | 3.4   | 6.2   | 2.3   |
| 211218_at   | AF118078 | -                        | -      | 0.8    | 4.8   | 0.8   | 0.5   | 3.9   |
| 211219_s_at | U11701   | LHX2                     | 9355   | 6.0    | 18.6  | 12.6  | 2.1   | 8.9   |
| 211220_s_at | BC005329 | HSF2                     | 3298   | 18.1   | 14.7  | 18.4  | 17.2  | 14.8  |
| 211221_at   | AL117487 | TADA3                    | 10474  | 3.7    | 7.6   | 1.5   | 4.2   | 10.5  |
| 211222_s_at | AF040723 | HAP1                     | 9001   | 15.5   | 16.3  | 12.3  | 10.3  | 12.6  |
| 211223_at   | AF076215 | PROP1                    | 5626   | 2.9    | 13.2  | 7.0   | 4.6   | 4.3   |
| 211224_s_at | AF136523 | ABCB11                   | 8647   | 3.9    | 2.7   | 1.3   | 6.4   | 2.0   |
| 211225_at   | U27329   | FUT5                     | 2527   | 2.1    | 2.1   | 1.4   | 1.0   | 6.0   |
| 211226_at   | AF080586 | GALR2                    | 8811   | 5.0    | 9.0   | 11.8  | 0.4   | 3.8   |
| 211227_s_at | AF332216 | PCDH11X /// 27328 /// 83 |        | 8.0    | 8.8   | 3.1   | 8.3   | 3.2   |
| 211228_s_at | AF085736 | RAD17                    | 5884   | 44.6   | 53.5  | 59.6  | 56.6  | 53.9  |
| 211230_s_at | U57843   | PIK3CD                   | 5293   | 24.9   | 14.6  | 22.2  | 25.8  | 20.4  |
| 211231_x_at | D13705   | CYP4A11                  | 1579   | 1.0    | 6.1   | 2.3   | 1.6   | 3.7   |
| 211232_x_at | L23503   | GLP1R                    | 2740   | 0.9    | 0.7   | 0.9   | 0.9   | 1.4   |
| 211233_x_at | M12674   | ESR1                     | 2099   | 2.0    | 3.3   | 3.8   | 1.3   | 1.8   |
| 211234_x_at | AF258449 | ESR1                     | 2099   | 2.1    | 2.7   | 8.2   | 1.2   | 2.5   |
| 211235_s_at | AF258450 | ESR1                     | 2099   | 1.2    | 9.2   | 1.6   | 4.2   | 1.5   |
| 211237_s_at | AF202063 | FGFR4                    | 2264   | 1.3    | 3.5   | 1.2   | 1.0   | 0.5   |
| 211238_at   | AF215824 | ADAM7                    | 8756   | 9.1    | 0.5   | 11.1  | 6.0   | 12.9  |
| 211239_s_at | AF215824 | ADAM7                    | 8756   | 9.2    | 6.5   | 22.5  | 7.0   | 14.9  |
| 211240_x_at | AB002382 | CTNND1 /// 1500 /// 100  |        | 148.8  | 146.4 | 159.1 | 152.5 | 110.6 |
| 211241_at   | M62895   | ANXA2P3                  | 305    | 5.1    | 4.0   | 1.8   | 8.8   | 5.3   |
| 211242_x_at | AF276292 | KIR2DL4                  | 3805   | 9.9    | 7.5   | 5.1   | 4.7   | 1.1   |
| 211245_x_at | AF002256 | KIR2DL4                  | 3805   | 7.7    | 9.9   | 1.5   | 4.3   | 0.3   |
| 211248_s_at | AF283325 | CHRD                     | 8646   | 2.2    | 5.5   | 13.1  | 13.0  | 4.7   |
| 211249_at   | U35398   | GPR68                    | 8111   | 2.1    | 0.2   | 5.2   | 2.5   | 2.3   |
| 211250_s_at | AB000463 | SH3BP2                   | 6452   | 39.7   | 28.8  | 31.7  | 30.4  | 24.5  |
| 211251_x_at | U78774   | NFYC                     | 4802   | 105.4  | 113.8 | 128.3 | 103.6 | 98.5  |
| 211252_x_at | U36759   | PTCRA                    | 171558 | 43.7   | 27.1  | 31.6  | 36.5  | 20.0  |
| 211253_x_at | D13902   | PYY                      | 5697   | 14.1   | 1.1   | 1.7   | 8.4   | 6.1   |
| 211254_x_at | AF031549 | RHAG                     | 6005   | 18.1   | 10.4  | 19.0  | 11.2  | 8.6   |
| 211255_x_at | AF064605 | DEDD                     | 9191   | 71.8   | 50.1  | 65.3  | 51.5  | 56.4  |
| 211256_x_at | U90142   | BTN2A1                   | 11120  | 6.0    | 12.4  | 23.7  | 11.8  | 7.1   |
| 211257_x_at | AF273049 | ZNF638                   | 27332  | 65.6   | 59.7  | 60.4  | 56.4  | 43.3  |
| 211258_s_at | AF149096 | TGFA                     | 7039   | 12.2   | 4.7   | 9.3   | 1.4   | 1.2   |
| 211259_s_at | BC004248 | BMP7                     | 655    | 6.2    | 5.8   | 3.7   | 6.3   | 7.3   |
| 211260_at   | BC004248 | BMP7                     | 655    | 5.5    | 15.7  | 17.6  | 8.8   | 9.0   |
| 211261_at   | D14689   | NUP214                   | 8021   | 25.0   | 18.1  | 21.0  | 19.7  | 21.6  |
| 211262_at   | D28513   | PCSK6                    | 5046   | 11.4   | 8.4   | 9.0   | 9.9   | 11.3  |
| 211263_s_at | D87994   | PCSK6                    | 5046   | 1.5    | 2.5   | 2.0   | 1.2   | 5.2   |
| 211264_at   | M81882   | GAD2                     | 2572   | 0.3    | 0.3   | 0.4   | 2.2   | 0.6   |
| 211265_at   | U13216   | PTGER3                   | 5733   | 0.1    | 1.8   | 0.4   | 0.1   | 0.4   |
| 211266_s_at | U35399   | GPR4                     | 2828   | 9.4    | 9.1   | 2.5   | 3.5   | 2.4   |
| 211267_at   | U82811   | HESX1                    | 8820   | 7.5    | 1.1   | 3.2   | 3.2   | 2.9   |
| 211269_s_at | K03122   | IL2RA                    | 3559   | 9.4    | 6.8   | 15.2  | 9.9   | 1.6   |
| 211270_x_at | BC002397 | PTBP1                    | 5725   | 1026.8 | 727.3 | 904.3 | 726.2 | 724.3 |
| 211271_x_at | BC004383 | MIR4745 /// 5725 /// 100 |        | 759.6  | 739.6 | 901.6 | 648.2 | 741.1 |
| 211272_s_at | AF064771 | DGKA                     | 1606   | 4.0    | 0.5   | 0.7   | 9.3   | 4.6   |
| 211273_s_at | AF012130 | TBX1                     | 6899   | 66.9   | 59.4  | 60.2  | 55.7  | 43.9  |

|             |          |                          |        |        |        |        |        |        |
|-------------|----------|--------------------------|--------|--------|--------|--------|--------|--------|
| 211274_at   | AF012130 | TBX1                     | 6899   | 1.5    | 0.7    | 2.9    | 0.7    | 0.8    |
| 211275_s_at | AF087942 | GYG1                     | 2992   | 549.6  | 496.0  | 627.1  | 607.8  | 480.0  |
| 211276_at   | AF063606 | TCEAL2                   | 140597 | 7.1    | 4.4    | 3.5    | 1.9    | 0.7    |
| 211277_x_at | BC004369 | APP                      | 351    | 24.7   | 23.5   | 21.0   | 23.8   | 21.9   |
| 211279_at   | L22454   | NRF1                     | 4899   | 8.4    | 3.1    | 11.2   | 9.0    | 5.7    |
| 211280_s_at | L22454   | NRF1                     | 4899   | 16.7   | 10.0   | 17.0   | 4.7    | 9.7    |
| 211282_x_at | U94506   | TNFRSF25                 | 8718   | 25.9   | 12.6   | 3.0    | 3.6    | 6.6    |
| 211284_s_at | BC000324 | GRN                      | 2896   | 44.2   | 76.9   | 66.2   | 63.2   | 45.8   |
| 211285_s_at | U84404   | UBE3A                    | 7337   | 316.1  | 307.6  | 361.8  | 306.0  | 294.6  |
| 211286_x_at | L29349   | CSF2RA                   | 1438   | 7.1    | 2.7    | 2.4    | 0.4    | 0.8    |
| 211287_x_at | M64445   | CSF2RA                   | 1438   | 7.0    | 7.3    | 3.4    | 5.7    | 8.0    |
| 211289_x_at | AF067524 | CDK11A /// C984 /// 7286 |        | 25.8   | 26.7   | 36.2   | 25.5   | 25.8   |
| 211295_x_at | AF182275 | CYP2A6                   | 1548   | 15.1   | 19.5   | 17.1   | 13.9   | 6.7    |
| 211296_x_at | AB009010 | UBC                      | 7316   | 4355.9 | 3171.1 | 3412.5 | 3419.5 | 3302.2 |
| 211297_s_at | L20320   | CDK7                     | 1022   | 120.6  | 129.4  | 136.1  | 129.9  | 98.8   |
| 211298_s_at | AF116645 | ALB                      | 213    | 4.8    | 3.6    | 9.2    | 6.6    | 6.6    |
| 211299_s_at | BC003683 | FLOT2                    | 2319   | 47.6   | 52.9   | 57.7   | 59.1   | 44.9   |
| 211300_s_at | K03199   | TP53                     | 7157   | 215.5  | 244.3  | 263.0  | 265.9  | 193.3  |
| 211301_at   | AF120491 | KCND3                    | 3752   | 6.0    | 0.9    | 2.9    | 0.7    | 0.8    |
| 211302_s_at | L20966   | PDE4B                    | 5142   | 5.5    | 1.4    | 1.5    | 4.0    | 5.7    |
| 211303_x_at | AF261715 | FOLH1B                   | 219595 | 890.9  | 836.8  | 812.1  | 804.7  | 610.2  |
| 211304_x_at | D50134   | KCNJ5                    | 3762   | 5.6    | 8.8    | 3.3    | 9.2    | 3.4    |
| 211305_x_at | U56236   | FCAR                     | 2204   | 5.7    | 5.6    | 7.1    | 7.3    | 4.9    |
| 211306_s_at | U56237   | FCAR                     | 2204   | 0.3    | 0.4    | 0.4    | 0.8    | 0.7    |
| 211307_s_at | U43677   | FCAR                     | 2204   | 0.7    | 0.4    | 0.8    | 0.9    | 0.6    |
| 211310_at   | AB004818 | EZH1                     | 2145   | 0.3    | 0.4    | 2.1    | 1.3    | 0.3    |
| 211312_s_at | AB034725 | WISP1                    | 8840   | 2.0    | 1.0    | 1.4    | 1.0    | 0.6    |
| 211313_s_at | AB032253 | BAZ1B                    | 9031   | 2.8    | 4.9    | 1.5    | 7.7    | 6.5    |
| 211314_at   | AB012043 | CACNA1G                  | 8913   | 0.8    | 0.7    | 0.7    | 0.6    | 0.4    |
| 211315_s_at | AB012043 | CACNA1G                  | 8913   | 4.3    | 4.2    | 3.8    | 5.4    | 2.9    |
| 211316_x_at | AF009616 | CFLAR                    | 8837   | 30.4   | 31.0   | 28.1   | 28.1   | 25.7   |
| 211317_s_at | AF041461 | CFLAR                    | 8837   | 12.6   | 5.0    | 12.8   | 7.1    | 9.2    |
| 211318_s_at | U85943   | RAE1                     | 8480   | 184.1  | 179.0  | 189.9  | 156.0  | 160.1  |
| 211319_at   | U85943   | RAE1                     | 8480   | 2.2    | 0.2    | 0.7    | 0.6    | 0.8    |
| 211320_s_at | U71075   | PTPRU                    | 10076  | 51.2   | 39.9   | 32.7   | 31.0   | 23.0   |
| 211322_s_at | AF047004 | SARDH                    | 1757   | 2.4    | 2.6    | 6.3    | 2.7    | 4.2    |
| 211323_s_at | L38019   | ITPR1                    | 3708   | 7.1    | 4.6    | 5.9    | 9.1    | 6.4    |
| 211324_s_at | AL136868 | RGPD3 /// R084220 /// 28 |        | 0.3    | 0.6    | 0.4    | 3.5    | 0.3    |
| 211325_x_at | U72518   | DSTNP2                   | 171220 | 75.1   | 83.7   | 81.5   | 85.5   | 77.8   |
| 211326_x_at | AF150664 | HFE                      | 3077   | 16.6   | 13.3   | 18.4   | 19.1   | 10.9   |
| 211327_x_at | AF149804 | HFE                      | 3077   | 18.3   | 16.1   | 15.5   | 15.3   | 15.1   |
| 211328_x_at | AF144244 | HFE                      | 3077   | 25.5   | 25.9   | 22.9   | 19.5   | 11.3   |
| 211329_x_at | AF115264 | HFE                      | 3077   | 19.7   | 18.5   | 12.0   | 12.2   | 11.0   |
| 211330_s_at | AF144242 | HFE                      | 3077   | 14.7   | 17.0   | 14.4   | 15.0   | 6.4    |
| 211331_x_at | AF144243 | HFE                      | 3077   | 3.8    | 8.8    | 3.2    | 5.6    | 1.9    |
| 211332_x_at | AF144241 | HFE                      | 3077   | 19.7   | 17.4   | 25.7   | 18.5   | 17.1   |
| 211333_s_at | AF288573 | FASLG                    | 356    | 10.5   | 9.9    | 2.6    | 6.8    | 0.7    |
| 211334_at   | BC005241 | MRE11A                   | 4361   | 2.6    | 6.9    | 0.8    | 1.1    | 3.8    |
| 211336_x_at | AF009007 | LILRB1                   | 10859  | 1.1    | 1.5    | 3.5    | 2.1    | 1.6    |
| 211337_s_at | BC000966 | TUBGCP4                  | 27229  | 89.7   | 69.2   | 103.3  | 79.4   | 68.3   |
| 211338_at   | M54886   | IFNA2                    | 3440   | 0.1    | 2.5    | 1.1    | 0.4    | 0.4    |
| 211339_s_at | D13720   | ITK                      | 3702   | 7.6    | 11.5   | 3.2    | 7.1    | 3.0    |
| 211340_s_at | M28882   | MCAM /// M4162 /// 102   |        | 1.4    | 1.4    | 9.6    | 14.5   | 2.4    |

|             |          |                           |              |        |        |        |        |        |
|-------------|----------|---------------------------|--------------|--------|--------|--------|--------|--------|
| 211341_at   | L20433   | POU4F1                    | 5457         | 1.5    | 5.9    | 4.0    | 4.1    | 2.8    |
| 211342_x_at | BC004354 | MED12                     | 9968         | 51.3   | 53.0   | 44.4   | 42.5   | 31.5   |
| 211343_s_at | M33653   | COL13A1                   | 1305         | 0.2    | 3.2    | 2.4    | 3.4    | 1.8    |
| 211345_x_at | AF119850 | EEF1G /// MI1937 /// 100  |              | 3094.4 | 2995.1 | 3308.2 | 3042.7 | 2952.7 |
| 211347_at   | AF064105 | CDC14B                    | 8555         | 10.9   | 1.1    | 5.9    | 5.6    | 1.2    |
| 211348_s_at | AF064105 | CDC14B                    | 8555         | 2.2    | 5.4    | 8.3    | 2.3    | 1.1    |
| 211349_at   | AB001328 | SLC15A1                   | 6564         | 5.8    | 6.6    | 6.5    | 4.1    | 0.3    |
| 211350_s_at | AB016900 | KIF25-AS1                 | 100505879    | 2.5    | 2.2    | 4.2    | 7.1    | 4.8    |
| 211351_at   | AB016900 | KIF25-AS1                 | 100505879    | 3.8    | 0.1    | 0.3    | 0.6    | 0.1    |
| 211352_s_at | U80737   | NCOA3                     | 8202         | 8.6    | 9.6    | 7.2    | 10.7   | 6.8    |
| 211353_at   | AB031547 | LRIT1                     | 26103        | 0.3    | 0.5    | 0.9    | 0.3    | 0.9    |
| 211354_s_at | U52913   | LEPR /// LEPI3953 /// 547 |              | 5.1    | 3.1    | 4.6    | 7.5    | 1.0    |
| 211355_x_at | U52914   | LEPR /// LEPI3953 /// 547 |              | 5.0    | 0.7    | 2.4    | 4.2    | 8.8    |
| 211356_x_at | U66495   | LEPR /// LEPI3953 /// 547 |              | 5.3    | 4.4    | 7.9    | 6.6    | 6.1    |
| 211357_s_at | BC005314 | ALDOB                     | 229          | 0.7    | 0.6    | 1.7    | 1.1    | 0.9    |
| 211358_s_at | AF234161 | CIZ1                      | 25792        | 45.5   | 51.9   | 68.9   | 52.6   | 40.8   |
| 211359_s_at | U12569   | OPRM1                     | 4988         | 11.6   | 8.0    | 8.5    | 6.9    | 6.4    |
| 211360_s_at | AB012610 | ITPR2                     | 3709         | 1.2    | 1.5    | 1.7    | 1.3    | 0.9    |
| 211361_s_at | AJ001696 | SERPINB13                 | 5275         | 0.3    | 0.1    | 0.2    | 1.9    | 0.3    |
| 211362_s_at | AF169949 | SERPINB13                 | 5275         | 10.3   | 6.5    | 5.9    | 5.0    | 7.7    |
| 211363_s_at | AF109294 | MTAP                      | 4507         | 24.5   | 24.1   | 31.3   | 20.7   | 26.0   |
| 211364_at   | AF109294 | MTAP                      | 4507         | 12.5   | 18.4   | 13.2   | 14.5   | 11.4   |
| 211365_s_at | AF152480 | PCDHA2                    | 56146        | 1.4    | 0.3    | 0.6    | 0.6    | 0.7    |
| 211366_x_at | U13698   | CASP1                     | 834          | 34.6   | 25.5   | 16.2   | 17.9   | 15.0   |
| 211367_s_at | U13699   | CASP1                     | 834          | 0.7    | 2.7    | 2.8    | 0.8    | 5.0    |
| 211368_s_at | U13700   | CASP1                     | 834          | 0.5    | 0.1    | 1.3    | 0.5    | 0.8    |
| 211369_at   | AF116689 | -                         | -            | 1.0    | 0.5    | 4.6    | 6.3    | 2.4    |
| 211370_s_at | U71088   | MAP2K5                    | 5607         | 60.4   | 71.6   | 72.1   | 73.3   | 58.8   |
| 211371_at   | U71088   | MAP2K5                    | 5607         | 1.8    | 4.1    | 1.2    | 2.8    | 0.6    |
| 211372_s_at | U64094   | IL1R2                     | 7850         | 0.7    | 0.5    | 1.1    | 0.5    | 0.7    |
| 211373_s_at | U34349   | PSEN2                     | 5664         | 63.3   | 64.5   | 58.7   | 59.9   | 53.0   |
| 211374_x_at | AF116715 | -                         | -            | 9.3    | 5.3    | 11.4   | 10.5   | 9.4    |
| 211375_s_at | AF141870 | ILF3                      | 3609         | 342.8  | 353.4  | 411.6  | 349.3  | 293.6  |
| 211376_s_at | BC005212 | NSMCE4A                   | 54780        | 108.0  | 136.2  | 146.7  | 125.1  | 105.0  |
| 211377_x_at | AF320053 | MYCN                      | 4613         | 1.3    | 0.6    | 1.5    | 0.8    | 0.4    |
| 211378_x_at | BC001224 | LOC10106031               | 5478 /// 101 | 3807.8 | 3663.7 | 3889.2 | 3678.3 | 3530.3 |
| 211379_x_at | AB050855 | B3GALNT1                  | 8706         | 0.1    | 1.7    | 0.3    | 0.3    | 1.6    |
| 211380_s_at | D45864   | PRKG1                     | 5592         | 1.6    | 1.3    | 1.4    | 3.0    | 2.3    |
| 211381_x_at | AF168617 | SPAG11A /// 10407 /// 65  |              | 7.3    | 0.4    | 0.8    | 1.5    | 0.3    |
| 211382_s_at | AF220152 | TACC2                     | 10579        | 51.5   | 72.1   | 56.6   | 67.8   | 47.5   |
| 211383_s_at | AL136827 | WDR37                     | 22884        | 62.6   | 64.3   | 62.3   | 69.0   | 68.3   |
| 211384_s_at | D50855   | CASR                      | 846          | 2.8    | 0.4    | 0.9    | 3.7    | 1.0    |
| 211385_x_at | U28169   | SULT1A2                   | 6799         | 87.1   | 69.7   | 78.5   | 82.7   | 53.8   |
| 211386_at   | BC005372 | MGC12488                  | 84786        | 5.3    | 3.7    | 1.1    | 3.1    | 2.0    |
| 211387_x_at | AB012143 | RNGTT                     | 8732         | 14.1   | 5.0    | 8.9    | 14.1   | 15.7   |
| 211388_s_at | U80761   | -                         | -            | 12.7   | 5.0    | 9.9    | 10.4   | 9.2    |
| 211389_x_at | U73396   | KIR3DS1                   | 3813         | 5.4    | 2.9    | 1.6    | 1.5    | 0.4    |
| 211390_at   | AF113009 | N4BP2L1                   | 90634        | 0.8    | 0.5    | 0.9    | 0.5    | 0.3    |
| 211391_s_at | AF254087 | PATZ1                     | 23598        | 47.8   | 52.8   | 43.9   | 39.7   | 29.2   |
| 211392_s_at | AF242522 | PATZ1                     | 23598        | 75.3   | 76.2   | 61.9   | 70.3   | 45.5   |
| 211393_at   | AF242522 | PATZ1                     | 23598        | 15.7   | 8.8    | 7.7    | 9.5    | 16.0   |
| 211395_x_at | U90940   | FCGR2C                    | 9103         | 13.1   | 18.0   | 16.5   | 15.2   | 16.5   |
| 211396_at   | U90941   | FCGR2C                    | 9103         | 1.0    | 0.7    | 4.9    | 6.4    | 0.8    |

|                      |                           |        |       |       |       |       |       |
|----------------------|---------------------------|--------|-------|-------|-------|-------|-------|
| 211397_x_at L76669   | KIR2DL2                   | 3803   | 2.3   | 1.4   | 1.4   | 1.5   | 2.1   |
| 211398_at AB030075   | FGFR2                     | 2263   | 2.1   | 6.8   | 7.3   | 1.2   | 3.5   |
| 211399_at AB030077   | FGFR2                     | 2263   | 2.3   | 1.0   | 9.3   | 2.1   | 6.8   |
| 211400_at AB030073   | FGFR2                     | 2263   | 3.5   | 0.6   | 0.7   | 4.5   | 5.1   |
| 211401_s_at AB030078 | FGFR2                     | 2263   | 1.3   | 0.8   | 0.8   | 1.4   | 0.7   |
| 211402_x_at AF004291 | NR6A1                     | 2649   | 4.6   | 2.5   | 6.1   | 4.1   | 11.3  |
| 211403_x_at AF167079 | VCX2                      | 51480  | 28.4  | 33.1  | 33.9  | 40.8  | 24.3  |
| 211404_s_at BC004371 | APLP2                     | 334    | 245.3 | 175.3 | 227.4 | 179.5 | 161.9 |
| 211405_x_at M38289   | IFNA17                    | 3451   | 24.6  | 29.6  | 26.9  | 23.1  | 20.1  |
| 211406_at AF119875   | IER3IP1                   | 51124  | 36.7  | 33.1  | 29.4  | 31.2  | 22.7  |
| 211407_at M33374     | NDUFB7                    | 4713   | 5.6   | 8.8   | 6.9   | 6.4   | 6.6   |
| 211410_x_at AF217487 | KIR2DL5A                  | 57292  | 18.1  | 10.4  | 4.2   | 5.6   | 11.0  |
| 211411_at AF117899   | -                         | -      | 3.8   | 5.9   | 11.2  | 7.4   | 3.4   |
| 211412_at AF229067   | PADI4                     | 23569  | 6.3   | 3.7   | 1.2   | 3.5   | 1.8   |
| 211413_s_at AF229067 | PADI4                     | 23569  | 5.6   | 2.7   | 3.5   | 1.8   | 0.4   |
| 211414_at AF097495   | GLS                       | 2744   | 1.1   | 5.7   | 2.0   | 0.5   | 4.4   |
| 211416_x_at L20492   | GGTLC1                    | 92086  | 32.9  | 38.6  | 35.4  | 39.4  | 34.1  |
| 211417_x_at L20493   | GGT1 /// GG 2678 /// 912  |        | 41.7  | 45.3  | 51.1  | 41.5  | 27.2  |
| 211419_s_at L29126   | CHN2                      | 1124   | 1.4   | 2.2   | 1.6   | 1.4   | 2.2   |
| 211421_s_at M31213   | RET                       | 5979   | 1.2   | 2.4   | 0.4   | 5.7   | 2.3   |
| 211422_at AL136545   | TRPM3                     | 80036  | 9.0   | 0.3   | 4.6   | 4.2   | 1.6   |
| 211423_s_at D85181   | SC5D                      | 6309   | 168.6 | 152.7 | 173.4 | 137.5 | 119.4 |
| 211424_x_at AF113007 | METTL7A                   | 25840  | 9.6   | 6.0   | 5.5   | 10.2  | 9.6   |
| 211425_x_at AF257500 | SSX4 /// SSX 6759 /// 548 |        | 14.3  | 11.5  | 20.6  | 13.7  | 11.8  |
| 211426_x_at U40038   | GNAQ                      | 2776   | 46.8  | 28.9  | 42.5  | 38.8  | 32.5  |
| 211427_s_at AB013889 | KCNJ13                    | 3769   | 1.1   | 0.4   | 0.4   | 0.6   | 0.2   |
| 211428_at AF119873   | SERPINA1                  | 5265   | 5.8   | 3.9   | 5.3   | 1.4   | 0.2   |
| 211429_s_at AF119873 | SERPINA1                  | 5265   | 3.1   | 7.3   | 19.5  | 5.6   | 15.8  |
| 211430_s_at M87789   | IGHG1 /// IG 3500 /// 350 |        | 8.2   | 1.7   | 6.3   | 5.2   | 1.6   |
| 211431_s_at D50479   | TYRO3                     | 7301   | 16.5  | 12.6  | 19.5  | 19.9  | 13.5  |
| 211432_s_at U05682   | TYRO3                     | 7301   | 61.3  | 75.5  | 76.3  | 64.5  | 59.4  |
| 211433_x_at AL583909 | FAM214B                   | 80256  | 40.8  | 54.4  | 51.6  | 49.5  | 29.9  |
| 211434_s_at AF015524 | CCRL2                     | 9034   | 2.3   | 7.8   | 3.1   | 1.9   | 2.0   |
| 211435_at AF202635   | -                         | -      | 10.4  | 7.0   | 7.9   | 2.2   | 0.7   |
| 211436_at AF130053   | -                         | -      | 0.9   | 4.3   | 0.2   | 0.1   | 1.2   |
| 211437_at AF130093   | -                         | -      | 1.1   | 0.4   | 0.2   | 1.0   | 0.9   |
| 211438_at D16845     | TRHR                      | 7201   | 0.7   | 0.5   | 0.5   | 0.4   | 0.7   |
| 211439_at AF055270   | SRSF7                     | 6432   | 21.3  | 21.4  | 22.2  | 20.6  | 5.8   |
| 211440_x_at AF280110 | CYP3A43                   | 64816  | 23.7  | 16.9  | 16.1  | 11.5  | 10.4  |
| 211441_x_at AF280113 | CYP3A43                   | 64816  | 2.6   | 2.3   | 2.9   | 5.7   | 2.1   |
| 211442_x_at AF280111 | CYP3A43                   | 64816  | 19.4  | 2.0   | 6.8   | 1.9   | 6.0   |
| 211444_at BC002811   | RP11-649A18-              |        | 25.9  | 15.3  | 21.9  | 17.5  | 13.7  |
| 211445_x_at AF315951 | NACAP1                    | 83955  | 406.7 | 224.7 | 310.3 | 314.5 | 219.2 |
| 211446_at AL136902   | RGSL1                     | 353299 | 2.8   | 1.9   | 5.6   | 2.8   | 4.3   |
| 211447_s_at U18088   | PDE4A                     | 5141   | 5.1   | 0.2   | 4.2   | 0.6   | 0.4   |
| 211448_s_at AF107619 | RGS6                      | 9628   | 0.4   | 3.3   | 0.5   | 0.4   | 0.4   |
| 211449_at D89646     | MSH6                      | 2956   | 4.2   | 4.5   | 1.4   | 4.2   | 0.4   |
| 211450_s_at D89646   | MSH6                      | 2956   | 117.7 | 84.6  | 143.5 | 101.2 | 118.5 |
| 211451_s_at U24056   | KCNJ4                     | 3761   | 0.8   | 0.9   | 0.9   | 1.6   | 1.9   |
| 211452_x_at AF130054 | LRRFIP1                   | 9208   | 266.8 | 234.6 | 266.9 | 223.5 | 230.7 |
| 211453_s_at M77198   | AKT2                      | 208    | 36.4  | 28.0  | 28.0  | 19.9  | 21.6  |
| 211454_x_at AF336878 | FKSG49                    | 400949 | 104.0 | 61.5  | 75.8  | 62.9  | 51.3  |
| 211455_at AF354444   | -                         | -      | 7.7   | 10.2  | 12.3  | 6.7   | 0.9   |

|             |          |             |        |        |        |        |        |        |
|-------------|----------|-------------|--------|--------|--------|--------|--------|--------|
| 211456_x_at | AF333388 | MT1HL1      | 645745 | 1001.6 | 898.8  | 912.8  | 696.7  | 596.9  |
| 211457_at   | AF180519 | GABARAPL3   | 23766  | 1.6    | 1.9    | 5.6    | 1.7    | 7.7    |
| 211458_s_at | AF180519 | GABARAPL1   | 23710  | 57.0   | 90.8   | 91.6   | 79.4   | 55.3   |
| 211459_at   | AF234262 | -           | -      | 1.7    | 0.1    | 1.8    | 1.7    | 1.7    |
| 211460_at   | AF332238 | TTY9A       | 83864  | 9.4    | 13.1   | 10.5   | 3.8    | 4.2    |
| 211461_at   | AF332228 | CSPG4P1Y    | 114758 | 0.8    | 0.9    | 0.9    | 3.8    | 1.1    |
| 211462_s_at | AF332222 | TBL1Y       | 90665  | 7.9    | 1.6    | 1.5    | 4.4    | 3.5    |
| 211463_at   | AF332509 | ZIC4        | 84107  | 8.6    | 4.1    | 1.3    | 10.4   | 6.4    |
| 211464_x_at | U20537   | CASP6       | 839    | 31.9   | 26.0   | 39.5   | 27.3   | 20.8   |
| 211465_x_at | U27335   | FUT6        | 2528   | 47.9   | 31.4   | 41.1   | 30.0   | 40.4   |
| 211466_at   | U70862   | NFIB        | 4781   | 0.2    | 2.1    | 0.8    | 0.6    | 3.5    |
| 211467_s_at | U70862   | NFIB        | 4781   | 15.5   | 20.5   | 20.1   | 25.4   | 12.0   |
| 211468_s_at | AB042825 | RECQL5      | 9400   | 2.2    | 1.4    | 8.9    | 1.6    | 0.5    |
| 211469_s_at | U73531   | CXCR6       | 10663  | 1.4    | 1.1    | 2.3    | 2.4    | 0.3    |
| 211470_s_at | AF186255 | SULT1C2     | 6819   | 6.0    | 0.3    | 1.7    | 0.3    | 1.2    |
| 211471_s_at | AF133588 | RAB36       | 9609   | 45.4   | 42.7   | 52.7   | 47.9   | 39.7   |
| 211472_at   | AF336795 | PLXNB2      | 23654  | 1.6    | 2.6    | 9.2    | 7.4    | 0.8    |
| 211473_s_at | U04845   | COL4A6      | 1288   | 1.1    | 0.6    | 9.2    | 1.0    | 2.7    |
| 211474_s_at | BC004948 | SERPINB6    | 5269   | 447.9  | 447.0  | 479.8  | 475.5  | 442.5  |
| 211475_s_at | AF116273 | BAG1        | 573    | 143.6  | 118.0  | 156.9  | 146.8  | 120.3  |
| 211476_at   | AY013295 | MYOZ2       | 51778  | 0.4    | 0.5    | 0.4    | 1.4    | 0.4    |
| 211478_s_at | M74777   | DPP4        | 1803   | 2.5    | 1.8    | 2.9    | 0.5    | 0.3    |
| 211479_s_at | M81778   | HTR2C       | 3358   | 9.7    | 8.3    | 5.6    | 7.7    | 6.3    |
| 211480_s_at | AF085224 | SLCO1A2     | 6579   | 0.7    | 1.0    | 3.9    | 0.1    | 0.3    |
| 211481_at   | AF085224 | SLCO1A2     | 6579   | 3.6    | 7.9    | 10.0   | 4.0    | 4.5    |
| 211483_x_at | AF081924 | CAMK2B      | 816    | 27.9   | 18.2   | 19.9   | 17.9   | 19.9   |
| 211484_s_at | AF023450 | DSCAM       | 1826   | 4.2    | 4.0    | 10.4   | 2.5    | 9.2    |
| 211485_s_at | AF211188 | FGF18       | 8817   | 1.5    | 1.0    | 1.9    | 1.8    | 1.4    |
| 211486_s_at | AF110020 | KCNQ2       | 3785   | 1.0    | 0.7    | 3.8    | 0.7    | 1.1    |
| 211487_x_at | BC004886 | RPS17       | 6218   | 3022.4 | 2913.0 | 3035.9 | 2922.1 | 2755.9 |
| 211488_s_at | BC002630 | ITGB8       | 3696   | 9.3    | 1.1    | 7.4    | 8.3    | 6.0    |
| 211489_at   | D32201   | ADRA1A      | 148    | 1.1    | 4.6    | 6.8    | 3.6    | 1.7    |
| 211490_at   | AF013261 | ADRA1A      | 148    | 1.1    | 1.5    | 1.1    | 1.8    | 2.0    |
| 211491_at   | D32202   | ADRA1A      | 148    | 1.6    | 1.3    | 2.9    | 7.6    | 4.3    |
| 211492_s_at | U02569   | ADRA1A      | 148    | 0.7    | 0.8    | 1.1    | 0.8    | 1.2    |
| 211493_x_at | U46744   | DTNA        | 1837   | 7.9    | 12.9   | 17.8   | 15.0   | 13.5   |
| 211494_s_at | AF157492 | SLC4A4      | 8671   | 31.9   | 25.6   | 27.4   | 25.0   | 21.5   |
| 211495_x_at | AF114011 | TNFSF12-TNF | 8741   | 43.2   | 47.9   | 61.0   | 62.5   | 29.7   |
| 211496_s_at | M33478   | PDC         | 5132   | 2.3    | 2.0    | 1.9    | 2.6    | 2.4    |
| 211497_x_at | AF249671 | NKX3-1      | 4824   | 35.8   | 39.2   | 53.2   | 47.3   | 63.5   |
| 211498_s_at | AF249669 | NKX3-1      | 4824   | 6.7    | 23.7   | 34.1   | 29.2   | 41.8   |
| 211499_s_at | U92268   | MAPK11      | 5600   | 8.4    | 20.6   | 11.4   | 10.1   | 2.3    |
| 211500_at   | U53442   | MAPK11      | 5600   | 2.4    | 3.8    | 3.1    | 2.5    | 1.6    |
| 211501_s_at | BC001173 | EIF3B       | 8662   | 294.4  | 287.8  | 462.4  | 377.3  | 446.0  |
| 211502_s_at | AF119833 | CDK14       | 5218   | 19.5   | 16.7   | 16.3   | 18.1   | 13.8   |
| 211503_s_at | AF112206 | RAB14       | 51552  | 202.5  | 178.3  | 202.0  | 170.6  | 155.5  |
| 211504_x_at | D87931   | ROCK2       | 9475   | 22.3   | 8.0    | 19.5   | 22.4   | 16.7   |
| 211505_s_at | AL136601 | STAU1       | 6780   | 235.8  | 160.1  | 257.3  | 242.6  | 206.0  |
| 211506_s_at | AF043337 | CXCL8       | 3576   | 3.2    | 0.6    | 1.0    | 5.1    | 0.5    |
| 211507_s_at | AF233437 | MTMR3       | 8897   | 21.4   | 13.1   | 20.1   | 17.7   | 20.6   |
| 211508_s_at | AF006060 | GH2         | 2689   | 1.3    | 0.8    | 0.9    | 0.8    | 0.4    |
| 211509_s_at | AB015639 | RTN4        | 57142  | 943.9  | 850.2  | 998.5  | 885.9  | 758.4  |
| 211510_s_at | AF019381 | CRHR2       | 1395   | 0.6    | 0.8    | 0.3    | 3.4    | 0.7    |

|                      |                           |           |        |        |        |        |        |
|----------------------|---------------------------|-----------|--------|--------|--------|--------|--------|
| 211512_s_at AF172450 | OGFR                      | 11054     | 26.1   | 25.2   | 21.4   | 21.5   | 22.2   |
| 211513_s_at AF172449 | OGFR                      | 11054     | 17.1   | 38.9   | 26.4   | 35.0   | 16.1   |
| 211514_at AF068286   | DSTYK                     | 25778     | 7.8    | 7.0    | 6.5    | 7.2    | 0.6    |
| 211515_s_at AF068286 | DSTYK                     | 25778     | 19.5   | 16.2   | 17.7   | 18.0   | 14.9   |
| 211516_at M96651     | IL5RA                     | 3568      | 5.2    | 5.1    | 0.7    | 0.2    | 3.9    |
| 211517_s_at M96651   | IL5RA                     | 3568      | 1.4    | 1.8    | 0.7    | 0.7    | 3.3    |
| 211518_s_at D30751   | BMP4                      | 652       | 1.7    | 1.5    | 1.3    | 1.1    | 0.9    |
| 211519_s_at AY026505 | KIF2C                     | 11004     | 105.8  | 87.7   | 116.4  | 86.9   | 105.9  |
| 211520_s_at M64752   | GRIA1                     | 2890      | 2.5    | 0.5    | 0.9    | 0.6    | 0.4    |
| 211521_s_at AF125349 | CYTH4                     | 27128     | 8.4    | 5.4    | 5.2    | 13.4   | 4.7    |
| 211522_s_at L03380   | GNRHR                     | 2798      | 0.2    | 0.3    | 0.2    | 1.5    | 0.2    |
| 211523_at L07949     | GNRHR                     | 2798      | 0.7    | 1.0    | 0.3    | 0.1    | 0.7    |
| 211524_at U09609     | NFKB2                     | 4791      | 1.6    | 4.2    | 4.0    | 6.6    | 1.0    |
| 211525_s_at L11238   | GP5                       | 2814      | 3.9    | 1.6    | 3.1    | 0.7    | 1.4    |
| 211526_s_at BC000673 | RTKL1 /// RTI51750 /// 10 |           | 0.7    | 0.7    | 6.1    | 0.6    | 5.0    |
| 211527_x_at M27281   | VEGFA                     | 7422      | 21.5   | 12.9   | 21.9   | 26.1   | 15.6   |
| 211528_x_at M90685   | HLA-G                     | 3135      | 139.1  | 142.7  | 95.0   | 109.6  | 86.8   |
| 211529_x_at M90684   | HLA-G                     | 3135      | 100.5  | 84.4   | 67.2   | 41.7   | 36.8   |
| 211530_x_at M90686   | HLA-G                     | 3135      | 50.1   | 60.5   | 69.1   | 69.6   | 36.4   |
| 211531_x_at K03205   | PRB1                      | 5542      | 5.7    | 11.0   | 13.7   | 16.7   | 5.8    |
| 211532_x_at L76668   | KIR2DS2                   | 100132285 | 1.1    | 1.1    | 1.3    | 1.0    | 0.7    |
| 211533_at M22734     | PDGFRA                    | 5156      | 6.1    | 0.2    | 6.0    | 0.6    | 0.5    |
| 211534_x_at U65065   | PTPRN2                    | 5799      | 9.6    | 1.7    | 13.1   | 7.5    | 6.5    |
| 211535_s_at M60485   | FGFR1                     | 2260      | 32.1   | 19.7   | 24.5   | 19.6   | 23.9   |
| 211536_x_at AB009358 | MAP3K7                    | 6885      | 30.7   | 21.8   | 27.0   | 21.8   | 23.6   |
| 211537_x_at AF218074 | MAP3K7                    | 6885      | 26.4   | 21.9   | 26.0   | 27.6   | 20.9   |
| 211538_s_at U56725   | HSPA2                     | 3306      | 6.6    | 4.3    | 9.4    | 7.9    | 9.3    |
| 211540_s_at M19701   | RB1                       | 5925      | 15.5   | 15.1   | 17.5   | 14.6   | 10.3   |
| 211541_s_at U52373   | DYRK1A                    | 1859      | 2.8    | 7.9    | 2.7    | 1.4    | 1.6    |
| 211542_x_at BC004334 | RPS10                     | 6204      | 4896.1 | 4598.1 | 4815.7 | 4520.2 | 4389.3 |
| 211543_s_at AF040752 | GRK6                      | 2870      | 62.3   | 46.9   | 75.6   | 59.2   | 61.5   |
| 211544_s_at AB058895 | GHRHR                     | 2692      | 1.7    | 5.3    | 14.2   | 4.4    | 6.1    |
| 211545_at AB058895   | GHRHR                     | 2692      | 0.5    | 2.0    | 1.5    | 1.9    | 3.0    |
| 211546_x_at L36674   | SNCA                      | 6622      | 25.3   | 10.3   | 17.0   | 9.2    | 3.0    |
| 211547_s_at L13387   | PAFAH1B1                  | 5048      | 54.7   | 42.1   | 54.9   | 46.3   | 39.8   |
| 211548_s_at J05594   | HPGD                      | 3248      | 1.2    | 1.3    | 13.0   | 3.1    | 3.8    |
| 211549_s_at U63296   | HPGD                      | 3248      | 4.9    | 4.0    | 10.6   | 1.3    | 7.0    |
| 211550_at AF125253   | EGFR                      | 1956      | 1.4    | 1.0    | 0.7    | 1.7    | 0.5    |
| 211551_at K03193     | EGFR                      | 1956      | 22.2   | 17.8   | 20.6   | 8.5    | 9.8    |
| 211552_s_at U24267   | ALDH4A1                   | 8659      | 35.5   | 40.4   | 33.5   | 33.9   | 33.7   |
| 211553_x_at AF248734 | APAF1                     | 317       | 0.4    | 5.6    | 10.0   | 8.6    | 1.8    |
| 211554_s_at AF149794 | APAF1                     | 317       | 2.7    | 1.5    | 13.2   | 2.3    | 11.8   |
| 211555_s_at AF020340 | GUCY1B3                   | 2983      | 12.4   | 8.2    | 9.2    | 8.0    | 6.1    |
| 211556_at AB016823   | MAPRE2                    | 10982     | 0.6    | 0.7    | 1.2    | 0.4    | 0.3    |
| 211557_x_at AF205073 | SLCO2B1                   | 11309     | 6.2    | 11.2   | 16.9   | 16.8   | 2.5    |
| 211558_s_at U26266   | DHPS                      | 1725      | 210.2  | 209.9  | 225.2  | 236.5  | 161.7  |
| 211559_s_at L49506   | CCNG2                     | 901       | 152.8  | 161.2  | 155.3  | 166.1  | 83.6   |
| 211560_s_at AF130113 | ALAS2                     | 212       | 0.7    | 0.7    | 0.5    | 0.6    | 0.7    |
| 211561_x_at L35253   | MAPK14                    | 1432      | 57.3   | 47.4   | 44.4   | 45.3   | 49.5   |
| 211562_s_at BC001755 | LMOD1                     | 25802     | 1.0    | 1.8    | 8.0    | 1.4    | 0.8    |
| 211563_s_at AB006572 | URI1                      | 8725      | 122.6  | 89.9   | 131.1  | 106.8  | 90.8   |
| 211564_s_at BC003096 | PDLIM4                    | 8572      | 1.0    | 0.6    | 0.4    | 3.3    | 0.5    |
| 211565_at AF036272   | SH3GL3                    | 6457      | 9.9    | 9.4    | 9.6    | 5.2    | 6.6    |

|                      |                          |              |        |        |        |        |       |
|----------------------|--------------------------|--------------|--------|--------|--------|--------|-------|
| 211566_x_at U19178   | BRE                      | 9577         | 92.2   | 111.8  | 122.8  | 83.1   | 115.1 |
| 211567_at J04168     | -                        | -            | 0.9    | 2.5    | 2.7    | 1.3    | 1.3   |
| 211568_at AB011122   | BAI3                     | 577          | 0.5    | 1.4    | 0.6    | 2.2    | 3.9   |
| 211569_s_at AF001903 | HADH                     | 3033         | 365.7  | 290.6  | 336.1  | 349.0  | 248.4 |
| 211570_s_at BC004196 | RAPSN                    | 5913         | 4.4    | 0.3    | 1.9    | 3.5    | 0.8   |
| 211571_s_at D32039   | VCAN                     | 1462         | 0.7    | 0.4    | 0.9    | 0.2    | 0.5   |
| 211572_s_at AF092511 | SLC23A2                  | 9962         | 9.8    | 10.1   | 8.2    | 7.9    | 6.9   |
| 211573_x_at M98478   | TGM2                     | 7052         | 1.4    | 0.4    | 1.1    | 1.1    | 2.5   |
| 211574_s_at D84105   | CD46                     | 4179         | 113.6  | 92.3   | 124.4  | 110.3  | 102.5 |
| 211575_s_at AF116702 | UBE3A                    | 7337         | 120.1  | 95.3   | 145.6  | 120.5  | 110.9 |
| 211576_s_at BC003068 | LOC1019287               | 6573 /// 101 | 150.8  | 126.8  | 197.3  | 154.5  | 170.7 |
| 211577_s_at M37484   | IGF1                     | 3479         | 13.5   | 15.1   | 14.9   | 14.3   | 12.0  |
| 211578_s_at M60725   | RPS6KB1                  | 6198         | 25.0   | 20.4   | 24.2   | 33.8   | 24.3  |
| 211579_at U95204     | ITGB3                    | 3690         | 1.4    | 7.0    | 9.0    | 5.3    | 4.9   |
| 211580_s_at AF028785 | PIK3R3                   | 8503         | 55.9   | 50.6   | 60.6   | 58.9   | 37.6  |
| 211581_x_at AF000426 | LST1                     | 7940         | 8.9    | 2.3    | 10.3   | 12.9   | 1.7   |
| 211582_x_at AF000424 | LST1                     | 7940         | 2.0    | 2.0    | 4.2    | 1.4    | 1.6   |
| 211583_x_at AF031136 | NCR3                     | 259197       | 3.1    | 3.5    | 1.1    | 4.5    | 2.2   |
| 211584_s_at U58852   | NPAT                     | 4863         | 29.6   | 26.8   | 28.6   | 21.2   | 21.7  |
| 211585_at U58852     | NPAT                     | 4863         | 5.8    | 4.4    | 1.0    | 3.7    | 4.4   |
| 211586_s_at M97260   | ATP2B2                   | 491          | 1.0    | 0.5    | 0.4    | 0.8    | 0.6   |
| 211587_x_at M37981   | CHRNA3                   | 1136         | 6.4    | 3.9    | 4.9    | 2.6    | 3.0   |
| 211588_s_at AF230401 | PML                      | 5371         | 1.7    | 1.6    | 1.3    | 8.5    | 2.2   |
| 211589_at AF230401   | PML                      | 5371         | 4.2    | 1.2    | 4.1    | 6.9    | 6.9   |
| 211590_x_at U11271   | TBXA2R                   | 6915         | 27.0   | 23.7   | 28.4   | 22.6   | 21.9  |
| 211591_s_at L20965   | PDE4A                    | 5141         | 0.6    | 1.8    | 1.0    | 0.9    | 4.0   |
| 211592_s_at L29536   | CACNA1C                  | 775          | 0.3    | 1.1    | 1.1    | 0.8    | 1.4   |
| 211593_s_at AB047005 | MAST2                    | 23139        | 32.2   | 34.2   | 48.9   | 31.7   | 37.0  |
| 211594_s_at AB049636 | MRPL9                    | 65005        | 129.3  | 159.0  | 169.7  | 138.1  | 144.2 |
| 211595_s_at AB049944 | MRPS11                   | 64963        | 294.6  | 349.2  | 365.2  | 340.7  | 317.7 |
| 211596_s_at AB050468 | LRIG1                    | 26018        | 96.2   | 91.8   | 111.0  | 104.4  | 102.9 |
| 211597_s_at AB059408 | HOPX                     | 84525        | 8.4    | 3.3    | 10.6   | 0.7    | 3.2   |
| 211598_x_at U18810   | VIPR2                    | 7434         | 12.7   | 4.5    | 11.5   | 11.2   | 3.7   |
| 211599_x_at U19348   | MET                      | 4233         | 16.1   | 7.8    | 12.3   | 10.4   | 13.4  |
| 211600_at U20489     | PTPRO                    | 5800         | 1389.4 | 1116.8 | 1254.6 | 1324.9 | 920.7 |
| 211601_at U25433     | CATR1                    | 856          | 0.4    | 0.1    | 0.5    | 0.2    | 0.1   |
| 211602_s_at U31110   | TRPC1                    | 7220         | 2.9    | 0.4    | 3.0    | 0.6    | 0.7   |
| 211603_s_at U35622   | ETV4                     | 2118         | 1.2    | 2.1    | 1.4    | 3.9    | 0.9   |
| 211604_x_at U38371   | HAP1                     | 9001         | 5.8    | 6.0    | 0.8    | 0.7    | 0.6   |
| 211605_s_at U41742   | RARA                     | 5914         | 3.6    | 1.6    | 4.8    | 1.3    | 2.2   |
| 211606_at U43279     | -                        | -            | 2.6    | 1.6    | 5.6    | 0.3    | 0.6   |
| 211607_x_at U48722   | EGFR                     | 1956         | 1.4    | 1.7    | 1.2    | 4.8    | 1.2   |
| 211608_at U50073     | TCRBV12S3                | -            | 3.2    | 1.4    | 0.8    | 3.6    | 0.7   |
| 211609_x_at U51007   | PSMD4                    | 5710         | 504.1  | 540.9  | 534.3  | 487.9  | 423.3 |
| 211610_at U51869     | KLF6                     | 1316         | 24.0   | 6.0    | 16.0   | 13.2   | 6.6   |
| 211611_s_at U52696   | ATF6B /// TN1388 /// 714 |              | 0.6    | 1.3    | 4.4    | 0.8    | 0.6   |
| 211612_s_at U62858   | IL13RA1                  | 3597         | 40.2   | 39.4   | 36.7   | 36.7   | 29.9  |
| 211613_s_at U79250   | GPD2                     | 2820         | 10.3   | 5.1    | 11.7   | 6.7    | 10.0  |
| 211614_at U88898     | ERVH-6                   | 51581        | 2.4    | 0.5    | 1.3    | 0.8    | 1.1   |
| 211615_s_at M92439   | LRPPRC                   | 10128        | 84.6   | 78.3   | 82.0   | 84.8   | 70.0  |
| 211616_s_at M86841   | HTR2A                    | 3356         | 6.6    | 2.6    | 4.8    | 3.7    | 2.4   |
| 211617_at M21191     | ALDOAP2                  | 228          | 8.0    | 5.6    | 4.4    | 1.4    | 2.8   |
| 211618_s_at M31008   | ALPI                     | 248          | 0.6    | 0.5    | 0.6    | 0.4    | 0.4   |



|                      |            |             |          |        |        |        |        |        |
|----------------------|------------|-------------|----------|--------|--------|--------|--------|--------|
| 211619_s_at M13077   | ALPP       | /// ALP 250 | /// 251  | 0.7    | 5.7    | 2.9    | 11.2   | 7.4    |
| 211620_x_at L21756   | LOC1005064 | 861         | /// 1005 | 3.9    | 5.1    | 1.9    | 0.7    | 1.2    |
| 211621_at M73069     | AR         | 367         |          | 83.3   | 83.8   | 97.6   | 96.5   | 76.0   |
| 211622_s_at M33384   | ARF3       | 377         |          | 105.0  | 166.8  | 161.3  | 171.3  | 127.3  |
| 211623_s_at M30448   | FBL        | 2091        |          | 1367.4 | 1188.6 | 1517.1 | 1281.9 | 1347.6 |
| 211624_s_at M30625   | DRD2       | 1813        |          | 1.4    | 3.5    | 1.5    | 7.3    | 2.7    |
| 211625_s_at L20469   | DRD3       | 1814        |          | 1.5    | 0.5    | 0.4    | 0.3    | 0.5    |
| 211626_x_at M21535   | ERG        | 2078        |          | 3.9    | 1.0    | 1.1    | 1.4    | 1.8    |
| 211627_x_at M69297   | ESR1       | 2099        |          | 0.7    | 0.9    | 1.1    | 0.4    | 2.4    |
| 211628_x_at J04755   | FTH1P5     | 2509        |          | 2779.9 | 2338.5 | 2551.1 | 2513.8 | 2107.5 |
| 211630_s_at L42531   | GSS        | 2937        |          | 492.7  | 449.2  | 468.4  | 430.2  | 411.0  |
| 211631_x_at M22921   | B4GALT1    | 2683        |          | 47.0   | 40.1   | 43.4   | 38.8   | 32.2   |
| 211632_at L34163     | IGHD       | /// IGH3495 | /// 350  | 0.7    | 2.9    | 1.1    | 6.5    | 2.0    |
| 211633_x_at M24668   | -          | -           |          | 3.2    | 1.6    | 4.9    | 0.7    | 6.2    |
| 211634_x_at M24669   | IGHM       | 3507        |          | 1.7    | 2.3    | 1.4    | 1.5    | 0.5    |
| 211635_x_at M24670   | IGHA1      | /// IG 3493 | /// 349  | 5.0    | 1.1    | 1.6    | 0.7    | 1.2    |
| 211636_at L23515     | IGHA1      | /// IG 3493 | /// 349  | 2.5    | 0.5    | 1.3    | 0.6    | 1.0    |
| 211637_x_at L23516   | IGH        | /// IGH3492 | /// 349  | 3.7    | 1.8    | 1.7    | 5.5    | 1.7    |
| 211638_at L23517     | IGH        | /// IGH3492 | /// 349  | 3.9    | 0.4    | 0.9    | 1.3    | 1.8    |
| 211639_x_at L23518   | IGH        | /// IGH3492 | /// 349  | 1.6    | 0.7    | 1.5    | 2.2    | 1.5    |
| 211640_x_at L23519   | IGHG1      | /// IG 3500 | /// 350  | 1.0    | 1.1    | 5.2    | 1.2    | 1.4    |
| 211641_x_at L06101   | IGHA1      | /// IG 3493 | /// 349  | 6.7    | 4.7    | 2.9    | 2.4    | 4.9    |
| 211642_at L06102     | IGHV3-73   | /// -       |          | 0.2    | 0.3    | 0.9    | 0.2    | 0.3    |
| 211643_x_at L14457   | IGK        | /// IGK3514 | /// 508  | 13.5   | 1.6    | 1.4    | 5.6    | 2.8    |
| 211644_x_at L14458   | IGK        | /// IGK3514 | /// 508  | 2.3    | 0.9    | 1.2    | 1.5    | 1.3    |
| 211645_x_at M85256   | IGKV1-17   | /// -       |          | 1.4    | 0.7    | 8.1    | 0.7    | 0.9    |
| 211646_at L14453     | IGH        | /// IGH3492 | /// 349  | 2.3    | 4.3    | 4.9    | 1.7    | 2.3    |
| 211647_x_at L14454   | IGHG1      | /// IG 3500 | /// 350  | 8.6    | 0.9    | 3.5    | 2.2    | 2.3    |
| 211648_at L14455     | IGHG1      | /// IG 3500 | /// 350  | 0.8    | 0.3    | 0.7    | 0.3    | 0.5    |
| 211649_x_at L14456   | IGHA1      | /// IG 3493 | /// 350  | 1.8    | 1.5    | 3.2    | 1.5    | 1.6    |
| 211650_x_at L34164   | IGH        | /// IGH3492 | /// 349  | 0.6    | 0.6    | 4.5    | 3.1    | 0.7    |
| 211651_s_at M20206   | LAMB1      | 3912        |          | 2.1    | 1.2    | 9.5    | 5.7    | 2.2    |
| 211652_s_at M35533   | LBP        | 3929        |          | 22.8   | 12.6   | 17.0   | 7.5    | 10.1   |
| 211653_x_at M33376   | AKR1C2     | /// L1646   | /// 101  | 4.8    | 8.6    | 6.9    | 6.4    | 5.9    |
| 211654_x_at M17565   | HLA-DQB1   | 3119        |          | 47.4   | 44.9   | 52.4   | 39.5   | 34.2   |
| 211655_at D01059     | IGLC1      | 3537        |          | 0.5    | 0.5    | 2.2    | 3.4    | 4.3    |
| 211656_x_at M32577   | HLA-DQB1   | // 3119     | /// 101  | 31.7   | 19.2   | 37.0   | 14.7   | 18.4   |
| 211657_at M18728     | CEACAM6    | 4680        |          | 9.4    | 8.5    | 11.4   | 11.5   | 11.9   |
| 211658_at L19185     | PRDX2      | 7001        |          | 948.3  | 766.7  | 923.2  | 869.5  | 664.8  |
| 211659_at M76676     | GPR135     | 64582       |          | 1.2    | 0.4    | 0.6    | 1.6    | 0.5    |
| 211660_at M36653     | POU2F2     | 5452        |          | 16.8   | 3.1    | 9.5    | 11.0   | 9.0    |
| 211661_x_at M80436   | PTAFR      | 5724        |          | 29.4   | 19.0   | 19.5   | 20.1   | 17.3   |
| 211662_s_at L08666   | VDAC2      | 7417        |          | 1249.7 | 1052.0 | 1336.4 | 1124.1 | 1029.3 |
| 211663_x_at M61900   | PTGDS      | 5730        |          | 12.7   | 7.9    | 6.2    | 9.2    | 4.6    |
| 211665_s_at L20686   | SOS2       | 6655        |          | 10.3   | 16.4   | 12.9   | 17.6   | 7.5    |
| 211666_x_at L22453   | RNU86      | /// R16122  | /// 116  | 2913.0 | 3000.2 | 3045.7 | 2956.2 | 2732.6 |
| 211667_x_at L34698   | TRAV12-2   | 28673       |          | 1.9    | 8.6    | 8.1    | 1.1    | 3.5    |
| 211668_s_at K03226   | PLAU       | 5328        |          | 1.7    | 5.5    | 0.3    | 0.8    | 2.7    |
| 211670_x_at S82471   | SSX3       | 10214       |          | 3.0    | 2.4    | 4.8    | 9.4    | 6.4    |
| 211671_s_at U01351   | NR3C1      | 2908        |          | 6.7    | 0.9    | 4.4    | 3.2    | 3.0    |
| 211672_s_at AF019888 | ARPC4      | /// AF10093 | /// 10   | 162.9  | 209.3  | 223.0  | 171.1  | 203.4  |
| 211673_s_at AF034374 | MOCS1      | 4337        |          | 18.3   | 16.7   | 19.4   | 17.6   | 18.5   |
| 211674_x_at AF038567 | CTAG1A     | /// C1485   | /// 246  | 0.4    | 1.5    | 0.9    | 0.4    | 0.3    |

|                      |                           |        |        |        |        |        |        |
|----------------------|---------------------------|--------|--------|--------|--------|--------|--------|
| 211675_s_at AF054589 | MDFIC                     | 29969  | 0.8    | 0.7    | 3.7    | 0.6    | 5.1    |
| 211676_s_at AF056979 | IFNGR1                    | 3459   | 51.0   | 41.1   | 43.3   | 42.5   | 34.7   |
| 211677_x_at AF062733 | CADM3                     | 57863  | 13.0   | 1.9    | 4.2    | 3.6    | 8.8    |
| 211678_s_at AF090934 | RNF114                    | 55905  | 249.6  | 200.6  | 226.4  | 207.5  | 183.9  |
| 211679_x_at AF095784 | GABBR2                    | 9568   | 5.0    | 3.0    | 6.5    | 3.3    | 1.5    |
| 211680_at AF116705   | PDLIM5                    | 10611  | 0.3    | 0.2    | 1.9    | 1.2    | 0.6    |
| 211681_s_at AF116705 | PDLIM5                    | 10611  | 45.8   | 37.6   | 47.8   | 35.2   | 35.4   |
| 211682_x_at AF177272 | UGT2B28                   | 54490  | 94.6   | 87.2   | 113.3  | 96.4   | 85.9   |
| 211684_s_at AF250307 | DYNC1I2                   | 1781   | 190.3  | 205.3  | 197.7  | 188.8  | 160.4  |
| 211685_s_at AF251061 | NCALD                     | 83988  | 5.4    | 9.8    | 14.0   | 12.2   | 9.5    |
| 211686_s_at AF251062 | MAK16                     | 84549  | 153.3  | 107.0  | 191.2  | 110.2  | 137.7  |
| 211687_x_at AF262973 | KIR3DL1                   | 3811   | 4.1    | 5.0    | 2.6    | 1.0    | 1.0    |
| 211688_x_at AF263617 | KIR3DL1 /// 13811 /// 381 |        | 1.0    | 1.3    | 2.5    | 0.5    | 3.4    |
| 211689_s_at AF270487 | TMPRSS2                   | 7113   | 63.8   | 51.9   | 86.9   | 67.2   | 87.0   |
| 211690_at AF274945   | RPS6                      | 6194   | 0.9    | 1.8    | 2.0    | 2.3    | 0.9    |
| 211691_x_at AF293339 | -                         | -      | 17.0   | 3.6    | 14.4   | 13.6   | 14.7   |
| 211692_s_at AF332558 | BBC3 /// MIF27113 /// 10  |        | 32.6   | 31.9   | 27.4   | 27.0   | 19.2   |
| 211693_at AF343666   | IGH                       | 3492   | 16.7   | 20.7   | 19.5   | 17.5   | 13.9   |
| 211694_at AF348076   | TSSK1B                    | 83942  | 0.3    | 0.6    | 0.6    | 0.4    | 0.7    |
| 211695_x_at AF348143 | MUC1                      | 4582   | 16.8   | 10.3   | 9.6    | 1.6    | 3.8    |
| 211696_x_at AF349114 | HBB                       | 3043   | 20.2   | 13.9   | 15.7   | 17.6   | 15.8   |
| 211697_x_at AF349314 | PNO1                      | 56902  | 148.7  | 108.3  | 143.9  | 139.9  | 120.3  |
| 211698_at AF349444   | EID1                      | 23741  | 565.2  | 335.3  | 571.2  | 440.2  | 354.2  |
| 211699_x_at AF349571 | HBA1 /// HB,3039 /// 304  |        | 3.4    | 2.2    | 2.8    | 2.4    | 1.9    |
| 211700_s_at AF349719 | TRO                       | 7216   | 0.7    | 0.9    | 0.7    | 1.0    | 1.3    |
| 211701_s_at AF349720 | TRO                       | 7216   | 3.0    | 4.1    | 7.8    | 6.5    | 1.1    |
| 211702_s_at AF350251 | USP32                     | 84669  | 35.4   | 32.3   | 35.5   | 30.9   | 26.9   |
| 211703_s_at AF353990 | TM2D1                     | 83941  | 61.9   | 68.2   | 69.1   | 58.6   | 56.9   |
| 211704_s_at AF356353 | SPIN2A /// SI54466 /// 47 |        | 50.1   | 47.5   | 59.5   | 61.3   | 41.5   |
| 211705_s_at AF356525 | SORBS1                    | 10580  | 1.2    | 1.1    | 1.5    | 0.9    | 0.5    |
| 211706_s_at AY028424 | CDK19                     | 23097  | 5.1    | 10.6   | 20.4   | 12.8   | 17.2   |
| 211707_s_at BC005806 | IQCB1                     | 9657   | 66.8   | 51.6   | 66.4   | 60.4   | 58.0   |
| 211708_s_at BC005807 | SCD                       | 6319   | 167.9  | 142.0  | 162.9  | 145.8  | 141.2  |
| 211709_s_at BC005810 | CLEC11A                   | 6320   | 144.4  | 145.5  | 166.0  | 149.0  | 162.2  |
| 211710_x_at BC005817 | RPL4 /// SNC6124 /// 595  |        | 3101.8 | 2921.8 | 3148.7 | 3017.8 | 2907.7 |
| 211711_s_at BC005821 | PTEN                      | 5728   | 69.1   | 65.6   | 73.1   | 70.6   | 57.6   |
| 211712_s_at BC005830 | ANXA9                     | 8416   | 26.5   | 27.8   | 21.3   | 26.5   | 19.2   |
| 211713_x_at BC005832 | KIAA0101                  | 9768   | 76.7   | 60.2   | 85.7   | 68.3   | 71.5   |
| 211714_x_at BC005838 | TUBB                      | 203068 | 3398.8 | 3322.5 | 3634.7 | 3292.1 | 3256.6 |
| 211715_s_at BC005844 | BDH1                      | 622    | 101.7  | 90.2   | 119.1  | 102.9  | 97.0   |
| 211716_x_at BC005851 | ARHGDI1A                  | 396    | 432.8  | 379.4  | 502.3  | 452.7  | 381.7  |
| 211717_at BC005853   | ANKRD40                   | 91369  | 57.7   | 47.3   | 61.2   | 39.5   | 57.9   |
| 211718_at BC005856   | MGC2889                   | 84789  | 2.8    | 4.5    | 6.4    | 2.7    | 0.5    |
| 211719_x_at BC005858 | FN1                       | 2335   | 154.4  | 128.1  | 156.2  | 158.5  | 108.5  |
| 211720_x_at BC005863 | RPLP0                     | 6175   | 4039.2 | 3737.2 | 4154.9 | 3814.1 | 3745.3 |
| 211721_s_at BC005868 | ZNF551                    | 90233  | 41.3   | 30.6   | 46.1   | 31.1   | 26.6   |
| 211722_s_at BC005872 | HDAC6                     | 10013  | 6.9    | 3.8    | 14.0   | 7.0    | 6.0    |
| 211724_x_at BC005883 | MIOS                      | 54468  | 68.7   | 62.7   | 96.3   | 58.1   | 75.6   |
| 211725_s_at BC005884 | BID                       | 637    | 101.9  | 104.9  | 101.4  | 112.0  | 95.2   |
| 211726_s_at BC005894 | FMO2                      | 2327   | 15.8   | 10.6   | 13.7   | 11.6   | 4.8    |
| 211727_s_at BC005895 | COX11                     | 1353   | 250.7  | 203.6  | 275.3  | 212.0  | 210.5  |
| 211728_s_at BC005896 | HYAL3                     | 8372   | 37.3   | 31.8   | 35.6   | 26.1   | 23.7   |
| 211729_x_at BC005902 | BLVRA                     | 644    | 300.6  | 356.5  | 353.5  | 333.5  | 302.2  |

|                      |                           |        |        |        |        |        |        |
|----------------------|---------------------------|--------|--------|--------|--------|--------|--------|
| 211730_s_at BC005903 | POLR2L                    | 5441   | 1717.2 | 1666.4 | 1799.9 | 1791.2 | 1502.5 |
| 211731_x_at BC005904 | SSX3                      | 10214  | 12.0   | 12.4   | 11.6   | 10.0   | 10.7   |
| 211732_x_at BC005907 | HNMT                      | 3176   | 1.3    | 0.8    | 0.7    | 2.2    | 0.4    |
| 211733_x_at BC005911 | SCP2                      | 6342   | 404.7  | 379.4  | 419.3  | 375.4  | 324.8  |
| 211734_s_at BC005912 | FCER1A                    | 2205   | 12.4   | 6.1    | 6.7    | 0.6    | 2.8    |
| 211735_x_at BC005913 | SFTPC                     | 6440   | 1.5    | 1.1    | 1.2    | 1.2    | 1.0    |
| 211736_at BC005914   | SP2                       | 6668   | 1.7    | 4.0    | 2.7    | 4.4    | 5.1    |
| 211737_x_at BC005916 | PTN                       | 5764   | 8.1    | 8.4    | 10.1   | 2.1    | 8.5    |
| 211738_x_at BC005918 | CELA3A                    | 10136  | 13.5   | 13.9   | 9.1    | 15.6   | 10.5   |
| 211739_x_at BC005921 | CSH1 /// CSH1442 /// 144  |        | 0.4    | 0.9    | 0.4    | 0.9    | 0.3    |
| 211740_at BC005922   | ICA1                      | 3382   | 5.1    | 7.4    | 5.9    | 1.5    | 6.4    |
| 211741_x_at BC005924 | PSG3                      | 5671   | 1.2    | 5.8    | 1.0    | 1.4    | 0.2    |
| 211742_s_at BC005926 | EVI2B                     | 2124   | 1.5    | 0.8    | 5.4    | 5.0    | 0.3    |
| 211743_s_at BC005929 | PRG2                      | 5553   | 1.1    | 1.6    | 1.8    | 3.0    | 0.9    |
| 211744_s_at BC005930 | CD58                      | 965    | 25.5   | 20.7   | 25.6   | 21.8   | 16.2   |
| 211745_x_at BC005931 | HBA1 /// HB, 3039 /// 304 |        | 14.9   | 18.4   | 14.6   | 5.3    | 7.4    |
| 211746_x_at BC005932 | PSMA1                     | 5682   | 1409.5 | 1177.3 | 1461.1 | 1325.5 | 1138.6 |
| 211747_s_at BC005938 | LSM5                      | 23658  | 647.5  | 535.8  | 710.0  | 538.9  | 539.0  |
| 211748_x_at BC005939 | PTGDS                     | 5730   | 24.9   | 4.0    | 7.5    | 8.4    | 2.7    |
| 211749_s_at BC005941 | VAMP3                     | 9341   | 440.0  | 407.3  | 437.8  | 375.5  | 347.7  |
| 211750_x_at BC005946 | TUBA1C                    | 84790  | 2977.4 | 2845.4 | 3240.4 | 2865.1 | 2917.9 |
| 211751_at BC005949   | LOC1009967.9659 /// 653   |        | 0.5    | 2.6    | 1.2    | 0.4    | 0.3    |
| 211752_s_at BC005954 | NDUFS7                    | 374291 | 271.4  | 310.9  | 357.8  | 354.8  | 305.0  |
| 211753_s_at BC005956 | RLN1                      | 6013   | 286.9  | 281.6  | 346.7  | 315.4  | 214.9  |
| 211754_s_at BC005957 | SLC25A17                  | 10478  | 181.6  | 151.1  | 166.2  | 166.8  | 149.5  |
| 211755_s_at BC005960 | ATP5F1                    | 515    | 1486.9 | 1361.3 | 1601.0 | 1350.7 | 1262.3 |
| 211756_at BC005961   | PTHLH                     | 5744   | 0.4    | 0.1    | 2.3    | 2.9    | 2.6    |
| 211758_x_at BC005968 | TXNDC9                    | 10190  | 109.5  | 118.6  | 135.7  | 93.6   | 84.1   |
| 211759_x_at BC005969 | TBCB                      | 1155   | 252.9  | 338.5  | 322.8  | 301.7  | 261.4  |
| 211760_s_at BC005974 | VAMP4                     | 8674   | 19.6   | 18.5   | 18.4   | 19.5   | 15.8   |
| 211761_s_at BC005975 | CACYBP                    | 27101  | 332.0  | 250.1  | 350.4  | 277.5  | 265.1  |
| 211762_s_at BC005978 | KPNA2                     | 3838   | 1191.7 | 1010.0 | 1355.2 | 938.2  | 1003.0 |
| 211763_s_at BC005979 | UBE2B                     | 7320   | 123.1  | 87.1   | 110.5  | 93.2   | 82.0   |
| 211764_s_at BC005980 | UBE2D1                    | 7321   | 75.9   | 41.2   | 64.0   | 63.8   | 60.0   |
| 211765_x_at BC005982 | PPIA                      | 5478   | 3871.7 | 3792.4 | 4000.4 | 3768.8 | 3677.1 |
| 211766_s_at BC005989 | PNLIPRP2                  | 5408   | 0.5    | 1.9    | 3.0    | 2.9    | 1.9    |
| 211767_at BC005995   | GINS4                     | 84296  | 77.2   | 45.7   | 85.7   | 60.2   | 46.7   |
| 211768_at BC006080   | LAT2                      | 7462   | 4.9    | 4.7    | 3.1    | 9.8    | 3.5    |
| 211769_x_at BC006088 | SERINC3                   | 10955  | 304.4  | 361.5  | 307.2  | 326.7  | 233.1  |
| 211771_s_at BC006101 | POU2F2                    | 5452   | 2.9    | 1.7    | 0.7    | 1.7    | 0.5    |
| 211772_x_at BC006114 | CHRNA3                    | 1136   | 2.3    | 1.5    | 1.8    | 3.3    | 2.0    |
| 211773_s_at BC006118 | ZKSCAN3                   | 80317  | 33.6   | 25.5   | 25.6   | 28.1   | 21.9   |
| 211774_s_at BC006122 | MMACHC                    | 25974  | 86.4   | 72.0   | 106.2  | 68.2   | 74.7   |
| 211775_x_at BC006134 | MGC13053 /,-              |        | 0.9    | 0.3    | 3.3    | 3.2    | 2.4    |
| 211776_s_at BC006141 | EPB41L3                   | 23136  | 4.2    | 6.1    | 5.4    | 1.7    | 5.8    |
| 211778_s_at BC006148 | OVOL2                     | 58495  | 125.2  | 120.4  | 138.8  | 106.9  | 102.2  |
| 211779_x_at BC006155 | AP2A2                     | 161    | 274.6  | 264.9  | 260.7  | 292.4  | 224.4  |
| 211780_x_at BC006163 | DCTN1                     | 1639   | 135.1  | 101.9  | 113.7  | 104.4  | 82.2   |
| 211781_x_at BC006164 | -                         | -      | 12.4   | 4.5    | 1.9    | 4.2    | 12.3   |
| 211782_at BC006170   | IDS                       | 3423   | 5.2    | 1.8    | 2.6    | 4.2    | 4.5    |
| 211783_s_at BC006177 | MTA1                      | 9112   | 163.5  | 155.1  | 148.8  | 165.7  | 136.0  |
| 211784_s_at BC006181 | SRSF1                     | 6426   | 784.2  | 606.7  | 773.7  | 588.6  | 629.4  |
| 211786_at BC006196   | TNFRSF9                   | 3604   | 1.0    | 0.6    | 0.5    | 0.1    | 0.5    |

|                      |           |              |         |        |        |        |        |        |
|----------------------|-----------|--------------|---------|--------|--------|--------|--------|--------|
| 211787_s_at BC006210 | EIF4A1    | /// LC1973   | /// 267 | 3172.1 | 2855.8 | 3160.8 | 2845.6 | 2837.7 |
| 211788_s_at AF319573 | HAUS7     | /// TF11219  | /// 55  | 0.4    | 0.3    | 0.4    | 0.3    | 0.2    |
| 211789_s_at AF312918 | MLXIP     | 22877        |         | 0.7    | 0.3    | 1.6    | 8.5    | 0.2    |
| 211790_s_at AF010404 | KMT2D     | 8085         |         | 7.5    | 5.9    | 6.8    | 1.6    | 6.2    |
| 211791_s_at AF044253 | KCNAB2    | 8514         |         | 15.0   | 12.3   | 13.6   | 8.2    | 8.1    |
| 211792_s_at U17074   | CDKN2C    | 1031         |         | 37.8   | 43.2   | 58.0   | 42.0   | 44.8   |
| 211793_s_at AF260261 | ABI2      | 10152        |         | 42.0   | 33.0   | 28.9   | 34.7   | 26.3   |
| 211794_at AF198052   | FYB       | 2533         |         | 1.4    | 1.6    | 1.5    | 1.3    | 1.0    |
| 211795_s_at AF198052 | FYB       | 2533         |         | 0.2    | 3.8    | 7.4    | 6.3    | 1.5    |
| 211796_s_at AF043179 | TRBC1     | 28639        |         | 2.2    | 4.2    | 4.9    | 2.4    | 5.0    |
| 211797_s_at U62296   | NFYC      | 4802         |         | 93.9   | 84.4   | 99.2   | 110.1  | 77.3   |
| 211798_x_at AB001733 | IGLJ3     | 28831        |         | 5.1    | 6.9    | 0.9    | 2.8    | 3.8    |
| 211799_x_at U62824   | HLA-C     | 3107         |         | 38.2   | 58.5   | 48.0   | 43.7   | 33.1   |
| 211800_s_at AF017306 | USP4      | 7375         |         | 117.4  | 93.9   | 117.6  | 109.0  | 86.0   |
| 211801_x_at AF329637 | MFN1      | 55669        |         | 69.3   | 69.4   | 78.7   | 57.5   | 50.0   |
| 211802_x_at AF227750 | CACNA1G   | 8913         |         | 3.5    | 4.6    | 3.1    | 2.4    | 1.7    |
| 211803_at AB012305   | CDK2      | 1017         |         | 6.9    | 12.3   | 0.9    | 6.3    | 5.0    |
| 211804_s_at AB012305 | CDK2      | 1017         |         | 158.5  | 112.1  | 177.0  | 127.2  | 119.7  |
| 211805_s_at AF108389 | SLC8A1    | 6546         |         | 16.0   | 6.2    | 11.3   | 9.0    | 9.8    |
| 211806_s_at D87291   | KCNJ15    | 3772         |         | 12.8   | 12.0   | 10.4   | 2.0    | 10.1   |
| 211807_x_at AF152521 | PCDHGB5   | 56101        |         | 18.5   | 21.1   | 21.2   | 17.9   | 12.9   |
| 211808_s_at U85962   | CREBBP    | 1387         |         | 1.0    | 1.8    | 1.5    | 1.6    | 4.2    |
| 211809_x_at M59217   | COL13A1   | 1305         |         | 7.3    | 2.4    | 3.4    | 10.1   | 2.8    |
| 211810_s_at D25284   | GALC      | 2581         |         | 7.7    | 6.2    | 9.8    | 10.1   | 7.4    |
| 211811_s_at AF152484 | PCDHA5    | /// I56142   | /// 56  | 1.4    | 3.8    | 4.9    | 5.6    | 0.8    |
| 211812_s_at AB050856 | B3GALNT1  | 8706         |         | 0.7    | 0.5    | 0.7    | 1.7    | 0.1    |
| 211813_x_at AF138303 | DCN       | 1634         |         | 2.1    | 1.8    | 1.8    | 3.0    | 2.0    |
| 211814_s_at AF112857 | CCNE2     | 9134         |         | 59.8   | 37.5   | 82.8   | 50.1   | 58.1   |
| 211815_s_at AF219138 | GGA3      | 23163        |         | 25.1   | 23.1   | 27.6   | 20.4   | 22.2   |
| 211816_x_at D87858   | FCAR      | 2204         |         | 3.6    | 6.1    | 7.8    | 1.4    | 2.7    |
| 211817_s_at L47208   | KCNJ5     | 3762         |         | 19.6   | 2.7    | 3.9    | 5.0    | 11.1   |
| 211818_s_at U88712   | LOC729966 | / 5143       | /// 729 | 1.1    | 9.0    | 11.4   | 12.7   | 9.8    |
| 211819_s_at AF136381 | SORBS1    | 10580        |         | 12.5   | 9.3    | 11.0   | 2.7    | 4.6    |
| 211820_x_at U00179   | GYPA      | 2993         |         | 0.5    | 1.2    | 0.6    | 3.4    | 0.4    |
| 211821_x_at U00178   | GYPA      | 2993         |         | 2.6    | 0.7    | 1.4    | 1.3    | 0.3    |
| 211822_s_at AF229061 | NLRP1     | 22861        |         | 2.4    | 1.1    | 6.1    | 1.0    | 1.0    |
| 211823_s_at D86862   | PXN       | 5829         |         | 17.4   | 22.1   | 26.1   | 28.9   | 16.5   |
| 211824_x_at AF229062 | NLRP1     | 22861        |         | 1.2    | 0.8    | 1.0    | 0.8    | 0.5    |
| 211825_s_at AF327066 | FLI1      | 2313         |         | 6.4    | 1.5    | 11.1   | 2.2    | 1.1    |
| 211826_s_at L22179   | AFF1      | 4299         |         | 17.0   | 6.6    | 13.3   | 15.0   | 12.1   |
| 211827_s_at AF187964 | KCND3     | 3752         |         | 2.6    | 2.3    | 9.6    | 0.8    | 0.7    |
| 211828_s_at AF172268 | TNIK      | 23043        |         | 2.6    | 0.5    | 2.8    | 1.1    | 1.1    |
| 211829_s_at U58828   | GPER1     | 2852         |         | 22.1   | 14.2   | 19.7   | 13.4   | 8.3    |
| 211830_s_at AF211189 | CACNA1I   | 8911         |         | 3.6    | 1.6    | 1.6    | 1.6    | 1.5    |
| 211831_s_at U59495   | THPO      | 7066         |         | 13.6   | 11.2   | 10.5   | 2.4    | 7.2    |
| 211832_s_at AF201370 | MDM2      | 4193         |         | 4.8    | 1.1    | 0.9    | 4.7    | 5.3    |
| 211833_s_at U19599   | BAX       | 581          |         | 57.3   | 50.5   | 58.0   | 66.5   | 50.8   |
| 211834_s_at AB042841 | TP63      | 8626         |         | 7.4    | 5.5    | 8.4    | 6.2    | 5.2    |
| 211835_at AJ225093   | IGKC      | /// IGK\3514 |         | 0.7    | 0.8    | 0.6    | 0.6    | 1.0    |
| 211836_s_at U18800   | MOG       | 4340         |         | 2.6    | 3.0    | 3.4    | 0.6    | 0.9    |
| 211837_s_at AF165312 | PTCRA     | 171558       |         | 1.0    | 1.6    | 2.7    | 6.2    | 1.4    |
| 211838_x_at AF152483 | PCDHA5    | 56143        |         | 1.3    | 2.9    | 9.5    | 1.2    | 6.3    |
| 211839_s_at U22386   | CSF1      | 1435         |         | 1.7    | 1.4    | 2.2    | 1.5    | 1.0    |

|                      |                    |              |        |        |        |        |        |
|----------------------|--------------------|--------------|--------|--------|--------|--------|--------|
| 211840_s_at U50157   | PDE4D              | 5144         | 4.7    | 0.6    | 0.4    | 3.6    | 0.3    |
| 211841_s_at U94510   | TNFRSF25           | 8718         | 3.1    | 3.0    | 7.1    | 1.6    | 2.1    |
| 211842_s_at AF026132 | SLC24A1            | 9187         | 8.6    | 4.9    | 7.6    | 6.7    | 5.0    |
| 211843_x_at AF315325 | CYP3A7-CYP3A4      | 100861540    | 1.4    | 0.5    | 1.6    | 1.1    | 1.3    |
| 211844_s_at AF022859 | NRP2               | 8828         | 0.9    | 0.6    | 1.4    | 0.5    | 0.5    |
| 211845_at AF110314   | PVRL1              | 5818         | 0.6    | 0.4    | 0.5    | 0.8    | 1.0    |
| 211846_s_at AF110314 | PVRL1              | 5818         | 6.0    | 0.8    | 11.3   | 10.5   | 4.5    |
| 211848_s_at AF006623 | CEACAM7            | 1087         | 1.3    | 5.3    | 1.8    | 0.9    | 0.6    |
| 211849_s_at AB009023 | RNGTT              | 8732         | 15.0   | 16.1   | 18.4   | 8.2    | 9.6    |
| 211851_x_at AF005068 | BRCA1              | 672          | 44.4   | 34.6   | 41.6   | 31.2   | 28.3   |
| 211852_s_at AF106861 | ATRNL1             | 8455         | 27.8   | 24.8   | 12.6   | 26.1   | 27.4   |
| 211855_s_at AF155810 | SLC25A14           | 9016         | 44.8   | 43.2   | 40.6   | 46.6   | 38.4   |
| 211856_x_at AF222341 | CD28               | 940          | 4.3    | 1.9    | 1.8    | 5.4    | 1.1    |
| 211858_x_at AF088184 | GNAS               | 2778         | 1393.7 | 1562.2 | 1625.1 | 1602.5 | 1268.1 |
| 211861_x_at AF222343 | CD28               | 940          | 1.2    | 4.0    | 4.0    | 0.5    | 2.2    |
| 211862_x_at AF015451 | CFLAR              | 8837         | 18.3   | 21.9   | 19.1   | 16.3   | 17.5   |
| 211863_x_at AF079408 | HFE                | 3077         | 27.4   | 18.1   | 19.3   | 23.8   | 11.1   |
| 211864_s_at AF207990 | MYOF               | 26509        | 2.4    | 2.4    | 1.5    | 2.4    | 0.9    |
| 211865_s_at AB013463 | FZR1               | 51343        | 28.6   | 29.0   | 25.7   | 25.0   | 25.0   |
| 211866_x_at AF079409 | HFE                | 3077         | 27.4   | 18.6   | 13.1   | 20.7   | 12.0   |
| 211867_s_at AF152475 | PCDHA10            | 56139        | 0.7    | 0.5    | 1.9    | 0.4    | 3.5    |
| 211868_x_at AJ225092 | IGH /// IGHA3      | 3492 /// 349 | 2.2    | 1.8    | 4.0    | 1.5    | 1.4    |
| 211869_at AF049656   | -                  | -            | 0.6    | 1.0    | 0.6    | 0.7    | 0.4    |
| 211870_s_at AF152481 | PCDHA2 /// I56145  | /// 56       | 1.1    | 0.6    | 0.8    | 0.7    | 0.8    |
| 211871_x_at AF300650 | GNB5               | 10681        | 19.7   | 17.6   | 20.2   | 23.5   | 13.4   |
| 211872_s_at AB016929 | RGS11              | 8786         | 8.0    | 4.4    | 1.8    | 1.7    | 6.6    |
| 211873_s_at AF152516 | PCDHGA9            | 56107        | 1.2    | 0.6    | 0.8    | 0.6    | 0.6    |
| 211874_s_at AF119230 | KAT6B              | 23522        | 21.0   | 19.0   | 21.5   | 18.6   | 9.1    |
| 211875_x_at AF152503 | PCDHGA10           | 56106        | 5.1    | 1.1    | 2.1    | 0.6    | 1.5    |
| 211876_x_at AF152504 | PCDHGA10 / I5098   | /// 260      | 6.4    | 3.0    | 2.4    | 5.5    | 6.9    |
| 211877_s_at AF152505 | PCDHGA11 / I5098   | /// 561      | 0.5    | 0.2    | 0.6    | 0.5    | 0.5    |
| 211878_at M26463     | -                  | -            | 1.0    | 0.9    | 0.9    | 0.7    | 5.3    |
| 211879_x_at AF152510 | PCDHGA3            | 56112        | 7.7    | 1.6    | 5.5    | 1.1    | 6.1    |
| 211880_x_at AF152507 | PCDHGA1            | 56114        | 21.7   | 17.6   | 16.4   | 5.6    | 8.4    |
| 211881_x_at AB014341 | IGLJ3              | 28831        | 9.9    | 3.2    | 10.6   | 5.6    | 5.7    |
| 211882_x_at U27331   | FUT6               | 2528         | 2.5    | 1.4    | 1.8    | 1.1    | 1.1    |
| 211883_x_at M76742   | CEACAM1            | 634          | 13.5   | 9.0    | 11.8   | 3.5    | 5.9    |
| 211884_s_at U31931   | CIITA              | 4261         | 4.5    | 2.2    | 0.9    | 1.3    | 5.0    |
| 211885_x_at U27332   | FUT6               | 2528         | 0.9    | 1.9    | 1.2    | 3.6    | 0.8    |
| 211886_s_at U80987   | TBX5               | 6910         | 12.9   | 10.8   | 8.6    | 13.6   | 6.9    |
| 211887_x_at AF037351 | MSR1               | 4481         | 1.4    | 4.9    | 1.4    | 2.3    | 0.8    |
| 211888_x_at AF111345 | CASP10             | 843          | 7.8    | 4.3    | 2.6    | 2.2    | 1.3    |
| 211889_x_at D12502   | CEACAM1            | 634          | 1.0    | 3.4    | 1.8    | 0.4    | 3.1    |
| 211890_x_at AF127765 | CAPN3              | 825          | 0.5    | 0.4    | 0.7    | 0.8    | 0.4    |
| 211891_s_at AB042199 | ARHGEF4 /// I50649 | /// 10       | 13.0   | 10.5   | 8.8    | 6.6    | 3.7    |
| 211892_s_at AF297052 | PTGIS              | 5740         | 12.1   | 4.8    | 9.0    | 11.1   | 5.1    |
| 211893_x_at U66145   | CD6                | 923          | 18.1   | 1.5    | 5.1    | 4.9    | 9.3    |
| 211894_x_at AB041736 | SEZ6L              | 23544        | 23.9   | 15.9   | 14.8   | 5.7    | 13.4   |
| 211896_s_at AF138302 | DCN                | 1634         | 5.3    | 5.8    | 3.9    | 1.0    | 5.7    |
| 211897_s_at AF180301 | CRHR1              | 1394         | 1.2    | 1.2    | 3.5    | 3.0    | 0.4    |
| 211898_s_at AF037333 | EPHB1              | 2047         | 1.5    | 0.9    | 0.9    | 1.0    | 0.4    |
| 211899_s_at AF082185 | TRAF4              | 9618         | 181.6  | 129.8  | 162.2  | 128.1  | 107.4  |
| 211900_x_at U66146   | CD6                | 923          | 22.2   | 14.0   | 8.0    | 5.2    | 9.1    |

|                      |                     |            |        |        |        |        |        |        |
|----------------------|---------------------|------------|--------|--------|--------|--------|--------|--------|
| 211901_s_at AF073745 | PDE4A               | 5141       | 0.6    | 0.5    | 1.4    | 0.6    | 0.9    |        |
| 211902_x_at L34703   | YME1L1              | 10730      | 12.5   | 5.6    | 2.1    | 1.3    | 11.9   |        |
| 211903_s_at M90103   | MPL                 | 4352       | 0.5    | 0.3    | 3.7    | 4.5    | 0.5    |        |
| 211904_x_at AF125950 | RAD52               | 5893       | 9.5    | 7.6    | 14.8   | 8.9    | 7.2    |        |
| 211905_s_at AF011375 | ITGB4               | 3691       | 9.4    | 10.6   | 4.9    | 3.1    | 0.9    |        |
| 211906_s_at AB046400 | SERPINB4            | 6318       | 0.3    | 0.4    | 0.2    | 2.8    | 1.2    |        |
| 211907_s_at AB044555 | PARD6B              | 84612      | 6.1    | 11.8   | 6.1    | 11.6   | 4.1    |        |
| 211908_x_at M87268   | IGK                 | 50802      | 1.5    | 2.0    | 1.3    | 0.7    | 1.4    |        |
| 211909_x_at L32662   | PTGER3              | 5733       | 6.8    | 9.3    | 7.5    | 12.4   | 6.6    |        |
| 211910_at U87229     | -                   | -          | 1.9    | 2.2    | 2.0    | 1.6    | 1.5    |        |
| 211911_x_at L07950   | HLA-B               | 3106       | 159.1  | 137.7  | 132.6  | 135.8  | 92.5   |        |
| 211912_at L08961     | MERTK               | 10461      | 6.7    | 3.6    | 7.4    | 8.6    | 7.1    |        |
| 211913_s_at L08961   | MERTK               | 10461      | 1.3    | 8.3    | 6.2    | 10.8   | 14.1   |        |
| 211914_x_at M60915   | LOC1019301.4763 /// | 101        | 1.2    | 6.7    | 1.6    | 11.4   | 1.8    |        |
| 211915_s_at U83110   | TUBB7P              | 56604      | 1.0    | 3.0    | 0.6    | 1.0    | 1.6    |        |
| 211916_s_at AF009961 | MYO1A               | 4640       | 16.4   | 7.6    | 9.2    | 9.6    | 15.0   |        |
| 211917_s_at AF349939 | PRLR                | 5618       | 7.5    | 5.2    | 6.3    | 0.9    | 0.5    |        |
| 211918_x_at AF311940 | PAPPA2              | 60676      | 4.0    | 22.5   | 32.6   | 15.4   | 12.3   |        |
| 211919_s_at AF348491 | CXCR4               | 7852       | 12.6   | 17.8   | 9.8    | 20.2   | 13.9   |        |
| 211920_at AF349679   | CFB                 | 629        | 2.0    | 1.4    | 4.1    | 1.1    | 0.8    |        |
| 211921_x_at AF348514 | LOC1005062.5757 /// | 728        | 1754.3 | 1636.1 | 2141.8 | 1851.7 | 1875.8 |        |
| 211922_s_at AY028632 | CAT                 | 847        | 181.3  | 199.1  | 196.8  | 185.9  | 140.4  |        |
| 211923_s_at AF352026 | ZNF471              | 57573      | 2.6    | 10.1   | 2.0    | 5.2    | 4.7    |        |
| 211924_s_at AY029180 | PLAUR               | 5329       | 7.2    | 8.5    | 2.6    | 9.5    | 4.6    |        |
| 211925_s_at AY004175 | PLCB1               | 23236      | 3.4    | 4.0    | 4.0    | 2.2    | 0.9    |        |
| 211926_s_at AI827941 | MYH9                | 4627       | 175.5  | 177.8  | 179.6  | 179.2  | 165.8  |        |
| 211927_x_at BE963164 | EEF1G ///           | MI1937 /// | 100    | 3385.7 | 3153.7 | 3389.2 | 3346.5 | 3143.2 |
| 211928_at AB002323   | DYNC1H1             | 1778       | 168.2  | 216.5  | 172.8  | 242.4  | 186.5  |        |
| 211929_at AA527502   | HNRNPA3             | 220988     | 120.1  | 90.6   | 137.2  | 99.4   | 123.6  |        |
| 211930_at AW080932   | HNRNPA3             | 220988     | 52.6   | 30.1   | 39.6   | 50.2   | 46.1   |        |
| 211931_s_at BG505670 | HNRNPA3 ///         | 10151 ///  | 22     | 607.5  | 487.8  | 691.6  | 560.4  | 530.4  |
| 211932_at BF195526   | HNRNPA3             | 220988     | 132.9  | 118.2  | 144.5  | 120.4  | 113.6  |        |
| 211933_s_at AA528233 | HNRNPA3 ///         | 10151 ///  | 22     | 316.9  | 283.0  | 300.8  | 273.6  | 286.5  |
| 211934_x_at W87689   | GANAB               | 23193      | 489.3  | 487.8  | 522.3  | 480.4  | 398.8  |        |
| 211935_at D31885     | ARL6IP1             | 23204      | 743.2  | 681.7  | 781.9  | 709.0  | 653.6  |        |
| 211936_at AF216292   | HSPA5               | 3309       | 1004.1 | 942.1  | 929.9  | 1052.0 | 854.7  |        |
| 211937_at NM_001417  | EIF4B               | 1975       | 1135.3 | 1166.6 | 1246.5 | 1221.3 | 1065.9 |        |
| 211938_at BF247371   | EIF4B               | 1975       | 539.3  | 533.3  | 551.8  | 497.3  | 436.9  |        |
| 211939_x_at X74070   | BTF3                | 689        | 2072.3 | 1918.7 | 2164.6 | 1872.5 | 1837.7 |        |
| 211940_x_at BE869922 | H3F3A ///           | H33020 /// | 302    | 1844.2 | 1998.4 | 2014.8 | 1804.0 | 1599.8 |
| 211941_s_at BE969671 | PEBP1               | 5037       | 978.7  | 947.7  | 1093.7 | 1020.0 | 876.0  |        |
| 211942_x_at BF979419 | RPL13A ///          | R23521 /// | 26     | 3471.5 | 2970.9 | 3026.9 | 2829.0 | 3097.1 |
| 211943_x_at AL565449 | LOC1019288.7178 /// | 101        | 3220.5 | 2704.7 | 3169.0 | 2874.2 | 2720.2 |        |
| 211944_at BE729523   | PRRC2C              | 23215      | 29.2   | 22.2   | 32.5   | 29.4   | 26.1   |        |
| 211945_s_at BG500301 | ITGB1               | 3688       | 810.5  | 601.4  | 690.8  | 678.5  | 541.0  |        |
| 211946_s_at AL096857 | PRRC2C              | 23215      | 208.6  | 172.5  | 229.3  | 200.4  | 153.5  |        |
| 211947_s_at AI359472 | PRRC2C              | 23215      | 2.8    | 5.9    | 5.0    | 5.3    | 5.7    |        |
| 211948_x_at BG261071 | PRRC2C              | 23215      | 69.0   | 58.3   | 64.2   | 67.7   | 45.0   |        |
| 211949_s_at AI355279 | NOLC1               | 9221       | 127.0  | 88.2   | 131.9  | 87.6   | 120.2  |        |
| 211950_at AB007931   | UBR4                | 23352      | 90.5   | 84.5   | 76.7   | 102.5  | 66.6   |        |
| 211951_at D21262     | NOLC1               | 9221       | 402.0  | 341.8  | 440.1  | 348.1  | 448.1  |        |
| 211952_at AF339834   | IPO5                | 3843       | 40.2   | 33.2   | 41.2   | 34.5   | 36.1   |        |
| 211953_s_at AU148466 | IPO5                | 3843       | 139.5  | 113.8  | 164.1  | 116.6  | 127.4  |        |

|             |           |                            |        |        |        |        |        |        |
|-------------|-----------|----------------------------|--------|--------|--------|--------|--------|--------|
| 211954_s_at | BC000947  | IPO5                       | 3843   | 214.9  | 194.1  | 285.7  | 187.2  | 272.5  |
| 211955_at   | NM_002271 | IPO5                       | 3843   | 166.5  | 159.7  | 184.8  | 168.2  | 166.8  |
| 211956_s_at | BF246436  | EIF1                       | 10209  | 3369.1 | 3111.6 | 3510.9 | 3366.1 | 3212.6 |
| 211958_at   | R73554    | IGFBP5                     | 3488   | 7.8    | 1.0    | 8.3    | 3.3    | 0.7    |
| 211959_at   | AW007532  | IGFBP5                     | 3488   | 0.5    | 1.1    | 0.4    | 0.7    | 1.4    |
| 211960_s_at | BG261416  | RAB7A                      | 7879   | 311.8  | 213.7  | 281.5  | 256.2  | 205.9  |
| 211961_s_at | AK000826  | RAB7A                      | 7879   | 210.2  | 188.2  | 213.3  | 193.8  | 163.7  |
| 211962_s_at | BG250310  | ZFP36L1                    | 677    | 117.3  | 108.3  | 111.3  | 109.9  | 68.4   |
| 211963_s_at | AL516350  | ARPC5                      | 10092  | 608.7  | 520.2  | 611.7  | 490.6  | 482.5  |
| 211964_at   | X05610    | COL4A2                     | 1284   | 14.0   | 11.7   | 20.0   | 11.2   | 12.8   |
| 211965_at   | BE620915  | ZFP36L1                    | 677    | 13.5   | 11.3   | 4.7    | 12.0   | 6.1    |
| 211966_at   | AA909035  | COL4A2                     | 1284   | 10.2   | 6.6    | 8.5    | 13.1   | 6.3    |
| 211967_at   | BG538627  | TMEM123                    | 114908 | 297.6  | 229.5  | 290.1  | 226.1  | 227.5  |
| 211968_s_at | AI962933  | HSP90AA1                   | 3320   | 2080.2 | 1716.3 | 2366.6 | 1926.0 | 1926.1 |
| 211969_at   | BG420237  | HSP90AA1                   | 3320   | 1994.4 | 1659.7 | 2248.9 | 1879.1 | 1903.2 |
| 211970_x_at | BG026805  | ACTB /// ACT160 /// 71     |        | 2539.2 | 2552.2 | 2663.0 | 2503.8 | 2355.8 |
| 211971_s_at | AI653608  | LRPPRC                     | 10128  | 361.5  | 265.2  | 335.5  | 302.7  | 273.3  |
| 211972_x_at | AI953822  | RPLP0                      | 6175   | 3620.4 | 3231.6 | 3569.7 | 3308.1 | 3204.6 |
| 211973_at   | AW341200  | NUDT3                      | 11165  | 19.2   | 17.0   | 14.6   | 16.7   | 14.7   |
| 211974_x_at | AL513759  | RBPJ                       | 3516   | 194.8  | 168.8  | 192.3  | 174.9  | 170.4  |
| 211975_at   | BE299671  | ARFGAP2                    | 84364  | 112.5  | 95.5   | 105.3  | 97.7   | 69.2   |
| 211976_at   | AK026168  | NUDT3                      | 11165  | 70.7   | 57.6   | 70.5   | 59.6   | 49.7   |
| 211977_at   | AK024651  | GPR107                     | 57720  | 43.2   | 46.4   | 50.8   | 41.9   | 38.4   |
| 211978_x_at | AI708767  | LOC10106035478 /// 101     |        | 4009.7 | 3842.6 | 4083.4 | 3987.1 | 3724.8 |
| 211979_at   | AB046844  | GPR107                     | 57720  | 52.1   | 42.3   | 41.9   | 55.3   | 51.0   |
| 211980_at   | AI922605  | COL4A1                     | 1282   | 7.7    | 5.4    | 3.9    | 4.9    | 4.3    |
| 211981_at   | NM_001845 | COL4A1                     | 1282   | 3.2    | 0.8    | 1.3    | 1.2    | 1.0    |
| 211982_x_at | AL546600  | XPO6                       | 23214  | 284.3  | 251.2  | 294.0  | 236.9  | 229.4  |
| 211983_x_at | BE741683  | ACTB /// ACT160 /// 71     |        | 3058.0 | 3201.3 | 3283.3 | 3165.5 | 2851.2 |
| 211984_at   | AI653730  | CALM1 /// C, 801 /// 805 / |        | 270.7  | 268.8  | 320.3  | 309.9  | 253.0  |
| 211985_s_at | AI653730  | CALM1 /// C, 801 /// 805 / |        | 264.9  | 243.1  | 283.7  | 250.0  | 222.6  |
| 211986_at   | BG287862  | AHNAK                      | 79026  | 32.1   | 49.2   | 37.7   | 54.5   | 25.6   |
| 211987_at   | NM_001068 | TOP2B                      | 7155   | 171.3  | 131.8  | 168.1  | 128.8  | 124.2  |
| 211988_at   | BG289800  | SMARCE1                    | 6605   | 394.6  | 277.8  | 333.5  | 320.3  | 243.2  |
| 211989_at   | NM_003079 | SMARCE1                    | 6605   | 285.7  | 257.2  | 320.4  | 284.3  | 235.0  |
| 211990_at   | M27487    | HLA-DPA1                   | 3113   | 7.1    | 4.4    | 1.5    | 4.8    | 8.5    |
| 211991_s_at | M27487    | HLA-DPA1                   | 3113   | 7.0    | 0.8    | 2.9    | 6.1    | 1.1    |
| 211992_at   | AI445745  | WNK1                       | 65125  | 86.6   | 93.0   | 91.1   | 93.1   | 63.5   |
| 211993_at   | AI768512  | WNK1                       | 65125  | 10.6   | 9.3    | 10.6   | 1.7    | 10.7   |
| 211994_at   | AI742553  | WNK1                       | 65125  | 83.5   | 99.7   | 90.8   | 93.4   | 88.4   |
| 211995_x_at | AL567820  | ACTB /// ACT160 /// 71     |        | 2956.7 | 2807.4 | 3011.4 | 2755.0 | 2605.7 |
| 211996_s_at | BG256504  | LOC101060223117 /// 44     |        | 42.4   | 42.8   | 41.7   | 38.1   | 31.0   |
| 211997_x_at | NM_005324 | H3F3A /// H33020 /// 302   |        | 1826.6 | 1674.5 | 2003.5 | 1813.8 | 1700.3 |
| 211998_at   | AW138159  | H3F3A /// H33020 /// 302   |        | 20.3   | 16.0   | 18.4   | 18.2   | 13.0   |
| 211999_at   | Z48950    | H3F3A /// H33020 /// 302   |        | 1119.4 | 1050.7 | 1215.1 | 1042.7 | 931.9  |
| 212000_at   | AB002363  | SUGP2                      | 10147  | 32.1   | 17.4   | 23.9   | 23.6   | 21.6   |
| 212001_at   | AV738039  | SUGP2                      | 10147  | 49.5   | 56.6   | 57.7   | 50.0   | 49.7   |
| 212002_at   | AL561657  | SZRD1                      | 26099  | 90.1   | 100.1  | 95.3   | 93.1   | 86.1   |
| 212003_at   | BG171020  | SZRD1                      | 26099  | 88.2   | 69.0   | 88.6   | 73.2   | 63.9   |
| 212004_at   | AL050028  | SZRD1                      | 26099  | 162.4  | 141.1  | 146.0  | 133.6  | 102.2  |
| 212005_at   | AL582808  | SZRD1                      | 26099  | 74.7   | 70.8   | 79.8   | 48.4   | 46.7   |
| 212006_at   | AU149908  | UBXN4                      | 23190  | 72.4   | 69.5   | 75.7   | 77.2   | 68.4   |
| 212007_at   | AI927512  | UBXN4                      | 23190  | 73.4   | 75.6   | 66.6   | 60.6   | 58.8   |

|             |          |                          |              |        |        |        |        |        |
|-------------|----------|--------------------------|--------------|--------|--------|--------|--------|--------|
| 212008_at   | N29889   | UBXN4                    | 23190        | 79.1   | 68.9   | 60.6   | 68.2   | 49.6   |
| 212009_s_at | AL553320 | STIP1                    | 10963        | 277.7  | 274.3  | 333.0  | 270.4  | 292.7  |
| 212010_s_at | AK025647 | CDV3                     | 55573        | 203.9  | 182.3  | 230.8  | 181.9  | 207.5  |
| 212012_at   | BF342851 | PXDN                     | 7837         | 21.9   | 19.4   | 21.8   | 17.3   | 16.2   |
| 212013_at   | D86983   | PXDN                     | 7837         | 7.5    | 10.0   | 6.7    | 7.3    | 4.6    |
| 212014_x_at | AI493245 | CD44                     | 960          | 1.7    | 2.1    | 4.3    | 5.1    | 2.8    |
| 212015_x_at | BF690062 | MIR4745 /// 5725 /// 100 |              | 768.1  | 663.4  | 846.6  | 653.8  | 663.0  |
| 212016_s_at | AA679988 | MIR4745 /// 5725 /// 100 |              | 285.5  | 225.1  | 350.6  | 236.8  | 273.4  |
| 212017_at   | BF677404 | FAM168B                  | 130074       | 152.5  | 146.9  | 171.2  | 140.5  | 103.8  |
| 212018_s_at | AK000822 | RSL1D1                   | 26156        | 388.8  | 300.2  | 419.9  | 348.5  | 386.8  |
| 212019_at   | AK025446 | RSL1D1                   | 26156        | 23.1   | 10.9   | 26.6   | 12.8   | 23.0   |
| 212020_s_at | AU152107 | MKI67                    | 4288         | 58.2   | 45.8   | 61.7   | 48.5   | 42.4   |
| 212021_s_at | AU132185 | MKI67                    | 4288         | 66.5   | 49.2   | 71.8   | 55.6   | 61.0   |
| 212022_s_at | BF001806 | MKI67                    | 4288         | 66.4   | 49.3   | 79.1   | 52.8   | 51.0   |
| 212023_s_at | AU147044 | MKI67                    | 4288         | 67.7   | 40.1   | 60.8   | 40.5   | 46.2   |
| 212024_x_at | U80184   | FLII                     | 2314         | 157.2  | 121.5  | 151.4  | 166.6  | 141.4  |
| 212025_s_at | BG421186 | FLII                     | 2314         | 134.2  | 109.8  | 99.2   | 86.9   | 93.8   |
| 212026_s_at | BE646386 | EXOC7                    | 23265        | 38.4   | 32.8   | 39.3   | 27.7   | 29.7   |
| 212027_at   | AI925305 | RBM25                    | 58517        | 85.1   | 69.6   | 95.2   | 80.9   | 78.8   |
| 212028_at   | BE466128 | RBM25                    | 58517        | 106.4  | 67.4   | 114.2  | 82.9   | 83.5   |
| 212029_s_at | U79287   | LOC1019283               | 101928378    | 6.1    | 2.1    | 0.7    | 1.5    | 5.6    |
| 212030_at   | BG251218 | RBM25                    | 58517        | 85.1   | 71.5   | 95.4   | 67.2   | 78.8   |
| 212031_at   | AV757384 | RBM25                    | 58517        | 134.6  | 111.2  | 146.8  | 127.0  | 119.1  |
| 212032_s_at | AL046054 | PTOV1                    | 53635        | 250.3  | 307.1  | 299.6  | 297.3  | 221.9  |
| 212033_at   | BF055107 | RBM25                    | 58517        | 144.8  | 117.3  | 153.8  | 136.3  | 141.7  |
| 212034_s_at | AB028990 | EXOC7                    | 23265        | 152.7  | 147.6  | 158.9  | 164.6  | 136.4  |
| 212035_s_at | AI817079 | EXOC7                    | 23265        | 60.1   | 63.7   | 59.5   | 50.0   | 54.8   |
| 212036_s_at | AW152664 | PNN                      | 5411         | 158.9  | 136.9  | 189.1  | 152.8  | 167.3  |
| 212037_at   | BF508848 | PNN                      | 5411         | 153.5  | 136.8  | 158.8  | 139.0  | 132.1  |
| 212038_s_at | AL515918 | VDAC1                    | 7416         | 1260.1 | 989.8  | 1281.3 | 1147.1 | 1003.2 |
| 212039_x_at | BG339228 | RNU86 /// R16122 /// 116 |              | 3895.7 | 3695.6 | 3890.9 | 3951.3 | 3617.2 |
| 212040_at   | BG249599 | TGOLN2                   | 10618        | 35.2   | 30.8   | 38.4   | 33.9   | 26.8   |
| 212041_at   | AL566172 | ATP6V0D1                 | 9114         | 1063.0 | 920.4  | 1084.2 | 916.3  | 837.9  |
| 212042_x_at | BG389744 | RPL7                     | 6129         | 2784.7 | 2227.3 | 3007.2 | 2421.6 | 2280.6 |
| 212043_at   | W72053   | TGOLN2                   | 10618        | 149.5  | 144.8  | 153.0  | 126.4  | 105.9  |
| 212044_s_at | BE737027 | RPL27A                   | 6157         | 57.7   | 50.9   | 71.2   | 41.1   | 41.4   |
| 212045_at   | N32761   | GLG1                     | 2734         | 12.7   | 25.1   | 19.2   | 18.5   | 14.6   |
| 212046_x_at | X60188   | MAPK3                    | 5595         | 144.8  | 161.8  | 147.5  | 138.8  | 109.2  |
| 212047_s_at | AK025329 | RNF167                   | 26001        | 190.5  | 239.1  | 188.3  | 197.2  | 170.9  |
| 212048_s_at | AW245400 | YARS                     | 8565         | 404.3  | 392.1  | 428.0  | 422.0  | 357.6  |
| 212049_at   | BG230612 | WIPF2                    | 147179       | 51.3   | 40.5   | 44.8   | 55.2   | 46.2   |
| 212050_at   | AK026913 | WIPF2                    | 147179       | 128.0  | 133.8  | 124.2  | 129.2  | 106.2  |
| 212051_at   | AA676803 | WIPF2                    | 147179       | 84.1   | 95.9   | 102.8  | 93.9   | 58.8   |
| 212052_s_at | AB014576 | TBC1D9B                  | 23061        | 198.7  | 159.2  | 279.7  | 270.2  | 128.3  |
| 212053_at   | AK025504 | LOC1027249               | 23042 /// 10 | 275.8  | 178.1  | 241.2  | 193.3  | 199.1  |
| 212054_x_at | AK026096 | TBC1D9B                  | 23061        | 112.9  | 124.2  | 112.0  | 109.9  | 93.1   |
| 212055_at   | BF689173 | TPGS2                    | 25941        | 219.2  | 254.6  | 222.4  | 220.4  | 190.5  |
| 212056_at   | D80004   | GSE1                     | 23199        | 186.7  | 145.7  | 151.2  | 103.1  | 132.0  |
| 212057_at   | AA206161 | GSE1                     | 23199        | 215.2  | 212.6  | 234.3  | 215.8  | 143.5  |
| 212058_at   | AI184562 | U2SURP                   | 23350        | 134.2  | 117.8  | 142.3  | 107.5  | 105.3  |
| 212059_s_at | AL117480 | TRPC4AP                  | 26133        | 124.0  | 120.7  | 131.1  | 133.5  | 102.9  |
| 212060_at   | AU152088 | U2SURP                   | 23350        | 43.2   | 29.4   | 49.8   | 32.3   | 38.5   |
| 212061_at   | AB002330 | U2SURP                   | 23350        | 20.9   | 18.3   | 26.1   | 21.8   | 23.2   |



|             |          |          |        |        |        |        |        |        |
|-------------|----------|----------|--------|--------|--------|--------|--------|--------|
| 212062_at   | AB014511 | ATP9A    | 10079  | 57.1   | 73.4   | 63.5   | 80.9   | 58.9   |
| 212063_at   | BE903880 | CD44     | 960    | 3.9    | 1.2    | 5.1    | 3.9    | 5.1    |
| 212064_x_at | AI471665 | MAZ      | 4150   | 352.1  | 319.9  | 415.5  | 385.6  | 352.3  |
| 212065_s_at | AW502434 | USP34    | 9736   | 24.9   | 20.1   | 22.2   | 26.3   | 19.3   |
| 212066_s_at | AB018272 | USP34    | 9736   | 76.7   | 77.7   | 85.2   | 76.1   | 56.2   |
| 212067_s_at | AL573058 | C1R      | 715    | 21.0   | 28.1   | 18.0   | 36.8   | 15.5   |
| 212068_s_at | AB011087 | PRRC2B   | 84726  | 121.9  | 108.9  | 105.3  | 119.1  | 75.6   |
| 212069_s_at | AK026025 | PRRC2B   | 84726  | 73.2   | 79.4   | 84.8   | 102.6  | 51.6   |
| 212070_at   | AL554008 | GPR56    | 9289   | 148.7  | 126.9  | 134.9  | 134.0  | 102.7  |
| 212071_s_at | BE968833 | SPTBN1   | 6711   | 8.8    | 7.8    | 6.0    | 7.4    | 7.7    |
| 212072_s_at | AL049761 | CSNK2A1  | 1457   | 399.0  | 326.5  | 426.1  | 366.4  | 336.1  |
| 212073_at   | AI631874 | CSNK2A1  | 1457   | 50.8   | 43.0   | 49.2   | 51.5   | 48.4   |
| 212074_at   | BE972774 | SUN1     | 23353  | 238.6  | 183.7  | 233.3  | 214.5  | 170.4  |
| 212075_s_at | AI161318 | CSNK2A1  | 1457   | 207.3  | 186.3  | 217.8  | 188.8  | 177.9  |
| 212076_at   | AI701430 | KMT2A    | 4297   | 36.8   | 24.8   | 27.7   | 25.5   | 15.5   |
| 212077_at   | AL583520 | CALD1    | 800    | 854.6  | 681.6  | 816.8  | 742.0  | 553.3  |
| 212078_s_at | AA704766 | KMT2A    | 4297   | 23.5   | 30.7   | 34.2   | 26.8   | 17.4   |
| 212079_s_at | AA715041 | KMT2A    | 4297   | 6.8    | 7.2    | 6.5    | 9.9    | 4.2    |
| 212080_at   | AV714029 | KMT2A    | 4297   | 41.8   | 31.9   | 46.4   | 31.5   | 24.1   |
| 212081_x_at | AF129756 | PRRC2A   | 7916   | 143.3  | 119.3  | 140.3  | 145.5  | 115.9  |
| 212082_s_at | BE734356 | MYL6     | 4637   | 2127.2 | 1945.1 | 2228.1 | 2220.4 | 1891.9 |
| 212083_at   | BG170659 | TEX261   | 113419 | 203.5  | 176.6  | 209.8  | 173.1  | 153.5  |
| 212084_at   | AV759552 | TEX261   | 113419 | 35.5   | 36.2   | 37.6   | 51.3   | 34.1   |
| 212085_at   | AA916851 | SLC25A6  | 293    | 2119.9 | 2390.3 | 2317.2 | 2387.5 | 2084.6 |
| 212086_x_at | AK026584 | LMNA     | 4000   | 86.7   | 93.3   | 81.0   | 65.9   | 82.9   |
| 212087_s_at | AL562733 | ERAL1    | 26284  | 201.4  | 174.3  | 224.9  | 198.4  | 181.3  |
| 212088_at   | BF570122 | PMPCA    | 23203  | 240.4  | 191.1  | 219.0  | 229.6  | 184.8  |
| 212089_at   | M13452   | LMNA     | 4000   | 33.7   | 33.3   | 53.5   | 46.2   | 49.0   |
| 212090_at   | AL571424 | GRINA    | 2907   | 359.6  | 467.1  | 519.0  | 437.5  | 329.6  |
| 212091_s_at | AI141603 | COL6A1   | 1291   | 38.3   | 22.2   | 26.8   | 29.3   | 17.1   |
| 212092_at   | BE858180 | PEG10    | 23089  | 13.2   | 1.7    | 0.7    | 2.4    | 11.6   |
| 212093_s_at | AI695017 | MTUS1    | 57509  | 59.4   | 50.3   | 61.1   | 41.9   | 51.0   |
| 212094_at   | AL582836 | PEG10    | 23089  | 4.0    | 4.4    | 0.4    | 4.9    | 6.1    |
| 212095_s_at | BE552421 | MTUS1    | 57509  | 43.3   | 30.0   | 41.1   | 33.0   | 30.8   |
| 212096_s_at | AL096842 | MTUS1    | 57509  | 119.2  | 90.0   | 116.1  | 96.2   | 87.7   |
| 212097_at   | AU147399 | CAV1     | 857    | 0.6    | 1.1    | 3.2    | 2.1    | 4.1    |
| 212098_at   | AL134724 | MGAT5    | 4249   | 78.1   | 76.5   | 85.8   | 71.7   | 67.2   |
| 212099_at   | AI263909 | RHOB     | 388    | 431.5  | 405.8  | 409.2  | 432.6  | 271.1  |
| 212100_s_at | Z93241   | POLDIP3  | 84271  | 235.3  | 259.9  | 242.5  | 244.7  | 206.5  |
| 212101_at   | AU154321 | KPNA6    | 23633  | 95.6   | 92.1   | 90.8   | 119.9  | 84.4   |
| 212102_s_at | AK002111 | KPNA6    | 23633  | 63.9   | 57.0   | 71.3   | 61.7   | 52.0   |
| 212103_at   | BG403834 | KPNA6    | 23633  | 68.0   | 57.0   | 72.7   | 71.8   | 71.0   |
| 212104_s_at | N95026   | RBFOX2   | 23543  | 68.0   | 89.1   | 85.8   | 83.3   | 83.9   |
| 212105_s_at | BF313832 | DHX9     | 1660   | 75.4   | 72.0   | 77.9   | 60.0   | 71.2   |
| 212106_at   | BF116183 | FAF2     | 23197  | 75.8   | 56.4   | 69.8   | 60.5   | 47.6   |
| 212107_s_at | BE561014 | DHX9     | 1660   | 98.7   | 103.8  | 114.2  | 96.8   | 109.7  |
| 212108_at   | AB020694 | FAF2     | 23197  | 263.3  | 185.3  | 291.3  | 205.2  | 233.4  |
| 212109_at   | AI590869 | HN1L     | 90861  | 132.7  | 108.9  | 167.1  | 111.3  | 119.3  |
| 212110_at   | D31887   | SLC39A14 | 23516  | 254.9  | 211.1  | 237.9  | 215.5  | 228.7  |
| 212111_at   | AA628051 | STX12    | 23673  | 48.6   | 64.1   | 60.6   | 57.5   | 52.3   |
| 212112_s_at | AI816243 | STX12    | 23673  | 199.3  | 174.5  | 188.3  | 160.6  | 148.1  |
| 212113_at   | AI927479 | ATXN7L3B | 552889 | 79.0   | 63.9   | 66.5   | 54.3   | 48.0   |
| 212114_at   | BE967207 | ATXN7L3B | 552889 | 396.7  | 381.9  | 472.3  | 402.1  | 328.7  |

|             |           |             |              |        |        |        |        |        |
|-------------|-----------|-------------|--------------|--------|--------|--------|--------|--------|
| 212115_at   | AK023154  | HN1L        | 90861        | 927.8  | 945.4  | 1285.8 | 1050.1 | 1030.8 |
| 212116_at   | NM_006510 | TRIM27      | 5987         | 223.8  | 230.0  | 249.2  | 224.3  | 223.6  |
| 212117_at   | BF978689  | RHOQ        | 23433        | 75.5   | 61.4   | 65.5   | 68.0   | 48.8   |
| 212118_at   | AL523814  | TRIM27      | 5987         | 90.3   | 67.7   | 97.0   | 63.3   | 72.8   |
| 212119_at   | BF670447  | RHOQ        | 23433        | 84.8   | 85.7   | 72.0   | 79.7   | 47.2   |
| 212120_at   | BE897886  | RHOQ        | 23433        | 70.6   | 75.5   | 79.0   | 62.4   | 51.0   |
| 212121_at   | BE962354  | TCTN3       | 26123        | 196.2  | 185.7  | 193.4  | 192.7  | 150.5  |
| 212122_at   | AW771590  | RHOQ        | 23433        | 8.7    | 7.3    | 9.9    | 6.4    | 6.2    |
| 212123_at   | AL050022  | TCTN3       | 26123        | 119.4  | 95.3   | 117.9  | 120.8  | 100.7  |
| 212124_at   | AF070622  | ZMIZ1       | 57178        | 104.9  | 108.2  | 96.6   | 104.3  | 81.1   |
| 212125_at   | NM_002883 | RANGAP1     | 5905         | 202.4  | 155.6  | 214.0  | 163.4  | 148.7  |
| 212126_at   | BG391282  | CBX5        | 23468        | 120.6  | 130.1  | 128.3  | 133.7  | 91.8   |
| 212127_at   | BE379408  | RANGAP1     | 5905         | 120.1  | 123.9  | 150.3  | 133.2  | 165.5  |
| 212128_s_at | AW411370  | DAG1        | 1605         | 51.6   | 67.2   | 74.7   | 74.4   | 56.7   |
| 212129_at   | AI589507  | NIPA2       | 81614        | 313.0  | 245.3  | 344.9  | 254.7  | 302.5  |
| 212130_x_at | AL537707  | EIF1        | 10209        | 2068.8 | 1809.1 | 2031.7 | 1724.4 | 1631.9 |
| 212131_at   | BG054966  | LSM14A      | 26065        | 61.0   | 55.3   | 73.0   | 52.6   | 52.5   |
| 212132_at   | AL117499  | LSM14A      | 26065        | 167.3  | 177.9  | 193.7  | 161.5  | 146.7  |
| 212133_at   | AI681536  | NIPA2       | 81614        | 56.6   | 39.1   | 72.3   | 46.4   | 53.2   |
| 212134_at   | AB014538  | MIR6716 /// | 23187 /// 10 | 43.1   | 37.9   | 43.2   | 38.1   | 33.2   |
| 212135_s_at | AW517686  | ATP2B4      | 493          | 64.8   | 53.9   | 63.8   | 59.5   | 49.5   |
| 212136_at   | AW517686  | ATP2B4      | 493          | 68.6   | 46.3   | 57.7   | 60.7   | 53.6   |
| 212137_at   | AV746402  | LARP1       | 23367        | 643.7  | 617.2  | 679.1  | 614.2  | 567.0  |
| 212138_at   | AK021757  | PDS5A       | 23244        | 154.6  | 131.2  | 132.1  | 136.4  | 143.3  |
| 212139_at   | D86973    | GCN1L1      | 10985        | 229.2  | 205.8  | 246.6  | 230.9  | 230.2  |
| 212140_at   | AB014548  | PDS5A       | 23244        | 116.3  | 96.1   | 113.6  | 103.8  | 84.8   |
| 212141_at   | AA604621  | MCM4        | 4173         | 170.2  | 154.0  | 257.6  | 169.1  | 240.5  |
| 212142_at   | AI936566  | MCM4        | 4173         | 123.6  | 86.4   | 169.1  | 103.2  | 122.3  |
| 212143_s_at | BF340228  | IGFBP3      | 3486         | 20.8   | 18.5   | 21.4   | 17.6   | 16.4   |
| 212144_at   | AL021707  | SUN2        | 25777        | 55.8   | 43.1   | 46.2   | 62.8   | 64.9   |
| 212145_at   | D87453    | MRPS27      | 23107        | 414.2  | 487.5  | 466.8  | 460.7  | 383.5  |
| 212146_at   | AB020649  | PLEKHM2     | 23207        | 17.0   | 32.8   | 26.5   | 29.1   | 21.8   |
| 212147_at   | AB029012  | SMG5        | 23381        | 36.2   | 39.2   | 36.9   | 40.6   | 33.7   |
| 212148_at   | AL049381  | PBX1        | 5087         | 30.9   | 27.7   | 27.3   | 29.9   | 16.8   |
| 212149_at   | AW470003  | EFR3A       | 23167        | 139.0  | 123.4  | 131.2  | 125.7  | 101.9  |
| 212150_at   | AA805651  | EFR3A       | 23167        | 47.7   | 47.4   | 44.5   | 36.6   | 37.1   |
| 212151_at   | BF967998  | PBX1        | 5087         | 40.9   | 47.6   | 63.4   | 41.7   | 31.8   |
| 212152_x_at | AI679080  | ARID1A      | 8289         | 133.4  | 91.3   | 115.0  | 105.9  | 94.0   |
| 212153_at   | AB007930  | POGZ        | 23126        | 66.6   | 60.1   | 62.8   | 65.6   | 36.8   |
| 212154_at   | AI380298  | SDC2        | 6383         | 55.0   | 53.2   | 71.8   | 60.0   | 48.5   |
| 212155_at   | AA085748  | RNF187      | 149603       | 1082.2 | 1135.2 | 1036.5 | 1222.8 | 805.4  |
| 212156_at   | AA812224  | VPS39       | 23339        | 39.8   | 50.2   | 50.5   | 55.9   | 27.0   |
| 212157_at   | BE048514  | SDC2        | 6383         | 16.9   | 21.8   | 19.8   | 20.3   | 21.5   |
| 212158_at   | AL577322  | SDC2        | 6383         | 95.7   | 54.5   | 81.9   | 63.7   | 51.6   |
| 212159_x_at | AI125280  | AP2A2       | 161          | 288.5  | 333.4  | 309.5  | 322.2  | 272.1  |
| 212160_at   | AI984005  | XPOT        | 11260        | 585.1  | 476.4  | 641.4  | 532.6  | 478.0  |
| 212161_at   | AA994666  | AP2A2       | 161          | 44.5   | 31.0   | 35.0   | 23.5   | 40.0   |
| 212162_at   | AK022873  | KIDINS220   | 57498        | 32.7   | 34.3   | 40.1   | 39.4   | 36.7   |
| 212163_at   | AB033076  | KIDINS220   | 57498        | 77.1   | 62.4   | 81.4   | 70.5   | 56.7   |
| 212164_at   | AL522296  | TMEM183A /  | 92703 /// 65 | 90.7   | 57.3   | 75.4   | 70.7   | 57.3   |
| 212165_at   | AF070537  | TMEM183A /  | 92703 /// 65 | 561.7  | 596.5  | 615.4  | 622.9  | 509.7  |
| 212166_at   | H38643    | XPO7        | 23039        | 181.1  | 145.6  | 190.2  | 180.4  | 209.9  |
| 212167_s_at | AK021419  | SMARCB1     | 6598         | 218.4  | 188.6  | 217.2  | 179.4  | 180.2  |

|             |           |                           |           |        |        |        |        |        |
|-------------|-----------|---------------------------|-----------|--------|--------|--------|--------|--------|
| 212168_at   | AL514547  | RBM12                     | 10137     | 307.7  | 237.0  | 370.2  | 265.7  | 271.5  |
| 212169_at   | AL050187  | FKBP9                     | 11328     | 41.0   | 70.3   | 61.7   | 50.3   | 47.7   |
| 212170_at   | BF447705  | RBM12                     | 10137     | 44.1   | 20.8   | 33.6   | 24.5   | 44.5   |
| 212171_x_at | H95344    | VEGFA                     | 7422      | 60.2   | 74.3   | 65.1   | 82.9   | 52.1   |
| 212172_at   | AW277253  | AK2                       | 204       | 14.3   | 5.3    | 6.3    | 8.7    | 10.3   |
| 212173_at   | AU154985  | AK2                       | 204       | 21.6   | 16.4   | 25.3   | 20.5   | 20.4   |
| 212174_at   | W02312    | AK2                       | 204       | 78.4   | 53.0   | 71.5   | 58.6   | 70.2   |
| 212175_s_at | AL513611  | AK2                       | 204       | 311.7  | 264.0  | 306.0  | 261.0  | 256.1  |
| 212176_at   | AA902326  | PNISR                     | 25957     | 37.6   | 20.5   | 27.4   | 25.0   | 27.6   |
| 212177_at   | AW081113  | PNISR                     | 25957     | 14.9   | 12.8   | 13.6   | 16.4   | 11.5   |
| 212178_s_at | AK022555  | POM121C                   | 100101267 | 122.2  | 98.3   | 141.6  | 133.2  | 95.2   |
| 212179_at   | AW157501  | PNISR                     | 25957     | 12.0   | 10.5   | 12.8   | 13.9   | 6.0    |
| 212180_at   | AK000311  | CRKL                      | 1399      | 120.9  | 110.6  | 141.4  | 106.1  | 114.1  |
| 212181_s_at | AF191654  | NUDT4 /// N 11163 /// 17  |           | 222.7  | 187.3  | 225.2  | 185.9  | 203.2  |
| 212182_at   | AB007956  | NUDT4                     | 11163     | 0.6    | 3.1    | 0.3    | 0.4    | 0.4    |
| 212183_at   | AW511135  | NUDT4 /// N 11163 /// 44  |           | 44.4   | 26.5   | 47.6   | 29.9   | 26.3   |
| 212184_s_at | AL117407  | TAB2                      | 23118     | 50.0   | 49.8   | 44.6   | 45.8   | 42.6   |
| 212185_x_at | NM_005953 | MT2A                      | 4502      | 1631.1 | 1792.4 | 1779.4 | 1810.4 | 1591.3 |
| 212186_at   | BE855983  | ACACA                     | 31        | 243.6  | 168.1  | 221.1  | 227.8  | 197.1  |
| 212187_x_at | NM_000954 | PTGDS                     | 5730      | 13.1   | 6.3    | 6.2    | 6.0    | 1.8    |
| 212188_at   | AA551075  | KCTD12                    | 115207    | 1.6    | 5.0    | 1.4    | 1.2    | 0.7    |
| 212189_s_at | AK022874  | COG4                      | 25839     | 104.3  | 96.9   | 104.0  | 111.9  | 77.8   |
| 212190_at   | AL541302  | SERPINE2                  | 5270      | 20.1   | 16.6   | 14.4   | 16.9   | 23.9   |
| 212191_x_at | AW574664  | RPL13 /// SN 6137 /// 606 |           | 2745.3 | 2975.3 | 3102.7 | 2949.4 | 2747.3 |
| 212192_at   | AI718937  | KCTD12                    | 115207    | 0.3    | 1.7    | 1.2    | 1.2    | 1.7    |
| 212193_s_at | BE881529  | LARP1                     | 23367     | 97.2   | 86.5   | 94.1   | 97.0   | 91.1   |
| 212194_s_at | AI418892  | TM9SF4                    | 9777      | 85.8   | 97.5   | 108.9  | 98.5   | 96.2   |
| 212195_at   | AL049265  | IL6ST                     | 3572      | 126.9  | 120.8  | 128.9  | 120.2  | 102.3  |
| 212196_at   | AW242916  | IL6ST                     | 3572      | 53.9   | 37.7   | 39.6   | 41.5   | 30.9   |
| 212197_x_at | AB020671  | MPRIP                     | 23164     | 179.3  | 196.2  | 178.9  | 191.2  | 163.6  |
| 212198_s_at | AL515964  | TM9SF4                    | 9777      | 51.3   | 67.7   | 64.0   | 75.4   | 66.9   |
| 212199_at   | AL566962  | MRFAP1L1                  | 114932    | 272.3  | 278.7  | 291.7  | 266.4  | 228.3  |
| 212200_at   | AK025933  | ANKLE2                    | 23141     | 52.4   | 30.6   | 42.4   | 34.7   | 33.2   |
| 212201_at   | AW274877  | ANKLE2                    | 23141     | 47.1   | 31.7   | 52.9   | 52.6   | 36.2   |
| 212202_s_at | BG493972  | TMEM87A                   | 25963     | 131.8  | 104.4  | 135.1  | 101.9  | 149.2  |
| 212203_x_at | BF338947  | IFITM3                    | 10410     | 374.0  | 481.0  | 414.2  | 480.2  | 355.1  |
| 212204_at   | AL049944  | TMEM87A                   | 25963     | 270.3  | 212.2  | 258.5  | 227.4  | 285.6  |
| 212205_at   | AA534860  | H2AFV                     | 94239     | 249.0  | 204.0  | 272.8  | 225.3  | 212.1  |
| 212206_s_at | BF343852  | H2AFV                     | 94239     | 96.3   | 70.8   | 104.9  | 84.6   | 74.2   |
| 212207_at   | BG426689  | MED13L                    | 23389     | 8.5    | 15.7   | 12.3   | 11.6   | 9.0    |
| 212208_at   | AK023837  | MED13L                    | 23389     | 27.4   | 16.9   | 23.5   | 19.3   | 21.2   |
| 212209_at   | AL133033  | MED13L                    | 23389     | 35.2   | 17.8   | 25.4   | 22.9   | 25.2   |
| 212210_at   | BF513430  | INTS1                     | 26173     | 2.9    | 6.7    | 2.0    | 4.9    | 6.7    |
| 212211_at   | AI986295  | ANKRD17                   | 26057     | 132.5  | 102.5  | 137.5  | 111.1  | 100.4  |
| 212212_s_at | BF055496  | INTS1                     | 26173     | 99.8   | 111.1  | 104.2  | 110.6  | 81.9   |
| 212213_x_at | AB011139  | OPA1                      | 4976      | 93.5   | 82.0   | 98.6   | 92.5   | 62.2   |
| 212214_at   | BF439570  | OPA1                      | 4976      | 59.7   | 40.7   | 53.4   | 46.8   | 41.2   |
| 212215_at   | AB007896  | PREPL                     | 9581      | 132.9  | 102.8  | 148.0  | 110.5  | 118.3  |
| 212216_at   | AW000954  | PREPL                     | 9581      | 99.6   | 100.9  | 89.8   | 74.4   | 67.6   |
| 212217_at   | AU154782  | PREPL                     | 9581      | 63.7   | 60.6   | 70.1   | 57.6   | 51.7   |
| 212218_s_at | AI954041  | FASN                      | 2194      | 641.6  | 511.5  | 735.7  | 617.0  | 606.1  |
| 212219_at   | D38521    | PSME4                     | 23198     | 125.2  | 91.4   | 110.5  | 118.8  | 119.0  |
| 212220_at   | AI972268  | PSME4                     | 23198     | 41.2   | 31.7   | 44.4   | 36.3   | 38.9   |

|             |           |                           |        |        |        |        |        |        |
|-------------|-----------|---------------------------|--------|--------|--------|--------|--------|--------|
| 212221_x_at | AV703259  | IDS                       | 3423   | 45.4   | 39.6   | 41.0   | 36.9   | 40.0   |
| 212222_at   | AU143855  | PSME4                     | 23198  | 32.8   | 27.6   | 28.2   | 22.6   | 23.0   |
| 212223_at   | AI926544  | IDS                       | 3423   | 43.9   | 49.5   | 53.4   | 47.2   | 33.1   |
| 212224_at   | NM_000689 | ALDH1A1                   | 216    | 0.5    | 0.4    | 0.5    | 0.9    | 0.9    |
| 212225_at   | AL516854  | EIF1                      | 10209  | 5.7    | 1.1    | 5.6    | 4.4    | 2.2    |
| 212226_s_at | AA628586  | PPAP2B                    | 8613   | 42.7   | 27.8   | 54.8   | 38.5   | 39.3   |
| 212227_x_at | W67644    | EIF1                      | 10209  | 2150.1 | 2070.6 | 2254.8 | 2054.2 | 1942.2 |
| 212228_s_at | AC004382  | COQ9                      | 57017  | 526.0  | 485.2  | 550.3  | 473.8  | 457.3  |
| 212229_s_at | AK001699  | FBXO21                    | 23014  | 129.5  | 124.4  | 131.8  | 107.0  | 113.1  |
| 212230_at   | AV725664  | PPAP2B                    | 8613   | 35.8   | 28.1   | 57.1   | 28.1   | 33.1   |
| 212231_at   | AB020682  | FBXO21                    | 23014  | 220.1  | 216.1  | 250.4  | 216.0  | 203.3  |
| 212232_at   | AB023231  | FNBP4                     | 23360  | 73.2   | 55.5   | 74.6   | 62.8   | 60.6   |
| 212233_at   | AL523076  | MAP1B                     | 4131   | 186.6  | 191.0  | 141.8  | 180.2  | 111.4  |
| 212234_at   | AL034550  | ASXL1                     | 171023 | 22.4   | 20.5   | 28.7   | 25.3   | 15.5   |
| 212235_at   | AL575403  | PLXND1                    | 23129  | 1.0    | 0.5    | 1.3    | 0.8    | 1.7    |
| 212236_x_at | Z19574    | JUP /// KRT1 3728 /// 387 |        | 15.0   | 10.7   | 14.4   | 12.4   | 19.5   |
| 212237_at   | N64780    | ASXL1                     | 171023 | 52.8   | 47.6   | 48.8   | 46.1   | 36.2   |
| 212238_at   | AL117518  | ASXL1                     | 171023 | 64.3   | 37.8   | 52.2   | 43.3   | 53.1   |
| 212239_at   | AI680192  | PIK3R1                    | 5295   | 83.6   | 71.2   | 97.9   | 73.6   | 66.5   |
| 212240_s_at | AI679268  | PIK3R1                    | 5295   | 93.4   | 59.3   | 76.1   | 70.1   | 51.5   |
| 212241_at   | AI632774  | GCOM1 /// N81488 /// 14   |        | 102.0  | 60.7   | 70.8   | 66.1   | 56.6   |
| 212242_at   | AL565074  | TUBA4A                    | 7277   | 1078.3 | 968.9  | 1253.6 | 1016.3 | 1056.0 |
| 212243_at   | BE645501  | GCOM1 /// P81488 /// 14   |        | 90.1   | 73.7   | 82.3   | 76.6   | 55.1   |
| 212244_at   | AL050091  | GCOM1 /// P81488 /// 14   |        | 117.2  | 89.6   | 120.4  | 100.0  | 91.4   |
| 212245_at   | AL567779  | MCFD2                     | 90411  | 111.4  | 86.7   | 111.2  | 96.0   | 84.0   |
| 212246_at   | BE880828  | MCFD2                     | 90411  | 79.3   | 80.1   | 85.0   | 87.1   | 73.6   |
| 212247_at   | AW008531  | NUP205                    | 23165  | 255.8  | 223.4  | 267.6  | 243.1  | 219.8  |
| 212248_at   | AI886796  | MTDH                      | 92140  | 92.9   | 80.4   | 92.2   | 86.6   | 74.9   |
| 212249_at   | AI934473  | PIK3R1                    | 5295   | 28.5   | 20.1   | 27.7   | 23.9   | 17.6   |
| 212250_at   | AV700332  | MTDH                      | 92140  | 353.2  | 269.3  | 378.6  | 275.5  | 302.0  |
| 212251_at   | AI972475  | MTDH                      | 92140  | 346.9  | 283.5  | 377.0  | 286.4  | 307.4  |
| 212252_at   | AA181179  | CAMKK2                    | 10645  | 66.3   | 77.6   | 92.0   | 85.8   | 61.0   |
| 212253_x_at | BG253119  | DST                       | 667    | 1.1    | 2.3    | 1.7    | 1.4    | 1.0    |
| 212254_s_at | AI798790  | DST                       | 667    | 15.6   | 13.4   | 14.4   | 7.9    | 13.2   |
| 212255_s_at | AK001684  | ATP2C1                    | 27032  | 119.7  | 84.1   | 107.3  | 90.0   | 69.0   |
| 212256_at   | BE906572  | GALNT10                   | 55568  | 68.0   | 73.6   | 64.4   | 78.5   | 44.1   |
| 212257_s_at | AW131754  | SMARCA2                   | 6595   | 22.7   | 12.7   | 17.1   | 12.1   | 13.0   |
| 212258_s_at | X72889    | SMARCA2                   | 6595   | 8.7    | 4.4    | 2.2    | 5.5    | 3.5    |
| 212259_s_at | BF344265  | PBXIP1                    | 57326  | 3.6    | 16.7   | 2.8    | 11.8   | 6.6    |
| 212260_at   | AL045800  | GIGYF2                    | 26058  | 61.2   | 43.5   | 45.4   | 42.5   | 47.9   |
| 212261_at   | AB014542  | GIGYF2                    | 26058  | 74.5   | 68.5   | 70.2   | 60.8   | 54.5   |
| 212262_at   | AA149639  | QKI                       | 9444   | 23.5   | 23.2   | 27.4   | 25.5   | 21.0   |
| 212263_at   | AI114716  | QKI                       | 9444   | 41.4   | 39.0   | 44.8   | 35.5   | 31.0   |
| 212264_s_at | BE645850  | WAPAL                     | 23063  | 50.5   | 47.5   | 58.1   | 49.8   | 45.5   |
| 212265_at   | AL031781  | QKI                       | 9444   | 109.3  | 84.8   | 138.9  | 106.9  | 104.5  |
| 212266_s_at | AW084582  | SRSF5                     | 6430   | 336.0  | 309.4  | 338.1  | 320.7  | 258.7  |
| 212267_at   | D87450    | WAPAL                     | 23063  | 30.4   | 20.3   | 27.2   | 21.1   | 24.5   |
| 212268_at   | NM_030666 | SERPINB1                  | 1992   | 1.6    | 0.8    | 0.5    | 0.4    | 0.7    |
| 212269_s_at | AJ010089  | MCM3AP                    | 8888   | 51.7   | 84.4   | 57.6   | 61.6   | 62.3   |
| 212270_x_at | BG168283  | C18orf32 /// 6139 /// 267 |        | 2678.5 | 2528.7 | 2782.5 | 2663.4 | 2287.7 |
| 212271_at   | AA195999  | MAPK1                     | 5594   | 159.1  | 147.5  | 184.5  | 164.7  | 138.8  |
| 212272_at   | AA813260  | LPIN1                     | 23175  | 21.3   | 12.9   | 20.0   | 19.8   | 12.0   |
| 212273_x_at | AI591100  | GNAS                      | 2778   | 2129.3 | 2223.2 | 2117.0 | 2314.2 | 1929.3 |

|             |           |            |              |        |        |        |        |        |
|-------------|-----------|------------|--------------|--------|--------|--------|--------|--------|
| 212274_at   | AV705559  | LPIN1      | 23175        | 44.3   | 22.6   | 49.1   | 32.0   | 34.8   |
| 212275_s_at | NM_006662 | SRCAP      | 10847        | 31.1   | 31.0   | 26.4   | 37.8   | 23.7   |
| 212276_at   | D80010    | LPIN1      | 23175        | 72.0   | 44.9   | 71.8   | 49.0   | 45.9   |
| 212277_at   | AB014547  | MTMR4      | 9110         | 130.7  | 115.7  | 133.3  | 114.1  | 103.1  |
| 212278_x_at | BF588511  | UBE3A      | 7337         | 5.1    | 5.1    | 6.7    | 9.4    | 4.6    |
| 212279_at   | BE779865  | TMEM97     | 27346        | 621.1  | 494.6  | 705.5  | 537.4  | 606.2  |
| 212280_x_at | AA532726  | ATG4B      | 23192        | 55.6   | 62.8   | 59.0   | 59.2   | 56.4   |
| 212281_s_at | BF038366  | TMEM97     | 27346        | 645.9  | 536.2  | 755.3  | 559.7  | 679.3  |
| 212282_at   | BF038366  | TMEM97     | 27346        | 615.3  | 496.6  | 752.3  | 551.0  | 649.6  |
| 212283_at   | AI424797  | AGRN       | 375790       | 5.1    | 7.5    | 5.4    | 7.8    | 7.7    |
| 212284_x_at | BG498776  | LOC1019288 | 7178 /// 101 | 3663.6 | 3020.8 | 3693.0 | 3284.2 | 3207.9 |
| 212285_s_at | AW008051  | AGRN       | 375790       | 71.7   | 76.0   | 73.9   | 89.5   | 64.2   |
| 212286_at   | AW572909  | ANKRD12    | 23253        | 15.1   | 13.5   | 15.4   | 10.5   | 14.4   |
| 212287_at   | BF382924  | SUZ12      | 23512        | 190.9  | 149.7  | 224.9  | 175.1  | 168.7  |
| 212288_at   | AB011126  | FNBP1      | 23048        | 61.0   | 57.0   | 44.4   | 45.5   | 42.2   |
| 212289_at   | AB020681  | ANKRD12    | 23253        | 13.1   | 3.2    | 13.4   | 4.6    | 4.6    |
| 212290_at   | AA527433  | SLC7A1     | 6541         | 51.8   | 81.2   | 80.0   | 72.7   | 84.1   |
| 212291_at   | AI393355  | HIPK1      | 204851       | 23.5   | 26.2   | 31.6   | 22.9   | 23.8   |
| 212292_at   | AW452623  | SLC7A1     | 6541         | 23.5   | 16.1   | 29.5   | 21.3   | 19.5   |
| 212293_at   | BG111260  | HIPK1      | 204851       | 78.8   | 62.6   | 96.7   | 94.6   | 63.8   |
| 212294_at   | BG111761  | GNG12      | 55970        | 139.2  | 115.8  | 135.4  | 125.3  | 107.0  |
| 212295_s_at | AA148507  | SLC7A1     | 6541         | 241.2  | 279.2  | 272.4  | 250.1  | 220.3  |
| 212296_at   | NM_005805 | PSMD14     | 10213        | 382.2  | 319.8  | 390.9  | 362.7  | 301.3  |
| 212297_at   | BF218804  | ATP13A3    | 79572        | 81.2   | 42.3   | 75.5   | 63.6   | 48.8   |
| 212298_at   | BE620457  | NRP1       | 8829         | 200.5  | 191.3  | 187.3  | 200.1  | 164.1  |
| 212299_at   | AL117502  | NEK9       | 91754        | 92.4   | 81.0   | 96.8   | 81.6   | 72.5   |
| 212300_at   | AL049795  | TXLNA      | 200081       | 102.4  | 100.9  | 116.5  | 111.4  | 110.4  |
| 212301_at   | D87440    | RTF1       | 23168        | 174.8  | 142.4  | 181.5  | 161.3  | 144.6  |
| 212302_at   | AI192081  | RTF1       | 23168        | 57.3   | 47.6   | 74.9   | 62.1   | 49.2   |
| 212303_x_at | BG026366  | KHSRP      | 8570         | 94.5   | 63.1   | 105.4  | 137.3  | 81.2   |
| 212305_s_at | AK025122  | MIA3       | 375056       | 117.0  | 104.4  | 119.1  | 113.2  | 96.7   |
| 212306_at   | AI741784  | CLASP2     | 23122        | 85.7   | 86.1   | 87.4   | 74.1   | 71.3   |
| 212307_s_at | BF001665  | OGT        | 8473         | 77.6   | 88.9   | 65.5   | 81.0   | 55.0   |
| 212308_at   | AL137636  | CLASP2     | 23122        | 11.9   | 9.4    | 12.8   | 11.0   | 8.0    |
| 212309_at   | AV725315  | CLASP2     | 23122        | 41.8   | 30.9   | 43.6   | 36.4   | 34.2   |
| 212310_at   | D87742    | MIA3       | 375056       | 20.4   | 24.6   | 18.3   | 23.8   | 15.8   |
| 212311_at   | AA522514  | SEL1L3     | 23231        | 196.7  | 206.7  | 192.5  | 192.1  | 148.6  |
| 212312_at   | AL117381  | BCL2L1     | 598          | 100.5  | 90.5   | 104.0  | 106.8  | 90.6   |
| 212313_at   | BC004344  | CHMP7      | 91782        | 112.3  | 83.1   | 93.8   | 87.5   | 81.2   |
| 212314_at   | AB018289  | SEL1L3     | 23231        | 175.2  | 192.8  | 185.4  | 185.1  | 155.8  |
| 212315_s_at | AA502912  | NUP210     | 23225        | 18.3   | 20.3   | 32.2   | 25.0   | 24.7   |
| 212316_at   | AA502912  | NUP210     | 23225        | 66.1   | 72.6   | 93.6   | 95.8   | 54.0   |
| 212317_at   | AK022910  | TNPO3      | 23534        | 94.4   | 76.3   | 99.8   | 70.6   | 80.1   |
| 212318_at   | NM_012470 | TNPO3      | 23534        | 115.5  | 92.6   | 130.8  | 106.3  | 100.3  |
| 212319_at   | AB007857  | SGSM2      | 9905         | 8.4    | 31.5   | 22.9   | 27.6   | 13.6   |
| 212320_at   | BC001002  | TUBB       | 203068       | 1867.7 | 1576.5 | 1995.1 | 1577.7 | 1646.0 |
| 212321_at   | AB033078  | SGPL1      | 8879         | 65.1   | 66.9   | 64.9   | 65.9   | 47.0   |
| 212322_at   | BE999972  | SGPL1      | 8879         | 204.3  | 199.7  | 194.2  | 198.2  | 133.9  |
| 212323_s_at | AA524553  | VPS13D     | 55187        | 38.6   | 27.9   | 23.3   | 31.3   | 18.6   |
| 212324_s_at | BF111962  | VPS13D     | 55187        | 18.4   | 25.9   | 22.1   | 17.2   | 20.1   |
| 212325_at   | AK027231  | LIMCH1     | 22998        | 431.1  | 369.1  | 433.0  | 408.7  | 434.1  |
| 212326_at   | AB007922  | VPS13D     | 55187        | 18.7   | 16.3   | 16.0   | 11.8   | 8.3    |
| 212327_at   | AK026815  | LIMCH1     | 22998        | 396.7  | 319.6  | 393.4  | 400.7  | 381.6  |

|             |           |             |               |        |        |        |        |        |
|-------------|-----------|-------------|---------------|--------|--------|--------|--------|--------|
| 212328_at   | AB029025  | LIMCH1      | 22998         | 304.8  | 275.4  | 285.0  | 270.6  | 302.8  |
| 212329_at   | D83782    | SCAP        | 22937         | 207.5  | 159.0  | 207.9  | 166.5  | 180.6  |
| 212330_at   | R60866    | TFDP1       | 7027          | 169.1  | 180.0  | 216.5  | 174.2  | 184.2  |
| 212331_at   | X76061    | RBL2        | 5934          | 228.7  | 156.9  | 168.4  | 184.5  | 107.0  |
| 212332_at   | BF110947  | RBL2        | 5934          | 50.6   | 46.0   | 36.8   | 58.6   | 41.6   |
| 212333_at   | AL049943  | FAM98A      | 25940         | 202.0  | 231.1  | 262.2  | 198.7  | 205.4  |
| 212334_at   | BE880245  | GNS         | 2799          | 185.8  | 157.2  | 167.4  | 183.9  | 149.2  |
| 212335_at   | AW167793  | GNS         | 2799          | 216.3  | 184.9  | 208.5  | 193.5  | 152.4  |
| 212336_at   | AA912711  | EPB41L1     | 2036          | 25.3   | 29.9   | 21.1   | 23.6   | 20.6   |
| 212337_at   | AI687738  | TUG1        | 55000         | 133.6  | 142.5  | 154.4  | 126.3  | 112.0  |
| 212338_at   | AA621962  | MYO1D       | 4642          | 58.4   | 49.8   | 42.5   | 50.2   | 35.9   |
| 212339_at   | AL121895  | EPB41L1     | 2036          | 20.5   | 30.5   | 27.3   | 24.5   | 14.9   |
| 212340_at   | BE673723  | YIPF6       | 286451        | 75.8   | 57.3   | 74.6   | 65.7   | 52.9   |
| 212341_at   | AA195936  | YIPF6       | 286451        | 156.1  | 145.0  | 145.3  | 163.0  | 142.5  |
| 212342_at   | BG500611  | YIPF6       | 286451        | 37.3   | 33.0   | 32.9   | 33.3   | 26.3   |
| 212343_at   | AL117461  | YIPF6       | 286451        | 32.5   | 32.6   | 37.9   | 28.1   | 29.1   |
| 212344_at   | AW043713  | SULF1       | 23213         | 6.4    | 3.1    | 1.3    | 2.6    | 2.3    |
| 212345_s_at | BE675139  | CREB3L2     | 64764         | 90.2   | 62.4   | 65.4   | 66.1   | 49.0   |
| 212346_s_at | AK026392  | MIR4800 /// | 10608 /// 10  | 58.6   | 56.1   | 51.0   | 82.8   | 45.9   |
| 212347_x_at | AA831438  | MIR4800 /// | 10608 /// 10  | 115.1  | 140.9  | 117.8  | 133.8  | 98.7   |
| 212348_s_at | AB011173  | KDM1A       | 23028         | 204.2  | 175.3  | 219.2  | 186.4  | 170.0  |
| 212349_at   | AL045513  | POFUT1      | 23509         | 44.9   | 37.1   | 66.5   | 41.9   | 45.7   |
| 212350_at   | AB029031  | TBC1D1      | 23216         | 88.0   | 87.5   | 105.1  | 93.8   | 83.2   |
| 212351_at   | U23028    | EIF2B5      | 8893          | 104.7  | 92.4   | 126.8  | 100.2  | 98.7   |
| 212352_s_at | BE780075  | TMED10      | 10972         | 429.3  | 478.5  | 425.8  | 458.8  | 446.7  |
| 212353_at   | AI479175  | SULF1       | 23213         | 4.2    | 3.1    | 0.6    | 2.8    | 3.1    |
| 212354_at   | BE500977  | SULF1       | 23213         | 1.4    | 10.4   | 6.6    | 2.0    | 5.4    |
| 212355_at   | AI075450  | KHNYN       | 23351         | 89.9   | 82.3   | 94.4   | 90.4   | 66.9   |
| 212356_at   | AB002321  | KHNYN       | 23351         | 29.9   | 19.7   | 13.4   | 21.8   | 17.8   |
| 212357_at   | AI096888  | FAM168A     | 23201         | 50.3   | 53.1   | 46.1   | 49.5   | 45.4   |
| 212358_at   | AL117468  | CLIP3       | 25999         | 2.7    | 2.4    | 2.3    | 2.7    | 1.5    |
| 212359_s_at | W89120    | ZSWIM8      | 23053         | 45.9   | 59.0   | 57.2   | 59.9   | 49.6   |
| 212360_at   | AI916249  | AMPD2       | 271           | 102.5  | 110.7  | 124.6  | 110.0  | 86.3   |
| 212361_s_at | AW190070  | ATP2A2      | 488           | 43.3   | 28.9   | 43.3   | 33.5   | 30.9   |
| 212362_at   | AA805753  | ATP2A2      | 488           | 11.5   | 9.3    | 6.5    | 1.5    | 12.2   |
| 212363_x_at | AU145192  | ACTB ///    | ACT160 /// 71 | 2706.5 | 2862.3 | 2930.9 | 2663.0 | 2517.8 |
| 212364_at   | BF432550  | MYO1B       | 4430          | 13.7   | 9.0    | 15.8   | 15.9   | 14.6   |
| 212365_at   | BF215996  | MYO1B       | 4430          | 28.5   | 22.4   | 44.2   | 25.5   | 30.8   |
| 212366_at   | BF223237  | ZNF292      | 23036         | 12.9   | 9.0    | 7.0    | 13.9   | 10.2   |
| 212367_at   | AI799061  | FEM1B       | 10116         | 61.4   | 52.6   | 61.3   | 48.6   | 46.1   |
| 212368_at   | AA972711  | ZNF292      | 23036         | 16.9   | 14.1   | 12.0   | 29.2   | 11.6   |
| 212369_at   | AI264312  | ZNF384      | 171017        | 103.5  | 83.0   | 108.0  | 92.3   | 81.5   |
| 212370_x_at | AL080183  | FAM21A ///  | 1253725 /// 3 | 111.6  | 127.5  | 125.2  | 128.9  | 110.8  |
| 212371_at   | AL049397  | DESI2       | 51029         | 123.1  | 110.3  | 127.3  | 111.7  | 99.5   |
| 212372_at   | AK026977  | MYH10       | 4628          | 438.4  | 498.5  | 418.2  | 424.1  | 352.6  |
| 212373_at   | AW139179  | FEM1B       | 10116         | 49.2   | 44.0   | 51.9   | 39.6   | 45.8   |
| 212374_at   | NM_015322 | FEM1B       | 10116         | 19.7   | 16.0   | 14.0   | 15.2   | 15.0   |
| 212375_at   | AL563727  | EP400       | 57634         | 31.2   | 19.6   | 21.1   | 20.5   | 11.8   |
| 212376_s_at | BE880591  | EP400       | 57634         | 40.7   | 30.2   | 42.7   | 32.8   | 29.8   |
| 212377_s_at | AU158495  | NOTCH2      | 4853          | 65.0   | 75.4   | 71.0   | 62.2   | 49.6   |
| 212378_at   | NM_000819 | GART        | 2618          | 204.8  | 154.3  | 222.2  | 190.5  | 197.1  |
| 212379_at   | BE966876  | GART        | 2618          | 167.6  | 127.8  | 181.9  | 138.4  | 158.7  |
| 212380_at   | D43949    | CMTR1       | 23070         | 57.4   | 51.2   | 57.4   | 51.5   | 48.7   |

|             |          |                 |                      |        |        |        |        |        |
|-------------|----------|-----------------|----------------------|--------|--------|--------|--------|--------|
| 212381_at   | BF444943 | USP24           | 23358                | 32.6   | 30.7   | 36.2   | 36.9   | 27.7   |
| 212382_at   | BF433429 | TCF4            | 6925                 | 3.0    | 7.7    | 4.2    | 6.3    | 1.2    |
| 212383_at   | AL096733 | ATP6V0A1        | 535                  | 96.3   | 87.5   | 109.8  | 80.4   | 68.0   |
| 212384_at   | AI282485 | ATP6V1G2-D      | 7919 /// 692         | 7.2    | 11.3   | 16.2   | 14.2   | 9.9    |
| 212385_at   | AU118026 | TCF4            | 6925                 | 4.5    | 3.4    | 1.9    | 8.6    | 5.9    |
| 212386_at   | BF592782 | TCF4            | 6925                 | 7.1    | 6.4    | 8.3    | 2.3    | 2.9    |
| 212387_at   | BG495771 | TCF4            | 6925                 | 9.9    | 13.3   | 14.2   | 9.0    | 11.0   |
| 212388_at   | AB028980 | USP24           | 23358                | 23.0   | 25.8   | 27.8   | 27.3   | 17.6   |
| 212389_at   | AW243200 | SBF1            | 6305                 | 1.6    | 1.2    | 1.8    | 2.0    | 2.7    |
| 212390_at   | AB007923 | LOC1009967.9659 | /// 100              | 1.3    | 1.0    | 1.3    | 1.5    | 0.9    |
| 212391_x_at | AI925635 | RPS3A           | /// SN6189 /// 894   | 4793.1 | 4237.4 | 4583.2 | 4301.9 | 4252.1 |
| 212392_s_at | AI950145 | LOC1009967.9659 | /// 100              | 10.3   | 14.8   | 17.8   | 7.7    | 10.1   |
| 212393_at   | AL096767 | SBF1            | 6305                 | 32.0   | 31.8   | 40.2   | 41.4   | 34.6   |
| 212394_at   | D42044   | EMC1            | 23065                | 16.0   | 14.0   | 18.8   | 16.8   | 12.3   |
| 212395_s_at | BF197122 | EMC1            | 23065                | 30.6   | 26.5   | 27.8   | 30.3   | 24.2   |
| 212396_s_at | AI143233 | EMC1            | 23065                | 49.4   | 42.7   | 41.3   | 50.5   | 38.6   |
| 212397_at   | AL137751 | RDX             | 5962                 | 421.0  | 359.4  | 418.1  | 370.5  | 258.8  |
| 212398_at   | AI057093 | RDX             | 5962                 | 193.2  | 168.8  | 192.0  | 165.8  | 134.7  |
| 212399_s_at | D50911   | VGLL4           | 9686                 | 102.4  | 110.9  | 115.3  | 115.4  | 89.6   |
| 212400_at   | AL043266 | FAM102A         | 399665               | 68.8   | 69.0   | 58.9   | 65.4   | 47.0   |
| 212401_s_at | AI767436 | CDK11A          | /// C984 /// 7286    | 105.7  | 141.2  | 159.4  | 119.9  | 122.9  |
| 212402_at   | BE895685 | ZC3H13          | 23091                | 71.6   | 58.5   | 83.0   | 72.8   | 68.4   |
| 212403_at   | AI749193 | UBE3B           | 89910                | 56.7   | 42.4   | 44.6   | 47.2   | 31.7   |
| 212404_s_at | AL096740 | UBE3B           | 89910                | 23.4   | 23.6   | 31.1   | 30.4   | 23.6   |
| 212405_s_at | AK001172 | METTL13         | 51603                | 141.7  | 118.6  | 181.8  | 135.9  | 138.2  |
| 212406_s_at | AB028973 | PCMTD2          | 55251                | 126.3  | 114.7  | 116.6  | 113.5  | 85.4   |
| 212407_at   | AL049669 | METTL13         | 51603                | 96.0   | 72.0   | 94.9   | 76.7   | 86.2   |
| 212408_at   | AK023204 | TOR1AIP1        | 26092                | 108.4  | 131.5  | 126.5  | 126.9  | 89.8   |
| 212409_s_at | AK021613 | TOR1AIP1        | 26092                | 88.6   | 65.7   | 58.6   | 46.5   | 42.8   |
| 212410_at   | AI346431 | MICU2           | 221154               | 233.7  | 193.4  | 247.3  | 189.1  | 144.8  |
| 212411_at   | BE747342 | IMP4            | 92856                | 311.7  | 216.8  | 267.4  | 243.0  | 226.9  |
| 212412_at   | AV715767 | PDLIM5          | 10611                | 108.3  | 118.7  | 119.7  | 107.1  | 104.4  |
| 212413_at   | D50918   | SEPT6           | 23157                | 12.5   | 10.3   | 12.3   | 9.2    | 12.5   |
| 212414_s_at | D50918   | GLYR1           | /// SEI 23157 /// 84 | 13.2   | 13.2   | 9.2    | 9.6    | 10.6   |
| 212415_at   | AW150913 | SEPT6           | 23157                | 40.5   | 54.8   | 58.4   | 55.8   | 40.4   |
| 212416_at   | AV745949 | SCAMP1          | 9522                 | 299.4  | 296.8  | 337.9  | 293.6  | 283.1  |
| 212417_at   | BF058944 | SCAMP1          | 9522                 | 101.3  | 105.0  | 83.5   | 69.3   | 84.4   |
| 212418_at   | M82882   | ELF1            | 1997                 | 46.8   | 20.4   | 44.3   | 29.9   | 16.1   |
| 212419_at   | AA131324 | ZCCHC24         | 219654               | 76.0   | 66.4   | 75.0   | 58.7   | 40.0   |
| 212420_at   | AL559590 | ELF1            | 1997                 | 36.7   | 30.5   | 31.0   | 23.7   | 23.6   |
| 212421_at   | AB023147 | KIAA0930        | 23313                | 60.6   | 40.6   | 49.0   | 46.4   | 49.5   |
| 212422_at   | AL547263 | PDCD11          | 22984                | 151.0  | 118.8  | 139.2  | 129.9  | 120.7  |
| 212423_at   | AK024784 | ZCCHC24         | 219654               | 88.6   | 62.6   | 84.0   | 67.9   | 70.1   |
| 212424_at   | AW026194 | PDCD11          | 22984                | 81.1   | 65.8   | 95.6   | 77.3   | 68.5   |
| 212425_at   | AL049223 | SCAMP1          | 9522                 | 14.0   | 11.4   | 14.7   | 13.1   | 10.1   |
| 212426_s_at | BF033313 | YWHAQ           | 10971                | 1004.2 | 906.0  | 1130.0 | 982.7  | 933.4  |
| 212427_at   | AB002366 | KIAA0368        | 23392                | 4.0    | 2.5    | 7.6    | 3.0    | 7.3    |
| 212428_at   | AW001101 | KIAA0368        | 23392                | 165.2  | 155.2  | 192.2  | 164.5  | 152.3  |
| 212429_s_at | AW194657 | GTF3C2          | 2976                 | 170.2  | 157.3  | 156.5  | 138.4  | 123.9  |
| 212430_at   | AL109955 | RBM38           | 55544                | 43.0   | 43.5   | 42.7   | 36.7   | 32.6   |
| 212431_at   | D83778   | HMGXB3          | 22993                | 83.2   | 49.0   | 73.3   | 65.2   | 62.8   |
| 212432_at   | AL542571 | GRPEL1          | 80273                | 309.4  | 269.6  | 371.2  | 286.0  | 359.8  |
| 212433_x_at | AA630314 | RPS2            | /// SNC 6187 /// 267 | 4260.8 | 3627.8 | 4204.1 | 3932.8 | 3953.8 |

|             |          |           |        |       |       |       |       |       |
|-------------|----------|-----------|--------|-------|-------|-------|-------|-------|
| 212434_at   | AI984421 | GRPEL1    | 80273  | 202.0 | 159.7 | 245.6 | 182.6 | 201.8 |
| 212435_at   | AA205593 | TRIM33    | 51592  | 36.6  | 19.5  | 42.5  | 31.7  | 30.9  |
| 212436_at   | AI967961 | TRIM33    | 51592  | 45.9  | 30.3  | 42.4  | 24.4  | 28.7  |
| 212437_at   | AL109804 | CENPB     | 1059   | 111.1 | 89.1  | 141.2 | 110.0 | 112.2 |
| 212438_at   | BG252325 | SNRNP27   | 11017  | 81.0  | 83.3  | 94.7  | 75.5  | 82.2  |
| 212439_at   | BE614199 | IP6K1     | 9807   | 72.5  | 76.1  | 68.5  | 75.3  | 55.3  |
| 212440_at   | X76302   | SNRNP27   | 11017  | 152.1 | 135.9 | 172.5 | 132.9 | 113.1 |
| 212441_at   | D86985   | KIAA0232  | 9778   | 81.1  | 76.3  | 83.7  | 70.0  | 54.8  |
| 212442_s_at | BG289001 | CERS6     | 253782 | 162.0 | 131.0 | 169.5 | 155.8 | 147.8 |
| 212443_at   | AB011112 | NBEAL2    | 23218  | 31.9  | 28.4  | 35.8  | 28.1  | 37.6  |
| 212444_at   | AA156240 | GPRC5A    | 9052   | 1.6   | 1.1   | 1.6   | 1.5   | 0.9   |
| 212445_s_at | AI357376 | NEDD4L    | 23327  | 188.1 | 167.9 | 196.6 | 187.2 | 173.8 |
| 212446_s_at | AI658534 | CERS6     | 253782 | 92.6  | 67.1  | 93.8  | 75.4  | 71.4  |
| 212447_at   | AF161402 | KBTBD2    | 25948  | 51.6  | 43.9  | 71.1  | 38.6  | 38.0  |
| 212448_at   | AB007899 | NEDD4L    | 23327  | 27.1  | 23.7  | 25.0  | 31.3  | 20.0  |
| 212449_s_at | BG288007 | LYPLA1    | 10434  | 803.5 | 555.6 | 766.5 | 593.1 | 578.9 |
| 212450_at   | D87445   | SECISBP2L | 9728   | 70.1  | 54.2  | 82.5  | 60.3  | 44.9  |
| 212451_at   | N52532   | SECISBP2L | 9728   | 28.4  | 21.7  | 15.1  | 15.8  | 16.9  |
| 212452_x_at | AF113514 | KAT6B     | 23522  | 24.1  | 24.9  | 25.2  | 21.2  | 18.5  |
| 212453_at   | AB033105 | KIAA1279  | 26128  | 259.3 | 215.9 | 284.9 | 250.1 | 227.3 |
| 212454_x_at | AI762552 | HNRNPDL   | 9987   | 188.6 | 132.9 | 185.5 | 160.6 | 130.5 |
| 212455_at   | N36997   | YTHDC1    | 91746  | 204.2 | 186.5 | 237.6 | 195.0 | 173.6 |
| 212456_at   | AB014564 | CLUH      | 23277  | 161.7 | 149.9 | 154.4 | 147.3 | 121.6 |
| 212457_at   | AL161985 | TFE3      | 7030   | 116.7 | 127.6 | 122.1 | 154.9 | 104.6 |
| 212458_at   | H97931   | SPRED2    | 200734 | 34.1  | 30.7  | 33.7  | 38.2  | 29.9  |
| 212459_x_at | BF593940 | SUCLG2    | 8801   | 232.5 | 226.7 | 266.6 | 245.1 | 203.3 |
| 212460_at   | BE738425 | SPTSSA    | 171546 | 210.6 | 143.5 | 238.1 | 209.1 | 189.2 |
| 212461_at   | BF793951 | AZIN1     | 51582  | 259.2 | 232.5 | 256.6 | 244.6 | 212.2 |
| 212462_at   | AU144267 | KAT6B     | 23522  | 50.7  | 52.2  | 54.8  | 48.0  | 36.7  |
| 212463_at   | BE379006 | CD59      | 966    | 36.7  | 32.4  | 38.4  | 35.2  | 28.6  |
| 212464_s_at | X02761   | FN1       | 2335   | 140.6 | 106.9 | 168.7 | 136.9 | 82.0  |
| 212465_at   | AA524500 | SETD3     | 84193  | 87.4  | 124.3 | 70.5  | 83.3  | 90.7  |
| 212466_at   | AW138902 | SPRED2    | 200734 | 3.9   | 4.1   | 4.4   | 2.6   | 2.8   |
| 212467_at   | AB014578 | DNAJC13   | 23317  | 79.5  | 90.5  | 92.9  | 65.9  | 46.4  |
| 212468_at   | AK023512 | SPAG9     | 9043   | 10.1  | 11.6  | 18.5  | 12.7  | 13.7  |
| 212469_at   | AB019494 | NIPBL     | 25836  | 11.5  | 4.1   | 3.4   | 5.5   | 7.3   |
| 212470_at   | AB011088 | SPAG9     | 9043   | 67.9  | 53.0  | 65.3  | 63.6  | 49.4  |
| 212471_at   | BE503381 | AVL9      | 23080  | 27.7  | 22.0  | 20.8  | 27.5  | 22.9  |
| 212472_at   | BE965029 | MICAL2    | 9645   | 46.2  | 44.3  | 44.2  | 47.7  | 41.6  |
| 212473_s_at | BE965029 | MICAL2    | 9645   | 85.9  | 104.6 | 108.9 | 62.3  | 94.6  |
| 212474_at   | D87682   | AVL9      | 23080  | 82.4  | 80.1  | 88.1  | 75.7  | 58.8  |
| 212475_at   | AI797458 | AVL9      | 23080  | 19.3  | 16.5  | 15.7  | 18.9  | 13.9  |
| 212476_at   | D26069   | ACAP2     | 23527  | 78.3  | 42.0  | 71.3  | 53.9  | 54.8  |
| 212477_at   | D26069   | ACAP2     | 23527  | 6.9   | 6.4   | 1.5   | 0.8   | 3.0   |
| 212478_at   | H65865   | RMND5A    | 64795  | 11.3  | 23.1  | 8.6   | 15.7  | 11.5  |
| 212479_s_at | AK022815 | RMND5A    | 64795  | 91.1  | 61.5  | 114.8 | 78.9  | 75.0  |
| 212480_at   | AB002374 | SPECC1L   | 23384  | 88.4  | 96.6  | 100.0 | 87.8  | 101.1 |
| 212481_s_at | AI214061 | TPM4      | 7171   | 64.6  | 73.1  | 72.0  | 59.6  | 55.5  |
| 212482_at   | BF671894 | RMND5A    | 64795  | 100.2 | 70.5  | 81.1  | 74.8  | 68.3  |
| 212483_at   | AW339587 | NIPBL     | 25836  | 10.6  | 10.4  | 9.6   | 13.2  | 10.1  |
| 212484_at   | BF974389 | FAM89B    | 23625  | 321.9 | 202.8 | 302.4 | 234.3 | 169.1 |
| 212485_at   | AU146596 | GPATCH8   | 23131  | 42.0  | 21.6  | 37.9  | 35.6  | 33.7  |
| 212486_s_at | N20923   | FYN       | 2534   | 4.9   | 1.1   | 4.9   | 1.7   | 0.2   |



|             |           |                           |        |        |        |        |        |        |
|-------------|-----------|---------------------------|--------|--------|--------|--------|--------|--------|
| 212487_at   | AI673812  | GPATCH8                   | 23131  | 26.1   | 19.9   | 25.9   | 26.4   | 24.4   |
| 212488_at   | N30339    | COL5A1                    | 1289   | 5.7    | 2.9    | 7.3    | 12.0   | 1.2    |
| 212489_at   | AI983428  | COL5A1                    | 1289   | 1.6    | 0.3    | 1.6    | 0.8    | 0.5    |
| 212490_at   | AA843895  | DNAJC8                    | 22826  | 24.0   | 13.3   | 18.8   | 14.7   | 14.7   |
| 212491_s_at | AA843895  | DNAJC8                    | 22826  | 105.7  | 110.1  | 116.9  | 108.8  | 108.1  |
| 212492_s_at | AW237172  | KDM4B                     | 23030  | 88.1   | 76.8   | 89.0   | 95.2   | 65.4   |
| 212493_s_at | AI761110  | SETD2                     | 29072  | 38.8   | 22.7   | 38.8   | 32.6   | 28.2   |
| 212494_at   | AB028998  | TENC1                     | 23371  | 15.9   | 14.0   | 17.3   | 15.9   | 12.0   |
| 212495_at   | BE256900  | KDM4B                     | 23030  | 46.2   | 36.0   | 45.9   | 53.7   | 35.0   |
| 212496_s_at | BE256900  | KDM4B                     | 23030  | 118.0  | 121.9  | 120.8  | 134.2  | 98.7   |
| 212497_at   | AI554879  | MAPK1IP1L                 | 93487  | 42.3   | 41.3   | 46.6   | 49.0   | 42.4   |
| 212498_at   | AF056433  | MARCH6                    | 10299  | 79.1   | 77.1   | 80.3   | 82.8   | 69.5   |
| 212499_s_at | AK025580  | FCF1 /// MAI51077 /// 93  |        | 114.4  | 88.6   | 123.4  | 108.5  | 97.0   |
| 212500_at   | AL049319  | ADO                       | 84890  | 82.7   | 54.2   | 74.7   | 61.6   | 63.0   |
| 212501_at   | AL564683  | CEBPB                     | 1051   | 462.5  | 597.0  | 512.0  | 576.9  | 422.7  |
| 212502_at   | AV713053  | ADO                       | 84890  | 228.0  | 197.8  | 228.3  | 224.1  | 178.1  |
| 212503_s_at | N22859    | DIP2C                     | 22982  | 46.0   | 35.5   | 49.5   | 41.3   | 29.4   |
| 212504_at   | N31807    | DIP2C                     | 22982  | 28.9   | 31.2   | 32.9   | 42.8   | 15.0   |
| 212505_s_at | AL110250  | MAU2                      | 23383  | 54.1   | 53.2   | 48.0   | 57.4   | 42.4   |
| 212506_at   | AL135735  | PICALM                    | 8301   | 154.9  | 133.5  | 135.2  | 123.7  | 125.6  |
| 212507_at   | D87446    | TMEM131                   | 23505  | 69.3   | 61.2   | 67.8   | 66.9   | 54.4   |
| 212508_at   | AK024029  | MOAP1                     | 64112  | 148.3  | 137.3  | 146.7  | 147.5  | 121.4  |
| 212509_s_at | BF968134  | MXRA7                     | 439921 | 27.8   | 28.6   | 22.4   | 35.7   | 23.2   |
| 212510_at   | AA135522  | GPD1L                     | 23171  | 52.2   | 62.2   | 62.5   | 56.7   | 67.8   |
| 212511_at   | AI766247  | PICALM                    | 8301   | 14.4   | 19.2   | 18.7   | 14.0   | 12.0   |
| 212512_s_at | AA551784  | CARM1                     | 10498  | 47.3   | 40.8   | 53.2   | 52.9   | 45.1   |
| 212513_s_at | AB029020  | USP33                     | 23032  | 151.4  | 144.0  | 164.5  | 131.8  | 121.2  |
| 212514_x_at | R60068    | DDX3X                     | 1654   | 184.9  | 130.8  | 211.0  | 148.0  | 160.6  |
| 212515_s_at | BG492602  | DDX3X                     | 1654   | 296.2  | 164.1  | 306.2  | 252.3  | 180.1  |
| 212516_at   | AB018325  | ARAP1                     | 116985 | 22.6   | 20.0   | 35.3   | 30.6   | 22.4   |
| 212517_at   | AL132773  | ATRN                      | 8455   | 43.9   | 54.2   | 57.8   | 53.8   | 33.8   |
| 212518_at   | AB011161  | PIP5K1C                   | 23396  | 49.1   | 59.5   | 56.9   | 55.6   | 34.3   |
| 212519_at   | AL518159  | UBE2E1                    | 7324   | 813.6  | 705.4  | 927.0  | 725.0  | 707.5  |
| 212520_s_at | AI684141  | SMARCA4                   | 6597   | 102.0  | 100.9  | 120.5  | 118.5  | 112.0  |
| 212521_s_at | BE568219  | PDE8A                     | 5151   | 40.3   | 32.2   | 43.8   | 34.4   | 32.6   |
| 212522_at   | W73272    | PDE8A                     | 5151   | 53.3   | 33.6   | 39.1   | 41.7   | 35.5   |
| 212523_s_at | D63480    | SPIDR                     | 23514  | 38.6   | 27.0   | 33.1   | 33.0   | 27.7   |
| 212524_x_at | BE901081  | H2AFX                     | 3014   | 4.7    | 2.0    | 12.0   | 6.6    | 1.4    |
| 212525_s_at | AA760862  | H2AFX                     | 3014   | 300.9  | 255.5  | 420.1  | 280.0  | 278.1  |
| 212526_at   | AK002207  | SPG20                     | 23111  | 0.5    | 0.5    | 2.4    | 0.5    | 1.9    |
| 212527_at   | BF057059  | DESI1                     | 27351  | 173.4  | 152.7  | 205.4  | 169.5  | 162.5  |
| 212528_at   | AI348009  | DESI1                     | 27351  | 68.6   | 47.2   | 82.9   | 58.4   | 53.3   |
| 212529_at   | BF197707  | LSM12                     | 124801 | 79.3   | 51.8   | 103.9  | 79.8   | 89.2   |
| 212530_at   | AL080111  | NEK7                      | 140609 | 170.7  | 124.7  | 182.1  | 138.6  | 125.1  |
| 212531_at   | NM_005564 | LCN2                      | 3934   | 11.6   | 13.5   | 13.5   | 7.5    | 8.7    |
| 212532_s_at | AW873564  | LSM12                     | 124801 | 199.0  | 169.9  | 214.6  | 161.3  | 165.4  |
| 212533_at   | X62048    | WEE1                      | 7465   | 207.4  | 191.4  | 228.8  | 177.9  | 154.9  |
| 212534_at   | AU144066  | ZNF24                     | 7572   | 170.7  | 148.2  | 155.5  | 140.3  | 111.2  |
| 212535_at   | AA142929  | MEF2A                     | 4205   | 59.2   | 59.2   | 43.8   | 54.1   | 38.1   |
| 212536_at   | AB023173  | ATP11B                    | 23200  | 71.4   | 50.5   | 63.3   | 48.4   | 46.6   |
| 212537_x_at | BE733979  | C18orf32 /// 6139 /// 267 |        | 2901.6 | 2503.8 | 2879.6 | 2792.7 | 2455.3 |
| 212538_at   | AL576253  | DOCK9                     | 23348  | 25.8   | 23.0   | 20.4   | 25.2   | 17.3   |
| 212539_at   | AI422099  | CHD1L                     | 9557   | 161.8  | 182.5  | 191.4  | 162.4  | 142.5  |

|             |           |              |              |        |        |        |        |        |
|-------------|-----------|--------------|--------------|--------|--------|--------|--------|--------|
| 212540_at   | BG476661  | CDC34        | 997          | 143.3  | 133.5  | 152.1  | 140.5  | 105.4  |
| 212541_at   | AL562282  | FLAD1        | 80308        | 118.5  | 82.5   | 148.0  | 95.6   | 99.9   |
| 212542_s_at | BF224151  | PHIP         | 55023        | 71.8   | 64.3   | 85.9   | 63.6   | 71.3   |
| 212543_at   | U83115    | AIM1         | 202          | 28.1   | 21.8   | 37.4   | 19.0   | 25.9   |
| 212544_at   | AI131008  | ZNHIT3       | 9326         | 150.1  | 148.7  | 162.0  | 154.6  | 115.9  |
| 212545_s_at | AW292783  | ZHX3         | 23051        | 7.6    | 6.1    | 9.0    | 9.3    | 4.8    |
| 212546_s_at | AI126634  | FRYL         | 285527       | 28.6   | 23.4   | 23.4   | 22.0   | 22.1   |
| 212547_at   | N34842    | BRD3         | 8019         | 136.8  | 127.0  | 152.0  | 132.4  | 106.3  |
| 212548_s_at | BF515124  | FRYL         | 285527       | 37.3   | 33.9   | 47.4   | 39.0   | 27.2   |
| 212549_at   | BE645861  | STAT5B       | 6777         | 42.4   | 32.9   | 39.5   | 38.8   | 29.5   |
| 212550_at   | AI149535  | STAT5B       | 6777         | 37.0   | 24.9   | 31.3   | 29.1   | 28.1   |
| 212551_at   | NM_006366 | CAP2         | 10486        | 41.0   | 54.3   | 57.5   | 42.9   | 44.1   |
| 212552_at   | BE617588  | HPCAL1       | 3241         | 106.8  | 133.9  | 176.3  | 156.0  | 128.3  |
| 212553_at   | AK026120  | RPRD2        | 23248        | 133.8  | 119.2  | 119.4  | 119.5  | 94.4   |
| 212554_at   | N90755    | CAP2         | 10486        | 70.4   | 57.0   | 57.0   | 68.0   | 50.9   |
| 212555_at   | AI814660  | PRKAR1B      | 5575         | 38.4   | 32.8   | 15.7   | 21.4   | 25.9   |
| 212556_at   | AI469403  | SCRIB        | 23513        | 69.3   | 49.4   | 58.6   | 54.3   | 38.7   |
| 212557_at   | AB011148  | ZNF451       | 26036        | 31.6   | 24.2   | 31.4   | 26.3   | 22.6   |
| 212558_at   | BF508662  | SPRY1        | 10252        | 31.5   | 24.1   | 25.6   | 18.9   | 28.2   |
| 212559_at   | AU148827  | PRKAR1B      | 5575         | 27.8   | 29.0   | 22.5   | 35.2   | 16.3   |
| 212560_at   | AV728268  | SORL1        | 6653         | 49.8   | 43.3   | 30.6   | 43.9   | 23.1   |
| 212561_at   | AA349595  | DENND5A      | 23258        | 75.3   | 70.4   | 117.8  | 81.7   | 89.0   |
| 212562_s_at | AA418800  | CTSZ         | 1522         | 2.3    | 2.9    | 2.1    | 3.2    | 2.1    |
| 212563_at   | BG491842  | BOP1 /// MIF | 23246 /// 10 | 176.1  | 149.4  | 235.7  | 155.3  | 196.5  |
| 212564_at   | AA523921  | KCTD2        | 23510        | 47.9   | 39.1   | 24.0   | 35.2   | 30.4   |
| 212565_at   | BE302191  | STK38L       | 23012        | 19.0   | 9.7    | 2.6    | 10.0   | 7.0    |
| 212566_at   | AL523310  | MAP4         | 4134         | 158.6  | 140.9  | 138.6  | 170.5  | 117.0  |
| 212567_s_at | AL523310  | MAP4         | 4134         | 54.1   | 54.7   | 55.3   | 42.4   | 40.7   |
| 212568_s_at | BF978872  | DLAT         | 1737         | 302.4  | 214.5  | 337.0  | 250.8  | 257.4  |
| 212569_at   | AV699744  | SMCHD1       | 23347        | 65.9   | 44.9   | 71.1   | 48.1   | 46.8   |
| 212570_at   | AL573201  | ENDOD1       | 23052        | 97.2   | 79.8   | 114.4  | 83.3   | 95.9   |
| 212571_at   | U00955    | CHD8         | 57680        | 93.3   | 76.7   | 81.9   | 76.6   | 61.5   |
| 212572_at   | AW779556  | STK38L       | 23012        | 97.5   | 78.6   | 96.2   | 90.2   | 70.1   |
| 212573_at   | AF131747  | ENDOD1       | 23052        | 182.6  | 156.5  | 225.7  | 166.7  | 210.7  |
| 212574_x_at | AC004528  | TMEM259      | 91304        | 100.2  | 84.6   | 104.0  | 99.0   | 71.7   |
| 212575_at   | BF966155  | TMEM259      | 91304        | 27.5   | 27.7   | 27.2   | 34.3   | 29.0   |
| 212576_at   | AB011116  | MGRN1        | 23295        | 118.0  | 120.2  | 121.1  | 140.4  | 99.2   |
| 212577_at   | AA868754  | SMCHD1       | 23347        | 92.4   | 76.9   | 103.9  | 70.2   | 87.1   |
| 212578_x_at | BF026595  | RPS17        | 6218         | 2601.3 | 2262.2 | 2500.8 | 2334.7 | 2187.0 |
| 212579_at   | AB014550  | SMCHD1       | 23347        | 65.8   | 48.2   | 79.5   | 61.0   | 80.5   |
| 212580_at   | BG111635  | CAST         | 831          | 1.7    | 1.2    | 0.4    | 4.2    | 2.6    |
| 212581_x_at | BE561479  | GAPDH        | 2597         | 3753.8 | 3181.5 | 3529.7 | 3307.0 | 3377.8 |
| 212582_at   | AL049923  | OSBPL8       | 114882       | 153.3  | 158.9  | 188.5  | 133.7  | 178.1  |
| 212583_at   | AB011132  | AQR          | 9716         | 1.3    | 4.4    | 1.2    | 7.9    | 0.4    |
| 212584_at   | BG260519  | AQR          | 9716         | 140.8  | 125.8  | 151.1  | 131.5  | 113.8  |
| 212585_at   | BF970829  | OSBPL8       | 114882       | 90.1   | 80.1   | 113.2  | 89.3   | 88.8   |
| 212586_at   | AA195244  | CAST         | 831          | 67.5   | 70.9   | 60.3   | 70.6   | 52.4   |
| 212587_s_at | AI809341  | PTPRC        | 5788         | 2.1    | 0.3    | 3.5    | 3.6    | 0.7    |
| 212588_at   | Y00062    | PTPRC        | 5788         | 3.2    | 0.3    | 6.2    | 5.0    | 2.6    |
| 212589_at   | AI753792  | RRAS2        | 22800        | 59.8   | 61.8   | 85.7   | 68.1   | 59.6   |
| 212590_at   | AI431643  | RRAS2        | 22800        | 83.5   | 76.0   | 113.7  | 90.7   | 77.8   |
| 212591_at   | AA887480  | ARID4B /// R | 23029 /// 51 | 143.2  | 144.7  | 176.1  | 147.7  | 143.9  |
| 212592_at   | AV733266  | IGJ          | 3512         | 0.2    | 0.3    | 0.7    | 0.7    | 0.3    |

|             |           |           |     |        |     |    |        |        |        |        |        |
|-------------|-----------|-----------|-----|--------|-----|----|--------|--------|--------|--------|--------|
| 212593_s_at | N92498    | MIR4680   | /// | 27250  | /// | 10 | 370.9  | 386.0  | 413.1  | 413.9  | 309.2  |
| 212594_at   | AI185160  | MIR4680   | /// | 27250  | /// | 10 | 61.3   | 45.2   | 51.2   | 45.1   | 45.3   |
| 212595_s_at | AL534321  | DAZAP2    |     | 9802   |     |    | 412.3  | 348.6  | 413.4  | 341.0  | 307.1  |
| 212596_s_at | AJ010070  | HMGXB4    |     | 10042  |     |    | 84.4   | 61.0   | 86.3   | 66.2   | 74.0   |
| 212597_s_at | AL079310  | HMGXB4    |     | 10042  |     |    | 83.1   | 65.4   | 92.4   | 76.0   | 64.3   |
| 212598_at   | BE348236  | WDFY3     |     | 23001  |     |    | 13.1   | 12.3   | 14.6   | 14.0   | 10.7   |
| 212599_at   | AK025298  | AUTS2     |     | 26053  |     |    | 22.1   | 26.9   | 19.3   | 21.5   | 17.6   |
| 212600_s_at | AV727381  | UQCRC2    |     | 7385   |     |    | 856.1  | 783.6  | 893.3  | 795.8  | 712.4  |
| 212601_at   | AB007859  | ZZEF1     |     | 23140  |     |    | 34.1   | 33.4   | 38.7   | 20.8   | 31.4   |
| 212602_at   | AI806395  | WDFY3     |     | 23001  |     |    | 79.9   | 81.0   | 69.6   | 68.8   | 52.1   |
| 212603_at   | NM_005830 | MRPS31    |     | 10240  |     |    | 100.0  | 62.2   | 82.5   | 66.7   | 52.2   |
| 212604_at   | AI937794  | MRPS31    |     | 10240  |     |    | 98.2   | 85.4   | 104.7  | 77.4   | 86.9   |
| 212605_s_at | AK025759  | NUDT3     |     | 11165  |     |    | 25.1   | 21.8   | 21.1   | 19.1   | 18.5   |
| 212606_at   | AL536319  | WDFY3     |     | 23001  |     |    | 30.1   | 25.0   | 24.5   | 36.0   | 16.8   |
| 212607_at   | N32526    | AKT3      |     | 10000  |     |    | 11.9   | 8.6    | 9.3    | 2.8    | 9.0    |
| 212608_s_at | W85912    | NUDT3     |     | 11165  |     |    | 60.1   | 27.9   | 42.4   | 50.0   | 28.3   |
| 212609_s_at | U79271    | AKT3      |     | 10000  |     |    | 34.8   | 23.7   | 34.7   | 35.4   | 23.3   |
| 212610_at   | U79291    | PTPN11    |     | 5781   |     |    | 349.7  | 298.0  | 378.6  | 301.0  | 307.6  |
| 212611_at   | AV728526  | DTX4      |     | 23220  |     |    | 20.2   | 22.7   | 24.1   | 28.8   | 12.4   |
| 212612_at   | D31888    | RCOR1     |     | 23186  |     |    | 129.7  | 91.8   | 120.7  | 99.1   | 82.1   |
| 212613_at   | AI991252  | BTN3A2    |     | 11118  |     |    | 13.3   | 1.9    | 18.7   | 12.6   | 7.1    |
| 212614_at   | BG285011  | ARID5B    |     | 84159  |     |    | 82.2   | 91.0   | 87.9   | 84.7   | 59.8   |
| 212615_at   | AI742305  | CHD9      |     | 80205  |     |    | 33.2   | 18.6   | 27.0   | 13.8   | 15.0   |
| 212616_at   | BF668950  | CHD9      |     | 80205  |     |    | 39.9   | 33.1   | 32.8   | 43.1   | 30.9   |
| 212617_at   | AB002293  | ZNF609    |     | 23060  |     |    | 32.9   | 27.2   | 42.8   | 32.7   | 30.4   |
| 212618_at   | AA913513  | ZNF609    |     | 23060  |     |    | 5.1    | 8.4    | 4.1    | 20.4   | 13.2   |
| 212619_at   | AW205215  | TMEM194A  |     | 23306  |     |    | 47.5   | 40.6   | 48.0   | 40.0   | 32.5   |
| 212620_at   | AW165979  | ZNF609    |     | 23060  |     |    | 16.7   | 12.6   | 18.2   | 28.4   | 11.3   |
| 212621_at   | AB006624  | TMEM194A  |     | 23306  |     |    | 41.4   | 43.3   | 39.4   | 32.5   | 36.5   |
| 212622_at   | N64760    | TMEM41B   |     | 440026 |     |    | 89.4   | 70.1   | 95.2   | 72.8   | 61.7   |
| 212623_at   | AU153138  | TMEM41B   |     | 440026 |     |    | 108.7  | 100.9  | 125.5  | 109.2  | 92.5   |
| 212624_s_at | BF339445  | CHN1      |     | 1123   |     |    | 3.3    | 2.3    | 3.4    | 2.3    | 1.2    |
| 212625_at   | NM_003765 | STX10     |     | 8677   |     |    | 123.0  | 116.0  | 115.3  | 120.1  | 108.1  |
| 212626_x_at | AA664258  | HNRNPC    |     | 3183   |     |    | 1224.9 | 1145.2 | 1280.7 | 1128.2 | 1100.1 |
| 212627_s_at | AL581473  | EXOSC7    |     | 23016  |     |    | 215.7  | 184.8  | 289.6  | 193.7  | 197.9  |
| 212628_at   | BG292065  | PKN2      |     | 5586   |     |    | 80.0   | 54.9   | 77.7   | 68.0   | 54.2   |
| 212629_s_at | AI633689  | PKN2      |     | 5586   |     |    | 57.0   | 35.1   | 49.2   | 40.3   | 32.1   |
| 212630_at   | AF055006  | EXOC3     |     | 11336  |     |    | 35.6   | 26.8   | 47.2   | 31.8   | 24.1   |
| 212631_at   | AI566082  | STX7      |     | 8417   |     |    | 19.4   | 20.1   | 28.8   | 29.8   | 22.6   |
| 212632_at   | N32035    | STX7      |     | 8417   |     |    | 15.9   | 19.7   | 18.3   | 27.4   | 13.0   |
| 212633_at   | AL132776  | UFL1      |     | 23376  |     |    | 142.4  | 100.8  | 130.9  | 107.6  | 85.5   |
| 212634_at   | AW298092  | UFL1      |     | 23376  |     |    | 48.2   | 41.1   | 48.8   | 43.2   | 36.3   |
| 212635_at   | AW161626  | TNPO1     |     | 3842   |     |    | 95.7   | 69.1   | 85.7   | 66.6   | 71.2   |
| 212636_at   | AL031781  | QKI       |     | 9444   |     |    | 5.7    | 7.6    | 5.2    | 2.1    | 6.4    |
| 212637_s_at | AU155187  | WWP1      |     | 11059  |     |    | 91.4   | 62.3   | 97.5   | 80.2   | 62.8   |
| 212638_s_at | BF131791  | WWP1      |     | 11059  |     |    | 244.4  | 177.0  | 254.5  | 191.8  | 210.3  |
| 212639_x_at | AL581768  | TUBA1B    |     | 10376  |     |    | 4220.5 | 3734.2 | 4344.2 | 3907.0 | 3872.6 |
| 212640_at   | AV712602  | PTPLB     |     | 201562 |     |    | 317.1  | 218.9  | 354.8  | 268.6  | 241.6  |
| 212641_at   | AL023584  | HIVEP2    |     | 3097   |     |    | 17.7   | 12.4   | 13.5   | 13.1   | 10.6   |
| 212642_s_at | AL023584  | HIVEP2    |     | 3097   |     |    | 30.0   | 18.3   | 23.8   | 25.3   | 19.2   |
| 212643_at   | AI671747  | MAPK1IP1L |     | 93487  |     |    | 762.9  | 772.5  | 823.6  | 743.9  | 623.0  |
| 212644_s_at | AI671747  | MAPK1IP1L |     | 93487  |     |    | 270.2  | 292.1  | 294.0  | 302.5  | 220.5  |
| 212645_x_at | AL566299  | BRE       |     | 9577   |     |    | 123.6  | 102.3  | 131.3  | 133.4  | 82.3   |

|             |           |            |                      |        |        |        |        |        |
|-------------|-----------|------------|----------------------|--------|--------|--------|--------|--------|
| 212646_at   | D42043    | RFTN1      | 23180                | 1.0    | 1.7    | 1.6    | 1.8    | 0.7    |
| 212647_at   | NM_006270 | RRAS       | 6237                 | 33.0   | 64.2   | 70.8   | 70.3   | 59.5   |
| 212648_at   | AL079292  | DHX29      | 54505                | 117.4  | 75.1   | 100.0  | 85.2   | 84.2   |
| 212649_at   | AL079292  | -          | -                    | 24.3   | 19.3   | 26.9   | 23.4   | 15.0   |
| 212650_at   | BF116032  | EHBP1      | 23301                | 6.0    | 5.3    | 5.6    | 5.3    | 1.8    |
| 212651_at   | AB018283  | RHOBTB1    | 9886                 | 0.3    | 3.3    | 1.4    | 4.0    | 2.8    |
| 212652_s_at | AA524345  | SNX4       | 8723                 | 137.3  | 105.8  | 146.9  | 111.3  | 97.8   |
| 212653_s_at | AB020710  | EHBP1      | 23301                | 54.5   | 53.8   | 58.0   | 49.9   | 44.8   |
| 212654_at   | AL566786  | TPM2       | 7169                 | 1.1    | 1.1    | 0.9    | 0.6    | 2.9    |
| 212655_at   | AB011151  | ZCCHC14    | 23174                | 33.8   | 30.5   | 30.3   | 35.3   | 26.0   |
| 212656_at   | AF110399  | TSFM       | 10102                | 213.3  | 130.9  | 188.1  | 183.7  | 163.5  |
| 212657_s_at | U65590    | IL1RN      | 3557                 | 33.4   | 25.4   | 22.3   | 38.8   | 21.3   |
| 212658_at   | N66633    | LHFPL2     | 10184                | 32.0   | 30.4   | 24.9   | 24.8   | 21.9   |
| 212659_s_at | AW083357  | IL1RN      | 3557                 | 16.8   | 28.7   | 7.9    | 18.8   | 12.8   |
| 212660_at   | AI735639  | JADE2      | 23338                | 28.1   | 34.7   | 36.4   | 27.8   | 26.4   |
| 212661_x_at | BE731738  | LOC1010603 | 5478 /// 101         | 4186.8 | 4115.0 | 4335.6 | 4094.8 | 3961.2 |
| 212662_at   | BE615277  | PVR        | 5817                 | 23.1   | 19.5   | 21.3   | 27.9   | 26.3   |
| 212663_at   | AB014574  | FKBP15     | 23307                | 106.0  | 97.5   | 112.9  | 98.6   | 90.7   |
| 212664_at   | AL567012  | TUBB4A     | 10382                | 50.4   | 57.6   | 58.1   | 81.7   | 35.5   |
| 212665_at   | AL556438  | TIPARP     | 25976                | 28.1   | 25.0   | 27.1   | 27.6   | 20.7   |
| 212666_at   | AB046845  | SMURF1     | 57154                | 31.7   | 23.1   | 25.4   | 22.7   | 26.7   |
| 212667_at   | AL575922  | SPARC      | 6678                 | 3.5    | 0.6    | 0.4    | 0.5    | 0.8    |
| 212668_at   | AI654869  | SMURF1     | 57154                | 2.0    | 1.9    | 1.0    | 4.9    | 1.0    |
| 212669_at   | AI093569  | CAMK2G     | 818                  | 50.1   | 50.6   | 53.6   | 51.7   | 45.9   |
| 212670_at   | AA479278  | ELN        | 2006                 | 2.0    | 1.0    | 2.0    | 1.3    | 1.3    |
| 212671_s_at | BG397856  | HLA-DQA1   | // 3117 /// 311      | 0.9    | 0.3    | 1.0    | 0.2    | 3.3    |
| 212672_at   | U82828    | ATM        | 472                  | 16.0   | 9.8    | 25.6   | 17.3   | 12.6   |
| 212673_at   | D42084    | METAP1     | 23173                | 200.2  | 171.3  | 249.4  | 175.3  | 174.1  |
| 212674_s_at | AK002076  | DHX30      | 22907                | 149.4  | 118.2  | 153.7  | 137.4  | 129.9  |
| 212675_s_at | AB011154  | CEP68      | 23177                | 37.5   | 36.9   | 34.4   | 41.9   | 40.2   |
| 212676_at   | AW293356  | LOC1019301 | 4763 /// 101         | 75.3   | 76.3   | 104.6  | 68.0   | 70.6   |
| 212677_s_at | BG530481  | CEP68      | 23177                | 42.3   | 23.8   | 29.3   | 32.1   | 21.5   |
| 212678_at   | AW054826  | LOC1019301 | 4763 /// 101         | 21.2   | 29.7   | 26.0   | 26.1   | 18.1   |
| 212679_at   | AK026529  | TBL2       | 26608                | 12.1   | 9.4    | 8.5    | 7.7    | 4.8    |
| 212680_x_at | BE305165  | PPP1R14B   | 26472                | 475.0  | 467.7  | 563.8  | 526.3  | 441.3  |
| 212681_at   | AI770004  | EPB41L3    | 23136                | 4.3    | 0.1    | 1.7    | 0.4    | 0.1    |
| 212682_s_at | AI081535  | LMF2       | 91289                | 42.2   | 48.0   | 57.7   | 48.4   | 49.7   |
| 212683_at   | AL526243  | SLC25A44   | 9673                 | 88.1   | 62.4   | 99.0   | 75.7   | 70.5   |
| 212684_at   | AI752257  | ZNF3       | 7551                 | 52.6   | 45.5   | 55.8   | 62.2   | 44.3   |
| 212685_s_at | AI608789  | TBL2       | 26608                | 205.3  | 200.9  | 256.6  | 208.4  | 206.9  |
| 212686_at   | AB032983  | PPM1H      | 57460                | 81.3   | 73.5   | 89.2   | 84.0   | 57.8   |
| 212687_at   | AL110164  | LIMS1      | /// LIM 3987 /// 966 | 74.0   | 76.9   | 89.8   | 74.4   | 84.0   |
| 212688_at   | BC003393  | PIK3CB     | 5291                 | 112.5  | 115.3  | 129.9  | 117.2  | 109.4  |
| 212689_s_at | AA524505  | KDM3A      | 55818                | 62.7   | 58.4   | 52.3   | 55.7   | 45.1   |
| 212690_at   | AB018268  | DDHD2      | 23259                | 54.2   | 42.7   | 50.0   | 55.0   | 49.5   |
| 212691_at   | AW131863  | NUP188     | 23511                | 190.8  | 157.3  | 226.7  | 178.5  | 188.5  |
| 212692_s_at | W60686    | LRBA       | 987                  | 281.2  | 277.3  | 255.0  | 258.3  | 252.7  |
| 212693_at   | BE670928  | MDN1       | 23195                | 35.4   | 20.5   | 34.0   | 34.7   | 23.0   |
| 212694_s_at | NM_000532 | PCCB       | 5096                 | 542.6  | 606.7  | 593.1  | 645.7  | 508.0  |
| 212695_at   | AB014558  | CRY2       | 1408                 | 2.3    | 4.8    | 2.0    | 2.9    | 2.0    |
| 212696_s_at | BF968633  | RNF4       | 6047                 | 249.6  | 182.6  | 228.2  | 219.0  | 194.0  |
| 212697_at   | AL515874  | FAM134C    | 162427               | 160.8  | 201.8  | 187.4  | 193.1  | 142.0  |
| 212698_s_at | BF966021  | SEPT10     | 151011               | 83.5   | 71.8   | 99.2   | 78.8   | 65.2   |

|             |          |            |                     |        |        |        |        |        |
|-------------|----------|------------|---------------------|--------|--------|--------|--------|--------|
| 212699_at   | BE222801 | SCAMP5     | 192683              | 31.7   | 31.7   | 27.0   | 32.5   | 17.8   |
| 212700_x_at | AJ002220 | MIR4315-1  | /,9842 /// 440      | 14.3   | 17.7   | 22.9   | 19.4   | 14.5   |
| 212701_at   | AB002318 | TLN2       | 83660               | 1.9    | 0.9    | 12.6   | 1.5    | 1.8    |
| 212702_s_at | N45111   | BICD2      | 23299               | 21.2   | 18.6   | 20.7   | 19.3   | 15.5   |
| 212703_at   | AV728958 | TLN2       | 83660               | 8.2    | 13.0   | 5.0    | 12.5   | 12.2   |
| 212704_at   | AI049962 | ZCCHC11    | 23318               | 67.7   | 52.8   | 56.4   | 55.8   | 44.1   |
| 212705_x_at | BF570210 | PNPLA2     | 57104               | 37.2   | 28.5   | 36.3   | 34.6   | 14.7   |
| 212706_at   | AB011110 | LOC1027242 | 10156 /// 10        | 6.4    | 12.2   | 5.4    | 9.0    | 5.5    |
| 212707_s_at | AI738591 | LOC1027251 | 10156 /// 40        | 4.4    | 3.6    | 1.8    | 5.5    | 1.2    |
| 212708_at   | AV721987 | MSL1       | 339287              | 214.5  | 183.6  | 210.6  | 178.5  | 163.0  |
| 212709_at   | D83781   | NUP160     | 23279               | 88.4   | 61.1   | 98.7   | 84.8   | 82.2   |
| 212710_at   | AL043774 | CAMSAP1    | 157922              | 43.9   | 50.6   | 48.9   | 40.7   | 21.8   |
| 212711_at   | AA019977 | CAMSAP1    | 157922              | 36.6   | 37.3   | 38.0   | 41.1   | 31.0   |
| 212712_at   | BE222901 | CAMSAP1    | 157922              | 62.4   | 42.1   | 50.7   | 48.1   | 35.4   |
| 212713_at   | R72286   | MFAP4      | 4239                | 0.7    | 0.7    | 0.7    | 0.9    | 0.6    |
| 212714_at   | AL050205 | LARP4      | 113251              | 97.0   | 80.5   | 101.8  | 74.4   | 94.3   |
| 212715_s_at | AB020626 | MICAL3     | 57553               | 28.0   | 20.0   | 25.9   | 32.1   | 20.8   |
| 212716_s_at | AW083133 | EIF3K      | 27335               | 1229.4 | 968.9  | 1137.5 | 1097.4 | 943.0  |
| 212717_at   | AB002354 | PLEKHM1    | 9842                | 35.0   | 37.6   | 33.8   | 36.7   | 18.1   |
| 212718_at   | BF797555 | PAPOLA     | 10914               | 446.9  | 406.5  | 404.9  | 356.6  | 364.5  |
| 212719_at   | AB011178 | PHLPP1     | 23239               | 46.5   | 37.0   | 43.7   | 45.1   | 33.5   |
| 212720_at   | AI670847 | PAPOLA     | 10914               | 100.2  | 87.7   | 88.1   | 81.3   | 83.5   |
| 212721_at   | AI810380 | SREK1      | 140890              | 167.7  | 132.8  | 179.5  | 130.6  | 134.5  |
| 212722_s_at | AK021780 | JMJD6      | 23210               | 47.5   | 38.8   | 64.5   | 43.7   | 59.4   |
| 212723_at   | AK021780 | JMJD6      | 23210               | 104.8  | 97.7   | 91.0   | 100.9  | 83.7   |
| 212724_at   | BG054844 | RND3       | 390                 | 1.5    | 6.7    | 1.0    | 3.1    | 1.0    |
| 212725_s_at | N37081   | TUG1       | 55000               | 279.1  | 260.5  | 287.7  | 272.8  | 223.2  |
| 212726_at   | AB014562 | PHF2       | 5253                | 66.8   | 64.4   | 73.8   | 84.5   | 68.5   |
| 212727_at   | AB033058 | DLG3       | 1741                | 55.9   | 36.0   | 47.4   | 49.2   | 39.8   |
| 212728_at   | T62872   | DLG3       | 1741                | 60.4   | 52.3   | 63.2   | 52.3   | 48.7   |
| 212729_at   | AI916274 | DLG3       | 1741                | 73.3   | 68.4   | 89.0   | 64.0   | 57.3   |
| 212730_at   | AK026420 | SYNM       | 23336               | 14.8   | 15.6   | 22.9   | 24.3   | 14.0   |
| 212731_at   | U79297   | ANKRD46    | 157567              | 101.3  | 104.7  | 93.1   | 107.0  | 80.3   |
| 212732_at   | AI950273 | MEG3       | 55384               | 8.4    | 6.3    | 7.0    | 7.0    | 2.5    |
| 212733_at   | AI798908 | KIAA0226   | 9711                | 53.8   | 59.2   | 69.1   | 53.3   | 48.7   |
| 212734_x_at | AI186735 | RPL13      | /// SN 6137 /// 606 | 3534.2 | 3481.6 | 3665.7 | 3497.6 | 3412.7 |
| 212735_at   | BF448041 | KIAA0226   | 9711                | 19.4   | 19.8   | 12.9   | 14.6   | 16.2   |
| 212736_at   | BE299456 | C16orf45   | 89927               | 19.0   | 22.5   | 14.4   | 24.2   | 12.4   |
| 212737_at   | AL513583 | GM2A       | 2760                | 193.5  | 163.9  | 195.8  | 187.0  | 136.8  |
| 212738_at   | AV717623 | ARHGAP19   | 84986               | 95.7   | 84.7   | 102.8  | 88.5   | 81.9   |
| 212739_s_at | AL523860 | NME4       | 4833                | 6.2    | 9.3    | 11.9   | 5.0    | 9.2    |
| 212740_at   | BF740111 | PIK3R4     | 30849               | 93.3   | 78.7   | 112.7  | 93.9   | 94.2   |
| 212741_at   | AA923354 | MAOA       | 4128                | 572.1  | 497.1  | 713.2  | 608.6  | 542.4  |
| 212742_at   | AL530462 | RNF115     | 27246               | 83.7   | 68.6   | 71.9   | 64.8   | 59.3   |
| 212743_at   | AV694093 | RCHY1      | 25898               | 24.8   | 11.5   | 21.0   | 20.4   | 20.2   |
| 212744_at   | AI813772 | BBS4       | 585                 | 68.8   | 48.1   | 83.1   | 61.0   | 67.2   |
| 212745_s_at | AI813772 | BBS4       | 585                 | 44.2   | 35.5   | 60.4   | 41.6   | 47.1   |
| 212746_s_at | AA126789 | CEP170     | /// C 9859 /// 645  | 11.6   | 11.7   | 10.8   | 8.9    | 7.4    |
| 212747_at   | AI990523 | ANKS1A     | 23294               | 56.3   | 61.1   | 59.0   | 69.6   | 57.1   |
| 212748_at   | AB037859 | MKL1       | 57591               | 28.3   | 29.7   | 18.4   | 28.2   | 26.4   |
| 212749_s_at | AI096477 | RCHY1      | 25898               | 196.0  | 165.5  | 203.0  | 176.1  | 164.9  |
| 212750_at   | AB020630 | PPP1R16B   | 26051               | 0.7    | 1.3    | 0.4    | 0.8    | 0.7    |
| 212751_at   | BG290646 | UBE2N      | 7334                | 95.8   | 101.4  | 113.4  | 98.8   | 92.1   |

|             |          |              |              |        |        |        |        |        |
|-------------|----------|--------------|--------------|--------|--------|--------|--------|--------|
| 212752_at   | AA176798 | CLASP1       | 23332        | 50.1   | 38.0   | 42.8   | 33.8   | 32.0   |
| 212753_at   | AI692203 | PCGF3        | 10336        | 80.6   | 84.6   | 92.9   | 85.4   | 73.1   |
| 212754_s_at | AI760249 | MON2         | 23041        | 75.5   | 55.8   | 54.6   | 67.4   | 54.1   |
| 212755_at   | BG548738 | MON2         | 23041        | 2.6    | 2.3    | 7.9    | 4.9    | 2.4    |
| 212756_s_at | AI761518 | UBR2         | 23304        | 29.6   | 25.4   | 33.3   | 24.7   | 25.5   |
| 212757_s_at | BF111268 | CAMK2G       | 818          | 49.9   | 67.7   | 71.2   | 52.3   | 51.7   |
| 212758_s_at | AI373166 | LOC1009966   | 6935 /// 100 | 2.5    | 1.6    | 1.5    | 1.2    | 1.0    |
| 212759_s_at | AI703074 | TCF7L2       | 6934         | 7.7    | 6.8    | 11.0   | 13.4   | 7.7    |
| 212760_at   | AB002347 | UBR2         | 23304        | 36.9   | 31.9   | 31.5   | 40.8   | 26.0   |
| 212761_at   | AI949687 | TCF7L2       | 6934         | 73.3   | 76.9   | 68.1   | 69.3   | 46.5   |
| 212762_s_at | AI375916 | TCF7L2       | 6934         | 37.8   | 32.4   | 35.4   | 33.9   | 27.3   |
| 212763_at   | AW593213 | CAMSAP2      | 23271        | 28.2   | 22.7   | 25.8   | 29.5   | 18.5   |
| 212764_at   | AI806174 | LOC1009966   | 6935 /// 100 | 3.2    | 0.4    | 6.3    | 1.7    | 0.4    |
| 212765_at   | AB029001 | CAMSAP2      | 23271        | 67.5   | 53.0   | 54.0   | 57.5   | 48.6   |
| 212766_s_at | AW294587 | ISG20L2      | 81875        | 139.2  | 116.2  | 158.6  | 116.4  | 133.9  |
| 212767_at   | BC004409 | MTG1         | 92170        | 108.7  | 107.8  | 93.5   | 112.5  | 100.9  |
| 212768_s_at | AL390736 | OLFM4        | 10562        | 0.5    | 0.9    | 0.4    | 0.2    | 0.2    |
| 212769_at   | AI567426 | TLE3         | 7090         | 62.6   | 59.3   | 67.9   | 63.1   | 53.2   |
| 212770_at   | AW873621 | TLE3         | 7090         | 82.3   | 109.2  | 106.0  | 98.1   | 90.6   |
| 212771_at   | AU150943 | FAM171A1     | 221061       | 98.0   | 99.3   | 84.9   | 83.5   | 75.7   |
| 212772_s_at | AL162060 | ABCA2        | 20           | 66.5   | 62.0   | 66.6   | 62.4   | 43.7   |
| 212773_s_at | BG165094 | TOMM20       | 9804         | 580.5  | 477.0  | 602.1  | 533.7  | 495.6  |
| 212774_at   | AJ223321 | ZBTB18       | 10472        | 40.3   | 43.3   | 41.7   | 46.4   | 29.8   |
| 212775_at   | AI978623 | OBSL1        | 23363        | 12.7   | 13.1   | 12.2   | 16.7   | 12.0   |
| 212776_s_at | AI978623 | OBSL1        | 23363        | 2.4    | 7.4    | 3.4    | 8.1    | 2.0    |
| 212777_at   | L13857   | SOS1         | 6654         | 9.6    | 15.1   | 12.4   | 4.8    | 10.0   |
| 212778_at   | AL583340 | PACS2        | 23241        | 55.6   | 51.3   | 57.5   | 67.9   | 50.3   |
| 212779_at   | AB029032 | KIAA1109     | 84162        | 19.4   | 27.3   | 23.5   | 26.6   | 22.1   |
| 212780_at   | AA700167 | SOS1         | 6654         | 15.2   | 11.0   | 8.7    | 11.6   | 8.6    |
| 212781_at   | AK026954 | RBBP6        | 5930         | 81.4   | 63.9   | 85.3   | 64.9   | 57.7   |
| 212782_x_at | BG335629 | POLR2J       | 5439         | 656.6  | 642.1  | 738.9  | 707.5  | 547.6  |
| 212783_at   | AI538172 | RBBP6        | 5930         | 62.6   | 49.9   | 66.5   | 56.8   | 63.9   |
| 212784_at   | AB002304 | CIC          | 23152        | 34.9   | 32.2   | 27.6   | 31.7   | 31.6   |
| 212785_s_at | AA160181 | LARP7        | 51574        | 74.1   | 71.1   | 81.0   | 61.8   | 60.0   |
| 212786_at   | AA731693 | CLEC16A      | 23274        | 30.4   | 32.2   | 32.6   | 37.2   | 24.5   |
| 212787_at   | AI952986 | YLPM1        | 56252        | 176.6  | 161.5  | 178.4  | 152.6  | 125.4  |
| 212788_x_at | BG537190 | FTL          | 2512         | 2165.9 | 1617.3 | 2224.7 | 2260.5 | 1737.8 |
| 212789_at   | AI796581 | NCAPD3       | 23310        | 225.4  | 158.1  | 224.5  | 185.3  | 208.3  |
| 212790_x_at | BF942308 | RPL13A /// R | 23521 /// 26 | 4612.8 | 4515.2 | 4748.1 | 4530.5 | 4420.9 |
| 212791_at   | AL042729 | C1orf216     | 127703       | 89.1   | 85.0   | 93.1   | 90.1   | 72.9   |
| 212792_at   | AB020684 | DPY19L1      | 23333        | 19.3   | 8.8    | 1.8    | 15.7   | 6.5    |
| 212793_at   | BF513244 | DAAM2        | 23500        | 16.5   | 15.5   | 21.1   | 11.2   | 11.5   |
| 212794_s_at | AK001728 | KIAA1033     | 23325        | 73.3   | 60.3   | 74.0   | 46.3   | 44.0   |
| 212795_at   | AL137753 | KIAA1033     | 23325        | 63.5   | 48.7   | 78.3   | 51.5   | 49.5   |
| 212796_s_at | BF195608 | TBC1D2B      | 23102        | 50.3   | 51.2   | 59.4   | 44.3   | 52.2   |
| 212797_at   | BE742268 | SORT1        | 6272         | 8.3    | 7.4    | 12.8   | 10.6   | 8.2    |
| 212798_s_at | AK001389 | ANKMY2       | 57037        | 46.5   | 48.3   | 50.4   | 48.3   | 32.9   |
| 212799_at   | BE217875 | STX6         | 10228        | 81.3   | 60.3   | 72.6   | 55.8   | 59.5   |
| 212800_at   | AI740832 | STX6         | 10228        | 39.8   | 36.9   | 40.6   | 36.0   | 37.9   |
| 212801_at   | AI861788 | CIT /// MIR1 | 11113 /// 10 | 69.2   | 47.5   | 64.6   | 48.5   | 42.3   |
| 212802_s_at | AK023841 | GAPVD1       | 26130        | 100.7  | 90.4   | 111.3  | 95.5   | 87.6   |
| 212803_at   | BF337329 | NAB2         | 4665         | 15.1   | 9.9    | 17.7   | 11.1   | 5.9    |
| 212804_s_at | AI797397 | GAPVD1       | 26130        | 82.0   | 64.4   | 76.7   | 79.9   | 65.7   |

|             |          |                          |        |        |        |        |        |        |
|-------------|----------|--------------------------|--------|--------|--------|--------|--------|--------|
| 212805_at   | AB002365 | PRUNE2                   | 158471 | 355.3  | 408.6  | 402.7  | 417.3  | 325.3  |
| 212806_at   | AL138349 | PRUNE2                   | 158471 | 202.6  | 270.2  | 267.3  | 207.7  | 173.0  |
| 212807_s_at | BF447105 | SORT1                    | 6272   | 42.4   | 45.7   | 49.4   | 37.7   | 31.9   |
| 212808_at   | AI884627 | NFATC2IP                 | 84901  | 26.5   | 18.8   | 29.9   | 24.8   | 26.7   |
| 212809_at   | AA152202 | NFATC2IP                 | 84901  | 119.3  | 93.5   | 113.7  | 73.9   | 78.5   |
| 212810_s_at | W72527   | SLC1A4                   | 6509   | 19.8   | 21.2   | 19.0   | 25.7   | 18.6   |
| 212811_x_at | AI889380 | SLC1A4                   | 6509   | 54.7   | 72.0   | 48.3   | 55.8   | 40.4   |
| 212812_at   | AI700633 | SERINC5                  | 256987 | 367.2  | 324.9  | 361.1  | 334.3  | 281.3  |
| 212813_at   | AA149644 | JAM3                     | 83700  | 10.9   | 10.9   | 14.5   | 10.8   | 9.5    |
| 212814_at   | AB020635 | AHCYL2                   | 23382  | 60.2   | 36.1   | 37.9   | 40.7   | 25.4   |
| 212815_at   | AA156961 | ASCC3                    | 10973  | 122.8  | 109.0  | 133.4  | 119.9  | 89.2   |
| 212816_s_at | BE613178 | CBS                      | 875    | 236.3  | 259.8  | 236.7  | 250.4  | 196.9  |
| 212817_at   | AK023253 | DNAJB5                   | 25822  | 25.2   | 22.2   | 29.8   | 22.1   | 17.6   |
| 212818_s_at | AF055024 | ASB1                     | 51665  | 42.6   | 45.4   | 45.3   | 36.0   | 27.9   |
| 212819_at   | AF055024 | ASB1                     | 51665  | 20.0   | 12.7   | 13.4   | 15.7   | 17.9   |
| 212820_at   | AB020663 | DMXL2                    | 23312  | 35.4   | 29.4   | 44.1   | 35.5   | 30.4   |
| 212821_at   | AU147160 | PLEKHG3                  | 26030  | 1.2    | 5.9    | 2.5    | 1.0    | 3.3    |
| 212822_at   | AA121502 | HEG1                     | 57493  | 7.8    | 18.4   | 26.6   | 6.0    | 9.6    |
| 212823_s_at | AI738980 | PLEKHG3                  | 26030  | 34.6   | 36.0   | 40.7   | 32.0   | 26.1   |
| 212824_at   | U69127   | FUBP3                    | 8939   | 80.9   | 58.7   | 98.0   | 67.0   | 54.5   |
| 212825_at   | AI357401 | PAXIP1                   | 22976  | 101.1  | 83.3   | 123.5  | 76.3   | 84.2   |
| 212826_s_at | AI961224 | SLC25A6                  | 293    | 2368.7 | 2136.3 | 2319.0 | 2335.8 | 1957.4 |
| 212827_at   | X17115   | IGHM                     | 3507   | 10.7   | 14.5   | 12.1   | 7.0    | 8.0    |
| 212828_at   | AA191573 | SYNJ2                    | 8871   | 3.2    | 5.2    | 7.0    | 10.4   | 5.5    |
| 212829_at   | BE878277 | PIP4K2A                  | 5305   | 23.0   | 26.4   | 29.3   | 17.8   | 20.2   |
| 212830_at   | W68084   | MEGF9                    | 1955   | 32.4   | 35.7   | 33.3   | 34.6   | 27.2   |
| 212831_at   | BF110421 | MEGF9                    | 1955   | 2.3    | 2.2    | 2.2    | 12.4   | 9.8    |
| 212832_s_at | AI143124 | CKAP5                    | 9793   | 158.9  | 136.7  | 151.4  | 110.5  | 123.7  |
| 212833_at   | M74089   | SLC25A46                 | 91137  | 103.3  | 96.6   | 124.5  | 87.8   | 83.7   |
| 212834_at   | BE963238 | DDX52                    | 11056  | 30.8   | 24.2   | 27.6   | 18.7   | 19.3   |
| 212835_at   | AA777641 | FAM175B                  | 23172  | 63.1   | 45.8   | 50.5   | 43.7   | 36.1   |
| 212836_at   | D26018   | POLD3                    | 10714  | 66.6   | 51.7   | 82.5   | 67.1   | 72.7   |
| 212837_at   | D63877   | FAM175B                  | 23172  | 53.4   | 42.4   | 44.5   | 30.0   | 39.2   |
| 212838_at   | AB023227 | DNMBP                    | 23268  | 27.4   | 27.7   | 31.3   | 26.5   | 19.8   |
| 212839_s_at | AK024044 | TROVE2                   | 6738   | 9.6    | 14.5   | 16.8   | 15.5   | 7.6    |
| 212840_at   | BG339560 | UBXN7                    | 26043  | 43.1   | 51.5   | 53.8   | 38.6   | 49.8   |
| 212841_s_at | AI692180 | PPFIBP2                  | 8495   | 31.3   | 28.9   | 40.5   | 37.3   | 35.3   |
| 212842_x_at | AL043571 | RGPD3 /// R(84220 /// 28 |        | 54.5   | 36.2   | 49.4   | 52.6   | 33.9   |
| 212843_at   | AA126505 | NCAM1                    | 4684   | 2.5    | 6.3    | 5.1    | 5.4    | 3.6    |
| 212844_at   | AI400490 | RRP1B                    | 23076  | 24.6   | 11.7   | 35.1   | 18.0   | 10.8   |
| 212845_at   | AB028976 | SAMD4A                   | 23034  | 0.7    | 2.6    | 0.5    | 0.3    | 8.1    |
| 212846_at   | AA811192 | RRP1B                    | 23076  | 241.7  | 185.2  | 253.0  | 207.1  | 225.8  |
| 212847_at   | AL036840 | FUBP1                    | 8880   | 68.5   | 57.2   | 69.5   | 55.2   | 47.6   |
| 212848_s_at | BG036668 | C9orf3                   | 84909  | 24.7   | 30.0   | 34.4   | 29.1   | 19.5   |
| 212849_at   | AA745954 | AXIN1                    | 8312   | 24.9   | 20.3   | 23.2   | 16.8   | 19.0   |
| 212850_s_at | AA584297 | LRP4                     | 4038   | 3.8    | 1.0    | 1.0    | 0.9    | 4.3    |
| 212851_at   | AA194584 | DCUN1D4                  | 23142  | 47.1   | 37.3   | 47.1   | 40.6   | 33.9   |
| 212852_s_at | AL538601 | TROVE2                   | 6738   | 174.4  | 129.5  | 173.1  | 147.2  | 154.9  |
| 212853_at   | AA779297 | DCUN1D4                  | 23142  | 31.6   | 23.5   | 24.6   | 19.8   | 26.3   |
| 212854_x_at | AB051480 | NBPF1                    | 55672  | 237.9  | 234.2  | 227.3  | 270.4  | 168.0  |
| 212855_at   | D87466   | DCUN1D4                  | 23142  | 49.0   | 44.4   | 42.5   | 38.6   | 41.6   |
| 212856_at   | AB018310 | GRAMD4                   | 23151  | 23.1   | 21.0   | 27.1   | 33.3   | 19.0   |
| 212857_x_at | BG231551 | SUB1                     | 10923  | 1052.7 | 994.5  | 1154.5 | 1023.7 | 910.9  |

|             |           |                        |             |        |        |        |        |        |
|-------------|-----------|------------------------|-------------|--------|--------|--------|--------|--------|
| 212858_at   | AL520675  | PAQR4                  | 124222      | 72.4   | 39.2   | 64.2   | 50.0   | 44.0   |
| 212859_x_at | BF217861  | MT1E                   | 4493        | 65.2   | 50.5   | 73.6   | 41.9   | 42.3   |
| 212860_at   | BG168720  | ZDHHC18                | 84243       | 37.1   | 31.1   | 32.6   | 29.2   | 23.5   |
| 212861_at   | BF690150  | MFSD5                  | 84975       | 122.0  | 111.8  | 147.6  | 127.5  | 110.3  |
| 212862_at   | AL568982  | CDS2                   | 8760        | 74.2   | 77.9   | 82.7   | 73.2   | 58.8   |
| 212863_x_at | BF337195  | CTBP1                  | 1487        | 589.5  | 547.1  | 628.5  | 586.7  | 518.3  |
| 212864_at   | Y16521    | CDS2                   | 8760        | 53.2   | 64.2   | 63.8   | 56.5   | 56.8   |
| 212865_s_at | BF449063  | COL14A1                | 7373        | 6.0    | 2.7    | 1.9    | 1.8    | 2.9    |
| 212866_at   | AI081543  | R3HCC1                 | 203069      | 166.2  | 147.6  | 140.5  | 139.0  | 131.2  |
| 212867_at   | AI040324  | NCOA2                  | 10499       | 136.8  | 122.7  | 123.3  | 141.9  | 91.5   |
| 212868_x_at | NM_003668 | MAPKAPK5- <del>1</del> | 51275       | 4.5    | 6.8    | 7.2    | 19.3   | 8.3    |
| 212869_x_at | AI721229  | LOC1019288.7           | 178 /// 101 | 3529.0 | 3367.8 | 3696.1 | 3369.3 | 3193.9 |
| 212870_at   | AI628605  | SOS2                   | 6655        | 48.0   | 35.1   | 35.8   | 43.3   | 28.9   |
| 212871_at   | NM_003668 | MAPKAPK5               | 8550        | 69.4   | 53.4   | 75.3   | 62.1   | 57.4   |
| 212872_s_at | AK023092  | MED20                  | 9477        | 61.4   | 55.0   | 53.7   | 60.3   | 54.5   |
| 212873_at   | BE349017  | HMHA1                  | 23526       | 44.5   | 30.2   | 45.8   | 36.9   | 30.2   |
| 212874_at   | AI358867  | -                      | -           | 1.0    | 0.4    | 1.0    | 0.4    | 0.3    |
| 212875_s_at | AP001745  | C2CD2                  | 25966       | 56.8   | 51.2   | 59.7   | 48.7   | 41.8   |
| 212876_at   | BF223021  | B4GALT4                | 8702        | 32.0   | 24.6   | 34.3   | 31.7   | 26.2   |
| 212877_at   | AA284075  | KLC1                   | 3831        | 49.7   | 51.5   | 44.2   | 45.3   | 43.7   |
| 212878_s_at | AA284075  | KLC1                   | 3831        | 83.5   | 85.0   | 92.5   | 100.3  | 69.9   |
| 212879_x_at | NM_015897 | PIAS4                  | 51588       | 28.3   | 23.5   | 24.3   | 27.6   | 18.9   |
| 212880_at   | AB011113  | WDR7                   | 23335       | 48.5   | 54.4   | 56.7   | 61.4   | 51.3   |
| 212881_at   | AK022481  | PIAS4                  | 51588       | 42.8   | 30.3   | 27.8   | 25.9   | 30.3   |
| 212882_at   | AB018338  | KLHL18                 | 23276       | 71.9   | 53.9   | 68.9   | 60.1   | 52.6   |
| 212883_at   | AI358867  | -                      | -           | 3.9    | 1.2    | 5.9    | 1.1    | 1.4    |
| 212884_x_at | AI358867  | APOE                   | 348         | 17.2   | 26.5   | 34.6   | 21.9   | 18.6   |
| 212885_at   | AL545921  | MPHOSPH10              | 10199       | 55.2   | 36.7   | 63.2   | 36.6   | 51.0   |
| 212886_at   | AL080169  | CCDC69                 | 26112       | 6.8    | 7.9    | 5.7    | 6.8    | 7.9    |
| 212887_at   | AI753659  | SEC23A                 | 10484       | 260.1  | 213.7  | 253.3  | 224.2  | 199.5  |
| 212888_at   | BG109746  | DICER1                 | 23405       | 47.3   | 34.2   | 44.6   | 38.1   | 35.4   |
| 212889_x_at | BF303939  | GADD45GIP1             | 90480       | 1.3    | 4.0    | 6.4    | 1.6    | 0.9    |
| 212890_at   | BF663461  | SLC38A10               | 124565      | 101.4  | 143.0  | 104.5  | 112.8  | 83.4   |
| 212891_s_at | BF972185  | GADD45GIP1             | 90480       | 163.6  | 164.3  | 217.5  | 201.4  | 188.6  |
| 212892_at   | AW130128  | ZNF282                 | 8427        | 50.8   | 69.3   | 76.8   | 80.7   | 50.5   |
| 212893_at   | AL080063  | ZZZ3                   | 26009       | 91.8   | 87.8   | 107.1  | 65.2   | 56.7   |
| 212894_at   | NM_003171 | SUPV3L1                | 6832        | 116.0  | 102.0  | 125.6  | 109.3  | 112.2  |
| 212895_s_at | AL527773  | ABR                    | 29          | 114.4  | 93.7   | 96.6   | 108.9  | 66.9   |
| 212896_at   | D29641    | SKIV2L2                | 23517       | 157.8  | 111.6  | 154.8  | 125.0  | 133.9  |
| 212897_at   | AI738802  | CDK19                  | 23097       | 109.3  | 126.6  | 108.2  | 106.2  | 83.3   |
| 212898_at   | AB007866  | TTI1                   | 9675        | 86.8   | 52.4   | 84.4   | 81.2   | 73.6   |
| 212899_at   | AB028951  | CDK19                  | 23097       | 204.4  | 240.1  | 223.2  | 205.6  | 182.4  |
| 212900_at   | AJ131244  | SEC24A                 | 10802       | 95.6   | 68.0   | 87.8   | 73.9   | 69.0   |
| 212901_s_at | BF732638  | CSTF2T                 | 23283       | 104.6  | 62.6   | 86.9   | 84.2   | 62.4   |
| 212902_at   | BE645231  | SEC24A                 | 10802       | 62.4   | 52.5   | 53.1   | 55.6   | 53.2   |
| 212904_at   | AB033011  | LRRC47                 | 57470       | 533.6  | 526.9  | 612.1  | 560.9  | 517.1  |
| 212905_at   | AI872408  | CSTF2T                 | 23283       | 79.7   | 65.8   | 81.5   | 70.7   | 68.6   |
| 212906_at   | BE044440  | GRAMD1B                | 57476       | 9.9    | 6.3    | 11.9   | 2.0    | 13.6   |
| 212907_at   | AI972416  | SLC30A1                | 7779        | 44.5   | 30.9   | 33.9   | 34.5   | 21.8   |
| 212908_at   | AK022530  | DNAJC16                | 23341       | 28.3   | 27.8   | 23.2   | 20.5   | 25.7   |
| 212909_at   | AL567376  | LYPD1                  | 116372      | 0.5    | 3.5    | 3.5    | 0.8    | 1.1    |
| 212910_at   | W19873    | THAP11                 | 57215       | 102.5  | 91.1   | 111.7  | 87.1   | 89.0   |
| 212911_at   | AB023179  | DNAJC16                | 23341       | 22.7   | 14.9   | 23.9   | 20.6   | 18.3   |



|             |          |               |                 |        |        |        |        |        |
|-------------|----------|---------------|-----------------|--------|--------|--------|--------|--------|
| 212912_at   | AI992251 | RPS6KA2       | 6196            | 73.9   | 57.1   | 58.2   | 64.3   | 34.0   |
| 212913_at   | BE674960 | MSH5-SAPCC    | 401251 /// 1    | 11.2   | 13.2   | 26.1   | 7.7    | 11.7   |
| 212914_at   | AV648364 | CBX7          | 23492           | 35.6   | 33.8   | 34.1   | 44.4   | 32.2   |
| 212915_at   | AL569804 | PDZRN3        | 23024           | 18.9   | 18.2   | 21.2   | 24.2   | 17.0   |
| 212916_at   | AW249934 | PHF8          | 23133           | 43.6   | 37.3   | 64.6   | 54.3   | 46.9   |
| 212917_x_at | AI814728 | RECQL         | 5965            | 39.6   | 27.9   | 46.7   | 39.1   | 33.0   |
| 212918_at   | AI962943 | RECQL         | 5965            | 66.2   | 43.1   | 63.4   | 41.6   | 41.8   |
| 212919_at   | AV715578 | DCP2          | 167227          | 169.1  | 125.1  | 170.2  | 152.9  | 145.2  |
| 212920_at   | AV682285 | REST          | 5978            | 72.9   | 55.4   | 74.0   | 53.8   | 52.9   |
| 212921_at   | AF070592 | SMYD2         | 56950           | 3.0    | 4.1    | 5.1    | 0.8    | 4.0    |
| 212922_s_at | AI809870 | SMYD2         | 56950           | 31.5   | 33.2   | 32.0   | 22.4   | 24.6   |
| 212923_s_at | AK024828 | PXDC1         | 221749          | 4.8    | 4.3    | 7.0    | 5.2    | 7.0    |
| 212924_s_at | N37057   | LSM4          | 25804           | 9.4    | 2.0    | 2.0    | 4.3    | 14.6   |
| 212925_at   | AA143765 | MISP          | 126353          | 10.1   | 8.1    | 22.5   | 17.2   | 6.4    |
| 212926_at   | AW183677 | SMC5          | 23137           | 36.1   | 27.0   | 39.8   | 32.8   | 29.5   |
| 212927_at   | AB011166 | SMC5          | 23137           | 44.6   | 23.7   | 34.4   | 21.5   | 30.3   |
| 212928_at   | AL050331 | TSPYL4        | 23270           | 298.9  | 284.8  | 295.4  | 283.1  | 188.6  |
| 212929_s_at | W68158   | FAM21A ///    | 1253725 /// 3   | 42.1   | 52.4   | 63.5   | 57.1   | 44.7   |
| 212930_at   | AW576457 | ATP2B1        | 490             | 35.4   | 44.8   | 38.1   | 37.5   | 22.0   |
| 212931_at   | AB006630 | TCF20         | 6942            | 50.3   | 43.1   | 51.4   | 32.0   | 36.7   |
| 212932_at   | AK022494 | RAB3GAP1      | 22930           | 34.0   | 14.0   | 30.1   | 26.8   | 26.9   |
| 212933_x_at | AA961748 | RPL13 ///     | SN 6137 /// 606 | 2180.0 | 2169.8 | 2358.4 | 2389.9 | 2039.7 |
| 212934_at   | AI245523 | UBXN2B        | 137886          | 51.3   | 33.4   | 52.1   | 61.4   | 55.2   |
| 212935_at   | AB002360 | MCF2L         | 23263           | 6.3    | 2.9    | 5.6    | 15.0   | 2.5    |
| 212936_at   | AI927701 | FAM172A       | 83989           | 61.8   | 56.3   | 57.5   | 51.1   | 47.0   |
| 212937_s_at | M20776   | COL6A1        | 1291            | 17.6   | 4.5    | 14.7   | 19.1   | 8.4    |
| 212938_at   | M20776   | COL6A1        | 1291            | 20.5   | 14.0   | 19.6   | 9.4    | 8.2    |
| 212939_at   | M20776   | COL6A1        | 1291            | 1.6    | 0.6    | 0.9    | 0.9    | 1.2    |
| 212940_at   | BE350145 | COL6A1        | 1291            | 11.1   | 4.1    | 3.2    | 4.1    | 7.8    |
| 212942_s_at | AB033025 | CEMIP         | 57214           | 7.9    | 1.9    | 5.7    | 4.1    | 2.7    |
| 212943_at   | AB011100 | C2CD5         | 9847            | 36.8   | 35.2   | 50.7   | 32.8   | 39.9   |
| 212944_at   | AK024896 | SLC5A3        | 6526            | 95.4   | 62.8   | 93.9   | 75.6   | 76.0   |
| 212945_s_at | BE502432 | MGA           | 23269           | 23.8   | 22.9   | 28.8   | 23.6   | 27.9   |
| 212946_at   | AK025432 | VWA8          | 23078           | 52.3   | 37.4   | 51.2   | 45.3   | 42.4   |
| 212947_at   | AL031685 | SLC9A8        | 23315           | 20.2   | 20.7   | 21.9   | 22.2   | 20.2   |
| 212948_at   | AB020716 | CAMTA2        | 23125           | 50.2   | 45.2   | 58.0   | 45.8   | 27.5   |
| 212949_at   | D38553   | NCAPH         | 23397           | 92.2   | 112.6  | 140.4  | 87.1   | 109.4  |
| 212950_at   | BF941499 | GPR116        | 221395          | 1.1    | 5.8    | 4.1    | 5.7    | 3.6    |
| 212951_at   | N95226   | GPR116        | 221395          | 2.0    | 1.1    | 0.8    | 1.2    | 3.2    |
| 212952_at   | AA910371 | CTC-425F1.4 - |                 | 176.6  | 150.5  | 167.9  | 146.0  | 130.5  |
| 212953_x_at | BE251303 | CALR          | 811             | 578.9  | 826.1  | 886.1  | 839.9  | 695.5  |
| 212954_at   | AF263541 | DYRK4         | 8798            | 58.6   | 59.9   | 61.5   | 68.4   | 40.3   |
| 212955_s_at | AL037557 | POLR2I        | 5438            | 693.3  | 658.4  | 849.1  | 827.4  | 689.2  |
| 212956_at   | AI348094 | TBC1D9        | 23158           | 138.0  | 136.7  | 132.7  | 135.7  | 120.1  |
| 212957_s_at | AU154785 | LINC01278     | 92249           | 59.1   | 74.4   | 63.1   | 74.7   | 53.1   |
| 212958_x_at | AI022882 | PAM           | 5066            | 23.2   | 14.7   | 25.7   | 21.6   | 14.7   |
| 212959_s_at | AK001821 | GNPTAB        | 79158           | 96.5   | 74.3   | 94.4   | 87.4   | 70.8   |
| 212960_at   | BE646554 | TBC1D9        | 23158           | 40.1   | 35.2   | 38.7   | 43.1   | 24.7   |
| 212961_x_at | L43578   | CXorf40B      | 541578          | 199.0  | 175.6  | 198.5  | 189.4  | 166.4  |
| 212962_at   | AK023573 | SYDE1         | 85360           | 1.1    | 0.9    | 1.3    | 0.6    | 0.5    |
| 212963_at   | BF968960 | TM2D1         | 83941           | 7.5    | 2.5    | 9.1    | 0.5    | 6.9    |
| 212964_at   | AI912206 | HIC2          | 23119           | 25.4   | 18.4   | 15.6   | 16.9   | 11.2   |
| 212965_at   | BE465318 | HIC2          | 23119           | 1.1    | 12.4   | 1.6    | 6.8    | 8.0    |

|             |           |                      |        |        |        |        |        |        |
|-------------|-----------|----------------------|--------|--------|--------|--------|--------|--------|
| 212966_at   | AL043112  | HIC2                 | 23119  | 18.6   | 15.1   | 14.3   | 13.9   | 10.3   |
| 212967_x_at | AW148801  | NAP1L1               | 4673   | 1378.1 | 1368.8 | 1519.0 | 1381.9 | 1290.0 |
| 212968_at   | BF940276  | RFNG                 | 5986   | 44.5   | 46.4   | 57.7   | 52.0   | 36.3   |
| 212969_x_at | BE222618  | EML3                 | 256364 | 55.7   | 51.3   | 48.5   | 60.8   | 38.8   |
| 212970_at   | AI694303  | APBB2                | 323    | 41.4   | 19.3   | 29.5   | 30.3   | 25.3   |
| 212971_at   | AI769685  | CARS                 | 833    | 495.7  | 519.5  | 506.1  | 514.5  | 420.6  |
| 212972_x_at | AL080130  | APBB2                | 323    | 14.4   | 8.6    | 11.0   | 10.5   | 3.2    |
| 212973_at   | AI692341  | RPIA                 | 22934  | 37.7   | 36.8   | 35.9   | 35.1   | 52.0   |
| 212974_at   | AI808958  | DENND3               | 22898  | 18.3   | 9.9    | 9.2    | 10.3   | 10.1   |
| 212975_at   | AB020677  | DENND3               | 22898  | 4.9    | 10.0   | 9.8    | 5.1    | 6.2    |
| 212976_at   | R41498    | LRR8B                | 23507  | 4.5    | 0.3    | 4.1    | 4.5    | 0.1    |
| 212977_at   | AI817041  | ACKR3                | 57007  | 374.6  | 353.0  | 305.8  | 362.1  | 236.4  |
| 212978_at   | AU146004  | LRR8B                | 23507  | 51.2   | 36.2   | 52.2   | 47.3   | 39.4   |
| 212979_s_at | AW293343  | FAM115A ///9747 ///  | 100    | 45.0   | 38.1   | 50.3   | 45.2   | 38.6   |
| 212980_at   | AL050376  | AHSA2                | 130872 | 1.9    | 0.3    | 2.1    | 7.1    | 1.2    |
| 212981_s_at | BF030508  | FAM115A ///9747 ///  | 100    | 172.7  | 110.2  | 159.6  | 125.7  | 103.1  |
| 212982_at   | AI621223  | ZDHHC17              | 23390  | 57.4   | 52.2   | 51.8   | 51.0   | 47.8   |
| 212983_at   | NM_005343 | HRAS                 | 3265   | 277.5  | 283.3  | 343.6  | 297.7  | 269.2  |
| 212984_at   | BE786164  | ATF2                 | 1386   | 38.1   | 24.6   | 32.8   | 36.3   | 32.7   |
| 212985_at   | BF115739  | APBB2                | 323    | 27.3   | 23.7   | 26.9   | 21.0   | 21.6   |
| 212986_s_at | BF112255  | TLK2                 | 11011  | 77.0   | 55.5   | 67.8   | 51.4   | 48.9   |
| 212987_at   | AL031178  | FBXO9                | 26268  | 289.5  | 247.4  | 271.8  | 285.8  | 191.9  |
| 212988_x_at | AL515810  | ACTB /// ACT160 ///  | 71     | 2765.3 | 2785.0 | 2965.6 | 2634.7 | 2641.3 |
| 212989_at   | AI377497  | SGMS1                | 259230 | 91.9   | 70.5   | 78.5   | 76.8   | 67.3   |
| 212990_at   | AB020717  | SYNJ1                | 8867   | 20.6   | 25.9   | 24.8   | 21.2   | 24.4   |
| 212991_at   | AL137520  | FBXO9                | 26268  | 6.5    | 7.1    | 6.7    | 8.7    | 5.9    |
| 212992_at   | AI935123  | AHNAK2               | 113146 | 10.5   | 9.3    | 8.2    | 5.7    | 8.6    |
| 212993_at   | AA114166  | NACC2                | 138151 | 94.6   | 97.9   | 86.4   | 96.1   | 47.8   |
| 212994_at   | BE543527  | THOC2                | 57187  | 44.6   | 27.1   | 48.6   | 33.7   | 23.9   |
| 212995_x_at | BG255188  | MZT2A /// M26227 /// | 80     | 622.6  | 578.0  | 645.3  | 639.4  | 542.5  |
| 212996_s_at | AI803485  | URB1                 | 9875   | 18.7   | 14.7   | 27.8   | 19.0   | 19.0   |
| 212997_s_at | AU151689  | TLK2                 | 11011  | 71.3   | 48.4   | 77.2   | 60.2   | 44.0   |
| 212998_x_at | AI583173  | HLA-DQB1 //3119 ///  | 101    | 22.6   | 19.0   | 12.4   | 17.8   | 11.6   |
| 212999_x_at | AW276186  | HLA-DQB1 //3119 ///  | 101    | 11.9   | 11.2   | 17.5   | 16.9   | 11.8   |
| 213000_at   | AP000693  | MORC3                | 23515  | 49.9   | 36.6   | 53.0   | 49.8   | 42.4   |
| 213001_at   | AF007150  | ANGPTL2              | 23452  | 18.5   | 5.2    | 15.7   | 7.5    | 7.6    |
| 213002_at   | AA770596  | MARCKS               | 4082   | 35.4   | 24.7   | 32.0   | 26.9   | 18.6   |
| 213003_s_at | BF061054  | SPIDR                | 23514  | 10.9   | 2.7    | 5.9    | 5.3    | 5.2    |
| 213004_at   | AI074333  | ANGPTL2              | 23452  | 7.5    | 6.3    | 8.4    | 5.8    | 2.9    |
| 213005_s_at | D79994    | KANK1                | 23189  | 11.8   | 8.2    | 1.5    | 7.1    | 5.0    |
| 213006_at   | AV655640  | CEBPD                | 1052   | 1.9    | 6.7    | 2.1    | 3.6    | 0.2    |
| 213007_at   | W74442    | FANCI                | 55215  | 210.0  | 153.2  | 218.5  | 171.7  | 180.3  |
| 213008_at   | BG403615  | FANCI                | 55215  | 109.1  | 93.1   | 145.9  | 88.9   | 119.3  |
| 213009_s_at | AK022701  | TRIM37               | 4591   | 110.7  | 91.9   | 115.6  | 103.8  | 88.9   |
| 213010_at   | AI088622  | PRKCDBP              | 112464 | 6.8    | 4.2    | 1.1    | 0.7    | 0.9    |
| 213011_s_at | BF116254  | TPI1                 | 7167   | 2093.8 | 1844.9 | 2152.7 | 1949.8 | 1766.3 |
| 213012_at   | D42055    | NEDD4                | 4734   | 18.2   | 14.8   | 20.6   | 11.4   | 10.7   |
| 213013_at   | BG164295  | LOC644172 / 9479 /// | 644    | 29.1   | 39.4   | 37.9   | 26.8   | 22.3   |
| 213014_at   | BG222394  | MAPK8IP1             | 9479   | 26.3   | 20.5   | 24.5   | 24.7   | 17.2   |
| 213015_at   | BF448315  | BBX                  | 56987  | 30.9   | 25.5   | 32.8   | 32.0   | 28.8   |
| 213016_at   | AA573805  | BBX                  | 56987  | 79.6   | 71.3   | 84.9   | 71.2   | 63.2   |
| 213017_at   | AL534702  | ABHD3                | 171586 | 132.4  | 73.1   | 171.3  | 84.4   | 121.1  |
| 213018_at   | AI337901  | GATAD1               | 57798  | 40.4   | 35.8   | 46.2   | 37.2   | 28.9   |

|             |           |               |              |       |       |        |        |       |
|-------------|-----------|---------------|--------------|-------|-------|--------|--------|-------|
| 213019_at   | AI123233  | RANBP6        | 26953        | 111.4 | 93.0  | 136.4  | 92.7   | 97.1  |
| 213020_at   | AI814252  | GOSR1         | 9527         | 39.9  | 36.4  | 41.4   | 30.0   | 24.7  |
| 213021_at   | AI741876  | GOSR1         | 9527         | 87.5  | 79.3  | 101.1  | 83.3   | 68.0  |
| 213022_s_at | NM_007124 | UTRN          | 7402         | 47.6  | 51.4  | 45.5   | 47.9   | 47.6  |
| 213023_at   | NM_007124 | UTRN          | 7402         | 24.2  | 21.2  | 24.5   | 21.4   | 25.5  |
| 213024_at   | BF593908  | TMF1          | 7110         | 26.6  | 16.1  | 21.6   | 21.1   | 17.2  |
| 213025_at   | AL134904  | THUMPD1       | 55623        | 103.0 | 77.4  | 113.2  | 85.8   | 94.3  |
| 213026_at   | BE965998  | ATG12         | 9140         | 68.6  | 61.0  | 74.2   | 50.4   | 52.7  |
| 213027_at   | AU146655  | AK022030 //,  | 6738         | 45.6  | 41.2  | 52.6   | 49.9   | 45.0  |
| 213028_at   | AI887378  | NFRKB         | 4798         | 78.8  | 67.5  | 67.9   | 73.0   | 49.7  |
| 213029_at   | BG478428  | NFIB          | 4781         | 41.2  | 34.0  | 30.9   | 33.5   | 27.2  |
| 213030_s_at | AI688418  | PLXNA2        | 5362         | 12.3  | 2.0   | 2.4    | 3.3    | 5.7   |
| 213031_s_at | AF161382  | WDR73         | 84942        | 134.0 | 123.7 | 153.3  | 142.3  | 121.0 |
| 213032_at   | AI186739  | NFIB          | 4781         | 16.2  | 15.1  | 21.7   | 18.8   | 17.4  |
| 213033_s_at | AI186739  | NFIB          | 4781         | 0.8   | 9.5   | 8.9    | 9.7    | 5.0   |
| 213034_at   | AB023216  | SIK3          | 23387        | 23.4  | 18.9  | 24.3   | 25.5   | 12.8  |
| 213035_at   | AI081194  | ANKRD28       | 23243        | 20.3  | 20.7  | 19.6   | 11.8   | 13.7  |
| 213036_x_at | Y15724    | ATP2A3        | 489          | 1.2   | 0.9   | 3.0    | 1.6    | 0.8   |
| 213037_x_at | AJ132258  | STAU1         | 6780         | 322.0 | 359.5 | 363.0  | 330.7  | 295.0 |
| 213038_at   | AL031602  | RNF19B        | 127544       | 43.5  | 60.9  | 53.9   | 57.7   | 36.0  |
| 213039_at   | AB011093  | ARHGEF18      | 23370        | 97.4  | 109.9 | 85.2   | 81.7   | 67.4  |
| 213040_s_at | AL008583  | NPTXR         | 23467        | 13.0  | 12.8  | 20.4   | 17.6   | 10.1  |
| 213041_s_at | BE798517  | ATP5D         | 513          | 922.7 | 972.6 | 1083.4 | 1110.2 | 929.8 |
| 213042_s_at | AA877910  | ATP2A3        | 489          | 0.8   | 1.1   | 1.0    | 6.0    | 1.2   |
| 213043_s_at | AI023317  | MED24 /// N   | 9862 /// 102 | 78.8  | 76.3  | 91.0   | 72.5   | 66.0  |
| 213044_at   | N22548    | ROCK1         | 6093         | 132.5 | 134.6 | 142.1  | 140.2  | 109.6 |
| 213045_at   | AB011133  | MAST3         | 23031        | 24.4  | 24.1  | 27.2   | 11.9   | 20.4  |
| 213046_at   | AI130920  | PABPN1        | 8106         | 46.4  | 35.9  | 47.0   | 41.6   | 35.8  |
| 213047_x_at | AI278616  | SET /// SETSI | 6418 /// 646 | 877.5 | 706.7 | 887.7  | 755.8  | 683.4 |
| 213048_s_at | W26593    | Y16709        | -            | 750.5 | 657.0 | 826.7  | 653.5  | 718.3 |
| 213049_at   | BG436400  | RALGAPA1      | 253959       | 72.9  | 61.0  | 71.4   | 69.1   | 55.8  |
| 213050_at   | AA594937  | COBL          | 23242        | 69.6  | 62.0  | 74.3   | 64.0   | 54.2  |
| 213051_at   | AI133727  | ZC3HAV1       | 56829        | 117.4 | 113.1 | 124.6  | 100.4  | 119.9 |
| 213052_at   | BF246917  | PRKAR2A       | 5576         | 236.5 | 195.0 | 260.7  | 221.0  | 211.4 |
| 213053_at   | AW189966  | HAUS5         | 23354        | 60.8  | 51.5  | 80.1   | 63.4   | 53.8  |
| 213054_at   | AA845355  | HAUS5         | 23354        | 15.0  | 16.7  | 19.0   | 13.5   | 15.3  |
| 213055_at   | BF693956  | CD47          | 961          | 26.5  | 16.4  | 12.8   | 7.2    | 12.5  |
| 213056_at   | AU145019  | FRMD4B        | 23150        | 9.3   | 7.3   | 14.0   | 11.5   | 5.3   |
| 213057_at   | AW118608  | ATPAF2        | 91647        | 55.1  | 65.5  | 77.9   | 71.4   | 69.7  |
| 213058_at   | AL033538  | TTC28         | 23331        | 7.0   | 3.0   | 6.8    | 8.3    | 11.5  |
| 213059_at   | AF055009  | CREB3L1       | 90993        | 2.3   | 2.0   | 2.3    | 6.4    | 2.6   |
| 213060_s_at | U58515    | CHI3L2        | 1117         | 12.3  | 9.0   | 10.9   | 11.0   | 10.0  |
| 213061_s_at | AA643304  | NTAN1         | 123803       | 101.5 | 61.9  | 76.1   | 68.5   | 73.5  |
| 213062_at   | AA643304  | NTAN1         | 123803       | 56.3  | 49.7  | 57.6   | 43.9   | 41.1  |
| 213063_at   | BF970253  | ZC3H14        | 79882        | 49.5  | 51.0  | 59.7   | 47.1   | 37.7  |
| 213064_at   | N64802    | ZC3H14        | 79882        | 144.2 | 98.0  | 128.0  | 128.6  | 120.1 |
| 213065_at   | AB011118  | ZFC3H1        | 196441       | 46.7  | 31.2  | 36.3   | 27.9   | 30.7  |
| 213066_at   | AB002373  | RUSC2         | 9853         | 2.2   | 1.3   | 4.3    | 4.4    | 2.6   |
| 213067_at   | AI382123  | MYH10         | 4628         | 44.6  | 47.7  | 51.0   | 42.4   | 36.0  |
| 213068_at   | AI146848  | DPT           | 1805         | 5.5   | 6.6   | 3.7    | 1.0    | 0.7   |
| 213069_at   | AI148659  | HEG1          | 57493        | 2.9   | 1.9   | 3.3    | 4.6    | 2.6   |
| 213070_at   | AV682436  | PIK3C2A       | 5286         | 122.8 | 98.7  | 126.3  | 106.2  | 102.9 |
| 213071_at   | AL049798  | DPT           | 1805         | 1.8   | 1.4   | 3.9    | 0.8    | 0.4   |

|             |          |                           |        |        |        |        |        |        |
|-------------|----------|---------------------------|--------|--------|--------|--------|--------|--------|
| 213072_at   | AI928387 | CYHR1                     | 50626  | 27.7   | 31.5   | 29.1   | 16.0   | 22.1   |
| 213073_at   | AB002319 | ZFYVE26                   | 23503  | 31.5   | 17.0   | 24.8   | 23.7   | 16.7   |
| 213074_at   | BG545769 | PHIP                      | 55023  | 68.1   | 63.7   | 66.0   | 54.6   | 61.2   |
| 213075_at   | AL050002 | OLFML2A                   | 169611 | 2.2    | 3.7    | 2.1    | 4.6    | 4.3    |
| 213076_at   | D38169   | ITPKC                     | 80271  | 46.7   | 24.6   | 33.6   | 32.8   | 19.1   |
| 213077_at   | AL049305 | YTHDC2                    | 64848  | 97.1   | 70.5   | 96.4   | 80.4   | 70.3   |
| 213078_x_at | AI889513 | LPCAT4                    | 254531 | 21.9   | 18.0   | 10.2   | 20.3   | 14.7   |
| 213079_at   | AA223871 | TSR2                      | 90121  | 144.9  | 130.4  | 158.6  | 170.4  | 126.4  |
| 213080_x_at | BF214492 | RPL5 /// SNC6083 /// 612  |        | 2405.7 | 2008.2 | 2497.4 | 2270.0 | 2049.3 |
| 213081_at   | AL523144 | ZBTB22                    | 9278   | 28.5   | 21.3   | 43.4   | 36.8   | 19.6   |
| 213082_s_at | AJ005866 | SLC35D2                   | 11046  | 27.9   | 25.6   | 34.5   | 39.3   | 21.6   |
| 213083_at   | AJ005866 | SLC35D2                   | 11046  | 60.8   | 55.4   | 66.2   | 74.2   | 53.2   |
| 213084_x_at | BF125158 | RPL23A /// S 6147 /// 268 |        | 4893.5 | 4573.8 | 4766.6 | 4624.0 | 4609.2 |
| 213085_s_at | AB020676 | WWC1                      | 23286  | 78.6   | 68.4   | 92.7   | 74.1   | 80.7   |
| 213086_s_at | BF341845 | CSNK1A1                   | 1452   | 420.4  | 427.0  | 469.3  | 419.7  | 365.2  |
| 213087_s_at | BF690020 | EEF1D                     | 1936   | 16.0   | 22.5   | 21.8   | 11.8   | 18.1   |
| 213088_s_at | BE551340 | DNAJC9                    | 23234  | 317.1  | 237.6  | 425.8  | 284.7  | 293.0  |
| 213089_at   | AU158490 | LOC1002722 100272216      |        | 34.7   | 41.3   | 35.2   | 28.2   | 25.5   |
| 213090_s_at | AI744029 | TAF4                      | 6874   | 60.1   | 45.3   | 62.6   | 49.2   | 50.1   |
| 213091_at   | AB014516 | CRTC1                     | 23373  | 5.1    | 3.5    | 4.8    | 4.1    | 4.5    |
| 213092_x_at | AW241779 | DNAJC9                    | 23234  | 64.0   | 57.5   | 70.3   | 68.0   | 52.6   |
| 213093_at   | AI471375 | PRKCA                     | 5578   | 25.4   | 19.4   | 17.1   | 19.9   | 16.4   |
| 213094_at   | AL033377 | GPR126                    | 57211  | 399.0  | 447.0  | 367.8  | 395.3  | 275.7  |
| 213095_x_at | AF299327 | AIF1                      | 199    | 1.2    | 1.1    | 1.1    | 0.9    | 1.0    |
| 213096_at   | T51252   | TMCC2                     | 9911   | 22.8   | 9.0    | 9.5    | 14.2   | 12.4   |
| 213097_s_at | AI338837 | DNAJC2                    | 27000  | 101.3  | 67.8   | 126.9  | 104.0  | 93.9   |
| 213098_at   | AI567462 | RQCD1                     | 9125   | 66.2   | 54.5   | 88.3   | 53.9   | 62.7   |
| 213099_at   | AB018302 | ANGEL1                    | 23357  | 61.7   | 63.2   | 82.5   | 64.7   | 58.2   |
| 213100_at   | AA127885 | UNC5B                     | 219699 | 4.1    | 5.1    | 10.0   | 10.8   | 3.3    |
| 213101_s_at | Z78330   | ACTR3                     | 10096  | 741.3  | 708.6  | 886.3  | 679.5  | 772.3  |
| 213102_at   | Z78330   | ACTR3                     | 10096  | 299.1  | 204.4  | 306.1  | 229.9  | 250.5  |
| 213103_at   | AA128023 | STARD13                   | 90627  | 20.1   | 9.7    | 5.3    | 11.4   | 8.7    |
| 213104_at   | AI799802 | TSR3                      | 115939 | 103.7  | 114.4  | 115.8  | 110.1  | 99.1   |
| 213105_s_at | AI799802 | TSR3                      | 115939 | 102.9  | 90.7   | 106.6  | 107.3  | 96.4   |
| 213106_at   | AI769688 | ATP8A1                    | 10396  | 10.9   | 9.5    | 10.7   | 9.6    | 6.0    |
| 213107_at   | R59093   | TNIK                      | 23043  | 21.6   | 10.1   | 12.0   | 10.1   | 4.7    |
| 213108_at   | AW131813 | CAMK2A                    | 815    | 1.2    | 7.9    | 4.5    | 6.9    | 12.8   |
| 213109_at   | N25621   | TNIK                      | 23043  | 12.8   | 4.9    | 11.8   | 6.6    | 6.0    |
| 213110_s_at | AW052179 | COL4A5                    | 1287   | 63.2   | 54.3   | 67.9   | 53.1   | 56.8   |
| 213111_at   | AB023198 | PIKFYVE                   | 200576 | 27.5   | 25.8   | 27.3   | 31.0   | 22.7   |
| 213112_s_at | N30649   | SQSTM1                    | 8878   | 5.6    | 11.0   | 3.3    | 9.6    | 10.9   |
| 213113_s_at | AI630178 | SLC43A3                   | 29015  | 9.7    | 10.0   | 11.9   | 3.9    | 4.6    |
| 213114_at   | AI818736 | -                         | -      | 10.2   | 11.7   | 17.8   | 16.9   | 17.3   |
| 213115_at   | AL031177 | ATG4A                     | 115201 | 61.1   | 55.6   | 75.0   | 57.7   | 56.0   |
| 213116_at   | AI191920 | NEK3                      | 4752   | 3.5    | 4.1    | 4.4    | 5.2    | 0.4    |
| 213117_at   | AW138594 | KLHL9                     | 55958  | 84.0   | 74.0   | 77.8   | 86.5   | 61.6   |
| 213118_at   | AL136821 | UHRF1BP1L 23074           |        | 45.7   | 39.3   | 51.3   | 45.7   | 35.8   |
| 213119_at   | AW058600 | SLC36A1 206358            |        | 28.9   | 19.7   | 18.5   | 19.5   | 17.4   |
| 213120_at   | AA405798 | UHRF1BP1L 23074           |        | 3.2    | 3.2    | 5.0    | 5.7    | 5.8    |
| 213121_at   | W67744   | SNRNP70 6625              |        | 3.8    | 1.6    | 1.2    | 2.1    | 0.8    |
| 213122_at   | AI096375 | TSPYL5 85453              |        | 4.1    | 7.2    | 0.1    | 6.0    | 3.1    |
| 213123_at   | BE222709 | MFAP3 4238                |        | 103.0  | 101.4  | 117.0  | 82.4   | 100.5  |
| 213124_at   | BG538800 | ZNF473 25888              |        | 41.5   | 37.3   | 33.2   | 28.7   | 31.9   |

|             |          |                          |        |        |        |        |        |        |
|-------------|----------|--------------------------|--------|--------|--------|--------|--------|--------|
| 213125_at   | AW007573 | OLFML2B                  | 25903  | 8.8    | 6.0    | 6.2    | 4.4    | 5.0    |
| 213126_at   | BG230758 | MED8                     | 112950 | 56.8   | 48.9   | 74.1   | 56.9   | 43.2   |
| 213127_s_at | BG230758 | MED8                     | 112950 | 80.6   | 78.2   | 80.3   | 70.1   | 57.3   |
| 213128_s_at | AA527499 | UBE3A                    | 7337   | 158.5  | 140.0  | 168.3  | 132.2  | 126.3  |
| 213129_s_at | AI970157 | GCSH /// LOC2653 /// 101 |        | 824.4  | 616.1  | 884.3  | 656.3  | 688.1  |
| 213130_at   | AB032967 | ZNF473                   | 25888  | 24.1   | 20.3   | 27.2   | 26.5   | 20.6   |
| 213131_at   | R38389   | OLFM1                    | 10439  | 2.7    | 0.7    | 0.3    | 0.5    | 2.4    |
| 213132_s_at | AL022237 | MCAT                     | 27349  | 174.5  | 134.2  | 184.2  | 146.7  | 150.5  |
| 213133_s_at | AW237404 | GCSH /// LOC2653 /// 101 |        | 740.8  | 525.3  | 722.2  | 602.9  | 566.6  |
| 213134_x_at | AI765445 | BTG3                     | 10950  | 297.4  | 266.3  | 328.1  | 237.0  | 254.1  |
| 213135_at   | U90902   | TIAM1                    | 7074   | 6.1    | 7.4    | 2.9    | 2.2    | 0.5    |
| 213136_at   | AI828880 | PTPN2                    | 5771   | 94.5   | 74.0   | 98.0   | 80.2   | 75.0   |
| 213137_s_at | AI828880 | PTPN2                    | 5771   | 60.4   | 33.2   | 58.7   | 63.5   | 55.5   |
| 213138_at   | M62324   | ARID5A                   | 10865  | 28.5   | 22.2   | 21.6   | 19.2   | 23.3   |
| 213139_at   | AI572079 | SNAI2                    | 6591   | 3.5    | 3.8    | 2.6    | 4.1    | 5.5    |
| 213140_s_at | AB014593 | SS18L1                   | 26039  | 70.0   | 53.2   | 57.4   | 55.1   | 37.5   |
| 213141_at   | AJ272212 | PSKH1                    | 5681   | 68.1   | 97.2   | 82.4   | 62.4   | 61.5   |
| 213142_x_at | AV700415 | GSAP                     | 54103  | 5.5    | 5.8    | 7.0    | 3.3    | 3.4    |
| 213143_at   | BE856707 | C2orf72                  | 257407 | 10.7   | 14.4   | 15.2   | 12.7   | 21.6   |
| 213144_at   | AI074611 | GOSR2                    | 9570   | 40.8   | 28.8   | 35.1   | 34.0   | 27.7   |
| 213145_at   | BF001666 | FBXL14                   | 144699 | 105.5  | 96.9   | 127.9  | 99.3   | 107.0  |
| 213146_at   | AA521267 | KDM6B                    | 23135  | 28.1   | 26.1   | 20.4   | 30.7   | 17.5   |
| 213147_at   | AI375919 | HOXA10                   | 3206   | 20.0   | 32.7   | 31.0   | 31.6   | 20.1   |
| 213148_at   | AW156899 | C2orf72                  | 257407 | 2.3    | 2.5    | 18.8   | 11.1   | 16.7   |
| 213149_at   | AW299740 | DLAT                     | 1737   | 179.5  | 123.5  | 231.4  | 128.2  | 154.8  |
| 213150_at   | BF792917 | HOXA10                   | 3206   | 61.0   | 40.7   | 53.5   | 51.5   | 30.9   |
| 213151_s_at | AU157515 | SEPT7                    | 989    | 287.0  | 236.9  | 285.5  | 256.6  | 225.1  |
| 213152_s_at | AI343248 | SRSF8                    | 10929  | 181.1  | 186.4  | 202.1  | 181.1  | 186.4  |
| 213153_at   | AB028999 | SETD1B                   | 23067  | 86.8   | 97.5   | 80.6   | 110.8  | 60.1   |
| 213154_s_at | AI934125 | BICD2                    | 23299  | 52.3   | 37.6   | 65.2   | 44.6   | 49.6   |
| 213155_at   | AB011095 | LOC339166 / 23302 /// 33 |        | 0.6    | 0.6    | 0.6    | 0.7    | 0.7    |
| 213156_at   | BG251521 | ZBTB20                   | 26137  | 7.3    | 4.3    | 3.7    | 7.3    | 1.3    |
| 213157_s_at | BF115148 | LOC339166 / 23302 /// 33 |        | 4.1    | 3.7    | 14.1   | 0.6    | 1.4    |
| 213158_at   | AA045174 | ZBTB20                   | 26137  | 7.5    | 6.5    | 4.6    | 8.1    | 3.5    |
| 213159_at   | AB018348 | PCNX                     | 22990  | 11.9   | 14.1   | 8.7    | 11.7   | 9.5    |
| 213160_at   | D86964   | DOCK2                    | 1794   | 1.0    | 0.8    | 0.9    | 0.7    | 0.6    |
| 213161_at   | AI583393 | TMOD1 /// T 7111 /// 158 |        | 85.8   | 81.5   | 93.6   | 74.8   | 68.4   |
| 213162_at   | AI640861 | DYNC1LI2                 | 1783   | 10.6   | 2.5    | 9.0    | 8.2    | 3.7    |
| 213164_at   | AI867198 | SLC5A3                   | 6526   | 69.8   | 57.4   | 69.6   | 57.6   | 54.9   |
| 213165_at   | AI041204 | CEP350                   | 9857   | 45.2   | 24.7   | 38.1   | 28.0   | 29.7   |
| 213166_x_at | BG332462 | MIR4784 /// 80097 /// 65 |        | 523.2  | 548.2  | 580.9  | 584.1  | 494.4  |
| 213167_s_at | BF982927 | SLC5A3                   | 6526   | 16.3   | 26.6   | 19.2   | 13.0   | 17.3   |
| 213168_at   | AU145005 | SP3                      | 6670   | 165.2  | 131.1  | 184.1  | 134.4  | 122.7  |
| 213169_at   | BG109855 | SEMA5A                   | 9037   | 5.7    | 3.6    | 3.5    | 13.5   | 3.3    |
| 213170_at   | AA406605 | GPX7                     | 2882   | 0.8    | 4.7    | 8.4    | 0.5    | 0.2    |
| 213171_s_at | AL121753 | MMP24                    | 10893  | 1.2    | 9.6    | 0.8    | 2.8    | 1.8    |
| 213172_at   | AW235608 | TTC9                     | 23508  | 2.7    | 1.0    | 5.0    | 2.4    | 2.7    |
| 213173_at   | AI815033 | PCNX                     | 22990  | 13.6   | 11.4   | 13.8   | 16.1   | 15.8   |
| 213174_at   | BE675549 | TTC9                     | 23508  | 0.8    | 14.7   | 10.1   | 8.2    | 1.3    |
| 213175_s_at | AL049650 | SNRPB                    | 6628   | 1530.6 | 1315.2 | 1605.7 | 1440.5 | 1349.9 |
| 213176_s_at | AI910869 | LTBP4                    | 8425   | 4.7    | 3.1    | 6.7    | 3.1    | 2.0    |
| 213177_at   | AB028989 | MAPK8IP3                 | 23162  | 1.8    | 6.6    | 1.0    | 3.6    | 3.5    |
| 213178_s_at | AB028989 | MAPK8IP3                 | 23162  | 30.6   | 24.3   | 27.0   | 27.4   | 12.1   |

|             |          |                           |        |        |        |        |        |        |
|-------------|----------|---------------------------|--------|--------|--------|--------|--------|--------|
| 213179_at   | BG289914 | RQCD1                     | 9125   | 223.1  | 176.3  | 217.0  | 192.6  | 186.1  |
| 213180_s_at | BE895285 | GOSR2                     | 9570   | 36.5   | 37.1   | 41.8   | 39.0   | 29.9   |
| 213181_s_at | AL583528 | MOCS1                     | 4337   | 24.3   | 22.0   | 30.9   | 19.7   | 30.3   |
| 213182_x_at | R78668   | CDKN1C                    | 1028   | 0.9    | 1.0    | 0.7    | 0.9    | 0.4    |
| 213183_s_at | N95363   | -                         | -      | 2.1    | 10.8   | 0.8    | 1.0    | 1.2    |
| 213184_at   | N48361   | SENP5                     | 205564 | 48.8   | 32.1   | 42.2   | 37.1   | 39.8   |
| 213185_at   | AI758896 | KIAA0556                  | 23247  | 74.2   | 66.2   | 69.3   | 66.2   | 52.4   |
| 213186_at   | BG502305 | DZIP3                     | 9666   | 20.7   | 24.8   | 20.9   | 25.3   | 11.1   |
| 213187_x_at | BG538564 | FTL                       | 2512   | 749.9  | 834.9  | 872.5  | 964.4  | 657.4  |
| 213188_s_at | AI823896 | MINA                      | 84864  | 133.6  | 100.4  | 132.6  | 104.2  | 103.1  |
| 213189_at   | BE966695 | MINA                      | 84864  | 153.9  | 121.9  | 173.2  | 147.8  | 99.3   |
| 213190_at   | R61519   | COG7                      | 91949  | 33.3   | 26.8   | 33.9   | 38.0   | 31.9   |
| 213191_at   | AF070530 | TICAM1                    | 148022 | 27.3   | 10.5   | 22.1   | 17.2   | 19.7   |
| 213192_at   | AL031447 | THAP3                     | 90326  | 18.3   | 24.6   | 23.6   | 23.8   | 19.3   |
| 213193_x_at | AL559122 | TRBC1                     | 28639  | 19.4   | 10.3   | 14.6   | 13.6   | 12.0   |
| 213194_at   | BF059159 | ROBO1                     | 6091   | 21.0   | 15.4   | 17.1   | 34.0   | 16.4   |
| 213195_at   | AI625844 | LYRM9                     | 201229 | 27.3   | 22.7   | 20.7   | 23.5   | 20.0   |
| 213196_at   | AI924293 | ZNF629                    | 23361  | 40.6   | 31.8   | 26.3   | 39.4   | 16.5   |
| 213197_at   | AB006627 | ASTN1                     | 460    | 0.9    | 1.4    | 3.3    | 3.7    | 0.2    |
| 213198_at   | AL117643 | ACVR1B                    | 91     | 129.3  | 131.3  | 110.8  | 119.4  | 99.9   |
| 213199_at   | AL080220 | C2CD3                     | 26005  | 51.0   | 35.1   | 45.4   | 42.0   | 33.8   |
| 213200_at   | U93305   | SYP                       | 6855   | 2.5    | 3.0    | 7.0    | 2.2    | 1.1    |
| 213201_s_at | AJ011712 | TNNT1                     | 7138   | 1.0    | 0.6    | 0.5    | 0.7    | 0.5    |
| 213202_at   | N30342   | SETD1A                    | 9739   | 12.9   | 11.7   | 22.8   | 2.7    | 12.6   |
| 213203_at   | AI633709 | SNAPC5                    | 10302  | 155.8  | 130.3  | 186.9  | 147.3  | 130.3  |
| 213204_at   | AB014608 | CUL9                      | 23113  | 15.7   | 12.1   | 17.3   | 18.4   | 13.8   |
| 213205_s_at | AU159543 | RAD54L2                   | 23132  | 6.3    | 22.1   | 4.5    | 17.5   | 14.0   |
| 213206_at   | AW149492 | GOSR2                     | 9570   | 23.0   | 17.3   | 20.2   | 20.9   | 14.6   |
| 213207_s_at | AW149492 | GOSR2                     | 9570   | 23.1   | 27.1   | 34.3   | 28.2   | 28.8   |
| 213208_at   | AI801951 | GLTSCR1L                  | 23506  | 43.4   | 33.8   | 43.5   | 51.2   | 32.0   |
| 213209_at   | BF058726 | TAF6L                     | 10629  | 56.7   | 43.0   | 55.2   | 50.3   | 49.2   |
| 213210_at   | AI005317 | TAF6L                     | 10629  | 26.0   | 16.2   | 27.7   | 16.4   | 10.5   |
| 213211_s_at | AI005317 | TAF6L                     | 10629  | 31.2   | 30.0   | 30.4   | 40.3   | 32.2   |
| 213212_x_at | AI632181 | GOLGA6L4 // 374650 /// 4  |        | 45.5   | 27.5   | 34.3   | 29.1   | 22.3   |
| 213213_at   | AL035669 | DIDO1                     | 11083  | 16.0   | 11.9   | 14.8   | 8.6    | 11.5   |
| 213214_x_at | AW190090 | ACTB /// AC160 /// 71     |        | 2922.8 | 2966.1 | 3161.7 | 2937.3 | 2832.4 |
| 213215_at   | AI910895 | AP3S2 /// C1 10239 /// 10 |        | 105.6  | 85.5   | 93.4   | 99.7   | 60.6   |
| 213216_at   | AL537463 | OTUD3                     | 23252  | 16.1   | 11.1   | 19.0   | 15.0   | 17.4   |
| 213217_at   | AU149572 | ADCY2                     | 108    | 2.3    | 1.2    | 1.8    | 1.5    | 1.5    |
| 213218_at   | AV705032 | ZSCAN26                   | 7741   | 16.8   | 22.8   | 11.7   | 22.9   | 13.5   |
| 213219_at   | AB028983 | ADCY2                     | 108    | 5.1    | 2.9    | 6.5    | 4.7    | 3.5    |
| 213220_at   | AV706096 | BBIP1                     | 92482  | 119.0  | 121.6  | 139.4  | 108.2  | 81.8   |
| 213221_s_at | AB018324 | SIK2                      | 23235  | 41.7   | 32.0   | 33.2   | 27.1   | 32.7   |
| 213222_at   | AL049593 | PLCB1                     | 23236  | 8.1    | 10.0   | 8.8    | 8.8    | 6.3    |
| 213223_at   | AK025866 | MIR6805 /// 6158 /// 102  |        | 106.8  | 94.7   | 103.3  | 86.5   | 73.2   |
| 213224_s_at | AK025724 | BBIP1                     | 92482  | 44.6   | 36.5   | 34.3   | 39.6   | 29.8   |
| 213225_at   | AJ271832 | PPM1B                     | 5495   | 23.7   | 23.1   | 23.3   | 21.2   | 24.8   |
| 213226_at   | AI346350 | CCNA2                     | 890    | 212.3  | 143.2  | 252.5  | 157.2  | 190.4  |
| 213227_at   | BE879873 | PGRMC2                    | 10424  | 66.7   | 86.2   | 78.1   | 88.3   | 70.5   |
| 213228_at   | AK023913 | PDE8B                     | 8622   | 14.5   | 5.3    | 10.1   | 9.9    | 9.4    |
| 213229_at   | BF590131 | DICER1                    | 23405  | 46.5   | 40.4   | 46.7   | 53.6   | 39.1   |
| 213230_at   | AI422335 | CDR2L                     | 30850  | 53.5   | 57.5   | 55.5   | 76.5   | 64.9   |
| 213231_at   | L19267   | DMWD                      | 1762   | 8.9    | 6.6    | 2.1    | 1.7    | 2.5    |

|             |           |            |              |       |       |       |       |       |
|-------------|-----------|------------|--------------|-------|-------|-------|-------|-------|
| 213232_at   | AB040900  | KIAA1467   | 57613        | 15.3  | 1.5   | 2.5   | 5.2   | 0.9   |
| 213233_s_at | AA460694  | KLHL9      | 55958        | 168.6 | 175.3 | 173.1 | 166.0 | 151.3 |
| 213234_at   | AB040900  | KIAA1467   | 57613        | 51.9  | 49.1  | 64.5  | 46.8  | 44.5  |
| 213235_at   | BE504197  | KNOP1      | 400506       | 50.1  | 39.2  | 53.0  | 44.4  | 59.8  |
| 213236_at   | AK025495  | SASH1      | 23328        | 28.3  | 23.5  | 30.6  | 31.5  | 24.5  |
| 213237_at   | AI652058  | KNOP1      | 400506       | 115.5 | 88.6  | 136.6 | 104.2 | 97.3  |
| 213238_at   | AI478147  | ATP10D     | 57205        | 7.1   | 4.2   | 5.2   | 7.3   | 3.5   |
| 213239_at   | NM_006346 | PIBF1      | 10464        | 5.5   | 3.2   | 7.5   | 5.6   | 3.0   |
| 213240_s_at | X07695    | KRT4       | 3851         | 1.5   | 0.8   | 3.3   | 2.5   | 1.8   |
| 213241_at   | AF035307  | PLXNC1     | 10154        | 6.0   | 2.4   | 2.0   | 3.2   | 4.0   |
| 213242_x_at | AB006622  | CEP170B    | 283638       | 89.3  | 63.9  | 68.5  | 63.4  | 53.3  |
| 213243_at   | AI052003  | VPS13B     | 157680       | 21.6  | 14.9  | 12.1  | 19.6  | 17.6  |
| 213244_at   | AI207792  | SCAMP4     | 113178       | 184.6 | 164.5 | 233.1 | 174.2 | 140.5 |
| 213245_at   | AL120173  | ADCY1      | 107          | 31.8  | 28.4  | 24.6  | 28.9  | 18.8  |
| 213246_at   | AI346504  | TMEM251    | 26175        | 279.6 | 241.2 | 365.6 | 257.9 | 259.4 |
| 213247_at   | AA716107  | SVEP1      | 79987        | 1.8   | 11.8  | 2.9   | 1.5   | 2.7   |
| 213248_at   | AL577024  | LOC730101  | 730101       | 29.0  | 17.0  | 28.2  | 26.0  | 16.7  |
| 213249_at   | AU145127  | FBXL7      | 23194        | 13.5  | 13.1  | 16.0  | 14.1  | 12.3  |
| 213250_at   | BE966372  | CCDC85B    | 11007        | 13.6  | 7.2   | 5.7   | 8.4   | 4.0   |
| 213251_at   | AV712064  | SMARCA5    | 8467         | 68.8  | 63.9  | 83.6  | 69.5  | 61.4  |
| 213252_at   | AI739005  | SH3PXD2A   | 9644         | 13.9  | 2.1   | 9.9   | 2.0   | 11.0  |
| 213253_at   | AU154486  | SMC2       | 10592        | 47.7  | 38.5  | 65.3  | 43.5  | 47.8  |
| 213254_at   | N64803    | TNRC6B     | 23112        | 57.8  | 46.8  | 59.8  | 44.3  | 41.6  |
| 213256_at   | AW593996  | MARCH3     | 115123       | 21.9  | 24.8  | 35.5  | 25.3  | 20.9  |
| 213257_at   | AJ290445  | SARM1      | 23098        | 22.2  | 18.7  | 25.2  | 24.2  | 23.4  |
| 213258_at   | BF511231  | TFPI       | 7035         | 101.0 | 90.4  | 153.2 | 93.0  | 108.4 |
| 213259_s_at | AI937297  | SARM1      | 23098        | 59.4  | 58.2  | 70.5  | 71.3  | 45.6  |
| 213260_at   | AU145890  | FOXC1      | 2296         | 10.0  | 15.9  | 13.6  | 10.1  | 5.7   |
| 213261_at   | AA035414  | TRANK1     | 9881         | 13.9  | 9.1   | 11.5  | 2.6   | 3.6   |
| 213262_at   | AI932370  | SACS       | 26278        | 32.9  | 27.4  | 38.4  | 25.6  | 28.2  |
| 213263_s_at | AW025150  | PCBP2      | 5094         | 84.6  | 85.9  | 86.0  | 86.3  | 78.4  |
| 213264_at   | AW025150  | PCBP2      | 5094         | 113.9 | 77.0  | 88.5  | 80.7  | 70.2  |
| 213265_at   | AI570199  | LOC1019298 | 5222 /// 643 | 9.8   | 3.4   | 8.6   | 11.3  | 2.7   |
| 213266_at   | BF592982  | TP53BP1    | 7158         | 31.0  | 18.6  | 22.4  | 14.7  | 18.7  |
| 213267_at   | AL162056  | DOPEY1     | 23033        | 2.0   | 1.7   | 0.5   | 0.7   | 1.3   |
| 213268_at   | Z98884    | CAMTA1     | 23261        | 0.9   | 4.5   | 9.8   | 3.1   | 3.4   |
| 213269_at   | N21541    | ZNF248     | 57209        | 31.6  | 14.9  | 17.3  | 16.4  | 14.3  |
| 213270_at   | AW450911  | MPP2       | 4355         | 35.8  | 52.5  | 54.9  | 61.0  | 46.5  |
| 213271_s_at | AB029040  | DOPEY1     | 23033        | 23.6  | 24.7  | 27.9  | 28.5  | 23.1  |
| 213272_s_at | AF070596  | TMEM159    | 57146        | 41.5  | 48.8  | 35.9  | 43.4  | 18.5  |
| 213273_at   | BF112171  | TENM4      | 26011        | 3.1   | 4.5   | 1.1   | 0.9   | 1.5   |
| 213274_s_at | AA020826  | CTSB       | 1508         | 34.6  | 33.5  | 39.1  | 45.4  | 31.1  |
| 213275_x_at | W47179    | CTSB       | 1508         | 42.9  | 46.9  | 53.8  | 59.5  | 37.1  |
| 213276_at   | T15766    | CAMK2B     | 816          | 8.0   | 6.5   | 2.6   | 1.0   | 1.6   |
| 213277_at   | AI344045  | ZFP36L1    | 677          | 2.5   | 1.1   | 0.6   | 0.8   | 2.6   |
| 213278_at   | AW014788  | MTMR9      | 66036        | 33.7  | 27.8  | 41.2  | 27.4  | 26.0  |
| 213279_at   | AL050217  | DHRS1      | 115817       | 156.1 | 144.2 | 164.4 | 139.1 | 112.8 |
| 213280_at   | AK000478  | RAP1GAP2   | 23108        | 99.5  | 74.1  | 104.5 | 68.5  | 82.8  |
| 213281_at   | BE327172  | JUN        | 3725         | 14.4  | 15.9  | 18.6  | 21.9  | 14.6  |
| 213282_at   | BE501952  | APOOL      | 139322       | 69.1  | 59.8  | 63.4  | 69.7  | 47.8  |
| 213283_s_at | BG285616  | SALL2      | 6297         | 76.6  | 91.8  | 80.7  | 81.9  | 53.8  |
| 213284_at   | BG482928  | ZFP36L1    | 677          | 1.0   | 0.6   | 1.9   | 0.4   | 2.4   |
| 213285_at   | AV691491  | TMEM30B    | 161291       | 5.3   | 3.2   | 7.1   | 6.4   | 2.9   |

|             |           |                           |        |       |       |       |       |       |
|-------------|-----------|---------------------------|--------|-------|-------|-------|-------|-------|
| 213286_at   | BF445199  | ZFR                       | 51663  | 33.2  | 35.8  | 38.5  | 30.0  | 21.4  |
| 213287_s_at | X14487    | KRT10                     | 3858   | 549.7 | 435.4 | 588.9 | 467.6 | 434.1 |
| 213288_at   | AI761250  | MBOAT2                    | 129642 | 42.9  | 31.1  | 46.0  | 33.8  | 39.9  |
| 213289_at   | BE221922  | APOOL                     | 139322 | 50.6  | 53.6  | 48.9  | 44.2  | 46.9  |
| 213290_at   | AL531750  | COL6A2                    | 1292   | 12.1  | 6.0   | 4.8   | 10.9  | 4.9   |
| 213291_s_at | AA160522  | UBE3A                     | 7337   | 178.6 | 177.4 | 204.9 | 152.3 | 161.4 |
| 213292_s_at | AA908770  | SNX13                     | 23161  | 64.0  | 67.5  | 68.8  | 65.5  | 51.3  |
| 213293_s_at | AA083478  | TRIM22                    | 10346  | 6.2   | 2.2   | 7.2   | 3.6   | 2.9   |
| 213294_at   | AV755522  | EIF2AK2                   | 5610   | 44.1  | 36.6  | 44.0  | 43.3  | 33.0  |
| 213295_at   | AA555096  | CYLD                      | 1540   | 15.3  | 10.9  | 15.4  | 14.6  | 9.1   |
| 213296_at   | BF339133  | RER1                      | 11079  | 39.9  | 36.0  | 37.4  | 42.9  | 22.1  |
| 213297_at   | AW131783  | RMND5B                    | 64777  | 24.3  | 22.0  | 18.7  | 20.8  | 20.8  |
| 213298_at   | X12492    | NFIC                      | 4782   | 28.8  | 25.3  | 26.5  | 22.8  | 32.9  |
| 213299_at   | AW027070  | ZBTB7A                    | 51341  | 3.4   | 5.2   | 4.9   | 1.5   | 0.9   |
| 213300_at   | AW168132  | ATG2A                     | 23130  | 53.0  | 64.0  | 65.6  | 57.6  | 56.2  |
| 213301_x_at | AL538264  | TRIM24                    | 8805   | 68.1  | 66.0  | 87.4  | 66.1  | 58.0  |
| 213302_at   | AL044326  | PFAS                      | 5198   | 68.2  | 60.8  | 70.4  | 44.8  | 70.6  |
| 213303_x_at | AF097916  | ZBTB7A                    | 51341  | 12.1  | 12.6  | 19.9  | 9.0   | 11.3  |
| 213304_at   | AI823592  | FAM179B                   | 23116  | 31.7  | 38.1  | 36.1  | 37.6  | 31.1  |
| 213305_s_at | L42375    | PPP2R5C                   | 5527   | 105.4 | 80.9  | 114.7 | 83.2  | 82.1  |
| 213306_at   | AA917899  | MPDZ                      | 8777   | 19.5  | 29.2  | 17.3  | 17.7  | 9.6   |
| 213307_at   | AF131790  | SHANK2                    | 22941  | 8.1   | 7.7   | 8.8   | 7.1   | 7.1   |
| 213308_at   | BF435773  | SHANK2                    | 22941  | 28.7  | 21.6  | 29.9  | 28.4  | 15.7  |
| 213309_at   | AL117515  | PLCL2                     | 23228  | 1.6   | 0.3   | 2.1   | 1.0   | 2.4   |
| 213310_at   | AI613483  | AGO2 /// CA: 27161 /// 28 |        | 111.0 | 70.6  | 106.7 | 91.5  | 88.2  |
| 213311_s_at | BF000251  | TCF25                     | 22980  | 134.5 | 109.8 | 124.4 | 150.9 | 112.1 |
| 213312_at   | NM_020425 | SMIM8                     | 57150  | 22.4  | 22.8  | 29.0  | 20.6  | 15.4  |
| 213313_at   | AI922519  | RABGAP1                   | 23637  | 152.3 | 136.2 | 163.1 | 134.3 | 119.0 |
| 213314_at   | NM_020425 | SMIM8                     | 57150  | 14.3  | 7.7   | 15.2  | 15.5  | 9.5   |
| 213315_x_at | L43577    | CXorf40A                  | 91966  | 208.0 | 185.8 | 221.9 | 198.9 | 166.8 |
| 213316_at   | AL050154  | KIAA1462                  | 57608  | 0.7   | 5.8   | 3.3   | 0.4   | 3.7   |
| 213317_at   | AL049313  | CLIC5                     | 53405  | 0.2   | 4.2   | 0.4   | 4.9   | 4.2   |
| 213318_s_at | BG028844  | BAG6                      | 7917   | 493.3 | 621.6 | 546.7 | 554.7 | 502.8 |
| 213319_s_at | AW170359  | YBX3                      | 8531   | 6.8   | 6.2   | 7.4   | 6.2   | 4.3   |
| 213320_at   | AL551971  | PRMT3                     | 10196  | 103.2 | 66.9  | 105.7 | 77.6  | 82.9  |
| 213321_at   | AL531533  | BCKDHB                    | 594    | 16.4  | 16.3  | 17.3  | 27.5  | 16.7  |
| 213322_at   | AL031778  | OARD1                     | 221443 | 55.5  | 63.6  | 68.6  | 68.0  | 46.9  |
| 213323_s_at | BE855831  | ZC3H7B                    | 23264  | 50.0  | 33.9  | 43.9  | 35.2  | 17.3  |
| 213324_at   | AK024281  | SRC                       | 6714   | 35.1  | 40.2  | 31.3  | 32.4  | 28.3  |
| 213325_at   | AA129716  | PVRL3                     | 25945  | 8.0   | 3.9   | 0.3   | 4.3   | 2.3   |
| 213326_at   | AU150319  | VAMP1                     | 6843   | 13.6  | 14.1  | 15.7  | 11.6  | 7.0   |
| 213327_s_at | AI820101  | USP12                     | 219333 | 22.7  | 23.4  | 28.2  | 24.7  | 18.0  |
| 213328_at   | AI936517  | NEK1                      | 4750   | 18.6  | 12.2  | 16.3  | 3.0   | 11.4  |
| 213329_at   | AA742261  | SRGAP2 /// S23380 /// 64  |        | 29.9  | 21.3  | 27.3  | 28.4  | 30.9  |
| 213330_s_at | BE886580  | STIP1                     | 10963  | 230.0 | 424.8 | 374.6 | 334.8 | 485.2 |
| 213331_s_at | AV700007  | NEK1                      | 4750   | 34.0  | 37.0  | 28.7  | 34.0  | 36.8  |
| 213332_at   | AL031290  | PAPPA2                    | 60676  | 18.8  | 6.1   | 13.9  | 13.1  | 6.2   |
| 213333_at   | AL520774  | MDH2                      | 4191   | 71.3  | 53.1  | 71.1  | 52.9  | 65.8  |
| 213334_x_at | BE676218  | HAUS7                     | 55559  | 71.6  | 65.7  | 72.0  | 59.1  | 64.5  |
| 213335_s_at | AK001922  | ST3GAL6                   | 10402  | 0.8   | 1.1   | 0.9   | 1.0   | 0.8   |
| 213336_at   | AI826454  | BAZ1B                     | 9031   | 4.8   | 5.0   | 12.2  | 1.1   | 9.6   |
| 213337_s_at | AA877218  | SOCS1                     | 8651   | 20.2  | 17.5  | 11.1  | 6.6   | 5.9   |
| 213338_at   | BF062629  | TMEM158                   | 25907  | 20.1  | 16.7  | 2.6   | 17.0  | 4.7   |



|             |          |            |                     |        |        |        |        |        |
|-------------|----------|------------|---------------------|--------|--------|--------|--------|--------|
| 213339_at   | AB007964 | TP73-AS1   | 57212               | 1.7    | 7.4    | 5.8    | 3.5    | 3.3    |
| 213340_s_at | AI073551 | TP73-AS1   | 57212               | 105.8  | 96.7   | 105.3  | 93.8   | 82.7   |
| 213341_at   | AI862658 | FEM1C      | 56929               | 74.8   | 67.4   | 58.9   | 57.6   | 44.5   |
| 213342_at   | AI745185 | YAP1       | 10413               | 83.3   | 86.9   | 80.6   | 82.6   | 65.8   |
| 213343_s_at | AL041124 | GDPD5      | 81544               | 2.6    | 7.0    | 2.3    | 2.2    | 2.3    |
| 213344_s_at | H51429   | H2AFX      | 3014                | 44.0   | 28.8   | 43.8   | 29.8   | 32.2   |
| 213345_at   | AI624015 | NFATC4     | 4776                | 8.2    | 5.3    | 6.7    | 5.5    | 4.5    |
| 213346_at   | BE748563 | TEX30      | 93081               | 53.9   | 29.2   | 65.9   | 51.8   | 48.4   |
| 213347_x_at | AW132023 | RPS4X      | 6191                | 3105.3 | 2933.7 | 3262.8 | 2943.8 | 2803.5 |
| 213348_at   | N33167   | CDKN1C     | 1028                | 17.6   | 18.3   | 12.0   | 12.4   | 11.6   |
| 213349_at   | AI934469 | TMCC1      | 23023               | 45.6   | 39.3   | 50.3   | 46.1   | 30.9   |
| 213350_at   | BF680255 | RPS11      | 6205                | 27.6   | 34.5   | 31.8   | 37.7   | 33.2   |
| 213351_s_at | AB018322 | TMCC1      | 23023               | 7.6    | 11.7   | 9.6    | 8.4    | 6.8    |
| 213352_at   | AB018322 | TMCC1      | 23023               | 16.1   | 7.8    | 19.5   | 7.4    | 8.7    |
| 213353_at   | BF693921 | ABCA5      | 23461               | 4.7    | 6.4    | 5.7    | 5.2    | 6.4    |
| 213354_s_at | AI935343 | NR2F6      | 2063                | 0.4    | 0.6    | 0.6    | 0.4    | 1.6    |
| 213355_at   | AI989567 | ST3GAL6    | 10402               | 1.1    | 0.5    | 0.2    | 0.4    | 0.1    |
| 213356_x_at | AL568186 | HNRNPA1    | ///,3178 /// 144    | 2327.9 | 2405.9 | 2406.5 | 2300.8 | 2225.7 |
| 213357_at   | AV701318 | GTF2H5     | 404672              | 234.6  | 193.9  | 240.9  | 214.1  | 184.7  |
| 213358_at   | AB018345 | MTCL1      | 23255               | 30.0   | 25.0   | 22.7   | 34.3   | 23.0   |
| 213359_at   | W74620   | HNRNPD     | 3184                | 40.6   | 25.1   | 40.4   | 27.9   | 33.6   |
| 213360_s_at | AA514622 | POM121     | /// 9883 /// 100    | 451.4  | 330.3  | 446.6  | 373.6  | 345.0  |
| 213361_at   | AW129593 | TDRD7      | 23424               | 30.5   | 27.6   | 24.3   | 26.4   | 28.7   |
| 213362_at   | N73931   | PTPRD      | 5789                | 3.5    | 0.5    | 2.6    | 3.3    | 2.8    |
| 213363_at   | AW170549 | CA5BP1     | 340591              | 14.9   | 12.4   | 22.8   | 10.9   | 19.0   |
| 213364_s_at | AI052536 | SNX1       | 6642                | 8.3    | 10.5   | 1.5    | 1.5    | 3.2    |
| 213365_at   | N64622   | ERI2       | 112479              | 122.4  | 112.0  | 139.7  | 115.3  | 111.1  |
| 213366_x_at | AV711183 | ATP5C1     | 509                 | 1414.6 | 1252.6 | 1457.2 | 1289.9 | 1115.7 |
| 213367_at   | AF035281 | LOC155060  | 155060              | 27.4   | 30.7   | 28.7   | 35.6   | 16.0   |
| 213368_x_at | BE501428 | PPFIA3     | 8541                | 69.0   | 59.5   | 86.5   | 62.7   | 54.4   |
| 213369_at   | AI825832 | CDHR1      | 92211               | 5.6    | 0.5    | 2.2    | 1.3    | 1.7    |
| 213370_s_at | BF057298 | SFMBT1     | 51460               | 66.0   | 60.9   | 69.8   | 58.7   | 55.2   |
| 213371_at   | AI803302 | LDB3       | 11155               | 3.8    | 0.3    | 4.8    | 0.7    | 3.2    |
| 213372_at   | AW173157 | PAQR3      | 152559              | 43.0   | 33.2   | 37.9   | 30.8   | 25.7   |
| 213373_s_at | BF439983 | CASP8      | 841                 | 29.2   | 32.3   | 39.0   | 33.2   | 26.5   |
| 213374_x_at | AW000964 | HIBCH      | 26275               | 47.3   | 35.2   | 45.8   | 36.5   | 23.9   |
| 213375_s_at | N80918   | N4BP2L1    | 90634               | 5.5    | 9.2    | 4.2    | 2.4    | 0.6    |
| 213376_at   | AI656706 | ZBTB1      | 22890               | 85.5   | 88.0   | 96.3   | 88.2   | 68.9   |
| 213377_x_at | AI799007 | RPS12      | 6206                | 3662.8 | 3358.6 | 3776.1 | 3593.7 | 3378.6 |
| 213378_s_at | AI983033 | DDX11      | /// D[ 1663 /// 440 | 68.5   | 51.7   | 71.1   | 51.6   | 44.1   |
| 213379_at   | AF091086 | COQ2       | 27235               | 126.3  | 111.6  | 135.0  | 131.1  | 124.2  |
| 213380_x_at | AA911235 | LOC1019300 | 4485 /// 112        | 16.7   | 12.0   | 17.5   | 7.0    | 5.5    |
| 213381_at   | N91149   | VSTM4      | 196740              | 1.6    | 2.5    | 2.4    | 1.6    | 1.2    |
| 213382_at   | AL137798 | MST1L      | 11223               | 6.5    | 1.9    | 3.6    | 0.8    | 3.5    |
| 213383_at   | AW593269 | SBF1       | 6305                | 24.4   | 25.1   | 23.0   | 24.9   | 13.0   |
| 213384_x_at | Z37544   | PLCB3      | 5331                | 24.0   | 13.5   | 18.0   | 13.8   | 9.8    |
| 213385_at   | AK026415 | CHN2       | 1124                | 0.8    | 1.7    | 1.1    | 1.0    | 0.7    |
| 213386_at   | AV726900 | TMEM246    | 84302               | 15.3   | 5.9    | 12.3   | 10.6   | 5.6    |
| 213387_at   | AB033066 | ATAD2B     | 54454               | 21.3   | 18.8   | 25.8   | 25.0   | 11.4   |
| 213388_at   | H15535   | LOC1009967 | 9659 /// 100        | 9.1    | 10.8   | 4.9    | 10.2   | 3.3    |
| 213389_at   | BF508616 | ZNF592     | 9640                | 41.9   | 38.4   | 43.1   | 36.7   | 21.7   |
| 213390_at   | AB028987 | ZC3H4      | 23211               | 116.0  | 110.8  | 118.8  | 112.3  | 90.9   |
| 213391_at   | AI669947 | DPY19L4    | 286148              | 82.7   | 66.3   | 64.9   | 70.3   | 63.2   |

|             |           |                           |        |        |        |        |        |        |
|-------------|-----------|---------------------------|--------|--------|--------|--------|--------|--------|
| 213392_at   | AW070229  | IQCK                      | 124152 | 28.7   | 24.1   | 30.1   | 32.7   | 25.3   |
| 213393_at   | AI767210  | MFSD9                     | 84804  | 12.7   | 10.1   | 11.3   | 10.2   | 9.6    |
| 213394_at   | AI674759  | MAPKBP1                   | 23005  | 16.1   | 3.0    | 7.1    | 12.8   | 12.5   |
| 213395_at   | AL022327  | MLC1                      | 23209  | 3.9    | 4.0    | 6.4    | 1.4    | 5.3    |
| 213396_s_at | AA456929  | AKAP10                    | 11216  | 45.1   | 31.0   | 41.3   | 46.4   | 29.4   |
| 213397_x_at | AI761728  | RNASE4                    | 6038   | 37.8   | 34.8   | 38.3   | 44.3   | 25.1   |
| 213398_s_at | AI347090  | SDR39U1                   | 56948  | 285.4  | 304.0  | 311.7  | 306.6  | 243.6  |
| 213399_x_at | AI560720  | RPN2                      | 6185   | 918.5  | 986.3  | 981.6  | 936.3  | 813.3  |
| 213400_s_at | AV753028  | TBL1X                     | 6907   | 113.3  | 136.9  | 144.1  | 133.0  | 138.4  |
| 213401_s_at | AA724134  | TBL1X                     | 6907   | 11.7   | 1.5    | 16.8   | 14.5   | 9.8    |
| 213402_at   | AA029811  | ZNF787                    | 126208 | 32.6   | 33.4   | 38.5   | 44.4   | 39.0   |
| 213403_at   | BF223370  | MFSD9                     | 84804  | 3.9    | 3.3    | 8.3    | 2.5    | 4.2    |
| 213404_s_at | BF033683  | RHEB                      | 6009   | 443.1  | 334.1  | 495.0  | 376.4  | 333.9  |
| 213405_at   | N95443    | RAB22A                    | 57403  | 28.9   | 20.7   | 24.5   | 22.5   | 21.8   |
| 213406_at   | AA521269  | WSB1                      | 26118  | 8.3    | 5.9    | 12.1   | 8.6    | 4.7    |
| 213407_at   | AB023148  | PHLPP2                    | 23035  | 41.6   | 24.2   | 47.0   | 38.0   | 40.3   |
| 213408_s_at | AK024034  | PI4KA /// PI45297 /// 375 |        | 174.7  | 184.6  | 165.6  | 191.0  | 143.8  |
| 213409_s_at | BF593727  | RHEB                      | 6009   | 21.5   | 17.1   | 24.3   | 17.5   | 23.5   |
| 213410_at   | AL050102  | EDRF1                     | 26098  | 102.8  | 63.6   | 85.1   | 76.9   | 66.5   |
| 213411_at   | AW242701  | ADAM22                    | 53616  | 7.0    | 5.0    | 1.7    | 5.6    | 3.3    |
| 213412_at   | NM_014428 | TJP3                      | 27134  | 15.7   | 10.5   | 8.4    | 2.4    | 2.3    |
| 213413_at   | BG434174  | STON1                     | 11037  | 8.7    | 12.4   | 9.1    | 12.6   | 8.8    |
| 213414_s_at | BE259729  | RPS19                     | 6223   | 3081.2 | 2914.8 | 3078.4 | 3332.3 | 2877.5 |
| 213415_at   | AI768628  | CLIC2                     | 1193   | 3.5    | 0.7    | 1.2    | 0.2    | 0.3    |
| 213416_at   | BG532690  | ITGA4                     | 3676   | 1.1    | 3.6    | 0.9    | 1.7    | 0.3    |
| 213417_at   | AW173045  | TBX2                      | 6909   | 2.0    | 0.7    | 2.0    | 0.9    | 2.1    |
| 213418_at   | NM_002155 | HSPA6                     | 3310   | 12.3   | 5.7    | 5.3    | 12.7   | 6.4    |
| 213419_at   | U62325    | APBB2                     | 323    | 14.1   | 12.0   | 11.3   | 17.8   | 5.9    |
| 213420_at   | AA100250  | DHX57                     | 90957  | 10.0   | 8.6    | 19.6   | 20.3   | 22.5   |
| 213421_x_at | AW007273  | PRSS3                     | 5646   | 15.3   | 22.3   | 17.6   | 12.3   | 12.7   |
| 213422_s_at | AW888223  | MXRA8                     | 54587  | 74.1   | 57.5   | 68.6   | 59.4   | 47.5   |
| 213423_x_at | AI884858  | TUSC3                     | 7991   | 149.0  | 175.2  | 204.4  | 169.7  | 131.4  |
| 213424_at   | AB020702  | KIAA0895                  | 23366  | 19.8   | 16.3   | 18.9   | 23.8   | 13.5   |
| 213425_at   | AI968085  | WNT5A                     | 7474   | 4.2    | 5.1    | 8.9    | 8.6    | 5.3    |
| 213426_s_at | AA150110  | CAV2                      | 858    | 8.3    | 5.6    | 5.5    | 6.4    | 3.8    |
| 213427_at   | NM_006638 | RPP40                     | 10799  | 155.9  | 126.1  | 178.5  | 125.7  | 143.7  |
| 213428_s_at | AA292373  | COL6A1                    | 1291   | 172.0  | 148.8  | 143.9  | 151.7  | 99.1   |
| 213429_at   | AW025579  | BICC1                     | 80114  | 8.8    | 0.6    | 4.2    | 3.4    | 1.6    |
| 213430_at   | BF224071  | RUFY3                     | 22902  | 4.1    | 6.5    | 8.0    | 3.6    | 5.0    |
| 213431_x_at | AB011114  | SFI1                      | 9814   | 25.9   | 13.2   | 21.8   | 18.8   | 13.1   |
| 213432_at   | AI697108  | MUC5B                     | 727897 | 1.0    | 0.6    | 1.2    | 0.9    | 0.6    |
| 213433_at   | AF038193  | ARL3                      | 403    | 7.7    | 10.9   | 12.0   | 5.5    | 4.9    |
| 213434_at   | H95263    | STX2                      | 2054   | 47.8   | 21.0   | 38.1   | 27.2   | 32.0   |
| 213435_at   | AB028957  | SATB2                     | 23314  | 15.1   | 8.9    | 12.6   | 12.0   | 10.7   |
| 213436_at   | U73304    | CNR1                      | 1268   | 6.0    | 2.5    | 0.3    | 2.8    | 2.7    |
| 213437_at   | AA861784  | RUFY3                     | 22902  | 9.9    | 17.8   | 17.9   | 18.5   | 14.0   |
| 213438_at   | AA995925  | NFASC                     | 23114  | 0.6    | 2.5    | 0.5    | 1.1    | 5.7    |
| 213439_x_at | AI197870  | RUNDC3A                   | 10900  | 8.8    | 9.1    | 10.0   | 1.1    | 6.3    |
| 213440_at   | AL530264  | RAB1A                     | 5861   | 57.6   | 47.4   | 58.0   | 51.8   | 51.5   |
| 213441_x_at | AI745526  | SPDEF                     | 25803  | 160.3  | 160.0  | 169.8  | 155.7  | 137.6  |
| 213442_x_at | AI745526  | SPDEF                     | 25803  | 5.6    | 10.5   | 12.0   | 12.1   | 11.2   |
| 213443_at   | N36774    | TRADD                     | 8717   | 0.6    | 0.5    | 0.6    | 2.6    | 2.8    |
| 213444_at   | AB011115  | ZNF862                    | 643641 | 4.5    | 4.6    | 6.7    | 12.9   | 18.1   |

|             |          |                           |        |        |        |        |        |        |
|-------------|----------|---------------------------|--------|--------|--------|--------|--------|--------|
| 213445_at   | D63484   | ZC3H3                     | 23144  | 43.9   | 24.1   | 37.2   | 34.2   | 36.0   |
| 213446_s_at | AI679073 | IQGAP1                    | 8826   | 19.4   | 18.0   | 13.5   | 24.6   | 20.5   |
| 213447_at   | AI672541 | IPW /// LOC13653 /// 663  |        | 134.2  | 118.4  | 129.1  | 125.8  | 105.2  |
| 213448_at   | AI693193 | -                         | -      | 44.1   | 23.0   | 22.8   | 31.2   | 21.1   |
| 213449_at   | D31765   | POP1                      | 10940  | 23.6   | 15.8   | 26.6   | 19.0   | 22.0   |
| 213450_s_at | AI659611 | ICOSLG                    | 23308  | 27.7   | 29.5   | 21.8   | 25.2   | 13.0   |
| 213451_x_at | BE044614 | TNXA /// TN>7146 /// 714  |        | 1.6    | 7.0    | 3.9    | 5.0    | 1.6    |
| 213452_at   | AI811577 | ZNF184                    | 7738   | 30.4   | 18.8   | 25.0   | 27.5   | 25.4   |
| 213453_x_at | BF689355 | GAPDH                     | 2597   | 3410.2 | 3019.0 | 3221.0 | 3140.7 | 3041.2 |
| 213454_at   | AL578583 | APITD1 /// A 378708 /// 1 |        | 132.7  | 108.5  | 152.5  | 129.2  | 112.5  |
| 213455_at   | W87466   | FAM114A1                  | 92689  | 107.1  | 120.7  | 117.6  | 116.5  | 85.0   |
| 213456_at   | AI927000 | SOSTDC1                   | 25928  | 0.7    | 0.4    | 2.3    | 0.2    | 0.2    |
| 213457_at   | BF739959 | MFHAS1                    | 9258   | 24.4   | 26.6   | 41.5   | 28.1   | 28.4   |
| 213458_at   | AB023191 | FAM149B1                  | 317662 | 3.1    | 0.4    | 1.6    | 2.9    | 0.2    |
| 213459_at   | AU155515 | RPL37A                    | 6168   | 35.6   | 20.2   | 32.3   | 28.0   | 19.0   |
| 213460_x_at | N29665   | NSUN5P1 /// 155400 /// 2  |        | 63.4   | 55.9   | 59.3   | 71.8   | 45.2   |
| 213461_at   | AI800983 | NUDT21                    | 11051  | 75.1   | 67.7   | 79.4   | 47.5   | 59.7   |
| 213462_at   | AW000928 | NPAS2                     | 4862   | 6.0    | 1.4    | 2.9    | 7.8    | 2.4    |
| 213463_s_at | AW300504 | FAM149B1                  | 317662 | 46.0   | 28.3   | 37.0   | 22.6   | 18.7   |
| 213464_at   | AV705938 | SHC2                      | 25759  | 14.7   | 22.6   | 7.6    | 21.1   | 13.3   |
| 213465_s_at | BF718769 | PPP1R7                    | 5510   | 243.5  | 248.0  | 219.5  | 229.9  | 200.0  |
| 213466_at   | BE965869 | RAB40C                    | 57799  | 1.1    | 1.1    | 3.1    | 2.0    | 4.6    |
| 213467_at   | BF511718 | RND2                      | 8153   | 2.2    | 7.0    | 13.3   | 11.7   | 1.7    |
| 213468_at   | AI918117 | ERCC2                     | 2068   | 22.1   | 26.5   | 32.5   | 24.1   | 19.7   |
| 213469_at   | AV705244 | PGAP1                     | 80055  | 4.7    | 1.6    | 9.0    | 9.9    | 5.1    |
| 213470_s_at | BF983406 | HNRNPH1                   | 3187   | 105.0  | 94.2   | 90.3   | 82.3   | 117.4  |
| 213471_at   | AB014573 | NPHP4                     | 261734 | 19.1   | 19.6   | 21.8   | 20.2   | 15.2   |
| 213472_at   | AI022387 | HNRNPH1                   | 3187   | 10.1   | 6.1    | 3.1    | 1.5    | 1.4    |
| 213473_at   | AL042733 | BRAP                      | 8315   | 16.7   | 17.6   | 13.0   | 16.7   | 16.4   |
| 213474_at   | AI890903 | KCTD7 /// RA>27342 /// 15 |        | 1.9    | 5.7    | 9.6    | 6.9    | 2.3    |
| 213475_s_at | AC002310 | ITGAL                     | 3683   | 11.8   | 14.5   | 11.0   | 2.2    | 8.8    |
| 213476_x_at | AL565749 | TUBB3                     | 10381  | 876.2  | 986.2  | 1113.6 | 830.4  | 1072.1 |
| 213477_x_at | AL515273 | EEF1A1                    | 1915   | 4254.9 | 3433.4 | 4150.9 | 3880.2 | 3800.3 |
| 213478_at   | AB028949 | KAZN                      | 23254  | 27.1   | 24.1   | 27.8   | 14.3   | 20.1   |
| 213479_at   | U26662   | NPTX2                     | 4885   | 9.6    | 11.6   | 11.6   | 9.5    | 7.5    |
| 213480_at   | AF052100 | VAMP4                     | 8674   | 20.5   | 17.1   | 13.9   | 20.6   | 14.3   |
| 213481_at   | N92920   | S100A13                   | 6284   | 20.8   | 16.1   | 13.9   | 8.6    | 13.0   |
| 213482_at   | BF593175 | DOCK3                     | 1795   | 1.6    | 3.6    | 1.4    | 0.4    | 1.3    |
| 213483_at   | AK025679 | PPWD1                     | 23398  | 42.7   | 27.9   | 23.3   | 19.3   | 23.5   |
| 213484_at   | AI097640 | ADD2                      | 119    | 1.8    | 5.9    | 7.4    | 5.1    | 8.2    |
| 213485_s_at | AK000002 | ABCC10                    | 89845  | 26.6   | 18.8   | 24.2   | 20.9   | 14.1   |
| 213486_at   | BF435376 | COPG2IT1                  | 53844  | 2.5    | 7.5    | 15.9   | 4.0    | 14.7   |
| 213487_at   | AI762811 | MAP2K2                    | 5605   | 1.2    | 2.2    | 2.1    | 1.8    | 1.9    |
| 213488_at   | N73970   | SNED1                     | 25992  | 15.3   | 6.9    | 9.3    | 8.3    | 6.9    |
| 213489_at   | BE671156 | MAPRE2                    | 10982  | 2.2    | 1.1    | 4.2    | 3.9    | 6.8    |
| 213490_s_at | AI762811 | MAP2K2                    | 5605   | 107.0  | 120.2  | 128.9  | 105.7  | 89.5   |
| 213491_x_at | AL514285 | RPN2                      | 6185   | 879.5  | 1020.7 | 932.2  | 929.3  | 776.9  |
| 213492_at   | X06268   | COL2A1                    | 1280   | 7.4    | 5.2    | 4.2    | 1.0    | 1.8    |
| 213493_at   | BF509657 | SNED1                     | 25992  | 1.2    | 3.5    | 0.5    | 3.7    | 0.4    |
| 213494_s_at | AA748649 | YY1                       | 7528   | 22.3   | 19.1   | 24.0   | 14.0   | 20.0   |
| 213495_s_at | AW166067 | RRBP1                     | 6238   | 0.8    | 0.6    | 0.9    | 0.3    | 1.8    |
| 213496_at   | AW592563 | LPPR4                     | 9890   | 4.2    | 2.6    | 7.7    | 3.4    | 2.9    |
| 213497_at   | AL050374 | ABTB2                     | 25841  | 41.5   | 35.0   | 27.7   | 42.5   | 25.1   |

|             |           |              |               |       |        |        |        |       |
|-------------|-----------|--------------|---------------|-------|--------|--------|--------|-------|
| 213498_at   | BG328407  | CREB3L1      | 90993         | 7.5   | 1.3    | 7.4    | 9.7    | 5.4   |
| 213499_at   | NM_004366 | CLCN2        | 1181          | 29.2  | 19.5   | 21.1   | 20.6   | 12.4  |
| 213500_at   | AI307760  | -            | -             | 4.7   | 2.8    | 7.3    | 6.4    | 4.5   |
| 213501_at   | T62985    | ACOX1        | 51            | 64.2  | 60.8   | 68.6   | 81.4   | 53.9  |
| 213502_x_at | AA398569  | GUSBP11      | 91316         | 12.9  | 9.5    | 2.9    | 13.0   | 11.3  |
| 213503_x_at | BE908217  | ANXA2        | 302           | 30.8  | 19.3   | 22.6   | 22.7   | 16.6  |
| 213504_at   | W63732    | COPS6        | 10980         | 269.3 | 202.7  | 192.6  | 229.3  | 172.4 |
| 213505_s_at | BG252853  | SUGP2        | 10147         | 77.5  | 63.9   | 58.5   | 59.3   | 28.5  |
| 213506_at   | BE965369  | F2RL1        | 2150          | 124.1 | 95.7   | 149.6  | 116.1  | 107.2 |
| 213507_s_at | BG249565  | KPNB1        | 3837          | 824.9 | 892.6  | 1072.4 | 863.3  | 945.0 |
| 213508_at   | AA142942  | SPTSSA       | 171546        | 64.1  | 53.8   | 70.2   | 50.7   | 56.4  |
| 213509_x_at | AW157619  | CES2         | 8824          | 104.5 | 83.4   | 107.7  | 90.2   | 88.0  |
| 213510_x_at | AW194543  | USP32P2      | 220594        | 67.2  | 45.1   | 56.2   | 50.6   | 37.7  |
| 213511_s_at | AI167164  | MTMR1        | 8776          | 145.7 | 96.5   | 154.1  | 124.6  | 120.8 |
| 213512_at   | BF109941  | C14orf79     | 122616        | 21.4  | 22.7   | 20.7   | 16.9   | 19.1  |
| 213513_x_at | BG034239  | ARPC2        | 10109         | 361.7 | 271.6  | 338.2  | 346.7  | 254.0 |
| 213514_s_at | AU158818  | DIAPH1       | 1729          | 58.7  | 53.6   | 84.0   | 61.8   | 59.9  |
| 213515_x_at | AI133353  | HBG1 /// HB  | 3047 /// 304  | 6.5   | 6.2    | 1.1    | 2.2    | 0.8   |
| 213516_at   | AF126008  | -            | -             | 9.6   | 0.3    | 3.2    | 1.9    | 3.0   |
| 213517_at   | AW103422  | PCBP2        | 5094          | 21.5  | 6.9    | 17.2   | 13.1   | 9.1   |
| 213518_at   | AI689429  | PRKCI        | 5584          | 69.7  | 81.9   | 117.2  | 79.3   | 84.1  |
| 213519_s_at | AI078169  | LAMA2        | 3908          | 14.4  | 7.0    | 5.7    | 4.6    | 6.2   |
| 213520_at   | NM_004260 | RECQL4       | 9401          | 43.1  | 50.3   | 23.6   | 30.7   | 24.1  |
| 213521_at   | AW575379  | PTPN18       | 26469         | 72.6  | 66.6   | 77.7   | 68.5   | 57.0  |
| 213522_s_at | AA527578  | CSNK1D       | 1453          | 6.8   | 2.8    | 4.0    | 2.2    | 2.6   |
| 213523_at   | AI671049  | CCNE1        | 898           | 89.0  | 63.7   | 92.3   | 77.5   | 80.0  |
| 213524_s_at | NM_015714 | G0S2         | 50486         | 7.1   | 6.4    | 10.2   | 9.9    | 4.6   |
| 213525_at   | AC002310  | AC002310.7,- | -             | 4.6   | 4.5    | 7.8    | 6.6    | 1.9   |
| 213526_s_at | BF215644  | LIN37        | 55957         | 57.5  | 50.0   | 58.1   | 67.3   | 45.7  |
| 213527_s_at | AI095896  | ZNF688       | 146542        | 42.0  | 52.3   | 53.9   | 50.6   | 43.7  |
| 213528_at   | AL035369  | METTL18      | 92342         | 82.5  | 54.7   | 69.8   | 54.3   | 56.3  |
| 213529_at   | AI350500  | ZNF688       | 146542        | 31.8  | 28.8   | 26.2   | 25.8   | 20.8  |
| 213530_at   | AI040009  | RAB3GAP1     | 22930         | 33.7  | 25.7   | 48.5   | 33.2   | 30.1  |
| 213531_s_at | AI040009  | RAB3GAP1     | 22930         | 105.1 | 114.2  | 137.7  | 95.1   | 90.3  |
| 213532_at   | AI797833  | ADAM17       | 6868          | 24.9  | 23.5   | 26.9   | 19.5   | 26.8  |
| 213533_at   | M98528    | NSG1         | 27065         | 12.9  | 1.5    | 0.8    | 11.4   | 1.1   |
| 213534_s_at | D50925    | PASK         | 23178         | 100.3 | 78.5   | 105.7  | 86.7   | 90.2  |
| 213535_s_at | AA910614  | UBE2I        | 7329          | 995.4 | 1026.9 | 1273.5 | 1105.8 | 912.2 |
| 213536_s_at | AA910614  | LA16c-358B7- | -             | 4.4   | 3.3    | 2.0    | 3.9    | 3.5   |
| 213537_at   | AI128225  | HLA-DPA1     | 3113          | 0.4   | 1.5    | 4.6    | 0.2    | 0.4   |
| 213538_at   | AI936458  | SON          | 6651          | 42.4  | 40.2   | 61.0   | 58.0   | 38.9  |
| 213539_at   | NM_000732 | CD3D         | 915           | 14.3  | 4.1    | 1.8    | 1.2    | 1.1   |
| 213540_at   | AL031228  | HSD17B8      | 7923          | 347.2 | 341.8  | 392.2  | 311.3  | 277.7 |
| 213541_s_at | AI351043  | ERG          | 2078          | 4.5   | 4.5    | 5.0    | 0.9    | 2.3   |
| 213542_at   | AI246730  | ZNF710       | 374655        | 31.2  | 36.6   | 35.7   | 35.9   | 30.1  |
| 213543_at   | AA570453  | SGCD         | 6444          | 1.3   | 0.5    | 5.1    | 3.6    | 0.1   |
| 213544_at   | AI186701  | ING2         | 3622          | 3.1   | 1.4    | 6.8    | 1.8    | 1.7   |
| 213545_x_at | BE962615  | SNX3         | 8724          | 127.0 | 117.3  | 146.7  | 123.9  | 95.1  |
| 213546_at   | AL050378  | DKFZP586I14  | 222161        | 10.0  | 16.0   | 23.3   | 20.9   | 13.0  |
| 213547_at   | AB014567  | CAND2        | 23066         | 1.7   | 5.5    | 8.4    | 5.4    | 4.6   |
| 213548_s_at | BG257762  | CDV3         | 55573         | 47.9  | 31.6   | 59.9   | 44.5   | 47.7  |
| 213549_at   | AI890972  | PDZD8        | 118987        | 46.0  | 32.9   | 67.0   | 48.3   | 42.7  |
| 213550_s_at | AA993683  | IK /// TMC0  | €3550 /// 553 | 12.6  | 12.7   | 22.2   | 13.9   | 15.0  |

|             |           |             |           |        |        |        |        |        |
|-------------|-----------|-------------|-----------|--------|--------|--------|--------|--------|
| 213551_x_at | AI744229  | PCGF2       | 7703      | 68.4   | 48.0   | 58.9   | 43.0   | 34.7   |
| 213552_at   | W87398    | GLCE        | 26035     | 12.6   | 8.6    | 12.0   | 12.2   | 7.9    |
| 213553_x_at | W79394    | APOC1       | 341       | 7.6    | 11.6   | 10.2   | 5.0    | 9.9    |
| 213554_s_at | AI928407  | CDV3        | 55573     | 84.7   | 58.5   | 84.6   | 69.7   | 69.0   |
| 213555_at   | AL049699  | RWDD2A      | 112611    | 90.2   | 75.2   | 85.2   | 83.2   | 66.6   |
| 213556_at   | BE673445  | PINLYP      | 390940    | 1.6    | 3.6    | 1.4    | 1.4    | 6.6    |
| 213557_at   | AW305119  | CDK12       | 51755     | 20.8   | 13.2   | 14.8   | 19.3   | 14.6   |
| 213558_at   | AB011131  | PCLO        | 27445     | 11.7   | 10.9   | 8.6    | 6.4    | 5.8    |
| 213559_s_at | BF223401  | ZNF467      | 168544    | 3.2    | 0.5    | 1.5    | 5.3    | 1.5    |
| 213560_at   | AV658684  | GADD45B     | 4616      | 1.8    | 1.4    | 1.4    | 1.1    | 3.3    |
| 213561_at   | BF062335  | MCM9        | 254394    | 20.3   | 15.4   | 22.7   | 10.7   | 22.3   |
| 213562_s_at | BF979497  | SQLE        | 6713      | 32.3   | 33.4   | 40.4   | 26.0   | 32.3   |
| 213563_s_at | AA016035  | TUBGCP2     | 10844     | 4.0    | 7.8    | 9.3    | 8.4    | 3.4    |
| 213564_x_at | BE042354  | LDHB        | 3945      | 1802.3 | 1587.8 | 2050.1 | 1600.3 | 1677.5 |
| 213565_s_at | AI193899  | SMAD6       | 4091      | 9.0    | 2.0    | 9.3    | 2.1    | 5.4    |
| 213566_at   | NM_005615 | RNASE6      | 6039      | 2.4    | 0.5    | 0.5    | 0.4    | 0.4    |
| 213567_at   | BF431965  | KPNA4       | 3840      | 23.8   | 16.2   | 28.5   | 19.2   | 13.9   |
| 213568_at   | AI811298  | OSR2        | 116039    | 121.6  | 110.0  | 115.7  | 134.6  | 94.3   |
| 213569_at   | AV705485  | LOC10050661 | 100506603 | 5.9    | 16.1   | 23.5   | 27.0   | 21.4   |
| 213570_at   | BF516289  | EIF4E2      | 9470      | 33.2   | 25.7   | 34.6   | 32.5   | 26.9   |
| 213571_s_at | BF516289  | EIF4E2      | 9470      | 311.2  | 272.3  | 342.2  | 286.4  | 255.9  |
| 213572_s_at | AI554300  | SERPINB1    | 1992      | 0.1    | 0.1    | 1.4    | 2.0    | 0.3    |
| 213573_at   | AA861608  | KPNB1       | 3837      | 48.8   | 33.6   | 49.8   | 42.4   | 39.1   |
| 213574_s_at | AA861608  | KPNB1       | 3837      | 78.4   | 69.2   | 93.3   | 76.7   | 71.5   |
| 213575_at   | AA831170  | TRA2A       | 29896     | 4.6    | 7.6    | 0.5    | 4.5    | 0.3    |
| 213577_at   | AA639705  | SQLE        | 6713      | 47.4   | 27.4   | 58.2   | 44.7   | 44.1   |
| 213578_at   | AI678679  | BMPR1A      | 657       | 61.6   | 45.7   | 73.6   | 49.6   | 49.3   |
| 213579_s_at | AI459462  | EP300       | 2033      | 28.5   | 20.5   | 29.7   | 20.0   | 21.3   |
| 213580_at   | AA521272  | -           | -         | 3.6    | 1.1    | 1.1    | 0.9    | 3.4    |
| 213581_at   | BF446180  | PDCD2       | 5134      | 186.4  | 160.6  | 199.1  | 165.2  | 163.9  |
| 213582_at   | BF439472  | ATP11A      | 23250     | 15.8   | 8.9    | 8.2    | 9.4    | 11.3   |
| 213583_x_at | BE964125  | EEF1A1      | 1915      | 3246.5 | 2902.5 | 3350.7 | 3109.3 | 3034.0 |
| 213584_s_at | AI432137  | CREBZF      | 58487     | 33.4   | 26.6   | 33.0   | 24.0   | 22.4   |
| 213585_s_at | AA764988  | PDCD2       | 5134      | 14.7   | 3.3    | 3.7    | 2.7    | 2.6    |
| 213586_at   | AI401296  | CDKN2D      | 1032      | 1.6    | 0.9    | 0.9    | 1.0    | 0.6    |
| 213587_s_at | AI884867  | ATP6V0E2    | 155066    | 694.5  | 755.6  | 775.8  | 797.0  | 622.4  |
| 213588_x_at | AA838274  | RPL14       | 9045      | 2117.1 | 1669.8 | 2014.9 | 1717.2 | 1775.1 |
| 213589_s_at | AW468201  | B3GNTL1     | 146712    | 2.7    | 6.2    | 22.2   | 13.8   | 1.1    |
| 213590_at   | AA705628  | SLC16A5     | 9121      | 9.8    | 6.2    | 6.2    | 6.7    | 2.3    |
| 213591_at   | AU149534  | ALDH7A1     | 501       | 5.5    | 0.6    | 0.8    | 1.2    | 6.2    |
| 213592_at   | X89271    | APLNR       | 187       | 3.5    | 2.5    | 3.5    | 2.3    | 3.0    |
| 213593_s_at | AW978896  | TRA2A       | 29896     | 11.0   | 8.6    | 11.3   | 10.5   | 10.5   |
| 213594_x_at | AU130523  | SRSF10      | 10772     | 132.9  | 90.6   | 127.2  | 88.5   | 82.6   |
| 213595_s_at | AA127643  | CDC42BPA    | 8476      | 18.8   | 10.9   | 2.8    | 16.6   | 16.6   |
| 213596_at   | AL050391  | CASP4       | 837       | 7.5    | 2.4    | 6.8    | 4.3    | 1.3    |
| 213597_s_at | BF002474  | CTDSPL      | 10217     | 9.9    | 11.0   | 15.1   | 12.7   | 7.8    |
| 213598_at   | W87688    | -           | -         | 22.4   | 12.3   | 18.4   | 15.8   | 14.8   |
| 213599_at   | BE045993  | OIP5        | 11339     | 202.5  | 140.2  | 211.9  | 168.0  | 172.2  |
| 213600_at   | AA425633  | SIPA1L3     | 23094     | 13.6   | 17.4   | 25.9   | 16.7   | 11.6   |
| 213601_at   | AB011537  | SLIT1       | 6585      | 19.6   | 17.3   | 16.4   | 10.5   | 16.1   |
| 213602_s_at | AA401885  | -           | -         | 1.9    | 1.6    | 1.5    | 3.1    | 0.6    |
| 213603_s_at | BE138888  | RAC2        | 5880      | 6.6    | 9.7    | 3.5    | 6.5    | 1.5    |
| 213604_at   | AW451236  | TCEB3       | 6924      | 114.5  | 115.4  | 140.8  | 105.6  | 108.0  |

|             |           |          |              |        |        |        |        |        |       |
|-------------|-----------|----------|--------------|--------|--------|--------|--------|--------|-------|
| 213605_s_at | AL049987  | -        | -            | 35.3   | 24.4   | 26.3   | 29.6   | 17.6   |       |
| 213606_s_at | AI571798  | ARHGDI3  | 396          | 179.2  | 169.7  | 227.0  | 192.0  | 137.3  |       |
| 213607_x_at | BE551347  | NADK     | 65220        | 80.3   | 74.7   | 91.5   | 71.2   | 86.0   |       |
| 213608_s_at | AI220627  | SRRD     | 402055       | 98.7   | 87.2   | 95.0   | 83.5   | 80.0   |       |
| 213609_s_at | AB023144  | SEZ6L    | 23544        | 11.8   | 3.9    | 9.3    | 4.1    | 0.9    |       |
| 213610_s_at | BE326381  | KLHL23   | /// P151230  | /// 1  | 87.4   | 67.1   | 75.1   | 68.4   | 94.7  |
| 213611_at   | BF726531  | AQP5     | 362          | 2.5    | 1.1    | 1.5    | 1.9    | 1.8    |       |
| 213612_x_at | AI800419  | NBPF10   | /// N25832   | /// 14 | 378.2  | 361.7  | 336.2  | 364.0  | 259.3 |
| 213613_s_at | BE551347  | NADK     | 65220        | 6.3    | 2.0    | 1.3    | 9.3    | 1.4    |       |
| 213614_x_at | BE786672  | EEF1A1   | 1915         | 4171.5 | 3577.0 | 4157.1 | 3799.6 | 3737.5 |       |
| 213615_at   | AA773554  | LPCAT3   | /// U10162   | 28.0   | 24.6   | 32.8   | 22.4   | 17.2   |       |
| 213616_at   | BF063896  | TPGS2    | 25941        | 59.6   | 63.0   | 66.0   | 53.3   | 54.0   |       |
| 213617_s_at | BF063896  | TPGS2    | 25941        | 232.6  | 231.3  | 264.7  | 241.4  | 206.3  |       |
| 213618_at   | AB011152  | ARAP2    | /// LC116984 | /// 1  | 7.4    | 5.7    | 6.3    | 7.1    | 6.5   |
| 213619_at   | AV753392  | -        | -            | 1113.1 | 791.7  | 1153.6 | 942.2  | 822.1  |       |
| 213620_s_at | AA126728  | ICAM2    | 3384         | 2.7    | 2.6    | 0.9    | 2.8    | 1.0    |       |
| 213621_s_at | AW182892  | GUK1     | 2987         | 16.7   | 9.0    | 12.5   | 8.6    | 6.8    |       |
| 213622_at   | AI733465  | COL9A2   | 1298         | 28.1   | 35.4   | 27.1   | 30.4   | 18.7   |       |
| 213623_at   | NM_007054 | KIF3A    | 11127        | 17.3   | 11.9   | 15.7   | 19.1   | 12.6   |       |
| 213624_at   | AA873600  | SMPDL3A  | 10924        | 47.3   | 41.4   | 50.7   | 38.8   | 45.6   |       |
| 213625_at   | AW190088  | ZKSCAN4  | 387032       | 31.1   | 25.1   | 28.8   | 33.0   | 27.6   |       |
| 213626_at   | AL049442  | CBR4     | 84869        | 40.3   | 28.5   | 50.4   | 35.7   | 28.5   |       |
| 213627_at   | AI924630  | MAGED2   | 10916        | 47.5   | 40.2   | 45.0   | 47.3   | 43.0   |       |
| 213628_at   | AA883493  | CLCC1    | 23155        | 33.1   | 37.5   | 47.4   | 29.2   | 36.3   |       |
| 213629_x_at | BF246115  | MT1F     | 4494         | 198.7  | 236.3  | 197.2  | 218.6  | 163.2  |       |
| 213630_at   | AB002361  | NACAD    | 23148        | 8.3    | 2.0    | 1.1    | 1.5    | 1.6    |       |
| 213631_x_at | BE789211  | DHODH    | 1723         | 27.2   | 33.6   | 30.2   | 36.0   | 31.9   |       |
| 213632_at   | M94065    | DHODH    | 1723         | 47.1   | 33.2   | 52.5   | 37.9   | 49.0   |       |
| 213633_at   | NM_018957 | SH3BP1   | 23616        | 28.0   | 18.0   | 20.7   | 19.0   | 14.2   |       |
| 213634_s_at | AL031588  | TRMU     | 55687        | 61.1   | 54.5   | 73.3   | 43.0   | 68.6   |       |
| 213635_s_at | AI761858  | SAFB     | 6294         | 16.4   | 9.9    | 17.4   | 10.2   | 9.3    |       |
| 213636_at   | AB028968  | KIAA1045 | 23349        | 3.8    | 8.5    | 15.4   | 2.8    | 10.2   |       |
| 213637_at   | BE503392  | DDX52    | 11056        | 35.3   | 37.3   | 50.3   | 50.4   | 29.1   |       |
| 213638_at   | AW054711  | PHACTR1  | 221692       | 1.0    | 0.7    | 1.1    | 0.5    | 0.7    |       |
| 213639_s_at | AI871396  | ZNF500   | 26048        | 24.7   | 27.4   | 27.4   | 28.1   | 31.2   |       |
| 213640_s_at | BE503425  | LOX      | 4015         | 1.6    | 3.0    | 1.0    | 1.5    | 0.7    |       |
| 213641_at   | AB011129  | ZNF500   | 26048        | 12.6   | 2.1    | 4.2    | 5.3    | 10.1   |       |
| 213642_at   | BE312027  | -        | -            | 76.0   | 61.0   | 80.9   | 67.4   | 66.8   |       |
| 213643_s_at | AK022846  | INPP5B   | 3633         | 14.6   | 12.5   | 19.0   | 17.4   | 11.2   |       |
| 213644_at   | AI979276  | CEP112   | 201134       | 4.4    | 6.1    | 6.8    | 6.5    | 6.9    |       |
| 213645_at   | AF305057  | ENOSF1   | 55556        | 43.1   | 33.2   | 37.0   | 33.3   | 34.3   |       |
| 213646_x_at | BE300252  | TUBA1B   | 10376        | 3186.6 | 3271.1 | 3459.6 | 3022.5 | 2962.1 |       |
| 213647_at   | D42046    | DNA2     | 1763         | 54.6   | 37.2   | 54.2   | 30.1   | 32.1   |       |
| 213648_at   | AW614427  | EXOSC7   | 23016        | 54.6   | 58.8   | 69.9   | 63.1   | 55.3   |       |
| 213649_at   | AA524053  | SRSF7    | 6432         | 54.8   | 34.0   | 52.7   | 34.4   | 34.1   |       |
| 213650_at   | AW006438  | GOLGA8A  | ///,23015    | /// 44 | 12.7   | 10.8   | 20.3   | 14.4   | 10.9  |
| 213651_at   | AI935720  | INPP5J   | 27124        | 20.3   | 23.1   | 20.7   | 25.0   | 10.6   |       |
| 213652_at   | AU152579  | PCSK5    | 5125         | 0.3    | 0.3    | 0.3    | 0.3    | 0.2    |       |
| 213653_at   | AW069290  | METTL3   | 56339        | 17.7   | 17.0   | 23.9   | 8.1    | 8.7    |       |
| 213654_at   | R60550    | TAF5L    | 27097        | 56.4   | 36.0   | 59.8   | 36.2   | 35.6   |       |
| 213655_at   | AA502643  | -        | -            | 849.1  | 742.4  | 824.4  | 712.8  | 697.3  |       |
| 213656_s_at | BF593594  | KLC1     | 3831         | 71.0   | 66.8   | 64.2   | 71.4   | 49.9   |       |
| 213657_s_at | BE858194  | AK055981 | ///,-        | 35.1   | 30.9   | 31.9   | 27.1   | 17.2   |       |

|             |           |              |               |        |        |        |        |        |
|-------------|-----------|--------------|---------------|--------|--------|--------|--------|--------|
| 213658_at   | BE858194  | AK055981     | -             | 32.7   | 17.8   | 19.7   | 22.2   | 15.8   |
| 213659_at   | AA209420  | ZNF75D       | 7626          | 12.5   | 13.5   | 9.7    | 20.3   | 12.4   |
| 213660_s_at | AA581879  | TOP3B        | 8940          | 12.4   | 15.6   | 10.0   | 15.5   | 15.1   |
| 213661_at   | AI671186  | PAMR1        | 25891         | 9.0    | 8.8    | 5.8    | 0.9    | 1.4    |
| 213662_at   | AI740515  | FAM134B      | 54463         | 8.5    | 9.0    | 10.9   | 8.2    | 5.4    |
| 213663_s_at | AI740515  | FAM134B      | 54463         | 7.2    | 3.2    | 3.1    | 6.1    | 0.8    |
| 213664_at   | AW235061  | SLC1A1       | 6505          | 33.6   | 25.0   | 32.1   | 24.5   | 28.2   |
| 213665_at   | AI989477  | SOX4         | 6659          | 7.0    | 3.0    | 3.9    | 3.6    | 1.6    |
| 213666_at   | AK026589  | SEPT6        | 23157         | 13.3   | 10.8   | 2.2    | 10.8   | 3.5    |
| 213667_at   | AB002307  | LOC1008626   | 10847 /// 10  | 10.8   | 21.6   | 11.1   | 11.6   | 2.5    |
| 213668_s_at | AI989477  | SOX4         | 6659          | 45.9   | 38.3   | 46.0   | 45.1   | 27.6   |
| 213669_at   | AB006628  | FCHO1        | 23149         | 8.9    | 8.0    | 9.6    | 2.3    | 4.1    |
| 213670_x_at | AI768378  | NSUN5P1      | 155400        | 59.4   | 45.9   | 52.5   | 48.4   | 44.3   |
| 213671_s_at | AA621558  | MARS /// MI  | 4141 /// 102  | 441.9  | 446.5  | 476.0  | 466.4  | 390.1  |
| 213672_at   | AA621558  | MARS /// MI  | 4141 /// 102  | 6.7    | 7.3    | 4.3    | 1.2    | 1.1    |
| 213673_x_at | AA156251  | NENF         | 29937         | 2.8    | 8.3    | 7.0    | 10.5   | 8.1    |
| 213674_x_at | AI858004  | IGHD         | 3495          | 0.8    | 0.6    | 0.6    | 0.4    | 0.4    |
| 213675_at   | W61005    | PARVA        | 55742         | 5.9    | 9.2    | 12.5   | 1.1    | 1.1    |
| 213676_at   | AL038824  | TMEM151B     | 441151        | 8.1    | 7.8    | 12.3   | 8.9    | 14.6   |
| 213677_s_at | BG434893  | PMS1         | 5378          | 70.5   | 49.4   | 69.3   | 56.7   | 65.8   |
| 213678_at   | F09448    | TMEM151B     | 441151        | 11.0   | 2.3    | 12.2   | 6.1    | 1.1    |
| 213679_at   | AL049329  | TTC30A       | 92104         | 25.5   | 28.6   | 21.3   | 25.2   | 17.7   |
| 213680_at   | AI831452  | KRT6B        | 3854          | 8.6    | 8.2    | 5.2    | 3.7    | 8.2    |
| 213681_at   | AW512817  | CYHR1        | 50626         | 32.8   | 19.1   | 19.2   | 29.0   | 18.6   |
| 213682_at   | AL036344  | NUP50        | 10762         | 151.9  | 116.3  | 165.6  | 122.6  | 133.7  |
| 213683_at   | AV727634  | ACSL6        | 23305         | 2.3    | 2.2    | 0.8    | 3.3    | 6.5    |
| 213684_s_at | BF671400  | PDLIM5       | 10611         | 9.8    | 4.6    | 6.2    | 5.5    | 4.3    |
| 213685_at   | AA830143  | TCEB3-AS1    | 100506963     | 33.5   | 30.2   | 45.3   | 44.9   | 25.6   |
| 213686_at   | AI186145  | VPS13A       | 23230         | 17.2   | 11.9   | 7.2    | 15.2   | 11.3   |
| 213687_s_at | BE968801  | RPL35A       | 6165          | 2050.5 | 1820.7 | 2123.5 | 2026.3 | 1848.3 |
| 213688_at   | N25325    | CALM1 /// C, | 801 /// 805 / | 33.9   | 28.7   | 28.8   | 29.2   | 20.4   |
| 213689_x_at | AL137958  | FAM69A       | 388650        | 22.9   | 26.4   | 26.7   | 28.0   | 26.3   |
| 213690_s_at | AL050131  | LOC1019283   | 101928378     | 11.1   | 9.7    | 9.2    | 2.0    | 4.0    |
| 213691_at   | AL050131  | LOC1019283   | 101928378     | 3.7    | 2.2    | 3.7    | 11.8   | 7.0    |
| 213692_s_at | AA904259  | VDR          | 7421          | 13.2   | 13.6   | 14.8   | 8.8    | 12.8   |
| 213693_s_at | AI610869  | MUC1         | 4582          | 1.4    | 1.7    | 1.9    | 0.8    | 1.8    |
| 213694_at   | AW027347  | RSBN1        | 54665         | 53.4   | 45.8   | 47.2   | 48.7   | 37.7   |
| 213695_at   | L48516    | PON3         | 5446          | 5.1    | 0.6    | 2.8    | 0.9    | 0.4    |
| 213696_s_at | AA421957  | MED8         | 112950        | 59.4   | 61.5   | 98.2   | 72.0   | 62.3   |
| 213697_at   | AW291829  | HIPK3        | 10114         | 8.2    | 1.9    | 9.3    | 2.4    | 6.4    |
| 213698_at   | AI805560  | ZMYM6 /// Z  | 9204 /// 100  | 59.8   | 46.3   | 78.9   | 51.2   | 50.7   |
| 213699_s_at | AA854017  | YWHAQ        | 10971         | 1456.4 | 1221.8 | 1593.6 | 1381.7 | 1247.2 |
| 213700_s_at | AA554945  | PKM          | 5315          | 24.5   | 13.2   | 31.4   | 20.9   | 23.7   |
| 213701_at   | AW299245  | C12orf29     | 91298         | 59.2   | 44.2   | 56.2   | 43.1   | 40.7   |
| 213702_x_at | AI934569  | ASAH1        | 427           | 483.7  | 365.0  | 469.0  | 377.9  | 338.9  |
| 213703_at   | W95043    | LINC00342    | 150759        | 4.3    | 3.6    | 8.8    | 6.7    | 0.9    |
| 213704_at   | AA129753  | RABGGTB ///  | 5876 /// 268  | 58.8   | 41.2   | 49.4   | 43.5   | 39.1   |
| 213705_at   | AW301861  | GGCX         | 2677          | 32.2   | 18.5   | 26.0   | 19.7   | 21.9   |
| 213706_at   | AI368018  | GPD1         | 2819          | 2.7    | 2.2    | 1.7    | 0.9    | 1.3    |
| 213707_s_at | NM_005221 | DLX5         | 1749          | 5.0    | 4.4    | 1.6    | 3.6    | 2.5    |
| 213708_s_at | N40555    | MLX          | 6945          | 318.3  | 254.8  | 351.7  | 321.5  | 264.8  |
| 213709_at   | H11725    | BHLHB9       | 80823         | 20.7   | 20.5   | 20.2   | 22.7   | 18.0   |
| 213710_s_at | AL523275  | CALM1        | 801           | 37.5   | 22.0   | 33.7   | 27.5   | 23.0   |

|             |           |            |              |        |        |        |        |        |
|-------------|-----------|------------|--------------|--------|--------|--------|--------|--------|
| 213711_at   | NM_002281 | KRT81      | 3887         | 3.0    | 10.2   | 2.1    | 3.0    | 1.3    |
| 213712_at   | BF508639  | ELOVL2     | 54898        | 5.8    | 1.3    | 8.7    | 0.5    | 1.1    |
| 213713_s_at | R48779    | GLB1L2     | 89944        | 144.1  | 122.0  | 151.5  | 108.7  | 128.3  |
| 213714_at   | AI040163  | CACNB2     | 783          | 1.1    | 2.3    | 8.3    | 3.3    | 3.5    |
| 213715_s_at | AF070591  | KANK3      | 256949       | 2.1    | 0.8    | 7.6    | 1.5    | 0.9    |
| 213716_s_at | BF939675  | SECTM1     | 6398         | 40.6   | 37.2   | 38.1   | 52.4   | 46.9   |
| 213717_at   | AA211481  | LDB3       | 11155        | 0.9    | 1.7    | 0.8    | 1.3    | 2.4    |
| 213718_at   | BE222257  | RBM14-RBM  | 5936 /// 100 | 19.4   | 22.6   | 21.2   | 22.9   | 19.5   |
| 213719_s_at | AI831675  | SMARCA4    | 6597         | 3.8    | 1.7    | 4.2    | 1.1    | 2.1    |
| 213720_s_at | AI831675  | SMARCA4    | 6597         | 357.4  | 287.0  | 397.2  | 316.7  | 295.6  |
| 213721_at   | L07335    | SOX2       | 6657         | 7.9    | 5.4    | 5.6    | 8.4    | 1.2    |
| 213722_at   | AW007161  | SOX2       | 6657         | 1.0    | 2.3    | 1.2    | 0.6    | 0.8    |
| 213723_s_at | AI424441  | IDUA       | 3425         | 2.7    | 0.8    | 1.0    | 2.1    | 1.0    |
| 213724_s_at | AI870615  | PDK2       | 5164         | 86.6   | 67.7   | 78.1   | 75.4   | 58.3   |
| 213725_x_at | AI693140  | XYLT1      | 64131        | 9.2    | 1.3    | 8.5    | 6.6    | 7.2    |
| 213726_x_at | AA515698  | TUBB4B     | 10383        | 2097.9 | 1902.0 | 2235.1 | 1962.2 | 1824.7 |
| 213727_x_at | AI743654  | MPPE1      | 65258        | 60.5   | 61.6   | 65.5   | 74.9   | 54.7   |
| 213728_at   | AI248598  | LAMP1      | 3916         | 31.1   | 35.0   | 34.1   | 30.8   | 26.2   |
| 213729_at   | Z78308    | PRPF40A    | 55660        | 253.7  | 204.5  | 251.6  | 210.9  | 244.8  |
| 213730_x_at | BE962186  | TCF3       | 6929         | 56.8   | 72.5   | 61.6   | 73.3   | 48.5   |
| 213731_s_at | AI871234  | TCF3       | 6929         | 2.4    | 1.3    | 0.8    | 2.0    | 1.1    |
| 213732_at   | AI871234  | TCF3       | 6929         | 4.5    | 0.5    | 5.2    | 1.9    | 5.0    |
| 213733_at   | BF740152  | MYO1F      | 4542         | 18.9   | 20.2   | 16.7   | 10.5   | 12.8   |
| 213734_at   | BG260658  | RFC5       | 5985         | 250.5  | 193.5  | 247.8  | 198.5  | 196.3  |
| 213735_s_at | AI557312  | COX5B      | 1329         | 1147.1 | 1100.9 | 1208.6 | 1167.5 | 963.8  |
| 213736_at   | AI557312  | COX5B      | 1329         | 2.5    | 1.6    | 1.7    | 10.4   | 1.1    |
| 213737_x_at | AI620911  | GOLGA8N    | 643699       | 23.8   | 13.4   | 15.6   | 14.1   | 11.1   |
| 213738_s_at | AI587323  | ATP5A1     | 498          | 2558.2 | 2140.3 | 2600.1 | 2443.2 | 2287.0 |
| 213739_at   | AL049387  | LOC1033449 | 103344931    | 2.6    | 10.9   | 8.2    | 13.1   | 7.6    |
| 213740_s_at | AI401287  | TMEM262    | 100130348    | 6.2    | 1.4    | 11.3   | 1.8    | 3.5    |
| 213741_s_at | BF575685  | KPNA1      | 3836         | 63.8   | 52.5   | 73.8   | 61.9   | 53.8   |
| 213742_at   | AW241752  | SRSF11     | 9295         | 16.3   | 12.6   | 19.7   | 9.2    | 14.2   |
| 213743_at   | BE674119  | CCNT2      | 905          | 37.6   | 28.6   | 42.7   | 39.0   | 33.4   |
| 213744_at   | AI817331  | ATRNL1     | 26033        | 6.9    | 6.6    | 11.8   | 4.0    | 2.4    |
| 213745_at   | AW151108  | ATRNL1     | 26033        | 0.4    | 0.3    | 0.6    | 0.2    | 2.0    |
| 213746_s_at | AW051856  | FLNA       | 2316         | 68.1   | 59.7   | 65.0   | 73.4   | 43.7   |
| 213747_at   | AA047234  | -          | -            | 7.7    | 10.0   | 14.0   | 12.1   | 2.7    |
| 213748_at   | AW271713  | TRIM66     | 9866         | 15.4   | 12.8   | 10.6   | 19.6   | 10.8   |
| 213749_at   | AV686235  | MASP1      | 5648         | 1.0    | 1.4    | 1.1    | 0.9    | 1.8    |
| 213750_at   | AA928506  | RSL1D1     | 26156        | 21.1   | 40.4   | 50.1   | 32.0   | 34.7   |
| 213751_at   | AW873594  | PPP1R37    | 284352       | 2.8    | 7.0    | 9.7    | 8.0    | 6.4    |
| 213752_at   | BF111846  | KAZN       | 23254        | 0.8    | 0.9    | 2.8    | 2.3    | 1.2    |
| 213753_x_at | BF541557  | EIF5A      | 1984         | 328.0  | 317.1  | 337.6  | 306.3  | 274.4  |
| 213754_s_at | AW613203  | PAIP1      | 10605        | 167.8  | 127.1  | 158.8  | 163.5  | 141.5  |
| 213755_s_at | BF431501  | -          | -            | 2.5    | 1.2    | 1.5    | 2.2    | 1.0    |
| 213756_s_at | AI393937  | HSF1       | 3297         | 58.4   | 46.2   | 66.5   | 54.0   | 55.4   |
| 213757_at   | AA393940  | -          | -            | 40.6   | 30.2   | 36.5   | 40.7   | 35.8   |
| 213758_at   | AW337510  | COX4I1     | 1327         | 3.4    | 2.2    | 7.3    | 3.7    | 4.4    |
| 213759_at   | N74140    | ARL4C      | 10123        | 0.5    | 0.5    | 0.9    | 1.0    | 1.4    |
| 213760_s_at | H82458    | ZNF330     | 27309        | 66.7   | 48.3   | 67.6   | 67.5   | 57.9   |
| 213761_at   | AW664850  | MDM1       | 56890        | 36.4   | 33.3   | 38.3   | 33.8   | 29.3   |
| 213762_x_at | AI452524  | LOC1019287 | 26787 /// 27 | 777.8  | 667.3  | 879.2  | 711.9  | 669.6  |
| 213763_at   | R37104    | HIPK2      | 28996        | 38.9   | 43.9   | 40.3   | 30.7   | 25.7   |



|             |           |                           |        |        |        |        |        |        |
|-------------|-----------|---------------------------|--------|--------|--------|--------|--------|--------|
| 213764_s_at | AW665892  | MFAP5                     | 8076   | 0.3    | 0.2    | 0.1    | 1.0    | 1.6    |
| 213765_at   | AW665892  | MFAP5                     | 8076   | 3.4    | 0.6    | 5.9    | 0.5    | 0.5    |
| 213766_x_at | N36926    | GNA11                     | 2767   | 316.4  | 235.7  | 339.3  | 264.8  | 243.4  |
| 213767_at   | U43586    | KSR1                      | 8844   | 4.5    | 0.3    | 5.3    | 1.5    | 0.4    |
| 213768_s_at | AW950513  | ASCL1                     | 429    | 2.4    | 1.6    | 2.2    | 2.2    | 8.3    |
| 213769_at   | AA971768  | KSR1                      | 8844   | 1.2    | 1.3    | 14.2   | 1.0    | 6.0    |
| 213770_at   | U43586    | KSR1                      | 8844   | 3.5    | 2.4    | 5.0    | 1.4    | 1.8    |
| 213771_at   | AI401612  | IRF2BP1                   | 26145  | 34.3   | 50.5   | 46.4   | 38.1   | 34.0   |
| 213772_s_at | BF196572  | GGA2                      | 23062  | 30.8   | 28.5   | 35.4   | 23.2   | 35.3   |
| 213773_x_at | AW248552  | NSUN5                     | 55695  | 213.7  | 212.9  | 209.2  | 202.9  | 190.0  |
| 213774_s_at | AW614578  | PPP1R2                    | 5504   | 2.3    | 3.9    | 1.0    | 0.5    | 0.8    |
| 213775_x_at | AI357871  | ZNF638 /// Z 27332 /// 10 |        | 59.7   | 45.2   | 56.8   | 51.6   | 63.6   |
| 213776_at   | AA583336  | LOC157562                 | 157562 | 2.7    | 1.1    | 2.0    | 4.7    | 0.9    |
| 213777_s_at | AI762013  | -                         | -      | 1.7    | 3.4    | 5.3    | 0.6    | 4.7    |
| 213778_x_at | AI983201  | ZNF276                    | 92822  | 17.4   | 11.6   | 2.6    | 19.9   | 7.3    |
| 213779_at   | AL031186  | EMID1                     | 129080 | 20.5   | 2.7    | 4.1    | 14.7   | 5.5    |
| 213780_at   | N30878    | TCHH                      | 7062   | 3.2    | 2.0    | 5.6    | 4.2    | 0.4    |
| 213781_at   | AC005757  | PPP1R37                   | 284352 | 1.6    | 6.2    | 7.5    | 4.8    | 5.8    |
| 213782_s_at | BF939176  | MYOZ2                     | 51778  | 0.5    | 0.3    | 0.3    | 0.8    | 0.4    |
| 213783_at   | AI760053  | MFNG                      | 4242   | 10.2   | 1.5    | 1.4    | 10.3   | 0.8    |
| 213784_at   | AL037167  | IFT27                     | 11020  | 25.8   | 21.9   | 21.3   | 9.6    | 16.3   |
| 213785_at   | AW269792  | IPO9                      | 55705  | 16.9   | 14.9   | 17.4   | 14.6   | 13.5   |
| 213786_at   | AI935415  | TAX1BP1                   | 8887   | 55.4   | 34.1   | 54.5   | 43.9   | 28.9   |
| 213787_s_at | AV702405  | EBP                       | 10682  | 496.7  | 417.4  | 674.2  | 455.2  | 507.6  |
| 213788_s_at | AI701156  | -                         | -      | 27.4   | 22.8   | 29.9   | 19.1   | 22.1   |
| 213789_at   | N58493    | EBP                       | 10682  | 68.5   | 45.4   | 76.3   | 50.3   | 66.0   |
| 213790_at   | W46291    | ADAM12                    | 8038   | 4.3    | 4.9    | 1.6    | 0.7    | 1.1    |
| 213791_at   | NM_006211 | PENK                      | 5179   | 4.3    | 4.7    | 12.2   | 7.7    | 4.5    |
| 213792_s_at | AA485908  | INSR                      | 3643   | 15.9   | 13.4   | 13.1   | 16.7   | 15.6   |
| 213793_s_at | BE550452  | HOMER1                    | 9456   | 90.7   | 75.8   | 99.0   | 74.6   | 73.5   |
| 213794_s_at | AI269117  | NGDN                      | 25983  | 140.2  | 109.2  | 176.0  | 115.2  | 124.3  |
| 213795_s_at | AL121905  | PTPRA                     | 5786   | 60.8   | 50.8   | 60.1   | 51.5   | 46.2   |
| 213796_at   | AI923984  | SPRR1A                    | 6698   | 0.5    | 0.7    | 1.3    | 0.2    | 0.5    |
| 213797_at   | AI337069  | RSAD2                     | 91543  | 0.9    | 9.1    | 2.9    | 3.7    | 2.3    |
| 213798_s_at | AA806142  | CAP1                      | 10487  | 335.6  | 319.3  | 336.3  | 330.1  | 279.9  |
| 213799_s_at | BF740139  | PTPRA                     | 5786   | 37.4   | 42.8   | 44.4   | 39.3   | 23.7   |
| 213800_at   | X04697    | CFH                       | 3075   | 0.9    | 0.3    | 1.1    | 0.5    | 0.9    |
| 213801_x_at | AW304232  | RPSA /// RPS 3921 /// 604 |        | 3413.9 | 3135.8 | 3527.2 | 3388.6 | 3130.1 |
| 213802_at   | AI810767  | PRSS12                    | 8492   | 1.0    | 0.3    | 5.1    | 0.6    | 0.6    |
| 213803_at   | BG545463  | KPNB1                     | 3837   | 42.5   | 37.2   | 52.3   | 43.6   | 55.2   |
| 213804_at   | AI039084  | INPP5B                    | 3633   | 8.8    | 20.0   | 9.9    | 7.5    | 9.8    |
| 213805_at   | AI692428  | ABHD5                     | 51099  | 33.9   | 24.3   | 31.2   | 26.5   | 28.4   |
| 213806_at   | BE222739  | PURA                      | 5813   | 2.3    | 0.8    | 2.4    | 0.9    | 1.4    |
| 213807_x_at | BE870509  | MET                       | 4233   | 13.2   | 13.3   | 2.9    | 13.0   | 4.1    |
| 213808_at   | BE674466  | ADAM23                    | 8745   | 0.4    | 2.1    | 1.8    | 0.1    | 0.6    |
| 213809_x_at | BG393795  | TCF3                      | 6929   | 3.5    | 1.3    | 1.8    | 1.7    | 1.5    |
| 213810_s_at | AW007137  | -                         | -      | 1.9    | 8.0    | 8.7    | 7.0    | 1.4    |
| 213811_x_at | AW062341  | TCF3                      | 6929   | 83.7   | 82.8   | 112.2  | 95.9   | 73.2   |
| 213812_s_at | AK024748  | CAMKK2                    | 10645  | 94.7   | 96.0   | 113.6  | 83.1   | 67.4   |
| 213813_x_at | AI345238  | -                         | -      | 20.7   | 8.9    | 16.1   | 19.3   | 8.8    |
| 213814_s_at | AA741303  | SNTB2                     | 6645   | 8.9    | 6.3    | 7.1    | 5.6    | 0.6    |
| 213815_x_at | AI913329  | CACTIN                    | 58509  | 57.0   | 54.0   | 64.7   | 49.0   | 46.4   |
| 213816_s_at | AA005141  | MET                       | 4233   | 6.4    | 0.8    | 4.4    | 2.1    | 4.8    |

|             |           |              |              |        |        |        |        |        |
|-------------|-----------|--------------|--------------|--------|--------|--------|--------|--------|
| 213817_at   | AL049435  | IRAK3        | 11213        | 0.2    | 0.1    | 0.1    | 0.1    | 0.1    |
| 213818_x_at | AI862325  | TMEM223      | 79064        | 17.8   | 6.2    | 15.9   | 12.8   | 4.9    |
| 213819_s_at | H45696    | FLOT1        | 10211        | 10.6   | 1.9    | 5.9    | 11.7   | 9.4    |
| 213820_s_at | T54159    | STARD5       | 80765        | 22.6   | 9.6    | 20.4   | 15.8   | 14.5   |
| 213821_s_at | AI819115  | IDS          | 3423         | 1.0    | 0.6    | 5.0    | 3.5    | 7.7    |
| 213822_s_at | BE856776  | UBE3B        | 89910        | 103.8  | 98.5   | 109.6  | 111.3  | 94.3   |
| 213823_at   | H94842    | HOXA11       | 3207         | 3.4    | 5.3    | 7.2    | 0.9    | 1.7    |
| 213824_at   | AI870776  | OLIG2        | 10215        | 0.8    | 3.3    | 5.4    | 3.9    | 1.9    |
| 213825_at   | AA757419  | OLIG2        | 10215        | 2.6    | 6.2    | 5.1    | 0.8    | 0.4    |
| 213826_s_at | AA292281  | H3F3A        | 3020         | 26.0   | 22.8   | 29.4   | 31.3   | 30.7   |
| 213827_at   | AL137579  | ARHGAP33     | 115703       | 23.0   | 29.6   | 28.7   | 18.3   | 2.8    |
| 213828_x_at | AA477655  | H3F3A /// H3 | 3020 /// 302 | 2231.7 | 2225.5 | 2312.9 | 2186.3 | 1879.3 |
| 213829_x_at | AK000485  | RTEL1        | 51750        | 32.7   | 25.1   | 24.3   | 18.9   | 21.9   |
| 213830_at   | AW007751  | YME1L1       | 10730        | 4.2    | 2.9    | 3.2    | 2.5    | 1.4    |
| 213831_at   | X00452    | HLA-DQA1 //  | 3117 /// 100 | 6.7    | 3.9    | 6.1    | 6.2    | 3.2    |
| 213832_at   | AA530995  | KCND3        | 3752         | 12.4   | 8.8    | 13.6   | 9.7    | 9.9    |
| 213833_x_at | AA931929  | NOP16        | 51491        | 5.6    | 4.5    | 9.0    | 6.3    | 9.8    |
| 213834_at   | AB029033  | IQSEC3       | 440073       | 1.5    | 1.5    | 3.4    | 1.3    | 3.3    |
| 213835_x_at | AL524262  | GTPBP3       | 84705        | 110.4  | 71.6   | 111.4  | 86.3   | 82.2   |
| 213836_s_at | AW052084  | WIPI1        | 55062        | 14.9   | 15.7   | 10.5   | 15.3   | 9.8    |
| 213837_at   | Z98752    | L3MBTL1      | 26013        | 6.3    | 10.2   | 5.4    | 5.6    | 4.7    |
| 213838_at   | AA191426  | NOL7         | 51406        | 70.1   | 46.4   | 64.7   | 42.5   | 52.7   |
| 213839_at   | AW028110  | CLMN         | 79789        | 34.9   | 21.9   | 25.7   | 31.1   | 14.5   |
| 213840_s_at | R68573    | MRPS12       | 6183         | 6.3    | 5.8    | 8.6    | 5.0    | 5.2    |
| 213841_at   | BE223030  | TNR          | 7143         | 2.6    | 1.7    | 2.2    | 1.7    | 0.8    |
| 213842_x_at | AK021688  | NSUN5P1 ///  | 155400 /// 2 | 170.5  | 158.4  | 183.0  | 169.4  | 142.7  |
| 213843_x_at | AW276522  | SLC6A8       | 6535         | 226.0  | 228.4  | 246.8  | 241.1  | 202.9  |
| 213844_at   | NM_019102 | HOXA5        | 3202         | 22.6   | 20.9   | 23.7   | 21.3   | 22.1   |
| 213845_at   | AL355532  | GRIK2        | 2898         | 0.8    | 1.4    | 0.6    | 1.8    | 5.5    |
| 213846_at   | AA382702  | COX7C        | 1350         | 234.6  | 222.3  | 271.8  | 246.5  | 198.5  |
| 213847_at   | NM_006262 | PRPH         | 5630         | 21.3   | 17.0   | 23.8   | 23.4   | 9.6    |
| 213848_at   | AI655015  | DUSP7        | 1849         | 44.7   | 30.9   | 50.4   | 35.0   | 41.0   |
| 213849_s_at | AA974416  | PPP2R2B      | 5521         | 7.9    | 1.2    | 11.3   | 8.7    | 5.4    |
| 213850_s_at | AI984932  | SCAF11       | 9169         | 86.2   | 77.9   | 100.2  | 68.7   | 65.9   |
| 213851_at   | BG031677  | TMEM110      | 375346       | 47.2   | 47.8   | 50.4   | 31.7   | 35.3   |
| 213852_at   | BG289199  | RBM8A        | 9939         | 84.5   | 83.5   | 81.6   | 71.7   | 63.8   |
| 213853_at   | AL050199  | DNAJC24      | 120526       | 21.5   | 21.1   | 31.7   | 21.5   | 16.9   |
| 213854_at   | BF511590  | SYNGR1       | 9145         | 20.2   | 16.3   | 14.4   | 17.8   | 11.6   |
| 213855_s_at | AI500366  | LIPE         | 3991         | 11.0   | 7.9    | 7.9    | 4.9    | 7.1    |
| 213856_at   | BG230614  | CD47         | 961          | 0.6    | 1.1    | 2.3    | 0.3    | 0.1    |
| 213857_s_at | BG230614  | CD47         | 961          | 231.5  | 177.1  | 242.5  | 175.4  | 168.0  |
| 213858_at   | BE350026  | ZNF250       | 58500        | 30.5   | 23.6   | 25.4   | 16.7   | 20.1   |
| 213859_x_at | AI652586  | SMARCA5      | 8467         | 55.3   | 47.5   | 67.3   | 49.3   | 52.1   |
| 213860_x_at | AW268585  | CSNK1A1      | 1452         | 756.8  | 559.8  | 654.9  | 608.7  | 567.5  |
| 213861_s_at | N67741    | METTL21B     | 25895        | 28.5   | 31.3   | 34.4   | 29.6   | 23.9   |
| 213862_at   | AI979087  | -            | -            | 0.4    | 0.3    | 2.7    | 0.3    | 0.7    |
| 213863_s_at | AW611641  | OAZ3         | 51686        | 1.8    | 11.9   | 11.7   | 3.5    | 4.1    |
| 213864_s_at | AI985751  | NAP1L1       | 4673         | 1291.6 | 1312.7 | 1395.0 | 1313.2 | 1285.1 |
| 213865_at   | AI378788  | DCBLD2       | 131566       | 0.8    | 0.3    | 0.5    | 0.5    | 0.3    |
| 213866_at   | AL134453  | SAMD14       | 201191       | 6.7    | 4.9    | 5.5    | 9.2    | 8.8    |
| 213867_x_at | AA809056  | ACTB         | 60           | 3557.7 | 3744.9 | 3874.9 | 3574.6 | 3527.4 |
| 213868_s_at | AW243128  | DHRS7        | 51635        | 22.2   | 9.2    | 22.7   | 15.5   | 18.0   |
| 213869_x_at | AA218868  | THY1         | 7070         | 2.0    | 3.2    | 2.7    | 5.6    | 1.7    |

|             |           |                |               |        |        |        |        |        |
|-------------|-----------|----------------|---------------|--------|--------|--------|--------|--------|
| 213870_at   | AL031228  | COL11A2        | 1302          | 9.4    | 9.4    | 10.4   | 13.3   | 10.5   |
| 213871_s_at | AA523444  | DNPH1          | 10591         | 5.9    | 14.3   | 4.0    | 2.0    | 3.9    |
| 213872_at   | BE465032  | -              | -             | 602.2  | 586.0  | 647.4  | 568.1  | 526.5  |
| 213873_at   | D29810    | ST3GAL6        | 10402         | 9.7    | 6.9    | 7.5    | 7.6    | 5.5    |
| 213874_at   | NM_006215 | SERPINA4       | 5267          | 16.4   | 12.4   | 12.1   | 13.4   | 10.2   |
| 213875_x_at | BG252842  | C6orf62        | 81688         | 73.6   | 48.8   | 57.6   | 58.2   | 50.7   |
| 213876_x_at | AW089584  | ZRSR2          | 8233          | 30.7   | 15.9   | 27.7   | 25.0   | 19.1   |
| 213877_x_at | AI568533  | TCEB2          | 6923          | 38.7   | 47.2   | 50.2   | 58.9   | 35.5   |
| 213878_at   | AI685944  | PYROXD1        | 79912         | 41.1   | 32.9   | 33.4   | 36.0   | 25.5   |
| 213879_at   | AV726646  | -              | -             | 111.5  | 69.5   | 102.8  | 93.9   | 87.1   |
| 213880_at   | AL524520  | LGR5           | 8549          | 2.6    | 0.3    | 0.7    | 0.2    | 2.1    |
| 213881_x_at | AI971724  | LOC10192906612 | 6612 /// 661  | 1625.1 | 1471.3 | 1806.4 | 1533.3 | 1452.4 |
| 213882_at   | AA012917  | TM2D1          | 83941         | 26.3   | 19.9   | 22.6   | 27.3   | 17.8   |
| 213883_s_at | AA012917  | TM2D1          | 83941         | 138.7  | 129.5  | 162.3  | 133.6  | 115.0  |
| 213884_s_at | AA114843  | TRIM3          | 10612         | 2.1    | 2.2    | 8.1    | 11.1   | 11.7   |
| 213885_at   | AA114843  | TRIM3          | 10612         | 21.8   | 25.8   | 28.9   | 23.4   | 24.4   |
| 213887_s_at | AI554759  | POLR2E         | 5434          | 712.9  | 679.8  | 733.3  | 730.3  | 667.7  |
| 213888_s_at | AL022398  | TRAF3IP3       | 80342         | 2.1    | 0.8    | 0.5    | 4.3    | 0.5    |
| 213889_at   | AI742901  | PIGL           | 9487          | 29.7   | 25.0   | 32.1   | 29.1   | 23.4   |
| 213890_x_at | AI200589  | RPS16          | 6217          | 3730.0 | 3437.2 | 3800.7 | 3744.0 | 3373.8 |
| 213891_s_at | AI927067  | TCF4           | 6925          | 5.9    | 7.7    | 10.2   | 5.3    | 4.2    |
| 213892_s_at | AA927724  | APRT           | 353           | 942.6  | 853.6  | 1028.8 | 942.9  | 849.8  |
| 213893_x_at | AA161026  | PMS2P5         | 15383 /// 100 | 101.7  | 109.0  | 119.1  | 114.9  | 73.0   |
| 213894_at   | BF447246  | THSD7A         | 221981        | 1.1    | 0.2    | 4.6    | 2.8    | 0.6    |
| 213895_at   | BF445047  | EMP1           | 2012          | 6.7    | 0.8    | 5.7    | 0.8    | 0.5    |
| 213896_x_at | BE856549  | FAM149B1       | 317662        | 35.3   | 48.5   | 50.7   | 39.7   | 36.6   |
| 213897_s_at | AI832239  | MRPL23         | 6150          | 536.9  | 550.7  | 608.7  | 552.3  | 496.8  |
| 213898_at   | AW149379  | RBFOX2         | 23543         | 4.9    | 4.2    | 9.9    | 10.6   | 5.6    |
| 213899_at   | AI743685  | METAP2         | 10988         | 50.9   | 29.3   | 41.5   | 41.2   | 39.7   |
| 213900_at   | AA524029  | FAM189A2       | 9413          | 19.8   | 8.2    | 16.2   | 9.6    | 8.1    |
| 213901_x_at | AW149379  | RBFOX2         | 23543         | 81.5   | 70.4   | 98.3   | 90.7   | 74.6   |
| 213902_at   | AI379338  | ASAH1          | 427           | 127.9  | 196.4  | 175.1  | 195.0  | 174.5  |
| 213903_s_at | AI380850  | RQCD1          | 9125          | 7.6    | 9.8    | 1.3    | 1.1    | 2.4    |
| 213904_at   | AL390170  | FRRS1L         | 23732         | 1.0    | 1.5    | 1.0    | 2.4    | 2.6    |
| 213905_x_at | AA845258  | BGN            | 633           | 0.5    | 1.0    | 0.7    | 2.5    | 1.0    |
| 213906_at   | AW592266  | MYBL1          | 4603          | 6.3    | 3.6    | 9.4    | 6.1    | 2.7    |
| 213907_at   | N32257    | EEF1E1         | 9521          | 23.8   | 11.8   | 24.1   | 15.5   | 14.3   |
| 213908_at   | AI824078  | WHAMMP2        | 339005 /// 4  | 11.3   | 10.9   | 10.9   | 8.9    | 0.8    |
| 213909_at   | AU147799  | LRRC15         | 131578        | 10.0   | 1.4    | 6.3    | 7.5    | 1.0    |
| 213910_at   | AW770896  | IGFBP7         | 3490          | 0.9    | 0.7    | 0.7    | 0.9    | 0.6    |
| 213911_s_at | BF718636  | H2AFZ          | 3015          | 2153.1 | 1694.2 | 2131.3 | 1803.6 | 1806.3 |
| 213912_at   | AW134976  | TBC1D30        | 23329         | 46.8   | 42.6   | 45.8   | 40.2   | 38.6   |
| 213913_s_at | AW134976  | TBC1D30        | 23329         | 40.1   | 26.3   | 58.7   | 44.3   | 40.2   |
| 213914_s_at | R85779    | SPTBN1         | 6711          | 2.4    | 0.7    | 0.9    | 0.3    | 1.7    |
| 213915_at   | NM_005601 | NKG7           | 4818          | 0.6    | 1.3    | 0.8    | 0.4    | 0.3    |
| 213916_at   | AU154474  | ZNF20          | 7568 /// 100  | 26.6   | 28.8   | 30.9   | 33.4   | 28.8   |
| 213917_at   | BE465829  | PAX8           | 7849          | 14.6   | 13.2   | 6.3    | 9.3    | 7.9    |
| 213918_s_at | BF221673  | NIPBL          | 25836         | 45.6   | 23.5   | 47.2   | 37.0   | 36.1   |
| 213919_at   | AW024467  | DNAJC4         | 3338          | 21.1   | 11.8   | 12.3   | 14.0   | 17.2   |
| 213920_at   | AB006631  | CUX2           | 23316         | 4.5    | 0.3    | 0.3    | 3.4    | 3.4    |
| 213921_at   | NM_001048 | SST            | 6750          | 10.8   | 2.1    | 1.8    | 0.4    | 5.7    |
| 213922_at   | AW294686  | TTBK2          | 146057        | 8.3    | 5.9    | 5.9    | 4.8    | 4.2    |
| 213923_at   | AW005535  | RAP2B          | 5912          | 127.6  | 98.4   | 119.3  | 104.3  | 87.9   |

|             |          |                          |              |        |        |        |        |        |
|-------------|----------|--------------------------|--------------|--------|--------|--------|--------|--------|
| 213924_at   | BF476502 | GNAL                     | 2774         | 3.5    | 2.5    | 1.2    | 1.9    | 0.7    |
| 213925_at   | AL134612 | C1orf95                  | 375057       | 12.0   | 7.3    | 12.4   | 11.9   | 2.1    |
| 213926_s_at | AI742626 | AGFG1                    | 3267         | 15.1   | 13.2   | 14.8   | 16.4   | 11.2   |
| 213927_at   | AV753204 | MAP3K9                   | 4293         | 27.5   | 17.5   | 22.6   | 22.4   | 23.9   |
| 213928_s_at | AI742626 | AGFG1                    | 3267         | 9.0    | 9.2    | 4.8    | 8.7    | 7.8    |
| 213929_at   | AL050204 | EXPH5                    | 23086        | 80.5   | 52.9   | 79.2   | 65.5   | 64.6   |
| 213930_at   | N51708   | ATG12                    | 9140         | 17.3   | 11.3   | 15.1   | 13.8   | 8.7    |
| 213931_at   | AI819238 | ID2 /// ID2B             | 3398 /// 840 | 7.8    | 10.1   | 4.8    | 0.8    | 5.0    |
| 213932_x_at | AI923492 | HLA-A                    | 3105         | 224.0  | 322.8  | 257.9  | 358.7  | 257.5  |
| 213933_at   | AW242315 | PTGER3                   | 5733         | 3.0    | 0.6    | 2.0    | 4.9    | 2.9    |
| 213934_s_at | AL567808 | ZNF23                    | 7571         | 12.8   | 15.0   | 2.1    | 8.6    | 2.4    |
| 213935_at   | AF007132 | ABHD5                    | 51099        | 13.0   | 9.3    | 10.1   | 12.8   | 8.7    |
| 213936_x_at | AW276646 | SFTPB                    | 6439         | 25.5   | 21.2   | 38.1   | 25.6   | 16.3   |
| 213937_s_at | AV723177 | FTSJ1                    | 24140        | 90.8   | 82.1   | 113.9  | 101.2  | 90.0   |
| 213938_at   | Z38645   | ERC2                     | 26059        | 5.4    | 4.0    | 0.2    | 0.9    | 0.3    |
| 213939_s_at | AI871641 | RUFY3                    | 22902        | 13.5   | 14.8   | 21.9   | 15.8   | 8.8    |
| 213940_s_at | AU145053 | FNBP1                    | 23048        | 31.5   | 22.0   | 30.7   | 38.2   | 20.5   |
| 213941_x_at | AI970731 | RPS7                     | 6201         | 2091.9 | 1747.7 | 2189.7 | 1928.3 | 1798.4 |
| 213942_at   | AL134303 | MEGF6                    | 1953         | 2.2    | 0.9    | 4.9    | 0.7    | 0.7    |
| 213943_at   | X99268   | TWIST1                   | 7291         | 30.8   | 26.0   | 30.5   | 25.7   | 28.2   |
| 213944_x_at | BG236220 | GNA11                    | 2767         | 154.6  | 169.0  | 162.2  | 135.4  | 136.6  |
| 213945_s_at | AA909765 | NUP210                   | 23225        | 14.3   | 11.4   | 15.0   | 13.8   | 12.6   |
| 213946_s_at | AI633851 | OBSL1                    | 23363        | 2.0    | 0.3    | 1.2    | 2.1    | 1.3    |
| 213947_s_at | AI867102 | NUP210                   | 23225        | 93.2   | 71.1   | 86.0   | 70.9   | 66.1   |
| 213948_x_at | AI564838 | CADM3                    | 57863        | 17.5   | 8.5    | 7.3    | 7.7    | 4.3    |
| 213949_s_at | AI370867 | DOHH                     | 83475        | 2.4    | 1.2    | 1.3    | 4.0    | 8.4    |
| 213950_s_at | BE670265 | PPP3CC                   | 5533         | 12.8   | 3.8    | 5.3    | 7.7    | 4.5    |
| 213951_s_at | BE964655 | PSMC3IP                  | 29893        | 60.0   | 44.3   | 86.7   | 53.7   | 58.1   |
| 213952_s_at | AI372974 | ALOX5                    | 240          | 4.6    | 3.0    | 8.6    | 4.4    | 7.5    |
| 213953_at   | AI732381 | KRT20                    | 54474        | 5.9    | 8.4    | 8.1    | 6.1    | 4.0    |
| 213954_at   | AB020695 | FAM169A                  | 26049        | 24.2   | 11.2   | 15.5   | 13.5   | 10.9   |
| 213955_at   | BE673151 | MYOZ3                    | 91977        | 2.8    | 13.2   | 3.4    | 0.5    | 1.0    |
| 213956_at   | AW299294 | CEP350                   | 9857         | 4.5    | 5.0    | 5.8    | 9.5    | 8.5    |
| 213957_s_at | AA635523 | CEP350                   | 9857         | 18.4   | 7.3    | 15.1   | 10.7   | 8.6    |
| 213958_at   | AW134823 | CD6                      | 923          | 4.5    | 3.3    | 6.3    | 5.7    | 5.5    |
| 213959_s_at | BF515597 | RPGRIP1L                 | 23322        | 30.1   | 23.3   | 28.8   | 26.0   | 22.3   |
| 213960_at   | T87225   | NTRK3                    | 4916         | 1.4    | 4.5    | 6.5    | 4.6    | 4.2    |
| 213961_s_at | AI077556 | -                        | -            | 11.9   | 18.4   | 6.9    | 18.7   | 17.2   |
| 213962_s_at | AI924382 | ANKLE2                   | 23141        | 2.9    | 1.8    | 1.9    | 10.0   | 1.5    |
| 213963_s_at | AW589975 | SAP30                    | 8819         | 10.5   | 7.3    | 3.5    | 10.3   | 7.5    |
| 213964_x_at | AI307586 | RPARP-AS1                | 100505761    | 19.5   | 16.1   | 20.0   | 21.4   | 16.9   |
| 213965_s_at | AL035406 | CHD5                     | 26038        | 5.2    | 9.6    | 9.7    | 1.7    | 4.6    |
| 213966_at   | N25429   | HMG20B                   | 10362        | 1.1    | 3.4    | 1.0    | 0.9    | 0.7    |
| 213967_at   | AI634532 | RALYL                    | 138046       | 12.1   | 3.0    | 16.1   | 10.1   | 11.9   |
| 213968_at   | AA748177 | -                        | -            | 1.6    | 2.8    | 5.6    | 3.8    | 0.9    |
| 213969_x_at | BF683426 | RPL29                    | 6159         | 3488.8 | 3488.9 | 3758.9 | 3592.9 | 3331.7 |
| 213970_at   | AA744682 | RABL3                    | 285282       | 31.6   | 25.3   | 39.7   | 25.4   | 24.9   |
| 213971_s_at | AI924660 | SUZ12 /// SU23512 /// 44 |              | 53.6   | 43.2   | 57.7   | 32.7   | 31.7   |
| 213972_at   | AI080288 | RP11-79P5.2 -            |              | 0.7    | 0.8    | 1.2    | 0.8    | 0.3    |
| 213973_at   | BE646396 | RRBP1                    | 6238         | 2.3    | 1.7    | 7.0    | 4.0    | 8.2    |
| 213974_at   | AB033059 | ADAMTSL3                 | 57188        | 8.7    | 4.0    | 6.4    | 5.8    | 4.7    |
| 213975_s_at | AV711904 | LYZ                      | 4069         | 1.2    | 0.3    | 0.3    | 0.5    | 0.1    |
| 213976_at   | AA054734 | CIZ1                     | 25792        | 4.8    | 10.3   | 10.8   | 10.9   | 5.9    |

|             |           |                           |        |        |        |        |        |        |
|-------------|-----------|---------------------------|--------|--------|--------|--------|--------|--------|
| 213977_s_at | AA054734  | CIZ1                      | 25792  | 78.6   | 94.0   | 91.5   | 95.3   | 76.8   |
| 213978_at   | AA338945  | MTSS1L                    | 92154  | 2.2    | 1.5    | 2.5    | 1.1    | 1.6    |
| 213979_s_at | BF984434  | -                         | -      | 327.1  | 151.2  | 195.2  | 176.2  | 147.0  |
| 213980_s_at | AA053830  | CTBP1                     | 1487   | 426.2  | 379.3  | 448.3  | 399.2  | 353.3  |
| 213981_at   | BG054676  | COMT                      | 1312   | 18.4   | 12.7   | 10.6   | 20.8   | 11.2   |
| 213982_s_at | BG107203  | RABGAP1L                  | 9910   | 1.7    | 8.5    | 7.2    | 7.2    | 7.2    |
| 213983_s_at | AW991219  | PDS5A                     | 23244  | 23.5   | 20.3   | 32.8   | 24.1   | 21.7   |
| 213984_at   | AW991219  | PDS5A                     | 23244  | 30.1   | 16.2   | 25.5   | 16.5   | 14.8   |
| 213985_s_at | H45660    | TMEM259                   | 91304  | 2.2    | 0.6    | 1.2    | 1.0    | 0.9    |
| 213986_s_at | AI805266  | TMEM259                   | 91304  | 79.7   | 68.3   | 98.0   | 80.8   | 76.6   |
| 213987_s_at | AA576621  | CDK13                     | 8621   | 0.6    | 1.4    | 0.7    | 1.0    | 0.5    |
| 213988_s_at | BE971383  | SAT1                      | 6303   | 149.0  | 141.9  | 188.5  | 150.5  | 143.9  |
| 213989_x_at | AB004853  | SETD4                     | 54093  | 33.0   | 33.2   | 30.9   | 25.5   | 34.9   |
| 213990_s_at | BF056517  | PAK7                      | 57144  | 3.2    | 5.6    | 0.6    | 0.6    | 0.4    |
| 213991_s_at | BF940710  | HS3ST1                    | 9957   | 16.0   | 5.6    | 1.1    | 1.1    | 4.1    |
| 213992_at   | AI889941  | COL4A6                    | 1288   | 10.4   | 9.3    | 8.1    | 4.4    | 8.1    |
| 213993_at   | AI885290  | SPON1                     | 10418  | 2.0    | 3.5    | 5.3    | 2.2    | 0.2    |
| 213994_s_at | AI885290  | SPON1                     | 10418  | 0.3    | 0.1    | 1.8    | 1.2    | 0.3    |
| 213995_at   | AW195882  | ATP5S                     | 27109  | 171.6  | 165.0  | 192.3  | 167.0  | 118.9  |
| 213996_at   | NM_013313 | YPEL1                     | 29799  | 15.2   | 13.9   | 16.7   | 10.0   | 12.5   |
| 213997_at   | AB011146  | FAM189A1                  | 23359  | 1.5    | 1.0    | 7.5    | 1.3    | 0.6    |
| 213998_s_at | AW188131  | DDX17                     | 10521  | 24.6   | 23.3   | 15.7   | 28.3   | 14.0   |
| 213999_at   | BE999993  | YIPF4                     | 84272  | 11.4   | 5.6    | 8.5    | 7.2    | 6.0    |
| 214000_s_at | AI744627  | RGS10                     | 6001   | 2.0    | 9.9    | 10.5   | 10.0   | 6.8    |
| 214001_x_at | AW302047  | RPS10                     | 6204   | 48.3   | 34.1   | 43.8   | 30.4   | 34.8   |
| 214002_at   | AA419227  | MYL6                      | 4637   | 14.8   | 8.3    | 11.9   | 14.7   | 14.0   |
| 214003_x_at | BF184532  | RPS20 /// SN 6224 /// 267 |        | 3347.0 | 2989.0 | 3559.5 | 3492.4 | 3190.3 |
| 214004_s_at | AI806207  | VGLL4                     | 9686   | 40.4   | 52.9   | 52.4   | 49.2   | 42.8   |
| 214005_at   | BE326952  | GGCX                      | 2677   | 115.0  | 100.2  | 109.8  | 141.7  | 85.0   |
| 214006_s_at | BE326952  | GGCX                      | 2677   | 113.5  | 135.4  | 130.6  | 137.4  | 107.5  |
| 214007_s_at | AW665024  | TWF1                      | 5756   | 114.8  | 109.5  | 117.3  | 102.0  | 105.5  |
| 214008_at   | N25562    | TWF1                      | 5756   | 15.0   | 9.0    | 13.0   | 5.8    | 8.3    |
| 214009_at   | R10150    | MSL3                      | 10943  | 13.3   | 10.7   | 6.9    | 10.3   | 9.1    |
| 214010_s_at | R50094    | ATP9B                     | 374868 | 3.0    | 2.3    | 2.8    | 1.3    | 2.5    |
| 214011_s_at | BE314601  | NOP16                     | 51491  | 274.3  | 186.4  | 285.2  | 218.2  | 268.0  |
| 214012_at   | BE551138  | ERAP1                     | 51752  | 1.3    | 2.1    | 0.4    | 2.2    | 2.4    |
| 214013_s_at | BE675153  | TBC1D1                    | 23216  | 4.9    | 2.6    | 0.5    | 2.1    | 1.2    |
| 214014_at   | W81196    | CDC42EP2                  | 10435  | 1.7    | 2.3    | 13.6   | 6.9    | 14.4   |
| 214015_at   | AI968839  | SOCS7                     | 30837  | 8.6    | 7.6    | 8.5    | 14.3   | 11.5   |
| 214016_s_at | AL558875  | SFPQ                      | 6421   | 103.7  | 93.2   | 94.0   | 110.8  | 76.2   |
| 214017_s_at | AA039439  | DHX34                     | 9704   | 17.0   | 11.7   | 24.3   | 16.5   | 12.9   |
| 214018_at   | AI203397  | GRIP1                     | 23426  | 0.6    | 0.6    | 0.7    | 0.6    | 0.2    |
| 214019_at   | Z23022    | -                         | -      | 5.6    | 1.2    | 6.2    | 3.3    | 4.9    |
| 214020_x_at | BE138575  | ITGB5                     | 3693   | 93.6   | 19.9   | 32.2   | 45.0   | 23.6   |
| 214021_x_at | AI335208  | ITGB5                     | 3693   | 7.5    | 3.9    | 6.0    | 9.1    | 4.2    |
| 214022_s_at | AA749101  | IFITM1                    | 8519   | 34.6   | 23.8   | 20.2   | 15.0   | 15.5   |
| 214023_x_at | AL533838  | TUBB2B                    | 347733 | 0.6    | 2.1    | 4.9    | 0.6    | 0.3    |
| 214024_s_at | AA631156  | DGCR6L                    | 85359  | 0.5    | 0.8    | 7.4    | 7.2    | 1.1    |
| 214025_at   | AI922937  | DDX28                     | 55794  | 1.7    | 2.4    | 7.1    | 4.3    | 1.2    |
| 214026_s_at | AI860246  | SPRED2                    | 200734 | 0.7    | 0.7    | 1.5    | 0.4    | 0.7    |
| 214027_x_at | AA889653  | DES /// SUPT 1674 /// 555 |        | 2.8    | 2.8    | 3.1    | 2.8    | 2.7    |
| 214028_x_at | AU156998  | TDRD3                     | 81550  | 20.1   | 13.6   | 22.6   | 6.9    | 10.5   |
| 214029_at   | AI435954  | SLC25A42                  | 284439 | 1.0    | 3.5    | 2.6    | 0.4    | 0.8    |

|             |          |                          |        |       |       |       |       |       |
|-------------|----------|--------------------------|--------|-------|-------|-------|-------|-------|
| 214030_at   | BE501352 | CRYBG3                   | 131544 | 41.6  | 40.0  | 45.8  | 39.6  | 42.7  |
| 214031_s_at | AI920979 | KRT7                     | 3855   | 0.5   | 0.8   | 0.2   | 0.4   | 0.4   |
| 214032_at   | AI817942 | ZAP70                    | 7535   | 1.8   | 1.1   | 1.8   | 1.1   | 0.9   |
| 214033_at   | AI084637 | ABCC6 /// AE368 /// 6531 |        | 51.0  | 33.3  | 37.1  | 35.2  | 30.9  |
| 214034_at   | AB011097 | ERAP1                    | 51752  | 3.9   | 2.3   | 3.2   | 1.9   | 3.5   |
| 214035_x_at | AA308853 | LOC399491                | 399491 | 94.9  | 105.9 | 128.8 | 57.5  | 52.5  |
| 214036_at   | BE464799 | EFNA5                    | 1946   | 92.0  | 65.9  | 70.4  | 51.8  | 50.2  |
| 214037_s_at | BF224247 | CCDC22                   | 28952  | 25.1  | 19.3  | 25.7  | 22.8  | 23.6  |
| 214038_at   | AI984980 | CCL8                     | 6355   | 4.7   | 9.3   | 9.5   | 0.9   | 7.6   |
| 214039_s_at | T15777   | LAPTM4B                  | 55353  | 432.2 | 419.7 | 403.7 | 451.9 | 317.2 |
| 214040_s_at | BE675337 | GSN                      | 2934   | 1.2   | 1.1   | 1.5   | 1.1   | 0.6   |
| 214041_x_at | BE857772 | RPL37A                   | 6168   | 210.8 | 140.3 | 205.5 | 173.6 | 161.2 |
| 214042_s_at | AW071997 | RPL22                    | 6146   | 445.6 | 448.9 | 509.1 | 497.1 | 420.1 |
| 214043_at   | BF062299 | PTPRD                    | 5789   | 0.7   | 1.3   | 0.3   | 2.8   | 4.8   |
| 214044_at   | BE968750 | RYR2                     | 6262   | 8.4   | 4.4   | 7.3   | 6.6   | 3.0   |
| 214045_at   | BF056778 | LIAS                     | 11019  | 40.2  | 36.9  | 44.3  | 31.5  | 36.5  |
| 214046_at   | AA017721 | FUT9                     | 10690  | 0.6   | 0.5   | 2.2   | 0.2   | 0.1   |
| 214047_s_at | AI913365 | MBD4                     | 8930   | 91.9  | 59.1  | 83.8  | 71.9  | 68.7  |
| 214048_at   | AI913365 | MBD4                     | 8930   | 8.5   | 4.1   | 8.7   | 9.4   | 8.2   |
| 214049_x_at | AI829961 | CD7                      | 924    | 1.0   | 1.8   | 12.5  | 2.1   | 1.2   |
| 214050_at   | AI694317 | -                        | -      | 11.3  | 5.6   | 3.8   | 10.3  | 7.7   |
| 214051_at   | BF677486 | TMSB15A /// 11013 /// 28 |        | 16.8  | 12.0  | 16.9  | 11.0  | 14.2  |
| 214052_x_at | AW301305 | PRRC2C                   | 23215  | 11.3  | 9.6   | 7.7   | 4.5   | 10.5  |
| 214053_at   | AW772192 | ERBB4                    | 2066   | 7.9   | 0.8   | 4.7   | 7.9   | 5.2   |
| 214054_at   | AI828929 | DOK2                     | 9046   | 2.2   | 17.2  | 10.9  | 5.1   | 1.2   |
| 214055_x_at | AW238632 | PRRC2C                   | 23215  | 64.5  | 42.2  | 62.3  | 53.9  | 42.0  |
| 214056_at   | BF981280 | MCL1                     | 4170   | 34.7  | 28.2  | 41.2  | 26.8  | 28.7  |
| 214057_at   | H71805   | MCL1                     | 4170   | 11.8  | 14.6  | 23.8  | 20.5  | 16.3  |
| 214058_at   | M19720   | MYCL                     | 4610   | 30.6  | 26.2  | 25.3  | 19.8  | 17.2  |
| 214059_at   | BE049439 | IFI44                    | 10561  | 4.3   | 3.7   | 2.8   | 3.2   | 0.2   |
| 214060_at   | BE220360 | SSBP1                    | 6742   | 12.7  | 13.3  | 10.0  | 8.1   | 10.9  |
| 214061_at   | AI017564 | TBC1D31                  | 93594  | 34.0  | 31.9  | 46.1  | 26.0  | 31.9  |
| 214062_x_at | AI684894 | NFKBIB                   | 4793   | 7.7   | 1.1   | 9.9   | 10.0  | 14.9  |
| 214063_s_at | AI073407 | TF                       | 7018   | 1.3   | 3.7   | 1.5   | 0.3   | 1.2   |
| 214064_at   | AI073407 | TF                       | 7018   | 2.0   | 7.7   | 1.4   | 3.3   | 1.7   |
| 214065_s_at | BG251252 | CIB2                     | 10518  | 1.4   | 1.4   | 1.1   | 1.4   | 4.8   |
| 214066_x_at | AA565715 | NPR2                     | 4882   | 5.6   | 7.2   | 10.2  | 12.8  | 4.3   |
| 214067_at   | AL031709 | TSR3                     | 115939 | 0.8   | 1.1   | 2.6   | 5.4   | 1.0   |
| 214068_at   | AF070610 | BEAN1                    | 146227 | 7.0   | 9.4   | 8.3   | 9.2   | 4.5   |
| 214069_at   | AA865601 | ACSM2A /// 123876 /// 3  |        | 11.2  | 1.2   | 7.3   | 0.7   | 0.8   |
| 214070_s_at | AW006935 | ATP10B                   | 23120  | 18.5  | 18.9  | 29.0  | 12.6  | 10.8  |
| 214071_at   | AI082827 | GNAL                     | 2774   | 1.9   | 0.4   | 4.4   | 0.4   | 0.3   |
| 214072_x_at | AA679297 | NENF                     | 29937  | 10.6  | 18.2  | 11.2  | 14.4  | 14.1  |
| 214073_at   | BG475299 | CTTN                     | 2017   | 27.5  | 21.2  | 17.2  | 23.9  | 10.3  |
| 214074_s_at | BG475299 | CTTN                     | 2017   | 43.5  | 42.2  | 53.1  | 45.5  | 29.1  |
| 214075_at   | AI984136 | NENF                     | 29937  | 58.8  | 57.7  | 70.7  | 73.2  | 67.9  |
| 214076_at   | AI697803 | GFOD2                    | 81577  | 66.0  | 60.2  | 54.3  | 51.2  | 39.2  |
| 214077_x_at | H15129   | MEIS3P1                  | 4213   | 42.7  | 46.1  | 50.6  | 33.8  | 28.1  |
| 214078_at   | AF070581 | AF070581                 | -      | 1.3   | 0.2   | 0.1   | 1.4   | 1.5   |
| 214079_at   | AK000345 | DHRS2                    | 10202  | 57.7  | 53.5  | 87.2  | 42.8  | 45.7  |
| 214080_x_at | AI815793 | PRKCSH                   | 5589   | 280.6 | 222.7 | 294.6 | 235.8 | 189.4 |
| 214081_at   | AF070526 | PLXDC1                   | 57125  | 9.1   | 7.1   | 13.3  | 8.6   | 5.7   |
| 214082_at   | AW003516 | CA5B                     | 11238  | 0.9   | 0.8   | 11.8  | 1.2   | 5.2   |

|             |          |                           |        |       |        |       |       |       |
|-------------|----------|---------------------------|--------|-------|--------|-------|-------|-------|
| 214083_at   | AW772123 | PPP2R5C                   | 5527   | 10.0  | 15.4   | 22.3  | 12.8  | 19.0  |
| 214084_x_at | AW072388 | NCF1                      | 653361 | 1.3   | 1.8    | 1.8   | 1.2   | 0.4   |
| 214085_x_at | AI912583 | GLIPR1                    | 11010  | 11.6  | 11.0   | 16.5  | 10.8  | 13.7  |
| 214086_s_at | AK001980 | PARP2                     | 10038  | 158.4 | 129.2  | 191.1 | 137.4 | 178.1 |
| 214087_s_at | BF593509 | MYBPC1                    | 4604   | 5.2   | 3.1    | 7.3   | 0.8   | 0.8   |
| 214088_s_at | AW080549 | FUT3                      | 2525   | 9.1   | 8.8    | 6.5   | 9.7   | 12.8  |
| 214089_at   | AA976278 | RPS8                      | 6202   | 1.7   | 1.3    | 1.4   | 4.9   | 7.1   |
| 214090_at   | BF732462 | PAWR                      | 5074   | 0.5   | 3.6    | 1.9   | 4.5   | 5.4   |
| 214091_s_at | AW149846 | GPX3                      | 2878   | 9.1   | 10.8   | 9.9   | 5.2   | 11.8  |
| 214092_x_at | AI928127 | SUGP2                     | 10147  | 64.5  | 59.9   | 70.0  | 66.6  | 63.9  |
| 214093_s_at | AA156865 | FUBP1                     | 8880   | 54.6  | 45.0   | 46.5  | 60.0  | 43.9  |
| 214094_at   | AA156865 | FUBP1                     | 8880   | 9.4   | 5.3    | 1.0   | 2.4   | 1.2   |
| 214095_at   | AW190316 | SHMT2                     | 6472   | 134.9 | 150.5  | 150.8 | 169.7 | 115.1 |
| 214096_s_at | AW190316 | SHMT2                     | 6472   | 990.0 | 1044.8 | 977.6 | 952.3 | 845.0 |
| 214097_at   | AW024383 | RPS21                     | 6227   | 166.9 | 162.1  | 170.9 | 165.5 | 153.9 |
| 214098_at   | AB029030 | KIAA1107                  | 23285  | 10.8  | 7.8    | 13.4  | 11.7  | 8.0   |
| 214099_s_at | AK001619 | LOC1009967.9659 /// 100   |        | 2.1   | 1.4    | 2.3   | 1.1   | 3.6   |
| 214100_x_at | AI284845 | NSUN5P1                   | 155400 | 65.8  | 79.9   | 84.0  | 56.9  | 51.5  |
| 214101_s_at | BG153399 | NPEPPS                    | 9520   | 65.2  | 48.2   | 51.0  | 58.5  | 46.0  |
| 214102_at   | AK023737 | -                         | -      | 6.9   | 6.8    | 16.6  | 5.8   | 7.0   |
| 214103_s_at | BE669921 | RAP2A                     | 5911   | 2.1   | 1.7    | 1.9   | 1.0   | 2.6   |
| 214104_at   | AI703188 | GPR161                    | 23432  | 22.9  | 18.4   | 16.5  | 15.2  | 15.1  |
| 214105_at   | AI922872 | SOCS3                     | 9021   | 7.3   | 6.7    | 1.8   | 8.1   | 6.4   |
| 214106_s_at | AI762113 | GMDS                      | 2762   | 59.6  | 53.7   | 52.5  | 57.4  | 48.2  |
| 214107_x_at | AW340850 | LOC440434                 | 440434 | 100.8 | 114.6  | 122.5 | 106.5 | 94.1  |
| 214108_at   | AI346181 | MAX                       | 4149   | 1.4   | 3.9    | 11.0  | 10.1  | 6.4   |
| 214109_at   | AI659561 | LRBA                      | 987    | 164.2 | 124.6  | 135.3 | 133.7 | 109.8 |
| 214110_s_at | BF195104 | LOC645166 / 645166 /// 6  |        | 87.3  | 96.1   | 101.5 | 110.4 | 87.4  |
| 214111_at   | AF070577 | OPCML                     | 4978   | 3.9   | 3.0    | 0.4   | 4.2   | 0.7   |
| 214112_s_at | AA543076 | CXorf40A /// 91966 /// 54 |        | 155.4 | 124.3  | 162.9 | 128.7 | 136.9 |
| 214113_s_at | AI738479 | RBM8A                     | 9939   | 202.8 | 176.9  | 193.7 | 180.9 | 153.8 |
| 214114_x_at | AK023141 | FASTK                     | 10922  | 271.4 | 217.8  | 246.0 | 236.2 | 201.4 |
| 214115_at   | AI814466 | VAMP5                     | 10791  | 0.4   | 0.7    | 0.6   | 1.2   | 0.6   |
| 214116_at   | AI767414 | BTD                       | 686    | 30.7  | 28.2   | 32.2  | 28.9  | 22.8  |
| 214117_s_at | AI767414 | BTD                       | 686    | 71.1  | 73.0   | 61.8  | 86.8  | 67.5  |
| 214118_x_at | AI205598 | PCM1                      | 5108   | 57.4  | 56.2   | 57.6  | 57.1  | 47.5  |
| 214119_s_at | AI936769 | FKBP1A /// L 2280 /// 101 |        | 271.1 | 355.0  | 329.7 | 364.8 | 290.3 |
| 214120_at   | AW157535 | RFPL1S                    | 10740  | 0.8   | 0.6    | 5.6   | 0.8   | 0.2   |
| 214121_x_at | AA086229 | PDLIM7                    | 9260   | 3.1   | 14.6   | 24.6  | 15.8  | 18.1  |
| 214122_at   | AA086229 | PDLIM7                    | 9260   | 1.2   | 1.1    | 1.1   | 2.1   | 1.3   |
| 214123_s_at | AI126492 | NOP14-AS1                 | 317648 | 1.5   | 5.0    | 1.1   | 4.4   | 2.0   |
| 214124_x_at | AL043487 | FGFR1OP                   | 11116  | 24.6  | 14.8   | 19.5  | 17.4  | 17.2  |
| 214125_s_at | BF440021 | NENF                      | 29937  | 3.4   | 2.3    | 1.3   | 2.6   | 2.2   |
| 214126_at   | N39314   | -                         | -      | 24.5  | 21.0   | 21.4  | 21.4  | 23.0  |
| 214127_s_at | H28020   | SRRT                      | 51593  | 1.6   | 1.3    | 1.3   | 0.8   | 0.8   |
| 214128_at   | AB014559 | DAGLA                     | 747    | 5.8   | 1.6    | 6.6   | 2.8   | 1.0   |
| 214129_at   | AI821791 | LOC1009967.9659 /// 100   |        | 78.3  | 62.6   | 81.0  | 70.0  | 52.6  |
| 214130_s_at | AI821791 | LOC1009967.9659 /// 100   |        | 10.0  | 14.1   | 11.1  | 22.2  | 11.7  |
| 214131_at   | AL049280 | TXLNGY                    | 246126 | 10.1  | 7.7    | 6.5   | 5.8   | 6.3   |
| 214132_at   | BG232034 | ATP5C1                    | 509    | 16.4  | 7.9    | 9.3   | 8.9   | 7.9   |
| 214133_at   | AI611214 | MUC6                      | 4588   | 3.8   | 10.5   | 9.6   | 8.3   | 1.6   |
| 214134_at   | BF939689 | KIAA1211L                 | 343990 | 2.5   | 0.5    | 0.8   | 1.1   | 0.3   |
| 214135_at   | BE551219 | CLDN18                    | 51208  | 11.5  | 5.6    | 6.0   | 9.6   | 6.9   |

|             |          |                           |        |        |        |        |        |        |
|-------------|----------|---------------------------|--------|--------|--------|--------|--------|--------|
| 214136_at   | W80642   | NUDT13                    | 25961  | 6.2    | 8.2    | 6.5    | 8.6    | 7.3    |
| 214137_at   | AI806482 | PTPRJ                     | 5795   | 11.0   | 10.0   | 11.5   | 8.2    | 9.4    |
| 214138_at   | AA284829 | ZNF79                     | 7633   | 24.0   | 15.8   | 19.5   | 16.8   | 17.3   |
| 214139_at   | AI051476 | ARID4B                    | 51742  | 6.1    | 8.4    | 5.4    | 7.3    | 8.7    |
| 214140_at   | AI827990 | SLC25A16                  | 8034   | 53.6   | 41.0   | 52.6   | 44.7   | 41.0   |
| 214141_x_at | BF033354 | SRSF7                     | 6432   | 495.7  | 405.0  | 596.6  | 450.6  | 423.7  |
| 214142_at   | AI732905 | ZG16                      | 653808 | 1.2    | 4.1    | 3.4    | 5.1    | 4.7    |
| 214143_x_at | AI560573 | RPL24                     | 6152   | 2966.4 | 2663.6 | 3106.2 | 2906.9 | 2738.9 |
| 214144_at   | BF432147 | POLR2D                    | 5433   | 49.2   | 32.6   | 52.0   | 38.6   | 48.2   |
| 214145_s_at | BG223341 | SPTB                      | 6710   | 1.3    | 0.8    | 1.6    | 0.7    | 0.5    |
| 214146_s_at | R64130   | PPBP                      | 5473   | 0.9    | 0.2    | 3.7    | 0.5    | 0.3    |
| 214147_at   | AL046350 | MROH7                     | 374977 | 2.1    | 1.3    | 3.5    | 2.1    | 4.4    |
| 214148_at   | U90917   | ITFG2 /// LO(55846 /// 10 |        | 9.9    | 10.4   | 10.1   | 5.0    | 6.9    |
| 214149_s_at | AI252582 | ATP6V0E1                  | 8992   | 41.7   | 45.9   | 44.1   | 44.2   | 35.7   |
| 214150_x_at | BE043477 | ATP6V0E1                  | 8992   | 748.1  | 729.1  | 725.3  | 713.3  | 697.4  |
| 214151_s_at | AU144243 | CCPG1 /// D\9236 /// 100  |        | 38.0   | 23.3   | 28.3   | 31.8   | 21.5   |
| 214152_at   | AU144243 | CCPG1 /// D\9236 /// 100  |        | 31.3   | 17.8   | 31.9   | 26.2   | 22.0   |
| 214153_at   | BE467941 | ELOVL5                    | 60481  | 4.0    | 4.9    | 5.9    | 6.1    | 1.8    |
| 214154_s_at | AA888057 | PKP2                      | 5318   | 2.4    | 5.5    | 4.8    | 1.4    | 0.8    |
| 214155_s_at | AI743740 | LARP4                     | 113251 | 78.1   | 68.5   | 100.7  | 64.9   | 76.6   |
| 214156_at   | AL050090 | MYRIP                     | 25924  | 111.1  | 95.1   | 83.8   | 89.3   | 56.0   |
| 214157_at   | AA401492 | GNAS                      | 2778   | 73.9   | 73.6   | 96.9   | 81.2   | 72.1   |
| 214158_s_at | AV682503 | PRDM10                    | 56980  | 0.9    | 0.7    | 8.5    | 4.1    | 1.4    |
| 214159_at   | AW771015 | PLCE1                     | 51196  | 5.6    | 3.9    | 3.6    | 1.7    | 3.5    |
| 214160_at   | AI738463 | -                         | -      | 1.2    | 0.9    | 8.4    | 1.8    | 0.3    |
| 214161_at   | BF057458 | OSGIN2                    | 734    | 3.9    | 0.6    | 1.0    | 0.6    | 1.1    |
| 214162_at   | AF070541 | ASXL3                     | 80816  | 1.6    | 1.6    | 3.5    | 3.3    | 0.6    |
| 214163_at   | AV700696 | HSPB11                    | 51668  | 9.9    | 6.1    | 8.3    | 8.7    | 4.4    |
| 214164_x_at | BF752277 | CA12                      | 771    | 81.7   | 70.6   | 69.0   | 80.8   | 60.1   |
| 214165_s_at | BF512553 | HS6ST1                    | 9394   | 0.8    | 0.2    | 0.4    | 0.3    | 0.9    |
| 214166_at   | AW294107 | SDHB                      | 6390   | 1.0    | 2.3    | 6.6    | 1.4    | 1.4    |
| 214167_s_at | AA555113 | RPLP0                     | 6175   | 2793.8 | 2517.9 | 2826.8 | 2606.2 | 2625.1 |
| 214168_s_at | AA813018 | TJP1                      | 7082   | 94.1   | 92.9   | 115.3  | 100.5  | 94.5   |
| 214169_at   | BE615699 | SUN1                      | 23353  | 30.6   | 26.5   | 36.4   | 37.3   | 27.2   |
| 214170_x_at | AA669797 | FH                        | 2271   | 930.4  | 866.7  | 1037.2 | 873.5  | 782.3  |
| 214171_s_at | AI810156 | U2AF2                     | 11338  | 5.8    | 1.8    | 6.5    | 1.4    | 4.9    |
| 214172_x_at | BG032035 | RYK                       | 6259   | 50.7   | 36.1   | 49.9   | 41.8   | 40.1   |
| 214173_x_at | AW514900 | URI1                      | 8725   | 302.0  | 275.9  | 365.6  | 309.6  | 279.0  |
| 214174_s_at | BE043700 | PDLIM4                    | 8572   | 7.6    | 2.2    | 9.6    | 7.0    | 1.7    |
| 214175_x_at | AI254547 | PDLIM4                    | 8572   | 0.8    | 1.5    | 2.2    | 1.3    | 1.2    |
| 214176_s_at | AI348545 | -                         | -      | 2.7    | 4.9    | 13.5   | 6.7    | 1.5    |
| 214177_s_at | AI935162 | PBXIP1                    | 57326  | 25.5   | 24.8   | 16.9   | 32.1   | 17.3   |
| 214178_s_at | AI356682 | SOX2                      | 6657   | 7.6    | 11.3   | 12.2   | 10.5   | 10.3   |
| 214179_s_at | H93013   | NFE2L1                    | 4779   | 112.8  | 117.1  | 144.0  | 143.1  | 114.5  |
| 214180_at   | AW340588 | MAN1C1                    | 57134  | 18.0   | 15.2   | 24.5   | 19.5   | 7.5    |
| 214181_x_at | AI735692 | LST1                      | 7940   | 0.8    | 1.2    | 1.2    | 1.4    | 1.6    |
| 214182_at   | AA243143 | -                         | -      | 96.9   | 74.5   | 106.8  | 85.1   | 85.8   |
| 214183_s_at | X91817   | TKTL1                     | 8277   | 1.5    | 0.6    | 2.4    | 0.9    | 1.7    |
| 214184_at   | AW195837 | NPFF                      | 8620   | 1.8    | 1.1    | 8.4    | 2.6    | 1.3    |
| 214185_at   | AW592227 | KHDRBS1                   | 10657  | 6.2    | 8.5    | 14.2   | 6.3    | 9.1    |
| 214186_s_at | AI346483 | HCG26                     | 352961 | 2.2    | 2.9    | 6.6    | 5.7    | 0.7    |
| 214187_x_at | AA129726 | CTDSPL                    | 10217  | 17.7   | 3.1    | 3.2    | 2.5    | 9.4    |
| 214188_at   | AW665096 | -                         | -      | 18.6   | 3.1    | 14.4   | 13.1   | 13.4   |



|             |           |                    |        |        |        |        |        |        |
|-------------|-----------|--------------------|--------|--------|--------|--------|--------|--------|
| 214189_s_at | AI799984  | GGA2               | 23062  | 7.4    | 10.3   | 7.8    | 6.2    | 5.8    |
| 214190_x_at | AI799984  | GGA2               | 23062  | 35.4   | 21.1   | 37.4   | 31.4   | 25.9   |
| 214191_at   | W67992    | ICA1               | 3382   | 0.8    | 0.7    | 1.4    | 3.8    | 0.6    |
| 214192_at   | Y08613    | NUP88              | 4927   | 1.2    | 0.8    | 1.5    | 0.7    | 0.7    |
| 214193_s_at | AI770084  | DIEXF              | 27042  | 41.0   | 14.3   | 34.6   | 27.3   | 34.1   |
| 214194_at   | AW043622  | DIS3               | 22894  | 13.8   | 11.1   | 9.7    | 3.9    | 8.2    |
| 214195_at   | AA602532  | TPP1               | 1200   | 2.8    | 3.3    | 2.3    | 2.0    | 2.7    |
| 214196_s_at | AA602532  | TPP1               | 1200   | 72.2   | 70.8   | 67.8   | 57.9   | 61.0   |
| 214197_s_at | AI762193  | SETDB1             | 9869   | 31.1   | 25.5   | 30.0   | 25.9   | 18.4   |
| 214198_s_at | AU150824  | DGCR2              | 9993   | 93.3   | 86.6   | 101.2  | 99.8   | 95.2   |
| 214199_at   | NM_003019 | SFTPD              | 6441   | 9.6    | 1.8    | 1.7    | 2.5    | 1.8    |
| 214200_s_at | AI193744  | COL6A1             | 1291   | 2.6    | 3.2    | 3.5    | 1.3    | 1.1    |
| 214201_x_at | AA742237  | PRRC2A             | 7916   | 86.0   | 86.4   | 105.4  | 106.4  | 78.2   |
| 214202_at   | N21364    | CTC-428G20.-       |        | 1.7    | 12.4   | 10.3   | 12.3   | 4.4    |
| 214203_s_at | AA074145  | LOC10272475625 /// | 102    | 6.7    | 1.2    | 3.7    | 3.4    | 4.4    |
| 214204_at   | BF224076  | PACRG              | 135138 | 7.5    | 1.8    | 1.7    | 4.3    | 2.8    |
| 214205_x_at | AK022131  | GLRX3              | 10539  | 147.2  | 132.0  | 172.4  | 139.8  | 121.9  |
| 214206_at   | AI739480  | PPIL6              | 285755 | 0.8    | 0.4    | 0.6    | 0.4    | 0.5    |
| 214207_s_at | AW024347  | CARD10             | 29775  | 1.1    | 3.2    | 3.7    | 5.9    | 0.9    |
| 214208_at   | BF448703  | KLHL35             | 283212 | 2.6    | 1.5    | 2.7    | 1.4    | 4.8    |
| 214209_s_at | BE504895  | ABCB9              | 23457  | 20.2   | 10.6   | 20.1   | 13.0   | 13.4   |
| 214210_at   | AL049764  | SLC25A17           | 10478  | 22.5   | 19.2   | 23.3   | 20.2   | 25.6   |
| 214211_at   | AA083483  | FTH1               | 2495   | 213.3  | 257.3  | 206.9  | 254.8  | 171.9  |
| 214212_x_at | AI928241  | FERMT2             | 10979  | 11.7   | 7.4    | 11.1   | 11.7   | 8.3    |
| 214213_x_at | AA063189  | LMNA               | 4000   | 33.8   | 29.6   | 28.6   | 41.4   | 24.0   |
| 214214_s_at | AU151801  | C1QBP              | 708    | 1440.4 | 1107.0 | 1460.2 | 1215.1 | 1165.3 |
| 214215_s_at | AW514174  | LARP4B             | 23185  | 1.5    | 10.7   | 1.4    | 5.1    | 0.9    |
| 214216_s_at | AW628686  | LARP4B             | 23185  | 24.3   | 22.8   | 26.6   | 18.4   | 28.3   |
| 214217_at   | D60132    | GRM5               | 2915   | 2.7    | 1.1    | 6.8    | 4.5    | 0.7    |
| 214218_s_at | AV699347  | XIST               | 7503   | 5.8    | 4.3    | 0.9    | 1.1    | 2.8    |
| 214219_x_at | BE646618  | MAP4K1             | 11184  | 1.6    | 2.2    | 2.1    | 1.2    | 0.6    |
| 214220_s_at | AW003635  | ALMS1              | 7840   | 12.2   | 13.6   | 12.8   | 4.7    | 7.6    |
| 214221_at   | AI825212  | ALMS1              | 7840   | 14.9   | 8.4    | 14.1   | 11.3   | 9.1    |
| 214222_at   | AB023161  | DNAH7              | 56171  | 13.9   | 10.6   | 11.3   | 9.7    | 12.9   |
| 214223_at   | AA427737  | PTP4A3             | 11156  | 1.1    | 6.9    | 2.8    | 1.8    | 2.2    |
| 214224_s_at | BE674061  | PIN4               | 5303   | 189.8  | 148.3  | 186.3  | 194.3  | 163.1  |
| 214225_at   | BE674061  | PIN4               | 5303   | 13.0   | 10.9   | 10.1   | 9.6    | 9.5    |
| 214226_at   | AA528252  | PRSS53             | 339105 | 16.4   | 13.8   | 25.4   | 15.8   | 8.6    |
| 214227_at   | BF432795  | -                  | -      | 0.5    | 0.5    | 1.6    | 0.4    | 0.4    |
| 214228_x_at | AJ277151  | TNFRSF4            | 7293   | 1.2    | 1.5    | 8.0    | 1.0    | 5.8    |
| 214229_at   | AL122077  | DNAH17             | 8632   | 9.4    | 8.4    | 2.0    | 4.6    | 9.5    |
| 214230_at   | R37664    | CDC42              | 998    | 6.0    | 7.6    | 3.8    | 4.7    | 4.1    |
| 214231_s_at | AI744626  | VWA8               | 23078  | 27.8   | 18.9   | 26.7   | 20.8   | 25.4   |
| 214232_at   | AL037534  | ABCF2              | 10061  | 23.0   | 16.4   | 20.1   | 16.1   | 12.9   |
| 214233_at   | AW086154  | GGA2               | 23062  | 19.8   | 4.2    | 1.2    | 3.8    | 2.8    |
| 214234_s_at | X90579    | CYP3A5             | 1577   | 0.7    | 1.4    | 4.7    | 4.0    | 0.9    |
| 214235_at   | X90579    | CYP3A5             | 1577   | 6.5    | 3.4    | 3.1    | 2.1    | 4.7    |
| 214236_at   | AA166684  | -                  | -      | 18.9   | 6.1    | 16.7   | 8.9    | 8.6    |
| 214237_x_at | AI760470  | PAWR               | 5074   | 24.4   | 28.5   | 22.3   | 29.6   | 15.8   |
| 214238_at   | AI093572  | AC012065.7         | -      | 4.9    | 5.2    | 12.3   | 17.7   | 1.5    |
| 214239_x_at | AI560455  | PCGF2              | 7703   | 93.4   | 104.1  | 91.7   | 111.1  | 71.7   |
| 214240_at   | AL556409  | GAL                | 51083  | 187.3  | 168.4  | 254.3  | 204.4  | 204.3  |
| 214241_at   | AA723057  | NDUFB8             | 4714   | 17.0   | 13.1   | 16.1   | 13.0   | 11.2   |

|             |          |                           |        |        |        |        |        |        |
|-------------|----------|---------------------------|--------|--------|--------|--------|--------|--------|
| 214242_at   | AI189305 | MAN1A2                    | 10905  | 3.8    | 2.2    | 1.4    | 1.0    | 0.8    |
| 214243_s_at | AL450314 | SERHL /// SEI94009 /// 25 |        | 4.7    | 5.9    | 3.7    | 3.7    | 1.0    |
| 214244_s_at | AV717561 | ATP6V0E1                  | 8992   | 14.2   | 14.7   | 16.7   | 19.1   | 8.2    |
| 214245_at   | AI734124 | RPS14                     | 6208   | 22.5   | 24.1   | 26.6   | 18.7   | 15.4   |
| 214246_x_at | AI859060 | MINK1                     | 50488  | 120.4  | 128.5  | 136.6  | 133.7  | 107.1  |
| 214247_s_at | AU148057 | DKK3                      | 27122  | 0.8    | 0.4    | 5.9    | 3.7    | 2.7    |
| 214248_s_at | AW071795 | TRIM2                     | 23321  | 2.3    | 1.3    | 1.5    | 0.8    | 1.2    |
| 214249_at   | AK000179 | TRIM2                     | 23321  | 1.1    | 0.4    | 1.0    | 0.8    | 6.8    |
| 214250_at   | AI337584 | NUMA1                     | 4926   | 2.8    | 1.0    | 0.5    | 1.2    | 1.0    |
| 214251_s_at | AI337584 | NUMA1                     | 4926   | 51.3   | 44.1   | 58.5   | 57.1   | 44.7   |
| 214252_s_at | AV700514 | CLN5                      | 1203   | 102.9  | 113.4  | 145.5  | 119.0  | 126.1  |
| 214253_s_at | AI672185 | DTNB                      | 1838   | 28.5   | 41.5   | 28.4   | 30.1   | 21.4   |
| 214254_at   | AW438674 | MAGEA4                    | 4103   | 27.8   | 6.0    | 12.5   | 14.0   | 6.7    |
| 214255_at   | N35112   | ATP10A                    | 57194  | 8.9    | 19.3   | 16.0   | 14.6   | 14.9   |
| 214256_at   | AB011138 | ATP10A                    | 57194  | 16.5   | 8.4    | 1.1    | 8.1    | 12.9   |
| 214257_s_at | AA890010 | SEC22B                    | 9554   | 155.5  | 114.1  | 157.5  | 143.6  | 120.0  |
| 214258_x_at | AA886971 | KAT5                      | 10524  | 174.0  | 179.0  | 200.1  | 188.5  | 143.1  |
| 214259_s_at | AI144075 | AKR7A2                    | 8574   | 223.3  | 250.9  | 259.3  | 262.0  | 220.4  |
| 214260_at   | AI079287 | COPS8                     | 10920  | 22.7   | 18.9   | 26.1   | 19.9   | 18.7   |
| 214261_s_at | H71135   | ADH6                      | 130    | 4.8    | 6.6    | 2.7    | 2.1    | 1.3    |
| 214262_at   | BE964082 | MIR6875 /// 7205 /// 102  |        | 2.3    | 1.1    | 0.8    | 1.2    | 5.1    |
| 214263_x_at | AI192781 | POLR2C                    | 5432   | 177.3  | 163.6  | 177.4  | 164.4  | 120.7  |
| 214264_s_at | AI656610 | EFCAB11                   | 90141  | 229.1  | 198.0  | 190.2  | 208.4  | 142.8  |
| 214265_at   | AI193623 | ITGA8                     | 8516   | 2.0    | 3.8    | 5.0    | 8.4    | 6.5    |
| 214266_s_at | AW206786 | PDLIM7                    | 9260   | 16.8   | 19.5   | 12.5   | 24.8   | 16.0   |
| 214267_s_at | AI050793 | CADM4                     | 199731 | 1.3    | 0.5    | 0.5    | 0.6    | 0.4    |
| 214268_s_at | AL042220 | MTMR4                     | 9110   | 154.7  | 145.6  | 160.2  | 146.7  | 121.1  |
| 214269_at   | AK025922 | MFSD7                     | 84179  | 1.0    | 1.4    | 0.8    | 0.7    | 0.9    |
| 214270_s_at | AI885178 | MAPRE3                    | 22924  | 22.4   | 17.3   | 25.9   | 24.5   | 8.7    |
| 214271_x_at | AA281332 | RPL12                     | 6136   | 2616.6 | 2631.7 | 2749.5 | 2748.3 | 2417.1 |
| 214272_at   | AI362018 | CYLD                      | 1540   | 9.5    | 2.2    | 14.9   | 13.3   | 7.9    |
| 214273_x_at | AV704353 | NPRL3                     | 8131   | 69.4   | 64.9   | 71.9   | 55.9   | 66.8   |
| 214274_s_at | AI860341 | ACAA1                     | 30     | 223.8  | 187.1  | 265.2  | 240.1  | 208.6  |
| 214275_at   | AI217362 | MED12                     | 9968   | 4.1    | 7.8    | 8.4    | 0.8    | 5.8    |
| 214276_at   | N49268   | KLF12                     | 11278  | 3.0    | 2.5    | 2.0    | 9.4    | 7.2    |
| 214277_at   | AI376724 | COX11                     | 1353   | 16.8   | 12.2   | 21.9   | 22.0   | 20.5   |
| 214278_s_at | AI358939 | NDRG2                     | 57447  | 4.9    | 2.4    | 1.0    | 1.3    | 1.2    |
| 214279_s_at | W74452   | NDRG2                     | 57447  | 77.3   | 85.7   | 86.0   | 82.3   | 70.2   |
| 214280_x_at | X79536   | HNRNPA1                   | 3178   | 305.2  | 391.6  | 372.1  | 410.7  | 299.0  |
| 214281_s_at | AA524525 | RCHY1                     | 25898  | 168.6  | 147.5  | 180.9  | 154.4  | 136.5  |
| 214282_at   | AA191647 | -                         | -      | 2.2    | 1.7    | 2.5    | 2.8    | 3.0    |
| 214283_at   | AU150186 | TMEM97                    | 27346  | 67.2   | 55.0   | 75.4   | 59.7   | 62.2   |
| 214284_s_at | AA022949 | FGF18                     | 8817   | 5.7    | 5.1    | 9.9    | 5.4    | 3.0    |
| 214285_at   | AI041520 | FABP3                     | 2170   | 6.1    | 6.5    | 8.4    | 4.7    | 4.8    |
| 214286_at   | X63749   | GNAT1                     | 2779   | 3.2    | 0.9    | 1.6    | 1.1    | 1.0    |
| 214287_s_at | BE675449 | CDK13                     | 8621   | 1.2    | 3.9    | 6.3    | 6.0    | 4.8    |
| 214288_s_at | W86293   | PSMB1                     | 5689   | 1249.2 | 1088.6 | 1268.1 | 1171.4 | 958.7  |
| 214289_at   | W86293   | PSMB1                     | 5689   | 1.6    | 0.9    | 6.8    | 5.8    | 0.7    |
| 214290_s_at | AI313324 | HIST2H2AA3 8337 /// 723   |        | 1705.8 | 1794.5 | 1717.5 | 1898.4 | 1448.9 |
| 214291_at   | AA522618 | RPL17 /// RP 6139 /// 267 |        | 24.0   | 15.3   | 27.2   | 19.6   | 17.9   |
| 214292_at   | AA808063 | ITGB4                     | 3691   | 0.8    | 1.0    | 2.6    | 1.2    | 5.9    |
| 214293_at   | AI539361 | SEPT11                    | 55752  | 8.8    | 6.0    | 13.5   | 9.7    | 7.8    |
| 214294_at   | AI122905 | KIAA0485                  | 57235  | 2.0    | 7.9    | 8.7    | 8.9    | 4.6    |

|             |          |                         |        |        |        |        |        |        |
|-------------|----------|-------------------------|--------|--------|--------|--------|--------|--------|
| 214295_at   | AW129056 | KIAA0485                | 57235  | 6.1    | 5.2    | 10.1   | 7.6    | 0.9    |
| 214296_x_at | AV721013 | IZUMO4                  | 113177 | 11.4   | 7.2    | 5.4    | 1.0    | 7.5    |
| 214297_at   | BE857703 | CSPG4                   | 1464   | 0.7    | 6.4    | 6.3    | 0.6    | 1.8    |
| 214298_x_at | AL568374 | SEPT6                   | 23157  | 12.0   | 8.0    | 6.7    | 12.9   | 4.7    |
| 214299_at   | AI676092 | TOP3A                   | 7156   | 24.1   | 14.9   | 26.5   | 28.9   | 19.1   |
| 214300_s_at | AI676092 | TOP3A                   | 7156   | 22.1   | 18.0   | 19.5   | 18.6   | 14.7   |
| 214301_s_at | AI857455 | DPYSL4                  | 10570  | 1.3    | 1.9    | 2.2    | 1.2    | 4.1    |
| 214302_x_at | BF061637 | GJC2                    | 57165  | 1.2    | 1.5    | 0.8    | 1.1    | 0.8    |
| 214303_x_at | AW192795 | MUC5AC                  | 4586   | 0.9    | 1.4    | 0.9    | 0.9    | 1.1    |
| 214304_x_at | AI077476 | RP11-654A1(-            |        | 0.3    | 0.2    | 0.3    | 0.4    | 0.2    |
| 214305_s_at | AW003030 | SF3B1                   | 23451  | 73.2   | 64.3   | 67.4   | 65.6   | 61.8   |
| 214306_at   | AA209332 | OPA1                    | 4976   | 23.8   | 18.1   | 27.4   | 12.5   | 12.8   |
| 214307_at   | AI478172 | HGD                     | 3081   | 1.0    | 0.8    | 1.8    | 3.7    | 0.7    |
| 214308_s_at | AI478172 | HGD                     | 3081   | 19.8   | 7.9    | 12.2   | 12.5   | 14.6   |
| 214309_s_at | AI435747 | -                       | -      | 1.7    | 0.8    | 2.0    | 2.1    | 0.5    |
| 214310_s_at | AI767884 | ZFPL1                   | 7542   | 53.9   | 49.3   | 53.0   | 55.6   | 35.9   |
| 214311_at   | AI767884 | ZFPL1                   | 7542   | 11.2   | 13.3   | 10.3   | 13.5   | 6.3    |
| 214312_at   | AI693985 | FOXA2                   | 3170   | 8.8    | 1.6    | 3.9    | 2.5    | 8.5    |
| 214313_s_at | BE138647 | EIF5B                   | 9669   | 3.7    | 5.0    | 14.1   | 9.0    | 6.7    |
| 214314_s_at | BE138647 | EIF5B                   | 9669   | 35.5   | 20.8   | 37.6   | 25.4   | 26.6   |
| 214315_x_at | AI348935 | CALR                    | 811    | 481.1  | 427.9  | 565.4  | 514.3  | 445.0  |
| 214316_x_at | AI378706 | CTC-425F1.4 -           |        | 50.1   | 43.2   | 63.6   | 53.0   | 48.6   |
| 214317_x_at | BE348997 | RPS9                    | 6203   | 2740.2 | 2827.6 | 3115.1 | 3077.8 | 2755.6 |
| 214318_s_at | W58342   | FRY                     | 10129  | 9.7    | 12.0   | 12.5   | 12.5   | 10.9   |
| 214319_at   | W58342   | FRY                     | 10129  | 16.6   | 8.1    | 15.4   | 10.1   | 10.6   |
| 214320_x_at | T67741   | CYP2A6                  | 1548   | 10.4   | 14.8   | 17.6   | 10.1   | 15.0   |
| 214321_at   | BF440025 | NOV                     | 4856   | 4.2    | 9.4    | 8.7    | 8.9    | 5.3    |
| 214322_at   | AA284757 | CAMK2G                  | 818    | 11.9   | 5.4    | 13.1   | 8.3    | 3.4    |
| 214323_s_at | N36842   | UPF3A                   | 65110  | 107.7  | 84.4   | 125.4  | 112.4  | 86.5   |
| 214324_at   | BF222483 | GP2                     | 2813   | 3.1    | 1.5    | 2.3    | 0.9    | 0.5    |
| 214325_at   | BF046750 | GP2                     | 2813   | 1.8    | 0.6    | 2.6    | 1.2    | 0.9    |
| 214326_x_at | AI339541 | JUND                    | 3727   | 67.3   | 56.9   | 68.0   | 55.1   | 38.5   |
| 214327_x_at | AI888178 | LOC1019288.7178 /// 101 |        | 2520.7 | 2393.1 | 2837.0 | 2470.4 | 2333.5 |
| 214328_s_at | R01140   | HSP90AA1                | 3320   | 2108.7 | 1583.8 | 2269.9 | 1778.9 | 1942.7 |
| 214329_x_at | AW474434 | TNFSF10                 | 8743   | 1.9    | 4.0    | 0.7    | 0.4    | 3.4    |
| 214330_at   | AF070584 | ATPAF2                  | 91647  | 26.5   | 15.7   | 13.8   | 21.7   | 17.4   |
| 214331_at   | AI796813 | TSFM                    | 10102  | 9.9    | 15.2   | 11.5   | 22.9   | 11.5   |
| 214332_s_at | AI796813 | TSFM                    | 10102  | 11.9   | 12.5   | 17.0   | 13.9   | 13.6   |
| 214333_x_at | U69268   | IDH3G                   | 3421   | 40.1   | 50.5   | 34.1   | 40.1   | 26.6   |
| 214334_x_at | N34846   | DAZAP2                  | 9802   | 320.6  | 467.6  | 399.4  | 333.7  | 285.4  |
| 214335_at   | AI669349 | RPL18                   | 6141   | 14.9   | 18.7   | 8.8    | 14.8   | 17.0   |
| 214336_s_at | AI621079 | COPA                    | 1314   | 65.8   | 75.8   | 79.0   | 77.4   | 67.4   |
| 214337_at   | AI621079 | COPA                    | 1314   | 5.9    | 2.9    | 2.1    | 5.1    | 3.1    |
| 214338_at   | AL050381 | DNAJB12                 | 54788  | 20.7   | 14.4   | 4.2    | 12.5   | 5.6    |
| 214339_s_at | AA744529 | MAP4K1                  | 11184  | 22.8   | 12.5   | 19.8   | 9.9    | 8.4    |
| 214340_at   | AF020774 | ALOX12P2                | 245    | 2.8    | 1.9    | 1.5    | 1.8    | 0.9    |
| 214341_at   | AI741833 | AP1G2                   | 8906   | 6.7    | 0.9    | 6.7    | 8.1    | 7.7    |
| 214342_at   | AI017382 | ATXN7L1                 | 222255 | 8.7    | 3.4    | 1.6    | 1.2    | 7.7    |
| 214343_s_at | AI017382 | ATXN7L1                 | 222255 | 9.1    | 1.2    | 10.7   | 8.3    | 4.2    |
| 214344_at   | R87507   | LINC00950               | 92973  | 6.9    | 2.2    | 0.7    | 2.8    | 4.3    |
| 214345_at   | BF058643 | CTD-2269F5. -           |        | 10.2   | 5.7    | 12.9   | 10.7   | 4.0    |
| 214346_at   | AW026646 | C1QL1                   | 10882  | 0.3    | 0.1    | 0.4    | 0.4    | 0.1    |
| 214347_s_at | AW772056 | DDC                     | 1644   | 8.9    | 1.3    | 11.1   | 9.1    | 1.0    |

|             |           |                           |        |        |        |        |        |        |
|-------------|-----------|---------------------------|--------|--------|--------|--------|--------|--------|
| 214348_at   | NM_001057 | TACR2                     | 6865   | 14.7   | 11.0   | 3.3    | 5.1    | 1.4    |
| 214349_at   | AV764378  | -                         | -      | 29.9   | 21.2   | 29.0   | 30.9   | 24.3   |
| 214350_at   | AI762021  | SNTB2                     | 6645   | 5.2    | 6.2    | 7.4    | 4.0    | 1.9    |
| 214351_x_at | AA789278  | RPL13 /// SN 6137 /// 606 |        | 3579.8 | 3234.9 | 3601.2 | 3389.1 | 3223.2 |
| 214352_s_at | BF673699  | KRAS                      | 3845   | 169.7  | 154.3  | 163.8  | 122.5  | 137.0  |
| 214353_at   | AW241864  | -                         | -      | 9.2    | 3.7    | 1.1    | 7.7    | 0.8    |
| 214354_x_at | T91506    | SFTPB                     | 6439   | 29.9   | 36.6   | 31.3   | 23.1   | 26.5   |
| 214355_x_at | AW274747  | CTAGE15 /// 441294 /// 6  |        | 76.8   | 58.4   | 72.5   | 74.9   | 47.4   |
| 214356_s_at | AI272899  | KIAA0368                  | 23392  | 176.1  | 116.8  | 183.4  | 145.4  | 132.2  |
| 214357_at   | AL035295  | C1orf105                  | 92346  | 11.7   | 11.7   | 10.7   | 0.4    | 8.5    |
| 214358_at   | AW188201  | ACACA                     | 31     | 25.6   | 31.5   | 41.7   | 31.8   | 36.6   |
| 214359_s_at | AI218219  | HSP90AB1                  | 3326   | 1479.8 | 1225.8 | 1607.5 | 1401.1 | 1299.9 |
| 214360_at   | AA772023  | SMARCA4                   | 6597   | 4.2    | 0.7    | 1.6    | 0.4    | 2.6    |
| 214361_s_at | AW170602  | RGS12                     | 6002   | 5.3    | 2.0    | 2.7    | 6.4    | 5.0    |
| 214362_at   | AW170602  | RGS12                     | 6002   | 5.7    | 3.7    | 1.5    | 0.9    | 3.0    |
| 214363_s_at | AA129420  | MATR3 /// SI9782 /// 724  |        | 881.9  | 752.0  | 891.6  | 770.1  | 630.7  |
| 214364_at   | W84525    | MTERF4                    | 130916 | 53.6   | 50.3   | 52.1   | 64.2   | 42.4   |
| 214365_at   | X04201    | TPM3                      | 7170   | 9.3    | 1.7    | 1.7    | 1.4    | 4.8    |
| 214366_s_at | AA995910  | ALOX5                     | 240    | 0.5    | 0.9    | 3.8    | 5.5    | 2.9    |
| 214367_at   | AI688812  | RASGRP2                   | 10235  | 2.7    | 3.2    | 5.6    | 4.5    | 5.0    |
| 214368_at   | AI688812  | RASGRP2                   | 10235  | 1.9    | 1.0    | 1.2    | 5.3    | 1.7    |
| 214369_s_at | AI688812  | RASGRP2                   | 10235  | 9.2    | 6.0    | 5.5    | 6.1    | 6.2    |
| 214370_at   | AW238654  | S100A8                    | 6279   | 0.4    | 0.2    | 0.6    | 0.2    | 1.3    |
| 214371_at   | AI652441  | TSSK2                     | 23617  | 7.8    | 3.5    | 6.8    | 4.2    | 5.4    |
| 214372_x_at | AI732416  | ERN2                      | 10595  | 13.3   | 15.8   | 16.6   | 6.1    | 9.9    |
| 214373_at   | AI582773  | -                         | -      | 32.2   | 31.0   | 20.1   | 22.2   | 15.4   |
| 214374_s_at | AI962377  | PPFIBP1                   | 8496   | 1.4    | 2.6    | 9.3    | 6.4    | 5.4    |
| 214375_at   | AI962377  | PPFIBP1                   | 8496   | 1.0    | 0.7    | 3.5    | 2.8    | 5.5    |
| 214376_at   | AI263044  | MAPK10                    | 5602   | 13.0   | 8.1    | 8.6    | 0.9    | 3.3    |
| 214377_s_at | BF508685  | CTRL                      | 1506   | 16.4   | 11.1   | 17.8   | 13.7   | 5.6    |
| 214378_at   | BF109662  | TFPI                      | 7035   | 10.7   | 7.9    | 12.8   | 8.1    | 8.9    |
| 214379_at   | AI954458  | HNRNPDL                   | 9987   | 12.6   | 5.6    | 4.3    | 5.8    | 3.6    |
| 214380_at   | AI334332  | PRPF31                    | 26121  | 1.0    | 1.5    | 0.8    | 0.8    | 0.9    |
| 214381_at   | BG150564  | LOC441601                 | 441601 | 15.3   | 12.9   | 10.2   | 15.3   | 3.6    |
| 214382_at   | AL021331  | UNC93A                    | 54346  | 1.0    | 1.6    | 4.8    | 0.8    | 3.2    |
| 214383_x_at | BF063121  | KLHDC3                    | 116138 | 246.2  | 277.5  | 299.9  | 270.8  | 249.1  |
| 214384_s_at | BF446672  | DCTN2                     | 10540  | 2.4    | 4.7    | 7.1    | 7.0    | 3.8    |
| 214385_s_at | AI521646  | MUC5AC                    | 4586   | 1.3    | 1.2    | 1.9    | 2.7    | 0.8    |
| 214386_at   | AI939402  | -                         | -      | 1.9    | 0.8    | 1.9    | 1.9    | 1.6    |
| 214387_x_at | AA633841  | SFTPC                     | 6440   | 2.7    | 6.7    | 2.0    | 3.5    | 1.3    |
| 214388_at   | AI732885  | -                         | -      | 1.7    | 3.5    | 5.9    | 9.5    | 1.2    |
| 214389_at   | AI733515  | SLC5A12                   | 159963 | 1.7    | 1.6    | 0.2    | 1.2    | 1.9    |
| 214390_s_at | AI652662  | BCAT1                     | 586    | 1.9    | 0.9    | 2.2    | 3.0    | 3.2    |
| 214391_x_at | AI762344  | PTGER1                    | 5731   | 3.0    | 3.3    | 2.8    | 2.6    | 1.9    |
| 214392_at   | AA431984  | IRGC                      | 56269  | 7.1    | 2.2    | 8.1    | 0.3    | 0.6    |
| 214393_at   | AI884814  | RND2                      | 8153   | 1.2    | 1.7    | 6.2    | 1.3    | 3.6    |
| 214394_x_at | AI613383  | EEF1D                     | 1936   | 2036.3 | 1871.2 | 2143.0 | 2077.9 | 1745.5 |
| 214395_x_at | AI335509  | EEF1D                     | 1936   | 26.0   | 30.1   | 19.3   | 24.9   | 22.7   |
| 214396_s_at | AI827820  | MBD2                      | 8932   | 12.8   | 0.5    | 14.1   | 7.5    | 0.8    |
| 214397_at   | AI827820  | MBD2                      | 8932   | 3.8    | 5.6    | 8.5    | 5.1    | 7.4    |
| 214398_s_at | AW340333  | IKBKE                     | 9641   | 38.7   | 27.9   | 23.4   | 20.1   | 13.7   |
| 214399_s_at | BF588953  | KRT4                      | 3851   | 0.5    | 0.5    | 0.3    | 1.0    | 0.8    |
| 214400_at   | AI991694  | INSL3                     | 3640   | 1.1    | 0.6    | 0.6    | 0.5    | 0.3    |

|             |           |                           |        |        |        |        |        |        |
|-------------|-----------|---------------------------|--------|--------|--------|--------|--------|--------|
| 214401_at   | AA725078  | PAX1                      | 5075   | 13.9   | 18.9   | 24.1   | 16.2   | 15.1   |
| 214402_s_at | AA521233  | SFI1                      | 9814   | 13.9   | 10.6   | 15.4   | 2.5    | 6.4    |
| 214403_x_at | AI307915  | SPDEF                     | 25803  | 13.2   | 14.6   | 18.5   | 13.7   | 18.9   |
| 214404_x_at | AI435670  | SPDEF                     | 25803  | 134.4  | 117.3  | 153.1  | 158.4  | 137.9  |
| 214405_at   | Z39557    | -                         | -      | 0.4    | 0.1    | 0.4    | 0.1    | 0.7    |
| 214406_s_at | AW135332  | SLC7A4                    | 6545   | 0.9    | 1.3    | 1.0    | 1.0    | 0.4    |
| 214407_x_at | AI240545  | GYPB                      | 2994   | 2.2    | 4.3    | 2.6    | 1.5    | 2.2    |
| 214408_s_at | AL021937  | RFPL1S /// RI10737 /// 10 |        | 5.5    | 2.7    | 10.5   | 6.6    | 2.3    |
| 214409_at   | AL021937  | RFPL3S                    | 10737  | 0.2    | 0.8    | 0.2    | 0.1    | 1.6    |
| 214410_at   | N32151    | RP11-348B17-              |        | 0.9    | 0.9    | 1.0    | 0.7    | 0.9    |
| 214411_x_at | AW584011  | CTRB2                     | 440387 | 18.1   | 13.0   | 16.6   | 10.8   | 5.0    |
| 214412_at   | AI218431  | H2AFB1 /// H83740 /// 47  |        | 1.6    | 1.0    | 0.6    | 0.8    | 0.6    |
| 214413_at   | AV647713  | TAT                       | 6898   | 1.0    | 0.5    | 0.3    | 3.4    | 0.2    |
| 214414_x_at | T50399    | HBA1 /// HB,3039 /// 304  |        | 10.8   | 0.8    | 1.5    | 8.3    | 1.1    |
| 214415_at   | N58120    | PLGLB1 /// P5342 /// 534  |        | 4.8    | 4.6    | 2.2    | 1.2    | 2.6    |
| 214416_at   | AA654415  | -                         | -      | 0.9    | 2.7    | 0.9    | 0.3    | 2.9    |
| 214417_s_at | N39010    | -                         | -      | 9.4    | 5.2    | 4.7    | 8.2    | 4.6    |
| 214418_at   | AI656822  | CT62                      | 196993 | 1.2    | 0.6    | 0.5    | 0.7    | 0.7    |
| 214419_s_at | AV646536  | CYP2C9                    | 1559   | 12.4   | 7.9    | 15.2   | 8.7    | 8.7    |
| 214420_s_at | AV657878  | CYP2C9                    | 1559   | 2.7    | 3.8    | 3.4    | 6.1    | 3.4    |
| 214421_x_at | AV652420  | CYP2C9                    | 1559   | 35.5   | 22.5   | 22.7   | 25.1   | 13.1   |
| 214422_at   | T93562    | RAD23B                    | 5887   | 4.2    | 8.0    | 1.8    | 3.5    | 5.0    |
| 214423_x_at | AV652403  | ALDOB                     | 229    | 17.3   | 22.9   | 10.4   | 14.3   | 10.2   |
| 214424_s_at | AV650852  | ALDOB                     | 229    | 6.6    | 1.8    | 6.9    | 0.3    | 0.1    |
| 214425_at   | AV645756  | AMBP                      | 259    | 11.2   | 5.4    | 14.5   | 10.3   | 3.4    |
| 214426_x_at | BF062223  | CHAF1A                    | 10036  | 98.8   | 72.6   | 110.8  | 92.4   | 83.0   |
| 214427_at   | NM_006170 | NOP2                      | 4839   | 165.9  | 114.8  | 211.7  | 128.1  | 143.2  |
| 214428_x_at | K02403    | C4A /// C4B,720 /// 721 / |        | 13.2   | 22.5   | 18.0   | 16.4   | 17.1   |
| 214429_at   | U47635    | MTMR6                     | 9107   | 77.1   | 48.8   | 95.9   | 78.3   | 70.6   |
| 214430_at   | NM_000169 | GLA                       | 2717   | 144.9  | 109.3  | 154.3  | 114.1  | 121.4  |
| 214431_at   | NM_003875 | GMPS                      | 8833   | 242.3  | 181.1  | 247.0  | 211.7  | 229.3  |
| 214432_at   | NM_000703 | ATP1A3 /// L478 /// 1019  |        | 8.3    | 9.0    | 10.4   | 6.0    | 12.6   |
| 214433_s_at | NM_003944 | SELENBP1                  | 8991   | 1648.4 | 1958.8 | 1475.7 | 2063.0 | 1139.2 |
| 214434_at   | AB007877  | HSPA12A                   | 259217 | 10.4   | 7.6    | 14.1   | 14.7   | 12.6   |
| 214435_x_at | NM_005402 | RALA                      | 5898   | 159.6  | 125.2  | 166.9  | 133.1  | 131.3  |
| 214436_at   | AF176518  | FBXL2                     | 25827  | 1.9    | 1.2    | 7.7    | 2.9    | 8.0    |
| 214437_s_at | NM_005412 | SHMT2                     | 6472   | 391.0  | 426.5  | 388.2  | 396.9  | 338.2  |
| 214438_at   | M60721    | HLX                       | 3142   | 10.6   | 6.5    | 1.5    | 5.8    | 6.4    |
| 214439_x_at | AF043899  | BIN1                      | 274    | 91.1   | 68.4   | 82.0   | 95.8   | 62.8   |
| 214440_at   | NM_000662 | NAT1                      | 9      | 123.7  | 92.8   | 129.9  | 111.8  | 74.8   |
| 214441_at   | NM_005819 | STX6                      | 10228  | 25.1   | 13.9   | 33.9   | 17.4   | 25.4   |
| 214442_s_at | AF077953  | PIAS2                     | 9063   | 133.0  | 148.0  | 120.4  | 137.7  | 120.2  |
| 214443_at   | NM_006505 | PVR                       | 5817   | 11.9   | 13.0   | 17.9   | 11.9   | 14.1   |
| 214444_s_at | NM_006505 | PVR                       | 5817   | 10.8   | 16.0   | 25.3   | 28.9   | 3.1    |
| 214445_at   | NM_012081 | ELL2                      | 22936  | 0.4    | 7.6    | 2.4    | 0.6    | 8.2    |
| 214446_at   | NM_012081 | ELL2                      | 22936  | 26.4   | 6.2    | 17.0   | 14.3   | 17.5   |
| 214447_at   | NM_005238 | ETS1                      | 2113   | 19.1   | 13.4   | 5.7    | 14.9   | 7.5    |
| 214448_x_at | NM_002503 | NFKBIB                    | 4793   | 17.9   | 20.7   | 34.0   | 15.3   | 15.7   |
| 214449_s_at | NM_012249 | RHOQ                      | 23433  | 32.6   | 28.2   | 32.2   | 31.8   | 29.8   |
| 214450_at   | NM_001335 | CTSW                      | 1521   | 2.4    | 1.7    | 3.3    | 1.8    | 0.9    |
| 214451_at   | NM_003221 | TFAP2B                    | 7021   | 4.5    | 1.6    | 0.7    | 3.1    | 2.3    |
| 214452_at   | NM_005504 | BCAT1                     | 586    | 5.5    | 4.5    | 3.5    | 3.9    | 2.0    |
| 214453_s_at | NM_006417 | IFI44                     | 10561  | 6.4    | 4.2    | 6.6    | 9.0    | 9.2    |

|             |           |              |              |       |       |       |       |       |
|-------------|-----------|--------------|--------------|-------|-------|-------|-------|-------|
| 214454_at   | NM_014244 | ADAMTS2      | 9509         | 1.9   | 4.6   | 1.2   | 5.1   | 0.9   |
| 214455_at   | NM_003526 | HIST1H2BC /  | 8339 /// 834 | 68.3  | 71.1  | 73.4  | 64.6  | 51.0  |
| 214456_x_at | M23699    | SAA1 /// SAA | 6288 /// 628 | 1.9   | 3.4   | 1.8   | 0.8   | 1.6   |
| 214457_at   | NM_006735 | HOXA2        | 3199         | 0.3   | 1.2   | 2.9   | 4.0   | 1.7   |
| 214458_at   | AF230877  | TRAF3IP1     | 26146        | 18.4  | 8.5   | 11.1  | 9.3   | 11.7  |
| 214459_x_at | M12679    | HLA-C        | 3107         | 277.0 | 304.0 | 258.8 | 295.4 | 228.4 |
| 214460_at   | NM_002338 | LSAMP        | 4045         | 0.6   | 0.5   | 0.4   | 0.4   | 0.5   |
| 214461_at   | NM_004139 | LBP          | 3929         | 0.9   | 1.0   | 0.8   | 0.5   | 0.6   |
| 214462_at   | NM_004232 | SOCS6        | 9306         | 21.6  | 13.7  | 17.3  | 21.4  | 13.4  |
| 214463_x_at | NM_003541 | HIST1H4J     | 8363         | 63.2  | 79.2  | 54.5  | 62.8  | 54.8  |
| 214464_at   | NM_003607 | CDC42BPA     | 8476         | 25.8  | 22.9  | 24.1  | 23.9  | 18.2  |
| 214465_at   | NM_000608 | ORM1 /// OF  | 5004 /// 500 | 1.5   | 0.6   | 1.9   | 1.3   | 9.0   |
| 214466_at   | NM_005266 | GJA5         | 2702         | 3.4   | 1.4   | 1.4   | 2.5   | 1.7   |
| 214467_at   | NM_003608 | GPR65        | 8477         | 0.5   | 9.9   | 4.6   | 2.8   | 4.1   |
| 214468_at   | D00943    | MYH6         | 4624         | 1.6   | 1.8   | 0.7   | 0.8   | 0.4   |
| 214469_at   | NM_021052 | HIST1H2AE    | 3012         | 33.5  | 51.3  | 56.8  | 37.1  | 36.8  |
| 214470_at   | NM_002258 | KLRB1        | 3820         | 2.7   | 6.6   | 1.2   | 1.3   | 1.3   |
| 214471_x_at | NM_000894 | CGB1 /// LHE | 3972 /// 114 | 4.2   | 5.4   | 4.0   | 6.5   | 6.6   |
| 214472_at   | NM_003530 | HIST1H2AD /  | 3013 /// 835 | 21.7  | 24.2  | 22.6  | 19.1  | 16.1  |
| 214473_x_at | NM_005395 | PMS2P3       | 5387         | 121.9 | 124.9 | 115.3 | 112.4 | 93.4  |
| 214474_at   | NM_005399 | PRKAB2       | 5565         | 11.9  | 10.1  | 12.0  | 10.5  | 6.9   |
| 214475_x_at | AF127764  | CAPN3        | 825          | 0.3   | 0.4   | 0.3   | 0.3   | 0.2   |
| 214476_at   | NM_005423 | TFF2         | 7032         | 1.1   | 1.5   | 1.8   | 4.0   | 1.9   |
| 214477_at   | NM_005934 | MLLT1        | 4298         | 1.4   | 4.7   | 13.1  | 7.1   | 8.1   |
| 214478_at   | NM_006944 | SPP2         | 6694         | 2.1   | 5.3   | 2.0   | 5.1   | 5.1   |
| 214479_at   | NM_001496 | GFRA3        | 2676         | 4.8   | 2.2   | 2.3   | 1.0   | 1.9   |
| 214480_at   | L16464    | ETV3         | 2117         | 0.9   | 5.6   | 0.6   | 0.6   | 1.1   |
| 214481_at   | NM_003514 | HIST1H2AM    | 8336         | 59.8  | 45.6  | 42.0  | 64.6  | 37.7  |
| 214482_at   | NM_006977 | ZBTB25       | 7597         | 15.0  | 20.7  | 13.8  | 14.9  | 18.2  |
| 214483_s_at | AF124489  | ARFIP1       | 27236        | 53.6  | 45.4  | 55.6  | 37.5  | 32.7  |
| 214484_s_at | AF226604  | SIGMAR1      | 10280        | 233.2 | 188.4 | 323.3 | 292.1 | 275.9 |
| 214485_at   | NM_024410 | ODF1         | 4956         | 8.5   | 2.9   | 7.0   | 0.9   | 6.9   |
| 214486_x_at | AF041459  | CFLAR        | 8837         | 5.8   | 6.3   | 11.2  | 10.3  | 7.6   |
| 214487_s_at | NM_002886 | RAP2A /// R/ | 5911 /// 591 | 43.4  | 40.0  | 38.3  | 24.4  | 27.1  |
| 214488_at   | NM_002886 | RAP2B        | 5912         | 1.9   | 5.9   | 7.1   | 2.8   | 6.8   |
| 214489_at   | NM_000510 | FSHB         | 2488         | 1.3   | 4.0   | 1.0   | 8.2   | 4.1   |
| 214490_at   | NM_004042 | ARSF         | 416          | 13.8  | 7.0   | 4.7   | 2.9   | 9.7   |
| 214491_at   | NM_001051 | SSTR3        | 6753         | 3.1   | 2.5   | 1.8   | 2.5   | 1.4   |
| 214492_at   | NM_000337 | SGCD         | 6444         | 1.6   | 5.1   | 4.5   | 1.0   | 5.6   |
| 214493_s_at | NM_005799 | INADL        | 10207        | 6.1   | 11.1  | 13.4  | 8.0   | 7.0   |
| 214494_s_at | NM_005200 | LOC1019301   | 6687 /// 101 | 112.9 | 93.0  | 95.5  | 99.0  | 81.9  |
| 214495_at   | NM_006078 | CACNG2       | 10369        | 1.6   | 5.8   | 2.2   | 1.7   | 1.1   |
| 214496_x_at | NM_012330 | KAT6B        | 23522        | 30.9  | 21.4  | 20.7  | 19.3  | 18.2  |
| 214497_s_at | NM_005599 | NHLH2        | 4808         | 0.5   | 1.9   | 1.2   | 1.1   | 0.6   |
| 214498_at   | NM_001672 | ASIP         | 434          | 8.2   | 5.7   | 1.3   | 1.6   | 0.9   |
| 214499_s_at | AF249273  | BCLAF1       | 9774         | 74.8  | 61.2  | 68.5  | 54.7  | 61.5  |
| 214500_at   | AF044286  | H2AFY        | 9555         | 13.0  | 10.3  | 10.9  | 12.0  | 8.2   |
| 214501_s_at | AF044286  | H2AFY        | 9555         | 623.1 | 585.3 | 612.9 | 595.1 | 496.4 |
| 214502_at   | NM_021058 | HIST1H2BJ    | 8970         | 14.6  | 8.7   | 16.5  | 14.6  | 16.0  |
| 214503_x_at | NM_022571 | GPR135       | 64582        | 0.9   | 0.3   | 0.6   | 0.6   | 0.5   |
| 214504_at   | NM_020469 | ABO          | 28           | 3.8   | 0.9   | 1.1   | 1.1   | 0.3   |
| 214505_s_at | AF220153  | FHL1         | 2273         | 2.9   | 1.1   | 1.2   | 3.5   | 1.1   |
| 214506_at   | NM_007264 | GPR182       | 11318        | 18.8  | 12.0  | 6.8   | 10.0  | 14.2  |

|             |           |           |                    |        |        |        |        |        |
|-------------|-----------|-----------|--------------------|--------|--------|--------|--------|--------|
| 214507_s_at | NM_014285 | EXOSC2    | 23404              | 100.6  | 72.1   | 107.6  | 85.1   | 100.8  |
| 214508_x_at | U44836    | CREM      | 1390               | 7.3    | 15.7   | 25.8   | 18.6   | 10.2   |
| 214509_at   | NM_003533 | HIST1H3I  | 8354               | 1.7    | 1.2    | 3.0    | 1.1    | 1.3    |
| 214510_at   | NM_005293 | GPR20     | 2843               | 1.0    | 0.9    | 1.2    | 4.3    | 1.3    |
| 214511_x_at | L03419    | FCGR1B    | 2210               | 3.5    | 2.2    | 6.7    | 1.9    | 0.7    |
| 214512_s_at | NM_006713 | SUB1      | 10923              | 513.6  | 413.4  | 561.4  | 476.3  | 437.4  |
| 214513_s_at | M34356    | CREB1     | 1385               | 48.2   | 32.7   | 39.1   | 39.4   | 33.7   |
| 214514_at   | NM_003906 | MCM3AP    | 8888               | 0.3    | 0.8    | 1.1    | 0.9    | 1.6    |
| 214515_at   | NM_003553 | OR1E1     | 8387               | 0.7    | 10.6   | 5.5    | 3.6    | 6.4    |
| 214516_at   | NM_003544 | HIST1H4A  | ///,8294 /// 835   | 5.2    | 11.8   | 9.6    | 10.6   | 5.4    |
| 214517_at   | NM_005553 | KRTAP5-9  | 3846               | 3.1    | 1.5    | 1.9    | 3.0    | 3.0    |
| 214518_at   | NM_005390 | PDHA2     | 5161               | 4.0    | 8.1    | 0.9    | 11.7   | 7.0    |
| 214519_s_at | NM_005059 | RLN2      | 6019               | 86.7   | 106.5  | 99.4   | 122.7  | 64.8   |
| 214520_at   | NM_005251 | FOXC2     | 2303               | 0.6    | 2.3    | 4.7    | 1.1    | 4.1    |
| 214521_at   | NM_019089 | HES2      | 54626              | 6.0    | 1.0    | 6.0    | 2.7    | 0.7    |
| 214522_x_at | NM_021065 | HIST1H2AD | / 3013 /// 835     | 38.1   | 44.6   | 47.4   | 34.3   | 42.7   |
| 214523_at   | NM_001805 | CEBPE     | 1053               | 9.4    | 13.1   | 3.0    | 3.1    | 6.7    |
| 214524_at   | NM_021081 | GHRH      | 2691               | 1.6    | 5.8    | 6.3    | 7.5    | 6.2    |
| 214525_x_at | AB039667  | MLH3      | 27030              | 27.1   | 21.1   | 24.4   | 19.9   | 18.4   |
| 214526_x_at | NM_005394 | PMS2P1    | 5379               | 117.8  | 103.1  | 104.8  | 104.7  | 84.4   |
| 214527_s_at | AB041836  | PQBP1     | 10084              | 405.9  | 347.2  | 414.5  | 393.3  | 343.2  |
| 214528_s_at | NM_013951 | PAX8      | 7849               | 0.3    | 1.1    | 4.2    | 0.8    | 3.3    |
| 214529_at   | NM_000549 | TSHB      | 7252               | 17.9   | 7.8    | 14.6   | 10.8   | 9.1    |
| 214530_x_at | AF156225  | EPB41     | 2035               | 1.1    | 0.9    | 0.8    | 0.7    | 0.7    |
| 214531_s_at | AF065484  | SNX1      | 6642               | 145.1  | 171.8  | 155.3  | 142.2  | 121.1  |
| 214532_x_at | AF268615  | POU5F1B   | 5462               | 22.4   | 18.6   | 13.6   | 19.9   | 20.3   |
| 214533_at   | NM_001836 | CMA1      | 1215               | 2.8    | 7.3    | 4.2    | 0.5    | 0.9    |
| 214534_at   | NM_005322 | HIST1H1B  | 3009               | 1.2    | 0.9    | 3.3    | 1.4    | 1.1    |
| 214535_s_at | NM_021599 | ADAMTS2   | 9509               | 5.1    | 3.7    | 2.1    | 7.7    | 1.5    |
| 214536_at   | NM_020427 | SLURP1    | 57152              | 13.9   | 3.7    | 1.8    | 8.5    | 0.7    |
| 214537_at   | NM_005320 | HIST1H1D  | 3007               | 31.9   | 13.8   | 21.7   | 29.2   | 20.5   |
| 214538_x_at | AF073921  | RGS6      | 9628               | 2.2    | 1.0    | 1.2    | 1.2    | 1.8    |
| 214539_at   | NM_005024 | SERPINB10 | 5273               | 1.6    | 12.4   | 6.6    | 0.9    | 1.0    |
| 214540_at   | NM_003527 | HIST1H2BO | 8348               | 19.8   | 8.7    | 12.6   | 13.9   | 7.8    |
| 214541_s_at | AF142418  | QKI       | 9444               | 1.1    | 3.0    | 0.8    | 3.1    | 0.2    |
| 214542_x_at | NM_003509 | HIST1H2AG | / 8329 /// 833     | 79.6   | 54.5   | 57.8   | 49.2   | 43.6   |
| 214543_x_at | AF142421  | QKI       | 9444               | 23.6   | 20.6   | 27.2   | 21.3   | 22.6   |
| 214544_s_at | NM_003825 | SNAP23    | 8773               | 68.5   | 56.6   | 67.5   | 58.7   | 43.8   |
| 214545_s_at | NM_007198 | PROSC     | 11212              | 21.3   | 15.8   | 17.9   | 19.1   | 19.4   |
| 214546_s_at | NM_002566 | P2RY11    | /// P 5032 /// 692 | 6.8    | 5.7    | 13.4   | 9.9    | 1.5    |
| 214547_at   | NM_018417 | ADCY10    | 55811              | 0.3    | 0.7    | 0.8    | 0.5    | 4.1    |
| 214548_x_at | AF064092  | GNAS      | 2778               | 1864.3 | 2179.7 | 2179.8 | 1820.9 | 1735.5 |
| 214549_x_at | NM_005987 | SPRR1A    | 6698               | 40.0   | 24.3   | 23.6   | 20.7   | 17.2   |
| 214550_s_at | AF145029  | TNPO3     | 23534              | 72.5   | 62.4   | 74.1   | 64.5   | 65.6   |
| 214551_s_at | NM_006137 | CD7       | 924                | 1.1    | 0.7    | 1.2    | 0.9    | 0.6    |
| 214552_s_at | AF098638  | RABEP1    | 9135               | 46.4   | 45.4   | 48.7   | 44.2   | 37.0   |
| 214553_s_at | NM_006628 | ARPP19    | 10776              | 99.1   | 81.5   | 100.7  | 78.5   | 77.6   |
| 214554_at   | NM_003511 | HIST1H2AL | 8332               | 10.1   | 12.4   | 14.5   | 11.0   | 8.1    |
| 214555_at   | NM_001053 | SSTR5     | 6755               | 6.1    | 7.7    | 6.1    | 4.6    | 6.3    |
| 214556_at   | NM_001052 | SSTR4     | 6754               | 6.4    | 7.8    | 7.4    | 0.7    | 1.4    |
| 214557_at   | NM_006607 | PTTG2     | 10744              | 3.7    | 3.8    | 9.3    | 6.8    | 4.1    |
| 214558_at   | NM_005288 | GPR12     | 2835               | 17.0   | 6.7    | 13.8   | 10.8   | 11.6   |
| 214559_at   | NM_000796 | DRD3      | 1814               | 0.6    | 0.2    | 0.3    | 0.5    | 0.5    |

|             |           |                           |       |        |        |        |        |        |
|-------------|-----------|---------------------------|-------|--------|--------|--------|--------|--------|
| 214560_at   | NM_002030 | FPR3                      | 2359  | 2.9    | 7.6    | 1.8    | 1.0    | 0.6    |
| 214561_at   | NM_024317 | LILRP2                    | 79166 | 6.8    | 0.6    | 1.0    | 4.6    | 4.5    |
| 214562_at   | NM_003546 | HIST1H4L                  | 8368  | 5.9    | 0.9    | 3.8    | 0.4    | 0.8    |
| 214563_at   | AF152524  | PCDHGC3                   | 5098  | 1.2    | 1.2    | 0.9    | 0.5    | 4.1    |
| 214564_s_at | AF152524  | PCDHGC3                   | 5098  | 17.4   | 18.3   | 12.2   | 16.5   | 11.1   |
| 214565_s_at | NM_012390 | SMR3A /// SI10879 /// 26  |       | 4.1    | 1.5    | 3.3    | 0.7    | 1.2    |
| 214566_at   | NM_012390 | SMR3A                     | 26952 | 7.4    | 0.8    | 7.9    | 4.6    | 4.1    |
| 214567_s_at | NM_003175 | XCL1 /// XCL:6375 /// 684 |       | 0.4    | 1.9    | 0.7    | 0.4    | 0.3    |
| 214568_at   | NM_012217 | TPSD1                     | 23430 | 1.4    | 1.6    | 1.6    | 1.4    | 1.8    |
| 214569_at   | NM_002169 | IFNA5                     | 3442  | 7.6    | 6.1    | 4.6    | 3.6    | 3.4    |
| 214570_x_at | NM_014348 | LOC1027250`25812 /// 29   |       | 3.3    | 4.2    | 1.6    | 2.5    | 3.9    |
| 214571_at   | NM_005247 | FGF3                      | 2248  | 0.6    | 0.5    | 0.9    | 0.4    | 0.4    |
| 214572_s_at | NM_005543 | INSL3                     | 3640  | 8.1    | 1.6    | 1.3    | 1.8    | 2.1    |
| 214574_x_at | NM_007161 | LST1                      | 7940  | 3.4    | 2.7    | 1.2    | 1.6    | 1.8    |
| 214575_s_at | NM_001700 | AZU1                      | 566   | 3.0    | 6.4    | 1.6    | 4.2    | 3.4    |
| 214576_at   | NM_003771 | KRT36                     | 8689  | 1.0    | 0.2    | 0.3    | 0.2    | 0.2    |
| 214577_at   | BG164365  | MAP1B                     | 4131  | 38.0   | 54.8   | 27.2   | 58.2   | 19.9   |
| 214578_s_at | AV683882  | ROCK1                     | 6093  | 51.4   | 38.8   | 44.2   | 43.4   | 29.8   |
| 214579_at   | NM_020448 | NIPAL3                    | 57185 | 25.1   | 16.1   | 35.3   | 29.4   | 19.1   |
| 214580_x_at | AL569511  | KRT6A /// KR3853 /// 385  |       | 1.0    | 0.9    | 1.7    | 0.7    | 0.9    |
| 214581_x_at | BE568134  | TNFRSF21                  | 27242 | 41.2   | 36.2   | 40.6   | 27.8   | 25.3   |
| 214582_at   | NM_000753 | PDE3B                     | 5140  | 43.9   | 33.3   | 38.1   | 30.9   | 32.3   |
| 214583_at   | AI268381  | DDI2 /// RSC 6248 /// 843 |       | 37.4   | 19.6   | 33.2   | 31.4   | 26.1   |
| 214584_x_at | R99037    | ACACB                     | 32    | 1.4    | 1.0    | 0.6    | 3.4    | 1.3    |
| 214585_s_at | AL390171  | VPS52                     | 6293  | 287.3  | 290.1  | 285.8  | 329.3  | 236.7  |
| 214586_at   | T16257    | GPR37                     | 2861  | 0.3    | 0.3    | 1.1    | 1.8    | 0.5    |
| 214587_at   | BE877796  | COL8A1                    | 1295  | 4.1    | 3.0    | 0.2    | 3.6    | 2.2    |
| 214588_s_at | R38475    | MFAP3                     | 4238  | 26.3   | 18.2   | 25.2   | 17.4   | 17.6   |
| 214589_at   | AL119322  | FGF12                     | 2257  | 6.1    | 2.0    | 1.1    | 2.1    | 0.9    |
| 214590_s_at | AL545760  | UBE2D1                    | 7321  | 29.3   | 25.2   | 41.5   | 28.1   | 34.2   |
| 214591_at   | BF215673  | KLHL4                     | 56062 | 0.6    | 2.5    | 3.4    | 5.9    | 2.8    |
| 214592_s_at | BE259395  | SNAPC5                    | 10302 | 10.9   | 6.5    | 10.3   | 8.2    | 8.3    |
| 214593_at   | AV703470  | PIAS2                     | 9063  | 9.1    | 7.7    | 10.5   | 5.2    | 3.6    |
| 214594_x_at | BG252666  | ATP8B1                    | 5205  | 39.8   | 40.1   | 49.3   | 36.8   | 40.4   |
| 214595_at   | AI332979  | KCNG1                     | 3755  | 17.0   | 21.0   | 17.5   | 12.6   | 11.0   |
| 214596_at   | T15991    | CHRM3                     | 1131  | 2.1    | 8.0    | 4.5    | 3.8    | 1.2    |
| 214597_at   | BC000256  | SSTR2                     | 6752  | 6.3    | 3.9    | 5.3    | 6.2    | 4.2    |
| 214598_at   | AL049977  | CLDN8                     | 9073  | 28.3   | 13.8   | 27.9   | 21.8   | 18.1   |
| 214599_at   | NM_005547 | IVL                       | 3713  | 10.4   | 3.3    | 7.5    | 3.6    | 3.5    |
| 214600_at   | AW771935  | TEAD1                     | 7003  | 9.9    | 7.4    | 7.9    | 7.6    | 3.8    |
| 214601_at   | AI350339  | TPH1                      | 7166  | 0.3    | 0.1    | 1.9    | 0.4    | 2.5    |
| 214602_at   | D17391    | COL4A4                    | 1286  | 0.3    | 0.8    | 0.6    | 0.6    | 0.5    |
| 214603_at   | U82671    | MAGEA2 /// 4101 /// 266   |       | 413.3  | 355.3  | 473.2  | 392.1  | 390.8  |
| 214604_at   | NM_021192 | HOXD11                    | 3237  | 3.8    | 5.7    | 1.1    | 4.0    | 1.4    |
| 214605_x_at | AL046992  | GPR1                      | 2825  | 2.3    | 1.2    | 4.0    | 5.7    | 4.4    |
| 214606_at   | BF129969  | TSPAN2                    | 10100 | 2.0    | 3.1    | 2.3    | 3.9    | 1.2    |
| 214607_at   | AW085556  | PAK3                      | 5063  | 2.2    | 1.5    | 6.9    | 2.0    | 2.1    |
| 214608_s_at | AJ000098  | EYA1                      | 2138  | 0.6    | 3.6    | 1.1    | 0.6    | 0.8    |
| 214609_at   | AI469991  | PHOX2A                    | 401   | 8.4    | 1.5    | 7.5    | 1.9    | 1.5    |
| 214610_at   | AV702430  | CYP11B1                   | 1584  | 3.4    | 5.1    | 3.7    | 2.5    | 1.7    |
| 214611_at   | U16125    | GRIK1                     | 2897  | 8.9    | 6.0    | 7.0    | 8.0    | 6.8    |
| 214612_x_at | U10691    | MAGEA6                    | 4105  | 1299.3 | 1175.7 | 1388.8 | 1067.9 | 1031.3 |
| 214613_at   | AW024085  | GPR3                      | 2827  | 12.1   | 3.9    | 1.7    | 2.2    | 2.5    |



|             |           |                        |              |       |       |       |       |       |
|-------------|-----------|------------------------|--------------|-------|-------|-------|-------|-------|
| 214614_at   | AI738662  | MNX1                   | 3110         | 64.8  | 62.5  | 82.4  | 74.9  | 60.2  |
| 214615_at   | NM_014499 | P2RY10                 | 27334        | 2.0   | 0.5   | 5.8   | 2.8   | 2.1   |
| 214616_at   | NM_003532 | HIST1H3E               | 8353         | 32.1  | 26.7  | 32.8  | 31.5  | 17.2  |
| 214617_at   | AI445650  | PRF1                   | 5551         | 2.5   | 1.0   | 14.4  | 1.2   | 9.6   |
| 214618_at   | AF015452  | CFLAR                  | 8837         | 4.5   | 3.0   | 2.3   | 6.1   | 0.7   |
| 214619_at   | X72304    | CRHR1                  | 1394         | 10.3  | 10.1  | 1.5   | 11.4  | 11.3  |
| 214620_x_at | BF038548  | PAM                    | 5066         | 6.5   | 5.9   | 5.0   | 6.6   | 3.9   |
| 214621_at   | S70004    | GYS2                   | 2998         | 0.2   | 0.5   | 0.7   | 0.7   | 0.3   |
| 214622_at   | M17252    | CYP21A1P ///           | 1589 /// 159 | 2.6   | 2.2   | 2.1   | 1.2   | 1.1   |
| 214623_at   | AA845710  | FBXW4P1                | 26226        | 3.1   | 7.3   | 4.1   | 5.7   | 7.3   |
| 214624_at   | AA548647  | UPK1A                  | 11045        | 10.5  | 2.0   | 1.8   | 4.4   | 4.7   |
| 214625_s_at | AF218033  | MINK1                  | 50488        | 9.8   | 10.6  | 19.2  | 8.2   | 2.2   |
| 214626_s_at | AK026548  | GANAB                  | 23193        | 262.4 | 212.6 | 224.2 | 224.5 | 138.6 |
| 214627_at   | X14346    | EPX                    | 8288         | 8.5   | 5.6   | 5.1   | 3.7   | 0.8   |
| 214628_at   | M96739    | NHLH1                  | 4807         | 1.6   | 2.1   | 2.5   | 1.1   | 1.7   |
| 214629_x_at | AF320999  | RTN4                   | 57142        | 667.0 | 673.9 | 691.9 | 647.5 | 588.8 |
| 214630_at   | X54741    | CYP11B2                | 1585         | 2.1   | 2.7   | 2.8   | 2.4   | 1.2   |
| 214631_at   | BG391005  | ZBTB33                 | 10009        | 7.7   | 8.0   | 6.5   | 10.1  | 7.1   |
| 214632_at   | AA295257  | NRP2                   | 8828         | 0.7   | 0.8   | 5.5   | 1.1   | 5.1   |
| 214633_at   | AI824954  | SOX3                   | 6658         | 0.9   | 1.4   | 3.4   | 5.3   | 5.6   |
| 214634_at   | AL523073  | HIST1H4I               | -            | 9.0   | 8.1   | 4.7   | 0.8   | 5.2   |
| 214635_at   | AI701514  | CLDN9                  | 9080         | 15.1  | 6.8   | 8.1   | 7.1   | 7.2   |
| 214636_at   | AA747379  | CALCB                  | 797          | 4.3   | 3.4   | 3.0   | 4.8   | 5.2   |
| 214637_at   | BG437034  | OSM                    | 5008         | 1.4   | 0.5   | 0.7   | 0.5   | 1.1   |
| 214638_s_at | AV681875  | CCNT2                  | 905          | 22.6  | 21.1  | 20.1  | 18.2  | 15.4  |
| 214639_s_at | S79910    | HOXA1                  | 3198         | 4.8   | 2.5   | 6.2   | 7.9   | 5.3   |
| 214640_at   | AL021331  | UNC93A                 | 54346        | 5.6   | 5.1   | 7.0   | 1.0   | 0.2   |
| 214641_at   | M81379    | COL4A3                 | 1285         | 1.2   | 1.6   | 1.4   | 1.7   | 0.8   |
| 214642_x_at | AI200443  | MAGEA10-M4104 ///      | 100          | 86.6  | 101.6 | 89.5  | 76.8  | 69.6  |
| 214643_x_at | BG034080  | BIN1                   | 274          | 37.8  | 32.4  | 31.3  | 24.3  | 31.0  |
| 214644_at   | BF061074  | HIST1H2AK              | 8330         | 0.6   | 5.2   | 4.5   | 1.4   | 5.4   |
| 214645_at   | AK025116  | -                      | -            | 5.9   | 5.5   | 1.2   | 6.5   | 5.3   |
| 214646_at   | AL522145  | HIST1H3A ///           | 8350 /// 835 | 3.3   | 2.3   | 5.9   | 6.9   | 8.1   |
| 214647_s_at | BG402460  | HFE                    | 3077         | 11.5  | 12.7  | 11.3  | 8.8   | 7.6   |
| 214648_at   | AI207120  | GPX5                   | 2880         | 5.3   | 4.6   | 3.1   | 1.2   | 0.8   |
| 214649_s_at | U58033    | MTMR2                  | 8898         | 47.4  | 56.8  | 57.1  | 49.5  | 56.7  |
| 214650_x_at | AL050328  | MOG                    | 4340         | 8.7   | 5.9   | 7.5   | 0.9   | 2.9   |
| 214651_s_at | U41813    | HOXA10-HO3205 ///      | 442          | 4.0   | 4.3   | 3.1   | 0.6   | 2.1   |
| 214652_at   | X58987    | DRD1                   | 1812         | 0.4   | 0.4   | 0.4   | 0.3   | 0.3   |
| 214655_at   | U18549    | GPR6                   | 2830         | 0.7   | 4.4   | 1.1   | 0.4   | 2.4   |
| 214656_x_at | BE790157  | MYO1C                  | 4641         | 129.0 | 79.7  | 94.2  | 91.7  | 68.0  |
| 214657_s_at | AU134977  | MIR612 /// N283131 /// | 6            | 25.5  | 17.4  | 20.6  | 22.2  | 14.7  |
| 214658_at   | BG286537  | TMED7 /// TI51014 ///  | 10           | 181.2 | 117.6 | 206.5 | 173.7 | 154.6 |
| 214659_x_at | AC007956  | YLPM1                  | 56252        | 53.7  | 59.9  | 56.3  | 45.2  | 42.9  |
| 214660_at   | X68742    | ITGA1                  | 3672         | 0.2   | 3.4   | 2.5   | 1.6   | 1.7   |
| 214661_s_at | R06783    | NOP14                  | 8602         | 153.1 | 149.3 | 228.2 | 110.8 | 150.6 |
| 214662_at   | D26488    | WDR43                  | 23160        | 57.3  | 39.5  | 57.3  | 48.4  | 56.4  |
| 214663_at   | AB007941  | DSTYK                  | 25778        | 30.6  | 28.6  | 25.7  | 22.8  | 22.9  |
| 214664_at   | AU121975  | PAICS                  | 10606        | 8.5   | 9.5   | 12.2  | 9.1   | 11.6  |
| 214665_s_at | AK000095  | CHP1                   | 11261        | 491.7 | 473.8 | 461.6 | 465.5 | 385.6 |
| 214666_x_at | AI204981  | IREB2                  | 3658         | 44.3  | 26.9  | 34.4  | 33.4  | 27.5  |
| 214667_s_at | AK026607  | TP53I11                | 9537         | 19.0  | 17.7  | 20.8  | 21.0  | 18.8  |
| 214668_at   | BG532405  | SPRYD7                 | 57213        | 10.2  | 7.2   | 12.7  | 8.8   | 11.7  |

|             |          |              |              |        |        |        |        |        |
|-------------|----------|--------------|--------------|--------|--------|--------|--------|--------|
| 214669_x_at | BG485135 | IGKC         | 3514         | 2.9    | 2.1    | 3.9    | 2.8    | 4.4    |
| 214670_at   | AA653300 | ZKSCAN1      | 7586         | 61.1   | 56.7   | 48.6   | 50.6   | 39.9   |
| 214671_s_at | L19704   | ABR          | 29           | 24.7   | 21.9   | 25.7   | 23.9   | 15.9   |
| 214672_at   | AB023215 | TTLL5        | 23093        | 67.6   | 64.3   | 63.6   | 65.1   | 57.6   |
| 214673_s_at | AU140931 | HUWE1        | 10075        | 12.9   | 9.8    | 13.4   | 10.9   | 10.0   |
| 214674_at   | AW451502 | USP19        | 10869        | 29.9   | 33.8   | 29.2   | 23.8   | 25.7   |
| 214675_at   | BC005407 | NUP188       | 23511        | 1.3    | 1.9    | 0.7    | 0.9    | 1.0    |
| 214676_x_at | AF113616 | MUC3B        | 57876        | 5.2    | 6.1    | 2.0    | 1.6    | 3.6    |
| 214677_x_at | X57812   | IGLC1        | 3537         | 1.8    | 0.8    | 0.9    | 0.8    | 0.4    |
| 214678_x_at | R51161   | ZFX          | 7543         | 27.8   | 18.4   | 34.5   | 25.1   | 25.2   |
| 214679_x_at | AL110227 | GNA11        | 2767         | 190.5  | 168.8  | 172.8  | 148.8  | 114.4  |
| 214680_at   | BF674712 | NTRK2        | 4915         | 1.0    | 1.0    | 2.0    | 0.5    | 0.5    |
| 214681_at   | AI830490 | GK           | 2710         | 15.8   | 21.4   | 15.1   | 22.0   | 28.2   |
| 214682_at   | AK023376 | PKD1P1       | 339044       | 14.4   | 6.7    | 12.5   | 16.2   | 5.1    |
| 214683_s_at | AI251890 | CLK1         | 1195         | 52.3   | 18.0   | 41.9   | 24.8   | 26.8   |
| 214684_at   | X63381   | MEF2A        | 4205         | 21.0   | 20.8   | 30.1   | 15.8   | 16.1   |
| 214685_at   | AB000464 | NOP14-AS1    | 317648       | 1.4    | 0.3    | 1.0    | 0.4    | 0.2    |
| 214686_at   | AA868898 | ZNF266       | 10781        | 95.1   | 81.6   | 109.1  | 91.7   | 78.0   |
| 214687_x_at | AK026577 | ALDOA        | 226          | 2429.0 | 2364.4 | 2627.2 | 2425.6 | 2266.8 |
| 214688_at   | BF217301 | TLE4         | 7091         | 6.7    | 7.1    | 8.1    | 4.7    | 4.9    |
| 214689_at   | BF435151 | PAPPA2       | 60676        | 3.2    | 2.7    | 16.1   | 1.8    | 2.6    |
| 214690_at   | AA004579 | TAF1B        | 9014         | 7.9    | 1.4    | 5.5    | 1.9    | 2.5    |
| 214691_x_at | AU121431 | FAM63B       | 54629        | 33.3   | 17.2   | 31.2   | 30.8   | 17.5   |
| 214692_s_at | AL041139 | JRK          | 8629         | 4.2    | 7.9    | 2.1    | 5.3    | 9.4    |
| 214693_x_at | BE732345 | NBPF10 /// N | 25832 /// 40 | 74.8   | 126.8  | 82.7   | 123.0  | 95.0   |
| 214694_at   | N31673   | MPRIP        | 23164        | 8.0    | 19.9   | 19.5   | 15.7   | 8.7    |
| 214695_at   | AW051361 | UBAP2L       | 9898         | 29.5   | 31.6   | 41.1   | 25.4   | 27.8   |
| 214696_at   | AF070569 | MIR22 /// M  | 84981 /// 40 | 11.8   | 13.7   | 10.5   | 14.9   | 10.5   |
| 214697_s_at | AW190873 | PTBP3        | 9991         | 21.4   | 29.5   | 24.4   | 24.5   | 20.7   |
| 214698_at   | AW190873 | PTBP3        | 9991         | 12.7   | 14.8   | 23.9   | 18.8   | 14.8   |
| 214699_x_at | AK024279 | WIPI2        | 26100        | 28.1   | 18.7   | 35.0   | 29.2   | 15.9   |
| 214700_x_at | AK000323 | LOC1019293   | 55183 /// 10 | 24.6   | 16.2   | 36.8   | 19.9   | 26.6   |
| 214701_s_at | AJ276395 | FN1          | 2335         | 13.6   | 11.8   | 15.1   | 16.0   | 18.0   |
| 214702_at   | AJ276395 | FN1          | 2335         | 1.4    | 0.2    | 5.5    | 0.4    | 1.2    |
| 214703_s_at | AW954107 | MAN2B2       | 23324        | 38.8   | 49.7   | 43.0   | 52.0   | 37.2   |
| 214704_at   | AK024679 | TCF25        | 22980        | 0.9    | 0.6    | 1.3    | 0.6    | 1.1    |
| 214705_at   | AJ001306 | INADL        | 10207        | 6.0    | 5.3    | 3.6    | 5.9    | 4.6    |
| 214706_at   | AU149447 | ZNF200       | 7752         | 50.5   | 41.4   | 60.9   | 49.4   | 51.3   |
| 214707_x_at | AB002326 | ALMS1        | 7840         | 50.6   | 30.4   | 26.3   | 43.1   | 30.6   |
| 214708_at   | BG484314 | SNTB1        | 6641         | 1.6    | 0.4    | 0.2    | 0.3    | 1.8    |
| 214709_s_at | Z22551   | KTN1         | 3895         | 272.4  | 205.5  | 308.7  | 245.9  | 238.2  |
| 214710_s_at | BE407516 | CCNB1        | 891          | 1096.7 | 831.7  | 1110.6 | 902.2  | 813.9  |
| 214711_at   | BE568184 | GATC         | 283459       | 103.0  | 99.5   | 116.2  | 99.7   | 85.4   |
| 214712_at   | AK023827 | SNX29P2      | 440352       | 1.2    | 3.0    | 0.1    | 2.6    | 0.3    |
| 214713_at   | AI703162 | YLPM1        | 56252        | 34.8   | 25.9   | 21.3   | 35.6   | 19.4   |
| 214714_at   | AK022360 | ZNF394       | 84124        | 46.2   | 24.9   | 54.0   | 47.5   | 32.1   |
| 214715_x_at | AK024789 | ZNF160       | 90338        | 80.4   | 68.1   | 82.0   | 47.1   | 53.8   |
| 214716_at   | AW504018 | BMP2K        | 55589        | 0.3    | 0.5    | 2.4    | 0.5    | 0.3    |
| 214717_at   | AL137534 | PKI55        | 150967       | 2.4    | 6.2    | 6.6    | 4.1    | 2.2    |
| 214718_at   | AK026142 | GATAD1       | 57798        | 67.6   | 50.5   | 52.1   | 58.3   | 37.4   |
| 214719_at   | AK026720 | SLC46A3      | 283537       | 0.3    | 1.1    | 3.6    | 0.8    | 0.4    |
| 214720_x_at | BF981643 | SEPT10       | 151011       | 26.2   | 21.5   | 25.3   | 23.5   | 21.9   |
| 214721_x_at | AL162074 | CDC42EP4     | 23580        | 80.8   | 67.8   | 77.3   | 63.5   | 60.2   |

|             |          |                           |        |        |        |        |        |        |
|-------------|----------|---------------------------|--------|--------|--------|--------|--------|--------|
| 214722_at   | AW516297 | NOTCH2NL                  | 388677 | 73.0   | 45.0   | 55.8   | 59.7   | 49.9   |
| 214723_x_at | AB046861 | ANKRD36                   | 375248 | 0.2    | 0.2    | 0.3    | 0.3    | 3.0    |
| 214724_at   | AF070621 | DIXDC1                    | 85458  | 21.2   | 15.6   | 25.5   | 13.9   | 11.0   |
| 214725_at   | BE968773 | SBSPON                    | 157869 | 0.3    | 1.3    | 0.1    | 3.8    | 0.6    |
| 214726_x_at | AL556041 | ADD1                      | 118    | 107.8  | 109.8  | 110.1  | 100.4  | 82.7   |
| 214727_at   | X95152   | BRCA2                     | 675    | 29.2   | 21.9   | 26.1   | 21.8   | 24.6   |
| 214728_x_at | AK026573 | SMARCA4                   | 6597   | 289.5  | 244.4  | 288.4  | 285.2  | 224.0  |
| 214729_at   | AA400421 | TWISTNB                   | 221830 | 12.2   | 5.1    | 14.4   | 5.3    | 10.1   |
| 214730_s_at | AK025457 | GLG1                      | 2734   | 112.6  | 110.8  | 106.0  | 118.2  | 84.5   |
| 214731_at   | AB037854 | -                         | -      | 8.5    | 6.4    | 11.5   | 8.6    | 10.7   |
| 214732_at   | AU121035 | SP1                       | 6667   | 15.9   | 15.7   | 18.8   | 23.8   | 17.7   |
| 214733_s_at | AL031427 | YIPF1                     | 54432  | 128.8  | 103.7  | 99.3   | 88.0   | 86.9   |
| 214734_at   | AB014524 | EXPH5                     | 23086  | 105.3  | 72.9   | 93.8   | 95.6   | 80.9   |
| 214735_at   | AW166711 | IPCEF1                    | 26034  | 0.7    | 3.2    | 3.9    | 1.4    | 2.4    |
| 214736_s_at | BE898639 | ADD1                      | 118    | 156.8  | 151.7  | 151.1  | 150.4  | 118.1  |
| 214737_x_at | AV725195 | HNRNPC                    | 3183   | 1144.2 | 1090.5 | 1248.7 | 1085.0 | 1026.6 |
| 214738_s_at | BE792298 | NEK9                      | 91754  | 32.5   | 23.4   | 34.8   | 30.8   | 29.4   |
| 214739_at   | AI357539 | LRCH3                     | 84859  | 55.8   | 36.1   | 53.3   | 32.2   | 30.7   |
| 214740_at   | BE676209 | POLR2J /// P15439 /// 246 |        | 2.9    | 10.0   | 4.7    | 1.1    | 5.6    |
| 214741_at   | AW968301 | LOC1005066.7690 /// 100   |        | 56.0   | 30.3   | 50.7   | 40.9   | 39.8   |
| 214742_at   | AB029041 | CEP131                    | 22994  | 27.5   | 22.0   | 26.2   | 22.4   | 21.8   |
| 214743_at   | BE046521 | CUX1                      | 1523   | 59.9   | 50.2   | 57.0   | 49.2   | 42.0   |
| 214744_s_at | AK021960 | RPL23 /// SN 9349 /// 619 |        | 61.3   | 46.6   | 53.7   | 54.7   | 54.3   |
| 214745_at   | AW665865 | PLCH1                     | 23007  | 18.5   | 11.3   | 18.3   | 13.9   | 12.0   |
| 214746_s_at | BE549732 | ZNF467                    | 168544 | 61.6   | 72.7   | 58.2   | 90.3   | 51.1   |
| 214747_at   | AK022892 | ZBED4                     | 9889   | 6.7    | 1.7    | 5.6    | 6.8    | 3.9    |
| 214748_at   | U50529   | N4BP2L2                   | 10443  | 9.1    | 11.3   | 2.9    | 5.9    | 7.1    |
| 214749_s_at | AK000818 | ARMCX6                    | 54470  | 226.9  | 234.5  | 263.7  | 253.6  | 198.0  |
| 214750_at   | L13197   | PLAC4                     | 191585 | 27.8   | 13.3   | 2.8    | 4.7    | 8.8    |
| 214751_at   | BE541042 | ZNF468                    | 90333  | 51.3   | 37.8   | 48.0   | 42.4   | 48.7   |
| 214752_x_at | AI625550 | FLNA                      | 2316   | 123.4  | 163.0  | 124.8  | 135.6  | 77.9   |
| 214753_at   | AW084068 | N4BP2L2 /// 10443         |        | 3.8    | 3.7    | 0.9    | 1.4    | 2.4    |
| 214754_at   | AB007861 | TET3                      | 200424 | 17.9   | 15.8   | 29.5   | 19.1   | 13.5   |
| 214755_at   | AK022632 | UAP1L1                    | 91373  | 33.9   | 35.4   | 38.4   | 40.0   | 39.7   |
| 214756_x_at | AB017004 | PMS2P1                    | 5379   | 127.0  | 102.2  | 104.2  | 109.5  | 80.3   |
| 214757_at   | BG178274 | PMS2L2                    | 5380   | 10.8   | 15.7   | 7.7    | 16.2   | 18.3   |
| 214758_at   | AL080157 | DCAF4                     | 26094  | 5.5    | 6.5    | 11.0   | 10.9   | 8.1    |
| 214759_at   | AL583911 | WTAP                      | 9589   | 20.9   | 12.3   | 19.1   | 13.2   | 12.2   |
| 214760_at   | AL049942 | ZNF337                    | 26152  | 37.2   | 28.9   | 29.0   | 39.4   | 31.8   |
| 214761_at   | AW149417 | ZNF423                    | 23090  | 1.5    | 2.8    | 6.5    | 2.8    | 0.4    |
| 214762_at   | BF340635 | ATP6V1G2                  | 534    | 8.2    | 10.9   | 13.4   | 7.0    | 7.4    |
| 214763_at   | AK023937 | ACOT11                    | 26027  | 33.0   | 30.5   | 25.6   | 18.9   | 16.8   |
| 214764_at   | AW029169 | RRP15                     | 51018  | 14.3   | 6.8    | 14.0   | 3.6    | 7.3    |
| 214765_s_at | AK024677 | NAAA                      | 27163  | 103.5  | 98.9   | 133.1  | 122.2  | 118.7  |
| 214766_s_at | AL080144 | AHCTF1                    | 25909  | 90.2   | 56.6   | 101.1  | 82.7   | 81.2   |
| 214767_s_at | AL551046 | HSPB6                     | 126393 | 6.8    | 12.4   | 6.0    | 11.4   | 3.8    |
| 214768_x_at | BG540628 | IGKC /// IGK\ 3514        |        | 7.9    | 1.5    | 1.4    | 3.9    | 1.0    |
| 214769_at   | AF052117 | CLCN4                     | 1183   | 2.3    | 7.2    | 8.5    | 13.2   | 8.8    |
| 214770_at   | AI299239 | MSR1                      | 4481   | 0.1    | 0.8    | 0.4    | 0.6    | 2.5    |
| 214771_x_at | AK025604 | MPRIIP                    | 23164  | 265.4  | 248.3  | 249.7  | 238.3  | 205.3  |
| 214772_at   | H08993   | KIAA1549L                 | 25758  | 10.0   | 3.4    | 5.7    | 5.2    | 7.6    |
| 214773_x_at | AI983505 | TIPRL                     | 261726 | 40.0   | 42.8   | 38.1   | 39.1   | 37.1   |
| 214774_x_at | AK027006 | TOX3                      | 27324  | 4.9    | 6.2    | 7.7    | 6.4    | 4.1    |

|             |          |                            |        |        |        |        |        |        |
|-------------|----------|----------------------------|--------|--------|--------|--------|--------|--------|
| 214775_at   | AW139448 | N4BP3                      | 23138  | 12.7   | 8.6    | 11.9   | 16.4   | 8.4    |
| 214776_x_at | AA777793 | XYLB                       | 9942   | 7.0    | 3.9    | 4.5    | 4.0    | 6.7    |
| 214777_at   | BG482805 | abParts /// K3514          |        | 1.0    | 0.4    | 0.5    | 0.6    | 0.8    |
| 214778_at   | AB011541 | MEGF8                      | 1954   | 7.2    | 9.4    | 9.3    | 12.2   | 7.3    |
| 214779_s_at | R51077   | SGSM3                      | 27352  | 72.3   | 55.3   | 57.1   | 62.7   | 49.8   |
| 214780_s_at | AK002201 | MYO9B                      | 4650   | 28.4   | 27.7   | 33.5   | 32.4   | 25.7   |
| 214781_at   | AL162013 | -                          | -      | 1.2    | 1.1    | 1.0    | 1.4    | 0.7    |
| 214782_at   | AU155105 | CTTN                       | 2017   | 4.7    | 0.6    | 3.6    | 3.7    | 4.8    |
| 214783_s_at | BG177920 | ANXA11                     | 311    | 14.7   | 21.5   | 24.5   | 25.2   | 19.7   |
| 214784_x_at | BE966299 | XPO6                       | 23214  | 259.5  | 138.0  | 162.1  | 153.1  | 155.3  |
| 214785_at   | AB023203 | VPS13A                     | 23230  | 39.4   | 21.4   | 41.5   | 28.6   | 20.7   |
| 214786_at   | AA361361 | MAP3K1                     | 4214   | 8.1    | 4.6    | 4.9    | 1.6    | 2.7    |
| 214787_at   | BE268538 | DENND4A                    | 10260  | 13.2   | 9.3    | 10.4   | 17.8   | 12.3   |
| 214788_x_at | AA731713 | DDN                        | 23109  | 2.3    | 1.0    | 1.3    | 1.5    | 1.3    |
| 214789_x_at | AA524274 | SRSF8                      | 10929  | 746.8  | 697.6  | 810.5  | 629.8  | 618.7  |
| 214790_at   | AK001406 | SENP6                      | 26054  | 9.8    | 7.8    | 13.1   | 6.0    | 9.5    |
| 214791_at   | AK023116 | SP140L                     | 93349  | 9.5    | 3.2    | 6.4    | 5.2    | 6.3    |
| 214792_x_at | AI955119 | VAMP2                      | 6844   | 28.4   | 17.3   | 25.7   | 27.2   | 15.0   |
| 214793_at   | X93921   | DUSP7                      | 1849   | 5.5    | 6.5    | 9.3    | 5.3    | 9.3    |
| 214794_at   | BF669264 | PA2G4                      | 5036   | 192.9  | 148.1  | 244.7  | 170.6  | 188.4  |
| 214795_at   | AL137703 | ZMYND8                     | 23613  | 16.0   | 4.6    | 16.1   | 10.5   | 15.0   |
| 214796_at   | AW439543 | KIAA1456 /// 57604 /// 10  |        | 3.7    | 4.8    | 9.6    | 3.6    | 5.5    |
| 214797_s_at | BC000281 | CDK18                      | 5129   | 1.3    | 2.0    | 1.7    | 1.5    | 1.1    |
| 214798_at   | AW291664 | ATP2C2                     | 9914   | 19.7   | 22.9   | 27.6   | 23.2   | 26.2   |
| 214799_at   | AI821777 | NFASC                      | 23114  | 2.1    | 1.2    | 1.2    | 3.1    | 0.8    |
| 214800_x_at | R83000   | BTF3                       | 689    | 1580.3 | 1128.0 | 1553.5 | 1591.4 | 1402.1 |
| 214801_at   | W88821   | TOR1AIP2                   | 163590 | 115.4  | 75.8   | 119.4  | 70.2   | 54.4   |
| 214802_at   | AK022397 | EXOC7                      | 23265  | 7.9    | 9.7    | 3.6    | 11.1   | 4.2    |
| 214803_at   | BF344237 | CDH6                       | 1004   | 0.7    | 1.2    | 1.2    | 2.0    | 1.0    |
| 214804_at   | BF793446 | CENPI                      | 2491   | 31.9   | 28.6   | 43.6   | 34.7   | 30.5   |
| 214805_at   | U79273   | EIF4A1 /// SM 1973 /// 267 |        | 107.7  | 75.3   | 136.1  | 86.2   | 66.8   |
| 214806_at   | U90030   | BICD1                      | 636    | 8.5    | 14.1   | 11.1   | 17.2   | 12.5   |
| 214807_at   | AI278204 | PLXDC2                     | 84898  | 7.6    | 5.3    | 6.2    | 10.5   | 2.1    |
| 214808_at   | AU147851 | RP11-395B7. -              |        | 10.1   | 12.5   | 12.3   | 6.7    | 6.3    |
| 214809_at   | AL050047 | LOC1002941.100294145       |        | 7.7    | 1.2    | 3.2    | 2.8    | 4.8    |
| 214811_at   | AB002316 | RIMBP2                     | 23504  | 5.8    | 4.8    | 5.1    | 1.0    | 4.3    |
| 214812_s_at | D80006   | MOB1A                      | 55233  | 71.8   | 40.5   | 58.3   | 55.0   | 37.7   |
| 214813_at   | W90796   | ZNF75D                     | 7626   | 16.8   | 20.4   | 18.3   | 19.1   | 14.4   |
| 214814_at   | BF592058 | YTHDC1                     | 91746  | 8.9    | 10.0   | 16.1   | 6.8    | 4.8    |
| 214815_at   | AU136587 | TRIM33                     | 51592  | 8.6    | 1.2    | 0.9    | 7.0    | 1.0    |
| 214816_x_at | BC003535 | C19orf40                   | 91442  | 32.0   | 23.5   | 33.1   | 24.2   | 25.5   |
| 214817_at   | BE783668 | UNC13A                     | 23025  | 1.8    | 3.9    | 1.1    | 1.0    | 4.5    |
| 214818_at   | AF007146 | CCDC57                     | 284001 | 1.6    | 1.2    | 2.3    | 1.9    | 0.7    |
| 214819_at   | BF571239 | IQSEC2                     | 23096  | 13.3   | 10.0   | 7.5    | 3.3    | 5.3    |
| 214820_at   | AJ002572 | BRWD1                      | 54014  | 28.0   | 22.7   | 26.1   | 21.3   | 20.2   |
| 214821_at   | AF052119 | SLC25A4                    | 291    | 5.3    | 2.8    | 2.8    | 2.4    | 6.4    |
| 214822_at   | AF131833 | BRINP2                     | 57795  | 1.2    | 0.8    | 1.8    | 2.0    | 2.7    |
| 214823_at   | AF033199 | ZNF204P                    | 7754   | 9.8    | 5.1    | 8.9    | 7.9    | 5.2    |
| 214824_at   | Z73903   | -                          | -      | 1.3    | 1.1    | 1.3    | 1.3    | 1.3    |
| 214825_at   | L10374   | FAM155A                    | 728215 | 2.8    | 6.0    | 4.4    | 1.9    | 4.7    |
| 214826_at   | U79276   | PDE12                      | 201626 | 8.9    | 4.5    | 12.3   | 9.5    | 1.0    |
| 214827_at   | AL031680 | PARD6B                     | 84612  | 2.9    | 0.8    | 4.7    | 0.6    | 3.3    |
| 214828_s_at | AL157851 | RRP7A /// RF 27341 /// 91  |        | 28.0   | 35.7   | 43.8   | 41.7   | 30.4   |

|             |          |                           |           |       |       |       |       |       |
|-------------|----------|---------------------------|-----------|-------|-------|-------|-------|-------|
| 214829_at   | AK023446 | AASS                      | 10157     | 10.0  | 4.8   | 7.1   | 4.3   | 7.9   |
| 214830_at   | AI537540 | SLC38A6                   | 145389    | 34.2  | 34.9  | 35.4  | 37.1  | 27.6  |
| 214831_at   | AK024944 | ELK4                      | 2005      | 19.2  | 2.2   | 26.8  | 17.0  | 16.9  |
| 214832_at   | X87870   | HNF4A                     | 3172      | 1.6   | 0.5   | 0.6   | 0.5   | 0.8   |
| 214833_at   | AB007958 | TMEM63A                   | 9725      | 13.6  | 11.9  | 6.0   | 12.5  | 3.6   |
| 214834_at   | AU118874 | PWAR5                     | 8123      | 7.5   | 3.8   | 9.0   | 2.4   | 5.3   |
| 214835_s_at | AF131748 | SUCLG2                    | 8801      | 221.3 | 174.1 | 234.4 | 210.0 | 172.3 |
| 214836_x_at | BG536224 | IGK /// IGKC 3514 /// 508 |           | 11.3  | 7.9   | 3.9   | 8.3   | 5.8   |
| 214837_at   | M12523   | ALB                       | 213       | 7.3   | 1.4   | 3.2   | 0.4   | 5.7   |
| 214838_at   | AL035297 | SFT2D2                    | 375035    | 44.4  | 41.8  | 48.5  | 26.5  | 27.3  |
| 214839_at   | AF052108 | LINC00599 // 157627 /// 4 |           | 9.6   | 4.5   | 3.4   | 1.5   | 3.8   |
| 214840_at   | AF038192 | TOM1L2                    | 146691    | 4.5   | 5.6   | 1.8   | 3.2   | 3.5   |
| 214841_at   | AF070524 | CNIH3                     | 149111    | 5.3   | 6.6   | 3.3   | 1.0   | 4.9   |
| 214842_s_at | M12523   | ALB                       | 213       | 2.9   | 0.5   | 0.8   | 8.6   | 1.0   |
| 214843_s_at | AK022864 | USP33                     | 23032     | 80.7  | 59.8  | 57.5  | 68.8  | 53.8  |
| 214844_s_at | AL050069 | DOK5                      | 55816     | 13.2  | 4.7   | 13.3  | 10.3  | 7.2   |
| 214845_s_at | AF257659 | CALU                      | 813       | 90.5  | 114.9 | 118.1 | 110.7 | 93.4  |
| 214846_s_at | AB037751 | ALPK3                     | 57538     | 5.8   | 6.0   | 1.5   | 2.8   | 1.4   |
| 214847_s_at | BG111168 | GPSM3                     | 63940     | 13.6  | 4.1   | 2.8   | 13.7  | 4.0   |
| 214848_at   | U79277   | YWHAZ                     | 7534      | 12.0  | 10.9  | 20.1  | 8.7   | 9.8   |
| 214849_at   | AW500220 | KCTD20                    | 222658    | 64.1  | 50.5  | 67.4  | 53.0  | 51.2  |
| 214850_at   | X75940   | SMA4                      | 11039     | 49.1  | 32.4  | 38.7  | 46.4  | 23.5  |
| 214851_at   | X87870   | HNF4A                     | 3172      | 11.0  | 5.4   | 10.8  | 2.2   | 2.0   |
| 214852_x_at | BF573874 | VPS13A                    | 23230     | 9.4   | 6.2   | 9.0   | 2.8   | 8.1   |
| 214853_s_at | AI091079 | SHC1                      | 6464      | 507.4 | 481.6 | 504.8 | 480.7 | 393.8 |
| 214854_at   | AC004490 | AC004490.1,-              |           | 0.9   | 1.1   | 0.6   | 0.3   | 1.3   |
| 214855_s_at | AL050050 | RALGAPA1 // 26134 /// 25  |           | 52.7  | 47.2  | 45.1  | 53.3  | 41.0  |
| 214856_at   | BF434424 | SPTBN1                    | 6711      | 0.5   | 0.2   | 1.2   | 1.9   | 0.8   |
| 214857_at   | AL050035 | RPARP-AS1                 | 100505761 | 69.1  | 60.0  | 76.3  | 83.4  | 61.1  |
| 214858_at   | AF070536 | PP14571                   | 100130449 | 0.5   | 1.0   | 3.7   | 3.1   | 0.4   |
| 214859_at   | AI635302 | FSTL4                     | 23105     | 3.1   | 2.2   | 3.9   | 1.9   | 8.7   |
| 214860_at   | AL022165 | SLC9A7                    | 84679     | 9.0   | 8.3   | 11.1  | 8.2   | 3.4   |
| 214861_at   | AI341811 | KDM4C                     | 23081     | 2.1   | 1.8   | 1.0   | 1.6   | 4.4   |
| 214862_x_at | AL080082 | RP11-119F7.-!             |           | 4.5   | 2.1   | 3.3   | 2.9   | 3.3   |
| 214863_at   | AL022165 | -                         | -         | 6.4   | 3.7   | 2.8   | 5.4   | 1.0   |
| 214864_s_at | AK024386 | GRHPR                     | 9380      | 377.3 | 315.9 | 347.1 | 333.4 | 300.0 |
| 214865_at   | AC004490 | DOT1L                     | 84444     | 8.5   | 0.8   | 0.7   | 0.4   | 0.5   |
| 214866_at   | X74039   | PLAUR                     | 5329      | 10.0  | 0.9   | 3.6   | 1.9   | 7.4   |
| 214867_at   | AL080182 | NDST2 /// ZS 8509 /// 100 |           | 12.3  | 12.5  | 16.3  | 6.7   | 8.5   |
| 214868_at   | AW189518 | PIWIL1                    | 9271      | 8.2   | 1.8   | 6.6   | 4.9   | 0.3   |
| 214869_x_at | AK021533 | GAPVD1                    | 26130     | 71.2  | 58.5  | 72.4  | 60.0  | 54.9  |
| 214870_x_at | AC002045 | LOC10193009284 /// 339    |           | 137.1 | 115.9 | 109.1 | 148.7 | 61.0  |
| 214871_x_at | BC005066 | LOC1002875100287590       |           | 29.6  | 28.0  | 37.4  | 27.1  | 28.3  |
| 214872_at   | AL080129 | LOC101929355183 /// 10    |           | 0.8   | 0.5   | 1.4   | 0.4   | 0.3   |
| 214873_at   | AL137651 | LRP5L                     | 91355     | 12.6  | 9.4   | 14.8  | 10.1  | 6.9   |
| 214874_at   | AL050364 | PKP4                      | 8502      | 9.9   | 7.4   | 6.0   | 7.0   | 4.5   |
| 214875_x_at | AW001847 | APLP2                     | 334       | 115.0 | 136.3 | 150.2 | 131.4 | 115.7 |
| 214876_s_at | AI628925 | TUBGCP5                   | 114791    | 21.0  | 23.0  | 35.2  | 31.7  | 33.5  |
| 214877_at   | BE794663 | CDKAL1                    | 54901     | 18.7  | 25.2  | 30.2  | 24.9  | 20.1  |
| 214878_at   | AU118165 | LOC10192977587 /// 101    |           | 7.2   | 4.6   | 5.1   | 6.0   | 6.3   |
| 214879_x_at | AY007087 | USF2                      | 7392      | 95.3  | 93.1  | 100.9 | 110.1 | 82.3  |
| 214880_x_at | D90453   | CALD1                     | 800       | 17.9  | 39.4  | 38.5  | 35.9  | 34.9  |
| 214881_s_at | X56687   | UBTF                      | 7343      | 31.6  | 34.5  | 31.5  | 25.9  | 24.4  |

|             |          |                           |       |       |       |       |       |
|-------------|----------|---------------------------|-------|-------|-------|-------|-------|
| 214882_s_at | BG254869 | MIR636 /// S 6427 /// 693 | 937.9 | 851.3 | 963.4 | 694.2 | 899.2 |
| 214883_at   | X55005   | THRA 7067                 | 4.2   | 6.5   | 10.0  | 13.0  | 6.9   |
| 214884_at   | AL033403 | MCF2 4168                 | 0.8   | 3.7   | 0.9   | 4.4   | 1.0   |
| 214885_at   | AL050395 | KAT8 84148                | 23.1  | 20.3  | 24.9  | 31.5  | 18.8  |
| 214886_s_at | AL049786 | N4BP2L1 90634             | 3.0   | 1.5   | 3.4   | 0.6   | 1.0   |
| 214887_at   | AL049786 | N4BP2L1 90634             | 0.3   | 0.1   | 0.3   | 0.2   | 0.1   |
| 214888_at   | AK023851 | CAPN2 824                 | 11.4  | 6.7   | 10.3  | 9.4   | 8.3   |
| 214889_at   | AL080065 | FAM149A 25854             | 7.8   | 4.0   | 2.6   | 7.0   | 4.8   |
| 214890_s_at | AL080065 | FAM149A 25854             | 1.5   | 8.6   | 4.7   | 1.7   | 0.6   |
| 214891_at   | U79257   | FBXO21 23014              | 8.9   | 1.5   | 1.8   | 1.1   | 8.1   |
| 214892_x_at | BC004262 | CACTIN 58509              | 40.7  | 31.6  | 49.0  | 44.4  | 32.4  |
| 214893_x_at | AI421964 | HCN2 610                  | 13.5  | 5.5   | 11.3  | 6.9   | 6.4   |
| 214894_x_at | AK023285 | MACF1 23499               | 64.0  | 56.6  | 64.1  | 66.2  | 53.2  |
| 214895_s_at | AU135154 | ADAM10 102                | 36.1  | 32.7  | 36.4  | 36.5  | 30.7  |
| 214896_at   | AL109671 | LINC01314 100996492       | 11.9  | 3.0   | 8.8   | 9.7   | 11.0  |
| 214897_at   | AB007975 | - -                       | 3.2   | 4.5   | 5.1   | 0.4   | 5.5   |
| 214898_x_at | AB038783 | MUC3B 57876               | 2.7   | 2.3   | 1.6   | 1.6   | 1.1   |
| 214899_at   | AC007842 | ZNF780B 163131            | 4.8   | 5.9   | 8.2   | 5.4   | 2.5   |
| 214900_at   | AC004522 | ZKSCAN1 7586              | 36.9  | 23.2  | 11.6  | 25.1  | 13.4  |
| 214901_at   | AI671579 | ZNF8 7554                 | 39.0  | 31.5  | 37.4  | 28.1  | 21.1  |
| 214902_x_at | AL080232 | LPP 4026                  | 61.1  | 33.2  | 59.1  | 35.7  | 32.8  |
| 214903_at   | AF070580 | SYT2 127833               | 11.8  | 6.5   | 12.9  | 3.2   | 1.6   |
| 214904_at   | AI927984 | ZNF41 7592                | 5.2   | 6.9   | 1.2   | 4.8   | 3.2   |
| 214905_at   | AL109674 | RASGRF1 5923              | 8.7   | 7.4   | 12.1  | 8.0   | 1.0   |
| 214906_x_at | AL049786 | N4BP2L1 90634             | 26.3  | 17.2  | 14.4  | 15.6  | 20.3  |
| 214907_at   | BF110434 | CEACAM21 90273            | 13.2  | 4.6   | 2.7   | 4.7   | 6.9   |
| 214908_s_at | AC004893 | TRRAP 8295                | 46.0  | 35.5  | 37.4  | 35.8  | 24.3  |
| 214909_s_at | AK026191 | DDAH2 23564               | 46.5  | 65.3  | 43.2  | 52.9  | 47.4  |
| 214910_s_at | AF161454 | APOM 55937                | 27.2  | 27.7  | 25.9  | 23.4  | 19.9  |
| 214911_s_at | S78771   | BRD2 6046                 | 269.2 | 234.8 | 272.3 | 254.3 | 216.2 |
| 214912_at   | AK022067 | - -                       | 0.8   | 0.4   | 3.6   | 2.2   | 0.9   |
| 214913_at   | AB002364 | ADAMTS3 9508              | 4.1   | 4.6   | 2.9   | 1.8   | 4.4   |
| 214914_at   | U79304   | FAM13C 220965             | 0.6   | 3.6   | 4.8   | 1.8   | 0.1   |
| 214915_at   | AK021842 | ZNF362 149076             | 2.7   | 3.9   | 7.9   | 7.1   | 7.5   |
| 214916_x_at | BG340548 | IGHA1 /// IG 3493 /// 349 | 3.8   | 6.5   | 2.9   | 1.0   | 2.8   |
| 214917_at   | AK024252 | PRKAA1 5562               | 14.1  | 9.4   | 9.8   | 9.7   | 9.3   |
| 214918_at   | AK024911 | HNRNPM 4670               | 13.3  | 10.3  | 15.3  | 10.2  | 10.8  |
| 214919_s_at | R39094   | ANKHD1 /// 8637 /// 548   | 253.1 | 263.6 | 295.7 | 284.7 | 225.2 |
| 214920_at   | R33964   | THSD7A 221981             | 0.8   | 1.5   | 2.5   | 3.8   | 3.0   |
| 214921_at   | U02632   | KCNMA1 3778               | 0.9   | 0.8   | 6.3   | 1.7   | 1.3   |
| 214922_at   | BE567977 | ZNF484 83744              | 7.9   | 6.4   | 9.7   | 6.8   | 6.2   |
| 214923_at   | AK001155 | ATP6V1D 51382             | 16.8  | 18.9  | 19.2  | 9.3   | 13.3  |
| 214924_s_at | AK000754 | TRAK1 22906               | 49.1  | 30.9  | 49.9  | 30.3  | 26.7  |
| 214925_s_at | AK026484 | SPTAN1 6709               | 15.9  | 3.5   | 9.1   | 7.6   | 13.6  |
| 214926_at   | AK026484 | SPTAN1 6709               | 6.1   | 5.2   | 6.2   | 1.3   | 6.8   |
| 214927_at   | AL359052 | ITGBL1 9358               | 11.4  | 9.9   | 6.4   | 7.1   | 6.1   |
| 214928_at   | AI915513 | OBSL1 23363               | 1.9   | 11.7  | 1.6   | 7.6   | 0.8   |
| 214929_s_at | AL137384 | KIAA1109 84162            | 6.9   | 3.3   | 6.4   | 7.1   | 3.9   |
| 214930_at   | AW449813 | SLITRK5 26050             | 0.6   | 0.7   | 0.4   | 0.7   | 1.6   |
| 214931_s_at | AC005070 | SRPK2 6733                | 37.5  | 35.6  | 38.1  | 34.1  | 26.5  |
| 214932_at   | AL133620 | KIDINS220 57498           | 3.3   | 1.4   | 4.2   | 2.7   | 0.6   |
| 214933_at   | AA769818 | CACNA1A /// 773 /// 1005  | 10.2  | 9.1   | 12.5  | 11.8  | 9.1   |
| 214934_at   | AW411030 | ATP9B 374868              | 13.4  | 31.6  | 45.6  | 37.4  | 20.8  |

|             |          |                           |        |        |        |        |        |
|-------------|----------|---------------------------|--------|--------|--------|--------|--------|
| 214935_at   | BE794962 | IL4I1 /// NUF23636 /// 25 | 3.9    | 7.7    | 7.9    | 4.2    | 8.1    |
| 214936_at   | AW298219 | LRCH1 23143               | 9.4    | 3.5    | 1.0    | 1.3    | 2.5    |
| 214937_x_at | AI924817 | PCM1 5108                 | 92.7   | 106.6  | 105.0  | 89.0   | 96.9   |
| 214938_x_at | AF283771 | HMGB1 3146                | 1392.7 | 1586.9 | 1455.5 | 1375.2 | 1360.5 |
| 214939_x_at | AB011399 | MLLT4 4301                | 3.2    | 2.2    | 3.1    | 1.8    | 2.6    |
| 214940_s_at | AB018275 | SMG6 23293                | 1.8    | 6.0    | 3.8    | 6.3    | 6.1    |
| 214941_s_at | AA675900 | PRPF40A 55660             | 125.3  | 126.0  | 148.9  | 111.4  | 98.2   |
| 214942_at   | D38491   | RBM34 23029               | 4.8    | 4.0    | 7.4    | 5.3    | 8.6    |
| 214943_s_at | D38491   | ARID4B /// R 23029 /// 51 | 26.5   | 22.0   | 37.8   | 23.2   | 18.4   |
| 214944_at   | AK001854 | PHLPP2 23035              | 14.6   | 7.7    | 16.9   | 0.5    | 9.4    |
| 214945_at   | AW514267 | FAM153A ///, 202134 /// 2 | 4.4    | 2.5    | 11.5   | 4.1    | 6.9    |
| 214946_x_at | AV728658 | FAM21A ///   253725 /// 3 | 87.3   | 117.4  | 101.1  | 90.5   | 80.3   |
| 214947_at   | AF052146 | FAM105A 54491             | 4.3    | 1.2    | 7.0    | 0.7    | 4.5    |
| 214948_s_at | AL050136 | TMF1 7110                 | 167.4  | 178.8  | 171.7  | 157.2  | 140.8  |
| 214949_at   | AL050136 | - -                       | 194.7  | 179.3  | 180.7  | 178.2  | 153.7  |
| 214950_at   | L39064   | - -                       | 13.3   | 1.0    | 12.3   | 1.6    | 8.6    |
| 214951_at   | AL050358 | SLC26A10 65012            | 1.7    | 3.7    | 0.8    | 0.7    | 1.3    |
| 214952_at   | BF348061 | NCAM1 4684                | 6.1    | 2.6    | 7.4    | 1.2    | 5.0    |
| 214953_s_at | X06989   | APP 351                   | 232.5  | 183.0  | 183.1  | 184.9  | 126.1  |
| 214954_at   | BF977837 | SUSD5 26032               | 0.3    | 2.3    | 0.4    | 2.1    | 3.2    |
| 214955_at   | AI912086 | TMPRSS6 164656            | 16.7   | 8.1    | 15.0   | 13.0   | 11.9   |
| 214956_at   | AF090101 | AAK1 22848                | 0.6    | 0.6    | 0.3    | 0.6    | 0.4    |
| 214957_at   | BF594459 | ACTL8 81569               | 1.5    | 3.4    | 2.8    | 1.6    | 1.6    |
| 214958_s_at | AK021738 | TMC6 11322                | 37.8   | 37.9   | 47.9   | 38.0   | 34.9   |
| 214959_s_at | AF229253 | API5 8539                 | 77.4   | 91.0   | 70.2   | 68.2   | 70.2   |
| 214960_at   | AF229253 | API5 8539                 | 31.7   | 23.9   | 30.8   | 30.1   | 25.5   |
| 214961_at   | AI818409 | MTUS2 23281               | 1.7    | 1.1    | 0.2    | 0.4    | 0.3    |
| 214962_s_at | AK026236 | NUP160 23279              | 51.1   | 36.6   | 47.4   | 51.0   | 42.5   |
| 214963_at   | AK026236 | NUP160 23279              | 21.0   | 13.7   | 23.7   | 19.0   | 14.7   |
| 214964_at   | AA554430 | - -                       | 9.7    | 8.1    | 8.2    | 8.7    | 10.2   |
| 214965_at   | AF070574 | SPATA2L 124044            | 130.8  | 76.0   | 81.0   | 69.1   | 69.7   |
| 214966_at   | S40369   | GRIK5 2901                | 1.8    | 0.5    | 0.4    | 1.7    | 0.6    |
| 214967_at   | AU146983 | - -                       | 0.4    | 0.3    | 0.8    | 2.3    | 2.7    |
| 214968_at   | AV694312 | DDX51 317781              | 14.9   | 3.1    | 10.3   | 11.6   | 8.2    |
| 214969_at   | AF251442 | MAP3K9 4293               | 19.6   | 17.9   | 13.4   | 11.4   | 17.8   |
| 214970_s_at | X17247   | ST6GAL1 6480              | 2.8    | 2.7    | 3.8    | 0.7    | 0.9    |
| 214971_s_at | AV695711 | ST6GAL1 6480              | 0.6    | 0.7    | 1.0    | 0.6    | 0.5    |
| 214972_at   | AU144791 | MGEA5 10724               | 22.3   | 14.9   | 17.7   | 15.2   | 8.9    |
| 214973_x_at | AJ275469 | IGHD 3495                 | 18.6   | 18.3   | 21.0   | 15.2   | 10.1   |
| 214974_x_at | AK026546 | CXCL5 6374                | 1.3    | 2.4    | 0.3    | 2.9    | 0.6    |
| 214975_s_at | AK001816 | MTMR1 8776                | 45.2   | 35.7   | 44.4   | 39.2   | 35.6   |
| 214976_at   | AI554467 | RPL13 /// SN 6137 /// 606 | 7.8    | 7.6    | 6.1    | 10.4   | 5.3    |
| 214977_at   | AK023852 | - -                       | 1.9    | 1.3    | 1.1    | 0.4    | 0.6    |
| 214978_s_at | AK023365 | PPFIA4 8497               | 5.1    | 0.8    | 1.0    | 0.4    | 0.8    |
| 214979_at   | AK000791 | - -                       | 4.8    | 9.8    | 0.9    | 2.0    | 2.7    |
| 214980_at   | AF037219 | UBE3A 7337                | 2.7    | 2.0    | 13.4   | 11.4   | 4.5    |
| 214981_at   | AW137148 | POSTN 10631               | 0.7    | 0.4    | 1.3    | 0.1    | 0.3    |
| 214982_at   | AK021418 | LOC1019292.23020 /// 10   | 6.0    | 4.0    | 5.7    | 3.3    | 1.2    |
| 214983_at   | AL080135 | TTY15 64595               | 61.4   | 30.7   | 44.0   | 40.0   | 30.5   |
| 214984_at   | AC003007 | LOC1010606.81893 /// 10   | 7.2    | 7.0    | 9.6    | 3.9    | 5.4    |
| 214985_at   | AF070571 | EXT1 2131                 | 0.7    | 0.5    | 6.9    | 6.0    | 1.0    |
| 214986_x_at | U37221   | PPIL2 23759               | 25.3   | 30.7   | 24.6   | 30.5   | 26.4   |
| 214987_at   | AL049449 | GAB1 2549                 | 7.3    | 3.7    | 5.3    | 6.8    | 4.3    |

|             |          |            |                     |       |       |       |       |       |
|-------------|----------|------------|---------------------|-------|-------|-------|-------|-------|
| 214988_s_at | X63071   | SON        | 6651                | 398.9 | 278.1 | 321.5 | 348.2 | 293.0 |
| 214989_x_at | BC000969 | -          | -                   | 44.1  | 37.3  | 35.8  | 43.6  | 43.0  |
| 214990_at   | AC004472 | PIGO       | 84720               | 3.2   | 2.3   | 7.6   | 1.4   | 4.1   |
| 214991_s_at | AC004472 | PIGO       | 84720               | 45.3  | 42.4  | 36.2  | 41.1  | 31.7  |
| 214992_s_at | AD000092 | DNASE2     | 1777                | 75.3  | 89.2  | 101.6 | 105.3 | 72.4  |
| 214993_at   | AF070642 | ASPHD1     | 253982              | 26.6  | 26.4  | 33.6  | 31.6  | 19.4  |
| 214994_at   | BF508948 | APOBEC3F   | 200316              | 13.7  | 9.7   | 9.2   | 8.9   | 8.1   |
| 214995_s_at | BF508948 | APOBEC3F   | // 60489 /// 20     | 22.1  | 16.1  | 28.3  | 19.0  | 17.3  |
| 214996_at   | AL079294 | -          | -                   | 2.8   | 4.7   | 6.1   | 10.1  | 5.4   |
| 214997_at   | AW675473 | SCAI       | 286205              | 11.4  | 9.9   | 6.9   | 3.9   | 4.6   |
| 214998_at   | AF090100 | AAK1       | 22848               | 1.0   | 1.0   | 3.4   | 0.8   | 1.2   |
| 214999_s_at | AW243089 | RAB11FIP3  | 9727                | 17.6  | 11.8  | 17.8  | 13.6  | 8.3   |
| 215000_s_at | AL117593 | FEZ2       | 9637                | 97.8  | 82.3  | 99.7  | 106.0 | 63.5  |
| 215001_s_at | AL161952 | GLUL       | 2752                | 561.2 | 508.5 | 583.7 | 552.5 | 463.6 |
| 215002_at   | BE000837 | LOC1019299 | 23117 /// 44        | 0.7   | 0.9   | 0.4   | 4.0   | 0.3   |
| 215003_at   | AA921844 | DGCR9      | 25787               | 2.1   | 8.1   | 2.2   | 1.5   | 1.5   |
| 215004_s_at | AC004475 | SUGP1      | 57794               | 49.0  | 37.9  | 51.4  | 44.6  | 43.6  |
| 215005_at   | AV723666 | NECAB2     | 54550               | 3.9   | 2.5   | 1.3   | 1.4   | 2.1   |
| 215006_at   | AK023816 | -          | -                   | 12.8  | 10.8  | 13.4  | 9.5   | 8.9   |
| 215008_at   | AA582404 | TLL2       | 7093                | 0.9   | 0.7   | 3.8   | 0.8   | 0.4   |
| 215009_s_at | U92014   | THAP9-AS1  | 100499177           | 115.0 | 66.6  | 111.2 | 98.2  | 86.4  |
| 215010_s_at | AJ006701 | BRSK2      | 9024                | 1.6   | 3.9   | 1.0   | 2.5   | 3.1   |
| 215011_at   | AJ006835 | SNHG3      | /// SI 6080 /// 842 | 20.4  | 14.4  | 29.7  | 21.1  | 21.6  |
| 215012_at   | AU144775 | ZNF451     | 26036               | 16.2  | 11.4  | 19.0  | 12.4  | 11.2  |
| 215013_s_at | AK023845 | USP34      | 9736                | 0.7   | 3.9   | 2.9   | 0.7   | 3.7   |
| 215014_at   | AL512727 | KCND3      | 3752                | 4.1   | 3.3   | 11.6  | 7.2   | 0.5   |
| 215015_at   | AA319460 | CCDC64     | 92558               | 21.0  | 5.6   | 7.9   | 10.6  | 12.0  |
| 215016_x_at | BC004912 | DST        | 667                 | 11.7  | 12.6  | 11.5  | 6.6   | 12.5  |
| 215017_s_at | AW270932 | FNBP1L     | 54874               | 105.2 | 116.9 | 102.4 | 115.8 | 69.2  |
| 215018_at   | AB051518 | KIAA1731   | 85459               | 1.0   | 0.4   | 2.4   | 0.3   | 4.7   |
| 215019_x_at | AW474158 | ZNF528     | 84436               | 39.3  | 33.2  | 40.7  | 43.9  | 32.9  |
| 215020_at   | AF123462 | NRXN3      | 9369                | 1.2   | 0.9   | 1.7   | 1.3   | 0.6   |
| 215021_s_at | AF123462 | NRXN3      | 9369                | 4.6   | 2.3   | 9.0   | 0.3   | 4.3   |
| 215022_x_at | BG429214 | ZNF33B     | 7582                | 26.4  | 23.0  | 29.1  | 37.2  | 25.2  |
| 215023_s_at | AC000064 | PEX1       | 5189                | 27.3  | 28.9  | 32.2  | 26.8  | 27.6  |
| 215024_at   | AK000993 | CCZ1B      | 221960              | 9.6   | 3.0   | 10.7  | 4.6   | 4.4   |
| 215025_at   | S76476   | NTRK3      | 4916                | 0.5   | 0.5   | 1.0   | 0.3   | 0.6   |
| 215026_x_at | U81961   | SCNN1A     | 6337                | 16.4  | 2.2   | 14.2  | 3.9   | 8.7   |
| 215027_at   | U79275   | RAPGEF3    | 10411               | 10.2  | 4.4   | 1.8   | 1.5   | 1.1   |
| 215028_at   | AB002438 | SEMA6A     | 57556               | 26.6  | 17.6  | 11.5  | 15.9  | 11.5  |
| 215029_at   | AL117451 | -          | -                   | 17.5  | 17.3  | 13.8  | 12.6  | 13.5  |
| 215030_at   | AK023187 | GRSF1      | 2926                | 23.5  | 19.4  | 28.2  | 26.2  | 21.0  |
| 215031_x_at | BG420893 | RNF126     | 55658               | 83.1  | 65.6  | 84.3  | 63.7  | 71.9  |
| 215032_at   | AK022442 | RREB1      | 6239                | 16.1  | 17.6  | 14.0  | 14.8  | 20.4  |
| 215033_at   | AI189753 | TM4SF1     | 4071                | 1.0   | 3.6   | 2.5   | 0.4   | 0.4   |
| 215034_s_at | AI189753 | TM4SF1     | 4071                | 10.8  | 8.1   | 19.4  | 14.8  | 16.5  |
| 215035_at   | AI952772 | IGLV6-57   | 28778               | 0.8   | 0.5   | 0.6   | 0.7   | 0.3   |
| 215036_at   | AI952772 | -          | -                   | 2.5   | 1.9   | 3.8   | 1.4   | 0.9   |
| 215037_s_at | U72398   | BCL2L1     | 598                 | 66.5  | 69.6  | 84.0  | 79.3  | 61.2  |
| 215038_s_at | AF049103 | SETD2      | 29072               | 26.3  | 23.6  | 26.0  | 22.3  | 20.8  |
| 215039_at   | AK002179 | LINC01140  | 339524              | 2.5   | 0.7   | 3.6   | 2.8   | 4.1   |
| 215040_at   | AL049218 | RNASEH2B   | 79621               | 22.5  | 30.3  | 33.0  | 14.9  | 18.1  |
| 215041_s_at | BE259050 | DOCK9      | 23348               | 5.0   | 3.1   | 1.5   | 5.1   | 6.3   |



|             |          |            |           |       |       |       |       |       |
|-------------|----------|------------|-----------|-------|-------|-------|-------|-------|
| 215042_at   | AI123471 | BMP6       | 654       | 3.3   | 4.3   | 1.0   | 1.3   | 1.3   |
| 215043_s_at | X83301   | GUSBP3     | 11039     | 161.0 | 139.1 | 137.5 | 164.8 | 96.5  |
| 215044_s_at | AI571996 | STAM2      | 10254     | 25.6  | 25.8  | 24.0  | 25.5  | 18.8  |
| 215045_at   | BC004145 | CELF3      | 11189     | 0.9   | 0.8   | 0.7   | 6.0   | 0.5   |
| 215046_at   | AL133053 | KANSL1L    | 151050    | 4.7   | 2.6   | 5.5   | 4.8   | 3.6   |
| 215047_at   | AL080170 | TRIM58     | 25893     | 1.1   | 0.3   | 1.1   | 0.2   | 0.1   |
| 215048_at   | AW663885 | ZNF280B    | 140883    | 11.4  | 1.3   | 1.8   | 2.5   | 1.4   |
| 215049_x_at | Z22969   | CD163      | 9332      | 1.8   | 6.1   | 4.9   | 6.2   | 3.8   |
| 215050_x_at | BG325734 | MAPKAPK2   | 9261      | 24.3  | 15.2  | 31.7  | 15.6  | 14.3  |
| 215051_x_at | BF213829 | AIF1       | 199       | 1.2   | 1.0   | 1.1   | 1.2   | 1.6   |
| 215052_at   | AW297087 | FRMPD4     | 9758      | 5.7   | 1.6   | 0.9   | 0.9   | 0.5   |
| 215053_at   | AK023808 | SRCAP      | 10847     | 8.3   | 14.0  | 14.3  | 15.1  | 11.2  |
| 215054_at   | H16758   | EPOR       | 2057      | 25.3  | 24.1  | 31.0  | 34.7  | 17.2  |
| 215055_at   | U79265   | B3GNTL1    | 146712    | 5.5   | 3.6   | 2.3   | 6.6   | 6.6   |
| 215056_at   | AI267546 | -          | -         | 10.8  | 8.3   | 13.6  | 9.4   | 3.7   |
| 215057_at   | U66046   | LINC00894  | 100272228 | 7.5   | 7.6   | 11.9  | 3.5   | 6.6   |
| 215058_at   | AU144041 | DENND5B    | 160518    | 5.1   | 5.8   | 7.5   | 8.0   | 5.1   |
| 215059_at   | AA053967 | -          | -         | 2.5   | 0.3   | 1.1   | 1.4   | 6.1   |
| 215060_at   | AL390145 | -          | -         | 2.9   | 2.1   | 2.2   | 0.6   | 0.9   |
| 215061_at   | AK023081 | METTL10    | 399818    | 0.9   | 1.3   | 0.6   | 1.0   | 0.9   |
| 215062_at   | AL390143 | -          | -         | 1.6   | 0.3   | 0.6   | 0.7   | 0.9   |
| 215063_x_at | AL390149 | LRRC40     | 55631     | 41.3  | 11.3  | 30.9  | 27.1  | 18.3  |
| 215064_at   | AK027246 | SC5D       | 6309      | 6.9   | 10.5  | 7.1   | 7.7   | 3.5   |
| 215065_at   | AF091081 | PHF8       | 23133     | 3.6   | 4.9   | 2.7   | 3.4   | 5.0   |
| 215066_at   | AU158443 | PTPRF      | 5792      | 14.9  | 14.3  | 12.3  | 13.1  | 5.6   |
| 215067_x_at | AU147942 | PRDX2      | 7001      | 17.2  | 15.5  | 29.2  | 20.3  | 15.4  |
| 215068_s_at | BC004228 | FBXL18     | 80028     | 36.3  | 43.7  | 55.9  | 42.3  | 35.6  |
| 215069_at   | AK025065 | NMT2       | 9397      | 6.3   | 4.5   | 7.8   | 8.7   | 4.5   |
| 215070_x_at | AK022408 | RABGAP1    | 23637     | 2.8   | 2.4   | 4.3   | 2.5   | 1.5   |
| 215071_s_at | AL353759 | HIST1H2AC  | 8334      | 476.0 | 408.3 | 525.6 | 430.2 | 371.7 |
| 215072_x_at | AK025270 | EDRF1      | 26098     | 16.1  | 7.2   | 3.9   | 4.5   | 5.3   |
| 215073_s_at | AL554245 | NR2F2      | 7026      | 56.8  | 40.5  | 53.5  | 48.6  | 38.4  |
| 215074_at   | AK022489 | MYO1B      | 4430      | 0.8   | 3.4   | 0.5   | 0.4   | 1.8   |
| 215075_s_at | L29511   | GRB2       | 2885      | 138.3 | 139.5 | 125.5 | 143.4 | 113.3 |
| 215076_s_at | AU144167 | COL3A1     | 1281      | 8.7   | 2.5   | 8.2   | 7.0   | 4.2   |
| 215077_at   | AU144167 | -          | -         | 1.0   | 0.3   | 11.3  | 1.0   | 0.7   |
| 215078_at   | AL050388 | LOC1001295 | 6648      | 0.8   | 0.4   | 0.2   | 0.2   | 2.1   |
| 215079_at   | AK026723 | -          | -         | 8.8   | 6.6   | 6.5   | 6.9   | 1.2   |
| 215080_s_at | U81031   | AGAP2      | 116986    | 0.5   | 0.2   | 0.3   | 0.3   | 0.3   |
| 215081_at   | AF035294 | KIAA1024   | 23251     | 0.9   | 2.7   | 1.0   | 1.2   | 3.7   |
| 215082_at   | BF973387 | ELOVL5     | 60481     | 10.7  | 8.9   | 19.5  | 10.5  | 12.5  |
| 215083_at   | AL049263 | -          | -         | 5.3   | 7.2   | 0.8   | 6.8   | 4.6   |
| 215084_s_at | AL031427 | LRRC42     | 115353    | 137.0 | 129.4 | 130.9 | 133.6 | 122.9 |
| 215085_x_at | AL137706 | DLEC1      | 9940      | 17.3  | 12.7  | 6.5   | 12.3  | 5.3   |
| 215086_at   | AB037838 | IBTK       | 25998     | 0.5   | 0.2   | 4.6   | 5.1   | 0.4   |
| 215087_at   | AL109730 | C15orf39   | 56905     | 8.6   | 9.6   | 15.4  | 7.8   | 15.1  |
| 215088_s_at | BG110532 | SDHC       | 6391      | 469.4 | 403.7 | 487.1 | 454.2 | 386.1 |
| 215089_s_at | AW409974 | RBM10      | 8241      | 200.6 | 183.4 | 221.5 | 199.6 | 198.7 |
| 215090_x_at | AK021884 | LOC440434  | 440434    | 113.2 | 115.9 | 112.3 | 91.2  | 87.1  |
| 215091_s_at | BE542815 | GTF3A      | 2971      | 915.1 | 635.3 | 913.0 | 708.6 | 725.2 |
| 215092_s_at | AJ005683 | NFAT5      | 10725     | 20.0  | 13.3  | 7.9   | 18.6  | 6.7   |
| 215093_at   | U82671   | NSDHL      | 50814     | 60.2  | 59.1  | 67.4  | 63.0  | 71.0  |
| 215094_at   | U79249   | SPICE1     | 152185    | 0.2   | 0.5   | 0.2   | 0.2   | 0.1   |

|             |          |              |               |       |       |       |       |       |
|-------------|----------|--------------|---------------|-------|-------|-------|-------|-------|
| 215095_at   | AU145746 | -            | -             | 8.2   | 3.5   | 4.7   | 6.9   | 7.2   |
| 215096_s_at | AU145746 | ESD          | 2098          | 641.6 | 562.0 | 674.7 | 488.8 | 468.8 |
| 215097_at   | BG420053 | CAPZB        | 832           | 5.5   | 3.0   | 7.4   | 1.1   | 1.1   |
| 215098_at   | BF337038 | RXR          | 6257          | 3.4   | 2.4   | 8.6   | 6.2   | 5.8   |
| 215099_s_at | BF337038 | RXR          | 6257          | 24.3  | 30.4  | 31.7  | 25.0  | 21.6  |
| 215100_at   | AL022724 | ADTRP        | 84830         | 17.2  | 15.1  | 16.1  | 13.7  | 12.0  |
| 215101_s_at | BG166705 | CXCL5        | 6374          | 2.2   | 1.2   | 0.8   | 0.5   | 0.1   |
| 215102_at   | AK026768 | DPY19L1P1    | 100129460     | 0.3   | 0.2   | 0.9   | 0.3   | 0.2   |
| 215103_at   | AW192911 | CYP2C18      | 1562          | 3.1   | 1.1   | 4.0   | 0.7   | 2.4   |
| 215104_at   | AL136557 | NRIP2        | 83714         | 1.4   | 1.2   | 0.8   | 1.0   | 2.3   |
| 215105_at   | U50531   | N4BP2L2-IT2  | 116828        | 5.3   | 1.3   | 0.7   | 0.7   | 1.6   |
| 215106_at   | AI923972 | TTC22        | 55001         | 2.6   | 1.2   | 1.3   | 3.3   | 1.0   |
| 215107_s_at | AI923972 | TTC22        | 55001         | 0.5   | 0.2   | 0.3   | 1.8   | 0.1   |
| 215108_x_at | U80736   | TOX3         | 27324         | 4.5   | 7.3   | 6.3   | 5.7   | 4.1   |
| 215109_at   | R02172   | RC3H1        | 149041        | 20.1  | 8.1   | 12.2  | 12.4  | 8.6   |
| 215110_at   | AF019382 | LOC1002889   | 8512 /// 100  | 1.3   | 1.8   | 0.6   | 1.8   | 1.0   |
| 215111_s_at | AK027071 | TSC22D1      | 8848          | 555.2 | 396.6 | 440.5 | 485.5 | 380.2 |
| 215112_x_at | AB020668 | MCF2L2       | 23101         | 0.6   | 1.3   | 0.7   | 1.8   | 0.1   |
| 215113_s_at | AK000923 | SENP3 /// SE | 26168 /// 10  | 128.0 | 131.2 | 160.7 | 158.7 | 144.7 |
| 215114_at   | AK000923 | SENP3        | 26168         | 7.1   | 7.6   | 7.9   | 7.9   | 12.1  |
| 215115_x_at | AI613045 | NTRK3        | 4916          | 2.2   | 4.7   | 12.5  | 10.9  | 5.1   |
| 215116_s_at | AF035321 | DNM1         | 1759          | 11.4  | 5.3   | 18.1  | 12.3  | 12.9  |
| 215117_at   | AW058148 | RAG2         | 5897          | 2.0   | 1.0   | 3.1   | 3.4   | 0.2   |
| 215118_s_at | AW519168 | AL928768.3   | 3492          | 6.2   | 5.3   | 8.3   | 4.2   | 4.1   |
| 215119_at   | AI522028 | MYO16        | 23026         | 1.0   | 0.7   | 0.7   | 0.9   | 0.4   |
| 215120_s_at | BF697247 | SAMD4A       | 23034         | 0.9   | 1.0   | 5.1   | 0.7   | 1.2   |
| 215121_x_at | AA680302 | CYAT1 /// IG | 3537 /// 288  | 7.9   | 2.4   | 6.8   | 2.4   | 6.3   |
| 215122_at   | AK022330 | TBX6         | 6911          | 6.1   | 0.9   | 0.3   | 6.9   | 8.5   |
| 215123_at   | AL049250 | LOC1019299   | 23117 /// 44  | 10.5  | 6.5   | 7.8   | 14.6  | 2.8   |
| 215124_at   | BE886287 | ZNF550       | 162972        | 0.9   | 8.5   | 9.9   | 1.6   | 2.6   |
| 215125_s_at | AV691323 | UGT1A1 ///   | 154575 /// 54 | 3.9   | 5.4   | 5.4   | 0.7   | 5.9   |
| 215126_at   | AL109716 | LINC01314    | 100996492     | 10.8  | 6.9   | 8.0   | 7.0   | 4.5   |
| 215127_s_at | AL517946 | RBMS1        | 5937          | 3.7   | 1.5   | 4.8   | 2.8   | 1.4   |
| 215128_at   | AV704232 | -            | -             | 29.8  | 18.4  | 17.3  | 15.8  | 13.3  |
| 215129_at   | AJ000008 | PIK3C2G      | 5288          | 5.7   | 1.0   | 6.4   | 6.2   | 6.8   |
| 215130_s_at | AC002550 | IQCK         | 124152        | 24.6  | 11.4  | 20.8  | 19.3  | 16.2  |
| 215131_at   | AC002550 | IQCK         | 124152        | 14.0  | 12.9  | 15.2  | 11.4  | 13.2  |
| 215132_at   | AL137474 | -            | -             | 20.0  | 13.0  | 15.4  | 21.9  | 10.8  |
| 215133_s_at | AL117630 | FAM153A ///  | 202134 /// 2  | 4.9   | 1.9   | 2.0   | 0.6   | 2.4   |
| 215134_at   | H84390   | PI4K2A       | 55361         | 19.9  | 7.6   | 16.5  | 13.2  | 5.7   |
| 215135_at   | AI690583 | DNPEP        | 23549         | 8.8   | 11.4  | 5.1   | 12.9  | 8.9   |
| 215136_s_at | AL050353 | EXOSC8       | 11340         | 259.9 | 202.3 | 276.2 | 219.0 | 220.9 |
| 215137_at   | H92070   | -            | -             | 9.8   | 6.9   | 2.7   | 15.8  | 6.8   |
| 215138_s_at | AB015329 | KAZN         | 23254         | 10.1  | 2.1   | 8.9   | 2.0   | 5.1   |
| 215139_at   | AL137508 | ARHGEF10     | 9639          | 2.7   | 0.9   | 1.2   | 5.3   | 2.7   |
| 215140_at   | AL109667 | -            | -             | 1.4   | 0.9   | 2.0   | 1.1   | 0.9   |
| 215141_at   | AA493300 | NOP14-AS1    | 317648        | 10.0  | 3.0   | 6.4   | 6.7   | 8.1   |
| 215142_at   | AA815276 | HYPM         | 25763         | 0.5   | 0.3   | 0.5   | 0.7   | 1.2   |
| 215143_at   | AL049437 | DPY19L2P2    | 349152        | 4.1   | 3.7   | 0.8   | 5.1   | 0.4   |
| 215144_at   | AF007147 | -            | -             | 0.8   | 1.8   | 1.2   | 1.2   | 1.2   |
| 215145_s_at | AC005378 | CNTNAP2      | 26047         | 1.7   | 1.1   | 2.1   | 5.1   | 6.6   |
| 215146_s_at | AB028966 | TTC28        | 23331         | 15.7  | 12.0  | 13.2  | 15.7  | 7.4   |
| 215147_at   | AF007147 | AF007147     | -             | 3.9   | 9.2   | 3.5   | 3.0   | 2.1   |

|             |          |                  |               |         |        |        |        |        |     |
|-------------|----------|------------------|---------------|---------|--------|--------|--------|--------|-----|
| 215148_s_at | AI141541 | APBA3            | 9546          | 42.9    | 40.5   | 47.1   | 51.5   | 38.7   |     |
| 215149_at   | AF052109 | AJAP1            | 55966         | 6.3     | 3.0    | 1.3    | 3.9    | 7.2    |     |
| 215150_at   | AF090896 | YOD1             | 55432         | 26.0    | 19.3   | 25.4   | 19.6   | 16.3   |     |
| 215151_at   | AB014594 | DOCK10           | 55619         | 1.1     | 0.3    | 1.5    | 0.3    | 2.8    |     |
| 215152_at   | AI357042 | MYB              | 4602          | 0.8     | 0.2    | 2.0    | 3.9    | 2.3    |     |
| 215153_at   | AF037070 | NOS1AP           | 9722          | 1.8     | 2.0    | 1.0    | 1.3    | 1.3    |     |
| 215154_at   | AL080134 | ULK2             | 9706          | 19.7    | 7.6    | 14.2   | 10.9   | 11.7   |     |
| 215155_at   | J04178   | HEXA             | 3073          | 2.7     | 1.8    | 4.4    | 1.5    | 1.3    |     |
| 215156_at   | AL109709 | WDR61            | 80349         | 24.1    | 14.7   | 19.6   | 17.8   | 10.3   |     |
| 215157_x_at | AI734929 | PABPC1           | 26986         | 2514.5  | 2521.9 | 2683.6 | 2491.9 | 2271.2 |     |
| 215158_s_at | AK022531 | DEDD             | 9191          | 160.0   | 133.4  | 156.2  | 165.9  | 113.7  |     |
| 215159_s_at | AI239732 | NADK             | 65220         | 23.2    | 25.9   | 27.3   | 27.3   | 27.5   |     |
| 215160_x_at | AL441988 | LOC1002890642236 | /// 1         | 97.4    | 78.8   | 111.2  | 97.0   | 74.5   |     |
| 215161_at   | AW016039 | CAMK1G           | 57172         | 1.2     | 0.6    | 0.7    | 0.6    | 0.4    |     |
| 215162_at   | AB020691 | RALGAPA1         | 253959        | 6.5     | 1.0    | 3.0    | 5.9    | 3.9    |     |
| 215163_at   | AK022211 | -                | -             | 4.4     | 2.5    | 1.4    | 1.0    | 0.2    |     |
| 215164_at   | AL049279 | -                | -             | 0.4     | 3.8    | 0.7    | 0.3    | 0.8    |     |
| 215165_x_at | AL080099 | UMPS             | 7372          | 185.8   | 169.3  | 237.5  | 171.5  | 168.2  |     |
| 215166_at   | AB028953 | IGSF9B           | 22997         | 0.5     | 0.6    | 1.0    | 0.9    | 0.5    |     |
| 215167_at   | BE567032 | MED14            | 9282          | 11.0    | 7.8    | 11.7   | 5.0    | 5.1    |     |
| 215168_at   | AK023063 | TIMM17A          | 10440         | 1.6     | 1.6    | 4.5    | 2.0    | 1.2    |     |
| 215169_at   | BE885244 | SLC35E2          | /// 9906      | /// 728 | 3.8    | 2.9    | 6.3    | 3.1    | 0.2 |
| 215170_s_at | AB020719 | CEP152           | 22995         | 8.5     | 0.6    | 8.7    | 8.6    | 7.2    |     |
| 215171_s_at | AK023063 | TIMM17A          | 10440         | 380.8   | 339.6  | 477.6  | 370.2  | 370.6  |     |
| 215172_at   | AL050040 | PTPN20B          | 26095         | 12.8    | 8.4    | 15.2   | 11.6   | 11.5   |     |
| 215173_at   | N46852   | DNAAF1           | 123872        | 0.8     | 0.8    | 14.8   | 1.7    | 0.9    |     |
| 215174_at   | AL021026 | FMO6P            | 388714        | 1.4     | 4.7    | 0.6    | 1.6    | 1.8    |     |
| 215175_at   | AB023212 | PCNX             | 22990         | 4.7     | 1.8    | 5.6    | 3.3    | 5.2    |     |
| 215176_x_at | AW404894 | IGK              | /// IGKC 3514 | /// 508 | 2.7    | 0.7    | 2.2    | 0.5    | 0.6 |
| 215177_s_at | AV733308 | ITGA6            | 3655          | 22.4    | 17.8   | 25.8   | 22.2   | 19.2   |     |
| 215178_x_at | AV724215 | NAAA             | 27163         | 54.3    | 46.1   | 47.4   | 27.2   | 36.3   |     |
| 215179_x_at | AK023843 | PGF              | 5228          | 88.8    | 66.2   | 78.3   | 65.0   | 50.3   |     |
| 215180_at   | AL109703 | RP11-429B14      | -             | 8.0     | 5.5    | 3.9    | 12.7   | 3.5    |     |
| 215181_at   | AF035300 | CDH22            | 64405         | 2.3     | 2.9    | 4.9    | 2.0    | 2.1    |     |
| 215182_x_at | AL050122 | -                | -             | 64.8    | 29.1   | 50.5   | 52.6   | 45.3   |     |
| 215183_at   | AF090886 | -                | -             | 11.5    | 2.3    | 9.9    | 6.2    | 2.7    |     |
| 215184_at   | AK026801 | DAPK2            | 23604         | 2.2     | 4.2    | 3.3    | 2.3    | 7.0    |     |
| 215185_at   | AK024177 | LINC00963        | 100506190     | 45.5    | 51.0   | 49.7   | 44.6   | 44.2   |     |
| 215186_at   | AL050074 | TBC1D30          | 23329         | 17.9    | 14.3   | 14.4   | 14.9   | 11.0   |     |
| 215187_at   | AK023417 | FLJ11292         | 55338         | 5.5     | 1.9    | 9.4    | 3.4    | 5.2    |     |
| 215188_at   | AF339785 | STK24            | 8428          | 2.5     | 0.5    | 1.6    | 0.5    | 0.7    |     |
| 215189_at   | X99142   | KRT86            | /// LO 3892   | /// 100 | 9.2    | 7.5    | 10.3   | 8.6    | 4.1 |
| 215190_at   | AV717062 | EIF3M            | 10480         | 18.6    | 8.8    | 12.5   | 15.0   | 13.2   |     |
| 215191_at   | AW836210 | -                | -             | 7.3     | 8.9    | 6.7    | 9.5    | 3.3    |     |
| 215192_at   | D38500   | PMS2P4           | 5382          | 0.3     | 1.1    | 0.3    | 0.7    | 0.2    |     |
| 215193_x_at | AJ297586 | HLA-DQB1         | /// 3119      | /// 312 | 16.7   | 7.7    | 16.5   | 16.6   | 5.3 |
| 215194_at   | AF035594 | PRKCA            | 5578          | 3.8     | 1.3    | 1.2    | 2.0    | 1.2    |     |
| 215195_at   | AF035594 | PRKCA            | 5578          | 3.0     | 2.7    | 17.5   | 8.8    | 12.5   |     |
| 215196_at   | AU158566 | -                | -             | 6.0     | 10.5   | 10.9   | 4.2    | 5.5    |     |
| 215197_at   | AK023838 | -                | -             | 0.6     | 0.9    | 1.0    | 5.0    | 2.6    |     |
| 215198_s_at | AU147402 | CALD1            | 800           | 14.2    | 10.8   | 13.1   | 14.1   | 10.9   |     |
| 215199_at   | AU147402 | CALD1            | 800           | 1.0     | 3.9    | 11.1   | 1.3    | 1.7    |     |
| 215200_x_at | AK022362 | -                | -             | 1.0     | 6.2    | 4.5    | 7.0    | 6.2    |     |

|             |          |                |              |       |       |       |       |       |
|-------------|----------|----------------|--------------|-------|-------|-------|-------|-------|
| 215201_at   | AW166925 | REPS1          | 85021        | 5.0   | 2.8   | 2.4   | 2.1   | 0.3   |
| 215202_at   | AK025313 | GUSBP11        | 91316        | 2.6   | 1.8   | 2.4   | 1.5   | 1.3   |
| 215203_at   | AW438464 | GOLGA4         | 2803         | 6.7   | 13.9  | 8.1   | 12.6  | 9.7   |
| 215204_at   | AU147295 | -              | -            | 5.5   | 5.5   | 2.4   | 2.8   | 2.1   |
| 215205_x_at | S83390   | NCOR2          | 9612         | 7.3   | 1.2   | 1.0   | 4.6   | 1.2   |
| 215206_at   | AK025143 | -              | -            | 6.0   | 10.6  | 7.0   | 5.5   | 10.9  |
| 215207_x_at | BF695847 | NUS1 /// NU    | 11049 /// 11 | 44.2  | 47.6  | 70.0  | 44.3  | 45.3  |
| 215208_x_at | AK021571 | RPL35A         | 6165         | 12.4  | 13.5  | 11.3  | 6.5   | 4.6   |
| 215209_at   | AU143984 | SEC24D         | 9871         | 3.5   | 0.8   | 6.5   | 3.3   | 3.4   |
| 215210_s_at | S72422   | DLST           | 1743         | 379.2 | 331.9 | 351.0 | 308.2 | 302.7 |
| 215211_at   | AF054994 | RRN3P1         | 730092       | 5.1   | 0.9   | 0.4   | 0.4   | 0.5   |
| 215212_at   | AU147166 | -              | -            | 0.7   | 0.2   | 0.1   | 0.8   | 2.5   |
| 215213_at   | AU146949 | NUP54          | 53371        | 6.1   | 3.7   | 5.1   | 3.0   | 1.0   |
| 215214_at   | H53689   | IGLC1 /// IGL  | 3537         | 7.0   | 5.3   | 4.1   | 4.8   | 1.9   |
| 215215_s_at | AC004381 | LOC81691       | 81691        | 54.5  | 52.1  | 77.8  | 57.3  | 57.1  |
| 215216_at   | AA779495 | VPS16          | 64601        | 1.7   | 6.1   | 1.4   | 2.3   | 1.1   |
| 215217_at   | AA476303 | IGKC           | 3514         | 12.0  | 6.5   | 16.9  | 10.7  | 7.7   |
| 215218_s_at | AC004144 | WDR62          | 284403       | 35.2  | 22.1  | 38.5  | 38.3  | 24.3  |
| 215219_at   | AK025095 | DOPEY2         | 9980         | 0.8   | 0.9   | 3.4   | 2.5   | 0.2   |
| 215220_s_at | AK023111 | TPR            | 7175         | 7.8   | 10.0  | 13.6  | 8.3   | 5.7   |
| 215221_at   | AK025064 | -              | -            | 15.9  | 19.2  | 28.9  | 17.9  | 18.3  |
| 215222_x_at | AK023406 | MACF1          | 23499        | 58.3  | 41.2  | 54.4  | 50.8  | 37.3  |
| 215223_s_at | W46388   | LOC1001295     | 6648 /// 100 | 31.9  | 34.4  | 40.0  | 35.8  | 28.0  |
| 215224_at   | AK025200 | SNORA21        | 619505       | 11.0  | 14.1  | 11.7  | 8.2   | 12.8  |
| 215225_s_at | Z94154   | GPR17          | 2840         | 0.9   | 0.8   | 0.7   | 0.7   | 0.8   |
| 215226_at   | AK000786 | EXPH5          | 23086        | 7.6   | 2.5   | 5.0   | 2.1   | 0.3   |
| 215227_x_at | BG035989 | ACP1           | 52           | 204.8 | 191.8 | 225.3 | 234.3 | 179.1 |
| 215228_at   | AA166895 | NHLH2          | 4808         | 5.9   | 4.0   | 7.6   | 3.8   | 4.7   |
| 215229_at   | AF007131 | LOC1001299     | 100129973    | 1.0   | 0.2   | 0.3   | 0.3   | 0.5   |
| 215230_x_at | AA679705 | EIF3C /// EIF: | 8663 /// 728 | 224.5 | 268.9 | 237.8 | 233.0 | 238.0 |
| 215231_at   | AU144309 | PRKAG2         | 51422        | 0.9   | 0.1   | 0.1   | 2.4   | 2.3   |
| 215232_at   | AK023797 | ARHGAP44       | 9912         | 25.2  | 13.6  | 16.7  | 13.3  | 11.8  |
| 215233_at   | AA351360 | JMJD6          | 23210        | 2.4   | 1.3   | 4.1   | 4.2   | 0.9   |
| 215234_at   | AW301235 | DYRK1A         | 1859         | 1.6   | 0.3   | 3.9   | 1.0   | 1.1   |
| 215235_at   | AL110273 | SPTAN1         | 6709         | 60.0  | 76.2  | 46.6  | 77.9  | 35.9  |
| 215236_s_at | AV721177 | PICALM         | 8301         | 61.4  | 39.7  | 53.0  | 49.1  | 36.9  |
| 215237_at   | AW450751 | DOCK9          | 23348        | 1.9   | 7.3   | 0.8   | 4.9   | 1.2   |
| 215238_s_at | AW450751 | DOCK9          | 23348        | 2.3   | 6.8   | 1.8   | 8.3   | 9.6   |
| 215239_x_at | AU132789 | ZNF273         | 10793        | 31.1  | 26.6  | 30.8  | 18.2  | 18.8  |
| 215240_at   | AI189839 | ITGB3          | 3690         | 1.7   | 3.0   | 0.5   | 3.0   | 0.2   |
| 215241_at   | AJ300461 | ANO3           | 63982        | 4.5   | 1.3   | 0.5   | 0.4   | 0.5   |
| 215242_at   | AL035301 | PIGC           | 5279         | 4.3   | 5.1   | 5.3   | 3.7   | 2.7   |
| 215243_s_at | AF099730 | GJB3           | 2707         | 7.4   | 12.1  | 2.6   | 2.2   | 5.1   |
| 215244_at   | AI479306 | DGCR5          | 26220        | 5.3   | 2.9   | 2.3   | 12.4  | 4.0   |
| 215245_x_at | AA830884 | FMR1           | 2332         | 140.8 | 108.8 | 128.8 | 113.6 | 97.7  |
| 215246_at   | AK000089 | LARP7          | 51574        | 11.8  | 4.8   | 10.7  | 13.5  | 10.6  |
| 215247_at   | AI561253 | LOC1002885     | 100288570    | 23.6  | 11.5  | 17.0  | 14.8  | 12.5  |
| 215248_at   | AU145003 | GRB10          | 2887         | 14.4  | 13.6  | 14.9  | 16.2  | 8.5   |
| 215249_at   | AK021571 | RPL35A         | 6165         | 7.9   | 8.8   | 6.3   | 3.1   | 4.8   |
| 215250_at   | AU147317 | EMC3           | 55831        | 8.2   | 2.7   | 6.5   | 8.5   | 5.6   |
| 215251_at   | AA595276 | -              | -            | 7.7   | 7.8   | 7.1   | 2.0   | 1.2   |
| 215252_at   | AW814026 | -              | -            | 19.4  | 17.3  | 15.3  | 20.8  | 13.6  |
| 215253_s_at | AL049369 | RCAN1          | 1827         | 27.7  | 17.0  | 28.1  | 16.1  | 14.7  |

|             |          |                           |           |       |       |       |       |       |
|-------------|----------|---------------------------|-----------|-------|-------|-------|-------|-------|
| 215254_at   | AL049369 | RCAN1                     | 1827      | 6.3   | 4.1   | 1.1   | 4.3   | 3.2   |
| 215255_at   | AB028953 | IGSF9B                    | 22997     | 9.3   | 11.8  | 6.6   | 5.3   | 9.4   |
| 215256_x_at | AC002398 | ARHGAP33                  | 115703    | 5.3   | 10.8  | 9.7   | 4.1   | 5.1   |
| 215257_at   | AF308298 | ERGIC3                    | 51614     | 0.9   | 0.5   | 0.7   | 6.1   | 0.4   |
| 215258_at   | AC005525 | CADM4                     | 199731    | 1.1   | 6.3   | 3.2   | 1.3   | 1.9   |
| 215259_s_at | AC005525 | CADM4                     | 199731    | 5.4   | 3.0   | 7.6   | 5.4   | 2.0   |
| 215260_s_at | X52078   | TCF3                      | 6929      | 20.5  | 21.3  | 29.3  | 20.9  | 16.5  |
| 215261_at   | AF052091 | -                         | -         | 3.2   | 1.0   | 1.4   | 2.1   | 1.2   |
| 215262_at   | AF052160 | -                         | -         | 7.4   | 12.0  | 0.8   | 1.6   | 1.9   |
| 215263_at   | BF509566 | ZXDA /// ZXI 7789 /// 158 |           | 4.6   | 7.9   | 8.5   | 9.5   | 6.7   |
| 215264_at   | AW196403 | EMX1                      | 2016      | 0.4   | 1.6   | 0.5   | 1.9   | 0.6   |
| 215265_at   | BF515060 | -                         | -         | 1.8   | 4.7   | 8.3   | 4.0   | 3.4   |
| 215266_at   | AL096732 | DNAH3                     | 55567     | 13.9  | 3.3   | 3.3   | 8.5   | 1.6   |
| 215267_s_at | AI127885 | SLC8A2                    | 6543      | 2.4   | 2.3   | 1.7   | 1.0   | 1.6   |
| 215268_at   | AW663712 | KIAA0754                  | 643314    | 0.4   | 0.5   | 0.4   | 2.4   | 0.5   |
| 215269_at   | AI922538 | TRAPPC10                  | 7109      | 7.1   | 6.7   | 6.9   | 5.1   | 6.0   |
| 215270_at   | U94354   | LFNG                      | 3955      | 1.6   | 1.1   | 1.8   | 1.4   | 0.7   |
| 215271_at   | BF432086 | TNN                       | 63923     | 8.8   | 4.6   | 4.1   | 3.0   | 2.3   |
| 215272_at   | R59977   | OGG1                      | 4968      | 5.3   | 1.8   | 6.2   | 10.6  | 7.7   |
| 215273_s_at | AK024982 | TADA3                     | 10474     | 188.6 | 238.4 | 268.9 | 258.3 | 177.1 |
| 215274_at   | AI627943 | SLC12A3                   | 6559      | 22.3  | 15.1  | 12.2  | 6.0   | 14.3  |
| 215275_at   | AW963138 | TRAF3IP3                  | 80342     | 10.4  | 4.8   | 6.7   | 7.2   | 4.3   |
| 215276_at   | AL133571 | WFDC8                     | 90199     | 9.9   | 13.8  | 7.2   | 10.7  | 5.6   |
| 215277_at   | AA481656 | PCDH1                     | 5097      | 10.9  | 7.8   | 8.3   | 9.5   | 1.2   |
| 215278_at   | AF052090 | -                         | -         | 0.9   | 1.5   | 1.4   | 0.9   | 1.6   |
| 215279_at   | AF035278 | -                         | -         | 6.6   | 5.8   | 3.6   | 3.7   | 9.7   |
| 215280_s_at | AK023850 | PPFIA3                    | 8541      | 78.6  | 68.8  | 70.1  | 67.0  | 63.3  |
| 215281_x_at | AK000199 | POGZ                      | 23126     | 7.0   | 5.0   | 7.8   | 6.5   | 4.6   |
| 215282_at   | BE677493 | ANAPC13                   | 25847     | 0.4   | 2.8   | 4.2   | 3.0   | 3.6   |
| 215283_at   | U79248   | LINC00667                 | 339290    | 27.6  | 24.7  | 29.9  | 25.9  | 18.3  |
| 215284_at   | AF070575 | -                         | -         | 2.9   | 4.3   | 4.7   | 7.0   | 3.3   |
| 215285_s_at | AA927671 | PHTF1                     | 10745     | 1.0   | 3.6   | 1.2   | 6.2   | 4.6   |
| 215286_s_at | AL050389 | PHTF2                     | 57157     | 23.7  | 24.5  | 28.5  | 19.5  | 16.8  |
| 215287_at   | AA975427 | STRN                      | 6801      | 5.0   | 2.9   | 6.0   | 4.2   | 2.5   |
| 215288_at   | AI769824 | TRPC2                     | 7221      | 1.3   | 0.8   | 0.7   | 3.7   | 1.0   |
| 215289_at   | BE892698 | ZNF749                    | 388567    | 7.0   | 7.6   | 4.9   | 4.1   | 4.6   |
| 215290_at   | AI480014 | -                         | -         | 0.3   | 3.7   | 1.6   | 4.8   | 0.7   |
| 215291_at   | AL022238 | MKL1                      | 57591     | 7.2   | 1.0   | 2.0   | 1.4   | 0.7   |
| 215292_s_at | AL022238 | MKL1                      | 57591     | 4.2   | 4.7   | 3.4   | 3.7   | 1.8   |
| 215293_s_at | AL049261 | PGAP2                     | 27315     | 186.5 | 157.9 | 177.7 | 160.6 | 147.3 |
| 215294_s_at | AK026426 | SMARCA1                   | 6594      | 0.2   | 0.1   | 0.5   | 0.5   | 0.1   |
| 215295_at   | Y15718   | DTNB                      | 1838      | 4.5   | 3.5   | 4.7   | 1.7   | 3.4   |
| 215296_at   | AK027000 | CDC42BPA                  | 8476      | 1.0   | 0.7   | 1.1   | 0.9   | 0.8   |
| 215297_at   | AK022806 | LOC441204                 | 441204    | 0.5   | 0.4   | 0.6   | 0.3   | 0.1   |
| 215298_at   | U79300   | RP11-714L20-              |           | 9.5   | 9.2   | 8.8   | 0.4   | 6.3   |
| 215299_x_at | U37025   | SULT1A1                   | 6817      | 131.9 | 192.7 | 129.6 | 165.2 | 127.4 |
| 215300_s_at | AK022172 | FMO5                      | 2330      | 1.5   | 1.0   | 3.5   | 1.1   | 0.5   |
| 215301_at   | AL512697 | SYCE1L                    | 100130958 | 0.4   | 2.1   | 5.7   | 0.5   | 4.4   |
| 215302_at   | AU150691 | LOC257152                 | 257152    | 3.4   | 0.8   | 3.9   | 1.9   | 0.9   |
| 215303_at   | BE046461 | DCLK1                     | 9201      | 5.5   | 3.3   | 2.5   | 2.2   | 4.5   |
| 215304_at   | U79293   | -                         | -         | 1.4   | 1.4   | 5.2   | 2.4   | 4.1   |
| 215305_at   | H79306   | PDGFRA                    | 5156      | 1.7   | 0.9   | 0.9   | 1.6   | 0.7   |
| 215306_at   | AL049443 | -                         | -         | 1.7   | 1.1   | 6.2   | 5.8   | 3.0   |

|             |          |                          |           |       |       |       |       |       |
|-------------|----------|--------------------------|-----------|-------|-------|-------|-------|-------|
| 215307_at   | AL109722 | ZNF529                   | 57711     | 19.4  | 17.6  | 14.5  | 13.2  | 9.0   |
| 215308_at   | AF052148 | XRCC6                    | 2547      | 6.9   | 7.6   | 7.1   | 6.6   | 6.0   |
| 215309_at   | BG429154 | ZNF674                   | 641339    | 0.5   | 0.2   | 2.1   | 0.5   | 0.4   |
| 215310_at   | AF038181 | APC                      | 324       | 7.3   | 1.1   | 6.7   | 2.6   | 1.1   |
| 215311_at   | AL109696 | NTRK3                    | 4916      | 8.0   | 4.7   | 3.3   | 4.5   | 4.8   |
| 215312_at   | AA621286 | -                        | -         | 4.9   | 0.6   | 1.5   | 2.4   | 0.1   |
| 215313_x_at | AA573862 | HLA-A                    | 3105      | 226.6 | 269.2 | 287.8 | 266.7 | 160.4 |
| 215314_at   | AU146646 | -                        | -         | 8.5   | 6.2   | 2.8   | 10.6  | 9.5   |
| 215315_at   | AC003682 | ZNF549                   | 256051    | 5.0   | 6.4   | 13.0  | 1.3   | 3.9   |
| 215316_at   | AL080180 | -                        | -         | 1.8   | 3.9   | 2.7   | 4.9   | 0.5   |
| 215317_at   | AL109696 | -                        | -         | 4.5   | 3.5   | 0.5   | 2.8   | 1.7   |
| 215318_at   | AL049782 | MINOS1P1                 | 100462953 | 1.9   | 6.0   | 5.6   | 1.9   | 3.6   |
| 215319_at   | AC004755 | ATP8B3                   | 148229    | 2.3   | 1.1   | 1.5   | 1.5   | 9.7   |
| 215320_at   | AL080179 | SPATA31C2                | 645961    | 0.4   | 0.8   | 2.0   | 5.1   | 2.1   |
| 215321_at   | AI825798 | RUNDC3B                  | 154661    | 0.4   | 2.8   | 0.1   | 0.8   | 1.0   |
| 215322_at   | AL080190 | LONRF1                   | 91694     | 19.2  | 13.3  | 9.9   | 6.3   | 9.1   |
| 215323_at   | X81895   | LUZP2                    | 338645    | 57.6  | 37.1  | 37.7  | 48.0  | 29.2  |
| 215324_at   | AA343027 | SEMA3D                   | 223117    | 1.5   | 0.3   | 3.7   | 2.1   | 0.9   |
| 215325_x_at | AC004221 | C19orf26                 | 255057    | 0.8   | 2.5   | 4.0   | 4.2   | 0.4   |
| 215326_at   | AB032968 | PAK4                     | 10298     | 1.9   | 11.0  | 2.5   | 1.3   | 10.7  |
| 215327_at   | AI675458 | RP11-414H1.-             | -         | 3.1   | 1.7   | 2.3   | 13.3  | 4.9   |
| 215328_at   | AB023170 | EFR3B                    | 22979     | 8.1   | 6.0   | 7.5   | 9.1   | 10.7  |
| 215329_s_at | AL031282 | CDK11A /// C984 /// 7286 | -         | 35.4  | 33.0  | 47.1  | 51.1  | 47.4  |
| 215330_at   | AL049991 | -                        | -         | 0.9   | 4.5   | 0.2   | 4.1   | 2.5   |
| 215331_at   | BF062942 | MYH15                    | 22989     | 10.1  | 6.5   | 9.0   | 9.4   | 4.1   |
| 215332_s_at | AW296309 | CD8B /// LOC926 /// 1009 | -         | 4.9   | 0.4   | 10.0  | 7.9   | 5.8   |
| 215333_x_at | X08020   | GSTM1                    | 2944      | 11.2  | 29.1  | 17.4  | 18.5  | 15.9  |
| 215334_at   | AB023170 | EFR3B                    | 22979     | 10.9  | 6.4   | 5.2   | 9.3   | 4.5   |
| 215335_at   | AL137325 | CTB-176F20.-             | -         | 0.8   | 1.4   | 0.7   | 0.6   | 1.1   |
| 215336_at   | AK002166 | AKAP11                   | 11215     | 14.3  | 13.0  | 6.5   | 5.6   | 8.0   |
| 215337_at   | AK022508 | MED24                    | 9862      | 2.6   | 5.8   | 3.9   | 4.5   | 4.2   |
| 215338_s_at | AI688640 | NKTR                     | 4820      | 33.5  | 34.5  | 27.4  | 24.1  | 27.9  |
| 215339_at   | AI688640 | NKTR                     | 4820      | 4.3   | 0.2   | 0.1   | 0.4   | 1.2   |
| 215340_at   | L05500   | ADCY1                    | 107       | 1.0   | 4.5   | 1.7   | 9.9   | 0.7   |
| 215341_at   | AK027182 | DNAH6                    | 1768      | 3.2   | 2.0   | 2.6   | 3.0   | 1.2   |
| 215342_s_at | AB019490 | RABGAP1L                 | 9910      | 4.2   | 3.4   | 5.5   | 0.2   | 3.2   |
| 215343_at   | AF070587 | CCDC88C                  | 440193    | 16.2  | 6.9   | 12.4  | 6.4   | 5.7   |
| 215344_at   | AL137325 | -                        | -         | 0.9   | 1.6   | 0.4   | 1.0   | 1.2   |
| 215345_x_at | AA310709 | AK291611 ///-            | -         | 3.5   | 1.9   | 1.8   | 0.8   | 4.5   |
| 215346_at   | BF664114 | CD40                     | 958       | 1.2   | 3.8   | 1.7   | 0.7   | 0.9   |
| 215347_at   | AK001127 | -                        | -         | 0.6   | 0.4   | 0.7   | 0.4   | 0.5   |
| 215348_at   | L05500   | ADCY1                    | 107       | 10.9  | 1.4   | 6.2   | 8.5   | 1.0   |
| 215349_at   | AK000995 | BTBD18                   | 643376    | 1.1   | 0.7   | 1.7   | 4.7   | 0.3   |
| 215350_at   | AB033088 | SYNE1                    | 23345     | 0.2   | 2.8   | 3.2   | 3.2   | 3.2   |
| 215351_at   | BG536504 | -                        | -         | 0.6   | 0.9   | 4.9   | 5.2   | 1.5   |
| 215352_at   | AL080068 | GIMAP1-GIM55340 /// 10   | -         | 0.9   | 0.7   | 0.9   | 0.7   | 1.3   |
| 215353_at   | AL080068 | -                        | -         | 4.8   | 8.2   | 11.9  | 9.9   | 1.5   |
| 215354_s_at | BC002875 | PELP1                    | 27043     | 73.9  | 60.6  | 97.6  | 73.4  | 68.3  |
| 215355_at   | AI686582 | POU2F3                   | 25833     | 2.5   | 0.6   | 0.7   | 5.2   | 1.0   |
| 215356_at   | AK023134 | TDRD12                   | 91646     | 1.3   | 1.6   | 1.8   | 0.6   | 1.3   |
| 215357_s_at | Z93241   | POLDIP3                  | 84271     | 74.4  | 65.9  | 86.8  | 76.5  | 67.9  |
| 215358_x_at | AK026980 | ZNF37BP                  | 100129482 | 8.3   | 4.8   | 2.8   | 9.0   | 4.7   |
| 215359_x_at | AI758888 | LOC1010601:51710 /// 10  | -         | 71.2  | 71.9  | 77.1  | 53.9  | 54.5  |

|             |          |                           |        |        |        |        |        |        |
|-------------|----------|---------------------------|--------|--------|--------|--------|--------|--------|
| 215360_at   | AK022063 | -                         | -      | 3.0    | 0.3    | 2.1    | 1.0    | 6.1    |
| 215361_at   | AK022242 | DOCK5                     | 80005  | 0.7    | 1.0    | 0.7    | 0.9    | 0.3    |
| 215362_at   | AF007143 | -                         | -      | 0.8    | 0.6    | 0.7    | 0.4    | 0.7    |
| 215363_x_at | AW168915 | FOLH1 /// FC 2346 /// 219 |        | 1723.8 | 1653.9 | 1583.5 | 1582.7 | 1202.5 |
| 215364_s_at | AB007936 | SZT2                      | 23334  | 8.3    | 2.4    | 10.0   | 10.9   | 10.0   |
| 215365_at   | AK022426 | CACNB2                    | 783    | 0.5    | 0.8    | 0.7    | 0.7    | 0.7    |
| 215366_at   | AL353943 | SNX13                     | 23161  | 22.6   | 14.9   | 14.6   | 14.9   | 9.7    |
| 215367_at   | AB046834 | KIAA1614                  | 57710  | 1.0    | 0.9    | 5.6    | 0.9    | 1.1    |
| 215368_at   | R78299   | NEB                       | 4703   | 5.2    | 2.0    | 2.9    | 0.8    | 4.1    |
| 215369_at   | AU145354 | -                         | -      | 1.0    | 3.1    | 1.0    | 1.4    | 0.4    |
| 215370_at   | AU145394 | -                         | -      | 13.8   | 9.9    | 17.0   | 7.0    | 13.5   |
| 215371_at   | AU147599 | MED27                     | 9442   | 1.6    | 17.6   | 6.0    | 5.6    | 7.8    |
| 215372_x_at | AU146794 | MAGI1                     | 9223   | 4.8    | 10.6   | 34.6   | 12.4   | 25.3   |
| 215373_x_at | AK022213 | -                         | -      | 29.9   | 26.1   | 15.9   | 23.2   | 26.4   |
| 215374_at   | AK024849 | PAPOLA                    | 10914  | 8.1    | 3.8    | 8.0    | 4.1    | 5.3    |
| 215375_x_at | AK023938 | LRRFIP1                   | 9208   | 8.2    | 7.7    | 13.8   | 12.1   | 7.9    |
| 215376_at   | AU147830 | -                         | -      | 22.5   | 16.9   | 14.3   | 15.0   | 8.3    |
| 215377_at   | AK024129 | CTBP2                     | 1488   | 1.7    | 1.2    | 7.3    | 7.1    | 1.0    |
| 215378_at   | AU148255 | -                         | -      | 3.1    | 3.9    | 4.2    | 1.6    | 4.7    |
| 215379_x_at | AV698647 | IGLV1-44                  | 28823  | 1.0    | 1.6    | 1.3    | 1.3    | 0.8    |
| 215380_s_at | AK021779 | GGCT                      | 79017  | 811.8  | 657.6  | 938.5  | 687.5  | 782.1  |
| 215381_at   | AK024393 | MTOR                      | 2475   | 0.5    | 0.7    | 5.9    | 11.2   | 6.4    |
| 215382_x_at | AF206666 | TPSAB1                    | 7177   | 3.4    | 6.1    | 1.6    | 1.8    | 2.5    |
| 215383_x_at | AL137312 | SPG21                     | 51324  | 57.9   | 55.2   | 73.7   | 33.2   | 53.0   |
| 215384_s_at | AF095910 | MAP1A                     | 4130   | 1.5    | 6.8    | 4.5    | 3.0    | 5.7    |
| 215385_at   | AK022473 | -                         | -      | 5.6    | 9.9    | 7.2    | 5.0    | 5.3    |
| 215386_at   | AU148161 | -                         | -      | 0.6    | 1.0    | 1.2    | 1.3    | 0.6    |
| 215387_x_at | AK021505 | -                         | -      | 13.7   | 5.7    | 2.7    | 0.9    | 12.2   |
| 215388_s_at | X56210   | CFH /// CFHF 3075 /// 307 |        | 0.3    | 1.2    | 0.3    | 3.0    | 1.3    |
| 215389_s_at | X79857   | TNNT2                     | 7139   | 10.0   | 3.1    | 11.5   | 10.5   | 8.7    |
| 215390_at   | AU147194 | -                         | -      | 7.5    | 10.9   | 6.6    | 8.2    | 7.6    |
| 215391_at   | AA633627 | MAP1A                     | 4130   | 4.4    | 1.0    | 2.7    | 0.9    | 1.5    |
| 215392_at   | AU148154 | -                         | -      | 5.6    | 7.5    | 4.6    | 2.4    | 3.1    |
| 215393_s_at | AK002054 | COBLL1                    | 22837  | 11.6   | 12.3   | 14.2   | 15.0   | 8.0    |
| 215394_at   | AU148957 | PIK3C3                    | 5289   | 3.5    | 7.0    | 9.3    | 9.7    | 7.6    |
| 215395_x_at | U66061   | PRSS3P2                   | 154754 | 11.1   | 16.3   | 6.6    | 2.1    | 11.2   |
| 215396_at   | AB014586 | GPR98                     | 84059  | 0.5    | 2.3    | 0.3    | 0.2    | 0.1    |
| 215397_x_at | AU148086 | -                         | -      | 2.4    | 17.6   | 11.1   | 8.5    | 13.4   |
| 215398_at   | AF038194 | -                         | -      | 7.7    | 3.0    | 0.9    | 2.0    | 2.9    |
| 215399_s_at | AI683900 | OS9                       | 10956  | 123.0  | 111.2  | 99.4   | 136.3  | 108.6  |
| 215400_x_at | AU146952 | ADCY9                     | 115    | 6.2    | 7.4    | 1.1    | 0.8    | 0.7    |
| 215401_at   | AU147698 | -                         | -      | 0.8    | 0.5    | 1.5    | 0.5    | 0.6    |
| 215402_at   | AL157428 | APPBP2                    | 10513  | 2.2    | 0.2    | 0.6    | 3.3    | 1.2    |
| 215403_at   | AK024860 | -                         | -      | 1.6    | 1.7    | 1.5    | 5.1    | 6.5    |
| 215404_x_at | AK024388 | FGFR1                     | 2260   | 24.0   | 16.6   | 16.6   | 8.3    | 15.0   |
| 215405_at   | AK025072 | -                         | -      | 2.3    | 0.8    | 6.4    | 3.3    | 3.2    |
| 215406_at   | AK024860 | -                         | -      | 0.5    | 0.7    | 1.9    | 1.0    | 0.8    |
| 215407_s_at | AK024064 | ASTN2                     | 23245  | 48.2   | 42.1   | 35.3   | 36.9   | 30.8   |
| 215408_at   | AK025072 | -                         | -      | 3.3    | 3.1    | 1.5    | 1.2    | 0.5    |
| 215409_at   | BG255923 | LPCAT4                    | 254531 | 5.1    | 5.5    | 4.6    | 2.7    | 7.1    |
| 215410_at   | AB017005 | LOC441259 / 5379 /// 538  |        | 4.8    | 4.2    | 7.2    | 9.3    | 7.3    |
| 215411_s_at | AL008730 | TRAF3IP2                  | 10758  | 73.7   | 80.8   | 75.0   | 55.4   | 45.2   |
| 215412_x_at | AB017007 | PMS2P8                    | 729299 | 28.9   | 39.6   | 34.3   | 37.7   | 20.4   |

|             |          |                      |             |       |       |       |       |       |       |
|-------------|----------|----------------------|-------------|-------|-------|-------|-------|-------|-------|
| 215413_at   | AK023832 | EXOC7                | 23265       | 1.5   | 1.2   | 11.1  | 1.5   | 0.5   |       |
| 215414_at   | AI524687 | FARS2                | 10667       | 2.5   | 1.1   | 0.8   | 0.8   | 0.4   |       |
| 215415_s_at | U70064   | LYST                 | 1130        | 3.1   | 1.8   | 2.3   | 1.1   | 5.4   |       |
| 215416_s_at | AC004472 | STOML2               | 30968       | 473.4 | 491.6 | 560.3 | 521.8 | 476.0 |       |
| 215417_at   | AI803703 | EXOC6B               | 23233       | 3.5   | 4.5   | 10.8  | 11.2  | 4.7   |       |
| 215418_at   | AK022316 | PARVA                | 55742       | 12.9  | 5.3   | 7.1   | 11.8  | 8.1   |       |
| 215419_at   | AB029009 | ZFR2                 | 23217       | 15.9  | 10.0  | 9.9   | 5.3   | 3.7   |       |
| 215420_at   | BE869172 | IHH                  | 3549        | 12.7  | 12.5  | 6.4   | 4.7   | 9.8   |       |
| 215421_at   | AI821657 | LOC1001315           | 100131510   | 10.2  | 14.2  | 11.6  | 9.8   | 8.1   |       |
| 215422_at   | AA757368 | MARCH6               | 10299       | 8.3   | 2.8   | 5.2   | 5.3   | 1.5   |       |
| 215423_at   | U52827   | MARCH6               | 10299       | 6.6   | 11.5  | 6.8   | 9.2   | 2.7   |       |
| 215424_s_at | AV689564 | SNW1                 | 22938       | 149.5 | 124.8 | 161.4 | 130.6 | 120.9 |       |
| 215425_at   | AL049332 | BTG3                 | 10950       | 10.6  | 8.1   | 4.4   | 6.7   | 7.2   |       |
| 215426_at   | AL117532 | ZCCHC14              | 23174       | 1.0   | 0.9   | 0.5   | 0.4   | 0.5   |       |
| 215427_s_at | AL117532 | ZCCHC14              | 23174       | 3.3   | 0.9   | 1.3   | 0.7   | 0.5   |       |
| 215428_at   | AL109707 | RP11-680F8.-         |             | 8.8   | 10.4  | 13.2  | 6.4   | 5.2   |       |
| 215429_s_at | BE045982 | ZNF428               | 126299      | 33.1  | 27.6  | 29.0  | 40.6  | 26.5  |       |
| 215430_at   | AA757089 | GK2                  | 2712        | 11.1  | 2.1   | 9.5   | 5.7   | 1.0   |       |
| 215431_at   | AI033054 | SNTB1                | 6641        | 0.8   | 0.5   | 1.7   | 1.6   | 0.9   |       |
| 215432_at   | AC003034 | ACSM1                | 116285      | 0.9   | 0.7   | 1.2   | 0.4   | 0.8   |       |
| 215433_at   | BF447983 | AJ011981 ///         | 23333       | 1.4   | 1.5   | 1.4   | 1.9   | 0.4   |       |
| 215434_x_at | AV684285 | LOC1027242.25832 /// | 55          | 73.3  | 90.3  | 82.2  | 118.8 | 74.6  |       |
| 215435_at   | AK021983 | -                    | -           | 4.5   | 3.0   | 2.1   | 2.2   | 1.9   |       |
| 215436_at   | AK023959 | HSDL2                | 84263       | 12.3  | 7.7   | 8.0   | 10.5  | 5.1   |       |
| 215437_x_at | BE513659 | BAZ2A                | 11176       | 2.4   | 1.7   | 2.2   | 1.5   | 1.3   |       |
| 215438_x_at | BE906054 | GSPT1                | 2935        | 658.0 | 522.9 | 754.6 | 622.1 | 546.5 |       |
| 215439_x_at | AU146391 | -                    | -           | 6.1   | 3.5   | 5.3   | 2.4   | 3.5   |       |
| 215440_s_at | AL523320 | BEX4                 | 56271       | 42.6  | 42.5  | 40.1  | 45.7  | 34.0  |       |
| 215441_at   | U79301   | -                    | -           | 11.1  | 4.8   | 12.2  | 12.0  | 5.5   |       |
| 215442_s_at | BE740743 | TSHR                 | 7253        | 4.4   | 2.4   | 1.1   | 3.6   | 0.7   |       |
| 215443_at   | BE740743 | TSHR                 | 7253        | 0.6   | 0.5   | 0.4   | 1.0   | 2.0   |       |
| 215444_s_at | X81006   | TRIM31               | 11074       | 1.0   | 1.2   | 3.3   | 1.5   | 5.1   |       |
| 215445_x_at | AF007136 | -                    | -           | 12.4  | 4.6   | 12.8  | 10.9  | 5.8   |       |
| 215446_s_at | L16895   | LOX                  | 4015        | 3.4   | 2.3   | 4.5   | 2.4   | 1.6   |       |
| 215447_at   | AL080215 | -                    | -           | 7.3   | 5.4   | 8.9   | 8.6   | 6.0   |       |
| 215448_at   | AF035290 | -                    | -           | 1.5   | 1.4   | 2.3   | 1.0   | 1.3   |       |
| 215449_at   | AI052224 | TSPO2                | 222642      | 4.0   | 2.7   | 2.9   | 6.0   | 4.9   |       |
| 215450_at   | W87901   | SNRPE                | 6635        | 197.4 | 128.1 | 185.7 | 140.7 | 134.0 |       |
| 215451_s_at | BF575588 | AFF1                 | 4299        | 17.8  | 15.0  | 13.3  | 12.3  | 2.6   |       |
| 215452_x_at | AL031133 | SUMO4                | 387082      | 313.8 | 221.0 | 303.1 | 253.8 | 249.3 |       |
| 215454_x_at | AI831055 | SFTPC                | 6440        | 1.3   | 1.9   | 2.2   | 1.4   | 3.4   |       |
| 215455_at   | AK000721 | TIMELESS             | 8914        | 3.1   | 6.7   | 7.4   | 0.6   | 6.0   |       |
| 215456_at   | AF070625 | -                    | -           | 1.4   | 0.5   | 5.4   | 3.0   | 6.1   |       |
| 215457_at   | AF070647 | -                    | -           | 4.5   | 4.5   | 2.3   | 3.1   | 0.2   |       |
| 215458_s_at | AF199364 | SMURF1               | 57154       | 20.8  | 14.2  | 18.4  | 17.0  | 12.1  |       |
| 215459_at   | AK001327 | CTNS                 | 1497        | 5.6   | 3.1   | 4.2   | 8.2   | 4.2   |       |
| 215460_x_at | AL080149 | BRD1                 | 23774       | 45.8  | 38.6  | 52.4  | 43.4  | 39.7  |       |
| 215461_at   | AI807507 | ZNRF4                | 148066      | 6.1   | 9.7   | 4.7   | 4.6   | 1.6   |       |
| 215462_at   | AI978990 | PLK3                 | 1263        | 23.7  | 12.7  | 17.2  | 12.3  | 11.7  |       |
| 215463_at   | BF062364 | OR7E24               | 26648       | 8.9   | 6.2   | 5.5   | 3.1   | 2.3   |       |
| 215464_s_at | AK001327 | P2RX5 ///            | P2 5026 /// | 308   | 174.2 | 158.8 | 178.4 | 159.2 | 130.7 |
| 215465_at   | AL080207 | ABCA12               | 26154       | 10.5  | 8.1   | 6.8   | 7.2   | 8.5   |       |
| 215466_at   | AF035314 | -                    | -           | 4.0   | 7.5   | 1.2   | 6.8   | 0.5   |       |



|             |          |             |                 |       |       |       |       |       |
|-------------|----------|-------------|-----------------|-------|-------|-------|-------|-------|
| 215467_x_at | AK001442 | LOC647070   | 647070          | 20.5  | 12.9  | 10.3  | 21.3  | 9.3   |
| 215468_at   | AK001442 | -           | -               | 0.6   | 2.2   | 2.5   | 0.5   | 0.9   |
| 215469_at   | AF339807 | SLITRK5     | 26050           | 1.2   | 0.1   | 4.5   | 0.2   | 0.4   |
| 215470_at   | U21915   | GTF2H2B     | 653238          | 34.6  | 33.0  | 37.2  | 29.9  | 22.2  |
| 215471_s_at | AJ242502 | MAP7        | 9053            | 71.2  | 67.2  | 71.1  | 69.7  | 67.7  |
| 215472_at   | AI017119 | PACRG       | 135138          | 9.1   | 11.0  | 10.6  | 11.0  | 7.7   |
| 215473_at   | AF052140 | -           | -               | 5.5   | 0.4   | 0.4   | 6.3   | 3.9   |
| 215474_at   | AK022094 | -           | -               | 0.5   | 4.8   | 1.1   | 0.4   | 0.3   |
| 215475_at   | AK022094 | -           | -               | 6.9   | 0.5   | 3.9   | 0.6   | 2.3   |
| 215476_at   | AF052103 | -           | -               | 8.9   | 14.5  | 17.1  | 13.7  | 6.1   |
| 215477_at   | H49077   | -           | -               | 2.8   | 3.3   | 3.3   | 4.2   | 1.1   |
| 215478_at   | AF007156 | RIMS2       | 9699            | 4.4   | 3.6   | 7.2   | 2.0   | 3.8   |
| 215479_at   | AK000787 | -           | -               | 9.4   | 13.6  | 23.7  | 16.2  | 17.0  |
| 215480_at   | AB007978 | KIAA0509    | 57242           | 1.2   | 2.3   | 5.1   | 2.0   | 3.1   |
| 215481_s_at | AW468717 | PEX5        | 5830            | 39.9  | 29.1  | 35.6  | 21.5  | 34.9  |
| 215482_s_at | AJ011307 | EIF2B4      | 8890            | 177.5 | 155.9 | 191.2 | 176.9 | 130.9 |
| 215483_at   | AK000270 | AKAP9       | 10142           | 7.4   | 6.6   | 6.8   | 2.6   | 4.0   |
| 215484_at   | AF070538 | -           | -               | 19.2  | 20.1  | 13.0  | 15.6  | 11.0  |
| 215485_s_at | AA284705 | ICAM1       | 3383            | 12.9  | 19.3  | 19.9  | 10.7  | 15.2  |
| 215486_at   | AW072461 | PRPS1L1     | 221823          | 12.7  | 10.4  | 7.3   | 1.2   | 5.3   |
| 215487_x_at | AL096727 | FAM182B     | ///728882 /// 1 | 9.6   | 3.8   | 2.7   | 4.8   | 3.6   |
| 215488_at   | AF052095 | -           | -               | 1.3   | 0.5   | 9.3   | 2.3   | 1.2   |
| 215489_x_at | AI871287 | HOMER3      | 9454            | 60.6  | 51.5  | 50.8  | 58.8  | 35.8  |
| 215490_at   | AK023911 | IBA57       | 200205          | 11.9  | 8.0   | 17.7  | 10.8  | 10.4  |
| 215491_at   | AI273812 | MYCL        | 4610            | 7.2   | 2.3   | 1.8   | 3.3   | 0.9   |
| 215492_x_at | AL035587 | PTCRA       | 171558          | 19.3  | 8.9   | 12.0  | 13.6  | 13.4  |
| 215493_x_at | AL121936 | BTN2A1      | 11120           | 41.3  | 35.1  | 41.5  | 31.8  | 29.0  |
| 215494_at   | AF174394 | -           | -               | 5.0   | 2.0   | 3.0   | 0.1   | 1.1   |
| 215495_s_at | AL117523 | SAMD4A      | 23034           | 1.5   | 0.9   | 0.8   | 1.2   | 0.3   |
| 215496_at   | AL117523 | SAMD4A      | 23034           | 3.5   | 3.7   | 1.0   | 1.1   | 0.5   |
| 215497_s_at | AK023778 | WDTC1       | 23038           | 20.3  | 29.7  | 19.5  | 4.6   | 18.9  |
| 215498_s_at | AA780381 | LOC1009967  | 5606 /// 100    | 328.6 | 366.8 | 334.9 | 371.4 | 267.0 |
| 215499_at   | AA780381 | LOC1009967  | 5606 /// 100    | 143.8 | 152.7 | 156.6 | 169.8 | 89.3  |
| 215500_at   | U95737   | LOC1019293  | 92017 /// 10    | 2.9   | 2.5   | 2.8   | 1.1   | 1.6   |
| 215501_s_at | AK022513 | DUSP10      | 11221           | 22.3  | 19.9  | 21.2  | 17.3  | 18.1  |
| 215502_at   | R37655   | LA16c-381G  | -               | 4.6   | 1.7   | 1.8   | 0.6   | 0.6   |
| 215503_at   | AW118166 | SPINT3      | 10816           | 1.8   | 1.0   | 1.5   | 1.1   | 0.7   |
| 215504_x_at | AF131777 | ANKRD10-IT1 | 100505494       | 37.4  | 36.5  | 48.4  | 36.1  | 38.2  |
| 215505_s_at | AF243424 | STRN3       | 29966           | 28.9  | 14.8  | 28.9  | 26.5  | 15.6  |
| 215506_s_at | AK021882 | DIRAS3      | 9077            | 1.8   | 3.3   | 0.5   | 0.4   | 2.5   |
| 215507_x_at | AL049985 | -           | -               | 9.1   | 6.1   | 12.4  | 7.6   | 7.0   |
| 215508_at   | AL137654 | BUB1        | 699             | 2.2   | 0.1   | 3.1   | 1.2   | 2.3   |
| 215509_s_at | AL137654 | BUB1        | 699             | 80.0  | 64.3  | 61.8  | 50.1  | 49.1  |
| 215510_at   | AV693985 | ETV2        | 2116            | 13.6  | 14.0  | 9.8   | 16.4  | 11.1  |
| 215511_at   | U19345   | TCF20       | 6942            | 30.8  | 25.1  | 26.0  | 25.2  | 14.3  |
| 215512_at   | AK000970 | MARCH6      | 10299           | 6.1   | 4.1   | 1.1   | 3.0   | 6.2   |
| 215513_at   | AF241534 | HYMAI       | 57061           | 1.1   | 4.1   | 7.6   | 1.4   | 4.1   |
| 215514_at   | AL080072 | RP4-621B10  | -               | 0.0   | 0.2   | 2.4   | 0.1   | 0.1   |
| 215515_at   | AL049268 | -           | -               | 2.4   | 3.0   | 2.5   | 2.5   | 0.9   |
| 215516_at   | AC005048 | LAMB4       | 22798           | 4.1   | 0.2   | 2.5   | 1.0   | 0.1   |
| 215517_at   | AL049925 | PYGO1       | 26108           | 5.2   | 1.0   | 6.4   | 8.1   | 7.1   |
| 215518_at   | AB023223 | STXBPL      | 9515            | 36.4  | 30.1  | 37.3  | 28.9  | 22.6  |
| 215519_x_at | AI081779 | SGSM3       | 27352           | 44.6  | 42.1  | 41.7  | 49.3  | 37.4  |

|             |          |             |                     |       |       |       |       |       |
|-------------|----------|-------------|---------------------|-------|-------|-------|-------|-------|
| 215520_at   | AL049925 | PYGO1       | 26108               | 1.0   | 3.0   | 6.3   | 1.0   | 1.0   |
| 215521_at   | AK023029 | PHC3        | 80012               | 14.2  | 8.0   | 11.8  | 9.9   | 9.7   |
| 215522_at   | AB028982 | SORCS3      | 22986               | 0.3   | 0.7   | 0.5   | 0.3   | 0.2   |
| 215523_at   | AL031118 | ZNF391      | 346157              | 13.2  | 10.7  | 11.4  | 6.5   | 10.1  |
| 215524_x_at | AW966434 | MGC40069    | /,10730 /// 28      | 0.6   | 0.4   | 0.5   | 0.9   | 0.3   |
| 215525_at   | AL050185 | -           | -                   | 9.3   | 3.0   | 1.6   | 4.5   | 5.1   |
| 215526_at   | AL050145 | -           | -                   | 0.4   | 7.2   | 0.4   | 0.5   | 2.1   |
| 215527_at   | AL049544 | KHDRBS2     | 202559              | 1.4   | 1.4   | 6.0   | 4.0   | 3.1   |
| 215528_at   | AL049390 | -           | -                   | 13.0  | 12.1  | 13.6  | 14.9  | 10.5  |
| 215529_x_at | AI590053 | DIP2A       | 23181               | 42.1  | 41.8  | 45.2  | 31.3  | 41.0  |
| 215530_at   | BG484069 | FANCA       | 2175                | 12.7  | 15.7  | 12.3  | 16.4  | 8.2   |
| 215531_s_at | BF966183 | GABRA5      | 2558                | 6.2   | 1.9   | 5.1   | 4.6   | 1.6   |
| 215532_x_at | AB040906 | ZNF492      | 57615               | 13.2  | 4.4   | 5.7   | 9.0   | 6.2   |
| 215533_s_at | AF091093 | UBE4B       | 10277               | 65.2  | 70.4  | 75.8  | 82.6  | 62.6  |
| 215534_at   | AL117546 | -           | -                   | 1.9   | 5.4   | 1.1   | 0.9   | 4.4   |
| 215535_s_at | AF007145 | AGPAT1      | 10554               | 242.8 | 262.7 | 223.6 | 232.7 | 169.5 |
| 215536_at   | X87344   | HLA-DQB2    | 3120                | 1.9   | 4.1   | 7.7   | 5.1   | 5.7   |
| 215537_x_at | AJ012008 | DDAH2       | 23564               | 47.3  | 46.2  | 35.7  | 55.2  | 27.9  |
| 215538_at   | BF057493 | -           | -                   | 16.1  | 5.0   | 4.6   | 4.9   | 11.6  |
| 215539_at   | AK021967 | -           | -                   | 0.3   | 0.2   | 1.5   | 0.3   | 0.5   |
| 215540_at   | AW950865 | TRA@ /// YV | 10730               | 3.1   | 1.3   | 1.7   | 1.7   | 0.9   |
| 215541_s_at | AK023345 | DIAPH1      | 1729                | 69.9  | 61.0  | 71.3  | 53.7  | 55.3  |
| 215542_at   | AK023121 | -           | -                   | 8.8   | 5.1   | 5.5   | 7.7   | 3.8   |
| 215543_s_at | AB011181 | LARGE       | 9215                | 2.4   | 3.6   | 19.7  | 14.3  | 7.8   |
| 215544_s_at | AL121891 | UBOX5       | 22888               | 26.6  | 29.0  | 21.1  | 35.5  | 20.2  |
| 215545_at   | AK024185 | -           | -                   | 9.4   | 8.6   | 13.8  | 17.2  | 7.7   |
| 215546_at   | AK001065 | PSMD5       | 5711                | 1.0   | 5.8   | 4.2   | 1.0   | 2.7   |
| 215547_at   | AF201291 | TSC22D2     | 9819                | 2.1   | 1.1   | 4.7   | 7.5   | 2.8   |
| 215548_s_at | AB020724 | SCFD1       | 23256               | 167.1 | 121.2 | 130.0 | 120.9 | 106.8 |
| 215549_x_at | AC005587 | CTAGE4      | /// C643854 /// 1   | 47.5  | 40.9  | 46.4  | 36.2  | 25.1  |
| 215550_at   | AL137457 | SRGAP3      | 9901                | 3.6   | 7.5   | 9.0   | 6.8   | 4.6   |
| 215551_at   | AI073549 | ESR1        | 2099                | 10.2  | 8.4   | 10.6  | 13.7  | 6.7   |
| 215552_s_at | AI073549 | ESR1        | 2099                | 1.3   | 6.1   | 1.8   | 1.0   | 5.8   |
| 215553_x_at | AK024315 | -           | -                   | 55.5  | 22.2  | 41.8  | 30.5  | 25.5  |
| 215554_at   | AV699786 | GPLD1       | 2822                | 4.2   | 0.1   | 3.0   | 0.6   | 0.3   |
| 215555_at   | AU158442 | -           | -                   | 0.3   | 0.5   | 0.5   | 0.3   | 0.1   |
| 215556_at   | AK023774 | -           | -                   | 8.7   | 1.8   | 13.0  | 6.5   | 9.5   |
| 215557_at   | AU144900 | -           | -                   | 6.7   | 8.3   | 15.1  | 14.5  | 13.4  |
| 215558_at   | AK001118 | UBR2        | 23304               | 0.6   | 0.5   | 0.2   | 0.7   | 1.1   |
| 215559_at   | AI074459 | ABCC6       | /// LC 368 /// 1019 | 11.1  | 2.2   | 1.1   | 1.4   | 1.1   |
| 215560_x_at | AU145135 | MTRF1L      | 54516               | 4.0   | 11.5  | 13.8  | 12.4  | 5.8   |
| 215561_s_at | AK026803 | IL1R1       | 3554                | 9.0   | 9.2   | 9.8   | 9.9   | 5.5   |
| 215562_at   | AK000220 | TTC39A      | 22996               | 2.8   | 2.5   | 4.4   | 5.3   | 0.6   |
| 215563_s_at | U28055   | MST1L       | 11223               | 1.5   | 1.6   | 1.8   | 5.5   | 5.7   |
| 215564_at   | AV652031 | AREG        | 374                 | 0.9   | 0.5   | 0.5   | 0.3   | 0.1   |
| 215565_at   | AK022277 | LOC1019292  | 101929272           | 1.2   | 0.6   | 0.6   | 0.5   | 0.5   |
| 215566_x_at | AK024724 | LYPLA2      | 11313               | 89.7  | 62.0  | 75.5  | 71.3  | 61.5  |
| 215567_at   | AU144919 | FCF1        | 51077               | 3.7   | 3.9   | 8.0   | 4.6   | 2.7   |
| 215568_x_at | AL031295 | LYPLA2      | 11313               | 43.9  | 34.0  | 26.7  | 16.7  | 32.8  |
| 215569_at   | AC004883 | GTF2IRD2B   | 389524              | 9.8   | 8.9   | 9.6   | 15.9  | 8.3   |
| 215570_s_at | AC005614 | ZNF780A     | /// 163131 /// 2    | 21.8  | 17.2  | 18.3  | 19.7  | 14.4  |
| 215571_at   | AK021495 | -           | -                   | 9.0   | 7.1   | 12.5  | 7.9   | 6.4   |
| 215572_at   | AL109708 | -           | -                   | 0.6   | 0.5   | 1.5   | 0.3   | 0.4   |

|             |          |                          |           |      |      |      |      |      |
|-------------|----------|--------------------------|-----------|------|------|------|------|------|
| 215573_at   | AU147084 | CAT                      | 847       | 6.0  | 2.4  | 4.0  | 0.3  | 3.5  |
| 215574_at   | AU144294 | -                        | -         | 9.1  | 7.6  | 9.5  | 3.1  | 3.1  |
| 215575_at   | AU157078 | PDE4DIP                  | 9659      | 1.9  | 0.3  | 1.3  | 0.7  | 0.2  |
| 215576_at   | AU146809 | -                        | -         | 8.2  | 10.4 | 8.5  | 5.9  | 7.1  |
| 215577_at   | AU146791 | -                        | -         | 9.9  | 8.0  | 10.5 | 10.1 | 9.5  |
| 215578_at   | AU145365 | -                        | -         | 2.5  | 3.3  | 3.3  | 5.3  | 2.6  |
| 215579_at   | AK022802 | APOBEC3G                 | 60489     | 1.9  | 5.9  | 1.9  | 1.8  | 3.4  |
| 215580_at   | AK022303 | MCM3AP                   | 8888      | 2.9  | 1.6  | 6.3  | 2.2  | 5.3  |
| 215581_s_at | AK022303 | MCM3AP                   | 8888      | 24.0 | 24.6 | 25.4 | 23.0 | 13.5 |
| 215582_x_at | AK022303 | MCM3AP                   | 8888      | 55.3 | 32.7 | 57.0 | 46.4 | 37.0 |
| 215583_at   | AU148184 | TMEM63A                  | 9725      | 7.6  | 14.2 | 7.0  | 2.8  | 1.2  |
| 215584_at   | AK022679 | HECW1                    | 23072     | 32.9 | 19.5 | 28.9 | 15.0 | 17.8 |
| 215585_at   | AK024081 | -                        | -         | 3.1  | 5.4  | 0.3  | 6.7  | 3.1  |
| 215586_at   | AK024173 | -                        | -         | 4.6  | 4.0  | 4.0  | 4.1  | 2.9  |
| 215587_x_at | AK023891 | -                        | -         | 1.1  | 1.6  | 10.6 | 2.9  | 12.1 |
| 215588_x_at | AK024958 | RIOK3                    | 8780      | 52.6 | 57.7 | 69.0 | 42.0 | 33.4 |
| 215589_at   | AK024937 | -                        | -         | 0.6  | 2.2  | 2.7  | 0.4  | 0.1  |
| 215590_x_at | AK025619 | ACVR2B-AS1               | 100128640 | 14.0 | 19.6 | 8.7  | 17.1 | 11.6 |
| 215591_at   | AK025127 | SATB2                    | 23314     | 4.0  | 1.9  | 3.0  | 2.8  | 0.3  |
| 215592_at   | AU147620 | -                        | -         | 1.9  | 1.3  | 1.0  | 0.5  | 0.5  |
| 215593_at   | AK023918 | -                        | -         | 0.7  | 2.7  | 1.0  | 1.0  | 0.5  |
| 215594_at   | AU148611 | ERV9-1                   | 100616497 | 12.2 | 9.1  | 11.1 | 0.9  | 3.2  |
| 215595_x_at | AK023918 | -                        | -         | 4.2  | 14.3 | 13.1 | 6.9  | 13.3 |
| 215596_s_at | AL163248 | LTN1                     | 26046     | 96.4 | 76.2 | 87.7 | 73.9 | 44.4 |
| 215597_x_at | AU143799 | -                        | -         | 3.4  | 0.9  | 4.3  | 0.4  | 1.0  |
| 215598_at   | AK027161 | TTC12                    | 54970     | 9.9  | 10.1 | 8.7  | 11.0 | 10.7 |
| 215599_at   | X83300   | GUSBP3 /// (653188 /// 1 |           | 41.5 | 14.8 | 18.5 | 19.0 | 15.0 |
| 215600_x_at | AK022174 | FBXW12                   | 285231    | 57.6 | 39.1 | 41.7 | 32.3 | 45.8 |
| 215601_at   | AU159040 | -                        | -         | 6.8  | 0.8  | 1.9  | 3.2  | 5.7  |
| 215602_at   | AK024456 | FGD2                     | 221472    | 3.1  | 0.6  | 3.1  | 2.6  | 4.4  |
| 215603_x_at | AI344075 | GGT1 /// GG 2678 /// 267 |           | 39.8 | 52.3 | 40.6 | 37.2 | 24.2 |
| 215604_x_at | AK023783 | -                        | -         | 18.9 | 23.2 | 16.7 | 16.5 | 14.7 |
| 215605_at   | AU145806 | NCOA2                    | 10499     | 22.6 | 16.1 | 19.9 | 15.6 | 11.6 |
| 215606_s_at | AB029004 | ERC1                     | 23085     | 23.4 | 31.2 | 28.8 | 27.6 | 18.6 |
| 215607_x_at | AU144530 | -                        | -         | 1.1  | 9.6  | 12.6 | 9.6  | 11.7 |
| 215608_at   | AU144378 | AK021537                 | -         | 37.2 | 8.3  | 21.5 | 28.8 | 21.2 |
| 215609_at   | AK023895 | -                        | -         | 5.4  | 1.6  | 2.0  | 8.4  | 0.8  |
| 215610_at   | AK022038 | -                        | -         | 4.7  | 4.1  | 7.7  | 6.2  | 8.1  |
| 215611_at   | AU146580 | TCF12                    | 6938      | 5.5  | 0.8  | 3.3  | 2.6  | 1.6  |
| 215612_at   | AU147983 | -                        | -         | 4.9  | 5.7  | 5.7  | 3.2  | 2.7  |
| 215613_at   | AU145357 | ADAM12                   | 8038      | 1.4  | 0.8  | 7.9  | 3.5  | 1.2  |
| 215614_at   | AK022038 | -                        | -         | 6.6  | 1.2  | 7.1  | 1.0  | 3.6  |
| 215615_x_at | AU148274 | -                        | -         | 6.4  | 0.2  | 3.8  | 7.3  | 2.6  |
| 215616_s_at | AB020683 | KDM4B                    | 23030     | 15.3 | 7.9  | 25.3 | 18.4 | 11.2 |
| 215617_at   | AU145711 | SPATS2L                  | 26010     | 3.0  | 0.8  | 3.0  | 4.1  | 1.6  |
| 215618_at   | AK024109 | RSU1                     | 6251      | 8.0  | 1.1  | 3.6  | 2.6  | 1.5  |
| 215619_at   | AK024214 | -                        | -         | 0.2  | 0.2  | 0.6  | 2.3  | 1.2  |
| 215620_at   | AU147182 | RREB1                    | 6239      | 8.9  | 9.8  | 12.7 | 7.4  | 5.9  |
| 215621_s_at | BG340670 | IGHD                     | 3495      | 4.1  | 2.1  | 1.6  | 1.2  | 1.1  |
| 215622_x_at | AL137671 | PHF7                     | 51533     | 31.2 | 28.5 | 31.4 | 25.2 | 15.3 |
| 215623_x_at | AK002200 | SMC4                     | 10051     | 0.2  | 6.9  | 9.2  | 9.0  | 9.5  |
| 215624_at   | AU147962 | TSC2                     | 7249      | 4.6  | 1.1  | 3.1  | 8.9  | 6.8  |
| 215625_at   | AK001448 | LOC1019286 644450 /// 1  |           | 1.6  | 7.3  | 6.2  | 1.3  | 9.0  |

|             |          |            |             |         |       |       |       |       |      |
|-------------|----------|------------|-------------|---------|-------|-------|-------|-------|------|
| 215626_at   | AU144887 | -          | -           | 3.9     | 0.5   | 0.9   | 1.2   | 4.2   |      |
| 215627_at   | AK023515 | LOC1019269 | 101926913   | 0.6     | 0.8   | 6.6   | 0.6   | 0.2   |      |
| 215628_x_at | AL049285 | -          | -           | 70.7    | 39.9  | 64.0  | 47.6  | 43.6  |      |
| 215629_s_at | AA905286 | DLEU2      | /// DL 8847 | /// 794 | 23.3  | 12.3  | 35.4  | 19.3  | 17.7 |
| 215630_at   | AU147528 | -          | -           | 2.7     | 0.8   | 5.3   | 3.1   | 2.4   |      |
| 215631_s_at | AL050008 | BRMS1      | 25855       | 193.4   | 150.5 | 123.3 | 160.8 | 122.9 |      |
| 215632_at   | AF303002 | NEUROG2    | 63973       | 0.6     | 0.3   | 0.7   | 0.8   | 0.6   |      |
| 215633_x_at | AV713720 | LST1       | 7940        | 3.9     | 4.0   | 3.2   | 1.8   | 1.1   |      |
| 215634_at   | AF007137 | -          | -           | 4.7     | 3.5   | 0.3   | 0.8   | 6.7   |      |
| 215635_at   | AL109691 | -          | -           | 0.5     | 0.7   | 3.5   | 3.4   | 0.5   |      |
| 215636_at   | AK022322 | UBR4       | 23352       | 1.5     | 5.2   | 1.8   | 0.7   | 0.4   |      |
| 215637_at   | AU155621 | CEP41      | 95681       | 4.1     | 8.6   | 8.2   | 10.0  | 2.1   |      |
| 215638_at   | U88358   | ERBB3      | 2065        | 9.9     | 8.8   | 4.5   | 7.1   | 8.9   |      |
| 215639_at   | AK000861 | SH2D3C     | 10044       | 2.9     | 4.5   | 1.1   | 3.9   | 1.4   |      |
| 215640_at   | AK000173 | TBC1D2B    | 23102       | 19.6    | 7.9   | 16.1  | 8.9   | 9.6   |      |
| 215641_at   | AK000709 | SEC24D     | 9871        | 0.8     | 2.3   | 0.3   | 0.3   | 1.8   |      |
| 215642_at   | AF090887 | -          | -           | 1.1     | 1.2   | 3.9   | 1.4   | 2.9   |      |
| 215643_at   | AU145680 | SEMA3D     | 223117      | 2.8     | 0.6   | 4.5   | 5.4   | 0.2   |      |
| 215644_at   | AF090887 | ZNF518A    | 9849        | 4.2     | 7.4   | 2.7   | 10.2  | 5.3   |      |
| 215645_at   | AF090883 | FLCN       | 201163      | 16.5    | 11.2  | 12.7  | 13.0  | 9.9   |      |
| 215646_s_at | R94644   | VCAN       | 1462        | 4.7     | 4.7   | 0.2   | 0.5   | 0.2   |      |
| 215647_at   | AK021576 | -          | -           | 2.8     | 1.1   | 0.5   | 0.2   | 0.2   |      |
| 215648_at   | AU144324 | -          | -           | 14.3    | 1.3   | 10.8  | 11.7  | 5.0   |      |
| 215649_s_at | AF217536 | MVK        | 4598        | 36.7    | 38.3  | 41.2  | 50.5  | 39.6  |      |
| 215650_at   | AK021614 | -          | -           | 1.0     | 0.4   | 2.6   | 0.7   | 2.5   |      |
| 215651_at   | AK026682 | -          | -           | 6.6     | 10.7  | 1.7   | 10.0  | 7.3   |      |
| 215652_at   | AK024382 | SDHD       | 6392        | 1.3     | 2.9   | 4.3   | 1.0   | 0.7   |      |
| 215653_at   | AF339805 | -          | -           | 0.1     | 3.4   | 2.3   | 0.0   | 0.5   |      |
| 215654_at   | AK023909 | BCAT2      | 587         | 15.1    | 2.4   | 9.9   | 1.3   | 2.1   |      |
| 215655_at   | AU156204 | GRIK2      | 2898        | 0.0     | 2.6   | 0.3   | 2.8   | 0.9   |      |
| 215656_at   | AK025041 | LMAN2      | 10960       | 1.7     | 0.5   | 0.6   | 0.7   | 0.3   |      |
| 215657_at   | AK025044 | SLC26A3    | 1811        | 0.3     | 3.0   | 4.4   | 2.5   | 1.5   |      |
| 215658_at   | AK024897 | LINC00675  | 100289255   | 6.0     | 4.7   | 4.8   | 5.2   | 4.8   |      |
| 215659_at   | AK025174 | GSDMB      | 55876       | 1.0     | 1.7   | 4.4   | 1.9   | 0.5   |      |
| 215660_s_at | AK025352 | MAST2      | 23139       | 21.8    | 11.8  | 19.0  | 13.0  | 3.1   |      |
| 215661_at   | AK025352 | MAST2      | 23139       | 1.5     | 1.8   | 0.9   | 2.0   | 2.3   |      |
| 215662_at   | AK025352 | -          | -           | 14.0    | 10.0  | 13.1  | 11.1  | 10.7  |      |
| 215663_at   | BC005296 | MBNL1      | 4154        | 4.2     | 1.0   | 0.5   | 5.1   | 3.9   |      |
| 215664_s_at | X95425   | EPHA5      | 2044        | 2.4     | 2.8   | 4.3   | 3.1   | 0.3   |      |
| 215665_at   | AL359553 | HSD3B2     | -           | 1.1     | 3.7   | 0.9   | 3.4   | 2.1   |      |
| 215666_at   | U70544   | HLA-DRB4   | 3126        | 0.2     | 1.4   | 0.2   | 0.4   | 0.2   |      |
| 215667_x_at | AI375694 | PMS2P5     | /// F5383   | /// 100 | 122.0 | 109.5 | 136.7 | 130.4 | 85.5 |
| 215668_s_at | AJ011414 | PLXNB1     | 5364        | 4.5     | 4.0   | 4.1   | 2.5   | 2.1   |      |
| 215669_at   | U70544   | -          | -           | 5.4     | 7.1   | 7.1   | 6.6   | 2.3   |      |
| 215670_s_at | AK022844 | SCAND2P    | 54581       | 4.7     | 2.9   | 9.0   | 7.3   | 9.3   |      |
| 215671_at   | AU144792 | PDE4B      | 5142        | 2.2     | 1.7   | 2.5   | 0.1   | 0.1   |      |
| 215672_s_at | AK025372 | AHCYL2     | 23382       | 25.2    | 17.5  | 27.7  | 19.6  | 9.1   |      |
| 215673_at   | AB051442 | TEF        | 7008        | 0.7     | 0.5   | 2.2   | 0.1   | 3.1   |      |
| 215674_at   | AB051446 | -          | -           | 3.3     | 1.0   | 2.1   | 0.1   | 1.6   |      |
| 215675_at   | AB051442 | -          | -           | 1.1     | 0.9   | 0.7   | 1.0   | 0.5   |      |
| 215676_at   | N91109   | BRF1       | 2972        | 1.5     | 4.4   | 8.5   | 1.8   | 2.0   |      |
| 215677_s_at | N91109   | BRF1       | 2972        | 6.1     | 7.7   | 6.0   | 5.6   | 3.5   |      |
| 215678_at   | AB051440 | LOC440792  | 440792      | 1.8     | 1.7   | 1.2   | 1.6   | 1.1   |      |

|             |          |                          |           |       |       |       |       |       |
|-------------|----------|--------------------------|-----------|-------|-------|-------|-------|-------|
| 215679_at   | AL109706 | AL109706                 | -         | 6.8   | 0.4   | 1.4   | 1.4   | 0.2   |
| 215680_at   | AB051441 | KIAA1654                 | 85368     | 6.9   | 1.2   | 0.6   | 1.5   | 0.6   |
| 215681_at   | AB051441 | KIAA1654                 | 85368     | 2.9   | 2.2   | 1.9   | 1.3   | 4.8   |
| 215682_at   | AB051440 | LOC440792                | 440792    | 13.8  | 0.9   | 9.6   | 3.4   | 2.0   |
| 215683_at   | AF070628 | RBFADN                   | 100506070 | 16.1  | 8.1   | 13.8  | 15.1  | 9.5   |
| 215684_s_at | AL096741 | ASCC2                    | 84164     | 92.0  | 78.0  | 124.5 | 101.7 | 100.1 |
| 215685_s_at | BE792224 | DLX2                     | 1746      | 14.0  | 9.5   | 11.2  | 8.0   | 4.8   |
| 215686_x_at | AL031224 | TFAP2B                   | 7021      | 3.5   | 3.9   | 3.3   | 9.8   | 2.2   |
| 215687_x_at | AA393484 | PLCB1                    | 23236     | 2.6   | 12.0  | 6.3   | 2.1   | 2.7   |
| 215688_at   | AL359931 | RASGRF1                  | 5923      | 10.5  | 14.1  | 10.0  | 8.9   | 8.9   |
| 215689_s_at | AI056852 | SHBG                     | 6462      | 2.0   | 1.3   | 1.1   | 1.7   | 0.7   |
| 215690_x_at | AL157437 | GPAA1                    | 8733      | 344.9 | 402.9 | 402.0 | 339.6 | 317.8 |
| 215691_x_at | AV702994 | HSPB11                   | 51668     | 473.9 | 324.5 | 445.7 | 369.7 | 282.7 |
| 215692_s_at | BE645386 | MPPED2                   | 744       | 4.6   | 0.1   | 0.7   | 0.9   | 0.5   |
| 215693_x_at | AL512707 | DDX27                    | 55661     | 106.0 | 111.2 | 121.3 | 103.3 | 87.6  |
| 215694_at   | AK022348 | SPATA5L1                 | 79029     | 11.0  | 7.3   | 7.1   | 7.1   | 9.5   |
| 215695_s_at | U94357   | GYG2                     | 8908      | 26.9  | 22.9  | 20.3  | 28.4  | 21.5  |
| 215696_s_at | BC001404 | SEC16A                   | 9919      | 215.3 | 201.8 | 220.3 | 194.6 | 177.2 |
| 215697_at   | AF052172 | -                        | -         | 5.1   | 3.1   | 2.1   | 3.0   | 4.4   |
| 215698_at   | AF007135 | KDM5A                    | 5927      | 12.7  | 7.6   | 11.2  | 13.6  | 10.3  |
| 215699_x_at | AL096768 | SFI1                     | 9814      | 17.4  | 12.2  | 26.2  | 15.4  | 14.9  |
| 215700_x_at | AL050397 | CPNE6                    | 9362      | 1.2   | 2.3   | 2.0   | 1.4   | 1.3   |
| 215701_at   | AL109666 | -                        | -         | 8.6   | 13.9  | 12.4  | 10.6  | 10.6  |
| 215702_s_at | W60595   | CFTR                     | 1080      | 0.5   | 0.3   | 0.2   | 0.2   | 3.3   |
| 215703_at   | W60595   | CFTR                     | 1080      | 0.2   | 1.1   | 0.2   | 0.3   | 0.7   |
| 215704_at   | AL356504 | FLG                      | 2312      | 0.3   | 2.6   | 1.6   | 4.3   | 1.4   |
| 215705_at   | BC000750 | PPP5C                    | 5536      | 16.6  | 4.2   | 16.2  | 5.5   | 1.1   |
| 215706_x_at | BC002323 | ZYX                      | 7791      | 68.5  | 75.9  | 79.3  | 72.3  | 50.2  |
| 215707_s_at | AV725328 | PRNP                     | 5621      | 83.0  | 66.3  | 84.5  | 74.0  | 70.8  |
| 215708_s_at | AL121975 | PRIM2 /// PR5558 /// 100 |           | 67.9  | 46.7  | 59.4  | 41.8  | 46.3  |
| 215709_at   | AL121975 | PRIM2 /// PR5558 /// 100 |           | 0.8   | 1.2   | 1.5   | 0.4   | 3.4   |
| 215710_at   | AK021929 | ST3GAL4                  | 6484      | 1.0   | 2.8   | 0.3   | 0.6   | 0.5   |
| 215711_s_at | AJ277546 | WEE1                     | 7465      | 135.2 | 84.7  | 114.8 | 96.6  | 70.7  |
| 215712_s_at | AW338791 | IGFALS                   | 3483      | 9.8   | 8.3   | 13.2  | 14.8  | 8.7   |
| 215713_at   | AK026778 | -                        | -         | 1.8   | 0.2   | 0.9   | 0.3   | 0.3   |
| 215714_s_at | AF254822 | SMARCA4                  | 6597      | 128.6 | 124.9 | 143.1 | 137.0 | 101.3 |
| 215715_at   | BC000563 | SLC6A2                   | 6530      | 2.3   | 2.7   | 3.1   | 2.2   | 1.5   |
| 215716_s_at | L14561   | ATP2B1                   | 490       | 153.7 | 125.2 | 132.7 | 132.2 | 95.6  |
| 215717_s_at | X62009   | FBN2                     | 2201      | 0.3   | 0.1   | 0.3   | 2.1   | 3.1   |
| 215718_s_at | AI949220 | PHF3                     | 23469     | 14.7  | 7.1   | 6.0   | 14.6  | 9.4   |
| 215719_x_at | X83493   | FAS                      | 355       | 18.3  | 11.1  | 23.9  | 13.4  | 15.6  |
| 215720_s_at | AL031778 | NFYA                     | 4800      | 21.0  | 10.9  | 16.8  | 6.9   | 13.9  |
| 215721_at   | X58397   | IGHG1 /// LC3500 /// 100 |           | 1.9   | 0.6   | 1.0   | 1.0   | 0.5   |
| 215722_s_at | AJ130971 | SNRPA1                   | 6627      | 86.0  | 72.1  | 101.5 | 77.3  | 98.9  |
| 215723_s_at | AJ276230 | PLD1                     | 5337      | 1.0   | 1.9   | 2.7   | 0.6   | 2.4   |
| 215724_at   | AJ276230 | PLD1                     | 5337      | 0.7   | 0.2   | 0.3   | 0.4   | 2.0   |
| 215725_at   | L77561   | DGCR11                   | 25786     | 20.1  | 37.1  | 42.4  | 29.7  | 23.6  |
| 215726_s_at | M22976   | CYB5A                    | 1528      | 778.8 | 563.3 | 799.7 | 636.2 | 638.7 |
| 215727_x_at | AF064839 | ARMCX6                   | 54470     | 9.5   | 3.0   | 14.4  | 1.7   | 4.4   |
| 215728_s_at | AL031848 | ACOT7                    | 11332     | 79.7  | 79.9  | 105.0 | 77.0  | 75.6  |
| 215729_s_at | BE542323 | VGLL1                    | 51442     | 0.3   | 0.2   | 0.2   | 0.5   | 0.4   |
| 215730_at   | BE542323 | VGLL1                    | 51442     | 2.9   | 2.6   | 4.6   | 5.4   | 1.8   |
| 215731_s_at | X98258   | MPHOSPH9                 | 10198     | 7.0   | 9.6   | 11.4  | 4.9   | 13.7  |

|             |          |            |           |         |         |       |       |        |       |       |
|-------------|----------|------------|-----------|---------|---------|-------|-------|--------|-------|-------|
| 215732_s_at | AK023924 | DTX2       | LOC113878 | 20.7    | 22.5    | 18.2  | 19.4  | 17.1   |       |       |
| 215733_x_at | AJ012833 | CTAG2      | 30848     | 1.9     | 1.5     | 1.9   | 2.1   | 2.0    |       |       |
| 215734_at   | AW182303 | IZUMO4     | 113177    | 24.6    | 14.6    | 15.6  | 27.7  | 21.7   |       |       |
| 215735_s_at | AC005600 | TSC2       | 7249      | 315.5   | 287.4   | 403.5 | 362.5 | 262.5  |       |       |
| 215736_at   | AF035317 | KCNV1      | 27012     | 10.3    | 2.8     | 11.1  | 3.1   | 10.1   |       |       |
| 215737_x_at | X90824   | USF2       | 7392      | 48.2    | 79.8    | 92.2  | 69.2  | 38.9   |       |       |
| 215738_at   | U79295   | LINC00563  | 100861554 | 16.1    | 8.8     | 15.0  | 12.2  | 9.6    |       |       |
| 215739_s_at | AJ003062 | TUBGCP3    | 10426     | 32.4    | 17.1    | 31.9  | 31.9  | 25.7   |       |       |
| 215740_at   | AU148808 | LOC1001307 | 100130741 | 1.8     | 1.1     | 9.4   | 0.2   | 1.0    |       |       |
| 215741_x_at | AB015332 | AKAP8L     | 26993     | 1.1     | 4.4     | 4.3   | 9.9   | 5.9    |       |       |
| 215742_at   | AK022219 | -          | -         | 0.9     | 1.1     | 2.1   | 1.0   | 0.5    |       |       |
| 215743_at   | AL134489 | NMT2       | 9397      | 11.0    | 5.6     | 7.6   | 8.3   | 3.6    |       |       |
| 215744_at   | AW514140 | FUS        | 2521      | 21.2    | 14.3    | 16.5  | 14.4  | 12.9   |       |       |
| 215745_at   | L34409   | -          | -         | 10.2    | 4.3     | 7.4   | 6.7   | 6.6    |       |       |
| 215746_at   | L34409   | -          | -         | 4.3     | 2.0     | 2.0   | 8.7   | 5.5    |       |       |
| 215747_s_at | X06130   | RCC1       | 1104      | 80.0    | 66.4    | 99.8  | 53.2  | 67.1   |       |       |
| 215748_at   | AL050370 | KLHL35     | 283212    | 5.2     | 1.7     | 8.4   | 4.9   | 0.9    |       |       |
| 215749_s_at | AK001574 | GORASP1    | 64689     | 72.6    | 58.6    | 66.3  | 65.4  | 62.4   |       |       |
| 215750_at   | AB051446 | -          | -         | 2.7     | 3.4     | 6.8   | 8.8   | 4.4    |       |       |
| 215751_at   | AK021576 | RBM26      | 64062     | 2.1     | 0.2     | 0.6   | 1.3   | 0.2    |       |       |
| 215752_at   | AK026682 | SIK2       | 23235     | 3.6     | 0.9     | 0.7   | 5.8   | 0.8    |       |       |
| 215753_at   | AK021614 | -          | -         | 0.8     | 2.0     | 4.5   | 1.9   | 3.6    |       |       |
| 215754_at   | AU148040 | SCARB2     | 950       | 15.6    | 11.5    | 9.9   | 7.5   | 8.2    |       |       |
| 215755_at   | AK022006 | RN7SKP150  | -         | 8.8     | 6.9     | 15.3  | 9.2   | 8.9    |       |       |
| 215756_at   | AU153979 | LINC01136  | 730227    | 18.2    | 8.3     | 10.4  | 14.9  | 9.4    |       |       |
| 215757_at   | AK022387 | PRKDC      | 5591      | 8.0     | 4.6     | 4.1   | 3.5   | 0.9    |       |       |
| 215758_x_at | AC007204 | ZNF93      | 81931     | 126.6   | 80.6    | 119.7 | 91.2  | 83.0   |       |       |
| 215759_at   | AK022118 | ANKRD53    | 79998     | 1.1     | 2.2     | 1.6   | 1.9   | 1.1    |       |       |
| 215760_s_at | AC005390 | SBNO2      | 22904     | 37.1    | 38.2    | 35.7  | 39.4  | 30.8   |       |       |
| 215761_at   | AK000156 | DMXL2      | 23312     | 3.4     | 1.0     | 15.5  | 3.6   | 5.8    |       |       |
| 215762_at   | BE669609 | -          | -         | 1.0     | 9.6     | 1.8   | 0.5   | 0.6    |       |       |
| 215763_at   | AL080072 | -          | -         | 2.7     | 3.5     | 1.3   | 2.6   | 0.8    |       |       |
| 215764_x_at | AA877641 | AP2A2      | 161       | 89.8    | 108.0   | 106.7 | 52.0  | 89.2   |       |       |
| 215765_at   | AK024051 | LRRC41     | 10489     | 12.2    | 9.7     | 20.5  | 10.6  | 11.9   |       |       |
| 215766_at   | AL096729 | GSTA1      | 2938      | 24.3    | 19.1    | 23.1  | 25.1  | 15.0   |       |       |
| 215767_at   | AF052145 | ZNF804A    | 91752     | 2.0     | 3.3     | 4.9   | 3.9   | 4.1    |       |       |
| 215768_at   | AL049337 | -          | -         | 5.9     | 1.7     | 2.0   | 2.1   | 1.3    |       |       |
| 215769_at   | AW873544 | TRA        | TRAV10730 | 6.8     | 0.9     | 2.4   | 6.5   | 6.1    |       |       |
| 215770_at   | AF065857 | OR7E2P     | 8587      | 6.2     | 1.1     | 3.0   | 2.7   | 0.6    |       |       |
| 215771_x_at | X15786   | RET        | 5979      | 2.5     | 13.5    | 6.7   | 9.7   | 10.8   |       |       |
| 215772_x_at | AL050226 | SUCLG2     | 8801      | 235.3   | 249.9   | 293.3 | 274.7 | 211.4  |       |       |
| 215773_x_at | AJ236912 | PARP2      | 10038     | 312.3   | 226.3   | 331.7 | 237.4 | 243.8  |       |       |
| 215774_s_at | AV650470 | -          | -         | 6.6     | 6.2     | 0.3   | 1.0   | 1.4    |       |       |
| 215775_at   | BF084105 | THBS1      | 7057      | 12.2    | 9.9     | 10.4  | 9.0   | 8.0    |       |       |
| 215776_at   | J05046   | INSRR      | 3645      | 2.6     | 1.8     | 1.9   | 1.9   | 1.5    |       |       |
| 215777_at   | AW405975 | IGLV4-60   | /// -     | 6.3     | 3.1     | 4.3   | 0.9   | 2.4    |       |       |
| 215778_x_at | AJ006206 | HAB1       | 55547     | 23.7    | 39.7    | 32.2  | 30.3  | 18.2   |       |       |
| 215779_s_at | BE271470 | HIST1H2BG  | /8339     | /// 897 | 70.1    | 52.6  | 54.6  | 78.3   | 38.9  |       |
| 215780_s_at | Z95126   | SET        | /// SETP2 | 6418    | /// 642 | 905.6 | 778.3 | 1059.4 | 824.3 | 853.5 |
| 215781_s_at | D87012   | TOP3B      | 8940      | 25.4    | 23.4    | 19.1  | 19.6  | 19.8   |       |       |
| 215782_at   | Z95624   | RAB40AL    | 282808    | 5.6     | 5.6     | 0.4   | 9.6   | 4.1    |       |       |
| 215783_s_at | X14174   | ALPL       | 249       | 5.9     | 6.0     | 10.8  | 8.6   | 5.8    |       |       |
| 215784_at   | AA309511 | CD1E       | 913       | 0.3     | 0.2     | 0.5   | 0.8   | 0.4    |       |       |

|             |          |                           |        |        |        |        |        |        |
|-------------|----------|---------------------------|--------|--------|--------|--------|--------|--------|
| 215785_s_at | AL161999 | CYFIP2                    | 26999  | 98.5   | 121.5  | 92.8   | 133.5  | 92.6   |
| 215786_at   | AK022170 | -                         | -      | 6.4    | 4.9    | 8.4    | 8.1    | 7.5    |
| 215787_at   | AK025094 | ACTA2                     | 59     | 3.7    | 3.2    | 5.3    | 4.1    | 5.3    |
| 215788_at   | AL137547 | KIAA1751                  | 85452  | 20.8   | 18.3   | 16.6   | 17.6   | 2.2    |
| 215789_s_at | AA835004 | AJAP1                     | 55966  | 6.6    | 2.5    | 7.3    | 7.7    | 3.3    |
| 215790_at   | AA835004 | AJAP1                     | 55966  | 0.4    | 0.6    | 1.5    | 0.3    | 0.3    |
| 215791_at   | AF003738 | -                         | -      | 8.6    | 3.9    | 5.2    | 5.6    | 4.3    |
| 215792_s_at | AL109978 | DNAJC11                   | 55735  | 142.2  | 117.9  | 178.2  | 136.0  | 104.8  |
| 215793_at   | AF073482 | MTMR7                     | 9108   | 3.1    | 1.8    | 4.3    | 4.2    | 0.5    |
| 215794_x_at | AC006144 | GLUD2                     | 2747   | 89.6   | 93.5   | 113.6  | 100.7  | 85.5   |
| 215795_at   | AK000947 | MYH7B                     | 57644  | 0.9    | 0.5    | 0.9    | 3.0    | 3.6    |
| 215796_at   | BF976764 | AV8S2 /// TR-             |        | 1.8    | 2.0    | 3.5    | 4.3    | 0.9    |
| 215797_at   | AE000659 | TRAV8-3                   | 28683  | 6.9    | 3.7    | 9.6    | 4.8    | 6.0    |
| 215798_at   | AL133015 | ALDH1L1                   | 10840  | 11.5   | 19.3   | 12.4   | 6.1    | 4.1    |
| 215799_at   | AK024971 | LOC1019270.101927051      |        | 1.2    | 1.3    | 1.1    | 1.0    | 1.7    |
| 215800_at   | AL137592 | DUOX1                     | 53905  | 9.2    | 4.4    | 6.2    | 3.6    | 3.7    |
| 215801_at   | AL133604 | RP11-496I2.2-             |        | 3.0    | 4.6    | 1.5    | 3.7    | 4.8    |
| 215802_at   | AK000144 | -                         | -      | 0.9    | 4.0    | 4.5    | 3.4    | 0.3    |
| 215803_at   | AK001040 | CXorf57                   | 55086  | 0.3    | 5.6    | 3.5    | 0.4    | 0.5    |
| 215804_at   | Z27409   | EPHA1                     | 2041   | 2.3    | 0.9    | 1.8    | 0.6    | 0.8    |
| 215805_at   | BF574664 | -                         | -      | 1.9    | 8.9    | 4.6    | 11.1   | 5.4    |
| 215806_x_at | M13231   | TARP /// TRC6967 /// 698  |        | 14.3   | 16.0   | 40.9   | 14.2   | 47.3   |
| 215807_s_at | AV693216 | PLXNB1                    | 5364   | 12.0   | 23.0   | 15.0   | 18.4   | 13.1   |
| 215808_at   | AK026045 | KLK10                     | 5655   | 13.2   | 5.8    | 11.9   | 3.0    | 0.7    |
| 215809_at   | X16866   | CYP2D6                    | 1565   | 2.9    | 4.8    | 5.2    | 3.6    | 2.7    |
| 215810_x_at | AL049215 | DST                       | 667    | 4.4    | 8.2    | 9.6    | 6.0    | 4.2    |
| 215811_at   | AF238870 | -                         | -      | 9.6    | 8.3    | 1.6    | 5.5    | 5.0    |
| 215812_s_at | U41163   | SLC6A10P ///,6535 /// 386 |        | 118.0  | 105.7  | 155.4  | 150.0  | 118.0  |
| 215813_s_at | S36219   | PTGS1                     | 5742   | 17.7   | 2.4    | 9.4    | 2.1    | 10.2   |
| 215814_at   | AL049215 | DST                       | 667    | 1.2    | 0.5    | 0.6    | 2.6    | 0.4    |
| 215815_at   | AK001615 | BUD31                     | 8896   | 0.6    | 2.8    | 1.5    | 1.2    | 1.7    |
| 215816_at   | L02326   | GUSBP11                   | 91316  | 10.3   | 7.9    | 13.5   | 10.4   | 1.9    |
| 215817_at   | BE148534 | SERPINB13                 | 5275   | 5.3    | 5.8    | 5.6    | 0.5    | 3.9    |
| 215818_at   | AK026469 | NUDT7                     | 283927 | 1.3    | 4.2    | 0.8    | 0.7    | 1.4    |
| 215819_s_at | N53959   | RHCE /// RHI6006 /// 600  |        | 16.0   | 2.3    | 4.1    | 3.1    | 1.7    |
| 215820_x_at | AK001861 | SNX13                     | 23161  | 18.5   | 17.7   | 20.9   | 17.3   | 17.1   |
| 215821_x_at | R32065   | PSG11 /// PS5671 /// 568  |        | 13.6   | 14.9   | 10.8   | 9.1    | 7.2    |
| 215822_x_at | M96980   | MYT1                      | 4661   | 18.1   | 17.5   | 15.3   | 15.7   | 12.4   |
| 215823_x_at | U64661   | PABPC1 /// F26986 /// 51  |        | 2412.5 | 1878.1 | 2337.7 | 1971.4 | 1878.9 |
| 215824_at   | AK026469 | -                         | -      | 0.7    | 0.5    | 1.4    | 0.8    | 0.3    |
| 215825_at   | AF070579 | RP11-255C15-              |        | 11.3   | 13.3   | 11.3   | 7.1    | 4.4    |
| 215826_x_at | AK023017 | ZNF835                    | 90485  | 1.6    | 0.7    | 0.6    | 0.6    | 0.4    |
| 215827_x_at | BE300056 | CROCCP3                   | 114819 | 0.9    | 0.6    | 1.3    | 0.6    | 0.7    |
| 215828_at   | AL359599 | -                         | -      | 11.8   | 11.2   | 20.9   | 7.6    | 3.4    |
| 215829_at   | AF141901 | SHANK2                    | 22941  | 12.2   | 1.9    | 9.6    | 7.3    | 9.0    |
| 215830_at   | AF141901 | BC127192 //,22941         |        | 1.4    | 0.4    | 0.7    | 0.4    | 0.6    |
| 215831_at   | AF113018 | -                         | -      | 2.4    | 0.7    | 0.9    | 2.9    | 4.3    |
| 215832_x_at | AV722190 | PICALM                    | 8301   | 52.1   | 35.5   | 54.9   | 48.8   | 49.0   |
| 215833_s_at | AC004410 | SPPL2B                    | 56928  | 27.4   | 32.5   | 31.5   | 43.6   | 27.1   |
| 215834_x_at | AV708130 | SCARB1                    | 949    | 24.5   | 24.6   | 18.3   | 23.3   | 12.5   |
| 215835_at   | AV708130 | SCARB1                    | 949    | 5.1    | 0.8    | 6.8    | 4.1    | 0.9    |
| 215836_s_at | AK026188 | PCDHGA1 ///,5098 /// 864  |        | 62.7   | 74.9   | 88.0   | 70.2   | 57.9   |
| 215837_x_at | AF113018 | -                         | -      | 8.8    | 5.0    | 5.5    | 4.1    | 4.3    |

|             |          |             |          |       |       |       |       |       |
|-------------|----------|-------------|----------|-------|-------|-------|-------|-------|
| 215838_at   | AF212842 | LILRA5      | 353514   | 6.7   | 6.6   | 6.8   | 4.2   | 0.5   |
| 215839_at   | AF212842 | LILRA5      | 353514   | 1.9   | 1.4   | 1.0   | 1.1   | 0.6   |
| 215840_at   | AB040936 | DNAH2       | 146754   | 2.1   | 1.0   | 1.7   | 1.3   | 1.0   |
| 215841_at   | AL096814 | GUCA1B      | 2979     | 10.6  | 1.9   | 2.6   | 11.7  | 1.8   |
| 215842_s_at | AK024264 | ATP11A      | 23250    | 2.4   | 7.4   | 9.7   | 10.7  | 13.3  |
| 215843_s_at | AK026106 | TLL2        | 7093     | 2.0   | 1.5   | 4.1   | 3.4   | 3.1   |
| 215844_at   | AK022217 | TNPO2       | 30000    | 2.9   | 1.2   | 7.7   | 1.6   | 4.1   |
| 215845_x_at | AK026493 | -           | -        | 18.2  | 3.8   | 15.3  | 17.5  | 16.1  |
| 215846_at   | AL117571 | -           | -        | 1.0   | 0.2   | 0.6   | 0.4   | 0.3   |
| 215847_at   | BC000975 | HERC2P3     | 283755   | 1.2   | 3.7   | 1.9   | 1.9   | 1.0   |
| 215848_at   | AW139369 | SCAPER      | 49855    | 14.1  | 8.0   | 15.4  | 7.4   | 7.1   |
| 215849_x_at | AK022235 | TTC18       | 118491   | 30.3  | 24.6  | 39.8  | 4.1   | 19.4  |
| 215850_s_at | AK022209 | NDUFA5      | 4698     | 8.5   | 6.8   | 6.5   | 2.4   | 2.7   |
| 215851_at   | S82592   | MECOM       | 2122     | 1.7   | 2.3   | 4.5   | 1.0   | 0.7   |
| 215852_x_at | AK022023 | SOGA1       | 140710   | 15.0  | 2.2   | 14.8  | 15.3  | 10.8  |
| 215853_at   | AK021640 | -           | -        | 1.1   | 3.8   | 2.3   | 0.2   | 3.6   |
| 215854_at   | AU146050 | -           | -        | 8.1   | 7.8   | 7.3   | 9.0   | 6.0   |
| 215855_s_at | AK021741 | TMF1        | 7110     | 10.4  | 13.1  | 7.5   | 9.1   | 6.5   |
| 215856_at   | AK025833 | SIGLEC15    | 284266   | 12.1  | 20.0  | 17.1  | 11.0  | 9.0   |
| 215857_at   | AK022309 | NCLN        | 56926    | 2.6   | 2.1   | 6.0   | 0.9   | 3.3   |
| 215858_at   | AK022363 | -           | -        | 10.3  | 11.4  | 11.0  | 10.9  | 7.8   |
| 215859_at   | AK022309 | NCLN        | 56926    | 5.1   | 7.1   | 5.7   | 6.1   | 1.2   |
| 215860_at   | AU158606 | SYT12       | 91683    | 8.6   | 6.5   | 8.8   | 8.2   | 9.5   |
| 215861_at   | AK024093 | LOC1019277  | 10192770 | 4.2   | 4.7   | 7.2   | 4.8   | 4.4   |
| 215862_at   | AK022363 | -           | -        | 5.3   | 10.7  | 9.1   | 7.9   | 5.8   |
| 215863_at   | AK022002 | TFR2        | 7036     | 1.6   | 1.0   | 7.7   | 5.1   | 9.4   |
| 215864_at   | AK025077 | -           | -        | 15.3  | 9.4   | 11.1  | 11.7  | 6.2   |
| 215865_at   | AK024381 | SYT12       | 91683    | 4.3   | 7.7   | 3.3   | 11.7  | 12.6  |
| 215866_at   | AK024938 | -           | -        | 8.0   | 5.8   | 1.0   | 3.7   | 5.0   |
| 215867_x_at | AL050025 | CA12        | 771      | 94.9  | 72.8  | 90.2  | 82.5  | 57.9  |
| 215868_x_at | AK026238 | -           | -        | 5.1   | 4.2   | 1.6   | 3.0   | 6.4   |
| 215869_at   | AK022254 | -           | -        | 0.9   | 3.5   | 10.1  | 1.1   | 1.9   |
| 215870_s_at | AL158172 | PLA2G5      | 5322     | 1.8   | 5.8   | 2.8   | 2.0   | 3.2   |
| 215871_at   | AL158172 | PLA2G5      | 5322     | 1.7   | 5.6   | 1.4   | 1.6   | 0.4   |
| 215872_at   | AK024445 | RP6-91H8.1  | -        | 2.6   | 0.5   | 1.3   | 0.4   | 2.3   |
| 215873_x_at | AK024446 | ABCC10      | 89845    | 22.1  | 19.9  | 29.6  | 29.3  | 20.2  |
| 215874_at   | AK026820 | -           | -        | 18.0  | 23.5  | 20.9  | 14.7  | 18.4  |
| 215875_at   | AK026820 | -           | -        | 14.8  | 14.5  | 17.3  | 4.4   | 9.9   |
| 215876_at   | AK022254 | RP11-217B7. | -        | 2.0   | 4.0   | 1.6   | 7.4   | 1.2   |
| 215877_at   | AK024445 | -           | -        | 11.1  | 7.1   | 5.3   | 6.2   | 5.6   |
| 215878_at   | BG435463 | ITGB1       | 3688     | 2.8   | 1.1   | 0.2   | 1.9   | 0.2   |
| 215879_at   | M34189   | ITGB1       | 3688     | 0.4   | 0.6   | 1.0   | 0.2   | 0.5   |
| 215880_at   | AI364950 | NAGLU       | 4669     | 1.8   | 3.4   | 1.7   | 1.3   | 5.0   |
| 215881_x_at | BF184274 | SSX2        | 6757     | 6.6   | 5.9   | 3.1   | 9.7   | 8.1   |
| 215882_at   | AK025247 | CEP152      | 22995    | 5.6   | 1.0   | 1.5   | 0.9   | 0.9   |
| 215883_at   | AK022326 | CTNNA1      | 1495     | 20.3  | 7.8   | 10.2  | 11.9  | 9.5   |
| 215884_s_at | AK001029 | UBQLN2      | 29978    | 441.4 | 425.0 | 463.4 | 444.2 | 362.4 |
| 215885_at   | BF184274 | SSX2B       | 727837   | 0.8   | 0.8   | 1.2   | 1.5   | 1.1   |
| 215886_x_at | AF022790 | USP12       | 219333   | 4.1   | 1.6   | 5.8   | 1.4   | 5.1   |
| 215887_at   | AK027128 | ZNF277      | 11179    | 17.0  | 18.8  | 6.5   | 11.0  | 2.0   |
| 215888_at   | AK026889 | PDS5B       | 23047    | 4.8   | 6.8   | 7.4   | 5.2   | 7.4   |
| 215889_at   | X15217   | SKIL        | 6498     | 3.8   | 5.9   | 0.9   | 5.2   | 4.5   |
| 215890_at   | X61094   | GM2A        | 2760     | 3.0   | 10.6  | 15.2  | 11.2  | 2.9   |



|             |          |                          |           |       |       |       |       |       |
|-------------|----------|--------------------------|-----------|-------|-------|-------|-------|-------|
| 215891_s_at | X61094   | GM2A                     | 2760      | 72.2  | 65.6  | 64.0  | 70.6  | 55.3  |
| 215892_at   | AK021474 | ZNF440                   | 126070    | 3.5   | 0.7   | 1.4   | 5.0   | 4.7   |
| 215893_x_at | AF339787 | -                        | -         | 3.5   | 4.1   | 1.0   | 4.9   | 1.2   |
| 215894_at   | AI460323 | PTGDR                    | 5729      | 6.0   | 0.9   | 2.4   | 4.2   | 0.5   |
| 215895_x_at | AK022061 | PLIN2                    | 123       | 23.3  | 11.6  | 14.4  | 6.3   | 16.8  |
| 215896_at   | AU144277 | -                        | -         | 4.4   | 4.1   | 1.0   | 5.8   | 1.8   |
| 215897_at   | AF283769 | MED25                    | 81857     | 8.7   | 6.6   | 7.3   | 6.9   | 7.5   |
| 215898_at   | AK021879 | TLL5                     | 23093     | 0.7   | 1.6   | 2.6   | 2.6   | 3.8   |
| 215899_at   | AK022331 | -                        | -         | 20.7  | 17.3  | 19.1  | 24.6  | 18.0  |
| 215900_at   | AK022331 | -                        | -         | 4.6   | 2.5   | 1.5   | 2.1   | 0.2   |
| 215901_at   | X68011   | ZNF81                    | 347344    | 4.1   | 2.2   | 1.6   | 1.4   | 0.4   |
| 215902_at   | AF009267 | -                        | -         | 4.9   | 2.8   | 7.0   | 1.4   | 8.2   |
| 215903_s_at | BE786598 | MAST2                    | 23139     | 39.6  | 35.8  | 49.5  | 33.0  | 36.2  |
| 215904_at   | AL049698 | MLLT4                    | 4301      | 4.1   | 0.7   | 6.5   | 4.8   | 1.8   |
| 215905_s_at | AL157420 | SNRNP40                  | 9410      | 246.2 | 238.0 | 330.0 | 264.1 | 267.4 |
| 215906_at   | S65921   | Igk                      | 243469    | 17.2  | 5.6   | 5.6   | 9.8   | 7.6   |
| 215907_at   | AK027193 | -                        | -         | 1.8   | 14.6  | 2.9   | 1.4   | 3.7   |
| 215908_at   | AF009267 | -                        | -         | 4.8   | 9.0   | 7.3   | 6.6   | 2.6   |
| 215909_x_at | AL157418 | MINK1                    | 50488     | 32.7  | 34.1  | 31.9  | 35.9  | 30.2  |
| 215910_s_at | AL137000 | FNDC3A                   | 22862     | 25.5  | 11.8  | 14.1  | 13.4  | 15.9  |
| 215911_x_at | AW615612 | ATP2B3                   | 492       | 0.8   | 3.9   | 0.8   | 3.4   | 0.6   |
| 215912_at   | AA758795 | GNAO1                    | 2775      | 2.6   | 2.9   | 0.5   | 1.7   | 0.8   |
| 215913_s_at | AK023668 | GULP1                    | 51454     | 230.3 | 218.1 | 230.8 | 241.0 | 167.9 |
| 215914_at   | AK000864 | -                        | -         | 9.9   | 5.8   | 4.6   | 2.6   | 1.0   |
| 215915_at   | AK023668 | GULP1                    | 51454     | 9.2   | 5.4   | 4.3   | 3.2   | 5.0   |
| 215916_at   | AL157418 | CHRNE                    | 1145      | 3.3   | 12.3  | 8.9   | 9.0   | 9.1   |
| 215917_at   | AL049037 | RAD21L1                  | 642636    | 2.5   | 3.6   | 0.5   | 2.3   | 0.2   |
| 215918_s_at | AA131826 | SPTBN1                   | 6711      | 6.5   | 5.5   | 9.7   | 1.8   | 1.1   |
| 215919_s_at | BC000200 | MRPS11                   | 64963     | 12.9  | 10.4  | 13.1  | 13.0  | 13.6  |
| 215920_s_at | AC002544 | NPIPA1 /// N9284 /// 231 |           | 10.5  | 17.1  | 12.4  | 8.3   | 9.3   |
| 215921_at   | AC002544 | NPIPA5 /// N23117 /// 72 |           | 1.2   | 3.8   | 10.7  | 4.1   | 0.5   |
| 215922_at   | AL049259 | REPS1                    | 85021     | 0.9   | 0.5   | 2.2   | 0.8   | 3.6   |
| 215923_s_at | AK023421 | PSD4                     | 23550     | 18.7  | 22.1  | 28.2  | 19.0  | 17.1  |
| 215924_at   | AK022102 | -                        | -         | 0.3   | 0.3   | 4.4   | 0.2   | 2.5   |
| 215925_s_at | AF283777 | CD72                     | 971       | 1.3   | 0.4   | 0.8   | 0.7   | 0.7   |
| 215926_x_at | AK023513 | SNAPC4                   | 6621      | 13.7  | 19.9  | 31.2  | 27.7  | 10.1  |
| 215927_at   | AV657604 | ARFGEF2                  | 10564     | 8.1   | 1.1   | 1.1   | 2.2   | 1.5   |
| 215928_at   | AK022192 | -                        | -         | 1.0   | 1.0   | 3.0   | 4.0   | 1.2   |
| 215929_at   | AL080132 | LINC00837                | 100507605 | 4.2   | 2.5   | 2.0   | 0.2   | 0.9   |
| 215930_s_at | U73682   | CTAGE5                   | 4253      | 16.1  | 13.8  | 14.4  | 22.2  | 13.4  |
| 215931_s_at | AV657604 | ARFGEF2                  | 10564     | 39.9  | 22.5  | 23.4  | 18.6  | 22.2  |
| 215932_at   | AL031073 | MAGEC2                   | 51438     | 1.4   | 6.9   | 1.3   | 1.8   | 3.1   |
| 215933_s_at | Z21533   | HHEX                     | 3087      | 6.8   | 5.5   | 7.1   | 7.3   | 5.4   |
| 215934_at   | D16471   | -                        | -         | 1.7   | 0.9   | 1.3   | 1.0   | 1.2   |
| 215935_at   | AL080148 | SPATA31A1 / 26165 /// 38 |           | 1.8   | 6.8   | 4.3   | 2.9   | 4.3   |
| 215936_s_at | AK001657 | KIAA1033                 | 23325     | 37.9  | 25.0  | 42.9  | 27.7  | 25.4  |
| 215937_at   | U31099   | PTGDR                    | 5729      | 0.7   | 4.7   | 1.0   | 2.0   | 0.2   |
| 215938_s_at | AK001290 | PLA2G6                   | 8398      | 28.2  | 27.2  | 30.6  | 30.1  | 18.2  |
| 215939_at   | AU148005 | -                        | -         | 3.9   | 3.1   | 4.3   | 3.1   | 4.2   |
| 215940_at   | U80773   | LINC01361                | 101927498 | 0.4   | 0.6   | 0.9   | 0.7   | 1.3   |
| 215941_at   | D16471   | -                        | -         | 4.6   | 2.2   | 5.3   | 1.5   | 6.7   |
| 215942_s_at | BF973178 | GTSE1                    | 51512     | 55.2  | 50.9  | 75.1  | 46.4  | 49.2  |
| 215943_at   | AB051448 | KIAA1661                 | 85375     | 0.9   | 4.9   | 1.1   | 0.8   | 0.4   |

|             |          |            |                     |        |        |        |        |        |
|-------------|----------|------------|---------------------|--------|--------|--------|--------|--------|
| 215944_at   | U80773   | LINC01361  | 101927498           | 0.6    | 1.8    | 0.5    | 4.4    | 0.3    |
| 215945_s_at | BC005016 | TRIM2      | 23321               | 2.3    | 6.6    | 1.8    | 1.2    | 3.7    |
| 215946_x_at | AL022324 | IGLL3P     | 91353               | 19.6   | 14.1   | 15.8   | 12.6   | 12.5   |
| 215947_s_at | AF090094 | FAM136A    | ///,84908 /// 10    | 207.4  | 150.1  | 237.0  | 163.5  | 207.2  |
| 215948_x_at | AI522311 | ZMYM5      | 9205                | 23.7   | 16.1   | 21.6   | 20.8   | 15.7   |
| 215949_x_at | BF002659 | IGHM       | 3507                | 1.2    | 2.3    | 1.4    | 2.3    | 0.9    |
| 215951_at   | AL137303 | RP11-114H2 | -                   | 12.4   | 5.3    | 10.5   | 10.1   | 9.0    |
| 215952_s_at | AF090094 | OAZ1       | 4946                | 2524.9 | 2405.4 | 2655.8 | 2471.0 | 2309.3 |
| 215953_at   | AL050020 | SMG7-AS1   | 284649              | 5.5    | 4.9    | 3.5    | 1.9    | 0.8    |
| 215954_s_at | AI200896 | CACTIN     | 58509               | 63.5   | 40.2   | 58.3   | 39.7   | 45.1   |
| 215955_x_at | Y10388   | ARHGAP26   | 23092               | 2.6    | 5.1    | 7.1    | 2.6    | 0.5    |
| 215956_at   | AK022065 | -          | -                   | 6.1    | 0.8    | 0.9    | 4.9    | 0.5    |
| 215957_at   | AV731367 | UBE2D1     | 7321                | 7.0    | 0.9    | 2.9    | 1.7    | 0.2    |
| 215958_at   | AK022065 | -          | -                   | 1.5    | 5.0    | 6.2    | 1.2    | 1.0    |
| 215959_at   | AK001131 | -          | -                   | 12.6   | 11.5   | 18.1   | 4.0    | 10.2   |
| 215960_at   | AJ133127 | SLC5A4     | 6527                | 1.4    | 0.9    | 1.5    | 0.6    | 1.4    |
| 215961_at   | BF530348 | F12        | 2161                | 2.2    | 4.8    | 3.6    | 2.2    | 2.8    |
| 215962_at   | F10112   | -          | -                   | 0.2    | 2.3    | 0.1    | 2.5    | 3.0    |
| 215963_x_at | Z98200   | RPL3       | 6122                | 3556.7 | 3498.9 | 3502.2 | 3548.9 | 3209.4 |
| 215964_at   | U80766   | -          | -                   | 0.7    | 1.0    | 0.5    | 0.5    | 1.0    |
| 215965_at   | AK022421 | -          | -                   | 1.4    | 1.3    | 0.2    | 1.0    | 0.6    |
| 215966_x_at | AA292874 | GK3P       | 2713                | 37.5   | 17.5   | 31.5   | 31.1   | 14.0   |
| 215967_s_at | AL582804 | LY9        | 4063                | 8.6    | 1.1    | 2.9    | 6.5    | 0.7    |
| 215968_at   | AF055018 | -          | -                   | 1.4    | 6.8    | 6.3    | 10.4   | 5.2    |
| 215969_at   | AL079289 | -          | -                   | 0.6    | 1.8    | 0.8    | 0.5    | 0.7    |
| 215970_at   | AL122093 | LOC1001303 | 100130331           | 0.9    | 0.3    | 1.5    | 2.3    | 0.5    |
| 215971_at   | AK022120 | -          | -                   | 12.9   | 6.9    | 7.6    | 6.0    | 5.6    |
| 215972_at   | AF070547 | PART1      | 25859               | 9.5    | 7.1    | 4.9    | 5.5    | 6.6    |
| 215973_at   | AF036973 | HCG4B      | 80868               | 1.9    | 3.3    | 6.9    | 1.0    | 3.3    |
| 215974_at   | AF036973 | -          | -                   | 2.0    | 11.7   | 1.5    | 0.9    | 8.2    |
| 215975_x_at | X68285   | GK-AS1     | /// G-              | 16.3   | 10.4   | 9.2    | 10.2   | 8.5    |
| 215976_at   | AU146945 | -          | -                   | 0.9    | 1.2    | 1.8    | 3.8    | 6.3    |
| 215977_x_at | X68285   | GK         | 2710                | 12.9   | 21.7   | 27.0   | 13.0   | 24.4   |
| 215978_x_at | AK021514 | ZNF721     | 170960              | 75.2   | 51.3   | 77.2   | 48.2   | 50.0   |
| 215979_s_at | AK022999 | SLC7A1     | 6541                | 1.3    | 1.2    | 6.7    | 5.0    | 1.4    |
| 215980_s_at | AF052128 | IGHMBP2    | 3508                | 30.9   | 17.1   | 19.6   | 18.5   | 18.3   |
| 215981_at   | AL137606 | LOC1005055 | 100505534           | 0.9    | 0.4    | 1.0    | 0.7    | 1.0    |
| 215982_s_at | AL049547 | DXO        | 1797                | 71.8   | 69.1   | 80.2   | 66.5   | 57.2   |
| 215983_s_at | D83768   | UBXN8      | 7993                | 92.3   | 79.6   | 111.1  | 87.0   | 81.4   |
| 215984_s_at | AL121845 | ARFRP1     | 10139               | 63.0   | 50.7   | 57.3   | 61.5   | 43.7   |
| 215985_at   | X92110   | HCG8       | /// ZNI80862 /// 10 | 7.4    | 5.4    | 8.5    | 1.9    | 4.9    |
| 215986_at   | AU146999 | -          | -                   | 3.4    | 2.8    | 4.6    | 4.0    | 0.6    |
| 215987_at   | AV654984 | RAPGEF2    | 9693                | 7.3    | 1.7    | 6.5    | 3.3    | 6.7    |
| 215988_s_at | AL121981 | DLG1       | 1739                | 0.6    | 0.7    | 0.6    | 0.9    | 0.3    |
| 215989_at   | BE258133 | CBX2       | 84733               | 1.1    | 1.4    | 0.9    | 3.1    | 9.9    |
| 215990_s_at | S67779   | BCL6       | 604                 | 18.2   | 30.2   | 29.4   | 37.2   | 35.8   |
| 215991_s_at | AU121504 | EMC1       | 23065               | 9.4    | 12.3   | 11.2   | 9.2    | 9.4    |
| 215992_s_at | AL117397 | RAPGEF2    | 9693                | 5.4    | 0.5    | 2.1    | 4.5    | 1.2    |
| 215993_at   | AF070543 | -          | -                   | 1.0    | 0.5    | 2.7    | 6.6    | 1.9    |
| 215994_x_at | AK001196 | TBC1D9B    | 23061               | 126.0  | 127.6  | 163.4  | 133.9  | 129.6  |
| 215995_x_at | AU147598 | -          | -                   | 14.5   | 5.9    | 14.9   | 9.2    | 11.8   |
| 215996_at   | AI446234 | -          | -                   | 1.0    | 1.6    | 0.9    | 0.7    | 0.8    |
| 215997_s_at | AV694732 | CUL4B      | 8450                | 53.9   | 40.8   | 51.9   | 42.0   | 40.5   |

|             |          |              |              |       |       |       |       |       |
|-------------|----------|--------------|--------------|-------|-------|-------|-------|-------|
| 215998_at   | R38712   | -            | -            | 0.5   | 2.8   | 0.7   | 4.3   | 0.4   |
| 215999_at   | U43383   | CDRT1        | 374286       | 5.4   | 7.3   | 9.0   | 2.1   | 0.7   |
| 216000_at   | AA732995 | -            | -            | 0.3   | 0.5   | 0.5   | 0.9   | 0.5   |
| 216001_at   | AL023753 | PRAMEF12     | 390999       | 9.9   | 3.9   | 8.4   | 1.5   | 5.2   |
| 216002_at   | AU147200 | -            | -            | 0.8   | 1.6   | 4.7   | 1.0   | 1.1   |
| 216003_at   | U43383   | AC005838.2   | -            | 5.5   | 1.0   | 4.4   | 1.5   | 5.4   |
| 216004_s_at | AP001748 | PKNOX1       | 5316         | 10.1  | 12.0  | 14.7  | 8.0   | 14.2  |
| 216005_at   | BF434846 | TNC          | 3371         | 4.1   | 5.8   | 0.3   | 2.8   | 3.9   |
| 216006_at   | AF070620 | -            | -            | 1.3   | 10.4  | 7.1   | 3.2   | 5.7   |
| 216007_at   | AF052176 | -            | -            | 3.1   | 1.9   | 0.7   | 0.9   | 2.2   |
| 216008_s_at | AV694434 | ARIH2        | 10425        | 34.9  | 36.0  | 40.8  | 33.2  | 36.9  |
| 216009_at   | U92027   | SLC39A9      | 55334        | 1.1   | 1.8   | 6.2   | 6.7   | 1.2   |
| 216010_x_at | D89324   | FUT3         | 2525         | 7.1   | 4.2   | 6.7   | 9.1   | 3.8   |
| 216011_at   | U92027   | SLC39A9      | 55334        | 7.0   | 4.1   | 1.4   | 0.9   | 7.0   |
| 216012_at   | U43604   | -            | -            | 10.9  | 5.8   | 12.6  | 6.3   | 6.1   |
| 216013_at   | AL034396 | ZXDB         | 158586       | 1.6   | 5.9   | 12.8  | 9.3   | 1.4   |
| 216014_s_at | AL034396 | ZXDA /// ZXC | 7789 /// 158 | 11.9  | 4.5   | 0.7   | 2.8   | 9.5   |
| 216015_s_at | AK027194 | NLRP3        | 114548       | 1.0   | 0.7   | 1.1   | 0.6   | 0.3   |
| 216016_at   | AK027194 | NLRP3        | 114548       | 0.3   | 0.4   | 0.4   | 0.7   | 0.2   |
| 216017_s_at | AJ011081 | NAB2         | 4665         | 2.7   | 2.6   | 10.8  | 16.8  | 1.9   |
| 216018_at   | AJ243936 | RNF5         | 6048         | 4.5   | 11.5  | 1.5   | 6.4   | 1.1   |
| 216019_x_at | AK021690 | MIR6716 ///  | 23187 /// 10 | 7.7   | 13.0  | 3.7   | 2.6   | 3.9   |
| 216020_at   | AL080107 | IFIH1        | 64135        | 0.5   | 2.0   | 1.2   | 0.7   | 1.8   |
| 216021_s_at | AW298713 | GLRA3        | 8001         | 6.8   | 2.6   | 7.4   | 7.7   | 8.1   |
| 216022_at   | AL049278 | -            | -            | 1.5   | 1.5   | 2.0   | 0.8   | 3.6   |
| 216023_at   | AK026040 | KDM4B        | 23030        | 3.2   | 7.2   | 3.0   | 0.9   | 5.4   |
| 216024_at   | AK023207 | DNM2         | 1785         | 1.1   | 1.5   | 2.0   | 0.5   | 0.9   |
| 216025_x_at | M21940   | CYP2C9       | 1559         | 42.0  | 30.4  | 27.8  | 26.6  | 23.0  |
| 216026_s_at | AL080203 | POLE         | 5426         | 20.0  | 27.1  | 39.6  | 34.7  | 35.0  |
| 216027_at   | AI005473 | TMX4         | 56255        | 4.6   | 0.4   | 1.0   | 2.7   | 2.0   |
| 216028_at   | AL049980 | -            | -            | 13.9  | 8.3   | 16.7  | 12.7  | 7.4   |
| 216029_at   | AU159412 | -            | -            | 4.1   | 9.2   | 6.8   | 3.0   | 7.6   |
| 216030_s_at | AL049767 | SEMG2        | 6407         | 3.2   | 0.2   | 1.3   | 3.6   | 1.5   |
| 216031_x_at | T53900   | HN1L         | 90861        | 112.6 | 80.3  | 101.0 | 102.9 | 85.4  |
| 216032_s_at | AF091085 | ERGIC3       | 51614        | 681.1 | 677.9 | 661.5 | 690.3 | 557.4 |
| 216033_s_at | S74774   | FYN          | 2534         | 0.6   | 1.2   | 0.5   | 3.7   | 2.3   |
| 216034_at   | AA558468 | ZNF280A      | 129025       | 15.8  | 11.0  | 11.6  | 11.6  | 5.3   |
| 216035_x_at | AV721430 | TCF7L2       | 6934         | 39.4  | 42.7  | 39.5  | 36.3  | 29.4  |
| 216036_x_at | AK001734 | WDTC1        | 23038        | 45.1  | 24.6  | 31.5  | 36.7  | 20.8  |
| 216037_x_at | AA664011 | TCF7L2       | 6934         | 38.1  | 41.9  | 42.8  | 43.1  | 30.4  |
| 216038_x_at | BE965715 | DAXX         | 1616         | 64.1  | 48.4  | 72.6  | 44.6  | 60.2  |
| 216039_at   | D38503   | GABRA2       | 2555         | 0.5   | 2.3   | 0.4   | 2.1   | 0.4   |
| 216040_x_at | AK024135 | -            | -            | 11.1  | 9.5   | 16.7  | 9.1   | 6.4   |
| 216041_x_at | AK023348 | GRN          | 2896         | 95.1  | 66.5  | 104.2 | 107.4 | 85.3  |
| 216042_at   | AI275938 | TNFRSF25     | 8718         | 4.7   | 3.7   | 9.2   | 12.5  | 0.9   |
| 216043_x_at | AK024135 | -            | -            | 16.3  | 8.1   | 13.1  | 8.1   | 8.4   |
| 216044_x_at | AK027146 | FAM69A       | 388650       | 27.6  | 23.9  | 34.1  | 29.6  | 27.6  |
| 216045_at   | AB011137 | CCDC144A     | 9720         | 0.8   | 3.5   | 2.6   | 0.5   | 0.8   |
| 216046_at   | AL109726 | -            | -            | 5.9   | 5.4   | 6.4   | 3.9   | 4.2   |
| 216047_x_at | AL050253 | SEZ6L        | 23544        | 2.1   | 7.1   | 10.3  | 2.1   | 7.1   |
| 216048_s_at | AK023621 | RHOBTB3      | 22836        | 11.6  | 8.6   | 7.8   | 8.6   | 3.6   |
| 216049_at   | AK023621 | RHOBTB3      | 22836        | 7.1   | 4.8   | 6.5   | 6.2   | 3.3   |
| 216050_at   | AK024584 | -            | -            | 0.3   | 2.0   | 3.0   | 0.3   | 3.5   |

|             |          |              |                  |       |       |       |       |       |
|-------------|----------|--------------|------------------|-------|-------|-------|-------|-------|
| 216051_x_at | AK022045 | -            | -                | 18.0  | 16.5  | 28.3  | 25.4  | 26.4  |
| 216052_x_at | AF115765 | ARTN         | 9048             | 32.7  | 22.2  | 36.2  | 23.8  | 20.1  |
| 216053_x_at | AI143919 | FAM182A ///  | 284800 /// 7     | 3.1   | 0.7   | 2.1   | 0.6   | 0.6   |
| 216054_x_at | X58851   | MYL4         | 4635             | 18.7  | 22.2  | 18.7  | 17.7  | 17.5  |
| 216055_at   | AK022920 | PDGFB        | 5155             | 1.6   | 4.2   | 0.7   | 6.7   | 3.7   |
| 216056_at   | AW851559 | CD44         | 960              | 1.1   | 0.9   | 0.9   | 0.9   | 0.6   |
| 216057_at   | AK021928 | RAB3GAP2     | 25782            | 2.8   | 0.9   | 4.6   | 0.3   | 5.5   |
| 216058_s_at | X65962   | CYP2C19      | 1557             | 16.9  | 20.6  | 22.4  | 19.0  | 13.1  |
| 216059_at   | U02309   | PAX3         | 5077             | 3.9   | 0.8   | 0.8   | 3.6   | 0.2   |
| 216060_s_at | AK021890 | DAAM1        | 23002            | 65.7  | 43.2  | 50.0  | 53.4  | 39.4  |
| 216061_x_at | AU150748 | PDGFB        | 5155             | 14.8  | 19.2  | 17.4  | 20.3  | 16.1  |
| 216062_at   | AW851559 | RP1-68D18.4- |                  | 7.2   | 4.2   | 3.8   | 6.2   | 2.7   |
| 216063_at   | N55205   | HBBP1        | 3044             | 5.9   | 5.1   | 6.5   | 7.3   | 0.6   |
| 216064_s_at | W27131   | AGA          | 175              | 119.5 | 112.6 | 112.9 | 116.5 | 88.3  |
| 216065_at   | AL031228 | B3GALT4      | 8705             | 7.4   | 0.8   | 0.3   | 6.4   | 2.8   |
| 216066_at   | AK024328 | ABCA1        | 19               | 4.2   | 1.9   | 1.0   | 1.2   | 0.8   |
| 216067_at   | AU145203 | -            | -                | 4.7   | 1.4   | 0.5   | 1.4   | 1.0   |
| 216068_at   | AL110248 | -            | -                | 0.4   | 2.3   | 2.7   | 2.1   | 1.8   |
| 216069_at   | AL050065 | PRMT2        | 3275             | 1.0   | 0.5   | 5.5   | 5.1   | 0.4   |
| 216070_at   | AL049331 | -            | -                | 3.5   | 3.8   | 3.5   | 3.4   | 1.4   |
| 216071_x_at | AF132033 | MED12        | 9968             | 37.3  | 47.5  | 40.7  | 40.2  | 28.6  |
| 216072_at   | AL050065 | DSTNP1 ///   | [-               | 5.2   | 4.8   | 6.8   | 1.1   | 4.7   |
| 216073_at   | AL109678 | ANKRD34C     | 390616           | 5.1   | 0.5   | 4.1   | 4.8   | 1.2   |
| 216074_x_at | AK001727 | WWC1         | 23286            | 17.2  | 11.6  | 18.7  | 17.9  | 22.0  |
| 216075_at   | AF119418 | -            | -                | 5.6   | 8.3   | 5.7   | 4.7   | 0.8   |
| 216076_at   | AW445040 | L3MBTL1      | 26013            | 2.2   | 1.1   | 4.9   | 6.9   | 1.0   |
| 216077_s_at | AW445040 | L3MBTL1      | 26013            | 4.8   | 4.2   | 8.1   | 7.3   | 5.8   |
| 216078_at   | AL109681 | -            | -                | 1.8   | 4.6   | 2.2   | 0.6   | 0.9   |
| 216079_at   | AK022721 | EPM2A        | 7957             | 3.1   | 14.2  | 4.0   | 0.9   | 1.3   |
| 216080_s_at | AC004770 | FADS3        | 3995             | 52.7  | 35.9  | 35.8  | 36.0  | 33.9  |
| 216081_at   | AK027151 | LAMA4        | 3910             | 15.5  | 8.4   | 12.5  | 9.9   | 5.5   |
| 216082_at   | AK022450 | NEU3         | 10825            | 9.2   | 5.7   | 7.9   | 2.3   | 4.5   |
| 216083_s_at | AK022450 | NEU3         | 10825            | 20.2  | 15.7  | 31.2  | 19.6  | 16.5  |
| 216084_at   | AL080137 | FAM205B      | 389715           | 0.5   | 2.0   | 4.9   | 3.0   | 3.3   |
| 216085_at   | AL080128 | DKFZP434C1   | 26105 /// 84     | 7.7   | 3.3   | 5.2   | 0.8   | 6.7   |
| 216086_at   | AB028977 | SV2C         | 22987            | 16.6  | 9.7   | 10.8  | 12.5  | 8.8   |
| 216087_at   | AL078636 | -            | -                | 0.5   | 0.2   | 0.5   | 0.1   | 0.5   |
| 216088_s_at | AL078633 | PSMA7        | 5688             | 282.1 | 277.5 | 326.0 | 274.3 | 241.7 |
| 216089_at   | BE877397 | MCFD2P1 ///  | -                | 0.3   | 0.1   | 2.6   | 4.0   | 1.1   |
| 216090_x_at | AL078636 | -            | -                | 1.4   | 14.8  | 11.0  | 9.8   | 6.2   |
| 216091_s_at | AF101784 | BTRC         | 8945             | 23.3  | 23.2  | 21.6  | 18.1  | 19.9  |
| 216092_s_at | AL365347 | SLC7A8       | 23428            | 110.9 | 103.7 | 132.1 | 107.8 | 71.5  |
| 216093_at   | AL050053 | -            | -                | 2.5   | 5.1   | 7.6   | 5.6   | 2.8   |
| 216094_at   | AK025323 | -            | -                | 0.9   | 5.7   | 2.6   | 1.0   | 3.8   |
| 216095_x_at | AF057354 | MTMR1        | 8776             | 164.4 | 130.0 | 149.5 | 132.4 | 134.7 |
| 216096_s_at | AF064842 | NRXN1        | 9378             | 7.1   | 4.1   | 6.0   | 6.7   | 0.8   |
| 216097_at   | AF090910 | -            | -                | 0.1   | 1.0   | 1.8   | 1.1   | 1.9   |
| 216098_s_at | U86813   | HTR7 ///     | HTF 3363 /// 931 | 0.6   | 3.8   | 0.5   | 0.3   | 0.2   |
| 216099_at   | U86813   | HTR7P1       | 93164            | 0.4   | 0.5   | 0.4   | 0.6   | 0.8   |
| 216100_s_at | BG289527 | TOR1AIP1     | 26092            | 28.4  | 28.3  | 22.6  | 20.8  | 15.6  |
| 216101_at   | AL049242 | -            | -                | 9.7   | 4.3   | 12.6  | 9.5   | 6.4   |
| 216102_at   | AK021690 | PHLDB1       | 23187            | 2.3   | 0.7   | 2.5   | 2.5   | 1.2   |
| 216103_at   | AB014607 | ACOT11       | 26027            | 4.2   | 2.0   | 6.3   | 3.8   | 4.1   |

|             |          |              |              |       |       |       |       |       |
|-------------|----------|--------------|--------------|-------|-------|-------|-------|-------|
| 216104_at   | AF090910 | -            | -            | 1.3   | 0.2   | 3.3   | 5.0   | 3.0   |
| 216105_x_at | X86428   | PPP2R4       | 5524         | 214.2 | 277.8 | 240.3 | 243.7 | 242.2 |
| 216106_at   | AL109682 | LOC145678    | 145678       | 0.9   | 2.0   | 1.3   | 0.8   | 2.5   |
| 216107_at   | AF218021 | PP13         | 100129503    | 10.9  | 8.1   | 6.8   | 2.6   | 8.4   |
| 216108_at   | AK024142 | -            | -            | 0.3   | 4.6   | 3.8   | 0.3   | 4.1   |
| 216109_at   | AK025348 | MED13L       | 23389        | 3.0   | 3.7   | 3.7   | 3.5   | 2.6   |
| 216110_x_at | AU147017 | AC068039.4   | -            | 2.9   | 0.6   | 0.6   | 0.4   | 3.2   |
| 216111_x_at | U38979   | PMS2P3       | 5387         | 58.8  | 60.1  | 55.0  | 50.8  | 42.9  |
| 216112_at   | AU157200 | -            | -            | 15.9  | 10.8  | 14.0  | 9.8   | 8.5   |
| 216113_at   | AF070566 | ABI2         | 10152        | 0.5   | 0.6   | 0.1   | 2.5   | 0.3   |
| 216114_at   | AL049430 | NCKIPSD      | 51517        | 10.4  | 11.8  | 23.1  | 17.6  | 2.3   |
| 216115_at   | AK024873 | LOC1019301.4 | 4763 /// 101 | 9.2   | 8.3   | 9.9   | 9.8   | 9.4   |
| 216116_at   | AL049430 | CELSR3-AS1   | 102724368    | 1.2   | 0.8   | 0.7   | 1.0   | 1.3   |
| 216117_at   | AK025114 | EXOSC2       | 23404        | 6.2   | 5.7   | 3.4   | 5.3   | 11.2  |
| 216118_at   | AU148024 | -            | -            | 1.6   | 1.1   | 7.6   | 0.5   | 4.3   |
| 216119_s_at | AL109804 | SPEF1        | 25876        | 23.3  | 10.4  | 17.6  | 16.7  | 5.4   |
| 216120_s_at | X63575   | ATP2B2       | 491          | 0.3   | 0.4   | 0.9   | 6.2   | 0.5   |
| 216121_at   | AL080106 | -            | -            | 6.1   | 2.8   | 3.7   | 2.4   | 3.1   |
| 216122_at   | AK024543 | -            | -            | 0.7   | 0.6   | 0.8   | 3.1   | 0.8   |
| 216123_x_at | AK024158 | -            | -            | 9.3   | 8.0   | 9.7   | 0.6   | 4.4   |
| 216124_at   | AK024158 | -            | -            | 5.2   | 6.1   | 3.0   | 0.6   | 0.4   |
| 216125_s_at | AF064606 | RANBP9       | 10048        | 56.0  | 49.3  | 43.4  | 55.3  | 42.7  |
| 216126_at   | AK022418 | -            | -            | 18.3  | 22.6  | 22.1  | 15.0  | 13.7  |
| 216127_at   | Z84717   | PDIA2        | 64714        | 1.0   | 1.4   | 2.3   | 3.8   | 0.4   |
| 216128_at   | AF052173 | LOC1019295.6 | 6904 /// 101 | 1.1   | 6.0   | 1.1   | 5.0   | 1.1   |
| 216129_at   | AL117659 | ATP9A        | 10079        | 2.0   | 1.1   | 3.0   | 6.5   | 9.4   |
| 216130_at   | AK021633 | -            | -            | 1.8   | 3.5   | 1.0   | 1.1   | 2.5   |
| 216131_at   | AK000244 | FRMD4B       | 23150        | 3.3   | 4.3   | 3.4   | 1.9   | 1.2   |
| 216132_at   | AK021992 | -            | -            | 8.1   | 5.8   | 4.3   | 0.4   | 2.8   |
| 216133_at   | AA284903 | TCRA /// TRA | 10730        | 7.7   | 7.4   | 1.2   | 2.1   | 3.7   |
| 216134_at   | AK000244 | FRMD4B       | 23150        | 0.3   | 2.9   | 1.0   | 0.6   | 0.5   |
| 216135_at   | AK000122 | IQCK         | 124152       | 0.5   | 2.8   | 4.3   | 1.6   | 2.7   |
| 216136_at   | AF113683 | -            | -            | 0.3   | 0.5   | 0.1   | 0.3   | 2.1   |
| 216137_s_at | AL031718 | MAPK8IP3     | 23162        | 2.3   | 0.9   | 8.9   | 5.7   | 1.1   |
| 216138_at   | AL137285 | -            | -            | 1.8   | 1.8   | 1.1   | 1.9   | 1.5   |
| 216139_s_at | AL031718 | MAPK8IP3     | 23162        | 6.1   | 6.8   | 4.3   | 3.7   | 1.1   |
| 216140_at   | AL137378 | -            | -            | 9.2   | 0.5   | 0.3   | 0.6   | 0.3   |
| 216141_at   | AL137285 | -            | -            | 6.2   | 6.9   | 2.9   | 8.4   | 0.9   |
| 216142_at   | AL137403 | -            | -            | 6.2   | 7.8   | 6.7   | 3.4   | 1.1   |
| 216143_at   | AL137403 | -            | -            | 2.8   | 0.7   | 9.8   | 3.8   | 1.6   |
| 216144_at   | AL137378 | -            | -            | 0.8   | 1.2   | 4.2   | 3.1   | 5.1   |
| 216145_at   | AL137713 | -            | -            | 23.5  | 9.0   | 16.1  | 8.8   | 10.3  |
| 216146_at   | AF113683 | -            | -            | 4.5   | 5.1   | 5.5   | 3.5   | 7.2   |
| 216147_at   | AL353942 | -            | -            | 0.3   | 2.8   | 0.6   | 0.5   | 1.7   |
| 216148_at   | AL353942 | -            | -            | 1.5   | 1.2   | 9.6   | 9.6   | 5.3   |
| 216149_at   | AL359623 | LRRC37BP1    | 147172       | 1.4   | 0.7   | 1.2   | 3.1   | 0.8   |
| 216150_at   | AK021609 | -            | -            | 14.2  | 6.6   | 12.6  | 10.0  | 8.7   |
| 216151_at   | AK021609 | -            | -            | 0.3   | 4.6   | 0.3   | 0.4   | 0.1   |
| 216152_at   | AK021633 | -            | -            | 21.7  | 19.1  | 15.7  | 20.3  | 11.0  |
| 216153_x_at | AK022897 | RECK         | 8434         | 106.6 | 114.4 | 131.0 | 151.4 | 103.7 |
| 216154_at   | AF339787 | -            | -            | 1.4   | 3.5   | 1.5   | 5.6   | 0.5   |
| 216155_at   | AK024543 | -            | -            | 0.3   | 4.9   | 3.4   | 4.3   | 7.3   |
| 216156_at   | AK022897 | RECK         | 8434         | 4.5   | 0.5   | 2.2   | 6.7   | 3.5   |

|             |          |             |        |       |       |       |       |       |
|-------------|----------|-------------|--------|-------|-------|-------|-------|-------|
| 216157_at   | AK024231 | -           | -      | 9.8   | 0.4   | 0.7   | 7.1   | 0.4   |
| 216158_at   | AK024123 | -           | -      | 0.3   | 0.6   | 1.3   | 0.2   | 2.1   |
| 216159_s_at | AK023757 | -           | -      | 18.4  | 9.9   | 12.6  | 9.1   | 10.6  |
| 216160_at   | AK024231 | -           | -      | 7.1   | 3.6   | 5.4   | 6.8   | 4.5   |
| 216161_at   | AK024128 | SBNO1       | 55206  | 8.4   | 5.2   | 5.4   | 3.1   | 0.7   |
| 216162_at   | AK024128 | SBNO1       | 55206  | 8.3   | 4.2   | 4.0   | 2.4   | 6.1   |
| 216163_at   | AK025086 | -           | -      | 1.5   | 3.2   | 2.0   | 1.3   | 1.8   |
| 216164_at   | AK024867 | -           | -      | 15.3  | 11.1  | 15.4  | 15.9  | 11.2  |
| 216165_at   | AK025650 | -           | -      | 0.4   | 0.3   | 0.6   | 0.8   | 0.2   |
| 216166_at   | AK024909 | -           | -      | 9.4   | 6.3   | 10.9  | 5.5   | 1.1   |
| 216167_at   | AK024867 | LRRN2       | 10446  | 1.3   | 1.7   | 3.2   | 0.2   | 2.2   |
| 216168_at   | AK024909 | -           | -      | 15.8  | 5.8   | 7.6   | 6.2   | 3.1   |
| 216169_at   | AK025430 | -           | -      | 9.6   | 2.4   | 4.1   | 5.4   | 0.4   |
| 216170_at   | AK025271 | -           | -      | 3.3   | 3.4   | 6.1   | 4.3   | 4.4   |
| 216171_at   | AK025271 | -           | -      | 0.2   | 0.4   | 0.7   | 0.5   | 0.5   |
| 216172_at   | AK025114 | -           | -      | 8.8   | 7.5   | 7.7   | 7.9   | 1.6   |
| 216173_at   | AK025360 | -           | -      | 3.5   | 3.1   | 2.1   | 0.3   | 3.5   |
| 216174_at   | AK025343 | HCRP1       | 387535 | 17.6  | 6.8   | 12.8  | 10.4  | 6.8   |
| 216175_at   | AK025276 | -           | -      | 17.5  | 16.0  | 15.5  | 13.8  | 14.2  |
| 216176_at   | AK025343 | HCRP1       | 387535 | 10.5  | 1.4   | 7.5   | 6.0   | 1.3   |
| 216177_at   | AW582267 | RPL29P7 /// | -      | 147.6 | 115.7 | 172.5 | 149.3 | 109.2 |
| 216178_x_at | AA215854 | ITGB1       | 3688   | 8.9   | 5.6   | 8.9   | 7.9   | 9.6   |
| 216179_x_at | AK027173 | -           | -      | 14.3  | 6.7   | 12.7  | 12.9  | 9.7   |
| 216180_s_at | AK026758 | SYNJ2       | 8871   | 11.7  | 23.1  | 19.3  | 3.5   | 4.0   |
| 216181_at   | AK026758 | SYNJ2       | 8871   | 3.4   | 3.4   | 2.1   | 1.9   | 1.5   |
| 216182_at   | AK026758 | SYNJ2       | 8871   | 0.8   | 0.8   | 1.0   | 0.7   | 1.4   |
| 216183_at   | AL512703 | TGM2        | 7052   | 11.4  | 3.0   | 2.7   | 5.8   | 4.4   |
| 216184_s_at | AF263310 | RIMS1       | 22999  | 74.3  | 80.8  | 75.3  | 69.9  | 50.0  |
| 216185_at   | BC001879 | FUT9        | 10690  | 1.1   | 1.7   | 0.7   | 0.4   | 0.2   |
| 216186_at   | T90013   | -           | -      | 6.1   | 4.3   | 9.5   | 12.5  | 3.1   |
| 216187_x_at | AF222691 | -           | -      | 136.1 | 95.0  | 117.6 | 106.1 | 106.0 |
| 216188_at   | BC002892 | MYCNOS      | 10408  | 6.5   | 3.5   | 1.0   | 4.8   | 0.4   |
| 216189_at   | BC002465 | -           | -      | 4.5   | 7.4   | 7.0   | 7.7   | 3.3   |
| 216190_x_at | AA215854 | ITGB1       | 3688   | 3.0   | 2.5   | 4.3   | 4.0   | 0.5   |
| 216191_s_at | X72501   | TRDV3       | 28516  | 3.9   | 3.3   | 0.6   | 0.8   | 2.4   |
| 216192_at   | AL512688 | FABP7       | 2173   | 6.1   | 1.0   | 6.0   | 1.8   | 3.5   |
| 216193_at   | X69637   | -           | -      | 5.0   | 2.0   | 1.2   | 1.1   | 2.5   |
| 216194_s_at | AD001527 | TBCB        | 1155   | 409.0 | 484.1 | 461.7 | 458.3 | 365.5 |
| 216195_at   | AF131823 | ANK2        | 287    | 1.3   | 1.8   | 9.0   | 3.7   | 2.3   |
| 216196_at   | X69637   | HERC2P5 /// | -      | 14.6  | 6.7   | 11.3  | 8.9   | 6.5   |
| 216197_at   | AK021569 | -           | -      | 9.2   | 2.2   | 3.0   | 0.6   | 3.5   |
| 216198_at   | AK021569 | -           | -      | 2.5   | 2.5   | 1.4   | 0.4   | 1.8   |
| 216199_s_at | AL109942 | MAP3K4      | 4216   | 54.7  | 40.6  | 41.1  | 38.7  | 40.6  |
| 216200_at   | AK025379 | PLEKHM1     | 9842   | 3.2   | 4.1   | 2.3   | 7.0   | 3.8   |
| 216201_at   | AK025239 | -           | -      | 1.5   | 1.2   | 1.0   | 1.1   | 3.4   |
| 216202_s_at | U15555   | SPTLC2      | 9517   | 39.2  | 40.2  | 39.5  | 35.5  | 34.3  |
| 216203_at   | U15555   | SPTLC2      | 9517   | 9.3   | 5.1   | 6.0   | 9.9   | 6.1   |
| 216204_at   | BC005092 | COMT        | 1312   | 8.6   | 1.4   | 8.6   | 1.2   | 1.7   |
| 216205_s_at | AK021947 | MFN2        | 9927   | 122.3 | 112.2 | 138.2 | 121.0 | 127.5 |
| 216206_x_at | BC005365 | MAP2K7      | 5609   | 4.2   | 1.2   | 2.3   | 1.5   | 0.6   |
| 216207_x_at | AW408194 | IGKC        | 3514   | 7.2   | 16.7  | 22.2  | 4.9   | 4.1   |
| 216208_s_at | AU117487 | ATF6B       | 1388   | 8.8   | 2.7   | 12.8  | 6.3   | 1.3   |
| 216209_at   | AL137270 | LINC00939   | 400084 | 3.1   | 1.3   | 2.3   | 0.3   | 0.9   |

|             |          |                           |       |       |       |       |       |       |
|-------------|----------|---------------------------|-------|-------|-------|-------|-------|-------|
| 216210_x_at | AA046650 | TRIOBP                    | 11078 | 56.6  | 67.2  | 64.5  | 65.8  | 46.0  |
| 216211_at   | AL049233 | -                         | -     | 1.4   | 4.5   | 6.8   | 6.6   | 4.1   |
| 216212_s_at | AJ010395 | DKC1 /// MIF 1736 /// 677 |       | 185.6 | 180.1 | 252.2 | 179.6 | 195.3 |
| 216213_at   | AF155113 | NEK1                      | 4750  | 11.0  | 6.2   | 8.8   | 6.2   | 7.0   |
| 216214_at   | AF070602 | -                         | -     | 0.8   | 2.1   | 1.2   | 1.9   | 0.7   |
| 216215_s_at | AL049748 | RBFOX2                    | 23543 | 52.0  | 59.5  | 57.5  | 60.2  | 47.9  |
| 216216_at   | AL122074 | SLIT3                     | 6586  | 1.1   | 2.8   | 8.6   | 6.4   | 1.6   |
| 216217_at   | AK023546 | PLCL2                     | 23228 | 4.1   | 3.2   | 15.8  | 3.5   | 7.1   |
| 216218_s_at | AK023546 | PLCL2                     | 23228 | 2.6   | 1.8   | 1.3   | 2.4   | 1.9   |
| 216219_at   | AL137716 | AQP6                      | 363   | 7.1   | 7.9   | 3.7   | 2.5   | 7.0   |
| 216220_s_at | X68485   | ADORA1                    | 134   | 14.4  | 8.5   | 17.9  | 14.2  | 8.9   |
| 216221_s_at | D87078   | PUM2                      | 23369 | 90.3  | 83.2  | 82.6  | 85.4  | 69.6  |
| 216222_s_at | AI561354 | MYO10                     | 4651  | 0.4   | 0.6   | 3.2   | 5.0   | 3.7   |
| 216223_at   | JO5158   | CPN2                      | 1370  | 7.3   | 0.7   | 2.5   | 2.7   | 1.0   |
| 216224_s_at | AK024083 | HDAC6                     | 10013 | 12.2  | 12.2  | 16.1  | 18.4  | 14.0  |
| 216225_at   | R37427   | -                         | -     | 1.0   | 0.3   | 0.2   | 1.5   | 3.9   |
| 216226_at   | Y09321   | TAF4B                     | 6875  | 9.3   | 9.5   | 18.6  | 10.0  | 12.2  |
| 216227_at   | X81001   | -                         | -     | 4.0   | 1.0   | 1.2   | 2.7   | 3.3   |
| 216228_s_at | AK001538 | WDHD1                     | 11169 | 39.1  | 28.6  | 57.3  | 32.8  | 34.4  |
| 216229_x_at | X81001   | -                         | -     | 26.7  | 14.9  | 29.0  | 16.8  | 18.9  |
| 216230_x_at | M59917   | SMPD1                     | 6609  | 34.7  | 23.4  | 54.7  | 44.7  | 27.0  |
| 216231_s_at | AW188940 | B2M                       | 567   | 799.8 | 817.1 | 961.8 | 815.8 | 780.3 |
| 216232_s_at | AI697055 | GCN1L1                    | 10985 | 151.6 | 130.3 | 144.5 | 142.0 | 118.0 |
| 216233_at   | Z22970   | CD163                     | 9332  | 4.7   | 0.3   | 0.4   | 0.5   | 0.2   |
| 216234_s_at | M80335   | PRKACA                    | 5566  | 18.3  | 18.5  | 12.9  | 15.5  | 13.9  |
| 216235_s_at | S81545   | EDNRA                     | 1909  | 15.0  | 4.6   | 8.4   | 1.4   | 8.2   |
| 216236_s_at | AL110298 | SLC2A14 /// :6515 /// 144 |       | 8.2   | 6.4   | 4.5   | 2.1   | 6.8   |
| 216237_s_at | AA807529 | MCM5                      | 4174  | 309.7 | 286.5 | 424.6 | 280.4 | 332.9 |
| 216238_s_at | BG545288 | FGB                       | 2244  | 3.7   | 3.2   | 2.0   | 2.0   | 2.3   |
| 216239_at   | U87408   | BBS9                      | 27241 | 5.3   | 5.1   | 3.1   | 6.1   | 3.0   |
| 216240_at   | M34428   | MIR1204 /// 5820 /// 100  |       | 3.9   | 7.1   | 6.3   | 6.2   | 5.0   |
| 216241_s_at | X57198   | TCEA1                     | 6917  | 616.7 | 608.1 | 675.5 | 613.5 | 524.3 |
| 216242_x_at | AW402635 | POLR2J /// P:5439 /// 848 |       | 201.7 | 228.2 | 209.7 | 231.8 | 147.1 |
| 216243_s_at | BE563442 | IL1RN                     | 3557  | 37.8  | 35.1  | 23.8  | 30.2  | 5.4   |
| 216244_at   | BE563442 | IL1RN                     | 3557  | 0.3   | 1.1   | 0.6   | 3.9   | 0.2   |
| 216245_at   | BE563442 | IL1RN                     | 3557  | 1.6   | 3.9   | 1.3   | 8.6   | 4.2   |
| 216246_at   | AF113008 | -                         | -     | 35.4  | 50.2  | 36.2  | 45.8  | 45.6  |
| 216247_at   | AF113008 | RPS20 /// SN 6224 /// 267 |       | 13.9  | 6.6   | 11.4  | 9.4   | 5.7   |
| 216248_s_at | S77154   | NR4A2                     | 4929  | 3.0   | 0.1   | 0.3   | 0.3   | 0.3   |
| 216249_at   | M34428   | -                         | -     | 8.7   | 8.4   | 10.1  | 7.5   | 9.0   |
| 216250_s_at | X77598   | LPXN                      | 9404  | 36.3  | 33.4  | 32.3  | 33.4  | 28.6  |
| 216251_s_at | BF965437 | TTLL12                    | 23170 | 323.8 | 295.9 | 352.4 | 296.1 | 318.3 |
| 216252_x_at | Z70519   | FAS                       | 355   | 16.2  | 14.6  | 23.8  | 17.4  | 15.1  |
| 216253_s_at | N73272   | PARVB                     | 29780 | 56.9  | 58.5  | 79.6  | 69.0  | 61.5  |
| 216254_at   | N73272   | PARVB                     | 29780 | 3.0   | 1.0   | 0.6   | 0.9   | 6.1   |
| 216255_s_at | AC000099 | GRM8                      | 2918  | 0.8   | 0.6   | 5.4   | 0.4   | 0.3   |
| 216256_at   | AC000099 | GRM8                      | 2918  | 10.8  | 5.9   | 1.0   | 13.6  | 16.7  |
| 216257_at   | BE148534 | SERPINB13                 | 5275  | 1.3   | 5.1   | 0.5   | 0.5   | 0.3   |
| 216258_s_at | BE148534 | SERPINB13                 | 5275  | 2.6   | 1.3   | 0.3   | 0.2   | 0.7   |
| 216259_at   | U85992   | LOC1005066:100506699      |       | 7.0   | 7.6   | 7.3   | 4.9   | 7.4   |
| 216260_at   | AK001827 | DICER1                    | 23405 | 1.1   | 6.5   | 3.8   | 5.0   | 2.9   |
| 216261_at   | AI151479 | ITGB3                     | 3690  | 1.5   | 5.2   | 7.2   | 7.3   | 1.3   |
| 216262_s_at | AL050318 | TGIF2                     | 60436 | 40.4  | 55.2  | 41.8  | 46.9  | 35.3  |

|                      |                           |        |        |       |        |       |       |
|----------------------|---------------------------|--------|--------|-------|--------|-------|-------|
| 216263_s_at AK022215 | NGDN                      | 25983  | 4.9    | 3.6   | 4.6    | 0.4   | 5.1   |
| 216264_s_at X79683   | LAMB2                     | 3913   | 35.2   | 43.5  | 34.3   | 37.2  | 28.9  |
| 216265_x_at AI292276 | MYH7                      | 4625   | 3.9    | 1.9   | 3.9    | 2.8   | 1.1   |
| 216266_s_at AK025637 | ARFGEF1                   | 10565  | 56.9   | 68.4  | 78.8   | 56.3  | 53.9  |
| 216267_s_at BF034906 | TMEM115                   | 11070  | 84.9   | 72.9  | 91.5   | 71.9  | 69.7  |
| 216268_s_at U77914   | JAG1                      | 182    | 200.1  | 196.3 | 212.3  | 216.0 | 148.4 |
| 216269_s_at M24782   | ELN                       | 2006   | 7.7    | 4.1   | 2.0    | 0.9   | 5.5   |
| 216270_at AF209931   | ILVBL                     | 10994  | 0.5    | 0.4   | 0.6    | 1.0   | 0.8   |
| 216271_x_at AC004794 | SYDE1                     | 85360  | 9.2    | 6.9   | 14.2   | 4.0   | 1.9   |
| 216272_x_at AF209931 | SYDE1                     | 85360  | 6.9    | 8.6   | 2.7    | 2.3   | 7.9   |
| 216273_at X78931     | ZNF460                    | 10794  | 10.4   | 12.2  | 9.3    | 4.3   | 6.8   |
| 216274_s_at N99438   | SEC11A                    | 23478  | 522.3  | 474.7 | 560.9  | 508.3 | 426.3 |
| 216275_at AK023540   | BUB1                      | 699    | 10.1   | 4.6   | 15.0   | 10.4  | 10.3  |
| 216276_s_at X89657   | ADAM3A                    | 1587   | 3.3    | 4.9   | 5.0    | 2.9   | 4.1   |
| 216277_at AU156551   | BUB1                      | 699    | 1.4    | 2.8   | 5.9    | 1.2   | 1.0   |
| 216278_at AL109705   | -                         | -      | 3.1    | 3.7   | 2.2    | 4.0   | 0.2   |
| 216279_at X78931     | ZNF460                    | 10794  | 13.6   | 8.5   | 9.7    | 6.3   | 8.6   |
| 216280_s_at AK001827 | DICER1                    | 23405  | 1.2    | 0.6   | 6.7    | 2.0   | 4.3   |
| 216281_at AK001827   | DICER1                    | 23405  | 0.9    | 1.4   | 0.7    | 2.8   | 0.7   |
| 216282_x_at AJ224143 | POLR2C                    | 5432   | 54.4   | 39.7  | 58.5   | 57.9  | 37.4  |
| 216283_s_at X64116   | PVR                       | 5817   | 14.4   | 1.1   | 12.3   | 1.3   | 7.3   |
| 216284_at AK024123   | -                         | -      | 2.3    | 1.5   | 6.9    | 5.2   | 0.6   |
| 216285_at AL137713   | DGCR14 /// 18220 /// 236  |        | 8.1    | 1.1   | 1.1    | 0.5   | 0.9   |
| 216286_at AV760769   | -                         | -      | 4.1    | 5.3   | 0.3    | 3.1   | 0.7   |
| 216287_at AK021930   | -                         | -      | 4.0    | 0.9   | 6.9    | 2.5   | 5.1   |
| 216288_at AU159276   | CYSLTR1                   | 10800  | 7.1    | 5.9   | 5.7    | 5.5   | 2.4   |
| 216289_at AU148039   | GPR144                    | 347088 | 5.8    | 0.9   | 2.5    | 8.1   | 4.0   |
| 216290_x_at AK000864 | -                         | -      | 4.6    | 0.4   | 8.0    | 2.9   | 6.7   |
| 216291_at AK021474   | ZNF440                    | 126070 | 0.8    | 1.2   | 4.8    | 2.3   | 0.3   |
| 216292_at AK024455   | -                         | -      | 19.0   | 18.6  | 20.9   | 15.7  | 10.9  |
| 216293_at X81636     | CLTA                      | 1211   | 33.6   | 12.1  | 36.7   | 27.6  | 17.8  |
| 216294_s_at AL137254 | KIAA1109                  | 84162  | 17.3   | 13.6  | 15.7   | 14.8  | 15.3  |
| 216295_s_at X81636   | CLTA                      | 1211   | 648.5  | 554.3 | 702.8  | 611.5 | 566.5 |
| 216296_at X81636     | CLTA                      | 1211   | 11.5   | 8.7   | 8.1    | 7.1   | 2.4   |
| 216297_at AL049314   | RP11-348N5.-              |        | 3.8    | 2.1   | 3.5    | 1.7   | 1.5   |
| 216298_at AL580863   | TARP                      | 445347 | 6.1    | 0.4   | 0.5    | 4.2   | 0.5   |
| 216299_s_at AK022829 | XRCC3                     | 7517   | 35.6   | 35.5  | 65.1   | 37.8  | 47.8  |
| 216300_x_at BE383139 | RARA                      | 5914   | 4.5    | 4.8   | 3.6    | 12.4  | 2.4   |
| 216301_at AW405975   | -                         | -      | 30.5   | 12.4  | 27.9   | 7.2   | 19.7  |
| 216302_at AL022101   | HNRNPCL1 //, 343069 /// 4 |        | 38.5   | 16.9  | 15.6   | 24.2  | 11.8  |
| 216303_s_at AK023451 | MTMR1                     | 8776   | 1.0    | 0.8   | 1.0    | 1.0   | 1.1   |
| 216304_x_at AJ295618 | YME1L1                    | 10730  | 205.6  | 201.2 | 186.2  | 166.5 | 165.2 |
| 216305_s_at AC005034 | GCFC2                     | 6936   | 90.9   | 56.5  | 90.9   | 77.1  | 70.5  |
| 216306_x_at X62006   | MIR4745 /// 5725 /// 100  |        | 1052.4 | 906.8 | 1117.6 | 940.5 | 959.7 |
| 216307_at AB018261   | DGKB                      | 1607   | 36.6   | 29.4  | 40.0   | 38.9  | 31.1  |
| 216308_x_at AK026752 | GRHPR                     | 9380   | 287.0  | 300.2 | 285.7  | 270.0 | 239.1 |
| 216309_x_at AF072467 | JRK                       | 8629   | 39.6   | 29.5  | 31.0   | 23.6  | 24.7  |
| 216310_at AK024376   | TAOK1                     | 57551  | 1.3    | 6.5   | 1.0    | 0.9   | 0.9   |
| 216311_at AI206718   | OVOL3                     | 728361 | 1.0    | 0.8   | 0.8    | 0.7   | 0.4   |
| 216312_at AW615612   | ATP2B3                    | 492    | 0.9    | 2.1   | 0.7    | 1.6   | 3.6   |
| 216313_at AF152527   | PCDHB17                   | 54661  | 0.3    | 0.5   | 0.6    | 0.3   | 1.9   |
| 216314_at X95238     | CRISP1                    | 167    | 0.6    | 0.5   | 1.6    | 0.6   | 2.4   |
| 216315_x_at AL121873 | UBE2V1P9 //-              |        | 28.6   | 18.5  | 24.0   | 27.4  | 28.1  |



|                      |            |               |        |        |        |        |        |
|----------------------|------------|---------------|--------|--------|--------|--------|--------|
| 216316_x_at X78713   | RP11-548H1 | -             | 25.1   | 21.4   | 22.7   | 17.9   | 18.2   |
| 216317_x_at X63095   | RHCE       | /// RHI 6006  | 2.1    | 5.5    | 2.1    | 0.7    | 0.9    |
| 216318_at S55735     | -          | -             | 5.2    | 6.1    | 9.7    | 8.1    | 8.6    |
| 216319_at AK022686   | RP11-69I   | 8.2 -         | 7.0    | 1.7    | 3.5    | 3.3    | 2.7    |
| 216320_x_at U37055   | MST1       | 4485          | 18.1   | 15.2   | 23.5   | 13.9   | 1.9    |
| 216321_s_at X03348   | NR3C1      | 2908          | 0.2    | 1.5    | 1.2    | 1.2    | 3.2    |
| 216322_at D28586     | CD58       | 965           | 9.4    | 0.4    | 3.3    | 4.2    | 0.2    |
| 216323_x_at K03460   | TUBA3C     | /// 17278     | 162.3  | 116.9  | 172.3  | 120.0  | 112.4  |
| 216324_at Z21967     | -          | -             | 0.9    | 0.9    | 3.3    | 0.9    | 0.6    |
| 216325_x_at AF217796 | RTKL1      | /// RTI 51750 | 3.1    | 4.1    | 5.7    | 2.2    | 9.8    |
| 216326_s_at AF059650 | HDAC3      | 8841          | 135.9  | 121.3  | 156.8  | 127.7  | 115.0  |
| 216327_s_at AF287892 | SIGLEC8    | 27181         | 6.4    | 3.8    | 4.6    | 1.7    | 0.4    |
| 216328_at AF287892   | SIGLEC8    | 27181         | 1.3    | 0.8    | 1.0    | 0.8    | 0.9    |
| 216329_at Z21967     | -          | -             | 0.7    | 1.3    | 1.0    | 7.6    | 0.7    |
| 216330_s_at L14482   | POU6F1     | 5463          | 2.2    | 6.2    | 2.3    | 1.8    | 1.2    |
| 216331_at AK022548   | ITGA7      | 3679          | 2.0    | 2.9    | 3.0    | 2.1    | 2.1    |
| 216332_at L14482     | POU6F1     | 5463          | 2.3    | 1.5    | 2.4    | 0.9    | 1.6    |
| 216333_x_at M25813   | TNXA       | /// TN> 7146  | 2.8    | 3.1    | 3.9    | 3.7    | 2.8    |
| 216334_s_at U22030   | CYP2A7P1   | 1550          | 1.7    | 3.3    | 2.5    | 0.7    | 2.9    |
| 216336_x_at AL031602 | MT1E       | 4493          | 147.2  | 83.4   | 100.9  | 99.4   | 86.5   |
| 216337_at L23852     | -          | -             | 2.2    | 1.1    | 1.7    | 1.6    | 0.8    |
| 216338_s_at AK021433 | YIPF3      | 25844         | 67.7   | 78.5   | 79.5   | 71.7   | 66.5   |
| 216339_s_at AF086641 | TNXA       | /// TN> 7146  | 1.5    | 1.0    | 0.5    | 0.9    | 0.3    |
| 216340_s_at U22044   | CYP2A7P1   | 1550          | 1.4    | 0.9    | 1.0    | 2.2    | 0.5    |
| 216341_s_at Z81148   | GNRHR      | 2798          | 10.6   | 6.6    | 9.2    | 5.1    | 3.9    |
| 216342_x_at AL121916 | RPS4XP2    | /// -         | 2040.0 | 1508.6 | 2092.7 | 1678.5 | 1650.6 |
| 216343_at AF152509   | -          | -             | 1.1    | 0.4    | 1.8    | 1.0    | 1.1    |
| 216344_at AL117405   | NPHP4      | 261734        | 6.5    | 1.8    | 8.2    | 12.3   | 8.0    |
| 216345_at AB020720   | ZSWIM8     | 23053         | 3.2    | 0.6    | 7.2    | 1.0    | 1.5    |
| 216346_at AC004832   | SEC14L3    | 266629        | 0.3    | 0.3    | 0.4    | 0.2    | 0.2    |
| 216347_s_at AK023188 | PPP1R13B   | 23368         | 25.4   | 31.1   | 32.3   | 33.2   | 26.6   |
| 216348_at AL049693   | RPS17P5    | /// -         | 589.6  | 332.7  | 523.9  | 400.5  | 368.7  |
| 216349_at AL136527   | DGKH       | 160851        | 43.2   | 28.0   | 38.9   | 39.2   | 31.1   |
| 216350_s_at X52332   | ZNF10      | 7556          | 11.9   | 11.2   | 7.3    | 12.3   | 5.2    |
| 216351_x_at AF248483 | DAZ1       | /// DAi 1617  | 0.9    | 6.4    | 8.2    | 2.8    | 6.7    |
| 216352_x_at AF152509 | PCDHGA3    | 56112         | 10.4   | 5.0    | 7.2    | 12.1   | 7.9    |
| 216353_s_at AL121582 | RNF11B     | -             | 2.8    | 3.3    | 0.2    | 0.9    | 0.6    |
| 216354_at AL031669   | -          | -             | 66.1   | 34.7   | 38.7   | 36.6   | 34.4   |
| 216355_at AF152527   | -          | -             | 10.1   | 5.0    | 11.0   | 6.9    | 7.8    |
| 216356_x_at AB018277 | BAIAP3     | 8938          | 5.0    | 8.7    | 14.2   | 12.8   | 5.4    |
| 216357_at AL050148   | SNX1       | 6642          | 1.3    | 1.1    | 1.5    | 2.6    | 1.0    |
| 216358_at AL137010   | SMARCE1P2  | -             | 2.4    | 3.1    | 9.3    | 1.7    | 8.0    |
| 216359_at L13283     | MUC7       | 4589          | 4.7    | 5.2    | 0.5    | 3.9    | 0.8    |
| 216360_x_at AK000238 | RRP12      | 23223         | 55.7   | 36.7   | 56.0   | 54.0   | 48.3   |
| 216361_s_at AJ251844 | KAT6A      | 7994          | 6.2    | 6.7    | 5.3    | 6.3    | 4.0    |
| 216362_at AJ251844   | -          | -             | 10.1   | 3.5    | 3.1    | 0.6    | 4.4    |
| 216363_at S73614     | -          | -             | 22.3   | 10.4   | 15.2   | 7.5    | 5.1    |
| 216364_s_at AJ001550 | AFF2       | 2334          | 1.3    | 0.7    | 0.5    | 1.6    | 2.2    |
| 216365_x_at AF047245 | CKAP2      | /// IG 26586  | 0.6    | 2.4    | 1.7    | 0.7    | 2.2    |
| 216366_x_at AF047245 | -          | -             | 66.1   | 27.4   | 33.2   | 26.0   | 22.4   |
| 216367_at U02520     | COL4A3     | 1285          | 4.4    | 2.2    | 5.3    | 0.8    | 1.8    |
| 216368_s_at U02520   | COL4A3     | 1285          | 10.0   | 7.5    | 5.3    | 4.3    | 5.5    |
| 216369_at AF203728   | -          | -             | 2.9    | 5.9    | 4.7    | 4.9    | 5.2    |

|             |          |                     |           |       |       |        |       |       |      |
|-------------|----------|---------------------|-----------|-------|-------|--------|-------|-------|------|
| 216370_s_at | Z49258   | TKTL1               | 8277      | 2.9   | 1.0   | 2.8    | 7.5   | 1.0   |      |
| 216371_at   | AF103295 | -                   | -         | 21.7  | 7.4   | 15.3   | 12.8  | 7.1   |      |
| 216372_at   | AF103295 | -                   | -         | 7.9   | 5.3   | 6.6    | 7.9   | 8.1   |      |
| 216373_at   | AF189251 | TAPT1               | 202018    | 2.7   | 0.3   | 0.5    | 0.2   | 0.2   |      |
| 216374_at   | AC006986 | TSPY13P ///         | -         | 11.0  | 5.6   | 12.8   | 7.9   | 5.5   |      |
| 216375_s_at | X76184   | ETV5                | 2119      | 10.4  | 9.1   | 4.7    | 5.5   | 1.9   |      |
| 216376_x_at | AC006371 | KALP /// KAL        | -         | 24.9  | 14.7  | 17.7   | 8.9   | 10.3  |      |
| 216377_x_at | X07247   | ALPPL2              | 251       | 23.0  | 13.5  | 25.3   | 14.2  | 9.8   |      |
| 216378_at   | AF168811 | -                   | -         | 0.9   | 0.2   | 1.2    | 0.5   | 0.2   |      |
| 216379_x_at | AK000168 | CD24                | 100133941 | 17.1  | 10.8  | 17.3   | 24.9  | 10.3  |      |
| 216380_x_at | AC005011 | GS1-111G14.         | -         | 342.7 | 376.4 | 396.3  | 395.4 | 343.8 |      |
| 216381_x_at | AL035413 | AKR7A3              | 22977     | 42.2  | 41.0  | 61.5   | 58.5  | 52.5  |      |
| 216382_s_at | U80756   | -                   | -         | 2.5   | 6.1   | 1.5    | 1.3   | 1.5   |      |
| 216383_at   | U52111   | RPL18AP16 /         | -         | 225.2 | 130.8 | 175.3  | 112.2 | 99.2  |      |
| 216384_x_at | AF257099 | LOC1005062.5757 /// | 728       | 786.2 | 540.4 | 1277.2 | 648.0 | 752.0 |      |
| 216385_at   | AF229166 | LOC220077           | 220077    | 4.6   | 8.0   | 3.0    | 12.9  | 7.3   |      |
| 216386_at   | AF229166 | LOC220077           | 220077    | 1.1   | 3.7   | 0.4    | 3.2   | 2.1   |      |
| 216387_x_at | AL353580 | NPM1P22 //,         | -         | 126.8 | 78.1  | 117.0  | 145.6 | 112.6 |      |
| 216388_s_at | U33448   | LTB4R               | 1241      | 2.1   | 11.5  | 2.6    | 4.7   | 11.0  |      |
| 216389_s_at | AF283773 | DCAF11              | 80344     | 109.3 | 95.9  | 101.9  | 97.5  | 85.9  |      |
| 216390_at   | X06537   | LCAT                | 3931      | 1.3   | 0.8   | 1.1    | 0.3   | 0.5   |      |
| 216391_s_at | AF126749 | KLHL1               | 57626     | 13.8  | 1.4   | 1.6    | 3.8   | 1.6   |      |
| 216392_s_at | AK021846 | SEC23IP             | 11196     | 190.1 | 137.7 | 147.3  | 110.0 | 98.1  |      |
| 216393_at   | AL049938 | C10orf12            | 26148     | 5.8   | 6.9   | 5.5    | 5.4   | 2.8   |      |
| 216394_x_at | AF043586 | -                   | -         | 1.2   | 1.2   | 3.9    | 1.2   | 0.9   |      |
| 216395_at   | AL137434 | FBXL18              | 80028     | 2.1   | 8.2   | 9.0    | 7.3   | 1.2   |      |
| 216396_s_at | AF131850 | EI24                | 9538      | 707.8 | 586.6 | 693.2  | 591.4 | 536.4 |      |
| 216397_s_at | AK024840 | BOP1 /// MIF        | 23246 /// | 10    | 95.3  | 78.6   | 98.7  | 78.9  | 83.4 |
| 216398_at   | U05255   | GYPB                | 2994      | 11.3  | 14.6  | 14.4   | 7.9   | 11.2  |      |
| 216399_s_at | AK025663 | SCAPER              | 49855     | 16.1  | 16.5  | 21.1   | 21.2  | 14.1  |      |
| 216400_at   | M18917   | GBAP1 /// LC        | 2630 ///  | 100   | 8.8   | 4.2    | 2.0   | 0.6   | 1.8  |
| 216401_x_at | AJ408433 | IGKV1-37 ///        | -         | 1.1   | 0.6   | 1.4    | 1.1   | 0.7   |      |
| 216402_at   | AC004832 | SEC14L4             | 284904    | 9.0   | 3.7   | 5.1    | 2.2   | 5.1   |      |
| 216403_at   | AL163533 | SP3P                | 160824    | 3.0   | 1.1   | 0.6    | 3.0   | 1.4   |      |
| 216404_at   | AF126749 | ATXN8OS             | 6315      | 7.7   | 1.5   | 12.8   | 9.6   | 1.1   |      |
| 216405_at   | M14087   | -                   | -         | 1.1   | 0.5   | 0.6    | 0.3   | 0.6   |      |
| 216406_at   | AL390237 | RP11-278J20         | -         | 0.8   | 0.1   | 0.2    | 0.2   | 2.3   |      |
| 216407_at   | U25801   | VAC14               | 55697     | 9.9   | 10.8  | 15.3   | 12.8  | 8.0   |      |
| 216408_at   | AJ302584 | OR2B2               | 81697     | 3.6   | 4.1   | 7.9    | 6.1   | 4.3   |      |
| 216409_at   | AL390168 | ACSL6               | 23305     | 12.4  | 17.0  | 10.9   | 16.5  | 4.5   |      |
| 216410_at   | AL137181 | CNN3P1 /// (-       | -         | 0.5   | 1.6   | 1.0    | 0.5   | 0.8   |      |
| 216411_s_at | AK023699 | GALK2               | 2585      | 10.1  | 9.0   | 7.7    | 2.2   | 9.7   |      |
| 216412_x_at | AF043584 | CKAP2 /// IG        | 3537 ///  | 265   | 7.3   | 0.7    | 1.0   | 0.5   | 0.5  |
| 216413_at   | AL139112 | CYCSP44 ///         | -         | 0.9   | 0.2   | 1.3    | 5.0   | 0.2   |      |
| 216414_at   | AL136094 | HMGB3P19 /          | -         | 0.8   | 0.5   | 0.9    | 4.3   | 3.9   |      |
| 216415_at   | AK026793 | DNAH3               | 55567     | 0.6   | 5.1   | 7.4    | 4.8   | 2.2   |      |
| 216416_at   | AK027254 | -                   | -         | 2.1   | 5.7   | 2.1    | 2.9   | 1.8   |      |
| 216417_x_at | X16172   | HOXB9               | 3219      | 13.8  | 10.5  | 15.4   | 8.3   | 4.2   |      |
| 216418_at   | AL133173 | ABCD1P2 ///         | -         | 2.2   | 6.1   | 2.4    | 2.2   | 7.5   |      |
| 216419_at   | AK026910 | CROCC               | 9696      | 2.5   | 1.7   | 7.4    | 7.1   | 5.9   |      |
| 216420_at   | AL359954 | TARDBPP1 //         | -         | 3.4   | 8.5   | 6.6    | 5.8   | 10.3  |      |
| 216421_at   | AL121886 | RPL27AP ///         | -         | 31.5  | 39.0  | 41.6   | 41.6  | 23.1  |      |
| 216422_at   | AL136460 | PA2G4P2 ///         | -         | 25.6  | 27.4  | 27.4   | 13.6  | 19.9  |      |

|             |          |              |              |       |       |       |       |       |
|-------------|----------|--------------|--------------|-------|-------|-------|-------|-------|
| 216423_at   | AK026694 | -            | -            | 4.0   | 1.6   | 1.2   | 5.1   | 7.3   |
| 216424_at   | S79267   | CD4          | 920          | 0.4   | 0.2   | 0.3   | 0.3   | 0.2   |
| 216425_at   | AK026465 | -            | -            | 2.2   | 1.4   | 2.2   | 1.4   | 1.2   |
| 216426_at   | AL136318 | TCEB1P3 ///  | -            | 2.1   | 1.8   | 5.9   | 1.6   | 3.8   |
| 216427_at   | AK026439 | -            | -            | 0.6   | 1.2   | 1.1   | 0.8   | 1.3   |
| 216428_x_at | AK024467 | KIR3DX1      | 90011        | 7.8   | 8.1   | 9.2   | 11.5  | 3.7   |
| 216429_at   | AK025422 | -            | -            | 22.8  | 4.6   | 7.9   | 9.9   | 4.9   |
| 216430_x_at | AF043586 | IGLV1-44     | 28823        | 0.8   | 1.0   | 1.1   | 0.7   | 0.5   |
| 216431_at   | AK025363 | -            | -            | 10.6  | 0.5   | 1.9   | 1.7   | 0.8   |
| 216432_at   | AK025121 | SLC28A2      | 9153         | 1.4   | 1.2   | 1.4   | 1.4   | 1.2   |
| 216433_s_at | U23736   | PRDM2        | 7799         | 6.7   | 1.9   | 0.8   | 0.8   | 0.1   |
| 216434_at   | AK025188 | TTC38        | 55020        | 2.6   | 0.9   | 1.4   | 1.2   | 1.2   |
| 216435_at   | AK025177 | MAP2K5       | 5607         | 1.7   | 0.4   | 3.3   | 0.5   | 1.7   |
| 216436_at   | AK025026 | PIK3R4       | 30849        | 4.2   | 0.4   | 4.7   | 0.3   | 0.6   |
| 216437_at   | AK024949 | -            | -            | 9.2   | 8.5   | 8.5   | 3.6   | 1.0   |
| 216438_s_at | AL133228 | TMSB4X       | 7114         | 172.9 | 158.3 | 147.2 | 179.5 | 102.8 |
| 216439_at   | AK024904 | TNK2         | 10188        | 1.1   | 1.1   | 0.7   | 0.7   | 0.7   |
| 216440_at   | AK024868 | -            | -            | 6.2   | 2.9   | 1.7   | 4.5   | 4.3   |
| 216441_at   | AK025573 | -            | -            | 0.7   | 2.2   | 0.7   | 0.4   | 0.2   |
| 216442_x_at | AK026737 | FN1          | 2335         | 130.6 | 149.8 | 150.3 | 139.7 | 119.1 |
| 216443_at   | AK024615 | -            | -            | 4.1   | 5.8   | 3.2   | 3.6   | 1.5   |
| 216444_at   | AK024138 | -            | -            | 1.0   | 0.3   | 0.7   | 5.4   | 2.1   |
| 216445_at   | U23736   | -            | -            | 1.2   | 1.4   | 0.8   | 1.2   | 0.8   |
| 216446_at   | AK024568 | -            | -            | 11.5  | 3.0   | 6.7   | 1.9   | 1.6   |
| 216447_at   | AK024525 | -            | -            | 5.0   | 2.0   | 1.7   | 0.8   | 0.7   |
| 216448_at   | AK022686 | -            | -            | 1.5   | 5.8   | 10.8  | 4.9   | 3.8   |
| 216449_x_at | AK025862 | HSP90B1      | 7184         | 227.8 | 217.0 | 218.7 | 228.9 | 214.8 |
| 216450_x_at | AK025862 | HSP90B1      | 7184         | 60.8  | 45.6  | 38.1  | 47.3  | 57.4  |
| 216451_at   | AF034187 | STK38        | 11329        | 11.1  | 5.0   | 1.8   | 4.0   | 11.4  |
| 216452_at   | AB046836 | TRPM3        | 80036        | 7.7   | 4.5   | 6.2   | 7.2   | 1.2   |
| 216453_at   | AL359578 | ZNF287       | 57336        | 14.6  | 2.7   | 10.2  | 9.1   | 2.8   |
| 216454_at   | AL390133 | TRMT1        | 55621        | 2.0   | 0.3   | 1.2   | 0.3   | 0.5   |
| 216455_at   | AK024457 | -            | -            | 12.1  | 7.9   | 18.9  | 8.3   | 10.9  |
| 216456_at   | AL162044 | -            | -            | 0.8   | 0.9   | 4.2   | 5.2   | 0.9   |
| 216457_s_at | AK026080 | SF3A1        | 10291        | 343.4 | 274.1 | 371.7 | 300.9 | 280.1 |
| 216458_at   | AL161956 | PQLC3        | 130814       | 3.1   | 2.2   | 4.1   | 6.1   | 2.3   |
| 216459_x_at | AL137624 | DDR1-AS1     | 414771       | 4.4   | 1.1   | 14.6  | 10.6  | 0.6   |
| 216460_at   | AK024457 | LOC1019271   | 101927181    | 1.8   | 1.4   | 4.6   | 1.0   | 0.8   |
| 216461_at   | AK000834 | -            | -            | 12.7  | 1.2   | 4.1   | 5.1   | 5.7   |
| 216462_at   | X79200   | -            | -            | 4.8   | 1.2   | 0.5   | 0.4   | 1.7   |
| 216463_at   | AL117520 | -            | -            | 2.0   | 0.1   | 1.1   | 0.5   | 2.8   |
| 216464_x_at | AF118265 | PTGDR2       | 11251        | 0.9   | 0.6   | 2.1   | 0.5   | 0.8   |
| 216465_at   | AL110206 | -            | -            | 1.1   | 1.1   | 0.9   | 1.0   | 2.9   |
| 216466_at   | AL080104 | NAV3         | 89795        | 2.7   | 2.0   | 1.5   | 2.1   | 0.9   |
| 216467_s_at | AL049997 | -            | -            | 13.7  | 4.7   | 16.0  | 4.7   | 5.4   |
| 216468_s_at | AC006539 | ZNF682       | 91120        | 13.7  | 5.6   | 10.2  | 10.6  | 10.4  |
| 216469_at   | AL163202 | LOC1027251   | 441666 ///   | 3.5   | 1.8   | 5.4   | 0.7   | 3.3   |
| 216470_x_at | AF009664 | PRSS2        | 5645         | 15.0  | 10.7  | 9.0   | 3.3   | 4.3   |
| 216471_x_at | X79200   | SSX2 ///     | SSX:6757 /// | 14.8  | 17.2  | 16.4  | 20.6  | 16.4  |
| 216472_at   | AF003737 | -            | -            | 1.0   | 1.5   | 1.7   | 6.6   | 1.6   |
| 216473_x_at | D38024   | DBET ///     | DU:22947 /// | 5.4   | 6.5   | 3.9   | 11.2  | 11.1  |
| 216474_x_at | AF206667 | TPSAB1 ///   | T 7177 ///   | 2.6   | 4.9   | 4.4   | 2.0   | 9.4   |
| 216475_at   | AL133269 | TUBB4BP7 //- | -            | 41.2  | 26.9  | 28.3  | 25.6  | 22.9  |

|             |          |                           |        |        |        |        |        |
|-------------|----------|---------------------------|--------|--------|--------|--------|--------|
| 216476_at   | AL353580 | OR7E111P //-              | 20.4   | 7.0    | 10.0   | 1.2    | 5.4    |
| 216477_at   | AL157837 | RPL23AP22 /-              | 3.2    | 4.5    | 4.2    | 2.1    | 6.1    |
| 216478_at   | AL049252 | -                         | 2.0    | 3.1    | 0.1    | 2.8    | 1.7    |
| 216479_at   | AL356414 | RPL21 /// RP 6144 /// 267 | 31.1   | 30.2   | 30.7   | 29.4   | 22.5   |
| 216480_x_at | AF060927 | MLLT10 8028               | 4.1    | 3.9    | 0.6    | 2.4    | 4.0    |
| 216481_at   | AF052177 | GRIP2 80852               | 3.6    | 8.3    | 9.2    | 3.8    | 2.7    |
| 216482_x_at | X65232   | ZNF79 7633                | 5.0    | 5.8    | 1.3    | 6.9    | 8.3    |
| 216483_s_at | AC005339 | C19orf10 56005            | 363.2  | 368.6  | 428.6  | 377.0  | 354.6  |
| 216484_x_at | L24521   | -                         | 467.7  | 389.7  | 443.8  | 377.3  | 339.6  |
| 216485_s_at | AF206667 | TPSAB1 7177               | 1.7    | 1.4    | 1.1    | 1.3    | 1.2    |
| 216486_x_at | X65232   | ZNF79 7633                | 40.4   | 25.1   | 46.7   | 39.8   | 38.6   |
| 216487_at   | AL049988 | -                         | 1.0    | 1.2    | 3.3    | 2.9    | 1.0    |
| 216488_s_at | AL161996 | ATP11A 23250              | 19.1   | 18.2   | 14.7   | 23.1   | 13.3   |
| 216489_at   | AB046836 | LOC1019270:101927086      | 5.7    | 8.7    | 4.5    | 6.7    | 2.4    |
| 216490_x_at | AL133267 | RPLP2P1 /// -             | 27.8   | 23.9   | 41.1   | 29.1   | 35.0   |
| 216491_x_at | U80139   | IGHM 3507                 | 3.9    | 0.6    | 2.0    | 0.5    | 0.9    |
| 216492_at   | AK024467 | KIR3DX1 90011             | 9.0    | 11.5   | 3.5    | 3.4    | 1.7    |
| 216493_s_at | AL023775 | IGF2BP3 10643             | 0.6    | 2.2    | 0.9    | 3.1    | 0.2    |
| 216494_at   | AL023775 | RP3-497J21.1-             | 5.7    | 2.5    | 1.0    | 3.1    | 0.4    |
| 216495_x_at | AF043584 | -                         | 21.3   | 11.0   | 13.4   | 2.7    | 7.9    |
| 216496_s_at | AK021988 | -                         | 0.6    | 0.7    | 0.7    | 3.2    | 1.5    |
| 216497_at   | AL390738 | -                         | 37.0   | 16.8   | 35.2   | 19.6   | 24.7   |
| 216498_at   | AL390026 | RP3-336K20_-              | 1.1    | 4.0    | 0.9    | 0.6    | 1.1    |
| 216499_at   | AL137590 | LOC1027236:102723620      | 16.0   | 22.4   | 18.2   | 14.7   | 10.7   |
| 216500_at   | M14087   | -                         | 3.5    | 3.1    | 3.4    | 2.8    | 2.0    |
| 216501_at   | U25801   | VAC14 55697               | 0.5    | 1.1    | 2.1    | 0.9    | 0.3    |
| 216502_at   | AL096734 | ISG20L2 81875             | 10.1   | 4.0    | 8.8    | 4.3    | 4.9    |
| 216503_s_at | AF060927 | MLLT10 8028               | 18.2   | 17.1   | 17.2   | 17.1   | 17.8   |
| 216504_s_at | AL049963 | SLC39A8 64116             | 24.5   | 8.9    | 11.7   | 9.7    | 14.9   |
| 216505_x_at | AL118502 | RPS10L -                  | 827.3  | 709.4  | 872.9  | 752.7  | 585.4  |
| 216506_x_at | AF060938 | MLLT10 8028               | 22.9   | 12.8   | 25.3   | 24.0   | 12.7   |
| 216507_at   | AF189251 | TAPT1 202018              | 2.8    | 2.3    | 2.8    | 10.4   | 3.3    |
| 216508_x_at | AC007277 | HMGB1P4 //-               | 273.9  | 170.1  | 223.4  | 166.8  | 186.0  |
| 216509_x_at | AF060938 | MLLT10 8028               | 13.0   | 6.3    | 7.4    | 11.5   | 0.8    |
| 216510_x_at | AB035175 | IGHA1 /// IG 3493 /// 350 | 1.9    | 0.4    | 1.5    | 1.1    | 2.7    |
| 216511_s_at | AJ270770 | TCF7L2 6934               | 31.6   | 42.5   | 37.8   | 39.6   | 23.1   |
| 216512_s_at | AL139318 | DCT 1638                  | 14.8   | 18.4   | 12.9   | 12.9   | 11.5   |
| 216513_at   | AL139318 | DCT 1638                  | 3.7    | 0.4    | 0.9    | 3.2    | 0.7    |
| 216514_at   | AF203728 | -                         | 12.1   | 4.0    | 14.0   | 8.3    | 8.4    |
| 216515_x_at | AL121585 | MIR1244-3 100422872       | 1456.1 | 1188.6 | 1501.4 | 1330.4 | 1271.4 |
| 216516_at   | AL080315 | RP1-6P5.2 -               | 4.0    | 3.7    | 4.6    | 3.8    | 5.1    |
| 216517_at   | Z00008   | IGKC 3514                 | 5.5    | 6.3    | 0.3    | 0.3    | 4.5    |
| 216518_at   | AL049260 | -                         | 3.1    | 0.4    | 1.1    | 0.4    | 3.1    |
| 216519_s_at | AK021923 | PROSC 11212               | 3.4    | 3.3    | 1.2    | 3.3    | 3.5    |
| 216520_s_at | AF072098 | LOC1019288:7178 /// 101   | 3258.0 | 2870.4 | 3223.8 | 2924.8 | 2678.5 |
| 216521_s_at | S72931   | BRCC3 79184               | 30.3   | 26.4   | 32.1   | 30.9   | 34.8   |
| 216522_at   | AL133267 | OR2B6 26212               | 21.2   | 12.2   | 22.0   | 10.7   | 10.6   |
| 216524_x_at | AL049260 | -                         | 42.3   | 34.2   | 31.7   | 27.2   | 26.3   |
| 216525_x_at | D38437   | PMS2P3 5387               | 149.9  | 133.1  | 149.0  | 163.2  | 109.9  |
| 216526_x_at | AK024836 | HLA-C 3107                | 657.6  | 637.3  | 607.7  | 670.6  | 496.7  |
| 216527_at   | AL049252 | HCG18 414777              | 6.4    | 0.8    | 7.3    | 3.9    | 5.3    |
| 216528_at   | AL049244 | -                         | 9.1    | 2.3    | 7.8    | 2.9    | 7.3    |
| 216529_at   | AL049244 | -                         | 4.5    | 0.8    | 0.7    | 1.9    | 0.2    |

|             |          |             |                       |        |        |        |        |        |
|-------------|----------|-------------|-----------------------|--------|--------|--------|--------|--------|
| 216530_at   | AL137435 | -           | -                     | 13.4   | 8.4    | 7.3    | 12.2   | 1.2    |
| 216531_at   | U73479   | MBTPS2      | /// \51360 /// 40     | 19.6   | 15.5   | 21.2   | 16.6   | 16.1   |
| 216532_x_at | AL138831 | RP3-406P24. | -                     | 106.1  | 112.7  | 113.2  | 45.2   | 62.8   |
| 216533_at   | AL122056 | PCCA        | 5095                  | 0.3    | 1.4    | 1.9    | 1.7    | 0.3    |
| 216534_at   | AL110223 | -           | -                     | 1.1    | 1.4    | 4.7    | 0.4    | 6.6    |
| 216535_at   | AL050219 | CADM3       | 57863                 | 3.7    | 2.1    | 7.9    | 3.1    | 2.1    |
| 216536_at   | AC006271 | OR7E19P     | 26651                 | 2.6    | 1.1    | 1.1    | 0.5    | 0.8    |
| 216537_s_at | AJ130713 | SIGLEC7     | 27036                 | 13.3   | 4.0    | 9.0    | 9.5    | 8.5    |
| 216538_at   | AL049351 | -           | -                     | 15.2   | 4.1    | 8.8    | 12.2   | 8.0    |
| 216539_at   | AB050195 | ATXN3L      | 92552                 | 7.1    | 4.3    | 3.0    | 0.8    | 6.8    |
| 216540_at   | X61072   | YME1L1      | 10730                 | 9.9    | 6.9    | 8.5    | 10.1   | 6.0    |
| 216541_x_at | AJ275397 | IGHG1       | /// IG 3500 /// 350   | 1.0    | 1.3    | 0.6    | 1.2    | 0.8    |
| 216542_x_at | AJ275355 | IGHA1       | /// IG 3493 /// 350   | 26.1   | 23.4   | 33.1   | 13.9   | 20.1   |
| 216543_at   | AB050195 | GS1-600G8.3 | 100093698             | 0.5    | 2.7    | 3.4    | 1.1    | 3.2    |
| 216544_at   | AC007320 | LOC1006529  | 159162 /// 1          | 1.9    | 4.1    | 10.8   | 4.4    | 3.7    |
| 216545_at   | AL049710 | GOT2P1      | /// C-                | 33.9   | 25.7   | 33.2   | 30.1   | 28.9   |
| 216546_s_at | AJ251847 | CHI3L1      | 1116                  | 3.1    | 3.4    | 1.8    | 1.5    | 1.0    |
| 216547_at   | AL353681 | RP4-710M16- | -                     | 145.7  | 124.3  | 149.3  | 147.6  | 96.0   |
| 216548_x_at | AL049709 | HMGB3P1     | 128872                | 52.1   | 43.5   | 47.3   | 38.9   | 30.8   |
| 216549_s_at | AL096712 | TBC1D22B    | 55633                 | 5.6    | 7.3    | 8.0    | 10.8   | 5.9    |
| 216550_x_at | X80821   | ANKRD12     | 23253                 | 11.2   | 2.4    | 3.9    | 4.2    | 6.1    |
| 216551_x_at | AL110247 | PLCG1       | 5335                  | 39.6   | 35.2   | 35.6   | 40.3   | 32.2   |
| 216552_x_at | AF135564 | KIR2DS4     | 3809                  | 6.6    | 1.8    | 1.4    | 1.2    | 6.2    |
| 216553_x_at | AL121890 | LOC1027249  | 102724905             | 7.3    | 7.1    | 4.3    | 8.9    | 9.2    |
| 216554_s_at | U88968   | ENO1        | 2023                  | 47.3   | 38.3   | 32.8   | 27.7   | 37.3   |
| 216555_at   | AK026712 | PRR14L      | 253143                | 7.5    | 2.9    | 1.0    | 2.6    | 8.2    |
| 216556_x_at | AL135926 | SUMO1P2     | ///-                  | 11.5   | 14.2   | 22.3   | 10.8   | 11.3   |
| 216557_x_at | U92706   | IGHA1       | /// IG 3493 /// 349   | 1.4    | 3.5    | 1.4    | 9.4    | 6.3    |
| 216558_x_at | AF044595 | IGHA1       | /// IG 3493 /// 349   | 2.4    | 2.7    | 1.0    | 1.8    | 6.0    |
| 216559_x_at | AL050348 | HNRNPA1P3   | -                     | 362.9  | 243.7  | 316.4  | 291.0  | 214.5  |
| 216560_x_at | D87021   | IGLC1       | /// IGL 3537          | 1.4    | 0.6    | 0.9    | 0.6    | 0.6    |
| 216561_x_at | AF032454 | SOX5P       | /// SC-               | 10.4   | 1.9    | 0.3    | 5.0    | 0.6    |
| 216562_at   | AL121777 | SRMP1       | /// SF-               | 9.5    | 8.6    | 12.6   | 0.9    | 7.5    |
| 216563_at   | X80821   | ANKRD12     | 23253                 | 8.9    | 8.6    | 4.1    | 6.5    | 7.6    |
| 216564_at   | AC003989 | AC003989.4  | -                     | 1.2    | 6.6    | 1.1    | 2.6    | 1.6    |
| 216565_x_at | AL121994 | RP4-781L3.1 | -                     | 49.8   | 53.6   | 49.2   | 39.1   | 42.7   |
| 216566_at   | D84140   | -           | -                     | 0.6    | 4.2    | 1.4    | 1.2    | 0.5    |
| 216567_at   | L41657   | -           | -                     | 0.5    | 0.7    | 1.1    | 3.0    | 0.5    |
| 216568_x_at | Z83821   | -           | -                     | 26.7   | 17.3   | 22.9   | 15.0   | 23.0   |
| 216569_at   | U72237   | FABP3P2     | /// -                 | 2.2    | 7.3    | 16.7   | 12.6   | 12.3   |
| 216570_x_at | AL096829 | RP4-595K12. | -                     | 2402.2 | 1814.4 | 2322.7 | 2293.1 | 1939.1 |
| 216571_at   | M81780   | -           | -                     | 3.0    | 5.7    | 3.0    | 3.3    | 1.6    |
| 216572_at   | AF315075 | FOX1        | 2300                  | 0.5    | 0.4    | 0.3    | 0.5    | 0.3    |
| 216573_at   | X84340   | IGLV1-44    | 28823                 | 3.7    | 0.9    | 0.9    | 4.9    | 0.9    |
| 216574_s_at | J04742   | RPE         | /// RPEL 6120 /// 729 | 29.4   | 27.5   | 34.5   | 22.1   | 24.2   |
| 216575_at   | AL035604 | HMGB1P17    | /-                    | 2.3    | 3.5    | 3.1    | 0.2    | 4.6    |
| 216576_x_at | AF103529 | IGK         | /// IGKC 3514 /// 508 | 3.1    | 1.2    | 2.5    | 2.6    | 8.2    |
| 216577_at   | AL049690 | RPS11P1     | /// -                 | 11.9   | 5.3    | 4.3    | 10.0   | 8.9    |
| 216578_at   | AF009660 | TRBV5-2     | ///-                  | 2.0    | 2.0    | 1.8    | 1.4    | 1.8    |
| 216579_at   | AL121988 | GJB4        | 127534                | 1.8    | 2.1    | 1.5    | 1.3    | 1.3    |
| 216580_at   | AL049545 | RP1-263J7.1 | -                     | 11.6   | 7.0    | 17.9   | 6.2    | 2.8    |
| 216581_at   | AL022068 | KRT18P38    | ///-                  | 9.6    | 12.1   | 7.1    | 1.7    | 1.8    |
| 216582_at   | AL021808 | POM121L2    | 94026                 | 5.5    | 10.6   | 14.2   | 7.2    | 8.3    |

|             |          |                          |       |       |       |       |       |
|-------------|----------|--------------------------|-------|-------|-------|-------|-------|
| 216583_x_at | AC004079 | NHP2P2 /// 1-            | 104.4 | 95.7  | 91.9  | 91.0  | 84.4  |
| 216584_at   | AL031291 | UBE2V2P3 //              | 1.0   | 1.6   | 1.9   | 1.5   | 2.1   |
| 216585_at   | AL031777 | HIST1H2APS-              | 9.8   | 0.6   | 4.9   | 5.6   | 2.8   |
| 216586_at   | X92986   | -                        | 13.9  | 6.6   | 1.1   | 9.2   | 3.4   |
| 216587_s_at | AL121749 | FZD8 /// MIR8325 /// 100 | 1.1   | 0.2   | 0.5   | 0.3   | 0.4   |
| 216588_at   | AL031577 | RP3-391O22.-             | 4.5   | 2.8   | 3.2   | 2.2   | 3.4   |
| 216589_at   | AL031276 | RP5-1118D2-              | 13.4  | 9.2   | 13.9  | 3.7   | 14.6  |
| 216590_at   | AC004862 | GNAT3 346562             | 2.7   | 1.1   | 4.3   | 1.9   | 4.9   |
| 216591_s_at | AF080579 | SDHC 6391                | 355.9 | 324.2 | 334.9 | 341.0 | 284.0 |
| 216592_at   | AL022152 | MAGEC3 139081            | 1.3   | 2.8   | 4.5   | 5.5   | 5.8   |
| 216593_s_at | AB000359 | PIGC 5279                | 92.6  | 81.8  | 107.0 | 90.9  | 75.1  |
| 216594_x_at | S68290   | AKR1C1 1645              | 20.3  | 13.2  | 18.7  | 8.9   | 14.6  |
| 216595_at   | AL049983 | FAM186A 121006           | 6.3   | 7.4   | 6.5   | 7.4   | 5.7   |
| 216596_at   | AL117445 | DKFZP434L1826082         | 5.9   | 1.2   | 0.8   | 4.7   | 1.2   |
| 216597_at   | U66059   | PRSS3P3 -                | 1.7   | 2.1   | 1.3   | 1.1   | 1.3   |
| 216598_s_at | S69738   | CCL2 6347                | 0.6   | 0.3   | 0.4   | 1.3   | 1.6   |
| 216599_x_at | AJ271205 | SLC22A6 9356             | 1.9   | 1.5   | 1.0   | 1.5   | 2.9   |
| 216600_x_at | AK026411 | ALDOB 229                | 26.2  | 16.0  | 23.0  | 22.1  | 15.7  |
| 216601_at   | AF047485 | AOC4P 90586              | 5.4   | 4.7   | 12.3  | 3.4   | 12.8  |
| 216602_s_at | AD000092 | FARSA 2193               | 298.8 | 327.8 | 406.5 | 318.7 | 365.4 |
| 216603_at   | AL365343 | SLC7A8 23428             | 2.1   | 1.1   | 2.0   | 2.7   | 0.7   |
| 216604_s_at | AL365343 | SLC7A8 23428             | 18.4  | 12.5  | 11.2  | 6.9   | 15.4  |
| 216605_s_at | AC005626 | CEACAM21 90273           | 0.4   | 0.6   | 0.8   | 0.9   | 0.8   |
| 216606_x_at | AL050332 | LYPLA2 11313             | 56.9  | 59.4  | 67.5  | 57.8  | 44.3  |
| 216607_s_at | U40053   | CYP51A1 /// 1595 /// 401 | 226.2 | 169.1 | 250.3 | 175.0 | 194.6 |
| 216608_at   | AL080191 | DKFZP434A026102          | 2.9   | 2.4   | 7.5   | 7.0   | 10.6  |
| 216609_at   | AF065241 | TXN 7295                 | 61.4  | 55.8  | 73.0  | 60.1  | 57.9  |
| 216610_at   | AB022847 | SLC6A2 6530              | 10.1  | 1.0   | 6.3   | 3.2   | 0.9   |
| 216611_s_at | AB022847 | SLC6A2 6530              | 8.9   | 7.2   | 8.9   | 2.2   | 8.9   |
| 216612_x_at | AK021988 | -                        | 5.6   | 1.4   | 4.7   | 1.6   | 6.8   |
| 216613_at   | AL050042 | -                        | 0.2   | 1.8   | 3.2   | 0.6   | 0.2   |
| 216614_at   | AL049988 | -                        | 0.6   | 3.0   | 0.5   | 0.2   | 0.1   |
| 216615_s_at | AJ005205 | HTR3A 3359               | 17.2  | 1.7   | 14.4  | 9.9   | 12.1  |
| 216616_at   | AL137428 | -                        | 0.4   | 0.6   | 0.3   | 0.2   | 0.4   |
| 216617_s_at | X98405   | MAG 4099                 | 2.6   | 0.6   | 0.5   | 1.0   | 1.3   |
| 216618_at   | AL117520 | -                        | 3.9   | 5.3   | 5.8   | 4.0   | 3.6   |
| 216619_at   | AL080161 | GTPBP10 /// 85865 /// 10 | 2.5   | 1.8   | 3.9   | 3.2   | 0.6   |
| 216620_s_at | AF009205 | ARHGEF10 9639            | 24.1  | 28.3  | 27.0  | 22.4  | 22.9  |
| 216621_at   | AL050032 | -                        | 4.6   | 2.4   | 2.3   | 1.1   | 1.6   |
| 216622_at   | AF029325 | LAMB4 22798              | 1.5   | 5.4   | 5.3   | 9.5   | 4.3   |
| 216623_x_at | AK025084 | TOX3 27324               | 7.4   | 5.9   | 6.1   | 3.8   | 4.3   |
| 216624_s_at | Z69744   | KMT2A 4297               | 27.5  | 15.1  | 18.5  | 19.4  | 11.8  |
| 216625_at   | AL050032 | -                        | 0.7   | 3.3   | 1.2   | 0.2   | 2.4   |
| 216626_at   | AL050026 | -                        | 6.9   | 0.9   | 4.7   | 5.3   | 4.9   |
| 216627_s_at | U10473   | B4GALT1 2683             | 52.7  | 38.1  | 48.2  | 45.7  | 40.4  |
| 216628_at   | AL117447 | -                        | 9.2   | 4.5   | 2.2   | 2.9   | 5.8   |
| 216629_at   | AC004493 | SRRM2 23524              | 6.1   | 4.0   | 12.8  | 6.9   | 2.0   |
| 216630_at   | AL110190 | -                        | 2.1   | 2.8   | 2.1   | 1.7   | 1.9   |
| 216631_s_at | X01634   | HLA-DPA2 //              | 9.0   | 11.1  | 11.3  | 7.0   | 6.0   |
| 216632_at   | AL080104 | NAV3 89795               | 1.1   | 2.8   | 0.6   | 0.4   | 0.4   |
| 216633_s_at | AK022610 | PLCH1 23007              | 8.3   | 2.9   | 5.5   | 8.1   | 8.1   |
| 216634_at   | AK022610 | PLCH1 23007              | 7.0   | 2.0   | 1.8   | 1.3   | 0.6   |
| 216635_at   | AL050043 | -                        | 8.1   | 10.6  | 16.5  | 9.8   | 9.8   |

|             |          |                      |              |       |       |       |       |       |
|-------------|----------|----------------------|--------------|-------|-------|-------|-------|-------|
| 216636_at   | AL050043 | -                    | -            | 2.9   | 5.7   | 1.2   | 1.9   | 0.7   |
| 216637_at   | AL117447 | -                    | -            | 4.1   | 3.5   | 1.6   | 8.0   | 0.7   |
| 216638_s_at | S78505   | PRLR                 | 5618         | 3.0   | 0.4   | 3.2   | 5.5   | 1.1   |
| 216639_at   | AL110206 | SRPX2                | 27286        | 4.3   | 3.2   | 3.6   | 3.4   | 2.1   |
| 216640_s_at | AK026926 | PDIA6                | 10130        | 400.8 | 385.9 | 440.1 | 412.7 | 377.7 |
| 216641_s_at | U58994   | LAD1                 | 3898         | 93.1  | 97.2  | 140.8 | 105.5 | 100.9 |
| 216642_at   | AL110190 | -                    | -            | 7.0   | 2.5   | 2.3   | 0.6   | 2.8   |
| 216643_at   | D25272   | -                    | -            | 4.5   | 4.3   | 8.5   | 5.9   | 3.5   |
| 216644_at   | AK000185 | -                    | -            | 6.7   | 6.2   | 8.4   | 3.7   | 3.8   |
| 216645_at   | AL117663 | -                    | -            | 11.9  | 1.9   | 14.4  | 5.0   | 9.7   |
| 216646_at   | L11372   | DSCC1                | 79075        | 2.1   | 0.6   | 1.3   | 0.6   | 1.4   |
| 216647_at   | AL117663 | TCF3                 | 6929         | 12.6  | 14.8  | 13.0  | 11.3  | 13.3  |
| 216648_s_at | AF072826 | RREB1                | 6239         | 1.8   | 4.5   | 8.1   | 0.4   | 3.4   |
| 216649_at   | AF072826 | RREB1                | 6239         | 0.5   | 0.4   | 0.4   | 1.9   | 0.3   |
| 216650_at   | AL008627 | RP1-130G2.1-         |              | 52.3  | 45.1  | 91.5  | 57.7  | 30.3  |
| 216651_s_at | X69936   | GAD2                 | 2572         | 3.9   | 11.7  | 1.9   | 3.0   | 3.9   |
| 216652_s_at | AL137673 | DR1                  | 1810         | 118.5 | 117.6 | 147.1 | 129.9 | 117.9 |
| 216653_at   | AL137673 | DR1                  | 1810         | 0.7   | 3.0   | 7.2   | 5.0   | 4.8   |
| 216654_at   | X71923   | TNXB                 | 7148         | 8.3   | 8.4   | 5.3   | 7.2   | 9.9   |
| 216655_s_at | AF041811 | -                    | -            | 4.0   | 6.4   | 5.2   | 1.5   | 4.6   |
| 216656_at   | AF041811 | -                    | -            | 0.5   | 0.6   | 0.7   | 0.5   | 1.4   |
| 216657_at   | U63332   | ATXN3                | 4287         | 5.6   | 3.3   | 1.3   | 4.4   | 3.4   |
| 216658_at   | AK000185 | -                    | -            | 13.1  | 6.1   | 12.9  | 11.9  | 7.8   |
| 216659_at   | J00146   | LOC1720              | 1720         | 3.2   | 4.2   | 5.5   | 0.5   | 4.5   |
| 216660_at   | AK000145 | MYO7B                | 4648         | 0.3   | 0.7   | 0.4   | 0.7   | 0.4   |
| 216661_x_at | M15331   | CYP2C9               | 1559         | 20.3  | 18.1  | 17.7  | 20.7  | 14.4  |
| 216662_at   | AK000145 | MYO7B                | 4648         | 7.6   | 8.5   | 8.9   | 5.6   | 6.6   |
| 216663_s_at | AC002481 | ZMYND10              | 51364        | 4.8   | 13.5  | 14.9  | 18.8  | 2.3   |
| 216664_at   | AL133618 | LOC1019291.101929148 |              | 1.3   | 0.8   | 1.6   | 4.5   | 5.0   |
| 216665_s_at | AL133618 | LOC1019291.101929148 |              | 2.0   | 0.2   | 4.1   | 0.5   | 0.5   |
| 216666_at   | AK000645 | LOC93432             | 93432        | 7.1   | 6.5   | 8.0   | 6.7   | 4.0   |
| 216667_at   | X55989   | ECRP                 | 643332       | 1.9   | 1.1   | 1.2   | 1.1   | 1.0   |
| 216668_at   | U63542   | PABPC1P1 //-         |              | 20.8  | 25.6  | 11.8  | 17.2  | 16.0  |
| 216669_at   | AK000293 | -                    | -            | 4.2   | 1.4   | 6.2   | 4.5   | 4.0   |
| 216670_at   | AL050220 | KLK13                | 26085        | 2.0   | 1.0   | 2.0   | 1.2   | 0.6   |
| 216671_x_at | U14383   | MUC8                 | 100129528    | 3.7   | 1.9   | 1.9   | 2.1   | 1.8   |
| 216672_s_at | AL133024 | MYT1L                | 23040        | 0.6   | 0.4   | 0.2   | 0.2   | 0.4   |
| 216673_at   | AF000990 | TTY1 /// TT          | 50858 /// 10 | 10.3  | 11.0  | 12.4  | 9.4   | 7.3   |
| 216674_at   | AL031848 | HES2                 | 54626        | 0.8   | 0.4   | 0.5   | 1.0   | 0.8   |
| 216675_at   | AK000834 | -                    | -            | 24.3  | 18.2  | 10.3  | 24.6  | 12.9  |
| 216676_x_at | AC006293 | KIR3DL3              | 115653       | 3.1   | 2.1   | 1.9   | 1.2   | 2.1   |
| 216677_at   | U20648   | -                    | -            | 15.5  | 12.3  | 17.4  | 9.4   | 9.5   |
| 216678_at   | AK000773 | IFT122               | 55764        | 38.3  | 22.0  | 34.2  | 19.1  | 20.6  |
| 216679_at   | AL137624 | DDR1-AS1             | 414771       | 7.7   | 4.7   | 10.0  | 1.4   | 6.2   |
| 216680_s_at | BC004264 | EPHB4                | 2050         | 24.9  | 30.8  | 32.5  | 23.6  | 25.9  |
| 216681_at   | AK000353 | -                    | -            | 3.0   | 1.6   | 1.1   | 3.7   | 3.6   |
| 216682_s_at | AK021457 | SUPT20H              | 55578        | 6.6   | 6.0   | 4.0   | 6.4   | 2.9   |
| 216683_at   | AL353949 | -                    | -            | 2.3   | 5.9   | 2.9   | 0.4   | 4.0   |
| 216684_s_at | AF257501 | SS18                 | 6760         | 29.3  | 25.5  | 37.6  | 25.9  | 22.3  |
| 216685_s_at | AF216650 | MTAP                 | 4507         | 37.2  | 32.7  | 41.1  | 41.5  | 39.5  |
| 216686_at   | AL137717 | ANKRD36BP1           | 645784       | 2.3   | 0.4   | 2.1   | 3.3   | 0.3   |
| 216687_x_at | U06641   | UGT2B15              | 7366         | 312.0 | 228.2 | 136.9 | 196.5 | 94.7  |
| 216688_at   | AL137495 | -                    | -            | 2.0   | 8.9   | 5.6   | 1.7   | 6.4   |

|             |          |              |              |      |      |       |      |      |
|-------------|----------|--------------|--------------|------|------|-------|------|------|
| 216689_x_at | U62794   | ARHGAP1      | 392          | 88.5 | 75.0 | 103.9 | 57.2 | 75.7 |
| 216690_at   | AC005255 | OR7C1        | 26664        | 6.8  | 8.0  | 8.5   | 4.6  | 5.9  |
| 216691_at   | AL137705 | -            | -            | 0.7  | 0.4  | 3.7   | 2.6  | 0.7  |
| 216692_at   | AL137428 | -            | -            | 16.2 | 14.3 | 20.0  | 14.1 | 3.4  |
| 216693_x_at | AL133102 | HDGFRP3      | 50810        | 69.8 | 64.6 | 69.5  | 79.5 | 54.0 |
| 216694_at   | AL161956 | -            | -            | 12.4 | 11.5 | 8.0   | 9.0  | 18.6 |
| 216695_s_at | AF082559 | TNKS         | 8658         | 6.3  | 1.5  | 11.3  | 5.0  | 6.5  |
| 216696_s_at | U95090   | PRODH2       | 58510        | 17.1 | 3.9  | 12.1  | 2.2  | 11.4 |
| 216697_at   | AL161955 | TRIO         | 7204         | 1.8  | 2.4  | 4.5   | 2.6  | 2.8  |
| 216698_x_at | AF065854 | OR7E12P      | 10821        | 58.4 | 54.5 | 52.1  | 54.9 | 39.4 |
| 216699_s_at | L10038   | KLK1         | 3816         | 18.2 | 14.7 | 14.2  | 25.3 | 11.5 |
| 216700_at   | AL161955 | TRIO         | 7204         | 2.6  | 1.3  | 5.8   | 0.5  | 6.3  |
| 216701_at   | AF005081 | C1orf68      | 100129271    | 4.0  | 5.3  | 7.0   | 3.3  | 4.6  |
| 216702_x_at | U82303   | -            | -            | 11.4 | 1.1  | 2.0   | 3.7  | 4.2  |
| 216703_at   | AL162040 | -            | -            | 5.6  | 5.2  | 7.1   | 4.8  | 1.3  |
| 216704_at   | AL353949 | -            | -            | 0.8  | 0.7  | 1.9   | 1.6  | 4.2  |
| 216705_s_at | X02189   | ADA          | 100          | 36.9 | 54.9 | 44.9  | 68.8 | 36.8 |
| 216706_x_at | M21388   | IGHD3-16 /// | 3500 /// 893 | 0.5  | 1.6  | 2.0   | 1.5  | 1.4  |
| 216707_at   | AL162044 | -            | -            | 1.3  | 0.4  | 0.5   | 0.5  | 0.5  |
| 216708_x_at | D84143   | -            | -            | 1.2  | 0.9  | 1.2   | 0.4  | 0.5  |
| 216709_at   | AL162040 | -            | -            | 3.5  | 2.9  | 2.8   | 3.0  | 2.2  |
| 216710_x_at | AL359578 | ZNF287       | 57336        | 7.5  | 13.8 | 2.6   | 7.3  | 7.8  |
| 216711_s_at | M73444   | TAF1         | 6872         | 9.3  | 9.5  | 17.5  | 13.5 | 15.6 |
| 216712_at   | AL359557 | SLC25A30     | 253512       | 6.2  | 8.3  | 5.0   | 7.1  | 4.0  |
| 216713_at   | AL049325 | KRIT1        | 889          | 60.1 | 39.1 | 58.7  | 47.0 | 42.5 |
| 216714_at   | Z77651   | CCL13        | 6357         | 1.3  | 1.0  | 1.3   | 0.8  | 0.7  |
| 216715_at   | AL080315 | EEF1DP5 ///  | -            | 16.4 | 16.8 | 6.4   | 4.9  | 9.0  |
| 216716_at   | U15197   | -            | -            | 1.7  | 7.7  | 12.5  | 10.9 | 12.7 |
| 216717_at   | AK021457 | SUPT20H      | 55578        | 1.0  | 0.5  | 0.5   | 1.3  | 0.2  |
| 216718_at   | AF005082 | LINC00302    | 388699       | 1.1  | 0.7  | 1.0   | 3.8  | 2.2  |
| 216719_s_at | AL359563 | RP11-286E11- | -            | 2.4  | 4.6  | 3.3   | 2.1  | 0.5  |
| 216720_at   | AL359563 | CYP2U1       | 113612       | 1.5  | 0.9  | 0.6   | 0.7  | 0.2  |
| 216721_at   | AL359557 | SLC25A30     | 253512       | 15.6 | 14.8 | 11.7  | 15.4 | 8.4  |
| 216722_at   | AF164963 | VENTXP1      | 139538       | 0.7  | 2.2  | 2.6   | 0.2  | 0.1  |
| 216723_at   | AL390157 | -            | -            | 5.8  | 3.8  | 5.3   | 4.9  | 2.5  |
| 216724_at   | AL359602 | DCLK2        | 166614       | 1.2  | 0.5  | 3.8   | 0.9  | 1.3  |
| 216725_at   | AL359602 | DCLK2        | 166614       | 1.3  | 1.0  | 1.8   | 2.2  | 1.1  |
| 216726_at   | AF164963 | VENTXP1      | 139538       | 1.3  | 1.0  | 1.0   | 1.1  | 0.7  |
| 216727_at   | AF034187 | STK38        | 11329        | 1.2  | 1.4  | 2.5   | 1.5  | 0.4  |
| 216728_at   | AL390157 | -            | -            | 3.1  | 4.0  | 2.1   | 2.4  | 3.0  |
| 216729_at   | AK025388 | -            | -            | 4.3  | 3.9  | 3.9   | 1.7  | 3.7  |
| 216730_at   | AK024561 | -            | -            | 18.2 | 9.2  | 12.6  | 13.1 | 11.6 |
| 216731_s_at | AK023690 | -            | -            | 0.6  | 0.3  | 0.5   | 0.5  | 0.4  |
| 216732_at   | AK023690 | -            | -            | 0.7  | 0.4  | 0.3   | 0.6  | 0.5  |
| 216733_s_at | X86401   | GATM         | 2628         | 11.0 | 7.7  | 12.5  | 6.9  | 7.9  |
| 216734_s_at | X68829   | CXCR5        | 643          | 2.4  | 1.7  | 1.0   | 0.6  | 0.8  |
| 216735_x_at | AK024553 | -            | -            | 7.9  | 4.2  | 5.9   | 7.5  | 6.6  |
| 216736_at   | AK024515 | TM6SF2       | 53345        | 3.2  | 2.2  | 8.3   | 2.8  | 3.3  |
| 216737_at   | AK024525 | -            | -            | 0.1  | 3.0  | 1.5   | 0.2  | 0.8  |
| 216738_at   | AK024553 | -            | -            | 5.5  | 2.3  | 2.4   | 10.1 | 1.5  |
| 216739_at   | AK024527 | -            | -            | 19.8 | 15.6 | 17.1  | 7.4  | 5.0  |
| 216740_at   | AK024851 | -            | -            | 5.6  | 3.6  | 2.6   | 2.1  | 3.0  |
| 216741_at   | AK024568 | -            | -            | 1.0  | 1.7  | 1.9   | 1.4  | 1.0  |



|             |          |          |        |      |      |      |      |      |
|-------------|----------|----------|--------|------|------|------|------|------|
| 216742_at   | AK024561 | -        | -      | 0.7  | 0.5  | 1.9  | 2.2  | 0.5  |
| 216743_at   | AK024915 | -        | -      | 4.3  | 1.5  | 1.9  | 5.4  | 4.5  |
| 216744_at   | AK024615 | -        | -      | 17.7 | 10.4 | 8.9  | 9.7  | 9.5  |
| 216745_x_at | AK024606 | -        | -      | 15.7 | 11.0 | 12.8 | 3.9  | 12.3 |
| 216746_at   | AK024606 | -        | -      | 2.7  | 3.1  | 3.0  | 0.5  | 1.1  |
| 216747_at   | AK024871 | APBB2    | 323    | 8.0  | 9.9  | 1.8  | 2.5  | 10.8 |
| 216748_at   | AK024890 | PYHIN1   | 149628 | 2.0  | 10.1 | 6.2  | 5.9  | 9.4  |
| 216749_at   | AK024851 | -        | -      | 8.0  | 1.0  | 8.4  | 0.2  | 3.3  |
| 216750_at   | AK024871 | APBB2    | 323    | 13.8 | 13.6 | 6.1  | 20.1 | 9.5  |
| 216751_at   | AK024879 | -        | -      | 9.7  | 10.8 | 16.5 | 5.1  | 6.2  |
| 216752_at   | AK025026 | PIK3R4   | 30849  | 4.1  | 0.9  | 5.3  | 3.9  | 3.7  |
| 216753_at   | AK025152 | -        | -      | 11.8 | 13.8 | 1.1  | 9.0  | 0.6  |
| 216754_at   | AK025388 | -        | -      | 11.7 | 2.1  | 10.8 | 1.4  | 1.0  |
| 216755_at   | AK024945 | OSBPL10  | 114884 | 2.0  | 3.7  | 2.6  | 0.8  | 0.6  |
| 216756_at   | AK024995 | -        | -      | 7.2  | 5.4  | 7.5  | 4.0  | 4.5  |
| 216757_at   | AK024995 | -        | -      | 10.1 | 9.1  | 6.0  | 4.9  | 9.5  |
| 216758_at   | AK025038 | -        | -      | 0.4  | 1.8  | 0.3  | 0.2  | 1.0  |
| 216759_at   | AK025029 | HRASLS2  | 54979  | 9.7  | 4.5  | 13.2 | 9.5  | 4.6  |
| 216760_at   | AK025029 | HRASLS2  | 54979  | 4.1  | 2.1  | 1.6  | 1.9  | 3.1  |
| 216761_at   | AK025038 | -        | -      | 0.8  | 1.7  | 1.3  | 1.3  | 0.6  |
| 216762_at   | AK025097 | -        | -      | 5.2  | 8.3  | 12.2 | 7.2  | 10.4 |
| 216763_at   | AK025097 | -        | -      | 2.2  | 1.7  | 2.4  | 6.5  | 0.9  |
| 216764_at   | AK025191 | -        | -      | 1.0  | 5.0  | 4.6  | 2.7  | 0.3  |
| 216765_at   | AK025177 | MAP2K5   | 5607   | 0.5  | 2.5  | 1.3  | 5.9  | 2.2  |
| 216766_at   | AK025152 | -        | -      | 0.4  | 0.2  | 0.6  | 3.1  | 2.2  |
| 216767_at   | AK025363 | -        | -      | 7.0  | 1.9  | 4.5  | 6.7  | 6.9  |
| 216768_x_at | AK025188 | TTC38    | 55020  | 8.6  | 3.1  | 2.5  | 11.4 | 0.8  |
| 216769_x_at | AK025180 | -        | -      | 6.6  | 6.5  | 3.8  | 5.7  | 3.6  |
| 216770_at   | AK025325 | -        | -      | 18.0 | 8.2  | 10.3 | 1.4  | 9.5  |
| 216771_at   | AK025194 | -        | -      | 6.9  | 8.1  | 10.8 | 6.4  | 0.7  |
| 216772_at   | AK025194 | -        | -      | 0.6  | 1.4  | 3.7  | 1.5  | 1.0  |
| 216773_at   | AK025191 | -        | -      | 8.0  | 1.0  | 7.2  | 1.0  | 3.6  |
| 216774_at   | AK025325 | -        | -      | 7.4  | 8.0  | 4.7  | 11.3 | 0.8  |
| 216775_at   | AK025301 | USP53    | 54532  | 2.1  | 1.7  | 0.4  | 0.2  | 0.7  |
| 216776_at   | AK025206 | -        | -      | 9.6  | 5.9  | 9.0  | 10.0 | 4.9  |
| 216777_at   | AK025206 | -        | -      | 0.3  | 0.5  | 0.4  | 0.3  | 1.3  |
| 216778_s_at | Z22780   | CYLC1    | 1538   | 7.1  | 1.0  | 1.9  | 0.2  | 0.4  |
| 216779_at   | Z22780   | CYLC1    | 1538   | 9.2  | 8.5  | 10.9 | 10.8 | 7.2  |
| 216780_at   | AK025564 | ZNF443   | 10224  | 0.9  | 0.5  | 1.1  | 1.0  | 1.1  |
| 216781_at   | AB051538 | KIAA1751 | 85452  | 1.9  | 0.4  | 1.2  | 1.3  | 0.6  |
| 216782_at   | AK026679 | -        | -      | 3.6  | 1.4  | 0.9  | 0.8  | 3.1  |
| 216783_at   | AK025552 | -        | -      | 4.2  | 4.1  | 4.9  | 0.9  | 2.8  |
| 216784_at   | AK025422 | -        | -      | 1.5  | 2.5  | 3.2  | 2.6  | 2.8  |
| 216785_at   | AK026273 | -        | -      | 0.6  | 7.5  | 6.9  | 7.9  | 3.9  |
| 216786_at   | AK026667 | FAM224A  | 401630 | 7.3  | 4.4  | 5.8  | 5.7  | 1.8  |
| 216787_at   | AK026273 | -        | -      | 8.8  | 2.0  | 1.9  | 1.4  | 2.0  |
| 216788_at   | AK025564 | ZNF443   | 10224  | 2.0  | 7.4  | 1.1  | 0.7  | 0.7  |
| 216789_at   | AK026439 | -        | -      | 1.8  | 0.6  | 0.6  | 1.1  | 0.9  |
| 216790_at   | AK026465 | -        | -      | 1.1  | 1.0  | 0.5  | 0.8  | 1.0  |
| 216791_at   | AK026449 | -        | -      | 9.9  | 8.6  | 16.6 | 11.9 | 10.2 |
| 216792_at   | AK026867 | -        | -      | 12.8 | 7.1  | 12.2 | 11.2 | 9.3  |
| 216793_x_at | AK026856 | -        | -      | 0.2  | 0.9  | 1.1  | 1.1  | 2.8  |
| 216794_at   | AK026856 | -        | -      | 1.9  | 11.8 | 8.1  | 2.0  | 1.5  |

|             |          |              |               |         |       |       |       |       |      |
|-------------|----------|--------------|---------------|---------|-------|-------|-------|-------|------|
| 216795_at   | AK026847 | -            | -             | 3.9     | 0.2   | 4.2   | 0.9   | 0.3   |      |
| 216796_s_at | AK026847 | -            | -             | 0.9     | 0.5   | 0.5   | 1.6   | 2.1   |      |
| 216797_at   | AK026847 | -            | -             | 0.3     | 1.0   | 0.3   | 0.5   | 0.5   |      |
| 216798_at   | AK027172 | FLJ23519     | /// 6050      | /// 842 | 7.2   | 6.2   | 3.8   | 8.5   | 5.5  |
| 216799_at   | AL442084 | -            | -             | 0.8     | 0.8   | 0.6   | 1.1   | 1.8   |      |
| 216800_at   | AK027069 | -            | -             | 0.8     | 1.9   | 1.5   | 1.8   | 1.4   |      |
| 216801_at   | AK026910 | -            | -             | 18.5    | 11.2  | 7.7   | 5.3   | 0.3   |      |
| 216802_at   | AL442084 | -            | -             | 3.9     | 0.3   | 2.6   | 0.1   | 1.3   |      |
| 216803_at   | AK027217 | PDLIM5       | 10611         | 5.7     | 5.3   | 4.5   | 4.6   | 4.5   |      |
| 216804_s_at | AK027217 | PDLIM5       | 10611         | 37.1    | 49.8  | 52.4  | 46.7  | 41.6  |      |
| 216805_at   | AK027254 | -            | -             | 0.3     | 0.4   | 0.2   | 0.3   | 0.2   |      |
| 216806_at   | AL136306 | RP3-334F4.1  | -             | 99.9    | 86.2  | 73.4  | 70.6  | 59.4  |      |
| 216807_at   | AB051538 | KIAA1751     | 85452         | 10.6    | 8.7   | 0.6   | 1.6   | 4.0   |      |
| 216808_at   | AL354915 | MIR622       | 693207        | 1.3     | 1.2   | 0.7   | 0.8   | 1.7   |      |
| 216809_at   | Z22780   | CYLC1        | 1538          | 10.2    | 7.7   | 6.8   | 6.5   | 7.8   |      |
| 216810_at   | AJ406939 | KRTAP4-7     | 100132476     | 3.6     | 4.3   | 0.8   | 0.1   | 1.9   |      |
| 216811_at   | AF308291 | -            | -             | 6.2     | 1.0   | 1.7   | 3.7   | 1.0   |      |
| 216812_at   | AF308291 | -            | -             | 1.3     | 1.4   | 5.8   | 5.1   | 4.5   |      |
| 216813_at   | AL512728 | -            | -             | 2.1     | 0.9   | 1.7   | 4.9   | 0.8   |      |
| 216814_at   | AL353587 | ACTR3P2      | /// -         | 4.3     | 5.0   | 6.4   | 3.1   | 6.5   |      |
| 216815_at   | AL136306 | RP3-334F4.2  | -             | 2.1     | 0.5   | 1.1   | 1.5   | 0.4   |      |
| 216816_at   | AL050335 | RP1-190J20.1 | -             | 0.5     | 1.2   | 5.1   | 0.6   | 1.4   |      |
| 216817_s_at | AJ302604 | OR2H1        | 26716         | 6.6     | 9.1   | 1.2   | 1.6   | 1.5   |      |
| 216818_s_at | AJ302559 | OR2J2        | 26707         | 1.9     | 0.9   | 0.9   | 1.6   | 2.2   |      |
| 216819_at   | AL359553 | HSD3BP1      | /// -         | 0.5     | 0.8   | 0.4   | 0.6   | 0.2   |      |
| 216820_at   | AL390857 | HNRNPA1P3    | -             | 0.8     | 1.2   | 1.5   | 0.8   | 0.9   |      |
| 216821_at   | AL137067 | KRT8P11      | /// -         | 10.3    | 0.7   | 7.9   | 8.4   | 8.1   |      |
| 216822_x_at | AL359763 | CYCSP33      | /// -         | 21.2    | 11.4  | 24.1  | 15.4  | 7.8   |      |
| 216823_at   | AL356115 | RPS3A        | /// SN6189    | /// 894 | 44.5  | 11.0  | 44.4  | 27.8  | 21.8 |
| 216824_at   | AL157375 | ARF1P1       | /// A-        | 0.6     | 12.0  | 12.7  | 5.1   | 1.6   |      |
| 216825_s_at | AL139289 | MPL          | 4352          | 7.9     | 1.0   | 1.8   | 1.2   | 0.6   |      |
| 216826_at   | AL356954 | ELL2P3       | /// EL-       | 6.5     | 0.3   | 0.8   | 0.6   | 0.8   |      |
| 216827_at   | AL355379 | RP3-508D13.  | -             | 1.1     | 1.0   | 1.1   | 1.2   | 0.8   |      |
| 216828_at   | AL441988 | LOC1005058   | 140678        | /// 1   | 5.5   | 2.3   | 12.9  | 6.0   | 4.1  |
| 216829_at   | X72475   | IGK          | /// IGKC 3514 | /// 508 | 0.6   | 0.8   | 0.6   | 0.8   | 0.3  |
| 216830_at   | AC004460 | HERC2        | /// HE8924    | /// 390 | 1.7   | 7.1   | 4.9   | 4.9   | 0.8  |
| 216831_s_at | AF018283 | RUNX1T1      | 862           | 0.4     | 0.5   | 0.4   | 0.3   | 0.3   |      |
| 216832_at   | AF018283 | RUNX1T1      | 862           | 4.7     | 14.2  | 17.4  | 14.6  | 8.7   |      |
| 216833_x_at | U05255   | GYPB         | 2994          | 14.3    | 1.1   | 14.3  | 6.8   | 7.7   |      |
| 216834_at   | S59049   | RGS1         | 5996          | 0.2     | 0.1   | 0.3   | 0.1   | 0.4   |      |
| 216835_s_at | AF035299 | DOK1         | 1796          | 16.2    | 14.7  | 17.0  | 21.0  | 14.4  |      |
| 216836_s_at | X03363   | ERBB2        | 2064          | 181.6   | 201.8 | 159.1 | 209.2 | 129.7 |      |
| 216837_at   | L36644   | EPHA5        | 2044          | 5.4     | 7.2   | 11.9  | 7.9   | 2.1   |      |
| 216838_at   | AK023798 | LINC01278    | 92249         | 14.7    | 15.2  | 3.4   | 9.8   | 9.5   |      |
| 216839_at   | AK026829 | LAMA2        | 3908          | 0.4     | 0.3   | 0.4   | 2.8   | 2.1   |      |
| 216840_s_at | AK026829 | LAMA2        | 3908          | 1.0     | 1.7   | 1.4   | 0.3   | 0.8   |      |
| 216841_s_at | X15132   | LOC1001295   | 6648          | /// 100 | 25.6  | 18.8  | 29.9  | 21.6  | 23.9 |
| 216842_x_at | U38460   | AC007967.3   | -             | 12.1    | 6.4   | 13.2  | 11.6  | 6.2   |      |
| 216843_x_at | U38964   | PMS2P1       | 5379          | 147.5   | 137.0 | 129.5 | 119.7 | 83.8  |      |
| 216844_at   | BC004857 | ZC3H7B       | 23264         | 0.4     | 0.9   | 0.9   | 0.4   | 0.3   |      |
| 216845_x_at | U80756   | KMT2D        | 8085          | 1.4     | 1.3   | 2.1   | 2.7   | 3.2   |      |
| 216846_at   | AF234254 | CYAT1        | 100290481     | 1.5     | 1.5   | 1.3   | 1.1   | 1.2   |      |
| 216847_at   | AB051447 | -            | -             | 3.2     | 14.2  | 12.4  | 5.2   | 1.1   |      |

|             |          |                          |           |      |      |      |      |      |
|-------------|----------|--------------------------|-----------|------|------|------|------|------|
| 216848_at   | AB051447 | -                        | -         | 11.1 | 5.6  | 7.6  | 11.6 | 2.8  |
| 216849_at   | AL080233 | AC007389.3               | -         | 23.5 | 4.7  | 10.7 | 10.7 | 11.8 |
| 216850_at   | AF319523 | IPW /// LOC13653 /// 663 |           | 9.9  | 6.9  | 0.9  | 3.5  | 4.2  |
| 216851_at   | AF234254 | -                        | -         | 4.5  | 0.5  | 9.0  | 0.9  | 5.2  |
| 216852_x_at | AF234255 | IGLJ3                    | 28831     | 4.8  | 1.2  | 1.1  | 2.2  | 1.5  |
| 216853_x_at | AF234255 | IGLJ3 /// IGL'           | 28831     | 7.6  | 0.7  | 1.3  | 0.9  | 0.5  |
| 216854_at   | AF028333 | GDF11                    | 10220     | 0.8  | 1.0  | 1.8  | 1.2  | 0.8  |
| 216855_s_at | D13413   | HNRNPU                   | 3192      | 47.3 | 36.7 | 42.9 | 46.8 | 44.8 |
| 216856_s_at | AF264787 | DLEU2L                   | -         | 3.4  | 0.7  | 0.8  | 5.5  | 5.5  |
| 216857_at   | L48728   | IL23A /// TCF            | 51561     | 4.1  | 4.4  | 5.0  | 5.6  | 7.2  |
| 216858_x_at | AL080112 | -                        | -         | 16.3 | 15.7 | 18.9 | 10.5 | 16.8 |
| 216859_x_at | AL080112 | -                        | -         | 12.6 | 5.0  | 16.9 | 7.3  | 12.6 |
| 216860_s_at | AF028333 | GDF11                    | 10220     | 29.5 | 12.5 | 30.1 | 22.4 | 16.7 |
| 216861_at   | U05589   | -                        | -         | 0.4  | 0.5  | 0.2  | 0.3  | 0.1  |
| 216862_s_at | Z24459   | CMC4                     | 100272147 | 69.1 | 72.6 | 40.4 | 72.7 | 54.9 |
| 216863_s_at | AC004542 | MORC2                    | 22880     | 85.0 | 98.6 | 89.4 | 78.8 | 67.4 |
| 216864_at   | U05589   | -                        | -         | 1.1  | 1.3  | 6.0  | 4.2  | 2.6  |
| 216865_at   | M64108   | COL14A1                  | 7373      | 7.2  | 2.9  | 9.1  | 3.6  | 3.0  |
| 216866_s_at | M64108   | COL14A1                  | 7373      | 0.6  | 4.3  | 1.1  | 1.9  | 1.1  |
| 216867_s_at | X03795   | PDGFA                    | 5154      | 2.3  | 0.7  | 7.8  | 1.1  | 2.1  |
| 216868_s_at | D13413   | -                        | -         | 1.0  | 0.2  | 0.4  | 0.3  | 0.2  |
| 216869_at   | U40372   | PDE1C                    | 5137      | 11.2 | 3.8  | 6.7  | 10.7 | 9.2  |
| 216870_x_at | AF264787 | DLEU2                    | 8847      | 31.8 | 25.2 | 32.4 | 20.2 | 22.0 |
| 216871_at   | AF161412 | -                        | -         | 9.3  | 9.1  | 9.3  | 11.3 | 3.3  |
| 216872_at   | X91103   | -                        | -         | 4.8  | 0.2  | 3.3  | 2.4  | 0.5  |
| 216873_s_at | AL137537 | ATP8B2                   | 57198     | 23.1 | 24.4 | 14.0 | 19.9 | 15.2 |
| 216874_at   | U80770   | LOC1005054'              | 100505498 | 0.7  | 4.6  | 4.1  | 0.3  | 0.3  |
| 216875_x_at | X83412   | HAB1                     | 55547     | 3.6  | 1.6  | 2.5  | 2.0  | 1.8  |
| 216876_s_at | Z58820   | IL17A                    | 3605      | 0.5  | 0.2  | 0.2  | 0.5  | 0.1  |
| 216877_at   | U80770   | LOC1005054'              | 100505498 | 8.3  | 4.2  | 5.0  | 8.0  | 4.7  |
| 216878_x_at | X83412   | HAB1                     | 55547     | 22.5 | 16.6 | 22.0 | 9.9  | 8.3  |
| 216879_at   | X91103   | -                        | -         | 2.2  | 3.7  | 8.9  | 5.5  | 2.3  |
| 216880_at   | Y15571   | RAD51B                   | 5890      | 1.0  | 7.6  | 1.3  | 5.7  | 1.2  |
| 216881_x_at | X07882   | PRB4                     | 5545      | 5.0  | 3.0  | 4.7  | 4.5  | 3.9  |
| 216882_s_at | AL157398 | NEBL                     | 10529     | 17.6 | 10.9 | 14.8 | 11.8 | 13.4 |
| 216883_x_at | AJ001626 | PDE6D                    | 5147      | 27.0 | 38.8 | 34.0 | 30.5 | 26.4 |
| 216884_at   | S69182   | PTPN12                   | 5782      | 0.2  | 0.4  | 0.3  | 0.3  | 0.6  |
| 216885_s_at | AK026481 | DCAF8                    | 50717     | 46.8 | 31.9 | 38.8 | 33.0 | 27.3 |
| 216886_at   | X89745   | CHRNA4                   | 1137      | 1.1  | 0.5  | 6.9  | 5.3  | 3.0  |
| 216887_s_at | AJ133768 | LDB3                     | 11155     | 12.4 | 9.0  | 9.7  | 5.6  | 10.0 |
| 216888_at   | AJ133768 | LDB3                     | 11155     | 3.6  | 2.7  | 4.6  | 1.3  | 2.0  |
| 216889_s_at | Z49825   | HNF4A                    | 3172      | 3.5  | 3.7  | 4.3  | 6.8  | 0.6  |
| 216890_at   | U00956   | -                        | -         | 1.7  | 1.0  | 3.2  | 0.7  | 0.7  |
| 216891_at   | U00956   | -                        | -         | 2.5  | 1.0  | 5.6  | 4.8  | 1.2  |
| 216892_at   | S65761   | IGHG1                    | 3500      | 0.8  | 10.9 | 3.3  | 1.3  | 1.4  |
| 216893_s_at | U02519   | COL4A3                   | 1285      | 3.7  | 5.3  | 3.6  | 4.2  | 5.6  |
| 216894_x_at | D64137   | CDKN1C                   | 1028      | 1.1  | 0.9  | 1.4  | 0.6  | 1.3  |
| 216895_at   | S82769   | GABRG3                   | 2567      | 8.5  | 6.4  | 3.3  | 5.8  | 4.8  |
| 216896_at   | U02519   | COL4A3                   | 1285      | 4.5  | 0.8  | 0.6  | 0.7  | 1.2  |
| 216897_s_at | AL035309 | FAM76A                   | 199870    | 3.9  | 1.5  | 6.9  | 6.4  | 3.4  |
| 216898_s_at | U02520   | COL4A3                   | 1285      | 0.9  | 1.1  | 2.2  | 1.4  | 0.8  |
| 216899_s_at | AC003999 | SKAP2                    | 8935      | 63.5 | 61.6 | 85.3 | 68.3 | 42.5 |
| 216900_s_at | X89745   | CHRNA4                   | 1137      | 0.5  | 0.3  | 0.4  | 0.3  | 0.3  |

|                      |                           |        |       |       |       |       |       |
|----------------------|---------------------------|--------|-------|-------|-------|-------|-------|
| 216901_s_at S80876   | IKZF1                     | 10320  | 0.8   | 0.8   | 1.6   | 0.2   | 0.7   |
| 216902_s_at AF001549 | RRN3 /// RR154700 /// 65  |        | 55.3  | 37.8  | 51.7  | 53.1  | 39.0  |
| 216903_s_at AK022697 | MICU1                     | 10367  | 265.4 | 226.7 | 196.4 | 244.9 | 170.0 |
| 216904_at X15880     | COL6A1                    | 1291   | 2.9   | 6.7   | 1.3   | 1.0   | 3.8   |
| 216905_s_at U20428   | ST14                      | 6768   | 37.2  | 45.6  | 47.5  | 50.8  | 60.6  |
| 216906_at U20428     | ST14                      | 6768   | 0.6   | 2.2   | 0.6   | 0.8   | 0.5   |
| 216907_x_at X93596   | KIR3DL1 /// 13811 /// 381 |        | 2.6   | 3.0   | 2.3   | 4.0   | 4.7   |
| 216908_x_at AF001549 | RRN3P1                    | 730092 | 76.6  | 65.4  | 87.2  | 65.0  | 61.1  |
| 216909_at AK021460   | RRP12                     | 23223  | 13.3  | 1.4   | 10.2  | 5.3   | 6.6   |
| 216910_at AF195953   | XPNPEP2                   | 7512   | 2.2   | 7.3   | 8.1   | 5.4   | 4.4   |
| 216911_s_at AL162003 | HIC2                      | 23119  | 5.2   | 0.7   | 0.6   | 0.5   | 0.5   |
| 216912_at AB029035   | ARHGEF4                   | 50649  | 0.5   | 1.1   | 6.3   | 0.4   | 5.7   |
| 216913_s_at AK021460 | RRP12                     | 23223  | 93.5  | 65.0  | 81.9  | 58.4  | 70.4  |
| 216914_at AF277724   | CDC25C                    | 995    | 13.9  | 3.2   | 2.7   | 7.0   | 4.5   |
| 216915_s_at S69182   | PTPN12                    | 5782   | 14.0  | 13.2  | 14.6  | 16.7  | 15.8  |
| 216916_s_at AF009204 | DLGAP2                    | 9228   | 1.7   | 0.9   | 2.1   | 1.0   | 1.0   |
| 216917_s_at X95654   | SYCP1                     | 6847   | 0.5   | 0.4   | 5.1   | 0.4   | 0.1   |
| 216918_s_at AL096710 | DST                       | 667    | 3.4   | 2.8   | 2.8   | 3.0   | 1.6   |
| 216919_at U79302     | TP53I11                   | 9537   | 22.9  | 14.7  | 17.6  | 2.1   | 15.0  |
| 216920_s_at M27331   | TARP /// TRC6967 /// 698  |        | 27.2  | 13.6  | 51.7  | 18.6  | 53.3  |
| 216921_s_at X90763   | KRT35                     | 3886   | 1.9   | 1.0   | 0.6   | 3.0   | 0.7   |
| 216922_x_at AF271088 | DAZ1 /// DA21617 /// 570  |        | 3.5   | 8.0   | 10.7  | 6.0   | 11.3  |
| 216923_at AL049684   | CDKL5                     | 6792   | 12.8  | 5.0   | 7.5   | 6.9   | 7.6   |
| 216924_s_at S62137   | DRD2                      | 1813   | 2.6   | 1.6   | 4.9   | 3.8   | 3.6   |
| 216925_s_at X51990   | TAL1                      | 6886   | 3.8   | 3.2   | 6.8   | 0.9   | 4.2   |
| 216926_s_at AC003030 | MAU2                      | 23383  | 9.3   | 6.8   | 8.6   | 8.8   | 5.6   |
| 216927_at AC003030   | MAU2                      | 23383  | 1.0   | 1.1   | 5.8   | 5.4   | 5.3   |
| 216928_at X51990     | TAL1                      | 6886   | 1.2   | 1.1   | 2.2   | 1.6   | 5.6   |
| 216929_x_at U15197   | ABO                       | 28     | 1.6   | 4.0   | 6.5   | 1.5   | 1.2   |
| 216930_at X71347     | HNF1A                     | 6927   | 7.5   | 6.4   | 6.4   | 0.7   | 5.7   |
| 216931_at L23852     | -                         | -      | 5.3   | 6.1   | 5.7   | 1.4   | 8.9   |
| 216932_at M20919     | -                         | -      | 3.7   | 15.1  | 11.4  | 6.9   | 3.1   |
| 216933_x_at S67788   | APC                       | 324    | 4.5   | 3.5   | 4.1   | 2.0   | 3.3   |
| 216934_at X81637     | -                         | -      | 11.8  | 8.5   | 4.5   | 6.1   | 4.5   |
| 216935_at AF005082   | LINC00302                 | 388699 | 0.9   | 1.4   | 1.7   | 6.5   | 0.8   |
| 216936_at X81637     | -                         | -      | 9.2   | 13.1  | 3.1   | 8.0   | 5.3   |
| 216937_s_at AL049684 | RS1                       | 6247   | 5.1   | 4.6   | 1.8   | 3.1   | 4.8   |
| 216938_x_at S69899   | DRD2                      | 1813   | 11.4  | 17.9  | 17.3  | 8.4   | 7.0   |
| 216939_s_at Y08756   | HTR4                      | 3360   | 2.3   | 2.3   | 1.5   | 4.2   | 1.4   |
| 216940_x_at X96666   | YBX1                      | 4904   | 11.2  | 0.7   | 6.2   | 12.7  | 2.5   |
| 216941_s_at AK026521 | TAF1B                     | 9014   | 16.9  | 14.9  | 17.4  | 13.3  | 10.8  |
| 216942_s_at D28586   | CD58                      | 965    | 24.5  | 19.1  | 26.9  | 24.8  | 12.0  |
| 216943_at AF095723   | -                         | -      | 9.0   | 1.6   | 2.0   | 0.6   | 0.6   |
| 216944_s_at U23850   | ITPR1                     | 3708   | 11.3  | 10.9  | 9.4   | 12.6  | 5.1   |
| 216945_x_at U79240   | PASK                      | 23178  | 73.8  | 54.1  | 71.8  | 58.6  | 67.3  |
| 216946_at M29335     | HLA-DOA                   | 3111   | 5.3   | 8.9   | 4.3   | 6.0   | 7.0   |
| 216947_at AK022087   | DES                       | 1674   | 0.2   | 2.8   | 3.8   | 3.6   | 4.3   |
| 216948_at AL049545   | RP1-263J7.2 -             |        | 0.5   | 3.3   | 0.8   | 0.9   | 3.7   |
| 216949_s_at L39891   | LOC10193005310 /// 101    |        | 4.7   | 1.1   | 2.8   | 2.5   | 0.9   |
| 216950_s_at X14355   | FCGR1A /// F2209 /// 221  |        | 4.6   | 8.8   | 6.6   | 9.9   | 2.1   |
| 216951_at X14355     | FCGR1A                    | 2209   | 0.7   | 0.4   | 5.8   | 3.3   | 1.8   |
| 216952_s_at M94363   | LMNB2                     | 84823  | 72.1  | 60.5  | 107.1 | 79.6  | 97.1  |
| 216953_s_at S75264   | WT1                       | 7490   | 3.2   | 0.9   | 1.1   | 1.2   | 0.6   |

|                      |                     |             |       |       |       |       |       |
|----------------------|---------------------|-------------|-------|-------|-------|-------|-------|
| 216954_x_at S77356   | ATP5O               | 539         | 122.9 | 110.2 | 173.9 | 117.6 | 102.5 |
| 216955_at X07024     | TAF1                | 6872        | 20.0  | 3.7   | 12.2  | 1.8   | 9.5   |
| 216956_s_at AF098114 | ITGA2B              | 3674        | 0.6   | 0.5   | 0.5   | 0.6   | 0.4   |
| 216957_at AL162082   | USP22               | 23326       | 8.0   | 0.6   | 5.2   | 3.2   | 8.5   |
| 216958_s_at AK022777 | IVD                 | 3712        | 108.8 | 105.1 | 126.6 | 138.6 | 105.7 |
| 216959_x_at U55258   | NRCAM               | 4897        | 2.1   | 0.5   | 4.4   | 9.0   | 5.0   |
| 216960_s_at AL049646 | ZNF133              | 7692        | 35.2  | 29.2  | 31.8  | 30.9  | 29.5  |
| 216961_s_at M69039   | RPAIN               | 84268       | 24.3  | 17.2  | 28.0  | 20.4  | 19.3  |
| 216962_at M69039     | RPAIN               | 84268       | 6.6   | 17.4  | 13.9  | 9.6   | 11.6  |
| 216963_s_at AF279774 | GAP43               | 2596        | 10.0  | 3.7   | 11.8  | 5.6   | 4.5   |
| 216964_at AL162082   | USP22               | 23326       | 2.0   | 6.6   | 6.7   | 2.8   | 4.6   |
| 216965_x_at AL139377 | SPG20               | 23111       | 11.9  | 3.4   | 2.7   | 1.0   | 2.7   |
| 216966_at J02963     | ITGA2B              | 3674        | 0.5   | 0.6   | 1.5   | 0.8   | 0.9   |
| 216967_at AF279774   | GAP43               | 2596        | 3.0   | 0.4   | 3.9   | 0.4   | 1.1   |
| 216968_at Y18284     | MASP2               | 10747       | 1.3   | 1.8   | 2.0   | 1.2   | 7.0   |
| 216969_s_at AC002301 | KIF22               | 3835        | 71.5  | 66.2  | 80.9  | 66.9  | 72.6  |
| 216970_at AF090117   | -                   | -           | 0.5   | 1.7   | 0.4   | 0.3   | 0.4   |
| 216971_s_at Z54367   | PLEC                | 5339        | 25.7  | 18.0  | 26.0  | 34.9  | 19.5  |
| 216972_at L13779     | SPAM1               | 6677        | 3.8   | 0.4   | 2.0   | 4.4   | 3.2   |
| 216973_s_at S49765   | HOXB7               | 3217        | 12.0  | 11.3  | 10.4  | 7.6   | 6.2   |
| 216974_at S80491     | -                   | -           | 0.2   | 0.1   | 0.2   | 2.6   | 0.2   |
| 216975_x_at U51628   | NPAS1               | 4861        | 0.5   | 0.8   | 4.8   | 2.1   | 2.3   |
| 216976_s_at X96588   | RYK                 | 6259        | 30.8  | 25.3  | 34.9  | 32.4  | 23.1  |
| 216977_x_at AJ130972 | SNRPA1              | 6627        | 149.5 | 120.7 | 209.0 | 142.8 | 156.7 |
| 216978_x_at U50277   | -                   | -           | 1.5   | 0.9   | 0.3   | 0.3   | 0.7   |
| 216979_at X89894     | NR4A3               | 8013        | 11.7  | 7.6   | 9.8   | 8.7   | 6.5   |
| 216980_s_at X60502   | SPN                 | 6693        | 6.0   | 2.2   | 1.7   | 1.7   | 0.8   |
| 216981_x_at X60502   | LOC1019298:6693 /// | 101         | 9.0   | 9.3   | 5.0   | 18.2  | 18.7  |
| 216982_x_at U50277   | -                   | -           | 0.8   | 1.8   | 0.7   | 0.4   | 0.5   |
| 216983_s_at BC002889 | ZNF224              | 7767        | 7.5   | 9.6   | 2.3   | 3.4   | 0.7   |
| 216984_x_at D84143   | CKAP2 ///           | IG 3537 /// | 1.8   | 1.3   | 1.0   | 3.1   | 1.9   |
| 216985_s_at AJ002077 | STX3                | 6809        | 47.0  | 49.9  | 51.6  | 41.3  | 42.0  |
| 216986_s_at D78261   | IRF4                | 3662        | 11.8  | 1.2   | 6.5   | 6.6   | 9.1   |
| 216987_at D78261     | IRF4                | 3662        | 0.3   | 0.1   | 0.1   | 2.0   | 1.1   |
| 216988_s_at L48722   | PTP4A2              | 8073        | 537.4 | 491.9 | 655.8 | 579.1 | 434.7 |
| 216989_at L13779     | SPAM1               | 6677        | 6.2   | 3.6   | 9.1   | 4.9   | 5.3   |
| 216990_at AF008655   | GART                | 2618        | 0.7   | 0.7   | 0.4   | 1.8   | 0.8   |
| 216991_at BC002889   | AC084219.3          | -           | 4.0   | 2.0   | 5.3   | 5.0   | 0.3   |
| 216992_s_at AJ236922 | GRM8                | 2918        | 10.3  | 2.1   | 6.6   | 2.2   | 2.7   |
| 216993_s_at U32169   | COL11A2             | 1302        | 40.5  | 27.4  | 34.5  | 30.2  | 23.5  |
| 216994_s_at L40992   | RUNX2               | 860         | 2.2   | 2.2   | 5.5   | 5.2   | 0.6   |
| 216995_x_at X06409   | MKRN2               | 23609       | 0.5   | 1.7   | 4.6   | 1.4   | 1.6   |
| 216996_s_at AK021557 | FASTKD2             | 22868       | 89.7  | 70.7  | 110.1 | 81.6  | 110.4 |
| 216997_x_at AL358975 | TLE4                | 7091        | 0.4   | 0.2   | 0.4   | 2.9   | 0.2   |
| 216998_s_at AJ132821 | ADAM5               | 255926      | 6.3   | 4.6   | 7.7   | 6.4   | 5.7   |
| 216999_at X97671     | EPOR                | 2057        | 3.2   | 0.7   | 1.0   | 5.1   | 0.6   |
| 217000_at AL034348   | KRT18P50 ///        | -           | 2.3   | 0.5   | 2.3   | 1.0   | 1.0   |
| 217001_x_at M29335   | HLA-DOA             | 3111        | 23.8  | 7.8   | 4.5   | 6.3   | 13.7  |
| 217002_s_at AJ003078 | HTR3A               | 3359        | 1.8   | 0.8   | 0.5   | 0.5   | 1.1   |
| 217003_s_at AJ132823 | ADAM5               | 255926      | 9.4   | 3.1   | 6.7   | 0.4   | 6.2   |
| 217004_s_at X13230   | MCF2                | 4168        | 4.2   | 6.2   | 6.0   | 10.3  | 1.6   |
| 217005_at M28219     | LDLR                | 3949        | 1.5   | 1.2   | 1.8   | 1.7   | 0.7   |
| 217006_x_at U52428   | FASN                | 2194        | 5.3   | 6.7   | 1.3   | 4.1   | 7.2   |

|             |          |                |              |       |       |       |       |       |
|-------------|----------|----------------|--------------|-------|-------|-------|-------|-------|
| 217007_s_at | AK000667 | ADAM15         | 8751         | 197.3 | 213.2 | 212.3 | 258.9 | 173.1 |
| 217008_s_at | X94552   | GRM7 /// LO    | 2917 /// 100 | 12.2  | 13.5  | 15.6  | 13.2  | 5.6   |
| 217009_at   | AL121974 | PGK2           | 5232         | 10.2  | 14.7  | 9.4   | 7.8   | 10.2  |
| 217010_s_at | AF277724 | CDC25C         | 995          | 40.8  | 51.9  | 53.6  | 37.0  | 34.3  |
| 217011_at   | L11239   | GBX1           | 2636         | 1.8   | 2.4   | 1.1   | 1.1   | 1.3   |
| 217012_at   | AL080233 | -              | -            | 1.4   | 1.9   | 0.5   | 0.1   | 1.2   |
| 217013_at   | AC004522 | AZGP1P1        | 646282       | 2.9   | 9.6   | 15.7  | 1.9   | 8.6   |
| 217014_s_at | AC004522 | AZGP1 /// AZ   | 563 /// 6462 | 28.7  | 35.6  | 49.7  | 42.9  | 42.2  |
| 217015_at   | AL390237 | RBBP4P4 ///    | -            | 5.3   | 3.8   | 5.6   | 0.4   | 0.7   |
| 217016_x_at | AK026825 | TMEM212        | 389177       | 14.3  | 12.1  | 12.5  | 7.9   | 9.6   |
| 217017_at   | AK024945 | OSBPL10        | 114884       | 7.0   | 0.5   | 0.5   | 2.8   | 0.9   |
| 217018_at   | AK000293 | -              | -            | 0.7   | 0.6   | 0.7   | 1.2   | 3.7   |
| 217019_at   | AL137162 | RPS4XP3 ///    | -            | 42.1  | 23.0  | 28.5  | 51.6  | 23.5  |
| 217020_at   | X04014   | RARB           | 5915         | 11.6  | 9.7   | 15.4  | 6.2   | 17.0  |
| 217021_at   | AL353132 | CYB5A          | 1528         | 6.3   | 2.0   | 8.4   | 5.7   | 7.0   |
| 217022_s_at | S55735   | IGH /// IGHA   | 3492 /// 349 | 0.7   | 0.5   | 0.4   | 0.3   | 0.9   |
| 217023_x_at | AF099143 | TPSAB1 /// T   | 7177 /// 644 | 3.6   | 1.8   | 6.4   | 2.9   | 3.1   |
| 217024_x_at | AC004832 | SIRPAP1 /// S- | -            | 3.8   | 9.0   | 15.7  | 13.7  | 5.0   |
| 217025_s_at | AL110225 | DBN1           | 1627         | 173.4 | 209.9 | 163.6 | 228.6 | 121.7 |
| 217026_at   | M96936   | CFTR           | 1080         | 1.3   | 1.1   | 6.9   | 2.3   | 1.2   |
| 217027_x_at | AC004941 | AC004941.5     | -            | 80.1  | 48.7  | 86.5  | 55.3  | 57.3  |
| 217028_at   | AJ224869 | CXCR4          | 7852         | 5.6   | 1.6   | 10.0  | 4.7   | 3.5   |
| 217029_at   | AL049301 | -              | -            | 1.6   | 1.0   | 1.3   | 0.6   | 0.9   |
| 217030_at   | AL137475 | LOC1019295     | 101929550    | 18.9  | 12.6  | 18.2  | 13.9  | 4.5   |
| 217031_at   | Y19209   | KRT84          | 3890         | 1.2   | 1.5   | 0.8   | 5.7   | 1.2   |
| 217032_at   | AL078621 | FOX D4 /// FC  | 2298 /// 200 | 0.8   | 1.0   | 4.2   | 2.8   | 1.1   |
| 217033_x_at | S76475   | NTRK3          | 4916         | 12.1  | 20.3  | 19.3  | 20.5  | 4.8   |
| 217034_at   | AF103529 | LOC1019284     | 101928457    | 5.6   | 1.2   | 0.8   | 1.1   | 1.6   |
| 217035_at   | X95660   | SKAP2          | 8935         | 4.0   | 2.4   | 5.9   | 2.5   | 2.0   |
| 217036_at   | AF103530 | -              | -            | 0.6   | 1.3   | 2.3   | 1.5   | 0.6   |
| 217037_at   | S83374   | -              | -            | 0.7   | 0.6   | 0.5   | 2.5   | 0.2   |
| 217038_at   | AL035067 | HMGB1P12 /-    | -            | 1.4   | 0.7   | 3.4   | 1.9   | 0.5   |
| 217039_x_at | AB016195 | ELK2AP         | 2003         | 44.7  | 43.6  | 47.9  | 44.1  | 40.9  |
| 217040_x_at | AB025355 | SOX15          | 6665         | 59.0  | 27.9  | 30.4  | 38.3  | 30.3  |
| 217041_at   | AL162057 | NPTXR          | 23467        | 8.4   | 9.4   | 16.3  | 10.7  | 14.0  |
| 217042_at   | AL096716 | RDH11          | 51109        | 32.5  | 35.1  | 39.3  | 31.2  | 25.2  |
| 217043_s_at | U95822   | MFN1           | 55669        | 121.8 | 114.8 | 155.8 | 123.2 | 125.9 |
| 217044_s_at | BC004298 | PLEKHG3        | 26030        | 2.6   | 8.8   | 6.3   | 1.7   | 4.1   |
| 217045_x_at | AL136967 | NCR2           | 9436         | 23.5  | 26.3  | 25.8  | 23.5  | 13.2  |
| 217046_s_at | AJ133822 | AGER           | 177          | 1.6   | 0.8   | 1.4   | 1.1   | 0.7   |
| 217047_s_at | AK027138 | FAM13A         | 10144        | 91.8  | 93.9  | 104.6 | 85.2  | 73.2  |
| 217048_at   | Y09846   | SHC1P1 /// S-  | -            | 16.5  | 12.8  | 10.2  | 17.2  | 15.7  |
| 217049_x_at | AJ276803 | PCDH11X ///    | 27328 /// 83 | 15.3  | 11.2  | 11.8  | 5.8   | 8.7   |
| 217050_at   | L22650   | DIAPH2-AS1     | 10824        | 5.9   | 3.1   | 0.3   | 0.2   | 4.5   |
| 217051_s_at | AF257501 | -              | -            | 1.6   | 1.2   | 2.5   | 15.3  | 1.7   |
| 217052_x_at | AK024108 | -              | -            | 36.0  | 31.8  | 47.6  | 34.8  | 22.5  |
| 217053_x_at | X87175   | ETV1           | 2115         | 91.2  | 121.3 | 107.0 | 84.4  | 80.7  |
| 217054_at   | AF007194 | AK096803 ///   | -            | 12.4  | 14.1  | 9.2   | 12.5  | 9.6   |
| 217055_x_at | S83374   | -              | -            | 3.0   | 1.3   | 1.0   | 1.9   | 1.1   |
| 217056_at   | X61070   | AV8S2A1N1T     | 10730        | 6.4   | 5.3   | 3.0   | 0.7   | 0.6   |
| 217057_s_at | AF107846 | GNAS           | 2778         | 6.3   | 3.4   | 1.2   | 0.9   | 2.0   |
| 217058_at   | AF107846 | GNAS           | 2778         | 1.1   | 1.9   | 1.3   | 1.8   | 4.4   |
| 217059_at   | L13283   | MUC7           | 4589         | 0.5   | 0.4   | 6.9   | 0.4   | 2.1   |

|             |          |                           |           |       |       |       |       |       |
|-------------|----------|---------------------------|-----------|-------|-------|-------|-------|-------|
| 217060_at   | U03115   | -                         | -         | 2.6   | 2.3   | 0.9   | 3.1   | 2.0   |
| 217061_s_at | AC004857 | ETV1                      | 2115      | 89.6  | 93.2  | 98.2  | 93.3  | 85.8  |
| 217062_at   | M87313   | AC074212.6                | -         | 0.7   | 0.6   | 0.9   | 0.8   | 1.0   |
| 217063_x_at | X61079   | YME1L1                    | 10730     | 6.6   | 4.2   | 8.1   | 8.5   | 5.7   |
| 217065_at   | X61079   | -                         | -         | 1.6   | 3.5   | 0.6   | 0.4   | 4.7   |
| 217066_s_at | M87313   | DMPK                      | 1760      | 1.4   | 3.1   | 1.0   | 3.0   | 3.4   |
| 217067_s_at | U34037   | DMP1                      | 1758      | 0.2   | 0.6   | 4.0   | 0.2   | 0.9   |
| 217068_at   | U82303   | -                         | -         | 8.7   | 0.8   | 1.8   | 0.6   | 0.2   |
| 217069_at   | AF105279 | KMT2B                     | 9757      | 1.3   | 1.3   | 0.6   | 1.5   | 0.4   |
| 217070_at   | AJ249275 | MTHFR                     | 4524      | 8.0   | 6.8   | 7.0   | 0.8   | 2.3   |
| 217071_s_at | AJ249275 | MTHFR                     | 4524      | 1.0   | 4.6   | 3.7   | 4.7   | 1.4   |
| 217072_at   | AF161346 | CD300A                    | 11314     | 9.3   | 1.0   | 9.4   | 10.2  | 8.7   |
| 217073_x_at | X02162   | APOA1                     | 335       | 2.3   | 2.6   | 2.3   | 2.6   | 1.0   |
| 217074_at   | AK025938 | SMOX                      | 54498     | 0.9   | 1.2   | 1.1   | 1.2   | 0.7   |
| 217075_x_at | AF105279 | KMT2B /// KI9757          |           | 0.6   | 1.4   | 0.6   | 0.4   | 2.2   |
| 217076_s_at | Y09980   | HOXD3 /// H 3232 /// 323  |           | 0.3   | 0.3   | 0.4   | 2.7   | 0.7   |
| 217077_s_at | AF095723 | GABBR2                    | 9568      | 6.7   | 0.7   | 2.7   | 1.5   | 1.4   |
| 217078_s_at | AJ010102 | CD300A                    | 11314     | 0.4   | 0.2   | 0.4   | 0.2   | 0.1   |
| 217079_at   | U82306   | -                         | -         | 5.7   | 6.6   | 1.0   | 2.0   | 1.9   |
| 217080_s_at | Y19026   | HOMER2                    | 9455      | 160.4 | 139.4 | 237.5 | 154.9 | 194.7 |
| 217081_at   | AL031983 | OR2H2                     | 7932      | 8.6   | 0.5   | 3.5   | 0.7   | 0.7   |
| 217082_at   | U82306   | -                         | -         | 2.2   | 3.6   | 1.8   | 0.8   | 0.8   |
| 217083_at   | AF015124 | -                         | -         | 0.3   | 1.3   | 0.8   | 0.5   | 0.3   |
| 217084_at   | AF015124 | IGHA1 /// IG 3493 /// 350 |           | 0.4   | 0.2   | 0.4   | 2.1   | 2.2   |
| 217085_at   | AL049328 | RP11-116018               |           | 0.4   | 0.1   | 1.2   | 0.4   | 0.2   |
| 217086_at   | X67513   | CHRNA3                    | 1142      | 0.8   | 0.6   | 1.1   | 0.9   | 1.1   |
| 217087_at   | AF005081 | C1orf68                   | 100129271 | 3.9   | 2.8   | 2.6   | 2.4   | 2.5   |
| 217088_s_at | AJ006121 | NCR1                      | 9437      | 1.2   | 0.9   | 1.6   | 0.6   | 0.5   |
| 217090_at   | X89655   | -                         | -         | 5.7   | 5.3   | 3.4   | 3.8   | 2.2   |
| 217091_at   | X86400   | -                         | -         | 0.1   | 0.2   | 0.2   | 0.5   | 0.2   |
| 217092_x_at | AL031589 | RP6-1107.2                |           | 564.8 | 508.0 | 745.6 | 499.3 | 419.3 |
| 217093_at   | S79281   | RNASE1                    | 6035      | 0.1   | 0.3   | 3.3   | 0.3   | 0.2   |
| 217094_s_at | AL109923 | ITCH                      | 83737     | 45.6  | 43.1  | 59.0  | 55.2  | 44.8  |
| 217095_x_at | AJ006122 | NCR1                      | 9437      | 3.2   | 12.8  | 1.7   | 3.5   | 2.7   |
| 217096_at   | AC004082 | PCLO                      | 27445     | 2.6   | 0.7   | 1.5   | 0.9   | 1.2   |
| 217097_s_at | AC004990 | PHTF2                     | 57157     | 36.1  | 21.2  | 37.0  | 29.7  | 21.3  |
| 217098_s_at | Z98745   | ZSCAN12                   | 9753      | 0.8   | 0.5   | 0.3   | 0.4   | 0.2   |
| 217099_s_at | AF258545 | GEMIN4                    | 50628     | 144.1 | 134.1 | 175.0 | 133.6 | 149.1 |
| 217100_s_at | AK026451 | UBXN7                     | 26043     | 47.6  | 48.8  | 40.4  | 36.2  | 34.9  |
| 217101_at   | AB007921 | TTC39A                    | 22996     | 0.7   | 0.8   | 0.9   | 0.9   | 0.4   |
| 217102_at   | AF041410 | -                         | -         | 18.5  | 18.8  | 17.6  | 9.4   | 8.3   |
| 217103_at   | M28219   | LDLR                      | 3949      | 0.3   | 0.5   | 0.7   | 0.3   | 0.2   |
| 217104_at   | AL109714 | ST20                      | 400410    | 7.2   | 3.7   | 8.5   | 4.3   | 6.4   |
| 217105_at   | AF041410 | -                         | -         | 3.6   | 2.0   | 3.6   | 2.0   | 0.3   |
| 217106_x_at | AF091078 | DIMT1                     | 27292     | 451.0 | 398.7 | 467.7 | 372.2 | 327.4 |
| 217107_at   | AL035603 | RPS4XP9 ///               |           | 19.5  | 8.8   | 22.2  | 11.5  | 8.8   |
| 217108_at   | X63966   | -                         | -         | 1.8   | 0.5   | 0.9   | 1.0   | 1.3   |
| 217109_at   | AJ242547 | MUC4                      | 4585      | 1.5   | 3.1   | 7.0   | 0.8   | 4.4   |
| 217110_s_at | AJ242547 | MUC4                      | 4585      | 1.2   | 0.9   | 7.9   | 5.1   | 2.6   |
| 217111_at   | AK022765 | AMACR                     | 23600     | 1.7   | 7.0   | 10.4  | 7.7   | 8.5   |
| 217112_at   | Z81010   | PDGFB                     | 5155      | 1.4   | 0.6   | 1.1   | 1.2   | 5.7   |
| 217113_at   | AK022765 | AMACR                     | 23600     | 6.1   | 1.5   | 8.9   | 6.1   | 2.8   |
| 217114_at   | Z70200   | LOC1019292.23020 /// 10   |           | 19.1  | 5.3   | 8.0   | 4.7   | 5.4   |

|             |          |                            |       |       |       |       |       |       |
|-------------|----------|----------------------------|-------|-------|-------|-------|-------|-------|
| 217115_at   | AL031686 | MKRN7P                     | 7686  | 0.8   | 0.7   | 0.9   | 0.5   | 1.1   |
| 217117_x_at | AF007194 | MUC3A /// N4584 /// 578    |       | 23.3  | 16.5  | 20.8  | 5.6   | 1.0   |
| 217118_s_at | AK025608 | KIAA0930                   | 23313 | 164.8 | 138.2 | 173.5 | 150.7 | 133.9 |
| 217119_s_at | Z79783   | CXCR3                      | 2833  | 8.1   | 1.1   | 10.0  | 6.1   | 1.5   |
| 217120_s_at | AK023368 | MED14                      | 9282  | 14.4  | 9.7   | 12.9  | 9.9   | 10.6  |
| 217121_at   | AF082559 | TNKS                       | 8658  | 12.8  | 9.0   | 1.1   | 1.4   | 14.0  |
| 217122_s_at | AL031282 | SLC35E2 /// 9906 /// 728   |       | 266.3 | 254.5 | 241.3 | 291.0 | 193.8 |
| 217123_x_at | S64288   | PMCHL1                     | 5369  | 1.4   | 0.8   | 6.9   | 3.7   | 2.0   |
| 217124_at   | AL136792 | IQCE                       | 23288 | 8.0   | 5.8   | 9.1   | 9.5   | 7.9   |
| 217125_at   | X04802   | UBBP2 /// UI-              |       | 71.9  | 46.0  | 68.5  | 43.5  | 45.3  |
| 217126_at   | K00627   | -                          | -     | 2.5   | 0.1   | 1.0   | 0.3   | 1.1   |
| 217127_at   | AL354872 | CTH                        | 1491  | 83.5  | 93.6  | 90.9  | 87.1  | 72.8  |
| 217128_s_at | AL049688 | CAMK1G                     | 57172 | 7.4   | 2.0   | 9.7   | 7.6   | 5.5   |
| 217129_at   | AL031320 | TUBB8P2 /// -              |       | 5.5   | 16.6  | 10.5  | 7.8   | 6.5   |
| 217130_at   | AF072164 | -                          | -     | 5.8   | 9.2   | 6.5   | 8.3   | 3.6   |
| 217131_at   | AL022151 | RPS29P28 //,-              |       | 1.6   | 2.1   | 0.4   | 6.7   | 4.2   |
| 217132_at   | AF055011 | -                          | -     | 3.6   | 0.1   | 3.2   | 2.0   | 0.2   |
| 217133_x_at | X06399   | CYP2B6                     | 1555  | 4.6   | 4.5   | 8.5   | 1.2   | 6.7   |
| 217134_at   | AF216650 | MTAP                       | 4507  | 2.1   | 1.2   | 6.4   | 4.0   | 4.0   |
| 217135_x_at | AL031594 | COX6B1P3 //-               |       | 24.3  | 32.5  | 31.6  | 30.8  | 15.0  |
| 217136_at   | AL022240 | PPIAL4B /// F644591 /// 6  |       | 4.5   | 6.6   | 6.0   | 2.3   | 2.3   |
| 217137_x_at | K00627   | -                          | -     | 3.4   | 1.7   | 3.5   | 3.8   | 8.4   |
| 217138_x_at | AJ249377 | IGLC1                      | 3537  | 1.7   | 0.9   | 1.1   | 0.4   | 0.9   |
| 217139_at   | AJ002428 | VDAC1                      | 7416  | 22.2  | 16.4  | 21.8  | 14.0  | 11.2  |
| 217140_s_at | AJ002428 | VDAC1                      | 7416  | 554.2 | 490.7 | 636.1 | 553.9 | 518.2 |
| 217141_at   | AL049394 | BTBD7                      | 55727 | 2.1   | 4.7   | 10.6  | 1.2   | 1.8   |
| 217142_at   | AL035687 | EEF1A1P42 -                |       | 41.1  | 109.9 | 56.4  | 41.2  | 45.9  |
| 217143_s_at | X06557   | TCRDV2 /// T10730          |       | 2.3   | 3.6   | 1.9   | 6.3   | 2.6   |
| 217144_at   | X04801   | UBBP1 /// UI-              |       | 804.3 | 463.5 | 718.5 | 589.4 | 460.6 |
| 217145_at   | AF103574 | IGK /// IGKC 3514 /// 508  |       | 1.5   | 0.8   | 2.1   | 3.8   | 3.6   |
| 217146_at   | AF072468 | JRK                        | 8629  | 0.6   | 1.0   | 0.5   | 0.8   | 0.9   |
| 217147_s_at | AJ240085 | TRAT1                      | 50852 | 0.2   | 0.1   | 0.8   | 0.2   | 0.5   |
| 217148_x_at | AJ249377 | IGLC1 /// IGL 3537 /// 354 |       | 14.5  | 15.0  | 20.2  | 15.5  | 12.2  |
| 217149_x_at | AF097738 | TNK1                       | 8711  | 79.8  | 85.8  | 51.6  | 61.9  | 44.2  |
| 217150_s_at | S73854   | NF2                        | 4771  | 24.9  | 20.0  | 34.1  | 23.2  | 10.9  |
| 217151_at   | AF103574 | LOC1019284.101928457       |       | 0.5   | 0.4   | 0.2   | 0.4   | 3.4   |
| 217152_at   | AK024136 | -                          | -     | 7.5   | 9.8   | 7.6   | 7.4   | 4.9   |
| 217153_at   | U62794   | ARHGAP1                    | 392   | 1.4   | 2.0   | 3.3   | 1.2   | 5.6   |
| 217154_s_at | AL035250 | EDN3                       | 1908  | 2.1   | 0.9   | 1.8   | 1.3   | 3.2   |
| 217155_at   | AL049714 | RP1-181J22.1-              |       | 0.9   | 0.7   | 0.6   | 0.2   | 0.6   |
| 217156_at   | U04628   | HADHAP1 //,-               |       | 13.2  | 8.3   | 13.2  | 15.5  | 12.5  |
| 217157_x_at | AF103530 | IGK /// IGKC 3514 /// 508  |       | 1.9   | 5.1   | 3.3   | 1.2   | 5.3   |
| 217158_at   | X97875   | PTGER4P2-CI442421          |       | 2.4   | 1.6   | 1.9   | 1.1   | 1.3   |
| 217159_x_at | AJ130712 | SIGLEC7                    | 27036 | 3.6   | 1.3   | 2.1   | 1.3   | 1.5   |
| 217160_at   | M94893   | TSPY1                      | 7258  | 2.0   | 0.6   | 1.2   | 1.4   | 2.3   |
| 217161_x_at | X17406   | ACAN                       | 176   | 10.6  | 2.4   | 11.7  | 1.2   | 9.8   |
| 217162_at   | M94893   | -                          | -     | 0.8   | 0.9   | 0.7   | 4.8   | 4.8   |
| 217163_at   | X63118   | ESR1                       | 2099  | 0.6   | 4.0   | 1.3   | 4.4   | 0.3   |
| 217164_at   | AK024108 | -                          | -     | 6.0   | 3.8   | 4.4   | 5.2   | 5.3   |
| 217165_x_at | M10943   | MT1F                       | 4494  | 346.1 | 367.3 | 380.4 | 394.9 | 338.9 |
| 217166_at   | J04798   | PTMAP1 /// I-              |       | 23.7  | 18.1  | 23.4  | 18.9  | 16.7  |
| 217167_x_at | AJ252550 | GK                         | 2710  | 17.1  | 11.2  | 20.3  | 17.0  | 20.3  |
| 217168_s_at | AF217990 | HERPUD1                    | 9709  | 462.1 | 494.8 | 423.5 | 482.9 | 331.0 |



|             |          |                           |       |       |       |       |       |
|-------------|----------|---------------------------|-------|-------|-------|-------|-------|
| 217169_at   | M31949   | IGHA1 /// IG 3493 /// 350 | 1.8   | 1.8   | 3.8   | 1.0   | 0.4   |
| 217170_at   | AE000659 | TCRA /// TRA-             | 0.7   | 1.6   | 1.1   | 0.4   | 0.3   |
| 217171_at   | M81780   | SMPD1 6609                | 15.3  | 9.5   | 8.1   | 2.1   | 1.2   |
| 217172_at   | X84340   | - -                       | 1.3   | 1.3   | 0.9   | 0.5   | 0.9   |
| 217173_s_at | S70123   | LDLR 3949                 | 24.4  | 20.9  | 19.2  | 14.1  | 14.6  |
| 217174_s_at | AL078616 | APC2 10297                | 1.0   | 1.0   | 1.4   | 1.1   | 0.7   |
| 217175_at   | U06641   | - -                       | 6.8   | 6.4   | 8.7   | 7.5   | 6.6   |
| 217176_s_at | X59740   | ZFX 7543                  | 13.2  | 10.5  | 14.1  | 9.9   | 21.2  |
| 217177_s_at | AL080103 | PTPRB 5787                | 2.4   | 4.8   | 1.0   | 4.1   | 2.0   |
| 217178_at   | L12060   | RARG 5916                 | 8.0   | 0.5   | 7.9   | 0.6   | 1.1   |
| 217179_x_at | X79782   | - -                       | 3.6   | 1.2   | 7.6   | 2.1   | 1.1   |
| 217180_at   | X79782   | - -                       | 2.1   | 1.1   | 10.2  | 4.0   | 0.7   |
| 217181_at   | M22005   | - -                       | 0.5   | 0.5   | 1.0   | 0.4   | 0.4   |
| 217182_at   | Z34282   | - -                       | 7.1   | 2.9   | 16.0  | 2.3   | 9.6   |
| 217183_at   | S70123   | SPC24 147841              | 2.0   | 1.9   | 0.9   | 1.3   | 0.6   |
| 217184_s_at | X52213   | LTK 4058                  | 3.6   | 1.3   | 1.9   | 3.3   | 1.6   |
| 217185_s_at | Z95118   | ZNF259P1 //,8882 /// 442  | 74.0  | 60.7  | 62.5  | 70.3  | 55.9  |
| 217186_at   | Z95118   | ZNF259P1 442240           | 3.0   | 0.9   | 0.8   | 3.9   | 2.4   |
| 217187_at   | Z34282   | MUC5AC 4586               | 21.2  | 16.9  | 12.0  | 8.1   | 8.9   |
| 217188_s_at | AC007182 | C14orf1 11161             | 212.1 | 186.6 | 208.2 | 210.4 | 133.0 |
| 217189_s_at | AL137800 | SMG7 9887                 | 40.9  | 29.0  | 37.8  | 37.9  | 29.1  |
| 217190_x_at | S67777   | ESR1 2099                 | 3.4   | 2.4   | 3.6   | 1.3   | 1.3   |
| 217191_x_at | AF042163 | COX6CP1 /// -             | 35.8  | 15.6  | 36.2  | 22.8  | 21.4  |
| 217192_s_at | AL022067 | PRDM1 639                 | 2.5   | 7.6   | 9.3   | 11.9  | 12.2  |
| 217193_x_at | X93006   | - -                       | 18.8  | 8.3   | 15.4  | 7.1   | 11.6  |
| 217194_at   | AB007970 | - -                       | 2.2   | 0.7   | 1.5   | 0.1   | 2.4   |
| 217195_at   | L42230   | GCNT1P1 /// -             | 4.3   | 3.9   | 9.1   | 3.0   | 3.1   |
| 217196_s_at | AL110158 | CAMSAP2 23271             | 76.6  | 47.5  | 60.1  | 59.7  | 57.4  |
| 217197_x_at | AL049785 | N4BP2L1 90634             | 26.4  | 12.9  | 20.8  | 11.7  | 9.0   |
| 217198_x_at | U80164   | IGH /// IGHA 3492 /// 349 | 7.1   | 7.2   | 4.4   | 1.2   | 0.7   |
| 217199_s_at | S81491   | STAT2 6773                | 3.2   | 3.4   | 2.4   | 12.4  | 2.0   |
| 217200_x_at | U06715   | CYB561 1534               | 408.3 | 285.6 | 355.6 | 276.2 | 244.7 |
| 217201_at   | AB007970 | RASAL2 9462               | 3.2   | 0.4   | 6.3   | 0.8   | 0.3   |
| 217202_s_at | U08626   | GLUL 2752                 | 159.8 | 143.8 | 123.0 | 127.6 | 106.9 |
| 217203_at   | U08626   | GLULP4 /// C-             | 1.6   | 7.7   | 10.0  | 8.9   | 5.1   |
| 217204_at   | AL049992 | MTRF1L 54516              | 1.4   | 2.1   | 0.1   | 2.9   | 2.0   |
| 217205_at   | Y08772   | AL590762.11-              | 17.4  | 24.5  | 35.6  | 17.9  | 23.3  |
| 217206_at   | D00267   | CYCSP19 /// -             | 5.1   | 3.1   | 5.6   | 2.5   | 4.0   |
| 217207_s_at | AK025267 | BTNL3 10917               | 28.2  | 22.8  | 22.5  | 12.4  | 21.2  |
| 217208_s_at | AL121981 | DLG1 1739                 | 22.0  | 17.9  | 18.0  | 16.8  | 17.5  |
| 217209_at   | X16454   | CEACAM3 1084              | 8.2   | 10.7  | 8.0   | 6.6   | 5.1   |
| 217210_at   | AL031737 | RP1-8B22.1 -              | 17.7  | 3.4   | 8.4   | 6.7   | 9.9   |
| 217211_at   | D50604   | ACTBP9 /// A-             | 113.6 | 78.8  | 103.1 | 92.8  | 72.8  |
| 217212_s_at | Z84723   | IL9R 3581                 | 11.6  | 11.2  | 7.2   | 14.0  | 4.7   |
| 217213_at   | AB022847 | SLC6A2 6530               | 1.0   | 0.4   | 0.2   | 0.4   | 0.4   |
| 217214_s_at | AB022847 | SLC6A2 6530               | 4.4   | 4.8   | 1.7   | 2.7   | 2.1   |
| 217215_s_at | Z82180   | - -                       | 1.9   | 1.1   | 0.6   | 0.3   | 1.2   |
| 217216_x_at | AC006530 | MLH3 27030                | 38.8  | 19.3  | 28.7  | 32.5  | 22.7  |
| 217217_at   | X95660   | IGHA1 /// IG 3493 /// 349 | 1.1   | 0.6   | 1.3   | 0.5   | 0.5   |
| 217218_at   | AK027005 | WAPAL 23063               | 5.9   | 3.7   | 3.8   | 2.5   | 1.7   |
| 217219_at   | AL080191 | DKFZP434A0 26102          | 2.5   | 1.2   | 2.6   | 1.6   | 2.4   |
| 217220_at   | AL050153 | LOC1002873;100287387      | 2.3   | 3.7   | 3.5   | 1.6   | 0.3   |
| 217221_x_at | AL137421 | RBM10 8241                | 170.3 | 157.7 | 156.9 | 134.5 | 120.1 |

|             |          |               |              |       |       |       |       |       |
|-------------|----------|---------------|--------------|-------|-------|-------|-------|-------|
| 217222_at   | S74639   | IGHG1         | 3500         | 1.7   | 1.3   | 0.9   | 1.9   | 1.3   |
| 217223_s_at | U07000   | BCR           | 613          | 35.7  | 42.0  | 40.8  | 60.2  | 32.8  |
| 217224_at   | U53583   | OR1E3 /// Of- |              | 5.7   | 7.6   | 10.6  | 9.9   | 5.8   |
| 217225_x_at | AL512687 | LOC1010603    | 23420 /// 28 | 525.3 | 546.7 | 526.3 | 537.9 | 458.9 |
| 217226_s_at | M95929   | SFXN3         | 81855        | 64.5  | 59.7  | 78.6  | 61.9  | 53.0  |
| 217227_x_at | X93006   | IGLV1-44      | 28823        | 1.8   | 1.9   | 7.1   | 0.8   | 1.3   |
| 217228_s_at | AC003079 | ASB4          | 51666        | 6.0   | 2.8   | 6.1   | 0.8   | 0.6   |
| 217229_at   | AC003079 | ASB4          | 51666        | 0.2   | 0.2   | 0.4   | 2.6   | 0.3   |
| 217230_at   | AF199015 | EZR           | 7430         | 0.5   | 1.4   | 0.5   | 1.0   | 1.3   |
| 217231_s_at | AD000092 | MAST1         | 22983        | 0.5   | 0.7   | 0.8   | 0.8   | 0.6   |
| 217232_x_at | AF059180 | HBB           | 3043         | 35.3  | 18.4  | 24.5  | 17.4  | 15.8  |
| 217233_at   | Z97206   | RP3-359N14.-  |              | 9.0   | 1.5   | 1.2   | 1.5   | 2.1   |
| 217234_s_at | AF199015 | EZR           | 7430         | 64.4  | 55.3  | 61.4  | 49.3  | 47.5  |
| 217235_x_at | D84140   | IGLL5         | 100423062    | 2.8   | 12.1  | 13.5  | 8.0   | 5.8   |
| 217236_x_at | S74639   | IGH /// IGHA  | 3492 /// 349 | 13.2  | 11.2  | 17.2  | 8.9   | 5.1   |
| 217237_at   | Y10615   | ADAM3B /// -  |              | 0.6   | 0.3   | 0.2   | 0.6   | 0.1   |
| 217238_s_at | AK026411 | ALDOB         | 229          | 0.6   | 0.3   | 0.5   | 0.3   | 0.5   |
| 217239_x_at | AF044592 | LOC1019304    | 101930405    | 7.8   | 2.1   | 1.2   | 3.9   | 2.0   |
| 217240_at   | AL049634 | SIRPB1        | 10326        | 1.2   | 1.8   | 5.0   | 1.7   | 12.6  |
| 217242_at   | U20648   | ZNF154        | 7710         | 0.5   | 2.1   | 1.3   | 2.0   | 1.4   |
| 217244_at   | AL021327 | DNAJA1P4 //-  |              | 6.4   | 1.4   | 1.6   | 0.8   | 0.8   |
| 217245_at   | L22650   | DIAPH2-AS1    | 10824        | 5.3   | 5.9   | 8.6   | 1.1   | 5.6   |
| 217246_s_at | L22650   | DIAPH2        | 1730         | 1.0   | 0.4   | 1.0   | 6.9   | 2.1   |
| 217247_at   | Z98751   | RP4-560B9.4 - |              | 20.1  | 11.7  | 14.4  | 10.3  | 13.7  |
| 217248_s_at | AL365343 | SLC7A8        | 23428        | 25.3  | 26.4  | 35.5  | 28.4  | 26.5  |
| 217249_x_at | AC004544 | COX7A2P2 //-  |              | 391.6 | 328.2 | 360.0 | 388.6 | 343.1 |
| 217250_s_at | AL110281 | CHD5          | 26038        | 6.3   | 0.9   | 1.0   | 0.7   | 0.8   |
| 217251_x_at | AF043583 | -             | -            | 2.7   | 2.1   | 2.5   | 0.9   | 1.2   |
| 217252_at   | U46752   | -             | -            | 10.1  | 1.8   | 1.5   | 1.5   | 5.7   |
| 217253_at   | L37198   | SH3BP2        | 6452         | 30.2  | 22.7  | 27.3  | 28.8  | 29.7  |
| 217254_s_at | AF053356 | EPO           | 2056         | 6.8   | 1.0   | 12.0  | 11.2  | 5.2   |
| 217255_at   | U46752   | -             | -            | 1.5   | 0.8   | 0.9   | 0.7   | 0.7   |
| 217256_x_at | Z98950   | RP3-507I15.1- |              | 763.6 | 627.8 | 725.3 | 742.8 | 544.3 |
| 217257_at   | L37198   | SH3BP2        | 6452         | 1.4   | 4.7   | 6.6   | 7.1   | 3.0   |
| 217258_x_at | AF043583 | IGLV1-44      | 28823        | 0.6   | 1.2   | 0.4   | 1.3   | 0.3   |
| 217259_at   | AL117549 | -             | -            | 0.7   | 0.5   | 1.3   | 6.6   | 0.6   |
| 217260_x_at | AJ239383 | LOC1027234    | 102723479    | 1.8   | 0.6   | 5.2   | 0.8   | 0.7   |
| 217261_at   | AF000991 | TTY2 /// TT   | 60439 /// 10 | 8.2   | 16.7  | 9.0   | 5.1   | 11.3  |
| 217262_s_at | BC000059 | CELSR1        | 9620         | 1.2   | 1.2   | 2.1   | 2.3   | 4.1   |
| 217263_x_at | S76346   | LOC1005064    | 861 /// 1005 | 4.8   | 2.8   | 6.6   | 0.8   | 1.4   |
| 217264_s_at | U81961   | SCNN1A        | 6337         | 11.7  | 5.8   | 8.5   | 16.5  | 16.9  |
| 217265_at   | AL020989 | RP1-192P9.1 - |              | 0.5   | 0.6   | 0.6   | 0.4   | 0.4   |
| 217266_at   | Z97353   | RPL15         | 6138         | 606.2 | 370.1 | 593.0 | 449.3 | 374.9 |
| 217267_s_at | AK024417 | RAB7A         | 7879         | 0.7   | 0.6   | 0.5   | 2.0   | 0.8   |
| 217268_at   | AK024417 | RAB7A         | 7879         | 0.3   | 0.3   | 1.0   | 0.2   | 1.3   |
| 217269_s_at | AP001672 | TMPRSS15      | 5651         | 34.7  | 30.5  | 31.7  | 27.3  | 18.4  |
| 217270_s_at | AC005393 | DYRK1B        | 9149         | 25.8  | 17.5  | 28.8  | 36.8  | 16.7  |
| 217271_at   | AF011499 | GS1-124K5.9 - |              | 7.3   | 3.5   | 8.8   | 3.9   | 3.8   |
| 217272_s_at | AJ001698 | SERPINB13     | 5275         | 7.6   | 1.8   | 4.7   | 3.4   | 1.9   |
| 217273_at   | AL022101 | PRAMEF10      | 343071       | 1.4   | 1.0   | 2.2   | 1.6   | 0.5   |
| 217274_x_at | X52005   | MYL4          | 4635         | 6.2   | 20.0  | 14.7  | 9.2   | 1.7   |
| 217275_at   | L77565   | TSSK2         | 23617        | 3.7   | 2.7   | 2.2   | 1.4   | 2.3   |
| 217276_x_at | AL590118 | SERHL2        | 253190       | 4.3   | 2.9   | 3.4   | 6.7   | 1.8   |

|             |          |                           |        |        |        |        |        |
|-------------|----------|---------------------------|--------|--------|--------|--------|--------|
| 217277_at   | AL008721 | IGLVIVOR22--              | 8.4    | 7.3    | 1.7    | 5.9    | 7.0    |
| 217278_x_at | AF023203 | -                         | 0.3    | 0.4    | 0.6    | 5.4    | 0.5    |
| 217279_x_at | X83535   | MMP14 4323                | 2.6    | 1.7    | 1.1    | 0.9    | 1.4    |
| 217280_x_at | AF061785 | GABRA5 2558               | 8.5    | 14.1   | 9.5    | 5.9    | 7.0    |
| 217281_x_at | AJ239383 | IGH /// IGHA 3492 /// 349 | 0.4    | 0.6    | 0.6    | 0.4    | 0.3    |
| 217282_at   | AK001970 | MAN1A2 10905              | 2.0    | 0.6    | 1.5    | 2.5    | 0.5    |
| 217283_at   | AF023203 | -                         | 1.2    | 0.6    | 0.7    | 0.8    | 1.9    |
| 217284_x_at | AL589866 | SERHL2 253190             | 3.8    | 9.2    | 5.5    | 5.0    | 10.5   |
| 217285_at   | L77565   | DGCR14 /// 18220 /// 236  | 3.5    | 7.9    | 2.9    | 1.5    | 1.4    |
| 217286_s_at | BC001805 | NDRG3 57446               | 295.2  | 278.9  | 255.5  | 281.3  | 225.6  |
| 217287_s_at | AJ271068 | TRPC6 7225                | 0.7    | 1.0    | 5.5    | 5.2    | 5.1    |
| 217288_at   | AL049983 | -                         | 4.4    | 8.1    | 8.2    | 5.0    | 7.7    |
| 217289_s_at | AF097831 | SLC37A4 2542              | 91.6   | 81.5   | 132.4  | 58.2   | 81.8   |
| 217290_at   | AL030995 | RP5-1170D6.-              | 2.1    | 0.9    | 1.1    | 0.7    | 0.6    |
| 217291_at   | Z21818   | CEACAM5 1048              | 21.8   | 22.0   | 15.5   | 11.2   | 3.3    |
| 217292_at   | AL117549 | MTMR7 9108                | 0.4    | 1.4    | 1.9    | 5.1    | 2.6    |
| 217293_at   | AF209975 | -                         | 10.9   | 9.6    | 13.5   | 9.4    | 5.6    |
| 217294_s_at | U88968   | ENO1 2023                 | 1939.7 | 1607.2 | 2011.0 | 1742.4 | 1758.1 |
| 217295_at   | U14383   | MUC8 100129528            | 6.1    | 2.1    | 6.7    | 2.7    | 2.7    |
| 217296_at   | AF135564 | KIR2DS1 3806              | 10.4   | 7.2    | 7.4    | 8.2    | 5.5    |
| 217297_s_at | AF143684 | MYO9B 4650                | 2.7    | 11.1   | 13.7   | 12.8   | 12.3   |
| 217298_at   | M13934   | RPS14 6208                | 1.5    | 3.2    | 0.4    | 0.7    | 0.5    |
| 217299_s_at | AK001017 | NBN 4683                  | 36.0   | 28.5   | 44.7   | 32.6   | 37.9   |
| 217300_at   | U80771   | -                         | 9.7    | 11.2   | 10.3   | 5.6    | 1.5    |
| 217301_x_at | X71810   | RBBP4 5928                | 710.7  | 676.3  | 734.9  | 709.9  | 676.9  |
| 217302_at   | AC004853 | OR2F2 135948              | 10.4   | 13.1   | 3.0    | 1.1    | 12.3   |
| 217303_s_at | X70812   | ADRB3 155                 | 0.7    | 0.5    | 1.6    | 1.4    | 1.2    |
| 217304_at   | Y14488   | SHMT1 6470                | 8.6    | 4.4    | 8.2    | 6.9    | 7.7    |
| 217305_s_at | AL035122 | ADCY10 55811              | 1.7    | 6.1    | 5.4    | 7.6    | 4.3    |
| 217306_at   | AL031119 | RP1-28C20.1 -             | 0.2    | 0.3    | 5.9    | 2.6    | 0.3    |
| 217307_at   | AF086790 | ACO2 50                   | 26.6   | 17.9   | 27.2   | 23.9   | 26.4   |
| 217308_at   | AJ003145 | OR1F2P 26184              | 2.2    | 0.7    | 1.8    | 2.1    | 0.6    |
| 217309_s_at | AJ001867 | DSCR3 10311               | 42.9   | 32.4   | 35.2   | 33.9   | 27.9   |
| 217310_s_at | AK027075 | FOXJ3 22887               | 23.1   | 16.4   | 24.1   | 23.1   | 19.1   |
| 217311_at   | AF086790 | -                         | 1.2    | 0.5    | 1.2    | 0.6    | 0.5    |
| 217312_s_at | L23982   | COL7A1 1294               | 3.8    | 2.3    | 2.2    | 2.1    | 1.7    |
| 217313_at   | AC004692 | AC004692.5 -              | 128.4  | 97.6   | 118.0  | 86.5   | 86.2   |
| 217314_at   | AC002544 | CDC37P1 /// -             | 1.8    | 1.8    | 1.6    | 1.2    | 0.9    |
| 217315_s_at | AL050220 | KLK13 26085               | 8.2    | 4.3    | 10.3   | 4.3    | 8.3    |
| 217316_at   | AC005255 | OR7A10 390892             | 0.4    | 4.4    | 3.2    | 0.8    | 3.7    |
| 217317_s_at | AB002391 | HERC2P2 /// 400322 /// 4  | 35.2   | 29.3   | 28.4   | 28.2   | 20.7   |
| 217318_x_at | AJ000190 | KIR2DL1 /// 13802 /// 380 | 2.6    | 9.5    | 11.3   | 15.3   | 5.3    |
| 217319_x_at | AL135960 | CYP4A11 /// 1579 /// 284  | 0.5    | 4.1    | 1.3    | 2.2    | 2.8    |
| 217320_at   | AJ275413 | LOC1002932 100293211      | 0.6    | 0.4    | 2.4    | 3.9    | 2.8    |
| 217321_x_at | U63332   | ATXN3 4287                | 2.3    | 1.9    | 5.4    | 2.4    | 1.8    |
| 217322_x_at | AL024509 | RP3-522P13.-              | 33.1   | 30.0   | 38.1   | 35.1   | 39.5   |
| 217323_at   | AF005487 | HLA-DRB6 3128             | 2.8    | 2.1    | 1.1    | 0.8    | 2.9    |
| 217324_at   | AL133099 | -                         | 23.9   | 16.5   | 22.2   | 15.4   | 2.9    |
| 217325_at   | X05421   | KRT3 3850                 | 1.6    | 5.2    | 3.7    | 7.6    | 1.8    |
| 217326_x_at | AF009787 | BV03S1J2.2 / 28568 /// 51 | 1.0    | 1.5    | 2.1    | 1.1    | 1.6    |
| 217327_at   | AC005756 | AC104537.2,-              | 1.0    | 0.9    | 1.2    | 0.6    | 0.7    |
| 217328_at   | AF009787 | -                         | 0.6    | 1.1    | 8.5    | 1.0    | 0.6    |
| 217329_x_at | AF042164 | COX7BP1 /// -             | 83.3   | 86.8   | 75.3   | 101.2  | 76.3   |

|             |          |                           |           |        |       |        |        |       |
|-------------|----------|---------------------------|-----------|--------|-------|--------|--------|-------|
| 217330_at   | AK025293 | DISC1                     | 27185     | 7.9    | 2.0   | 2.0    | 8.9    | 0.7   |
| 217331_at   | U63542   | -                         | -         | 17.5   | 11.0  | 16.6   | 10.7   | 14.1  |
| 217332_at   | AL133018 | CTAGE11P                  | 647288    | 10.0   | 7.7   | 7.8    | 4.1    | 8.8   |
| 217333_at   | AL031903 | KRT18P44 //,-             |           | 1.5    | 1.2   | 0.9    | 0.5    | 0.6   |
| 217334_at   | AL022727 | OR2J3                     | 442186    | 3.7    | 0.3   | 5.1    | 0.5    | 2.8   |
| 217335_at   | AK023539 | FLJ11292                  | 55338     | 6.9    | 5.7   | 6.0    | 1.2    | 3.7   |
| 217336_at   | AL118510 | RPS10P2 /// -             |           | 141.0  | 71.4  | 108.9  | 113.7  | 75.4  |
| 217337_at   | AL021877 | RP1-101G11.-              |           | 20.3   | 9.7   | 18.4   | 10.1   | 9.2   |
| 217338_at   | AB041269 | KRT19P2                   | 160313    | 3.2    | 1.4   | 1.3    | 8.6    | 6.0   |
| 217339_x_at | AJ275978 | CTAG1A /// (1485 /// 246  |           | 6.6    | 0.9   | 1.6    | 3.2    | 1.4   |
| 217340_at   | AL024509 | RP3-522P13.-              |           | 15.9   | 11.7  | 13.6   | 13.9   | 12.2  |
| 217341_at   | L07810   | -                         | -         | 8.5    | 4.0   | 9.1    | 7.2    | 5.6   |
| 217342_x_at | AK023539 | FLJ11292                  | 55338     | 4.6    | 4.8   | 6.7    | 0.9    | 5.8   |
| 217343_at   | AL034369 | RP6-149D17.-              |           | 4.2    | 4.8   | 0.8    | 0.2    | 1.8   |
| 217344_at   | AL022163 | FDPSP5 /// F -            |           | 8.4    | 6.6   | 11.8   | 3.3    | 6.8   |
| 217345_at   | U91640   | RP11-15P13.-              |           | 6.0    | 4.3   | 9.8    | 0.5    | 0.6   |
| 217346_at   | AL021395 | PPIAP21 /// I-            |           | 33.8   | 30.4  | 32.7   | 31.3   | 23.4  |
| 217347_at   | Z82202   | RPL35P8 /// I-            |           | 358.9  | 151.5 | 220.1  | 219.1  | 126.9 |
| 217348_x_at | AK023853 | ARHGEF15                  | 22899     | 3.8    | 8.0   | 9.3    | 1.5    | 10.2  |
| 217349_s_at | U93305   | PRICKLE3                  | 4007      | 18.4   | 21.9  | 28.7   | 13.9   | 21.5  |
| 217350_at   | AB041269 | KRT19P2 /// 160313 /// 5  |           | 2.7    | 5.5   | 0.8    | 0.9    | 1.5   |
| 217351_at   | AL024458 | KRT8P17 /// -             |           | 1.6    | 1.1   | 0.8    | 6.1    | 1.0   |
| 217352_at   | AL050308 | GS1-164F24.-              |           | 10.9   | 14.4  | 14.0   | 14.7   | 16.9  |
| 217353_at   | AL022097 | HNRNPA1P3'-               |           | 26.9   | 19.2  | 36.7   | 22.7   | 19.8  |
| 217354_s_at | AL022313 | HPS1                      | 3257      | 15.3   | 17.1  | 17.3   | 7.0    | 12.2  |
| 217355_at   | AL022313 | RP5-1119A7.-              |           | 0.5    | 6.0   | 9.0    | 3.8    | 10.9  |
| 217356_s_at | S81916   | PGK1                      | 5230      | 1105.6 | 973.3 | 1150.6 | 1079.1 | 946.1 |
| 217357_at   | AB028239 | RP11-560G2.-              |           | 3.1    | 1.9   | 8.7    | 1.1    | 5.0   |
| 217358_at   | AL137715 | DNAJC16                   | 23341     | 7.4    | 2.4   | 3.6    | 13.4   | 3.3   |
| 217359_s_at | M22094   | NCAM1                     | 4684      | 5.5    | 8.4   | 9.8    | 6.5    | 5.2   |
| 217360_x_at | AJ275408 | IGHA1 /// IG 3493 /// 350 |           | 0.3    | 0.7   | 0.4    | 0.8    | 1.7   |
| 217361_at   | X73110   | PRKAR1AP //-              |           | 2.3    | 1.9   | 3.5    | 2.2    | 6.1   |
| 217362_x_at | AF005487 | HLA-DRB6                  | 3128      | 19.4   | 9.7   | 13.0   | 8.3    | 11.8  |
| 217363_x_at | AL031313 | RPL22P22 //,-             |           | 20.4   | 32.8  | 24.7   | 38.3   | 4.5   |
| 217364_x_at | AL031313 | RP4-581F12.-              |           | 18.9   | 15.7  | 28.4   | 37.4   | 14.2  |
| 217365_at   | AL022101 | PRAMEF11                  | 440560    | 20.4   | 14.1  | 8.3    | 13.6   | 13.6  |
| 217366_at   | Z37994   | CTNNAP1                   | -         | 1.4    | 1.4   | 1.1    | 1.4    | 0.7   |
| 217367_s_at | AB007855 | ZHX3                      | 23051     | 28.7   | 25.5  | 24.9   | 33.7   | 23.4  |
| 217368_at   | X69909   | ATP5G2P1 //-              |           | 27.3   | 34.5  | 28.4   | 32.4   | 29.1  |
| 217369_at   | AJ275383 | IGHG1 /// LC 3500 /// 101 |           | 10.8   | 3.1   | 11.5   | 15.2   | 10.7  |
| 217370_x_at | S75762   | FUS                       | 2521      | 181.8  | 172.4 | 189.7  | 165.7  | 169.2 |
| 217371_s_at | Y09908   | IL15                      | 3600      | 0.8    | 0.8   | 3.1    | 4.2    | 3.1   |
| 217372_at   | Y09908   | -                         | -         | 1.2    | 2.5   | 0.9    | 0.3    | 0.6   |
| 217373_x_at | AJ276888 | MDM2                      | 4193      | 19.3   | 13.2  | 16.5   | 15.6   | 14.8  |
| 217374_x_at | AC006033 | -                         | -         | 2.1    | 1.0   | 2.9    | 0.8    | 1.3   |
| 217375_at   | Z93929   | RP1-272E8.1 -             |           | 4.0    | 4.8   | 6.0    | 3.3    | 5.2   |
| 217376_at   | AL109809 | LOC1002894                | 100289473 | 2.7    | 1.2   | 2.4    | 0.9    | 0.9   |
| 217377_x_at | AF041811 | NTRK3                     | 4916      | 29.1   | 14.9  | 22.9   | 20.7   | 11.4  |
| 217378_x_at | X51887   | IGKV1OR2-1(-              |           | 1.5    | 0.9   | 1.2    | 0.9    | 0.8   |
| 217379_at   | AL121934 | RP11-209A2.-              |           | 549.6  | 459.3 | 640.0  | 519.7  | 371.4 |
| 217380_s_at | U92992   | ADD3-AS1                  | 100505933 | 4.1    | 4.2   | 0.5    | 3.6    | 0.4   |
| 217381_s_at | X69383   | TARP                      | 445347    | 7.2    | 1.3   | 1.1    | 4.7    | 4.8   |
| 217382_at   | U85978   | CLIC1P1 /// (-            |           | 0.7    | 7.0   | 9.7    | 0.7    | 3.2   |

|             |          |                |             |        |        |        |        |        |      |
|-------------|----------|----------------|-------------|--------|--------|--------|--------|--------|------|
| 217383_at   | S81916   | PGK1           | 5230        | 24.5   | 13.2   | 27.4   | 13.8   | 13.7   |      |
| 217384_x_at | AJ275374 | LOC1002932     | 100293211   | 1.0    | 0.6    | 3.6    | 5.7    | 0.3    |      |
| 217385_at   | AL023773 | RP3-406C18.    | -           | 0.7    | 0.9    | 0.7    | 0.4    | 0.3    |      |
| 217386_at   | AL109953 | MRPS11P1 //    | -           | 7.6    | 10.3   | 11.4   | 6.7    | 8.0    |      |
| 217387_at   | AJ000388 | CAPN6          | 827         | 0.6    | 0.7    | 0.8    | 1.5    | 0.7    |      |
| 217388_s_at | D55639   | KYNU           | 8942        | 3.5    | 1.2    | 2.1    | 0.8    | 0.3    |      |
| 217389_s_at | AF101388 | ATF5           | 22809       | 7.9    | 6.1    | 9.4    | 8.1    | 2.8    |      |
| 217390_x_at | AJ275371 | -              | -           | 20.7   | 23.1   | 16.5   | 13.9   | 10.4   |      |
| 217391_x_at | X72882   | -              | -           | 5.5    | 2.6    | 9.4    | 4.1    | 2.2    |      |
| 217392_at   | AL024493 | RP3-452M16-    | -           | 3.4    | 0.4    | 0.5    | 0.4    | 0.6    |      |
| 217393_x_at | AL109622 | UBE2NL         | 389898      | 105.6  | 40.7   | 74.7   | 73.4   | 72.9   |      |
| 217394_at   | AE000659 | TCR-alpha //   | -           | 2.3    | 1.5    | 6.8    | 5.7    | 1.8    |      |
| 217395_at   | X55503   | MT4            | 84560       | 1.8    | 3.8    | 1.1    | 1.3    | 0.8    |      |
| 217396_at   | AL133075 | -              | -           | 7.6    | 3.8    | 5.4    | 2.1    | 2.1    |      |
| 217397_at   | AE000659 | TCRA ///       | TCR10730    | 14.3   | 10.7   | 12.5   | 17.4   | 10.1   |      |
| 217398_x_at | AK026525 | GAPDH          | 2597        | 3774.0 | 3544.2 | 3543.7 | 3516.5 | 3482.6 |      |
| 217399_s_at | AF032887 | FOXO3 ///      | FC2309 ///  | 231    | 6.9    | 2.8    | 9.6    | 10.5   | 11.3 |
| 217400_at   | AL034410 | PCNAP3 ///     | F-          | 2.8    | 4.9    | 9.1    | 5.2    | 6.1    |      |
| 217401_at   | AL035555 | RP1-217P22.    | -           | 5.0    | 7.2    | 0.4    | 8.6    | 5.8    |      |
| 217402_at   | AL031732 | TBCAP2 ///     | T-          | 2.6    | 0.2    | 0.7    | 0.1    | 0.1    |      |
| 217403_s_at | AC074331 | ZNF227         | 7770        | 19.4   | 20.6   | 16.1   | 20.2   | 20.3   |      |
| 217404_s_at | X16468   | COL2A1         | 1280        | 0.5    | 0.2    | 0.6    | 0.3    | 0.7    |      |
| 217405_x_at | AL031230 | GPLD1          | 2822        | 11.3   | 6.4    | 10.3   | 8.8    | 4.7    |      |
| 217406_at   | AL021937 | RP1-149A16.    | -           | 18.0   | 11.7   | 7.0    | 8.0    | 9.4    |      |
| 217407_x_at | U37220   | PPIL2          | 23759       | 34.5   | 53.4   | 32.3   | 33.9   | 33.3   |      |
| 217408_at   | AL050361 | MRPS18B        | 28973       | 343.6  | 268.6  | 368.2  | 324.8  | 263.3  |      |
| 217409_at   | Z22957   | -              | -           | 3.7    | 1.4    | 1.3    | 0.4    | 0.3    |      |
| 217410_at   | AK021586 | AGRN           | 375790      | 3.9    | 4.7    | 4.6    | 0.9    | 1.0    |      |
| 217411_s_at | AF072826 | RREB1          | 6239        | 2.5    | 1.4    | 1.2    | 1.1    | 2.0    |      |
| 217412_at   | AE000659 | T-Cell Recept- | -           | 3.8    | 3.6    | 1.1    | 1.5    | 5.6    |      |
| 217413_s_at | X71923   | TNXB           | 7148        | 8.1    | 2.0    | 2.8    | 1.1    | 0.7    |      |
| 217414_x_at | V00489   | HBA1 ///       | HB,3039 /// | 304    | 0.8    | 0.5    | 1.2    | 0.8    | 0.7  |
| 217415_at   | M21610   | POLR2A         | 5430        | 1.5    | 3.9    | 1.7    | 2.6    | 4.7    |      |
| 217416_x_at | AK000918 | -              | -           | 44.6   | 28.8   | 37.7   | 33.9   | 29.5   |      |
| 217417_at   | Z22957   | MYO5A          | 4644        | 1.5    | 0.2    | 0.8    | 3.5    | 1.3    |      |
| 217418_x_at | X12530   | MS4A1          | 931         | 2.5    | 8.2    | 7.8    | 5.7    | 1.6    |      |
| 217419_x_at | AK021586 | AGRN           | 375790      | 59.0   | 49.4   | 60.6   | 55.3   | 42.7   |      |
| 217420_s_at | M21610   | POLR2A         | 5430        | 4.9    | 1.7    | 1.3    | 3.0    | 10.9   |      |
| 217421_at   | AK000397 | PIWIL2         | 55124       | 1.5    | 0.7    | 1.0    | 1.5    | 1.2    |      |
| 217422_s_at | X52785   | CD22           | 933         | 2.2    | 0.8    | 1.0    | 1.2    | 3.2    |      |
| 217423_at   | AK000257 | -              | -           | 9.1    | 5.7    | 8.9    | 9.9    | 0.9    |      |
| 217424_at   | AL122122 | -              | -           | 0.9    | 1.8    | 1.2    | 1.1    | 1.6    |      |
| 217425_at   | Y10259   | MC2R           | 4158        | 1.8    | 1.0    | 1.3    | 0.4    | 1.4    |      |
| 217426_at   | L11372   | -              | -           | 1.9    | 1.0    | 1.4    | 5.2    | 1.0    |      |
| 217427_s_at | X75296   | HIRA           | 7290        | 173.0  | 140.7  | 149.2  | 134.4  | 144.2  |      |
| 217428_s_at | X98568   | COL10A1        | 1300        | 2.5    | 4.6    | 0.7    | 0.5    | 2.8    |      |
| 217429_at   | AL049307 | -              | -           | 1.0    | 1.9    | 2.0    | 1.0    | 1.6    |      |
| 217430_x_at | Y15916   | COL1A1         | 1277        | 50.1   | 19.9   | 36.9   | 33.8   | 16.5   |      |
| 217431_x_at | S67289   | CYBB           | 1536        | 2.3    | 1.1    | 3.3    | 0.7    | 2.0    |      |
| 217432_s_at | AF179281 | IDS            | 3423        | 24.1   | 35.9   | 35.9   | 29.0   | 17.2   |      |
| 217433_at   | AB029026 | TACC1          | 6867        | 0.4    | 1.0    | 0.6    | 0.8    | 0.4    |      |
| 217434_at   | Y10259   | MC2R           | 4158        | 3.1    | 6.3    | 4.9    | 3.6    | 5.6    |      |
| 217435_x_at | Y15916   | -              | -           | 8.3    | 8.8    | 8.5    | 6.9    | 3.2    |      |

|             |          |                           |           |        |        |        |        |        |
|-------------|----------|---------------------------|-----------|--------|--------|--------|--------|--------|
| 217436_x_at | M80469   | HLA-J                     | 3137      | 32.2   | 46.1   | 39.4   | 45.5   | 32.3   |
| 217437_s_at | AB029026 | TACC1                     | 6867      | 59.7   | 45.2   | 66.3   | 43.2   | 49.4   |
| 217438_at   | D25272   | -                         | -         | 8.6    | 0.8    | 1.9    | 1.0    | 6.7    |
| 217439_at   | AL122122 | LOC1019282                | 101928278 | 0.7    | 2.3    | 0.5    | 1.0    | 3.5    |
| 217440_at   | AL049342 | -                         | -         | 2.0    | 0.1    | 2.9    | 0.2    | 0.1    |
| 217441_at   | AK023664 | USP33                     | 23032     | 11.2   | 8.9    | 13.7   | 9.0    | 9.0    |
| 217442_at   | AL050219 | CADM3-AS1                 | 100131825 | 0.7    | 0.6    | 1.4    | 0.5    | 0.7    |
| 217443_at   | AL080152 | LOC1019277                | 101927792 | 0.5    | 2.8    | 0.9    | 1.1    | 0.4    |
| 217444_at   | AL080086 | RP5-1184F4.-              | -         | 8.1    | 1.7    | 1.2    | 2.3    | 1.8    |
| 217445_s_at | AF008655 | GART                      | 2618      | 74.3   | 41.7   | 75.4   | 49.0   | 70.3   |
| 217446_x_at | AL080160 | -                         | -         | 16.8   | 11.1   | 20.7   | 16.2   | 18.5   |
| 217447_at   | X98405   | MAG                       | 4099      | 6.7    | 8.6    | 5.3    | 7.1    | 7.5    |
| 217448_s_at | AL117508 | TOX4                      | 9878      | 74.4   | 70.5   | 62.3   | 65.3   | 47.7   |
| 217449_at   | AL137284 | -                         | -         | 14.1   | 6.4    | 12.3   | 8.7    | 1.1    |
| 217450_at   | AF053356 | AGFG2                     | 3268      | 14.8   | 10.1   | 5.8    | 1.6    | 6.5    |
| 217451_at   | AF042162 | RP11-665C16-              | -         | 0.4    | 0.2    | 6.3    | 1.6    | 1.5    |
| 217452_s_at | Y15014   | B3GALT2                   | 8707      | 0.9    | 0.2    | 1.0    | 2.0    | 0.7    |
| 217453_at   | AL133089 | -                         | -         | 10.1   | 2.0    | 9.3    | 5.5    | 2.6    |
| 217454_at   | AL034450 | HMGB3P30 /-               | -         | 1.3    | 4.0    | 1.9    | 0.6    | 0.9    |
| 217455_s_at | AF184174 | SSTR2                     | 6752      | 8.4    | 5.8    | 11.9   | 2.4    | 8.1    |
| 217456_x_at | M31183   | HLA-E                     | 3133      | 43.4   | 49.8   | 23.1   | 39.1   | 25.3   |
| 217457_s_at | X63465   | RAP1GDS1                  | 5910      | 83.4   | 71.2   | 71.1   | 62.6   | 51.0   |
| 217458_at   | AL137435 | -                         | -         | 3.2    | 1.8    | 1.0    | 1.4    | 1.4    |
| 217459_at   | AL137292 | -                         | -         | 5.4    | 1.4    | 1.9    | 5.1    | 1.0    |
| 217460_at   | X63759   | TNP2                      | 7142      | 0.3    | 0.5    | 0.3    | 2.0    | 1.6    |
| 217461_x_at | M90355   | BTF3P12 ///               | -         | 38.2   | 20.1   | 16.3   | 20.1   | 7.2    |
| 217462_at   | AC004770 | MYRF                      | 745       | 6.0    | 0.8    | 5.6    | 1.2    | 4.7    |
| 217463_s_at | AC004770 | MYRF                      | 745       | 0.7    | 0.3    | 0.6    | 0.6    | 0.9    |
| 217464_at   | L48784   | -                         | -         | 0.4    | 0.8    | 1.2    | 1.1    | 0.5    |
| 217465_at   | AK001291 | NCKAP1                    | 10787     | 19.2   | 17.4   | 25.0   | 13.1   | 11.1   |
| 217466_x_at | L48784   | RPS2 /// SNC 6187 /// 267 | -         | 2852.5 | 2490.1 | 2822.0 | 2519.4 | 2508.9 |
| 217467_at   | M90356   | BTF3P13 ///               | -         | 5.5    | 6.7    | 5.5    | 5.6    | 8.1    |
| 217468_at   | X07618   | CYP2D6                    | 1565      | 11.1   | 2.0    | 11.5   | 8.8    | 2.6    |
| 217469_at   | X95746   | IGH                       | 3492      | 6.1    | 1.2    | 1.5    | 1.8    | 1.3    |
| 217470_at   | AL157490 | -                         | -         | 4.7    | 6.2    | 6.2    | 2.2    | 1.5    |
| 217471_at   | AL117652 | LOC1019281                | 101928104 | 14.7   | 10.9   | 10.8   | 8.3    | 4.0    |
| 217472_at   | J02963   | -                         | -         | 1.6    | 8.7    | 4.9    | 1.3    | 2.4    |
| 217473_x_at | AF229163 | SLC11A1                   | 6556      | 42.0   | 36.6   | 52.0   | 33.0   | 30.1   |
| 217474_at   | AL117652 | -                         | -         | 10.1   | 10.3   | 2.7    | 7.0    | 3.9    |
| 217475_s_at | AC002073 | LIMK2                     | 3985      | 13.2   | 11.7   | 20.1   | 18.1   | 16.8   |
| 217476_at   | M24900   | NR1D1 /// TF 7067 /// 957 | -         | 1.4    | 1.3    | 1.6    | 1.8    | 0.8    |
| 217477_at   | U78581   | PIP5K1B                   | 8395      | 4.4    | 5.8    | 12.2   | 9.7    | 10.0   |
| 217478_s_at | X76775   | HLA-DMA                   | 3108      | 73.0   | 66.9   | 61.9   | 67.4   | 55.1   |
| 217479_at   | AL110201 | -                         | -         | 1.4    | 6.3    | 1.7    | 4.3    | 2.3    |
| 217480_x_at | M20812   | AC128677.4,-              | -         | 15.6   | 11.3   | 24.3   | 15.0   | 8.4    |
| 217481_x_at | AL110201 | RP11-680C21-              | -         | 6.8    | 3.4    | 5.7    | 7.0    | 7.9    |
| 217482_at   | AK021987 | -                         | -         | 13.5   | 13.0   | 13.9   | 12.3   | 9.4    |
| 217483_at   | AF254357 | FOLH1                     | 2346      | 173.9  | 94.5   | 95.7   | 138.5  | 101.7  |
| 217484_at   | X14362   | CR1                       | 1378      | 11.4   | 10.4   | 9.6    | 3.9    | 3.5    |
| 217485_x_at | D38435   | PMS2P1                    | 5379      | 124.6  | 135.0  | 113.0  | 102.1  | 80.4   |
| 217486_s_at | AF161412 | ZDHHC17                   | 23390     | 6.4    | 1.4    | 9.6    | 1.7    | 4.7    |
| 217487_x_at | AF254357 | FOLH1 /// FC 2346 /// 219 | -         | 1621.9 | 1730.2 | 1602.9 | 1750.0 | 1255.3 |
| 217488_x_at | D38437   | PMS2P3                    | 5387      | 1.1    | 0.7    | 1.2    | 0.9    | 0.7    |

|             |          |            |              |         |        |        |        |        |      |
|-------------|----------|------------|--------------|---------|--------|--------|--------|--------|------|
| 217489_s_at | S72848   | IL6R       | 3570         | 9.1     | 7.6    | 10.9   | 2.6    | 11.0   |      |
| 217490_at   | AL049301 | -          | -            | 3.3     | 1.0    | 13.0   | 3.9    | 8.6    |      |
| 217491_x_at | AF042165 | COX7C      | 1350         | 1638.6  | 1350.9 | 1697.3 | 1509.3 | 1278.5 |      |
| 217492_s_at | AF023139 | PTEN       | /// PTE 5728 | /// 111 | 73.1   | 77.1   | 73.7   | 73.7   | 53.4 |
| 217493_x_at | AL136967 | NCR2       | 9436         | 5.9     | 3.8    | 8.4    | 17.1   | 2.0    |      |
| 217494_s_at | AF023139 | -          | -            | 4.4     | 1.1    | 7.2    | 8.2    | 2.0    |      |
| 217495_x_at | X15943   | CALCA      | 796          | 1.7     | 2.3    | 1.7    | 2.5    | 3.2    |      |
| 217496_s_at | AA918442 | IDE        | 3416         | 98.5    | 84.2   | 95.1   | 84.6   | 75.5   |      |
| 217497_at   | AW613387 | TYMP       | 1890         | 6.4     | 7.4    | 8.0    | 7.3    | 3.1    |      |
| 217498_at   | BG389073 | GDF11      | 10220        | 0.9     | 4.5    | 10.1   | 1.6    | 5.5    |      |
| 217499_x_at | AW874308 | OR7E37P    | 100506759    | 174.1   | 169.5  | 189.1  | 197.4  | 144.1  |      |
| 217500_at   | R27378   | TIAL1      | 7073         | 9.4     | 4.7    | 16.7   | 3.2    | 9.6    |      |
| 217501_at   | AI339732 | CIAO1      | 9391         | 45.9    | 37.4   | 52.7   | 32.5   | 48.9   |      |
| 217502_at   | BE888744 | IFIT2      | 3433         | 11.7    | 10.1   | 7.6    | 2.5    | 5.3    |      |
| 217503_at   | AA203487 | STK17B     | 9262         | 7.1     | 6.1    | 8.9    | 9.7    | 7.0    |      |
| 217504_at   | AA099357 | ABCA6      | 23460        | 0.4     | 0.6    | 3.6    | 0.2    | 1.8    |      |
| 217505_at   | BG403790 | KLHL23     | /// P 151230 | /// 1   | 3.1    | 0.1    | 3.0    | 1.1    | 0.1  |
| 217506_at   | H49382   | -          | -            | 42.6    | 36.9   | 31.5   | 28.9   | 27.7   |      |
| 217507_at   | AI346187 | SLC11A1    | 6556         | 1.0     | 12.9   | 3.1    | 1.5    | 4.8    |      |
| 217508_s_at | BE783279 | C18orf25   | 147339       | 26.3    | 21.5   | 23.9   | 28.1   | 24.4   |      |
| 217509_x_at | BG151527 | GRIK5      | 2901         | 30.0    | 21.6   | 10.1   | 7.4    | 5.9    |      |
| 217510_at   | BE257838 | CRX        | 1406         | 9.1     | 0.8    | 1.5    | 0.5    | 4.0    |      |
| 217511_at   | W28828   | KAZALD1    | 81621        | 15.5    | 14.5   | 14.3   | 22.7   | 20.2   |      |
| 217512_at   | BG398937 | KNG1       | 3827         | 2.1     | 2.5    | 4.0    | 3.4    | 4.2    |      |
| 217513_at   | BG334495 | MILR1      | 284021       | 0.6     | 0.6    | 1.6    | 0.8    | 0.6    |      |
| 217514_at   | BF509345 | ST8SIA5    | 29906        | 0.7     | 5.7    | 5.1    | 4.0    | 1.6    |      |
| 217515_s_at | AI391509 | CACNA1S    | 779          | 8.3     | 2.6    | 13.3   | 8.5    | 2.4    |      |
| 217516_x_at | BG149428 | ARVCF      | 421          | 10.1    | 33.7   | 7.7    | 33.2   | 5.4    |      |
| 217517_x_at | AI886482 | SRPK2      | 6733         | 1.9     | 5.1    | 8.3    | 2.2    | 4.8    |      |
| 217518_at   | BF056029 | MYOF       | 26509        | 1.3     | 3.5    | 6.3    | 4.8    | 2.6    |      |
| 217519_at   | AI246331 | -          | -            | 0.8     | 3.1    | 2.1    | 0.2    | 0.9    |      |
| 217520_x_at | BG396614 | LOC1019292 | 646278       | /// 1   | 10.3   | 4.4    | 9.5    | 5.8    | 1.2  |
| 217521_at   | N54942   | HAL        | 3034         | 8.3     | 5.0    | 2.7    | 4.6    | 6.0    |      |
| 217522_at   | AI206888 | KCNV2      | 169522       | 3.6     | 1.0    | 0.7    | 0.5    | 3.0    |      |
| 217523_at   | AV700298 | CD44       | 960          | 4.3     | 2.9    | 2.2    | 4.3    | 3.6    |      |
| 217524_x_at | AA018923 | -          | -            | 2.6     | 1.4    | 1.6    | 2.4    | 0.1    |      |
| 217525_at   | AW305097 | OLFML1     | 283298       | 2.1     | 0.3    | 2.0    | 2.4    | 2.8    |      |
| 217526_at   | AI478300 | NFATC2IP   | 84901        | 42.9    | 33.4   | 45.7   | 35.0   | 33.4   |      |
| 217527_s_at | AI478300 | NFATC2IP   | 84901        | 75.2    | 51.5   | 65.9   | 62.1   | 62.6   |      |
| 217528_at   | BF003134 | CLCA2      | 9635         | 1.0     | 3.0    | 0.2    | 0.9    | 0.5    |      |
| 217529_at   | BE547674 | ORAI2      | 80228        | 13.1    | 9.6    | 12.3   | 10.8   | 6.5    |      |
| 217530_at   | AW295295 | SLC34A1    | 6569         | 4.6     | 5.0    | 0.5    | 13.4   | 2.6    |      |
| 217531_at   | AW301775 | -          | -            | 0.6     | 0.9    | 3.9    | 0.9    | 3.8    |      |
| 217532_x_at | AW268081 | -          | -            | 1.3     | 0.6    | 0.7    | 1.2    | 1.1    |      |
| 217533_x_at | AW268081 | PWWP2A     | 114825       | 7.6     | 1.8    | 7.9    | 3.1    | 8.7    |      |
| 217534_at   | AA845825 | FAM49B     | 51571        | 7.7     | 1.1    | 5.0    | 0.9    | 1.8    |      |
| 217535_at   | AV720514 | -          | -            | 1.7     | 4.1    | 0.6    | 1.1    | 0.8    |      |
| 217536_x_at | M78162   | -          | -            | 0.1     | 0.1    | 0.1    | 0.3    | 0.5    |      |
| 217537_x_at | M78162   | -          | -            | 0.6     | 0.8    | 0.3    | 1.0    | 0.7    |      |
| 217538_at   | BF347113 | SGSM2      | 9905         | 14.2    | 13.4   | 11.1   | 8.6    | 7.3    |      |
| 217539_at   | W28849   | C18orf25   | 147339       | 21.3    | 9.8    | 12.6   | 9.3    | 10.3   |      |
| 217540_at   | AA721025 | NXPE3      | 91775        | 7.9     | 7.8    | 6.3    | 9.2    | 9.0    |      |
| 217541_x_at | BG290532 | ZNF816     | /// Z 125893 | /// 1   | 23.4   | 17.6   | 26.5   | 18.5   | 19.6 |

|             |          |                           |           |      |      |      |      |      |
|-------------|----------|---------------------------|-----------|------|------|------|------|------|
| 217542_at   | BE930512 | MDM2                      | 4193      | 9.5  | 4.1  | 5.4  | 5.2  | 9.1  |
| 217543_s_at | BE890314 | MBTPS1                    | 8720      | 53.2 | 45.5 | 53.1 | 56.4 | 41.6 |
| 217544_at   | AA768909 | MIR3916                   | 100500849 | 5.3  | 7.7  | 9.7  | 4.4  | 5.4  |
| 217545_at   | AW081820 | MYH14                     | 79784     | 3.4  | 3.8  | 9.0  | 5.7  | 1.7  |
| 217546_at   | R06655   | MT1M                      | 4499      | 0.3  | 0.6  | 0.4  | 0.4  | 0.7  |
| 217547_x_at | BF308250 | ZNF675                    | 171392    | 23.2 | 12.8 | 30.4 | 13.6 | 8.6  |
| 217548_at   | AA491625 | ARPIN                     | 348110    | 15.0 | 5.9  | 13.3 | 14.2 | 6.0  |
| 217549_at   | AW574933 | NCKAP1L                   | 3071      | 3.0  | 5.1  | 2.0  | 1.2  | 5.4  |
| 217550_at   | AA576497 | ATF6                      | 22926     | 8.4  | 3.9  | 6.3  | 7.0  | 10.0 |
| 217551_at   | AA719797 | OR7E14P                   | 10819     | 44.2 | 51.4 | 39.3 | 50.3 | 34.4 |
| 217552_x_at | AI432713 | CR1                       | 1378      | 0.3  | 1.8  | 3.9  | 1.8  | 2.3  |
| 217553_at   | AW129021 | STEAP1B                   | 256227    | 17.1 | 6.5  | 6.4  | 8.1  | 4.8  |
| 217554_at   | AV719355 | -                         | -         | 7.7  | 10.1 | 6.4  | 5.6  | 5.6  |
| 217555_at   | AI042030 | SMC1A                     | 8243      | 6.7  | 7.1  | 2.8  | 10.3 | 6.0  |
| 217556_at   | W26966   | CLCN4                     | 1183      | 14.8 | 9.2  | 7.9  | 7.9  | 1.6  |
| 217557_s_at | AV710357 | CPM                       | 1368      | 15.1 | 14.8 | 2.2  | 1.6  | 0.9  |
| 217558_at   | BE971373 | CYP2C9                    | 1559      | 11.7 | 4.9  | 4.6  | 8.2  | 4.4  |
| 217559_at   | AI001784 | RPL10L                    | 140801    | 78.5 | 73.7 | 75.5 | 75.8 | 63.4 |
| 217560_at   | AI879383 | GGA1                      | 26088     | 6.1  | 6.3  | 14.1 | 2.2  | 7.2  |
| 217561_at   | BF447272 | CALCA                     | 796       | 3.1  | 4.3  | 7.4  | 1.5  | 3.8  |
| 217562_at   | BF589529 | BRINP3                    | 339479    | 5.2  | 4.5  | 8.8  | 7.3  | 4.1  |
| 217563_at   | AW238724 | CLOCK                     | 9575      | 3.4  | 8.8  | 6.7  | 2.6  | 1.8  |
| 217564_s_at | W80357   | CPS1                      | 1373      | 27.6 | 19.5 | 14.8 | 21.9 | 13.9 |
| 217565_at   | BF110551 | GRIA3                     | 2892      | 2.1  | 1.1  | 6.2  | 3.0  | 2.4  |
| 217566_s_at | BF222018 | TGM4                      | 7047      | 6.5  | 4.5  | 3.5  | 4.5  | 4.6  |
| 217567_at   | BF222018 | TGM4                      | 7047      | 7.4  | 4.4  | 0.6  | 3.1  | 2.7  |
| 217568_at   | AI696737 | EDDM3A                    | 10876     | 3.2  | 0.8  | 10.1 | 5.6  | 0.6  |
| 217569_x_at | AA017093 | -                         | -         | 14.9 | 6.8  | 15.8 | 6.4  | 8.1  |
| 217570_x_at | AV718487 | -                         | -         | 0.8  | 1.4  | 0.6  | 4.2  | 5.6  |
| 217571_at   | AV661138 | -                         | -         | 1.2  | 0.6  | 0.2  | 0.3  | 0.2  |
| 217572_at   | AA654586 | -                         | -         | 0.7  | 0.9  | 0.7  | 0.8  | 0.3  |
| 217573_at   | AW138468 | GRIN2C                    | 2905      | 11.2 | 6.9  | 7.2  | 2.8  | 1.6  |
| 217574_at   | T65123   | CDH8                      | 1006      | 7.3  | 5.6  | 7.6  | 5.4  | 5.3  |
| 217575_s_at | BF692958 | SOS2                      | 6655      | 0.6  | 0.3  | 0.2  | 1.8  | 1.1  |
| 217576_x_at | BF692958 | SOS2                      | 6655      | 2.7  | 8.9  | 4.6  | 9.8  | 9.0  |
| 217577_at   | AW576871 | -                         | -         | 0.7  | 2.9  | 2.3  | 1.5  | 1.7  |
| 217578_at   | AI679024 | -                         | -         | 5.1  | 2.0  | 0.1  | 3.1  | 2.1  |
| 217579_x_at | AW301806 | -                         | -         | 28.6 | 13.9 | 22.4 | 21.4 | 13.6 |
| 217580_x_at | AW301806 | -                         | -         | 35.5 | 15.4 | 31.1 | 23.3 | 21.3 |
| 217581_at   | AA741028 | -                         | -         | 0.9  | 0.6  | 1.8  | 0.9  | 0.6  |
| 217582_at   | AA018777 | -                         | -         | 2.3  | 1.0  | 4.9  | 1.0  | 0.5  |
| 217583_at   | BG433489 | LOC1019290.5053 /// 101   |           | 0.9  | 3.6  | 0.4  | 0.3  | 1.8  |
| 217584_at   | U55987   | NPC1                      | 4864      | 3.2  | 3.1  | 1.8  | 4.0  | 1.0  |
| 217585_at   | BE502910 | NEBL                      | 10529     | 0.8  | 0.4  | 0.6  | 0.7  | 0.5  |
| 217586_x_at | N35922   | -                         | -         | 10.6 | 12.6 | 18.3 | 18.4 | 20.7 |
| 217587_at   | AI274196 | -                         | -         | 1.1  | 0.7  | 0.8  | 0.8  | 0.9  |
| 217588_at   | AW971983 | CATSPER2 //, 117155 /// 4 |           | 14.6 | 15.2 | 10.2 | 16.7 | 13.4 |
| 217589_at   | AW300309 | RAB40A                    | 142684    | 1.0  | 5.5  | 11.1 | 3.4  | 4.6  |
| 217590_s_at | AA502609 | TRPA1                     | 8989      | 4.8  | 1.1  | 1.4  | 0.4  | 0.7  |
| 217591_at   | BF725121 | SKIL                      | 6498      | 11.1 | 15.1 | 13.1 | 14.8 | 14.7 |
| 217592_at   | AV684859 | ZSWIM1                    | 90204     | 23.3 | 18.5 | 21.2 | 15.3 | 14.6 |
| 217593_at   | AI375002 | ZSCAN18                   | 65982     | 1.7  | 14.4 | 12.6 | 10.0 | 6.5  |
| 217594_at   | R25849   | ZCCHC11                   | 23318     | 3.2  | 2.0  | 3.4  | 0.8  | 5.9  |



|             |          |              |              |      |      |      |      |      |
|-------------|----------|--------------|--------------|------|------|------|------|------|
| 217595_at   | AV701723 | GSPT1        | 2935         | 14.8 | 9.4  | 17.5 | 15.8 | 14.1 |
| 217596_at   | AA649851 | UPF3A        | 65110        | 8.5  | 1.6  | 12.2 | 6.5  | 13.2 |
| 217597_x_at | AI344141 | RAB40B       | 10966        | 23.5 | 24.0 | 29.9 | 18.7 | 19.3 |
| 217598_at   | BG236351 | CINP         | 51550        | 22.6 | 14.2 | 23.7 | 15.6 | 13.2 |
| 217599_s_at | BE910600 | MDFIC        | 29969        | 0.4  | 0.6  | 0.4  | 0.8  | 0.5  |
| 217600_at   | BF511678 | SCUBE3       | 222663       | 5.9  | 9.7  | 13.0 | 8.4  | 10.6 |
| 217601_at   | AL523184 | NUP188       | 23511        | 11.7 | 15.8 | 22.5 | 13.7 | 17.4 |
| 217602_at   | AI191118 | LOC10106031  | 5478 /// 101 | 12.8 | 5.3  | 7.6  | 6.4  | 8.2  |
| 217603_at   | AW444520 | ATP6V0A2     | 23545        | 12.9 | 4.1  | 13.5 | 9.1  | 1.8  |
| 217604_at   | AI086530 | -            | -            | 11.8 | 15.2 | 18.2 | 13.0 | 11.2 |
| 217605_at   | AW851066 | USP27X       | 389856       | 10.8 | 10.8 | 6.8  | 9.0  | 8.1  |
| 217606_at   | AI653960 | -            | -            | 14.8 | 10.7 | 8.3  | 8.0  | 10.1 |
| 217607_x_at | AA733172 | EIF4G2       | 1982         | 5.0  | 4.2  | 12.4 | 11.0 | 12.0 |
| 217608_at   | AW408767 | SREK1IP1     | 285672       | 9.1  | 7.7  | 9.9  | 8.8  | 8.0  |
| 217609_at   | BG420747 | LRRC23 /// R | 10233 /// 28 | 19.6 | 15.6 | 14.4 | 10.8 | 10.5 |
| 217610_at   | AL047879 | SPDYE2       | 441273       | 22.0 | 10.2 | 13.7 | 12.8 | 10.3 |
| 217611_at   | W28800   | ERICH1       | 157697       | 0.6  | 0.6  | 2.4  | 2.2  | 0.7  |
| 217612_at   | BE378994 | TIMM50       | 92609        | 28.2 | 23.4 | 29.0 | 21.5 | 23.8 |
| 217613_at   | AW173720 | TMEM144      | 55314        | 0.2  | 0.3  | 2.8  | 2.4  | 2.5  |
| 217614_at   | AI439416 | HMHA1        | 23526        | 4.3  | 4.9  | 7.6  | 5.8  | 1.3  |
| 217615_at   | BF448531 | -            | -            | 1.5  | 1.6  | 7.6  | 1.4  | 1.4  |
| 217616_at   | AV763520 | -            | -            | 0.7  | 2.7  | 6.9  | 7.3  | 4.1  |
| 217617_at   | AW451711 | -            | -            | 0.8  | 0.9  | 7.7  | 0.9  | 1.1  |
| 217618_x_at | AW007988 | HUS1         | 3364         | 22.0 | 31.4 | 31.9 | 28.1 | 22.6 |
| 217619_x_at | AW474615 | -            | -            | 48.6 | 45.2 | 58.3 | 51.0 | 42.5 |
| 217620_s_at | AA805318 | PIK3CB       | 5291         | 30.1 | 20.4 | 22.6 | 35.3 | 24.7 |
| 217621_at   | AI399889 | SLC6A2       | 6530         | 1.9  | 1.1  | 1.5  | 1.1  | 2.2  |
| 217622_at   | AA018187 | RHBDD3       | 25807        | 18.9 | 26.0 | 22.6 | 14.2 | 21.4 |
| 217623_at   | BF114815 | MYLK3        | 91807        | 1.5  | 1.7  | 0.5  | 2.0  | 2.0  |
| 217624_at   | AA464753 | PDAP1        | 11333        | 0.7  | 0.2  | 5.8  | 1.2  | 4.1  |
| 217625_x_at | AA102667 | LINC00963    | 100506190    | 28.6 | 23.6 | 23.7 | 23.1 | 19.5 |
| 217626_at   | BF508244 | AKR1C1       | 1645         | 5.2  | 3.4  | 6.9  | 0.6  | 2.9  |
| 217627_at   | BE515346 | ZNF573       | 126231       | 29.7 | 33.4 | 25.4 | 27.8 | 25.3 |
| 217628_at   | BF032808 | CLIC5        | 53405        | 1.5  | 6.5  | 1.3  | 3.2  | 2.0  |
| 217629_at   | AA365670 | -            | -            | 10.4 | 13.3 | 10.9 | 9.4  | 7.8  |
| 217630_at   | AI188346 | ANGEL2       | 90806        | 6.7  | 5.4  | 13.1 | 5.0  | 11.0 |
| 217631_at   | AI081107 | GTPBP4       | 23560        | 16.2 | 10.3 | 17.6 | 7.8  | 6.3  |
| 217632_at   | BF035279 | GNL3L        | 54552        | 13.1 | 3.0  | 10.6 | 6.0  | 5.8  |
| 217633_at   | AW513509 | URB1         | 9875         | 19.4 | 5.1  | 2.3  | 15.9 | 4.7  |
| 217634_at   | AW872377 | SVIL         | 6840         | 10.1 | 4.4  | 6.8  | 5.2  | 2.1  |
| 217635_s_at | AA769006 | POLG         | 5428         | 21.2 | 22.7 | 14.7 | 17.3 | 24.5 |
| 217636_at   | AA769006 | POLG         | 5428         | 2.5  | 6.0  | 1.0  | 2.0  | 0.9  |
| 217637_at   | R25692   | KCNB1        | 3745         | 12.3 | 4.1  | 8.3  | 7.7  | 6.5  |
| 217638_at   | BF939092 | -            | -            | 8.4  | 5.6  | 2.7  | 7.3  | 8.6  |
| 217639_at   | BF674749 | -            | -            | 0.2  | 2.5  | 6.7  | 5.6  | 1.9  |
| 217640_x_at | BF038461 | SKA1         | 220134       | 19.4 | 21.4 | 29.3 | 18.2 | 25.4 |
| 217641_at   | AA634446 | GPR135       | 64582        | 2.7  | 0.9  | 1.5  | 1.0  | 0.7  |
| 217642_at   | AI379492 | RNF40        | 9810         | 1.2  | 4.4  | 3.3  | 1.1  | 1.4  |
| 217643_x_at | AA443771 | -            | -            | 4.2  | 7.6  | 5.7  | 5.4  | 4.1  |
| 217644_s_at | AI276593 | SOS2         | 6655         | 7.8  | 6.7  | 8.9  | 7.9  | 5.1  |
| 217645_at   | AW088547 | COX16 /// SY | 51241 /// 10 | 35.7 | 28.2 | 24.8 | 29.8 | 18.0 |
| 217646_at   | AW449390 | SURF1        | 6834         | 1.5  | 6.3  | 3.4  | 1.0  | 0.4  |
| 217647_at   | AA070330 | DHODH        | 1723         | 10.1 | 14.1 | 18.1 | 13.4 | 15.0 |

|             |          |                           |           |       |       |       |       |       |
|-------------|----------|---------------------------|-----------|-------|-------|-------|-------|-------|
| 217648_at   | AW295367 | -                         | -         | 0.8   | 2.5   | 1.5   | 0.9   | 6.6   |
| 217649_at   | AV702306 | ZFAND5                    | 7763      | 5.7   | 4.8   | 2.1   | 2.5   | 3.5   |
| 217650_x_at | AI088162 | ST3GAL2                   | 6483      | 11.7  | 11.7  | 8.8   | 9.7   | 12.2  |
| 217651_at   | BF512531 | -                         | -         | 11.1  | 1.9   | 6.9   | 4.2   | 0.9   |
| 217652_at   | AW157731 | MAU2                      | 23383     | 9.5   | 0.3   | 2.2   | 5.8   | 0.5   |
| 217653_x_at | AW150065 | -                         | -         | 32.1  | 27.2  | 28.3  | 19.7  | 24.9  |
| 217654_at   | R71245   | CFLAR                     | 8837      | 7.3   | 0.9   | 2.5   | 5.3   | 0.6   |
| 217655_at   | BE552409 | LOC1001279                | 100127972 | 1.1   | 0.8   | 0.9   | 2.2   | 1.2   |
| 217656_at   | AW128846 | -                         | -         | 7.8   | 9.8   | 17.4  | 10.6  | 10.4  |
| 217657_at   | AL583687 | -                         | -         | 8.6   | 2.7   | 7.2   | 0.8   | 2.8   |
| 217658_at   | BF448596 | THAP3                     | 90326     | 8.9   | 8.6   | 11.4  | 6.1   | 1.6   |
| 217659_at   | AA457019 | -                         | -         | 5.9   | 4.2   | 0.7   | 3.4   | 1.6   |
| 217660_at   | AW188214 | MYH14                     | 79784     | 0.5   | 1.0   | 1.0   | 2.6   | 7.6   |
| 217661_x_at | AW513514 | SIX5                      | 147912    | 1.7   | 1.9   | 1.3   | 3.9   | 3.9   |
| 217662_x_at | AI393960 | -                         | -         | 2.8   | 14.9  | 6.1   | 7.9   | 0.8   |
| 217663_at   | AW264320 | ZNF234                    | 10780     | 5.8   | 7.9   | 5.8   | 5.4   | 7.2   |
| 217664_at   | AA780524 | -                         | -         | 0.9   | 0.8   | 4.0   | 2.7   | 2.2   |
| 217665_at   | AA420614 | ZNF813                    | 126017    | 24.0  | 18.1  | 31.2  | 19.9  | 17.4  |
| 217666_at   | AW974481 | -                         | -         | 6.2   | 5.9   | 10.8  | 0.9   | 6.5   |
| 217667_at   | AV761014 | SEC14L1P1                 | 729799    | 1.7   | 4.5   | 3.9   | 4.7   | 1.1   |
| 217668_at   | BF511164 | LRRC75B                   | 388886    | 6.7   | 3.0   | 14.4  | 11.8  | 11.6  |
| 217669_s_at | AW451230 | AKAP6                     | 9472      | 0.2   | 0.7   | 0.6   | 0.3   | 0.8   |
| 217670_at   | AW149827 | RPLP2                     | 6181      | 3.8   | 3.4   | 4.3   | 0.9   | 5.6   |
| 217671_at   | BE466926 | DSERG1                    | 751816    | 5.2   | 9.7   | 2.5   | 6.0   | 4.4   |
| 217672_x_at | BF114906 | EIF1                      | 10209     | 73.6  | 71.1  | 77.3  | 83.9  | 57.4  |
| 217673_x_at | AA650558 | GNAS                      | 2778      | 286.8 | 465.6 | 315.9 | 441.5 | 252.8 |
| 217674_at   | AA923707 | -                         | -         | 0.6   | 4.8   | 2.3   | 1.0   | 0.3   |
| 217675_at   | BE734331 | ZBTB7C                    | 201501    | 1.2   | 0.3   | 6.8   | 0.6   | 0.3   |
| 217676_at   | AA071454 | -                         | -         | 6.2   | 6.9   | 8.5   | 5.9   | 1.8   |
| 217677_at   | BF542055 | PLEKHA2                   | 59339     | 2.3   | 2.2   | 4.1   | 5.3   | 1.0   |
| 217678_at   | AA488687 | SLC7A11                   | 23657     | 99.4  | 119.0 | 104.8 | 112.5 | 69.3  |
| 217679_x_at | AI683552 | -                         | -         | 58.2  | 54.8  | 71.4  | 57.1  | 56.5  |
| 217680_x_at | BG151284 | RPL10 /// SN 6134 /// 267 |           | 8.2   | 2.3   | 6.4   | 10.5  | 16.7  |
| 217681_at   | BE736994 | WNT7B                     | 7477      | 13.4  | 14.7  | 13.0  | 19.0  | 10.4  |
| 217682_at   | AW503390 | RP11-473I1.5-             |           | 37.0  | 24.9  | 30.7  | 26.5  | 26.5  |
| 217683_at   | AA115963 | HBE1                      | 3046      | 1.5   | 0.9   | 1.7   | 0.6   | 0.4   |
| 217684_at   | BG281679 | TYMS                      | 7298      | 1.1   | 2.4   | 6.9   | 2.0   | 3.9   |
| 217685_at   | AA853175 | -                         | -         | 8.4   | 6.2   | 8.8   | 6.5   | 1.4   |
| 217686_at   | BF222916 | PTPN1                     | 5770      | 4.5   | 1.4   | 1.8   | 5.4   | 0.5   |
| 217687_at   | AA224446 | ADCY2                     | 108       | 13.4  | 8.9   | 9.5   | 9.2   | 8.4   |
| 217688_at   | BE677757 | -                         | -         | 11.1  | 4.6   | 4.0   | 1.3   | 0.3   |
| 217689_at   | BG109555 | PTPN1                     | 5770      | 2.1   | 2.8   | 2.1   | 1.7   | 1.6   |
| 217690_at   | BG281679 | ENOSF1                    | 55556     | 14.1  | 0.9   | 4.3   | 1.9   | 5.3   |
| 217691_x_at | AA853175 | MIR6787 /// 9123 /// 102  |           | 25.2  | 13.7  | 8.4   | 12.4  | 3.1   |
| 217692_at   | AW371924 | MAGOH2                    | 100506898 | 10.1  | 4.9   | 6.1   | 6.0   | 4.9   |
| 217693_x_at | AW469555 | MAGOH2                    | 100506898 | 27.1  | 20.8  | 25.7  | 19.5  | 18.7  |
| 217694_at   | AV687010 | -                         | -         | 2.1   | 0.2   | 3.2   | 0.2   | 0.1   |
| 217695_x_at | BF942161 | -                         | -         | 8.1   | 10.9  | 12.6  | 17.4  | 11.5  |
| 217696_at   | AA767713 | FUT7                      | 2529      | 10.8  | 11.3  | 3.3   | 1.9   | 4.0   |
| 217697_at   | AV661514 | -                         | -         | 4.5   | 2.9   | 0.4   | 3.1   | 1.9   |
| 217698_at   | AV651668 | -                         | -         | 3.6   | 1.1   | 1.4   | 1.2   | 1.5   |
| 217699_at   | AV700338 | -                         | -         | 1.2   | 6.7   | 2.0   | 5.4   | 1.8   |
| 217700_at   | AI818951 | CNPY4                     | 245812    | 4.8   | 1.6   | 1.4   | 2.2   | 2.5   |

|             |           |            |        |        |        |        |        |        |
|-------------|-----------|------------|--------|--------|--------|--------|--------|--------|
| 217701_x_at | AA653456  | -          | -      | 7.3    | 6.4    | 0.8    | 3.0    | 3.3    |
| 217702_at   | AW295066  | IL27RA     | 9466   | 1.1    | 1.9    | 3.9    | 1.8    | 0.4    |
| 217703_x_at | AA401963  | -          | -      | 85.7   | 42.8   | 63.8   | 55.0   | 51.0   |
| 217704_x_at | AI820796  | -          | -      | 5.1    | 12.2   | 9.1    | 13.9   | 8.4    |
| 217705_at   | AW085172  | PRKD1      | 5587   | 0.7    | 4.3    | 0.8    | 0.6    | 0.4    |
| 217706_at   | AV742010  | -          | -      | 10.0   | 7.5    | 9.5    | 6.2    | 5.6    |
| 217707_x_at | AI535683  | SMARCA2    | 6595   | 69.8   | 63.0   | 83.3   | 59.9   | 60.6   |
| 217708_x_at | AI734156  | -          | -      | 10.4   | 15.0   | 24.5   | 11.8   | 10.1   |
| 217709_at   | AV647366  | -          | -      | 0.3    | 2.8    | 1.6    | 0.4    | 1.1    |
| 217710_x_at | AI075181  | ITPK1      | 3705   | 1.9    | 1.9    | 4.3    | 3.2    | 1.3    |
| 217711_at   | BF594294  | TEK        | 7010   | 6.3    | 3.2    | 13.6   | 6.5    | 2.7    |
| 217712_at   | AA479678  | -          | -      | 4.0    | 3.7    | 9.5    | 3.9    | 6.9    |
| 217713_x_at | AA126763  | -          | -      | 29.2   | 21.3   | 27.4   | 24.6   | 19.1   |
| 217714_x_at | AV756729  | MIR3917    | 3925   | 66.7   | 53.1   | 62.8   | 45.7   | 48.1   |
| 217715_x_at | BE045142  | -          | -      | 13.7   | 22.1   | 26.8   | 28.8   | 22.0   |
| 217716_s_at | NM_013336 | SEC61A1    | 29927  | 483.7  | 442.3  | 456.5  | 456.2  | 419.1  |
| 217717_s_at | BF246499  | YWHAB      | 7529   | 364.7  | 325.0  | 383.4  | 304.9  | 286.7  |
| 217718_s_at | NM_014052 | YWHAB      | 7529   | 1001.6 | 939.5  | 1066.8 | 976.3  | 848.2  |
| 217719_at   | NM_016091 | EIF3L      | 51386  | 1710.7 | 1577.7 | 1824.9 | 1725.3 | 1539.0 |
| 217720_at   | NM_016139 | CHCHD2     | 51142  | 2531.5 | 2412.8 | 2683.6 | 2485.7 | 2279.7 |
| 217721_at   | BE551361  | SEPT7      | 989    | 6.8    | 5.4    | 9.4    | 10.2   | 8.1    |
| 217722_s_at | NM_016645 | NGRN       | 51335  | 655.2  | 573.9  | 671.4  | 586.0  | 538.4  |
| 217723_x_at | BC002550  | -          | -      | 3.7    | 2.1    | 12.0   | 2.4    | 11.7   |
| 217724_at   | AF131807  | SERBP1     | 26135  | 1037.2 | 805.4  | 1160.5 | 896.7  | 927.5  |
| 217725_x_at | NM_015640 | SERBP1     | 26135  | 723.3  | 579.4  | 767.5  | 518.3  | 618.9  |
| 217726_at   | NM_016057 | COPZ1      | 22818  | 668.7  | 612.9  | 732.7  | 627.1  | 566.9  |
| 217727_x_at | NM_018206 | VPS35      | 55737  | 276.2  | 269.4  | 291.3  | 273.3  | 245.4  |
| 217728_at   | NM_014624 | S100A6     | 6277   | 0.4    | 1.1    | 0.4    | 0.8    | 0.3    |
| 217729_s_at | NM_001130 | AES        | 166    | 145.1  | 183.3  | 158.8  | 199.7  | 145.7  |
| 217730_at   | NM_022152 | MIR6513    | 64114  | 212.7  | 240.9  | 370.2  | 330.3  | 251.2  |
| 217731_s_at | NM_021999 | ITM2B      | 9445   | 264.5  | 173.8  | 252.2  | 241.9  | 204.7  |
| 217732_s_at | AF092128  | ITM2B      | 9445   | 770.1  | 706.4  | 740.5  | 770.8  | 593.7  |
| 217733_s_at | NM_021103 | TMSB10     | 9168   | 755.2  | 745.1  | 747.2  | 793.8  | 620.9  |
| 217734_s_at | NM_018031 | WDR6       | 11180  | 200.1  | 203.7  | 215.2  | 189.2  | 179.5  |
| 217735_s_at | AW007368  | EIF2AK1    | 27102  | 61.1   | 34.1   | 44.6   | 48.2   | 33.0   |
| 217736_s_at | NM_014413 | EIF2AK1    | 27102  | 666.5  | 594.2  | 614.7  | 625.5  | 466.2  |
| 217737_x_at | NM_016407 | RTFDC1     | 51507  | 171.4  | 178.1  | 179.1  | 187.6  | 170.3  |
| 217738_at   | BF575514  | NAMPT      | 10135  | 72.9   | 69.0   | 75.7   | 76.4   | 65.7   |
| 217739_s_at | NM_005746 | NAMPT      | 10135  | 106.6  | 102.0  | 123.1  | 100.3  | 89.2   |
| 217740_x_at | NM_000972 | RPL7A      | 6130   | 4747.4 | 4547.8 | 4951.8 | 4403.0 | 4483.0 |
| 217741_s_at | AW471220  | ZFAND5     | 7763   | 378.4  | 224.6  | 307.8  | 257.7  | 224.3  |
| 217742_s_at | NM_016628 | WAC        | 51322  | 193.8  | 213.8  | 214.6  | 193.1  | 170.0  |
| 217743_s_at | NM_018247 | TMEM30A    | 55754  | 108.7  | 91.6   | 116.0  | 88.8   | 89.0   |
| 217744_s_at | NM_022121 | PERP       | 64065  | 364.6  | 330.5  | 444.4  | 362.0  | 314.2  |
| 217745_s_at | NM_025146 | NAA50      | 80218  | 555.5  | 423.0  | 674.5  | 401.4  | 423.8  |
| 217746_s_at | NM_013374 | PDCD6IP    | 10015  | 498.4  | 450.8  | 521.2  | 482.7  | 411.7  |
| 217747_s_at | NM_001013 | RPS9       | 6203   | 2756.0 | 2652.5 | 3012.6 | 2872.0 | 2581.1 |
| 217748_at   | NM_015999 | ADIPOR1    | 51094  | 476.4  | 402.9  | 459.5  | 402.7  | 342.8  |
| 217749_at   | NM_016128 | COPG1      | 22820  | 168.6  | 209.5  | 200.5  | 234.0  | 164.9  |
| 217750_s_at | NM_023079 | UBE2Z      | 65264  | 247.4  | 238.0  | 266.8  | 266.3  | 244.2  |
| 217751_at   | NM_015917 | GSTK1      | 373156 | 126.6  | 123.5  | 113.8  | 135.1  | 106.4  |
| 217752_s_at | NM_018235 | CNDP2      | 55748  | 762.3  | 947.4  | 1028.1 | 901.7  | 882.7  |
| 217753_s_at | NM_001029 | LOC1009967 | 6231   | 2621.2 | 2246.1 | 2632.7 | 2365.4 | 2261.1 |

|             |           |              |              |        |        |        |        |        |
|-------------|-----------|--------------|--------------|--------|--------|--------|--------|--------|
| 217754_at   | NM_019082 | DDX56        | 54606        | 186.2  | 150.8  | 228.3  | 182.9  | 191.9  |
| 217755_at   | NM_016185 | HN1          | 51155        | 1362.4 | 1151.2 | 1446.6 | 1276.2 | 1153.5 |
| 217756_x_at | NM_005770 | HYPK /// MIF | 10169 /// 25 | 930.1  | 1043.1 | 1299.2 | 1085.2 | 964.7  |
| 217757_at   | NM_000014 | A2M          | 2            | 1.6    | 1.4    | 4.4    | 1.5    | 1.5    |
| 217758_s_at | NM_020123 | TM9SF3       | 56889        | 218.4  | 190.6  | 216.7  | 199.4  | 174.2  |
| 217759_at   | BF431488  | TRIM44       | 54765        | 174.5  | 176.8  | 203.3  | 175.4  | 161.7  |
| 217760_at   | AA176780  | TRIM44       | 54765        | 76.6   | 74.3   | 77.7   | 71.3   | 68.2   |
| 217761_at   | NM_018269 | ADI1         | 55256        | 520.7  | 426.9  | 555.2  | 461.2  | 439.6  |
| 217762_s_at | BE789881  | RAB31        | 11031        | 5.6    | 4.7    | 1.1    | 1.8    | 6.1    |
| 217763_s_at | NM_006868 | RAB31        | 11031        | 1.2    | 8.8    | 3.5    | 3.5    | 0.6    |
| 217764_s_at | AF183421  | RAB31        | 11031        | 8.7    | 6.8    | 10.7   | 14.6   | 11.6   |
| 217765_at   | NM_013392 | NRBP1        | 29959        | 86.8   | 89.6   | 99.6   | 94.7   | 80.0   |
| 217766_s_at | NM_014313 | TMEM50A      | 23585        | 35.5   | 22.6   | 41.0   | 34.1   | 27.7   |
| 217767_at   | NM_000064 | C3           | 718          | 1.3    | 1.9    | 2.4    | 1.1    | 1.6    |
| 217768_at   | NM_016039 | C14orf166    | 51637        | 557.1  | 533.5  | 578.5  | 497.6  | 472.1  |
| 217769_s_at | NM_015932 | POMP         | 51371        | 1176.0 | 1186.5 | 1221.0 | 1207.0 | 974.6  |
| 217770_at   | NM_015937 | PIGT         | 51604        | 170.9  | 208.8  | 174.7  | 220.8  | 147.1  |
| 217771_at   | NM_016548 | GOLM1        | 51280        | 186.2  | 170.6  | 208.9  | 199.8  | 201.2  |
| 217772_s_at | NM_014342 | MTCH2        | 23788        | 948.0  | 901.2  | 1095.4 | 911.3  | 940.5  |
| 217773_s_at | NM_002489 | NDUFA4       | 4697         | 953.6  | 900.4  | 1027.0 | 1015.3 | 776.1  |
| 217774_s_at | NM_016404 | TRMT112      | 51504        | 1406.4 | 1152.1 | 1599.4 | 1288.3 | 1249.7 |
| 217775_s_at | NM_016026 | RDH11        | 51109        | 771.7  | 776.6  | 964.2  | 871.0  | 777.2  |
| 217776_at   | AF167438  | RDH11        | 51109        | 1261.4 | 1092.0 | 1560.7 | 1344.0 | 1071.0 |
| 217777_s_at | NM_016395 | PTPLAD1      | 51495        | 189.4  | 161.0  | 196.3  | 171.4  | 114.1  |
| 217778_at   | NM_014437 | SLC39A1      | 27173        | 71.2   | 73.3   | 71.3   | 80.3   | 74.8   |
| 217779_s_at | NM_017761 | PNRC2        | 55629        | 208.7  | 210.9  | 222.9  | 206.6  | 153.1  |
| 217780_at   | NM_016145 | WDR83OS      | 51398        | 567.7  | 590.8  | 603.5  | 634.5  | 499.0  |
| 217781_s_at | NM_022473 | ZNF106       | 64397        | 68.8   | 51.4   | 70.3   | 63.1   | 59.6   |
| 217782_s_at | NM_004127 | GPS1         | 2873         | 174.7  | 196.9  | 241.7  | 203.1  | 175.6  |
| 217783_s_at | NM_016061 | YPEL5        | 51646        | 38.1   | 48.7   | 34.8   | 53.0   | 27.3   |
| 217784_at   | BE384482  | YKT6         | 10652        | 66.4   | 98.8   | 100.3  | 106.6  | 82.1   |
| 217785_s_at | NM_006555 | YKT6         | 10652        | 79.1   | 73.0   | 77.2   | 84.1   | 75.0   |
| 217786_at   | NM_006109 | PRMT5        | 10419        | 485.4  | 489.4  | 570.7  | 469.9  | 492.6  |
| 217787_s_at | AL525086  | GALNT2       | 2590         | 59.4   | 54.3   | 60.3   | 62.4   | 55.1   |
| 217788_s_at | NM_004481 | GALNT2       | 2590         | 219.8  | 209.4  | 158.4  | 181.0  | 157.5  |
| 217789_at   | NM_021249 | SNX6         | 58533        | 47.1   | 60.2   | 64.1   | 61.3   | 51.2   |
| 217790_s_at | NM_007107 | SSR3         | 6747         | 98.7   | 104.9  | 116.9  | 108.0  | 102.9  |
| 217791_s_at | NM_002860 | ALDH18A1     | 5832         | 366.8  | 333.0  | 346.6  | 346.3  | 334.4  |
| 217792_at   | NM_014426 | SNX5         | 27131        | 116.9  | 117.1  | 138.7  | 109.4  | 89.0   |
| 217793_at   | AL575337  | RAB11B       | 9230         | 37.1   | 27.4   | 38.1   | 33.2   | 22.9   |
| 217794_at   | NM_018457 | PRR13        | 54458        | 312.0  | 309.5  | 334.2  | 358.2  | 264.1  |
| 217795_s_at | W74580    | TMEM43       | 79188        | 110.4  | 102.1  | 101.4  | 86.8   | 76.4   |
| 217796_s_at | NM_017921 | NPLOC4       | 55666        | 163.7  | 113.1  | 143.7  | 127.1  | 107.7  |
| 217797_at   | NM_016406 | UFC1         | 51506        | 431.2  | 423.0  | 497.5  | 441.3  | 412.0  |
| 217798_at   | AI123426  | CNOT2        | 4848         | 134.2  | 112.8  | 124.8  | 114.7  | 96.2   |
| 217799_x_at | NM_003344 | UBE2H        | 7328         | 113.4  | 97.3   | 108.6  | 118.2  | 76.0   |
| 217800_s_at | NM_030571 | NDFIP1       | 80762        | 415.4  | 448.3  | 464.0  | 396.1  | 344.5  |
| 217801_at   | NM_006886 | ATP5E        | 514          | 1180.0 | 1069.8 | 1245.2 | 1190.1 | 1029.0 |
| 217802_s_at | NM_022731 | NUCKS1       | 64710        | 494.0  | 491.6  | 468.6  | 462.7  | 452.2  |
| 217803_at   | NM_022130 | GOLPH3       | 64083        | 468.4  | 391.0  | 552.2  | 476.0  | 418.6  |
| 217804_s_at | BC003086  | ILF3         | 3609         | 118.4  | 107.4  | 109.9  | 121.2  | 81.4   |
| 217805_at   | NM_004516 | ILF3         | 3609         | 200.2  | 173.4  | 228.1  | 202.1  | 170.6  |
| 217806_s_at | NM_015584 | POLDIP2      | 26073        | 380.9  | 330.7  | 323.7  | 289.0  | 288.0  |

|             |           |                           |        |       |        |        |        |
|-------------|-----------|---------------------------|--------|-------|--------|--------|--------|
| 217807_s_at | NM_015710 | GLTSCR2 /// 29997 /// 69  | 691.9  | 736.1 | 696.6  | 798.2  | 549.9  |
| 217808_s_at | NM_024117 | MAPKAP1 79109             | 155.7  | 148.9 | 134.5  | 149.5  | 122.4  |
| 217809_at   | NM_014038 | BZW2 28969                | 623.1  | 493.2 | 713.9  | 555.7  | 545.5  |
| 217810_x_at | NM_020117 | LARS 51520                | 78.0   | 90.5  | 92.0   | 79.7   | 56.8   |
| 217811_at   | NM_016275 | SELT 51714                | 239.2  | 271.5 | 320.8  | 283.6  | 252.6  |
| 217812_at   | NM_016258 | YTHDF2 51441              | 570.8  | 488.1 | 628.3  | 498.9  | 433.0  |
| 217813_s_at | NM_006717 | SPIN1 10927               | 66.6   | 48.6  | 62.7   | 50.0   | 45.6   |
| 217814_at   | NM_020198 | CCDC47 57003              | 217.4  | 179.5 | 266.8  | 212.4  | 208.5  |
| 217815_at   | NM_007192 | SUPT16H 11198             | 203.7  | 190.0 | 241.2  | 190.8  | 190.4  |
| 217816_s_at | NM_020357 | PCNP 57092                | 467.2  | 409.5 | 471.5  | 421.1  | 341.0  |
| 217817_at   | BE891920  | ARPC4 10093               | 185.5  | 215.2 | 248.8  | 206.3  | 134.3  |
| 217818_s_at | NM_005718 | ARPC4 10093               | 62.8   | 132.2 | 140.9  | 122.9  | 88.7   |
| 217819_at   | NM_016099 | GOLGA7 51125              | 205.2  | 172.2 | 221.6  | 193.3  | 166.1  |
| 217820_s_at | NM_018212 | ENAH 55740                | 174.5  | 177.9 | 180.5  | 186.7  | 147.4  |
| 217821_s_at | AF118023  | WBP11 51729               | 238.8  | 186.8 | 244.0  | 185.4  | 184.6  |
| 217822_at   | NM_016312 | WBP11 51729               | 406.6  | 324.5 | 462.8  | 389.1  | 350.8  |
| 217823_s_at | AL562528  | UBE2J1 51465              | 50.9   | 35.6  | 58.7   | 50.0   | 55.0   |
| 217824_at   | AW500009  | UBE2J1 51465              | 10.2   | 13.3  | 6.7    | 8.6    | 9.2    |
| 217825_s_at | AF151039  | UBE2J1 51465              | 40.9   | 35.8  | 38.1   | 35.0   | 29.7   |
| 217826_s_at | NM_016021 | UBE2J1 51465              | 76.9   | 77.8  | 91.0   | 68.1   | 61.8   |
| 217827_s_at | NM_016630 | SPG21 51324               | 462.8  | 521.2 | 523.9  | 557.3  | 429.0  |
| 217828_at   | NM_024755 | SLTM 79811                | 90.4   | 71.5  | 89.2   | 59.8   | 76.2   |
| 217829_s_at | NM_006590 | USP39 10713               | 95.5   | 79.2  | 96.1   | 79.7   | 90.5   |
| 217830_s_at | AL109658  | NSFL1C 55968              | 66.8   | 54.8  | 63.8   | 62.7   | 49.4   |
| 217831_s_at | NM_016143 | NSFL1C 55968              | 81.3   | 94.6  | 100.1  | 95.8   | 96.6   |
| 217832_at   | BE672181  | SYNCRIP 10492             | 322.7  | 244.4 | 405.7  | 267.9  | 312.7  |
| 217833_at   | AL520908  | SYNCRIP 10492             | 84.0   | 62.2  | 96.3   | 58.1   | 73.9   |
| 217834_s_at | NM_006372 | SYNCRIP 10492             | 297.0  | 199.1 | 346.4  | 256.2  | 291.9  |
| 217835_x_at | NM_018840 | C20orf24 /// 55969 /// 10 | 826.7  | 824.8 | 1027.6 | 847.2  | 794.0  |
| 217836_s_at | NM_018253 | YY1AP1 55249              | 122.7  | 118.9 | 141.8  | 161.9  | 112.3  |
| 217837_s_at | NM_016079 | CHMP3 /// R 51652 /// 10  | 112.8  | 107.0 | 107.9  | 97.2   | 71.8   |
| 217838_s_at | NM_016337 | EVL 51466                 | 65.3   | 53.0  | 71.3   | 61.5   | 64.3   |
| 217839_at   | NM_006070 | TFG 10342                 | 553.3  | 448.7 | 582.5  | 438.4  | 381.4  |
| 217840_at   | NM_016222 | DDX41 51428               | 258.7  | 274.4 | 271.6  | 292.0  | 211.9  |
| 217841_s_at | NM_016147 | PPME1 51400               | 174.4  | 178.1 | 218.9  | 176.4  | 163.9  |
| 217842_at   | NM_016019 | C7orf55-LUC 51631 /// 10  | 64.0   | 39.1  | 68.2   | 43.3   | 53.1   |
| 217843_s_at | NM_014166 | MED4 29079                | 71.1   | 47.9  | 73.6   | 63.3   | 55.8   |
| 217844_at   | NM_021198 | CTDSP1 58190              | 141.4  | 115.1 | 138.4  | 122.7  | 87.1   |
| 217845_x_at | NM_014056 | HIGD1A 25994              | 1233.4 | 835.1 | 1055.2 | 845.2  | 814.1  |
| 217846_at   | NM_005051 | MIR6890 /// 5859 /// 102  | 785.0  | 725.8 | 789.8  | 805.9  | 659.1  |
| 217847_s_at | NM_005119 | THRAP3 9967               | 36.0   | 16.7  | 38.9   | 37.4   | 23.9   |
| 217848_s_at | NM_021129 | PPA1 5464                 | 1223.6 | 935.5 | 1279.0 | 1094.9 | 1007.4 |
| 217849_s_at | NM_006035 | CDC42BPB 9578             | 95.9   | 68.1  | 86.6   | 93.5   | 64.9   |
| 217850_at   | NM_014366 | GNL3 /// SNC 26354 /// 10 | 399.3  | 320.9 | 403.9  | 366.6  | 340.9  |
| 217851_s_at | NM_016045 | SLMO2 51012               | 252.6  | 170.9 | 263.0  | 194.1  | 185.7  |
| 217852_s_at | NM_018184 | ARL8B 55207               | 250.2  | 246.6 | 260.2  | 234.9  | 205.4  |
| 217853_at   | NM_022748 | TNS3 64759                | 1.9    | 0.7   | 0.4    | 5.9    | 1.4    |
| 217854_s_at | NM_002695 | POLR2E 5434               | 677.8  | 656.8 | 748.6  | 728.8  | 672.8  |
| 217855_x_at | NM_016547 | SDF4 51150                | 353.6  | 378.4 | 420.7  | 347.5  | 354.4  |
| 217856_at   | AF182415  | RBM8A 9939                | 27.4   | 24.9  | 38.5   | 28.0   | 25.0   |
| 217857_s_at | NM_005105 | RBM8A 9939                | 54.1   | 70.2  | 71.0   | 56.6   | 70.4   |
| 217858_s_at | NM_016607 | ARMCX3 51566              | 155.2  | 156.1 | 170.3  | 151.5  | 108.0  |
| 217859_s_at | NM_018375 | SLC39A9 55334             | 70.6   | 69.1  | 64.2   | 57.6   | 60.6   |

|             |           |          |       |        |        |        |        |        |
|-------------|-----------|----------|-------|--------|--------|--------|--------|--------|
| 217860_at   | NM_004544 | NDUFA10  | 4705  | 366.2  | 355.5  | 388.6  | 353.8  | 278.0  |
| 217861_s_at | NM_013388 | PREB     | 10113 | 138.4  | 114.7  | 136.9  | 116.8  | 129.9  |
| 217862_at   | N24868    | PIAS1    | 8554  | 31.2   | 22.9   | 31.5   | 23.5   | 22.6   |
| 217863_at   | AI348378  | PIAS1    | 8554  | 33.5   | 23.2   | 35.0   | 44.7   | 24.7   |
| 217864_s_at | NM_016166 | PIAS1    | 8554  | 71.6   | 49.7   | 61.5   | 42.2   | 43.7   |
| 217865_at   | NM_018434 | RNF130   | 55819 | 226.1  | 204.8  | 206.2  | 217.9  | 145.5  |
| 217866_at   | NM_024811 | CPSF7    | 79869 | 173.6  | 181.5  | 242.8  | 171.7  | 161.4  |
| 217867_x_at | NM_012105 | BACE2    | 25825 | 6.5    | 10.9   | 6.7    | 0.8    | 1.7    |
| 217868_s_at | NM_016025 | METTL9   | 51108 | 243.2  | 205.7  | 275.4  | 221.7  | 211.1  |
| 217869_at   | NM_016142 | HSD17B12 | 51144 | 141.0  | 151.3  | 126.5  | 145.2  | 136.0  |
| 217870_s_at | NM_016308 | CMPK1    | 51727 | 286.2  | 236.2  | 284.7  | 244.3  | 222.1  |
| 217871_s_at | NM_002415 | MIF      | 4282  | 2866.2 | 2435.0 | 2872.0 | 2892.9 | 2529.4 |
| 217872_at   | NM_017916 | PIH1D1   | 55011 | 265.9  | 243.9  | 249.1  | 249.4  | 206.7  |
| 217873_at   | NM_016289 | CAB39    | 51719 | 74.5   | 61.2   | 81.7   | 67.5   | 57.4   |
| 217874_at   | NM_003849 | SUCLG1   | 8802  | 485.0  | 504.5  | 536.3  | 517.5  | 448.8  |
| 217875_s_at | NM_020182 | PMEPA1   | 56937 | 8.7    | 9.7    | 24.0   | 20.9   | 9.8    |
| 217876_at   | NM_012087 | GTF3C5   | 9328  | 34.3   | 26.8   | 31.7   | 28.1   | 27.0   |
| 217877_s_at | NM_021639 | GPBP1L1  | 60313 | 117.3  | 110.2  | 124.9  | 131.2  | 94.4   |
| 217878_s_at | AI203880  | CDC27    | 996   | 42.0   | 40.0   | 50.4   | 34.0   | 34.4   |
| 217879_at   | AL566824  | CDC27    | 996   | 125.9  | 94.0   | 143.2  | 93.8   | 100.5  |
| 217880_at   | N21397    | CDC27    | 996   | 105.3  | 69.6   | 99.9   | 65.1   | 82.8   |
| 217881_s_at | NM_001256 | CDC27    | 996   | 67.9   | 58.2   | 78.4   | 58.5   | 70.2   |
| 217882_at   | NM_018447 | EMC3     | 55831 | 308.4  | 325.2  | 329.3  | 314.4  | 254.4  |
| 217883_at   | NM_015702 | MMADHC   | 27249 | 880.4  | 918.1  | 937.7  | 819.9  | 773.9  |
| 217884_at   | NM_024662 | NAT10    | 55226 | 174.0  | 196.3  | 221.0  | 204.8  | 197.8  |
| 217885_at   | NM_018085 | IPO9     | 55705 | 275.8  | 245.9  | 324.4  | 283.6  | 271.5  |
| 217886_at   | BF213575  | EPS15    | 2060  | 28.6   | 38.3   | 49.0   | 42.5   | 37.0   |
| 217887_s_at | NM_001981 | EPS15    | 2060  | 181.3  | 210.2  | 207.7  | 211.3  | 177.9  |
| 217888_s_at | NM_018209 | ARFGAP1  | 55738 | 58.4   | 45.6   | 56.6   | 52.0   | 43.4   |
| 217889_s_at | NM_024843 | CYBRD1   | 79901 | 0.4    | 0.4    | 0.6    | 0.5    | 0.3    |
| 217890_s_at | NM_018222 | PARVA    | 55742 | 2.2    | 6.7    | 13.3   | 15.9   | 10.5   |
| 217891_at   | NM_022744 | C16orf58 | 64755 | 134.4  | 159.4  | 120.0  | 100.6  | 83.6   |
| 217892_s_at | NM_016357 | LIMA1    | 51474 | 143.2  | 134.6  | 153.4  | 142.4  | 102.0  |
| 217893_s_at | NM_024595 | AKIRIN1  | 79647 | 86.2   | 86.7   | 109.0  | 84.5   | 77.7   |
| 217894_at   | NM_016121 | KCTD3    | 51133 | 101.9  | 65.5   | 94.3   | 68.5   | 64.9   |
| 217895_at   | NM_017952 | PTCD3    | 55037 | 163.4  | 142.4  | 162.4  | 133.9  | 131.5  |
| 217896_s_at | NM_024946 | FAM192A  | 80011 | 26.1   | 35.8   | 41.1   | 30.6   | 27.2   |
| 217897_at   | NM_022003 | FXVD6    | 53826 | 1.6    | 2.0    | 0.6    | 1.4    | 4.8    |
| 217898_at   | NM_020154 | EMC7     | 56851 | 518.4  | 505.8  | 608.4  | 508.1  | 468.2  |
| 217899_at   | NM_017727 | TMEM214  | 54867 | 144.8  | 123.9  | 143.8  | 142.4  | 110.8  |
| 217900_at   | NM_018060 | IARS2    | 55699 | 463.3  | 384.7  | 465.9  | 420.6  | 304.8  |
| 217901_at   | BF031829  | DSG2     | 1829  | 206.1  | 185.5  | 255.8  | 246.4  | 206.2  |
| 217902_s_at | NM_004667 | HERC2    | 8924  | 40.1   | 30.6   | 35.1   | 38.0   | 27.6   |
| 217903_at   | NM_013403 | STRN4    | 29888 | 53.2   | 44.9   | 65.3   | 59.4   | 51.0   |
| 217904_s_at | NM_012104 | BACE1    | 23621 | 25.1   | 28.0   | 37.9   | 21.3   | 24.6   |
| 217905_at   | NM_024834 | MCMBP    | 79892 | 33.0   | 29.9   | 36.2   | 29.1   | 26.0   |
| 217906_at   | NM_014315 | KLHDC2   | 23588 | 294.5  | 244.5  | 277.7  | 251.8  | 224.9  |
| 217907_at   | NM_014161 | MRPL18   | 29074 | 624.9  | 487.7  | 651.6  | 502.7  | 515.0  |
| 217908_s_at | NM_018442 | DCAF6    | 55827 | 292.1  | 197.3  | 304.8  | 236.3  | 246.6  |
| 217909_s_at | BF056105  | MLX      | 6945  | 259.2  | 186.8  | 258.0  | 222.0  | 214.5  |
| 217910_x_at | NM_013383 | MLX      | 6945  | 259.3  | 200.3  | 241.6  | 209.0  | 242.7  |
| 217911_s_at | NM_004281 | BAG3     | 9531  | 381.0  | 311.5  | 401.0  | 340.5  | 297.6  |
| 217912_at   | NM_022156 | DUS1L    | 64118 | 162.3  | 138.0  | 175.7  | 138.0  | 119.8  |

|             |           |             |              |        |        |        |        |        |
|-------------|-----------|-------------|--------------|--------|--------|--------|--------|--------|
| 217913_at   | NM_013245 | VPS4A       | 27183        | 163.5  | 154.0  | 168.0  | 167.9  | 145.7  |
| 217914_at   | NM_017901 | TPCN1       | 53373        | 84.2   | 62.6   | 78.2   | 54.5   | 57.0   |
| 217915_s_at | NM_016304 | RSL24D1     | 51187        | 463.3  | 354.0  | 505.1  | 427.8  | 366.0  |
| 217916_s_at | NM_016623 | FAM49B      | 51571        | 66.5   | 96.7   | 78.2   | 79.8   | 89.1   |
| 217917_s_at | NM_014183 | DYNLRB1     | 83658        | 670.7  | 660.0  | 744.1  | 697.5  | 607.8  |
| 217918_at   | NM_014183 | DYNLRB1     | 83658        | 1001.8 | 975.7  | 1018.5 | 969.8  | 832.2  |
| 217919_s_at | BE782148  | MRPL42      | 28977        | 389.2  | 297.5  | 399.8  | 306.9  | 288.3  |
| 217920_at   | H97940    | MAN1A2      | 10905        | 30.6   | 25.6   | 27.5   | 23.6   | 24.1   |
| 217921_at   | BE543064  | MAN1A2      | 10905        | 37.0   | 30.6   | 38.9   | 37.8   | 32.9   |
| 217922_at   | AL157902  | MAN1A2      | 10905        | 40.2   | 44.1   | 48.1   | 40.1   | 37.1   |
| 217923_at   | NM_012392 | PEF1        | 553115       | 292.8  | 289.3  | 326.2  | 286.1  | 264.8  |
| 217924_at   | AL523965  | C6orf106    | 64771        | 47.3   | 42.2   | 54.6   | 45.3   | 39.5   |
| 217925_s_at | NM_022758 | C6orf106    | 64771        | 40.1   | 53.3   | 76.0   | 40.2   | 40.6   |
| 217926_at   | NM_014047 | C19orf53    | 28974        | 630.8  | 640.0  | 695.0  | 649.6  | 558.0  |
| 217927_at   | NM_014041 | SPCS1       | 28972        | 1515.2 | 1443.4 | 1583.6 | 1548.5 | 1297.4 |
| 217928_s_at | NM_018312 | PPP6R3      | 55291        | 51.5   | 42.9   | 63.6   | 37.7   | 52.5   |
| 217929_s_at | NM_024874 | KIAA0319L   | 79932        | 53.1   | 46.9   | 32.1   | 47.0   | 39.2   |
| 217930_s_at | NM_019009 | TOLLIP      | 54472        | 76.0   | 83.0   | 85.1   | 84.3   | 63.7   |
| 217931_at   | BC004423  | CNPY3       | 10695        | 33.0   | 42.0   | 49.2   | 40.8   | 38.9   |
| 217932_at   | NM_015971 | MRPS7       | 51081        | 414.7  | 382.8  | 455.1  | 407.1  | 355.0  |
| 217933_s_at | NM_015907 | LAP3        | 51056        | 522.0  | 352.9  | 457.2  | 419.5  | 334.8  |
| 217934_x_at | NM_005861 | STUB1       | 10273        | 635.8  | 653.4  | 713.0  | 676.6  | 618.1  |
| 217935_s_at | NM_018244 | UQCC1       | 55245        | 52.7   | 49.0   | 59.1   | 49.7   | 33.1   |
| 217936_at   | AW044631  | ARHGAP5     | 394          | 45.4   | 41.6   | 44.1   | 38.9   | 29.5   |
| 217937_s_at | NM_016596 | HDAC7       | 51564        | 25.3   | 11.8   | 18.4   | 2.9    | 11.0   |
| 217938_s_at | NM_020122 | KCMF1       | 56888        | 375.9  | 339.0  | 399.9  | 368.9  | 317.1  |
| 217939_s_at | NM_017657 | AFTPH       | 54812        | 87.0   | 62.6   | 83.9   | 81.6   | 64.9   |
| 217940_s_at | NM_018210 | CARKD       | 55739        | 131.5  | 129.3  | 133.5  | 130.2  | 110.2  |
| 217941_s_at | NM_018695 | ERBB2IP     | 55914        | 158.2  | 126.7  | 133.6  | 142.7  | 80.9   |
| 217942_at   | NM_021821 | MRPS35      | 60488        | 470.1  | 394.8  | 500.6  | 395.3  | 371.6  |
| 217943_s_at | NM_018067 | MAP7D1      | 55700        | 155.9  | 145.5  | 165.2  | 132.5  | 114.4  |
| 217944_at   | NM_017739 | POMGNT1     | 55624        | 256.0  | 213.4  | 293.4  | 252.4  | 203.1  |
| 217945_at   | NM_025238 | BTBD1       | 53339        | 222.1  | 205.0  | 256.5  | 209.8  | 178.1  |
| 217946_s_at | NM_016402 | SAE1        | 10055        | 351.2  | 374.7  | 371.5  | 353.8  | 285.6  |
| 217947_at   | NM_017801 | CMTM6       | 54918        | 311.1  | 282.1  | 351.1  | 321.6  | 267.5  |
| 217948_at   | NM_015582 | FAM127B     | 26071        | 126.7  | 108.5  | 122.6  | 147.0  | 86.1   |
| 217949_s_at | NM_024006 | VKORC1      | 79001        | 346.3  | 331.1  | 427.2  | 362.0  | 323.0  |
| 217950_at   | NM_015953 | NOSIP       | 51070        | 170.2  | 183.5  | 221.8  | 180.8  | 163.5  |
| 217951_s_at | AW189430  | PHF3        | 23469        | 5.4    | 3.8    | 9.7    | 6.1    | 8.2    |
| 217952_x_at | BF430956  | PHF3        | 23469        | 36.7   | 27.6   | 33.7   | 25.3   | 22.9   |
| 217953_at   | AL050329  | PHF3        | 23469        | 2.7    | 2.3    | 2.1    | 1.1    | 0.0    |
| 217954_s_at | NM_015153 | PHF3        | 23469        | 32.7   | 40.7   | 36.3   | 28.7   | 36.1   |
| 217955_at   | NM_015367 | BCL2L13     | 23786        | 142.9  | 145.9  | 150.7  | 133.2  | 123.5  |
| 217956_s_at | NM_021204 | ENOPH1      | 58478        | 860.5  | 595.8  | 826.2  | 619.9  | 643.0  |
| 217957_at   | NM_013242 | C16orf80    | 29105        | 343.1  | 354.4  | 465.6  | 355.6  | 306.7  |
| 217958_at   | NM_016146 | MIR3656 /// | 51399 /// 10 | 426.3  | 397.0  | 474.4  | 442.1  | 371.9  |
| 217959_s_at | NM_016146 | MIR3656 /// | 51399 /// 10 | 366.8  | 314.5  | 365.8  | 327.8  | 292.2  |
| 217960_s_at | NM_020243 | TOMM22      | 56993        | 393.8  | 383.0  | 444.2  | 378.0  | 377.2  |
| 217961_at   | NM_017875 | SLC25A38    | 54977        | 184.2  | 167.9  | 197.1  | 178.6  | 147.1  |
| 217962_at   | NM_018648 | NOP10       | 55505        | 1293.5 | 1320.2 | 1432.4 | 1374.8 | 1206.4 |
| 217963_s_at | NM_014380 | NGFRAP1     | 27018        | 2039.1 | 2064.6 | 2147.4 | 2078.4 | 1760.0 |
| 217964_at   | NM_017775 | TTC19       | 54902        | 267.5  | 288.4  | 276.8  | 275.4  | 208.9  |
| 217965_s_at | NM_013260 | SAP30BP     | 29115        | 83.4   | 74.6   | 96.4   | 74.7   | 74.6   |

|             |           |            |        |        |        |        |        |        |
|-------------|-----------|------------|--------|--------|--------|--------|--------|--------|
| 217966_s_at | NM_022083 | FAM129A    | 116496 | 3.5    | 3.8    | 5.4    | 11.4   | 4.5    |
| 217967_s_at | AF288391  | FAM129A    | 116496 | 21.6   | 32.5   | 13.9   | 25.3   | 17.6   |
| 217968_at   | NM_003310 | TSSC1      | 7260   | 92.0   | 98.7   | 111.8  | 101.5  | 80.9   |
| 217969_at   | NM_013265 | VPS51      | 738    | 487.0  | 584.1  | 540.4  | 566.1  | 468.2  |
| 217970_s_at | NM_015455 | CNOT6      | 57472  | 105.2  | 122.3  | 135.9  | 118.6  | 103.6  |
| 217971_at   | NM_021970 | LAMTOR3    | 8649   | 109.4  | 109.9  | 130.0  | 128.8  | 93.8   |
| 217972_at   | NM_017812 | CHCHD3     | 54927  | 226.8  | 150.7  | 219.0  | 183.4  | 194.5  |
| 217973_at   | NM_016286 | DCXR       | 51181  | 1099.7 | 1101.5 | 1293.1 | 1153.7 | 1080.8 |
| 217974_at   | NM_016551 | TM7SF3     | 51768  | 8.4    | 10.8   | 14.4   | 12.0   | 15.8   |
| 217975_at   | NM_016303 | WBP5       | 51186  | 150.6  | 118.9  | 137.7  | 133.5  | 114.3  |
| 217976_s_at | NM_016141 | DYNC1L1    | 51143  | 102.8  | 85.0   | 110.5  | 93.3   | 88.6   |
| 217977_at   | NM_016332 | MSRB1      | 51734  | 203.5  | 238.7  | 272.7  | 242.5  | 233.6  |
| 217978_s_at | NM_017582 | UBE2Q1     | 55585  | 234.1  | 210.1  | 248.7  | 211.6  | 197.2  |
| 217979_at   | NM_014399 | TSPAN13    | 27075  | 590.2  | 567.2  | 574.6  | 559.6  | 447.5  |
| 217980_s_at | NM_017840 | MRPL16     | 54948  | 286.9  | 232.7  | 280.8  | 216.9  | 239.0  |
| 217981_s_at | NM_012192 | TIMM10B    | 26515  | 58.3   | 42.9   | 72.1   | 88.7   | 54.9   |
| 217982_s_at | NM_006791 | MORF4L1    | 10933  | 1336.3 | 994.0  | 1216.3 | 1066.7 | 951.7  |
| 217983_s_at | NM_003730 | RNASET2    | 8635   | 390.7  | 395.9  | 405.7  | 379.1  | 423.9  |
| 217984_at   | NM_003730 | RNASET2    | 8635   | 214.4  | 197.8  | 226.4  | 209.5  | 199.8  |
| 217985_s_at | AA102574  | BAZ1A      | 11177  | 134.1  | 110.7  | 156.0  | 101.0  | 115.6  |
| 217986_s_at | NM_013448 | BAZ1A      | 11177  | 115.2  | 82.8   | 111.8  | 91.7   | 104.2  |
| 217987_at   | NM_019048 | ASNSD1     | 54529  | 156.7  | 112.7  | 171.9  | 124.9  | 130.2  |
| 217988_at   | NM_021178 | CCNB1IP1   | 57820  | 145.0  | 131.9  | 132.5  | 138.9  | 103.1  |
| 217989_at   | NM_016245 | HSD17B11   | 51170  | 33.9   | 25.5   | 38.2   | 26.0   | 17.4   |
| 217990_at   | NM_016576 | GMPR2      | 51292  | 175.6  | 174.0  | 218.5  | 170.0  | 150.4  |
| 217991_x_at | NM_018070 | SSBP3      | 23648  | 70.2   | 76.3   | 92.0   | 88.6   | 62.5   |
| 217992_s_at | NM_024329 | EFHD2      | 79180  | 83.3   | 69.8   | 85.9   | 60.9   | 52.6   |
| 217993_s_at | NM_013283 | MAT2B      | 27430  | 223.7  | 192.6  | 255.8  | 207.5  | 202.6  |
| 217994_x_at | NM_017871 | CPSF3L     | 54973  | 188.2  | 191.2  | 199.6  | 196.0  | 163.8  |
| 217995_at   | NM_021199 | SQRDL      | 58472  | 158.6  | 133.0  | 135.0  | 159.1  | 124.1  |
| 217996_at   | AA576961  | PHLDA1     | 22822  | 11.9   | 5.8    | 18.6   | 8.7    | 15.3   |
| 217997_at   | AI795908  | PHLDA1     | 22822  | 9.1    | 2.4    | 10.3   | 3.2    | 6.4    |
| 217998_at   | NM_007350 | PHLDA1     | 22822  | 38.0   | 12.3   | 24.3   | 6.2    | 15.0   |
| 217999_s_at | NM_007350 | PHLDA1     | 22822  | 3.2    | 5.0    | 7.9    | 3.1    | 3.3    |
| 218000_s_at | NM_007350 | PHLDA1     | 22822  | 1.9    | 0.6    | 1.8    | 0.6    | 1.3    |
| 218001_at   | NM_016034 | MRPS2      | 51116  | 336.5  | 349.6  | 397.3  | 370.8  | 350.1  |
| 218002_s_at | NM_004887 | CXCL14     | 9547   | 2.2    | 0.3    | 0.9    | 0.2    | 0.2    |
| 218003_s_at | NM_002013 | FKBP3      | 2287   | 517.2  | 426.5  | 529.8  | 479.0  | 390.8  |
| 218004_at   | NM_018045 | BSDC1      | 55108  | 90.6   | 71.4   | 74.9   | 92.4   | 59.8   |
| 218005_at   | AA744771  | ZNF22      | 7570   | 3.2    | 6.7    | 3.1    | 5.2    | 1.6    |
| 218006_s_at | NM_006963 | ZNF22      | 7570   | 4.7    | 0.6    | 3.8    | 5.0    | 0.9    |
| 218007_s_at | NM_015920 | RPS27L     | 51065  | 883.1  | 829.3  | 935.7  | 895.7  | 692.2  |
| 218008_at   | NM_017994 | TMEM248    | 55069  | 243.2  | 240.1  | 253.2  | 242.1  | 208.5  |
| 218009_s_at | NM_003981 | PRC1       | 9055   | 332.8  | 265.5  | 369.2  | 308.7  | 289.5  |
| 218010_x_at | NM_024299 | PPDPF      | 79144  | 506.4  | 644.4  | 652.3  | 652.1  | 464.4  |
| 218011_at   | NM_024292 | UBL5       | 59286  | 602.4  | 681.7  | 655.8  | 716.9  | 604.5  |
| 218012_at   | NM_022117 | TSPYL2     | 64061  | 48.8   | 57.0   | 48.4   | 42.8   | 19.5   |
| 218013_x_at | NM_016221 | DCTN4      | 51164  | 139.7  | 144.5  | 135.8  | 129.7  | 108.5  |
| 218014_at   | NM_024844 | NUP85      | 79902  | 257.9  | 229.4  | 298.0  | 213.4  | 261.5  |
| 218015_s_at | NM_020135 | WRNIP1     | 56897  | 6.4    | 5.1    | 1.3    | 5.3    | 0.8    |
| 218016_s_at | NM_018119 | LOC1010605 | 55718  | 164.7  | 137.4  | 187.3  | 159.6  | 163.3  |
| 218017_s_at | NM_025070 | HGSNAT     | 138050 | 59.7   | 43.5   | 78.3   | 56.9   | 50.2   |
| 218018_at   | AW449022  | PDXK       | 8566   | 172.1  | 138.4  | 150.8  | 85.9   | 87.9   |



|             |           |              |              |       |       |       |       |       |
|-------------|-----------|--------------|--------------|-------|-------|-------|-------|-------|
| 218019_s_at | NM_021941 | PDXK         | 8566         | 136.9 | 145.5 | 139.6 | 144.2 | 110.2 |
| 218020_s_at | NM_021943 | ZFAND3       | 60685        | 103.3 | 90.0  | 85.3  | 93.9  | 81.1  |
| 218021_at   | NM_021004 | DHRS4 /// Df | 10901 /// 31 | 145.1 | 133.0 | 133.6 | 137.5 | 100.3 |
| 218022_at   | NM_016440 | VRK3         | 51231        | 93.9  | 87.7  | 93.5  | 95.9  | 68.1  |
| 218023_s_at | NM_016605 | FAM53C       | 51307        | 231.0 | 202.5 | 254.0 | 204.1 | 178.4 |
| 218024_at   | NM_016098 | MPC1         | 51660        | 134.8 | 111.0 | 117.6 | 113.2 | 96.4  |
| 218025_s_at | NM_006117 | ECI2         | 10455        | 494.4 | 553.8 | 604.6 | 521.8 | 504.8 |
| 218026_at   | NM_014019 | COA3         | 28958        | 799.3 | 759.2 | 834.0 | 760.3 | 689.0 |
| 218027_at   | NM_014175 | MRPL15       | 29088        | 434.8 | 352.2 | 486.2 | 413.0 | 372.8 |
| 218028_at   | NM_016031 | ELOVL1 /// N | 64834 /// 10 | 192.9 | 175.3 | 229.3 | 187.5 | 193.3 |
| 218029_at   | NM_024519 | FAM65A       | 79567        | 43.5  | 66.0  | 72.1  | 52.5  | 53.6  |
| 218030_at   | NM_014030 | GIT1         | 28964        | 65.3  | 53.8  | 57.8  | 30.8  | 39.8  |
| 218031_s_at | NM_018589 | FOXN3        | 1112         | 47.2  | 50.7  | 39.5  | 52.4  | 35.6  |
| 218032_at   | AF070673  | SNN          | 8303         | 124.1 | 127.1 | 134.3 | 131.6 | 85.4  |
| 218033_s_at | NM_003498 | SNN          | 8303         | 18.4  | 4.1   | 20.6  | 21.0  | 6.3   |
| 218034_at   | NM_016068 | FIS1         | 51024        | 554.0 | 556.9 | 597.4 | 597.8 | 491.7 |
| 218035_s_at | NM_019027 | RBM47        | 54502        | 182.9 | 195.8 | 223.2 | 170.5 | 129.6 |
| 218036_x_at | NM_015938 | NMD3         | 51068        | 44.0  | 29.1  | 52.8  | 40.4  | 36.6  |
| 218037_at   | NM_024293 | FAM134A      | 79137        | 105.9 | 156.8 | 149.6 | 136.1 | 105.9 |
| 218038_at   | NM_018035 | ATP5SL       | 55101        | 47.8  | 55.8  | 58.9  | 45.9  | 46.6  |
| 218039_at   | NM_016359 | NUSAP1       | 51203        | 531.4 | 387.2 | 593.8 | 426.4 | 439.2 |
| 218040_at   | NM_018061 | PRPF38B      | 55119        | 40.5  | 32.6  | 42.6  | 37.0  | 28.5  |
| 218041_x_at | NM_018573 | SLC38A2      | 54407        | 526.2 | 563.5 | 541.0 | 508.4 | 463.4 |
| 218042_at   | NM_016129 | COPS4        | 51138        | 314.1 | 266.8 | 328.5 | 260.7 | 232.8 |
| 218043_s_at | NM_022461 | AZI2         | 64343        | 30.4  | 20.3  | 33.6  | 22.5  | 11.9  |
| 218044_x_at | M24398    | PTMS         | 5763         | 6.0   | 0.6   | 2.4   | 3.6   | 4.0   |
| 218045_x_at | NM_002824 | PTMS         | 5763         | 107.2 | 121.5 | 101.3 | 111.4 | 78.6  |
| 218046_s_at | NM_016065 | MRPS16       | 51021        | 296.9 | 289.3 | 322.0 | 291.2 | 296.9 |
| 218047_at   | NM_024586 | OSBPL9       | 114883       | 68.0  | 66.2  | 79.3  | 75.3  | 67.6  |
| 218048_at   | NM_012071 | COMMD3       | 23412        | 166.2 | 169.1 | 173.3 | 171.9 | 143.3 |
| 218049_s_at | NM_014078 | MRPL13       | 28998        | 146.0 | 109.7 | 170.6 | 131.5 | 120.0 |
| 218050_at   | NM_016617 | UFM1         | 51569        | 86.4  | 68.5  | 88.6  | 76.8  | 60.9  |
| 218051_s_at | NM_022908 | NT5DC2       | 64943        | 371.7 | 392.5 | 448.4 | 432.6 | 386.2 |
| 218052_s_at | NM_020410 | ATP13A1      | 57130        | 166.0 | 169.9 | 178.9 | 166.6 | 141.8 |
| 218053_at   | NM_017892 | PRPF40A      | 55660        | 179.6 | 148.6 | 217.7 | 159.3 | 151.7 |
| 218054_s_at | BC001080  | KXD1         | 79036        | 4.3   | 1.9   | 8.4   | 0.6   | 9.0   |
| 218055_s_at | NM_018268 | WDR41        | 55255        | 51.7  | 48.7  | 52.6  | 45.9  | 54.9  |
| 218056_at   | NM_016561 | BFAR         | 51283        | 65.5  | 52.6  | 65.3  | 69.2  | 52.5  |
| 218057_x_at | NM_006067 | EMC8         | 10328        | 265.6 | 231.0 | 340.8 | 257.9 | 228.7 |
| 218058_at   | NM_014593 | CXXC1        | 30827        | 103.8 | 77.7  | 107.6 | 103.6 | 80.1  |
| 218059_at   | NM_016096 | ZNF706       | 51123        | 338.2 | 297.8 | 361.7 | 309.7 | 315.6 |
| 218060_s_at | NM_024598 | USB1         | 79650        | 28.1  | 38.6  | 53.6  | 37.2  | 35.4  |
| 218061_at   | NM_014623 | MEA1         | 4201         | 320.5 | 321.3 | 425.6 | 352.8 | 319.4 |
| 218062_x_at | NM_012121 | CDC42EP4     | 23580        | 129.3 | 88.8  | 119.4 | 80.0  | 86.0  |
| 218063_s_at | AF099664  | CDC42EP4     | 23580        | 2.5   | 3.5   | 10.9  | 5.7   | 1.2   |
| 218064_s_at | NM_014371 | AKAP8L       | 26993        | 82.7  | 70.9  | 84.2  | 80.2  | 62.4  |
| 218065_s_at | NM_020644 | TMEM9B       | 56674        | 214.7 | 167.4 | 218.2 | 180.2 | 137.0 |
| 218066_at   | NM_006598 | SLC12A7      | 10723        | 181.2 | 132.4 | 140.7 | 131.4 | 137.0 |
| 218067_s_at | NM_018011 | ARGLU1       | 55082        | 127.3 | 118.0 | 125.9 | 111.9 | 103.1 |
| 218068_s_at | NM_024836 | ZNF672       | 79894        | 104.9 | 99.1  | 120.0 | 120.2 | 89.0  |
| 218069_at   | NM_024096 | DCTPP1       | 79077        | 780.6 | 555.1 | 701.2 | 614.8 | 477.7 |
| 218070_s_at | NM_013335 | GMPPA        | 29926        | 51.8  | 54.1  | 54.4  | 61.0  | 53.6  |
| 218071_s_at | NM_014160 | MKRN2        | 23609        | 40.2  | 40.0  | 41.1  | 32.8  | 29.1  |

|             |           |            |               |        |        |        |        |        |
|-------------|-----------|------------|---------------|--------|--------|--------|--------|--------|
| 218072_at   | NM_014186 | COMMD9     | 29099         | 70.4   | 139.0  | 117.9  | 126.5  | 94.3   |
| 218073_s_at | NM_018087 | NDC1       | 55706         | 209.5  | 161.7  | 214.4  | 182.8  | 188.5  |
| 218074_at   | NM_016062 | FAM96B     | 51647         | 766.7  | 818.1  | 883.9  | 802.0  | 701.0  |
| 218075_at   | NM_015665 | AAAS       | 8086          | 80.0   | 132.1  | 136.3  | 128.4  | 97.1   |
| 218076_s_at | NM_018054 | ARHGAP17   | 55114         | 91.1   | 78.5   | 82.1   | 69.6   | 64.0   |
| 218077_s_at | BE542551  | ZDHHC3     | 51304         | 68.3   | 55.4   | 65.2   | 57.8   | 52.6   |
| 218078_s_at | NM_016598 | ZDHHC3     | 51304         | 155.2  | 136.4  | 158.1  | 146.0  | 128.4  |
| 218079_s_at | NM_024835 | GGNBP2     | 79893         | 117.1  | 127.9  | 137.7  | 121.0  | 110.5  |
| 218080_x_at | NM_007051 | FAF1       | 11124         | 163.0  | 109.1  | 176.7  | 140.1  | 139.0  |
| 218081_at   | NM_017874 | C20orf27   | 54976         | 88.9   | 53.2   | 114.5  | 102.9  | 81.0   |
| 218082_s_at | NM_014517 | UBP1       | 7342          | 259.1  | 242.0  | 278.8  | 245.5  | 214.2  |
| 218083_at   | NM_025072 | PTGES2     | 80142         | 139.1  | 149.5  | 178.3  | 158.1  | 133.0  |
| 218084_x_at | NM_014164 | FXDY5      | 53827         | 26.8   | 6.1    | 21.4   | 4.9    | 7.5    |
| 218085_at   | NM_015961 | CHMP5      | 51510         | 169.8  | 96.1   | 161.6  | 137.3  | 107.2  |
| 218086_at   | NM_015392 | NPDC1      | 56654         | 153.3  | 184.7  | 175.6  | 183.6  | 136.8  |
| 218087_s_at | NM_015385 | SORBS1     | 10580         | 3.5    | 3.7    | 2.2    | 0.6    | 3.3    |
| 218088_s_at | NM_022157 | RRAGC      | 64121         | 58.3   | 74.0   | 75.3   | 71.7   | 57.4   |
| 218089_at   | NM_015511 | AAR2       | 25980         | 147.1  | 103.6  | 167.1  | 118.2  | 96.2   |
| 218090_s_at | NM_018117 | WDR11      | 55717         | 117.5  | 83.6   | 92.6   | 87.5   | 75.5   |
| 218091_at   | AI989512  | AGFG1      | 3267          | 32.0   | 23.5   | 21.9   | 33.5   | 19.4   |
| 218092_s_at | NM_004504 | AGFG1      | 3267          | 88.4   | 75.6   | 103.3  | 80.2   | 65.2   |
| 218093_s_at | NM_017664 | ANKRD10    | 55608         | 27.0   | 21.0   | 23.7   | 22.1   | 22.6   |
| 218094_s_at | NM_018478 | DBNDD2 /// | 55861 /// 90  | 23.3   | 23.2   | 18.0   | 20.2   | 12.4   |
| 218095_s_at | NM_018475 | TMEM165    | 55858         | 225.2  | 208.1  | 227.7  | 219.2  | 205.3  |
| 218096_at   | NM_018361 | AGPAT5     | 55326         | 117.6  | 69.6   | 118.5  | 84.0   | 102.6  |
| 218097_s_at | NM_024040 | CUEDC2     | 79004         | 619.9  | 622.0  | 665.0  | 602.9  | 512.8  |
| 218098_at   | AL121903  | ARFGEF2    | 10564         | 91.9   | 76.5   | 75.9   | 81.4   | 74.3   |
| 218099_at   | NM_018469 | TEX2       | 55852         | 109.0  | 84.3   | 132.8  | 100.1  | 89.7   |
| 218100_s_at | NM_018010 | IFT57      | 55081         | 107.4  | 93.9   | 128.8  | 101.1  | 106.9  |
| 218101_s_at | NM_004549 | NDUFC2 /// | 14718 /// 100 | 1595.0 | 1428.5 | 1708.9 | 1404.5 | 1318.4 |
| 218102_at   | NM_015954 | DERA       | 51071         | 233.0  | 203.2  | 218.1  | 209.3  | 177.1  |
| 218103_at   | NM_017647 | FTSJ3      | 117246        | 177.5  | 167.9  | 193.9  | 187.8  | 161.5  |
| 218104_at   | NM_017746 | TEX10      | 54881         | 99.4   | 86.6   | 101.6  | 82.5   | 76.4   |
| 218105_s_at | NM_015956 | MRPL4      | 51073         | 377.8  | 288.0  | 391.2  | 318.8  | 322.0  |
| 218106_s_at | NM_018141 | MRPS10     | 55173         | 89.7   | 77.4   | 85.5   | 90.5   | 79.3   |
| 218107_at   | NM_025160 | WDR26      | 80232         | 253.1  | 259.6  | 242.9  | 272.3  | 189.6  |
| 218108_at   | NM_018108 | UBR7       | 55148         | 192.4  | 166.1  | 250.8  | 166.4  | 224.4  |
| 218109_s_at | NM_022736 | MFSD1      | 64747         | 174.2  | 181.7  | 203.4  | 164.6  | 155.8  |
| 218110_at   | NM_020196 | XAB2       | 56949         | 26.4   | 30.2   | 50.7   | 31.7   | 26.3   |
| 218111_s_at | NM_018686 | CMAS       | 55907         | 120.3  | 81.1   | 118.7  | 81.2   | 94.4   |
| 218112_at   | NM_023936 | MRPS34     | 65993         | 245.3  | 194.9  | 223.4  | 219.6  | 261.7  |
| 218113_at   | NM_013390 | TMEM2      | 23670         | 24.3   | 14.3   | 27.6   | 23.0   | 20.0   |
| 218114_at   | NM_013365 | GGA1       | 26088         | 70.2   | 55.3   | 70.9   | 60.7   | 68.5   |
| 218115_at   | NM_018154 | ASF1B      | 55723         | 240.0  | 200.5  | 291.5  | 187.6  | 220.9  |
| 218116_at   | NM_016520 | C9orf78    | 51759         | 65.9   | 54.1   | 71.9   | 60.7   | 48.0   |
| 218117_at   | NM_014248 | RBX1       | 9978          | 640.1  | 545.2  | 745.4  | 552.8  | 550.7  |
| 218118_s_at | NM_006327 | TIMM23 /// | 100287932 /   | 337.7  | 231.6  | 313.6  | 240.2  | 286.5  |
| 218119_at   | NM_006327 | TIMM23 /// | 100287932 /   | 236.3  | 240.0  | 295.9  | 227.7  | 287.5  |
| 218120_s_at | D21243    | HMOX2      | 3163          | 167.3  | 178.8  | 226.7  | 198.0  | 188.8  |
| 218121_at   | NM_002134 | HMOX2      | 3163          | 43.7   | 27.9   | 34.7   | 44.5   | 44.0   |
| 218122_s_at | NM_021627 | SEN2       | 59343         | 80.8   | 72.7   | 84.5   | 66.9   | 71.5   |
| 218123_at   | NM_017835 | C21orf59   | 56683         | 137.6  | 129.4  | 178.1  | 141.3  | 138.4  |
| 218124_at   | NM_017750 | RETSAT     | 54884         | 84.5   | 77.9   | 74.0   | 82.4   | 59.5   |

|             |           |           |                |       |       |       |       |       |
|-------------|-----------|-----------|----------------|-------|-------|-------|-------|-------|
| 218125_s_at | NM_018246 | CCDC25    | 55246          | 30.6  | 21.7  | 30.1  | 25.5  | 26.5  |
| 218126_at   | NM_018145 | RMDN3     | 55177          | 184.8 | 164.6 | 207.6 | 155.4 | 157.4 |
| 218127_at   | AI804118  | NFYB      | 4801           | 46.0  | 39.2  | 50.1  | 48.9  | 47.5  |
| 218128_at   | AU151875  | NFYB      | 4801           | 34.5  | 21.3  | 36.0  | 24.5  | 21.6  |
| 218129_s_at | NM_006166 | NFYB      | 4801           | 57.5  | 31.6  | 41.8  | 45.6  | 34.8  |
| 218130_at   | NM_024510 | C17orf62  | 79415          | 96.7  | 57.7  | 76.4  | 65.1  | 52.5  |
| 218131_s_at | NM_017660 | GATAD2A   | 54815          | 185.3 | 115.0 | 165.3 | 136.8 | 100.6 |
| 218132_s_at | NM_024075 | TSEN34    | 79042          | 346.2 | 338.7 | 358.9 | 306.5 | 285.8 |
| 218133_s_at | NM_021824 | NIF3L1    | 60491          | 191.8 | 142.0 | 189.6 | 148.3 | 145.8 |
| 218134_s_at | NM_018047 | RBM22     | 55696          | 106.9 | 94.0  | 115.1 | 95.6  | 102.9 |
| 218135_at   | NM_016570 | ERGIC2    | 51290          | 77.2  | 80.2  | 101.9 | 81.2  | 78.3  |
| 218136_s_at | NM_018579 | SLC25A37  | 51312          | 55.3  | 39.5  | 54.0  | 49.1  | 42.4  |
| 218137_s_at | NM_021940 | SMAP1     | 60682          | 87.6  | 85.1  | 99.7  | 87.0  | 71.4  |
| 218138_at   | NM_018848 | MKKS      | 8195           | 129.0 | 94.4  | 108.8 | 92.4  | 93.7  |
| 218139_s_at | NM_018229 | AP5M1     | 55745          | 99.2  | 83.4  | 101.9 | 93.0  | 77.2  |
| 218140_x_at | NM_021203 | SRPRB     | 58477          | 483.3 | 470.3 | 586.3 | 452.5 | 506.9 |
| 218141_at   | NM_022066 | UBE2O     | 63893          | 28.0  | 35.5  | 49.1  | 52.8  | 36.3  |
| 218142_s_at | NM_016302 | CRBN      | 51185          | 78.4  | 67.0  | 79.7  | 76.9  | 74.9  |
| 218143_s_at | NM_005697 | SCAMP2    | 10066          | 158.4 | 161.6 | 194.0 | 171.9 | 123.1 |
| 218144_s_at | NM_022489 | INF2      | 64423          | 34.6  | 14.2  | 29.7  | 47.2  | 20.2  |
| 218145_at   | NM_021158 | TRIB3     | 57761          | 310.0 | 324.7 | 415.6 | 382.1 | 256.8 |
| 218146_at   | NM_018446 | GLT8D1    | 55830          | 127.9 | 96.6  | 123.9 | 93.7  | 106.4 |
| 218147_s_at | NM_018446 | GLT8D1    | 55830          | 107.3 | 76.0  | 108.7 | 100.1 | 99.1  |
| 218148_at   | NM_025082 | CENPT     | 80152          | 32.2  | 26.4  | 29.5  | 27.3  | 21.1  |
| 218149_s_at | NM_017606 | ZNF395    | 55893          | 54.3  | 51.6  | 50.8  | 51.2  | 54.9  |
| 218150_at   | NM_012097 | ARL5A /// | LC26225 /// 10 | 211.1 | 164.3 | 202.0 | 149.6 | 169.4 |
| 218151_x_at | NM_024531 | SLC52A2   | 79581          | 219.7 | 183.6 | 133.2 | 111.5 | 114.5 |
| 218152_at   | NM_018200 | HMG20A    | 10363          | 21.4  | 14.0  | 16.7  | 19.2  | 11.7  |
| 218153_at   | NM_024537 | CARS2     | 79587          | 104.1 | 114.3 | 101.6 | 104.6 | 96.3  |
| 218154_at   | NM_024736 | GSDMD     | 79792          | 7.2   | 5.0   | 2.4   | 2.7   | 2.2   |
| 218155_x_at | AK026565  | TSR1      | 55720          | 42.3  | 31.9  | 42.0  | 37.1  | 38.9  |
| 218156_s_at | NM_018128 | TSR1      | 55720          | 287.8 | 297.8 | 388.6 | 221.0 | 276.0 |
| 218157_x_at | NM_020239 | CDC42SE1  | 56882          | 212.2 | 152.4 | 216.6 | 187.7 | 166.5 |
| 218158_s_at | NM_012096 | APPL1     | 26060          | 36.9  | 30.8  | 40.6  | 30.4  | 31.1  |
| 218159_at   | NM_023935 | DDRGK1    | 65992          | 173.8 | 168.3 | 211.9 | 155.2 | 154.4 |
| 218160_at   | NM_014222 | NDUFA8    | 4702           | 387.5 | 394.2 | 430.7 | 402.8 | 368.9 |
| 218161_s_at | NM_017882 | CLN6      | 54982          | 48.5  | 54.2  | 59.5  | 59.1  | 51.2  |
| 218162_at   | NM_020190 | OLFML3    | 56944          | 10.7  | 5.1   | 4.8   | 3.0   | 1.1   |
| 218163_at   | NM_014060 | MCTS1     | 28985          | 325.2 | 303.4 | 342.2 | 318.6 | 295.9 |
| 218164_at   | NM_022827 | SPATA20   | 64847          | 332.8 | 460.8 | 362.9 | 450.4 | 291.6 |
| 218165_at   | NM_022756 | MEAF6     | 64769          | 369.8 | 313.4 | 301.4 | 333.3 | 262.0 |
| 218166_s_at | NM_016578 | RSF1      | 51773          | 17.7  | 18.7  | 24.7  | 19.1  | 16.9  |
| 218167_at   | NM_016627 | AMZ2      | 51321          | 733.3 | 678.6 | 748.2 | 727.5 | 556.1 |
| 218168_s_at | NM_020247 | ADCK3     | 56997          | 148.8 | 136.1 | 175.0 | 131.1 | 141.9 |
| 218169_at   | NM_018052 | VAC14     | 55697          | 51.8  | 67.8  | 63.4  | 73.7  | 57.4  |
| 218170_at   | NM_016048 | ISOC1     | 51015          | 301.3 | 256.5 | 336.6 | 182.2 | 255.1 |
| 218171_at   | AF195514  | VPS4B     | 9525           | 133.9 | 130.2 | 128.8 | 99.7  | 83.4  |
| 218172_s_at | NM_018630 | DERL1     | 79139          | 180.8 | 151.6 | 175.9 | 155.2 | 139.7 |
| 218173_s_at | NM_017778 | WHSC1L1   | 54904          | 9.9   | 7.2   | 12.1  | 5.6   | 12.2  |
| 218174_s_at | NM_025125 | TMEM254   | 80195          | 41.2  | 34.1  | 43.4  | 39.5  | 30.9  |
| 218175_at   | NM_025140 | CCDC92    | 80212          | 77.9  | 101.9 | 71.8  | 104.8 | 45.4  |
| 218176_at   | NM_022149 | MAGEF1    | 64110          | 280.3 | 288.6 | 320.6 | 247.0 | 231.8 |
| 218177_at   | AA293502  | CHMP1B    | 57132          | 38.2  | 36.3  | 40.3  | 27.4  | 22.5  |

|             |           |          |       |        |        |        |        |        |
|-------------|-----------|----------|-------|--------|--------|--------|--------|--------|
| 218178_s_at | NM_020412 | CHMP1B   | 57132 | 150.9  | 148.0  | 168.0  | 137.9  | 112.4  |
| 218179_s_at | NM_021942 | TRAPPC11 | 60684 | 37.8   | 26.8   | 37.6   | 33.4   | 26.9   |
| 218180_s_at | NM_022772 | EPS8L2   | 64787 | 44.7   | 51.2   | 51.1   | 40.5   | 35.6   |
| 218181_s_at | NM_017792 | MAP4K4   | 9448  | 38.9   | 26.5   | 28.7   | 20.4   | 23.0   |
| 218182_s_at | NM_021101 | CLDN1    | 9076  | 1.9    | 1.1    | 3.3    | 0.9    | 0.7    |
| 218183_at   | NM_013399 | CDIP1    | 29965 | 30.4   | 43.5   | 41.6   | 45.6   | 37.8   |
| 218184_at   | NM_020245 | TULP4    | 56995 | 52.5   | 42.1   | 41.2   | 39.5   | 30.3   |
| 218185_s_at | NM_018120 | ARMC1    | 55156 | 216.0  | 163.9  | 242.0  | 177.9  | 167.1  |
| 218186_at   | NM_020387 | RAB25    | 57111 | 395.1  | 453.2  | 464.6  | 466.0  | 344.4  |
| 218187_s_at | NM_023080 | C8orf33  | 65265 | 198.4  | 206.8  | 234.8  | 220.0  | 203.8  |
| 218188_s_at | NM_012458 | TIMM13   | 26517 | 505.9  | 507.3  | 591.0  | 537.7  | 490.3  |
| 218189_s_at | NM_018946 | NANS     | 54187 | 370.5  | 340.0  | 466.7  | 423.5  | 373.5  |
| 218190_s_at | NM_013387 | UQCR10   | 29796 | 2215.2 | 1907.8 | 2121.6 | 1817.5 | 1509.5 |
| 218191_s_at | NM_018368 | LMBRD1   | 55788 | 152.8  | 147.5  | 125.0  | 127.8  | 114.2  |
| 218192_at   | NM_016291 | IP6K2    | 51447 | 174.9  | 218.0  | 207.2  | 231.6  | 178.5  |
| 218193_s_at | NM_016072 | GOLT1B   | 51026 | 91.7   | 83.2   | 100.8  | 70.0   | 74.9   |
| 218194_at   | NM_015523 | REXO2    | 25996 | 361.1  | 338.5  | 398.3  | 390.6  | 346.3  |
| 218195_at   | NM_024573 | C6orf211 | 79624 | 92.4   | 67.8   | 88.5   | 78.4   | 70.4   |
| 218196_at   | NM_014028 | OSTM1    | 28962 | 60.0   | 44.6   | 49.2   | 43.9   | 43.1   |
| 218197_s_at | NM_018002 | OXR1     | 55074 | 44.6   | 25.9   | 46.3   | 34.8   | 30.7   |
| 218198_at   | NM_018180 | DHX32    | 55760 | 133.5  | 151.9  | 138.7  | 151.5  | 109.8  |
| 218199_s_at | NM_022917 | NOL6     | 65083 | 80.8   | 83.2   | 83.4   | 75.4   | 84.0   |
| 218200_s_at | NM_004546 | NDUFB2   | 4708  | 933.8  | 948.8  | 1006.2 | 1034.7 | 850.0  |
| 218201_at   | NM_004546 | NDUFB2   | 4708  | 342.1  | 365.1  | 410.0  | 397.4  | 312.7  |
| 218202_x_at | NM_022915 | MRPL44   | 65080 | 95.3   | 65.5   | 102.1  | 76.2   | 78.6   |
| 218203_at   | NM_013338 | ALG5     | 29880 | 258.1  | 210.6  | 262.6  | 219.7  | 197.5  |
| 218204_s_at | NM_024513 | FYCO1    | 79443 | 61.4   | 60.2   | 69.8   | 62.5   | 53.3   |
| 218205_s_at | NM_017572 | MKNK2    | 2872  | 1278.4 | 1047.8 | 1044.1 | 1277.1 | 894.6  |
| 218206_x_at | NM_016558 | SCAND1   | 51282 | 685.8  | 694.6  | 795.1  | 813.4  | 602.0  |
| 218207_s_at | NM_015894 | STMN3    | 50861 | 4.3    | 6.1    | 4.4    | 6.6    | 5.6    |
| 218208_at   | NM_025078 | PQLC1    | 80148 | 80.3   | 82.6   | 91.7   | 85.5   | 70.5   |
| 218209_s_at | NM_018170 | RPRD1A   | 55197 | 200.0  | 150.2  | 209.3  | 159.3  | 156.0  |
| 218210_at   | NM_024619 | FN3KRP   | 79672 | 140.0  | 90.8   | 116.9  | 93.9   | 93.0   |
| 218211_s_at | NM_024101 | MLPH     | 79083 | 239.9  | 218.4  | 240.3  | 209.8  | 179.9  |
| 218212_s_at | NM_004531 | MOCS2    | 4338  | 206.0  | 149.5  | 194.0  | 157.1  | 122.1  |
| 218213_s_at | NM_014206 | TMEM258  | 746   | 1720.1 | 1711.3 | 1952.8 | 1881.5 | 1527.2 |
| 218214_at   | NM_021934 | ATG101   | 60673 | 123.3  | 133.0  | 151.3  | 142.4  | 144.1  |
| 218215_s_at | NM_007121 | NR1H2    | 7376  | 51.2   | 65.9   | 68.7   | 66.9   | 50.9   |
| 218216_x_at | NM_016638 | ARL6IP4  | 51329 | 230.4  | 236.2  | 254.8  | 262.1  | 201.7  |
| 218217_at   | NM_021626 | SCPEP1   | 59342 | 79.6   | 85.6   | 95.8   | 94.3   | 76.9   |
| 218218_at   | NM_018171 | APPL2    | 55198 | 107.4  | 105.6  | 100.5  | 113.3  | 69.9   |
| 218219_s_at | NM_018697 | LANCL2   | 55915 | 66.2   | 88.0   | 102.8  | 104.0  | 66.6   |
| 218220_at   | NM_021640 | C12orf10 | 60314 | 216.4  | 219.0  | 242.9  | 221.7  | 167.0  |
| 218221_at   | AL042842  | ARNT     | 405   | 35.6   | 33.6   | 40.3   | 43.5   | 32.6   |
| 218222_x_at | NM_001668 | ARNT     | 405   | 45.1   | 41.8   | 65.0   | 29.0   | 37.5   |
| 218223_s_at | NM_016274 | PLEKHO1  | 51177 | 10.7   | 7.1    | 0.7    | 1.3    | 7.2    |
| 218224_at   | NM_006029 | PNMA1    | 9240  | 61.9   | 71.0   | 93.1   | 79.2   | 57.6   |
| 218225_at   | NM_016581 | ECSIT    | 51295 | 141.1  | 141.8  | 174.3  | 172.4  | 156.9  |
| 218226_s_at | NM_004547 | NDUFB4   | 4710  | 2835.4 | 2497.5 | 2747.7 | 2710.5 | 2272.2 |
| 218227_at   | NM_012225 | NUBP2    | 10101 | 140.3  | 151.2  | 173.1  | 172.9  | 145.0  |
| 218228_s_at | NM_025235 | TNKS2    | 80351 | 90.1   | 97.7   | 87.2   | 67.7   | 66.2   |
| 218229_s_at | NM_017542 | POGK     | 57645 | 173.1  | 116.0  | 179.8  | 162.2  | 129.8  |
| 218230_at   | AL044651  | ARFIP1   | 27236 | 86.7   | 53.0   | 79.6   | 82.1   | 69.1   |

|             |           |                           |       |        |        |        |        |        |
|-------------|-----------|---------------------------|-------|--------|--------|--------|--------|--------|
| 218231_at   | NM_017567 | NAGK                      | 55577 | 68.2   | 67.7   | 90.4   | 88.3   | 54.4   |
| 218232_at   | NM_015991 | C1QA                      | 712   | 1.6    | 0.8    | 1.8    | 8.8    | 0.4    |
| 218233_s_at | NM_017601 | PRICKLE4 /// 29964 /// 10 |       | 1215.8 | 1008.3 | 1225.7 | 1112.8 | 1060.4 |
| 218234_at   | NM_016162 | ING4                      | 51147 | 15.0   | 29.5   | 27.7   | 26.5   | 19.7   |
| 218235_s_at | NM_016037 | UTP11L                    | 51118 | 211.9  | 191.6  | 200.3  | 172.1  | 169.5  |
| 218236_s_at | NM_005813 | PRKD3                     | 23683 | 42.3   | 34.3   | 43.6   | 38.4   | 28.6   |
| 218237_s_at | NM_030674 | SLC38A1                   | 81539 | 119.5  | 137.2  | 137.9  | 122.1  | 116.0  |
| 218238_at   | NM_012341 | GTPBP4                    | 23560 | 256.5  | 210.6  | 342.7  | 246.8  | 272.8  |
| 218239_s_at | NM_012341 | GTPBP4                    | 23560 | 478.3  | 294.6  | 530.4  | 411.8  | 368.7  |
| 218240_at   | NM_017595 | NKIRAS2                   | 28511 | 88.6   | 113.4  | 123.1  | 108.6  | 106.2  |
| 218241_at   | NM_005113 | GOLGA5                    | 9950  | 119.3  | 115.7  | 119.4  | 113.8  | 93.9   |
| 218242_s_at | NM_017635 | SUV420H1                  | 51111 | 64.0   | 56.1   | 57.0   | 61.7   | 43.0   |
| 218243_at   | NM_025158 | RUFY1                     | 80230 | 114.6  | 82.5   | 92.5   | 82.5   | 77.7   |
| 218244_at   | NM_017948 | NOL8                      | 55035 | 34.9   | 27.1   | 39.1   | 42.5   | 31.5   |
| 218245_at   | NM_015516 | TSKU                      | 25987 | 75.5   | 48.9   | 54.6   | 60.4   | 37.7   |
| 218246_at   | NM_024544 | MUL1                      | 79594 | 40.3   | 37.1   | 60.4   | 28.6   | 37.3   |
| 218247_s_at | NM_016626 | MEX3C                     | 51320 | 127.6  | 110.0  | 116.0  | 127.8  | 81.0   |
| 218248_at   | NM_022074 | FAM111A                   | 63901 | 186.7  | 139.9  | 167.8  | 142.3  | 156.4  |
| 218249_at   | NM_022494 | ZDHHC6                    | 64429 | 152.0  | 117.7  | 158.6  | 127.4  | 111.9  |
| 218250_s_at | NM_013354 | CNOT7                     | 29883 | 752.8  | 763.9  | 927.6  | 799.1  | 731.9  |
| 218251_at   | NM_021242 | MID1IP1                   | 58526 | 241.0  | 291.2  | 334.8  | 321.4  | 239.5  |
| 218252_at   | NM_018204 | CKAP2                     | 26586 | 174.1  | 157.7  | 183.9  | 149.8  | 141.1  |
| 218253_s_at | NM_006893 | EIF2D                     | 1939  | 186.9  | 187.1  | 199.8  | 182.4  | 133.7  |
| 218254_s_at | NM_016103 | SAR1B                     | 51128 | 412.0  | 295.4  | 436.9  | 354.7  | 312.7  |
| 218255_s_at | NM_022452 | FBRS                      | 64319 | 46.2   | 32.9   | 41.9   | 39.8   | 29.6   |
| 218256_s_at | NM_017426 | NUP54                     | 53371 | 222.1  | 200.5  | 269.0  | 202.2  | 204.6  |
| 218257_s_at | NM_020120 | UGGT1                     | 56886 | 25.6   | 32.6   | 29.4   | 26.4   | 25.2   |
| 218258_at   | NM_015972 | POLR1D                    | 51082 | 784.9  | 682.1  | 792.3  | 779.9  | 628.2  |
| 218259_at   | NM_014048 | MKL2                      | 57496 | 116.2  | 82.6   | 93.7   | 84.9   | 76.5   |
| 218260_at   | NM_024050 | DDA1                      | 79016 | 179.2  | 189.6  | 218.4  | 194.8  | 174.3  |
| 218261_at   | NM_005498 | AP1M2                     | 10053 | 246.0  | 284.3  | 268.5  | 292.0  | 210.8  |
| 218262_at   | NM_022762 | RMND5B                    | 64777 | 107.5  | 125.0  | 138.2  | 120.6  | 107.3  |
| 218263_s_at | NM_021211 | ZBED5                     | 58486 | 180.0  | 177.5  | 239.8  | 186.1  | 172.3  |
| 218264_at   | NM_016567 | BCCIP                     | 56647 | 130.3  | 92.8   | 110.7  | 113.3  | 99.9   |
| 218265_at   | NM_024077 | SECISBP2                  | 79048 | 45.8   | 34.3   | 42.0   | 54.3   | 30.3   |
| 218266_s_at | NM_014286 | NCS1                      | 23413 | 33.6   | 26.6   | 51.3   | 29.6   | 27.8   |
| 218267_at   | NM_016550 | CINP                      | 51550 | 22.5   | 42.5   | 44.1   | 38.9   | 38.9   |
| 218268_at   | NM_022771 | TBC1D15                   | 64786 | 54.8   | 39.0   | 65.3   | 44.3   | 42.2   |
| 218269_at   | NM_013235 | DROSHA                    | 29102 | 118.0  | 103.4  | 128.4  | 117.4  | 98.4   |
| 218270_at   | NM_024540 | MRPL24                    | 79590 | 743.5  | 620.2  | 763.7  | 778.6  | 678.8  |
| 218271_s_at | NM_018622 | PARL                      | 55486 | 223.5  | 276.5  | 246.0  | 241.5  | 217.6  |
| 218272_at   | NM_017931 | TTC38                     | 55020 | 58.9   | 64.8   | 78.3   | 88.9   | 64.5   |
| 218273_s_at | NM_018444 | PDP1                      | 54704 | 25.1   | 12.4   | 22.9   | 17.9   | 14.9   |
| 218274_s_at | NM_018089 | ANKZF1                    | 55139 | 15.1   | 22.7   | 22.4   | 19.7   | 23.3   |
| 218275_at   | NM_012140 | SLC25A10                  | 1468  | 410.1  | 335.3  | 437.8  | 423.9  | 374.8  |
| 218276_s_at | NM_021818 | SAV1                      | 60485 | 29.2   | 32.1   | 47.2   | 32.2   | 26.4   |
| 218277_s_at | NM_024612 | DHX40                     | 79665 | 177.5  | 146.5  | 175.6  | 162.5  | 142.7  |
| 218278_at   | NM_018093 | WDR74                     | 54663 | 94.8   | 75.6   | 80.2   | 56.0   | 65.4   |
| 218279_s_at | BC001629  | -                         | -     | 14.5   | 13.6   | 12.8   | 12.7   | 10.2   |
| 218280_x_at | NM_003516 | HIST2H2AA3 8337 /// 723   |       | 681.2  | 680.1  | 696.7  | 688.1  | 555.3  |
| 218281_at   | NM_016055 | MRPL48                    | 51642 | 132.4  | 142.3  | 148.2  | 133.6  | 117.1  |
| 218282_at   | NM_018217 | EDEM2                     | 55741 | 46.0   | 34.9   | 41.8   | 52.5   | 45.3   |
| 218283_at   | NM_016305 | SS18L2                    | 51188 | 201.9  | 114.9  | 226.8  | 147.4  | 144.3  |

|             |           |              |              |       |       |       |       |       |
|-------------|-----------|--------------|--------------|-------|-------|-------|-------|-------|
| 218284_at   | NM_015400 | SMAD3        | 4088         | 16.4  | 4.1   | 13.9  | 15.8  | 9.5   |
| 218285_s_at | NM_020139 | BDH2         | 56898        | 20.1  | 19.9  | 17.0  | 23.7  | 10.6  |
| 218286_s_at | NM_014245 | RNF7         | 9616         | 136.1 | 143.1 | 138.6 | 140.2 | 134.5 |
| 218287_s_at | NM_012199 | AGO1         | 26523        | 56.7  | 55.6  | 62.4  | 58.0  | 46.3  |
| 218288_s_at | NM_021825 | CCDC90B      | 60492        | 130.0 | 110.4 | 135.9 | 128.9 | 110.3 |
| 218289_s_at | NM_024818 | UBA5         | 79876        | 72.4  | 74.1  | 91.4  | 61.1  | 61.5  |
| 218290_at   | NM_018049 | MIR6789 ///  | 55111 /// 10 | 109.8 | 126.2 | 150.6 | 121.7 | 117.1 |
| 218291_at   | NM_014017 | LAMTOR2      | 28956        | 176.2 | 178.1 | 196.1 | 198.0 | 158.2 |
| 218292_s_at | NM_016203 | PRKAG2       | 51422        | 46.1  | 27.4  | 32.4  | 36.0  | 28.3  |
| 218293_x_at | AW589982  | NUP50        | 10762        | 1.4   | 6.1   | 3.8   | 2.8   | 3.4   |
| 218294_s_at | AF267865  | NUP50        | 10762        | 83.7  | 57.3  | 86.2  | 65.9  | 65.0  |
| 218295_s_at | NM_007172 | NUP50        | 10762        | 71.5  | 54.7  | 93.4  | 65.3  | 76.2  |
| 218296_x_at | NM_018116 | MSTO1 /// N  | 55154 /// 10 | 48.1  | 47.0  | 59.4  | 59.4  | 55.6  |
| 218297_at   | NM_024948 | FAM188A      | 80013        | 64.6  | 49.3  | 69.9  | 104.2 | 97.6  |
| 218298_s_at | NM_024952 | C14orf159    | 80017        | 57.4  | 56.8  | 59.2  | 71.6  | 42.3  |
| 218299_at   | NM_022338 | C11orf24     | 53838        | 97.0  | 70.2  | 104.7 | 75.7  | 71.4  |
| 218300_at   | NM_024516 | PAGR1        | 79447        | 90.0  | 94.1  | 134.8 | 98.7  | 114.3 |
| 218301_at   | NM_018226 | RNPEPL1      | 57140        | 39.5  | 34.0  | 36.9  | 35.2  | 32.2  |
| 218302_at   | NM_018468 | PSENE1       | 55851        | 243.8 | 276.4 | 308.4 | 313.0 | 254.4 |
| 218303_x_at | NM_016618 | KRCC1        | 51315        | 64.9  | 57.3  | 60.3  | 64.5  | 44.1  |
| 218304_s_at | NM_022776 | OSBPL11      | 114885       | 46.2  | 33.0  | 39.2  | 39.1  | 32.5  |
| 218305_at   | NM_024658 | IPO4         | 79711        | 206.9 | 187.0 | 236.6 | 200.9 | 185.0 |
| 218306_s_at | NM_003922 | HERC1        | 8925         | 51.1  | 33.3  | 54.2  | 51.8  | 39.7  |
| 218307_at   | NM_018346 | RSAD1        | 55316        | 82.8  | 68.7  | 84.7  | 62.0  | 61.1  |
| 218308_at   | NM_006342 | TACC3        | 10460        | 193.4 | 153.4 | 237.9 | 156.9 | 224.9 |
| 218309_at   | NM_018584 | CAMK2N1      | 55450        | 549.7 | 533.8 | 344.7 | 558.6 | 262.1 |
| 218310_at   | NM_014504 | KCTD7 /// RA | 27342 /// 15 | 32.7  | 27.9  | 22.5  | 19.5  | 26.1  |
| 218311_at   | NM_003618 | MAP4K3       | 8491         | 32.3  | 27.3  | 32.4  | 26.9  | 23.9  |
| 218312_s_at | NM_023926 | ZSCAN18      | 65982        | 46.3  | 49.2  | 52.5  | 54.8  | 42.9  |
| 218313_s_at | NM_017423 | GALNT7       | 51809        | 91.1  | 66.5  | 112.7 | 82.7  | 99.2  |
| 218314_s_at | NM_018195 | C11orf57     | 55216        | 58.9  | 59.0  | 74.0  | 57.2  | 65.4  |
| 218315_s_at | NM_016408 | CDK5RAP1     | 51654        | 114.7 | 107.8 | 105.4 | 108.1 | 101.7 |
| 218316_at   | NM_012460 | TIMM9        | 26520        | 161.5 | 134.7 | 170.8 | 133.7 | 147.4 |
| 218317_x_at | NM_024044 | LOC1019298   | 79008 /// 54 | 128.7 | 131.7 | 134.4 | 127.4 | 123.1 |
| 218318_s_at | NM_016231 | NLK          | 51701        | 16.4  | 17.8  | 18.3  | 15.2  | 10.6  |
| 218319_at   | NM_020651 | PELI1        | 57162        | 19.6  | 19.3  | 27.6  | 25.9  | 14.2  |
| 218320_s_at | NM_019056 | NDUFB11      | 54539        | 795.1 | 782.2 | 841.8 | 825.6 | 708.8 |
| 218321_x_at | NM_016086 | STYXL1       | 51657        | 131.8 | 163.9 | 106.7 | 133.8 | 95.9  |
| 218322_s_at | NM_016234 | ACSL5        | 51703        | 10.0  | 9.3   | 13.0  | 9.3   | 8.0   |
| 218323_at   | NM_018307 | RHOT1        | 55288        | 110.2 | 87.8  | 125.7 | 85.4  | 75.4  |
| 218324_s_at | NM_023071 | SPATS2       | 65244        | 77.1  | 73.8  | 70.4  | 75.4  | 62.2  |
| 218325_s_at | NM_022105 | DIDO1        | 11083        | 36.2  | 35.4  | 34.2  | 38.0  | 21.9  |
| 218326_s_at | NM_018490 | LGR4         | 55366        | 19.0  | 19.3  | 11.7  | 11.6  | 14.8  |
| 218327_s_at | NM_004782 | SNAP29       | 9342         | 93.0  | 75.5  | 100.5 | 82.3  | 78.3  |
| 218328_at   | NM_016035 | COQ4         | 51117        | 133.4 | 145.6 | 151.7 | 154.4 | 114.8 |
| 218329_at   | NM_012406 | PRDM4        | 11108        | 58.0  | 46.6  | 41.9  | 44.3  | 43.1  |
| 218330_s_at | NM_018162 | NAV2         | 89797        | 1.3   | 2.0   | 2.0   | 6.5   | 0.9   |
| 218331_s_at | NM_017782 | FAM208B      | 54906        | 126.6 | 97.1  | 128.2 | 113.8 | 123.7 |
| 218332_at   | NM_018476 | BEX1         | 55859        | 15.2  | 12.1  | 15.1  | 12.2  | 7.8   |
| 218333_at   | NM_016041 | DERL2        | 51009        | 149.4 | 125.6 | 150.0 | 145.0 | 124.4 |
| 218334_at   | NM_025075 | THOC7        | 80145        | 295.1 | 225.8 | 335.2 | 286.1 | 251.2 |
| 218335_x_at | NM_024309 | TNIP2        | 79155        | 67.5  | 56.6  | 69.1  | 46.6  | 60.6  |
| 218336_at   | NM_012394 | PFDN2        | 5202         | 407.0 | 343.7 | 487.6 | 385.7 | 400.8 |

|             |           |             |              |        |        |        |        |        |
|-------------|-----------|-------------|--------------|--------|--------|--------|--------|--------|
| 218337_at   | NM_022749 | FAM160B2    | 64760        | 52.1   | 46.3   | 42.6   | 57.1   | 39.4   |
| 218338_at   | NM_004426 | PHC1        | 1911         | 44.5   | 49.7   | 39.6   | 44.9   | 34.0   |
| 218339_at   | NM_014180 | MRPL22      | 29093        | 238.8  | 208.0  | 277.9  | 237.4  | 185.0  |
| 218340_s_at | NM_018227 | UBA6        | 55236        | 66.2   | 71.1   | 77.8   | 61.9   | 51.9   |
| 218341_at   | NM_024664 | PPCS        | 79717        | 163.5  | 244.4  | 275.2  | 245.8  | 198.0  |
| 218342_s_at | NM_024896 | ERMP1       | 79956        | 66.5   | 62.3   | 53.9   | 60.8   | 41.8   |
| 218343_s_at | NM_012086 | GTF3C3      | 9330         | 74.0   | 58.8   | 60.7   | 55.4   | 55.5   |
| 218344_s_at | NM_018254 | RCOR3       | 55758        | 33.9   | 36.8   | 39.4   | 38.1   | 28.7   |
| 218345_at   | NM_018487 | TMEM176A    | 55365        | 8.5    | 1.7    | 2.0    | 2.5    | 1.4    |
| 218346_s_at | NM_014454 | SESN1       | 27244        | 269.7  | 293.3  | 238.2  | 262.1  | 162.7  |
| 218347_at   | NM_018264 | TYW1        | 55253        | 117.4  | 105.2  | 109.2  | 83.8   | 96.5   |
| 218348_s_at | NM_014153 | ZC3H7A      | 29066        | 65.4   | 62.0   | 70.1   | 68.8   | 56.5   |
| 218349_s_at | NM_017975 | ZWILCH      | 55055        | 125.9  | 99.6   | 168.1  | 91.5   | 134.2  |
| 218350_s_at | NM_015895 | GMNN        | 51053        | 477.1  | 293.4  | 494.4  | 363.0  | 395.7  |
| 218351_at   | NM_017845 | COMMD8      | 54951        | 203.6  | 184.9  | 227.3  | 197.4  | 167.6  |
| 218352_at   | NM_018191 | RCBTB1      | 55213        | 94.7   | 66.2   | 88.3   | 81.8   | 60.3   |
| 218353_at   | NM_025226 | RGS5        | 8490         | 6.4    | 5.3    | 3.1    | 1.1    | 3.1    |
| 218354_at   | NM_016209 | TRAPPC2L    | 51693        | 354.7  | 388.9  | 374.6  | 377.2  | 318.2  |
| 218355_at   | NM_012310 | KIF4A       | 24137        | 129.2  | 108.6  | 147.3  | 102.5  | 136.8  |
| 218356_at   | NM_013393 | FTSJ2       | 29960        | 272.2  | 189.2  | 283.8  | 226.9  | 238.2  |
| 218357_s_at | NM_012459 | TIMM8B      | 26521        | 1310.8 | 1279.3 | 1522.6 | 1407.3 | 1263.6 |
| 218358_at   | NM_024324 | CRELD2      | 79174        | 344.8  | 379.7  | 357.3  | 344.2  | 315.0  |
| 218359_at   | NM_024958 | NRSN2       | 80023        | 183.5  | 158.1  | 179.1  | 170.8  | 133.0  |
| 218360_at   | NM_020673 | RAB22A      | 57403        | 95.0   | 106.6  | 100.4  | 94.1   | 72.7   |
| 218361_at   | NM_018178 | GOLPH3L     | 55204        | 135.9  | 155.1  | 148.3  | 138.7  | 108.8  |
| 218362_s_at | NM_014953 | DIS3        | 22894        | 0.2    | 6.4    | 0.3    | 0.4    | 0.9    |
| 218363_at   | NM_018199 | EXD2        | 55218        | 92.7   | 85.7   | 92.6   | 88.8   | 85.7   |
| 218364_at   | NM_017724 | LRRFIP2     | 9209         | 66.1   | 56.4   | 62.0   | 63.3   | 44.1   |
| 218365_s_at | AI765051  | DARS2       | 55157        | 63.5   | 70.3   | 75.2   | 72.3   | 70.0   |
| 218366_x_at | NM_022734 | METTTL17    | 64745        | 153.7  | 147.6  | 172.7  | 127.5  | 132.3  |
| 218367_x_at | NM_012475 | USP21       | 27005        | 113.2  | 170.1  | 144.6  | 144.1  | 95.9   |
| 218368_s_at | NM_016639 | TNFRSF12A   | 51330        | 83.1   | 64.2   | 79.7   | 56.9   | 36.8   |
| 218369_s_at | NM_016046 | EXOSC1      | 51013        | 0.6    | 5.5    | 4.7    | 2.8    | 0.6    |
| 218370_s_at | NM_022753 | S100PBP     | 64766        | 53.9   | 40.0   | 71.4   | 54.0   | 49.1   |
| 218371_s_at | NM_018282 | PSPC1       | 55269        | 49.9   | 49.8   | 51.4   | 53.7   | 43.9   |
| 218372_at   | NM_018019 | MED9        | 55090        | 34.2   | 22.1   | 32.4   | 25.2   | 19.8   |
| 218373_at   | NM_022476 | AKTIP       | 64400        | 220.7  | 188.8  | 219.4  | 225.1  | 170.4  |
| 218374_s_at | NM_020374 | C12orf4     | 57102        | 43.7   | 57.2   | 54.3   | 44.6   | 42.1   |
| 218375_at   | NM_024047 | NUDT9       | 53343        | 152.4  | 180.0  | 195.7  | 173.2  | 148.7  |
| 218376_s_at | NM_022765 | MICAL1      | 64780        | 10.8   | 8.8    | 1.7    | 11.5   | 1.1    |
| 218377_s_at | NM_016940 | RWDD2B      | 10069        | 52.9   | 58.1   | 42.5   | 55.9   | 36.7   |
| 218378_s_at | NM_024653 | LOC1002895  | 79706 /// 10 | 24.0   | 28.3   | 32.7   | 35.3   | 23.1   |
| 218379_at   | NM_016090 | RBM7        | 10179        | 87.9   | 95.4   | 96.8   | 78.8   | 73.4   |
| 218380_at   | NM_021730 | LOC728392   | 728392       | 3.8    | 0.8    | 1.0    | 5.1    | 0.9    |
| 218381_s_at | NM_007279 | U2AF2       | 11338        | 502.7  | 430.5  | 670.1  | 512.3  | 500.1  |
| 218382_s_at | NM_007279 | U2AF2       | 11338        | 123.3  | 141.3  | 124.3  | 123.2  | 101.4  |
| 218383_at   | NM_017815 | HAUS4 /// M | 54930 /// 10 | 255.6  | 201.4  | 243.2  | 192.9  | 191.1  |
| 218384_at   | NM_014316 | CARHSP1     | 23589        | 200.2  | 183.0  | 227.8  | 156.3  | 188.4  |
| 218385_at   | NM_018135 | MRPS18A     | 55168        | 81.4   | 100.3  | 109.0  | 107.8  | 101.5  |
| 218386_x_at | NM_006447 | USP16       | 10600        | 114.9  | 98.7   | 131.7  | 84.9   | 77.7   |
| 218387_s_at | NM_012088 | PGLS        | 25796        | 268.1  | 180.9  | 249.9  | 247.2  | 190.4  |
| 218388_at   | NM_012088 | PGLS        | 25796        | 233.9  | 231.0  | 215.6  | 259.2  | 202.0  |
| 218389_s_at | NM_016022 | APH1A       | 51107        | 345.9  | 327.5  | 341.6  | 290.0  | 268.8  |

|             |           |          |        |       |       |       |       |       |
|-------------|-----------|----------|--------|-------|-------|-------|-------|-------|
| 218390_s_at | NM_022063 | FAM204A  | 63877  | 8.6   | 1.1   | 11.0  | 2.6   | 6.2   |
| 218391_at   | NM_007241 | SNF8     | 11267  | 204.9 | 233.9 | 236.6 | 239.0 | 208.8 |
| 218392_x_at | NM_022754 | SFXN1    | 94081  | 213.2 | 121.8 | 187.7 | 125.4 | 121.5 |
| 218393_s_at | NM_018225 | SMU1     | 55234  | 103.9 | 96.5  | 121.0 | 105.0 | 86.6  |
| 218394_at   | NM_024589 | ROGDI    | 79641  | 325.5 | 324.0 | 292.7 | 315.2 | 237.0 |
| 218395_at   | NM_022496 | ACTR6    | 64431  | 116.4 | 86.3  | 105.9 | 95.6  | 74.1  |
| 218396_at   | NM_017684 | VPS13C   | 54832  | 48.9  | 74.5  | 53.8  | 51.0  | 39.5  |
| 218397_at   | NM_018062 | FANCL    | 55120  | 40.3  | 36.3  | 51.1  | 45.8  | 37.0  |
| 218398_at   | NM_016640 | MRPS30   | 10884  | 247.5 | 162.6 | 303.6 | 175.8 | 188.8 |
| 218399_s_at | NM_017955 | CDCA4    | 55038  | 211.5 | 150.0 | 203.7 | 141.8 | 139.7 |
| 218400_at   | NM_006187 | OAS3     | 4940   | 51.0  | 34.5  | 47.9  | 40.8  | 38.5  |
| 218401_s_at | NM_012482 | ZNF281   | 23528  | 25.5  | 23.5  | 31.9  | 23.8  | 20.0  |
| 218402_s_at | NM_022081 | HPS4     | 89781  | 43.4  | 34.1  | 36.6  | 47.0  | 31.7  |
| 218403_at   | NM_016399 | TRIAP1   | 51499  | 241.9 | 214.6 | 290.6 | 213.8 | 210.4 |
| 218404_at   | NM_013322 | SNX10    | 29887  | 49.2  | 37.0  | 43.2  | 32.3  | 32.9  |
| 218405_at   | NM_013375 | ABT1     | 29777  | 70.9  | 55.5  | 76.5  | 61.8  | 60.4  |
| 218406_x_at | AF173937  | NENF     | 29937  | 7.4   | 2.9   | 9.5   | 9.0   | 6.0   |
| 218407_x_at | NM_013349 | NENF     | 29937  | 162.1 | 237.1 | 245.7 | 227.1 | 146.6 |
| 218408_at   | NM_012456 | TIMM10   | 26519  | 226.2 | 224.2 | 296.8 | 237.6 | 247.2 |
| 218409_s_at | NM_022365 | DNAJC1   | 64215  | 49.5  | 52.7  | 74.0  | 47.2  | 36.3  |
| 218410_s_at | NM_024118 | PGP      | 283871 | 12.2  | 11.7  | 12.8  | 12.5  | 3.8   |
| 218411_s_at | NM_016586 | MBIP     | 51562  | 38.0  | 30.4  | 45.6  | 25.9  | 22.2  |
| 218412_s_at | NM_016328 | GTF2IRD1 | 9569   | 133.1 | 147.8 | 127.3 | 145.6 | 123.5 |
| 218413_s_at | NM_016331 | ZNF639   | 51193  | 7.8   | 8.1   | 7.9   | 14.3  | 13.0  |
| 218414_s_at | NM_017668 | NDE1     | 54820  | 32.3  | 32.9  | 31.3  | 35.7  | 30.5  |
| 218415_at   | NM_018668 | VPS33B   | 26276  | 62.2  | 84.2  | 63.2  | 62.9  | 57.1  |
| 218416_s_at | AW149696  | SLC48A1  | 55652  | 23.5  | 25.3  | 31.7  | 30.3  | 21.6  |
| 218417_s_at | NM_017842 | SLC48A1  | 55652  | 76.2  | 74.5  | 67.2  | 60.5  | 59.3  |
| 218418_s_at | NM_015493 | KANK2    | 25959  | 140.4 | 93.8  | 147.0 | 130.2 | 112.0 |
| 218419_s_at | NM_024107 | TMUB2    | 79089  | 27.8  | 19.7  | 29.0  | 20.4  | 25.2  |
| 218420_s_at | NM_025138 | PROSER1  | 80209  | 66.2  | 58.2  | 58.1  | 58.2  | 55.6  |
| 218421_at   | NM_022766 | CERK     | 64781  | 10.5  | 10.0  | 11.2  | 18.0  | 10.0  |
| 218422_s_at | NM_022118 | RBM26    | 64062  | 38.7  | 27.6  | 30.3  | 32.9  | 25.1  |
| 218423_x_at | NM_016516 | VPS54    | 51542  | 43.9  | 40.7  | 37.5  | 31.3  | 31.5  |
| 218424_s_at | NM_018234 | STEAP3   | 55240  | 46.8  | 41.4  | 46.5  | 33.6  | 42.8  |
| 218425_at   | BC000787  | RNF216   | 54476  | 18.3  | 26.4  | 35.6  | 26.3  | 22.6  |
| 218426_s_at | NM_019011 | RNF216   | 54476  | 46.7  | 53.7  | 42.1  | 46.7  | 41.2  |
| 218427_at   | NM_006643 | SDCCAG3  | 10807  | 119.5 | 97.2  | 147.6 | 112.8 | 119.3 |
| 218428_s_at | NM_016316 | REV1     | 51455  | 58.1  | 39.5  | 59.3  | 29.6  | 46.2  |
| 218429_s_at | NM_018381 | C19orf66 | 55337  | 17.8  | 5.7   | 28.1  | 14.2  | 7.6   |
| 218430_s_at | NM_022841 | RFX7     | 64864  | 9.1   | 19.8  | 18.0  | 19.7  | 21.6  |
| 218431_at   | NM_022067 | VIPAS39  | 63894  | 84.3  | 84.7  | 83.9  | 100.4 | 62.9  |
| 218432_at   | NM_012175 | FBXO3    | 26273  | 134.4 | 98.8  | 136.9 | 123.8 | 108.6 |
| 218433_at   | NM_024594 | PANK3    | 79646  | 43.7  | 41.5  | 25.8  | 37.0  | 16.1  |
| 218434_s_at | NM_023928 | AACS     | 65985  | 314.8 | 347.7 | 438.3 | 408.9 | 298.6 |
| 218435_at   | NM_013238 | DNAJC15  | 29103  | 92.9  | 80.1  | 113.0 | 95.4  | 80.0  |
| 218436_at   | NM_022464 | SIL1     | 64374  | 253.3 | 270.6 | 263.9 | 260.7 | 204.1 |
| 218437_s_at | NM_020347 | LZTFL1   | 54585  | 31.2  | 25.5  | 22.1  | 22.9  | 27.2  |
| 218438_s_at | NM_025205 | MED28    | 80306  | 133.7 | 98.9  | 121.3 | 105.4 | 97.9  |
| 218439_s_at | NM_016144 | COMMD10  | 51397  | 115.2 | 77.6  | 112.5 | 104.4 | 73.7  |
| 218440_at   | NM_020166 | MCCC1    | 56922  | 202.3 | 190.3 | 193.6 | 201.2 | 153.7 |
| 218441_s_at | NM_015540 | RPAP1    | 26015  | 63.8  | 41.8  | 49.3  | 43.2  | 40.1  |
| 218442_at   | NM_004623 | TTC4     | 7268   | 66.1  | 59.5  | 90.8  | 76.5  | 94.6  |



|             |           |          |        |       |       |       |       |       |
|-------------|-----------|----------|--------|-------|-------|-------|-------|-------|
| 218443_s_at | NM_018959 | DAZAP1   | 26528  | 408.2 | 313.2 | 419.9 | 367.4 | 326.9 |
| 218444_at   | NM_024105 | ALG12    | 79087  | 25.4  | 33.6  | 30.4  | 32.8  | 33.1  |
| 218445_at   | NM_018649 | H2AFY2   | 55506  | 87.6  | 118.7 | 106.8 | 147.3 | 80.4  |
| 218446_s_at | NM_016078 | TVP23B   | 51030  | 120.4 | 79.1  | 133.3 | 99.5  | 101.8 |
| 218447_at   | NM_020188 | CMC2     | 56942  | 294.5 | 239.8 | 394.3 | 295.1 | 309.3 |
| 218448_at   | NM_017896 | GID8     | 54994  | 184.1 | 150.8 | 197.6 | 165.3 | 165.6 |
| 218449_at   | NM_018359 | UFSP2    | 55325  | 83.2  | 60.2  | 59.5  | 60.3  | 58.7  |
| 218450_at   | NM_015987 | HEBP1    | 50865  | 215.9 | 224.0 | 243.0 | 226.0 | 201.0 |
| 218451_at   | NM_022842 | CDCP1    | 64866  | 61.5  | 66.2  | 70.2  | 60.3  | 49.1  |
| 218452_at   | NM_014140 | SMARCAL1 | 50485  | 44.3  | 39.2  | 47.1  | 45.4  | 32.9  |
| 218453_s_at | NM_018452 | TMEM242  | 729515 | 16.9  | 14.1  | 16.1  | 15.1  | 10.9  |
| 218454_at   | NM_024829 | PLBD1    | 79887  | 4.7   | 8.8   | 4.9   | 1.4   | 5.7   |
| 218455_at   | NM_021100 | NFS1     | 9054   | 118.9 | 90.4  | 104.9 | 96.0  | 78.4  |
| 218456_at   | NM_023925 | CAPRIN2  | 65981  | 79.4  | 75.2  | 76.5  | 70.9  | 66.3  |
| 218457_s_at | NM_022552 | DNMT3A   | 1788   | 0.7   | 10.6  | 6.4   | 1.1   | 1.0   |
| 218458_at   | NM_022471 | GMCL1    | 64395  | 45.4  | 36.8  | 44.4  | 30.7  | 38.4  |
| 218459_at   | NM_022371 | TOR3A    | 64222  | 170.4 | 160.1 | 210.7 | 167.1 | 172.4 |
| 218460_at   | NM_017802 | HEATR2   | 54919  | 338.8 | 249.0 | 366.9 | 266.6 | 288.6 |
| 218461_at   | NM_016301 | GPN3     | 51184  | 172.1 | 121.8 | 200.4 | 132.0 | 154.2 |
| 218462_at   | NM_025065 | RPF1     | 80135  | 394.6 | 297.0 | 427.1 | 321.2 | 326.3 |
| 218463_s_at | NM_025128 | MUS81    | 80198  | 61.5  | 65.2  | 67.5  | 59.2  | 53.8  |
| 218464_s_at | NM_018182 | FAM222B  | 55731  | 88.9  | 76.6  | 81.3  | 79.4  | 68.9  |
| 218465_at   | NM_018126 | TMEM33   | 55161  | 170.0 | 169.5 | 215.7 | 151.3 | 188.1 |
| 218466_at   | NM_024682 | TBC1D17  | 79735  | 59.2  | 54.2  | 63.7  | 64.1  | 48.4  |
| 218467_at   | NM_020232 | PSMG2    | 56984  | 582.8 | 522.8 | 649.1 | 522.3 | 497.2 |
| 218468_s_at | AF154054  | GREM1    | 26585  | 0.2   | 0.1   | 1.2   | 3.2   | 2.9   |
| 218469_at   | NM_013372 | GREM1    | 26585  | 7.6   | 3.2   | 1.7   | 3.7   | 3.2   |
| 218470_at   | NM_015936 | YARS2    | 51067  | 60.1  | 55.1  | 71.7  | 76.8  | 56.9  |
| 218471_s_at | NM_024649 | BBS1     | 582    | 75.2  | 81.5  | 78.4  | 64.3  | 55.2  |
| 218472_s_at | NM_015946 | PELO     | 53918  | 154.5 | 141.0 | 177.2 | 130.5 | 137.4 |
| 218473_s_at | NM_024656 | COLGALT1 | 79709  | 143.5 | 112.9 | 120.0 | 106.1 | 117.4 |
| 218474_s_at | NM_018992 | KCTD5    | 54442  | 197.1 | 199.0 | 236.6 | 168.5 | 160.6 |
| 218475_at   | NM_022727 | TRMT2A   | 27037  | 29.1  | 25.6  | 28.5  | 28.9  | 20.8  |
| 218476_at   | NM_007171 | POMT1    | 10585  | 32.1  | 34.0  | 43.8  | 32.0  | 31.8  |
| 218477_at   | NM_014051 | TMEM14A  | 28978  | 334.8 | 312.2 | 347.6 | 324.8 | 265.2 |
| 218478_s_at | NM_017612 | ZCCHC8   | 55596  | 71.7  | 91.9  | 105.7 | 95.7  | 80.3  |
| 218479_s_at | NM_022459 | XPO4     | 64328  | 25.0  | 12.9  | 21.6  | 21.0  | 11.4  |
| 218480_at   | NM_021831 | AGBL5    | 60509  | 49.5  | 41.8  | 47.5  | 58.7  | 40.8  |
| 218481_at   | NM_020158 | EXOSC5   | 56915  | 58.6  | 43.2  | 44.9  | 51.2  | 42.1  |
| 218482_at   | NM_020189 | ENY2     | 56943  | 189.9 | 220.0 | 224.6 | 187.2 | 187.1 |
| 218483_s_at | NM_020153 | IFT46    | 56912  | 91.3  | 89.4  | 108.5 | 122.1 | 77.7  |
| 218484_at   | NM_020142 | NDUFA4L2 | 56901  | 9.9   | 12.2  | 22.0  | 17.8  | 9.9   |
| 218485_s_at | NM_018389 | SLC35C1  | 55343  | 41.9  | 43.1  | 41.0  | 38.9  | 34.0  |
| 218486_at   | AA149594  | KLF11    | 8462   | 52.5  | 24.5  | 36.4  | 28.4  | 35.2  |
| 218487_at   | BC000977  | ALAD     | 210    | 24.1  | 24.5  | 26.5  | 21.7  | 19.8  |
| 218488_at   | NM_020365 | EIF2B3   | 8891   | 174.5 | 145.0 | 209.8 | 157.4 | 133.7 |
| 218489_s_at | NM_000031 | ALAD     | 210    | 20.8  | 24.3  | 31.2  | 32.9  | 21.0  |
| 218490_s_at | NM_018443 | ZNF302   | 55900  | 50.8  | 41.3  | 63.1  | 46.6  | 36.0  |
| 218491_s_at | NM_014174 | THYN1    | 29087  | 191.8 | 187.2 | 226.5 | 203.1 | 161.8 |
| 218492_s_at | NM_030573 | THAP7    | 80764  | 152.7 | 140.2 | 178.9 | 131.7 | 121.9 |
| 218493_at   | NM_024571 | SNRNP25  | 79622  | 692.7 | 641.1 | 745.7 | 662.2 | 595.6 |
| 218494_s_at | NM_020062 | SLC2A4RG | 56731  | 374.3 | 372.5 | 418.1 | 419.0 | 330.2 |
| 218495_at   | NM_004182 | UXT      | 8409   | 393.6 | 398.6 | 446.2 | 467.6 | 335.4 |

|             |           |          |        |       |       |       |       |       |
|-------------|-----------|----------|--------|-------|-------|-------|-------|-------|
| 218496_at   | BG534527  | RNASEH1  | 246243 | 50.1  | 43.0  | 62.6  | 51.2  | 52.9  |
| 218497_s_at | NM_002936 | RNASEH1  | 246243 | 142.1 | 133.2 | 160.2 | 134.1 | 133.6 |
| 218498_s_at | NM_014584 | ERO1L    | 30001  | 13.7  | 5.6   | 11.2  | 12.6  | 9.5   |
| 218499_at   | NM_016542 | MST4     | 51765  | 81.6  | 61.8  | 69.1  | 54.9  | 47.7  |
| 218500_at   | NM_016647 | THEM6    | 51337  | 144.2 | 126.3 | 161.8 | 132.6 | 147.1 |
| 218501_at   | NM_019555 | ARHGEF3  | 50650  | 5.6   | 1.9   | 1.8   | 1.3   | 0.6   |
| 218502_s_at | NM_014112 | TRPS1    | 7227   | 34.4  | 27.2  | 41.0  | 43.2  | 20.8  |
| 218503_at   | NM_017794 | FOCAD    | 54914  | 130.2 | 145.6 | 127.3 | 139.5 | 135.4 |
| 218504_at   | NM_016044 | FAHD2A   | 51011  | 119.6 | 58.6  | 75.5  | 79.2  | 57.1  |
| 218505_at   | NM_024673 | WDR59    | 79726  | 63.1  | 50.8  | 62.4  | 59.3  | 49.7  |
| 218506_x_at | NM_018459 | GLYR1    | 84656  | 187.0 | 132.7 | 169.4 | 132.9 | 137.9 |
| 218507_at   | NM_013332 | HILPDA   | 29923  | 147.8 | 112.0 | 182.5 | 136.7 | 106.3 |
| 218508_at   | NM_018403 | DCP1A    | 55802  | 69.6  | 71.1  | 66.7  | 70.5  | 66.8  |
| 218509_at   | NM_022737 | LPPR2    | 64748  | 62.3  | 75.5  | 80.1  | 80.4  | 56.7  |
| 218510_x_at | AI816291  | FAM134B  | 54463  | 38.1  | 24.2  | 39.5  | 41.7  | 21.2  |
| 218511_s_at | NM_018129 | PNPO     | 55163  | 266.9 | 223.5 | 262.2 | 239.7 | 217.9 |
| 218512_at   | NM_018256 | WDR12    | 55759  | 233.6 | 191.2 | 259.8 | 243.1 | 175.8 |
| 218513_at   | NM_018352 | TMA16    | 55319  | 40.5  | 20.0  | 42.2  | 31.8  | 28.9  |
| 218514_at   | NM_018149 | SMG8     | 55181  | 193.4 | 143.2 | 184.7 | 158.4 | 136.1 |
| 218515_at   | NM_016631 | PAXBP1   | 94104  | 57.0  | 42.6  | 50.4  | 35.4  | 38.2  |
| 218516_s_at | NM_017813 | IMPAD1   | 54928  | 84.7  | 81.6  | 101.2 | 100.7 | 83.1  |
| 218517_at   | NM_024900 | JADE1    | 79960  | 30.0  | 28.9  | 22.0  | 29.8  | 19.4  |
| 218518_at   | NM_016603 | FAM13B   | 51306  | 64.6  | 63.0  | 69.5  | 57.5  | 52.3  |
| 218519_at   | NM_017945 | SLC35A5  | 55032  | 91.0  | 108.3 | 141.7 | 121.8 | 108.2 |
| 218520_at   | NM_013254 | TBK1     | 29110  | 104.6 | 85.7  | 120.9 | 90.6  | 88.0  |
| 218521_s_at | NM_018299 | UBE2W    | 55284  | 24.7  | 20.2  | 17.0  | 18.4  | 18.7  |
| 218522_s_at | NM_018174 | MAP1S    | 55201  | 64.5  | 73.6  | 76.6  | 65.0  | 55.1  |
| 218523_at   | NM_022126 | LHPP     | 64077  | 24.3  | 26.1  | 18.4  | 32.4  | 27.2  |
| 218524_at   | NM_004424 | E4F1     | 1877   | 52.1  | 47.4  | 49.9  | 44.8  | 44.6  |
| 218525_s_at | NM_017902 | HIF1AN   | 55662  | 24.1  | 25.4  | 34.0  | 36.0  | 28.0  |
| 218526_s_at | NM_014185 | RANGRF   | 29098  | 76.8  | 65.9  | 66.0  | 69.7  | 58.2  |
| 218527_at   | NM_017692 | APTX     | 54840  | 147.6 | 129.4 | 152.0 | 128.3 | 114.6 |
| 218528_s_at | NM_022781 | RNF38    | 152006 | 87.4  | 71.4  | 81.6  | 71.1  | 58.8  |
| 218529_at   | NM_016579 | CD320    | 51293  | 225.5 | 224.9 | 349.6 | 228.9 | 290.5 |
| 218530_at   | NM_013241 | FHOD1    | 29109  | 93.8  | 68.3  | 92.9  | 88.5  | 75.3  |
| 218531_at   | NM_025124 | TMEM134  | 80194  | 392.8 | 445.9 | 443.9 | 444.8 | 352.8 |
| 218532_s_at | NM_019000 | FAM134B  | 54463  | 55.7  | 53.7  | 66.3  | 69.8  | 53.9  |
| 218533_s_at | NM_017859 | UCLK1    | 54963  | 80.3  | 63.3  | 88.9  | 92.7  | 68.4  |
| 218534_s_at | NM_018046 | AGGF1    | 55109  | 105.6 | 75.1  | 103.7 | 98.1  | 83.6  |
| 218535_s_at | NM_018343 | RIOK2    | 55781  | 66.8  | 50.2  | 69.5  | 66.5  | 64.8  |
| 218536_at   | AF052167  | MRS2     | 57380  | 63.4  | 39.6  | 69.4  | 46.6  | 48.8  |
| 218537_at   | NM_017885 | HCFC1R1  | 54985  | 38.0  | 68.6  | 67.4  | 58.0  | 67.8  |
| 218538_s_at | NM_020662 | MRS2     | 57380  | 112.0 | 82.6  | 120.6 | 91.3  | 89.6  |
| 218539_at   | NM_017943 | FBXO34   | 55030  | 76.8  | 68.1  | 78.2  | 71.8  | 60.7  |
| 218540_at   | NM_024328 | THTPA    | 79178  | 231.8 | 221.8 | 246.3 | 194.9 | 143.1 |
| 218541_s_at | NM_020130 | C8orf4   | 56892  | 0.2   | 0.2   | 0.1   | 0.1   | 0.1   |
| 218542_at   | NM_018131 | CEP55    | 55165  | 167.6 | 105.9 | 199.9 | 114.4 | 136.9 |
| 218543_s_at | NM_022750 | PARP12   | 64761  | 75.7  | 43.0  | 49.2  | 59.1  | 42.4  |
| 218544_s_at | NM_005772 | RCL1     | 10171  | 75.8  | 73.0  | 80.9  | 72.0  | 65.3  |
| 218545_at   | NM_018318 | CCDC91   | 55297  | 45.0  | 33.9  | 37.7  | 39.9  | 35.3  |
| 218546_at   | NM_024709 | C1orf115 | 79762  | 111.6 | 99.6  | 122.1 | 107.4 | 91.8  |
| 218547_at   | NM_024887 | DHDDS    | 79947  | 29.0  | 35.6  | 39.2  | 45.8  | 35.3  |
| 218548_x_at | NM_015926 | TEX264   | 51368  | 151.2 | 165.2 | 196.4 | 166.9 | 165.5 |

|             |           |                          |       |       |       |       |       |       |
|-------------|-----------|--------------------------|-------|-------|-------|-------|-------|-------|
| 218549_s_at | NM_016033 | RMDN1                    | 51115 | 276.9 | 207.8 | 257.5 | 233.3 | 195.0 |
| 218550_s_at | NM_018205 | LRRC20                   | 55222 | 107.3 | 78.7  | 131.0 | 84.5  | 77.5  |
| 218551_at   | NM_021933 | MIIP                     | 60672 | 31.0  | 38.5  | 40.8  | 31.2  | 26.2  |
| 218552_at   | NM_018281 | ECHDC2                   | 55268 | 53.7  | 75.5  | 72.9  | 74.0  | 62.0  |
| 218553_s_at | NM_024076 | KCTD15                   | 79047 | 47.2  | 42.9  | 56.1  | 56.1  | 39.3  |
| 218554_s_at | NM_018489 | ASH1L                    | 55870 | 22.9  | 14.4  | 20.6  | 17.1  | 15.8  |
| 218555_at   | NM_013366 | ANAPC2                   | 29882 | 97.0  | 81.3  | 97.8  | 93.9  | 75.8  |
| 218556_at   | NM_014182 | ORMDL2                   | 29095 | 521.4 | 499.5 | 558.6 | 502.8 | 445.2 |
| 218557_at   | NM_020202 | NIT2                     | 56954 | 344.0 | 366.1 | 354.3 | 373.7 | 295.5 |
| 218558_s_at | NM_017446 | MRPL39                   | 54148 | 237.1 | 211.1 | 245.0 | 192.5 | 186.0 |
| 218559_s_at | NM_005461 | MAFB                     | 9935  | 133.1 | 127.4 | 159.1 | 150.6 | 124.8 |
| 218560_s_at | NM_023007 | JMJD4                    | 65094 | 60.3  | 57.9  | 63.9  | 40.8  | 56.0  |
| 218561_s_at | NM_020408 | LYRM4                    | 57128 | 128.0 | 123.7 | 151.8 | 131.4 | 95.6  |
| 218562_s_at | NM_018202 | TMEM57                   | 55219 | 31.3  | 31.0  | 31.8  | 31.7  | 24.4  |
| 218563_at   | NM_004542 | NDUFA3                   | 4696  | 513.6 | 640.6 | 661.9 | 717.1 | 552.2 |
| 218564_at   | BC002574  | RFWD3                    | 55159 | 48.3  | 30.5  | 54.3  | 46.0  | 50.2  |
| 218565_at   | BG223334  | C9orf114                 | 51490 | 28.6  | 29.0  | 33.9  | 35.6  | 31.3  |
| 218566_s_at | NM_012124 | CHORDC1                  | 26973 | 511.1 | 305.0 | 451.2 | 303.9 | 384.2 |
| 218567_x_at | NM_005700 | DPP3                     | 10072 | 192.2 | 190.2 | 183.9 | 199.2 | 174.4 |
| 218568_at   | NM_018238 | AGK                      | 55750 | 90.4  | 84.3  | 105.5 | 102.5 | 69.2  |
| 218569_s_at | NM_018095 | KBTBD4                   | 55709 | 66.5  | 52.8  | 62.7  | 72.6  | 44.4  |
| 218570_at   | NM_018095 | KBTBD4 /// P55709 /// 11 |       | 86.5  | 142.6 | 101.1 | 94.5  | 70.3  |
| 218571_s_at | NM_014169 | CHMP4A /// 10548 /// 29  |       | 100.6 | 120.0 | 89.4  | 122.0 | 103.2 |
| 218572_at   | NM_014169 | CHMP4A /// 10548 /// 29  |       | 82.9  | 67.2  | 93.6  | 86.3  | 65.1  |
| 218573_at   | NM_014061 | MAGEH1                   | 28986 | 1.4   | 1.5   | 4.0   | 4.3   | 0.7   |
| 218574_s_at | NM_014583 | LMCD1                    | 29995 | 4.3   | 9.9   | 1.2   | 1.8   | 2.6   |
| 218575_at   | NM_022662 | ANAPC1 /// I64682 /// 73 |       | 90.1  | 53.4  | 58.2  | 61.7  | 64.7  |
| 218576_s_at | NM_007240 | DUSP12                   | 11266 | 77.4  | 51.9  | 51.9  | 59.2  | 61.6  |
| 218577_at   | NM_017768 | LRRC40                   | 55631 | 156.0 | 137.6 | 163.4 | 121.5 | 123.5 |
| 218578_at   | NM_024529 | CDC73                    | 79577 | 159.7 | 90.0  | 142.4 | 103.1 | 112.6 |
| 218579_s_at | NM_021931 | DHX35                    | 60625 | 22.3  | 20.2  | 23.5  | 19.5  | 18.8  |
| 218580_x_at | NM_017900 | AURKAIP1                 | 54998 | 820.2 | 804.0 | 868.7 | 812.0 | 689.4 |
| 218581_at   | NM_022060 | ABHD4                    | 63874 | 192.3 | 122.9 | 166.6 | 102.6 | 118.5 |
| 218582_at   | NM_017824 | MARCH5                   | 54708 | 185.7 | 178.5 | 201.3 | 190.5 | 169.6 |
| 218583_s_at | NM_020640 | DCUN1D1                  | 54165 | 86.3  | 96.9  | 93.1  | 85.1  | 70.8  |
| 218584_at   | NM_024549 | TCTN1                    | 79600 | 105.0 | 104.2 | 91.6  | 99.0  | 76.5  |
| 218585_s_at | NM_016448 | DTL                      | 51514 | 154.7 | 113.0 | 197.4 | 117.1 | 171.3 |
| 218586_at   | NM_018270 | MRGBP                    | 55257 | 43.5  | 50.0  | 77.2  | 57.9  | 45.9  |
| 218587_s_at | NM_020231 | POGLUT1                  | 56983 | 5.4   | 13.9  | 15.3  | 15.8  | 13.6  |
| 218588_s_at | NM_018691 | FAM114A2                 | 10827 | 27.8  | 24.0  | 28.3  | 28.6  | 20.8  |
| 218589_at   | NM_005767 | LPAR6                    | 10161 | 41.6  | 35.6  | 39.8  | 29.6  | 28.0  |
| 218590_at   | NM_021830 | C10orf2                  | 56652 | 51.7  | 24.8  | 39.4  | 35.2  | 42.9  |
| 218591_s_at | NM_024894 | NOL10                    | 79954 | 9.2   | 1.6   | 8.8   | 1.2   | 8.4   |
| 218592_s_at | NM_017829 | CECR5                    | 27440 | 453.2 | 326.0 | 413.7 | 374.3 | 345.7 |
| 218593_at   | NM_018077 | RBM28                    | 55131 | 125.6 | 91.4  | 130.3 | 98.9  | 96.0  |
| 218594_at   | NM_018072 | HEATR1                   | 55127 | 137.8 | 105.7 | 137.7 | 114.2 | 136.6 |
| 218595_s_at | NM_018072 | HEATR1                   | 55127 | 161.9 | 110.3 | 147.0 | 105.9 | 111.7 |
| 218596_at   | NM_018201 | TBC1D13                  | 54662 | 8.2   | 35.1  | 28.9  | 25.9  | 27.7  |
| 218597_s_at | NM_018464 | CISD1                    | 55847 | 253.1 | 185.1 | 288.7 | 219.5 | 217.8 |
| 218598_at   | NM_021930 | RINT1                    | 60561 | 88.3  | 51.7  | 87.8  | 66.2  | 63.3  |
| 218599_at   | NM_005132 | REC8                     | 9985  | 15.0  | 15.0  | 24.9  | 10.8  | 17.0  |
| 218600_at   | NM_030576 | LIMD2                    | 80774 | 7.9   | 1.3   | 5.3   | 1.1   | 1.9   |
| 218601_at   | NM_017920 | URGCP                    | 55665 | 93.6  | 85.6  | 93.1  | 80.9  | 71.0  |

|             |           |                          |       |        |        |        |        |        |
|-------------|-----------|--------------------------|-------|--------|--------|--------|--------|--------|
| 218602_s_at | NM_017645 | HAUS6                    | 54801 | 36.8   | 10.7   | 36.4   | 18.4   | 25.6   |
| 218603_at   | NM_016217 | HECA                     | 51696 | 26.0   | 31.4   | 33.1   | 29.7   | 23.3   |
| 218604_at   | NM_014319 | LEMD3                    | 23592 | 78.2   | 58.4   | 94.1   | 53.2   | 62.7   |
| 218605_at   | NM_022366 | TFB2M                    | 64216 | 238.3  | 192.8  | 291.6  | 204.6  | 271.3  |
| 218606_at   | NM_017740 | ZDHHC7                   | 55625 | 139.8  | 114.6  | 140.1  | 139.6  | 133.1  |
| 218607_s_at | NM_018115 | SDAD1                    | 55153 | 131.3  | 116.1  | 145.7  | 122.6  | 120.6  |
| 218608_at   | NM_022089 | ATP13A2                  | 23400 | 52.6   | 69.7   | 38.8   | 74.1   | 37.5   |
| 218609_s_at | NM_001161 | NUDT2                    | 318   | 105.1  | 91.0   | 97.7   | 100.5  | 98.3   |
| 218610_s_at | NM_018340 | CPPED1                   | 55313 | 13.0   | 6.4    | 8.9    | 6.5    | 9.3    |
| 218611_at   | NM_016545 | IER5                     | 51278 | 77.3   | 65.1   | 85.6   | 62.8   | 65.7   |
| 218612_s_at | NM_005706 | TSSC4                    | 10078 | 81.2   | 72.6   | 78.8   | 81.3   | 77.2   |
| 218613_at   | NM_018422 | PSD3                     | 23362 | 31.5   | 21.8   | 36.7   | 19.8   | 19.5   |
| 218614_at   | NM_018169 | KIAA1551                 | 55196 | 16.4   | 14.4   | 22.4   | 16.1   | 15.5   |
| 218615_s_at | NM_018266 | TMEM39A                  | 55254 | 36.7   | 42.2   | 44.8   | 33.3   | 32.0   |
| 218616_at   | NM_020395 | INTS12                   | 57117 | 101.4  | 116.4  | 124.6  | 113.7  | 86.6   |
| 218617_at   | NM_017646 | TRIT1                    | 54802 | 111.3  | 103.9  | 122.7  | 106.0  | 112.5  |
| 218618_s_at | NM_022763 | FNDC3B /// L64778 /// 10 |       | 48.2   | 44.0   | 47.4   | 41.3   | 40.6   |
| 218619_s_at | NM_003173 | SUV39H1                  | 6839  | 66.2   | 39.5   | 73.9   | 51.1   | 58.4   |
| 218620_s_at | AF131220  | HEMK1                    | 51409 | 76.1   | 72.1   | 71.1   | 89.5   | 62.4   |
| 218621_at   | NM_016173 | HEMK1                    | 51409 | 3.8    | 8.8    | 2.0    | 10.0   | 2.0    |
| 218622_at   | NM_024057 | NUP37                    | 79023 | 129.0  | 111.1  | 152.5  | 104.8  | 106.7  |
| 218623_at   | NM_015980 | HMP19                    | 51617 | 2.6    | 1.2    | 2.1    | 3.9    | 1.4    |
| 218624_s_at | NM_023939 | CENPBD1P1                | 65996 | 72.4   | 68.1   | 76.5   | 78.9   | 68.7   |
| 218625_at   | NM_016588 | NRN1                     | 51299 | 57.6   | 53.7   | 76.6   | 67.2   | 60.4   |
| 218626_at   | NM_019843 | EIF4ENIF1                | 56478 | 81.6   | 78.6   | 89.7   | 75.2   | 68.9   |
| 218627_at   | NM_018370 | DRAM1                    | 55332 | 40.3   | 17.8   | 34.0   | 35.0   | 30.6   |
| 218628_at   | NM_016053 | CCDC53                   | 51019 | 108.4  | 126.1  | 122.6  | 121.6  | 91.4   |
| 218629_at   | NM_005631 | SMO                      | 6608  | 24.6   | 19.8   | 26.3   | 17.8   | 16.4   |
| 218630_at   | NM_017777 | MKS1                     | 54903 | 47.8   | 31.9   | 41.9   | 36.3   | 35.6   |
| 218631_at   | NM_021732 | AVPI1                    | 60370 | 72.2   | 67.8   | 54.0   | 54.4   | 51.8   |
| 218632_at   | NM_024602 | HECTD3                   | 79654 | 111.5  | 100.1  | 121.3  | 111.9  | 91.6   |
| 218633_x_at | NM_018394 | ABHD10                   | 55347 | 209.0  | 193.3  | 232.4  | 195.3  | 183.7  |
| 218634_at   | NM_012396 | PHLDA3                   | 23612 | 87.1   | 75.1   | 90.4   | 76.9   | 62.1   |
| 218636_s_at | NM_016219 | MAN1B1                   | 11253 | 70.1   | 53.8   | 57.0   | 61.2   | 59.3   |
| 218637_at   | NM_018439 | IMPACT                   | 55364 | 48.4   | 24.7   | 40.2   | 31.4   | 36.7   |
| 218638_s_at | NM_012445 | LOC1001308 10417 /// 10  |       | 1873.7 | 1994.0 | 2218.9 | 2072.7 | 1832.8 |
| 218639_s_at | NM_025112 | ZXDC                     | 79364 | 37.7   | 37.0   | 45.8   | 30.7   | 30.1   |
| 218640_s_at | NM_024613 | PLEKHF2                  | 79666 | 62.3   | 34.3   | 38.9   | 40.8   | 32.5   |
| 218641_at   | NM_023941 | C11orf95                 | 65998 | 35.0   | 31.0   | 29.5   | 34.9   | 18.6   |
| 218642_s_at | NM_024300 | CHCHD7                   | 79145 | 66.7   | 62.0   | 64.4   | 61.0   | 61.3   |
| 218643_s_at | NM_014171 | CRIPT                    | 9419  | 25.7   | 25.4   | 27.3   | 24.1   | 24.7   |
| 218644_at   | NM_016445 | PLEK2                    | 26499 | 25.7   | 4.4    | 18.9   | 18.0   | 3.0    |
| 218645_at   | NM_021994 | ZNF277                   | 11179 | 55.2   | 56.4   | 47.8   | 42.0   | 31.5   |
| 218646_at   | NM_017867 | C4orf27                  | 54969 | 180.7  | 145.7  | 188.4  | 158.2  | 146.2  |
| 218647_s_at | NM_024640 | YRDC                     | 79693 | 279.3  | 180.6  | 321.4  | 219.8  | 243.7  |
| 218648_at   | NM_022769 | CRTC3                    | 64784 | 117.3  | 99.4   | 119.8  | 106.6  | 72.4   |
| 218649_x_at | NM_004713 | NEMF                     | 9147  | 80.6   | 69.2   | 94.7   | 95.0   | 58.8   |
| 218650_at   | NM_022775 | DGCR8 /// M54487 /// 10  |       | 47.8   | 51.2   | 50.9   | 44.9   | 42.9   |
| 218651_s_at | NM_018357 | LARP6                    | 55323 | 40.5   | 32.0   | 20.1   | 32.0   | 17.4   |
| 218652_s_at | NM_017733 | PIGG                     | 54872 | 203.8  | 195.6  | 211.4  | 188.6  | 160.7  |
| 218653_at   | NM_014252 | SLC25A15                 | 10166 | 165.5  | 115.9  | 178.3  | 136.1  | 151.1  |
| 218654_s_at | NM_016071 | MRPS33                   | 51650 | 438.4  | 425.3  | 495.3  | 438.6  | 379.4  |
| 218655_s_at | NM_017748 | CWC25                    | 54883 | 41.4   | 31.3   | 34.0   | 31.6   | 17.5   |

|             |           |                          |       |       |       |       |       |       |
|-------------|-----------|--------------------------|-------|-------|-------|-------|-------|-------|
| 218656_s_at | NM_005780 | LHFP                     | 10186 | 3.8   | 1.1   | 3.0   | 0.5   | 1.4   |
| 218657_at   | NM_016339 | RAPGEFL1                 | 51195 | 1.7   | 1.9   | 1.8   | 1.7   | 1.1   |
| 218658_s_at | NM_022899 | ACTR8                    | 93973 | 28.8  | 35.9  | 31.2  | 39.7  | 19.2  |
| 218659_at   | NM_018263 | ASXL2                    | 55252 | 105.3 | 118.3 | 124.8 | 110.6 | 82.8  |
| 218660_at   | NM_003494 | DYSF                     | 8291  | 3.7   | 17.1  | 28.0  | 14.0  | 2.2   |
| 218661_at   | NM_024845 | NAA60                    | 79903 | 37.8  | 52.5  | 41.3  | 40.3  | 41.8  |
| 218662_s_at | NM_022346 | NCAPG                    | 64151 | 74.9  | 67.2  | 96.8  | 74.3  | 77.6  |
| 218663_at   | NM_022346 | NCAPG                    | 64151 | 89.4  | 75.9  | 110.9 | 74.1  | 83.4  |
| 218664_at   | NM_016011 | MECR                     | 51102 | 97.8  | 115.4 | 130.4 | 127.0 | 81.7  |
| 218665_at   | NM_012193 | FZD4                     | 8322  | 26.8  | 22.4  | 23.1  | 11.1  | 13.7  |
| 218666_s_at | NM_017919 | STX17                    | 55014 | 62.8  | 58.2  | 70.5  | 53.1  | 45.5  |
| 218667_at   | NM_022368 | PJA1                     | 64219 | 127.8 | 179.7 | 126.4 | 123.6 | 83.2  |
| 218668_s_at | NM_021183 | RAP2C                    | 57826 | 39.5  | 25.9  | 36.8  | 34.4  | 20.6  |
| 218669_at   | NM_021183 | RAP2C                    | 57826 | 39.3  | 37.0  | 50.5  | 39.2  | 36.8  |
| 218670_at   | NM_025215 | PUS1                     | 80324 | 49.3  | 35.1  | 60.6  | 48.4  | 44.4  |
| 218671_s_at | NM_016311 | ATPIF1                   | 93974 | 476.7 | 450.8 | 487.3 | 513.5 | 411.4 |
| 218672_at   | NM_024041 | SCNM1 /// T179005 /// 10 | 170.7 | 170.7 | 135.0 | 151.4 | 142.1 | 137.7 |
| 218673_s_at | NM_006395 | ATG7                     | 10533 | 98.9  | 85.1  | 118.0 | 93.0  | 71.0  |
| 218674_at   | NM_024941 | TRAPPC13                 | 80006 | 29.8  | 14.1  | 24.7  | 24.5  | 16.9  |
| 218675_at   | NM_020372 | SLC22A17                 | 51310 | 44.1  | 26.6  | 24.2  | 34.7  | 22.7  |
| 218676_s_at | NM_021213 | PCTP                     | 58488 | 44.0  | 24.8  | 33.3  | 27.6  | 26.6  |
| 218677_at   | NM_020672 | S100A14                  | 57402 | 10.7  | 7.3   | 20.9  | 11.9  | 3.1   |
| 218678_at   | NM_024609 | NES                      | 10763 | 7.4   | 6.8   | 8.0   | 2.3   | 1.7   |
| 218679_s_at | NM_016208 | VPS28                    | 51160 | 290.6 | 306.2 | 327.3 | 385.7 | 275.4 |
| 218680_x_at | NM_016400 | HYPK /// MIF10169 /// 25 | 10169 | 498.5 | 503.9 | 558.7 | 480.8 | 497.9 |
| 218681_s_at | NM_022044 | SDF2L1                   | 23753 | 120.6 | 128.0 | 131.1 | 135.0 | 123.3 |
| 218682_s_at | NM_018158 | SLC4A1AP                 | 22950 | 97.8  | 80.0  | 94.3  | 87.3  | 68.9  |
| 218683_at   | NM_021190 | PTBP2                    | 58155 | 33.7  | 15.6  | 22.3  | 24.5  | 12.9  |
| 218684_at   | NM_018103 | LRRC8D                   | 55144 | 170.7 | 190.0 | 206.4 | 180.9 | 124.0 |
| 218685_s_at | NM_014311 | SMUG1                    | 23583 | 43.6  | 39.6  | 43.5  | 61.2  | 37.0  |
| 218686_s_at | NM_022450 | RHBDF1                   | 64285 | 87.0  | 57.3  | 83.2  | 70.0  | 53.5  |
| 218687_s_at | NM_017648 | MUC13                    | 56667 | 10.0  | 7.8   | 2.0   | 4.3   | 6.9   |
| 218688_at   | NM_015533 | DAK                      | 26007 | 114.7 | 139.5 | 140.8 | 135.6 | 115.2 |
| 218689_at   | NM_022725 | FANCF                    | 2188  | 104.5 | 84.0  | 82.6  | 46.1  | 41.9  |
| 218690_at   | NM_003687 | PDLIM4                   | 8572  | 9.9   | 4.0   | 6.4   | 2.6   | 2.6   |
| 218691_s_at | AF153882  | PDLIM4                   | 8572  | 0.8   | 0.6   | 1.4   | 0.6   | 2.6   |
| 218692_at   | NM_017786 | SYBU                     | 55638 | 118.5 | 134.0 | 133.3 | 125.3 | 95.4  |
| 218693_at   | NM_012339 | TSPAN15                  | 23555 | 51.9  | 46.9  | 54.3  | 60.1  | 49.1  |
| 218694_at   | NM_016608 | ARMCX1                   | 51309 | 6.8   | 5.9   | 5.6   | 0.7   | 4.4   |
| 218695_at   | NM_019037 | EXOSC4                   | 54512 | 167.6 | 205.6 | 226.6 | 215.1 | 216.6 |
| 218696_at   | NM_004836 | EIF2AK3                  | 9451  | 67.8  | 62.0  | 65.9  | 65.4  | 72.1  |
| 218697_at   | NM_016453 | NCKIPSD                  | 51517 | 80.6  | 78.4  | 77.8  | 79.9  | 66.1  |
| 218698_at   | NM_015957 | APIP                     | 51074 | 68.4  | 55.9  | 89.7  | 60.4  | 72.2  |
| 218699_at   | BG338251  | RAB29                    | 8934  | 80.3  | 90.4  | 87.1  | 85.4  | 83.0  |
| 218700_s_at | BC002585  | RAB29                    | 8934  | 67.5  | 50.9  | 76.5  | 56.9  | 56.4  |
| 218701_at   | NM_016027 | LACTB2                   | 51110 | 177.8 | 135.4 | 168.4 | 158.9 | 133.2 |
| 218702_at   | NM_017827 | SARS2                    | 54938 | 73.5  | 63.7  | 78.5  | 69.8  | 62.7  |
| 218703_at   | NM_012430 | SEC22A                   | 26984 | 26.4  | 31.0  | 35.8  | 31.1  | 30.3  |
| 218704_at   | NM_017763 | RNF43                    | 54894 | 27.2  | 30.5  | 28.8  | 18.3  | 12.3  |
| 218705_s_at | NM_014035 | SNX24                    | 28966 | 9.4   | 10.9  | 11.6  | 10.9  | 10.0  |
| 218706_s_at | AW575493  | GRAMD3                   | 65983 | 36.7  | 37.1  | 37.5  | 39.1  | 30.0  |
| 218707_at   | NM_018337 | ZNF444                   | 55311 | 18.9  | 13.3  | 14.8  | 20.4  | 20.8  |
| 218708_at   | NM_013248 | NXT1                     | 29107 | 111.1 | 92.9  | 138.4 | 100.5 | 111.4 |

|             |           |          |       |       |       |       |       |       |
|-------------|-----------|----------|-------|-------|-------|-------|-------|-------|
| 218709_s_at | NM_016004 | IFT52    | 51098 | 116.9 | 107.3 | 123.9 | 115.0 | 93.2  |
| 218710_at   | NM_017735 | TTC27    | 55622 | 75.4  | 60.1  | 96.5  | 60.9  | 69.1  |
| 218711_s_at | NM_004657 | SDPR     | 8436  | 5.7   | 4.6   | 6.1   | 7.7   | 4.4   |
| 218712_at   | NM_017850 | C1orf109 | 54955 | 188.6 | 107.7 | 189.8 | 135.4 | 128.0 |
| 218713_at   | NM_024611 | ICE2     | 79664 | 100.8 | 73.0  | 95.7  | 79.7  | 70.4  |
| 218714_at   | NM_024031 | PRR14    | 78994 | 116.2 | 106.2 | 108.2 | 95.9  | 80.4  |
| 218715_at   | NM_018428 | UTP6     | 55813 | 126.5 | 97.5  | 122.7 | 116.5 | 122.6 |
| 218716_x_at | NM_012123 | MTO1     | 25821 | 80.1  | 72.1  | 93.6  | 62.8  | 71.5  |
| 218717_s_at | NM_018192 | LEPREL1  | 55214 | 1.1   | 2.5   | 2.5   | 1.3   | 1.1   |
| 218718_at   | NM_016205 | PDGFC    | 56034 | 4.8   | 2.6   | 2.7   | 2.8   | 2.3   |
| 218719_s_at | NM_022770 | GINS3    | 64785 | 49.8  | 39.6  | 61.8  | 45.5  | 56.6  |
| 218720_x_at | NM_012410 | SEZ6L2   | 26470 | 102.6 | 99.1  | 77.4  | 97.2  | 65.4  |
| 218721_s_at | NM_017847 | C1orf27  | 54953 | 56.5  | 38.3  | 68.6  | 49.7  | 42.9  |
| 218722_s_at | NM_024661 | CCDC51   | 79714 | 260.1 | 248.7 | 287.7 | 249.5 | 237.2 |
| 218723_s_at | NM_014059 | RGCC     | 28984 | 16.1  | 11.3  | 14.7  | 13.3  | 10.5  |
| 218724_s_at | NM_021809 | TGIF2    | 60436 | 17.9  | 20.2  | 15.4  | 17.5  | 13.8  |
| 218725_at   | NM_024698 | SLC25A22 | 79751 | 73.2  | 69.1  | 73.6  | 61.9  | 63.2  |
| 218726_at   | NM_018410 | HJURP    | 55355 | 163.2 | 118.8 | 193.3 | 137.2 | 152.3 |
| 218727_at   | NM_018231 | SLC38A7  | 55238 | 33.0  | 28.6  | 38.6  | 26.6  | 24.7  |
| 218728_s_at | NM_014184 | CNIH4    | 29097 | 256.7 | 194.3 | 295.2 | 241.2 | 194.7 |
| 218729_at   | NM_020169 | LXN      | 56925 | 4.3   | 0.9   | 7.0   | 1.0   | 0.5   |
| 218730_s_at | NM_014057 | OGN      | 4969  | 0.7   | 0.2   | 0.4   | 0.3   | 3.6   |
| 218731_s_at | NM_022834 | VWA1     | 64856 | 101.9 | 63.2  | 100.5 | 82.2  | 76.1  |
| 218732_at   | NM_016077 | PTRH2    | 51651 | 242.0 | 161.7 | 278.1 | 190.7 | 194.2 |
| 218733_at   | NM_018133 | MSL2     | 55167 | 41.7  | 31.1  | 37.8  | 46.4  | 40.0  |
| 218734_at   | NM_024771 | NAA40    | 79829 | 53.0  | 58.7  | 47.4  | 39.4  | 37.8  |
| 218735_s_at | AA349848  | ZNF544   | 27300 | 172.1 | 135.4 | 163.3 | 136.7 | 123.3 |
| 218736_s_at | NM_017734 | PALMD    | 54873 | 16.0  | 8.2   | 14.4  | 11.6  | 14.0  |
| 218737_at   | NM_018183 | SBNO1    | 55206 | 45.7  | 28.5  | 47.4  | 39.6  | 35.0  |
| 218738_s_at | NM_016271 | RNF138   | 51444 | 187.5 | 146.9 | 244.1 | 161.9 | 183.8 |
| 218739_at   | NM_016006 | ABHD5    | 51099 | 85.2  | 63.8  | 72.8  | 64.5  | 63.8  |
| 218740_s_at | NM_025197 | CDK5RAP3 | 80279 | 228.2 | 209.1 | 221.7 | 219.8 | 189.5 |
| 218741_at   | NM_024053 | CENPM    | 79019 | 141.3 | 134.2 | 161.6 | 131.9 | 122.7 |
| 218742_at   | NM_022493 | NARFL    | 64428 | 68.1  | 55.8  | 59.0  | 53.6  | 64.0  |
| 218743_at   | NM_024591 | CHMP6    | 79643 | 63.3  | 63.4  | 62.1  | 66.0  | 55.8  |
| 218744_s_at | NM_016223 | PACSIN3  | 29763 | 28.3  | 26.6  | 21.8  | 26.3  | 36.2  |
| 218745_x_at | NM_017814 | TMEM161A | 54929 | 92.1  | 88.9  | 86.0  | 87.1  | 72.5  |
| 218746_at   | NM_018009 | TAPBPL   | 55080 | 10.7  | 8.4   | 6.3   | 11.0  | 13.2  |
| 218747_s_at | NM_018009 | TAPBPL   | 55080 | 1.1   | 14.7  | 7.8   | 10.6  | 11.4  |
| 218748_s_at | NM_006544 | EXOC5    | 10640 | 96.1  | 65.2  | 76.3  | 74.0  | 72.8  |
| 218749_s_at | NM_024959 | SLC8B1   | 80024 | 26.2  | 22.1  | 29.8  | 26.9  | 15.8  |
| 218750_at   | NM_024116 | TAF1D    | 79101 | 35.0  | 29.2  | 35.7  | 27.7  | 22.2  |
| 218751_s_at | NM_018315 | FBXW7    | 55294 | 14.7  | 13.0  | 19.5  | 11.5  | 16.2  |
| 218752_at   | NM_019103 | ZMAT5    | 55954 | 53.2  | 75.6  | 54.1  | 49.5  | 41.4  |
| 218753_at   | NM_018053 | XKR8     | 55113 | 101.2 | 63.6  | 79.9  | 51.8  | 57.7  |
| 218754_at   | NM_024654 | NOL9     | 79707 | 123.7 | 119.8 | 138.8 | 111.5 | 104.4 |
| 218755_at   | NM_005733 | KIF20A   | 10112 | 239.7 | 184.1 | 289.7 | 228.7 | 214.2 |
| 218756_s_at | NM_024308 | DHRS11   | 79154 | 44.3  | 39.5  | 50.3  | 44.3  | 35.9  |
| 218757_s_at | NM_023010 | UPF3B    | 65109 | 35.3  | 35.1  | 26.5  | 33.3  | 30.1  |
| 218758_s_at | NM_003683 | RRP1     | 8568  | 60.7  | 48.6  | 65.4  | 53.1  | 37.3  |
| 218759_at   | NM_004422 | DVL2     | 1856  | 25.1  | 48.2  | 51.4  | 55.2  | 50.5  |
| 218760_at   | NM_015940 | COQ6     | 51004 | 58.6  | 64.0  | 68.1  | 76.5  | 46.5  |
| 218761_at   | NM_017610 | RNF111   | 54778 | 69.7  | 70.7  | 86.4  | 61.9  | 52.3  |

|             |           |              |              |       |       |       |       |       |
|-------------|-----------|--------------|--------------|-------|-------|-------|-------|-------|
| 218762_at   | NM_022752 | ZNF574       | 64763        | 15.4  | 13.7  | 23.6  | 26.0  | 23.1  |
| 218763_at   | NM_016930 | STX18        | 53407        | 81.3  | 68.1  | 83.4  | 72.7  | 66.1  |
| 218764_at   | NM_024064 | PRKCH        | 5583         | 34.3  | 32.5  | 44.0  | 36.5  | 38.5  |
| 218765_at   | NM_015996 | SIDT2        | 51092        | 24.4  | 35.6  | 46.4  | 36.3  | 25.5  |
| 218766_s_at | NM_015836 | WARS2        | 10352        | 86.7  | 80.1  | 106.1 | 90.8  | 61.3  |
| 218767_at   | NM_020385 | REXO4        | 57109        | 63.5  | 49.0  | 68.3  | 58.7  | 66.0  |
| 218768_at   | NM_020401 | NUP107       | 57122        | 141.9 | 142.8 | 139.8 | 133.0 | 133.2 |
| 218769_s_at | NM_023039 | ANKRA2       | 57763        | 69.3  | 77.9  | 73.0  | 65.4  | 62.6  |
| 218770_s_at | NM_018056 | TMEM39B      | 55116        | 46.3  | 32.3  | 72.0  | 47.0  | 39.7  |
| 218771_at   | NM_018216 | PANK4        | 55229        | 114.9 | 106.1 | 109.7 | 97.5  | 92.9  |
| 218772_x_at | NM_018112 | TMEM38B      | 55151        | 297.7 | 224.6 | 232.8 | 244.6 | 159.9 |
| 218773_s_at | NM_012228 | MSRB2        | 22921        | 449.9 | 516.0 | 433.7 | 511.7 | 343.4 |
| 218774_at   | NM_014026 | DCPS         | 28960        | 152.0 | 130.8 | 140.3 | 134.3 | 124.9 |
| 218775_s_at | NM_024949 | CLDN22 /// v | 53842 /// 80 | 1.4   | 1.2   | 0.6   | 0.6   | 2.1   |
| 218776_s_at | NM_024956 | TMEM62       | 80021        | 86.0  | 73.8  | 96.3  | 61.4  | 52.4  |
| 218777_at   | NM_025232 | REEP4        | 80346        | 200.8 | 113.0 | 210.4 | 157.9 | 160.3 |
| 218778_x_at | AI343292  | EPS8L1       | 54869        | 10.0  | 13.4  | 13.8  | 20.7  | 1.8   |
| 218779_x_at | NM_017729 | EPS8L1       | 54869        | 21.2  | 13.5  | 12.2  | 8.8   | 10.3  |
| 218780_at   | NM_013312 | HOOK2        | 29911        | 123.7 | 97.5  | 92.1  | 104.6 | 76.3  |
| 218781_at   | NM_024624 | SMC6         | 79677        | 23.7  | 23.9  | 28.2  | 24.9  | 24.5  |
| 218782_s_at | NM_014109 | ATAD2        | 29028        | 195.8 | 115.5 | 226.1 | 128.9 | 177.9 |
| 218783_at   | AL133049  | INTS7        | 25896        | 15.7  | 7.4   | 10.6  | 14.6  | 14.0  |
| 218784_s_at | NM_018322 | SAYSD1       | 55776        | 40.4  | 40.6  | 41.9  | 24.2  | 40.6  |
| 218785_s_at | NM_022777 | IFT22        | 64792        | 37.2  | 31.4  | 44.0  | 25.3  | 23.2  |
| 218786_at   | NM_016575 | NT5DC3       | 51559        | 18.8  | 13.5  | 13.5  | 12.9  | 14.7  |
| 218787_x_at | NM_018294 | CWF19L1      | 55280        | 45.8  | 48.0  | 52.2  | 34.1  | 38.5  |
| 218788_s_at | NM_022743 | SMYD3        | 64754        | 122.8 | 136.5 | 112.6 | 123.4 | 89.8  |
| 218789_s_at | NM_019021 | C11orf71     | 54494        | 219.1 | 236.5 | 255.8 | 251.5 | 190.2 |
| 218790_s_at | NM_018196 | TMLHE        | 55217        | 0.6   | 0.9   | 0.8   | 0.6   | 4.1   |
| 218791_s_at | NM_024713 | KATNBL1      | 79768        | 22.1  | 19.0  | 31.9  | 24.3  | 19.5  |
| 218792_s_at | NM_017688 | BSPRY        | 54836        | 35.3  | 49.5  | 58.6  | 60.0  | 41.9  |
| 218793_s_at | NM_006746 | SCML1        | 6322         | 103.4 | 92.9  | 112.5 | 80.2  | 68.1  |
| 218794_s_at | NM_017853 | TXNL4B       | 54957        | 43.6  | 44.6  | 48.3  | 37.4  | 34.1  |
| 218795_at   | NM_016361 | ACP6         | 51205        | 110.6 | 116.7 | 128.6 | 119.8 | 92.4  |
| 218796_at   | NM_017671 | FERMT1       | 55612        | 29.0  | 28.1  | 42.3  | 32.5  | 20.9  |
| 218797_s_at | NM_016538 | SIRT7        | 51547        | 51.6  | 44.6  | 54.7  | 48.0  | 40.3  |
| 218798_at   | NM_023008 | KRI1         | 65095        | 43.1  | 27.9  | 43.6  | 31.4  | 34.8  |
| 218799_at   | NM_018066 | GPN2         | 54707        | 97.2  | 108.2 | 108.8 | 97.8  | 95.5  |
| 218800_at   | NM_024592 | SRD5A3       | 79644        | 29.1  | 28.9  | 39.1  | 35.4  | 28.5  |
| 218801_at   | NM_020121 | UGGT2        | 55757        | 13.8  | 13.4  | 17.9  | 15.6  | 17.9  |
| 218802_at   | NM_017918 | CCDC109B     | 55013        | 27.1  | 21.7  | 18.5  | 30.5  | 20.0  |
| 218803_at   | NM_018223 | CHFR         | 55743        | 83.9  | 76.9  | 77.1  | 77.6  | 71.7  |
| 218804_at   | NM_018043 | ANO1         | 55107        | 0.3   | 0.1   | 4.3   | 0.2   | 2.2   |
| 218805_at   | NM_018384 | GIMAP1-GIM   | 55340 /// 10 | 3.2   | 4.4   | 3.0   | 7.3   | 2.3   |
| 218806_s_at | AF118887  | VAV3         | 10451        | 2.2   | 1.1   | 1.2   | 0.9   | 0.6   |
| 218807_at   | NM_006113 | VAV3         | 10451        | 8.7   | 7.9   | 6.6   | 10.8  | 6.1   |
| 218808_at   | NM_018114 | DALRD3       | 55152        | 14.7  | 17.3  | 27.4  | 17.9  | 8.4   |
| 218809_at   | NM_024960 | PANK2        | 80025        | 154.5 | 131.6 | 155.2 | 132.7 | 121.3 |
| 218810_at   | NM_025079 | MIR6732 ///  | 80149 /// 10 | 37.3  | 25.6  | 37.8  | 36.9  | 15.7  |
| 218811_at   | BF939788  | ORAI2        | 80228        | 11.7  | 14.8  | 14.6  | 13.3  | 9.9   |
| 218812_s_at | NM_025156 | ORAI2        | 80228        | 15.4  | 15.3  | 25.9  | 31.5  | 11.9  |
| 218813_s_at | NM_020145 | SH3GLB2      | 56904        | 88.0  | 83.9  | 98.4  | 107.7 | 79.7  |
| 218814_s_at | NM_018252 | TMEM206      | 55248        | 13.6  | 6.0   | 13.8  | 9.3   | 6.9   |

|             |           |                  |              |        |       |       |       |       |       |
|-------------|-----------|------------------|--------------|--------|-------|-------|-------|-------|-------|
| 218815_s_at | NM_018022 | TMEM51           | 55092        | 11.4   | 10.1  | 11.1  | 13.5  | 2.4   |       |
| 218816_at   | NM_018214 | LRRRC1           | 55227        | 36.9   | 36.9  | 34.8  | 24.2  | 16.2  |       |
| 218817_at   | NM_021928 | SPCS3            | 60559        | 33.0   | 27.5  | 35.9  | 24.4  | 23.9  |       |
| 218818_at   | NM_004468 | FHL3             | 2275         | 9.7    | 8.5   | 9.1   | 12.6  | 6.2   |       |
| 218819_at   | NM_012141 | INTS6            | 26512        | 24.0   | 19.5  | 24.5  | 31.9  | 29.3  |       |
| 218820_at   | NM_020215 | C14orf132        | 56967        | 23.1   | 18.2  | 13.8  | 23.9  | 15.1  |       |
| 218821_at   | AL139349  | LOC1006529:79716 | /// 10       | 17.3   | 14.6  | 16.9  | 24.6  | 14.6  |       |
| 218822_s_at | NM_024663 | LOC1006529:79716 | /// 10       | 14.7   | 12.9  | 3.0   | 9.8   | 3.8   |       |
| 218823_s_at | NM_017634 | KCTD9            | 54793        | 52.0   | 40.4  | 59.9  | 44.2  | 48.6  |       |
| 218824_at   | NM_018215 | PNMAL1           | 55228        | 8.8    | 4.7   | 1.9   | 2.2   | 0.7   |       |
| 218825_at   | NM_016215 | EGFL7            | 51162        | 66.9   | 62.5  | 65.8  | 59.4  | 56.5  |       |
| 218826_at   | NM_017515 | SLC35F2          | 54733        | 92.3   | 65.6  | 110.5 | 76.5  | 71.7  |       |
| 218827_s_at | NM_018069 | CEP192           | 55125        | 37.8   | 26.3  | 43.3  | 24.2  | 25.3  |       |
| 218828_at   | NM_020360 | PLSCR3           | /// TI57048  | /// 10 | 10.9  | 40.2  | 50.6  | 27.7  | 11.0  |
| 218829_s_at | NM_017780 | CHD7             | 55636        | 14.6   | 12.3  | 16.7  | 13.1  | 14.9  |       |
| 218830_at   | NM_016093 | RPL26L1          | 51121        | 578.7  | 384.4 | 501.3 | 441.1 | 354.8 |       |
| 218831_s_at | NM_004107 | FCGRT            | 2217         | 3.5    | 2.2   | 2.5   | 2.3   | 2.6   |       |
| 218832_x_at | NM_004041 | ARRB1            | 408          | 13.0   | 14.9  | 15.1  | 11.8  | 12.7  |       |
| 218833_at   | NM_016653 | ZAK              | 51776        | 17.0   | 8.4   | 20.1  | 15.2  | 8.1   |       |
| 218834_s_at | NM_017870 | TMEM132A         | 54972        | 111.1  | 108.6 | 87.6  | 118.2 | 77.3  |       |
| 218835_at   | NM_006926 | SFTPA1           | /// SI653509 | /// 7  | 33.1  | 42.5  | 42.7  | 39.8  | 40.1  |
| 218836_at   | NM_024839 | RPP21            | /// TR56658  | /// 79 | 141.3 | 126.4 | 168.4 | 158.1 | 111.8 |
| 218837_s_at | NM_015983 | UBE2D4           | 51619        | 147.1  | 118.8 | 146.9 | 121.2 | 102.7 |       |
| 218838_s_at | NM_022492 | TTC31            | 64427        | 35.8   | 28.0  | 36.3  | 39.8  | 26.1  |       |
| 218839_at   | NM_012258 | HEY1             | 23462        | 3.2    | 5.7   | 1.3   | 1.3   | 1.8   |       |
| 218840_s_at | NM_018161 | NADSYN1          | 55191        | 49.8   | 54.9  | 44.2  | 52.0  | 41.3  |       |
| 218841_at   | NM_024095 | ASB8             | 140461       | 29.4   | 41.9  | 40.2  | 44.8  | 35.3  |       |
| 218842_at   | NM_024604 | RPAP3            | 79657        | 139.7  | 77.1  | 132.1 | 95.7  | 87.7  |       |
| 218843_at   | NM_022823 | FNDC4            | 64838        | 3.3    | 1.7   | 2.4   | 4.0   | 2.2   |       |
| 218844_at   | NM_025149 | ACSF2            | 80221        | 19.9   | 28.9  | 14.7  | 17.9  | 15.0  |       |
| 218845_at   | NM_020185 | DUSP22           | 56940        | 43.9   | 40.6  | 40.0  | 50.4  | 31.1  |       |
| 218846_at   | NM_004830 | MED23            | 9439         | 63.3   | 48.0  | 51.4  | 52.9  | 49.7  |       |
| 218847_at   | NM_006548 | IGF2BP2          | 10644        | 1.7    | 1.2   | 1.4   | 2.6   | 0.7   |       |
| 218848_at   | NM_024339 | THOC6            | 79228        | 70.8   | 70.7  | 92.4  | 70.6  | 79.3  |       |
| 218849_s_at | NM_006663 | PPP1R13L         | 10848        | 25.1   | 24.7  | 26.6  | 24.4  | 18.6  |       |
| 218850_s_at | NM_014240 | LIMD1            | 8994         | 42.1   | 37.6  | 32.0  | 37.7  | 32.1  |       |
| 218851_s_at | NM_018383 | SFT2D3           | /// V55339   | /// 84 | 1.8   | 0.6   | 0.7   | 2.7   | 0.5   |
| 218852_at   | NM_017917 | PPP2R3C          | 55012        | 71.8   | 64.5  | 94.1  | 71.2  | 61.3  |       |
| 218853_s_at | NM_019556 | MOSPD1           | 56180        | 61.8   | 61.4  | 64.2  | 63.9  | 50.5  |       |
| 218854_at   | NM_013352 | DSE              | 29940        | 7.8    | 4.5   | 9.6   | 9.5   | 7.6   |       |
| 218855_at   | NM_016372 | TPRA1            | 131601       | 59.1   | 52.3  | 56.0  | 50.1  | 50.4  |       |
| 218856_at   | NM_016629 | TNFRSF21         | 27242        | 60.2   | 52.1  | 54.1  | 48.7  | 47.3  |       |
| 218857_s_at | NM_025080 | ASRGL1           | 80150        | 39.3   | 40.0  | 64.4  | 46.6  | 47.2  |       |
| 218858_at   | NM_022783 | DEPTOR           | 64798        | 58.1   | 54.5  | 52.4  | 49.1  | 35.2  |       |
| 218859_s_at | NM_016649 | ESF1             | 51575        | 46.5   | 33.2  | 60.2  | 39.9  | 47.6  |       |
| 218860_at   | NM_024078 | NOC4L            | 79050        | 59.8   | 54.3  | 66.6  | 51.2  | 64.3  |       |
| 218861_at   | NM_022453 | RNF25            | 64320        | 34.2   | 24.2  | 36.3  | 26.5  | 22.5  |       |
| 218862_at   | NM_024701 | ASB13            | 79754        | 73.2   | 64.1  | 68.0  | 57.3  | 52.0  |       |
| 218863_s_at | NM_022648 | TNS1             | 7145         | 1.4    | 6.9   | 1.7   | 2.5   | 2.2   |       |
| 218864_at   | AF116610  | TNS1             | 7145         | 2.7    | 0.5   | 1.0   | 0.8   | 1.3   |       |
| 218865_at   | NM_022746 | MARC1            | 64757        | 346.8  | 285.8 | 327.9 | 260.1 | 271.3 |       |
| 218866_s_at | NM_016310 | POLR3K           | 51728        | 379.9  | 296.4 | 403.2 | 325.6 | 353.2 |       |
| 218867_s_at | NM_024738 | C12orf49         | 79794        | 53.5   | 39.2  | 42.6  | 42.0  | 30.1  |       |



|             |           |            |       |       |       |       |       |       |
|-------------|-----------|------------|-------|-------|-------|-------|-------|-------|
| 218868_at   | NM_020445 | ACTR3B     | 57180 | 59.5  | 51.7  | 60.0  | 58.7  | 50.1  |
| 218869_at   | NM_012213 | MLYCD      | 23417 | 33.1  | 53.3  | 53.0  | 55.3  | 42.3  |
| 218870_at   | NM_018460 | ARHGAP15   | 55843 | 0.6   | 0.4   | 0.4   | 0.3   | 0.5   |
| 218871_x_at | NM_018590 | CSGALNACT2 | 55454 | 50.9  | 25.9  | 42.9  | 35.7  | 31.5  |
| 218872_at   | NM_017899 | TESC       | 54997 | 23.4  | 27.8  | 23.0  | 31.0  | 18.9  |
| 218873_at   | NM_017710 | GON4L      | 54856 | 38.4  | 19.1  | 27.0  | 18.2  | 21.7  |
| 218874_s_at | NM_024909 | ATAT1      | 79969 | 33.3  | 37.9  | 28.5  | 38.9  | 28.6  |
| 218875_s_at | NM_012177 | FBXO5      | 26271 | 82.6  | 61.9  | 98.9  | 59.8  | 67.9  |
| 218876_at   | NM_016140 | TPPP3      | 51673 | 0.9   | 0.6   | 0.6   | 0.8   | 0.8   |
| 218877_s_at | NM_021820 | TRMT11     | 60487 | 39.9  | 32.3  | 66.9  | 31.6  | 42.7  |
| 218878_s_at | NM_012238 | SIRT1      | 23411 | 57.4  | 50.4  | 61.2  | 59.8  | 39.1  |
| 218879_s_at | NM_022764 | MTHFSD     | 64779 | 22.9  | 26.0  | 31.6  | 34.0  | 23.3  |
| 218880_at   | N36408    | FOSL2      | 2355  | 8.9   | 11.8  | 14.0  | 16.9  | 6.5   |
| 218881_s_at | NM_024530 | FOSL2      | 2355  | 3.8   | 9.6   | 7.1   | 6.5   | 1.5   |
| 218882_s_at | NM_006784 | WDR3       | 10885 | 163.9 | 108.1 | 150.7 | 121.8 | 138.2 |
| 218883_s_at | NM_024629 | CENPU      | 79682 | 412.2 | 302.0 | 463.0 | 317.0 | 349.8 |
| 218884_s_at | NM_021927 | GUF1       | 60558 | 46.3  | 37.7  | 44.4  | 42.5  | 39.4  |
| 218885_s_at | NM_024642 | GALNT12    | 79695 | 0.4   | 0.2   | 1.0   | 0.8   | 0.1   |
| 218886_at   | NM_017906 | PAK1IP1    | 55003 | 54.3  | 39.8  | 60.2  | 44.8  | 74.4  |
| 218887_at   | NM_015950 | MRPL2      | 51069 | 157.7 | 147.5 | 186.1 | 165.0 | 171.8 |
| 218888_s_at | NM_018092 | NETO2      | 81831 | 176.2 | 156.9 | 190.7 | 152.2 | 171.7 |
| 218889_at   | NM_022451 | NOC3L      | 64318 | 63.4  | 49.2  | 76.8  | 52.6  | 62.5  |
| 218890_x_at | NM_016622 | MRPL35     | 51318 | 97.7  | 91.0  | 106.5 | 107.1 | 107.6 |
| 218891_at   | NM_024541 | C10orf76   | 79591 | 37.3  | 44.1  | 23.2  | 28.9  | 28.3  |
| 218892_at   | NM_024542 | DCHS1      | 8642  | 2.8   | 9.4   | 5.2   | 3.0   | 1.6   |
| 218893_at   | NM_024710 | ISOC2      | 79763 | 284.6 | 274.4 | 358.9 | 275.9 | 290.1 |
| 218894_s_at | NM_018048 | MAGOHB     | 55110 | 124.0 | 73.1  | 140.0 | 87.1  | 98.4  |
| 218895_at   | NM_022078 | GPATCH3    | 63906 | 43.8  | 39.4  | 52.7  | 46.7  | 32.3  |
| 218896_s_at | NM_018553 | C17orf85   | 55421 | 59.9  | 49.7  | 62.9  | 53.0  | 34.3  |
| 218897_at   | NM_030577 | TMEM177    | 80775 | 117.5 | 69.0  | 108.9 | 80.3  | 80.7  |
| 218898_at   | NM_024792 | FAM57A     | 79850 | 104.0 | 99.1  | 133.7 | 96.7  | 97.3  |
| 218899_s_at | NM_024812 | BAALC      | 79870 | 5.2   | 3.8   | 0.8   | 1.6   | 0.7   |
| 218900_at   | NM_020184 | CNNM4      | 26504 | 47.1  | 43.2  | 51.3  | 34.0  | 30.9  |
| 218901_at   | NM_020353 | PLSCR4     | 57088 | 4.4   | 3.5   | 1.8   | 0.6   | 2.8   |
| 218902_at   | NM_017617 | NOTCH1     | 4851  | 40.4  | 31.3  | 38.9  | 18.8  | 25.5  |
| 218903_s_at | NM_024068 | NABP2      | 79035 | 102.6 | 109.6 | 137.5 | 134.6 | 88.6  |
| 218904_s_at | NM_017998 | C9orf40    | 55071 | 32.3  | 32.2  | 45.2  | 26.6  | 32.7  |
| 218905_at   | NM_017864 | INTS8      | 55656 | 161.9 | 189.8 | 181.1 | 195.7 | 159.2 |
| 218906_x_at | NM_022822 | KLC2       | 64837 | 83.6  | 56.3  | 104.8 | 69.4  | 54.6  |
| 218907_s_at | NM_023942 | LRRC61     | 65999 | 39.1  | 31.8  | 33.5  | 28.9  | 30.3  |
| 218908_at   | NM_024083 | ASPSCR1    | 79058 | 79.9  | 66.8  | 77.2  | 72.4  | 67.9  |
| 218909_at   | NM_012424 | RPS6KC1    | 26750 | 88.8  | 77.7  | 92.6  | 83.3  | 69.4  |
| 218910_at   | NM_018075 | ANO10      | 55129 | 39.1  | 61.1  | 57.9  | 66.3  | 34.7  |
| 218911_at   | NM_006530 | YEATS4     | 8089  | 132.3 | 83.0  | 153.1 | 108.1 | 105.0 |
| 218912_at   | NM_024523 | GCC1       | 79571 | 84.1  | 63.2  | 75.8  | 60.1  | 53.0  |
| 218913_s_at | NM_016573 | GMIP       | 51291 | 42.4  | 36.0  | 21.6  | 43.0  | 24.2  |
| 218914_at   | NM_015997 | RRNAD1     | 51093 | 39.8  | 36.2  | 63.0  | 59.4  | 38.3  |
| 218915_at   | NM_016418 | NF2        | 4771  | 114.4 | 85.0  | 112.8 | 108.2 | 102.4 |
| 218916_at   | NM_024671 | ZNF747     | 65988 | 52.8  | 51.3  | 49.0  | 45.3  | 36.9  |
| 218917_s_at | NM_018450 | ARID1A     | 8289  | 118.0 | 105.6 | 116.3 | 118.0 | 79.5  |
| 218918_at   | NM_020379 | MAN1C1     | 57134 | 13.5  | 9.3   | 6.8   | 9.0   | 6.4   |
| 218919_at   | NM_024699 | ZFAND1     | 79752 | 141.2 | 86.4  | 142.9 | 108.9 | 97.9  |
| 218920_at   | NM_019057 | FAM193B    | 54540 | 73.6  | 63.1  | 62.1  | 57.2  | 48.8  |

|             |           |                  |        |       |       |       |       |       |
|-------------|-----------|------------------|--------|-------|-------|-------|-------|-------|
| 218921_at   | NM_021805 | SIGIRR           | 59307  | 67.1  | 69.6  | 77.6  | 78.5  | 68.0  |
| 218922_s_at | NM_024552 | CERS4            | 79603  | 62.5  | 74.1  | 58.3  | 70.4  | 54.4  |
| 218923_at   | AW304174  | CTBS             | 1486   | 63.2  | 56.3  | 79.4  | 62.7  | 55.0  |
| 218924_s_at | NM_004388 | CTBS             | 1486   | 118.7 | 109.4 | 131.7 | 125.2 | 88.1  |
| 218925_s_at | NM_022761 | C11orf1          | 64776  | 5.6   | 1.6   | 4.2   | 4.8   | 4.1   |
| 218926_at   | NM_018657 | MYNN             | 55892  | 139.4 | 160.5 | 112.2 | 167.8 | 67.3  |
| 218927_s_at | NM_018641 | CHST12           | 55501  | 63.1  | 54.6  | 57.1  | 53.9  | 37.7  |
| 218928_s_at | NM_018964 | SLC37A1          | 54020  | 31.6  | 36.1  | 42.1  | 50.5  | 23.5  |
| 218929_at   | NM_017632 | CDKN2AIP         | 55602  | 27.9  | 22.9  | 42.0  | 29.6  | 31.3  |
| 218930_s_at | NM_018374 | TMEM106B         | 54664  | 69.1  | 56.2  | 68.0  | 60.5  | 42.7  |
| 218931_at   | NM_022449 | RAB17            | 64284  | 112.2 | 70.9  | 116.5 | 77.6  | 57.8  |
| 218932_at   | NM_017953 | ZNHIT6           | 54680  | 78.6  | 73.8  | 90.2  | 73.9  | 70.6  |
| 218933_at   | NM_024063 | SPATA5L1         | 79029  | 41.0  | 18.8  | 39.4  | 25.7  | 28.5  |
| 218934_s_at | NM_014424 | HSPB7            | 27129  | 19.7  | 5.2   | 8.4   | 2.7   | 4.5   |
| 218935_at   | NM_014600 | EHD3             | 30845  | 39.3  | 33.6  | 30.5  | 31.1  | 22.3  |
| 218936_s_at | NM_014167 | CCDC59           | 29080  | 175.1 | 133.2 | 196.6 | 158.4 | 117.5 |
| 218937_at   | NM_017810 | ZSCAN32          | 54925  | 57.4  | 37.9  | 51.1  | 47.3  | 37.4  |
| 218938_at   | NM_024326 | FBXL15           | 79176  | 62.2  | 52.4  | 80.9  | 63.4  | 40.2  |
| 218939_at   | NM_012318 | LETM1            | 3954   | 51.7  | 29.3  | 41.9  | 37.5  | 34.1  |
| 218940_at   | NM_024558 | VCPKMT           | 79609  | 24.0  | 17.5  | 25.3  | 23.8  | 18.3  |
| 218941_at   | NM_012164 | FBXW2            | 26190  | 62.6  | 61.3  | 63.4  | 50.9  | 54.5  |
| 218942_at   | NM_024779 | PIP4K2C          | 79837  | 95.1  | 97.5  | 108.9 | 111.8 | 94.2  |
| 218943_s_at | NM_014314 | DDX58            | 23586  | 12.5  | 9.4   | 7.4   | 1.8   | 5.1   |
| 218944_at   | NM_023078 | PYCRL            | 65263  | 134.6 | 105.4 | 149.4 | 105.3 | 133.3 |
| 218945_at   | NM_024109 | METTL22          | 79091  | 78.2  | 54.3  | 68.4  | 60.5  | 66.1  |
| 218946_at   | NM_015700 | NFU1             | 27247  | 75.6  | 70.1  | 71.6  | 80.6  | 58.1  |
| 218947_s_at | NM_018109 | MTPAP            | 55149  | 79.9  | 51.2  | 76.9  | 54.7  | 56.2  |
| 218948_at   | AL136679  | QRSL1            | 55278  | 36.3  | 30.6  | 34.5  | 30.9  | 30.0  |
| 218949_s_at | NM_018292 | QRSL1            | 55278  | 93.5  | 73.4  | 88.3  | 71.7  | 78.0  |
| 218950_at   | NM_022481 | ARAP3            | 64411  | 1.4   | 1.1   | 0.9   | 0.7   | 6.5   |
| 218951_s_at | NM_018390 | PLCXD1           | 55344  | 88.3  | 59.1  | 76.4  | 65.0  | 64.5  |
| 218952_at   | NM_013271 | PCSK1N           | 27344  | 97.9  | 105.0 | 104.4 | 115.7 | 84.7  |
| 218953_s_at | NM_024028 | PCYOX1L          | 78991  | 175.4 | 158.1 | 224.7 | 166.2 | 167.4 |
| 218954_s_at | AF298153  | BRF2             | 55290  | 35.6  | 24.8  | 29.5  | 26.0  | 26.2  |
| 218955_at   | NM_018310 | BRF2             | 55290  | 77.9  | 70.6  | 79.0  | 78.9  | 65.4  |
| 218956_s_at | NM_015545 | ATP5J2-PTCC26024 | /// 10 | 70.2  | 62.7  | 80.8  | 88.5  | 75.5  |
| 218957_s_at | NM_025155 | PAAF1            | 80227  | 240.5 | 195.2 | 231.7 | 246.0 | 207.3 |
| 218958_at   | NM_017967 | C19orf60         | 55049  | 42.3  | 59.5  | 58.2  | 51.2  | 63.3  |
| 218959_at   | NM_017409 | HOXC10           | 3226   | 19.1  | 12.6  | 17.2  | 14.6  | 10.4  |
| 218960_at   | NM_016425 | TMPRSS4          | 56649  | 7.5   | 1.4   | 1.5   | 0.5   | 1.2   |
| 218961_s_at | NM_007254 | PNKP             | 11284  | 69.1  | 94.3  | 76.6  | 81.1  | 68.6  |
| 218962_s_at | NM_022484 | TMEM168          | 64418  | 160.3 | 93.3  | 165.3 | 114.0 | 118.6 |
| 218963_s_at | NM_015515 | KRT23            | 25984  | 1.7   | 0.8   | 1.0   | 0.5   | 3.8   |
| 218964_at   | NM_006465 | ARID3B           | 10620  | 2.8   | 3.9   | 5.6   | 1.9   | 1.9   |
| 218965_s_at | NM_022830 | TUT1             | 64852  | 28.1  | 23.1  | 16.6  | 16.8  | 16.5  |
| 218966_at   | NM_018728 | MYO5C            | 55930  | 174.6 | 167.9 | 189.7 | 141.3 | 140.5 |
| 218967_s_at | NM_030664 | PTER             | 9317   | 53.6  | 53.7  | 67.2  | 57.8  | 43.0  |
| 218968_s_at | NM_018197 | ZFP64            | 55734  | 101.4 | 109.7 | 86.3  | 82.9  | 73.3  |
| 218969_at   | NM_016069 | PAM16            | 51025  | 175.6 | 192.4 | 248.3 | 185.0 | 215.4 |
| 218970_s_at | NM_015960 | CUTC             | 51076  | 37.7  | 35.2  | 42.2  | 19.7  | 22.1  |
| 218971_s_at | NM_014149 | WDR91            | 29062  | 28.7  | 31.8  | 39.9  | 33.7  | 32.1  |
| 218972_at   | NM_018259 | TTC17            | 55761  | 45.1  | 43.4  | 43.8  | 45.4  | 34.1  |
| 218973_at   | NM_024580 | EFTUD1           | 79631  | 69.0  | 73.1  | 78.8  | 67.1  | 60.2  |

|             |           |          |        |       |       |       |       |       |
|-------------|-----------|----------|--------|-------|-------|-------|-------|-------|
| 218974_at   | NM_018013 | SOBP     | 55084  | 30.6  | 25.5  | 25.4  | 28.4  | 25.4  |
| 218975_at   | NM_015719 | COL5A3   | 50509  | 1.0   | 1.1   | 1.6   | 0.9   | 0.7   |
| 218976_at   | NM_021800 | DNAJC12  | 56521  | 91.2  | 63.2  | 100.5 | 84.9  | 60.1  |
| 218977_s_at | NM_017846 | TRNAU1AP | 54952  | 64.3  | 64.5  | 64.5  | 64.9  | 55.3  |
| 218978_s_at | NM_018586 | SLC25A37 | 51312  | 3.5   | 15.1  | 6.2   | 13.7  | 10.5  |
| 218979_at   | NM_024945 | RMI1     | 80010  | 173.8 | 159.4 | 223.1 | 156.3 | 173.5 |
| 218980_at   | NM_025135 | FHOD3    | 80206  | 6.3   | 6.3   | 5.4   | 5.8   | 2.2   |
| 218981_at   | NM_020186 | ACN9     | 57001  | 83.4  | 59.0  | 111.1 | 60.7  | 58.3  |
| 218982_s_at | NM_015969 | MRPS17   | 51373  | 407.8 | 325.4 | 473.7 | 355.7 | 381.7 |
| 218983_at   | NM_016546 | C1RL     | 51279  | 101.4 | 92.8  | 98.6  | 101.8 | 76.6  |
| 218984_at   | NM_019042 | PUS7     | 54517  | 113.2 | 69.7  | 113.5 | 69.8  | 98.5  |
| 218985_at   | NM_014580 | SLC2A8   | 29988  | 39.0  | 35.0  | 42.7  | 48.1  | 36.0  |
| 218986_s_at | NM_017631 | DDX60    | 55601  | 9.9   | 9.9   | 10.0  | 6.4   | 7.5   |
| 218987_at   | NM_018179 | ATF7IP   | 55729  | 53.7  | 41.1  | 53.5  | 46.9  | 55.6  |
| 218988_at   | NM_018656 | SLC35E3  | 55508  | 42.6  | 54.4  | 48.2  | 50.4  | 36.1  |
| 218989_x_at | NM_022902 | SLC30A5  | 64924  | 143.7 | 119.2 | 145.9 | 134.8 | 108.7 |
| 218990_s_at | NM_005416 | SPRR3    | 6707   | 2.4   | 5.6   | 12.3  | 2.2   | 6.8   |
| 218991_at   | NM_022070 | HEATR6   | 63897  | 25.6  | 25.7  | 18.7  | 22.7  | 18.5  |
| 218992_at   | NM_018465 | PLGRKT   | 55848  | 347.0 | 383.5 | 400.3 | 359.1 | 305.7 |
| 218993_at   | NM_018146 | RNMTL1   | 55178  | 191.9 | 173.1 | 189.4 | 176.9 | 170.3 |
| 218994_s_at | NM_022906 | STAG3L4  | 64940  | 19.3  | 19.1  | 15.5  | 18.7  | 9.5   |
| 218995_s_at | NM_001955 | EDN1     | 1906   | 1.9   | 1.9   | 3.9   | 3.4   | 1.0   |
| 218996_at   | NM_013342 | TFPT     | 29844  | 68.2  | 76.0  | 84.0  | 79.8  | 65.6  |
| 218997_at   | NM_022490 | POLR1E   | 64425  | 86.7  | 86.1  | 90.9  | 91.1  | 94.9  |
| 218998_at   | NM_017832 | FAM206A  | 54942  | 110.3 | 80.3  | 84.8  | 73.6  | 68.6  |
| 218999_at   | NM_018295 | TMEM140  | 55281  | 26.0  | 32.2  | 23.4  | 42.3  | 16.3  |
| 219000_s_at | NM_024094 | DSCC1    | 79075  | 70.1  | 43.6  | 87.1  | 45.9  | 76.0  |
| 219001_s_at | NM_024345 | DCAF10   | 79269  | 41.5  | 28.8  | 40.3  | 36.0  | 27.1  |
| 219002_at   | NM_024622 | FASTKD1  | 79675  | 73.0  | 76.1  | 95.5  | 52.6  | 82.1  |
| 219003_s_at | NM_024641 | MANEA    | 79694  | 205.4 | 161.1 | 167.6 | 195.9 | 108.8 |
| 219004_s_at | NM_018944 | MIS18A   | 54069  | 46.4  | 43.9  | 62.1  | 45.3  | 45.3  |
| 219005_at   | NM_012109 | TMEM59L  | 25789  | 2.5   | 12.2  | 1.6   | 4.0   | 3.1   |
| 219006_at   | NM_014165 | NDUFAF4  | 29078  | 332.4 | 231.3 | 274.3 | 257.2 | 191.0 |
| 219007_at   | NM_024647 | NUP43    | 348995 | 145.2 | 159.4 | 155.2 | 155.3 | 135.2 |
| 219008_at   | NM_021925 | C2orf43  | 60526  | 45.2  | 29.8  | 47.2  | 45.8  | 40.8  |
| 219009_at   | NM_021944 | C14orf93 | 60686  | 21.1  | 13.7  | 20.9  | 17.1  | 11.5  |
| 219010_at   | NM_018265 | C1orf106 | 55765  | 9.0   | 3.3   | 17.2  | 9.8   | 15.7  |
| 219011_at   | NM_020904 | PLEKHA4  | 57664  | 0.8   | 0.8   | 1.6   | 0.5   | 0.5   |
| 219012_s_at | NM_020193 | C11orf30 | 56946  | 26.4  | 23.0  | 25.3  | 21.9  | 23.6  |
| 219013_at   | NM_022087 | GALNT11  | 63917  | 113.6 | 123.5 | 134.8 | 146.3 | 106.3 |
| 219014_at   | NM_016619 | PLAC8    | 51316  | 9.2   | 1.5   | 9.5   | 8.3   | 6.1   |
| 219015_s_at | NM_018466 | ALG13    | 79868  | 137.3 | 104.4 | 147.8 | 113.4 | 99.7  |
| 219016_at   | NM_021826 | FASTKD5  | 60493  | 130.8 | 94.7  | 140.5 | 105.7 | 90.9  |
| 219017_at   | NM_018638 | ETNK1    | 55500  | 131.8 | 111.1 | 116.2 | 118.5 | 88.4  |
| 219018_s_at | NM_022747 | CCDC85C  | 317762 | 34.3  | 38.2  | 42.8  | 42.4  | 30.6  |
| 219019_at   | NM_018494 | PIDD1    | 55367  | 34.4  | 25.1  | 33.7  | 13.3  | 12.6  |
| 219020_at   | NM_022460 | HS1BP3   | 64342  | 97.9  | 112.7 | 106.1 | 99.1  | 78.3  |
| 219021_at   | NM_018320 | RNF121   | 55298  | 30.7  | 23.5  | 31.8  | 14.4  | 26.3  |
| 219022_at   | NM_022895 | C12orf43 | 64897  | 95.0  | 75.4  | 71.8  | 75.7  | 79.2  |
| 219023_at   | NM_018569 | AP1AR    | 55435  | 39.1  | 29.9  | 41.1  | 34.6  | 24.3  |
| 219024_at   | NM_021622 | PLEKHA1  | 59338  | 48.5  | 22.0  | 18.0  | 23.5  | 25.7  |
| 219025_at   | NM_020404 | CD248    | 57124  | 26.7  | 13.2  | 16.0  | 15.4  | 12.6  |
| 219026_s_at | NM_004841 | RASAL2   | 9462   | 2.8   | 1.5   | 10.0  | 11.2  | 1.4   |

|             |           |                          |        |       |       |       |       |       |
|-------------|-----------|--------------------------|--------|-------|-------|-------|-------|-------|
| 219027_s_at | NM_006901 | MYO9A                    | 4649   | 17.6  | 6.6   | 14.6  | 14.9  | 7.4   |
| 219028_at   | NM_022740 | HIPK2                    | 28996  | 28.6  | 23.0  | 17.8  | 23.7  | 23.4  |
| 219029_at   | NM_022483 | C5orf28                  | 64417  | 55.8  | 41.3  | 69.2  | 46.8  | 45.6  |
| 219030_at   | NM_016058 | TPRKB                    | 51002  | 182.2 | 115.4 | 173.1 | 136.3 | 124.6 |
| 219031_s_at | NM_016101 | NIP7                     | 51388  | 137.2 | 79.4  | 166.6 | 117.1 | 84.3  |
| 219032_x_at | NM_014322 | OPN3                     | 23596  | 9.8   | 4.7   | 8.4   | 8.6   | 8.0   |
| 219033_at   | NM_024615 | PARP8                    | 79668  | 20.2  | 15.2  | 20.8  | 24.9  | 9.6   |
| 219034_at   | NM_017851 | PARP16                   | 54956  | 47.7  | 36.4  | 38.6  | 42.7  | 35.1  |
| 219035_s_at | NM_025126 | RNF34                    | 80196  | 256.4 | 246.8 | 239.8 | 239.8 | 181.8 |
| 219036_at   | NM_024491 | CEP70                    | 80321  | 42.6  | 32.8  | 46.2  | 38.8  | 32.5  |
| 219037_at   | NM_016052 | RRP15                    | 51018  | 133.5 | 78.9  | 143.2 | 93.4  | 105.9 |
| 219038_at   | NM_024657 | MORC4                    | 79710  | 84.6  | 83.6  | 98.4  | 86.8  | 79.9  |
| 219039_at   | NM_017789 | SEMA4C                   | 54910  | 20.3  | 16.4  | 13.9  | 11.0  | 7.5   |
| 219040_at   | NM_024535 | CORO7                    | 79585  | 7.2   | 15.2  | 11.3  | 10.9  | 8.0   |
| 219041_s_at | NM_014374 | REPIN1                   | 29803  | 586.1 | 403.3 | 539.5 | 505.3 | 443.6 |
| 219042_at   | NM_021020 | LZTS1                    | 11178  | 1.8   | 0.4   | 1.4   | 0.7   | 0.8   |
| 219043_s_at | NM_024065 | PDCL3 /// PD79031 /// 28 |        | 159.0 | 129.4 | 165.8 | 132.1 | 141.6 |
| 219044_at   | NM_018271 | THNSL2                   | 55258  | 87.2  | 96.1  | 80.1  | 92.6  | 66.5  |
| 219045_at   | NM_019034 | RHOF                     | 54509  | 23.3  | 24.4  | 25.7  | 18.8  | 22.1  |
| 219046_s_at | NM_022062 | PKNOX2                   | 63876  | 49.5  | 32.6  | 55.1  | 67.4  | 31.5  |
| 219047_s_at | NM_024706 | ZNF668                   | 79759  | 13.0  | 25.4  | 22.5  | 30.7  | 14.1  |
| 219048_at   | NM_012327 | PIGN                     | 23556  | 77.6  | 52.4  | 67.0  | 71.4  | 46.5  |
| 219049_at   | NM_018371 | CSGALNACT155790          |        | 1.3   | 4.5   | 3.4   | 3.6   | 1.8   |
| 219050_s_at | NM_014205 | ZNHIT2                   | 741    | 60.1  | 69.1  | 64.3  | 62.9  | 65.8  |
| 219051_x_at | NM_024042 | METRNL                   | 79006  | 269.7 | 233.7 | 315.3 | 305.8 | 217.3 |
| 219052_at   | NM_024747 | HPS6                     | 79803  | 143.0 | 76.3  | 141.7 | 88.4  | 76.5  |
| 219053_s_at | NM_017966 | VPS37C                   | 55048  | 284.4 | 273.7 | 274.8 | 230.8 | 230.6 |
| 219054_at   | NM_024563 | NPR3                     | 4883   | 0.6   | 7.9   | 5.3   | 4.8   | 1.2   |
| 219055_at   | NM_018079 | SRBD1                    | 55133  | 46.6  | 31.1  | 52.7  | 39.0  | 31.3  |
| 219056_at   | NM_024570 | RNASEH2B                 | 79621  | 8.3   | 3.3   | 9.9   | 7.6   | 3.9   |
| 219057_at   | NM_024816 | RABEP2                   | 79874  | 4.1   | 18.4  | 16.6  | 22.7  | 19.0  |
| 219058_x_at | NM_022164 | TINAGL1                  | 64129  | 14.7  | 7.4   | 5.0   | 8.0   | 2.1   |
| 219059_s_at | AL574194  | LYVE1                    | 10894  | 13.5  | 3.8   | 1.6   | 2.6   | 3.1   |
| 219060_at   | NM_018024 | WDYHV1                   | 55093  | 92.9  | 74.1  | 89.2  | 80.9  | 60.5  |
| 219061_s_at | NM_006014 | LAGE3                    | 8270   | 278.4 | 337.4 | 385.6 | 282.6 | 243.2 |
| 219062_s_at | NM_017742 | ZCCHC2                   | 54877  | 70.0  | 45.8  | 71.7  | 54.1  | 62.6  |
| 219063_at   | NM_024319 | C1orf35                  | 79169  | 44.9  | 40.4  | 69.1  | 43.2  | 37.8  |
| 219064_at   | NM_030569 | ITIH5                    | 80760  | 2.4   | 1.4   | 2.9   | 5.7   | 3.5   |
| 219065_s_at | NM_015955 | DPY30 /// MI51072 /// 84 |        | 155.3 | 145.3 | 212.4 | 150.2 | 150.9 |
| 219066_at   | NM_021823 | PPCDC                    | 60490  | 62.3  | 50.1  | 88.7  | 70.3  | 63.8  |
| 219067_s_at | NM_017615 | NSMCE4A                  | 54780  | 87.2  | 84.6  | 88.0  | 82.6  | 84.6  |
| 219068_x_at | NM_018188 | ATAD3A /// /55210 /// 83 |        | 86.7  | 72.8  | 83.0  | 86.3  | 87.6  |
| 219069_at   | NM_017704 | ANKRD49                  | 54851  | 57.7  | 49.7  | 65.3  | 60.2  | 52.1  |
| 219070_s_at | NM_023948 | MOSPD3                   | 64598  | 69.4  | 101.2 | 88.0  | 115.4 | 87.2  |
| 219071_x_at | NM_016458 | HGH1                     | 51236  | 136.3 | 126.2 | 147.2 | 137.9 | 124.7 |
| 219072_at   | NM_004765 | BCL7C                    | 9274   | 84.9  | 76.4  | 66.4  | 90.2  | 59.1  |
| 219073_s_at | NM_017784 | OSBPL10                  | 114884 | 17.0  | 9.7   | 16.8  | 9.8   | 16.8  |
| 219074_at   | NM_018241 | TMEM184C                 | 55751  | 110.2 | 88.8  | 102.9 | 101.1 | 77.4  |
| 219075_at   | NM_024029 | YIPF2                    | 78992  | 31.2  | 33.5  | 45.3  | 40.9  | 37.2  |
| 219076_s_at | NM_018663 | PXMP2                    | 5827   | 130.7 | 120.8 | 126.3 | 139.6 | 113.8 |
| 219077_s_at | NM_016373 | WWOX                     | 51741  | 39.9  | 46.0  | 44.0  | 47.2  | 30.5  |
| 219078_at   | NM_018040 | GPATCH2                  | 55105  | 71.8  | 57.7  | 60.2  | 60.4  | 49.1  |
| 219079_at   | NM_016230 | CYB5R4                   | 51167  | 22.0  | 16.6  | 20.9  | 15.9  | 18.8  |

|             |           |                          |       |       |       |       |       |       |
|-------------|-----------|--------------------------|-------|-------|-------|-------|-------|-------|
| 219080_s_at | NM_019857 | CTPS2                    | 56474 | 108.2 | 111.6 | 114.1 | 103.3 | 102.6 |
| 219081_at   | NM_024668 | ANKHD1 /// .54882 /// 40 |       | 86.3  | 78.2  | 86.4  | 69.8  | 79.2  |
| 219082_at   | NM_015944 | AMDHD2 /// 51005 /// 75  |       | 20.8  | 23.3  | 33.3  | 24.3  | 19.8  |
| 219083_at   | NM_018130 | SHQ1                     | 55164 | 105.4 | 83.6  | 126.8 | 107.6 | 84.1  |
| 219084_at   | NM_022455 | NSD1                     | 64324 | 29.3  | 16.8  | 27.4  | 23.0  | 22.3  |
| 219085_s_at | NM_024707 | GEMIN7                   | 79760 | 2.6   | 2.3   | 0.6   | 6.5   | 6.3   |
| 219086_at   | NM_018335 | ZNF839                   | 55778 | 31.7  | 31.0  | 38.9  | 28.7  | 21.1  |
| 219087_at   | NM_017680 | ASPN                     | 54829 | 13.1  | 0.9   | 5.9   | 1.6   | 2.3   |
| 219088_s_at | AA639585  | ZNF576                   | 79177 | 26.9  | 28.8  | 30.1  | 44.5  | 30.0  |
| 219089_s_at | NM_024327 | ZNF576                   | 79177 | 52.7  | 9.7   | 35.5  | 31.7  | 27.8  |
| 219090_at   | NM_020689 | SLC24A3                  | 57419 | 0.6   | 3.2   | 1.3   | 0.6   | 1.1   |
| 219091_s_at | NM_024756 | MMRN2                    | 79812 | 13.0  | 8.2   | 8.4   | 5.2   | 4.9   |
| 219092_s_at | NM_022755 | IPPK                     | 64768 | 56.0  | 43.9  | 54.7  | 42.1  | 59.6  |
| 219093_at   | NM_017933 | PID1                     | 55022 | 2.8   | 2.4   | 3.0   | 3.1   | 0.2   |
| 219094_at   | NM_014154 | ARMC8                    | 25852 | 12.6  | 8.8   | 13.3  | 8.8   | 11.2  |
| 219095_at   | NM_005090 | JMJD7-PLA2(8681 /// 100  |       | 11.8  | 10.9  | 6.1   | 11.1  | 6.7   |
| 219096_at   | NM_024585 | ARMC7                    | 79637 | 47.2  | 37.8  | 58.4  | 44.9  | 49.9  |
| 219097_x_at | NM_024104 | SMIM7                    | 79086 | 204.1 | 235.2 | 219.9 | 235.1 | 187.6 |
| 219098_at   | NM_014520 | MYBBP1A                  | 10514 | 124.3 | 91.9  | 121.3 | 102.4 | 90.0  |
| 219099_at   | NM_020375 | C12orf5                  | 57103 | 75.6  | 69.5  | 82.2  | 81.7  | 62.4  |
| 219100_at   | NM_024928 | OBFC1                    | 79991 | 62.1  | 66.0  | 72.4  | 78.1  | 58.5  |
| 219101_x_at | NM_024527 | ABHD8                    | 79575 | 42.1  | 36.7  | 34.1  | 35.2  | 23.6  |
| 219102_at   | NM_020650 | RCN3                     | 57333 | 16.9  | 10.4  | 23.4  | 14.2  | 12.7  |
| 219103_at   | NM_017707 | ASAP3                    | 55616 | 21.5  | 17.6  | 13.9  | 18.3  | 16.3  |
| 219104_at   | NM_016422 | RNF141                   | 50862 | 46.2  | 44.0  | 45.8  | 64.1  | 41.4  |
| 219105_x_at | NM_014321 | ORC6                     | 23594 | 158.5 | 84.3  | 182.5 | 113.7 | 131.7 |
| 219106_s_at | NM_006063 | KLHL41                   | 10324 | 2.5   | 0.1   | 0.2   | 2.5   | 0.9   |
| 219107_at   | NM_021948 | BCAN                     | 63827 | 2.0   | 2.4   | 11.5  | 2.4   | 1.8   |
| 219108_x_at | NM_017895 | DDX27 /// SS6760 /// 556 |       | 96.0  | 104.0 | 104.1 | 98.1  | 95.7  |
| 219109_at   | NM_024532 | SPAG16                   | 79582 | 14.0  | 23.3  | 22.7  | 14.9  | 15.0  |
| 219110_at   | NM_018983 | GAR1                     | 54433 | 181.7 | 153.7 | 230.0 | 135.1 | 151.7 |
| 219111_s_at | NM_024072 | DDX54                    | 79039 | 70.8  | 85.2  | 81.3  | 74.8  | 71.5  |
| 219112_at   | NM_016340 | RAPGEF6                  | 51735 | 13.2  | 16.9  | 16.4  | 17.2  | 18.4  |
| 219113_x_at | NM_016246 | HSD17B14                 | 51171 | 3.9   | 2.1   | 2.7   | 7.6   | 8.1   |
| 219114_at   | NM_016210 | C3orf18                  | 51161 | 33.6  | 48.7  | 46.7  | 52.2  | 43.0  |
| 219115_s_at | NM_014432 | IL20RA                   | 53832 | 2.2   | 3.7   | 2.0   | 3.0   | 2.2   |
| 219116_s_at | NM_018185 | DCUN1D2                  | 55208 | 20.2  | 21.0  | 23.4  | 21.3  | 14.9  |
| 219117_s_at | NM_016594 | FKBP11                   | 51303 | 226.8 | 233.6 | 277.9 | 284.3 | 255.1 |
| 219118_at   | NM_016594 | FKBP11                   | 51303 | 82.9  | 94.4  | 105.7 | 110.0 | 91.6  |
| 219119_at   | NM_016200 | LSM8                     | 51691 | 138.4 | 175.4 | 213.7 | 137.1 | 140.3 |
| 219120_at   | NM_025203 | C2orf44                  | 80304 | 17.0  | 14.5  | 18.8  | 14.0  | 10.3  |
| 219121_s_at | NM_017697 | ESRP1                    | 54845 | 98.2  | 104.4 | 88.4  | 90.1  | 76.6  |
| 219122_s_at | NM_017872 | THG1L                    | 54974 | 46.4  | 37.2  | 40.0  | 43.7  | 34.2  |
| 219123_at   | NM_014519 | ZNF232                   | 7775  | 206.6 | 162.5 | 227.1 | 205.2 | 181.4 |
| 219124_at   | NM_025115 | TTI2                     | 80185 | 75.1  | 60.5  | 98.8  | 93.4  | 74.7  |
| 219125_s_at | NM_018845 | SLC50A1                  | 55974 | 225.6 | 240.0 | 278.7 | 268.7 | 218.5 |
| 219126_at   | NM_018288 | PHF10                    | 55274 | 130.2 | 129.5 | 159.1 | 127.8 | 109.6 |
| 219127_at   | NM_024320 | PRR15L                   | 79170 | 133.2 | 122.4 | 144.0 | 129.2 | 111.6 |
| 219128_at   | NM_017880 | C2orf42                  | 54980 | 30.8  | 25.5  | 29.7  | 26.2  | 23.8  |
| 219129_s_at | NM_024632 | SAP30L                   | 79685 | 47.8  | 41.4  | 65.1  | 46.0  | 39.9  |
| 219130_at   | NM_019083 | TRMT13                   | 54482 | 47.6  | 32.8  | 47.6  | 35.6  | 36.6  |
| 219131_at   | NM_013319 | UBIAD1                   | 29914 | 107.8 | 102.0 | 130.2 | 74.5  | 101.5 |
| 219132_at   | NM_021255 | PELI2                    | 57161 | 20.0  | 8.6   | 13.4  | 14.0  | 10.1  |

|             |           |                           |        |       |       |       |       |       |
|-------------|-----------|---------------------------|--------|-------|-------|-------|-------|-------|
| 219133_at   | NM_017897 | OXSM                      | 54995  | 122.1 | 125.1 | 128.3 | 115.7 | 107.3 |
| 219134_at   | NM_022159 | ELTD1                     | 64123  | 0.4   | 0.2   | 0.6   | 0.2   | 1.5   |
| 219135_s_at | AL515916  | LMF1                      | 64788  | 40.7  | 32.8  | 58.2  | 41.0  | 29.7  |
| 219136_s_at | NM_022773 | LMF1                      | 64788  | 1.3   | 2.0   | 2.5   | 5.9   | 1.7   |
| 219137_s_at | NM_020194 | MFF                       | 56947  | 128.7 | 86.5  | 109.3 | 94.0  | 82.9  |
| 219138_at   | BC000606  | RPL14                     | 9045   | 6.8   | 2.0   | 2.7   | 13.3  | 14.6  |
| 219139_s_at | AF119868  | CROCCP3                   | 114819 | 12.2  | 4.6   | 7.5   | 4.5   | 4.8   |
| 219140_s_at | NM_006744 | RBP4                      | 5950   | 1.5   | 0.4   | 5.7   | 2.3   | 0.7   |
| 219141_s_at | NM_017749 | AMBRA1                    | 55626  | 54.0  | 48.2  | 53.4  | 50.5  | 52.5  |
| 219142_at   | NM_023940 | RASL11B                   | 65997  | 35.3  | 26.4  | 26.0  | 19.9  | 24.7  |
| 219143_s_at | NM_017793 | RPP25                     | 54913  | 19.0  | 14.2  | 15.7  | 22.0  | 13.8  |
| 219144_at   | NM_024025 | DUSP26                    | 78986  | 2.5   | 6.1   | 2.5   | 0.6   | 1.8   |
| 219145_at   | NM_024679 | LPHN1                     | 22859  | 84.5  | 59.3  | 78.5  | 84.0  | 63.2  |
| 219146_at   | NM_024683 | TEFM                      | 79736  | 66.2  | 48.4  | 74.0  | 56.4  | 64.4  |
| 219147_s_at | NM_017881 | NMRK1                     | 54981  | 94.0  | 69.2  | 88.6  | 76.0  | 63.9  |
| 219148_at   | NM_018492 | PBK                       | 55872  | 392.2 | 260.5 | 435.7 | 297.4 | 310.2 |
| 219149_x_at | NM_016216 | DBR1                      | 51163  | 63.3  | 43.7  | 69.6  | 48.7  | 51.5  |
| 219150_s_at | NM_006869 | ADAP1                     | 11033  | 2.2   | 1.5   | 3.1   | 11.7  | 0.7   |
| 219151_s_at | NM_007081 | RABL2A /// R11158 /// 11  |        | 37.5  | 36.1  | 42.2  | 44.1  | 37.6  |
| 219152_at   | NM_015720 | PODXL2                    | 50512  | 43.2  | 60.0  | 61.0  | 54.7  | 62.2  |
| 219153_s_at | NM_024817 | THSD4                     | 79875  | 1.3   | 4.3   | 7.1   | 1.6   | 0.7   |
| 219154_at   | NM_024714 | TMEM120B                  | 144404 | 27.1  | 19.6  | 22.7  | 20.4  | 27.5  |
| 219155_at   | NM_012417 | PITPNC1                   | 26207  | 26.9  | 37.3  | 22.0  | 31.2  | 25.6  |
| 219156_at   | NM_018373 | SYNJ2BP /// :55333 /// 10 |        | 102.2 | 90.4  | 98.6  | 98.9  | 89.4  |
| 219157_at   | NM_007246 | KLHL2                     | 11275  | 43.7  | 34.0  | 46.6  | 29.3  | 38.6  |
| 219158_s_at | NM_025085 | NAA15                     | 80155  | 105.6 | 82.5  | 138.7 | 99.7  | 109.8 |
| 219159_s_at | NM_021181 | SLAMF7                    | 57823  | 3.4   | 2.6   | 2.2   | 1.0   | 1.4   |
| 219160_s_at | NM_022894 | PAPOLG                    | 64895  | 5.3   | 1.5   | 4.1   | 2.8   | 3.8   |
| 219161_s_at | NM_016951 | CKLF /// CKLI51192 /// 10 |        | 220.6 | 191.6 | 289.4 | 215.9 | 214.0 |
| 219162_s_at | NM_016050 | MRPL11                    | 65003  | 266.0 | 198.3 | 290.5 | 233.2 | 224.5 |
| 219163_at   | NM_017656 | ZNF562                    | 54811  | 44.8  | 43.4  | 54.8  | 31.8  | 34.5  |
| 219164_s_at | NM_018036 | ATG2B                     | 55102  | 28.4  | 22.2  | 32.4  | 30.3  | 21.0  |
| 219165_at   | NM_021630 | PDLIM2                    | 64236  | 116.7 | 147.1 | 129.7 | 156.4 | 100.2 |
| 219166_at   | NM_018139 | DNAAF2                    | 55172  | 67.0  | 43.0  | 70.1  | 56.6  | 56.2  |
| 219167_at   | NM_016563 | RASL12                    | 51285  | 1.9   | 3.8   | 5.0   | 1.5   | 4.7   |
| 219168_s_at | NM_017701 | PRR5                      | 55615  | 42.2  | 25.7  | 39.6  | 27.5  | 20.4  |
| 219169_s_at | NM_016020 | TFB1M                     | 51106  | 46.6  | 36.6  | 45.7  | 43.8  | 40.1  |
| 219170_at   | NM_024333 | FSD1                      | 79187  | 2.4   | 2.1   | 1.2   | 1.8   | 1.0   |
| 219171_s_at | NM_007345 | ZNF236                    | 7776   | 5.9   | 3.0   | 10.2  | 8.1   | 5.0   |
| 219172_at   | NM_024954 | UBTD1                     | 80019  | 41.5  | 26.3  | 29.0  | 25.8  | 19.3  |
| 219173_at   | NM_024957 | MYO15B                    | 80022  | 8.0   | 2.2   | 5.6   | 7.5   | 2.0   |
| 219174_at   | NM_025103 | IFT74                     | 80173  | 43.8  | 38.1  | 34.6  | 31.3  | 30.4  |
| 219175_s_at | NM_017836 | SLC41A3                   | 54946  | 56.5  | 46.0  | 71.6  | 57.8  | 46.3  |
| 219176_at   | NM_024520 | C2orf47                   | 79568  | 173.7 | 141.1 | 175.5 | 148.2 | 146.4 |
| 219177_at   | NM_018321 | BRIX1                     | 55299  | 82.6  | 28.6  | 90.7  | 59.9  | 65.8  |
| 219178_at   | NM_024638 | QTRTD1                    | 79691  | 45.2  | 34.9  | 56.9  | 36.7  | 36.5  |
| 219179_at   | NM_016651 | DACT1                     | 51339  | 1.9   | 0.2   | 1.0   | 0.6   | 0.2   |
| 219180_s_at | AI817074  | PEX26                     | 55670  | 81.3  | 61.4  | 79.7  | 54.2  | 56.3  |
| 219181_at   | NM_006033 | LIPG                      | 9388   | 3.5   | 5.3   | 7.8   | 5.7   | 4.9   |
| 219182_at   | NM_024533 | TMEM231                   | 79583  | 52.6  | 40.4  | 56.1  | 56.4  | 38.1  |
| 219183_s_at | NM_013385 | CYTH4                     | 27128  | 20.6  | 7.2   | 18.3  | 11.3  | 4.7   |
| 219184_x_at | NM_013337 | TIMM22                    | 29928  | 60.5  | 54.9  | 62.1  | 57.1  | 49.1  |
| 219185_at   | NM_012241 | SIRT5                     | 23408  | 56.9  | 48.5  | 51.1  | 51.4  | 48.2  |

|             |           |          |        |       |       |       |       |       |
|-------------|-----------|----------|--------|-------|-------|-------|-------|-------|
| 219186_at   | NM_020224 | ZBTB7A   | 51341  | 19.8  | 18.6  | 24.5  | 22.7  | 15.6  |
| 219187_at   | NM_022110 | FKBPL    | 63943  | 42.9  | 35.4  | 40.4  | 29.0  | 34.9  |
| 219188_s_at | NM_014067 | MACROD1  | 28992  | 100.6 | 113.2 | 106.9 | 133.6 | 85.5  |
| 219189_at   | NM_024555 | FBXL6    | 26233  | 49.1  | 37.3  | 56.2  | 46.3  | 39.3  |
| 219190_s_at | NM_017629 | AGO4     | 192670 | 11.9  | 15.2  | 10.6  | 16.6  | 12.6  |
| 219191_s_at | NM_016293 | BIN2     | 51411  | 1.9   | 1.2   | 1.8   | 2.1   | 1.3   |
| 219192_at   | NM_018449 | UBAP2    | 55833  | 164.4 | 148.3 | 181.5 | 171.1 | 157.3 |
| 219193_at   | NM_018034 | WDR70    | 55100  | 135.0 | 77.5  | 109.2 | 107.5 | 71.5  |
| 219194_at   | NM_017893 | SEMA4G   | 57715  | 17.5  | 10.6  | 11.1  | 7.2   | 9.9   |
| 219195_at   | NM_013261 | PPARGC1A | 10891  | 7.2   | 0.7   | 2.3   | 1.2   | 4.8   |
| 219196_at   | NM_013243 | SCG3     | 29106  | 1.9   | 0.2   | 1.3   | 0.4   | 0.1   |
| 219197_s_at | AI424243  | SCUBE2   | 57758  | 1.7   | 2.1   | 1.2   | 1.0   | 4.2   |
| 219198_at   | NM_012204 | GTF3C4   | 9329   | 68.6  | 40.8  | 71.1  | 60.1  | 46.7  |
| 219199_at   | NM_014423 | AFF4     | 27125  | 24.9  | 29.8  | 37.6  | 27.4  | 26.0  |
| 219200_at   | NM_024091 | FASTKD3  | 79072  | 111.6 | 72.6  | 100.0 | 81.7  | 75.5  |
| 219201_s_at | NM_020648 | TWSG1    | 57045  | 62.6  | 46.3  | 49.4  | 47.0  | 34.5  |
| 219202_at   | NM_024599 | RHBDF2   | 79651  | 25.1  | 16.8  | 28.0  | 21.2  | 30.2  |
| 219203_at   | NM_016049 | EMC9     | 51016  | 209.7 | 237.7 | 252.6 | 214.1 | 206.1 |
| 219204_s_at | NM_021947 | SRR      | 63826  | 80.9  | 77.6  | 84.6  | 82.3  | 61.9  |
| 219205_at   | NM_021947 | SRR      | 63826  | 72.4  | 81.1  | 63.1  | 81.2  | 64.0  |
| 219206_x_at | NM_016056 | TMBIM4   | 51643  | 168.5 | 143.6 | 163.8 | 137.6 | 104.5 |
| 219207_at   | NM_025083 | EDC3     | 80153  | 53.9  | 43.5  | 55.1  | 51.5  | 46.7  |
| 219208_at   | NM_025133 | FBXO11   | 80204  | 8.0   | 1.4   | 5.7   | 3.3   | 3.8   |
| 219209_at   | NM_022168 | IFIH1    | 64135  | 10.3  | 7.9   | 17.2  | 4.8   | 10.9  |
| 219210_s_at | NM_016530 | RAB8B    | 51762  | 35.1  | 31.0  | 33.2  | 32.7  | 20.4  |
| 219211_at   | NM_017414 | USP18    | 11274  | 76.4  | 50.5  | 105.4 | 53.7  | 45.7  |
| 219212_at   | NM_016299 | HSPA14   | 51182  | 97.7  | 78.4  | 114.3 | 80.6  | 88.1  |
| 219213_at   | NM_021219 | JAM2     | 58494  | 8.0   | 1.7   | 14.8  | 3.7   | 1.1   |
| 219214_s_at | NM_021163 | NT5C     | 30833  | 34.2  | 19.4  | 30.6  | 23.6  | 22.4  |
| 219215_s_at | NM_017767 | SLC39A4  | 55630  | 308.0 | 335.7 | 397.5 | 333.1 | 322.2 |
| 219216_at   | NM_019002 | ETAA1    | 54465  | 5.0   | 10.5  | 20.4  | 11.6  | 8.8   |
| 219217_at   | NM_024678 | NARS2    | 79731  | 157.2 | 121.7 | 187.0 | 134.9 | 147.6 |
| 219218_at   | NM_024696 | BAHCC1   | 57597  | 8.2   | 7.9   | 21.5  | 9.7   | 1.7   |
| 219219_at   | NM_017854 | TMEM160  | 54958  | 59.1  | 69.6  | 83.1  | 90.9  | 59.0  |
| 219220_x_at | NM_020191 | MRPS22   | 56945  | 257.5 | 173.3 | 240.9 | 198.9 | 179.4 |
| 219221_at   | NM_024724 | ZBTB38   | 253461 | 25.6  | 27.2  | 21.9  | 16.0  | 14.5  |
| 219222_at   | NM_022128 | RBKS     | 64080  | 35.8  | 35.4  | 25.1  | 29.7  | 19.0  |
| 219223_at   | NM_017586 | CACFD1   | 11094  | 43.8  | 43.8  | 41.0  | 43.2  | 31.5  |
| 219224_x_at | NM_024741 | ZNF408   | 79797  | 37.8  | 33.9  | 46.8  | 32.3  | 40.9  |
| 219225_at   | NM_024554 | PGBD5    | 79605  | 2.4   | 2.8   | 2.2   | 1.9   | 2.8   |
| 219226_at   | NM_016507 | CDK12    | 51755  | 51.2  | 37.8  | 49.3  | 42.2  | 42.8  |
| 219227_at   | NM_024565 | CCNJL    | 79616  | 6.8   | 4.9   | 4.6   | 5.1   | 4.1   |
| 219228_at   | NM_018555 | ZNF331   | 55422  | 58.2  | 45.5  | 58.9  | 50.6  | 46.8  |
| 219229_at   | NM_013272 | SLCO3A1  | 28232  | 4.8   | 0.6   | 0.3   | 2.7   | 0.8   |
| 219230_at   | NM_018286 | TMEM100  | 55273  | 4.0   | 0.8   | 4.8   | 2.3   | 3.6   |
| 219231_at   | NM_024831 | TGS1     | 96764  | 57.5  | 64.5  | 61.0  | 54.6  | 59.4  |
| 219232_s_at | NM_022073 | EGLN3    | 112399 | 18.2  | 15.0  | 24.8  | 9.0   | 8.2   |
| 219233_s_at | NM_018530 | GSDMB    | 55876  | 1.3   | 1.9   | 2.3   | 6.9   | 2.0   |
| 219234_x_at | NM_024583 | SCRN3    | 79634  | 11.4  | 15.6  | 10.8  | 12.9  | 11.5  |
| 219235_s_at | NM_023923 | PHACTR4  | 65979  | 40.1  | 27.4  | 39.0  | 34.6  | 36.2  |
| 219236_at   | NM_024897 | PAQR6    | 79957  | 7.6   | 5.5   | 10.4  | 8.5   | 1.1   |
| 219237_s_at | NM_024920 | DNAJB14  | 79982  | 34.0  | 23.5  | 40.4  | 26.7  | 25.2  |
| 219238_at   | NM_017837 | PIGV     | 55650  | 110.9 | 105.6 | 130.3 | 126.7 | 94.7  |

|             |           |            |              |       |       |       |       |       |
|-------------|-----------|------------|--------------|-------|-------|-------|-------|-------|
| 219239_s_at | NM_018293 | ZNF654     | 55279        | 15.0  | 17.0  | 24.3  | 23.1  | 17.0  |
| 219240_s_at | NM_024942 | C10orf88   | 80007        | 25.2  | 26.2  | 23.2  | 23.4  | 25.1  |
| 219241_x_at | NM_017857 | SSH3       | 54961        | 53.0  | 53.2  | 49.8  | 52.9  | 43.0  |
| 219242_at   | NM_025180 | CEP63      | 80254        | 27.6  | 41.7  | 40.9  | 32.8  | 29.1  |
| 219243_at   | NM_018326 | GIMAP4     | 55303        | 0.4   | 0.4   | 1.0   | 2.8   | 1.1   |
| 219244_s_at | NM_022163 | MRPL46     | 26589        | 124.5 | 100.6 | 133.4 | 126.5 | 110.2 |
| 219245_s_at | AI309636  | OGFOD2     | 79676        | 57.3  | 71.6  | 76.6  | 65.7  | 47.8  |
| 219246_s_at | NM_024623 | OGFOD2     | 79676        | 21.6  | 23.5  | 21.4  | 24.5  | 16.6  |
| 219247_s_at | NM_024630 | ZDHHC14    | 79683        | 6.5   | 18.1  | 14.1  | 6.0   | 15.8  |
| 219248_at   | NM_025264 | THUMPD2    | 80745        | 17.2  | 14.9  | 22.4  | 17.9  | 14.7  |
| 219249_s_at | NM_021939 | FKBP10     | 60681        | 69.8  | 79.9  | 70.3  | 80.0  | 58.1  |
| 219250_s_at | NM_013281 | FLRT3      | 23767        | 4.9   | 1.3   | 3.7   | 0.7   | 1.8   |
| 219251_s_at | NM_018051 | WDR60      | 55112        | 7.3   | 3.8   | 2.5   | 0.9   | 8.5   |
| 219252_s_at | NM_017856 | GEMIN8     | 54960        | 31.5  | 24.6  | 23.5  | 23.3  | 18.4  |
| 219253_at   | NM_024121 | TMEM185B   | 79134        | 81.2  | 68.1  | 76.4  | 60.3  | 65.2  |
| 219254_at   | NM_024648 | OGFOD3     | 79701        | 24.1  | 11.3  | 24.2  | 19.8  | 16.8  |
| 219255_x_at | NM_018725 | IL17RB     | 55540        | 55.4  | 39.8  | 58.8  | 47.0  | 48.2  |
| 219256_s_at | NM_018986 | SH3TC1     | 54436        | 35.4  | 20.8  | 19.8  | 22.6  | 18.8  |
| 219257_s_at | NM_021972 | SPHK1      | 8877         | 21.5  | 13.9  | 18.6  | 16.4  | 12.4  |
| 219258_at   | NM_017858 | TIPIN      | 54962        | 161.4 | 109.3 | 174.9 | 112.4 | 135.1 |
| 219259_at   | NM_022367 | SEMA4A     | 64218        | 75.1  | 68.6  | 75.9  | 68.5  | 56.8  |
| 219260_s_at | NM_015362 | ELP5       | 23587        | 157.9 | 182.0 | 214.8 | 164.4 | 200.6 |
| 219261_at   | NM_024067 | C7orf26    | 79034        | 98.9  | 74.3  | 53.4  | 59.6  | 56.6  |
| 219262_at   | NM_024670 | SUV39H2    | 79723        | 24.6  | 12.0  | 17.2  | 10.3  | 13.1  |
| 219263_at   | NM_024539 | RNF128     | 79589        | 14.2  | 10.4  | 6.2   | 8.6   | 5.4   |
| 219264_s_at | NM_013239 | LOC1027250 | 28227 /// 10 | 20.3  | 13.7  | 23.9  | 21.6  | 17.5  |
| 219265_at   | NM_024761 | MOB3B      | 79817        | 24.4  | 15.8  | 22.6  | 18.5  | 4.7   |
| 219266_at   | NM_021632 | ZNF350     | 59348        | 19.2  | 18.3  | 20.9  | 17.8  | 13.2  |
| 219267_at   | NM_016433 | GLTP       | 51228        | 54.1  | 55.0  | 61.9  | 57.2  | 54.2  |
| 219268_at   | NM_018208 | ETNK2      | 55224        | 16.5  | 14.4  | 23.2  | 18.5  | 7.8   |
| 219269_at   | NM_024567 | HMBOX1     | 79618        | 37.9  | 25.8  | 15.1  | 33.3  | 19.0  |
| 219270_at   | NM_024111 | CHAC1      | 79094        | 108.4 | 113.5 | 69.4  | 128.9 | 42.1  |
| 219271_at   | NM_024572 | GALNT14    | 79623        | 6.2   | 2.1   | 1.6   | 4.5   | 6.1   |
| 219272_at   | NM_018207 | TRIM62     | 55223        | 28.3  | 21.6  | 17.5  | 15.8  | 13.9  |
| 219273_at   | NM_003858 | CCNK       | 8812         | 2.3   | 3.0   | 1.4   | 2.1   | 1.8   |
| 219274_at   | NM_012338 | TSPAN12    | 23554        | 7.7   | 6.5   | 9.9   | 9.4   | 2.1   |
| 219275_at   | NM_004708 | PDCD5      | 9141         | 128.7 | 137.2 | 177.4 | 149.2 | 155.7 |
| 219276_x_at | NM_024828 | CAAP1      | 79886        | 147.4 | 130.8 | 162.4 | 143.3 | 112.3 |
| 219277_s_at | NM_018245 | OGDHL      | 55753        | 12.3  | 7.6   | 24.5  | 24.0  | 12.6  |
| 219278_at   | NM_004672 | MAP3K6     | 9064         | 26.9  | 26.2  | 34.4  | 25.9  | 24.0  |
| 219279_at   | NM_017718 | DOCK10     | 55619        | 0.3   | 0.1   | 0.3   | 0.3   | 0.7   |
| 219280_at   | NM_018963 | BRWD1      | 54014        | 12.2  | 9.9   | 9.8   | 11.1  | 10.7  |
| 219281_at   | NM_012331 | MSRA       | 4482         | 76.0  | 61.0  | 60.3  | 59.6  | 38.2  |
| 219282_s_at | NM_015930 | TRPV2      | 51393        | 7.4   | 8.1   | 0.9   | 7.3   | 4.4   |
| 219283_at   | NM_014158 | C1GALT1C1  | 29071        | 107.2 | 94.5  | 121.5 | 101.9 | 103.9 |
| 219284_at   | NM_024610 | HSPBAP1    | 79663        | 23.6  | 17.8  | 25.0  | 25.6  | 17.7  |
| 219285_s_at | NM_016350 | NIN        | 51199        | 5.0   | 0.2   | 2.0   | 1.9   | 2.6   |
| 219286_s_at | NM_022768 | RBM15      | 64783        | 59.8  | 58.7  | 73.2  | 61.6  | 59.8  |
| 219287_at   | NM_014505 | KCNMB4     | 27345        | 24.5  | 24.6  | 23.0  | 17.7  | 12.8  |
| 219288_at   | NM_020685 | C3orf14    | 57415        | 0.5   | 0.4   | 3.8   | 3.2   | 0.2   |
| 219289_at   | NM_017939 | HEATR3     | 55027        | 83.2  | 75.0  | 76.3  | 76.3  | 76.6  |
| 219290_x_at | NM_014395 | DAPP1      | 27071        | 10.8  | 13.0  | 13.1  | 12.0  | 14.4  |
| 219291_at   | NM_020234 | DTWD1      | 56986        | 36.8  | 21.2  | 29.3  | 42.3  | 34.8  |



|             |           |          |       |       |       |        |       |       |
|-------------|-----------|----------|-------|-------|-------|--------|-------|-------|
| 219292_at   | NM_018105 | THAP1    | 55145 | 43.0  | 34.5  | 41.6   | 29.0  | 20.8  |
| 219293_s_at | NM_013341 | OLA1     | 29789 | 927.0 | 825.2 | 1001.5 | 871.9 | 796.2 |
| 219294_at   | NM_018132 | CENPQ    | 55166 | 29.6  | 17.0  | 40.4   | 21.3  | 20.1  |
| 219295_s_at | NM_013363 | PCOLCE2  | 26577 | 0.9   | 2.7   | 3.7    | 0.9   | 0.1   |
| 219296_at   | NM_019028 | ZDHHC13  | 54503 | 92.0  | 88.2  | 107.0  | 91.0  | 94.2  |
| 219297_at   | NM_019045 | WDR44    | 54521 | 40.5  | 31.9  | 36.4   | 40.3  | 39.5  |
| 219298_at   | NM_024693 | ECHDC3   | 79746 | 246.4 | 208.6 | 216.2  | 217.6 | 198.9 |
| 219299_at   | NM_017956 | TRMT12   | 55039 | 130.7 | 140.7 | 101.7  | 88.7  | 119.4 |
| 219300_s_at | AB020675  | CNTNAP2  | 26047 | 22.2  | 14.2  | 24.6   | 19.7  | 17.5  |
| 219301_s_at | AU144598  | CNTNAP2  | 26047 | 10.2  | 8.2   | 9.2    | 7.5   | 6.5   |
| 219302_s_at | NM_014141 | CNTNAP2  | 26047 | 11.5  | 9.8   | 14.1   | 14.5  | 10.3  |
| 219303_at   | NM_024546 | RNF219   | 79596 | 29.0  | 20.3  | 38.3   | 20.2  | 31.6  |
| 219304_s_at | NM_025208 | PDGFD    | 80310 | 10.0  | 2.5   | 11.9   | 9.3   | 4.7   |
| 219305_x_at | NM_012168 | FBXO2    | 26232 | 45.6  | 42.5  | 39.7   | 52.5  | 26.4  |
| 219306_at   | NM_020242 | KIF15    | 56992 | 36.6  | 33.3  | 42.6   | 36.2  | 34.8  |
| 219307_at   | NM_020381 | PDSS2    | 57107 | 72.1  | 74.8  | 68.1   | 65.0  | 60.4  |
| 219308_s_at | NM_012093 | AK5      | 26289 | 14.9  | 1.4   | 10.3   | 6.4   | 5.9   |
| 219309_at   | NM_024588 | C22orf46 | 79640 | 19.8  | 24.9  | 17.0   | 14.2  | 25.4  |
| 219310_at   | NM_024893 | SYNDIG1  | 79953 | 9.4   | 6.8   | 6.4    | 1.6   | 5.6   |
| 219311_at   | NM_024899 | CEP76    | 79959 | 54.2  | 42.9  | 52.6   | 41.5  | 46.6  |
| 219312_s_at | NM_023929 | ZBTB10   | 65986 | 27.1  | 23.6  | 38.4   | 28.5  | 30.2  |
| 219313_at   | NM_017577 | GRAMD1C  | 54762 | 27.0  | 15.5  | 18.2   | 28.9  | 19.7  |
| 219314_s_at | NM_016423 | ZNF219   | 51222 | 43.1  | 32.4  | 24.6   | 31.6  | 19.3  |
| 219315_s_at | NM_024600 | TMEM204  | 79652 | 4.9   | 1.0   | 10.9   | 6.9   | 2.1   |
| 219316_s_at | NM_017791 | FLVCR2   | 55640 | 7.9   | 10.9  | 21.4   | 15.4  | 13.1  |
| 219317_at   | NM_007195 | POLI     | 11201 | 50.5  | 37.9  | 47.3   | 51.2  | 32.7  |
| 219318_x_at | NM_016060 | MED31    | 51003 | 16.2  | 10.0  | 16.9   | 17.1  | 10.3  |
| 219319_at   | NM_022462 | HIF3A    | 64344 | 3.8   | 0.9   | 3.5    | 3.2   | 2.7   |
| 219320_at   | NM_025109 | MYO19    | 80179 | 67.0  | 45.3  | 59.1   | 49.2  | 53.3  |
| 219321_at   | NM_022474 | MPP5     | 64398 | 116.1 | 98.6  | 120.7  | 93.5  | 86.1  |
| 219322_s_at | NM_017818 | WRAP73   | 49856 | 41.9  | 35.9  | 50.3   | 40.6  | 38.6  |
| 219323_s_at | NM_005699 | IL18BP   | 10068 | 2.7   | 1.3   | 1.0    | 2.4   | 1.4   |
| 219324_at   | NM_024313 | NOL12    | 79159 | 92.9  | 96.5  | 100.0  | 94.5  | 79.2  |
| 219325_s_at | NM_018696 | ELAC1    | 55520 | 9.2   | 6.1   | 13.2   | 10.4  | 7.5   |
| 219326_s_at | NM_006577 | B3GNT2   | 10678 | 16.7  | 20.0  | 22.3   | 17.5  | 11.6  |
| 219327_s_at | NM_022036 | GPRC5C   | 55890 | 32.1  | 31.3  | 23.3   | 31.9  | 21.7  |
| 219328_at   | NM_022779 | DDX31    | 64794 | 25.7  | 18.1  | 24.1   | 23.6  | 22.3  |
| 219329_s_at | NM_016085 | ATRAID   | 51374 | 928.4 | 910.3 | 1055.0 | 963.0 | 839.4 |
| 219330_at   | NM_024062 | VANGL1   | 81839 | 61.8  | 55.5  | 66.6   | 58.5  | 53.2  |
| 219331_s_at | NM_018203 | KLHDC8A  | 55220 | 13.0  | 1.1   | 9.1    | 7.0   | 1.1   |
| 219332_at   | NM_024723 | MICALL2  | 79778 | 26.7  | 19.7  | 27.9   | 24.8  | 19.6  |
| 219333_s_at | NM_023083 | CAPN10   | 11132 | 9.1   | 7.2   | 17.8   | 11.4  | 18.4  |
| 219334_s_at | NM_022837 | NABP1    | 64859 | 4.4   | 2.3   | 4.9    | 2.8   | 0.8   |
| 219335_at   | NM_022838 | ARMCX5   | 64860 | 74.0  | 54.8  | 80.2   | 63.2  | 57.3  |
| 219336_s_at | NM_015947 | ASCC1    | 51008 | 68.3  | 84.3  | 77.5   | 79.1  | 67.9  |
| 219337_at   | NM_017891 | C1orf159 | 54991 | 22.8  | 20.3  | 19.8   | 15.7  | 16.6  |
| 219338_s_at | NM_017691 | LRRC49   | 54839 | 21.6  | 23.6  | 22.0   | 19.1  | 20.7  |
| 219339_s_at | NM_024757 | EHMT1    | 79813 | 16.0  | 9.0   | 23.1   | 17.1  | 13.1  |
| 219340_s_at | AF123759  | CLN8     | 2055  | 48.1  | 28.9  | 44.5   | 49.5  | 34.3  |
| 219341_at   | NM_018941 | CLN8     | 2055  | 2.6   | 4.6   | 10.6   | 1.8   | 7.9   |
| 219342_at   | NM_022900 | CASD1    | 64921 | 26.3  | 31.9  | 34.7   | 38.9  | 34.3  |
| 219343_at   | NM_017913 | CDC37L1  | 55664 | 35.7  | 31.3  | 47.6   | 33.9  | 33.7  |
| 219344_at   | NM_018344 | SLC29A3  | 55315 | 42.0  | 44.4  | 43.9   | 52.4  | 37.1  |

|             |           |                           |        |       |       |       |       |       |
|-------------|-----------|---------------------------|--------|-------|-------|-------|-------|-------|
| 219345_at   | NM_016074 | BOLA1                     | 51027  | 94.3  | 90.4  | 116.3 | 82.1  | 72.0  |
| 219346_at   | NM_024509 | LRFN3                     | 79414  | 24.8  | 17.6  | 19.9  | 26.3  | 12.0  |
| 219347_at   | NM_018283 | NUDT15                    | 55270  | 103.2 | 75.3  | 119.2 | 90.3  | 105.4 |
| 219348_at   | NM_018467 | USE1                      | 55850  | 96.8  | 77.3  | 90.2  | 91.1  | 71.4  |
| 219349_s_at | NM_018303 | EXOC2                     | 55770  | 24.2  | 17.0  | 18.9  | 20.8  | 12.5  |
| 219350_s_at | NM_019887 | DIABLO                    | 56616  | 373.4 | 357.3 | 385.9 | 358.2 | 312.1 |
| 219351_at   | NM_014563 | TRAPPC2                   | 6399   | 31.7  | 27.9  | 34.2  | 28.9  | 25.1  |
| 219352_at   | NM_017912 | HERC6                     | 55008  | 23.9  | 16.5  | 21.3  | 20.8  | 18.3  |
| 219353_at   | NM_017687 | NHLRC2                    | 374354 | 24.0  | 15.9  | 15.8  | 16.7  | 11.6  |
| 219354_at   | NM_018316 | KLHL26                    | 55295  | 57.1  | 54.5  | 60.5  | 59.1  | 55.3  |
| 219355_at   | NM_018015 | CXorf57                   | 55086  | 0.6   | 0.4   | 0.6   | 0.5   | 0.3   |
| 219356_s_at | NM_016410 | CHMP5                     | 51510  | 278.2 | 209.2 | 300.2 | 237.4 | 189.9 |
| 219357_at   | NM_014027 | GTPBP1                    | 9567   | 143.1 | 149.2 | 122.2 | 102.3 | 98.1  |
| 219358_s_at | NM_018404 | ADAP2                     | 55803  | 16.9  | 14.0  | 20.4  | 19.7  | 20.6  |
| 219359_at   | NM_025092 | ATHL1                     | 80162  | 4.6   | 8.5   | 3.9   | 8.6   | 7.3   |
| 219360_s_at | NM_017636 | TRPM4                     | 54795  | 155.6 | 177.1 | 168.5 | 194.0 | 133.3 |
| 219361_s_at | NM_022767 | AEN                       | 64782  | 79.5  | 60.8  | 88.8  | 64.9  | 70.3  |
| 219362_at   | NM_024635 | NAA35                     | 60560  | 58.8  | 53.6  | 66.7  | 54.8  | 44.9  |
| 219363_s_at | NM_015942 | MTERF3                    | 51001  | 112.7 | 84.8  | 142.1 | 81.6  | 93.3  |
| 219364_at   | NM_024119 | DHX58                     | 79132  | 1.9   | 0.6   | 0.9   | 0.7   | 0.7   |
| 219365_s_at | NM_024046 | CAMKV                     | 79012  | 22.3  | 12.6  | 4.1   | 12.5  | 13.3  |
| 219366_at   | NM_020371 | AVEN                      | 57099  | 102.7 | 80.9  | 105.2 | 132.8 | 72.3  |
| 219367_s_at | NM_018534 | NRP2                      | 8828   | 17.3  | 9.6   | 4.4   | 1.9   | 3.6   |
| 219368_at   | NM_021963 | NAP1L2                    | 4674   | 51.9  | 52.5  | 49.4  | 72.3  | 45.9  |
| 219369_s_at | NM_023112 | OTUB2                     | 78990  | 26.4  | 21.8  | 31.0  | 26.0  | 20.0  |
| 219370_at   | NM_019845 | RPRM                      | 56475  | 8.6   | 4.2   | 5.9   | 5.2   | 0.9   |
| 219371_s_at | NM_016270 | KLF2                      | 10365  | 7.7   | 17.6  | 10.9  | 14.8  | 11.8  |
| 219372_at   | NM_014055 | IFT81                     | 28981  | 50.3  | 24.3  | 35.9  | 30.2  | 19.0  |
| 219373_at   | NM_018973 | DPM3                      | 54344  | 235.5 | 273.4 | 330.9 | 293.0 | 288.6 |
| 219374_s_at | NM_024740 | ALG9                      | 79796  | 85.3  | 87.8  | 112.1 | 101.8 | 66.3  |
| 219375_at   | NM_006090 | CEPT1                     | 10390  | 60.0  | 39.4  | 75.5  | 64.9  | 61.0  |
| 219376_at   | NM_024639 | ZNF322                    | 79692  | 44.3  | 45.2  | 37.9  | 41.9  | 34.8  |
| 219377_at   | NM_022751 | GAREM                     | 64762  | 14.2  | 11.9  | 15.8  | 14.7  | 14.8  |
| 219378_at   | NM_024561 | NAA16                     | 79612  | 40.3  | 29.1  | 38.1  | 34.4  | 36.4  |
| 219379_x_at | NM_018083 | ZNF358                    | 140467 | 76.4  | 88.1  | 95.9  | 85.6  | 59.0  |
| 219380_x_at | NM_006502 | POLH                      | 5429   | 10.2  | 9.8   | 9.3   | 5.2   | 11.5  |
| 219381_at   | NM_023073 | C5orf42                   | 65250  | 1.2   | 0.3   | 0.5   | 0.7   | 0.3   |
| 219382_at   | NM_013368 | SERTAD3                   | 29946  | 72.5  | 91.0  | 78.2  | 83.8  | 59.0  |
| 219383_at   | NM_024841 | PRR5L                     | 79899  | 6.7   | 3.9   | 4.1   | 0.4   | 0.3   |
| 219384_s_at | NM_012091 | ADAT1                     | 23536  | 61.7  | 37.5  | 58.8  | 55.0  | 39.0  |
| 219385_at   | NM_020125 | SLAMF8                    | 56833  | 3.8   | 9.4   | 8.5   | 9.6   | 8.0   |
| 219386_s_at | NM_020125 | SLAMF8                    | 56833  | 0.3   | 0.9   | 2.2   | 0.3   | 0.5   |
| 219387_at   | NM_017571 | CCDC88A                   | 55704  | 0.8   | 4.0   | 4.5   | 0.2   | 1.7   |
| 219388_at   | NM_024915 | GRHL2                     | 79977  | 171.5 | 148.3 | 140.4 | 162.5 | 135.6 |
| 219389_at   | NM_017982 | SUSD4                     | 55061  | 6.3   | 23.1  | 3.8   | 23.1  | 10.4  |
| 219390_at   | NM_017946 | FKBP14                    | 55033  | 15.5  | 14.5  | 20.4  | 14.5  | 13.2  |
| 219391_at   | NM_006085 | BPNT1                     | 10380  | 2.1   | 4.5   | 3.6   | 1.5   | 3.8   |
| 219392_x_at | NM_018304 | PRR11                     | 55771  | 107.9 | 127.1 | 150.7 | 88.5  | 124.0 |
| 219393_s_at | NM_005465 | AKT3                      | 10000  | 10.7  | 9.8   | 14.4  | 10.2  | 8.5   |
| 219394_at   | NM_024419 | PGS1                      | 9489   | 29.5  | 23.0  | 25.2  | 34.4  | 22.4  |
| 219395_at   | NM_024939 | ESRP2 /// MI 80004 /// 10 |        | 182.0 | 149.3 | 223.2 | 166.1 | 169.5 |
| 219396_s_at | NM_024608 | MIR631 /// N 79661 /// 69 |        | 12.2  | 7.6   | 8.8   | 11.2  | 12.0  |
| 219397_at   | NM_025147 | COQ10B                    | 80219  | 72.7  | 82.7  | 82.2  | 78.6  | 62.3  |

|             |           |                           |           |       |       |       |       |       |
|-------------|-----------|---------------------------|-----------|-------|-------|-------|-------|-------|
| 219398_at   | NM_022094 | CIDEC                     | 63924     | 22.1  | 12.1  | 16.1  | 11.2  | 21.9  |
| 219399_at   | NM_018362 | LIN7C                     | 55327     | 71.3  | 63.5  | 88.6  | 71.4  | 67.8  |
| 219400_at   | NM_003632 | CNTNAP1                   | 8506      | 11.4  | 3.4   | 13.2  | 6.8   | 5.4   |
| 219401_at   | NM_022167 | XYLT2                     | 64132     | 12.7  | 18.2  | 18.3  | 20.0  | 16.4  |
| 219402_s_at | NM_024295 | DERL1                     | 79139     | 232.1 | 185.6 | 255.4 | 214.7 | 189.3 |
| 219403_s_at | NM_006665 | HPSE                      | 10855     | 2.6   | 6.6   | 2.0   | 1.8   | 4.8   |
| 219404_at   | NM_024526 | EPS8L3                    | 79574     | 15.9  | 9.3   | 19.0  | 13.5  | 7.8   |
| 219405_at   | NM_018073 | TRIM68                    | 55128     | 125.2 | 152.1 | 125.7 | 137.6 | 119.4 |
| 219406_at   | NM_024097 | C1orf50                   | 79078     | 44.1  | 40.3  | 51.7  | 57.2  | 40.2  |
| 219407_s_at | NM_006059 | LAMC3                     | 10319     | 8.6   | 8.0   | 12.2  | 6.7   | 2.4   |
| 219408_at   | NM_019023 | PRMT7                     | 54496     | 70.3  | 113.6 | 130.5 | 140.5 | 124.5 |
| 219409_at   | NM_024700 | SNIP1                     | 79753     | 54.7  | 46.3  | 54.0  | 47.0  | 35.2  |
| 219410_at   | NM_018004 | TMEM45A                   | 55076     | 24.6  | 19.6  | 20.6  | 24.6  | 9.0   |
| 219411_at   | NM_024712 | ELMO3                     | 79767     | 90.5  | 88.9  | 86.3  | 82.4  | 67.6  |
| 219412_at   | NM_022337 | RAB38                     | 23682     | 6.6   | 0.8   | 3.7   | 2.2   | 4.6   |
| 219413_at   | NM_024722 | ACBD4                     | 79777     | 30.8  | 35.6  | 23.8  | 32.6  | 27.5  |
| 219414_at   | NM_022131 | CLSTN2                    | 64084     | 4.0   | 0.6   | 1.9   | 2.9   | 0.5   |
| 219415_at   | NM_020659 | TTYH1                     | 57348     | 1.3   | 4.0   | 7.5   | 0.7   | 1.0   |
| 219416_at   | NM_016240 | SCARA3                    | 51435     | 9.3   | 11.5  | 11.4  | 11.9  | 7.2   |
| 219417_s_at | NM_017622 | C17orf59                  | 54785     | 9.7   | 22.4  | 39.0  | 23.4  | 24.1  |
| 219418_at   | NM_024782 | NHEJ1 /// SLI79840 /// 15 |           | 42.4  | 57.1  | 49.8  | 42.8  | 40.0  |
| 219419_at   | NM_024805 | RBFA                      | 79863     | 66.1  | 44.1  | 71.3  | 60.3  | 57.3  |
| 219420_s_at | NM_023077 | COA7                      | 65260     | 63.5  | 74.1  | 77.7  | 63.1  | 44.0  |
| 219421_at   | NM_012382 | TTC33                     | 23548     | 27.0  | 18.3  | 24.7  | 25.2  | 20.0  |
| 219422_at   | U72763    | ESPN                      | 83715     | 1.2   | 6.4   | 1.6   | 0.7   | 1.8   |
| 219423_x_at | NM_003790 | TNFRSF25                  | 8718      | 3.2   | 7.3   | 2.5   | 1.5   | 2.6   |
| 219424_at   | NM_005755 | EBI3                      | 10148     | 0.4   | 0.4   | 0.8   | 1.3   | 1.2   |
| 219425_at   | NM_014351 | SULT4A1                   | 25830     | 12.0  | 7.2   | 6.4   | 8.6   | 6.6   |
| 219426_at   | NM_024852 | AGO3                      | 192669    | 45.1  | 35.0  | 42.1  | 45.9  | 26.0  |
| 219427_at   | NM_024582 | FAT4                      | 79633     | 4.4   | 0.3   | 5.2   | 3.0   | 2.5   |
| 219428_s_at | BF057649  | PXMP4                     | 11264     | 48.0  | 28.8  | 28.8  | 24.8  | 32.3  |
| 219429_at   | NM_024306 | FA2H                      | 79152     | 12.3  | 8.8   | 15.3  | 15.6  | 13.2  |
| 219430_at   | NM_020155 | GPR137                    | 56834     | 20.4  | 51.3  | 37.3  | 44.7  | 42.8  |
| 219431_at   | NM_024605 | ARHGAP10                  | 79658     | 41.7  | 35.1  | 42.1  | 34.0  | 31.4  |
| 219432_at   | NM_014556 | EVC                       | 2121      | 3.8   | 9.1   | 11.5  | 13.4  | 10.8  |
| 219433_at   | NM_017745 | BCOR                      | 54880     | 49.0  | 46.5  | 48.1  | 45.6  | 34.3  |
| 219434_at   | NM_018643 | TREM1                     | 54210     | 5.6   | 1.9   | 7.6   | 2.1   | 7.1   |
| 219435_at   | NM_025099 | CTC1                      | 80169     | 29.5  | 30.6  | 34.9  | 25.8  | 25.8  |
| 219436_s_at | NM_016242 | EMCN                      | 51705     | 0.6   | 0.3   | 0.8   | 0.3   | 2.3   |
| 219437_s_at | NM_013275 | ANKRD11                   | 29123     | 48.8  | 45.9  | 44.7  | 48.4  | 25.2  |
| 219438_at   | NM_024522 | NKAIN1                    | 79570     | 1.1   | 2.2   | 4.1   | 1.7   | 8.3   |
| 219439_at   | NM_020156 | C1GALT1                   | 56913     | 26.1  | 17.7  | 27.3  | 18.2  | 18.0  |
| 219440_at   | NM_021785 | RAI2                      | 10742     | 3.5   | 3.6   | 0.4   | 1.0   | 0.8   |
| 219441_s_at | NM_024652 | LRRK1                     | 79705     | 5.1   | 1.1   | 0.8   | 0.8   | 0.8   |
| 219442_at   | NM_024048 | CLUHP3                    | 100132341 | 25.8  | 28.1  | 15.2  | 23.7  | 21.2  |
| 219443_at   | NM_017714 | TASP1                     | 55617     | 35.6  | 32.9  | 39.5  | 27.7  | 22.6  |
| 219444_at   | NM_021946 | BCORL1                    | 63035     | 35.3  | 24.7  | 33.5  | 33.0  | 25.2  |
| 219445_at   | NM_015711 | GLTSCR1                   | 29998     | 41.2  | 15.3  | 25.8  | 20.0  | 23.3  |
| 219446_at   | NM_018157 | RIC8B                     | 55188     | 32.6  | 35.3  | 42.3  | 32.2  | 29.9  |
| 219447_s_at | NM_015945 | SLC35C2                   | 51006     | 40.9  | 38.3  | 50.0  | 40.8  | 32.5  |
| 219448_at   | BC002748  | TMEM70                    | 54968     | 8.2   | 12.6  | 18.0  | 12.9  | 9.8   |
| 219449_s_at | NM_017866 | TMEM70                    | 54968     | 368.9 | 295.8 | 434.8 | 324.6 | 338.3 |
| 219450_at   | NM_018302 | C4orf19                   | 55286     | 10.8  | 11.6  | 11.0  | 9.5   | 7.0   |

|             |           |            |              |       |       |       |       |       |
|-------------|-----------|------------|--------------|-------|-------|-------|-------|-------|
| 219451_at   | NM_016064 | MSRB2      | 22921        | 20.4  | 24.4  | 31.9  | 43.8  | 20.1  |
| 219452_at   | NM_022355 | DPEP2      | 64174        | 0.8   | 1.0   | 1.1   | 0.6   | 1.0   |
| 219453_at   | NM_024731 | KLHL36     | 79786        | 21.8  | 25.0  | 19.5  | 29.6  | 21.0  |
| 219454_at   | NM_015507 | EGFL6      | 25975        | 8.6   | 5.4   | 6.7   | 3.6   | 7.1   |
| 219455_at   | NM_024788 | C7orf63    | 79846        | 51.9  | 43.9  | 31.9  | 47.1  | 26.9  |
| 219456_s_at | AW027923  | RIN3       | 79890        | 1.4   | 0.7   | 0.7   | 1.0   | 0.9   |
| 219457_s_at | NM_024832 | RIN3       | 79890        | 1.5   | 0.8   | 0.8   | 0.6   | 2.3   |
| 219458_s_at | NM_022072 | NSUN3      | 63899        | 29.7  | 33.1  | 46.1  | 36.3  | 31.2  |
| 219459_at   | NM_018082 | POLR3B     | 55703        | 103.0 | 94.7  | 112.7 | 98.0  | 92.6  |
| 219460_s_at | NM_017849 | TMEM127    | 55654        | 27.4  | 28.2  | 24.0  | 27.2  | 22.2  |
| 219461_at   | AJ236915  | PAK6       | 56924        | 2.0   | 1.1   | 1.0   | 0.8   | 5.8   |
| 219462_at   | NM_024587 | TMEM53     | 79639        | 49.8  | 43.0  | 40.4  | 23.6  | 30.4  |
| 219463_at   | NM_012261 | LAMP5      | 24141        | 2.4   | 1.5   | 1.9   | 1.8   | 3.4   |
| 219464_at   | NM_012113 | CA14       | 23632        | 18.8  | 15.8  | 12.7  | 7.2   | 3.4   |
| 219465_at   | NM_001643 | APOA2      | 336          | 7.0   | 4.9   | 1.5   | 2.8   | 4.0   |
| 219466_s_at | NM_001643 | APOA2      | 336          | 7.2   | 3.1   | 8.7   | 0.5   | 7.8   |
| 219467_at   | NM_017676 | GIN1       | 54826        | 36.5  | 34.7  | 42.9  | 38.6  | 35.6  |
| 219468_s_at | NM_017949 | CUEDC1     | 404093       | 3.6   | 2.4   | 7.8   | 9.9   | 1.4   |
| 219469_at   | NM_024606 | DYNC2H1    | 79659        | 22.4  | 17.7  | 19.1  | 19.2  | 16.7  |
| 219470_x_at | NM_019084 | CCNJ       | 54619        | 2.3   | 3.1   | 2.9   | 1.8   | 1.8   |
| 219471_at   | NM_025113 | KIAA0226L  | 80183        | 0.9   | 1.7   | 1.8   | 7.2   | 4.4   |
| 219472_at   | NM_024322 | CENPO      | 79172        | 23.9  | 25.1  | 19.9  | 18.3  | 20.3  |
| 219473_at   | NM_017686 | GDAP2      | 54834        | 16.7  | 15.2  | 16.5  | 13.6  | 20.1  |
| 219474_at   | NM_024616 | C3orf52    | 79669        | 7.7   | 6.7   | 7.4   | 3.7   | 6.1   |
| 219475_at   | NM_013370 | OSGIN1     | 29948        | 7.1   | 7.4   | 2.5   | 6.1   | 4.3   |
| 219476_at   | NM_024115 | C1orf116   | 79098        | 68.4  | 58.6  | 94.8  | 71.9  | 73.3  |
| 219477_s_at | NM_018676 | LOC1019305 | 55901 /// 10 | 4.2   | 11.0  | 2.8   | 8.8   | 1.5   |
| 219478_at   | NM_021197 | WFDC1      | 58189        | 1.8   | 1.3   | 4.6   | 3.7   | 1.1   |
| 219479_at   | NM_024089 | KDELC1     | 79070        | 37.3  | 28.8  | 34.7  | 38.2  | 30.0  |
| 219480_at   | NM_005985 | SNAI1      | 6615         | 1.6   | 16.5  | 15.3  | 4.4   | 8.9   |
| 219481_at   | NM_024525 | TTC13      | 79573        | 53.2  | 45.8  | 61.2  | 57.1  | 39.9  |
| 219482_at   | NM_017438 | SETD4      | 54093        | 10.3  | 11.4  | 17.8  | 8.8   | 2.3   |
| 219483_s_at | NM_022825 | PORCN      | 64840        | 39.7  | 47.7  | 33.2  | 41.3  | 32.5  |
| 219484_at   | NM_013320 | HCFC2      | 29915        | 19.6  | 27.4  | 27.7  | 20.6  | 27.0  |
| 219485_s_at | NM_002814 | PSMD10     | 5716         | 382.1 | 364.3 | 425.6 | 371.0 | 358.6 |
| 219486_at   | NM_017803 | DUS2       | 54920        | 94.8  | 58.0  | 62.4  | 85.6  | 88.0  |
| 219487_at   | NM_024685 | BBS10      | 79738        | 49.5  | 33.6  | 73.8  | 47.1  | 37.5  |
| 219488_at   | NM_017436 | A4GALT     | 53947        | 3.3   | 2.7   | 2.7   | 2.8   | 4.4   |
| 219489_s_at | NM_017821 | NXN        | 64359        | 63.0  | 62.6  | 61.4  | 74.4  | 50.6  |
| 219490_s_at | NM_022836 | DCLRE1B    | 64858        | 36.0  | 33.7  | 36.5  | 28.7  | 37.4  |
| 219491_at   | NM_024036 | LRFN4      | 78999        | 42.4  | 39.4  | 46.8  | 48.8  | 26.7  |
| 219492_at   | NM_012110 | CHIC2      | 26511        | 77.0  | 60.3  | 83.9  | 62.1  | 61.7  |
| 219493_at   | NM_024745 | SHCBP1     | 79801        | 123.0 | 64.0  | 141.2 | 99.9  | 122.5 |
| 219494_at   | NM_012415 | RAD54B     | 25788        | 45.4  | 39.3  | 60.0  | 42.9  | 59.6  |
| 219495_s_at | NM_013256 | ZNF180     | 7733         | 24.3  | 25.5  | 19.2  | 11.9  | 17.8  |
| 219496_at   | NM_023016 | SOWAHC     | 65124        | 23.7  | 17.9  | 28.9  | 18.3  | 21.0  |
| 219497_s_at | NM_022893 | BCL11A     | 53335        | 5.6   | 9.1   | 1.1   | 5.1   | 6.8   |
| 219498_s_at | NM_018014 | BCL11A     | 53335        | 8.8   | 1.7   | 4.6   | 1.1   | 5.3   |
| 219499_at   | NM_018144 | SEC61A2    | 55176        | 32.3  | 26.5  | 25.2  | 32.1  | 26.1  |
| 219500_at   | NM_013246 | CLCF1      | 23529        | 2.3   | 11.7  | 6.1   | 11.3  | 1.7   |
| 219501_at   | NM_017993 | ENOX1      | 55068        | 28.5  | 41.1  | 36.1  | 27.3  | 28.6  |
| 219502_at   | NM_018248 | NEIL3      | 55247        | 45.6  | 28.3  | 54.9  | 32.9  | 35.3  |
| 219503_s_at | NM_018306 | TMEM40     | 55287        | 7.1   | 8.5   | 10.0  | 9.8   | 7.1   |

|             |           |           |       |       |       |       |       |       |
|-------------|-----------|-----------|-------|-------|-------|-------|-------|-------|
| 219504_s_at | NM_024813 | RPAP2     | 79871 | 14.8  | 19.8  | 10.6  | 20.5  | 19.0  |
| 219505_at   | NM_017424 | CECR1     | 51816 | 2.5   | 9.8   | 3.0   | 3.1   | 1.1   |
| 219506_at   | NM_024579 | C1orf54   | 79630 | 2.0   | 5.7   | 1.5   | 1.8   | 1.0   |
| 219507_at   | NM_016625 | RSRC1     | 51319 | 37.8  | 35.5  | 53.9  | 38.7  | 29.7  |
| 219508_at   | NM_004751 | GCNT3     | 9245  | 14.5  | 2.0   | 8.3   | 2.7   | 6.5   |
| 219509_at   | NM_021245 | MYOZ1     | 58529 | 8.8   | 12.0  | 2.3   | 7.6   | 1.9   |
| 219510_at   | NM_006596 | POLQ      | 10721 | 67.6  | 33.0  | 47.9  | 47.8  | 40.2  |
| 219511_s_at | NM_005460 | SNCAIP    | 9627  | 2.6   | 1.6   | 1.5   | 2.5   | 1.0   |
| 219512_at   | NM_024918 | DSN1      | 79980 | 48.9  | 32.2  | 62.5  | 28.2  | 48.4  |
| 219513_s_at | NM_005490 | SH2D3A    | 10045 | 5.1   | 0.7   | 0.6   | 1.7   | 1.0   |
| 219514_at   | NM_012098 | ANGPTL2   | 23452 | 12.1  | 1.0   | 4.7   | 7.0   | 0.8   |
| 219515_at   | NM_020228 | PRDM10    | 56980 | 21.4  | 26.0  | 34.8  | 32.6  | 29.3  |
| 219516_at   | NM_021625 | TRPV4     | 59341 | 3.8   | 7.8   | 1.3   | 5.4   | 1.1   |
| 219517_at   | NM_025165 | ELL3      | 80237 | 183.5 | 106.6 | 166.9 | 127.8 | 126.6 |
| 219518_s_at | NM_025165 | ELL3      | 80237 | 68.0  | 60.5  | 86.6  | 67.8  | 80.0  |
| 219519_s_at | NM_023068 | SIGLEC1   | 6614  | 1.3   | 0.9   | 1.3   | 0.4   | 0.4   |
| 219520_s_at | NM_018458 | WWC3      | 55841 | 46.5  | 52.7  | 43.0  | 50.3  | 44.1  |
| 219521_at   | NM_018644 | B3GAT1    | 27087 | 1.8   | 1.2   | 2.0   | 1.0   | 0.9   |
| 219522_at   | NM_014344 | FJX1      | 24147 | 5.7   | 1.5   | 8.0   | 2.0   | 9.0   |
| 219523_s_at | NM_018104 | TENM3     | 55714 | 0.3   | 5.0   | 0.7   | 1.0   | 4.7   |
| 219524_s_at | NM_024120 | NDUFAF5   | 79133 | 1.7   | 1.1   | 7.7   | 1.9   | 1.2   |
| 219525_at   | NM_018242 | SLC47A1   | 55244 | 4.3   | 5.6   | 1.9   | 3.8   | 6.3   |
| 219526_at   | NM_024644 | C14orf169 | 79697 | 22.3  | 12.4  | 10.7  | 17.0  | 16.5  |
| 219527_at   | NM_017898 | MARC2     | 54996 | 67.4  | 59.7  | 72.2  | 58.4  | 48.5  |
| 219528_s_at | NM_022898 | BCL11B    | 64919 | 7.0   | 5.3   | 9.9   | 6.1   | 2.9   |
| 219529_at   | NM_004669 | CLIC3     | 9022  | 0.8   | 7.4   | 5.9   | 5.5   | 4.0   |
| 219530_at   | NM_024675 | PALB2     | 79728 | 29.0  | 16.4  | 28.2  | 17.9  | 23.8  |
| 219531_at   | NM_018140 | CEP72     | 55722 | 14.8  | 14.0  | 22.9  | 18.7  | 23.9  |
| 219532_at   | NM_022726 | ELOVL4    | 6785  | 0.5   | 0.5   | 1.8   | 0.2   | 0.2   |
| 219533_at   | NM_000076 | -         | -     | 0.6   | 2.1   | 0.5   | 0.4   | 0.5   |
| 219534_x_at | NM_000076 | CDKN1C    | 1028  | 0.6   | 0.7   | 0.9   | 0.9   | 0.8   |
| 219535_at   | NM_014586 | HUNK      | 30811 | 7.5   | 7.5   | 8.8   | 3.4   | 9.1   |
| 219536_s_at | NM_022088 | ZFP64     | 55734 | 7.7   | 3.0   | 11.9  | 19.8  | 11.4  |
| 219537_x_at | NM_016941 | DLL3      | 10683 | 67.5  | 50.1  | 62.4  | 61.4  | 49.2  |
| 219538_at   | NM_019069 | WDR5B     | 54554 | 78.4  | 56.0  | 73.3  | 62.7  | 42.1  |
| 219539_at   | NM_024775 | GEMIN6    | 79833 | 83.9  | 84.1  | 97.9  | 73.0  | 74.3  |
| 219540_at   | AU150728  | ZNF267    | 10308 | 30.3  | 24.2  | 38.9  | 31.9  | 23.4  |
| 219541_at   | NM_017806 | LIME1     | 54923 | 2.5   | 5.6   | 5.2   | 8.2   | 2.6   |
| 219542_at   | NM_024800 | NEK11     | 79858 | 18.6  | 14.1  | 15.8  | 9.0   | 9.8   |
| 219543_at   | NM_022129 | PBLD      | 64081 | 18.0  | 17.9  | 14.3  | 22.2  | 13.5  |
| 219544_at   | NM_024808 | BORA      | 79866 | 14.1  | 14.7  | 18.6  | 14.6  | 20.3  |
| 219545_at   | NM_023930 | KCTD14    | 65987 | 1.9   | 1.4   | 1.5   | 1.0   | 0.5   |
| 219546_at   | NM_017593 | BMP2K     | 55589 | 11.4  | 10.4  | 9.2   | 10.4  | 8.4   |
| 219547_at   | NM_004376 | COX15     | 1355  | 72.3  | 85.4  | 76.6  | 81.5  | 60.8  |
| 219548_at   | NM_006958 | ZNF16     | 7564  | 44.3  | 41.4  | 33.9  | 34.1  | 28.8  |
| 219549_s_at | NM_006054 | RTN3      | 10313 | 352.0 | 409.7 | 376.0 | 399.7 | 355.1 |
| 219550_at   | NM_022370 | ROBO3     | 64221 | 4.2   | 15.5  | 5.6   | 14.5  | 5.6   |
| 219551_at   | NM_018456 | EAF2      | 55840 | 20.5  | 15.1  | 24.6  | 16.3  | 18.5  |
| 219552_at   | NM_024500 | SVEP1     | 79987 | 4.3   | 2.2   | 2.7   | 0.4   | 1.9   |
| 219553_at   | NM_013330 | NME7      | 29922 | 125.9 | 106.5 | 131.8 | 128.2 | 99.3  |
| 219554_at   | NM_016321 | RHCG      | 51458 | 2.3   | 1.2   | 2.1   | 1.0   | 1.2   |
| 219555_s_at | NM_018455 | CENPN     | 55839 | 234.0 | 188.5 | 356.0 | 217.2 | 295.7 |
| 219556_at   | NM_025108 | C16orf59  | 80178 | 30.8  | 18.2  | 37.0  | 26.9  | 40.5  |

|             |                                     |       |       |       |       |       |       |
|-------------|-------------------------------------|-------|-------|-------|-------|-------|-------|
| 219557_s_at | NM_020645 NRIP3                     | 56675 | 19.6  | 15.9  | 19.8  | 11.0  | 11.1  |
| 219558_at   | NM_024524 ATP13A3                   | 79572 | 31.4  | 21.3  | 31.9  | 23.8  | 23.5  |
| 219559_at   | NM_022082 SLC17A9                   | 63910 | 20.4  | 2.7   | 10.4  | 5.3   | 4.2   |
| 219560_at   | NM_024627 C22orf29 /// 54584 /// 79 |       | 37.5  | 28.7  | 29.9  | 33.3  | 37.6  |
| 219561_at   | NM_016429 COPZ2                     | 51226 | 5.2   | 3.1   | 5.3   | 1.1   | 7.3   |
| 219562_at   | NM_014353 RAB26                     | 25837 | 146.3 | 117.6 | 122.8 | 144.7 | 94.7  |
| 219563_at   | NM_024633 LINC00341 //,79686 /// 16 |       | 7.1   | 6.6   | 6.6   | 13.4  | 6.7   |
| 219564_at   | NM_018658 KCNJ16                    | 3773  | 3.7   | 4.7   | 7.0   | 0.4   | 2.8   |
| 219565_at   | NM_020674 CYP20A1                   | 57404 | 24.5  | 29.3  | 39.1  | 23.2  | 16.6  |
| 219566_at   | NM_024310 PLEKHF1                   | 79156 | 35.9  | 25.4  | 33.2  | 15.7  | 25.4  |
| 219567_s_at | NM_022774 EXO5                      | 64789 | 13.2  | 7.8   | 8.1   | 9.2   | 7.7   |
| 219568_x_at | NM_018419 SOX18                     | 54345 | 3.6   | 0.7   | 2.0   | 2.2   | 2.1   |
| 219569_s_at | NM_025246 SLC35G2                   | 80723 | 16.2  | 7.2   | 4.7   | 6.1   | 7.6   |
| 219570_at   | NM_024704 KIF16B                    | 55614 | 12.2  | 7.6   | 8.9   | 9.3   | 7.4   |
| 219571_s_at | NM_016265 ZNF12                     | 7559  | 58.4  | 49.0  | 56.1  | 51.2  | 33.6  |
| 219572_at   | NM_017954 CADPS2                    | 93664 | 28.6  | 28.8  | 44.6  | 33.7  | 22.5  |
| 219573_at   | NM_017640 LRRC16A                   | 55604 | 29.2  | 17.1  | 30.8  | 28.7  | 16.6  |
| 219574_at   | NM_017923 MARCH1                    | 55016 | 6.0   | 5.5   | 0.9   | 3.2   | 1.9   |
| 219575_s_at | NM_022341 COG8 /// PDI64146 /// 84  |       | 175.1 | 201.4 | 212.6 | 177.8 | 190.1 |
| 219576_at   | NM_024765 MAP7D3                    | 79649 | 8.9   | 7.9   | 10.7  | 11.7  | 5.7   |
| 219577_s_at | NM_019112 ABCA7                     | 10347 | 31.8  | 20.1  | 33.9  | 24.8  | 16.5  |
| 219578_s_at | NM_030594 CPEB1                     | 64506 | 2.2   | 6.9   | 1.1   | 1.9   | 0.8   |
| 219579_at   | NM_013401 RAB3IL1                   | 5866  | 36.8  | 43.7  | 48.0  | 38.6  | 43.1  |
| 219580_s_at | NM_024780 TMC5                      | 79838 | 0.4   | 3.8   | 4.9   | 4.4   | 5.2   |
| 219581_at   | NM_025265 TSEN2                     | 80746 | 50.1  | 46.9  | 57.4  | 42.1  | 43.5  |
| 219582_at   | NM_024576 OGFRL1                    | 79627 | 36.8  | 26.9  | 47.7  | 37.7  | 17.8  |
| 219583_s_at | NM_018418 SPATA7                    | 55812 | 27.0  | 20.8  | 26.9  | 30.4  | 19.0  |
| 219584_at   | NM_015900 PLA1A                     | 51365 | 8.2   | 3.6   | 8.1   | 2.3   | 8.3   |
| 219585_at   | NM_024296 CCDC28B                   | 79140 | 7.7   | 6.4   | 6.0   | 7.8   | 3.3   |
| 219586_at   | NM_030581 WDR59                     | 79726 | 5.5   | 5.3   | 6.9   | 3.1   | 5.7   |
| 219587_at   | NM_017868 TTC12                     | 54970 | 47.1  | 56.1  | 64.3  | 51.4  | 50.2  |
| 219588_s_at | NM_017760 NCAPG2                    | 54892 | 166.4 | 133.0 | 181.1 | 142.3 | 156.3 |
| 219589_s_at | NM_018273 TMEM143                   | 55260 | 1.6   | 6.8   | 1.4   | 4.0   | 0.8   |
| 219590_x_at | NM_015958 DPH5                      | 51611 | 437.0 | 376.0 | 418.8 | 382.1 | 302.7 |
| 219591_at   | NM_016564 CEND1                     | 51286 | 21.9  | 12.3  | 23.4  | 12.6  | 10.3  |
| 219592_at   | NM_024596 MCPH1                     | 79648 | 14.7  | 11.5  | 3.5   | 12.4  | 7.8   |
| 219593_at   | NM_016582 SLC15A3                   | 51296 | 1.8   | 2.3   | 1.8   | 0.7   | 0.7   |
| 219594_at   | NM_016533 NINJ2                     | 4815  | 3.1   | 1.9   | 2.0   | 5.2   | 0.7   |
| 219595_at   | NM_019591 ZNF26                     | 7574  | 28.3  | 12.9  | 14.4  | 19.5  | 16.7  |
| 219596_at   | NM_020147 THAP10                    | 56906 | 73.4  | 61.1  | 69.5  | 53.9  | 50.7  |
| 219597_s_at | NM_017434 DUOX1                     | 53905 | 3.5   | 1.7   | 8.1   | 1.2   | 4.3   |
| 219598_s_at | NM_016104 RWDD1                     | 51389 | 187.9 | 140.2 | 190.5 | 182.4 | 160.8 |
| 219599_at   | NM_018507 EIF4B                     | 1975  | 55.8  | 71.7  | 76.2  | 64.4  | 60.4  |
| 219600_s_at | NM_006134 TMEM50B                   | 757   | 100.7 | 102.8 | 106.3 | 93.5  | 78.3  |
| 219601_s_at | NM_015652 C10orf12                  | 26148 | 1.1   | 0.4   | 0.5   | 0.7   | 0.3   |
| 219602_s_at | NM_022068 PIEZO2                    | 63895 | 13.8  | 1.1   | 11.2  | 2.2   | 2.1   |
| 219603_s_at | NM_015919 ZNF226                    | 7769  | 45.3  | 42.0  | 49.7  | 38.8  | 33.9  |
| 219604_s_at | NM_017715 ZNF3                      | 7551  | 10.3  | 1.7   | 2.6   | 5.9   | 0.6   |
| 219605_at   | NM_017715 ZNF3                      | 7551  | 11.3  | 6.5   | 5.9   | 5.1   | 5.0   |
| 219606_at   | NM_016018 PHF20L1                   | 51105 | 2.9   | 3.2   | 0.5   | 0.8   | 1.7   |
| 219607_s_at | NM_024021 MS4A4A                    | 51338 | 0.2   | 0.4   | 1.0   | 2.6   | 0.5   |
| 219608_s_at | NM_024862 FBXO38                    | 81545 | 14.2  | 15.4  | 23.1  | 17.3  | 14.9  |
| 219609_at   | NM_024515 WDR25                     | 79446 | 16.2  | 24.6  | 23.8  | 17.4  | 23.9  |

|             |           |                          |        |       |       |       |       |       |
|-------------|-----------|--------------------------|--------|-------|-------|-------|-------|-------|
| 219610_at   | NM_022448 | ARHGEF28                 | 64283  | 5.3   | 13.4  | 3.7   | 3.6   | 8.2   |
| 219611_s_at | NM_022778 | CEP85                    | 64793  | 45.5  | 40.4  | 38.5  | 38.0  | 43.0  |
| 219612_s_at | NM_000509 | FGG                      | 2266   | 3.4   | 4.0   | 5.2   | 2.9   | 4.9   |
| 219613_s_at | NM_016539 | SIRT6                    | 51548  | 80.5  | 69.1  | 77.7  | 73.5  | 59.5  |
| 219614_s_at | NM_020208 | SLC6A20                  | 54716  | 0.7   | 1.8   | 1.3   | 1.5   | 3.6   |
| 219615_s_at | NM_003740 | KCNK5                    | 8645   | 18.9  | 12.1  | 17.1  | 13.9  | 17.6  |
| 219616_at   | NM_024560 | ACSS3                    | 79611  | 10.3  | 8.6   | 9.0   | 2.7   | 6.0   |
| 219617_at   | NM_024766 | CAMKMT                   | 79823  | 10.3  | 1.0   | 15.1  | 7.0   | 7.9   |
| 219618_at   | NM_016123 | IRAK4                    | 51135  | 18.3  | 18.9  | 14.9  | 21.2  | 19.6  |
| 219619_at   | NM_017594 | DIRAS2                   | 54769  | 0.9   | 1.3   | 0.3   | 2.0   | 0.0   |
| 219620_x_at | NM_017723 | TOR4A                    | 54863  | 10.3  | 12.9  | 19.2  | 16.6  | 16.8  |
| 219621_at   | NM_022111 | CLSPN                    | 63967  | 2.4   | 5.7   | 4.5   | 1.7   | 1.5   |
| 219622_at   | NM_017817 | RAB20                    | 55647  | 83.2  | 58.9  | 56.3  | 50.9  | 53.5  |
| 219623_at   | NM_024855 | ACTR5                    | 79913  | 59.6  | 42.0  | 38.6  | 24.5  | 32.3  |
| 219624_at   | NM_004874 | BAG4                     | 9530   | 29.8  | 20.1  | 30.1  | 19.9  | 26.1  |
| 219625_s_at | NM_005713 | COL4A3BP                 | 10087  | 53.3  | 37.0  | 58.5  | 38.4  | 37.7  |
| 219626_at   | NM_024597 | MAP7D3                   | 79649  | 17.0  | 13.5  | 16.8  | 17.7  | 12.3  |
| 219627_at   | NM_024910 | ZNF767P                  | 79970  | 14.8  | 20.2  | 12.6  | 19.1  | 8.9   |
| 219628_at   | NM_022470 | ZMAT3                    | 64393  | 35.7  | 34.8  | 35.2  | 31.0  | 29.3  |
| 219629_at   | NM_017911 | FAM118A                  | 55007  | 25.6  | 32.3  | 26.1  | 26.6  | 19.7  |
| 219630_at   | NM_005764 | PDZK1IP1                 | 10158  | 7.4   | 1.6   | 8.6   | 4.1   | 2.4   |
| 219631_at   | NM_024937 | LRP12                    | 29967  | 9.9   | 16.9  | 10.6  | 9.9   | 5.0   |
| 219632_s_at | AF196175  | SHPK /// TRP7442 /// 237 |        | 6.7   | 11.4  | 8.8   | 6.0   | 8.6   |
| 219633_at   | NM_024331 | TTPAL                    | 79183  | 43.2  | 43.5  | 38.4  | 44.8  | 29.0  |
| 219634_at   | NM_018413 | CHST11                   | 50515  | 7.8   | 5.5   | 1.0   | 7.5   | 2.1   |
| 219635_at   | NM_025027 | ZNF606                   | 80095  | 24.9  | 25.8  | 36.3  | 46.4  | 28.3  |
| 219636_s_at | NM_025139 | ARMC9                    | 80210  | 15.0  | 13.6  | 12.4  | 11.7  | 14.5  |
| 219637_at   | NM_025139 | ARMC9                    | 80210  | 17.6  | 16.8  | 20.0  | 20.8  | 14.8  |
| 219638_at   | NM_012170 | FBXO22                   | 26263  | 2.2   | 10.3  | 6.9   | 0.4   | 1.8   |
| 219639_x_at | NM_020213 | PARP6                    | 56965  | 47.8  | 32.6  | 44.4  | 30.7  | 16.6  |
| 219640_at   | NM_014343 | CLDN15                   | 24146  | 24.2  | 15.4  | 20.3  | 16.0  | 30.4  |
| 219641_at   | NM_017996 | DET1                     | 55070  | 53.2  | 36.1  | 38.8  | 37.0  | 33.9  |
| 219642_s_at | NM_016559 | PEX5L                    | 51555  | 0.9   | 1.3   | 0.6   | 1.1   | 0.9   |
| 219643_at   | NM_018557 | LRP1B                    | 53353  | 0.4   | 1.8   | 1.1   | 2.1   | 0.3   |
| 219644_at   | NM_016122 | CEP83                    | 51134  | 10.4  | 11.0  | 14.8  | 9.8   | 13.2  |
| 219645_at   | NM_001231 | CASQ1                    | 844    | 6.1   | 5.8   | 4.9   | 3.3   | 7.9   |
| 219646_at   | NM_017702 | DEF8                     | 54849  | 72.6  | 84.4  | 78.6  | 74.9  | 62.0  |
| 219647_at   | NM_022135 | POPDC2                   | 64091  | 1.1   | 3.5   | 4.4   | 3.3   | 2.4   |
| 219648_at   | NM_018000 | MREG                     | 55686  | 43.9  | 39.9  | 51.0  | 39.4  | 43.9  |
| 219649_at   | NM_013339 | ALG6                     | 29929  | 203.2 | 175.1 | 214.4 | 155.3 | 156.1 |
| 219650_at   | NM_017669 | ERCC6L                   | 54821  | 54.0  | 33.4  | 63.9  | 40.8  | 61.1  |
| 219651_at   | NM_018189 | DPPA4                    | 55211  | 4.7   | 6.0   | 0.4   | 4.9   | 2.7   |
| 219652_s_at | NM_024689 | CXorf36                  | 79742  | 1.0   | 0.7   | 1.0   | 0.7   | 0.7   |
| 219653_at   | NM_014054 | LSM14B                   | 149986 | 32.7  | 19.9  | 25.9  | 21.7  | 23.2  |
| 219654_at   | NM_014241 | PTPLA                    | 9200   | 9.6   | 6.6   | 9.4   | 6.2   | 0.7   |
| 219655_at   | NM_024728 | SUGCT                    | 79783  | 6.0   | 5.0   | 2.2   | 8.2   | 2.0   |
| 219656_at   | NM_016580 | PCDH12                   | 51294  | 14.0  | 1.6   | 3.7   | 1.8   | 2.1   |
| 219657_s_at | NM_016531 | KLF3                     | 51274  | 19.3  | 23.1  | 34.8  | 26.2  | 24.9  |
| 219658_at   | NM_024754 | PTCD2                    | 79810  | 1.4   | 1.0   | 2.4   | 1.9   | 1.5   |
| 219659_at   | AU146927  | ATP8A2                   | 51761  | 1.4   | 1.4   | 0.4   | 0.9   | 0.5   |
| 219660_s_at | NM_016529 | ATP8A2                   | 51761  | 1.2   | 3.9   | 6.2   | 0.8   | 6.4   |
| 219661_at   | NM_022897 | RANBP17                  | 64901  | 33.5  | 37.0  | 28.6  | 28.1  | 16.6  |
| 219662_at   | NM_024093 | C2orf49                  | 79074  | 41.8  | 35.1  | 45.0  | 34.3  | 37.6  |

|             |           |                      |        |       |       |       |       |       |
|-------------|-----------|----------------------|--------|-------|-------|-------|-------|-------|
| 219663_s_at | NM_025268 | TMEM121              | 80757  | 22.0  | 24.1  | 15.8  | 14.0  | 15.4  |
| 219664_s_at | NM_020664 | DECR2                | 26063  | 102.5 | 85.4  | 69.6  | 82.5  | 70.4  |
| 219665_at   | NM_024815 | NUDT18               | 79873  | 41.2  | 35.6  | 44.8  | 27.4  | 33.4  |
| 219666_at   | NM_022349 | MS4A6A               | 64231  | 8.1   | 0.7   | 7.4   | 6.1   | 2.1   |
| 219667_s_at | NM_017935 | BANK1                | 55024  | 25.0  | 16.6  | 28.2  | 15.4  | 15.7  |
| 219668_at   | NM_024034 | GDAP1L1              | 78997  | 2.3   | 9.0   | 11.9  | 9.6   | 7.3   |
| 219669_at   | NM_020406 | CD177                | 57126  | 2.7   | 4.9   | 6.0   | 8.5   | 3.8   |
| 219670_at   | NM_024603 | BEND5                | 79656  | 1.3   | 2.8   | 0.5   | 3.4   | 0.5   |
| 219671_at   | AL136591  | HPCAL4               | 51440  | 16.3  | 9.9   | 7.4   | 4.5   | 7.0   |
| 219672_at   | NM_016633 | AHSP                 | 51327  | 7.7   | 5.2   | 5.3   | 6.4   | 5.6   |
| 219673_at   | NM_017696 | MCM9                 | 254394 | 20.5  | 14.2  | 16.7  | 16.3  | 18.7  |
| 219674_s_at | NM_018635 | HDLBP                | 3069   | 15.1  | 3.8   | 11.5  | 9.1   | 4.0   |
| 219675_s_at | NM_025076 | UXS1                 | 80146  | 42.8  | 47.0  | 58.9  | 51.3  | 42.2  |
| 219676_at   | NM_025231 | ZSCAN16              | 80345  | 38.3  | 27.1  | 39.0  | 33.1  | 25.4  |
| 219677_at   | NM_025106 | SPSB1                | 80176  | 14.0  | 9.3   | 9.8   | 9.7   | 7.3   |
| 219678_x_at | NM_022487 | DCLRE1C              | 64421  | 40.0  | 45.9  | 50.8  | 51.4  | 43.3  |
| 219679_s_at | NM_018604 | WAC                  | 51322  | 78.5  | 58.1  | 76.0  | 74.7  | 54.5  |
| 219680_at   | NM_024618 | NLRX1                | 79671  | 90.5  | 93.9  | 77.3  | 82.3  | 74.1  |
| 219681_s_at | NM_025151 | RAB11FIP1            | 80223  | 92.7  | 74.0  | 95.6  | 74.3  | 69.1  |
| 219682_s_at | NM_016569 | TBX3                 | 6926   | 196.5 | 184.9 | 195.0 | 171.7 | 124.9 |
| 219683_at   | NM_017412 | FZD3                 | 7976   | 34.0  | 26.2  | 36.3  | 30.8  | 30.8  |
| 219684_at   | NM_022147 | RTP4                 | 64108  | 2.0   | 1.8   | 1.0   | 3.2   | 1.5   |
| 219685_at   | NM_021637 | TMEM35               | 59353  | 5.4   | 4.8   | 4.8   | 0.7   | 0.4   |
| 219686_at   | NM_018401 | STK32B               | 55351  | 1.8   | 0.9   | 1.1   | 0.8   | 1.0   |
| 219687_at   | NM_018194 | HHAT                 | 55733  | 1.6   | 3.0   | 3.1   | 6.0   | 3.2   |
| 219688_at   | NM_018190 | BBS7                 | 55212  | 30.5  | 25.1  | 32.3  | 27.5  | 19.7  |
| 219689_at   | NM_020163 | SEMA3G               | 56920  | 14.5  | 3.3   | 17.9  | 9.0   | 19.6  |
| 219690_at   | NM_024660 | IGFLR1               | 79713  | 53.0  | 45.3  | 77.9  | 61.0  | 54.7  |
| 219691_at   | NM_017654 | SAMD9                | 54809  | 5.5   | 5.4   | 0.5   | 4.8   | 4.9   |
| 219692_at   | NM_024507 | KREMEN2              | 79412  | 23.6  | 8.6   | 13.4  | 16.8  | 10.3  |
| 219693_at   | NM_020133 | AGPAT4               | 56895  | 0.8   | 1.3   | 2.5   | 0.5   | 1.1   |
| 219694_at   | NM_019018 | FAM105A              | 54491  | 1.8   | 9.0   | 20.8  | 11.9  | 11.8  |
| 219695_at   | NM_024703 | SMPD3                | 55512  | 9.1   | 1.8   | 7.8   | 8.1   | 0.7   |
| 219696_at   | NM_019049 | DENND1B              | 163486 | 149.9 | 166.8 | 138.5 | 140.4 | 68.6  |
| 219697_at   | NM_006043 | HS3ST2               | 9956   | 1.4   | 6.1   | 16.6  | 9.7   | 11.5  |
| 219698_s_at | NM_022840 | METTL4               | 64863  | 31.4  | 26.2  | 26.5  | 18.7  | 22.6  |
| 219699_at   | NM_018176 | LGI2                 | 55203  | 2.0   | 1.9   | 1.7   | 1.3   | 1.3   |
| 219700_at   | NM_020405 | PLXDC1               | 57125  | 5.5   | 8.0   | 2.5   | 5.3   | 5.7   |
| 219701_at   | NM_014548 | TMOD2                | 29767  | 3.7   | 0.5   | 0.4   | 4.7   | 0.1   |
| 219702_at   | NM_021796 | PLAC1                | 10761  | 17.9  | 11.4  | 19.1  | 17.3  | 14.1  |
| 219703_at   | NM_018365 | MNS1                 | 55329  | 50.8  | 25.2  | 44.4  | 28.6  | 44.0  |
| 219704_at   | NM_015982 | YBX2                 | 51087  | 7.8   | 1.6   | 12.5  | 3.9   | 2.2   |
| 219705_at   | NM_024774 | QSER1                | 79832  | 14.8  | 8.6   | 8.9   | 6.1   | 7.2   |
| 219706_at   | NM_018347 | AP5S1                | 55317  | 78.3  | 71.6  | 74.8  | 69.7  | 50.8  |
| 219707_at   | NM_014427 | CPNE7                | 27132  | 43.7  | 27.6  | 49.6  | 37.2  | 36.8  |
| 219708_at   | NM_020201 | NT5M                 | 56953  | 24.8  | 22.1  | 31.6  | 19.0  | 24.7  |
| 219709_x_at | NM_023933 | FAM173A              | 65990  | 110.4 | 106.4 | 115.9 | 120.8 | 99.6  |
| 219710_at   | NM_024577 | SH3TC2               | 79628  | 0.9   | 0.5   | 1.1   | 1.3   | 1.9   |
| 219711_at   | NM_017652 | ZNF586               | 54807  | 69.4  | 56.1  | 54.9  | 37.9  | 39.3  |
| 219712_s_at | NM_013276 | SHPK /// TRP7442 /// | 237    | 1.5   | 10.4  | 8.6   | 8.8   | 10.1  |
| 219713_at   | NM_013276 | SHPK                 | 23729  | 47.5  | 36.2  | 41.4  | 33.6  | 31.7  |
| 219714_s_at | NM_018398 | CACNA2D3             | 55799  | 1.4   | 1.4   | 3.3   | 0.3   | 2.1   |
| 219715_s_at | NM_018319 | TDP1                 | 55775  | 315.5 | 212.9 | 260.0 | 233.8 | 214.9 |



|             |           |              |        |        |        |        |        |        |
|-------------|-----------|--------------|--------|--------|--------|--------|--------|--------|
| 219716_at   | NM_030641 | APOL6        | 80830  | 14.3   | 7.9    | 3.2    | 5.0    | 9.0    |
| 219717_at   | NM_017741 | DCAF16       | 54876  | 34.1   | 33.9   | 45.8   | 29.4   | 30.6   |
| 219718_at   | NM_018291 | FGGY         | 55277  | 51.0   | 37.1   | 46.9   | 43.9   | 39.2   |
| 219719_at   | NM_016438 | HIGD1B       | 51751  | 1.0    | 1.5    | 1.7    | 2.0    | 0.5    |
| 219720_s_at | NM_017972 | GPATCH2L     | 55668  | 10.0   | 8.0    | 13.6   | 6.7    | 9.1    |
| 219721_at   | NM_018350 | -            | -      | 1.3    | 2.4    | 0.8    | 0.9    | 5.3    |
| 219722_s_at | NM_024307 | GDPD3        | 79153  | 11.6   | 16.8   | 6.1    | 2.6    | 1.4    |
| 219723_x_at | NM_020132 | AGPAT3       | 56894  | 34.3   | 36.0   | 26.4   | 41.1   | 26.9   |
| 219724_s_at | NM_014796 | TESPA1       | 9840   | 8.6    | 7.3    | 5.3    | 10.8   | 6.1    |
| 219725_at   | NM_018965 | TREM2        | 54209  | 1.3    | 1.0    | 1.4    | 1.0    | 4.5    |
| 219726_at   | NM_018977 | NLGN3        | 54413  | 6.0    | 3.4    | 7.9    | 7.8    | 5.0    |
| 219727_at   | NM_014080 | DUOX2        | 50506  | 1.8    | 0.6    | 1.1    | 1.1    | 0.5    |
| 219728_at   | NM_006790 | MYOT         | 9499   | 3.9    | 1.8    | 0.5    | 3.8    | 2.0    |
| 219729_at   | NM_016307 | PRRX2        | 51450  | 12.5   | 8.1    | 1.6    | 1.7    | 1.6    |
| 219730_at   | NM_017638 | LOC100996754 | 79777  | 11.4   | 7.8    | 8.0    | 6.7    | 12.4   |
| 219731_at   | NM_024343 | ENTPD1-AS1   | 728558 | 49.6   | 43.3   | 53.2   | 37.9   | 41.1   |
| 219732_at   | NM_017753 | LPPR1        | 54886  | 9.6    | 7.5    | 7.0    | 7.2    | 9.7    |
| 219733_s_at | NM_012254 | SLC27A5      | 10998  | 143.5  | 138.9  | 169.6  | 182.3  | 162.3  |
| 219734_at   | NM_017699 | SIDT1        | 54847  | 10.0   | 5.9    | 5.5    | 9.1    | 3.4    |
| 219735_s_at | NM_014553 | TFCP2L1      | 29842  | 10.4   | 9.3    | 10.1   | 6.4    | 5.7    |
| 219736_at   | NM_018700 | TRIM36       | 55521  | 25.7   | 15.0   | 17.3   | 16.1   | 17.8   |
| 219737_s_at | AI524125  | PCDH9        | 5101   | 3.9    | 7.3    | 6.4    | 8.3    | 8.6    |
| 219738_s_at | NM_020403 | PCDH9        | 5101   | 0.9    | 0.7    | 0.8    | 2.1    | 0.7    |
| 219739_at   | NM_019062 | RNF186       | 54546  | 12.6   | 2.9    | 2.5    | 2.1    | 2.0    |
| 219740_at   | NM_024749 | VASH2        | 79805  | 14.7   | 6.4    | 14.6   | 12.3   | 7.8    |
| 219741_x_at | NM_024762 | ZNF552       | 79818  | 94.0   | 64.0   | 103.6  | 75.2   | 66.4   |
| 219742_at   | NM_030567 | PRR7         | 80758  | 123.6  | 117.6  | 141.0  | 154.3  | 136.1  |
| 219743_at   | NM_012259 | HEY2         | 23493  | 3.7    | 3.1    | 2.2    | 1.1    | 0.9    |
| 219744_at   | NM_022158 | FN3K         | 64122  | 0.8    | 1.0    | 2.0    | 0.7    | 2.4    |
| 219745_at   | NM_024789 | TMEM180      | 79847  | 18.0   | 29.3   | 15.4   | 19.2   | 21.5   |
| 219746_at   | NM_012074 | DPF3         | 8110   | 16.4   | 14.8   | 19.1   | 8.5    | 8.6    |
| 219747_at   | NM_024574 | NDNF         | 79625  | 12.7   | 6.5    | 5.8    | 1.9    | 1.5    |
| 219748_at   | NM_024807 | TREML2       | 79865  | 11.7   | 1.3    | 2.3    | 3.2    | 1.1    |
| 219749_at   | NM_022071 | SH2D4A       | 63898  | 36.8   | 42.0   | 38.6   | 35.2   | 33.9   |
| 219750_at   | NM_018342 | TMEM144      | 55314  | 27.1   | 22.4   | 24.5   | 21.3   | 20.5   |
| 219751_at   | NM_024860 | SETD6        | 79918  | 28.6   | 23.3   | 32.3   | 30.3   | 25.6   |
| 219752_at   | NM_004658 | RASAL1       | 8437   | 7.9    | 14.1   | 4.3    | 15.2   | 10.0   |
| 219753_at   | NM_012447 | STAG3        | 10734  | 15.5   | 11.4   | 10.6   | 4.3    | 9.2    |
| 219754_at   | NM_018301 | RBM41        | 55285  | 20.8   | 20.5   | 12.3   | 14.6   | 12.0   |
| 219755_at   | NM_020649 | CBX8         | 57332  | 32.5   | 7.3    | 20.8   | 26.1   | 20.6   |
| 219756_s_at | NM_024921 | POF1B        | 79983  | 7.5    | 1.7    | 1.1    | 4.1    | 2.3    |
| 219757_s_at | NM_017799 | TMEM260      | 54916  | 35.5   | 28.1   | 35.3   | 28.1   | 23.1   |
| 219758_at   | NM_024926 | TTC26        | 79989  | 52.5   | 53.6   | 73.7   | 48.7   | 52.6   |
| 219759_at   | NM_022350 | ERAP2        | 64167  | 2.2    | 0.1    | 0.2    | 0.5    | 0.2    |
| 219760_at   | NM_022165 | LIN7B        | 64130  | 12.2   | 19.4   | 9.9    | 16.2   | 14.6   |
| 219761_at   | NM_016511 | CLEC1A       | 51267  | 14.8   | 9.4    | 13.3   | 10.2   | 5.5    |
| 219762_s_at | NM_015414 | RPL36        | 25873  | 2902.7 | 2879.0 | 3340.2 | 3064.2 | 2784.1 |
| 219763_at   | NM_024820 | DENND1A      | 57706  | 173.9  | 233.4  | 211.6  | 205.3  | 174.0  |
| 219764_at   | NM_007197 | FZD10        | 11211  | 1.2    | 3.4    | 0.6    | 0.4    | 1.5    |
| 219765_at   | NM_024620 | ZNF329       | 79673  | 33.8   | 38.8   | 33.6   | 38.9   | 29.6   |
| 219766_at   | NM_030578 | B9D2         | 80776  | 7.0    | 6.5    | 1.1    | 10.1   | 11.4   |
| 219767_s_at | NM_005111 | CRYZL1       | 9946   | 59.3   | 55.7   | 60.0   | 56.4   | 52.9   |
| 219768_at   | NM_024626 | VTCN1        | 79679  | 1.4    | 3.7    | 2.0    | 0.5    | 9.2    |

|             |           |                   |            |        |       |       |       |       |     |
|-------------|-----------|-------------------|------------|--------|-------|-------|-------|-------|-----|
| 219769_at   | NM_020238 | INCENP            | 3619       | 43.4   | 27.7  | 62.3  | 29.0  | 29.6  |     |
| 219770_at   | NM_024659 | GTDC1             | 79712      | 19.1   | 17.4  | 28.3  | 18.6  | 21.0  |     |
| 219771_at   | NM_017752 | TBC1D8B           | 54885      | 9.9    | 13.5  | 7.8   | 9.0   | 11.4  |     |
| 219772_s_at | NM_014332 | SMPX              | 23676      | 0.7    | 1.0   | 2.3   | 0.6   | 0.6   |     |
| 219773_at   | NM_016931 | NOX4              | 50507      | 0.6    | 3.4   | 4.6   | 2.7   | 1.1   |     |
| 219774_at   | NM_019044 | CCDC93            | 54520      | 22.3   | 13.8  | 21.2  | 21.7  | 12.3  |     |
| 219775_s_at | NM_024695 | CPLX3             | 594855     | 2.5    | 1.1   | 4.3   | 1.7   | 0.9   |     |
| 219776_s_at | NM_018331 | -                 | -          | 2.4    | 0.9   | 2.1   | 0.7   | 0.8   |     |
| 219777_at   | NM_024711 | GIMAP6            | 474344     | 0.2    | 1.5   | 0.2   | 1.6   | 1.9   |     |
| 219778_at   | NM_012082 | ZFPM2             | 23414      | 7.7    | 0.4   | 3.4   | 3.9   | 2.6   |     |
| 219779_at   | NM_024721 | ZFHx4             | 79776      | 16.5   | 16.5  | 18.9  | 20.3  | 16.1  |     |
| 219780_at   | AF242768  | ZNF771            | 51333      | 4.3    | 2.0   | 3.0   | 6.7   | 0.7   |     |
| 219781_s_at | AI992095  | ZNF771            | 51333      | 39.1   | 26.4  | 38.0  | 33.1  | 28.9  |     |
| 219782_s_at | NM_016643 | ZNF771            | 51333      | 0.3    | 0.3   | 0.2   | 0.3   | 0.2   |     |
| 219783_at   | NM_017877 | SLC35F6           | 54978      | 41.2   | 36.5  | 35.9  | 35.8  | 19.7  |     |
| 219784_at   | NM_024735 | C16orf95          | 100506581  | 36.5   | 41.1  | 47.0  | 51.0  | 33.5  |     |
| 219785_s_at | NM_024735 | C16orf95          | 100506581  | 47.5   | 35.9  | 57.1  | 52.0  | 47.5  |     |
| 219786_at   | NM_004923 | MTL5              | 9633       | 13.6   | 8.9   | 11.3  | 13.6  | 6.7   |     |
| 219787_s_at | NM_018098 | ECT2              | 1894       | 198.4  | 124.9 | 226.5 | 152.8 | 156.1 |     |
| 219788_at   | NM_013439 | PILRA             | 29992      | 1.0    | 4.3   | 1.1   | 2.5   | 5.3   |     |
| 219789_at   | AI628360  | NPR3              | 4883       | 3.6    | 2.1   | 5.1   | 2.6   | 6.3   |     |
| 219790_s_at | NM_000908 | NPR3              | 4883       | 0.7    | 0.6   | 0.6   | 0.4   | 0.3   |     |
| 219791_s_at | NM_024748 | HAND2-AS1         | 79804      | 0.4    | 0.3   | 0.4   | 0.3   | 0.2   |     |
| 219792_at   | NM_024758 | AGMAT             | 79814      | 12.1   | 6.7   | 7.1   | 10.1  | 11.1  |     |
| 219793_at   | NM_022133 | SNX16             | 64089      | 17.5   | 14.7  | 20.0  | 17.9  | 17.1  |     |
| 219794_at   | NM_018289 | VPS53             | 55275      | 4.7    | 1.1   | 10.4  | 6.3   | 4.3   |     |
| 219795_at   | NM_007231 | SLC6A14           | 11254      | 3.4    | 2.7   | 0.3   | 2.7   | 0.1   |     |
| 219796_s_at | NM_021924 | CDHR5             | 53841      | 1.4    | 0.5   | 0.9   | 0.7   | 0.4   |     |
| 219797_at   | NM_012214 | MGAT4A            | 11320      | 4.4    | 4.0   | 3.4   | 6.3   | 4.4   |     |
| 219798_s_at | NM_019606 | MEPCE             | 56257      | 247.9  | 251.3 | 290.6 | 245.2 | 233.6 |     |
| 219799_s_at | NM_005771 | DHRS9             | 10170      | 26.1   | 18.6  | 15.7  | 11.0  | 13.5  |     |
| 219800_s_at | NM_024838 | THNSL1            | 79896      | 25.5   | 20.3  | 23.9  | 17.8  | 13.8  |     |
| 219801_at   | NM_030580 | ZNF34             | 80778      | 12.1   | 13.4  | 16.1  | 12.9  | 13.4  |     |
| 219802_at   | NM_024854 | PYROXD1           | 79912      | 28.2   | 24.2  | 37.8  | 26.6  | 14.0  |     |
| 219803_at   | NM_014495 | ANGPTL3           | 27329      | 1.1    | 3.0   | 0.3   | 1.9   | 3.1   |     |
| 219804_at   | NM_024875 | SYNPO2L           | 79933      | 0.5    | 2.0   | 2.9   | 2.3   | 3.4   |     |
| 219805_at   | NM_022101 | CXorf56           | 63932      | 23.6   | 11.3  | 24.4  | 18.6  | 13.7  |     |
| 219806_s_at | NM_020179 | SMCO4             | 56935      | 333.2  | 309.4 | 417.4 | 342.5 | 298.8 |     |
| 219807_x_at | NM_016154 | MIA-RAB4B / 53916 | /// 10     | 10.7   | 55.3  | 14.2  | 46.4  | 31.3  |     |
| 219808_at   | NM_016510 | SCLY              | 51540      | 12.1   | 11.6  | 10.6  | 8.6   | 10.8  |     |
| 219809_at   | NM_017706 | WDR55             | 54853      | 90.6   | 96.6  | 94.8  | 70.0  | 80.9  |     |
| 219810_at   | NM_025054 | VCPIP1            | 80124      | 9.9    | 3.0   | 8.9   | 7.9   | 4.7   |     |
| 219811_at   | NM_022720 | DGCR8             | /// M54487 | /// 10 | 18.2  | 4.8   | 13.3  | 3.0   | 7.7 |
| 219812_at   | NM_024070 | PVRIG             | 79037      | 6.9    | 14.0  | 7.1   | 1.7   | 10.5  |     |
| 219813_at   | NM_004690 | LATS1             | 9113       | 8.6    | 10.1  | 11.1  | 8.9   | 8.5   |     |
| 219814_at   | NM_018388 | MBNL3             | 55796      | 8.5    | 5.1   | 9.2   | 0.9   | 5.0   |     |
| 219815_at   | NM_024637 | GAL3ST4           | 79690      | 22.1   | 5.1   | 1.9   | 1.1   | 2.8   |     |
| 219816_s_at | NM_018107 | RBM23             | 55147      | 285.2  | 231.9 | 262.5 | 234.2 | 224.9 |     |
| 219817_at   | NM_016534 | MAPKAPK5-1        | 51275      | 99.7   | 70.9  | 79.4  | 66.2  | 55.1  |     |
| 219818_s_at | NM_018025 | GPATCH1           | 55094      | 35.1   | 30.1  | 39.0  | 36.1  | 29.8  |     |
| 219819_s_at | NM_014018 | MRPS28            | 28957      | 371.4  | 370.9 | 436.2 | 401.5 | 367.0 |     |
| 219820_at   | NM_014037 | SLC6A16           | 28968      | 8.8    | 0.5   | 7.6   | 1.2   | 0.8   |     |
| 219821_s_at | NM_018988 | GFOD1             | 54438      | 31.2   | 28.3  | 34.4  | 29.6  | 31.6  |     |

|             |           |           |        |       |       |       |       |       |
|-------------|-----------|-----------|--------|-------|-------|-------|-------|-------|
| 219822_at   | NM_004294 | MTRF1     | 9617   | 10.1  | 10.4  | 11.2  | 11.2  | 12.1  |
| 219823_at   | NM_024674 | LIN28A    | 79727  | 1.5   | 0.7   | 0.6   | 1.6   | 3.0   |
| 219824_at   | NM_012450 | SLC13A4   | 26266  | 11.7  | 1.6   | 11.8  | 1.2   | 5.1   |
| 219825_at   | NM_019885 | CYP26B1   | 56603  | 1.4   | 1.3   | 2.0   | 4.5   | 2.1   |
| 219826_at   | NM_024691 | ZNF419    | 79744  | 77.2  | 70.9  | 65.9  | 74.0  | 51.5  |
| 219827_at   | NM_003356 | UCP3      | 7352   | 12.8  | 2.8   | 1.9   | 13.2  | 8.9   |
| 219828_at   | NM_024718 | RABL6     | 55684  | 30.6  | 25.7  | 45.2  | 14.4  | 22.2  |
| 219829_at   | NM_012278 | ITGB1BP2  | 26548  | 0.6   | 1.7   | 5.2   | 0.9   | 0.9   |
| 219830_at   | NM_030665 | RAI1      | 10743  | 0.9   | 1.9   | 0.8   | 2.2   | 3.6   |
| 219831_at   | NM_016508 | CDKL3     | 51265  | 6.2   | 2.0   | 9.8   | 8.8   | 8.2   |
| 219832_s_at | NM_017410 | HOXC13    | 3229   | 58.7  | 42.7  | 39.8  | 35.2  | 26.4  |
| 219833_s_at | NM_018100 | EFHC1     | 114327 | 31.9  | 23.9  | 36.7  | 33.2  | 26.7  |
| 219834_at   | NM_024744 | CARF      | 79800  | 9.4   | 9.9   | 5.8   | 7.7   | 8.2   |
| 219835_at   | NM_020226 | PRDM8     | 56978  | 0.8   | 0.5   | 0.5   | 0.5   | 0.6   |
| 219836_at   | NM_024508 | ZBED2     | 79413  | 1.5   | 0.4   | 1.2   | 0.6   | 0.7   |
| 219837_s_at | NM_018659 | CYTL1     | 54360  | 1.2   | 1.3   | 1.2   | 1.0   | 1.2   |
| 219838_at   | NM_022905 | TTC23     | 64927  | 30.7  | 23.9  | 26.5  | 18.4  | 24.3  |
| 219839_x_at | NM_012468 | TCL6      | 27004  | 1.2   | 1.0   | 2.2   | 1.2   | 0.7   |
| 219840_s_at | AF195820  | TCL6      | 27004  | 2.2   | 5.7   | 3.9   | 0.7   | 1.5   |
| 219841_at   | NM_020661 | AICDA     | 57379  | 1.7   | 3.9   | 7.5   | 0.2   | 1.8   |
| 219842_at   | NM_019087 | ARL15     | 54622  | 9.4   | 4.2   | 3.9   | 5.9   | 6.5   |
| 219843_at   | NM_005897 | IPP       | 3652   | 53.3  | 58.6  | 55.3  | 48.5  | 58.0  |
| 219844_at   | NM_018017 | CCDC186   | 55088  | 12.6  | 13.3  | 17.5  | 13.6  | 10.1  |
| 219845_at   | NM_021570 | BARX1     | 56033  | 8.0   | 4.0   | 12.1  | 4.7   | 3.8   |
| 219846_at   | NM_025174 | GON4L     | 54856  | 15.3  | 12.2  | 11.3  | 7.2   | 7.7   |
| 219847_at   | NM_024827 | HDAC11    | 79885  | 5.6   | 16.1  | 4.0   | 5.0   | 0.9   |
| 219848_s_at | NM_014650 | ZNF432    | 9668   | 30.7  | 34.1  | 36.5  | 33.6  | 30.1  |
| 219849_at   | NM_024833 | ZNF671    | 79891  | 11.4  | 15.1  | 16.5  | 7.4   | 3.9   |
| 219850_s_at | NM_012153 | EHF       | 26298  | 151.9 | 130.2 | 172.1 | 118.0 | 145.9 |
| 219851_at   | NM_024840 | ZNF613    | 79898  | 6.8   | 2.1   | 4.0   | 7.0   | 10.2  |
| 219852_s_at | NM_024848 | MORN1     | 79906  | 2.8   | 2.2   | 1.2   | 3.3   | 1.0   |
| 219853_at   | NM_024301 | FKRP      | 79147  | 0.5   | 0.7   | 0.5   | 0.5   | 0.6   |
| 219854_at   | NM_021030 | ZNF14     | 7561   | 12.6  | 15.8  | 22.6  | 15.5  | 21.2  |
| 219855_at   | NM_018159 | NUDT11    | 55190  | 9.3   | 11.9  | 9.7   | 14.4  | 7.1   |
| 219856_at   | NM_023938 | C1orf116  | 79098  | 62.1  | 80.5  | 115.2 | 96.2  | 92.3  |
| 219857_at   | NM_024889 | PLEKHS1   | 79949  | 2.8   | 0.6   | 2.7   | 2.4   | 1.6   |
| 219858_s_at | NM_017694 | MFSD6     | 54842  | 14.2  | 18.1  | 14.8  | 17.5  | 13.6  |
| 219859_at   | NM_014358 | CLEC4E    | 26253  | 14.5  | 3.5   | 4.8   | 8.6   | 0.1   |
| 219860_at   | NM_025262 | LY6G5C    | 80741  | 8.8   | 2.4   | 5.1   | 8.9   | 5.1   |
| 219861_at   | NM_018163 | DNAJC17   | 55192  | 32.4  | 35.0  | 34.7  | 32.8  | 26.4  |
| 219862_s_at | NM_012336 | NARF      | 26502  | 124.9 | 140.5 | 153.9 | 143.7 | 123.1 |
| 219863_at   | NM_016323 | HERC5     | 51191  | 18.0  | 7.4   | 16.4  | 13.5  | 7.2   |
| 219864_s_at | NM_013441 | RCAN3     | 11123  | 19.4  | 15.4  | 16.0  | 18.8  | 14.9  |
| 219865_at   | NM_014179 | LINC00339 | 29092  | 23.2  | 23.4  | 27.0  | 18.6  | 25.6  |
| 219866_at   | NM_016929 | CLIC5     | 53405  | 8.2   | 6.3   | 11.3  | 15.0  | 12.7  |
| 219867_at   | NM_024944 | CHODL     | 140578 | 0.8   | 2.7   | 1.1   | 4.3   | 3.9   |
| 219868_s_at | NM_016376 | ANKFY1    | 51479  | 33.2  | 32.7  | 29.4  | 31.9  | 24.2  |
| 219869_s_at | NM_022154 | SLC39A8   | 64116  | 72.9  | 51.8  | 70.3  | 62.4  | 56.1  |
| 219870_at   | NM_024997 | ATF7IP2   | 80063  | 9.4   | 1.9   | 5.3   | 8.1   | 5.1   |
| 219871_at   | NM_024614 | KLF3-AS1  | 79667  | 0.4   | 5.0   | 3.6   | 0.6   | 1.1   |
| 219872_at   | NM_016613 | FAM198B   | 51313  | 125.7 | 101.2 | 91.5  | 103.0 | 79.2  |
| 219873_at   | NM_024027 | COLEC11   | 78989  | 17.9  | 9.9   | 15.1  | 12.0  | 9.3   |
| 219874_at   | NM_024628 | SLC12A8   | 84561  | 37.9  | 36.3  | 40.0  | 34.5  | 25.1  |

|             |           |                          |           |       |       |       |       |       |
|-------------|-----------|--------------------------|-----------|-------|-------|-------|-------|-------|
| 219875_s_at | NM_016076 | DESI2                    | 51029     | 15.2  | 10.0  | 21.5  | 21.2  | 12.1  |
| 219876_s_at | NM_017600 | GOLGA2P5                 | 55592     | 4.3   | 2.9   | 0.9   | 0.9   | 0.5   |
| 219877_at   | NM_024645 | ZMAT4                    | 79698     | 2.0   | 1.6   | 3.4   | 1.6   | 1.4   |
| 219878_s_at | NM_015995 | KLF13                    | 51621     | 0.9   | 0.6   | 0.6   | 0.4   | 1.3   |
| 219879_s_at | NM_024032 | C17orf53                 | 78995     | 26.1  | 21.3  | 17.0  | 18.4  | 17.7  |
| 219880_at   | NM_022907 | CTC-338M12               | 101928649 | 35.3  | 46.0  | 36.2  | 47.2  | 34.2  |
| 219881_s_at | NM_022907 | CTC-338M12               | 101928649 | 36.2  | 25.0  | 32.3  | 31.6  | 16.9  |
| 219882_at   | NM_024686 | TLL7                     | 79739     | 32.9  | 34.8  | 45.7  | 33.5  | 27.6  |
| 219883_at   | NM_016611 | TEX40                    | 25858     | 15.2  | 19.4  | 23.5  | 13.4  | 8.8   |
| 219884_at   | NM_014368 | LHX6                     | 26468     | 11.0  | 0.9   | 0.9   | 2.8   | 1.4   |
| 219885_at   | NM_018042 | SLFN12                   | 55106     | 0.6   | 3.4   | 0.7   | 1.5   | 2.1   |
| 219886_at   | NM_024548 | CEP97                    | 79598     | 14.2  | 7.7   | 19.0  | 14.7  | 7.6   |
| 219887_at   | NM_018219 | CCDC87                   | 55231     | 4.6   | 7.8   | 3.4   | 5.1   | 1.4   |
| 219888_at   | NM_003116 | SPAG4                    | 6676      | 17.5  | 13.6  | 17.0  | 11.4  | 7.2   |
| 219889_at   | NM_005479 | FRAT1                    | 10023     | 20.9  | 25.8  | 38.4  | 32.2  | 25.2  |
| 219890_at   | NM_013252 | CLEC5A                   | 23601     | 3.2   | 0.8   | 1.0   | 4.6   | 2.2   |
| 219891_at   | NM_017712 | PGPEP1                   | 54858     | 37.6  | 42.9  | 32.1  | 27.3  | 26.8  |
| 219892_at   | NM_023003 | TM6SF1                   | 53346     | 4.6   | 4.9   | 5.9   | 4.0   | 4.3   |
| 219893_at   | NM_022903 | CCDC71                   | 64925     | 12.7  | 18.9  | 19.9  | 15.4  | 14.0  |
| 219894_at   | NM_019066 | MAGEL2                   | 54551     | 1.7   | 0.4   | 1.6   | 0.4   | 1.0   |
| 219895_at   | NM_017938 | TMEM255A                 | 55026     | 0.4   | 0.9   | 0.3   | 0.1   | 0.3   |
| 219896_at   | NM_015722 | CALY                     | 50632     | 0.5   | 2.2   | 5.0   | 0.5   | 0.4   |
| 219897_at   | NM_024787 | RNF122                   | 79845     | 24.3  | 9.0   | 20.6  | 13.4  | 12.8  |
| 219898_at   | NM_018970 | GPR85                    | 54329     | 3.3   | 5.2   | 5.8   | 4.5   | 4.1   |
| 219899_x_at | NM_014434 | NDOR1                    | 27158     | 24.2  | 15.4  | 13.0  | 14.6  | 10.5  |
| 219900_s_at | NM_017908 | ZNF446                   | 55663     | 27.2  | 32.1  | 20.9  | 23.3  | 16.5  |
| 219901_at   | NM_018351 | FGD6                     | 55785     | 2.7   | 4.0   | 4.8   | 4.8   | 9.5   |
| 219902_at   | NM_017614 | BHMT2                    | 23743     | 1.7   | 1.1   | 1.0   | 1.0   | 1.1   |
| 219903_s_at | NM_000770 | CYP2C8                   | 1558      | 2.7   | 0.4   | 0.3   | 6.4   | 0.4   |
| 219904_at   | NM_024303 | ZSCAN5A                  | 79149     | 33.3  | 34.8  | 36.1  | 34.1  | 28.8  |
| 219905_at   | NM_018538 | ERMAP                    | 114625    | 24.4  | 14.8  | 14.4  | 26.4  | 17.8  |
| 219906_at   | NM_018029 | EBLN2                    | 55096     | 8.0   | 5.5   | 5.1   | 6.1   | 10.6  |
| 219907_at   | NM_006653 | FRS3                     | 10817     | 28.7  | 19.8  | 18.4  | 18.9  | 21.7  |
| 219908_at   | NM_014421 | DKK2                     | 27123     | 2.3   | 0.2   | 2.1   | 0.4   | 3.1   |
| 219909_at   | NM_024302 | MMP28                    | 79148     | 0.8   | 0.4   | 0.9   | 0.6   | 0.3   |
| 219910_at   | NM_007076 | FICD                     | 11153     | 40.4  | 28.9  | 29.3  | 32.1  | 23.8  |
| 219911_s_at | NM_016354 | SLCO4A1                  | 28231     | 72.1  | 73.6  | 117.5 | 83.0  | 81.2  |
| 219912_s_at | NM_005021 | -                        | -         | 7.4   | 5.2   | 4.3   | 8.1   | 1.5   |
| 219913_s_at | NM_016652 | CRNKL1                   | 51340     | 88.3  | 66.3  | 86.2  | 79.7  | 67.3  |
| 219914_at   | NM_004826 | ECEL1                    | 9427      | 1.2   | 0.9   | 1.2   | 1.7   | 2.0   |
| 219915_s_at | NM_018593 | SLC16A10                 | 117247    | 9.6   | 7.3   | 3.4   | 3.6   | 5.2   |
| 219916_s_at | NM_025236 | RNF39                    | 80352     | 21.0  | 5.0   | 12.8  | 8.9   | 5.5   |
| 219917_at   | NM_024936 | ZCCHC4                   | 29063     | 18.7  | 16.5  | 21.9  | 18.8  | 14.3  |
| 219918_s_at | NM_018123 | ASPM                     | 259266    | 50.5  | 40.7  | 49.1  | 42.9  | 45.0  |
| 219919_s_at | NM_018276 | SSH3                     | 54961     | 28.6  | 26.7  | 30.3  | 32.5  | 34.0  |
| 219920_s_at | NM_021971 | AMIGO3 /// (29925 /// 38 |           | 205.3 | 215.1 | 227.9 | 250.3 | 187.9 |
| 219921_s_at | NM_024940 | DOCK5                    | 80005     | 26.5  | 13.9  | 7.8   | 8.3   | 14.7  |
| 219922_s_at | NM_021070 | LTBP3                    | 4054      | 173.0 | 191.2 | 206.8 | 242.9 | 164.1 |
| 219923_at   | NM_025188 | TRIM45                   | 80263     | 24.0  | 27.4  | 21.2  | 26.8  | 13.9  |
| 219924_s_at | NM_007167 | ZMYM6                    | 9204      | 53.3  | 39.2  | 89.7  | 59.3  | 66.9  |
| 219925_at   | NM_007167 | ZMYM6                    | 9204      | 10.1  | 7.6   | 14.6  | 10.6  | 13.6  |
| 219926_at   | NM_022361 | POPDC3                   | 64208     | 14.8  | 9.3   | 1.5   | 5.9   | 10.0  |
| 219927_at   | NM_015962 | FCF1                     | 51077     | 24.4  | 17.4  | 29.5  | 25.1  | 16.4  |

|             |           |          |       |       |       |       |       |       |
|-------------|-----------|----------|-------|-------|-------|-------|-------|-------|
| 219928_s_at | NM_012189 | CABYR    | 26256 | 9.3   | 7.0   | 11.9  | 8.8   | 5.5   |
| 219929_s_at | NM_024071 | ZFYVE21  | 79038 | 66.9  | 55.6  | 75.2  | 66.1  | 54.1  |
| 219930_at   | NM_007250 | KLF8     | 11279 | 0.5   | 1.2   | 0.8   | 2.2   | 0.4   |
| 219931_s_at | NM_021633 | KLHL12   | 59349 | 52.4  | 62.2  | 76.6  | 66.8  | 52.7  |
| 219932_at   | NM_014031 | SLC27A6  | 28965 | 2.9   | 4.2   | 0.6   | 3.7   | 2.2   |
| 219933_at   | NM_016066 | GLRX2    | 51022 | 255.0 | 194.5 | 335.6 | 205.0 | 258.7 |
| 219934_s_at | NM_005420 | SULT1E1  | 6783  | 6.2   | 3.5   | 2.9   | 8.3   | 0.2   |
| 219935_at   | NM_007038 | ADAMTS5  | 11096 | 4.4   | 2.5   | 4.3   | 4.8   | 5.2   |
| 219936_s_at | NM_023915 | GPR87    | 53836 | 3.8   | 0.4   | 0.8   | 0.4   | 0.4   |
| 219937_at   | NM_013381 | TRHDE    | 29953 | 0.8   | 2.0   | 2.3   | 0.4   | 0.1   |
| 219938_s_at | NM_024430 | PSTPIP2  | 9050  | 5.1   | 7.6   | 10.9  | 9.3   | 7.5   |
| 219939_s_at | NM_007158 | CSDE1    | 7812  | 564.9 | 534.9 | 586.2 | 586.6 | 481.8 |
| 219940_s_at | NM_018386 | PCID2    | 55795 | 143.6 | 132.3 | 155.8 | 135.6 | 133.8 |
| 219941_at   | NM_018279 | TMEM19   | 55266 | 5.2   | 3.1   | 4.9   | 6.9   | 1.8   |
| 219942_at   | NM_021223 | MYL7     | 58498 | 7.3   | 0.9   | 4.4   | 0.7   | 5.1   |
| 219943_s_at | NM_022741 | USP46    | 64854 | 1.8   | 2.4   | 10.7  | 1.8   | 1.9   |
| 219944_at   | NM_024692 | CLIP4    | 79745 | 6.5   | 10.0  | 7.3   | 0.8   | 2.9   |
| 219945_at   | NM_013264 | DDX25    | 29118 | 5.0   | 4.9   | 8.1   | 9.3   | 6.4   |
| 219946_x_at | NM_024729 | MYH14    | 79784 | 51.0  | 45.5  | 47.3  | 53.2  | 37.4  |
| 219947_at   | NM_016184 | CLEC4A   | 50856 | 1.5   | 2.1   | 0.1   | 1.2   | 0.5   |
| 219948_x_at | NM_024743 | UGT2A3   | 79799 | 2.1   | 2.4   | 1.7   | 0.2   | 1.5   |
| 219949_at   | NM_024512 | LRRC2    | 79442 | 0.3   | 3.5   | 1.0   | 1.2   | 1.4   |
| 219950_s_at | NM_012454 | TIAM2    | 26230 | 8.8   | 8.7   | 6.5   | 5.4   | 3.4   |
| 219951_s_at | NM_018152 | DZANK1   | 55184 | 10.7  | 1.8   | 6.7   | 5.2   | 7.1   |
| 219952_s_at | NM_020533 | MCOLN1   | 57192 | 84.2  | 56.2  | 56.6  | 75.1  | 68.3  |
| 219953_s_at | NM_020642 | AKIP1    | 56672 | 108.4 | 121.0 | 103.4 | 96.6  | 90.3  |
| 219954_s_at | NM_020973 | GBA3     | 57733 | 8.6   | 7.0   | 9.7   | 10.9  | 6.1   |
| 219955_at   | NM_019079 | L1TD1    | 54596 | 6.5   | 1.8   | 9.5   | 1.4   | 6.6   |
| 219956_at   | NM_007210 | GALNT6   | 11226 | 7.4   | 8.4   | 3.9   | 5.3   | 2.5   |
| 219957_at   | NM_017987 | RUFY2    | 55680 | 1.7   | 2.0   | 3.5   | 5.1   | 6.6   |
| 219958_at   | NM_018354 | TMEM74B  | 55321 | 11.5  | 1.6   | 4.5   | 1.8   | 8.9   |
| 219959_at   | NM_017947 | MOCOS    | 55034 | 148.2 | 156.5 | 160.8 | 168.2 | 127.0 |
| 219960_s_at | NM_015984 | UCHL5    | 51377 | 165.7 | 107.0 | 191.9 | 110.8 | 144.3 |
| 219961_s_at | NM_018474 | KIZ      | 55857 | 9.3   | 19.2  | 23.1  | 21.0  | 10.2  |
| 219962_at   | NM_021804 | ACE2     | 59272 | 4.7   | 2.2   | 6.1   | 3.6   | 2.4   |
| 219963_at   | NM_016364 | DUSP13   | 51207 | 12.8  | 17.8  | 20.2  | 19.5  | 15.6  |
| 219964_at   | NM_017744 | ST7L     | 54879 | 8.2   | 8.6   | 8.7   | 1.9   | 9.1   |
| 219965_s_at | NM_024859 | MAGIX    | 79917 | 3.2   | 6.3   | 0.5   | 3.2   | 0.7   |
| 219966_x_at | NM_017869 | BANP     | 54971 | 115.7 | 104.2 | 106.1 | 106.6 | 83.6  |
| 219967_at   | NM_024864 | MRM1     | 79922 | 23.7  | 17.5  | 32.3  | 13.6  | 27.7  |
| 219968_at   | NM_016089 | ZNF589   | 51385 | 24.8  | 20.4  | 19.7  | 22.3  | 16.8  |
| 219969_at   | NM_018360 | TXLNG    | 55787 | 11.2  | 9.6   | 17.2  | 7.6   | 12.3  |
| 219970_at   | NM_017655 | GIPC2    | 54810 | 3.9   | 1.8   | 0.3   | 0.2   | 0.2   |
| 219971_at   | NM_021798 | IL21R    | 50615 | 0.6   | 0.8   | 0.7   | 1.8   | 0.3   |
| 219972_s_at | NM_022495 | PCNXL4   | 64430 | 73.0  | 42.6  | 64.2  | 62.0  | 52.8  |
| 219973_at   | NM_024590 | ARSJ     | 79642 | 3.1   | 0.8   | 0.4   | 0.8   | 0.8   |
| 219974_x_at | NM_018479 | ECHDC1   | 55862 | 0.7   | 0.2   | 1.0   | 1.2   | 3.9   |
| 219975_x_at | NM_018324 | OLAH     | 55301 | 5.1   | 0.5   | 3.4   | 2.1   | 1.9   |
| 219976_at   | NM_015888 | HOOK1    | 51361 | 19.4  | 17.5  | 28.0  | 16.7  | 16.7  |
| 219977_at   | NM_014336 | AIPL1    | 23746 | 14.3  | 5.9   | 10.7  | 10.0  | 8.6   |
| 219978_s_at | NM_018454 | NUSAP1   | 51203 | 230.6 | 192.2 | 284.1 | 185.6 | 204.1 |
| 219979_s_at | NM_016401 | C11orf73 | 51501 | 155.7 | 107.8 | 153.6 | 145.0 | 103.1 |
| 219980_at   | NM_025097 | C4orf29  | 80167 | 11.3  | 8.5   | 7.5   | 8.2   | 5.2   |

|             |           |              |              |       |      |       |       |      |
|-------------|-----------|--------------|--------------|-------|------|-------|-------|------|
| 219981_x_at | NM_017961 | ZNF587       | 84914        | 103.7 | 78.3 | 90.8  | 102.2 | 70.3 |
| 219982_s_at | NM_022978 | SERF1A /// S | 8293 /// 728 | 57.7  | 45.2 | 58.1  | 56.2  | 45.8 |
| 219983_at   | NM_020386 | HRASLS       | 57110        | 2.6   | 2.6  | 2.0   | 0.9   | 1.4  |
| 219984_s_at | NM_020386 | HRASLS       | 57110        | 5.5   | 1.2  | 3.4   | 0.8   | 2.6  |
| 219985_at   | NM_006042 | HS3ST3A1     | 9955         | 0.4   | 1.0  | 0.4   | 1.0   | 0.3  |
| 219986_s_at | NM_025247 | ACAD10       | 80724        | 26.7  | 20.7 | 24.6  | 20.8  | 15.9 |
| 219987_at   | NM_024534 | ERVMER34-1   | 100288413    | 25.4  | 15.6 | 24.0  | 18.7  | 19.1 |
| 219988_s_at | NM_018150 | RNF220       | 55182        | 90.3  | 95.1 | 117.2 | 118.5 | 91.9 |
| 219989_s_at | NM_020140 | ANKS1B       | 56899        | 4.1   | 5.5  | 1.4   | 0.7   | 1.3  |
| 219990_at   | NM_024680 | E2F8         | 79733        | 45.0  | 22.7 | 48.9  | 31.4  | 36.6 |
| 219991_at   | NM_020041 | SLC2A9       | 56606        | 23.0  | 16.6 | 13.1  | 25.4  | 12.0 |
| 219992_at   | NM_013251 | TAC3         | 6866         | 26.1  | 11.7 | 17.8  | 16.5  | 21.8 |
| 219993_at   | NM_022454 | SOX17        | 64321        | 6.9   | 4.7  | 3.1   | 7.0   | 6.5  |
| 219994_at   | NM_019043 | APBB1IP      | 54518        | 7.3   | 1.4  | 7.7   | 3.8   | 3.1  |
| 219995_s_at | NM_024702 | ZNF750       | 79755        | 3.4   | 0.6  | 0.1   | 0.2   | 1.0  |
| 219996_at   | NM_024708 | ASB7         | 140460       | 18.5  | 16.4 | 16.0  | 16.9  | 12.9 |
| 219997_s_at | NM_022730 | COPS7B       | 64708        | 70.4  | 34.9 | 55.0  | 41.6  | 39.1 |
| 219998_at   | NM_014181 | LGALS1       | 29094        | 39.0  | 20.5 | 26.1  | 24.8  | 19.9 |
| 219999_at   | NM_018621 | MAN2A2       | 4122         | 9.9   | 8.9  | 6.1   | 12.0  | 9.3  |
| 220000_at   | NM_003830 | SIGLEC5      | 8778         | 2.6   | 2.7  | 3.2   | 8.9   | 9.1  |
| 220001_at   | NM_012387 | PADI4        | 23569        | 1.4   | 0.9  | 0.6   | 0.8   | 1.1  |
| 220002_at   | NM_018012 | KIF26B       | 55083        | 5.5   | 7.7  | 1.9   | 1.0   | 1.3  |
| 220003_at   | NM_018296 | LRRC36       | 55282        | 12.5  | 0.7  | 13.0  | 9.5   | 5.5  |
| 220004_at   | NM_018665 | DDX43        | 55510        | 23.4  | 16.9 | 12.0  | 10.4  | 13.4 |
| 220005_at   | NM_023914 | P2RY13       | 53829        | 0.6   | 0.4  | 0.9   | 0.3   | 0.3  |
| 220006_at   | NM_024768 | EFCC1        | 79825        | 1.0   | 1.4  | 1.2   | 0.8   | 1.0  |
| 220007_at   | NM_024770 | METTL8       | 79828        | 31.6  | 27.2 | 54.9  | 28.8  | 35.7 |
| 220008_at   | NM_024776 | PEAK1        | 79834        | 1.6   | 5.0  | 1.7   | 5.4   | 4.6  |
| 220009_at   | NM_024778 | LONRF3       | 79836        | 15.6  | 8.3  | 13.7  | 5.8   | 7.1  |
| 220010_at   | NM_012282 | KCNE1L       | 23630        | 2.2   | 6.2  | 3.5   | 4.3   | 0.8  |
| 220011_at   | NM_024037 | AUNIP        | 79000        | 63.2  | 40.1 | 47.1  | 40.3  | 41.8 |
| 220012_at   | NM_019891 | ERO1LB       | 56605        | 0.8   | 5.1  | 1.0   | 2.7   | 1.7  |
| 220013_at   | NM_024794 | EPHX3        | 79852        | 0.8   | 3.6  | 2.3   | 0.6   | 0.9  |
| 220014_at   | NM_016644 | PRR16        | 51334        | 15.4  | 12.4 | 20.5  | 22.5  | 10.7 |
| 220015_at   | NM_017766 | CASZ1        | 54897        | 41.9  | 38.3 | 43.1  | 37.1  | 33.8 |
| 220016_at   | NM_024060 | AHNAK        | 79026        | 1.5   | 1.6  | 2.7   | 1.3   | 1.7  |
| 220017_x_at | NM_000771 | CYP2C9       | 1559         | 22.2  | 22.1 | 24.6  | 30.9  | 16.5 |
| 220018_at   | NM_024814 | CBLL1        | 79872        | 29.6  | 15.7 | 27.6  | 17.8  | 17.3 |
| 220019_s_at | NM_005774 | ZNF224       | 7767         | 10.2  | 4.9  | 7.5   | 0.7   | 3.6  |
| 220020_at   | NM_022098 | XPNPEP3      | 63929        | 57.7  | 38.6 | 42.6  | 42.4  | 33.9 |
| 220021_at   | NM_024847 | TMC7         | 79905        | 6.5   | 1.5  | 11.5  | 8.8   | 7.2  |
| 220022_at   | NM_018102 | ZNF334       | 55713        | 8.2   | 6.5  | 9.3   | 6.4   | 4.9  |
| 220023_at   | NM_018690 | APOBR        | 55911        | 1.0   | 0.8  | 0.7   | 2.9   | 2.6  |
| 220024_s_at | NM_020956 | PRX          | 57716        | 10.9  | 1.5  | 12.2  | 2.9   | 4.4  |
| 220025_at   | NM_006593 | TBR1         | 10716        | 5.0   | 6.0  | 5.7   | 3.9   | 7.7  |
| 220026_at   | NM_012128 | CLCA4        | 22802        | 1.1   | 1.0  | 0.4   | 0.1   | 0.3  |
| 220027_s_at | NM_017805 | RASIP1       | 54922        | 7.9   | 7.6  | 9.9   | 4.8   | 8.7  |
| 220028_at   | NM_001106 | ACVR2B       | 93           | 34.9  | 17.3 | 22.2  | 13.1  | 14.7 |
| 220029_at   | NM_017770 | ELOVL2       | 54898        | 0.5   | 5.3  | 2.1   | 1.3   | 5.1  |
| 220030_at   | NM_018423 | STYK1        | 55359        | 8.9   | 9.5  | 12.7  | 7.8   | 10.6 |
| 220031_at   | NM_020205 | OTUD7B       | 56957        | 1.6   | 1.9  | 0.8   | 0.7   | 3.1  |
| 220032_at   | NM_024913 | CPED1        | 79974        | 19.5  | 15.4 | 15.4  | 11.3  | 9.0  |
| 220033_at   | NM_024601 | -            | -            | 40.2  | 46.1 | 36.8  | 30.9  | 35.2 |

|             |           |                  |              |       |       |       |       |       |
|-------------|-----------|------------------|--------------|-------|-------|-------|-------|-------|
| 220034_at   | NM_007199 | IRAK3            | 11213        | 5.0   | 0.7   | 1.1   | 3.8   | 0.3   |
| 220035_at   | NM_024923 | NUP210           | 23225        | 32.6  | 25.3  | 51.3  | 37.1  | 27.4  |
| 220036_s_at | NM_018113 | LMBR1L           | 55716        | 61.2  | 48.0  | 55.4  | 48.5  | 40.5  |
| 220037_s_at | NM_016164 | LYVE1            | 10894        | 3.3   | 3.6   | 1.1   | 0.5   | 2.2   |
| 220038_at   | NM_013257 | C8orf44-SGK      | 23678 /// 10 | 42.0  | 32.7  | 44.0  | 29.6  | 29.1  |
| 220039_s_at | NM_017774 | CDKAL1           | 54901        | 15.1  | 9.3   | 14.1  | 4.2   | 4.4   |
| 220040_x_at | NM_018684 | ZC4H2            | 55906        | 39.3  | 40.4  | 36.9  | 42.0  | 31.7  |
| 220041_at   | NM_025163 | PIGZ             | 80235        | 25.5  | 30.8  | 29.5  | 24.4  | 22.5  |
| 220042_x_at | NM_024503 | HIVEP3           | 59269        | 20.9  | 2.7   | 17.2  | 3.6   | 2.2   |
| 220043_s_at | NM_005929 | MFI2             | 4241         | 2.6   | 4.0   | 7.0   | 2.2   | 5.7   |
| 220044_x_at | NM_016424 | LUC7L3           | 51747        | 147.6 | 109.8 | 156.5 | 120.4 | 114.2 |
| 220045_at   | NM_022728 | NEUROD6          | 63974        | 11.7  | 2.7   | 4.6   | 2.2   | 2.1   |
| 220046_s_at | NM_020307 | CCNL1            | 57018        | 66.1  | 50.1  | 62.5  | 62.1  | 47.1  |
| 220047_at   | NM_012240 | SIRT4            | 23409        | 7.5   | 7.8   | 6.5   | 5.4   | 2.9   |
| 220048_at   | NM_022336 | EDAR             | 10913        | 21.9  | 19.3  | 23.4  | 17.8  | 9.9   |
| 220049_s_at | NM_025239 | PDCD1LG2         | 80380        | 0.5   | 0.5   | 0.8   | 0.4   | 0.4   |
| 220050_at   | NM_018956 | C9orf9           | 11092        | 26.4  | 28.5  | 26.1  | 23.2  | 24.9  |
| 220051_at   | NM_006799 | PRSS21           | 10942        | 9.1   | 10.5  | 10.0  | 9.1   | 8.6   |
| 220052_s_at | NM_012461 | TINF2            | 26277        | 99.6  | 167.4 | 174.8 | 174.5 | 137.4 |
| 220053_at   | NM_020634 | GDF3             | 9573         | 9.9   | 9.8   | 11.6  | 7.2   | 1.4   |
| 220054_at   | NM_016584 | IL23A            | 51561        | 19.2  | 17.3  | 22.6  | 21.6  | 12.8  |
| 220055_at   | NM_020653 | ZNF287           | 57336        | 10.9  | 13.3  | 9.2   | 1.8   | 4.6   |
| 220056_at   | NM_021258 | IL22RA1          | 58985        | 2.4   | 8.2   | 7.2   | 8.0   | 5.9   |
| 220057_at   | NM_020411 | XAGE1B /// >     | 653067 /// 6 | 16.8  | 15.4  | 24.8  | 28.6  | 18.2  |
| 220058_at   | NM_024052 | GID4             | 79018        | 11.6  | 12.5  | 17.3  | 16.3  | 11.8  |
| 220059_at   | NM_012108 | STAP1            | 26228        | 0.6   | 1.0   | 1.1   | 0.8   | 3.6   |
| 220060_s_at | NM_017915 | PARPBP           | 55010        | 87.2  | 66.5  | 92.2  | 56.1  | 72.9  |
| 220061_at   | NM_017888 | ACSM5            | 54988        | 10.6  | 0.6   | 6.3   | 5.9   | 6.0   |
| 220062_s_at | NM_016249 | MAGEC2           | 51438        | 16.9  | 19.6  | 13.5  | 16.9  | 11.1  |
| 220063_at   | NM_024751 | GSTCD            | 79807        | 8.8   | 9.5   | 9.6   | 8.1   | 10.3  |
| 220064_at   | NM_024753 | LOC1005061.79809 | /// 10       | 3.2   | 0.5   | 5.8   | 3.0   | 1.3   |
| 220065_at   | NM_022144 | TNMD             | 64102        | 0.8   | 0.4   | 0.5   | 0.7   | 0.5   |
| 220066_at   | NM_022162 | NOD2             | 64127        | 0.5   | 0.7   | 0.9   | 0.7   | 3.2   |
| 220067_at   | NM_016642 | SPTBN5           | 51332        | 14.9  | 13.3  | 15.6  | 13.9  | 13.4  |
| 220068_at   | NM_013378 | VPREB3           | 29802        | 13.5  | 11.9  | 16.6  | 12.6  | 15.0  |
| 220069_at   | NM_018943 | TUBA8            | 51807        | 6.6   | 1.6   | 4.2   | 2.1   | 0.4   |
| 220070_at   | NM_024773 | KDM8             | 79831        | 23.5  | 17.6  | 23.5  | 14.0  | 11.6  |
| 220071_x_at | NM_018097 | HAUS2            | 55142        | 89.1  | 57.8  | 70.3  | 54.6  | 61.6  |
| 220072_at   | NM_024790 | CSPP1            | 79848        | 13.8  | 18.5  | 19.1  | 13.7  | 8.3   |
| 220073_s_at | NM_018173 | PLEKHG6          | 55200        | 15.8  | 14.6  | 15.6  | 13.1  | 9.1   |
| 220074_at   | NM_017717 | CDHR5            | 53841        | 0.9   | 0.5   | 0.8   | 0.6   | 0.5   |
| 220075_s_at | NM_017717 | CDHR5            | 53841        | 0.4   | 0.4   | 0.4   | 0.4   | 0.2   |
| 220076_at   | NM_019847 | ANKH             | 56172        | 1.7   | 1.0   | 1.4   | 0.9   | 2.2   |
| 220077_at   | NM_024821 | CCDC134          | 79879        | 4.0   | 3.2   | 2.9   | 2.8   | 1.4   |
| 220078_at   | NM_018391 | USP48            | 84196        | 7.0   | 10.1  | 8.9   | 6.7   | 10.8  |
| 220079_s_at | NM_018391 | USP48            | 84196        | 41.3  | 41.0  | 50.4  | 56.7  | 53.3  |
| 220080_at   | NM_018378 | FBXL8            | 55336        | 14.5  | 16.7  | 10.5  | 12.3  | 12.6  |
| 220081_x_at | NM_016371 | HSD17B7          | 51478        | 199.3 | 164.4 | 225.5 | 205.5 | 168.2 |
| 220082_at   | NM_017726 | PPP1R14D         | 54866        | 17.4  | 9.6   | 14.5  | 13.4  | 10.8  |
| 220083_x_at | NM_016017 | UCHL5            | 51377        | 44.6  | 31.8  | 51.1  | 35.4  | 36.5  |
| 220084_at   | NM_018168 | C14orf105        | 55195        | 0.1   | 0.1   | 0.6   | 1.6   | 0.1   |
| 220085_at   | NM_018063 | HELLS            | 3070         | 11.0  | 2.8   | 16.3  | 13.8  | 15.1  |
| 220086_at   | NM_022466 | IKZF5            | 64376        | 44.2  | 31.5  | 39.2  | 33.2  | 29.8  |

|             |           |                          |       |       |       |       |       |       |
|-------------|-----------|--------------------------|-------|-------|-------|-------|-------|-------|
| 220087_at   | NM_017429 | BCMO1                    | 53630 | 5.2   | 3.6   | 0.8   | 0.4   | 2.5   |
| 220088_at   | NM_001736 | C5AR1                    | 728   | 0.6   | 0.5   | 0.3   | 0.6   | 0.4   |
| 220089_at   | NM_024884 | L2HGDH                   | 79944 | 29.1  | 16.5  | 30.2  | 19.2  | 15.8  |
| 220090_at   | NM_016190 | CRNN                     | 49860 | 2.1   | 1.2   | 9.2   | 2.9   | 1.2   |
| 220091_at   | NM_017585 | SLC2A6                   | 11182 | 39.0  | 42.6  | 32.1  | 31.4  | 27.4  |
| 220092_s_at | NM_018153 | ANTXR1                   | 84168 | 9.2   | 16.6  | 6.9   | 11.1  | 2.8   |
| 220093_at   | NM_018153 | ANTXR1                   | 84168 | 2.0   | 1.0   | 2.6   | 5.4   | 2.3   |
| 220094_s_at | NM_022102 | MCUR1                    | 63933 | 151.2 | 161.7 | 182.1 | 151.9 | 137.5 |
| 220095_at   | NM_017738 | CNTLN                    | 54875 | 6.0   | 6.4   | 8.3   | 4.1   | 5.6   |
| 220096_at   | NM_017795 | -                        | -     | 12.9  | 16.3  | 14.3  | 9.6   | 5.2   |
| 220097_s_at | NM_017728 | TMEM104                  | 54868 | 20.7  | 17.3  | 22.9  | 13.7  | 21.3  |
| 220098_at   | NM_017558 | HYDIN /// HY54768 /// 10 |       | 1.6   | 2.9   | 1.7   | 1.6   | 1.0   |
| 220099_s_at | NM_016007 | C7orf55-LUC 51631 /// 10 |       | 271.1 | 229.3 | 333.9 | 256.0 | 265.3 |
| 220100_at   | NM_018484 | SLC22A11                 | 55867 | 1.1   | 2.1   | 1.3   | 1.0   | 0.5   |
| 220101_x_at | NM_018628 | -                        | -     | 6.1   | 1.3   | 7.6   | 4.9   | 0.4   |
| 220102_at   | NM_023067 | FOXL2                    | 668   | 5.1   | 0.5   | 7.4   | 1.2   | 6.1   |
| 220103_s_at | NM_016067 | MRPS18C                  | 51023 | 7.1   | 4.5   | 4.7   | 5.3   | 1.9   |
| 220104_at   | NM_020119 | ZC3HAV1                  | 56829 | 42.1  | 48.0  | 59.2  | 38.7  | 46.8  |
| 220105_at   | NM_014433 | RTDR1                    | 27156 | 5.1   | 3.7   | 13.0  | 10.3  | 3.7   |
| 220106_at   | NM_013389 | NPC1L1                   | 29881 | 7.9   | 5.2   | 5.2   | 7.3   | 3.9   |
| 220107_s_at | NM_024643 | ZC2HC1C                  | 79696 | 26.4  | 24.4  | 19.5  | 17.6  | 16.9  |
| 220108_at   | NM_004297 | GNA14                    | 9630  | 13.2  | 3.1   | 11.5  | 10.5  | 10.5  |
| 220109_at   | NM_014111 | TF                       | 7018  | 0.5   | 0.2   | 3.7   | 2.6   | 0.3   |
| 220110_s_at | NM_022052 | NXF3                     | 56000 | 5.5   | 1.4   | 1.2   | 0.5   | 0.3   |
| 220111_s_at | NM_020373 | ANO2                     | 57101 | 7.4   | 6.3   | 7.6   | 8.5   | 5.5   |
| 220112_at   | NM_024669 | ANKRD55                  | 79722 | 10.9  | 6.7   | 9.0   | 6.6   | 6.0   |
| 220113_x_at | NM_019014 | POLR1B                   | 84172 | 43.1  | 24.3  | 30.6  | 21.5  | 25.5  |
| 220114_s_at | NM_017564 | STAB2                    | 55576 | 13.7  | 2.6   | 3.0   | 11.6  | 2.3   |
| 220115_s_at | NM_006727 | CDH10                    | 1008  | 8.0   | 5.6   | 5.9   | 6.5   | 6.3   |
| 220116_at   | NM_021614 | KCNN2                    | 3781  | 184.4 | 109.8 | 246.0 | 177.0 | 239.7 |
| 220117_at   | NM_024697 | ZNF385D                  | 79750 | 1.4   | 1.8   | 3.9   | 5.7   | 1.0   |
| 220118_at   | NM_014383 | ZBTB32                   | 27033 | 0.7   | 0.7   | 1.1   | 1.3   | 3.9   |
| 220119_at   | NM_022140 | EPB41L4A                 | 64097 | 11.5  | 1.3   | 11.1  | 1.3   | 2.5   |
| 220120_s_at | NM_022140 | EPB41L4A                 | 64097 | 0.3   | 0.8   | 0.5   | 1.6   | 0.3   |
| 220121_at   | NM_018148 | LINS                     | 55180 | 9.5   | 10.1  | 9.1   | 12.5  | 13.1  |
| 220122_at   | NM_024717 | MCTP1                    | 79772 | 4.6   | 0.6   | 6.5   | 8.1   | 4.9   |
| 220123_at   | NM_025181 | SLC35F5                  | 80255 | 3.7   | 0.6   | 5.1   | 2.7   | 3.1   |
| 220124_at   | NM_022041 | GAN                      | 8139  | 11.0  | 12.1  | 6.9   | 7.9   | 4.6   |
| 220125_at   | NM_012144 | DNAI1                    | 27019 | 12.2  | 0.9   | 5.8   | 1.9   | 4.0   |
| 220126_at   | NM_013270 | PRSS50                   | 29122 | 0.9   | 8.1   | 3.5   | 3.0   | 4.9   |
| 220127_s_at | NM_017703 | FBXL12                   | 54850 | 83.3  | 67.5  | 81.0  | 67.5  | 62.5  |
| 220128_s_at | NM_024759 | NIPAL2                   | 79815 | 4.0   | 16.0  | 4.8   | 15.5  | 15.5  |
| 220129_at   | NM_017826 | CCDC169-SO 54937 /// 10  |       | 10.7  | 10.4  | 11.2  | 6.9   | 3.9   |
| 220130_x_at | NM_019839 | LTB4R2                   | 56413 | 1.6   | 1.8   | 0.8   | 0.5   | 1.4   |
| 220131_at   | NM_022006 | FXYP7                    | 53822 | 1.4   | 0.9   | 8.2   | 0.9   | 2.8   |
| 220132_s_at | NM_013269 | CLEC2D                   | 29121 | 8.9   | 4.0   | 5.1   | 3.7   | 3.5   |
| 220133_at   | NM_017855 | ODAM                     | 54959 | 16.3  | 15.6  | 18.2  | 17.3  | 10.2  |
| 220134_x_at | NM_018166 | EVA1B                    | 55194 | 40.8  | 32.5  | 34.2  | 26.6  | 26.8  |
| 220135_s_at | NM_014270 | SLC7A9                   | 11136 | 17.7  | 8.9   | 11.9  | 11.0  | 3.7   |
| 220136_s_at | NM_005209 | CRYBA2                   | 1412  | 0.6   | 0.3   | 0.3   | 0.4   | 0.3   |
| 220137_at   | NM_019086 | LOC1019282 54621 /// 10  |       | 32.6  | 26.9  | 27.8  | 30.1  | 29.2  |
| 220138_at   | NM_004821 | HAND1                    | 9421  | 18.1  | 11.8  | 13.5  | 7.5   | 11.0  |
| 220139_at   | NM_013369 | DNMT3L                   | 29947 | 0.8   | 1.1   | 3.0   | 1.4   | 2.7   |



|             |           |                          |        |       |       |       |       |       |
|-------------|-----------|--------------------------|--------|-------|-------|-------|-------|-------|
| 220140_s_at | NM_013323 | SNX11                    | 29916  | 60.9  | 51.7  | 67.7  | 56.5  | 38.9  |
| 220141_at   | NM_024806 | C11orf63                 | 79864  | 1.4   | 4.5   | 1.2   | 2.5   | 2.3   |
| 220142_at   | NM_021817 | HAPLN2                   | 60484  | 3.2   | 1.0   | 8.9   | 0.5   | 4.4   |
| 220143_x_at | NM_018032 | LUC7L                    | 55692  | 30.8  | 21.8  | 41.1  | 23.4  | 30.9  |
| 220144_s_at | NM_022096 | ANKEF1                   | 63926  | 68.8  | 63.1  | 90.3  | 65.5  | 76.1  |
| 220145_at   | NM_024826 | MAP9                     | 79884  | 30.2  | 19.8  | 28.5  | 20.4  | 21.8  |
| 220146_at   | NM_016562 | TLR7                     | 51284  | 0.2   | 4.0   | 2.3   | 0.3   | 0.6   |
| 220147_s_at | NM_021238 | FAM60A                   | 58516  | 296.8 | 280.7 | 329.5 | 277.1 | 279.6 |
| 220148_at   | NM_022568 | ALDH8A1                  | 64577  | 4.6   | 0.5   | 3.0   | 2.0   | 3.0   |
| 220149_at   | NM_024861 | C2orf54                  | 79919  | 8.3   | 10.1  | 7.9   | 7.5   | 5.2   |
| 220150_s_at | NM_024581 | FAM184A                  | 79632  | 11.4  | 4.6   | 9.2   | 10.9  | 7.8   |
| 220151_at   | NM_018111 | C19orf73                 | 55150  | 20.5  | 22.8  | 21.6  | 22.0  | 19.2  |
| 220152_at   | NM_024886 | C10orf95                 | 79946  | 4.2   | 3.6   | 1.8   | 4.5   | 3.1   |
| 220153_at   | NM_020354 | ENTPD7                   | 57089  | 26.0  | 9.5   | 33.4  | 21.3  | 26.9  |
| 220154_at   | NM_020388 | DST                      | 667    | 3.9   | 3.2   | 5.9   | 4.8   | 3.1   |
| 220155_s_at | NM_023924 | BRD9                     | 65980  | 75.4  | 72.6  | 73.7  | 82.8  | 71.6  |
| 220156_at   | NM_024593 | EFCAB1                   | 79645  | 8.2   | 1.6   | 4.1   | 3.0   | 2.6   |
| 220157_x_at | NM_015899 | PLEKHA8P1                | 51054  | 8.7   | 3.5   | 6.5   | 2.7   | 3.9   |
| 220158_at   | NM_020129 | LGALS14                  | 56891  | 12.5  | 13.3  | 8.5   | 8.4   | 9.7   |
| 220159_at   | NM_024903 | ABCA11P                  | 79963  | 28.1  | 22.6  | 33.6  | 29.0  | 21.5  |
| 220160_s_at | NM_007059 | KPTN                     | 11133  | 26.0  | 25.9  | 24.1  | 27.9  | 23.6  |
| 220161_s_at | NM_019114 | EPB41L4B                 | 54566  | 249.5 | 204.5 | 255.3 | 217.7 | 221.9 |
| 220162_s_at | NM_022352 | CARD9 /// DI64170 /// 72 |        | 2.0   | 0.8   | 5.3   | 1.5   | 4.2   |
| 220163_s_at | NM_018411 | HR                       | 55806  | 17.1  | 12.9  | 18.4  | 14.1  | 10.8  |
| 220164_s_at | NM_016298 | FBXO40                   | 51725  | 1.1   | 0.5   | 0.9   | 0.7   | 0.3   |
| 220165_at   | NM_017759 | INO80D                   | 54891  | 17.5  | 3.8   | 15.1  | 14.5  | 16.7  |
| 220166_at   | NM_020348 | CNNM1                    | 26507  | 9.4   | 12.2  | 11.1  | 11.4  | 13.6  |
| 220167_s_at | NM_015369 | TP53TG3 /// 24150 /// 65 |        | 70.0  | 78.3  | 65.1  | 59.7  | 46.8  |
| 220168_at   | NM_018272 | CASC1                    | 55259  | 4.2   | 4.1   | 7.2   | 7.5   | 0.6   |
| 220169_at   | NM_024943 | TMEM156                  | 80008  | 0.4   | 3.4   | 5.7   | 3.7   | 0.6   |
| 220170_at   | NM_020482 | FHL5                     | 9457   | 2.4   | 2.0   | 2.1   | 3.4   | 0.5   |
| 220171_x_at | NM_018559 | GPALPP1                  | 55425  | 18.2  | 20.9  | 20.0  | 17.0  | 9.5   |
| 220172_at   | NM_025000 | DCAF17                   | 80067  | 17.6  | 15.0  | 16.7  | 15.2  | 12.5  |
| 220173_at   | NM_025057 | CCDC176                  | 80127  | 30.5  | 26.9  | 26.3  | 29.4  | 23.4  |
| 220174_at   | NM_025061 | LRRC8E                   | 80131  | 30.7  | 30.9  | 26.9  | 28.8  | 28.5  |
| 220175_s_at | NM_020667 | CBWD1 /// C55871 /// 15  |        | 128.1 | 182.2 | 248.0 | 148.4 | 166.3 |
| 220176_at   | NM_025152 | NUBPL                    | 80224  | 47.7  | 15.0  | 34.0  | 26.6  | 30.6  |
| 220177_s_at | NM_024022 | TMPRSS3                  | 64699  | 0.4   | 3.0   | 6.4   | 0.5   | 3.9   |
| 220178_at   | NM_021731 | MFSD12                   | 126321 | 44.1  | 32.4  | 42.5  | 54.5  | 34.0  |
| 220179_at   | NM_022357 | DPEP3                    | 64180  | 1.0   | 1.0   | 1.5   | 1.6   | 2.9   |
| 220180_at   | NM_025214 | CCDC68                   | 80323  | 0.7   | 0.3   | 0.5   | 0.2   | 4.0   |
| 220181_x_at | NM_024055 | SLC30A5                  | 64924  | 94.9  | 82.9  | 109.4 | 77.8  | 78.0  |
| 220182_at   | NM_024103 | SLC25A23                 | 79085  | 17.0  | 28.4  | 23.0  | 27.7  | 22.5  |
| 220183_s_at | NM_007083 | NUDT6                    | 11162  | 40.1  | 38.4  | 47.8  | 44.6  | 37.2  |
| 220184_at   | NM_024865 | NANOG                    | 79923  | 0.4   | 0.3   | 0.8   | 0.5   | 0.3   |
| 220185_at   | NM_025213 | SPTBN4                   | 57731  | 11.0  | 11.9  | 5.4   | 12.0  | 19.8  |
| 220186_s_at | NM_017675 | CDHR2                    | 54825  | 15.5  | 10.3  | 16.7  | 5.9   | 8.5   |
| 220187_at   | NM_024636 | STEAP4                   | 79689  | 2.6   | 4.8   | 4.3   | 4.7   | 3.6   |
| 220188_at   | NM_020655 | JPH3                     | 57338  | 4.6   | 10.6  | 2.0   | 7.6   | 1.3   |
| 220189_s_at | NM_014275 | MGAT4B                   | 11282  | 161.2 | 167.4 | 196.4 | 194.7 | 154.0 |
| 220190_s_at | NM_006873 | GTF2A1L /// 11036 /// 28 |        | 0.5   | 0.1   | 0.3   | 0.3   | 1.6   |
| 220191_at   | NM_019617 | GKN1                     | 56287  | 0.2   | 0.5   | 0.3   | 0.5   | 0.2   |
| 220192_x_at | NM_012391 | SPDEF                    | 25803  | 161.5 | 170.4 | 174.1 | 164.5 | 141.7 |

|             |           |                          |        |        |       |       |        |       |
|-------------|-----------|--------------------------|--------|--------|-------|-------|--------|-------|
| 220193_at   | NM_024676 | SH3D21                   | 79729  | 12.4   | 3.9   | 10.0  | 9.2    | 6.1   |
| 220194_at   | NM_024677 | NSUN7                    | 79730  | 5.2    | 5.0   | 6.9   | 0.4    | 2.9   |
| 220195_at   | NM_018328 | MBD5                     | 55777  | 40.4   | 35.1  | 26.7  | 29.7   | 17.8  |
| 220196_at   | NM_024690 | MUC16                    | 94025  | 0.9    | 0.5   | 1.3   | 0.7    | 0.5   |
| 220197_at   | NM_020632 | ATP6V0A4                 | 50617  | 0.7    | 0.8   | 1.1   | 0.4    | 0.8   |
| 220198_s_at | NM_020390 | EIF5A2                   | 56648  | 15.8   | 8.8   | 11.4  | 2.1    | 9.7   |
| 220199_s_at | NM_022831 | AIDA                     | 64853  | 1087.6 | 908.4 | 942.1 | 1001.6 | 793.6 |
| 220200_s_at | NM_020382 | SETD8                    | 387893 | 62.4   | 66.3  | 60.5  | 76.5   | 58.4  |
| 220201_at   | NM_018835 | RC3H2                    | 54542  | 14.1   | 14.0  | 19.3  | 13.2   | 14.4  |
| 220202_s_at | NM_018835 | RC3H2                    | 54542  | 70.2   | 75.7  | 80.1  | 77.5   | 65.7  |
| 220203_at   | NM_024732 | BMP8A                    | 353500 | 14.4   | 2.2   | 3.1   | 3.4    | 1.8   |
| 220204_s_at | NM_024732 | BMP8A                    | 353500 | 3.0    | 2.3   | 3.1   | 5.9    | 1.0   |
| 220205_at   | NM_013315 | TPTE                     | 7179   | 5.0    | 5.2   | 2.1   | 2.8    | 0.3   |
| 220206_at   | NM_024772 | ZMYM1                    | 79830  | 22.6   | 15.8  | 33.0  | 26.6   | 23.4  |
| 220207_at   | NM_022125 | YIF1B                    | 90522  | 14.8   | 15.0  | 14.7  | 8.5    | 9.0   |
| 220208_at   | NM_017587 | ADAMTS13                 | 11093  | 18.8   | 10.4  | 3.0   | 14.7   | 12.4  |
| 220209_at   | NM_021093 | PYY2                     | 23615  | 1.7    | 2.4   | 1.0   | 1.4    | 1.0   |
| 220210_at   | NM_020402 | CHRNA10                  | 57053  | 6.5    | 2.6   | 6.1   | 4.6    | 7.3   |
| 220211_at   | NM_024799 | FLJ13224                 | 79857  | 4.5    | 1.3   | 4.3   | 4.5    | 3.4   |
| 220212_s_at | NM_022065 | THADA                    | 63892  | 37.2   | 28.7  | 38.1  | 32.1   | 28.9  |
| 220213_at   | NM_018692 | TSHZ2                    | 128553 | 4.0    | 2.3   | 3.6   | 3.0    | 1.9   |
| 220214_at   | NM_013250 | ZNF215                   | 7762   | 14.9   | 13.7  | 18.2  | 16.1   | 2.5   |
| 220215_at   | NM_024804 | ZNF669                   | 79862  | 23.2   | 21.9  | 15.6  | 13.3   | 13.0  |
| 220216_at   | NM_019607 | C8orf44                  | 56260  | 8.7    | 2.6   | 10.8  | 6.2    | 3.2   |
| 220217_x_at | NM_022661 | SPANXA1 /// 30014 /// 64 |        | 16.0   | 6.9   | 8.5   | 8.0    | 10.1  |
| 220218_at   | NM_017985 | SPATA6L                  | 55064  | 1.2    | 7.2   | 0.5   | 3.0    | 6.2   |
| 220219_s_at | NM_018001 | LRRC37A /// 9884 /// 550 |        | 22.7   | 26.5  | 22.3  | 15.5   | 13.9  |
| 220220_at   | NM_018001 | LRRC37A2 //,55073 /// 47 |        | 11.0   | 11.2  | 10.5  | 11.6   | 6.5   |
| 220221_at   | NM_018156 | VPS13D                   | 55187  | 3.6    | 7.4   | 5.0   | 2.3    | 6.9   |
| 220222_at   | NM_018608 | RBM12B-AS155472          |        | 0.4    | 0.4   | 0.3   | 0.5    | 0.3   |
| 220223_at   | NM_024857 | ATAD5                    | 79915  | 17.8   | 10.4  | 16.3  | 4.4    | 9.4   |
| 220224_at   | NM_017545 | HAO1                     | 54363  | 6.2    | 1.6   | 0.5   | 0.5    | 0.6   |
| 220225_at   | NM_016358 | IRX4                     | 50805  | 48.3   | 44.9  | 48.0  | 45.8   | 41.2  |
| 220226_at   | NM_024080 | TRPM8                    | 79054  | 13.7   | 6.9   | 6.6   | 6.9    | 6.6   |
| 220227_at   | NM_024883 | CDH4                     | 1002   | 9.0    | 3.6   | 10.4  | 4.0    | 6.3   |
| 220228_at   | AB030653  | AP4E1                    | 23431  | 0.2    | 0.8   | 1.6   | 0.6    | 3.6   |
| 220229_s_at | NM_007347 | AP4E1                    | 23431  | 0.8    | 4.0   | 3.6   | 4.4    | 3.7   |
| 220230_s_at | NM_016229 | CYB5R2                   | 51700  | 15.6   | 16.7  | 17.4  | 14.1   | 7.4   |
| 220231_at   | NM_006658 | PPP1R17                  | 10842  | 9.1    | 4.7   | 10.9  | 5.4    | 7.4   |
| 220232_at   | NM_024906 | SCD5                     | 79966  | 29.4   | 24.9  | 51.0  | 38.0   | 28.8  |
| 220233_at   | NM_024907 | FBXO17                   | 115290 | 1.3    | 0.6   | 1.2   | 0.5    | 0.6   |
| 220234_at   | NM_004056 | CA8                      | 767    | 6.0    | 1.3   | 7.0   | 2.8    | 0.4   |
| 220235_s_at | NM_018372 | LRIF1                    | 55791  | 59.2   | 46.3  | 49.1  | 48.6   | 39.3  |
| 220236_at   | NM_017990 | PDPR                     | 55066  | 8.1    | 10.4  | 6.0   | 9.9    | 3.8   |
| 220237_at   | NM_022488 | ATG3                     | 64422  | 9.1    | 15.9  | 9.3   | 8.9    | 8.5   |
| 220238_s_at | NM_018846 | KLHL7                    | 55975  | 52.8   | 40.0  | 59.5  | 50.4   | 38.7  |
| 220239_at   | NM_018846 | KLHL7                    | 55975  | 70.1   | 51.5  | 66.3  | 54.6   | 47.7  |
| 220240_s_at | NM_017905 | TMCO3                    | 55002  | 60.2   | 67.4  | 68.5  | 72.0   | 55.4  |
| 220241_at   | NM_017905 | TMCO3                    | 55002  | 20.9   | 12.6  | 14.3  | 13.5   | 9.9   |
| 220242_x_at | NM_018260 | ZNF701                   | 55762  | 17.4   | 14.8  | 14.3  | 11.0   | 8.7   |
| 220243_at   | NM_014155 | ZBTB44                   | 29068  | 2.5    | 3.0   | 0.9   | 4.1    | 5.1   |
| 220244_at   | NM_013343 | LINC00312                | 29931  | 17.7   | 9.0   | 18.4  | 14.9   | 10.6  |
| 220245_at   | NM_016180 | SLC45A2                  | 51151  | 12.8   | 14.6  | 3.8   | 12.3   | 10.9  |

|             |           |                          |        |       |       |       |       |       |
|-------------|-----------|--------------------------|--------|-------|-------|-------|-------|-------|
| 220246_at   | NM_020397 | CAMK1D                   | 57118  | 3.2   | 0.7   | 1.2   | 1.0   | 0.6   |
| 220247_at   | NM_020380 | CASC5                    | 57082  | 2.3   | 1.3   | 2.3   | 1.0   | 1.3   |
| 220248_x_at | NM_018839 | NSFL1C                   | 55968  | 281.1 | 232.0 | 244.6 | 232.3 | 200.4 |
| 220249_at   | NM_012269 | HYAL4                    | 23553  | 0.8   | 1.3   | 1.1   | 1.5   | 0.8   |
| 220250_at   | NM_020652 | ZNF286A                  | 57335  | 20.1  | 15.4  | 23.1  | 17.2  | 19.3  |
| 220251_at   | NM_024998 | DIEXF                    | 27042  | 15.9  | 15.0  | 23.8  | 19.8  | 14.4  |
| 220252_x_at | NM_025159 | CXorf21                  | 80231  | 9.5   | 1.1   | 10.9  | 6.8   | 3.9   |
| 220253_s_at | NM_013437 | LRP12                    | 29967  | 13.4  | 7.0   | 7.7   | 10.2  | 4.2   |
| 220254_at   | NM_013437 | LRP12                    | 29967  | 7.9   | 4.2   | 4.3   | 5.3   | 6.3   |
| 220255_at   | NM_021922 | FANCE                    | 2178   | 37.7  | 44.8  | 54.7  | 32.4  | 36.8  |
| 220256_s_at | NM_022120 | OXCT2                    | 64064  | 13.5  | 7.2   | 16.4  | 15.9  | 9.2   |
| 220257_x_at | NM_017809 | NXF2 /// NXF56001 /// 72 |        | 18.1  | 19.5  | 20.7  | 12.2  | 18.3  |
| 220258_s_at | NM_018081 | WRAP53                   | 55135  | 90.8  | 66.6  | 102.2 | 81.1  | 85.3  |
| 220259_at   | NM_024927 | PLEKHH3                  | 79990  | 4.1   | 8.3   | 17.6  | 10.9  | 8.0   |
| 220260_at   | NM_018317 | TBC1D19                  | 55296  | 2.6   | 11.8  | 3.1   | 1.3   | 1.1   |
| 220261_s_at | NM_018106 | ZDHHC4                   | 55146  | 264.1 | 261.5 | 276.8 | 280.6 | 215.1 |
| 220262_s_at | NM_023932 | DLK2                     | 65989  | 4.5   | 1.4   | 2.9   | 3.6   | 10.1  |
| 220263_at   | NM_022001 | SMAD5-AS1                | 9597   | 8.8   | 7.5   | 7.4   | 0.7   | 5.5   |
| 220264_s_at | NM_020960 | GPR107                   | 57720  | 1.9   | 2.5   | 5.0   | 4.5   | 4.0   |
| 220265_at   | NM_020960 | GPR107                   | 57720  | 2.0   | 4.0   | 7.2   | 0.6   | 4.6   |
| 220266_s_at | NM_004235 | KLF4                     | 9314   | 15.7  | 8.9   | 9.2   | 9.1   | 9.2   |
| 220267_at   | NM_019016 | KRT24                    | 192666 | 4.8   | 6.8   | 7.9   | 10.7  | 4.3   |
| 220268_at   | NM_014040 | AAMDC                    | 28971  | 0.8   | 1.0   | 8.6   | 0.6   | 4.4   |
| 220269_at   | NM_024687 | ZBBX                     | 79740  | 11.6  | 11.9  | 12.7  | 14.4  | 9.3   |
| 220270_at   | NM_019038 | RNF17                    | 56163  | 7.0   | 5.9   | 3.3   | 1.1   | 3.7   |
| 220271_x_at | NM_022785 | EFCAB6                   | 64800  | 1.2   | 1.7   | 0.7   | 1.8   | 1.1   |
| 220272_at   | NM_017637 | BNC2                     | 54796  | 9.8   | 7.4   | 10.2  | 10.6  | 5.8   |
| 220273_at   | NM_014443 | IL17B                    | 27190  | 0.5   | 0.5   | 4.2   | 1.6   | 4.6   |
| 220274_at   | NM_024726 | IQCA1                    | 79781  | 11.4  | 10.8  | 5.5   | 5.9   | 4.6   |
| 220275_at   | NM_022034 | CUZD1                    | 50624  | 12.5  | 11.0  | 14.3  | 6.3   | 4.1   |
| 220276_at   | NM_024730 | RERGL                    | 79785  | 0.5   | 0.5   | 0.8   | 0.3   | 1.6   |
| 220277_at   | NM_025212 | CXXC4                    | 80319  | 2.4   | 2.6   | 2.7   | 2.4   | 1.4   |
| 220278_at   | NM_018039 | KDM4D                    | 55693  | 12.0  | 10.7  | 11.7  | 17.6  | 11.9  |
| 220279_at   | NM_016102 | TRIM17                   | 51127  | 1.9   | 1.3   | 1.3   | 2.7   | 1.3   |
| 220280_s_at | NM_016552 | ANKMY1                   | 51281  | 2.6   | 2.5   | 8.5   | 1.3   | 4.1   |
| 220281_at   | AI632015  | SLC12A1                  | 6557   | 0.5   | 2.7   | 2.3   | 0.2   | 0.7   |
| 220282_at   | NM_024557 | RIC3                     | 79608  | 10.5  | 6.8   | 8.4   | 13.8  | 7.7   |
| 220283_at   | NM_024746 | HHIPL2                   | 79802  | 20.6  | 13.1  | 9.0   | 8.5   | 15.1  |
| 220284_at   | NM_014419 | DKKL1                    | 27120  | 1.3   | 1.2   | 1.2   | 2.2   | 0.7   |
| 220285_at   | NM_016014 | ABHD17B                  | 51104  | 24.6  | 19.0  | 26.3  | 22.6  | 22.8  |
| 220286_at   | NM_017762 | MTMR10                   | 54893  | 3.8   | 3.4   | 8.8   | 1.0   | 4.2   |
| 220287_at   | NM_020249 | ADAMTS9                  | 56999  | 12.5  | 17.5  | 17.3  | 10.5  | 11.0  |
| 220288_at   | NM_016239 | MYO15A                   | 51168  | 15.6  | 11.3  | 13.6  | 8.3   | 10.1  |
| 220289_s_at | NM_017977 | AIM1L                    | 55057  | 1.9   | 6.4   | 6.4   | 1.1   | 1.3   |
| 220290_at   | NM_017977 | AIM1L                    | 55057  | 6.5   | 3.0   | 7.1   | 3.8   | 9.4   |
| 220291_at   | NM_017711 | GDPD2                    | 54857  | 6.6   | 3.1   | 6.4   | 6.3   | 3.2   |
| 220292_at   | NM_024340 | ZSCAN32                  | 54925  | 20.4  | 15.9  | 18.2  | 19.7  | 13.2  |
| 220293_at   | NM_024764 | CATSPERB                 | 79820  | 3.6   | 4.0   | 4.9   | 0.2   | 0.6   |
| 220294_at   | NM_014379 | KCNV1                    | 27012  | 0.3   | 2.0   | 0.2   | 3.5   | 2.4   |
| 220295_x_at | NM_017779 | DEPDC1                   | 55635  | 33.4  | 26.0  | 35.0  | 23.4  | 28.1  |
| 220296_at   | NM_024564 | -                        | -      | 2.3   | 6.4   | 3.0   | 2.0   | 3.9   |
| 220297_at   | NM_018167 | BTBD7                    | 55727  | 9.4   | 8.0   | 19.1  | 13.1  | 13.8  |
| 220298_s_at | NM_019073 | SPATA6                   | 54558  | 7.6   | 3.2   | 8.1   | 4.6   | 4.3   |

|             |           |                         |        |      |      |      |      |      |
|-------------|-----------|-------------------------|--------|------|------|------|------|------|
| 220299_at   | NM_019073 | SPATA6                  | 54558  | 10.0 | 7.2  | 5.5  | 9.8  | 9.0  |
| 220300_at   | NM_017790 | RGS3                    | 5998   | 13.5 | 8.2  | 19.4 | 8.0  | 10.2 |
| 220301_at   | NM_024781 | CCDC102B                | 79839  | 0.7  | 0.3  | 0.2  | 0.1  | 0.7  |
| 220302_at   | NM_005906 | MAK                     | 4117   | 1.3  | 0.9  | 3.1  | 0.7  | 4.1  |
| 220303_at   | NM_024791 | PDZD3                   | 79849  | 1.8  | 3.2  | 1.6  | 1.9  | 2.2  |
| 220304_s_at | NM_019098 | CNGB3                   | 54714  | 11.5 | 1.6  | 12.2 | 7.6  | 13.0 |
| 220305_at   | NM_024030 | MAVS                    | 57506  | 73.1 | 61.3 | 70.5 | 63.4 | 60.8 |
| 220306_at   | NM_017709 | FAM46C                  | 54855  | 13.6 | 4.7  | 14.4 | 12.3 | 9.4  |
| 220307_at   | NM_016382 | CD244                   | 51744  | 0.9  | 0.6  | 0.7  | 6.7  | 8.1  |
| 220308_at   | NM_012337 | CCDC19                  | 25790  | 8.9  | 4.3  | 11.3 | 10.3 | 8.2  |
| 220309_at   | NM_017904 | TTC22                   | 55001  | 2.6  | 1.8  | 7.3  | 1.5  | 0.6  |
| 220310_at   | NM_024803 | TUBAL3                  | 79861  | 7.1  | 2.4  | 2.7  | 5.6  | 2.8  |
| 220311_at   | NM_013240 | N6AMT1                  | 29104  | 17.7 | 24.0 | 17.0 | 18.6 | 11.3 |
| 220312_at   | NM_017708 | FAM83E                  | 54854  | 0.5  | 0.9  | 0.5  | 0.6  | 0.3  |
| 220313_at   | NM_022049 | GPR88                   | 54112  | 1.1  | 1.9  | 3.8  | 3.5  | 7.6  |
| 220314_at   | NM_016153 | HSFX1 /// HS100130086 / |        | 0.4  | 6.3  | 0.5  | 7.5  | 2.1  |
| 220315_at   | NM_020367 | PARP11                  | 57097  | 0.6  | 3.4  | 5.5  | 4.0  | 4.5  |
| 220316_at   | NM_022123 | NPAS3                   | 64067  | 5.4  | 6.0  | 1.2  | 1.7  | 5.9  |
| 220317_at   | NM_004744 | LOC10192799227 /// 101  |        | 4.9  | 0.5  | 0.7  | 0.9  | 0.6  |
| 220318_at   | NM_017957 | EPN3                    | 55040  | 59.0 | 74.0 | 77.6 | 67.6 | 51.3 |
| 220319_s_at | NM_013262 | MYLIP                   | 29116  | 51.6 | 41.1 | 49.6 | 37.2 | 45.3 |
| 220320_at   | NM_024872 | DOK3                    | 79930  | 5.4  | 9.3  | 3.6  | 3.8  | 3.6  |
| 220321_s_at | NM_024584 | CCDC121                 | 79635  | 11.7 | 9.5  | 10.9 | 10.5 | 7.9  |
| 220322_at   | NM_019618 | IL36G                   | 56300  | 5.7  | 7.5  | 9.5  | 12.6 | 9.4  |
| 220323_at   | NM_024877 | CNTD2                   | 79935  | 25.7 | 13.8 | 1.7  | 3.6  | 1.9  |
| 220324_at   | NM_024882 | LINC00472               | 79940  | 1.1  | 3.4  | 5.3  | 4.0  | 3.4  |
| 220325_at   | NM_024885 | TAF7L                   | 54457  | 1.4  | 4.8  | 9.3  | 1.1  | 10.7 |
| 220326_s_at | NM_018071 | ARHGEF40                | 55701  | 8.9  | 5.5  | 10.3 | 4.0  | 1.9  |
| 220327_at   | NM_016206 | VGLL3                   | 389136 | 0.1  | 0.7  | 0.1  | 0.8  | 1.8  |
| 220328_at   | NM_024947 | PHC3                    | 80012  | 3.2  | 2.7  | 2.7  | 2.1  | 3.6  |
| 220329_s_at | NM_017909 | RMND1                   | 55005  | 52.4 | 37.3 | 51.8 | 40.3 | 32.9 |
| 220330_s_at | NM_022136 | SAMSN1                  | 64092  | 2.0  | 0.3  | 0.4  | 0.1  | 2.7  |
| 220331_at   | NM_006668 | CYP46A1                 | 10858  | 8.0  | 6.1  | 7.0  | 7.1  | 10.7 |
| 220332_at   | NM_006580 | CLDN16                  | 10686  | 2.6  | 1.6  | 1.2  | 3.3  | 4.8  |
| 220333_at   | NM_017705 | PAQR5                   | 54852  | 1.5  | 1.8  | 1.1  | 1.0  | 1.1  |
| 220334_at   | NM_012419 | RGS17                   | 26575  | 0.6  | 8.9  | 12.6 | 2.9  | 1.1  |
| 220335_x_at | NM_024922 | CES3                    | 23491  | 34.9 | 22.4 | 21.2 | 13.6 | 12.1 |
| 220336_s_at | AB043821  | GP6                     | 51206  | 12.5 | 5.7  | 6.9  | 6.3  | 4.4  |
| 220337_at   | NM_021257 | NGB                     | 58157  | 9.6  | 0.7  | 2.2  | 3.7  | 1.8  |
| 220338_at   | NM_018037 | RALGPS2                 | 55103  | 4.5  | 5.3  | 4.2  | 3.4  | 3.6  |
| 220339_s_at | NM_012467 | TPSG1                   | 25823  | 2.7  | 2.6  | 9.1  | 1.5  | 2.4  |
| 220340_at   | NM_024935 | GREB1L                  | 80000  | 22.2 | 5.4  | 14.8 | 7.9  | 7.9  |
| 220341_s_at | NM_016175 | C5orf45                 | 51149  | 17.0 | 10.2 | 11.7 | 8.0  | 7.5  |
| 220342_x_at | NM_017992 | EDEM3                   | 80267  | 28.5 | 29.7 | 29.1 | 31.2 | 25.3 |
| 220343_at   | NM_018945 | PDE7B                   | 27115  | 14.0 | 7.1  | 7.5  | 6.3  | 5.7  |
| 220344_at   | NM_020643 | C11orf16                | 56673  | 3.3  | 1.9  | 3.5  | 3.4  | 2.2  |
| 220345_at   | NM_024993 | LRRTM4                  | 80059  | 2.7  | 1.9  | 4.7  | 4.5  | 0.1  |
| 220346_at   | NM_025001 | MTHFD2L                 | 441024 | 7.5  | 5.1  | 11.7 | 4.9  | 8.5  |
| 220347_at   | NM_025023 | SMG6                    | 23293  | 7.7  | 2.5  | 8.4  | 8.4  | 4.0  |
| 220348_at   | NM_025067 | KLHL29                  | 114818 | 6.4  | 0.6  | 0.8  | 1.1  | 2.1  |
| 220349_s_at | NM_022759 | ENGASE                  | 64772  | 20.5 | 21.4 | 17.1 | 16.4 | 10.4 |
| 220350_at   | NM_004234 | ZNF235                  | 9310   | 1.6  | 1.7  | 1.6  | 1.3  | 0.9  |
| 220351_at   | NM_016557 | ACKR4                   | 51554  | 4.0  | 5.1  | 2.8  | 4.4  | 1.8  |

|             |           |              |           |       |       |       |       |      |
|-------------|-----------|--------------|-----------|-------|-------|-------|-------|------|
| 220352_x_at | NM_024305 | FLJ42627     | 645644    | 24.1  | 24.9  | 27.5  | 26.7  | 21.3 |
| 220353_at   | NM_018172 | FAM86C1      | 55199     | 49.3  | 42.2  | 55.3  | 49.6  | 36.8 |
| 220354_at   | NM_025266 | MCF2L-AS1    | 100289410 | 33.4  | 35.3  | 37.4  | 39.5  | 37.6 |
| 220355_s_at | NM_018165 | PBRM1        | 55193     | 102.8 | 80.0  | 80.6  | 85.2  | 69.5 |
| 220356_at   | NM_006587 | CORIN        | 10699     | 1.9   | 1.1   | 1.4   | 0.2   | 0.4  |
| 220357_s_at | NM_016276 | SGK2         | 10110     | 30.2  | 28.7  | 29.7  | 28.5  | 18.1 |
| 220358_at   | NM_018664 | BATF3        | 55509     | 7.9   | 6.0   | 5.9   | 10.4  | 10.9 |
| 220359_s_at | NM_016300 | ARPP21       | 10777     | 0.3   | 0.3   | 0.8   | 0.3   | 2.1  |
| 220360_at   | NM_024672 | THAP9        | 79725     | 7.8   | 4.8   | 4.4   | 3.0   | 7.5  |
| 220361_at   | NM_022784 | IQCH         | 64799     | 1.3   | 4.7   | 2.3   | 2.7   | 4.8  |
| 220362_at   | NM_014068 | PSORS1C1     | 170679    | 1.6   | 1.2   | 2.0   | 1.0   | 8.0  |
| 220363_s_at | NM_022086 | ELMO2        | 63916     | 39.2  | 23.7  | 33.4  | 28.7  | 34.6 |
| 220364_at   | NM_019033 | EPB41L4A-AS1 | 54508     | 1.3   | 6.2   | 0.7   | 0.6   | 0.6  |
| 220365_at   | NM_018436 | ALLC         | 55821     | 4.9   | 7.4   | 14.2  | 12.2  | 10.3 |
| 220366_at   | NM_022142 | ELSPBP1      | 64100     | 12.2  | 7.1   | 6.0   | 7.7   | 5.8  |
| 220367_s_at | NM_024545 | SAP130       | 79595     | 86.9  | 72.2  | 85.3  | 78.3  | 57.5 |
| 220368_s_at | NM_017936 | SMEK1        | 55671     | 43.1  | 43.1  | 62.6  | 45.0  | 47.3 |
| 220369_at   | NM_017936 | SMEK1        | 55671     | 1.1   | 1.1   | 0.7   | 1.0   | 0.6  |
| 220370_s_at | NM_025090 | USP36        | 57602     | 21.9  | 7.8   | 13.0  | 14.9  | 9.7  |
| 220371_s_at | NM_020246 | SLC12A9      | 56996     | 27.1  | 28.9  | 33.3  | 28.5  | 24.9 |
| 220372_at   | NM_017833 | DNAJC28      | 54943     | 6.7   | 7.3   | 4.8   | 5.9   | 5.3  |
| 220373_at   | NM_017639 | DCHS2        | 54798     | 1.1   | 2.0   | 0.9   | 1.9   | 0.6  |
| 220374_at   | NM_017658 | KLHL28       | 54813     | 8.5   | 6.6   | 9.0   | 12.6  | 6.6  |
| 220375_s_at | NM_024752 | C5orf66      | 100996485 | 66.1  | 49.5  | 57.1  | 56.2  | 49.7 |
| 220376_at   | NM_022901 | LRRC19       | 64922     | 5.6   | 0.7   | 2.9   | 0.2   | 0.2  |
| 220377_at   | NM_014151 | KIAA0125     | 9834      | 0.6   | 0.4   | 0.4   | 0.5   | 0.3  |
| 220378_at   | NM_018679 | TCP11        | 6954      | 6.7   | 5.8   | 5.6   | 6.0   | 0.4  |
| 220379_at   | NM_020369 | FSCN3        | 29999     | 20.2  | 12.9  | 3.6   | 14.7  | 11.3 |
| 220380_at   | NM_021233 | DNASE2B      | 58511     | 87.5  | 49.6  | 91.9  | 71.6  | 81.2 |
| 220381_at   | NM_030672 | ARHGAP28     | 79822     | 5.8   | 4.4   | 11.1  | 8.7   | 1.9  |
| 220382_s_at | NM_030672 | ARHGAP28     | 79822     | 17.4  | 15.1  | 20.9  | 15.9  | 14.0 |
| 220383_at   | NM_022436 | ABCG5        | 64240     | 0.8   | 0.9   | 0.4   | 0.6   | 1.6  |
| 220384_at   | NM_016616 | NME8         | 51314     | 0.8   | 0.5   | 0.4   | 2.2   | 0.5  |
| 220385_at   | NM_020433 | JPH2         | 57158     | 0.6   | 0.5   | 0.6   | 0.5   | 0.4  |
| 220386_s_at | NM_019063 | EML4         | 27436     | 38.4  | 40.4  | 41.2  | 37.6  | 33.9 |
| 220387_s_at | NM_007071 | HHLA3        | 11147     | 104.5 | 133.3 | 102.2 | 123.6 | 81.5 |
| 220388_at   | NM_024777 | FER1L4       | 80307     | 1.0   | 6.5   | 0.8   | 0.9   | 1.7  |
| 220389_at   | NM_021827 | CCDC81       | 60494     | 3.9   | 5.6   | 5.7   | 4.6   | 1.3  |
| 220390_at   | NM_024783 | AGBL2        | 79841     | 2.5   | 4.4   | 5.2   | 1.4   | 0.9  |
| 220391_at   | NM_024784 | ZBTB3        | 79842     | 18.2  | 19.0  | 19.0  | 19.4  | 12.2 |
| 220392_at   | NM_022659 | EBF2         | 64641     | 1.9   | 0.5   | 6.5   | 2.8   | 1.1  |
| 220393_at   | NM_016571 | LGSN         | 51557     | 0.6   | 0.3   | 0.6   | 0.1   | 0.2  |
| 220394_at   | NM_019851 | FGF20        | 26281     | 0.3   | 0.7   | 4.2   | 0.5   | 0.4  |
| 220395_at   | NM_018602 | DNAJA4       | 55466     | 59.7  | 38.9  | 39.2  | 33.4  | 32.3 |
| 220396_at   | NM_018520 | SLC35E3      | 55508     | 2.3   | 3.2   | 2.5   | 2.0   | 1.0  |
| 220397_at   | NM_020128 | MDM1         | 56890     | 15.3  | 21.9  | 23.2  | 15.4  | 16.5 |
| 220398_at   | NM_024312 | GNPTAB       | 79158     | 21.1  | 15.5  | 20.7  | 17.5  | 13.6 |
| 220399_at   | NM_024796 | LINC00115    | 79854     | 17.2  | 7.9   | 19.4  | 11.2  | 11.2 |
| 220400_at   | NM_017890 | VPS13B       | 157680    | 1.2   | 8.9   | 8.4   | 11.8  | 5.1  |
| 220401_at   | NM_024802 | FLJ21369     | 79860     | 5.6   | 1.7   | 5.5   | 4.1   | 0.5  |
| 220402_at   | NM_022112 | TP53AIP1     | 63970     | 0.8   | 0.4   | 3.9   | 2.2   | 1.5  |
| 220403_s_at | NM_022112 | TP53AIP1     | 63970     | 3.1   | 1.6   | 0.4   | 0.3   | 0.8  |
| 220404_at   | NM_014076 | GPR97        | 222487    | 18.6  | 1.9   | 3.7   | 4.8   | 4.4  |

|             |           |              |              |       |       |       |       |       |
|-------------|-----------|--------------|--------------|-------|-------|-------|-------|-------|
| 220405_at   | NM_018967 | SNTG1        | 54212        | 1.5   | 1.4   | 4.9   | 5.1   | 2.7   |
| 220406_at   | NM_003238 | TGFB2        | 7042         | 6.3   | 3.2   | 11.0  | 1.5   | 3.8   |
| 220407_s_at | NM_003238 | TGFB2        | 7042         | 6.1   | 2.1   | 3.7   | 4.8   | 3.4   |
| 220408_x_at | NM_017569 | SUPT20H      | 55578        | 32.2  | 23.8  | 43.0  | 32.2  | 32.8  |
| 220409_at   | NM_018627 | CAMSAP1      | 157922       | 0.7   | 0.8   | 0.5   | 5.0   | 5.1   |
| 220410_s_at | NM_018627 | CAMSAP1      | 157922       | 9.0   | 7.2   | 3.2   | 10.6  | 3.9   |
| 220411_x_at | NM_024825 | PODNL1       | 79883        | 7.1   | 7.1   | 2.1   | 9.0   | 5.0   |
| 220412_x_at | NM_005714 | KCNK7        | 10089        | 1.4   | 0.8   | 2.6   | 2.1   | 1.8   |
| 220413_at   | NM_014579 | SLC39A2      | 29986        | 2.9   | 2.2   | 5.1   | 3.0   | 13.3  |
| 220414_at   | NM_017422 | CALML5       | 51806        | 8.5   | 0.6   | 1.0   | 0.7   | 5.8   |
| 220415_at   | NM_015978 | FPGT-TNNI3F  | 51086 /// 10 | 3.1   | 1.3   | 4.3   | 3.4   | 3.4   |
| 220416_at   | NM_024837 | ATP8B4       | 79895        | 4.1   | 1.8   | 4.4   | 1.9   | 1.0   |
| 220417_s_at | NM_015963 | THAP4        | 51078        | 208.0 | 185.5 | 222.6 | 236.6 | 180.4 |
| 220418_at   | NM_018961 | UBASH3A      | 53347        | 0.3   | 0.4   | 0.3   | 0.6   | 0.3   |
| 220419_s_at | NM_013396 | USP25        | 29761        | 73.6  | 44.6  | 65.3  | 57.7  | 42.2  |
| 220420_at   | NM_021819 | LMAN1L       | 79748        | 1.6   | 1.2   | 0.9   | 1.3   | 0.8   |
| 220421_at   | NM_024850 | BTNL8        | 79908        | 9.2   | 6.4   | 10.5  | 1.1   | 2.2   |
| 220422_at   | NM_017481 | UBQLN3       | 50613        | 4.8   | 4.0   | 4.9   | 4.1   | 2.8   |
| 220423_at   | NM_012400 | PLA2G2D      | 26279        | 2.0   | 1.0   | 1.3   | 1.0   | 1.0   |
| 220424_at   | NM_014625 | NPHS2        | 7827         | 3.4   | 1.4   | 0.6   | 1.1   | 0.7   |
| 220425_x_at | NM_017578 | ROPN1B       | 152015       | 2.6   | 1.7   | 1.0   | 1.2   | 3.2   |
| 220426_at   | NM_024059 | C20orf195    | 79025        | 2.2   | 0.7   | 1.9   | 1.0   | 1.3   |
| 220427_at   | NM_024868 | OBSCN        | 84033        | 4.0   | 5.8   | 1.2   | 1.0   | 1.0   |
| 220428_at   | NM_015717 | CD207        | 50489        | 4.3   | 7.3   | 13.7  | 7.3   | 0.6   |
| 220429_at   | NM_004784 | NDST3        | 9348         | 1.3   | 3.9   | 3.0   | 3.8   | 2.6   |
| 220430_at   | NM_024869 | FAM110D      | 79927        | 1.6   | 0.9   | 1.4   | 4.7   | 1.6   |
| 220431_at   | NM_014058 | TMPRSS11E    | 28983        | 3.3   | 5.5   | 0.9   | 0.7   | 6.2   |
| 220432_s_at | NM_016593 | CYP39A1      | 51302        | 12.7  | 12.0  | 10.5  | 9.4   | 9.9   |
| 220433_at   | NM_024082 | PRRG3        | 79057        | 2.8   | 4.0   | 3.4   | 1.1   | 2.8   |
| 220434_at   | NM_024876 | ADCK4        | 79934        | 5.0   | 7.8   | 5.9   | 2.9   | 4.4   |
| 220435_at   | NM_018713 | SLC30A10     | 55532        | 10.7  | 5.0   | 12.2  | 1.0   | 5.4   |
| 220436_at   | NM_024879 | CNTNAP3P2    | 643827       | 6.3   | 5.2   | 3.6   | 2.9   | 6.6   |
| 220437_at   | NM_018687 | C19orf80     | 55908        | 0.5   | 0.5   | 0.8   | 0.4   | 0.4   |
| 220438_at   | NM_017659 | QPCTL        | 54814        | 5.5   | 9.2   | 11.7  | 5.5   | 8.5   |
| 220439_at   | NM_024892 | RIN3         | 79890        | 14.2  | 11.4  | 8.5   | 11.1  | 6.9   |
| 220440_at   | NM_013268 | LGALS13      | 29124        | 9.8   | 6.5   | 3.2   | 7.0   | 1.5   |
| 220441_at   | NM_024902 | DNAJC22      | 79962        | 30.1  | 27.5  | 35.7  | 37.6  | 21.8  |
| 220442_at   | NM_003774 | GALNT4 /// F | 8693 /// 100 | 11.8  | 9.7   | 13.5  | 9.9   | 11.0  |
| 220443_s_at | NM_012476 | VAX2         | 25806        | 10.4  | 8.7   | 13.1  | 5.9   | 6.2   |
| 220444_at   | NM_024341 | ZNF557       | 79230        | 13.4  | 20.2  | 20.8  | 22.2  | 14.9  |
| 220445_s_at | NM_004909 | CSAG2 /// CS | 389903 /// 1 | 191.6 | 175.4 | 196.7 | 217.6 | 186.9 |
| 220446_s_at | NM_005769 | CHST4        | 10164        | 17.8  | 16.9  | 23.0  | 11.7  | 9.4   |
| 220447_at   | NM_007232 | HRH3         | 11255        | 1.3   | 1.1   | 0.6   | 0.5   | 0.5   |
| 220448_at   | NM_022055 | KCNK12       | 56660        | 0.3   | 0.6   | 0.3   | 1.0   | 1.2   |
| 220449_at   | NM_024049 | LINC01260    | 79015        | 1.9   | 11.5  | 5.3   | 4.7   | 9.2   |
| 220450_at   | NM_024914 | -            | -            | 3.6   | 1.1   | 4.0   | 2.6   | 0.5   |
| 220451_s_at | NM_022161 | BIRC7        | 79444        | 13.8  | 12.9  | 17.5  | 9.5   | 13.6  |
| 220452_x_at | NM_021031 | -            | -            | 52.9  | 23.6  | 22.2  | 29.2  | 19.2  |
| 220453_at   | NM_017765 | PQLC2        | 54896        | 10.2  | 12.7  | 3.9   | 8.0   | 12.9  |
| 220454_s_at | NM_020796 | SEMA6A       | 57556        | 38.7  | 35.6  | 25.2  | 31.9  | 31.6  |
| 220455_at   | NM_013356 | SLC16A8      | 23539        | 3.9   | 7.7   | 1.7   | 3.0   | 1.2   |
| 220456_at   | NM_018327 | SPTLC3       | 55304        | 0.5   | 4.5   | 0.9   | 0.2   | 0.7   |
| 220457_at   | NM_018028 | SAMD4B       | 55095        | 2.1   | 10.0  | 0.8   | 1.1   | 1.6   |

|             |           |            |            |        |       |       |       |       |      |
|-------------|-----------|------------|------------|--------|-------|-------|-------|-------|------|
| 220458_at   | NM_018038 | -          | -          | 12.5   | 12.6  | 8.2   | 9.2   | 5.9   |      |
| 220459_at   | NM_018118 | MCM3AP-AS  | 114044     | 30.8   | 12.8  | 28.0  | 21.0  | 20.6  |      |
| 220460_at   | NM_017435 | SLCO1C1    | 53919      | 2.2    | 0.9   | 0.8   | 3.4   | 0.4   |      |
| 220461_at   | NM_024938 | PCNXL2     | 80003      | 1.4    | 0.9   | 1.7   | 0.6   | 0.7   |      |
| 220462_at   | NM_024969 | CSRNP3     | 80034      | 1.2    | 0.6   | 5.7   | 1.3   | 5.2   |      |
| 220463_at   | NM_024971 | TRPM3      | 80036      | 2.3    | 7.7   | 12.6  | 4.3   | 5.0   |      |
| 220464_at   | NM_024979 | MCF2L      | 23263      | 8.1    | 2.2   | 9.3   | 2.6   | 5.5   |      |
| 220465_at   | NM_024988 | CEBPA-AS1  | 80054      | 33.5   | 30.2  | 32.6  | 29.9  | 30.3  |      |
| 220466_at   | NM_025004 | CCDC15     | 80071      | 33.6   | 17.5  | 33.2  | 28.1  | 28.1  |      |
| 220467_at   | NM_025032 | -          | -          | 12.9   | 8.6   | 11.3  | 6.3   | 4.0   |      |
| 220468_at   | NM_025047 | ARL14      | 80117      | 1.6    | 1.2   | 0.5   | 0.3   | 0.7   |      |
| 220469_at   | NM_025088 | COPE       | 11316      | 12.6   | 6.7   | 3.7   | 8.2   | 2.4   |      |
| 220470_at   | NM_016526 | BET1L      | 51272      | 26.9   | 17.9  | 30.1  | 21.0  | 15.9  |      |
| 220471_s_at | NM_025107 | MYCT1      | 80177      | 3.8    | 4.6   | 4.4   | 2.3   | 1.0   |      |
| 220472_at   | NM_014150 | ZCCHC4     | 29063      | 2.1    | 1.1   | 7.1   | 7.5   | 1.4   |      |
| 220473_s_at | NM_014150 | ZCCHC4     | 29063      | 17.5   | 14.2  | 18.4  | 10.1  | 12.0  |      |
| 220474_at   | NM_030631 | SLC25A21   | 89874      | 16.9   | 14.1  | 27.5  | 14.5  | 8.3   |      |
| 220475_at   | NM_022127 | SLC28A3    | 64078      | 23.6   | 7.5   | 10.4  | 7.1   | 4.9   |      |
| 220476_s_at | NM_019099 | FAM212B    | /// 55924  | /// 10 | 5.0   | 4.6   | 7.9   | 10.1  | 1.0  |
| 220477_s_at | NM_014145 | TMEM230    | 29058      | 313.4  | 387.8 | 367.8 | 365.7 | 293.9 |      |
| 220478_at   | NM_030642 | APOL5      | 80831      | 1.0    | 0.7   | 1.8   | 1.0   | 1.1   |      |
| 220479_at   | NM_014116 | CPS1-IT1   | 29034      | 2.9    | 1.9   | 1.4   | 2.5   | 1.4   |      |
| 220480_at   | NM_021973 | HAND2      | 9464       | 1.3    | 0.7   | 2.8   | 1.2   | 1.5   |      |
| 220481_at   | NM_006794 | GPR75      | 10936      | 6.6    | 1.8   | 6.5   | 6.6   | 4.8   |      |
| 220482_s_at | NM_012139 | SERGEF     | 26297      | 21.6   | 22.9  | 29.3  | 28.9  | 13.1  |      |
| 220483_s_at | NM_015435 | RNF19A     | 25897      | 8.3    | 13.6  | 4.7   | 7.0   | 1.5   |      |
| 220484_at   | NM_018298 | MCOLN3     | 55283      | 6.4    | 0.4   | 0.8   | 1.2   | 0.5   |      |
| 220485_s_at | NM_018556 | SIRPG      | 55423      | 3.9    | 7.2   | 4.3   | 5.8   | 6.6   |      |
| 220486_x_at | NM_017698 | LOC1019285 | 84187      | /// 10 | 72.3  | 68.3  | 88.0  | 81.7  | 93.3 |
| 220487_at   | NM_018968 | SNTG2      | 54221      | 0.5    | 0.5   | 0.5   | 1.0   | 0.3   |      |
| 220488_s_at | NM_017679 | BCAS3      | 54828      | 17.3   | 21.3  | 25.8  | 25.8  | 14.3  |      |
| 220489_s_at | NM_018565 | SERINC2    | 347735     | 1.4    | 0.5   | 3.2   | 2.9   | 0.7   |      |
| 220490_at   | NM_018565 | SERINC2    | 347735     | 11.2   | 1.7   | 6.0   | 8.7   | 5.9   |      |
| 220491_at   | NM_021175 | HAMP       | 57817      | 14.9   | 14.6  | 17.6  | 13.0  | 13.3  |      |
| 220492_s_at | NM_004802 | OTOF       | 9381       | 1.1    | 0.7   | 5.9   | 0.8   | 0.7   |      |
| 220493_at   | NM_021951 | DMRT1      | 1761       | 1.5    | 1.3   | 0.6   | 3.2   | 0.7   |      |
| 220494_s_at | NM_018678 | -          | -          | 20.6   | 23.2  | 19.4  | 23.1  | 22.2  |      |
| 220495_s_at | NM_024715 | TXNDC15    | 79770      | 169.0  | 147.7 | 213.4 | 195.9 | 172.6 |      |
| 220496_at   | NM_016509 | CLEC1B     | 51266      | 6.4    | 3.8   | 3.8   | 7.1   | 2.7   |      |
| 220497_at   | NM_013249 | ZNF214     | 7761       | 5.3    | 2.8   | 5.8   | 2.7   | 3.0   |      |
| 220498_at   | NM_006686 | ACTL7B     | 10880      | 2.0    | 0.6   | 0.9   | 0.5   | 3.7   |      |
| 220499_at   | NM_017559 | FNDC8      | 54752      | 0.6    | 5.0   | 1.6   | 0.7   | 0.5   |      |
| 220500_s_at | NM_007082 | RABL2A     | /// R11158 | /// 11 | 32.0  | 38.8  | 38.6  | 38.6  | 38.9 |
| 220501_at   | NM_006687 | ACTL7A     | 10881      | 2.2    | 1.7   | 1.2   | 2.2   | 1.2   |      |
| 220502_s_at | NM_022444 | SLC13A1    | 6561       | 1.1    | 1.0   | 3.4   | 0.3   | 0.9   |      |
| 220503_at   | AF260824  | SLC13A1    | 6561       | 0.3    | 3.4   | 0.2   | 1.6   | 0.2   |      |
| 220504_at   | NM_007035 | KERA       | 11081      | 0.1    | 0.2   | 3.1   | 2.9   | 3.0   |      |
| 220505_at   | NM_016349 | C9orf53    | 51198      | 0.6    | 0.8   | 0.5   | 1.1   | 0.4   |      |
| 220506_at   | NM_004129 | GUCY1B2    | 2974       | 1.2    | 1.7   | 0.7   | 0.9   | 4.3   |      |
| 220507_s_at | NM_016327 | UPB1       | 51733      | 0.5    | 0.6   | 0.6   | 1.0   | 6.0   |      |
| 220508_at   | NM_014406 | CCT8L2     | 150160     | 1.2    | 7.5   | 5.9   | 2.4   | 4.9   |      |
| 220509_at   | NM_018605 | RBM26      | 64062      | 3.5    | 2.3   | 5.3   | 4.5   | 2.9   |      |
| 220510_at   | NM_020407 | RHBG       | 57127      | 1.4    | 1.9   | 1.4   | 0.9   | 2.3   |      |

|             |           |                  |              |         |       |        |       |       |     |
|-------------|-----------|------------------|--------------|---------|-------|--------|-------|-------|-----|
| 220511_s_at | NM_024767 | DLC1             | 10395        | 5.3     | 6.7   | 6.6    | 7.2   | 5.0   |     |
| 220512_at   | NM_024767 | DLC1             | 10395        | 0.8     | 4.8   | 1.0    | 3.1   | 0.5   |     |
| 220513_at   | NM_030568 | KHDC1L           | 100129128    | 4.3     | 0.4   | 1.6    | 0.6   | 0.3   |     |
| 220514_at   | NM_018568 | -                | -            | 2.4     | 2.5   | 2.4    | 1.1   | 1.5   |     |
| 220515_at   | NM_022076 | DUSP21           | 63904        | 1.6     | 1.1   | 0.9    | 1.1   | 1.0   |     |
| 220516_at   | NM_017894 | ZSCAN2           | 54993        | 4.8     | 12.3  | 8.4    | 18.6  | 10.4  |     |
| 220517_at   | NM_018080 | VPS13C           | 54832        | 8.7     | 3.8   | 3.8    | 2.1   | 1.2   |     |
| 220518_at   | NM_024801 | ABI3BP           | 25890        | 0.4     | 2.3   | 4.4    | 4.2   | 1.4   |     |
| 220519_s_at | NM_030657 | LIM2             | 3982         | 3.3     | 8.6   | 10.9   | 6.2   | 5.6   |     |
| 220520_s_at | NM_017681 | NUP62CL          | 54830        | 37.7    | 38.5  | 41.4   | 39.8  | 39.5  |     |
| 220521_s_at | NM_017974 | ATG16L1          | 55054        | 5.2     | 5.0   | 5.2    | 2.0   | 3.4   |     |
| 220522_at   | NM_012076 | CRB1             | 23418        | 2.6     | 4.2   | 11.4   | 1.3   | 5.5   |     |
| 220523_at   | NM_024822 | EFHC2            | 80258        | 3.5     | 5.2   | 6.1    | 4.3   | 4.8   |     |
| 220524_at   | NM_024823 | EPB41L4B         | 54566        | 2.6     | 7.4   | 0.6    | 4.2   | 1.1   |     |
| 220525_s_at | NM_012103 | AUP1             | 550          | 141.0   | 102.1 | 163.2  | 116.1 | 120.4 |     |
| 220526_s_at | NM_017971 | MRPL20           | 55052        | 1061.4  | 852.6 | 1200.9 | 913.5 | 865.4 |     |
| 220527_at   | NM_017971 | MRPL20           | 55052        | 1.9     | 0.6   | 1.0    | 0.3   | 3.4   |     |
| 220528_at   | NM_018399 | VNN3             | 55350        | 0.8     | 0.4   | 1.1    | 0.7   | 0.6   |     |
| 220529_at   | NM_024846 | FLJ11710         | 79904        | 4.7     | 9.8   | 15.7   | 1.7   | 3.1   |     |
| 220530_at   | NM_018519 | -                | -            | 5.6     | 1.8   | 2.2    | 8.1   | 3.1   |     |
| 220531_at   | NM_024849 | -                | -            | 0.7     | 0.4   | 0.5    | 0.4   | 0.5   |     |
| 220532_s_at | NM_014020 | TMEM176B         | 28959        | 7.9     | 7.5   | 4.8    | 4.2   | 1.5   |     |
| 220533_at   | NM_024853 | -                | -            | 14.1    | 0.6   | 7.7    | 8.1   | 4.4   |     |
| 220534_at   | NM_024114 | LOC1019302.79097 | /// 39       | 10.5    | 7.5   | 11.9   | 5.6   | 8.6   |     |
| 220535_at   | NM_018088 | FAM90A1          | 55138        | 1.9     | 1.3   | 0.9    | 0.9   | 0.8   |     |
| 220536_at   | NM_018228 | VRTN             | 55237        | 6.5     | 13.2  | 10.6   | 6.5   | 4.1   |     |
| 220537_at   | NM_017677 | ASB12            | /// M' 55613 | /// 14  | 5.3   | 3.2    | 1.8   | 4.0   | 5.0 |
| 220538_at   | NM_024866 | ADM2             | 79924        | 33.2    | 12.4  | 12.8   | 13.9  | 14.5  |     |
| 220539_at   | NM_017609 | TTC40            | 54777        | 5.0     | 3.9   | 0.5    | 0.8   | 4.0   |     |
| 220540_at   | NM_022358 | KCNK15           | 60598        | 0.9     | 0.8   | 0.9    | 1.2   | 0.7   |     |
| 220541_at   | NM_021801 | MMP26            | 56547        | 11.0    | 7.3   | 11.3   | 10.5  | 5.5   |     |
| 220542_s_at | NM_016583 | BPIFA1           | 51297        | 9.5     | 8.0   | 8.7    | 9.7   | 11.6  |     |
| 220543_at   | NM_019596 | C21orf62         | 56245        | 14.3    | 5.5   | 5.0    | 9.1   | 5.2   |     |
| 220544_at   | NM_021733 | TSKS             | 60385        | 7.4     | 4.7   | 6.0    | 5.0   | 2.5   |     |
| 220545_s_at | NM_021733 | TSKS             | 60385        | 6.8     | 7.2   | 13.1   | 10.5  | 7.7   |     |
| 220546_at   | NM_024891 | KMT2A            | /// L(4297   | /// 101 | 0.9   | 5.1    | 1.2   | 2.7   | 2.5 |
| 220547_s_at | NM_019054 | FAM35A           | 54537        | 142.7   | 137.9 | 220.3  | 139.5 | 127.7 |     |
| 220548_at   | NM_006071 | PKDREJ           | 10343        | 1.1     | 0.4   | 1.8    | 1.5   | 4.9   |     |
| 220549_at   | NM_006550 | FSBP             | /// RAD25788 | /// 10  | 5.3   | 4.1    | 8.9   | 5.1   | 3.2 |
| 220550_at   | NM_018007 | FBXO4            | 26272        | 2.1     | 0.1   | 4.0    | 1.0   | 0.9   |     |
| 220551_at   | NM_020346 | SLC17A6          | 57084        | 1.0     | 2.0   | 4.2    | 0.3   | 0.2   |     |
| 220552_at   | NM_012471 | TRPC5            | 7224         | 2.4     | 0.4   | 7.7    | 0.6   | 0.2   |     |
| 220553_s_at | NM_018333 | PRPF39           | 55015        | 55.4    | 27.9  | 60.9   | 48.8  | 35.2  |     |
| 220554_at   | NM_006672 | SLC22A7          | 10864        | 1.6     | 4.6   | 6.1    | 5.6   | 6.4   |     |
| 220555_s_at | NM_024895 | PDZD7            | 79955        | 11.2    | 4.6   | 19.7   | 2.0   | 7.9   |     |
| 220556_at   | NM_012069 | ATP1B4           | 23439        | 2.4     | 4.4   | 4.8    | 3.9   | 1.6   |     |
| 220557_s_at | NM_018026 | PACS1            | 55690        | 0.9     | 5.7   | 2.5    | 1.9   | 2.6   |     |
| 220558_x_at | NM_005705 | TSPAN32          | 10077        | 19.6    | 6.4   | 15.5   | 19.2  | 12.7  |     |
| 220559_at   | NM_001426 | EN1              | 2019         | 3.9     | 8.3   | 9.0    | 3.7   | 2.6   |     |
| 220560_at   | NM_014144 | C11orf21         | 29125        | 9.3     | 7.7   | 8.2    | 6.9   | 2.8   |     |
| 220561_at   | NM_016412 | IGF2-AS          | 51214        | 2.9     | 1.5   | 2.6    | 1.6   | 1.4   |     |
| 220562_at   | NM_017781 | CYP2W1           | 54905        | 5.7     | 0.8   | 7.0    | 2.7   | 5.5   |     |
| 220563_s_at | NM_016148 | SHANK1           | 50944        | 2.4     | 1.5   | 1.2    | 6.2   | 0.6   |     |



|             |           |                           |        |       |       |       |       |       |
|-------------|-----------|---------------------------|--------|-------|-------|-------|-------|-------|
| 220564_at   | NM_018363 | RNLS                      | 55328  | 7.3   | 4.5   | 14.0  | 9.1   | 6.5   |
| 220565_at   | NM_016602 | CCR10                     | 2826   | 0.5   | 2.1   | 5.8   | 1.6   | 0.3   |
| 220566_at   | NM_014308 | PIK3R5                    | 23533  | 26.6  | 16.0  | 21.9  | 14.1  | 19.2  |
| 220567_at   | NM_016260 | IKZF2                     | 22807  | 1.1   | 1.8   | 1.8   | 0.8   | 1.1   |
| 220568_at   | NM_018582 | PRO1483                   | 55448  | 1.0   | 0.7   | 0.8   | 0.4   | 0.4   |
| 220569_at   | NM_018505 | -                         | -      | 0.7   | 1.7   | 6.9   | 1.2   | 3.8   |
| 220570_at   | NM_020415 | RETN                      | 56729  | 10.8  | 1.9   | 6.1   | 4.2   | 4.1   |
| 220571_at   | NM_020229 | PRDM11                    | 56981  | 18.8  | 8.8   | 6.9   | 3.2   | 6.1   |
| 220572_at   | NM_018705 | LOC1005062100506282       |        | 5.6   | 1.2   | 5.8   | 4.3   | 6.7   |
| 220573_at   | NM_022046 | KLK14                     | 43847  | 1.6   | 1.0   | 1.6   | 1.1   | 0.8   |
| 220574_at   | NM_024966 | SEMA6D                    | 80031  | 7.5   | 1.9   | 5.0   | 9.5   | 6.8   |
| 220575_at   | NM_024974 | FAM106A                   | 80039  | 8.6   | 5.3   | 10.2  | 5.0   | 5.4   |
| 220576_at   | NM_024989 | PGAP1                     | 80055  | 8.1   | 4.3   | 4.5   | 5.4   | 4.1   |
| 220577_at   | NM_025006 | GVINP1                    | 387751 | 10.1  | 9.6   | 9.4   | 7.2   | 7.5   |
| 220578_at   | NM_025008 | ADAMTSL4                  | 54507  | 1.5   | 0.9   | 0.7   | 0.7   | 0.6   |
| 220579_at   | NM_025025 | -                         | -      | 0.6   | 0.3   | 0.6   | 0.4   | 0.4   |
| 220580_at   | NM_025044 | BICC1                     | 80114  | 10.5  | 7.0   | 14.9  | 9.0   | 10.0  |
| 220581_at   | NM_025059 | CCDC170                   | 80129  | 4.0   | 0.9   | 8.2   | 1.8   | 3.6   |
| 220582_at   | NM_025071 | -                         | -      | 0.3   | 1.2   | 0.7   | 1.4   | 2.4   |
| 220583_at   | NM_025086 | -                         | -      | 3.2   | 3.9   | 3.4   | 1.8   | 2.3   |
| 220584_at   | NM_025094 | FLJ22184                  | 80164  | 5.4   | 31.4  | 13.5  | 28.3  | 11.8  |
| 220585_at   | NM_025130 | HKDC1                     | 80201  | 1.6   | 5.3   | 1.3   | 0.8   | 0.9   |
| 220586_at   | NM_025134 | CHD9                      | 80205  | 4.9   | 1.3   | 3.2   | 4.1   | 2.9   |
| 220587_s_at | NM_022372 | MLST8                     | 64223  | 371.7 | 421.4 | 386.7 | 354.9 | 285.4 |
| 220588_at   | NM_017843 | BCAS4                     | 55653  | 21.0  | 23.3  | 25.7  | 16.7  | 13.7  |
| 220589_s_at | NM_018463 | ITFG2 /// LOC55846 /// 10 |        | 7.8   | 3.4   | 5.8   | 11.5  | 5.2   |
| 220590_at   | NM_018463 | ITFG2                     | 55846  | 2.6   | 1.7   | 10.9  | 8.0   | 7.8   |
| 220591_s_at | NM_025184 | EFHC2                     | 80258  | 30.6  | 25.5  | 24.7  | 19.2  | 15.5  |
| 220592_at   | NM_017950 | CCDC40                    | 55036  | 13.1  | 4.0   | 14.1  | 2.3   | 3.1   |
| 220593_s_at | NM_017950 | CCDC40                    | 55036  | 13.8  | 8.4   | 7.6   | 10.4  | 9.1   |
| 220594_at   | NM_025192 | OGT                       | 8473   | 8.4   | 2.0   | 6.4   | 3.3   | 0.7   |
| 220595_at   | NM_013377 | PDZRN4                    | 29951  | 1.8   | 5.8   | 1.3   | 4.7   | 3.9   |
| 220596_at   | NM_015590 | GPATCH4                   | 54865  | 18.6  | 23.0  | 23.1  | 9.1   | 12.7  |
| 220597_s_at | NM_018694 | ARL6IP4                   | 51329  | 159.2 | 127.7 | 177.0 | 173.3 | 128.9 |
| 220598_at   | NM_024110 | CARD14                    | 79092  | 0.9   | 0.7   | 0.9   | 1.3   | 0.5   |
| 220599_s_at | NM_024110 | CARD14                    | 79092  | 19.6  | 10.6  | 12.2  | 4.6   | 11.4  |
| 220600_at   | NM_017713 | ELP6                      | 54859  | 23.1  | 16.6  | 17.5  | 14.3  | 10.5  |
| 220601_at   | NM_025187 | C16orf70                  | 80262  | 4.6   | 0.3   | 1.2   | 0.7   | 0.8   |
| 220602_s_at | NM_025084 | GOLGA2P7 //,80154 /// 38  |        | 38.2  | 43.8  | 48.7  | 45.9  | 36.3  |
| 220603_s_at | NM_018349 | MCTP2                     | 55784  | 68.9  | 48.2  | 65.7  | 56.0  | 55.1  |
| 220604_x_at | NM_006657 | FTCD                      | 10841  | 10.2  | 5.0   | 3.9   | 2.9   | 1.5   |
| 220605_s_at | NM_012237 | SIRT2                     | 22933  | 136.9 | 150.2 | 130.9 | 139.2 | 117.0 |
| 220606_s_at | NM_020233 | ADPRM                     | 56985  | 24.2  | 31.5  | 33.2  | 31.8  | 21.3  |
| 220607_x_at | NM_016397 | NELFCD                    | 51497  | 593.7 | 635.4 | 668.1 | 585.2 | 532.4 |
| 220608_s_at | NM_014106 | BC069776                  | -      | 13.2  | 11.9  | 13.5  | 13.1  | 9.4   |
| 220609_at   | NM_024651 | LOC202181                 | 202181 | 1.2   | 5.3   | 0.9   | 0.9   | 0.7   |
| 220610_s_at | NM_006309 | LRRFIP2                   | 9209   | 36.0  | 43.2  | 41.3  | 32.2  | 20.2  |
| 220611_at   | NM_021080 | DAB1                      | 1600   | 1.4   | 0.7   | 1.0   | 0.6   | 1.7   |
| 220612_at   | NM_014135 | AF090939                  | -      | 2.4   | 9.4   | 8.9   | 1.2   | 1.1   |
| 220613_s_at | NM_017695 | SYTL2                     | 54843  | 5.7   | 7.6   | 3.5   | 4.3   | 5.7   |
| 220614_s_at | NM_024694 | ADGB                      | 79747  | 0.8   | 2.1   | 2.6   | 2.9   | 3.3   |
| 220615_s_at | NM_018099 | FAR2                      | 55711  | 1.6   | 3.3   | 9.3   | 7.1   | 6.0   |
| 220616_at   | NM_006448 | ZNF384                    | 171017 | 3.8   | 2.9   | 1.6   | 0.5   | 1.6   |

|             |           |                          |        |       |       |       |       |       |
|-------------|-----------|--------------------------|--------|-------|-------|-------|-------|-------|
| 220617_s_at | NM_018181 | ZNF532                   | 55205  | 19.0  | 24.8  | 28.1  | 21.8  | 17.0  |
| 220618_s_at | NM_017984 | ZCWPW1                   | 55063  | 4.6   | 1.2   | 3.4   | 1.0   | 3.2   |
| 220619_at   | NM_017783 | CHD7                     | 55636  | 0.3   | 1.4   | 0.6   | 0.1   | 0.4   |
| 220620_at   | NM_019060 | CRCT1                    | 54544  | 8.2   | 0.7   | 3.3   | 0.6   | 0.2   |
| 220621_at   | NM_012186 | FOXE3                    | 2301   | 2.0   | 0.8   | 0.8   | 6.7   | 0.6   |
| 220622_at   | NM_024727 | LRRC31                   | 79782  | 18.7  | 17.8  | 13.6  | 17.6  | 8.5   |
| 220623_s_at | NM_025244 | TSGA10                   | 80705  | 3.5   | 1.1   | 5.1   | 1.9   | 5.3   |
| 220624_s_at | NM_001422 | ELF5                     | 2001   | 1.5   | 0.8   | 3.4   | 1.0   | 0.7   |
| 220625_s_at | AF115403  | ELF5                     | 2001   | 8.9   | 8.2   | 9.6   | 8.2   | 7.9   |
| 220626_at   | NM_016186 | SERPINA10                | 51156  | 1.1   | 5.3   | 1.9   | 4.0   | 3.4   |
| 220627_at   | NM_005492 | CST8                     | 10047  | 5.3   | 11.9  | 7.2   | 1.4   | 2.1   |
| 220628_s_at | NM_019064 | SDK2                     | 54549  | 1.4   | 1.0   | 3.3   | 1.0   | 0.6   |
| 220629_at   | NM_018722 | KCNQ1DN                  | 55539  | 1.4   | 0.9   | 1.0   | 0.8   | 0.7   |
| 220630_s_at | NM_021797 | CHIA                     | 27159  | 6.0   | 5.4   | 2.9   | 4.9   | 1.5   |
| 220631_at   | NM_022353 | OSGEPL1                  | 64172  | 57.0  | 53.5  | 64.3  | 50.7  | 52.2  |
| 220632_s_at | NM_013382 | POMT2                    | 29954  | 17.5  | 21.5  | 21.9  | 16.0  | 15.4  |
| 220633_s_at | NM_016287 | HP1BP3                   | 50809  | 10.0  | 6.0   | 6.6   | 8.8   | 17.5  |
| 220634_at   | NM_018488 | TBX4                     | 9496   | 1.6   | 1.1   | 1.5   | 1.8   | 5.9   |
| 220635_at   | NM_014069 | PSORS1C2                 | 170680 | 1.7   | 2.7   | 2.3   | 1.0   | 4.2   |
| 220636_at   | NM_023036 | DNAI2                    | 64446  | 1.7   | 1.0   | 1.5   | 5.2   | 2.6   |
| 220637_at   | NM_024785 | FAM124B                  | 79843  | 2.1   | 1.0   | 4.5   | 1.5   | 1.0   |
| 220638_s_at | NM_012116 | CBLC                     | 23624  | 2.5   | 4.7   | 1.7   | 4.4   | 3.9   |
| 220639_at   | NM_024795 | TM4SF20                  | 79853  | 1.2   | 1.3   | 1.3   | 0.8   | 4.9   |
| 220640_at   | NM_022048 | CSNK1G1                  | 53944  | 5.2   | 7.6   | 7.8   | 1.0   | 7.6   |
| 220641_at   | NM_024505 | NOX5                     | 79400  | 18.0  | 1.7   | 20.2  | 11.9  | 14.5  |
| 220642_x_at | NM_016334 | GPR89A /// C51463 /// 65 |        | 122.6 | 132.5 | 144.2 | 116.9 | 113.0 |
| 220643_s_at | NM_018147 | FAIM                     | 55179  | 148.1 | 111.1 | 156.6 | 120.1 | 123.1 |
| 220644_at   | NM_014137 | -                        | -      | 1.2   | 1.6   | 1.3   | 1.0   | 1.0   |
| 220645_at   | NM_017678 | NXPE4                    | 54827  | 1.5   | 0.6   | 1.5   | 0.9   | 0.6   |
| 220646_s_at | NM_016523 | KLRF1                    | 51348  | 0.4   | 0.1   | 0.5   | 0.7   | 1.2   |
| 220647_s_at | NM_016565 | COA4                     | 51287  | 291.3 | 279.6 | 328.8 | 280.4 | 245.6 |
| 220648_at   | NM_018702 | ADARB2                   | 105    | 1.7   | 5.9   | 7.0   | 0.8   | 2.0   |
| 220649_at   | NM_024856 | AGBL3                    | 340351 | 0.3   | 0.8   | 0.3   | 0.3   | 0.6   |
| 220650_s_at | NM_004594 | SLC9A5                   | 6553   | 15.1  | 2.1   | 4.7   | 12.1  | 2.0   |
| 220651_s_at | NM_018518 | MCM10                    | 55388  | 132.9 | 87.0  | 167.6 | 97.7  | 125.4 |
| 220652_at   | NM_018278 | KIF24                    | 347240 | 0.3   | 4.8   | 0.4   | 3.3   | 1.0   |
| 220653_at   | NM_015363 | PEG3 /// ZIM5178 /// 236 |        | 17.6  | 13.0  | 15.4  | 15.2  | 19.1  |
| 220654_at   | NM_021092 | PPY2                     | 23614  | 0.4   | 0.4   | 0.4   | 0.8   | 0.6   |
| 220655_at   | NM_024873 | TNIP3                    | 79931  | 0.6   | 0.2   | 0.1   | 1.0   | 0.4   |
| 220656_at   | NM_018527 | -                        | -      | 2.2   | 0.2   | 2.9   | 0.4   | 0.1   |
| 220657_at   | NM_018143 | KLHL11                   | 55175  | 3.7   | 8.7   | 6.2   | 2.2   | 1.1   |
| 220658_s_at | NM_020183 | ARNTL2                   | 56938  | 18.3  | 17.7  | 19.9  | 11.5  | 15.0  |
| 220659_s_at | NM_018275 | C7orf43                  | 55262  | 29.9  | 25.4  | 34.0  | 15.9  | 23.9  |
| 220660_at   | NM_021208 | LINC00474                | 58483  | 0.8   | 0.4   | 1.6   | 1.8   | 1.0   |
| 220661_s_at | NM_017865 | ZNF692                   | 55657  | 70.5  | 61.5  | 84.8  | 50.9  | 51.1  |
| 220662_s_at | NM_014571 | HEYL                     | 26508  | 1.1   | 2.6   | 3.7   | 3.4   | 2.8   |
| 220663_at   | NM_014271 | IL1RAPL1                 | 11141  | 14.5  | 10.5  | 13.1  | 9.5   | 10.4  |
| 220664_at   | NM_006518 | SPRR2C                   | 6702   | 2.1   | 4.1   | 7.6   | 0.5   | 5.4   |
| 220665_at   | NM_016383 | LUZP4                    | 51213  | 9.5   | 2.4   | 5.3   | 1.3   | 4.5   |
| 220666_at   | NM_018611 | -                        | -      | 1.2   | 0.9   | 0.3   | 2.6   | 0.3   |
| 220667_at   | NM_018540 | USP49                    | 25862  | 2.7   | 3.0   | 2.9   | 2.7   | 1.7   |
| 220668_s_at | NM_006892 | DNMT3B                   | 1789   | 54.6  | 43.4  | 45.1  | 39.7  | 39.0  |
| 220669_at   | NM_017493 | OTUD4                    | 54726  | 8.0   | 5.9   | 9.4   | 5.5   | 3.1   |

|             |           |            |           |       |       |       |       |       |
|-------------|-----------|------------|-----------|-------|-------|-------|-------|-------|
| 220670_at   | NM_018549 | -          | 0.6       | 0.7   | 3.9   | 0.4   | 2.9   |       |
| 220671_at   | NM_012118 | CCRN4L     | 25819     | 31.7  | 23.8  | 35.3  | 25.6  | 17.5  |
| 220672_at   | NM_020958 | PPP4R4     | 57718     | 8.1   | 0.9   | 9.4   | 6.1   | 3.8   |
| 220673_s_at | NM_020958 | PPP4R4     | 57718     | 0.3   | 2.1   | 0.4   | 0.4   | 0.3   |
| 220674_at   | NM_024916 | CD22       | 933       | 1.2   | 4.4   | 3.5   | 4.7   | 0.7   |
| 220675_s_at | NM_025225 | PNPLA3     | 80339     | 11.8  | 1.8   | 1.1   | 1.3   | 1.4   |
| 220676_at   | NM_007037 | ADAMTS8    | 11095     | 0.6   | 3.0   | 5.7   | 1.9   | 0.7   |
| 220677_s_at | NM_007037 | ADAMTS8    | 11095     | 3.4   | 1.6   | 3.4   | 7.4   | 1.4   |
| 220678_at   | NM_017937 | FLJ20712   | 55025     | 1.5   | 0.6   | 1.2   | 0.8   | 0.8   |
| 220679_s_at | NM_004361 | CDH7       | 1005      | 1.6   | 0.8   | 0.9   | 1.2   | 0.3   |
| 220680_at   | NM_018211 | RAVER2     | 55225     | 4.7   | 0.8   | 0.6   | 0.9   | 0.7   |
| 220681_at   | NM_018280 | PRR34      | 55267     | 3.5   | 3.1   | 9.1   | 3.1   | 5.8   |
| 220682_s_at | NM_015990 | -          | -         | 8.2   | 7.6   | 7.4   | 9.1   | 7.2   |
| 220683_at   | NM_015725 | RDH8       | 50700     | 11.2  | 9.0   | 14.3  | 5.3   | 4.2   |
| 220684_at   | NM_013351 | TBX21      | 30009     | 15.6  | 7.5   | 12.8  | 6.8   | 1.6   |
| 220685_at   | NM_017848 | FAM120C    | 54954     | 17.8  | 16.0  | 15.0  | 13.0  | 13.8  |
| 220686_s_at | NM_018068 | PIWIL2     | 55124     | 8.5   | 4.3   | 5.1   | 6.1   | 7.2   |
| 220687_at   | NM_018175 | LOC1019275 | 101927550 | 1.1   | 2.6   | 8.3   | 0.7   | 3.4   |
| 220688_s_at | NM_016183 | MRTO4      | 51154     | 92.8  | 82.5  | 131.1 | 88.0  | 101.9 |
| 220689_at   | NM_018055 | -          | -         | 18.9  | 6.4   | 5.3   | 2.0   | 7.9   |
| 220690_s_at | NM_015510 | DHRS7B     | 25979     | 136.7 | 140.4 | 150.7 | 135.1 | 119.6 |
| 220691_at   | NM_014114 | -          | -         | 11.7  | 9.2   | 9.6   | 8.5   | 9.9   |
| 220692_at   | NM_014147 | -          | -         | 10.8  | 3.9   | 9.1   | 8.5   | 5.0   |
| 220693_at   | NM_014148 | CCDC82     | 79780     | 2.7   | 1.1   | 5.3   | 4.8   | 5.7   |
| 220694_at   | NM_014152 | ASAP1-IT1  | 29065     | 8.6   | 1.5   | 4.1   | 1.6   | 4.7   |
| 220695_at   | NM_014163 | -          | -         | 2.6   | 1.3   | 1.3   | 1.2   | 1.6   |
| 220696_at   | NM_014129 | -          | -         | 6.5   | 4.9   | 8.2   | 3.8   | 5.4   |
| 220697_at   | NM_016380 | -          | -         | 2.1   | 3.2   | 1.8   | 0.3   | 3.6   |
| 220698_at   | NM_024314 | MGC4294    | 79160     | 7.4   | 2.6   | 2.5   | 1.6   | 1.5   |
| 220699_s_at | NM_018517 | PRO2214    | 55387     | 0.6   | 6.5   | 5.7   | 0.6   | 1.1   |
| 220700_at   | NM_018543 | -          | -         | 0.3   | 1.9   | 2.3   | 2.1   | 2.1   |
| 220701_at   | NM_018587 | LINC00216  | 55451     | 9.3   | 6.8   | 6.6   | 10.5  | 6.8   |
| 220702_at   | NM_018616 | -          | -         | 2.3   | 5.0   | 6.5   | 3.2   | 6.1   |
| 220703_at   | NM_018470 | IDI2-AS1   | 55853     | 13.3  | 10.8  | 6.6   | 14.2  | 6.9   |
| 220704_at   | NM_018563 | IKZF1      | 10320     | 2.6   | 1.0   | 0.4   | 1.3   | 2.1   |
| 220705_s_at | NM_014272 | ADAMTS7    | 11173     | 10.0  | 9.6   | 9.7   | 9.4   | 8.7   |
| 220706_at   | NM_014272 | ADAMTS7    | 11173     | 5.0   | 1.1   | 1.7   | 4.5   | 0.6   |
| 220707_s_at | NM_024955 | FOXRED2    | 80020     | 86.4  | 75.9  | 85.5  | 80.2  | 61.8  |
| 220708_at   | NM_024961 | -          | -         | 26.0  | 14.0  | 17.1  | 11.0  | 9.3   |
| 220709_at   | NM_024967 | ZNF556     | 80032     | 1.1   | 0.9   | 1.1   | 1.0   | 1.2   |
| 220710_at   | NM_024970 | ANP32A-IT1 | 80035     | 2.6   | 4.3   | 1.5   | 7.8   | 6.0   |
| 220711_at   | NM_024978 | -          | -         | 1.4   | 0.8   | 0.6   | 0.8   | 1.2   |
| 220712_at   | NM_024984 | C8orf60    | 619426    | 15.8  | 10.0  | 17.2  | 16.7  | 16.2  |
| 220713_at   | NM_024987 | DENND6B    | 414918    | 2.6   | 6.9   | 8.7   | 5.9   | 9.2   |
| 220714_at   | NM_024504 | PRDM14     | 63978     | 3.0   | 14.5  | 3.6   | 2.6   | 1.0   |
| 220715_at   | NM_024992 | -          | -         | 1.9   | 3.5   | 0.4   | 0.5   | 4.6   |
| 220716_at   | NM_024994 | ERCC8      | 1161      | 11.6  | 12.4  | 2.4   | 6.7   | 9.6   |
| 220717_at   | NM_025003 | ADAMTS20   | 80070     | 0.3   | 2.8   | 3.8   | 1.1   | 2.6   |
| 220718_at   | NM_025005 | HEXA-AS1   | 80072     | 5.0   | 5.4   | 3.4   | 3.6   | 4.2   |
| 220719_at   | NM_025012 | -          | -         | 1.5   | 4.2   | 1.4   | 4.0   | 1.2   |
| 220720_x_at | NM_025029 | MZT2B      | 80097     | 25.6  | 30.0  | 25.5  | 23.5  | 23.9  |
| 220721_at   | NM_025040 | ZNF614     | 80110     | 30.2  | 20.7  | 30.4  | 19.0  | 21.5  |
| 220722_s_at | NM_021815 | SLC5A7     | 60482     | 5.4   | 4.0   | 1.2   | 0.9   | 2.2   |

|             |           |                            |        |       |       |       |       |       |
|-------------|-----------|----------------------------|--------|-------|-------|-------|-------|-------|
| 220723_s_at | NM_025087 | CWH43                      | 80157  | 3.1   | 1.0   | 1.3   | 8.2   | 1.5   |
| 220724_at   | NM_025087 | CWH43                      | 80157  | 0.8   | 0.5   | 1.8   | 0.6   | 0.3   |
| 220725_x_at | NM_025095 | DNAH3                      | 55567  | 74.6  | 62.0  | 84.1  | 69.6  | 48.9  |
| 220726_at   | NM_025100 | -                          | -      | 0.2   | 0.4   | 1.9   | 0.4   | 0.1   |
| 220727_at   | NM_021161 | KCNK10                     | 54207  | 9.1   | 6.4   | 7.9   | 2.5   | 4.5   |
| 220728_at   | NM_025120 | -                          | -      | 3.2   | 0.7   | 4.0   | 3.9   | 6.6   |
| 220729_at   | NM_014092 | BC069739                   | -      | 4.1   | 0.1   | 3.4   | 2.0   | 5.4   |
| 220730_at   | NM_025148 | DQ583205 // 642533         |        | 26.4  | 17.4  | 26.2  | 19.5  | 10.7  |
| 220731_s_at | NM_018090 | NECAP2                     | 55707  | 53.0  | 45.6  | 60.8  | 57.4  | 47.1  |
| 220732_at   | NM_025170 | PREX2                      | 80243  | 14.9  | 5.5   | 9.3   | 1.0   | 1.4   |
| 220733_at   | NM_022042 | SLC26A1                    | 10861  | 0.7   | 0.4   | 1.9   | 3.4   | 0.7   |
| 220734_s_at | NM_030575 | CPTP                       | 80772  | 86.7  | 65.8  | 92.3  | 124.6 | 95.0  |
| 220735_s_at | NM_020654 | SENP7                      | 57337  | 7.0   | 5.6   | 5.8   | 9.0   | 9.7   |
| 220736_at   | NM_025243 | SLC19A3                    | 80704  | 2.6   | 0.4   | 5.4   | 3.9   | 6.7   |
| 220737_at   | AF184965  | RPS6KA6                    | 27330  | 8.9   | 11.7  | 5.9   | 10.8  | 5.8   |
| 220738_s_at | NM_014496 | RPS6KA6                    | 27330  | 34.7  | 19.3  | 30.1  | 11.6  | 21.5  |
| 220739_s_at | NM_017623 | CNNM3                      | 26505  | 69.2  | 68.7  | 81.1  | 60.7  | 67.9  |
| 220740_s_at | NM_005135 | SLC12A6                    | 9990   | 15.7  | 19.4  | 16.2  | 14.7  | 12.8  |
| 220741_s_at | NM_006903 | PPA2                       | 27068  | 371.5 | 374.5 | 391.6 | 368.7 | 296.0 |
| 220742_s_at | NM_018297 | NGLY1                      | 55768  | 120.7 | 120.7 | 125.9 | 112.0 | 109.5 |
| 220743_at   | NM_014117 | -                          | -      | 6.6   | 1.9   | 7.1   | 2.0   | 6.4   |
| 220744_s_at | NM_018262 | IFT122 /// LC 55764 /// 10 |        | 37.7  | 47.5  | 47.5  | 56.7  | 40.5  |
| 220745_at   | NM_013371 | IL19                       | 29949  | 6.6   | 3.0   | 3.6   | 4.7   | 5.3   |
| 220746_s_at | NM_016290 | UIMC1                      | 51720  | 65.9  | 59.9  | 66.9  | 60.6  | 56.6  |
| 220747_at   | NM_014162 | LINC00652                  | 29075  | 10.3  | 1.0   | 12.7  | 1.0   | 9.9   |
| 220748_s_at | NM_016202 | ZNF580                     | 51157  | 98.4  | 132.2 | 111.2 | 130.2 | 111.5 |
| 220749_at   | NM_024688 | CCDC7                      | 79741  | 10.4  | 8.5   | 9.8   | 3.8   | 2.4   |
| 220750_s_at | NM_022356 | LEPRE1                     | 64175  | 61.4  | 38.8  | 51.8  | 46.8  | 27.4  |
| 220751_s_at | NM_016348 | FAXDC2                     | 10826  | 4.0   | 2.5   | 6.1   | 6.3   | 7.5   |
| 220752_at   | NM_016158 | LOC51145                   | 51145  | 2.4   | 3.7   | 4.5   | 10.1  | 0.8   |
| 220753_s_at | NM_015974 | CRYL1                      | 51084  | 117.1 | 111.3 | 145.6 | 144.3 | 77.2  |
| 220754_at   | NM_024720 | ARMC9                      | 80210  | 0.2   | 0.2   | 3.0   | 2.1   | 0.2   |
| 220755_s_at | NM_016947 | C6orf48                    | 50854  | 266.9 | 280.8 | 222.5 | 263.3 | 197.5 |
| 220756_s_at | NM_017986 | SLC52A1                    | 55065  | 5.4   | 1.0   | 2.6   | 0.9   | 0.8   |
| 220757_s_at | NM_025241 | MIR4746 /// 80700 /// 10   |        | 89.8  | 114.9 | 107.0 | 129.4 | 90.0  |
| 220758_s_at | NM_019055 | ROBO4                      | 54538  | 12.6  | 16.0  | 13.2  | 13.9  | 10.4  |
| 220759_at   | NM_022360 | EDDM3B                     | 64184  | 0.6   | 0.6   | 0.7   | 0.6   | 0.7   |
| 220760_x_at | NM_024733 | ZNF665                     | 79788  | 140.7 | 72.9  | 77.0  | 89.8  | 64.6  |
| 220761_s_at | NM_016281 | TAOK3                      | 51347  | 65.3  | 58.5  | 68.4  | 71.2  | 88.1  |
| 220762_s_at | NM_022446 | GNB1L                      | 54584  | 34.6  | 28.2  | 28.0  | 34.6  | 32.2  |
| 220763_at   | NM_025015 | HSPA12A                    | 259217 | 0.9   | 1.0   | 0.8   | 1.1   | 0.5   |
| 220764_at   | NM_019853 | PPP4R2                     | 151987 | 24.7  | 21.3  | 18.1  | 11.4  | 13.0  |
| 220765_s_at | NM_017980 | LIMS2                      | 55679  | 13.5  | 19.0  | 26.3  | 15.6  | 19.0  |
| 220766_at   | NM_017589 | BTG4                       | 54766  | 0.9   | 0.3   | 5.7   | 0.5   | 5.8   |
| 220767_at   | NM_018619 | -                          | -      | 7.0   | 5.3   | 3.1   | 5.5   | 2.2   |
| 220768_s_at | NM_004384 | CSNK1G3                    | 1456   | 91.0  | 87.7  | 114.3 | 69.8  | 69.5  |
| 220769_s_at | NM_024763 | WDR78                      | 79819  | 5.3   | 7.0   | 4.8   | 9.1   | 4.2   |
| 220770_s_at | NM_022090 | ZBED8                      | 63920  | 35.0  | 32.3  | 43.1  | 37.2  | 31.9  |
| 220771_at   | NM_016181 | LINC00328                  | 51152  | 12.3  | 10.7  | 7.8   | 10.8  | 11.8  |
| 220772_at   | NM_021812 | BPESC1                     | 60467  | 0.2   | 0.4   | 0.4   | 0.1   | 1.6   |
| 220773_s_at | NM_020806 | GPHN                       | 10243  | 47.7  | 46.0  | 48.7  | 55.3  | 46.6  |
| 220774_at   | NM_017653 | DYM                        | 54808  | 4.6   | 3.3   | 1.3   | 1.3   | 2.5   |
| 220775_s_at | NM_018314 | UEVLD                      | 55293  | 57.9  | 38.5  | 64.3  | 42.0  | 45.1  |

|             |           |                        |        |       |       |       |       |       |
|-------------|-----------|------------------------|--------|-------|-------|-------|-------|-------|
| 220776_at   | NM_013348 | KCNJ14                 | 3770   | 11.4  | 7.4   | 9.3   | 8.6   | 10.1  |
| 220777_at   | NM_022113 | KIF13A                 | 63971  | 1.3   | 0.6   | 5.9   | 0.7   | 1.0   |
| 220778_x_at | NM_020241 | SEMA6B                 | 10501  | 16.2  | 11.1  | 5.7   | 2.7   | 6.6   |
| 220779_at   | NM_016233 | PADI3                  | 51702  | 10.2  | 2.9   | 1.9   | 4.8   | 3.5   |
| 220780_at   | NM_015715 | PLA2G3                 | 50487  | 3.1   | 5.8   | 3.0   | 0.8   | 0.7   |
| 220781_at   | NM_017418 | DEC1                   | 50514  | 4.1   | 7.6   | 8.2   | 1.8   | 3.6   |
| 220782_x_at | NM_019598 | KLK12                  | 43849  | 23.2  | 13.4  | 15.7  | 21.4  | 13.8  |
| 220783_at   | NM_022122 | MMP27                  | 64066  | 11.8  | 3.9   | 12.3  | 9.2   | 2.9   |
| 220784_s_at | NM_021995 | UTS2                   | 10911  | 4.4   | 1.8   | 3.2   | 2.7   | 2.9   |
| 220785_at   | NM_021995 | UTS2                   | 10911  | 3.7   | 1.8   | 5.3   | 4.8   | 2.8   |
| 220786_s_at | NM_018018 | SLC38A4                | 55089  | 1.8   | 0.4   | 2.4   | 0.2   | 1.6   |
| 220787_at   | NM_018629 | -                      | -      | 0.4   | 3.2   | 0.4   | 0.2   | 0.2   |
| 220788_s_at | NM_017999 | IRF9 /// RNF:10379 /// | 55     | 47.4  | 46.1  | 44.5  | 40.4  | 30.5  |
| 220789_s_at | NM_004749 | SNORA5B ///9238 ///    | 677    | 213.6 | 134.1 | 205.6 | 185.6 | 175.5 |
| 220790_s_at | NM_023945 | MS4A5                  | 64232  | 1.5   | 1.6   | 1.9   | 1.2   | 0.8   |
| 220791_x_at | NM_014139 | SCN11A                 | 11280  | 5.0   | 2.0   | 4.8   | 2.6   | 4.9   |
| 220792_at   | NM_018699 | PRDM5                  | 11107  | 12.0  | 6.8   | 9.9   | 1.6   | 8.7   |
| 220793_at   | NM_018666 | SAGE1                  | 55511  | 0.8   | 0.2   | 0.3   | 0.5   | 0.2   |
| 220794_at   | NM_022469 | GREM2                  | 64388  | 0.9   | 1.0   | 1.2   | 1.3   | 1.4   |
| 220795_s_at | NM_020836 | BEGAIN                 | 57596  | 11.2  | 11.0  | 9.0   | 6.4   | 2.3   |
| 220796_x_at | NM_024881 | SLC35E1                | 79939  | 91.1  | 79.5  | 127.3 | 92.9  | 87.6  |
| 220797_at   | NM_024086 | LOC284009 / 79066 ///  | 28     | 28.4  | 24.5  | 32.6  | 23.9  | 24.1  |
| 220798_x_at | NM_024888 | LPPR3                  | 79948  | 9.7   | 1.4   | 4.0   | 3.6   | 8.5   |
| 220799_at   | NM_004752 | GCM2                   | 9247   | 1.2   | 0.7   | 0.4   | 4.0   | 0.6   |
| 220800_s_at | NM_014547 | TMOD3                  | 29766  | 38.6  | 27.9  | 34.0  | 30.2  | 28.8  |
| 220801_s_at | NM_016527 | HAO2                   | 51179  | 10.8  | 4.2   | 9.3   | 7.7   | 5.7   |
| 220802_at   | NM_012285 | KCNH4                  | 23415  | 5.2   | 2.7   | 5.3   | 0.5   | 0.5   |
| 220803_at   | NM_017597 | BC069782 ///           | 57559  | 2.0   | 3.4   | 7.7   | 2.7   | 0.4   |
| 220804_s_at | NM_005427 | TP73                   | 7161   | 1.9   | 1.8   | 0.6   | 1.5   | 0.6   |
| 220805_at   | NM_022304 | HRH2                   | 3274   | 8.8   | 1.5   | 10.6  | 3.6   | 7.9   |
| 220806_x_at | NM_016541 | GNG13                  | 51764  | 22.2  | 23.9  | 18.0  | 16.1  | 11.5  |
| 220807_at   | NM_005331 | HBQ1                   | 3049   | 0.6   | 0.7   | 0.8   | 0.9   | 1.0   |
| 220808_at   | NM_016585 | THEG                   | 51298  | 3.3   | 0.9   | 3.9   | 3.3   | 1.7   |
| 220809_at   | NM_024912 | -                      | -      | 3.5   | 4.2   | 1.4   | 4.9   | 0.4   |
| 220810_at   | NM_004921 | CLCA3P                 | 9629   | 0.7   | 0.1   | 1.7   | 0.2   | 0.5   |
| 220811_at   | NM_006093 | PRG3                   | 10394  | 1.1   | 1.4   | 0.7   | 4.4   | 1.3   |
| 220812_s_at | NM_007072 | HHLA2                  | 11148  | 2.2   | 1.5   | 2.6   | 0.1   | 0.3   |
| 220813_at   | NM_020377 | CYSLTR2                | 57105  | 6.4   | 3.9   | 8.8   | 6.3   | 7.1   |
| 220814_at   | NM_017964 | -                      | -      | 0.7   | 2.2   | 1.1   | 1.7   | 0.6   |
| 220815_at   | NM_013266 | CTNNA3                 | 29119  | 3.8   | 1.1   | 1.8   | 0.8   | 1.2   |
| 220816_at   | NM_012152 | LPAR3                  | 23566  | 83.2  | 68.5  | 92.7  | 73.0  | 74.5  |
| 220817_at   | NM_016179 | TRPC4                  | 7223   | 1.1   | 0.1   | 0.8   | 0.2   | 0.6   |
| 220818_s_at | NM_016179 | TRPC4                  | 7223   | 1.0   | 0.5   | 0.9   | 0.7   | 1.1   |
| 220819_at   | NM_024919 | FRMD1                  | 79981  | 18.5  | 2.4   | 4.8   | 3.2   | 1.5   |
| 220820_at   | NM_018539 | -                      | -      | 9.7   | 3.3   | 8.8   | 8.1   | 4.5   |
| 220821_at   | NM_001480 | GALR1                  | 2587   | 0.8   | 0.3   | 0.4   | 0.4   | 0.3   |
| 220822_at   | NM_017973 | -                      | -      | 5.1   | 0.7   | 1.3   | 5.5   | 4.2   |
| 220823_at   | NM_017624 | LOC729164              | 729164 | 6.3   | 8.7   | 11.1  | 11.2  | 10.6  |
| 220824_at   | NM_017674 | -                      | -      | 3.0   | 4.2   | 2.6   | 1.8   | 9.8   |
| 220825_s_at | NM_018240 | KIRREL                 | 55243  | 0.7   | 0.5   | 0.7   | 0.7   | 0.5   |
| 220826_at   | NM_018277 | TCP10L                 | 140290 | 13.1  | 5.4   | 12.8  | 6.6   | 7.8   |
| 220827_at   | NM_018329 | -                      | -      | 2.2   | 0.7   | 0.5   | 1.9   | 0.3   |
| 220828_s_at | NM_018382 | FLJ11292               | 55338  | 7.2   | 1.1   | 6.0   | 0.7   | 1.0   |

|             |           |            |           |        |        |        |        |       |
|-------------|-----------|------------|-----------|--------|--------|--------|--------|-------|
| 220829_s_at | NM_020981 | B3GALT1    | 8708      | 0.7    | 1.2    | 1.2    | 2.2    | 0.8   |
| 220830_at   | NM_016247 | IMPG2      | 50939     | 1.0    | 5.2    | 0.5    | 1.8    | 0.2   |
| 220831_at   | NM_016591 | GCNT4      | 51301     | 5.9    | 5.9    | 3.8    | 1.1    | 5.4   |
| 220832_at   | NM_016610 | TLR8       | 51311     | 1.5    | 1.1    | 3.3    | 0.5    | 0.5   |
| 220833_at   | NM_016241 | -          | -         | 6.1    | 5.3    | 6.3    | 3.9    | 4.4   |
| 220834_at   | NM_017716 | MS4A12     | 54860     | 10.1   | 4.0    | 1.8    | 6.5    | 1.0   |
| 220835_s_at | NM_017757 | ZNF407     | 55628     | 0.5    | 0.2    | 3.3    | 4.4    | 0.6   |
| 220836_at   | NM_017757 | ZNF407     | 55628     | 0.2    | 0.2    | 3.1    | 0.2    | 0.2   |
| 220837_at   | NM_017808 | LOC1009963 | 100996325 | 0.8    | 0.2    | 0.1    | 0.6    | 0.1   |
| 220838_at   | NM_017820 | EXD3       | 54932     | 25.5   | 12.0   | 35.2   | 24.9   | 17.4  |
| 220839_at   | NM_014168 | METTL5     | 29081     | 12.7   | 10.2   | 11.5   | 16.0   | 13.2  |
| 220840_s_at | NM_018186 | C1orf112   | 55732     | 46.5   | 38.6   | 62.0   | 40.3   | 47.9  |
| 220841_s_at | NM_017651 | AHI1       | 54806     | 19.9   | 9.9    | 21.4   | 12.7   | 13.1  |
| 220842_at   | NM_017651 | AHI1       | 54806     | 3.5    | 4.1    | 2.1    | 2.6    | 2.6   |
| 220843_s_at | NM_014156 | DCAF13     | 25879     | 3.9    | 3.7    | 2.7    | 2.9    | 1.9   |
| 220844_at   | NM_016427 | TCEB3B     | 51224     | 6.4    | 7.6    | 1.2    | 8.4    | 5.2   |
| 220845_at   | NM_018308 | ACOXL      | 55289     | 0.2    | 4.2    | 4.4    | 0.2    | 1.9   |
| 220846_s_at | NM_018065 | LOC1005065 | 100506504 | 3.8    | 7.7    | 6.0    | 2.9    | 2.6   |
| 220847_x_at | NM_013359 | ZNF221     | 7638      | 0.5    | 0.7    | 0.6    | 0.4    | 0.5   |
| 220848_x_at | NM_014582 | OBP2A      | 29991     | 2.6    | 1.5    | 3.1    | 1.9    | 1.3   |
| 220849_at   | NM_024934 | LOC79999   | 79999     | 12.8   | 9.9    | 12.3   | 4.7    | 4.9   |
| 220850_at   | NM_014429 | MORC1      | 27136     | 0.5    | 0.1    | 2.4    | 0.2    | 0.2   |
| 220851_at   | NM_014095 | BC069756   | -         | 11.6   | 8.3    | 2.0    | 7.3    | 3.5   |
| 220852_at   | NM_014099 | FOXN3-AS2  | 29018     | 2.0    | 2.0    | 2.8    | 1.6    | 2.5   |
| 220853_at   | NM_014118 | GTDC1      | 79712     | 8.8    | 5.8    | 13.4   | 10.3   | 5.1   |
| 220854_at   | NM_014123 | -          | -         | 1.1    | 3.3    | 3.0    | 3.6    | 1.5   |
| 220855_at   | NM_014127 | CLTC-IT1   | 100506863 | 1.2    | 4.5    | 5.9    | 7.1    | 1.2   |
| 220856_x_at | NM_014128 | -          | -         | 174.4  | 120.4  | 136.7  | 139.7  | 108.0 |
| 220857_at   | NM_014131 | -          | -         | 7.2    | 5.5    | 8.3    | 8.6    | 7.5   |
| 220858_at   | NM_014133 | SORBS2     | 8470      | 1.2    | 0.9    | 0.5    | 0.6    | 4.2   |
| 220859_at   | NM_014136 | -          | -         | 6.6    | 1.9    | 3.9    | 2.3    | 9.2   |
| 220860_at   | NM_013357 | PURG       | 29942     | 2.8    | 3.0    | 3.8    | 2.9    | 0.2   |
| 220861_at   | AF118067  | USP22      | 23326     | 2.7    | 0.5    | 1.5    | 5.2    | 0.5   |
| 220862_s_at | NM_014093 | -          | -         | 3.1    | 1.7    | 1.5    | 1.0    | 1.0   |
| 220863_at   | NM_012064 | MIP        | 4284      | 14.2   | 8.4    | 12.6   | 12.7   | 6.7   |
| 220864_s_at | NM_015965 | NDUFA13    | 51079     | 1077.0 | 1135.9 | 1196.5 | 1221.7 | 952.3 |
| 220865_s_at | NM_014317 | PDSS1      | 23590     | 119.3  | 94.5   | 154.7  | 100.2  | 125.3 |
| 220866_at   | NM_014273 | ADAMTS6    | 11174     | 5.0    | 9.3    | 9.7    | 11.8   | 7.6   |
| 220867_s_at | NM_020344 | SLC24A2    | 25769     | 13.2   | 1.7    | 9.4    | 2.2    | 7.2   |
| 220868_s_at | NM_017965 | SLC7A10    | 56301     | 1.2    | 1.4    | 9.1    | 1.1    | 1.5   |
| 220869_at   | NM_018496 | UBA6       | 55236     | 8.1    | 5.6    | 5.0    | 5.8    | 1.2   |
| 220870_at   | NM_018503 | -          | -         | 9.9    | 2.6    | 1.8    | 7.8    | 6.9   |
| 220871_at   | NM_018513 | -          | -         | 5.5    | 0.6    | 5.6    | 2.9    | 1.0   |
| 220872_at   | NM_018547 | PRO2964    | 55415     | 9.5    | 3.0    | 1.3    | 4.7    | 2.8   |
| 220873_at   | NM_018562 | -          | -         | 3.2    | 3.5    | 5.7    | 1.6    | 2.9   |
| 220874_at   | NM_018575 | -          | -         | 4.9    | 12.1   | 7.7    | 6.5    | 8.1   |
| 220875_at   | NM_018576 | -          | -         | 8.5    | 9.6    | 6.3    | 6.3    | 0.7   |
| 220876_at   | NM_018578 | -          | -         | 0.3    | 0.5    | 1.0    | 2.5    | 0.4   |
| 220877_at   | NM_018580 | -          | -         | 3.2    | 1.8    | 5.1    | 0.5    | 7.6   |
| 220878_at   | NM_018592 | -          | -         | 0.2    | 0.6    | 3.4    | 0.1    | 2.8   |
| 220879_at   | NM_018600 | -          | -         | 7.9    | 6.2    | 8.4    | 9.1    | 1.7   |
| 220880_at   | NM_018601 | -          | -         | 1.9    | 0.3    | 4.9    | 3.4    | 4.7   |
| 220881_at   | NM_018606 | -          | -         | 9.0    | 6.9    | 9.4    | 6.3    | 7.0   |

|             |           |             |           |        |       |       |       |       |       |
|-------------|-----------|-------------|-----------|--------|-------|-------|-------|-------|-------|
| 220882_at   | NM_018612 | -           | -         | 1.0    | 1.3   | 1.7   | 0.9   | 0.8   |       |
| 220883_at   | NM_018614 | PRO2012     | 55478     | 0.7    | 6.6   | 3.8   | 7.3   | 5.3   |       |
| 220884_at   | NM_018633 | -           | -         | 0.4    | 0.4   | 1.9   | 0.8   | 1.4   |       |
| 220885_s_at | NM_018451 | CENPJ       | 55835     | 10.9   | 12.1  | 18.1  | 9.8   | 16.6  |       |
| 220886_at   | NM_018558 | GABRQ       | 55879     | 14.3   | 9.1   | 12.1  | 9.4   | 5.5   |       |
| 220887_at   | NM_020181 | CCDC177     | 56936     | 21.6   | 9.4   | 12.5  | 12.8  | 11.7  |       |
| 220888_s_at | NM_020356 | CASS4       | 57091     | 0.3    | 0.5   | 0.8   | 0.3   | 0.2   |       |
| 220889_s_at | NM_020178 | CA10        | 56934     | 0.5    | 1.2   | 0.4   | 0.5   | 0.2   |       |
| 220890_s_at | NM_016355 | APOLD1      | [[[ 51202 | [[[ 81 | 384.6 | 386.4 | 425.6 | 374.9 | 329.1 |
| 220891_at   | NM_024950 | TRMT44      | 152992    | 7.6    | 0.3   | 1.1   | 0.2   | 3.8   |       |
| 220892_s_at | NM_021154 | PSAT1       | 29968     | 839.9  | 865.9 | 871.5 | 865.0 | 727.9 |       |
| 220893_at   | NM_020669 | LOC57399    | 57399     | 6.7    | 0.7   | 0.3   | 6.1   | 3.3   |       |
| 220894_x_at | NM_021619 | PRDM12      | 59335     | 3.1    | 2.8   | 1.5   | 1.4   | 1.8   |       |
| 220895_at   | NM_020903 | USP29       | 57663     | 3.1    | 1.2   | 0.5   | 5.4   | 1.7   |       |
| 220896_at   | NM_024963 | FBXL18      | 80028     | 6.0    | 2.6   | 0.9   | 1.1   | 1.3   |       |
| 220897_at   | NM_024964 | -           | -         | 0.6    | 7.2   | 5.6   | 4.3   | 7.2   |       |
| 220898_at   | NM_024972 | -           | -         | 8.1    | 5.7   | 10.4  | 6.6   | 4.8   |       |
| 220899_at   | NM_024973 | -           | -         | 7.4    | 1.1   | 1.1   | 4.3   | 3.2   |       |
| 220900_at   | NM_024977 | RP11-549J18 | -         | 0.7    | 0.2   | 0.1   | 0.1   | 0.1   |       |
| 220901_at   | NM_024980 | GPR157      | 80045     | 9.7    | 11.6  | 14.9  | 11.7  | 9.6   |       |
| 220902_at   | NM_024995 | -           | -         | 4.1    | 1.9   | 11.1  | 8.5   | 0.5   |       |
| 220903_at   | NM_024996 | GFM1        | 85476     | 0.6    | 5.5   | 1.3   | 1.2   | 1.1   |       |
| 220904_at   | NM_025002 | LINC00574   | 80069     | 15.9   | 11.9  | 4.3   | 9.8   | 3.0   |       |
| 220905_at   | NM_025007 | -           | -         | 11.8   | 16.9  | 18.2  | 14.1  | 16.0  |       |
| 220906_at   | NM_025016 | -           | -         | 6.2    | 4.9   | 6.5   | 5.4   | 3.2   |       |
| 220907_at   | NM_025048 | GPR110      | 266977    | 1.3    | 0.5   | 4.2   | 2.0   | 2.3   |       |
| 220908_at   | NM_025055 | CCDC33      | 80125     | 2.8    | 7.5   | 9.0   | 0.7   | 1.5   |       |
| 220909_at   | NM_025058 | TRIM46      | 80128     | 6.6    | 3.7   | 1.3   | 10.7  | 10.4  |       |
| 220910_at   | NM_025074 | FRAS1       | 80144     | 10.8   | 1.6   | 7.1   | 8.3   | 5.8   |       |
| 220911_s_at | NM_025081 | NYNRIN      | 57523     | 2.5    | 0.9   | 4.9   | 1.1   | 6.7   |       |
| 220912_at   | NM_025093 | -           | -         | 2.0    | 0.9   | 3.6   | 4.3   | 6.4   |       |
| 220913_at   | NM_025102 | -           | -         | 2.4    | 1.0   | 2.9   | 0.6   | 2.9   |       |
| 220914_at   | NM_025117 | AK021933    | -         | 20.1   | 15.0  | 32.2  | 18.7  | 20.0  |       |
| 220915_s_at | NM_025117 | AK021933    | -         | 47.3   | 42.8  | 45.1  | 45.5  | 35.0  |       |
| 220916_at   | NM_025118 | -           | -         | 2.2    | 6.7   | 2.8   | 5.7   | 0.9   |       |
| 220917_s_at | NM_025132 | WDR19       | 57728     | 32.4   | 28.4  | 17.9  | 28.0  | 26.4  |       |
| 220918_at   | NM_025143 | RUNX1-IT1   | 80215     | 3.0    | 3.5   | 7.8   | 1.6   | 1.0   |       |
| 220919_s_at | NM_025145 | WDR96       | 80217     | 0.4    | 0.4   | 0.3   | 0.9   | 0.6   |       |
| 220920_at   | NM_025153 | ATP10B      | 23120     | 7.8    | 1.5   | 0.9   | 8.7   | 9.3   |       |
| 220921_at   | NM_013453 | SPANXB1     | 728695    | 1.3    | 2.8   | 2.6   | 1.3   | 0.4   |       |
| 220922_s_at | NM_013453 | SPANXA1     | [[[ 30014 | [[[ 64 | 6.8   | 0.4   | 1.8   | 0.9   | 0.4   |
| 220923_s_at | NM_013364 | PNMA3       | 29944     | 0.9    | 4.0   | 2.7   | 1.3   | 1.7   |       |
| 220924_s_at | NM_018976 | SLC38A2     | 54407     | 469.2  | 519.8 | 470.5 | 457.0 | 403.9 |       |
| 220925_at   | NM_021929 | NAA35       | 60560     | 169.5  | 132.5 | 170.0 | 147.7 | 123.1 |       |
| 220926_s_at | NM_025191 | EDEM3       | 80267     | 27.1   | 19.7  | 40.1  | 30.3  | 28.9  |       |
| 220927_s_at | NM_021828 | HPSE2       | 60495     | 6.2    | 0.8   | 5.3   | 1.0   | 1.1   |       |
| 220928_s_at | NM_022114 | PRDM16      | 63976     | 8.5    | 0.6   | 0.9   | 2.6   | 4.8   |       |
| 220929_at   | NM_017417 | GALNT8      | 26290     | 5.4    | 7.7   | 7.4   | 2.8   | 1.4   |       |
| 220930_s_at | NM_024058 | SMIM2       | 79024     | 3.7    | 1.7   | 1.1   | 4.4   | 0.6   |       |
| 220931_at   | NM_024058 | SMIM2       | 79024     | 3.6    | 5.1   | 5.3   | 4.1   | 5.5   |       |
| 220932_at   | NM_024073 | -           | -         | 0.4    | 0.4   | 0.4   | 0.3   | 0.2   |       |
| 220933_s_at | NM_024617 | ZCCHC6      | 79670     | 35.0   | 37.4  | 33.0  | 36.4  | 30.9  |       |
| 220934_s_at | NM_024084 | TMEM223     | 79064     | 182.9  | 158.1 | 204.7 | 185.6 | 170.6 |       |

|             |           |            |           |        |        |        |        |        |      |      |
|-------------|-----------|------------|-----------|--------|--------|--------|--------|--------|------|------|
| 220935_s_at | NM_018249 | CDK5RAP2   | 55755     | 58.8   | 42.4   | 58.3   | 50.8   | 46.6   |      |      |
| 220936_s_at | NM_018267 | H2AFJ      | 55766     | 15.5   | 11.4   | 21.5   | 12.8   | 16.2   |      |      |
| 220937_s_at | NM_014403 | ST6GALNAC4 | 27090     | 53.6   | 56.8   | 43.3   | 63.2   | 37.5   |      |      |
| 220938_s_at | NM_006582 | GMEB1      | 10691     | 29.6   | 25.2   | 25.6   | 17.1   | 21.3   |      |      |
| 220939_s_at | NM_017743 | DPP8       | 54878     | 127.1  | 120.2  | 132.2  | 123.3  | 105.1  |      |      |
| 220940_at   | NM_025190 | ANKRD36B   | 57730     | 7.0    | 7.1    | 5.8    | 3.4    | 4.2    |      |      |
| 220941_s_at | NM_017447 | C21orf91   | 54149     | 16.3   | 12.6   | 18.9   | 15.6   | 17.9   |      |      |
| 220942_x_at | NM_014367 | FAM162A    | 26355     | 1382.4 | 1544.4 | 1488.9 | 1367.1 | 1260.5 |      |      |
| 220943_s_at | NM_018607 | NDUFAF7    | 55471     | 10.1   | 7.6    | 7.4    | 5.8    | 8.5    |      |      |
| 220944_at   | NM_020393 | PGLYRP4    | 57115     | 21.2   | 4.8    | 9.5    | 6.7    | 8.1    |      |      |
| 220945_x_at | NM_018050 | MANSC1     | 54682     | 215.0  | 126.2  | 200.9  | 132.1  | 128.8  |      |      |
| 220946_s_at | NM_014159 | SETD2      | 29072     | 11.6   | 10.5   | 17.2   | 12.5   | 8.9    |      |      |
| 220947_s_at | NM_015527 | TBC1D10B   | 26000     | 142.4  | 109.1  | 167.4  | 133.2  | 110.1  |      |      |
| 220948_s_at | NM_000701 | ATP1A1     | 476       | 336.4  | 361.6  | 394.0  | 366.8  | 324.1  |      |      |
| 220949_s_at | NM_024033 | C7orf49    | 78996     | 214.3  | 179.4  | 218.7  | 192.5  | 171.7  |      |      |
| 220950_s_at | NM_017991 | KANSL3     | 55683     | 5.2    | 1.8    | 2.5    | 6.4    | 12.4   |      |      |
| 220951_s_at | NM_014576 | A1CF       | 29974     | 26.0   | 15.4   | 23.5   | 14.8   | 11.5   |      |      |
| 220952_s_at | NM_019012 | PLEKHA5    | 54477     | 87.9   | 68.9   | 82.3   | 67.5   | 64.5   |      |      |
| 220953_s_at | NM_019061 | MTMR12     | 54545     | 47.4   | 38.9   | 42.7   | 38.8   | 31.7   |      |      |
| 220954_s_at | NM_013440 | MIR6840    | /// 29990 | /// 10 | 22.0   | 9.5    | 17.8   | 12.9   | 8.7  |      |
| 220955_x_at | NM_016277 | RAB23      | 51715     | 23.6   | 15.2   | 22.9   | 20.8   | 15.2   |      |      |
| 220956_s_at | NM_017555 | EGLN2      | /// RA    | 112398 | /// 1  | 43.9   | 39.8   | 43.8   | 51.3 | 40.2 |
| 220957_at   | NM_022663 | CTAGE1     | 64693     | 7.4    | 9.2    | 7.6    | 6.5    | 3.1    |      |      |
| 220958_at   | NM_017886 | ULK4       | 54986     | 6.7    | 5.7    | 3.8    | 5.2    | 2.3    |      |      |
| 220959_s_at | NM_014581 | OBP2A      | /// OI    | 29989  | /// 29 | 1.0    | 2.8    | 2.1    | 4.2  | 6.4  |
| 220960_x_at | NM_000983 | RPL22      | 6146      | 1646.8 | 1559.7 | 1687.7 | 1625.0 | 1451.7 |      |      |
| 220961_s_at | NM_030900 | TBRG4      | 9238      | 13.1   | 7.6    | 14.3   | 11.7   | 8.4    |      |      |
| 220962_s_at | NM_013358 | PADI1      | 29943     | 34.6   | 23.6   | 67.0   | 30.4   | 28.7   |      |      |
| 220963_s_at | NM_030907 | RSG1       | 79363     | 14.1   | 4.1    | 8.2    | 8.2    | 6.1    |      |      |
| 220964_s_at | NM_030981 | RAB1B      | 81876     | 393.0  | 316.0  | 374.2  | 364.3  | 319.2  |      |      |
| 220965_s_at | NM_030785 | RSPH6A     | 81492     | 13.3   | 6.6    | 9.1    | 14.0   | 16.0   |      |      |
| 220966_x_at | NM_030978 | ARPC5L     | 81873     | 603.9  | 614.4  | 706.8  | 580.6  | 574.5  |      |      |
| 220967_s_at | NM_030895 | ZNF696     | 79943     | 10.4   | 16.1   | 14.5   | 16.3   | 19.2   |      |      |
| 220968_s_at | NM_031285 | TSPAN9     | 10867     | 37.3   | 56.2   | 42.4   | 44.5   | 32.0   |      |      |
| 220969_s_at | NM_030892 | -          | -         | 7.0    | 3.6    | 6.1    | 3.3    | 1.3    |      |      |
| 220970_s_at | NM_030977 | KRTAP2-3   | /// 85294 | /// 73 | 5.1    | 1.1    | 4.5    | 1.0    | 3.0  |      |
| 220971_at   | NM_022789 | IL25       | 64806     | 1.5    | 4.1    | 9.5    | 2.2    | 1.2    |      |      |
| 220972_s_at | NM_030975 | KRTAP9-9   | 81870     | 0.3    | 0.2    | 0.6    | 1.0    | 1.0    |      |      |
| 220973_s_at | NM_030974 | SHARPIN    | 81858     | 55.3   | 68.8   | 71.4   | 74.2   | 56.0   |      |      |
| 220974_x_at | NM_030971 | SFXN3      | 81855     | 52.8   | 63.8   | 70.5   | 62.7   | 47.9   |      |      |
| 220975_s_at | NM_030968 | C1QTNF1    | 114897    | 14.0   | 12.2   | 9.0    | 16.1   | 13.5   |      |      |
| 220976_s_at | NM_030967 | KRTAP1-1   | 81851     | 4.9    | 2.6    | 2.2    | 7.9    | 8.4    |      |      |
| 220977_x_at | NM_020909 | EPB41L5    | 57669     | 14.5   | 7.6    | 5.1    | 10.9   | 9.1    |      |      |
| 220978_at   | NM_030966 | KRTAP1-3   | 81850     | 0.7    | 0.5    | 2.9    | 0.9    | 0.3    |      |      |
| 220979_s_at | NM_030965 | ST6GALNAC5 | 81849     | 3.2    | 3.5    | 8.6    | 2.7    | 0.7    |      |      |
| 220980_s_at | NM_031284 | ADPGK      | 83440     | 142.5  | 123.0  | 160.9  | 117.9  | 108.2  |      |      |
| 220981_x_at | NM_022053 | NXF2       | /// NXF   | 56001  | /// 72 | 6.8    | 17.9   | 12.9   | 12.7 | 9.3  |
| 220982_s_at | NM_030960 | SPACA1     | 81833     | 0.4    | 0.8    | 2.7    | 0.7    | 1.1    |      |      |
| 220983_s_at | NM_030964 | MIR612     | /// N     | 283131 | /// 6  | 1.5    | 0.3    | 1.0    | 1.4  | 4.5  |
| 220984_s_at | NM_030958 | SLCO5A1    | 81796     | 11.0   | 12.1   | 12.1   | 14.8   | 6.5    |      |      |
| 220985_s_at | NM_030954 | RNF170     | 81790     | 22.3   | 20.0   | 17.3   | 23.9   | 13.8   |      |      |
| 220986_s_at | NM_030953 | TIGD6      | 81789     | 4.9    | 5.5    | 5.6    | 9.2    | 4.4    |      |      |
| 220987_s_at | NM_030952 | AKIP1      | /// NU    | 56672  | /// 81 | 63.7   | 45.9   | 60.8   | 57.3 | 48.3 |



|             |           |                          |        |       |       |       |       |       |
|-------------|-----------|--------------------------|--------|-------|-------|-------|-------|-------|
| 220988_s_at | NM_030945 | C1QTNF3                  | 114899 | 12.9  | 4.6   | 11.7  | 13.2  | 9.2   |
| 220989_s_at | NM_030943 | AMN                      | 81693  | 11.5  | 11.9  | 14.0  | 15.7  | 8.6   |
| 220990_s_at | NM_030938 | MIR21 /// VM81671 /// 40 | 419.0  | 447.6 | 530.4 | 416.2 | 420.8 |       |
| 220991_s_at | NM_030936 | RNF32                    | 140545 | 5.7   | 5.3   | 6.4   | 1.0   | 5.8   |
| 220992_s_at | NM_030934 | TRMT1L                   | 81627  | 39.8  | 27.9  | 35.2  | 35.5  | 28.5  |
| 220993_s_at | NM_030784 | GPR63                    | 81491  | 16.5  | 16.0  | 16.2  | 8.5   | 13.5  |
| 220994_s_at | NM_014178 | STXBP6                   | 29091  | 6.0   | 2.3   | 4.9   | 8.8   | 0.7   |
| 220995_at   | NM_014178 | STXBP6                   | 29091  | 8.7   | 5.4   | 10.5  | 11.1  | 2.5   |
| 220996_s_at | NM_030933 | SHCBP1L                  | 81626  | 4.5   | 0.9   | 7.5   | 1.2   | 7.8   |
| 220997_s_at | NM_030932 | DIAPH3                   | 81624  | 0.7   | 3.6   | 7.1   | 0.6   | 0.2   |
| 220998_s_at | NM_030930 | UNC93B1                  | 81622  | 15.6  | 12.4  | 16.0  | 16.1  | 16.1  |
| 220999_s_at | NM_030778 | CYFIP2                   | 26999  | 29.0  | 22.5  | 23.1  | 32.6  | 16.8  |
| 221000_s_at | NM_030929 | KAZALD1                  | 81621  | 18.9  | 19.5  | 20.5  | 22.4  | 14.1  |
| 221001_at   | NM_030879 | C15orf49                 | -      | 2.6   | 1.6   | 2.2   | 1.0   | 1.5   |
| 221002_s_at | NM_030927 | TSPAN14                  | 81619  | 103.5 | 110.2 | 114.6 | 128.3 | 68.6  |
| 221003_s_at | NM_030925 | CAB39L                   | 81617  | 51.6  | 36.9  | 62.4  | 48.1  | 47.9  |
| 221004_s_at | NM_030926 | ITM2C                    | 81618  | 51.6  | 71.1  | 64.5  | 89.2  | 45.9  |
| 221005_s_at | NM_030783 | PTDSS2                   | 81490  | 45.9  | 26.2  | 44.5  | 47.2  | 38.8  |
| 221006_s_at | NM_030918 | SNX27                    | 81609  | 59.5  | 40.7  | 42.5  | 45.5  | 32.7  |
| 221007_s_at | NM_030917 | FIP1L1                   | 81608  | 48.0  | 37.2  | 50.8  | 38.5  | 34.9  |
| 221008_s_at | NM_031279 | ETNPPL                   | 64850  | 9.4   | 5.9   | 4.8   | 9.1   | 5.8   |
| 221009_s_at | NM_016109 | ANGPTL4                  | 51129  | 1.7   | 4.1   | 1.8   | 1.2   | 8.8   |
| 221010_s_at | NM_031244 | SIRT5                    | 23408  | 10.2  | 10.7  | 10.7  | 11.6  | 5.6   |
| 221011_s_at | NM_030915 | LBH                      | 81606  | 9.4   | 6.3   | 13.0  | 4.1   | 3.5   |
| 221012_s_at | NM_030912 | TRIM8                    | 81603  | 86.4  | 77.6  | 82.9  | 112.5 | 62.4  |
| 221013_s_at | NM_030882 | APOL2                    | 23780  | 7.1   | 3.7   | 16.7  | 11.7  | 6.9   |
| 221014_s_at | NM_031296 | RAB33B                   | 83452  | 18.3  | 11.2  | 22.1  | 21.5  | 17.7  |
| 221015_s_at | NM_030911 | CDADC1                   | 81602  | 4.8   | 9.7   | 8.7   | 7.5   | 8.1   |
| 221016_s_at | NM_031283 | TCF7L1                   | 83439  | 11.9  | 2.7   | 1.7   | 8.2   | 4.5   |
| 221017_s_at | NM_030891 | LRRC3                    | 81543  | 0.9   | 1.6   | 6.6   | 0.4   | 0.9   |
| 221018_s_at | NM_031278 | TDRD1                    | 56165  | 4.8   | 2.0   | 1.0   | 3.7   | 0.9   |
| 221019_s_at | NM_030781 | COLEC12                  | 81035  | 148.1 | 145.6 | 112.0 | 116.3 | 78.8  |
| 221020_s_at | NM_030780 | SLC25A32                 | 81034  | 101.4 | 70.6  | 124.9 | 65.9  | 100.7 |
| 221021_s_at | NM_030877 | CTNBL1                   | 56259  | 59.3  | 66.7  | 62.3  | 58.7  | 51.2  |
| 221022_s_at | NM_031293 | PMFBP1                   | 83449  | 4.4   | 0.8   | 1.1   | 7.3   | 1.9   |
| 221023_s_at | NM_030779 | KCNH6                    | 81033  | 8.7   | 3.8   | 1.7   | 7.3   | 3.5   |
| 221024_s_at | NM_030777 | SLC2A10                  | 81031  | 1.1   | 0.5   | 0.5   | 0.3   | 0.5   |
| 221025_x_at | NM_031292 | PUS7L                    | 83448  | 28.0  | 26.5  | 31.2  | 22.4  | 25.5  |
| 221026_s_at | NM_031309 | SCRT1                    | 83482  | 1.1   | 0.7   | 1.0   | 0.4   | 0.8   |
| 221027_s_at | NM_030821 | PLA2G12A                 | 81579  | 168.2 | 106.9 | 159.7 | 129.7 | 120.2 |
| 221028_s_at | NM_030819 | GFOD2                    | 81577  | 43.1  | 47.9  | 50.4  | 42.3  | 34.9  |
| 221029_s_at | NM_030775 | WNT5B                    | 81029  | 2.2   | 0.6   | 1.5   | 0.4   | 1.1   |
| 221030_s_at | NM_031305 | ARHGAP24                 | 83478  | 6.9   | 2.0   | 1.7   | 8.1   | 4.6   |
| 221031_s_at | NM_030817 | APOLD1                   | 81575  | 13.5  | 17.7  | 6.5   | 10.2  | 2.5   |
| 221032_s_at | NM_030770 | TMPRSS5                  | 80975  | 5.3   | 9.4   | 4.0   | 5.0   | 4.7   |
| 221033_s_at | NM_031277 | RNF17                    | 56163  | 3.4   | 0.8   | 4.2   | 1.0   | 0.7   |
| 221034_s_at | NM_031273 | TEX13B                   | 56156  | 7.4   | 1.5   | 2.1   | 10.4  | 5.8   |
| 221035_s_at | NM_031272 | TEX14                    | 56155  | 2.2   | 3.7   | 0.8   | 0.4   | 0.8   |
| 221036_s_at | NM_031301 | APH1B                    | 83464  | 70.7  | 104.7 | 60.6  | 87.7  | 47.1  |
| 221037_s_at | NM_031291 | SLC25A31                 | 83447  | 0.0   | 1.5   | 1.1   | 0.3   | 1.1   |
| 221038_at   | NM_018610 | -                        | -      | 6.7   | 7.0   | 7.3   | 9.1   | 8.6   |
| 221039_s_at | NM_018482 | ASAP1                    | 50807  | 21.3  | 19.2  | 17.3  | 14.2  | 10.4  |
| 221040_at   | NM_023089 | CAPN10                   | 11132  | 0.6   | 3.1   | 1.5   | 0.2   | 0.2   |

|             |           |                           |           |       |       |       |       |       |
|-------------|-----------|---------------------------|-----------|-------|-------|-------|-------|-------|
| 221041_s_at | NM_012434 | SLC17A5                   | 26503     | 31.3  | 30.2  | 36.9  | 33.8  | 18.8  |
| 221042_s_at | NM_024734 | CLMN                      | 79789     | 15.4  | 26.3  | 23.5  | 25.5  | 18.6  |
| 221043_at   | NM_013395 | -                         | -         | 3.3   | 10.2  | 5.1   | 7.2   | 8.5   |
| 221044_s_at | NM_021616 | TRIM34 /// T 53840 /// 44 |           | 10.8  | 6.6   | 4.7   | 6.7   | 7.4   |
| 221045_s_at | NM_016831 | PER3                      | 8863      | 46.4  | 40.5  | 47.7  | 38.4  | 37.1  |
| 221046_s_at | NM_014170 | GTPBP8                    | 29083     | 82.0  | 90.2  | 116.7 | 76.3  | 91.8  |
| 221047_s_at | NM_018650 | MARK1                     | 4139      | 40.4  | 38.4  | 39.3  | 35.5  | 34.7  |
| 221048_x_at | NM_017941 | C17orf80                  | 55028     | 12.3  | 15.6  | 11.4  | 4.0   | 9.0   |
| 221049_s_at | NM_013274 | POLL                      | 27343     | 20.6  | 17.9  | 31.3  | 27.3  | 17.9  |
| 221050_s_at | NM_019096 | GTPBP2                    | 54676     | 59.0  | 55.0  | 38.8  | 51.0  | 33.2  |
| 221051_s_at | NM_014446 | NMRK2                     | 27231     | 5.3   | 20.6  | 13.0  | 7.5   | 6.4   |
| 221052_at   | NM_006862 | TDRKH                     | 11022     | 12.3  | 12.6  | 12.0  | 9.1   | 10.9  |
| 221053_s_at | NM_006862 | TDRKH                     | 11022     | 6.8   | 6.0   | 3.8   | 5.3   | 8.4   |
| 221054_s_at | NM_014418 | TCL6                      | 27004     | 2.8   | 0.7   | 0.8   | 3.8   | 0.4   |
| 221056_x_at | NM_021235 | EPS15L1                   | 58513     | 39.9  | 42.2  | 46.5  | 42.5  | 30.1  |
| 221057_at   | NM_022354 | SPATA1                    | 100505741 | 0.5   | 1.3   | 2.8   | 1.1   | 0.1   |
| 221058_s_at | NM_016326 | CKLF                      | 51192     | 109.9 | 87.4  | 120.5 | 106.1 | 98.7  |
| 221059_s_at | NM_021615 | COTL1                     | 23406     | 67.3  | 71.2  | 100.9 | 94.1  | 76.2  |
| 221060_s_at | NM_003266 | TLR4                      | 7099      | 5.8   | 5.9   | 14.9  | 15.0  | 9.7   |
| 221061_at   | NM_016112 | PKD2L1                    | 9033      | 33.6  | 13.2  | 6.5   | 13.2  | 2.0   |
| 221062_at   | NM_006041 | HS3ST3B1                  | 9953      | 7.4   | 1.0   | 11.4  | 5.1   | 6.0   |
| 221063_x_at | NM_022064 | RNF123                    | 63891     | 48.5  | 51.1  | 57.2  | 41.8  | 29.4  |
| 221064_s_at | NM_023076 | UNKL                      | 64718     | 57.1  | 39.3  | 49.5  | 42.8  | 44.6  |
| 221065_s_at | NM_022467 | CHST8                     | 64377     | 1.2   | 7.0   | 3.8   | 10.3  | 12.4  |
| 221066_at   | NM_016568 | RXFP3                     | 51289     | 0.3   | 0.5   | 0.8   | 0.7   | 0.7   |
| 221067_s_at | NM_030572 | SPX                       | 80763     | 20.6  | 7.8   | 15.1  | 15.2  | 2.8   |
| 221068_at   | NM_017616 | KANK2                     | 25959     | 1.3   | 1.0   | 2.5   | 8.9   | 2.9   |
| 221069_s_at | NM_016360 | TACO1                     | 51204     | 157.5 | 130.3 | 138.6 | 145.4 | 126.1 |
| 221070_s_at | NM_021174 | CCAR2                     | 57805     | 0.7   | 0.4   | 1.2   | 0.6   | 0.4   |
| 221071_at   | NM_021651 | -                         | -         | 4.6   | 1.6   | 8.4   | 1.5   | 1.5   |
| 221072_at   | NM_020250 | GSN-AS1                   | 57000     | 1.3   | 0.5   | 1.6   | 0.9   | 0.9   |
| 221073_s_at | NM_006092 | NOD1                      | 10392     | 8.6   | 22.6  | 19.7  | 12.1  | 17.3  |
| 221074_at   | NM_004828 | -                         | -         | 3.0   | 6.0   | 3.3   | 2.8   | 8.7   |
| 221075_s_at | NM_004828 | NCR2                      | 9436      | 1.2   | 1.4   | 0.9   | 0.7   | 0.7   |
| 221076_at   | NM_014100 | PELO                      | 53918     | 5.6   | 5.4   | 5.1   | 0.3   | 0.1   |
| 221077_at   | NM_018076 | ARMC4                     | 55130     | 4.9   | 17.2  | 17.1  | 15.6  | 2.0   |
| 221078_s_at | NM_018084 | CCDC88A                   | 55704     | 1.9   | 9.8   | 10.3  | 8.5   | 4.1   |
| 221079_s_at | NM_018396 | METTL2A /// 55798 /// 33  |           | 42.2  | 24.1  | 30.1  | 32.7  | 42.1  |
| 221080_s_at | NM_024898 | DENND1C                   | 79958     | 12.4  | 4.1   | 16.4  | 12.9  | 12.0  |
| 221081_s_at | NM_024901 | DENND2D                   | 79961     | 2.3   | 7.2   | 5.1   | 8.3   | 1.3   |
| 221082_s_at | NM_022477 | NDRG3                     | 57446     | 78.2  | 103.4 | 89.3  | 76.6  | 66.3  |
| 221083_at   | NM_004700 | KCNQ4                     | 9132      | 10.3  | 6.5   | 7.7   | 7.1   | 1.1   |
| 221084_at   | NM_006028 | HTR3B                     | 9177      | 11.8  | 2.1   | 4.8   | 6.0   | 1.5   |
| 221085_at   | NM_005118 | TNFSF15                   | 9966      | 11.7  | 9.0   | 6.5   | 7.1   | 10.4  |
| 221086_s_at | NM_018008 | FEZF2                     | 55079     | 1.9   | 2.6   | 4.2   | 0.3   | 1.1   |
| 221087_s_at | NM_014349 | APOL3                     | 80833     | 14.1  | 10.2  | 10.9  | 5.4   | 13.6  |
| 221088_s_at | NM_017650 | PPP1R9A                   | 55607     | 8.8   | 9.8   | 4.7   | 10.3  | 5.4   |
| 221089_at   | NM_015718 | NOX3                      | 50508     | 0.5   | 0.4   | 1.9   | 2.1   | 0.4   |
| 221090_s_at | NM_018233 | OGFOD1                    | 55239     | 101.8 | 98.3  | 123.7 | 100.8 | 98.8  |
| 221091_at   | NM_005478 | INSL5                     | 10022     | 2.4   | 8.9   | 1.9   | 5.7   | 4.9   |
| 221092_at   | NM_012481 | IKZF3                     | 22806     | 2.9   | 1.2   | 8.6   | 1.0   | 0.8   |
| 221093_at   | NM_012107 | BRD7P3                    | 23629     | 1.6   | 0.6   | 0.8   | 0.7   | 0.6   |
| 221094_s_at | NM_018091 | ELP3                      | 55140     | 83.7  | 78.0  | 85.7  | 77.6  | 78.2  |

|             |           |                       |           |      |      |      |      |      |
|-------------|-----------|-----------------------|-----------|------|------|------|------|------|
| 221095_s_at | NM_005136 | KCNE2                 | 9992      | 2.6  | 1.8  | 2.9  | 1.3  | 1.6  |
| 221096_s_at | NM_018502 | TMCO6                 | 55374     | 81.9 | 59.0 | 67.3 | 75.4 | 65.0 |
| 221097_s_at | NM_005832 | KCNMB2                | 10242     | 10.7 | 9.6  | 15.5 | 7.3  | 5.9  |
| 221098_x_at | NM_006649 | UTP14A                | 10813     | 10.1 | 6.2  | 7.8  | 6.3  | 11.3 |
| 221099_at   | NM_017960 | -                     | -         | 7.9  | 7.3  | 7.0  | 5.1  | 11.7 |
| 221100_at   | NM_014070 | C6orf15               | 29113     | 14.1 | 2.6  | 16.0 | 10.3 | 5.6  |
| 221101_at   | NM_017630 | -                     | -         | 2.4  | 1.1  | 6.2  | 1.1  | 1.7  |
| 221102_s_at | NM_017662 | TRPM6                 | 140803    | 6.4  | 3.7  | 2.0  | 1.9  | 4.6  |
| 221103_s_at | NM_018338 | WDR52                 | 55779     | 2.7  | 1.9  | 4.6  | 2.8  | 4.0  |
| 221104_s_at | NM_018376 | NIPSNAP3B             | 55335     | 7.3  | 4.9  | 5.8  | 3.8  | 5.6  |
| 221105_at   | NM_018395 | -                     | -         | 10.0 | 5.0  | 4.9  | 0.4  | 5.8  |
| 221106_at   | NM_016609 | SLC22A17              | 51310     | 7.3  | 3.8  | 4.0  | 4.0  | 6.5  |
| 221107_at   | NM_017581 | CHRNA9                | 55584     | 3.2  | 4.8  | 2.1  | 5.4  | 5.5  |
| 221108_at   | NM_016449 | DRICH1                | 51233     | 1.2  | 0.9  | 2.3  | 0.9  | 1.2  |
| 221109_at   | NM_017598 | LOC1005065            | 100506571 | 1.3  | 1.3  | 1.8  | 1.2  | 0.7  |
| 221110_x_at | NM_016953 | PDE11A                | 50940     | 9.9  | 2.1  | 16.1 | 8.7  | 7.3  |
| 221111_at   | NM_018402 | IL26                  | 55801     | 0.4  | 0.3  | 1.0  | 0.4  | 0.1  |
| 221112_at   | NM_017416 | IL1RAPL2              | 26280     | 15.3 | 11.0 | 17.3 | 12.8 | 10.4 |
| 221113_s_at | NM_016087 | WNT16                 | 51384     | 15.6 | 8.0  | 9.1  | 10.7 | 4.4  |
| 221114_at   | NM_016519 | AMBN                  | 258       | 3.2  | 2.7  | 2.9  | 2.5  | 4.5  |
| 221115_s_at | NM_018655 | LENEP                 | 55891     | 13.6 | 9.3  | 19.4 | 13.4 | 14.9 |
| 221116_at   | NM_016566 | -                     | -         | 0.7  | 7.6  | 6.1  | 1.0  | 5.5  |
| 221117_at   | NM_016637 | -                     | -         | 1.4  | 0.9  | 0.7  | 1.1  | 0.6  |
| 221118_at   | NM_014386 | PKD2L2                | 27039     | 3.1  | 0.9  | 4.8  | 3.8  | 1.7  |
| 221119_at   | NM_017700 | ARHGEF38              | 54848     | 12.9 | 0.8  | 1.3  | 7.8  | 6.5  |
| 221120_at   | NM_017756 | -                     | -         | 10.1 | 4.4  | 10.3 | 11.1 | 8.2  |
| 221121_at   | NM_017863 | CT55                  | 54967     | 1.1  | 1.1  | 0.5  | 1.2  | 5.2  |
| 221122_at   | NM_017878 | HRASLS2               | 54979     | 1.7  | 1.9  | 6.8  | 4.9  | 2.4  |
| 221123_x_at | NM_018660 | FBXO16 /// Z55893 /// | 15        | 37.2 | 42.4 | 45.5 | 30.0 | 33.4 |
| 221124_s_at | NM_014588 | VSX1                  | 30813     | 0.6  | 2.0  | 1.6  | 1.9  | 0.6  |
| 221125_s_at | NM_014407 | KCNMB3                | 27094     | 4.0  | 10.5 | 3.2  | 3.1  | 1.7  |
| 221126_at   | NM_006394 | DKK3                  | 27122     | 4.9  | 3.2  | 6.9  | 2.5  | 1.6  |
| 221127_s_at | NM_006394 | DKK3                  | 27122     | 0.6  | 0.1  | 3.8  | 2.8  | 0.9  |
| 221128_at   | NM_023038 | ADAM19                | 8728      | 2.6  | 6.6  | 8.4  | 4.5  | 4.6  |
| 221129_at   | NM_014318 | FAM215A               | 23591     | 8.3  | 1.5  | 10.1 | 2.0  | 4.5  |
| 221130_s_at | NM_014113 | -                     | -         | 1.3  | 0.5  | 1.3  | 1.2  | 5.5  |
| 221131_at   | NM_016161 | A4GNT                 | 51146     | 11.5 | 12.7 | 11.4 | 11.6 | 13.2 |
| 221132_at   | NM_016369 | CLDN18                | 51208     | 0.6  | 0.8  | 0.7  | 0.5  | 0.4  |
| 221133_s_at | NM_016369 | CLDN18                | 51208     | 0.7  | 0.5  | 1.2  | 0.6  | 0.7  |
| 221134_at   | NM_015985 | ANGPT4                | 51378     | 3.5  | 1.9  | 1.9  | 1.5  | 1.2  |
| 221135_s_at | NM_014065 | ASTE1                 | 28990     | 21.7 | 24.3 | 26.0 | 21.5 | 19.1 |
| 221136_at   | NM_016204 | GDF2                  | 2658      | 2.9  | 7.4  | 6.4  | 2.2  | 6.0  |
| 221137_at   | AF118071  | -                     | -         | 10.5 | 7.9  | 10.9 | 8.4  | 9.5  |
| 221138_s_at | NM_014097 | -                     | -         | 0.5  | 4.7  | 1.8  | 0.7  | 0.2  |
| 221139_s_at | NM_015989 | CSAD                  | 51380     | 20.8 | 16.2 | 14.7 | 13.9 | 19.1 |
| 221140_s_at | NM_013345 | GPR132                | 29933     | 0.8  | 1.5  | 0.9  | 1.4  | 1.2  |
| 221141_x_at | NM_013333 | EPN1                  | 29924     | 13.5 | 13.3 | 24.2 | 18.4 | 25.9 |
| 221142_s_at | NM_018441 | PECR                  | 55825     | 52.3 | 35.6 | 48.0 | 38.9 | 30.6 |
| 221143_at   | NM_013347 | RPA4                  | 29935     | 6.3  | 3.5  | 3.0  | 3.0  | 2.7  |
| 221144_at   | NM_018497 | -                     | -         | 3.3  | 3.8  | 0.5  | 3.2  | 1.0  |
| 221145_at   | NM_018499 | -                     | -         | 0.3  | 3.2  | 0.7  | 0.8  | 2.8  |
| 221146_at   | NM_018532 | -                     | -         | 0.8  | 1.0  | 0.7  | 3.7  | 1.0  |
| 221147_x_at | NM_018560 | WWOX                  | 51741     | 22.5 | 16.8 | 19.1 | 14.0 | 11.9 |

|             |           |             |              |        |       |      |       |      |      |
|-------------|-----------|-------------|--------------|--------|-------|------|-------|------|------|
| 221148_at   | NM_018625 | RP11-457116 | -            | 3.7    | 9.2   | 8.0  | 8.9   | 9.7  |      |
| 221149_at   | NM_018485 | C5AR2       | 27202        | 6.9    | 0.6   | 4.6  | 0.6   | 4.0  |      |
| 221150_at   | NM_020203 | MEPE        | 56955        | 2.7    | 1.3   | 1.3  | 0.9   | 0.6  |      |
| 221151_at   | NM_020227 | PRDM9       | 56979        | 3.8    | 0.9   | 1.8  | 2.0   | 2.1  |      |
| 221152_at   | NM_020351 | COL8A1      | 1295         | 4.6    | 2.8   | 4.1  | 0.6   | 2.0  |      |
| 221153_s_at | NM_020355 | -           | -            | 2.0    | 1.7   | 1.1  | 2.6   | 3.4  |      |
| 221154_at   | NM_020358 | TRIM49      | /// T 57093  | /// 64 | 6.5   | 4.5  | 2.3   | 3.8  | 5.5  |
| 221155_x_at | NM_018603 | -           | -            | 4.6    | 2.0   | 14.6 | 4.8   | 3.7  |      |
| 221156_x_at | NM_004748 | CCPG1       | 9236         | 22.1   | 14.4  | 20.5 | 18.9  | 15.1 |      |
| 221157_s_at | NM_012172 | FBXO24      | 26261        | 0.8    | 11.3  | 7.2  | 6.7   | 5.2  |      |
| 221158_at   | NM_013329 | PAXBP1      | 94104        | 32.3   | 16.9  | 26.4 | 18.7  | 21.8 |      |
| 221159_at   | NM_016414 | -           | -            | 6.0    | 1.0   | 1.1  | 2.1   | 0.7  |      |
| 221160_s_at | NM_019855 | CABP5       | 56344        | 1.1    | 0.5   | 0.6  | 1.0   | 0.9  |      |
| 221161_at   | NM_020646 | ASCL3       | 56676        | 2.9    | 6.5   | 7.2  | 1.4   | 0.9  |      |
| 221162_at   | NM_005712 | HHLA1       | 10086        | 22.0   | 8.6   | 13.0 | 5.1   | 4.4  |      |
| 221163_s_at | NM_015977 | MLXIPL      | 51085        | 1.8    | 3.4   | 1.6  | 10.7  | 12.5 |      |
| 221164_x_at | NM_012126 | CHST5       | 23563        | 19.8   | 28.7  | 21.8 | 11.9  | 15.4 |      |
| 221165_s_at | NM_020525 | IL22        | 50616        | 19.3   | 4.2   | 10.7 | 6.1   | 6.2  |      |
| 221166_at   | NM_020638 | FGF23       | 8074         | 1.0    | 0.9   | 1.1  | 0.8   | 3.0  |      |
| 221167_s_at | NM_031290 | CCDC70      | 83446        | 6.0    | 0.7   | 1.0  | 1.0   | 0.4  |      |
| 221168_at   | NM_021620 | PRDM13      | 59336        | 0.6    | 0.3   | 0.4  | 3.9   | 1.2  |      |
| 221169_s_at | NM_021624 | HRH4        | 59340        | 3.8    | 4.3   | 2.5  | 1.6   | 2.8  |      |
| 221170_at   | AF312230  | HRH4        | 59340        | 2.7    | 0.9   | 3.7  | 3.2   | 1.7  |      |
| 221171_at   | NM_025030 | CCDC30      | 728621       | 4.0    | 6.4   | 0.8  | 4.0   | 2.0  |      |
| 221172_at   | NM_025031 | C7orf69     | 80099        | 4.8    | 1.1   | 2.3  | 4.6   | 1.2  |      |
| 221173_at   | NM_025034 | USH1C       | 10083        | 6.3    | 6.5   | 1.5  | 1.7   | 0.4  |      |
| 221174_at   | NM_025039 | -           | -            | 0.7    | 1.6   | 6.0  | 0.8   | 4.9  |      |
| 221175_at   | NM_025041 | C3orf36     | 80111        | 2.9    | 0.7   | 1.0  | 0.5   | 0.4  |      |
| 221176_x_at | NM_025042 | -           | -            | 11.1   | 3.6   | 16.2 | 18.8  | 10.7 |      |
| 221177_at   | NM_025043 | MIA2        | 117153       | 3.1    | 2.4   | 3.8  | 0.8   | 2.0  |      |
| 221178_at   | NM_025045 | BAIAP2L2    | 80115        | 1.6    | 0.6   | 0.6  | 0.7   | 0.4  |      |
| 221179_at   | NM_025050 | PRORY       | 100533178    | 1.4    | 1.5   | 1.3  | 1.1   | 1.0  |      |
| 221180_at   | NM_025052 | MAP3K19     | 80122        | 3.9    | 3.0   | 2.0  | 2.4   | 8.4  |      |
| 221181_at   | NM_025062 | -           | -            | 1.6    | 0.6   | 2.6  | 5.9   | 1.4  |      |
| 221182_at   | NM_025063 | MROH9       | 80133        | 0.2    | 3.1   | 0.6  | 2.4   | 0.4  |      |
| 221183_at   | NM_025064 | LOC1005073  | 100507388    | 2.1    | 2.5   | 0.9  | 5.4   | 1.8  |      |
| 221184_at   | NM_025089 | -           | -            | 10.4   | 8.0   | 12.0 | 9.6   | 3.4  |      |
| 221185_s_at | NM_025111 | IQCG        | 84223        | 23.3   | 20.6  | 19.0 | 17.0  | 24.2 |      |
| 221186_at   | NM_025116 | LOC1001315  | 100131532    | 10.3   | 9.4   | 1.6  | 11.7  | 1.0  |      |
| 221187_s_at | NM_025129 | FUZ         | 80199        | 18.9   | 36.3  | 26.6 | 34.3  | 22.8 |      |
| 221188_s_at | NM_014430 | CIDEB       | 27141        | 44.6   | 48.8  | 60.5 | 50.9  | 49.2 |      |
| 221189_s_at | NM_025150 | MIR6878     | /// 80222    | /// 10 | 111.7 | 95.9 | 131.7 | 76.0 | 94.9 |
| 221190_s_at | NM_013326 | C18orf8     | 29919        | 69.0   | 66.8  | 77.7 | 66.7  | 60.0 |      |
| 221191_at   | NM_018991 | STAG3L3     | 442578       | 10.6   | 8.6   | 11.9 | 8.5   | 8.4  |      |
| 221192_x_at | NM_024311 | MFSD11      | 79157        | 36.2   | 24.7  | 40.0 | 31.8  | 27.7 |      |
| 221193_s_at | NM_017665 | ZCCHC10     | 54819        | 66.3   | 46.5  | 67.1 | 56.2  | 47.3 |      |
| 221194_s_at | NM_016125 | RNFT1       | /// TB 51136 | /// 65 | 36.6  | 30.0 | 36.3  | 27.2 | 27.5 |
| 221195_at   | NM_016125 | RNFT1       | 51136        | 5.4    | 4.0   | 6.4  | 8.9   | 0.5  |      |
| 221196_x_at | NM_024332 | BRCC3       | 79184        | 75.8   | 47.4  | 85.1 | 49.6  | 57.3 |      |
| 221197_s_at | NM_020985 | CHAT        | 1103         | 2.2    | 3.4   | 4.5  | 0.4   | 0.6  |      |
| 221198_at   | NM_021920 | SCT         | 6343         | 0.5    | 0.6   | 0.5  | 0.6   | 1.2  |      |
| 221199_at   | NM_022139 | GFRA4       | 64096        | 2.3    | 1.2   | 2.0  | 2.2   | 1.3  |      |
| 221200_at   | NM_022155 | ERVK3-2     | 100862697    | 1.4    | 1.8   | 4.4  | 1.3   | 0.9  |      |

|             |           |                           |       |       |       |       |       |       |
|-------------|-----------|---------------------------|-------|-------|-------|-------|-------|-------|
| 221201_s_at | NM_003445 | ZNF155                    | 7711  | 10.5  | 10.4  | 11.9  | 10.9  | 10.1  |
| 221202_at   | NM_018523 | -                         | -     | 0.9   | 3.1   | 3.6   | 1.8   | 2.9   |
| 221203_s_at | NM_018023 | YEATS2                    | 55689 | 48.4  | 41.9  | 48.3  | 46.4  | 38.6  |
| 221204_s_at | NM_018058 | CRTAC1                    | 55118 | 18.9  | 10.5  | 9.2   | 10.8  | 8.6   |
| 221205_at   | NM_018041 | -                         | -     | 4.5   | 6.2   | 8.1   | 3.7   | 6.4   |
| 221206_at   | NM_024521 | PMS2 /// PM5395 /// 441   |       | 88.3  | 88.1  | 77.3  | 82.6  | 57.9  |
| 221207_s_at | NM_015678 | NBEA                      | 26960 | 4.6   | 4.9   | 8.6   | 5.0   | 5.4   |
| 221208_s_at | NM_024631 | MSANTD2                   | 79684 | 28.0  | 18.2  | 23.5  | 24.9  | 26.4  |
| 221209_s_at | NM_020157 | OTOR                      | 56914 | 6.4   | 1.6   | 1.7   | 4.5   | 7.5   |
| 221210_s_at | NM_030769 | NPL                       | 80896 | 12.9  | 10.3  | 8.0   | 14.0  | 7.5   |
| 221211_s_at | NM_020152 | MAP3K7CL                  | 56911 | 4.7   | 2.6   | 1.5   | 2.6   | 0.6   |
| 221212_x_at | NM_018313 | PBRM1                     | 55193 | 6.4   | 0.6   | 3.8   | 2.5   | 2.7   |
| 221213_s_at | NM_017661 | LOC145783 / 54816 /// 14  |       | 13.5  | 4.9   | 12.4  | 10.1  | 6.5   |
| 221214_s_at | NM_015537 | MIR7114 /// 26012 /// 10  |       | 149.2 | 150.2 | 157.4 | 169.1 | 122.2 |
| 221215_s_at | NM_020639 | RIPK4                     | 54101 | 65.0  | 55.1  | 61.7  | 57.9  | 53.4  |
| 221216_s_at | NM_012236 | SCMH1                     | 22955 | 204.4 | 185.6 | 235.0 | 207.8 | 196.9 |
| 221217_s_at | NM_018723 | RBFOX1                    | 54715 | 2.1   | 0.9   | 6.4   | 5.2   | 5.8   |
| 221218_s_at | NM_022445 | TPK1                      | 27010 | 14.7  | 14.9  | 17.3  | 18.7  | 9.9   |
| 221219_s_at | NM_017566 | KLHDC4                    | 54758 | 63.9  | 53.6  | 69.6  | 60.6  | 57.5  |
| 221220_s_at | NM_017988 | SCYL2                     | 55681 | 56.7  | 72.3  | 52.7  | 48.8  | 43.3  |
| 221221_s_at | NM_017415 | KLHL3                     | 26249 | 12.3  | 8.6   | 10.3  | 8.4   | 9.3   |
| 221222_s_at | NM_017860 | C1orf56                   | 54964 | 15.5  | 16.8  | 26.4  | 19.6  | 15.5  |
| 221223_x_at | NM_013324 | CISH                      | 1154  | 37.1  | 15.0  | 28.5  | 16.8  | 23.4  |
| 221224_s_at | NM_024819 | DKAKD                     | 79877 | 42.6  | 51.1  | 53.6  | 61.3  | 43.9  |
| 221225_at   | NM_024819 | DKAKD                     | 79877 | 1.2   | 1.9   | 0.9   | 3.1   | 0.8   |
| 221226_s_at | NM_018674 | ASIC4                     | 55515 | 10.4  | 2.4   | 3.0   | 1.3   | 2.5   |
| 221227_x_at | NM_017421 | COQ3                      | 51805 | 100.9 | 61.0  | 72.7  | 62.6  | 52.3  |
| 221228_s_at | NM_016528 | -                         | -     | 2.0   | 3.9   | 0.9   | 0.5   | 0.5   |
| 221229_s_at | NM_017910 | TRMT61B                   | 55006 | 73.7  | 61.4  | 91.8  | 74.7  | 62.4  |
| 221230_s_at | NM_016374 | ARID4B                    | 51742 | 63.2  | 54.7  | 72.0  | 59.4  | 45.6  |
| 221231_s_at | NM_017970 | NRDE2                     | 55051 | 4.8   | 1.9   | 0.9   | 0.7   | 0.9   |
| 221232_s_at | NM_020349 | ANKRD2                    | 26287 | 3.4   | 1.2   | 1.0   | 3.4   | 2.0   |
| 221233_s_at | NM_020819 | FAM135A                   | 57579 | 0.5   | 0.4   | 0.3   | 3.7   | 0.3   |
| 221234_s_at | NM_021813 | BACH2                     | 60468 | 0.3   | 0.5   | 3.9   | 4.5   | 0.4   |
| 221235_s_at | NM_030825 | TGFBRAP1                  | 9392  | 32.2  | 28.9  | 26.7  | 25.4  | 27.4  |
| 221236_s_at | NM_030795 | STMN4                     | 81551 | 8.5   | 8.2   | 5.9   | 5.9   | 7.2   |
| 221237_s_at | NM_030758 | OSBP2                     | 23762 | 5.4   | 2.0   | 2.7   | 2.2   | 1.6   |
| 221238_at   | NM_030763 | HMGNS5                    | 79366 | 7.6   | 9.3   | 10.3  | 7.4   | 8.8   |
| 221239_s_at | NM_030764 | FCRL2                     | 79368 | 4.5   | 3.3   | 6.4   | 4.2   | 2.3   |
| 221240_s_at | NM_030765 | B3GNT4                    | 79369 | 17.5  | 25.1  | 9.9   | 7.6   | 20.3  |
| 221241_s_at | NM_030766 | BCL2L14                   | 79370 | 3.5   | 2.6   | 2.6   | 6.7   | 2.0   |
| 221242_at   | NM_025051 | -                         | -     | 12.2  | 5.2   | 2.3   | 12.2  | 20.0  |
| 221243_s_at | NM_031270 | PRO1596                   | 29013 | 1.1   | 1.2   | 3.7   | 2.6   | 0.7   |
| 221244_s_at | NM_031268 | PDPK1                     | 5170  | 16.4  | 9.3   | 10.7  | 1.8   | 6.0   |
| 221245_s_at | NM_030804 | FZD5                      | 7855  | 47.3  | 43.5  | 68.2  | 50.6  | 51.3  |
| 221246_x_at | NM_018274 | TNS1                      | 7145  | 8.1   | 1.7   | 8.3   | 1.2   | 5.8   |
| 221247_s_at | NM_030798 | WBSCR16                   | 81554 | 101.4 | 118.3 | 145.0 | 108.9 | 106.8 |
| 221248_s_at | NM_023034 | WHSC1L1                   | 54904 | 12.3  | 24.2  | 15.7  | 9.1   | 8.0   |
| 221249_s_at | NM_030802 | FAM117A                   | 81558 | 84.4  | 92.3  | 77.5  | 86.5  | 68.8  |
| 221250_s_at | NM_031300 | MXD3                      | 83463 | 60.1  | 32.1  | 61.7  | 54.1  | 52.4  |
| 221251_x_at | NM_031288 | INO80B /// I183444 /// 10 |       | 14.0  | 19.8  | 17.8  | 18.8  | 19.4  |
| 221252_s_at | NM_031289 | GSG1                      | 83445 | 1.2   | 1.6   | 4.2   | 0.8   | 2.1   |
| 221253_s_at | NM_030810 | BLOC1S5-TX1 81567 /// 10  |       | 469.1 | 445.1 | 499.5 | 433.8 | 396.2 |

|             |           |            |               |       |       |       |       |       |
|-------------|-----------|------------|---------------|-------|-------|-------|-------|-------|
| 221254_s_at | NM_031220 | PITPNM3    | 83394         | 0.4   | 0.6   | 0.6   | 0.3   | 0.3   |
| 221255_s_at | NM_031298 | EMC6       | 83460         | 400.8 | 287.5 | 390.5 | 322.4 | 351.1 |
| 221256_s_at | NM_031219 | HDHD3      | 81932         | 58.6  | 44.7  | 65.8  | 44.3  | 46.2  |
| 221257_x_at | NM_030793 | FBXO38     | 81545         | 77.7  | 70.5  | 92.4  | 72.9  | 72.7  |
| 221258_s_at | NM_031217 | KIF18A     | 81930         | 37.5  | 20.1  | 35.0  | 23.2  | 28.8  |
| 221259_s_at | NM_031276 | TEX11      | 56159         | 0.9   | 1.0   | 0.7   | 1.1   | 1.0   |
| 221260_s_at | NM_030809 | CSRNP2     | 81566         | 34.6  | 36.2  | 31.8  | 35.3  | 30.8  |
| 221261_x_at | NM_030801 | MAGED4 /// | 81557 /// 72  | 15.3  | 25.9  | 22.7  | 24.8  | 19.2  |
| 221262_s_at | NM_030807 | SLC2A11    | 66035         | 18.4  | 12.2  | 15.1  | 17.8  | 8.5   |
| 221263_s_at | NM_031287 | SF3B5      | 83443         | 828.2 | 737.2 | 928.4 | 812.5 | 747.3 |
| 221264_s_at | NM_031214 | TARDBP     | 23435         | 36.5  | 29.6  | 26.1  | 26.8  | 31.0  |
| 221265_s_at | NM_030800 | VWA9       | 81556         | 102.7 | 90.7  | 114.3 | 96.2  | 88.4  |
| 221266_s_at | NM_030788 | DCSTAMP    | 81501         | 1.8   | 4.9   | 9.4   | 0.9   | 6.4   |
| 221267_s_at | NM_031213 | ABHD17A    | 81926         | 458.7 | 422.1 | 484.1 | 491.6 | 435.5 |
| 221268_s_at | NM_030791 | SGPP1      | 81537         | 112.4 | 89.2  | 103.6 | 92.7  | 80.3  |
| 221269_s_at | NM_031286 | SH3BGL3    | 83442         | 112.5 | 116.3 | 105.0 | 140.7 | 71.3  |
| 221270_s_at | NM_031209 | QTRT1      | 81890         | 39.7  | 39.3  | 38.9  | 40.5  | 38.8  |
| 221271_at   | NM_021803 | IL21       | 59067         | 0.9   | 7.9   | 1.0   | 1.0   | 0.4   |
| 221272_s_at | NM_030806 | C1orf21    | 81563         | 11.3  | 8.2   | 13.3  | 7.1   | 8.0   |
| 221273_s_at | NM_031297 | RNF208     | 727800        | 60.2  | 60.1  | 54.2  | 53.7  | 29.8  |
| 221274_s_at | NM_030805 | LMAN2L     | 81562         | 89.4  | 103.1 | 79.2  | 87.9  | 70.8  |
| 221275_s_at | NM_030896 | -          | -             | 1.8   | 1.2   | 1.5   | 1.3   | 1.0   |
| 221276_s_at | NM_030786 | SYNC       | 81493         | 6.0   | 1.5   | 6.1   | 3.7   | 5.2   |
| 221277_s_at | NM_031307 | PUS3       | 83480         | 108.1 | 89.7  | 126.5 | 100.9 | 120.0 |
| 221278_at   | NM_024016 | HOXB8      | 3218          | 0.7   | 1.2   | 1.0   | 0.4   | 0.9   |
| 221279_at   | NM_018972 | GDAP1      | 54332         | 19.0  | 9.7   | 15.8  | 9.7   | 6.9   |
| 221280_s_at | NM_019619 | PARD3      | 56288         | 1.7   | 0.8   | 0.6   | 0.5   | 1.2   |
| 221281_at   | NM_005417 | SRC        | 6714          | 1.6   | 1.6   | 2.8   | 5.1   | 3.6   |
| 221282_x_at | NM_004348 | RUNX2      | 860           | 1.1   | 1.1   | 1.4   | 1.4   | 0.6   |
| 221283_at   | NM_004348 | RUNX2      | 860           | 6.6   | 3.7   | 2.9   | 1.3   | 1.5   |
| 221284_s_at | NM_005417 | SRC        | 6714          | 14.8  | 7.4   | 4.2   | 8.0   | 4.6   |
| 221285_at   | NM_006011 | ST8SIA2    | 8128          | 1.7   | 0.9   | 1.0   | 0.3   | 0.3   |
| 221286_s_at | NM_016459 | MZB1       | 51237         | 1.8   | 2.9   | 1.3   | 1.0   | 1.7   |
| 221287_at   | NM_021133 | RNASEL     | 6041          | 14.3  | 7.8   | 1.3   | 0.7   | 2.2   |
| 221288_at   | NM_005295 | GPR22      | 2845          | 0.3   | 0.6   | 0.4   | 0.4   | 0.5   |
| 221289_at   | NM_005222 | DLX6       | 1750          | 1.5   | 0.9   | 1.0   | 0.6   | 0.4   |
| 221290_s_at | NM_016473 | MUM1       | 84939         | 25.0  | 27.0  | 31.3  | 34.0  | 34.6  |
| 221291_at   | NM_025217 | ULBP2      | 80328         | 14.2  | 19.1  | 11.1  | 20.3  | 6.9   |
| 221292_at   | NM_003738 | PTCH2      | 8643          | 2.9   | 2.8   | 4.3   | 6.6   | 2.1   |
| 221293_s_at | NM_022047 | DEF6       | 50619         | 27.4  | 9.6   | 18.0  | 12.7  | 9.7   |
| 221294_at   | NM_005294 | GPR21      | 2844          | 21.2  | 13.3  | 12.3  | 13.5  | 12.1  |
| 221295_at   | NM_001279 | CIDEA      | 1149          | 17.3  | 1.6   | 7.0   | 3.9   | 1.5   |
| 221296_at   | NM_005422 | TECTA      | 7007          | 6.4   | 1.6   | 6.5   | 3.7   | 2.9   |
| 221297_at   | NM_018654 | GPRC5D     | 55507         | 23.5  | 17.6  | 20.1  | 17.8  | 18.5  |
| 221298_s_at | NM_004254 | SLC22A8    | 9376          | 1.3   | 1.9   | 4.9   | 0.8   | 0.7   |
| 221299_at   | NM_018969 | GPR173     | 54328         | 9.9   | 1.4   | 9.3   | 7.7   | 5.5   |
| 221300_at   | NM_018958 | NPAP1      | 23742         | 25.0  | 25.9  | 27.0  | 5.6   | 10.8  |
| 221301_at   | NM_025258 | VWA7       | 80737         | 0.9   | 0.7   | 0.7   | 1.1   | 0.7   |
| 221302_at   | NM_014079 | KLF15      | 28999         | 33.9  | 23.9  | 26.8  | 27.3  | 14.8  |
| 221303_at   | NM_013340 | PCDHB1     | 29930         | 5.5   | 7.0   | 2.6   | 2.8   | 9.9   |
| 221304_at   | NM_019076 | UGT1A1 /// | U54576 /// 54 | 6.1   | 1.9   | 1.0   | 2.5   | 2.1   |
| 221305_s_at | NM_019076 | UGT1A1 /// | U54576 /// 54 | 4.8   | 0.5   | 1.1   | 0.7   | 0.2   |
| 221306_at   | NM_018971 | GPR27      | 2850          | 30.5  | 19.3  | 12.9  | 14.2  | 13.4  |

|             |           |                         |        |      |      |      |      |      |
|-------------|-----------|-------------------------|--------|------|------|------|------|------|
| 221307_at   | NM_014592 | KCNIP1                  | 30820  | 21.3 | 7.2  | 3.3  | 4.8  | 4.3  |
| 221308_at   | NM_006654 | FRS2                    | 10818  | 10.3 | 11.7 | 10.0 | 16.0 | 10.8 |
| 221309_at   | NM_006450 | RBM17                   | 84991  | 3.5  | 6.6  | 16.7 | 3.4  | 6.8  |
| 221310_at   | NM_004115 | FGF14                   | 2259   | 5.7  | 1.2  | 3.4  | 1.9  | 1.5  |
| 221311_x_at | NM_020466 | LYRM2                   | 57226  | 48.7 | 43.6 | 58.6 | 51.4 | 46.7 |
| 221312_at   | NM_004246 | GLP2R                   | 9340   | 1.1  | 1.3  | 1.3  | 5.3  | 1.0  |
| 221313_at   | NM_005684 | GPR52                   | 9293   | 1.0  | 1.1  | 1.7  | 0.6  | 1.1  |
| 221314_at   | NM_005260 | GDF9                    | 2661   | 19.0 | 14.1 | 17.0 | 8.6  | 10.0 |
| 221315_s_at | NM_020637 | FGF22                   | 27006  | 5.8  | 8.8  | 12.0 | 13.0 | 15.7 |
| 221316_at   | NM_021185 | CATSPERG                | 57828  | 1.3  | 6.7  | 2.8  | 3.8  | 2.2  |
| 221317_x_at | NM_018939 | PCDHB6                  | 56130  | 18.1 | 16.9 | 4.1  | 12.5 | 6.7  |
| 221318_at   | NM_021191 | NEUROD4                 | 58158  | 10.7 | 8.3  | 11.4 | 2.3  | 6.7  |
| 221319_at   | NM_019120 | PCDHB8                  | 56128  | 5.4  | 2.0  | 6.2  | 5.7  | 3.1  |
| 221320_at   | NM_020396 | BCL2L10                 | 10017  | 1.2  | 3.6  | 6.9  | 4.0  | 1.6  |
| 221321_s_at | NM_014591 | KCNIP2                  | 30819  | 1.9  | 10.9 | 8.0  | 4.4  | 3.5  |
| 221322_at   | NM_022150 | NPVF                    | 64111  | 2.7  | 5.0  | 4.4  | 2.9  | 2.5  |
| 221323_at   | NM_025218 | ULBP1                   | 80329  | 17.9 | 7.3  | 10.4 | 6.8  | 7.4  |
| 221324_at   | NM_019599 | TAS2R1                  | 50834  | 17.1 | 9.3  | 6.8  | 11.8 | 10.5 |
| 221325_at   | NM_022054 | KCNK13                  | 56659  | 3.9  | 1.6  | 6.0  | 4.2  | 4.9  |
| 221326_s_at | NM_016261 | TUBD1                   | 51174  | 26.7 | 18.2 | 23.7 | 25.5 | 19.2 |
| 221327_s_at | NM_000513 | LOC1010602.2652 /// 595 |        | 0.7  | 0.9  | 1.0  | 0.8  | 1.0  |
| 221328_at   | NM_012131 | CLDN17                  | 26285  | 2.6  | 1.2  | 1.3  | 2.6  | 10.4 |
| 221329_at   | NM_012375 | OR52A1                  | 23538  | 5.7  | 6.6  | 13.1 | 8.6  | 7.8  |
| 221330_at   | NM_000739 | CHRM2                   | 1129   | 5.6  | 4.7  | 0.7  | 1.4  | 0.7  |
| 221331_x_at | NM_005214 | CTLA4                   | 1493   | 0.8  | 5.3  | 0.6  | 1.6  | 1.8  |
| 221332_at   | NM_005448 | BMP15                   | 9210   | 3.5  | 7.3  | 6.9  | 13.7 | 11.1 |
| 221333_at   | NM_014009 | FOXP3                   | 50943  | 1.3  | 1.2  | 1.7  | 3.5  | 1.1  |
| 221334_s_at | NM_014009 | FOXP3                   | 50943  | 1.2  | 8.6  | 5.4  | 7.1  | 5.1  |
| 221335_x_at | NM_019108 | SMG9                    | 56006  | 31.0 | 28.3 | 31.9 | 24.6 | 17.3 |
| 221336_at   | NM_005172 | ATOH1                   | 474    | 4.4  | 4.6  | 4.3  | 5.4  | 0.4  |
| 221337_s_at | NM_021780 | ADAM29 /// 11086 /// 10 |        | 3.3  | 2.2  | 2.6  | 1.8  | 0.4  |
| 221338_at   | NM_024123 | LY6G6E                  | 79136  | 1.8  | 5.9  | 8.0  | 2.0  | 0.4  |
| 221339_at   | NM_013941 | OR10C1                  | 442194 | 11.4 | 7.0  | 7.2  | 8.4  | 4.5  |
| 221340_at   | NM_005193 | CDX4                    | 1046   | 1.1  | 0.8  | 0.9  | 1.3  | 0.7  |
| 221341_s_at | NM_003552 | OR1D5                   | 8386   | 5.1  | 4.7  | 3.5  | 7.7  | 3.8  |
| 221342_at   | NM_025260 | C6orf25                 | 80739  | 1.3  | 1.3  | 6.9  | 1.3  | 1.2  |
| 221343_at   | NM_013937 | OR11A1                  | 26531  | 0.3  | 1.2  | 1.4  | 1.2  | 0.8  |
| 221344_at   | NM_013936 | OR12D2                  | 26529  | 12.1 | 8.7  | 13.6 | 5.7  | 5.0  |
| 221345_at   | NM_005306 | FFAR2                   | 2867   | 6.5  | 6.3  | 4.8  | 0.4  | 1.6  |
| 221346_at   | NM_012351 | OR10J1                  | 26476  | 20.4 | 12.1 | 10.1 | 11.8 | 9.3  |
| 221347_at   | NM_012125 | CHRM5                   | 1133   | 6.7  | 4.6  | 10.0 | 10.5 | 7.6  |
| 221348_at   | NM_024409 | NPPC                    | 4880   | 4.7  | 0.5  | 1.5  | 1.2  | 3.0  |
| 221349_at   | NM_007128 | VPREB1                  | 7441   | 3.8  | 4.7  | 2.8  | 0.9  | 4.1  |
| 221350_at   | NM_022658 | HOXC8                   | 3224   | 9.5  | 4.7  | 5.5  | 2.9  | 6.1  |
| 221351_at   | NM_000524 | HTR1A                   | 3350   | 1.5  | 1.1  | 1.1  | 2.0  | 0.9  |
| 221352_at   | NM_013288 | -                       | -      | 7.2  | 9.1  | 4.7  | 8.7  | 0.4  |
| 221353_at   | NM_002550 | OR3A1                   | 4994   | 1.3  | 1.6  | 1.0  | 1.4  | 1.5  |
| 221354_s_at | NM_005297 | MCHR1                   | 2847   | 3.2  | 1.3  | 1.2  | 3.0  | 1.1  |
| 221355_at   | NM_005199 | CHRNA                   | 1146   | 18.6 | 17.9 | 7.0  | 10.7 | 13.3 |
| 221356_x_at | NM_016318 | P2RX2                   | 22953  | 1.3  | 2.4  | 1.8  | 1.4  | 0.8  |
| 221357_at   | NM_000741 | CHRM4                   | 1132   | 13.7 | 2.1  | 2.0  | 3.0  | 5.4  |
| 221358_at   | NM_005286 | NPBWR2                  | 2832   | 4.6  | 1.3  | 1.4  | 3.1  | 0.7  |
| 221359_at   | NM_000514 | GDNF                    | 2668   | 1.9  | 0.7  | 4.1  | 1.2  | 3.4  |

|             |           |               |              |       |       |       |       |       |
|-------------|-----------|---------------|--------------|-------|-------|-------|-------|-------|
| 221360_s_at | NM_004122 | GHSR          | 2693         | 0.4   | 1.1   | 0.6   | 1.0   | 0.3   |
| 221361_at   | NM_006189 | OMP           | 4975         | 1.2   | 1.0   | 1.1   | 0.5   | 0.9   |
| 221362_at   | NM_024012 | HTR5A         | 3361         | 0.8   | 0.9   | 1.8   | 1.1   | 0.7   |
| 221363_x_at | NM_005298 | GPR25         | 2848         | 1.4   | 2.7   | 2.0   | 1.0   | 3.5   |
| 221364_at   | NM_001510 | GRID2         | 2895         | 12.3  | 1.1   | 5.6   | 0.9   | 2.9   |
| 221365_at   | NM_001507 | MLNR          | 2862         | 0.5   | 0.4   | 5.6   | 4.2   | 0.3   |
| 221366_at   | NM_006168 | NKX6-1        | 4825         | 1.6   | 5.3   | 1.4   | 0.6   | 0.9   |
| 221367_at   | NM_005372 | MOS           | 4342         | 16.6  | 11.5  | 12.2  | 9.4   | 6.6   |
| 221368_at   | NM_005383 | NEU2          | 4759         | 0.7   | 1.4   | 1.0   | 0.6   | 0.5   |
| 221369_at   | NM_005958 | MTNR1A        | 4543         | 3.4   | 0.9   | 1.2   | 1.7   | 2.7   |
| 221370_at   | NM_012480 | ZNF717        | 100131827    | 12.4  | 9.4   | 13.9  | 4.7   | 10.6  |
| 221371_at   | NM_005092 | TNFSF18       | 8995         | 2.7   | 6.2   | 3.7   | 8.7   | 2.9   |
| 221372_s_at | NM_012226 | P2RX2         | 22953        | 7.9   | 6.5   | 3.1   | 8.8   | 3.1   |
| 221373_x_at | NM_004158 | PSPN          | 5623         | 5.0   | 0.7   | 2.6   | 5.6   | 1.3   |
| 221374_at   | NM_003868 | FGF16         | 8823         | 5.3   | 4.9   | 2.4   | 16.2  | 8.4   |
| 221375_at   | NM_003555 | OR1G1         | 8390         | 1.6   | 4.6   | 2.1   | 2.8   | 1.5   |
| 221376_at   | NM_003867 | FGF17         | 8822         | 8.9   | 4.2   | 3.1   | 8.1   | 1.6   |
| 221377_s_at | NM_014276 | RBPJL         | 11317        | 10.0  | 1.0   | 5.5   | 4.3   | 7.6   |
| 221378_at   | NM_005454 | CER1          | 9350         | 22.2  | 14.6  | 17.6  | 13.1  | 12.0  |
| 221379_at   | NM_020527 | -             | -            | 5.1   | 4.2   | 12.9  | 9.4   | 8.6   |
| 221380_at   | NM_006543 | -             | -            | 0.6   | 1.2   | 1.3   | 0.4   | 2.1   |
| 221381_s_at | NM_006792 | MORF4L1       | 10933        | 566.3 | 472.1 | 553.8 | 510.2 | 439.2 |
| 221382_at   | NM_012348 | OR2N1P /// (- | -            | 18.9  | 5.7   | 10.5  | 10.7  | 9.0   |
| 221383_at   | NM_006056 | NMUR1         | 10316        | 0.8   | 0.7   | 0.7   | 2.1   | 0.7   |
| 221384_at   | NM_021833 | UCP1          | 7350         | 1.1   | 2.0   | 1.4   | 1.5   | 0.3   |
| 221385_s_at | NM_005305 | FFAR3 /// GP  | 2865 /// 286 | 2.2   | 1.4   | 1.6   | 1.6   | 1.5   |
| 221386_at   | NM_002551 | OR3A2         | 4995         | 6.4   | 5.4   | 5.4   | 6.3   | 3.0   |
| 221387_at   | NM_022146 | NPFFR1        | 64106        | 11.2  | 11.5  | 7.7   | 5.8   | 4.1   |
| 221388_at   | NM_014565 | OR1A1         | 8383         | 2.3   | 1.3   | 4.0   | 1.7   | 1.2   |
| 221389_at   | NM_014589 | PLA2G2E       | 30814        | 2.1   | 1.2   | 0.8   | 2.2   | 1.1   |
| 221390_s_at | NM_004686 | ASB12 /// M   | 55613 /// 14 | 4.5   | 2.8   | 3.1   | 2.5   | 2.6   |
| 221391_at   | NM_023922 | TAS2R14       | 50840        | 6.9   | 5.3   | 6.5   | 7.4   | 1.2   |
| 221392_at   | NM_016944 | TAS2R4        | 50832        | 8.1   | 3.3   | 8.6   | 3.2   | 0.5   |
| 221393_at   | NM_014627 | TAAR3         | 9288         | 1.7   | 0.6   | 1.7   | 1.7   | 0.8   |
| 221394_at   | NM_014626 | TAAR2         | 9287         | 10.2  | 5.1   | 8.6   | 6.7   | 4.8   |
| 221395_at   | NM_023920 | TAS2R13       | 50838        | 1.1   | 2.1   | 1.4   | 1.0   | 0.8   |
| 221396_at   | NM_023919 | TAS2R7        | 50837        | 3.0   | 1.3   | 1.1   | 3.3   | 5.2   |
| 221397_at   | NM_023921 | TAS2R10       | 50839        | 0.6   | 2.8   | 4.7   | 0.9   | 1.1   |
| 221398_at   | NM_023918 | TAS2R8        | 50836        | 0.3   | 0.5   | 0.4   | 0.4   | 0.6   |
| 221399_at   | NM_021783 | EDA2R         | 60401        | 2.4   | 6.4   | 8.2   | 3.2   | 2.1   |
| 221400_at   | NM_017433 | MYO3A         | 53904        | 0.8   | 0.7   | 1.7   | 3.1   | 0.9   |
| 221401_at   | NM_014404 | CACNG5        | 27091        | 2.1   | 1.0   | 1.7   | 1.2   | 1.1   |
| 221402_at   | NM_012360 | OR1F1         | 4992         | 22.6  | 9.4   | 19.0  | 13.4  | 12.8  |
| 221403_s_at | NM_016421 | INSL6         | 11172        | 0.7   | 0.6   | 1.1   | 0.5   | 0.3   |
| 221404_at   | NM_014440 | IL36A         | 27179        | 7.9   | 7.9   | 13.4  | 6.3   | 6.6   |
| 221405_at   | NM_016317 | -             | -            | 8.0   | 9.0   | 12.9  | 2.8   | 6.9   |
| 221406_s_at | NM_025259 | MSH5-SAPC     | 401251 /// 1 | 0.7   | 0.4   | 1.8   | 1.7   | 0.5   |
| 221407_at   | NM_020660 | GJD2          | 57369        | 32.1  | 18.2  | 22.7  | 13.1  | 12.8  |
| 221408_x_at | NM_018932 | PCDHB12       | 56124        | 8.5   | 1.7   | 1.5   | 13.6  | 6.0   |
| 221409_at   | NM_019897 | OR2S2         | 56656        | 15.5  | 12.5  | 12.3  | 16.7  | 13.8  |
| 221410_x_at | NM_018937 | PCDHB3        | 56132        | 18.5  | 15.3  | 12.8  | 16.3  | 13.5  |
| 221411_at   | NM_021193 | HOXD12        | 3238         | 0.5   | 0.6   | 0.3   | 0.5   | 0.2   |
| 221412_at   | NM_020633 | VN1R1         | 57191        | 5.8   | 5.2   | 0.9   | 3.7   | 5.8   |



|             |           |                           |       |       |       |       |       |       |
|-------------|-----------|---------------------------|-------|-------|-------|-------|-------|-------|
| 221413_at   | NM_004732 | KCNAB3                    | 9196  | 5.7   | 6.7   | 4.5   | 4.4   | 5.0   |
| 221414_s_at | NM_030931 | DEFB126                   | 81623 | 5.9   | 10.0  | 5.1   | 4.4   | 2.6   |
| 221415_s_at | NM_030772 | GJA9 /// GJA 26292 /// 81 |       | 11.8  | 7.3   | 11.2  | 9.5   | 11.4  |
| 221416_at   | NM_022819 | PLA2G2F                   | 64600 | 2.0   | 6.0   | 2.8   | 5.2   | 1.8   |
| 221417_x_at | NM_030760 | S1PR5                     | 53637 | 0.4   | 0.3   | 0.5   | 0.5   | 0.3   |
| 221418_s_at | NM_005481 | MED16                     | 10025 | 61.5  | 60.4  | 64.6  | 61.1  | 52.6  |
| 221419_s_at | NM_013307 | -                         | -     | 211.8 | 161.4 | 208.6 | 206.0 | 172.8 |
| 221420_at   | NM_005179 | -                         | -     | 0.5   | 0.4   | 0.5   | 0.2   | 1.9   |
| 221421_s_at | NM_030955 | ADAMTS12                  | 81792 | 16.9  | 9.5   | 18.9  | 7.0   | 1.7   |
| 221422_s_at | NM_030814 | MIR600 /// \ 81571 /// 69 |       | 1.5   | 15.0  | 4.9   | 4.0   | 1.5   |
| 221423_s_at | NM_030799 | YIPF5                     | 81555 | 98.6  | 81.7  | 106.8 | 94.3  | 76.4  |
| 221424_s_at | NM_030774 | OR51E2                    | 81285 | 2.4   | 1.1   | 1.7   | 0.9   | 1.0   |
| 221425_s_at | NM_030940 | ISCA1                     | 81689 | 125.9 | 103.9 | 140.9 | 106.8 | 96.2  |
| 221426_s_at | NM_012373 | OR3A3                     | 8392  | 18.4  | 15.1  | 14.9  | 10.5  | 10.7  |
| 221427_s_at | NM_030937 | CCNL2                     | 81669 | 23.3  | 18.9  | 29.1  | 22.7  | 13.3  |
| 221428_s_at | NM_030921 | TBL1XR1                   | 79718 | 191.4 | 140.8 | 209.4 | 159.8 | 139.1 |
| 221429_x_at | NM_031274 | TEX13A                    | 56157 | 7.5   | 3.2   | 8.9   | 1.1   | 1.8   |
| 221430_s_at | NM_030963 | RNF146                    | 81847 | 34.9  | 28.4  | 37.4  | 41.5  | 21.4  |
| 221431_s_at | NM_030959 | OR12D3                    | 81797 | 0.8   | 0.6   | 0.7   | 0.5   | 0.5   |
| 221432_s_at | NM_031212 | SLC25A28                  | 81894 | 46.6  | 32.1  | 60.6  | 41.4  | 35.0  |
| 221433_at   | NM_019113 | FGF21                     | 26291 | 4.0   | 8.4   | 6.6   | 12.3  | 2.2   |
| 221434_s_at | NM_031210 | SLIRP                     | 81892 | 869.0 | 786.5 | 987.3 | 933.1 | 732.1 |
| 221435_x_at | NM_031207 | HYI                       | 81888 | 16.0  | 10.2  | 8.1   | 13.7  | 9.7   |
| 221436_s_at | NM_031299 | CDCA3                     | 83461 | 233.7 | 191.5 | 302.2 | 205.0 | 233.4 |
| 221437_s_at | NM_031280 | MRPS15                    | 64960 | 308.8 | 302.9 | 425.7 | 338.9 | 289.0 |
| 221438_s_at | NM_031275 | TEX12                     | 56158 | 1.8   | 3.4   | 0.5   | 0.6   | 0.2   |
| 221439_at   | NM_006606 | RBBP9                     | 10741 | 4.3   | 2.2   | 7.3   | 2.1   | 5.4   |
| 221440_s_at | NM_006606 | RBBP9                     | 10741 | 19.8  | 19.1  | 18.6  | 19.6  | 20.3  |
| 221441_at   | NM_005315 | GSC2                      | 2928  | 2.3   | 2.8   | 1.0   | 1.7   | 0.2   |
| 221442_at   | NM_019888 | MC3R                      | 4159  | 11.2  | 2.1   | 0.6   | 5.4   | 1.4   |
| 221443_x_at | NM_015893 | PRLH                      | 51052 | 16.3  | 9.7   | 9.9   | 7.4   | 4.0   |
| 221444_at   | NM_016945 | TAS2R16                   | 50833 | 8.1   | 11.3  | 3.0   | 5.0   | 4.1   |
| 221445_at   | NM_012352 | OR1A2                     | 26189 | 1.5   | 0.5   | 0.5   | 3.0   | 0.6   |
| 221446_at   | NM_021794 | ADAM30                    | 11085 | 8.0   | 9.5   | 7.2   | 10.2  | 2.9   |
| 221447_s_at | NM_031302 | GLT8D2                    | 83468 | 5.0   | 3.8   | 11.3  | 3.3   | 11.8  |
| 221448_s_at | NM_031271 | TEX15                     | 56154 | 10.2  | 11.2  | 5.0   | 11.3  | 6.4   |
| 221449_s_at | NM_030790 | ITFG1                     | 81533 | 206.0 | 187.8 | 213.2 | 226.0 | 167.4 |
| 221450_x_at | NM_018933 | PCDHB13                   | 56123 | 15.7  | 9.6   | 7.0   | 21.6  | 15.6  |
| 221451_s_at | NM_030903 | OR2W1                     | 26692 | 8.3   | 6.1   | 5.1   | 5.9   | 6.1   |
| 221452_s_at | NM_030969 | TMEM14B                   | 81853 | 570.3 | 498.9 | 604.0 | 533.3 | 423.0 |
| 221453_at   | NM_021176 | G6PC2                     | 57818 | 22.1  | 7.7   | 12.8  | 6.2   | 5.8   |
| 221454_at   | NM_014204 | -                         | -     | 1.1   | 2.7   | 0.7   | 0.7   | 1.0   |
| 221455_s_at | NM_030753 | LOC1019297 7473 /// 101   |       | 7.7   | 7.8   | 5.9   | 4.4   | 7.4   |
| 221456_at   | NM_016943 | TAS2R3                    | 50831 | 0.6   | 0.4   | 0.5   | 0.3   | 0.3   |
| 221457_s_at | NM_019602 | BTNL2                     | 56244 | 2.7   | 2.2   | 1.3   | 2.5   | 2.5   |
| 221458_at   | NM_000866 | HTR1F                     | 3355  | 14.5  | 3.8   | 7.9   | 8.8   | 7.9   |
| 221459_at   | NM_003967 | TAAR5                     | 9038  | 1.3   | 1.5   | 7.5   | 1.9   | 1.5   |
| 221460_at   | NM_012368 | OR2C1                     | 4993  | 16.2  | 15.3  | 11.4  | 16.7  | 10.5  |
| 221461_at   | NM_023917 | TAS2R9                    | 50835 | 6.5   | 3.8   | 2.3   | 1.3   | 5.2   |
| 221462_x_at | NM_017509 | KLK15                     | 55554 | 2.1   | 2.5   | 11.2  | 3.4   | 6.8   |
| 221463_at   | NM_002991 | CCL24                     | 6369  | 7.2   | 1.0   | 1.5   | 2.0   | 0.8   |
| 221464_at   | NM_002548 | OR1D2                     | 4991  | 19.7  | 13.2  | 18.3  | 19.8  | 14.0  |
| 221465_at   | NM_003696 | OR6A2                     | 8590  | 9.2   | 2.1   | 11.4  | 6.2   | 1.7   |

|             |           |            |                    |        |        |        |        |        |
|-------------|-----------|------------|--------------------|--------|--------|--------|--------|--------|
| 221466_at   | NM_002565 | P2RY4      | 5030               | 13.6   | 9.5    | 12.1   | 9.3    | 10.0   |
| 221467_at   | NM_005912 | MC4R       | 4160               | 13.8   | 1.2    | 10.4   | 9.7    | 4.9    |
| 221468_at   | NM_005283 | XCR1       | 2829               | 2.2    | 0.9    | 4.2    | 0.7    | 2.1    |
| 221469_at   | NM_001506 | GPR32      | 2854               | 2.4    | 2.5    | 1.9    | 4.2    | 1.3    |
| 221470_s_at | NM_014439 | IL37       | 27178              | 0.9    | 0.4    | 0.6    | 1.0    | 0.9    |
| 221471_at   | AW173623  | SERINC3    | 10955              | 337.9  | 288.3  | 265.8  | 300.1  | 228.9  |
| 221472_at   | Z97053    | SERINC3    | 10955              | 101.3  | 101.7  | 105.6  | 113.6  | 75.9   |
| 221473_x_at | U49188    | SERINC3    | 10955              | 220.6  | 203.6  | 177.5  | 238.7  | 149.9  |
| 221474_at   | U26162    | MYL12B     | 103910             | 1098.9 | 917.4  | 1107.4 | 1023.1 | 893.6  |
| 221475_s_at | NM_002948 | RPL15      | 6138               | 3372.7 | 2731.5 | 3309.6 | 3149.0 | 2839.7 |
| 221476_s_at | AF279903  | RPL15      | 6138               | 1124.1 | 1169.0 | 1265.0 | 1179.4 | 978.5  |
| 221477_s_at | BF575213  | LOC1001295 | 6648 /// 100       | 35.2   | 16.7   | 32.8   | 27.0   | 26.6   |
| 221478_at   | AL132665  | BNIP3L     | 665                | 174.5  | 163.1  | 164.7  | 171.3  | 119.5  |
| 221479_s_at | AF060922  | BNIP3L     | 665                | 211.6  | 218.0  | 217.2  | 245.8  | 165.0  |
| 221480_at   | BG180941  | HNRNPD     | 3184               | 44.4   | 30.3   | 47.4   | 37.1   | 34.0   |
| 221481_x_at | D55672    | HNRNPD     | 3184               | 735.3  | 560.2  | 793.4  | 621.0  | 639.4  |
| 221482_s_at | BC003418  | ARPP19     | 10776              | 272.9  | 199.1  | 293.3  | 215.6  | 202.0  |
| 221483_s_at | AF084555  | ARPP19     | 10776              | 403.7  | 309.7  | 420.8  | 321.7  | 343.4  |
| 221484_at   | BF691447  | B4GALT5    | 9334               | 125.8  | 109.6  | 141.1  | 128.3  | 104.9  |
| 221485_at   | AL035683  | B4GALT5    | 9334               | 105.7  | 81.3   | 108.0  | 76.1   | 84.8   |
| 221486_at   | AF067170  | ENSA       | 2029               | 203.4  | 156.2  | 191.7  | 166.6  | 162.1  |
| 221487_s_at | AF157510  | ENSA       | 2029               | 162.8  | 162.0  | 156.7  | 170.1  | 141.1  |
| 221488_s_at | AF230924  | CUTA       | 51596              | 790.6  | 836.0  | 844.9  | 828.2  | 631.7  |
| 221489_s_at | W48843    | SPRY4      | 81848              | 18.6   | 6.8    | 10.8   | 3.3    | 13.2   |
| 221490_at   | AL136733  | UBAP1      | 51271              | 133.5  | 117.8  | 139.2  | 111.7  | 88.6   |
| 221491_x_at | AA807056  | HLA-DQB1   | // 3119 /// 312    | 1.0    | 4.9    | 4.6    | 2.1    | 5.5    |
| 221492_s_at | AF202092  | ATG3       | 64422              | 372.0  | 285.6  | 376.7  | 316.9  | 265.3  |
| 221493_at   | AL136629  | TSPYL1     | 7259               | 857.6  | 663.3  | 736.0  | 723.7  | 579.3  |
| 221494_x_at | AF085358  | EIF3K      | 27335              | 948.7  | 1009.2 | 1058.7 | 939.9  | 869.6  |
| 221495_s_at | AF322111  | TCF25      | 22980              | 332.5  | 359.1  | 364.1  | 425.2  | 310.9  |
| 221496_s_at | D64109    | TOB2       | 10766              | 3.4    | 10.2   | 9.8    | 18.5   | 14.6   |
| 221497_x_at | BC005369  | EGLN1      | 54583              | 41.4   | 34.7   | 33.9   | 29.4   | 31.5   |
| 221498_at   | BF939727  | SNX27      | 81609              | 89.2   | 56.2   | 66.4   | 59.4   | 54.3   |
| 221499_s_at | AK026970  | STX16      | 8675               | 42.6   | 52.9   | 46.2   | 44.9   | 38.3   |
| 221500_s_at | BE782754  | STX16      | 8675               | 94.2   | 76.1   | 92.5   | 72.4   | 72.9   |
| 221501_x_at | AF229069  | LOC1019300 | 9284 /// 339       | 117.3  | 120.1  | 98.5   | 90.7   | 54.3   |
| 221502_at   | AL120704  | KPNA3      | 3839               | 90.7   | 83.1   | 109.5  | 73.8   | 93.2   |
| 221503_s_at | AF034756  | KPNA3      | 3839               | 39.1   | 31.8   | 35.6   | 34.6   | 31.2   |
| 221504_s_at | AF112204  | ATP6V1H    | 51606              | 229.0  | 220.6  | 247.8  | 238.4  | 202.7  |
| 221505_at   | AW612574  | ANP32E     | 81611              | 132.0  | 102.9  | 137.9  | 125.1  | 99.0   |
| 221506_s_at | BG258639  | TNPO2      | 30000              | 264.2  | 244.4  | 305.6  | 259.8  | 258.3  |
| 221507_at   | BG258639  | TNPO2      | 30000              | 183.3  | 161.0  | 209.0  | 161.5  | 148.6  |
| 221508_at   | AF181985  | TAOK3      | 51347              | 17.1   | 13.2   | 16.5   | 19.8   | 14.7   |
| 221509_at   | AB014731  | DENR       | 8562               | 245.0  | 199.3  | 246.0  | 224.3  | 207.4  |
| 221510_s_at | AF158555  | GLS        | 2744               | 49.3   | 28.9   | 48.9   | 37.0   | 37.4   |
| 221511_x_at | AB033080  | CCPG1      | /// D\9236 /// 100 | 17.6   | 33.2   | 32.1   | 26.1   | 16.8   |
| 221512_at   | AL136683  | TMEM222    | 84065              | 163.6  | 145.5  | 168.9  | 155.5  | 141.3  |
| 221513_s_at | BC001149  | ALG11      | /// U\9724 /// 108 | 94.7   | 68.6   | 98.3   | 70.6   | 77.0   |
| 221514_at   | BC001149  | UTP14A     | 10813              | 85.2   | 81.8   | 93.7   | 77.1   | 92.1   |
| 221515_s_at | BC001214  | LCMT1      | 51451              | 115.7  | 130.9  | 139.6  | 161.8  | 118.1  |
| 221516_s_at | BC002587  | MIEF1      | 54471              | 162.3  | 132.9  | 160.2  | 123.3  | 128.0  |
| 221517_s_at | AF105421  | MED17      | 9440               | 158.4  | 136.2  | 169.7  | 148.5  | 132.5  |
| 221518_s_at | BE966019  | USP47      | 55031              | 125.3  | 101.8  | 104.5  | 115.7  | 73.4   |

|             |          |                          |       |       |       |       |       |       |
|-------------|----------|--------------------------|-------|-------|-------|-------|-------|-------|
| 221519_at   | AF281859 | FBXW4                    | 6468  | 137.8 | 118.4 | 126.3 | 128.4 | 96.7  |
| 221520_s_at | BC001651 | CDCA8                    | 55143 | 208.2 | 181.5 | 256.5 | 184.5 | 183.2 |
| 221521_s_at | BC003186 | GINS2                    | 51659 | 190.5 | 152.8 | 270.3 | 185.7 | 204.7 |
| 221522_at   | AL136784 | ANKRD27                  | 84079 | 105.5 | 84.6  | 131.6 | 105.5 | 94.8  |
| 221523_s_at | AL138717 | RRAGD                    | 58528 | 35.5  | 28.1  | 38.0  | 29.6  | 30.5  |
| 221524_s_at | AF272036 | RRAGD                    | 58528 | 40.8  | 52.1  | 49.3  | 46.1  | 45.6  |
| 221525_at   | AL136572 | ZMIZ2                    | 83637 | 3.7   | 4.0   | 3.7   | 14.2  | 6.3   |
| 221526_x_at | AW452651 | PARD3                    | 56288 | 12.8  | 3.4   | 7.0   | 7.9   | 12.4  |
| 221527_s_at | AF196185 | PARD3                    | 56288 | 2.4   | 2.4   | 0.6   | 0.7   | 0.8   |
| 221528_s_at | BC000143 | ELMO2                    | 63916 | 69.2  | 62.4  | 76.8  | 73.4  | 60.6  |
| 221529_s_at | AF326591 | PLVAP                    | 83483 | 14.9  | 4.2   | 1.9   | 1.1   | 3.6   |
| 221530_s_at | BE857425 | BHLHE41                  | 79365 | 1.0   | 0.6   | 4.1   | 2.0   | 0.7   |
| 221531_at   | AF309553 | WDR61                    | 80349 | 317.5 | 220.8 | 304.8 | 244.5 | 203.3 |
| 221532_s_at | AF309553 | WDR61                    | 80349 | 593.9 | 513.6 | 607.1 | 496.5 | 401.6 |
| 221533_at   | AF250321 | FAM162A                  | 26355 | 18.8  | 8.5   | 15.3  | 10.1  | 10.6  |
| 221534_at   | AF073483 | C11orf68                 | 83638 | 117.9 | 139.6 | 131.2 | 122.3 | 102.4 |
| 221535_at   | AL136897 | LSG1                     | 55341 | 151.5 | 140.3 | 148.1 | 121.8 | 112.1 |
| 221536_s_at | AL136897 | LSG1                     | 55341 | 92.6  | 94.0  | 123.8 | 91.2  | 94.6  |
| 221537_at   | T16388   | PLXNA1                   | 5361  | 34.8  | 27.9  | 31.9  | 20.8  | 18.4  |
| 221538_s_at | AL136663 | PLXNA1                   | 5361  | 25.6  | 25.8  | 29.6  | 31.3  | 19.6  |
| 221539_at   | AB044548 | EIF4EBP1                 | 1978  | 705.9 | 648.1 | 752.5 | 700.8 | 616.6 |
| 221540_x_at | AF078847 | GTF2H2 /// C2966 /// 653 |       | 440.6 | 254.0 | 377.4 | 325.9 | 268.2 |
| 221541_at   | AL136861 | CRISPLD2                 | 83716 | 31.8  | 35.6  | 29.6  | 27.4  | 22.6  |
| 221542_s_at | T90773   | ERLIN2                   | 11160 | 147.3 | 141.5 | 144.3 | 159.5 | 115.4 |
| 221543_s_at | AL442077 | ERLIN2                   | 11160 | 212.1 | 226.3 | 193.3 | 207.3 | 177.2 |
| 221544_s_at | BG339606 | MED16                    | 10025 | 22.6  | 54.4  | 32.9  | 38.8  | 40.9  |
| 221545_x_at | AF106934 | MED16                    | 10025 | 108.6 | 127.5 | 167.3 | 117.7 | 103.1 |
| 221546_at   | BC000794 | PRPF18                   | 8559  | 16.3  | 2.0   | 7.3   | 6.7   | 1.9   |
| 221547_at   | BC000794 | PRPF18                   | 8559  | 63.5  | 56.9  | 71.8  | 44.1  | 46.1  |
| 221548_s_at | AY024365 | ILKAP                    | 80895 | 106.8 | 113.9 | 110.4 | 100.5 | 92.2  |
| 221549_at   | AF337808 | GRWD1                    | 83743 | 42.7  | 32.6  | 60.0  | 37.9  | 23.3  |
| 221550_at   | BC002382 | COX15                    | 1355  | 83.7  | 91.7  | 95.5  | 92.9  | 77.7  |
| 221551_x_at | AB035172 | ST6GALNAC4               | 27090 | 29.0  | 43.7  | 45.1  | 41.8  | 28.9  |
| 221552_at   | BC001698 | ABHD6                    | 57406 | 38.0  | 40.7  | 47.4  | 47.2  | 40.1  |
| 221553_at   | AL136636 | MAGT1                    | 84061 | 120.5 | 120.7 | 132.2 | 120.9 | 111.0 |
| 221554_at   | AF308302 | STRADA                   | 92335 | 67.1  | 51.3  | 53.0  | 53.6  | 38.7  |
| 221555_x_at | AU145941 | CDC14B                   | 8555  | 26.1  | 18.1  | 25.5  | 12.8  | 16.7  |
| 221556_at   | BF792631 | CDC14B                   | 8555  | 19.4  | 20.9  | 24.4  | 25.0  | 16.6  |
| 221557_s_at | AI762816 | LEF1                     | 51176 | 3.2   | 3.1   | 2.4   | 1.7   | 1.8   |
| 221558_s_at | AF288571 | LEF1                     | 51176 | 16.2  | 21.5  | 6.5   | 12.5  | 9.1   |
| 221559_s_at | BC000229 | MIS12                    | 79003 | 168.2 | 147.8 | 200.2 | 160.1 | 140.3 |
| 221560_at   | AB049127 | MARK4                    | 57787 | 6.7   | 3.0   | 3.5   | 19.8  | 6.1   |
| 221561_at   | L21934   | SOAT1                    | 6646  | 65.1  | 36.3  | 72.0  | 62.7  | 68.1  |
| 221562_s_at | AF083108 | SIRT3                    | 23410 | 57.2  | 44.0  | 54.9  | 41.6  | 37.2  |
| 221563_at   | N36770   | DUSP10                   | 11221 | 38.5  | 25.6  | 31.3  | 33.2  | 22.3  |
| 221564_at   | AL570294 | PRMT2                    | 3275  | 48.8  | 41.6  | 39.0  | 41.5  | 31.1  |
| 221565_s_at | BC000039 | CALHM2                   | 51063 | 14.7  | 1.5   | 1.7   | 0.7   | 1.2   |
| 221566_s_at | AF043244 | NOL3                     | 8996  | 61.4  | 47.9  | 68.2  | 77.5  | 55.4  |
| 221567_at   | AF064599 | NOL3                     | 8996  | 63.7  | 85.5  | 86.2  | 81.1  | 79.9  |
| 221568_s_at | AF090900 | LIN7C                    | 55327 | 117.6 | 110.7 | 124.4 | 104.9 | 93.2  |
| 221569_at   | AL136797 | AHI1                     | 54806 | 13.7  | 14.6  | 16.1  | 15.4  | 9.8   |
| 221570_s_at | AF201938 | METTL5                   | 29081 | 374.5 | 325.1 | 407.1 | 354.1 | 298.4 |
| 221571_at   | AI721219 | TRAF3                    | 7187  | 56.1  | 44.5  | 58.7  | 62.1  | 52.8  |

|             |          |                           |        |        |        |        |        |
|-------------|----------|---------------------------|--------|--------|--------|--------|--------|
| 221572_s_at | AF288410 | MIR6824 /// 65010 /// 10  | 30.4   | 33.7   | 38.7   | 30.7   | 21.8   |
| 221573_at   | BC000769 | C7orf25 /// F5683 /// 790 | 53.3   | 38.9   | 52.1   | 37.2   | 37.9   |
| 221575_at   | BC000586 | SCLY 51540                | 77.3   | 60.4   | 85.2   | 72.7   | 63.2   |
| 221576_at   | BC000529 | GDF15 9518                | 1.1    | 0.4    | 0.3    | 0.7    | 0.5    |
| 221577_x_at | AF003934 | GDF15 9518                | 605.4  | 703.0  | 630.6  | 650.7  | 484.5  |
| 221578_at   | AF260335 | RASSF4 83937              | 1.0    | 1.8    | 2.1    | 2.4    | 1.2    |
| 221579_s_at | AF062530 | NUDT3 /// RI11165 /// 10  | 150.6  | 122.0  | 153.2  | 150.3  | 112.5  |
| 221580_s_at | BC001972 | MIR1304 /// 79101 /// 65  | 132.7  | 120.3  | 145.5  | 118.0  | 111.9  |
| 221581_s_at | AF257135 | LAT2 7462                 | 12.9   | 0.8    | 2.5    | 1.2    | 3.2    |
| 221582_at   | BC001193 | HIST3H2A 92815            | 254.4  | 257.1  | 269.5  | 293.0  | 197.8  |
| 221583_s_at | AI129381 | KCNMA1 3778               | 11.3   | 8.3    | 12.3   | 6.8    | 9.2    |
| 221584_s_at | U11058   | KCNMA1 3778               | 38.5   | 48.4   | 66.7   | 22.5   | 44.5   |
| 221585_at   | BC004504 | CACNG4 27092              | 1.3    | 0.9    | 1.0    | 1.6    | 1.1    |
| 221586_s_at | U15642   | E2F5 1875                 | 19.3   | 21.7   | 23.4   | 27.3   | 25.9   |
| 221587_s_at | BC000890 | C19orf24 55009            | 210.3  | 241.2  | 296.1  | 274.3  | 262.5  |
| 221588_x_at | AI640855 | ALDH6A1 4329              | 177.4  | 185.5  | 188.7  | 215.5  | 139.5  |
| 221589_s_at | AW612403 | ALDH6A1 4329              | 204.4  | 221.5  | 214.7  | 216.0  | 174.4  |
| 221590_s_at | AF130089 | ALDH6A1 4329              | 66.5   | 57.1   | 74.8   | 74.7   | 55.6   |
| 221591_s_at | BC005004 | FAM64A 54478              | 199.2  | 146.3  | 256.1  | 166.2  | 213.8  |
| 221592_at   | BC001663 | TBC1D8 11138              | 2.0    | 1.6    | 1.2    | 0.9    | 1.3    |
| 221593_s_at | BC001663 | RPL31 6160                | 50.4   | 40.6   | 61.9   | 52.4   | 28.2   |
| 221594_at   | AL136619 | RBM48 84060               | 13.5   | 8.4    | 11.8   | 9.1    | 5.0    |
| 221595_at   | AL527334 | RBM48 84060               | 11.1   | 14.3   | 20.2   | 10.4   | 17.1   |
| 221596_s_at | AL136619 | RBM48 84060               | 60.7   | 49.3   | 67.1   | 52.7   | 52.8   |
| 221597_s_at | BC003080 | TMEM208 29100             | 295.1  | 295.8  | 325.5  | 321.7  | 279.4  |
| 221598_s_at | BC002878 | MED27 9442                | 67.9   | 57.7   | 72.4   | 81.8   | 64.0   |
| 221599_at   | BC002752 | AAMDC 28971               | 47.5   | 56.3   | 63.1   | 58.8   | 37.8   |
| 221600_s_at | BC002752 | AAMDC 28971               | 42.1   | 38.0   | 38.5   | 57.6   | 32.1   |
| 221601_s_at | AI084226 | FAIM3 9214                | 18.9   | 18.3   | 20.2   | 15.5   | 8.3    |
| 221602_s_at | AF057557 | FAIM3 9214                | 4.2    | 3.5    | 4.1    | 3.2    | 1.7    |
| 221603_at   | BC000467 | PEX16 9409                | 24.8   | 12.8   | 12.5   | 17.5   | 1.6    |
| 221604_s_at | AB016531 | PEX16 9409                | 67.3   | 91.1   | 86.3   | 86.8   | 76.7   |
| 221605_s_at | AF136970 | PIPOX 51268               | 12.3   | 21.6   | 13.3   | 21.0   | 12.6   |
| 221606_s_at | BC005342 | HMGNS5 79366              | 47.2   | 27.7   | 44.3   | 40.5   | 27.8   |
| 221607_x_at | BC001920 | ACTB /// ACT160 /// 71    | 3135.2 | 3077.8 | 3362.9 | 3206.6 | 2973.9 |
| 221608_at   | AY009401 | WNT6 7475                 | 0.6    | 2.0    | 0.7    | 0.9    | 0.4    |
| 221609_s_at | AY009401 | WNT6 7475                 | 0.7    | 1.3    | 1.9    | 2.5    | 4.4    |
| 221610_s_at | BC000795 | STAP2 55620               | 201.1  | 224.8  | 187.2  | 227.1  | 159.0  |
| 221611_s_at | AY014283 | PHF7 51533                | 20.0   | 14.6   | 18.8   | 19.6   | 19.7   |
| 221612_at   | AF225421 | LRTM1 57408               | 8.0    | 12.0   | 8.0    | 12.9   | 8.1    |
| 221613_s_at | AL136598 | ZFAND6 54469              | 277.6  | 223.4  | 300.3  | 271.3  | 201.7  |
| 221614_s_at | BC005153 | RPH3AL 9501               | 35.2   | 29.7   | 21.3   | 30.6   | 20.8   |
| 221615_at   | AF104013 | BMP8B 656                 | 16.2   | 4.4    | 15.7   | 7.3    | 5.9    |
| 221616_s_at | AF077053 | TAF9B 51616               | 9.5    | 3.6    | 10.4   | 9.2    | 10.0   |
| 221617_at   | AF077053 | TAF9B 51616               | 14.9   | 9.0    | 11.3   | 8.3    | 7.9    |
| 221618_s_at | AF220509 | TAF9B 51616               | 119.7  | 87.2   | 78.5   | 79.4   | 76.7   |
| 221619_s_at | AF189289 | MTCH1 23787               | 961.9  | 871.5  | 1015.1 | 959.0  | 818.0  |
| 221620_s_at | AF061264 | APOO 79135                | 274.8  | 194.5  | 255.5  | 205.5  | 198.6  |
| 221621_at   | AF130050 | MIR6516 /// 654434 /// 6  | 30.8   | 23.7   | 31.6   | 34.4   | 21.9   |
| 221622_s_at | AF246240 | TMEM126B 55863            | 332.3  | 258.0  | 328.1  | 259.0  | 247.8  |
| 221623_at   | AF229053 | BCAN 63827                | 0.9    | 2.4    | 5.6    | 0.2    | 0.3    |
| 221624_at   | AF195821 | TCL6 27004                | 6.3    | 4.2    | 2.3    | 3.4    | 0.7    |
| 221625_at   | AL136548 | - -                       | 4.2    | 6.1    | 1.7    | 3.8    | 1.1    |

|             |          |            |                       |       |       |       |       |       |
|-------------|----------|------------|-----------------------|-------|-------|-------|-------|-------|
| 221626_at   | AL136548 | ZNF506     | 440515                | 11.2  | 11.0  | 16.9  | 13.7  | 9.5   |
| 221627_at   | AF220123 | TRIM10     | 10107                 | 15.2  | 13.3  | 14.2  | 6.7   | 8.2   |
| 221628_s_at | AF326966 | GLYR1      | 84656                 | 43.6  | 34.9  | 38.3  | 35.4  | 31.1  |
| 221629_x_at | AF151022 | HGH1       | 51236                 | 93.6  | 77.0  | 111.8 | 80.3  | 66.3  |
| 221630_s_at | AY004154 | DDX4       | 54514                 | 0.6   | 0.5   | 1.0   | 0.6   | 0.4   |
| 221631_at   | AB032946 | CACNA1I    | 8911                  | 15.1  | 2.6   | 15.5  | 14.8  | 16.3  |
| 221632_s_at | BC001074 | WDR4       | 10785                 | 24.3  | 18.7  | 28.1  | 16.6  | 23.6  |
| 221633_at   | BC000473 | NCAPH2     | 29781                 | 12.8  | 6.2   | 15.3  | 9.5   | 13.2  |
| 221634_at   | BC000596 | CENPBD1P1  | 65996 /// 11          | 65.2  | 48.1  | 50.6  | 57.3  | 28.2  |
| 221636_s_at | AL136931 | MARC2      | 54996                 | 135.7 | 105.7 | 137.3 | 110.3 | 117.7 |
| 221637_s_at | BC001434 | C11orf48   | /// 79081 /// 10      | 401.0 | 310.1 | 434.6 | 355.5 | 349.0 |
| 221638_s_at | AF008937 | STX16      | 8675                  | 20.7  | 22.4  | 26.4  | 22.8  | 18.8  |
| 221639_x_at | AF068846 | LOC1027235 | 102723559             | 1.0   | 5.8   | 9.2   | 1.1   | 8.8   |
| 221640_s_at | AF274972 | PIDD1      | 55367                 | 7.6   | 17.7  | 30.3  | 19.7  | 10.4  |
| 221641_s_at | AF241787 | ACOT9      | 23597                 | 108.0 | 77.5  | 99.3  | 88.8  | 55.0  |
| 221642_at   | BC002903 | -          | -                     | 23.5  | 15.1  | 19.4  | 18.0  | 12.7  |
| 221643_s_at | AF016005 | RERE       | 473                   | 5.0   | 5.5   | 1.2   | 7.2   | 5.2   |
| 221644_s_at | BC003597 | SLC45A2    | 51151                 | 0.8   | 2.0   | 2.7   | 0.9   | 0.9   |
| 221645_s_at | M27877   | ZNF83      | 55769                 | 37.7  | 29.9  | 51.3  | 38.6  | 34.4  |
| 221646_s_at | AF267859 | ZDHHC11    | /// 79844 /// 65      | 34.5  | 23.5  | 22.9  | 31.0  | 14.0  |
| 221647_s_at | AL136935 | MIR6743    | /// 60626 /// 10      | 189.8 | 214.8 | 214.4 | 207.0 | 191.5 |
| 221648_s_at | AK025651 | AGMAT      | 79814                 | 10.1  | 5.3   | 5.9   | 4.1   | 5.8   |
| 221649_s_at | BC000535 | PPAN       | /// PP/ 56342 /// 69  | 185.3 | 124.6 | 246.2 | 205.4 | 161.8 |
| 221650_s_at | BC002694 | LOC1009967 | 54797 /// 10          | 36.9  | 37.6  | 34.0  | 28.3  | 19.2  |
| 221651_x_at | BC005332 | IGK        | /// IGKC 3514 /// 508 | 6.6   | 3.3   | 15.5  | 15.9  | 5.4   |
| 221652_s_at | AF274950 | ASUN       | 55726                 | 198.0 | 166.4 | 239.8 | 156.9 | 195.7 |
| 221653_x_at | BC004395 | APOL2      | 23780                 | 9.6   | 17.7  | 20.4  | 22.5  | 13.4  |
| 221654_s_at | AF077040 | USP3       | 9960                  | 213.0 | 177.1 | 190.3 | 176.8 | 133.1 |
| 221655_x_at | AF282167 | EPS8L1     | 54869                 | 15.4  | 7.0   | 2.8   | 9.5   | 9.9   |
| 221656_s_at | BC003073 | ARHGEF10L  | 55160                 | 19.5  | 28.2  | 17.1  | 20.3  | 23.3  |
| 221657_s_at | BC001719 | ASB6       | 140459                | 36.0  | 34.4  | 36.2  | 41.6  | 19.8  |
| 221658_s_at | AF269133 | IL21R      | 50615                 | 2.3   | 4.5   | 1.6   | 1.4   | 1.3   |
| 221659_s_at | BC002778 | MYL10      | 93408                 | 13.1  | 9.8   | 13.0  | 10.5  | 5.8   |
| 221660_at   | BC002778 | MYL10      | 93408                 | 38.3  | 13.7  | 13.9  | 38.3  | 30.3  |
| 221661_at   | AF210455 | SLC22A7    | 10864                 | 2.2   | 1.4   | 7.7   | 2.1   | 1.6   |
| 221662_s_at | AF210455 | SLC22A7    | 10864                 | 13.9  | 8.9   | 17.1  | 9.6   | 6.7   |
| 221663_x_at | AB045369 | HRH3       | 11255                 | 1.7   | 4.6   | 3.5   | 4.4   | 6.1   |
| 221664_s_at | AF154005 | F11R       | 50848                 | 119.6 | 140.2 | 136.9 | 148.4 | 119.9 |
| 221665_s_at | BC004907 | EPS8L1     | 54869                 | 10.8  | 7.3   | 0.7   | 4.2   | 2.5   |
| 221666_s_at | BC004470 | PYCARD     | 29108                 | 0.5   | 0.5   | 5.1   | 0.6   | 0.7   |
| 221667_s_at | AF133207 | HSPB8      | 26353                 | 14.8  | 17.0  | 9.1   | 19.0  | 9.1   |
| 221668_s_at | AF250288 | DNAI2      | 64446                 | 7.9   | 0.4   | 2.0   | 8.7   | 0.8   |
| 221669_s_at | BC001964 | ACAD8      | 27034                 | 86.4  | 91.1  | 103.4 | 101.3 | 80.2  |
| 221670_s_at | AF156888 | LHX3       | 8022                  | 21.7  | 18.6  | 14.0  | 2.1   | 14.2  |
| 221671_x_at | M63438   | IGK        | /// IGKC 3514 /// 508 | 4.8   | 4.5   | 5.6   | 3.2   | 9.9   |
| 221672_s_at | BC003650 | TRAPPC9    | 83696                 | 7.4   | 14.0  | 9.6   | 1.8   | 2.8   |
| 221673_s_at | AB042563 | CSNK1G1    | 53944                 | 11.4  | 14.5  | 15.2  | 10.1  | 7.5   |
| 221674_s_at | AF209929 | CHRD       | 8646                  | 5.9   | 1.3   | 4.2   | 1.5   | 3.3   |
| 221675_s_at | AF195624 | CHPT1      | 56994                 | 829.8 | 753.2 | 880.4 | 850.1 | 735.2 |
| 221676_s_at | BC002342 | CORO1C     | 23603                 | 162.3 | 176.1 | 188.1 | 158.4 | 145.5 |
| 221677_s_at | AF232674 | DONSON     | 29980                 | 53.8  | 40.7  | 67.7  | 36.5  | 48.4  |
| 221678_at   | AF225418 | ABHD6      | 57406                 | 1.9   | 6.6   | 4.4   | 1.0   | 0.9   |
| 221679_s_at | AF225418 | ABHD6      | 57406                 | 36.2  | 32.1  | 35.6  | 36.8  | 31.3  |

|             |           |          |        |        |        |        |        |        |
|-------------|-----------|----------|--------|--------|--------|--------|--------|--------|
| 221680_s_at | AF147782  | ETV7     | 51513  | 18.2   | 8.1    | 15.0   | 8.1    | 9.2    |
| 221681_s_at | AF094508  | DSPP     | 1834   | 12.9   | 7.3    | 11.5   | 7.3    | 5.0    |
| 221682_s_at | AF135156  | PCDHGB6  | 56100  | 1.9    | 4.8    | 6.8    | 7.9    | 2.0    |
| 221683_s_at | AF317887  | CEP290   | 80184  | 7.8    | 6.4    | 6.2    | 0.8    | 0.4    |
| 221684_s_at | AF254868  | NYX      | 60506  | 9.4    | 6.1    | 1.0    | 3.4    | 9.3    |
| 221685_s_at | AF269167  | SPDL1    | 54908  | 102.8  | 71.0   | 131.5  | 74.5   | 79.8   |
| 221686_s_at | AL136869  | RECQL5   | 9400   | 20.6   | 24.6   | 27.5   | 31.4   | 29.8   |
| 221687_s_at | BC000122  | MVB12B   | 89853  | 13.0   | 5.3    | 13.7   | 13.1   | 15.7   |
| 221688_s_at | AL136913  | IMP3     | 55272  | 453.9  | 482.0  | 578.2  | 459.9  | 537.5  |
| 221689_s_at | AB035745  | PIGP     | 51227  | 593.8  | 728.9  | 685.6  | 675.5  | 503.4  |
| 221690_s_at | AF298547  | NLRP2    | 55655  | 177.8  | 163.6  | 178.5  | 159.5  | 156.0  |
| 221691_x_at | AB042278  | NPM1     | 4869   | 1691.1 | 1566.0 | 1939.7 | 1569.1 | 1616.3 |
| 221692_s_at | AB049652  | MRPL34   | 64981  | 351.8  | 288.1  | 399.0  | 344.9  | 314.3  |
| 221693_s_at | AB049952  | MRPS18A  | 55168  | 137.1  | 100.9  | 108.6  | 116.3  | 102.5  |
| 221695_s_at | AF239798  | MAP3K2   | 10746  | 19.6   | 21.6   | 19.5   | 17.4   | 17.6   |
| 221696_s_at | AF251059  | STYK1    | 55359  | 34.0   | 28.6   | 30.3   | 29.1   | 25.4   |
| 221697_at   | AF276659  | MAP1LC3C | 440738 | 10.6   | 8.7    | 4.8    | 5.2    | 7.5    |
| 221698_s_at | AF313468  | CLEC7A   | 64581  | 12.8   | 8.7    | 10.3   | 6.6    | 15.6   |
| 221699_s_at | AF334103  | DDX50    | 79009  | 149.6  | 158.4  | 170.0  | 145.4  | 161.8  |
| 221700_s_at | AF348700  | UBA52    | 7311   | 2181.9 | 2257.6 | 2333.5 | 2333.2 | 2063.7 |
| 221701_s_at | AF352728  | STRA6    | 64220  | 11.1   | 11.0   | 5.9    | 13.2   | 9.4    |
| 221702_s_at | AF353992  | TM2D3    | 80213  | 183.3  | 182.2  | 237.1  | 181.2  | 165.7  |
| 221703_at   | AF360549  | BRIP1    | 83990  | 22.6   | 10.2   | 19.9   | 13.5   | 12.7   |
| 221704_s_at | BC005882  | VPS37B   | 79720  | 86.6   | 81.9   | 95.1   | 92.9   | 89.6   |
| 221705_s_at | BC005934  | SIKE1    | 80143  | 26.8   | 27.1   | 27.4   | 23.0   | 28.4   |
| 221706_s_at | BC006005  | USE1     | 55850  | 78.3   | 64.2   | 79.7   | 82.4   | 74.3   |
| 221707_s_at | BC006116  | VPS53    | 55275  | 12.7   | 10.7   | 16.6   | 12.7   | 8.0    |
| 221708_s_at | BC006214  | UNC45A   | 55898  | 129.6  | 154.4  | 191.1  | 145.9  | 98.0   |
| 221709_s_at | BC006222  | ZNF839   | 55778  | 16.7   | 29.1   | 28.9   | 23.9   | 28.1   |
| 221710_x_at | BC006241  | EVA1B    | 55194  | 36.3   | 29.9   | 30.7   | 29.2   | 19.5   |
| 221711_s_at | BC006244  | BABAM1   | 29086  | 166.8  | 191.4  | 180.1  | 184.4  | 151.9  |
| 221712_s_at | BC006351  | WDR74    | 54663  | 220.0  | 217.9  | 298.0  | 240.3  | 272.7  |
| 221713_s_at | BC006434  | MAP6D1   | 79929  | 6.5    | 2.8    | 22.3   | 7.9    | 6.3    |
| 221714_s_at | BC006441  | RRN3P1   | 730092 | 2.3    | 2.6    | 3.3    | 1.2    | 6.4    |
| 221715_at   | Z25437    | -        | -      | 10.1   | 7.2    | 8.5    | 2.9    | 2.4    |
| 221716_s_at | AY009107  | ACSBG2   | 81616  | 1.4    | 1.5    | 9.2    | 4.5    | 1.4    |
| 221717_at   | L25664    | -        | -      | 11.2   | 6.7    | 12.8   | 2.9    | 3.5    |
| 221718_s_at | M90360    | AKAP13   | 11214  | 20.1   | 19.5   | 22.7   | 16.6   | 17.5   |
| 221719_s_at | AF123654  | LZTS1    | 11178  | 9.5    | 8.6    | 3.6    | 5.5    | 2.7    |
| 221720_s_at | L11573    | -        | -      | 0.9    | 0.6    | 1.1    | 1.5    | 0.5    |
| 221721_s_at | AF123656  | LZTS1    | 11178  | 0.3    | 0.2    | 0.3    | 0.3    | 0.2    |
| 221722_x_at | AF123652  | LZTS1    | 11178  | 0.5    | 0.4    | 0.5    | 0.5    | 0.3    |
| 221723_s_at | AF243499  | SLC4A5   | 57835  | 6.3    | 8.1    | 14.4   | 7.8    | 3.9    |
| 221724_s_at | AF200738  | CLEC4A   | 50856  | 1.3    | 1.1    | 0.7    | 0.7    | 0.9    |
| 221725_at   | AI962978  | WASF2    | 10163  | 142.8  | 127.4  | 167.6  | 171.3  | 149.4  |
| 221726_at   | BE250348  | RPL22    | 6146   | 533.0  | 502.9  | 520.2  | 505.6  | 430.2  |
| 221727_at   | AA456973  | SUB1     | 10923  | 102.3  | 73.7   | 108.7  | 90.1   | 93.4   |
| 221728_x_at | AA628440  | XIST     | 7503   | 7.6    | 1.1    | 7.8    | 7.4    | 5.6    |
| 221729_at   | AL575735  | COL5A2   | 1290   | 22.4   | 15.1   | 10.9   | 13.1   | 11.7   |
| 221730_at   | NM_000393 | COL5A2   | 1290   | 14.2   | 8.6    | 15.4   | 16.2   | 5.5    |
| 221731_x_at | BF218922  | VCAN     | 1462   | 4.9    | 9.8    | 8.1    | 4.8    | 5.2    |
| 221732_at   | AK026161  | CANT1    | 124583 | 186.2  | 202.4  | 243.9  | 221.4  | 195.4  |
| 221733_s_at | BE546897  | GPATCH4  | 54865  | 6.9    | 4.6    | 5.4    | 1.7    | 4.0    |

|             |          |                    |        |        |        |        |        |        |
|-------------|----------|--------------------|--------|--------|--------|--------|--------|--------|
| 221734_at   | BE328312 | PRRC1              | 133619 | 99.3   | 84.1   | 94.6   | 85.8   | 88.8   |
| 221735_at   | H04342   | WDR48              | 57599  | 30.0   | 29.8   | 36.3   | 32.9   | 23.9   |
| 221736_at   | AA156777 | RALGAPB            | 57148  | 56.5   | 52.4   | 49.0   | 48.0   | 37.1   |
| 221737_at   | AK024696 | GNA12              | 2768   | 44.8   | 29.6   | 50.0   | 42.9   | 29.9   |
| 221738_at   | BG236163 | RALGAPB            | 57148  | 28.1   | 21.4   | 35.3   | 27.2   | 22.3   |
| 221739_at   | AL524093 | C19orf10           | 56005  | 525.8  | 481.7  | 539.8  | 484.4  | 455.5  |
| 221740_x_at | AI140364 | DQ597730 // 474170 |        | 26.5   | 28.7   | 21.1   | 27.5   | 18.1   |
| 221741_s_at | AL096828 | YTHDF1             | 54915  | 225.6  | 216.7  | 267.4  | 240.9  | 210.2  |
| 221742_at   | BF037823 | CELF1              | 10658  | 53.3   | 53.3   | 58.9   | 65.5   | 57.4   |
| 221743_at   | AI472139 | CELF1              | 10658  | 286.5  | 274.4  | 338.0  | 287.4  | 283.1  |
| 221744_at   | AK026008 | DCAF7              | 10238  | 94.5   | 83.1   | 97.1   | 93.1   | 80.2   |
| 221745_at   | BE538424 | DCAF7              | 10238  | 126.1  | 113.8  | 128.7  | 113.7  | 98.8   |
| 221746_at   | BE543027 | UBL4A              | 8266   | 155.6  | 148.3  | 139.3  | 89.1   | 116.4  |
| 221747_at   | AL046979 | TNS1               | 7145   | 7.4    | 1.1    | 7.7    | 2.4    | 5.3    |
| 221748_s_at | AL046979 | TNS1               | 7145   | 6.0    | 5.3    | 4.4    | 1.7    | 8.0    |
| 221749_at   | AU157915 | YTHDF3             | 253943 | 204.1  | 150.8  | 166.6  | 155.1  | 124.8  |
| 221750_at   | BG035985 | HMGCS1             | 3157   | 58.4   | 47.3   | 70.4   | 55.5   | 47.6   |
| 221751_at   | AL565516 | PANK3              | 79646  | 170.7  | 136.1  | 162.9  | 144.3  | 127.2  |
| 221752_at   | AL041728 | SSH1               | 54434  | 42.8   | 33.2   | 36.4   | 33.0   | 34.0   |
| 221753_at   | AI651213 | SSH1               | 54434  | 35.3   | 33.2   | 39.0   | 33.7   | 44.0   |
| 221754_s_at | AI341234 | CORO1B             | 57175  | 39.4   | 47.7   | 50.1   | 47.6   | 51.4   |
| 221755_at   | BG334196 | EHBP1L1            | 254102 | 0.8    | 0.8    | 0.6    | 0.6    | 0.5    |
| 221756_at   | AL540260 | PIK3IP1            | 113791 | 34.2   | 17.6   | 25.0   | 23.7   | 16.7   |
| 221757_at   | BE042976 | PIK3IP1            | 113791 | 49.7   | 34.3   | 44.9   | 46.7   | 25.2   |
| 221758_at   | BC003700 | ARMC6              | 93436  | 66.4   | 51.9   | 51.2   | 46.7   | 47.5   |
| 221759_at   | AL583123 | G6PC3              | 92579  | 183.1  | 199.0  | 217.9  | 180.1  | 160.6  |
| 221760_at   | BG287153 | MAN1A1             | 4121   | 14.8   | 15.5   | 7.3    | 12.8   | 3.4    |
| 221761_at   | AA628948 | ADSS               | 159    | 108.9  | 90.8   | 126.8  | 91.3   | 112.9  |
| 221762_s_at | AL162458 | PCIF1              | 63935  | 64.9   | 81.0   | 59.3   | 69.3   | 44.0   |
| 221763_at   | AI694023 | JMJD1C             | 221037 | 39.3   | 27.2   | 34.0   | 34.3   | 26.0   |
| 221764_at   | AL574186 | R3HDM4             | 91300  | 112.2  | 81.4   | 143.3  | 133.7  | 89.6   |
| 221765_at   | AI378044 | UGCG               | 7357   | 14.3   | 10.7   | 17.6   | 10.8   | 13.0   |
| 221766_s_at | AW246673 | FAM46A             | 55603  | 1.1    | 2.3    | 5.1    | 7.2    | 1.2    |
| 221767_x_at | AA515560 | HDLBP              | 3069   | 338.5  | 510.3  | 380.9  | 423.4  | 450.6  |
| 221768_at   | AV705803 | SFPQ               | 6421   | 44.7   | 36.5   | 42.7   | 47.2   | 28.5   |
| 221769_at   | AL571723 | SPSB3              | 90864  | 19.6   | 21.8   | 22.3   | 20.2   | 19.4   |
| 221770_at   | BE964473 | RPE                | 6120   | 50.4   | 43.3   | 65.8   | 38.2   | 40.1   |
| 221771_s_at | BC003542 | MPHOSPH8           | 54737  | 49.2   | 45.3   | 53.9   | 50.5   | 42.3   |
| 221772_s_at | AI138993 | PPP2R2D            | 55844  | 66.7   | 56.3   | 93.1   | 66.2   | 58.5   |
| 221773_at   | AW575374 | ELK3               | 2004   | 18.3   | 17.5   | 17.5   | 19.4   | 9.6    |
| 221774_x_at | AW003334 | SUPT20H            | 55578  | 27.7   | 36.9   | 52.3   | 38.1   | 27.1   |
| 221775_x_at | BG152979 | RPL22              | 6146   | 1652.7 | 1609.2 | 1715.6 | 1516.5 | 1353.3 |
| 221776_s_at | AI885109 | BRD7               | 29117  | 93.5   | 107.4  | 120.1  | 102.9  | 81.7   |
| 221777_at   | BE966197 | RITA1              | 84934  | 217.4  | 154.3  | 134.5  | 171.8  | 144.5  |
| 221778_at   | BE217882 | KDM7A              | 80853  | 16.8   | 21.6   | 17.6   | 24.5   | 12.5   |
| 221779_at   | BC001090 | MICALL1            | 85377  | 14.4   | 37.6   | 14.1   | 34.8   | 29.4   |
| 221780_s_at | AF336851 | DDX27              | 55661  | 63.1   | 63.6   | 67.0   | 64.8   | 93.1   |
| 221781_s_at | BG168666 | DNAJC10            | 54431  | 29.9   | 41.4   | 38.6   | 34.6   | 40.4   |
| 221782_at   | BG168666 | DNAJC10            | 54431  | 46.6   | 39.0   | 44.3   | 43.0   | 35.2   |
| 221783_at   | W67467   | WIZ                | 58525  | 69.0   | 64.2   | 50.2   | 55.6   | 55.4   |
| 221784_at   | AI089655 | WIZ                | 58525  | 2.1    | 2.0    | 4.2    | 2.0    | 1.6    |
| 221785_at   | AI828531 | WIZ                | 58525  | 27.0   | 28.8   | 34.0   | 31.6   | 17.6   |
| 221786_at   | BF197222 | C6orf120           | 387263 | 115.4  | 98.4   | 146.0  | 95.4   | 98.7   |

|             |           |                          |        |        |        |        |        |        |
|-------------|-----------|--------------------------|--------|--------|--------|--------|--------|--------|
| 221787_at   | BF431618  | C6orf120                 | 387263 | 78.6   | 72.0   | 81.1   | 59.2   | 67.0   |
| 221788_at   | AV727934  | PGM3                     | 5238   | 11.5   | 13.6   | 14.9   | 13.3   | 13.5   |
| 221789_x_at | AK024450  | RHOT2                    | 89941  | 41.1   | 44.8   | 50.5   | 40.1   | 40.9   |
| 221790_s_at | AL545035  | LDLRAP1                  | 26119  | 40.1   | 37.5   | 34.3   | 43.8   | 41.4   |
| 221791_s_at | BG167522  | TMA7                     | 51372  | 2487.0 | 2152.6 | 2707.2 | 2368.4 | 2371.4 |
| 221792_at   | AW118072  | RAB6B                    | 51560  | 28.9   | 24.8   | 19.3   | 21.0   | 17.6   |
| 221793_at   | BE531136  | DOCK6                    | 57572  | 1.3    | 3.1    | 1.3    | 0.6    | 4.7    |
| 221794_at   | AI198543  | DOCK6                    | 57572  | 30.2   | 31.9   | 21.4   | 41.9   | 22.2   |
| 221795_at   | AI346341  | NTRK2                    | 4915   | 1.2    | 1.7    | 1.5    | 8.4    | 4.7    |
| 221796_at   | AA707199  | NTRK2                    | 4915   | 0.7    | 0.8    | 4.2    | 0.9    | 2.1    |
| 221797_at   | AY007126  | OXLD1                    | 339229 | 134.4  | 108.8  | 143.0  | 141.1  | 126.3  |
| 221798_x_at | AI183766  | RP5-88207.1-             |        | 4380.6 | 3968.5 | 4222.9 | 4135.8 | 4064.0 |
| 221799_at   | AB037823  | CHPF2                    | 54480  | 21.3   | 20.4   | 29.6   | 30.0   | 24.4   |
| 221800_s_at | AA551370  | C17orf70                 | 80233  | 54.9   | 53.8   | 59.2   | 66.7   | 45.1   |
| 221801_x_at | AL566528  | NEFL                     | 4747   | 9.7    | 1.2    | 3.7    | 12.4   | 11.0   |
| 221802_s_at | AU157109  | KIAA1598                 | 57698  | 186.1  | 152.9  | 161.7  | 154.3  | 127.1  |
| 221803_s_at | AA883074  | NRBF2                    | 29982  | 37.0   | 31.8   | 40.5   | 33.2   | 25.1   |
| 221804_s_at | BE565675  | FAM45A /// 155855 /// 40 |        | 257.0  | 255.9  | 269.6  | 234.9  | 199.0  |
| 221805_at   | AL537457  | NEFL                     | 4747   | 42.0   | 35.6   | 47.5   | 43.9   | 28.6   |
| 221806_s_at | BF590997  | SETD5                    | 55209  | 122.5  | 123.2  | 125.3  | 143.4  | 118.1  |
| 221807_s_at | BG399562  | TRABD                    | 80305  | 62.5   | 54.1   | 76.7   | 62.6   | 53.6   |
| 221808_at   | NM_004251 | RAB9A                    | 9367   | 179.0  | 123.6  | 174.6  | 180.5  | 120.9  |
| 221809_at   | AB040897  | RANBP10                  | 57610  | 40.3   | 38.9   | 32.0   | 36.5   | 34.5   |
| 221810_at   | AA631242  | RAB15                    | 376267 | 59.1   | 47.5   | 40.5   | 46.9   | 32.6   |
| 221811_at   | BF033007  | PGAP3                    | 93210  | 15.2   | 17.7   | 20.4   | 21.1   | 3.4    |
| 221812_at   | AK025059  | FBXO42                   | 54455  | 24.3   | 20.0   | 10.8   | 16.8   | 10.7   |
| 221813_at   | AI129395  | FBXO42                   | 54455  | 56.6   | 51.7   | 53.2   | 45.5   | 32.3   |
| 221814_at   | BF511315  | GPR124                   | 25960  | 11.3   | 5.3    | 4.5    | 6.6    | 13.1   |
| 221815_at   | BE671816  | ABHD2                    | 11057  | 38.4   | 40.3   | 47.1   | 35.3   | 46.7   |
| 221816_s_at | BF055474  | PHF11                    | 51131  | 1.7    | 1.3    | 2.3    | 1.1    | 0.8    |
| 221817_at   | AI684664  | DOLPP1                   | 57171  | 193.9  | 177.9  | 218.3  | 155.9  | 147.9  |
| 221818_at   | BF446693  | INTS5                    | 80789  | 102.7  | 78.7   | 122.5  | 87.8   | 92.0   |
| 221819_at   | BF791960  | RAB35                    | 11021  | 190.4  | 117.6  | 130.1  | 117.8  | 110.7  |
| 221820_s_at | AK024102  | KAT8                     | 84148  | 90.4   | 81.4   | 92.0   | 69.6   | 61.0   |
| 221821_s_at | AK022732  | KANSL2                   | 54934  | 163.6  | 101.3  | 171.4  | 138.0  | 126.4  |
| 221822_at   | BE544663  | CCDC101                  | 112869 | 58.2   | 48.6   | 67.6   | 61.8   | 55.1   |
| 221823_at   | AL565741  | C5orf30                  | 90355  | 122.2  | 121.8  | 141.4  | 125.6  | 74.1   |
| 221824_s_at | AA770170  | MARCH8                   | 220972 | 38.1   | 37.8   | 49.9   | 33.5   | 37.0   |
| 221825_at   | AU151793  | ANGEL2                   | 90806  | 73.5   | 44.8   | 63.8   | 62.6   | 44.0   |
| 221826_at   | BE671941  | ANGEL2                   | 90806  | 26.5   | 30.3   | 44.1   | 33.4   | 28.7   |
| 221827_at   | BE788439  | RBCK1                    | 10616  | 566.5  | 605.5  | 634.1  | 590.8  | 521.5  |
| 221828_s_at | AK024432  | MVB12B                   | 89853  | 2.7    | 5.4    | 1.7    | 2.0    | 1.8    |
| 221829_s_at | AI307759  | TNPO1                    | 3842   | 256.8  | 217.1  | 261.3  | 225.3  | 230.6  |
| 221830_at   | AI302106  | RAP2A                    | 5911   | 64.3   | 61.8   | 62.9   | 76.5   | 46.9   |
| 221831_at   | AV741657  | LUZP1                    | 7798   | 2.6    | 5.0    | 12.4   | 7.3    | 5.8    |
| 221832_s_at | AV741657  | LUZP1                    | 7798   | 15.8   | 1.9    | 11.7   | 17.6   | 8.1    |
| 221833_at   | AI971258  | LOC1005075:6477 /// 837  |        | 13.0   | 16.8   | 18.5   | 14.1   | 9.0    |
| 221834_at   | AV700132  | LOC1005075:83752 /// 10  |        | 44.0   | 41.0   | 41.0   | 49.2   | 38.9   |
| 221835_at   | N92708    | DTX3                     | 196403 | 7.9    | 3.5    | 6.5    | 8.2    | 1.9    |
| 221836_s_at | AW291218  | TRAPPC9                  | 83696  | 51.3   | 45.8   | 45.1   | 50.1   | 28.1   |
| 221837_at   | BG325646  | KLHL22                   | 84861  | 21.8   | 20.5   | 24.2   | 23.5   | 24.1   |
| 221838_at   | N38751    | KLHL22                   | 84861  | 40.0   | 34.7   | 38.8   | 37.4   | 26.8   |
| 221839_s_at | AK026088  | UBAP2                    | 55833  | 151.9  | 125.7  | 160.0  | 138.8  | 123.6  |



|             |           |              |                 |        |        |        |        |        |
|-------------|-----------|--------------|-----------------|--------|--------|--------|--------|--------|
| 221840_at   | AA775177  | PTPRE        | 5791            | 8.4    | 15.7   | 12.9   | 17.0   | 7.5    |
| 221841_s_at | BF514079  | KLF4         | 9314            | 16.7   | 19.7   | 18.3   | 16.0   | 12.6   |
| 221842_s_at | BE972394  | LOC100506676 | 7690 /// 100    | 59.5   | 48.6   | 69.9   | 61.2   | 50.9   |
| 221843_s_at | AA195017  | TLDC1        | 57707           | 3.8    | 15.3   | 13.7   | 14.6   | 1.7    |
| 221844_x_at | AV756161  | SPCS3        | 60559           | 163.1  | 133.0  | 190.7  | 142.2  | 155.5  |
| 221845_s_at | AI655698  | CLPB         | 81570           | 31.8   | 38.0   | 36.6   | 38.8   | 33.0   |
| 221846_s_at | AI970096  | CASKIN2      | 57513           | 4.2    | 3.2    | 3.4    | 20.5   | 2.6    |
| 221847_at   | BF665706  | LOC10012931  | 100129361       | 354.1  | 299.1  | 358.1  | 338.4  | 275.2  |
| 221848_at   | AL121845  | ZGPAT        | 84619           | 27.1   | 30.1   | 25.6   | 29.1   | 25.9   |
| 221849_s_at | AA733079  | DCAF15       | 90379           | 33.6   | 29.2   | 38.7   | 28.9   | 30.6   |
| 221850_x_at | AI826075  | AGAP11 ///   | 119016 /// 1    | 59.6   | 35.7   | 45.1   | 38.7   | 21.6   |
| 221851_at   | AI073983  | DCAF15       | 90379           | 47.1   | 41.0   | 45.8   | 55.9   | 43.2   |
| 221852_at   | N39536    | -            | -               | 1.1    | 1.2    | 0.6    | 1.4    | 0.8    |
| 221853_s_at | N39536    | LOC1010603   | 23420 /// 28    | 227.0  | 250.4  | 244.8  | 226.9  | 196.2  |
| 221854_at   | AI378979  | PKP1         | 5317            | 0.9    | 0.6    | 0.7    | 0.6    | 0.5    |
| 221855_at   | N31716    | SDHAF1       | 644096          | 116.4  | 115.6  | 150.4  | 90.3   | 86.0   |
| 221856_s_at | AL561943  | FAM63A       | 55793           | 68.4   | 38.8   | 62.4   | 46.3   | 48.1   |
| 221857_s_at | AK024269  | TJAP1        | 93643           | 11.5   | 5.8    | 21.9   | 9.1    | 6.0    |
| 221858_at   | N34407    | TBC1D12      | 23232           | 22.9   | 25.2   | 32.4   | 23.3   | 18.0   |
| 221859_at   | AW089736  | SYT13        | 57586           | 21.4   | 13.6   | 9.7    | 9.3    | 8.7    |
| 221860_at   | AL044078  | -            | -               | 22.0   | 22.1   | 18.0   | 20.0   | 19.5   |
| 221861_at   | AL157484  | ARRB1        | 408             | 38.3   | 40.4   | 33.5   | 37.6   | 29.9   |
| 221862_at   | AB033019  | MIER2        | 54531           | 14.8   | 10.7   | 12.3   | 16.6   | 10.1   |
| 221863_at   | AW003889  | MIER2        | 54531           | 4.6    | 11.0   | 8.1    | 15.8   | 9.1    |
| 221864_at   | AW517464  | ORAI3        | 93129           | 63.4   | 74.3   | 58.5   | 67.8   | 53.7   |
| 221865_at   | BF969986  | C9orf91      | 203197          | 54.5   | 35.5   | 53.6   | 49.6   | 47.9   |
| 221866_at   | AL035588  | TFEB         | 7942            | 17.7   | 11.2   | 18.2   | 16.4   | 13.6   |
| 221867_at   | BF436315  | N4BP1        | 9683            | 4.5    | 7.7    | 13.1   | 14.8   | 1.0    |
| 221868_at   | AB032981  | PAIP2B       | 400961          | 15.1   | 18.7   | 12.2   | 12.6   | 3.3    |
| 221869_at   | AL118506  | ZNF512B      | 57473           | 30.0   | 32.7   | 31.2   | 32.0   | 33.4   |
| 221870_at   | AI417917  | EHD2         | 30846           | 1.7    | 1.3    | 1.9    | 1.3    | 1.1    |
| 221871_s_at | BF057492  | TFG          | 10342           | 37.3   | 35.1   | 41.6   | 30.0   | 28.0   |
| 221872_at   | AI669229  | RARRES1      | 5918            | 2.1    | 1.6    | 4.1    | 0.4    | 0.3    |
| 221873_at   | AW162015  | ZNF143       | 7702            | 70.7   | 81.2   | 71.8   | 75.3   | 70.5   |
| 221874_at   | AB037745  | KIAA1324     | 57535           | 7.7    | 9.5    | 5.0    | 11.0   | 3.6    |
| 221875_x_at | AW514210  | HLA-F        | 3134            | 75.2   | 68.9   | 71.3   | 60.6   | 65.8   |
| 221876_at   | AU151157  | ZNF783       | 100289678       | 12.2   | 21.9   | 3.2    | 33.6   | 20.2   |
| 221877_at   | BF508835  | IRGQ         | 126298          | 51.6   | 40.7   | 46.3   | 57.4   | 27.2   |
| 221878_at   | BF110411  | C2orf68      | 388969          | 2.0    | 5.1    | 8.0    | 9.0    | 4.1    |
| 221879_at   | AA886335  | CALML4       | 91860           | 112.4  | 82.5   | 90.4   | 109.0  | 71.2   |
| 221880_s_at | AI279819  | FAM174B      | 400451          | 44.5   | 26.4   | 35.5   | 40.0   | 36.9   |
| 221881_s_at | AI638420  | CLIC4        | 25932           | 44.1   | 44.1   | 39.2   | 30.7   | 37.5   |
| 221882_s_at | AI636233  | TMEM8A       | 58986           | 94.9   | 95.3   | 121.9  | 117.5  | 88.9   |
| 221883_at   | AA133342  | PKNOX1       | 5316            | 33.7   | 26.7   | 33.3   | 25.5   | 29.8   |
| 221884_at   | BE466525  | MECOM        | 2122            | 1.4    | 1.3    | 1.8    | 8.1    | 0.7    |
| 221885_at   | AI131051  | DENND2A      | 27147           | 0.9    | 0.4    | 1.8    | 0.6    | 0.4    |
| 221886_at   | AL037701  | DENND2A      | 27147           | 4.2    | 1.2    | 0.6    | 3.4    | 2.0    |
| 221887_s_at | BE045998  | DFNB31       | 25861           | 3.9    | 7.6    | 8.8    | 15.2   | 2.5    |
| 221888_at   | AW183030  | CC2D1A       | 54862           | 37.4   | 48.2   | 45.5   | 49.6   | 37.4   |
| 221889_at   | AW026481  | KCTD13       | 253980          | 39.2   | 37.7   | 34.2   | 26.5   | 21.6   |
| 221890_at   | NM_022095 | ZNF335       | 63925           | 5.5    | 21.0   | 32.5   | 25.9   | 22.7   |
| 221891_x_at | AA704004  | HSPA8 ///    | SN 3312 /// 853 | 3115.4 | 2288.1 | 3078.1 | 2708.4 | 2684.8 |
| 221892_at   | AK024548  | H6PD         | 9563            | 20.0   | 24.2   | 22.9   | 26.4   | 19.0   |

|             |          |                           |        |        |        |        |        |       |
|-------------|----------|---------------------------|--------|--------|--------|--------|--------|-------|
| 221893_s_at | N32831   | ADCK2                     | 90956  | 183.6  | 155.2  | 204.1  | 193.1  | 147.8 |
| 221894_at   | N32831   | ADCK2                     | 90956  | 61.4   | 37.7   | 75.4   | 58.2   | 35.2  |
| 221895_at   | AW469184 | MOSPD2                    | 158747 | 34.0   | 24.6   | 7.8    | 19.6   | 21.5  |
| 221896_s_at | BE739519 | HIGD1A                    | 25994  | 563.8  | 479.1  | 556.7  | 482.0  | 448.4 |
| 221897_at   | AA205660 | TRIM52                    | 84851  | 29.4   | 39.3   | 29.7   | 31.1   | 25.7  |
| 221898_at   | AU154455 | PDPN                      | 10630  | 4.1    | 0.8    | 1.6    | 0.2    | 0.4   |
| 221899_at   | AI809961 | N4BP2L2                   | 10443  | 21.5   | 18.0   | 15.2   | 18.7   | 12.2  |
| 221900_at   | AI806793 | COL8A2                    | 1296   | 0.7    | 1.0    | 1.1    | 1.1    | 0.7   |
| 221901_at   | BF516072 | KIAA1644                  | 85352  | 1.4    | 1.2    | 1.6    | 1.4    | 1.7   |
| 221902_at   | AL567940 | GPR153                    | 387509 | 2.3    | 4.7    | 8.7    | 3.5    | 1.3   |
| 221903_s_at | BE046443 | CYLD                      | 1540   | 17.2   | 24.2   | 26.8   | 23.6   | 22.2  |
| 221904_at   | AI141670 | FAM131A                   | 131408 | 89.2   | 72.7   | 72.4   | 95.3   | 60.5  |
| 221905_at   | BF516433 | CYLD                      | 1540   | 11.6   | 2.0    | 5.5    | 1.7    | 1.1   |
| 221906_at   | BF513089 | TXNRD3 /// 1114112 /// 6  |        | 42.4   | 44.5   | 45.7   | 35.2   | 36.9  |
| 221907_at   | AI679213 | TRMT61A                   | 115708 | 58.5   | 52.2   | 71.8   | 62.1   | 61.8  |
| 221908_at   | AL120375 | RNFT2                     | 84900  | 14.4   | 22.2   | 15.8   | 13.2   | 8.4   |
| 221909_at   | AW299700 | RNFT2                     | 84900  | 57.8   | 75.6   | 57.2   | 97.8   | 37.3  |
| 221910_at   | BF131965 | ETV1                      | 2115   | 10.3   | 12.7   | 20.9   | 9.8    | 13.0  |
| 221911_at   | BE881590 | ETV1                      | 2115   | 268.5  | 225.7  | 289.8  | 247.1  | 214.4 |
| 221912_s_at | AL049795 | CCDC28B                   | 79140  | 36.7   | 37.0   | 39.3   | 47.2   | 27.2  |
| 221913_at   | AI492888 | SIRT3                     | 23410  | 30.5   | 27.6   | 24.1   | 34.0   | 22.3  |
| 221914_at   | H19843   | SYN1                      | 6853   | 2.5    | 2.4    | 1.1    | 3.3    | 1.5   |
| 221915_s_at | AI221318 | RANBP1                    | 5902   | 23.0   | 12.1   | 13.2   | 12.7   | 10.3  |
| 221916_at   | BF055311 | NEFL                      | 4747   | 24.4   | 10.4   | 18.8   | 14.2   | 13.6  |
| 221917_s_at | BF058465 | GRSF1                     | 2926   | 16.8   | 20.9   | 17.3   | 15.6   | 11.5  |
| 221918_at   | AI742210 | CDK17                     | 5128   | 22.8   | 19.8   | 25.5   | 29.6   | 28.0  |
| 221919_at   | AW450929 | HNRNPA1                   | 3178   | 21.9   | 14.8   | 27.9   | 21.8   | 15.4  |
| 221920_s_at | BE677761 | SLC25A37                  | 51312  | 46.1   | 33.1   | 47.4   | 39.7   | 32.7  |
| 221921_s_at | AI951798 | CADM3                     | 57863  | 1.8    | 1.9    | 1.2    | 2.2    | 1.4   |
| 221922_at   | AW195581 | GPSM2                     | 29899  | 65.6   | 39.9   | 54.3   | 57.0   | 45.2  |
| 221923_s_at | AA191576 | NPM1                      | 4869   | 1119.1 | 1027.0 | 1251.1 | 1042.8 | 998.4 |
| 221924_at   | AW444969 | ZMIZ2                     | 83637  | 1.9    | 6.7    | 3.3    | 1.0    | 5.1   |
| 221925_s_at | BE044503 | CSPP1                     | 79848  | 12.6   | 12.7   | 13.6   | 1.3    | 12.4  |
| 221926_s_at | BF196320 | IL17RC                    | 84818  | 38.4   | 78.9   | 73.9   | 94.7   | 53.5  |
| 221927_s_at | AI923458 | ABHD11                    | 83451  | 141.2  | 136.9  | 174.4  | 146.3  | 148.5 |
| 221928_at   | AI057637 | ACACB                     | 32     | 15.2   | 8.6    | 12.3   | 8.7    | 13.0  |
| 221929_at   | BG149837 | RP11-10N23.-              |        | 12.0   | 8.7    | 14.7   | 12.8   | 9.4   |
| 221930_at   | AI217472 | PHF7                      | 51533  | 1.3    | 1.1    | 7.5    | 3.0    | 1.5   |
| 221931_s_at | AV701173 | SEH1L                     | 81929  | 314.6  | 287.7  | 328.8  | 269.7  | 278.0 |
| 221932_s_at | AA133341 | GLRX5                     | 51218  | 304.5  | 337.6  | 379.1  | 323.1  | 338.2 |
| 221933_at   | AI338338 | NLGN4X                    | 57502  | 21.8   | 19.4   | 18.4   | 14.3   | 14.4  |
| 221934_s_at | BF941492 | DALRD3                    | 55152  | 92.6   | 95.9   | 110.0  | 103.0  | 81.4  |
| 221935_s_at | AK023140 | EOGT                      | 285203 | 11.8   | 9.4    | 12.6   | 11.4   | 5.8   |
| 221936_x_at | AI090841 | MRPL41                    | 64975  | 10.6   | 1.6    | 2.8    | 1.3    | 2.1   |
| 221937_at   | AI472320 | SYNRG                     | 11276  | 75.5   | 83.6   | 81.6   | 85.9   | 55.4  |
| 221938_x_at | AW262690 | MED16                     | 10025  | 112.3  | 148.6  | 148.5  | 126.9  | 97.7  |
| 221939_at   | AL529396 | YIPF2                     | 78992  | 50.3   | 41.4   | 57.6   | 55.2   | 54.5  |
| 221940_at   | AI571208 | RPUSD2                    | 27079  | 47.8   | 45.2   | 54.2   | 49.9   | 45.8  |
| 221941_at   | BE646315 | PAOX                      | 196743 | 24.3   | 24.2   | 14.2   | 14.5   | 21.8  |
| 221942_s_at | AI719730 | GUCY1A3                   | 2982   | 186.3  | 161.3  | 200.7  | 219.8  | 169.4 |
| 221943_x_at | AW303136 | RPL38                     | 6169   | 247.4  | 185.2  | 251.8  | 201.5  | 192.3 |
| 221944_at   | N56912   | FLJ42627                  | 645644 | 3.1    | 2.8    | 3.2    | 6.1    | 1.4   |
| 221945_at   | AA906578 | FBXO41 /// L 150726 /// 1 |        | 15.0   | 3.5    | 21.4   | 12.2   | 11.7  |

|             |          |            |                  |        |        |        |        |       |
|-------------|----------|------------|------------------|--------|--------|--------|--------|-------|
| 221946_at   | AU160041 | C9orf116   | 138162           | 23.9   | 29.1   | 45.1   | 36.6   | 23.2  |
| 221947_at   | BF112057 | -          | -                | 13.3   | 6.0    | 11.2   | 7.0    | 8.4   |
| 221948_s_at | BF732879 | KLHL22     | 84861            | 2.7    | 2.7    | 3.2    | 1.6    | 1.8   |
| 221949_at   | AW006953 | UBE2D4     | 51619            | 27.3   | 27.4   | 25.1   | 30.2   | 28.0  |
| 221950_at   | AI478455 | EMX2       | 2018             | 0.5    | 0.1    | 0.7    | 6.4    | 0.5   |
| 221951_at   | AI739035 | TMEM80     | 283232           | 72.2   | 49.6   | 69.7   | 67.4   | 61.8  |
| 221952_x_at | AB037814 | TRMT5      | 57570            | 1237.6 | 1067.7 | 1221.5 | 1146.2 | 964.7 |
| 221953_s_at | W45551   | MMP24-AS1  | 101410538        | 77.8   | 53.2   | 62.9   | 101.8  | 69.4  |
| 221954_at   | AA160474 | OSER1      | 51526            | 66.2   | 63.6   | 64.8   | 59.9   | 49.0  |
| 221955_at   | AI040021 | -          | -                | 0.5    | 0.4    | 0.4    | 0.4    | 0.6   |
| 221956_at   | AI631881 | LRCH4      | 4034             | 3.8    | 18.6   | 7.1    | 9.5    | 10.9  |
| 221957_at   | BF939522 | PDK3       | 5165             | 53.5   | 50.3   | 49.5   | 40.0   | 38.7  |
| 221958_s_at | AA775681 | WLS        | 79971            | 53.1   | 60.1   | 47.6   | 61.0   | 46.3  |
| 221959_at   | BE672313 | FAM110B    | 90362            | 8.9    | 5.5    | 10.8   | 15.7   | 11.2  |
| 221960_s_at | AI189609 | RAB2A      | 5862             | 22.3   | 33.0   | 32.2   | 33.4   | 20.7  |
| 221961_at   | AW190208 | CLCN7      | 1186             | 5.5    | 0.9    | 7.3    | 3.1    | 0.7   |
| 221962_s_at | AI829920 | UBE2H      | 7328             | 69.2   | 64.1   | 72.6   | 76.3   | 54.8  |
| 221963_x_at | BE999967 | ZNF587B    | 100293516        | 86.7   | 64.5   | 84.4   | 68.2   | 73.1  |
| 221964_at   | AI591305 | TULP3      | 7289             | 42.6   | 33.0   | 35.5   | 37.2   | 28.2  |
| 221965_at   | AI990326 | -          | -                | 34.6   | 29.1   | 40.0   | 28.6   | 31.2  |
| 221966_at   | AA813194 | GPR137     | 56834            | 74.0   | 87.9   | 86.9   | 86.7   | 61.9  |
| 221967_at   | AI933199 | NXPH4      | 11247            | 37.9   | 30.1   | 35.6   | 24.7   | 28.6  |
| 221968_s_at | AW014373 | ZNF771     | 51333            | 0.9    | 7.2    | 0.8    | 1.7    | 1.1   |
| 221969_at   | BF510692 | PAX5       | 5079             | 8.7    | 3.0    | 9.3    | 1.3    | 1.6   |
| 221970_s_at | AU158148 | NOL11      | 25926            | 217.9  | 178.1  | 258.4  | 189.3  | 225.9 |
| 221971_x_at | BE672818 | AGAP10 /// | 119016 /// 1     | 42.7   | 41.8   | 44.1   | 37.6   | 26.0  |
| 221972_s_at | AL571362 | SDF4       | 51150            | 171.6  | 182.2  | 200.6  | 181.6  | 181.1 |
| 221973_at   | AI983904 | LOC1005060 | 100506076 /      | 3.7    | 0.6    | 1.1    | 0.6    | 3.0   |
| 221974_at   | AW770748 | IPW ///    | LOC13653 /// 663 | 136.2  | 97.9   | 121.6  | 138.0  | 98.5  |
| 221975_s_at | AI539305 | AP001062.7 | 755              | 1.6    | 8.8    | 9.2    | 3.5    | 9.2   |
| 221976_s_at | AW207448 | HDGFRP3    | 50810            | 2.0    | 0.5    | 2.5    | 0.6    | 3.5   |
| 221977_at   | AW303460 | TBX2       | 6909             | 0.3    | 1.0    | 1.0    | 0.8    | 1.0   |
| 221978_at   | BE138825 | HLA-F      | 3134             | 4.0    | 1.0    | 1.4    | 6.2    | 1.9   |
| 221979_at   | AI150117 | TOPORS-AS1 | 100129250        | 60.9   | 85.4   | 67.2   | 76.3   | 85.2  |
| 221980_at   | AL117592 | EMILIN2    | 84034            | 1.4    | 1.2    | 6.5    | 1.1    | 0.9   |
| 221981_s_at | AA702154 | WDR59      | 79726            | 2.4    | 16.5   | 12.3   | 8.3    | 8.8   |
| 221982_x_at | AA034498 | -          | -                | 1.7    | 1.9    | 2.4    | 2.3    | 2.0   |
| 221983_at   | AL040896 | FAM134A    | 79137            | 65.4   | 92.8   | 91.3   | 90.4   | 70.9  |
| 221984_s_at | AL040896 | FAM134A    | 79137            | 150.5  | 148.5  | 150.8  | 141.3  | 117.9 |
| 221985_at   | AW006750 | KLHL24     | 54800            | 26.8   | 38.7   | 17.9   | 28.5   | 17.9  |
| 221986_s_at | AW006750 | KLHL24     | 54800            | 12.3   | 19.3   | 14.0   | 8.8    | 5.9   |
| 221987_s_at | AI803633 | TSR1       | 55720            | 122.5  | 84.6   | 114.3  | 106.3  | 96.1  |
| 221988_at   | AA463853 | SMIM7      | 79086            | 32.8   | 27.9   | 30.1   | 32.0   | 19.6  |
| 221989_at   | AW057781 | RPL10 ///  | SN 6134 /// 267  | 28.2   | 30.7   | 35.8   | 27.5   | 23.9  |
| 221990_at   | AI948472 | PAX8       | 7849             | 7.1    | 13.1   | 13.6   | 10.5   | 13.0  |
| 221991_at   | AI937333 | NXPH3      | 11248            | 31.9   | 2.4    | 6.1    | 9.6    | 10.1  |
| 221992_at   | AI925734 | NPIP15     | 440348           | 17.3   | 13.9   | 13.4   | 14.9   | 13.0  |
| 221993_s_at | BE328802 | TSR3       | 115939           | 0.5    | 0.8    | 0.8    | 0.8    | 0.9   |
| 221994_at   | AA196325 | PDLIM5     | 10611            | 7.9    | 7.2    | 12.8   | 2.4    | 5.2   |
| 221995_s_at | BF195165 | -          | -                | 42.2   | 24.0   | 44.6   | 32.1   | 32.4  |
| 221996_s_at | AW170546 | CLTB       | 1212             | 8.1    | 8.1    | 4.7    | 10.0   | 2.2   |
| 221997_s_at | AI560951 | MRPL52     | 122704           | 16.2   | 8.4    | 11.5   | 13.1   | 11.7  |
| 221998_s_at | BF062886 | VRK3       | 51231            | 89.4   | 105.2  | 93.3   | 104.7  | 86.0  |

|             |           |                           |        |       |       |       |       |       |
|-------------|-----------|---------------------------|--------|-------|-------|-------|-------|-------|
| 221999_at   | BF062886  | VRK3                      | 51231  | 33.7  | 21.7  | 23.7  | 23.1  | 20.6  |
| 222000_at   | AI915947  | C1orf174                  | 339448 | 136.0 | 92.2  | 145.4 | 98.2  | 108.4 |
| 222001_x_at | AI160126  | LINC00623 // 57234 /// 72 |        | 68.9  | 71.7  | 73.2  | 84.9  | 62.5  |
| 222002_at   | BE503090  | C7orf26                   | 79034  | 1.2   | 1.3   | 1.9   | 0.5   | 0.9   |
| 222003_s_at | BE857715  | DOCK6                     | 57572  | 27.3  | 20.2  | 23.2  | 25.0  | 14.5  |
| 222004_s_at | AA534504  | DOCK6                     | 57572  | 0.7   | 1.2   | 0.5   | 0.7   | 0.4   |
| 222005_s_at | AL538966  | GNG3                      | 2785   | 26.7  | 15.6  | 21.1  | 11.0  | 11.7  |
| 222006_at   | AI359368  | LETM1                     | 3954   | 79.0  | 72.8  | 103.9 | 74.9  | 102.2 |
| 222007_s_at | N95418    | FKBP8                     | 23770  | 0.8   | 1.4   | 0.6   | 6.1   | 1.6   |
| 222008_at   | NM_001851 | COL9A1                    | 1297   | 1.3   | 1.6   | 1.8   | 0.7   | 0.7   |
| 222009_at   | AI829081  | CEMP1                     | 752014 | 0.9   | 0.9   | 1.6   | 1.1   | 1.4   |
| 222010_at   | BF224073  | SNORA29 /// 6950 /// 677  |        | 163.5 | 160.7 | 175.3 | 136.2 | 144.9 |
| 222011_s_at | BF224073  | SNORA29 /// 6950 /// 677  |        | 251.2 | 195.4 | 265.6 | 211.8 | 180.5 |
| 222012_at   | AA535066  | DCAF15                    | 90379  | 1.3   | 0.7   | 1.0   | 0.8   | 1.7   |
| 222013_x_at | BE348837  | FAM86A                    | 196483 | 176.9 | 26.1  | 135.7 | 71.1  | 55.1  |
| 222014_x_at | AI249752  | MTO1                      | 25821  | 71.7  | 51.5  | 89.8  | 60.3  | 57.1  |
| 222015_at   | AW192876  | CSNK1E                    | 1454   | 21.3  | 12.4  | 16.0  | 30.3  | 19.9  |
| 222016_s_at | AW086021  | ZSCAN31                   | 64288  | 23.6  | 24.1  | 15.7  | 24.2  | 16.3  |
| 222017_x_at | AI660075  | LRCH4                     | 4034   | 18.7  | 16.4  | 15.2  | 22.6  | 2.3   |
| 222018_at   | AI992187  | NACA                      | 4666   | 13.5  | 16.7  | 18.7  | 10.5  | 12.5  |
| 222019_at   | AW007185  | MIR6834 /// 10471 /// 10  |        | 45.5  | 38.7  | 60.7  | 54.3  | 41.4  |
| 222020_s_at | AW117456  | LOC1027252 50863 /// 10   |        | 1.1   | 1.1   | 1.9   | 8.0   | 0.6   |
| 222021_x_at | AI348006  | SDHAP1 /// 255812 /// 7   |        | 332.7 | 273.6 | 301.1 | 255.9 | 247.5 |
| 222022_at   | AW574818  | DTX3                      | 196403 | 5.6   | 3.9   | 17.3  | 3.9   | 6.1   |
| 222023_at   | AK022014  | AKAP13                    | 11214  | 1.1   | 0.7   | 1.3   | 6.1   | 3.1   |
| 222024_s_at | AK022014  | AKAP13                    | 11214  | 18.7  | 16.9  | 17.8  | 15.0  | 12.1  |
| 222025_s_at | AI991887  | OPLAH                     | 26873  | 40.0  | 46.5  | 39.2  | 41.4  | 27.6  |
| 222026_at   | BF437591  | RBM3                      | 5935   | 64.1  | 55.5  | 60.9  | 64.7  | 51.7  |
| 222027_at   | AW515443  | NUCKS1                    | 64710  | 65.9  | 52.0  | 62.4  | 46.4  | 53.6  |
| 222028_at   | AI967981  | ZNF45                     | 7596   | 38.5  | 30.0  | 31.9  | 31.3  | 27.6  |
| 222029_x_at | NM_014260 | MIR6834 /// 10471 /// 10  |        | 126.2 | 134.4 | 176.6 | 150.7 | 136.6 |
| 222030_at   | AW024335  | SIVA1                     | 10572  | 39.4  | 34.5  | 46.7  | 35.8  | 38.9  |
| 222031_at   | AW452796  | LOC389906                 | 389906 | 4.6   | 1.1   | 7.2   | 7.7   | 2.5   |
| 222032_s_at | BF591638  | USP7                      | 7874   | 9.0   | 3.1   | 8.4   | 1.1   | 3.2   |
| 222033_s_at | AA058828  | FLT1                      | 2321   | 12.6  | 7.8   | 13.7  | 8.7   | 7.3   |
| 222034_at   | AA443762  | GNB2L1 /// S10399 /// 61  |        | 30.7  | 22.8  | 21.1  | 17.4  | 21.3  |
| 222035_s_at | AI984479  | PAPOLA                    | 10914  | 293.0 | 270.3 | 301.8 | 265.1 | 226.8 |
| 222036_s_at | AI859865  | MCM4                      | 4173   | 374.1 | 290.1 | 428.9 | 296.9 | 362.7 |
| 222037_at   | AI859865  | MCM4                      | 4173   | 137.8 | 93.4  | 138.1 | 103.0 | 115.9 |
| 222038_s_at | AA993099  | UTP18                     | 51096  | 14.5  | 9.8   | 11.8  | 7.8   | 7.5   |
| 222039_at   | AA292789  | KIF18B                    | 146909 | 109.0 | 76.2  | 135.1 | 86.3  | 104.0 |
| 222040_at   | AI144007  | HNRNPA1                   | 3178   | 23.4  | 9.4   | 15.5  | 12.2  | 16.1  |
| 222041_at   | BG235929  | DPH1 /// OV1801 /// 124   |        | 33.7  | 42.5  | 43.7  | 42.8  | 40.8  |
| 222042_x_at | BF056534  | MEX3D                     | 399664 | 6.6   | 10.7  | 1.7   | 2.2   | 6.1   |
| 222043_at   | AI982754  | CLU                       | 1191   | 6.1   | 0.8   | 5.8   | 1.1   | 2.4   |
| 222044_at   | AI199589  | -                         | -      | 69.5  | 66.3  | 81.0  | 60.2  | 60.9  |
| 222045_s_at | AI199589  | PCIF1                     | 63935  | 50.9  | 51.9  | 61.0  | 48.0  | 45.2  |
| 222046_at   | AI523895  | SRRT                      | 51593  | 8.3   | 7.5   | 14.0  | 8.8   | 4.6   |
| 222047_s_at | AI523895  | SRRT                      | 51593  | 482.9 | 407.2 | 585.2 | 481.3 | 426.7 |
| 222048_at   | AA536000  | CRYBB2P1                  | 1416   | 22.8  | 11.5  | 16.4  | 21.9  | 15.7  |
| 222049_s_at | AA908769  | RBP4                      | 5950   | 0.5   | 0.8   | 0.9   | 0.8   | 0.7   |
| 222050_at   | AI703341  | -                         | -      | 8.4   | 6.0   | 9.1   | 7.4   | 10.7  |
| 222051_s_at | AW139195  | RP11-219B4.-              |        | 4.1   | 7.8   | 3.8   | 3.8   | 2.8   |

|             |           |             |           |       |       |       |       |       |
|-------------|-----------|-------------|-----------|-------|-------|-------|-------|-------|
| 222052_at   | AA001552  | C19orf54    | 284325    | 71.5  | 68.8  | 77.9  | 74.8  | 58.4  |
| 222053_at   | AI497781  | TAF6L       | 10629     | 9.4   | 1.5   | 1.9   | 1.9   | 4.3   |
| 222054_at   | BF511556  | PPIEL       | 728448    | 2.1   | 0.9   | 2.0   | 2.4   | 1.6   |
| 222055_at   | AA723370  | FAHD2A      | 51011     | 0.6   | 0.9   | 0.9   | 0.4   | 0.8   |
| 222056_s_at | AA723370  | FAHD2A      | 51011     | 78.1  | 56.1  | 76.9  | 72.9  | 62.1  |
| 222057_at   | AW002578  | NOL12       | 79159     | 2.3   | 0.7   | 4.5   | 8.8   | 1.3   |
| 222058_at   | AW194818  | RNF130      | 55819     | 7.6   | 8.6   | 8.9   | 7.6   | 8.4   |
| 222059_at   | BE676476  | ZNF335      | 63925     | 0.6   | 1.2   | 0.7   | 0.6   | 1.3   |
| 222060_at   | AI357616  | KRT8P12     | 90133     | 22.4  | 17.8  | 27.5  | 16.8  | 19.1  |
| 222061_at   | AA700015  | CD58        | 965       | 3.6   | 0.9   | 0.3   | 0.8   | 1.3   |
| 222062_at   | AI983115  | IL27RA      | 9466      | 4.8   | 4.7   | 0.9   | 4.0   | 2.1   |
| 222063_s_at | AI991484  | CDS1        | 1040      | 0.6   | 1.5   | 1.1   | 5.0   | 2.8   |
| 222064_s_at | AI093187  | AARSD1      | 80755     | 100.7 | 71.1  | 120.4 | 100.1 | 91.0  |
| 222065_s_at | AI830227  | FLII        | 2314      | 172.1 | 171.6 | 206.4 | 213.2 | 157.5 |
| 222066_at   | AA573523  | -           | -         | 3.4   | 14.2  | 2.3   | 9.2   | 2.8   |
| 222067_x_at | AL353759  | HIST1H2BD   | 3017      | 218.1 | 221.1 | 222.6 | 291.5 | 218.6 |
| 222068_s_at | AW663632  | DNAAF1      | 123872    | 9.1   | 1.7   | 5.1   | 1.4   | 4.5   |
| 222069_s_at | BF058311  | -           | -         | 1.5   | 7.9   | 5.5   | 3.3   | 1.2   |
| 222070_at   | AW090043  | DND1        | 373863    | 24.1  | 23.3  | 18.7  | 14.7  | 9.3   |
| 222071_s_at | BE552428  | SLCO4C1     | 353189    | 0.2   | 2.0   | 5.6   | 4.5   | 0.3   |
| 222072_at   | AW450360  | ADD3-AS1    | 100505933 | 1.1   | 6.2   | 2.2   | 2.9   | 3.9   |
| 222073_at   | AI694562  | COL4A3      | 1285      | 0.1   | 4.6   | 3.1   | 5.0   | 0.2   |
| 222074_at   | AW614435  | UROD        | 7389      | 8.8   | 10.8  | 4.9   | 9.0   | 3.2   |
| 222075_s_at | BE792072  | OAZ3        | 51686     | 106.2 | 121.9 | 134.0 | 110.8 | 108.7 |
| 222076_at   | BE222436  | HBEGF       | 1839      | 0.7   | 0.6   | 0.8   | 0.3   | 0.3   |
| 222077_s_at | AU153848  | RACGAP1     | 29127     | 586.7 | 470.1 | 644.7 | 414.3 | 451.3 |
| 222078_at   | BF110802  | PKLR        | 5313      | 3.6   | 2.2   | 7.2   | 1.2   | 2.3   |
| 222079_at   | BF739971  | ERG         | 2078      | 5.2   | 7.2   | 8.0   | 5.0   | 6.4   |
| 222080_s_at | AW188134  | RP1-223E5.4 | 23408     | 9.0   | 14.7  | 16.2  | 10.2  | 4.9   |
| 222081_at   | AW188134  | RP1-223E5.4 | 23408     | 35.0  | 26.2  | 25.8  | 22.1  | 33.4  |
| 222082_at   | AI568395  | ZBTB7A      | 51341     | 5.4   | 4.7   | 5.9   | 6.3   | 5.5   |
| 222083_at   | AW024233  | GLYAT       | 10249     | 1.3   | 0.5   | 0.8   | 0.8   | 0.4   |
| 222084_s_at | AI333707  | SBF1        | 6305      | 1.0   | 2.1   | 4.2   | 0.6   | 4.9   |
| 222085_at   | AW452357  | -           | -         | 1.3   | 3.5   | 0.6   | 0.9   | 0.3   |
| 222086_s_at | AI191771  | WNT6        | 7475      | 0.5   | 0.6   | 0.5   | 0.5   | 0.3   |
| 222087_at   | AW451806  | MIR1204     | 5820      | 4.1   | 8.4   | 8.4   | 5.7   | 1.5   |
| 222088_s_at | AA778684  | SLC2A14     | 6515      | 6.4   | 4.2   | 4.5   | 5.4   | 3.4   |
| 222089_s_at | BF508774  | C16orf71    | 146562    | 2.4   | 3.7   | 1.9   | 0.8   | 1.5   |
| 222090_at   | BF509069  | NDUFB2-AS1  | 100134713 | 16.5  | 18.7  | 10.2  | 11.2  | 12.0  |
| 222091_at   | BE550384  | HPCAL4      | 51440     | 1.5   | 1.0   | 1.0   | 1.0   | 0.9   |
| 222092_at   | BF116199  | PTPN21      | 11099     | 3.3   | 1.7   | 4.6   | 1.3   | 1.6   |
| 222093_s_at | BF223045  | INO80B      | 83444     | 39.7  | 28.6  | 38.0  | 43.4  | 39.6  |
| 222094_at   | AI580112  | LOC1019298  | 6818      | 6.2   | 6.6   | 3.5   | 3.7   | 10.0  |
| 222095_s_at | AW450345  | FAM163A     | 148753    | 1.6   | 2.1   | 2.3   | 3.2   | 0.9   |
| 222096_x_at | BF056462  | -           | -         | 12.4  | 7.8   | 12.8  | 8.0   | 2.7   |
| 222097_at   | AI733248  | -           | -         | 15.5  | 6.2   | 14.3  | 15.8  | 7.9   |
| 222098_s_at | AI733248  | -           | -         | 3.1   | 0.9   | 1.5   | 2.3   | 2.5   |
| 222099_s_at | AW593859  | LSM14A      | 26065     | 85.1  | 50.7  | 84.4  | 62.4  | 65.3  |
| 222100_at   | AV650427  | -           | -         | 1.7   | 1.2   | 0.7   | 0.7   | 0.7   |
| 222101_s_at | BF222893  | DCHS1       | 8642      | 14.0  | 8.8   | 12.9  | 8.5   | 7.9   |
| 222102_at   | NM_000847 | GSTA3       | 2940      | 1.8   | 1.5   | 1.4   | 1.4   | 1.7   |
| 222103_at   | AI434345  | ATF1        | 466       | 92.8  | 68.6  | 102.4 | 82.1  | 68.1  |
| 222104_x_at | AI569458  | GTF2H3      | 2967      | 82.2  | 79.7  | 108.1 | 76.5  | 109.1 |

|             |          |                          |        |       |       |       |       |       |
|-------------|----------|--------------------------|--------|-------|-------|-------|-------|-------|
| 222105_s_at | AA452565 | NKIRAS2                  | 28511  | 91.5  | 96.1  | 96.1  | 116.4 | 84.6  |
| 222106_at   | AL133396 | PRND                     | 23627  | 7.9   | 9.7   | 3.5   | 4.6   | 6.4   |
| 222107_x_at | BE312985 | LZTS1                    | 11178  | 1.9   | 8.1   | 11.1  | 7.7   | 6.8   |
| 222108_at   | AC004010 | AMIGO2                   | 347902 | 25.1  | 28.0  | 23.2  | 24.8  | 14.6  |
| 222109_at   | AA558583 | GNL3L                    | 54552  | 24.1  | 11.8  | 20.3  | 13.4  | 10.3  |
| 222110_at   | AW008921 | SENP5                    | 205564 | 18.7  | 8.9   | 9.0   | 11.1  | 9.0   |
| 222111_at   | AU145293 | FAM63B                   | 54629  | 21.4  | 20.5  | 21.0  | 16.9  | 12.9  |
| 222112_at   | AV710549 | EPS15L1                  | 58513  | 0.9   | 0.7   | 1.0   | 0.9   | 0.4   |
| 222113_s_at | AV710549 | EPS15L1                  | 58513  | 42.1  | 37.3  | 53.8  | 37.5  | 28.7  |
| 222114_x_at | BE409994 | WDR55                    | 54853  | 3.2   | 13.4  | 3.5   | 4.2   | 9.0   |
| 222115_x_at | BC003693 | GLYR1                    | 84656  | 24.2  | 27.0  | 25.2  | 25.6  | 20.1  |
| 222116_s_at | AL157485 | TBC1D16                  | 125058 | 63.4  | 60.4  | 54.0  | 68.5  | 42.2  |
| 222117_s_at | AF131745 | ADCK2                    | 90956  | 5.2   | 5.3   | 1.5   | 2.1   | 3.4   |
| 222118_at   | AK023669 | CENPN                    | 55839  | 68.0  | 42.4  | 70.5  | 43.5  | 72.5  |
| 222119_s_at | AL117620 | FBXO11                   | 80204  | 36.5  | 41.9  | 35.5  | 36.5  | 34.4  |
| 222120_at   | BC000016 | ZNF764                   | 92595  | 22.5  | 28.4  | 22.1  | 24.3  | 18.0  |
| 222121_at   | AU118383 | ARHGEF26                 | 26084  | 66.5  | 38.0  | 99.1  | 43.9  | 82.1  |
| 222122_s_at | BG403671 | THOC2                    | 57187  | 51.5  | 49.8  | 62.3  | 50.9  | 59.0  |
| 222123_s_at | AK021881 | HIF3A                    | 64344  | 3.6   | 1.1   | 6.5   | 6.0   | 4.6   |
| 222124_at   | AK021881 | HIF3A                    | 64344  | 1.7   | 5.9   | 14.8  | 2.3   | 6.4   |
| 222125_s_at | BC000580 | P4HTM                    | 54681  | 288.9 | 245.5 | 265.1 | 253.5 | 188.2 |
| 222126_at   | AI247494 | AGFG2                    | 3268   | 82.7  | 71.3  | 96.8  | 68.2  | 72.2  |
| 222127_s_at | AK023461 | EXOC1                    | 55763  | 86.2  | 75.7  | 77.3  | 70.7  | 63.0  |
| 222128_at   | U80764   | NSUN6                    | 221078 | 6.3   | 8.0   | 5.3   | 0.5   | 2.3   |
| 222129_at   | AK026155 | FAM134A                  | 79137  | 33.7  | 24.4  | 20.4  | 28.9  | 17.0  |
| 222130_s_at | AK024635 | FTSJ2                    | 29960  | 195.1 | 137.0 | 203.6 | 136.8 | 141.7 |
| 222131_x_at | BC004327 | RHOT2                    | 89941  | 39.3  | 40.4  | 44.8  | 22.9  | 44.5  |
| 222132_s_at | AJ278150 | AGK                      | 55750  | 163.0 | 151.0 | 201.4 | 148.3 | 123.7 |
| 222133_s_at | AK022280 | PHF20L1                  | 51105  | 7.0   | 12.4  | 14.0  | 12.5  | 7.9   |
| 222134_at   | AL050350 | DDO                      | 8528   | 5.6   | 13.0  | 23.5  | 13.0  | 8.1   |
| 222135_at   | AK022663 | ZNF814                   | 730051 | 0.3   | 3.7   | 3.1   | 0.4   | 3.8   |
| 222136_x_at | AK022905 | ZNF43 /// ZN7594 /// 100 |        | 145.1 | 106.6 | 134.1 | 107.5 | 96.5  |
| 222137_at   | AK023399 | CC2D1A                   | 54862  | 1.9   | 0.3   | 3.8   | 7.0   | 1.8   |
| 222138_s_at | AF158978 | WDR13                    | 64743  | 116.8 | 140.6 | 134.2 | 129.1 | 114.6 |
| 222139_at   | AI765383 | ERV3-2                   | 57612  | 6.9   | 6.7   | 7.2   | 5.5   | 0.7   |
| 222140_s_at | AK021758 | GPR89A /// C51463 /// 65 |        | 77.2  | 66.3  | 91.2  | 74.5  | 70.1  |
| 222141_at   | AK024369 | KLHL22                   | 84861  | 7.9   | 4.8   | 5.3   | 4.6   | 4.6   |
| 222142_at   | AK024212 | CYLD                     | 1540   | 3.7   | 0.7   | 1.4   | 2.4   | 3.5   |
| 222143_s_at | AY007098 | MTMR14                   | 64419  | 89.9  | 84.6  | 94.2  | 94.4  | 70.9  |
| 222144_at   | AA909345 | KIF17                    | 57576  | 0.8   | 0.9   | 0.7   | 0.9   | 0.9   |
| 222145_at   | AK027225 | -                        | -      | 17.8  | 15.7  | 12.4  | 19.6  | 7.1   |
| 222146_s_at | AK026674 | TCF4                     | 6925   | 11.0  | 3.4   | 8.3   | 9.7   | 7.1   |
| 222147_s_at | AL133519 | ACTR5                    | 79913  | 36.4  | 24.7  | 43.2  | 29.1  | 28.4  |
| 222148_s_at | BF688108 | RHOT1                    | 55288  | 191.5 | 141.5 | 166.3 | 158.9 | 112.5 |
| 222149_x_at | AL137398 | GOLGA8CP /,283768 /// 3  |        | 18.0  | 11.8  | 11.0  | 9.5   | 7.2   |
| 222150_s_at | AK026747 | GSAP                     | 54103  | 3.3   | 5.4   | 5.3   | 2.4   | 3.9   |
| 222151_s_at | AK023738 | CEP63                    | 80254  | 43.4  | 31.2  | 54.7  | 39.0  | 33.5  |
| 222152_at   | AK024175 | PDCD6                    | 10016  | 2.6   | 7.2   | 11.1  | 13.6  | 5.0   |
| 222153_at   | AK023133 | MYEF2                    | 50804  | 1.9   | 1.5   | 3.7   | 1.2   | 0.2   |
| 222154_s_at | AK002064 | SPATS2L                  | 26010  | 92.9  | 106.2 | 116.7 | 82.4  | 87.3  |
| 222155_s_at | AK021918 | SLC52A2                  | 79581  | 251.1 | 243.6 | 284.6 | 244.5 | 211.6 |
| 222156_x_at | AK022459 | CCPG1 /// D\9236 /// 100 |        | 14.6  | 8.8   | 7.7   | 11.1  | 9.6   |
| 222157_s_at | AB040882 | WDR48                    | 57599  | 40.9  | 23.6  | 33.8  | 34.0  | 35.5  |

|             |          |                     |            |       |       |       |       |       |
|-------------|----------|---------------------|------------|-------|-------|-------|-------|-------|
| 222158_s_at | AF229834 | DESI2               | 51029      | 63.4  | 52.4  | 64.6  | 59.1  | 57.0  |
| 222159_at   | AK023058 | -                   | -          | 17.6  | 12.5  | 13.3  | 9.9   | 8.7   |
| 222160_at   | AL133576 | AKAP8L              | 26993      | 15.7  | 2.7   | 18.3  | 13.0  | 2.1   |
| 222161_at   | AJ012370 | NAALAD2             | 10003      | 4.9   | 6.5   | 6.5   | 3.6   | 0.6   |
| 222162_s_at | AK023795 | ADAMTS1             | 9510       | 186.5 | 177.1 | 162.6 | 159.3 | 123.4 |
| 222163_s_at | BE890973 | SPATA5L1            | 79029      | 141.6 | 112.4 | 167.7 | 105.0 | 131.7 |
| 222164_at   | AU145411 | FGFR1               | 2260       | 25.3  | 18.8  | 31.4  | 31.9  | 10.1  |
| 222165_x_at | AK022885 | C9orf16             | 79095      | 114.7 | 88.7  | 73.4  | 61.8  | 46.8  |
| 222166_at   | AK022885 | C9orf16             | 79095      | 8.9   | 0.3   | 1.8   | 2.9   | 1.9   |
| 222167_at   | AK021836 | -                   | -          | 15.2  | 6.8   | 8.8   | 8.0   | 7.6   |
| 222168_at   | AF198444 | AF198444            | -          | 5.0   | 1.0   | 0.3   | 1.0   | 2.6   |
| 222169_x_at | N71739   | SH2D3A              | 10045      | 35.3  | 29.9  | 31.4  | 25.0  | 19.2  |
| 222170_at   | AF098968 | ZNF213-AS1          | 100507458  | 20.1  | 14.9  | 2.4   | 11.4  | 11.0  |
| 222171_s_at | AK023792 | PKNOX2              | 63876      | 26.5  | 37.1  | 23.9  | 31.2  | 18.8  |
| 222172_at   | AL079281 | NPAS3               | 64067      | 1.4   | 0.6   | 0.6   | 5.2   | 0.2   |
| 222173_s_at | AK026105 | TBC1D2              | 55357      | 11.4  | 6.0   | 2.9   | 10.8  | 0.4   |
| 222174_at   | AU145025 | -                   | -          | 1.9   | 1.7   | 6.9   | 4.5   | 0.9   |
| 222175_s_at | AK000003 | MED15               | 51586      | 49.6  | 59.1  | 52.4  | 49.0  | 35.3  |
| 222176_at   | AK021487 | -                   | -          | 0.8   | 0.5   | 0.4   | 0.5   | 0.9   |
| 222177_s_at | AF244812 | SCAND2P             | 54581      | 2.4   | 4.5   | 1.5   | 1.3   | 0.6   |
| 222178_s_at | AL133262 | -                   | -          | 6.2   | 0.3   | 2.0   | 0.3   | 4.4   |
| 222179_at   | AL133262 | CDC5L               | 988        | 5.4   | 2.1   | 5.5   | 5.0   | 5.0   |
| 222180_at   | AU147889 | RP11-76908.-        | -          | 3.7   | 7.7   | 4.1   | 4.0   | 2.9   |
| 222181_at   | BG105204 | CNOT2               | 4848       | 7.9   | 0.6   | 6.9   | 1.1   | 3.9   |
| 222182_s_at | BG105204 | CNOT2               | 4848       | 127.3 | 129.3 | 132.8 | 120.5 | 87.1  |
| 222183_x_at | AL390153 | MBD3                | 53615      | 31.1  | 17.6  | 34.3  | 27.6  | 10.5  |
| 222184_at   | AF131844 | LINC00965           | 349196     | 35.3  | 22.3  | 20.6  | 28.2  | 19.3  |
| 222185_at   | AK023792 | PKNOX2              | 63876      | 27.0  | 11.7  | 16.4  | 16.0  | 2.5   |
| 222186_at   | AL109684 | -                   | -          | 13.8  | 6.7   | 9.1   | 5.3   | 10.9  |
| 222187_x_at | X78262   | G3BP1               | 10146      | 27.2  | 23.2  | 33.1  | 23.9  | 24.1  |
| 222188_at   | AK023069 | C9orf156            | 51531      | 5.4   | 0.3   | 1.1   | 0.8   | 0.1   |
| 222189_at   | AB051523 | -                   | -          | 1.1   | 3.1   | 6.4   | 0.5   | 0.8   |
| 222190_s_at | BC000822 | C16orf58            | 64755      | 110.6 | 86.2  | 128.4 | 117.9 | 92.0  |
| 222191_s_at | AK022566 | B4GALT7             | 11285      | 29.0  | 42.4  | 25.7  | 42.8  | 41.3  |
| 222192_s_at | AK021672 | C2orf43             | 60526      | 50.2  | 45.8  | 44.7  | 36.0  | 37.1  |
| 222193_at   | AK021672 | C2orf43             | 60526      | 24.8  | 16.4  | 18.0  | 13.8  | 16.5  |
| 222194_at   | AL390183 | FAM66D              | 100132923  | 1.0   | 0.8   | 1.2   | 0.2   | 11.8  |
| 222195_s_at | AK023069 | C9orf156            | 51531      | 38.9  | 35.5  | 38.0  | 34.3  | 21.6  |
| 222196_at   | AK000470 | LOC389906           | 389906     | 21.7  | 26.7  | 30.6  | 25.2  | 18.5  |
| 222197_s_at | AF131813 | -                   | -          | 3.6   | 5.1   | 2.5   | 5.1   | 4.7   |
| 222198_at   | AA447740 | RP11-930P14-        | -          | 1.2   | 1.7   | 1.8   | 0.9   | 1.3   |
| 222199_s_at | AK001289 | BIN3                | 55909      | 42.5  | 33.8  | 43.3  | 39.5  | 23.9  |
| 222200_s_at | AK021440 | BSDC1               | 55108      | 58.0  | 51.2  | 52.6  | 63.9  | 30.4  |
| 222201_s_at | AB037736 | CASP8AP2            | 9994       | 12.2  | 11.4  | 16.1  | 12.8  | 16.0  |
| 222202_at   | AK024355 | -                   | -          | 0.6   | 0.4   | 4.8   | 2.0   | 0.1   |
| 222203_s_at | AK023625 | NT5C1B-RDH57665 /// | 10         | 74.4  | 59.8  | 91.4  | 54.1  | 72.0  |
| 222204_s_at | AL110238 | RRN3                | 54700      | 147.6 | 96.6  | 127.8 | 94.8  | 104.2 |
| 222205_x_at | AA446466 | FAM182B ///         | 728882 /// | 3.7   | 9.8   | 12.7  | 1.6   | 2.7   |
| 222206_s_at | AA781143 | NCLN                | 56926      | 55.1  | 66.0  | 76.8  | 74.6  | 61.7  |
| 222207_x_at | AK024602 | -                   | -          | 48.4  | 35.8  | 45.2  | 32.8  | 32.1  |
| 222208_s_at | W07700   | POLR2J4             | 84820      | 14.3  | 20.6  | 20.8  | 12.1  | 16.0  |
| 222209_s_at | AK000684 | TMEM135             | 65084      | 127.7 | 117.5 | 139.7 | 125.1 | 104.4 |
| 222210_at   | AK025262 | KIAA0195 ///        | 9772 ///   | 10.1  | 1.2   | 4.8   | 6.7   | 8.7   |

|             |          |                       |        |        |       |        |        |       |
|-------------|----------|-----------------------|--------|--------|-------|--------|--------|-------|
| 222211_x_at | AF244812 | SCAND2P               | 54581  | 0.6    | 1.9   | 2.6    | 1.2    | 0.9   |
| 222212_s_at | AK001105 | CERS2                 | 29956  | 769.7  | 764.8 | 787.7  | 736.1  | 636.3 |
| 222213_x_at | AU147800 | -                     | -      | 5.3    | 1.0   | 2.5    | 2.0    | 3.8   |
| 222214_at   | AK024988 | -                     | -      | 14.6   | 11.3  | 12.8   | 7.7    | 5.2   |
| 222215_at   | AK022786 | SLC38A7               | 55238  | 1.0    | 6.1   | 0.8    | 1.3    | 5.7   |
| 222216_s_at | AK026857 | MRPL17                | 63875  | 407.6  | 353.3 | 516.3  | 425.4  | 476.5 |
| 222217_s_at | BC003654 | SLC27A3               | 11000  | 7.0    | 3.8   | 12.5   | 8.6    | 8.8   |
| 222218_s_at | AJ400843 | PILRA                 | 29992  | 7.0    | 7.3   | 6.2    | 6.3    | 1.1   |
| 222219_s_at | AC007766 | TLE6                  | 79816  | 10.9   | 14.1  | 12.1   | 6.4    | 5.3   |
| 222220_s_at | AK027245 | TSNAXIP1              | 55815  | 30.4   | 17.5  | 30.9   | 20.6   | 12.8  |
| 222221_x_at | AY007161 | EHD1                  | 10938  | 10.2   | 10.0  | 7.3    | 16.7   | 9.7   |
| 222222_s_at | AC002985 | HOMER3                | 9454   | 2.8    | 2.3   | 5.8    | 0.9    | 1.4   |
| 222223_s_at | AF216693 | IL36RN                | 26525  | 16.7   | 18.0  | 18.2   | 14.4   | 11.4  |
| 222224_at   | AJ278883 | NACA2                 | 342538 | 9.5    | 9.6   | 12.1   | 13.2   | 7.6   |
| 222225_at   | AC004908 | RPL23AP53             | 644128 | 4.6    | 1.3   | 3.2    | 1.0    | 8.1   |
| 222226_at   | X13895   | SAA3P                 | 6290   | 0.7    | 0.9   | 3.9    | 1.6    | 0.6   |
| 222227_at   | AK000847 | -                     | -      | 0.1    | 1.1   | 3.2    | 0.1    | 2.7   |
| 222228_s_at | AK026097 | ALKBH4                | 54784  | 43.6   | 37.4  | 48.4   | 49.1   | 35.6  |
| 222229_x_at | AL121871 | RP13-258O1!           | -      | 1155.2 | 943.3 | 1248.8 | 1060.8 | 969.4 |
| 222230_s_at | AK022248 | ACTR10                | 55860  | 274.2  | 309.1 | 264.9  | 284.4  | 213.8 |
| 222231_s_at | AK025328 | LRRC59                | 55379  | 677.0  | 622.4 | 750.7  | 609.5  | 645.1 |
| 222233_s_at | AK022922 | DCLRE1C               | 64421  | 22.9   | 19.2  | 28.4   | 24.2   | 19.0  |
| 222234_s_at | AK022644 | DBNDD1                | 79007  | 43.6   | 52.2  | 73.1   | 67.4   | 68.3  |
| 222235_s_at | AL139812 | CSGALNACT2            | 55454  | 31.4   | 15.0  | 31.1   | 16.4   | 24.4  |
| 222236_s_at | AK000253 | ASAP3                 | 55616  | 24.2   | 24.1  | 23.1   | 8.6    | 14.8  |
| 222237_s_at | AC084239 | ZNF112                | 7771   | 17.8   | 12.2  | 12.8   | 7.8    | 11.5  |
| 222238_s_at | AK023002 | POLM                  | 27434  | 19.1   | 14.6  | 10.9   | 14.0   | 16.5  |
| 222239_s_at | AL117626 | INTS6                 | 26512  | 30.7   | 33.2  | 28.1   | 30.8   | 28.1  |
| 222240_s_at | AL137749 | ISYNA1                | 51477  | 47.4   | 42.2  | 57.5   | 55.1   | 43.4  |
| 222241_at   | AK000001 | MVB12B                | 89853  | 14.4   | 2.6   | 6.0    | 9.6    | 5.6   |
| 222242_s_at | AF243527 | KLK5                  | 25818  | 22.3   | 15.0  | 16.7   | 17.2   | 5.9   |
| 222243_s_at | AB051450 | TOB2                  | 10766  | 86.3   | 89.1  | 70.5   | 100.8  | 74.8  |
| 222244_s_at | AK000749 | TUG1                  | 55000  | 308.7  | 288.6 | 296.4  | 306.3  | 258.3 |
| 222245_s_at | AF218012 | FER1L4                | 80307  | 21.0   | 12.6  | 20.9   | 12.3   | 18.2  |
| 222246_at   | AF090913 | -                     | -      | 0.7    | 0.9   | 0.2    | 0.3    | 0.4   |
| 222247_at   | S58722   | -                     | -      | 4.0    | 2.1   | 2.3    | 2.7    | 4.3   |
| 222248_s_at | AC003982 | SIRT4                 | 23409  | 1.5    | 3.8   | 1.0    | 1.4    | 1.3   |
| 222249_at   | AB051438 | -                     | -      | 2.5    | 1.6   | 3.3    | 3.2    | 2.5   |
| 222250_s_at | AK001363 | INTS7                 | 25896  | 85.0   | 65.1  | 87.6   | 66.5   | 64.2  |
| 222251_s_at | AL133646 | GMEB2                 | 26205  | 56.6   | 63.5  | 47.9   | 50.0   | 37.7  |
| 222252_x_at | AK023354 | UBQLN4                | 56893  | 14.1   | 13.2  | 11.4   | 15.0   | 17.9  |
| 222253_s_at | AL117484 | POM121L9P             | 29774  | 3.5    | 0.5   | 0.4    | 1.4    | 3.1   |
| 222254_at   | AL034429 | COX6CP2 ///           | -      | 3.2    | 5.9   | 2.6    | 6.1    | 6.0   |
| 222255_at   | AB046840 | PRX                   | 57716  | 0.3    | 0.4   | 0.4    | 0.3    | 0.9   |
| 222256_s_at | AK000550 | JMJD7 /// JM 8681 /// | 100    | 43.4   | 49.7  | 36.4   | 48.7   | 33.3  |
| 222257_s_at | AK026461 | ACE2                  | 59272  | 8.0    | 7.1   | 6.8    | 3.7    | 5.5   |
| 222258_s_at | AF015043 | SH3BP4                | 23677  | 81.4   | 92.2  | 75.3   | 94.7   | 67.8  |
| 222259_s_at | AL135939 | SPO11                 | 23626  | 5.3    | 0.2   | 3.8    | 3.0    | 3.1   |
| 222260_at   | AK026947 | CTD-3126B1(-          | -      | 1.1    | 1.6   | 2.2    | 1.1    | 1.3   |
| 222261_at   | AL137316 | TLDC1                 | 57707  | 1.9    | 0.5   | 0.6    | 0.4    | 1.0   |
| 222262_s_at | AL137750 | ETNK1                 | 55500  | 79.5   | 63.0  | 76.3   | 60.0   | 62.9  |
| 222263_at   | BE904333 | SLC35E1               | 79939  | 34.7   | 44.4  | 48.6   | 46.1   | 42.4  |
| 222264_at   | BG167570 | HNRNPUL2              | 221092 | 47.2   | 37.7  | 64.4   | 41.9   | 42.7  |



|             |          |            |           |       |       |       |       |       |
|-------------|----------|------------|-----------|-------|-------|-------|-------|-------|
| 222265_at   | BE735851 | TNS4       | 84951     | 4.3   | 1.6   | 3.0   | 8.2   | 7.3   |
| 222266_at   | BF796940 | -          | -         | 34.9  | 33.7  | 35.7  | 30.5  | 33.1  |
| 222267_at   | BE619220 | TMEM209    | 84928     | 15.3  | 3.5   | 19.0  | 16.0  | 11.3  |
| 222268_x_at | AA587390 | MUC5B      | 727897    | 10.1  | 0.7   | 5.2   | 5.0   | 2.6   |
| 222269_at   | W87634   | APOOL      | 139322    | 38.6  | 24.3  | 38.9  | 47.4  | 27.4  |
| 222270_at   | BG540048 | SMEK2      | 57223     | 11.5  | 5.5   | 13.5  | 6.8   | 10.2  |
| 222271_at   | AV720803 | -          | -         | 1.7   | 2.8   | 6.9   | 5.6   | 4.6   |
| 222272_x_at | BG283584 | SCIN       | 85477     | 10.5  | 5.8   | 6.7   | 4.5   | 1.0   |
| 222273_at   | AI419423 | PAPOLG     | 64895     | 6.3   | 5.9   | 6.6   | 4.8   | 4.8   |
| 222274_at   | AW975050 | ZDHHC8P1   | 150244    | 7.9   | 4.2   | 12.1  | 4.5   | 2.4   |
| 222275_at   | AI039469 | MRPS30     | 10884     | 34.9  | 24.4  | 26.1  | 22.8  | 23.3  |
| 222276_at   | AA837026 | METTL2B    | 55798     | 10.4  | 12.3  | 16.1  | 10.7  | 4.5   |
| 222277_at   | BG032839 | C1QTNF9B-A | 542767    | 36.7  | 24.8  | 25.9  | 29.8  | 22.1  |
| 222278_at   | AW969655 | LOC1019297 | 101929726 | 1.8   | 2.3   | 1.3   | 1.5   | 1.3   |
| 222279_at   | AI669379 | HLA-F-AS1  | 285830    | 251.6 | 143.3 | 180.0 | 164.6 | 117.6 |
| 222280_at   | BG491393 | LOC1005064 | 100506469 | 42.0  | 27.3  | 42.3  | 42.3  | 26.1  |
| 222281_s_at | AW517716 | C1orf186   | 440712    | 2.1   | 2.2   | 2.1   | 3.1   | 4.5   |
| 222282_at   | AV761453 | -          | -         | 11.4  | 11.9  | 12.8  | 14.7  | 6.1   |
| 222283_at   | BG387770 | ZNF480     | 147657    | 24.6  | 17.3  | 20.1  | 17.4  | 17.6  |
| 222284_at   | AI734111 | -          | -         | 7.8   | 12.2  | 2.4   | 1.2   | 6.6   |
| 222285_at   | AW134608 | IGHD       | 3495      | 2.2   | 6.6   | 1.6   | 4.8   | 3.9   |
| 222286_at   | R43279   | SNAPC3     | 6619      | 8.0   | 7.6   | 6.6   | 7.8   | 5.3   |
| 222287_at   | AW969675 | TRDN       | 10345     | 0.1   | 0.4   | 2.3   | 0.1   | 2.1   |
| 222288_at   | AI004009 | -          | -         | 0.3   | 1.9   | 0.5   | 0.6   | 0.5   |
| 222289_at   | AW149844 | KCNC2      | 3747      | 5.5   | 5.8   | 9.6   | 4.1   | 1.4   |
| 222290_at   | AA731709 | OR2A20P    | 401428    | 0.8   | 11.3  | 6.6   | 5.7   | 4.5   |
| 222291_at   | AI478795 | FAM149A    | 25854     | 5.9   | 7.3   | 6.6   | 8.2   | 5.3   |
| 222292_at   | AW298127 | CD40       | 958       | 0.7   | 0.3   | 6.0   | 3.1   | 2.9   |
| 222293_at   | AW204383 | CADM4      | 199731    | 1.4   | 9.7   | 6.6   | 4.1   | 1.6   |
| 222294_s_at | AW971415 | RAB27A     | 5873      | 10.0  | 7.8   | 9.9   | 6.6   | 7.0   |
| 222295_x_at | AI732770 | -          | -         | 9.2   | 8.4   | 7.7   | 5.0   | 4.3   |
| 222296_at   | AI668610 | -          | -         | 2.5   | 1.7   | 1.9   | 1.5   | 4.1   |
| 222297_x_at | AV738806 | RPL18P10   | -         | 133.1 | 72.9  | 118.8 | 78.6  | 86.3  |
| 222298_at   | AA129909 | -          | -         | 1.2   | 1.9   | 2.4   | 1.3   | 1.7   |
| 222299_x_at | AW301937 | -          | -         | 0.3   | 0.1   | 0.1   | 1.8   | 0.2   |
| 222300_at   | BF155672 | -          | -         | 0.8   | 0.9   | 4.0   | 2.5   | 4.0   |
| 222301_at   | BF530257 | C1orf61    | 10485     | 12.6  | 11.4  | 15.5  | 9.3   | 9.3   |
| 222302_at   | BE813017 | RP11-82L18 | -         | 21.9  | 27.0  | 23.3  | 21.8  | 12.6  |
| 222303_at   | AV700891 | -          | -         | 1.0   | 2.2   | 0.8   | 3.2   | 1.0   |
| 222304_x_at | AW514038 | OR7E47P    | 26628     | 24.0  | 25.3  | 20.9  | 20.7  | 17.9  |
| 222305_at   | AW975638 | HK2        | RP113099  | 7.6   | 12.2  | 14.5  | 12.7  | 11.2  |
| 222306_at   | AA521034 | -          | -         | 5.2   | 4.6   | 6.2   | 3.0   | 1.0   |
| 222307_at   | AI695595 | PDCD4-AS1  | 282997    | 13.3  | 9.0   | 12.1  | 14.9  | 6.8   |
| 222308_x_at | AV700403 | -          | -         | 2.3   | 0.1   | 3.2   | 1.3   | 0.1   |
| 222309_at   | AW972292 | C6orf62    | 81688     | 14.6  | 7.6   | 18.2  | 9.2   | 11.4  |
| 222310_at   | AA648521 | SCAF4      | 57466     | 4.4   | 5.9   | 6.1   | 4.5   | 5.6   |
| 222311_s_at | AA648521 | SCAF4      | 57466     | 22.3  | 15.0  | 21.5  | 21.2  | 13.0  |
| 222312_s_at | AW969803 | -          | -         | 1.4   | 8.0   | 8.4   | 4.2   | 5.9   |
| 222313_at   | AW972359 | -          | -         | 0.2   | 0.4   | 0.8   | 0.4   | 2.1   |
| 222314_x_at | AW970881 | EGOT       | 100126791 | 3.2   | 0.7   | 3.0   | 3.0   | 0.6   |
| 222315_at   | AW972855 | LOC1009967 | 100996756 | 8.7   | 13.1  | 10.5  | 18.7  | 3.2   |
| 222316_at   | AW973253 | -          | -         | 5.6   | 4.1   | 7.0   | 7.1   | 2.9   |
| 222317_at   | AA888858 | PDE3B      | 5140      | 21.4  | 16.9  | 29.6  | 16.3  | 18.7  |

|             |          |                           |        |       |      |       |       |      |
|-------------|----------|---------------------------|--------|-------|------|-------|-------|------|
| 222318_at   | AI744673 | ZNF324B                   | 388569 | 23.0  | 26.4 | 29.2  | 34.0  | 22.7 |
| 222319_at   | AW970948 | -                         | -      | 4.5   | 6.9  | 20.3  | 9.6   | 8.7  |
| 222320_at   | AW970584 | -                         | -      | 4.9   | 0.5  | 2.8   | 1.6   | 1.7  |
| 222321_at   | AI911273 | AGTR2                     | 186    | 7.1   | 7.8  | 5.2   | 14.2  | 8.0  |
| 222322_at   | AI791860 | -                         | -      | 0.8   | 0.6  | 0.1   | 0.5   | 0.2  |
| 222323_at   | AI742810 | CRYGEP                    | -      | 8.1   | 1.1  | 9.8   | 1.5   | 0.9  |
| 222324_at   | AI344415 | -                         | -      | 5.9   | 0.8  | 4.6   | 8.5   | 0.6  |
| 222325_at   | AW974812 | -                         | -      | 0.4   | 0.6  | 2.8   | 0.4   | 1.0  |
| 222326_at   | AW973834 | -                         | -      | 4.8   | 1.0  | 3.8   | 3.1   | 1.7  |
| 222327_x_at | AA459867 | OR7E156P                  | 283491 | 28.9  | 24.5 | 38.4  | 41.1  | 31.0 |
| 222328_x_at | AI133721 | -                         | -      | 8.6   | 9.0  | 9.4   | 10.7  | 1.1  |
| 222329_x_at | AW974816 | -                         | -      | 47.7  | 34.4 | 75.1  | 40.9  | 27.6 |
| 222330_at   | AW974995 | -                         | -      | 0.2   | 1.3  | 1.0   | 0.2   | 0.1  |
| 222331_at   | AV652328 | -                         | -      | 1.8   | 2.6  | 1.1   | 0.6   | 1.1  |
| 222332_at   | N58524   | -                         | -      | 1.9   | 0.4  | 1.9   | 0.6   | 0.3  |
| 222333_at   | AV661533 | ALS2CL                    | 259173 | 32.4  | 27.7 | 33.3  | 24.3  | 23.6 |
| 222334_at   | AW979289 | C1orf186 /// 440712 /// 1 |        | 18.2  | 3.0  | 19.1  | 13.4  | 3.6  |
| 222335_at   | BG025063 | -                         | -      | 12.1  | 10.2 | 23.4  | 13.8  | 11.5 |
| 222336_at   | AW974915 | SMIM14                    | 201895 | 6.6   | 5.6  | 4.3   | 5.4   | 0.3  |
| 222337_at   | AW968210 | -                         | -      | 1.0   | 1.0  | 1.1   | 1.9   | 4.5  |
| 222338_x_at | AI375965 | RP11-54K16.               | -      | 135.3 | 80.1 | 116.6 | 103.8 | 72.2 |
| 222339_x_at | AI054381 | -                         | -      | 12.6  | 15.6 | 8.3   | 14.4  | 15.8 |
| 222340_at   | AW975117 | -                         | -      | 3.3   | 1.9  | 2.6   | 3.9   | 2.0  |
| 222341_x_at | AW973235 | -                         | -      | 5.5   | 2.8  | 4.7   | 5.9   | 4.2  |
| 222342_at   | AW979196 | -                         | -      | 0.8   | 0.1  | 0.6   | 0.5   | 0.4  |
| 222343_at   | AA629050 | BCL2L11                   | 10018  | 15.2  | 12.0 | 17.5  | 16.1  | 7.8  |
| 222344_at   | AW972765 | -                         | -      | 9.4   | 6.0  | 8.0   | 6.7   | 4.6  |
| 222345_at   | BF229395 | EMC10                     | 284361 | 0.8   | 1.9  | 1.5   | 0.9   | 2.1  |
| 222346_at   | AI633741 | LAMA1                     | 284217 | 3.0   | 4.9  | 1.4   | 1.2   | 5.1  |
| 222347_at   | AI050036 | -                         | -      | 21.2  | 32.8 | 28.7  | 16.3  | 10.4 |
| 222348_at   | AW971134 | MAST4                     | 375449 | 6.4   | 7.6  | 5.7   | 0.9   | 5.1  |
| 222349_x_at | AW303476 | RNF126P1                  | 376412 | 52.8  | 19.5 | 36.4  | 23.8  | 22.9 |
| 222350_at   | AW969913 | -                         | -      | 8.0   | 4.4  | 9.0   | 5.7   | 5.7  |
| 222351_at   | AW009884 | PPP2R1B                   | 5519   | 9.8   | 9.8  | 20.6  | 19.9  | 10.3 |
| 222352_at   | BE465371 | FBXO31                    | 79791  | 3.5   | 3.0  | 6.5   | 8.9   | 7.7  |
| 222353_at   | AV720842 | LIMD1                     | 8994   | 0.3   | 0.4  | 0.4   | 0.7   | 0.1  |
| 222354_at   | AW675655 | F11R                      | 50848  | 10.7  | 17.1 | 15.5  | 16.5  | 12.5 |
| 222355_at   | H24302   | -                         | -      | 8.9   | 8.7  | 7.5   | 8.2   | 0.9  |
| 222356_at   | AW974910 | -                         | -      | 22.5  | 26.5 | 39.2  | 27.2  | 31.4 |
| 222357_at   | AW974823 | ZBTB20                    | 26137  | 1.1   | 3.9  | 1.6   | 1.0   | 1.0  |
| 222358_x_at | AI523613 | -                         | -      | 8.0   | 14.0 | 11.8  | 11.4  | 9.7  |
| 222359_x_at | BF573849 | KDSR                      | 2531   | 0.5   | 0.3  | 0.4   | 1.3   | 1.9  |
| 222360_at   | AI291720 | DPH5                      | 51611  | 17.7  | 16.2 | 24.3  | 22.1  | 23.9 |
| 222361_at   | AI433261 | TUBBP5                    | 643224 | 30.2  | 27.6 | 29.9  | 30.4  | 17.4 |
| 222362_at   | H07885   | AGFG2                     | 3268   | 16.2  | 14.8 | 22.2  | 21.4  | 15.9 |
| 222363_at   | AW979018 | -                         | -      | 5.6   | 1.6  | 1.0   | 11.2  | 3.4  |
| 222364_at   | AW971205 | SLC44A1                   | 23446  | 1.2   | 1.5  | 0.6   | 1.4   | 1.2  |
| 222365_at   | AW974666 | TBCEL                     | 219899 | 2.3   | 1.3  | 1.5   | 0.8   | 1.4  |
| 222366_at   | W86781   | -                         | -      | 16.7  | 8.0  | 19.7  | 14.2  | 8.6  |
| 222367_at   | AI921841 | WHAMMP2 ,339005 /// 4     |        | 0.8   | 3.3  | 4.1   | 6.8   | 1.3  |
| 222368_at   | AW972351 | -                         | -      | 21.4  | 18.6 | 24.5  | 14.3  | 4.2  |
| 222369_at   | AW971254 | NAA40                     | 79829  | 52.1  | 43.7 | 42.2  | 36.1  | 24.1 |
| 222370_x_at | N57781   | -                         | -      | 14.8  | 12.6 | 15.1  | 7.7   | 10.0 |

|             |          |               |              |       |       |       |       |       |
|-------------|----------|---------------|--------------|-------|-------|-------|-------|-------|
| 222371_at   | AI732802 | -             | -            | 5.0   | 3.4   | 8.0   | 3.3   | 4.9   |
| 222372_at   | AW971248 | MAGI1         | 9223         | 0.5   | 1.3   | 4.4   | 0.5   | 3.2   |
| 222373_at   | AV651241 | -             | -            | 4.8   | 1.0   | 0.6   | 0.5   | 1.5   |
| 222374_at   | AI186064 | BTRC          | 8945         | 2.1   | 0.6   | 1.2   | 1.7   | 0.5   |
| 222375_at   | AW970944 | -             | -            | 6.8   | 4.5   | 6.8   | 6.3   | 3.9   |
| 222376_at   | AV704017 | RP11-499E18-  |              | 14.2  | 10.5  | 12.8  | 7.3   | 4.1   |
| 222377_at   | AI674138 | TBX10         | 347853       | 9.8   | 9.2   | 11.1  | 8.9   | 7.1   |
| 222378_at   | AW973791 | -             | -            | 0.4   | 0.6   | 0.7   | 3.7   | 0.5   |
| 222379_at   | AI002715 | KCNE4         | 23704        | 2.3   | 6.4   | 4.1   | 1.7   | 4.6   |
| 222380_s_at | AI907083 | PDCD6         | 10016        | 28.7  | 26.1  | 16.2  | 13.5  | 11.5  |
| 222381_at   | AI907083 | -             | -            | 11.8  | 7.2   | 11.7  | 8.2   | 8.0   |
| 222382_x_at | AW206115 | NUP205        | 23165        | 27.5  | 10.6  | 27.2  | 17.8  | 17.8  |
| 222383_s_at | AW003512 | ALOXE3        | 59344        | 11.7  | 5.0   | 11.0  | 9.0   | 5.1   |
| 222384_at   | AA417256 | SMG7-AS1      | 284649       | 10.1  | 0.5   | 5.7   | 6.7   | 4.8   |
| 243_g_at    | M64571   | MAP4          | 4134         | 355.6 | 321.2 | 347.6 | 340.4 | 272.2 |
| 266_s_at    | L33930   | CD24          | 100133941    | 4.7   | 3.0   | 4.8   | 0.9   | 2.2   |
| 31637_s_at  | X72631   | NR1D1 /// T7  | 7067 /// 957 | 55.7  | 42.9  | 68.5  | 57.8  | 44.1  |
| 31799_at    | AF070618 | -             | -            | 5.5   | 9.5   | 4.6   | 5.5   | 4.8   |
| 31807_at    | AC002985 | DDX49         | 54555        | 225.6 | 203.8 | 235.5 | 224.9 | 195.8 |
| 31826_at    | AB014574 | FKBP15        | 23307        | 75.9  | 71.2  | 88.2  | 74.9  | 63.5  |
| 31835_at    | M13149   | HRG           | 3273         | 5.0   | 5.2   | 9.1   | 4.8   | 5.5   |
| 31837_at    | U62317   | LMF2          | 91289        | 110.7 | 92.4  | 110.4 | 114.6 | 90.9  |
| 31845_at    | U32645   | ELF4          | 2000         | 20.5  | 22.6  | 14.8  | 21.8  | 11.1  |
| 31846_at    | AW003733 | RHOD          | 29984        | 345.4 | 289.9 | 338.4 | 323.1 | 249.6 |
| 31861_at    | L14754   | IGHMBP2       | 3508         | 82.4  | 51.7  | 67.4  | 48.1  | 47.5  |
| 31874_at    | Y07846   | GAS2L1        | 10634        | 177.9 | 156.3 | 185.6 | 168.6 | 155.2 |
| 320_at      | D83703   | PEX6          | 5190         | 17.5  | 17.9  | 14.5  | 17.9  | 12.7  |
| 32029_at    | AC005591 | LOC1010607.5  | 170 /// 101  | 42.7  | 45.6  | 48.4  | 41.2  | 34.0  |
| 32032_at    | L77566   | DGCR14 /// 18 | 220 /// 236  | 86.2  | 58.3  | 76.5  | 73.0  | 52.1  |
| 32042_at    | S72904   | ENOX2         | 10495        | 33.9  | 27.3  | 34.1  | 29.2  | 22.4  |
| 32062_at    | D25216   | LRRC14        | 9684         | 21.5  | 21.3  | 18.9  | 21.3  | 12.1  |
| 32069_at    | AB014515 | N4BP1         | 9683         | 52.2  | 36.4  | 51.8  | 35.4  | 37.6  |
| 32088_at    | U79751   | BLZF1         | 8548         | 19.1  | 9.5   | 19.9  | 14.8  | 12.1  |
| 32091_at    | AB007915 | SLC25A44      | 9673         | 102.7 | 88.4  | 102.9 | 87.2  | 87.8  |
| 32094_at    | AB017915 | CHST3         | 9469         | 19.4  | 23.2  | 21.0  | 18.0  | 15.4  |
| 32099_at    | D50928   | SAFB2         | 9667         | 93.1  | 81.9  | 116.5 | 85.6  | 88.4  |
| 32128_at    | Y13710   | CCL18         | 6362         | 1.6   | 2.6   | 8.4   | 1.5   | 3.5   |
| 32137_at    | Y14330   | JAG2          | 3714         | 158.5 | 124.6 | 164.0 | 136.9 | 132.9 |
| 32209_at    | AF052151 | FAM89B        | 23625        | 312.4 | 325.0 | 340.5 | 319.9 | 236.7 |
| 32259_at    | AB002386 | EZH1          | 2145         | 18.9  | 23.9  | 27.0  | 22.3  | 17.3  |
| 32402_s_at  | Y10931   | SYMPK         | 8189         | 24.8  | 19.6  | 31.7  | 20.8  | 15.9  |
| 32502_at    | AL041124 | GDPD5         | 81544        | 25.3  | 9.1   | 16.7  | 20.4  | 8.2   |
| 32540_at    | AI762547 | PPP3CC        | 5533         | 8.2   | 10.4  | 15.6  | 9.5   | 13.0  |
| 32541_at    | S46622   | PPP3CC        | 5533         | 32.5  | 33.3  | 34.2  | 29.1  | 27.1  |
| 32625_at    | X15357   | NPR1          | 4881         | 2.6   | 1.5   | 3.2   | 2.8   | 1.6   |
| 32699_s_at  | X64116   | PVR           | 5817         | 38.8  | 27.6  | 34.5  | 35.0  | 27.4  |
| 32723_at    | L02547   | CSTF1         | 1477         | 102.2 | 68.9  | 102.7 | 81.2  | 94.5  |
| 32811_at    | X98507   | MYO1C         | 4641         | 137.8 | 131.3 | 150.5 | 149.9 | 134.9 |
| 32836_at    | U56417   | AGPAT1        | 10554        | 329.8 | 365.6 | 333.4 | 353.9 | 243.1 |
| 32837_at    | U56418   | AGPAT2        | 10555        | 97.1  | 98.9  | 101.8 | 88.9  | 70.5  |
| 33132_at    | U37012   | CPSF1 /// MI  | 29894 /// 10 | 107.1 | 116.0 | 118.9 | 84.2  | 107.6 |
| 33148_at    | AI459274 | ZFR           | 51663        | 17.3  | 14.9  | 21.7  | 23.0  | 13.4  |
| 33197_at    | U39226   | MYO7A         | 4647         | 18.7  | 8.1   | 8.3   | 11.1  | 9.0   |

|            |          |               |              |        |       |        |        |       |
|------------|----------|---------------|--------------|--------|-------|--------|--------|-------|
| 33304_at   | U88964   | ISG20         | 3669         | 40.7   | 42.1  | 33.3   | 34.2   | 26.5  |
| 33307_at   | AL022316 | RRP7A         | 27341        | 79.2   | 69.7  | 104.8  | 94.7   | 91.4  |
| 33322_i_at | X57348   | SFN           | 2810         | 116.5  | 84.3  | 109.0  | 107.3  | 87.9  |
| 33323_r_at | X57348   | SFN           | 2810         | 27.2   | 41.7  | 41.3   | 31.5   | 28.2  |
| 33494_at   | S69232   | ETFDH         | 2110         | 82.5   | 76.9  | 80.7   | 83.7   | 65.0  |
| 33579_i_at | Z97630   | GALR3         | 8484         | 26.7   | 6.6   | 9.6    | 19.8   | 9.6   |
| 336_at     | D38081   | TBXA2R        | 6915         | 16.3   | 7.5   | 15.9   | 11.0   | 6.8   |
| 33646_g_at | X61094   | GM2A          | 2760         | 65.3   | 71.6  | 70.1   | 72.2   | 56.2  |
| 33736_at   | Y16522   | STOML1        | 9399         | 75.0   | 58.2  | 72.4   | 75.2   | 62.3  |
| 33760_at   | AB017546 | PEX14         | 5195         | 96.9   | 79.3  | 103.2  | 99.7   | 82.1  |
| 33767_at   | X15306   | NEFH          | 4744         | 1.6    | 3.4   | 3.6    | 0.2    | 0.2   |
| 33768_at   | L19267   | DMWD          | 1762         | 58.8   | 34.0  | 48.9   | 43.1   | 35.1  |
| 33778_at   | AL096779 | TBC1D22A      | 25771        | 107.7  | 91.4  | 105.1  | 105.2  | 69.9  |
| 33814_at   | AF005046 | PAK4          | 10298        | 563.1  | 497.6 | 540.8  | 494.5  | 415.3 |
| 33850_at   | W28892   | MAP4          | 4134         | 28.7   | 41.9  | 42.7   | 37.6   | 29.7  |
| 34031_i_at | U90269   | KRIT1         | 889          | 56.4   | 46.3  | 57.6   | 50.1   | 44.1  |
| 34063_at   | AB006533 | RECQL5        | 9400         | 16.8   | 15.3  | 18.8   | 14.9   | 14.1  |
| 34187_at   | D28483   | RBMS2         | 5939         | 14.2   | 10.2  | 13.4   | 18.9   | 6.9   |
| 34206_at   | AB018325 | ARAP1         | 116985       | 48.5   | 46.1  | 54.0   | 44.3   | 38.0  |
| 34210_at   | N90866   | CD52          | 1043         | 0.5    | 0.4   | 1.3    | 0.6    | 0.4   |
| 34221_at   | D83778   | HMGXB3        | 22993        | 75.2   | 79.2  | 80.8   | 83.9   | 70.3  |
| 34225_at   | AF101434 | MIR943 /// N  | 7469 /// 100 | 110.7  | 95.0  | 113.9  | 97.0   | 83.5  |
| 34260_at   | AB014583 | TELO2         | 9894         | 46.9   | 46.7  | 59.5   | 52.4   | 52.3  |
| 34406_at   | AB011174 | PACS2         | 23241        | 87.4   | 61.0  | 64.1   | 59.8   | 54.3  |
| 34408_at   | AF004222 | RTN2          | 6253         | 6.1    | 12.1  | 11.8   | 11.8   | 10.0  |
| 34449_at   | U13022   | CASP2         | 835          | 58.3   | 31.2  | 41.9   | 36.6   | 28.6  |
| 34471_at   | M36769   | MYH8          | 4626         | 0.5    | 7.0   | 0.7    | 0.5    | 0.5   |
| 34478_at   | X79780   | RAB11B        | 9230         | 52.3   | 54.9  | 63.8   | 70.1   | 45.8  |
| 34689_at   | AJ243797 | ATRIP /// TRI | 11277 /// 84 | 256.0  | 247.8 | 277.1  | 251.1  | 214.7 |
| 34697_at   | AF074264 | LRP6          | 4040         | 31.3   | 14.5  | 24.8   | 14.1   | 15.0  |
| 34726_at   | U07139   | CACNB3        | 784          | 46.7   | 43.8  | 29.4   | 39.7   | 36.6  |
| 34764_at   | D21851   | LARS2         | 23395        | 165.0  | 140.4 | 164.0  | 144.0  | 124.5 |
| 34846_at   | AF112472 | CAMK2B        | 816          | 22.4   | 27.4  | 25.0   | 15.8   | 28.3  |
| 34858_at   | D79998   | KCTD2         | 23510        | 62.7   | 57.9  | 67.1   | 54.5   | 50.1  |
| 34868_at   | AB029012 | SMG5          | 23381        | 64.3   | 64.8  | 89.2   | 84.3   | 58.3  |
| 35147_at   | AB002360 | MCF2L         | 23263        | 67.9   | 54.8  | 61.6   | 61.8   | 47.7  |
| 35148_at   | AC005954 | TJP3          | 27134        | 27.4   | 21.0  | 17.3   | 29.6   | 19.0  |
| 35150_at   | X60592   | CD40          | 958          | 49.6   | 26.7  | 34.7   | 36.0   | 20.9  |
| 35156_at   | AL050297 | R3HCC1        | 203069       | 283.8  | 249.8 | 268.9  | 267.8  | 203.9 |
| 35160_at   | AF064491 | LDB1          | 8861         | 41.3   | 42.2  | 47.8   | 45.7   | 40.0  |
| 35179_at   | AB009598 | B3GAT3        | 26229        | 58.7   | 68.2  | 61.7   | 67.7   | 49.8  |
| 35201_at   | X16135   | HNRNPL        | 3191         | 1095.6 | 990.0 | 1106.2 | 1092.7 | 905.3 |
| 35254_at   | AB007447 | TRAFD1        | 10906        | 75.3   | 60.8  | 86.0   | 74.2   | 74.5  |
| 35265_at   | AF044263 | FXR2          | 9513         | 200.5  | 182.1 | 197.7  | 195.7  | 135.9 |
| 35436_at   | L06147   | GOLGA2        | 2801         | 47.7   | 44.5  | 51.1   | 50.2   | 41.5  |
| 35617_at   | U29725   | MAPK7         | 5598         | 28.0   | 29.6  | 35.0   | 32.1   | 34.3  |
| 35626_at   | U30894   | SGSH          | 6448         | 98.1   | 75.9  | 93.4   | 89.7   | 81.6  |
| 35666_at   | U38276   | SEMA3F        | 6405         | 118.2  | 79.3  | 96.0   | 92.2   | 87.7  |
| 35671_at   | U02619   | GTF3C1        | 2975         | 199.6  | 194.0 | 178.6  | 186.8  | 159.9 |
| 35685_at   | AL031228 | RING1         | 6015         | 126.9  | 102.0 | 113.6  | 113.6  | 85.1  |
| 35776_at   | AF064243 | ITSN1         | 6453         | 58.8   | 38.0  | 48.2   | 47.9   | 44.3  |
| 35820_at   | M76477   | GM2A          | 2760         | 103.9  | 121.9 | 113.8  | 125.9  | 97.6  |
| 35846_at   | M24899   | THRA          | 7067         | 29.7   | 31.4  | 35.5   | 21.4   | 22.9  |

|            |          |                          |        |        |        |        |        |        |
|------------|----------|--------------------------|--------|--------|--------|--------|--------|--------|
| 35974_at   | U10485   | LRMP                     | 4033   | 0.6    | 0.6    | 1.0    | 3.3    | 0.6    |
| 36004_at   | AF074382 | IKBKG                    | 8517   | 54.3   | 51.7   | 48.7   | 68.7   | 44.3   |
| 36019_at   | L26260   | STK19                    | 8859   | 96.8   | 88.6   | 92.6   | 82.8   | 65.6   |
| 36030_at   | AL080214 | IFFO1                    | 25900  | 17.5   | 6.1    | 14.1   | 10.3   | 8.4    |
| 36084_at   | D38548   | CUL7                     | 9820   | 56.4   | 43.7   | 50.3   | 51.2   | 36.1   |
| 36129_at   | AB007857 | SGSM2                    | 9905   | 111.1  | 84.5   | 90.6   | 97.1   | 51.1   |
| 36475_at   | Z97630   | GCAT                     | 23464  | 181.2  | 143.9  | 159.3  | 171.7  | 158.5  |
| 36499_at   | D87469   | CELSR2                   | 1952   | 47.7   | 55.1   | 54.1   | 53.6   | 28.2   |
| 36545_s_at | AB011114 | SFI1                     | 9814   | 21.4   | 16.3   | 25.0   | 16.1   | 15.0   |
| 36552_at   | AL080220 | C2CD3                    | 26005  | 46.8   | 42.1   | 56.0   | 43.0   | 34.8   |
| 36553_at   | AA669799 | ASMTL                    | 8623   | 224.9  | 242.3  | 250.8  | 250.0  | 208.1  |
| 36554_at   | Y15521   | ASMTL                    | 8623   | 158.9  | 179.0  | 206.6  | 191.3  | 147.1  |
| 36564_at   | W27419   | RNF19B                   | 127544 | 67.2   | 58.2   | 64.1   | 62.2   | 50.3   |
| 36566_at   | AJ222967 | CTNS                     | 1497   | 35.0   | 33.5   | 49.7   | 32.3   | 33.1   |
| 36612_at   | D87470   | FAM168A                  | 23201  | 49.4   | 26.1   | 36.2   | 39.9   | 23.7   |
| 36711_at   | AL021977 | MAFF                     | 23764  | 4.6    | 5.3    | 3.5    | 4.2    | 0.3    |
| 36742_at   | U34249   | TRIM15                   | 89870  | 10.7   | 4.0    | 8.5    | 7.5    | 0.9    |
| 36829_at   | AF022991 | MIR6883 /// 5187 /// 102 |        | 48.9   | 39.2   | 39.2   | 37.7   | 38.3   |
| 36830_at   | U80034   | MIPEP                    | 4285   | 87.1   | 75.7   | 94.4   | 86.5   | 70.7   |
| 36865_at   | AB018302 | ANGEL1                   | 23357  | 59.3   | 47.8   | 60.2   | 49.6   | 51.3   |
| 36888_at   | AB020648 | HAUS5                    | 23354  | 60.9   | 47.6   | 53.7   | 35.9   | 40.4   |
| 36907_at   | M88468   | MVK                      | 4598   | 157.4  | 101.6  | 147.0  | 127.6  | 110.7  |
| 36920_at   | U46024   | MTM1                     | 4534   | 10.9   | 8.3    | 11.6   | 11.4   | 10.5   |
| 36936_at   | U58766   | TSTA3                    | 7264   | 359.8  | 356.9  | 386.7  | 379.7  | 335.0  |
| 36994_at   | M62762   | ATP6VOC                  | 527    | 1224.6 | 1252.7 | 1362.9 | 1288.5 | 1140.8 |
| 37004_at   | J02761   | SFTP8                    | 6439   | 5.9    | 3.7    | 5.6    | 4.0    | 3.2    |
| 37005_at   | D28124   | MINOS1-NBL 4681 /// 100  |        | 19.4   | 14.8   | 6.7    | 11.2   | 20.3   |
| 37012_at   | U03271   | CAPZB                    | 832    | 335.2  | 345.5  | 414.2  | 337.7  | 302.1  |
| 37020_at   | X56692   | CRP                      | 1401   | 0.7    | 0.7    | 0.6    | 0.7    | 2.3    |
| 37022_at   | U41344   | PRELP                    | 5549   | 13.5   | 16.6   | 15.2   | 12.3   | 17.8   |
| 37028_at   | U83981   | PPP1R15A                 | 23645  | 25.3   | 16.1   | 17.8   | 16.2   | 10.3   |
| 37079_at   | U82319   | NUS1P3                   | 11049  | 24.4   | 21.9   | 27.6   | 16.2   | 21.4   |
| 37117_at   | Z83838   | ARHGAP8 /// 23779 /// 55 |        | 126.2  | 97.4   | 128.5  | 113.5  | 107.7  |
| 37145_at   | M85276   | GNLY                     | 10578  | 1.2    | 0.2    | 0.5    | 1.6    | 0.8    |
| 37152_at   | L07592   | PPARD                    | 5467   | 98.0   | 71.4   | 79.5   | 80.0   | 66.1   |
| 37170_at   | AB015331 | BMP2K                    | 55589  | 5.7    | 3.9    | 3.5    | 2.9    | 4.6    |
| 37201_at   | D38535   | ITIH4                    | 3700   | 8.5    | 3.4    | 0.7    | 4.7    | 2.0    |
| 37226_at   | U15172   | BNIP1                    | 662    | 44.7   | 47.0   | 52.6   | 46.1   | 44.8   |
| 37232_at   | AB011158 | KIAA0586                 | 9786   | 21.8   | 20.2   | 20.3   | 19.2   | 17.5   |
| 37254_at   | U09366   | ZNF133                   | 7692   | 52.1   | 39.6   | 36.6   | 43.9   | 33.9   |
| 37278_at   | X92762   | TAZ                      | 6901   | 41.7   | 33.4   | 41.9   | 32.7   | 28.2   |
| 37384_at   | D86995   | PPM1F                    | 9647   | 45.4   | 36.9   | 47.0   | 33.5   | 26.7   |
| 37408_at   | AB014609 | MRC2                     | 9902   | 6.5    | 10.2   | 28.4   | 24.3   | 9.4    |
| 37424_at   | AB029343 | CCHCR1                   | 54535  | 39.1   | 36.6   | 39.5   | 43.9   | 28.5   |
| 37425_g_at | AB029343 | CCHCR1                   | 54535  | 25.2   | 27.6   | 41.2   | 23.8   | 20.1   |
| 37433_at   | AF077954 | PIAS2                    | 9063   | 31.3   | 17.3   | 40.1   | 26.6   | 25.3   |
| 37462_i_at | L21990   | SF3A2                    | 8175   | 219.7  | 171.8  | 230.9  | 200.9  | 183.0  |
| 37512_at   | U89281   | HSD17B6                  | 8630   | 8.4    | 5.2    | 11.4   | 8.8    | 9.3    |
| 37547_at   | U85995   | BBS9                     | 27241  | 0.9    | 2.3    | 2.8    | 0.6    | 0.8    |
| 37549_g_at | U87408   | BBS9                     | 27241  | 15.3   | 15.9   | 23.2   | 23.1   | 9.0    |
| 37566_at   | AB028968 | KIAA1045                 | 23349  | 5.8    | 1.2    | 3.6    | 4.1    | 1.1    |
| 37577_at   | U79256   | ARHGAP19                 | 84986  | 76.5   | 52.6   | 85.5   | 52.6   | 54.8   |
| 37586_at   | D87073   | ZNF142                   | 7701   | 19.9   | 14.0   | 18.7   | 16.8   | 20.1   |

|            |          |                          |        |        |        |        |        |
|------------|----------|--------------------------|--------|--------|--------|--------|--------|
| 37590_g_at | AL109698 | AK055981 //,-            | 26.3   | 29.7   | 27.5   | 28.5   | 22.7   |
| 37652_at   | AB002328 | CABIN1 23523             | 88.1   | 70.1   | 73.7   | 75.7   | 60.7   |
| 37793_r_at | AF034956 | RAD51D 5892              | 18.3   | 16.8   | 23.0   | 16.0   | 14.4   |
| 37796_at   | AF053356 | LRCH4 /// SA4034 /// 100 | 29.1   | 19.6   | 24.9   | 20.0   | 15.6   |
| 37802_r_at | AL049226 | FAM63B 54629             | 12.5   | 5.1    | 7.6    | 1.1    | 7.8    |
| 37831_at   | AB011117 | SIPA1L3 23094            | 42.6   | 28.9   | 32.5   | 41.4   | 18.8   |
| 37860_at   | AL049942 | ZNF337 26152             | 27.5   | 21.1   | 36.2   | 29.4   | 22.7   |
| 37872_at   | AF072468 | JRK 8629                 | 54.2   | 36.2   | 45.2   | 41.9   | 33.3   |
| 37892_at   | J04177   | COL11A1 1301             | 0.9    | 0.3    | 0.5    | 0.4    | 0.7    |
| 37943_at   | AB002319 | ZFYVE26 23503            | 24.1   | 19.8   | 21.5   | 19.1   | 16.4   |
| 37950_at   | X74496   | PREP 5550                | 38.6   | 44.5   | 47.1   | 42.2   | 34.4   |
| 37953_s_at | U78181   | ASIC1 41                 | 14.9   | 8.7    | 9.4    | 6.5    | 11.0   |
| 37965_at   | AA181053 | PARVB 29780              | 139.0  | 179.4  | 188.6  | 182.1  | 139.5  |
| 37966_at   | AA187563 | PARVB 29780              | 80.7   | 75.1   | 125.5  | 81.3   | 68.9   |
| 37986_at   | M60459   | EPOR 2057                | 43.2   | 26.0   | 30.9   | 25.4   | 19.0   |
| 37996_s_at | L08835   | DMPK 1760                | 13.1   | 13.0   | 13.8   | 17.2   | 11.9   |
| 38037_at   | M60278   | HBEGF 1839               | 17.3   | 13.3   | 19.5   | 14.7   | 10.3   |
| 38043_at   | X55448   | FAM3A 60343              | 71.1   | 85.9   | 96.1   | 90.7   | 76.7   |
| 38069_at   | Z67743   | CLCN7 1186               | 45.3   | 39.9   | 53.1   | 37.4   | 30.4   |
| 38149_at   | D29642   | ARHGAP25 9938            | 4.8    | 9.2    | 9.1    | 10.5   | 6.3    |
| 38157_at   | AF059252 | DXO 1797                 | 86.2   | 78.9   | 87.9   | 86.6   | 52.8   |
| 38158_at   | D79987   | ESPL1 9700               | 107.5  | 101.9  | 132.3  | 99.3   | 97.1   |
| 38241_at   | U90548   | BTN3A3 10384             | 36.9   | 27.2   | 32.9   | 33.7   | 30.5   |
| 38269_at   | AL050147 | PRKD2 25865              | 78.2   | 63.4   | 64.8   | 60.2   | 53.6   |
| 38290_at   | AF037195 | RGS14 10636              | 16.2   | 19.0   | 18.2   | 21.3   | 18.7   |
| 38340_at   | AB014555 | HIP1R 9026               | 107.0  | 95.5   | 83.7   | 84.5   | 72.1   |
| 38398_at   | AB002356 | MADD 8567                | 49.1   | 41.2   | 43.2   | 44.0   | 33.3   |
| 38447_at   | U08438   | ADRBK1 156               | 79.1   | 57.3   | 72.0   | 56.3   | 48.2   |
| 38487_at   | D87433   | STAB1 23166              | 16.9   | 7.3    | 32.5   | 9.7    | 15.2   |
| 38521_at   | X59350   | CD22 933                 | 25.8   | 16.3   | 23.6   | 14.3   | 12.2   |
| 38671_at   | AB014520 | PLXND1 23129             | 19.6   | 2.5    | 15.0   | 2.6    | 10.2   |
| 38691_s_at | J03553   | SFTPC 6440               | 20.6   | 17.3   | 10.3   | 4.7    | 2.3    |
| 38703_at   | AF005050 | DNPEP 23549              | 135.4  | 144.8  | 144.9  | 164.4  | 123.8  |
| 38707_r_at | S75174   | E2F4 1874                | 234.2  | 146.5  | 190.6  | 173.4  | 129.2  |
| 38710_at   | AL096714 | LOC1019276 55611 /// 10  | 326.1  | 345.0  | 349.5  | 312.9  | 234.0  |
| 38766_at   | AB002307 | LOC1008626 10847 /// 10  | 31.2   | 28.4   | 34.4   | 32.7   | 26.9   |
| 38892_at   | D87077   | GLTSCR1L 23506           | 38.5   | 31.7   | 41.1   | 33.8   | 24.4   |
| 38918_at   | AF083105 | SOX13 9580               | 28.0   | 19.2   | 24.3   | 20.7   | 19.9   |
| 38964_r_at | U12707   | WAS 7454                 | 40.6   | 10.6   | 10.8   | 13.5   | 12.3   |
| 39248_at   | N74607   | AQP3 360                 | 68.7   | 74.3   | 76.4   | 86.0   | 57.8   |
| 39249_at   | AB001325 | AQP3 360                 | 23.8   | 21.1   | 27.8   | 31.3   | 16.7   |
| 39313_at   | AB002342 | WNK1 65125               | 4.9    | 6.1    | 5.2    | 5.1    | 3.1    |
| 39318_at   | X82240   | TCL1A 8115               | 14.0   | 1.0    | 1.9    | 3.8    | 7.0    |
| 39402_at   | M15330   | IL1B 3553                | 9.7    | 14.9   | 9.6    | 6.5    | 7.4    |
| 39548_at   | U77970   | NPAS2 4862               | 7.3    | 5.6    | 9.7    | 4.0    | 7.5    |
| 39549_at   | AI743090 | NPAS2 4862               | 3.8    | 2.5    | 0.4    | 3.4    | 2.9    |
| 39582_at   | AL050166 | CYLD 1540                | 8.7    | 3.4    | 7.3    | 5.3    | 8.1    |
| 396_f_at   | X97671   | EPOR 2057                | 109.0  | 80.0   | 127.0  | 98.6   | 61.2   |
| 39650_s_at | AB007895 | PCNXL2 80003             | 28.3   | 22.5   | 39.5   | 24.7   | 38.4   |
| 39705_at   | AB014600 | SIN3B 23309              | 33.9   | 25.9   | 22.1   | 34.3   | 16.8   |
| 39729_at   | L19185   | PRDX2 7001               | 1983.8 | 1775.4 | 2111.9 | 2056.6 | 1649.1 |
| 39763_at   | M36803   | HPX 3263                 | 41.4   | 22.6   | 23.1   | 16.0   | 28.5   |
| 39817_s_at | AF040105 | DNPH1 10591              | 194.8  | 168.7  | 156.8  | 175.2  | 141.4  |

|            |          |               |              |       |       |       |       |       |
|------------|----------|---------------|--------------|-------|-------|-------|-------|-------|
| 39835_at   | U93181   | SBF1          | 6305         | 123.6 | 95.8  | 115.8 | 117.5 | 99.0  |
| 39854_r_at | AF055000 | PNPLA2        | 57104        | 249.2 | 168.8 | 237.5 | 170.0 | 165.7 |
| 39891_at   | AI246730 | ZNF710        | 374655       | 41.4  | 27.3  | 31.9  | 30.4  | 21.7  |
| 39966_at   | AF059274 | CSPG5         | 10675        | 128.9 | 113.9 | 160.4 | 121.2 | 116.1 |
| 40016_g_at | AB002301 | MAST4         | 375449       | 51.6  | 48.6  | 40.3  | 60.2  | 30.6  |
| 40020_at   | AB011536 | CELSR3        | 1951         | 14.3  | 11.1  | 7.7   | 9.4   | 6.6   |
| 40093_at   | X83425   | BCAM          | 4059         | 30.1  | 21.0  | 27.1  | 22.4  | 19.4  |
| 40148_at   | U62325   | APBB2         | 323          | 9.7   | 13.7  | 15.7  | 20.7  | 13.7  |
| 40149_at   | AL049924 | SH2B1         | 25970        | 43.2  | 32.0  | 46.9  | 42.8  | 26.0  |
| 40189_at   | M93651   | SET /// SETSI | 6418 /// 646 | 745.7 | 616.5 | 805.6 | 652.5 | 605.2 |
| 40225_at   | D88435   | GAK           | 2580         | 174.6 | 147.4 | 159.6 | 143.3 | 133.6 |
| 40255_at   | AC004531 | DDX28         | 55794        | 94.0  | 85.1  | 112.2 | 92.6  | 90.9  |
| 40273_at   | AA485440 | SPHK2         | 56848        | 90.3  | 85.3  | 104.8 | 84.7  | 59.3  |
| 40284_at   | AB028021 | FOXA2         | 3170         | 0.6   | 0.8   | 0.6   | 0.6   | 0.8   |
| 40359_at   | M91083   | RASSF7        | 8045         | 135.0 | 111.8 | 119.1 | 101.2 | 96.7  |
| 40420_at   | AB015718 | STK10         | 6793         | 31.0  | 19.7  | 22.0  | 22.2  | 13.8  |
| 40446_at   | AL021366 | PHF1          | 5252         | 82.1  | 84.7  | 95.5  | 86.3  | 72.4  |
| 40465_at   | AF026402 | DDX23         | 9416         | 120.2 | 103.0 | 132.7 | 108.2 | 100.9 |
| 40472_at   | AF007155 | LPCAT4        | 254531       | 26.2  | 21.8  | 18.3  | 25.1  | 20.7  |
| 40489_at   | D31840   | ATN1          | 1822         | 55.2  | 51.3  | 62.9  | 63.1  | 38.7  |
| 40524_at   | X79510   | PTPN21        | 11099        | 1.7   | 5.2   | 5.1   | 5.3   | 3.3   |
| 40560_at   | U28049   | TBX2          | 6909         | 1.9   | 2.3   | 2.4   | 2.0   | 3.3   |
| 40562_at   | AF011499 | GNA11         | 2767         | 156.6 | 150.2 | 155.9 | 136.2 | 142.3 |
| 40569_at   | M58297   | MZF1          | 7593         | 70.8  | 78.5  | 70.1  | 74.6  | 63.7  |
| 40612_at   | AB029040 | DOPEY1        | 23033        | 11.8  | 8.8   | 8.3   | 13.3  | 15.2  |
| 40640_at   | U62317   | NCAPH2        | 29781        | 15.1  | 11.3  | 23.8  | 15.1  | 4.3   |
| 40665_at   | M83772   | FMO3          | 2328         | 1.7   | 1.1   | 1.7   | 0.3   | 1.8   |
| 40687_at   | M96789   | GJA4          | 2701         | 8.7   | 7.2   | 4.1   | 1.5   | 1.9   |
| 40829_at   | AB028960 | WDTC1         | 23038        | 77.6  | 83.8  | 83.7  | 83.1  | 57.2  |
| 40837_at   | M99436   | TLE2          | 7089         | 60.6  | 64.8  | 65.3  | 75.2  | 51.3  |
| 40850_at   | L37033   | FKBP8         | 23770        | 146.7 | 120.3 | 155.9 | 149.0 | 112.7 |
| 41037_at   | U63824   | TEAD4         | 7004         | 71.7  | 59.8  | 75.4  | 59.9  | 62.1  |
| 41047_at   | AI885170 | C9orf16       | 79095        | 239.5 | 221.2 | 252.2 | 261.9 | 177.3 |
| 41113_at   | AI871396 | ZNF500        | 26048        | 23.3  | 24.3  | 27.7  | 27.0  | 25.2  |
| 41160_at   | AC005943 | MBD3          | 53615        | 305.5 | 275.9 | 281.6 | 277.3 | 241.6 |
| 41220_at   | AB023208 | SEPT9         | 10801        | 786.2 | 852.3 | 784.8 | 830.1 | 777.4 |
| 41329_at   | AI458463 | SCYL3         | 57147        | 17.0  | 18.5  | 21.8  | 17.0  | 14.0  |
| 41386_i_at | AB002344 | KDM6B         | 23135        | 103.0 | 81.6  | 57.8  | 78.0  | 41.5  |
| 41387_r_at | AB002344 | KDM6B         | 23135        | 88.5  | 70.9  | 79.2  | 89.0  | 57.5  |
| 41397_at   | AF070588 | ZNF821        | 55565        | 29.2  | 29.2  | 16.0  | 26.6  | 20.3  |
| 41469_at   | L10343   | PI3           | 5266         | 5.6   | 8.9   | 5.4   | 4.4   | 5.8   |
| 41512_at   | AL042733 | BRAP          | 8315         | 15.1  | 15.3  | 18.0  | 14.4  | 10.8  |
| 41553_at   | AI738702 | OSGIN2        | 734          | 15.3  | 9.4   | 5.7   | 5.9   | 8.3   |
| 41577_at   | AB020630 | PPP1R16B      | 26051        | 0.3   | 0.7   | 1.1   | 0.8   | 0.7   |
| 41644_at   | AB018333 | SASH1         | 23328        | 44.4  | 37.8  | 39.9  | 42.3  | 34.4  |
| 41657_at   | AF035625 | STK11         | 6794         | 106.8 | 73.7  | 93.4  | 79.3  | 58.6  |
| 41660_at   | AL031588 | CELSR1        | 9620         | 18.1  | 15.5  | 9.6   | 19.5  | 13.3  |
| 41856_at   | AL049370 | UNC5B         | 219699       | 36.2  | 31.5  | 31.8  | 28.6  | 19.6  |
| 41858_at   | AL049261 | PGAP2         | 27315        | 179.4 | 147.9 | 193.8 | 149.6 | 130.0 |
| 42361_g_at | AI588986 | CCHCR1        | 54535        | 32.3  | 23.5  | 32.6  | 22.2  | 17.1  |
| 43427_at   | AI970898 | ACACB         | 32           | 12.4  | 13.4  | 17.4  | 12.9  | 6.6   |
| 43511_s_at | AI201594 | ARRB1         | 408          | 52.7  | 40.6  | 47.3  | 41.4  | 51.6  |
| 43544_at   | AA314406 | MED16         | 10025        | 182.7 | 176.7 | 190.3 | 193.1 | 166.3 |

|            |          |              |              |       |       |       |       |       |
|------------|----------|--------------|--------------|-------|-------|-------|-------|-------|
| 43934_at   | AA479495 | GPR137       | 56834        | 112.2 | 91.1  | 101.2 | 110.7 | 73.5  |
| 43977_at   | AI660497 | TMEM161A     | 54929        | 222.1 | 220.2 | 221.7 | 208.8 | 173.7 |
| 44040_at   | AA524093 | FBXO41 /// L | 150726 /// 1 | 26.0  | 31.8  | 35.2  | 40.7  | 26.9  |
| 44065_at   | AI937468 | RITA1        | 84934        | 48.3  | 47.4  | 66.8  | 47.9  | 49.6  |
| 44111_at   | AI672363 | VPS33B       | 26276        | 155.5 | 98.5  | 122.6 | 95.8  | 74.8  |
| 44120_at   | AI879381 | ADCK2        | 90956        | 167.3 | 139.2 | 192.1 | 160.6 | 139.7 |
| 44146_at   | AA045183 | GMEB2        | 26205        | 101.2 | 78.2  | 93.7  | 81.1  | 86.7  |
| 44563_at   | AI858000 | WRAP53       | 55135        | 232.0 | 167.3 | 250.7 | 192.2 | 198.1 |
| 44617_at   | AI431902 | OGFOD2       | 79676        | 93.5  | 70.9  | 69.3  | 69.5  | 53.8  |
| 44654_at   | AI669655 | G6PC3        | 92579        | 301.6 | 301.6 | 309.5 | 304.9 | 273.3 |
| 44669_at   | N31716   | SDHAF1       | 644096       | 96.0  | 82.5  | 104.5 | 90.9  | 79.5  |
| 44673_at   | N53555   | SIGLEC1      | 6614         | 22.2  | 10.4  | 11.4  | 10.6  | 5.0   |
| 44696_at   | AA915989 | TBC1D13      | 54662        | 58.4  | 69.8  | 75.7  | 65.5  | 55.7  |
| 44702_at   | R77097   | SYDE1        | 85360        | 25.4  | 21.5  | 19.7  | 17.2  | 13.6  |
| 44783_s_at | R61374   | HEY1         | 23462        | 22.3  | 18.8  | 17.6  | 13.4  | 12.0  |
| 44790_s_at | AI129310 | KIAA0226L    | 80183        | 0.4   | 0.4   | 3.3   | 2.2   | 0.5   |
| 44822_s_at | AW003889 | MIER2        | 54531        | 47.1  | 38.4  | 48.5  | 41.7  | 32.0  |
| 45288_at   | AA209239 | ABHD6        | 57406        | 47.2  | 41.7  | 57.3  | 54.2  | 38.5  |
| 45297_at   | AI417917 | EHD2         | 30846        | 2.1   | 3.5   | 7.7   | 5.7   | 1.1   |
| 45526_g_at | AI246641 | NAA60        | 79903        | 253.2 | 246.7 | 239.8 | 230.2 | 182.3 |
| 45572_s_at | AW009695 | GGA1         | 26088        | 243.6 | 262.7 | 272.8 | 255.1 | 211.2 |
| 45633_at   | AI421812 | GINS3        | 64785        | 58.9  | 36.9  | 75.9  | 42.9  | 50.0  |
| 45653_at   | AW026481 | KCTD13       | 253980       | 43.6  | 28.6  | 34.6  | 42.4  | 28.1  |
| 45687_at   | AA161130 | PRR14        | 78994        | 129.4 | 96.6  | 112.3 | 105.7 | 87.2  |
| 45714_at   | AA436930 | HCFC1R1      | 54985        | 114.9 | 95.4  | 136.4 | 112.4 | 102.6 |
| 45749_at   | AA400206 | FAM65A       | 79567        | 224.9 | 205.9 | 257.7 | 236.4 | 177.8 |
| 45828_at   | AI768100 | ATP5SL       | 55101        | 150.1 | 98.1  | 107.0 | 106.8 | 79.3  |
| 46142_at   | AI003763 | LMF1         | 64788        | 32.2  | 37.5  | 41.0  | 41.2  | 33.5  |
| 46167_at   | W22690   | MROH7-TTC4   | 7268 /// 100 | 119.0 | 108.5 | 130.2 | 109.8 | 102.9 |
| 46256_at   | AA522670 | SPSB3        | 90864        | 102.6 | 74.6  | 68.3  | 85.3  | 55.3  |
| 46270_at   | AL039447 | UBAP1        | 51271        | 152.9 | 105.8 | 127.7 | 105.6 | 91.5  |
| 46323_at   | AL120741 | CANT1        | 124583       | 340.8 | 296.5 | 343.2 | 320.2 | 277.0 |
| 46665_at   | AI949392 | SEMA4C       | 54910        | 34.8  | 37.8  | 27.8  | 42.5  | 25.3  |
| 46947_at   | T87245   | GNL3L        | 54552        | 21.3  | 28.1  | 22.1  | 22.8  | 22.7  |
| 47069_at   | AA533284 | PRR5         | 55615        | 73.0  | 53.4  | 79.3  | 62.8  | 62.3  |
| 47083_at   | AI280108 | C7orf26      | 79034        | 139.9 | 97.3  | 136.3 | 135.3 | 83.2  |
| 47105_at   | AA886893 | DUS2         | 54920        | 59.1  | 45.9  | 71.7  | 49.5  | 60.7  |
| 47530_at   | AA748492 | C9orf156     | 51531        | 75.1  | 44.9  | 70.6  | 68.6  | 40.8  |
| 47550_at   | N21184   | LZTS1        | 11178        | 1.8   | 2.8   | 4.0   | 2.3   | 3.1   |
| 47553_at   | AA813332 | DFNB31       | 25861        | 1.7   | 8.5   | 2.4   | 4.2   | 4.0   |
| 47560_at   | AI525402 | LPHN1        | 22859        | 190.2 | 126.1 | 173.9 | 174.5 | 127.1 |
| 47571_at   | AA004757 | ZNF236       | 7776         | 35.1  | 40.1  | 41.3  | 31.2  | 24.9  |
| 47608_at   | AI697401 | TJAP1        | 93643        | 79.0  | 54.9  | 57.8  | 60.0  | 43.5  |
| 47773_at   | AA836114 | FBXO42       | 54455        | 36.7  | 34.0  | 39.2  | 32.6  | 28.5  |
| 48030_i_at | H93077   | FAXDC2       | 10826        | 241.3 | 151.9 | 186.6 | 107.1 | 79.7  |
| 48031_r_at | H93077   | FAXDC2       | 10826        | 17.6  | 12.5  | 10.7  | 20.6  | 9.3   |
| 48106_at   | H14241   | SLC48A1      | 55652        | 71.6  | 71.8  | 75.1  | 82.8  | 64.9  |
| 48117_at   | AA160496 | CCDC101      | 112869       | 77.6  | 67.0  | 79.8  | 56.5  | 53.4  |
| 48531_at   | AA522816 | TNIP2        | 79155        | 88.2  | 52.9  | 81.6  | 75.4  | 63.5  |
| 48580_at   | U55777   | CXXC1        | 30827        | 221.2 | 233.6 | 252.5 | 204.0 | 185.2 |
| 48612_at   | AA225490 | N4BP1        | 9683         | 112.4 | 78.2  | 116.7 | 96.4  | 90.7  |
| 48659_at   | W60802   | MIIP         | 60672        | 135.1 | 101.3 | 129.9 | 132.8 | 85.4  |
| 48808_at   | AI144299 | DHFR         | 1719         | 601.5 | 498.0 | 622.6 | 500.2 | 555.0 |



|            |          |                           |           |       |       |       |       |       |
|------------|----------|---------------------------|-----------|-------|-------|-------|-------|-------|
| 48825_at   | AA887083 | ING4                      | 51147     | 36.4  | 34.4  | 35.1  | 40.0  | 26.0  |
| 49049_at   | N92708   | DTX3                      | 196403    | 10.3  | 7.7   | 9.2   | 2.8   | 4.0   |
| 49051_g_at | N92708   | DTX3                      | 196403    | 4.8   | 3.1   | 5.2   | 6.2   | 1.7   |
| 49077_at   | AL040538 | PPME1                     | 51400     | 231.6 | 178.8 | 201.2 | 212.1 | 152.1 |
| 49111_at   | N80935   | ARRB1                     | 408       | 30.4  | 18.1  | 32.8  | 29.9  | 25.5  |
| 49306_at   | AI890191 | RASSF4                    | 83937     | 7.0   | 5.9   | 0.9   | 3.5   | 3.8   |
| 49327_at   | AI492888 | SIRT3                     | 23410     | 119.5 | 77.0  | 89.6  | 84.5  | 58.0  |
| 49329_at   | N38751   | KLHL22                    | 84861     | 64.1  | 49.1  | 50.3  | 58.7  | 44.2  |
| 49452_at   | AI057637 | ACACB                     | 32        | 14.5  | 13.9  | 18.2  | 12.0  | 15.4  |
| 49485_at   | W22625   | PRDM4                     | 11108     | 46.4  | 39.4  | 46.0  | 41.9  | 31.4  |
| 49679_s_at | AA243774 | MMP24-AS1                 | 101410538 | 100.5 | 98.8  | 91.2  | 117.1 | 70.7  |
| 49878_at   | AA523441 | PEX16                     | 9409      | 189.9 | 158.7 | 164.2 | 156.3 | 128.3 |
| 50221_at   | AI524138 | TFEB                      | 7942      | 20.1  | 20.1  | 18.7  | 14.5  | 11.9  |
| 50277_at   | AW001443 | GGA1                      | 26088     | 252.4 | 256.5 | 262.2 | 250.5 | 211.9 |
| 50314_i_at | AI761506 | C20orf27                  | 54976     | 153.9 | 151.1 | 200.4 | 175.6 | 165.6 |
| 50374_at   | AA150503 | OXLD1                     | 339229    | 270.4 | 250.4 | 286.5 | 255.1 | 237.0 |
| 50376_at   | AI278629 | ZNF444                    | 55311     | 94.0  | 87.8  | 86.6  | 104.4 | 48.0  |
| 50400_at   | AI743990 | PAOX                      | 196743    | 29.2  | 28.9  | 26.0  | 34.6  | 19.3  |
| 50965_at   | AI690165 | RAB26                     | 25837     | 150.2 | 126.6 | 140.6 | 127.2 | 109.1 |
| 51146_at   | AA203365 | PIGV                      | 55650     | 68.5  | 57.3  | 70.2  | 70.6  | 55.1  |
| 51158_at   | AI801973 | FAM174B                   | 400451    | 50.9  | 47.8  | 64.8  | 56.4  | 56.1  |
| 51176_at   | AA131335 | MED27                     | 9442      | 186.6 | 158.2 | 196.5 | 161.6 | 159.7 |
| 51192_at   | AA134926 | SSH3                      | 54961     | 48.5  | 43.2  | 42.3  | 48.4  | 32.6  |
| 51200_at   | AI744084 | C19orf60                  | 55049     | 195.1 | 189.9 | 219.1 | 209.0 | 178.6 |
| 51226_at   | N53536   | RP11-10N23.-              |           | 0.6   | 5.8   | 0.9   | 0.6   | 2.5   |
| 51228_at   | N36928   | RBM12B                    | 389677    | 35.4  | 19.0  | 32.3  | 24.4  | 19.6  |
| 51774_s_at | AW014299 | UBE2D4                    | 51619     | 136.2 | 111.3 | 103.7 | 94.6  | 88.8  |
| 52005_at   | AA422049 | WIZ                       | 58525     | 99.3  | 83.2  | 88.2  | 63.2  | 64.5  |
| 52078_at   | AI828080 | TMEM222                   | 84065     | 308.0 | 205.7 | 224.9 | 200.5 | 159.3 |
| 52159_at   | W93807   | HEMK1                     | 51409     | 92.9  | 84.9  | 91.4  | 82.5  | 67.9  |
| 52164_at   | AA065185 | C11orf24                  | 53838     | 216.2 | 130.3 | 228.8 | 160.8 | 150.0 |
| 52169_at   | AI302185 | STRADA                    | 92335     | 97.0  | 94.0  | 99.0  | 91.2  | 66.6  |
| 52255_s_at | AI984221 | COL5A3                    | 50509     | 11.7  | 13.5  | 9.2   | 6.7   | 8.0   |
| 52285_f_at | AW002970 | CEP76                     | 79959     | 63.3  | 47.7  | 69.8  | 49.7  | 51.2  |
| 52651_at   | AI806793 | COL8A2                    | 1296      | 26.5  | 12.4  | 9.4   | 10.5  | 8.2   |
| 52731_at   | AI359466 | AMBRA1                    | 55626     | 50.8  | 43.3  | 59.7  | 45.3  | 35.0  |
| 52741_at   | AI962879 | TRMT61A                   | 115708    | 29.8  | 37.4  | 37.8  | 33.3  | 34.9  |
| 52837_at   | AL047020 | KIAA1644                  | 85352     | 7.9   | 2.5   | 6.9   | 4.8   | 2.8   |
| 52940_at   | AA085764 | SIGIRR                    | 59307     | 165.2 | 154.2 | 150.8 | 177.0 | 145.5 |
| 52975_at   | AA534894 | MVB12B                    | 89853     | 44.5  | 32.9  | 32.7  | 41.2  | 31.6  |
| 53071_s_at | AI885411 | OGFOD3                    | 79701     | 137.8 | 147.5 | 176.9 | 166.0 | 123.9 |
| 53076_at   | AI040029 | B4GALT7                   | 11285     | 67.6  | 61.8  | 64.8  | 54.0  | 53.4  |
| 53202_at   | AA402435 | C7orf25 /// F5683 /// 790 |           | 20.3  | 14.8  | 25.8  | 16.4  | 15.0  |
| 53720_at   | AI862559 | C19orf66                  | 55337     | 14.0  | 15.7  | 13.7  | 11.0  | 11.6  |
| 53912_at   | AI668643 | SNX11                     | 29916     | 141.5 | 151.2 | 75.2  | 166.1 | 144.3 |
| 53968_at   | AI869988 | INTS5                     | 80789     | 162.0 | 146.4 | 185.1 | 152.7 | 155.8 |
| 53987_at   | AL041852 | RANBP10                   | 57610     | 44.9  | 42.1  | 52.2  | 54.8  | 37.1  |
| 53991_at   | AA127623 | DENND2A                   | 27147     | 3.2   | 6.0   | 1.9   | 4.2   | 7.2   |
| 54037_at   | AL041451 | HPS4                      | 89781     | 24.0  | 22.5  | 26.3  | 22.4  | 20.3  |
| 54051_at   | H59033   | PKNOX1                    | 5316      | 15.9  | 14.0  | 18.5  | 17.1  | 13.3  |
| 54632_at   | AI286226 | THADA                     | 63892     | 53.2  | 36.6  | 54.9  | 38.4  | 36.3  |
| 54970_at   | AA868332 | ZMIZ2                     | 83637     | 90.2  | 89.7  | 95.5  | 117.7 | 77.8  |
| 55065_at   | AL120554 | MARK4                     | 57787     | 17.7  | 40.9  | 46.6  | 48.9  | 28.5  |

|            |          |                           |        |       |       |       |       |       |
|------------|----------|---------------------------|--------|-------|-------|-------|-------|-------|
| 55081_at   | W46406   | MICALL1                   | 85377  | 53.5  | 51.0  | 61.3  | 71.5  | 51.8  |
| 55093_at   | AA534198 | CHPF2                     | 54480  | 48.9  | 38.2  | 40.5  | 48.4  | 31.5  |
| 55583_at   | AI198543 | DOCK6                     | 57572  | 29.5  | 35.4  | 36.1  | 38.4  | 24.4  |
| 55616_at   | AI703342 | PGAP3                     | 93210  | 58.9  | 49.6  | 53.6  | 43.0  | 33.7  |
| 55662_at   | H27225   | C10orf76                  | 79591  | 22.5  | 26.7  | 24.8  | 24.8  | 23.3  |
| 55692_at   | W22924   | ELMO2                     | 63916  | 56.9  | 54.0  | 52.0  | 56.0  | 43.2  |
| 55705_at   | W07773   | R3HDM4                    | 91300  | 351.6 | 327.2 | 336.9 | 313.1 | 261.2 |
| 55872_at   | AI493119 | ZNF512B                   | 57473  | 97.6  | 79.1  | 108.7 | 89.4  | 86.0  |
| 56197_at   | AI783924 | PLSCR3 /// T157048 /// 10 |        | 161.3 | 138.1 | 148.7 | 141.2 | 112.7 |
| 56256_at   | AA150165 | SIDT2                     | 51092  | 148.0 | 166.4 | 144.0 | 155.6 | 100.6 |
| 564_at     | M69013   | GNA11                     | 2767   | 213.5 | 174.0 | 214.1 | 194.7 | 165.8 |
| 56748_at   | X90539   | TRIM10                    | 10107  | 3.8   | 4.1   | 0.6   | 3.1   | 1.5   |
| 56821_at   | AI963454 | SLC38A7                   | 55238  | 51.7  | 46.9  | 56.6  | 56.2  | 39.6  |
| 56829_at   | H61826   | TRAPPC9                   | 83696  | 122.1 | 98.9  | 137.5 | 127.3 | 79.7  |
| 56919_at   | AI806628 | WDR48                     | 57599  | 29.3  | 24.7  | 29.3  | 20.2  | 22.1  |
| 57082_at   | AA169780 | LDLRAP1                   | 26119  | 49.0  | 36.0  | 31.5  | 43.5  | 34.5  |
| 57163_at   | H93026   | ELOVL1 /// M64834 /// 10  |        | 273.7 | 219.3 | 289.3 | 246.9 | 245.1 |
| 57516_at   | AA746290 | ZNF764                    | 92595  | 32.0  | 31.6  | 34.0  | 33.6  | 38.5  |
| 57532_at   | AW016304 | DVL2                      | 1856   | 151.8 | 127.7 | 126.0 | 150.5 | 125.3 |
| 57539_at   | AA535065 | LIME1 /// ZG54923 /// 84  |        | 26.4  | 23.3  | 23.1  | 28.8  | 21.1  |
| 57540_at   | AI823980 | RBKS                      | 64080  | 25.8  | 31.0  | 15.1  | 28.1  | 18.1  |
| 57588_at   | R62432   | SLC24A3                   | 57419  | 4.5   | 2.5   | 4.0   | 6.4   | 2.4   |
| 57703_at   | N32782   | SENP5                     | 205564 | 13.8  | 14.5  | 14.4  | 13.9  | 17.8  |
| 57715_at   | W72694   | CALHM2                    | 51063  | 8.0   | 1.3   | 1.3   | 5.2   | 6.7   |
| 57739_at   | AI949010 | DND1                      | 373863 | 49.4  | 38.4  | 58.5  | 52.1  | 44.4  |
| 58308_at   | R71157   | TRIM62                    | 55223  | 40.4  | 48.3  | 33.7  | 34.5  | 24.4  |
| 58367_s_at | AA429615 | ZNF419                    | 79744  | 126.0 | 118.0 | 107.0 | 109.5 | 75.2  |
| 58696_at   | AL039469 | EXOSC4                    | 54512  | 310.8 | 254.7 | 321.5 | 269.8 | 266.2 |
| 58780_s_at | R42449   | ARHGEF40                  | 55701  | 18.2  | 17.7  | 16.9  | 18.4  | 12.9  |
| 58900_at   | AW025284 | UBE2D4                    | 51619  | 130.8 | 75.7  | 101.4 | 96.1  | 74.6  |
| 58916_at   | AI672101 | KCTD14 /// M65987 /// 10  |        | 8.2   | 3.5   | 11.0  | 7.5   | 5.5   |
| 58994_at   | AI689402 | CC2D1A                    | 54862  | 75.2  | 68.1  | 79.2  | 75.8  | 55.9  |
| 59375_at   | AI825877 | MYO15B                    | 80022  | 31.3  | 18.3  | 24.5  | 10.8  | 14.2  |
| 59433_at   | N32185   | LOC1027252389906 /// 1    |        | 35.1  | 26.6  | 31.2  | 29.6  | 29.3  |
| 59437_at   | AI830563 | C9orf116                  | 138162 | 63.1  | 60.0  | 91.9  | 62.6  | 69.2  |
| 59625_at   | AI912351 | NOL3                      | 8996   | 113.1 | 96.5  | 113.1 | 108.9 | 94.3  |
| 59631_at   | AI247566 | TXNRD3 /// T114112 /// 6  |        | 64.6  | 54.7  | 70.9  | 68.5  | 54.5  |
| 59644_at   | AI735391 | BMP2K                     | 55589  | 15.0  | 13.8  | 13.9  | 6.8   | 9.8   |
| 59697_at   | AA582932 | RAB15                     | 376267 | 78.7  | 49.1  | 53.2  | 53.4  | 50.8  |
| 59705_at   | AA911739 | SCLY                      | 51540  | 16.9  | 14.7  | 20.5  | 15.0  | 18.4  |
| 59999_at   | W37897   | HIF1AN                    | 55662  | 28.4  | 24.2  | 27.2  | 25.3  | 21.4  |
| 60084_at   | AI453099 | CYLD                      | 1540   | 1.4   | 0.6   | 1.8   | 0.5   | 3.9   |
| 60471_at   | AA625133 | RIN3                      | 79890  | 7.5   | 3.2   | 5.6   | 2.2   | 1.3   |
| 60474_at   | AA469071 | FERMT1                    | 55612  | 32.8  | 25.8  | 29.7  | 25.8  | 20.5  |
| 60528_at   | N71116   | JMJD7-PLA2(8681 /// 100   |        | 77.8  | 68.9  | 63.6  | 64.6  | 48.7  |
| 60794_f_at | AI400621 | ZNF814                    | 730051 | 18.2  | 15.8  | 19.4  | 15.4  | 15.0  |
| 60815_at   | AA601208 | POLR2J4                   | 84820  | 15.4  | 8.6   | 10.5  | 9.2   | 7.3   |
| 61297_at   | AL037338 | CASKIN2                   | 57513  | 3.4   | 3.8   | 2.9   | 12.0  | 4.9   |
| 61732_r_at | AI610355 | IFT74                     | 80173  | 29.5  | 9.0   | 18.2  | 12.0  | 17.1  |
| 61734_at   | AI797684 | RCN3                      | 57333  | 51.7  | 38.2  | 41.0  | 42.2  | 42.6  |
| 61874_at   | AL042496 | CACFD1                    | 11094  | 86.6  | 75.0  | 88.5  | 77.3  | 60.6  |
| 62212_at   | W37846   | C1orf50 /// L79078 /// 10 |        | 63.2  | 54.7  | 72.3  | 50.7  | 59.0  |
| 62987_r_at | AI675178 | CACNG4                    | 27092  | 94.2  | 21.4  | 27.9  | 37.7  | 25.8  |

|            |          |                        |              |       |       |       |       |       |
|------------|----------|------------------------|--------------|-------|-------|-------|-------|-------|
| 63009_at   | AI188402 | SHQ1                   | 55164        | 67.9  | 57.1  | 93.5  | 61.3  | 59.9  |
| 632_at     | L40027   | GSK3A                  | 2931         | 76.9  | 64.6  | 74.4  | 66.0  | 55.8  |
| 63305_at   | D81792   | PKNOX2                 | 63876        | 65.8  | 62.0  | 53.0  | 64.4  | 43.8  |
| 635_s_at   | L42374   | PPP2R5B                | 5526         | 28.2  | 25.4  | 32.5  | 30.0  | 15.5  |
| 63825_at   | AI557319 | ABHD2                  | 11057        | 110.9 | 69.3  | 108.0 | 83.1  | 92.5  |
| 64064_at   | AI435089 | GIMAP1-GIM             | 55340 /// 10 | 21.2  | 9.2   | 17.7  | 4.3   | 19.2  |
| 64371_at   | AI978718 | SUGP2                  | 10147        | 21.7  | 18.4  | 19.9  | 15.6  | 16.3  |
| 64408_s_at | AW025529 | CALML4                 | 91860        | 49.0  | 38.5  | 47.1  | 48.9  | 39.2  |
| 64418_at   | AI472320 | SYNRG                  | 11276        | 69.1  | 77.8  | 59.4  | 69.8  | 50.2  |
| 64432_at   | W05463   | MAPKAPK5- <del>7</del> | 51275        | 60.5  | 80.0  | 102.6 | 71.6  | 82.5  |
| 64438_at   | W19668   | OGFOD3                 | 79701        | 36.9  | 38.0  | 45.0  | 50.3  | 38.8  |
| 64440_at   | AI560217 | IL17RC                 | 84818        | 150.5 | 133.3 | 156.6 | 145.1 | 111.2 |
| 64474_g_at | AA203219 | DGCR8 /// M            | 54487 /// 10 | 60.3  | 56.5  | 62.6  | 50.0  | 44.1  |
| 64486_at   | AI341234 | CORO1B                 | 57175        | 275.4 | 258.6 | 287.0 | 264.1 | 212.4 |
| 64488_at   | AW003091 | IRGQ                   | 126298       | 41.5  | 38.8  | 33.4  | 41.6  | 27.5  |
| 64883_at   | AI744083 | MOSPD2                 | 158747       | 35.0  | 34.8  | 29.8  | 33.1  | 21.5  |
| 64899_at   | AA209463 | LPPR2                  | 64748        | 177.6 | 163.4 | 183.0 | 189.6 | 116.0 |
| 64900_at   | AA401703 | TMEM231                | 79583        | 65.9  | 44.4  | 66.7  | 70.5  | 53.5  |
| 64942_at   | AI937160 | GPR153                 | 387509       | 47.8  | 39.3  | 45.0  | 30.2  | 23.1  |
| 65086_at   | Z78349   | YIPF2                  | 78992        | 81.7  | 55.5  | 71.8  | 64.7  | 60.5  |
| 65133_i_at | AI862454 | INO80B /// II          | 83444 /// 10 | 37.6  | 29.4  | 36.2  | 30.7  | 26.2  |
| 65438_at   | AA195124 | TLDC1                  | 57707        | 6.4   | 5.7   | 6.8   | 2.0   | 4.7   |
| 65472_at   | AI161338 | C2orf68                | 388969       | 4.5   | 4.7   | 2.7   | 7.4   | 5.4   |
| 65493_at   | AA555088 | HEATR6                 | 63897        | 31.2  | 18.7  | 32.0  | 20.3  | 27.4  |
| 65517_at   | AA910946 | AP1M2                  | 10053        | 180.8 | 176.5 | 180.8 | 183.3 | 140.3 |
| 65521_at   | W74577   | UBE2D4                 | 51619        | 103.0 | 85.4  | 93.4  | 92.8  | 82.9  |
| 65585_at   | AA527515 | FAM86B1 ///            | 55199 /// 85 | 147.3 | 140.4 | 184.9 | 161.1 | 142.6 |
| 65588_at   | AA827892 | SNHG17                 | 388796       | 48.0  | 45.9  | 57.9  | 47.8  | 47.8  |
| 65591_at   | N64681   | WDR48                  | 57599        | 70.8  | 46.7  | 51.8  | 57.1  | 47.6  |
| 65630_at   | AI742455 | TMEM80                 | 283232       | 57.2  | 45.4  | 57.7  | 45.6  | 46.2  |
| 65635_at   | AL044097 | ENGASE                 | 64772        | 84.1  | 60.7  | 78.3  | 65.0  | 49.5  |
| 65718_at   | AI655903 | GPR124                 | 25960        | 6.8   | 6.3   | 9.3   | 5.9   | 2.2   |
| 65770_at   | AI186666 | RHOT2                  | 89941        | 87.3  | 82.3  | 90.5  | 97.9  | 79.0  |
| 65884_at   | AA631254 | MAN1B1                 | 11253        | 127.6 | 117.6 | 118.0 | 128.6 | 101.5 |
| 66053_at   | AI738452 | HNRNPUL2 /             | 221092 /// 1 | 15.0  | 14.5  | 22.2  | 14.4  | 13.9  |
| 71933_at   | AI218134 | WNT6                   | 7475         | 40.9  | 38.1  | 39.0  | 32.3  | 22.6  |
| 74694_s_at | AA907940 | RABEP2                 | 79874        | 68.1  | 62.1  | 74.9  | 68.8  | 55.5  |
| 76897_s_at | AA628140 | FKBP15                 | 23307        | 15.3  | 12.3  | 16.4  | 12.7  | 12.7  |
| 77508_r_at | AW001436 | RABEP2                 | 79874        | 78.2  | 50.0  | 62.4  | 60.0  | 51.9  |
| 78047_s_at | AW001777 | MMP24-AS1              | 101410538    | 207.9 | 220.1 | 224.8 | 216.3 | 149.6 |
| 78330_at   | AA845577 | ZNF335                 | 63925        | 10.5  | 13.0  | 5.2   | 6.5   | 5.0   |
| 78383_at   | AI150117 | TOPORS-AS1             | 100129250    | 55.8  | 57.1  | 65.7  | 59.2  | 31.7  |
| 78495_at   | R61320   | ZNF783                 | 100289678    | 20.3  | 10.7  | 12.8  | 20.3  | 15.2  |
| 79005_at   | AA504646 | SLC35E1                | 79939        | 78.0  | 77.9  | 82.7  | 71.5  | 58.0  |
| 81737_at   | AI424872 | LOC1005059             | 100505915    | 9.9   | 9.4   | 8.3   | 12.5  | 9.6   |
| 81811_at   | AI744451 | -                      | -            | 25.9  | 22.5  | 23.5  | 19.9  | 18.4  |
| 823_at     | U84487   | CX3CL1                 | 6376         | 9.6   | 3.1   | 8.7   | 5.7   | 4.2   |
| 87100_at   | AI832249 | ABHD2                  | 11057        | 53.4  | 53.6  | 70.5  | 36.8  | 49.2  |
| 89476_r_at | AA398062 | NPEPL1                 | 79716        | 22.2  | 35.7  | 20.4  | 24.9  | 20.0  |
| 89948_at   | AI743331 | PCIF1                  | 63935        | 60.8  | 44.6  | 71.1  | 53.3  | 47.5  |
| 89977_at   | AI733019 | ACSM5                  | 54988        | 9.2   | 7.0   | 7.8   | 12.0  | 4.6   |
| 90265_at   | AW050627 | ADAP1                  | 11033        | 53.5  | 37.6  | 47.9  | 35.3  | 28.5  |
| 90610_at   | AI654857 | LRCH4                  | 4034         | 86.1  | 47.8  | 60.1  | 70.2  | 40.1  |

|            |          |         |                   |       |       |       |       |       |
|------------|----------|---------|-------------------|-------|-------|-------|-------|-------|
| 91580_at   | W22117   | LRTM1   | 57408             | 1.0   | 0.4   | 0.1   | 0.6   | 2.2   |
| 91617_at   | AI028241 | DGCR8   | /// M54487 /// 10 | 37.5  | 25.2  | 37.4  | 31.1  | 25.4  |
| 91682_at   | AI571298 | -       | -                 | 51.5  | 28.7  | 42.2  | 44.2  | 34.8  |
| 91684_g_at | AI571298 | EXOSC4  | 54512             | 149.3 | 129.4 | 177.4 | 152.3 | 134.4 |
| 91703_at   | AA149545 | EHBP1L1 | 254102            | 6.6   | 11.8  | 3.1   | 9.2   | 3.7   |
| 91816_f_at | C18318   | MEX3D   | 399664            | 79.9  | 67.8  | 93.1  | 78.1  | 60.2  |
| 91826_at   | AI219073 | EPS8L1  | 54869             | 2.6   | 2.5   | 2.2   | 2.6   | 1.5   |
| 91920_at   | AI205180 | BCAN    | 63827             | 33.8  | 24.8  | 23.4  | 29.3  | 22.1  |
| 91952_at   | AI363375 | DCAF15  | 90379             | 38.7  | 38.3  | 45.9  | 39.3  | 27.1  |

| Batch.1 | V€Batch.1 | E»Batch.1 | E»Batch.1 | E»Batch.1 | C«Batch.1 | E»Batch.1 | Bi Batch.1 | Bi Batch.1 | V€Batch.1 |
|---------|-----------|-----------|-----------|-----------|-----------|-----------|------------|------------|-----------|
| 216.9   | 180.8     | 171.6     | 183.4     | 187.8     | 172.3     | 269.4     | 260.8      | 225.9      |           |
| 111.5   | 77.4      | 107.4     | 129.3     | 119.8     | 91.4      | 144.8     | 162.7      | 132.8      |           |
| 11.3    | 7.5       | 14.2      | 11.0      | 12.4      | 9.3       | 19.4      | 14.4       | 5.4        |           |
| 103.7   | 87.8      | 72.5      | 69.7      | 97.0      | 70.3      | 89.0      | 111.1      | 91.6       |           |
| 4.1     | 2.8       | 0.6       | 4.3       | 0.4       | 1.5       | 4.7       | 5.8        | 1.1        |           |
| 8.4     | 12.2      | 11.0      | 13.6      | 13.6      | 12.4      | 12.2      | 12.9       | 15.0       |           |
| 10.4    | 9.2       | 6.4       | 6.1       | 8.4       | 7.4       | 11.5      | 11.8       | 7.8        |           |
| 7.2     | 1.2       | 1.0       | 1.4       | 1.3       | 1.7       | 3.0       | 1.2        | 7.8        |           |
| 1.2     | 1.1       | 2.4       | 0.2       | 0.6       | 0.5       | 0.8       | 0.2        | 0.5        |           |
| 9.0     | 1.3       | 3.1       | 3.8       | 0.8       | 2.3       | 4.2       | 7.6        | 4.6        |           |
| 37.9    | 19.7      | 29.3      | 26.7      | 26.9      | 21.9      | 24.5      | 18.2       | 29.5       |           |
| 147.2   | 106.2     | 99.2      | 118.8     | 129.7     | 115.8     | 174.6     | 195.4      | 151.3      |           |
| 14.9    | 13.9      | 12.5      | 9.5       | 22.0      | 12.1      | 16.5      | 20.5       | 14.1       |           |
| 58.7    | 60.2      | 61.8      | 71.9      | 60.9      | 61.1      | 82.9      | 82.7       | 81.6       |           |
| 27.2    | 38.7      | 23.0      | 22.8      | 38.6      | 24.7      | 25.6      | 46.0       | 36.4       |           |
| 61.6    | 37.9      | 56.1      | 59.7      | 56.5      | 48.3      | 57.3      | 75.4       | 62.7       |           |
| 3.2     | 5.5       | 6.2       | 3.6       | 7.2       | 5.9       | 10.1      | 5.6        | 7.7        |           |
| 49.4    | 33.3      | 33.6      | 40.6      | 30.1      | 32.7      | 41.2      | 49.5       | 38.2       |           |
| 51.0    | 87.7      | 63.5      | 44.9      | 67.3      | 43.8      | 90.3      | 145.1      | 61.2       |           |
| 77.6    | 51.6      | 60.8      | 56.3      | 67.5      | 57.2      | 82.0      | 94.6       | 76.2       |           |
| 530.6   | 330.6     | 406.7     | 375.7     | 428.1     | 382.5     | 604.5     | 546.5      | 418.1      |           |
| 1299.5  | 853.2     | 988.6     | 1086.9    | 1016.4    | 847.3     | 1475.0    | 1362.9     | 1105.0     |           |
| 2954.7  | 2517.7    | 2433.7    | 2550.1    | 2763.9    | 2702.3    | 3307.0    | 3395.6     | 2873.3     |           |
| 3302.7  | 2554.5    | 2509.0    | 2796.6    | 3025.9    | 2744.3    | 3530.7    | 3752.5     | 2862.6     |           |
| 1615.4  | 1165.0    | 1139.0    | 1291.7    | 1450.0    | 1263.9    | 1785.8    | 1974.2     | 1774.7     |           |
| 845.7   | 767.9     | 868.3     | 876.4     | 912.2     | 864.1     | 1140.5    | 1100.6     | 753.0      |           |
| 2249.3  | 1554.9    | 1566.0    | 1814.7    | 1858.9    | 1674.0    | 2316.3    | 2382.9     | 1768.9     |           |
| 1096.9  | 716.6     | 676.4     | 818.5     | 852.5     | 848.6     | 1046.0    | 1312.0     | 1456.4     |           |
| 706.3   | 530.6     | 654.4     | 637.6     | 679.3     | 646.6     | 882.0     | 843.1      | 678.5      |           |
| 1094.1  | 758.6     | 954.2     | 1026.9    | 998.0     | 1005.7    | 1239.3    | 1243.6     | 977.0      |           |
| 1673.2  | 1123.0    | 1133.6    | 1206.6    | 1320.7    | 1359.4    | 1687.6    | 2012.9     | 1451.5     |           |
| 535.3   | 383.4     | 377.5     | 443.2     | 459.9     | 392.4     | 550.8     | 478.1      | 375.7      |           |
| 2027.5  | 1660.7    | 1706.6    | 1869.6    | 1903.5    | 1816.1    | 2238.4    | 2575.9     | 1937.9     |           |
| 3406.4  | 2541.8    | 2635.6    | 3006.9    | 3071.0    | 2635.1    | 3271.2    | 3665.4     | 2727.4     |           |
| 603.4   | 486.0     | 491.7     | 538.8     | 628.2     | 567.3     | 781.2     | 887.1      | 594.0      |           |
| 414.7   | 276.9     | 279.4     | 304.9     | 336.4     | 297.6     | 464.2     | 601.3      | 442.5      |           |
| 2489.9  | 2476.2    | 2196.4    | 2384.6    | 2409.3    | 2264.0    | 2546.7    | 2826.8     | 1691.6     |           |
| 1782.7  | 1513.0    | 1335.3    | 1681.9    | 1811.0    | 1512.5    | 2360.6    | 2625.9     | 1847.3     |           |
| 2993.8  | 2366.2    | 2468.4    | 2607.9    | 2912.1    | 2677.4    | 3438.4    | 3392.4     | 2501.7     |           |
| 2498.0  | 1945.2    | 2092.3    | 2113.0    | 2341.9    | 2213.6    | 2807.0    | 3140.8     | 2204.7     |           |
| 381.7   | 260.7     | 288.3     | 321.0     | 306.9     | 297.1     | 387.1     | 462.8      | 365.9      |           |
| 2672.4  | 2452.6    | 2157.8    | 2474.3    | 2278.9    | 2243.1    | 2652.6    | 2822.5     | 2231.3     |           |
| 2328.6  | 2260.5    | 2067.6    | 2111.5    | 2877.4    | 2193.1    | 3046.6    | 3190.4     | 1964.6     |           |
| 1446.6  | 1143.8    | 1257.0    | 1218.9    | 1346.1    | 1302.7    | 1500.9    | 1591.1     | 1439.9     |           |
| 2626.9  | 2181.8    | 1877.2    | 2030.4    | 2260.6    | 2336.1    | 3020.5    | 2943.2     | 2600.3     |           |
| 2880.9  | 2416.0    | 2264.5    | 2800.7    | 2766.0    | 2508.1    | 3648.5    | 3681.1     | 2767.2     |           |
| 2521.1  | 1362.3    | 1852.5    | 2392.9    | 1901.6    | 2358.2    | 3066.5    | 3164.8     | 1862.2     |           |
| 750.7   | 487.8     | 484.9     | 523.3     | 569.1     | 505.8     | 691.8     | 845.0      | 520.8      |           |
| 553.9   | 399.0     | 439.5     | 439.8     | 420.2     | 478.2     | 560.2     | 647.4      | 397.9      |           |
| 2920.5  | 2197.9    | 2470.2    | 2594.6    | 2655.2    | 2556.6    | 2854.7    | 3061.7     | 2548.0     |           |
| 2141.5  | 1738.6    | 1803.3    | 2058.5    | 2043.9    | 1880.5    | 2408.3    | 2330.6     | 1949.3     |           |
| 3556.5  | 3067.5    | 2806.4    | 3191.8    | 3356.6    | 3035.8    | 3960.9    | 4117.9     | 2929.8     |           |

|        |        |        |        |        |        |        |        |        |
|--------|--------|--------|--------|--------|--------|--------|--------|--------|
| 3498.3 | 2819.7 | 2840.4 | 2998.7 | 3199.5 | 3025.8 | 4287.7 | 4561.6 | 3346.3 |
| 1062.2 | 662.5  | 703.3  | 987.7  | 855.1  | 976.6  | 1137.0 | 1376.7 | 980.3  |
| 2208.0 | 1537.9 | 1626.8 | 1826.4 | 1978.0 | 1863.4 | 2704.1 | 2963.1 | 1984.0 |
| 157.9  | 110.1  | 149.8  | 135.9  | 207.0  | 165.5  | 148.5  | 189.7  | 130.9  |
| 1941.5 | 1406.8 | 1635.4 | 1517.0 | 1776.9 | 1636.9 | 2038.8 | 2176.7 | 1609.1 |
| 581.1  | 412.3  | 384.1  | 439.9  | 523.7  | 478.6  | 686.8  | 1012.0 | 875.3  |
| 2968.6 | 2746.6 | 2494.9 | 2768.2 | 3081.7 | 2749.2 | 3505.5 | 3889.6 | 2619.1 |
| 952.7  | 660.4  | 755.3  | 783.8  | 824.4  | 794.0  | 1028.0 | 965.7  | 667.5  |
| 525.5  | 441.5  | 402.5  | 525.9  | 483.5  | 417.8  | 661.4  | 812.7  | 494.9  |
| 995.4  | 672.0  | 771.7  | 813.6  | 841.5  | 793.3  | 1023.8 | 980.0  | 745.0  |
| 321.2  | 261.7  | 257.8  | 367.4  | 332.2  | 309.1  | 371.7  | 375.0  | 325.8  |
| 1525.5 | 975.9  | 1147.5 | 1136.7 | 1413.4 | 1369.4 | 1741.4 | 1795.0 | 1538.1 |
| 1073.5 | 650.2  | 793.4  | 751.2  | 1083.0 | 878.8  | 997.1  | 1060.2 | 821.7  |
| 220.1  | 160.6  | 171.8  | 168.2  | 172.4  | 168.8  | 226.6  | 212.0  | 165.3  |
| 1010.7 | 676.6  | 732.9  | 857.7  | 818.9  | 841.3  | 1067.0 | 1055.4 | 822.4  |
| 481.0  | 321.0  | 342.5  | 366.9  | 450.0  | 438.1  | 515.4  | 707.7  | 392.4  |
| 986.2  | 746.2  | 839.8  | 810.3  | 903.8  | 824.5  | 1172.7 | 1340.2 | 796.8  |
| 135.9  | 107.8  | 123.5  | 138.4  | 151.7  | 129.4  | 171.9  | 161.9  | 150.1  |
| 215.4  | 104.6  | 125.2  | 126.1  | 140.6  | 136.6  | 188.9  | 256.6  | 152.3  |
| 77.3   | 78.3   | 81.2   | 68.0   | 82.8   | 70.0   | 109.4  | 103.9  | 76.2   |
| 877.1  | 573.2  | 656.8  | 697.7  | 737.4  | 659.9  | 869.1  | 956.6  | 699.4  |
| 166.0  | 122.6  | 113.4  | 131.7  | 128.0  | 115.6  | 171.4  | 176.2  | 111.0  |
| 72.9   | 62.3   | 98.2   | 78.9   | 107.4  | 96.5   | 95.8   | 110.4  | 93.3   |
| 950.5  | 609.2  | 758.0  | 741.9  | 816.9  | 779.3  | 1018.8 | 1008.3 | 638.1  |
| 59.9   | 47.8   | 39.9   | 57.0   | 56.8   | 53.2   | 74.1   | 117.1  | 72.6   |
| 1484.1 | 1142.7 | 1239.0 | 1335.8 | 1413.7 | 1293.9 | 1730.3 | 1741.0 | 1225.0 |
| 442.4  | 285.1  | 301.2  | 328.9  | 326.6  | 312.3  | 438.4  | 424.6  | 505.1  |
| 1848.9 | 1099.0 | 977.6  | 1199.5 | 1115.4 | 1130.2 | 1480.9 | 1376.8 | 1419.9 |
| 861.2  | 687.6  | 702.6  | 775.5  | 812.5  | 804.4  | 899.9  | 1130.3 | 1341.7 |
| 2620.4 | 2112.1 | 2071.9 | 2213.6 | 2334.8 | 2390.0 | 2858.0 | 3170.9 | 1785.0 |
| 3176.7 | 2699.7 | 2694.4 | 3038.5 | 2861.9 | 2928.3 | 3653.6 | 4078.4 | 2946.7 |
| 2360.9 | 1845.8 | 1843.3 | 2066.3 | 2195.5 | 2177.6 | 2679.0 | 3149.4 | 2097.0 |
| 2174.3 | 1493.2 | 1566.9 | 1724.4 | 1708.8 | 1602.5 | 2156.7 | 2111.3 | 1945.2 |
| 1788.2 | 1219.9 | 1394.8 | 1429.3 | 1555.1 | 1469.7 | 1792.5 | 1897.6 | 1277.3 |
| 230.0  | 191.1  | 205.0  | 267.9  | 230.4  | 229.2  | 290.4  | 304.2  | 188.2  |
| 254.8  | 156.5  | 176.5  | 199.5  | 218.4  | 203.5  | 280.7  | 361.1  | 181.3  |
| 721.0  | 410.1  | 521.5  | 485.7  | 568.0  | 572.8  | 693.9  | 806.6  | 553.1  |
| 52.3   | 24.6   | 38.6   | 36.1   | 32.7   | 56.7   | 36.7   | 59.0   | 40.7   |
| 86.4   | 50.2   | 46.0   | 62.0   | 65.6   | 55.6   | 85.9   | 101.3  | 79.1   |
| 331.7  | 212.5  | 242.0  | 250.3  | 288.0  | 277.4  | 346.7  | 408.4  | 271.1  |
| 725.9  | 467.9  | 567.7  | 604.6  | 614.6  | 617.1  | 887.0  | 916.7  | 632.9  |
| 1052.9 | 680.7  | 776.7  | 762.8  | 981.7  | 905.9  | 1228.7 | 1332.3 | 958.6  |
| 1807.9 | 1127.2 | 1138.5 | 1250.9 | 1361.7 | 1236.0 | 1693.9 | 1763.1 | 1242.2 |
| 572.6  | 374.0  | 391.3  | 407.8  | 431.6  | 387.1  | 579.9  | 570.0  | 360.2  |
| 263.7  | 146.0  | 199.0  | 216.1  | 206.9  | 218.0  | 255.1  | 256.3  | 169.1  |
| 2655.7 | 2132.5 | 2036.5 | 2347.5 | 2383.1 | 2292.8 | 2850.7 | 2955.2 | 2585.4 |
| 1137.6 | 679.8  | 775.8  | 790.5  | 858.1  | 781.6  | 1059.7 | 1047.6 | 870.4  |
| 944.0  | 643.3  | 792.2  | 795.8  | 827.3  | 853.9  | 1031.8 | 1060.6 | 659.1  |
| 2238.1 | 1546.4 | 1387.2 | 1375.0 | 2009.3 | 1761.3 | 2166.9 | 2648.8 | 1665.0 |
| 3138.6 | 2655.9 | 2670.0 | 2707.8 | 3284.8 | 2871.4 | 3615.4 | 3909.9 | 2864.7 |
| 2133.5 | 1830.6 | 1718.7 | 2150.5 | 2009.6 | 2135.2 | 2534.0 | 2807.3 | 1673.5 |
| 567.7  | 303.1  | 372.8  | 357.8  | 423.6  | 392.3  | 545.4  | 625.1  | 555.9  |
| 426.3  | 323.4  | 329.3  | 326.6  | 388.9  | 356.0  | 478.3  | 629.6  | 431.0  |

|        |        |        |        |        |        |        |        |        |
|--------|--------|--------|--------|--------|--------|--------|--------|--------|
| 995.8  | 630.4  | 749.3  | 711.8  | 804.9  | 770.6  | 1076.7 | 1083.9 | 761.2  |
| 1108.4 | 757.5  | 845.6  | 865.8  | 1000.7 | 971.3  | 1272.7 | 1388.6 | 961.8  |
| 1247.5 | 792.7  | 805.5  | 926.6  | 968.0  | 944.7  | 1135.6 | 1383.2 | 1050.9 |
| 3069.2 | 2565.1 | 2571.3 | 2711.9 | 2794.0 | 2687.8 | 3267.0 | 3450.2 | 2210.3 |
| 2402.1 | 1864.6 | 1943.6 | 2113.7 | 2074.2 | 2044.8 | 3297.5 | 3411.8 | 2444.5 |
| 379.2  | 265.8  | 318.8  | 319.2  | 330.0  | 286.1  | 403.0  | 447.4  | 258.7  |
| 1656.6 | 1112.4 | 1093.1 | 1275.7 | 1530.5 | 1348.3 | 2038.3 | 2288.2 | 1505.0 |
| 3360.3 | 2744.0 | 2584.4 | 2625.6 | 2865.0 | 2680.5 | 3466.8 | 3723.2 | 2483.2 |
| 1152.6 | 846.2  | 859.7  | 868.1  | 1081.1 | 1021.9 | 1333.0 | 1708.1 | 1147.7 |
| 2703.9 | 2339.5 | 2334.4 | 2881.5 | 2667.0 | 2691.4 | 3670.2 | 3585.8 | 2688.4 |
| 4097.1 | 3728.4 | 3603.5 | 3578.8 | 3896.5 | 3657.0 | 4401.8 | 4519.7 | 3221.7 |
| 844.0  | 540.2  | 602.2  | 687.1  | 645.4  | 626.1  | 685.7  | 673.6  | 667.1  |
| 794.5  | 537.6  | 562.2  | 657.7  | 664.6  | 635.8  | 938.2  | 1069.2 | 716.1  |
| 726.2  | 476.1  | 580.1  | 609.2  | 639.0  | 595.7  | 792.5  | 865.4  | 737.5  |
| 3762.8 | 2823.0 | 2834.9 | 3134.0 | 3252.0 | 3038.5 | 3926.2 | 3983.5 | 3753.7 |
| 617.9  | 329.3  | 430.2  | 432.6  | 429.7  | 476.2  | 594.4  | 680.6  | 611.8  |
| 1063.3 | 749.8  | 819.7  | 876.9  | 996.9  | 930.3  | 1198.2 | 1289.7 | 802.3  |
| 486.9  | 319.6  | 350.7  | 368.1  | 427.6  | 396.0  | 588.7  | 805.9  | 437.1  |
| 160.7  | 82.0   | 150.2  | 116.5  | 129.1  | 128.2  | 273.7  | 346.6  | 121.8  |
| 52.2   | 25.7   | 26.3   | 33.3   | 36.2   | 27.0   | 35.3   | 66.1   | 37.2   |
| 509.6  | 176.8  | 225.1  | 283.1  | 253.8  | 299.2  | 412.2  | 665.0  | 348.5  |
| 1061.6 | 516.7  | 597.0  | 611.7  | 697.1  | 658.9  | 851.0  | 1299.7 | 783.4  |
| 99.5   | 57.1   | 72.3   | 83.8   | 78.5   | 92.3   | 108.6  | 96.1   | 76.4   |
| 233.6  | 156.0  | 208.9  | 182.4  | 192.2  | 213.4  | 285.0  | 297.8  | 181.0  |
| 60.8   | 64.0   | 33.7   | 61.8   | 62.5   | 57.3   | 89.9   | 117.5  | 116.2  |
| 373.2  | 287.8  | 231.2  | 311.2  | 316.8  | 282.9  | 400.4  | 514.9  | 411.6  |
| 213.2  | 103.2  | 118.7  | 145.0  | 120.9  | 136.6  | 207.1  | 139.9  | 140.0  |
| 344.8  | 205.3  | 239.1  | 293.0  | 270.9  | 277.9  | 365.7  | 405.8  | 323.8  |
| 209.0  | 149.1  | 166.3  | 191.8  | 175.1  | 168.6  | 220.4  | 228.4  | 221.7  |
| 170.9  | 109.1  | 108.6  | 117.7  | 134.4  | 128.9  | 202.7  | 186.3  | 129.8  |
| 453.0  | 318.0  | 295.7  | 330.3  | 390.5  | 365.4  | 525.0  | 647.5  | 690.3  |
| 322.4  | 243.8  | 253.2  | 262.0  | 360.7  | 281.3  | 374.5  | 359.7  | 349.9  |
| 1671.3 | 1112.0 | 1189.5 | 1277.1 | 1400.4 | 1435.9 | 1898.2 | 2035.8 | 1267.4 |
| 486.7  | 339.8  | 408.7  | 438.9  | 412.6  | 411.5  | 505.1  | 539.2  | 431.6  |
| 216.8  | 148.6  | 139.4  | 175.5  | 138.5  | 169.9  | 249.2  | 266.0  | 198.1  |
| 457.2  | 504.2  | 457.9  | 546.0  | 470.5  | 460.2  | 778.0  | 715.9  | 564.8  |
| 1338.7 | 937.9  | 1081.1 | 1077.4 | 1134.3 | 1113.9 | 1533.0 | 1592.2 | 1094.1 |
| 257.9  | 160.7  | 189.4  | 201.1  | 192.7  | 186.0  | 221.9  | 257.9  | 193.0  |
| 280.1  | 107.0  | 191.7  | 187.9  | 179.9  | 219.9  | 245.3  | 295.9  | 200.4  |
| 341.0  | 162.8  | 202.0  | 202.2  | 202.4  | 209.9  | 302.1  | 368.6  | 241.6  |
| 179.2  | 336.2  | 305.0  | 365.8  | 353.5  | 256.7  | 426.8  | 432.4  | 411.0  |
| 533.0  | 326.1  | 387.6  | 423.1  | 452.5  | 441.1  | 635.7  | 600.4  | 347.0  |
| 398.0  | 310.3  | 329.1  | 364.5  | 324.5  | 327.5  | 464.6  | 485.8  | 357.6  |
| 565.2  | 381.0  | 393.8  | 431.9  | 445.4  | 396.8  | 639.6  | 589.3  | 486.0  |
| 251.3  | 160.7  | 177.2  | 207.1  | 202.6  | 193.2  | 262.5  | 296.0  | 181.0  |
| 289.4  | 204.4  | 241.6  | 258.1  | 247.1  | 269.6  | 326.7  | 410.5  | 197.5  |
| 496.0  | 326.2  | 348.9  | 412.5  | 383.9  | 406.7  | 538.6  | 633.7  | 345.4  |
| 334.0  | 264.3  | 253.4  | 337.4  | 334.1  | 271.8  | 452.6  | 439.1  | 335.2  |
| 571.9  | 377.1  | 406.1  | 493.1  | 434.8  | 422.3  | 586.3  | 763.2  | 515.9  |
| 2104.9 | 1534.7 | 1608.1 | 1857.7 | 1915.8 | 1997.0 | 2358.1 | 2681.7 | 1731.2 |
| 128.4  | 103.3  | 81.3   | 113.4  | 109.3  | 102.8  | 153.0  | 150.8  | 110.4  |
| 236.2  | 168.6  | 182.9  | 174.5  | 172.5  | 163.4  | 240.7  | 207.0  | 172.8  |
| 1170.4 | 890.4  | 968.0  | 1031.9 | 1085.8 | 1061.7 | 1265.7 | 1424.8 | 1041.6 |

|        |        |        |        |        |        |        |        |        |
|--------|--------|--------|--------|--------|--------|--------|--------|--------|
| 691.7  | 479.5  | 498.7  | 557.2  | 598.5  | 614.1  | 774.6  | 920.0  | 596.2  |
| 119.4  | 113.5  | 111.4  | 123.3  | 104.8  | 93.3   | 174.7  | 164.2  | 132.4  |
| 3165.3 | 2581.7 | 2482.2 | 2816.8 | 2830.5 | 2641.6 | 3227.2 | 3073.5 | 2932.3 |
| 2095.3 | 1817.1 | 1568.8 | 1605.0 | 1918.0 | 1653.9 | 2417.3 | 2223.5 | 1800.0 |
| 149.5  | 100.3  | 107.5  | 130.9  | 115.9  | 113.3  | 125.8  | 185.8  | 114.8  |
| 357.4  | 226.7  | 252.1  | 282.5  | 262.4  | 270.7  | 367.4  | 448.7  | 365.4  |
| 147.5  | 65.2   | 98.0   | 104.2  | 87.1   | 88.8   | 132.5  | 133.7  | 94.1   |
| 917.4  | 637.1  | 661.3  | 680.1  | 772.3  | 718.6  | 896.6  | 1089.4 | 901.9  |
| 874.7  | 519.8  | 495.2  | 617.6  | 659.0  | 798.9  | 925.9  | 941.2  | 903.0  |
| 751.8  | 468.6  | 555.1  | 570.0  | 586.1  | 586.4  | 730.6  | 804.2  | 584.7  |
| 761.5  | 509.2  | 495.6  | 576.8  | 627.5  | 626.3  | 740.9  | 863.1  | 564.0  |
| 1518.3 | 1199.8 | 1207.3 | 1298.4 | 1428.5 | 1349.9 | 1820.5 | 1896.6 | 1343.2 |
| 214.5  | 177.5  | 223.8  | 209.7  | 210.8  | 244.0  | 266.6  | 267.3  | 227.0  |
| 1666.4 | 1143.4 | 1197.2 | 1214.2 | 1317.5 | 1280.9 | 1633.0 | 1572.3 | 1093.6 |
| 1647.2 | 1152.9 | 1216.4 | 1274.8 | 1293.3 | 1139.4 | 1490.8 | 1485.1 | 1212.8 |
| 41.0   | 16.7   | 30.6   | 22.6   | 24.0   | 16.6   | 32.2   | 33.5   | 27.3   |
| 529.8  | 333.0  | 415.5  | 337.9  | 368.3  | 384.7  | 525.7  | 489.1  | 384.7  |
| 102.5  | 75.5   | 76.5   | 95.8   | 92.9   | 75.8   | 125.4  | 121.7  | 99.4   |
| 69.3   | 40.8   | 42.9   | 40.7   | 49.8   | 47.5   | 63.6   | 55.5   | 41.0   |
| 2343.9 | 1753.9 | 1866.9 | 1905.2 | 2016.4 | 1993.9 | 2448.1 | 2588.6 | 1891.9 |
| 3089.8 | 2802.3 | 2651.0 | 2829.4 | 3035.5 | 2783.5 | 3465.6 | 3586.3 | 2861.2 |
| 869.1  | 479.9  | 522.6  | 519.9  | 600.6  | 502.6  | 679.8  | 787.3  | 402.4  |
| 509.0  | 296.3  | 283.6  | 372.1  | 360.4  | 332.8  | 551.2  | 629.0  | 363.5  |
| 1564.2 | 1132.2 | 1297.1 | 1240.9 | 1408.9 | 1285.2 | 1590.9 | 1798.2 | 1158.5 |
| 751.2  | 509.5  | 508.6  | 557.0  | 653.5  | 567.7  | 728.1  | 812.2  | 602.3  |
| 929.1  | 626.3  | 642.7  | 691.4  | 743.5  | 641.0  | 930.3  | 1008.0 | 780.3  |
| 2551.1 | 1980.6 | 1900.7 | 2066.4 | 2321.1 | 2133.1 | 2593.7 | 2597.3 | 2115.8 |
| 606.2  | 349.3  | 467.8  | 492.8  | 491.7  | 529.4  | 641.9  | 719.8  | 497.5  |
| 207.7  | 120.3  | 160.1  | 152.8  | 160.4  | 153.0  | 195.9  | 202.4  | 132.7  |
| 613.7  | 275.5  | 353.3  | 439.9  | 352.7  | 422.9  | 836.0  | 711.6  | 521.6  |
| 88.7   | 58.9   | 53.9   | 62.6   | 60.9   | 51.2   | 60.9   | 76.0   | 45.7   |
| 664.5  | 354.2  | 379.0  | 395.9  | 448.3  | 426.9  | 612.3  | 725.4  | 461.7  |
| 845.2  | 561.2  | 640.8  | 672.9  | 661.9  | 604.1  | 859.6  | 856.6  | 723.5  |
| 222.7  | 171.6  | 188.8  | 201.7  | 200.2  | 208.5  | 245.9  | 250.5  | 220.7  |
| 0.7    | 0.7    | 2.1    | 0.3    | 0.4    | 2.1    | 0.7    | 2.2    | 0.8    |
| 332.0  | 242.1  | 277.4  | 293.0  | 310.0  | 278.2  | 431.4  | 397.1  | 288.8  |
| 251.9  | 196.4  | 203.2  | 226.3  | 225.5  | 205.6  | 270.6  | 288.2  | 205.4  |
| 1134.4 | 801.3  | 889.8  | 934.5  | 996.0  | 928.6  | 1262.3 | 1223.7 | 1127.0 |
| 657.8  | 464.2  | 532.7  | 577.6  | 614.0  | 558.9  | 771.9  | 751.5  | 589.6  |
| 328.7  | 396.9  | 346.6  | 397.6  | 439.7  | 348.7  | 523.3  | 490.3  | 420.5  |
| 0.5    | 0.4    | 0.7    | 0.3    | 0.4    | 0.5    | 0.2    | 1.2    | 0.5    |
| 10.8   | 2.6    | 5.1    | 9.8    | 2.4    | 1.4    | 2.4    | 13.2   | 2.5    |
| 678.6  | 459.1  | 497.6  | 574.4  | 566.0  | 570.6  | 722.1  | 824.9  | 700.9  |
| 3082.6 | 2351.8 | 2382.9 | 2651.1 | 2765.5 | 2728.0 | 3286.5 | 3347.0 | 2325.5 |
| 1284.0 | 1077.0 | 1031.4 | 1151.6 | 1209.5 | 1132.2 | 1569.7 | 1610.0 | 1597.2 |
| 30.5   | 28.4   | 22.9   | 31.8   | 32.4   | 23.5   | 45.4   | 33.8   | 33.5   |
| 369.2  | 236.3  | 252.8  | 307.6  | 284.8  | 303.4  | 366.7  | 355.4  | 377.5  |
| 158.6  | 91.0   | 106.5  | 97.9   | 114.7  | 117.7  | 110.9  | 102.6  | 80.5   |
| 490.1  | 503.3  | 612.5  | 604.2  | 652.4  | 671.9  | 929.1  | 984.2  | 751.5  |
| 1457.4 | 1527.2 | 1904.4 | 1942.0 | 1715.8 | 1934.0 | 2014.8 | 2210.4 | 1257.2 |
| 1291.7 | 685.9  | 825.3  | 933.3  | 947.5  | 977.6  | 1227.8 | 1398.4 | 1034.0 |
| 983.9  | 802.2  | 947.6  | 939.6  | 1050.0 | 998.6  | 1326.1 | 1370.2 | 982.4  |
| 273.1  | 208.2  | 224.1  | 247.5  | 235.0  | 217.1  | 317.5  | 339.1  | 242.6  |



|        |        |        |        |        |        |        |        |        |
|--------|--------|--------|--------|--------|--------|--------|--------|--------|
| 94.8   | 68.9   | 103.5  | 108.0  | 91.7   | 87.0   | 140.1  | 136.4  | 99.9   |
| 7.2    | 10.0   | 8.6    | 11.4   | 5.9    | 12.9   | 8.9    | 22.6   | 4.4    |
| 592.7  | 286.5  | 260.0  | 375.9  | 398.2  | 324.3  | 580.2  | 870.0  | 355.4  |
| 349.3  | 209.0  | 267.7  | 275.4  | 283.9  | 279.7  | 421.2  | 397.8  | 367.5  |
| 36.7   | 45.2   | 54.8   | 35.1   | 50.4   | 40.5   | 55.8   | 51.6   | 58.4   |
| 3046.5 | 2671.0 | 2536.6 | 2794.9 | 2792.4 | 2693.5 | 3086.7 | 3310.2 | 2620.1 |
| 58.4   | 41.5   | 31.8   | 43.6   | 42.9   | 40.7   | 62.8   | 89.4   | 50.6   |
| 563.9  | 406.8  | 394.9  | 432.9  | 486.4  | 457.5  | 655.7  | 708.3  | 435.4  |
| 367.5  | 214.2  | 270.4  | 273.9  | 293.7  | 291.1  | 380.7  | 452.3  | 313.1  |
| 1256.9 | 904.8  | 910.6  | 1053.6 | 1083.2 | 987.7  | 1420.0 | 1443.4 | 1136.6 |
| 540.0  | 395.3  | 428.0  | 476.4  | 467.7  | 450.1  | 633.4  | 638.2  | 467.6  |
| 158.5  | 267.3  | 177.9  | 173.5  | 172.0  | 188.6  | 305.3  | 305.2  | 278.2  |
| 35.4   | 13.6   | 12.2   | 16.1   | 19.5   | 12.8   | 15.8   | 22.5   | 12.2   |
| 359.1  | 313.1  | 295.5  | 340.1  | 381.7  | 346.8  | 456.7  | 437.3  | 326.0  |
| 730.6  | 474.7  | 482.1  | 513.5  | 573.4  | 543.1  | 666.0  | 826.1  | 577.8  |
| 220.4  | 106.8  | 112.4  | 145.7  | 133.7  | 128.7  | 181.8  | 180.8  | 110.1  |
| 1087.1 | 674.1  | 731.6  | 733.5  | 830.5  | 818.7  | 946.5  | 1056.4 | 795.5  |
| 258.2  | 156.3  | 170.8  | 158.3  | 170.3  | 160.8  | 222.0  | 224.3  | 131.6  |
| 123.6  | 74.9   | 86.6   | 94.8   | 107.0  | 85.2   | 149.9  | 127.3  | 97.4   |
| 1270.3 | 1164.5 | 1141.4 | 1261.5 | 1419.8 | 1154.0 | 1778.8 | 1847.6 | 1047.1 |
| 388.9  | 410.6  | 444.7  | 494.3  | 495.3  | 452.1  | 690.1  | 567.8  | 465.1  |
| 1790.8 | 1104.9 | 1249.3 | 1368.6 | 1430.1 | 1346.0 | 1876.3 | 1988.5 | 1504.3 |
| 249.4  | 196.2  | 242.9  | 263.8  | 279.8  | 250.4  | 382.7  | 351.5  | 288.3  |
| 216.9  | 122.8  | 155.9  | 152.6  | 162.4  | 180.4  | 291.3  | 263.3  | 134.0  |
| 936.2  | 614.9  | 843.2  | 795.6  | 781.7  | 861.2  | 1161.4 | 1104.1 | 893.1  |
| 392.9  | 359.5  | 356.0  | 399.6  | 404.1  | 374.9  | 514.9  | 580.8  | 413.1  |
| 401.3  | 278.0  | 244.9  | 274.6  | 294.5  | 267.7  | 372.0  | 426.1  | 316.6  |
| 328.4  | 248.9  | 259.6  | 274.9  | 308.5  | 286.7  | 364.5  | 442.4  | 341.8  |
| 225.2  | 151.9  | 164.2  | 164.0  | 204.0  | 170.0  | 267.2  | 303.2  | 236.1  |
| 509.0  | 330.6  | 378.7  | 436.2  | 431.4  | 422.0  | 522.4  | 518.2  | 358.3  |
| 226.2  | 256.2  | 246.4  | 251.7  | 270.4  | 249.9  | 284.5  | 315.1  | 252.3  |
| 2834.1 | 2722.7 | 2694.6 | 3110.2 | 3001.5 | 2932.3 | 3174.3 | 3238.9 | 2942.8 |
| 4058.9 | 3763.2 | 3676.7 | 3987.2 | 4213.1 | 3700.8 | 4434.5 | 4435.2 | 3834.3 |
| 3312.7 | 2531.5 | 2670.6 | 2966.7 | 2800.7 | 2875.5 | 3431.7 | 3911.3 | 2813.2 |
| 1865.0 | 1464.6 | 1291.9 | 1476.8 | 1706.3 | 1452.9 | 1877.7 | 2069.0 | 1424.7 |
| 55.4   | 39.9   | 39.0   | 51.6   | 50.4   | 43.1   | 60.0   | 65.1   | 50.1   |
| 169.5  | 94.7   | 134.4  | 130.4  | 113.7  | 133.2  | 137.2  | 119.8  | 119.1  |
| 233.0  | 142.8  | 148.5  | 178.2  | 151.7  | 185.6  | 230.6  | 239.9  | 155.5  |
| 419.7  | 303.2  | 346.6  | 406.9  | 444.0  | 408.6  | 631.7  | 619.4  | 533.3  |
| 1082.3 | 819.4  | 858.7  | 1021.8 | 998.4  | 970.8  | 1555.3 | 1373.3 | 1069.4 |
| 1.9    | 5.6    | 2.6    | 5.0    | 6.7    | 4.6    | 7.1    | 6.7    | 4.1    |
| 1974.2 | 1429.8 | 1514.1 | 1708.6 | 1720.6 | 1778.5 | 2220.9 | 2258.8 | 1537.4 |
| 867.9  | 707.1  | 783.2  | 781.7  | 899.5  | 834.2  | 1115.5 | 1354.3 | 863.1  |
| 74.1   | 59.2   | 61.3   | 70.4   | 76.9   | 65.1   | 82.6   | 94.2   | 71.3   |
| 116.0  | 123.6  | 108.2  | 126.6  | 125.2  | 120.3  | 145.6  | 201.9  | 106.2  |
| 157.2  | 109.3  | 109.4  | 131.1  | 128.2  | 120.3  | 193.9  | 217.9  | 161.4  |
| 177.0  | 90.2   | 102.3  | 113.1  | 124.2  | 108.2  | 167.5  | 176.1  | 115.3  |
| 107.7  | 62.0   | 59.4   | 66.3   | 78.9   | 74.2   | 87.9   | 117.4  | 80.3   |
| 159.6  | 97.5   | 104.4  | 123.0  | 101.9  | 112.1  | 157.2  | 178.7  | 111.7  |
| 261.3  | 112.3  | 134.2  | 169.1  | 204.8  | 188.8  | 270.1  | 371.8  | 267.6  |
| 495.1  | 278.2  | 410.1  | 358.0  | 336.2  | 364.7  | 467.4  | 446.2  | 284.3  |
| 2974.3 | 2393.5 | 2569.2 | 2593.6 | 2740.1 | 2748.3 | 3156.0 | 3394.9 | 2200.9 |
| 1595.2 | 818.6  | 910.9  | 932.6  | 1056.0 | 1014.5 | 1330.8 | 1186.5 | 902.3  |

|        |        |        |        |        |        |        |        |        |
|--------|--------|--------|--------|--------|--------|--------|--------|--------|
| 673.7  | 494.4  | 432.9  | 529.4  | 537.4  | 481.5  | 749.3  | 905.0  | 608.4  |
| 1820.0 | 1476.3 | 1369.4 | 1425.0 | 1748.9 | 1523.4 | 1882.4 | 2005.0 | 1888.7 |
| 239.7  | 134.6  | 166.8  | 133.3  | 165.6  | 146.8  | 193.0  | 193.5  | 127.6  |
| 711.7  | 416.7  | 417.7  | 476.2  | 509.1  | 391.0  | 537.9  | 519.6  | 507.7  |
| 2902.0 | 2834.7 | 2206.6 | 2640.2 | 2827.0 | 2701.3 | 3225.1 | 3485.3 | 2452.6 |
| 151.3  | 106.1  | 128.4  | 126.0  | 118.9  | 119.3  | 144.4  | 158.7  | 111.2  |
| 135.2  | 76.6   | 78.2   | 78.1   | 76.1   | 84.1   | 121.5  | 118.2  | 111.8  |
| 510.5  | 307.2  | 333.3  | 356.6  | 398.3  | 407.5  | 561.0  | 457.8  | 431.2  |
| 506.6  | 322.1  | 355.9  | 373.3  | 378.7  | 341.1  | 438.9  | 414.9  | 328.5  |
| 571.1  | 369.7  | 397.6  | 433.1  | 436.3  | 395.8  | 509.5  | 532.1  | 372.0  |
| 119.4  | 105.4  | 119.4  | 128.3  | 108.5  | 97.5   | 171.6  | 140.7  | 125.0  |
| 1937.0 | 1228.1 | 1234.7 | 1327.1 | 1495.2 | 1382.6 | 1785.5 | 2024.4 | 1143.9 |
| 271.9  | 179.9  | 197.3  | 239.4  | 238.9  | 217.9  | 335.6  | 376.9  | 227.9  |
| 1725.8 | 1435.3 | 1580.8 | 1588.7 | 1708.7 | 1683.5 | 2121.0 | 2389.2 | 1809.0 |
| 790.4  | 621.2  | 672.6  | 642.7  | 744.7  | 643.7  | 1212.3 | 1184.2 | 769.7  |
| 62.8   | 38.7   | 42.6   | 57.0   | 54.1   | 34.2   | 68.4   | 84.7   | 44.7   |
| 440.5  | 346.2  | 356.9  | 410.1  | 405.8  | 392.5  | 629.9  | 680.0  | 634.8  |
| 1040.2 | 937.3  | 970.9  | 945.4  | 986.5  | 1124.4 | 1137.8 | 1435.5 | 1004.2 |
| 145.2  | 44.6   | 51.9   | 70.3   | 62.1   | 72.4   | 98.5   | 112.6  | 86.9   |
| 104.0  | 48.7   | 47.4   | 55.8   | 62.6   | 62.9   | 86.0   | 94.2   | 58.0   |
| 216.3  | 107.0  | 132.7  | 134.3  | 144.9  | 151.1  | 165.1  | 248.4  | 166.1  |
| 166.1  | 111.7  | 111.5  | 142.1  | 112.4  | 119.0  | 166.2  | 183.7  | 84.4   |
| 230.4  | 151.9  | 118.1  | 173.2  | 186.5  | 118.8  | 211.0  | 249.9  | 128.7  |
| 488.6  | 283.9  | 324.8  | 370.9  | 356.6  | 351.9  | 417.0  | 458.7  | 423.5  |
| 666.7  | 474.4  | 469.8  | 593.4  | 537.9  | 541.0  | 678.5  | 729.8  | 530.7  |
| 57.4   | 71.0   | 75.2   | 92.1   | 88.5   | 68.4   | 102.1  | 104.0  | 70.2   |
| 3203.4 | 3176.1 | 2958.6 | 2984.3 | 3464.0 | 3129.3 | 3870.1 | 3787.7 | 2647.2 |
| 243.0  | 206.4  | 203.8  | 212.0  | 221.0  | 201.5  | 307.1  | 312.1  | 224.5  |
| 349.2  | 268.0  | 280.2  | 311.0  | 317.0  | 299.2  | 407.7  | 400.5  | 355.9  |
| 70.5   | 46.2   | 56.1   | 65.7   | 70.4   | 61.5   | 68.4   | 76.0   | 62.4   |
| 44.5   | 42.0   | 47.8   | 45.4   | 42.1   | 46.2   | 61.4   | 55.5   | 57.1   |
| 453.5  | 194.9  | 247.0  | 245.7  | 276.4  | 277.9  | 299.8  | 387.2  | 260.2  |
| 134.2  | 85.5   | 69.6   | 80.1   | 88.6   | 84.7   | 64.4   | 87.9   | 95.3   |
| 143.1  | 51.2   | 51.5   | 55.0   | 66.0   | 69.5   | 58.7   | 118.9  | 66.7   |
| 193.8  | 52.7   | 82.3   | 74.8   | 78.4   | 58.8   | 91.8   | 108.9  | 86.3   |
| 1886.6 | 1310.3 | 1555.9 | 1436.6 | 1569.6 | 1765.7 | 2125.7 | 2301.3 | 1863.6 |
| 1816.3 | 1452.3 | 1465.4 | 1597.3 | 1637.5 | 1767.5 | 2110.1 | 2161.4 | 1659.8 |
| 956.1  | 731.7  | 809.5  | 940.1  | 894.6  | 924.0  | 1170.5 | 1297.2 | 958.1  |
| 1302.4 | 1043.3 | 918.5  | 1208.6 | 1231.2 | 1068.1 | 1551.4 | 1597.7 | 1162.6 |
| 482.8  | 346.5  | 366.7  | 335.2  | 388.8  | 401.5  | 588.1  | 681.8  | 349.3  |
| 355.4  | 341.2  | 296.6  | 327.9  | 356.8  | 309.7  | 467.4  | 604.5  | 514.3  |
| 575.1  | 328.4  | 417.2  | 404.2  | 435.5  | 444.3  | 518.7  | 585.5  | 394.4  |
| 677.3  | 403.5  | 555.4  | 535.0  | 615.8  | 625.5  | 866.6  | 1072.1 | 463.1  |
| 2441.2 | 1821.6 | 1981.7 | 2026.1 | 2030.9 | 1942.1 | 2166.6 | 2317.3 | 1826.9 |
| 2559.4 | 2181.4 | 2122.7 | 2374.8 | 2364.6 | 2436.3 | 2929.4 | 3407.1 | 1979.7 |
| 501.0  | 327.2  | 324.1  | 364.9  | 474.1  | 352.2  | 468.5  | 501.0  | 356.0  |
| 90.6   | 72.3   | 79.7   | 84.8   | 81.1   | 87.9   | 124.2  | 135.0  | 121.8  |
| 1.4    | 2.1    | 1.1    | 2.7    | 2.5    | 1.5    | 1.6    | 2.8    | 2.0    |
| 21.1   | 9.6    | 15.9   | 8.7    | 15.7   | 12.4   | 16.6   | 13.8   | 7.7    |
| 670.6  | 469.8  | 512.1  | 632.7  | 566.5  | 548.1  | 730.0  | 678.9  | 677.8  |
| 327.3  | 221.4  | 278.8  | 265.1  | 305.8  | 309.6  | 429.1  | 417.8  | 280.1  |
| 393.7  | 273.8  | 315.2  | 357.9  | 327.0  | 361.9  | 402.9  | 449.5  | 378.0  |
| 520.0  | 358.3  | 349.3  | 376.8  | 400.1  | 349.9  | 672.5  | 672.1  | 604.4  |

|        |        |        |        |        |        |        |        |        |
|--------|--------|--------|--------|--------|--------|--------|--------|--------|
| 2307.1 | 1378.5 | 1507.7 | 1604.0 | 1634.7 | 1508.2 | 1886.3 | 1947.4 | 1588.8 |
| 42.7   | 30.2   | 38.7   | 33.9   | 34.6   | 35.6   | 35.9   | 49.2   | 40.7   |
| 1549.1 | 978.2  | 1186.1 | 1289.3 | 1169.2 | 1297.9 | 1841.3 | 1739.8 | 1455.5 |
| 376.2  | 353.7  | 357.0  | 387.4  | 479.4  | 388.7  | 471.3  | 523.1  | 372.7  |
| 615.0  | 485.5  | 542.1  | 617.5  | 619.0  | 554.0  | 737.1  | 755.0  | 554.5  |
| 4.7    | 4.7    | 4.9    | 5.3    | 8.0    | 3.6    | 7.0    | 11.4   | 5.0    |
| 58.4   | 41.0   | 43.0   | 54.1   | 44.9   | 50.5   | 86.0   | 76.9   | 46.7   |
| 361.9  | 300.7  | 283.8  | 314.4  | 256.5  | 258.6  | 383.4  | 482.8  | 295.0  |
| 240.3  | 226.6  | 183.5  | 212.2  | 223.4  | 188.4  | 287.6  | 297.5  | 236.9  |
| 0.6    | 2.2    | 3.4    | 2.8    | 1.9    | 6.9    | 5.0    | 6.2    | 2.6    |
| 391.6  | 238.2  | 286.4  | 292.1  | 278.2  | 316.2  | 443.4  | 458.9  | 361.7  |
| 4144.6 | 3488.8 | 3368.6 | 3700.3 | 3795.1 | 3628.1 | 3978.1 | 3957.0 | 2820.8 |
| 472.5  | 278.9  | 330.1  | 349.7  | 355.0  | 337.6  | 457.2  | 437.8  | 390.4  |
| 1174.1 | 1082.8 | 946.9  | 1023.4 | 1103.3 | 1001.9 | 1232.8 | 1402.5 | 1086.6 |
| 990.3  | 708.9  | 793.1  | 793.1  | 769.4  | 790.6  | 1062.9 | 1097.2 | 764.9  |
| 151.9  | 161.5  | 148.4  | 146.5  | 167.6  | 139.8  | 198.1  | 184.9  | 150.9  |
| 1818.7 | 1199.5 | 1375.4 | 1438.8 | 1493.8 | 1537.4 | 1910.6 | 2068.8 | 1688.6 |
| 2795.8 | 2499.1 | 2186.2 | 2344.1 | 2572.3 | 2463.9 | 2794.2 | 3193.3 | 3166.0 |
| 38.6   | 34.2   | 28.3   | 32.9   | 29.0   | 28.6   | 44.9   | 39.3   | 46.1   |
| 2871.2 | 2596.2 | 2639.5 | 2719.9 | 2822.8 | 2712.7 | 3109.5 | 3288.8 | 2386.3 |
| 475.0  | 414.7  | 536.3  | 550.4  | 540.6  | 521.8  | 781.4  | 775.5  | 490.1  |
| 420.4  | 412.7  | 508.2  | 512.7  | 560.6  | 492.4  | 682.1  | 662.4  | 449.3  |
| 397.5  | 328.8  | 431.3  | 392.4  | 431.7  | 422.1  | 698.4  | 622.5  | 460.8  |
| 44.8   | 47.0   | 39.7   | 59.1   | 41.9   | 45.0   | 63.5   | 77.3   | 57.8   |
| 261.7  | 289.4  | 319.9  | 309.1  | 278.2  | 337.9  | 350.3  | 333.7  | 193.8  |
| 96.3   | 95.7   | 102.8  | 118.1  | 115.0  | 95.0   | 124.7  | 135.6  | 97.5   |
| 72.1   | 60.3   | 49.4   | 76.2   | 71.9   | 65.7   | 101.3  | 118.0  | 62.3   |
| 4608.5 | 3917.0 | 3946.3 | 4065.4 | 4232.4 | 4061.5 | 4738.9 | 4863.0 | 3063.2 |
| 858.4  | 628.1  | 651.2  | 734.0  | 708.9  | 768.9  | 882.6  | 1078.7 | 808.0  |
| 3636.4 | 3101.7 | 2973.6 | 3174.0 | 3386.2 | 3316.4 | 3782.6 | 4028.3 | 3422.4 |
| 1040.4 | 536.7  | 691.1  | 576.6  | 641.1  | 636.1  | 863.9  | 889.4  | 595.6  |
| 140.2  | 100.8  | 91.3   | 93.6   | 124.4  | 97.7   | 141.5  | 175.5  | 131.4  |
| 2088.8 | 1759.7 | 1933.0 | 1928.7 | 2109.6 | 1957.0 | 2349.5 | 2230.3 | 2076.2 |
| 2535.6 | 1650.1 | 1707.9 | 1738.2 | 1958.7 | 1888.8 | 2323.0 | 2496.3 | 2149.2 |
| 12.1   | 18.6   | 14.2   | 15.6   | 15.1   | 14.6   | 21.3   | 14.2   | 12.3   |
| 458.8  | 277.0  | 396.8  | 318.9  | 335.5  | 339.6  | 413.5  | 583.1  | 281.9  |
| 1406.0 | 918.9  | 1094.4 | 1180.5 | 1156.3 | 1133.1 | 1503.4 | 1623.6 | 1061.6 |
| 117.2  | 74.4   | 84.0   | 89.0   | 101.3  | 78.0   | 112.1  | 123.8  | 108.6  |
| 1008.8 | 778.7  | 852.7  | 881.7  | 949.0  | 968.6  | 982.2  | 1053.8 | 1035.9 |
| 447.4  | 334.4  | 395.6  | 400.6  | 440.7  | 410.9  | 583.1  | 577.8  | 421.6  |
| 607.6  | 538.0  | 586.6  | 588.7  | 610.7  | 615.2  | 763.2  | 766.2  | 669.6  |
| 249.7  | 120.2  | 128.7  | 146.8  | 145.9  | 141.5  | 191.7  | 275.2  | 118.0  |
| 576.9  | 228.5  | 243.5  | 276.7  | 292.5  | 291.3  | 383.7  | 586.6  | 307.3  |
| 177.2  | 136.2  | 142.3  | 158.6  | 181.8  | 160.0  | 229.2  | 249.0  | 187.6  |
| 3206.7 | 2492.2 | 2520.6 | 2535.6 | 3067.8 | 2798.5 | 3803.2 | 4008.0 | 2561.5 |
| 12.9   | 2.1    | 9.2    | 3.0    | 2.2    | 2.8    | 14.1   | 7.1    | 11.9   |
| 117.2  | 68.8   | 72.2   | 92.6   | 90.9   | 77.5   | 83.6   | 115.4  | 82.9   |
| 801.5  | 536.5  | 728.6  | 704.9  | 804.4  | 653.2  | 797.6  | 686.9  | 519.3  |
| 184.4  | 128.7  | 127.8  | 119.7  | 172.9  | 161.2  | 252.6  | 264.0  | 147.3  |
| 235.6  | 159.8  | 173.8  | 190.3  | 186.5  | 186.3  | 296.0  | 277.5  | 176.8  |
| 1460.6 | 1051.4 | 1140.7 | 1231.1 | 1209.2 | 1173.6 | 1580.2 | 1584.4 | 1182.5 |
| 140.4  | 51.4   | 79.2   | 76.9   | 116.5  | 89.8   | 100.8  | 123.9  | 84.7   |
| 275.2  | 135.7  | 137.9  | 153.5  | 165.4  | 167.3  | 242.5  | 307.3  | 167.2  |

|        |        |        |        |        |        |        |        |        |
|--------|--------|--------|--------|--------|--------|--------|--------|--------|
| 330.5  | 191.3  | 211.4  | 205.1  | 196.0  | 226.2  | 333.6  | 360.4  | 235.5  |
| 1635.9 | 1024.9 | 1227.2 | 1308.9 | 1224.4 | 1324.0 | 1351.6 | 1498.1 | 1116.1 |
| 1127.3 | 708.0  | 743.2  | 767.3  | 887.8  | 1012.9 | 951.3  | 1186.3 | 922.7  |
| 509.8  | 301.5  | 339.1  | 345.0  | 355.8  | 325.5  | 474.1  | 430.8  | 336.8  |
| 562.7  | 341.9  | 317.2  | 401.1  | 449.9  | 381.3  | 731.6  | 765.6  | 500.9  |
| 98.6   | 74.5   | 53.8   | 62.4   | 77.7   | 70.9   | 97.7   | 111.9  | 97.0   |
| 138.6  | 152.7  | 100.8  | 157.3  | 141.3  | 113.4  | 185.8  | 182.9  | 157.0  |
| 319.1  | 204.3  | 232.3  | 258.6  | 305.7  | 231.3  | 357.9  | 344.1  | 240.3  |
| 278.5  | 204.5  | 215.8  | 251.9  | 219.4  | 195.6  | 269.7  | 259.5  | 186.0  |
| 545.0  | 395.1  | 430.1  | 565.3  | 500.0  | 381.4  | 693.3  | 662.2  | 488.5  |
| 2101.3 | 1460.1 | 1435.1 | 1544.8 | 1717.9 | 1555.6 | 2214.4 | 2457.9 | 1772.8 |
| 135.6  | 58.7   | 76.8   | 77.1   | 79.1   | 81.6   | 96.5   | 135.2  | 69.9   |
| 21.0   | 14.7   | 9.3    | 7.8    | 14.7   | 11.9   | 16.1   | 21.0   | 9.7    |
| 23.0   | 17.9   | 13.8   | 12.6   | 21.0   | 11.6   | 16.3   | 19.2   | 11.2   |
| 67.9   | 45.5   | 43.2   | 48.0   | 45.5   | 45.6   | 59.8   | 84.0   | 58.1   |
| 2836.2 | 2436.5 | 2409.0 | 2148.9 | 2683.9 | 2625.1 | 3289.8 | 3332.9 | 2219.5 |
| 141.1  | 48.6   | 62.7   | 71.3   | 57.6   | 70.0   | 79.6   | 102.5  | 67.6   |
| 353.0  | 270.2  | 308.1  | 330.2  | 309.1  | 308.4  | 407.4  | 407.8  | 319.2  |
| 114.8  | 95.1   | 100.4  | 101.4  | 98.5   | 112.4  | 151.1  | 159.9  | 140.0  |
| 1156.5 | 387.7  | 471.0  | 502.2  | 510.4  | 573.0  | 580.4  | 801.0  | 505.8  |
| 885.8  | 584.6  | 695.9  | 666.4  | 704.0  | 682.0  | 879.1  | 1025.6 | 634.1  |
| 151.2  | 81.2   | 82.4   | 104.7  | 91.8   | 91.0   | 144.0  | 212.2  | 110.4  |
| 2.5    | 3.3    | 0.6    | 2.0    | 0.9    | 1.0    | 3.8    | 0.5    | 2.4    |
| 423.8  | 325.6  | 322.3  | 336.7  | 349.6  | 302.2  | 442.0  | 453.0  | 382.5  |
| 120.1  | 80.5   | 75.1   | 100.0  | 94.6   | 87.2   | 142.0  | 152.9  | 116.1  |
| 252.0  | 156.7  | 184.6  | 182.7  | 179.9  | 167.0  | 243.8  | 256.1  | 151.1  |
| 3731.6 | 2660.3 | 2789.0 | 3011.3 | 3160.6 | 3016.4 | 4009.6 | 4019.3 | 3143.0 |
| 821.9  | 660.1  | 656.1  | 680.5  | 779.9  | 717.9  | 858.7  | 1032.2 | 927.1  |
| 799.1  | 607.5  | 626.3  | 591.6  | 696.4  | 699.1  | 791.0  | 860.6  | 849.1  |
| 18.1   | 8.8    | 7.1    | 11.1   | 17.2   | 7.7    | 22.6   | 10.9   | 10.4   |
| 1135.0 | 869.0  | 940.9  | 921.6  | 1060.0 | 1041.2 | 1424.1 | 1618.9 | 1486.5 |
| 103.3  | 69.5   | 89.6   | 85.6   | 78.0   | 81.7   | 113.3  | 138.0  | 94.2   |
| 551.6  | 313.2  | 400.6  | 383.2  | 383.8  | 479.3  | 562.4  | 713.9  | 477.3  |
| 917.2  | 594.6  | 647.2  | 665.7  | 746.1  | 648.5  | 853.2  | 962.8  | 730.7  |
| 922.9  | 905.6  | 1035.7 | 1040.0 | 1144.0 | 916.5  | 1525.4 | 1473.6 | 967.2  |
| 0.8    | 11.5   | 10.9   | 9.4    | 6.9    | 6.8    | 10.7   | 5.3    | 8.4    |
| 0.7    | 4.9    | 1.4    | 5.3    | 4.2    | 1.0    | 3.7    | 4.4    | 1.2    |
| 351.0  | 241.8  | 277.5  | 288.9  | 314.3  | 287.1  | 399.0  | 443.3  | 428.3  |
| 721.6  | 500.9  | 563.2  | 627.7  | 605.9  | 613.4  | 891.2  | 956.9  | 819.9  |
| 476.9  | 328.1  | 362.1  | 419.5  | 434.3  | 395.4  | 475.0  | 460.5  | 321.0  |
| 578.8  | 492.5  | 464.3  | 456.7  | 568.7  | 517.0  | 631.3  | 756.9  | 413.0  |
| 1372.8 | 904.9  | 1037.5 | 990.4  | 1087.8 | 1034.3 | 1411.7 | 1527.8 | 1107.6 |
| 794.1  | 605.1  | 771.4  | 746.7  | 658.2  | 630.3  | 1021.6 | 816.1  | 523.0  |
| 1880.6 | 1563.1 | 1578.2 | 1814.8 | 1660.0 | 1649.1 | 2048.3 | 2018.0 | 1858.4 |
| 137.0  | 113.7  | 151.5  | 132.0  | 130.9  | 101.1  | 143.9  | 159.4  | 115.9  |
| 2289.1 | 1472.7 | 1644.6 | 1713.6 | 1893.5 | 1989.1 | 2660.8 | 2952.8 | 1625.5 |
| 463.7  | 203.2  | 232.0  | 251.8  | 263.7  | 272.9  | 355.3  | 431.4  | 335.6  |
| 297.0  | 141.7  | 144.5  | 149.4  | 154.6  | 177.3  | 212.6  | 243.8  | 150.5  |
| 782.1  | 290.6  | 332.1  | 354.4  | 423.0  | 430.5  | 782.6  | 1065.5 | 539.4  |
| 383.7  | 327.2  | 322.6  | 377.1  | 425.5  | 379.3  | 514.5  | 630.6  | 413.1  |
| 774.3  | 545.0  | 609.1  | 662.7  | 738.2  | 716.2  | 913.5  | 1092.1 | 772.5  |
| 350.8  | 306.7  | 379.4  | 346.6  | 365.9  | 377.5  | 504.2  | 480.1  | 307.0  |
| 1014.2 | 811.3  | 943.0  | 916.8  | 948.4  | 892.5  | 1253.0 | 1150.0 | 862.6  |

|        |        |        |        |        |        |        |        |        |
|--------|--------|--------|--------|--------|--------|--------|--------|--------|
| 926.4  | 670.6  | 800.6  | 819.3  | 848.6  | 843.2  | 990.0  | 958.5  | 688.0  |
| 100.0  | 59.2   | 61.4   | 82.4   | 70.0   | 68.4   | 96.0   | 112.6  | 46.0   |
| 148.0  | 98.0   | 138.2  | 137.6  | 121.8  | 164.2  | 186.1  | 211.5  | 130.5  |
| 81.7   | 51.4   | 64.4   | 64.4   | 60.8   | 69.3   | 95.1   | 116.9  | 71.6   |
| 134.8  | 94.2   | 123.6  | 136.1  | 123.5  | 113.8  | 158.9  | 169.7  | 140.0  |
| 165.3  | 160.0  | 147.0  | 185.3  | 176.0  | 167.3  | 283.8  | 239.0  | 186.2  |
| 346.3  | 292.2  | 284.7  | 309.4  | 371.5  | 360.0  | 474.3  | 646.8  | 321.6  |
| 1032.7 | 670.7  | 746.6  | 814.9  | 800.0  | 730.3  | 1024.7 | 991.0  | 819.5  |
| 3.0    | 7.6    | 8.3    | 4.2    | 9.1    | 4.4    | 8.6    | 2.6    | 1.8    |
| 55.7   | 53.0   | 68.4   | 50.5   | 69.7   | 45.9   | 68.6   | 71.6   | 56.1   |
| 19.0   | 14.6   | 9.8    | 12.3   | 14.5   | 18.0   | 25.3   | 23.8   | 10.0   |
| 64.6   | 32.0   | 47.8   | 39.3   | 47.9   | 53.8   | 64.8   | 86.2   | 54.6   |
| 12.9   | 10.8   | 10.8   | 11.9   | 17.7   | 12.2   | 21.3   | 22.0   | 9.0    |
| 3212.9 | 2571.5 | 2565.4 | 2612.1 | 3065.0 | 2917.8 | 3541.6 | 3709.2 | 3181.5 |
| 1401.5 | 1069.4 | 1115.5 | 1289.2 | 1214.4 | 1084.9 | 1669.1 | 1564.0 | 1329.8 |
| 193.5  | 170.2  | 181.9  | 203.0  | 180.1  | 211.3  | 224.4  | 291.5  | 205.9  |
| 658.6  | 1171.7 | 1048.6 | 1022.4 | 1127.7 | 1063.6 | 1225.2 | 1591.3 | 1113.5 |
| 156.7  | 124.7  | 169.0  | 123.6  | 139.6  | 143.2  | 240.7  | 266.8  | 159.5  |
| 154.9  | 51.2   | 43.4   | 54.7   | 92.7   | 72.5   | 138.5  | 179.7  | 97.1   |
| 297.7  | 152.9  | 156.1  | 167.1  | 178.1  | 172.6  | 237.2  | 327.9  | 143.4  |
| 424.4  | 466.2  | 445.2  | 503.2  | 483.5  | 407.4  | 599.7  | 642.9  | 489.0  |
| 86.6   | 34.8   | 60.3   | 56.1   | 50.4   | 56.6   | 72.9   | 71.7   | 40.8   |
| 358.2  | 165.1  | 195.6  | 220.3  | 191.9  | 188.2  | 261.8  | 301.0  | 231.5  |
| 134.9  | 115.8  | 120.0  | 111.2  | 115.8  | 109.7  | 125.5  | 128.0  | 107.8  |
| 510.8  | 724.3  | 880.4  | 821.4  | 957.8  | 1091.3 | 1366.1 | 1693.8 | 1044.4 |
| 650.8  | 806.5  | 802.8  | 916.3  | 965.4  | 961.8  | 1324.6 | 1656.3 | 1300.0 |
| 163.4  | 82.7   | 88.0   | 102.0  | 102.6  | 93.0   | 118.7  | 119.1  | 105.7  |
| 20.2   | 11.4   | 9.2    | 12.8   | 12.7   | 12.7   | 19.9   | 16.5   | 16.1   |
| 150.7  | 111.7  | 120.3  | 135.4  | 110.0  | 114.2  | 118.0  | 157.1  | 134.2  |
| 1857.2 | 1508.9 | 1629.2 | 1686.5 | 1847.6 | 1744.8 | 2115.9 | 2558.2 | 1478.5 |
| 4078.5 | 3418.4 | 3421.3 | 3690.1 | 3764.6 | 3749.9 | 4513.4 | 4478.6 | 3084.3 |
| 171.2  | 98.0   | 137.8  | 132.5  | 135.9  | 132.3  | 201.1  | 203.6  | 168.2  |
| 3.3    | 2.4    | 3.7    | 1.8    | 4.6    | 2.4    | 2.0    | 8.0    | 4.1    |
| 715.0  | 495.8  | 485.1  | 477.8  | 551.6  | 530.3  | 600.9  | 738.2  | 566.1  |
| 1.0    | 2.7    | 0.6    | 0.6    | 1.0    | 0.7    | 1.0    | 1.3    | 7.8    |
| 334.7  | 231.6  | 285.5  | 302.6  | 266.7  | 263.1  | 353.3  | 374.3  | 233.1  |
| 310.5  | 196.3  | 275.3  | 280.6  | 271.0  | 244.1  | 339.2  | 321.0  | 241.6  |
| 2964.1 | 2671.0 | 2544.2 | 2592.6 | 3009.2 | 2643.7 | 3259.6 | 3462.9 | 2329.8 |
| 411.5  | 185.5  | 247.3  | 317.5  | 281.5  | 310.8  | 405.2  | 443.7  | 372.3  |
| 292.7  | 131.8  | 166.8  | 168.2  | 122.8  | 153.9  | 207.2  | 253.4  | 185.2  |
| 3694.4 | 3089.9 | 3115.5 | 3273.0 | 3455.6 | 3407.0 | 4073.5 | 4027.1 | 3005.1 |
| 1583.5 | 1116.2 | 1149.4 | 1208.8 | 1393.2 | 1251.1 | 1993.7 | 2154.8 | 1557.1 |
| 0.7    | 0.6    | 0.8    | 0.3    | 0.9    | 1.6    | 1.5    | 7.5    | 2.2    |
| 0.4    | 0.7    | 2.2    | 0.8    | 7.2    | 0.4    | 2.1    | 1.3    | 0.5    |
| 19.4   | 26.0   | 13.1   | 21.5   | 21.1   | 24.9   | 24.6   | 31.6   | 18.7   |
| 132.7  | 75.2   | 80.9   | 98.0   | 85.6   | 91.2   | 141.3  | 144.9  | 69.5   |
| 540.6  | 293.2  | 332.9  | 405.6  | 367.4  | 396.0  | 519.4  | 586.7  | 370.9  |
| 1034.9 | 392.8  | 453.4  | 884.2  | 551.2  | 762.8  | 824.4  | 962.5  | 813.1  |
| 1011.3 | 626.5  | 698.1  | 800.2  | 726.5  | 689.6  | 887.1  | 1043.9 | 809.8  |
| 319.8  | 232.1  | 248.0  | 293.6  | 292.2  | 249.3  | 408.6  | 421.3  | 298.8  |
| 287.4  | 169.5  | 206.3  | 229.3  | 232.2  | 228.1  | 293.7  | 338.1  | 229.8  |
| 201.8  | 123.2  | 154.0  | 184.1  | 176.2  | 164.2  | 262.2  | 294.6  | 180.1  |
| 774.6  | 563.9  | 610.2  | 658.3  | 617.7  | 593.3  | 820.9  | 831.5  | 492.0  |

|        |        |        |        |        |        |        |        |        |
|--------|--------|--------|--------|--------|--------|--------|--------|--------|
| 2216.5 | 1784.2 | 1938.8 | 2067.0 | 2259.3 | 2145.9 | 2659.9 | 2924.9 | 2417.5 |
| 777.4  | 480.1  | 694.0  | 628.2  | 630.1  | 622.8  | 832.8  | 772.4  | 655.1  |
| 0.5    | 1.3    | 0.4    | 0.8    | 0.3    | 1.9    | 0.3    | 0.8    | 0.9    |
| 3.7    | 7.4    | 6.6    | 1.9    | 1.9    | 0.6    | 2.7    | 7.9    | 0.7    |
| 5.1    | 5.5    | 1.4    | 2.3    | 0.8    | 5.7    | 7.9    | 2.9    | 0.8    |
| 479.6  | 405.2  | 353.2  | 383.0  | 423.3  | 370.3  | 478.5  | 487.5  | 556.5  |
| 281.6  | 157.5  | 194.8  | 204.5  | 191.7  | 244.6  | 285.1  | 309.2  | 265.7  |
| 293.2  | 169.0  | 255.0  | 214.5  | 256.0  | 218.2  | 339.1  | 292.9  | 207.8  |
| 327.0  | 181.4  | 263.2  | 264.9  | 265.7  | 267.1  | 386.4  | 359.1  | 292.6  |
| 403.8  | 202.0  | 193.4  | 217.7  | 254.3  | 220.3  | 288.5  | 366.9  | 231.0  |
| 351.9  | 264.8  | 342.2  | 330.3  | 348.8  | 336.2  | 432.2  | 410.7  | 436.7  |
| 860.8  | 660.1  | 763.0  | 809.9  | 771.5  | 788.0  | 1087.5 | 1120.4 | 545.5  |
| 220.6  | 153.1  | 134.4  | 200.3  | 182.0  | 166.3  | 244.2  | 274.5  | 237.8  |
| 52.0   | 52.9   | 48.9   | 48.9   | 57.6   | 50.4   | 64.6   | 77.6   | 51.1   |
| 2744.6 | 2216.5 | 2344.8 | 2480.5 | 2653.3 | 2531.0 | 3542.4 | 4407.7 | 3127.9 |
| 1097.3 | 642.2  | 853.7  | 821.8  | 754.6  | 865.0  | 1019.9 | 940.5  | 716.6  |
| 110.0  | 75.0   | 97.4   | 110.5  | 112.3  | 110.0  | 109.4  | 170.1  | 96.9   |
| 2486.3 | 1981.0 | 1751.7 | 2144.7 | 2296.8 | 2182.6 | 2621.7 | 2628.0 | 2260.5 |
| 2003.8 | 1394.2 | 1298.5 | 1393.2 | 1734.5 | 1446.2 | 2012.8 | 2239.3 | 1652.2 |
| 1906.7 | 1083.1 | 1403.8 | 1236.4 | 1427.8 | 1403.1 | 1775.8 | 1945.9 | 1105.1 |
| 249.1  | 152.1  | 169.6  | 197.0  | 202.6  | 206.8  | 248.7  | 367.5  | 233.7  |
| 355.3  | 281.1  | 277.7  | 317.5  | 361.5  | 325.1  | 475.3  | 601.8  | 341.1  |
| 1591.8 | 955.7  | 1019.1 | 964.3  | 1144.1 | 1509.4 | 1516.7 | 1763.1 | 1124.6 |
| 299.5  | 282.8  | 263.2  | 336.7  | 329.3  | 285.3  | 448.0  | 422.5  | 316.7  |
| 138.3  | 136.6  | 135.9  | 159.6  | 166.4  | 154.3  | 231.1  | 208.3  | 150.4  |
| 35.9   | 27.1   | 39.6   | 42.0   | 42.5   | 33.9   | 48.7   | 51.0   | 41.7   |
| 461.3  | 385.1  | 403.5  | 430.1  | 466.0  | 415.5  | 569.6  | 553.2  | 456.6  |
| 192.5  | 175.2  | 170.1  | 215.5  | 198.5  | 183.5  | 253.3  | 276.2  | 258.0  |
| 205.3  | 231.1  | 213.8  | 249.3  | 274.3  | 224.2  | 342.6  | 377.2  | 220.0  |
| 504.9  | 436.1  | 460.0  | 470.9  | 545.0  | 492.8  | 582.2  | 793.2  | 392.1  |
| 47.7   | 37.8   | 37.5   | 41.0   | 48.7   | 37.7   | 48.6   | 80.8   | 46.2   |
| 245.7  | 191.8  | 248.5  | 229.1  | 274.7  | 277.5  | 403.6  | 416.3  | 258.3  |
| 2321.3 | 1673.8 | 1787.4 | 1826.7 | 1821.4 | 1877.3 | 2013.0 | 2237.2 | 1871.8 |
| 220.5  | 102.4  | 156.3  | 153.5  | 132.1  | 184.6  | 219.9  | 210.9  | 153.7  |
| 151.6  | 115.4  | 125.7  | 142.3  | 151.0  | 118.3  | 167.0  | 178.8  | 143.0  |
| 105.8  | 88.6   | 100.6  | 101.4  | 112.2  | 104.2  | 137.9  | 125.9  | 91.3   |
| 96.5   | 77.3   | 94.8   | 108.3  | 96.0   | 97.9   | 116.7  | 130.6  | 79.0   |
| 3.0    | 0.6    | 0.7    | 3.5    | 3.1    | 1.5    | 1.5    | 5.0    | 0.3    |
| 315.5  | 203.9  | 239.6  | 240.4  | 247.9  | 250.0  | 272.4  | 295.5  | 277.4  |
| 84.9   | 47.8   | 71.6   | 56.2   | 61.4   | 71.7   | 67.3   | 72.4   | 64.7   |
| 355.8  | 183.3  | 190.4  | 234.0  | 228.8  | 208.9  | 262.9  | 382.5  | 204.2  |
| 871.8  | 613.8  | 1006.9 | 670.6  | 823.3  | 974.5  | 1155.0 | 1119.8 | 812.1  |
| 227.0  | 142.6  | 157.2  | 163.6  | 171.6  | 169.0  | 223.7  | 200.4  | 167.9  |
| 415.2  | 282.2  | 303.5  | 338.8  | 326.9  | 356.8  | 511.5  | 628.8  | 413.6  |
| 372.4  | 240.9  | 279.9  | 317.7  | 292.3  | 298.1  | 407.6  | 525.0  | 366.3  |
| 239.2  | 158.2  | 174.5  | 191.8  | 211.1  | 230.4  | 319.4  | 421.8  | 232.5  |
| 54.4   | 35.2   | 41.1   | 51.1   | 48.3   | 39.3   | 62.6   | 92.4   | 48.3   |
| 596.9  | 347.2  | 372.4  | 400.8  | 407.2  | 461.4  | 555.1  | 801.1  | 504.4  |
| 419.7  | 321.6  | 341.9  | 374.6  | 395.4  | 367.1  | 449.6  | 449.0  | 359.4  |
| 132.6  | 48.7   | 47.8   | 71.2   | 72.7   | 67.0   | 98.5   | 114.1  | 73.9   |
| 341.8  | 173.6  | 216.8  | 185.7  | 209.2  | 203.2  | 264.8  | 355.1  | 244.8  |
| 874.1  | 492.9  | 670.0  | 723.7  | 630.0  | 679.3  | 836.4  | 933.1  | 734.1  |
| 285.8  | 177.3  | 195.0  | 248.5  | 245.5  | 222.0  | 317.3  | 333.8  | 282.2  |

|        |        |        |        |        |        |        |        |        |
|--------|--------|--------|--------|--------|--------|--------|--------|--------|
| 493.4  | 325.8  | 352.4  | 375.5  | 389.0  | 426.8  | 535.8  | 518.6  | 403.4  |
| 422.9  | 266.1  | 241.8  | 288.2  | 269.6  | 231.6  | 333.4  | 298.0  | 405.8  |
| 1419.6 | 1017.1 | 1280.9 | 1261.1 | 1279.9 | 1325.7 | 1458.0 | 1555.2 | 1020.1 |
| 1490.2 | 751.8  | 952.9  | 982.4  | 950.5  | 850.7  | 1317.9 | 1394.0 | 978.0  |
| 25.7   | 27.5   | 13.2   | 13.8   | 25.3   | 20.9   | 34.6   | 19.5   | 53.9   |
| 316.4  | 224.7  | 258.2  | 273.1  | 302.8  | 233.9  | 371.0  | 386.0  | 298.6  |
| 225.2  | 115.1  | 154.6  | 132.8  | 92.0   | 128.0  | 178.1  | 138.2  | 175.7  |
| 272.9  | 142.1  | 147.9  | 148.7  | 159.7  | 145.1  | 232.5  | 191.3  | 186.4  |
| 392.0  | 244.2  | 221.7  | 256.3  | 270.2  | 230.1  | 338.4  | 281.2  | 214.4  |
| 553.6  | 443.7  | 505.7  | 523.6  | 559.6  | 546.8  | 840.6  | 1031.2 | 516.6  |
| 2.7    | 7.7    | 3.8    | 6.9    | 6.7    | 3.7    | 3.9    | 0.9    | 4.1    |
| 907.9  | 697.9  | 752.7  | 851.5  | 836.0  | 825.7  | 1077.9 | 1238.1 | 912.2  |
| 761.0  | 479.2  | 554.3  | 579.6  | 530.0  | 636.9  | 779.6  | 955.7  | 656.5  |
| 556.7  | 529.5  | 520.1  | 619.2  | 608.4  | 550.2  | 694.4  | 637.6  | 550.2  |
| 258.5  | 140.9  | 143.1  | 162.1  | 198.0  | 197.0  | 280.8  | 402.1  | 262.7  |
| 126.4  | 57.5   | 81.0   | 61.4   | 85.1   | 90.0   | 126.6  | 169.1  | 91.0   |
| 77.0   | 49.7   | 38.7   | 54.1   | 58.9   | 50.5   | 68.2   | 137.4  | 59.6   |
| 365.2  | 196.0  | 205.9  | 223.4  | 282.8  | 270.8  | 382.3  | 508.0  | 366.4  |
| 128.4  | 120.0  | 131.7  | 124.3  | 142.8  | 137.9  | 219.0  | 211.6  | 145.5  |
| 1066.2 | 894.7  | 929.7  | 1081.6 | 1142.6 | 1124.8 | 1518.0 | 1647.6 | 948.7  |
| 830.6  | 843.9  | 964.3  | 959.5  | 1012.5 | 979.3  | 1176.1 | 1331.4 | 948.5  |
| 434.5  | 364.4  | 362.6  | 378.3  | 443.7  | 436.8  | 550.2  | 581.4  | 566.4  |
| 129.8  | 52.8   | 71.1   | 72.3   | 69.8   | 81.7   | 116.8  | 147.7  | 106.5  |
| 28.7   | 22.2   | 26.2   | 26.0   | 23.5   | 32.7   | 44.3   | 51.3   | 32.0   |
| 21.2   | 21.3   | 20.2   | 18.0   | 19.7   | 20.8   | 24.1   | 38.1   | 18.5   |
| 77.0   | 40.9   | 44.3   | 56.4   | 46.3   | 73.7   | 67.7   | 108.9  | 53.2   |
| 609.4  | 321.7  | 388.8  | 432.0  | 405.6  | 404.3  | 551.3  | 524.1  | 450.0  |
| 954.1  | 629.3  | 648.2  | 774.4  | 691.8  | 680.1  | 884.9  | 917.3  | 760.0  |
| 1843.3 | 1093.5 | 1229.0 | 1293.2 | 1247.3 | 1422.8 | 1617.9 | 1891.7 | 1060.7 |
| 724.9  | 457.8  | 580.3  | 644.6  | 573.5  | 570.3  | 858.3  | 1061.5 | 618.8  |
| 204.3  | 184.8  | 209.1  | 200.6  | 210.3  | 237.1  | 269.3  | 286.4  | 164.1  |
| 3621.1 | 3544.8 | 3173.4 | 3538.9 | 3628.2 | 3323.9 | 3575.4 | 3782.0 | 2863.4 |
| 84.8   | 94.3   | 73.3   | 107.1  | 88.9   | 102.8  | 133.5  | 144.7  | 135.5  |
| 155.1  | 109.9  | 104.4  | 113.8  | 119.9  | 121.6  | 180.1  | 176.2  | 151.2  |
| 390.7  | 271.8  | 288.6  | 320.3  | 445.3  | 357.4  | 419.9  | 569.0  | 387.0  |
| 212.0  | 251.2  | 296.9  | 296.8  | 298.0  | 317.1  | 390.3  | 411.5  | 348.0  |
| 128.2  | 91.8   | 98.1   | 101.7  | 122.6  | 119.6  | 163.0  | 177.0  | 138.6  |
| 305.6  | 166.0  | 253.6  | 247.2  | 250.5  | 254.0  | 329.6  | 336.8  | 283.4  |
| 30.2   | 16.7   | 14.1   | 26.9   | 20.4   | 27.4   | 35.5   | 29.7   | 17.5   |
| 142.1  | 177.5  | 171.4  | 186.7  | 214.8  | 153.2  | 265.1  | 190.2  | 186.2  |
| 3.6    | 5.8    | 4.3    | 0.6    | 2.6    | 1.3    | 5.6    | 0.8    | 1.1    |
| 180.5  | 121.1  | 137.9  | 136.5  | 160.7  | 150.9  | 211.1  | 240.0  | 166.9  |
| 9.1    | 6.9    | 10.1   | 12.4   | 14.0   | 3.5    | 22.8   | 11.9   | 5.2    |
| 10.4   | 5.6    | 2.3    | 0.6    | 0.8    | 0.8    | 1.0    | 1.5    | 0.5    |
| 331.8  | 215.7  | 304.7  | 315.3  | 299.0  | 345.3  | 374.3  | 381.1  | 345.8  |
| 201.5  | 130.3  | 144.7  | 156.0  | 156.6  | 148.2  | 194.2  | 215.5  | 169.2  |
| 32.9   | 14.8   | 28.7   | 22.0   | 24.5   | 26.8   | 34.2   | 32.5   | 20.5   |
| 3463.0 | 2989.9 | 2894.4 | 3185.4 | 3271.4 | 3097.5 | 3668.4 | 3757.5 | 3343.6 |
| 116.0  | 60.8   | 70.0   | 77.9   | 72.8   | 79.5   | 112.7  | 140.4  | 115.4  |
| 506.2  | 356.3  | 400.4  | 458.2  | 447.2  | 403.9  | 539.8  | 605.9  | 530.4  |
| 352.4  | 244.4  | 287.5  | 296.1  | 328.2  | 279.2  | 403.5  | 359.0  | 279.4  |
| 156.9  | 108.7  | 112.7  | 120.1  | 122.2  | 116.1  | 159.1  | 197.6  | 143.2  |
| 504.4  | 364.2  | 419.1  | 447.9  | 460.0  | 451.1  | 628.9  | 688.3  | 466.2  |

|        |        |        |        |        |        |        |        |        |
|--------|--------|--------|--------|--------|--------|--------|--------|--------|
| 209.7  | 125.5  | 163.0  | 173.3  | 190.3  | 184.8  | 241.8  | 264.5  | 199.2  |
| 23.2   | 22.6   | 21.3   | 19.6   | 21.3   | 24.3   | 36.0   | 35.6   | 21.2   |
| 73.2   | 50.8   | 64.6   | 61.9   | 68.4   | 48.7   | 85.1   | 101.2  | 80.3   |
| 0.9    | 0.4    | 0.6    | 0.7    | 0.3    | 0.9    | 0.5    | 0.3    | 0.6    |
| 153.4  | 89.9   | 82.0   | 89.8   | 106.1  | 116.1  | 172.0  | 184.5  | 159.5  |
| 6.4    | 9.0    | 8.1    | 9.8    | 11.9   | 10.2   | 10.3   | 13.6   | 7.7    |
| 5.6    | 15.9   | 6.8    | 4.7    | 4.3    | 12.7   | 9.7    | 12.2   | 8.5    |
| 0.1    | 0.1    | 0.4    | 0.2    | 0.2    | 0.1    | 0.1    | 0.2    | 0.1    |
| 217.6  | 106.3  | 103.8  | 121.9  | 133.1  | 139.4  | 189.8  | 254.1  | 142.9  |
| 554.5  | 501.5  | 588.3  | 590.2  | 629.1  | 605.7  | 881.2  | 977.7  | 571.1  |
| 254.1  | 179.9  | 178.4  | 210.4  | 197.9  | 176.7  | 263.6  | 283.6  | 205.4  |
| 1329.7 | 1178.7 | 1348.5 | 1328.8 | 1467.7 | 1380.0 | 1836.9 | 1683.5 | 1187.9 |
| 51.5   | 31.1   | 29.6   | 29.4   | 26.8   | 31.1   | 24.9   | 43.2   | 34.4   |
| 454.2  | 275.2  | 299.0  | 361.4  | 319.6  | 392.2  | 442.4  | 533.7  | 341.7  |
| 5.8    | 9.7    | 11.1   | 8.7    | 5.7    | 8.3    | 14.3   | 9.0    | 4.3    |
| 70.8   | 61.2   | 50.8   | 59.1   | 47.0   | 46.8   | 64.2   | 88.5   | 52.8   |
| 420.2  | 260.7  | 317.3  | 343.7  | 331.8  | 356.2  | 403.6  | 526.5  | 373.9  |
| 27.5   | 21.3   | 24.0   | 23.3   | 21.2   | 21.5   | 26.6   | 32.7   | 30.8   |
| 74.4   | 51.3   | 47.3   | 49.0   | 39.5   | 56.0   | 80.9   | 89.3   | 54.3   |
| 151.3  | 108.1  | 102.2  | 92.1   | 100.4  | 93.3   | 173.9  | 202.9  | 120.7  |
| 82.6   | 55.7   | 51.5   | 71.0   | 72.3   | 57.1   | 86.4   | 105.3  | 72.2   |
| 247.3  | 187.3  | 220.4  | 205.3  | 196.7  | 240.7  | 351.3  | 357.3  | 239.6  |
| 982.4  | 782.6  | 932.0  | 903.8  | 1054.0 | 995.8  | 1228.4 | 1265.8 | 928.8  |
| 451.5  | 297.9  | 312.3  | 361.7  | 381.5  | 357.6  | 488.8  | 557.6  | 401.6  |
| 1445.0 | 941.7  | 962.9  | 1168.0 | 1192.3 | 1103.6 | 1468.4 | 1384.8 | 793.4  |
| 68.0   | 44.8   | 42.1   | 43.1   | 51.0   | 45.9   | 54.3   | 62.5   | 44.7   |
| 40.4   | 25.8   | 35.3   | 25.4   | 41.1   | 30.2   | 48.9   | 37.2   | 32.7   |
| 68.7   | 38.2   | 46.5   | 59.7   | 49.7   | 55.7   | 82.4   | 80.6   | 48.1   |
| 38.2   | 32.6   | 26.0   | 35.4   | 37.9   | 39.3   | 82.8   | 98.4   | 39.5   |
| 416.1  | 286.7  | 332.8  | 359.8  | 339.2  | 332.3  | 431.2  | 514.3  | 337.5  |
| 64.9   | 32.3   | 39.0   | 54.1   | 57.8   | 35.5   | 62.9   | 71.4   | 46.7   |
| 217.8  | 116.5  | 142.8  | 155.9  | 147.8  | 140.4  | 273.6  | 301.8  | 185.3  |
| 81.2   | 55.7   | 63.2   | 71.9   | 37.9   | 59.1   | 74.9   | 60.5   | 53.5   |
| 939.1  | 675.4  | 642.3  | 796.1  | 847.1  | 730.8  | 1268.1 | 1174.4 | 1091.1 |
| 289.4  | 213.3  | 283.3  | 270.3  | 272.4  | 272.0  | 361.3  | 320.1  | 221.1  |
| 3068.4 | 2781.1 | 2757.3 | 2760.3 | 2930.4 | 2750.7 | 3036.3 | 3004.2 | 2193.9 |
| 315.2  | 211.4  | 187.1  | 249.4  | 306.9  | 282.1  | 432.2  | 559.2  | 356.1  |
| 512.7  | 405.7  | 406.3  | 493.1  | 477.9  | 449.6  | 626.9  | 702.9  | 597.6  |
| 201.5  | 190.4  | 170.6  | 202.6  | 195.0  | 175.5  | 285.2  | 292.0  | 173.0  |
| 3310.3 | 2597.2 | 2536.4 | 2852.0 | 2820.2 | 2920.6 | 3552.2 | 3767.9 | 2895.5 |
| 355.7  | 257.7  | 240.6  | 249.0  | 271.7  | 345.5  | 394.1  | 467.2  | 305.6  |
| 990.9  | 404.9  | 463.4  | 494.7  | 512.0  | 521.8  | 639.6  | 714.4  | 581.9  |
| 1238.9 | 648.0  | 669.7  | 681.0  | 796.3  | 707.7  | 904.8  | 1088.4 | 837.9  |
| 191.8  | 159.5  | 182.3  | 214.9  | 195.0  | 193.1  | 316.3  | 363.6  | 200.4  |
| 73.8   | 54.1   | 59.6   | 58.0   | 62.2   | 58.1   | 81.5   | 101.3  | 57.0   |
| 128.7  | 80.3   | 81.9   | 95.4   | 76.3   | 92.1   | 140.5  | 189.4  | 141.8  |
| 117.7  | 61.4   | 81.9   | 80.5   | 90.6   | 95.9   | 126.0  | 135.3  | 87.4   |
| 165.8  | 131.6  | 108.1  | 123.6  | 129.2  | 121.6  | 150.2  | 201.0  | 173.7  |
| 339.5  | 212.4  | 231.6  | 225.1  | 236.8  | 252.8  | 276.4  | 394.5  | 252.7  |
| 173.5  | 122.9  | 133.0  | 111.9  | 139.2  | 126.2  | 163.1  | 244.0  | 179.9  |
| 1.0    | 0.6    | 1.5    | 1.7    | 0.5    | 1.2    | 0.5    | 0.7    | 0.4    |
| 1029.1 | 771.6  | 904.7  | 940.4  | 1005.6 | 956.0  | 1334.1 | 1407.6 | 1070.7 |
| 0.6    | 0.4    | 0.8    | 1.0    | 2.0    | 0.9    | 0.5    | 2.1    | 0.5    |



|        |        |        |        |        |        |        |        |        |
|--------|--------|--------|--------|--------|--------|--------|--------|--------|
| 8.5    | 11.4   | 5.2    | 13.4   | 7.8    | 8.9    | 10.7   | 11.8   | 12.1   |
| 1.1    | 0.8    | 1.9    | 1.0    | 0.3    | 0.2    | 0.8    | 1.4    | 1.3    |
| 2.0    | 0.1    | 1.1    | 1.7    | 1.0    | 0.1    | 0.1    | 2.2    | 0.2    |
| 315.3  | 162.1  | 193.1  | 211.1  | 203.6  | 240.6  | 269.5  | 360.3  | 329.3  |
| 799.0  | 539.7  | 612.6  | 653.0  | 692.6  | 655.1  | 983.7  | 1073.8 | 819.6  |
| 1239.3 | 875.3  | 1006.4 | 1032.2 | 1099.4 | 1112.1 | 1304.8 | 1318.9 | 956.6  |
| 938.0  | 595.8  | 690.5  | 700.6  | 690.4  | 786.4  | 790.5  | 1085.9 | 582.2  |
| 629.4  | 406.5  | 415.5  | 418.8  | 557.0  | 441.7  | 765.1  | 690.9  | 459.4  |
| 91.4   | 72.1   | 67.3   | 80.3   | 103.9  | 90.6   | 121.3  | 151.1  | 71.9   |
| 85.0   | 58.8   | 63.6   | 98.0   | 91.2   | 98.0   | 160.3  | 206.5  | 115.1  |
| 511.4  | 334.8  | 439.2  | 376.8  | 459.9  | 456.5  | 563.8  | 589.0  | 400.3  |
| 1751.7 | 1379.5 | 1266.4 | 1635.9 | 1655.9 | 1528.7 | 1923.3 | 1848.9 | 1344.2 |
| 348.0  | 212.7  | 245.7  | 255.8  | 266.4  | 286.3  | 372.2  | 416.2  | 242.7  |
| 545.4  | 408.3  | 352.3  | 402.8  | 448.8  | 423.1  | 639.8  | 756.1  | 425.5  |
| 717.7  | 589.9  | 488.3  | 502.3  | 576.2  | 554.9  | 736.3  | 766.6  | 716.2  |
| 1699.9 | 1144.6 | 1336.7 | 1447.9 | 1484.7 | 1381.2 | 1780.0 | 1815.5 | 1266.1 |
| 8.6    | 12.8   | 5.4    | 5.2    | 5.9    | 10.1   | 17.3   | 9.2    | 8.7    |
| 59.8   | 55.6   | 50.3   | 60.4   | 52.7   | 51.5   | 84.3   | 84.8   | 62.0   |
| 89.3   | 50.6   | 54.7   | 70.1   | 72.2   | 56.4   | 97.1   | 113.0  | 67.4   |
| 311.2  | 135.1  | 163.7  | 169.1  | 186.3  | 194.4  | 316.4  | 284.3  | 220.8  |
| 1175.0 | 612.1  | 702.7  | 759.6  | 814.9  | 763.5  | 966.9  | 1056.6 | 966.5  |
| 191.9  | 152.1  | 157.4  | 169.2  | 156.8  | 188.8  | 225.1  | 267.6  | 188.0  |
| 125.6  | 95.0   | 106.0  | 127.1  | 113.1  | 113.1  | 144.2  | 158.8  | 139.4  |
| 738.5  | 657.8  | 633.8  | 864.3  | 730.5  | 708.6  | 950.3  | 985.1  | 707.9  |
| 275.2  | 163.1  | 150.4  | 195.3  | 211.2  | 179.2  | 341.6  | 360.8  | 218.4  |
| 114.4  | 62.0   | 84.4   | 85.8   | 86.6   | 78.1   | 94.7   | 129.4  | 93.2   |
| 1519.2 | 1058.1 | 1125.9 | 1450.3 | 1277.7 | 1536.8 | 1758.2 | 2222.2 | 1085.8 |
| 1413.2 | 977.3  | 1119.9 | 1105.2 | 1208.1 | 1179.0 | 1388.4 | 1398.5 | 1214.3 |
| 44.6   | 15.5   | 19.8   | 15.0   | 17.3   | 16.3   | 16.9   | 20.5   | 18.0   |
| 2.0    | 2.3    | 3.1    | 7.5    | 2.0    | 1.3    | 2.1    | 9.5    | 1.2    |
| 196.0  | 96.4   | 122.9  | 147.3  | 134.0  | 123.8  | 234.0  | 299.2  | 170.8  |
| 185.7  | 108.3  | 106.7  | 192.5  | 140.7  | 145.8  | 249.5  | 321.7  | 174.4  |
| 239.0  | 205.0  | 217.6  | 218.6  | 224.5  | 223.3  | 257.9  | 293.2  | 187.0  |
| 12.9   | 8.9    | 5.4    | 10.8   | 11.7   | 11.8   | 10.4   | 12.4   | 5.2    |
| 192.3  | 88.2   | 126.9  | 119.3  | 125.3  | 150.2  | 147.1  | 193.7  | 180.6  |
| 115.1  | 38.2   | 56.4   | 49.9   | 53.8   | 81.7   | 99.2   | 134.4  | 83.3   |
| 693.7  | 407.2  | 537.3  | 531.2  | 514.3  | 645.2  | 851.1  | 903.6  | 517.7  |
| 950.4  | 638.1  | 772.0  | 750.5  | 775.9  | 751.6  | 943.2  | 938.3  | 633.6  |
| 173.2  | 114.4  | 122.9  | 135.0  | 160.3  | 151.8  | 189.9  | 273.1  | 146.3  |
| 5.3    | 1.5    | 0.2    | 1.3    | 1.2    | 2.6    | 2.5    | 2.0    | 0.6    |
| 11.2   | 7.1    | 1.3    | 1.7    | 14.9   | 7.6    | 4.4    | 6.9    | 5.2    |
| 7.4    | 8.4    | 10.3   | 11.1   | 4.4    | 6.3    | 13.3   | 15.6   | 9.9    |
| 6.3    | 5.7    | 5.4    | 0.8    | 1.6    | 0.7    | 6.7    | 0.9    | 0.7    |
| 31.4   | 39.4   | 39.8   | 40.5   | 47.4   | 40.3   | 83.7   | 117.6  | 79.6   |
| 89.0   | 81.6   | 100.5  | 96.0   | 95.2   | 104.3  | 178.6  | 263.7  | 177.8  |
| 102.3  | 88.2   | 99.3   | 130.8  | 112.6  | 117.9  | 148.7  | 239.9  | 122.8  |
| 3027.8 | 2547.6 | 2662.7 | 2875.2 | 2793.0 | 2694.7 | 3374.0 | 3601.2 | 2569.2 |
| 360.6  | 272.2  | 338.2  | 331.9  | 330.4  | 286.9  | 309.5  | 366.0  | 286.3  |
| 188.4  | 97.0   | 140.2  | 143.2  | 146.3  | 140.4  | 188.6  | 184.1  | 134.5  |
| 120.3  | 79.0   | 85.2   | 85.8   | 91.5   | 92.5   | 108.8  | 122.8  | 73.8   |
| 28.4   | 14.9   | 18.8   | 18.2   | 19.0   | 20.0   | 36.7   | 38.5   | 18.1   |
| 13.7   | 4.9    | 5.1    | 3.3    | 5.1    | 2.3    | 9.5    | 3.8    | 9.1    |
| 927.8  | 573.4  | 686.0  | 651.4  | 732.9  | 781.2  | 937.0  | 1079.3 | 946.1  |

|        |       |       |        |        |        |        |        |        |
|--------|-------|-------|--------|--------|--------|--------|--------|--------|
| 445.3  | 247.4 | 307.1 | 289.8  | 374.1  | 294.3  | 478.9  | 601.4  | 385.7  |
| 0.9    | 0.7   | 0.8   | 0.9    | 0.8    | 1.5    | 0.8    | 1.8    | 0.6    |
| 1.1    | 2.0   | 0.9   | 0.2    | 0.7    | 0.2    | 0.2    | 2.1    | 0.3    |
| 191.2  | 117.0 | 138.0 | 150.0  | 153.5  | 154.2  | 202.4  | 241.0  | 151.8  |
| 274.5  | 159.2 | 142.4 | 197.8  | 199.8  | 183.4  | 235.9  | 301.0  | 206.8  |
| 333.3  | 254.4 | 242.4 | 273.4  | 296.7  | 243.7  | 336.4  | 391.2  | 285.1  |
| 158.7  | 115.1 | 145.1 | 145.8  | 146.8  | 158.4  | 182.2  | 175.2  | 121.2  |
| 496.8  | 362.7 | 377.6 | 386.4  | 434.6  | 435.4  | 561.8  | 542.3  | 360.6  |
| 8.6    | 6.6   | 0.6   | 1.1    | 1.7    | 0.4    | 4.5    | 2.2    | 10.3   |
| 70.3   | 18.7  | 31.6  | 34.0   | 28.3   | 31.8   | 37.7   | 43.4   | 23.7   |
| 16.1   | 12.1  | 7.6   | 10.5   | 17.2   | 11.1   | 23.2   | 23.9   | 13.9   |
| 742.1  | 560.4 | 627.4 | 616.9  | 724.8  | 671.5  | 804.6  | 832.8  | 570.4  |
| 481.5  | 387.2 | 438.0 | 480.5  | 466.4  | 469.4  | 625.6  | 612.6  | 445.7  |
| 226.0  | 158.0 | 187.9 | 204.2  | 213.2  | 191.2  | 258.3  | 260.3  | 181.9  |
| 792.0  | 592.2 | 738.6 | 750.9  | 799.2  | 708.7  | 987.7  | 926.9  | 703.2  |
| 341.5  | 230.4 | 267.0 | 242.8  | 291.6  | 284.2  | 399.3  | 407.9  | 290.3  |
| 225.2  | 162.7 | 156.0 | 181.6  | 191.6  | 200.6  | 275.1  | 416.9  | 242.9  |
| 204.9  | 183.3 | 210.8 | 205.9  | 220.2  | 208.5  | 267.7  | 239.7  | 180.6  |
| 130.9  | 64.9  | 70.0  | 73.4   | 78.5   | 74.5   | 96.8   | 144.1  | 79.1   |
| 369.2  | 181.5 | 194.1 | 221.5  | 223.7  | 205.6  | 288.2  | 319.6  | 230.1  |
| 21.7   | 10.5  | 9.7   | 12.1   | 12.7   | 9.7    | 14.9   | 18.8   | 13.3   |
| 40.4   | 29.1  | 17.6  | 30.3   | 38.5   | 26.7   | 43.3   | 44.5   | 44.6   |
| 90.6   | 64.7  | 80.3  | 84.3   | 82.8   | 76.7   | 99.0   | 103.7  | 91.2   |
| 138.9  | 96.2  | 118.3 | 111.2  | 112.7  | 106.3  | 179.1  | 157.8  | 98.5   |
| 14.6   | 11.4  | 5.6   | 16.6   | 21.1   | 4.3    | 17.0   | 19.3   | 9.4    |
| 186.1  | 146.6 | 187.3 | 186.0  | 202.3  | 183.2  | 253.3  | 247.5  | 164.0  |
| 3.9    | 7.0   | 11.9  | 4.9    | 4.4    | 9.9    | 10.9   | 7.0    | 5.9    |
| 29.6   | 14.8  | 25.5  | 14.3   | 30.3   | 13.7   | 25.1   | 28.6   | 14.6   |
| 33.6   | 44.1  | 49.3  | 35.8   | 44.3   | 31.4   | 57.5   | 39.8   | 29.2   |
| 202.5  | 118.6 | 119.9 | 161.2  | 130.6  | 148.5  | 203.7  | 225.4  | 175.5  |
| 136.5  | 85.7  | 95.2  | 106.7  | 99.7   | 105.0  | 156.8  | 177.6  | 145.6  |
| 256.3  | 134.7 | 186.0 | 200.1  | 189.8  | 180.3  | 264.7  | 297.8  | 152.9  |
| 987.6  | 553.3 | 517.8 | 693.5  | 576.3  | 556.7  | 848.5  | 999.0  | 695.3  |
| 389.2  | 341.9 | 359.3 | 365.1  | 410.9  | 344.6  | 493.8  | 477.3  | 483.2  |
| 16.8   | 75.9  | 100.5 | 92.6   | 86.8   | 89.0   | 137.6  | 128.2  | 73.7   |
| 1129.5 | 926.6 | 974.3 | 1033.2 | 1225.9 | 1142.7 | 1483.0 | 1608.4 | 1018.2 |
| 937.9  | 649.9 | 685.8 | 775.0  | 887.3  | 872.6  | 1220.6 | 1416.1 | 842.0  |
| 260.5  | 157.9 | 194.1 | 203.9  | 193.0  | 202.5  | 254.3  | 258.9  | 182.9  |
| 238.7  | 115.6 | 184.5 | 162.2  | 179.5  | 185.8  | 248.0  | 282.0  | 213.8  |
| 258.5  | 194.1 | 184.0 | 207.4  | 210.8  | 211.9  | 286.3  | 421.0  | 303.9  |
| 839.5  | 609.6 | 697.3 | 688.3  | 748.1  | 701.2  | 867.2  | 879.9  | 750.6  |
| 731.9  | 474.8 | 522.8 | 564.8  | 621.6  | 620.3  | 814.9  | 985.3  | 693.0  |
| 9.6    | 1.1   | 10.0  | 3.0    | 3.4    | 11.7   | 11.4   | 18.5   | 12.7   |
| 110.4  | 67.1  | 79.7  | 79.6   | 77.3   | 71.7   | 108.0  | 135.9  | 81.4   |
| 14.3   | 5.9   | 13.0  | 10.8   | 11.9   | 14.8   | 9.1    | 17.1   | 18.5   |
| 26.1   | 4.1   | 12.2  | 7.2    | 6.6    | 13.6   | 23.2   | 13.7   | 7.8    |
| 95.9   | 75.0  | 88.6  | 71.2   | 82.8   | 73.3   | 98.4   | 91.0   | 68.8   |
| 29.8   | 17.7  | 18.3  | 24.1   | 26.2   | 23.7   | 35.4   | 37.9   | 31.9   |
| 621.9  | 519.0 | 579.3 | 597.1  | 691.8  | 663.2  | 873.2  | 937.8  | 660.5  |
| 783.9  | 447.6 | 519.1 | 515.2  | 595.8  | 605.0  | 769.3  | 1001.9 | 551.0  |
| 106.8  | 45.1  | 52.0  | 65.8   | 59.5   | 68.7   | 111.1  | 121.3  | 103.1  |
| 105.2  | 77.3  | 79.1  | 103.0  | 79.3   | 93.1   | 126.5  | 147.3  | 129.1  |
| 28.4   | 14.2  | 17.0  | 20.5   | 19.1   | 19.6   | 32.2   | 28.9   | 23.8   |

|        |        |        |        |        |        |        |        |        |
|--------|--------|--------|--------|--------|--------|--------|--------|--------|
| 196.1  | 162.0  | 158.8  | 170.2  | 179.8  | 171.4  | 214.9  | 234.1  | 149.0  |
| 181.3  | 128.4  | 133.9  | 147.6  | 152.5  | 156.6  | 210.8  | 248.4  | 180.4  |
| 682.0  | 491.8  | 582.1  | 558.5  | 646.6  | 573.8  | 693.9  | 659.4  | 475.4  |
| 3939.4 | 3742.5 | 3612.7 | 4013.7 | 3869.5 | 4004.7 | 4257.8 | 4415.5 | 3471.8 |
| 287.6  | 186.0  | 206.2  | 242.7  | 262.7  | 232.9  | 310.7  | 425.2  | 370.4  |
| 55.2   | 34.3   | 46.7   | 45.4   | 55.0   | 56.7   | 77.0   | 91.3   | 52.4   |
| 249.2  | 197.8  | 227.1  | 257.8  | 218.4  | 232.1  | 292.1  | 370.7  | 234.3  |
| 228.2  | 189.7  | 242.4  | 241.6  | 224.5  | 198.9  | 344.6  | 317.4  | 279.9  |
| 897.0  | 603.5  | 658.4  | 708.5  | 776.9  | 794.6  | 991.0  | 1053.8 | 887.3  |
| 295.9  | 191.7  | 185.1  | 231.6  | 235.0  | 218.9  | 324.9  | 395.9  | 311.1  |
| 97.0   | 70.2   | 77.9   | 74.8   | 72.0   | 86.5   | 76.8   | 136.6  | 59.0   |
| 404.0  | 266.0  | 319.6  | 312.2  | 315.3  | 326.0  | 407.0  | 454.8  | 319.7  |
| 340.8  | 231.6  | 215.2  | 330.8  | 326.3  | 280.0  | 351.8  | 369.3  | 204.0  |
| 356.2  | 263.9  | 277.3  | 332.0  | 317.4  | 284.9  | 428.8  | 486.4  | 424.2  |
| 25.4   | 18.1   | 19.2   | 20.7   | 16.3   | 15.6   | 41.9   | 25.8   | 31.3   |
| 108.4  | 49.9   | 60.6   | 54.7   | 54.3   | 63.7   | 84.9   | 97.4   | 69.6   |
| 77.5   | 37.7   | 35.8   | 42.9   | 45.2   | 37.5   | 53.9   | 65.3   | 47.3   |
| 2229.0 | 1931.3 | 2064.4 | 2128.8 | 2215.2 | 2131.1 | 2778.9 | 2666.9 | 2606.1 |
| 287.5  | 153.5  | 197.9  | 198.3  | 215.6  | 197.9  | 282.8  | 290.3  | 227.0  |
| 105.1  | 65.9   | 47.4   | 68.6   | 71.5   | 64.8   | 97.2   | 106.3  | 69.8   |
| 188.6  | 142.0  | 137.8  | 117.6  | 128.7  | 95.6   | 151.1  | 182.1  | 116.0  |
| 36.4   | 24.4   | 26.8   | 23.0   | 23.2   | 29.5   | 53.0   | 26.4   | 21.3   |
| 69.3   | 70.4   | 60.1   | 61.5   | 86.8   | 54.1   | 93.9   | 80.8   | 83.8   |
| 88.4   | 85.5   | 86.2   | 103.7  | 113.8  | 96.5   | 149.1  | 236.6  | 119.7  |
| 282.6  | 268.7  | 311.6  | 293.5  | 330.6  | 299.3  | 401.0  | 548.6  | 358.9  |
| 648.9  | 377.9  | 452.6  | 492.2  | 508.1  | 487.7  | 564.6  | 658.6  | 489.3  |
| 775.6  | 379.2  | 518.2  | 545.8  | 548.7  | 548.0  | 604.6  | 736.9  | 512.9  |
| 281.4  | 192.5  | 286.4  | 267.5  | 240.2  | 290.5  | 316.6  | 410.6  | 248.7  |
| 337.6  | 514.9  | 417.1  | 496.7  | 497.2  | 382.6  | 731.0  | 517.8  | 613.9  |
| 551.5  | 728.2  | 594.4  | 767.7  | 782.0  | 595.1  | 1069.2 | 757.1  | 817.3  |
| 227.9  | 101.7  | 118.1  | 124.9  | 136.0  | 126.2  | 168.6  | 196.6  | 139.2  |
| 259.8  | 154.3  | 197.2  | 194.9  | 195.9  | 169.6  | 247.8  | 263.4  | 168.9  |
| 116.9  | 65.2   | 75.6   | 69.4   | 86.7   | 65.0   | 101.3  | 100.1  | 76.1   |
| 116.6  | 82.3   | 77.3   | 65.8   | 71.0   | 76.5   | 124.1  | 131.7  | 83.7   |
| 102.1  | 55.3   | 49.1   | 67.6   | 64.5   | 63.9   | 86.9   | 100.5  | 76.0   |
| 5.7    | 5.5    | 12.0   | 4.7    | 4.1    | 2.0    | 15.4   | 8.6    | 2.8    |
| 48.9   | 64.7   | 47.4   | 51.8   | 50.3   | 60.7   | 69.9   | 77.3   | 65.5   |
| 1403.6 | 1092.7 | 1296.7 | 1307.7 | 1333.8 | 1232.5 | 1559.4 | 1570.0 | 1237.7 |
| 324.2  | 246.4  | 254.0  | 249.5  | 332.5  | 267.8  | 339.3  | 362.5  | 265.5  |
| 387.9  | 247.3  | 292.1  | 267.4  | 340.4  | 322.3  | 531.8  | 488.6  | 398.5  |
| 4105.3 | 3629.7 | 3620.6 | 3850.7 | 3980.1 | 3877.4 | 4310.3 | 4839.4 | 3465.8 |
| 328.5  | 197.1  | 229.7  | 221.1  | 225.4  | 201.9  | 260.8  | 249.2  | 164.3  |
| 454.1  | 297.6  | 317.1  | 376.9  | 360.6  | 365.5  | 408.2  | 417.5  | 344.2  |
| 4304.4 | 3595.9 | 3447.8 | 3579.6 | 3954.5 | 3682.7 | 4339.4 | 4501.0 | 3006.0 |
| 2421.8 | 2027.3 | 1967.8 | 2191.4 | 2443.0 | 2184.6 | 3023.6 | 3217.8 | 2126.0 |
| 511.1  | 337.0  | 402.5  | 419.6  | 447.1  | 457.2  | 498.7  | 521.7  | 365.0  |
| 376.4  | 256.2  | 229.0  | 265.7  | 288.3  | 283.6  | 389.1  | 488.8  | 368.6  |
| 4.6    | 0.6    | 5.7    | 2.8    | 11.6   | 2.8    | 4.8    | 12.1   | 3.0    |
| 0.5    | 0.6    | 2.0    | 0.7    | 3.0    | 1.9    | 0.8    | 1.1    | 0.4    |
| 465.0  | 227.1  | 305.7  | 323.6  | 330.6  | 343.2  | 482.5  | 625.4  | 333.9  |
| 685.5  | 511.6  | 565.4  | 601.8  | 665.6  | 580.3  | 839.9  | 790.0  | 544.7  |
| 4.7    | 3.8    | 5.7    | 9.6    | 9.0    | 9.8    | 1.9    | 18.0   | 8.9    |
| 509.5  | 331.4  | 397.5  | 360.0  | 394.0  | 470.5  | 516.8  | 684.1  | 433.2  |

|        |        |        |        |        |        |        |        |        |
|--------|--------|--------|--------|--------|--------|--------|--------|--------|
| 466.6  | 321.3  | 388.1  | 392.1  | 392.5  | 357.7  | 496.1  | 462.9  | 389.2  |
| 1499.2 | 1032.5 | 1229.9 | 1225.7 | 1253.1 | 1288.9 | 1488.5 | 1649.4 | 1253.3 |
| 13.3   | 9.7    | 10.3   | 14.5   | 12.2   | 8.4    | 11.8   | 9.5    | 8.5    |
| 137.6  | 124.1  | 130.0  | 157.2  | 121.0  | 119.6  | 183.4  | 154.4  | 140.9  |
| 148.5  | 115.4  | 127.1  | 151.8  | 119.9  | 147.5  | 230.0  | 240.9  | 132.0  |
| 9.9    | 6.9    | 9.3    | 5.9    | 6.1    | 4.8    | 2.2    | 12.2   | 4.1    |
| 951.3  | 720.0  | 719.2  | 861.6  | 937.4  | 858.2  | 1301.8 | 1581.1 | 809.6  |
| 479.1  | 315.3  | 403.4  | 381.3  | 416.0  | 386.4  | 454.4  | 541.2  | 475.4  |
| 528.2  | 231.8  | 296.0  | 279.0  | 333.0  | 347.6  | 410.2  | 440.5  | 336.1  |
| 115.3  | 85.8   | 85.8   | 98.8   | 98.4   | 88.8   | 130.9  | 124.6  | 151.3  |
| 886.7  | 499.4  | 669.8  | 613.5  | 677.1  | 730.6  | 833.4  | 1030.7 | 695.7  |
| 3.1    | 0.5    | 4.7    | 4.7    | 7.6    | 6.7    | 2.9    | 4.4    | 5.8    |
| 0.7    | 0.8    | 0.9    | 0.8    | 1.3    | 1.8    | 4.4    | 0.9    | 1.6    |
| 0.2    | 0.6    | 1.2    | 0.6    | 0.5    | 0.5    | 0.8    | 0.9    | 0.7    |
| 489.3  | 357.0  | 401.1  | 384.9  | 425.8  | 400.4  | 575.9  | 575.6  | 382.4  |
| 215.7  | 155.0  | 183.4  | 186.4  | 169.5  | 169.8  | 208.9  | 225.0  | 213.8  |
| 10.4   | 0.3    | 2.0    | 1.1    | 1.3    | 5.0    | 5.0    | 12.1   | 7.4    |
| 561.5  | 350.1  | 342.7  | 374.6  | 413.6  | 343.3  | 522.2  | 529.0  | 370.7  |
| 171.6  | 144.6  | 149.0  | 148.3  | 179.5  | 160.5  | 243.7  | 217.7  | 166.1  |
| 36.4   | 46.9   | 41.8   | 45.6   | 52.7   | 44.5   | 80.2   | 82.8   | 49.3   |
| 164.5  | 179.0  | 210.9  | 193.5  | 169.0  | 207.3  | 191.2  | 257.0  | 201.3  |
| 0.9    | 0.7    | 0.8    | 0.9    | 1.1    | 1.2    | 1.0    | 1.1    | 0.4    |
| 40.2   | 33.4   | 30.1   | 26.9   | 36.3   | 28.8   | 46.5   | 51.4   | 46.7   |
| 447.0  | 267.6  | 331.9  | 326.3  | 335.3  | 343.1  | 435.5  | 561.8  | 343.5  |
| 186.5  | 94.9   | 133.7  | 109.1  | 123.0  | 140.5  | 184.8  | 213.4  | 148.1  |
| 181.8  | 160.0  | 147.2  | 151.1  | 179.0  | 166.8  | 215.3  | 282.2  | 153.5  |
| 3988.5 | 3368.9 | 3381.7 | 3580.3 | 3525.4 | 3485.8 | 3759.7 | 3983.7 | 3338.7 |
| 9.7    | 5.2    | 4.2    | 7.7    | 6.9    | 6.0    | 3.4    | 9.7    | 7.3    |
| 4.5    | 2.0    | 1.6    | 1.3    | 0.6    | 0.5    | 1.8    | 4.9    | 3.5    |
| 129.1  | 80.5   | 79.3   | 95.1   | 90.0   | 88.5   | 112.8  | 161.9  | 99.2   |
| 13.7   | 11.6   | 12.6   | 16.4   | 14.5   | 14.1   | 27.5   | 29.1   | 18.4   |
| 44.1   | 46.9   | 50.8   | 54.5   | 65.5   | 55.8   | 47.1   | 78.4   | 50.9   |
| 14.9   | 12.1   | 8.6    | 11.9   | 12.4   | 12.4   | 19.2   | 21.9   | 12.4   |
| 322.6  | 195.2  | 182.4  | 211.1  | 249.5  | 239.0  | 349.7  | 494.2  | 407.0  |
| 144.2  | 87.1   | 114.6  | 114.0  | 142.1  | 135.9  | 155.6  | 167.4  | 132.5  |
| 91.5   | 67.2   | 72.6   | 67.0   | 83.4   | 65.0   | 89.7   | 124.1  | 79.3   |
| 829.3  | 474.6  | 529.5  | 520.0  | 577.2  | 536.3  | 682.9  | 724.3  | 438.4  |
| 265.1  | 132.3  | 138.8  | 155.6  | 172.8  | 162.0  | 218.3  | 344.6  | 154.5  |
| 624.7  | 393.6  | 443.4  | 400.1  | 485.0  | 536.1  | 860.9  | 861.1  | 465.1  |
| 1029.3 | 867.9  | 1001.1 | 1025.1 | 1075.4 | 1046.8 | 1240.9 | 1351.5 | 1112.9 |
| 210.1  | 175.1  | 172.5  | 181.6  | 196.7  | 167.3  | 233.5  | 280.9  | 235.9  |
| 50.8   | 34.1   | 44.3   | 36.8   | 40.2   | 40.1   | 51.9   | 69.5   | 56.7   |
| 82.3   | 50.1   | 44.7   | 48.5   | 53.7   | 52.5   | 100.7  | 91.3   | 75.3   |
| 223.7  | 165.6  | 154.8  | 188.4  | 199.1  | 165.7  | 235.5  | 212.3  | 181.7  |
| 45.9   | 27.6   | 32.1   | 33.4   | 34.2   | 36.6   | 37.8   | 58.5   | 30.1   |
| 105.2  | 79.9   | 82.4   | 82.9   | 109.8  | 118.3  | 111.0  | 180.4  | 89.9   |
| 41.1   | 45.8   | 42.1   | 39.1   | 42.7   | 36.8   | 56.4   | 64.2   | 32.5   |
| 103.4  | 70.7   | 73.0   | 88.9   | 75.2   | 84.0   | 110.1  | 132.2  | 90.0   |
| 309.3  | 73.3   | 54.7   | 65.1   | 61.5   | 48.7   | 88.1   | 100.0  | 80.3   |
| 58.8   | 35.8   | 36.4   | 44.8   | 48.3   | 49.4   | 52.5   | 82.1   | 48.8   |
| 820.0  | 606.0  | 561.4  | 623.6  | 704.4  | 657.2  | 857.1  | 1072.0 | 800.9  |
| 769.9  | 502.4  | 549.4  | 557.9  | 667.5  | 601.1  | 827.8  | 1000.7 | 536.5  |
| 186.9  | 138.4  | 132.4  | 136.1  | 109.1  | 110.0  | 169.8  | 177.3  | 157.4  |

|        |        |        |        |        |        |        |        |        |
|--------|--------|--------|--------|--------|--------|--------|--------|--------|
| 54.1   | 38.2   | 39.5   | 35.5   | 45.3   | 46.2   | 47.8   | 70.1   | 48.7   |
| 75.5   | 57.0   | 65.4   | 68.6   | 84.6   | 69.7   | 113.9  | 107.3  | 71.2   |
| 2756.3 | 2147.3 | 2235.4 | 2542.3 | 2289.8 | 2355.5 | 2804.7 | 2852.1 | 2345.7 |
| 103.7  | 68.0   | 90.5   | 96.4   | 105.5  | 108.2  | 156.2  | 170.2  | 116.7  |
| 1.2    | 0.3    | 0.4    | 2.4    | 0.2    | 3.2    | 3.2    | 0.5    | 0.9    |
| 4.6    | 0.7    | 2.9    | 0.6    | 0.3    | 1.0    | 8.9    | 0.5    | 0.3    |
| 336.5  | 216.1  | 267.9  | 275.9  | 289.0  | 308.1  | 439.2  | 495.1  | 333.1  |
| 556.1  | 411.6  | 416.6  | 439.4  | 535.5  | 518.5  | 653.0  | 827.1  | 656.2  |
| 1.2    | 1.7    | 7.5    | 2.0    | 5.8    | 4.7    | 5.4    | 0.6    | 3.0    |
| 15.5   | 7.5    | 11.9   | 16.9   | 10.5   | 10.6   | 12.9   | 17.4   | 14.8   |
| 385.0  | 138.1  | 174.6  | 328.2  | 282.5  | 201.1  | 397.5  | 413.0  | 106.7  |
| 7.8    | 4.6    | 7.6    | 0.5    | 1.6    | 9.8    | 7.6    | 4.5    | 1.7    |
| 2.1    | 1.2    | 0.4    | 5.9    | 5.2    | 0.9    | 2.1    | 1.7    | 0.8    |
| 22.6   | 27.5   | 21.8   | 22.9   | 24.9   | 28.0   | 44.0   | 33.5   | 29.3   |
| 126.2  | 67.2   | 108.3  | 98.7   | 115.6  | 124.4  | 161.4  | 148.6  | 177.9  |
| 3.6    | 5.3    | 1.2    | 1.6    | 2.0    | 4.4    | 4.1    | 8.2    | 0.7    |
| 347.4  | 226.6  | 244.1  | 273.7  | 274.7  | 292.8  | 356.7  | 367.1  | 314.6  |
| 254.3  | 148.2  | 205.9  | 177.6  | 233.4  | 224.8  | 236.5  | 264.2  | 191.2  |
| 680.8  | 602.3  | 671.8  | 729.9  | 740.4  | 783.2  | 988.6  | 1101.8 | 624.3  |
| 297.8  | 220.2  | 204.1  | 221.9  | 240.8  | 247.5  | 339.6  | 461.6  | 312.0  |
| 13.6   | 14.2   | 17.7   | 24.2   | 21.4   | 17.1   | 26.4   | 18.7   | 22.7   |
| 62.2   | 79.6   | 50.9   | 46.9   | 81.4   | 41.1   | 103.2  | 97.7   | 61.0   |
| 316.8  | 184.1  | 238.2  | 224.2  | 244.3  | 236.5  | 274.9  | 293.3  | 309.5  |
| 314.4  | 185.2  | 202.1  | 219.3  | 237.4  | 233.1  | 323.2  | 370.7  | 270.3  |
| 20.8   | 17.2   | 12.1   | 12.4   | 14.4   | 14.8   | 28.1   | 36.1   | 22.7   |
| 295.5  | 229.8  | 273.9  | 281.6  | 297.6  | 272.0  | 368.0  | 457.6  | 263.4  |
| 128.8  | 92.9   | 77.6   | 99.2   | 87.3   | 77.5   | 115.6  | 141.4  | 162.8  |
| 328.2  | 223.5  | 246.5  | 259.8  | 285.1  | 284.9  | 329.2  | 350.1  | 289.4  |
| 1.2    | 7.4    | 5.8    | 4.6    | 1.3    | 8.8    | 2.2    | 7.3    | 5.0    |
| 250.0  | 209.6  | 231.2  | 336.8  | 293.7  | 239.9  | 414.9  | 272.3  | 257.2  |
| 220.6  | 126.1  | 143.4  | 145.3  | 150.4  | 136.0  | 188.9  | 189.4  | 125.5  |
| 205.0  | 150.8  | 156.0  | 178.8  | 174.1  | 170.5  | 199.8  | 261.0  | 179.3  |
| 127.6  | 99.9   | 106.4  | 70.0   | 114.1  | 85.8   | 100.5  | 216.9  | 69.5   |
| 42.9   | 34.6   | 41.3   | 36.5   | 33.4   | 37.9   | 48.3   | 59.7   | 38.1   |
| 20.3   | 8.7    | 14.6   | 12.5   | 18.0   | 13.6   | 20.4   | 23.7   | 13.5   |
| 26.1   | 29.2   | 26.1   | 37.2   | 16.9   | 32.7   | 24.7   | 28.3   | 14.1   |
| 329.1  | 243.0  | 261.3  | 331.8  | 247.8  | 259.4  | 335.6  | 313.1  | 259.9  |
| 114.0  | 60.8   | 88.1   | 83.1   | 79.8   | 110.0  | 126.5  | 130.6  | 94.9   |
| 666.0  | 381.1  | 400.0  | 476.3  | 514.1  | 481.1  | 679.0  | 837.7  | 548.8  |
| 362.2  | 238.0  | 245.3  | 282.2  | 288.6  | 291.6  | 358.9  | 416.7  | 353.9  |
| 536.3  | 347.0  | 409.2  | 483.9  | 398.7  | 412.3  | 683.8  | 631.8  | 504.4  |
| 404.0  | 237.6  | 371.6  | 366.3  | 340.6  | 379.7  | 420.8  | 450.5  | 418.4  |
| 18.8   | 14.7   | 14.0   | 10.7   | 9.6    | 19.4   | 23.1   | 30.4   | 14.0   |
| 17.8   | 12.9   | 12.6   | 16.0   | 17.8   | 26.4   | 26.7   | 36.7   | 22.0   |
| 417.6  | 319.8  | 335.5  | 380.5  | 396.3  | 390.1  | 501.2  | 463.4  | 335.9  |
| 189.2  | 133.8  | 149.2  | 167.3  | 172.6  | 162.0  | 226.3  | 219.4  | 202.2  |
| 330.5  | 227.0  | 230.4  | 243.3  | 279.6  | 271.2  | 392.2  | 436.3  | 320.8  |
| 9.9    | 10.6   | 4.3    | 9.9    | 8.3    | 8.6    | 9.8    | 11.8   | 4.5    |
| 70.2   | 62.0   | 57.4   | 73.5   | 54.2   | 64.1   | 92.5   | 90.0   | 81.5   |
| 20.5   | 13.8   | 15.2   | 12.5   | 16.5   | 18.1   | 20.6   | 23.6   | 14.4   |
| 21.6   | 18.3   | 14.5   | 19.3   | 19.6   | 16.6   | 23.9   | 26.8   | 16.2   |
| 270.9  | 171.2  | 206.0  | 212.4  | 196.2  | 197.3  | 274.7  | 317.1  | 186.5  |
| 0.9    | 0.2    | 1.1    | 0.5    | 1.3    | 0.4    | 1.5    | 1.9    | 0.6    |

|        |        |        |        |        |        |        |        |        |
|--------|--------|--------|--------|--------|--------|--------|--------|--------|
| 21.9   | 12.9   | 33.3   | 17.1   | 24.9   | 33.9   | 31.6   | 44.5   | 22.0   |
| 0.4    | 0.4    | 3.4    | 4.7    | 5.1    | 1.0    | 6.2    | 6.3    | 5.8    |
| 551.9  | 435.6  | 564.9  | 543.7  | 582.3  | 540.7  | 771.0  | 915.3  | 574.1  |
| 495.4  | 275.2  | 344.1  | 349.5  | 388.2  | 372.7  | 464.7  | 536.1  | 338.5  |
| 310.3  | 190.9  | 246.2  | 281.9  | 250.4  | 253.9  | 298.5  | 310.1  | 225.0  |
| 359.7  | 259.6  | 314.9  | 302.7  | 353.5  | 321.8  | 444.7  | 451.4  | 298.3  |
| 137.4  | 129.8  | 148.1  | 141.4  | 142.8  | 138.9  | 207.9  | 201.1  | 160.8  |
| 68.4   | 42.0   | 48.1   | 45.6   | 54.6   | 44.9   | 66.9   | 69.5   | 49.8   |
| 547.8  | 497.6  | 419.8  | 446.5  | 539.7  | 541.0  | 630.4  | 844.0  | 522.9  |
| 5.7    | 10.4   | 9.0    | 4.2    | 15.3   | 13.0   | 19.6   | 7.2    | 7.7    |
| 82.7   | 68.4   | 65.4   | 78.1   | 63.3   | 66.8   | 87.8   | 95.2   | 88.2   |
| 153.1  | 122.8  | 128.1  | 150.6  | 158.1  | 142.8  | 188.0  | 204.5  | 136.0  |
| 1133.8 | 717.3  | 805.1  | 861.2  | 796.8  | 926.8  | 934.1  | 1204.8 | 994.6  |
| 683.1  | 462.2  | 597.1  | 555.2  | 529.1  | 557.6  | 692.8  | 863.8  | 509.2  |
| 16.8   | 23.8   | 15.8   | 11.0   | 19.9   | 18.5   | 25.0   | 25.5   | 15.3   |
| 533.8  | 298.4  | 398.1  | 427.0  | 456.3  | 342.6  | 467.8  | 421.5  | 338.6  |
| 31.9   | 34.4   | 19.5   | 28.7   | 25.0   | 26.1   | 28.9   | 35.3   | 40.7   |
| 719.9  | 500.0  | 632.1  | 608.0  | 619.2  | 602.8  | 821.3  | 683.3  | 623.3  |
| 497.8  | 394.9  | 561.1  | 524.8  | 524.1  | 544.5  | 653.7  | 661.6  | 606.0  |
| 161.1  | 46.5   | 51.8   | 49.3   | 37.7   | 46.6   | 65.6   | 71.6   | 49.3   |
| 273.3  | 114.1  | 105.3  | 125.4  | 110.5  | 101.1  | 123.5  | 148.2  | 122.6  |
| 96.2   | 52.0   | 63.0   | 53.5   | 47.7   | 51.8   | 71.4   | 87.1   | 55.3   |
| 75.7   | 56.8   | 47.9   | 53.8   | 62.9   | 51.3   | 84.6   | 80.8   | 54.4   |
| 148.2  | 73.4   | 98.9   | 89.3   | 105.3  | 104.1  | 131.8  | 143.0  | 86.7   |
| 920.1  | 623.9  | 646.5  | 722.6  | 657.2  | 605.4  | 939.2  | 820.6  | 643.4  |
| 284.4  | 175.9  | 165.4  | 186.2  | 250.4  | 193.4  | 279.4  | 375.6  | 295.0  |
| 319.4  | 212.3  | 228.6  | 226.1  | 253.1  | 236.1  | 276.7  | 336.9  | 219.9  |
| 1399.6 | 1088.8 | 1200.6 | 1236.3 | 1259.4 | 1175.9 | 1589.7 | 1503.7 | 1154.3 |
| 68.3   | 38.0   | 59.6   | 69.1   | 57.1   | 59.3   | 70.0   | 97.5   | 58.1   |
| 13.5   | 2.9    | 2.9    | 8.5    | 5.6    | 1.4    | 3.0    | 1.9    | 3.0    |
| 215.9  | 114.6  | 130.6  | 156.6  | 153.2  | 163.8  | 197.6  | 258.2  | 182.3  |
| 124.6  | 115.6  | 105.5  | 121.9  | 139.0  | 105.6  | 155.4  | 152.3  | 134.2  |
| 509.5  | 394.2  | 423.5  | 434.7  | 523.6  | 474.1  | 632.6  | 616.8  | 467.3  |
| 2816.3 | 2256.8 | 2516.9 | 2511.9 | 2631.6 | 2761.3 | 3409.0 | 3785.7 | 2520.6 |
| 198.7  | 110.2  | 88.9   | 104.9  | 130.5  | 123.1  | 181.0  | 269.0  | 221.1  |
| 37.7   | 21.1   | 25.7   | 13.9   | 24.5   | 27.9   | 43.9   | 63.6   | 28.1   |
| 125.0  | 50.7   | 48.5   | 58.4   | 69.8   | 73.6   | 107.3  | 158.2  | 63.0   |
| 270.5  | 184.1  | 198.0  | 217.0  | 284.4  | 241.8  | 322.3  | 361.3  | 191.4  |
| 124.0  | 62.7   | 75.1   | 91.1   | 103.1  | 95.1   | 120.3  | 115.5  | 82.0   |
| 193.9  | 124.9  | 148.7  | 150.1  | 149.4  | 104.7  | 170.6  | 156.9  | 144.8  |
| 643.0  | 258.7  | 359.0  | 313.1  | 353.5  | 378.2  | 450.9  | 608.1  | 298.5  |
| 125.5  | 72.7   | 110.8  | 133.2  | 114.4  | 128.4  | 149.4  | 212.1  | 152.6  |
| 417.7  | 261.0  | 293.9  | 311.5  | 335.7  | 329.7  | 402.5  | 396.2  | 282.4  |
| 75.0   | 39.4   | 47.2   | 41.7   | 57.8   | 45.1   | 64.5   | 73.2   | 37.1   |
| 311.6  | 154.2  | 146.7  | 190.9  | 176.5  | 156.3  | 229.0  | 261.0  | 188.1  |
| 64.8   | 24.7   | 32.4   | 42.4   | 25.8   | 32.4   | 40.7   | 47.0   | 35.2   |
| 88.3   | 85.5   | 80.1   | 61.5   | 85.5   | 87.4   | 74.6   | 81.7   | 63.9   |
| 260.0  | 184.0  | 246.6  | 214.1  | 232.5  | 249.2  | 304.0  | 322.4  | 250.3  |
| 118.8  | 76.5   | 77.9   | 86.4   | 82.9   | 80.6   | 138.6  | 117.2  | 88.4   |
| 12.0   | 22.5   | 9.6    | 13.7   | 7.5    | 19.3   | 2.2    | 4.0    | 1.0    |
| 163.2  | 110.4  | 154.6  | 148.3  | 150.1  | 169.5  | 216.4  | 250.9  | 157.1  |
| 119.9  | 95.6   | 117.7  | 101.5  | 158.0  | 145.6  | 217.3  | 280.7  | 165.3  |
| 200.6  | 80.6   | 86.2   | 87.9   | 98.4   | 93.1   | 129.7  | 160.5  | 105.2  |

|        |        |        |        |        |        |        |        |        |
|--------|--------|--------|--------|--------|--------|--------|--------|--------|
| 11.5   | 31.7   | 40.3   | 34.5   | 41.6   | 32.2   | 52.5   | 55.2   | 31.6   |
| 516.3  | 166.0  | 136.6  | 172.4  | 190.6  | 149.6  | 249.8  | 355.2  | 200.6  |
| 144.0  | 107.8  | 90.0   | 107.5  | 121.6  | 68.7   | 153.3  | 139.6  | 130.4  |
| 4492.4 | 3974.8 | 3450.9 | 3946.7 | 4181.2 | 3823.6 | 4483.4 | 4696.7 | 4511.5 |
| 1.0    | 15.5   | 18.2   | 19.2   | 20.9   | 14.6   | 23.3   | 25.8   | 19.7   |
| 5.6    | 14.1   | 22.2   | 18.2   | 18.8   | 13.5   | 26.0   | 28.1   | 20.4   |
| 561.6  | 428.3  | 403.2  | 545.5  | 464.2  | 451.2  | 671.4  | 706.2  | 638.8  |
| 552.5  | 382.6  | 476.2  | 450.0  | 492.9  | 530.3  | 568.6  | 647.8  | 346.7  |
| 91.9   | 103.6  | 91.6   | 109.5  | 109.3  | 113.2  | 133.2  | 149.2  | 122.2  |
| 400.0  | 273.3  | 307.9  | 325.3  | 310.1  | 339.9  | 399.4  | 477.1  | 326.9  |
| 50.5   | 31.7   | 27.9   | 32.6   | 39.6   | 35.0   | 62.7   | 69.1   | 49.8   |
| 239.7  | 96.8   | 143.1  | 156.7  | 172.0  | 170.6  | 273.1  | 336.2  | 193.5  |
| 1.4    | 1.3    | 1.2    | 1.2    | 0.9    | 1.0    | 5.7    | 2.9    | 10.6   |
| 86.6   | 59.6   | 79.6   | 76.4   | 76.6   | 79.8   | 111.6  | 114.9  | 73.3   |
| 155.7  | 93.7   | 111.0  | 125.4  | 112.2  | 134.2  | 183.7  | 170.8  | 127.2  |
| 1062.4 | 926.6  | 965.0  | 1011.3 | 1080.9 | 1043.8 | 1329.2 | 1408.5 | 863.0  |
| 5.4    | 9.8    | 4.8    | 3.1    | 8.1    | 7.5    | 9.3    | 6.0    | 6.1    |
| 408.6  | 266.2  | 284.1  | 299.1  | 309.8  | 321.2  | 445.4  | 547.5  | 289.8  |
| 214.1  | 147.5  | 162.0  | 169.8  | 173.2  | 139.5  | 235.2  | 326.1  | 174.6  |
| 0.6    | 0.4    | 5.3    | 4.0    | 4.6    | 0.9    | 0.8    | 0.8    | 4.5    |
| 68.5   | 57.2   | 50.5   | 49.6   | 57.0   | 54.9   | 77.0   | 87.5   | 66.0   |
| 13.5   | 11.9   | 14.9   | 14.8   | 14.5   | 14.4   | 23.0   | 32.7   | 25.0   |
| 31.7   | 18.9   | 26.0   | 22.3   | 31.4   | 29.7   | 38.3   | 48.3   | 25.5   |
| 7.5    | 5.2    | 6.1    | 3.3    | 5.4    | 7.1    | 9.7    | 4.9    | 9.7    |
| 36.8   | 18.6   | 22.0   | 34.5   | 32.4   | 34.8   | 53.1   | 60.2   | 40.9   |
| 1.0    | 0.8    | 0.7    | 1.4    | 1.3    | 0.7    | 4.2    | 3.7    | 3.4    |
| 17.1   | 15.9   | 10.7   | 11.8   | 15.1   | 17.9   | 12.8   | 18.8   | 14.3   |
| 502.0  | 300.6  | 379.6  | 400.3  | 417.5  | 455.3  | 508.6  | 664.3  | 324.9  |
| 131.5  | 50.2   | 76.2   | 60.4   | 59.7   | 78.7   | 105.0  | 112.2  | 54.2   |
| 150.2  | 74.1   | 87.3   | 86.8   | 96.4   | 95.7   | 131.7  | 144.8  | 110.5  |
| 134.3  | 108.5  | 111.7  | 115.1  | 134.2  | 128.1  | 174.1  | 203.5  | 176.7  |
| 669.3  | 440.9  | 600.9  | 583.8  | 582.9  | 643.8  | 806.7  | 897.4  | 615.8  |
| 224.3  | 159.7  | 189.7  | 212.0  | 187.8  | 187.0  | 301.8  | 270.4  | 201.6  |
| 360.0  | 249.6  | 330.6  | 288.2  | 327.5  | 331.2  | 424.1  | 348.7  | 294.5  |
| 69.9   | 76.7   | 67.3   | 77.8   | 73.0   | 66.9   | 90.9   | 78.7   | 81.3   |
| 22.8   | 15.3   | 17.1   | 23.4   | 25.0   | 24.0   | 36.3   | 28.7   | 34.8   |
| 2.7    | 2.4    | 4.1    | 0.4    | 1.2    | 1.6    | 1.0    | 6.3    | 2.9    |
| 992.7  | 622.5  | 789.3  | 778.6  | 875.3  | 837.6  | 1033.2 | 1078.2 | 952.3  |
| 120.4  | 115.7  | 107.6  | 109.4  | 143.3  | 88.5   | 190.3  | 188.4  | 135.8  |
| 12.7   | 9.1    | 11.0   | 15.1   | 15.6   | 17.8   | 24.8   | 21.9   | 16.4   |
| 7.9    | 13.5   | 14.5   | 15.8   | 15.8   | 12.9   | 27.7   | 29.1   | 26.1   |
| 128.9  | 126.3  | 130.5  | 143.1  | 141.6  | 137.3  | 207.9  | 182.3  | 156.0  |
| 132.2  | 139.6  | 142.0  | 149.4  | 141.1  | 161.3  | 209.5  | 200.6  | 174.8  |
| 163.0  | 87.2   | 138.7  | 132.9  | 114.6  | 130.9  | 156.0  | 167.8  | 91.1   |
| 597.8  | 348.5  | 386.6  | 385.5  | 411.8  | 424.5  | 534.7  | 526.4  | 476.5  |
| 339.0  | 159.4  | 183.1  | 190.9  | 210.5  | 175.6  | 239.2  | 262.0  | 204.5  |
| 438.7  | 344.7  | 388.8  | 431.2  | 425.4  | 386.7  | 498.3  | 651.6  | 361.7  |
| 59.6   | 85.0   | 92.4   | 102.8  | 111.2  | 86.3   | 130.8  | 121.4  | 85.7   |
| 7.0    | 1.3    | 1.3    | 1.9    | 4.1    | 1.9    | 8.2    | 10.9   | 4.6    |
| 412.9  | 254.2  | 289.9  | 273.6  | 276.1  | 263.5  | 349.7  | 337.8  | 244.3  |
| 315.9  | 231.8  | 316.7  | 310.9  | 322.9  | 293.1  | 407.8  | 462.9  | 317.3  |
| 522.2  | 377.0  | 406.2  | 477.1  | 506.3  | 472.9  | 891.9  | 843.5  | 629.8  |
| 399.0  | 310.6  | 408.3  | 310.3  | 305.0  | 340.2  | 375.9  | 437.6  | 318.4  |

|        |        |        |        |        |        |        |        |        |
|--------|--------|--------|--------|--------|--------|--------|--------|--------|
| 647.2  | 455.5  | 497.8  | 531.4  | 549.4  | 609.9  | 633.0  | 729.1  | 451.2  |
| 144.1  | 97.8   | 119.3  | 123.2  | 119.5  | 126.8  | 190.9  | 163.6  | 126.2  |
| 147.5  | 33.9   | 78.6   | 66.8   | 64.4   | 68.0   | 89.9   | 84.0   | 55.3   |
| 75.5   | 75.1   | 91.2   | 88.5   | 98.9   | 94.2   | 104.7  | 136.4  | 100.0  |
| 248.8  | 155.1  | 189.1  | 201.3  | 214.1  | 188.2  | 262.1  | 259.1  | 204.7  |
| 113.9  | 95.3   | 112.1  | 104.2  | 98.9   | 102.9  | 160.6  | 140.8  | 110.4  |
| 356.4  | 192.2  | 274.8  | 232.7  | 261.8  | 342.5  | 338.4  | 542.2  | 231.5  |
| 514.1  | 296.1  | 349.0  | 425.2  | 459.2  | 443.0  | 626.6  | 883.2  | 454.1  |
| 8.8    | 32.5   | 38.4   | 32.0   | 45.4   | 41.8   | 52.0   | 70.5   | 39.5   |
| 295.9  | 188.4  | 230.0  | 228.7  | 276.9  | 267.6  | 349.1  | 459.0  | 299.1  |
| 965.6  | 744.5  | 913.3  | 930.5  | 979.3  | 938.0  | 1297.4 | 1368.2 | 925.4  |
| 751.9  | 483.7  | 671.6  | 650.4  | 632.7  | 699.6  | 851.8  | 925.7  | 747.5  |
| 577.2  | 363.4  | 462.5  | 454.5  | 473.2  | 489.3  | 644.6  | 669.4  | 403.0  |
| 4237.4 | 3810.0 | 3434.3 | 3782.2 | 3858.0 | 3743.2 | 4150.0 | 4420.2 | 3369.0 |
| 114.9  | 68.7   | 76.9   | 83.0   | 84.5   | 101.3  | 120.7  | 136.0  | 77.9   |
| 142.4  | 80.2   | 106.9  | 119.8  | 117.6  | 111.9  | 161.5  | 164.5  | 96.7   |
| 0.7    | 0.5    | 0.9    | 0.9    | 0.7    | 1.3    | 0.5    | 0.6    | 0.9    |
| 0.5    | 5.5    | 5.8    | 1.4    | 8.1    | 4.6    | 4.9    | 7.2    | 1.1    |
| 1.3    | 1.5    | 1.5    | 1.1    | 1.5    | 1.7    | 3.1    | 3.7    | 3.8    |
| 172.0  | 78.3   | 103.9  | 109.1  | 108.9  | 117.3  | 144.4  | 191.6  | 136.9  |
| 402.7  | 166.2  | 176.8  | 259.9  | 261.0  | 246.9  | 415.0  | 474.3  | 294.9  |
| 265.5  | 158.8  | 190.3  | 214.8  | 200.9  | 189.2  | 239.3  | 232.9  | 213.1  |
| 134.8  | 98.1   | 103.6  | 112.8  | 122.5  | 117.0  | 163.8  | 207.6  | 135.1  |
| 221.9  | 146.0  | 220.9  | 213.8  | 235.2  | 281.1  | 320.9  | 385.2  | 222.0  |
| 582.0  | 359.9  | 442.7  | 491.8  | 480.2  | 529.0  | 713.4  | 860.4  | 516.4  |
| 96.1   | 51.7   | 73.4   | 80.5   | 59.7   | 69.2   | 114.5  | 114.9  | 80.2   |
| 2.8    | 1.1    | 0.3    | 0.3    | 2.8    | 1.7    | 0.1    | 0.1    | 1.5    |
| 5.8    | 1.6    | 1.9    | 0.9    | 1.4    | 5.2    | 1.1    | 2.6    | 4.4    |
| 144.3  | 159.6  | 131.6  | 123.3  | 137.3  | 150.1  | 232.3  | 237.6  | 114.7  |
| 0.6    | 0.6    | 6.9    | 0.7    | 0.9    | 0.8    | 1.1    | 3.8    | 2.4    |
| 96.6   | 79.1   | 87.9   | 92.9   | 86.4   | 87.3   | 112.1  | 120.9  | 94.3   |
| 18.0   | 11.2   | 14.1   | 12.0   | 14.1   | 12.8   | 12.3   | 18.5   | 5.8    |
| 159.9  | 89.5   | 84.0   | 108.9  | 105.3  | 102.2  | 146.5  | 138.5  | 105.0  |
| 212.4  | 193.8  | 215.2  | 196.2  | 230.9  | 234.7  | 308.1  | 317.7  | 248.7  |
| 21.1   | 14.1   | 18.8   | 19.7   | 22.0   | 21.1   | 27.4   | 30.2   | 21.7   |
| 171.4  | 108.0  | 136.0  | 137.6  | 137.1  | 156.4  | 212.8  | 231.7  | 139.1  |
| 238.4  | 166.3  | 219.7  | 182.7  | 216.2  | 220.7  | 273.6  | 293.5  | 219.8  |
| 804.7  | 437.1  | 568.0  | 561.6  | 623.4  | 627.6  | 882.1  | 853.2  | 586.0  |
| 139.4  | 118.2  | 120.1  | 129.6  | 146.7  | 122.3  | 206.3  | 239.8  | 182.0  |
| 345.5  | 229.1  | 244.6  | 275.8  | 280.3  | 272.4  | 370.7  | 410.7  | 301.4  |
| 359.5  | 359.7  | 394.7  | 338.9  | 361.0  | 400.9  | 457.7  | 513.8  | 402.9  |
| 476.6  | 369.8  | 443.3  | 493.9  | 446.9  | 456.6  | 520.2  | 627.8  | 393.6  |
| 128.5  | 75.0   | 85.3   | 94.3   | 100.1  | 103.9  | 165.2  | 174.9  | 117.5  |
| 1188.0 | 775.2  | 882.8  | 1074.3 | 1042.4 | 974.8  | 1271.9 | 1414.4 | 897.2  |
| 341.0  | 206.1  | 301.8  | 266.5  | 292.0  | 269.7  | 371.1  | 401.8  | 382.1  |
| 634.0  | 464.6  | 508.0  | 514.9  | 651.9  | 595.9  | 768.0  | 923.3  | 645.9  |
| 73.6   | 22.3   | 24.9   | 33.6   | 21.0   | 25.3   | 35.8   | 40.2   | 20.6   |
| 263.1  | 189.3  | 180.5  | 195.0  | 189.3  | 173.9  | 323.7  | 318.7  | 205.2  |
| 707.6  | 563.8  | 609.9  | 632.0  | 669.9  | 640.0  | 898.9  | 806.2  | 615.2  |
| 432.9  | 291.4  | 338.2  | 353.2  | 400.7  | 360.2  | 507.2  | 509.3  | 461.4  |
| 350.5  | 249.9  | 278.9  | 306.0  | 296.9  | 295.5  | 421.4  | 440.5  | 294.4  |
| 3008.3 | 2361.5 | 2358.5 | 2555.3 | 2720.1 | 2687.7 | 3098.7 | 3140.5 | 2385.2 |
| 49.8   | 32.5   | 49.6   | 34.0   | 49.4   | 37.8   | 58.0   | 48.5   | 43.7   |



|        |        |        |        |        |        |        |        |        |
|--------|--------|--------|--------|--------|--------|--------|--------|--------|
| 512.9  | 351.1  | 404.7  | 455.8  | 446.7  | 485.1  | 620.1  | 826.2  | 539.9  |
| 773.4  | 414.1  | 470.4  | 540.1  | 515.5  | 486.2  | 625.4  | 726.6  | 534.9  |
| 50.1   | 20.0   | 19.2   | 23.2   | 25.3   | 23.0   | 56.0   | 89.7   | 32.5   |
| 48.2   | 37.5   | 30.4   | 42.7   | 35.4   | 36.5   | 49.5   | 57.5   | 33.3   |
| 149.6  | 92.4   | 98.4   | 107.3  | 120.3  | 106.4  | 157.7  | 181.8  | 101.3  |
| 103.8  | 81.4   | 95.1   | 90.4   | 113.2  | 89.9   | 134.3  | 117.4  | 100.0  |
| 74.4   | 48.8   | 59.5   | 67.1   | 69.1   | 58.7   | 71.6   | 76.2   | 53.5   |
| 5.9    | 3.9    | 2.8    | 5.9    | 4.1    | 0.9    | 8.4    | 4.8    | 10.6   |
| 4.0    | 3.3    | 6.2    | 2.0    | 6.4    | 3.2    | 4.6    | 4.8    | 8.1    |
| 199.0  | 132.3  | 156.2  | 170.3  | 149.4  | 166.7  | 263.5  | 250.7  | 154.9  |
| 137.5  | 73.0   | 89.0   | 103.7  | 91.4   | 106.3  | 130.2  | 181.3  | 114.5  |
| 313.7  | 194.5  | 262.0  | 230.3  | 241.0  | 261.3  | 319.1  | 318.0  | 248.9  |
| 426.2  | 283.1  | 348.9  | 356.1  | 368.2  | 347.9  | 429.8  | 472.2  | 320.2  |
| 103.9  | 69.8   | 77.6   | 76.6   | 75.3   | 77.1   | 98.5   | 100.2  | 99.8   |
| 150.1  | 95.3   | 123.8  | 114.8  | 100.1  | 108.1  | 165.3  | 165.5  | 128.4  |
| 3.2    | 0.6    | 4.4    | 0.5    | 3.0    | 1.4    | 0.5    | 5.6    | 4.0    |
| 63.6   | 49.3   | 55.2   | 60.4   | 56.0   | 48.9   | 80.5   | 63.8   | 60.0   |
| 69.8   | 53.4   | 76.6   | 64.2   | 63.0   | 51.5   | 59.1   | 58.0   | 44.6   |
| 2831.5 | 2421.6 | 2501.9 | 2567.6 | 2567.1 | 2489.6 | 2845.8 | 2899.4 | 2368.7 |
| 134.1  | 97.4   | 137.3  | 171.1  | 132.3  | 126.2  | 182.6  | 152.8  | 142.6  |
| 238.2  | 206.5  | 239.6  | 268.2  | 273.2  | 227.5  | 346.2  | 328.3  | 239.9  |
| 633.0  | 757.3  | 716.6  | 767.7  | 767.1  | 741.3  | 922.4  | 927.0  | 641.7  |
| 478.3  | 518.9  | 693.2  | 619.6  | 640.4  | 725.4  | 832.2  | 854.8  | 559.3  |
| 248.7  | 123.6  | 175.6  | 137.9  | 158.9  | 162.2  | 211.9  | 287.3  | 167.2  |
| 23.2   | 16.9   | 17.7   | 28.4   | 20.5   | 20.1   | 29.2   | 24.5   | 19.7   |
| 32.0   | 32.8   | 28.6   | 36.5   | 30.2   | 33.0   | 54.4   | 45.9   | 22.6   |
| 184.3  | 138.1  | 166.0  | 169.5  | 172.3  | 154.8  | 201.7  | 222.5  | 173.1  |
| 66.5   | 33.7   | 19.3   | 16.1   | 23.4   | 20.0   | 23.7   | 39.3   | 25.3   |
| 138.8  | 26.9   | 49.0   | 38.9   | 51.4   | 45.5   | 59.2   | 58.7   | 39.2   |
| 225.1  | 137.0  | 161.8  | 190.7  | 182.0  | 168.4  | 261.2  | 277.9  | 179.8  |
| 1074.5 | 500.3  | 585.3  | 677.6  | 700.6  | 694.4  | 966.3  | 1140.2 | 536.3  |
| 2123.3 | 1143.9 | 1344.7 | 1405.2 | 1726.7 | 1547.2 | 1986.0 | 2290.7 | 1645.5 |
| 8.1    | 2.1    | 2.1    | 11.6   | 9.0    | 1.7    | 10.1   | 8.1    | 2.7    |
| 76.1   | 121.2  | 134.0  | 153.5  | 155.7  | 149.7  | 203.5  | 285.2  | 172.0  |
| 16.8   | 27.4   | 28.0   | 29.5   | 34.1   | 34.6   | 41.1   | 57.4   | 64.2   |
| 75.1   | 22.2   | 18.8   | 23.3   | 26.8   | 25.9   | 39.8   | 43.6   | 21.1   |
| 1817.1 | 1454.1 | 1531.1 | 1538.1 | 1783.6 | 1397.5 | 1696.8 | 2542.5 | 1559.6 |
| 197.6  | 150.5  | 180.3  | 191.3  | 238.4  | 199.7  | 283.2  | 296.6  | 200.3  |
| 285.4  | 250.0  | 260.1  | 291.6  | 315.9  | 286.3  | 433.8  | 454.5  | 261.2  |
| 139.7  | 83.3   | 109.4  | 120.1  | 107.4  | 127.4  | 139.5  | 166.5  | 113.1  |
| 227.3  | 146.6  | 165.0  | 169.5  | 171.7  | 163.7  | 240.9  | 246.3  | 189.6  |
| 324.9  | 235.5  | 257.6  | 265.7  | 275.1  | 290.2  | 397.4  | 467.0  | 262.1  |
| 340.6  | 276.2  | 281.2  | 314.8  | 312.7  | 315.4  | 392.6  | 465.9  | 332.2  |
| 192.8  | 144.5  | 163.4  | 187.4  | 200.3  | 180.5  | 267.6  | 304.2  | 201.5  |
| 158.3  | 69.6   | 98.9   | 96.4   | 102.2  | 98.2   | 138.2  | 130.4  | 109.2  |
| 1822.9 | 1540.9 | 1802.2 | 1682.8 | 1697.1 | 1662.8 | 2192.3 | 2158.9 | 1294.2 |
| 58.2   | 24.6   | 30.9   | 35.5   | 40.6   | 34.2   | 51.2   | 60.4   | 42.5   |
| 71.8   | 44.8   | 43.5   | 48.6   | 38.9   | 43.8   | 56.5   | 64.7   | 49.2   |
| 122.9  | 81.3   | 97.5   | 105.6  | 99.6   | 118.1  | 150.7  | 160.3  | 130.5  |
| 130.1  | 81.4   | 98.7   | 100.6  | 104.3  | 96.8   | 141.1  | 178.3  | 107.2  |
| 69.6   | 49.7   | 48.8   | 52.8   | 64.6   | 60.2   | 85.4   | 113.7  | 64.2   |
| 443.9  | 313.0  | 393.0  | 391.5  | 428.4  | 416.7  | 560.9  | 562.7  | 388.6  |
| 666.6  | 559.5  | 642.2  | 541.2  | 758.9  | 606.2  | 864.6  | 955.3  | 573.0  |

|        |        |        |        |        |        |        |        |        |
|--------|--------|--------|--------|--------|--------|--------|--------|--------|
| 241.4  | 176.5  | 206.8  | 201.0  | 228.2  | 225.9  | 306.2  | 331.8  | 234.2  |
| 674.2  | 494.6  | 605.7  | 658.1  | 680.9  | 638.6  | 924.0  | 852.3  | 671.1  |
| 783.8  | 506.8  | 545.5  | 553.2  | 534.4  | 606.3  | 795.9  | 815.8  | 573.2  |
| 580.8  | 394.2  | 483.4  | 538.8  | 493.4  | 513.8  | 643.8  | 803.7  | 487.0  |
| 339.5  | 273.0  | 261.0  | 294.7  | 344.8  | 305.9  | 401.2  | 494.0  | 299.6  |
| 24.0   | 23.7   | 32.1   | 21.6   | 29.9   | 23.8   | 21.6   | 24.6   | 23.5   |
| 114.9  | 54.5   | 70.1   | 74.7   | 84.2   | 74.0   | 85.7   | 92.6   | 92.0   |
| 738.5  | 595.6  | 618.1  | 678.6  | 701.5  | 706.8  | 918.8  | 1032.7 | 675.7  |
| 232.6  | 132.6  | 164.5  | 148.9  | 161.8  | 186.5  | 221.0  | 313.4  | 157.0  |
| 130.4  | 60.7   | 79.3   | 89.0   | 87.6   | 90.3   | 104.2  | 95.7   | 96.3   |
| 147.0  | 87.7   | 113.4  | 114.1  | 112.4  | 121.3  | 169.2  | 225.8  | 131.0  |
| 1924.5 | 1272.9 | 1431.3 | 1427.6 | 1569.6 | 1389.0 | 2100.2 | 1809.9 | 1239.1 |
| 1116.5 | 598.7  | 583.8  | 712.2  | 792.9  | 687.8  | 820.8  | 1067.0 | 674.7  |
| 34.2   | 43.5   | 37.9   | 25.8   | 32.7   | 37.8   | 34.9   | 52.9   | 34.2   |
| 31.0   | 22.2   | 41.6   | 40.9   | 34.3   | 45.0   | 54.9   | 86.1   | 54.6   |
| 1745.0 | 1536.8 | 1531.5 | 1576.2 | 1797.4 | 1663.0 | 1951.6 | 2224.4 | 1547.6 |
| 21.2   | 21.9   | 16.8   | 22.6   | 27.2   | 15.7   | 25.0   | 16.9   | 18.4   |
| 58.4   | 30.0   | 31.0   | 31.0   | 35.0   | 37.0   | 56.0   | 67.2   | 39.8   |
| 76.4   | 43.2   | 38.7   | 71.2   | 82.6   | 62.5   | 98.9   | 89.8   | 86.2   |
| 59.8   | 41.0   | 36.4   | 40.7   | 48.4   | 41.0   | 50.8   | 68.9   | 42.3   |
| 46.3   | 31.6   | 23.0   | 21.8   | 32.0   | 34.9   | 39.6   | 46.1   | 32.4   |
| 316.1  | 200.1  | 244.4  | 275.1  | 278.8  | 285.0  | 337.7  | 368.0  | 221.4  |
| 40.1   | 35.5   | 36.5   | 31.8   | 45.8   | 44.5   | 48.8   | 64.2   | 40.8   |
| 218.2  | 132.1  | 198.9  | 211.0  | 195.0  | 202.8  | 254.9  | 253.5  | 181.6  |
| 243.5  | 147.1  | 180.6  | 153.4  | 177.0  | 188.1  | 232.2  | 274.1  | 195.3  |
| 0.6    | 4.1    | 0.3    | 1.0    | 1.6    | 0.3    | 0.7    | 0.5    | 1.0    |
| 113.7  | 85.9   | 92.8   | 96.1   | 91.4   | 99.0   | 122.8  | 148.4  | 94.2   |
| 633.8  | 400.8  | 484.8  | 498.9  | 491.9  | 481.9  | 599.3  | 655.8  | 472.8  |
| 86.5   | 51.1   | 72.6   | 53.6   | 50.7   | 49.1   | 77.3   | 68.9   | 42.3   |
| 357.5  | 308.7  | 341.1  | 348.9  | 385.3  | 355.6  | 550.2  | 654.0  | 456.5  |
| 35.2   | 14.9   | 29.5   | 22.9   | 19.6   | 24.3   | 40.7   | 28.4   | 33.1   |
| 193.7  | 122.5  | 193.4  | 165.5  | 166.8  | 184.0  | 261.0  | 325.7  | 215.8  |
| 221.7  | 158.9  | 171.7  | 172.3  | 222.2  | 202.5  | 328.6  | 386.0  | 268.5  |
| 330.9  | 249.1  | 316.1  | 304.6  | 312.1  | 292.7  | 370.4  | 379.6  | 272.5  |
| 842.6  | 561.8  | 598.2  | 663.8  | 682.1  | 705.4  | 855.4  | 1083.7 | 561.6  |
| 79.6   | 65.7   | 43.1   | 72.9   | 59.3   | 52.1   | 68.8   | 66.1   | 68.4   |
| 1.2    | 0.7    | 0.9    | 1.5    | 1.5    | 1.8    | 0.7    | 1.2    | 0.9    |
| 365.7  | 202.4  | 267.6  | 264.3  | 266.8  | 252.4  | 283.7  | 311.6  | 268.8  |
| 210.5  | 135.8  | 152.3  | 169.8  | 172.2  | 169.5  | 233.0  | 322.6  | 152.1  |
| 231.2  | 145.3  | 181.3  | 169.7  | 187.5  | 194.4  | 227.1  | 300.4  | 166.4  |
| 178.4  | 54.3   | 90.9   | 85.9   | 102.1  | 70.3   | 116.9  | 143.7  | 76.5   |
| 270.3  | 126.4  | 121.7  | 133.8  | 174.0  | 174.5  | 213.5  | 323.5  | 236.3  |
| 252.2  | 132.1  | 122.3  | 131.1  | 155.8  | 151.5  | 261.0  | 305.0  | 152.5  |
| 617.9  | 445.3  | 538.6  | 580.1  | 614.6  | 553.3  | 757.9  | 810.5  | 624.5  |
| 105.1  | 82.3   | 96.2   | 103.6  | 96.9   | 111.1  | 143.9  | 188.3  | 97.3   |
| 133.7  | 130.0  | 126.9  | 134.4  | 142.7  | 132.7  | 157.8  | 204.6  | 151.0  |
| 8.5    | 10.7   | 9.1    | 13.0   | 9.1    | 5.1    | 11.6   | 15.8   | 14.0   |
| 311.4  | 194.5  | 209.2  | 242.5  | 259.8  | 205.1  | 305.6  | 274.3  | 311.5  |
| 174.9  | 132.3  | 111.7  | 113.5  | 103.8  | 109.7  | 214.3  | 182.4  | 171.1  |
| 127.0  | 68.8   | 97.2   | 76.5   | 100.6  | 102.4  | 180.9  | 204.9  | 155.6  |
| 129.7  | 127.1  | 144.8  | 180.0  | 130.0  | 187.7  | 151.6  | 204.5  | 131.1  |
| 84.9   | 83.2   | 82.1   | 90.1   | 84.1   | 92.1   | 136.3  | 162.0  | 90.0   |
| 148.8  | 137.0  | 153.1  | 166.6  | 168.8  | 164.1  | 227.4  | 257.9  | 192.0  |

|        |        |        |        |        |        |        |        |        |
|--------|--------|--------|--------|--------|--------|--------|--------|--------|
| 13.9   | 8.7    | 4.2    | 12.9   | 14.8   | 11.7   | 20.6   | 21.6   | 16.8   |
| 72.6   | 39.6   | 62.3   | 57.1   | 76.1   | 59.2   | 72.9   | 115.2  | 74.6   |
| 2.6    | 4.0    | 2.2    | 6.8    | 4.8    | 1.6    | 2.4    | 11.5   | 1.0    |
| 2.1    | 1.0    | 1.4    | 0.7    | 1.3    | 0.7    | 1.6    | 2.6    | 0.6    |
| 120.0  | 139.9  | 131.7  | 157.3  | 152.8  | 123.8  | 181.5  | 153.0  | 117.3  |
| 128.2  | 85.5   | 94.4   | 93.9   | 109.1  | 92.2   | 110.8  | 109.1  | 105.5  |
| 215.0  | 181.1  | 198.9  | 201.7  | 231.8  | 206.5  | 319.4  | 287.7  | 223.6  |
| 0.9    | 1.6    | 0.7    | 0.6    | 1.5    | 1.0    | 0.6    | 0.5    | 0.8    |
| 183.7  | 95.0   | 119.7  | 113.6  | 109.2  | 123.4  | 181.1  | 210.3  | 122.9  |
| 122.1  | 75.2   | 90.4   | 87.0   | 85.0   | 89.0   | 107.2  | 126.7  | 76.1   |
| 4.9    | 4.7    | 1.2    | 5.0    | 3.7    | 4.2    | 7.8    | 2.1    | 7.7    |
| 30.1   | 6.2    | 8.0    | 10.5   | 9.5    | 12.6   | 17.7   | 16.2   | 7.0    |
| 8.1    | 0.3    | 0.4    | 0.7    | 0.6    | 6.8    | 1.2    | 8.6    | 0.5    |
| 345.2  | 279.0  | 302.1  | 286.7  | 362.3  | 330.7  | 419.0  | 466.3  | 282.6  |
| 290.0  | 203.4  | 235.3  | 275.9  | 257.3  | 268.4  | 394.5  | 440.8  | 262.0  |
| 779.4  | 553.9  | 557.6  | 654.7  | 653.6  | 616.7  | 889.4  | 902.2  | 721.8  |
| 0.4    | 0.9    | 0.4    | 0.3    | 0.5    | 1.1    | 0.6    | 1.4    | 1.1    |
| 2.9    | 2.9    | 2.1    | 1.8    | 4.4    | 1.6    | 1.3    | 3.6    | 1.1    |
| 31.0   | 15.0   | 18.2   | 17.8   | 21.8   | 25.1   | 41.7   | 36.1   | 28.1   |
| 88.3   | 95.4   | 116.9  | 126.2  | 148.2  | 152.3  | 202.3  | 258.5  | 215.0  |
| 147.9  | 163.3  | 237.5  | 234.9  | 250.9  | 256.6  | 350.5  | 398.4  | 264.0  |
| 196.2  | 245.5  | 288.5  | 296.2  | 368.2  | 322.9  | 422.2  | 561.6  | 374.7  |
| 141.6  | 41.9   | 38.9   | 47.3   | 53.8   | 51.0   | 72.0   | 110.5  | 48.2   |
| 133.9  | 34.9   | 37.0   | 43.6   | 36.6   | 39.9   | 51.3   | 95.9   | 47.7   |
| 568.8  | 105.8  | 126.5  | 143.2  | 157.1  | 187.9  | 219.9  | 419.5  | 145.1  |
| 162.5  | 124.4  | 152.5  | 149.5  | 125.2  | 167.1  | 202.4  | 294.9  | 129.0  |
| 187.9  | 143.3  | 172.5  | 190.4  | 180.9  | 208.8  | 284.4  | 361.6  | 196.3  |
| 2876.0 | 2784.5 | 2555.6 | 2698.1 | 2758.4 | 2741.5 | 3052.6 | 3388.1 | 2560.8 |
| 10.8   | 11.9   | 10.8   | 2.0    | 5.1    | 5.5    | 6.8    | 6.2    | 3.2    |
| 0.1    | 0.4    | 1.3    | 0.2    | 0.1    | 1.9    | 0.2    | 2.6    | 1.1    |
| 58.7   | 40.7   | 41.1   | 41.4   | 50.0   | 53.8   | 52.5   | 70.8   | 45.0   |
| 379.0  | 255.3  | 257.1  | 282.9  | 341.7  | 321.5  | 363.9  | 561.3  | 414.0  |
| 113.8  | 62.6   | 77.4   | 94.0   | 87.6   | 92.3   | 136.8  | 170.0  | 107.9  |
| 128.2  | 59.4   | 64.9   | 62.2   | 66.3   | 62.2   | 89.5   | 108.4  | 78.4   |
| 791.0  | 541.7  | 550.7  | 618.9  | 644.0  | 638.5  | 867.8  | 1025.4 | 527.4  |
| 171.4  | 110.7  | 146.1  | 129.5  | 127.7  | 137.9  | 197.3  | 193.3  | 122.0  |
| 204.7  | 74.8   | 108.8  | 104.5  | 94.8   | 122.6  | 138.2  | 200.8  | 109.9  |
| 405.3  | 189.4  | 235.3  | 247.4  | 211.3  | 306.7  | 339.2  | 372.2  | 223.3  |
| 1006.8 | 875.2  | 861.9  | 1030.0 | 941.0  | 919.5  | 1070.0 | 1173.8 | 700.7  |
| 23.8   | 13.8   | 22.5   | 18.9   | 23.7   | 22.9   | 26.1   | 31.6   | 18.0   |
| 142.6  | 126.3  | 142.0  | 140.3  | 174.5  | 145.0  | 207.1  | 193.6  | 148.1  |
| 67.7   | 36.1   | 57.3   | 60.1   | 59.4   | 53.4   | 67.6   | 75.0   | 74.5   |
| 288.5  | 179.9  | 269.8  | 278.6  | 249.3  | 247.7  | 341.1  | 369.0  | 249.9  |
| 139.8  | 84.0   | 108.2  | 107.0  | 124.6  | 121.8  | 138.4  | 186.1  | 112.5  |
| 341.5  | 211.1  | 213.3  | 292.2  | 274.1  | 244.9  | 350.5  | 342.5  | 213.0  |
| 77.8   | 69.6   | 72.1   | 79.6   | 80.1   | 74.5   | 95.5   | 84.3   | 76.3   |
| 163.9  | 125.5  | 170.6  | 160.7  | 165.6  | 160.5  | 214.5  | 190.1  | 174.8  |
| 38.4   | 29.7   | 29.5   | 37.4   | 35.8   | 32.4   | 50.2   | 63.7   | 59.3   |
| 63.3   | 43.0   | 42.6   | 52.0   | 53.2   | 49.8   | 62.7   | 88.0   | 53.7   |
| 200.1  | 83.6   | 123.6  | 112.7  | 134.3  | 157.8  | 200.9  | 268.8  | 163.2  |
| 438.7  | 146.0  | 176.2  | 168.7  | 177.1  | 178.0  | 239.0  | 349.6  | 167.6  |
| 532.0  | 204.9  | 181.2  | 231.2  | 241.5  | 226.7  | 345.9  | 540.2  | 330.7  |
| 820.1  | 329.8  | 328.8  | 348.9  | 406.5  | 391.7  | 500.7  | 811.0  | 558.5  |

|       |       |       |       |       |       |        |        |       |
|-------|-------|-------|-------|-------|-------|--------|--------|-------|
| 18.7  | 9.6   | 5.1   | 6.3   | 14.5  | 9.3   | 12.1   | 15.0   | 12.4  |
| 285.2 | 184.2 | 179.6 | 175.8 | 213.6 | 194.8 | 331.4  | 329.6  | 252.1 |
| 17.7  | 15.8  | 12.1  | 5.9   | 10.9  | 14.1  | 10.2   | 16.8   | 6.4   |
| 2.7   | 4.0   | 0.4   | 3.8   | 5.8   | 5.2   | 8.7    | 4.6    | 4.9   |
| 219.4 | 197.6 | 235.2 | 216.2 | 210.2 | 235.5 | 273.6  | 320.5  | 228.5 |
| 186.1 | 96.4  | 118.3 | 118.2 | 115.7 | 125.5 | 194.1  | 195.9  | 119.7 |
| 275.5 | 190.5 | 222.7 | 225.4 | 245.1 | 236.5 | 299.4  | 356.1  | 347.8 |
| 770.3 | 539.9 | 638.4 | 676.5 | 694.8 | 662.7 | 1017.9 | 1105.5 | 785.6 |
| 252.5 | 152.0 | 166.1 | 188.2 | 191.8 | 208.3 | 329.2  | 393.3  | 222.5 |
| 317.1 | 278.1 | 297.4 | 363.5 | 327.5 | 282.0 | 416.7  | 386.0  | 318.1 |
| 77.3  | 77.4  | 58.7  | 57.4  | 82.9  | 71.6  | 121.6  | 134.8  | 131.0 |
| 46.9  | 35.3  | 51.9  | 38.4  | 44.1  | 32.7  | 42.3   | 48.4   | 39.3  |
| 218.1 | 132.5 | 142.9 | 168.1 | 157.6 | 145.8 | 175.9  | 195.3  | 179.2 |
| 184.9 | 79.9  | 115.7 | 82.7  | 95.0  | 103.9 | 135.4  | 149.3  | 104.7 |
| 341.3 | 185.5 | 274.8 | 253.4 | 238.2 | 258.5 | 293.6  | 356.9  | 295.5 |
| 198.2 | 158.1 | 171.1 | 164.1 | 177.3 | 176.1 | 222.1  | 193.3  | 183.5 |
| 125.3 | 89.1  | 99.9  | 115.2 | 122.9 | 109.1 | 162.2  | 145.4  | 110.7 |
| 270.7 | 163.6 | 197.7 | 207.9 | 193.2 | 195.9 | 245.7  | 221.6  | 193.7 |
| 474.0 | 243.3 | 283.9 | 283.3 | 316.1 | 275.3 | 343.5  | 370.4  | 259.7 |
| 180.6 | 147.2 | 193.5 | 150.3 | 157.2 | 152.2 | 206.4  | 215.3  | 143.8 |
| 79.9  | 40.0  | 47.2  | 43.9  | 39.2  | 39.9  | 57.6   | 73.4   | 44.8  |
| 33.1  | 30.9  | 29.2  | 21.1  | 20.6  | 29.1  | 33.7   | 42.0   | 30.1  |
| 169.8 | 88.7  | 68.9  | 124.8 | 86.5  | 91.3  | 141.2  | 161.0  | 93.2  |
| 708.7 | 475.3 | 582.9 | 580.8 | 635.4 | 593.1 | 818.5  | 766.7  | 562.5 |
| 76.6  | 47.6  | 62.2  | 71.8  | 53.5  | 65.0  | 97.3   | 108.8  | 65.4  |
| 181.5 | 144.2 | 178.6 | 145.7 | 161.6 | 169.3 | 196.4  | 201.0  | 147.2 |
| 766.1 | 607.9 | 727.2 | 711.7 | 736.3 | 678.3 | 871.2  | 829.7  | 668.7 |
| 9.3   | 7.2   | 8.9   | 11.1  | 5.4   | 5.1   | 8.2    | 16.0   | 4.0   |
| 5.5   | 7.3   | 9.9   | 8.9   | 7.2   | 9.6   | 11.7   | 13.3   | 5.2   |
| 3.0   | 2.9   | 1.6   | 7.6   | 10.6  | 1.7   | 2.0    | 2.6    | 2.0   |
| 3.8   | 6.2   | 0.5   | 6.2   | 13.7  | 7.0   | 9.1    | 17.1   | 9.9   |
| 212.3 | 113.5 | 126.6 | 147.9 | 147.7 | 148.4 | 221.0  | 254.4  | 114.2 |
| 88.4  | 83.2  | 80.2  | 88.3  | 75.2  | 67.9  | 115.4  | 121.8  | 108.0 |
| 85.1  | 52.1  | 53.5  | 64.1  | 56.3  | 57.7  | 68.4   | 89.4   | 64.8  |
| 350.2 | 243.8 | 238.9 | 249.3 | 259.9 | 255.8 | 342.5  | 385.1  | 295.7 |
| 905.7 | 746.3 | 744.0 | 817.1 | 831.1 | 800.6 | 944.9  | 1056.7 | 751.9 |
| 231.4 | 155.1 | 194.2 | 176.9 | 181.1 | 186.3 | 266.8  | 266.2  | 210.6 |
| 80.8  | 46.7  | 46.4  | 48.0  | 48.0  | 44.3  | 49.4   | 57.2   | 47.9  |
| 413.1 | 216.0 | 287.1 | 293.8 | 281.7 | 295.8 | 400.9  | 380.1  | 312.6 |
| 44.0  | 26.5  | 32.7  | 33.8  | 33.1  | 34.8  | 40.5   | 57.8   | 27.3  |
| 107.2 | 61.4  | 65.5  | 78.9  | 73.6  | 81.1  | 97.7   | 116.5  | 85.9  |
| 60.9  | 30.0  | 41.5  | 49.1  | 42.7  | 43.9  | 65.6   | 71.3   | 36.9  |
| 29.4  | 17.7  | 16.6  | 24.6  | 25.4  | 18.5  | 35.5   | 49.4   | 32.0  |
| 192.6 | 118.7 | 114.9 | 125.2 | 116.0 | 123.0 | 137.6  | 158.5  | 99.4  |
| 199.4 | 139.0 | 176.5 | 179.4 | 183.3 | 178.7 | 236.4  | 249.8  | 169.8 |
| 173.4 | 110.6 | 135.9 | 148.6 | 131.3 | 140.8 | 166.3  | 190.2  | 116.6 |
| 76.0  | 40.2  | 38.7  | 44.1  | 34.1  | 50.4  | 79.2   | 101.6  | 67.5  |
| 370.3 | 288.7 | 271.2 | 327.8 | 378.4 | 293.1 | 444.9  | 432.5  | 423.1 |
| 6.4   | 12.8  | 11.2  | 6.1   | 14.9  | 8.8   | 10.3   | 16.4   | 9.0   |
| 681.0 | 439.7 | 507.2 | 572.5 | 549.2 | 528.1 | 732.0  | 692.0  | 497.0 |
| 18.4  | 12.7  | 18.4  | 19.5  | 10.2  | 21.9  | 23.0   | 23.6   | 19.1  |
| 668.6 | 503.9 | 562.6 | 542.2 | 611.2 | 564.2 | 686.4  | 799.2  | 560.7 |
| 0.4   | 0.6   | 0.6   | 1.1   | 0.5   | 0.8   | 0.4    | 0.6    | 0.7   |

|        |       |        |        |        |        |        |        |        |
|--------|-------|--------|--------|--------|--------|--------|--------|--------|
| 0.1    | 0.1   | 2.9    | 0.1    | 2.0    | 0.4    | 0.1    | 2.0    | 0.1    |
| 211.0  | 193.0 | 144.0  | 178.0  | 196.4  | 167.5  | 252.4  | 318.0  | 310.2  |
| 415.6  | 306.7 | 364.8  | 399.3  | 382.9  | 337.3  | 445.3  | 435.8  | 394.5  |
| 45.3   | 26.4  | 40.3   | 44.9   | 35.1   | 45.6   | 40.1   | 50.2   | 55.1   |
| 130.8  | 85.3  | 90.7   | 89.5   | 81.6   | 94.5   | 136.3  | 137.3  | 108.2  |
| 12.2   | 1.3   | 6.9    | 5.8    | 6.3    | 6.1    | 25.1   | 9.0    | 13.6   |
| 2.7    | 4.7   | 2.4    | 8.2    | 5.7    | 2.1    | 8.7    | 3.4    | 3.7    |
| 101.3  | 69.2  | 105.8  | 88.3   | 83.2   | 95.1   | 147.4  | 151.4  | 88.3   |
| 68.0   | 72.9  | 55.2   | 82.9   | 54.2   | 75.2   | 82.7   | 75.8   | 82.1   |
| 52.8   | 52.7  | 44.9   | 56.4   | 59.4   | 62.1   | 90.7   | 86.9   | 90.3   |
| 954.6  | 549.9 | 663.7  | 745.0  | 694.2  | 729.9  | 994.9  | 1301.6 | 709.6  |
| 135.6  | 137.1 | 175.9  | 176.4  | 180.0  | 156.7  | 270.2  | 294.9  | 210.0  |
| 373.2  | 239.7 | 302.0  | 381.2  | 333.0  | 336.3  | 331.9  | 453.9  | 341.2  |
| 1521.7 | 932.2 | 1093.6 | 1190.1 | 1219.9 | 1240.2 | 1513.9 | 1765.8 | 1033.0 |
| 325.2  | 271.9 | 268.3  | 319.1  | 329.1  | 291.5  | 420.9  | 406.5  | 319.1  |
| 26.2   | 13.7  | 22.5   | 20.1   | 13.1   | 18.6   | 23.9   | 22.8   | 16.7   |
| 1025.6 | 599.1 | 608.0  | 687.5  | 697.9  | 640.0  | 816.6  | 947.1  | 757.8  |
| 483.6  | 244.2 | 291.6  | 316.2  | 327.6  | 369.0  | 470.9  | 594.0  | 378.8  |
| 500.1  | 300.8 | 388.6  | 363.7  | 392.9  | 424.6  | 444.2  | 523.8  | 355.9  |
| 62.7   | 59.4  | 52.3   | 58.8   | 67.2   | 60.8   | 72.0   | 64.2   | 52.3   |
| 518.1  | 412.7 | 632.6  | 465.9  | 634.3  | 583.3  | 699.4  | 699.0  | 502.8  |
| 98.4   | 50.7  | 67.9   | 57.5   | 71.8   | 63.1   | 109.6  | 91.0   | 62.1   |
| 4.8    | 6.0   | 6.8    | 7.3    | 6.5    | 3.9    | 7.1    | 7.8    | 7.0    |
| 159.3  | 102.9 | 120.6  | 144.6  | 141.9  | 161.0  | 209.7  | 208.9  | 188.7  |
| 98.1   | 74.6  | 75.7   | 70.2   | 71.0   | 74.8   | 93.5   | 114.1  | 73.2   |
| 114.0  | 85.5  | 84.7   | 90.1   | 91.6   | 92.1   | 127.2  | 159.5  | 114.2  |
| 326.2  | 229.0 | 289.5  | 276.5  | 308.2  | 300.8  | 439.0  | 370.5  | 245.7  |
| 378.9  | 206.5 | 295.5  | 288.9  | 269.9  | 279.8  | 366.9  | 389.1  | 245.3  |
| 221.6  | 146.2 | 167.2  | 160.9  | 190.8  | 203.5  | 287.4  | 356.5  | 216.3  |
| 333.0  | 247.9 | 322.3  | 314.2  | 250.4  | 297.4  | 356.6  | 369.2  | 275.6  |
| 232.8  | 174.3 | 203.0  | 200.4  | 235.0  | 194.1  | 291.3  | 269.1  | 221.3  |
| 61.8   | 46.8  | 53.6   | 59.4   | 60.3   | 60.9   | 85.1   | 117.2  | 53.8   |
| 88.8   | 80.7  | 73.1   | 88.6   | 79.8   | 68.7   | 101.4  | 128.0  | 79.5   |
| 78.2   | 55.1  | 61.7   | 68.9   | 64.8   | 61.4   | 91.1   | 103.7  | 84.6   |
| 116.0  | 90.5  | 114.1  | 120.5  | 112.3  | 107.6  | 149.5  | 189.6  | 112.6  |
| 119.7  | 79.8  | 99.6   | 108.8  | 97.6   | 129.2  | 151.3  | 177.2  | 98.8   |
| 64.0   | 39.2  | 54.6   | 56.8   | 58.1   | 62.8   | 92.0   | 122.0  | 90.9   |
| 108.3  | 76.9  | 91.1   | 78.5   | 107.9  | 78.5   | 120.5  | 108.1  | 82.4   |
| 194.1  | 159.1 | 149.5  | 159.6  | 228.4  | 148.7  | 265.8  | 259.6  | 203.1  |
| 229.1  | 174.1 | 196.5  | 199.1  | 195.7  | 176.1  | 252.9  | 232.0  | 199.4  |
| 595.6  | 264.5 | 412.0  | 419.1  | 345.2  | 362.4  | 555.0  | 768.8  | 500.2  |
| 13.0   | 3.6   | 5.5    | 13.0   | 6.6    | 6.8    | 3.4    | 15.4   | 11.1   |
| 326.2  | 246.0 | 316.4  | 318.6  | 325.9  | 309.9  | 388.5  | 421.4  | 258.6  |
| 1.1    | 1.1   | 0.9    | 0.7    | 0.7    | 1.2    | 0.6    | 2.0    | 1.3    |
| 179.7  | 110.1 | 119.5  | 115.9  | 127.2  | 152.0  | 155.6  | 205.3  | 129.6  |
| 0.5    | 6.1   | 0.6    | 5.9    | 0.7    | 3.2    | 0.9    | 8.8    | 2.2    |
| 227.6  | 133.4 | 133.5  | 166.1  | 160.6  | 158.4  | 244.0  | 253.4  | 212.5  |
| 270.1  | 117.6 | 122.7  | 145.6  | 133.4  | 136.1  | 190.4  | 216.7  | 160.9  |
| 5.0    | 1.9   | 7.7    | 2.4    | 4.2    | 2.6    | 4.5    | 4.1    | 1.1    |
| 22.0   | 10.1  | 8.2    | 19.6   | 15.8   | 19.4   | 21.2   | 24.4   | 13.8   |
| 122.9  | 80.8  | 98.7   | 105.2  | 95.3   | 90.4   | 138.7  | 140.3  | 89.1   |
| 368.5  | 186.3 | 192.6  | 257.1  | 271.2  | 263.3  | 309.1  | 505.0  | 199.9  |
| 73.3   | 53.2  | 57.6   | 66.2   | 54.1   | 53.8   | 85.2   | 83.2   | 72.2   |

|        |        |        |        |        |        |        |        |        |
|--------|--------|--------|--------|--------|--------|--------|--------|--------|
| 252.5  | 202.6  | 239.1  | 232.9  | 231.0  | 216.7  | 307.8  | 347.1  | 201.0  |
| 1.0    | 7.0    | 5.4    | 5.7    | 5.2    | 1.4    | 11.9   | 3.5    | 7.0    |
| 139.4  | 90.9   | 131.1  | 113.8  | 107.3  | 112.7  | 197.2  | 173.4  | 122.9  |
| 169.4  | 127.4  | 141.6  | 156.5  | 156.2  | 171.2  | 226.5  | 266.1  | 204.4  |
| 86.9   | 36.5   | 48.0   | 58.0   | 44.8   | 66.3   | 60.1   | 66.0   | 51.7   |
| 81.2   | 41.0   | 41.4   | 39.7   | 45.6   | 39.6   | 72.4   | 56.7   | 69.3   |
| 376.5  | 305.7  | 334.4  | 344.5  | 335.4  | 350.2  | 469.9  | 582.4  | 298.1  |
| 369.9  | 250.4  | 282.2  | 302.2  | 298.6  | 306.6  | 349.0  | 423.6  | 235.6  |
| 275.3  | 205.8  | 239.2  | 231.9  | 228.8  | 233.2  | 316.0  | 278.5  | 152.9  |
| 24.8   | 16.8   | 15.5   | 14.6   | 21.4   | 13.3   | 25.5   | 28.4   | 13.4   |
| 355.5  | 236.3  | 268.5  | 295.2  | 298.7  | 302.5  | 372.9  | 433.7  | 257.3  |
| 13.5   | 1.7    | 2.1    | 1.0    | 3.2    | 2.0    | 2.8    | 1.9    | 8.6    |
| 2.3    | 9.4    | 4.1    | 2.0    | 1.7    | 11.9   | 2.0    | 11.5   | 6.1    |
| 13.2   | 12.5   | 9.6    | 10.9   | 11.1   | 12.3   | 8.0    | 24.0   | 11.8   |
| 35.7   | 22.1   | 24.4   | 26.7   | 25.8   | 18.0   | 41.3   | 33.7   | 28.8   |
| 1354.0 | 896.5  | 995.3  | 1055.8 | 1128.4 | 1193.5 | 1505.3 | 1866.3 | 1101.9 |
| 59.8   | 34.0   | 44.7   | 33.8   | 41.0   | 34.7   | 59.8   | 81.3   | 58.4   |
| 67.0   | 53.3   | 57.6   | 50.2   | 72.4   | 51.7   | 63.2   | 86.4   | 67.1   |
| 42.6   | 30.9   | 27.5   | 34.4   | 28.6   | 19.9   | 22.7   | 32.2   | 18.0   |
| 415.3  | 290.0  | 262.3  | 308.5  | 320.0  | 282.9  | 455.4  | 524.4  | 289.7  |
| 172.0  | 94.6   | 116.4  | 115.6  | 127.5  | 116.0  | 160.7  | 200.7  | 127.6  |
| 119.4  | 50.8   | 59.1   | 60.4   | 64.3   | 52.4   | 89.8   | 114.9  | 50.4   |
| 173.9  | 75.0   | 91.2   | 97.5   | 92.5   | 84.9   | 129.0  | 141.1  | 93.7   |
| 2.5    | 1.9    | 2.8    | 0.7    | 1.9    | 1.7    | 1.8    | 1.7    | 1.6    |
| 411.8  | 215.5  | 260.8  | 282.8  | 309.9  | 322.5  | 436.7  | 591.8  | 462.3  |
| 8.6    | 6.6    | 11.1   | 10.3   | 11.9   | 6.7    | 11.0   | 17.1   | 11.5   |
| 162.5  | 83.5   | 116.4  | 115.0  | 116.4  | 126.4  | 155.8  | 174.0  | 129.9  |
| 96.0   | 58.9   | 49.4   | 67.4   | 73.3   | 58.8   | 100.7  | 120.7  | 111.8  |
| 128.6  | 62.2   | 73.1   | 73.3   | 67.1   | 62.2   | 106.5  | 99.2   | 57.2   |
| 32.0   | 30.4   | 26.3   | 22.2   | 31.9   | 23.5   | 29.8   | 41.1   | 27.2   |
| 277.2  | 182.7  | 216.8  | 239.2  | 216.1  | 226.2  | 316.4  | 315.5  | 198.5  |
| 397.8  | 295.6  | 325.6  | 352.3  | 366.1  | 360.6  | 413.2  | 444.0  | 330.1  |
| 92.0   | 70.5   | 64.9   | 72.0   | 69.9   | 63.6   | 89.7   | 106.4  | 81.0   |
| 140.5  | 75.5   | 88.7   | 87.7   | 77.2   | 95.6   | 120.4  | 146.8  | 75.9   |
| 100.7  | 56.3   | 79.2   | 70.5   | 73.1   | 81.7   | 109.2  | 127.3  | 99.4   |
| 179.2  | 129.9  | 135.0  | 132.0  | 137.3  | 151.7  | 207.0  | 269.0  | 159.5  |
| 401.0  | 268.2  | 233.7  | 259.4  | 300.8  | 284.2  | 371.5  | 519.8  | 404.6  |
| 26.3   | 23.0   | 18.6   | 19.1   | 13.8   | 19.3   | 23.8   | 26.0   | 22.9   |
| 37.2   | 20.9   | 27.1   | 26.0   | 23.7   | 30.4   | 25.9   | 40.5   | 22.4   |
| 16.5   | 18.8   | 16.3   | 15.7   | 20.0   | 20.9   | 20.6   | 26.4   | 23.0   |
| 65.8   | 43.0   | 54.2   | 74.8   | 68.3   | 68.3   | 91.7   | 119.6  | 79.7   |
| 15.1   | 10.4   | 14.0   | 11.8   | 9.7    | 14.8   | 17.7   | 15.8   | 10.2   |
| 316.9  | 241.8  | 226.0  | 255.0  | 287.6  | 285.0  | 393.9  | 532.8  | 333.6  |
| 755.4  | 482.2  | 532.1  | 478.2  | 722.9  | 591.1  | 889.4  | 927.2  | 505.0  |
| 1322.0 | 1033.3 | 1161.9 | 1231.7 | 1316.3 | 1156.5 | 1699.0 | 1552.7 | 971.5  |
| 2.3    | 1.8    | 3.0    | 2.9    | 4.4    | 2.9    | 7.3    | 1.6    | 2.2    |
| 0.1    | 1.5    | 0.4    | 3.2    | 2.5    | 0.4    | 1.3    | 1.9    | 2.4    |
| 103.0  | 51.5   | 49.5   | 57.9   | 44.2   | 57.6   | 63.1   | 71.8   | 49.9   |
| 121.5  | 58.4   | 63.3   | 70.6   | 63.0   | 63.4   | 78.3   | 103.5  | 88.6   |
| 75.5   | 36.3   | 32.1   | 34.4   | 44.6   | 40.2   | 46.1   | 54.4   | 30.5   |
| 248.5  | 157.6  | 139.6  | 157.3  | 174.2  | 178.7  | 220.3  | 235.2  | 156.2  |
| 317.5  | 223.6  | 259.7  | 283.5  | 334.0  | 317.2  | 435.6  | 458.0  | 311.1  |
| 427.3  | 305.0  | 285.8  | 350.9  | 345.8  | 364.9  | 488.4  | 663.2  | 411.8  |

|        |        |        |        |        |        |        |        |        |
|--------|--------|--------|--------|--------|--------|--------|--------|--------|
| 7.1    | 1.6    | 1.4    | 11.2   | 1.9    | 6.9    | 1.1    | 5.5    | 1.1    |
| 204.9  | 146.8  | 180.7  | 195.4  | 179.4  | 180.2  | 212.5  | 235.8  | 160.2  |
| 8.3    | 1.6    | 1.3    | 1.0    | 4.2    | 3.8    | 6.6    | 0.7    | 4.1    |
| 228.9  | 169.5  | 207.2  | 250.3  | 213.9  | 210.1  | 262.3  | 262.5  | 209.4  |
| 126.8  | 51.0   | 64.3   | 57.4   | 56.9   | 76.2   | 88.7   | 121.4  | 77.8   |
| 99.0   | 34.1   | 42.7   | 46.2   | 42.7   | 49.0   | 76.7   | 96.3   | 49.8   |
| 75.4   | 53.4   | 63.2   | 59.7   | 68.3   | 65.9   | 80.3   | 88.0   | 54.9   |
| 211.5  | 158.0  | 162.2  | 172.5  | 199.4  | 188.8  | 284.2  | 346.1  | 192.8  |
| 0.7    | 0.4    | 0.8    | 0.8    | 0.5    | 0.7    | 1.4    | 0.7    | 0.5    |
| 3.8    | 0.2    | 3.1    | 3.1    | 5.2    | 0.8    | 4.1    | 3.9    | 0.4    |
| 1.4    | 4.8    | 0.9    | 1.4    | 0.4    | 3.4    | 1.2    | 0.2    | 0.6    |
| 109.2  | 36.1   | 42.6   | 47.0   | 40.6   | 51.3   | 81.3   | 89.6   | 66.8   |
| 203.4  | 123.5  | 99.5   | 106.8  | 105.2  | 118.3  | 164.9  | 187.9  | 143.6  |
| 147.8  | 166.2  | 166.7  | 156.0  | 172.7  | 162.2  | 223.9  | 238.7  | 148.6  |
| 433.7  | 339.0  | 350.4  | 422.3  | 419.6  | 394.1  | 478.2  | 482.2  | 380.5  |
| 6.4    | 1.4    | 4.6    | 5.4    | 4.3    | 3.7    | 2.2    | 6.0    | 3.5    |
| 5.9    | 1.6    | 8.6    | 5.4    | 5.3    | 7.3    | 7.3    | 10.1   | 10.3   |
| 97.7   | 39.0   | 65.1   | 58.8   | 61.1   | 64.3   | 80.6   | 96.8   | 79.1   |
| 41.7   | 14.4   | 22.2   | 26.8   | 23.1   | 31.3   | 31.7   | 32.8   | 30.9   |
| 54.5   | 36.2   | 32.8   | 37.2   | 18.6   | 37.4   | 56.5   | 59.2   | 38.1   |
| 171.6  | 151.2  | 161.1  | 143.7  | 177.9  | 167.1  | 213.4  | 235.0  | 212.5  |
| 117.8  | 106.0  | 120.0  | 97.6   | 143.1  | 101.4  | 140.8  | 132.3  | 104.8  |
| 321.9  | 193.1  | 204.2  | 222.6  | 246.9  | 232.8  | 310.4  | 399.8  | 235.7  |
| 195.0  | 122.8  | 127.9  | 138.6  | 146.8  | 147.0  | 198.8  | 293.5  | 161.5  |
| 262.4  | 153.4  | 194.8  | 185.3  | 179.9  | 183.9  | 249.6  | 265.6  | 181.6  |
| 97.6   | 89.8   | 94.9   | 79.1   | 92.5   | 93.3   | 145.1  | 171.6  | 110.3  |
| 193.8  | 183.1  | 180.3  | 206.6  | 218.6  | 219.2  | 284.7  | 297.1  | 189.7  |
| 98.0   | 95.1   | 83.8   | 101.4  | 98.0   | 91.3   | 130.4  | 151.9  | 95.0   |
| 54.6   | 39.6   | 45.5   | 43.5   | 39.3   | 47.7   | 56.1   | 67.5   | 43.6   |
| 70.3   | 51.2   | 55.5   | 60.0   | 60.1   | 51.1   | 64.5   | 82.3   | 48.9   |
| 99.1   | 67.7   | 64.5   | 79.8   | 86.5   | 79.3   | 96.7   | 120.4  | 107.5  |
| 83.4   | 55.6   | 71.2   | 69.0   | 75.4   | 79.4   | 89.7   | 89.7   | 59.1   |
| 7.2    | 1.1    | 6.1    | 8.6    | 11.9   | 2.3    | 6.1    | 12.3   | 5.3    |
| 145.8  | 63.6   | 86.9   | 94.3   | 75.9   | 118.1  | 109.4  | 136.4  | 86.1   |
| 3.7    | 1.0    | 6.9    | 4.7    | 6.4    | 8.9    | 6.3    | 7.3    | 5.1    |
| 443.4  | 294.6  | 398.0  | 361.4  | 430.3  | 386.6  | 488.0  | 524.2  | 301.7  |
| 152.2  | 106.2  | 135.1  | 114.0  | 128.6  | 114.7  | 154.8  | 162.6  | 125.4  |
| 49.1   | 25.9   | 30.1   | 40.2   | 35.4   | 39.4   | 52.2   | 51.8   | 35.4   |
| 19.3   | 12.3   | 22.3   | 25.8   | 11.1   | 14.3   | 26.1   | 34.6   | 21.5   |
| 157.4  | 115.8  | 139.2  | 143.3  | 154.9  | 151.8  | 200.6  | 277.6  | 155.2  |
| 657.5  | 457.3  | 605.3  | 627.3  | 631.2  | 694.0  | 870.3  | 998.4  | 633.3  |
| 1073.6 | 362.2  | 395.0  | 377.8  | 452.2  | 443.6  | 576.6  | 818.1  | 398.4  |
| 1679.4 | 1178.0 | 1299.2 | 1342.6 | 1427.1 | 1379.7 | 1590.9 | 1659.7 | 1296.2 |
| 17.7   | 13.6   | 8.2    | 6.4    | 14.9   | 9.6    | 17.0   | 16.1   | 19.6   |
| 377.4  | 150.7  | 204.6  | 175.2  | 211.0  | 230.9  | 314.1  | 431.4  | 230.8  |
| 146.8  | 96.0   | 128.1  | 113.0  | 132.1  | 105.0  | 131.6  | 119.1  | 125.1  |
| 185.7  | 115.6  | 135.0  | 131.1  | 153.5  | 148.6  | 169.4  | 202.0  | 146.7  |
| 349.3  | 205.3  | 255.8  | 242.3  | 270.0  | 284.9  | 360.3  | 434.3  | 214.1  |
| 295.4  | 188.4  | 212.2  | 245.8  | 247.5  | 199.8  | 321.7  | 320.8  | 248.4  |
| 258.3  | 237.5  | 243.9  | 208.7  | 229.2  | 245.4  | 336.7  | 365.1  | 298.2  |
| 870.1  | 467.1  | 544.5  | 583.2  | 585.2  | 577.1  | 734.9  | 724.0  | 643.1  |
| 258.4  | 125.0  | 155.9  | 168.2  | 178.8  | 180.6  | 253.1  | 322.8  | 262.3  |
| 1.6    | 4.3    | 6.3    | 2.5    | 2.3    | 6.3    | 12.7   | 7.5    | 5.6    |

|        |        |        |        |        |        |        |        |        |
|--------|--------|--------|--------|--------|--------|--------|--------|--------|
| 1075.7 | 551.5  | 683.5  | 710.4  | 709.3  | 647.8  | 884.2  | 817.2  | 717.8  |
| 114.3  | 59.4   | 72.6   | 81.1   | 57.3   | 67.3   | 86.6   | 113.3  | 50.5   |
| 76.0   | 42.1   | 45.3   | 49.5   | 46.7   | 43.3   | 60.3   | 66.4   | 54.3   |
| 82.7   | 46.2   | 49.7   | 52.4   | 43.1   | 44.2   | 72.2   | 82.4   | 43.8   |
| 4.1    | 7.8    | 15.7   | 14.1   | 13.4   | 21.7   | 20.7   | 18.5   | 8.1    |
| 93.5   | 104.8  | 102.8  | 102.5  | 108.3  | 96.6   | 144.1  | 156.8  | 104.6  |
| 1225.6 | 911.8  | 1054.8 | 962.3  | 1096.3 | 1020.3 | 1377.3 | 1459.1 | 835.8  |
| 8.5    | 14.0   | 12.1   | 3.7    | 8.9    | 13.5   | 15.2   | 19.3   | 4.3    |
| 15.7   | 7.6    | 13.2   | 12.7   | 13.6   | 12.3   | 11.4   | 14.3   | 14.0   |
| 768.2  | 427.7  | 529.4  | 530.1  | 618.3  | 622.0  | 864.7  | 893.2  | 695.5  |
| 251.1  | 158.8  | 183.5  | 186.7  | 212.4  | 181.1  | 256.4  | 260.9  | 185.3  |
| 72.4   | 42.3   | 49.6   | 49.3   | 52.8   | 52.3   | 60.2   | 85.3   | 60.1   |
| 17.3   | 9.6    | 10.9   | 12.3   | 11.8   | 10.3   | 16.3   | 25.3   | 17.0   |
| 219.0  | 95.1   | 114.3  | 116.3  | 124.8  | 127.9  | 159.0  | 221.6  | 135.2  |
| 51.5   | 37.4   | 45.3   | 38.6   | 52.3   | 52.0   | 56.1   | 85.6   | 47.0   |
| 50.3   | 28.7   | 29.8   | 24.9   | 37.7   | 44.0   | 46.0   | 77.5   | 42.5   |
| 104.0  | 82.6   | 92.2   | 94.6   | 102.5  | 104.6  | 127.4  | 176.2  | 121.9  |
| 189.9  | 111.4  | 151.9  | 142.5  | 116.0  | 130.3  | 197.7  | 222.5  | 157.8  |
| 248.1  | 216.8  | 193.8  | 248.7  | 290.8  | 251.7  | 331.6  | 465.1  | 400.3  |
| 555.1  | 378.0  | 474.0  | 473.5  | 461.1  | 466.0  | 674.1  | 875.4  | 412.9  |
| 1066.0 | 705.5  | 779.4  | 848.7  | 927.7  | 922.4  | 1278.3 | 1476.0 | 1155.6 |
| 156.9  | 153.4  | 169.6  | 185.9  | 171.2  | 146.6  | 226.4  | 231.2  | 117.8  |
| 0.4    | 0.4    | 1.6    | 2.9    | 0.9    | 4.0    | 1.9    | 1.0    | 0.8    |
| 1.2    | 2.1    | 1.1    | 4.4    | 7.9    | 6.4    | 6.1    | 8.0    | 4.3    |
| 47.1   | 58.7   | 57.3   | 51.1   | 58.6   | 52.1   | 54.5   | 61.3   | 47.3   |
| 75.9   | 72.7   | 61.2   | 90.4   | 68.4   | 71.0   | 100.3  | 97.4   | 106.8  |
| 40.0   | 41.0   | 50.3   | 68.0   | 43.7   | 44.3   | 72.0   | 68.7   | 45.7   |
| 478.6  | 371.1  | 456.4  | 389.4  | 496.9  | 471.6  | 601.4  | 669.6  | 472.6  |
| 665.7  | 479.3  | 507.2  | 560.7  | 574.2  | 565.7  | 823.2  | 1012.3 | 702.8  |
| 213.8  | 146.2  | 166.3  | 174.7  | 189.5  | 141.7  | 202.4  | 182.6  | 138.5  |
| 148.4  | 90.0   | 92.0   | 104.9  | 103.1  | 94.8   | 141.7  | 129.8  | 147.5  |
| 407.9  | 227.2  | 226.9  | 225.5  | 255.9  | 241.7  | 302.8  | 349.0  | 252.1  |
| 38.1   | 24.1   | 30.3   | 37.8   | 26.8   | 30.5   | 31.8   | 41.3   | 22.2   |
| 17.3   | 15.0   | 7.4    | 16.9   | 16.9   | 13.5   | 30.5   | 41.7   | 18.3   |
| 81.4   | 94.8   | 92.2   | 103.8  | 101.0  | 87.4   | 107.7  | 97.5   | 92.6   |
| 906.4  | 608.8  | 582.9  | 671.0  | 780.0  | 720.2  | 1005.4 | 1152.9 | 897.8  |
| 38.1   | 75.3   | 75.4   | 81.4   | 90.8   | 102.9  | 164.8  | 199.7  | 155.9  |
| 55.5   | 29.6   | 28.3   | 37.6   | 35.5   | 28.9   | 48.0   | 61.1   | 36.1   |
| 76.3   | 52.4   | 52.4   | 58.3   | 66.8   | 55.8   | 70.2   | 95.0   | 71.5   |
| 51.2   | 26.7   | 25.2   | 25.9   | 28.3   | 27.5   | 35.5   | 42.0   | 18.5   |
| 63.9   | 42.1   | 43.3   | 49.3   | 42.8   | 44.6   | 63.2   | 80.4   | 51.8   |
| 279.3  | 192.3  | 213.5  | 215.8  | 229.1  | 259.9  | 275.7  | 342.2  | 280.0  |
| 21.1   | 14.3   | 7.1    | 13.0   | 16.2   | 14.6   | 14.3   | 14.3   | 11.8   |
| 943.9  | 691.0  | 769.4  | 772.8  | 857.6  | 810.8  | 1150.5 | 1187.6 | 791.5  |
| 1523.8 | 1131.2 | 1227.2 | 1248.6 | 1388.7 | 1363.4 | 1821.6 | 1965.6 | 1526.9 |
| 203.8  | 123.8  | 152.6  | 159.6  | 188.0  | 175.5  | 298.7  | 346.4  | 248.2  |
| 276.5  | 151.8  | 177.0  | 170.1  | 179.0  | 166.0  | 277.4  | 255.4  | 256.8  |
| 342.4  | 182.1  | 199.5  | 225.8  | 236.1  | 235.5  | 288.5  | 310.3  | 213.6  |
| 54.8   | 22.3   | 26.3   | 36.9   | 31.4   | 37.1   | 51.1   | 76.3   | 52.2   |
| 103.3  | 66.7   | 64.3   | 69.7   | 70.1   | 71.0   | 97.3   | 163.5  | 84.9   |
| 361.4  | 364.0  | 375.7  | 432.1  | 444.2  | 393.5  | 651.1  | 675.8  | 603.3  |
| 154.7  | 130.0  | 128.0  | 157.8  | 156.3  | 150.0  | 266.6  | 210.6  | 141.0  |
| 277.9  | 171.1  | 174.6  | 204.3  | 230.5  | 201.1  | 275.3  | 380.4  | 242.5  |



|        |        |        |        |        |        |        |        |        |
|--------|--------|--------|--------|--------|--------|--------|--------|--------|
| 102.7  | 69.6   | 88.2   | 88.3   | 71.7   | 92.2   | 95.7   | 115.6  | 78.4   |
| 17.3   | 12.9   | 13.1   | 16.0   | 13.1   | 17.8   | 16.4   | 13.0   | 11.6   |
| 0.9    | 1.1    | 0.9    | 0.8    | 0.5    | 1.0    | 0.8    | 0.8    | 0.5    |
| 151.7  | 164.1  | 220.9  | 214.3  | 228.4  | 241.7  | 375.3  | 492.0  | 270.8  |
| 294.6  | 401.6  | 358.6  | 423.9  | 463.6  | 437.0  | 639.6  | 944.9  | 438.6  |
| 166.4  | 55.6   | 87.4   | 76.1   | 62.2   | 102.5  | 138.3  | 125.3  | 101.3  |
| 171.5  | 39.4   | 58.5   | 72.0   | 59.8   | 66.5   | 119.7  | 141.2  | 72.3   |
| 443.1  | 264.7  | 237.6  | 297.7  | 311.3  | 240.2  | 346.5  | 401.7  | 327.8  |
| 33.2   | 25.3   | 29.8   | 23.3   | 27.6   | 29.4   | 36.3   | 51.7   | 35.5   |
| 14.0   | 8.9    | 15.0   | 9.6    | 7.7    | 11.8   | 7.9    | 12.2   | 18.5   |
| 736.6  | 601.6  | 569.2  | 572.5  | 650.7  | 605.6  | 776.4  | 761.5  | 588.5  |
| 41.2   | 24.1   | 37.9   | 33.6   | 28.3   | 30.9   | 43.3   | 47.8   | 30.3   |
| 310.7  | 176.7  | 185.3  | 188.5  | 245.1  | 210.8  | 258.1  | 257.2  | 221.4  |
| 36.3   | 14.7   | 20.9   | 18.1   | 23.4   | 25.8   | 31.3   | 34.5   | 24.9   |
| 348.8  | 181.1  | 245.6  | 215.9  | 237.4  | 256.9  | 338.7  | 443.8  | 230.7  |
| 178.4  | 142.5  | 187.2  | 193.6  | 193.0  | 210.3  | 274.9  | 280.9  | 196.7  |
| 473.4  | 427.0  | 452.3  | 525.8  | 539.0  | 542.6  | 685.4  | 674.7  | 522.8  |
| 573.8  | 368.6  | 430.0  | 499.9  | 456.9  | 463.5  | 612.3  | 678.7  | 436.7  |
| 13.6   | 16.0   | 11.0   | 6.7    | 6.4    | 12.1   | 9.3    | 16.9   | 11.4   |
| 63.6   | 46.6   | 42.0   | 41.8   | 52.6   | 48.5   | 77.2   | 105.6  | 59.2   |
| 40.2   | 28.6   | 33.2   | 34.8   | 48.0   | 33.3   | 51.0   | 42.9   | 31.9   |
| 39.1   | 34.0   | 33.1   | 36.9   | 41.7   | 33.6   | 39.5   | 43.1   | 35.3   |
| 26.9   | 36.5   | 37.7   | 32.2   | 29.4   | 24.5   | 32.7   | 44.7   | 49.1   |
| 96.7   | 71.7   | 75.4   | 87.1   | 104.1  | 80.3   | 89.9   | 103.5  | 80.3   |
| 100.9  | 86.1   | 81.3   | 96.0   | 100.0  | 104.8  | 122.2  | 136.7  | 106.9  |
| 1.6    | 4.8    | 1.2    | 0.8    | 3.5    | 1.1    | 4.1    | 0.6    | 0.3    |
| 13.7   | 11.3   | 1.2    | 10.0   | 4.0    | 6.4    | 4.8    | 10.9   | 7.7    |
| 6.9    | 11.5   | 12.6   | 15.9   | 20.0   | 26.3   | 29.1   | 26.6   | 26.3   |
| 30.1   | 29.4   | 22.2   | 27.0   | 26.9   | 32.3   | 34.4   | 44.0   | 29.8   |
| 79.6   | 50.0   | 69.3   | 71.6   | 76.5   | 72.5   | 91.0   | 118.7  | 75.6   |
| 36.0   | 46.7   | 41.1   | 43.3   | 57.6   | 49.9   | 68.7   | 76.7   | 55.7   |
| 65.4   | 59.4   | 49.3   | 62.4   | 57.9   | 56.8   | 98.4   | 114.1  | 73.9   |
| 91.8   | 76.4   | 84.0   | 94.5   | 103.3  | 84.6   | 124.5  | 129.9  | 99.6   |
| 164.4  | 150.1  | 134.2  | 152.1  | 169.0  | 147.5  | 212.6  | 225.7  | 157.2  |
| 82.7   | 69.2   | 69.3   | 79.0   | 72.7   | 68.0   | 96.3   | 122.8  | 87.6   |
| 491.1  | 520.0  | 467.4  | 585.5  | 432.0  | 450.2  | 681.1  | 705.4  | 513.1  |
| 96.7   | 69.1   | 88.5   | 84.6   | 72.0   | 110.5  | 118.6  | 111.2  | 78.4   |
| 338.5  | 189.5  | 220.2  | 249.8  | 249.9  | 292.8  | 311.1  | 392.3  | 288.4  |
| 1934.5 | 1302.1 | 1335.3 | 1604.0 | 1549.7 | 1541.5 | 1914.9 | 2191.1 | 1542.5 |
| 20.6   | 16.1   | 16.1   | 16.1   | 20.0   | 14.8   | 23.1   | 22.4   | 14.4   |
| 23.3   | 10.7   | 13.3   | 14.3   | 14.3   | 11.8   | 18.2   | 14.7   | 16.7   |
| 74.7   | 44.3   | 38.2   | 54.4   | 61.9   | 45.9   | 65.2   | 90.6   | 45.1   |
| 15.2   | 11.5   | 14.7   | 22.7   | 20.7   | 11.6   | 22.3   | 23.4   | 14.3   |
| 261.2  | 122.6  | 120.7  | 160.8  | 165.9  | 139.6  | 219.7  | 241.4  | 131.2  |
| 101.5  | 74.6   | 91.8   | 102.9  | 87.9   | 98.8   | 125.8  | 152.5  | 136.8  |
| 600.4  | 476.6  | 532.1  | 545.8  | 596.4  | 601.4  | 710.4  | 890.9  | 597.7  |
| 3.2    | 7.2    | 10.0   | 3.1    | 9.5    | 5.7    | 15.8   | 5.4    | 6.8    |
| 28.5   | 28.4   | 28.4   | 19.8   | 30.2   | 27.1   | 37.6   | 30.0   | 5.2    |
| 358.0  | 269.8  | 269.4  | 318.4  | 292.4  | 230.6  | 320.4  | 328.0  | 270.8  |
| 137.3  | 105.8  | 118.5  | 116.7  | 131.7  | 135.5  | 159.9  | 167.4  | 99.1   |
| 57.5   | 41.9   | 32.7   | 50.0   | 37.8   | 40.7   | 54.3   | 55.3   | 41.8   |
| 0.3    | 0.2    | 0.6    | 0.4    | 0.2    | 0.6    | 0.9    | 0.1    | 0.4    |
| 4.5    | 2.2    | 5.0    | 5.6    | 4.4    | 9.3    | 4.9    | 5.5    | 0.8    |

|        |        |        |        |        |        |        |        |        |
|--------|--------|--------|--------|--------|--------|--------|--------|--------|
| 50.8   | 25.8   | 32.1   | 25.5   | 32.1   | 35.5   | 38.9   | 48.3   | 56.5   |
| 114.1  | 79.5   | 97.0   | 89.9   | 122.2  | 101.6  | 156.2  | 160.9  | 117.3  |
| 445.7  | 311.2  | 375.6  | 355.2  | 384.9  | 398.9  | 528.4  | 738.3  | 388.8  |
| 96.6   | 85.8   | 81.4   | 97.5   | 91.3   | 91.4   | 130.7  | 124.9  | 119.1  |
| 56.3   | 34.0   | 36.8   | 31.3   | 38.6   | 29.3   | 46.4   | 49.8   | 32.3   |
| 3.6    | 1.2    | 3.6    | 1.8    | 1.7    | 0.6    | 1.0    | 4.7    | 1.7    |
| 1.6    | 1.3    | 2.7    | 3.9    | 2.8    | 4.1    | 1.4    | 4.6    | 0.3    |
| 173.7  | 220.9  | 288.9  | 245.8  | 329.0  | 265.8  | 336.7  | 419.2  | 337.9  |
| 662.0  | 785.6  | 861.1  | 870.3  | 891.8  | 849.7  | 998.8  | 976.8  | 885.6  |
| 1.8    | 0.6    | 0.6    | 0.6    | 0.8    | 0.7    | 0.9    | 1.0    | 0.5    |
| 55.1   | 43.0   | 42.4   | 55.4   | 52.6   | 45.0   | 50.4   | 59.0   | 45.3   |
| 83.5   | 62.4   | 51.3   | 51.3   | 71.3   | 60.9   | 84.9   | 86.5   | 68.2   |
| 1767.6 | 1132.0 | 1528.8 | 1397.9 | 1336.8 | 1486.1 | 1740.5 | 1770.1 | 1307.5 |
| 253.2  | 192.4  | 217.1  | 215.8  | 218.4  | 210.4  | 276.1  | 259.4  | 257.5  |
| 100.4  | 77.3   | 98.1   | 112.9  | 118.3  | 98.5   | 144.2  | 141.8  | 78.3   |
| 373.5  | 314.2  | 335.8  | 348.3  | 398.9  | 324.9  | 400.7  | 405.3  | 329.3  |
| 184.0  | 60.7   | 68.4   | 82.0   | 80.9   | 84.6   | 103.1  | 102.6  | 75.5   |
| 332.1  | 309.5  | 266.2  | 289.9  | 382.7  | 333.7  | 458.6  | 602.3  | 397.3  |
| 81.9   | 53.6   | 57.9   | 70.0   | 82.7   | 67.8   | 74.8   | 97.9   | 68.8   |
| 152.3  | 125.9  | 125.9  | 140.7  | 141.4  | 109.5  | 166.7  | 215.1  | 188.3  |
| 3280.6 | 2538.7 | 2665.4 | 2989.7 | 2948.8 | 2990.4 | 3472.3 | 3614.1 | 3182.1 |
| 133.4  | 70.2   | 98.7   | 91.9   | 97.8   | 97.7   | 128.5  | 133.9  | 88.8   |
| 133.2  | 96.9   | 101.7  | 116.7  | 165.9  | 99.2   | 178.7  | 190.1  | 149.2  |
| 36.4   | 29.9   | 26.4   | 36.8   | 34.2   | 35.6   | 36.4   | 67.9   | 46.6   |
| 92.3   | 50.5   | 57.2   | 64.6   | 61.8   | 72.6   | 74.1   | 109.6  | 57.1   |
| 15.0   | 9.9    | 14.0   | 11.8   | 9.6    | 10.5   | 24.2   | 31.9   | 17.7   |
| 0.6    | 2.9    | 3.4    | 3.0    | 2.8    | 0.6    | 3.1    | 2.3    | 1.1    |
| 0.6    | 0.6    | 0.4    | 0.9    | 2.7    | 0.9    | 0.8    | 2.1    | 1.2    |
| 3.0    | 7.7    | 3.8    | 13.0   | 6.8    | 10.0   | 0.9    | 8.7    | 3.2    |
| 397.1  | 315.6  | 372.7  | 345.4  | 385.2  | 400.8  | 485.3  | 516.8  | 410.9  |
| 41.7   | 27.3   | 30.9   | 30.8   | 29.1   | 31.4   | 42.0   | 53.4   | 45.0   |
| 33.9   | 17.8   | 19.2   | 25.1   | 20.4   | 19.2   | 23.5   | 17.5   | 19.9   |
| 630.2  | 485.7  | 583.1  | 558.9  | 701.5  | 628.5  | 869.3  | 813.6  | 603.2  |
| 369.5  | 215.5  | 288.1  | 247.3  | 275.5  | 273.6  | 378.3  | 402.3  | 249.9  |
| 557.8  | 191.1  | 254.3  | 300.3  | 289.2  | 327.3  | 450.1  | 595.7  | 312.7  |
| 1.4    | 9.4    | 10.6   | 14.9   | 5.5    | 15.3   | 14.8   | 10.4   | 12.3   |
| 28.9   | 23.7   | 17.9   | 24.0   | 33.7   | 13.7   | 30.7   | 35.6   | 32.1   |
| 19.5   | 17.1   | 18.2   | 22.1   | 16.4   | 18.1   | 28.1   | 29.1   | 21.8   |
| 259.7  | 279.1  | 242.3  | 259.0  | 263.5  | 259.7  | 454.4  | 457.1  | 314.6  |
| 104.0  | 135.4  | 109.8  | 106.4  | 93.4   | 156.3  | 114.9  | 128.2  | 119.1  |
| 65.3   | 45.1   | 68.5   | 71.3   | 54.2   | 72.0   | 89.8   | 109.7  | 97.2   |
| 66.3   | 41.1   | 46.8   | 48.1   | 43.0   | 46.4   | 62.4   | 75.7   | 56.5   |
| 51.3   | 40.2   | 40.1   | 57.2   | 43.7   | 46.7   | 65.1   | 72.7   | 53.8   |
| 41.9   | 16.4   | 16.1   | 15.4   | 15.3   | 17.3   | 27.0   | 35.7   | 21.2   |
| 177.1  | 150.5  | 203.3  | 160.2  | 180.2  | 237.7  | 284.0  | 315.0  | 220.2  |
| 65.1   | 67.1   | 74.0   | 61.6   | 71.3   | 97.9   | 99.3   | 131.3  | 53.7   |
| 93.9   | 62.8   | 91.2   | 106.2  | 91.3   | 74.7   | 123.3  | 133.1  | 102.9  |
| 55.5   | 36.4   | 39.3   | 40.4   | 34.8   | 55.9   | 61.5   | 80.7   | 45.8   |
| 13.2   | 8.6    | 8.9    | 9.2    | 11.6   | 10.3   | 17.3   | 14.3   | 11.4   |
| 93.3   | 63.2   | 87.7   | 94.8   | 86.6   | 89.7   | 124.9  | 119.0  | 98.6   |
| 121.7  | 90.9   | 109.1  | 154.3  | 138.2  | 124.0  | 202.3  | 207.1  | 134.7  |
| 220.9  | 161.3  | 183.8  | 210.4  | 251.4  | 198.3  | 311.6  | 368.5  | 230.2  |
| 109.1  | 65.9   | 72.2   | 88.1   | 101.2  | 105.0  | 107.4  | 172.2  | 107.7  |

|        |        |        |        |        |        |        |        |        |
|--------|--------|--------|--------|--------|--------|--------|--------|--------|
| 24.4   | 12.5   | 14.7   | 19.2   | 14.6   | 15.2   | 27.5   | 37.9   | 14.6   |
| 7.2    | 0.4    | 3.7    | 3.4    | 0.9    | 5.1    | 4.8    | 10.3   | 5.0    |
| 37.8   | 18.3   | 22.9   | 34.7   | 39.1   | 25.4   | 42.6   | 62.9   | 40.5   |
| 30.1   | 15.0   | 31.9   | 22.4   | 22.7   | 16.3   | 28.6   | 32.8   | 24.2   |
| 96.0   | 48.2   | 74.5   | 69.8   | 65.9   | 92.3   | 93.0   | 119.6  | 78.9   |
| 30.2   | 14.0   | 8.2    | 16.9   | 22.4   | 19.5   | 32.8   | 36.6   | 10.6   |
| 148.8  | 65.7   | 75.0   | 79.4   | 81.6   | 93.9   | 102.1  | 127.2  | 76.4   |
| 255.4  | 166.7  | 193.5  | 207.9  | 200.9  | 229.6  | 318.7  | 338.5  | 246.9  |
| 114.1  | 54.2   | 68.1   | 60.8   | 67.2   | 72.0   | 80.4   | 87.8   | 66.3   |
| 81.1   | 178.1  | 176.0  | 202.0  | 186.3  | 157.9  | 250.0  | 219.7  | 186.5  |
| 628.6  | 368.2  | 440.8  | 453.0  | 450.2  | 404.8  | 720.3  | 593.5  | 405.4  |
| 3.8    | 7.5    | 10.2   | 6.2    | 5.0    | 3.4    | 4.2    | 4.0    | 6.0    |
| 6.1    | 4.4    | 6.6    | 6.1    | 3.2    | 8.0    | 9.5    | 3.8    | 4.4    |
| 4.1    | 2.6    | 6.5    | 7.1    | 9.8    | 7.2    | 1.5    | 3.4    | 11.5   |
| 104.1  | 104.1  | 78.1   | 99.6   | 83.6   | 103.3  | 135.6  | 165.8  | 83.2   |
| 1558.3 | 1059.2 | 1305.2 | 1402.1 | 1290.8 | 1455.1 | 1751.2 | 1926.4 | 1301.5 |
| 329.9  | 218.4  | 260.0  | 272.4  | 303.7  | 294.3  | 421.4  | 473.9  | 254.7  |
| 37.3   | 3.0    | 11.9   | 16.2   | 11.7   | 31.2   | 31.0   | 27.8   | 19.8   |
| 45.8   | 20.9   | 30.8   | 18.5   | 30.0   | 27.3   | 33.0   | 37.9   | 23.5   |
| 414.4  | 341.5  | 355.0  | 378.7  | 418.8  | 346.7  | 486.6  | 496.2  | 352.1  |
| 19.5   | 14.1   | 14.4   | 13.5   | 13.1   | 18.8   | 17.3   | 22.6   | 10.3   |
| 7.0    | 3.9    | 5.9    | 4.4    | 5.2    | 10.5   | 14.3   | 5.6    | 5.4    |
| 62.7   | 38.4   | 40.2   | 46.9   | 54.1   | 57.6   | 66.0   | 68.7   | 52.7   |
| 69.3   | 73.2   | 77.7   | 88.1   | 95.7   | 77.3   | 109.6  | 130.9  | 86.7   |
| 1.6    | 12.8   | 7.3    | 11.3   | 18.9   | 8.2    | 4.9    | 13.2   | 6.7    |
| 150.6  | 83.2   | 92.0   | 101.5  | 104.2  | 109.3  | 129.6  | 157.6  | 113.3  |
| 528.9  | 297.1  | 350.7  | 370.4  | 384.8  | 448.9  | 449.5  | 815.5  | 471.8  |
| 368.3  | 176.3  | 214.6  | 228.8  | 231.8  | 291.5  | 392.4  | 539.7  | 214.7  |
| 1205.1 | 857.0  | 980.9  | 1035.5 | 1063.3 | 1018.3 | 1589.9 | 1842.0 | 1371.8 |
| 6.1    | 9.2    | 4.7    | 10.8   | 8.9    | 9.3    | 10.1   | 18.4   | 7.3    |
| 156.0  | 106.7  | 153.1  | 141.2  | 130.8  | 139.0  | 177.3  | 191.0  | 139.7  |
| 89.4   | 65.5   | 85.0   | 62.2   | 84.8   | 80.9   | 105.8  | 110.9  | 83.1   |
| 128.6  | 78.5   | 96.3   | 117.3  | 113.0  | 98.0   | 145.3  | 140.0  | 127.3  |
| 505.1  | 392.1  | 428.8  | 482.1  | 455.8  | 466.6  | 609.7  | 584.8  | 428.1  |
| 485.4  | 355.8  | 349.9  | 402.7  | 467.8  | 432.5  | 519.5  | 633.2  | 376.4  |
| 244.9  | 121.2  | 142.1  | 148.0  | 147.3  | 152.0  | 196.8  | 239.5  | 212.2  |
| 54.4   | 37.6   | 33.9   | 43.8   | 46.3   | 28.8   | 68.2   | 74.2   | 34.8   |
| 15.6   | 4.8    | 5.2    | 9.6    | 10.7   | 9.0    | 20.6   | 13.2   | 18.7   |
| 90.0   | 92.3   | 105.3  | 111.8  | 118.3  | 102.8  | 178.9  | 133.0  | 192.6  |
| 44.2   | 58.2   | 43.3   | 55.7   | 69.4   | 70.5   | 89.1   | 87.8   | 62.1   |
| 196.1  | 123.8  | 148.1  | 166.2  | 151.9  | 153.1  | 200.6  | 251.8  | 180.8  |
| 34.5   | 35.4   | 30.2   | 32.8   | 32.0   | 40.4   | 47.5   | 52.8   | 38.4   |
| 64.2   | 31.8   | 49.9   | 55.1   | 56.5   | 61.2   | 60.3   | 81.8   | 77.0   |
| 112.8  | 83.1   | 105.4  | 97.3   | 149.6  | 100.2  | 135.6  | 134.9  | 99.8   |
| 104.1  | 42.7   | 69.0   | 54.7   | 55.1   | 57.3   | 62.7   | 90.6   | 65.9   |
| 860.3  | 683.1  | 903.0  | 900.7  | 912.0  | 893.5  | 1212.4 | 1048.9 | 1055.7 |
| 116.2  | 74.8   | 72.4   | 82.9   | 85.9   | 79.6   | 124.6  | 108.7  | 71.8   |
| 282.4  | 159.7  | 177.3  | 183.7  | 206.1  | 174.6  | 220.4  | 243.3  | 229.1  |
| 709.0  | 513.8  | 631.6  | 700.2  | 675.6  | 791.0  | 922.2  | 1391.9 | 599.5  |
| 58.9   | 31.4   | 35.7   | 44.5   | 43.1   | 45.7   | 48.6   | 49.8   | 31.2   |
| 46.0   | 12.9   | 2.5    | 7.4    | 7.7    | 2.1    | 17.3   | 3.7    | 3.3    |
| 107.9  | 81.9   | 85.5   | 96.3   | 103.8  | 86.8   | 131.7  | 156.1  | 67.4   |
| 37.7   | 45.0   | 37.5   | 53.0   | 43.3   | 42.1   | 55.6   | 68.5   | 39.4   |

|        |        |        |       |        |       |        |        |        |
|--------|--------|--------|-------|--------|-------|--------|--------|--------|
| 193.0  | 138.5  | 177.9  | 166.5 | 148.1  | 159.7 | 226.2  | 217.5  | 118.7  |
| 89.5   | 114.4  | 85.2   | 88.5  | 77.2   | 70.4  | 86.5   | 96.3   | 56.8   |
| 337.9  | 232.7  | 261.2  | 256.2 | 310.4  | 266.7 | 325.3  | 343.2  | 288.5  |
| 553.1  | 559.1  | 619.9  | 646.7 | 689.5  | 611.2 | 776.8  | 865.9  | 694.8  |
| 799.9  | 809.0  | 835.1  | 991.9 | 1063.7 | 874.2 | 1247.9 | 1300.7 | 1058.4 |
| 496.9  | 336.4  | 380.7  | 330.2 | 379.0  | 400.3 | 526.0  | 580.7  | 674.6  |
| 620.4  | 320.1  | 378.6  | 394.0 | 429.7  | 400.9 | 579.5  | 571.1  | 365.6  |
| 200.7  | 145.8  | 168.6  | 175.1 | 178.7  | 180.8 | 224.7  | 206.7  | 159.6  |
| 101.1  | 75.3   | 75.0   | 106.7 | 101.0  | 77.8  | 112.5  | 132.1  | 93.1   |
| 56.4   | 34.4   | 46.0   | 48.5  | 56.3   | 57.6  | 58.7   | 63.7   | 44.0   |
| 44.3   | 33.3   | 34.1   | 47.4  | 52.3   | 47.1  | 57.4   | 60.1   | 50.5   |
| 141.7  | 110.9  | 89.7   | 102.0 | 112.4  | 107.3 | 156.1  | 187.6  | 127.9  |
| 31.4   | 12.1   | 12.9   | 16.0  | 17.5   | 19.5  | 28.8   | 35.9   | 18.3   |
| 81.1   | 48.2   | 62.5   | 63.1  | 53.4   | 54.4  | 77.4   | 76.0   | 65.0   |
| 71.1   | 47.9   | 68.4   | 49.0  | 57.0   | 57.8  | 97.5   | 98.6   | 58.0   |
| 91.2   | 57.9   | 65.0   | 73.4  | 65.0   | 65.1  | 67.0   | 88.2   | 108.5  |
| 34.4   | 21.4   | 13.5   | 26.9  | 18.9   | 24.6  | 39.4   | 31.8   | 30.8   |
| 8.1    | 1.9    | 2.1    | 1.5   | 1.9    | 9.6   | 5.0    | 4.0    | 1.1    |
| 8.3    | 0.4    | 0.2    | 0.8   | 0.2    | 1.2   | 2.5    | 0.4    | 0.5    |
| 12.7   | 2.5    | 2.3    | 2.5   | 2.3    | 1.6   | 2.7    | 8.2    | 0.9    |
| 213.1  | 148.0  | 170.9  | 186.5 | 197.7  | 167.9 | 268.9  | 234.6  | 256.0  |
| 193.9  | 155.9  | 189.9  | 210.6 | 199.3  | 198.1 | 284.0  | 291.1  | 172.5  |
| 54.5   | 41.9   | 49.3   | 59.6  | 50.1   | 50.1  | 62.0   | 61.9   | 40.3   |
| 581.7  | 478.9  | 575.1  | 607.3 | 550.3  | 572.4 | 728.3  | 674.4  | 512.7  |
| 198.8  | 128.5  | 165.4  | 165.8 | 182.6  | 149.7 | 204.7  | 215.0  | 133.3  |
| 70.0   | 63.1   | 70.1   | 61.2  | 58.0   | 60.5  | 69.9   | 89.6   | 48.9   |
| 256.7  | 187.2  | 188.4  | 234.5 | 232.0  | 230.1 | 303.5  | 328.9  | 306.5  |
| 104.1  | 118.1  | 111.1  | 111.9 | 125.9  | 126.9 | 193.7  | 218.0  | 198.2  |
| 171.3  | 143.3  | 141.7  | 128.7 | 155.6  | 173.8 | 216.9  | 217.9  | 120.0  |
| 466.4  | 272.3  | 344.6  | 383.3 | 381.5  | 375.5 | 538.9  | 514.2  | 496.9  |
| 115.4  | 109.8  | 146.5  | 168.0 | 158.9  | 147.6 | 222.3  | 206.8  | 199.2  |
| 24.9   | 14.5   | 13.7   | 15.6  | 21.0   | 15.2  | 24.3   | 36.8   | 19.1   |
| 22.8   | 14.3   | 8.9    | 17.4  | 16.9   | 13.1  | 25.8   | 33.6   | 20.3   |
| 377.7  | 225.8  | 269.5  | 242.2 | 249.1  | 257.1 | 384.6  | 426.5  | 263.6  |
| 9.4    | 16.6   | 18.1   | 22.5  | 15.2   | 9.1   | 20.3   | 20.6   | 20.8   |
| 13.7   | 22.0   | 15.4   | 20.4  | 21.6   | 17.9  | 22.9   | 18.7   | 23.6   |
| 151.2  | 92.4   | 115.6  | 105.3 | 136.7  | 120.6 | 176.7  | 157.1  | 145.5  |
| 102.2  | 70.4   | 64.0   | 56.0  | 70.8   | 56.6  | 119.6  | 125.1  | 83.6   |
| 277.5  | 117.0  | 177.9  | 164.1 | 156.8  | 209.9 | 234.5  | 278.0  | 170.7  |
| 1486.0 | 1004.2 | 1034.2 | 912.9 | 1156.2 | 996.3 | 1630.2 | 1531.3 | 953.9  |
| 55.6   | 40.3   | 52.3   | 54.4  | 58.0   | 39.5  | 65.7   | 78.7   | 67.6   |
| 0.2    | 0.1    | 0.6    | 0.8   | 1.2    | 0.5   | 0.4    | 0.6    | 0.2    |
| 11.3   | 10.1   | 5.5    | 4.0   | 7.1    | 7.4   | 4.7    | 7.5    | 10.3   |
| 3.0    | 0.3    | 2.0    | 3.2   | 2.9    | 0.2   | 0.8    | 0.9    | 3.5    |
| 430.4  | 282.9  | 306.1  | 287.6 | 313.6  | 332.4 | 438.8  | 456.7  | 378.3  |
| 75.3   | 65.9   | 51.2   | 65.6  | 57.1   | 57.4  | 93.0   | 106.5  | 98.1   |
| 125.1  | 62.8   | 74.7   | 77.8  | 89.4   | 95.0  | 92.0   | 102.1  | 84.7   |
| 110.9  | 72.6   | 78.3   | 77.5  | 78.0   | 70.1  | 85.0   | 109.9  | 79.2   |
| 31.5   | 28.8   | 29.0   | 35.8  | 38.7   | 43.5  | 66.5   | 66.3   | 37.5   |
| 86.0   | 84.2   | 71.0   | 87.0  | 73.8   | 85.2  | 97.7   | 125.5  | 81.9   |
| 35.3   | 32.0   | 33.5   | 27.7  | 39.8   | 47.6  | 50.3   | 73.5   | 38.4   |
| 143.2  | 157.0  | 150.9  | 167.5 | 178.2  | 182.6 | 237.3  | 333.3  | 232.7  |
| 85.3   | 54.6   | 76.7   | 85.6  | 80.2   | 86.5  | 77.0   | 100.9  | 76.3   |

|       |       |       |       |       |       |       |       |       |
|-------|-------|-------|-------|-------|-------|-------|-------|-------|
| 337.9 | 255.8 | 270.0 | 300.9 | 306.8 | 304.7 | 430.7 | 515.8 | 303.1 |
| 251.7 | 178.4 | 178.6 | 194.4 | 198.7 | 191.8 | 254.2 | 342.3 | 190.0 |
| 130.1 | 70.8  | 88.2  | 100.1 | 99.6  | 102.7 | 124.3 | 145.2 | 91.3  |
| 79.9  | 46.6  | 51.4  | 48.0  | 52.5  | 54.4  | 73.0  | 89.4  | 56.9  |
| 43.0  | 37.7  | 22.6  | 31.4  | 30.0  | 27.0  | 45.2  | 48.6  | 38.3  |
| 53.9  | 38.9  | 25.5  | 34.8  | 39.3  | 30.4  | 55.0  | 58.6  | 52.3  |
| 115.0 | 58.8  | 76.9  | 75.3  | 69.8  | 65.0  | 138.0 | 144.6 | 79.8  |
| 62.0  | 33.4  | 36.7  | 63.0  | 38.5  | 51.3  | 48.6  | 70.1  | 55.1  |
| 75.0  | 53.3  | 54.1  | 64.2  | 65.8  | 79.3  | 85.7  | 92.3  | 85.8  |
| 6.8   | 8.0   | 7.3   | 6.6   | 10.6  | 6.8   | 15.1  | 17.1  | 12.6  |
| 95.4  | 55.8  | 78.7  | 89.6  | 87.8  | 84.6  | 79.4  | 97.1  | 97.6  |
| 76.5  | 35.8  | 53.2  | 32.6  | 54.9  | 54.2  | 81.8  | 96.3  | 58.5  |
| 10.0  | 20.5  | 10.9  | 22.2  | 27.0  | 30.0  | 22.6  | 10.5  | 13.2  |
| 76.5  | 56.2  | 66.4  | 65.5  | 78.2  | 61.2  | 96.7  | 79.2  | 72.8  |
| 134.1 | 97.6  | 101.7 | 128.6 | 111.6 | 87.7  | 123.4 | 140.1 | 125.7 |
| 177.7 | 93.9  | 144.7 | 128.3 | 136.5 | 136.0 | 183.6 | 226.9 | 175.3 |
| 189.4 | 96.8  | 123.0 | 125.6 | 122.9 | 130.2 | 155.3 | 191.0 | 126.9 |
| 144.1 | 69.2  | 61.5  | 71.9  | 72.9  | 60.7  | 89.0  | 112.2 | 92.0  |
| 0.7   | 0.6   | 0.5   | 1.0   | 0.7   | 0.7   | 0.9   | 0.6   | 0.6   |
| 52.9  | 54.3  | 39.3  | 56.2  | 54.3  | 37.0  | 65.6  | 71.2  | 68.4  |
| 638.8 | 321.8 | 426.4 | 421.3 | 405.9 | 377.7 | 418.5 | 400.0 | 374.9 |
| 877.1 | 620.6 | 748.8 | 729.5 | 754.3 | 738.4 | 810.7 | 910.6 | 609.5 |
| 79.2  | 64.7  | 66.1  | 78.8  | 76.0  | 70.8  | 87.1  | 109.9 | 87.0  |
| 6.9   | 1.1   | 0.8   | 6.4   | 2.4   | 5.8   | 6.4   | 0.5   | 3.1   |
| 9.3   | 14.6  | 5.4   | 5.4   | 3.0   | 4.6   | 6.7   | 8.9   | 16.7  |
| 54.3  | 44.6  | 51.6  | 50.4  | 68.6  | 50.4  | 79.6  | 92.1  | 61.6  |
| 216.6 | 125.0 | 142.4 | 143.8 | 154.1 | 168.1 | 211.2 | 321.6 | 212.5 |
| 73.4  | 37.8  | 28.9  | 40.3  | 46.8  | 46.2  | 49.7  | 82.8  | 41.3  |
| 0.7   | 0.3   | 0.3   | 0.1   | 4.0   | 0.4   | 2.1   | 0.7   | 0.3   |
| 56.7  | 50.2  | 38.6  | 59.0  | 37.5  | 35.8  | 70.2  | 65.1  | 41.4  |
| 15.5  | 3.2   | 12.2  | 13.0  | 10.8  | 7.9   | 11.8  | 11.2  | 8.5   |
| 81.5  | 56.8  | 62.3  | 72.9  | 56.7  | 68.0  | 87.8  | 106.8 | 89.8  |
| 167.0 | 111.1 | 111.1 | 133.6 | 124.7 | 142.0 | 168.2 | 221.8 | 162.2 |
| 506.1 | 350.0 | 366.3 | 493.4 | 404.7 | 411.5 | 615.0 | 585.4 | 410.7 |
| 2.7   | 2.7   | 2.6   | 1.3   | 1.9   | 1.6   | 3.4   | 3.3   | 5.4   |
| 116.7 | 92.3  | 79.0  | 87.9  | 98.1  | 91.5  | 141.5 | 138.5 | 111.4 |
| 84.1  | 84.5  | 66.0  | 115.0 | 86.7  | 82.6  | 131.6 | 125.9 | 90.3  |
| 67.5  | 70.1  | 53.7  | 63.4  | 71.6  | 73.1  | 107.0 | 76.9  | 56.8  |
| 6.0   | 0.7   | 1.4   | 5.9   | 4.0   | 0.8   | 8.8   | 5.1   | 9.1   |
| 7.2   | 1.4   | 0.7   | 5.0   | 4.6   | 8.3   | 10.3  | 10.6  | 1.0   |
| 1.9   | 2.9   | 1.4   | 1.4   | 0.9   | 0.7   | 7.9   | 1.2   | 4.9   |
| 382.2 | 209.1 | 187.2 | 252.6 | 248.5 | 290.0 | 351.8 | 514.1 | 329.1 |
| 17.1  | 24.4  | 17.4  | 35.2  | 14.8  | 7.8   | 17.3  | 9.8   | 14.7  |
| 171.0 | 113.8 | 128.0 | 104.7 | 149.7 | 153.5 | 141.4 | 206.4 | 132.5 |
| 197.4 | 135.5 | 235.2 | 208.6 | 205.6 | 222.8 | 253.7 | 218.4 | 152.6 |
| 151.7 | 93.5  | 116.7 | 126.0 | 113.3 | 116.5 | 168.5 | 162.8 | 97.7  |
| 125.2 | 86.3  | 106.0 | 106.9 | 106.0 | 116.9 | 132.3 | 191.3 | 106.4 |
| 118.8 | 72.7  | 80.6  | 99.2  | 90.8  | 84.1  | 105.8 | 106.2 | 108.0 |
| 102.4 | 76.1  | 84.1  | 99.0  | 96.5  | 94.6  | 126.6 | 109.8 | 87.3  |
| 630.0 | 354.3 | 503.8 | 506.5 | 522.1 | 478.2 | 668.8 | 684.7 | 401.7 |
| 598.3 | 227.9 | 250.3 | 303.7 | 371.3 | 276.0 | 344.4 | 448.1 | 176.7 |
| 322.7 | 212.5 | 273.0 | 285.1 | 287.3 | 296.3 | 379.1 | 412.3 | 260.7 |
| 113.8 | 56.3  | 71.6  | 68.9  | 77.8  | 72.9  | 104.5 | 117.5 | 68.3  |

|        |       |        |        |        |        |        |        |        |
|--------|-------|--------|--------|--------|--------|--------|--------|--------|
| 45.5   | 29.2  | 25.8   | 38.6   | 39.6   | 37.7   | 51.7   | 71.2   | 49.6   |
| 1.0    | 3.8   | 4.6    | 3.5    | 8.9    | 1.9    | 9.6    | 9.0    | 9.6    |
| 473.7  | 274.4 | 320.6  | 361.2  | 320.8  | 378.0  | 375.1  | 440.1  | 276.0  |
| 99.7   | 77.6  | 64.4   | 85.6   | 68.8   | 91.5   | 91.0   | 142.4  | 110.1  |
| 125.5  | 81.6  | 93.3   | 104.8  | 101.7  | 94.2   | 127.1  | 163.7  | 87.2   |
| 86.4   | 67.4  | 72.9   | 77.8   | 71.0   | 64.8   | 87.0   | 120.4  | 53.4   |
| 164.4  | 103.0 | 125.6  | 118.1  | 134.5  | 126.7  | 159.1  | 176.4  | 129.8  |
| 257.7  | 281.8 | 236.6  | 293.5  | 357.9  | 283.9  | 364.8  | 431.7  | 354.7  |
| 21.3   | 2.6   | 13.8   | 8.0    | 16.3   | 2.1    | 15.0   | 18.9   | 18.3   |
| 329.2  | 209.5 | 229.4  | 294.2  | 261.5  | 241.6  | 329.9  | 367.2  | 282.7  |
| 843.3  | 640.8 | 660.1  | 798.7  | 874.1  | 787.0  | 1266.7 | 1440.0 | 968.2  |
| 707.2  | 561.0 | 575.3  | 602.5  | 746.1  | 712.1  | 1095.9 | 1322.0 | 901.0  |
| 1459.4 | 998.2 | 1135.0 | 1287.6 | 1311.3 | 1295.3 | 1752.3 | 2072.0 | 1863.8 |
| 19.2   | 9.6   | 8.2    | 10.3   | 9.8    | 3.3    | 9.3    | 14.4   | 8.7    |
| 14.8   | 5.1   | 4.8    | 3.4    | 5.2    | 4.2    | 9.6    | 10.3   | 8.3    |
| 265.4  | 97.1  | 120.3  | 107.4  | 124.8  | 131.9  | 196.8  | 234.5  | 124.3  |
| 10.2   | 0.6   | 6.2    | 1.3    | 1.2    | 10.3   | 8.6    | 9.0    | 10.9   |
| 1.9    | 0.8   | 2.3    | 1.8    | 1.1    | 1.8    | 2.5    | 1.1    | 0.5    |
| 109.7  | 100.5 | 103.4  | 123.1  | 104.2  | 113.8  | 146.6  | 147.6  | 139.6  |
| 184.4  | 130.0 | 182.7  | 175.2  | 219.4  | 178.7  | 281.3  | 249.6  | 192.5  |
| 71.4   | 81.5  | 64.9   | 93.9   | 71.3   | 57.3   | 95.1   | 85.4   | 68.6   |
| 5.3    | 3.7   | 6.1    | 8.2    | 9.3    | 6.0    | 10.9   | 16.4   | 5.3    |
| 841.4  | 494.4 | 570.9  | 617.1  | 585.1  | 581.9  | 812.7  | 856.0  | 513.0  |
| 987.8  | 616.0 | 613.4  | 761.4  | 769.6  | 734.5  | 954.2  | 1005.8 | 1014.0 |
| 160.7  | 61.4  | 81.1   | 87.7   | 85.3   | 68.6   | 124.0  | 114.9  | 70.9   |
| 951.9  | 555.6 | 668.0  | 663.2  | 732.5  | 732.4  | 1013.5 | 1019.9 | 714.2  |
| 31.4   | 28.2  | 34.8   | 36.4   | 34.0   | 34.2   | 37.9   | 49.3   | 34.8   |
| 31.6   | 21.0  | 21.6   | 20.0   | 24.1   | 25.5   | 37.9   | 45.1   | 24.1   |
| 61.0   | 59.2  | 70.2   | 64.9   | 42.8   | 58.6   | 89.7   | 95.0   | 71.1   |
| 70.8   | 30.0  | 66.9   | 50.5   | 55.3   | 49.5   | 61.4   | 78.6   | 65.2   |
| 58.0   | 30.9  | 50.3   | 40.8   | 47.1   | 41.1   | 72.4   | 63.4   | 54.4   |
| 334.4  | 255.2 | 246.3  | 266.1  | 268.2  | 249.6  | 520.0  | 400.7  | 252.0  |
| 76.0   | 56.1  | 41.2   | 56.2   | 51.5   | 48.8   | 89.7   | 85.6   | 69.0   |
| 5.6    | 3.9   | 8.4    | 6.3    | 4.3    | 2.4    | 9.0    | 15.4   | 1.5    |
| 28.8   | 23.9  | 26.7   | 28.0   | 22.9   | 26.7   | 33.0   | 37.9   | 44.1   |
| 59.9   | 25.6  | 35.6   | 31.2   | 34.2   | 40.9   | 56.6   | 60.1   | 43.5   |
| 81.9   | 80.8  | 85.2   | 90.6   | 99.5   | 71.1   | 75.6   | 111.0  | 97.6   |
| 62.8   | 27.3  | 67.8   | 51.2   | 41.9   | 50.5   | 62.9   | 91.3   | 61.0   |
| 17.1   | 11.8  | 16.5   | 16.1   | 18.3   | 16.2   | 17.2   | 31.6   | 23.3   |
| 79.7   | 86.1  | 94.7   | 94.1   | 104.7  | 94.5   | 128.0  | 118.5  | 94.0   |
| 250.5  | 172.1 | 181.6  | 181.5  | 190.1  | 180.8  | 272.3  | 215.9  | 198.0  |
| 48.2   | 37.7  | 18.8   | 31.8   | 31.0   | 26.5   | 33.8   | 37.4   | 27.3   |
| 225.0  | 120.3 | 163.6  | 166.8  | 148.7  | 156.2  | 202.8  | 196.7  | 135.8  |
| 179.4  | 101.3 | 136.9  | 136.3  | 139.9  | 152.5  | 186.8  | 206.2  | 139.0  |
| 63.9   | 37.6  | 61.1   | 60.5   | 72.6   | 69.0   | 85.6   | 120.0  | 68.4   |
| 95.1   | 71.1  | 75.7   | 83.1   | 94.1   | 81.5   | 107.3  | 167.3  | 106.9  |
| 7.1    | 8.2   | 6.5    | 8.6    | 8.6    | 1.4    | 2.2    | 1.5    | 3.3    |
| 438.8  | 256.6 | 306.9  | 318.9  | 334.9  | 357.7  | 458.5  | 549.6  | 377.9  |
| 0.7    | 0.2   | 1.1    | 0.3    | 0.4    | 1.2    | 4.8    | 0.9    | 0.8    |
| 4.3    | 1.0   | 0.7    | 0.2    | 0.8    | 0.6    | 1.8    | 4.3    | 0.2    |
| 190.7  | 78.9  | 84.4   | 112.6  | 101.1  | 89.1   | 170.3  | 198.8  | 140.3  |
| 309.4  | 143.7 | 178.7  | 226.8  | 182.0  | 209.1  | 275.3  | 368.4  | 239.0  |
| 2.4    | 1.8   | 2.1    | 5.7    | 5.1    | 2.5    | 7.0    | 7.3    | 9.0    |

|        |       |       |        |       |        |        |        |       |
|--------|-------|-------|--------|-------|--------|--------|--------|-------|
| 7.9    | 12.9  | 17.7  | 12.2   | 24.6  | 12.4   | 15.9   | 13.2   | 19.7  |
| 136.1  | 71.6  | 73.4  | 88.2   | 83.5  | 82.0   | 130.3  | 114.8  | 82.5  |
| 458.2  | 238.5 | 282.8 | 316.1  | 329.2 | 294.6  | 446.3  | 532.6  | 476.1 |
| 227.0  | 147.9 | 167.4 | 198.4  | 218.4 | 189.6  | 243.9  | 316.6  | 244.1 |
| 52.6   | 34.3  | 38.7  | 42.9   | 42.1  | 48.2   | 49.7   | 65.2   | 48.0  |
| 318.4  | 202.3 | 202.6 | 261.1  | 248.7 | 247.5  | 318.4  | 381.2  | 278.8 |
| 0.7    | 0.5   | 0.4   | 1.0    | 1.0   | 1.3    | 1.7    | 0.5    | 0.7   |
| 74.9   | 59.6  | 75.1  | 55.4   | 80.1  | 55.9   | 102.9  | 102.3  | 72.2  |
| 814.6  | 574.6 | 681.8 | 759.0  | 742.0 | 674.8  | 908.3  | 852.7  | 787.0 |
| 2.5    | 4.1   | 0.9   | 1.1    | 1.0   | 1.2    | 2.4    | 1.5    | 2.0   |
| 163.7  | 159.7 | 171.7 | 211.9  | 214.9 | 154.6  | 215.6  | 199.1  | 210.8 |
| 1.1    | 5.6   | 6.4   | 3.5    | 8.8   | 8.9    | 5.0    | 1.1    | 1.1   |
| 17.0   | 14.3  | 18.7  | 19.7   | 19.0  | 20.4   | 23.6   | 22.2   | 24.7  |
| 1.0    | 3.8   | 1.0   | 3.9    | 1.8   | 0.8    | 1.0    | 6.9    | 4.2   |
| 31.9   | 14.7  | 15.0  | 16.8   | 20.3  | 17.0   | 23.9   | 18.9   | 21.0  |
| 53.5   | 36.9  | 42.9  | 46.2   | 38.5  | 39.9   | 64.2   | 65.0   | 65.0  |
| 251.1  | 180.5 | 180.1 | 202.6  | 209.6 | 212.1  | 276.5  | 290.5  | 185.1 |
| 1.0    | 1.1   | 1.5   | 1.4    | 0.7   | 0.9    | 1.7    | 1.4    | 0.4   |
| 145.6  | 101.2 | 99.3  | 108.6  | 103.6 | 103.6  | 111.8  | 122.9  | 81.4  |
| 38.9   | 27.4  | 25.6  | 34.0   | 37.1  | 31.8   | 46.7   | 52.8   | 33.6  |
| 28.3   | 14.1  | 23.9  | 25.5   | 25.3  | 20.2   | 26.5   | 30.2   | 19.1  |
| 707.3  | 603.4 | 582.0 | 611.2  | 642.9 | 525.7  | 774.2  | 649.6  | 615.0 |
| 723.3  | 400.0 | 529.5 | 554.1  | 536.3 | 531.9  | 671.8  | 668.1  | 577.1 |
| 436.6  | 328.1 | 383.5 | 371.3  | 646.1 | 341.1  | 614.3  | 603.4  | 314.5 |
| 1206.0 | 718.7 | 914.5 | 1120.0 | 959.5 | 1045.6 | 1177.8 | 1514.0 | 876.9 |
| 416.6  | 248.5 | 268.6 | 323.8  | 310.4 | 338.6  | 418.3  | 478.2  | 326.2 |
| 469.9  | 360.3 | 332.9 | 397.3  | 436.5 | 431.4  | 564.5  | 628.1  | 445.5 |
| 80.2   | 49.7  | 55.1  | 68.1   | 73.3  | 67.7   | 93.2   | 114.8  | 100.3 |
| 270.4  | 171.6 | 194.9 | 201.4  | 226.9 | 240.2  | 285.8  | 337.1  | 172.3 |
| 114.7  | 44.4  | 63.3  | 63.3   | 55.7  | 75.0   | 98.0   | 128.2  | 85.6  |
| 70.2   | 49.9  | 56.4  | 46.8   | 59.3  | 62.7   | 59.1   | 80.6   | 52.2  |
| 66.7   | 43.5  | 51.2  | 43.7   | 50.0  | 45.6   | 67.9   | 82.7   | 43.1  |
| 657.1  | 396.5 | 456.7 | 465.8  | 502.5 | 464.0  | 611.4  | 635.0  | 416.2 |
| 44.1   | 31.5  | 47.8  | 42.7   | 39.8  | 36.5   | 56.2   | 72.2   | 59.2  |
| 321.4  | 198.9 | 178.2 | 229.0  | 228.3 | 260.5  | 327.6  | 418.7  | 200.7 |
| 691.4  | 483.1 | 473.8 | 513.4  | 563.0 | 505.0  | 755.5  | 847.9  | 470.5 |
| 17.8   | 9.4   | 15.3  | 15.7   | 8.8   | 10.8   | 19.7   | 13.3   | 14.2  |
| 0.4    | 5.3   | 1.0   | 2.6    | 1.8   | 2.6    | 4.6    | 3.6    | 2.7   |
| 14.5   | 7.6   | 8.7   | 4.1    | 2.4   | 13.3   | 10.6   | 2.9    | 4.3   |
| 539.5  | 560.1 | 500.8 | 523.8  | 593.6 | 449.7  | 582.7  | 592.8  | 416.5 |
| 134.9  | 54.8  | 57.7  | 70.0   | 79.9  | 73.4   | 131.3  | 151.7  | 118.8 |
| 98.8   | 63.0  | 79.5  | 76.2   | 84.3  | 72.5   | 104.0  | 101.1  | 84.6  |
| 70.2   | 25.6  | 54.9  | 48.1   | 43.6  | 48.8   | 57.1   | 56.0   | 28.3  |
| 78.5   | 42.3  | 49.3  | 43.8   | 58.9  | 66.9   | 76.9   | 75.0   | 61.0  |
| 80.2   | 43.1  | 40.9  | 46.8   | 43.2  | 45.7   | 73.5   | 88.6   | 59.2  |
| 5.9    | 4.6   | 2.9   | 4.2    | 4.7   | 5.1    | 7.4    | 10.4   | 5.4   |
| 154.4  | 123.2 | 166.6 | 149.9  | 174.6 | 172.5  | 190.2  | 195.5  | 132.3 |
| 34.9   | 18.9  | 20.1  | 13.6   | 18.1  | 15.8   | 33.4   | 40.9   | 20.9  |
| 167.3  | 81.6  | 111.3 | 89.2   | 88.4  | 105.0  | 108.4  | 109.4  | 69.8  |
| 66.8   | 25.9  | 21.0  | 28.4   | 38.3  | 20.8   | 26.0   | 51.6   | 30.3  |
| 113.4  | 57.6  | 77.9  | 74.0   | 69.7  | 75.1   | 100.2  | 140.0  | 71.7  |
| 919.1  | 666.8 | 642.5 | 735.3  | 796.9 | 747.6  | 1148.8 | 1258.6 | 940.5 |
| 78.4   | 43.3  | 55.0  | 44.0   | 50.1  | 50.1   | 80.5   | 57.8   | 49.9  |

|       |       |       |       |       |       |       |       |       |
|-------|-------|-------|-------|-------|-------|-------|-------|-------|
| 10.9  | 7.1   | 6.0   | 11.4  | 11.3  | 17.2  | 11.1  | 9.4   | 8.5   |
| 15.3  | 12.5  | 11.1  | 3.0   | 16.8  | 10.5  | 18.3  | 16.6  | 18.2  |
| 137.8 | 88.8  | 93.4  | 125.2 | 91.0  | 118.1 | 155.6 | 189.4 | 131.1 |
| 365.2 | 152.1 | 246.1 | 205.8 | 241.4 | 281.6 | 416.5 | 458.3 | 305.4 |
| 69.4  | 37.4  | 36.0  | 43.5  | 43.2  | 50.1  | 71.5  | 68.8  | 55.9  |
| 30.2  | 17.6  | 33.1  | 16.6  | 26.8  | 25.7  | 39.3  | 48.7  | 29.8  |
| 163.8 | 98.9  | 103.2 | 111.1 | 127.2 | 113.0 | 178.3 | 234.0 | 139.2 |
| 105.6 | 67.6  | 67.0  | 70.9  | 86.9  | 84.0  | 92.1  | 130.3 | 69.8  |
| 4.4   | 3.8   | 2.9   | 2.4   | 3.5   | 0.5   | 4.2   | 7.5   | 4.6   |
| 2.9   | 2.9   | 10.3  | 5.6   | 10.4  | 10.4  | 13.7  | 12.3  | 7.7   |
| 172.2 | 104.8 | 133.0 | 124.1 | 140.2 | 135.3 | 172.9 | 168.4 | 103.2 |
| 311.5 | 256.1 | 262.4 | 275.3 | 335.9 | 286.4 | 485.6 | 422.6 | 494.7 |
| 2.8   | 12.3  | 2.9   | 1.3   | 10.0  | 4.4   | 10.8  | 7.2   | 1.3   |
| 25.3  | 13.3  | 14.7  | 6.2   | 10.7  | 11.7  | 12.1  | 16.1  | 3.2   |
| 1.0   | 1.1   | 1.1   | 5.7   | 8.2   | 0.8   | 6.0   | 0.8   | 1.9   |
| 6.6   | 1.2   | 1.7   | 3.0   | 1.0   | 2.4   | 3.2   | 4.2   | 2.1   |
| 862.5 | 604.0 | 689.8 | 734.6 | 765.4 | 698.7 | 957.9 | 981.1 | 719.0 |
| 112.3 | 80.4  | 89.9  | 94.5  | 115.3 | 96.8  | 153.1 | 143.9 | 118.4 |
| 0.7   | 2.4   | 1.0   | 0.7   | 0.6   | 0.5   | 0.7   | 0.3   | 0.6   |
| 265.6 | 175.8 | 182.2 | 189.9 | 215.5 | 206.1 | 234.3 | 317.9 | 226.3 |
| 393.3 | 235.0 | 265.0 | 318.3 | 356.4 | 344.8 | 443.3 | 469.6 | 343.9 |
| 151.8 | 82.9  | 112.8 | 102.8 | 110.1 | 116.5 | 134.6 | 139.2 | 114.9 |
| 139.8 | 94.9  | 105.8 | 111.7 | 110.9 | 116.8 | 134.9 | 142.4 | 91.0  |
| 4.6   | 4.3   | 3.1   | 1.1   | 1.7   | 3.3   | 4.9   | 1.9   | 2.6   |
| 92.5  | 69.3  | 51.0  | 83.2  | 73.8  | 63.5  | 104.4 | 150.0 | 83.0  |
| 324.6 | 222.9 | 264.5 | 267.7 | 276.6 | 271.5 | 317.0 | 412.2 | 298.6 |
| 90.1  | 64.3  | 67.3  | 83.6  | 74.7  | 71.8  | 103.4 | 133.3 | 79.9  |
| 94.6  | 80.6  | 96.9  | 111.4 | 88.4  | 108.8 | 139.9 | 113.1 | 118.0 |
| 143.5 | 98.7  | 137.4 | 137.5 | 133.4 | 151.6 | 192.5 | 188.9 | 129.9 |
| 115.2 | 105.1 | 156.6 | 124.2 | 138.0 | 112.6 | 148.4 | 147.3 | 115.0 |
| 3.8   | 1.4   | 3.0   | 0.6   | 0.6   | 7.1   | 1.8   | 4.2   | 8.6   |
| 95.9  | 74.2  | 56.3  | 76.3  | 72.8  | 85.4  | 111.5 | 143.6 | 86.9  |
| 45.5  | 39.8  | 41.3  | 38.6  | 50.8  | 36.4  | 64.9  | 66.6  | 45.0  |
| 95.0  | 70.6  | 79.9  | 90.6  | 104.9 | 81.0  | 119.4 | 124.0 | 86.1  |
| 155.8 | 89.9  | 98.0  | 89.9  | 103.6 | 104.3 | 134.5 | 149.7 | 133.2 |
| 229.8 | 177.4 | 166.8 | 201.7 | 232.8 | 193.1 | 254.0 | 362.0 | 228.5 |
| 17.5  | 1.3   | 5.8   | 1.4   | 8.2   | 11.7  | 1.2   | 2.2   | 1.4   |
| 139.6 | 102.7 | 119.1 | 126.3 | 139.5 | 113.2 | 156.1 | 165.7 | 114.3 |
| 181.3 | 166.4 | 190.5 | 173.7 | 167.8 | 179.4 | 211.5 | 232.5 | 141.4 |
| 56.6  | 24.4  | 36.4  | 38.3  | 41.9  | 54.4  | 58.0  | 65.4  | 47.1  |
| 26.0  | 29.0  | 20.1  | 38.3  | 25.5  | 27.4  | 23.9  | 43.1  | 41.3  |
| 21.0  | 9.5   | 10.1  | 11.1  | 10.7  | 15.4  | 18.5  | 15.2  | 7.5   |
| 30.1  | 10.8  | 22.3  | 20.0  | 31.0  | 13.4  | 28.0  | 30.0  | 29.3  |
| 187.4 | 100.3 | 135.3 | 136.0 | 118.2 | 138.6 | 164.4 | 222.7 | 131.2 |
| 332.4 | 166.5 | 237.8 | 304.9 | 224.5 | 256.0 | 403.8 | 473.8 | 374.1 |
| 42.1  | 36.8  | 41.0  | 43.6  | 48.1  | 43.0  | 32.8  | 66.0  | 37.2  |
| 83.5  | 58.7  | 48.7  | 61.7  | 48.7  | 51.7  | 70.0  | 96.9  | 71.5  |
| 43.6  | 25.3  | 28.2  | 29.2  | 25.2  | 32.3  | 11.8  | 30.4  | 35.5  |
| 44.8  | 31.5  | 22.3  | 29.0  | 42.0  | 30.6  | 45.1  | 70.6  | 48.0  |
| 1.5   | 1.9   | 5.7   | 1.5   | 1.4   | 1.4   | 2.9   | 1.8   | 2.0   |
| 120.1 | 96.6  | 99.6  | 118.8 | 110.1 | 96.6  | 103.6 | 110.8 | 87.1  |
| 52.9  | 44.1  | 49.3  | 49.3  | 40.5  | 50.1  | 66.2  | 60.0  | 47.9  |
| 58.2  | 31.9  | 31.6  | 38.2  | 40.8  | 33.3  | 61.0  | 64.7  | 45.4  |



|        |       |        |        |        |        |        |        |        |
|--------|-------|--------|--------|--------|--------|--------|--------|--------|
| 32.8   | 22.1  | 23.0   | 12.0   | 11.8   | 16.2   | 20.3   | 36.6   | 27.7   |
| 402.5  | 125.2 | 121.8  | 134.3  | 145.2  | 139.1  | 181.8  | 325.1  | 154.6  |
| 140.8  | 88.2  | 97.2   | 100.5  | 101.1  | 98.2   | 142.6  | 146.8  | 107.8  |
| 57.5   | 41.7  | 56.2   | 45.8   | 60.7   | 62.0   | 73.9   | 65.4   | 47.4   |
| 46.6   | 25.0  | 36.1   | 37.5   | 26.4   | 32.3   | 51.8   | 56.0   | 42.6   |
| 71.0   | 53.3  | 59.6   | 69.6   | 67.2   | 74.8   | 80.2   | 106.2  | 67.4   |
| 53.8   | 30.7  | 38.4   | 48.0   | 31.2   | 32.0   | 42.8   | 44.3   | 31.4   |
| 85.9   | 58.7  | 63.1   | 75.9   | 62.1   | 59.8   | 76.5   | 105.3  | 61.5   |
| 3.5    | 1.7   | 0.5    | 0.9    | 0.8    | 1.2    | 0.7    | 9.0    | 1.0    |
| 38.0   | 26.8  | 25.6   | 25.5   | 24.2   | 19.8   | 30.2   | 30.1   | 15.2   |
| 16.8   | 7.3   | 14.2   | 14.0   | 19.9   | 21.6   | 20.0   | 31.1   | 15.2   |
| 6.8    | 14.4  | 20.4   | 11.4   | 14.9   | 7.5    | 18.2   | 13.5   | 13.0   |
| 43.1   | 31.6  | 41.1   | 43.9   | 43.5   | 38.5   | 58.6   | 50.5   | 39.7   |
| 98.8   | 72.0  | 66.0   | 99.5   | 94.6   | 80.2   | 118.2  | 125.2  | 89.3   |
| 93.5   | 79.8  | 93.3   | 108.4  | 103.9  | 97.1   | 133.2  | 134.3  | 93.7   |
| 232.7  | 204.8 | 271.1  | 276.6  | 235.8  | 250.7  | 349.8  | 313.8  | 255.1  |
| 142.9  | 75.6  | 83.5   | 90.2   | 94.6   | 100.2  | 150.7  | 193.8  | 106.2  |
| 1005.4 | 812.5 | 858.5  | 860.3  | 966.1  | 876.9  | 1102.0 | 1243.0 | 755.0  |
| 37.0   | 21.5  | 24.3   | 28.0   | 26.0   | 20.7   | 38.8   | 30.3   | 29.5   |
| 553.9  | 356.9 | 457.9  | 472.8  | 498.9  | 458.4  | 506.8  | 499.1  | 564.3  |
| 15.6   | 14.9  | 16.3   | 17.6   | 16.9   | 18.6   | 22.7   | 20.0   | 20.9   |
| 34.1   | 11.3  | 15.6   | 11.4   | 17.4   | 11.6   | 27.5   | 7.8    | 3.7    |
| 104.4  | 36.1  | 38.7   | 42.2   | 37.4   | 48.1   | 61.3   | 58.9   | 42.5   |
| 2.4    | 4.6   | 0.8    | 3.4    | 1.4    | 9.1    | 10.4   | 6.7    | 9.9    |
| 0.7    | 0.5   | 3.9    | 1.3    | 1.8    | 0.7    | 1.5    | 1.1    | 0.2    |
| 53.6   | 23.9  | 37.8   | 40.2   | 42.9   | 36.1   | 46.2   | 55.4   | 26.1   |
| 242.0  | 137.2 | 157.2  | 189.5  | 194.3  | 162.9  | 259.6  | 304.0  | 219.5  |
| 59.3   | 38.0  | 37.3   | 49.1   | 53.1   | 51.3   | 67.5   | 75.5   | 49.0   |
| 178.1  | 86.1  | 125.5  | 113.1  | 138.3  | 134.3  | 178.5  | 189.6  | 116.4  |
| 4.9    | 7.1   | 4.2    | 4.0    | 1.0    | 6.4    | 5.9    | 4.5    | 5.1    |
| 0.7    | 1.9   | 0.4    | 0.8    | 0.9    | 0.5    | 0.6    | 0.7    | 1.3    |
| 1.8    | 1.7   | 3.1    | 1.0    | 1.8    | 4.9    | 1.5    | 5.3    | 2.1    |
| 90.3   | 38.0  | 58.2   | 58.5   | 55.5   | 68.7   | 86.7   | 135.8  | 75.1   |
| 207.4  | 123.8 | 164.3  | 167.2  | 163.4  | 173.7  | 224.8  | 281.7  | 179.1  |
| 18.5   | 21.8  | 21.9   | 19.0   | 19.0   | 16.0   | 30.7   | 33.0   | 28.4   |
| 126.7  | 78.5  | 88.1   | 90.7   | 96.6   | 92.3   | 142.7  | 125.0  | 95.8   |
| 190.6  | 144.9 | 175.2  | 202.5  | 172.4  | 183.2  | 252.0  | 272.1  | 204.2  |
| 258.1  | 146.5 | 177.5  | 204.5  | 165.4  | 181.4  | 287.0  | 299.6  | 165.1  |
| 481.2  | 321.5 | 331.2  | 352.3  | 372.4  | 357.2  | 433.6  | 433.5  | 327.7  |
| 62.1   | 42.0  | 47.7   | 43.8   | 42.5   | 37.0   | 58.1   | 70.8   | 61.5   |
| 251.7  | 173.2 | 192.3  | 217.5  | 192.6  | 191.1  | 232.0  | 322.5  | 246.2  |
| 20.8   | 22.5  | 28.0   | 27.3   | 27.5   | 24.5   | 28.2   | 33.9   | 22.6   |
| 2.4    | 3.0   | 1.4    | 3.1    | 1.7    | 0.7    | 3.8    | 1.5    | 1.2    |
| 95.8   | 52.1  | 84.0   | 73.2   | 66.1   | 62.0   | 78.2   | 101.4  | 70.6   |
| 451.3  | 292.4 | 317.1  | 331.1  | 348.6  | 365.1  | 439.1  | 604.8  | 416.7  |
| 409.2  | 238.5 | 190.3  | 233.7  | 310.9  | 247.4  | 301.5  | 392.3  | 589.0  |
| 34.2   | 31.5  | 37.5   | 32.1   | 34.4   | 43.3   | 47.0   | 44.3   | 35.1   |
| 1657.1 | 864.4 | 1004.1 | 1100.6 | 1243.8 | 1207.8 | 1475.7 | 2063.7 | 1310.0 |
| 1268.5 | 630.3 | 728.3  | 865.3  | 783.6  | 831.1  | 1133.1 | 1372.1 | 1185.4 |
| 1006.0 | 720.6 | 791.7  | 851.1  | 993.1  | 904.7  | 1252.4 | 1567.6 | 1044.6 |
| 0.1    | 0.1   | 0.1    | 0.1    | 0.2    | 1.3    | 0.2    | 0.1    | 0.1    |
| 835.4  | 420.7 | 562.9  | 508.7  | 538.9  | 616.1  | 765.7  | 897.7  | 654.7  |
| 107.7  | 50.1  | 46.8   | 73.5   | 64.9   | 64.4   | 72.5   | 86.1   | 74.6   |

|        |       |       |       |        |        |        |        |        |
|--------|-------|-------|-------|--------|--------|--------|--------|--------|
| 410.0  | 208.1 | 283.5 | 296.4 | 292.7  | 265.8  | 323.2  | 348.4  | 279.7  |
| 1.1    | 1.1   | 1.1   | 0.3   | 0.4    | 1.3    | 1.1    | 0.8    | 0.4    |
| 1.8    | 0.8   | 3.9   | 4.2   | 1.0    | 7.2    | 1.1    | 4.6    | 4.0    |
| 9.6    | 4.6   | 6.6   | 5.1   | 4.1    | 3.6    | 4.3    | 9.5    | 8.2    |
| 3.5    | 0.2   | 1.4   | 0.2   | 0.2    | 1.0    | 0.2    | 0.2    | 0.4    |
| 6.1    | 4.6   | 4.9   | 3.9   | 6.6    | 7.1    | 10.8   | 9.6    | 5.3    |
| 33.7   | 16.6  | 17.0  | 20.0  | 20.5   | 23.2   | 25.7   | 28.2   | 15.7   |
| 28.2   | 23.5  | 24.2  | 25.6  | 22.4   | 19.2   | 29.4   | 20.8   | 20.9   |
| 101.4  | 61.3  | 77.0  | 68.6  | 75.3   | 87.3   | 93.7   | 147.7  | 89.1   |
| 151.3  | 107.6 | 100.9 | 119.3 | 122.3  | 105.8  | 152.4  | 181.6  | 105.9  |
| 101.2  | 78.1  | 73.3  | 79.8  | 76.1   | 72.0   | 104.7  | 120.0  | 96.1   |
| 52.5   | 37.2  | 44.4  | 48.9  | 37.9   | 47.2   | 57.1   | 64.4   | 46.2   |
| 9.4    | 7.1   | 5.5   | 10.8  | 9.2    | 10.3   | 9.8    | 12.3   | 17.0   |
| 4.0    | 0.7   | 3.5   | 0.4   | 2.7    | 0.8    | 1.1    | 0.8    | 0.6    |
| 156.5  | 70.2  | 77.4  | 86.2  | 98.7   | 83.7   | 103.3  | 130.7  | 88.9   |
| 24.2   | 33.8  | 25.1  | 33.9  | 30.2   | 24.8   | 35.7   | 26.4   | 19.2   |
| 146.3  | 105.0 | 197.0 | 140.0 | 191.8  | 125.2  | 218.3  | 251.2  | 166.9  |
| 18.1   | 9.9   | 17.8  | 15.4  | 15.6   | 6.8    | 21.5   | 30.9   | 18.6   |
| 88.3   | 48.7  | 62.6  | 63.6  | 56.9   | 64.9   | 77.6   | 109.7  | 80.4   |
| 54.9   | 34.4  | 42.1  | 46.8  | 43.3   | 34.7   | 69.7   | 52.2   | 32.9   |
| 76.9   | 46.2  | 52.7  | 52.3  | 48.5   | 64.3   | 75.4   | 97.8   | 48.3   |
| 182.2  | 129.9 | 147.8 | 162.4 | 150.0  | 127.0  | 207.3  | 212.4  | 119.0  |
| 30.1   | 17.0  | 16.7  | 18.5  | 19.2   | 5.7    | 36.3   | 33.0   | 22.5   |
| 13.9   | 10.8  | 14.7  | 20.0  | 12.4   | 22.1   | 24.1   | 19.8   | 10.1   |
| 1073.6 | 823.8 | 776.0 | 874.5 | 995.3  | 932.0  | 1146.2 | 1434.9 | 1251.2 |
| 13.6   | 23.5  | 15.7  | 14.4  | 23.1   | 21.9   | 42.2   | 13.3   | 23.3   |
| 74.8   | 45.2  | 50.5  | 66.0  | 59.8   | 72.7   | 67.5   | 84.9   | 55.6   |
| 53.2   | 44.1  | 43.6  | 32.1  | 58.5   | 49.0   | 42.7   | 75.3   | 59.3   |
| 173.1  | 149.2 | 160.4 | 157.1 | 170.5  | 182.1  | 211.3  | 231.4  | 176.5  |
| 200.9  | 128.4 | 158.8 | 187.8 | 165.2  | 178.8  | 256.0  | 314.3  | 217.8  |
| 48.4   | 37.4  | 53.2  | 49.1  | 31.1   | 43.7   | 53.0   | 34.3   | 36.8   |
| 30.4   | 11.0  | 26.0  | 12.5  | 27.0   | 30.7   | 36.5   | 56.6   | 26.5   |
| 2.9    | 1.8   | 2.4   | 3.2   | 1.5    | 1.1    | 1.1    | 1.0    | 1.9    |
| 105.5  | 52.8  | 63.1  | 66.9  | 70.5   | 66.8   | 88.7   | 115.9  | 59.1   |
| 331.3  | 200.7 | 251.0 | 255.4 | 266.5  | 289.1  | 364.2  | 443.3  | 311.9  |
| 187.4  | 87.1  | 109.9 | 131.5 | 113.1  | 115.1  | 146.1  | 177.4  | 136.8  |
| 357.9  | 239.1 | 316.9 | 311.1 | 323.7  | 315.4  | 493.9  | 510.9  | 305.3  |
| 39.1   | 17.6  | 19.7  | 31.0  | 29.6   | 22.9   | 32.5   | 46.6   | 26.0   |
| 303.4  | 234.0 | 253.4 | 267.3 | 276.6  | 261.5  | 383.3  | 343.3  | 276.5  |
| 161.0  | 98.9  | 115.8 | 116.5 | 120.6  | 118.1  | 162.6  | 167.4  | 115.4  |
| 3.3    | 3.2   | 1.3   | 1.1   | 1.0    | 3.7    | 2.4    | 2.4    | 7.2    |
| 112.3  | 62.5  | 72.7  | 98.5  | 95.2   | 67.5   | 137.4  | 131.2  | 90.5   |
| 611.4  | 448.4 | 503.9 | 527.8 | 504.0  | 515.4  | 666.8  | 653.7  | 568.9  |
| 59.0   | 50.2  | 41.6  | 61.1  | 45.0   | 35.6   | 49.1   | 50.4   | 44.5   |
| 189.3  | 134.3 | 153.7 | 155.3 | 98.8   | 125.8  | 178.7  | 172.9  | 136.7  |
| 0.9    | 0.7   | 1.2   | 1.0   | 1.0    | 0.4    | 0.8    | 0.8    | 0.7    |
| 0.7    | 9.4   | 4.6   | 6.3   | 10.4   | 3.9    | 7.7    | 6.8    | 8.4    |
| 41.1   | 30.5  | 32.0  | 35.2  | 34.8   | 37.6   | 45.8   | 48.1   | 38.5   |
| 38.0   | 23.4  | 18.9  | 21.4  | 35.7   | 18.0   | 31.6   | 20.6   | 19.3   |
| 12.9   | 13.1  | 25.7  | 9.3   | 15.8   | 15.5   | 20.4   | 27.1   | 22.1   |
| 1173.5 | 719.1 | 946.5 | 983.7 | 1040.2 | 1053.0 | 1438.7 | 1484.5 | 932.3  |
| 228.1  | 146.6 | 156.8 | 174.8 | 192.2  | 177.4  | 229.9  | 290.7  | 178.2  |
| 6.6    | 6.0   | 13.3  | 7.8   | 9.7    | 8.2    | 12.5   | 11.5   | 10.7   |

|       |       |       |       |       |       |       |        |       |
|-------|-------|-------|-------|-------|-------|-------|--------|-------|
| 134.3 | 115.2 | 108.2 | 129.0 | 123.5 | 124.9 | 191.4 | 194.5  | 235.1 |
| 540.9 | 368.1 | 391.5 | 466.6 | 469.7 | 538.7 | 619.0 | 635.7  | 416.4 |
| 54.5  | 49.2  | 49.9  | 42.6  | 46.0  | 37.0  | 63.1  | 64.6   | 50.4  |
| 230.5 | 71.7  | 71.0  | 86.6  | 94.4  | 84.9  | 96.2  | 111.7  | 96.0  |
| 5.4   | 3.7   | 4.8   | 5.3   | 2.9   | 2.2   | 3.1   | 6.3    | 3.4   |
| 84.6  | 72.0  | 71.1  | 81.5  | 89.7  | 80.0  | 113.6 | 125.0  | 115.1 |
| 88.1  | 62.5  | 65.9  | 62.4  | 70.8  | 66.9  | 85.1  | 104.7  | 76.5  |
| 0.7   | 0.8   | 0.7   | 0.7   | 0.5   | 0.8   | 0.7   | 0.6    | 0.4   |
| 83.1  | 57.4  | 70.1  | 67.2  | 63.5  | 64.7  | 97.0  | 109.4  | 84.5  |
| 92.3  | 54.7  | 72.6  | 60.3  | 84.3  | 87.4  | 99.0  | 109.6  | 78.0  |
| 63.9  | 55.6  | 47.7  | 50.4  | 53.1  | 52.6  | 72.3  | 71.0   | 51.9  |
| 1.6   | 1.0   | 1.2   | 0.5   | 1.2   | 1.4   | 1.3   | 1.2    | 2.6   |
| 2.8   | 1.8   | 1.6   | 1.0   | 0.5   | 3.4   | 0.4   | 2.2    | 4.4   |
| 1.8   | 0.1   | 0.3   | 1.3   | 2.9   | 3.3   | 1.9   | 0.4    | 0.2   |
| 49.5  | 23.8  | 36.3  | 40.5  | 32.0  | 32.1  | 40.0  | 42.9   | 41.6  |
| 50.8  | 53.3  | 54.2  | 46.3  | 52.9  | 56.7  | 58.5  | 79.0   | 52.1  |
| 294.1 | 167.5 | 164.8 | 177.9 | 222.0 | 229.2 | 252.1 | 384.3  | 202.0 |
| 916.6 | 609.1 | 710.4 | 715.7 | 753.3 | 727.9 | 827.5 | 1044.8 | 670.2 |
| 8.3   | 17.3  | 16.2  | 15.7  | 21.5  | 4.7   | 10.2  | 9.4    | 23.1  |
| 331.7 | 254.7 | 284.2 | 307.3 | 325.1 | 289.7 | 383.5 | 465.7  | 290.0 |
| 68.5  | 365.9 | 333.4 | 390.9 | 420.2 | 409.7 | 539.0 | 673.1  | 533.6 |
| 14.1  | 12.9  | 3.2   | 13.6  | 12.1  | 9.9   | 13.1  | 15.8   | 12.4  |
| 1.4   | 3.6   | 0.6   | 2.9   | 0.4   | 0.8   | 0.2   | 1.6    | 0.6   |
| 1.7   | 0.9   | 0.9   | 0.8   | 0.6   | 1.9   | 1.2   | 1.6    | 0.6   |
| 11.5  | 7.1   | 3.3   | 7.3   | 5.9   | 9.3   | 10.5  | 2.9    | 10.1  |
| 131.1 | 76.1  | 86.5  | 98.4  | 96.5  | 96.4  | 127.6 | 160.1  | 113.9 |
| 8.9   | 5.8   | 7.2   | 7.8   | 6.1   | 8.6   | 9.8   | 16.5   | 10.9  |
| 120.1 | 78.8  | 77.7  | 95.1  | 67.2  | 51.4  | 109.3 | 93.4   | 78.6  |
| 68.1  | 35.7  | 47.3  | 47.0  | 47.9  | 41.1  | 57.5  | 85.0   | 33.4  |
| 93.1  | 74.9  | 73.6  | 84.5  | 100.6 | 83.6  | 113.1 | 155.0  | 91.4  |
| 19.4  | 18.7  | 16.6  | 17.8  | 23.7  | 15.2  | 22.6  | 39.5   | 23.0  |
| 1.1   | 3.9   | 6.8   | 18.8  | 2.1   | 8.6   | 9.0   | 2.7    | 2.4   |
| 90.8  | 65.1  | 83.2  | 102.9 | 88.7  | 75.7  | 103.4 | 143.0  | 87.5  |
| 97.5  | 56.4  | 78.5  | 64.5  | 78.5  | 37.8  | 67.9  | 67.4   | 83.1  |
| 480.0 | 282.9 | 318.6 | 314.0 | 314.6 | 323.7 | 409.0 | 440.5  | 460.0 |
| 133.8 | 98.2  | 125.9 | 109.4 | 145.6 | 149.2 | 178.1 | 190.2  | 121.7 |
| 227.7 | 162.9 | 192.9 | 193.1 | 171.2 | 186.7 | 265.4 | 314.4  | 225.2 |
| 9.5   | 16.0  | 9.8   | 17.4  | 12.1  | 14.6  | 17.0  | 18.9   | 20.4  |
| 16.1  | 22.6  | 14.9  | 15.6  | 8.6   | 12.5  | 25.0  | 16.4   | 15.7  |
| 164.6 | 81.7  | 99.4  | 116.4 | 94.1  | 90.9  | 133.6 | 130.9  | 99.5  |
| 10.2  | 4.8   | 4.2   | 2.8   | 4.8   | 3.9   | 8.5   | 8.6    | 5.6   |
| 141.7 | 77.2  | 88.6  | 91.0  | 109.6 | 85.4  | 163.8 | 173.4  | 121.9 |
| 101.2 | 38.5  | 45.3  | 44.2  | 43.6  | 35.9  | 45.1  | 75.3   | 40.5  |
| 184.6 | 172.6 | 155.4 | 159.5 | 188.3 | 196.6 | 229.3 | 268.5  | 144.8 |
| 75.4  | 43.1  | 49.0  | 57.9  | 51.6  | 44.4  | 78.1  | 75.8   | 40.8  |
| 20.1  | 28.4  | 20.4  | 24.7  | 29.3  | 25.8  | 27.1  | 36.9   | 25.0  |
| 256.7 | 154.6 | 163.1 | 176.3 | 217.4 | 181.4 | 298.7 | 388.7  | 234.9 |
| 311.6 | 158.2 | 195.9 | 203.7 | 210.0 | 204.4 | 347.5 | 372.6  | 220.8 |
| 592.0 | 403.9 | 347.0 | 421.8 | 523.0 | 419.6 | 677.5 | 873.9  | 639.3 |
| 134.1 | 77.7  | 124.6 | 92.9  | 158.7 | 127.1 | 158.6 | 188.1  | 87.1  |
| 146.7 | 67.3  | 65.3  | 85.6  | 87.8  | 97.5  | 110.7 | 164.3  | 81.5  |
| 109.1 | 49.2  | 49.8  | 53.0  | 65.7  | 52.3  | 82.0  | 108.2  | 66.8  |
| 70.0  | 48.9  | 51.3  | 46.9  | 50.3  | 57.3  | 77.2  | 95.4   | 69.9  |

|        |        |        |        |        |        |        |        |        |
|--------|--------|--------|--------|--------|--------|--------|--------|--------|
| 159.7  | 59.9   | 65.5   | 74.0   | 55.2   | 80.6   | 93.1   | 139.4  | 95.0   |
| 125.0  | 38.6   | 46.7   | 63.9   | 61.6   | 53.6   | 70.5   | 122.9  | 66.3   |
| 80.4   | 47.7   | 58.7   | 55.9   | 66.4   | 59.2   | 82.5   | 113.6  | 73.0   |
| 205.3  | 177.8  | 179.8  | 205.5  | 200.8  | 219.7  | 309.6  | 370.2  | 233.5  |
| 145.2  | 110.6  | 103.7  | 124.1  | 133.5  | 136.0  | 163.8  | 256.6  | 110.6  |
| 174.9  | 170.4  | 144.4  | 166.7  | 187.1  | 182.6  | 219.7  | 290.7  | 172.3  |
| 98.3   | 62.9   | 57.3   | 49.6   | 54.1   | 45.2   | 68.1   | 43.0   | 41.0   |
| 328.7  | 283.3  | 306.1  | 285.5  | 322.5  | 294.1  | 515.4  | 508.4  | 300.3  |
| 14.2   | 18.7   | 21.9   | 24.9   | 24.8   | 23.8   | 25.3   | 37.5   | 20.5   |
| 43.9   | 69.3   | 67.1   | 76.5   | 70.5   | 67.7   | 76.5   | 83.3   | 74.1   |
| 1.0    | 0.5    | 2.5    | 1.2    | 3.9    | 1.4    | 8.8    | 12.2   | 4.3    |
| 251.9  | 163.4  | 182.9  | 192.6  | 187.6  | 190.2  | 250.9  | 307.5  | 170.5  |
| 4.6    | 9.8    | 8.2    | 7.3    | 10.6   | 6.4    | 16.3   | 16.4   | 9.1    |
| 3.5    | 5.9    | 2.5    | 5.6    | 4.1    | 7.6    | 7.7    | 12.2   | 9.0    |
| 33.7   | 32.3   | 23.0   | 23.0   | 33.1   | 29.2   | 42.4   | 61.6   | 36.6   |
| 716.6  | 290.7  | 276.6  | 359.4  | 345.3  | 297.5  | 528.5  | 476.2  | 390.2  |
| 1.0    | 10.9   | 7.3    | 8.5    | 4.8    | 7.5    | 9.9    | 1.9    | 9.6    |
| 153.2  | 117.3  | 128.4  | 127.6  | 148.0  | 114.0  | 183.9  | 174.9  | 116.6  |
| 48.8   | 24.4   | 27.7   | 27.6   | 33.9   | 31.4   | 49.5   | 71.9   | 31.7   |
| 55.6   | 17.1   | 17.0   | 21.4   | 24.0   | 25.3   | 26.4   | 46.6   | 22.8   |
| 110.4  | 87.6   | 97.9   | 134.5  | 143.3  | 95.7   | 174.9  | 184.7  | 106.8  |
| 299.9  | 200.4  | 226.3  | 250.8  | 278.5  | 259.0  | 337.4  | 353.2  | 265.0  |
| 33.3   | 18.3   | 18.2   | 29.9   | 27.1   | 24.5   | 34.2   | 41.2   | 27.3   |
| 272.6  | 161.4  | 199.8  | 194.2  | 192.7  | 236.3  | 262.6  | 241.1  | 199.5  |
| 3.0    | 7.2    | 3.6    | 3.2    | 5.6    | 3.3    | 1.0    | 11.0   | 5.2    |
| 286.8  | 213.2  | 191.5  | 214.7  | 235.7  | 206.3  | 301.4  | 315.2  | 214.6  |
| 14.9   | 12.9   | 11.5   | 19.3   | 9.4    | 14.8   | 14.0   | 16.5   | 21.3   |
| 10.0   | 1.8    | 5.2    | 3.6    | 3.9    | 2.5    | 7.5    | 9.2    | 1.9    |
| 784.1  | 512.1  | 584.2  | 549.7  | 589.1  | 616.1  | 820.4  | 966.1  | 502.6  |
| 55.0   | 55.9   | 58.7   | 53.9   | 60.0   | 65.8   | 101.2  | 95.2   | 63.4   |
| 44.5   | 33.0   | 21.3   | 33.6   | 34.0   | 34.0   | 51.9   | 66.4   | 41.7   |
| 18.3   | 11.4   | 14.6   | 16.6   | 19.5   | 20.2   | 18.5   | 12.8   | 20.4   |
| 19.0   | 17.1   | 16.1   | 13.6   | 16.0   | 18.0   | 19.9   | 16.4   | 15.0   |
| 25.8   | 22.0   | 27.5   | 27.4   | 31.5   | 16.1   | 25.3   | 31.7   | 23.9   |
| 166.9  | 85.8   | 119.0  | 102.6  | 104.0  | 113.1  | 153.4  | 156.8  | 133.5  |
| 53.8   | 24.5   | 43.3   | 37.5   | 45.0   | 41.0   | 44.2   | 78.9   | 60.0   |
| 6.7    | 22.2   | 14.3   | 9.2    | 12.2   | 11.4   | 15.8   | 16.7   | 17.1   |
| 84.9   | 69.1   | 109.8  | 76.8   | 88.3   | 64.7   | 109.7  | 105.2  | 68.6   |
| 69.4   | 34.9   | 55.5   | 45.6   | 56.4   | 50.8   | 89.6   | 84.3   | 77.3   |
| 71.9   | 49.9   | 52.5   | 60.7   | 46.6   | 69.2   | 68.5   | 93.3   | 56.1   |
| 190.9  | 98.9   | 120.0  | 131.0  | 108.9  | 146.2  | 130.6  | 203.3  | 126.2  |
| 201.0  | 142.6  | 164.4  | 168.7  | 160.7  | 165.1  | 203.4  | 215.1  | 211.7  |
| 867.6  | 609.1  | 680.2  | 843.7  | 714.5  | 710.0  | 936.7  | 969.8  | 1001.7 |
| 219.7  | 161.1  | 158.7  | 204.4  | 195.9  | 166.2  | 253.0  | 314.7  | 165.1  |
| 72.0   | 67.8   | 56.3   | 48.2   | 65.1   | 68.2   | 93.5   | 115.8  | 59.9   |
| 80.1   | 55.2   | 62.2   | 56.2   | 60.0   | 57.3   | 85.2   | 100.2  | 54.3   |
| 35.0   | 26.3   | 33.6   | 33.6   | 25.9   | 29.5   | 39.7   | 36.3   | 29.6   |
| 41.6   | 36.8   | 39.4   | 43.5   | 44.5   | 40.3   | 44.7   | 46.8   | 40.8   |
| 294.4  | 200.2  | 211.0  | 215.6  | 242.3  | 216.6  | 351.1  | 282.6  | 282.0  |
| 4.8    | 3.5    | 6.0    | 10.7   | 22.7   | 2.8    | 12.4   | 7.8    | 15.8   |
| 1640.3 | 1247.3 | 1474.4 | 1515.3 | 1588.0 | 1613.1 | 1985.6 | 2004.8 | 1449.6 |
| 35.9   | 38.7   | 29.2   | 36.5   | 33.5   | 28.4   | 53.2   | 38.3   | 39.1   |
| 963.6  | 647.4  | 723.4  | 797.6  | 844.5  | 854.7  | 1145.6 | 1273.9 | 995.5  |

|       |       |       |       |       |       |       |       |       |
|-------|-------|-------|-------|-------|-------|-------|-------|-------|
| 243.5 | 167.5 | 177.7 | 212.4 | 200.6 | 203.7 | 295.0 | 316.1 | 198.0 |
| 256.5 | 181.0 | 229.9 | 220.8 | 231.4 | 235.8 | 300.1 | 314.1 | 183.7 |
| 109.7 | 71.5  | 75.0  | 81.6  | 93.6  | 84.9  | 113.1 | 135.9 | 88.3  |
| 209.2 | 140.5 | 160.7 | 179.4 | 183.4 | 173.0 | 240.2 | 252.4 | 152.9 |
| 523.9 | 469.8 | 566.7 | 554.2 | 621.0 | 497.5 | 856.6 | 749.5 | 504.4 |
| 94.2  | 139.4 | 112.5 | 148.1 | 124.3 | 102.5 | 170.5 | 136.5 | 141.1 |
| 108.4 | 60.7  | 70.2  | 56.8  | 66.9  | 60.2  | 76.0  | 71.7  | 69.8  |
| 112.9 | 37.7  | 42.4  | 37.3  | 42.0  | 45.7  | 57.0  | 86.6  | 62.5  |
| 85.0  | 22.8  | 19.9  | 17.8  | 27.8  | 29.5  | 48.4  | 57.2  | 39.4  |
| 19.6  | 9.9   | 12.1  | 17.3  | 11.9  | 15.4  | 21.8  | 30.5  | 15.8  |
| 151.0 | 85.6  | 91.1  | 101.1 | 152.6 | 125.1 | 195.0 | 219.0 | 211.3 |
| 216.6 | 178.1 | 195.3 | 190.9 | 200.3 | 215.0 | 281.9 | 334.4 | 185.0 |
| 38.2  | 27.5  | 33.4  | 31.3  | 39.2  | 32.4  | 39.6  | 56.2  | 24.5  |
| 240.2 | 175.9 | 199.2 | 204.6 | 222.3 | 206.7 | 285.7 | 281.4 | 195.0 |
| 111.5 | 68.9  | 63.3  | 71.5  | 65.6  | 63.0  | 98.4  | 151.3 | 75.8  |
| 49.3  | 35.5  | 33.5  | 38.4  | 55.8  | 39.4  | 59.0  | 74.0  | 52.5  |
| 17.1  | 7.7   | 16.8  | 19.3  | 15.0  | 12.5  | 20.4  | 12.1  | 15.5  |
| 32.7  | 33.5  | 28.6  | 35.6  | 34.3  | 30.3  | 40.3  | 52.1  | 37.5  |
| 55.8  | 32.8  | 41.7  | 40.0  | 44.0  | 48.3  | 54.1  | 83.4  | 39.2  |
| 8.4   | 10.7  | 9.0   | 8.2   | 10.8  | 10.7  | 12.2  | 15.8  | 19.4  |
| 3.9   | 3.6   | 1.0   | 3.8   | 1.3   | 6.8   | 0.9   | 8.4   | 3.4   |
| 241.5 | 118.0 | 171.7 | 155.9 | 154.6 | 189.7 | 217.6 | 237.4 | 171.6 |
| 214.4 | 104.8 | 109.6 | 109.8 | 132.7 | 140.3 | 171.3 | 230.7 | 178.1 |
| 27.3  | 14.5  | 15.2  | 14.2  | 9.5   | 12.0  | 15.3  | 22.4  | 11.7  |
| 22.2  | 17.9  | 22.3  | 34.3  | 16.5  | 20.3  | 23.1  | 34.8  | 24.3  |
| 34.3  | 11.1  | 31.9  | 30.0  | 22.7  | 32.2  | 40.1  | 47.6  | 29.0  |
| 37.7  | 26.7  | 34.3  | 37.9  | 29.7  | 32.3  | 50.6  | 51.0  | 35.8  |
| 6.0   | 6.2   | 6.0   | 5.2   | 4.3   | 1.2   | 6.6   | 5.3   | 9.4   |
| 2.6   | 2.8   | 2.0   | 0.2   | 2.5   | 2.2   | 2.4   | 1.2   | 2.2   |
| 145.6 | 91.3  | 121.4 | 108.3 | 146.3 | 121.7 | 155.8 | 150.7 | 120.1 |
| 90.7  | 49.6  | 43.6  | 59.8  | 44.9  | 53.8  | 90.6  | 84.6  | 70.9  |
| 159.5 | 111.8 | 140.1 | 119.9 | 141.5 | 118.9 | 185.5 | 214.6 | 120.8 |
| 66.6  | 36.2  | 62.5  | 52.3  | 54.4  | 53.4  | 66.7  | 89.1  | 59.7  |
| 45.5  | 16.3  | 18.9  | 15.0  | 21.9  | 17.5  | 26.7  | 36.2  | 24.1  |
| 30.4  | 12.7  | 22.2  | 19.2  | 20.3  | 24.9  | 27.0  | 31.5  | 20.3  |
| 1.3   | 2.7   | 1.4   | 1.5   | 1.2   | 9.2   | 3.0   | 7.2   | 1.3   |
| 2.0   | 0.9   | 1.0   | 1.0   | 0.8   | 0.5   | 4.5   | 1.4   | 1.4   |
| 108.3 | 52.5  | 62.4  | 72.1  | 60.8  | 64.5  | 88.4  | 118.0 | 64.3  |
| 36.1  | 17.9  | 19.0  | 19.7  | 26.3  | 19.4  | 28.1  | 53.5  | 27.0  |
| 55.2  | 37.2  | 28.1  | 35.9  | 38.6  | 33.2  | 52.0  | 62.1  | 40.2  |
| 343.1 | 217.3 | 193.3 | 209.4 | 251.6 | 213.1 | 327.1 | 307.1 | 192.8 |
| 93.9  | 75.4  | 84.9  | 75.9  | 88.8  | 89.6  | 126.3 | 155.1 | 89.4  |
| 82.0  | 90.1  | 75.8  | 91.3  | 102.9 | 96.0  | 126.3 | 224.6 | 126.3 |
| 167.9 | 147.8 | 171.9 | 180.3 | 180.9 | 208.7 | 250.8 | 401.6 | 169.5 |
| 109.8 | 81.0  | 73.2  | 93.9  | 94.7  | 99.0  | 114.1 | 159.5 | 84.4  |
| 4.2   | 6.8   | 1.9   | 2.3   | 12.6  | 1.6   | 1.9   | 9.9   | 2.7   |
| 4.1   | 1.4   | 9.8   | 4.2   | 4.3   | 1.0   | 0.5   | 5.2   | 6.5   |
| 60.5  | 37.4  | 62.8  | 51.4  | 56.0  | 58.8  | 85.5  | 101.9 | 52.2  |
| 70.7  | 41.0  | 51.2  | 45.8  | 43.3  | 69.3  | 76.7  | 90.1  | 56.3  |
| 191.7 | 115.8 | 151.6 | 141.7 | 151.2 | 152.1 | 186.3 | 247.8 | 155.3 |
| 69.8  | 37.2  | 51.1  | 50.1  | 43.4  | 47.6  | 61.5  | 64.1  | 41.2  |
| 7.4   | 3.7   | 5.0   | 5.3   | 0.8   | 1.3   | 4.8   | 3.0   | 6.9   |
| 9.0   | 10.6  | 13.3  | 11.9  | 7.6   | 9.5   | 9.8   | 15.7  | 8.8   |

|        |        |        |        |        |        |        |        |        |
|--------|--------|--------|--------|--------|--------|--------|--------|--------|
| 119.8  | 70.0   | 87.5   | 85.4   | 96.5   | 103.4  | 125.6  | 138.9  | 86.6   |
| 319.0  | 240.2  | 220.6  | 272.8  | 257.1  | 230.5  | 307.2  | 338.5  | 278.4  |
| 116.9  | 73.1   | 83.6   | 95.4   | 100.0  | 88.8   | 115.0  | 138.2  | 124.2  |
| 1.6    | 1.1    | 4.4    | 1.1    | 3.4    | 1.6    | 9.6    | 2.3    | 6.3    |
| 2346.4 | 1834.4 | 1924.2 | 2110.4 | 2143.9 | 2122.4 | 2620.1 | 2836.5 | 2212.3 |
| 30.6   | 18.4   | 16.3   | 25.2   | 21.6   | 22.9   | 26.6   | 33.7   | 27.0   |
| 37.8   | 36.9   | 31.5   | 35.2   | 46.6   | 42.1   | 67.9   | 77.1   | 46.2   |
| 4.5    | 4.8    | 11.2   | 13.4   | 10.4   | 13.1   | 1.9    | 6.6    | 2.5    |
| 75.3   | 54.4   | 42.6   | 56.9   | 53.9   | 49.6   | 83.2   | 129.6  | 102.7  |
| 83.1   | 50.8   | 57.6   | 66.4   | 67.2   | 60.3   | 91.2   | 121.8  | 76.0   |
| 499.0  | 237.9  | 295.2  | 274.4  | 336.4  | 349.4  | 437.0  | 689.2  | 287.9  |
| 13.1   | 16.1   | 9.8    | 16.1   | 14.7   | 18.5   | 24.6   | 27.0   | 11.3   |
| 16.9   | 17.6   | 25.4   | 26.0   | 28.8   | 23.6   | 28.9   | 40.4   | 23.4   |
| 133.9  | 87.8   | 103.2  | 117.7  | 113.1  | 106.8  | 127.5  | 136.6  | 84.1   |
| 75.9   | 58.1   | 61.1   | 67.1   | 99.4   | 70.7   | 87.3   | 113.6  | 71.5   |
| 4.4    | 5.4    | 3.1    | 3.1    | 3.9    | 6.8    | 9.0    | 7.0    | 6.4    |
| 0.7    | 4.2    | 0.4    | 0.5    | 0.3    | 2.5    | 1.9    | 1.1    | 1.1    |
| 5.2    | 1.0    | 0.9    | 3.8    | 6.8    | 6.9    | 8.3    | 7.4    | 4.9    |
| 0.4    | 1.2    | 2.3    | 0.9    | 0.4    | 0.6    | 1.0    | 1.7    | 0.4    |
| 0.3    | 1.7    | 4.9    | 1.7    | 1.4    | 0.2    | 3.9    | 3.4    | 0.4    |
| 1.0    | 6.2    | 15.0   | 9.2    | 12.2   | 1.3    | 11.3   | 2.5    | 6.3    |
| 278.8  | 163.9  | 189.4  | 202.7  | 245.7  | 242.7  | 371.2  | 410.7  | 344.3  |
| 122.6  | 58.4   | 91.4   | 95.0   | 72.0   | 68.5   | 117.3  | 134.2  | 104.1  |
| 72.0   | 59.2   | 33.2   | 42.0   | 46.9   | 38.6   | 61.1   | 62.9   | 51.0   |
| 36.8   | 18.9   | 14.4   | 17.1   | 15.0   | 13.1   | 25.1   | 29.6   | 14.0   |
| 313.4  | 218.8  | 234.2  | 227.6  | 266.8  | 245.6  | 368.9  | 383.3  | 239.7  |
| 157.5  | 119.9  | 127.9  | 127.9  | 141.7  | 119.0  | 182.1  | 158.0  | 118.7  |
| 119.8  | 77.0   | 90.8   | 109.2  | 110.7  | 93.5   | 104.0  | 150.5  | 83.3   |
| 405.3  | 231.3  | 228.9  | 276.0  | 276.5  | 287.0  | 345.6  | 556.0  | 463.7  |
| 3.4    | 2.5    | 3.8    | 1.3    | 6.6    | 3.8    | 5.4    | 5.2    | 3.7    |
| 182.6  | 123.5  | 173.3  | 156.6  | 197.8  | 181.0  | 212.2  | 234.7  | 154.4  |
| 145.0  | 135.1  | 167.7  | 145.6  | 140.2  | 161.9  | 161.8  | 166.9  | 107.2  |
| 111.3  | 88.2   | 92.5   | 95.3   | 99.0   | 104.0  | 111.4  | 151.8  | 104.2  |
| 528.7  | 332.8  | 436.8  | 512.5  | 448.4  | 485.8  | 518.7  | 646.7  | 637.5  |
| 65.9   | 73.1   | 97.5   | 103.2  | 99.2   | 92.7   | 131.2  | 116.7  | 100.2  |
| 195.9  | 110.9  | 104.0  | 157.2  | 147.5  | 138.0  | 200.5  | 194.1  | 171.4  |
| 87.9   | 46.2   | 57.8   | 59.7   | 41.6   | 57.7   | 64.1   | 66.6   | 52.8   |
| 77.7   | 47.1   | 43.1   | 49.7   | 42.6   | 49.3   | 67.3   | 75.7   | 48.3   |
| 41.8   | 37.2   | 38.8   | 24.9   | 35.4   | 40.4   | 62.9   | 81.3   | 43.5   |
| 8.8    | 5.8    | 3.7    | 5.4    | 5.7    | 7.9    | 6.8    | 11.9   | 8.5    |
| 2.7    | 3.7    | 4.3    | 2.9    | 3.6    | 2.3    | 6.0    | 8.1    | 7.2    |
| 4.9    | 5.3    | 3.5    | 5.1    | 1.5    | 7.2    | 6.7    | 2.3    | 3.2    |
| 2.7    | 3.3    | 0.9    | 0.6    | 0.5    | 0.4    | 0.4    | 0.6    | 1.5    |
| 4.9    | 2.0    | 2.2    | 2.1    | 0.9    | 2.8    | 2.1    | 3.4    | 2.1    |
| 100.5  | 72.9   | 78.1   | 73.7   | 70.1   | 68.9   | 111.5  | 122.6  | 84.3   |
| 557.1  | 307.6  | 374.4  | 410.7  | 424.4  | 483.0  | 686.5  | 840.2  | 605.5  |
| 91.8   | 48.6   | 68.4   | 65.7   | 70.8   | 69.5   | 79.3   | 111.3  | 68.6   |
| 50.1   | 52.3   | 59.8   | 54.6   | 79.1   | 48.9   | 91.8   | 105.0  | 52.2   |
| 25.0   | 24.0   | 12.0   | 21.4   | 22.3   | 17.6   | 24.7   | 34.3   | 29.1   |
| 0.4    | 0.4    | 0.3    | 4.7    | 1.8    | 0.6    | 3.6    | 7.3    | 2.5    |
| 11.9   | 12.1   | 11.9   | 14.6   | 6.3    | 13.1   | 13.8   | 16.5   | 5.6    |
| 99.8   | 50.0   | 46.8   | 70.3   | 53.4   | 57.5   | 71.1   | 96.0   | 67.6   |
| 317.0  | 228.1  | 278.6  | 248.4  | 308.4  | 277.8  | 347.3  | 384.5  | 321.0  |

|        |        |        |        |        |        |        |        |        |
|--------|--------|--------|--------|--------|--------|--------|--------|--------|
| 1538.9 | 1347.2 | 1378.7 | 1400.6 | 1445.6 | 1393.2 | 1799.1 | 1970.2 | 1281.5 |
| 16.0   | 5.2    | 11.6   | 12.3   | 9.3    | 4.4    | 14.4   | 20.3   | 15.3   |
| 4.4    | 4.0    | 11.9   | 6.8    | 1.0    | 7.2    | 15.6   | 16.8   | 12.8   |
| 13.4   | 7.2    | 11.4   | 12.3   | 3.1    | 5.5    | 15.1   | 16.1   | 14.3   |
| 105.4  | 57.5   | 61.5   | 85.4   | 83.2   | 87.2   | 85.2   | 98.3   | 91.9   |
| 66.3   | 44.2   | 49.0   | 48.2   | 46.8   | 44.6   | 65.3   | 72.4   | 52.9   |
| 459.6  | 551.0  | 459.5  | 534.5  | 646.9  | 531.5  | 879.9  | 909.6  | 784.2  |
| 352.2  | 214.0  | 249.6  | 283.7  | 301.4  | 306.1  | 522.3  | 461.4  | 333.4  |
| 171.5  | 172.3  | 186.3  | 165.5  | 183.2  | 186.4  | 232.4  | 319.3  | 225.5  |
| 26.9   | 21.5   | 24.0   | 24.7   | 19.8   | 17.6   | 27.5   | 35.4   | 23.2   |
| 314.5  | 286.4  | 281.0  | 332.0  | 306.3  | 284.6  | 397.4  | 410.2  | 307.5  |
| 13.5   | 14.6   | 12.7   | 6.5    | 8.0    | 10.4   | 17.6   | 19.0   | 10.7   |
| 77.4   | 63.2   | 72.3   | 64.7   | 65.6   | 68.3   | 83.9   | 104.4  | 63.9   |
| 9.9    | 2.0    | 1.5    | 4.9    | 3.4    | 5.9    | 8.7    | 11.3   | 6.9    |
| 331.6  | 146.6  | 162.4  | 149.7  | 178.2  | 156.3  | 211.3  | 234.4  | 135.5  |
| 188.8  | 124.4  | 150.0  | 128.3  | 162.0  | 157.6  | 202.5  | 192.9  | 136.9  |
| 15.8   | 7.1    | 8.7    | 6.4    | 8.5    | 8.6    | 14.0   | 16.7   | 14.0   |
| 131.2  | 90.2   | 115.4  | 125.7  | 116.5  | 117.1  | 158.0  | 163.0  | 133.2  |
| 51.0   | 33.6   | 35.5   | 21.8   | 39.2   | 37.6   | 58.9   | 61.7   | 42.1   |
| 77.1   | 67.1   | 72.9   | 75.1   | 69.3   | 77.7   | 95.0   | 118.2  | 97.1   |
| 302.2  | 226.1  | 264.2  | 276.9  | 331.5  | 266.0  | 390.2  | 374.6  | 323.8  |
| 57.9   | 23.6   | 35.4   | 40.2   | 38.1   | 47.0   | 59.8   | 63.4   | 35.2   |
| 150.3  | 104.8  | 114.6  | 109.7  | 126.7  | 100.4  | 157.4  | 193.5  | 140.5  |
| 104.8  | 84.7   | 79.1   | 88.2   | 87.0   | 80.2   | 104.2  | 107.8  | 85.5   |
| 166.5  | 101.3  | 117.7  | 128.3  | 118.2  | 110.3  | 187.3  | 218.6  | 174.5  |
| 1.1    | 5.1    | 1.9    | 5.0    | 2.9    | 0.9    | 1.4    | 6.0    | 1.8    |
| 6.0    | 8.9    | 7.5    | 3.6    | 12.2   | 5.5    | 9.9    | 11.2   | 9.8    |
| 75.4   | 65.9   | 69.2   | 77.0   | 52.6   | 69.7   | 108.9  | 129.8  | 60.7   |
| 62.7   | 49.7   | 50.9   | 45.1   | 46.8   | 46.2   | 75.4   | 73.1   | 69.6   |
| 72.0   | 45.4   | 48.2   | 45.7   | 61.3   | 51.6   | 66.0   | 94.1   | 73.6   |
| 0.7    | 1.3    | 1.5    | 2.8    | 1.2    | 1.1    | 1.2    | 1.4    | 1.1    |
| 15.4   | 9.4    | 5.6    | 15.4   | 13.8   | 7.4    | 14.4   | 12.7   | 26.2   |
| 96.2   | 43.8   | 47.5   | 57.4   | 59.7   | 53.0   | 87.7   | 97.0   | 72.2   |
| 237.7  | 116.6  | 126.5  | 138.4  | 146.3  | 144.6  | 188.1  | 209.7  | 179.5  |
| 86.5   | 85.1   | 93.5   | 106.1  | 90.0   | 73.7   | 121.4  | 112.6  | 92.4   |
| 46.4   | 49.8   | 49.4   | 48.0   | 50.4   | 45.6   | 53.6   | 51.3   | 44.5   |
| 25.1   | 17.0   | 20.8   | 24.4   | 17.8   | 13.5   | 31.9   | 25.4   | 27.1   |
| 252.8  | 121.5  | 135.3  | 123.1  | 179.3  | 162.4  | 238.1  | 279.7  | 159.4  |
| 899.6  | 621.2  | 836.0  | 715.0  | 810.3  | 858.1  | 976.4  | 990.2  | 704.5  |
| 1206.7 | 713.7  | 832.7  | 956.0  | 996.5  | 963.3  | 1307.8 | 1297.0 | 1033.7 |
| 185.2  | 109.3  | 116.0  | 124.3  | 117.4  | 127.3  | 172.2  | 196.9  | 132.9  |
| 64.8   | 41.7   | 38.7   | 47.8   | 52.2   | 51.8   | 79.3   | 88.4   | 89.1   |
| 760.6  | 351.1  | 381.5  | 344.8  | 409.0  | 409.6  | 475.9  | 495.3  | 380.4  |
| 956.0  | 1026.4 | 1042.2 | 1107.4 | 1113.2 | 1082.0 | 1481.6 | 1761.2 | 1216.1 |
| 459.9  | 544.0  | 439.2  | 518.5  | 557.6  | 471.9  | 713.0  | 799.1  | 533.3  |
| 206.0  | 274.8  | 237.3  | 322.0  | 313.3  | 237.0  | 421.5  | 391.5  | 296.8  |
| 13.2   | 14.4   | 19.7   | 17.9   | 20.1   | 15.5   | 21.2   | 27.8   | 24.4   |
| 48.0   | 22.5   | 30.4   | 37.8   | 31.0   | 44.3   | 44.6   | 63.7   | 34.1   |
| 0.1    | 0.2    | 2.8    | 1.9    | 1.5    | 0.3    | 3.1    | 1.1    | 0.1    |
| 1.6    | 2.7    | 1.8    | 1.5    | 2.8    | 4.4    | 3.5    | 3.5    | 1.7    |
| 9.2    | 3.7    | 6.5    | 9.5    | 5.5    | 6.7    | 5.0    | 11.1   | 2.7    |
| 352.0  | 274.9  | 301.4  | 267.7  | 327.7  | 307.2  | 374.4  | 393.7  | 339.9  |
| 42.9   | 41.7   | 57.0   | 55.9   | 46.8   | 44.1   | 75.5   | 65.2   | 61.7   |

|        |        |        |        |        |        |        |        |        |
|--------|--------|--------|--------|--------|--------|--------|--------|--------|
| 10.4   | 7.4    | 7.4    | 7.4    | 6.1    | 6.9    | 1.2    | 9.0    | 5.4    |
| 109.3  | 127.9  | 122.9  | 136.8  | 106.2  | 88.8   | 144.5  | 164.4  | 163.4  |
| 638.2  | 307.1  | 367.0  | 384.0  | 356.4  | 382.6  | 469.2  | 535.1  | 350.9  |
| 141.2  | 105.4  | 107.3  | 113.9  | 119.9  | 110.2  | 162.9  | 192.7  | 142.8  |
| 6.9    | 7.0    | 7.5    | 5.6    | 6.3    | 3.7    | 6.4    | 4.2    | 3.6    |
| 8.4    | 31.2   | 11.8   | 21.0   | 3.1    | 28.1   | 20.1   | 32.8   | 20.5   |
| 172.8  | 118.4  | 137.1  | 143.7  | 137.9  | 144.7  | 170.2  | 186.6  | 134.4  |
| 129.5  | 115.6  | 133.5  | 117.6  | 135.8  | 143.3  | 128.2  | 122.3  | 118.6  |
| 8.5    | 4.1    | 10.0   | 7.7    | 10.5   | 6.3    | 6.0    | 9.9    | 9.3    |
| 3.5    | 4.7    | 8.2    | 6.3    | 4.2    | 4.8    | 7.1    | 7.0    | 6.6    |
| 55.7   | 52.8   | 64.3   | 57.7   | 53.7   | 58.4   | 80.4   | 92.7   | 63.1   |
| 14.6   | 16.0   | 14.3   | 14.6   | 10.9   | 13.4   | 18.0   | 20.7   | 11.0   |
| 37.0   | 21.1   | 21.5   | 29.9   | 25.6   | 21.9   | 36.4   | 51.3   | 42.5   |
| 46.1   | 33.6   | 38.0   | 36.5   | 40.6   | 33.0   | 42.6   | 41.9   | 30.0   |
| 0.5    | 3.1    | 0.4    | 1.0    | 0.9    | 1.5    | 1.2    | 1.4    | 1.1    |
| 2.8    | 2.4    | 2.9    | 0.5    | 0.5    | 0.3    | 2.1    | 0.7    | 1.8    |
| 125.7  | 49.8   | 54.1   | 84.4   | 72.2   | 61.2   | 93.1   | 107.5  | 73.8   |
| 1.6    | 1.4    | 1.1    | 0.9    | 0.8    | 0.9    | 0.9    | 1.0    | 2.1    |
| 197.1  | 233.2  | 160.3  | 243.9  | 235.6  | 153.2  | 328.6  | 256.5  | 205.3  |
| 126.4  | 159.1  | 105.4  | 144.1  | 152.8  | 105.5  | 172.7  | 140.8  | 152.4  |
| 109.7  | 77.3   | 114.4  | 122.9  | 84.7   | 98.6   | 107.7  | 151.4  | 66.9   |
| 97.6   | 76.8   | 79.0   | 72.0   | 86.9   | 80.3   | 102.8  | 89.3   | 81.1   |
| 26.9   | 19.3   | 16.3   | 20.1   | 22.5   | 17.1   | 15.3   | 33.1   | 19.3   |
| 62.3   | 46.2   | 42.4   | 47.2   | 50.2   | 64.9   | 82.0   | 86.0   | 59.4   |
| 38.3   | 21.7   | 31.9   | 39.3   | 39.5   | 34.8   | 44.3   | 57.1   | 32.8   |
| 198.6  | 121.3  | 149.0  | 151.1  | 157.2  | 179.4  | 238.8  | 274.2  | 133.1  |
| 128.1  | 81.9   | 70.1   | 77.7   | 80.4   | 82.4   | 103.8  | 117.8  | 102.0  |
| 83.3   | 65.3   | 74.3   | 84.1   | 86.7   | 86.4   | 121.3  | 171.5  | 85.1   |
| 1533.7 | 1088.2 | 1357.3 | 1374.7 | 1454.7 | 1307.5 | 1687.4 | 1628.6 | 1242.3 |
| 230.4  | 96.7   | 86.4   | 105.9  | 93.3   | 105.7  | 119.9  | 201.3  | 112.0  |
| 40.8   | 37.5   | 40.7   | 33.7   | 44.0   | 43.3   | 60.4   | 61.7   | 42.2   |
| 42.2   | 30.8   | 35.0   | 37.1   | 26.9   | 25.0   | 41.8   | 38.7   | 40.3   |
| 0.9    | 0.2    | 0.8    | 0.4    | 1.9    | 2.1    | 2.8    | 0.6    | 1.5    |
| 5.4    | 0.5    | 0.9    | 3.2    | 3.7    | 3.9    | 0.8    | 5.2    | 0.4    |
| 539.1  | 315.8  | 368.0  | 366.6  | 388.5  | 401.9  | 452.3  | 583.9  | 401.7  |
| 272.0  | 51.4   | 81.2   | 64.2   | 79.9   | 112.3  | 91.0   | 211.6  | 123.4  |
| 109.3  | 63.2   | 56.7   | 60.5   | 63.4   | 52.4   | 81.7   | 66.8   | 69.0   |
| 162.9  | 95.0   | 89.2   | 74.8   | 84.8   | 62.3   | 116.0  | 110.7  | 103.0  |
| 50.0   | 26.9   | 39.6   | 43.8   | 31.4   | 42.2   | 45.9   | 55.9   | 40.1   |
| 737.7  | 344.5  | 314.1  | 444.6  | 438.9  | 385.8  | 550.3  | 561.8  | 342.2  |
| 32.1   | 16.4   | 22.1   | 29.8   | 28.0   | 23.8   | 27.5   | 52.5   | 21.9   |
| 14.9   | 8.2    | 9.3    | 14.6   | 3.8    | 4.7    | 5.4    | 5.7    | 6.7    |
| 102.6  | 97.5   | 78.6   | 91.6   | 105.7  | 94.4   | 112.9  | 144.6  | 145.6  |
| 15.1   | 6.0    | 5.3    | 6.0    | 9.5    | 5.6    | 7.4    | 6.1    | 12.4   |
| 58.2   | 51.8   | 67.9   | 58.4   | 62.3   | 51.2   | 70.1   | 82.4   | 48.4   |
| 18.2   | 10.2   | 8.5    | 3.8    | 6.7    | 3.0    | 4.7    | 3.6    | 4.1    |
| 159.1  | 71.7   | 90.0   | 93.9   | 104.0  | 112.6  | 146.5  | 187.0  | 129.0  |
| 147.9  | 107.0  | 107.9  | 119.0  | 119.4  | 127.6  | 134.3  | 220.6  | 134.6  |
| 306.7  | 207.8  | 233.2  | 239.1  | 242.1  | 239.9  | 295.9  | 309.3  | 212.8  |
| 66.5   | 43.2   | 50.7   | 61.6   | 66.9   | 58.4   | 88.3   | 84.4   | 71.4   |
| 11.6   | 3.9    | 6.0    | 6.7    | 0.9    | 3.6    | 7.6    | 10.3   | 7.3    |
| 107.3  | 69.6   | 77.7   | 88.0   | 95.3   | 82.8   | 89.9   | 126.5  | 72.8   |
| 133.0  | 70.5   | 85.0   | 88.0   | 91.1   | 81.3   | 123.9  | 125.8  | 95.6   |



|       |       |       |       |       |       |       |        |       |
|-------|-------|-------|-------|-------|-------|-------|--------|-------|
| 3.4   | 5.7   | 1.1   | 3.2   | 5.6   | 8.5   | 11.5  | 7.4    | 5.6   |
| 188.4 | 61.5  | 73.5  | 71.0  | 74.5  | 78.8  | 94.7  | 132.2  | 71.3  |
| 86.8  | 23.7  | 37.8  | 36.0  | 35.6  | 43.5  | 46.6  | 60.7   | 40.2  |
| 144.7 | 107.6 | 102.3 | 135.1 | 147.7 | 112.7 | 177.7 | 167.5  | 150.2 |
| 41.4  | 30.6  | 28.4  | 34.8  | 25.1  | 37.4  | 39.0  | 33.4   | 39.4  |
| 110.5 | 93.0  | 93.2  | 104.9 | 108.2 | 100.4 | 134.5 | 142.4  | 100.6 |
| 133.7 | 106.2 | 118.2 | 141.2 | 129.7 | 140.0 | 178.9 | 191.9  | 142.0 |
| 554.8 | 495.6 | 556.0 | 616.2 | 577.1 | 587.3 | 760.8 | 722.6  | 660.5 |
| 145.8 | 95.3  | 112.5 | 117.9 | 124.7 | 124.0 | 154.3 | 168.7  | 135.2 |
| 97.9  | 41.5  | 43.0  | 58.9  | 57.3  | 54.3  | 67.6  | 105.0  | 57.9  |
| 31.7  | 14.9  | 20.9  | 18.2  | 19.9  | 24.6  | 26.3  | 41.8   | 22.9  |
| 129.0 | 97.3  | 95.7  | 111.3 | 110.1 | 117.2 | 164.4 | 165.7  | 130.3 |
| 17.1  | 15.6  | 19.3  | 16.1  | 17.3  | 18.9  | 33.2  | 34.2   | 21.4  |
| 39.1  | 32.0  | 40.9  | 48.6  | 47.5  | 50.7  | 69.8  | 79.4   | 57.6  |
| 43.3  | 29.3  | 43.0  | 51.4  | 46.5  | 51.2  | 64.4  | 70.2   | 47.4  |
| 58.9  | 38.6  | 49.5  | 41.5  | 42.4  | 48.9  | 55.6  | 57.0   | 54.2  |
| 102.6 | 57.5  | 61.6  | 71.8  | 89.8  | 80.8  | 97.5  | 86.0   | 67.4  |
| 2.1   | 3.8   | 3.7   | 7.7   | 8.1   | 9.6   | 8.8   | 19.8   | 8.8   |
| 20.2  | 19.7  | 18.6  | 12.7  | 22.6  | 23.4  | 17.2  | 22.4   | 24.8  |
| 85.2  | 63.9  | 86.0  | 62.2  | 76.5  | 64.5  | 92.9  | 142.2  | 82.9  |
| 73.8  | 63.1  | 50.1  | 65.2  | 83.1  | 68.6  | 116.2 | 163.8  | 121.0 |
| 648.1 | 511.9 | 527.0 | 509.3 | 636.6 | 542.0 | 858.0 | 953.0  | 576.2 |
| 183.2 | 150.7 | 171.6 | 196.7 | 181.6 | 182.5 | 231.2 | 249.6  | 198.5 |
| 300.4 | 196.7 | 252.6 | 255.7 | 226.5 | 252.2 | 363.9 | 346.8  | 335.8 |
| 1.1   | 1.5   | 3.3   | 0.7   | 1.1   | 1.8   | 2.3   | 2.8    | 1.2   |
| 0.6   | 2.4   | 1.0   | 0.8   | 0.9   | 0.7   | 1.8   | 1.0    | 1.7   |
| 235.7 | 232.9 | 239.7 | 260.0 | 306.5 | 277.5 | 352.6 | 427.4  | 279.7 |
| 140.4 | 73.0  | 92.0  | 90.1  | 93.2  | 103.7 | 126.5 | 147.4  | 98.2  |
| 8.4   | 1.0   | 8.2   | 3.2   | 0.9   | 4.9   | 5.8   | 1.7    | 12.9  |
| 40.1  | 28.1  | 41.6  | 32.7  | 40.7  | 33.1  | 50.3  | 55.0   | 40.5  |
| 1.2   | 1.3   | 0.5   | 0.3   | 0.6   | 0.5   | 3.1   | 1.0    | 0.7   |
| 6.0   | 7.7   | 5.3   | 4.0   | 8.4   | 9.4   | 9.6   | 22.8   | 7.0   |
| 25.0  | 9.5   | 19.5  | 14.2  | 19.4  | 15.2  | 20.0  | 31.2   | 19.8  |
| 921.0 | 535.0 | 588.9 | 667.9 | 693.2 | 672.0 | 903.5 | 1008.3 | 573.8 |
| 24.0  | 6.4   | 18.6  | 22.1  | 19.7  | 17.2  | 20.1  | 22.2   | 29.5  |
| 86.3  | 56.8  | 82.9  | 90.1  | 80.0  | 86.4  | 78.5  | 80.6   | 57.6  |
| 215.8 | 110.7 | 133.9 | 147.9 | 144.2 | 138.4 | 221.6 | 213.8  | 195.7 |
| 126.1 | 56.6  | 85.9  | 77.9  | 88.1  | 87.0  | 116.0 | 146.3  | 87.6  |
| 71.7  | 59.7  | 51.6  | 67.1  | 53.8  | 52.6  | 80.6  | 101.5  | 60.2  |
| 103.6 | 70.1  | 86.0  | 73.3  | 93.6  | 93.8  | 115.8 | 171.4  | 109.0 |
| 17.6  | 21.6  | 18.7  | 18.4  | 25.6  | 17.0  | 31.3  | 46.3   | 34.1  |
| 39.7  | 30.1  | 28.0  | 36.9  | 38.0  | 36.7  | 40.8  | 58.7   | 35.8  |
| 78.4  | 54.1  | 55.7  | 62.0  | 62.6  | 65.6  | 86.8  | 107.2  | 114.6 |
| 91.4  | 59.4  | 88.2  | 86.2  | 66.5  | 65.6  | 103.6 | 111.0  | 62.6  |
| 329.6 | 113.4 | 152.0 | 141.3 | 157.6 | 154.4 | 198.9 | 216.4  | 120.2 |
| 64.5  | 47.2  | 26.8  | 46.4  | 56.3  | 46.6  | 47.2  | 66.8   | 47.5  |
| 110.6 | 51.6  | 62.9  | 80.0  | 87.1  | 76.2  | 86.2  | 119.3  | 73.2  |
| 176.0 | 118.6 | 109.1 | 165.6 | 151.5 | 135.2 | 169.5 | 222.3  | 156.0 |
| 26.6  | 4.5   | 12.3  | 8.9   | 5.8   | 4.6   | 25.2  | 17.1   | 14.2  |
| 120.0 | 88.7  | 96.2  | 108.6 | 89.5  | 96.5  | 154.8 | 154.7  | 123.3 |
| 83.3  | 65.0  | 80.2  | 79.4  | 95.3  | 90.4  | 124.5 | 154.2  | 107.9 |
| 338.2 | 242.4 | 253.6 | 273.7 | 296.0 | 325.6 | 395.4 | 526.6  | 437.4 |
| 1.3   | 3.9   | 3.0   | 4.8   | 4.7   | 4.5   | 3.5   | 10.0   | 5.7   |

|       |       |       |       |       |       |        |        |       |
|-------|-------|-------|-------|-------|-------|--------|--------|-------|
| 8.1   | 9.3   | 10.6  | 9.4   | 13.5  | 7.0   | 10.4   | 14.4   | 12.1  |
| 433.2 | 270.8 | 299.5 | 371.7 | 361.8 | 359.4 | 462.2  | 552.1  | 333.5 |
| 540.2 | 300.9 | 337.4 | 438.3 | 362.4 | 455.9 | 645.4  | 636.7  | 472.7 |
| 3.5   | 6.7   | 2.3   | 3.5   | 5.1   | 0.7   | 0.8    | 8.4    | 7.4   |
| 40.2  | 33.2  | 46.3  | 32.0  | 33.4  | 40.1  | 50.2   | 66.1   | 54.2  |
| 1.4   | 10.8  | 3.2   | 2.2   | 1.8   | 7.9   | 2.3    | 2.8    | 1.7   |
| 171.5 | 136.9 | 129.6 | 136.5 | 158.8 | 133.8 | 204.2  | 200.9  | 134.8 |
| 15.2  | 16.1  | 14.6  | 6.3   | 13.1  | 11.8  | 13.3   | 20.8   | 7.8   |
| 13.9  | 3.2   | 10.3  | 11.0  | 8.4   | 10.3  | 13.2   | 22.3   | 10.2  |
| 36.3  | 29.0  | 20.6  | 24.5  | 25.7  | 20.5  | 42.2   | 47.0   | 28.7  |
| 132.5 | 90.1  | 93.9  | 102.7 | 83.5  | 90.9  | 128.7  | 131.1  | 96.8  |
| 167.7 | 95.7  | 135.8 | 117.0 | 131.7 | 101.8 | 156.0  | 144.4  | 104.5 |
| 360.6 | 216.8 | 310.6 | 287.8 | 279.2 | 308.5 | 365.6  | 396.5  | 280.2 |
| 2.0   | 7.0   | 1.1   | 6.9   | 5.4   | 5.2   | 9.5    | 9.3    | 5.0   |
| 550.7 | 326.6 | 427.4 | 396.7 | 430.0 | 407.0 | 559.4  | 499.3  | 371.6 |
| 251.6 | 109.9 | 161.9 | 172.1 | 151.4 | 156.6 | 252.4  | 234.4  | 172.5 |
| 69.9  | 45.6  | 46.8  | 59.0  | 63.4  | 53.7  | 80.0   | 76.7   | 63.7  |
| 18.9  | 16.1  | 15.7  | 13.4  | 13.9  | 16.5  | 19.1   | 21.5   | 23.0  |
| 113.0 | 92.6  | 96.0  | 106.6 | 91.7  | 87.7  | 136.9  | 160.4  | 105.3 |
| 15.0  | 14.5  | 10.8  | 12.5  | 14.5  | 12.0  | 8.8    | 20.1   | 15.7  |
| 31.2  | 18.3  | 18.7  | 17.1  | 14.4  | 21.5  | 20.2   | 27.3   | 21.1  |
| 1.3   | 1.0   | 1.7   | 1.4   | 1.5   | 5.0   | 1.4    | 2.4    | 3.1   |
| 0.8   | 4.4   | 2.1   | 0.8   | 0.4   | 0.9   | 9.5    | 8.7    | 0.8   |
| 2.2   | 3.5   | 16.8  | 4.4   | 9.3   | 10.0  | 1.5    | 3.2    | 9.5   |
| 32.3  | 13.2  | 16.3  | 18.0  | 20.9  | 19.1  | 19.3   | 36.7   | 16.7  |
| 10.1  | 4.8   | 11.0  | 1.2   | 9.8   | 2.8   | 7.1    | 6.9    | 5.3   |
| 354.8 | 182.8 | 214.2 | 223.3 | 237.2 | 255.3 | 391.4  | 459.0  | 281.5 |
| 87.9  | 80.4  | 76.1  | 87.1  | 84.0  | 83.2  | 110.0  | 110.4  | 87.2  |
| 73.5  | 65.7  | 70.9  | 57.1  | 54.8  | 60.0  | 80.5   | 73.2   | 47.8  |
| 2.2   | 20.4  | 9.1   | 7.6   | 1.3   | 1.6   | 2.3    | 15.1   | 1.6   |
| 92.8  | 76.4  | 76.2  | 98.6  | 98.3  | 102.3 | 118.6  | 121.9  | 96.7  |
| 640.1 | 354.2 | 339.0 | 362.6 | 394.0 | 347.8 | 530.5  | 506.6  | 426.8 |
| 0.3   | 4.4   | 0.4   | 2.8   | 1.6   | 0.3   | 1.9    | 0.9    | 1.4   |
| 74.3  | 51.1  | 42.3  | 46.4  | 49.7  | 45.6  | 66.5   | 53.1   | 52.4  |
| 155.8 | 82.9  | 87.6  | 100.9 | 94.8  | 108.1 | 124.5  | 150.5  | 122.7 |
| 162.8 | 124.4 | 151.1 | 142.5 | 161.7 | 151.5 | 194.0  | 197.5  | 127.1 |
| 184.9 | 126.6 | 125.9 | 150.5 | 142.6 | 156.7 | 185.8  | 203.9  | 137.0 |
| 94.2  | 92.5  | 90.2  | 94.4  | 90.2  | 86.8  | 137.3  | 119.0  | 94.9  |
| 57.3  | 18.4  | 15.0  | 18.8  | 29.3  | 26.5  | 27.5   | 30.7   | 26.7  |
| 5.8   | 4.3   | 6.9   | 1.8   | 7.5   | 13.6  | 8.1    | 9.5    | 12.8  |
| 9.1   | 12.8  | 5.7   | 7.7   | 3.7   | 8.8   | 20.9   | 14.8   | 6.5   |
| 3.6   | 4.4   | 0.3   | 2.1   | 0.8   | 0.6   | 1.2    | 3.0    | 3.0   |
| 50.3  | 34.0  | 21.8  | 30.1  | 27.2  | 30.2  | 41.0   | 52.1   | 30.2  |
| 798.2 | 541.6 | 723.6 | 699.8 | 706.8 | 631.1 | 1017.3 | 1034.1 | 743.1 |
| 447.7 | 243.8 | 296.4 | 304.6 | 340.2 | 366.4 | 464.7  | 534.1  | 406.1 |
| 0.0   | 4.2   | 0.0   | 2.4   | 2.7   | 0.1   | 0.1    | 1.8    | 1.4   |
| 7.9   | 0.8   | 4.6   | 1.0   | 1.6   | 0.9   | 0.9    | 5.7    | 1.0   |
| 37.6  | 26.1  | 23.2  | 31.0  | 29.0  | 30.4  | 51.0   | 50.8   | 34.1  |
| 58.8  | 33.2  | 30.3  | 43.4  | 49.4  | 44.5  | 70.7   | 98.2   | 64.7  |
| 64.4  | 55.1  | 42.6  | 44.3  | 46.2  | 48.9  | 63.4   | 72.7   | 41.7  |
| 72.3  | 41.1  | 54.4  | 46.0  | 61.8  | 63.9  | 77.5   | 107.6  | 61.1  |
| 165.7 | 110.6 | 102.4 | 123.6 | 123.2 | 130.3 | 162.6  | 251.4  | 108.3 |
| 85.0  | 67.4  | 83.2  | 69.9  | 72.6  | 72.3  | 81.9   | 101.7  | 70.1  |

|        |       |        |        |        |        |        |        |        |
|--------|-------|--------|--------|--------|--------|--------|--------|--------|
| 219.7  | 101.1 | 109.6  | 114.2  | 110.1  | 123.4  | 142.0  | 212.7  | 151.7  |
| 20.1   | 0.7   | 7.4    | 1.9    | 1.2    | 1.1    | 3.3    | 0.7    | 1.7    |
| 187.2  | 107.8 | 141.0  | 125.8  | 139.7  | 158.1  | 189.5  | 253.4  | 153.1  |
| 7.3    | 2.7   | 4.8    | 10.6   | 9.5    | 8.3    | 12.6   | 9.8    | 5.4    |
| 36.8   | 26.0  | 20.5   | 26.6   | 32.9   | 28.4   | 37.4   | 47.6   | 24.9   |
| 23.3   | 11.7  | 11.6   | 12.2   | 15.4   | 19.4   | 18.3   | 24.8   | 19.1   |
| 83.4   | 51.2  | 65.8   | 69.4   | 73.1   | 64.0   | 78.6   | 95.6   | 54.2   |
| 39.3   | 26.9  | 35.4   | 29.5   | 28.8   | 24.5   | 41.8   | 46.7   | 38.5   |
| 1.1    | 5.0   | 3.5    | 4.3    | 2.9    | 3.3    | 1.8    | 2.9    | 0.3    |
| 199.3  | 140.3 | 144.4  | 158.8  | 193.3  | 165.5  | 216.3  | 315.9  | 198.3  |
| 126.7  | 83.8  | 90.2   | 76.1   | 104.6  | 75.1   | 106.1  | 135.4  | 86.4   |
| 1.3    | 5.0   | 2.1    | 1.3    | 6.8    | 1.6    | 3.9    | 8.2    | 3.7    |
| 2.2    | 4.8   | 7.0    | 4.8    | 4.3    | 3.7    | 3.6    | 8.8    | 1.9    |
| 34.7   | 16.9  | 19.7   | 19.2   | 17.6   | 10.2   | 21.2   | 30.6   | 23.2   |
| 41.1   | 21.3  | 20.8   | 18.8   | 19.4   | 26.9   | 39.1   | 53.7   | 27.0   |
| 24.7   | 24.4  | 24.4   | 20.5   | 27.9   | 27.2   | 30.0   | 36.8   | 24.4   |
| 40.8   | 38.7  | 38.2   | 36.7   | 36.8   | 46.4   | 42.8   | 60.1   | 34.8   |
| 38.1   | 27.8  | 37.0   | 36.1   | 36.6   | 39.8   | 56.6   | 55.2   | 40.4   |
| 131.7  | 111.1 | 97.9   | 103.1  | 131.5  | 103.5  | 158.3  | 136.2  | 134.0  |
| 2.7    | 1.5   | 6.1    | 1.0    | 2.3    | 2.4    | 8.0    | 10.8   | 3.5    |
| 362.8  | 247.1 | 299.7  | 355.8  | 311.9  | 368.0  | 483.7  | 599.4  | 370.7  |
| 113.9  | 89.8  | 71.2   | 94.7   | 101.4  | 103.2  | 151.4  | 197.5  | 108.9  |
| 65.3   | 54.0  | 65.1   | 58.5   | 55.1   | 59.6   | 66.6   | 91.5   | 62.9   |
| 126.5  | 49.9  | 65.8   | 64.2   | 67.8   | 60.1   | 94.4   | 129.2  | 81.9   |
| 211.3  | 71.7  | 67.3   | 79.5   | 102.9  | 99.3   | 163.6  | 200.2  | 132.7  |
| 113.5  | 47.4  | 73.8   | 73.0   | 78.1   | 104.4  | 146.5  | 187.4  | 109.5  |
| 11.9   | 2.9   | 4.6    | 4.2    | 7.8    | 3.2    | 7.2    | 8.2    | 7.6    |
| 9.6    | 2.6   | 6.9    | 11.4   | 7.0    | 5.7    | 11.0   | 6.5    | 3.1    |
| 106.2  | 97.3  | 136.8  | 111.4  | 146.7  | 123.7  | 155.6  | 173.6  | 100.4  |
| 41.8   | 29.4  | 41.6   | 33.5   | 21.3   | 32.9   | 29.8   | 35.2   | 38.2   |
| 359.1  | 252.5 | 264.7  | 288.2  | 288.1  | 284.1  | 372.6  | 448.0  | 258.1  |
| 8.1    | 7.4   | 9.3    | 10.1   | 12.2   | 7.5    | 7.2    | 11.4   | 5.8    |
| 1064.8 | 845.0 | 944.3  | 1031.9 | 1058.8 | 993.3  | 1231.8 | 1333.0 | 1043.0 |
| 539.2  | 342.9 | 410.6  | 377.4  | 386.2  | 385.3  | 471.2  | 504.9  | 442.8  |
| 141.6  | 118.1 | 147.5  | 127.9  | 137.6  | 129.5  | 151.3  | 162.2  | 119.9  |
| 78.6   | 41.1  | 61.1   | 64.8   | 72.4   | 70.3   | 103.8  | 89.5   | 50.6   |
| 181.0  | 102.8 | 130.0  | 145.2  | 131.7  | 127.7  | 162.3  | 188.8  | 148.1  |
| 47.3   | 27.3  | 37.5   | 32.8   | 31.7   | 36.7   | 54.7   | 56.7   | 41.6   |
| 3.2    | 1.6   | 9.1    | 2.6    | 2.0    | 5.7    | 2.8    | 5.3    | 2.6    |
| 60.0   | 31.2  | 34.2   | 37.0   | 41.2   | 44.3   | 53.7   | 75.8   | 53.3   |
| 2.3    | 7.9   | 1.7    | 1.2    | 5.0    | 0.9    | 2.8    | 2.1    | 1.1    |
| 75.8   | 42.6  | 43.6   | 65.7   | 66.0   | 60.8   | 68.9   | 94.5   | 68.9   |
| 76.4   | 44.9  | 47.4   | 50.2   | 56.0   | 48.5   | 52.7   | 81.1   | 52.7   |
| 3.9    | 0.3   | 0.3    | 2.5    | 6.2    | 9.5    | 0.9    | 0.2    | 0.8    |
| 4.1    | 4.1   | 4.7    | 6.1    | 7.9    | 0.8    | 10.8   | 3.7    | 6.5    |
| 731.6  | 536.2 | 638.2  | 656.0  | 670.0  | 695.8  | 786.9  | 717.0  | 647.6  |
| 39.9   | 37.0  | 34.5   | 37.2   | 37.6   | 33.2   | 41.8   | 60.7   | 32.6   |
| 84.2   | 52.6  | 48.3   | 59.2   | 41.9   | 39.2   | 70.5   | 72.2   | 51.3   |
| 5.9    | 7.8   | 8.1    | 4.0    | 1.9    | 7.3    | 7.6    | 9.6    | 8.6    |
| 43.9   | 24.1  | 35.5   | 38.6   | 37.2   | 32.4   | 46.2   | 42.5   | 30.2   |
| 35.0   | 25.8  | 26.0   | 25.2   | 27.0   | 24.6   | 34.5   | 38.8   | 22.4   |
| 107.1  | 75.3  | 57.2   | 72.6   | 84.7   | 81.1   | 98.6   | 115.5  | 76.2   |
| 1538.8 | 989.2 | 1111.6 | 1265.7 | 1222.5 | 1312.0 | 1399.7 | 1672.2 | 1453.3 |

|        |        |        |        |        |        |        |        |        |
|--------|--------|--------|--------|--------|--------|--------|--------|--------|
| 26.0   | 27.6   | 17.7   | 24.0   | 12.2   | 17.0   | 17.1   | 29.0   | 20.8   |
| 160.5  | 109.6  | 96.7   | 123.0  | 125.7  | 98.6   | 160.7  | 168.5  | 124.7  |
| 119.7  | 96.5   | 91.7   | 108.1  | 115.1  | 87.1   | 144.7  | 145.4  | 89.6   |
| 0.7    | 0.3    | 0.9    | 0.4    | 0.7    | 0.8    | 0.9    | 0.9    | 1.0    |
| 3.3    | 3.9    | 1.2    | 3.5    | 2.4    | 5.9    | 7.1    | 6.4    | 1.7    |
| 122.8  | 56.7   | 44.0   | 52.4   | 42.3   | 37.3   | 48.0   | 63.7   | 57.6   |
| 14.6   | 11.2   | 20.7   | 18.3   | 12.9   | 15.1   | 25.0   | 24.4   | 13.2   |
| 11.2   | 11.2   | 9.2    | 12.2   | 14.6   | 12.5   | 18.9   | 20.3   | 14.6   |
| 8.8    | 6.4    | 7.4    | 1.0    | 7.2    | 0.7    | 9.2    | 11.7   | 2.7    |
| 6.9    | 5.1    | 5.7    | 0.4    | 5.2    | 3.5    | 7.5    | 12.8   | 5.7    |
| 37.2   | 25.6   | 22.5   | 16.0   | 20.1   | 23.2   | 28.8   | 40.3   | 29.4   |
| 121.6  | 54.7   | 61.0   | 59.4   | 49.5   | 49.9   | 64.5   | 89.7   | 62.2   |
| 10.5   | 12.1   | 4.5    | 15.8   | 10.6   | 1.9    | 11.8   | 17.5   | 22.1   |
| 16.7   | 9.0    | 7.6    | 9.1    | 12.7   | 8.5    | 15.5   | 12.1   | 13.3   |
| 9.8    | 3.2    | 6.1    | 2.7    | 4.9    | 4.2    | 8.2    | 10.7   | 3.4    |
| 3.5    | 4.9    | 2.0    | 0.6    | 1.8    | 1.3    | 7.2    | 13.7   | 4.8    |
| 35.6   | 46.6   | 39.5   | 36.2   | 52.9   | 54.2   | 55.9   | 68.4   | 48.9   |
| 45.4   | 43.4   | 25.7   | 40.6   | 49.6   | 46.8   | 59.6   | 80.7   | 64.1   |
| 31.2   | 19.7   | 18.0   | 23.1   | 25.6   | 21.4   | 47.5   | 45.9   | 34.6   |
| 166.9  | 128.6  | 121.4  | 179.1  | 125.1  | 125.0  | 171.4  | 188.9  | 134.5  |
| 123.9  | 165.1  | 118.2  | 127.7  | 98.7   | 146.2  | 133.3  | 184.2  | 185.1  |
| 294.4  | 348.4  | 412.9  | 415.2  | 436.4  | 448.4  | 582.1  | 794.6  | 427.6  |
| 39.8   | 27.1   | 33.0   | 37.0   | 30.6   | 37.6   | 53.7   | 66.7   | 40.1   |
| 215.7  | 132.9  | 158.6  | 166.9  | 159.6  | 154.4  | 205.4  | 243.4  | 221.7  |
| 9.1    | 2.1    | 3.7    | 12.8   | 11.1   | 6.3    | 14.6   | 13.2   | 8.4    |
| 4.8    | 2.0    | 4.8    | 4.3    | 5.5    | 4.4    | 5.7    | 3.1    | 1.1    |
| 0.2    | 0.1    | 0.2    | 0.3    | 0.3    | 0.1    | 3.9    | 1.1    | 0.2    |
| 0.2    | 2.5    | 3.3    | 2.6    | 0.2    | 0.3    | 0.2    | 0.1    | 0.4    |
| 11.8   | 9.6    | 13.3   | 9.2    | 9.6    | 11.5   | 13.2   | 12.8   | 6.5    |
| 47.0   | 27.7   | 42.0   | 44.7   | 32.1   | 34.2   | 43.9   | 46.9   | 33.2   |
| 3.7    | 1.7    | 5.0    | 2.2    | 4.1    | 2.9    | 11.6   | 7.9    | 4.9    |
| 169.0  | 69.7   | 99.0   | 93.0   | 93.2   | 83.5   | 111.7  | 112.5  | 87.3   |
| 0.9    | 1.1    | 1.0    | 0.8    | 0.7    | 1.6    | 0.6    | 1.4    | 0.9    |
| 4.7    | 4.2    | 0.5    | 4.4    | 5.2    | 4.3    | 6.9    | 8.0    | 6.8    |
| 60.3   | 51.8   | 44.9   | 55.6   | 89.9   | 64.9   | 138.9  | 71.9   | 41.0   |
| 0.6    | 11.4   | 11.0   | 13.0   | 8.4    | 12.5   | 13.6   | 10.5   | 6.7    |
| 2.7    | 99.4   | 118.3  | 121.7  | 132.6  | 125.0  | 208.9  | 206.5  | 99.7   |
| 4.1    | 1.1    | 2.8    | 1.7    | 2.7    | 2.4    | 4.2    | 6.5    | 6.1    |
| 0.6    | 0.4    | 0.3    | 0.6    | 0.3    | 3.6    | 0.5    | 0.4    | 1.0    |
| 2.5    | 5.2    | 0.8    | 5.6    | 1.0    | 5.7    | 5.9    | 1.4    | 2.4    |
| 20.7   | 18.2   | 18.7   | 25.1   | 15.4   | 14.7   | 27.3   | 25.0   | 22.8   |
| 10.7   | 4.4    | 6.4    | 5.9    | 2.3    | 1.7    | 3.6    | 15.5   | 8.4    |
| 8.1    | 10.8   | 12.6   | 6.9    | 4.6    | 3.2    | 16.1   | 9.6    | 10.6   |
| 157.3  | 63.0   | 85.7   | 69.6   | 74.4   | 77.8   | 123.8  | 140.7  | 83.5   |
| 162.7  | 200.1  | 197.6  | 207.6  | 229.0  | 225.2  | 284.7  | 270.1  | 231.4  |
| 317.2  | 195.3  | 206.4  | 248.6  | 281.5  | 258.0  | 351.1  | 467.6  | 350.3  |
| 112.0  | 66.8   | 68.2   | 78.2   | 88.5   | 74.6   | 82.7   | 152.6  | 68.3   |
| 7.8    | 2.6    | 6.8    | 10.2   | 7.3    | 1.6    | 3.5    | 12.4   | 2.2    |
| 18.3   | 5.9    | 9.8    | 1.8    | 10.0   | 3.8    | 17.8   | 11.4   | 8.3    |
| 173.1  | 105.1  | 127.2  | 137.5  | 135.5  | 122.4  | 190.1  | 194.9  | 114.0  |
| 4125.0 | 3378.8 | 3470.4 | 3532.8 | 3697.8 | 3470.7 | 3656.9 | 3928.7 | 2890.7 |
| 133.6  | 90.7   | 108.8  | 121.5  | 121.5  | 118.9  | 151.0  | 148.0  | 106.8  |
| 61.6   | 53.1   | 52.4   | 62.5   | 46.2   | 34.8   | 50.4   | 63.9   | 51.0   |

|        |        |        |        |        |        |        |        |        |
|--------|--------|--------|--------|--------|--------|--------|--------|--------|
| 50.8   | 48.3   | 60.0   | 53.0   | 56.7   | 56.1   | 81.4   | 100.5  | 47.1   |
| 85.9   | 75.4   | 101.1  | 102.3  | 111.1  | 98.5   | 139.0  | 211.8  | 105.8  |
| 86.9   | 73.6   | 87.9   | 88.9   | 73.1   | 94.1   | 128.4  | 168.5  | 92.2   |
| 42.3   | 34.7   | 40.2   | 42.3   | 44.8   | 50.9   | 69.8   | 90.3   | 52.4   |
| 23.9   | 16.9   | 18.6   | 20.0   | 21.3   | 27.2   | 32.9   | 26.8   | 21.0   |
| 14.7   | 12.6   | 12.7   | 15.3   | 8.6    | 10.9   | 17.0   | 22.9   | 9.6    |
| 63.8   | 45.4   | 49.5   | 68.6   | 55.3   | 49.3   | 76.0   | 94.2   | 48.9   |
| 553.1  | 438.0  | 560.4  | 523.9  | 569.5  | 566.0  | 746.2  | 672.5  | 681.9  |
| 189.1  | 92.8   | 102.4  | 103.6  | 141.3  | 145.1  | 232.2  | 284.6  | 231.9  |
| 322.1  | 244.1  | 235.1  | 296.4  | 287.9  | 269.9  | 344.3  | 396.3  | 308.3  |
| 203.6  | 138.3  | 179.3  | 164.6  | 189.9  | 184.2  | 250.6  | 260.7  | 210.3  |
| 115.5  | 100.4  | 121.1  | 121.7  | 135.8  | 101.0  | 128.0  | 125.5  | 85.9   |
| 15.3   | 6.3    | 4.5    | 3.5    | 3.4    | 0.9    | 3.5    | 2.7    | 5.7    |
| 1.1    | 1.8    | 2.7    | 1.5    | 2.7    | 9.1    | 1.8    | 2.8    | 1.7    |
| 0.8    | 0.7    | 0.9    | 0.8    | 0.7    | 1.1    | 1.3    | 1.7    | 0.8    |
| 0.5    | 0.4    | 0.9    | 0.6    | 0.5    | 0.3    | 0.6    | 0.5    | 0.4    |
| 113.0  | 83.7   | 71.6   | 61.4   | 93.8   | 67.9   | 106.2  | 139.5  | 87.2   |
| 202.2  | 123.5  | 136.9  | 139.0  | 177.3  | 155.0  | 272.0  | 260.5  | 217.5  |
| 974.6  | 651.4  | 756.1  | 798.0  | 790.7  | 762.7  | 1025.2 | 1094.6 | 627.1  |
| 3654.3 | 3125.0 | 2854.2 | 3215.7 | 3489.6 | 3277.1 | 4324.3 | 3926.7 | 2975.0 |
| 49.1   | 44.7   | 58.2   | 50.8   | 48.2   | 41.6   | 57.6   | 65.4   | 60.2   |
| 0.9    | 2.0    | 0.8    | 0.8    | 0.8    | 1.3    | 1.1    | 3.0    | 1.3    |
| 2.6    | 6.7    | 9.1    | 5.9    | 7.0    | 3.2    | 2.8    | 4.5    | 7.0    |
| 12.2   | 9.4    | 7.0    | 6.0    | 6.6    | 8.0    | 6.5    | 6.4    | 6.3    |
| 288.8  | 189.8  | 202.2  | 220.6  | 250.4  | 224.2  | 314.9  | 341.7  | 235.8  |
| 333.9  | 223.7  | 259.0  | 274.7  | 265.1  | 272.4  | 363.6  | 358.2  | 245.5  |
| 167.1  | 147.2  | 153.9  | 172.4  | 168.3  | 195.6  | 244.3  | 221.8  | 148.9  |
| 69.4   | 48.6   | 52.1   | 65.7   | 60.6   | 56.3   | 87.0   | 114.8  | 88.3   |
| 87.7   | 79.5   | 80.6   | 80.6   | 69.5   | 59.5   | 114.0  | 97.5   | 76.4   |
| 117.3  | 76.2   | 90.2   | 85.0   | 89.8   | 103.2  | 133.9  | 201.6  | 124.9  |
| 164.2  | 135.7  | 141.8  | 145.2  | 166.2  | 153.5  | 249.1  | 216.7  | 160.8  |
| 208.5  | 148.5  | 185.5  | 220.7  | 217.2  | 177.9  | 268.2  | 279.6  | 162.5  |
| 4.1    | 11.3   | 10.9   | 4.7    | 2.3    | 10.8   | 10.8   | 2.5    | 6.6    |
| 31.6   | 21.4   | 20.3   | 20.5   | 27.9   | 24.6   | 33.1   | 40.9   | 39.4   |
| 35.2   | 25.1   | 22.7   | 27.3   | 25.9   | 29.4   | 36.9   | 49.9   | 30.9   |
| 42.7   | 23.0   | 33.3   | 31.8   | 30.7   | 29.6   | 52.0   | 43.4   | 33.8   |
| 21.5   | 11.9   | 20.9   | 24.3   | 18.5   | 22.1   | 19.4   | 31.9   | 17.3   |
| 2.9    | 9.3    | 9.6    | 6.8    | 4.3    | 7.1    | 8.7    | 11.1   | 5.4    |
| 223.1  | 110.6  | 137.1  | 142.3  | 137.6  | 171.8  | 182.1  | 260.1  | 172.4  |
| 120.2  | 126.2  | 113.4  | 117.6  | 135.2  | 119.9  | 176.2  | 151.0  | 123.1  |
| 24.7   | 29.8   | 23.6   | 17.6   | 27.7   | 28.3   | 23.1   | 48.8   | 27.7   |
| 23.3   | 20.1   | 16.9   | 18.8   | 13.3   | 24.5   | 26.3   | 24.4   | 26.1   |
| 84.9   | 58.6   | 72.6   | 73.5   | 53.9   | 75.2   | 74.8   | 107.4  | 81.5   |
| 0.5    | 5.3    | 6.3    | 1.0    | 8.2    | 5.0    | 0.9    | 1.2    | 3.2    |
| 5.2    | 6.3    | 6.7    | 6.3    | 9.7    | 8.0    | 5.0    | 7.1    | 8.7    |
| 0.7    | 1.5    | 3.3    | 6.0    | 1.9    | 2.5    | 7.0    | 3.6    | 1.1    |
| 85.8   | 19.5   | 40.9   | 31.2   | 25.1   | 31.4   | 48.4   | 67.2   | 39.2   |
| 130.2  | 54.1   | 51.1   | 59.5   | 56.5   | 56.2   | 82.7   | 110.9  | 57.9   |
| 27.8   | 22.5   | 42.2   | 19.5   | 25.8   | 17.1   | 34.0   | 39.9   | 13.5   |
| 105.2  | 58.1   | 87.5   | 70.1   | 73.2   | 108.1  | 127.8  | 115.1  | 80.9   |
| 0.2    | 0.6    | 1.8    | 4.7    | 0.2    | 7.3    | 1.4    | 0.8    | 0.4    |
| 3.4    | 8.6    | 14.2   | 12.2   | 12.8   | 14.9   | 16.1   | 14.0   | 14.6   |
| 302.6  | 211.3  | 226.0  | 253.8  | 267.0  | 257.8  | 362.4  | 460.7  | 307.6  |

|        |        |        |        |        |        |        |        |        |
|--------|--------|--------|--------|--------|--------|--------|--------|--------|
| 98.8   | 51.1   | 58.8   | 45.2   | 52.1   | 58.8   | 58.6   | 70.8   | 59.9   |
| 1.2    | 1.7    | 6.2    | 1.6    | 2.9    | 2.2    | 1.3    | 4.4    | 2.4    |
| 1.1    | 13.1   | 1.3    | 2.4    | 1.3    | 1.3    | 2.0    | 5.4    | 0.9    |
| 3.0    | 0.8    | 1.9    | 1.0    | 1.4    | 2.7    | 2.0    | 1.5    | 1.1    |
| 16.1   | 9.7    | 11.4   | 5.1    | 15.3   | 13.2   | 16.4   | 13.9   | 7.0    |
| 97.1   | 80.0   | 75.0   | 94.8   | 93.0   | 74.2   | 100.9  | 117.7  | 124.3  |
| 27.7   | 25.4   | 3.2    | 17.4   | 19.1   | 17.3   | 25.7   | 27.8   | 25.9   |
| 112.0  | 77.8   | 89.1   | 96.2   | 103.2  | 101.9  | 119.4  | 146.0  | 103.4  |
| 121.0  | 104.1  | 98.1   | 106.5  | 105.8  | 104.0  | 115.4  | 115.2  | 97.1   |
| 55.1   | 31.2   | 39.7   | 42.4   | 38.3   | 49.7   | 66.3   | 68.4   | 42.1   |
| 11.6   | 11.5   | 9.8    | 11.8   | 15.0   | 14.8   | 24.5   | 22.2   | 13.2   |
| 81.6   | 42.1   | 67.8   | 60.9   | 67.9   | 73.0   | 86.5   | 124.9  | 61.6   |
| 5.7    | 7.3    | 8.5    | 5.3    | 7.6    | 7.4    | 5.5    | 12.6   | 5.9    |
| 48.6   | 19.2   | 19.6   | 28.6   | 17.6   | 9.3    | 26.3   | 24.9   | 21.7   |
| 100.5  | 52.0   | 68.8   | 71.4   | 74.3   | 71.0   | 100.5  | 106.7  | 90.8   |
| 4.0    | 8.0    | 8.4    | 3.3    | 5.1    | 6.5    | 7.6    | 8.9    | 3.7    |
| 3.8    | 0.5    | 2.0    | 10.7   | 2.0    | 6.2    | 1.1    | 2.2    | 0.8    |
| 0.5    | 1.1    | 3.9    | 3.0    | 5.5    | 0.6    | 6.1    | 0.4    | 1.0    |
| 21.5   | 27.6   | 20.0   | 13.3   | 20.0   | 25.7   | 23.2   | 32.8   | 24.5   |
| 110.8  | 64.0   | 64.8   | 72.7   | 80.3   | 81.7   | 104.3  | 132.7  | 96.7   |
| 0.8    | 2.2    | 0.4    | 1.4    | 1.0    | 5.4    | 1.1    | 2.0    | 1.0    |
| 115.3  | 69.1   | 80.4   | 79.5   | 85.3   | 111.2  | 104.6  | 137.2  | 85.1   |
| 125.9  | 91.5   | 81.7   | 99.2   | 98.5   | 89.9   | 150.9  | 143.3  | 102.0  |
| 104.0  | 95.4   | 97.8   | 115.7  | 121.2  | 112.1  | 136.2  | 162.8  | 107.1  |
| 96.7   | 54.5   | 83.2   | 73.5   | 56.8   | 75.0   | 123.7  | 112.0  | 60.5   |
| 158.8  | 96.6   | 115.0  | 130.9  | 126.5  | 123.1  | 143.4  | 183.9  | 125.7  |
| 80.9   | 47.7   | 55.0   | 63.3   | 57.5   | 59.4   | 85.6   | 82.1   | 76.9   |
| 107.9  | 76.1   | 87.0   | 84.2   | 91.0   | 99.1   | 112.6  | 147.0  | 110.6  |
| 11.9   | 10.4   | 8.1    | 6.2    | 7.1    | 6.3    | 11.2   | 11.7   | 6.3    |
| 48.9   | 25.6   | 31.5   | 34.6   | 33.1   | 29.9   | 43.5   | 58.0   | 39.8   |
| 57.0   | 38.8   | 29.7   | 56.8   | 41.7   | 53.0   | 58.3   | 66.0   | 40.0   |
| 37.9   | 19.4   | 25.4   | 25.7   | 29.5   | 16.5   | 42.4   | 40.4   | 32.4   |
| 47.5   | 23.6   | 31.4   | 43.6   | 39.6   | 30.2   | 47.1   | 57.5   | 37.0   |
| 14.7   | 13.7   | 11.0   | 12.0   | 11.1   | 12.7   | 10.7   | 7.8    | 11.1   |
| 277.2  | 169.2  | 183.7  | 237.6  | 215.6  | 242.3  | 268.2  | 423.8  | 211.8  |
| 636.6  | 391.4  | 524.8  | 505.5  | 498.9  | 515.4  | 595.8  | 570.3  | 444.9  |
| 7.6    | 10.9   | 4.7    | 8.5    | 9.6    | 4.0    | 13.1   | 10.0   | 6.5    |
| 144.8  | 55.1   | 74.7   | 75.7   | 73.1   | 80.1   | 95.9   | 146.9  | 81.4   |
| 10.5   | 4.8    | 8.0    | 7.7    | 9.9    | 4.8    | 10.2   | 14.8   | 9.4    |
| 3945.8 | 3740.4 | 3393.4 | 3704.2 | 3918.1 | 3624.2 | 3964.8 | 4102.9 | 3670.6 |
| 1.2    | 1.2    | 1.3    | 0.9    | 2.5    | 1.5    | 0.9    | 2.1    | 2.4    |
| 636.1  | 329.4  | 463.6  | 495.5  | 506.3  | 494.7  | 690.5  | 660.3  | 663.6  |
| 52.9   | 51.5   | 65.5   | 65.9   | 63.1   | 68.5   | 87.1   | 89.3   | 50.0   |
| 8.3    | 19.9   | 17.8   | 19.3   | 9.6    | 20.8   | 27.3   | 29.1   | 19.4   |
| 92.1   | 69.1   | 78.8   | 73.1   | 93.9   | 80.8   | 104.3  | 106.4  | 86.9   |
| 1418.0 | 1179.8 | 1365.6 | 1308.9 | 1550.5 | 1414.4 | 1777.6 | 1798.7 | 1316.3 |
| 108.1  | 85.5   | 99.9   | 117.1  | 112.8  | 131.0  | 169.2  | 149.3  | 171.0  |
| 132.0  | 61.2   | 65.4   | 64.5   | 65.6   | 64.8   | 104.5  | 118.5  | 103.7  |
| 557.9  | 188.5  | 260.2  | 245.0  | 254.4  | 273.8  | 300.5  | 438.9  | 307.8  |
| 39.1   | 26.3   | 33.5   | 23.6   | 22.4   | 29.6   | 45.7   | 50.8   | 35.0   |
| 43.8   | 4.7    | 18.1   | 17.6   | 7.0    | 5.5    | 7.5    | 18.5   | 17.2   |
| 411.1  | 239.0  | 302.1  | 305.3  | 323.1  | 324.9  | 428.6  | 437.8  | 303.0  |
| 32.1   | 20.6   | 28.0   | 34.1   | 27.8   | 25.4   | 37.8   | 42.2   | 38.6   |

|        |       |       |       |       |       |        |        |        |
|--------|-------|-------|-------|-------|-------|--------|--------|--------|
| 27.8   | 13.8  | 12.6  | 23.3  | 1.9   | 8.7   | 28.3   | 36.8   | 17.1   |
| 147.5  | 65.4  | 73.7  | 73.1  | 76.2  | 67.6  | 97.7   | 112.8  | 78.7   |
| 202.0  | 84.0  | 99.6  | 103.0 | 104.9 | 100.7 | 120.8  | 160.1  | 105.2  |
| 65.7   | 29.5  | 47.0  | 38.3  | 47.5  | 52.9  | 53.1   | 53.4   | 39.6   |
| 216.1  | 100.6 | 117.0 | 144.6 | 135.7 | 156.0 | 199.5  | 213.4  | 124.9  |
| 67.3   | 51.4  | 48.3  | 56.7  | 48.6  | 63.7  | 60.3   | 73.4   | 56.5   |
| 25.0   | 8.5   | 3.8   | 15.3  | 12.3  | 7.2   | 14.3   | 19.0   | 13.8   |
| 17.7   | 1.4   | 1.2   | 2.0   | 2.3   | 9.9   | 4.2    | 14.8   | 5.8    |
| 43.1   | 19.7  | 22.6  | 22.0  | 31.7  | 32.6  | 28.4   | 49.9   | 25.2   |
| 0.7    | 4.1   | 3.3   | 0.8   | 0.3   | 0.2   | 0.4    | 0.9    | 1.2    |
| 87.9   | 63.0  | 58.3  | 74.5  | 96.0  | 76.0  | 119.4  | 156.3  | 101.5  |
| 1303.0 | 652.0 | 922.9 | 826.0 | 824.2 | 999.1 | 1458.5 | 1619.0 | 1134.9 |
| 11.3   | 14.0  | 12.0  | 11.0  | 24.1  | 27.3  | 24.0   | 20.0   | 9.2    |
| 48.8   | 29.1  | 54.5  | 38.0  | 31.9  | 39.6  | 40.4   | 60.8   | 35.7   |
| 136.4  | 69.3  | 82.6  | 68.6  | 89.3  | 82.4  | 109.2  | 101.7  | 66.9   |
| 377.2  | 144.5 | 184.4 | 179.3 | 206.1 | 195.8 | 219.9  | 265.1  | 203.8  |
| 223.9  | 144.9 | 156.3 | 167.1 | 199.2 | 200.1 | 233.8  | 373.6  | 163.8  |
| 0.5    | 12.6  | 4.7   | 6.5   | 11.8  | 9.4   | 9.4    | 11.5   | 8.5    |
| 148.1  | 89.2  | 107.6 | 97.0  | 125.3 | 140.7 | 141.7  | 147.9  | 99.8   |
| 9.5    | 8.6   | 15.2  | 11.1  | 10.7  | 18.3  | 23.0   | 24.0   | 15.8   |
| 51.3   | 52.5  | 47.7  | 45.2  | 45.1  | 45.6  | 59.4   | 70.0   | 40.3   |
| 9.5    | 17.0  | 15.7  | 17.7  | 14.6  | 19.0  | 18.1   | 23.7   | 18.6   |
| 1.4    | 15.2  | 2.5   | 2.0   | 12.3  | 9.8   | 15.6   | 18.3   | 16.3   |
| 212.8  | 164.3 | 192.5 | 179.6 | 214.9 | 196.3 | 285.8  | 253.9  | 196.2  |
| 10.3   | 13.4  | 6.5   | 8.2   | 13.7  | 4.9   | 8.4    | 3.8    | 6.5    |
| 37.5   | 30.7  | 28.7  | 36.5  | 37.9  | 40.0  | 58.4   | 37.2   | 40.8   |
| 87.6   | 69.9  | 93.3  | 108.8 | 98.5  | 98.6  | 126.4  | 145.0  | 107.2  |
| 40.9   | 25.3  | 25.3  | 26.3  | 32.1  | 24.8  | 38.9   | 35.9   | 23.0   |
| 164.4  | 126.5 | 117.5 | 118.3 | 141.9 | 142.0 | 169.7  | 168.3  | 139.8  |
| 17.8   | 30.0  | 19.8  | 18.2  | 18.9  | 19.2  | 23.6   | 26.0   | 22.1   |
| 333.4  | 236.4 | 278.6 | 293.9 | 299.2 | 316.9 | 456.0  | 483.6  | 273.9  |
| 1.2    | 3.1   | 5.3   | 5.6   | 9.4   | 1.1   | 13.1   | 9.6    | 2.3    |
| 354.2  | 215.7 | 260.4 | 270.7 | 292.6 | 306.5 | 343.8  | 386.0  | 292.0  |
| 98.5   | 40.0  | 53.1  | 47.6  | 56.0  | 48.9  | 78.8   | 82.4   | 44.7   |
| 79.0   | 77.1  | 81.4  | 82.4  | 91.5  | 81.4  | 119.8  | 144.9  | 87.8   |
| 14.9   | 19.7  | 26.5  | 26.3  | 19.4  | 26.9  | 32.3   | 41.3   | 38.9   |
| 10.6   | 10.5  | 21.2  | 23.2  | 17.3  | 21.5  | 30.6   | 33.9   | 19.1   |
| 31.8   | 54.5  | 46.5  | 49.2  | 40.3  | 49.1  | 65.6   | 80.2   | 41.1   |
| 62.9   | 38.8  | 45.8  | 46.2  | 47.2  | 49.0  | 77.1   | 83.5   | 45.4   |
| 0.4    | 0.3   | 0.4   | 0.4   | 0.6   | 0.4   | 0.8    | 0.7    | 0.4    |
| 239.1  | 98.9  | 154.1 | 133.7 | 179.9 | 143.7 | 204.8  | 185.4  | 144.7  |
| 63.1   | 22.7  | 38.4  | 32.6  | 38.2  | 36.6  | 41.2   | 49.0   | 36.0   |
| 129.9  | 103.8 | 131.5 | 137.7 | 131.5 | 127.1 | 163.2  | 195.1  | 149.9  |
| 70.6   | 55.2  | 58.0  | 63.3  | 75.3  | 58.3  | 94.0   | 125.6  | 105.4  |
| 90.4   | 46.2  | 69.4  | 60.3  | 58.7  | 75.4  | 119.9  | 149.1  | 74.5   |
| 20.0   | 9.4   | 13.1  | 12.3  | 9.7   | 2.3   | 18.9   | 2.8    | 18.3   |
| 16.8   | 2.7   | 12.4  | 8.9   | 16.5  | 4.7   | 9.0    | 17.8   | 11.9   |
| 44.3   | 32.5  | 37.5  | 45.2  | 45.2  | 46.7  | 55.8   | 57.8   | 56.0   |
| 6.3    | 2.1   | 2.8   | 0.4   | 2.3   | 6.8   | 6.7    | 3.0    | 4.0    |
| 110.2  | 100.9 | 95.1  | 70.9  | 88.4  | 90.1  | 98.3   | 111.2  | 68.5   |
| 89.7   | 39.9  | 56.6  | 43.2  | 58.8  | 67.0  | 80.7   | 114.3  | 55.0   |
| 104.3  | 77.0  | 72.3  | 80.0  | 88.8  | 73.9  | 124.6  | 110.5  | 84.1   |
| 43.9   | 27.9  | 20.9  | 29.4  | 31.4  | 28.3  | 38.3   | 60.7   | 36.9   |

|       |       |       |       |        |        |        |        |       |
|-------|-------|-------|-------|--------|--------|--------|--------|-------|
| 117.8 | 83.6  | 106.4 | 96.7  | 112.1  | 104.3  | 152.8  | 148.9  | 105.8 |
| 119.0 | 71.9  | 100.9 | 66.8  | 92.7   | 106.3  | 118.9  | 135.1  | 155.0 |
| 185.1 | 94.2  | 110.6 | 122.3 | 138.2  | 136.7  | 174.4  | 248.8  | 155.6 |
| 3.6   | 1.1   | 2.1   | 2.5   | 2.5    | 3.9    | 3.7    | 4.6    | 1.4   |
| 85.3  | 53.4  | 55.2  | 57.6  | 67.9   | 56.2   | 72.3   | 81.6   | 60.4  |
| 90.2  | 13.4  | 23.3  | 20.4  | 23.6   | 23.2   | 40.8   | 45.8   | 34.3  |
| 83.2  | 34.7  | 70.0  | 51.6  | 51.1   | 67.0   | 99.4   | 98.0   | 72.8  |
| 181.8 | 112.1 | 133.2 | 140.8 | 137.1  | 147.9  | 189.4  | 224.3  | 129.8 |
| 22.9  | 15.1  | 22.0  | 24.4  | 17.1   | 21.9   | 25.8   | 31.7   | 23.5  |
| 5.8   | 2.9   | 4.9   | 0.5   | 6.0    | 3.0    | 0.7    | 3.0    | 4.7   |
| 9.4   | 9.8   | 6.3   | 7.1   | 6.8    | 6.8    | 6.7    | 7.2    | 6.0   |
| 2.1   | 1.2   | 1.6   | 1.8   | 0.6    | 1.2    | 1.7    | 1.1    | 0.7   |
| 35.0  | 19.6  | 18.5  | 23.2  | 33.4   | 16.9   | 25.4   | 30.3   | 20.1  |
| 111.3 | 61.6  | 89.5  | 112.4 | 94.5   | 92.8   | 111.2  | 123.0  | 78.1  |
| 357.8 | 197.5 | 251.2 | 244.8 | 267.8  | 248.9  | 319.6  | 326.2  | 264.2 |
| 882.5 | 551.9 | 575.8 | 596.2 | 670.7  | 640.6  | 870.9  | 934.1  | 649.4 |
| 1.0   | 0.4   | 1.1   | 0.3   | 0.6    | 1.5    | 1.0    | 0.9    | 0.3   |
| 118.5 | 69.5  | 78.2  | 93.0  | 81.3   | 96.1   | 121.8  | 124.1  | 82.4  |
| 32.0  | 27.8  | 31.4  | 29.3  | 34.9   | 28.7   | 58.0   | 45.3   | 76.4  |
| 113.0 | 90.0  | 110.3 | 95.7  | 101.9  | 100.5  | 135.3  | 160.5  | 115.1 |
| 51.5  | 25.5  | 38.2  | 37.1  | 27.6   | 49.0   | 68.7   | 68.4   | 39.0  |
| 333.0 | 27.2  | 33.5  | 25.9  | 35.3   | 75.5   | 97.7   | 211.6  | 60.2  |
| 115.0 | 81.6  | 84.6  | 71.2  | 74.0   | 63.7   | 112.7  | 129.4  | 73.2  |
| 84.2  | 58.8  | 77.6  | 63.7  | 75.4   | 64.6   | 109.1  | 92.3   | 103.9 |
| 46.1  | 25.7  | 27.7  | 35.3  | 40.2   | 31.0   | 61.1   | 39.6   | 36.9  |
| 105.2 | 75.2  | 88.1  | 85.5  | 102.4  | 88.8   | 136.6  | 144.2  | 121.7 |
| 122.3 | 46.3  | 62.2  | 57.6  | 68.1   | 73.9   | 88.8   | 106.4  | 52.5  |
| 93.5  | 63.3  | 70.3  | 82.7  | 78.9   | 74.5   | 88.5   | 113.2  | 60.2  |
| 77.0  | 47.7  | 43.3  | 45.6  | 72.3   | 56.6   | 110.3  | 158.4  | 78.8  |
| 31.6  | 33.4  | 26.5  | 29.5  | 12.9   | 21.6   | 37.0   | 23.5   | 25.0  |
| 41.9  | 28.9  | 32.0  | 31.5  | 45.7   | 24.3   | 42.9   | 37.2   | 58.1  |
| 49.8  | 24.9  | 47.8  | 38.5  | 45.0   | 33.8   | 47.9   | 64.7   | 39.8  |
| 199.9 | 117.7 | 158.7 | 165.5 | 152.1  | 184.5  | 200.8  | 236.4  | 122.8 |
| 215.5 | 151.7 | 188.2 | 234.5 | 188.9  | 182.4  | 259.5  | 307.5  | 214.4 |
| 220.1 | 127.2 | 150.4 | 146.9 | 182.8  | 180.4  | 240.7  | 293.9  | 219.6 |
| 138.5 | 99.5  | 108.9 | 99.4  | 112.1  | 112.2  | 146.9  | 158.0  | 115.0 |
| 159.9 | 100.1 | 105.3 | 113.0 | 133.8  | 155.8  | 186.3  | 227.6  | 142.3 |
| 44.5  | 20.5  | 21.4  | 33.0  | 29.5   | 36.2   | 47.2   | 52.2   | 30.4  |
| 879.1 | 874.1 | 901.9 | 951.9 | 1159.4 | 1157.0 | 1564.6 | 2018.7 | 846.0 |
| 380.2 | 482.7 | 577.2 | 623.2 | 556.8  | 654.5  | 674.1  | 1033.9 | 640.3 |
| 661.9 | 237.7 | 229.2 | 251.4 | 282.0  | 270.2  | 377.7  | 466.6  | 322.1 |
| 866.5 | 479.1 | 409.8 | 529.1 | 553.5  | 475.9  | 717.2  | 910.0  | 717.9 |
| 15.9  | 11.3  | 10.2  | 16.1  | 13.4   | 14.7   | 18.3   | 20.0   | 16.8  |
| 110.7 | 76.1  | 90.3  | 114.5 | 114.9  | 97.9   | 128.5  | 175.5  | 81.6  |
| 577.0 | 315.4 | 439.8 | 413.6 | 426.5  | 429.2  | 551.7  | 556.8  | 462.3 |
| 21.3  | 30.0  | 22.2  | 37.5  | 26.5   | 25.8   | 43.4   | 37.6   | 38.3  |
| 29.2  | 91.3  | 78.4  | 107.3 | 99.8   | 103.8  | 135.0  | 108.4  | 104.1 |
| 7.7   | 27.7  | 41.0  | 14.9  | 31.6   | 29.5   | 45.8   | 48.9   | 26.0  |
| 22.9  | 11.1  | 11.1  | 16.6  | 15.2   | 13.6   | 29.9   | 46.6   | 23.7  |
| 163.8 | 75.9  | 117.8 | 112.7 | 118.3  | 168.0  | 185.6  | 259.9  | 164.7 |
| 163.9 | 84.1  | 111.5 | 117.1 | 118.9  | 128.5  | 173.4  | 256.5  | 100.6 |
| 53.5  | 35.6  | 28.8  | 29.8  | 38.9   | 43.5   | 45.6   | 46.5   | 39.7  |
| 49.1  | 34.7  | 32.0  | 30.0  | 24.1   | 30.5   | 49.2   | 51.3   | 33.6  |



|       |       |       |       |       |       |       |       |       |
|-------|-------|-------|-------|-------|-------|-------|-------|-------|
| 206.5 | 109.2 | 124.8 | 133.7 | 121.7 | 124.7 | 179.2 | 160.5 | 99.1  |
| 71.7  | 80.1  | 68.8  | 90.4  | 77.0  | 99.9  | 134.6 | 162.6 | 93.5  |
| 142.1 | 60.3  | 68.9  | 75.4  | 71.8  | 67.5  | 112.8 | 122.9 | 90.4  |
| 5.2   | 0.9   | 3.7   | 3.7   | 5.3   | 1.0   | 2.8   | 9.7   | 0.9   |
| 8.0   | 5.5   | 8.4   | 11.0  | 10.3  | 6.7   | 9.1   | 9.3   | 7.9   |
| 4.3   | 2.2   | 1.9   | 1.8   | 4.0   | 4.4   | 9.5   | 2.8   | 3.3   |
| 6.4   | 1.5   | 5.1   | 1.7   | 5.6   | 7.5   | 11.8  | 5.7   | 1.8   |
| 113.9 | 93.7  | 127.2 | 95.4  | 90.1  | 99.2  | 130.2 | 125.0 | 165.0 |
| 1.7   | 8.5   | 1.0   | 2.3   | 1.9   | 6.9   | 6.5   | 3.3   | 4.0   |
| 2.9   | 3.7   | 2.4   | 2.6   | 2.1   | 5.1   | 5.3   | 6.3   | 2.5   |
| 19.3  | 29.2  | 42.6  | 34.2  | 24.3  | 28.3  | 60.5  | 48.1  | 27.5  |
| 128.0 | 84.5  | 99.8  | 97.4  | 111.2 | 99.5  | 173.6 | 193.5 | 114.3 |
| 1.8   | 2.1   | 4.5   | 1.9   | 3.7   | 7.3   | 11.6  | 16.6  | 2.7   |
| 17.4  | 13.6  | 1.2   | 14.6  | 18.6  | 13.6  | 22.5  | 21.5  | 11.2  |
| 42.8  | 28.3  | 27.0  | 31.8  | 33.8  | 35.0  | 48.6  | 67.7  | 35.6  |
| 165.5 | 63.0  | 131.0 | 96.5  | 107.2 | 116.1 | 121.3 | 216.7 | 116.6 |
| 170.0 | 117.2 | 156.2 | 141.8 | 131.8 | 140.5 | 202.2 | 207.0 | 171.0 |
| 82.6  | 82.6  | 78.4  | 89.2  | 104.1 | 66.2  | 115.3 | 93.5  | 80.7  |
| 386.0 | 202.6 | 230.6 | 215.8 | 234.9 | 253.8 | 316.8 | 293.9 | 196.8 |
| 103.6 | 77.3  | 91.8  | 84.7  | 82.4  | 83.2  | 128.9 | 142.4 | 99.5  |
| 55.3  | 40.4  | 38.7  | 49.5  | 42.6  | 39.6  | 48.4  | 61.0  | 35.1  |
| 5.5   | 3.4   | 6.5   | 8.0   | 4.6   | 4.5   | 5.1   | 5.2   | 3.5   |
| 183.1 | 81.4  | 98.7  | 89.2  | 94.6  | 105.9 | 135.5 | 170.2 | 114.6 |
| 271.6 | 139.0 | 174.8 | 168.4 | 183.4 | 186.7 | 207.2 | 269.8 | 207.4 |
| 31.1  | 19.8  | 17.9  | 23.7  | 30.2  | 30.2  | 37.4  | 57.7  | 38.3  |
| 36.7  | 23.6  | 31.1  | 39.1  | 33.8  | 40.7  | 34.5  | 40.9  | 29.7  |
| 41.3  | 21.3  | 40.4  | 25.6  | 25.5  | 41.0  | 49.9  | 67.3  | 44.2  |
| 1.4   | 0.9   | 1.1   | 0.5   | 1.4   | 0.8   | 1.6   | 0.8   | 1.8   |
| 88.4  | 57.0  | 61.8  | 65.3  | 71.9  | 65.0  | 90.6  | 86.9  | 65.8  |
| 217.0 | 142.1 | 172.5 | 171.6 | 145.6 | 186.0 | 231.4 | 262.4 | 168.7 |
| 286.9 | 182.9 | 196.0 | 214.1 | 220.5 | 220.1 | 292.4 | 334.3 | 227.6 |
| 15.2  | 13.2  | 12.2  | 11.9  | 16.1  | 15.5  | 23.4  | 29.3  | 9.5   |
| 259.4 | 154.6 | 170.5 | 188.9 | 175.7 | 179.8 | 207.5 | 263.3 | 196.7 |
| 159.3 | 93.9  | 96.0  | 155.7 | 122.7 | 122.5 | 160.9 | 196.9 | 106.0 |
| 36.0  | 29.9  | 37.4  | 34.0  | 30.6  | 32.1  | 42.8  | 46.0  | 24.5  |
| 25.0  | 28.9  | 20.2  | 24.0  | 23.6  | 24.7  | 38.0  | 42.9  | 30.3  |
| 51.1  | 31.4  | 33.2  | 47.0  | 41.0  | 33.8  | 55.3  | 75.4  | 32.9  |
| 82.7  | 42.5  | 56.1  | 56.6  | 47.1  | 50.3  | 72.6  | 97.1  | 51.4  |
| 140.1 | 81.5  | 116.9 | 119.1 | 104.8 | 96.8  | 135.9 | 126.1 | 106.4 |
| 75.0  | 47.5  | 66.0  | 66.3  | 51.3  | 44.7  | 74.6  | 100.3 | 69.1  |
| 133.8 | 88.8  | 93.0  | 96.9  | 106.2 | 105.4 | 139.7 | 168.7 | 101.7 |
| 136.7 | 87.1  | 126.0 | 124.0 | 113.1 | 101.6 | 167.0 | 162.1 | 123.5 |
| 36.8  | 23.5  | 29.9  | 29.5  | 29.5  | 25.2  | 45.0  | 48.0  | 32.3  |
| 207.0 | 132.1 | 118.4 | 156.4 | 137.4 | 118.6 | 204.5 | 219.2 | 129.9 |
| 68.0  | 47.9  | 34.2  | 39.7  | 42.4  | 53.2  | 49.4  | 80.5  | 65.6  |
| 284.2 | 253.5 | 267.0 | 312.9 | 294.8 | 266.4 | 355.5 | 339.5 | 271.9 |
| 26.5  | 17.0  | 13.6  | 17.1  | 14.3  | 16.3  | 29.2  | 34.3  | 19.1  |
| 364.1 | 184.8 | 189.6 | 243.8 | 293.7 | 298.1 | 394.0 | 444.8 | 383.6 |
| 103.0 | 62.7  | 100.4 | 81.4  | 61.9  | 92.6  | 107.5 | 115.0 | 70.1  |
| 27.8  | 6.1   | 23.4  | 16.1  | 12.0  | 24.2  | 25.2  | 28.8  | 21.7  |
| 49.4  | 38.8  | 32.9  | 55.0  | 37.8  | 25.9  | 61.3  | 60.1  | 35.9  |
| 29.7  | 17.6  | 23.0  | 15.2  | 23.2  | 21.1  | 37.8  | 39.1  | 24.1  |
| 3.9   | 2.3   | 3.0   | 1.8   | 1.9   | 5.3   | 7.7   | 5.3   | 4.2   |

|        |       |       |       |        |       |        |        |       |
|--------|-------|-------|-------|--------|-------|--------|--------|-------|
| 154.0  | 89.7  | 89.0  | 101.2 | 96.9   | 90.5  | 134.0  | 140.3  | 119.1 |
| 17.5   | 10.6  | 10.2  | 16.9  | 17.2   | 10.7  | 14.5   | 23.0   | 14.5  |
| 41.4   | 35.9  | 35.0  | 31.7  | 37.9   | 36.0  | 50.0   | 66.2   | 40.5  |
| 8.7    | 9.6   | 7.8   | 6.9   | 5.8    | 8.4   | 10.5   | 13.5   | 8.8   |
| 95.5   | 79.1  | 57.7  | 84.6  | 72.1   | 76.8  | 106.3  | 108.7  | 76.0  |
| 327.5  | 263.7 | 292.1 | 307.4 | 306.8  | 324.5 | 410.4  | 431.7  | 359.7 |
| 28.8   | 23.3  | 22.0  | 15.7  | 20.5   | 19.1  | 26.5   | 27.6   | 17.8  |
| 67.7   | 25.2  | 42.8  | 41.5  | 42.8   | 33.1  | 43.8   | 50.1   | 46.6  |
| 1.0    | 3.5   | 0.8   | 0.4   | 1.1    | 0.6   | 1.1    | 0.9    | 0.8   |
| 48.9   | 36.7  | 44.6  | 45.9  | 50.2   | 52.3  | 67.1   | 69.4   | 45.3  |
| 32.4   | 31.1  | 23.9  | 33.0  | 40.9   | 30.4  | 43.6   | 55.1   | 33.6  |
| 51.5   | 42.9  | 60.9  | 43.3  | 40.0   | 49.2  | 56.6   | 68.8   | 31.9  |
| 33.3   | 19.0  | 24.0  | 20.0  | 18.8   | 22.1  | 34.0   | 48.7   | 24.5  |
| 0.9    | 4.0   | 1.3   | 0.2   | 0.3    | 1.8   | 7.6    | 1.7    | 5.2   |
| 3.3    | 0.5   | 1.5   | 2.3   | 0.2    | 1.7   | 0.6    | 2.1    | 4.1   |
| 81.3   | 60.5  | 39.3  | 58.0  | 56.8   | 42.3  | 63.9   | 56.9   | 42.9  |
| 36.0   | 26.3  | 26.1  | 26.2  | 27.6   | 26.3  | 16.1   | 26.1   | 26.9  |
| 5.3    | 0.5   | 4.4   | 0.9   | 3.5    | 4.1   | 3.9    | 4.9    | 3.5   |
| 14.1   | 14.5  | 10.3  | 8.2   | 13.9   | 11.6  | 11.0   | 23.5   | 13.4  |
| 36.3   | 34.2  | 32.6  | 34.2  | 37.2   | 36.1  | 46.3   | 71.2   | 43.9  |
| 139.8  | 88.0  | 107.5 | 128.0 | 130.3  | 137.2 | 201.1  | 232.3  | 151.7 |
| 118.8  | 114.2 | 112.5 | 139.5 | 127.0  | 109.7 | 152.6  | 181.4  | 116.7 |
| 286.2  | 359.9 | 240.3 | 290.6 | 306.9  | 198.2 | 512.6  | 269.0  | 318.8 |
| 8.4    | 1.0   | 7.6   | 0.5   | 8.0    | 7.6   | 3.4    | 7.9    | 6.3   |
| 23.4   | 11.5  | 8.6   | 12.5  | 11.9   | 12.2  | 10.5   | 19.0   | 16.0  |
| 33.3   | 27.5  | 32.2  | 17.6  | 32.0   | 21.3  | 43.6   | 31.5   | 18.8  |
| 19.9   | 24.2  | 18.0  | 23.8  | 21.4   | 21.3  | 28.9   | 25.9   | 27.8  |
| 17.1   | 15.6  | 12.4  | 13.2  | 8.4    | 9.6   | 13.8   | 17.6   | 8.0   |
| 85.5   | 72.9  | 55.3  | 67.2  | 81.9   | 81.7  | 98.1   | 136.1  | 89.8  |
| 376.0  | 150.4 | 248.1 | 191.5 | 179.2  | 206.3 | 220.7  | 242.8  | 228.6 |
| 564.3  | 282.3 | 321.7 | 434.0 | 417.7  | 409.2 | 476.6  | 571.6  | 341.7 |
| 80.9   | 52.7  | 60.2  | 60.5  | 75.2   | 62.0  | 92.2   | 96.0   | 58.0  |
| 162.3  | 130.2 | 120.6 | 156.9 | 143.0  | 142.4 | 218.0  | 234.5  | 133.4 |
| 59.7   | 49.7  | 46.0  | 50.2  | 56.5   | 47.0  | 57.0   | 62.5   | 52.0  |
| 1079.3 | 854.4 | 864.9 | 917.2 | 1010.0 | 980.4 | 1352.9 | 1519.5 | 784.0 |
| 40.8   | 25.3  | 27.7  | 36.5  | 33.6   | 36.4  | 36.8   | 36.1   | 31.9  |
| 53.8   | 33.4  | 41.3  | 47.6  | 52.6   | 47.1  | 69.1   | 94.4   | 43.2  |
| 54.8   | 27.1  | 33.6  | 42.0  | 41.3   | 41.7  | 63.2   | 76.8   | 42.6  |
| 38.2   | 23.7  | 26.5  | 22.2  | 30.1   | 21.7  | 40.4   | 44.0   | 31.2  |
| 77.1   | 43.8  | 50.3  | 60.7  | 52.3   | 56.2  | 78.2   | 77.8   | 65.5  |
| 122.5  | 62.6  | 75.2  | 72.7  | 78.4   | 88.1  | 103.6  | 115.9  | 96.8  |
| 5.5    | 3.9   | 3.6   | 2.8   | 1.8    | 2.6   | 4.3    | 4.7    | 2.3   |
| 1.0    | 0.1   | 1.9   | 1.4   | 4.1    | 0.5   | 2.1    | 1.1    | 1.8   |
| 3.9    | 0.6   | 3.4   | 3.4   | 6.7    | 6.4   | 4.1    | 4.1    | 3.0   |
| 1.1    | 1.1   | 3.3   | 1.8   | 4.6    | 3.1   | 1.6    | 1.3    | 2.5   |
| 79.9   | 40.1  | 46.6  | 44.0  | 59.8   | 58.1  | 83.8   | 102.2  | 68.7  |
| 83.5   | 60.3  | 66.8  | 65.0  | 69.7   | 62.7  | 89.4   | 102.9  | 74.7  |
| 45.7   | 11.0  | 14.2  | 12.0  | 13.7   | 13.7  | 16.2   | 31.2   | 20.0  |
| 56.1   | 45.3  | 44.2  | 50.5  | 56.4   | 42.4  | 57.9   | 61.6   | 48.8  |
| 0.4    | 0.8   | 1.2   | 0.3   | 0.4    | 0.4   | 0.4    | 1.2    | 0.7   |
| 10.1   | 21.2  | 11.2  | 9.8   | 16.2   | 15.8  | 9.5    | 6.5    | 20.9  |
| 90.8   | 65.0  | 64.9  | 77.6  | 93.6   | 75.3  | 107.3  | 119.1  | 102.7 |
| 52.1   | 29.6  | 39.1  | 44.3  | 32.1   | 39.1  | 57.1   | 48.6   | 40.0  |

|       |       |       |       |       |       |       |       |       |
|-------|-------|-------|-------|-------|-------|-------|-------|-------|
| 181.3 | 102.7 | 104.1 | 115.7 | 121.3 | 109.8 | 154.2 | 199.6 | 108.3 |
| 72.2  | 61.7  | 61.3  | 62.4  | 73.3  | 57.1  | 98.7  | 90.0  | 70.4  |
| 50.2  | 26.1  | 44.4  | 31.8  | 46.1  | 25.8  | 34.2  | 59.9  | 30.8  |
| 156.8 | 103.8 | 113.1 | 117.7 | 142.6 | 120.5 | 174.6 | 218.7 | 156.2 |
| 18.4  | 8.5   | 7.5   | 13.9  | 15.7  | 12.8  | 15.8  | 31.9  | 12.4  |
| 34.1  | 21.3  | 22.3  | 33.1  | 26.3  | 22.2  | 32.6  | 37.5  | 21.6  |
| 45.4  | 22.5  | 33.6  | 32.6  | 46.9  | 45.8  | 53.3  | 108.7 | 32.0  |
| 250.5 | 160.8 | 185.9 | 193.3 | 208.1 | 181.4 | 260.5 | 259.0 | 162.5 |
| 102.8 | 81.5  | 71.8  | 88.9  | 85.8  | 89.6  | 125.3 | 167.3 | 97.4  |
| 92.8  | 59.8  | 74.6  | 73.4  | 77.3  | 90.1  | 91.4  | 149.6 | 81.2  |
| 79.3  | 48.1  | 47.4  | 50.0  | 57.8  | 74.4  | 81.6  | 90.0  | 58.6  |
| 24.8  | 22.2  | 18.5  | 27.7  | 30.6  | 18.5  | 23.5  | 36.0  | 27.7  |
| 18.3  | 14.2  | 11.7  | 17.3  | 18.2  | 14.8  | 43.3  | 27.1  | 19.0  |
| 1.0   | 1.0   | 6.0   | 7.6   | 5.9   | 1.0   | 2.3   | 2.2   | 5.9   |
| 1.1   | 1.0   | 4.1   | 0.9   | 3.6   | 1.9   | 1.6   | 10.9  | 5.4   |
| 155.4 | 130.0 | 107.6 | 110.7 | 154.4 | 126.1 | 218.7 | 196.7 | 155.6 |
| 115.1 | 78.9  | 75.9  | 79.6  | 86.0  | 93.9  | 118.5 | 148.3 | 103.6 |
| 18.6  | 8.8   | 13.1  | 5.7   | 15.9  | 10.2  | 13.6  | 23.7  | 10.5  |
| 92.0  | 49.5  | 57.5  | 47.9  | 65.9  | 57.7  | 77.0  | 86.1  | 56.4  |
| 13.8  | 8.5   | 6.9   | 0.8   | 1.9   | 11.7  | 1.6   | 8.1   | 19.8  |
| 37.3  | 8.5   | 12.9  | 10.5  | 13.5  | 16.5  | 22.2  | 30.6  | 24.9  |
| 66.8  | 32.8  | 33.1  | 40.6  | 47.4  | 37.2  | 60.5  | 92.0  | 52.9  |
| 66.9  | 39.1  | 48.2  | 40.7  | 50.6  | 55.2  | 70.6  | 68.1  | 46.6  |
| 88.6  | 98.0  | 79.3  | 69.6  | 117.3 | 80.5  | 114.3 | 142.6 | 117.0 |
| 183.3 | 133.9 | 158.4 | 168.0 | 161.4 | 164.3 | 198.1 | 230.5 | 174.5 |
| 156.6 | 76.9  | 96.3  | 117.0 | 112.6 | 129.6 | 141.4 | 208.3 | 146.1 |
| 42.3  | 31.0  | 34.4  | 26.4  | 41.4  | 32.8  | 47.0  | 55.7  | 36.4  |
| 475.8 | 363.0 | 288.6 | 349.6 | 449.6 | 405.4 | 506.6 | 826.7 | 846.7 |
| 104.7 | 73.7  | 92.1  | 85.2  | 104.9 | 82.4  | 123.4 | 116.7 | 94.8  |
| 69.0  | 64.3  | 60.2  | 75.5  | 64.8  | 61.0  | 80.8  | 91.0  | 77.4  |
| 27.3  | 10.5  | 18.3  | 33.6  | 16.3  | 26.4  | 46.2  | 52.8  | 29.4  |
| 67.4  | 41.8  | 40.9  | 47.2  | 55.8  | 42.7  | 72.6  | 71.3  | 82.1  |
| 166.3 | 105.2 | 136.4 | 125.9 | 123.7 | 140.1 | 158.7 | 175.2 | 121.0 |
| 33.2  | 18.4  | 19.1  | 20.5  | 23.7  | 16.5  | 23.6  | 22.1  | 25.7  |
| 15.0  | 11.5  | 0.7   | 4.5   | 1.1   | 15.5  | 7.0   | 5.1   | 12.6  |
| 41.8  | 26.4  | 31.9  | 36.9  | 43.4  | 42.1  | 35.6  | 60.1  | 35.5  |
| 213.8 | 132.9 | 159.5 | 179.8 | 172.6 | 195.1 | 266.9 | 302.1 | 151.3 |
| 12.2  | 6.9   | 3.4   | 4.8   | 0.5   | 5.5   | 6.7   | 12.6  | 4.4   |
| 24.5  | 12.6  | 8.9   | 9.8   | 8.1   | 10.3  | 17.0  | 20.0  | 19.0  |
| 46.2  | 33.5  | 34.1  | 41.6  | 41.2  | 43.7  | 46.5  | 68.6  | 29.7  |
| 40.9  | 22.0  | 27.0  | 29.3  | 30.5  | 25.3  | 31.5  | 55.8  | 33.8  |
| 81.6  | 45.8  | 43.1  | 64.0  | 53.6  | 54.2  | 75.6  | 90.4  | 59.6  |
| 29.9  | 11.6  | 18.7  | 13.9  | 17.1  | 13.1  | 27.5  | 31.4  | 15.0  |
| 18.5  | 26.0  | 18.5  | 20.1  | 18.4  | 26.5  | 33.5  | 51.8  | 24.4  |
| 102.3 | 54.9  | 70.9  | 61.0  | 59.5  | 60.3  | 101.4 | 82.0  | 69.3  |
| 187.8 | 122.0 | 194.1 | 189.6 | 178.3 | 165.7 | 184.9 | 244.3 | 173.5 |
| 3.7   | 1.0   | 5.7   | 5.4   | 6.2   | 3.4   | 4.2   | 9.5   | 6.1   |
| 0.7   | 0.9   | 0.9   | 0.9   | 1.0   | 0.4   | 0.8   | 1.1   | 1.7   |
| 58.9  | 49.6  | 53.5  | 52.9  | 64.6  | 56.0  | 82.5  | 86.6  | 49.7  |
| 27.5  | 25.1  | 29.3  | 29.9  | 36.2  | 30.4  | 45.4  | 44.0  | 34.9  |
| 17.0  | 19.6  | 19.4  | 18.1  | 17.6  | 17.4  | 23.1  | 24.4  | 17.7  |
| 44.1  | 23.5  | 23.7  | 46.3  | 39.7  | 39.8  | 46.8  | 53.5  | 34.8  |
| 58.0  | 26.3  | 38.5  | 39.2  | 37.0  | 39.3  | 46.4  | 60.6  | 39.1  |

|        |       |       |       |       |       |       |        |       |
|--------|-------|-------|-------|-------|-------|-------|--------|-------|
| 93.0   | 55.0  | 76.3  | 58.8  | 54.5  | 67.1  | 64.8  | 77.0   | 61.6  |
| 17.2   | 2.5   | 13.2  | 18.6  | 11.5  | 3.4   | 11.8  | 3.6    | 4.9   |
| 19.3   | 15.3  | 17.5  | 18.9  | 19.7  | 18.7  | 32.2  | 34.8   | 23.8  |
| 132.1  | 74.1  | 94.9  | 83.8  | 90.8  | 106.7 | 136.9 | 136.7  | 82.0  |
| 490.3  | 360.4 | 392.4 | 473.4 | 448.2 | 409.5 | 492.5 | 591.4  | 452.0 |
| 0.7    | 0.9   | 1.6   | 5.9   | 1.5   | 0.8   | 0.4   | 1.6    | 2.2   |
| 9.9    | 24.1  | 23.2  | 20.3  | 28.9  | 31.4  | 34.3  | 42.7   | 35.3  |
| 11.5   | 20.7  | 21.9  | 16.0  | 14.8  | 28.3  | 25.9  | 20.1   | 23.6  |
| 627.4  | 406.5 | 433.7 | 510.8 | 507.2 | 528.3 | 670.3 | 972.7  | 563.7 |
| 78.8   | 263.8 | 268.6 | 302.5 | 299.8 | 292.8 | 407.6 | 524.8  | 372.3 |
| 4.4    | 8.4   | 2.6   | 0.6   | 10.1  | 1.0   | 4.9   | 10.6   | 5.8   |
| 2.9    | 0.6   | 3.6   | 0.8   | 0.5   | 4.9   | 2.6   | 6.7    | 0.7   |
| 0.4    | 1.5   | 0.2   | 0.3   | 0.7   | 0.9   | 0.6   | 0.7    | 0.8   |
| 87.7   | 66.4  | 64.3  | 76.5  | 79.4  | 74.4  | 100.1 | 123.3  | 105.9 |
| 25.0   | 18.5  | 24.9  | 29.3  | 22.9  | 27.3  | 28.5  | 49.5   | 19.1  |
| 191.8  | 124.1 | 134.0 | 149.5 | 135.2 | 131.3 | 201.0 | 257.0  | 151.2 |
| 0.4    | 0.5   | 0.5   | 0.9   | 1.1   | 0.7   | 0.5   | 0.6    | 1.1   |
| 325.1  | 189.5 | 220.7 | 217.4 | 259.6 | 253.9 | 383.6 | 498.7  | 263.8 |
| 280.5  | 184.8 | 196.9 | 205.6 | 223.1 | 232.3 | 276.0 | 345.0  | 202.2 |
| 15.7   | 6.8   | 6.8   | 7.9   | 9.8   | 9.3   | 18.1  | 11.7   | 10.3  |
| 1.5    | 1.8   | 0.9   | 0.5   | 0.5   | 0.6   | 1.6   | 1.2    | 1.2   |
| 111.7  | 180.6 | 195.1 | 186.7 | 211.3 | 159.4 | 219.0 | 138.5  | 184.4 |
| 56.7   | 41.4  | 49.0  | 49.1  | 33.5  | 47.4  | 62.7  | 92.7   | 43.6  |
| 127.2  | 102.3 | 115.7 | 92.2  | 91.7  | 95.6  | 119.2 | 105.9  | 84.8  |
| 43.5   | 34.2  | 43.2  | 21.2  | 43.3  | 36.7  | 47.6  | 41.5   | 29.1  |
| 13.8   | 8.0   | 11.6  | 7.4   | 6.9   | 8.0   | 10.9  | 6.2    | 25.7  |
| 76.4   | 31.9  | 23.4  | 51.4  | 48.7  | 34.0  | 56.5  | 63.3   | 41.8  |
| 257.9  | 219.2 | 268.1 | 276.3 | 262.1 | 286.9 | 325.4 | 428.4  | 375.1 |
| 17.0   | 11.6  | 2.0   | 15.3  | 12.5  | 3.8   | 14.8  | 14.9   | 13.5  |
| 4.7    | 1.6   | 5.5   | 2.3   | 2.1   | 10.2  | 4.4   | 2.0    | 6.0   |
| 232.5  | 161.7 | 167.0 | 173.6 | 161.3 | 187.1 | 239.1 | 277.9  | 173.6 |
| 21.9   | 17.1  | 29.5  | 14.6  | 33.0  | 17.0  | 28.8  | 30.7   | 23.9  |
| 124.5  | 76.7  | 76.7  | 98.3  | 98.4  | 92.1  | 116.9 | 151.3  | 92.6  |
| 24.1   | 10.4  | 10.3  | 19.5  | 14.8  | 13.2  | 4.7   | 12.8   | 5.3   |
| 106.1  | 59.7  | 107.5 | 83.8  | 103.6 | 92.0  | 127.9 | 133.1  | 98.0  |
| 6.8    | 5.6   | 11.3  | 5.4   | 5.6   | 1.4   | 2.7   | 1.2    | 6.0   |
| 0.7    | 0.4   | 2.8   | 0.2   | 0.7   | 0.5   | 4.4   | 0.6    | 1.0   |
| 7.4    | 0.8   | 4.1   | 8.1   | 6.1   | 1.9   | 4.4   | 13.3   | 7.1   |
| 5.7    | 5.8   | 1.3   | 1.5   | 3.3   | 7.0   | 6.5   | 5.3    | 5.2   |
| 92.0   | 78.2  | 79.5  | 76.7  | 99.1  | 80.5  | 113.5 | 160.5  | 89.8  |
| 153.8  | 105.6 | 103.6 | 110.7 | 126.1 | 129.4 | 163.8 | 200.3  | 151.7 |
| 114.2  | 62.9  | 64.2  | 71.3  | 54.8  | 70.6  | 95.6  | 152.6  | 80.3  |
| 1009.8 | 491.1 | 546.6 | 570.2 | 595.5 | 689.7 | 753.5 | 1020.9 | 790.6 |
| 27.5   | 38.3  | 40.6  | 45.1  | 46.7  | 43.4  | 51.0  | 52.0   | 31.2  |
| 290.8  | 234.9 | 264.2 | 269.3 | 274.4 | 288.1 | 353.8 | 409.9  | 291.2 |
| 188.9  | 84.3  | 107.6 | 123.1 | 113.2 | 143.3 | 190.8 | 221.9  | 97.2  |
| 337.6  | 438.1 | 384.7 | 439.9 | 481.8 | 400.0 | 642.4 | 721.9  | 432.6 |
| 92.5   | 88.1  | 94.5  | 85.9  | 118.4 | 99.8  | 211.6 | 215.0  | 181.3 |
| 209.4  | 136.2 | 172.2 | 189.2 | 178.0 | 171.6 | 190.5 | 218.1  | 128.4 |
| 124.6  | 69.6  | 83.8  | 84.8  | 89.7  | 94.0  | 101.2 | 113.2  | 80.3  |
| 19.7   | 13.1  | 1.4   | 14.1  | 1.5   | 5.7   | 13.7  | 25.3   | 7.4   |
| 32.9   | 30.5  | 34.0  | 22.6  | 26.0  | 28.6  | 28.6  | 42.0   | 35.5  |
| 1.6    | 0.2   | 2.0   | 4.0   | 0.1   | 0.2   | 0.8   | 0.9    | 1.9   |

|       |       |       |       |       |       |        |        |       |
|-------|-------|-------|-------|-------|-------|--------|--------|-------|
| 10.0  | 8.3   | 6.5   | 8.3   | 6.8   | 7.0   | 5.5    | 9.7    | 11.3  |
| 66.2  | 43.5  | 36.2  | 43.6  | 55.9  | 49.6  | 62.6   | 71.3   | 44.5  |
| 4.2   | 7.9   | 5.1   | 2.3   | 9.0   | 10.4  | 8.9    | 2.5    | 3.0   |
| 63.7  | 22.7  | 40.1  | 44.9  | 34.0  | 34.5  | 49.9   | 58.6   | 28.5  |
| 148.6 | 112.8 | 100.8 | 143.5 | 118.2 | 106.6 | 166.9  | 173.4  | 168.7 |
| 81.9  | 51.1  | 57.8  | 56.3  | 59.6  | 58.1  | 76.9   | 70.8   | 58.9  |
| 58.8  | 0.4   | 1.5   | 1.2   | 3.4   | 2.7   | 1.3    | 3.6    | 0.9   |
| 54.7  | 37.9  | 40.6  | 44.3  | 48.1  | 54.2  | 68.0   | 84.4   | 69.7  |
| 53.3  | 49.2  | 44.4  | 47.8  | 50.4  | 47.3  | 71.2   | 77.7   | 54.6  |
| 222.4 | 151.2 | 200.4 | 206.2 | 200.1 | 215.1 | 230.1  | 266.4  | 176.2 |
| 38.9  | 35.3  | 37.5  | 40.3  | 44.5  | 34.0  | 40.3   | 45.9   | 44.9  |
| 47.7  | 46.7  | 61.7  | 63.7  | 60.7  | 53.2  | 68.2   | 69.6   | 40.0  |
| 241.9 | 62.8  | 60.2  | 76.9  | 56.5  | 62.6  | 66.8   | 54.8   | 48.4  |
| 509.7 | 320.7 | 344.1 | 428.1 | 402.5 | 373.3 | 556.9  | 596.2  | 391.7 |
| 450.8 | 264.9 | 205.7 | 224.5 | 257.5 | 223.7 | 283.8  | 418.4  | 306.9 |
| 72.1  | 30.7  | 48.1  | 52.0  | 56.0  | 52.2  | 60.2   | 73.0   | 39.6  |
| 9.9   | 6.7   | 10.9  | 2.0   | 8.6   | 7.8   | 18.4   | 21.5   | 12.5  |
| 138.2 | 131.9 | 125.4 | 140.8 | 146.0 | 120.6 | 181.7  | 169.8  | 116.9 |
| 84.7  | 67.8  | 71.7  | 85.7  | 76.6  | 70.4  | 105.9  | 96.1   | 91.9  |
| 124.6 | 54.9  | 82.5  | 81.6  | 66.6  | 96.2  | 104.8  | 101.8  | 109.7 |
| 4.0   | 4.9   | 5.3   | 3.9   | 6.7   | 10.0  | 8.8    | 10.7   | 5.0   |
| 813.8 | 523.1 | 648.6 | 658.2 | 670.9 | 671.0 | 796.5  | 885.1  | 605.0 |
| 24.5  | 7.2   | 14.6  | 20.1  | 12.0  | 20.6  | 27.3   | 27.6   | 15.1  |
| 50.0  | 40.1  | 42.5  | 46.3  | 32.0  | 49.9  | 70.2   | 84.7   | 46.1  |
| 169.6 | 114.4 | 118.2 | 144.2 | 146.0 | 171.6 | 226.8  | 330.0  | 241.8 |
| 140.0 | 123.0 | 134.2 | 150.6 | 154.9 | 131.3 | 179.7  | 155.4  | 135.4 |
| 75.3  | 44.9  | 57.8  | 61.9  | 58.1  | 49.5  | 83.2   | 82.1   | 69.1  |
| 31.9  | 24.2  | 27.0  | 27.1  | 31.8  | 27.1  | 44.8   | 45.3   | 32.3  |
| 85.4  | 30.5  | 50.2  | 40.7  | 43.5  | 48.0  | 50.9   | 44.9   | 30.7  |
| 2.7   | 7.5   | 3.2   | 2.9   | 3.5   | 3.8   | 3.1    | 1.4    | 3.8   |
| 15.9  | 11.2  | 3.9   | 4.6   | 8.2   | 13.0  | 9.4    | 14.2   | 13.6  |
| 2.4   | 3.4   | 4.3   | 1.5   | 1.8   | 1.1   | 0.8    | 2.5    | 7.9   |
| 14.7  | 8.7   | 8.6   | 11.9  | 7.4   | 11.7  | 2.9    | 8.9    | 19.6  |
| 73.5  | 4.6   | 3.8   | 6.5   | 4.8   | 8.3   | 6.0    | 23.5   | 5.1   |
| 7.0   | 8.2   | 4.8   | 2.8   | 3.3   | 6.8   | 4.8    | 2.6    | 1.4   |
| 0.8   | 4.5   | 3.1   | 5.7   | 1.3   | 4.7   | 5.7    | 6.7    | 6.1   |
| 0.7   | 3.3   | 0.3   | 0.2   | 0.2   | 2.9   | 3.6    | 3.3    | 4.5   |
| 944.2 | 651.0 | 679.5 | 771.6 | 843.6 | 808.6 | 1013.4 | 1039.2 | 780.5 |
| 7.1   | 1.4   | 3.1   | 1.1   | 5.9   | 1.5   | 5.1    | 7.6    | 3.4   |
| 62.2  | 54.9  | 46.9  | 54.1  | 46.9  | 69.1  | 66.8   | 89.7   | 62.3  |
| 29.1  | 8.6   | 10.9  | 13.4  | 15.3  | 14.6  | 21.2   | 40.8   | 17.9  |
| 7.5   | 7.1   | 7.8   | 8.8   | 5.6   | 13.5  | 7.9    | 13.9   | 6.8   |
| 0.9   | 1.3   | 1.8   | 0.6   | 0.8   | 2.0   | 2.6    | 1.5    | 1.2   |
| 818.1 | 501.1 | 528.7 | 545.8 | 603.3 | 610.3 | 763.4  | 930.2  | 630.4 |
| 21.0  | 6.3   | 6.2   | 7.6   | 9.4   | 9.8   | 13.1   | 9.8    | 8.2   |
| 44.5  | 34.8  | 46.6  | 50.1  | 47.0  | 60.1  | 60.7   | 95.3   | 54.4  |
| 18.8  | 10.6  | 17.9  | 13.4  | 14.1  | 13.6  | 22.0   | 29.4   | 12.7  |
| 60.2  | 40.3  | 54.0  | 59.0  | 51.7  | 46.3  | 77.3   | 93.9   | 57.2  |
| 260.0 | 169.5 | 222.6 | 220.2 | 214.3 | 231.6 | 283.3  | 273.5  | 229.7 |
| 3.7   | 1.0   | 1.6   | 1.7   | 2.0   | 1.7   | 1.1    | 2.9    | 1.5   |
| 24.9  | 18.8  | 21.0  | 21.0  | 18.5  | 25.6  | 34.0   | 48.1   | 22.6  |
| 52.5  | 27.1  | 42.1  | 47.8  | 39.9  | 50.6  | 60.8   | 79.8   | 38.3  |
| 47.2  | 15.8  | 26.5  | 31.4  | 33.5  | 28.9  | 54.0   | 74.7   | 43.1  |

|       |       |       |       |       |       |       |       |       |
|-------|-------|-------|-------|-------|-------|-------|-------|-------|
| 50.5  | 24.1  | 36.2  | 33.6  | 38.8  | 39.6  | 51.2  | 75.7  | 50.1  |
| 20.1  | 9.1   | 10.9  | 10.9  | 15.9  | 16.6  | 20.5  | 31.0  | 23.8  |
| 21.1  | 2.8   | 12.5  | 12.8  | 4.3   | 14.2  | 4.8   | 11.9  | 17.9  |
| 100.6 | 59.2  | 64.2  | 61.1  | 72.1  | 70.5  | 116.5 | 150.2 | 100.6 |
| 3.9   | 11.3  | 6.2   | 2.7   | 6.4   | 3.3   | 5.6   | 7.0   | 13.9  |
| 15.3  | 11.1  | 9.6   | 14.9  | 12.3  | 5.3   | 13.6  | 17.4  | 10.9  |
| 80.3  | 51.1  | 55.1  | 47.4  | 58.5  | 61.4  | 65.2  | 82.1  | 59.0  |
| 20.0  | 12.0  | 3.7   | 12.2  | 13.1  | 13.2  | 13.4  | 20.0  | 16.5  |
| 34.3  | 31.6  | 31.9  | 43.1  | 44.9  | 38.5  | 59.1  | 57.5  | 79.5  |
| 114.3 | 37.4  | 63.6  | 30.3  | 33.5  | 40.5  | 41.5  | 42.0  | 78.5  |
| 2.5   | 8.8   | 5.5   | 4.2   | 10.6  | 7.7   | 10.5  | 13.8  | 14.0  |
| 2.5   | 5.2   | 5.9   | 6.7   | 2.8   | 4.9   | 1.4   | 4.6   | 1.4   |
| 32.3  | 29.0  | 26.7  | 27.7  | 26.3  | 31.0  | 34.2  | 34.6  | 24.8  |
| 8.7   | 5.6   | 3.2   | 0.5   | 6.0   | 8.2   | 4.7   | 5.5   | 0.6   |
| 1.1   | 5.5   | 0.5   | 1.2   | 1.8   | 0.5   | 1.5   | 0.8   | 4.0   |
| 27.5  | 59.1  | 48.3  | 64.0  | 59.6  | 49.0  | 78.1  | 58.8  | 64.0  |
| 0.5   | 10.2  | 0.9   | 5.3   | 11.9  | 4.2   | 5.2   | 6.1   | 3.3   |
| 332.6 | 226.9 | 238.8 | 274.2 | 264.7 | 263.8 | 366.9 | 361.7 | 217.3 |
| 102.1 | 64.8  | 76.8  | 81.4  | 76.7  | 73.7  | 130.9 | 136.0 | 95.5  |
| 171.0 | 103.2 | 126.9 | 139.0 | 139.6 | 120.3 | 186.7 | 197.7 | 143.0 |
| 34.5  | 27.8  | 15.7  | 19.9  | 24.1  | 19.3  | 23.8  | 36.0  | 20.3  |
| 238.4 | 165.7 | 211.6 | 181.1 | 207.8 | 190.4 | 269.4 | 242.1 | 192.5 |
| 108.0 | 46.8  | 42.3  | 62.0  | 61.6  | 50.2  | 88.8  | 74.2  | 68.0  |
| 130.4 | 69.5  | 90.9  | 86.7  | 100.6 | 92.4  | 140.8 | 179.0 | 95.0  |
| 6.1   | 4.9   | 3.2   | 5.4   | 7.9   | 3.0   | 9.1   | 8.7   | 6.7   |
| 42.4  | 32.2  | 33.2  | 40.6  | 39.6  | 36.0  | 48.4  | 62.2  | 32.5  |
| 11.5  | 10.8  | 9.9   | 4.7   | 6.1   | 10.3  | 24.1  | 12.1  | 15.1  |
| 16.1  | 11.2  | 11.6  | 16.5  | 15.8  | 9.1   | 16.9  | 18.4  | 14.7  |
| 74.0  | 57.8  | 51.9  | 61.3  | 70.6  | 47.4  | 90.7  | 84.7  | 78.4  |
| 1.3   | 1.0   | 0.8   | 1.0   | 1.0   | 1.5   | 1.3   | 0.6   | 0.9   |
| 167.5 | 99.9  | 123.6 | 129.2 | 136.7 | 136.5 | 162.4 | 199.4 | 129.6 |
| 24.0  | 20.5  | 14.7  | 20.2  | 15.1  | 14.4  | 29.1  | 31.9  | 25.2  |
| 13.7  | 10.0  | 10.6  | 10.2  | 10.0  | 6.2   | 16.7  | 19.2  | 10.5  |
| 1.3   | 2.2   | 2.0   | 1.7   | 1.2   | 2.2   | 1.2   | 1.7   | 0.8   |
| 31.7  | 13.9  | 11.0  | 7.5   | 16.8  | 10.1  | 16.6  | 27.3  | 21.4  |
| 373.4 | 323.1 | 353.9 | 368.0 | 376.2 | 351.0 | 442.1 | 435.0 | 295.5 |
| 53.0  | 32.7  | 45.5  | 45.6  | 41.4  | 34.4  | 55.9  | 52.3  | 39.9  |
| 135.3 | 90.8  | 92.2  | 102.7 | 105.0 | 90.5  | 122.0 | 193.0 | 104.0 |
| 24.0  | 14.2  | 19.6  | 15.0  | 17.6  | 18.1  | 21.4  | 26.6  | 19.5  |
| 24.2  | 14.8  | 13.5  | 9.2   | 16.7  | 13.1  | 21.4  | 36.3  | 29.1  |
| 205.8 | 154.2 | 173.7 | 150.6 | 182.8 | 197.5 | 189.0 | 244.7 | 131.5 |
| 1.1   | 1.4   | 0.7   | 1.0   | 0.9   | 8.3   | 1.8   | 1.1   | 1.9   |
| 98.1  | 51.2  | 58.4  | 70.2  | 89.3  | 69.9  | 102.1 | 123.4 | 104.3 |
| 150.5 | 91.9  | 118.4 | 141.4 | 124.3 | 119.3 | 181.9 | 155.6 | 114.7 |
| 82.7  | 55.2  | 57.9  | 69.3  | 66.8  | 84.4  | 88.4  | 111.8 | 105.4 |
| 0.8   | 0.6   | 0.4   | 0.9   | 0.6   | 0.4   | 0.9   | 1.5   | 1.5   |
| 0.8   | 0.9   | 1.0   | 0.4   | 1.3   | 0.6   | 0.5   | 0.9   | 0.6   |
| 4.5   | 9.3   | 8.0   | 11.6  | 8.7   | 15.7  | 9.5   | 10.3  | 7.2   |
| 32.7  | 36.8  | 32.4  | 41.2  | 45.8  | 33.7  | 55.4  | 50.1  | 43.0  |
| 37.9  | 33.4  | 24.3  | 35.3  | 36.0  | 27.1  | 54.4  | 61.9  | 41.9  |
| 136.8 | 95.3  | 81.7  | 98.7  | 126.1 | 98.4  | 144.5 | 178.5 | 128.9 |
| 326.4 | 221.8 | 231.6 | 228.0 | 243.9 | 201.5 | 322.6 | 304.7 | 246.0 |
| 85.9  | 60.4  | 67.1  | 73.1  | 67.7  | 55.4  | 74.4  | 85.2  | 52.5  |

|       |       |        |        |        |        |        |        |        |
|-------|-------|--------|--------|--------|--------|--------|--------|--------|
| 13.0  | 8.5   | 10.6   | 12.8   | 17.0   | 10.9   | 9.9    | 13.5   | 9.8    |
| 3.2   | 0.3   | 1.0    | 0.8    | 1.1    | 0.5    | 1.1    | 0.3    | 1.0    |
| 7.9   | 2.3   | 1.7    | 7.0    | 3.8    | 4.2    | 4.9    | 3.9    | 6.1    |
| 231.2 | 62.9  | 110.5  | 110.5  | 108.0  | 130.0  | 182.8  | 209.2  | 120.4  |
| 21.4  | 12.6  | 17.3   | 15.7   | 20.6   | 20.8   | 27.3   | 37.9   | 16.4   |
| 22.5  | 15.1  | 14.3   | 13.5   | 18.1   | 16.0   | 21.6   | 33.9   | 26.0   |
| 30.4  | 18.5  | 19.8   | 20.2   | 21.6   | 18.3   | 28.0   | 27.8   | 20.2   |
| 939.7 | 986.4 | 1165.6 | 1138.0 | 1196.2 | 1087.9 | 1382.2 | 1345.3 | 1074.8 |
| 85.4  | 38.5  | 70.1   | 62.2   | 57.8   | 84.4   | 98.3   | 95.0   | 89.0   |
| 52.0  | 51.7  | 76.4   | 65.2   | 65.1   | 61.0   | 94.0   | 87.2   | 70.5   |
| 317.9 | 259.5 | 314.0  | 353.8  | 360.3  | 336.1  | 427.1  | 443.9  | 316.8  |
| 13.6  | 1.0   | 6.3    | 1.6    | 6.9    | 7.2    | 3.9    | 7.0    | 1.0    |
| 1.3   | 1.4   | 1.3    | 3.9    | 2.5    | 3.1    | 1.3    | 1.1    | 5.0    |
| 106.2 | 118.3 | 119.3  | 166.0  | 178.2  | 164.1  | 200.7  | 278.5  | 180.1  |
| 4.6   | 4.0   | 2.6    | 5.5    | 4.9    | 2.5    | 0.3    | 4.6    | 3.7    |
| 9.1   | 1.4   | 6.5    | 0.6    | 1.1    | 3.6    | 2.7    | 7.0    | 3.8    |
| 4.0   | 2.8   | 3.5    | 1.8    | 5.0    | 3.9    | 5.1    | 7.6    | 4.4    |
| 235.0 | 191.2 | 198.1  | 169.3  | 204.7  | 187.9  | 256.3  | 248.9  | 246.0  |
| 26.7  | 25.4  | 27.3   | 23.3   | 32.9   | 29.1   | 39.2   | 41.8   | 28.9   |
| 59.6  | 48.5  | 39.0   | 54.4   | 52.6   | 40.9   | 66.1   | 99.4   | 68.3   |
| 50.6  | 44.9  | 42.5   | 46.1   | 52.5   | 50.7   | 61.5   | 54.0   | 39.2   |
| 18.4  | 10.2  | 15.1   | 17.6   | 18.9   | 16.6   | 29.8   | 34.6   | 21.5   |
| 14.0  | 11.2  | 15.7   | 11.4   | 5.1    | 18.1   | 19.2   | 27.7   | 17.4   |
| 41.5  | 22.9  | 25.1   | 32.3   | 24.5   | 29.6   | 44.8   | 45.9   | 27.5   |
| 0.4   | 1.7   | 0.4    | 0.9    | 0.5    | 0.4    | 0.8    | 0.8    | 0.6    |
| 147.0 | 127.1 | 140.1  | 146.1  | 115.7  | 136.5  | 190.0  | 180.4  | 137.9  |
| 132.6 | 76.5  | 99.7   | 82.1   | 90.2   | 69.9   | 115.1  | 116.2  | 80.3   |
| 66.5  | 54.7  | 56.7   | 52.6   | 63.0   | 58.3   | 75.0   | 70.6   | 59.7   |
| 48.5  | 73.2  | 51.3   | 51.9   | 58.2   | 51.3   | 70.9   | 74.2   | 76.0   |
| 174.7 | 167.6 | 163.4  | 149.1  | 155.7  | 190.3  | 193.6  | 169.5  | 234.6  |
| 33.9  | 21.2  | 28.3   | 22.5   | 25.1   | 25.2   | 29.1   | 51.2   | 31.7   |
| 17.8  | 6.7   | 9.4    | 9.3    | 10.6   | 11.2   | 17.9   | 18.6   | 8.5    |
| 32.4  | 14.2  | 20.8   | 17.8   | 23.2   | 20.0   | 33.5   | 22.3   | 20.5   |
| 42.1  | 47.3  | 31.2   | 20.1   | 38.7   | 36.6   | 51.0   | 69.2   | 32.1   |
| 240.3 | 131.6 | 126.5  | 125.0  | 196.6  | 160.9  | 213.6  | 317.5  | 179.0  |
| 250.2 | 110.2 | 118.5  | 141.5  | 167.1  | 174.5  | 220.6  | 316.8  | 198.9  |
| 127.4 | 76.9  | 79.9   | 104.0  | 84.1   | 85.5   | 113.2  | 152.4  | 94.6   |
| 104.8 | 82.6  | 80.4   | 78.6   | 101.5  | 88.7   | 119.5  | 166.7  | 112.4  |
| 17.6  | 15.1  | 8.5    | 20.7   | 10.3   | 15.6   | 3.0    | 11.6   | 9.1    |
| 14.4  | 14.0  | 15.9   | 16.1   | 16.5   | 13.0   | 17.4   | 19.9   | 19.0   |
| 0.4   | 2.6   | 5.5    | 2.4    | 2.4    | 2.1    | 4.6    | 0.8    | 3.5    |
| 98.9  | 98.5  | 150.1  | 115.8  | 108.0  | 108.1  | 143.0  | 148.9  | 93.0   |
| 19.1  | 17.3  | 20.0   | 28.1   | 18.3   | 20.1   | 30.0   | 38.5   | 21.7   |
| 47.3  | 34.4  | 53.3   | 50.3   | 65.4   | 44.4   | 65.4   | 81.2   | 58.1   |
| 0.7   | 5.2   | 0.8    | 6.1    | 0.4    | 5.9    | 1.7    | 5.0    | 5.0    |
| 16.0  | 12.8  | 15.4   | 18.6   | 19.7   | 19.0   | 20.3   | 21.2   | 22.5   |
| 83.7  | 31.9  | 29.4   | 38.5   | 30.7   | 33.9   | 34.5   | 65.6   | 44.7   |
| 301.2 | 184.1 | 217.3  | 243.4  | 235.2  | 248.0  | 348.5  | 405.7  | 229.6  |
| 11.2  | 4.7   | 1.3    | 4.4    | 8.4    | 8.7    | 9.7    | 6.5    | 7.0    |
| 11.3  | 1.6   | 2.0    | 6.7    | 0.9    | 1.9    | 2.2    | 8.9    | 3.7    |
| 18.5  | 18.0  | 25.4   | 27.4   | 26.7   | 26.8   | 31.8   | 36.8   | 25.4   |
| 19.5  | 19.0  | 27.2   | 19.6   | 22.1   | 24.8   | 39.0   | 48.1   | 38.6   |
| 22.1  | 24.6  | 20.8   | 26.8   | 26.1   | 26.2   | 22.4   | 42.8   | 29.7   |

|       |       |       |       |       |       |       |       |       |
|-------|-------|-------|-------|-------|-------|-------|-------|-------|
| 107.1 | 61.7  | 74.3  | 61.8  | 76.8  | 70.0  | 104.3 | 106.7 | 53.2  |
| 13.4  | 9.4   | 10.5  | 3.6   | 5.8   | 6.3   | 5.2   | 10.4  | 3.0   |
| 35.6  | 33.8  | 27.6  | 31.6  | 30.8  | 22.1  | 39.8  | 41.2  | 44.1  |
| 0.1   | 0.3   | 0.1   | 0.1   | 0.1   | 0.1   | 0.3   | 0.0   | 1.0   |
| 4.5   | 1.4   | 4.4   | 7.3   | 4.2   | 8.6   | 6.4   | 12.3  | 1.3   |
| 210.1 | 120.4 | 142.3 | 135.9 | 141.0 | 138.4 | 163.8 | 203.1 | 117.2 |
| 668.7 | 484.9 | 598.9 | 614.2 | 654.0 | 603.9 | 904.4 | 870.9 | 713.8 |
| 23.6  | 24.1  | 14.2  | 14.8  | 17.6  | 13.8  | 23.2  | 33.2  | 15.2  |
| 13.9  | 22.2  | 31.8  | 25.3  | 24.0  | 24.2  | 35.0  | 42.3  | 24.9  |
| 3.0   | 1.8   | 1.1   | 1.0   | 0.3   | 2.1   | 1.8   | 2.7   | 0.3   |
| 25.7  | 21.3  | 28.1  | 33.3  | 29.7  | 25.0  | 53.7  | 49.5  | 46.0  |
| 117.3 | 91.7  | 122.5 | 115.6 | 110.8 | 107.3 | 137.6 | 136.1 | 112.0 |
| 139.5 | 84.1  | 130.0 | 107.6 | 130.4 | 106.7 | 195.9 | 181.4 | 121.9 |
| 475.2 | 378.5 | 392.0 | 411.3 | 473.4 | 435.3 | 548.9 | 681.1 | 475.0 |
| 65.3  | 52.0  | 59.7  | 57.4  | 51.4  | 52.6  | 70.5  | 94.6  | 62.1  |
| 172.8 | 77.4  | 72.0  | 87.7  | 98.4  | 81.9  | 101.4 | 121.7 | 73.8  |
| 136.3 | 139.0 | 124.5 | 111.9 | 145.3 | 110.3 | 183.3 | 189.6 | 164.5 |
| 101.0 | 95.5  | 88.9  | 95.3  | 86.7  | 85.7  | 102.2 | 120.5 | 96.0  |
| 12.4  | 4.8   | 11.8  | 8.6   | 8.8   | 4.3   | 13.8  | 9.1   | 4.5   |
| 1.8   | 0.4   | 2.1   | 1.1   | 1.4   | 0.7   | 0.5   | 2.0   | 4.3   |
| 11.9  | 4.9   | 5.3   | 5.9   | 0.7   | 1.7   | 0.9   | 8.9   | 8.4   |
| 470.4 | 449.1 | 472.8 | 528.6 | 575.7 | 560.7 | 716.0 | 856.0 | 646.9 |
| 162.2 | 123.5 | 134.3 | 149.6 | 154.0 | 151.9 | 210.2 | 219.7 | 128.5 |
| 7.9   | 11.2  | 0.6   | 6.1   | 8.6   | 1.1   | 9.8   | 10.1  | 1.6   |
| 61.1  | 50.5  | 41.8  | 47.8  | 55.7  | 50.5  | 66.8  | 76.1  | 41.7  |
| 173.6 | 112.2 | 127.8 | 105.6 | 144.2 | 166.8 | 173.3 | 275.6 | 188.5 |
| 52.6  | 25.6  | 47.9  | 34.4  | 34.9  | 55.5  | 62.7  | 80.3  | 51.0  |
| 23.4  | 4.6   | 5.2   | 3.7   | 4.9   | 8.2   | 8.3   | 15.3  | 9.5   |
| 9.8   | 5.6   | 1.3   | 3.4   | 3.9   | 2.2   | 9.9   | 2.1   | 1.3   |
| 39.1  | 15.7  | 16.1  | 23.7  | 20.9  | 24.4  | 36.3  | 51.9  | 29.0  |
| 83.1  | 41.7  | 51.0  | 53.6  | 54.1  | 40.7  | 67.7  | 72.0  | 46.0  |
| 10.6  | 11.5  | 6.2   | 4.7   | 6.7   | 6.8   | 9.7   | 8.2   | 7.0   |
| 10.5  | 1.0   | 6.8   | 1.4   | 5.1   | 0.9   | 9.4   | 1.3   | 6.2   |
| 276.1 | 219.4 | 193.1 | 250.5 | 211.8 | 211.8 | 281.5 | 245.5 | 172.6 |
| 47.4  | 36.8  | 37.2  | 49.8  | 29.2  | 31.5  | 43.2  | 47.0  | 50.8  |
| 56.2  | 32.2  | 30.5  | 36.4  | 21.8  | 31.9  | 73.6  | 54.6  | 62.9  |
| 5.9   | 6.8   | 2.3   | 3.2   | 10.2  | 4.0   | 7.4   | 7.1   | 1.8   |
| 5.7   | 9.4   | 8.6   | 5.1   | 8.7   | 7.9   | 3.7   | 6.3   | 7.9   |
| 1.3   | 0.7   | 0.6   | 0.8   | 0.6   | 1.3   | 1.1   | 2.9   | 1.3   |
| 0.4   | 0.4   | 1.2   | 0.4   | 0.6   | 1.0   | 1.0   | 0.5   | 0.9   |
| 5.7   | 1.3   | 4.1   | 9.1   | 3.9   | 4.2   | 5.8   | 11.0  | 5.9   |
| 56.4  | 28.9  | 30.1  | 41.0  | 33.4  | 42.8  | 46.1  | 62.0  | 26.2  |
| 107.6 | 58.3  | 59.9  | 67.2  | 69.0  | 66.7  | 90.3  | 134.8 | 79.4  |
| 47.9  | 33.2  | 35.5  | 36.9  | 38.9  | 30.3  | 57.7  | 44.5  | 40.8  |
| 23.8  | 3.5   | 13.1  | 13.1  | 11.0  | 20.5  | 4.4   | 36.8  | 22.6  |
| 4.6   | 1.5   | 2.8   | 8.6   | 5.2   | 2.0   | 8.3   | 0.9   | 5.1   |
| 130.9 | 133.6 | 176.8 | 171.8 | 121.0 | 212.9 | 214.3 | 278.5 | 140.8 |
| 322.8 | 247.7 | 324.0 | 322.2 | 338.0 | 352.0 | 443.0 | 440.6 | 333.9 |
| 146.5 | 65.9  | 88.6  | 75.4  | 96.7  | 80.8  | 107.3 | 102.6 | 84.3  |
| 30.4  | 58.1  | 60.7  | 64.7  | 55.7  | 39.2  | 83.8  | 56.4  | 67.9  |
| 6.2   | 6.4   | 7.5   | 9.8   | 4.8   | 8.3   | 13.0  | 5.4   | 7.4   |
| 33.7  | 16.3  | 15.7  | 21.5  | 15.7  | 15.6  | 28.7  | 33.5  | 21.3  |
| 80.2  | 75.0  | 64.5  | 78.2  | 86.1  | 58.9  | 109.4 | 106.2 | 83.9  |



|        |        |        |        |        |        |        |        |        |
|--------|--------|--------|--------|--------|--------|--------|--------|--------|
| 55.6   | 19.6   | 26.3   | 32.6   | 23.8   | 26.6   | 40.6   | 40.4   | 32.1   |
| 95.3   | 64.5   | 85.3   | 86.9   | 76.3   | 94.2   | 109.5  | 155.9  | 103.1  |
| 16.5   | 19.6   | 20.5   | 18.1   | 26.7   | 21.4   | 23.4   | 36.9   | 26.1   |
| 49.0   | 31.7   | 37.5   | 38.8   | 28.4   | 39.7   | 46.9   | 56.3   | 35.3   |
| 42.2   | 24.6   | 33.2   | 23.6   | 24.3   | 14.7   | 23.9   | 29.3   | 20.6   |
| 83.2   | 63.3   | 55.3   | 62.9   | 58.7   | 57.0   | 86.9   | 68.8   | 74.8   |
| 38.6   | 27.1   | 27.7   | 31.0   | 28.5   | 27.4   | 47.2   | 57.2   | 36.2   |
| 38.1   | 25.4   | 22.1   | 28.2   | 23.1   | 33.3   | 35.6   | 52.2   | 32.7   |
| 12.3   | 6.4    | 10.8   | 15.2   | 14.4   | 14.2   | 22.8   | 13.3   | 14.3   |
| 4.2    | 9.6    | 7.1    | 2.2    | 9.9    | 1.1    | 9.9    | 4.4    | 2.9    |
| 1551.9 | 1404.4 | 1277.9 | 1358.4 | 1459.2 | 1390.6 | 1992.4 | 2122.6 | 1819.8 |
| 89.4   | 42.6   | 75.0   | 64.6   | 66.9   | 83.7   | 107.6  | 107.6  | 89.0   |
| 19.2   | 21.0   | 22.9   | 24.6   | 30.2   | 19.3   | 28.8   | 25.0   | 23.9   |
| 5.2    | 16.8   | 10.6   | 7.1    | 6.4    | 11.5   | 21.6   | 13.0   | 12.3   |
| 1090.1 | 787.9  | 919.3  | 858.7  | 964.4  | 1032.5 | 1316.3 | 1657.0 | 899.9  |
| 45.3   | 29.0   | 39.7   | 33.9   | 36.0   | 32.8   | 45.9   | 54.3   | 36.0   |
| 42.3   | 26.4   | 39.8   | 38.1   | 39.8   | 35.2   | 41.3   | 43.0   | 31.2   |
| 1.0    | 4.3    | 4.4    | 0.8    | 6.2    | 4.1    | 7.9    | 7.4    | 1.5    |
| 19.5   | 6.3    | 9.3    | 11.3   | 11.1   | 13.9   | 18.0   | 14.5   | 12.8   |
| 83.3   | 35.1   | 65.5   | 69.8   | 62.4   | 65.9   | 85.2   | 94.7   | 76.4   |
| 1.9    | 18.9   | 3.5    | 1.6    | 3.4    | 15.7   | 13.4   | 19.6   | 9.3    |
| 63.9   | 51.4   | 44.3   | 50.9   | 52.5   | 38.2   | 67.4   | 85.0   | 55.5   |
| 82.9   | 84.7   | 71.2   | 69.4   | 78.7   | 78.3   | 108.5  | 147.4  | 77.7   |
| 63.4   | 29.6   | 47.3   | 39.3   | 30.8   | 43.1   | 71.5   | 55.3   | 35.2   |
| 129.2  | 79.2   | 98.9   | 99.6   | 102.4  | 106.0  | 135.5  | 124.6  | 82.0   |
| 74.4   | 40.7   | 51.9   | 47.7   | 50.7   | 56.3   | 64.7   | 83.4   | 64.0   |
| 112.6  | 78.8   | 87.6   | 69.4   | 82.5   | 95.1   | 107.5  | 109.2  | 105.0  |
| 84.1   | 56.9   | 57.0   | 66.4   | 70.0   | 52.7   | 87.5   | 111.9  | 64.6   |
| 0.7    | 0.3    | 1.3    | 0.8    | 0.5    | 0.3    | 0.7    | 0.6    | 0.8    |
| 98.7   | 53.3   | 72.4   | 65.1   | 58.7   | 56.0   | 93.1   | 98.7   | 78.5   |
| 12.8   | 5.0    | 10.4   | 6.1    | 4.5    | 8.4    | 7.6    | 9.3    | 0.6    |
| 2.1    | 3.6    | 1.4    | 0.7    | 1.5    | 1.1    | 1.8    | 9.5    | 5.6    |
| 5.5    | 6.4    | 4.4    | 5.3    | 8.6    | 8.5    | 8.6    | 4.4    | 5.1    |
| 148.3  | 117.7  | 133.1  | 134.3  | 162.4  | 128.7  | 156.7  | 166.1  | 141.4  |
| 2.1    | 5.2    | 9.8    | 2.1    | 11.4   | 1.6    | 1.9    | 1.4    | 1.1    |
| 18.3   | 15.4   | 10.2   | 16.0   | 21.2   | 20.3   | 35.2   | 41.3   | 26.6   |
| 68.7   | 49.6   | 57.3   | 66.2   | 57.7   | 74.3   | 100.3  | 125.3  | 58.4   |
| 78.2   | 87.4   | 75.8   | 96.0   | 112.5  | 108.8  | 140.9  | 194.0  | 132.5  |
| 4.6    | 3.6    | 2.5    | 0.5    | 0.7    | 3.1    | 0.5    | 3.1    | 5.9    |
| 34.4   | 30.4   | 35.5   | 25.5   | 25.1   | 23.1   | 35.1   | 51.0   | 30.6   |
| 62.2   | 30.5   | 26.5   | 25.4   | 35.8   | 31.8   | 50.5   | 60.0   | 52.7   |
| 131.3  | 85.4   | 97.9   | 112.4  | 114.0  | 101.8  | 124.8  | 142.2  | 111.5  |
| 9.9    | 1.8    | 7.4    | 5.0    | 6.4    | 2.1    | 3.2    | 7.8    | 8.1    |
| 162.4  | 131.1  | 127.3  | 145.7  | 165.9  | 154.6  | 255.9  | 241.8  | 213.7  |
| 1.2    | 2.5    | 2.0    | 2.0    | 5.8    | 2.4    | 5.7    | 2.1    | 3.4    |
| 0.5    | 1.2    | 0.2    | 1.2    | 0.5    | 0.5    | 0.3    | 0.2    | 0.9    |
| 0.6    | 3.7    | 2.5    | 2.5    | 5.2    | 1.0    | 1.0    | 4.8    | 3.1    |
| 7.2    | 5.5    | 4.9    | 9.6    | 1.0    | 6.3    | 10.3   | 6.4    | 0.3    |
| 80.5   | 54.9   | 82.4   | 78.0   | 84.7   | 92.0   | 92.6   | 105.7  | 88.5   |
| 25.4   | 15.2   | 10.5   | 19.9   | 4.6    | 5.7    | 22.5   | 34.3   | 24.6   |
| 7.8    | 7.9    | 9.9    | 8.8    | 2.9    | 9.8    | 5.6    | 14.7   | 9.4    |
| 138.3  | 76.7   | 85.6   | 86.8   | 92.7   | 103.6  | 130.9  | 184.1  | 127.1  |
| 10.7   | 9.1    | 10.5   | 6.0    | 8.9    | 11.5   | 9.9    | 17.2   | 4.6    |

|       |       |       |       |       |       |       |       |       |
|-------|-------|-------|-------|-------|-------|-------|-------|-------|
| 5.1   | 4.5   | 6.6   | 8.7   | 8.2   | 5.1   | 9.5   | 12.2  | 4.4   |
| 91.5  | 52.8  | 69.7  | 69.3  | 76.5  | 77.7  | 92.8  | 84.2  | 55.9  |
| 0.4   | 1.1   | 0.5   | 0.8   | 0.5   | 3.5   | 7.4   | 4.1   | 0.7   |
| 92.1  | 59.4  | 47.7  | 61.2  | 55.7  | 72.3  | 60.7  | 74.6  | 77.1  |
| 8.1   | 9.3   | 9.7   | 14.4  | 9.6   | 7.0   | 10.5  | 7.4   | 11.2  |
| 31.7  | 10.1  | 14.6  | 21.0  | 18.6  | 15.3  | 25.3  | 50.2  | 21.4  |
| 78.9  | 39.8  | 38.7  | 35.5  | 44.1  | 41.6  | 47.1  | 72.7  | 43.1  |
| 39.2  | 34.9  | 32.6  | 35.8  | 31.7  | 30.7  | 36.7  | 46.8  | 29.0  |
| 123.7 | 88.6  | 82.7  | 78.3  | 87.5  | 96.1  | 131.6 | 137.8 | 91.6  |
| 35.4  | 25.0  | 36.7  | 23.7  | 30.0  | 35.7  | 48.8  | 62.3  | 35.8  |
| 0.8   | 0.6   | 0.4   | 0.9   | 0.8   | 0.4   | 0.6   | 0.8   | 0.9   |
| 8.0   | 1.3   | 0.7   | 6.7   | 7.1   | 0.9   | 4.8   | 1.1   | 1.0   |
| 60.5  | 31.7  | 58.7  | 46.2  | 43.8  | 47.2  | 75.3  | 62.5  | 58.0  |
| 81.8  | 60.7  | 65.4  | 64.8  | 55.7  | 42.6  | 80.6  | 73.5  | 55.1  |
| 92.7  | 76.2  | 78.8  | 80.6  | 82.4  | 70.2  | 108.6 | 103.8 | 94.1  |
| 340.8 | 226.2 | 245.9 | 269.4 | 317.1 | 282.6 | 398.8 | 466.5 | 247.1 |
| 73.7  | 32.7  | 51.3  | 44.9  | 48.1  | 38.6  | 56.0  | 41.6  | 58.2  |
| 44.6  | 26.7  | 33.5  | 40.6  | 41.8  | 33.6  | 43.6  | 43.3  | 32.5  |
| 10.4  | 4.8   | 4.4   | 6.3   | 0.7   | 5.2   | 3.7   | 9.3   | 1.6   |
| 33.1  | 20.0  | 18.0  | 23.1  | 17.0  | 25.2  | 30.5  | 45.1  | 30.5  |
| 30.7  | 32.7  | 36.6  | 42.1  | 32.0  | 34.5  | 48.3  | 54.9  | 32.2  |
| 86.4  | 69.9  | 72.0  | 88.4  | 105.3 | 69.5  | 104.8 | 85.1  | 84.9  |
| 68.6  | 37.5  | 48.1  | 43.0  | 59.5  | 50.1  | 61.6  | 64.0  | 38.6  |
| 6.8   | 2.2   | 4.7   | 3.7   | 0.9   | 0.5   | 2.1   | 3.8   | 1.9   |
| 27.4  | 26.4  | 23.7  | 28.8  | 25.8  | 28.3  | 38.2  | 35.1  | 35.2  |
| 22.7  | 15.0  | 23.0  | 19.8  | 16.4  | 16.8  | 24.2  | 39.3  | 21.7  |
| 60.0  | 48.7  | 49.3  | 59.6  | 48.8  | 47.0  | 66.9  | 77.1  | 51.0  |
| 156.5 | 122.6 | 104.1 | 129.3 | 132.6 | 134.3 | 159.0 | 186.5 | 137.3 |
| 66.7  | 60.9  | 68.2  | 74.2  | 70.8  | 73.7  | 85.7  | 88.2  | 61.9  |
| 50.1  | 30.3  | 28.3  | 25.1  | 41.1  | 36.3  | 39.8  | 83.1  | 35.4  |
| 17.2  | 9.4   | 9.6   | 7.2   | 9.3   | 12.1  | 13.3  | 20.4  | 12.9  |
| 83.7  | 47.8  | 61.6  | 62.1  | 39.2  | 79.9  | 90.8  | 104.3 | 57.0  |
| 141.0 | 79.0  | 80.9  | 95.0  | 92.0  | 91.0  | 113.5 | 138.6 | 88.6  |
| 142.1 | 119.7 | 117.6 | 148.4 | 130.1 | 124.4 | 207.1 | 204.9 | 186.8 |
| 315.9 | 114.2 | 143.5 | 101.7 | 120.7 | 138.0 | 170.5 | 180.2 | 140.1 |
| 4.6   | 7.2   | 5.4   | 4.8   | 2.1   | 0.6   | 12.0  | 9.8   | 4.9   |
| 30.0  | 34.2  | 38.1  | 23.8  | 19.6  | 34.2  | 48.7  | 57.8  | 35.8  |
| 234.3 | 151.0 | 148.1 | 177.1 | 194.1 | 185.9 | 261.6 | 355.4 | 249.8 |
| 176.9 | 115.6 | 133.8 | 125.4 | 137.6 | 144.3 | 192.2 | 179.6 | 123.1 |
| 74.8  | 45.1  | 61.5  | 67.5  | 71.2  | 74.0  | 86.4  | 83.8  | 76.0  |
| 155.1 | 123.3 | 135.6 | 159.1 | 159.2 | 134.1 | 195.4 | 222.1 | 188.7 |
| 17.6  | 32.5  | 28.6  | 34.9  | 32.4  | 28.9  | 48.9  | 55.7  | 48.5  |
| 0.5   | 1.0   | 1.1   | 0.5   | 0.9   | 1.3   | 0.7   | 1.5   | 1.3   |
| 19.1  | 15.9  | 14.8  | 17.3  | 20.9  | 17.2  | 21.7  | 16.4  | 16.5  |
| 0.7   | 0.5   | 5.2   | 0.9   | 8.0   | 3.7   | 6.2   | 7.0   | 6.2   |
| 41.2  | 25.4  | 37.3  | 49.0  | 37.8  | 33.8  | 58.0  | 58.4  | 47.6  |
| 760.2 | 602.2 | 694.6 | 689.1 | 744.6 | 653.9 | 823.6 | 861.4 | 750.8 |
| 8.1   | 4.0   | 10.0  | 8.3   | 10.2  | 5.5   | 6.6   | 11.6  | 7.3   |
| 11.2  | 10.4  | 12.6  | 10.0  | 15.3  | 10.5  | 17.6  | 30.5  | 33.2  |
| 319.3 | 185.2 | 263.5 | 287.9 | 280.8 | 298.7 | 410.9 | 479.7 | 323.9 |
| 29.2  | 21.8  | 29.9  | 24.3  | 24.0  | 35.9  | 34.4  | 25.6  | 18.8  |
| 1.6   | 1.1   | 1.6   | 2.1   | 3.3   | 1.3   | 6.1   | 1.0   | 1.2   |
| 32.7  | 27.0  | 24.4  | 30.2  | 26.7  | 27.4  | 35.7  | 45.9  | 32.0  |

|       |       |       |       |       |       |       |       |       |
|-------|-------|-------|-------|-------|-------|-------|-------|-------|
| 21.3  | 8.9   | 13.1  | 16.9  | 19.6  | 18.6  | 24.2  | 19.7  | 15.6  |
| 1.3   | 1.1   | 0.5   | 1.2   | 0.7   | 0.5   | 1.1   | 0.6   | 1.3   |
| 2.9   | 5.9   | 12.9  | 3.8   | 6.5   | 7.2   | 6.5   | 17.5  | 12.2  |
| 10.3  | 0.2   | 2.1   | 5.1   | 3.3   | 8.0   | 6.9   | 7.8   | 4.5   |
| 7.4   | 6.5   | 7.7   | 4.1   | 9.0   | 6.9   | 8.8   | 11.3  | 8.1   |
| 200.4 | 154.7 | 174.9 | 180.1 | 183.4 | 173.4 | 228.7 | 248.6 | 162.5 |
| 28.6  | 33.6  | 19.9  | 35.9  | 45.4  | 36.8  | 40.7  | 65.9  | 38.9  |
| 1.5   | 0.6   | 1.1   | 2.2   | 1.4   | 1.3   | 0.5   | 1.1   | 1.1   |
| 27.9  | 18.4  | 19.1  | 20.8  | 19.6  | 26.1  | 31.1  | 41.8  | 28.7  |
| 11.1  | 9.8   | 7.8   | 10.4  | 12.4  | 12.6  | 12.0  | 12.6  | 10.6  |
| 4.9   | 5.1   | 7.6   | 1.9   | 12.5  | 7.8   | 7.8   | 15.7  | 12.2  |
| 2.4   | 0.5   | 0.6   | 2.0   | 1.2   | 1.4   | 0.7   | 1.4   | 0.9   |
| 77.6  | 50.4  | 54.6  | 61.2  | 57.9  | 55.1  | 95.9  | 97.9  | 62.2  |
| 0.7   | 2.5   | 6.8   | 2.6   | 2.5   | 0.3   | 6.8   | 1.5   | 6.1   |
| 315.7 | 229.3 | 282.9 | 265.7 | 214.7 | 204.4 | 317.9 | 273.2 | 135.1 |
| 72.0  | 39.2  | 44.6  | 46.0  | 48.0  | 57.2  | 80.0  | 107.2 | 50.6  |
| 144.3 | 95.4  | 86.2  | 100.1 | 121.0 | 98.5  | 152.3 | 147.5 | 115.9 |
| 90.2  | 69.1  | 77.3  | 83.2  | 79.0  | 79.5  | 117.8 | 107.6 | 74.7  |
| 134.3 | 88.1  | 82.2  | 102.8 | 106.1 | 88.4  | 124.5 | 172.3 | 106.6 |
| 23.9  | 43.0  | 30.6  | 52.8  | 49.3  | 38.6  | 46.6  | 50.0  | 38.4  |
| 11.7  | 10.8  | 9.6   | 12.6  | 16.5  | 15.5  | 21.7  | 31.5  | 16.0  |
| 32.7  | 30.0  | 27.6  | 30.4  | 42.0  | 32.2  | 55.4  | 84.6  | 61.7  |
| 645.7 | 552.1 | 434.1 | 516.8 | 508.6 | 475.7 | 332.0 | 429.9 | 418.9 |
| 157.8 | 98.6  | 118.1 | 109.0 | 119.4 | 109.3 | 156.9 | 154.6 | 123.0 |
| 1.9   | 6.8   | 11.6  | 13.7  | 10.8  | 9.1   | 8.4   | 17.2  | 17.5  |
| 11.5  | 9.9   | 14.2  | 11.4  | 12.5  | 20.1  | 20.4  | 37.9  | 13.2  |
| 132.6 | 79.6  | 114.1 | 122.1 | 117.8 | 121.0 | 144.1 | 143.9 | 132.5 |
| 320.8 | 322.9 | 351.9 | 360.3 | 331.1 | 352.3 | 414.7 | 428.8 | 323.9 |
| 52.8  | 75.9  | 54.7  | 95.5  | 74.1  | 54.6  | 92.7  | 71.1  | 84.0  |
| 13.8  | 13.6  | 12.5  | 15.5  | 16.0  | 7.6   | 19.5  | 19.7  | 16.6  |
| 46.9  | 58.6  | 53.6  | 67.7  | 58.6  | 55.8  | 89.3  | 98.3  | 57.8  |
| 51.6  | 63.3  | 58.6  | 61.9  | 55.4  | 59.7  | 59.2  | 95.8  | 52.7  |
| 73.2  | 53.2  | 52.4  | 51.1  | 54.1  | 47.2  | 89.8  | 120.3 | 76.7  |
| 68.4  | 49.6  | 48.9  | 62.4  | 53.6  | 48.5  | 74.8  | 64.3  | 35.4  |
| 27.4  | 30.9  | 31.8  | 31.2  | 38.2  | 27.4  | 49.9  | 38.0  | 25.3  |
| 46.7  | 29.4  | 27.6  | 43.0  | 30.9  | 35.7  | 33.1  | 54.0  | 30.3  |
| 38.0  | 22.1  | 28.1  | 20.5  | 19.0  | 25.1  | 38.4  | 45.9  | 26.5  |
| 20.2  | 13.4  | 9.6   | 12.8  | 17.8  | 9.4   | 18.6  | 23.5  | 9.2   |
| 5.3   | 11.2  | 6.2   | 9.4   | 12.7  | 2.4   | 8.1   | 17.9  | 15.6  |
| 0.3   | 1.9   | 0.4   | 0.2   | 0.7   | 0.1   | 2.1   | 0.3   | 0.4   |
| 9.9   | 4.4   | 3.4   | 7.5   | 5.1   | 3.9   | 6.9   | 6.6   | 7.9   |
| 296.0 | 207.8 | 232.8 | 250.5 | 262.4 | 263.0 | 286.9 | 337.9 | 315.3 |
| 31.1  | 20.3  | 24.1  | 25.1  | 21.2  | 29.5  | 30.4  | 39.1  | 25.8  |
| 157.4 | 100.1 | 114.7 | 106.4 | 142.8 | 114.9 | 156.4 | 169.8 | 117.1 |
| 24.3  | 11.0  | 10.7  | 7.7   | 11.4  | 8.9   | 13.6  | 16.6  | 11.1  |
| 159.5 | 84.3  | 95.7  | 121.5 | 128.5 | 140.4 | 162.9 | 218.5 | 153.0 |
| 46.2  | 16.2  | 30.1  | 25.0  | 24.8  | 25.3  | 36.8  | 39.4  | 37.7  |
| 18.6  | 0.7   | 9.1   | 4.3   | 13.0  | 10.0  | 11.2  | 7.4   | 14.4  |
| 1.0   | 0.8   | 0.4   | 0.9   | 0.4   | 0.6   | 1.1   | 0.4   | 0.4   |
| 7.4   | 7.6   | 2.3   | 5.3   | 7.6   | 7.4   | 7.0   | 6.7   | 6.7   |
| 34.4  | 24.3  | 31.4  | 37.6  | 24.0  | 33.1  | 39.3  | 50.4  | 26.8  |
| 19.4  | 15.5  | 10.8  | 29.2  | 26.3  | 15.0  | 15.9  | 29.1  | 18.3  |
| 9.4   | 10.7  | 12.4  | 7.3   | 12.7  | 14.4  | 13.2  | 13.5  | 17.5  |

|       |       |       |       |       |       |        |        |       |
|-------|-------|-------|-------|-------|-------|--------|--------|-------|
| 20.8  | 3.8   | 10.1  | 16.3  | 4.0   | 3.6   | 10.7   | 17.2   | 6.2   |
| 0.9   | 1.6   | 4.5   | 1.5   | 0.5   | 1.6   | 5.2    | 1.4    | 1.4   |
| 186.2 | 101.3 | 111.8 | 119.4 | 117.4 | 109.9 | 146.6  | 139.5  | 159.1 |
| 50.1  | 61.1  | 53.2  | 53.7  | 79.7  | 60.0  | 79.5   | 73.8   | 60.7  |
| 86.2  | 71.0  | 78.6  | 79.7  | 79.7  | 91.5  | 109.0  | 118.0  | 65.5  |
| 1.2   | 5.0   | 5.9   | 5.0   | 7.9   | 3.3   | 7.2    | 7.1    | 5.1   |
| 134.1 | 78.7  | 115.1 | 94.6  | 102.4 | 106.8 | 137.0  | 154.7  | 97.1  |
| 17.9  | 13.2  | 14.8  | 22.0  | 17.4  | 17.4  | 27.4   | 27.6   | 20.7  |
| 14.9  | 24.1  | 15.8  | 23.4  | 25.0  | 21.9  | 29.7   | 34.2   | 29.4  |
| 20.9  | 19.0  | 36.2  | 44.3  | 34.1  | 33.0  | 53.5   | 21.7   | 28.4  |
| 70.8  | 37.6  | 39.7  | 44.5  | 51.4  | 43.3  | 63.9   | 81.5   | 62.7  |
| 61.3  | 51.9  | 51.3  | 46.6  | 58.2  | 65.8  | 97.3   | 78.8   | 63.9  |
| 5.7   | 4.3   | 5.9   | 3.9   | 5.6   | 3.7   | 6.5    | 8.9    | 5.2   |
| 197.4 | 134.4 | 129.6 | 166.8 | 160.8 | 166.8 | 233.0  | 234.0  | 166.0 |
| 24.4  | 24.1  | 26.4  | 21.4  | 34.7  | 26.7  | 42.6   | 35.2   | 20.6  |
| 19.5  | 18.1  | 25.6  | 30.3  | 26.6  | 27.0  | 34.3   | 48.0   | 23.8  |
| 0.6   | 0.6   | 0.4   | 0.5   | 0.7   | 0.4   | 1.0    | 0.9    | 0.4   |
| 20.2  | 36.9  | 41.7  | 50.2  | 46.2  | 30.6  | 52.8   | 52.7   | 47.3  |
| 57.2  | 26.1  | 41.9  | 32.9  | 44.7  | 31.4  | 63.5   | 72.3   | 61.5  |
| 85.2  | 59.3  | 67.6  | 68.6  | 59.4  | 59.6  | 113.1  | 107.9  | 71.2  |
| 781.9 | 585.6 | 631.9 | 654.4 | 674.7 | 740.9 | 1043.5 | 1015.4 | 877.2 |
| 46.6  | 31.5  | 35.8  | 24.5  | 25.8  | 33.5  | 42.1   | 57.7   | 35.5  |
| 48.5  | 34.9  | 33.9  | 38.6  | 36.2  | 35.2  | 49.9   | 50.9   | 32.6  |
| 0.4   | 0.9   | 2.3   | 0.9   | 2.0   | 0.5   | 2.2    | 2.8    | 2.4   |
| 33.9  | 18.5  | 23.1  | 27.6  | 23.0  | 31.6  | 47.4   | 43.1   | 28.1  |
| 41.0  | 32.7  | 44.4  | 40.2  | 49.7  | 45.2  | 64.1   | 74.9   | 69.5  |
| 7.6   | 12.3  | 7.9   | 0.8   | 7.9   | 5.1   | 7.4    | 15.5   | 7.7   |
| 32.1  | 24.4  | 15.0  | 26.3  | 26.4  | 12.6  | 36.1   | 42.0   | 28.7  |
| 22.1  | 18.3  | 20.0  | 23.5  | 34.0  | 19.5  | 48.7   | 63.2   | 45.9  |
| 12.7  | 3.4   | 0.7   | 9.4   | 15.9  | 3.8   | 3.0    | 17.7   | 3.4   |
| 4.3   | 4.1   | 5.4   | 6.5   | 5.6   | 0.9   | 4.0    | 5.7    | 1.6   |
| 48.8  | 16.6  | 23.0  | 23.7  | 20.8  | 23.1  | 22.3   | 33.0   | 19.9  |
| 1.9   | 5.2   | 1.7   | 5.0   | 4.8   | 2.8   | 4.7    | 2.0    | 2.9   |
| 19.5  | 19.8  | 10.5  | 16.3  | 16.2  | 13.0  | 22.6   | 38.3   | 23.8  |
| 124.6 | 101.8 | 83.4  | 111.0 | 104.7 | 100.9 | 114.5  | 114.5  | 108.1 |
| 89.5  | 62.1  | 68.8  | 70.7  | 70.8  | 78.1  | 88.8   | 116.5  | 83.9  |
| 69.8  | 45.5  | 31.8  | 51.0  | 38.6  | 41.3  | 53.5   | 59.3   | 43.9  |
| 12.3  | 8.8   | 8.7   | 11.8  | 12.0  | 16.4  | 16.8   | 14.3   | 21.1  |
| 0.6   | 1.6   | 0.2   | 3.3   | 0.9   | 2.7   | 0.9    | 4.6    | 1.1   |
| 5.0   | 5.9   | 4.5   | 1.1   | 2.1   | 7.1   | 1.6    | 6.1    | 1.3   |
| 153.8 | 74.8  | 97.9  | 87.2  | 138.1 | 129.6 | 232.4  | 287.2  | 164.0 |
| 1.9   | 5.0   | 1.8   | 1.4   | 5.3   | 4.3   | 2.9    | 4.3    | 3.6   |
| 0.4   | 2.3   | 3.0   | 3.3   | 3.0   | 3.7   | 0.4    | 9.9    | 1.4   |
| 34.8  | 26.1  | 17.1  | 27.8  | 25.0  | 23.8  | 40.3   | 60.9   | 42.6  |
| 149.9 | 119.4 | 130.3 | 141.9 | 145.8 | 178.1 | 208.9  | 254.1  | 155.6 |
| 202.8 | 115.2 | 134.5 | 133.6 | 148.7 | 156.5 | 181.8  | 266.1  | 173.4 |
| 117.9 | 85.8  | 101.0 | 105.0 | 82.8  | 66.9  | 77.7   | 66.2   | 65.0  |
| 2.9   | 7.4   | 9.9   | 2.1   | 1.5   | 10.5  | 16.2   | 10.2   | 8.0   |
| 35.7  | 27.3  | 31.6  | 29.1  | 33.0  | 33.6  | 55.8   | 47.9   | 33.3  |
| 0.9   | 0.8   | 1.0   | 0.7   | 0.9   | 1.1   | 1.6    | 1.7    | 2.6   |
| 1.6   | 0.5   | 2.3   | 2.3   | 4.5   | 0.9   | 0.7    | 1.1    | 0.7   |
| 1.3   | 1.5   | 0.3   | 1.8   | 1.7   | 2.4   | 1.5    | 0.8    | 1.3   |
| 11.0  | 13.7  | 17.4  | 11.8  | 9.7   | 5.8   | 13.9   | 13.9   | 8.0   |

|       |       |       |       |       |       |       |       |       |
|-------|-------|-------|-------|-------|-------|-------|-------|-------|
| 12.2  | 9.5   | 14.1  | 10.3  | 9.0   | 13.5  | 16.7  | 11.0  | 13.4  |
| 38.5  | 24.2  | 33.4  | 34.1  | 35.3  | 26.7  | 42.3  | 33.2  | 31.5  |
| 155.3 | 121.4 | 118.1 | 118.1 | 120.4 | 125.2 | 151.3 | 159.4 | 173.4 |
| 9.1   | 4.6   | 2.3   | 5.3   | 4.9   | 5.9   | 3.1   | 4.4   | 3.0   |
| 73.1  | 38.2  | 45.1  | 51.0  | 54.0  | 63.8  | 70.0  | 95.3  | 49.4  |
| 70.4  | 43.2  | 40.7  | 54.1  | 57.3  | 43.6  | 84.4  | 115.8 | 71.3  |
| 258.3 | 132.0 | 156.1 | 196.8 | 154.3 | 180.3 | 251.0 | 244.3 | 179.1 |
| 6.6   | 1.6   | 2.5   | 5.5   | 1.9   | 6.2   | 8.1   | 7.8   | 5.3   |
| 4.5   | 0.9   | 0.7   | 6.0   | 4.9   | 7.1   | 6.7   | 7.5   | 5.3   |
| 4.9   | 3.0   | 7.1   | 3.2   | 6.4   | 2.5   | 2.7   | 10.6  | 1.0   |
| 1.0   | 1.1   | 0.3   | 0.1   | 1.5   | 0.8   | 2.2   | 0.7   | 0.8   |
| 5.9   | 4.1   | 6.7   | 8.6   | 7.5   | 4.6   | 10.7  | 9.4   | 4.1   |
| 6.1   | 1.4   | 0.4   | 0.6   | 1.8   | 0.3   | 1.8   | 2.0   | 2.3   |
| 25.0  | 19.0  | 24.3  | 22.7  | 20.7  | 24.0  | 27.3  | 25.1  | 16.0  |
| 172.2 | 134.4 | 148.9 | 126.3 | 126.6 | 105.7 | 161.2 | 144.5 | 113.6 |
| 584.7 | 485.7 | 521.4 | 574.6 | 608.0 | 617.1 | 700.5 | 729.2 | 605.4 |
| 0.1   | 2.9   | 0.2   | 1.0   | 2.6   | 0.5   | 4.0   | 4.6   | 0.4   |
| 18.3  | 9.7   | 9.3   | 13.5  | 12.4  | 12.6  | 19.9  | 16.0  | 10.3  |
| 30.1  | 17.4  | 23.2  | 18.5  | 21.8  | 23.8  | 35.1  | 45.8  | 23.2  |
| 29.9  | 18.2  | 18.7  | 11.3  | 22.1  | 20.4  | 26.8  | 37.8  | 24.9  |
| 102.8 | 93.5  | 116.5 | 118.4 | 116.7 | 116.3 | 140.6 | 168.8 | 150.4 |
| 0.7   | 1.6   | 2.8   | 0.6   | 1.3   | 1.2   | 0.5   | 0.8   | 0.9   |
| 3.0   | 4.2   | 1.7   | 3.3   | 6.2   | 1.3   | 2.8   | 3.1   | 4.3   |
| 1.3   | 0.5   | 0.9   | 0.6   | 1.9   | 0.9   | 0.9   | 1.3   | 1.8   |
| 0.5   | 1.6   | 4.0   | 3.2   | 2.5   | 3.7   | 0.3   | 5.1   | 2.9   |
| 61.8  | 54.2  | 59.5  | 65.2  | 64.4  | 57.8  | 81.6  | 72.2  | 66.6  |
| 38.4  | 26.5  | 31.2  | 38.7  | 32.3  | 25.6  | 37.5  | 39.8  | 20.9  |
| 11.9  | 11.8  | 11.2  | 7.6   | 16.5  | 7.9   | 13.1  | 14.2  | 10.5  |
| 155.6 | 79.5  | 109.0 | 90.2  | 118.9 | 125.1 | 157.4 | 240.9 | 146.7 |
| 23.0  | 32.6  | 20.9  | 22.1  | 13.0  | 22.7  | 38.2  | 25.7  | 21.6  |
| 122.9 | 82.8  | 83.8  | 95.2  | 85.8  | 98.1  | 133.5 | 166.3 | 118.4 |
| 53.0  | 36.7  | 30.7  | 34.5  | 40.8  | 39.4  | 47.8  | 51.9  | 39.9  |
| 178.1 | 86.4  | 106.5 | 115.4 | 114.1 | 129.1 | 151.0 | 188.1 | 99.2  |
| 53.9  | 33.7  | 34.9  | 33.0  | 46.7  | 50.1  | 52.7  | 74.8  | 60.0  |
| 38.0  | 21.6  | 30.7  | 29.6  | 20.5  | 32.1  | 35.8  | 44.7  | 30.0  |
| 8.5   | 4.5   | 5.3   | 4.0   | 4.1   | 3.7   | 7.8   | 12.7  | 3.9   |
| 38.1  | 22.6  | 28.2  | 30.0  | 31.3  | 25.4  | 41.3  | 39.7  | 33.5  |
| 3.4   | 0.5   | 0.5   | 0.5   | 4.2   | 2.2   | 5.1   | 4.4   | 3.7   |
| 0.5   | 7.5   | 2.7   | 4.8   | 0.7   | 2.2   | 10.6  | 7.3   | 2.9   |
| 23.1  | 28.0  | 32.8  | 4.1   | 30.0  | 12.3  | 29.7  | 32.6  | 40.7  |
| 106.2 | 88.1  | 115.2 | 112.9 | 99.1  | 100.1 | 122.8 | 153.8 | 103.3 |
| 40.9  | 15.7  | 8.6   | 24.2  | 19.5  | 18.1  | 31.1  | 39.2  | 16.0  |
| 46.0  | 16.8  | 18.0  | 22.1  | 21.6  | 18.2  | 27.9  | 32.9  | 25.4  |
| 140.5 | 13.9  | 13.8  | 5.9   | 15.1  | 11.2  | 17.8  | 20.9  | 12.8  |
| 50.4  | 52.9  | 57.0  | 63.8  | 50.3  | 47.7  | 77.7  | 74.1  | 63.8  |
| 103.6 | 135.3 | 144.8 | 147.3 | 156.6 | 120.6 | 180.2 | 158.8 | 108.6 |
| 58.1  | 21.1  | 24.5  | 32.1  | 23.5  | 22.4  | 36.2  | 39.2  | 32.1  |
| 76.0  | 52.2  | 40.9  | 57.9  | 59.3  | 37.5  | 73.4  | 83.8  | 67.9  |
| 33.2  | 0.5   | 0.6   | 3.6   | 3.1   | 2.2   | 0.7   | 12.5  | 0.9   |
| 43.3  | 4.4   | 1.6   | 3.1   | 2.1   | 2.9   | 0.6   | 3.6   | 3.4   |
| 13.8  | 6.4   | 10.9  | 2.7   | 8.6   | 5.1   | 11.7  | 7.9   | 7.3   |
| 21.6  | 25.6  | 25.3  | 26.0  | 31.1  | 25.6  | 22.7  | 31.4  | 19.7  |
| 161.8 | 66.3  | 87.6  | 83.8  | 70.8  | 77.6  | 109.1 | 136.8 | 85.4  |

|       |       |       |       |       |       |       |        |       |
|-------|-------|-------|-------|-------|-------|-------|--------|-------|
| 23.4  | 25.6  | 29.3  | 18.3  | 22.9  | 24.9  | 34.7  | 16.8   | 26.8  |
| 70.8  | 27.8  | 40.2  | 48.8  | 49.1  | 44.1  | 61.1  | 64.4   | 26.8  |
| 82.9  | 59.1  | 60.0  | 75.8  | 67.9  | 71.6  | 101.8 | 85.4   | 73.3  |
| 5.6   | 4.5   | 3.9   | 1.2   | 4.9   | 7.4   | 3.6   | 6.2    | 5.6   |
| 10.2  | 10.1  | 8.8   | 11.8  | 6.2   | 6.8   | 6.2   | 11.8   | 8.2   |
| 0.8   | 5.4   | 6.4   | 5.1   | 3.3   | 5.3   | 0.7   | 5.3    | 5.9   |
| 38.8  | 16.6  | 13.7  | 15.1  | 2.5   | 8.8   | 9.6   | 12.8   | 10.6  |
| 192.2 | 116.4 | 129.2 | 140.2 | 154.9 | 151.9 | 182.8 | 205.8  | 140.6 |
| 342.9 | 261.2 | 279.5 | 303.3 | 353.1 | 324.3 | 366.5 | 482.2  | 385.5 |
| 28.5  | 13.3  | 13.0  | 14.6  | 14.2  | 16.7  | 18.7  | 10.8   | 18.1  |
| 20.8  | 57.7  | 55.0  | 39.7  | 63.4  | 47.7  | 79.3  | 53.5   | 53.6  |
| 32.6  | 21.2  | 31.3  | 23.1  | 29.8  | 32.7  | 41.7  | 54.2   | 29.8  |
| 3.4   | 10.7  | 7.3   | 7.0   | 9.6   | 5.5   | 6.1   | 17.6   | 7.9   |
| 443.1 | 323.5 | 363.7 | 372.4 | 422.8 | 413.8 | 536.4 | 549.1  | 441.5 |
| 85.0  | 69.7  | 75.8  | 71.2  | 109.0 | 86.5  | 81.4  | 122.4  | 88.8  |
| 61.1  | 56.0  | 44.6  | 38.8  | 44.9  | 53.4  | 69.7  | 80.4   | 54.8  |
| 1.3   | 5.6   | 3.5   | 3.2   | 0.8   | 3.4   | 3.4   | 4.3    | 4.9   |
| 47.7  | 39.5  | 47.9  | 43.7  | 41.0  | 37.1  | 65.8  | 65.7   | 51.2  |
| 19.6  | 16.0  | 12.5  | 13.8  | 18.3  | 14.5  | 16.4  | 22.3   | 14.5  |
| 11.8  | 2.0   | 6.8   | 3.5   | 7.7   | 1.6   | 15.3  | 14.0   | 10.8  |
| 16.1  | 13.0  | 18.4  | 25.1  | 17.6  | 20.1  | 26.5  | 21.9   | 21.2  |
| 1.6   | 3.3   | 6.1   | 0.5   | 0.9   | 2.8   | 0.5   | 0.6    | 0.3   |
| 9.2   | 5.5   | 8.7   | 10.3  | 4.7   | 5.1   | 7.2   | 8.5    | 14.9  |
| 89.3  | 50.6  | 53.7  | 75.5  | 61.7  | 72.7  | 61.7  | 74.7   | 60.4  |
| 30.6  | 15.1  | 11.0  | 30.8  | 21.1  | 3.8   | 28.2  | 28.5   | 19.9  |
| 100.0 | 56.2  | 76.5  | 69.8  | 70.9  | 74.8  | 118.9 | 135.6  | 86.1  |
| 43.6  | 33.4  | 28.9  | 32.0  | 22.9  | 31.6  | 28.1  | 41.5   | 28.3  |
| 99.9  | 60.3  | 76.8  | 58.5  | 81.1  | 92.4  | 91.8  | 127.7  | 92.8  |
| 835.7 | 384.9 | 692.9 | 514.9 | 663.6 | 791.1 | 743.1 | 1164.5 | 487.6 |
| 154.6 | 177.9 | 158.4 | 176.1 | 193.0 | 179.7 | 216.3 | 228.2  | 272.0 |
| 0.4   | 0.7   | 0.3   | 0.5   | 0.6   | 0.4   | 0.7   | 0.3    | 0.9   |
| 7.1   | 7.4   | 5.9   | 8.4   | 3.7   | 9.3   | 5.8   | 8.2    | 5.2   |
| 3.3   | 15.2  | 10.1  | 2.7   | 11.6  | 5.3   | 3.7   | 14.3   | 7.2   |
| 1.5   | 2.8   | 3.2   | 1.5   | 4.4   | 0.6   | 3.1   | 1.5    | 2.2   |
| 35.4  | 45.5  | 25.5  | 44.6  | 32.0  | 31.1  | 42.0  | 21.5   | 37.3  |
| 216.5 | 155.7 | 184.8 | 179.8 | 195.4 | 187.8 | 264.7 | 264.3  | 210.7 |
| 148.1 | 126.4 | 137.2 | 131.1 | 143.3 | 163.8 | 195.1 | 280.3  | 133.8 |
| 24.4  | 22.5  | 27.1  | 19.5  | 20.4  | 25.2  | 29.2  | 28.8   | 23.6  |
| 185.5 | 105.1 | 121.2 | 147.0 | 137.8 | 146.9 | 209.1 | 222.5  | 151.9 |
| 49.3  | 29.1  | 35.6  | 38.2  | 42.7  | 43.7  | 46.0  | 72.5   | 45.3  |
| 12.4  | 17.4  | 11.2  | 10.6  | 15.6  | 14.3  | 15.2  | 12.1   | 10.1  |
| 37.8  | 24.1  | 22.5  | 30.5  | 16.4  | 27.9  | 44.5  | 35.9   | 23.2  |
| 119.4 | 79.1  | 85.3  | 89.6  | 78.9  | 101.1 | 136.4 | 150.2  | 83.8  |
| 22.6  | 22.4  | 28.5  | 32.9  | 30.2  | 27.8  | 35.1  | 47.2   | 26.8  |
| 35.2  | 45.3  | 39.8  | 41.4  | 56.2  | 35.9  | 61.3  | 54.4   | 46.0  |
| 36.2  | 39.6  | 53.3  | 45.1  | 48.3  | 48.0  | 98.2  | 81.2   | 46.3  |
| 0.9   | 4.3   | 3.5   | 0.9   | 4.4   | 0.4   | 0.5   | 3.6    | 0.7   |
| 22.0  | 27.2  | 22.7  | 33.6  | 21.9  | 29.2  | 30.5  | 38.4   | 20.7  |
| 213.3 | 104.3 | 122.6 | 113.8 | 113.9 | 91.7  | 133.7 | 160.4  | 91.4  |
| 202.4 | 118.4 | 159.2 | 158.9 | 179.1 | 183.0 | 232.4 | 291.5  | 190.4 |
| 231.4 | 101.4 | 193.0 | 152.8 | 164.9 | 209.5 | 243.8 | 324.9  | 232.4 |
| 8.4   | 5.1   | 10.1  | 5.4   | 6.7   | 8.0   | 11.1  | 13.3   | 8.0   |
| 47.9  | 27.8  | 28.5  | 33.6  | 37.3  | 34.6  | 58.5  | 70.8   | 54.5  |

|       |       |       |       |       |       |       |       |       |
|-------|-------|-------|-------|-------|-------|-------|-------|-------|
| 87.8  | 46.4  | 59.5  | 55.5  | 69.3  | 74.3  | 103.0 | 112.7 | 71.9  |
| 124.6 | 89.5  | 104.4 | 106.0 | 114.4 | 113.3 | 135.3 | 181.8 | 126.5 |
| 148.2 | 51.8  | 110.5 | 90.3  | 75.9  | 150.9 | 143.0 | 251.6 | 91.6  |
| 82.5  | 67.1  | 63.4  | 72.6  | 84.7  | 77.8  | 85.4  | 86.2  | 76.6  |
| 75.3  | 32.6  | 50.4  | 54.0  | 57.7  | 56.2  | 90.0  | 93.7  | 55.0  |
| 68.7  | 44.9  | 63.6  | 63.8  | 61.7  | 70.1  | 87.4  | 125.8 | 62.8  |
| 1.1   | 1.6   | 0.7   | 0.8   | 0.9   | 1.0   | 1.1   | 3.5   | 1.5   |
| 98.8  | 49.4  | 64.1  | 70.0  | 61.9  | 73.0  | 92.7  | 120.0 | 71.4  |
| 2.0   | 2.6   | 4.8   | 2.3   | 1.9   | 1.4   | 13.1  | 2.8   | 3.0   |
| 1.0   | 4.7   | 3.1   | 2.6   | 3.3   | 0.3   | 6.4   | 2.6   | 3.5   |
| 22.7  | 21.5  | 18.8  | 24.9  | 28.2  | 21.7  | 36.0  | 42.5  | 24.6  |
| 6.6   | 7.8   | 1.0   | 8.3   | 6.9   | 9.0   | 8.2   | 14.4  | 5.3   |
| 263.5 | 155.3 | 151.2 | 167.3 | 217.3 | 175.0 | 263.5 | 355.7 | 204.2 |
| 36.2  | 35.9  | 33.1  | 41.8  | 44.8  | 34.3  | 73.3  | 47.6  | 49.2  |
| 57.4  | 46.6  | 44.7  | 54.7  | 58.2  | 41.5  | 65.3  | 59.2  | 51.1  |
| 21.7  | 19.5  | 21.3  | 27.3  | 28.6  | 26.5  | 39.6  | 27.0  | 13.5  |
| 67.9  | 48.9  | 42.3  | 57.2  | 57.4  | 55.0  | 78.3  | 93.4  | 65.0  |
| 22.6  | 22.6  | 21.7  | 24.9  | 18.3  | 27.3  | 24.0  | 26.6  | 28.7  |
| 16.1  | 8.9   | 6.4   | 9.4   | 8.4   | 8.7   | 13.4  | 11.1  | 13.2  |
| 120.2 | 129.5 | 138.3 | 152.6 | 178.7 | 147.5 | 198.1 | 196.6 | 129.6 |
| 85.1  | 93.7  | 87.7  | 103.6 | 115.7 | 94.7  | 135.1 | 165.5 | 122.1 |
| 227.0 | 265.8 | 286.1 | 305.2 | 273.6 | 268.5 | 348.0 | 420.1 | 302.0 |
| 1.0   | 0.9   | 1.7   | 0.7   | 1.3   | 0.8   | 1.7   | 1.8   | 1.1   |
| 21.4  | 2.4   | 11.0  | 9.9   | 7.5   | 9.3   | 2.6   | 13.1  | 1.0   |
| 1.6   | 2.0   | 11.4  | 1.4   | 2.7   | 1.4   | 8.8   | 2.3   | 2.8   |
| 15.4  | 13.3  | 10.9  | 8.3   | 3.3   | 3.6   | 10.3  | 4.2   | 8.8   |
| 83.6  | 39.3  | 61.1  | 68.0  | 68.0  | 62.1  | 97.0  | 104.3 | 74.7  |
| 0.7   | 0.7   | 0.2   | 0.6   | 2.1   | 2.2   | 0.9   | 0.5   | 1.0   |
| 15.0  | 12.2  | 10.9  | 11.8  | 4.3   | 7.0   | 6.8   | 6.9   | 13.6  |
| 26.5  | 13.3  | 10.1  | 18.9  | 15.9  | 14.1  | 21.9  | 18.3  | 14.6  |
| 59.1  | 52.8  | 51.9  | 63.1  | 53.7  | 57.1  | 90.1  | 98.2  | 64.1  |
| 16.8  | 28.9  | 24.2  | 17.4  | 24.1  | 17.6  | 25.7  | 34.9  | 23.7  |
| 46.9  | 35.1  | 30.1  | 42.2  | 34.0  | 37.6  | 43.4  | 67.0  | 57.7  |
| 107.2 | 47.7  | 53.9  | 69.5  | 54.2  | 55.5  | 86.0  | 111.7 | 70.5  |
| 95.5  | 62.5  | 59.6  | 72.1  | 79.6  | 75.0  | 101.7 | 130.7 | 88.4  |
| 0.6   | 4.6   | 8.0   | 3.0   | 3.1   | 4.1   | 0.5   | 0.6   | 3.3   |
| 7.6   | 4.7   | 6.8   | 1.4   | 7.6   | 3.4   | 6.8   | 10.8  | 1.8   |
| 41.8  | 31.6  | 31.9  | 35.3  | 37.4  | 38.3  | 48.5  | 64.0  | 46.3  |
| 233.3 | 152.5 | 163.8 | 180.1 | 194.8 | 179.8 | 219.0 | 283.7 | 190.6 |
| 16.7  | 9.2   | 8.5   | 7.7   | 8.7   | 6.7   | 13.0  | 24.9  | 8.5   |
| 9.7   | 4.7   | 4.8   | 1.0   | 7.3   | 4.3   | 3.3   | 2.4   | 6.1   |
| 258.7 | 185.2 | 217.0 | 219.6 | 219.0 | 212.1 | 278.1 | 333.8 | 174.2 |
| 0.2   | 0.8   | 0.4   | 0.2   | 5.4   | 0.1   | 0.5   | 0.4   | 3.3   |
| 26.3  | 4.6   | 6.2   | 3.1   | 5.6   | 8.0   | 6.8   | 9.7   | 3.3   |
| 49.8  | 8.7   | 16.1  | 10.9  | 8.8   | 11.0  | 22.1  | 30.1  | 25.4  |
| 76.8  | 49.0  | 41.9  | 51.0  | 58.9  | 42.9  | 65.9  | 59.2  | 59.4  |
| 23.9  | 22.4  | 27.4  | 30.7  | 30.0  | 25.8  | 32.1  | 36.6  | 36.2  |
| 2.1   | 2.2   | 2.9   | 7.7   | 5.5   | 1.3   | 3.5   | 3.6   | 10.6  |
| 23.0  | 25.9  | 25.3  | 27.6  | 26.3  | 25.1  | 43.6  | 52.3  | 27.6  |
| 197.0 | 251.4 | 226.8 | 299.3 | 276.3 | 215.9 | 361.9 | 333.9 | 279.7 |
| 117.0 | 106.0 | 85.5  | 104.1 | 123.5 | 99.1  | 180.3 | 177.0 | 138.5 |
| 109.9 | 69.4  | 86.0  | 94.1  | 95.2  | 70.8  | 102.8 | 93.3  | 100.2 |
| 246.5 | 180.8 | 224.5 | 221.0 | 265.0 | 277.6 | 301.9 | 480.7 | 295.5 |

|        |        |        |        |        |        |        |        |        |
|--------|--------|--------|--------|--------|--------|--------|--------|--------|
| 14.1   | 9.3    | 11.1   | 13.8   | 15.4   | 10.6   | 13.4   | 26.1   | 15.1   |
| 48.7   | 23.0   | 23.2   | 20.3   | 24.2   | 36.0   | 36.5   | 54.2   | 45.1   |
| 897.7  | 546.7  | 691.5  | 709.7  | 773.5  | 794.8  | 981.7  | 1184.0 | 840.3  |
| 82.0   | 60.0   | 73.2   | 78.9   | 76.7   | 76.3   | 109.4  | 109.5  | 78.9   |
| 72.0   | 52.1   | 52.8   | 59.9   | 68.7   | 74.2   | 81.5   | 95.5   | 56.4   |
| 29.0   | 18.3   | 18.5   | 23.8   | 25.9   | 21.5   | 32.5   | 36.0   | 30.6   |
| 0.3    | 1.8    | 0.7    | 1.7    | 6.5    | 0.5    | 3.1    | 4.0    | 2.4    |
| 1507.5 | 1323.9 | 1424.0 | 1338.1 | 1600.0 | 1249.0 | 1888.9 | 1934.4 | 1606.1 |
| 21.2   | 8.6    | 6.8    | 6.5    | 6.0    | 11.1   | 10.3   | 22.0   | 13.3   |
| 301.5  | 182.8  | 222.8  | 217.7  | 242.7  | 250.8  | 294.4  | 377.8  | 247.7  |
| 95.0   | 59.1   | 45.2   | 62.0   | 82.3   | 63.4   | 75.5   | 96.5   | 96.2   |
| 3.3    | 3.9    | 2.2    | 4.3    | 3.8    | 3.9    | 0.8    | 6.3    | 8.3    |
| 3.2    | 0.2    | 2.6    | 3.4    | 2.3    | 4.0    | 4.7    | 3.7    | 3.9    |
| 9.8    | 8.5    | 5.1    | 5.8    | 6.4    | 3.5    | 8.9    | 11.8   | 0.9    |
| 16.6   | 18.9   | 19.3   | 20.3   | 18.7   | 19.6   | 24.6   | 26.0   | 14.2   |
| 114.5  | 93.8   | 90.6   | 101.8  | 91.1   | 81.7   | 115.3  | 112.8  | 87.5   |
| 22.5   | 14.8   | 16.6   | 20.5   | 17.8   | 10.7   | 26.1   | 26.6   | 30.9   |
| 1.2    | 1.6    | 0.8    | 2.0    | 1.1    | 1.1    | 1.5    | 2.0    | 0.9    |
| 115.9  | 84.2   | 95.1   | 92.4   | 119.3  | 121.4  | 149.1  | 183.0  | 120.7  |
| 15.6   | 14.2   | 10.9   | 8.2    | 8.4    | 4.7    | 5.9    | 7.8    | 5.6    |
| 1.1    | 4.7    | 1.0    | 0.9    | 9.4    | 2.0    | 4.4    | 1.7    | 0.9    |
| 147.2  | 112.1  | 142.0  | 132.0  | 155.4  | 129.4  | 201.1  | 230.0  | 164.7  |
| 4.2    | 3.0    | 1.6    | 4.7    | 4.8    | 0.9    | 4.1    | 4.1    | 6.3    |
| 9.5    | 0.8    | 1.2    | 8.1    | 1.1    | 4.7    | 5.1    | 11.4   | 1.7    |
| 36.6   | 12.9   | 10.9   | 16.6   | 14.9   | 11.6   | 25.1   | 23.6   | 18.6   |
| 27.2   | 14.2   | 14.9   | 11.1   | 11.7   | 13.1   | 14.5   | 20.0   | 12.7   |
| 556.4  | 358.8  | 409.5  | 428.4  | 425.4  | 460.0  | 694.7  | 740.4  | 479.0  |
| 13.3   | 9.9    | 5.6    | 4.1    | 11.3   | 4.8    | 9.2    | 5.2    | 6.2    |
| 3.8    | 0.8    | 5.6    | 0.4    | 5.5    | 0.8    | 1.3    | 1.3    | 0.6    |
| 61.8   | 41.5   | 50.5   | 57.8   | 54.6   | 47.5   | 81.7   | 75.2   | 58.8   |
| 28.6   | 22.4   | 21.2   | 26.2   | 26.2   | 26.7   | 44.6   | 52.3   | 26.2   |
| 2.5    | 2.6    | 0.2    | 0.6    | 0.2    | 0.1    | 3.0    | 2.8    | 3.4    |
| 46.7   | 27.9   | 29.4   | 34.2   | 22.9   | 39.7   | 41.6   | 64.5   | 45.7   |
| 2.2    | 1.7    | 6.1    | 2.2    | 7.0    | 7.3    | 16.3   | 2.3    | 7.6    |
| 84.6   | 35.4   | 34.6   | 47.5   | 45.4   | 41.0   | 55.0   | 79.4   | 47.1   |
| 250.9  | 133.3  | 127.6  | 168.8  | 162.0  | 169.9  | 175.4  | 238.0  | 192.3  |
| 40.8   | 19.8   | 34.2   | 32.7   | 33.8   | 34.9   | 36.9   | 51.6   | 25.9   |
| 18.3   | 11.5   | 11.1   | 12.5   | 11.4   | 15.0   | 14.8   | 25.6   | 19.2   |
| 37.3   | 18.9   | 16.3   | 22.7   | 16.9   | 16.9   | 24.9   | 30.6   | 26.8   |
| 14.4   | 7.0    | 8.2    | 7.3    | 10.9   | 11.2   | 15.7   | 14.8   | 8.1    |
| 91.7   | 53.6   | 41.3   | 62.0   | 60.0   | 49.5   | 78.4   | 83.9   | 56.4   |
| 38.4   | 32.8   | 30.7   | 35.2   | 44.1   | 23.9   | 42.5   | 42.3   | 24.8   |
| 29.6   | 17.8   | 22.3   | 24.7   | 21.2   | 15.7   | 28.1   | 39.3   | 26.2   |
| 150.3  | 102.7  | 116.7  | 131.9  | 110.9  | 109.4  | 147.3  | 147.3  | 146.4  |
| 54.8   | 48.8   | 57.4   | 63.2   | 62.3   | 60.4   | 86.4   | 107.4  | 72.4   |
| 20.6   | 3.5    | 6.3    | 3.7    | 9.3    | 5.3    | 5.1    | 10.4   | 8.7    |
| 9.1    | 5.0    | 7.6    | 10.3   | 6.4    | 8.0    | 7.4    | 4.0    | 8.4    |
| 55.5   | 24.0   | 38.0   | 36.8   | 45.6   | 42.2   | 62.1   | 88.7   | 62.7   |
| 10.9   | 6.3    | 6.1    | 4.5    | 5.6    | 6.7    | 14.8   | 9.1    | 7.0    |
| 6.7    | 7.1    | 4.6    | 6.2    | 2.0    | 1.1    | 5.7    | 2.2    | 3.1    |
| 47.6   | 34.8   | 49.9   | 57.5   | 36.5   | 47.1   | 50.5   | 69.1   | 46.1   |
| 33.6   | 12.8   | 12.8   | 20.7   | 19.6   | 12.4   | 33.7   | 55.1   | 17.2   |
| 54.0   | 23.8   | 26.6   | 26.3   | 22.2   | 27.9   | 24.7   | 34.0   | 23.1   |



|        |        |        |        |        |        |        |        |        |
|--------|--------|--------|--------|--------|--------|--------|--------|--------|
| 33.5   | 19.4   | 24.2   | 17.5   | 16.1   | 13.5   | 23.1   | 27.3   | 11.3   |
| 74.6   | 50.1   | 49.8   | 51.6   | 68.8   | 61.7   | 103.0  | 111.1  | 79.1   |
| 41.8   | 37.5   | 33.9   | 35.8   | 32.2   | 33.0   | 50.7   | 41.1   | 49.9   |
| 70.6   | 50.3   | 71.6   | 74.8   | 67.6   | 65.0   | 94.7   | 101.8  | 60.2   |
| 39.3   | 28.2   | 44.1   | 43.3   | 41.0   | 30.5   | 38.7   | 54.0   | 35.7   |
| 29.2   | 38.5   | 31.6   | 37.0   | 40.5   | 36.0   | 48.1   | 45.6   | 30.4   |
| 1.1    | 0.5    | 0.6    | 0.2    | 0.6    | 0.4    | 0.4    | 0.3    | 0.4    |
| 155.6  | 247.3  | 270.6  | 370.1  | 324.3  | 348.6  | 462.0  | 626.8  | 340.9  |
| 25.7   | 41.1   | 39.8   | 54.1   | 54.6   | 54.9   | 85.7   | 96.6   | 66.6   |
| 175.2  | 190.3  | 218.0  | 239.9  | 239.5  | 203.1  | 325.5  | 267.7  | 222.7  |
| 81.3   | 54.9   | 66.7   | 63.4   | 58.0   | 73.5   | 78.4   | 90.2   | 68.2   |
| 63.9   | 64.6   | 44.6   | 66.3   | 57.0   | 43.6   | 81.9   | 62.7   | 69.2   |
| 62.7   | 29.5   | 29.3   | 22.6   | 25.8   | 35.6   | 30.2   | 41.3   | 35.8   |
| 55.3   | 26.5   | 60.6   | 61.4   | 65.0   | 33.3   | 35.5   | 49.9   | 48.8   |
| 34.4   | 27.1   | 40.4   | 32.7   | 41.2   | 37.5   | 50.6   | 43.5   | 25.7   |
| 249.9  | 128.4  | 195.7  | 173.1  | 234.5  | 222.2  | 300.2  | 303.5  | 151.4  |
| 452.0  | 400.2  | 515.8  | 475.2  | 545.6  | 544.7  | 698.2  | 894.2  | 619.9  |
| 71.2   | 51.0   | 50.4   | 69.5   | 70.1   | 58.4   | 120.8  | 132.1  | 81.9   |
| 10.6   | 7.6    | 15.3   | 11.0   | 10.7   | 17.4   | 22.6   | 23.2   | 19.0   |
| 20.9   | 11.1   | 19.0   | 23.9   | 19.9   | 22.8   | 30.7   | 27.8   | 18.6   |
| 77.9   | 54.7   | 68.0   | 82.7   | 75.0   | 69.5   | 92.3   | 99.6   | 75.8   |
| 59.3   | 50.7   | 51.3   | 62.4   | 59.3   | 58.9   | 74.5   | 94.7   | 70.2   |
| 33.9   | 42.5   | 31.6   | 34.8   | 34.6   | 31.0   | 38.9   | 47.2   | 32.7   |
| 2.5    | 1.9    | 4.6    | 1.4    | 3.5    | 2.1    | 1.5    | 3.0    | 1.8    |
| 1.0    | 9.6    | 8.7    | 4.4    | 7.0    | 7.7    | 8.5    | 15.1   | 11.2   |
| 2488.3 | 2233.9 | 2259.8 | 2328.3 | 2576.5 | 2416.8 | 3066.9 | 3186.7 | 2533.3 |
| 1.0    | 2.8    | 4.7    | 1.2    | 1.8    | 1.1    | 1.7    | 2.3    | 2.9    |
| 57.2   | 36.3   | 50.5   | 52.2   | 54.8   | 50.4   | 74.0   | 68.1   | 38.8   |
| 0.7    | 2.3    | 4.2    | 0.7    | 1.3    | 1.0    | 4.0    | 0.9    | 2.6    |
| 58.0   | 34.4   | 46.2   | 43.5   | 29.8   | 34.3   | 55.7   | 60.9   | 63.5   |
| 34.4   | 25.6   | 31.4   | 20.8   | 26.6   | 24.3   | 35.3   | 49.3   | 23.1   |
| 49.5   | 35.7   | 34.5   | 33.4   | 36.6   | 36.9   | 47.4   | 59.7   | 47.8   |
| 41.5   | 30.0   | 30.0   | 36.8   | 30.6   | 30.8   | 33.5   | 54.0   | 26.8   |
| 8.5    | 2.6    | 4.8    | 0.8    | 4.0    | 4.1    | 4.2    | 4.6    | 7.4    |
| 2.7    | 1.7    | 3.1    | 2.6    | 0.8    | 1.2    | 1.3    | 1.3    | 0.6    |
| 2.2    | 0.2    | 2.8    | 4.1    | 0.2    | 0.8    | 0.7    | 0.9    | 0.3    |
| 59.3   | 42.2   | 48.1   | 63.9   | 57.2   | 66.4   | 81.3   | 81.7   | 66.5   |
| 0.6    | 6.9    | 4.7    | 7.7    | 5.0    | 2.0    | 2.1    | 7.8    | 11.3   |
| 0.2    | 1.0    | 0.2    | 0.3    | 2.4    | 0.6    | 0.3    | 0.3    | 0.2    |
| 8.6    | 10.6   | 11.3   | 6.1    | 7.7    | 13.9   | 10.8   | 24.2   | 13.5   |
| 36.3   | 30.5   | 36.2   | 39.1   | 40.2   | 35.0   | 64.8   | 88.6   | 47.3   |
| 10.0   | 12.2   | 1.9    | 8.8    | 11.0   | 9.2    | 10.9   | 10.1   | 6.5    |
| 304.8  | 211.8  | 262.8  | 254.5  | 255.8  | 272.3  | 371.0  | 414.8  | 228.4  |
| 77.4   | 61.6   | 46.6   | 60.7   | 87.7   | 60.4   | 111.1  | 138.5  | 132.7  |
| 34.6   | 24.5   | 24.0   | 24.5   | 21.8   | 19.8   | 24.2   | 23.4   | 19.9   |
| 0.6    | 2.4    | 1.8    | 4.0    | 0.9    | 4.6    | 4.0    | 5.5    | 5.9    |
| 52.5   | 42.5   | 33.4   | 59.7   | 55.0   | 44.4   | 37.2   | 40.1   | 24.8   |
| 3.7    | 3.2    | 4.5    | 0.7    | 1.8    | 1.4    | 7.7    | 11.7   | 5.4    |
| 131.4  | 83.9   | 91.1   | 97.3   | 129.9  | 90.4   | 163.0  | 176.2  | 101.7  |
| 136.3  | 80.3   | 124.8  | 116.0  | 113.2  | 108.3  | 147.0  | 175.0  | 84.7   |
| 196.0  | 184.4  | 239.9  | 237.0  | 249.4  | 279.1  | 339.5  | 421.7  | 236.5  |
| 105.4  | 111.2  | 157.0  | 125.7  | 157.2  | 155.8  | 187.7  | 259.7  | 168.4  |
| 32.6   | 34.2   | 29.6   | 34.2   | 27.1   | 25.7   | 40.6   | 38.8   | 41.7   |

|       |       |       |       |       |       |        |        |        |
|-------|-------|-------|-------|-------|-------|--------|--------|--------|
| 49.4  | 32.7  | 35.1  | 32.5  | 38.8  | 43.3  | 64.7   | 59.2   | 35.8   |
| 92.5  | 40.5  | 47.8  | 51.2  | 47.0  | 52.3  | 74.7   | 78.1   | 55.0   |
| 79.3  | 38.2  | 38.4  | 38.7  | 47.6  | 41.9  | 65.7   | 62.9   | 51.3   |
| 172.7 | 60.2  | 99.1  | 80.2  | 90.0  | 98.2  | 117.2  | 140.3  | 84.0   |
| 1.4   | 1.1   | 1.1   | 1.5   | 1.5   | 1.9   | 2.2    | 1.4    | 1.1    |
| 4.8   | 5.8   | 3.9   | 1.1   | 2.8   | 3.0   | 7.5    | 2.0    | 5.4    |
| 2.1   | 5.3   | 5.6   | 5.1   | 1.3   | 4.0   | 10.6   | 11.0   | 4.9    |
| 32.4  | 30.4  | 27.4  | 25.3  | 30.1  | 35.9  | 37.9   | 44.9   | 25.6   |
| 11.8  | 2.5   | 3.5   | 16.8  | 13.7  | 20.9  | 17.9   | 12.0   | 3.7    |
| 64.6  | 45.7  | 44.8  | 48.5  | 57.5  | 55.4  | 61.8   | 57.9   | 43.6   |
| 33.9  | 23.7  | 22.3  | 24.2  | 24.6  | 18.9  | 26.9   | 32.8   | 28.4   |
| 240.6 | 159.3 | 196.0 | 187.0 | 188.9 | 187.2 | 283.2  | 220.2  | 158.7  |
| 74.6  | 30.7  | 46.8  | 69.0  | 65.6  | 48.9  | 74.0   | 90.8   | 57.0   |
| 114.6 | 78.1  | 94.6  | 106.6 | 109.9 | 108.9 | 146.2  | 155.6  | 102.5  |
| 30.1  | 14.4  | 20.8  | 15.4  | 21.8  | 13.6  | 21.4   | 25.9   | 21.5   |
| 81.9  | 82.8  | 65.9  | 61.4  | 74.7  | 70.7  | 103.8  | 118.9  | 111.3  |
| 174.2 | 90.5  | 88.8  | 112.8 | 117.7 | 114.8 | 170.0  | 329.0  | 144.0  |
| 27.3  | 26.2  | 23.1  | 32.8  | 29.8  | 33.3  | 37.0   | 40.2   | 23.4   |
| 247.4 | 140.3 | 149.8 | 168.0 | 172.7 | 162.9 | 224.4  | 197.2  | 141.7  |
| 5.3   | 0.2   | 0.3   | 0.3   | 0.2   | 0.8   | 0.9    | 0.3    | 0.5    |
| 15.0  | 7.6   | 1.2   | 10.0  | 6.5   | 1.8   | 13.0   | 3.4    | 2.2    |
| 16.7  | 25.1  | 17.8  | 20.1  | 25.9  | 13.4  | 25.7   | 26.9   | 24.5   |
| 1.6   | 2.2   | 2.0   | 2.6   | 0.9   | 5.9   | 0.9    | 2.7    | 3.0    |
| 7.8   | 6.1   | 6.9   | 5.0   | 6.8   | 4.6   | 9.8    | 2.5    | 3.6    |
| 4.5   | 6.2   | 2.7   | 12.1  | 10.4  | 7.1   | 5.9    | 11.1   | 15.3   |
| 7.9   | 18.0  | 9.4   | 13.6  | 14.3  | 12.5  | 10.5   | 10.3   | 6.7    |
| 10.0  | 0.5   | 3.4   | 3.6   | 6.7   | 3.5   | 4.4    | 5.4    | 8.2    |
| 12.4  | 7.9   | 11.3  | 11.7  | 16.2  | 14.0  | 17.9   | 21.4   | 24.5   |
| 24.5  | 8.9   | 11.0  | 11.5  | 18.5  | 12.5  | 23.0   | 21.2   | 17.2   |
| 177.8 | 133.7 | 135.1 | 131.4 | 152.9 | 143.3 | 186.6  | 201.5  | 197.8  |
| 29.6  | 10.2  | 18.3  | 25.2  | 14.1  | 16.3  | 33.4   | 35.4   | 20.3   |
| 12.3  | 9.0   | 6.1   | 7.9   | 6.8   | 7.8   | 18.0   | 18.5   | 14.5   |
| 213.4 | 128.1 | 152.0 | 153.2 | 188.4 | 174.4 | 249.9  | 290.4  | 186.2  |
| 0.5   | 0.5   | 0.4   | 0.6   | 0.6   | 0.8   | 1.1    | 1.9    | 1.0    |
| 26.1  | 21.5  | 33.1  | 33.0  | 35.4  | 38.6  | 58.8   | 52.4   | 44.9   |
| 26.0  | 19.2  | 23.3  | 23.1  | 28.8  | 25.0  | 38.3   | 38.2   | 21.3   |
| 74.6  | 58.2  | 83.5  | 58.5  | 75.4  | 64.8  | 98.7   | 112.2  | 66.9   |
| 55.6  | 20.2  | 27.5  | 28.8  | 32.3  | 24.5  | 39.0   | 41.3   | 20.1   |
| 462.4 | 346.8 | 338.9 | 387.0 | 369.2 | 367.5 | 471.5  | 527.8  | 374.1  |
| 61.4  | 53.9  | 56.8  | 86.7  | 69.7  | 97.9  | 113.0  | 122.1  | 105.7  |
| 923.0 | 767.7 | 769.0 | 955.7 | 997.9 | 940.9 | 1229.7 | 1368.3 | 1062.1 |
| 31.2  | 13.0  | 19.5  | 22.4  | 24.6  | 21.6  | 34.8   | 62.0   | 30.8   |
| 52.2  | 57.6  | 59.3  | 56.2  | 73.2  | 91.7  | 90.4   | 128.9  | 85.0   |
| 183.2 | 133.9 | 141.4 | 127.2 | 157.4 | 158.0 | 201.8  | 223.2  | 188.4  |
| 5.7   | 6.6   | 6.9   | 11.4  | 2.1   | 8.9   | 7.0    | 1.9    | 2.9    |
| 118.6 | 64.0  | 89.5  | 104.2 | 116.1 | 102.7 | 139.5  | 137.7  | 120.8  |
| 51.2  | 35.1  | 24.4  | 34.8  | 44.2  | 25.2  | 62.2   | 66.9   | 62.1   |
| 66.5  | 21.6  | 42.7  | 48.2  | 46.6  | 52.5  | 65.5   | 77.0   | 54.3   |
| 228.1 | 136.7 | 177.8 | 185.6 | 190.3 | 165.4 | 231.6  | 263.2  | 222.1  |
| 323.6 | 216.2 | 231.8 | 272.0 | 218.2 | 217.2 | 301.1  | 403.6  | 206.9  |
| 23.1  | 15.1  | 21.1  | 17.3  | 13.9  | 16.3  | 26.1   | 28.4   | 15.7   |
| 47.1  | 25.3  | 27.1  | 20.2  | 28.4  | 23.9  | 31.8   | 48.9   | 38.4   |
| 11.7  | 1.3   | 5.1   | 4.9   | 4.3   | 8.8   | 15.6   | 11.5   | 10.2   |

|       |       |       |       |       |       |       |       |       |
|-------|-------|-------|-------|-------|-------|-------|-------|-------|
| 22.6  | 11.5  | 9.0   | 12.8  | 13.3  | 15.0  | 12.1  | 13.8  | 5.6   |
| 13.8  | 8.6   | 11.7  | 10.8  | 10.5  | 12.7  | 12.0  | 17.0  | 13.1  |
| 219.8 | 150.9 | 182.8 | 194.2 | 196.6 | 222.5 | 250.8 | 314.0 | 177.7 |
| 143.3 | 85.0  | 107.7 | 76.3  | 112.9 | 124.1 | 128.0 | 166.1 | 130.3 |
| 10.4  | 7.2   | 5.5   | 6.4   | 8.6   | 12.4  | 13.3  | 10.1  | 9.7   |
| 23.1  | 24.6  | 34.2  | 29.4  | 26.9  | 22.5  | 37.4  | 46.5  | 37.7  |
| 20.1  | 17.2  | 28.8  | 16.8  | 22.0  | 34.6  | 36.0  | 36.4  | 23.1  |
| 31.9  | 30.6  | 30.6  | 34.1  | 34.5  | 31.4  | 40.6  | 56.4  | 48.1  |
| 13.5  | 7.1   | 10.2  | 7.6   | 7.5   | 9.9   | 11.7  | 15.3  | 14.1  |
| 5.8   | 1.2   | 0.5   | 0.4   | 2.5   | 1.1   | 0.8   | 0.7   | 0.9   |
| 34.2  | 33.9  | 30.7  | 49.6  | 45.4  | 31.8  | 57.9  | 63.7  | 41.5  |
| 32.9  | 12.8  | 16.1  | 11.6  | 14.7  | 13.5  | 25.4  | 31.4  | 15.0  |
| 24.3  | 3.4   | 23.3  | 19.9  | 9.0   | 22.3  | 16.7  | 21.8  | 18.6  |
| 1.0   | 8.7   | 2.0   | 2.3   | 1.7   | 7.6   | 12.7  | 14.6  | 11.1  |
| 4.8   | 5.5   | 6.5   | 1.0   | 12.2  | 6.9   | 8.9   | 10.5  | 6.4   |
| 0.8   | 0.2   | 0.2   | 0.3   | 0.4   | 0.5   | 1.7   | 1.2   | 0.2   |
| 2.3   | 7.6   | 7.1   | 8.6   | 9.2   | 6.6   | 8.1   | 12.2  | 11.1  |
| 5.2   | 14.3  | 18.8  | 12.3  | 13.5  | 27.5  | 19.7  | 17.7  | 18.5  |
| 31.8  | 9.3   | 10.4  | 19.5  | 17.7  | 15.5  | 28.3  | 28.6  | 14.6  |
| 61.6  | 64.4  | 54.9  | 69.9  | 75.0  | 70.1  | 100.4 | 116.0 | 85.3  |
| 100.3 | 53.4  | 65.9  | 75.5  | 83.9  | 76.0  | 101.5 | 127.6 | 69.8  |
| 29.4  | 24.2  | 19.6  | 15.2  | 16.6  | 15.5  | 30.8  | 28.2  | 21.4  |
| 3.5   | 4.4   | 3.8   | 0.9   | 0.1   | 3.2   | 0.9   | 4.5   | 1.1   |
| 72.9  | 56.3  | 56.0  | 68.6  | 80.8  | 65.1  | 90.9  | 98.3  | 83.0  |
| 40.3  | 24.1  | 29.7  | 19.7  | 18.1  | 20.4  | 27.7  | 27.7  | 24.1  |
| 21.7  | 8.8   | 5.6   | 11.7  | 3.3   | 9.8   | 11.8  | 18.7  | 10.4  |
| 55.3  | 49.1  | 47.9  | 56.9  | 50.3  | 51.7  | 56.1  | 64.3  | 39.9  |
| 23.8  | 13.9  | 14.3  | 17.4  | 22.5  | 22.2  | 26.4  | 29.8  | 19.3  |
| 53.0  | 25.0  | 22.6  | 26.5  | 40.7  | 65.8  | 30.8  | 53.4  | 35.8  |
| 86.3  | 46.7  | 39.8  | 45.9  | 48.5  | 42.6  | 52.9  | 76.6  | 58.6  |
| 24.4  | 23.7  | 12.2  | 16.9  | 12.5  | 19.9  | 27.4  | 32.5  | 21.7  |
| 100.8 | 40.0  | 39.5  | 49.6  | 38.9  | 46.2  | 64.0  | 60.9  | 55.4  |
| 37.2  | 33.5  | 32.5  | 42.5  | 44.2  | 44.8  | 62.9  | 86.3  | 60.8  |
| 137.5 | 90.4  | 100.9 | 92.3  | 94.9  | 92.8  | 118.6 | 141.0 | 120.1 |
| 4.1   | 1.7   | 1.3   | 0.3   | 1.6   | 0.7   | 5.6   | 1.1   | 0.9   |
| 125.8 | 79.2  | 66.1  | 107.8 | 57.6  | 65.4  | 116.6 | 115.6 | 92.1  |
| 548.3 | 372.5 | 469.5 | 507.4 | 467.7 | 461.3 | 502.8 | 544.5 | 502.2 |
| 0.5   | 0.3   | 0.6   | 0.4   | 1.7   | 1.2   | 0.5   | 0.7   | 0.3   |
| 7.2   | 4.5   | 4.3   | 4.1   | 2.6   | 4.8   | 2.9   | 5.5   | 1.3   |
| 1.4   | 0.5   | 1.8   | 4.1   | 0.6   | 0.9   | 0.7   | 4.5   | 0.6   |
| 1.3   | 1.9   | 1.1   | 1.0   | 1.5   | 3.3   | 1.0   | 3.7   | 1.3   |
| 90.5  | 73.9  | 58.2  | 74.0  | 88.5  | 79.9  | 95.8  | 130.0 | 100.3 |
| 15.5  | 11.5  | 7.7   | 1.2   | 11.7  | 10.7  | 14.9  | 17.6  | 9.2   |
| 22.8  | 17.9  | 11.8  | 13.6  | 15.0  | 9.5   | 18.9  | 30.4  | 16.0  |
| 52.4  | 33.6  | 30.5  | 37.1  | 33.0  | 33.2  | 48.5  | 44.0  | 49.0  |
| 192.6 | 125.4 | 164.5 | 168.8 | 173.0 | 178.1 | 233.5 | 283.3 | 179.6 |
| 2.0   | 8.2   | 3.9   | 2.7   | 1.4   | 1.7   | 2.2   | 3.7   | 2.1   |
| 4.2   | 18.6  | 2.2   | 6.3   | 1.4   | 7.8   | 14.2  | 21.1  | 11.1  |
| 110.7 | 58.5  | 75.9  | 65.6  | 64.9  | 73.4  | 85.5  | 98.7  | 87.0  |
| 7.4   | 12.2  | 13.1  | 9.1   | 9.5   | 15.0  | 10.8  | 12.1  | 6.7   |
| 80.4  | 29.7  | 31.3  | 32.8  | 28.5  | 34.7  | 54.1  | 50.9  | 35.5  |
| 58.1  | 32.7  | 32.0  | 37.0  | 41.0  | 36.7  | 47.6  | 65.3  | 40.3  |
| 323.3 | 199.7 | 188.8 | 203.5 | 223.6 | 192.4 | 326.4 | 392.8 | 230.0 |

|       |       |       |       |       |       |       |       |       |
|-------|-------|-------|-------|-------|-------|-------|-------|-------|
| 1.6   | 0.1   | 0.4   | 0.6   | 0.1   | 0.3   | 2.6   | 0.1   | 0.2   |
| 708.6 | 328.1 | 331.8 | 411.4 | 446.0 | 419.7 | 607.1 | 801.5 | 389.3 |
| 126.1 | 59.1  | 61.4  | 55.0  | 51.6  | 73.0  | 98.0  | 107.1 | 58.4  |
| 7.3   | 3.7   | 12.3  | 18.5  | 4.7   | 5.0   | 9.8   | 18.6  | 10.2  |
| 100.9 | 62.9  | 74.8  | 76.3  | 78.9  | 78.0  | 109.1 | 120.8 | 77.6  |
| 27.2  | 15.0  | 12.3  | 12.9  | 11.2  | 20.1  | 16.4  | 25.9  | 25.5  |
| 18.7  | 10.5  | 9.9   | 13.2  | 5.6   | 9.9   | 11.9  | 12.4  | 15.9  |
| 20.8  | 19.2  | 15.4  | 19.1  | 17.8  | 15.5  | 19.9  | 26.9  | 23.6  |
| 133.5 | 73.4  | 70.7  | 85.4  | 91.7  | 88.2  | 109.0 | 167.1 | 111.0 |
| 79.0  | 33.7  | 64.1  | 44.7  | 51.9  | 63.5  | 82.9  | 101.7 | 61.6  |
| 696.7 | 558.1 | 572.1 | 578.9 | 668.2 | 576.3 | 764.2 | 732.5 | 535.7 |
| 149.0 | 81.1  | 130.1 | 125.1 | 132.2 | 137.5 | 135.2 | 130.0 | 113.0 |
| 110.7 | 70.8  | 85.5  | 100.3 | 111.2 | 98.8  | 150.3 | 170.6 | 105.7 |
| 2.8   | 1.7   | 5.4   | 5.1   | 6.8   | 0.2   | 6.0   | 7.9   | 8.0   |
| 8.0   | 13.0  | 8.7   | 8.4   | 8.9   | 12.2  | 6.5   | 5.4   | 10.8  |
| 25.1  | 19.5  | 20.2  | 20.6  | 17.4  | 19.6  | 21.7  | 34.8  | 24.9  |
| 283.2 | 209.4 | 236.3 | 235.2 | 260.1 | 245.0 | 321.9 | 420.2 | 252.6 |
| 21.0  | 12.5  | 8.2   | 2.9   | 15.2  | 19.6  | 16.1  | 13.9  | 17.9  |
| 73.1  | 31.4  | 45.3  | 45.7  | 50.9  | 61.0  | 74.3  | 82.1  | 56.4  |
| 42.2  | 19.8  | 18.3  | 18.7  | 18.8  | 20.0  | 38.0  | 26.8  | 16.4  |
| 109.2 | 41.2  | 51.5  | 52.6  | 62.6  | 53.6  | 68.4  | 97.0  | 52.0  |
| 29.3  | 28.1  | 32.2  | 16.7  | 30.6  | 33.8  | 27.3  | 41.4  | 22.1  |
| 43.6  | 28.9  | 23.7  | 23.6  | 25.8  | 24.4  | 43.8  | 54.9  | 25.4  |
| 11.4  | 5.8   | 7.0   | 5.7   | 3.3   | 7.8   | 12.7  | 13.3  | 3.1   |
| 5.1   | 9.3   | 8.1   | 5.7   | 4.2   | 6.4   | 0.9   | 1.6   | 8.0   |
| 20.1  | 12.4  | 22.3  | 10.9  | 1.2   | 10.2  | 19.7  | 12.3  | 15.7  |
| 62.2  | 38.6  | 36.5  | 31.8  | 30.5  | 36.6  | 41.5  | 72.3  | 38.2  |
| 93.5  | 46.9  | 73.9  | 61.2  | 56.8  | 57.5  | 95.9  | 84.8  | 98.7  |
| 112.6 | 72.5  | 60.7  | 86.1  | 112.0 | 77.4  | 135.1 | 142.1 | 109.0 |
| 12.2  | 9.5   | 16.9  | 9.5   | 2.2   | 5.4   | 7.7   | 19.1  | 3.4   |
| 64.7  | 23.2  | 24.0  | 32.3  | 24.7  | 28.0  | 38.0  | 61.2  | 41.1  |
| 141.1 | 117.9 | 150.8 | 145.8 | 167.3 | 168.5 | 201.2 | 192.5 | 207.0 |
| 9.4   | 9.4   | 7.6   | 4.4   | 1.9   | 1.0   | 4.1   | 5.7   | 5.6   |
| 49.6  | 36.2  | 40.2  | 37.1  | 33.6  | 41.1  | 47.8  | 50.0  | 39.5  |
| 18.0  | 14.7  | 10.1  | 19.0  | 8.0   | 12.6  | 20.8  | 21.5  | 15.7  |
| 6.2   | 4.4   | 2.0   | 3.4   | 4.2   | 4.2   | 3.8   | 3.2   | 8.2   |
| 1.8   | 8.6   | 3.0   | 7.5   | 8.6   | 1.9   | 8.6   | 3.9   | 9.9   |
| 0.1   | 0.0   | 1.5   | 0.1   | 0.1   | 0.0   | 1.7   | 0.0   | 0.0   |
| 184.0 | 137.3 | 150.5 | 169.2 | 195.7 | 189.8 | 208.6 | 254.1 | 146.4 |
| 52.9  | 31.6  | 34.2  | 48.7  | 43.2  | 40.4  | 56.6  | 75.0  | 42.6  |
| 40.3  | 31.2  | 22.2  | 32.4  | 25.6  | 35.7  | 43.6  | 51.3  | 34.6  |
| 4.3   | 9.8   | 9.7   | 11.6  | 9.1   | 9.9   | 9.4   | 16.9  | 6.7   |
| 75.6  | 45.7  | 51.5  | 59.0  | 61.5  | 70.8  | 88.8  | 110.1 | 56.3  |
| 8.5   | 9.8   | 13.1  | 10.1  | 12.1  | 10.3  | 13.6  | 13.9  | 15.9  |
| 20.0  | 23.2  | 19.7  | 27.7  | 24.0  | 21.2  | 29.9  | 41.6  | 20.7  |
| 113.8 | 73.5  | 94.8  | 84.4  | 98.1  | 99.9  | 113.7 | 112.3 | 100.9 |
| 42.7  | 27.8  | 33.4  | 40.3  | 36.7  | 37.5  | 40.4  | 52.0  | 33.3  |
| 65.4  | 62.9  | 56.7  | 62.1  | 70.9  | 55.7  | 83.4  | 88.5  | 75.7  |
| 2.4   | 10.6  | 1.2   | 4.5   | 1.7   | 1.2   | 4.2   | 4.0   | 1.6   |
| 80.2  | 30.9  | 36.7  | 40.9  | 40.6  | 53.0  | 50.9  | 102.5 | 52.0  |
| 25.5  | 12.8  | 16.9  | 19.3  | 21.2  | 15.7  | 27.2  | 52.2  | 20.8  |
| 17.4  | 11.7  | 10.4  | 15.7  | 10.5  | 20.3  | 23.8  | 15.0  | 8.9   |
| 23.7  | 1.5   | 6.4   | 4.8   | 9.3   | 4.4   | 11.2  | 6.5   | 13.6  |

|       |       |       |       |       |       |       |       |       |
|-------|-------|-------|-------|-------|-------|-------|-------|-------|
| 2.2   | 0.8   | 5.0   | 6.2   | 0.4   | 10.9  | 2.4   | 2.9   | 8.6   |
| 267.0 | 132.1 | 141.5 | 137.1 | 170.5 | 221.2 | 198.3 | 260.1 | 173.8 |
| 11.4  | 11.8  | 10.1  | 6.7   | 6.7   | 9.5   | 19.1  | 28.7  | 16.5  |
| 1.9   | 3.7   | 5.3   | 4.3   | 6.5   | 8.6   | 7.0   | 7.8   | 10.9  |
| 13.5  | 8.1   | 1.6   | 1.0   | 1.3   | 2.8   | 1.6   | 3.4   | 3.5   |
| 14.3  | 17.8  | 11.9  | 11.0  | 13.0  | 11.9  | 20.4  | 19.5  | 11.3  |
| 565.6 | 320.1 | 384.1 | 431.8 | 458.6 | 433.4 | 615.9 | 570.0 | 518.9 |
| 1.5   | 1.2   | 5.2   | 6.3   | 2.1   | 1.0   | 1.3   | 1.7   | 5.2   |
| 113.4 | 66.2  | 67.6  | 82.8  | 90.9  | 73.6  | 107.9 | 108.7 | 69.7  |
| 10.3  | 3.2   | 4.9   | 0.4   | 4.4   | 5.5   | 7.2   | 3.7   | 4.5   |
| 44.3  | 27.9  | 32.8  | 24.9  | 38.6  | 35.6  | 61.5  | 75.9  | 55.5  |
| 48.1  | 44.4  | 35.8  | 47.4  | 30.0  | 34.3  | 38.2  | 41.2  | 27.8  |
| 15.2  | 12.3  | 20.3  | 10.3  | 26.9  | 13.1  | 22.8  | 29.0  | 17.5  |
| 3.0   | 8.1   | 12.7  | 3.5   | 14.7  | 12.0  | 14.4  | 8.6   | 19.0  |
| 10.7  | 9.1   | 10.6  | 14.8  | 2.4   | 6.8   | 18.0  | 8.5   | 5.0   |
| 0.1   | 5.6   | 4.1   | 0.8   | 4.7   | 4.2   | 0.8   | 5.0   | 5.1   |
| 142.7 | 96.3  | 108.6 | 88.6  | 97.9  | 93.9  | 134.7 | 134.0 | 99.4  |
| 127.5 | 70.1  | 98.9  | 73.8  | 102.2 | 83.1  | 144.3 | 165.3 | 98.8  |
| 1.6   | 0.9   | 1.1   | 3.7   | 1.6   | 6.0   | 9.4   | 1.7   | 1.7   |
| 18.7  | 17.8  | 20.6  | 18.4  | 17.9  | 16.4  | 23.6  | 17.2  | 12.4  |
| 10.7  | 2.1   | 3.1   | 4.0   | 2.1   | 6.4   | 0.6   | 5.6   | 0.8   |
| 3.5   | 5.2   | 0.6   | 0.6   | 4.5   | 1.1   | 9.3   | 1.3   | 4.8   |
| 9.6   | 2.5   | 6.0   | 2.2   | 2.9   | 6.4   | 4.2   | 3.7   | 5.3   |
| 42.3  | 41.6  | 35.7  | 44.7  | 41.4  | 47.2  | 61.5  | 71.2  | 45.7  |
| 80.6  | 58.9  | 60.5  | 62.0  | 57.3  | 63.2  | 77.1  | 105.1 | 55.2  |
| 48.5  | 28.5  | 36.0  | 33.9  | 38.2  | 35.6  | 56.8  | 71.5  | 43.2  |
| 38.1  | 25.9  | 28.4  | 34.7  | 37.6  | 38.9  | 40.7  | 39.7  | 42.7  |
| 12.4  | 16.8  | 14.5  | 13.0  | 13.3  | 12.3  | 16.2  | 19.3  | 17.0  |
| 28.7  | 18.1  | 27.2  | 22.0  | 18.5  | 15.1  | 36.8  | 35.2  | 26.4  |
| 100.3 | 59.0  | 71.6  | 74.2  | 77.4  | 69.7  | 127.3 | 102.5 | 100.9 |
| 96.7  | 69.6  | 81.8  | 86.1  | 117.2 | 100.1 | 126.9 | 122.7 | 99.8  |
| 0.6   | 0.6   | 4.7   | 1.5   | 1.5   | 7.4   | 2.9   | 1.1   | 1.8   |
| 51.0  | 29.0  | 32.3  | 42.0  | 35.8  | 30.8  | 40.9  | 44.6  | 48.4  |
| 0.5   | 0.6   | 0.5   | 1.0   | 0.9   | 1.1   | 1.2   | 1.8   | 1.0   |
| 7.6   | 11.1  | 7.6   | 8.8   | 10.5  | 7.1   | 5.3   | 12.7  | 5.2   |
| 14.2  | 7.4   | 12.8  | 5.8   | 10.6  | 7.9   | 16.6  | 17.4  | 13.5  |
| 11.1  | 5.8   | 10.8  | 11.8  | 14.1  | 16.7  | 10.9  | 16.9  | 11.1  |
| 920.9 | 403.9 | 460.6 | 459.8 | 540.0 | 503.8 | 587.5 | 613.0 | 406.9 |
| 41.2  | 27.8  | 28.4  | 28.5  | 25.9  | 34.5  | 39.8  | 49.3  | 31.0  |
| 86.0  | 36.2  | 52.2  | 55.0  | 59.8  | 50.0  | 58.8  | 59.4  | 41.9  |
| 2.4   | 3.4   | 2.6   | 3.2   | 3.1   | 4.8   | 11.4  | 11.3  | 9.1   |
| 36.6  | 19.8  | 26.9  | 24.4  | 31.8  | 24.2  | 34.4  | 41.5  | 33.4  |
| 727.3 | 527.2 | 627.8 | 645.0 | 683.3 | 656.7 | 896.8 | 926.5 | 616.6 |
| 147.2 | 104.7 | 114.9 | 120.7 | 119.5 | 101.8 | 149.4 | 147.0 | 93.3  |
| 46.5  | 38.6  | 30.3  | 35.4  | 42.5  | 29.5  | 50.6  | 54.4  | 38.4  |
| 19.8  | 15.2  | 12.0  | 18.7  | 9.1   | 11.4  | 16.6  | 11.0  | 16.2  |
| 58.8  | 35.2  | 44.9  | 42.2  | 47.7  | 43.5  | 65.1  | 59.3  | 83.6  |
| 35.4  | 31.6  | 31.4  | 44.0  | 43.1  | 30.9  | 51.5  | 48.1  | 44.7  |
| 1.4   | 1.8   | 0.9   | 5.0   | 2.0   | 1.4   | 0.5   | 2.7   | 7.5   |
| 0.3   | 0.6   | 0.6   | 0.8   | 1.8   | 0.8   | 0.7   | 0.7   | 0.4   |
| 1.2   | 4.4   | 8.3   | 1.8   | 1.4   | 1.7   | 3.4   | 4.3   | 2.0   |
| 139.5 | 83.6  | 131.3 | 79.9  | 123.9 | 113.5 | 128.2 | 131.8 | 99.0  |
| 122.9 | 107.1 | 111.0 | 115.1 | 126.5 | 126.0 | 133.7 | 152.2 | 85.0  |

|        |       |        |        |        |        |        |        |        |
|--------|-------|--------|--------|--------|--------|--------|--------|--------|
| 68.0   | 43.6  | 31.7   | 36.5   | 50.0   | 37.0   | 68.3   | 43.7   | 36.6   |
| 45.3   | 39.9  | 53.0   | 40.0   | 38.8   | 40.5   | 65.7   | 71.5   | 58.7   |
| 64.7   | 53.0  | 47.6   | 69.4   | 57.8   | 77.1   | 112.2  | 115.5  | 82.8   |
| 4.9    | 1.2   | 9.0    | 1.0    | 1.5    | 0.8    | 10.4   | 1.8    | 1.5    |
| 61.5   | 16.5  | 33.4   | 36.7   | 32.9   | 32.8   | 46.8   | 45.6   | 26.2   |
| 56.7   | 22.3  | 25.8   | 29.3   | 33.9   | 43.2   | 69.5   | 73.3   | 32.6   |
| 362.8  | 254.2 | 191.2  | 216.2  | 198.8  | 222.8  | 294.9  | 322.9  | 200.1  |
| 52.1   | 26.1  | 46.8   | 43.8   | 44.5   | 45.1   | 68.7   | 81.1   | 49.4   |
| 75.8   | 68.5  | 65.7   | 72.6   | 73.2   | 74.3   | 84.5   | 119.1  | 73.2   |
| 44.1   | 1.5   | 7.1    | 9.7    | 1.1    | 12.2   | 13.6   | 13.8   | 7.5    |
| 2.7    | 1.3   | 4.9    | 4.7    | 4.2    | 0.5    | 7.1    | 4.3    | 5.0    |
| 100.3  | 36.3  | 56.4   | 43.8   | 60.5   | 68.6   | 64.7   | 85.1   | 37.7   |
| 119.2  | 58.3  | 70.1   | 63.9   | 62.2   | 81.1   | 101.4  | 117.4  | 74.3   |
| 156.7  | 77.0  | 87.5   | 115.1  | 111.4  | 101.4  | 151.8  | 172.0  | 153.0  |
| 0.9    | 1.4   | 0.9    | 1.1    | 1.0    | 0.7    | 0.9    | 1.3    | 1.5    |
| 24.1   | 12.1  | 4.1    | 16.8   | 22.1   | 2.3    | 11.1   | 14.9   | 23.1   |
| 7.7    | 5.3   | 8.6    | 3.9    | 0.7    | 8.2    | 0.9    | 4.3    | 4.0    |
| 2.6    | 2.7   | 3.2    | 2.8    | 0.6    | 2.0    | 0.4    | 3.6    | 0.8    |
| 71.7   | 31.6  | 42.4   | 37.1   | 41.6   | 41.3   | 57.7   | 72.5   | 42.8   |
| 34.5   | 19.1  | 25.4   | 34.9   | 29.5   | 32.7   | 45.5   | 52.4   | 52.3   |
| 62.6   | 53.2  | 44.1   | 56.2   | 68.8   | 55.0   | 91.3   | 103.8  | 61.1   |
| 0.4    | 0.6   | 0.9    | 2.7    | 0.7    | 0.5    | 2.2    | 2.0    | 1.3    |
| 8.0    | 17.7  | 14.5   | 20.0   | 14.5   | 10.3   | 18.9   | 13.5   | 18.1   |
| 18.9   | 21.8  | 15.0   | 15.2   | 15.9   | 12.3   | 19.8   | 19.9   | 17.6   |
| 147.8  | 111.6 | 150.6  | 155.8  | 159.8  | 135.4  | 212.1  | 211.0  | 122.7  |
| 96.7   | 64.0  | 82.0   | 73.7   | 95.8   | 62.6   | 90.7   | 97.3   | 84.9   |
| 14.9   | 16.5  | 8.5    | 14.3   | 24.2   | 8.2    | 17.2   | 14.8   | 14.1   |
| 13.0   | 6.9   | 10.3   | 12.4   | 11.6   | 14.0   | 13.0   | 15.6   | 14.3   |
| 75.0   | 67.0  | 53.3   | 65.1   | 85.6   | 68.9   | 114.4  | 132.4  | 90.1   |
| 34.9   | 22.6  | 23.6   | 27.1   | 24.5   | 28.9   | 32.0   | 31.9   | 24.3   |
| 328.1  | 196.5 | 247.1  | 238.7  | 309.2  | 267.6  | 382.0  | 435.0  | 295.6  |
| 24.1   | 8.7   | 14.0   | 19.0   | 15.8   | 13.6   | 23.9   | 31.1   | 20.4   |
| 21.1   | 11.1  | 1.7    | 6.9    | 14.6   | 7.7    | 16.3   | 12.0   | 2.3    |
| 23.5   | 11.5  | 9.7    | 16.1   | 11.6   | 15.9   | 19.6   | 15.8   | 11.4   |
| 0.6    | 0.7   | 1.2    | 0.7    | 0.4    | 0.3    | 1.0    | 0.7    | 2.9    |
| 6.4    | 3.6   | 2.7    | 4.7    | 7.2    | 5.0    | 4.8    | 1.1    | 5.6    |
| 12.7   | 3.0   | 2.5    | 7.1    | 0.8    | 12.5   | 19.9   | 9.9    | 14.3   |
| 17.8   | 2.2   | 8.9    | 5.0    | 12.1   | 10.8   | 8.4    | 19.2   | 11.3   |
| 5.0    | 1.5   | 7.7    | 3.6    | 7.3    | 11.4   | 3.2    | 10.3   | 6.0    |
| 78.5   | 58.6  | 46.8   | 62.6   | 66.0   | 50.5   | 83.2   | 80.0   | 107.1  |
| 58.6   | 36.5  | 37.3   | 40.5   | 30.4   | 32.4   | 53.6   | 64.1   | 43.3   |
| 27.4   | 31.8  | 39.3   | 38.8   | 32.6   | 31.3   | 44.9   | 45.2   | 39.5   |
| 21.2   | 13.6  | 19.1   | 11.2   | 16.0   | 15.4   | 13.9   | 19.4   | 18.0   |
| 9.2    | 18.4  | 21.3   | 15.5   | 16.7   | 8.4    | 27.2   | 25.1   | 8.8    |
| 1068.1 | 835.8 | 1029.6 | 1000.5 | 1156.5 | 1148.5 | 1386.8 | 1532.9 | 1120.4 |
| 99.4   | 62.1  | 51.0   | 64.2   | 88.9   | 94.9   | 112.8  | 154.2  | 130.6  |
| 809.2  | 330.6 | 482.2  | 455.8  | 489.4  | 580.8  | 664.9  | 865.3  | 787.6  |
| 919.7  | 284.5 | 478.0  | 464.8  | 397.2  | 639.0  | 645.7  | 924.3  | 505.2  |
| 0.3    | 0.3   | 0.6    | 0.3    | 0.4    | 0.4    | 0.5    | 0.7    | 0.5    |
| 57.8   | 43.7  | 37.0   | 39.3   | 43.7   | 35.8   | 64.7   | 80.8   | 38.2   |
| 51.3   | 32.3  | 38.0   | 37.4   | 36.3   | 28.6   | 51.1   | 47.5   | 41.0   |
| 168.8  | 199.1 | 119.3  | 170.5  | 160.7  | 102.0  | 232.0  | 163.9  | 162.3  |
| 143.8  | 23.0  | 36.4   | 27.1   | 33.5   | 28.1   | 45.0   | 59.6   | 40.2   |

|       |       |       |       |       |       |       |       |       |
|-------|-------|-------|-------|-------|-------|-------|-------|-------|
| 19.5  | 10.7  | 2.9   | 3.5   | 8.3   | 2.6   | 9.3   | 8.1   | 14.2  |
| 3.4   | 6.2   | 0.6   | 4.5   | 3.9   | 1.1   | 3.9   | 6.1   | 10.4  |
| 8.9   | 15.3  | 10.2  | 15.0  | 12.6  | 18.2  | 4.7   | 12.0  | 9.7   |
| 28.7  | 22.2  | 13.8  | 25.1  | 21.0  | 16.3  | 33.6  | 23.9  | 24.9  |
| 5.5   | 8.1   | 0.8   | 6.8   | 2.0   | 8.4   | 11.0  | 5.2   | 1.6   |
| 172.8 | 167.6 | 192.8 | 222.3 | 220.3 | 205.1 | 298.4 | 310.0 | 262.8 |
| 7.4   | 1.2   | 0.9   | 1.1   | 2.2   | 1.3   | 0.9   | 0.9   | 1.2   |
| 62.4  | 35.7  | 32.2  | 42.9  | 41.5  | 40.8  | 66.7  | 54.9  | 41.4  |
| 58.6  | 45.2  | 60.1  | 54.9  | 65.8  | 60.9  | 77.7  | 92.6  | 54.0  |
| 50.5  | 55.0  | 47.8  | 47.6  | 50.5  | 41.5  | 78.5  | 67.6  | 54.5  |
| 433.1 | 337.8 | 337.4 | 349.6 | 393.8 | 386.4 | 474.7 | 580.9 | 297.4 |
| 0.7   | 2.2   | 0.8   | 0.4   | 0.6   | 6.9   | 6.6   | 2.1   | 4.0   |
| 77.4  | 78.8  | 46.8  | 56.1  | 87.5  | 62.4  | 110.5 | 138.2 | 188.4 |
| 121.2 | 130.6 | 103.4 | 98.9  | 118.2 | 104.9 | 207.2 | 152.9 | 126.9 |
| 169.0 | 122.4 | 94.4  | 118.1 | 124.9 | 110.5 | 169.4 | 215.4 | 146.1 |
| 29.0  | 20.1  | 24.6  | 27.1  | 25.2  | 28.6  | 39.6  | 40.2  | 22.7  |
| 0.7   | 1.0   | 0.8   | 0.6   | 0.7   | 1.6   | 1.5   | 1.6   | 1.6   |
| 0.5   | 0.9   | 0.7   | 1.1   | 1.1   | 1.4   | 1.4   | 2.3   | 4.6   |
| 16.4  | 18.3  | 12.6  | 24.0  | 20.7  | 12.3  | 22.7  | 16.7  | 17.6  |
| 0.3   | 2.6   | 2.1   | 1.3   | 1.3   | 0.1   | 4.1   | 0.4   | 0.2   |
| 52.6  | 15.7  | 21.8  | 21.2  | 24.4  | 24.8  | 34.9  | 27.5  | 23.8  |
| 6.9   | 3.5   | 2.8   | 4.9   | 3.8   | 3.1   | 2.2   | 2.3   | 1.3   |
| 0.2   | 3.4   | 0.4   | 3.0   | 1.2   | 0.5   | 0.3   | 2.9   | 1.0   |
| 18.8  | 12.2  | 13.4  | 10.4  | 13.0  | 7.8   | 16.3  | 20.9  | 21.9  |
| 1.0   | 1.5   | 7.4   | 1.8   | 13.6  | 3.5   | 9.0   | 2.6   | 7.7   |
| 1.1   | 1.0   | 1.6   | 1.1   | 0.8   | 1.4   | 8.4   | 4.2   | 2.1   |
| 1.1   | 1.6   | 2.4   | 0.6   | 0.9   | 1.3   | 5.2   | 1.4   | 0.7   |
| 0.2   | 0.1   | 0.1   | 0.7   | 2.7   | 0.1   | 0.6   | 2.9   | 2.6   |
| 105.3 | 51.8  | 55.7  | 61.6  | 50.9  | 56.4  | 80.5  | 74.8  | 70.5  |
| 1.9   | 2.1   | 2.0   | 0.4   | 1.4   | 1.8   | 1.8   | 7.7   | 5.1   |
| 4.6   | 4.1   | 2.0   | 1.8   | 1.9   | 3.1   | 1.2   | 6.4   | 1.8   |
| 395.5 | 213.6 | 247.4 | 204.1 | 302.0 | 297.6 | 440.0 | 513.4 | 417.0 |
| 494.2 | 218.1 | 298.3 | 309.0 | 297.9 | 346.6 | 445.8 | 524.6 | 326.5 |
| 0.8   | 0.3   | 0.4   | 0.4   | 1.4   | 0.5   | 0.6   | 0.6   | 0.4   |
| 22.3  | 20.5  | 17.3  | 20.4  | 19.3  | 18.0  | 16.5  | 14.4  | 21.6  |
| 2.3   | 1.8   | 0.6   | 1.0   | 2.0   | 2.5   | 1.5   | 1.3   | 0.8   |
| 36.5  | 7.6   | 22.8  | 17.7  | 15.1  | 19.3  | 23.0  | 23.2  | 18.7  |
| 61.3  | 43.0  | 56.4  | 49.3  | 60.3  | 52.2  | 76.9  | 98.4  | 82.6  |
| 42.6  | 27.8  | 6.3   | 41.8  | 34.8  | 39.2  | 52.4  | 69.7  | 47.6  |
| 30.7  | 32.3  | 25.8  | 20.2  | 31.1  | 28.7  | 29.0  | 45.8  | 30.9  |
| 58.4  | 32.2  | 24.2  | 36.3  | 25.4  | 45.3  | 43.0  | 71.6  | 40.4  |
| 28.1  | 8.2   | 20.8  | 14.5  | 15.8  | 15.0  | 15.7  | 27.8  | 17.0  |
| 17.3  | 18.1  | 18.6  | 22.1  | 29.3  | 15.0  | 21.3  | 26.9  | 17.9  |
| 3.8   | 7.1   | 0.6   | 0.3   | 2.7   | 3.9   | 1.4   | 3.0   | 0.9   |
| 0.2   | 0.4   | 4.0   | 0.5   | 0.3   | 0.2   | 0.4   | 0.5   | 0.1   |
| 16.8  | 24.9  | 23.8  | 20.4  | 14.3  | 24.4  | 27.4  | 20.7  | 27.7  |
| 124.6 | 86.4  | 104.3 | 106.7 | 122.8 | 107.2 | 157.4 | 174.1 | 95.7  |
| 21.0  | 6.8   | 10.8  | 2.9   | 4.1   | 13.7  | 15.6  | 20.2  | 8.5   |
| 15.1  | 17.4  | 13.1  | 13.2  | 11.8  | 11.5  | 15.4  | 11.7  | 7.9   |
| 52.1  | 34.9  | 39.3  | 43.5  | 38.1  | 42.8  | 69.4  | 68.9  | 50.9  |
| 5.3   | 1.3   | 1.9   | 4.3   | 5.8   | 5.2   | 9.6   | 2.6   | 2.1   |
| 4.5   | 1.8   | 2.8   | 2.2   | 0.9   | 4.0   | 3.3   | 4.0   | 0.1   |
| 18.2  | 4.5   | 13.4  | 13.7  | 10.0  | 10.7  | 17.4  | 16.2  | 16.5  |

|       |        |        |        |        |        |        |        |        |
|-------|--------|--------|--------|--------|--------|--------|--------|--------|
| 42.8  | 31.3   | 41.9   | 35.3   | 36.5   | 40.7   | 50.4   | 58.7   | 31.6   |
| 28.9  | 9.9    | 17.4   | 14.6   | 16.3   | 20.9   | 32.6   | 30.6   | 43.5   |
| 2.1   | 6.2    | 10.6   | 1.7    | 2.7    | 13.0   | 13.8   | 16.3   | 4.7    |
| 30.8  | 39.6   | 41.3   | 46.4   | 49.1   | 40.8   | 73.6   | 82.8   | 44.4   |
| 18.9  | 17.3   | 17.5   | 22.9   | 20.3   | 14.6   | 24.0   | 21.6   | 16.5   |
| 41.8  | 23.9   | 19.9   | 28.0   | 30.3   | 32.9   | 45.6   | 47.9   | 26.4   |
| 335.7 | 1188.7 | 1212.5 | 1347.2 | 1349.2 | 1277.3 | 1660.2 | 1497.2 | 1291.2 |
| 1.3   | 2.0    | 0.8    | 0.7    | 1.9    | 0.9    | 2.8    | 2.1    | 3.6    |
| 0.4   | 0.5    | 0.4    | 0.2    | 0.2    | 0.7    | 0.4    | 0.3    | 0.4    |
| 0.2   | 0.2    | 0.4    | 0.8    | 0.2    | 0.4    | 0.8    | 0.5    | 1.4    |
| 27.8  | 18.4   | 24.2   | 17.6   | 24.3   | 19.6   | 40.7   | 41.5   | 30.0   |
| 126.1 | 109.6  | 117.6  | 146.2  | 124.2  | 96.6   | 120.5  | 144.3  | 97.5   |
| 87.4  | 67.9   | 84.6   | 77.3   | 63.0   | 85.2   | 95.5   | 106.3  | 105.2  |
| 137.9 | 81.6   | 84.5   | 103.2  | 110.1  | 116.9  | 152.6  | 201.2  | 159.1  |
| 14.7  | 13.6   | 12.5   | 15.4   | 15.4   | 12.6   | 16.1   | 17.7   | 15.7   |
| 0.1   | 0.3    | 2.5    | 0.2    | 0.1    | 0.1    | 0.3    | 0.2    | 0.2    |
| 5.9   | 2.4    | 4.0    | 0.3    | 5.5    | 4.7    | 7.3    | 5.2    | 6.8    |
| 6.1   | 10.4   | 4.1    | 1.2    | 1.1    | 6.4    | 6.8    | 5.8    | 1.4    |
| 3.3   | 9.8    | 1.4    | 1.6    | 5.4    | 2.6    | 6.0    | 10.3   | 1.1    |
| 10.9  | 7.4    | 6.7    | 1.0    | 5.9    | 8.6    | 2.8    | 3.0    | 2.8    |
| 0.6   | 0.4    | 0.9    | 1.9    | 0.8    | 0.5    | 0.4    | 0.2    | 5.2    |
| 2.6   | 1.4    | 3.6    | 3.0    | 1.3    | 0.8    | 1.5    | 2.7    | 0.8    |
| 1.1   | 0.2    | 0.8    | 1.1    | 5.0    | 0.7    | 5.4    | 3.7    | 3.2    |
| 0.5   | 0.4    | 0.5    | 0.2    | 0.1    | 0.5    | 0.4    | 0.6    | 2.5    |
| 4.7   | 9.0    | 5.4    | 7.9    | 9.0    | 5.5    | 5.5    | 9.8    | 5.2    |
| 49.5  | 34.9   | 35.3   | 43.3   | 34.9   | 32.5   | 52.7   | 48.1   | 35.7   |
| 44.4  | 27.4   | 28.5   | 31.0   | 31.8   | 24.9   | 46.2   | 46.0   | 35.3   |
| 0.1   | 3.4    | 0.2    | 3.1    | 0.1    | 2.0    | 4.1    | 4.1    | 0.2    |
| 62.7  | 15.2   | 40.1   | 17.7   | 34.4   | 42.9   | 27.0   | 61.7   | 39.6   |
| 21.8  | 15.7   | 23.5   | 24.2   | 26.0   | 18.8   | 22.3   | 30.6   | 33.9   |
| 96.9  | 42.6   | 62.8   | 70.6   | 71.0   | 75.3   | 121.3  | 113.4  | 88.0   |
| 69.7  | 63.6   | 77.1   | 84.2   | 83.9   | 69.2   | 122.4  | 104.9  | 78.7   |
| 225.5 | 151.9  | 163.5  | 172.3  | 185.5  | 185.6  | 230.1  | 240.7  | 183.6  |
| 27.1  | 30.0   | 26.9   | 27.0   | 26.7   | 29.7   | 29.5   | 45.3   | 38.5   |
| 2.0   | 1.6    | 3.9    | 1.9    | 2.4    | 1.6    | 3.1    | 3.0    | 1.5    |
| 35.2  | 19.8   | 21.3   | 27.5   | 29.0   | 30.5   | 35.4   | 37.7   | 24.1   |
| 61.3  | 38.7   | 36.8   | 64.2   | 79.6   | 62.9   | 106.0  | 119.6  | 76.7   |
| 151.8 | 113.9  | 117.1  | 124.4  | 114.2  | 114.6  | 150.2  | 205.8  | 118.6  |
| 2.3   | 0.7    | 0.9    | 0.4    | 0.3    | 1.8    | 1.8    | 0.7    | 0.6    |
| 4.3   | 14.5   | 12.2   | 12.0   | 11.7   | 10.2   | 19.9   | 18.6   | 18.6   |
| 174.8 | 104.4  | 124.3  | 121.5  | 130.9  | 122.5  | 140.5  | 164.7  | 117.5  |
| 1.3   | 2.2    | 1.3    | 9.2    | 2.2    | 0.8    | 4.3    | 3.7    | 1.7    |
| 6.8   | 6.5    | 4.9    | 2.8    | 5.0    | 7.8    | 6.8    | 2.1    | 2.9    |
| 15.9  | 21.3   | 24.2   | 33.1   | 36.1   | 22.0   | 40.3   | 49.1   | 25.2   |
| 14.7  | 6.0    | 3.7    | 6.7    | 9.3    | 7.6    | 14.8   | 22.8   | 13.3   |
| 44.3  | 56.0   | 59.2   | 76.9   | 74.7   | 68.7   | 97.8   | 91.7   | 64.3   |
| 40.3  | 25.7   | 35.9   | 36.7   | 30.8   | 31.4   | 50.9   | 55.6   | 39.2   |
| 38.9  | 25.5   | 31.3   | 33.5   | 37.3   | 37.9   | 38.4   | 53.4   | 29.3   |
| 93.0  | 65.9   | 49.2   | 72.0   | 72.1   | 58.1   | 103.9  | 111.4  | 77.1   |
| 29.2  | 18.7   | 27.6   | 25.5   | 30.5   | 21.1   | 33.5   | 33.0   | 26.0   |
| 10.0  | 8.2    | 13.6   | 15.9   | 9.5    | 14.4   | 13.0   | 16.4   | 11.9   |
| 0.7   | 4.3    | 3.5    | 2.3    | 1.1    | 1.2    | 6.2    | 1.2    | 2.4    |
| 58.4  | 16.3   | 26.9   | 26.1   | 26.4   | 39.4   | 52.1   | 50.2   | 29.3   |



|        |        |        |        |        |        |        |        |        |
|--------|--------|--------|--------|--------|--------|--------|--------|--------|
| 4.0    | 16.8   | 1.1    | 9.3    | 7.7    | 1.5    | 17.6   | 13.5   | 5.6    |
| 49.8   | 24.2   | 34.4   | 38.5   | 27.1   | 39.0   | 53.2   | 45.8   | 25.1   |
| 25.8   | 15.6   | 20.3   | 23.4   | 25.1   | 18.0   | 29.3   | 34.0   | 37.7   |
| 181.4  | 118.9  | 151.6  | 133.0  | 148.2  | 159.8  | 227.9  | 242.8  | 173.7  |
| 49.7   | 42.3   | 40.0   | 53.5   | 58.8   | 41.4   | 47.3   | 63.9   | 64.7   |
| 67.3   | 29.5   | 41.9   | 47.7   | 52.6   | 52.9   | 58.8   | 76.0   | 51.6   |
| 69.3   | 40.8   | 51.8   | 50.4   | 50.7   | 50.5   | 72.5   | 93.4   | 83.8   |
| 14.4   | 14.1   | 17.0   | 19.0   | 12.3   | 9.6    | 24.6   | 17.3   | 13.6   |
| 7.6    | 6.1    | 1.7    | 4.2    | 5.2    | 9.8    | 5.6    | 11.4   | 9.4    |
| 117.5  | 77.9   | 88.8   | 91.2   | 97.4   | 112.0  | 131.8  | 163.1  | 107.3  |
| 23.0   | 27.5   | 25.7   | 27.0   | 25.5   | 20.7   | 35.8   | 27.5   | 19.0   |
| 43.3   | 14.6   | 16.4   | 15.8   | 23.4   | 20.1   | 31.2   | 43.3   | 20.9   |
| 4.3    | 3.2    | 0.8    | 5.9    | 2.9    | 4.0    | 5.0    | 1.9    | 0.8    |
| 66.0   | 34.7   | 56.1   | 59.5   | 47.6   | 52.7   | 66.5   | 84.4   | 79.4   |
| 1.0    | 3.7    | 5.4    | 4.1    | 3.2    | 0.5    | 3.3    | 2.2    | 0.3    |
| 18.2   | 15.8   | 8.9    | 9.1    | 17.7   | 11.9   | 25.7   | 21.0   | 16.1   |
| 26.1   | 55.8   | 47.3   | 60.9   | 56.7   | 62.9   | 79.1   | 83.1   | 63.3   |
| 13.5   | 15.9   | 18.5   | 24.0   | 22.2   | 15.6   | 30.2   | 35.0   | 24.6   |
| 33.8   | 37.7   | 38.0   | 39.3   | 43.2   | 42.5   | 51.8   | 53.1   | 37.7   |
| 64.7   | 39.6   | 49.9   | 45.0   | 39.5   | 49.6   | 53.8   | 69.7   | 41.6   |
| 162.4  | 128.9  | 139.8  | 142.5  | 198.7  | 173.4  | 237.3  | 310.6  | 170.1  |
| 46.8   | 18.4   | 15.8   | 20.3   | 18.1   | 17.8   | 22.6   | 24.2   | 19.7   |
| 76.6   | 44.3   | 51.1   | 58.3   | 60.8   | 47.6   | 84.3   | 97.7   | 47.1   |
| 37.3   | 27.9   | 21.0   | 25.2   | 33.8   | 32.2   | 46.7   | 58.3   | 40.8   |
| 7.8    | 3.9    | 2.8    | 4.0    | 4.7    | 3.2    | 7.8    | 13.7   | 6.7    |
| 24.5   | 32.4   | 23.5   | 25.6   | 27.5   | 24.6   | 38.4   | 39.6   | 27.4   |
| 35.0   | 20.2   | 10.7   | 23.8   | 23.7   | 16.6   | 35.9   | 44.7   | 24.5   |
| 234.8  | 192.5  | 163.2  | 161.1  | 211.5  | 232.7  | 331.2  | 445.2  | 291.8  |
| 4.3    | 2.9    | 3.1    | 2.9    | 4.5    | 4.5    | 5.5    | 3.0    | 3.4    |
| 4.1    | 0.8    | 4.0    | 0.2    | 1.8    | 4.8    | 2.1    | 3.1    | 3.1    |
| 69.5   | 48.0   | 53.2   | 51.9   | 72.3   | 54.3   | 83.2   | 139.4  | 64.4   |
| 10.3   | 9.0    | 24.4   | 20.0   | 18.5   | 16.9   | 17.2   | 18.9   | 13.4   |
| 9.9    | 12.1   | 7.7    | 1.9    | 1.9    | 10.8   | 11.5   | 6.1    | 8.7    |
| 1.7    | 3.2    | 0.9    | 2.2    | 0.4    | 5.5    | 0.5    | 0.9    | 0.3    |
| 1.8    | 1.6    | 2.7    | 4.5    | 3.8    | 2.5    | 10.6   | 8.6    | 5.5    |
| 8.0    | 6.2    | 1.3    | 0.9    | 1.4    | 4.9    | 8.9    | 1.6    | 9.0    |
| 0.9    | 2.3    | 1.8    | 1.3    | 3.1    | 3.2    | 0.4    | 2.2    | 0.8    |
| 73.3   | 36.8   | 40.2   | 59.0   | 40.1   | 33.4   | 56.4   | 120.0  | 9.7    |
| 0.4    | 0.4    | 0.6    | 2.7    | 1.1    | 4.9    | 0.3    | 0.6    | 0.3    |
| 2682.2 | 2181.7 | 2211.0 | 2481.0 | 2772.1 | 2246.9 | 3520.2 | 3445.6 | 2158.7 |
| 10.5   | 5.9    | 6.8    | 3.2    | 3.1    | 4.4    | 10.6   | 12.7   | 11.8   |
| 7.4    | 2.7    | 1.2    | 4.9    | 10.4   | 2.1    | 1.4    | 14.0   | 0.9    |
| 1.0    | 0.9    | 1.2    | 1.1    | 1.1    | 0.6    | 1.7    | 2.5    | 0.9    |
| 72.5   | 48.4   | 52.2   | 61.5   | 72.9   | 68.0   | 93.1   | 109.5  | 66.1   |
| 1.3    | 0.6    | 2.4    | 3.9    | 0.9    | 1.9    | 0.9    | 2.3    | 4.5    |
| 17.6   | 11.4   | 22.3   | 16.8   | 19.9   | 34.2   | 21.7   | 18.4   | 16.3   |
| 95.4   | 67.7   | 68.2   | 71.3   | 79.8   | 71.5   | 103.2  | 106.1  | 96.7   |
| 2.7    | 2.8    | 0.6    | 1.1    | 0.6    | 0.6    | 0.6    | 5.6    | 0.5    |
| 11.9   | 15.5   | 13.6   | 11.9   | 14.7   | 10.1   | 14.1   | 16.7   | 13.9   |
| 17.1   | 10.2   | 12.1   | 8.5    | 8.9    | 8.9    | 9.8    | 14.0   | 10.4   |
| 0.8    | 4.6    | 5.2    | 0.5    | 3.7    | 1.7    | 1.1    | 5.8    | 1.0    |
| 7.5    | 7.0    | 12.0   | 7.4    | 8.7    | 7.6    | 11.2   | 15.9   | 10.9   |
| 9.5    | 2.1    | 11.9   | 4.8    | 8.1    | 3.2    | 12.3   | 3.9    | 13.3   |

|        |       |        |       |        |        |        |        |        |
|--------|-------|--------|-------|--------|--------|--------|--------|--------|
| 44.2   | 34.7  | 48.7   | 50.2  | 47.0   | 41.5   | 86.0   | 81.0   | 57.8   |
| 23.5   | 14.9  | 12.0   | 8.6   | 14.9   | 6.6    | 19.7   | 20.9   | 9.2    |
| 1.6    | 14.8  | 4.4    | 2.4   | 4.6    | 2.6    | 3.0    | 3.7    | 2.2    |
| 0.1    | 0.1   | 0.9    | 0.2   | 0.2    | 0.2    | 2.7    | 0.1    | 0.2    |
| 83.7   | 52.4  | 72.3   | 54.3  | 70.3   | 76.8   | 74.9   | 107.3  | 67.9   |
| 562.4  | 278.7 | 429.5  | 376.6 | 481.7  | 538.9  | 743.0  | 687.5  | 379.3  |
| 85.5   | 2.8   | 22.9   | 13.3  | 15.8   | 31.6   | 34.1   | 61.9   | 24.7   |
| 1.9    | 3.3   | 2.1    | 2.1   | 2.9    | 1.3    | 2.6    | 2.8    | 2.0    |
| 5.5    | 8.4   | 5.1    | 11.3  | 9.3    | 6.4    | 10.8   | 13.2   | 4.7    |
| 11.4   | 5.6   | 10.5   | 6.6   | 3.6    | 5.0    | 11.2   | 4.4    | 5.9    |
| 55.5   | 34.4  | 31.1   | 38.3  | 50.8   | 40.0   | 43.9   | 64.3   | 42.7   |
| 137.7  | 88.5  | 118.9  | 116.1 | 110.5  | 123.1  | 137.1  | 167.7  | 114.4  |
| 62.7   | 32.1  | 40.5   | 37.7  | 41.7   | 41.8   | 64.2   | 76.7   | 45.6   |
| 22.9   | 47.7  | 26.8   | 63.1  | 64.4   | 35.1   | 62.4   | 77.5   | 55.9   |
| 49.2   | 27.9  | 31.4   | 35.7  | 37.3   | 29.3   | 45.1   | 48.5   | 30.8   |
| 30.8   | 20.5  | 21.5   | 18.1  | 26.7   | 17.4   | 49.5   | 42.1   | 27.7   |
| 0.9    | 0.9   | 0.9    | 0.7   | 0.4    | 0.7    | 0.5    | 0.4    | 0.7    |
| 154.3  | 112.5 | 106.6  | 138.8 | 143.0  | 161.3  | 196.6  | 230.5  | 130.8  |
| 13.1   | 10.2  | 14.1   | 15.2  | 13.4   | 13.6   | 14.9   | 21.1   | 9.5    |
| 47.8   | 21.5  | 46.9   | 37.5  | 48.1   | 105.2  | 90.5   | 109.1  | 47.8   |
| 3.8    | 4.9   | 6.7    | 0.9   | 1.8    | 5.3    | 5.0    | 2.8    | 10.1   |
| 0.4    | 0.9   | 0.5    | 0.7   | 1.8    | 1.5    | 0.7    | 0.5    | 0.8    |
| 73.7   | 57.3  | 53.7   | 72.1  | 56.1   | 56.7   | 81.3   | 75.6   | 47.9   |
| 11.3   | 9.1   | 7.4    | 9.3   | 9.4    | 12.8   | 11.0   | 16.1   | 16.8   |
| 36.4   | 19.6  | 12.3   | 18.0  | 19.6   | 20.1   | 25.2   | 29.0   | 18.3   |
| 12.5   | 1.1   | 3.0    | 6.1   | 4.7    | 6.7    | 11.6   | 8.2    | 11.4   |
| 4.5    | 4.4   | 6.1    | 7.4   | 6.7    | 5.1    | 7.1    | 5.2    | 4.3    |
| 0.9    | 0.8   | 3.9    | 1.0   | 1.1    | 0.9    | 2.0    | 0.7    | 2.1    |
| 2346.6 | 229.0 | 1233.2 | 584.1 | 979.7  | 1645.1 | 1485.2 | 2630.2 | 994.7  |
| 2378.6 | 255.8 | 1274.3 | 609.0 | 1005.5 | 1682.9 | 1435.8 | 2371.4 | 1016.1 |
| 2.2    | 6.1   | 1.2    | 1.4   | 6.1    | 1.3    | 1.3    | 7.3    | 1.0    |
| 0.8    | 0.9   | 1.3    | 0.5   | 0.7    | 0.7    | 1.0    | 1.0    | 0.8    |
| 0.9    | 1.0   | 1.1    | 4.1   | 1.1    | 1.9    | 1.7    | 2.1    | 1.7    |
| 60.7   | 56.8  | 66.8   | 60.3  | 55.2   | 54.1   | 70.2   | 74.7   | 62.0   |
| 3.6    | 1.9   | 3.0    | 2.1   | 5.6    | 12.1   | 14.5   | 11.8   | 2.7    |
| 7.9    | 14.5  | 12.4   | 16.9  | 11.8   | 9.1    | 14.8   | 19.8   | 16.3   |
| 39.7   | 31.7  | 25.7   | 22.7  | 29.7   | 24.9   | 24.4   | 33.7   | 36.4   |
| 0.2    | 0.6   | 0.3    | 0.3   | 0.1    | 0.2    | 0.2    | 0.8    | 0.2    |
| 2.9    | 1.6   | 6.9    | 6.4   | 4.9    | 3.8    | 8.8    | 6.3    | 7.1    |
| 118.4  | 100.8 | 105.1  | 109.0 | 123.1  | 109.4  | 158.7  | 205.1  | 106.5  |
| 91.1   | 76.8  | 104.7  | 104.6 | 87.1   | 112.7  | 141.6  | 156.9  | 123.4  |
| 12.6   | 13.3  | 3.3    | 14.1  | 22.1   | 13.8   | 8.1    | 9.5    | 22.4   |
| 7.7    | 6.8   | 8.3    | 8.3   | 2.4    | 1.4    | 15.4   | 8.2    | 5.9    |
| 0.5    | 2.0   | 3.1    | 3.4   | 6.5    | 1.7    | 7.5    | 10.4   | 3.6    |
| 13.5   | 8.3   | 14.5   | 24.9  | 14.5   | 18.6   | 21.3   | 27.7   | 14.5   |
| 166.1  | 137.8 | 120.7  | 129.9 | 133.9  | 110.3  | 173.4  | 177.4  | 106.7  |
| 33.1   | 21.8  | 26.3   | 26.5  | 19.5   | 12.2   | 29.4   | 26.0   | 26.8   |
| 21.2   | 3.4   | 12.5   | 14.4  | 14.5   | 11.9   | 7.7    | 34.4   | 21.3   |
| 3.7    | 7.0   | 5.9    | 8.7   | 7.3    | 9.7    | 10.4   | 11.3   | 9.7    |
| 70.5   | 42.1  | 69.6   | 59.5  | 66.3   | 84.0   | 119.4  | 119.2  | 68.2   |
| 63.5   | 119.1 | 96.0   | 103.9 | 119.8  | 92.3   | 192.5  | 174.6  | 98.3   |
| 51.0   | 38.6  | 31.9   | 42.4  | 41.8   | 44.1   | 50.5   | 69.8   | 39.2   |
| 1.3    | 0.8   | 2.8    | 8.0   | 3.0    | 2.5    | 3.7    | 4.5    | 2.0    |

|       |       |       |       |       |       |       |       |       |
|-------|-------|-------|-------|-------|-------|-------|-------|-------|
| 36.1  | 34.2  | 26.5  | 18.2  | 20.0  | 23.1  | 45.5  | 26.6  | 28.1  |
| 120.7 | 73.3  | 88.2  | 89.2  | 104.3 | 93.5  | 126.8 | 137.6 | 118.8 |
| 0.4   | 0.6   | 0.3   | 0.4   | 0.2   | 0.2   | 0.4   | 0.3   | 0.3   |
| 444.9 | 318.9 | 385.4 | 357.8 | 386.4 | 416.3 | 558.0 | 559.1 | 368.3 |
| 17.8  | 9.4   | 31.9  | 12.6  | 27.5  | 21.6  | 32.8  | 16.4  | 19.8  |
| 4.1   | 12.3  | 16.6  | 15.1  | 13.3  | 12.7  | 19.3  | 23.1  | 17.5  |
| 1.7   | 10.0  | 11.7  | 10.3  | 12.7  | 8.7   | 10.0  | 11.3  | 20.3  |
| 1.3   | 1.0   | 3.6   | 5.5   | 1.0   | 1.6   | 3.3   | 8.9   | 0.5   |
| 221.4 | 107.1 | 135.0 | 127.3 | 113.6 | 148.2 | 176.0 | 283.8 | 157.7 |
| 287.8 | 282.6 | 360.8 | 382.1 | 353.5 | 391.9 | 488.2 | 617.0 | 431.6 |
| 93.0  | 62.1  | 77.9  | 77.6  | 74.8  | 71.7  | 84.3  | 86.5  | 78.1  |
| 53.4  | 29.0  | 40.5  | 38.3  | 50.2  | 45.6  | 70.8  | 73.1  | 57.3  |
| 0.2   | 1.8   | 0.1   | 0.6   | 1.9   | 1.1   | 0.4   | 0.8   | 2.1   |
| 13.9  | 3.2   | 9.1   | 9.3   | 8.7   | 6.0   | 10.8  | 12.6  | 7.5   |
| 0.8   | 6.6   | 1.2   | 3.3   | 6.0   | 3.6   | 8.5   | 1.2   | 2.0   |
| 0.4   | 8.5   | 7.9   | 10.2  | 10.7  | 6.4   | 9.5   | 8.1   | 3.5   |
| 18.3  | 9.2   | 11.8  | 13.4  | 5.8   | 8.6   | 12.1  | 9.3   | 17.5  |
| 13.0  | 14.6  | 13.8  | 16.3  | 13.8  | 13.4  | 23.9  | 20.7  | 15.9  |
| 0.7   | 0.9   | 1.0   | 1.7   | 1.0   | 2.6   | 1.2   | 1.3   | 0.8   |
| 14.8  | 11.7  | 2.4   | 9.9   | 7.2   | 13.4  | 11.5  | 15.1  | 11.7  |
| 3.4   | 0.4   | 3.2   | 0.7   | 1.9   | 3.5   | 2.0   | 1.3   | 1.0   |
| 14.1  | 8.7   | 14.2  | 9.1   | 7.1   | 11.8  | 9.9   | 12.5  | 14.8  |
| 154.8 | 141.0 | 157.0 | 149.4 | 159.9 | 160.1 | 223.6 | 253.6 | 198.9 |
| 160.9 | 89.2  | 91.1  | 101.9 | 104.7 | 101.3 | 159.2 | 182.2 | 111.8 |
| 5.6   | 5.1   | 5.3   | 3.3   | 6.4   | 3.6   | 6.3   | 8.0   | 5.0   |
| 47.6  | 47.4  | 49.3  | 64.4  | 58.1  | 63.9  | 83.7  | 94.8  | 72.7  |
| 42.2  | 33.0  | 45.4  | 41.9  | 46.1  | 43.4  | 61.6  | 66.6  | 39.8  |
| 125.4 | 55.4  | 66.6  | 65.9  | 68.6  | 72.5  | 109.4 | 137.1 | 102.6 |
| 32.1  | 34.3  | 32.9  | 32.0  | 40.6  | 40.6  | 49.4  | 75.8  | 41.4  |
| 1.3   | 0.6   | 1.0   | 0.7   | 0.8   | 0.5   | 1.0   | 1.0   | 0.6   |
| 1.1   | 1.6   | 2.0   | 0.5   | 1.9   | 0.9   | 2.3   | 3.8   | 1.9   |
| 9.1   | 1.3   | 6.1   | 4.7   | 6.0   | 5.0   | 6.0   | 2.3   | 7.3   |
| 52.5  | 38.8  | 45.8  | 48.4  | 43.8  | 45.3  | 81.1  | 46.2  | 56.8  |
| 186.3 | 109.1 | 139.0 | 125.9 | 118.5 | 138.2 | 156.5 | 176.8 | 117.5 |
| 158.0 | 139.8 | 129.3 | 140.0 | 155.4 | 140.0 | 212.3 | 245.3 | 206.2 |
| 3.1   | 1.8   | 0.6   | 0.6   | 2.3   | 0.8   | 0.4   | 0.3   | 4.2   |
| 43.7  | 27.7  | 34.7  | 39.3  | 34.9  | 27.2  | 31.5  | 51.4  | 31.1  |
| 8.5   | 8.9   | 5.8   | 6.0   | 2.8   | 13.7  | 2.3   | 6.3   | 0.8   |
| 26.0  | 24.3  | 17.8  | 22.7  | 26.2  | 23.2  | 35.2  | 48.9  | 33.8  |
| 2.0   | 0.1   | 1.9   | 0.1   | 1.3   | 2.2   | 1.0   | 1.8   | 0.2   |
| 65.2  | 34.0  | 18.2  | 33.0  | 32.7  | 19.3  | 43.9  | 34.1  | 38.3  |
| 5.4   | 0.8   | 4.0   | 4.6   | 1.1   | 2.3   | 3.6   | 6.9   | 0.8   |
| 77.7  | 50.9  | 52.2  | 55.7  | 57.0  | 56.7  | 95.4  | 84.0  | 72.7  |
| 30.8  | 23.9  | 21.0  | 33.3  | 37.4  | 29.7  | 23.4  | 31.9  | 21.8  |
| 28.6  | 18.1  | 28.0  | 25.9  | 22.0  | 23.0  | 29.4  | 33.0  | 27.7  |
| 39.2  | 25.8  | 27.4  | 30.9  | 30.5  | 22.1  | 38.2  | 35.9  | 16.6  |
| 25.6  | 15.7  | 18.0  | 22.8  | 20.9  | 26.3  | 25.3  | 31.3  | 17.4  |
| 6.7   | 9.9   | 3.2   | 7.6   | 4.8   | 7.7   | 15.2  | 16.9  | 9.1   |
| 3.3   | 0.6   | 3.6   | 5.6   | 0.5   | 3.2   | 1.2   | 1.2   | 1.5   |
| 26.4  | 12.5  | 11.8  | 14.3  | 17.7  | 18.1  | 16.9  | 27.8  | 12.9  |
| 30.4  | 23.6  | 22.6  | 18.6  | 37.2  | 22.0  | 31.4  | 24.4  | 21.2  |
| 184.5 | 142.2 | 137.0 | 157.0 | 196.6 | 164.2 | 254.5 | 267.2 | 244.9 |
| 78.2  | 49.8  | 63.1  | 69.2  | 88.8  | 55.2  | 98.0  | 108.5 | 71.0  |

|       |       |       |       |       |       |       |       |       |
|-------|-------|-------|-------|-------|-------|-------|-------|-------|
| 3.0   | 2.1   | 2.3   | 3.2   | 1.8   | 3.2   | 4.2   | 4.4   | 3.4   |
| 1.5   | 0.9   | 1.4   | 3.1   | 0.9   | 1.7   | 0.7   | 1.9   | 0.7   |
| 29.1  | 15.4  | 23.2  | 23.8  | 19.1  | 28.7  | 40.0  | 58.1  | 33.5  |
| 0.9   | 3.5   | 4.1   | 0.9   | 1.1   | 4.5   | 6.1   | 3.0   | 1.0   |
| 0.4   | 0.3   | 0.4   | 0.5   | 0.4   | 0.3   | 0.5   | 0.5   | 0.4   |
| 9.9   | 4.5   | 5.2   | 8.7   | 4.3   | 8.3   | 6.1   | 7.4   | 10.2  |
| 22.6  | 17.2  | 10.6  | 9.0   | 12.1  | 17.3  | 15.0  | 32.2  | 24.0  |
| 310.6 | 207.9 | 225.0 | 219.7 | 228.8 | 260.8 | 349.0 | 370.5 | 347.4 |
| 14.3  | 9.9   | 13.1  | 14.2  | 9.3   | 15.3  | 14.8  | 13.0  | 8.5   |
| 16.5  | 13.0  | 18.8  | 21.7  | 20.0  | 14.0  | 29.0  | 30.8  | 18.4  |
| 14.0  | 18.8  | 7.6   | 18.6  | 18.5  | 17.2  | 21.5  | 17.0  | 20.9  |
| 2.4   | 2.5   | 5.5   | 6.0   | 6.7   | 4.3   | 3.0   | 10.2  | 5.2   |
| 0.5   | 2.3   | 3.5   | 2.6   | 3.1   | 2.0   | 1.6   | 4.3   | 3.1   |
| 9.1   | 9.7   | 6.2   | 1.9   | 1.8   | 2.4   | 2.4   | 7.1   | 1.4   |
| 1.1   | 1.5   | 1.4   | 1.5   | 1.4   | 0.8   | 1.1   | 2.4   | 4.5   |
| 77.3  | 45.6  | 44.2  | 54.7  | 51.0  | 55.1  | 72.7  | 76.1  | 58.9  |
| 169.1 | 101.1 | 121.6 | 109.7 | 113.0 | 134.0 | 169.6 | 194.0 | 141.9 |
| 0.2   | 0.2   | 1.0   | 0.2   | 0.8   | 0.4   | 0.4   | 0.7   | 0.6   |
| 10.1  | 25.2  | 22.1  | 33.7  | 38.2  | 31.5  | 53.5  | 60.0  | 23.9  |
| 36.6  | 53.5  | 74.6  | 84.9  | 80.1  | 74.2  | 108.9 | 141.8 | 77.9  |
| 13.2  | 9.3   | 5.6   | 1.0   | 8.0   | 5.0   | 14.1  | 15.8  | 8.8   |
| 22.7  | 4.7   | 5.9   | 2.0   | 7.3   | 8.1   | 12.6  | 16.0  | 6.4   |
| 13.3  | 1.9   | 6.5   | 6.3   | 12.1  | 4.4   | 9.8   | 11.4  | 12.6  |
| 5.5   | 1.8   | 5.6   | 11.4  | 3.0   | 7.8   | 8.6   | 14.5  | 2.1   |
| 0.9   | 3.1   | 6.3   | 1.2   | 2.9   | 3.7   | 1.2   | 7.4   | 4.9   |
| 9.0   | 3.5   | 5.4   | 2.6   | 1.2   | 1.0   | 2.0   | 1.6   | 1.4   |
| 3.7   | 1.0   | 4.6   | 0.5   | 0.2   | 0.2   | 1.3   | 4.8   | 0.5   |
| 14.1  | 8.3   | 8.2   | 16.4  | 10.7  | 7.6   | 14.6  | 1.6   | 18.0  |
| 5.7   | 0.7   | 7.6   | 3.1   | 0.7   | 6.0   | 4.8   | 1.8   | 5.5   |
| 2.3   | 5.4   | 3.8   | 6.0   | 8.6   | 4.4   | 4.3   | 3.9   | 5.9   |
| 108.1 | 67.1  | 84.3  | 87.3  | 93.7  | 88.1  | 132.0 | 121.6 | 86.4  |
| 58.0  | 51.6  | 42.5  | 46.7  | 49.8  | 34.1  | 77.3  | 72.8  | 46.7  |
| 11.8  | 24.5  | 13.1  | 16.8  | 24.9  | 18.6  | 19.3  | 23.5  | 20.2  |
| 8.4   | 14.9  | 15.0  | 13.5  | 12.5  | 15.3  | 14.6  | 19.7  | 16.3  |
| 2.0   | 6.8   | 5.3   | 3.7   | 1.7   | 4.5   | 1.4   | 1.6   | 6.2   |
| 89.7  | 28.2  | 75.0  | 38.4  | 72.1  | 73.7  | 95.4  | 82.3  | 47.2  |
| 43.0  | 18.4  | 22.4  | 20.0  | 17.6  | 29.6  | 30.5  | 24.8  | 18.0  |
| 2.7   | 7.9   | 6.2   | 7.3   | 0.8   | 5.7   | 5.1   | 9.5   | 1.9   |
| 1.4   | 1.2   | 2.0   | 1.9   | 1.3   | 0.6   | 0.9   | 0.8   | 1.3   |
| 61.6  | 32.6  | 35.3  | 42.0  | 46.2  | 37.5  | 88.3  | 65.0  | 50.5  |
| 77.4  | 33.1  | 55.1  | 51.2  | 51.8  | 54.4  | 76.9  | 92.1  | 55.3  |
| 53.7  | 38.9  | 40.0  | 45.4  | 40.2  | 51.8  | 52.4  | 53.0  | 61.6  |
| 22.3  | 14.4  | 14.0  | 12.8  | 18.5  | 15.5  | 22.1  | 36.2  | 17.5  |
| 30.6  | 41.6  | 28.0  | 25.6  | 40.8  | 27.3  | 46.4  | 45.9  | 38.6  |
| 1.0   | 1.3   | 0.2   | 0.3   | 0.2   | 1.4   | 1.7   | 0.3   | 0.9   |
| 1.4   | 1.7   | 1.1   | 1.1   | 0.7   | 0.4   | 0.9   | 1.0   | 1.1   |
| 46.7  | 24.8  | 33.5  | 26.8  | 31.5  | 31.4  | 51.8  | 63.8  | 28.0  |
| 2.0   | 4.0   | 0.8   | 0.5   | 0.9   | 0.5   | 6.6   | 7.3   | 6.1   |
| 7.9   | 4.4   | 0.8   | 4.3   | 0.3   | 0.2   | 1.3   | 1.1   | 0.7   |
| 36.6  | 26.7  | 42.8  | 33.0  | 47.4  | 47.7  | 46.2  | 65.6  | 42.4  |
| 221.8 | 137.0 | 148.0 | 150.7 | 150.3 | 152.5 | 202.5 | 226.5 | 184.6 |
| 47.2  | 27.6  | 28.8  | 41.1  | 37.0  | 39.5  | 44.2  | 53.5  | 38.2  |
| 0.4   | 2.4   | 0.4   | 2.8   | 2.5   | 0.7   | 2.7   | 0.5   | 0.3   |

|        |       |       |       |       |       |       |       |       |
|--------|-------|-------|-------|-------|-------|-------|-------|-------|
| 12.8   | 2.4   | 0.3   | 1.1   | 0.8   | 0.7   | 7.7   | 1.6   | 0.8   |
| 31.8   | 0.7   | 5.1   | 6.1   | 8.1   | 6.7   | 6.9   | 10.1  | 6.5   |
| 46.2   | 37.6  | 37.9  | 44.7  | 42.9  | 43.3  | 56.1  | 59.4  | 50.7  |
| 69.8   | 54.8  | 52.1  | 63.6  | 57.3  | 50.5  | 70.8  | 130.3 | 58.0  |
| 62.3   | 21.7  | 30.9  | 25.6  | 30.4  | 40.1  | 47.0  | 57.2  | 35.8  |
| 7.3    | 13.1  | 8.3   | 9.2   | 15.0  | 8.8   | 16.5  | 13.7  | 12.8  |
| 3.3    | 0.6   | 0.4   | 0.6   | 2.9   | 1.8   | 1.9   | 0.3   | 1.9   |
| 3.2    | 7.0   | 9.5   | 8.8   | 9.5   | 6.2   | 10.1  | 11.3  | 9.0   |
| 4.4    | 3.4   | 3.5   | 2.2   | 2.7   | 4.2   | 3.7   | 0.4   | 0.6   |
| 0.8    | 0.6   | 0.6   | 0.3   | 0.6   | 0.4   | 0.5   | 0.7   | 1.4   |
| 1.5    | 5.1   | 1.0   | 1.4   | 2.2   | 4.3   | 0.3   | 3.0   | 3.8   |
| 2.6    | 1.4   | 0.9   | 1.7   | 3.4   | 0.7   | 1.7   | 0.7   | 2.0   |
| 79.2   | 58.8  | 75.5  | 61.3  | 71.9  | 66.6  | 100.8 | 107.6 | 73.7  |
| 3.7    | 0.2   | 0.3   | 0.3   | 0.5   | 0.2   | 1.2   | 2.0   | 0.6   |
| 15.5   | 9.8   | 10.0  | 10.3  | 6.4   | 12.2  | 24.0  | 37.8  | 17.7  |
| 30.6   | 23.4  | 10.9  | 14.7  | 20.7  | 13.5  | 27.8  | 30.9  | 27.4  |
| 2.3    | 3.0   | 12.9  | 9.2   | 12.0  | 12.0  | 9.0   | 8.0   | 2.8   |
| 10.3   | 4.2   | 0.6   | 4.0   | 5.0   | 6.1   | 5.1   | 4.0   | 6.6   |
| 15.3   | 11.5  | 12.6  | 11.8  | 18.0  | 9.8   | 20.4  | 22.4  | 13.2  |
| 26.9   | 13.1  | 16.0  | 17.1  | 21.9  | 13.5  | 28.8  | 36.4  | 32.1  |
| 16.0   | 7.8   | 7.5   | 10.2  | 10.1  | 8.9   | 11.9  | 12.0  | 13.9  |
| 1.2    | 0.6   | 0.4   | 0.7   | 2.6   | 1.9   | 4.6   | 1.4   | 0.7   |
| 3.2    | 9.7   | 6.9   | 9.2   | 9.2   | 8.9   | 13.6  | 16.7  | 10.2  |
| 2.8    | 0.5   | 0.7   | 0.6   | 1.2   | 0.9   | 0.2   | 0.6   | 0.1   |
| 0.2    | 0.4   | 0.2   | 0.7   | 0.5   | 0.2   | 0.3   | 0.4   | 0.3   |
| 11.5   | 26.3  | 21.9  | 17.6  | 26.8  | 18.3  | 32.2  | 30.5  | 22.7  |
| 10.9   | 10.5  | 9.6   | 8.1   | 13.4  | 11.1  | 17.9  | 18.1  | 7.9   |
| 24.9   | 19.3  | 16.1  | 21.8  | 25.5  | 34.0  | 28.6  | 36.8  | 27.7  |
| 2.2    | 14.9  | 13.5  | 11.2  | 7.8   | 4.2   | 9.9   | 9.8   | 23.7  |
| 21.4   | 15.3  | 20.1  | 19.3  | 21.2  | 19.0  | 34.0  | 40.9  | 21.2  |
| 6.1    | 9.8   | 10.3  | 4.5   | 10.2  | 5.1   | 9.6   | 15.2  | 2.2   |
| 1048.9 | 552.3 | 645.7 | 701.7 | 618.5 | 685.1 | 808.6 | 927.4 | 539.2 |
| 599.6  | 103.2 | 195.1 | 182.5 | 212.0 | 179.2 | 236.0 | 239.5 | 151.5 |
| 32.4   | 29.3  | 37.9  | 20.5  | 26.0  | 36.3  | 40.7  | 42.5  | 23.5  |
| 12.1   | 10.4  | 9.6   | 7.0   | 8.6   | 11.2  | 9.3   | 1.7   | 6.2   |
| 0.6    | 1.3   | 1.5   | 1.3   | 0.5   | 0.3   | 0.7   | 0.2   | 0.9   |
| 14.4   | 8.0   | 5.7   | 5.0   | 8.8   | 5.7   | 9.9   | 12.1  | 8.2   |
| 33.8   | 16.5  | 10.4  | 20.8  | 21.7  | 20.4  | 49.7  | 49.3  | 30.5  |
| 126.2  | 63.0  | 72.8  | 95.7  | 92.5  | 97.3  | 135.8 | 196.3 | 116.3 |
| 311.3  | 253.4 | 310.1 | 299.8 | 306.8 | 320.9 | 321.3 | 379.1 | 272.4 |
| 36.0   | 30.0  | 33.5  | 39.7  | 35.7  | 42.6  | 49.3  | 72.7  | 49.0  |
| 6.9    | 9.4   | 10.3  | 11.5  | 12.1  | 7.7   | 6.5   | 19.6  | 9.3   |
| 18.2   | 17.9  | 18.4  | 14.6  | 18.2  | 26.5  | 30.2  | 37.2  | 22.1  |
| 24.2   | 11.5  | 6.4   | 21.6  | 25.9  | 20.8  | 31.1  | 28.4  | 13.0  |
| 27.8   | 37.1  | 45.3  | 58.5  | 38.8  | 46.4  | 71.7  | 48.9  | 48.2  |
| 1.2    | 1.6   | 1.3   | 1.2   | 0.5   | 1.4   | 2.8   | 1.3   | 6.8   |
| 11.6   | 9.7   | 12.6  | 7.7   | 11.9  | 10.0  | 18.2  | 9.5   | 14.7  |
| 8.9    | 6.3   | 0.9   | 0.7   | 7.0   | 2.1   | 7.6   | 7.8   | 1.6   |
| 18.8   | 8.4   | 15.8  | 9.5   | 18.5  | 10.7  | 26.3  | 28.9  | 19.6  |
| 8.5    | 7.4   | 10.1  | 6.7   | 8.3   | 9.1   | 12.9  | 8.4   | 15.6  |
| 11.9   | 3.3   | 1.9   | 2.8   | 1.4   | 1.8   | 2.4   | 4.0   | 0.8   |
| 37.8   | 32.4  | 30.9  | 40.9  | 37.4  | 31.5  | 44.0  | 40.6  | 39.5  |
| 70.7   | 42.9  | 47.4  | 56.4  | 75.9  | 50.0  | 99.1  | 111.0 | 70.9  |

|       |       |       |       |       |       |       |       |       |
|-------|-------|-------|-------|-------|-------|-------|-------|-------|
| 66.7  | 58.2  | 66.2  | 59.1  | 80.8  | 59.3  | 91.0  | 91.5  | 59.7  |
| 329.0 | 231.0 | 279.0 | 271.2 | 329.1 | 332.0 | 427.7 | 563.9 | 337.3 |
| 368.9 | 220.2 | 274.0 | 297.3 | 309.0 | 368.4 | 436.5 | 475.2 | 335.1 |
| 32.4  | 20.4  | 22.7  | 32.3  | 32.0  | 30.5  | 42.7  | 47.9  | 27.5  |
| 12.4  | 10.8  | 5.3   | 5.2   | 3.8   | 7.6   | 14.2  | 8.9   | 8.0   |
| 53.4  | 29.9  | 34.3  | 35.7  | 36.1  | 38.4  | 47.5  | 58.6  | 60.3  |
| 38.7  | 29.8  | 26.8  | 35.1  | 32.3  | 29.4  | 35.3  | 48.3  | 36.6  |
| 25.8  | 20.3  | 19.2  | 15.3  | 20.4  | 24.0  | 26.9  | 22.4  | 22.2  |
| 4.9   | 5.6   | 2.5   | 4.9   | 9.9   | 4.8   | 3.2   | 5.5   | 1.3   |
| 55.2  | 31.1  | 43.3  | 59.8  | 44.7  | 56.9  | 61.0  | 63.0  | 39.7  |
| 12.9  | 10.0  | 9.1   | 4.4   | 1.0   | 7.4   | 5.3   | 9.2   | 6.4   |
| 4.9   | 10.3  | 5.3   | 1.1   | 7.5   | 7.0   | 5.9   | 7.4   | 4.0   |
| 1.8   | 7.2   | 3.6   | 11.0  | 9.8   | 2.5   | 2.6   | 7.1   | 18.1  |
| 6.7   | 4.4   | 2.4   | 10.6  | 4.8   | 3.0   | 7.7   | 4.7   | 2.3   |
| 14.4  | 19.1  | 21.9  | 17.6  | 19.9  | 34.1  | 35.2  | 37.2  | 15.4  |
| 12.0  | 15.5  | 12.6  | 17.0  | 14.2  | 23.9  | 12.5  | 20.3  | 7.8   |
| 2.6   | 2.5   | 0.9   | 2.8   | 6.1   | 1.4   | 8.5   | 6.4   | 3.2   |
| 23.4  | 29.6  | 38.8  | 43.7  | 33.7  | 37.3  | 49.0  | 73.1  | 33.2  |
| 46.0  | 55.5  | 55.4  | 77.6  | 65.4  | 68.8  | 90.1  | 119.3 | 87.1  |
| 50.4  | 30.2  | 34.3  | 28.4  | 37.9  | 27.5  | 48.1  | 47.8  | 25.1  |
| 5.9   | 4.3   | 4.7   | 5.2   | 0.4   | 2.0   | 10.8  | 12.9  | 8.7   |
| 0.7   | 7.5   | 5.7   | 0.7   | 3.5   | 6.1   | 2.0   | 7.7   | 1.1   |
| 70.7  | 45.1  | 58.9  | 69.0  | 66.0  | 57.4  | 76.4  | 80.1  | 68.5  |
| 5.6   | 1.2   | 1.1   | 2.3   | 2.0   | 1.3   | 0.8   | 2.3   | 1.9   |
| 34.3  | 36.0  | 31.2  | 33.3  | 38.9  | 39.3  | 49.2  | 42.7  | 49.5  |
| 35.6  | 17.5  | 17.5  | 18.5  | 20.4  | 18.4  | 31.4  | 32.3  | 25.1  |
| 7.1   | 8.5   | 7.8   | 7.7   | 7.7   | 7.8   | 10.4  | 9.6   | 7.0   |
| 6.3   | 3.4   | 3.2   | 4.6   | 0.4   | 5.8   | 5.7   | 4.3   | 8.4   |
| 71.8  | 44.1  | 46.7  | 52.6  | 59.5  | 58.3  | 79.9  | 93.1  | 84.8  |
| 50.3  | 24.7  | 40.3  | 32.4  | 34.2  | 30.1  | 40.3  | 37.0  | 51.3  |
| 8.2   | 5.9   | 5.5   | 6.3   | 6.5   | 8.5   | 6.0   | 9.0   | 7.0   |
| 44.7  | 20.0  | 24.1  | 22.1  | 27.5  | 27.9  | 33.5  | 34.9  | 26.6  |
| 21.6  | 13.6  | 15.9  | 14.8  | 20.5  | 11.4  | 15.6  | 24.0  | 19.7  |
| 41.7  | 21.0  | 28.6  | 25.6  | 28.3  | 32.7  | 40.1  | 57.2  | 31.2  |
| 26.9  | 22.3  | 28.4  | 21.3  | 24.0  | 25.9  | 33.1  | 27.5  | 23.9  |
| 10.0  | 11.7  | 2.5   | 3.5   | 7.0   | 11.5  | 17.7  | 4.6   | 5.2   |
| 0.6   | 4.2   | 0.1   | 1.8   | 0.7   | 0.2   | 0.6   | 0.7   | 0.4   |
| 0.4   | 3.8   | 1.5   | 1.0   | 0.4   | 3.1   | 0.7   | 0.6   | 0.2   |
| 69.2  | 47.2  | 44.8  | 32.6  | 67.8  | 63.0  | 65.6  | 67.7  | 60.6  |
| 743.3 | 450.4 | 557.9 | 610.9 | 566.3 | 574.1 | 857.6 | 909.5 | 664.5 |
| 56.4  | 40.8  | 34.9  | 45.4  | 49.8  | 34.3  | 53.7  | 36.1  | 40.3  |
| 65.8  | 32.6  | 44.0  | 41.6  | 54.0  | 43.0  | 61.6  | 91.0  | 47.3  |
| 211.6 | 180.6 | 211.7 | 267.3 | 223.5 | 235.5 | 292.8 | 344.1 | 217.8 |
| 123.9 | 70.5  | 71.9  | 93.6  | 90.5  | 97.7  | 121.0 | 166.4 | 91.9  |
| 1.0   | 0.8   | 0.9   | 0.5   | 2.2   | 0.5   | 0.8   | 0.8   | 1.7   |
| 10.7  | 6.8   | 9.3   | 5.1   | 7.9   | 7.0   | 10.8  | 18.3  | 8.2   |
| 95.9  | 76.1  | 83.8  | 88.2  | 69.3  | 66.7  | 91.1  | 117.0 | 106.1 |
| 11.7  | 16.0  | 10.8  | 14.3  | 12.3  | 9.2   | 8.1   | 15.7  | 20.2  |
| 0.6   | 0.4   | 0.6   | 0.2   | 0.4   | 2.3   | 3.8   | 0.8   | 1.4   |
| 17.0  | 3.2   | 16.6  | 10.0  | 17.2  | 10.0  | 20.5  | 9.7   | 19.3  |
| 1.8   | 4.4   | 0.6   | 5.8   | 0.9   | 1.4   | 4.4   | 1.1   | 0.4   |
| 96.6  | 72.2  | 72.2  | 92.3  | 78.7  | 80.3  | 89.6  | 107.1 | 79.5  |
| 0.6   | 3.5   | 0.2   | 3.0   | 0.8   | 0.5   | 4.2   | 0.3   | 0.8   |

|       |       |       |       |       |       |       |       |       |
|-------|-------|-------|-------|-------|-------|-------|-------|-------|
| 27.2  | 20.4  | 7.6   | 15.5  | 31.3  | 15.2  | 12.3  | 21.1  | 18.7  |
| 75.7  | 33.9  | 21.1  | 28.2  | 32.5  | 47.0  | 41.9  | 55.6  | 41.5  |
| 45.0  | 8.6   | 12.1  | 11.6  | 13.8  | 17.9  | 17.4  | 29.0  | 11.0  |
| 62.0  | 23.9  | 27.6  | 22.9  | 27.5  | 38.2  | 37.9  | 52.8  | 29.1  |
| 21.2  | 11.1  | 16.9  | 31.0  | 18.1  | 21.5  | 51.5  | 60.6  | 37.8  |
| 168.0 | 91.5  | 123.8 | 122.3 | 132.9 | 127.1 | 178.7 | 193.8 | 124.3 |
| 347.2 | 178.5 | 305.4 | 261.2 | 299.4 | 292.5 | 394.8 | 482.6 | 305.9 |
| 114.1 | 67.5  | 116.8 | 81.1  | 113.7 | 111.8 | 143.2 | 101.2 | 90.9  |
| 56.1  | 44.2  | 51.1  | 45.6  | 45.7  | 49.0  | 59.8  | 54.3  | 46.9  |
| 50.6  | 38.4  | 45.0  | 44.9  | 41.3  | 38.4  | 44.1  | 47.2  | 39.5  |
| 1.2   | 1.5   | 3.1   | 1.7   | 5.0   | 0.8   | 3.9   | 4.7   | 1.8   |
| 6.4   | 5.1   | 1.2   | 5.4   | 1.1   | 7.3   | 2.0   | 8.5   | 1.1   |
| 106.9 | 42.8  | 44.1  | 52.1  | 57.6  | 52.5  | 75.6  | 75.7  | 54.5  |
| 37.6  | 22.9  | 24.3  | 26.8  | 52.6  | 38.4  | 40.0  | 50.9  | 30.1  |
| 26.9  | 14.3  | 22.3  | 23.8  | 13.1  | 27.5  | 30.9  | 46.3  | 26.6  |
| 0.4   | 0.6   | 2.1   | 3.4   | 2.3   | 3.9   | 5.4   | 2.9   | 3.0   |
| 65.8  | 44.1  | 62.6  | 58.2  | 65.0  | 64.2  | 84.8  | 102.5 | 46.3  |
| 49.9  | 25.0  | 16.9  | 15.8  | 12.8  | 16.7  | 18.5  | 26.2  | 11.9  |
| 51.6  | 32.5  | 35.5  | 33.2  | 26.5  | 34.6  | 49.3  | 73.7  | 46.4  |
| 34.8  | 26.0  | 20.1  | 25.4  | 20.1  | 26.6  | 36.1  | 49.2  | 29.8  |
| 412.9 | 357.8 | 310.0 | 442.1 | 402.1 | 389.0 | 446.2 | 457.5 | 383.8 |
| 3.8   | 2.4   | 0.1   | 2.7   | 0.8   | 1.4   | 4.2   | 3.7   | 2.9   |
| 17.6  | 5.3   | 6.7   | 9.2   | 9.4   | 5.6   | 11.7  | 18.3  | 9.4   |
| 187.9 | 84.2  | 90.1  | 105.6 | 107.6 | 99.5  | 149.8 | 196.5 | 99.3  |
| 37.9  | 21.0  | 18.0  | 14.7  | 15.0  | 28.1  | 20.5  | 35.8  | 21.5  |
| 1.9   | 0.3   | 1.1   | 0.3   | 0.3   | 2.2   | 3.0   | 0.3   | 0.1   |
| 5.9   | 2.9   | 0.5   | 3.3   | 2.3   | 4.1   | 4.3   | 3.9   | 6.4   |
| 0.6   | 3.9   | 7.0   | 4.4   | 1.4   | 3.2   | 1.9   | 3.1   | 0.9   |
| 52.3  | 34.1  | 39.9  | 50.7  | 43.5  | 48.2  | 63.2  | 95.3  | 57.7  |
| 2.2   | 2.3   | 1.6   | 6.6   | 3.9   | 1.5   | 8.1   | 11.8  | 3.9   |
| 88.3  | 86.4  | 79.8  | 105.1 | 100.8 | 92.7  | 117.2 | 153.0 | 134.0 |
| 5.8   | 2.0   | 9.9   | 3.8   | 6.9   | 6.9   | 7.7   | 1.3   | 3.4   |
| 0.4   | 0.3   | 0.2   | 0.2   | 0.8   | 0.1   | 0.4   | 0.4   | 0.6   |
| 1.0   | 8.6   | 5.6   | 5.0   | 8.1   | 5.7   | 12.3  | 7.6   | 4.4   |
| 61.1  | 42.3  | 46.8  | 47.3  | 49.9  | 41.8  | 69.7  | 84.6  | 49.8  |
| 1.2   | 0.9   | 0.4   | 6.4   | 2.3   | 1.9   | 0.5   | 1.5   | 0.4   |
| 18.8  | 7.1   | 5.9   | 1.7   | 9.7   | 15.4  | 8.2   | 10.0  | 9.0   |
| 4.9   | 1.4   | 7.3   | 14.1  | 6.8   | 3.8   | 17.3  | 4.1   | 3.1   |
| 70.5  | 37.4  | 48.1  | 45.7  | 48.7  | 50.1  | 71.7  | 63.1  | 49.1  |
| 44.5  | 34.5  | 41.9  | 32.0  | 41.8  | 40.5  | 41.6  | 38.1  | 43.6  |
| 7.7   | 6.4   | 9.0   | 7.0   | 5.1   | 7.0   | 4.4   | 12.4  | 11.6  |
| 15.8  | 14.7  | 9.1   | 16.1  | 12.5  | 12.9  | 16.9  | 21.4  | 14.8  |
| 8.3   | 13.3  | 11.2  | 12.7  | 12.5  | 11.1  | 12.5  | 14.5  | 8.7   |
| 238.9 | 125.3 | 153.8 | 160.4 | 160.5 | 139.2 | 172.3 | 201.9 | 123.8 |
| 13.4  | 8.9   | 0.7   | 11.6  | 8.0   | 8.7   | 13.1  | 14.4  | 12.7  |
| 12.6  | 11.4  | 6.8   | 10.6  | 5.0   | 7.5   | 8.9   | 10.1  | 10.3  |
| 1.6   | 0.6   | 0.1   | 1.4   | 2.4   | 0.2   | 1.8   | 0.3   | 0.8   |
| 36.5  | 26.6  | 37.4  | 35.8  | 39.8  | 36.5  | 52.7  | 47.7  | 49.9  |
| 144.8 | 62.4  | 74.2  | 71.8  | 82.6  | 81.3  | 130.6 | 114.1 | 67.4  |
| 435.4 | 322.4 | 408.4 | 401.5 | 411.8 | 393.1 | 531.2 | 524.8 | 322.4 |
| 7.9   | 0.8   | 4.5   | 0.3   | 3.5   | 0.3   | 3.6   | 4.5   | 2.6   |
| 0.4   | 1.0   | 1.3   | 1.3   | 0.3   | 0.3   | 0.6   | 1.9   | 0.2   |
| 15.2  | 11.2  | 21.6  | 17.7  | 14.9  | 19.8  | 21.9  | 32.2  | 13.9  |

|        |        |        |        |        |        |        |        |        |
|--------|--------|--------|--------|--------|--------|--------|--------|--------|
| 0.9    | 0.4    | 0.2    | 2.5    | 5.7    | 0.6    | 1.5    | 4.1    | 3.8    |
| 25.5   | 10.8   | 12.7   | 11.6   | 10.6   | 8.9    | 23.7   | 19.6   | 17.1   |
| 2.0    | 2.4    | 1.9    | 2.5    | 1.9    | 2.4    | 2.7    | 2.5    | 1.3    |
| 95.3   | 43.0   | 71.9   | 57.4   | 64.0   | 63.0   | 101.5  | 101.7  | 78.3   |
| 11.3   | 18.5   | 14.2   | 15.1   | 17.4   | 11.6   | 13.4   | 16.1   | 7.8    |
| 28.1   | 22.5   | 29.1   | 29.9   | 28.6   | 25.1   | 39.1   | 39.1   | 28.0   |
| 35.4   | 16.8   | 13.4   | 16.4   | 16.1   | 23.6   | 19.5   | 23.3   | 29.0   |
| 0.6    | 0.5    | 0.7    | 1.2    | 0.6    | 0.4    | 0.4    | 0.4    | 0.4    |
| 106.9  | 64.9   | 89.7   | 80.0   | 103.4  | 81.7   | 128.2  | 106.5  | 89.9   |
| 47.1   | 12.4   | 19.1   | 24.4   | 22.2   | 21.1   | 28.8   | 37.9   | 18.5   |
| 0.5    | 0.8    | 0.4    | 0.7    | 1.0    | 1.4    | 1.8    | 1.7    | 0.7    |
| 102.5  | 76.7   | 84.4   | 78.2   | 74.7   | 95.0   | 98.1   | 135.5  | 97.2   |
| 8.7    | 4.8    | 5.5    | 5.9    | 5.2    | 6.4    | 12.4   | 9.8    | 13.9   |
| 1.2    | 1.1    | 1.4    | 0.6    | 0.4    | 0.8    | 1.8    | 1.6    | 0.5    |
| 12.5   | 3.9    | 4.7    | 6.9    | 7.3    | 9.3    | 7.1    | 20.3   | 12.7   |
| 53.8   | 31.3   | 29.4   | 34.1   | 38.6   | 30.9   | 59.0   | 65.7   | 31.0   |
| 6.9    | 6.2    | 1.6    | 6.1    | 4.3    | 6.2    | 5.9    | 8.1    | 5.2    |
| 10.1   | 9.6    | 9.7    | 7.1    | 7.0    | 15.3   | 14.5   | 10.8   | 14.6   |
| 1.1    | 1.9    | 1.5    | 1.2    | 0.3    | 1.2    | 1.5    | 1.3    | 1.5    |
| 1.4    | 0.7    | 0.5    | 1.5    | 0.8    | 0.7    | 0.9    | 1.4    | 0.8    |
| 3752.1 | 3267.5 | 3080.0 | 3360.1 | 3384.5 | 3315.0 | 3704.4 | 3961.2 | 2711.8 |
| 36.5   | 35.6   | 34.6   | 29.7   | 36.9   | 33.3   | 33.8   | 53.6   | 22.2   |
| 14.7   | 12.0   | 12.7   | 14.9   | 15.9   | 9.8    | 13.9   | 19.6   | 12.7   |
| 8.3    | 1.7    | 2.3    | 1.0    | 6.8    | 5.1    | 9.6    | 4.3    | 3.9    |
| 1.4    | 1.8    | 1.1    | 1.4    | 1.3    | 1.6    | 1.5    | 1.8    | 1.1    |
| 10.4   | 4.5    | 6.1    | 5.2    | 6.3    | 5.8    | 7.2    | 17.4   | 7.5    |
| 5.9    | 3.0    | 4.1    | 7.7    | 7.4    | 2.6    | 6.2    | 1.4    | 7.2    |
| 26.5   | 15.5   | 19.7   | 10.6   | 11.9   | 7.9    | 21.3   | 21.3   | 15.7   |
| 71.4   | 31.3   | 30.7   | 34.9   | 50.2   | 50.4   | 56.3   | 91.9   | 46.3   |
| 16.7   | 8.0    | 6.6    | 4.3    | 2.9    | 10.8   | 14.6   | 9.6    | 12.6   |
| 13.9   | 6.3    | 23.5   | 16.0   | 16.9   | 19.7   | 16.3   | 18.8   | 14.0   |
| 103.4  | 80.5   | 89.5   | 87.6   | 110.1  | 98.7   | 108.0  | 117.2  | 88.5   |
| 1.6    | 2.3    | 1.3    | 3.7    | 2.5    | 3.1    | 3.2    | 5.2    | 1.6    |
| 228.5  | 139.3  | 144.9  | 165.1  | 182.8  | 197.1  | 213.2  | 359.0  | 202.5  |
| 41.0   | 28.4   | 30.7   | 35.2   | 38.0   | 28.7   | 44.3   | 51.5   | 28.2   |
| 19.4   | 17.3   | 12.6   | 14.0   | 19.3   | 19.2   | 23.4   | 22.3   | 15.9   |
| 25.2   | 26.8   | 24.3   | 26.6   | 23.1   | 23.3   | 37.6   | 32.5   | 22.5   |
| 9.5    | 10.5   | 6.2    | 7.5    | 10.1   | 9.4    | 11.8   | 10.4   | 17.9   |
| 2.3    | 0.5    | 0.7    | 1.8    | 2.3    | 0.5    | 2.0    | 1.1    | 0.7    |
| 33.4   | 24.7   | 15.9   | 34.3   | 20.7   | 29.5   | 30.9   | 59.1   | 26.3   |
| 5.1    | 1.5    | 11.4   | 7.7    | 9.7    | 6.1    | 6.0    | 11.5   | 12.2   |
| 4.0    | 3.1    | 0.6    | 5.7    | 2.1    | 3.5    | 5.2    | 4.5    | 7.4    |
| 0.8    | 0.5    | 1.1    | 6.5    | 1.4    | 5.3    | 2.0    | 1.0    | 2.1    |
| 5.8    | 4.8    | 3.8    | 8.4    | 1.1    | 10.0   | 8.3    | 1.9    | 5.4    |
| 218.2  | 115.5  | 98.6   | 141.6  | 152.8  | 123.5  | 199.8  | 227.4  | 147.5  |
| 25.8   | 13.1   | 17.0   | 20.0   | 15.2   | 22.2   | 27.7   | 20.3   | 10.9   |
| 11.7   | 7.2    | 8.5    | 11.0   | 5.6    | 6.6    | 14.8   | 5.0    | 13.0   |
| 8.6    | 9.3    | 4.3    | 4.1    | 14.7   | 9.7    | 15.8   | 8.4    | 14.2   |
| 26.3   | 13.0   | 9.8    | 13.2   | 15.9   | 13.9   | 15.0   | 15.8   | 14.5   |
| 44.8   | 23.7   | 14.7   | 27.4   | 17.2   | 26.0   | 25.5   | 42.1   | 24.2   |
| 21.6   | 14.8   | 27.5   | 18.2   | 20.6   | 17.9   | 33.1   | 22.8   | 18.2   |
| 11.8   | 16.3   | 9.8    | 12.5   | 17.0   | 15.3   | 20.8   | 18.2   | 19.4   |
| 5.6    | 0.7    | 2.7    | 1.1    | 3.9    | 1.3    | 3.3    | 5.6    | 2.1    |



|       |       |       |       |       |       |       |       |       |
|-------|-------|-------|-------|-------|-------|-------|-------|-------|
| 30.0  | 20.6  | 24.3  | 20.4  | 20.5  | 23.1  | 31.1  | 29.5  | 26.4  |
| 2.5   | 1.0   | 0.3   | 1.7   | 6.6   | 1.2   | 4.7   | 6.8   | 0.7   |
| 80.0  | 69.8  | 73.8  | 61.4  | 73.6  | 58.1  | 79.6  | 128.8 | 68.7  |
| 62.7  | 37.6  | 55.4  | 45.3  | 37.3  | 42.0  | 58.3  | 58.8  | 45.5  |
| 3.0   | 3.9   | 9.1   | 7.8   | 2.8   | 4.9   | 1.9   | 14.1  | 1.7   |
| 33.8  | 32.5  | 35.3  | 32.4  | 30.7  | 28.6  | 52.1  | 39.5  | 39.5  |
| 0.4   | 0.3   | 3.4   | 0.2   | 0.5   | 1.6   | 0.3   | 1.9   | 3.1   |
| 0.0   | 2.1   | 1.4   | 1.9   | 3.3   | 2.2   | 2.4   | 3.8   | 1.8   |
| 0.2   | 0.9   | 1.1   | 0.3   | 0.5   | 2.7   | 1.5   | 0.4   | 0.2   |
| 169.4 | 68.9  | 86.8  | 82.4  | 83.2  | 93.6  | 99.4  | 116.1 | 101.5 |
| 5.3   | 2.9   | 1.6   | 5.5   | 4.7   | 4.0   | 7.0   | 11.8  | 5.3   |
| 2.4   | 1.3   | 9.2   | 13.9  | 10.9  | 6.1   | 15.3  | 25.3  | 6.9   |
| 138.8 | 111.8 | 95.3  | 96.6  | 125.4 | 95.5  | 159.0 | 166.4 | 115.0 |
| 0.4   | 3.5   | 0.7   | 0.9   | 0.4   | 0.4   | 2.7   | 0.5   | 4.1   |
| 0.7   | 2.0   | 0.5   | 4.9   | 0.7   | 0.4   | 0.6   | 2.9   | 4.1   |
| 1.2   | 0.4   | 1.8   | 0.1   | 2.2   | 1.6   | 0.2   | 0.3   | 3.2   |
| 20.2  | 47.8  | 51.3  | 71.6  | 63.0  | 56.7  | 77.5  | 76.5  | 61.6  |
| 102.8 | 137.6 | 145.5 | 154.9 | 220.1 | 137.4 | 178.2 | 151.3 | 121.9 |
| 2.8   | 5.1   | 5.0   | 2.9   | 5.7   | 2.9   | 5.3   | 17.1  | 6.6   |
| 23.2  | 5.5   | 6.7   | 9.7   | 6.3   | 10.4  | 13.2  | 12.5  | 11.9  |
| 6.6   | 13.0  | 6.8   | 8.6   | 7.1   | 9.1   | 14.6  | 18.0  | 13.6  |
| 46.8  | 38.3  | 32.2  | 35.9  | 35.9  | 44.2  | 44.1  | 51.3  | 45.9  |
| 71.2  | 65.6  | 70.7  | 68.3  | 69.0  | 61.3  | 70.0  | 97.1  | 66.5  |
| 18.1  | 3.3   | 3.4   | 15.9  | 20.8  | 7.8   | 2.7   | 8.1   | 9.8   |
| 159.8 | 81.6  | 99.9  | 102.8 | 105.5 | 110.4 | 158.6 | 143.1 | 125.3 |
| 16.0  | 22.5  | 20.4  | 16.9  | 18.4  | 12.8  | 17.2  | 19.1  | 20.6  |
| 11.5  | 5.1   | 4.8   | 7.8   | 9.6   | 10.8  | 3.3   | 10.9  | 1.9   |
| 17.7  | 15.8  | 15.6  | 21.0  | 21.5  | 15.6  | 10.5  | 10.5  | 12.9  |
| 1.1   | 1.3   | 0.4   | 0.7   | 1.0   | 0.9   | 2.4   | 1.2   | 0.7   |
| 12.0  | 11.5  | 6.5   | 13.1  | 13.3  | 7.3   | 17.1  | 3.5   | 7.4   |
| 3.4   | 4.2   | 7.4   | 6.7   | 8.6   | 9.8   | 11.7  | 9.6   | 9.9   |
| 16.7  | 13.2  | 15.2  | 14.9  | 16.5  | 21.2  | 26.2  | 39.3  | 23.5  |
| 170.8 | 69.2  | 94.1  | 79.0  | 83.3  | 105.7 | 125.5 | 179.7 | 105.2 |
| 10.0  | 14.9  | 6.4   | 11.4  | 9.1   | 6.5   | 11.9  | 16.4  | 13.1  |
| 0.3   | 0.3   | 4.0   | 0.2   | 1.2   | 0.5   | 1.9   | 0.4   | 0.2   |
| 0.9   | 1.8   | 0.6   | 1.3   | 0.6   | 0.5   | 0.7   | 5.0   | 2.6   |
| 0.9   | 0.9   | 0.5   | 0.6   | 0.4   | 0.8   | 2.0   | 1.1   | 0.6   |
| 155.0 | 89.7  | 96.9  | 115.2 | 119.4 | 90.9  | 175.4 | 195.7 | 154.9 |
| 3.6   | 4.1   | 3.6   | 3.3   | 1.0   | 1.8   | 2.5   | 2.6   | 0.3   |
| 0.5   | 0.9   | 0.3   | 0.5   | 1.1   | 1.1   | 1.6   | 1.3   | 1.3   |
| 0.3   | 5.0   | 5.1   | 4.9   | 7.8   | 0.9   | 4.9   | 3.6   | 2.7   |
| 14.6  | 10.6  | 17.8  | 12.1  | 13.3  | 14.4  | 21.2  | 16.4  | 13.6  |
| 54.9  | 42.1  | 46.5  | 52.5  | 45.6  | 39.4  | 55.1  | 62.6  | 54.3  |
| 28.4  | 28.9  | 28.9  | 27.1  | 29.2  | 26.7  | 24.4  | 37.8  | 13.9  |
| 29.9  | 37.0  | 33.1  | 40.0  | 42.5  | 48.3  | 52.0  | 54.9  | 45.6  |
| 22.2  | 9.9   | 19.2  | 20.8  | 15.2  | 22.1  | 23.9  | 22.4  | 16.0  |
| 11.3  | 8.0   | 12.3  | 10.3  | 9.3   | 10.1  | 14.0  | 16.5  | 5.7   |
| 6.8   | 12.1  | 0.5   | 7.5   | 11.2  | 5.8   | 6.6   | 10.0  | 8.3   |
| 23.0  | 27.6  | 23.1  | 16.0  | 19.1  | 14.5  | 23.2  | 17.9  | 14.2  |
| 75.5  | 51.2  | 63.9  | 94.6  | 99.4  | 76.9  | 111.0 | 138.0 | 80.6  |
| 91.0  | 63.1  | 60.5  | 74.4  | 72.2  | 84.3  | 107.6 | 138.7 | 97.8  |
| 129.4 | 57.4  | 66.7  | 81.5  | 78.5  | 73.4  | 110.0 | 135.1 | 99.1  |
| 147.9 | 102.1 | 121.7 | 142.3 | 121.1 | 144.7 | 185.8 | 192.6 | 126.0 |

|       |       |       |       |       |       |       |       |       |
|-------|-------|-------|-------|-------|-------|-------|-------|-------|
| 43.0  | 25.4  | 28.9  | 37.5  | 56.6  | 30.0  | 43.9  | 55.8  | 36.4  |
| 1.1   | 2.1   | 14.6  | 16.1  | 2.5   | 8.6   | 4.7   | 6.7   | 9.7   |
| 46.1  | 33.8  | 30.7  | 33.1  | 24.2  | 23.1  | 44.7  | 51.0  | 45.7  |
| 54.8  | 62.8  | 83.5  | 72.2  | 74.2  | 77.0  | 116.8 | 93.4  | 86.9  |
| 1.5   | 1.2   | 1.0   | 1.5   | 0.5   | 0.7   | 1.3   | 8.3   | 1.2   |
| 22.8  | 12.3  | 20.5  | 12.8  | 13.8  | 10.4  | 13.4  | 14.6  | 12.8  |
| 15.3  | 7.5   | 10.8  | 7.3   | 11.6  | 7.9   | 9.4   | 11.3  | 11.2  |
| 68.0  | 63.8  | 85.3  | 62.7  | 63.3  | 71.3  | 73.8  | 86.7  | 59.5  |
| 35.7  | 27.4  | 45.3  | 29.2  | 35.6  | 33.4  | 46.5  | 44.2  | 38.0  |
| 7.0   | 8.8   | 6.4   | 1.3   | 6.7   | 3.3   | 10.3  | 17.3  | 8.0   |
| 2.0   | 3.1   | 7.7   | 4.7   | 4.4   | 1.9   | 8.2   | 4.8   | 1.5   |
| 3.5   | 1.2   | 0.9   | 1.1   | 1.2   | 5.1   | 1.4   | 6.7   | 4.3   |
| 2.1   | 3.7   | 1.9   | 6.8   | 1.8   | 8.2   | 4.5   | 2.7   | 6.5   |
| 19.3  | 9.9   | 10.9  | 10.3  | 12.6  | 8.6   | 23.2  | 19.2  | 10.7  |
| 464.7 | 536.8 | 614.2 | 614.4 | 635.5 | 653.4 | 780.7 | 869.6 | 560.2 |
| 27.9  | 20.8  | 26.4  | 31.3  | 24.0  | 24.5  | 18.5  | 29.2  | 20.6  |
| 5.8   | 9.2   | 10.4  | 6.2   | 10.5  | 12.0  | 14.4  | 15.7  | 8.2   |
| 21.9  | 7.6   | 12.8  | 8.4   | 6.4   | 7.0   | 16.9  | 27.5  | 7.8   |
| 1.5   | 0.7   | 2.9   | 1.3   | 0.9   | 0.8   | 1.1   | 0.8   | 0.6   |
| 1.3   | 1.4   | 2.3   | 1.4   | 2.6   | 4.1   | 0.7   | 1.9   | 0.9   |
| 74.7  | 44.6  | 73.7  | 70.3  | 72.8  | 57.9  | 91.0  | 92.2  | 64.6  |
| 40.7  | 20.8  | 24.4  | 23.0  | 22.1  | 18.8  | 27.4  | 31.9  | 18.4  |
| 97.6  | 47.4  | 60.4  | 74.7  | 69.9  | 73.3  | 84.4  | 128.4 | 84.1  |
| 25.4  | 21.3  | 34.0  | 29.1  | 35.2  | 38.1  | 54.4  | 59.1  | 41.4  |
| 11.8  | 14.5  | 19.6  | 20.6  | 22.3  | 15.9  | 22.9  | 24.7  | 15.2  |
| 7.9   | 5.3   | 6.7   | 6.9   | 8.3   | 6.5   | 7.2   | 11.4  | 4.5   |
| 47.7  | 41.4  | 61.7  | 44.0  | 59.1  | 57.0  | 88.8  | 79.8  | 45.1  |
| 29.0  | 19.4  | 20.8  | 26.0  | 24.0  | 22.5  | 34.3  | 33.3  | 24.7  |
| 27.9  | 17.1  | 17.9  | 15.5  | 10.6  | 13.5  | 22.4  | 25.5  | 24.6  |
| 11.1  | 2.0   | 4.6   | 7.3   | 8.6   | 8.5   | 9.1   | 3.9   | 7.3   |
| 10.1  | 2.2   | 2.1   | 3.4   | 6.2   | 2.7   | 8.3   | 2.3   | 1.8   |
| 23.9  | 11.2  | 16.7  | 18.0  | 19.6  | 17.4  | 37.6  | 29.9  | 16.2  |
| 61.8  | 60.4  | 79.1  | 70.3  | 67.4  | 64.0  | 82.1  | 98.0  | 71.7  |
| 15.3  | 6.2   | 4.4   | 5.3   | 2.6   | 9.7   | 7.0   | 10.8  | 6.4   |
| 141.9 | 95.8  | 109.2 | 126.1 | 111.6 | 110.9 | 138.0 | 178.9 | 101.2 |
| 10.2  | 13.7  | 16.5  | 15.3  | 14.1  | 11.7  | 21.0  | 24.6  | 11.9  |
| 11.7  | 9.3   | 10.2  | 5.3   | 9.2   | 2.2   | 13.9  | 16.7  | 6.0   |
| 0.8   | 0.7   | 0.6   | 0.6   | 0.7   | 0.6   | 0.8   | 1.4   | 0.6   |
| 13.2  | 17.3  | 9.9   | 5.3   | 9.1   | 7.2   | 18.8  | 21.9  | 22.2  |
| 1.2   | 1.0   | 4.5   | 10.0  | 0.7   | 0.9   | 2.3   | 7.0   | 1.0   |
| 2.7   | 3.1   | 4.6   | 2.8   | 4.3   | 1.3   | 4.0   | 4.9   | 8.4   |
| 69.6  | 28.2  | 27.8  | 46.8  | 30.2  | 36.6  | 46.8  | 35.9  | 33.9  |
| 14.6  | 10.9  | 12.3  | 11.2  | 3.6   | 7.6   | 19.0  | 16.6  | 10.3  |
| 31.9  | 22.8  | 24.5  | 21.6  | 23.1  | 17.4  | 29.2  | 30.3  | 19.7  |
| 48.4  | 24.5  | 15.3  | 24.9  | 31.4  | 21.2  | 31.5  | 35.1  | 26.9  |
| 6.0   | 1.3   | 5.6   | 3.7   | 4.2   | 0.9   | 5.3   | 4.7   | 4.9   |
| 130.4 | 70.0  | 84.9  | 99.3  | 78.5  | 98.7  | 113.8 | 120.4 | 107.9 |
| 34.6  | 15.9  | 29.3  | 34.0  | 15.4  | 22.5  | 33.4  | 37.2  | 23.2  |
| 37.8  | 19.0  | 26.8  | 20.0  | 22.7  | 19.5  | 25.8  | 32.6  | 24.2  |
| 3.4   | 8.4   | 3.7   | 2.8   | 4.0   | 1.4   | 3.7   | 3.8   | 4.2   |
| 1.7   | 0.2   | 1.2   | 3.6   | 0.5   | 0.2   | 0.8   | 2.8   | 3.4   |
| 0.3   | 0.4   | 0.2   | 0.3   | 0.5   | 2.2   | 2.3   | 3.4   | 1.5   |
| 10.7  | 9.8   | 7.9   | 6.8   | 11.6  | 2.8   | 4.3   | 10.9  | 9.7   |

|       |       |       |       |       |       |       |       |       |
|-------|-------|-------|-------|-------|-------|-------|-------|-------|
| 4.0   | 2.2   | 0.9   | 2.3   | 1.7   | 2.3   | 2.6   | 2.1   | 2.4   |
| 9.9   | 9.6   | 8.1   | 9.2   | 7.6   | 8.6   | 9.9   | 9.8   | 6.8   |
| 10.6  | 8.0   | 6.0   | 1.6   | 3.3   | 5.2   | 6.1   | 12.1  | 8.2   |
| 107.0 | 65.3  | 82.9  | 76.1  | 90.1  | 103.9 | 111.7 | 180.9 | 123.6 |
| 24.9  | 15.1  | 23.5  | 27.6  | 24.5  | 22.1  | 26.2  | 22.9  | 25.4  |
| 149.2 | 87.0  | 99.9  | 108.6 | 114.4 | 109.2 | 166.9 | 179.4 | 146.5 |
| 171.3 | 122.6 | 127.5 | 144.0 | 160.3 | 144.5 | 186.6 | 178.6 | 174.4 |
| 0.4   | 1.3   | 1.6   | 0.3   | 1.2   | 2.4   | 0.7   | 1.1   | 4.6   |
| 5.5   | 21.1  | 7.1   | 3.0   | 3.5   | 11.6  | 3.6   | 4.3   | 13.7  |
| 16.0  | 4.8   | 1.7   | 1.6   | 1.7   | 6.0   | 0.5   | 1.8   | 3.0   |
| 32.1  | 0.3   | 0.3   | 2.2   | 1.9   | 2.5   | 3.5   | 1.9   | 2.1   |
| 4.3   | 3.6   | 2.3   | 5.8   | 3.7   | 2.2   | 4.0   | 6.4   | 6.7   |
| 0.6   | 0.9   | 0.5   | 0.9   | 0.7   | 0.8   | 1.3   | 0.7   | 0.9   |
| 1.1   | 0.8   | 1.3   | 0.9   | 3.5   | 1.2   | 0.7   | 1.7   | 1.5   |
| 18.6  | 13.9  | 15.8  | 20.6  | 16.4  | 16.5  | 24.9  | 29.3  | 15.2  |
| 34.4  | 23.0  | 20.1  | 25.0  | 33.9  | 25.0  | 28.8  | 37.2  | 17.5  |
| 648.4 | 252.3 | 275.5 | 303.8 | 290.3 | 316.7 | 399.5 | 422.1 | 312.6 |
| 336.5 | 196.9 | 216.6 | 240.1 | 301.6 | 254.8 | 431.9 | 472.6 | 310.3 |
| 13.7  | 2.1   | 1.5   | 3.5   | 4.6   | 1.1   | 5.8   | 3.4   | 2.4   |
| 40.1  | 10.6  | 16.2  | 23.1  | 19.9  | 25.6  | 28.2  | 26.5  | 12.4  |
| 1.1   | 2.5   | 0.9   | 0.6   | 9.6   | 1.2   | 3.8   | 1.8   | 7.8   |
| 117.7 | 74.1  | 91.4  | 105.1 | 90.0  | 103.4 | 116.1 | 163.4 | 73.2  |
| 159.3 | 86.8  | 111.2 | 116.1 | 116.9 | 127.7 | 144.5 | 209.2 | 144.3 |
| 4.4   | 0.8   | 7.9   | 6.8   | 8.0   | 6.9   | 7.5   | 8.8   | 3.2   |
| 487.2 | 292.1 | 362.7 | 342.2 | 410.0 | 432.7 | 508.3 | 629.0 | 407.4 |
| 1.1   | 1.0   | 0.7   | 0.9   | 1.1   | 0.9   | 1.6   | 0.7   | 1.6   |
| 1.7   | 1.4   | 0.8   | 1.9   | 4.5   | 1.0   | 1.2   | 2.9   | 1.4   |
| 16.3  | 7.7   | 14.7  | 7.7   | 8.9   | 11.0  | 12.4  | 7.6   | 4.6   |
| 22.8  | 21.0  | 23.4  | 20.4  | 25.3  | 25.4  | 36.0  | 26.0  | 23.5  |
| 47.9  | 39.8  | 59.5  | 30.6  | 67.9  | 71.3  | 50.4  | 81.3  | 36.0  |
| 144.9 | 88.6  | 95.5  | 96.7  | 101.1 | 116.7 | 149.5 | 159.9 | 95.1  |
| 9.4   | 11.5  | 6.1   | 14.7  | 10.4  | 10.0  | 13.8  | 20.3  | 12.1  |
| 49.0  | 34.3  | 30.5  | 30.8  | 47.0  | 41.1  | 63.9  | 104.3 | 64.4  |
| 5.4   | 1.1   | 5.9   | 7.0   | 1.5   | 4.3   | 2.0   | 4.1   | 8.6   |
| 4.8   | 7.1   | 0.3   | 0.8   | 2.9   | 6.5   | 0.4   | 1.5   | 2.5   |
| 25.9  | 11.1  | 21.5  | 18.8  | 23.9  | 18.3  | 23.8  | 29.1  | 22.1  |
| 2.3   | 10.4  | 15.4  | 19.4  | 13.4  | 4.5   | 13.3  | 22.8  | 11.4  |
| 17.3  | 10.8  | 11.9  | 15.1  | 6.8   | 20.4  | 18.6  | 18.4  | 16.5  |
| 5.0   | 0.3   | 0.3   | 3.9   | 7.2   | 6.8   | 1.2   | 5.0   | 0.9   |
| 49.6  | 36.1  | 56.4  | 50.4  | 61.8  | 60.7  | 71.9  | 85.0  | 67.3  |
| 1.5   | 1.2   | 0.6   | 5.2   | 5.5   | 0.7   | 9.3   | 17.2  | 2.8   |
| 7.3   | 5.9   | 4.2   | 6.5   | 11.2  | 5.2   | 7.9   | 14.0  | 8.6   |
| 26.1  | 42.8  | 26.0  | 43.3  | 44.6  | 49.1  | 65.0  | 63.1  | 35.3  |
| 73.7  | 59.9  | 42.6  | 58.3  | 54.4  | 53.5  | 85.1  | 87.0  | 71.8  |
| 5.0   | 1.1   | 3.5   | 4.6   | 2.1   | 6.0   | 6.4   | 1.4   | 11.2  |
| 11.9  | 5.4   | 3.9   | 11.1  | 5.0   | 2.4   | 10.7  | 10.0  | 8.9   |
| 113.1 | 81.5  | 71.2  | 93.0  | 87.8  | 80.2  | 109.0 | 147.7 | 92.3  |
| 80.6  | 54.4  | 50.1  | 67.0  | 75.3  | 60.0  | 83.0  | 90.3  | 76.6  |
| 19.8  | 17.0  | 19.1  | 15.2  | 9.9   | 14.8  | 19.0  | 19.3  | 23.0  |
| 17.9  | 8.3   | 7.6   | 12.5  | 5.8   | 10.9  | 14.9  | 21.2  | 15.9  |
| 1.2   | 2.7   | 0.4   | 2.0   | 0.4   | 2.3   | 0.8   | 1.2   | 0.9   |
| 8.3   | 4.2   | 4.6   | 3.9   | 6.1   | 1.5   | 1.9   | 1.8   | 4.1   |
| 4.0   | 1.5   | 0.7   | 4.9   | 7.0   | 4.6   | 4.3   | 9.3   | 2.2   |

|        |       |       |       |       |       |        |        |       |
|--------|-------|-------|-------|-------|-------|--------|--------|-------|
| 64.7   | 25.8  | 21.9  | 27.3  | 34.5  | 24.6  | 51.9   | 55.8   | 42.8  |
| 54.7   | 42.7  | 48.6  | 50.8  | 56.7  | 46.2  | 58.1   | 58.7   | 53.1  |
| 32.0   | 21.6  | 30.0  | 35.1  | 37.0  | 29.3  | 49.5   | 47.2   | 43.9  |
| 30.6   | 20.3  | 18.3  | 17.7  | 23.8  | 22.5  | 25.5   | 37.2   | 38.4  |
| 1.8    | 6.7   | 1.3   | 1.4   | 4.2   | 1.2   | 2.7    | 10.6   | 2.0   |
| 50.7   | 31.6  | 29.8  | 49.7  | 36.7  | 34.8  | 59.4   | 64.1   | 40.6  |
| 40.2   | 26.4  | 36.4  | 47.0  | 37.8  | 23.4  | 45.2   | 41.9   | 31.6  |
| 38.2   | 27.4  | 27.8  | 27.5  | 30.2  | 28.0  | 44.2   | 63.2   | 56.2  |
| 1.9    | 0.9   | 3.7   | 1.0   | 4.3   | 0.3   | 0.4    | 3.3    | 3.9   |
| 10.1   | 6.3   | 6.5   | 2.6   | 1.6   | 5.0   | 7.0    | 4.3    | 7.6   |
| 84.1   | 51.4  | 64.2  | 66.2  | 67.7  | 68.1  | 94.2   | 100.2  | 62.2  |
| 24.6   | 18.8  | 25.4  | 16.4  | 21.1  | 12.6  | 28.8   | 26.2   | 32.9  |
| 7.0    | 7.9   | 7.4   | 8.4   | 9.2   | 13.1  | 13.1   | 12.9   | 14.6  |
| 35.1   | 18.8  | 20.2  | 19.3  | 15.2  | 20.4  | 35.5   | 46.7   | 37.6  |
| 8.6    | 3.8   | 5.3   | 5.3   | 11.6  | 8.2   | 13.5   | 7.7    | 3.7   |
| 0.7    | 0.5   | 0.5   | 2.7   | 0.9   | 0.9   | 1.0    | 1.0    | 1.6   |
| 11.0   | 8.7   | 8.0   | 8.5   | 5.3   | 11.2  | 8.5    | 2.0    | 6.1   |
| 0.3    | 5.4   | 1.3   | 1.0   | 6.2   | 5.1   | 4.0    | 2.4    | 1.2   |
| 82.7   | 18.5  | 23.7  | 13.7  | 23.7  | 21.0  | 35.2   | 37.8   | 32.2  |
| 8.9    | 14.5  | 7.1   | 9.3   | 13.9  | 8.6   | 12.3   | 30.1   | 14.1  |
| 7.9    | 1.0   | 0.6   | 1.2   | 1.6   | 5.1   | 1.6    | 3.4    | 1.5   |
| 11.1   | 18.5  | 15.3  | 10.6  | 17.0  | 10.9  | 18.1   | 23.8   | 17.9  |
| 10.5   | 14.3  | 13.5  | 14.4  | 19.3  | 14.4  | 19.0   | 21.6   | 9.4   |
| 60.4   | 36.9  | 40.1  | 52.6  | 49.8  | 43.6  | 73.9   | 76.4   | 51.8  |
| 4.5    | 7.7   | 7.5   | 6.0   | 7.6   | 4.6   | 1.0    | 0.9    | 1.4   |
| 5.8    | 4.1   | 2.2   | 4.2   | 9.2   | 6.9   | 7.6    | 10.6   | 14.9  |
| 28.1   | 91.5  | 79.2  | 83.1  | 92.5  | 68.6  | 103.4  | 80.3   | 83.7  |
| 3.6    | 2.5   | 2.1   | 2.6   | 2.1   | 1.4   | 3.7    | 2.2    | 2.0   |
| 3.9    | 0.5   | 1.0   | 4.9   | 0.7   | 0.8   | 2.9    | 4.3    | 2.5   |
| 5.2    | 4.9   | 2.6   | 0.5   | 1.4   | 0.4   | 3.1    | 1.3    | 0.6   |
| 0.8    | 5.9   | 0.8   | 0.3   | 1.4   | 1.6   | 3.5    | 0.9    | 5.4   |
| 26.3   | 13.7  | 17.8  | 16.8  | 21.5  | 15.4  | 25.0   | 22.1   | 18.1  |
| 4.7    | 4.8   | 3.5   | 3.7   | 0.8   | 6.2   | 6.2    | 5.4    | 3.5   |
| 1.9    | 1.2   | 1.8   | 1.4   | 0.6   | 3.6   | 1.5    | 2.4    | 1.1   |
| 6.0    | 5.7   | 4.1   | 0.6   | 1.2   | 0.6   | 0.7    | 4.1    | 0.9   |
| 1.2    | 1.0   | 1.9   | 2.0   | 3.9   | 1.0   | 11.4   | 7.0    | 10.4  |
| 63.2   | 53.8  | 53.2  | 56.0  | 55.9  | 52.6  | 87.6   | 85.5   | 64.5  |
| 5.3    | 8.3   | 6.5   | 6.9   | 6.9   | 7.5   | 13.8   | 8.7    | 12.0  |
| 2.0    | 2.1   | 2.3   | 3.0   | 4.3   | 3.3   | 1.7    | 5.1    | 5.6   |
| 0.2    | 0.6   | 3.1   | 0.3   | 0.2   | 1.6   | 1.0    | 4.0    | 0.4   |
| 1.8    | 0.9   | 1.3   | 1.0   | 1.2   | 0.4   | 0.5    | 1.1    | 0.7   |
| 48.0   | 32.4  | 24.1  | 33.7  | 32.2  | 35.2  | 46.0   | 55.8   | 48.2  |
| 55.8   | 36.5  | 32.6  | 30.5  | 39.8  | 49.4  | 55.6   | 64.7   | 34.0  |
| 1.7    | 1.3   | 1.5   | 1.7   | 3.2   | 1.5   | 1.2    | 2.1    | 2.1   |
| 15.3   | 11.7  | 9.1   | 12.4  | 16.5  | 15.2  | 15.8   | 9.8    | 12.5  |
| 194.5  | 184.2 | 186.8 | 197.9 | 187.4 | 212.7 | 233.5  | 304.9  | 260.3 |
| 20.0   | 27.9  | 10.0  | 16.2  | 20.5  | 13.9  | 23.3   | 25.3   | 19.5  |
| 48.4   | 24.3  | 40.0  | 29.9  | 40.2  | 38.8  | 35.4   | 44.9   | 33.9  |
| 1.8    | 17.1  | 12.6  | 11.3  | 6.1   | 9.4   | 27.2   | 21.0   | 15.8  |
| 1138.9 | 547.5 | 788.8 | 770.8 | 940.7 | 985.3 | 1339.5 | 1615.0 | 738.5 |
| 38.8   | 37.2  | 49.4  | 57.0  | 52.1  | 56.1  | 67.3   | 90.3   | 55.0  |
| 51.1   | 53.5  | 63.6  | 66.0  | 75.1  | 72.2  | 97.1   | 130.9  | 108.5 |
| 19.3   | 16.9  | 14.8  | 26.6  | 29.8  | 23.1  | 30.3   | 37.4   | 35.9  |

|       |       |       |       |       |       |       |       |       |
|-------|-------|-------|-------|-------|-------|-------|-------|-------|
| 3.5   | 2.0   | 1.4   | 1.5   | 4.3   | 1.2   | 12.5  | 3.4   | 14.5  |
| 0.9   | 0.7   | 0.7   | 0.4   | 0.8   | 0.6   | 0.4   | 0.7   | 0.6   |
| 11.8  | 4.6   | 8.1   | 6.6   | 9.5   | 5.1   | 6.9   | 8.7   | 7.7   |
| 40.3  | 31.5  | 31.6  | 48.9  | 39.1  | 41.9  | 70.8  | 70.7  | 60.6  |
| 34.6  | 19.1  | 14.9  | 18.1  | 16.5  | 21.2  | 26.2  | 22.0  | 17.2  |
| 85.9  | 107.4 | 78.5  | 68.8  | 70.9  | 78.8  | 100.2 | 204.2 | 118.1 |
| 3.7   | 1.4   | 4.4   | 6.6   | 4.9   | 8.3   | 6.3   | 8.9   | 4.8   |
| 18.4  | 19.2  | 15.5  | 17.1  | 11.5  | 15.0  | 19.6  | 16.7  | 24.6  |
| 71.5  | 49.2  | 41.6  | 41.0  | 58.8  | 48.6  | 53.0  | 70.7  | 43.1  |
| 19.8  | 7.7   | 14.3  | 11.1  | 10.1  | 12.1  | 23.0  | 15.5  | 15.2  |
| 2.2   | 5.5   | 3.1   | 9.7   | 2.6   | 2.3   | 7.5   | 7.1   | 6.2   |
| 23.3  | 9.3   | 14.2  | 19.0  | 14.3  | 12.2  | 26.0  | 21.6  | 14.1  |
| 9.3   | 2.0   | 1.2   | 8.3   | 2.4   | 2.2   | 7.3   | 10.2  | 1.9   |
| 5.0   | 4.7   | 6.1   | 8.3   | 5.0   | 6.3   | 3.8   | 3.0   | 5.5   |
| 5.2   | 1.8   | 3.5   | 2.4   | 0.4   | 0.7   | 9.4   | 4.5   | 6.9   |
| 4.2   | 0.4   | 3.8   | 5.0   | 5.4   | 0.3   | 2.2   | 0.9   | 0.8   |
| 2.0   | 1.0   | 1.7   | 1.6   | 1.9   | 1.6   | 5.7   | 1.7   | 4.7   |
| 1.3   | 1.3   | 1.8   | 0.5   | 1.4   | 0.6   | 0.9   | 1.8   | 1.2   |
| 31.0  | 26.0  | 27.1  | 20.0  | 27.2  | 26.0  | 33.1  | 35.4  | 24.3  |
| 13.3  | 10.9  | 7.1   | 2.9   | 21.8  | 12.0  | 5.7   | 14.9  | 10.8  |
| 2.8   | 1.5   | 1.1   | 3.6   | 0.5   | 4.3   | 1.3   | 1.5   | 2.0   |
| 19.1  | 14.0  | 9.5   | 12.1  | 6.9   | 11.1  | 12.7  | 14.9  | 10.8  |
| 5.8   | 2.1   | 6.0   | 3.6   | 4.9   | 6.7   | 6.3   | 6.6   | 3.1   |
| 35.8  | 26.6  | 21.4  | 29.1  | 34.3  | 29.2  | 37.8  | 30.9  | 43.2  |
| 35.8  | 32.2  | 9.4   | 39.8  | 35.2  | 25.1  | 24.3  | 26.3  | 24.6  |
| 16.4  | 13.0  | 15.3  | 19.9  | 17.3  | 16.1  | 20.1  | 31.6  | 16.1  |
| 4.2   | 2.4   | 1.9   | 1.4   | 0.7   | 1.2   | 7.2   | 4.5   | 8.5   |
| 233.6 | 142.6 | 155.2 | 128.2 | 182.5 | 135.5 | 238.5 | 247.2 | 164.0 |
| 8.0   | 3.0   | 1.2   | 5.2   | 0.9   | 0.5   | 0.6   | 1.1   | 0.9   |
| 18.0  | 10.9  | 5.3   | 6.1   | 10.3  | 12.8  | 7.9   | 10.2  | 10.4  |
| 93.1  | 64.5  | 78.6  | 87.6  | 87.5  | 77.5  | 111.7 | 98.2  | 77.7  |
| 4.3   | 10.2  | 9.2   | 1.1   | 1.4   | 4.2   | 7.7   | 4.0   | 6.2   |
| 31.9  | 15.7  | 23.1  | 24.4  | 24.3  | 19.0  | 33.3  | 37.9  | 16.6  |
| 26.7  | 12.6  | 26.1  | 22.3  | 20.1  | 23.2  | 29.2  | 24.2  | 24.8  |
| 21.2  | 21.2  | 14.1  | 21.3  | 15.7  | 17.2  | 21.9  | 33.2  | 20.6  |
| 161.5 | 149.0 | 149.6 | 148.2 | 147.1 | 151.0 | 124.5 | 162.4 | 158.3 |
| 17.2  | 24.6  | 30.8  | 34.4  | 29.4  | 24.0  | 42.1  | 49.5  | 27.6  |
| 0.1   | 0.2   | 3.4   | 2.0   | 0.1   | 0.4   | 0.2   | 0.5   | 1.8   |
| 0.6   | 0.6   | 0.9   | 0.6   | 0.7   | 0.8   | 1.3   | 0.9   | 0.4   |
| 90.1  | 79.8  | 71.5  | 81.1  | 84.3  | 94.0  | 115.2 | 193.2 | 86.0  |
| 0.7   | 0.8   | 0.9   | 0.7   | 1.2   | 1.9   | 0.7   | 0.6   | 0.8   |
| 35.1  | 20.2  | 22.6  | 17.6  | 20.9  | 29.4  | 31.2  | 37.7  | 19.3  |
| 1.5   | 1.1   | 1.2   | 3.7   | 2.4   | 6.1   | 1.0   | 6.4   | 3.7   |
| 14.5  | 2.7   | 8.1   | 1.8   | 4.8   | 2.0   | 2.1   | 8.6   | 1.4   |
| 21.1  | 10.5  | 14.0  | 18.4  | 12.9  | 20.1  | 11.2  | 15.1  | 8.4   |
| 5.1   | 3.2   | 4.5   | 3.0   | 2.1   | 2.4   | 6.4   | 4.1   | 2.6   |
| 0.5   | 0.4   | 2.6   | 2.0   | 2.7   | 1.0   | 0.9   | 1.2   | 1.0   |
| 15.9  | 10.9  | 15.9  | 12.6  | 16.4  | 13.5  | 19.5  | 24.1  | 13.4  |
| 1.5   | 2.6   | 1.3   | 1.7   | 2.2   | 10.1  | 2.4   | 9.1   | 3.8   |
| 10.8  | 1.0   | 1.4   | 0.5   | 1.5   | 1.0   | 0.7   | 1.2   | 0.6   |
| 25.2  | 11.4  | 23.7  | 14.1  | 16.4  | 24.9  | 33.7  | 41.2  | 21.7  |
| 23.5  | 14.0  | 13.6  | 14.9  | 14.6  | 16.2  | 26.9  | 29.2  | 13.8  |
| 36.8  | 24.6  | 43.7  | 36.7  | 31.3  | 35.3  | 59.0  | 37.1  | 21.6  |

|       |       |       |       |       |       |       |       |       |
|-------|-------|-------|-------|-------|-------|-------|-------|-------|
| 26.8  | 36.0  | 34.0  | 34.7  | 37.1  | 32.3  | 43.9  | 53.6  | 50.9  |
| 22.9  | 23.7  | 15.6  | 20.0  | 25.1  | 21.1  | 37.4  | 42.1  | 33.1  |
| 13.6  | 9.1   | 12.1  | 14.3  | 1.9   | 5.9   | 17.6  | 20.7  | 18.0  |
| 6.1   | 9.8   | 13.4  | 16.7  | 2.6   | 1.6   | 4.5   | 16.6  | 7.6   |
| 128.2 | 87.6  | 67.5  | 94.2  | 116.4 | 81.7  | 131.0 | 163.2 | 138.3 |
| 138.9 | 119.4 | 201.4 | 178.3 | 243.6 | 191.3 | 290.4 | 352.2 | 180.3 |
| 260.7 | 151.5 | 228.9 | 273.0 | 280.0 | 227.2 | 348.6 | 304.9 | 222.2 |
| 17.9  | 29.0  | 21.7  | 30.7  | 25.1  | 28.0  | 35.3  | 48.2  | 37.3  |
| 7.4   | 12.1  | 13.8  | 17.5  | 14.3  | 13.3  | 13.7  | 30.7  | 9.7   |
| 13.8  | 11.0  | 14.4  | 7.7   | 14.7  | 8.8   | 13.1  | 11.3  | 12.1  |
| 2.3   | 1.4   | 3.6   | 1.7   | 1.9   | 0.9   | 1.1   | 1.7   | 1.0   |
| 12.8  | 20.2  | 15.8  | 10.5  | 11.1  | 13.2  | 3.8   | 12.7  | 12.6  |
| 145.2 | 66.4  | 75.5  | 74.9  | 90.2  | 89.4  | 122.1 | 140.0 | 82.0  |
| 16.4  | 16.3  | 7.2   | 18.8  | 22.3  | 10.7  | 12.0  | 13.7  | 17.3  |
| 25.0  | 15.4  | 31.6  | 21.0  | 18.1  | 17.5  | 21.5  | 29.8  | 16.6  |
| 13.3  | 10.0  | 4.6   | 7.8   | 1.4   | 8.6   | 10.4  | 9.1   | 11.0  |
| 5.8   | 10.4  | 5.4   | 0.8   | 6.0   | 3.0   | 1.2   | 6.2   | 5.0   |
| 5.3   | 8.9   | 8.0   | 3.1   | 2.3   | 3.8   | 10.0  | 4.1   | 3.0   |
| 5.6   | 5.5   | 5.6   | 4.5   | 2.5   | 2.4   | 4.1   | 1.7   | 1.8   |
| 31.0  | 12.0  | 17.4  | 18.8  | 16.1  | 17.6  | 23.7  | 25.5  | 21.2  |
| 2.9   | 10.0  | 2.8   | 9.8   | 5.3   | 6.6   | 10.9  | 5.2   | 2.6   |
| 26.3  | 13.1  | 13.3  | 27.5  | 20.4  | 19.0  | 21.6  | 40.0  | 20.9  |
| 2.0   | 3.7   | 1.0   | 2.5   | 7.2   | 9.5   | 5.6   | 5.3   | 3.8   |
| 0.9   | 0.7   | 0.9   | 1.9   | 0.8   | 2.5   | 1.5   | 0.9   | 1.1   |
| 5.9   | 6.5   | 8.6   | 9.5   | 9.1   | 10.5  | 15.6  | 24.0  | 9.9   |
| 8.2   | 6.7   | 6.6   | 8.1   | 8.5   | 9.0   | 7.3   | 3.6   | 8.7   |
| 1.5   | 6.6   | 3.5   | 1.3   | 8.4   | 7.8   | 7.7   | 1.1   | 1.4   |
| 61.3  | 44.4  | 51.9  | 40.9  | 54.9  | 52.2  | 70.5  | 89.6  | 37.7  |
| 54.5  | 22.0  | 18.9  | 45.4  | 38.0  | 49.5  | 62.5  | 71.3  | 35.7  |
| 78.5  | 58.3  | 51.1  | 64.8  | 61.6  | 68.7  | 79.5  | 113.4 | 69.8  |
| 0.6   | 0.8   | 1.2   | 0.6   | 5.8   | 7.3   | 3.6   | 2.0   | 5.6   |
| 22.5  | 0.8   | 0.7   | 1.3   | 1.3   | 0.6   | 1.6   | 10.8  | 5.3   |
| 6.5   | 2.9   | 7.8   | 5.3   | 6.4   | 8.2   | 9.3   | 10.5  | 8.1   |
| 8.9   | 11.6  | 16.5  | 13.0  | 10.5  | 7.4   | 15.9  | 17.8  | 1.8   |
| 51.6  | 35.6  | 45.6  | 55.2  | 48.4  | 52.2  | 59.7  | 96.7  | 43.6  |
| 3.6   | 4.7   | 3.4   | 3.6   | 7.2   | 6.6   | 10.6  | 9.2   | 5.0   |
| 10.2  | 12.9  | 10.8  | 12.2  | 14.7  | 12.0  | 16.4  | 18.8  | 16.8  |
| 12.1  | 14.8  | 23.4  | 27.1  | 12.1  | 10.7  | 33.3  | 38.9  | 30.5  |
| 9.0   | 2.4   | 4.6   | 5.1   | 8.2   | 3.4   | 8.8   | 2.2   | 10.0  |
| 2.6   | 4.3   | 0.8   | 1.0   | 1.0   | 0.3   | 2.5   | 6.2   | 0.9   |
| 6.2   | 6.4   | 7.3   | 8.0   | 4.7   | 12.3  | 9.4   | 9.0   | 8.5   |
| 20.3  | 11.3  | 9.3   | 15.3  | 16.2  | 15.4  | 22.0  | 27.4  | 13.9  |
| 18.4  | 23.8  | 15.2  | 11.0  | 22.4  | 16.9  | 15.4  | 21.1  | 16.2  |
| 6.1   | 5.6   | 7.1   | 7.2   | 11.4  | 8.4   | 14.6  | 10.2  | 11.2  |
| 0.4   | 0.7   | 0.0   | 0.1   | 0.5   | 0.6   | 2.4   | 2.4   | 0.3   |
| 26.6  | 14.6  | 37.7  | 21.1  | 19.2  | 22.7  | 42.1  | 44.2  | 28.8  |
| 21.4  | 8.6   | 17.3  | 9.5   | 15.3  | 10.0  | 9.4   | 11.9  | 8.6   |
| 7.6   | 6.8   | 1.9   | 8.6   | 7.9   | 6.8   | 4.2   | 2.2   | 5.6   |
| 83.1  | 53.3  | 62.1  | 67.4  | 70.6  | 52.6  | 71.4  | 76.0  | 80.8  |
| 3.9   | 2.3   | 0.3   | 4.9   | 3.4   | 4.6   | 1.2   | 3.7   | 2.4   |
| 27.4  | 13.3  | 18.3  | 26.3  | 27.8  | 29.6  | 37.8  | 34.4  | 30.4  |
| 249.4 | 179.3 | 207.4 | 209.5 | 244.8 | 212.8 | 294.7 | 306.6 | 262.1 |
| 0.2   | 0.3   | 0.4   | 0.9   | 0.2   | 0.5   | 0.1   | 0.5   | 0.8   |

|       |       |       |       |       |       |        |        |       |
|-------|-------|-------|-------|-------|-------|--------|--------|-------|
| 1.5   | 2.3   | 2.1   | 2.8   | 2.2   | 2.1   | 1.7    | 8.3    | 3.2   |
| 1.7   | 0.6   | 0.9   | 0.8   | 0.9   | 1.0   | 2.1    | 1.5    | 1.5   |
| 69.1  | 45.0  | 48.2  | 53.3  | 66.4  | 48.7  | 82.9   | 63.8   | 50.5  |
| 47.0  | 28.5  | 40.6  | 33.8  | 36.3  | 41.7  | 51.1   | 60.2   | 34.7  |
| 12.5  | 1.5   | 6.3   | 7.2   | 9.3   | 1.0   | 9.9    | 14.9   | 8.0   |
| 45.5  | 37.0  | 35.4  | 46.4  | 39.5  | 38.3  | 52.1   | 48.9   | 45.9  |
| 1.1   | 0.8   | 1.4   | 1.1   | 1.3   | 5.2   | 0.4    | 3.1    | 2.3   |
| 3.6   | 6.7   | 4.0   | 4.4   | 7.5   | 9.6   | 5.8    | 6.8    | 7.3   |
| 47.7  | 61.9  | 72.2  | 53.1  | 59.5  | 56.2  | 94.9   | 109.8  | 91.1  |
| 38.5  | 20.8  | 26.6  | 26.2  | 31.1  | 32.4  | 39.9   | 42.2   | 34.2  |
| 6.2   | 18.0  | 33.8  | 25.4  | 18.3  | 21.4  | 24.7   | 21.4   | 22.0  |
| 2.2   | 1.5   | 1.5   | 5.3   | 2.0   | 0.6   | 2.2    | 4.0    | 1.3   |
| 29.8  | 17.3  | 29.1  | 22.7  | 21.5  | 27.1  | 35.1   | 25.4   | 33.8  |
| 22.4  | 18.8  | 17.8  | 13.1  | 22.5  | 17.1  | 24.6   | 22.1   | 19.5  |
| 5.6   | 5.7   | 11.1  | 0.5   | 4.8   | 7.2   | 5.3    | 9.4    | 6.8   |
| 38.9  | 31.4  | 47.4  | 53.0  | 42.2  | 39.8  | 53.9   | 56.7   | 43.3  |
| 11.0  | 9.7   | 10.0  | 8.2   | 9.4   | 14.4  | 13.4   | 23.0   | 18.4  |
| 36.4  | 31.8  | 30.4  | 22.2  | 27.5  | 30.2  | 44.0   | 65.6   | 34.4  |
| 48.8  | 13.2  | 10.1  | 9.5   | 5.0   | 8.6   | 11.8   | 17.0   | 13.5  |
| 1.7   | 1.4   | 0.8   | 1.0   | 1.0   | 0.6   | 2.5    | 1.8    | 1.2   |
| 93.1  | 103.1 | 78.2  | 96.3  | 108.5 | 85.5  | 126.3  | 146.8  | 130.2 |
| 95.1  | 48.5  | 69.6  | 57.7  | 82.7  | 86.5  | 92.2   | 105.7  | 75.3  |
| 0.5   | 4.1   | 1.8   | 1.3   | 1.4   | 1.7   | 2.0    | 2.0    | 1.4   |
| 8.7   | 8.3   | 7.0   | 8.3   | 8.0   | 11.8  | 10.3   | 11.6   | 3.4   |
| 0.8   | 3.7   | 0.9   | 3.4   | 4.7   | 1.3   | 6.5    | 0.7    | 1.4   |
| 8.9   | 1.2   | 1.4   | 4.7   | 1.0   | 1.6   | 0.9    | 7.1    | 7.3   |
| 0.2   | 0.3   | 1.5   | 1.2   | 0.1   | 1.8   | 0.9    | 0.2    | 0.5   |
| 1.8   | 0.7   | 1.2   | 0.5   | 3.4   | 4.1   | 3.0    | 1.7    | 3.3   |
| 38.5  | 36.7  | 50.8  | 51.9  | 47.4  | 35.6  | 59.6   | 57.0   | 57.2  |
| 0.7   | 0.6   | 0.7   | 0.6   | 0.7   | 0.7   | 0.8    | 0.8    | 0.8   |
| 253.1 | 168.0 | 161.6 | 179.4 | 189.1 | 175.2 | 237.5  | 254.8  | 190.5 |
| 0.4   | 1.1   | 0.9   | 4.1   | 3.1   | 2.5   | 2.2    | 2.0    | 2.4   |
| 15.2  | 1.8   | 2.1   | 8.4   | 12.5  | 1.4   | 2.0    | 2.5    | 3.0   |
| 20.0  | 18.9  | 14.7  | 9.6   | 8.8   | 12.8  | 7.7    | 12.7   | 13.3  |
| 17.6  | 19.7  | 17.2  | 16.2  | 14.8  | 21.1  | 16.8   | 18.6   | 18.3  |
| 0.2   | 2.7   | 1.3   | 2.0   | 2.8   | 0.5   | 0.2    | 2.7    | 0.3   |
| 5.9   | 7.2   | 6.9   | 4.7   | 2.6   | 9.2   | 6.9    | 6.3    | 4.8   |
| 0.1   | 0.1   | 2.3   | 0.2   | 0.1   | 0.3   | 0.2    | 0.2    | 0.2   |
| 39.0  | 21.2  | 21.8  | 24.8  | 29.4  | 34.7  | 42.6   | 58.2   | 40.7  |
| 56.6  | 30.9  | 42.6  | 34.8  | 48.1  | 48.9  | 59.6   | 96.9   | 44.2  |
| 28.2  | 12.6  | 21.2  | 19.4  | 16.5  | 16.1  | 27.6   | 38.0   | 14.5  |
| 45.8  | 28.2  | 25.6  | 21.4  | 25.9  | 30.4  | 35.2   | 46.0   | 30.0  |
| 1.6   | 9.8   | 7.2   | 4.6   | 5.6   | 7.1   | 1.8    | 2.7    | 2.1   |
| 92.4  | 103.1 | 103.1 | 107.1 | 108.0 | 97.2  | 129.6  | 138.0  | 106.5 |
| 12.8  | 20.5  | 13.3  | 22.2  | 23.5  | 19.3  | 29.4   | 25.9   | 19.3  |
| 6.0   | 2.5   | 3.1   | 3.7   | 8.0   | 3.6   | 9.2    | 8.6    | 8.6   |
| 0.3   | 3.0   | 0.7   | 1.2   | 1.1   | 1.5   | 1.6    | 1.5    | 0.4   |
| 0.6   | 1.1   | 3.1   | 1.5   | 4.1   | 3.5   | 2.2    | 6.7    | 0.7   |
| 28.8  | 24.4  | 11.7  | 21.2  | 3.2   | 16.9  | 19.8   | 27.1   | 11.2  |
| 939.9 | 767.7 | 626.7 | 734.6 | 910.8 | 692.0 | 1065.0 | 1532.3 | 883.9 |
| 38.8  | 12.7  | 18.2  | 19.6  | 8.9   | 13.8  | 28.8   | 26.0   | 22.4  |
| 38.8  | 21.6  | 39.8  | 24.8  | 36.4  | 22.3  | 23.1   | 35.2   | 31.4  |
| 8.8   | 7.8   | 5.5   | 10.4  | 7.6   | 1.8   | 11.9   | 13.6   | 7.9   |

|       |       |       |       |       |       |       |       |       |
|-------|-------|-------|-------|-------|-------|-------|-------|-------|
| 20.6  | 12.2  | 13.4  | 12.5  | 18.6  | 13.4  | 13.5  | 21.6  | 12.7  |
| 1.3   | 4.1   | 0.6   | 4.5   | 1.7   | 3.6   | 11.1  | 8.1   | 5.6   |
| 32.2  | 25.2  | 28.9  | 28.3  | 30.8  | 28.7  | 34.2  | 35.1  | 21.0  |
| 4.6   | 0.5   | 0.5   | 0.7   | 1.0   | 5.3   | 6.2   | 6.4   | 5.7   |
| 81.9  | 59.0  | 70.4  | 68.8  | 63.6  | 66.7  | 95.1  | 74.5  | 93.6  |
| 33.9  | 19.5  | 25.2  | 18.6  | 22.0  | 29.6  | 27.7  | 45.5  | 33.9  |
| 2.8   | 0.8   | 0.4   | 5.5   | 6.2   | 4.7   | 0.5   | 4.0   | 5.7   |
| 1.1   | 4.4   | 1.2   | 2.9   | 3.4   | 0.6   | 1.2   | 0.7   | 1.4   |
| 1.5   | 0.7   | 1.8   | 2.1   | 0.2   | 1.0   | 1.5   | 0.8   | 0.9   |
| 7.8   | 3.4   | 11.9  | 8.8   | 8.8   | 9.2   | 9.0   | 15.7  | 9.3   |
| 0.8   | 7.3   | 2.2   | 1.7   | 4.7   | 1.5   | 4.9   | 6.0   | 5.5   |
| 3.9   | 3.3   | 1.5   | 4.0   | 5.1   | 2.9   | 6.1   | 6.4   | 5.6   |
| 24.2  | 11.9  | 22.6  | 17.4  | 18.6  | 19.8  | 21.4  | 32.2  | 21.3  |
| 43.2  | 22.6  | 35.4  | 41.0  | 25.2  | 33.1  | 51.5  | 37.7  | 40.3  |
| 56.6  | 46.6  | 38.6  | 51.9  | 49.6  | 38.7  | 54.2  | 72.7  | 45.9  |
| 520.6 | 321.1 | 393.7 | 440.2 | 393.2 | 311.9 | 422.4 | 365.7 | 390.9 |
| 0.8   | 6.2   | 0.6   | 0.9   | 1.0   | 0.4   | 0.8   | 1.0   | 0.6   |
| 38.9  | 32.8  | 47.4  | 43.7  | 54.2  | 45.1  | 53.2  | 58.7  | 60.1  |
| 4.1   | 0.9   | 0.5   | 0.3   | 0.2   | 0.4   | 0.9   | 0.6   | 0.4   |
| 63.5  | 49.5  | 43.9  | 58.7  | 58.1  | 50.2  | 63.2  | 69.1  | 68.5  |
| 13.6  | 2.5   | 6.4   | 0.3   | 0.8   | 0.4   | 0.9   | 5.2   | 0.7   |
| 6.2   | 0.5   | 4.3   | 7.8   | 8.5   | 5.6   | 9.7   | 10.1  | 7.4   |
| 7.6   | 11.6  | 7.5   | 3.3   | 7.5   | 7.6   | 2.6   | 23.8  | 2.3   |
| 12.0  | 5.8   | 8.2   | 7.7   | 8.5   | 11.6  | 13.4  | 12.6  | 10.4  |
| 8.2   | 4.7   | 3.1   | 6.2   | 1.5   | 6.5   | 9.5   | 9.2   | 10.0  |
| 436.3 | 336.8 | 413.3 | 400.5 | 416.3 | 441.5 | 474.4 | 477.8 | 358.0 |
| 29.5  | 13.0  | 21.7  | 23.2  | 31.4  | 33.5  | 29.9  | 39.9  | 41.6  |
| 29.1  | 14.8  | 21.1  | 26.7  | 20.2  | 21.6  | 28.0  | 37.5  | 34.9  |
| 314.9 | 175.4 | 216.5 | 235.5 | 278.8 | 257.6 | 354.9 | 386.0 | 203.9 |
| 1.8   | 7.5   | 0.7   | 0.6   | 3.5   | 0.9   | 2.1   | 2.0   | 7.5   |
| 15.7  | 17.7  | 7.5   | 10.4  | 15.5  | 3.5   | 10.2  | 12.1  | 11.9  |
| 50.5  | 40.9  | 22.7  | 35.0  | 35.2  | 32.6  | 41.1  | 63.3  | 27.8  |
| 8.2   | 11.9  | 10.3  | 12.3  | 10.6  | 9.3   | 7.0   | 5.8   | 10.2  |
| 46.1  | 29.3  | 41.8  | 40.4  | 33.1  | 38.3  | 50.3  | 68.2  | 39.5  |
| 4.0   | 3.7   | 0.9   | 1.5   | 1.1   | 1.1   | 0.9   | 1.7   | 0.3   |
| 2.2   | 5.3   | 2.1   | 4.9   | 1.0   | 6.7   | 4.8   | 6.3   | 0.9   |
| 12.1  | 1.7   | 0.9   | 4.2   | 8.5   | 3.0   | 9.2   | 8.4   | 2.0   |
| 39.1  | 20.8  | 7.4   | 19.4  | 36.1  | 17.1  | 28.1  | 51.0  | 30.1  |
| 8.2   | 1.0   | 2.0   | 7.7   | 7.1   | 6.8   | 5.4   | 1.5   | 6.0   |
| 402.9 | 257.1 | 316.5 | 342.2 | 361.2 | 379.9 | 430.3 | 602.6 | 350.3 |
| 2.9   | 3.9   | 8.4   | 0.7   | 5.1   | 6.4   | 1.7   | 1.4   | 1.1   |
| 1.4   | 1.7   | 2.3   | 3.0   | 4.7   | 0.4   | 2.6   | 3.5   | 1.6   |
| 7.0   | 13.1  | 10.5  | 9.6   | 7.8   | 8.2   | 22.1  | 18.6  | 9.9   |
| 95.8  | 49.6  | 60.1  | 72.6  | 73.1  | 82.2  | 95.6  | 129.1 | 116.7 |
| 48.4  | 31.9  | 26.9  | 25.6  | 33.8  | 34.2  | 50.9  | 67.3  | 40.1  |
| 2.5   | 2.0   | 2.6   | 2.4   | 2.3   | 2.6   | 6.1   | 4.9   | 4.9   |
| 0.4   | 0.4   | 1.7   | 0.3   | 3.7   | 0.8   | 3.6   | 1.0   | 3.1   |
| 4.8   | 1.0   | 6.5   | 2.0   | 5.0   | 3.6   | 2.6   | 8.7   | 2.7   |
| 27.2  | 4.8   | 12.5  | 8.1   | 3.2   | 9.9   | 22.7  | 24.3  | 7.6   |
| 167.7 | 140.1 | 170.2 | 185.5 | 181.0 | 200.2 | 277.3 | 302.2 | 173.3 |
| 5.1   | 1.1   | 0.8   | 0.7   | 1.0   | 4.4   | 1.8   | 2.8   | 0.8   |
| 184.4 | 113.9 | 104.2 | 119.3 | 122.7 | 131.4 | 164.4 | 226.2 | 137.6 |
| 12.6  | 8.9   | 8.1   | 6.3   | 12.6  | 13.2  | 12.7  | 12.4  | 9.7   |



|       |       |       |       |       |       |       |        |       |
|-------|-------|-------|-------|-------|-------|-------|--------|-------|
| 1.1   | 1.0   | 2.1   | 1.5   | 4.3   | 4.0   | 2.0   | 3.8    | 1.0   |
| 6.9   | 4.6   | 5.9   | 2.4   | 1.9   | 1.1   | 2.3   | 6.0    | 5.4   |
| 47.4  | 25.5  | 26.5  | 25.7  | 41.2  | 39.7  | 38.5  | 38.2   | 21.2  |
| 17.9  | 7.3   | 6.1   | 9.9   | 10.3  | 12.2  | 11.4  | 11.2   | 13.3  |
| 848.2 | 498.7 | 500.2 | 590.5 | 625.4 | 594.0 | 917.5 | 1006.9 | 708.7 |
| 335.9 | 204.5 | 277.9 | 286.7 | 307.9 | 304.9 | 381.7 | 385.8  | 250.3 |
| 53.0  | 12.0  | 25.2  | 21.5  | 25.4  | 36.7  | 24.9  | 29.9   | 41.2  |
| 132.1 | 115.1 | 128.3 | 163.6 | 132.9 | 118.2 | 187.1 | 200.7  | 128.3 |
| 5.5   | 5.1   | 2.5   | 6.7   | 7.8   | 5.9   | 6.3   | 5.8    | 4.2   |
| 0.3   | 0.3   | 0.4   | 0.3   | 0.3   | 0.2   | 0.2   | 0.3    | 0.4   |
| 11.0  | 3.1   | 6.9   | 2.8   | 6.4   | 4.6   | 8.7   | 9.2    | 4.6   |
| 10.6  | 6.8   | 11.6  | 7.8   | 1.6   | 1.8   | 5.1   | 4.8    | 12.3  |
| 238.4 | 177.1 | 183.8 | 222.3 | 237.9 | 226.7 | 330.9 | 426.9  | 372.9 |
| 15.6  | 15.2  | 17.1  | 13.0  | 17.6  | 14.1  | 31.1  | 39.2   | 19.5  |
| 0.3   | 0.9   | 0.3   | 0.8   | 2.1   | 4.0   | 4.3   | 3.2    | 0.5   |
| 1.2   | 8.6   | 6.4   | 7.3   | 9.5   | 3.0   | 1.4   | 1.2    | 1.2   |
| 4.2   | 3.1   | 5.2   | 1.2   | 6.8   | 4.5   | 6.7   | 3.4    | 4.6   |
| 9.3   | 17.2  | 23.9  | 23.8  | 21.9  | 17.3  | 29.3  | 25.6   | 24.1  |
| 59.2  | 37.3  | 33.6  | 44.8  | 33.7  | 40.0  | 43.5  | 51.7   | 39.5  |
| 2.9   | 0.9   | 1.0   | 3.7   | 1.8   | 2.1   | 3.6   | 3.4    | 2.2   |
| 91.4  | 67.5  | 70.9  | 76.3  | 86.8  | 70.3  | 113.0 | 141.3  | 99.0  |
| 345.4 | 194.1 | 173.7 | 272.5 | 217.4 | 194.6 | 298.6 | 390.8  | 216.4 |
| 62.7  | 46.0  | 43.4  | 40.1  | 46.7  | 45.6  | 60.2  | 83.9   | 60.4  |
| 0.4   | 0.7   | 2.2   | 0.3   | 3.1   | 0.3   | 2.2   | 0.7    | 0.1   |
| 3.5   | 2.8   | 6.8   | 4.7   | 0.8   | 4.2   | 2.2   | 3.8    | 3.1   |
| 0.8   | 11.3  | 9.9   | 2.8   | 13.0  | 12.0  | 9.5   | 9.7    | 12.1  |
| 8.3   | 3.8   | 1.3   | 7.4   | 14.5  | 5.8   | 10.4  | 6.8    | 12.2  |
| 19.2  | 5.8   | 6.6   | 6.4   | 9.1   | 14.2  | 9.6   | 25.3   | 13.3  |
| 1.9   | 1.1   | 1.7   | 2.5   | 2.9   | 0.9   | 2.4   | 1.0    | 1.7   |
| 3.5   | 0.9   | 3.1   | 1.1   | 0.6   | 0.7   | 0.5   | 1.2    | 4.4   |
| 37.9  | 30.0  | 27.3  | 38.7  | 34.6  | 44.5  | 35.2  | 60.2   | 34.1  |
| 2.7   | 2.7   | 0.6   | 2.9   | 2.8   | 5.4   | 0.5   | 0.5    | 4.6   |
| 2.2   | 5.9   | 0.9   | 1.6   | 5.1   | 5.5   | 3.3   | 4.6    | 4.1   |
| 18.6  | 9.2   | 12.3  | 17.8  | 16.8  | 15.5  | 20.1  | 30.5   | 27.0  |
| 18.1  | 20.3  | 2.7   | 15.9  | 15.8  | 9.2   | 16.0  | 13.0   | 10.9  |
| 4.5   | 5.3   | 1.0   | 3.4   | 6.8   | 1.1   | 1.0   | 9.2    | 1.1   |
| 0.7   | 2.8   | 1.5   | 3.1   | 1.0   | 1.4   | 1.4   | 1.3    | 7.7   |
| 12.5  | 5.6   | 5.9   | 6.1   | 8.2   | 7.4   | 15.3  | 11.1   | 9.1   |
| 0.9   | 1.2   | 0.6   | 1.4   | 0.4   | 1.1   | 6.8   | 1.2    | 1.3   |
| 8.5   | 1.6   | 2.1   | 2.1   | 0.9   | 4.5   | 1.1   | 2.7    | 1.8   |
| 0.9   | 0.6   | 3.1   | 2.5   | 1.2   | 1.4   | 1.8   | 6.4    | 5.5   |
| 0.8   | 0.9   | 1.3   | 0.8   | 0.8   | 0.5   | 1.1   | 1.4    | 1.1   |
| 0.5   | 1.2   | 0.8   | 0.4   | 0.9   | 0.5   | 1.3   | 1.9    | 0.7   |
| 1.9   | 16.9  | 1.4   | 2.1   | 1.4   | 1.2   | 2.5   | 2.2    | 1.4   |
| 74.5  | 44.8  | 52.7  | 46.4  | 63.9  | 63.2  | 104.9 | 136.5  | 97.8  |
| 110.6 | 58.7  | 84.9  | 77.5  | 87.9  | 92.3  | 105.6 | 137.8  | 94.0  |
| 57.3  | 28.4  | 24.5  | 34.9  | 32.3  | 41.3  | 53.8  | 73.2   | 42.0  |
| 10.2  | 5.3   | 6.1   | 6.5   | 6.3   | 8.6   | 9.1   | 16.0   | 15.9  |
| 2.9   | 3.4   | 1.8   | 3.1   | 1.3   | 1.5   | 1.2   | 2.2    | 1.9   |
| 2.8   | 10.7  | 12.3  | 19.6  | 10.3  | 2.7   | 3.2   | 7.6    | 10.0  |
| 0.4   | 1.3   | 0.1   | 0.9   | 2.1   | 2.5   | 3.0   | 0.2    | 0.8   |
| 3.2   | 6.1   | 6.9   | 5.6   | 0.8   | 2.3   | 2.6   | 3.3    | 3.6   |
| 42.4  | 16.9  | 27.7  | 27.2  | 25.2  | 26.1  | 30.6  | 37.7   | 32.4  |

|        |        |        |        |        |        |        |        |        |
|--------|--------|--------|--------|--------|--------|--------|--------|--------|
| 4.4    | 10.3   | 9.8    | 9.5    | 9.5    | 9.1    | 5.0    | 2.1    | 8.1    |
| 0.9    | 0.6    | 0.8    | 0.5    | 1.2    | 0.7    | 0.6    | 0.8    | 0.6    |
| 1.3    | 6.3    | 8.2    | 2.6    | 6.7    | 5.9    | 7.8    | 4.5    | 5.9    |
| 1.2    | 2.4    | 1.3    | 1.4    | 1.0    | 2.7    | 0.7    | 1.4    | 0.8    |
| 80.8   | 53.5   | 43.2   | 62.5   | 65.7   | 60.4   | 97.2   | 107.0  | 75.8   |
| 0.4    | 3.8    | 0.5    | 2.9    | 3.9    | 3.9    | 4.3    | 5.9    | 4.9    |
| 20.4   | 12.7   | 15.4   | 18.7   | 18.6   | 13.1   | 22.8   | 26.2   | 15.0   |
| 12.9   | 10.7   | 15.3   | 13.9   | 14.6   | 10.0   | 10.7   | 20.5   | 11.3   |
| 12.8   | 9.7    | 11.1   | 9.3    | 10.6   | 5.9    | 10.9   | 13.8   | 13.1   |
| 8.7    | 12.7   | 9.4    | 5.3    | 13.6   | 12.3   | 13.5   | 15.8   | 10.4   |
| 349.8  | 190.8  | 228.5  | 233.8  | 218.2  | 224.2  | 275.6  | 395.3  | 224.3  |
| 0.3    | 0.1    | 0.2    | 2.4    | 4.1    | 0.5    | 0.3    | 1.1    | 0.2    |
| 22.2   | 15.6   | 15.9   | 23.5   | 23.2   | 21.3   | 34.2   | 36.0   | 29.7   |
| 21.7   | 17.4   | 16.8   | 16.6   | 16.7   | 15.9   | 22.5   | 25.8   | 23.0   |
| 16.8   | 9.2    | 15.3   | 13.7   | 10.0   | 11.7   | 12.3   | 21.6   | 11.7   |
| 259.4  | 151.6  | 171.2  | 181.6  | 170.3  | 157.3  | 253.6  | 295.6  | 170.7  |
| 0.5    | 0.4    | 0.4    | 0.9    | 1.0    | 0.4    | 0.4    | 1.4    | 0.4    |
| 1.6    | 3.6    | 0.7    | 1.6    | 0.7    | 0.6    | 4.9    | 3.3    | 0.8    |
| 41.4   | 17.9   | 22.0   | 26.7   | 23.4   | 23.0   | 30.6   | 34.5   | 35.7   |
| 228.1  | 4.1    | 2.5    | 1.5    | 0.1    | 0.1    | 2.2    | 5.4    | 1.6    |
| 1.3    | 0.4    | 0.6    | 3.5    | 3.2    | 0.7    | 1.1    | 0.4    | 0.3    |
| 128.6  | 73.6   | 104.7  | 105.6  | 123.4  | 97.2   | 143.0  | 138.8  | 105.8  |
| 4.5    | 2.5    | 2.1    | 12.3   | 12.0   | 3.5    | 15.7   | 16.0   | 4.5    |
| 45.1   | 12.8   | 14.0   | 21.5   | 12.2   | 10.1   | 20.9   | 18.5   | 13.5   |
| 17.1   | 6.5    | 8.9    | 7.0    | 11.4   | 7.2    | 9.3    | 17.1   | 7.9    |
| 27.4   | 11.8   | 13.3   | 18.5   | 17.2   | 16.1   | 27.1   | 37.0   | 23.0   |
| 9.2    | 12.1   | 5.1    | 6.9    | 12.1   | 9.4    | 12.6   | 15.2   | 5.7    |
| 62.3   | 20.4   | 26.9   | 17.1   | 21.9   | 28.0   | 30.5   | 54.3   | 25.2   |
| 0.1    | 0.1    | 1.7    | 0.2    | 1.0    | 1.1    | 0.8    | 0.1    | 0.2    |
| 3.2    | 5.9    | 2.3    | 0.8    | 2.8    | 6.9    | 7.7    | 9.2    | 2.4    |
| 33.0   | 25.5   | 31.1   | 30.5   | 28.1   | 27.7   | 45.8   | 49.3   | 27.7   |
| 52.0   | 8.2    | 6.0    | 8.6    | 13.3   | 7.0    | 14.5   | 12.1   | 9.9    |
| 49.2   | 48.6   | 47.5   | 59.4   | 60.8   | 56.3   | 80.8   | 101.5  | 56.0   |
| 9.3    | 9.7    | 6.6    | 7.0    | 10.4   | 10.2   | 13.6   | 11.2   | 10.8   |
| 1951.5 | 1344.4 | 1575.9 | 1534.7 | 1647.2 | 1616.5 | 2142.2 | 2264.4 | 1780.6 |
| 23.1   | 19.3   | 17.5   | 18.9   | 15.2   | 17.3   | 30.6   | 29.9   | 22.6   |
| 2.8    | 5.0    | 1.1    | 0.9    | 3.2    | 1.8    | 1.6    | 1.9    | 1.3    |
| 27.3   | 6.0    | 5.3    | 6.1    | 16.3   | 11.0   | 13.5   | 9.1    | 10.1   |
| 0.6    | 0.3    | 0.2    | 0.3    | 1.8    | 2.6    | 2.4    | 0.4    | 0.9    |
| 81.9   | 37.6   | 43.3   | 34.6   | 47.1   | 41.6   | 53.3   | 61.7   | 44.3   |
| 15.2   | 7.6    | 10.1   | 17.0   | 19.3   | 13.2   | 13.5   | 28.5   | 22.6   |
| 36.1   | 19.6   | 34.9   | 21.6   | 23.8   | 29.0   | 32.2   | 53.1   | 23.2   |
| 5.4    | 2.0    | 7.0    | 9.9    | 4.9    | 9.6    | 11.3   | 16.2   | 9.7    |
| 0.7    | 8.2    | 10.3   | 7.3    | 8.0    | 6.7    | 9.6    | 8.8    | 7.5    |
| 25.1   | 14.9   | 17.2   | 16.1   | 16.7   | 19.8   | 24.0   | 25.1   | 12.3   |
| 5.2    | 0.8    | 2.1    | 1.1    | 2.6    | 6.9    | 1.4    | 2.0    | 0.6    |
| 25.2   | 14.0   | 12.3   | 12.3   | 11.0   | 16.6   | 19.1   | 21.2   | 9.6    |
| 560.2  | 323.4  | 357.1  | 389.4  | 410.3  | 427.5  | 662.7  | 623.4  | 564.3  |
| 39.1   | 23.9   | 30.5   | 32.1   | 38.8   | 29.3   | 34.0   | 41.7   | 34.7   |
| 9.4    | 5.7    | 6.4    | 12.0   | 2.1    | 1.1    | 12.1   | 4.0    | 2.6    |
| 74.2   | 70.1   | 71.1   | 81.0   | 86.8   | 83.3   | 115.3  | 118.1  | 66.5   |
| 1.9    | 4.6    | 1.4    | 1.3    | 1.4    | 7.0    | 2.8    | 4.7    | 2.4    |
| 1.8    | 2.4    | 8.1    | 3.6    | 2.0    | 3.8    | 8.7    | 5.8    | 5.2    |

|       |       |       |       |       |       |       |       |       |
|-------|-------|-------|-------|-------|-------|-------|-------|-------|
| 5.8   | 3.6   | 6.9   | 1.5   | 2.7   | 1.2   | 4.2   | 6.7   | 9.6   |
| 11.4  | 13.7  | 1.7   | 16.8  | 10.1  | 2.3   | 11.2  | 31.2  | 7.8   |
| 36.8  | 16.9  | 21.3  | 23.5  | 19.7  | 21.4  | 23.3  | 31.2  | 21.4  |
| 9.9   | 10.7  | 19.6  | 8.1   | 8.7   | 1.9   | 8.8   | 21.3  | 11.6  |
| 1.7   | 0.9   | 3.0   | 7.3   | 13.8  | 9.0   | 3.2   | 5.6   | 10.7  |
| 0.5   | 0.4   | 0.9   | 1.0   | 0.4   | 1.2   | 0.7   | 1.2   | 0.5   |
| 51.0  | 38.0  | 49.5  | 48.0  | 61.2  | 44.1  | 65.3  | 79.3  | 50.7  |
| 44.0  | 36.5  | 43.1  | 57.7  | 48.1  | 56.6  | 76.7  | 79.3  | 58.8  |
| 11.9  | 2.9   | 13.1  | 11.1  | 10.3  | 6.3   | 14.1  | 13.1  | 7.0   |
| 4.0   | 1.1   | 5.8   | 2.0   | 6.8   | 1.3   | 2.1   | 1.7   | 4.1   |
| 0.7   | 1.2   | 6.7   | 7.0   | 3.6   | 2.8   | 8.1   | 12.0  | 3.1   |
| 13.0  | 43.1  | 56.3  | 31.8  | 63.5  | 52.4  | 70.8  | 66.2  | 62.7  |
| 6.1   | 1.2   | 7.3   | 3.8   | 5.2   | 8.0   | 11.5  | 3.0   | 4.9   |
| 9.5   | 6.5   | 2.2   | 1.6   | 1.6   | 2.5   | 4.5   | 2.6   | 5.4   |
| 26.6  | 29.2  | 26.6  | 30.1  | 27.8  | 36.7  | 31.4  | 36.8  | 32.3  |
| 6.2   | 0.8   | 4.2   | 2.1   | 7.5   | 3.4   | 1.3   | 1.7   | 3.8   |
| 4.3   | 0.3   | 0.7   | 5.1   | 0.5   | 3.4   | 2.6   | 4.0   | 1.3   |
| 0.2   | 0.3   | 1.2   | 0.2   | 0.9   | 0.4   | 0.6   | 0.9   | 0.9   |
| 5.8   | 7.0   | 6.7   | 5.8   | 8.8   | 1.2   | 6.5   | 8.7   | 4.3   |
| 67.0  | 36.9  | 45.4  | 42.3  | 35.7  | 48.3  | 65.4  | 83.2  | 55.8  |
| 14.0  | 10.2  | 8.2   | 12.7  | 5.4   | 7.3   | 7.8   | 12.5  | 10.0  |
| 0.7   | 0.4   | 0.5   | 0.8   | 0.3   | 0.4   | 0.9   | 0.4   | 0.4   |
| 0.7   | 0.4   | 0.5   | 0.4   | 0.8   | 0.4   | 0.6   | 0.7   | 0.6   |
| 3.1   | 0.3   | 0.3   | 1.3   | 0.7   | 2.3   | 0.6   | 0.4   | 0.6   |
| 3.5   | 8.4   | 9.2   | 1.9   | 3.6   | 7.2   | 2.6   | 1.5   | 2.1   |
| 136.9 | 157.2 | 157.1 | 150.3 | 162.3 | 144.6 | 195.3 | 220.1 | 142.8 |
| 6.8   | 15.6  | 7.4   | 10.8  | 11.3  | 10.5  | 9.7   | 7.5   | 9.5   |
| 69.9  | 62.7  | 55.3  | 64.6  | 60.2  | 57.3  | 69.8  | 67.8  | 78.0  |
| 516.2 | 411.3 | 425.7 | 471.9 | 476.7 | 449.6 | 538.0 | 578.1 | 394.6 |
| 2.6   | 1.3   | 0.8   | 2.4   | 3.7   | 2.9   | 15.1  | 0.8   | 4.8   |
| 5.7   | 0.3   | 0.8   | 0.6   | 0.5   | 1.6   | 1.1   | 0.3   | 0.2   |
| 31.5  | 45.3  | 37.1  | 31.0  | 52.6  | 31.1  | 48.4  | 48.5  | 41.9  |
| 3.6   | 6.6   | 2.4   | 1.9   | 0.5   | 1.3   | 0.5   | 0.8   | 7.1   |
| 3.6   | 3.5   | 0.5   | 1.1   | 7.6   | 6.1   | 2.6   | 6.1   | 8.3   |
| 23.5  | 5.3   | 2.9   | 2.0   | 3.7   | 3.2   | 18.5  | 21.8  | 13.2  |
| 3.1   | 24.6  | 1.8   | 2.2   | 9.2   | 6.4   | 4.5   | 3.2   | 2.8   |
| 3.1   | 0.6   | 4.6   | 1.0   | 3.3   | 8.2   | 1.3   | 0.7   | 0.4   |
| 18.9  | 6.2   | 2.3   | 8.6   | 4.4   | 3.6   | 2.4   | 11.1  | 8.6   |
| 24.3  | 6.9   | 10.6  | 2.6   | 12.9  | 7.0   | 11.8  | 11.4  | 11.8  |
| 12.1  | 13.9  | 1.9   | 3.6   | 4.2   | 3.2   | 5.3   | 4.2   | 1.7   |
| 11.3  | 2.2   | 4.2   | 2.2   | 0.6   | 3.3   | 0.7   | 1.4   | 1.1   |
| 0.3   | 2.5   | 0.8   | 0.2   | 0.1   | 0.6   | 0.3   | 0.4   | 0.2   |
| 15.5  | 7.8   | 14.5  | 13.8  | 13.0  | 16.3  | 23.0  | 31.8  | 20.3  |
| 60.8  | 18.5  | 42.2  | 41.3  | 35.9  | 47.8  | 67.8  | 85.5  | 53.5  |
| 6.1   | 5.9   | 0.9   | 0.4   | 2.2   | 2.4   | 3.7   | 8.2   | 6.8   |
| 5.6   | 8.4   | 3.6   | 0.8   | 10.6  | 2.0   | 5.6   | 12.0  | 5.9   |
| 16.3  | 5.4   | 2.6   | 3.1   | 4.3   | 3.2   | 4.0   | 6.0   | 3.2   |
| 8.3   | 9.7   | 11.7  | 2.6   | 2.2   | 3.5   | 1.4   | 2.4   | 8.8   |
| 4.6   | 7.2   | 5.4   | 5.6   | 6.9   | 5.5   | 11.6  | 8.5   | 6.1   |
| 1.6   | 1.3   | 2.7   | 7.0   | 1.6   | 2.1   | 1.7   | 1.6   | 0.4   |
| 38.7  | 22.2  | 24.1  | 22.1  | 28.0  | 28.6  | 35.4  | 60.6  | 29.9  |
| 1.5   | 0.3   | 5.2   | 0.7   | 1.4   | 0.5   | 0.6   | 0.5   | 0.5   |
| 24.3  | 17.9  | 9.5   | 10.6  | 17.7  | 18.7  | 20.9  | 10.9  | 23.3  |

|        |       |       |       |       |        |        |        |       |
|--------|-------|-------|-------|-------|--------|--------|--------|-------|
| 2.4    | 8.1   | 4.2   | 2.1   | 5.7   | 11.1   | 6.8    | 13.3   | 7.8   |
| 5.7    | 3.6   | 3.4   | 2.0   | 8.2   | 8.8    | 6.1    | 4.5    | 1.8   |
| 26.5   | 29.3  | 20.9  | 20.6  | 24.5  | 21.1   | 39.7   | 33.8   | 28.0  |
| 0.6    | 3.7   | 1.1   | 1.1   | 3.0   | 1.8    | 0.7    | 1.7    | 2.8   |
| 251.5  | 171.3 | 196.6 | 208.4 | 216.7 | 230.6  | 265.7  | 306.4  | 219.7 |
| 3.8    | 12.9  | 4.8   | 9.3   | 7.1   | 11.0   | 6.1    | 9.9    | 3.2   |
| 32.1   | 18.4  | 14.0  | 21.3  | 20.2  | 19.9   | 16.6   | 31.3   | 17.0  |
| 4.6    | 0.2   | 3.1   | 4.4   | 1.2   | 0.7    | 2.8    | 6.8    | 5.7   |
| 112.5  | 68.0  | 86.9  | 87.1  | 84.6  | 75.1   | 60.6   | 66.7   | 44.1  |
| 2.0    | 0.7   | 4.1   | 3.8   | 0.7   | 0.7    | 4.4    | 9.3    | 1.2   |
| 3.8    | 0.4   | 0.8   | 4.3   | 4.2   | 3.5    | 3.2    | 2.4    | 4.8   |
| 25.7   | 13.4  | 19.5  | 18.5  | 16.6  | 19.1   | 25.6   | 32.7   | 14.9  |
| 4.8    | 3.0   | 8.3   | 13.8  | 8.2   | 7.4    | 6.4    | 8.4    | 9.5   |
| 39.0   | 30.7  | 31.2  | 31.0  | 26.3  | 28.1   | 45.4   | 41.1   | 22.1  |
| 5.1    | 6.0   | 5.5   | 8.8   | 9.7   | 5.7    | 1.0    | 0.9    | 7.1   |
| 0.3    | 4.6   | 0.4   | 0.3   | 2.1   | 2.8    | 0.7    | 4.0    | 0.1   |
| 2.2    | 5.0   | 0.9   | 1.0   | 6.6   | 0.8    | 3.9    | 3.1    | 1.0   |
| 9.4    | 6.7   | 6.6   | 6.0   | 12.4  | 9.3    | 11.1   | 11.8   | 11.9  |
| 48.9   | 29.8  | 28.8  | 39.0  | 39.6  | 38.2   | 49.2   | 63.2   | 33.3  |
| 154.7  | 85.2  | 119.0 | 94.1  | 132.7 | 126.4  | 164.7  | 165.9  | 140.6 |
| 0.4    | 0.1   | 2.2   | 4.1   | 0.4   | 0.3    | 1.9    | 2.9    | 1.0   |
| 3.4    | 2.4   | 3.3   | 4.5   | 0.3   | 1.2    | 1.0    | 6.2    | 2.2   |
| 48.1   | 37.8  | 30.4  | 32.8  | 37.5  | 38.6   | 66.0   | 66.4   | 39.8  |
| 36.6   | 42.6  | 62.4  | 54.6  | 51.3  | 61.2   | 66.7   | 77.6   | 69.5  |
| 4.9    | 4.2   | 1.9   | 2.0   | 2.0   | 0.4    | 4.0    | 2.7    | 2.0   |
| 0.6    | 3.0   | 3.0   | 0.2   | 0.2   | 0.3    | 0.6    | 4.7    | 0.6   |
| 1.6    | 3.6   | 0.6   | 0.2   | 1.4   | 2.8    | 5.4    | 0.5    | 2.5   |
| 0.6    | 0.9   | 3.6   | 0.1   | 0.3   | 0.2    | 0.2    | 0.4    | 0.2   |
| 22.7   | 15.3  | 16.9  | 15.2  | 22.6  | 17.1   | 15.6   | 15.7   | 15.9  |
| 1.0    | 1.3   | 4.4   | 5.9   | 1.4   | 3.4    | 4.1    | 2.2    | 1.9   |
| 32.7   | 28.2  | 37.0  | 32.9  | 37.8  | 34.6   | 52.2   | 71.2   | 61.8  |
| 6.8    | 7.6   | 2.8   | 6.2   | 3.5   | 5.5    | 5.4    | 12.9   | 1.3   |
| 9.9    | 7.4   | 13.3  | 12.3  | 14.1  | 14.6   | 19.3   | 14.8   | 21.0  |
| 49.7   | 42.6  | 37.5  | 40.1  | 50.7  | 46.2   | 46.8   | 66.5   | 37.5  |
| 1254.3 | 726.5 | 928.4 | 906.3 | 908.8 | 1034.3 | 1242.0 | 1643.0 | 836.3 |
| 28.0   | 45.0  | 52.7  | 56.4  | 54.5  | 52.1   | 72.4   | 79.8   | 70.2  |
| 0.5    | 0.6   | 4.5   | 0.4   | 1.5   | 0.5    | 1.0    | 1.0    | 0.4   |
| 180.9  | 145.8 | 166.8 | 174.9 | 167.3 | 182.3  | 235.8  | 249.8  | 167.0 |
| 42.4   | 38.5  | 44.0  | 48.9  | 51.0  | 49.6   | 53.8   | 51.1   | 39.1  |
| 9.5    | 10.3  | 9.2   | 8.0   | 8.3   | 8.2    | 9.0    | 12.6   | 5.3   |
| 124.8  | 83.0  | 95.3  | 114.2 | 109.0 | 121.2  | 136.3  | 195.5  | 128.1 |
| 0.7    | 0.3   | 1.0   | 5.8   | 3.1   | 5.7    | 1.0    | 2.2    | 0.7   |
| 136.1  | 102.1 | 126.6 | 129.9 | 123.1 | 111.4  | 145.0  | 151.7  | 111.9 |
| 1.0    | 0.9   | 1.4   | 0.6   | 1.1   | 0.8    | 0.3    | 0.8    | 0.8   |
| 3.1    | 4.2   | 6.0   | 6.9   | 5.1   | 1.3    | 11.4   | 8.8    | 6.8   |
| 0.2    | 1.3   | 0.3   | 0.5   | 0.3   | 0.3    | 0.5    | 0.5    | 0.4   |
| 5.3    | 5.1   | 7.4   | 7.8   | 8.3   | 4.6    | 4.6    | 10.7   | 1.1   |
| 3.0    | 10.2  | 15.1  | 11.3  | 20.5  | 9.6    | 19.5   | 16.2   | 25.8  |
| 2.0    | 1.4   | 2.6   | 3.5   | 3.5   | 4.9    | 4.6    | 2.0    | 4.1   |
| 2.8    | 1.1   | 2.3   | 2.0   | 1.8   | 1.2    | 2.2    | 1.8    | 0.8   |
| 25.6   | 26.8  | 27.4  | 19.7  | 23.9  | 27.4   | 17.8   | 21.6   | 21.4  |
| 1.9    | 0.4   | 0.5   | 0.5   | 2.9   | 0.3    | 1.0    | 3.0    | 0.2   |
| 0.4    | 2.6   | 0.8   | 0.8   | 2.3   | 0.3    | 0.2    | 0.5    | 0.4   |

|       |       |       |       |       |       |       |       |       |
|-------|-------|-------|-------|-------|-------|-------|-------|-------|
| 5.5   | 6.4   | 3.1   | 6.0   | 0.8   | 2.4   | 5.5   | 1.1   | 3.2   |
| 109.4 | 78.5  | 113.4 | 131.7 | 104.3 | 131.7 | 141.5 | 154.0 | 122.9 |
| 3.4   | 1.2   | 0.9   | 0.8   | 1.1   | 0.9   | 1.9   | 2.9   | 1.0   |
| 6.1   | 5.8   | 5.0   | 1.9   | 5.6   | 3.0   | 2.0   | 9.6   | 2.6   |
| 96.7  | 79.7  | 93.8  | 70.2  | 107.8 | 82.3  | 124.3 | 137.9 | 98.8  |
| 211.3 | 138.3 | 187.0 | 176.0 | 198.8 | 189.5 | 261.9 | 281.4 | 193.9 |
| 8.3   | 4.8   | 7.2   | 4.0   | 6.0   | 3.2   | 6.4   | 6.9   | 6.6   |
| 1.1   | 2.0   | 0.4   | 0.5   | 0.6   | 0.5   | 2.1   | 0.8   | 1.1   |
| 3.6   | 0.7   | 3.0   | 1.0   | 0.3   | 4.3   | 2.4   | 3.4   | 1.0   |
| 16.9  | 11.5  | 11.1  | 10.2  | 12.9  | 14.1  | 19.1  | 26.3  | 15.1  |
| 23.5  | 21.1  | 24.1  | 15.8  | 14.2  | 22.4  | 28.6  | 39.5  | 21.6  |
| 2.7   | 0.4   | 0.7   | 0.4   | 2.2   | 0.7   | 0.4   | 0.6   | 4.9   |
| 72.5  | 83.2  | 96.5  | 101.3 | 110.4 | 99.9  | 131.5 | 159.5 | 114.2 |
| 8.8   | 8.3   | 15.3  | 12.5  | 12.7  | 16.0  | 12.3  | 12.4  | 12.8  |
| 12.7  | 10.3  | 17.0  | 12.7  | 17.3  | 16.1  | 25.7  | 22.0  | 21.5  |
| 8.2   | 0.9   | 0.9   | 7.3   | 0.7   | 3.2   | 4.3   | 0.7   | 0.6   |
| 6.1   | 1.5   | 1.5   | 1.6   | 2.4   | 1.1   | 4.9   | 1.3   | 3.2   |
| 0.9   | 5.0   | 3.0   | 1.0   | 3.2   | 3.6   | 3.0   | 5.8   | 1.1   |
| 2.2   | 3.4   | 1.2   | 2.0   | 4.5   | 1.5   | 1.4   | 1.4   | 2.7   |
| 4.0   | 2.1   | 8.8   | 0.4   | 11.2  | 1.7   | 2.1   | 4.2   | 0.7   |
| 1.6   | 1.3   | 0.9   | 0.5   | 2.6   | 1.1   | 1.1   | 1.0   | 0.3   |
| 0.7   | 1.1   | 1.9   | 0.5   | 0.9   | 0.6   | 0.7   | 0.9   | 0.5   |
| 26.5  | 18.6  | 15.7  | 17.6  | 20.6  | 15.1  | 29.3  | 28.9  | 22.5  |
| 11.4  | 8.0   | 6.2   | 6.4   | 14.3  | 6.6   | 13.7  | 13.6  | 13.2  |
| 11.9  | 8.1   | 8.4   | 10.3  | 8.8   | 11.5  | 9.1   | 16.2  | 10.0  |
| 22.4  | 21.7  | 19.7  | 24.3  | 22.0  | 16.8  | 27.8  | 28.2  | 25.5  |
| 1.0   | 0.4   | 0.5   | 0.4   | 0.6   | 0.6   | 0.7   | 0.7   | 0.8   |
| 78.8  | 51.0  | 54.8  | 56.9  | 56.4  | 59.2  | 70.1  | 80.0  | 50.5  |
| 10.0  | 16.7  | 8.0   | 4.0   | 8.1   | 3.1   | 3.7   | 26.3  | 23.4  |
| 3.2   | 0.5   | 1.9   | 2.3   | 3.0   | 1.9   | 3.9   | 0.6   | 0.4   |
| 1.1   | 5.0   | 0.4   | 0.8   | 1.2   | 4.2   | 0.7   | 0.7   | 1.5   |
| 2.7   | 4.2   | 2.2   | 2.8   | 2.7   | 1.8   | 16.4  | 2.5   | 2.4   |
| 57.5  | 18.0  | 27.6  | 25.2  | 19.9  | 32.4  | 41.2  | 42.5  | 20.4  |
| 83.9  | 50.1  | 43.2  | 44.6  | 57.3  | 49.0  | 78.3  | 136.2 | 63.3  |
| 3.7   | 1.2   | 3.2   | 7.2   | 9.5   | 7.4   | 7.3   | 2.1   | 6.4   |
| 76.8  | 33.4  | 38.4  | 49.7  | 46.0  | 37.5  | 65.5  | 79.0  | 62.5  |
| 50.5  | 36.6  | 30.9  | 41.3  | 24.6  | 35.5  | 36.4  | 44.4  | 38.7  |
| 16.1  | 6.7   | 16.1  | 17.4  | 17.5  | 13.5  | 20.3  | 27.2  | 19.7  |
| 2.3   | 7.1   | 7.3   | 3.0   | 3.0   | 9.6   | 6.6   | 5.5   | 8.3   |
| 17.5  | 16.4  | 17.3  | 15.9  | 16.7  | 15.3  | 20.2  | 19.5  | 20.5  |
| 15.0  | 10.0  | 10.5  | 6.1   | 16.2  | 7.5   | 12.5  | 14.5  | 11.4  |
| 2.1   | 1.2   | 1.2   | 4.7   | 9.2   | 0.8   | 1.8   | 3.0   | 2.8   |
| 12.4  | 11.7  | 14.8  | 15.8  | 14.0  | 18.9  | 22.8  | 26.9  | 15.1  |
| 9.6   | 8.1   | 6.6   | 6.8   | 1.5   | 2.1   | 3.8   | 2.5   | 4.7   |
| 1.0   | 0.7   | 1.3   | 3.8   | 3.0   | 3.2   | 1.1   | 2.6   | 1.0   |
| 3.1   | 4.6   | 3.2   | 3.5   | 4.7   | 11.3  | 3.1   | 2.4   | 3.5   |
| 14.4  | 10.3  | 18.1  | 13.8  | 13.3  | 16.2  | 24.5  | 12.7  | 17.4  |
| 9.8   | 9.0   | 13.9  | 10.0  | 7.8   | 8.1   | 5.4   | 7.9   | 7.6   |
| 0.3   | 4.3   | 4.0   | 0.1   | 1.6   | 2.4   | 5.3   | 1.3   | 2.8   |
| 4.5   | 6.1   | 4.2   | 4.5   | 3.1   | 0.7   | 1.6   | 3.8   | 0.6   |
| 0.7   | 0.6   | 0.6   | 1.0   | 0.6   | 0.7   | 0.6   | 1.8   | 1.1   |
| 0.1   | 3.7   | 1.4   | 2.1   | 1.5   | 3.8   | 1.9   | 3.9   | 0.3   |
| 1.1   | 1.5   | 0.8   | 1.9   | 1.2   | 2.5   | 1.9   | 2.0   | 2.0   |

|       |       |       |       |       |       |       |        |       |
|-------|-------|-------|-------|-------|-------|-------|--------|-------|
| 2.8   | 3.5   | 3.0   | 3.6   | 11.7  | 13.3  | 15.0  | 5.6    | 3.5   |
| 1.1   | 0.2   | 0.3   | 0.5   | 0.5   | 0.6   | 0.2   | 2.2    | 0.2   |
| 9.8   | 7.4   | 7.1   | 2.4   | 11.3  | 2.0   | 5.0   | 3.0    | 10.1  |
| 46.2  | 35.1  | 46.9  | 35.3  | 43.4  | 49.1  | 52.7  | 45.2   | 35.0  |
| 109.2 | 58.7  | 86.2  | 78.3  | 81.2  | 80.1  | 105.7 | 146.4  | 85.9  |
| 2.5   | 2.9   | 1.7   | 2.5   | 1.4   | 1.0   | 0.9   | 4.4    | 0.8   |
| 5.0   | 0.7   | 2.7   | 0.9   | 1.2   | 2.6   | 2.7   | 1.4    | 5.3   |
| 112.5 | 91.5  | 106.4 | 100.6 | 104.6 | 105.7 | 118.1 | 124.3  | 89.1  |
| 54.6  | 31.1  | 40.7  | 44.2  | 44.3  | 48.0  | 53.2  | 51.0   | 41.1  |
| 0.5   | 1.2   | 1.0   | 0.8   | 0.9   | 0.5   | 1.0   | 0.8    | 1.2   |
| 1.2   | 3.9   | 10.8  | 1.4   | 5.0   | 0.3   | 0.7   | 4.4    | 5.6   |
| 4.0   | 2.7   | 4.3   | 3.8   | 4.0   | 3.0   | 2.4   | 2.7    | 4.2   |
| 2.2   | 1.8   | 4.7   | 4.2   | 3.7   | 5.4   | 4.5   | 2.9    | 2.8   |
| 0.8   | 0.4   | 0.5   | 0.9   | 1.0   | 0.7   | 0.9   | 0.8    | 0.9   |
| 61.9  | 27.5  | 35.0  | 31.7  | 37.2  | 40.7  | 55.6  | 60.6   | 50.6  |
| 0.7   | 0.4   | 1.3   | 0.4   | 0.6   | 1.0   | 5.0   | 1.0    | 2.4   |
| 0.4   | 4.4   | 3.3   | 1.7   | 4.8   | 6.0   | 1.1   | 5.7    | 1.0   |
| 34.2  | 27.5  | 24.2  | 23.3  | 21.3  | 31.1  | 36.9  | 46.0   | 26.0  |
| 6.5   | 10.2  | 5.8   | 9.0   | 3.3   | 6.4   | 7.4   | 11.5   | 8.1   |
| 315.4 | 159.7 | 169.7 | 174.8 | 211.4 | 166.0 | 229.2 | 238.8  | 204.0 |
| 136.1 | 96.2  | 122.0 | 130.5 | 130.7 | 99.8  | 164.8 | 131.5  | 133.0 |
| 0.5   | 0.5   | 1.0   | 0.4   | 1.3   | 4.4   | 1.1   | 6.5    | 0.4   |
| 2.6   | 16.5  | 6.9   | 9.4   | 12.1  | 7.1   | 8.2   | 12.5   | 17.3  |
| 11.9  | 8.9   | 11.1  | 8.4   | 10.5  | 3.9   | 14.7  | 14.7   | 12.0  |
| 0.1   | 0.4   | 2.6   | 0.4   | 0.9   | 3.0   | 0.9   | 0.6    | 3.4   |
| 1.5   | 0.8   | 2.4   | 1.7   | 2.3   | 1.7   | 7.1   | 6.3    | 1.2   |
| 1.3   | 3.4   | 5.4   | 1.0   | 1.6   | 1.5   | 0.9   | 2.2    | 1.0   |
| 54.7  | 38.7  | 51.4  | 54.9  | 46.0  | 57.7  | 59.4  | 70.9   | 56.9  |
| 6.9   | 7.4   | 7.0   | 7.2   | 1.1   | 8.3   | 7.6   | 8.3    | 6.7   |
| 7.8   | 6.6   | 6.1   | 5.9   | 5.1   | 9.3   | 3.8   | 3.9    | 8.6   |
| 714.3 | 507.8 | 609.4 | 656.5 | 707.6 | 719.8 | 949.1 | 1153.8 | 776.0 |
| 55.7  | 24.4  | 27.2  | 20.5  | 31.0  | 26.3  | 41.8  | 45.6   | 42.9  |
| 1.1   | 1.1   | 1.0   | 2.1   | 2.2   | 1.4   | 2.5   | 2.5    | 1.0   |
| 9.1   | 1.5   | 2.8   | 10.3  | 2.8   | 7.0   | 14.2  | 13.2   | 6.4   |
| 1.8   | 1.8   | 6.2   | 0.6   | 4.5   | 3.6   | 1.5   | 2.0    | 1.4   |
| 0.7   | 0.6   | 0.3   | 0.2   | 0.8   | 3.5   | 0.7   | 0.7    | 2.5   |
| 2.0   | 10.2  | 2.1   | 7.0   | 2.8   | 4.9   | 3.5   | 8.9    | 1.8   |
| 0.2   | 2.3   | 2.7   | 2.8   | 1.0   | 2.4   | 3.8   | 5.2    | 1.1   |
| 36.2  | 26.8  | 44.3  | 21.7  | 28.1  | 28.2  | 32.9  | 32.5   | 31.9  |
| 3.1   | 3.7   | 2.1   | 2.4   | 10.2  | 4.9   | 6.2   | 8.0    | 1.5   |
| 16.1  | 2.7   | 6.6   | 4.1   | 2.7   | 2.9   | 9.5   | 3.6    | 13.8  |
| 24.4  | 6.6   | 5.0   | 9.9   | 10.2  | 12.8  | 16.3  | 14.1   | 9.1   |
| 9.2   | 12.3  | 10.4  | 12.0  | 6.5   | 12.7  | 9.5   | 8.5    | 18.8  |
| 6.5   | 17.0  | 10.0  | 4.7   | 10.9  | 11.8  | 5.8   | 11.7   | 3.2   |
| 46.9  | 45.2  | 47.5  | 40.3  | 52.1  | 42.6  | 58.6  | 74.6   | 38.7  |
| 6.1   | 3.1   | 6.0   | 4.5   | 0.9   | 0.3   | 1.7   | 8.5    | 7.6   |
| 10.3  | 7.2   | 14.4  | 10.2  | 16.7  | 15.8  | 15.4  | 15.7   | 13.2  |
| 158.0 | 124.7 | 134.9 | 133.5 | 155.2 | 113.2 | 179.2 | 208.5  | 144.3 |
| 15.2  | 16.4  | 15.0  | 22.5  | 21.5  | 15.4  | 20.1  | 23.5   | 12.2  |
| 10.9  | 5.6   | 6.5   | 0.6   | 2.0   | 5.9   | 7.7   | 11.9   | 5.0   |
| 26.9  | 22.0  | 15.7  | 21.1  | 33.5  | 26.1  | 31.0  | 39.1   | 25.0  |
| 16.2  | 24.4  | 21.9  | 22.4  | 26.3  | 16.6  | 14.9  | 25.0   | 20.2  |
| 2.8   | 1.0   | 5.2   | 3.5   | 1.5   | 0.8   | 2.3   | 5.2    | 0.9   |

|        |       |       |       |       |       |        |        |       |
|--------|-------|-------|-------|-------|-------|--------|--------|-------|
| 31.5   | 17.9  | 21.7  | 24.4  | 18.0  | 24.2  | 40.7   | 49.1   | 26.9  |
| 2.6    | 1.8   | 2.3   | 2.7   | 0.3   | 0.1   | 0.8    | 0.1    | 0.3   |
| 47.2   | 45.4  | 45.5  | 47.3  | 44.3  | 40.7  | 58.6   | 66.3   | 42.5  |
| 0.4    | 0.8   | 0.5   | 0.7   | 0.5   | 0.5   | 0.5    | 0.7    | 0.8   |
| 3.7    | 1.6   | 1.8   | 0.6   | 0.9   | 1.4   | 1.0    | 0.9    | 1.4   |
| 48.2   | 41.7  | 40.0  | 41.1  | 40.9  | 33.9  | 55.3   | 69.7   | 32.6  |
| 1.0    | 0.8   | 1.0   | 2.7   | 4.1   | 8.4   | 3.4    | 4.3    | 6.5   |
| 9.2    | 7.5   | 2.6   | 0.4   | 9.3   | 4.0   | 1.0    | 6.0    | 12.0  |
| 0.8    | 2.3   | 0.9   | 0.6   | 0.8   | 0.3   | 0.7    | 4.4    | 2.4   |
| 14.5   | 13.4  | 9.9   | 6.0   | 12.1  | 14.9  | 18.0   | 16.7   | 8.7   |
| 195.7  | 230.4 | 270.7 | 299.7 | 314.6 | 306.1 | 360.7  | 385.5  | 286.8 |
| 4.9    | 0.6   | 0.3   | 6.8   | 1.9   | 0.9   | 1.6    | 2.3    | 1.3   |
| 10.0   | 15.0  | 10.0  | 6.6   | 12.0  | 5.3   | 10.7   | 14.2   | 13.6  |
| 0.9    | 5.4   | 2.5   | 0.5   | 1.1   | 2.4   | 0.6    | 0.9    | 0.7   |
| 1.1    | 2.3   | 1.8   | 0.5   | 1.6   | 0.7   | 4.1    | 1.1    | 3.3   |
| 24.9   | 24.4  | 23.9  | 17.9  | 18.2  | 22.5  | 28.9   | 25.5   | 26.3  |
| 1.7    | 1.0   | 3.3   | 10.4  | 1.5   | 9.2   | 1.6    | 1.9    | 2.6   |
| 34.0   | 27.9  | 23.5  | 29.3  | 30.7  | 29.4  | 43.6   | 54.7   | 29.6  |
| 8.3    | 1.1   | 8.3   | 1.1   | 2.9   | 0.8   | 0.9    | 3.5    | 10.4  |
| 1.2    | 3.3   | 0.9   | 0.7   | 1.1   | 0.6   | 1.3    | 0.9    | 4.5   |
| 134.2  | 80.1  | 90.3  | 86.6  | 100.1 | 116.0 | 136.8  | 150.2  | 115.8 |
| 18.3   | 10.0  | 14.8  | 17.8  | 9.9   | 14.8  | 14.1   | 15.4   | 22.1  |
| 16.5   | 10.0  | 14.8  | 12.9  | 5.7   | 8.2   | 15.8   | 25.0   | 18.6  |
| 282.2  | 162.1 | 205.9 | 209.4 | 200.8 | 208.8 | 303.8  | 336.6  | 179.9 |
| 5.4    | 5.6   | 10.0  | 10.8  | 8.6   | 4.8   | 13.4   | 13.5   | 7.3   |
| 4.1    | 0.7   | 1.3   | 1.0   | 4.4   | 0.8   | 1.8    | 1.3    | 5.7   |
| 10.8   | 14.8  | 12.1  | 2.5   | 4.9   | 5.9   | 17.9   | 9.1    | 9.3   |
| 4.1    | 2.6   | 4.2   | 9.1   | 4.2   | 4.1   | 6.9    | 4.2    | 7.9   |
| 12.0   | 6.2   | 7.5   | 8.5   | 14.5  | 10.2  | 4.5    | 11.0   | 5.3   |
| 1.7    | 6.1   | 4.3   | 2.0   | 5.2   | 2.5   | 4.8    | 6.1    | 5.9   |
| 0.9    | 7.3   | 0.9   | 1.9   | 1.2   | 1.6   | 2.3    | 1.3    | 3.3   |
| 39.1   | 47.0  | 59.6  | 57.0  | 46.0  | 64.0  | 59.8   | 62.4   | 36.3  |
| 5.0    | 1.8   | 0.6   | 2.5   | 2.3   | 5.5   | 5.1    | 6.4    | 4.5   |
| 7.9    | 3.3   | 0.8   | 10.1  | 1.6   | 8.0   | 10.7   | 2.7    | 9.1   |
| 22.6   | 17.8  | 14.3  | 26.1  | 17.3  | 26.2  | 27.6   | 22.3   | 25.6  |
| 3.0    | 2.8   | 5.3   | 0.5   | 4.8   | 7.7   | 9.7    | 7.5    | 7.6   |
| 1.4    | 0.7   | 0.4   | 0.2   | 1.1   | 0.4   | 1.4    | 0.5    | 0.6   |
| 39.4   | 12.2  | 24.6  | 22.1  | 25.2  | 17.5  | 28.7   | 24.1   | 22.8  |
| 6.5    | 9.9   | 4.4   | 6.4   | 3.2   | 5.7   | 8.8    | 10.4   | 7.8   |
| 7.0    | 0.4   | 6.5   | 5.5   | 1.2   | 3.9   | 10.8   | 10.4   | 7.7   |
| 38.1   | 27.1  | 34.5  | 36.3  | 22.2  | 32.1  | 50.6   | 46.9   | 37.2  |
| 210.5  | 105.7 | 153.6 | 120.0 | 133.3 | 139.4 | 204.4  | 271.1  | 172.4 |
| 78.7   | 48.9  | 44.9  | 71.1  | 80.9  | 52.0  | 114.5  | 127.1  | 102.6 |
| 2.5    | 6.6   | 4.4   | 0.2   | 5.7   | 6.1   | 9.6    | 10.8   | 6.6   |
| 1019.8 | 815.4 | 932.4 | 967.7 | 962.9 | 940.1 | 1196.5 | 1348.2 | 792.2 |
| 2.9    | 1.0   | 7.7   | 4.8   | 6.5   | 8.6   | 0.7    | 5.9    | 4.3   |
| 0.3    | 0.4   | 5.5   | 0.6   | 0.3   | 0.9   | 2.1    | 2.3    | 0.2   |
| 5.7    | 9.6   | 6.5   | 3.8   | 11.6  | 6.9   | 16.8   | 3.7    | 7.4   |
| 0.4    | 2.6   | 1.2   | 0.7   | 0.6   | 0.2   | 0.5    | 1.3    | 0.4   |
| 53.2   | 36.0  | 22.8  | 31.9  | 49.8  | 46.1  | 56.6   | 81.5   | 49.4  |
| 75.3   | 63.0  | 55.7  | 76.4  | 71.7  | 69.7  | 78.2   | 98.0   | 64.1  |
| 5.9    | 2.0   | 1.2   | 1.4   | 1.2   | 1.9   | 2.1    | 1.6    | 1.1   |
| 3.0    | 0.3   | 3.0   | 0.2   | 3.3   | 0.7   | 1.1    | 1.8    | 0.3   |

|       |       |       |       |       |       |       |       |       |
|-------|-------|-------|-------|-------|-------|-------|-------|-------|
| 1.0   | 0.8   | 0.8   | 0.9   | 0.5   | 0.6   | 0.8   | 1.2   | 1.2   |
| 1.0   | 1.2   | 1.0   | 0.8   | 1.7   | 1.0   | 1.3   | 1.2   | 1.1   |
| 6.4   | 0.8   | 1.3   | 1.3   | 2.0   | 3.4   | 1.2   | 1.8   | 1.4   |
| 14.5  | 16.1  | 7.9   | 11.3  | 14.2  | 13.1  | 21.5  | 22.7  | 22.1  |
| 2.5   | 0.7   | 1.5   | 2.1   | 0.6   | 1.6   | 5.4   | 1.6   | 1.1   |
| 7.4   | 1.0   | 1.8   | 0.8   | 7.3   | 2.7   | 1.3   | 0.6   | 5.3   |
| 13.5  | 14.8  | 18.0  | 12.6  | 18.7  | 10.4  | 22.8  | 20.8  | 20.9  |
| 0.6   | 0.9   | 1.0   | 0.7   | 0.2   | 0.7   | 2.4   | 0.6   | 0.8   |
| 0.7   | 0.9   | 7.0   | 3.0   | 4.6   | 8.8   | 6.0   | 21.8  | 5.8   |
| 7.1   | 5.5   | 5.2   | 7.6   | 6.5   | 4.0   | 6.7   | 5.1   | 9.8   |
| 2.4   | 1.6   | 3.7   | 1.9   | 8.0   | 1.4   | 4.0   | 2.8   | 1.0   |
| 18.5  | 6.7   | 11.6  | 8.5   | 18.8  | 18.1  | 25.3  | 26.1  | 16.4  |
| 19.7  | 19.5  | 18.8  | 21.0  | 21.8  | 21.2  | 26.9  | 29.7  | 17.1  |
| 37.8  | 30.2  | 28.1  | 31.1  | 37.8  | 34.4  | 34.0  | 50.0  | 28.7  |
| 0.3   | 0.3   | 0.3   | 0.5   | 0.3   | 0.4   | 0.4   | 0.4   | 0.3   |
| 1.8   | 0.3   | 0.5   | 0.9   | 1.0   | 1.1   | 1.9   | 1.0   | 1.4   |
| 0.6   | 1.3   | 0.3   | 1.2   | 0.7   | 0.6   | 0.3   | 1.5   | 0.6   |
| 7.2   | 8.0   | 2.8   | 3.4   | 5.9   | 3.0   | 1.3   | 4.5   | 1.3   |
| 5.2   | 2.9   | 4.3   | 4.0   | 6.7   | 3.3   | 1.4   | 8.3   | 6.9   |
| 29.7  | 19.3  | 20.7  | 18.7  | 25.3  | 21.5  | 29.0  | 39.4  | 21.4  |
| 183.8 | 151.7 | 167.6 | 164.1 | 187.4 | 184.4 | 264.4 | 228.5 | 149.7 |
| 2.1   | 4.4   | 5.7   | 7.7   | 6.3   | 9.7   | 2.2   | 10.6  | 1.7   |
| 8.9   | 7.2   | 5.3   | 0.5   | 12.2  | 3.7   | 9.8   | 12.4  | 8.4   |
| 10.8  | 6.4   | 16.6  | 2.3   | 15.2  | 17.1  | 12.8  | 11.4  | 9.2   |
| 4.6   | 8.3   | 9.3   | 11.6  | 12.7  | 10.0  | 10.3  | 15.5  | 10.5  |
| 24.3  | 16.0  | 17.6  | 19.1  | 18.2  | 27.6  | 26.5  | 25.2  | 16.5  |
| 15.3  | 9.3   | 9.1   | 8.5   | 10.2  | 6.2   | 10.2  | 19.9  | 12.2  |
| 1.0   | 5.9   | 1.2   | 4.2   | 1.0   | 2.4   | 7.8   | 1.1   | 0.5   |
| 178.2 | 100.0 | 139.2 | 139.9 | 166.0 | 180.6 | 215.4 | 281.8 | 145.3 |
| 5.8   | 2.8   | 4.0   | 3.1   | 2.6   | 11.4  | 7.0   | 13.3  | 6.2   |
| 83.6  | 50.6  | 43.5  | 38.1  | 47.6  | 41.1  | 60.8  | 72.5  | 70.1  |
| 0.3   | 0.2   | 1.7   | 7.8   | 1.0   | 0.3   | 0.5   | 0.3   | 2.8   |
| 19.7  | 21.0  | 9.6   | 18.4  | 17.6  | 17.6  | 22.6  | 29.7  | 13.9  |
| 1.3   | 1.3   | 1.1   | 0.7   | 1.2   | 0.4   | 0.7   | 1.1   | 2.6   |
| 1.2   | 3.7   | 6.9   | 3.4   | 1.4   | 1.1   | 1.2   | 3.1   | 0.9   |
| 1.0   | 4.9   | 1.3   | 1.4   | 5.7   | 3.1   | 0.8   | 1.0   | 1.4   |
| 67.2  | 52.6  | 53.3  | 55.7  | 62.6  | 62.6  | 78.1  | 76.7  | 70.4  |
| 36.2  | 16.5  | 19.4  | 9.5   | 20.5  | 19.8  | 28.9  | 29.6  | 32.3  |
| 1.4   | 2.2   | 2.1   | 2.2   | 2.2   | 1.7   | 2.0   | 1.6   | 2.3   |
| 36.9  | 23.7  | 22.6  | 29.5  | 24.8  | 21.9  | 40.6  | 30.6  | 20.6  |
| 16.7  | 11.0  | 9.1   | 7.9   | 11.9  | 16.2  | 20.5  | 17.2  | 11.2  |
| 39.3  | 24.7  | 36.3  | 24.6  | 28.9  | 41.8  | 39.8  | 44.8  | 30.9  |
| 9.4   | 7.4   | 8.9   | 3.5   | 3.6   | 7.4   | 8.1   | 8.4   | 7.0   |
| 68.9  | 38.9  | 49.9  | 54.4  | 49.2  | 58.5  | 80.1  | 85.6  | 48.1  |
| 5.4   | 3.7   | 1.1   | 9.0   | 0.7   | 2.7   | 0.4   | 0.7   | 7.3   |
| 2.3   | 0.8   | 0.4   | 4.7   | 1.1   | 4.6   | 4.6   | 1.0   | 5.2   |
| 7.2   | 7.7   | 3.1   | 7.4   | 2.7   | 1.6   | 2.6   | 8.0   | 5.0   |
| 2.0   | 0.2   | 0.1   | 1.3   | 0.3   | 0.4   | 0.1   | 0.5   | 0.3   |
| 43.1  | 61.1  | 81.3  | 78.8  | 97.3  | 98.1  | 142.3 | 148.0 | 101.8 |
| 80.2  | 117.2 | 126.7 | 137.8 | 126.2 | 140.9 | 170.2 | 190.2 | 140.1 |
| 323.5 | 172.8 | 231.8 | 298.0 | 239.7 | 239.7 | 311.0 | 335.3 | 272.7 |
| 38.3  | 22.6  | 17.9  | 22.6  | 21.2  | 13.2  | 34.8  | 45.9  | 32.3  |
| 4.3   | 1.0   | 4.5   | 0.7   | 5.2   | 6.4   | 0.3   | 6.5   | 1.3   |



|       |       |       |       |       |       |       |       |       |
|-------|-------|-------|-------|-------|-------|-------|-------|-------|
| 6.8   | 4.5   | 7.7   | 6.2   | 8.0   | 6.2   | 11.0  | 12.1  | 9.9   |
| 294.8 | 151.7 | 179.3 | 220.7 | 199.3 | 194.8 | 304.8 | 255.4 | 214.4 |
| 37.3  | 17.6  | 29.5  | 29.2  | 29.5  | 31.1  | 42.5  | 36.8  | 31.1  |
| 7.4   | 3.1   | 6.5   | 7.1   | 5.7   | 4.2   | 8.2   | 9.5   | 6.4   |
| 31.5  | 18.0  | 30.9  | 44.2  | 49.5  | 37.1  | 43.2  | 50.8  | 34.5  |
| 1.3   | 1.1   | 0.7   | 5.5   | 7.4   | 1.1   | 8.6   | 0.8   | 2.1   |
| 1.0   | 1.7   | 1.1   | 1.2   | 1.1   | 1.2   | 1.6   | 6.6   | 1.7   |
| 73.5  | 88.4  | 128.7 | 119.9 | 117.3 | 99.2  | 106.6 | 106.3 | 86.9  |
| 8.3   | 8.8   | 5.9   | 10.5  | 7.2   | 9.0   | 5.8   | 11.5  | 6.0   |
| 4.6   | 3.8   | 0.6   | 1.4   | 2.5   | 5.3   | 3.8   | 3.9   | 6.0   |
| 14.9  | 11.9  | 8.9   | 9.2   | 11.2  | 8.6   | 9.5   | 10.4  | 10.2  |
| 3.5   | 4.1   | 4.3   | 4.3   | 2.8   | 2.3   | 3.0   | 7.3   | 5.6   |
| 8.2   | 11.3  | 8.1   | 10.1  | 12.7  | 11.3  | 6.5   | 14.8  | 14.9  |
| 3.5   | 1.3   | 1.9   | 0.6   | 1.8   | 2.9   | 5.3   | 0.3   | 1.7   |
| 28.4  | 41.1  | 32.5  | 37.8  | 23.6  | 30.6  | 21.3  | 35.8  | 24.9  |
| 166.9 | 118.6 | 111.0 | 127.4 | 117.4 | 122.2 | 174.9 | 233.1 | 132.3 |
| 1.1   | 0.8   | 0.3   | 1.3   | 1.5   | 3.0   | 0.8   | 2.6   | 1.3   |
| 2.0   | 6.6   | 14.4  | 3.1   | 6.2   | 3.6   | 7.3   | 2.3   | 8.7   |
| 8.0   | 4.1   | 5.0   | 3.9   | 0.4   | 6.2   | 7.0   | 7.9   | 3.7   |
| 4.5   | 1.4   | 1.5   | 0.8   | 1.5   | 0.9   | 1.6   | 3.1   | 2.7   |
| 23.4  | 20.5  | 32.1  | 47.0  | 23.7  | 17.8  | 23.4  | 33.2  | 38.7  |
| 15.2  | 38.0  | 38.5  | 46.9  | 49.1  | 45.7  | 55.7  | 54.7  | 40.9  |
| 0.2   | 0.4   | 0.3   | 0.4   | 0.5   | 0.4   | 0.4   | 0.7   | 0.8   |
| 12.5  | 7.8   | 8.2   | 11.3  | 9.6   | 10.0  | 19.5  | 17.2  | 7.1   |
| 9.3   | 8.1   | 11.9  | 16.7  | 4.5   | 12.4  | 8.8   | 3.6   | 6.3   |
| 1.6   | 1.5   | 0.8   | 8.1   | 3.4   | 8.0   | 3.8   | 10.6  | 8.4   |
| 3.7   | 5.2   | 5.0   | 2.9   | 4.1   | 5.1   | 3.8   | 4.8   | 9.3   |
| 0.6   | 0.3   | 0.6   | 0.4   | 0.7   | 0.6   | 0.8   | 0.6   | 0.4   |
| 0.8   | 0.5   | 2.4   | 0.6   | 0.6   | 1.5   | 1.8   | 0.7   | 0.4   |
| 1.1   | 0.3   | 2.0   | 0.3   | 0.1   | 0.5   | 0.4   | 0.2   | 0.6   |
| 0.3   | 0.4   | 0.5   | 4.1   | 2.0   | 0.4   | 0.4   | 2.9   | 4.9   |
| 1.4   | 0.9   | 0.5   | 1.5   | 1.0   | 2.0   | 2.6   | 0.7   | 0.6   |
| 11.3  | 2.6   | 4.0   | 6.4   | 9.1   | 7.9   | 7.4   | 4.0   | 5.9   |
| 10.8  | 7.0   | 13.0  | 6.0   | 9.1   | 8.1   | 13.3  | 8.5   | 7.6   |
| 102.5 | 98.2  | 111.1 | 123.3 | 120.5 | 104.2 | 139.6 | 143.5 | 127.0 |
| 10.1  | 25.0  | 33.0  | 32.5  | 22.8  | 32.5  | 32.6  | 24.8  | 17.7  |
| 13.3  | 7.0   | 7.4   | 10.0  | 12.5  | 10.7  | 26.0  | 25.2  | 13.0  |
| 2.2   | 4.8   | 9.9   | 12.7  | 5.2   | 7.9   | 7.2   | 14.9  | 7.0   |
| 29.0  | 19.2  | 16.4  | 20.3  | 22.9  | 27.1  | 23.9  | 30.2  | 16.5  |
| 647.1 | 449.5 | 428.1 | 433.5 | 497.3 | 491.7 | 556.3 | 633.6 | 483.7 |
| 1.3   | 0.8   | 0.7   | 0.7   | 0.8   | 0.7   | 2.2   | 1.9   | 2.8   |
| 0.6   | 2.6   | 0.3   | 0.8   | 0.6   | 1.1   | 0.6   | 1.3   | 3.9   |
| 8.1   | 7.2   | 3.8   | 7.8   | 4.2   | 5.9   | 4.7   | 10.2  | 8.4   |
| 0.2   | 1.1   | 1.3   | 0.5   | 0.5   | 0.2   | 3.0   | 0.7   | 0.9   |
| 1.4   | 4.5   | 11.6  | 11.5  | 3.0   | 6.0   | 2.9   | 3.4   | 5.0   |
| 6.2   | 1.2   | 2.6   | 5.4   | 4.3   | 7.3   | 6.3   | 5.2   | 5.2   |
| 1.1   | 1.7   | 2.0   | 1.0   | 2.2   | 1.1   | 2.2   | 1.2   | 3.1   |
| 1.3   | 0.9   | 1.0   | 1.3   | 3.1   | 1.3   | 1.2   | 3.0   | 2.0   |
| 1.8   | 1.0   | 11.9  | 5.7   | 14.2  | 7.1   | 2.5   | 2.7   | 1.3   |
| 71.5  | 13.8  | 30.2  | 25.8  | 31.2  | 30.8  | 30.5  | 36.7  | 21.3  |
| 16.1  | 9.9   | 15.0  | 9.1   | 17.3  | 4.5   | 12.4  | 15.9  | 10.5  |
| 0.7   | 0.7   | 0.6   | 0.5   | 2.9   | 0.5   | 0.6   | 1.2   | 1.0   |
| 0.5   | 0.4   | 1.1   | 0.8   | 0.2   | 0.4   | 0.6   | 1.0   | 0.4   |

|        |        |        |        |        |        |        |        |        |
|--------|--------|--------|--------|--------|--------|--------|--------|--------|
| 4.2    | 0.7    | 3.8    | 1.0    | 1.7    | 0.5    | 7.9    | 6.5    | 7.1    |
| 0.6    | 0.9    | 0.3    | 1.3    | 1.5    | 0.5    | 3.9    | 0.6    | 1.8    |
| 2.0    | 6.9    | 6.6    | 8.7    | 7.0    | 2.8    | 0.7    | 4.1    | 8.1    |
| 18.8   | 20.1   | 28.8   | 26.1   | 24.4   | 23.1   | 43.1   | 49.5   | 27.6   |
| 157.3  | 23.4   | 40.7   | 39.5   | 43.8   | 36.6   | 59.2   | 102.9  | 56.3   |
| 6.9    | 5.9    | 6.4    | 8.4    | 12.1   | 6.1    | 7.7    | 9.2    | 8.6    |
| 12.8   | 14.6   | 10.8   | 13.2   | 20.3   | 8.2    | 14.4   | 18.7   | 15.3   |
| 24.3   | 13.7   | 20.2   | 19.6   | 23.7   | 18.1   | 17.5   | 33.6   | 18.6   |
| 9.8    | 9.3    | 10.0   | 9.2    | 15.4   | 7.7    | 4.1    | 10.1   | 9.8    |
| 13.1   | 16.2   | 12.2   | 12.1   | 15.6   | 12.8   | 19.7   | 23.7   | 18.3   |
| 39.4   | 21.1   | 31.4   | 24.4   | 28.9   | 20.7   | 33.4   | 38.1   | 27.2   |
| 0.3    | 0.4    | 2.7    | 1.2    | 1.6    | 2.5    | 0.4    | 0.3    | 0.7    |
| 0.9    | 0.6    | 1.1    | 0.4    | 5.7    | 0.8    | 1.2    | 0.3    | 0.3    |
| 1.1    | 2.8    | 3.1    | 4.8    | 1.6    | 1.3    | 8.8    | 7.5    | 2.1    |
| 1.4    | 10.2   | 7.0    | 1.4    | 1.4    | 1.4    | 7.3    | 2.2    | 6.8    |
| 6.0    | 5.0    | 4.2    | 2.9    | 2.8    | 0.6    | 8.1    | 9.0    | 2.7    |
| 19.9   | 13.4   | 23.2   | 20.6   | 17.7   | 10.1   | 20.7   | 30.2   | 19.3   |
| 18.2   | 6.6    | 14.2   | 15.3   | 9.0    | 4.6    | 12.4   | 14.9   | 4.1    |
| 0.2    | 0.5    | 3.4    | 0.8    | 0.2    | 2.8    | 0.4    | 0.6    | 2.5    |
| 1.7    | 2.7    | 0.8    | 0.9    | 3.1    | 3.0    | 2.0    | 0.8    | 2.5    |
| 1.0    | 1.5    | 0.5    | 0.5    | 1.2    | 4.8    | 8.3    | 0.3    | 4.5    |
| 13.1   | 19.8   | 7.8    | 20.4   | 16.0   | 12.6   | 19.2   | 22.0   | 13.3   |
| 2.6    | 15.7   | 14.6   | 17.7   | 20.6   | 14.6   | 19.5   | 23.5   | 24.4   |
| 1048.7 | 781.1  | 658.3  | 817.1  | 876.8  | 813.4  | 1124.9 | 1615.6 | 822.0  |
| 40.5   | 22.9   | 26.0   | 22.9   | 24.6   | 28.4   | 28.4   | 37.0   | 25.9   |
| 29.8   | 20.7   | 23.1   | 19.0   | 28.7   | 24.4   | 29.3   | 34.3   | 22.8   |
| 0.3    | 3.4    | 0.9    | 0.5    | 4.6    | 2.9    | 8.1    | 0.8    | 0.6    |
| 3.6    | 7.9    | 14.4   | 10.3   | 15.1   | 2.3    | 16.6   | 13.7   | 4.1    |
| 32.9   | 19.6   | 35.4   | 30.0   | 20.3   | 24.7   | 37.2   | 44.6   | 19.9   |
| 12.2   | 9.6    | 8.7    | 7.7    | 7.8    | 8.9    | 16.9   | 14.2   | 13.6   |
| 1.8    | 2.5    | 0.3    | 1.1    | 0.8    | 0.3    | 2.0    | 4.3    | 0.2    |
| 2.5    | 0.7    | 1.6    | 2.5    | 2.9    | 0.8    | 4.2    | 5.7    | 2.9    |
| 1.6    | 1.1    | 1.6    | 0.6    | 0.7    | 0.7    | 1.6    | 0.5    | 1.1    |
| 8.3    | 16.6   | 7.0    | 9.5    | 11.1   | 14.6   | 20.2   | 21.2   | 16.2   |
| 1088.2 | 1084.6 | 1062.3 | 1249.5 | 1114.0 | 1044.1 | 1348.3 | 1467.3 | 1098.1 |
| 5.1    | 10.1   | 2.1    | 2.4    | 5.8    | 7.3    | 1.9    | 3.3    | 6.2    |
| 20.8   | 2.5    | 3.0    | 3.1    | 3.8    | 10.0   | 6.0    | 25.0   | 9.9    |
| 7.8    | 6.6    | 3.2    | 6.3    | 7.8    | 9.5    | 5.9    | 5.7    | 4.8    |
| 10.4   | 13.6   | 9.8    | 14.1   | 7.9    | 10.3   | 9.8    | 14.7   | 10.3   |
| 12.1   | 5.5    | 9.0    | 13.6   | 16.0   | 7.2    | 16.9   | 22.5   | 13.8   |
| 1.6    | 1.5    | 5.0    | 1.0    | 2.7    | 1.1    | 2.9    | 4.5    | 5.8    |
| 9.3    | 8.3    | 9.3    | 6.4    | 10.0   | 5.9    | 10.1   | 21.6   | 9.8    |
| 18.6   | 13.8   | 15.0   | 17.6   | 9.9    | 10.5   | 21.5   | 18.8   | 13.9   |
| 0.6    | 1.0    | 1.4    | 8.9    | 4.0    | 1.5    | 4.5    | 1.8    | 7.8    |
| 1.2    | 1.2    | 1.2    | 8.1    | 4.7    | 3.6    | 3.2    | 0.7    | 1.3    |
| 0.7    | 0.1    | 1.8    | 1.6    | 4.7    | 3.3    | 4.0    | 2.8    | 1.2    |
| 1.7    | 1.5    | 1.2    | 1.1    | 1.6    | 1.1    | 8.3    | 2.1    | 1.7    |
| 25.2   | 21.2   | 20.3   | 17.9   | 13.3   | 14.1   | 25.4   | 29.7   | 20.5   |
| 1.3    | 1.4    | 1.3    | 5.4    | 0.6    | 0.6    | 1.5    | 1.8    | 0.9    |
| 186.6  | 59.0   | 103.1  | 96.6   | 91.0   | 114.8  | 115.4  | 140.9  | 81.3   |
| 7.5    | 3.3    | 1.5    | 3.3    | 8.8    | 2.9    | 8.6    | 8.8    | 5.6    |
| 21.1   | 12.6   | 19.8   | 18.1   | 15.4   | 7.4    | 10.8   | 19.3   | 21.6   |
| 3.3    | 3.4    | 1.0    | 2.4    | 2.1    | 0.9    | 1.6    | 1.6    | 0.4    |

|       |       |       |       |       |       |       |       |       |
|-------|-------|-------|-------|-------|-------|-------|-------|-------|
| 20.7  | 15.3  | 11.8  | 12.6  | 12.2  | 14.4  | 5.8   | 13.6  | 11.9  |
| 388.7 | 437.4 | 446.0 | 470.3 | 530.9 | 458.3 | 668.8 | 679.9 | 547.3 |
| 25.2  | 20.3  | 20.7  | 20.8  | 18.7  | 21.0  | 24.4  | 35.0  | 27.9  |
| 59.1  | 64.6  | 70.3  | 76.9  | 69.6  | 74.7  | 110.0 | 81.2  | 101.4 |
| 74.1  | 31.1  | 68.4  | 47.5  | 58.9  | 95.3  | 98.9  | 193.4 | 87.7  |
| 0.3   | 0.6   | 0.7   | 0.5   | 0.2   | 0.5   | 0.2   | 1.5   | 0.5   |
| 1.5   | 0.1   | 2.6   | 0.1   | 0.2   | 1.1   | 0.1   | 1.8   | 1.7   |
| 6.2   | 0.9   | 2.8   | 2.7   | 1.2   | 5.8   | 7.7   | 6.9   | 3.7   |
| 24.8  | 5.5   | 7.0   | 10.8  | 14.3  | 13.9  | 24.9  | 21.7  | 20.2  |
| 1.7   | 9.6   | 7.0   | 9.3   | 8.0   | 1.7   | 3.8   | 11.9  | 5.2   |
| 2.4   | 0.4   | 1.3   | 1.9   | 2.8   | 0.6   | 2.9   | 2.8   | 0.5   |
| 0.5   | 0.8   | 0.4   | 0.5   | 0.9   | 1.7   | 1.1   | 0.9   | 0.9   |
| 69.9  | 50.0  | 61.0  | 56.8  | 54.0  | 56.9  | 64.6  | 78.0  | 73.1  |
| 0.3   | 0.6   | 0.4   | 1.1   | 0.6   | 0.3   | 0.3   | 0.5   | 0.2   |
| 1.4   | 1.9   | 0.1   | 3.2   | 4.7   | 1.1   | 4.8   | 5.8   | 3.4   |
| 8.0   | 1.7   | 5.4   | 1.7   | 7.0   | 6.6   | 11.2  | 12.7  | 10.8  |
| 330.0 | 204.8 | 234.2 | 260.5 | 250.7 | 296.0 | 395.3 | 428.5 | 320.0 |
| 6.5   | 5.1   | 12.6  | 8.9   | 9.2   | 6.4   | 7.5   | 7.1   | 9.0   |
| 2.7   | 2.5   | 2.3   | 7.1   | 3.4   | 7.2   | 21.1  | 4.4   | 8.2   |
| 0.6   | 3.9   | 2.0   | 1.2   | 4.7   | 0.8   | 3.5   | 6.5   | 4.0   |
| 6.2   | 11.1  | 4.5   | 8.3   | 10.2  | 0.8   | 2.2   | 4.1   | 5.1   |
| 7.1   | 12.2  | 7.8   | 2.4   | 8.4   | 4.8   | 2.5   | 9.2   | 3.4   |
| 4.3   | 4.3   | 7.3   | 3.6   | 4.6   | 4.1   | 1.1   | 4.7   | 1.2   |
| 0.6   | 0.7   | 0.5   | 0.6   | 0.5   | 0.5   | 0.5   | 0.6   | 0.5   |
| 0.3   | 0.3   | 1.2   | 0.4   | 0.4   | 0.5   | 1.5   | 0.3   | 0.6   |
| 27.4  | 27.2  | 34.3  | 28.5  | 39.8  | 26.9  | 34.9  | 35.2  | 34.7  |
| 32.7  | 26.0  | 32.5  | 24.2  | 37.7  | 32.1  | 49.5  | 40.4  | 37.3  |
| 2.6   | 1.5   | 0.7   | 2.4   | 2.5   | 4.8   | 1.1   | 0.9   | 1.2   |
| 2.3   | 1.1   | 6.3   | 1.3   | 1.9   | 5.6   | 1.8   | 0.9   | 3.0   |
| 2.7   | 0.6   | 0.9   | 0.3   | 2.3   | 0.3   | 0.4   | 4.3   | 4.4   |
| 89.9  | 58.9  | 79.2  | 60.0  | 64.7  | 80.0  | 94.5  | 117.4 | 66.9  |
| 2.0   | 6.9   | 1.1   | 7.0   | 6.8   | 4.8   | 9.9   | 4.9   | 1.7   |
| 10.7  | 14.4  | 12.4  | 14.0  | 18.2  | 14.6  | 9.2   | 14.6  | 6.3   |
| 13.6  | 2.8   | 4.6   | 0.9   | 0.8   | 5.3   | 0.5   | 6.0   | 0.7   |
| 1.4   | 2.2   | 2.0   | 1.2   | 1.3   | 2.3   | 1.6   | 2.1   | 2.5   |
| 0.3   | 0.6   | 0.9   | 0.9   | 1.9   | 1.7   | 0.9   | 1.7   | 0.4   |
| 0.9   | 2.1   | 1.6   | 2.0   | 2.1   | 1.8   | 1.4   | 3.2   | 10.2  |
| 1.9   | 0.7   | 0.5   | 0.7   | 0.9   | 0.4   | 0.7   | 0.5   | 1.2   |
| 57.9  | 34.5  | 37.0  | 28.9  | 34.3  | 37.6  | 41.2  | 60.4  | 36.0  |
| 0.8   | 0.7   | 0.7   | 0.7   | 0.9   | 0.7   | 0.7   | 0.9   | 0.8   |
| 7.7   | 3.1   | 1.5   | 0.9   | 6.6   | 8.6   | 12.3  | 5.0   | 7.9   |
| 0.6   | 0.7   | 1.2   | 0.7   | 0.6   | 0.8   | 2.0   | 0.8   | 1.6   |
| 4.8   | 1.4   | 3.7   | 0.4   | 6.2   | 3.1   | 6.2   | 1.3   | 7.5   |
| 0.3   | 0.7   | 1.2   | 1.2   | 0.5   | 0.4   | 0.4   | 0.5   | 0.4   |
| 6.5   | 13.3  | 4.9   | 7.6   | 4.8   | 1.3   | 14.4  | 18.7  | 11.2  |
| 65.3  | 3.3   | 6.3   | 1.9   | 7.8   | 8.4   | 3.1   | 13.3  | 10.2  |
| 48.6  | 10.8  | 8.5   | 7.4   | 7.6   | 7.0   | 9.3   | 15.0  | 3.9   |
| 12.7  | 7.9   | 1.2   | 12.8  | 11.7  | 8.8   | 12.3  | 17.5  | 12.3  |
| 5.5   | 7.6   | 6.1   | 8.5   | 5.2   | 7.9   | 6.7   | 8.7   | 10.7  |
| 66.8  | 46.6  | 55.2  | 50.9  | 62.4  | 54.7  | 80.2  | 92.3  | 54.9  |
| 10.5  | 3.7   | 1.2   | 1.6   | 5.6   | 2.0   | 11.5  | 12.1  | 10.4  |
| 187.9 | 218.6 | 282.8 | 274.4 | 285.6 | 281.1 | 280.5 | 312.5 | 212.2 |
| 4.7   | 4.9   | 1.1   | 3.9   | 3.8   | 2.2   | 6.0   | 6.0   | 3.7   |

|       |       |       |       |       |       |       |       |       |
|-------|-------|-------|-------|-------|-------|-------|-------|-------|
| 40.0  | 31.8  | 43.4  | 44.1  | 36.1  | 40.5  | 56.9  | 66.2  | 37.9  |
| 27.3  | 28.5  | 59.6  | 39.6  | 49.2  | 48.5  | 76.0  | 85.2  | 54.0  |
| 0.4   | 1.6   | 3.0   | 0.4   | 0.1   | 2.2   | 3.5   | 4.0   | 0.4   |
| 7.8   | 3.2   | 2.8   | 2.1   | 5.2   | 0.6   | 5.6   | 4.9   | 4.8   |
| 1.8   | 1.0   | 1.1   | 1.3   | 1.4   | 0.8   | 1.2   | 1.4   | 1.0   |
| 27.4  | 22.1  | 27.2  | 25.2  | 27.2  | 30.7  | 39.6  | 58.8  | 29.6  |
| 25.0  | 6.0   | 2.7   | 0.3   | 4.0   | 0.4   | 4.9   | 3.7   | 4.8   |
| 6.3   | 8.0   | 4.7   | 2.6   | 7.7   | 4.6   | 2.0   | 8.0   | 7.3   |
| 0.6   | 0.2   | 0.3   | 0.3   | 0.4   | 0.5   | 0.8   | 0.9   | 0.6   |
| 0.8   | 0.7   | 4.6   | 2.6   | 8.3   | 5.9   | 9.8   | 7.4   | 2.7   |
| 45.4  | 24.3  | 34.1  | 29.3  | 41.1  | 48.2  | 45.8  | 56.6  | 25.1  |
| 5.2   | 2.5   | 3.0   | 4.3   | 5.1   | 1.8   | 3.1   | 2.2   | 3.0   |
| 10.7  | 5.4   | 10.3  | 17.7  | 2.3   | 7.1   | 5.1   | 3.8   | 4.8   |
| 40.9  | 25.0  | 37.9  | 26.4  | 38.3  | 48.4  | 68.5  | 77.1  | 42.3  |
| 2.7   | 3.5   | 1.5   | 0.7   | 10.1  | 1.4   | 1.3   | 1.5   | 0.7   |
| 0.3   | 1.1   | 0.9   | 0.2   | 0.6   | 0.5   | 0.2   | 0.8   | 0.4   |
| 1.7   | 2.2   | 1.2   | 1.2   | 5.0   | 2.0   | 1.7   | 2.0   | 4.6   |
| 6.1   | 8.5   | 4.0   | 3.9   | 11.4  | 5.1   | 9.3   | 5.3   | 5.2   |
| 11.2  | 8.6   | 15.3  | 5.0   | 7.1   | 7.4   | 9.9   | 17.8  | 11.8  |
| 0.1   | 1.5   | 2.2   | 1.1   | 0.3   | 1.5   | 1.5   | 2.4   | 0.7   |
| 6.8   | 4.8   | 5.6   | 2.8   | 3.3   | 4.6   | 4.8   | 7.3   | 1.1   |
| 32.4  | 17.8  | 23.1  | 19.9  | 22.9  | 34.6  | 26.9  | 28.0  | 25.5  |
| 6.1   | 4.6   | 1.1   | 7.0   | 2.9   | 3.0   | 1.9   | 4.1   | 5.0   |
| 17.2  | 17.7  | 9.9   | 17.3  | 16.6  | 12.5  | 22.4  | 13.2  | 19.0  |
| 83.1  | 60.9  | 51.9  | 72.0  | 63.5  | 67.1  | 67.0  | 91.1  | 65.1  |
| 10.5  | 15.8  | 19.8  | 20.4  | 16.1  | 13.8  | 12.0  | 30.5  | 15.7  |
| 1.6   | 1.3   | 3.3   | 0.5   | 1.0   | 0.8   | 1.6   | 1.2   | 0.5   |
| 0.3   | 6.0   | 1.1   | 0.5   | 0.7   | 5.5   | 1.4   | 1.2   | 2.4   |
| 3.3   | 3.7   | 3.0   | 9.3   | 4.5   | 1.1   | 1.1   | 5.8   | 3.1   |
| 102.6 | 71.4  | 69.6  | 66.5  | 73.5  | 83.3  | 95.1  | 129.6 | 66.3  |
| 5.6   | 3.6   | 1.3   | 0.6   | 3.3   | 1.6   | 4.6   | 1.9   | 1.8   |
| 394.7 | 247.3 | 337.3 | 309.2 | 319.8 | 327.9 | 406.3 | 423.5 | 326.0 |
| 24.1  | 34.2  | 28.7  | 26.2  | 20.0  | 21.8  | 50.7  | 32.8  | 29.0  |
| 4.2   | 5.3   | 2.1   | 1.2   | 3.7   | 3.7   | 5.1   | 4.0   | 3.3   |
| 10.5  | 7.0   | 7.2   | 4.9   | 6.1   | 10.8  | 10.5  | 19.0  | 9.7   |
| 418.9 | 113.9 | 145.5 | 122.4 | 175.0 | 185.9 | 281.7 | 283.5 | 212.1 |
| 21.4  | 23.1  | 24.9  | 44.5  | 25.9  | 28.6  | 42.0  | 34.4  | 26.7  |
| 3.8   | 1.0   | 0.4   | 1.1   | 6.3   | 1.7   | 2.3   | 0.5   | 2.4   |
| 17.9  | 25.7  | 11.1  | 6.0   | 23.3  | 12.6  | 26.4  | 36.8  | 6.9   |
| 1.3   | 5.8   | 1.2   | 5.3   | 8.0   | 3.5   | 1.3   | 1.8   | 5.8   |
| 7.5   | 5.8   | 2.0   | 1.4   | 5.4   | 1.5   | 6.0   | 2.1   | 7.0   |
| 3.6   | 2.6   | 4.7   | 0.7   | 3.6   | 0.6   | 8.0   | 11.7  | 3.7   |
| 0.5   | 1.0   | 0.3   | 0.4   | 0.5   | 0.6   | 0.7   | 4.6   | 0.1   |
| 5.3   | 5.5   | 6.6   | 6.4   | 3.1   | 5.6   | 12.1  | 13.4  | 1.1   |
| 3.4   | 4.4   | 4.6   | 7.1   | 3.0   | 3.0   | 2.1   | 6.1   | 2.8   |
| 22.6  | 19.3  | 11.1  | 28.3  | 16.6  | 16.0  | 48.3  | 26.0  | 22.3  |
| 2.3   | 0.8   | 0.3   | 1.0   | 1.0   | 3.8   | 4.8   | 0.3   | 0.7   |
| 0.4   | 0.8   | 0.5   | 0.2   | 2.2   | 0.8   | 0.8   | 1.1   | 0.2   |
| 72.3  | 73.4  | 50.0  | 74.8  | 88.3  | 53.8  | 91.1  | 103.4 | 103.3 |
| 31.1  | 18.1  | 17.9  | 17.2  | 23.5  | 24.0  | 24.2  | 31.3  | 25.2  |
| 1.3   | 1.0   | 0.8   | 0.8   | 0.8   | 0.9   | 1.1   | 1.1   | 1.7   |
| 4.0   | 7.6   | 7.4   | 6.5   | 6.2   | 5.4   | 10.9  | 12.4  | 8.8   |
| 0.4   | 4.1   | 0.4   | 3.4   | 0.6   | 5.0   | 5.4   | 3.9   | 5.9   |

|       |       |       |       |       |       |       |       |       |
|-------|-------|-------|-------|-------|-------|-------|-------|-------|
| 1.1   | 1.4   | 1.4   | 0.7   | 1.3   | 2.1   | 3.8   | 3.8   | 1.6   |
| 28.9  | 22.8  | 23.4  | 24.2  | 18.8  | 19.5  | 27.3  | 41.0  | 35.8  |
| 0.7   | 1.2   | 1.2   | 2.1   | 0.8   | 1.1   | 2.7   | 1.1   | 1.5   |
| 14.1  | 13.8  | 10.5  | 9.7   | 14.4  | 9.6   | 3.8   | 17.9  | 17.7  |
| 2.0   | 0.4   | 4.0   | 0.7   | 4.0   | 0.5   | 0.2   | 4.9   | 1.6   |
| 16.2  | 7.9   | 4.7   | 4.2   | 9.8   | 7.6   | 7.7   | 6.4   | 9.8   |
| 5.6   | 6.6   | 3.1   | 7.6   | 8.1   | 8.5   | 8.6   | 9.5   | 8.6   |
| 0.6   | 0.6   | 3.5   | 3.4   | 0.8   | 2.6   | 3.6   | 5.0   | 4.4   |
| 4.4   | 8.0   | 3.2   | 1.2   | 6.5   | 3.4   | 1.6   | 1.3   | 1.1   |
| 13.2  | 10.1  | 6.8   | 7.5   | 16.0  | 6.7   | 9.6   | 15.9  | 12.4  |
| 55.4  | 45.3  | 55.0  | 52.5  | 55.1  | 67.4  | 90.3  | 103.2 | 67.8  |
| 75.5  | 42.9  | 43.2  | 46.4  | 40.2  | 52.3  | 57.0  | 73.2  | 77.3  |
| 0.4   | 0.5   | 0.3   | 1.0   | 0.9   | 0.6   | 0.8   | 0.3   | 0.4   |
| 13.3  | 26.1  | 18.9  | 11.6  | 26.3  | 17.9  | 10.5  | 17.6  | 20.8  |
| 5.8   | 3.6   | 11.3  | 5.7   | 4.7   | 4.4   | 1.8   | 5.1   | 1.7   |
| 0.9   | 1.7   | 0.6   | 1.0   | 1.2   | 1.1   | 2.4   | 2.1   | 0.8   |
| 12.0  | 6.6   | 8.4   | 11.2  | 7.3   | 5.3   | 8.5   | 8.8   | 7.1   |
| 0.7   | 2.4   | 0.4   | 0.8   | 1.0   | 5.2   | 1.3   | 4.4   | 7.3   |
| 12.9  | 4.2   | 10.3  | 4.5   | 6.7   | 8.2   | 5.6   | 14.2  | 8.3   |
| 13.9  | 17.7  | 14.7  | 23.7  | 22.9  | 10.4  | 13.8  | 9.8   | 12.8  |
| 0.7   | 1.7   | 4.5   | 0.2   | 4.0   | 0.5   | 3.6   | 1.1   | 0.8   |
| 5.2   | 10.2  | 6.2   | 2.3   | 8.2   | 1.3   | 4.9   | 2.9   | 8.2   |
| 0.4   | 0.4   | 1.1   | 0.2   | 3.0   | 2.5   | 4.2   | 4.5   | 0.2   |
| 1.4   | 1.5   | 1.1   | 6.1   | 0.6   | 1.5   | 1.8   | 1.7   | 1.1   |
| 1.0   | 12.0  | 6.6   | 2.7   | 8.7   | 1.2   | 4.9   | 7.3   | 7.7   |
| 13.4  | 8.6   | 9.1   | 13.1  | 11.4  | 10.2  | 16.4  | 18.6  | 12.6  |
| 1.9   | 0.6   | 6.0   | 0.5   | 6.7   | 0.6   | 2.5   | 0.8   | 4.1   |
| 3.6   | 1.9   | 7.2   | 7.4   | 12.9  | 7.6   | 4.7   | 5.6   | 3.9   |
| 0.4   | 0.2   | 0.3   | 0.3   | 0.3   | 1.8   | 0.4   | 1.0   | 0.2   |
| 0.6   | 0.9   | 0.9   | 0.6   | 1.5   | 0.7   | 1.2   | 1.0   | 0.4   |
| 111.9 | 73.7  | 82.9  | 91.4  | 89.3  | 92.8  | 113.5 | 152.8 | 88.1  |
| 90.7  | 54.1  | 68.9  | 72.3  | 70.5  | 51.2  | 85.3  | 89.5  | 67.0  |
| 6.4   | 5.6   | 3.4   | 0.5   | 0.7   | 1.0   | 1.3   | 4.5   | 0.8   |
| 0.3   | 0.7   | 3.2   | 4.2   | 1.2   | 1.4   | 1.1   | 9.2   | 9.6   |
| 2.6   | 1.4   | 3.9   | 0.9   | 1.0   | 2.6   | 2.7   | 2.8   | 1.1   |
| 19.7  | 13.5  | 16.6  | 17.4  | 18.0  | 16.9  | 27.9  | 38.5  | 23.7  |
| 1.6   | 3.1   | 2.9   | 4.7   | 5.4   | 6.0   | 5.0   | 3.8   | 5.9   |
| 5.2   | 5.7   | 4.7   | 6.0   | 5.1   | 7.5   | 6.7   | 6.2   | 6.4   |
| 138.2 | 100.5 | 130.6 | 122.5 | 131.1 | 137.4 | 169.4 | 218.5 | 150.8 |
| 1.5   | 1.2   | 1.1   | 0.7   | 1.1   | 0.8   | 1.3   | 1.2   | 1.1   |
| 5.0   | 7.1   | 3.7   | 3.7   | 3.4   | 2.9   | 0.5   | 1.0   | 1.8   |
| 2.8   | 0.8   | 3.3   | 1.2   | 7.3   | 5.0   | 2.0   | 2.8   | 1.8   |
| 4.4   | 1.3   | 8.9   | 8.9   | 6.7   | 0.7   | 1.8   | 2.2   | 7.8   |
| 10.8  | 13.3  | 9.5   | 12.3  | 13.4  | 12.6  | 18.9  | 13.3  | 8.9   |
| 0.2   | 2.8   | 1.2   | 1.5   | 0.8   | 0.6   | 0.9   | 3.7   | 1.7   |
| 0.3   | 1.1   | 2.2   | 0.7   | 0.5   | 0.8   | 0.5   | 0.4   | 0.7   |
| 102.8 | 58.1  | 68.2  | 46.7  | 46.8  | 58.6  | 65.5  | 65.7  | 44.7  |
| 0.6   | 8.0   | 5.5   | 2.4   | 1.5   | 5.2   | 5.0   | 5.6   | 5.7   |
| 7.1   | 4.9   | 5.7   | 0.7   | 3.3   | 3.5   | 3.6   | 7.3   | 3.5   |
| 16.1  | 12.0  | 8.1   | 8.2   | 10.9  | 14.5  | 15.9  | 13.5  | 13.0  |
| 0.9   | 5.8   | 3.6   | 6.4   | 4.6   | 7.2   | 4.8   | 9.0   | 6.5   |
| 6.3   | 8.6   | 9.4   | 8.7   | 8.4   | 5.7   | 14.4  | 9.8   | 11.8  |
| 38.0  | 29.4  | 27.7  | 24.2  | 25.3  | 15.8  | 29.5  | 23.8  | 22.7  |

|       |       |       |       |       |       |       |       |       |
|-------|-------|-------|-------|-------|-------|-------|-------|-------|
| 23.8  | 8.8   | 7.8   | 15.4  | 11.1  | 12.0  | 21.0  | 15.9  | 9.1   |
| 5.7   | 6.1   | 6.7   | 4.5   | 1.9   | 5.8   | 3.8   | 1.7   | 9.6   |
| 0.8   | 0.4   | 0.7   | 0.5   | 0.9   | 0.7   | 1.1   | 0.5   | 0.5   |
| 835.3 | 609.4 | 661.6 | 670.0 | 704.5 | 679.0 | 895.4 | 976.1 | 591.1 |
| 48.8  | 28.7  | 19.4  | 32.9  | 24.0  | 32.6  | 31.8  | 37.0  | 27.4  |
| 31.2  | 28.1  | 18.6  | 27.7  | 25.9  | 23.1  | 37.3  | 29.4  | 22.3  |
| 0.9   | 3.9   | 3.1   | 0.4   | 5.0   | 1.1   | 1.1   | 0.3   | 2.5   |
| 12.0  | 11.0  | 11.7  | 7.1   | 19.0  | 5.7   | 17.2  | 18.1  | 1.9   |
| 12.9  | 10.6  | 9.3   | 11.4  | 9.2   | 18.3  | 7.7   | 8.9   | 3.6   |
| 8.5   | 4.1   | 5.3   | 2.9   | 1.2   | 7.1   | 9.8   | 7.0   | 8.6   |
| 24.2  | 17.1  | 13.7  | 6.6   | 20.9  | 13.1  | 17.8  | 19.1  | 17.4  |
| 368.1 | 248.1 | 303.2 | 335.3 | 321.2 | 313.2 | 437.4 | 393.1 | 259.0 |
| 1.8   | 5.9   | 4.1   | 1.1   | 9.1   | 1.1   | 2.4   | 7.9   | 1.5   |
| 508.2 | 294.7 | 353.7 | 346.8 | 412.2 | 400.9 | 560.5 | 732.9 | 523.9 |
| 22.6  | 18.0  | 21.6  | 21.7  | 18.1  | 17.4  | 18.6  | 35.3  | 24.4  |
| 1.6   | 4.3   | 1.8   | 1.2   | 5.2   | 1.3   | 4.3   | 1.2   | 0.7   |
| 422.1 | 234.1 | 215.5 | 277.8 | 288.8 | 303.8 | 374.6 | 467.7 | 364.4 |
| 20.0  | 14.6  | 19.7  | 8.2   | 13.4  | 17.1  | 16.3  | 23.6  | 19.2  |
| 5.3   | 13.4  | 8.8   | 12.8  | 3.8   | 11.4  | 21.3  | 15.6  | 6.1   |
| 7.1   | 10.1  | 6.7   | 2.1   | 8.3   | 9.2   | 5.4   | 3.7   | 9.2   |
| 112.2 | 72.1  | 116.5 | 92.5  | 78.7  | 108.7 | 114.5 | 127.3 | 127.6 |
| 0.4   | 0.7   | 1.3   | 3.4   | 0.5   | 1.0   | 1.0   | 0.5   | 7.0   |
| 36.8  | 17.3  | 20.3  | 20.5  | 21.7  | 22.0  | 29.4  | 55.2  | 23.7  |
| 6.6   | 4.0   | 9.9   | 5.1   | 1.4   | 6.6   | 1.2   | 6.1   | 5.7   |
| 30.9  | 23.9  | 33.5  | 25.4  | 20.7  | 32.8  | 25.3  | 28.0  | 16.1  |
| 18.9  | 4.6   | 13.8  | 26.6  | 13.6  | 11.5  | 25.9  | 17.2  | 22.1  |
| 3.4   | 5.8   | 3.1   | 0.9   | 0.2   | 4.8   | 12.3  | 8.2   | 4.6   |
| 159.9 | 121.5 | 164.8 | 166.8 | 167.7 | 172.4 | 218.2 | 259.1 | 158.5 |
| 0.5   | 0.8   | 0.1   | 0.3   | 1.8   | 0.7   | 0.9   | 0.8   | 0.2   |
| 0.5   | 0.9   | 1.0   | 1.5   | 0.5   | 3.6   | 0.7   | 0.9   | 4.3   |
| 4.1   | 3.0   | 1.0   | 0.3   | 2.8   | 0.3   | 5.2   | 2.4   | 0.5   |
| 21.5  | 14.6  | 13.8  | 18.1  | 20.6  | 18.7  | 26.9  | 47.6  | 25.4  |
| 3.8   | 5.4   | 0.5   | 9.0   | 8.1   | 1.7   | 3.8   | 10.4  | 6.1   |
| 5.3   | 0.5   | 4.0   | 1.2   | 4.8   | 1.7   | 5.0   | 2.2   | 2.2   |
| 2.9   | 0.9   | 4.3   | 0.5   | 3.0   | 3.8   | 7.1   | 11.1  | 7.4   |
| 239.9 | 182.4 | 194.7 | 228.3 | 205.1 | 198.0 | 296.6 | 295.1 | 284.5 |
| 247.0 | 144.8 | 209.9 | 185.0 | 202.6 | 185.1 | 206.7 | 235.1 | 158.9 |
| 23.0  | 18.3  | 23.7  | 24.1  | 25.6  | 26.5  | 31.5  | 26.6  | 20.5  |
| 1.4   | 5.7   | 1.6   | 1.3   | 1.5   | 1.7   | 0.9   | 2.7   | 0.9   |
| 1.4   | 4.3   | 8.3   | 2.4   | 4.6   | 2.2   | 7.1   | 8.4   | 6.5   |
| 13.6  | 14.1  | 7.5   | 6.8   | 8.1   | 7.8   | 16.6  | 15.9  | 5.6   |
| 7.8   | 0.8   | 1.3   | 2.1   | 2.0   | 6.8   | 7.1   | 11.0  | 2.1   |
| 15.7  | 1.5   | 7.9   | 12.2  | 5.9   | 11.7  | 14.9  | 16.3  | 9.2   |
| 1.3   | 0.4   | 1.1   | 0.8   | 1.0   | 0.6   | 0.9   | 0.9   | 0.7   |
| 2.5   | 2.2   | 1.9   | 8.0   | 2.1   | 1.0   | 6.5   | 4.3   | 1.2   |
| 25.4  | 9.8   | 8.0   | 6.0   | 8.1   | 11.0  | 14.8  | 14.3  | 9.1   |
| 25.2  | 8.7   | 10.6  | 10.9  | 15.9  | 12.9  | 18.4  | 23.7  | 10.2  |
| 16.4  | 10.1  | 8.9   | 12.7  | 9.8   | 8.5   | 14.9  | 17.0  | 13.9  |
| 19.7  | 5.2   | 5.5   | 9.2   | 8.9   | 4.7   | 6.4   | 4.5   | 4.5   |
| 10.2  | 8.2   | 13.6  | 14.1  | 13.5  | 10.6  | 12.7  | 11.2  | 11.6  |
| 0.6   | 0.8   | 1.1   | 0.9   | 1.7   | 4.8   | 5.7   | 0.5   | 1.1   |
| 0.4   | 1.7   | 5.9   | 0.5   | 2.6   | 1.2   | 1.3   | 2.5   | 9.4   |
| 1.6   | 0.0   | 1.3   | 0.2   | 0.3   | 1.0   | 1.6   | 2.3   | 1.2   |

|       |       |       |       |       |       |       |       |       |
|-------|-------|-------|-------|-------|-------|-------|-------|-------|
| 18.8  | 17.0  | 17.8  | 21.7  | 13.5  | 17.7  | 28.0  | 31.5  | 22.6  |
| 1.9   | 1.7   | 2.0   | 1.6   | 4.3   | 1.9   | 3.9   | 4.3   | 2.2   |
| 12.3  | 11.2  | 14.7  | 8.6   | 14.5  | 9.9   | 18.1  | 11.1  | 20.4  |
| 161.1 | 104.7 | 121.6 | 103.2 | 123.0 | 122.2 | 186.0 | 242.9 | 137.0 |
| 40.3  | 16.4  | 24.8  | 33.7  | 34.3  | 25.0  | 37.1  | 35.9  | 29.1  |
| 9.6   | 2.3   | 7.0   | 14.9  | 8.3   | 8.5   | 5.0   | 10.9  | 7.7   |
| 24.3  | 10.7  | 16.0  | 16.1  | 18.5  | 21.9  | 31.5  | 30.9  | 27.0  |
| 25.1  | 18.1  | 3.7   | 11.0  | 20.3  | 11.8  | 17.4  | 29.4  | 20.4  |
| 2.9   | 4.6   | 3.3   | 2.4   | 0.6   | 0.5   | 3.7   | 2.9   | 1.9   |
| 0.6   | 1.2   | 0.6   | 0.8   | 2.8   | 2.2   | 0.6   | 4.6   | 0.6   |
| 428.9 | 257.5 | 324.8 | 343.0 | 329.5 | 379.1 | 435.6 | 521.5 | 393.6 |
| 62.2  | 19.7  | 25.4  | 35.5  | 24.2  | 20.1  | 47.1  | 45.2  | 38.1  |
| 3.5   | 10.5  | 7.3   | 12.6  | 12.5  | 13.4  | 10.3  | 20.4  | 13.8  |
| 9.6   | 11.7  | 9.1   | 10.6  | 12.1  | 5.9   | 13.4  | 17.0  | 12.9  |
| 62.6  | 42.4  | 51.3  | 42.2  | 38.5  | 47.6  | 49.0  | 80.8  | 44.0  |
| 0.5   | 0.8   | 5.6   | 0.5   | 1.2   | 0.7   | 1.0   | 4.2   | 1.4   |
| 617.4 | 442.1 | 484.1 | 550.6 | 535.8 | 527.7 | 673.1 | 732.5 | 471.7 |
| 19.9  | 14.7  | 18.2  | 17.6  | 15.8  | 20.4  | 19.5  | 22.5  | 25.7  |
| 307.1 | 420.6 | 407.2 | 473.3 | 486.9 | 432.8 | 566.5 | 498.8 | 488.1 |
| 10.0  | 7.4   | 8.9   | 3.9   | 2.1   | 7.9   | 8.7   | 7.0   | 8.3   |
| 2.9   | 0.4   | 2.3   | 2.3   | 0.2   | 4.7   | 2.5   | 1.9   | 1.7   |
| 82.6  | 32.9  | 43.7  | 40.9  | 44.6  | 39.8  | 49.0  | 66.5  | 37.6  |
| 0.9   | 1.7   | 0.5   | 0.9   | 1.1   | 0.7   | 2.6   | 1.2   | 0.4   |
| 4.2   | 3.7   | 5.3   | 0.9   | 5.5   | 4.3   | 6.8   | 9.8   | 4.0   |
| 138.7 | 43.6  | 77.9  | 68.2  | 57.6  | 95.9  | 101.1 | 134.3 | 82.5  |
| 16.9  | 3.2   | 6.2   | 7.2   | 8.0   | 10.2  | 4.9   | 8.4   | 7.0   |
| 6.0   | 7.1   | 5.9   | 11.0  | 9.0   | 4.3   | 8.4   | 7.6   | 8.9   |
| 5.7   | 9.1   | 0.5   | 7.6   | 0.9   | 3.0   | 2.3   | 1.8   | 7.1   |
| 1.1   | 1.6   | 0.6   | 0.6   | 1.1   | 1.9   | 1.2   | 1.2   | 0.9   |
| 1.9   | 6.6   | 4.6   | 0.3   | 6.2   | 0.9   | 7.0   | 1.5   | 2.4   |
| 1.5   | 0.8   | 0.8   | 1.9   | 1.0   | 1.0   | 2.0   | 3.7   | 1.1   |
| 11.8  | 15.8  | 11.7  | 3.7   | 11.7  | 9.8   | 25.0  | 29.0  | 8.3   |
| 6.4   | 2.4   | 16.4  | 5.4   | 1.3   | 8.0   | 10.0  | 1.9   | 13.3  |
| 2.5   | 10.2  | 6.7   | 7.1   | 6.7   | 5.0   | 4.6   | 7.7   | 10.5  |
| 4.3   | 5.1   | 0.7   | 1.5   | 3.4   | 4.6   | 3.7   | 7.8   | 0.9   |
| 0.9   | 4.4   | 9.9   | 5.3   | 4.5   | 3.2   | 7.2   | 10.4  | 6.7   |
| 5.5   | 4.7   | 12.0  | 12.9  | 10.5  | 10.0  | 14.4  | 11.4  | 14.9  |
| 12.0  | 11.0  | 8.2   | 8.6   | 8.8   | 10.1  | 7.8   | 7.4   | 10.8  |
| 0.6   | 1.6   | 1.8   | 0.9   | 4.1   | 1.7   | 2.9   | 2.8   | 0.9   |
| 6.4   | 4.8   | 4.2   | 2.2   | 1.4   | 6.4   | 9.9   | 7.1   | 7.0   |
| 19.4  | 21.7  | 10.2  | 22.9  | 22.5  | 13.7  | 22.5  | 26.0  | 21.8  |
| 2.0   | 3.6   | 4.4   | 2.7   | 2.4   | 1.5   | 3.6   | 1.6   | 3.3   |
| 2.9   | 0.5   | 2.9   | 1.0   | 0.2   | 5.7   | 2.3   | 9.3   | 2.0   |
| 0.1   | 0.3   | 0.3   | 0.4   | 0.1   | 0.5   | 0.4   | 0.2   | 0.4   |
| 5.2   | 1.6   | 5.5   | 0.9   | 1.7   | 1.5   | 5.8   | 3.4   | 4.4   |
| 13.4  | 10.1  | 3.5   | 2.0   | 10.2  | 2.2   | 12.3  | 10.0  | 3.0   |
| 208.0 | 122.9 | 153.7 | 172.9 | 179.2 | 171.9 | 231.3 | 241.9 | 175.3 |
| 43.3  | 33.4  | 25.9  | 21.9  | 46.7  | 40.9  | 51.3  | 50.4  | 41.4  |
| 17.4  | 12.5  | 15.2  | 8.0   | 11.6  | 5.3   | 14.4  | 23.2  | 11.2  |
| 57.8  | 26.7  | 41.6  | 47.8  | 45.2  | 39.7  | 61.7  | 64.3  | 61.6  |
| 1.0   | 0.4   | 0.1   | 0.6   | 0.6   | 0.5   | 0.4   | 0.4   | 0.3   |
| 0.5   | 0.3   | 0.2   | 2.1   | 0.1   | 1.0   | 0.3   | 3.1   | 0.1   |
| 7.1   | 5.2   | 11.9  | 7.9   | 5.4   | 7.3   | 5.0   | 6.4   | 6.4   |

|       |       |       |       |       |       |        |        |        |
|-------|-------|-------|-------|-------|-------|--------|--------|--------|
| 2.1   | 2.8   | 3.0   | 2.0   | 2.1   | 2.3   | 8.3    | 1.2    | 1.5    |
| 1.6   | 1.2   | 0.8   | 0.8   | 0.8   | 0.6   | 1.2    | 6.3    | 1.1    |
| 81.8  | 79.6  | 64.8  | 84.9  | 100.3 | 72.9  | 130.0  | 150.8  | 101.0  |
| 2.0   | 1.9   | 0.7   | 1.1   | 1.3   | 1.5   | 1.3    | 2.0    | 0.8    |
| 0.7   | 1.0   | 0.7   | 0.7   | 1.0   | 0.9   | 1.0    | 1.1    | 1.4    |
| 2.6   | 4.1   | 3.7   | 0.6   | 1.7   | 12.7  | 2.0    | 6.3    | 1.5    |
| 1.1   | 2.3   | 2.2   | 1.9   | 2.0   | 5.6   | 5.4    | 3.1    | 0.8    |
| 2.3   | 2.8   | 3.9   | 2.4   | 11.3  | 7.0   | 1.2    | 10.6   | 2.4    |
| 4.4   | 6.3   | 1.1   | 1.9   | 5.4   | 0.8   | 3.7    | 3.4    | 1.0    |
| 10.1  | 13.7  | 8.4   | 7.2   | 6.0   | 4.2   | 8.8    | 1.8    | 11.1   |
| 2.2   | 0.6   | 1.2   | 0.6   | 0.5   | 0.5   | 3.5    | 0.5    | 0.8    |
| 0.7   | 0.8   | 0.9   | 0.8   | 1.3   | 2.0   | 0.8    | 2.0    | 1.0    |
| 1.2   | 1.7   | 0.8   | 2.2   | 2.7   | 3.3   | 2.4    | 0.1    | 2.2    |
| 857.6 | 546.5 | 738.2 | 825.7 | 732.6 | 769.1 | 1106.5 | 1392.2 | 1021.8 |
| 7.9   | 6.8   | 4.2   | 2.1   | 1.3   | 2.3   | 7.1    | 0.8    | 7.6    |
| 2.6   | 14.8  | 6.4   | 11.2  | 14.5  | 2.4   | 17.1   | 16.7   | 16.4   |
| 4.6   | 3.1   | 0.6   | 5.1   | 5.7   | 11.2  | 7.8    | 9.0    | 8.2    |
| 0.4   | 5.0   | 0.9   | 0.5   | 0.4   | 2.9   | 0.4    | 3.4    | 0.4    |
| 0.2   | 0.8   | 2.0   | 0.4   | 4.7   | 3.9   | 2.5    | 5.2    | 0.4    |
| 0.4   | 0.2   | 1.6   | 0.6   | 1.3   | 4.7   | 0.8    | 3.8    | 0.5    |
| 2.2   | 0.5   | 0.8   | 2.7   | 2.0   | 4.9   | 3.5    | 7.0    | 0.3    |
| 1.2   | 1.1   | 2.0   | 0.7   | 5.7   | 0.8   | 6.7    | 5.1    | 0.4    |
| 114.6 | 112.9 | 142.9 | 148.3 | 165.7 | 167.2 | 205.2  | 340.5  | 194.7  |
| 6.8   | 6.2   | 2.7   | 1.9   | 4.2   | 6.3   | 3.4    | 2.9    | 2.8    |
| 17.9  | 13.5  | 8.6   | 14.6  | 10.3  | 12.5  | 10.4   | 24.7   | 20.9   |
| 121.4 | 94.1  | 110.9 | 118.9 | 149.0 | 127.2 | 180.7  | 198.7  | 154.4  |
| 5.3   | 11.1  | 4.1   | 7.2   | 14.6  | 0.9   | 7.1    | 6.6    | 9.2    |
| 0.4   | 0.6   | 0.5   | 0.8   | 0.2   | 0.4   | 4.0    | 0.9    | 0.4    |
| 57.8  | 26.8  | 25.8  | 31.0  | 33.2  | 49.8  | 50.6   | 58.3   | 35.5   |
| 245.4 | 200.1 | 229.4 | 257.9 | 251.1 | 238.5 | 324.7  | 326.6  | 218.6  |
| 4.5   | 6.6   | 2.4   | 0.9   | 0.5   | 1.3   | 4.0    | 6.9    | 5.5    |
| 10.1  | 4.8   | 9.9   | 6.9   | 15.6  | 8.7   | 9.7    | 9.4    | 14.5   |
| 6.4   | 5.5   | 11.9  | 9.8   | 7.4   | 9.7   | 13.5   | 10.6   | 13.9   |
| 10.0  | 8.5   | 9.9   | 6.6   | 12.9  | 8.9   | 21.0   | 33.8   | 11.0   |
| 1.8   | 2.5   | 3.5   | 8.6   | 4.6   | 3.8   | 11.2   | 10.7   | 1.4    |
| 69.6  | 77.4  | 84.8  | 60.4  | 80.7  | 59.8  | 98.2   | 98.5   | 77.5   |
| 5.3   | 7.5   | 4.2   | 6.6   | 3.7   | 6.6   | 9.6    | 9.1    | 5.1    |
| 59.1  | 34.5  | 51.8  | 43.9  | 36.9  | 53.9  | 54.0   | 48.1   | 51.3   |
| 54.1  | 26.0  | 43.4  | 23.4  | 45.5  | 39.8  | 46.0   | 88.2   | 69.8   |
| 37.3  | 28.7  | 39.4  | 42.3  | 39.7  | 43.3  | 47.8   | 62.8   | 37.9   |
| 0.8   | 0.8   | 1.2   | 0.6   | 0.6   | 1.0   | 0.8    | 0.8    | 0.7    |
| 26.0  | 16.0  | 8.9   | 9.5   | 13.4  | 8.8   | 10.0   | 17.8   | 11.4   |
| 12.6  | 1.9   | 1.7   | 11.0  | 9.5   | 1.9   | 0.7    | 2.2    | 6.0    |
| 19.5  | 16.1  | 10.8  | 23.2  | 26.6  | 17.5  | 32.3   | 31.0   | 26.8   |
| 0.5   | 1.5   | 1.0   | 0.7   | 0.5   | 0.7   | 1.1    | 0.7    | 1.2    |
| 0.4   | 0.2   | 0.3   | 1.0   | 0.4   | 0.3   | 0.2    | 0.5    | 0.6    |
| 14.3  | 2.1   | 6.5   | 3.3   | 2.8   | 5.1   | 15.3   | 5.5    | 4.5    |
| 1.4   | 3.5   | 1.6   | 2.4   | 0.9   | 1.1   | 2.7    | 3.2    | 1.7    |
| 0.5   | 0.8   | 0.9   | 1.2   | 0.5   | 0.6   | 0.6    | 2.1    | 0.5    |
| 9.0   | 17.2  | 10.5  | 14.7  | 12.4  | 16.0  | 19.7   | 15.8   | 14.6   |
| 2.5   | 1.3   | 0.7   | 0.8   | 2.2   | 1.4   | 1.3    | 2.0    | 2.3    |
| 6.9   | 1.9   | 1.9   | 6.7   | 12.2  | 2.9   | 4.2    | 7.5    | 10.5   |
| 36.6  | 25.9  | 28.1  | 29.7  | 35.6  | 41.4  | 43.9   | 63.3   | 30.9   |



|       |       |       |       |       |       |       |       |       |
|-------|-------|-------|-------|-------|-------|-------|-------|-------|
| 2.7   | 0.1   | 0.3   | 0.4   | 0.3   | 0.4   | 1.3   | 0.2   | 0.1   |
| 7.7   | 5.9   | 7.2   | 11.5  | 5.2   | 2.8   | 5.2   | 7.8   | 7.9   |
| 309.6 | 293.9 | 320.3 | 398.9 | 374.8 | 405.5 | 523.4 | 440.4 | 332.4 |
| 1.1   | 0.1   | 0.1   | 0.2   | 0.3   | 0.7   | 0.2   | 0.1   | 0.2   |
| 0.1   | 1.5   | 0.2   | 0.0   | 0.3   | 0.9   | 0.5   | 0.1   | 0.1   |
| 1.7   | 1.3   | 4.2   | 1.5   | 1.9   | 5.2   | 4.8   | 0.8   | 2.7   |
| 4.7   | 2.5   | 4.1   | 4.3   | 8.5   | 4.3   | 3.3   | 6.7   | 6.7   |
| 64.4  | 27.1  | 30.7  | 27.7  | 38.7  | 37.8  | 52.7  | 86.3  | 52.7  |
| 2.4   | 1.0   | 1.1   | 0.7   | 2.3   | 0.7   | 2.5   | 4.0   | 1.2   |
| 7.2   | 3.6   | 2.9   | 6.6   | 1.3   | 1.0   | 2.4   | 6.0   | 6.7   |
| 2.1   | 1.4   | 5.1   | 1.1   | 3.0   | 0.3   | 5.2   | 9.5   | 1.4   |
| 5.6   | 8.7   | 2.6   | 6.9   | 8.8   | 12.4  | 8.7   | 12.5  | 10.3  |
| 0.4   | 1.2   | 0.8   | 0.6   | 1.0   | 0.4   | 0.4   | 1.3   | 1.2   |
| 0.5   | 2.2   | 0.8   | 0.4   | 0.2   | 0.4   | 0.2   | 0.4   | 1.3   |
| 15.8  | 18.1  | 14.9  | 15.7  | 20.3  | 13.3  | 13.5  | 17.7  | 16.8  |
| 32.3  | 40.3  | 47.3  | 44.7  | 56.2  | 39.4  | 64.5  | 51.3  | 40.3  |
| 5.3   | 9.4   | 8.2   | 10.5  | 8.4   | 10.6  | 10.0  | 16.8  | 13.2  |
| 11.3  | 1.2   | 2.4   | 2.1   | 4.8   | 2.7   | 3.3   | 5.6   | 3.3   |
| 2.2   | 2.7   | 1.1   | 2.3   | 4.1   | 0.9   | 1.4   | 2.4   | 2.9   |
| 40.9  | 23.5  | 28.2  | 30.3  | 33.1  | 25.5  | 31.3  | 36.9  | 37.3  |
| 7.5   | 6.5   | 5.0   | 6.6   | 8.2   | 10.8  | 8.9   | 15.2  | 6.0   |
| 5.0   | 10.7  | 6.9   | 5.7   | 9.9   | 3.7   | 4.6   | 6.1   | 7.1   |
| 24.0  | 20.2  | 22.0  | 26.1  | 25.6  | 21.2  | 31.5  | 41.3  | 35.0  |
| 0.2   | 0.9   | 0.5   | 0.2   | 0.5   | 0.3   | 0.3   | 0.3   | 0.6   |
| 7.2   | 6.1   | 7.6   | 4.0   | 7.5   | 4.2   | 7.2   | 2.3   | 8.6   |
| 5.8   | 9.9   | 5.6   | 4.9   | 4.4   | 2.1   | 10.2  | 11.1  | 5.2   |
| 0.2   | 3.5   | 1.1   | 2.8   | 1.5   | 1.4   | 2.5   | 1.2   | 4.4   |
| 12.9  | 13.0  | 15.9  | 9.6   | 8.3   | 13.3  | 8.5   | 15.5  | 8.6   |
| 3.6   | 6.4   | 4.2   | 1.7   | 7.3   | 8.0   | 3.9   | 9.9   | 4.5   |
| 18.2  | 6.6   | 6.7   | 4.4   | 8.2   | 14.1  | 4.3   | 14.2  | 7.7   |
| 0.4   | 5.6   | 1.8   | 10.5  | 9.5   | 5.7   | 6.4   | 4.0   | 3.8   |
| 10.2  | 3.1   | 13.2  | 8.5   | 7.4   | 9.0   | 11.1  | 6.4   | 1.3   |
| 3.3   | 1.9   | 0.7   | 0.8   | 0.9   | 1.2   | 3.5   | 1.7   | 0.6   |
| 17.6  | 20.9  | 14.2  | 28.2  | 20.5  | 22.6  | 18.0  | 37.0  | 23.0  |
| 1.6   | 0.8   | 1.3   | 1.5   | 1.9   | 6.6   | 4.2   | 8.1   | 4.1   |
| 13.6  | 13.0  | 10.8  | 10.9  | 9.6   | 8.8   | 14.0  | 29.4  | 21.8  |
| 6.2   | 7.1   | 5.1   | 6.1   | 1.8   | 3.4   | 1.8   | 0.8   | 1.8   |
| 15.1  | 16.6  | 11.2  | 15.3  | 13.3  | 12.3  | 15.9  | 26.4  | 17.1  |
| 0.8   | 0.7   | 1.1   | 0.5   | 2.7   | 0.8   | 5.4   | 6.9   | 1.0   |
| 0.9   | 0.7   | 0.8   | 1.5   | 0.8   | 0.6   | 0.6   | 1.0   | 1.3   |
| 34.8  | 18.5  | 21.9  | 21.7  | 27.6  | 26.1  | 30.5  | 45.0  | 37.7  |
| 4.7   | 8.4   | 9.9   | 11.3  | 13.6  | 12.1  | 7.6   | 10.9  | 9.3   |
| 26.7  | 15.2  | 18.6  | 15.8  | 14.1  | 22.4  | 28.0  | 26.6  | 22.6  |
| 6.7   | 1.4   | 5.1   | 2.4   | 5.9   | 12.7  | 10.4  | 9.3   | 4.4   |
| 5.9   | 9.5   | 10.6  | 6.8   | 3.5   | 4.8   | 4.4   | 2.2   | 4.6   |
| 0.4   | 3.2   | 0.8   | 2.9   | 0.8   | 0.7   | 1.0   | 1.1   | 1.0   |
| 0.8   | 0.3   | 0.4   | 0.3   | 0.7   | 3.1   | 1.1   | 6.7   | 1.7   |
| 85.0  | 51.6  | 54.0  | 45.3  | 49.8  | 73.2  | 84.6  | 99.0  | 68.5  |
| 4.6   | 2.7   | 2.4   | 3.3   | 1.9   | 14.1  | 1.3   | 3.0   | 2.3   |
| 2.6   | 5.0   | 5.8   | 4.6   | 2.3   | 4.7   | 1.2   | 1.0   | 0.9   |
| 12.8  | 11.1  | 5.6   | 12.8  | 7.0   | 10.7  | 12.2  | 14.0  | 4.0   |
| 11.3  | 8.3   | 11.7  | 11.4  | 16.8  | 18.7  | 15.2  | 11.1  | 10.1  |
| 1.5   | 1.2   | 1.5   | 2.0   | 0.8   | 1.2   | 8.4   | 1.1   | 2.0   |

|       |       |       |       |       |       |       |       |       |
|-------|-------|-------|-------|-------|-------|-------|-------|-------|
| 1.7   | 0.5   | 0.9   | 3.0   | 2.4   | 4.2   | 2.7   | 3.7   | 2.0   |
| 0.5   | 0.5   | 5.8   | 2.5   | 6.5   | 1.0   | 2.1   | 1.1   | 5.2   |
| 4.7   | 1.5   | 5.0   | 0.4   | 3.0   | 1.2   | 2.4   | 2.7   | 0.8   |
| 11.6  | 8.0   | 8.3   | 7.1   | 4.3   | 6.1   | 9.8   | 15.4  | 5.4   |
| 0.9   | 2.1   | 0.6   | 0.4   | 3.2   | 0.5   | 0.3   | 0.4   | 0.3   |
| 8.9   | 9.4   | 7.2   | 6.8   | 7.4   | 13.4  | 7.2   | 14.9  | 10.3  |
| 31.6  | 21.6  | 31.8  | 29.8  | 34.9  | 28.0  | 26.8  | 37.6  | 30.9  |
| 0.5   | 0.7   | 1.2   | 0.4   | 1.1   | 0.7   | 1.1   | 0.7   | 1.1   |
| 0.6   | 0.6   | 0.8   | 1.2   | 1.6   | 0.6   | 0.8   | 1.3   | 1.2   |
| 3.2   | 6.7   | 3.1   | 4.0   | 1.4   | 0.5   | 1.1   | 3.3   | 6.0   |
| 92.5  | 64.1  | 87.6  | 87.8  | 83.0  | 97.8  | 127.9 | 127.6 | 115.2 |
| 8.5   | 0.6   | 2.8   | 0.9   | 2.5   | 0.3   | 2.9   | 1.2   | 0.7   |
| 17.0  | 21.0  | 31.2  | 30.4  | 31.6  | 23.5  | 37.2  | 45.7  | 24.3  |
| 7.4   | 2.0   | 2.6   | 6.7   | 8.7   | 2.3   | 9.9   | 12.5  | 9.7   |
| 3.8   | 2.2   | 0.3   | 1.2   | 3.3   | 0.5   | 0.5   | 1.5   | 2.4   |
| 0.5   | 2.9   | 0.6   | 0.5   | 0.4   | 0.5   | 0.4   | 0.4   | 0.6   |
| 3.0   | 2.7   | 4.1   | 0.7   | 1.3   | 3.5   | 0.8   | 4.1   | 0.9   |
| 5.2   | 4.5   | 5.5   | 9.3   | 6.6   | 5.4   | 6.6   | 11.9  | 8.5   |
| 1.0   | 1.3   | 0.5   | 2.5   | 1.3   | 0.8   | 2.0   | 5.3   | 1.5   |
| 0.9   | 0.4   | 0.7   | 1.2   | 1.0   | 0.8   | 1.4   | 1.2   | 0.9   |
| 6.7   | 4.8   | 0.3   | 0.4   | 0.5   | 0.6   | 2.8   | 4.7   | 0.4   |
| 109.0 | 48.4  | 48.8  | 48.1  | 51.1  | 64.3  | 62.6  | 122.8 | 51.5  |
| 1.5   | 0.7   | 1.0   | 1.5   | 4.6   | 3.8   | 4.4   | 7.3   | 7.4   |
| 8.8   | 11.8  | 5.0   | 10.3  | 7.8   | 7.4   | 7.1   | 7.7   | 9.4   |
| 9.5   | 9.7   | 11.0  | 11.5  | 3.7   | 4.8   | 6.7   | 8.8   | 9.6   |
| 1.3   | 0.6   | 0.8   | 0.9   | 0.9   | 1.2   | 1.9   | 1.0   | 1.2   |
| 1.2   | 3.0   | 3.6   | 1.9   | 6.8   | 1.6   | 12.2  | 15.2  | 2.0   |
| 1.5   | 0.4   | 5.2   | 0.7   | 5.5   | 5.1   | 1.2   | 8.4   | 5.5   |
| 5.8   | 8.3   | 5.7   | 11.3  | 12.9  | 5.9   | 10.3  | 12.7  | 9.8   |
| 7.0   | 2.4   | 5.0   | 3.7   | 1.4   | 1.5   | 1.2   | 2.4   | 1.4   |
| 1.7   | 4.7   | 1.9   | 1.3   | 1.3   | 2.7   | 4.7   | 1.7   | 5.5   |
| 0.3   | 0.8   | 1.2   | 3.0   | 0.3   | 1.3   | 1.8   | 7.6   | 0.4   |
| 2.7   | 6.4   | 3.3   | 3.5   | 0.7   | 0.5   | 4.2   | 6.7   | 8.6   |
| 229.9 | 171.0 | 200.2 | 223.4 | 216.6 | 189.9 | 277.8 | 270.4 | 168.4 |
| 5.7   | 3.6   | 4.3   | 1.2   | 3.9   | 0.9   | 3.6   | 6.0   | 5.0   |
| 6.8   | 2.4   | 1.3   | 1.1   | 0.7   | 1.1   | 1.0   | 1.2   | 0.8   |
| 0.9   | 0.9   | 1.4   | 0.5   | 0.8   | 0.8   | 0.9   | 0.8   | 0.7   |
| 33.3  | 18.9  | 16.8  | 29.1  | 35.4  | 34.0  | 35.8  | 43.7  | 22.5  |
| 1.1   | 14.8  | 15.0  | 13.6  | 18.0  | 18.8  | 24.4  | 21.3  | 17.9  |
| 4.7   | 0.2   | 5.5   | 0.9   | 3.6   | 5.0   | 3.8   | 2.8   | 2.3   |
| 1.3   | 0.4   | 0.7   | 0.5   | 0.3   | 1.1   | 7.3   | 6.3   | 0.6   |
| 2.2   | 2.4   | 0.9   | 1.6   | 3.3   | 7.6   | 7.3   | 7.5   | 5.4   |
| 0.5   | 0.1   | 1.9   | 0.7   | 2.6   | 0.2   | 1.4   | 0.4   | 0.3   |
| 5.2   | 4.1   | 1.5   | 3.7   | 1.3   | 0.9   | 1.6   | 6.8   | 1.5   |
| 2.5   | 0.2   | 0.1   | 2.0   | 0.6   | 0.3   | 3.7   | 0.5   | 1.3   |
| 2.3   | 1.3   | 5.1   | 1.2   | 1.0   | 1.1   | 1.1   | 9.2   | 2.3   |
| 12.2  | 12.8  | 13.5  | 3.2   | 12.9  | 16.1  | 4.0   | 10.4  | 8.8   |
| 0.7   | 0.3   | 0.5   | 2.4   | 0.9   | 1.2   | 1.5   | 0.4   | 0.5   |
| 106.0 | 37.0  | 59.1  | 49.2  | 61.3  | 56.5  | 55.2  | 87.8  | 53.4  |
| 0.5   | 4.3   | 0.3   | 0.7   | 0.9   | 0.4   | 2.3   | 6.7   | 1.9   |
| 1.0   | 0.6   | 0.7   | 0.6   | 1.0   | 1.5   | 0.5   | 1.0   | 0.5   |
| 215.2 | 185.5 | 156.1 | 214.1 | 204.0 | 174.5 | 267.5 | 232.1 | 190.5 |
| 77.9  | 64.0  | 50.6  | 53.8  | 70.2  | 70.4  | 168.0 | 142.6 | 64.2  |

|       |       |       |       |       |       |       |       |       |
|-------|-------|-------|-------|-------|-------|-------|-------|-------|
| 1.7   | 0.9   | 4.1   | 0.7   | 0.9   | 4.9   | 1.4   | 1.0   | 1.0   |
| 0.9   | 0.7   | 4.2   | 0.8   | 1.8   | 1.6   | 0.6   | 6.1   | 0.8   |
| 0.3   | 4.3   | 4.4   | 3.9   | 3.3   | 6.2   | 7.1   | 6.0   | 4.5   |
| 14.4  | 18.5  | 8.5   | 9.9   | 22.5  | 19.7  | 19.5  | 19.3  | 23.6  |
| 14.4  | 18.9  | 10.9  | 12.8  | 10.5  | 11.7  | 11.9  | 15.8  | 18.7  |
| 3.8   | 6.7   | 8.4   | 6.9   | 14.5  | 7.1   | 12.8  | 12.0  | 8.4   |
| 1.9   | 1.5   | 0.4   | 0.8   | 0.6   | 1.2   | 0.7   | 3.5   | 1.1   |
| 0.6   | 3.3   | 5.0   | 6.9   | 2.2   | 0.4   | 0.9   | 2.1   | 2.9   |
| 8.4   | 4.2   | 2.7   | 1.9   | 7.1   | 4.5   | 9.8   | 0.9   | 3.0   |
| 6.1   | 1.4   | 10.2  | 5.5   | 2.3   | 6.0   | 10.9  | 8.7   | 5.4   |
| 1.9   | 0.3   | 0.2   | 0.3   | 0.6   | 0.1   | 1.1   | 0.4   | 0.2   |
| 1.4   | 1.7   | 1.2   | 2.1   | 1.6   | 2.1   | 1.1   | 2.5   | 1.9   |
| 58.6  | 33.2  | 46.1  | 49.0  | 40.0  | 51.7  | 53.2  | 84.4  | 62.3  |
| 28.2  | 12.9  | 31.7  | 24.4  | 27.7  | 17.6  | 29.2  | 24.2  | 28.0  |
| 6.9   | 3.0   | 4.9   | 0.8   | 4.4   | 2.1   | 2.8   | 2.7   | 3.1   |
| 8.8   | 5.5   | 2.6   | 4.7   | 4.8   | 5.9   | 5.5   | 8.2   | 8.2   |
| 1.0   | 1.5   | 0.8   | 1.3   | 2.1   | 1.7   | 9.7   | 1.4   | 4.8   |
| 0.6   | 0.4   | 0.5   | 0.5   | 0.7   | 0.4   | 1.0   | 1.5   | 0.8   |
| 2.4   | 1.7   | 5.7   | 4.9   | 3.7   | 2.0   | 2.9   | 9.2   | 3.7   |
| 442.3 | 211.6 | 228.4 | 255.6 | 186.4 | 266.4 | 349.4 | 521.5 | 300.8 |
| 0.9   | 1.2   | 6.8   | 1.9   | 4.5   | 2.0   | 2.4   | 6.7   | 9.2   |
| 0.8   | 0.9   | 9.2   | 4.7   | 1.8   | 0.6   | 2.0   | 2.4   | 1.1   |
| 1.5   | 1.6   | 0.5   | 1.0   | 0.6   | 2.4   | 0.4   | 1.3   | 0.7   |
| 13.8  | 14.4  | 23.8  | 11.7  | 13.0  | 18.8  | 16.7  | 13.8  | 12.1  |
| 1.2   | 1.1   | 1.0   | 0.9   | 3.4   | 0.6   | 1.2   | 1.9   | 0.8   |
| 3.6   | 2.8   | 5.7   | 0.5   | 0.7   | 3.6   | 0.5   | 0.7   | 0.9   |
| 1.1   | 1.0   | 0.9   | 0.7   | 0.7   | 1.1   | 1.0   | 1.9   | 0.9   |
| 10.2  | 6.0   | 0.6   | 5.4   | 5.0   | 2.4   | 0.8   | 1.0   | 4.6   |
| 0.2   | 1.4   | 2.1   | 0.1   | 0.1   | 0.5   | 0.7   | 0.4   | 1.2   |
| 0.6   | 1.0   | 1.1   | 1.3   | 0.7   | 1.6   | 0.4   | 0.7   | 0.9   |
| 0.8   | 1.4   | 1.0   | 0.4   | 1.0   | 3.5   | 2.8   | 6.1   | 0.8   |
| 39.7  | 29.6  | 28.8  | 23.6  | 24.2  | 34.3  | 47.1  | 49.4  | 35.6  |
| 2.2   | 1.1   | 2.2   | 3.0   | 1.6   | 0.4   | 2.0   | 4.0   | 4.0   |
| 3.9   | 5.2   | 1.2   | 4.0   | 5.1   | 5.9   | 7.1   | 4.3   | 5.9   |
| 1.8   | 1.1   | 2.1   | 2.7   | 1.5   | 2.5   | 1.7   | 1.5   | 1.6   |
| 1.3   | 0.8   | 3.7   | 2.1   | 13.3  | 6.3   | 13.4  | 8.7   | 10.4  |
| 1.3   | 4.0   | 3.1   | 3.1   | 4.9   | 0.7   | 4.8   | 1.1   | 2.5   |
| 4.4   | 2.1   | 0.9   | 4.2   | 0.5   | 5.3   | 2.2   | 6.3   | 1.2   |
| 35.5  | 39.2  | 36.2  | 44.9  | 30.5  | 36.4  | 55.5  | 55.0  | 27.2  |
| 0.8   | 0.9   | 0.1   | 0.7   | 3.3   | 0.4   | 0.8   | 1.0   | 1.2   |
| 3.1   | 0.6   | 2.3   | 1.6   | 3.0   | 2.6   | 0.6   | 5.7   | 4.9   |
| 8.2   | 1.3   | 2.4   | 2.6   | 13.2  | 8.0   | 5.7   | 15.4  | 7.0   |
| 1.7   | 3.2   | 0.6   | 0.8   | 3.9   | 0.4   | 1.1   | 3.3   | 2.4   |
| 24.5  | 20.7  | 17.1  | 21.3  | 21.1  | 20.7  | 28.6  | 31.4  | 18.7  |
| 53.6  | 27.5  | 30.9  | 26.6  | 34.6  | 29.6  | 40.7  | 39.8  | 33.9  |
| 0.3   | 0.2   | 0.1   | 0.3   | 0.3   | 0.6   | 0.4   | 0.2   | 0.1   |
| 7.4   | 3.9   | 10.3  | 7.2   | 2.3   | 5.1   | 10.4  | 11.0  | 10.3  |
| 198.8 | 35.9  | 53.9  | 52.3  | 61.2  | 76.6  | 109.7 | 148.8 | 115.4 |
| 273.0 | 57.5  | 66.3  | 64.5  | 68.9  | 76.8  | 82.3  | 148.6 | 87.5  |
| 19.0  | 6.6   | 10.7  | 8.9   | 9.8   | 10.7  | 8.8   | 14.1  | 16.4  |
| 5.6   | 0.1   | 1.5   | 2.5   | 4.6   | 0.2   | 3.8   | 1.0   | 2.9   |
| 3.6   | 0.2   | 1.5   | 0.4   | 1.6   | 1.8   | 4.1   | 6.0   | 1.4   |
| 3.3   | 0.8   | 0.3   | 0.5   | 4.0   | 0.5   | 0.9   | 0.5   | 1.2   |

|       |       |       |       |       |       |       |       |       |
|-------|-------|-------|-------|-------|-------|-------|-------|-------|
| 11.3  | 6.5   | 11.5  | 6.1   | 12.6  | 7.6   | 7.6   | 20.4  | 9.4   |
| 1.3   | 1.1   | 1.1   | 0.6   | 0.9   | 1.3   | 1.1   | 1.2   | 0.7   |
| 1.2   | 0.8   | 1.5   | 0.7   | 0.6   | 0.3   | 1.0   | 0.6   | 0.5   |
| 11.6  | 7.2   | 18.4  | 14.4  | 14.9  | 14.4  | 18.9  | 11.7  | 13.0  |
| 5.7   | 5.1   | 6.3   | 7.7   | 13.2  | 11.1  | 13.8  | 3.1   | 6.5   |
| 2.1   | 2.0   | 1.9   | 3.3   | 1.9   | 2.2   | 2.9   | 4.1   | 3.5   |
| 4.5   | 1.0   | 0.6   | 0.6   | 3.3   | 0.2   | 0.9   | 0.9   | 0.7   |
| 53.1  | 29.4  | 34.0  | 42.1  | 31.0  | 40.0  | 53.2  | 49.6  | 37.5  |
| 0.5   | 3.8   | 1.1   | 6.2   | 0.5   | 2.2   | 6.8   | 5.3   | 4.2   |
| 1.6   | 1.7   | 4.2   | 5.9   | 1.2   | 1.1   | 1.0   | 1.5   | 2.3   |
| 1.1   | 1.8   | 1.2   | 5.1   | 1.1   | 1.1   | 0.9   | 1.2   | 5.1   |
| 2.4   | 3.1   | 2.5   | 3.4   | 2.1   | 5.1   | 6.3   | 7.9   | 3.2   |
| 0.9   | 0.5   | 0.5   | 0.6   | 0.8   | 0.7   | 0.9   | 0.6   | 0.5   |
| 1.0   | 0.5   | 3.3   | 1.3   | 2.8   | 2.7   | 1.5   | 1.3   | 0.4   |
| 1.2   | 1.7   | 2.3   | 2.0   | 3.1   | 1.3   | 1.5   | 5.5   | 10.7  |
| 6.1   | 1.9   | 1.6   | 4.9   | 1.8   | 7.2   | 18.8  | 11.2  | 3.4   |
| 0.4   | 0.4   | 0.5   | 0.4   | 0.4   | 0.4   | 0.6   | 0.6   | 0.5   |
| 30.5  | 46.4  | 51.2  | 48.9  | 42.8  | 39.6  | 50.3  | 52.4  | 40.4  |
| 2.2   | 0.8   | 1.3   | 1.9   | 1.4   | 1.2   | 3.4   | 1.7   | 1.2   |
| 0.4   | 0.3   | 0.7   | 0.6   | 1.5   | 0.3   | 0.4   | 0.5   | 0.3   |
| 7.5   | 2.1   | 3.9   | 1.9   | 3.2   | 6.5   | 9.0   | 7.5   | 6.5   |
| 0.2   | 2.5   | 0.5   | 3.3   | 1.3   | 0.3   | 4.4   | 2.1   | 0.3   |
| 11.7  | 2.3   | 3.3   | 0.6   | 6.3   | 11.7  | 2.3   | 1.0   | 3.2   |
| 0.4   | 0.3   | 0.4   | 0.4   | 0.2   | 0.3   | 0.4   | 0.4   | 0.3   |
| 2.5   | 4.3   | 4.5   | 7.1   | 2.5   | 3.8   | 1.2   | 3.2   | 4.9   |
| 1.3   | 7.9   | 0.3   | 1.4   | 0.5   | 4.4   | 1.7   | 3.2   | 0.5   |
| 103.4 | 47.7  | 52.8  | 62.0  | 59.1  | 68.4  | 95.2  | 107.0 | 67.4  |
| 1.9   | 0.8   | 0.6   | 1.7   | 0.6   | 1.6   | 1.4   | 0.9   | 0.9   |
| 338.2 | 445.9 | 438.9 | 440.1 | 496.1 | 426.0 | 615.9 | 774.1 | 399.1 |
| 9.3   | 0.8   | 3.7   | 5.9   | 0.9   | 0.4   | 0.9   | 5.2   | 4.7   |
| 0.9   | 0.9   | 3.1   | 0.6   | 1.5   | 0.7   | 1.1   | 1.0   | 0.6   |
| 12.5  | 5.8   | 6.5   | 11.3  | 12.1  | 8.3   | 5.5   | 9.8   | 10.2  |
| 0.2   | 1.0   | 0.3   | 0.5   | 0.2   | 0.6   | 0.9   | 0.6   | 1.1   |
| 2.2   | 14.1  | 1.8   | 2.4   | 2.4   | 5.2   | 6.5   | 3.6   | 2.7   |
| 0.5   | 0.4   | 1.0   | 1.7   | 0.4   | 0.5   | 4.4   | 1.2   | 0.5   |
| 0.3   | 0.3   | 0.5   | 0.7   | 0.3   | 0.6   | 0.4   | 0.3   | 0.5   |
| 0.4   | 0.4   | 0.5   | 0.4   | 1.0   | 0.6   | 0.3   | 0.6   | 0.4   |
| 0.4   | 1.0   | 1.0   | 0.7   | 0.5   | 0.4   | 1.2   | 1.1   | 0.5   |
| 1.4   | 1.8   | 1.0   | 3.6   | 1.3   | 7.9   | 1.1   | 2.5   | 1.2   |
| 11.1  | 11.4  | 7.9   | 14.2  | 13.1  | 7.5   | 7.5   | 15.8  | 24.2  |
| 41.6  | 17.9  | 21.7  | 20.7  | 16.7  | 24.0  | 32.8  | 31.1  | 18.7  |
| 8.5   | 1.5   | 6.9   | 3.0   | 0.9   | 5.1   | 6.3   | 6.7   | 8.5   |
| 2.6   | 1.6   | 4.7   | 0.7   | 1.9   | 1.0   | 7.0   | 2.1   | 1.6   |
| 0.8   | 1.6   | 5.0   | 1.9   | 0.4   | 0.3   | 4.1   | 5.3   | 2.0   |
| 26.9  | 48.3  | 56.0  | 58.3  | 55.0  | 51.3  | 70.0  | 71.3  | 41.9  |
| 0.9   | 1.0   | 2.3   | 2.3   | 0.9   | 0.9   | 1.8   | 1.6   | 1.8   |
| 0.9   | 8.6   | 7.8   | 7.3   | 1.3   | 2.5   | 3.0   | 3.2   | 5.1   |
| 3.2   | 3.1   | 0.8   | 5.8   | 1.5   | 6.2   | 4.4   | 1.4   | 0.8   |
| 39.3  | 40.1  | 26.3  | 22.7  | 28.9  | 26.5  | 36.4  | 56.1  | 29.4  |
| 1.1   | 2.2   | 1.6   | 1.1   | 1.9   | 1.5   | 1.0   | 1.9   | 1.4   |
| 1.5   | 0.9   | 1.2   | 0.9   | 6.7   | 1.0   | 0.6   | 1.5   | 1.1   |
| 7.0   | 1.3   | 0.4   | 1.1   | 0.4   | 2.9   | 5.3   | 4.3   | 2.9   |
| 1.9   | 0.6   | 2.5   | 1.6   | 0.9   | 0.6   | 1.3   | 1.3   | 1.2   |

|        |       |       |       |       |       |        |        |       |
|--------|-------|-------|-------|-------|-------|--------|--------|-------|
| 8.2    | 4.7   | 6.3   | 7.8   | 10.9  | 6.3   | 10.2   | 9.6    | 3.5   |
| 12.3   | 14.6  | 14.3  | 12.1  | 9.8   | 9.5   | 14.7   | 16.1   | 8.2   |
| 7.2    | 6.5   | 1.5   | 7.0   | 1.0   | 1.6   | 10.2   | 1.5    | 4.7   |
| 1.2    | 0.9   | 1.9   | 1.4   | 2.3   | 1.6   | 1.9    | 2.1    | 2.2   |
| 54.9   | 42.4  | 40.4  | 50.4  | 45.0  | 33.7  | 51.6   | 57.5   | 39.3  |
| 3.1    | 1.8   | 1.7   | 1.6   | 1.9   | 3.2   | 3.6    | 2.5    | 1.5   |
| 7.6    | 10.0  | 6.8   | 11.4  | 3.6   | 6.9   | 11.4   | 15.5   | 9.2   |
| 8.9    | 13.8  | 0.6   | 2.0   | 0.8   | 3.4   | 5.3    | 0.7    | 8.2   |
| 0.9    | 0.6   | 0.8   | 0.4   | 0.5   | 0.6   | 0.6    | 2.9    | 0.6   |
| 25.2   | 18.1  | 28.9  | 11.5  | 32.6  | 26.0  | 20.3   | 25.7   | 30.4  |
| 3.8    | 1.2   | 2.5   | 4.9   | 4.9   | 0.2   | 3.0    | 4.3    | 1.8   |
| 1.2    | 0.8   | 1.4   | 0.7   | 0.9   | 1.9   | 1.3    | 0.8    | 2.0   |
| 1.7    | 0.7   | 0.6   | 4.3   | 0.7   | 1.0   | 1.4    | 1.1    | 2.0   |
| 0.8    | 0.7   | 1.1   | 1.3   | 1.3   | 0.5   | 0.9    | 1.4    | 4.9   |
| 1.7    | 0.8   | 1.7   | 1.6   | 1.5   | 2.0   | 1.5    | 1.7    | 2.3   |
| 0.2    | 5.2   | 4.8   | 4.6   | 0.7   | 5.6   | 4.5    | 9.1    | 4.0   |
| 0.8    | 1.6   | 2.5   | 0.3   | 4.1   | 2.4   | 3.5    | 2.4    | 2.1   |
| 3.3    | 1.5   | 2.9   | 0.6   | 0.5   | 4.8   | 2.1    | 3.6    | 3.1   |
| 0.3    | 0.7   | 0.7   | 0.3   | 0.3   | 0.5   | 0.5    | 1.1    | 0.5   |
| 53.8   | 21.1  | 33.0  | 31.6  | 25.3  | 39.6  | 41.3   | 48.9   | 36.8  |
| 2.8    | 1.6   | 2.4   | 1.2   | 1.7   | 1.6   | 3.0    | 1.3    | 1.5   |
| 84.0   | 92.9  | 92.0  | 84.3  | 95.9  | 80.1  | 109.9  | 111.8  | 80.3  |
| 2.2    | 3.5   | 0.6   | 1.5   | 3.4   | 2.8   | 2.5    | 1.4    | 0.4   |
| 2.1    | 1.9   | 2.3   | 0.3   | 3.2   | 0.2   | 4.2    | 3.3    | 2.6   |
| 2.0    | 2.3   | 0.4   | 1.3   | 0.3   | 3.3   | 0.7    | 2.8    | 0.6   |
| 16.1   | 11.7  | 11.5  | 7.7   | 15.8  | 11.1  | 14.2   | 7.8    | 11.3  |
| 17.6   | 4.1   | 16.0  | 4.9   | 6.6   | 7.7   | 10.4   | 15.1   | 12.5  |
| 2.1    | 5.7   | 2.0   | 10.5  | 2.8   | 4.6   | 13.6   | 20.3   | 2.2   |
| 59.0   | 74.2  | 53.7  | 73.1  | 44.1  | 51.6  | 56.8   | 77.3   | 73.4  |
| 0.5    | 0.2   | 1.6   | 2.5   | 1.9   | 1.6   | 1.0    | 3.0    | 2.1   |
| 14.4   | 5.2   | 2.2   | 6.5   | 5.5   | 7.9   | 11.4   | 11.9   | 5.9   |
| 218.8  | 142.1 | 189.9 | 179.4 | 179.8 | 166.8 | 248.3  | 249.3  | 190.8 |
| 0.5    | 4.6   | 3.5   | 0.9   | 0.6   | 2.0   | 0.2    | 3.2    | 2.6   |
| 0.4    | 1.3   | 0.7   | 0.9   | 0.9   | 0.8   | 1.2    | 0.5    | 0.7   |
| 1.5    | 2.3   | 7.3   | 1.3   | 6.4   | 10.8  | 6.6    | 2.0    | 1.2   |
| 1255.4 | 795.8 | 883.2 | 877.0 | 969.6 | 952.1 | 1068.6 | 1075.7 | 742.1 |
| 5.1    | 2.5   | 0.6   | 1.1   | 0.9   | 0.5   | 1.9    | 4.6    | 4.0   |
| 0.4    | 0.4   | 0.7   | 0.3   | 0.4   | 0.8   | 0.3    | 2.3    | 0.2   |
| 16.6   | 12.9  | 15.7  | 19.6  | 15.9  | 18.6  | 18.0   | 17.1   | 21.8  |
| 1.0    | 5.8   | 5.4   | 2.3   | 4.7   | 2.7   | 4.4    | 2.2    | 3.0   |
| 0.9    | 1.7   | 1.1   | 1.5   | 1.0   | 3.3   | 1.5    | 2.7    | 0.8   |
| 57.5   | 47.7  | 47.7  | 47.6  | 64.5  | 55.5  | 98.4   | 96.0   | 77.8  |
| 333.1  | 205.6 | 231.1 | 227.8 | 257.5 | 220.6 | 409.4  | 265.3  | 205.3 |
| 130.8  | 115.3 | 167.2 | 173.0 | 121.3 | 121.4 | 191.0  | 140.8  | 100.7 |
| 3.3    | 0.8   | 1.5   | 4.4   | 4.7   | 5.5   | 7.0    | 2.4    | 4.1   |
| 2.4    | 10.9  | 12.8  | 5.2   | 5.5   | 10.5  | 3.9    | 18.2   | 1.3   |
| 3.5    | 0.4   | 0.6   | 0.6   | 0.3   | 4.6   | 0.3    | 0.2    | 0.6   |
| 14.2   | 8.6   | 3.1   | 7.2   | 4.8   | 7.4   | 9.9    | 5.0    | 4.7   |
| 5.2    | 6.7   | 11.5  | 4.7   | 1.3   | 0.7   | 1.9    | 4.4    | 1.7   |
| 3.6    | 9.1   | 10.9  | 1.4   | 10.2  | 8.1   | 6.0    | 7.9    | 5.5   |
| 3.1    | 2.3   | 3.4   | 3.2   | 1.1   | 3.4   | 4.8    | 4.5    | 1.0   |
| 661.3  | 156.5 | 162.1 | 155.6 | 204.9 | 211.3 | 252.4  | 212.7  | 193.4 |
| 2.7    | 1.0   | 9.2   | 7.0   | 5.7   | 7.5   | 5.0    | 9.1    | 4.8   |

|       |       |       |       |       |       |       |       |       |
|-------|-------|-------|-------|-------|-------|-------|-------|-------|
| 49.8  | 9.7   | 28.7  | 19.7  | 23.5  | 25.1  | 35.6  | 27.0  | 21.0  |
| 14.9  | 7.8   | 6.0   | 8.8   | 5.5   | 11.3  | 16.8  | 9.0   | 3.9   |
| 3.0   | 1.1   | 1.8   | 0.6   | 0.8   | 1.1   | 1.1   | 6.4   | 1.5   |
| 0.6   | 0.8   | 0.6   | 0.2   | 0.2   | 4.0   | 2.6   | 1.1   | 0.6   |
| 19.5  | 7.2   | 12.9  | 20.6  | 11.6  | 9.0   | 18.8  | 20.4  | 7.5   |
| 88.6  | 63.6  | 99.0  | 67.2  | 84.6  | 86.7  | 112.8 | 109.9 | 90.8  |
| 55.0  | 50.9  | 40.7  | 47.0  | 50.7  | 50.2  | 66.2  | 64.9  | 54.8  |
| 0.3   | 0.7   | 0.6   | 0.5   | 0.5   | 0.6   | 0.3   | 0.5   | 0.4   |
| 9.6   | 2.3   | 1.3   | 3.6   | 3.2   | 4.3   | 2.1   | 6.5   | 4.4   |
| 98.2  | 92.9  | 92.2  | 112.3 | 91.2  | 89.5  | 142.2 | 104.5 | 118.9 |
| 54.9  | 31.6  | 30.1  | 44.9  | 42.7  | 41.4  | 61.1  | 62.2  | 38.2  |
| 5.3   | 9.4   | 6.0   | 7.6   | 8.0   | 7.0   | 7.8   | 11.4  | 5.1   |
| 2.1   | 1.9   | 1.2   | 1.4   | 6.0   | 1.5   | 0.8   | 2.0   | 2.7   |
| 0.3   | 2.9   | 0.3   | 0.6   | 0.8   | 0.2   | 0.2   | 1.7   | 1.9   |
| 8.5   | 2.3   | 1.0   | 2.1   | 11.8  | 6.5   | 6.9   | 3.3   | 3.8   |
| 6.8   | 6.7   | 5.5   | 8.0   | 3.6   | 9.5   | 4.7   | 9.2   | 10.1  |
| 0.4   | 2.1   | 1.6   | 0.1   | 0.5   | 2.0   | 4.3   | 0.2   | 0.4   |
| 0.3   | 0.3   | 0.7   | 1.9   | 0.7   | 1.2   | 0.8   | 0.8   | 6.6   |
| 0.4   | 0.6   | 6.3   | 0.2   | 1.5   | 0.5   | 0.3   | 0.5   | 0.5   |
| 1.1   | 4.6   | 2.7   | 0.9   | 0.9   | 0.6   | 0.8   | 1.3   | 7.8   |
| 12.7  | 8.4   | 14.7  | 10.1  | 9.4   | 8.7   | 11.0  | 21.0  | 8.7   |
| 1.6   | 3.5   | 1.7   | 9.8   | 4.8   | 1.1   | 2.1   | 2.4   | 3.7   |
| 11.7  | 14.4  | 3.9   | 3.6   | 18.9  | 14.7  | 4.8   | 5.9   | 5.9   |
| 1.4   | 4.4   | 0.5   | 1.2   | 0.6   | 1.6   | 5.1   | 1.0   | 4.8   |
| 1.5   | 1.1   | 0.4   | 0.4   | 1.7   | 0.7   | 0.7   | 6.2   | 0.6   |
| 1.6   | 4.5   | 2.9   | 0.4   | 1.0   | 0.5   | 1.0   | 1.2   | 1.6   |
| 1.1   | 0.7   | 0.3   | 3.3   | 0.5   | 1.6   | 0.7   | 0.5   | 3.1   |
| 9.3   | 0.4   | 6.5   | 1.5   | 4.1   | 0.7   | 2.7   | 0.8   | 0.7   |
| 214.2 | 150.9 | 160.5 | 178.6 | 184.5 | 160.2 | 221.0 | 231.5 | 181.9 |
| 1.1   | 6.2   | 9.3   | 7.6   | 9.5   | 6.7   | 4.3   | 1.7   | 7.9   |
| 7.1   | 7.9   | 13.5  | 3.0   | 9.8   | 8.6   | 13.8  | 11.4  | 7.8   |
| 0.2   | 0.2   | 1.3   | 0.5   | 0.7   | 0.7   | 0.6   | 1.2   | 0.5   |
| 48.3  | 21.3  | 26.1  | 31.6  | 28.4  | 29.6  | 33.6  | 32.2  | 33.3  |
| 0.3   | 4.0   | 0.4   | 2.1   | 0.9   | 3.9   | 1.7   | 2.4   | 1.2   |
| 14.9  | 3.3   | 7.7   | 6.6   | 10.9  | 4.8   | 8.5   | 14.8  | 11.4  |
| 6.6   | 4.9   | 9.1   | 1.6   | 3.7   | 2.2   | 2.0   | 11.2  | 5.2   |
| 298.9 | 243.1 | 305.6 | 281.6 | 281.4 | 315.1 | 415.4 | 432.7 | 465.6 |
| 0.7   | 3.5   | 0.3   | 2.5   | 4.0   | 0.5   | 0.6   | 7.8   | 3.2   |
| 128.4 | 14.7  | 9.7   | 7.3   | 14.4  | 9.5   | 6.1   | 18.8  | 14.6  |
| 2.1   | 3.4   | 0.4   | 0.3   | 1.4   | 2.8   | 3.4   | 2.6   | 8.7   |
| 11.2  | 7.7   | 26.7  | 9.8   | 11.1  | 12.9  | 18.9  | 10.2  | 2.4   |
| 3.9   | 0.7   | 0.3   | 0.9   | 4.2   | 2.0   | 1.4   | 3.5   | 4.5   |
| 4.9   | 2.7   | 0.1   | 0.1   | 0.1   | 2.6   | 1.0   | 3.7   | 0.1   |
| 20.5  | 14.5  | 9.4   | 13.5  | 17.6  | 10.8  | 11.5  | 9.6   | 17.5  |
| 19.4  | 9.9   | 16.5  | 13.8  | 12.1  | 16.8  | 20.1  | 34.2  | 20.1  |
| 2.0   | 2.0   | 1.8   | 10.8  | 2.2   | 2.6   | 2.8   | 3.3   | 5.8   |
| 3.5   | 10.0  | 13.0  | 1.5   | 1.1   | 4.8   | 10.2  | 15.7  | 5.3   |
| 5.6   | 14.1  | 12.2  | 13.4  | 6.6   | 7.2   | 13.0  | 10.0  | 12.4  |
| 12.0  | 9.9   | 1.5   | 10.7  | 9.1   | 2.1   | 9.5   | 10.1  | 6.1   |
| 0.8   | 0.8   | 0.9   | 0.8   | 0.8   | 0.7   | 7.7   | 2.8   | 2.3   |
| 1.6   | 12.0  | 4.8   | 6.7   | 5.6   | 0.8   | 6.3   | 14.7  | 9.3   |
| 0.7   | 1.0   | 0.6   | 1.3   | 4.0   | 0.3   | 1.0   | 0.6   | 1.8   |
| 4.1   | 1.4   | 3.9   | 3.2   | 1.7   | 4.8   | 2.0   | 3.1   | 1.1   |

|        |        |        |        |        |        |        |        |        |
|--------|--------|--------|--------|--------|--------|--------|--------|--------|
| 8.4    | 1.4    | 2.2    | 1.0    | 3.7    | 1.0    | 10.7   | 12.4   | 6.6    |
| 0.5    | 2.5    | 0.6    | 4.0    | 0.5    | 1.3    | 0.4    | 0.9    | 0.6    |
| 0.6    | 0.8    | 2.5    | 4.2    | 1.1    | 0.5    | 0.7    | 3.8    | 1.4    |
| 2.5    | 2.4    | 0.3    | 0.3    | 0.3    | 2.0    | 0.3    | 0.9    | 0.1    |
| 19.4   | 18.0   | 17.5   | 14.0   | 11.5   | 14.6   | 12.7   | 22.1   | 14.0   |
| 12.7   | 2.4    | 16.8   | 8.8    | 14.3   | 10.4   | 15.0   | 27.4   | 12.3   |
| 0.7    | 0.3    | 0.3    | 0.3    | 0.4    | 0.6    | 0.3    | 0.4    | 0.4    |
| 10.8   | 6.0    | 2.0    | 8.1    | 4.9    | 4.8    | 10.0   | 5.9    | 3.8    |
| 19.8   | 8.4    | 2.6    | 5.7    | 13.8   | 15.0   | 10.3   | 4.1    | 7.3    |
| 4.0    | 4.8    | 1.1    | 4.8    | 4.1    | 2.0    | 3.4    | 3.7    | 5.3    |
| 1.2    | 0.8    | 0.3    | 1.3    | 0.9    | 0.4    | 0.8    | 0.4    | 0.6    |
| 30.0   | 22.2   | 19.8   | 25.1   | 26.0   | 17.9   | 29.7   | 33.3   | 19.5   |
| 0.4    | 4.5    | 0.8    | 4.4    | 0.6    | 5.0    | 5.5    | 0.5    | 0.6    |
| 5.1    | 2.2    | 2.0    | 3.5    | 3.7    | 1.6    | 5.6    | 5.6    | 0.8    |
| 14.0   | 9.9    | 11.6   | 10.6   | 9.4    | 11.3   | 12.3   | 9.0    | 11.5   |
| 3.5    | 3.2    | 4.4    | 2.6    | 6.1    | 3.2    | 11.7   | 4.5    | 19.2   |
| 3.8    | 0.3    | 3.4    | 6.1    | 1.0    | 6.7    | 8.9    | 0.9    | 1.4    |
| 35.9   | 21.8   | 21.6   | 27.5   | 22.5   | 27.8   | 42.2   | 31.8   | 28.6   |
| 8.3    | 10.8   | 2.2    | 3.3    | 23.1   | 11.2   | 5.1    | 15.6   | 10.4   |
| 0.3    | 0.3    | 0.3    | 1.4    | 0.5    | 2.3    | 0.4    | 2.7    | 1.8    |
| 9.6    | 7.2    | 7.5    | 8.4    | 7.1    | 4.9    | 11.7   | 18.1   | 6.3    |
| 14.9   | 9.2    | 6.4    | 10.5   | 13.3   | 6.1    | 8.0    | 12.8   | 6.0    |
| 5.3    | 2.2    | 1.3    | 0.9    | 5.5    | 5.6    | 1.8    | 3.3    | 2.0    |
| 1.8    | 2.5    | 2.0    | 0.9    | 1.9    | 1.8    | 3.5    | 9.2    | 1.1    |
| 20.3   | 10.2   | 16.2   | 18.5   | 12.1   | 13.1   | 26.3   | 28.0   | 17.0   |
| 1.0    | 0.7    | 3.6    | 6.4    | 8.1    | 1.2    | 1.5    | 4.6    | 5.2    |
| 71.2   | 43.3   | 44.1   | 52.0   | 53.8   | 44.8   | 88.0   | 107.4  | 85.4   |
| 2.7    | 1.0    | 0.1    | 0.3    | 1.9    | 1.0    | 3.1    | 6.6    | 2.5    |
| 34.7   | 24.4   | 26.3   | 32.1   | 40.9   | 36.8   | 45.0   | 56.4   | 38.2   |
| 2.2    | 2.5    | 5.0    | 3.8    | 3.4    | 1.9    | 2.1    | 1.4    | 1.9    |
| 1.3    | 0.2    | 2.2    | 1.4    | 0.5    | 2.8    | 1.0    | 0.6    | 2.8    |
| 1.5    | 4.6    | 0.7    | 7.3    | 1.6    | 7.2    | 5.4    | 6.9    | 6.3    |
| 3.1    | 0.1    | 1.2    | 0.2    | 0.7    | 1.4    | 1.8    | 2.6    | 0.3    |
| 2.3    | 7.7    | 8.9    | 3.6    | 6.7    | 5.9    | 9.6    | 10.1   | 3.2    |
| 134.5  | 75.6   | 106.0  | 110.5  | 114.0  | 107.9  | 143.3  | 159.7  | 97.2   |
| 24.6   | 13.5   | 14.2   | 12.9   | 14.4   | 12.7   | 10.7   | 22.4   | 18.2   |
| 0.0    | 0.2    | 2.0    | 1.0    | 1.6    | 2.6    | 0.3    | 2.8    | 1.3    |
| 3.8    | 2.0    | 3.2    | 1.6    | 1.0    | 10.7   | 2.9    | 1.9    | 6.9    |
| 69.6   | 36.7   | 30.7   | 47.2   | 40.1   | 43.3   | 52.5   | 53.9   | 49.2   |
| 145.0  | 53.4   | 54.3   | 55.6   | 72.4   | 75.0   | 123.5  | 155.6  | 110.0  |
| 9.4    | 8.1    | 10.1   | 11.6   | 8.2    | 9.7    | 7.0    | 7.2    | 5.2    |
| 15.7   | 10.4   | 7.1    | 10.0   | 7.7    | 8.8    | 17.2   | 18.3   | 11.6   |
| 20.8   | 7.8    | 8.5    | 9.3    | 12.7   | 5.6    | 15.1   | 18.2   | 10.2   |
| 3716.3 | 3240.5 | 3227.2 | 3318.7 | 3313.7 | 3162.8 | 3748.1 | 4060.9 | 2485.4 |
| 13.3   | 10.8   | 10.5   | 3.4    | 17.8   | 22.1   | 8.7    | 11.6   | 11.2   |
| 7.2    | 5.6    | 1.9    | 6.0    | 0.6    | 0.7    | 6.9    | 10.2   | 7.0    |
| 368.2  | 222.4  | 235.3  | 275.9  | 267.6  | 264.8  | 411.8  | 455.4  | 284.7  |
| 1.0    | 4.4    | 5.6    | 4.5    | 1.7    | 9.8    | 11.3   | 5.1    | 9.4    |
| 3.5    | 1.5    | 3.8    | 4.8    | 7.3    | 6.9    | 13.6   | 6.8    | 3.5    |
| 101.1  | 139.0  | 130.7  | 148.1  | 144.8  | 103.8  | 170.5  | 168.3  | 118.0  |
| 18.3   | 15.8   | 15.0   | 17.9   | 18.5   | 26.9   | 21.3   | 31.5   | 12.9   |
| 36.6   | 26.5   | 39.6   | 31.8   | 36.2   | 27.2   | 45.5   | 54.9   | 41.5   |
| 3.6    | 10.4   | 1.1    | 8.0    | 4.4    | 1.4    | 1.6    | 13.0   | 2.2    |

|        |       |       |        |        |        |        |        |       |
|--------|-------|-------|--------|--------|--------|--------|--------|-------|
| 1.1    | 4.0   | 5.6   | 0.3    | 0.6    | 5.2    | 7.5    | 5.9    | 5.6   |
| 9.7    | 7.5   | 1.1   | 10.7   | 5.5    | 4.9    | 4.3    | 2.1    | 14.0  |
| 61.4   | 50.9  | 41.0  | 58.8   | 62.4   | 42.9   | 67.6   | 53.7   | 46.6  |
| 59.3   | 47.3  | 59.7  | 36.3   | 52.6   | 42.1   | 63.1   | 82.1   | 46.8  |
| 10.3   | 11.2  | 7.9   | 8.1    | 13.3   | 8.7    | 7.6    | 9.8    | 11.3  |
| 14.5   | 15.1  | 15.4  | 13.9   | 14.1   | 17.0   | 15.8   | 21.5   | 16.0  |
| 1.1    | 1.0   | 0.9   | 1.1    | 0.7    | 0.8    | 1.1    | 1.6    | 0.7   |
| 10.8   | 10.0  | 9.8   | 11.1   | 10.5   | 8.9    | 6.9    | 11.0   | 12.4  |
| 0.3    | 2.9   | 0.4   | 3.2    | 0.2    | 0.9    | 5.2    | 2.6    | 0.5   |
| 1.0    | 1.9   | 1.6   | 1.7    | 1.0    | 2.0    | 1.1    | 2.2    | 1.0   |
| 5.4    | 4.2   | 4.3   | 3.9    | 4.8    | 3.3    | 6.8    | 5.7    | 2.3   |
| 11.2   | 13.3  | 9.0   | 11.9   | 9.1    | 7.9    | 14.0   | 23.4   | 11.9  |
| 0.9    | 3.4   | 0.3   | 5.8    | 3.6    | 2.8    | 5.7    | 1.0    | 1.3   |
| 31.5   | 21.5  | 26.9  | 27.4   | 19.2   | 21.6   | 46.1   | 42.4   | 26.9  |
| 6.9    | 10.5  | 6.9   | 11.0   | 7.9    | 2.6    | 9.5    | 10.5   | 12.5  |
| 2.1    | 0.5   | 0.9   | 0.3    | 6.3    | 3.4    | 0.7    | 1.8    | 1.3   |
| 2.0    | 3.6   | 0.9   | 0.8    | 3.2    | 6.4    | 5.9    | 1.8    | 6.0   |
| 17.3   | 17.8  | 15.0  | 17.6   | 13.5   | 13.7   | 19.2   | 20.3   | 15.7  |
| 38.5   | 25.8  | 26.6  | 25.9   | 30.2   | 26.9   | 34.8   | 42.7   | 26.3  |
| 3.0    | 1.8   | 1.2   | 0.3    | 1.7    | 0.3    | 4.1    | 5.7    | 0.7   |
| 0.9    | 0.4   | 0.5   | 1.0    | 0.8    | 0.5    | 1.1    | 0.6    | 1.5   |
| 21.4   | 20.4  | 10.5  | 25.5   | 15.7   | 11.6   | 15.1   | 28.0   | 19.6  |
| 0.5    | 0.1   | 0.2   | 1.7    | 0.6    | 1.2    | 7.2    | 1.0    | 0.2   |
| 322.6  | 253.7 | 274.5 | 303.5  | 272.8  | 313.7  | 383.9  | 426.9  | 353.6 |
| 72.7   | 42.4  | 53.9  | 63.9   | 39.7   | 52.4   | 59.4   | 71.9   | 53.9  |
| 10.5   | 7.9   | 7.7   | 5.3    | 10.1   | 17.7   | 8.8    | 24.0   | 12.3  |
| 2.7    | 0.7   | 3.5   | 3.9    | 2.3    | 0.5    | 0.6    | 6.8    | 5.2   |
| 8.2    | 1.4   | 12.0  | 2.1    | 7.0    | 10.6   | 15.5   | 17.9   | 10.6  |
| 2.8    | 7.8   | 0.6   | 5.7    | 0.9    | 1.4    | 1.2    | 7.6    | 1.4   |
| 0.6    | 0.4   | 0.3   | 0.5    | 0.6    | 0.5    | 0.6    | 0.5    | 0.5   |
| 1.7    | 1.4   | 0.6   | 0.5    | 1.3    | 1.4    | 1.5    | 1.4    | 6.6   |
| 1.1    | 0.6   | 6.1   | 1.2    | 1.6    | 1.0    | 1.2    | 0.6    | 0.3   |
| 0.7    | 2.5   | 0.2   | 3.5    | 0.5    | 0.7    | 0.7    | 0.5    | 0.5   |
| 1.6    | 2.0   | 4.9   | 2.5    | 0.3    | 2.2    | 0.3    | 0.4    | 1.5   |
| 1.4    | 1.0   | 0.3   | 0.6    | 1.0    | 0.4    | 1.2    | 0.7    | 0.6   |
| 0.8    | 13.7  | 13.9  | 20.4   | 19.9   | 16.1   | 24.0   | 14.3   | 20.0  |
| 0.9    | 1.1   | 1.6   | 4.6    | 1.8    | 2.7    | 1.4    | 1.1    | 1.8   |
| 0.8    | 0.9   | 0.7   | 0.6    | 0.6    | 0.6    | 0.5    | 0.9    | 1.0   |
| 6.8    | 10.0  | 1.2   | 3.6    | 5.0    | 12.2   | 3.7    | 2.5    | 10.2  |
| 8.4    | 10.8  | 11.3  | 13.1   | 6.8    | 12.3   | 12.2   | 8.3    | 10.6  |
| 5.2    | 4.1   | 1.3   | 1.3    | 0.8    | 7.7    | 7.6    | 5.3    | 6.8   |
| 6.7    | 4.9   | 7.7   | 4.8    | 1.5    | 8.0    | 7.4    | 3.7    | 4.5   |
| 19.8   | 20.9  | 26.0  | 24.1   | 28.7   | 21.0   | 43.7   | 46.5   | 28.5  |
| 6.6    | 2.3   | 2.0   | 4.4    | 8.0    | 0.5    | 2.7    | 3.3    | 4.9   |
| 21.4   | 6.8   | 10.1  | 8.0    | 10.8   | 12.5   | 19.3   | 25.2   | 17.3  |
| 0.7    | 2.2   | 0.8   | 2.3    | 4.0    | 2.9    | 3.5    | 3.1    | 2.6   |
| 6.6    | 1.4   | 4.1   | 0.4    | 2.9    | 3.7    | 4.3    | 7.6    | 4.3   |
| 1.5    | 1.0   | 0.4   | 0.5    | 0.4    | 1.3    | 0.4    | 0.9    | 1.4   |
| 2.0    | 1.7   | 2.0   | 1.6    | 1.8    | 1.7    | 2.5    | 1.6    | 1.0   |
| 0.7    | 4.8   | 0.7   | 2.3    | 0.6    | 3.2    | 2.0    | 1.6    | 0.2   |
| 1.1    | 5.1   | 1.6   | 0.5    | 2.0    | 1.7    | 1.0    | 1.6    | 0.6   |
| 5.4    | 3.2   | 9.4   | 2.9    | 6.3    | 4.3    | 4.8    | 3.3    | 7.2   |
| 1128.0 | 940.1 | 940.2 | 1060.6 | 1105.6 | 1081.1 | 1202.3 | 1426.7 | 808.5 |



|       |        |        |        |        |        |        |        |        |
|-------|--------|--------|--------|--------|--------|--------|--------|--------|
| 4.6   | 1.4    | 2.7    | 1.6    | 6.0    | 1.6    | 5.6    | 1.4    | 1.2    |
| 1.7   | 5.7    | 4.7    | 5.3    | 1.6    | 5.3    | 7.2    | 4.7    | 6.3    |
| 77.7  | 66.2   | 59.8   | 59.0   | 63.9   | 69.1   | 104.3  | 147.5  | 81.0   |
| 5.7   | 10.5   | 7.0    | 2.3    | 12.6   | 4.5    | 10.6   | 3.8    | 7.2    |
| 11.9  | 8.0    | 11.1   | 16.6   | 8.7    | 2.0    | 12.4   | 10.8   | 19.1   |
| 0.4   | 0.3    | 0.1    | 0.9    | 0.2    | 0.4    | 0.2    | 0.2    | 2.2    |
| 6.1   | 10.8   | 5.5    | 12.8   | 11.1   | 7.0    | 7.4    | 8.8    | 3.7    |
| 0.5   | 0.5    | 0.3    | 0.8    | 0.3    | 0.3    | 0.5    | 1.1    | 0.5    |
| 13.3  | 7.5    | 4.6    | 11.4   | 8.2    | 1.5    | 2.4    | 10.8   | 7.1    |
| 0.9   | 0.6    | 1.0    | 1.3    | 0.4    | 0.2    | 0.2    | 2.1    | 4.8    |
| 187.2 | 166.1  | 168.5  | 179.5  | 213.3  | 169.5  | 312.4  | 293.9  | 249.2  |
| 6.5   | 3.4    | 2.7    | 8.3    | 3.2    | 7.1    | 10.0   | 6.6    | 3.3    |
| 0.7   | 0.5    | 7.8    | 1.7    | 1.0    | 1.3    | 4.6    | 1.3    | 4.1    |
| 18.8  | 8.8    | 9.5    | 15.9   | 3.6    | 12.9   | 6.1    | 5.1    | 16.3   |
| 5.7   | 8.1    | 9.5    | 12.6   | 8.3    | 9.7    | 9.2    | 13.4   | 10.3   |
| 3.3   | 0.2    | 0.9    | 0.8    | 4.6    | 0.2    | 1.9    | 2.7    | 3.8    |
| 0.6   | 0.3    | 1.5    | 0.2    | 0.2    | 0.5    | 0.2    | 0.5    | 0.3    |
| 5.2   | 8.5    | 3.3    | 2.6    | 2.8    | 0.8    | 0.3    | 5.2    | 3.5    |
| 971.4 | 1064.8 | 1228.4 | 1212.9 | 1235.7 | 1268.3 | 1474.5 | 1761.6 | 1010.9 |
| 0.5   | 2.0    | 2.3    | 0.4    | 0.7    | 0.2    | 0.5    | 0.7    | 1.9    |
| 0.3   | 0.1    | 1.5    | 2.8    | 1.5    | 2.5    | 1.0    | 2.7    | 2.3    |
| 2.4   | 3.3    | 1.4    | 1.8    | 2.6    | 6.7    | 0.6    | 7.4    | 5.2    |
| 2.7   | 1.0    | 1.3    | 1.8    | 3.7    | 2.2    | 3.2    | 1.8    | 3.7    |
| 5.4   | 5.7    | 5.5    | 1.7    | 6.2    | 3.4    | 1.9    | 3.3    | 5.4    |
| 5.5   | 1.4    | 1.5    | 0.5    | 3.4    | 1.6    | 1.3    | 9.2    | 1.5    |
| 0.4   | 0.4    | 0.6    | 0.4    | 0.6    | 0.7    | 1.1    | 0.6    | 0.8    |
| 9.8   | 5.6    | 9.5    | 11.0   | 9.8    | 10.0   | 13.4   | 18.3   | 10.4   |
| 51.2  | 36.9   | 33.6   | 43.1   | 40.8   | 32.7   | 72.9   | 67.6   | 64.7   |
| 9.8   | 11.0   | 18.5   | 8.3    | 13.0   | 17.0   | 18.3   | 19.7   | 12.0   |
| 4.8   | 6.9    | 3.2    | 0.3    | 3.8    | 3.0    | 3.7    | 1.5    | 0.9    |
| 6.8   | 0.2    | 3.8    | 1.5    | 4.4    | 3.6    | 4.5    | 5.5    | 7.0    |
| 19.1  | 9.3    | 10.9   | 14.1   | 17.8   | 14.2   | 25.3   | 25.0   | 13.0   |
| 8.6   | 4.3    | 10.2   | 3.7    | 7.2    | 6.3    | 9.4    | 13.8   | 7.0    |
| 5.2   | 3.4    | 3.0    | 7.7    | 2.1    | 4.3    | 0.8    | 10.2   | 0.7    |
| 506.4 | 343.4  | 464.1  | 513.3  | 405.6  | 404.8  | 543.6  | 634.0  | 456.0  |
| 1.8   | 0.6    | 1.6    | 1.6    | 1.7    | 1.1    | 1.8    | 3.0    | 1.3    |
| 5.6   | 1.2    | 1.9    | 6.1    | 5.7    | 7.4    | 5.3    | 10.9   | 1.2    |
| 24.2  | 17.6   | 19.9   | 20.0   | 18.4   | 22.2   | 27.6   | 32.0   | 18.0   |
| 0.8   | 5.2    | 3.0    | 0.6    | 1.0    | 1.2    | 4.5    | 8.0    | 0.7    |
| 3.7   | 3.6    | 2.1    | 0.5    | 5.3    | 1.8    | 0.7    | 2.4    | 4.6    |
| 62.3  | 32.3   | 29.8   | 32.3   | 33.5   | 33.4   | 53.1   | 60.2   | 41.2   |
| 4.8   | 1.4    | 3.3    | 1.2    | 2.1    | 4.0    | 1.8    | 7.5    | 7.4    |
| 4.7   | 17.1   | 13.9   | 16.8   | 15.0   | 7.0    | 22.8   | 19.6   | 18.4   |
| 44.2  | 26.0   | 37.2   | 37.1   | 44.9   | 41.2   | 63.7   | 70.1   | 45.6   |
| 5.9   | 3.6    | 6.6    | 4.4    | 8.1    | 1.4    | 2.2    | 9.9    | 1.1    |
| 113.3 | 52.0   | 58.7   | 74.7   | 64.8   | 65.5   | 78.4   | 107.5  | 94.9   |
| 71.8  | 37.4   | 56.5   | 54.3   | 46.0   | 49.4   | 65.1   | 71.9   | 63.6   |
| 0.3   | 1.0    | 2.8    | 1.2    | 7.1    | 4.2    | 4.0    | 10.9   | 9.4    |
| 1.1   | 1.7    | 1.8    | 0.8    | 1.1    | 4.6    | 4.9    | 6.6    | 5.3    |
| 1.2   | 10.3   | 3.8    | 1.4    | 5.8    | 5.4    | 1.2    | 3.3    | 2.6    |
| 18.5  | 23.2   | 21.0   | 8.7    | 23.3   | 11.1   | 4.8    | 12.9   | 10.1   |
| 12.4  | 16.8   | 15.8   | 25.3   | 17.8   | 17.7   | 12.6   | 16.0   | 18.1   |
| 7.1   | 2.4    | 9.1    | 6.5    | 1.7    | 6.2    | 9.2    | 6.9    | 6.7    |

|       |       |       |       |       |       |       |       |       |
|-------|-------|-------|-------|-------|-------|-------|-------|-------|
| 2.9   | 1.9   | 3.4   | 4.1   | 3.7   | 2.5   | 3.7   | 2.0   | 1.6   |
| 6.1   | 0.5   | 2.0   | 3.8   | 1.8   | 0.2   | 0.5   | 1.3   | 0.6   |
| 10.0  | 7.6   | 1.3   | 5.0   | 10.6  | 0.9   | 12.8  | 9.1   | 3.2   |
| 0.9   | 3.1   | 0.9   | 1.4   | 4.8   | 0.5   | 0.8   | 1.3   | 1.4   |
| 8.4   | 1.5   | 8.8   | 3.1   | 1.7   | 4.3   | 9.1   | 7.8   | 4.2   |
| 0.5   | 0.8   | 1.2   | 1.7   | 0.8   | 1.2   | 0.8   | 5.0   | 0.8   |
| 9.0   | 13.4  | 7.1   | 4.9   | 4.5   | 2.1   | 1.5   | 1.1   | 5.2   |
| 4.3   | 4.6   | 2.9   | 1.1   | 5.5   | 5.9   | 2.7   | 10.4  | 6.5   |
| 14.2  | 3.4   | 4.3   | 0.6   | 0.7   | 3.1   | 4.6   | 8.7   | 4.4   |
| 11.5  | 6.2   | 9.6   | 5.5   | 7.9   | 9.2   | 12.7  | 13.7  | 4.7   |
| 8.7   | 2.3   | 13.2  | 7.2   | 10.4  | 8.3   | 9.8   | 15.0  | 8.6   |
| 33.1  | 10.7  | 17.4  | 15.6  | 21.0  | 24.0  | 27.4  | 48.0  | 25.8  |
| 70.2  | 62.0  | 58.3  | 70.3  | 65.6  | 53.3  | 85.2  | 85.2  | 65.2  |
| 178.8 | 157.7 | 154.6 | 157.7 | 178.5 | 169.3 | 206.3 | 240.8 | 205.0 |
| 117.1 | 77.3  | 108.4 | 88.7  | 101.3 | 122.7 | 101.8 | 113.0 | 108.1 |
| 2.7   | 2.8   | 6.7   | 1.2   | 9.5   | 7.0   | 3.3   | 2.9   | 8.0   |
| 5.9   | 5.0   | 3.4   | 2.7   | 5.3   | 4.2   | 6.2   | 9.1   | 3.7   |
| 2.3   | 1.6   | 1.0   | 0.9   | 0.9   | 0.2   | 2.6   | 1.2   | 2.2   |
| 0.2   | 0.4   | 0.4   | 1.7   | 1.0   | 0.2   | 0.5   | 0.4   | 2.0   |
| 3.4   | 7.4   | 2.3   | 8.7   | 0.6   | 3.4   | 4.1   | 7.0   | 2.6   |
| 76.7  | 41.4  | 40.5  | 33.0  | 50.6  | 43.5  | 45.6  | 83.9  | 56.0  |
| 2.8   | 3.3   | 1.8   | 0.7   | 1.3   | 1.8   | 2.2   | 2.9   | 6.9   |
| 22.5  | 18.5  | 15.6  | 14.8  | 21.5  | 7.3   | 22.6  | 32.6  | 17.2  |
| 0.4   | 2.6   | 0.7   | 1.3   | 0.2   | 1.4   | 3.1   | 1.0   | 2.6   |
| 4.5   | 0.5   | 3.4   | 5.0   | 1.4   | 6.1   | 1.4   | 1.6   | 0.4   |
| 91.9  | 60.0  | 64.7  | 71.7  | 77.1  | 67.4  | 111.3 | 104.5 | 63.4  |
| 0.7   | 2.4   | 3.7   | 0.5   | 1.7   | 1.4   | 1.9   | 1.2   | 0.9   |
| 0.4   | 1.3   | 0.5   | 3.5   | 2.7   | 2.5   | 0.2   | 0.4   | 0.7   |
| 6.6   | 6.4   | 3.7   | 2.7   | 11.8  | 4.8   | 9.4   | 4.0   | 0.5   |
| 13.8  | 8.1   | 14.5  | 12.1  | 15.9  | 11.1  | 11.3  | 14.3  | 12.2  |
| 3.3   | 8.1   | 3.6   | 6.8   | 2.8   | 0.5   | 2.9   | 2.6   | 1.0   |
| 4.9   | 5.3   | 1.6   | 2.2   | 7.9   | 2.4   | 4.3   | 3.2   | 9.5   |
| 61.6  | 0.9   | 1.4   | 3.8   | 3.5   | 0.8   | 0.9   | 5.5   | 6.9   |
| 9.7   | 5.2   | 7.3   | 6.3   | 9.9   | 0.5   | 9.6   | 11.6  | 11.6  |
| 10.2  | 6.8   | 7.6   | 15.1  | 4.5   | 10.1  | 13.8  | 13.7  | 9.4   |
| 0.7   | 0.2   | 1.0   | 1.3   | 0.4   | 4.6   | 6.3   | 1.5   | 0.3   |
| 0.7   | 0.8   | 0.4   | 0.7   | 0.7   | 0.5   | 0.4   | 0.8   | 0.7   |
| 0.8   | 5.9   | 0.4   | 3.1   | 2.7   | 2.6   | 1.2   | 0.8   | 4.4   |
| 9.0   | 12.0  | 8.3   | 9.1   | 11.2  | 9.5   | 13.2  | 9.9   | 7.0   |
| 8.2   | 5.2   | 2.3   | 7.4   | 5.9   | 3.8   | 11.5  | 9.2   | 10.5  |
| 0.4   | 3.9   | 0.8   | 5.7   | 3.5   | 1.4   | 3.5   | 0.3   | 4.1   |
| 0.8   | 0.8   | 1.4   | 1.1   | 0.6   | 0.9   | 1.8   | 2.1   | 0.8   |
| 0.5   | 0.5   | 3.8   | 2.1   | 0.8   | 4.5   | 4.7   | 1.3   | 3.8   |
| 2.2   | 8.3   | 5.4   | 5.4   | 1.5   | 0.7   | 4.3   | 0.4   | 2.8   |
| 7.8   | 8.8   | 1.6   | 9.4   | 1.3   | 9.5   | 9.1   | 13.4  | 6.9   |
| 3.2   | 0.8   | 0.7   | 1.1   | 3.5   | 1.1   | 6.9   | 0.9   | 1.0   |
| 3.0   | 0.5   | 2.9   | 2.3   | 1.1   | 0.2   | 2.7   | 0.9   | 0.3   |
| 53.2  | 33.6  | 45.0  | 48.7  | 44.1  | 55.8  | 78.2  | 53.0  | 42.0  |
| 66.8  | 41.3  | 57.8  | 68.9  | 60.3  | 60.4  | 80.6  | 66.9  | 109.2 |
| 139.6 | 106.1 | 131.1 | 117.3 | 108.3 | 104.7 | 176.0 | 216.3 | 127.0 |
| 2.5   | 1.7   | 1.2   | 1.0   | 0.9   | 0.9   | 1.2   | 1.3   | 1.2   |
| 4.2   | 0.2   | 4.0   | 8.5   | 0.7   | 6.0   | 5.3   | 12.4  | 0.6   |
| 2.7   | 0.1   | 1.7   | 0.2   | 0.5   | 0.1   | 0.5   | 2.1   | 0.4   |

|       |      |      |      |      |      |       |       |      |
|-------|------|------|------|------|------|-------|-------|------|
| 2.7   | 3.3  | 0.7  | 0.6  | 7.6  | 0.8  | 2.6   | 12.3  | 0.9  |
| 11.0  | 9.7  | 7.6  | 10.6 | 5.2  | 3.4  | 11.5  | 13.7  | 4.2  |
| 0.9   | 0.2  | 0.1  | 2.9  | 0.2  | 0.3  | 0.3   | 0.6   | 0.3  |
| 6.0   | 2.9  | 6.9  | 2.6  | 6.2  | 2.7  | 1.8   | 4.2   | 3.7  |
| 18.7  | 2.5  | 1.4  | 1.8  | 5.4  | 5.4  | 7.6   | 1.2   | 4.3  |
| 6.5   | 9.0  | 1.7  | 1.9  | 9.1  | 4.4  | 6.9   | 2.1   | 4.0  |
| 16.9  | 15.7 | 13.4 | 17.9 | 28.0 | 14.3 | 29.8  | 49.1  | 16.5 |
| 8.2   | 6.4  | 2.1  | 6.3  | 1.8  | 6.3  | 1.4   | 2.4   | 2.4  |
| 7.4   | 5.6  | 6.1  | 0.9  | 8.6  | 3.4  | 9.5   | 0.8   | 6.4  |
| 1.0   | 1.2  | 0.5  | 0.7  | 1.0  | 1.1  | 1.1   | 0.8   | 0.9  |
| 12.2  | 19.4 | 15.6 | 16.4 | 14.1 | 11.1 | 11.6  | 22.3  | 14.4 |
| 11.7  | 5.9  | 23.2 | 9.4  | 18.2 | 22.2 | 40.7  | 41.0  | 26.2 |
| 2.1   | 2.3  | 2.5  | 2.8  | 1.0  | 7.5  | 3.2   | 4.2   | 10.0 |
| 2.3   | 1.1  | 2.0  | 3.0  | 5.5  | 1.2  | 2.1   | 1.8   | 1.7  |
| 2.0   | 7.7  | 1.7  | 2.1  | 3.9  | 1.3  | 1.7   | 8.1   | 3.1  |
| 0.5   | 0.3  | 0.3  | 0.4  | 0.6  | 0.4  | 0.9   | 3.5   | 0.4  |
| 7.0   | 7.7  | 6.9  | 8.4  | 10.9 | 8.2  | 15.6  | 18.5  | 13.4 |
| 2.9   | 11.9 | 6.5  | 6.1  | 3.7  | 11.4 | 8.8   | 22.6  | 13.5 |
| 1.5   | 1.6  | 1.4  | 1.0  | 2.6  | 1.4  | 4.2   | 1.4   | 1.3  |
| 44.0  | 28.6 | 25.2 | 22.4 | 27.7 | 18.8 | 29.7  | 29.0  | 17.4 |
| 20.7  | 12.6 | 18.9 | 17.0 | 19.0 | 18.7 | 23.7  | 25.4  | 15.2 |
| 0.9   | 1.6  | 5.7  | 1.6  | 0.3  | 1.2  | 1.3   | 1.6   | 0.4  |
| 15.4  | 7.4  | 13.0 | 17.8 | 8.1  | 15.7 | 14.6  | 18.3  | 12.4 |
| 0.5   | 2.3  | 0.4  | 0.3  | 0.7  | 2.5  | 2.0   | 2.1   | 3.0  |
| 48.9  | 15.2 | 26.8 | 28.3 | 23.3 | 34.8 | 37.2  | 54.5  | 36.7 |
| 2.3   | 3.4  | 1.2  | 1.9  | 2.1  | 1.8  | 6.8   | 3.1   | 7.2  |
| 1.3   | 11.3 | 0.8  | 1.7  | 1.8  | 0.5  | 1.2   | 4.8   | 4.3  |
| 0.8   | 7.5  | 2.7  | 0.9  | 1.1  | 4.4  | 4.4   | 11.6  | 4.2  |
| 1.6   | 2.3  | 0.9  | 1.0  | 1.4  | 2.4  | 1.4   | 7.8   | 1.1  |
| 0.5   | 1.9  | 0.4  | 0.2  | 0.4  | 3.1  | 2.6   | 1.6   | 4.8  |
| 14.3  | 5.1  | 4.4  | 19.0 | 14.4 | 16.7 | 12.8  | 21.5  | 7.0  |
| 0.6   | 1.1  | 0.8  | 0.4  | 1.2  | 0.6  | 1.0   | 4.6   | 0.6  |
| 0.5   | 1.4  | 0.4  | 0.5  | 0.5  | 0.3  | 1.1   | 0.5   | 0.5  |
| 1.9   | 1.4  | 1.9  | 5.0  | 1.1  | 3.2  | 0.6   | 3.8   | 0.4  |
| 0.5   | 0.4  | 1.0  | 0.5  | 1.1  | 0.9  | 1.3   | 0.6   | 0.5  |
| 11.0  | 6.6  | 10.0 | 2.1  | 9.4  | 5.1  | 2.0   | 8.9   | 10.7 |
| 40.2  | 14.9 | 15.7 | 22.9 | 6.3  | 27.8 | 15.1  | 11.4  | 15.2 |
| 7.7   | 5.6  | 3.0  | 4.9  | 6.1  | 8.4  | 9.9   | 12.1  | 1.7  |
| 12.2  | 15.2 | 9.5  | 9.5  | 14.4 | 11.0 | 8.1   | 9.9   | 11.2 |
| 13.7  | 13.4 | 9.1  | 12.9 | 11.7 | 15.1 | 15.1  | 18.0  | 20.1 |
| 1.7   | 5.9  | 5.9  | 7.4  | 4.9  | 1.1  | 7.0   | 8.3   | 6.3  |
| 1.5   | 1.6  | 1.1  | 4.2  | 0.7  | 0.8  | 1.0   | 0.9   | 0.6  |
| 122.3 | 65.3 | 80.4 | 60.3 | 70.9 | 91.4 | 117.7 | 147.6 | 78.9 |
| 14.0  | 1.4  | 5.2  | 9.3  | 10.4 | 12.7 | 11.3  | 11.8  | 7.9  |
| 1.3   | 6.9  | 5.7  | 0.4  | 4.3  | 5.2  | 3.8   | 6.0   | 1.3  |
| 5.6   | 1.6  | 3.3  | 4.9  | 1.4  | 5.7  | 5.2   | 4.9   | 4.1  |
| 9.0   | 3.0  | 8.9  | 11.5 | 11.8 | 6.7  | 15.1  | 11.5  | 11.8 |
| 2.6   | 5.2  | 1.0  | 2.3  | 2.1  | 2.2  | 2.3   | 2.3   | 6.8  |
| 8.3   | 4.4  | 8.8  | 11.5 | 7.9  | 8.3  | 9.5   | 14.4  | 10.5 |
| 22.0  | 8.4  | 17.6 | 21.3 | 21.1 | 19.1 | 23.0  | 28.6  | 17.3 |
| 1.8   | 1.7  | 0.8  | 1.8  | 1.8  | 1.1  | 1.8   | 2.4   | 1.6  |
| 4.4   | 3.1  | 0.6  | 0.7  | 2.0  | 2.8  | 0.8   | 1.4   | 0.5  |
| 1.4   | 2.0  | 2.6  | 2.9  | 2.5  | 9.2  | 13.5  | 19.2  | 12.1 |

|        |       |       |        |        |        |        |        |       |
|--------|-------|-------|--------|--------|--------|--------|--------|-------|
| 2.9    | 6.9   | 11.3  | 4.2    | 12.2   | 11.9   | 14.8   | 16.6   | 1.1   |
| 47.9   | 36.1  | 30.1  | 49.8   | 40.1   | 35.0   | 53.4   | 56.1   | 49.2  |
| 8.0    | 7.2   | 9.1   | 10.0   | 8.0    | 5.4    | 17.4   | 13.9   | 11.6  |
| 14.6   | 2.2   | 10.8  | 1.4    | 7.1    | 11.1   | 1.5    | 9.5    | 5.4   |
| 0.2    | 0.6   | 0.6   | 0.2    | 0.1    | 2.6    | 0.3    | 0.5    | 0.2   |
| 0.1    | 0.4   | 0.2   | 0.3    | 0.4    | 0.1    | 0.3    | 0.2    | 1.2   |
| 8.3    | 2.3   | 2.6   | 0.2    | 5.3    | 2.6    | 5.3    | 1.3    | 3.0   |
| 72.6   | 45.8  | 62.3  | 54.1   | 58.1   | 65.3   | 85.7   | 91.0   | 66.7  |
| 32.9   | 18.8  | 20.9  | 25.8   | 19.9   | 23.1   | 25.2   | 33.1   | 21.1  |
| 1216.6 | 973.7 | 903.9 | 1130.0 | 1155.2 | 1034.2 | 1400.4 | 1620.5 | 993.2 |
| 21.4   | 23.0  | 16.8  | 16.5   | 11.3   | 11.7   | 21.3   | 15.4   | 21.9  |
| 179.0  | 86.6  | 100.6 | 102.4  | 98.4   | 88.6   | 123.7  | 157.6  | 161.5 |
| 3.1    | 7.6   | 2.3   | 3.9    | 14.4   | 9.1    | 10.4   | 14.8   | 11.8  |
| 7.8    | 1.6   | 3.2   | 3.0    | 4.8    | 4.9    | 6.2    | 4.1    | 0.5   |
| 0.8    | 0.6   | 0.5   | 0.5    | 0.4    | 0.3    | 0.5    | 7.7    | 0.6   |
| 1.4    | 0.5   | 1.3   | 4.1    | 0.6    | 0.9    | 4.5    | 3.6    | 0.5   |
| 3.8    | 1.5   | 4.7   | 6.5    | 4.3    | 2.1    | 3.0    | 2.8    | 1.9   |
| 2.3    | 2.6   | 1.8   | 2.4    | 2.4    | 5.7    | 8.6    | 6.3    | 7.3   |
| 0.5    | 0.8   | 0.5   | 0.4    | 0.7    | 0.7    | 0.4    | 0.6    | 0.9   |
| 7.2    | 4.7   | 8.1   | 3.3    | 7.1    | 9.4    | 4.7    | 4.2    | 5.9   |
| 2.1    | 7.6   | 0.7   | 0.5    | 7.2    | 4.9    | 0.5    | 10.6   | 3.7   |
| 1.5    | 2.2   | 1.7   | 3.1    | 1.5    | 1.8    | 4.9    | 3.2    | 3.2   |
| 1.6    | 2.3   | 1.1   | 2.7    | 3.5    | 0.6    | 1.6    | 4.8    | 2.8   |
| 0.7    | 4.4   | 1.5   | 1.0    | 1.1    | 1.7    | 1.1    | 2.1    | 4.5   |
| 2.3    | 6.9   | 3.8   | 4.3    | 4.7    | 6.5    | 4.0    | 4.5    | 4.5   |
| 3.5    | 0.2   | 0.3   | 1.7    | 5.7    | 3.9    | 5.7    | 3.1    | 0.6   |
| 12.7   | 10.0  | 9.7   | 9.9    | 13.5   | 4.5    | 9.4    | 18.6   | 21.4  |
| 5.5    | 3.7   | 4.8   | 4.0    | 7.4    | 5.9    | 0.4    | 4.5    | 7.8   |
| 124.9  | 68.5  | 65.1  | 69.6   | 88.6   | 78.1   | 112.3  | 148.0  | 102.6 |
| 1.0    | 0.7   | 1.4   | 0.6    | 0.5    | 4.9    | 1.3    | 0.9    | 0.7   |
| 7.2    | 7.8   | 6.1   | 4.9    | 3.8    | 4.0    | 6.0    | 1.2    | 7.1   |
| 1.1    | 1.3   | 1.2   | 1.1    | 1.7    | 1.7    | 2.6    | 1.0    | 0.7   |
| 1.9    | 2.6   | 1.8   | 6.6    | 2.3    | 2.2    | 2.6    | 2.1    | 8.2   |
| 1.1    | 6.1   | 1.2   | 5.5    | 2.4    | 1.7    | 0.8    | 1.0    | 0.8   |
| 0.9    | 0.7   | 0.8   | 0.7    | 0.9    | 0.7    | 1.2    | 1.1    | 1.0   |
| 1.3    | 0.8   | 3.9   | 6.2    | 5.0    | 4.3    | 5.0    | 4.5    | 5.6   |
| 2.0    | 1.2   | 3.3   | 1.4    | 1.1    | 1.1    | 1.2    | 3.2    | 1.7   |
| 23.1   | 26.3  | 20.8  | 29.2   | 29.7   | 24.4   | 35.6   | 31.0   | 27.3  |
| 4.1    | 4.5   | 2.0   | 0.6    | 5.1    | 5.0    | 1.0    | 8.0    | 1.0   |
| 1.5    | 1.1   | 1.4   | 2.6    | 1.1    | 2.5    | 1.0    | 1.0    | 0.9   |
| 27.6   | 35.2  | 36.9  | 36.5   | 34.6   | 34.6   | 38.1   | 41.5   | 41.0  |
| 1.5    | 1.8   | 0.8   | 0.9    | 0.5    | 1.9    | 1.0    | 4.7    | 2.6   |
| 1.7    | 6.9   | 1.2   | 1.4    | 3.5    | 1.3    | 2.2    | 5.3    | 1.6   |
| 5.1    | 0.6   | 3.6   | 0.8    | 0.7    | 0.5    | 0.5    | 1.5    | 1.5   |
| 7.8    | 7.3   | 2.9   | 1.2    | 4.4    | 7.0    | 11.2   | 6.0    | 6.7   |
| 0.7    | 4.2   | 6.5   | 3.3    | 3.4    | 3.4    | 2.2    | 4.6    | 1.7   |
| 29.7   | 21.6  | 25.6  | 28.8   | 24.4   | 27.5   | 36.2   | 30.6   | 23.9  |
| 0.8    | 5.3   | 2.7   | 2.3    | 6.3    | 0.3    | 2.2    | 5.2    | 2.1   |
| 34.2   | 21.8  | 26.1  | 22.9   | 33.3   | 35.4   | 63.2   | 59.7   | 42.6  |
| 1.9    | 0.9   | 2.3   | 0.1    | 0.4    | 1.1    | 2.5    | 3.5    | 3.5   |
| 21.9   | 8.3   | 20.2  | 22.4   | 17.6   | 9.0    | 16.2   | 27.2   | 10.7  |
| 10.5   | 2.4   | 10.1  | 4.6    | 9.3    | 5.5    | 2.1    | 11.4   | 10.0  |
| 52.0   | 51.2  | 51.1  | 37.8   | 56.6   | 52.1   | 73.1   | 73.6   | 44.1  |

|       |       |       |       |       |       |       |       |       |
|-------|-------|-------|-------|-------|-------|-------|-------|-------|
| 1.5   | 3.0   | 5.4   | 1.8   | 7.7   | 12.0  | 14.6  | 10.6  | 7.7   |
| 0.2   | 1.0   | 0.2   | 2.3   | 0.7   | 0.2   | 4.0   | 3.1   | 2.5   |
| 0.9   | 6.1   | 9.1   | 7.9   | 1.3   | 1.3   | 1.5   | 16.2  | 8.4   |
| 1.7   | 1.9   | 0.9   | 0.3   | 2.0   | 5.4   | 1.4   | 1.0   | 0.7   |
| 1.6   | 0.9   | 2.4   | 4.5   | 1.5   | 3.4   | 4.7   | 3.6   | 5.9   |
| 5.1   | 2.4   | 15.0  | 2.8   | 9.9   | 3.4   | 1.7   | 7.7   | 6.4   |
| 6.7   | 4.5   | 8.7   | 4.0   | 10.4  | 1.1   | 6.6   | 7.0   | 1.1   |
| 0.6   | 0.3   | 3.1   | 0.5   | 0.2   | 0.3   | 0.5   | 0.3   | 1.0   |
| 1.8   | 0.6   | 0.7   | 0.9   | 0.9   | 1.8   | 1.3   | 1.3   | 0.6   |
| 0.7   | 0.5   | 0.5   | 0.5   | 0.9   | 0.6   | 1.7   | 0.6   | 0.3   |
| 1.3   | 0.5   | 0.6   | 0.2   | 1.6   | 0.9   | 1.5   | 0.5   | 0.5   |
| 129.5 | 88.6  | 99.0  | 120.1 | 101.8 | 104.0 | 166.0 | 130.0 | 97.6  |
| 79.2  | 54.1  | 62.3  | 57.5  | 54.6  | 51.0  | 79.3  | 90.9  | 54.3  |
| 4.0   | 4.4   | 4.2   | 5.6   | 1.6   | 2.8   | 4.6   | 10.5  | 6.1   |
| 29.4  | 17.6  | 18.6  | 18.6  | 11.5  | 24.9  | 23.9  | 25.8  | 19.2  |
| 4.7   | 2.8   | 11.2  | 4.9   | 4.2   | 1.1   | 3.7   | 1.7   | 6.9   |
| 1.9   | 3.0   | 2.3   | 7.9   | 2.3   | 10.0  | 1.4   | 2.2   | 1.7   |
| 4.4   | 0.8   | 0.9   | 1.5   | 1.1   | 1.3   | 0.8   | 1.1   | 3.5   |
| 4.7   | 2.8   | 2.1   | 0.5   | 3.8   | 2.3   | 2.9   | 1.5   | 1.4   |
| 19.3  | 7.9   | 0.8   | 9.2   | 10.3  | 10.6  | 10.6  | 13.8  | 8.5   |
| 33.0  | 10.7  | 13.2  | 12.7  | 10.1  | 16.8  | 17.1  | 24.0  | 19.3  |
| 156.4 | 60.4  | 72.8  | 80.7  | 88.7  | 62.8  | 134.6 | 109.2 | 86.3  |
| 2.9   | 1.9   | 5.4   | 2.8   | 1.2   | 0.9   | 1.5   | 1.1   | 1.0   |
| 8.9   | 0.7   | 0.7   | 0.4   | 0.6   | 1.1   | 1.0   | 0.8   | 0.3   |
| 233.2 | 242.9 | 240.0 | 280.9 | 281.2 | 231.6 | 383.7 | 417.3 | 261.9 |
| 1.3   | 1.2   | 0.7   | 0.7   | 1.1   | 0.6   | 1.9   | 1.1   | 1.1   |
| 88.1  | 93.3  | 97.4  | 95.9  | 101.4 | 109.2 | 147.0 | 176.4 | 110.8 |
| 163.5 | 81.2  | 87.7  | 92.6  | 92.1  | 99.4  | 110.4 | 134.1 | 93.5  |
| 4.4   | 7.5   | 4.2   | 8.0   | 3.2   | 6.4   | 11.9  | 10.4  | 3.9   |
| 0.7   | 4.1   | 1.7   | 4.2   | 0.9   | 4.6   | 9.0   | 0.9   | 1.8   |
| 6.7   | 1.9   | 3.1   | 2.5   | 3.6   | 0.8   | 1.8   | 3.6   | 0.6   |
| 0.9   | 0.7   | 1.6   | 0.6   | 4.1   | 0.9   | 0.7   | 1.1   | 0.5   |
| 1.7   | 0.9   | 3.1   | 1.3   | 4.1   | 0.8   | 0.6   | 0.9   | 1.4   |
| 2.2   | 7.9   | 5.4   | 2.0   | 2.3   | 1.9   | 2.8   | 9.4   | 1.3   |
| 8.8   | 8.7   | 9.2   | 3.4   | 5.8   | 6.4   | 11.3  | 21.1  | 4.1   |
| 1.0   | 0.8   | 0.7   | 0.8   | 0.7   | 1.9   | 1.3   | 1.5   | 2.3   |
| 7.9   | 3.8   | 2.8   | 1.9   | 5.3   | 3.0   | 1.7   | 4.7   | 7.5   |
| 0.8   | 1.0   | 1.7   | 0.7   | 1.1   | 3.3   | 0.5   | 1.5   | 1.0   |
| 6.6   | 9.3   | 4.5   | 7.7   | 7.6   | 6.8   | 2.3   | 2.7   | 3.9   |
| 2.0   | 5.9   | 1.4   | 2.4   | 3.2   | 2.0   | 6.5   | 8.1   | 1.3   |
| 18.7  | 12.3  | 16.2  | 14.1  | 15.9  | 12.1  | 25.5  | 24.4  | 20.1  |
| 63.4  | 44.9  | 38.7  | 59.1  | 56.8  | 50.1  | 60.8  | 114.7 | 50.2  |
| 0.9   | 0.3   | 0.3   | 3.4   | 3.0   | 4.1   | 1.0   | 1.2   | 3.1   |
| 5.8   | 5.0   | 1.0   | 0.6   | 4.6   | 2.9   | 2.4   | 1.9   | 1.2   |
| 9.8   | 17.6  | 9.1   | 11.9  | 7.9   | 12.5  | 19.6  | 16.4  | 13.0  |
| 0.3   | 1.6   | 2.1   | 7.7   | 2.6   | 5.2   | 3.6   | 3.3   | 1.4   |
| 9.8   | 6.6   | 10.3  | 2.4   | 6.1   | 13.7  | 13.0  | 11.8  | 11.1  |
| 0.8   | 1.9   | 0.5   | 2.6   | 1.3   | 0.5   | 0.8   | 0.6   | 1.1   |
| 1.4   | 2.0   | 1.3   | 1.8   | 0.9   | 1.2   | 3.5   | 0.9   | 1.6   |
| 2.4   | 8.2   | 2.9   | 3.7   | 9.4   | 1.3   | 1.2   | 11.4  | 7.0   |
| 1.5   | 0.4   | 5.2   | 0.4   | 0.5   | 0.8   | 0.4   | 0.6   | 1.0   |
| 1.6   | 0.8   | 1.9   | 0.9   | 1.3   | 1.8   | 4.9   | 1.9   | 3.4   |
| 5.0   | 2.6   | 6.5   | 0.7   | 1.9   | 0.9   | 2.0   | 2.1   | 1.1   |

|       |       |       |       |       |       |       |       |       |
|-------|-------|-------|-------|-------|-------|-------|-------|-------|
| 12.6  | 7.2   | 6.2   | 2.0   | 10.7  | 6.9   | 7.8   | 8.7   | 8.1   |
| 13.7  | 7.5   | 8.3   | 12.2  | 8.0   | 10.4  | 14.9  | 13.4  | 12.8  |
| 0.9   | 1.0   | 0.8   | 1.3   | 0.8   | 1.2   | 1.5   | 1.5   | 1.2   |
| 2.8   | 2.2   | 1.3   | 1.8   | 4.7   | 7.4   | 9.9   | 10.5  | 10.5  |
| 4.2   | 4.0   | 2.3   | 7.4   | 5.6   | 6.5   | 6.7   | 6.4   | 11.5  |
| 2.5   | 2.8   | 0.8   | 0.9   | 2.7   | 1.0   | 2.8   | 1.1   | 1.3   |
| 0.2   | 0.2   | 0.1   | 0.2   | 1.0   | 2.1   | 1.4   | 0.8   | 0.3   |
| 5.8   | 0.6   | 2.6   | 1.6   | 3.0   | 2.1   | 2.3   | 7.0   | 1.7   |
| 2.3   | 0.2   | 2.1   | 0.2   | 2.0   | 0.5   | 0.3   | 0.5   | 4.6   |
| 24.3  | 13.3  | 13.8  | 6.2   | 20.1  | 16.1  | 15.1  | 11.5  | 17.4  |
| 6.5   | 147.7 | 179.2 | 206.5 | 193.9 | 191.0 | 253.4 | 311.0 | 262.4 |
| 3.8   | 1.5   | 1.7   | 0.2   | 3.2   | 2.1   | 0.7   | 5.2   | 1.9   |
| 0.5   | 0.5   | 0.3   | 0.5   | 0.6   | 0.4   | 0.3   | 0.4   | 0.6   |
| 40.0  | 23.0  | 22.8  | 22.4  | 36.8  | 24.1  | 33.5  | 54.8  | 36.7  |
| 11.8  | 5.4   | 5.8   | 8.5   | 2.5   | 13.9  | 9.2   | 6.8   | 10.5  |
| 13.9  | 5.3   | 7.3   | 6.3   | 8.2   | 9.1   | 11.3  | 14.8  | 12.8  |
| 1.7   | 2.9   | 0.6   | 4.3   | 2.9   | 2.1   | 1.9   | 1.2   | 5.2   |
| 8.0   | 12.9  | 2.3   | 5.0   | 8.6   | 9.2   | 6.5   | 2.3   | 7.6   |
| 1.1   | 0.6   | 8.2   | 1.8   | 3.3   | 3.6   | 5.1   | 2.5   | 2.7   |
| 2.6   | 0.3   | 3.3   | 2.2   | 4.3   | 4.2   | 1.8   | 2.1   | 4.0   |
| 39.0  | 18.8  | 16.9  | 14.8  | 20.9  | 20.9  | 20.8  | 10.1  | 7.9   |
| 9.9   | 3.3   | 2.3   | 17.8  | 11.1  | 11.3  | 9.5   | 8.4   | 9.4   |
| 0.5   | 1.2   | 0.4   | 2.3   | 1.1   | 0.5   | 1.3   | 1.9   | 1.0   |
| 6.7   | 3.9   | 8.0   | 3.9   | 4.9   | 4.3   | 10.9  | 9.7   | 8.0   |
| 38.2  | 16.6  | 25.2  | 26.6  | 24.0  | 26.1  | 28.2  | 30.6  | 27.5  |
| 0.7   | 1.2   | 0.7   | 0.4   | 0.5   | 0.5   | 0.5   | 4.1   | 2.6   |
| 6.5   | 1.1   | 1.5   | 9.4   | 2.0   | 1.4   | 9.0   | 2.3   | 1.5   |
| 2.6   | 0.2   | 1.1   | 0.5   | 0.2   | 0.5   | 2.6   | 3.1   | 1.0   |
| 0.9   | 3.1   | 0.2   | 0.9   | 0.6   | 0.5   | 1.9   | 0.8   | 0.8   |
| 6.3   | 5.1   | 10.1  | 9.7   | 7.3   | 9.5   | 10.6  | 2.8   | 6.0   |
| 23.0  | 18.3  | 16.3  | 18.5  | 18.6  | 25.0  | 39.7  | 34.8  | 17.6  |
| 167.5 | 149.3 | 155.6 | 182.2 | 179.5 | 173.4 | 245.9 | 202.2 | 156.7 |
| 19.7  | 8.6   | 15.8  | 12.4  | 14.5  | 15.3  | 25.1  | 27.4  | 18.8  |
| 100.3 | 82.3  | 91.2  | 95.0  | 96.4  | 88.7  | 121.6 | 108.5 | 93.2  |
| 8.2   | 8.4   | 9.3   | 5.0   | 4.9   | 6.6   | 11.9  | 7.9   | 7.8   |
| 46.5  | 22.0  | 25.6  | 26.7  | 33.6  | 29.9  | 50.6  | 52.0  | 30.8  |
| 4.0   | 0.6   | 4.0   | 1.7   | 5.3   | 1.5   | 3.3   | 0.6   | 2.0   |
| 7.5   | 0.6   | 1.3   | 4.9   | 0.7   | 5.4   | 1.1   | 4.2   | 0.8   |
| 0.9   | 2.7   | 0.4   | 4.3   | 0.2   | 3.8   | 4.4   | 1.6   | 1.2   |
| 1.2   | 3.2   | 3.2   | 5.4   | 3.3   | 1.2   | 1.9   | 3.6   | 1.3   |
| 3.3   | 1.5   | 1.6   | 4.5   | 7.4   | 2.5   | 1.2   | 2.0   | 1.4   |
| 45.2  | 21.1  | 17.4  | 27.6  | 25.6  | 30.1  | 39.2  | 47.9  | 50.3  |
| 78.1  | 27.8  | 42.0  | 54.9  | 53.1  | 62.3  | 56.5  | 81.1  | 69.3  |
| 7.1   | 8.7   | 7.6   | 4.7   | 8.6   | 5.2   | 8.6   | 8.6   | 9.1   |
| 8.3   | 6.9   | 5.3   | 9.8   | 4.7   | 4.6   | 5.1   | 8.3   | 6.4   |
| 4.1   | 5.0   | 5.7   | 3.1   | 4.3   | 0.9   | 2.9   | 5.2   | 6.1   |
| 8.7   | 9.7   | 4.1   | 7.3   | 7.9   | 6.5   | 13.8  | 3.1   | 2.1   |
| 8.8   | 6.4   | 0.7   | 4.8   | 2.4   | 4.0   | 3.0   | 1.2   | 0.9   |
| 0.4   | 0.1   | 1.5   | 0.2   | 1.6   | 1.8   | 2.0   | 1.9   | 2.1   |
| 61.4  | 63.0  | 45.6  | 73.0  | 61.1  | 45.0  | 50.5  | 91.0  | 79.8  |
| 5.6   | 5.4   | 3.6   | 4.4   | 3.7   | 1.1   | 1.4   | 6.3   | 5.1   |
| 5.4   | 8.2   | 6.0   | 7.9   | 4.8   | 7.2   | 5.2   | 11.3  | 1.1   |
| 4.2   | 4.5   | 6.6   | 0.5   | 1.0   | 1.1   | 1.5   | 5.2   | 3.9   |

|       |       |       |       |       |       |       |       |       |
|-------|-------|-------|-------|-------|-------|-------|-------|-------|
| 7.4   | 7.2   | 8.5   | 8.4   | 11.1  | 10.4  | 10.8  | 13.5  | 9.7   |
| 0.1   | 1.8   | 2.5   | 0.5   | 2.1   | 1.8   | 0.2   | 0.4   | 0.1   |
| 9.9   | 2.8   | 5.1   | 5.6   | 7.6   | 7.3   | 8.4   | 11.6  | 8.6   |
| 10.8  | 13.4  | 4.7   | 8.1   | 9.3   | 17.9  | 14.3  | 1.4   | 12.2  |
| 8.8   | 16.4  | 15.3  | 6.7   | 16.3  | 4.6   | 14.8  | 15.4  | 11.9  |
| 7.8   | 12.5  | 10.8  | 5.2   | 10.9  | 8.2   | 17.9  | 10.0  | 10.1  |
| 1.2   | 3.7   | 2.8   | 0.6   | 1.4   | 1.2   | 4.9   | 3.1   | 4.9   |
| 4.9   | 7.9   | 6.2   | 4.3   | 8.4   | 0.6   | 2.3   | 10.5  | 1.0   |
| 19.0  | 15.9  | 14.3  | 16.5  | 10.6  | 10.1  | 17.0  | 17.6  | 15.0  |
| 214.9 | 154.9 | 184.7 | 197.9 | 189.8 | 169.4 | 252.5 | 242.8 | 210.1 |
| 1.1   | 0.2   | 0.6   | 0.1   | 4.4   | 0.3   | 0.4   | 0.8   | 0.3   |
| 10.1  | 15.9  | 14.9  | 14.1  | 16.9  | 10.6  | 10.9  | 19.4  | 11.2  |
| 0.2   | 1.1   | 0.2   | 2.2   | 0.2   | 2.3   | 1.0   | 0.4   | 2.4   |
| 0.7   | 1.9   | 3.8   | 0.8   | 2.8   | 3.6   | 3.3   | 0.2   | 2.0   |
| 1.2   | 6.5   | 7.4   | 10.9  | 5.3   | 1.2   | 7.2   | 1.8   | 1.1   |
| 1.8   | 2.4   | 1.5   | 2.1   | 1.9   | 1.1   | 5.9   | 2.2   | 7.9   |
| 24.2  | 23.3  | 27.0  | 28.0  | 18.6  | 30.4  | 31.7  | 35.1  | 26.6  |
| 5.2   | 2.1   | 6.0   | 2.8   | 0.7   | 3.2   | 1.0   | 0.7   | 0.9   |
| 56.7  | 43.7  | 56.7  | 55.8  | 53.6  | 58.3  | 61.3  | 104.6 | 55.6  |
| 15.4  | 6.5   | 14.5  | 13.4  | 13.0  | 13.1  | 28.1  | 23.5  | 14.0  |
| 3.6   | 2.8   | 3.0   | 2.5   | 3.0   | 2.9   | 5.9   | 4.6   | 1.6   |
| 27.5  | 20.9  | 18.5  | 15.4  | 21.6  | 14.6  | 25.5  | 18.3  | 15.1  |
| 1.2   | 2.2   | 5.5   | 0.3   | 8.6   | 0.9   | 0.4   | 1.8   | 3.7   |
| 1.3   | 5.1   | 7.6   | 2.3   | 2.4   | 0.5   | 4.1   | 0.9   | 0.6   |
| 0.7   | 3.2   | 0.9   | 0.7   | 1.5   | 0.8   | 0.4   | 1.0   | 0.3   |
| 2.1   | 1.9   | 4.2   | 0.2   | 1.8   | 0.3   | 1.3   | 2.5   | 0.6   |
| 14.2  | 3.1   | 8.1   | 4.6   | 14.6  | 3.6   | 5.2   | 6.9   | 6.4   |
| 15.8  | 6.1   | 12.4  | 9.6   | 10.6  | 10.2  | 18.9  | 13.2  | 10.3  |
| 68.1  | 46.7  | 49.8  | 53.2  | 48.3  | 50.2  | 65.4  | 70.8  | 49.5  |
| 0.5   | 1.6   | 0.7   | 1.5   | 0.4   | 0.2   | 1.3   | 0.4   | 0.2   |
| 1.3   | 1.3   | 4.0   | 0.5   | 1.0   | 0.8   | 0.8   | 3.1   | 1.9   |
| 14.7  | 12.9  | 6.9   | 13.2  | 7.7   | 7.5   | 11.5  | 9.6   | 9.6   |
| 9.6   | 1.6   | 12.0  | 1.9   | 9.1   | 1.9   | 12.0  | 4.3   | 5.6   |
| 65.3  | 52.0  | 71.7  | 61.8  | 64.3  | 69.7  | 79.9  | 127.6 | 54.8  |
| 5.7   | 5.3   | 4.1   | 5.4   | 4.6   | 8.3   | 4.8   | 13.0  | 6.3   |
| 0.7   | 1.0   | 1.4   | 0.6   | 0.8   | 0.9   | 0.7   | 1.5   | 0.5   |
| 288.1 | 306.7 | 346.6 | 444.4 | 417.2 | 500.8 | 581.0 | 657.9 | 475.6 |
| 2.0   | 0.1   | 1.3   | 0.5   | 0.1   | 2.0   | 3.1   | 0.2   | 0.2   |
| 2.2   | 3.8   | 1.1   | 4.3   | 0.2   | 1.3   | 2.5   | 1.0   | 1.0   |
| 6.7   | 7.8   | 1.3   | 9.1   | 2.0   | 6.1   | 6.0   | 9.0   | 7.5   |
| 0.9   | 0.8   | 0.7   | 0.4   | 0.9   | 0.9   | 1.3   | 1.3   | 1.2   |
| 2.3   | 2.5   | 1.6   | 2.1   | 1.2   | 1.0   | 1.1   | 2.0   | 1.7   |
| 4.3   | 1.3   | 0.7   | 1.0   | 0.2   | 0.2   | 0.7   | 1.1   | 0.9   |
| 0.7   | 0.2   | 0.4   | 0.9   | 0.9   | 1.4   | 7.3   | 0.5   | 0.8   |
| 0.4   | 0.8   | 3.4   | 0.9   | 4.3   | 4.7   | 1.2   | 4.5   | 0.2   |
| 2.2   | 7.3   | 1.7   | 6.1   | 1.8   | 1.7   | 2.1   | 11.9  | 1.3   |
| 4.1   | 8.5   | 1.5   | 7.2   | 0.6   | 3.9   | 3.9   | 5.4   | 5.0   |
| 0.9   | 1.4   | 4.4   | 0.6   | 4.5   | 0.7   | 0.4   | 2.8   | 3.3   |
| 4.6   | 1.2   | 3.7   | 1.6   | 5.7   | 1.2   | 2.6   | 2.7   | 3.2   |
| 110.8 | 58.7  | 69.1  | 80.9  | 74.5  | 59.8  | 115.4 | 129.5 | 92.2  |
| 5.9   | 4.1   | 6.7   | 7.0   | 10.5  | 8.9   | 1.9   | 14.5  | 1.0   |
| 1.9   | 1.8   | 1.8   | 2.8   | 15.1  | 7.4   | 21.0  | 15.4  | 17.2  |
| 88.4  | 62.5  | 71.3  | 80.8  | 83.6  | 117.2 | 103.0 | 110.4 | 65.1  |

|       |       |       |       |       |       |       |       |       |
|-------|-------|-------|-------|-------|-------|-------|-------|-------|
| 29.6  | 36.3  | 33.2  | 39.1  | 28.3  | 29.3  | 33.4  | 38.4  | 36.2  |
| 16.9  | 14.9  | 9.3   | 7.8   | 11.9  | 2.5   | 17.7  | 6.6   | 15.7  |
| 0.9   | 4.6   | 4.3   | 0.3   | 4.4   | 1.0   | 1.1   | 2.2   | 4.4   |
| 9.6   | 10.7  | 14.2  | 7.8   | 5.0   | 13.8  | 10.3  | 20.7  | 4.7   |
| 14.8  | 14.6  | 15.6  | 17.7  | 16.4  | 13.7  | 16.5  | 12.0  | 11.0  |
| 10.9  | 3.4   | 0.9   | 1.5   | 1.8   | 1.2   | 12.0  | 4.4   | 10.5  |
| 5.4   | 0.2   | 4.3   | 1.1   | 4.8   | 0.8   | 2.0   | 9.0   | 3.3   |
| 46.8  | 19.0  | 27.3  | 25.9  | 36.2  | 33.1  | 50.0  | 48.1  | 31.8  |
| 14.8  | 16.3  | 10.9  | 17.8  | 7.6   | 14.9  | 29.8  | 18.6  | 16.9  |
| 2.8   | 2.7   | 0.3   | 1.6   | 0.1   | 0.9   | 1.6   | 4.7   | 2.5   |
| 6.9   | 2.6   | 3.9   | 12.1  | 7.9   | 8.0   | 15.2  | 12.4  | 12.3  |
| 7.7   | 4.5   | 10.6  | 10.1  | 13.0  | 5.0   | 4.4   | 11.9  | 8.3   |
| 1.5   | 6.4   | 8.4   | 4.7   | 4.7   | 1.8   | 1.3   | 3.3   | 0.7   |
| 33.9  | 22.1  | 45.3  | 33.1  | 45.8  | 27.0  | 66.2  | 61.8  | 43.4  |
| 5.2   | 6.0   | 4.3   | 7.4   | 2.5   | 2.6   | 5.2   | 7.8   | 6.2   |
| 4.8   | 3.4   | 2.6   | 0.5   | 3.5   | 3.6   | 1.2   | 1.6   | 2.7   |
| 1.0   | 2.0   | 6.4   | 7.9   | 5.3   | 8.0   | 0.5   | 1.3   | 1.4   |
| 1.1   | 3.8   | 3.9   | 2.6   | 1.9   | 0.6   | 3.9   | 2.5   | 0.7   |
| 33.9  | 17.1  | 15.4  | 17.0  | 15.1  | 20.5  | 12.6  | 23.6  | 17.4  |
| 23.7  | 15.0  | 19.1  | 19.4  | 24.9  | 19.1  | 21.7  | 38.6  | 21.6  |
| 18.4  | 12.8  | 19.7  | 17.8  | 18.6  | 22.5  | 20.3  | 23.6  | 20.3  |
| 2.6   | 2.7   | 0.3   | 0.1   | 0.4   | 4.0   | 3.5   | 3.5   | 1.9   |
| 0.9   | 4.5   | 5.7   | 1.2   | 2.0   | 2.0   | 1.0   | 4.6   | 8.0   |
| 9.2   | 5.7   | 3.4   | 4.1   | 1.1   | 1.3   | 1.3   | 7.2   | 5.0   |
| 6.3   | 4.8   | 4.3   | 5.7   | 5.7   | 7.3   | 14.4  | 8.3   | 4.1   |
| 13.2  | 15.9  | 13.8  | 10.9  | 14.2  | 16.2  | 21.2  | 19.3  | 18.0  |
| 6.0   | 4.9   | 0.6   | 1.1   | 1.0   | 0.7   | 5.8   | 0.9   | 8.6   |
| 9.9   | 2.1   | 10.4  | 6.4   | 1.7   | 10.0  | 8.9   | 6.6   | 5.8   |
| 1.0   | 0.9   | 0.8   | 1.0   | 2.5   | 1.0   | 0.9   | 5.2   | 0.8   |
| 13.1  | 14.9  | 10.4  | 15.8  | 8.9   | 11.4  | 11.0  | 14.3  | 12.4  |
| 365.2 | 285.0 | 289.0 | 302.0 | 327.4 | 298.2 | 386.7 | 428.8 | 337.6 |
| 2.2   | 11.2  | 1.6   | 1.5   | 1.6   | 2.6   | 5.1   | 2.2   | 4.6   |
| 5.8   | 4.1   | 3.0   | 4.5   | 1.8   | 5.3   | 2.1   | 10.2  | 3.0   |
| 0.5   | 3.4   | 1.1   | 2.9   | 1.6   | 1.0   | 1.5   | 1.0   | 1.2   |
| 1.4   | 2.0   | 1.4   | 1.8   | 0.7   | 2.2   | 0.8   | 1.2   | 1.6   |
| 1.6   | 1.9   | 1.4   | 1.2   | 1.3   | 1.8   | 1.3   | 1.8   | 2.3   |
| 1.5   | 4.5   | 3.0   | 3.0   | 4.2   | 5.9   | 7.1   | 3.6   | 5.7   |
| 4.0   | 5.2   | 5.4   | 1.6   | 3.1   | 0.7   | 1.8   | 0.6   | 2.3   |
| 7.6   | 9.0   | 12.4  | 11.3  | 9.0   | 9.7   | 7.4   | 8.3   | 2.7   |
| 1.1   | 2.0   | 2.0   | 1.6   | 1.6   | 1.4   | 13.3  | 6.5   | 6.6   |
| 3.1   | 2.3   | 0.2   | 0.7   | 5.1   | 5.0   | 4.7   | 3.5   | 1.5   |
| 2.5   | 6.9   | 7.3   | 5.9   | 4.4   | 5.0   | 2.1   | 4.9   | 2.2   |
| 1.3   | 2.0   | 1.3   | 1.4   | 1.8   | 1.3   | 3.7   | 1.7   | 1.6   |
| 1.2   | 0.5   | 0.6   | 1.5   | 5.5   | 3.5   | 2.8   | 2.6   | 1.0   |
| 6.6   | 4.4   | 5.2   | 1.2   | 7.7   | 5.4   | 9.2   | 16.6  | 9.8   |
| 31.7  | 6.1   | 16.2  | 14.2  | 16.2  | 18.2  | 27.7  | 36.9  | 15.7  |
| 41.1  | 31.1  | 39.1  | 43.5  | 39.5  | 34.2  | 50.9  | 46.2  | 39.2  |
| 829.8 | 536.3 | 592.3 | 649.5 | 647.2 | 635.9 | 856.6 | 903.1 | 671.0 |
| 8.6   | 13.6  | 9.8   | 8.4   | 9.2   | 11.0  | 6.7   | 9.9   | 6.4   |
| 2.9   | 0.9   | 14.2  | 1.8   | 16.9  | 5.3   | 13.9  | 12.5  | 7.2   |
| 13.2  | 10.6  | 8.5   | 1.7   | 8.2   | 6.1   | 6.4   | 3.7   | 5.3   |
| 21.8  | 12.7  | 18.4  | 11.4  | 13.9  | 11.9  | 14.1  | 14.3  | 15.9  |
| 11.4  | 1.3   | 10.0  | 7.3   | 3.8   | 1.3   | 9.8   | 8.1   | 12.5  |



|       |        |        |        |        |        |        |        |        |
|-------|--------|--------|--------|--------|--------|--------|--------|--------|
| 32.9  | 33.2   | 45.4   | 42.6   | 49.0   | 50.4   | 80.3   | 58.6   | 43.9   |
| 5.5   | 2.9    | 9.4    | 6.3    | 3.5    | 1.3    | 5.8    | 9.4    | 1.4    |
| 13.4  | 7.2    | 1.7    | 14.4   | 9.1    | 8.1    | 6.8    | 18.0   | 13.2   |
| 0.8   | 0.6    | 1.0    | 0.7    | 0.8    | 0.4    | 0.5    | 1.1    | 0.4    |
| 5.1   | 6.1    | 4.8    | 0.7    | 6.6    | 5.6    | 0.7    | 1.0    | 7.5    |
| 1.2   | 8.5    | 3.4    | 8.7    | 8.7    | 9.4    | 6.6    | 10.3   | 1.9    |
| 4.2   | 2.4    | 1.1    | 2.2    | 6.4    | 3.3    | 5.2    | 0.4    | 1.1    |
| 0.9   | 0.3    | 0.6    | 0.6    | 0.5    | 0.5    | 0.7    | 0.4    | 0.6    |
| 0.2   | 1.9    | 0.2    | 0.2    | 0.5    | 0.1    | 0.2    | 0.4    | 0.7    |
| 0.6   | 1.4    | 1.0    | 0.4    | 0.9    | 0.7    | 0.7    | 1.0    | 1.1    |
| 5.5   | 0.3    | 1.1    | 2.1    | 1.5    | 3.6    | 3.0    | 2.7    | 2.4    |
| 8.6   | 0.6    | 6.8    | 1.4    | 6.7    | 1.2    | 4.9    | 6.8    | 4.1    |
| 0.9   | 0.2    | 0.8    | 3.4    | 4.5    | 0.8    | 3.4    | 3.9    | 3.3    |
| 20.8  | 21.4   | 14.6   | 21.7   | 19.0   | 15.9   | 19.2   | 28.5   | 12.9   |
| 13.7  | 9.1    | 18.3   | 9.4    | 11.5   | 14.6   | 15.5   | 15.5   | 13.1   |
| 19.4  | 11.5   | 7.5    | 15.5   | 14.7   | 12.3   | 21.9   | 21.6   | 21.3   |
| 0.3   | 0.3    | 0.4    | 0.6    | 0.4    | 0.2    | 0.3    | 0.2    | 0.4    |
| 1.2   | 0.6    | 0.8    | 0.5    | 0.9    | 1.0    | 1.0    | 0.9    | 0.5    |
| 15.8  | 12.5   | 16.1   | 19.1   | 20.6   | 16.5   | 20.8   | 26.5   | 13.8   |
| 14.3  | 12.9   | 12.5   | 11.3   | 13.7   | 10.2   | 12.4   | 12.9   | 11.4   |
| 1.3   | 1.1    | 0.9    | 2.0    | 0.5    | 1.0    | 0.4    | 0.9    | 1.5    |
| 5.5   | 6.6    | 8.6    | 6.7    | 6.7    | 10.0   | 2.4    | 6.7    | 5.3    |
| 4.0   | 7.9    | 4.8    | 6.9    | 4.6    | 5.7    | 11.0   | 12.4   | 6.2    |
| 27.0  | 35.4   | 36.5   | 39.5   | 46.4   | 35.4   | 60.1   | 53.4   | 41.3   |
| 1.6   | 4.5    | 2.2    | 5.3    | 8.0    | 1.1    | 13.4   | 3.6    | 2.0    |
| 128.6 | 89.6   | 88.6   | 89.0   | 101.5  | 91.8   | 121.8  | 134.9  | 115.8  |
| 6.3   | 1.9    | 6.0    | 1.7    | 1.5    | 4.0    | 2.8    | 9.1    | 1.9    |
| 2.3   | 0.9    | 0.6    | 0.6    | 2.5    | 1.1    | 0.8    | 0.9    | 2.2    |
| 4.6   | 2.0    | 2.8    | 1.2    | 5.8    | 2.8    | 4.3    | 2.7    | 8.0    |
| 0.6   | 0.8    | 0.7    | 0.9    | 0.8    | 1.0    | 1.9    | 5.4    | 1.2    |
| 256.8 | 87.5   | 113.6  | 101.8  | 121.1  | 105.4  | 143.4  | 152.9  | 140.2  |
| 1.4   | 0.5    | 2.4    | 1.5    | 0.4    | 2.8    | 3.3    | 2.9    | 0.9    |
| 3.5   | 4.4    | 1.5    | 3.0    | 2.4    | 0.9    | 4.3    | 3.1    | 2.4    |
| 114.9 | 61.4   | 103.4  | 93.4   | 100.9  | 120.9  | 128.3  | 106.2  | 73.9   |
| 0.9   | 1.0    | 2.7    | 0.2    | 4.1    | 0.3    | 3.3    | 0.8    | 2.7    |
| 78.6  | 59.7   | 67.0   | 64.8   | 62.6   | 66.2   | 100.7  | 91.6   | 78.3   |
| 1.5   | 6.5    | 11.3   | 5.5    | 2.2    | 1.9    | 4.6    | 1.5    | 2.1    |
| 0.6   | 4.0    | 5.5    | 8.4    | 9.0    | 6.5    | 13.0   | 15.9   | 10.8   |
| 0.9   | 0.7    | 0.5    | 0.6    | 4.0    | 0.9    | 4.4    | 1.2    | 0.6    |
| 1.0   | 9.6    | 0.6    | 1.3    | 1.3    | 0.7    | 1.2    | 1.9    | 0.6    |
| 991.0 | 1049.1 | 1177.9 | 1199.9 | 1231.6 | 1278.9 | 1469.0 | 1701.9 | 1015.7 |
| 0.8   | 0.5    | 1.6    | 1.4    | 0.5    | 1.5    | 1.0    | 3.2    | 3.6    |
| 637.9 | 405.0  | 545.4  | 485.9  | 458.3  | 496.8  | 633.5  | 535.9  | 479.8  |
| 3.5   | 4.3    | 2.8    | 2.9    | 4.1    | 0.3    | 3.3    | 2.2    | 0.2    |
| 35.2  | 31.5   | 29.7   | 31.1   | 40.0   | 39.5   | 46.8   | 67.1   | 30.0   |
| 4.2   | 0.8    | 1.4    | 0.3    | 3.1    | 0.5    | 6.0    | 1.8    | 1.8    |
| 2.3   | 0.9    | 0.2    | 0.6    | 0.7    | 0.5    | 0.3    | 0.4    | 1.5    |
| 11.6  | 16.3   | 11.2   | 16.4   | 9.7    | 7.4    | 12.6   | 15.2   | 13.7   |
| 1.1   | 4.6    | 0.9    | 4.1    | 1.9    | 1.0    | 11.3   | 2.7    | 20.1   |
| 4.9   | 7.7    | 0.6    | 6.3    | 7.3    | 3.9    | 14.8   | 4.1    | 3.3    |
| 14.8  | 13.3   | 8.3    | 9.3    | 18.6   | 8.8    | 17.7   | 24.2   | 15.0   |
| 1.1   | 0.3    | 0.5    | 1.1    | 0.6    | 0.3    | 2.4    | 3.7    | 3.3    |
| 125.3 | 73.5   | 90.9   | 103.2  | 110.5  | 105.8  | 155.9  | 210.3  | 109.2  |

|       |       |       |       |       |       |       |       |       |
|-------|-------|-------|-------|-------|-------|-------|-------|-------|
| 7.9   | 1.0   | 1.2   | 7.8   | 6.9   | 8.4   | 7.8   | 2.2   | 2.5   |
| 1.5   | 1.2   | 0.5   | 1.5   | 1.8   | 2.5   | 0.9   | 5.6   | 0.6   |
| 5.7   | 0.9   | 3.2   | 6.5   | 1.0   | 2.4   | 0.9   | 9.1   | 7.9   |
| 2.9   | 1.3   | 1.1   | 0.2   | 1.9   | 1.0   | 1.2   | 3.7   | 3.0   |
| 1.9   | 3.9   | 1.7   | 1.9   | 0.4   | 0.2   | 0.1   | 3.2   | 2.8   |
| 1.0   | 0.8   | 0.8   | 1.6   | 0.7   | 0.6   | 0.8   | 1.5   | 0.8   |
| 65.7  | 42.7  | 44.7  | 59.2  | 47.5  | 40.1  | 54.1  | 66.0  | 46.8  |
| 0.8   | 9.2   | 2.3   | 2.4   | 0.7   | 7.9   | 1.2   | 5.2   | 4.9   |
| 1.6   | 0.3   | 1.1   | 0.1   | 1.9   | 0.2   | 0.3   | 1.8   | 2.2   |
| 17.9  | 9.5   | 11.1  | 14.7  | 11.3  | 12.4  | 14.9  | 19.1  | 14.9  |
| 3.1   | 5.4   | 8.9   | 2.9   | 1.0   | 3.8   | 3.9   | 3.9   | 4.4   |
| 0.8   | 1.5   | 1.1   | 5.9   | 3.3   | 2.9   | 0.9   | 1.9   | 3.8   |
| 4.1   | 2.8   | 5.3   | 1.7   | 3.2   | 8.2   | 12.7  | 5.3   | 15.1  |
| 8.8   | 8.8   | 6.5   | 2.2   | 4.2   | 9.6   | 9.0   | 9.7   | 5.9   |
| 8.5   | 5.8   | 8.1   | 7.9   | 9.2   | 5.5   | 8.8   | 9.8   | 11.4  |
| 8.4   | 5.0   | 10.5  | 5.4   | 9.5   | 6.1   | 3.0   | 8.5   | 9.6   |
| 7.8   | 1.1   | 0.8   | 1.9   | 4.3   | 2.1   | 4.8   | 1.1   | 7.3   |
| 3.9   | 8.8   | 3.6   | 1.5   | 0.9   | 1.3   | 4.8   | 3.2   | 5.4   |
| 3.5   | 3.9   | 2.6   | 6.3   | 1.3   | 5.5   | 4.1   | 3.0   | 3.0   |
| 0.6   | 1.1   | 0.5   | 0.8   | 0.7   | 1.8   | 0.7   | 0.6   | 0.9   |
| 0.1   | 0.2   | 0.1   | 1.2   | 0.1   | 0.1   | 0.1   | 0.3   | 0.3   |
| 15.1  | 3.7   | 4.5   | 11.0  | 3.6   | 6.7   | 10.9  | 8.4   | 6.0   |
| 384.9 | 116.7 | 145.3 | 182.2 | 132.1 | 165.1 | 209.2 | 313.0 | 181.7 |
| 91.9  | 64.6  | 53.5  | 50.6  | 56.1  | 54.4  | 52.9  | 78.1  | 66.5  |
| 12.7  | 5.7   | 10.3  | 7.8   | 7.9   | 5.6   | 10.5  | 12.4  | 4.9   |
| 27.9  | 6.5   | 11.4  | 8.5   | 6.8   | 18.4  | 22.1  | 18.4  | 15.6  |
| 7.9   | 1.7   | 1.9   | 4.5   | 3.7   | 0.5   | 4.0   | 3.6   | 6.5   |
| 13.3  | 14.4  | 20.0  | 5.9   | 15.2  | 14.0  | 12.7  | 18.2  | 13.1  |
| 138.4 | 86.2  | 85.5  | 88.5  | 131.5 | 87.7  | 117.1 | 129.2 | 92.0  |
| 12.2  | 3.5   | 7.1   | 8.3   | 7.2   | 7.1   | 8.3   | 12.3  | 9.2   |
| 1.7   | 2.0   | 1.6   | 1.3   | 0.9   | 0.7   | 1.7   | 4.1   | 1.3   |
| 4.7   | 4.0   | 3.9   | 4.1   | 3.7   | 1.1   | 8.8   | 2.6   | 7.6   |
| 47.8  | 34.2  | 33.0  | 35.8  | 37.0  | 37.6  | 43.5  | 51.4  | 22.0  |
| 695.0 | 586.8 | 665.1 | 671.4 | 714.4 | 689.1 | 803.7 | 940.2 | 712.4 |
| 17.9  | 2.4   | 8.2   | 4.1   | 2.0   | 6.5   | 13.8  | 12.6  | 11.2  |
| 0.9   | 2.5   | 3.0   | 1.7   | 1.0   | 1.2   | 2.1   | 2.1   | 1.7   |
| 4.2   | 4.2   | 5.4   | 0.9   | 9.0   | 2.3   | 9.5   | 7.1   | 10.0  |
| 12.7  | 21.3  | 6.4   | 1.6   | 11.3  | 17.2  | 13.6  | 17.5  | 10.5  |
| 1.4   | 1.2   | 1.5   | 3.1   | 6.7   | 4.3   | 9.1   | 7.2   | 8.3   |
| 2.6   | 1.1   | 7.7   | 1.5   | 6.9   | 1.5   | 7.0   | 0.8   | 9.4   |
| 3.0   | 6.0   | 0.9   | 1.1   | 0.7   | 2.2   | 5.6   | 7.5   | 6.8   |
| 0.5   | 0.5   | 0.5   | 0.5   | 0.6   | 0.4   | 0.4   | 0.5   | 0.4   |
| 1.4   | 5.5   | 5.2   | 4.1   | 7.0   | 7.5   | 10.2  | 13.7  | 5.0   |
| 4.4   | 0.6   | 0.6   | 2.0   | 0.5   | 0.7   | 0.6   | 0.8   | 1.7   |
| 0.5   | 1.0   | 1.3   | 3.4   | 2.7   | 3.7   | 2.4   | 1.1   | 4.0   |
| 10.6  | 2.9   | 1.4   | 0.7   | 0.9   | 1.1   | 5.1   | 1.0   | 3.9   |
| 0.1   | 0.1   | 0.2   | 0.2   | 0.1   | 0.1   | 0.1   | 0.3   | 0.1   |
| 2.5   | 2.1   | 1.7   | 5.2   | 9.8   | 3.1   | 6.9   | 5.4   | 4.8   |
| 15.9  | 10.3  | 2.6   | 1.2   | 5.9   | 6.8   | 11.4  | 4.7   | 6.3   |
| 0.5   | 0.6   | 0.7   | 0.5   | 0.2   | 0.4   | 0.2   | 0.8   | 0.4   |
| 0.3   | 3.3   | 3.2   | 0.4   | 2.8   | 1.6   | 0.1   | 0.2   | 0.4   |
| 2.6   | 1.5   | 1.3   | 1.8   | 2.5   | 1.2   | 1.6   | 2.4   | 1.1   |
| 0.8   | 7.4   | 10.4  | 2.0   | 7.1   | 1.8   | 9.3   | 6.8   | 0.9   |

|        |        |        |        |        |        |        |        |        |
|--------|--------|--------|--------|--------|--------|--------|--------|--------|
| 11.0   | 13.1   | 8.3    | 9.8    | 9.9    | 13.9   | 12.7   | 12.4   | 13.0   |
| 61.0   | 26.2   | 37.5   | 48.9   | 45.6   | 50.5   | 56.9   | 76.7   | 50.6   |
| 6.3    | 7.4    | 3.0    | 5.5    | 8.8    | 5.1    | 5.2    | 3.5    | 3.4    |
| 10.4   | 9.9    | 1.0    | 9.4    | 9.6    | 5.7    | 4.6    | 1.1    | 0.6    |
| 45.1   | 63.3   | 50.8   | 72.7   | 100.1  | 58.6   | 111.5  | 117.6  | 67.3   |
| 1895.8 | 1425.0 | 1530.0 | 1634.1 | 1748.2 | 1803.0 | 2185.7 | 2143.1 | 1625.7 |
| 11.2   | 8.9    | 5.8    | 2.3    | 3.9    | 8.0    | 9.8    | 11.0   | 6.1    |
| 41.2   | 38.1   | 35.1   | 35.4   | 30.8   | 33.0   | 50.8   | 34.3   | 36.3   |
| 2.1    | 4.7    | 3.4    | 6.2    | 1.5    | 6.7    | 2.6    | 1.2    | 0.4    |
| 0.6    | 4.5    | 0.3    | 2.8    | 3.8    | 1.8    | 3.1    | 0.2    | 0.5    |
| 1.0    | 0.9    | 0.8    | 0.7    | 0.7    | 1.1    | 0.6    | 0.6    | 0.6    |
| 214.9  | 179.3  | 168.9  | 218.6  | 196.1  | 170.4  | 239.4  | 297.5  | 194.1  |
| 2.1    | 0.5    | 1.5    | 3.4    | 1.1    | 0.5    | 0.5    | 3.2    | 1.6    |
| 271.0  | 241.2  | 222.2  | 244.0  | 260.9  | 233.7  | 313.4  | 424.4  | 284.6  |
| 0.3    | 1.0    | 1.2    | 0.3    | 0.1    | 1.1    | 0.4    | 1.7    | 0.4    |
| 1.1    | 5.7    | 8.2    | 4.2    | 2.3    | 5.3    | 2.6    | 1.8    | 6.0    |
| 1404.6 | 1199.6 | 1256.2 | 1365.5 | 1508.2 | 1354.3 | 1675.1 | 1699.2 | 1149.7 |
| 148.3  | 136.2  | 161.0  | 145.6  | 143.0  | 133.2  | 186.6  | 175.9  | 124.0  |
| 134.0  | 118.7  | 84.9   | 81.5   | 152.8  | 115.8  | 208.0  | 214.9  | 129.8  |
| 1.9    | 1.7    | 1.5    | 1.0    | 1.6    | 1.1    | 2.8    | 2.0    | 5.6    |
| 4.6    | 4.4    | 1.9    | 4.9    | 0.7    | 0.6    | 4.4    | 5.1    | 1.9    |
| 2.2    | 2.8    | 3.8    | 0.7    | 0.2    | 3.3    | 0.4    | 0.4    | 2.4    |
| 3.3    | 4.5    | 2.1    | 4.8    | 3.3    | 3.6    | 4.7    | 3.5    | 3.2    |
| 23.5   | 15.6   | 13.3   | 9.3    | 14.6   | 14.3   | 20.3   | 23.2   | 17.9   |
| 30.5   | 6.9    | 17.2   | 17.1   | 12.7   | 19.9   | 32.0   | 39.8   | 20.9   |
| 2.7    | 5.4    | 4.8    | 3.6    | 6.2    | 3.0    | 7.3    | 16.7   | 1.6    |
| 2.3    | 1.4    | 5.6    | 0.6    | 2.5    | 1.1    | 2.3    | 2.2    | 1.9    |
| 2.6    | 5.0    | 2.5    | 1.1    | 2.2    | 9.9    | 4.5    | 5.3    | 2.4    |
| 77.4   | 87.5   | 82.3   | 82.3   | 101.1  | 75.3   | 127.4  | 136.2  | 89.1   |
| 0.2    | 0.3    | 0.3    | 0.2    | 0.2    | 0.3    | 0.7    | 5.6    | 0.2    |
| 14.0   | 13.3   | 12.5   | 14.3   | 11.6   | 12.4   | 20.1   | 18.3   | 10.2   |
| 11.2   | 13.0   | 12.0   | 20.6   | 15.4   | 11.4   | 16.8   | 18.3   | 12.4   |
| 8.1    | 10.0   | 13.1   | 10.8   | 13.7   | 8.2    | 10.1   | 17.1   | 9.1    |
| 39.8   | 21.2   | 16.9   | 17.1   | 25.8   | 22.4   | 28.0   | 26.2   | 17.1   |
| 20.2   | 22.1   | 23.1   | 18.2   | 14.2   | 14.7   | 18.8   | 23.3   | 21.5   |
| 18.1   | 6.3    | 8.0    | 2.2    | 1.6    | 7.7    | 2.6    | 1.5    | 11.7   |
| 12.8   | 8.9    | 11.4   | 13.8   | 11.8   | 14.6   | 8.3    | 13.3   | 13.6   |
| 1.2    | 0.6    | 1.5    | 0.6    | 0.9    | 0.7    | 1.1    | 0.7    | 1.0    |
| 2.4    | 0.9    | 6.2    | 7.7    | 5.3    | 1.3    | 0.8    | 4.9    | 8.0    |
| 2.7    | 5.6    | 3.7    | 1.0    | 2.9    | 1.3    | 9.2    | 14.4   | 4.1    |
| 9.4    | 5.2    | 2.6    | 1.3    | 7.0    | 10.1   | 3.5    | 11.8   | 5.4    |
| 4.9    | 1.4    | 0.2    | 1.0    | 2.9    | 3.9    | 6.3    | 0.7    | 2.7    |
| 0.3    | 0.7    | 0.5    | 4.1    | 5.6    | 0.9    | 4.7    | 0.5    | 7.1    |
| 69.4   | 57.8   | 85.4   | 76.4   | 91.2   | 65.6   | 125.9  | 103.3  | 100.8  |
| 2.2    | 3.9    | 0.3    | 2.2    | 6.0    | 0.3    | 1.6    | 1.1    | 1.2    |
| 90.0   | 37.5   | 38.3   | 49.6   | 47.8   | 44.2   | 50.9   | 54.3   | 52.5   |
| 13.8   | 1.8    | 21.3   | 7.1    | 1.4    | 4.8    | 1.9    | 14.1   | 21.7   |
| 0.4    | 2.0    | 1.5    | 0.9    | 1.0    | 0.5    | 1.0    | 1.2    | 0.9    |
| 2.0    | 3.8    | 9.7    | 0.4    | 1.1    | 1.4    | 8.5    | 6.1    | 1.7    |
| 1.9    | 5.9    | 1.8    | 0.8    | 0.5    | 1.1    | 1.0    | 2.7    | 0.6    |
| 13.1   | 7.5    | 1.9    | 9.4    | 6.8    | 11.6   | 15.1   | 11.0   | 7.8    |
| 0.7    | 0.7    | 0.2    | 3.8    | 0.2    | 0.3    | 1.2    | 2.3    | 2.7    |
| 8.9    | 14.8   | 5.6    | 14.2   | 8.7    | 15.2   | 14.5   | 14.4   | 9.3    |

|        |        |        |        |        |        |        |        |        |
|--------|--------|--------|--------|--------|--------|--------|--------|--------|
| 2.4    | 6.2    | 5.9    | 10.1   | 4.4    | 5.4    | 9.3    | 9.0    | 5.8    |
| 1.0    | 2.6    | 3.5    | 4.4    | 3.6    | 0.7    | 4.9    | 6.3    | 6.4    |
| 1.0    | 0.4    | 1.8    | 0.3    | 0.8    | 1.1    | 0.7    | 0.8    | 0.5    |
| 12.3   | 7.5    | 1.4    | 1.5    | 14.3   | 2.2    | 26.6   | 12.4   | 10.3   |
| 1.0    | 0.5    | 0.3    | 3.8    | 1.4    | 8.7    | 0.7    | 1.0    | 2.3    |
| 0.9    | 7.3    | 2.3    | 8.3    | 9.3    | 5.7    | 2.7    | 3.2    | 3.1    |
| 1.5    | 1.1    | 2.1    | 3.7    | 1.5    | 0.8    | 1.0    | 1.1    | 1.2    |
| 1.1    | 2.0    | 4.1    | 0.6    | 1.1    | 1.2    | 6.4    | 3.8    | 8.0    |
| 12.8   | 2.2    | 5.8    | 8.8    | 2.2    | 11.5   | 9.9    | 0.9    | 12.1   |
| 0.9    | 1.0    | 1.2    | 1.1    | 1.1    | 2.3    | 2.6    | 1.3    | 0.9    |
| 9.4    | 12.3   | 9.8    | 5.7    | 3.1    | 1.7    | 1.8    | 12.3   | 10.2   |
| 8.1    | 9.6    | 7.5    | 1.9    | 7.4    | 3.9    | 9.6    | 8.5    | 13.2   |
| 1.1    | 0.8    | 2.8    | 5.0    | 3.4    | 2.8    | 3.6    | 6.4    | 2.7    |
| 17.4   | 7.6    | 14.2   | 15.3   | 9.7    | 13.1   | 18.3   | 30.0   | 15.0   |
| 6.8    | 4.7    | 4.6    | 1.9    | 3.6    | 4.9    | 4.4    | 7.8    | 0.7    |
| 5.6    | 1.6    | 1.1    | 1.1    | 5.9    | 1.0    | 3.0    | 1.2    | 0.9    |
| 2.4    | 1.2    | 1.6    | 1.3    | 0.8    | 3.5    | 2.3    | 2.2    | 0.8    |
| 16.5   | 17.6   | 10.2   | 15.8   | 19.0   | 16.4   | 15.3   | 20.6   | 13.1   |
| 7.7    | 12.8   | 9.8    | 1.8    | 10.3   | 10.5   | 7.4    | 9.9    | 6.1    |
| 0.4    | 0.6    | 1.1    | 3.7    | 0.5    | 0.6    | 1.2    | 0.8    | 0.8    |
| 5.4    | 4.0    | 2.9    | 6.0    | 8.1    | 7.6    | 10.7   | 12.3   | 2.8    |
| 14.7   | 16.2   | 8.2    | 1.8    | 10.3   | 4.9    | 8.9    | 16.5   | 6.3    |
| 6.4    | 3.4    | 6.0    | 3.7    | 6.8    | 6.8    | 9.8    | 5.3    | 6.8    |
| 2.2    | 2.0    | 1.7    | 1.8    | 1.1    | 3.9    | 4.6    | 0.9    | 2.8    |
| 1.5    | 3.9    | 1.3    | 0.7    | 5.4    | 4.2    | 6.7    | 2.9    | 0.6    |
| 7.4    | 4.1    | 5.7    | 5.6    | 17.9   | 9.8    | 5.7    | 10.4   | 6.4    |
| 2.0    | 8.0    | 9.5    | 4.0    | 9.9    | 2.4    | 16.3   | 10.7   | 1.7    |
| 16.9   | 15.1   | 13.0   | 18.5   | 14.7   | 16.9   | 23.5   | 29.0   | 19.0   |
| 14.4   | 10.0   | 11.4   | 10.4   | 6.6    | 8.3    | 14.7   | 13.6   | 14.7   |
| 0.4    | 0.5    | 5.2    | 0.6    | 6.0    | 1.0    | 0.9    | 1.1    | 0.8    |
| 9.0    | 0.9    | 6.0    | 1.8    | 2.9    | 5.5    | 8.8    | 7.2    | 6.6    |
| 1.6    | 2.1    | 1.6    | 0.5    | 0.7    | 0.6    | 1.4    | 0.8    | 1.7    |
| 2.5    | 0.9    | 1.6    | 1.3    | 0.8    | 0.6    | 1.0    | 0.9    | 0.2    |
| 162.2  | 104.1  | 119.8  | 132.5  | 112.3  | 101.6  | 145.3  | 138.0  | 97.0   |
| 0.4    | 0.2    | 1.6    | 0.8    | 0.5    | 0.3    | 0.8    | 0.7    | 3.1    |
| 4.0    | 1.2    | 2.7    | 1.0    | 1.8    | 2.4    | 0.8    | 1.6    | 0.5    |
| 4.1    | 6.1    | 7.3    | 0.6    | 1.1    | 1.2    | 4.8    | 1.1    | 2.9    |
| 1690.4 | 1375.6 | 1450.7 | 1556.2 | 1588.5 | 1403.7 | 1806.0 | 1845.7 | 1170.0 |
| 4.5    | 7.4    | 7.3    | 7.7    | 3.9    | 2.5    | 8.3    | 9.9    | 7.7    |
| 127.0  | 32.5   | 68.3   | 64.8   | 77.7   | 58.0   | 102.9  | 91.6   | 64.1   |
| 17.2   | 9.3    | 7.9    | 6.0    | 11.8   | 9.6    | 11.8   | 14.8   | 12.0   |
| 15.8   | 7.6    | 10.2   | 11.5   | 9.0    | 10.6   | 7.9    | 16.1   | 11.9   |
| 1.3    | 3.6    | 1.6    | 3.6    | 1.9    | 8.0    | 0.7    | 4.9    | 3.1    |
| 0.5    | 1.0    | 0.5    | 0.5    | 0.7    | 0.5    | 0.6    | 0.5    | 0.6    |
| 1.0    | 2.6    | 1.2    | 5.3    | 2.4    | 5.2    | 0.5    | 1.7    | 0.9    |
| 7.0    | 9.8    | 5.3    | 6.6    | 6.8    | 6.9    | 0.8    | 7.3    | 4.4    |
| 8.2    | 11.9   | 8.0    | 6.7    | 8.4    | 7.4    | 3.4    | 2.2    | 5.5    |
| 61.8   | 42.6   | 46.4   | 53.7   | 46.8   | 55.4   | 74.0   | 77.8   | 44.0   |
| 0.3    | 2.0    | 2.5    | 0.3    | 2.6    | 4.8    | 0.4    | 3.9    | 1.0    |
| 1.0    | 5.0    | 2.8    | 11.4   | 1.8    | 3.7    | 7.9    | 6.6    | 4.2    |
| 0.2    | 0.4    | 1.4    | 1.8    | 0.1    | 0.4    | 0.3    | 0.1    | 0.1    |
| 1.9    | 0.6    | 0.4    | 0.4    | 0.5    | 0.4    | 0.5    | 1.5    | 0.3    |
| 1.1    | 1.3    | 1.8    | 1.0    | 1.0    | 1.4    | 2.8    | 2.2    | 0.6    |

|       |       |       |       |       |       |       |       |       |
|-------|-------|-------|-------|-------|-------|-------|-------|-------|
| 0.4   | 0.2   | 0.3   | 0.4   | 0.4   | 0.4   | 0.4   | 0.3   | 0.4   |
| 7.6   | 2.4   | 1.1   | 1.0   | 2.2   | 1.6   | 0.8   | 1.8   | 1.6   |
| 0.3   | 0.9   | 0.2   | 0.3   | 0.3   | 0.2   | 0.3   | 0.4   | 0.3   |
| 8.3   | 3.4   | 5.0   | 3.6   | 5.0   | 5.5   | 7.7   | 6.9   | 3.2   |
| 11.1  | 6.9   | 9.0   | 3.7   | 7.4   | 7.5   | 9.4   | 4.0   | 10.2  |
| 1.0   | 0.7   | 0.7   | 4.5   | 2.9   | 5.6   | 3.3   | 1.3   | 3.4   |
| 39.2  | 40.3  | 29.3  | 34.4  | 36.6  | 33.5  | 33.1  | 24.2  | 51.2  |
| 0.5   | 0.4   | 0.3   | 0.7   | 0.4   | 0.7   | 0.5   | 0.7   | 1.0   |
| 2.9   | 6.4   | 2.9   | 8.9   | 2.7   | 7.1   | 7.3   | 4.1   | 4.2   |
| 28.8  | 37.8  | 30.4  | 33.2  | 29.4  | 40.8  | 37.1  | 42.9  | 38.3  |
| 10.6  | 6.9   | 12.6  | 1.3   | 5.5   | 6.7   | 2.3   | 8.5   | 4.6   |
| 8.4   | 8.1   | 8.9   | 16.3  | 15.5  | 6.4   | 11.4  | 13.6  | 6.4   |
| 0.4   | 0.7   | 0.3   | 1.1   | 0.5   | 0.3   | 0.9   | 0.5   | 0.5   |
| 0.5   | 0.1   | 0.1   | 2.0   | 1.6   | 0.1   | 2.0   | 0.2   | 0.2   |
| 3.3   | 2.4   | 4.3   | 1.0   | 3.4   | 0.2   | 4.1   | 7.1   | 3.3   |
| 3.5   | 1.1   | 1.7   | 2.0   | 5.6   | 6.2   | 3.0   | 1.1   | 7.8   |
| 325.7 | 155.7 | 163.9 | 193.7 | 183.7 | 173.0 | 270.8 | 279.9 | 174.9 |
| 0.5   | 0.1   | 2.2   | 0.4   | 1.2   | 2.2   | 0.3   | 0.1   | 0.4   |
| 10.4  | 9.8   | 5.6   | 5.0   | 7.7   | 5.7   | 5.6   | 14.1  | 12.8  |
| 4.1   | 0.8   | 6.7   | 0.6   | 1.2   | 3.4   | 4.5   | 10.0  | 1.8   |
| 16.2  | 18.0  | 14.3  | 14.9  | 14.2  | 20.6  | 21.7  | 23.7  | 17.2  |
| 1.7   | 1.9   | 1.0   | 0.8   | 1.4   | 1.5   | 1.1   | 1.6   | 1.1   |
| 26.3  | 23.6  | 20.9  | 33.7  | 30.4  | 27.6  | 22.3  | 34.8  | 35.6  |
| 1.4   | 1.4   | 0.9   | 2.0   | 0.8   | 1.7   | 1.5   | 1.8   | 1.0   |
| 25.8  | 16.6  | 16.2  | 17.0  | 22.6  | 15.8  | 21.8  | 37.7  | 25.6  |
| 1.5   | 3.0   | 1.0   | 0.5   | 0.4   | 3.0   | 1.5   | 4.5   | 1.0   |
| 1.8   | 1.3   | 3.7   | 5.3   | 2.1   | 1.5   | 1.9   | 2.9   | 0.7   |
| 1.2   | 2.0   | 1.0   | 3.4   | 1.7   | 0.1   | 0.6   | 1.1   | 1.0   |
| 6.4   | 7.2   | 8.9   | 6.1   | 5.1   | 5.0   | 8.7   | 7.8   | 3.1   |
| 0.5   | 0.3   | 0.5   | 0.5   | 1.2   | 0.6   | 0.9   | 1.7   | 1.4   |
| 11.9  | 21.6  | 24.1  | 17.1  | 12.0  | 19.3  | 15.2  | 23.9  | 18.4  |
| 0.7   | 3.3   | 7.0   | 3.8   | 1.6   | 3.8   | 3.6   | 4.8   | 1.9   |
| 53.0  | 39.8  | 49.2  | 52.9  | 38.1  | 44.8  | 67.9  | 89.5  | 48.1  |
| 25.4  | 14.4  | 21.8  | 24.0  | 25.4  | 30.1  | 28.6  | 18.8  | 22.4  |
| 6.4   | 1.1   | 1.9   | 1.2   | 1.3   | 2.6   | 1.5   | 1.5   | 5.4   |
| 0.2   | 0.1   | 1.0   | 0.1   | 0.8   | 0.3   | 0.3   | 0.5   | 0.3   |
| 1.4   | 12.4  | 9.2   | 8.4   | 1.9   | 5.2   | 7.9   | 1.6   | 1.7   |
| 12.3  | 4.6   | 12.1  | 10.6  | 1.6   | 1.8   | 11.8  | 11.6  | 4.8   |
| 6.8   | 5.6   | 4.7   | 0.9   | 1.4   | 2.9   | 1.0   | 1.4   | 7.5   |
| 0.5   | 1.3   | 2.2   | 0.7   | 0.3   | 3.4   | 8.0   | 3.5   | 0.6   |
| 4.2   | 4.2   | 5.0   | 1.0   | 3.2   | 3.5   | 7.1   | 8.1   | 13.1  |
| 79.7  | 21.5  | 46.0  | 35.8  | 40.9  | 66.8  | 41.9  | 83.5  | 60.9  |
| 1.1   | 0.9   | 0.6   | 0.7   | 0.9   | 0.5   | 0.7   | 1.3   | 1.3   |
| 8.3   | 7.2   | 4.8   | 4.3   | 10.6  | 6.6   | 3.9   | 7.6   | 6.4   |
| 10.4  | 5.3   | 8.6   | 5.5   | 9.8   | 11.8  | 15.4  | 12.3  | 9.4   |
| 92.4  | 77.2  | 64.4  | 70.2  | 85.6  | 72.4  | 110.7 | 143.0 | 71.8  |
| 2.9   | 2.5   | 1.0   | 3.6   | 6.1   | 4.2   | 1.3   | 1.6   | 5.2   |
| 13.2  | 12.0  | 7.5   | 10.6  | 7.7   | 6.0   | 16.5  | 10.9  | 9.6   |
| 3.0   | 4.9   | 3.9   | 2.7   | 2.3   | 2.8   | 4.6   | 3.8   | 5.7   |
| 10.4  | 12.8  | 11.6  | 15.0  | 11.8  | 13.5  | 19.1  | 27.7  | 10.0  |
| 1.9   | 1.5   | 4.8   | 2.5   | 1.1   | 2.4   | 1.0   | 2.8   | 1.8   |
| 2.0   | 7.0   | 8.6   | 1.4   | 9.3   | 6.0   | 11.3  | 3.1   | 2.0   |
| 10.1  | 1.6   | 11.4  | 15.8  | 9.7   | 8.2   | 5.7   | 15.4  | 12.9  |

|       |       |       |       |       |       |       |        |       |
|-------|-------|-------|-------|-------|-------|-------|--------|-------|
| 10.2  | 8.2   | 11.6  | 6.9   | 9.5   | 10.6  | 1.0   | 9.4    | 6.8   |
| 2.1   | 8.9   | 2.0   | 3.0   | 5.4   | 5.0   | 4.9   | 7.0    | 3.3   |
| 4.6   | 1.7   | 2.2   | 0.8   | 4.0   | 4.2   | 7.1   | 4.8    | 2.4   |
| 2.6   | 3.8   | 4.4   | 1.4   | 1.3   | 0.6   | 4.3   | 3.0    | 1.5   |
| 3.8   | 1.6   | 1.7   | 1.8   | 1.4   | 10.9  | 1.8   | 2.5    | 1.2   |
| 51.4  | 39.4  | 43.5  | 40.3  | 45.9  | 36.1  | 55.8  | 74.8   | 71.7  |
| 21.6  | 14.4  | 11.4  | 19.9  | 18.0  | 12.4  | 25.2  | 30.0   | 18.4  |
| 409.2 | 283.4 | 312.6 | 298.0 | 413.0 | 340.2 | 382.5 | 416.5  | 278.2 |
| 15.7  | 2.4   | 16.0  | 8.4   | 6.0   | 6.6   | 14.0  | 18.7   | 5.7   |
| 0.6   | 4.5   | 3.3   | 2.9   | 1.3   | 0.5   | 3.8   | 7.3    | 3.5   |
| 16.3  | 6.3   | 6.7   | 11.9  | 7.6   | 16.6  | 8.8   | 24.9   | 9.7   |
| 6.9   | 1.2   | 3.7   | 0.8   | 1.0   | 1.1   | 6.4   | 12.0   | 1.8   |
| 78.7  | 305.9 | 369.4 | 393.4 | 429.0 | 376.5 | 536.7 | 668.4  | 443.3 |
| 0.4   | 2.3   | 7.7   | 2.3   | 3.5   | 0.8   | 3.4   | 1.9    | 1.2   |
| 8.6   | 0.6   | 2.5   | 3.3   | 7.8   | 0.5   | 4.0   | 5.5    | 3.7   |
| 123.8 | 71.6  | 76.5  | 88.6  | 76.1  | 86.0  | 142.3 | 172.6  | 177.4 |
| 0.6   | 4.5   | 4.1   | 4.3   | 7.3   | 4.0   | 0.8   | 13.8   | 4.2   |
| 6.5   | 7.2   | 10.0  | 4.8   | 7.4   | 7.8   | 11.5  | 9.0    | 6.1   |
| 2.0   | 0.3   | 0.3   | 1.3   | 0.8   | 0.1   | 1.8   | 2.2    | 1.5   |
| 845.7 | 538.3 | 748.7 | 693.7 | 654.6 | 848.3 | 898.7 | 1268.6 | 716.0 |
| 0.5   | 0.4   | 1.1   | 1.0   | 4.2   | 0.7   | 1.6   | 0.6    | 0.8   |
| 0.5   | 0.4   | 1.5   | 0.7   | 0.4   | 2.7   | 2.3   | 0.7    | 0.7   |
| 557.9 | 372.0 | 282.6 | 344.3 | 375.8 | 435.3 | 485.1 | 636.8  | 307.9 |
| 0.6   | 0.3   | 0.4   | 0.4   | 0.2   | 0.5   | 0.7   | 0.4    | 0.5   |
| 0.7   | 1.8   | 1.5   | 0.9   | 1.1   | 1.7   | 7.8   | 5.3    | 0.8   |
| 82.5  | 42.0  | 65.4  | 56.9  | 46.5  | 70.0  | 79.0  | 93.2   | 65.5  |
| 6.2   | 5.0   | 4.0   | 1.1   | 2.6   | 8.2   | 1.8   | 10.6   | 1.1   |
| 1.2   | 1.0   | 4.8   | 4.8   | 3.9   | 1.3   | 3.9   | 8.8    | 8.5   |
| 1.6   | 0.9   | 0.6   | 2.0   | 0.8   | 0.5   | 5.4   | 1.1    | 0.4   |
| 10.6  | 14.4  | 4.5   | 14.3  | 15.7  | 13.0  | 16.3  | 13.3   | 14.1  |
| 1.6   | 1.6   | 1.5   | 0.7   | 0.8   | 1.5   | 1.4   | 2.0    | 0.8   |
| 4.8   | 1.0   | 1.5   | 8.1   | 3.8   | 7.7   | 9.5   | 1.9    | 3.0   |
| 7.6   | 6.0   | 4.4   | 4.3   | 8.0   | 9.0   | 7.5   | 2.3    | 3.6   |
| 16.9  | 14.0  | 15.5  | 14.8  | 14.6  | 15.3  | 13.7  | 15.3   | 16.0  |
| 47.8  | 28.1  | 29.1  | 28.3  | 31.5  | 39.0  | 46.7  | 45.0   | 31.7  |
| 7.0   | 1.9   | 0.6   | 3.6   | 3.2   | 3.2   | 5.1   | 5.2    | 3.2   |
| 25.4  | 14.2  | 17.4  | 16.0  | 15.3  | 21.7  | 23.2  | 29.1   | 21.5  |
| 9.3   | 17.2  | 14.6  | 15.6  | 20.4  | 12.3  | 17.0  | 18.1   | 13.7  |
| 4.8   | 8.3   | 9.5   | 2.1   | 1.9   | 12.3  | 11.7  | 1.2    | 11.1  |
| 2.0   | 1.2   | 2.2   | 2.0   | 2.3   | 6.4   | 2.9   | 3.0    | 2.6   |
| 3.8   | 1.8   | 3.9   | 1.9   | 0.4   | 0.9   | 1.8   | 2.6    | 0.7   |
| 6.0   | 3.6   | 8.2   | 1.5   | 9.7   | 5.8   | 2.9   | 11.0   | 8.9   |
| 2.0   | 7.6   | 2.3   | 1.4   | 3.3   | 1.6   | 1.8   | 2.3    | 1.7   |
| 29.5  | 21.5  | 31.6  | 34.8  | 22.0  | 26.9  | 36.8  | 29.3   | 29.2  |
| 48.0  | 28.9  | 26.5  | 33.0  | 39.8  | 31.0  | 43.3  | 46.0   | 37.6  |
| 1.3   | 4.8   | 1.6   | 1.0   | 1.2   | 6.8   | 1.8   | 1.6    | 0.9   |
| 2.6   | 0.8   | 1.4   | 2.8   | 2.1   | 1.0   | 1.0   | 5.3    | 1.3   |
| 5.9   | 0.4   | 2.5   | 3.0   | 3.6   | 0.2   | 6.2   | 6.0    | 2.2   |
| 122.7 | 40.1  | 33.7  | 44.4  | 44.7  | 35.4  | 64.9  | 57.9   | 46.7  |
| 4.3   | 0.7   | 3.0   | 0.9   | 3.0   | 0.5   | 5.5   | 1.1    | 0.6   |
| 1.5   | 0.7   | 1.0   | 0.8   | 0.8   | 0.6   | 0.8   | 1.2    | 0.5   |
| 72.4  | 49.5  | 39.3  | 44.5  | 40.0  | 42.2  | 62.0  | 93.4   | 53.0  |
| 10.4  | 18.2  | 26.0  | 15.8  | 17.1  | 23.2  | 23.0  | 36.7   | 22.2  |

|       |       |       |       |       |       |       |       |       |
|-------|-------|-------|-------|-------|-------|-------|-------|-------|
| 5.9   | 1.7   | 1.9   | 6.6   | 2.9   | 4.5   | 6.3   | 8.5   | 2.8   |
| 0.7   | 0.5   | 0.8   | 0.6   | 0.7   | 1.2   | 0.4   | 0.8   | 0.4   |
| 10.6  | 9.0   | 2.3   | 4.6   | 8.5   | 10.3  | 4.8   | 14.3  | 4.1   |
| 3.8   | 6.5   | 2.8   | 1.3   | 1.6   | 4.2   | 7.0   | 2.0   | 0.6   |
| 0.2   | 0.4   | 0.4   | 3.0   | 0.4   | 0.2   | 0.6   | 1.4   | 0.4   |
| 0.9   | 1.8   | 0.7   | 0.4   | 1.2   | 0.9   | 0.6   | 0.8   | 1.0   |
| 0.3   | 0.5   | 0.4   | 0.4   | 0.8   | 0.9   | 0.4   | 0.7   | 0.8   |
| 7.2   | 0.3   | 2.5   | 2.3   | 1.9   | 0.5   | 3.7   | 0.9   | 4.2   |
| 9.8   | 12.4  | 12.5  | 14.1  | 9.6   | 19.4  | 20.6  | 16.2  | 8.3   |
| 2.2   | 2.7   | 1.0   | 2.6   | 1.9   | 1.1   | 2.2   | 1.5   | 2.8   |
| 1.0   | 0.6   | 0.6   | 0.2   | 0.4   | 0.6   | 0.5   | 0.9   | 0.5   |
| 0.6   | 0.3   | 0.4   | 0.3   | 0.7   | 0.9   | 0.3   | 0.7   | 0.3   |
| 1.7   | 0.8   | 1.4   | 1.0   | 0.4   | 4.5   | 1.8   | 5.1   | 2.4   |
| 8.5   | 2.3   | 3.9   | 4.6   | 4.7   | 6.1   | 6.9   | 4.4   | 8.3   |
| 1.0   | 1.3   | 1.2   | 1.6   | 1.2   | 0.8   | 1.8   | 0.9   | 1.4   |
| 1.6   | 4.4   | 2.2   | 1.3   | 4.2   | 2.0   | 2.7   | 8.2   | 5.0   |
| 0.9   | 1.0   | 0.5   | 0.3   | 1.1   | 0.5   | 1.0   | 1.2   | 1.3   |
| 1.1   | 1.5   | 1.5   | 0.7   | 1.7   | 1.3   | 1.8   | 1.3   | 0.9   |
| 0.7   | 0.8   | 0.7   | 0.6   | 0.6   | 0.6   | 0.5   | 0.7   | 0.6   |
| 4.2   | 3.3   | 5.4   | 5.5   | 1.7   | 3.5   | 3.6   | 2.6   | 2.7   |
| 18.6  | 8.4   | 9.9   | 7.3   | 13.4  | 10.1  | 18.7  | 23.1  | 13.3  |
| 10.9  | 8.0   | 9.6   | 19.3  | 8.8   | 9.0   | 14.4  | 10.1  | 12.0  |
| 20.1  | 13.3  | 13.9  | 12.9  | 16.3  | 20.3  | 28.5  | 27.9  | 23.6  |
| 76.6  | 57.3  | 62.1  | 66.3  | 70.5  | 66.0  | 86.8  | 86.3  | 54.7  |
| 78.8  | 65.8  | 65.3  | 66.8  | 69.8  | 58.5  | 73.5  | 84.6  | 85.0  |
| 205.8 | 122.5 | 106.9 | 92.1  | 89.9  | 79.7  | 104.0 | 123.9 | 80.4  |
| 0.7   | 3.1   | 1.3   | 2.2   | 0.9   | 0.3   | 4.7   | 5.7   | 0.7   |
| 11.6  | 6.6   | 6.0   | 7.7   | 9.9   | 12.3  | 11.1  | 16.3  | 9.5   |
| 0.7   | 4.3   | 2.3   | 3.7   | 6.5   | 1.3   | 1.6   | 5.7   | 8.1   |
| 335.2 | 269.4 | 305.7 | 328.5 | 315.4 | 325.1 | 410.1 | 364.3 | 401.9 |
| 0.2   | 0.4   | 0.3   | 0.2   | 0.5   | 0.1   | 0.4   | 0.5   | 0.6   |
| 0.8   | 2.6   | 0.9   | 1.5   | 1.7   | 2.6   | 0.7   | 3.2   | 0.9   |
| 1.3   | 1.0   | 4.6   | 0.6   | 2.3   | 0.8   | 1.9   | 0.7   | 1.1   |
| 2.4   | 7.8   | 9.5   | 8.0   | 4.1   | 3.1   | 6.8   | 4.6   | 12.0  |
| 5.1   | 1.5   | 5.8   | 0.9   | 3.9   | 2.2   | 4.1   | 1.5   | 7.3   |
| 24.3  | 15.3  | 18.6  | 15.4  | 12.3  | 15.1  | 23.5  | 21.5  | 20.4  |
| 11.9  | 4.6   | 6.4   | 8.6   | 6.2   | 10.3  | 13.4  | 11.0  | 8.1   |
| 9.3   | 6.6   | 4.2   | 2.3   | 5.9   | 3.5   | 5.5   | 3.4   | 6.1   |
| 68.1  | 30.1  | 34.6  | 43.9  | 48.1  | 45.7  | 61.6  | 77.4  | 46.4  |
| 0.6   | 2.7   | 0.2   | 2.5   | 2.0   | 0.2   | 1.2   | 4.2   | 1.7   |
| 0.3   | 2.8   | 1.0   | 4.7   | 7.9   | 5.6   | 3.7   | 1.6   | 4.0   |
| 20.8  | 14.6  | 17.1  | 23.2  | 16.2  | 17.7  | 15.2  | 33.5  | 13.1  |
| 3.8   | 1.3   | 0.4   | 0.6   | 1.1   | 2.8   | 0.3   | 0.9   | 1.8   |
| 0.7   | 0.6   | 0.2   | 0.6   | 0.3   | 0.3   | 0.2   | 0.9   | 0.3   |
| 5.8   | 1.4   | 1.4   | 1.4   | 5.6   | 7.5   | 0.9   | 3.9   | 4.7   |
| 5.5   | 7.4   | 5.7   | 1.4   | 12.2  | 7.8   | 12.9  | 6.9   | 5.0   |
| 56.3  | 31.3  | 35.1  | 24.3  | 29.3  | 33.4  | 41.2  | 46.9  | 39.1  |
| 4.9   | 3.0   | 1.0   | 2.6   | 3.5   | 0.3   | 0.8   | 0.3   | 1.1   |
| 23.5  | 10.4  | 16.0  | 14.0  | 11.6  | 28.9  | 21.3  | 17.6  | 13.6  |
| 11.4  | 10.6  | 11.9  | 10.3  | 14.5  | 9.5   | 11.2  | 15.7  | 10.8  |
| 3.3   | 2.8   | 0.7   | 4.1   | 0.9   | 2.2   | 0.8   | 3.1   | 0.5   |
| 0.8   | 1.1   | 0.8   | 0.5   | 0.6   | 0.7   | 0.6   | 0.9   | 0.9   |
| 7.8   | 6.6   | 5.4   | 8.3   | 3.0   | 6.4   | 2.7   | 1.5   | 1.5   |

|       |       |       |       |       |       |       |       |       |
|-------|-------|-------|-------|-------|-------|-------|-------|-------|
| 6.8   | 8.2   | 0.6   | 3.4   | 1.2   | 0.5   | 2.4   | 1.1   | 5.5   |
| 4.2   | 5.8   | 1.4   | 6.1   | 6.1   | 7.2   | 10.1  | 9.0   | 7.4   |
| 7.8   | 6.6   | 1.5   | 1.2   | 9.6   | 5.0   | 9.3   | 4.6   | 5.5   |
| 0.6   | 2.1   | 3.1   | 0.2   | 4.9   | 0.6   | 7.3   | 0.8   | 0.9   |
| 26.8  | 16.9  | 25.8  | 28.6  | 20.2  | 18.4  | 25.7  | 28.9  | 22.2  |
| 12.6  | 17.9  | 9.1   | 14.2  | 12.5  | 8.1   | 16.3  | 18.0  | 14.1  |
| 0.6   | 1.7   | 1.5   | 0.7   | 1.6   | 8.9   | 9.0   | 2.7   | 1.4   |
| 50.1  | 41.6  | 49.1  | 45.1  | 38.6  | 50.8  | 50.6  | 50.3  | 50.7  |
| 0.4   | 2.5   | 1.4   | 1.4   | 1.2   | 0.4   | 1.7   | 0.8   | 6.0   |
| 9.9   | 4.7   | 2.4   | 7.1   | 8.6   | 1.2   | 14.7  | 15.0  | 10.4  |
| 902.0 | 245.4 | 359.3 | 396.6 | 411.2 | 414.3 | 601.3 | 764.3 | 576.5 |
| 1.3   | 6.1   | 1.0   | 4.9   | 0.5   | 5.8   | 4.2   | 9.2   | 4.3   |
| 5.6   | 1.6   | 1.4   | 0.4   | 2.6   | 5.0   | 1.1   | 0.5   | 0.9   |
| 0.4   | 7.7   | 4.1   | 1.3   | 5.8   | 5.5   | 2.1   | 5.7   | 3.3   |
| 166.6 | 74.0  | 105.8 | 115.8 | 99.9  | 107.0 | 139.4 | 187.4 | 101.1 |
| 70.8  | 53.4  | 46.2  | 53.7  | 74.8  | 46.2  | 73.5  | 93.5  | 69.3  |
| 2.0   | 3.1   | 4.1   | 1.8   | 4.3   | 3.4   | 6.3   | 3.0   | 4.9   |
| 196.9 | 173.0 | 158.7 | 167.1 | 205.5 | 161.5 | 225.4 | 237.9 | 156.1 |
| 39.5  | 38.3  | 42.6  | 42.2  | 45.3  | 30.0  | 59.4  | 67.4  | 34.2  |
| 12.5  | 16.9  | 9.3   | 11.6  | 6.9   | 7.3   | 13.8  | 8.4   | 8.7   |
| 3.9   | 0.3   | 0.3   | 1.0   | 1.0   | 1.1   | 0.8   | 6.7   | 0.3   |
| 3.7   | 1.2   | 1.9   | 1.3   | 5.5   | 1.0   | 1.3   | 1.4   | 1.3   |
| 0.4   | 1.1   | 0.5   | 0.7   | 1.0   | 0.7   | 0.4   | 1.1   | 0.9   |
| 0.5   | 0.6   | 0.6   | 0.7   | 1.0   | 1.4   | 0.6   | 0.7   | 0.9   |
| 0.5   | 4.1   | 2.8   | 5.6   | 4.1   | 7.0   | 7.4   | 6.1   | 7.8   |
| 0.9   | 1.2   | 1.2   | 6.1   | 2.6   | 2.7   | 2.6   | 4.6   | 3.8   |
| 1.2   | 1.4   | 0.1   | 0.1   | 0.5   | 0.3   | 1.3   | 0.2   | 0.1   |
| 2.4   | 0.9   | 1.2   | 0.7   | 0.9   | 1.1   | 0.8   | 0.6   | 0.5   |
| 5.8   | 6.4   | 8.6   | 9.2   | 3.3   | 18.6  | 16.1  | 18.7  | 19.7  |
| 0.6   | 1.9   | 1.0   | 0.9   | 0.4   | 0.3   | 0.8   | 0.7   | 0.6   |
| 1.7   | 1.8   | 1.1   | 1.0   | 1.2   | 1.1   | 1.2   | 0.7   | 4.4   |
| 0.6   | 1.5   | 5.3   | 0.5   | 0.6   | 3.0   | 1.0   | 3.7   | 2.0   |
| 1.1   | 3.5   | 0.8   | 0.5   | 1.2   | 0.5   | 0.5   | 0.7   | 0.8   |
| 0.8   | 0.5   | 0.3   | 0.7   | 0.7   | 0.7   | 0.2   | 0.8   | 0.6   |
| 3.3   | 0.6   | 1.0   | 2.1   | 1.0   | 0.6   | 3.0   | 4.7   | 2.9   |
| 3.2   | 0.8   | 0.6   | 0.4   | 0.5   | 1.6   | 0.7   | 0.6   | 0.6   |
| 1.2   | 8.4   | 1.3   | 1.6   | 1.6   | 10.2  | 1.9   | 3.6   | 11.3  |
| 37.6  | 32.4  | 36.2  | 36.9  | 38.9  | 33.2  | 44.6  | 40.4  | 30.8  |
| 2.3   | 1.9   | 1.1   | 1.6   | 3.1   | 11.5  | 8.0   | 11.3  | 2.3   |
| 1.3   | 4.5   | 1.3   | 3.8   | 2.5   | 0.9   | 0.8   | 0.6   | 0.6   |
| 5.3   | 2.4   | 0.4   | 1.0   | 1.4   | 3.4   | 5.0   | 3.0   | 1.5   |
| 0.8   | 19.6  | 1.0   | 8.3   | 18.5  | 1.1   | 1.4   | 15.2  | 1.1   |
| 9.7   | 12.5  | 7.0   | 2.9   | 12.0  | 7.8   | 13.8  | 10.8  | 8.1   |
| 2.1   | 3.7   | 3.5   | 3.1   | 4.0   | 7.0   | 8.4   | 8.1   | 0.7   |
| 0.1   | 0.9   | 0.2   | 0.4   | 0.1   | 0.1   | 1.5   | 0.5   | 0.1   |
| 10.4  | 6.1   | 8.3   | 5.2   | 5.9   | 8.5   | 11.3  | 13.5  | 6.0   |
| 232.2 | 181.4 | 166.0 | 200.6 | 175.2 | 225.1 | 240.0 | 253.1 | 203.5 |
| 1.2   | 1.0   | 1.2   | 4.9   | 1.6   | 1.2   | 0.7   | 2.5   | 0.5   |
| 194.5 | 110.0 | 110.5 | 128.6 | 135.4 | 142.2 | 179.7 | 227.5 | 133.1 |
| 6.0   | 0.1   | 0.8   | 4.3   | 5.1   | 0.7   | 1.6   | 4.4   | 0.1   |
| 1.4   | 0.3   | 5.3   | 0.1   | 0.7   | 0.2   | 0.1   | 3.4   | 0.4   |
| 1.6   | 1.3   | 0.2   | 1.7   | 2.8   | 1.0   | 0.7   | 0.2   | 0.8   |
| 5.4   | 10.2  | 9.4   | 9.3   | 1.9   | 12.3  | 10.0  | 7.2   | 9.5   |



|        |        |        |        |        |        |        |        |        |
|--------|--------|--------|--------|--------|--------|--------|--------|--------|
| 2.7    | 2.9    | 3.3    | 0.3    | 2.9    | 0.2    | 2.6    | 1.6    | 0.2    |
| 6.3    | 2.2    | 3.2    | 5.2    | 6.3    | 5.9    | 11.7   | 5.2    | 3.7    |
| 2.3    | 1.0    | 1.3    | 0.7    | 4.1    | 7.8    | 8.1    | 11.7   | 1.8    |
| 0.4    | 0.5    | 0.2    | 4.9    | 0.9    | 0.4    | 2.9    | 0.7    | 0.4    |
| 3.6    | 3.2    | 1.0    | 4.5    | 0.5    | 3.6    | 1.5    | 2.6    | 3.2    |
| 1.6    | 1.0    | 0.4    | 0.5    | 1.7    | 2.8    | 1.2    | 3.2    | 1.9    |
| 3.6    | 2.8    | 4.0    | 6.2    | 3.9    | 3.9    | 3.4    | 4.7    | 4.3    |
| 0.3    | 1.8    | 0.3    | 0.3    | 0.2    | 0.4    | 0.3    | 3.4    | 3.0    |
| 11.2   | 6.1    | 5.8    | 6.5    | 0.7    | 9.2    | 12.7   | 3.3    | 4.8    |
| 203.3  | 112.0  | 144.0  | 183.7  | 176.7  | 156.4  | 284.1  | 329.4  | 227.0  |
| 22.7   | 15.3   | 22.4   | 26.4   | 15.9   | 15.3   | 9.4    | 18.3   | 20.3   |
| 8.6    | 4.2    | 0.6    | 7.8    | 0.6    | 4.4    | 6.4    | 1.9    | 0.7    |
| 12.2   | 13.8   | 16.5   | 12.8   | 10.3   | 12.4   | 15.6   | 10.7   | 8.8    |
| 0.1    | 1.8    | 1.3    | 0.8    | 0.5    | 0.3    | 0.7    | 0.7    | 3.3    |
| 1.1    | 1.1    | 3.1    | 0.6    | 1.5    | 0.8    | 3.9    | 2.8    | 1.4    |
| 0.3    | 0.6    | 0.2    | 0.5    | 0.7    | 0.2    | 0.4    | 3.2    | 3.3    |
| 33.4   | 47.3   | 47.5   | 27.0   | 35.9   | 41.4   | 55.7   | 65.0   | 57.6   |
| 5.4    | 11.6   | 7.1    | 3.0    | 8.6    | 10.0   | 1.6    | 2.4    | 2.8    |
| 7.9    | 0.7    | 1.4    | 3.9    | 4.5    | 2.6    | 1.3    | 1.2    | 7.0    |
| 9.9    | 2.2    | 6.9    | 2.3    | 8.9    | 4.1    | 0.6    | 3.5    | 5.1    |
| 24.1   | 12.7   | 24.2   | 21.8   | 29.4   | 16.7   | 9.2    | 19.6   | 3.6    |
| 17.3   | 15.3   | 8.1    | 11.4   | 15.5   | 13.5   | 20.8   | 13.0   | 13.7   |
| 4.7    | 0.8    | 3.7    | 5.1    | 3.5    | 4.4    | 4.0    | 0.7    | 3.7    |
| 1.7    | 0.7    | 4.5    | 6.7    | 1.2    | 3.8    | 3.4    | 1.3    | 2.1    |
| 6.7    | 1.8    | 1.7    | 5.3    | 0.6    | 1.2    | 1.1    | 0.7    | 1.3    |
| 95.3   | 68.9   | 74.3   | 82.3   | 112.7  | 90.6   | 136.1  | 104.4  | 88.8   |
| 0.4    | 3.2    | 1.0    | 0.9    | 5.0    | 0.7    | 5.1    | 4.4    | 4.6    |
| 0.5    | 5.1    | 4.9    | 0.2    | 0.5    | 1.7    | 2.8    | 4.1    | 3.0    |
| 1.3    | 0.3    | 0.3    | 0.4    | 2.2    | 4.4    | 2.1    | 5.0    | 1.9    |
| 0.5    | 2.0    | 8.5    | 5.7    | 5.8    | 7.4    | 11.2   | 2.8    | 7.4    |
| 4.2    | 10.1   | 2.1    | 9.0    | 11.5   | 4.6    | 13.0   | 3.7    | 3.2    |
| 10.5   | 9.9    | 3.0    | 4.4    | 1.2    | 1.0    | 14.5   | 14.0   | 6.0    |
| 7.6    | 7.7    | 3.6    | 5.9    | 5.8    | 1.7    | 4.8    | 6.9    | 1.9    |
| 1623.8 | 1262.8 | 1296.6 | 1363.4 | 1600.1 | 1361.0 | 1797.1 | 1994.2 | 1397.7 |
| 1490.8 | 1176.2 | 1242.0 | 1326.1 | 1464.5 | 1407.2 | 1826.3 | 1960.3 | 1595.4 |
| 6.9    | 8.0    | 5.5    | 1.3    | 7.4    | 7.5    | 6.6    | 1.4    | 9.8    |
| 9.5    | 7.6    | 2.3    | 2.2    | 7.1    | 2.8    | 12.5   | 21.4   | 7.0    |
| 20.8   | 3.7    | 17.8   | 10.9   | 9.1    | 14.2   | 16.3   | 21.0   | 10.8   |
| 53.2   | 33.7   | 34.7   | 47.2   | 42.3   | 43.8   | 58.6   | 75.2   | 48.4   |
| 0.8    | 0.8    | 0.8    | 0.9    | 0.5    | 1.0    | 0.6    | 0.4    | 0.7    |
| 109.9  | 57.7   | 71.4   | 68.5   | 72.5   | 70.7   | 83.4   | 102.5  | 86.8   |
| 1.2    | 0.2    | 0.3    | 3.7    | 3.9    | 2.8    | 4.7    | 1.5    | 1.7    |
| 7.2    | 2.2    | 3.3    | 4.7    | 0.9    | 3.4    | 1.1    | 3.2    | 1.3    |
| 7.9    | 2.9    | 6.5    | 2.8    | 9.0    | 6.5    | 9.3    | 9.1    | 3.4    |
| 2.1    | 5.3    | 6.9    | 8.3    | 4.4    | 9.1    | 6.2    | 4.6    | 5.1    |
| 12.9   | 5.3    | 3.3    | 6.4    | 5.7    | 6.0    | 8.9    | 7.3    | 9.1    |
| 1.1    | 0.8    | 0.4    | 0.6    | 0.7    | 0.5    | 1.1    | 1.1    | 0.8    |
| 0.9    | 0.8    | 1.0    | 0.7    | 0.5    | 1.7    | 0.8    | 1.1    | 1.6    |
| 0.8    | 3.7    | 3.2    | 2.7    | 4.4    | 3.8    | 0.7    | 1.4    | 0.1    |
| 25.8   | 73.8   | 59.8   | 72.7   | 65.0   | 68.0   | 69.3   | 92.2   | 47.2   |
| 161.8  | 131.2  | 117.2  | 139.0  | 156.2  | 143.8  | 174.6  | 202.9  | 137.8  |
| 1.2    | 1.4    | 10.3   | 4.2    | 2.3    | 5.3    | 0.9    | 11.6   | 2.7    |
| 4.4    | 5.3    | 0.7    | 4.7    | 1.3    | 7.9    | 1.5    | 3.1    | 6.6    |

|        |       |       |        |        |        |        |        |       |
|--------|-------|-------|--------|--------|--------|--------|--------|-------|
| 38.2   | 21.8  | 18.1  | 23.2   | 25.4   | 21.7   | 26.4   | 23.4   | 23.6  |
| 10.4   | 10.4  | 11.5  | 10.4   | 11.3   | 10.0   | 7.3    | 10.3   | 4.2   |
| 3.0    | 0.4   | 1.1   | 0.3    | 0.6    | 1.0    | 5.9    | 0.4    | 0.6   |
| 8.3    | 1.4   | 1.3   | 0.6    | 1.0    | 0.6    | 1.0    | 1.3    | 0.8   |
| 8.9    | 1.3   | 3.8   | 3.8    | 5.3    | 1.3    | 1.7    | 12.7   | 9.7   |
| 0.7    | 1.5   | 0.5   | 1.4    | 0.7    | 1.7    | 1.3    | 0.5    | 0.6   |
| 1.0    | 0.7   | 3.6   | 1.3    | 0.5    | 1.0    | 3.4    | 0.4    | 0.3   |
| 50.2   | 34.6  | 52.8  | 43.8   | 41.9   | 49.7   | 62.6   | 60.7   | 39.3  |
| 0.5    | 4.7   | 6.1   | 3.1    | 4.0    | 1.9    | 10.4   | 3.8    | 7.1   |
| 3.6    | 2.8   | 9.3   | 1.9    | 7.3    | 7.3    | 3.2    | 10.9   | 19.2  |
| 5.0    | 3.9   | 0.8   | 3.2    | 0.3    | 5.5    | 4.8    | 0.2    | 2.7   |
| 0.3    | 0.4   | 3.0   | 0.3    | 0.9    | 0.2    | 0.8    | 0.7    | 0.1   |
| 0.7    | 0.8   | 0.6   | 0.5    | 2.2    | 0.7    | 1.7    | 0.9    | 1.3   |
| 94.5   | 56.9  | 68.6  | 74.5   | 75.1   | 88.5   | 83.1   | 101.8  | 64.1  |
| 10.7   | 2.4   | 1.2   | 9.9    | 1.0    | 4.0    | 8.0    | 8.1    | 4.8   |
| 140.2  | 71.5  | 84.1  | 62.1   | 73.1   | 85.0   | 103.2  | 121.5  | 65.9  |
| 2.6    | 0.9   | 0.8   | 0.5    | 0.7    | 3.7    | 0.5    | 5.2    | 2.2   |
| 23.9   | 8.3   | 11.7  | 13.1   | 14.8   | 10.2   | 33.2   | 26.9   | 22.8  |
| 3.1    | 6.8   | 6.0   | 1.4    | 6.0    | 3.8    | 5.1    | 4.6    | 6.1   |
| 7.0    | 11.6  | 7.5   | 7.2    | 11.3   | 2.0    | 8.1    | 13.2   | 2.2   |
| 0.9    | 0.5   | 0.4   | 1.0    | 3.3    | 1.8    | 0.9    | 0.9    | 0.8   |
| 175.0  | 134.3 | 132.8 | 141.8  | 141.7  | 143.2  | 206.5  | 266.4  | 149.3 |
| 3.3    | 2.6   | 2.3   | 3.9    | 3.6    | 1.0    | 1.0    | 2.0    | 2.5   |
| 63.7   | 43.0  | 50.0  | 60.5   | 65.5   | 55.0   | 86.6   | 72.4   | 63.1  |
| 1.8    | 4.0   | 1.4   | 7.1    | 1.3    | 1.3    | 0.9    | 3.8    | 1.1   |
| 14.8   | 5.2   | 9.8   | 5.9    | 5.1    | 7.8    | 8.4    | 6.2    | 10.0  |
| 23.1   | 24.8  | 24.9  | 20.3   | 15.0   | 22.6   | 24.4   | 28.1   | 25.1  |
| 9.9    | 12.5  | 1.4   | 9.5    | 10.5   | 13.8   | 13.6   | 11.4   | 5.3   |
| 78.0   | 54.4  | 53.5  | 57.1   | 47.3   | 56.2   | 71.4   | 89.7   | 59.2  |
| 0.8    | 3.6   | 0.9   | 0.2    | 5.2    | 1.3    | 1.3    | 1.8    | 0.6   |
| 3.3    | 3.0   | 1.8   | 1.5    | 4.0    | 2.5    | 3.1    | 0.8    | 3.3   |
| 24.4   | 17.8  | 13.5  | 22.5   | 21.8   | 19.6   | 20.9   | 27.8   | 21.4  |
| 12.9   | 15.6  | 16.9  | 5.7    | 10.9   | 10.8   | 17.4   | 14.0   | 8.9   |
| 4.0    | 4.6   | 5.4   | 5.3    | 4.3    | 3.1    | 5.2    | 0.8    | 5.9   |
| 2.2    | 6.1   | 8.7   | 16.2   | 4.2    | 12.1   | 20.3   | 15.4   | 5.6   |
| 92.9   | 63.0  | 53.6  | 55.3   | 73.5   | 81.5   | 93.8   | 90.9   | 72.7  |
| 74.7   | 47.9  | 54.5  | 62.6   | 56.4   | 48.1   | 71.1   | 85.0   | 58.7  |
| 9.7    | 13.5  | 7.5   | 11.1   | 8.7    | 11.8   | 14.5   | 17.3   | 12.3  |
| 4.9    | 2.2   | 8.7   | 5.7    | 10.6   | 2.3    | 1.9    | 5.9    | 2.8   |
| 1.1    | 0.7   | 3.6   | 7.3    | 8.8    | 5.7    | 1.2    | 1.4    | 4.1   |
| 8.9    | 9.4   | 2.5   | 5.6    | 12.1   | 3.9    | 9.0    | 7.3    | 11.1  |
| 6.7    | 7.8   | 3.9   | 4.2    | 1.3    | 6.2    | 4.8    | 10.1   | 7.9   |
| 1.1    | 0.5   | 0.9   | 0.5    | 1.3    | 1.1    | 1.5    | 1.4    | 0.8   |
| 2.9    | 0.8   | 3.6   | 6.4    | 0.5    | 4.0    | 6.8    | 7.8    | 4.8   |
| 0.8    | 0.9   | 6.6   | 4.4    | 2.6    | 7.2    | 4.5    | 5.2    | 3.0   |
| 1248.8 | 888.0 | 967.5 | 1055.0 | 1093.1 | 1059.0 | 1300.7 | 1388.6 | 921.7 |
| 9.6    | 4.1   | 18.1  | 17.1   | 11.8   | 10.9   | 19.9   | 27.5   | 13.0  |
| 3.7    | 0.3   | 2.3   | 3.7    | 0.4    | 1.1    | 0.8    | 0.7    | 3.7   |
| 5.9    | 12.4  | 5.0   | 3.8    | 3.3    | 4.1    | 2.9    | 12.8   | 3.3   |
| 6.7    | 6.2   | 13.2  | 1.8    | 0.8    | 6.2    | 3.2    | 1.3    | 1.7   |
| 28.8   | 7.6   | 15.1  | 7.6    | 2.0    | 5.7    | 22.8   | 17.5   | 11.5  |
| 1.0    | 3.0   | 0.3   | 1.3    | 4.4    | 0.7    | 1.2    | 7.1    | 2.5   |
| 0.2    | 0.4   | 0.1   | 0.1    | 0.3    | 1.6    | 2.1    | 2.1    | 0.4   |

|        |       |        |        |        |        |        |        |        |
|--------|-------|--------|--------|--------|--------|--------|--------|--------|
| 0.7    | 0.5   | 0.5    | 1.4    | 0.5    | 0.5    | 0.2    | 1.2    | 0.6    |
| 8.3    | 8.4   | 7.7    | 7.1    | 7.5    | 9.7    | 11.5   | 15.6   | 15.4   |
| 0.7    | 3.3   | 0.4    | 0.4    | 2.4    | 2.3    | 3.4    | 1.3    | 2.7    |
| 2.2    | 4.7   | 2.7    | 0.4    | 2.5    | 0.2    | 0.3    | 1.2    | 2.0    |
| 1282.8 | 845.3 | 1002.2 | 1065.0 | 1066.0 | 1113.7 | 1449.2 | 1611.6 | 1300.8 |
| 1.4    | 1.1   | 1.1    | 1.6    | 1.4    | 0.7    | 1.4    | 1.5    | 0.8    |
| 0.5    | 3.1   | 0.3    | 1.4    | 1.4    | 6.8    | 2.0    | 0.7    | 4.0    |
| 4.0    | 0.3   | 2.4    | 2.5    | 0.7    | 0.1    | 0.4    | 2.0    | 1.0    |
| 0.8    | 0.4   | 2.2    | 1.5    | 2.1    | 1.3    | 0.6    | 3.8    | 2.3    |
| 24.4   | 15.0  | 24.2   | 12.8   | 19.8   | 15.3   | 27.9   | 33.3   | 25.3   |
| 9.5    | 8.6   | 9.7    | 5.7    | 5.4    | 2.0    | 10.1   | 17.6   | 3.7    |
| 5.8    | 4.1   | 4.9    | 7.7    | 3.6    | 0.9    | 7.1    | 1.8    | 4.8    |
| 9.8    | 12.0  | 6.6    | 7.9    | 8.8    | 5.8    | 10.6   | 3.1    | 9.6    |
| 13.9   | 9.5   | 13.0   | 9.6    | 7.7    | 10.2   | 10.9   | 9.7    | 11.0   |
| 8.1    | 6.5   | 14.9   | 7.9    | 7.8    | 13.8   | 21.4   | 15.7   | 10.2   |
| 2.3    | 2.4   | 6.7    | 2.4    | 2.1    | 2.4    | 2.7    | 4.5    | 3.5    |
| 10.0   | 7.4   | 6.8    | 8.0    | 7.8    | 5.3    | 4.4    | 7.2    | 6.1    |
| 20.8   | 16.9  | 20.5   | 15.6   | 22.3   | 17.9   | 23.2   | 35.4   | 28.3   |
| 0.4    | 0.6   | 0.4    | 0.4    | 0.5    | 0.2    | 1.3    | 0.2    | 0.9    |
| 7.7    | 10.0  | 7.8    | 5.5    | 8.0    | 1.0    | 1.2    | 8.8    | 2.1    |
| 14.4   | 13.6  | 13.0   | 15.4   | 12.1   | 18.2   | 12.2   | 13.5   | 12.4   |
| 10.5   | 7.6   | 8.5    | 0.6    | 4.5    | 5.2    | 11.4   | 9.9    | 9.3    |
| 3.9    | 3.8   | 2.9    | 0.6    | 4.5    | 2.1    | 3.4    | 4.8    | 0.6    |
| 18.3   | 1.6   | 10.1   | 14.4   | 13.3   | 18.0   | 13.2   | 17.4   | 18.2   |
| 20.9   | 21.0  | 15.7   | 17.8   | 17.9   | 16.4   | 20.5   | 30.0   | 17.5   |
| 22.8   | 17.0  | 14.4   | 20.2   | 15.8   | 12.5   | 24.3   | 27.2   | 12.5   |
| 0.1    | 0.1   | 0.4    | 0.2    | 0.1    | 0.1    | 0.1    | 0.1    | 0.2    |
| 28.9   | 28.3  | 19.7   | 19.5   | 25.3   | 24.4   | 40.2   | 47.1   | 33.6   |
| 0.8    | 1.3   | 5.0    | 0.9    | 1.2    | 2.2    | 1.6    | 2.4    | 8.6    |
| 0.8    | 1.9   | 0.8    | 0.7    | 1.0    | 0.9    | 4.8    | 4.2    | 1.4    |
| 1.1    | 6.3   | 7.3    | 6.8    | 14.1   | 8.4    | 16.7   | 11.8   | 13.1   |
| 1.3    | 1.2   | 1.1    | 0.5    | 0.7    | 1.3    | 1.2    | 0.7    | 4.5    |
| 0.5    | 1.0   | 0.6    | 1.1    | 1.1    | 0.6    | 0.6    | 0.7    | 0.3    |
| 130.2  | 74.8  | 105.4  | 98.4   | 96.1   | 125.9  | 155.8  | 180.7  | 96.0   |
| 8.0    | 2.5   | 6.1    | 1.5    | 1.3    | 10.7   | 6.1    | 1.6    | 2.1    |
| 66.0   | 50.4  | 44.4   | 51.8   | 59.5   | 51.4   | 74.8   | 96.1   | 42.8   |
| 1.4    | 0.5   | 0.6    | 0.7    | 0.8    | 3.9    | 0.9    | 1.2    | 2.3    |
| 185.7  | 138.3 | 188.6  | 179.7  | 166.3  | 172.8  | 234.4  | 227.3  | 170.5  |
| 0.5    | 7.1   | 1.4    | 1.0    | 4.0    | 1.0    | 5.1    | 5.7    | 0.5    |
| 26.1   | 8.7   | 14.4   | 6.7    | 13.0   | 11.8   | 23.7   | 26.7   | 17.5   |
| 150.8  | 84.4  | 105.1  | 108.2  | 106.4  | 104.4  | 125.5  | 146.9  | 96.9   |
| 177.2  | 131.5 | 168.5  | 181.7  | 193.9  | 164.0  | 215.1  | 227.8  | 148.7  |
| 6.9    | 1.9   | 1.1    | 4.3    | 6.6    | 0.6    | 4.6    | 1.0    | 0.4    |
| 7.7    | 6.4   | 3.7    | 8.0    | 6.5    | 5.4    | 16.0   | 8.8    | 10.6   |
| 61.5   | 30.0  | 43.1   | 49.0   | 34.2   | 39.2   | 34.6   | 55.0   | 48.2   |
| 5.2    | 3.6   | 0.8    | 0.4    | 5.0    | 0.9    | 2.8    | 5.9    | 4.5    |
| 0.2    | 4.3   | 2.2    | 0.8    | 3.8    | 4.6    | 1.8    | 5.4    | 1.0    |
| 386.7  | 289.6 | 326.4  | 353.4  | 375.5  | 339.5  | 508.5  | 492.4  | 345.8  |
| 25.7   | 17.7  | 20.9   | 20.9   | 21.8   | 23.2   | 20.8   | 20.4   | 21.1   |
| 30.8   | 19.2  | 29.8   | 22.0   | 32.4   | 21.4   | 27.8   | 31.2   | 30.8   |
| 6.4    | 6.2   | 3.1    | 2.7    | 2.8    | 2.3    | 5.7    | 3.3    | 1.3    |
| 1.5    | 6.1   | 5.2    | 2.4    | 0.6    | 0.3    | 3.4    | 1.7    | 0.8    |
| 4.3    | 1.7   | 0.5    | 2.4    | 4.1    | 6.2    | 6.8    | 5.7    | 4.6    |

|       |       |       |       |       |       |       |       |       |
|-------|-------|-------|-------|-------|-------|-------|-------|-------|
| 3.0   | 13.6  | 0.9   | 5.2   | 2.2   | 5.0   | 7.5   | 6.8   | 0.9   |
| 0.3   | 2.5   | 2.3   | 0.4   | 0.7   | 1.1   | 4.3   | 0.3   | 2.6   |
| 0.5   | 8.9   | 8.3   | 2.6   | 3.3   | 10.5  | 4.0   | 4.4   | 6.5   |
| 0.7   | 0.9   | 0.8   | 0.5   | 1.8   | 1.5   | 0.8   | 2.1   | 1.0   |
| 3.1   | 5.0   | 3.8   | 3.6   | 3.3   | 2.8   | 3.0   | 1.8   | 4.1   |
| 3.4   | 1.9   | 3.2   | 2.2   | 0.9   | 2.2   | 1.7   | 6.3   | 2.2   |
| 1.4   | 0.5   | 8.1   | 4.7   | 5.5   | 0.5   | 0.6   | 0.8   | 1.5   |
| 11.3  | 15.5  | 11.6  | 17.7  | 15.1  | 16.0  | 14.7  | 24.5  | 14.0  |
| 1.5   | 2.5   | 4.4   | 7.7   | 4.5   | 0.3   | 4.9   | 5.0   | 8.5   |
| 153.5 | 78.3  | 107.5 | 127.0 | 117.6 | 119.7 | 142.3 | 144.7 | 134.4 |
| 4.0   | 1.5   | 4.9   | 6.7   | 0.6   | 2.9   | 2.3   | 9.0   | 1.3   |
| 20.8  | 15.8  | 21.0  | 21.0  | 14.8  | 18.8  | 24.3  | 22.6  | 17.5  |
| 3.2   | 1.5   | 1.3   | 5.1   | 2.0   | 9.0   | 3.1   | 1.6   | 1.0   |
| 3.1   | 0.3   | 1.5   | 5.4   | 0.4   | 1.5   | 1.1   | 0.1   | 1.5   |
| 8.3   | 8.6   | 2.0   | 1.4   | 1.8   | 4.6   | 3.4   | 0.7   | 5.9   |
| 10.9  | 11.6  | 9.6   | 7.1   | 6.3   | 7.2   | 7.0   | 5.5   | 4.9   |
| 0.9   | 0.7   | 1.3   | 1.9   | 2.1   | 1.4   | 1.0   | 3.0   | 3.0   |
| 0.9   | 0.7   | 0.8   | 0.8   | 0.5   | 0.9   | 0.9   | 1.9   | 1.0   |
| 1.6   | 1.1   | 9.6   | 5.6   | 1.0   | 4.6   | 9.1   | 7.7   | 7.2   |
| 3.7   | 0.3   | 7.1   | 0.6   | 3.7   | 0.5   | 3.8   | 2.5   | 2.8   |
| 187.3 | 117.4 | 139.6 | 133.8 | 143.2 | 140.9 | 170.7 | 194.2 | 127.8 |
| 30.8  | 41.8  | 38.4  | 48.0  | 46.2  | 43.0  | 70.6  | 58.0  | 44.1  |
| 0.9   | 0.9   | 0.7   | 0.8   | 0.6   | 0.6   | 0.4   | 0.5   | 0.8   |
| 185.6 | 141.1 | 164.8 | 157.9 | 175.7 | 167.2 | 216.8 | 270.7 | 230.8 |
| 7.2   | 1.7   | 1.9   | 3.8   | 8.0   | 7.4   | 10.5  | 3.6   | 2.7   |
| 3.3   | 5.9   | 7.9   | 8.1   | 4.8   | 5.0   | 10.0  | 4.5   | 2.5   |
| 0.6   | 3.4   | 2.9   | 0.8   | 3.6   | 0.5   | 1.1   | 4.7   | 2.7   |
| 7.8   | 4.8   | 5.4   | 4.1   | 3.3   | 5.6   | 7.5   | 1.5   | 0.3   |
| 10.1  | 4.3   | 4.1   | 5.9   | 6.2   | 6.4   | 6.6   | 3.9   | 7.4   |
| 452.1 | 420.3 | 496.4 | 559.9 | 539.1 | 520.3 | 636.0 | 704.3 | 485.6 |
| 2.8   | 0.5   | 2.3   | 0.4   | 0.4   | 0.8   | 2.8   | 1.1   | 0.5   |
| 5.2   | 9.0   | 8.8   | 9.9   | 9.8   | 9.7   | 8.0   | 11.3  | 8.6   |
| 6.2   | 9.1   | 1.1   | 5.9   | 9.4   | 1.3   | 6.2   | 2.2   | 2.6   |
| 130.9 | 72.6  | 79.3  | 108.7 | 86.7  | 90.4  | 115.5 | 115.4 | 97.9  |
| 794.0 | 541.6 | 587.1 | 609.6 | 682.9 | 602.9 | 626.0 | 858.4 | 458.4 |
| 1.1   | 1.2   | 3.4   | 0.7   | 1.2   | 1.4   | 1.5   | 1.3   | 0.5   |
| 17.5  | 11.5  | 7.0   | 13.4  | 6.4   | 5.9   | 2.3   | 21.3  | 15.3  |
| 4.5   | 5.0   | 1.5   | 7.8   | 1.7   | 2.3   | 5.5   | 8.6   | 4.3   |
| 0.9   | 0.2   | 0.6   | 0.2   | 1.1   | 0.2   | 4.0   | 5.6   | 4.0   |
| 1.3   | 1.0   | 1.4   | 1.2   | 0.8   | 0.8   | 1.7   | 1.0   | 1.6   |
| 1.2   | 1.8   | 1.9   | 2.9   | 0.3   | 0.3   | 0.6   | 1.5   | 3.7   |
| 35.4  | 19.2  | 21.1  | 16.1  | 20.0  | 18.7  | 28.9  | 37.0  | 21.0  |
| 7.5   | 13.8  | 2.6   | 4.5   | 5.2   | 5.2   | 7.9   | 7.6   | 11.4  |
| 0.3   | 0.8   | 0.5   | 0.7   | 4.3   | 0.3   | 0.4   | 2.4   | 0.7   |
| 0.2   | 3.6   | 0.1   | 0.1   | 3.7   | 0.3   | 3.8   | 0.6   | 0.3   |
| 3.6   | 1.8   | 3.0   | 6.0   | 6.6   | 1.9   | 0.6   | 0.9   | 6.6   |
| 2.2   | 2.2   | 0.8   | 4.8   | 4.0   | 0.8   | 7.6   | 1.5   | 6.7   |
| 1.4   | 2.9   | 2.7   | 1.0   | 1.3   | 2.1   | 2.6   | 1.7   | 3.1   |
| 0.3   | 1.1   | 0.9   | 0.9   | 1.3   | 0.7   | 1.2   | 0.9   | 0.3   |
| 1.6   | 0.8   | 1.2   | 1.2   | 1.3   | 0.6   | 1.8   | 1.8   | 1.1   |
| 14.5  | 15.5  | 10.8  | 16.9  | 14.9  | 20.7  | 15.1  | 11.8  | 7.9   |
| 0.7   | 0.8   | 0.9   | 0.7   | 0.9   | 0.9   | 0.8   | 1.0   | 0.7   |
| 9.5   | 1.6   | 14.9  | 8.2   | 5.3   | 4.0   | 11.3  | 16.2  | 11.9  |

|        |        |        |        |        |        |        |        |        |
|--------|--------|--------|--------|--------|--------|--------|--------|--------|
| 8.1    | 10.7   | 16.0   | 16.3   | 10.2   | 16.1   | 20.0   | 14.8   | 19.3   |
| 65.9   | 56.6   | 48.2   | 61.3   | 89.0   | 61.2   | 110.4  | 127.9  | 83.2   |
| 11.6   | 9.9    | 11.4   | 8.2    | 10.1   | 10.4   | 12.2   | 12.0   | 11.7   |
| 3.3    | 10.4   | 4.0    | 11.6   | 10.3   | 9.8    | 1.7    | 3.8    | 5.1    |
| 7.0    | 5.2    | 2.9    | 5.5    | 6.1    | 4.4    | 1.7    | 7.1    | 8.4    |
| 8.2    | 6.7    | 8.8    | 14.3   | 13.4   | 8.2    | 4.2    | 12.9   | 10.9   |
| 0.9    | 1.5    | 2.6    | 0.8    | 2.1    | 0.6    | 1.4    | 2.1    | 1.1    |
| 4.8    | 9.3    | 4.6    | 3.3    | 3.7    | 5.7    | 4.2    | 5.0    | 5.9    |
| 2.4    | 1.3    | 3.4    | 3.5    | 2.2    | 1.7    | 6.0    | 1.7    | 0.6    |
| 0.1    | 0.1    | 0.8    | 0.2    | 0.2    | 1.5    | 0.1    | 0.2    | 0.2    |
| 1.0    | 0.4    | 1.3    | 0.8    | 2.9    | 0.7    | 0.6    | 0.8    | 1.3    |
| 1.4    | 2.5    | 1.5    | 6.8    | 1.6    | 6.2    | 8.4    | 2.3    | 1.8    |
| 15.3   | 13.2   | 20.7   | 14.9   | 7.7    | 9.4    | 17.0   | 11.9   | 5.7    |
| 25.2   | 18.2   | 13.9   | 21.1   | 27.9   | 15.8   | 17.9   | 22.5   | 13.6   |
| 16.0   | 20.1   | 5.1    | 16.6   | 18.2   | 11.8   | 10.4   | 24.8   | 17.9   |
| 1.2    | 0.6    | 1.0    | 0.9    | 1.1    | 1.1    | 0.6    | 0.5    | 0.6    |
| 0.6    | 7.9    | 8.8    | 4.4    | 0.3    | 4.3    | 5.4    | 11.5   | 1.1    |
| 1.7    | 2.2    | 0.8    | 1.8    | 1.2    | 3.5    | 7.5    | 1.2    | 1.9    |
| 6.9    | 6.9    | 8.8    | 8.6    | 9.5    | 10.4   | 13.7   | 14.6   | 12.8   |
| 0.2    | 0.3    | 6.8    | 0.2    | 2.9    | 0.1    | 0.3    | 2.6    | 0.3    |
| 325.1  | 122.5  | 159.7  | 171.1  | 197.0  | 193.1  | 216.1  | 246.5  | 171.8  |
| 17.5   | 22.3   | 13.6   | 15.3   | 16.1   | 17.2   | 18.1   | 23.8   | 21.8   |
| 6.1    | 5.8    | 10.1   | 8.0    | 10.2   | 4.7    | 11.7   | 18.0   | 10.9   |
| 0.9    | 0.8    | 0.5    | 4.9    | 5.9    | 1.6    | 1.2    | 4.8    | 0.5    |
| 20.0   | 6.5    | 10.1   | 13.4   | 13.7   | 6.8    | 9.4    | 10.5   | 8.1    |
| 7.6    | 6.2    | 5.6    | 9.2    | 6.4    | 8.7    | 13.1   | 7.8    | 14.5   |
| 60.0   | 62.1   | 52.6   | 65.5   | 60.1   | 53.0   | 82.4   | 82.2   | 66.2   |
| 0.7    | 1.0    | 0.7    | 0.6    | 0.8    | 0.7    | 0.8    | 1.5    | 0.8    |
| 0.7    | 1.1    | 1.7    | 2.8    | 0.8    | 2.0    | 1.1    | 6.4    | 3.0    |
| 16.7   | 16.2   | 8.5    | 11.3   | 9.2    | 10.3   | 8.8    | 15.8   | 6.1    |
| 4.8    | 8.8    | 8.7    | 7.5    | 10.4   | 8.9    | 9.1    | 12.1   | 12.5   |
| 14.5   | 19.4   | 6.6    | 12.0   | 7.7    | 9.3    | 2.5    | 4.4    | 9.0    |
| 34.7   | 22.0   | 18.5   | 26.6   | 24.7   | 22.6   | 31.7   | 47.3   | 24.6   |
| 0.4    | 2.0    | 1.6    | 2.9    | 0.4    | 1.7    | 0.9    | 1.2    | 1.4    |
| 1676.6 | 1316.9 | 1433.0 | 1428.1 | 1455.8 | 1531.2 | 1552.2 | 1953.8 | 1288.9 |
| 189.7  | 104.2  | 118.8  | 115.0  | 137.2  | 112.2  | 177.3  | 185.9  | 115.8  |
| 0.7    | 1.4    | 0.7    | 2.3    | 2.4    | 0.4    | 1.0    | 5.0    | 0.1    |
| 23.3   | 11.6   | 9.1    | 15.2   | 14.5   | 19.0   | 23.8   | 25.9   | 21.3   |
| 4.7    | 5.7    | 4.9    | 5.4    | 3.3    | 3.5    | 6.9    | 4.0    | 4.5    |
| 0.6    | 1.2    | 0.6    | 0.6    | 0.4    | 0.6    | 0.5    | 0.8    | 0.4    |
| 138.0  | 107.3  | 144.1  | 150.4  | 150.8  | 161.3  | 150.9  | 212.7  | 152.8  |
| 3.0    | 2.7    | 3.5    | 4.8    | 1.1    | 0.2    | 4.3    | 3.0    | 4.4    |
| 0.3    | 0.7    | 2.2    | 3.8    | 2.3    | 0.7    | 2.1    | 6.6    | 3.5    |
| 68.8   | 46.3   | 55.2   | 46.2   | 52.2   | 57.4   | 60.0   | 75.9   | 61.0   |
| 0.4    | 5.1    | 1.3    | 0.3    | 6.0    | 1.5    | 2.0    | 4.8    | 4.7    |
| 32.7   | 30.6   | 27.0   | 34.9   | 34.9   | 42.6   | 51.4   | 59.9   | 43.3   |
| 7.2    | 8.6    | 1.6    | 9.4    | 10.3   | 6.9    | 2.3    | 7.0    | 1.9    |
| 9.4    | 6.8    | 8.9    | 8.7    | 9.7    | 6.3    | 10.4   | 8.4    | 11.0   |
| 13.6   | 8.4    | 6.0    | 9.9    | 7.1    | 8.3    | 15.7   | 14.6   | 6.1    |
| 0.4    | 0.2    | 1.2    | 0.2    | 0.4    | 0.2    | 0.5    | 1.0    | 0.2    |
| 1.3    | 0.1    | 0.2    | 2.6    | 0.7    | 0.6    | 2.8    | 0.6    | 0.6    |
| 292.4  | 105.3  | 203.1  | 195.5  | 183.4  | 192.3  | 316.2  | 478.2  | 273.5  |
| 871.2  | 895.5  | 890.4  | 970.5  | 1132.9 | 1106.9 | 1353.6 | 1586.4 | 1230.8 |

|        |        |        |        |        |        |        |        |        |
|--------|--------|--------|--------|--------|--------|--------|--------|--------|
| 134.6  | 53.7   | 90.4   | 89.8   | 98.9   | 86.4   | 115.5  | 140.7  | 114.3  |
| 3.6    | 7.1    | 8.4    | 5.1    | 1.3    | 6.1    | 0.9    | 1.8    | 2.3    |
| 1.9    | 9.9    | 2.1    | 7.1    | 1.0    | 2.2    | 2.3    | 2.6    | 7.9    |
| 1.5    | 3.3    | 1.6    | 1.7    | 2.9    | 0.5    | 1.1    | 1.0    | 1.1    |
| 2.7    | 0.1    | 2.9    | 2.6    | 1.0    | 3.3    | 0.0    | 1.1    | 2.6    |
| 0.7    | 2.9    | 4.3    | 0.8    | 4.0    | 0.5    | 1.2    | 1.3    | 0.7    |
| 15.2   | 17.5   | 11.1   | 13.6   | 10.7   | 13.4   | 19.9   | 22.9   | 9.5    |
| 13.9   | 12.6   | 9.5    | 8.1    | 5.6    | 8.6    | 14.6   | 14.2   | 7.8    |
| 10.1   | 7.8    | 14.7   | 11.6   | 8.9    | 5.5    | 11.1   | 8.6    | 23.2   |
| 26.8   | 23.3   | 28.4   | 27.0   | 18.8   | 27.0   | 22.1   | 25.5   | 24.6   |
| 0.4    | 0.2    | 0.2    | 0.3    | 0.1    | 0.2    | 2.3    | 1.9    | 0.2    |
| 6.7    | 3.0    | 0.8    | 6.9    | 5.2    | 1.0    | 3.7    | 1.1    | 1.4    |
| 3.7    | 3.3    | 5.0    | 2.7    | 10.6   | 2.2    | 19.3   | 6.3    | 2.8    |
| 45.9   | 27.3   | 31.1   | 30.7   | 30.4   | 29.0   | 46.4   | 48.8   | 31.6   |
| 2.2    | 5.9    | 4.1    | 9.4    | 9.6    | 4.6    | 7.5    | 1.6    | 4.4    |
| 7.2    | 6.6    | 2.9    | 6.3    | 4.1    | 2.6    | 9.2    | 15.1   | 7.2    |
| 0.6    | 1.3    | 0.8    | 0.3    | 0.3    | 0.7    | 1.0    | 0.8    | 2.0    |
| 0.8    | 8.0    | 0.2    | 4.7    | 3.3    | 6.1    | 3.4    | 2.0    | 0.7    |
| 12.0   | 0.5    | 4.7    | 6.3    | 5.4    | 9.2    | 10.1   | 9.9    | 4.4    |
| 2.5    | 9.5    | 4.7    | 7.3    | 4.2    | 6.4    | 8.3    | 4.0    | 10.2   |
| 185.8  | 108.4  | 120.3  | 121.0  | 130.2  | 106.4  | 153.8  | 180.7  | 117.7  |
| 216.3  | 150.0  | 199.0  | 193.4  | 204.5  | 234.4  | 268.0  | 386.7  | 189.9  |
| 0.3    | 3.6    | 0.7    | 1.7    | 1.9    | 1.6    | 1.6    | 1.7    | 0.6    |
| 0.4    | 2.7    | 0.5    | 4.0    | 1.8    | 0.4    | 0.5    | 1.3    | 1.4    |
| 11.2   | 1.7    | 13.0   | 10.4   | 11.8   | 14.9   | 16.4   | 13.6   | 8.2    |
| 32.7   | 29.8   | 33.2   | 31.1   | 29.6   | 30.5   | 60.6   | 41.0   | 17.1   |
| 0.8    | 0.7    | 0.9    | 0.3    | 0.6    | 0.4    | 0.4    | 0.7    | 0.5    |
| 15.8   | 7.8    | 12.8   | 13.6   | 14.5   | 12.1   | 26.5   | 19.9   | 10.9   |
| 0.3    | 0.1    | 0.6    | 0.2    | 0.4    | 0.4    | 0.2    | 0.4    | 0.5    |
| 264.6  | 169.1  | 226.6  | 226.4  | 240.3  | 232.1  | 321.2  | 324.8  | 253.5  |
| 9.4    | 7.9    | 3.8    | 2.4    | 14.1   | 24.0   | 19.5   | 9.2    | 11.6   |
| 24.7   | 8.7    | 7.3    | 15.7   | 15.1   | 15.4   | 4.1    | 14.1   | 15.0   |
| 0.6    | 2.4    | 3.1    | 0.3    | 2.5    | 1.5    | 4.2    | 0.6    | 4.1    |
| 0.2    | 1.8    | 0.9    | 1.0    | 2.0    | 1.4    | 2.6    | 2.1    | 4.8    |
| 6.8    | 5.1    | 7.5    | 11.0   | 9.0    | 15.7   | 7.7    | 10.7   | 14.8   |
| 1.2    | 0.5    | 0.3    | 1.8    | 0.4    | 1.1    | 4.2    | 0.4    | 0.6    |
| 7.1    | 7.7    | 6.9    | 11.3   | 8.4    | 5.8    | 11.6   | 10.1   | 7.7    |
| 4.6    | 0.4    | 0.4    | 3.2    | 4.0    | 3.0    | 0.5    | 5.4    | 3.0    |
| 0.7    | 0.6    | 1.2    | 1.9    | 6.4    | 0.9    | 3.7    | 5.4    | 1.3    |
| 4.9    | 3.9    | 4.6    | 3.4    | 6.1    | 4.1    | 3.6    | 6.2    | 8.9    |
| 7.4    | 6.2    | 4.6    | 5.1    | 4.0    | 4.5    | 4.9    | 7.2    | 2.6    |
| 0.8    | 1.8    | 0.2    | 0.1    | 1.9    | 1.6    | 0.4    | 1.3    | 0.3    |
| 105.0  | 64.6   | 74.3   | 75.5   | 82.5   | 69.1   | 97.7   | 118.2  | 75.9   |
| 3489.6 | 3082.4 | 3092.7 | 3284.9 | 3447.5 | 3287.2 | 3822.2 | 4073.4 | 2613.4 |
| 1.5    | 0.5    | 1.1    | 2.7    | 1.0    | 1.7    | 2.2    | 1.2    | 0.8    |
| 118.7  | 95.2   | 78.5   | 95.2   | 98.1   | 83.4   | 147.5  | 186.0  | 106.4  |
| 16.9   | 12.7   | 9.4    | 12.5   | 13.7   | 10.8   | 14.8   | 20.2   | 15.4   |
| 2.3    | 2.5    | 1.1    | 1.0    | 1.9    | 1.9    | 6.1    | 1.3    | 2.5    |
| 34.3   | 19.0   | 23.9   | 29.0   | 27.8   | 18.4   | 32.2   | 30.3   | 26.0   |
| 4.7    | 12.4   | 6.9    | 9.0    | 2.7    | 12.9   | 3.4    | 9.7    | 2.3    |
| 8.6    | 10.8   | 3.0    | 4.3    | 12.2   | 3.6    | 2.7    | 4.0    | 7.6    |
| 182.7  | 100.1  | 121.1  | 134.7  | 121.3  | 138.0  | 192.3  | 214.1  | 140.4  |
| 0.8    | 1.2    | 5.4    | 4.2    | 1.0    | 2.2    | 0.9    | 1.0    | 1.3    |

|        |       |       |       |       |       |       |        |       |
|--------|-------|-------|-------|-------|-------|-------|--------|-------|
| 7.8    | 5.8   | 5.4   | 4.1   | 6.9   | 4.0   | 8.4   | 16.8   | 8.9   |
| 5.7    | 6.0   | 0.7   | 0.6   | 0.9   | 2.4   | 0.5   | 1.4    | 1.2   |
| 3.9    | 3.8   | 6.6   | 4.2   | 4.9   | 2.4   | 4.2   | 2.5    | 5.9   |
| 8.7    | 4.9   | 4.7   | 7.3   | 4.9   | 7.7   | 5.6   | 4.2    | 3.4   |
| 1.7    | 1.6   | 0.5   | 1.0   | 1.1   | 1.9   | 0.7   | 4.0    | 2.4   |
| 10.2   | 6.5   | 1.7   | 12.8  | 7.9   | 7.0   | 9.6   | 14.7   | 6.8   |
| 1.0    | 3.5   | 1.0   | 0.9   | 0.8   | 1.0   | 1.0   | 0.8    | 0.6   |
| 1.1    | 5.2   | 8.7   | 5.2   | 2.0   | 8.7   | 8.7   | 17.8   | 3.1   |
| 301.9  | 201.4 | 231.1 | 251.1 | 244.8 | 209.6 | 308.9 | 279.6  | 272.6 |
| 3.1    | 0.5   | 3.9   | 3.9   | 2.2   | 6.5   | 1.3   | 10.4   | 3.2   |
| 0.9    | 1.1   | 0.9   | 0.8   | 2.1   | 0.7   | 0.9   | 2.3    | 1.5   |
| 3.9    | 0.9   | 4.0   | 5.3   | 7.1   | 1.6   | 5.4   | 1.9    | 1.0   |
| 275.5  | 209.9 | 235.0 | 234.0 | 251.4 | 221.2 | 293.3 | 298.0  | 229.4 |
| 6.7    | 6.2   | 5.7   | 5.3   | 6.1   | 9.8   | 11.3  | 10.1   | 4.2   |
| 517.7  | 262.2 | 330.5 | 325.9 | 317.9 | 355.3 | 486.1 | 472.8  | 282.5 |
| 0.4    | 1.1   | 0.3   | 1.7   | 3.2   | 3.7   | 2.7   | 2.8    | 2.8   |
| 1.0    | 0.6   | 0.9   | 1.3   | 1.0   | 1.1   | 1.1   | 1.0    | 0.8   |
| 229.7  | 155.4 | 172.9 | 201.1 | 191.0 | 196.5 | 265.3 | 307.8  | 163.7 |
| 81.9   | 87.7  | 94.6  | 95.5  | 116.6 | 88.7  | 118.9 | 108.9  | 88.7  |
| 1.2    | 1.9   | 0.9   | 1.0   | 1.1   | 0.9   | 1.1   | 1.9    | 1.5   |
| 0.2    | 0.1   | 0.3   | 0.2   | 0.5   | 0.4   | 0.4   | 1.1    | 1.6   |
| 1.1    | 1.2   | 1.1   | 0.6   | 5.4   | 2.1   | 1.0   | 1.1    | 2.6   |
| 1.1    | 0.3   | 1.0   | 0.9   | 0.3   | 0.7   | 1.3   | 1.3    | 1.0   |
| 1.7    | 0.7   | 3.2   | 3.6   | 5.0   | 0.4   | 0.3   | 3.3    | 0.1   |
| 4.5    | 0.8   | 0.4   | 0.4   | 1.0   | 1.2   | 1.0   | 6.7    | 4.8   |
| 4.2    | 5.6   | 3.6   | 3.4   | 1.8   | 4.4   | 7.5   | 6.8    | 5.9   |
| 68.4   | 41.7  | 46.6  | 45.9  | 52.2  | 44.8  | 62.2  | 86.3   | 55.6  |
| 5.8    | 7.0   | 3.7   | 6.7   | 7.2   | 6.4   | 7.1   | 2.6    | 7.2   |
| 7.6    | 3.2   | 1.4   | 9.5   | 1.4   | 8.2   | 18.5  | 14.1   | 11.3  |
| 291.3  | 132.6 | 195.1 | 204.9 | 200.4 | 192.4 | 267.6 | 313.3  | 256.5 |
| 1.6    | 2.0   | 4.6   | 3.4   | 8.0   | 2.2   | 5.2   | 3.3    | 5.6   |
| 131.0  | 172.7 | 239.0 | 232.1 | 228.6 | 194.7 | 303.5 | 348.1  | 227.6 |
| 3.1    | 7.2   | 2.1   | 8.0   | 9.8   | 11.3  | 10.3  | 14.4   | 8.6   |
| 93.6   | 47.3  | 58.6  | 65.0  | 47.7  | 56.1  | 88.6  | 83.6   | 66.4  |
| 57.9   | 50.0  | 46.5  | 53.8  | 55.4  | 61.7  | 79.5  | 83.5   | 66.2  |
| 170.3  | 126.7 | 158.5 | 151.6 | 142.6 | 127.6 | 194.5 | 209.1  | 160.6 |
| 177.2  | 100.0 | 109.0 | 139.4 | 120.0 | 99.5  | 173.5 | 158.1  | 136.5 |
| 1.3    | 1.0   | 1.0   | 0.9   | 0.9   | 0.7   | 1.1   | 0.9    | 1.5   |
| 13.7   | 5.0   | 13.9  | 18.2  | 20.2  | 11.7  | 20.1  | 24.9   | 16.9  |
| 7.7    | 10.7  | 5.5   | 2.4   | 5.5   | 10.4  | 4.9   | 15.9   | 1.6   |
| 16.3   | 5.0   | 9.5   | 9.0   | 10.9  | 8.9   | 5.9   | 7.4    | 20.0  |
| 17.9   | 9.4   | 13.4  | 9.9   | 4.6   | 8.6   | 10.5  | 8.4    | 7.8   |
| 0.5    | 0.4   | 0.8   | 0.4   | 0.3   | 0.8   | 0.4   | 0.9    | 4.0   |
| 0.8    | 0.9   | 2.7   | 0.7   | 2.0   | 1.9   | 1.0   | 1.0    | 3.0   |
| 40.7   | 31.3  | 36.2  | 39.5  | 23.9  | 35.1  | 50.6  | 37.3   | 24.0  |
| 4.8    | 1.4   | 3.2   | 0.5   | 1.3   | 2.4   | 1.5   | 1.1    | 2.5   |
| 4.5    | 4.8   | 1.4   | 0.9   | 4.9   | 1.1   | 2.0   | 2.2    | 4.5   |
| 164.0  | 112.6 | 133.7 | 160.3 | 140.3 | 139.0 | 184.0 | 206.9  | 143.2 |
| 1028.8 | 575.4 | 715.0 | 648.7 | 784.8 | 833.7 | 853.0 | 1159.4 | 697.1 |
| 10.0   | 4.7   | 1.9   | 8.9   | 12.6  | 9.5   | 2.1   | 11.5   | 10.4  |
| 41.9   | 20.7  | 27.1  | 23.7  | 35.4  | 32.6  | 39.1  | 79.8   | 35.9  |
| 1.9    | 3.5   | 0.0   | 1.8   | 1.7   | 0.4   | 0.4   | 0.1    | 2.9   |
| 9.6    | 12.3  | 10.1  | 9.2   | 9.5   | 7.4   | 17.9  | 9.5    | 10.5  |

|       |       |       |       |       |       |       |       |       |
|-------|-------|-------|-------|-------|-------|-------|-------|-------|
| 1.4   | 1.8   | 1.2   | 0.9   | 1.7   | 7.1   | 1.2   | 2.2   | 2.0   |
| 1.3   | 1.6   | 2.1   | 0.2   | 3.0   | 0.4   | 1.1   | 0.3   | 0.4   |
| 2.6   | 0.5   | 1.2   | 3.4   | 3.9   | 0.6   | 2.3   | 8.8   | 0.8   |
| 9.4   | 1.4   | 9.3   | 9.1   | 3.6   | 9.6   | 8.9   | 12.1  | 7.3   |
| 0.3   | 1.1   | 3.3   | 1.5   | 3.2   | 1.6   | 2.5   | 1.3   | 1.5   |
| 3.2   | 1.4   | 0.9   | 1.4   | 1.4   | 0.9   | 0.9   | 1.2   | 1.2   |
| 0.6   | 0.3   | 2.4   | 1.2   | 3.6   | 2.4   | 5.2   | 0.9   | 1.2   |
| 68.1  | 45.8  | 52.3  | 58.8  | 62.4  | 62.1  | 105.1 | 153.6 | 91.6  |
| 140.5 | 70.2  | 108.4 | 94.0  | 109.2 | 89.3  | 126.4 | 182.7 | 117.3 |
| 5.9   | 4.3   | 3.9   | 3.2   | 2.8   | 0.7   | 5.6   | 3.5   | 0.4   |
| 0.6   | 0.9   | 0.6   | 0.6   | 0.7   | 1.1   | 1.4   | 1.5   | 1.6   |
| 4.5   | 5.7   | 6.6   | 6.6   | 9.1   | 4.7   | 4.5   | 7.7   | 12.2  |
| 0.7   | 0.5   | 0.9   | 0.6   | 0.3   | 0.6   | 0.6   | 0.8   | 1.4   |
| 1.6   | 1.6   | 2.3   | 1.8   | 1.4   | 1.1   | 1.1   | 1.2   | 1.6   |
| 0.9   | 2.4   | 0.5   | 14.7  | 1.1   | 3.3   | 13.3  | 11.3  | 5.4   |
| 1.0   | 2.8   | 1.2   | 1.1   | 1.4   | 1.3   | 1.8   | 1.7   | 2.0   |
| 0.6   | 4.4   | 3.4   | 0.5   | 0.5   | 0.5   | 0.5   | 0.6   | 0.7   |
| 0.8   | 6.9   | 2.2   | 4.0   | 0.8   | 3.6   | 5.5   | 0.7   | 8.1   |
| 0.6   | 0.7   | 0.7   | 0.6   | 0.8   | 0.8   | 1.2   | 3.5   | 0.3   |
| 1.6   | 2.5   | 3.9   | 3.3   | 2.6   | 2.8   | 5.1   | 5.8   | 4.0   |
| 25.4  | 16.9  | 19.2  | 10.5  | 15.4  | 17.7  | 15.5  | 30.0  | 21.3  |
| 0.3   | 0.1   | 0.4   | 0.3   | 0.1   | 2.2   | 0.1   | 0.7   | 0.8   |
| 0.4   | 1.0   | 0.9   | 3.8   | 1.0   | 0.7   | 6.0   | 3.7   | 3.1   |
| 260.0 | 419.9 | 486.2 | 548.4 | 536.2 | 553.6 | 768.3 | 650.5 | 523.2 |
| 4.9   | 2.1   | 5.7   | 0.8   | 1.2   | 2.0   | 4.3   | 7.2   | 2.8   |
| 11.4  | 10.1  | 1.7   | 10.3  | 3.8   | 10.3  | 11.8  | 10.5  | 2.4   |
| 0.9   | 0.5   | 0.9   | 0.4   | 1.5   | 0.6   | 8.8   | 3.7   | 4.2   |
| 0.3   | 0.2   | 0.3   | 0.6   | 0.3   | 0.2   | 0.4   | 0.4   | 0.3   |
| 18.8  | 12.9  | 8.2   | 2.2   | 0.7   | 4.4   | 14.2  | 13.8  | 5.9   |
| 96.3  | 50.9  | 60.3  | 61.0  | 58.1  | 62.1  | 75.7  | 99.3  | 71.0  |
| 1.6   | 0.8   | 0.8   | 1.0   | 0.8   | 0.7   | 0.8   | 1.4   | 0.7   |
| 0.1   | 2.0   | 0.5   | 0.2   | 2.4   | 1.8   | 0.2   | 0.3   | 1.4   |
| 3.8   | 1.6   | 3.3   | 4.2   | 4.1   | 3.4   | 3.8   | 4.5   | 1.5   |
| 3.3   | 3.6   | 3.1   | 3.5   | 5.8   | 5.4   | 2.7   | 4.5   | 2.7   |
| 5.4   | 7.3   | 6.1   | 7.1   | 7.8   | 12.3  | 5.5   | 1.4   | 6.2   |
| 1.6   | 6.6   | 1.4   | 4.8   | 3.3   | 1.4   | 8.0   | 14.3  | 6.4   |
| 3.3   | 3.7   | 7.1   | 3.9   | 2.2   | 2.8   | 5.9   | 10.4  | 12.6  |
| 0.5   | 0.3   | 1.3   | 0.8   | 0.8   | 0.7   | 1.1   | 0.9   | 0.6   |
| 0.9   | 0.3   | 0.9   | 0.5   | 0.5   | 1.3   | 2.8   | 0.8   | 0.4   |
| 2.3   | 4.6   | 3.6   | 5.5   | 2.9   | 1.7   | 1.4   | 2.2   | 5.5   |
| 0.6   | 4.1   | 0.2   | 0.4   | 0.2   | 0.9   | 0.4   | 0.2   | 0.1   |
| 1.4   | 0.5   | 0.5   | 0.2   | 0.4   | 0.3   | 0.7   | 0.8   | 0.5   |
| 17.6  | 14.8  | 13.9  | 16.9  | 2.3   | 16.2  | 12.7  | 28.2  | 19.6  |
| 64.3  | 33.3  | 37.3  | 39.5  | 49.6  | 41.9  | 66.5  | 59.5  | 47.2  |
| 4.2   | 2.4   | 1.6   | 2.4   | 2.2   | 1.1   | 1.6   | 2.2   | 0.9   |
| 1.1   | 1.1   | 1.2   | 1.1   | 1.1   | 0.8   | 0.5   | 1.2   | 1.2   |
| 2.0   | 2.2   | 8.3   | 5.2   | 1.2   | 7.8   | 3.0   | 4.5   | 2.2   |
| 0.6   | 1.8   | 0.8   | 0.6   | 1.1   | 0.4   | 0.8   | 0.5   | 0.9   |
| 1.3   | 0.7   | 1.2   | 1.0   | 0.9   | 1.8   | 1.2   | 1.7   | 0.7   |
| 3.8   | 7.1   | 5.5   | 2.4   | 10.7  | 11.6  | 5.5   | 11.0  | 14.1  |
| 0.8   | 1.2   | 1.2   | 2.0   | 2.5   | 1.2   | 1.8   | 1.3   | 7.4   |
| 3.0   | 3.4   | 4.4   | 9.1   | 5.5   | 1.3   | 7.1   | 3.0   | 1.5   |
| 0.5   | 2.0   | 4.8   | 2.8   | 2.4   | 4.6   | 3.7   | 1.8   | 2.4   |



|       |       |       |       |       |       |       |       |       |
|-------|-------|-------|-------|-------|-------|-------|-------|-------|
| 2.5   | 6.5   | 1.4   | 3.7   | 7.4   | 2.1   | 2.4   | 11.2  | 1.2   |
| 19.1  | 11.0  | 13.6  | 10.8  | 11.9  | 10.0  | 14.6  | 14.8  | 11.4  |
| 0.2   | 0.6   | 1.0   | 1.0   | 1.1   | 0.2   | 0.4   | 0.3   | 0.4   |
| 0.5   | 1.0   | 0.4   | 0.7   | 0.6   | 0.4   | 0.8   | 0.5   | 0.3   |
| 7.0   | 7.1   | 11.3  | 4.0   | 10.6  | 7.3   | 8.7   | 9.4   | 10.4  |
| 0.7   | 3.9   | 0.1   | 0.4   | 0.6   | 2.5   | 0.2   | 4.6   | 1.4   |
| 0.2   | 1.6   | 2.2   | 1.4   | 1.3   | 1.5   | 3.6   | 2.4   | 4.3   |
| 15.4  | 7.8   | 3.5   | 13.8  | 15.0  | 7.9   | 14.2  | 5.2   | 4.9   |
| 0.1   | 2.5   | 0.1   | 0.1   | 0.4   | 0.4   | 0.1   | 1.3   | 2.1   |
| 3.3   | 0.3   | 0.5   | 1.8   | 1.3   | 0.7   | 0.9   | 1.1   | 1.6   |
| 2.5   | 2.5   | 2.5   | 1.8   | 3.1   | 4.0   | 1.7   | 2.6   | 2.2   |
| 2.0   | 7.6   | 1.4   | 4.8   | 6.1   | 11.7  | 3.2   | 4.6   | 2.9   |
| 5.2   | 8.4   | 1.3   | 4.1   | 1.2   | 6.8   | 6.8   | 0.6   | 6.7   |
| 8.9   | 13.8  | 7.4   | 7.4   | 8.9   | 13.2  | 14.7  | 11.9  | 5.2   |
| 50.7  | 202.7 | 188.8 | 260.8 | 293.2 | 221.1 | 314.0 | 372.6 | 280.5 |
| 3.2   | 11.2  | 12.7  | 2.8   | 13.2  | 6.6   | 3.7   | 2.7   | 21.3  |
| 20.3  | 16.9  | 17.3  | 23.6  | 27.8  | 13.6  | 20.7  | 31.1  | 18.1  |
| 4.7   | 7.6   | 2.0   | 6.7   | 0.8   | 5.7   | 3.3   | 1.0   | 5.3   |
| 306.7 | 247.9 | 239.9 | 261.0 | 276.5 | 262.9 | 435.9 | 392.4 | 355.0 |
| 0.8   | 0.4   | 1.0   | 2.3   | 0.3   | 6.9   | 8.1   | 1.3   | 5.6   |
| 0.8   | 0.9   | 0.7   | 0.7   | 0.9   | 6.9   | 2.1   | 3.5   | 1.7   |
| 3.4   | 12.1  | 6.5   | 2.7   | 7.7   | 4.7   | 14.0  | 15.0  | 16.1  |
| 0.1   | 2.5   | 2.9   | 2.5   | 6.0   | 0.5   | 1.3   | 0.9   | 2.0   |
| 0.6   | 0.8   | 0.6   | 1.0   | 0.5   | 0.9   | 0.8   | 0.8   | 1.1   |
| 0.2   | 1.2   | 0.5   | 1.2   | 0.9   | 1.7   | 0.1   | 0.1   | 1.1   |
| 13.6  | 19.3  | 5.9   | 11.2  | 25.5  | 8.8   | 23.7  | 21.7  | 13.5  |
| 0.9   | 7.4   | 7.1   | 8.7   | 1.5   | 8.5   | 1.9   | 1.3   | 6.9   |
| 9.8   | 2.1   | 6.6   | 8.8   | 7.8   | 2.5   | 1.3   | 5.7   | 10.1  |
| 2.5   | 0.1   | 3.3   | 2.4   | 1.3   | 0.2   | 0.2   | 1.0   | 1.1   |
| 0.6   | 0.9   | 0.9   | 0.5   | 1.4   | 2.8   | 5.4   | 6.8   | 2.3   |
| 0.2   | 0.6   | 0.2   | 0.3   | 1.5   | 0.2   | 1.7   | 0.1   | 0.4   |
| 3.0   | 2.5   | 2.1   | 3.8   | 3.6   | 7.0   | 1.8   | 2.8   | 2.0   |
| 28.6  | 18.6  | 18.5  | 15.6  | 22.2  | 9.2   | 26.6  | 23.1  | 14.3  |
| 22.2  | 23.0  | 13.6  | 15.2  | 17.0  | 22.7  | 20.0  | 14.4  | 18.5  |
| 6.9   | 5.8   | 5.2   | 4.5   | 3.9   | 1.3   | 12.4  | 9.8   | 5.1   |
| 321.4 | 197.2 | 192.9 | 234.2 | 125.9 | 267.6 | 391.8 | 295.3 | 470.7 |
| 1.3   | 2.0   | 1.3   | 9.7   | 1.6   | 1.3   | 2.6   | 1.9   | 1.5   |
| 282.9 | 226.8 | 233.7 | 241.8 | 277.2 | 257.2 | 321.2 | 470.9 | 271.1 |
| 3.8   | 0.1   | 6.0   | 0.5   | 3.7   | 6.1   | 0.9   | 5.7   | 4.8   |
| 7.3   | 1.6   | 1.4   | 1.9   | 1.5   | 1.5   | 3.1   | 6.3   | 6.0   |
| 228.2 | 168.6 | 212.8 | 222.4 | 199.0 | 194.7 | 275.7 | 242.8 | 194.5 |
| 11.6  | 4.7   | 5.8   | 4.9   | 6.7   | 1.4   | 3.8   | 1.0   | 1.0   |
| 88.1  | 53.3  | 67.7  | 76.0  | 68.7  | 60.7  | 77.6  | 104.3 | 74.3  |
| 35.4  | 43.4  | 44.7  | 43.9  | 33.1  | 40.5  | 64.3  | 55.2  | 42.8  |
| 5.1   | 8.3   | 7.9   | 6.0   | 7.9   | 5.5   | 2.4   | 5.1   | 5.9   |
| 1.3   | 0.4   | 3.4   | 0.3   | 3.7   | 4.2   | 1.8   | 0.6   | 2.7   |
| 6.4   | 5.6   | 1.0   | 6.7   | 6.3   | 1.6   | 0.7   | 8.4   | 1.9   |
| 25.5  | 29.2  | 26.1  | 29.1  | 25.2  | 22.8  | 28.5  | 32.7  | 29.2  |
| 5.2   | 1.2   | 4.2   | 8.1   | 7.9   | 8.8   | 5.9   | 6.0   | 2.0   |
| 79.3  | 60.1  | 57.9  | 73.1  | 64.6  | 69.0  | 90.2  | 126.3 | 76.1  |
| 1.1   | 1.4   | 2.2   | 0.9   | 1.3   | 1.6   | 0.7   | 3.6   | 3.8   |
| 4.8   | 0.4   | 2.5   | 4.1   | 4.2   | 0.3   | 5.1   | 6.7   | 0.2   |
| 0.9   | 0.4   | 0.6   | 2.1   | 2.1   | 1.3   | 0.3   | 0.3   | 1.2   |

|       |       |       |       |       |       |        |        |       |
|-------|-------|-------|-------|-------|-------|--------|--------|-------|
| 13.3  | 14.2  | 13.5  | 15.1  | 15.6  | 11.0  | 13.0   | 14.4   | 16.2  |
| 1.4   | 1.7   | 3.2   | 3.6   | 3.2   | 0.7   | 1.4    | 6.0    | 1.1   |
| 4.6   | 8.3   | 3.6   | 6.5   | 3.1   | 0.6   | 1.7    | 2.0    | 3.6   |
| 6.1   | 1.1   | 4.7   | 7.1   | 5.2   | 3.9   | 8.6    | 5.9    | 6.5   |
| 6.4   | 2.8   | 10.8  | 2.4   | 7.0   | 1.9   | 5.8    | 5.5    | 10.6  |
| 0.5   | 0.4   | 4.5   | 3.8   | 3.4   | 2.8   | 0.3    | 0.6    | 0.4   |
| 81.0  | 52.9  | 37.9  | 53.3  | 51.4  | 44.7  | 53.0   | 57.1   | 58.5  |
| 2.3   | 1.1   | 1.7   | 3.0   | 0.5   | 1.8   | 2.7    | 2.4    | 2.0   |
| 0.8   | 1.1   | 3.4   | 0.4   | 1.3   | 0.5   | 1.7    | 2.1    | 3.5   |
| 14.6  | 14.6  | 12.3  | 15.1  | 12.8  | 13.8  | 17.6   | 18.0   | 12.4  |
| 15.9  | 10.7  | 16.8  | 13.9  | 9.7   | 12.4  | 15.8   | 23.2   | 6.1   |
| 7.6   | 3.0   | 1.1   | 2.6   | 5.1   | 1.0   | 5.3    | 6.6    | 5.3   |
| 13.1  | 16.8  | 13.2  | 12.1  | 11.0  | 8.2   | 15.4   | 12.5   | 7.3   |
| 883.4 | 676.8 | 724.7 | 775.1 | 829.1 | 815.3 | 1138.5 | 1100.4 | 878.1 |
| 4.6   | 7.6   | 5.8   | 9.2   | 9.5   | 1.5   | 3.9    | 1.9    | 3.2   |
| 5.0   | 0.5   | 1.8   | 2.0   | 1.8   | 4.4   | 1.8    | 1.1    | 4.4   |
| 1.3   | 2.6   | 5.5   | 1.1   | 4.4   | 3.9   | 1.4    | 4.9    | 8.1   |
| 2.1   | 5.8   | 5.5   | 2.0   | 6.0   | 1.6   | 4.0    | 2.1    | 6.1   |
| 79.0  | 80.4  | 97.9  | 97.3  | 122.8 | 131.1 | 145.6  | 182.4  | 99.1  |
| 2.6   | 4.7   | 3.4   | 0.6   | 0.7   | 4.0   | 2.0    | 2.6    | 4.4   |
| 1.6   | 10.4  | 2.5   | 1.7   | 1.5   | 10.8  | 10.3   | 4.9    | 1.5   |
| 91.8  | 57.2  | 71.3  | 65.5  | 61.7  | 75.8  | 97.0   | 126.6  | 79.4  |
| 153.0 | 104.7 | 129.2 | 116.4 | 138.2 | 122.5 | 164.9  | 171.9  | 119.0 |
| 2.0   | 1.8   | 0.6   | 7.9   | 1.4   | 1.3   | 4.2    | 2.2    | 0.6   |
| 477.7 | 233.6 | 253.1 | 277.5 | 268.1 | 305.0 | 404.7  | 316.7  | 261.2 |
| 0.7   | 4.0   | 0.4   | 0.6   | 1.2   | 1.6   | 1.6    | 0.3    | 0.7   |
| 246.0 | 197.0 | 184.2 | 215.0 | 232.2 | 210.9 | 318.4  | 412.0  | 231.6 |
| 0.4   | 3.7   | 0.2   | 0.4   | 2.6   | 2.4   | 0.7    | 2.7    | 1.8   |
| 9.6   | 12.7  | 11.7  | 7.4   | 15.9  | 14.5  | 18.0   | 19.9   | 15.6  |
| 12.7  | 12.3  | 10.1  | 3.4   | 10.0  | 13.4  | 16.8   | 14.7   | 4.5   |
| 4.7   | 9.2   | 5.2   | 3.6   | 9.4   | 5.2   | 16.4   | 6.8    | 4.1   |
| 89.7  | 48.0  | 60.8  | 60.4  | 60.1  | 77.0  | 71.6   | 82.7   | 46.5  |
| 0.4   | 0.4   | 1.2   | 0.7   | 0.2   | 0.2   | 0.2    | 0.5    | 0.2   |
| 4.6   | 6.6   | 10.1  | 11.1  | 3.2   | 6.6   | 1.6    | 14.4   | 3.9   |
| 0.2   | 0.6   | 0.3   | 2.5   | 0.3   | 0.2   | 0.4    | 2.4    | 0.2   |
| 2.9   | 8.9   | 1.9   | 7.9   | 8.2   | 9.4   | 7.8    | 5.2    | 4.4   |
| 17.3  | 6.9   | 10.3  | 17.9  | 15.1  | 2.4   | 11.7   | 20.0   | 16.1  |
| 8.9   | 0.8   | 5.7   | 11.3  | 2.1   | 6.2   | 8.4    | 8.9    | 13.0  |
| 382.7 | 218.7 | 277.0 | 262.2 | 286.6 | 263.0 | 353.0  | 323.1  | 277.9 |
| 33.3  | 20.7  | 19.7  | 13.5  | 14.0  | 9.6   | 19.0   | 23.5   | 15.6  |
| 6.7   | 3.9   | 6.4   | 1.5   | 8.1   | 4.9   | 11.8   | 11.5   | 6.7   |
| 5.4   | 9.6   | 6.0   | 0.5   | 8.5   | 4.9   | 13.3   | 6.6    | 9.2   |
| 8.3   | 1.8   | 8.5   | 2.9   | 2.3   | 5.3   | 6.8    | 8.0    | 3.9   |
| 2.6   | 2.2   | 2.6   | 5.9   | 2.4   | 0.9   | 7.8    | 1.3    | 5.6   |
| 7.0   | 6.5   | 5.9   | 9.0   | 8.3   | 3.7   | 7.2    | 10.7   | 2.1   |
| 46.2  | 45.4  | 70.1  | 56.1  | 51.5  | 54.4  | 67.5   | 79.6   | 66.0  |
| 0.5   | 0.8   | 0.0   | 0.1   | 0.4   | 0.2   | 0.8    | 0.5    | 0.2   |
| 1.2   | 2.8   | 0.4   | 1.9   | 0.3   | 3.5   | 4.4    | 2.1    | 0.6   |
| 49.8  | 41.3  | 44.4  | 41.5  | 44.5  | 36.1  | 43.2   | 43.5   | 35.1  |
| 6.6   | 9.4   | 7.4   | 7.7   | 7.8   | 9.5   | 11.2   | 13.3   | 15.4  |
| 12.9  | 12.2  | 14.1  | 12.5  | 11.3  | 11.7  | 10.6   | 13.2   | 20.1  |
| 5.4   | 7.2   | 4.3   | 4.7   | 5.0   | 0.3   | 0.7    | 3.7    | 3.0   |
| 3.9   | 4.1   | 2.7   | 2.4   | 3.0   | 4.9   | 0.2    | 3.5    | 1.0   |

|       |       |       |       |       |       |       |       |       |
|-------|-------|-------|-------|-------|-------|-------|-------|-------|
| 0.7   | 0.2   | 0.7   | 0.8   | 0.5   | 0.3   | 1.2   | 4.7   | 0.6   |
| 1.3   | 7.1   | 4.4   | 5.9   | 3.7   | 5.0   | 3.8   | 1.1   | 1.3   |
| 0.7   | 0.3   | 0.1   | 0.1   | 1.1   | 0.2   | 0.4   | 1.1   | 0.3   |
| 0.7   | 0.4   | 4.9   | 1.6   | 0.9   | 0.9   | 0.5   | 0.7   | 0.5   |
| 64.9  | 47.4  | 61.5  | 78.9  | 71.7  | 58.4  | 76.2  | 127.2 | 53.4  |
| 15.7  | 2.4   | 4.8   | 8.5   | 8.5   | 12.5  | 8.2   | 11.1  | 10.7  |
| 4.0   | 1.4   | 0.7   | 0.6   | 4.2   | 2.9   | 7.5   | 7.1   | 1.4   |
| 299.9 | 201.8 | 250.2 | 216.8 | 247.8 | 229.2 | 354.7 | 357.8 | 214.3 |
| 5.8   | 5.3   | 3.9   | 6.7   | 3.0   | 3.4   | 5.4   | 3.3   | 3.0   |
| 4.8   | 4.5   | 2.8   | 4.3   | 3.2   | 1.9   | 1.4   | 7.4   | 2.8   |
| 3.5   | 3.9   | 1.9   | 7.2   | 4.2   | 2.9   | 0.5   | 9.1   | 7.8   |
| 1.8   | 0.8   | 2.8   | 1.0   | 1.6   | 1.2   | 5.9   | 1.8   | 1.2   |
| 147.6 | 102.6 | 118.0 | 180.2 | 126.5 | 143.5 | 152.6 | 187.5 | 121.2 |
| 114.5 | 111.8 | 99.3  | 122.1 | 127.6 | 99.0  | 154.7 | 141.0 | 147.2 |
| 9.7   | 1.5   | 10.3  | 7.8   | 12.3  | 8.7   | 15.1  | 13.6  | 15.5  |
| 0.6   | 0.4   | 0.6   | 0.5   | 0.6   | 0.7   | 1.8   | 0.7   | 0.5   |
| 21.4  | 9.7   | 12.9  | 15.8  | 7.9   | 14.8  | 22.7  | 32.6  | 14.8  |
| 6.5   | 5.2   | 3.8   | 4.5   | 1.2   | 4.0   | 1.8   | 11.1  | 8.1   |
| 17.7  | 15.5  | 15.1  | 11.4  | 13.2  | 13.8  | 17.6  | 18.1  | 15.8  |
| 1.5   | 2.3   | 5.2   | 11.0  | 1.5   | 8.3   | 11.0  | 1.6   | 1.2   |
| 14.9  | 8.4   | 9.4   | 12.2  | 5.5   | 10.1  | 9.6   | 11.8  | 8.1   |
| 8.7   | 3.9   | 3.0   | 1.2   | 7.4   | 4.1   | 7.4   | 5.2   | 4.7   |
| 11.2  | 14.6  | 9.3   | 12.0  | 11.9  | 8.8   | 16.7  | 17.4  | 14.1  |
| 13.8  | 14.0  | 3.0   | 2.4   | 2.8   | 4.6   | 18.0  | 11.3  | 9.1   |
| 9.3   | 8.2   | 7.9   | 7.9   | 8.1   | 6.7   | 10.6  | 13.3  | 10.1  |
| 26.0  | 16.1  | 26.0  | 14.6  | 28.6  | 34.6  | 31.1  | 45.9  | 22.0  |
| 1.2   | 0.8   | 2.4   | 1.4   | 2.7   | 5.8   | 0.7   | 2.2   | 0.5   |
| 18.1  | 14.6  | 23.5  | 9.9   | 19.2  | 14.3  | 16.6  | 26.1  | 11.1  |
| 0.4   | 1.1   | 4.8   | 4.0   | 2.8   | 2.3   | 2.0   | 2.5   | 0.5   |
| 3.6   | 1.8   | 2.6   | 4.3   | 1.3   | 4.3   | 2.5   | 10.5  | 7.4   |
| 0.3   | 2.6   | 3.2   | 2.2   | 3.2   | 3.3   | 3.9   | 7.4   | 1.9   |
| 0.2   | 3.1   | 5.0   | 3.1   | 0.9   | 4.3   | 1.3   | 0.6   | 1.9   |
| 6.9   | 0.6   | 0.9   | 0.6   | 1.0   | 1.6   | 0.6   | 0.7   | 0.7   |
| 49.9  | 41.9  | 49.0  | 50.9  | 46.0  | 54.1  | 69.6  | 64.1  | 57.5  |
| 101.4 | 74.2  | 71.9  | 85.6  | 92.4  | 67.3  | 120.8 | 121.8 | 59.6  |
| 16.1  | 21.1  | 18.5  | 19.7  | 20.3  | 14.0  | 16.9  | 19.5  | 14.7  |
| 0.3   | 0.3   | 0.8   | 0.9   | 0.4   | 0.5   | 1.5   | 0.6   | 0.9   |
| 0.7   | 1.1   | 4.3   | 0.3   | 0.2   | 0.4   | 0.5   | 0.2   | 4.9   |
| 16.5  | 5.1   | 8.0   | 7.1   | 11.5  | 11.6  | 18.0  | 17.6  | 8.2   |
| 5.4   | 3.2   | 9.1   | 3.8   | 8.1   | 0.9   | 1.0   | 10.0  | 1.4   |
| 0.8   | 5.8   | 0.4   | 9.2   | 6.0   | 0.6   | 3.4   | 4.5   | 4.0   |
| 2.9   | 4.9   | 2.3   | 2.1   | 1.5   | 1.8   | 3.2   | 1.0   | 4.6   |
| 1.8   | 3.5   | 1.1   | 0.6   | 0.9   | 1.1   | 5.8   | 10.4  | 5.2   |
| 6.1   | 1.1   | 0.9   | 4.3   | 6.6   | 8.2   | 1.7   | 1.2   | 1.1   |
| 0.6   | 2.3   | 1.0   | 0.8   | 3.7   | 3.3   | 4.5   | 7.0   | 0.8   |
| 0.5   | 0.5   | 0.7   | 0.7   | 0.3   | 0.3   | 0.8   | 1.2   | 0.4   |
| 2.5   | 4.4   | 1.2   | 1.5   | 2.1   | 5.1   | 3.2   | 2.1   | 2.8   |
| 9.4   | 3.5   | 3.0   | 8.1   | 5.3   | 11.8  | 5.5   | 12.0  | 7.5   |
| 0.4   | 0.1   | 0.7   | 0.2   | 0.9   | 0.5   | 0.2   | 0.6   | 3.0   |
| 106.1 | 98.7  | 90.2  | 105.3 | 83.6  | 92.8  | 98.6  | 131.3 | 85.9  |
| 44.4  | 75.7  | 33.9  | 77.3  | 80.0  | 39.5  | 65.6  | 70.0  | 66.2  |
| 1.4   | 1.6   | 2.7   | 3.7   | 2.1   | 1.3   | 1.8   | 2.8   | 2.9   |
| 0.4   | 1.5   | 1.4   | 1.1   | 1.5   | 1.2   | 1.7   | 0.6   | 1.9   |

|        |        |        |        |        |        |        |        |        |
|--------|--------|--------|--------|--------|--------|--------|--------|--------|
| 24.6   | 19.7   | 18.1   | 14.9   | 14.7   | 9.2    | 31.4   | 41.4   | 21.0   |
| 0.8    | 1.0    | 1.3    | 1.9    | 1.1    | 1.1    | 1.9    | 1.1    | 2.0    |
| 28.4   | 14.5   | 22.2   | 28.5   | 22.8   | 31.2   | 45.6   | 34.4   | 29.5   |
| 193.5  | 122.9  | 107.1  | 125.2  | 131.4  | 127.5  | 147.6  | 206.5  | 138.2  |
| 1008.2 | 692.9  | 772.3  | 751.9  | 833.2  | 697.7  | 981.1  | 919.8  | 586.6  |
| 1.4    | 2.5    | 2.6    | 3.6    | 0.5    | 1.2    | 3.9    | 1.6    | 4.0    |
| 6.3    | 8.7    | 9.8    | 7.8    | 8.6    | 2.2    | 12.7   | 5.3    | 12.2   |
| 1.0    | 2.3    | 1.0    | 3.0    | 1.2    | 0.6    | 0.3    | 0.3    | 0.6    |
| 35.8   | 30.9   | 31.9   | 30.4   | 32.9   | 30.3   | 39.9   | 45.0   | 28.5   |
| 208.3  | 127.5  | 178.0  | 166.2  | 154.4  | 185.1  | 258.9  | 211.1  | 189.6  |
| 9.6    | 6.6    | 6.9    | 6.9    | 13.4   | 8.1    | 13.0   | 15.3   | 9.5    |
| 9.6    | 1.4    | 4.9    | 3.8    | 3.5    | 3.3    | 7.7    | 4.9    | 4.5    |
| 68.0   | 44.0   | 35.0   | 42.4   | 53.7   | 41.2   | 52.6   | 74.1   | 76.1   |
| 0.1    | 0.6    | 0.9    | 0.9    | 0.4    | 0.3    | 0.5    | 3.8    | 0.4    |
| 1.6    | 0.6    | 1.0    | 1.2    | 1.8    | 0.9    | 2.1    | 1.2    | 0.5    |
| 1.6    | 0.3    | 1.0    | 1.1    | 2.3    | 1.0    | 1.1    | 5.7    | 2.3    |
| 0.9    | 0.5    | 1.0    | 0.6    | 1.3    | 4.0    | 4.0    | 1.2    | 2.3    |
| 2.4    | 1.6    | 1.7    | 1.3    | 0.6    | 3.2    | 0.8    | 7.1    | 2.2    |
| 0.5    | 0.4    | 0.3    | 0.4    | 0.7    | 0.4    | 0.7    | 0.8    | 0.3    |
| 25.6   | 14.7   | 22.3   | 18.7   | 18.4   | 22.1   | 38.0   | 52.5   | 29.4   |
| 1.8    | 1.9    | 6.0    | 6.6    | 2.9    | 8.2    | 9.6    | 8.6    | 5.6    |
| 150.6  | 95.5   | 144.2  | 131.1  | 124.2  | 120.6  | 178.3  | 173.3  | 136.6  |
| 12.5   | 11.1   | 8.7    | 10.7   | 14.1   | 11.1   | 12.4   | 10.5   | 13.5   |
| 107.9  | 63.2   | 81.3   | 67.3   | 87.3   | 85.5   | 119.3  | 124.9  | 73.2   |
| 22.9   | 26.0   | 21.6   | 29.7   | 16.0   | 27.3   | 42.4   | 43.9   | 25.8   |
| 517.5  | 219.2  | 254.1  | 318.8  | 274.4  | 303.3  | 445.9  | 539.2  | 378.9  |
| 0.3    | 0.3    | 1.9    | 0.2    | 0.4    | 0.2    | 0.4    | 0.5    | 3.1    |
| 115.6  | 77.5   | 92.7   | 94.4   | 105.2  | 99.7   | 126.9  | 152.4  | 106.7  |
| 1.4    | 1.2    | 9.2    | 1.0    | 3.9    | 0.4    | 5.5    | 0.8    | 0.8    |
| 7.7    | 7.5    | 11.0   | 4.0    | 2.5    | 7.9    | 6.9    | 10.4   | 12.2   |
| 2.5    | 8.2    | 1.9    | 2.0    | 1.4    | 2.1    | 3.4    | 3.2    | 3.0    |
| 166.3  | 113.5  | 109.1  | 131.9  | 120.5  | 109.8  | 186.9  | 154.9  | 112.6  |
| 3.2    | 3.5    | 2.0    | 2.8    | 5.9    | 4.3    | 2.9    | 2.3    | 2.2    |
| 56.0   | 25.3   | 17.8   | 30.9   | 31.0   | 25.9   | 40.6   | 39.7   | 41.4   |
| 38.2   | 25.2   | 32.7   | 24.5   | 29.4   | 27.1   | 40.7   | 31.3   | 16.7   |
| 1.9    | 0.9    | 1.9    | 6.5    | 1.0    | 2.4    | 0.8    | 1.1    | 2.9    |
| 10.3   | 16.7   | 11.1   | 2.4    | 10.7   | 13.7   | 18.0   | 16.0   | 15.8   |
| 98.7   | 45.3   | 83.4   | 64.2   | 74.1   | 64.6   | 76.1   | 117.4  | 83.1   |
| 1.3    | 2.0    | 0.7    | 1.7    | 1.2    | 2.4    | 2.5    | 2.9    | 1.7    |
| 0.9    | 0.6    | 0.2    | 2.2    | 0.5    | 2.8    | 1.8    | 1.9    | 0.5    |
| 5.5    | 7.0    | 15.6   | 6.1    | 3.2    | 3.2    | 4.6    | 3.5    | 3.9    |
| 0.4    | 0.6    | 1.3    | 0.8    | 0.5    | 0.7    | 6.0    | 0.6    | 0.4    |
| 32.5   | 12.9   | 25.1   | 20.5   | 15.5   | 15.2   | 28.1   | 22.3   | 24.0   |
| 2177.8 | 1661.7 | 1725.4 | 1791.6 | 2140.8 | 1907.8 | 2585.5 | 2853.0 | 2032.7 |
| 227.9  | 130.0  | 206.5  | 158.9  | 201.1  | 184.2  | 255.2  | 304.5  | 217.3  |
| 8.4    | 4.8    | 4.5    | 5.0    | 6.9    | 4.9    | 11.5   | 10.8   | 5.1    |
| 2.0    | 3.3    | 3.7    | 3.2    | 5.7    | 4.4    | 3.0    | 3.1    | 3.5    |
| 163.4  | 99.5   | 148.1  | 142.8  | 142.8  | 149.3  | 200.2  | 206.1  | 187.5  |
| 27.0   | 21.2   | 16.6   | 23.5   | 33.0   | 28.5   | 39.0   | 47.4   | 35.3   |
| 32.6   | 21.8   | 17.4   | 12.6   | 10.8   | 20.0   | 34.9   | 33.5   | 19.1   |
| 80.0   | 59.1   | 55.4   | 52.9   | 56.1   | 55.6   | 91.5   | 117.3  | 82.8   |
| 3.1    | 1.1    | 4.4    | 5.7    | 4.6    | 3.6    | 6.4    | 7.8    | 4.3    |
| 3.8    | 2.5    | 1.4    | 1.2    | 7.4    | 1.7    | 1.6    | 2.8    | 2.3    |

|       |       |        |        |        |        |        |        |       |
|-------|-------|--------|--------|--------|--------|--------|--------|-------|
| 4.8   | 1.1   | 2.3    | 2.3    | 0.5    | 2.5    | 0.4    | 1.1    | 2.5   |
| 13.4  | 14.6  | 13.5   | 14.9   | 13.2   | 12.5   | 20.1   | 10.1   | 10.3  |
| 6.8   | 6.6   | 3.4    | 2.0    | 2.3    | 4.7    | 2.1    | 7.0    | 7.5   |
| 16.7  | 10.9  | 12.1   | 9.3    | 23.2   | 6.6    | 22.7   | 25.2   | 13.2  |
| 12.2  | 9.4   | 3.5    | 8.7    | 0.6    | 9.4    | 4.4    | 6.7    | 5.4   |
| 2.9   | 5.7   | 5.6    | 4.9    | 4.2    | 6.1    | 5.1    | 10.3   | 0.7   |
| 4.4   | 6.9   | 4.7    | 3.6    | 6.4    | 2.9    | 7.0    | 8.4    | 6.7   |
| 1.4   | 7.0   | 3.3    | 1.3    | 1.3    | 5.7    | 0.5    | 1.1    | 3.6   |
| 114.2 | 77.9  | 100.1  | 99.2   | 113.5  | 100.3  | 127.9  | 153.4  | 124.8 |
| 3.6   | 2.2   | 3.0    | 0.2    | 1.3    | 3.4    | 0.9    | 1.1    | 1.2   |
| 2.7   | 7.4   | 1.5    | 1.7    | 7.3    | 3.0    | 4.8    | 9.3    | 0.9   |
| 1.4   | 10.8  | 1.6    | 1.5    | 3.1    | 1.1    | 7.7    | 2.7    | 1.5   |
| 12.6  | 10.6  | 15.2   | 14.8   | 22.4   | 21.0   | 21.4   | 25.6   | 21.1  |
| 36.8  | 24.3  | 37.8   | 32.0   | 35.4   | 31.6   | 50.4   | 55.6   | 42.8  |
| 6.5   | 19.6  | 2.2    | 7.6    | 11.5   | 12.6   | 14.3   | 10.0   | 10.5  |
| 2.2   | 6.2   | 1.6    | 2.4    | 5.1    | 1.2    | 3.8    | 0.8    | 1.3   |
| 19.9  | 17.4  | 20.4   | 14.5   | 19.1   | 8.0    | 23.1   | 32.7   | 19.3  |
| 96.3  | 65.2  | 95.7   | 83.3   | 99.2   | 102.0  | 93.7   | 107.4  | 97.3  |
| 2.0   | 0.2   | 0.6    | 0.3    | 0.9    | 0.5    | 0.9    | 0.3    | 0.5   |
| 0.1   | 2.2   | 0.1    | 3.1    | 0.3    | 0.3    | 1.4    | 0.4    | 0.3   |
| 6.5   | 5.9   | 6.3    | 6.8    | 8.1    | 6.7    | 9.6    | 9.3    | 5.6   |
| 0.9   | 2.0   | 5.0    | 1.1    | 1.9    | 0.4    | 0.6    | 0.8    | 0.6   |
| 4.7   | 0.2   | 3.7    | 2.6    | 2.5    | 2.8    | 0.9    | 0.8    | 2.7   |
| 0.6   | 1.6   | 1.3    | 3.8    | 2.6    | 1.1    | 1.2    | 3.2    | 1.4   |
| 0.8   | 2.6   | 2.1    | 2.9    | 2.1    | 2.5    | 0.3    | 0.2    | 0.6   |
| 61.9  | 45.4  | 69.1   | 69.4   | 64.3   | 69.4   | 87.8   | 101.7  | 62.4  |
| 25.2  | 26.1  | 29.3   | 32.2   | 31.7   | 29.0   | 31.6   | 30.9   | 29.8  |
| 554.6 | 330.7 | 392.0  | 375.4  | 400.5  | 416.4  | 509.2  | 700.0  | 402.2 |
| 1.8   | 4.5   | 1.6    | 9.5    | 11.9   | 3.4    | 2.3    | 10.3   | 5.2   |
| 6.4   | 6.2   | 1.9    | 0.5    | 6.7    | 4.1    | 5.7    | 12.8   | 2.0   |
| 907.4 | 937.1 | 1204.2 | 1188.8 | 1130.8 | 1194.1 | 1337.4 | 1743.8 | 909.5 |
| 94.4  | 70.2  | 71.1   | 65.6   | 74.5   | 67.2   | 93.7   | 130.1  | 79.7  |
| 1.3   | 0.8   | 0.4    | 0.4    | 1.7    | 0.4    | 0.6    | 1.6    | 0.5   |
| 72.9  | 33.7  | 35.1   | 37.5   | 32.6   | 32.3   | 63.4   | 47.8   | 38.6  |
| 69.1  | 58.2  | 53.7   | 54.0   | 67.7   | 56.5   | 72.1   | 96.5   | 45.8  |
| 2.3   | 2.1   | 1.0    | 0.9    | 2.3    | 2.2    | 1.8    | 1.5    | 1.1   |
| 5.0   | 3.1   | 1.5    | 1.2    | 2.5    | 0.9    | 1.7    | 1.8    | 1.4   |
| 1.2   | 2.5   | 1.0    | 1.2    | 5.7    | 1.8    | 0.7    | 4.6    | 0.9   |
| 9.0   | 5.0   | 1.8    | 4.2    | 1.9    | 1.3    | 2.0    | 2.7    | 4.2   |
| 1.9   | 1.9   | 1.0    | 9.4    | 6.6    | 1.4    | 2.9    | 4.7    | 2.9   |
| 26.6  | 14.0  | 15.9   | 15.8   | 16.8   | 13.4   | 16.4   | 13.0   | 17.8  |
| 11.1  | 8.2   | 7.6    | 13.4   | 6.3    | 5.6    | 5.4    | 7.4    | 12.8  |
| 17.7  | 18.9  | 23.3   | 30.5   | 24.0   | 28.4   | 33.8   | 29.8   | 33.0  |
| 1.0   | 1.9   | 1.5    | 1.4    | 0.8    | 2.2    | 1.3    | 2.7    | 2.2   |
| 1.0   | 2.2   | 3.4    | 1.0    | 0.9    | 3.8    | 1.1    | 1.3    | 0.4   |
| 3.8   | 3.0   | 2.2    | 1.2    | 1.9    | 2.0    | 0.9    | 3.5    | 1.3   |
| 1.2   | 7.1   | 1.5    | 9.9    | 2.7    | 0.7    | 6.2    | 6.4    | 11.5  |
| 1.2   | 0.6   | 0.6    | 1.2    | 0.6    | 1.3    | 0.9    | 0.6    | 0.7   |
| 27.4  | 25.3  | 20.5   | 25.3   | 24.2   | 23.1   | 28.4   | 35.7   | 28.9  |
| 0.8   | 0.3   | 3.1    | 0.3    | 0.2    | 0.4    | 0.3    | 2.2    | 0.3   |
| 4.9   | 4.1   | 4.1    | 0.7    | 6.3    | 1.4    | 2.1    | 1.0    | 2.8   |
| 2.1   | 3.9   | 3.0    | 4.0    | 1.6    | 3.8    | 1.4    | 1.8    | 3.1   |
| 10.1  | 1.4   | 4.4    | 12.4   | 3.6    | 3.4    | 3.5    | 5.0    | 2.9   |

|       |       |       |       |       |       |       |       |       |
|-------|-------|-------|-------|-------|-------|-------|-------|-------|
| 10.6  | 7.8   | 5.1   | 1.7   | 3.8   | 2.2   | 3.1   | 1.8   | 4.6   |
| 125.2 | 83.4  | 98.4  | 108.8 | 106.7 | 98.2  | 131.2 | 129.9 | 121.6 |
| 6.9   | 8.7   | 9.7   | 8.3   | 8.7   | 9.9   | 12.9  | 16.9  | 8.5   |
| 5.2   | 6.8   | 4.5   | 4.4   | 4.9   | 5.8   | 11.3  | 6.4   | 9.0   |
| 2.4   | 0.5   | 4.4   | 0.6   | 2.2   | 0.9   | 0.7   | 0.7   | 4.9   |
| 23.5  | 22.8  | 23.4  | 30.0  | 15.6  | 21.6  | 31.1  | 27.0  | 14.4  |
| 23.8  | 17.2  | 10.6  | 27.8  | 16.1  | 5.3   | 8.9   | 25.9  | 16.2  |
| 1.5   | 4.8   | 5.1   | 9.8   | 8.3   | 3.4   | 2.5   | 9.7   | 2.6   |
| 1.3   | 5.7   | 1.8   | 3.2   | 6.9   | 2.7   | 1.4   | 2.7   | 2.3   |
| 8.0   | 18.8  | 3.5   | 5.2   | 8.7   | 8.7   | 8.2   | 11.8  | 6.2   |
| 3.0   | 1.8   | 2.6   | 1.2   | 1.3   | 2.2   | 2.3   | 1.9   | 1.7   |
| 215.1 | 159.4 | 180.3 | 169.8 | 207.1 | 177.7 | 262.8 | 262.7 | 164.9 |
| 13.9  | 20.0  | 7.7   | 11.6  | 17.7  | 14.5  | 18.2  | 21.8  | 5.9   |
| 0.3   | 0.1   | 0.2   | 2.5   | 1.0   | 0.2   | 0.4   | 2.6   | 0.1   |
| 5.5   | 1.6   | 1.2   | 1.2   | 0.7   | 8.4   | 5.1   | 0.8   | 1.0   |
| 9.1   | 5.3   | 10.7  | 8.6   | 9.3   | 6.8   | 17.2  | 13.0  | 8.3   |
| 2.7   | 0.9   | 5.7   | 3.0   | 6.1   | 3.8   | 10.2  | 6.3   | 9.9   |
| 0.8   | 6.1   | 1.9   | 5.9   | 3.8   | 2.5   | 6.5   | 8.3   | 10.8  |
| 4.1   | 17.2  | 3.7   | 9.1   | 20.9  | 5.2   | 5.2   | 4.6   | 17.7  |
| 12.1  | 6.6   | 9.6   | 10.9  | 11.9  | 12.8  | 15.0  | 20.1  | 8.0   |
| 2.7   | 4.0   | 4.3   | 4.5   | 2.7   | 8.2   | 7.2   | 7.8   | 6.3   |
| 1.0   | 3.2   | 3.6   | 2.3   | 3.2   | 4.8   | 3.3   | 4.8   | 1.2   |
| 0.6   | 2.1   | 0.5   | 0.5   | 7.7   | 0.8   | 6.9   | 0.9   | 0.4   |
| 1.7   | 4.5   | 2.7   | 1.7   | 1.8   | 2.1   | 1.7   | 1.9   | 3.6   |
| 13.4  | 13.6  | 1.0   | 3.7   | 2.7   | 12.8  | 2.1   | 5.1   | 3.2   |
| 8.4   | 3.5   | 5.9   | 9.8   | 7.0   | 6.4   | 8.0   | 19.0  | 7.5   |
| 1.2   | 1.2   | 1.6   | 1.4   | 1.6   | 1.6   | 2.9   | 1.6   | 1.8   |
| 2.1   | 0.3   | 0.9   | 0.5   | 4.6   | 3.3   | 4.3   | 1.4   | 3.4   |
| 4.1   | 8.6   | 1.3   | 1.2   | 10.8  | 3.8   | 6.4   | 1.1   | 6.4   |
| 2.0   | 2.2   | 0.5   | 0.4   | 2.3   | 1.2   | 2.1   | 4.0   | 1.6   |
| 8.4   | 12.2  | 9.6   | 9.1   | 9.2   | 5.1   | 10.6  | 11.1  | 9.7   |
| 1.4   | 12.9  | 4.2   | 10.2  | 6.0   | 3.8   | 12.0  | 8.1   | 10.7  |
| 0.9   | 0.7   | 4.1   | 3.7   | 2.8   | 4.0   | 11.5  | 13.7  | 6.7   |
| 0.7   | 4.9   | 1.9   | 1.3   | 0.5   | 0.9   | 2.2   | 3.5   | 1.2   |
| 0.4   | 1.9   | 0.4   | 0.8   | 1.0   | 1.2   | 4.1   | 0.8   | 0.3   |
| 0.4   | 0.6   | 0.4   | 0.7   | 0.4   | 0.5   | 0.4   | 0.3   | 0.3   |
| 6.4   | 6.0   | 4.7   | 7.2   | 9.1   | 7.0   | 10.8  | 8.4   | 5.0   |
| 11.4  | 7.1   | 1.1   | 12.6  | 15.8  | 11.3  | 11.7  | 14.0  | 12.1  |
| 8.2   | 8.3   | 1.2   | 5.4   | 6.8   | 1.6   | 9.5   | 4.5   | 9.0   |
| 1.3   | 0.9   | 4.7   | 1.4   | 1.4   | 0.8   | 1.2   | 1.6   | 1.8   |
| 1.7   | 8.2   | 3.0   | 2.7   | 2.8   | 4.1   | 11.6  | 4.8   | 1.0   |
| 7.6   | 1.8   | 7.8   | 4.0   | 4.5   | 6.1   | 1.0   | 8.9   | 1.8   |
| 1.8   | 0.6   | 10.4  | 2.1   | 3.6   | 1.8   | 5.1   | 5.1   | 1.7   |
| 6.4   | 3.4   | 6.5   | 3.5   | 6.3   | 0.7   | 9.0   | 8.4   | 7.0   |
| 8.1   | 13.2  | 6.5   | 14.4  | 1.8   | 3.1   | 6.0   | 7.8   | 7.4   |
| 6.6   | 1.2   | 1.0   | 2.4   | 1.5   | 1.3   | 0.4   | 0.9   | 4.7   |
| 1.2   | 2.8   | 0.7   | 2.9   | 2.6   | 6.7   | 1.0   | 2.2   | 5.0   |
| 6.2   | 7.3   | 15.6  | 8.6   | 15.5  | 11.0  | 8.5   | 17.0  | 15.0  |
| 2.1   | 2.4   | 2.6   | 4.0   | 3.7   | 0.5   | 8.3   | 9.8   | 3.0   |
| 19.0  | 9.1   | 14.4  | 8.8   | 10.6  | 13.5  | 13.6  | 20.0  | 15.9  |
| 8.1   | 7.8   | 0.8   | 0.6   | 1.4   | 0.5   | 5.5   | 1.8   | 0.9   |
| 0.5   | 4.8   | 2.9   | 1.8   | 4.2   | 2.9   | 0.5   | 7.2   | 4.0   |
| 3.0   | 3.3   | 8.4   | 1.3   | 2.2   | 0.8   | 6.3   | 11.9  | 5.3   |

|       |       |        |        |        |        |        |        |       |
|-------|-------|--------|--------|--------|--------|--------|--------|-------|
| 4.1   | 3.1   | 2.4    | 0.3    | 0.6    | 0.9    | 4.3    | 6.6    | 0.7   |
| 0.9   | 0.7   | 1.3    | 1.3    | 1.3    | 1.3    | 1.5    | 1.0    | 1.9   |
| 837.0 | 885.2 | 1078.8 | 1002.7 | 1073.2 | 1071.9 | 1341.7 | 1470.3 | 882.0 |
| 11.9  | 13.2  | 15.9   | 17.8   | 3.3    | 11.7   | 11.3   | 16.2   | 5.7   |
| 50.8  | 41.3  | 19.6   | 26.5   | 43.6   | 39.5   | 51.6   | 42.0   | 56.2  |
| 0.7   | 0.7   | 0.4    | 0.4    | 1.3    | 0.7    | 0.7    | 0.4    | 0.1   |
| 2.2   | 1.2   | 1.8    | 3.7    | 5.0    | 5.5    | 4.0    | 6.8    | 4.7   |
| 6.5   | 1.5   | 6.9    | 8.2    | 10.7   | 5.2    | 2.8    | 9.5    | 4.8   |
| 1.7   | 0.6   | 0.9    | 1.0    | 0.7    | 1.2    | 1.7    | 1.5    | 0.8   |
| 1.4   | 1.1   | 1.4    | 1.2    | 1.2    | 0.9    | 0.8    | 1.5    | 0.5   |
| 1.1   | 3.6   | 0.8    | 9.6    | 0.6    | 1.5    | 4.9    | 1.4    | 1.4   |
| 0.2   | 0.2   | 0.4    | 0.2    | 0.5    | 1.2    | 4.0    | 0.4    | 1.7   |
| 39.8  | 38.0  | 32.0   | 32.5   | 34.6   | 33.8   | 49.2   | 67.4   | 51.1  |
| 6.8   | 2.6   | 4.1    | 6.0    | 1.7    | 1.8    | 5.9    | 6.1    | 1.4   |
| 452.5 | 251.3 | 335.1  | 337.1  | 295.6  | 319.9  | 357.5  | 451.8  | 283.1 |
| 35.4  | 22.4  | 20.2   | 26.8   | 22.2   | 27.2   | 37.2   | 46.4   | 26.3  |
| 23.5  | 17.3  | 18.8   | 12.8   | 21.1   | 16.4   | 15.9   | 24.7   | 19.0  |
| 1.5   | 2.8   | 2.5    | 3.2    | 1.4    | 4.3    | 10.8   | 1.5    | 1.8   |
| 8.2   | 5.4   | 1.2    | 1.0    | 1.6    | 6.7    | 6.4    | 1.6    | 7.0   |
| 3.8   | 8.6   | 6.8    | 2.1    | 1.1    | 0.8    | 0.3    | 1.2    | 4.6   |
| 9.9   | 3.7   | 0.9    | 3.2    | 3.6    | 8.0    | 3.3    | 4.3    | 0.5   |
| 73.1  | 29.6  | 47.9   | 58.9   | 36.0   | 31.2   | 59.9   | 59.1   | 58.9  |
| 0.8   | 0.9   | 7.6    | 2.4    | 1.1    | 2.0    | 1.1    | 1.2    | 4.2   |
| 1.4   | 1.0   | 2.7    | 1.7    | 3.0    | 1.2    | 1.4    | 1.7    | 1.3   |
| 11.9  | 13.5  | 19.0   | 26.1   | 17.0   | 35.9   | 22.4   | 30.2   | 12.3  |
| 2.5   | 5.7   | 5.3    | 7.1    | 6.1    | 3.2    | 6.5    | 5.5    | 4.3   |
| 4.9   | 11.5  | 0.8    | 3.7    | 3.5    | 3.0    | 4.4    | 14.6   | 19.6  |
| 6.2   | 2.8   | 5.6    | 3.3    | 8.5    | 9.3    | 8.3    | 6.8    | 4.4   |
| 23.4  | 21.0  | 17.0   | 15.8   | 19.4   | 32.4   | 23.4   | 34.8   | 28.8  |
| 3.6   | 1.1   | 3.1    | 3.4    | 1.6    | 1.1    | 3.2    | 4.3    | 4.1   |
| 96.7  | 58.7  | 49.9   | 58.7   | 65.7   | 69.5   | 104.1  | 136.1  | 127.6 |
| 0.3   | 0.5   | 1.1    | 0.6    | 1.1    | 2.5    | 2.6    | 1.2    | 0.5   |
| 3.6   | 5.9   | 0.6    | 7.6    | 6.3    | 4.7    | 2.7    | 0.5    | 0.9   |
| 8.3   | 10.5  | 10.7   | 10.6   | 10.7   | 7.0    | 10.7   | 19.1   | 6.4   |
| 0.2   | 0.2   | 6.5    | 0.8    | 3.7    | 1.8    | 2.1    | 2.4    | 2.4   |
| 1.8   | 1.7   | 2.1    | 4.0    | 3.9    | 2.4    | 1.5    | 5.5    | 3.1   |
| 436.6 | 257.6 | 288.5  | 317.1  | 277.2  | 265.6  | 343.6  | 338.8  | 341.1 |
| 0.3   | 1.0   | 1.2    | 7.6    | 2.3    | 1.1    | 2.8    | 1.2    | 1.0   |
| 6.8   | 5.4   | 4.6    | 5.8    | 3.7    | 10.6   | 5.6    | 6.5    | 4.3   |
| 9.8   | 3.1   | 7.9    | 5.9    | 5.6    | 6.9    | 5.8    | 8.2    | 5.6   |
| 13.3  | 6.1   | 8.8    | 4.4    | 11.5   | 13.1   | 10.6   | 8.1    | 10.8  |
| 0.9   | 4.6   | 1.1    | 1.0    | 5.3    | 3.8    | 0.9    | 5.4    | 7.9   |
| 6.0   | 7.7   | 6.9    | 2.6    | 6.3    | 7.4    | 9.9    | 10.3   | 8.2   |
| 2.3   | 1.1   | 5.9    | 2.5    | 1.5    | 1.1    | 2.4    | 2.5    | 0.8   |
| 0.3   | 1.4   | 0.5    | 1.1    | 0.8    | 0.4    | 1.9    | 0.8    | 0.9   |
| 1.2   | 3.4   | 1.2    | 3.5    | 1.3    | 3.0    | 1.6    | 1.9    | 1.6   |
| 9.1   | 5.6   | 8.1    | 2.1    | 1.6    | 3.1    | 3.1    | 4.6    | 10.0  |
| 8.3   | 8.8   | 4.6    | 3.0    | 11.6   | 7.3    | 8.1    | 8.8    | 11.4  |
| 2.0   | 5.4   | 1.8    | 5.0    | 3.5    | 4.0    | 0.6    | 0.8    | 0.2   |
| 0.7   | 0.4   | 0.7    | 0.5    | 1.9    | 3.2    | 0.9    | 3.1    | 3.3   |
| 43.2  | 40.1  | 32.2   | 34.9   | 29.3   | 33.0   | 41.6   | 52.8   | 27.4  |
| 0.8   | 1.5   | 0.6    | 0.8    | 1.6    | 0.8    | 1.6    | 1.5    | 0.8   |
| 5.3   | 1.8   | 3.7    | 2.1    | 1.5    | 2.6    | 8.8    | 10.2   | 1.9   |

|        |        |        |        |        |        |        |        |        |
|--------|--------|--------|--------|--------|--------|--------|--------|--------|
| 13.2   | 1.6    | 4.9    | 1.4    | 1.7    | 8.6    | 1.6    | 9.1    | 6.9    |
| 2.7    | 0.5    | 0.6    | 1.4    | 5.4    | 3.6    | 0.7    | 1.9    | 2.9    |
| 258.1  | 210.2  | 192.5  | 233.9  | 259.4  | 221.4  | 334.1  | 349.3  | 329.3  |
| 316.2  | 186.8  | 233.7  | 254.1  | 259.7  | 284.0  | 358.3  | 440.8  | 217.7  |
| 0.3    | 0.4    | 3.8    | 0.5    | 1.1    | 0.9    | 0.8    | 2.7    | 0.9    |
| 4.3    | 4.5    | 5.0    | 5.5    | 7.2    | 5.0    | 7.5    | 7.4    | 8.8    |
| 1.8    | 1.4    | 1.6    | 2.9    | 6.6    | 7.1    | 9.0    | 1.7    | 1.7    |
| 1.2    | 0.4    | 0.5    | 0.3    | 0.7    | 0.9    | 0.8    | 0.6    | 1.2    |
| 0.8    | 0.7    | 3.5    | 3.7    | 1.3    | 2.6    | 1.2    | 0.4    | 1.1    |
| 114.1  | 26.7   | 26.3   | 27.6   | 32.6   | 39.3   | 46.2   | 72.6   | 44.3   |
| 11.5   | 5.9    | 9.4    | 2.7    | 6.1    | 5.6    | 6.1    | 5.5    | 7.9    |
| 0.3    | 1.0    | 0.3    | 0.3    | 0.5    | 0.6    | 0.5    | 0.5    | 1.1    |
| 7.1    | 7.2    | 8.9    | 8.0    | 5.5    | 7.9    | 7.6    | 14.9   | 3.9    |
| 6.6    | 2.8    | 5.3    | 1.8    | 7.5    | 7.2    | 4.7    | 10.4   | 8.5    |
| 9.5    | 8.9    | 6.1    | 0.9    | 10.4   | 2.0    | 17.2   | 9.1    | 12.9   |
| 9.6    | 5.4    | 4.6    | 2.8    | 3.8    | 4.4    | 6.0    | 5.9    | 6.3    |
| 1.3    | 7.3    | 1.1    | 0.9    | 1.0    | 4.4    | 9.2    | 5.8    | 1.5    |
| 1.0    | 4.1    | 0.4    | 2.2    | 0.9    | 1.3    | 1.3    | 0.8    | 0.8    |
| 0.2    | 0.8    | 0.1    | 0.3    | 0.7    | 3.2    | 0.2    | 0.6    | 0.5    |
| 11.4   | 13.6   | 9.9    | 8.8    | 11.4   | 9.6    | 12.0   | 12.1   | 14.3   |
| 0.5    | 0.9    | 4.0    | 1.1    | 0.9    | 4.9    | 1.5    | 7.2    | 2.3    |
| 1545.9 | 1087.4 | 1283.1 | 1333.7 | 1275.1 | 1231.9 | 1638.9 | 1543.8 | 1709.9 |
| 34.5   | 16.4   | 24.1   | 23.7   | 23.1   | 33.1   | 28.5   | 61.2   | 26.2   |
| 200.9  | 149.5  | 124.4  | 139.1  | 154.2  | 147.8  | 212.6  | 232.8  | 164.7  |
| 0.6    | 1.5    | 1.7    | 2.2    | 1.0    | 1.5    | 5.4    | 1.6    | 4.5    |
| 1.5    | 4.0    | 3.7    | 5.5    | 3.5    | 3.5    | 19.0   | 4.5    | 6.3    |
| 525.7  | 264.7  | 366.0  | 376.5  | 344.6  | 368.2  | 475.2  | 495.8  | 322.6  |
| 13.6   | 11.4   | 1.5    | 7.4    | 11.4   | 9.1    | 6.0    | 9.2    | 7.6    |
| 30.0   | 21.4   | 28.9   | 24.4   | 26.1   | 26.1   | 41.1   | 39.7   | 27.8   |
| 55.5   | 32.7   | 28.9   | 49.7   | 36.9   | 38.3   | 59.2   | 45.5   | 40.0   |
| 0.4    | 0.5    | 0.8    | 0.5    | 0.8    | 0.2    | 0.7    | 1.5    | 0.6    |
| 12.2   | 1.3    | 3.9    | 6.5    | 2.1    | 6.7    | 1.6    | 11.7   | 1.5    |
| 348.6  | 192.9  | 199.0  | 231.3  | 236.7  | 229.1  | 389.3  | 416.3  | 302.4  |
| 0.4    | 0.4    | 1.1    | 0.5    | 0.4    | 0.8    | 1.0    | 0.4    | 4.4    |
| 1.0    | 0.9    | 4.0    | 0.6    | 0.9    | 3.0    | 5.1    | 1.6    | 0.6    |
| 69.0   | 148.8  | 143.9  | 140.4  | 157.5  | 134.9  | 245.4  | 202.7  | 127.7  |
| 4.0    | 1.9    | 3.6    | 9.2    | 1.1    | 1.0    | 1.3    | 1.0    | 0.5    |
| 1.6    | 2.9    | 2.2    | 0.5    | 0.3    | 4.3    | 2.4    | 0.8    | 1.6    |
| 10.9   | 8.9    | 6.1    | 7.9    | 8.0    | 5.1    | 7.0    | 5.9    | 6.5    |
| 5.6    | 2.4    | 6.5    | 1.2    | 6.8    | 1.1    | 0.8    | 5.9    | 0.8    |
| 15.5   | 8.8    | 8.4    | 5.2    | 5.8    | 7.5    | 8.7    | 13.4   | 8.7    |
| 1.9    | 0.5    | 1.1    | 1.3    | 4.2    | 0.5    | 1.1    | 0.6    | 1.5    |
| 5.5    | 8.4    | 0.9    | 1.6    | 1.8    | 1.6    | 1.7    | 7.3    | 7.2    |
| 0.7    | 5.5    | 0.4    | 0.4    | 0.4    | 0.4    | 0.4    | 0.4    | 0.9    |
| 9.1    | 11.6   | 6.5    | 8.6    | 0.9    | 11.5   | 14.9   | 11.2   | 4.7    |
| 0.4    | 1.1    | 0.9    | 0.5    | 0.4    | 1.3    | 0.5    | 1.3    | 0.8    |
| 0.7    | 6.7    | 5.2    | 3.8    | 1.3    | 1.0    | 1.4    | 1.8    | 5.2    |
| 1.6    | 1.6    | 1.3    | 1.4    | 1.0    | 1.6    | 0.9    | 1.5    | 1.1    |
| 388.3  | 319.0  | 354.1  | 333.1  | 429.6  | 328.1  | 517.4  | 506.6  | 468.0  |
| 1.4    | 0.8    | 1.1    | 3.0    | 4.5    | 5.8    | 3.4    | 0.6    | 3.2    |
| 4.7    | 0.7    | 1.3    | 0.8    | 0.6    | 3.9    | 0.5    | 1.9    | 1.0    |
| 3.0    | 3.0    | 3.2    | 4.4    | 4.7    | 4.6    | 0.5    | 0.5    | 5.9    |
| 0.3    | 0.3    | 0.5    | 0.5    | 0.4    | 0.3    | 5.4    | 0.4    | 0.8    |



|       |       |       |       |       |       |       |        |       |
|-------|-------|-------|-------|-------|-------|-------|--------|-------|
| 3.6   | 1.0   | 1.2   | 0.5   | 1.3   | 1.6   | 0.7   | 1.7    | 1.1   |
| 1.1   | 1.6   | 1.2   | 1.1   | 1.5   | 1.3   | 1.0   | 1.1    | 1.5   |
| 0.3   | 1.2   | 0.1   | 1.1   | 0.3   | 0.3   | 1.4   | 0.5    | 0.2   |
| 7.2   | 6.3   | 6.0   | 4.5   | 7.3   | 10.5  | 7.0   | 8.5    | 3.3   |
| 0.9   | 0.8   | 0.7   | 0.7   | 3.0   | 4.8   | 1.3   | 3.5    | 1.3   |
| 0.4   | 1.3   | 0.6   | 2.3   | 1.2   | 2.4   | 0.4   | 1.4    | 0.3   |
| 14.2  | 8.2   | 7.5   | 15.7  | 10.4  | 7.0   | 34.5  | 18.4   | 10.5  |
| 0.2   | 2.0   | 2.0   | 2.0   | 0.1   | 2.0   | 1.6   | 1.9    | 1.9   |
| 2.3   | 0.6   | 2.4   | 0.9   | 5.2   | 6.0   | 6.3   | 1.1    | 3.3   |
| 6.8   | 0.9   | 1.4   | 0.4   | 1.7   | 2.8   | 0.5   | 0.8    | 0.9   |
| 69.7  | 46.0  | 53.9  | 58.1  | 45.5  | 52.4  | 76.0  | 74.0   | 81.9  |
| 0.9   | 1.6   | 2.2   | 0.9   | 0.7   | 1.8   | 4.7   | 3.3    | 1.4   |
| 8.7   | 2.2   | 2.2   | 2.6   | 8.1   | 7.1   | 8.4   | 8.8    | 7.9   |
| 0.9   | 0.8   | 0.3   | 0.4   | 0.8   | 0.3   | 0.5   | 1.1    | 0.7   |
| 0.7   | 0.5   | 0.4   | 0.7   | 1.6   | 1.2   | 0.4   | 0.6    | 2.0   |
| 1.4   | 1.1   | 0.9   | 1.5   | 1.2   | 1.0   | 1.1   | 6.4    | 1.8   |
| 1.3   | 11.6  | 24.4  | 20.8  | 19.9  | 20.9  | 19.4  | 18.1   | 20.2  |
| 4.4   | 2.9   | 1.6   | 1.2   | 2.3   | 4.2   | 9.3   | 1.9    | 7.4   |
| 8.7   | 7.7   | 10.9  | 8.1   | 10.9  | 10.9  | 12.1  | 17.3   | 11.5  |
| 59.2  | 38.5  | 43.6  | 53.3  | 60.0  | 50.8  | 75.7  | 64.4   | 41.4  |
| 11.3  | 8.5   | 11.9  | 8.4   | 9.8   | 12.0  | 7.9   | 8.8    | 9.5   |
| 10.1  | 1.4   | 1.3   | 1.3   | 8.8   | 5.1   | 1.7   | 1.4    | 6.0   |
| 8.3   | 5.6   | 0.9   | 4.5   | 6.3   | 6.9   | 8.5   | 8.0    | 7.2   |
| 1.9   | 4.0   | 5.3   | 3.8   | 1.6   | 6.3   | 4.1   | 8.9    | 4.8   |
| 0.7   | 1.7   | 0.5   | 0.7   | 0.9   | 0.4   | 1.5   | 1.3    | 5.7   |
| 21.9  | 17.6  | 10.3  | 18.9  | 14.0  | 17.3  | 31.6  | 33.9   | 21.9  |
| 69.4  | 45.4  | 62.3  | 53.8  | 60.0  | 53.3  | 63.4  | 72.4   | 58.7  |
| 36.7  | 16.1  | 16.0  | 23.1  | 31.3  | 25.1  | 25.2  | 32.8   | 23.1  |
| 60.9  | 33.8  | 50.4  | 37.5  | 34.6  | 50.2  | 58.8  | 55.9   | 73.6  |
| 19.6  | 2.6   | 20.0  | 15.9  | 20.2  | 15.5  | 20.2  | 24.6   | 14.3  |
| 2.7   | 2.1   | 2.1   | 1.7   | 1.5   | 7.0   | 11.5  | 3.2    | 2.5   |
| 798.2 | 537.1 | 549.0 | 644.7 | 622.3 | 637.7 | 955.1 | 1124.0 | 872.9 |
| 1.9   | 0.4   | 2.7   | 0.5   | 0.3   | 2.8   | 4.2   | 3.3    | 4.3   |
| 0.6   | 0.6   | 0.5   | 0.5   | 0.7   | 0.9   | 0.9   | 7.0    | 2.6   |
| 0.7   | 1.5   | 1.7   | 1.0   | 0.8   | 1.8   | 1.1   | 1.4    | 1.3   |
| 1.1   | 0.9   | 0.9   | 1.4   | 1.2   | 1.3   | 2.9   | 3.6    | 1.9   |
| 7.0   | 5.7   | 5.6   | 1.1   | 1.1   | 4.6   | 1.4   | 4.5    | 2.5   |
| 0.3   | 0.4   | 0.4   | 0.3   | 0.5   | 0.4   | 0.6   | 0.4    | 0.3   |
| 18.4  | 10.1  | 2.4   | 8.2   | 7.4   | 5.3   | 10.9  | 7.0    | 12.2  |
| 5.2   | 2.4   | 1.7   | 2.2   | 0.7   | 0.3   | 4.2   | 2.9    | 3.5   |
| 0.6   | 2.3   | 1.6   | 4.1   | 0.6   | 0.2   | 0.7   | 0.2    | 0.3   |
| 71.6  | 49.9  | 59.4  | 71.6  | 57.9  | 64.2  | 80.2  | 81.0   | 59.5  |
| 0.5   | 0.3   | 2.4   | 0.4   | 1.2   | 1.2   | 0.8   | 0.6    | 0.7   |
| 4.0   | 1.8   | 4.7   | 3.0   | 1.7   | 7.1   | 3.6   | 4.7    | 3.0   |
| 3.0   | 9.3   | 3.6   | 4.2   | 3.7   | 1.4   | 1.3   | 6.9    | 1.0   |
| 4.9   | 2.0   | 5.2   | 2.0   | 3.1   | 0.9   | 6.0   | 4.9    | 0.4   |
| 7.5   | 6.9   | 1.3   | 4.6   | 2.8   | 5.7   | 4.5   | 14.9   | 6.0   |
| 12.1  | 16.9  | 12.3  | 18.7  | 20.2  | 29.5  | 29.2  | 22.6   | 17.4  |
| 1.3   | 1.3   | 0.9   | 0.8   | 0.9   | 0.8   | 1.0   | 1.4    | 0.9   |
| 4.5   | 7.6   | 1.4   | 13.3  | 7.8   | 7.3   | 1.4   | 1.3    | 3.1   |
| 41.8  | 32.6  | 36.1  | 35.5  | 31.2  | 26.5  | 43.5  | 65.4   | 32.3  |
| 0.3   | 0.3   | 0.1   | 1.6   | 1.0   | 4.8   | 0.6   | 1.5    | 3.4   |
| 1.0   | 0.5   | 2.1   | 2.3   | 2.7   | 11.8  | 5.1   | 0.8    | 2.4   |

|       |       |       |       |       |       |       |       |       |
|-------|-------|-------|-------|-------|-------|-------|-------|-------|
| 0.2   | 7.5   | 2.1   | 0.8   | 2.1   | 0.6   | 0.3   | 0.6   | 0.8   |
| 1.4   | 2.0   | 2.0   | 0.8   | 1.4   | 1.5   | 1.9   | 3.2   | 1.0   |
| 153.3 | 224.4 | 344.4 | 341.8 | 379.8 | 397.9 | 437.2 | 523.4 | 406.2 |
| 5.6   | 0.9   | 2.7   | 0.4   | 4.1   | 0.1   | 0.4   | 1.0   | 5.1   |
| 0.9   | 3.7   | 1.4   | 5.3   | 5.3   | 1.1   | 7.0   | 6.2   | 5.8   |
| 1.8   | 1.8   | 0.9   | 4.5   | 1.9   | 1.9   | 7.0   | 2.6   | 2.1   |
| 1.4   | 1.1   | 6.3   | 0.8   | 7.6   | 6.0   | 6.4   | 6.6   | 9.7   |
| 40.8  | 29.8  | 41.1  | 40.2  | 48.2  | 33.8  | 47.6  | 42.8  | 44.5  |
| 6.3   | 1.8   | 13.3  | 2.2   | 2.3   | 6.2   | 4.0   | 15.1  | 9.9   |
| 506.1 | 275.8 | 309.7 | 313.9 | 361.3 | 342.5 | 499.2 | 614.5 | 361.5 |
| 1.5   | 0.9   | 0.8   | 1.0   | 1.7   | 0.9   | 0.9   | 1.0   | 0.6   |
| 44.1  | 39.3  | 42.5  | 49.2  | 47.4  | 40.2  | 79.9  | 77.4  | 74.4  |
| 9.1   | 13.1  | 6.8   | 4.4   | 14.1  | 2.6   | 15.6  | 13.8  | 14.6  |
| 0.9   | 10.0  | 5.3   | 0.8   | 1.5   | 1.9   | 8.5   | 5.9   | 2.1   |
| 7.3   | 3.9   | 7.9   | 4.1   | 4.6   | 6.1   | 7.8   | 10.0  | 3.6   |
| 0.3   | 1.0   | 0.1   | 2.0   | 0.8   | 1.0   | 0.6   | 2.6   | 0.6   |
| 1.0   | 7.4   | 3.1   | 0.4   | 4.1   | 1.6   | 2.7   | 5.0   | 3.9   |
| 1.0   | 0.4   | 0.9   | 0.4   | 0.5   | 0.3   | 0.2   | 0.8   | 0.5   |
| 5.7   | 2.0   | 6.3   | 1.9   | 2.2   | 2.9   | 6.7   | 2.7   | 1.7   |
| 36.1  | 44.9  | 56.0  | 37.1  | 42.3  | 51.6  | 58.9  | 90.1  | 28.4  |
| 2.0   | 4.7   | 2.6   | 7.3   | 13.9  | 2.7   | 9.7   | 11.1  | 3.7   |
| 7.4   | 6.3   | 10.0  | 9.0   | 6.3   | 3.9   | 10.4  | 18.8  | 14.3  |
| 88.9  | 68.2  | 102.3 | 96.5  | 88.4  | 88.5  | 107.8 | 130.3 | 70.6  |
| 3.2   | 2.8   | 0.5   | 6.2   | 4.0   | 4.9   | 6.3   | 4.2   | 6.1   |
| 0.7   | 3.3   | 7.2   | 1.6   | 2.7   | 9.1   | 0.9   | 4.4   | 1.2   |
| 0.8   | 5.9   | 5.6   | 2.3   | 2.4   | 9.9   | 10.0  | 3.5   | 6.6   |
| 160.5 | 89.9  | 139.1 | 124.1 | 137.0 | 125.7 | 170.0 | 186.8 | 121.5 |
| 3.3   | 0.8   | 1.0   | 1.3   | 1.0   | 1.1   | 0.8   | 1.1   | 4.1   |
| 2.7   | 4.8   | 6.3   | 6.1   | 2.8   | 6.3   | 6.6   | 9.1   | 14.5  |
| 4.4   | 0.6   | 0.6   | 1.6   | 4.3   | 3.1   | 3.5   | 4.1   | 2.0   |
| 0.9   | 1.2   | 0.5   | 0.2   | 4.5   | 0.4   | 5.3   | 0.2   | 1.0   |
| 4.3   | 12.3  | 6.3   | 8.0   | 13.6  | 10.6  | 13.4  | 18.5  | 18.3  |
| 5.5   | 5.7   | 1.9   | 1.1   | 4.1   | 1.7   | 5.5   | 8.2   | 0.6   |
| 9.4   | 2.5   | 8.3   | 8.2   | 11.7  | 3.1   | 7.8   | 8.9   | 15.6  |
| 1.6   | 0.9   | 0.9   | 1.4   | 1.0   | 1.3   | 1.7   | 1.1   | 0.5   |
| 51.3  | 20.7  | 27.0  | 27.9  | 30.1  | 39.3  | 46.1  | 51.0  | 41.3  |
| 0.3   | 0.4   | 1.4   | 0.3   | 0.7   | 0.2   | 0.5   | 0.5   | 1.0   |
| 0.5   | 1.1   | 1.0   | 1.1   | 0.4   | 0.9   | 0.9   | 0.6   | 1.0   |
| 33.8  | 32.6  | 32.9  | 36.1  | 47.5  | 38.3  | 42.6  | 43.1  | 39.9  |
| 0.8   | 1.2   | 8.0   | 1.2   | 2.3   | 2.3   | 10.2  | 1.6   | 1.1   |
| 11.3  | 2.2   | 7.8   | 1.7   | 3.4   | 4.8   | 4.4   | 7.6   | 7.4   |
| 2.0   | 11.7  | 1.4   | 3.3   | 2.2   | 1.2   | 15.8  | 11.4  | 2.2   |
| 1.6   | 1.8   | 1.2   | 1.9   | 1.2   | 2.3   | 0.6   | 1.4   | 0.9   |
| 7.7   | 5.9   | 7.2   | 10.2  | 10.0  | 5.6   | 4.9   | 1.1   | 6.8   |
| 8.9   | 6.0   | 9.7   | 5.1   | 3.4   | 7.7   | 9.8   | 6.6   | 8.0   |
| 5.7   | 8.9   | 6.6   | 7.8   | 10.7  | 5.2   | 11.4  | 5.3   | 8.8   |
| 128.4 | 69.7  | 99.5  | 79.3  | 89.6  | 112.9 | 137.0 | 160.5 | 86.1  |
| 13.0  | 8.6   | 12.1  | 9.3   | 9.7   | 4.1   | 10.9  | 13.5  | 11.0  |
| 336.6 | 214.4 | 261.9 | 271.8 | 278.4 | 298.1 | 391.4 | 423.2 | 322.4 |
| 6.8   | 4.9   | 4.5   | 3.8   | 5.7   | 4.6   | 4.4   | 6.7   | 5.6   |
| 0.4   | 0.2   | 0.3   | 0.4   | 0.3   | 0.4   | 0.8   | 0.2   | 0.6   |
| 1.5   | 1.1   | 1.0   | 0.6   | 1.1   | 0.8   | 3.8   | 2.5   | 0.7   |
| 8.9   | 11.3  | 3.4   | 8.2   | 3.2   | 10.9  | 10.8  | 10.8  | 5.9   |

|       |       |       |       |       |       |       |       |       |
|-------|-------|-------|-------|-------|-------|-------|-------|-------|
| 19.6  | 14.6  | 19.3  | 12.7  | 16.9  | 10.2  | 22.3  | 28.6  | 12.7  |
| 169.5 | 132.0 | 139.6 | 145.5 | 132.9 | 130.7 | 185.4 | 189.1 | 125.1 |
| 16.2  | 12.3  | 8.2   | 9.4   | 13.5  | 12.6  | 16.9  | 9.2   | 9.7   |
| 1.7   | 2.8   | 4.7   | 2.1   | 9.0   | 6.6   | 5.2   | 4.8   | 2.1   |
| 48.4  | 33.5  | 44.8  | 40.5  | 48.4  | 44.0  | 80.4  | 98.1  | 53.7  |
| 10.9  | 4.4   | 4.4   | 2.2   | 10.8  | 5.3   | 11.2  | 19.2  | 4.1   |
| 0.8   | 0.5   | 1.0   | 0.5   | 1.2   | 5.8   | 1.1   | 2.7   | 0.7   |
| 101.5 | 91.7  | 90.7  | 104.8 | 84.0  | 104.2 | 121.5 | 118.3 | 105.3 |
| 10.3  | 4.7   | 9.2   | 8.1   | 14.3  | 2.0   | 7.3   | 10.7  | 3.6   |
| 0.3   | 0.6   | 1.1   | 0.2   | 1.1   | 0.3   | 0.2   | 0.2   | 0.2   |
| 5.5   | 4.2   | 4.9   | 4.1   | 3.4   | 5.4   | 2.1   | 9.2   | 2.3   |
| 10.3  | 10.3  | 12.7  | 3.7   | 7.9   | 6.2   | 14.7  | 4.7   | 9.9   |
| 2.0   | 4.5   | 4.8   | 8.3   | 2.1   | 1.6   | 11.2  | 2.3   | 6.8   |
| 8.2   | 6.2   | 7.3   | 2.4   | 2.1   | 4.6   | 1.8   | 2.4   | 1.8   |
| 40.2  | 28.1  | 35.7  | 29.2  | 27.4  | 19.3  | 39.0  | 51.8  | 39.0  |
| 8.6   | 1.1   | 3.8   | 1.2   | 0.8   | 0.5   | 1.4   | 1.5   | 3.4   |
| 0.8   | 2.8   | 2.3   | 2.3   | 3.4   | 4.6   | 0.4   | 1.3   | 3.6   |
| 5.4   | 6.5   | 14.4  | 6.8   | 8.6   | 9.1   | 2.1   | 16.8  | 11.4  |
| 26.2  | 18.9  | 21.9  | 13.1  | 16.0  | 20.1  | 25.1  | 30.4  | 23.9  |
| 38.0  | 28.3  | 16.9  | 25.9  | 23.5  | 37.1  | 36.1  | 44.4  | 36.0  |
| 8.4   | 9.0   | 11.9  | 10.5  | 13.6  | 7.7   | 7.7   | 13.4  | 9.4   |
| 7.2   | 2.0   | 4.1   | 4.9   | 3.2   | 1.1   | 7.3   | 6.5   | 8.0   |
| 7.9   | 7.2   | 6.9   | 5.4   | 4.7   | 5.8   | 1.7   | 5.3   | 5.0   |
| 0.4   | 1.2   | 1.0   | 6.2   | 3.2   | 4.3   | 0.9   | 5.1   | 1.4   |
| 1.2   | 0.3   | 0.6   | 0.4   | 0.6   | 2.7   | 0.3   | 0.8   | 1.4   |
| 4.4   | 0.9   | 1.6   | 1.2   | 2.4   | 2.9   | 1.3   | 1.4   | 1.2   |
| 56.7  | 27.7  | 37.6  | 53.0  | 47.9  | 46.2  | 60.7  | 66.7  | 48.1  |
| 1.4   | 7.8   | 9.6   | 2.2   | 1.2   | 3.3   | 1.0   | 7.2   | 7.3   |
| 0.5   | 0.8   | 0.8   | 1.7   | 1.0   | 0.4   | 0.2   | 2.9   | 1.5   |
| 4.9   | 1.2   | 0.8   | 0.2   | 2.4   | 3.7   | 6.3   | 3.8   | 4.9   |
| 1.9   | 5.8   | 1.7   | 1.4   | 3.8   | 5.3   | 1.0   | 1.6   | 0.5   |
| 0.5   | 0.8   | 0.4   | 0.6   | 0.7   | 0.7   | 0.7   | 0.7   | 0.8   |
| 0.5   | 0.3   | 1.7   | 0.4   | 0.6   | 0.4   | 0.8   | 1.7   | 0.5   |
| 16.9  | 15.0  | 9.4   | 14.2  | 12.4  | 23.0  | 19.5  | 17.6  | 14.1  |
| 12.7  | 10.3  | 10.0  | 9.8   | 10.7  | 10.1  | 14.2  | 11.8  | 6.1   |
| 0.8   | 0.4   | 0.4   | 0.6   | 0.5   | 2.1   | 0.5   | 1.1   | 2.4   |
| 10.1  | 11.8  | 5.5   | 2.9   | 10.8  | 8.0   | 5.2   | 12.6  | 9.4   |
| 4.0   | 1.0   | 1.0   | 1.6   | 2.0   | 1.8   | 3.0   | 2.6   | 1.7   |
| 280.9 | 325.6 | 297.3 | 381.2 | 343.1 | 338.8 | 424.3 | 409.7 | 376.8 |
| 0.7   | 0.6   | 0.6   | 0.6   | 4.4   | 3.6   | 2.3   | 1.5   | 1.2   |
| 7.0   | 16.1  | 5.0   | 14.1  | 9.6   | 9.6   | 16.4  | 19.9  | 13.2  |
| 0.4   | 0.5   | 2.2   | 0.3   | 0.7   | 0.4   | 0.8   | 1.0   | 0.4   |
| 0.8   | 0.6   | 0.7   | 0.8   | 0.8   | 0.7   | 1.0   | 0.7   | 0.5   |
| 0.8   | 4.5   | 3.7   | 0.4   | 3.6   | 2.0   | 3.7   | 1.6   | 3.7   |
| 29.7  | 20.5  | 22.9  | 27.3  | 23.8  | 16.3  | 36.1  | 39.2  | 25.6  |
| 0.4   | 0.8   | 1.9   | 2.6   | 6.0   | 6.8   | 1.2   | 2.7   | 7.8   |
| 0.1   | 1.1   | 0.2   | 0.2   | 1.2   | 0.2   | 1.3   | 0.4   | 0.1   |
| 13.8  | 8.7   | 9.1   | 12.9  | 8.9   | 17.1  | 19.1  | 20.2  | 18.2  |
| 0.6   | 0.5   | 1.0   | 0.8   | 0.5   | 1.4   | 1.5   | 0.9   | 0.7   |
| 3.7   | 1.0   | 1.2   | 2.9   | 3.9   | 0.8   | 7.7   | 1.2   | 5.3   |
| 109.1 | 93.6  | 95.6  | 112.2 | 123.7 | 100.4 | 144.5 | 133.1 | 129.0 |
| 64.4  | 37.3  | 46.9  | 38.0  | 46.2  | 42.8  | 61.9  | 82.6  | 77.7  |
| 1.3   | 0.5   | 0.5   | 0.5   | 0.6   | 1.0   | 3.3   | 0.7   | 0.9   |

|        |        |        |        |        |        |        |        |        |
|--------|--------|--------|--------|--------|--------|--------|--------|--------|
| 2.2    | 13.8   | 7.6    | 5.0    | 9.0    | 11.2   | 4.5    | 3.4    | 8.7    |
| 8.0    | 6.7    | 7.7    | 8.2    | 8.7    | 6.9    | 9.3    | 7.0    | 3.9    |
| 1.6    | 1.0    | 1.2    | 1.3    | 1.2    | 1.8    | 1.0    | 1.2    | 1.1    |
| 2.3    | 0.1    | 1.1    | 0.3    | 0.4    | 1.4    | 0.4    | 0.4    | 1.2    |
| 7.4    | 7.4    | 11.5   | 4.3    | 6.8    | 8.6    | 6.5    | 6.9    | 6.8    |
| 7.9    | 1.5    | 1.3    | 1.1    | 6.2    | 2.0    | 12.3   | 4.7    | 1.6    |
| 62.9   | 42.0   | 45.9   | 63.4   | 89.9   | 85.6   | 84.9   | 90.7   | 98.0   |
| 0.7    | 0.6    | 0.3    | 0.6    | 3.1    | 0.6    | 0.8    | 0.2    | 0.3    |
| 0.3    | 1.5    | 1.3    | 0.2    | 1.0    | 0.3    | 1.4    | 0.6    | 0.4    |
| 8.4    | 14.1   | 8.0    | 5.2    | 16.3   | 4.2    | 6.5    | 2.1    | 4.1    |
| 15.1   | 18.2   | 17.3   | 13.0   | 20.0   | 16.5   | 15.7   | 18.0   | 19.8   |
| 1.4    | 3.8    | 2.0    | 7.8    | 1.0    | 1.4    | 1.2    | 0.4    | 2.1    |
| 1751.4 | 1397.1 | 1450.3 | 1489.1 | 1478.0 | 1491.0 | 1866.1 | 1979.6 | 1331.9 |
| 6.3    | 3.6    | 8.8    | 9.0    | 11.2   | 8.6    | 3.4    | 8.5    | 4.6    |
| 5.6    | 6.4    | 1.7    | 7.5    | 1.7    | 3.4    | 1.2    | 0.7    | 3.2    |
| 11.4   | 11.5   | 9.6    | 5.4    | 8.7    | 6.7    | 8.7    | 7.9    | 4.6    |
| 9.1    | 2.4    | 2.9    | 0.8    | 0.4    | 5.5    | 0.7    | 6.6    | 6.6    |
| 0.6    | 1.1    | 1.4    | 8.2    | 1.5    | 6.2    | 7.9    | 2.1    | 1.7    |
| 77.6   | 83.6   | 96.9   | 100.1  | 109.5  | 88.9   | 202.9  | 198.0  | 131.1  |
| 12.9   | 6.1    | 11.1   | 1.7    | 7.1    | 7.5    | 3.1    | 11.3   | 12.4   |
| 0.3    | 0.5    | 6.5    | 6.1    | 0.8    | 0.3    | 3.7    | 2.1    | 0.4    |
| 2.2    | 5.9    | 4.7    | 10.7   | 9.7    | 1.1    | 7.1    | 12.5   | 0.4    |
| 245.7  | 345.7  | 313.3  | 316.9  | 359.3  | 320.0  | 700.3  | 590.5  | 374.7  |
| 2.7    | 4.3    | 1.1    | 0.5    | 1.4    | 2.1    | 1.0    | 1.6    | 1.2    |
| 0.2    | 0.9    | 1.1    | 2.0    | 0.2    | 0.9    | 0.2    | 0.2    | 2.1    |
| 15.1   | 1.3    | 2.7    | 2.0    | 2.1    | 2.5    | 9.8    | 9.3    | 1.5    |
| 2.4    | 1.1    | 4.3    | 1.3    | 2.8    | 6.1    | 1.1    | 2.4    | 2.4    |
| 3.0    | 2.3    | 2.8    | 3.4    | 3.7    | 1.6    | 1.8    | 4.3    | 1.9    |
| 0.4    | 0.4    | 0.4    | 0.3    | 0.8    | 0.5    | 0.4    | 0.7    | 0.3    |
| 3.9    | 1.7    | 1.6    | 1.2    | 1.2    | 2.5    | 1.9    | 0.8    | 1.7    |
| 6.6    | 2.5    | 15.1   | 4.1    | 4.6    | 4.0    | 2.7    | 12.6   | 2.2    |
| 7.1    | 0.4    | 0.6    | 4.5    | 1.0    | 3.6    | 3.9    | 8.6    | 3.9    |
| 0.5    | 0.7    | 0.6    | 0.9    | 0.4    | 0.9    | 1.1    | 0.7    | 0.7    |
| 3.2    | 1.6    | 6.2    | 1.1    | 6.8    | 1.9    | 0.9    | 1.6    | 2.9    |
| 1.2    | 2.2    | 1.0    | 2.0    | 1.2    | 0.8    | 9.4    | 4.4    | 5.7    |
| 668.8  | 421.7  | 303.5  | 339.8  | 398.0  | 353.8  | 654.2  | 614.9  | 482.8  |
| 72.6   | 23.8   | 36.9   | 45.9   | 42.0   | 52.2   | 62.3   | 74.8   | 43.8   |
| 3.1    | 1.7    | 0.6    | 2.2    | 2.2    | 9.3    | 1.2    | 2.5    | 0.8    |
| 0.8    | 4.8    | 0.6    | 0.4    | 0.3    | 0.7    | 0.8    | 0.4    | 5.1    |
| 9.4    | 1.1    | 9.3    | 3.4    | 5.5    | 5.3    | 10.6   | 16.3   | 8.0    |
| 2.1    | 0.3    | 0.4    | 0.4    | 0.4    | 1.2    | 1.8    | 2.8    | 0.9    |
| 174.8  | 169.0  | 192.5  | 202.5  | 207.4  | 200.0  | 301.1  | 285.4  | 250.1  |
| 10.7   | 7.8    | 16.9   | 5.5    | 10.9   | 7.0    | 28.8   | 26.3   | 14.3   |
| 1.3    | 0.8    | 3.9    | 6.0    | 0.4    | 3.4    | 2.1    | 1.0    | 6.7    |
| 612.3  | 400.5  | 435.5  | 387.7  | 493.3  | 504.7  | 666.9  | 843.5  | 598.5  |
| 0.8    | 0.9    | 0.4    | 0.6    | 0.5    | 0.6    | 1.1    | 0.5    | 0.5    |
| 3.5    | 4.5    | 4.9    | 5.1    | 6.2    | 4.8    | 4.1    | 1.1    | 3.1    |
| 1.6    | 0.8    | 4.7    | 1.6    | 0.3    | 0.8    | 0.8    | 1.2    | 0.5    |
| 13.4   | 9.5    | 1.2    | 6.7    | 5.9    | 18.3   | 17.3   | 17.5   | 14.0   |
| 0.5    | 3.0    | 0.4    | 0.3    | 0.8    | 0.4    | 0.9    | 1.2    | 0.5    |
| 1.6    | 3.5    | 6.9    | 7.2    | 1.3    | 6.4    | 12.3   | 10.6   | 4.0    |
| 2.0    | 0.8    | 0.5    | 0.6    | 1.6    | 2.1    | 0.9    | 1.2    | 0.9    |
| 2.7    | 4.5    | 5.8    | 1.0    | 9.1    | 3.7    | 1.5    | 1.6    | 5.7    |

|        |       |        |        |        |        |        |        |        |
|--------|-------|--------|--------|--------|--------|--------|--------|--------|
| 1.5    | 9.3   | 8.8    | 3.2    | 3.7    | 5.5    | 6.7    | 6.0    | 3.5    |
| 2.1    | 1.3   | 0.9    | 4.3    | 1.3    | 1.4    | 1.1    | 1.1    | 1.6    |
| 0.8    | 1.4   | 1.4    | 1.2    | 1.3    | 0.9    | 0.7    | 1.2    | 4.3    |
| 2.7    | 2.3   | 4.1    | 1.4    | 5.2    | 3.6    | 1.0    | 3.9    | 1.4    |
| 0.5    | 3.6   | 2.2    | 1.5    | 1.1    | 1.0    | 1.9    | 0.6    | 1.7    |
| 0.6    | 1.3   | 0.6    | 0.9    | 0.3    | 0.3    | 0.3    | 0.5    | 0.7    |
| 3.4    | 0.6   | 0.5    | 0.3    | 3.5    | 5.0    | 7.0    | 1.7    | 2.9    |
| 3.5    | 1.8   | 4.9    | 1.7    | 2.0    | 0.9    | 4.3    | 7.0    | 4.6    |
| 0.3    | 0.1   | 0.2    | 1.8    | 0.2    | 1.7    | 0.2    | 0.3    | 0.3    |
| 0.3    | 0.3   | 1.3    | 4.7    | 0.5    | 0.5    | 0.5    | 2.1    | 0.4    |
| 5.4    | 2.5   | 11.2   | 9.0    | 13.9   | 14.7   | 2.5    | 3.6    | 8.9    |
| 11.3   | 17.8  | 9.1    | 5.6    | 12.5   | 8.3    | 10.4   | 7.4    | 14.2   |
| 3.7    | 0.4   | 1.2    | 0.4    | 5.5    | 6.6    | 5.5    | 0.6    | 3.6    |
| 1.2    | 0.9   | 0.2    | 1.8    | 0.6    | 0.2    | 5.9    | 0.5    | 3.7    |
| 0.6    | 0.6   | 0.3    | 0.9    | 0.9    | 3.0    | 3.6    | 1.2    | 1.4    |
| 7.9    | 11.7  | 4.8    | 12.2   | 12.2   | 13.1   | 13.5   | 10.4   | 16.4   |
| 3.1    | 0.6   | 0.5    | 1.7    | 1.5    | 6.4    | 4.0    | 1.4    | 1.6    |
| 4.5    | 0.9   | 5.2    | 5.3    | 5.0    | 9.6    | 3.8    | 9.2    | 1.6    |
| 11.5   | 11.2  | 8.4    | 11.2   | 17.6   | 10.4   | 15.4   | 17.2   | 9.0    |
| 0.8    | 1.9   | 0.3    | 0.6    | 0.9    | 0.9    | 0.7    | 2.0    | 1.1    |
| 9.5    | 13.7  | 5.6    | 7.0    | 5.4    | 9.5    | 12.8   | 16.4   | 12.4   |
| 880.7  | 981.3 | 1072.0 | 1294.7 | 1181.8 | 1074.1 | 1498.1 | 1300.4 | 1416.3 |
| 36.7   | 15.6  | 21.0   | 16.0   | 22.3   | 22.6   | 28.8   | 23.2   | 21.7   |
| 1151.9 | 402.7 | 513.2  | 458.8  | 539.5  | 467.0  | 533.1  | 497.1  | 386.6  |
| 0.5    | 2.5   | 0.2    | 2.5    | 0.9    | 0.5    | 1.9    | 0.4    | 0.4    |
| 92.4   | 93.9  | 124.4  | 109.4  | 118.2  | 117.4  | 104.0  | 184.5  | 103.0  |
| 1.8    | 1.3   | 1.8    | 1.8    | 2.1    | 0.8    | 2.0    | 1.0    | 1.9    |
| 11.1   | 6.8   | 1.8    | 8.1    | 4.0    | 4.9    | 11.1   | 10.5   | 6.9    |
| 0.9    | 0.2   | 2.1    | 0.3    | 3.1    | 4.4    | 2.9    | 2.8    | 0.8    |
| 11.6   | 7.9   | 8.3    | 12.8   | 7.5    | 4.4    | 10.0   | 16.5   | 14.6   |
| 8.7    | 10.8  | 7.4    | 8.7    | 3.2    | 9.7    | 9.5    | 5.8    | 13.0   |
| 1.0    | 0.8   | 0.8    | 0.5    | 1.3    | 0.4    | 0.5    | 0.9    | 3.8    |
| 0.8    | 1.0   | 3.5    | 0.8    | 0.8    | 0.6    | 1.0    | 0.5    | 1.3    |
| 21.4   | 19.7  | 16.9   | 17.9   | 15.1   | 21.7   | 20.2   | 23.6   | 13.9   |
| 1.5    | 3.7   | 6.4    | 5.2    | 1.5    | 2.4    | 2.7    | 1.2    | 1.8    |
| 5.3    | 4.0   | 4.9    | 3.3    | 6.2    | 1.7    | 9.4    | 11.9   | 8.1    |
| 5.4    | 4.8   | 1.8    | 5.9    | 12.3   | 10.2   | 9.0    | 11.1   | 6.1    |
| 38.7   | 25.7  | 28.8   | 26.0   | 24.2   | 28.3   | 45.7   | 44.7   | 21.6   |
| 2.1    | 2.9   | 7.2    | 6.3    | 15.5   | 5.1    | 8.3    | 7.2    | 7.8    |
| 2.6    | 0.7   | 5.6    | 2.1    | 2.2    | 0.5    | 1.5    | 1.5    | 7.1    |
| 254.8  | 212.7 | 217.2  | 220.2  | 171.7  | 202.7  | 294.8  | 290.6  | 232.5  |
| 1.8    | 2.8   | 1.9    | 2.6    | 1.2    | 2.8    | 3.4    | 1.7    | 1.7    |
| 0.7    | 0.9   | 0.5    | 0.4    | 0.5    | 5.3    | 0.5    | 0.4    | 0.4    |
| 1.6    | 2.7   | 11.7   | 5.9    | 6.2    | 2.6    | 10.2   | 1.0    | 3.3    |
| 0.5    | 1.0   | 0.6    | 0.6    | 0.8    | 0.6    | 0.5    | 0.7    | 0.5    |
| 9.1    | 3.3   | 2.5    | 2.3    | 6.2    | 2.3    | 5.3    | 3.6    | 2.1    |
| 7.0    | 1.3   | 7.3    | 0.7    | 7.1    | 3.0    | 11.8   | 2.9    | 0.9    |
| 0.4    | 0.7   | 0.2    | 1.0    | 0.4    | 3.5    | 0.4    | 1.1    | 0.8    |
| 0.4    | 0.5   | 0.4    | 1.0    | 0.6    | 0.3    | 1.5    | 0.5    | 1.4    |
| 0.3    | 1.0   | 2.3    | 0.4    | 1.0    | 0.6    | 1.2    | 0.8    | 0.8    |
| 0.3    | 0.7   | 0.5    | 0.7    | 1.2    | 1.1    | 0.4    | 0.5    | 0.4    |
| 4.1    | 1.4   | 1.5    | 5.0    | 2.1    | 1.3    | 0.6    | 2.4    | 2.4    |
| 78.3   | 41.0  | 52.0   | 56.7   | 48.8   | 57.7   | 75.3   | 92.6   | 62.2   |

|        |        |        |        |        |        |        |        |        |
|--------|--------|--------|--------|--------|--------|--------|--------|--------|
| 74.2   | 76.1   | 62.3   | 75.7   | 65.3   | 60.9   | 101.5  | 96.1   | 47.9   |
| 923.6  | 600.2  | 641.8  | 737.3  | 784.4  | 678.2  | 975.9  | 1068.7 | 856.8  |
| 109.1  | 103.0  | 123.8  | 126.6  | 109.2  | 94.8   | 162.5  | 155.2  | 125.9  |
| 94.3   | 78.0   | 90.2   | 98.5   | 75.7   | 95.0   | 124.3  | 157.4  | 102.7  |
| 79.9   | 53.2   | 49.9   | 50.6   | 53.9   | 56.0   | 80.7   | 83.7   | 62.7   |
| 703.9  | 457.0  | 512.3  | 582.9  | 595.3  | 573.3  | 792.3  | 874.1  | 516.9  |
| 170.3  | 114.9  | 110.6  | 125.5  | 137.8  | 133.5  | 147.4  | 159.5  | 130.7  |
| 186.6  | 139.5  | 187.0  | 180.4  | 178.8  | 134.2  | 222.9  | 278.0  | 164.9  |
| 567.2  | 458.6  | 441.4  | 440.2  | 622.1  | 484.6  | 630.8  | 646.9  | 552.2  |
| 40.1   | 25.8   | 31.1   | 28.5   | 33.2   | 26.4   | 53.9   | 55.5   | 36.3   |
| 45.4   | 29.8   | 30.6   | 31.6   | 27.8   | 27.6   | 45.5   | 46.7   | 41.3   |
| 103.8  | 53.2   | 63.4   | 67.5   | 70.5   | 67.7   | 121.8  | 120.9  | 79.4   |
| 140.8  | 117.6  | 168.5  | 170.5  | 152.2  | 162.7  | 209.7  | 212.1  | 189.6  |
| 822.2  | 612.6  | 776.4  | 773.4  | 754.9  | 833.8  | 1408.3 | 1247.4 | 747.7  |
| 150.7  | 56.2   | 64.1   | 62.4   | 75.2   | 76.8   | 96.7   | 77.9   | 82.5   |
| 1855.1 | 1299.1 | 1526.6 | 1718.4 | 1550.4 | 1632.1 | 2174.1 | 2126.1 | 2165.9 |
| 2209.0 | 1781.7 | 1846.9 | 1899.0 | 2141.7 | 1971.9 | 2587.4 | 2762.6 | 2105.9 |
| 157.7  | 86.5   | 151.2  | 126.8  | 114.8  | 137.4  | 140.5  | 168.6  | 129.2  |
| 119.5  | 67.3   | 89.0   | 93.4   | 85.6   | 85.8   | 124.8  | 130.7  | 113.1  |
| 245.3  | 157.3  | 196.1  | 206.2  | 188.9  | 200.0  | 268.6  | 243.0  | 278.4  |
| 43.9   | 23.2   | 27.8   | 22.9   | 31.0   | 29.4   | 38.6   | 32.4   | 25.7   |
| 30.1   | 21.8   | 19.7   | 25.8   | 14.1   | 25.3   | 24.6   | 29.4   | 24.3   |
| 63.7   | 50.8   | 48.7   | 48.7   | 55.0   | 49.6   | 66.9   | 60.8   | 49.5   |
| 3252.9 | 2541.1 | 2832.8 | 2652.1 | 2983.1 | 2912.8 | 3376.7 | 3585.1 | 2198.2 |
| 311.5  | 285.3  | 276.0  | 280.0  | 355.4  | 318.3  | 413.2  | 520.1  | 255.9  |
| 157.3  | 122.3  | 142.1  | 150.7  | 118.8  | 126.9  | 151.1  | 177.5  | 162.7  |
| 450.5  | 245.4  | 288.0  | 274.6  | 339.8  | 328.4  | 354.0  | 488.6  | 423.8  |
| 849.9  | 566.3  | 638.4  | 583.0  | 730.9  | 620.8  | 659.6  | 953.6  | 398.7  |
| 962.6  | 637.0  | 766.0  | 834.4  | 764.8  | 846.0  | 943.0  | 1024.8 | 798.6  |
| 507.4  | 355.0  | 404.8  | 397.8  | 448.9  | 431.3  | 550.5  | 569.5  | 430.2  |
| 1001.6 | 625.8  | 790.8  | 811.5  | 866.8  | 814.6  | 1191.1 | 1193.9 | 963.5  |
| 545.5  | 315.8  | 397.0  | 370.2  | 408.0  | 395.4  | 487.6  | 558.2  | 387.4  |
| 684.3  | 430.3  | 523.1  | 568.8  | 529.1  | 480.7  | 751.8  | 833.9  | 522.8  |
| 3460.0 | 2980.8 | 3023.2 | 3716.7 | 3218.5 | 3068.4 | 3557.4 | 3781.7 | 3023.8 |
| 1224.6 | 896.0  | 926.0  | 849.8  | 1171.4 | 712.1  | 1862.3 | 2240.9 | 1671.7 |
| 993.3  | 520.8  | 641.2  | 661.0  | 672.1  | 729.4  | 912.1  | 1065.2 | 696.4  |
| 227.8  | 186.3  | 191.9  | 199.1  | 217.5  | 211.8  | 300.0  | 305.0  | 253.0  |
| 701.5  | 445.5  | 508.3  | 522.6  | 581.8  | 529.7  | 771.5  | 743.1  | 534.3  |
| 2.3    | 3.0    | 1.1    | 3.9    | 3.7    | 7.7    | 0.3    | 6.9    | 2.0    |
| 2.7    | 5.6    | 1.0    | 5.0    | 0.7    | 1.3    | 3.9    | 7.4    | 5.5    |
| 407.0  | 327.7  | 313.4  | 363.3  | 368.7  | 371.9  | 525.3  | 593.8  | 477.7  |
| 221.1  | 137.3  | 125.0  | 143.8  | 149.5  | 150.0  | 242.4  | 326.2  | 117.5  |
| 371.6  | 244.9  | 218.6  | 235.6  | 258.5  | 248.1  | 337.6  | 451.7  | 293.3  |
| 1198.7 | 1037.2 | 964.8  | 1130.8 | 1222.2 | 1029.2 | 1505.2 | 1515.6 | 1034.8 |
| 1497.2 | 1213.4 | 1247.5 | 1417.9 | 1381.6 | 1299.0 | 1783.2 | 1715.8 | 1292.3 |
| 69.4   | 37.6   | 43.8   | 51.3   | 55.4   | 54.1   | 76.8   | 92.8   | 48.5   |
| 132.0  | 50.5   | 59.6   | 66.3   | 55.9   | 67.0   | 76.4   | 115.2  | 67.7   |
| 754.9  | 590.6  | 659.8  | 727.3  | 735.4  | 706.1  | 883.5  | 857.1  | 674.7  |
| 1128.5 | 866.2  | 1005.1 | 1043.9 | 1147.2 | 1100.8 | 1387.3 | 1347.3 | 1050.3 |
| 145.9  | 49.8   | 58.9   | 66.9   | 50.5   | 69.8   | 78.7   | 115.7  | 60.3   |
| 282.7  | 131.8  | 138.4  | 155.6  | 151.8  | 167.0  | 215.3  | 275.3  | 216.6  |
| 78.8   | 19.9   | 41.2   | 22.3   | 40.2   | 32.0   | 45.1   | 52.7   | 31.1   |
| 32.4   | 14.7   | 16.9   | 18.3   | 18.4   | 16.9   | 29.1   | 34.4   | 17.7   |

|        |        |        |        |        |        |        |        |        |
|--------|--------|--------|--------|--------|--------|--------|--------|--------|
| 178.4  | 100.3  | 90.2   | 108.3  | 113.1  | 90.0   | 156.4  | 177.5  | 164.4  |
| 299.7  | 162.3  | 160.1  | 192.4  | 190.8  | 188.0  | 241.9  | 306.0  | 217.4  |
| 1741.0 | 1182.1 | 1277.5 | 1365.8 | 1421.6 | 1457.6 | 1680.0 | 1694.6 | 1492.2 |
| 728.0  | 650.7  | 624.3  | 661.1  | 717.5  | 656.9  | 982.9  | 1076.1 | 830.7  |
| 171.7  | 123.4  | 159.2  | 215.7  | 135.9  | 151.5  | 238.0  | 272.2  | 241.0  |
| 189.0  | 119.0  | 103.8  | 128.2  | 121.9  | 124.5  | 169.8  | 207.4  | 161.0  |
| 1115.8 | 860.1  | 1133.4 | 907.9  | 1054.3 | 1038.3 | 1502.1 | 1632.1 | 1146.2 |
| 237.0  | 176.1  | 168.7  | 191.5  | 223.4  | 216.8  | 290.6  | 374.3  | 263.8  |
| 210.7  | 163.6  | 167.9  | 170.4  | 159.4  | 175.0  | 210.0  | 256.5  | 191.6  |
| 529.3  | 332.9  | 431.0  | 424.4  | 423.2  | 418.2  | 540.3  | 587.6  | 638.8  |
| 623.6  | 360.7  | 634.3  | 506.9  | 540.8  | 639.0  | 928.1  | 871.6  | 647.4  |
| 610.3  | 353.6  | 458.7  | 445.1  | 441.6  | 433.2  | 563.0  | 588.5  | 419.0  |
| 190.4  | 166.5  | 161.3  | 201.5  | 179.3  | 191.9  | 258.4  | 272.4  | 247.8  |
| 434.5  | 305.1  | 479.3  | 440.5  | 486.0  | 386.9  | 500.6  | 694.8  | 354.2  |
| 2093.3 | 1656.9 | 1725.3 | 1898.8 | 1886.7 | 1825.6 | 2275.0 | 2211.6 | 1730.5 |
| 179.8  | 75.2   | 67.1   | 100.2  | 69.2   | 58.5   | 96.9   | 128.8  | 96.1   |
| 169.7  | 87.6   | 121.6  | 104.4  | 111.7  | 116.8  | 135.6  | 150.6  | 97.4   |
| 219.0  | 188.1  | 184.4  | 235.9  | 205.8  | 203.6  | 249.2  | 253.0  | 189.3  |
| 257.8  | 195.5  | 200.1  | 194.2  | 201.1  | 204.3  | 227.0  | 287.5  | 207.8  |
| 165.0  | 104.0  | 110.7  | 134.4  | 143.1  | 124.0  | 184.7  | 250.9  | 125.3  |
| 3104.0 | 2449.0 | 2579.2 | 2712.8 | 2987.0 | 2556.2 | 3486.5 | 3497.5 | 2507.0 |
| 883.1  | 545.3  | 729.3  | 705.6  | 772.6  | 817.4  | 875.4  | 925.6  | 668.5  |
| 890.8  | 559.2  | 682.1  | 674.3  | 658.7  | 696.8  | 896.4  | 1072.1 | 753.4  |
| 155.3  | 208.5  | 256.3  | 256.0  | 325.7  | 208.0  | 338.0  | 314.7  | 216.2  |
| 1172.8 | 716.8  | 805.7  | 789.1  | 975.9  | 1122.9 | 1239.6 | 1684.2 | 1087.0 |
| 3247.1 | 2473.4 | 2511.7 | 2797.3 | 2895.9 | 2716.0 | 3548.0 | 3589.3 | 2622.0 |
| 629.1  | 319.8  | 441.0  | 384.3  | 402.1  | 485.4  | 512.7  | 700.6  | 475.3  |
| 174.1  | 151.7  | 144.5  | 144.8  | 158.8  | 149.7  | 230.9  | 279.7  | 180.5  |
| 3560.9 | 2847.5 | 2635.8 | 3062.6 | 3208.1 | 3006.7 | 3522.6 | 3582.6 | 2795.6 |
| 863.0  | 712.5  | 878.0  | 847.7  | 881.5  | 860.5  | 982.1  | 988.4  | 728.9  |
| 952.0  | 715.2  | 801.6  | 868.5  | 848.6  | 916.4  | 1202.7 | 1516.9 | 991.3  |
| 846.3  | 580.5  | 711.8  | 754.1  | 747.0  | 690.3  | 1005.9 | 928.9  | 775.6  |
| 1048.3 | 597.6  | 747.9  | 741.4  | 768.7  | 723.3  | 949.2  | 925.3  | 691.2  |
| 1813.8 | 935.3  | 1090.3 | 1219.3 | 1179.1 | 1300.1 | 1552.9 | 1612.5 | 1410.9 |
| 15.2   | 8.4    | 12.6   | 8.9    | 13.6   | 6.7    | 16.4   | 15.8   | 17.5   |
| 389.0  | 182.4  | 250.5  | 262.9  | 214.1  | 275.2  | 327.8  | 446.2  | 307.5  |
| 206.6  | 114.2  | 121.9  | 134.4  | 134.9  | 142.1  | 193.8  | 247.9  | 199.0  |
| 343.0  | 201.4  | 273.0  | 228.4  | 234.0  | 266.3  | 271.3  | 341.7  | 223.6  |
| 433.9  | 272.4  | 336.3  | 383.4  | 375.4  | 417.2  | 490.5  | 605.9  | 508.9  |
| 221.4  | 142.9  | 187.2  | 197.6  | 166.9  | 189.8  | 249.5  | 309.4  | 251.9  |
| 9.2    | 9.8    | 14.1   | 11.8   | 13.5   | 1.6    | 24.5   | 20.8   | 9.1    |
| 397.7  | 258.3  | 288.4  | 325.7  | 322.2  | 359.4  | 438.7  | 557.1  | 311.4  |
| 162.9  | 99.4   | 109.9  | 118.9  | 127.8  | 112.9  | 127.4  | 184.2  | 115.5  |
| 60.8   | 34.9   | 30.8   | 51.1   | 65.6   | 62.0   | 65.5   | 113.2  | 72.4   |
| 109.7  | 70.0   | 106.9  | 102.4  | 104.9  | 116.6  | 126.4  | 228.7  | 97.8   |
| 165.8  | 96.8   | 94.1   | 108.3  | 111.8  | 112.0  | 169.7  | 259.2  | 146.7  |
| 167.3  | 103.8  | 96.0   | 129.4  | 107.8  | 134.2  | 159.8  | 175.6  | 134.1  |
| 661.6  | 406.2  | 443.0  | 477.3  | 466.1  | 447.8  | 569.9  | 593.7  | 539.9  |
| 44.4   | 34.7   | 25.9   | 39.4   | 45.6   | 39.8   | 43.7   | 72.5   | 34.7   |
| 472.6  | 312.1  | 325.5  | 371.5  | 297.6  | 373.9  | 462.2  | 589.3  | 383.8  |
| 477.5  | 368.8  | 374.0  | 394.9  | 419.6  | 375.9  | 502.9  | 520.9  | 331.0  |
| 699.8  | 415.7  | 480.7  | 480.2  | 475.2  | 493.6  | 564.7  | 643.4  | 487.5  |
| 11.8   | 8.1    | 9.1    | 18.3   | 8.7    | 11.2   | 14.1   | 20.6   | 18.0   |

|        |        |        |        |        |        |        |        |        |
|--------|--------|--------|--------|--------|--------|--------|--------|--------|
| 453.7  | 319.2  | 371.6  | 350.4  | 370.6  | 433.7  | 505.7  | 557.7  | 401.3  |
| 272.2  | 155.0  | 228.8  | 197.5  | 202.0  | 216.9  | 298.1  | 328.4  | 164.5  |
| 401.6  | 302.7  | 358.9  | 348.7  | 409.1  | 336.5  | 452.5  | 485.1  | 381.5  |
| 81.8   | 60.2   | 62.6   | 75.6   | 79.8   | 61.2   | 82.8   | 71.1   | 62.1   |
| 808.5  | 466.2  | 503.0  | 592.7  | 805.1  | 595.1  | 674.8  | 848.4  | 588.4  |
| 2.0    | 1.5    | 3.8    | 1.4    | 2.1    | 1.0    | 3.3    | 2.6    | 1.0    |
| 508.1  | 349.8  | 363.9  | 377.3  | 423.4  | 422.7  | 535.2  | 678.0  | 355.0  |
| 168.3  | 59.7   | 160.9  | 131.3  | 114.6  | 156.1  | 183.8  | 190.2  | 130.9  |
| 100.9  | 67.7   | 82.0   | 92.6   | 95.1   | 114.6  | 145.1  | 159.7  | 135.1  |
| 75.7   | 33.6   | 45.7   | 53.4   | 53.9   | 46.3   | 61.3   | 52.5   | 47.6   |
| 72.5   | 40.8   | 67.2   | 74.2   | 68.1   | 54.6   | 45.2   | 67.7   | 42.6   |
| 304.5  | 159.9  | 198.9  | 215.4  | 218.4  | 208.2  | 329.8  | 385.1  | 246.7  |
| 84.3   | 48.1   | 58.8   | 57.4   | 69.1   | 66.2   | 85.2   | 102.2  | 67.2   |
| 1.7    | 2.6    | 4.4    | 3.5    | 4.1    | 3.7    | 3.0    | 5.4    | 3.9    |
| 231.6  | 131.0  | 156.4  | 178.3  | 173.4  | 185.1  | 251.2  | 277.7  | 180.7  |
| 45.7   | 44.5   | 40.4   | 43.7   | 47.6   | 54.1   | 43.3   | 54.7   | 43.3   |
| 493.3  | 307.4  | 317.9  | 357.2  | 374.2  | 397.5  | 514.6  | 627.1  | 453.6  |
| 369.7  | 247.4  | 247.2  | 259.3  | 305.1  | 310.2  | 481.1  | 532.5  | 287.1  |
| 1084.1 | 763.2  | 659.2  | 799.2  | 989.7  | 892.3  | 1330.9 | 1678.4 | 806.7  |
| 928.1  | 597.0  | 676.0  | 695.0  | 799.6  | 710.9  | 1116.4 | 1040.4 | 721.6  |
| 42.1   | 37.8   | 32.0   | 37.7   | 38.0   | 34.2   | 57.8   | 67.5   | 40.3   |
| 12.4   | 22.1   | 16.7   | 12.2   | 16.1   | 18.0   | 22.4   | 25.3   | 24.9   |
| 855.8  | 656.1  | 782.9  | 791.6  | 822.0  | 839.5  | 1008.8 | 1065.0 | 1010.5 |
| 431.6  | 296.2  | 282.0  | 339.1  | 369.1  | 319.8  | 525.4  | 617.1  | 450.1  |
| 134.6  | 181.9  | 226.2  | 242.4  | 226.5  | 266.6  | 384.4  | 335.2  | 235.2  |
| 77.4   | 64.3   | 71.2   | 65.7   | 67.5   | 105.0  | 139.4  | 213.8  | 93.6   |
| 1518.5 | 1126.4 | 1162.8 | 1290.7 | 1298.9 | 1282.0 | 1475.5 | 1683.1 | 1040.0 |
| 0.7    | 0.7    | 0.7    | 0.8    | 1.3    | 0.5    | 1.0    | 1.4    | 0.4    |
| 30.2   | 31.3   | 34.9   | 43.2   | 53.3   | 24.4   | 72.5   | 48.9   | 31.6   |
| 378.7  | 310.7  | 331.5  | 359.9  | 342.9  | 339.8  | 458.8  | 447.4  | 461.5  |
| 624.7  | 379.2  | 475.3  | 473.0  | 475.6  | 456.6  | 629.6  | 636.4  | 438.6  |
| 129.8  | 97.4   | 94.0   | 117.9  | 104.6  | 106.3  | 135.2  | 153.3  | 108.2  |
| 1391.6 | 1141.2 | 1455.5 | 1281.0 | 1462.6 | 1525.3 | 1695.3 | 2067.9 | 1194.3 |
| 273.5  | 218.0  | 238.5  | 263.4  | 303.5  | 298.7  | 419.2  | 530.7  | 333.1  |
| 189.4  | 137.1  | 166.0  | 166.6  | 198.8  | 196.2  | 309.2  | 363.6  | 215.4  |
| 1903.4 | 1734.1 | 1486.0 | 1687.4 | 1731.9 | 1726.3 | 1842.4 | 2125.5 | 1968.8 |
| 1049.7 | 691.4  | 797.4  | 854.3  | 886.0  | 877.2  | 1118.2 | 1182.4 | 973.0  |
| 372.7  | 120.2  | 123.2  | 189.3  | 292.2  | 274.4  | 311.2  | 414.1  | 142.4  |
| 843.2  | 800.6  | 956.9  | 1005.4 | 971.3  | 966.8  | 1221.3 | 1156.1 | 1091.2 |
| 128.2  | 72.9   | 71.3   | 97.1   | 88.7   | 95.8   | 88.2   | 162.8  | 94.8   |
| 31.1   | 14.2   | 14.5   | 22.5   | 27.2   | 20.9   | 30.5   | 37.9   | 27.8   |
| 215.0  | 138.7  | 152.7  | 170.9  | 165.4  | 172.8  | 249.1  | 270.4  | 167.2  |
| 6.9    | 4.1    | 5.9    | 5.6    | 9.4    | 7.1    | 15.3   | 16.4   | 14.9   |
| 91.8   | 98.0   | 82.2   | 122.9  | 107.4  | 84.8   | 142.0  | 116.4  | 109.2  |
| 1587.6 | 1089.8 | 1183.6 | 1156.7 | 1245.2 | 1220.7 | 1515.8 | 1532.4 | 1292.5 |
| 136.8  | 80.0   | 92.5   | 104.2  | 100.7  | 108.1  | 147.6  | 174.8  | 108.7  |
| 492.7  | 358.1  | 315.8  | 405.9  | 455.9  | 384.8  | 517.5  | 660.6  | 528.8  |
| 157.2  | 179.6  | 134.0  | 171.1  | 160.4  | 146.2  | 209.5  | 224.6  | 140.3  |
| 1532.6 | 1133.3 | 1099.3 | 1182.9 | 1296.6 | 1221.8 | 1640.4 | 1826.8 | 1008.3 |
| 36.5   | 34.9   | 50.0   | 40.1   | 42.9   | 26.4   | 38.0   | 47.1   | 29.8   |
| 146.7  | 131.0  | 123.7  | 148.7  | 137.7  | 137.7  | 220.4  | 228.3  | 162.7  |
| 229.6  | 189.8  | 219.9  | 236.4  | 219.2  | 223.4  | 292.7  | 283.9  | 227.7  |
| 127.1  | 43.4   | 60.6   | 67.4   | 52.1   | 77.4   | 92.1   | 118.5  | 68.4   |



|        |        |        |        |        |        |        |        |        |
|--------|--------|--------|--------|--------|--------|--------|--------|--------|
| 117.5  | 105.9  | 110.3  | 129.1  | 120.4  | 119.0  | 126.5  | 170.1  | 93.7   |
| 174.1  | 157.0  | 168.0  | 181.7  | 165.5  | 153.2  | 251.2  | 243.4  | 160.8  |
| 321.7  | 273.2  | 224.7  | 285.6  | 279.2  | 270.1  | 378.5  | 528.8  | 303.4  |
| 4.0    | 1.5    | 1.8    | 10.3   | 2.2    | 1.0    | 10.3   | 7.5    | 3.8    |
| 497.4  | 303.5  | 373.5  | 354.0  | 379.4  | 367.5  | 498.0  | 540.1  | 327.7  |
| 1500.1 | 817.5  | 1075.8 | 1326.1 | 1093.3 | 1154.5 | 1430.1 | 1431.6 | 1033.7 |
| 191.8  | 169.3  | 162.7  | 199.0  | 188.6  | 181.5  | 261.4  | 225.8  | 138.3  |
| 595.8  | 496.9  | 499.2  | 583.3  | 564.8  | 551.1  | 697.3  | 772.4  | 477.8  |
| 215.4  | 169.3  | 157.4  | 157.9  | 178.9  | 173.5  | 228.6  | 271.9  | 232.6  |
| 84.0   | 11.3   | 6.7    | 12.2   | 11.5   | 11.6   | 13.3   | 11.7   | 13.9   |
| 236.3  | 188.7  | 176.9  | 175.3  | 210.6  | 199.4  | 286.5  | 399.7  | 255.3  |
| 175.5  | 85.9   | 82.6   | 88.9   | 78.5   | 81.9   | 98.0   | 113.2  | 111.0  |
| 115.8  | 90.4   | 90.7   | 79.4   | 105.9  | 90.2   | 130.2  | 135.6  | 88.5   |
| 89.6   | 79.5   | 75.0   | 91.5   | 88.1   | 82.6   | 110.0  | 106.2  | 106.4  |
| 1041.7 | 884.7  | 916.6  | 995.8  | 1066.8 | 1097.3 | 1356.4 | 1674.1 | 1280.6 |
| 1274.9 | 224.3  | 280.1  | 285.3  | 298.9  | 350.3  | 363.8  | 667.0  | 317.3  |
| 1.5    | 2.1    | 2.1    | 1.8    | 1.1    | 1.0    | 3.8    | 1.9    | 1.3    |
| 0.5    | 2.7    | 0.3    | 2.9    | 0.3    | 3.1    | 0.9    | 0.4    | 0.4    |
| 57.6   | 52.3   | 33.3   | 49.9   | 45.5   | 42.1   | 80.6   | 63.2   | 62.1   |
| 29.9   | 33.6   | 28.9   | 36.0   | 30.1   | 36.7   | 48.3   | 46.6   | 25.7   |
| 52.2   | 46.3   | 48.3   | 61.1   | 50.6   | 45.5   | 79.2   | 97.9   | 57.1   |
| 328.5  | 235.5  | 265.6  | 239.9  | 274.3  | 249.7  | 345.6  | 373.5  | 218.5  |
| 612.6  | 364.7  | 396.2  | 461.3  | 388.8  | 448.1  | 588.0  | 550.4  | 610.0  |
| 849.0  | 672.5  | 655.2  | 804.4  | 821.2  | 772.8  | 1056.2 | 1297.4 | 907.1  |
| 8.8    | 5.8    | 2.9    | 3.5    | 5.4    | 9.1    | 5.8    | 7.7    | 7.9    |
| 17.7   | 7.9    | 10.3   | 10.1   | 11.0   | 18.7   | 14.4   | 37.4   | 14.2   |
| 1121.3 | 699.7  | 832.8  | 846.2  | 877.2  | 885.5  | 1079.7 | 1065.1 | 678.9  |
| 270.4  | 176.2  | 192.1  | 245.9  | 216.0  | 206.4  | 289.1  | 334.7  | 248.4  |
| 593.1  | 396.1  | 423.7  | 435.8  | 452.9  | 445.1  | 603.7  | 696.7  | 463.5  |
| 161.4  | 104.6  | 111.5  | 129.6  | 145.1  | 124.4  | 174.3  | 226.2  | 152.0  |
| 122.2  | 76.8   | 88.4   | 80.2   | 94.0   | 94.0   | 131.7  | 156.3  | 82.7   |
| 246.7  | 163.7  | 188.9  | 212.2  | 193.7  | 197.9  | 254.0  | 311.7  | 249.0  |
| 1149.7 | 778.4  | 828.5  | 931.0  | 934.2  | 922.5  | 1053.1 | 1342.7 | 891.6  |
| 35.3   | 19.0   | 19.5   | 23.1   | 22.8   | 14.2   | 21.2   | 22.8   | 26.2   |
| 114.3  | 81.4   | 93.7   | 101.7  | 79.9   | 97.9   | 126.2  | 149.3  | 81.0   |
| 534.9  | 298.2  | 339.9  | 355.9  | 370.1  | 389.8  | 546.9  | 736.5  | 539.9  |
| 242.6  | 147.7  | 135.4  | 148.6  | 171.1  | 152.2  | 242.8  | 294.2  | 211.7  |
| 114.5  | 99.3   | 82.3   | 100.8  | 132.6  | 105.1  | 189.2  | 264.3  | 166.2  |
| 106.8  | 77.8   | 75.8   | 92.6   | 96.6   | 114.0  | 140.8  | 158.7  | 124.5  |
| 347.6  | 118.3  | 122.2  | 140.8  | 130.1  | 132.2  | 160.9  | 143.6  | 136.0  |
| 342.4  | 274.0  | 319.4  | 306.2  | 342.1  | 341.8  | 462.0  | 463.5  | 303.1  |
| 19.2   | 14.4   | 14.9   | 14.2   | 25.7   | 16.9   | 26.9   | 20.9   | 22.8   |
| 364.9  | 284.5  | 313.9  | 350.3  | 355.4  | 368.6  | 502.0  | 557.2  | 480.3  |
| 3.4    | 5.0    | 2.2    | 17.1   | 11.0   | 4.2    | 3.6    | 25.9   | 17.4   |
| 483.1  | 345.1  | 371.7  | 442.7  | 455.4  | 403.4  | 601.5  | 629.5  | 493.2  |
| 1184.1 | 875.0  | 1073.2 | 1022.4 | 1111.0 | 1045.3 | 1312.6 | 1303.7 | 1104.5 |
| 253.0  | 185.5  | 207.5  | 219.9  | 211.6  | 226.1  | 273.6  | 309.7  | 250.1  |
| 95.1   | 63.3   | 62.2   | 71.5   | 67.2   | 74.7   | 88.4   | 117.3  | 72.6   |
| 1059.6 | 653.3  | 781.7  | 908.2  | 924.5  | 866.9  | 1319.7 | 1226.9 | 968.4  |
| 498.1  | 377.3  | 394.4  | 438.3  | 451.4  | 459.4  | 559.1  | 575.8  | 565.5  |
| 95.7   | 60.9   | 62.3   | 64.4   | 69.7   | 65.9   | 83.2   | 101.2  | 61.1   |
| 185.1  | 140.3  | 167.6  | 151.4  | 155.3  | 133.4  | 193.0  | 188.0  | 134.4  |
| 4769.7 | 4215.1 | 4002.1 | 4230.6 | 4419.3 | 4137.4 | 4319.9 | 4459.0 | 3409.7 |

|        |        |        |        |        |        |        |        |        |
|--------|--------|--------|--------|--------|--------|--------|--------|--------|
| 1593.3 | 1186.7 | 1245.9 | 1381.9 | 1409.7 | 1392.3 | 1474.5 | 1921.6 | 1298.2 |
| 789.6  | 500.8  | 588.3  | 634.0  | 606.0  | 632.3  | 823.1  | 852.9  | 614.5  |
| 517.9  | 407.4  | 417.5  | 468.8  | 485.3  | 471.4  | 646.6  | 721.6  | 666.1  |
| 57.9   | 62.2   | 44.8   | 69.9   | 49.1   | 55.2   | 82.6   | 75.3   | 56.5   |
| 68.4   | 61.6   | 68.4   | 74.5   | 54.1   | 64.6   | 96.2   | 117.5  | 59.9   |
| 91.7   | 41.6   | 62.5   | 64.5   | 75.2   | 62.5   | 89.1   | 80.5   | 53.0   |
| 58.1   | 40.0   | 37.9   | 45.2   | 51.1   | 44.8   | 70.3   | 68.3   | 51.5   |
| 1006.8 | 710.2  | 771.3  | 739.0  | 854.4  | 881.8  | 1034.8 | 1162.4 | 897.2  |
| 4913.5 | 4442.9 | 4380.5 | 4221.6 | 4438.9 | 4319.6 | 4491.2 | 4777.8 | 3558.1 |
| 77.7   | 49.3   | 59.9   | 52.4   | 55.8   | 60.4   | 79.5   | 100.6  | 55.7   |
| 1074.6 | 1180.3 | 1265.6 | 1386.5 | 1439.6 | 1382.7 | 1658.7 | 1824.0 | 1246.0 |
| 589.3  | 397.4  | 476.8  | 494.4  | 489.5  | 460.8  | 584.9  | 623.6  | 485.9  |
| 165.9  | 79.2   | 82.6   | 98.6   | 117.7  | 119.6  | 184.3  | 217.9  | 118.2  |
| 137.2  | 83.7   | 88.3   | 98.5   | 98.9   | 107.0  | 163.3  | 157.2  | 130.9  |
| 240.4  | 116.7  | 131.8  | 138.2  | 143.0  | 165.2  | 206.8  | 247.0  | 145.7  |
| 387.3  | 214.0  | 231.3  | 261.7  | 262.7  | 269.1  | 376.0  | 483.1  | 393.1  |
| 280.9  | 236.4  | 238.3  | 279.7  | 264.0  | 249.7  | 294.1  | 336.9  | 314.3  |
| 162.0  | 108.3  | 128.0  | 132.0  | 145.9  | 135.8  | 163.3  | 202.3  | 143.4  |
| 22.1   | 14.2   | 17.3   | 15.5   | 13.2   | 11.8   | 21.3   | 26.1   | 16.9   |
| 1044.4 | 858.5  | 861.6  | 963.5  | 1033.8 | 985.2  | 1230.0 | 1309.4 | 863.3  |
| 375.3  | 278.9  | 307.6  | 316.7  | 346.4  | 327.2  | 470.1  | 520.0  | 314.7  |
| 231.2  | 142.6  | 175.0  | 164.2  | 173.5  | 167.6  | 223.9  | 252.5  | 162.5  |
| 87.0   | 54.8   | 59.9   | 54.4   | 68.1   | 72.6   | 86.3   | 104.7  | 80.7   |
| 6.0    | 2.5    | 6.1    | 2.1    | 4.4    | 4.5    | 11.5   | 7.4    | 5.3    |
| 16.1   | 7.4    | 11.9   | 11.2   | 2.6    | 3.4    | 17.0   | 13.8   | 14.6   |
| 5.6    | 1.0    | 10.9   | 12.8   | 11.6   | 7.5    | 14.0   | 18.2   | 12.3   |
| 461.5  | 276.3  | 324.9  | 306.3  | 345.2  | 362.7  | 485.7  | 636.1  | 322.8  |
| 218.1  | 198.3  | 163.0  | 161.0  | 171.1  | 201.6  | 237.5  | 336.9  | 164.4  |
| 116.8  | 88.8   | 100.4  | 105.3  | 110.3  | 95.2   | 148.2  | 157.3  | 89.3   |
| 289.6  | 235.8  | 278.6  | 303.0  | 285.5  | 293.3  | 323.9  | 344.7  | 292.4  |
| 3682.7 | 3519.0 | 3354.9 | 3601.0 | 3724.9 | 3447.5 | 3771.3 | 3869.3 | 3188.9 |
| 171.1  | 106.2  | 116.6  | 128.0  | 137.7  | 116.9  | 190.0  | 177.0  | 136.4  |
| 153.6  | 65.2   | 102.9  | 104.1  | 100.6  | 112.7  | 157.4  | 148.8  | 95.1   |
| 15.9   | 7.0    | 13.8   | 9.9    | 6.6    | 16.5   | 20.8   | 24.7   | 13.9   |
| 36.6   | 25.5   | 26.9   | 28.6   | 24.6   | 27.1   | 40.3   | 57.1   | 33.2   |
| 87.7   | 74.8   | 67.8   | 73.6   | 80.6   | 69.1   | 92.0   | 131.5  | 76.8   |
| 144.8  | 105.1  | 126.4  | 160.3  | 140.1  | 106.1  | 181.4  | 202.9  | 133.6  |
| 248.1  | 202.9  | 232.3  | 182.2  | 231.5  | 238.1  | 334.6  | 377.5  | 215.0  |
| 767.3  | 492.6  | 520.8  | 598.7  | 576.9  | 611.6  | 841.8  | 1045.6 | 780.2  |
| 575.9  | 388.1  | 417.8  | 454.3  | 483.5  | 473.0  | 626.6  | 739.7  | 460.1  |
| 35.4   | 27.1   | 34.6   | 28.7   | 25.8   | 26.2   | 49.1   | 49.4   | 31.8   |
| 152.1  | 104.4  | 122.9  | 123.0  | 145.9  | 129.2  | 187.0  | 197.1  | 136.4  |
| 28.3   | 27.2   | 35.5   | 36.6   | 36.0   | 31.2   | 49.0   | 43.4   | 35.3   |
| 21.1   | 25.4   | 34.7   | 34.5   | 34.1   | 27.7   | 47.3   | 34.6   | 41.8   |
| 1185.8 | 1026.2 | 1064.4 | 1203.1 | 1158.2 | 1137.1 | 1286.5 | 1565.7 | 863.1  |
| 23.7   | 19.0   | 19.8   | 22.5   | 31.4   | 20.6   | 39.6   | 36.7   | 18.2   |
| 510.9  | 379.8  | 424.7  | 467.0  | 495.7  | 435.4  | 617.4  | 638.4  | 437.2  |
| 228.0  | 170.4  | 170.4  | 185.6  | 220.7  | 213.3  | 270.3  | 345.8  | 200.5  |
| 429.6  | 346.4  | 379.9  | 395.5  | 355.5  | 321.6  | 437.3  | 429.9  | 320.1  |
| 121.6  | 160.1  | 151.7  | 177.3  | 172.7  | 137.6  | 221.6  | 204.0  | 140.2  |
| 29.9   | 51.2   | 37.5   | 49.2   | 44.9   | 25.1   | 67.0   | 69.0   | 61.4   |
| 97.4   | 108.6  | 87.2   | 105.2  | 101.0  | 96.0   | 153.3  | 150.2  | 99.8   |
| 95.9   | 111.5  | 90.8   | 107.5  | 95.6   | 92.0   | 131.7  | 118.7  | 127.6  |

|        |        |        |        |        |        |        |        |        |
|--------|--------|--------|--------|--------|--------|--------|--------|--------|
| 92.4   | 65.1   | 107.1  | 107.9  | 97.4   | 88.4   | 103.3  | 80.2   | 88.0   |
| 219.6  | 135.3  | 178.3  | 215.4  | 169.9  | 194.9  | 256.8  | 209.3  | 148.7  |
| 266.7  | 82.8   | 165.4  | 140.6  | 126.1  | 159.1  | 191.2  | 291.0  | 116.0  |
| 68.2   | 50.7   | 65.7   | 64.4   | 69.3   | 53.7   | 89.1   | 105.5  | 53.1   |
| 23.3   | 24.2   | 14.8   | 17.5   | 16.4   | 23.4   | 34.2   | 43.8   | 21.7   |
| 145.9  | 107.4  | 121.9  | 118.7  | 130.3  | 141.2  | 172.6  | 203.4  | 116.7  |
| 271.7  | 90.7   | 97.5   | 104.4  | 97.4   | 108.4  | 143.2  | 166.2  | 111.5  |
| 244.3  | 292.0  | 237.9  | 483.0  | 373.7  | 387.8  | 478.0  | 490.6  | 368.1  |
| 623.7  | 395.6  | 518.3  | 518.0  | 551.6  | 546.0  | 698.9  | 683.4  | 537.5  |
| 1.0    | 1.4    | 1.3    | 2.9    | 0.8    | 2.0    | 2.5    | 8.2    | 5.9    |
| 6.7    | 8.0    | 9.3    | 2.3    | 12.7   | 1.7    | 15.9   | 12.3   | 2.8    |
| 176.0  | 153.9  | 188.6  | 221.9  | 192.7  | 212.0  | 237.7  | 290.6  | 150.3  |
| 1.6    | 0.6    | 4.4    | 0.2    | 0.1    | 2.0    | 2.5    | 3.8    | 1.9    |
| 3.2    | 0.0    | 2.3    | 0.2    | 0.4    | 0.3    | 1.6    | 2.1    | 0.3    |
| 0.4    | 0.5    | 1.8    | 0.5    | 1.0    | 0.4    | 0.6    | 0.7    | 0.4    |
| 3.1    | 3.1    | 5.8    | 1.4    | 4.2    | 0.5    | 0.7    | 2.2    | 3.6    |
| 146.5  | 81.7   | 87.0   | 117.0  | 108.5  | 110.5  | 163.4  | 188.3  | 120.4  |
| 101.8  | 35.7   | 62.6   | 53.3   | 57.5   | 59.2   | 93.2   | 107.5  | 73.9   |
| 156.6  | 66.6   | 108.9  | 80.9   | 89.1   | 108.7  | 139.2  | 149.2  | 131.6  |
| 223.3  | 142.4  | 159.4  | 191.4  | 192.6  | 196.4  | 257.4  | 297.0  | 241.0  |
| 249.0  | 175.6  | 224.2  | 209.3  | 213.0  | 209.5  | 260.0  | 300.4  | 233.6  |
| 68.1   | 46.5   | 41.7   | 45.7   | 60.3   | 65.3   | 70.9   | 95.4   | 47.6   |
| 352.7  | 275.9  | 249.9  | 329.9  | 319.1  | 308.8  | 444.5  | 593.1  | 236.7  |
| 11.9   | 10.6   | 8.8    | 10.9   | 16.2   | 9.4    | 15.3   | 19.3   | 10.5   |
| 65.2   | 37.9   | 53.4   | 55.0   | 45.0   | 48.2   | 75.1   | 73.8   | 44.5   |
| 2972.0 | 2730.8 | 2522.0 | 3014.0 | 2892.8 | 2704.1 | 3302.9 | 3384.6 | 2730.5 |
| 1785.3 | 1493.0 | 1464.4 | 1633.9 | 1861.5 | 1719.2 | 2008.8 | 2440.2 | 1901.0 |
| 434.0  | 262.9  | 333.9  | 301.2  | 333.3  | 378.6  | 556.0  | 417.3  | 354.5  |
| 216.9  | 155.4  | 207.1  | 191.7  | 180.8  | 187.1  | 190.8  | 227.2  | 200.2  |
| 98.1   | 81.9   | 102.7  | 84.1   | 105.5  | 98.9   | 153.1  | 170.2  | 100.7  |
| 1754.3 | 1388.4 | 1562.5 | 1777.0 | 1707.6 | 1675.2 | 2077.9 | 2115.4 | 1984.7 |
| 1277.0 | 976.0  | 957.4  | 1024.2 | 1175.2 | 1089.6 | 1422.4 | 1635.1 | 1274.6 |
| 289.4  | 126.3  | 169.8  | 170.6  | 180.9  | 175.6  | 257.1  | 273.7  | 144.6  |
| 233.2  | 112.7  | 138.9  | 153.8  | 149.9  | 144.2  | 238.8  | 207.4  | 216.1  |
| 87.5   | 51.9   | 74.0   | 71.6   | 55.5   | 81.3   | 89.2   | 107.7  | 49.1   |
| 52.8   | 45.6   | 45.7   | 53.0   | 40.2   | 41.8   | 54.7   | 55.4   | 49.6   |
| 69.9   | 43.9   | 75.0   | 49.9   | 70.6   | 54.5   | 80.6   | 84.3   | 67.8   |
| 155.0  | 62.2   | 76.2   | 80.7   | 74.3   | 64.9   | 120.5  | 125.2  | 105.8  |
| 42.0   | 34.1   | 43.6   | 48.5   | 37.0   | 36.7   | 66.2   | 35.3   | 41.8   |
| 232.8  | 139.3  | 154.7  | 172.9  | 196.4  | 189.3  | 245.5  | 272.9  | 211.8  |
| 157.9  | 87.9   | 102.5  | 125.1  | 137.5  | 132.3  | 164.9  | 201.0  | 112.3  |
| 13.0   | 6.4    | 8.1    | 10.8   | 7.2    | 8.1    | 17.8   | 19.2   | 17.2   |
| 334.5  | 174.8  | 252.7  | 264.5  | 234.4  | 227.2  | 358.6  | 291.9  | 225.1  |
| 147.5  | 93.5   | 118.7  | 118.8  | 116.3  | 113.0  | 163.7  | 157.2  | 88.9   |
| 302.2  | 152.4  | 182.2  | 182.5  | 210.3  | 203.8  | 288.4  | 322.0  | 219.9  |
| 371.4  | 282.6  | 300.1  | 335.8  | 396.6  | 331.5  | 518.4  | 605.3  | 524.8  |
| 107.5  | 59.5   | 79.5   | 68.6   | 74.7   | 93.0   | 140.8  | 150.0  | 100.3  |
| 74.3   | 45.9   | 45.9   | 42.6   | 32.4   | 36.7   | 45.3   | 29.2   | 36.9   |
| 150.3  | 98.1   | 105.1  | 123.4  | 90.1   | 94.1   | 142.2  | 184.0  | 99.4   |
| 98.5   | 51.6   | 65.6   | 80.1   | 71.1   | 56.5   | 87.8   | 95.1   | 60.4   |
| 2881.1 | 2263.6 | 2213.7 | 2576.4 | 2563.1 | 2427.3 | 3059.5 | 3043.3 | 2824.2 |
| 102.1  | 60.1   | 96.6   | 93.0   | 78.0   | 75.4   | 114.4  | 121.5  | 86.1   |
| 421.5  | 174.5  | 233.4  | 265.0  | 239.0  | 274.9  | 325.7  | 386.2  | 270.1  |

|        |        |        |        |        |        |        |        |        |
|--------|--------|--------|--------|--------|--------|--------|--------|--------|
| 313.3  | 172.9  | 223.5  | 209.2  | 235.2  | 243.8  | 331.6  | 299.9  | 288.0  |
| 21.2   | 15.1   | 10.3   | 21.5   | 15.2   | 11.8   | 16.5   | 29.3   | 15.1   |
| 53.4   | 32.7   | 38.3   | 42.4   | 42.4   | 41.0   | 59.9   | 58.7   | 49.9   |
| 9.1    | 7.7    | 6.5    | 7.0    | 9.8    | 7.6    | 16.4   | 16.1   | 9.4    |
| 24.8   | 23.8   | 18.4   | 20.9   | 15.4   | 20.5   | 24.4   | 29.0   | 17.4   |
| 133.9  | 125.5  | 164.1  | 157.3  | 165.6  | 172.9  | 226.7  | 218.6  | 166.2  |
| 124.4  | 76.9   | 96.5   | 104.4  | 112.1  | 91.5   | 145.4  | 149.7  | 101.0  |
| 148.2  | 77.5   | 100.2  | 124.7  | 106.9  | 129.1  | 163.2  | 177.7  | 104.1  |
| 32.0   | 26.4   | 26.7   | 36.8   | 37.2   | 28.3   | 39.9   | 59.5   | 42.1   |
| 195.9  | 105.2  | 134.8  | 150.8  | 138.7  | 146.2  | 199.5  | 202.9  | 154.9  |
| 123.8  | 70.0   | 92.5   | 97.0   | 89.3   | 91.3   | 162.9  | 215.2  | 114.3  |
| 225.6  | 158.1  | 144.3  | 174.2  | 170.1  | 169.0  | 246.0  | 308.0  | 191.9  |
| 7.0    | 4.0    | 9.0    | 6.0    | 7.3    | 5.4    | 9.7    | 6.1    | 7.4    |
| 104.5  | 83.3   | 93.7   | 73.0   | 97.1   | 85.0   | 105.3  | 129.9  | 89.0   |
| 171.4  | 122.9  | 151.2  | 150.2  | 155.4  | 163.6  | 216.0  | 232.0  | 167.6  |
| 24.4   | 23.4   | 36.9   | 29.8   | 25.0   | 39.0   | 50.0   | 55.9   | 26.9   |
| 338.0  | 217.6  | 245.3  | 265.3  | 267.6  | 255.2  | 353.3  | 400.7  | 282.6  |
| 13.2   | 8.6    | 6.1    | 4.7    | 6.4    | 6.9    | 8.6    | 12.6   | 6.3    |
| 2.2    | 0.5    | 1.4    | 0.8    | 1.6    | 2.1    | 4.2    | 2.3    | 1.2    |
| 5.6    | 5.5    | 5.3    | 2.5    | 4.8    | 1.0    | 5.2    | 6.9    | 0.7    |
| 107.4  | 71.4   | 90.8   | 85.2   | 94.0   | 86.2   | 124.6  | 129.4  | 92.1   |
| 106.4  | 60.2   | 65.2   | 76.7   | 77.7   | 76.6   | 89.3   | 122.5  | 80.8   |
| 67.8   | 30.4   | 40.7   | 39.8   | 42.2   | 49.0   | 56.9   | 69.1   | 41.5   |
| 36.9   | 46.7   | 32.9   | 43.5   | 40.5   | 46.1   | 54.3   | 58.3   | 27.1   |
| 825.4  | 594.5  | 680.2  | 724.5  | 829.9  | 872.5  | 1094.7 | 1311.5 | 895.4  |
| 29.8   | 22.3   | 27.4   | 19.9   | 23.1   | 31.7   | 25.1   | 37.9   | 19.6   |
| 5.0    | 0.8    | 2.4    | 0.2    | 1.0    | 7.5    | 2.4    | 9.3    | 5.7    |
| 241.1  | 130.7  | 174.8  | 191.2  | 178.9  | 191.0  | 249.5  | 295.1  | 230.4  |
| 6.0    | 2.0    | 0.9    | 5.5    | 2.2    | 1.2    | 4.4    | 10.1   | 5.1    |
| 0.9    | 0.5    | 1.0    | 3.3    | 1.1    | 1.3    | 2.8    | 16.8   | 8.3    |
| 418.9  | 92.8   | 130.3  | 126.7  | 153.0  | 152.8  | 216.9  | 273.5  | 152.1  |
| 231.4  | 55.0   | 93.5   | 100.7  | 67.0   | 81.7   | 142.9  | 150.1  | 69.9   |
| 290.6  | 154.1  | 158.9  | 171.3  | 168.4  | 192.8  | 236.3  | 305.7  | 163.9  |
| 0.2    | 0.3    | 0.3    | 0.5    | 0.3    | 2.7    | 2.3    | 0.7    | 0.4    |
| 5.0    | 2.6    | 1.4    | 6.5    | 0.6    | 1.0    | 1.4    | 1.2    | 1.0    |
| 615.1  | 446.4  | 511.7  | 562.7  | 571.8  | 563.9  | 697.4  | 714.0  | 444.3  |
| 415.7  | 320.2  | 403.3  | 397.3  | 409.0  | 384.7  | 472.4  | 430.6  | 349.1  |
| 385.9  | 311.2  | 372.0  | 398.8  | 369.6  | 365.5  | 505.1  | 496.2  | 397.8  |
| 191.0  | 141.4  | 149.6  | 146.7  | 180.1  | 148.0  | 214.1  | 216.9  | 148.2  |
| 78.2   | 54.8   | 50.7   | 61.7   | 59.8   | 52.4   | 86.6   | 70.8   | 68.0   |
| 380.8  | 290.9  | 326.7  | 341.3  | 336.2  | 325.3  | 367.2  | 414.0  | 344.8  |
| 193.0  | 103.2  | 132.6  | 138.9  | 146.7  | 122.4  | 180.0  | 181.0  | 123.8  |
| 876.0  | 402.2  | 504.8  | 465.3  | 493.1  | 596.2  | 698.1  | 901.0  | 532.9  |
| 402.7  | 138.8  | 219.1  | 172.5  | 257.6  | 244.3  | 317.8  | 417.2  | 235.1  |
| 2268.6 | 1789.6 | 1881.1 | 1970.4 | 1927.1 | 1935.7 | 2285.3 | 2386.0 | 1816.4 |
| 11.5   | 55.8   | 45.9   | 50.3   | 66.8   | 47.6   | 73.2   | 74.1   | 39.5   |
| 119.6  | 59.1   | 81.2   | 71.2   | 78.8   | 72.2   | 101.2  | 98.9   | 78.9   |
| 2433.7 | 2249.3 | 2264.5 | 2352.7 | 2467.4 | 2341.5 | 2929.2 | 3097.5 | 2462.9 |
| 9.7    | 0.8    | 1.5    | 7.7    | 1.4    | 1.5    | 3.1    | 10.5   | 5.0    |
| 9.7    | 5.3    | 12.5   | 8.4    | 9.5    | 7.9    | 10.2   | 12.4   | 11.4   |
| 1.5    | 1.1    | 0.7    | 1.0    | 1.3    | 0.8    | 0.4    | 0.7    | 0.6    |
| 208.5  | 122.4  | 197.3  | 161.6  | 153.5  | 138.4  | 212.7  | 179.8  | 151.8  |
| 328.9  | 164.8  | 190.3  | 206.0  | 203.5  | 244.6  | 375.3  | 454.7  | 253.8  |

|        |        |        |        |        |        |        |        |        |
|--------|--------|--------|--------|--------|--------|--------|--------|--------|
| 58.8   | 34.8   | 37.8   | 40.0   | 47.0   | 48.8   | 63.9   | 66.6   | 46.2   |
| 56.0   | 38.7   | 51.4   | 54.4   | 51.2   | 55.4   | 86.1   | 68.7   | 46.2   |
| 88.7   | 54.4   | 49.3   | 59.0   | 59.8   | 54.7   | 79.1   | 108.3  | 78.7   |
| 20.2   | 20.7   | 19.5   | 32.6   | 20.9   | 20.6   | 28.4   | 44.9   | 20.5   |
| 135.2  | 101.1  | 120.1  | 128.6  | 114.5  | 133.7  | 164.5  | 193.1  | 131.7  |
| 364.7  | 195.6  | 284.8  | 309.2  | 305.8  | 284.5  | 314.0  | 348.7  | 270.3  |
| 196.6  | 77.1   | 122.7  | 127.9  | 118.3  | 122.1  | 198.9  | 169.7  | 129.4  |
| 51.4   | 28.4   | 42.3   | 43.2   | 36.1   | 40.8   | 58.4   | 82.7   | 47.7   |
| 42.3   | 43.6   | 37.9   | 41.7   | 44.4   | 35.5   | 61.0   | 85.1   | 51.9   |
| 30.5   | 23.7   | 15.4   | 16.6   | 25.9   | 18.4   | 27.5   | 28.0   | 16.0   |
| 191.9  | 164.1  | 206.7  | 207.5  | 167.7  | 196.6  | 254.4  | 257.9  | 240.9  |
| 3.1    | 15.7   | 4.2    | 11.7   | 13.5   | 11.2   | 21.7   | 16.8   | 25.4   |
| 0.7    | 0.8    | 0.4    | 0.7    | 0.5    | 0.7    | 1.0    | 0.7    | 0.6    |
| 88.8   | 76.3   | 91.5   | 91.4   | 108.0  | 100.4  | 102.1  | 115.4  | 73.7   |
| 35.1   | 19.8   | 31.4   | 38.3   | 37.8   | 34.9   | 44.6   | 44.4   | 28.4   |
| 692.3  | 578.2  | 560.7  | 580.8  | 649.2  | 632.3  | 832.7  | 843.6  | 711.3  |
| 26.6   | 30.5   | 23.3   | 22.6   | 42.0   | 38.5   | 33.4   | 41.4   | 28.3   |
| 606.3  | 366.6  | 468.9  | 483.9  | 493.0  | 490.4  | 691.0  | 625.4  | 532.4  |
| 237.2  | 130.5  | 130.8  | 152.1  | 181.0  | 165.8  | 224.8  | 257.8  | 166.3  |
| 19.2   | 13.1   | 19.0   | 19.1   | 14.2   | 11.9   | 21.0   | 23.5   | 16.9   |
| 6.4    | 3.2    | 5.9    | 3.3    | 9.7    | 8.9    | 9.4    | 10.5   | 8.5    |
| 22.7   | 21.0   | 24.9   | 21.2   | 19.9   | 19.3   | 30.1   | 53.5   | 21.9   |
| 511.6  | 278.5  | 295.9  | 321.7  | 330.1  | 305.7  | 421.1  | 404.7  | 399.2  |
| 645.6  | 857.8  | 940.2  | 915.4  | 1057.8 | 1062.6 | 1384.3 | 1484.2 | 1033.0 |
| 0.4    | 0.4    | 0.8    | 0.9    | 0.3    | 2.8    | 0.8    | 0.4    | 0.6    |
| 28.0   | 25.7   | 20.5   | 19.5   | 25.4   | 23.0   | 23.7   | 24.8   | 18.6   |
| 11.9   | 9.3    | 6.0    | 12.8   | 12.2   | 11.0   | 17.2   | 22.1   | 14.2   |
| 4.4    | 2.5    | 2.2    | 2.6    | 1.2    | 3.7    | 4.6    | 3.4    | 1.2    |
| 600.1  | 409.9  | 525.1  | 550.3  | 488.1  | 506.2  | 631.8  | 597.7  | 465.0  |
| 13.0   | 16.5   | 19.7   | 21.8   | 17.1   | 23.6   | 32.2   | 23.6   | 30.4   |
| 0.6    | 3.8    | 7.2    | 5.7    | 1.0    | 0.7    | 0.6    | 1.4    | 4.2    |
| 319.6  | 191.9  | 253.8  | 235.8  | 229.7  | 236.4  | 327.6  | 342.5  | 197.6  |
| 51.9   | 63.2   | 41.0   | 30.0   | 36.6   | 33.8   | 41.4   | 56.7   | 32.4   |
| 45.3   | 29.6   | 38.6   | 36.1   | 46.1   | 37.3   | 50.2   | 74.0   | 44.1   |
| 98.2   | 83.4   | 101.5  | 94.4   | 113.2  | 96.8   | 115.4  | 129.3  | 103.5  |
| 92.8   | 51.1   | 80.4   | 89.9   | 83.3   | 80.8   | 122.7  | 110.4  | 75.2   |
| 159.4  | 128.8  | 126.6  | 143.9  | 136.8  | 170.1  | 247.1  | 279.7  | 181.1  |
| 69.1   | 44.4   | 46.3   | 41.6   | 51.6   | 60.1   | 82.4   | 129.0  | 87.2   |
| 444.9  | 169.7  | 217.7  | 222.3  | 226.7  | 249.9  | 328.4  | 376.4  | 313.0  |
| 168.2  | 83.1   | 80.8   | 93.3   | 103.2  | 94.9   | 131.8  | 168.1  | 121.6  |
| 3247.1 | 2301.0 | 2759.1 | 2566.5 | 2566.2 | 2731.6 | 2951.3 | 3083.8 | 2477.5 |
| 108.3  | 87.4   | 98.5   | 78.5   | 101.9  | 90.4   | 140.6  | 156.4  | 108.3  |
| 36.4   | 22.4   | 32.1   | 29.0   | 29.0   | 27.5   | 35.5   | 57.4   | 35.0   |
| 295.4  | 217.7  | 259.6  | 259.0  | 263.8  | 242.3  | 328.1  | 321.0  | 200.3  |
| 18.9   | 19.0   | 26.6   | 22.7   | 25.1   | 24.6   | 33.3   | 31.2   | 25.7   |
| 7.1    | 12.1   | 20.8   | 22.2   | 24.3   | 13.6   | 25.8   | 30.3   | 20.7   |
| 7.0    | 10.7   | 14.3   | 6.1    | 10.5   | 7.8    | 10.9   | 15.3   | 16.3   |
| 104.3  | 70.1   | 67.9   | 79.3   | 75.9   | 74.5   | 98.6   | 112.6  | 69.5   |
| 36.2   | 33.9   | 66.5   | 32.9   | 60.2   | 32.5   | 41.5   | 58.7   | 29.8   |
| 43.8   | 14.7   | 9.6    | 12.1   | 8.1    | 9.7    | 2.5    | 20.0   | 11.9   |
| 1592.0 | 1159.0 | 1139.9 | 1306.8 | 1367.0 | 1279.5 | 2059.7 | 1939.8 | 1352.1 |
| 19.2   | 7.5    | 20.9   | 16.9   | 16.9   | 13.8   | 20.0   | 19.8   | 10.2   |
| 3.0    | 0.8    | 13.0   | 8.8    | 2.0    | 10.7   | 18.5   | 17.1   | 4.3    |

|        |       |       |       |       |       |        |        |       |
|--------|-------|-------|-------|-------|-------|--------|--------|-------|
| 42.6   | 25.1  | 35.8  | 34.1  | 30.0  | 38.1  | 57.9   | 52.9   | 43.2  |
| 0.5    | 0.5   | 0.6   | 0.4   | 0.6   | 0.5   | 0.4    | 0.5    | 0.6   |
| 62.2   | 32.7  | 36.4  | 43.2  | 34.9  | 43.6  | 64.1   | 62.1   | 46.5  |
| 90.6   | 36.2  | 54.5  | 60.6  | 64.8  | 63.4  | 78.3   | 98.7   | 55.0  |
| 216.7  | 196.3 | 203.7 | 230.2 | 240.6 | 230.6 | 291.0  | 285.9  | 221.6 |
| 405.2  | 305.5 | 361.9 | 344.3 | 394.8 | 362.5 | 501.9  | 517.8  | 341.9 |
| 232.3  | 175.3 | 179.9 | 197.0 | 236.5 | 211.1 | 281.1  | 300.7  | 247.8 |
| 697.4  | 472.0 | 485.9 | 528.5 | 565.7 | 453.9 | 593.8  | 650.8  | 449.7 |
| 1.1    | 13.1  | 4.2   | 5.4   | 8.9   | 3.1   | 4.1    | 1.9    | 8.8   |
| 70.9   | 45.2  | 50.1  | 40.9  | 44.7  | 47.1  | 60.2   | 64.9   | 44.5  |
| 99.8   | 47.1  | 32.6  | 40.4  | 40.3  | 39.9  | 59.6   | 89.7   | 70.3  |
| 85.2   | 72.4  | 56.4  | 75.0  | 75.9  | 52.1  | 98.8   | 98.7   | 56.2  |
| 68.4   | 43.9  | 41.9  | 48.2  | 39.8  | 43.3  | 68.9   | 90.4   | 44.8  |
| 53.7   | 22.1  | 37.1  | 37.8  | 36.5  | 46.2  | 64.1   | 58.7   | 47.4  |
| 106.1  | 48.2  | 69.1  | 79.9  | 72.5  | 80.3  | 98.0   | 109.7  | 64.9  |
| 77.5   | 63.8  | 66.1  | 69.4  | 58.1  | 67.7  | 73.0   | 90.6   | 76.3  |
| 67.7   | 31.0  | 32.9  | 35.0  | 45.7  | 46.1  | 66.3   | 73.6   | 44.8  |
| 84.9   | 54.4  | 48.5  | 54.9  | 70.7  | 76.4  | 90.5   | 112.8  | 74.3  |
| 67.9   | 44.9  | 38.9  | 58.5  | 56.1  | 48.2  | 64.8   | 76.0   | 71.3  |
| 533.6  | 362.6 | 386.2 | 418.5 | 444.1 | 422.2 | 658.1  | 660.4  | 775.2 |
| 451.3  | 289.0 | 336.0 | 349.5 | 339.6 | 351.9 | 521.9  | 575.1  | 400.9 |
| 19.6   | 13.1  | 16.7  | 13.0  | 14.4  | 6.2   | 25.4   | 20.3   | 16.5  |
| 20.1   | 18.1  | 13.8  | 14.1  | 13.7  | 10.6  | 19.8   | 28.0   | 13.1  |
| 13.4   | 3.9   | 13.6  | 18.2  | 12.9  | 10.2  | 26.4   | 30.5   | 3.5   |
| 229.0  | 179.2 | 145.5 | 177.5 | 174.3 | 172.1 | 234.0  | 293.1  | 244.4 |
| 130.0  | 99.8  | 85.0  | 108.7 | 105.4 | 99.3  | 126.0  | 161.3  | 87.8  |
| 42.5   | 28.0  | 34.7  | 40.6  | 36.3  | 39.3  | 56.5   | 83.5   | 38.0  |
| 831.0  | 710.7 | 569.6 | 701.2 | 714.2 | 714.7 | 1138.5 | 1498.9 | 534.7 |
| 271.7  | 156.4 | 186.4 | 195.1 | 247.3 | 201.8 | 349.3  | 439.5  | 243.4 |
| 33.5   | 23.7  | 19.5  | 31.2  | 39.6  | 33.5  | 42.0   | 43.8   | 42.6  |
| 1157.4 | 525.0 | 661.0 | 727.8 | 686.9 | 679.5 | 895.7  | 957.5  | 842.3 |
| 1.9    | 7.2   | 2.2   | 1.3   | 2.4   | 1.8   | 6.1    | 1.6    | 10.7  |
| 0.9    | 0.9   | 1.3   | 3.8   | 6.6   | 4.4   | 2.0    | 2.6    | 7.1   |
| 1.5    | 1.5   | 5.6   | 2.7   | 1.2   | 1.0   | 2.9    | 7.0    | 2.1   |
| 50.4   | 44.7  | 38.8  | 38.8  | 47.5  | 41.2  | 61.6   | 69.3   | 45.0  |
| 1.0    | 2.8   | 1.1   | 0.6   | 0.7   | 0.6   | 0.9    | 1.9    | 1.8   |
| 481.5  | 347.2 | 360.3 | 293.3 | 427.2 | 427.5 | 463.4  | 609.7  | 319.6 |
| 353.8  | 241.4 | 251.5 | 300.5 | 252.3 | 287.4 | 373.6  | 360.6  | 356.9 |
| 307.7  | 216.7 | 272.6 | 300.7 | 284.1 | 298.8 | 389.8  | 339.2  | 379.4 |
| 281.7  | 199.5 | 236.5 | 247.0 | 242.8 | 225.5 | 325.5  | 344.2  | 264.4 |
| 116.8  | 76.4  | 108.4 | 90.3  | 84.1  | 71.9  | 96.2   | 112.0  | 73.1  |
| 464.9  | 305.0 | 338.9 | 360.3 | 392.2 | 377.4 | 470.9  | 560.7  | 352.6 |
| 8.8    | 3.5   | 7.4   | 5.8   | 1.9   | 7.6   | 3.9    | 19.3   | 6.2   |
| 7.2    | 9.4   | 11.8  | 16.0  | 13.6  | 11.9  | 13.6   | 20.9   | 18.8  |
| 2.5    | 3.9   | 5.0   | 9.3   | 9.7   | 14.7  | 7.4    | 2.3    | 8.2   |
| 19.8   | 11.0  | 17.9  | 16.5  | 17.1  | 18.7  | 20.5   | 25.7   | 30.2  |
| 113.9  | 71.5  | 81.1  | 82.4  | 84.7  | 96.0  | 133.5  | 179.0  | 89.6  |
| 2.5    | 21.7  | 9.3   | 11.3  | 11.9  | 14.1  | 19.1   | 14.2   | 13.6  |
| 6.2    | 7.0   | 10.3  | 7.6   | 11.1  | 18.4  | 15.9   | 14.7   | 11.7  |
| 70.6   | 36.3  | 45.8  | 45.0  | 51.6  | 60.5  | 62.7   | 84.1   | 52.5  |
| 182.6  | 68.2  | 78.9  | 84.2  | 91.2  | 100.7 | 133.0  | 162.0  | 83.9  |
| 3.9    | 14.1  | 13.6  | 13.9  | 14.1  | 8.4   | 23.6   | 24.5   | 15.6  |
| 92.1   | 118.9 | 131.0 | 119.9 | 129.0 | 125.5 | 161.9  | 188.3  | 127.5 |

|        |        |        |        |        |        |        |        |        |
|--------|--------|--------|--------|--------|--------|--------|--------|--------|
| 314.4  | 187.8  | 261.8  | 212.0  | 245.8  | 238.5  | 255.6  | 316.2  | 201.0  |
| 127.7  | 64.7   | 87.8   | 89.4   | 82.2   | 84.4   | 97.2   | 88.5   | 94.7   |
| 295.0  | 232.7  | 236.5  | 287.3  | 254.5  | 268.0  | 358.0  | 438.8  | 247.4  |
| 536.0  | 362.0  | 357.9  | 435.0  | 419.4  | 416.0  | 602.4  | 722.8  | 464.8  |
| 270.5  | 133.5  | 163.5  | 173.9  | 176.9  | 208.4  | 273.4  | 360.1  | 238.2  |
| 3.4    | 4.2    | 1.4    | 3.9    | 5.6    | 0.7    | 1.3    | 1.6    | 0.8    |
| 53.2   | 10.3   | 13.2   | 12.3   | 12.3   | 5.6    | 15.2   | 13.1   | 7.3    |
| 354.7  | 43.7   | 47.5   | 41.6   | 50.7   | 32.8   | 42.9   | 54.1   | 44.6   |
| 360.4  | 176.2  | 175.3  | 193.5  | 187.5  | 210.3  | 225.6  | 289.5  | 176.8  |
| 0.3    | 0.2    | 0.9    | 0.3    | 0.9    | 0.4    | 0.5    | 0.5    | 0.3    |
| 79.0   | 58.2   | 55.9   | 51.1   | 60.1   | 55.2   | 82.5   | 69.9   | 51.7   |
| 376.8  | 231.1  | 312.1  | 288.6  | 347.8  | 333.1  | 426.4  | 457.7  | 363.2  |
| 1105.2 | 967.3  | 1017.2 | 936.2  | 1059.6 | 993.7  | 1316.8 | 1420.1 | 1209.7 |
| 39.8   | 29.4   | 53.7   | 45.8   | 32.2   | 43.6   | 78.7   | 75.2   | 55.7   |
| 87.5   | 87.7   | 81.6   | 87.6   | 97.4   | 87.4   | 133.0  | 158.8  | 85.2   |
| 101.5  | 83.7   | 87.5   | 80.5   | 85.5   | 89.1   | 135.4  | 145.6  | 128.4  |
| 38.9   | 14.4   | 9.5    | 13.4   | 14.1   | 15.5   | 10.3   | 19.0   | 23.5   |
| 61.9   | 9.2    | 10.7   | 9.2    | 8.8    | 11.2   | 14.2   | 9.4    | 11.9   |
| 103.1  | 121.4  | 113.0  | 113.9  | 85.3   | 105.5  | 130.4  | 140.4  | 111.2  |
| 284.4  | 159.9  | 191.4  | 225.4  | 229.9  | 190.9  | 265.2  | 256.6  | 209.6  |
| 249.9  | 248.2  | 186.4  | 262.3  | 249.0  | 251.1  | 293.6  | 348.5  | 290.2  |
| 185.3  | 116.0  | 146.7  | 139.3  | 150.6  | 143.5  | 217.5  | 228.6  | 154.4  |
| 92.5   | 77.6   | 111.7  | 107.2  | 93.6   | 68.7   | 140.4  | 102.0  | 85.4   |
| 248.0  | 150.8  | 147.8  | 171.4  | 207.3  | 182.5  | 270.2  | 325.9  | 177.2  |
| 1.7    | 1.8    | 1.7    | 1.0    | 2.2    | 2.2    | 6.7    | 2.4    | 2.4    |
| 197.5  | 147.8  | 148.8  | 173.4  | 137.0  | 156.1  | 242.0  | 236.8  | 100.8  |
| 81.1   | 57.2   | 45.9   | 56.2   | 48.1   | 47.2   | 52.2   | 40.3   | 51.8   |
| 10.4   | 1.7    | 12.8   | 14.0   | 11.6   | 13.7   | 15.9   | 21.0   | 11.5   |
| 191.7  | 122.5  | 116.5  | 165.1  | 191.7  | 187.1  | 261.3  | 319.4  | 185.9  |
| 134.5  | 115.9  | 142.4  | 143.6  | 170.3  | 136.8  | 171.6  | 210.2  | 158.6  |
| 2.0    | 1.7    | 0.4    | 0.4    | 1.3    | 5.2    | 3.4    | 1.6    | 2.1    |
| 169.0  | 133.7  | 199.9  | 181.3  | 154.8  | 187.9  | 244.9  | 257.3  | 202.7  |
| 273.7  | 149.9  | 172.8  | 190.7  | 185.9  | 154.1  | 183.5  | 191.4  | 188.1  |
| 3.8    | 0.8    | 4.0    | 0.8    | 0.5    | 6.0    | 7.9    | 3.7    | 3.6    |
| 2.6    | 25.1   | 5.7    | 14.0   | 13.0   | 9.1    | 10.5   | 9.2    | 7.2    |
| 114.6  | 61.6   | 81.0   | 85.9   | 75.9   | 74.5   | 83.2   | 100.3  | 89.2   |
| 198.8  | 129.1  | 165.9  | 166.9  | 163.0  | 159.4  | 177.2  | 230.3  | 123.3  |
| 8.8    | 5.5    | 5.2    | 5.4    | 7.4    | 7.4    | 13.4   | 9.9    | 4.8    |
| 184.8  | 123.5  | 127.4  | 137.9  | 155.9  | 156.4  | 182.1  | 213.0  | 166.2  |
| 31.5   | 19.4   | 18.7   | 27.0   | 22.4   | 23.9   | 22.7   | 34.2   | 34.7   |
| 216.3  | 162.4  | 183.4  | 204.2  | 173.5  | 162.3  | 254.8  | 241.8  | 206.4  |
| 16.2   | 12.4   | 16.0   | 9.5    | 10.9   | 9.7    | 13.9   | 20.0   | 10.0   |
| 3303.5 | 2914.3 | 2617.7 | 2896.0 | 3088.4 | 2922.2 | 3656.4 | 3730.1 | 3142.7 |
| 79.5   | 521.7  | 386.4  | 342.5  | 608.3  | 448.8  | 508.3  | 727.5  | 554.8  |
| 111.4  | 59.6   | 79.4   | 79.3   | 81.6   | 91.0   | 96.7   | 129.5  | 83.4   |
| 151.5  | 92.3   | 96.1   | 117.2  | 92.9   | 107.9  | 142.4  | 178.9  | 155.1  |
| 2.8    | 1.3    | 0.7    | 3.6    | 13.1   | 0.6    | 1.2    | 4.0    | 4.7    |
| 118.7  | 80.3   | 81.3   | 88.6   | 95.6   | 100.9  | 118.2  | 139.4  | 111.6  |
| 194.7  | 90.9   | 76.5   | 110.6  | 102.6  | 86.6   | 112.3  | 89.7   | 101.7  |
| 323.7  | 216.1  | 212.8  | 243.0  | 236.6  | 231.5  | 317.5  | 365.7  | 315.1  |
| 322.7  | 197.2  | 209.2  | 211.3  | 277.8  | 241.6  | 343.1  | 392.8  | 250.4  |
| 318.7  | 206.0  | 241.1  | 268.7  | 279.0  | 258.9  | 400.4  | 467.6  | 283.1  |
| 14.2   | 12.6   | 12.4   | 17.9   | 12.7   | 8.9    | 21.2   | 21.3   | 14.2   |

|       |       |       |       |       |       |       |        |       |
|-------|-------|-------|-------|-------|-------|-------|--------|-------|
| 23.1  | 18.1  | 18.7  | 9.2   | 13.3  | 7.8   | 18.5  | 9.9    | 16.9  |
| 259.1 | 100.4 | 94.4  | 131.1 | 129.9 | 133.7 | 226.0 | 304.8  | 180.4 |
| 780.3 | 574.0 | 784.7 | 722.3 | 782.6 | 816.8 | 948.2 | 1004.9 | 814.1 |
| 82.8  | 62.2  | 62.3  | 84.1  | 70.4  | 52.6  | 79.0  | 71.3   | 76.8  |
| 170.7 | 113.5 | 136.2 | 127.5 | 118.6 | 110.3 | 156.7 | 168.7  | 99.4  |
| 289.8 | 151.3 | 176.0 | 165.6 | 206.9 | 219.9 | 254.3 | 270.1  | 160.9 |
| 15.0  | 18.0  | 15.3  | 18.0  | 13.2  | 6.0   | 21.9  | 20.2   | 15.6  |
| 24.7  | 22.8  | 24.0  | 20.8  | 30.1  | 25.1  | 44.7  | 48.8   | 17.3  |
| 59.9  | 21.4  | 44.2  | 34.7  | 53.9  | 38.3  | 69.2  | 83.7   | 39.6  |
| 433.3 | 383.6 | 360.3 | 444.1 | 443.0 | 395.4 | 541.2 | 493.3  | 501.6 |
| 165.6 | 136.7 | 121.7 | 168.0 | 169.4 | 157.5 | 289.6 | 323.9  | 183.7 |
| 11.7  | 9.7   | 12.3  | 8.6   | 14.5  | 6.6   | 13.2  | 10.3   | 11.2  |
| 354.6 | 257.3 | 223.7 | 303.3 | 311.6 | 313.4 | 479.6 | 566.3  | 450.7 |
| 45.9  | 35.7  | 40.2  | 35.7  | 43.9  | 29.6  | 41.3  | 51.7   | 37.6  |
| 1.0   | 0.8   | 1.1   | 1.0   | 2.2   | 0.7   | 1.5   | 1.0    | 0.6   |
| 5.0   | 2.1   | 5.0   | 0.4   | 0.6   | 0.3   | 3.2   | 1.3    | 0.6   |
| 165.2 | 113.8 | 156.6 | 145.5 | 142.8 | 150.6 | 196.9 | 220.7  | 171.2 |
| 164.8 | 114.6 | 137.4 | 125.9 | 141.6 | 144.6 | 175.7 | 185.4  | 126.0 |
| 378.6 | 302.4 | 361.8 | 407.3 | 365.5 | 326.0 | 477.2 | 558.8  | 373.8 |
| 251.3 | 163.8 | 196.6 | 206.5 | 181.5 | 209.5 | 254.3 | 310.3  | 212.0 |
| 194.7 | 141.4 | 197.1 | 197.4 | 196.8 | 196.0 | 270.7 | 269.7  | 175.2 |
| 157.3 | 91.6  | 92.7  | 106.9 | 97.5  | 102.8 | 148.5 | 137.5  | 106.5 |
| 0.8   | 1.3   | 0.6   | 0.6   | 4.7   | 0.9   | 8.4   | 8.4    | 4.1   |
| 5.9   | 10.2  | 9.9   | 12.4  | 12.5  | 14.7  | 21.3  | 19.6   | 13.8  |
| 6.2   | 7.1   | 5.1   | 2.5   | 10.2  | 3.6   | 3.8   | 15.0   | 10.6  |
| 0.5   | 0.5   | 0.4   | 0.5   | 3.2   | 5.1   | 6.9   | 5.6    | 0.9   |
| 179.8 | 120.2 | 115.0 | 145.0 | 144.8 | 143.0 | 205.9 | 223.3  | 159.6 |
| 31.1  | 14.8  | 21.5  | 16.9  | 17.2  | 22.5  | 25.0  | 27.8   | 24.0  |
| 23.7  | 21.3  | 20.3  | 10.8  | 25.3  | 14.1  | 24.8  | 31.2   | 12.2  |
| 120.0 | 76.5  | 62.3  | 82.4  | 47.2  | 82.1  | 73.8  | 118.2  | 128.1 |
| 143.3 | 97.9  | 96.5  | 99.0  | 101.5 | 97.2  | 177.1 | 183.7  | 151.0 |
| 33.3  | 16.6  | 23.7  | 20.6  | 21.1  | 18.9  | 29.0  | 33.2   | 12.8  |
| 493.1 | 243.4 | 282.8 | 294.4 | 337.9 | 334.2 | 396.5 | 374.1  | 354.2 |
| 64.7  | 33.7  | 29.9  | 46.5  | 31.8  | 46.0  | 55.8  | 67.4   | 33.8  |
| 237.6 | 131.7 | 139.9 | 144.9 | 167.9 | 124.1 | 216.9 | 239.6  | 144.8 |
| 190.0 | 122.3 | 125.5 | 160.8 | 176.9 | 150.2 | 197.7 | 229.6  | 125.2 |
| 385.2 | 224.7 | 246.4 | 245.0 | 286.6 | 283.7 | 399.2 | 668.0  | 421.1 |
| 3.9   | 4.9   | 0.6   | 7.6   | 1.4   | 4.9   | 5.5   | 2.1    | 1.3   |
| 1.7   | 1.5   | 1.4   | 2.2   | 1.8   | 1.0   | 1.2   | 1.3    | 1.8   |
| 11.4  | 4.6   | 11.1  | 11.6  | 9.0   | 13.6  | 11.4  | 18.9   | 18.2  |
| 19.4  | 4.4   | 19.5  | 14.1  | 17.0  | 16.4  | 20.4  | 38.4   | 11.1  |
| 820.0 | 559.1 | 699.6 | 726.7 | 731.0 | 747.8 | 903.8 | 1045.8 | 774.7 |
| 219.1 | 132.3 | 150.7 | 161.5 | 164.9 | 172.5 | 262.0 | 326.9  | 215.8 |
| 167.5 | 118.7 | 119.9 | 124.6 | 133.1 | 124.9 | 157.4 | 168.8  | 117.2 |
| 1.3   | 0.4   | 0.5   | 0.9   | 0.4   | 0.5   | 0.4   | 0.9    | 0.8   |
| 268.2 | 222.9 | 267.2 | 275.9 | 280.0 | 271.4 | 352.4 | 356.4  | 298.9 |
| 17.1  | 2.9   | 1.2   | 0.8   | 2.4   | 1.3   | 1.7   | 2.1    | 9.1   |
| 89.3  | 74.9  | 98.1  | 88.1  | 87.6  | 76.0  | 100.8 | 98.6   | 111.6 |
| 11.4  | 17.1  | 12.0  | 23.6  | 21.4  | 11.2  | 21.5  | 19.3   | 14.1  |
| 196.8 | 145.9 | 169.7 | 166.8 | 200.2 | 185.2 | 250.1 | 290.8  | 155.5 |
| 40.2  | 28.9  | 32.7  | 36.2  | 22.9  | 23.3  | 53.5  | 46.0   | 44.2  |
| 45.0  | 26.0  | 36.6  | 27.6  | 38.9  | 37.6  | 60.2  | 59.7   | 33.5  |
| 4.5   | 3.5   | 6.8   | 6.4   | 3.7   | 0.6   | 11.0  | 12.4   | 12.3  |



|       |       |       |       |       |       |       |       |       |
|-------|-------|-------|-------|-------|-------|-------|-------|-------|
| 4.3   | 4.4   | 3.1   | 2.9   | 4.4   | 3.2   | 7.2   | 6.4   | 2.7   |
| 2.0   | 0.5   | 1.2   | 3.0   | 3.9   | 2.3   | 1.2   | 2.7   | 3.4   |
| 0.4   | 0.3   | 0.2   | 0.4   | 1.1   | 0.2   | 0.2   | 0.5   | 0.7   |
| 2.5   | 1.4   | 2.0   | 0.8   | 1.8   | 2.0   | 3.0   | 2.8   | 2.6   |
| 16.6  | 12.4  | 18.8  | 7.4   | 13.0  | 10.5  | 17.7  | 22.5  | 17.2  |
| 17.6  | 12.3  | 10.9  | 13.3  | 11.9  | 14.0  | 18.9  | 25.6  | 13.6  |
| 22.6  | 11.6  | 10.1  | 20.2  | 16.6  | 9.1   | 23.3  | 24.2  | 11.9  |
| 109.1 | 84.8  | 95.3  | 118.5 | 97.0  | 97.5  | 184.9 | 128.7 | 138.3 |
| 82.5  | 54.4  | 57.0  | 61.0  | 72.2  | 60.8  | 89.5  | 117.9 | 112.7 |
| 178.1 | 103.0 | 112.8 | 128.6 | 129.3 | 138.5 | 175.6 | 193.6 | 161.6 |
| 433.6 | 307.0 | 348.9 | 324.8 | 359.5 | 313.7 | 483.0 | 466.4 | 455.2 |
| 10.1  | 4.7   | 1.9   | 8.1   | 6.4   | 7.2   | 7.2   | 7.5   | 2.3   |
| 20.3  | 10.9  | 8.2   | 11.9  | 10.4  | 9.3   | 12.1  | 18.2  | 15.5  |
| 5.2   | 2.9   | 2.8   | 5.9   | 4.6   | 3.0   | 10.0  | 10.4  | 9.5   |
| 7.4   | 4.6   | 7.1   | 5.0   | 9.2   | 8.0   | 13.5  | 14.1  | 7.2   |
| 72.3  | 25.7  | 42.9  | 31.3  | 37.4  | 41.6  | 37.5  | 59.6  | 34.0  |
| 498.9 | 284.8 | 357.0 | 383.8 | 416.2 | 381.6 | 505.3 | 531.9 | 429.1 |
| 34.9  | 29.4  | 29.7  | 25.8  | 21.9  | 24.0  | 35.1  | 48.3  | 30.1  |
| 141.8 | 89.1  | 89.3  | 100.7 | 107.2 | 78.2  | 148.1 | 117.9 | 93.0  |
| 96.4  | 67.1  | 60.5  | 62.8  | 64.5  | 67.7  | 97.3  | 90.2  | 54.4  |
| 230.7 | 113.0 | 135.4 | 153.5 | 135.2 | 163.0 | 195.8 | 251.9 | 147.2 |
| 259.2 | 162.6 | 216.8 | 177.6 | 219.5 | 204.6 | 230.8 | 190.5 | 179.8 |
| 14.2  | 5.7   | 9.0   | 13.2  | 15.7  | 11.2  | 8.8   | 14.5  | 12.2  |
| 25.1  | 11.1  | 25.6  | 26.5  | 24.4  | 32.1  | 38.8  | 48.9  | 20.9  |
| 51.9  | 31.3  | 43.6  | 47.5  | 45.2  | 35.3  | 52.4  | 47.6  | 37.4  |
| 13.6  | 10.0  | 7.6   | 16.2  | 10.9  | 12.4  | 11.2  | 13.3  | 8.2   |
| 559.9 | 402.2 | 446.7 | 502.8 | 527.1 | 464.2 | 714.6 | 857.4 | 483.5 |
| 169.3 | 125.5 | 135.6 | 130.5 | 138.3 | 158.6 | 245.8 | 312.7 | 177.0 |
| 190.9 | 145.8 | 154.1 | 152.4 | 176.3 | 150.6 | 184.9 | 264.8 | 179.4 |
| 17.6  | 14.2  | 15.0  | 15.8  | 14.9  | 12.8  | 20.1  | 24.1  | 12.1  |
| 155.4 | 106.8 | 124.4 | 115.3 | 118.4 | 89.6  | 117.0 | 137.9 | 141.1 |
| 77.4  | 63.3  | 89.8  | 84.7  | 78.9  | 91.3  | 120.4 | 144.3 | 104.5 |
| 348.2 | 171.0 | 192.7 | 191.5 | 223.3 | 209.2 | 302.1 | 275.8 | 168.0 |
| 113.7 | 91.1  | 94.4  | 101.6 | 100.2 | 98.7  | 120.3 | 108.5 | 93.0  |
| 107.4 | 75.2  | 90.2  | 74.9  | 99.1  | 79.0  | 110.0 | 111.4 | 95.5  |
| 476.6 | 308.2 | 418.8 | 413.2 | 472.1 | 476.4 | 531.3 | 581.3 | 513.6 |
| 129.0 | 90.4  | 96.4  | 90.1  | 104.1 | 79.0  | 117.1 | 129.5 | 75.1  |
| 8.2   | 4.3   | 3.0   | 6.9   | 4.3   | 12.7  | 4.6   | 12.1  | 11.5  |
| 16.3  | 7.9   | 2.1   | 9.7   | 11.1  | 8.8   | 15.9  | 20.2  | 11.6  |
| 16.6  | 3.4   | 10.1  | 2.1   | 1.8   | 15.6  | 4.9   | 8.7   | 0.6   |
| 110.7 | 66.5  | 69.5  | 69.2  | 84.0  | 88.6  | 114.8 | 97.8  | 83.2  |
| 94.4  | 118.4 | 146.1 | 175.3 | 150.9 | 141.7 | 199.1 | 186.0 | 126.7 |
| 180.6 | 135.8 | 137.1 | 132.9 | 148.5 | 135.9 | 169.7 | 243.9 | 148.1 |
| 25.6  | 22.5  | 36.7  | 29.0  | 34.3  | 20.3  | 32.2  | 32.8  | 31.7  |
| 738.2 | 116.8 | 136.3 | 172.8 | 170.9 | 147.7 | 271.2 | 255.7 | 172.0 |
| 187.1 | 20.1  | 31.0  | 39.1  | 34.6  | 33.0  | 53.5  | 60.0  | 35.5  |
| 52.5  | 26.5  | 29.0  | 28.0  | 31.3  | 39.3  | 55.0  | 63.8  | 33.6  |
| 1.1   | 1.2   | 0.4   | 0.4   | 0.4   | 1.8   | 0.9   | 0.7   | 0.5   |
| 22.4  | 24.6  | 3.3   | 20.8  | 16.5  | 9.2   | 30.0  | 31.8  | 29.0  |
| 218.9 | 150.2 | 171.8 | 189.3 | 174.1 | 175.3 | 237.6 | 295.9 | 221.5 |
| 593.9 | 429.4 | 422.0 | 443.1 | 511.2 | 460.8 | 632.1 | 764.1 | 646.1 |
| 861.5 | 609.9 | 624.9 | 693.2 | 668.8 | 658.2 | 840.1 | 966.1 | 604.4 |
| 673.2 | 190.3 | 229.1 | 259.2 | 279.2 | 287.5 | 408.0 | 674.3 | 320.2 |

|        |        |        |        |        |        |        |        |        |
|--------|--------|--------|--------|--------|--------|--------|--------|--------|
| 3154.9 | 2757.0 | 2858.1 | 2980.1 | 3075.5 | 2828.9 | 3043.6 | 2934.1 | 2499.2 |
| 97.4   | 80.8   | 91.5   | 96.3   | 99.6   | 109.5  | 122.2  | 144.6  | 111.9  |
| 32.0   | 42.5   | 24.7   | 25.9   | 22.9   | 23.6   | 55.6   | 62.9   | 38.9   |
| 59.9   | 40.6   | 38.7   | 36.3   | 46.4   | 50.5   | 62.0   | 62.9   | 58.1   |
| 53.3   | 36.2   | 37.3   | 48.3   | 42.0   | 34.7   | 58.0   | 72.1   | 37.5   |
| 56.6   | 35.3   | 46.7   | 43.8   | 50.2   | 49.4   | 62.6   | 71.7   | 38.8   |
| 74.4   | 26.8   | 40.7   | 40.7   | 35.8   | 50.7   | 55.4   | 81.2   | 48.9   |
| 26.6   | 11.7   | 16.0   | 9.5    | 17.8   | 11.5   | 25.1   | 33.5   | 17.2   |
| 164.2  | 70.4   | 67.7   | 86.5   | 97.2   | 80.5   | 117.9  | 182.6  | 101.7  |
| 2.6    | 3.0    | 6.0    | 1.9    | 5.0    | 7.1    | 9.1    | 2.8    | 1.4    |
| 39.1   | 34.8   | 27.9   | 40.2   | 32.6   | 45.5   | 45.0   | 62.8   | 38.3   |
| 214.6  | 127.4  | 169.9  | 178.6  | 170.5  | 190.4  | 233.4  | 229.8  | 156.6  |
| 52.5   | 51.8   | 46.1   | 48.1   | 60.0   | 45.6   | 64.1   | 58.9   | 50.3   |
| 34.5   | 27.6   | 26.5   | 30.1   | 27.1   | 22.3   | 39.8   | 44.1   | 28.9   |
| 243.1  | 145.2  | 162.9  | 188.3  | 175.8  | 166.1  | 245.8  | 251.5  | 199.8  |
| 3.7    | 1.1    | 4.9    | 3.2    | 0.8    | 3.1    | 0.6    | 5.7    | 1.0    |
| 95.5   | 205.4  | 190.7  | 224.4  | 239.4  | 209.6  | 306.8  | 382.3  | 303.4  |
| 65.7   | 52.0   | 60.0   | 46.6   | 55.3   | 48.6   | 69.8   | 83.8   | 61.6   |
| 0.7    | 0.9    | 0.8    | 0.9    | 0.2    | 0.4    | 1.3    | 0.6    | 1.4    |
| 2.2    | 2.5    | 1.9    | 2.8    | 3.4    | 1.3    | 1.7    | 2.1    | 4.9    |
| 52.5   | 27.4   | 34.6   | 34.4   | 31.0   | 29.8   | 45.0   | 60.4   | 38.8   |
| 9.5    | 9.4    | 7.8    | 8.2    | 9.3    | 8.4    | 14.0   | 19.5   | 12.1   |
| 228.7  | 80.7   | 114.4  | 86.7   | 146.5  | 135.7  | 138.9  | 203.3  | 147.7  |
| 264.7  | 129.6  | 134.8  | 145.0  | 172.0  | 176.1  | 317.2  | 333.8  | 197.4  |
| 106.7  | 71.8   | 71.9   | 66.2   | 59.1   | 54.6   | 123.9  | 67.3   | 83.8   |
| 40.6   | 26.5   | 31.7   | 29.1   | 23.1   | 31.8   | 41.0   | 38.5   | 31.0   |
| 0.3    | 0.6    | 2.6    | 0.3    | 0.2    | 0.3    | 4.5    | 1.4    | 1.9    |
| 0.8    | 1.0    | 0.2    | 0.2    | 0.6    | 0.4    | 0.2    | 0.6    | 1.5    |
| 98.8   | 55.0   | 78.8   | 86.0   | 82.5   | 84.8   | 109.9  | 98.9   | 75.0   |
| 9.0    | 1.3    | 7.1    | 12.0   | 3.7    | 3.9    | 8.1    | 2.0    | 8.0    |
| 55.1   | 62.6   | 38.9   | 59.5   | 54.1   | 43.2   | 63.2   | 65.0   | 47.8   |
| 35.7   | 28.7   | 29.4   | 29.1   | 32.2   | 25.7   | 40.3   | 37.3   | 27.5   |
| 20.2   | 13.4   | 7.9    | 11.7   | 9.7    | 1.6    | 11.6   | 8.0    | 7.5    |
| 47.7   | 34.1   | 29.4   | 38.8   | 36.9   | 26.6   | 49.7   | 68.8   | 41.6   |
| 3.3    | 4.0    | 1.4    | 1.1    | 0.2    | 3.9    | 4.2    | 4.3    | 0.4    |
| 18.1   | 18.2   | 17.6   | 9.8    | 9.7    | 13.0   | 19.0   | 43.5   | 15.7   |
| 23.9   | 10.3   | 17.8   | 19.9   | 15.6   | 18.7   | 18.5   | 23.8   | 9.7    |
| 23.1   | 9.1    | 21.0   | 20.4   | 17.6   | 27.7   | 25.8   | 53.4   | 30.3   |
| 77.6   | 21.0   | 29.2   | 32.9   | 33.4   | 30.8   | 47.9   | 65.0   | 40.0   |
| 66.5   | 21.5   | 25.6   | 24.2   | 28.4   | 27.5   | 33.8   | 46.0   | 29.6   |
| 2.1    | 1.9    | 3.4    | 2.9    | 3.6    | 0.9    | 2.9    | 3.7    | 2.2    |
| 2.1    | 0.1    | 3.1    | 1.7    | 1.8    | 2.1    | 3.3    | 3.5    | 2.4    |
| 6.3    | 8.6    | 5.1    | 7.0    | 8.0    | 5.2    | 5.4    | 7.1    | 2.1    |
| 74.9   | 78.8   | 75.1   | 54.7   | 74.4   | 57.0   | 66.2   | 82.5   | 66.8   |
| 229.1  | 166.0  | 201.6  | 223.6  | 207.6  | 199.4  | 259.0  | 296.6  | 220.6  |
| 69.5   | 38.4   | 44.4   | 66.6   | 51.4   | 60.5   | 72.2   | 86.0   | 58.2   |
| 31.1   | 1.3    | 15.3   | 3.3    | 2.8    | 17.0   | 17.4   | 23.5   | 16.6   |
| 18.5   | 6.2    | 9.4    | 6.5    | 4.1    | 6.0    | 9.7    | 20.7   | 10.3   |
| 23.7   | 13.7   | 28.3   | 30.4   | 26.3   | 30.7   | 28.7   | 26.0   | 19.6   |
| 339.2  | 253.7  | 239.0  | 270.2  | 323.9  | 285.2  | 393.1  | 420.3  | 341.2  |
| 0.2    | 0.6    | 0.3    | 2.9    | 0.7    | 0.3    | 3.8    | 0.6    | 0.5    |
| 531.5  | 433.8  | 515.5  | 530.1  | 527.8  | 576.1  | 692.2  | 728.1  | 569.9  |
| 176.5  | 125.3  | 132.9  | 159.8  | 157.8  | 158.1  | 223.3  | 287.0  | 161.3  |

|       |       |       |       |       |       |       |        |       |
|-------|-------|-------|-------|-------|-------|-------|--------|-------|
| 6.0   | 2.2   | 1.3   | 3.0   | 4.9   | 7.9   | 15.8  | 10.2   | 4.6   |
| 5.8   | 6.9   | 9.0   | 5.2   | 11.1  | 13.0  | 9.4   | 11.6   | 15.4  |
| 43.5  | 20.6  | 18.9  | 27.1  | 27.4  | 24.5  | 32.7  | 29.1   | 45.6  |
| 21.6  | 8.9   | 10.1  | 12.3  | 14.2  | 11.5  | 16.7  | 18.8   | 10.7  |
| 106.5 | 31.5  | 36.0  | 37.3  | 40.6  | 50.9  | 68.6  | 81.5   | 48.8  |
| 110.4 | 11.8  | 17.0  | 14.9  | 15.7  | 20.5  | 24.8  | 35.9   | 21.2  |
| 22.5  | 15.2  | 20.6  | 16.4  | 16.2  | 17.7  | 33.5  | 34.3   | 17.3  |
| 61.1  | 61.5  | 59.7  | 61.2  | 65.1  | 84.7  | 105.3 | 122.2  | 68.7  |
| 17.3  | 11.5  | 17.1  | 14.1  | 25.0  | 16.0  | 20.4  | 20.1   | 14.6  |
| 123.4 | 102.5 | 118.4 | 129.0 | 141.4 | 112.0 | 188.2 | 154.0  | 122.1 |
| 66.3  | 43.0  | 43.1  | 49.8  | 50.6  | 50.0  | 85.8  | 94.7   | 60.9  |
| 0.4   | 1.8   | 0.8   | 0.9   | 0.9   | 5.1   | 0.9   | 0.7    | 5.8   |
| 212.3 | 157.9 | 149.8 | 165.3 | 176.1 | 179.1 | 252.5 | 269.6  | 185.3 |
| 112.5 | 55.9  | 61.8  | 66.0  | 62.2  | 69.2  | 94.5  | 112.3  | 96.6  |
| 7.2   | 4.6   | 2.7   | 7.5   | 4.0   | 1.3   | 1.0   | 1.9    | 3.8   |
| 17.6  | 16.1  | 11.7  | 20.9  | 15.5  | 26.2  | 23.4  | 23.9   | 26.0  |
| 17.6  | 15.7  | 21.8  | 16.3  | 17.4  | 21.3  | 31.1  | 27.8   | 17.7  |
| 9.2   | 6.0   | 12.1  | 14.4  | 4.1   | 12.4  | 19.5  | 16.7   | 21.8  |
| 113.7 | 81.4  | 79.4  | 84.4  | 69.8  | 88.5  | 143.9 | 188.2  | 125.0 |
| 9.0   | 0.8   | 2.2   | 7.1   | 2.5   | 3.8   | 10.2  | 2.2    | 1.0   |
| 9.0   | 7.7   | 11.7  | 5.4   | 5.4   | 1.6   | 10.4  | 6.8    | 2.7   |
| 172.5 | 78.2  | 113.6 | 117.8 | 153.5 | 135.5 | 158.5 | 204.6  | 127.7 |
| 0.9   | 1.4   | 1.2   | 0.7   | 1.5   | 1.0   | 2.1   | 1.7    | 1.0   |
| 32.7  | 25.2  | 29.7  | 29.2  | 34.0  | 27.3  | 33.2  | 29.3   | 18.2  |
| 810.2 | 550.6 | 630.8 | 642.3 | 677.4 | 629.2 | 865.2 | 838.3  | 674.0 |
| 670.8 | 461.2 | 479.3 | 509.0 | 612.5 | 547.0 | 763.2 | 847.3  | 877.8 |
| 135.6 | 82.8  | 102.9 | 106.9 | 127.7 | 121.7 | 160.5 | 134.1  | 103.2 |
| 255.6 | 182.3 | 187.0 | 218.0 | 236.2 | 226.0 | 306.2 | 333.3  | 217.5 |
| 14.8  | 17.5  | 23.3  | 16.0  | 30.8  | 33.9  | 31.1  | 31.1   | 26.8  |
| 3.4   | 7.9   | 6.9   | 8.2   | 0.9   | 1.5   | 5.0   | 9.8    | 5.5   |
| 7.9   | 1.8   | 5.1   | 4.2   | 3.0   | 6.2   | 6.5   | 5.4    | 2.3   |
| 80.9  | 45.7  | 53.8  | 68.7  | 49.1  | 53.8  | 69.7  | 104.4  | 60.9  |
| 136.3 | 94.2  | 98.1  | 91.4  | 96.3  | 106.8 | 110.3 | 159.2  | 85.6  |
| 19.0  | 8.5   | 5.0   | 8.0   | 2.3   | 7.1   | 9.1   | 13.7   | 7.2   |
| 124.1 | 60.6  | 107.7 | 85.8  | 89.9  | 89.6  | 110.2 | 149.2  | 74.0  |
| 980.0 | 446.3 | 531.8 | 616.5 | 600.4 | 664.3 | 820.6 | 1147.7 | 938.8 |
| 19.8  | 17.0  | 19.2  | 31.1  | 18.6  | 22.7  | 33.4  | 31.8   | 19.7  |
| 18.7  | 8.0   | 11.7  | 11.1  | 10.8  | 11.2  | 17.1  | 15.9   | 11.5  |
| 8.7   | 15.8  | 5.5   | 6.2   | 2.8   | 13.6  | 14.0  | 6.8    | 10.9  |
| 54.3  | 8.5   | 15.5  | 8.2   | 6.9   | 11.9  | 14.8  | 17.6   | 10.3  |
| 98.9  | 78.6  | 81.7  | 87.6  | 90.7  | 73.2  | 111.7 | 103.7  | 73.6  |
| 17.3  | 1.7   | 5.1   | 14.0  | 22.4  | 22.8  | 24.2  | 12.2   | 17.2  |
| 0.3   | 0.6   | 1.0   | 0.2   | 0.5   | 0.6   | 2.6   | 0.5    | 0.3   |
| 20.2  | 1.8   | 2.8   | 3.8   | 3.9   | 0.7   | 3.5   | 4.0    | 2.8   |
| 14.8  | 9.9   | 9.8   | 9.3   | 9.7   | 8.6   | 10.4  | 19.6   | 12.4  |
| 71.8  | 53.9  | 45.2  | 55.1  | 52.6  | 54.9  | 71.7  | 85.8   | 46.3  |
| 4.5   | 3.8   | 0.5   | 5.1   | 3.6   | 1.9   | 1.1   | 4.0    | 3.8   |
| 30.6  | 17.8  | 26.2  | 25.1  | 31.5  | 28.4  | 35.9  | 43.5   | 25.3  |
| 5.1   | 1.6   | 12.0  | 4.1   | 1.0   | 1.5   | 2.0   | 2.3    | 2.8   |
| 5.6   | 3.9   | 5.8   | 10.1  | 3.7   | 5.6   | 7.3   | 1.7    | 12.7  |
| 30.0  | 17.1  | 22.5  | 20.8  | 19.0  | 14.7  | 29.6  | 38.5   | 20.3  |
| 3.5   | 4.6   | 2.7   | 2.0   | 1.5   | 1.4   | 0.7   | 3.2    | 4.9   |
| 136.4 | 126.2 | 146.0 | 134.9 | 187.8 | 172.9 | 213.6 | 244.5  | 196.4 |

|        |       |       |       |       |       |        |        |       |
|--------|-------|-------|-------|-------|-------|--------|--------|-------|
| 111.3  | 94.8  | 78.4  | 118.7 | 104.5 | 122.4 | 140.6  | 165.4  | 113.9 |
| 3.6    | 4.2   | 1.4   | 1.1   | 2.8   | 2.9   | 1.3    | 6.3    | 4.4   |
| 2.4    | 2.0   | 1.6   | 2.5   | 13.8  | 1.4   | 1.7    | 11.5   | 2.9   |
| 52.6   | 44.7  | 56.1  | 49.3  | 50.3  | 43.1  | 55.5   | 51.9   | 33.1  |
| 131.9  | 81.4  | 103.0 | 125.9 | 123.0 | 114.2 | 157.8  | 204.0  | 137.1 |
| 103.9  | 80.0  | 79.6  | 88.2  | 104.9 | 105.4 | 129.9  | 155.8  | 99.3  |
| 121.7  | 129.1 | 113.0 | 120.5 | 100.3 | 123.7 | 179.1  | 150.6  | 139.1 |
| 15.3   | 15.9  | 2.8   | 11.4  | 19.2  | 11.9  | 17.4   | 13.5   | 10.1  |
| 1146.1 | 598.7 | 789.2 | 737.1 | 826.5 | 848.4 | 1055.1 | 1287.6 | 844.0 |
| 97.3   | 77.7  | 84.2  | 88.8  | 86.8  | 80.0  | 128.8  | 118.5  | 88.9  |
| 81.5   | 54.3  | 65.2  | 77.8  | 72.6  | 58.6  | 76.2   | 94.9   | 63.2  |
| 0.7    | 1.3   | 0.2   | 2.6   | 2.7   | 0.1   | 1.1    | 5.8    | 4.9   |
| 33.5   | 17.5  | 24.6  | 30.0  | 36.7  | 24.1  | 29.4   | 40.2   | 27.1  |
| 13.4   | 15.3  | 10.3  | 10.4  | 7.1   | 17.5  | 9.0    | 20.1   | 2.4   |
| 110.2  | 55.7  | 49.3  | 61.5  | 57.6  | 60.4  | 90.4   | 83.7   | 102.5 |
| 43.7   | 71.9  | 84.0  | 81.7  | 91.2  | 77.1  | 107.6  | 70.3   | 96.4  |
| 12.1   | 1.8   | 3.5   | 8.2   | 3.9   | 1.1   | 6.4    | 3.7    | 2.7   |
| 58.6   | 74.8  | 53.6  | 57.9  | 49.8  | 41.4  | 97.1   | 92.0   | 67.8  |
| 64.1   | 49.4  | 49.0  | 40.4  | 45.0  | 66.6  | 63.4   | 67.5   | 56.6  |
| 428.7  | 184.9 | 217.2 | 224.4 | 264.3 | 215.0 | 269.8  | 337.1  | 201.0 |
| 22.7   | 13.3  | 16.9  | 26.8  | 24.5  | 22.3  | 26.3   | 24.1   | 17.1  |
| 13.7   | 8.6   | 17.2  | 16.7  | 13.2  | 14.5  | 19.9   | 25.9   | 14.6  |
| 43.9   | 37.1  | 38.7  | 42.6  | 42.3  | 41.0  | 44.7   | 47.9   | 41.4  |
| 74.0   | 69.6  | 75.4  | 68.3  | 67.6  | 77.4  | 110.1  | 119.2  | 79.4  |
| 58.7   | 68.7  | 68.4  | 70.0  | 70.5  | 75.3  | 89.5   | 87.0   | 68.8  |
| 22.2   | 28.1  | 25.1  | 23.7  | 24.5  | 13.5  | 33.8   | 48.9   | 17.7  |
| 90.6   | 57.0  | 73.9  | 64.9  | 68.4  | 63.8  | 91.0   | 85.3   | 68.0  |
| 72.8   | 34.7  | 55.2  | 41.8  | 62.0  | 61.2  | 75.1   | 74.6   | 56.1  |
| 45.6   | 5.9   | 9.2   | 9.4   | 12.9  | 18.4  | 16.8   | 26.6   | 7.4   |
| 60.6   | 2.5   | 6.4   | 10.8  | 4.0   | 3.5   | 7.6    | 5.8    | 8.8   |
| 83.7   | 64.2  | 62.0  | 66.8  | 88.8  | 77.8  | 130.1  | 177.0  | 143.4 |
| 721.1  | 298.9 | 351.4 | 396.9 | 365.1 | 405.6 | 503.6  | 791.1  | 391.1 |
| 51.1   | 35.0  | 34.5  | 45.8  | 32.6  | 48.6  | 55.1   | 55.3   | 30.4  |
| 126.6  | 93.4  | 102.8 | 96.7  | 99.0  | 104.8 | 146.4  | 154.5  | 140.2 |
| 3.9    | 0.4   | 1.3   | 0.3   | 1.0   | 1.9   | 0.1    | 7.7    | 1.3   |
| 219.4  | 135.9 | 174.5 | 164.7 | 182.1 | 180.1 | 233.3  | 225.7  | 218.0 |
| 173.5  | 106.1 | 142.0 | 123.6 | 121.5 | 141.3 | 174.9  | 171.7  | 105.8 |
| 0.5    | 1.7   | 0.2   | 1.1   | 1.1   | 0.6   | 0.5    | 0.8    | 0.5   |
| 3.7    | 0.5   | 4.7   | 1.7   | 1.1   | 5.4   | 0.4    | 0.3    | 1.5   |
| 189.0  | 174.0 | 203.2 | 213.1 | 219.3 | 185.1 | 281.6  | 309.6  | 210.2 |
| 726.9  | 746.2 | 765.5 | 867.9 | 840.7 | 745.7 | 1035.5 | 1208.6 | 666.5 |
| 20.0   | 15.7  | 18.3  | 19.2  | 17.1  | 20.9  | 19.0   | 23.8   | 14.4  |
| 1.3    | 0.6   | 5.1   | 1.5   | 0.6   | 5.7   | 4.4    | 9.2    | 5.4   |
| 3.6    | 7.3   | 7.5   | 0.7   | 1.0   | 0.9   | 0.7    | 1.3    | 1.1   |
| 3.6    | 2.7   | 11.4  | 3.3   | 2.0   | 2.6   | 1.9    | 6.7    | 5.4   |
| 13.6   | 2.6   | 6.1   | 6.5   | 2.2   | 9.0   | 2.2    | 23.3   | 8.9   |
| 130.6  | 78.0  | 66.0  | 92.8  | 91.3  | 74.7  | 127.4  | 213.8  | 108.2 |
| 37.0   | 21.0  | 28.1  | 26.7  | 35.2  | 22.9  | 39.2   | 50.1   | 29.6  |
| 45.5   | 25.7  | 28.6  | 32.5  | 33.9  | 39.2  | 40.2   | 70.2   | 34.3  |
| 94.0   | 114.1 | 122.2 | 146.7 | 114.6 | 135.0 | 130.2  | 114.2  | 67.9  |
| 171.8  | 167.1 | 166.0 | 163.1 | 192.2 | 152.0 | 205.9  | 191.8  | 156.2 |
| 307.8  | 344.4 | 291.8 | 342.9 | 339.3 | 224.9 | 368.5  | 284.1  | 239.2 |
| 105.2  | 129.8 | 97.6  | 138.1 | 119.8 | 76.2  | 147.3  | 99.6   | 118.1 |

|       |       |       |       |       |       |       |       |       |
|-------|-------|-------|-------|-------|-------|-------|-------|-------|
| 40.1  | 17.2  | 24.9  | 38.3  | 24.5  | 39.6  | 41.8  | 50.6  | 28.6  |
| 17.3  | 17.5  | 15.6  | 16.6  | 15.4  | 19.3  | 25.4  | 28.9  | 19.7  |
| 187.4 | 95.5  | 128.9 | 141.7 | 125.7 | 137.1 | 159.0 | 192.1 | 128.7 |
| 22.1  | 10.6  | 15.6  | 14.6  | 18.9  | 15.1  | 23.8  | 15.1  | 8.2   |
| 22.0  | 16.0  | 20.9  | 24.5  | 20.0  | 23.5  | 19.5  | 37.8  | 9.4   |
| 54.1  | 42.3  | 47.9  | 47.5  | 54.4  | 46.3  | 56.8  | 64.5  | 40.2  |
| 38.5  | 44.6  | 44.3  | 45.2  | 66.8  | 46.3  | 68.3  | 57.4  | 47.6  |
| 117.9 | 110.0 | 115.6 | 133.4 | 120.9 | 139.7 | 160.6 | 157.5 | 116.6 |
| 4.0   | 3.4   | 0.4   | 3.4   | 2.6   | 2.1   | 4.5   | 0.7   | 0.5   |
| 130.9 | 72.7  | 75.4  | 89.6  | 93.2  | 68.1  | 114.5 | 112.8 | 92.0  |
| 0.3   | 3.2   | 0.5   | 0.2   | 0.7   | 1.3   | 0.4   | 0.3   | 1.4   |
| 111.2 | 66.9  | 64.2  | 71.7  | 73.1  | 73.5  | 113.0 | 141.6 | 103.5 |
| 17.6  | 13.0  | 13.6  | 15.2  | 13.0  | 21.3  | 22.9  | 25.4  | 13.6  |
| 105.9 | 136.0 | 132.0 | 159.3 | 163.1 | 159.7 | 196.3 | 228.4 | 157.3 |
| 37.5  | 27.2  | 41.7  | 41.0  | 28.6  | 43.1  | 54.1  | 81.2  | 52.8  |
| 101.7 | 107.7 | 122.9 | 151.6 | 131.1 | 144.0 | 175.8 | 228.3 | 155.6 |
| 57.7  | 42.9  | 53.3  | 50.7  | 48.1  | 55.7  | 66.0  | 71.8  | 63.5  |
| 72.3  | 62.5  | 82.3  | 68.2  | 74.2  | 81.0  | 86.1  | 74.7  | 67.3  |
| 211.8 | 131.7 | 143.7 | 170.2 | 162.2 | 145.9 | 170.4 | 169.5 | 148.2 |
| 52.8  | 46.6  | 50.2  | 44.7  | 51.0  | 51.6  | 65.3  | 111.5 | 68.7  |
| 59.3  | 30.6  | 35.2  | 35.0  | 31.0  | 31.3  | 48.1  | 48.8  | 34.9  |
| 112.7 | 80.9  | 106.7 | 103.4 | 88.4  | 73.0  | 116.8 | 85.3  | 72.0  |
| 162.2 | 94.6  | 116.3 | 121.1 | 104.4 | 134.1 | 162.4 | 211.4 | 140.2 |
| 107.0 | 66.3  | 108.2 | 74.9  | 86.0  | 106.5 | 134.3 | 189.7 | 153.4 |
| 54.2  | 52.8  | 49.2  | 41.0  | 57.7  | 54.5  | 70.5  | 64.1  | 84.4  |
| 11.4  | 12.1  | 15.3  | 6.7   | 13.7  | 13.7  | 26.8  | 28.2  | 12.8  |
| 5.4   | 1.5   | 0.9   | 4.2   | 4.7   | 1.2   | 8.6   | 1.8   | 6.9   |
| 14.1  | 6.3   | 9.2   | 15.6  | 18.7  | 12.4  | 13.1  | 19.0  | 10.0  |
| 35.9  | 34.2  | 34.6  | 27.0  | 31.5  | 30.8  | 41.8  | 38.1  | 51.9  |
| 601.2 | 403.6 | 490.7 | 490.5 | 508.1 | 553.2 | 669.7 | 752.0 | 455.0 |
| 16.0  | 2.8   | 2.1   | 6.1   | 2.9   | 2.0   | 10.6  | 3.0   | 2.8   |
| 91.9  | 85.7  | 95.3  | 103.2 | 102.2 | 106.2 | 155.9 | 180.9 | 101.5 |
| 3.2   | 7.1   | 1.8   | 4.9   | 2.4   | 1.7   | 7.8   | 2.0   | 1.0   |
| 128.4 | 90.0  | 135.3 | 118.1 | 124.5 | 132.3 | 167.5 | 165.9 | 130.3 |
| 71.4  | 51.5  | 58.9  | 65.5  | 64.4  | 55.3  | 83.3  | 96.0  | 63.7  |
| 24.0  | 8.6   | 10.2  | 11.6  | 9.0   | 10.5  | 10.7  | 20.4  | 8.5   |
| 0.3   | 0.2   | 0.8   | 0.5   | 0.5   | 0.2   | 0.2   | 0.3   | 1.1   |
| 4.2   | 1.1   | 0.4   | 4.2   | 3.3   | 3.4   | 3.1   | 3.3   | 4.3   |
| 330.3 | 217.3 | 259.5 | 248.8 | 260.1 | 282.9 | 320.9 | 340.8 | 262.9 |
| 48.7  | 47.6  | 42.1  | 57.0  | 56.5  | 45.1  | 68.7  | 63.1  | 35.0  |
| 31.5  | 17.3  | 13.2  | 17.9  | 25.7  | 18.1  | 26.2  | 47.7  | 34.8  |
| 373.5 | 278.9 | 327.4 | 347.0 | 341.8 | 304.9 | 412.8 | 488.2 | 313.8 |
| 49.6  | 82.0  | 59.1  | 78.3  | 59.0  | 53.4  | 86.0  | 81.4  | 50.5  |
| 23.7  | 16.0  | 17.6  | 26.2  | 13.4  | 17.6  | 24.5  | 36.6  | 14.7  |
| 134.6 | 89.3  | 120.6 | 119.1 | 124.6 | 140.6 | 172.9 | 225.1 | 140.3 |
| 51.9  | 37.4  | 42.2  | 40.3  | 47.2  | 51.0  | 68.7  | 76.9  | 51.7  |
| 16.6  | 12.2  | 18.6  | 31.4  | 9.9   | 15.6  | 20.9  | 23.5  | 23.0  |
| 2.3   | 5.6   | 2.5   | 3.0   | 7.8   | 10.6  | 2.4   | 4.2   | 16.8  |
| 61.4  | 29.6  | 34.9  | 44.2  | 46.3  | 33.0  | 59.7  | 80.4  | 53.1  |
| 54.8  | 32.1  | 42.6  | 37.5  | 38.1  | 48.5  | 39.5  | 57.3  | 22.9  |
| 162.6 | 88.4  | 97.2  | 102.9 | 124.3 | 106.0 | 176.6 | 148.7 | 137.6 |
| 51.7  | 63.8  | 71.5  | 86.5  | 78.6  | 76.3  | 108.2 | 102.6 | 67.1  |
| 66.6  | 44.9  | 51.9  | 59.1  | 51.6  | 50.8  | 82.1  | 83.1  | 61.8  |

|        |       |       |       |       |       |        |        |       |
|--------|-------|-------|-------|-------|-------|--------|--------|-------|
| 142.0  | 117.9 | 167.3 | 130.3 | 118.2 | 121.5 | 209.3  | 200.0  | 176.8 |
| 0.6    | 0.5   | 1.3   | 0.6   | 0.8   | 1.0   | 3.1    | 3.1    | 3.4   |
| 11.2   | 11.5  | 10.6  | 12.0  | 13.3  | 16.0  | 29.7   | 17.5   | 17.3  |
| 98.8   | 71.5  | 72.6  | 73.1  | 79.3  | 64.7  | 79.2   | 105.8  | 84.6  |
| 41.1   | 31.2  | 54.6  | 39.1  | 42.7  | 41.4  | 50.6   | 61.6   | 40.4  |
| 0.1    | 2.2   | 1.1   | 0.4   | 0.1   | 0.2   | 0.5    | 1.9    | 0.5   |
| 0.5    | 0.7   | 2.0   | 1.6   | 0.6   | 0.8   | 4.7    | 0.1    | 0.4   |
| 180.4  | 105.9 | 124.9 | 139.3 | 135.9 | 147.1 | 209.7  | 244.7  | 134.5 |
| 56.8   | 45.9  | 52.2  | 63.1  | 58.4  | 57.8  | 78.0   | 86.5   | 52.8  |
| 1.7    | 4.9   | 4.6   | 1.1   | 8.6   | 1.6   | 7.9    | 13.4   | 11.2  |
| 0.7    | 4.8   | 1.4   | 0.3   | 1.2   | 0.3   | 3.5    | 1.1    | 3.5   |
| 28.8   | 12.4  | 29.8  | 20.5  | 18.8  | 22.4  | 32.3   | 33.4   | 21.9  |
| 252.5  | 192.3 | 196.5 | 244.7 | 228.4 | 227.6 | 304.2  | 423.5  | 210.1 |
| 90.3   | 74.1  | 78.9  | 84.7  | 106.4 | 87.7  | 119.1  | 144.7  | 93.8  |
| 595.4  | 306.5 | 434.5 | 403.0 | 422.4 | 426.7 | 524.9  | 521.4  | 364.1 |
| 44.8   | 34.5  | 48.0  | 40.6  | 43.7  | 60.2  | 58.0   | 77.0   | 48.9  |
| 5.7    | 9.2   | 9.5   | 6.7   | 0.8   | 8.7   | 10.3   | 5.1    | 8.7   |
| 63.1   | 59.4  | 56.1  | 56.4  | 57.2  | 57.6  | 78.8   | 91.2   | 58.3  |
| 308.3  | 172.2 | 196.5 | 215.9 | 242.4 | 232.5 | 305.1  | 304.8  | 234.4 |
| 4.8    | 2.9   | 0.6   | 4.8   | 1.0   | 5.7   | 6.3    | 7.3    | 4.0   |
| 205.0  | 140.0 | 124.7 | 143.2 | 204.9 | 167.8 | 220.1  | 299.8  | 214.7 |
| 31.5   | 9.9   | 13.7  | 18.3  | 13.9  | 15.1  | 29.8   | 32.8   | 22.1  |
| 143.4  | 116.4 | 122.3 | 135.9 | 147.5 | 154.3 | 171.7  | 212.4  | 137.2 |
| 35.9   | 19.0  | 18.5  | 17.4  | 20.7  | 17.7  | 33.9   | 20.2   | 19.6  |
| 55.3   | 19.7  | 17.2  | 20.6  | 20.7  | 16.1  | 34.1   | 19.9   | 16.5  |
| 171.2  | 91.9  | 113.0 | 107.5 | 105.1 | 119.2 | 139.0  | 171.4  | 126.6 |
| 16.5   | 16.8  | 19.6  | 13.5  | 22.9  | 10.1  | 17.7   | 15.6   | 12.0  |
| 0.9    | 7.5   | 3.7   | 7.0   | 7.7   | 1.2   | 2.2    | 2.3    | 1.5   |
| 1140.8 | 566.6 | 718.8 | 823.1 | 673.1 | 707.5 | 1299.2 | 1281.8 | 784.9 |
| 3.6    | 0.9   | 0.2   | 2.1   | 1.3   | 2.0   | 0.3    | 4.0    | 1.0   |
| 73.1   | 56.4  | 78.0  | 74.4  | 90.0  | 77.0  | 75.7   | 91.9   | 75.0  |
| 36.5   | 30.4  | 21.6  | 22.8  | 17.8  | 22.3  | 29.1   | 33.3   | 25.2  |
| 1.9    | 1.5   | 1.7   | 1.0   | 0.7   | 2.4   | 2.5    | 2.1    | 1.7   |
| 24.9   | 21.7  | 19.1  | 21.8  | 25.9  | 21.3  | 39.1   | 34.7   | 26.8  |
| 2.6    | 0.2   | 1.0   | 4.3   | 0.7   | 1.6   | 0.3    | 0.3    | 1.7   |
| 57.7   | 60.9  | 60.6  | 73.8  | 66.4  | 53.2  | 66.6   | 75.5   | 63.4  |
| 108.2  | 92.1  | 84.3  | 112.9 | 120.3 | 99.3  | 100.0  | 114.6  | 86.6  |
| 39.7   | 22.1  | 27.0  | 20.0  | 31.1  | 33.3  | 49.2   | 54.5   | 41.7  |
| 121.7  | 60.1  | 75.0  | 73.6  | 71.8  | 66.2  | 101.0  | 100.1  | 75.1  |
| 627.5  | 456.6 | 519.3 | 500.6 | 557.9 | 492.5 | 641.9  | 679.7  | 470.7 |
| 374.3  | 247.4 | 245.5 | 264.4 | 276.2 | 239.0 | 346.1  | 325.0  | 290.2 |
| 1.7    | 6.5   | 2.4   | 5.7   | 6.8   | 6.3   | 11.7   | 14.6   | 5.7   |
| 10.0   | 4.5   | 13.0  | 11.7  | 12.0  | 6.0   | 4.9    | 6.3    | 13.7  |
| 533.6  | 374.6 | 417.2 | 460.9 | 535.0 | 472.7 | 685.7  | 762.3  | 455.6 |
| 5.0    | 8.9   | 6.8   | 12.3  | 9.4   | 9.3   | 14.3   | 14.5   | 12.8  |
| 155.3  | 104.1 | 108.7 | 125.5 | 118.8 | 128.7 | 130.9  | 136.6  | 93.1  |
| 113.5  | 87.1  | 84.6  | 100.8 | 88.0  | 85.9  | 144.7  | 129.3  | 85.2  |
| 334.8  | 216.6 | 262.5 | 321.7 | 319.1 | 371.1 | 499.4  | 536.2  | 268.3 |
| 44.2   | 45.1  | 26.8  | 43.2  | 49.6  | 39.3  | 55.6   | 69.7   | 57.0  |
| 63.9   | 48.0  | 54.8  | 66.5  | 51.8  | 55.4  | 72.4   | 108.4  | 61.1  |
| 98.9   | 64.5  | 85.9  | 92.7  | 71.8  | 83.6  | 113.9  | 121.1  | 82.3  |
| 23.5   | 30.4  | 27.1  | 34.3  | 28.5  | 30.0  | 45.7   | 67.0   | 47.0  |
| 44.1   | 17.7  | 29.3  | 22.4  | 30.0  | 20.1  | 35.4   | 34.9   | 37.4  |

|       |       |       |       |       |       |       |        |       |
|-------|-------|-------|-------|-------|-------|-------|--------|-------|
| 181.1 | 136.9 | 134.9 | 159.9 | 162.4 | 150.1 | 184.5 | 227.5  | 142.6 |
| 35.8  | 23.2  | 20.4  | 25.2  | 43.1  | 29.3  | 68.8  | 51.4   | 45.1  |
| 9.2   | 3.1   | 5.5   | 3.8   | 5.9   | 3.5   | 13.7  | 11.4   | 9.8   |
| 84.2  | 73.6  | 74.7  | 91.2  | 83.4  | 97.6  | 120.5 | 141.6  | 107.1 |
| 6.8   | 5.7   | 6.7   | 4.4   | 6.1   | 6.0   | 7.7   | 1.8    | 2.2   |
| 89.4  | 29.1  | 42.2  | 37.3  | 36.2  | 30.9  | 51.7  | 46.2   | 36.6  |
| 77.1  | 48.6  | 50.9  | 57.2  | 63.8  | 63.7  | 85.1  | 107.6  | 62.8  |
| 66.1  | 41.1  | 36.3  | 43.7  | 36.4  | 38.9  | 67.4  | 88.0   | 50.1  |
| 1.7   | 2.2   | 7.2   | 0.2   | 4.5   | 0.6   | 3.4   | 6.0    | 2.0   |
| 65.4  | 48.1  | 49.5  | 52.5  | 57.3  | 56.0  | 66.9  | 91.1   | 62.2  |
| 111.0 | 71.5  | 66.7  | 84.2  | 81.2  | 93.1  | 91.5  | 132.3  | 90.1  |
| 17.9  | 29.7  | 22.4  | 29.7  | 32.8  | 21.9  | 42.0  | 43.6   | 22.5  |
| 100.3 | 21.1  | 26.8  | 26.3  | 27.2  | 21.0  | 33.9  | 30.5   | 21.9  |
| 34.5  | 28.5  | 38.1  | 31.0  | 25.4  | 40.3  | 31.1  | 48.7   | 31.2  |
| 188.2 | 103.5 | 116.2 | 113.0 | 136.9 | 107.3 | 173.3 | 161.1  | 129.6 |
| 5.3   | 7.6   | 3.2   | 6.5   | 8.4   | 6.3   | 8.9   | 21.0   | 5.3   |
| 79.2  | 50.2  | 52.7  | 54.7  | 66.5  | 64.5  | 95.4  | 123.3  | 67.3  |
| 17.3  | 17.8  | 21.4  | 19.1  | 22.5  | 16.5  | 22.1  | 26.0   | 20.4  |
| 6.1   | 7.3   | 6.1   | 5.2   | 6.5   | 2.4   | 7.8   | 11.9   | 8.2   |
| 142.1 | 95.8  | 105.9 | 100.2 | 125.8 | 123.6 | 145.3 | 143.5  | 129.7 |
| 67.5  | 42.8  | 70.9  | 51.5  | 57.1  | 66.7  | 61.3  | 120.7  | 65.8  |
| 151.8 | 90.3  | 98.8  | 143.8 | 111.6 | 99.9  | 165.7 | 155.7  | 127.9 |
| 8.7   | 7.9   | 7.4   | 6.4   | 0.8   | 7.8   | 11.5  | 14.1   | 1.5   |
| 1.7   | 1.2   | 2.0   | 1.1   | 5.6   | 6.2   | 9.5   | 7.8    | 3.5   |
| 9.0   | 1.1   | 5.2   | 10.6  | 5.6   | 7.8   | 13.0  | 16.0   | 9.8   |
| 3.4   | 8.9   | 0.9   | 2.2   | 1.6   | 5.7   | 8.0   | 6.3    | 11.6  |
| 13.3  | 13.8  | 4.0   | 11.4  | 9.0   | 7.7   | 9.1   | 12.9   | 17.9  |
| 11.1  | 6.1   | 7.5   | 13.2  | 12.8  | 11.6  | 23.7  | 32.1   | 10.8  |
| 123.9 | 93.7  | 132.7 | 116.8 | 120.1 | 117.6 | 152.2 | 166.5  | 116.9 |
| 1.5   | 5.3   | 1.1   | 6.1   | 8.7   | 1.0   | 2.0   | 7.0    | 2.2   |
| 4.7   | 6.3   | 1.7   | 3.8   | 4.7   | 4.2   | 5.1   | 6.8    | 1.8   |
| 166.0 | 140.5 | 156.1 | 159.5 | 166.2 | 158.6 | 226.2 | 251.6  | 179.9 |
| 252.5 | 153.4 | 187.0 | 174.8 | 170.7 | 173.8 | 301.7 | 330.1  | 245.6 |
| 17.5  | 11.8  | 12.0  | 14.9  | 20.3  | 10.5  | 26.0  | 37.7   | 26.3  |
| 5.0   | 11.3  | 2.1   | 2.2   | 3.9   | 1.9   | 8.0   | 3.0    | 2.5   |
| 30.8  | 30.2  | 23.5  | 29.3  | 29.1  | 30.4  | 46.9  | 44.0   | 33.8  |
| 1.0   | 0.7   | 1.6   | 0.4   | 0.2   | 0.6   | 0.5   | 0.6    | 0.2   |
| 1.5   | 1.1   | 3.1   | 0.3   | 0.8   | 0.5   | 0.5   | 0.6    | 2.2   |
| 54.5  | 69.4  | 65.8  | 75.0  | 63.5  | 53.4  | 73.8  | 80.2   | 63.3  |
| 15.9  | 12.0  | 13.8  | 28.9  | 14.0  | 5.2   | 15.4  | 13.6   | 11.2  |
| 32.0  | 17.3  | 28.3  | 38.8  | 25.4  | 19.2  | 34.4  | 33.3   | 24.4  |
| 2.1   | 2.5   | 3.8   | 11.5  | 3.2   | 5.4   | 2.0   | 4.4    | 2.1   |
| 13.4  | 11.2  | 6.1   | 7.8   | 14.0  | 8.2   | 10.7  | 12.0   | 6.0   |
| 17.7  | 2.1   | 4.4   | 6.6   | 13.9  | 9.7   | 15.6  | 18.4   | 10.1  |
| 843.3 | 587.4 | 655.3 | 702.3 | 737.1 | 725.0 | 942.6 | 1030.4 | 740.9 |
| 114.2 | 83.6  | 109.7 | 115.3 | 112.0 | 142.9 | 173.2 | 176.3  | 138.6 |
| 28.2  | 31.0  | 25.5  | 37.3  | 26.2  | 30.7  | 36.1  | 40.1   | 20.7  |
| 298.5 | 182.1 | 233.6 | 264.9 | 256.7 | 251.4 | 359.3 | 396.0  | 290.0 |
| 28.4  | 26.7  | 26.8  | 26.4  | 26.0  | 32.8  | 40.8  | 54.2   | 23.7  |
| 10.3  | 11.6  | 9.9   | 7.4   | 11.8  | 16.5  | 19.3  | 12.4   | 11.1  |
| 1.8   | 0.9   | 1.2   | 0.7   | 1.5   | 1.0   | 1.6   | 7.9    | 3.5   |
| 11.2  | 12.6  | 15.9  | 12.5  | 6.7   | 8.6   | 18.9  | 21.4   | 11.7  |
| 157.6 | 104.6 | 131.9 | 130.9 | 128.6 | 154.1 | 180.6 | 217.9  | 129.5 |

|        |       |       |       |       |       |        |        |       |
|--------|-------|-------|-------|-------|-------|--------|--------|-------|
| 1.8    | 5.0   | 4.4   | 7.7   | 1.9   | 1.1   | 1.1    | 2.6    | 1.5   |
| 1.1    | 7.0   | 6.3   | 7.9   | 5.0   | 8.4   | 8.5    | 8.9    | 5.8   |
| 34.7   | 19.9  | 23.7  | 19.7  | 20.1  | 26.2  | 32.9   | 29.1   | 22.7  |
| 35.5   | 8.2   | 18.5  | 15.4  | 15.5  | 22.0  | 23.3   | 33.8   | 13.0  |
| 125.2  | 52.8  | 76.4  | 63.2  | 69.1  | 72.2  | 104.7  | 123.9  | 57.1  |
| 39.5   | 23.9  | 33.3  | 32.4  | 34.3  | 34.3  | 45.5   | 51.2   | 38.0  |
| 110.5  | 90.9  | 137.8 | 130.5 | 130.1 | 152.5 | 211.0  | 218.5  | 154.9 |
| 96.2   | 106.3 | 100.2 | 103.6 | 130.0 | 116.0 | 174.8  | 211.8  | 119.5 |
| 87.2   | 50.2  | 51.4  | 62.9  | 79.3  | 56.9  | 79.3   | 105.0  | 57.8  |
| 2.4    | 1.7   | 3.7   | 1.2   | 4.0   | 4.9   | 8.7    | 6.3    | 3.4   |
| 0.8    | 3.8   | 4.2   | 3.8   | 5.7   | 5.2   | 1.9    | 1.4    | 1.0   |
| 9.1    | 5.3   | 6.0   | 4.1   | 8.3   | 8.9   | 15.4   | 21.0   | 7.4   |
| 52.9   | 40.8  | 39.1  | 43.5  | 47.6  | 39.7  | 80.0   | 85.7   | 58.0  |
| 137.7  | 105.7 | 135.3 | 138.5 | 124.2 | 137.2 | 163.8  | 156.9  | 125.4 |
| 34.8   | 47.8  | 42.8  | 50.6  | 50.6  | 33.0  | 53.8   | 49.5   | 46.2  |
| 6.6    | 4.6   | 9.4   | 14.4  | 14.6  | 8.6   | 12.3   | 9.1    | 16.0  |
| 11.2   | 7.6   | 4.8   | 9.9   | 8.5   | 3.0   | 5.0    | 8.2    | 8.3   |
| 7.6    | 4.5   | 1.2   | 1.3   | 1.1   | 9.5   | 2.0    | 6.9    | 0.8   |
| 0.3    | 0.9   | 1.1   | 6.2   | 6.2   | 0.8   | 1.2    | 4.0    | 9.4   |
| 121.3  | 96.1  | 92.6  | 89.6  | 94.2  | 97.7  | 126.3  | 150.1  | 87.3  |
| 55.8   | 33.9  | 43.2  | 62.3  | 49.4  | 47.7  | 67.1   | 78.5   | 72.1  |
| 13.8   | 7.3   | 15.9  | 14.8  | 11.1  | 9.0   | 4.1    | 17.6   | 12.2  |
| 49.1   | 29.1  | 62.5  | 59.8  | 72.2  | 64.5  | 115.4  | 158.4  | 86.6  |
| 1.7    | 7.8   | 1.2   | 4.8   | 2.1   | 3.8   | 11.3   | 5.9    | 8.0   |
| 3.4    | 0.9   | 0.4   | 0.7   | 0.3   | 0.3   | 0.6    | 0.6    | 0.9   |
| 5.7    | 5.0   | 2.2   | 2.4   | 5.0   | 10.8  | 3.6    | 9.2    | 5.3   |
| 35.8   | 25.0  | 30.1  | 25.4  | 31.2  | 30.5  | 24.2   | 44.4   | 27.9  |
| 116.6  | 57.8  | 75.7  | 89.8  | 74.8  | 72.3  | 90.7   | 105.3  | 102.6 |
| 2.4    | 3.9   | 0.7   | 2.6   | 1.0   | 1.1   | 0.5    | 5.3    | 0.9   |
| 3.4    | 0.1   | 0.3   | 0.2   | 0.2   | 0.3   | 0.2    | 0.3    | 0.2   |
| 1.2    | 5.2   | 0.3   | 0.6   | 0.5   | 2.3   | 0.2    | 1.3    | 0.4   |
| 9.7    | 13.2  | 10.6  | 8.0   | 5.6   | 8.1   | 14.1   | 9.2    | 9.9   |
| 245.8  | 219.1 | 258.0 | 253.8 | 275.5 | 198.4 | 301.8  | 301.7  | 255.6 |
| 2.2    | 0.7   | 3.5   | 2.2   | 1.7   | 5.4   | 2.0    | 3.9    | 0.4   |
| 80.4   | 51.8  | 58.7  | 66.1  | 59.7  | 57.0  | 68.8   | 89.0   | 59.9  |
| 238.5  | 125.7 | 125.8 | 120.5 | 146.0 | 168.0 | 180.6  | 232.5  | 156.8 |
| 330.4  | 237.0 | 306.0 | 333.6 | 328.0 | 355.2 | 427.9  | 425.4  | 322.3 |
| 44.4   | 23.8  | 23.0  | 27.2  | 35.2  | 27.7  | 45.7   | 32.3   | 25.4  |
| 12.6   | 12.1  | 18.4  | 16.2  | 20.0  | 16.7  | 11.2   | 18.9   | 11.4  |
| 0.9    | 0.8   | 3.5   | 6.1   | 1.5   | 3.6   | 3.5    | 4.3    | 1.2   |
| 0.1    | 0.0   | 0.6   | 0.3   | 0.2   | 0.1   | 1.3    | 2.9    | 0.1   |
| 1.3    | 0.5   | 3.5   | 0.5   | 1.1   | 0.9   | 1.4    | 1.3    | 1.3   |
| 2.8    | 10.4  | 1.9   | 8.0   | 9.1   | 12.9  | 14.9   | 17.8   | 12.0  |
| 7.0    | 6.4   | 5.4   | 9.2   | 0.7   | 4.5   | 2.0    | 4.7    | 5.0   |
| 4.4    | 5.8   | 1.2   | 3.7   | 4.4   | 6.3   | 4.5    | 5.8    | 2.5   |
| 0.4    | 1.9   | 0.5   | 0.6   | 1.1   | 1.1   | 2.4    | 0.6    | 0.1   |
| 8.8    | 8.1   | 3.6   | 7.1   | 14.5  | 7.2   | 10.4   | 10.0   | 11.6  |
| 68.1   | 41.0  | 52.4  | 66.8  | 62.0  | 52.7  | 75.7   | 71.6   | 52.8  |
| 1.6    | 0.9   | 0.6   | 1.3   | 1.0   | 0.7   | 1.3    | 1.7    | 1.9   |
| 53.5   | 31.7  | 35.3  | 33.4  | 41.6  | 41.1  | 52.9   | 44.6   | 40.2  |
| 1314.8 | 550.9 | 840.3 | 706.8 | 849.8 | 979.2 | 1014.8 | 1370.6 | 876.1 |
| 1243.1 | 305.4 | 600.2 | 448.9 | 516.6 | 791.3 | 647.3  | 876.7  | 453.1 |
| 115.8  | 57.4  | 86.6  | 68.6  | 74.2  | 98.1  | 112.4  | 173.9  | 72.9  |



|       |       |       |       |       |       |       |       |       |
|-------|-------|-------|-------|-------|-------|-------|-------|-------|
| 16.6  | 10.1  | 8.9   | 8.7   | 12.9  | 9.1   | 13.9  | 19.7  | 15.5  |
| 12.1  | 4.5   | 8.0   | 11.3  | 11.2  | 7.7   | 11.1  | 16.8  | 9.5   |
| 72.4  | 70.1  | 64.6  | 73.6  | 88.8  | 71.0  | 109.6 | 119.6 | 89.2  |
| 27.7  | 35.0  | 39.1  | 31.9  | 30.7  | 33.2  | 55.8  | 53.0  | 38.5  |
| 82.8  | 62.9  | 65.0  | 76.5  | 77.7  | 83.8  | 95.5  | 134.4 | 61.6  |
| 15.6  | 10.4  | 9.4   | 12.4  | 7.3   | 11.7  | 10.6  | 20.5  | 10.8  |
| 12.7  | 6.0   | 11.8  | 1.6   | 7.7   | 9.8   | 10.8  | 13.6  | 11.2  |
| 23.8  | 13.9  | 20.6  | 19.8  | 16.6  | 21.7  | 27.3  | 25.8  | 15.4  |
| 271.1 | 244.1 | 360.5 | 463.7 | 397.7 | 393.5 | 537.7 | 535.7 | 444.4 |
| 13.7  | 13.0  | 16.3  | 13.2  | 11.2  | 11.0  | 18.6  | 27.3  | 20.1  |
| 13.3  | 7.3   | 1.1   | 4.8   | 4.1   | 1.0   | 1.3   | 1.7   | 5.9   |
| 2.6   | 1.9   | 1.8   | 4.1   | 0.8   | 3.9   | 7.9   | 0.6   | 0.4   |
| 5.8   | 8.6   | 4.3   | 6.1   | 3.8   | 7.6   | 10.4  | 5.2   | 6.7   |
| 10.9  | 13.1  | 10.3  | 11.1  | 13.1  | 14.9  | 15.2  | 15.3  | 12.7  |
| 2.2   | 0.8   | 0.8   | 1.8   | 1.0   | 1.9   | 1.3   | 2.5   | 2.1   |
| 112.5 | 76.2  | 72.2  | 87.6  | 87.0  | 66.4  | 120.0 | 119.5 | 85.1  |
| 31.0  | 34.6  | 28.3  | 39.1  | 41.3  | 25.7  | 40.3  | 42.7  | 32.9  |
| 134.1 | 109.0 | 155.0 | 163.7 | 152.4 | 134.1 | 191.5 | 188.3 | 122.3 |
| 118.2 | 82.8  | 123.1 | 103.8 | 105.3 | 129.8 | 153.8 | 147.6 | 95.9  |
| 72.1  | 66.2  | 72.0  | 71.4  | 82.4  | 78.3  | 102.2 | 109.6 | 86.2  |
| 31.0  | 18.9  | 24.9  | 21.5  | 16.1  | 22.3  | 29.7  | 29.8  | 24.7  |
| 18.2  | 8.4   | 10.4  | 10.8  | 7.3   | 13.6  | 21.6  | 23.5  | 11.0  |
| 29.8  | 12.4  | 17.8  | 27.8  | 28.9  | 15.6  | 42.9  | 51.4  | 45.3  |
| 10.8  | 25.0  | 22.2  | 27.1  | 15.9  | 18.0  | 41.5  | 35.2  | 38.7  |
| 1.0   | 1.1   | 5.2   | 0.4   | 0.7   | 2.1   | 1.0   | 2.2   | 2.8   |
| 0.8   | 1.4   | 0.7   | 0.7   | 1.0   | 0.6   | 1.1   | 3.7   | 0.5   |
| 69.3  | 34.7  | 41.7  | 50.0  | 42.4  | 52.8  | 58.9  | 78.0  | 66.2  |
| 54.3  | 41.3  | 40.0  | 37.6  | 34.8  | 40.9  | 46.0  | 45.2  | 39.6  |
| 14.4  | 6.9   | 8.7   | 2.4   | 5.4   | 5.5   | 8.2   | 11.1  | 5.9   |
| 54.5  | 21.4  | 16.7  | 28.1  | 21.3  | 24.2  | 36.0  | 40.6  | 33.5  |
| 47.0  | 29.7  | 34.6  | 32.9  | 30.6  | 41.8  | 53.3  | 71.3  | 41.6  |
| 43.2  | 30.4  | 53.3  | 49.8  | 55.4  | 53.2  | 65.4  | 69.5  | 44.6  |
| 80.7  | 59.3  | 65.9  | 68.3  | 62.1  | 73.6  | 131.9 | 111.4 | 80.8  |
| 12.9  | 12.8  | 23.6  | 23.6  | 26.9  | 16.1  | 27.9  | 31.0  | 32.1  |
| 0.8   | 0.8   | 5.2   | 0.9   | 0.7   | 3.8   | 0.8   | 1.2   | 0.6   |
| 281.1 | 141.3 | 197.6 | 189.8 | 214.2 | 285.6 | 242.6 | 416.4 | 156.1 |
| 3.8   | 1.2   | 2.0   | 1.3   | 1.7   | 1.0   | 1.0   | 2.0   | 1.6   |
| 0.7   | 1.0   | 1.6   | 0.7   | 1.2   | 0.6   | 9.1   | 4.8   | 0.6   |
| 175.4 | 95.9  | 120.8 | 111.0 | 109.3 | 122.6 | 148.9 | 196.8 | 101.4 |
| 49.6  | 18.9  | 27.9  | 27.2  | 27.4  | 27.0  | 38.3  | 59.7  | 37.6  |
| 100.2 | 55.6  | 58.2  | 54.7  | 66.3  | 46.6  | 91.6  | 99.4  | 68.8  |
| 77.7  | 49.9  | 58.5  | 61.4  | 57.0  | 53.6  | 78.6  | 93.4  | 61.1  |
| 455.1 | 287.7 | 379.8 | 398.7 | 358.1 | 406.2 | 606.1 | 722.0 | 343.8 |
| 5.0   | 4.7   | 18.4  | 1.0   | 2.8   | 1.4   | 16.8  | 12.5  | 9.7   |
| 1.9   | 1.6   | 2.9   | 2.6   | 4.7   | 6.5   | 3.2   | 11.0  | 4.9   |
| 5.2   | 4.4   | 5.6   | 8.3   | 9.9   | 4.4   | 12.2  | 13.2  | 7.4   |
| 90.4  | 54.4  | 61.0  | 67.2  | 68.0  | 65.3  | 108.9 | 137.4 | 91.3  |
| 57.3  | 56.4  | 45.1  | 43.6  | 56.4  | 38.9  | 90.0  | 93.5  | 64.1  |
| 77.5  | 9.8   | 13.5  | 12.4  | 14.1  | 19.2  | 22.6  | 28.5  | 22.7  |
| 20.3  | 13.0  | 13.1  | 8.9   | 13.9  | 20.4  | 20.3  | 25.4  | 19.4  |
| 146.5 | 97.7  | 109.1 | 126.5 | 125.7 | 116.1 | 156.1 | 195.1 | 141.0 |
| 40.8  | 31.4  | 37.0  | 36.1  | 39.8  | 37.8  | 56.4  | 70.5  | 34.2  |
| 153.6 | 98.4  | 100.2 | 114.2 | 125.2 | 88.4  | 118.1 | 133.1 | 112.9 |

|       |       |       |       |       |       |       |       |       |
|-------|-------|-------|-------|-------|-------|-------|-------|-------|
| 169.7 | 86.7  | 88.0  | 110.9 | 98.5  | 106.2 | 183.9 | 272.8 | 203.9 |
| 20.8  | 21.2  | 17.7  | 18.7  | 19.4  | 18.1  | 25.8  | 24.7  | 14.4  |
| 3.7   | 0.7   | 0.6   | 0.8   | 0.9   | 2.1   | 0.6   | 0.4   | 0.5   |
| 22.9  | 3.9   | 5.9   | 3.9   | 2.6   | 0.4   | 4.6   | 4.4   | 4.6   |
| 1.2   | 11.0  | 9.9   | 7.2   | 5.8   | 5.6   | 9.5   | 4.6   | 5.6   |
| 0.2   | 0.6   | 2.1   | 0.9   | 0.6   | 0.5   | 0.9   | 0.7   | 0.4   |
| 6.4   | 4.1   | 2.4   | 3.7   | 0.6   | 2.9   | 1.6   | 3.0   | 0.4   |
| 17.2  | 10.6  | 14.3  | 11.9  | 14.7  | 14.3  | 19.7  | 22.6  | 12.9  |
| 1.5   | 7.5   | 1.5   | 9.1   | 5.3   | 8.1   | 8.7   | 8.2   | 8.0   |
| 1.5   | 8.2   | 3.5   | 3.6   | 5.8   | 0.8   | 2.4   | 3.5   | 1.4   |
| 2.2   | 4.0   | 2.5   | 7.2   | 4.0   | 1.6   | 11.3  | 1.9   | 8.0   |
| 8.6   | 11.1  | 13.2  | 22.2  | 13.1  | 9.4   | 16.6  | 13.4  | 12.1  |
| 26.1  | 19.5  | 24.3  | 23.5  | 26.6  | 27.6  | 37.4  | 25.0  | 22.8  |
| 291.1 | 215.1 | 194.5 | 223.1 | 259.7 | 248.1 | 338.0 | 495.6 | 205.4 |
| 9.3   | 18.9  | 16.6  | 25.7  | 26.5  | 16.3  | 27.6  | 27.1  | 27.2  |
| 12.7  | 12.2  | 6.7   | 7.2   | 19.2  | 7.5   | 6.0   | 5.8   | 5.3   |
| 0.9   | 3.1   | 2.9   | 4.6   | 5.7   | 1.5   | 10.3  | 8.2   | 5.4   |
| 43.9  | 44.6  | 28.7  | 15.3  | 23.9  | 37.2  | 41.2  | 36.2  | 49.5  |
| 1.3   | 11.4  | 6.9   | 11.0  | 1.8   | 2.8   | 9.7   | 5.5   | 9.4   |
| 2.7   | 0.1   | 1.7   | 3.4   | 0.0   | 1.1   | 1.8   | 1.5   | 0.2   |
| 9.3   | 11.2  | 7.8   | 10.9  | 12.3  | 11.3  | 16.2  | 9.0   | 8.5   |
| 126.0 | 129.8 | 144.3 | 148.8 | 138.3 | 140.7 | 180.5 | 185.4 | 126.8 |
| 65.5  | 33.0  | 32.1  | 37.6  | 34.9  | 49.7  | 43.0  | 64.9  | 35.9  |
| 21.1  | 8.0   | 8.6   | 12.0  | 6.1   | 15.7  | 15.6  | 22.6  | 15.1  |
| 42.6  | 18.0  | 26.8  | 29.2  | 24.8  | 19.3  | 44.0  | 57.6  | 30.9  |
| 774.2 | 241.0 | 467.7 | 339.5 | 416.2 | 547.5 | 571.0 | 902.3 | 383.2 |
| 66.8  | 60.6  | 71.2  | 61.1  | 85.3  | 74.7  | 85.2  | 107.2 | 62.2  |
| 1.9   | 8.3   | 10.6  | 11.0  | 5.4   | 11.5  | 5.3   | 10.3  | 5.2   |
| 195.8 | 173.4 | 155.2 | 164.9 | 231.9 | 162.6 | 200.8 | 281.7 | 151.1 |
| 216.9 | 145.4 | 175.8 | 174.2 | 189.7 | 135.7 | 240.2 | 276.8 | 163.2 |
| 4.6   | 0.7   | 6.2   | 1.4   | 1.2   | 4.7   | 1.1   | 7.5   | 2.7   |
| 3.6   | 2.4   | 5.4   | 0.6   | 7.1   | 6.1   | 1.5   | 1.7   | 1.8   |
| 0.3   | 2.9   | 1.0   | 2.2   | 1.4   | 0.7   | 4.6   | 5.4   | 1.1   |
| 260.8 | 220.9 | 247.4 | 277.7 | 266.3 | 286.7 | 389.7 | 508.4 | 288.8 |
| 90.0  | 44.2  | 55.3  | 73.6  | 62.5  | 56.1  | 66.7  | 52.4  | 54.9  |
| 16.4  | 4.8   | 7.8   | 9.2   | 1.3   | 3.8   | 10.5  | 6.7   | 10.8  |
| 27.4  | 23.4  | 19.0  | 25.2  | 20.0  | 18.4  | 21.3  | 51.5  | 22.7  |
| 17.3  | 21.1  | 16.7  | 13.1  | 18.0  | 19.8  | 13.1  | 20.4  | 9.4   |
| 6.3   | 11.7  | 5.7   | 6.0   | 2.5   | 2.9   | 11.7  | 9.4   | 11.2  |
| 0.1   | 0.3   | 0.1   | 3.2   | 0.4   | 0.3   | 0.8   | 0.7   | 0.2   |
| 2.6   | 2.9   | 1.0   | 1.2   | 4.7   | 0.9   | 3.3   | 0.9   | 2.1   |
| 4.4   | 0.7   | 3.5   | 3.6   | 0.7   | 1.0   | 0.9   | 1.2   | 0.7   |
| 4.3   | 2.3   | 7.9   | 6.4   | 3.6   | 5.6   | 0.3   | 3.1   | 5.9   |
| 28.9  | 17.6  | 14.3  | 18.7  | 23.2  | 20.0  | 36.5  | 46.1  | 21.2  |
| 67.6  | 44.9  | 49.8  | 44.0  | 51.0  | 43.6  | 59.6  | 75.8  | 74.1  |
| 21.4  | 4.1   | 12.5  | 6.3   | 6.0   | 9.1   | 11.1  | 12.8  | 16.6  |
| 45.5  | 36.2  | 37.7  | 42.0  | 24.3  | 43.3  | 64.7  | 64.8  | 49.3  |
| 0.5   | 0.7   | 0.6   | 0.7   | 0.7   | 0.8   | 0.7   | 0.8   | 0.7   |
| 77.9  | 60.3  | 81.5  | 86.8  | 75.5  | 86.2  | 98.4  | 92.5  | 53.8  |
| 15.0  | 2.9   | 12.4  | 5.9   | 13.2  | 3.9   | 7.0   | 4.5   | 8.7   |
| 102.1 | 61.5  | 71.8  | 77.5  | 78.2  | 86.1  | 107.8 | 105.2 | 80.2  |
| 0.5   | 0.5   | 2.3   | 4.4   | 6.4   | 0.5   | 0.6   | 1.4   | 3.8   |
| 12.0  | 13.5  | 13.4  | 10.7  | 9.7   | 13.1  | 13.1  | 18.7  | 11.8  |

|       |       |       |       |       |       |       |       |       |
|-------|-------|-------|-------|-------|-------|-------|-------|-------|
| 18.3  | 8.9   | 7.4   | 2.8   | 7.6   | 2.1   | 10.5  | 16.5  | 2.7   |
| 7.4   | 16.6  | 15.8  | 13.1  | 23.9  | 12.3  | 17.6  | 13.3  | 13.6  |
| 17.9  | 11.4  | 2.6   | 7.1   | 2.2   | 16.5  | 25.2  | 7.1   | 10.1  |
| 11.0  | 11.3  | 7.2   | 6.1   | 8.4   | 7.7   | 11.9  | 13.0  | 6.2   |
| 6.2   | 10.8  | 9.1   | 8.7   | 13.0  | 10.5  | 8.7   | 8.8   | 15.8  |
| 217.4 | 115.7 | 144.3 | 135.3 | 143.4 | 142.0 | 227.8 | 238.1 | 195.4 |
| 35.7  | 33.1  | 26.9  | 27.0  | 26.7  | 29.7  | 39.7  | 47.2  | 17.3  |
| 17.2  | 17.3  | 18.1  | 14.5  | 19.5  | 16.9  | 19.9  | 31.4  | 24.7  |
| 1.2   | 9.7   | 1.0   | 1.8   | 1.6   | 0.6   | 1.1   | 2.1   | 7.2   |
| 37.8  | 25.7  | 21.0  | 21.0  | 20.2  | 25.6  | 26.1  | 28.3  | 23.8  |
| 60.0  | 42.3  | 33.7  | 36.4  | 33.1  | 44.1  | 55.0  | 42.9  | 51.8  |
| 30.4  | 16.6  | 17.3  | 15.5  | 17.6  | 22.7  | 20.5  | 28.0  | 12.1  |
| 78.9  | 67.5  | 63.7  | 69.0  | 87.9  | 76.9  | 91.0  | 96.5  | 65.4  |
| 9.5   | 10.5  | 13.3  | 2.6   | 18.2  | 12.4  | 19.2  | 27.8  | 20.7  |
| 24.5  | 15.0  | 11.9  | 16.8  | 21.6  | 11.9  | 25.7  | 32.3  | 19.6  |
| 0.3   | 0.4   | 1.0   | 1.5   | 1.2   | 3.2   | 1.1   | 4.6   | 3.8   |
| 14.9  | 12.7  | 14.4  | 13.7  | 12.0  | 10.6  | 14.2  | 23.5  | 15.3  |
| 84.9  | 44.0  | 66.8  | 73.6  | 66.3  | 58.2  | 88.6  | 114.4 | 53.6  |
| 1.3   | 1.0   | 1.1   | 1.0   | 1.1   | 5.4   | 1.5   | 2.4   | 3.6   |
| 172.4 | 86.9  | 100.2 | 109.5 | 138.3 | 152.3 | 149.1 | 212.0 | 118.9 |
| 140.0 | 90.9  | 105.3 | 108.9 | 123.8 | 125.7 | 180.5 | 224.0 | 172.9 |
| 2.0   | 1.9   | 9.2   | 8.5   | 1.5   | 3.8   | 3.7   | 4.2   | 4.7   |
| 3.1   | 1.3   | 0.7   | 1.1   | 0.9   | 1.3   | 2.8   | 3.0   | 2.0   |
| 1.9   | 1.3   | 0.8   | 3.2   | 0.6   | 2.4   | 2.0   | 2.6   | 2.2   |
| 3.7   | 9.5   | 8.4   | 6.4   | 7.9   | 7.1   | 6.9   | 10.4  | 4.7   |
| 482.7 | 287.2 | 325.7 | 353.3 | 338.4 | 334.2 | 471.7 | 484.9 | 317.7 |
| 28.5  | 30.9  | 32.4  | 28.0  | 30.5  | 25.4  | 32.4  | 29.7  | 29.3  |
| 45.3  | 36.8  | 33.2  | 37.4  | 33.0  | 35.1  | 48.0  | 42.5  | 53.8  |
| 31.0  | 30.4  | 33.6  | 43.2  | 29.5  | 38.3  | 39.2  | 41.1  | 31.4  |
| 7.2   | 2.2   | 2.7   | 4.7   | 6.5   | 5.2   | 5.2   | 6.4   | 4.5   |
| 4.3   | 4.4   | 5.5   | 4.1   | 3.7   | 1.9   | 8.4   | 9.1   | 4.2   |
| 8.9   | 6.3   | 7.9   | 10.8  | 14.7  | 16.4  | 7.5   | 15.8  | 12.3  |
| 14.7  | 11.2  | 12.6  | 13.7  | 11.8  | 9.7   | 15.0  | 18.9  | 11.5  |
| 14.9  | 24.3  | 23.5  | 11.8  | 18.1  | 20.4  | 33.7  | 22.5  | 21.0  |
| 7.4   | 0.8   | 1.9   | 5.7   | 0.9   | 5.0   | 0.7   | 0.6   | 1.1   |
| 1.1   | 0.8   | 2.1   | 0.9   | 1.2   | 1.3   | 2.9   | 1.2   | 2.7   |
| 21.8  | 18.3  | 21.7  | 13.7  | 15.9  | 16.1  | 20.8  | 20.3  | 16.6  |
| 9.2   | 4.7   | 1.2   | 1.3   | 1.0   | 7.3   | 14.2  | 15.9  | 5.6   |
| 1.0   | 3.1   | 0.7   | 1.8   | 5.2   | 1.8   | 1.0   | 2.9   | 1.3   |
| 757.2 | 547.5 | 684.9 | 730.5 | 683.9 | 774.3 | 950.8 | 943.7 | 750.9 |
| 2.6   | 0.9   | 0.8   | 2.5   | 0.9   | 1.2   | 0.6   | 0.9   | 3.4   |
| 12.1  | 14.5  | 0.7   | 6.6   | 5.0   | 4.7   | 6.8   | 11.3  | 6.1   |
| 48.9  | 25.2  | 43.8  | 37.0  | 46.6  | 30.4  | 42.2  | 45.4  | 30.3  |
| 69.1  | 44.4  | 38.7  | 42.0  | 38.9  | 42.8  | 56.1  | 65.4  | 68.7  |
| 19.9  | 15.3  | 11.7  | 12.8  | 14.9  | 12.3  | 17.6  | 20.3  | 15.6  |
| 5.3   | 6.2   | 5.1   | 5.2   | 5.3   | 1.9   | 4.1   | 5.7   | 6.7   |
| 109.3 | 66.9  | 80.6  | 78.4  | 92.7  | 89.9  | 130.1 | 176.3 | 85.7  |
| 26.5  | 7.0   | 13.3  | 11.0  | 16.3  | 11.3  | 31.1  | 24.5  | 25.9  |
| 21.2  | 31.4  | 25.5  | 24.8  | 16.6  | 24.4  | 38.7  | 45.4  | 33.7  |
| 8.4   | 7.2   | 1.4   | 8.8   | 5.7   | 8.2   | 7.9   | 5.5   | 4.5   |
| 137.9 | 103.9 | 123.3 | 157.0 | 116.0 | 133.5 | 149.1 | 162.1 | 105.6 |
| 3.0   | 3.5   | 1.2   | 0.8   | 8.1   | 8.2   | 5.5   | 5.7   | 1.6   |
| 132.0 | 66.3  | 77.3  | 84.1  | 82.1  | 91.9  | 98.5  | 133.2 | 85.9  |

|        |        |        |        |        |        |        |        |        |
|--------|--------|--------|--------|--------|--------|--------|--------|--------|
| 95.1   | 62.9   | 58.2   | 59.1   | 74.6   | 71.8   | 94.7   | 130.9  | 62.2   |
| 8.5    | 7.7    | 11.3   | 6.7    | 11.4   | 9.0    | 14.1   | 15.8   | 13.7   |
| 5.4    | 2.6    | 1.6    | 0.8    | 4.0    | 0.8    | 2.0    | 3.6    | 2.2    |
| 24.4   | 24.7   | 31.1   | 28.6   | 32.9   | 34.1   | 43.4   | 38.9   | 40.3   |
| 9.8    | 14.8   | 12.9   | 12.6   | 13.1   | 21.3   | 15.2   | 16.4   | 21.2   |
| 1.4    | 1.5    | 1.7    | 1.3    | 1.7    | 1.4    | 1.0    | 2.2    | 1.0    |
| 3.0    | 5.3    | 1.1    | 3.0    | 1.3    | 1.2    | 6.6    | 1.1    | 3.1    |
| 13.7   | 14.8   | 13.0   | 5.1    | 13.5   | 11.2   | 10.2   | 19.8   | 12.2   |
| 0.1    | 0.3    | 4.2    | 0.2    | 2.6    | 2.7    | 4.2    | 0.3    | 1.0    |
| 244.4  | 160.7  | 134.6  | 202.8  | 215.3  | 150.8  | 311.9  | 340.7  | 224.5  |
| 119.1  | 75.7   | 78.2   | 97.0   | 86.3   | 93.0   | 118.2  | 142.4  | 84.3   |
| 35.2   | 21.0   | 37.8   | 33.1   | 19.3   | 27.2   | 34.7   | 42.5   | 22.8   |
| 86.7   | 47.2   | 64.7   | 64.1   | 77.5   | 74.2   | 104.7  | 102.7  | 63.3   |
| 1.9    | 1.1    | 0.8    | 0.2    | 2.2    | 1.3    | 0.4    | 1.2    | 0.5    |
| 12.0   | 6.2    | 6.8    | 7.6    | 6.5    | 10.4   | 12.2   | 7.5    | 4.8    |
| 386.9  | 425.5  | 299.4  | 358.9  | 555.7  | 366.5  | 581.9  | 670.6  | 740.7  |
| 43.2   | 28.1   | 37.8   | 27.1   | 35.6   | 29.2   | 53.3   | 75.8   | 36.6   |
| 38.0   | 31.6   | 32.7   | 32.6   | 36.0   | 42.8   | 46.3   | 55.1   | 39.4   |
| 1647.5 | 1752.2 | 1673.6 | 1796.6 | 1971.1 | 1785.4 | 2443.8 | 2394.2 | 1739.2 |
| 24.3   | 17.6   | 13.0   | 25.3   | 15.1   | 19.5   | 18.5   | 14.8   | 31.6   |
| 23.2   | 20.8   | 18.3   | 26.7   | 23.1   | 18.6   | 31.3   | 27.3   | 17.5   |
| 0.6    | 6.6    | 10.9   | 6.9    | 4.8    | 1.0    | 7.1    | 2.4    | 8.0    |
| 23.6   | 32.4   | 39.4   | 47.9   | 46.2   | 44.5   | 64.5   | 64.5   | 49.0   |
| 3.2    | 3.5    | 3.9    | 4.6    | 13.1   | 8.6    | 19.2   | 5.0    | 5.8    |
| 123.9  | 3.5    | 16.3   | 2.6    | 9.4    | 20.4   | 12.6   | 31.4   | 11.1   |
| 142.5  | 62.4   | 90.5   | 85.8   | 78.1   | 116.1  | 106.0  | 152.8  | 101.5  |
| 30.8   | 19.8   | 22.2   | 12.8   | 18.3   | 14.4   | 15.9   | 26.2   | 18.1   |
| 8.3    | 6.6    | 5.4    | 0.3    | 1.3    | 3.6    | 7.2    | 6.6    | 8.0    |
| 143.8  | 78.3   | 78.5   | 87.4   | 77.0   | 72.1   | 104.0  | 113.7  | 98.9   |
| 10.1   | 14.7   | 8.6    | 14.4   | 8.0    | 6.6    | 11.6   | 16.0   | 13.7   |
| 1.8    | 1.1    | 0.5    | 2.2    | 1.0    | 1.0    | 6.5    | 2.2    | 1.6    |
| 88.6   | 60.3   | 75.8   | 72.5   | 71.8   | 76.6   | 97.3   | 125.2  | 70.1   |
| 0.2    | 1.5    | 0.1    | 0.1    | 0.2    | 3.0    | 1.3    | 5.1    | 0.3    |
| 17.1   | 18.7   | 15.7   | 18.0   | 19.2   | 7.8    | 20.5   | 22.7   | 15.5   |
| 0.6    | 1.9    | 3.9    | 2.3    | 1.4    | 0.5    | 1.3    | 1.6    | 1.9    |
| 27.6   | 26.8   | 27.8   | 37.8   | 30.8   | 29.4   | 31.5   | 16.0   | 13.9   |
| 298.2  | 167.8  | 205.8  | 230.6  | 225.8  | 262.3  | 304.7  | 353.8  | 228.7  |
| 10.4   | 1.0    | 7.9    | 5.9    | 5.5    | 9.1    | 13.5   | 14.4   | 9.9    |
| 13.0   | 15.9   | 8.8    | 12.5   | 16.4   | 10.7   | 20.5   | 24.9   | 17.2   |
| 6.2    | 1.0    | 1.3    | 5.7    | 1.1    | 1.1    | 1.9    | 1.8    | 1.8    |
| 68.2   | 1.4    | 0.2    | 0.5    | 3.2    | 1.3    | 1.9    | 0.4    | 2.7    |
| 14.0   | 9.4    | 4.5    | 8.3    | 15.4   | 9.0    | 9.3    | 15.9   | 9.7    |
| 141.5  | 102.3  | 100.5  | 103.6  | 107.6  | 105.4  | 182.6  | 150.0  | 153.6  |
| 105.8  | 51.8   | 72.4   | 62.6   | 63.7   | 64.4   | 91.1   | 121.8  | 62.9   |
| 73.5   | 60.9   | 54.8   | 64.1   | 64.8   | 59.9   | 83.3   | 95.4   | 70.9   |
| 2.8    | 2.1    | 1.9    | 1.9    | 2.1    | 1.1    | 3.2    | 1.5    | 4.1    |
| 3.4    | 3.1    | 7.7    | 4.2    | 4.5    | 2.6    | 6.2    | 4.4    | 1.8    |
| 290.4  | 202.7  | 234.8  | 258.5  | 222.4  | 288.9  | 336.8  | 383.2  | 226.0  |
| 33.9   | 19.1   | 40.7   | 30.3   | 32.0   | 48.7   | 57.5   | 25.5   | 31.4   |
| 37.1   | 13.2   | 13.1   | 14.7   | 26.3   | 19.2   | 30.0   | 36.5   | 28.0   |
| 3.9    | 2.8    | 5.8    | 3.8    | 6.7    | 3.8    | 1.9    | 4.1    | 7.0    |
| 0.6    | 0.6    | 3.6    | 4.5    | 2.6    | 0.6    | 1.0    | 0.8    | 1.4    |
| 7.1    | 12.4   | 12.4   | 7.5    | 4.5    | 9.6    | 8.8    | 5.5    | 10.7   |

|       |       |       |       |       |       |       |       |       |
|-------|-------|-------|-------|-------|-------|-------|-------|-------|
| 2.4   | 2.1   | 3.0   | 2.8   | 3.9   | 1.7   | 11.8  | 5.4   | 8.5   |
| 1.9   | 1.4   | 1.6   | 1.0   | 1.3   | 2.4   | 4.1   | 5.9   | 1.9   |
| 628.8 | 370.0 | 376.9 | 508.5 | 432.1 | 349.3 | 572.6 | 490.3 | 412.7 |
| 58.5  | 56.2  | 57.6  | 63.3  | 60.5  | 68.4  | 95.3  | 91.9  | 59.5  |
| 23.5  | 6.1   | 8.3   | 12.4  | 15.1  | 14.6  | 17.8  | 21.9  | 14.5  |
| 1.3   | 1.7   | 2.0   | 5.4   | 1.0   | 3.4   | 4.0   | 1.1   | 0.7   |
| 11.9  | 17.7  | 17.4  | 22.8  | 25.4  | 21.6  | 19.5  | 17.3  | 11.7  |
| 162.3 | 85.1  | 136.0 | 127.7 | 115.2 | 129.6 | 173.5 | 170.8 | 140.0 |
| 55.3  | 20.3  | 18.9  | 23.2  | 18.9  | 22.7  | 17.9  | 37.4  | 26.8  |
| 13.4  | 9.9   | 6.9   | 4.7   | 3.0   | 6.5   | 7.7   | 3.7   | 7.9   |
| 549.6 | 385.8 | 476.6 | 421.7 | 498.5 | 445.4 | 552.5 | 524.9 | 420.0 |
| 217.9 | 166.3 | 171.5 | 155.0 | 211.0 | 191.7 | 246.9 | 202.5 | 195.5 |
| 557.3 | 31.2  | 288.2 | 90.6  | 200.7 | 433.3 | 268.6 | 785.7 | 330.8 |
| 4.2   | 1.9   | 2.2   | 7.2   | 8.6   | 13.1  | 7.5   | 19.0  | 2.6   |
| 14.4  | 18.7  | 18.0  | 11.6  | 8.9   | 16.3  | 14.9  | 16.0  | 16.3  |
| 22.2  | 10.8  | 12.7  | 3.5   | 11.3  | 13.7  | 5.0   | 8.4   | 4.7   |
| 48.2  | 28.4  | 38.9  | 34.9  | 43.5  | 34.4  | 59.7  | 62.2  | 33.3  |
| 0.4   | 0.2   | 6.4   | 0.4   | 0.6   | 5.2   | 4.9   | 1.1   | 4.5   |
| 547.1 | 328.7 | 393.9 | 434.2 | 451.2 | 445.8 | 537.2 | 614.5 | 437.3 |
| 172.8 | 128.0 | 165.2 | 156.1 | 145.1 | 149.0 | 256.6 | 307.1 | 206.8 |
| 43.9  | 27.5  | 36.0  | 33.0  | 32.8  | 40.8  | 40.7  | 49.3  | 36.0  |
| 6.8   | 5.1   | 5.6   | 8.3   | 7.0   | 5.4   | 7.1   | 13.2  | 8.4   |
| 148.1 | 122.0 | 122.2 | 138.3 | 123.5 | 121.9 | 143.5 | 163.8 | 110.2 |
| 35.7  | 25.6  | 18.2  | 28.6  | 33.1  | 23.5  | 47.6  | 61.2  | 38.0  |
| 0.5   | 0.3   | 0.5   | 0.4   | 0.8   | 0.3   | 0.6   | 1.4   | 3.9   |
| 1.2   | 0.4   | 0.9   | 0.4   | 2.2   | 0.9   | 1.3   | 1.7   | 0.8   |
| 2.9   | 4.8   | 0.9   | 3.2   | 0.9   | 3.1   | 0.4   | 4.1   | 4.4   |
| 73.3  | 6.1   | 6.5   | 5.6   | 8.4   | 7.0   | 4.0   | 14.0  | 6.0   |
| 63.2  | 36.5  | 30.8  | 39.1  | 49.1  | 40.2  | 64.1  | 62.0  | 37.7  |
| 22.7  | 15.6  | 2.9   | 6.3   | 6.3   | 10.3  | 17.9  | 21.1  | 4.9   |
| 99.4  | 64.5  | 70.9  | 80.9  | 76.9  | 83.7  | 91.9  | 95.6  | 66.5  |
| 314.8 | 176.4 | 212.5 | 223.2 | 189.5 | 207.7 | 290.4 | 305.1 | 240.8 |
| 32.8  | 36.6  | 34.7  | 38.0  | 32.3  | 23.0  | 29.5  | 40.0  | 34.2  |
| 1.7   | 0.9   | 5.5   | 0.6   | 2.5   | 2.3   | 5.0   | 5.0   | 0.9   |
| 19.4  | 12.4  | 16.1  | 14.4  | 12.1  | 2.9   | 29.9  | 14.5  | 4.6   |
| 0.8   | 2.6   | 1.9   | 0.7   | 1.5   | 0.6   | 9.5   | 2.2   | 1.2   |
| 87.7  | 35.7  | 46.6  | 67.4  | 62.9  | 61.0  | 85.8  | 98.3  | 78.3  |
| 1.3   | 3.5   | 1.9   | 1.6   | 7.6   | 8.5   | 9.6   | 15.1  | 1.2   |
| 3.1   | 7.0   | 6.0   | 1.6   | 0.9   | 2.7   | 3.2   | 4.4   | 2.5   |
| 2.8   | 1.7   | 2.7   | 2.0   | 1.9   | 2.7   | 3.8   | 3.7   | 2.6   |
| 39.3  | 22.8  | 27.6  | 24.9  | 26.5  | 26.0  | 29.0  | 37.6  | 25.8  |
| 4.4   | 9.4   | 6.7   | 2.1   | 3.3   | 5.8   | 9.2   | 4.6   | 6.0   |
| 51.6  | 22.7  | 29.3  | 22.5  | 27.8  | 23.3  | 45.5  | 84.7  | 52.3  |
| 89.4  | 63.1  | 75.6  | 80.8  | 89.9  | 83.7  | 103.1 | 85.0  | 72.7  |
| 6.0   | 7.9   | 11.1  | 10.3  | 11.3  | 10.9  | 14.0  | 14.7  | 12.8  |
| 2.0   | 6.6   | 7.7   | 0.4   | 2.8   | 8.1   | 3.0   | 4.8   | 4.6   |
| 2.3   | 2.2   | 6.4   | 1.4   | 8.2   | 4.9   | 2.4   | 1.3   | 5.9   |
| 1.3   | 1.4   | 1.0   | 1.3   | 2.6   | 1.9   | 2.4   | 1.6   | 1.1   |
| 4.0   | 5.4   | 8.3   | 9.7   | 6.8   | 9.5   | 8.6   | 9.5   | 9.0   |
| 75.7  | 60.6  | 73.9  | 68.0  | 84.4  | 84.1  | 127.4 | 133.9 | 81.7  |
| 1.3   | 1.8   | 3.2   | 1.1   | 3.2   | 1.2   | 11.8  | 8.3   | 7.9   |
| 3.8   | 6.7   | 9.3   | 3.7   | 4.3   | 1.6   | 7.1   | 9.7   | 11.7  |
| 2.1   | 0.4   | 0.5   | 0.5   | 3.7   | 2.4   | 0.1   | 0.2   | 1.1   |

|        |       |        |        |        |        |        |        |        |
|--------|-------|--------|--------|--------|--------|--------|--------|--------|
| 75.7   | 46.1  | 54.6   | 62.3   | 61.4   | 54.0   | 64.1   | 94.8   | 51.0   |
| 143.8  | 72.1  | 90.7   | 92.8   | 90.8   | 95.8   | 119.3  | 170.9  | 65.6   |
| 5.3    | 5.5   | 6.3    | 5.1    | 2.0    | 4.9    | 7.3    | 6.1    | 8.5    |
| 34.3   | 22.6  | 15.1   | 31.4   | 24.4   | 27.1   | 28.1   | 49.4   | 26.2   |
| 578.2  | 422.1 | 533.8  | 477.0  | 551.7  | 518.7  | 666.9  | 799.2  | 567.5  |
| 27.1   | 17.4  | 15.1   | 13.0   | 27.6   | 21.9   | 26.0   | 45.1   | 37.6   |
| 0.8    | 1.5   | 0.9    | 1.0    | 1.1    | 0.8    | 1.5    | 1.4    | 1.3    |
| 27.6   | 14.8  | 30.1   | 30.3   | 25.2   | 21.0   | 47.6   | 39.8   | 29.9   |
| 69.2   | 68.2  | 78.3   | 70.3   | 79.3   | 75.1   | 98.6   | 135.1  | 99.5   |
| 1.8    | 0.6   | 0.5    | 1.2    | 6.9    | 5.5    | 0.6    | 1.2    | 0.2    |
| 0.9    | 0.5   | 0.9    | 0.5    | 0.4    | 0.4    | 0.5    | 1.3    | 0.4    |
| 1.2    | 1.6   | 10.9   | 0.9    | 7.3    | 3.1    | 12.3   | 11.2   | 4.8    |
| 25.8   | 14.3  | 29.3   | 21.7   | 16.3   | 23.2   | 23.6   | 33.7   | 15.5   |
| 2.5    | 0.2   | 3.5    | 0.6    | 0.9    | 2.6    | 0.6    | 6.1    | 3.8    |
| 0.4    | 0.1   | 0.2    | 2.1    | 0.7    | 1.5    | 1.5    | 0.4    | 2.0    |
| 23.0   | 14.7  | 13.3   | 17.8   | 22.6   | 17.8   | 23.8   | 21.7   | 15.2   |
| 259.8  | 269.7 | 251.0  | 286.5  | 307.5  | 288.6  | 360.5  | 359.2  | 335.6  |
| 4.7    | 2.5   | 9.2    | 9.1    | 9.2    | 11.4   | 3.0    | 7.1    | 7.7    |
| 13.5   | 11.8  | 9.5    | 15.3   | 8.3    | 12.2   | 9.3    | 17.7   | 9.5    |
| 1.1    | 3.9   | 0.9    | 0.5    | 8.0    | 0.3    | 7.4    | 8.9    | 0.6    |
| 0.4    | 0.5   | 0.9    | 1.0    | 0.6    | 6.5    | 1.1    | 0.9    | 0.7    |
| 19.2   | 11.5  | 9.0    | 10.6   | 6.7    | 6.2    | 14.9   | 18.0   | 11.6   |
| 109.9  | 86.4  | 106.7  | 107.7  | 123.4  | 126.9  | 155.1  | 188.2  | 146.7  |
| 2.7    | 0.9   | 1.9    | 1.6    | 2.5    | 3.1    | 2.0    | 7.9    | 1.0    |
| 54.6   | 37.9  | 42.6   | 43.6   | 42.9   | 44.6   | 48.5   | 61.2   | 26.5   |
| 29.2   | 18.2  | 18.7   | 16.1   | 18.4   | 19.6   | 35.1   | 33.7   | 34.7   |
| 88.6   | 27.6  | 21.4   | 33.6   | 31.9   | 37.9   | 44.8   | 67.9   | 37.2   |
| 13.0   | 9.2   | 15.4   | 11.7   | 12.9   | 11.3   | 31.2   | 30.5   | 15.4   |
| 26.6   | 19.3  | 31.0   | 32.5   | 27.6   | 25.4   | 42.1   | 31.5   | 35.7   |
| 3.1    | 6.3   | 1.7    | 2.9    | 0.9    | 1.3    | 1.7    | 7.8    | 2.8    |
| 48.2   | 33.1  | 24.6   | 34.6   | 31.9   | 36.1   | 50.4   | 52.0   | 35.2   |
| 34.0   | 33.0  | 33.2   | 22.4   | 27.9   | 28.6   | 43.3   | 25.3   | 29.7   |
| 41.0   | 27.0  | 32.6   | 44.9   | 42.0   | 44.2   | 54.8   | 44.8   | 40.6   |
| 3.0    | 5.4   | 4.1    | 7.2    | 5.5    | 2.4    | 2.7    | 10.3   | 1.0    |
| 46.4   | 51.7  | 52.0   | 58.6   | 60.1   | 57.0   | 71.3   | 80.3   | 65.7   |
| 1.0    | 0.9   | 1.6    | 1.1    | 4.1    | 1.1    | 1.1    | 1.2    | 0.3    |
| 16.1   | 7.7   | 12.0   | 3.1    | 8.6    | 6.3    | 13.3   | 13.1   | 9.3    |
| 497.2  | 382.3 | 506.4  | 528.0  | 511.0  | 633.6  | 671.8  | 796.2  | 543.7  |
| 1.4    | 2.5   | 1.6    | 0.7    | 1.6    | 1.9    | 2.0    | 1.2    | 0.9    |
| 17.4   | 19.3  | 19.3   | 9.5    | 18.6   | 22.8   | 30.9   | 35.5   | 15.4   |
| 16.9   | 3.3   | 10.2   | 8.6    | 14.4   | 15.2   | 23.5   | 27.0   | 17.1   |
| 5.6    | 4.0   | 1.6    | 2.7    | 3.8    | 0.6    | 1.5    | 5.6    | 3.7    |
| 1.6    | 11.9  | 3.1    | 1.6    | 4.2    | 3.0    | 1.9    | 4.3    | 4.9    |
| 33.8   | 14.2  | 24.9   | 23.0   | 23.1   | 25.9   | 25.1   | 23.9   | 23.3   |
| 73.9   | 37.2  | 43.3   | 48.9   | 51.2   | 54.7   | 69.2   | 84.5   | 50.1   |
| 21.7   | 12.3  | 7.9    | 11.4   | 13.5   | 12.7   | 21.4   | 19.0   | 12.8   |
| 27.0   | 20.4  | 13.0   | 11.4   | 17.0   | 11.0   | 24.4   | 15.7   | 19.2   |
| 1303.3 | 968.4 | 1105.8 | 1162.8 | 1196.6 | 1167.7 | 1395.1 | 1549.4 | 1106.5 |
| 36.0   | 16.5  | 19.7   | 21.9   | 25.6   | 19.0   | 40.2   | 41.5   | 27.4   |
| 323.3  | 254.5 | 299.3  | 321.3  | 348.3  | 320.2  | 377.3  | 400.4  | 290.2  |
| 106.7  | 91.6  | 105.9  | 119.7  | 97.6   | 130.4  | 140.9  | 141.2  | 93.9   |
| 1.7    | 3.6   | 3.4    | 5.0    | 8.7    | 3.1    | 1.6    | 2.0    | 0.5    |
| 92.2   | 72.1  | 52.8   | 65.3   | 79.9   | 65.5   | 96.2   | 98.5   | 75.6   |

|       |       |       |       |       |       |       |       |       |
|-------|-------|-------|-------|-------|-------|-------|-------|-------|
| 16.7  | 12.9  | 12.1  | 6.1   | 12.4  | 13.2  | 21.2  | 28.7  | 6.1   |
| 3.2   | 0.3   | 1.2   | 1.4   | 0.7   | 1.3   | 0.7   | 1.6   | 1.7   |
| 3.4   | 1.5   | 1.2   | 1.7   | 1.5   | 1.8   | 1.4   | 1.4   | 1.7   |
| 15.1  | 9.3   | 9.4   | 12.5  | 10.6  | 9.8   | 13.3  | 23.1  | 11.1  |
| 16.7  | 4.2   | 4.8   | 7.7   | 7.5   | 7.2   | 12.0  | 10.8  | 7.3   |
| 247.1 | 164.2 | 182.1 | 183.5 | 204.5 | 191.5 | 290.4 | 309.8 | 199.4 |
| 44.3  | 31.4  | 26.7  | 21.3  | 38.6  | 37.0  | 46.8  | 54.7  | 29.2  |
| 1.4   | 1.0   | 0.9   | 1.9   | 0.9   | 0.5   | 1.5   | 1.9   | 0.9   |
| 27.4  | 17.2  | 22.3  | 22.3  | 22.4  | 16.6  | 28.8  | 29.4  | 19.3  |
| 17.0  | 11.4  | 6.4   | 16.5  | 15.8  | 19.3  | 21.6  | 16.7  | 19.9  |
| 8.1   | 24.2  | 12.9  | 11.1  | 18.4  | 5.8   | 25.8  | 21.4  | 22.4  |
| 1.2   | 2.2   | 0.9   | 2.4   | 2.3   | 1.4   | 3.5   | 2.4   | 2.0   |
| 0.1   | 0.3   | 0.2   | 0.1   | 0.2   | 0.2   | 0.2   | 0.4   | 4.7   |
| 16.2  | 13.5  | 10.3  | 7.5   | 13.9  | 8.8   | 13.9  | 13.2  | 13.5  |
| 17.4  | 17.8  | 20.6  | 32.4  | 31.5  | 28.7  | 25.7  | 31.0  | 14.4  |
| 10.9  | 14.4  | 18.6  | 16.7  | 11.6  | 16.8  | 18.5  | 18.7  | 14.9  |
| 18.6  | 6.3   | 5.7   | 8.3   | 11.8  | 9.9   | 9.9   | 16.6  | 13.6  |
| 31.7  | 25.7  | 25.9  | 33.0  | 25.8  | 23.8  | 33.0  | 38.1  | 36.3  |
| 5.5   | 2.2   | 3.1   | 1.0   | 5.4   | 0.7   | 4.1   | 4.4   | 5.2   |
| 7.0   | 9.7   | 4.6   | 15.4  | 7.7   | 11.2  | 14.5  | 13.6  | 11.1  |
| 1.4   | 2.0   | 0.7   | 0.6   | 3.1   | 0.5   | 1.1   | 3.8   | 1.5   |
| 27.2  | 10.5  | 19.4  | 27.6  | 26.6  | 23.4  | 29.2  | 31.3  | 27.2  |
| 17.3  | 11.5  | 12.4  | 13.5  | 10.3  | 8.3   | 8.9   | 11.5  | 12.5  |
| 701.0 | 609.8 | 692.7 | 673.1 | 678.9 | 635.8 | 823.9 | 809.5 | 607.2 |
| 22.4  | 14.4  | 17.3  | 14.2  | 14.6  | 19.4  | 19.9  | 22.6  | 27.5  |
| 11.1  | 7.5   | 12.2  | 35.3  | 30.9  | 13.4  | 31.6  | 19.4  | 25.7  |
| 408.7 | 369.1 | 365.0 | 392.4 | 442.9 | 410.7 | 550.8 | 649.5 | 481.1 |
| 8.1   | 1.7   | 8.5   | 7.4   | 0.6   | 7.1   | 2.9   | 7.2   | 2.3   |
| 2.4   | 1.1   | 0.4   | 0.4   | 1.1   | 0.5   | 1.1   | 1.2   | 1.6   |
| 1.8   | 1.0   | 1.3   | 1.1   | 1.1   | 0.4   | 2.1   | 3.4   | 0.4   |
| 1.0   | 0.7   | 4.9   | 0.7   | 0.8   | 0.6   | 1.3   | 1.2   | 0.4   |
| 0.9   | 0.9   | 0.8   | 0.8   | 0.9   | 1.4   | 1.6   | 1.0   | 0.5   |
| 138.3 | 91.0  | 122.6 | 112.0 | 106.2 | 133.0 | 148.0 | 131.3 | 87.8  |
| 1.7   | 2.7   | 1.8   | 4.5   | 1.7   | 0.9   | 1.2   | 1.0   | 1.4   |
| 6.0   | 2.0   | 8.2   | 0.9   | 0.8   | 1.2   | 6.3   | 7.8   | 5.2   |
| 7.7   | 0.6   | 0.7   | 0.8   | 1.5   | 0.8   | 3.8   | 0.8   | 0.5   |
| 30.9  | 14.1  | 28.0  | 24.9  | 25.6  | 25.0  | 34.7  | 39.4  | 22.8  |
| 1.0   | 0.9   | 2.5   | 5.5   | 4.4   | 5.3   | 2.1   | 4.5   | 1.1   |
| 6.1   | 1.1   | 0.6   | 4.2   | 1.8   | 2.1   | 0.9   | 0.8   | 1.1   |
| 1.0   | 0.7   | 0.6   | 0.3   | 3.9   | 1.9   | 4.1   | 0.5   | 0.5   |
| 4.2   | 4.2   | 3.7   | 0.5   | 3.2   | 4.1   | 3.2   | 0.6   | 2.0   |
| 12.0  | 12.9  | 14.8  | 14.9  | 15.1  | 8.3   | 14.1  | 17.6  | 18.3  |
| 0.6   | 2.7   | 6.4   | 1.2   | 0.2   | 0.7   | 0.6   | 5.0   | 2.0   |
| 7.5   | 11.7  | 6.1   | 6.8   | 4.6   | 8.3   | 8.5   | 4.3   | 9.2   |
| 25.3  | 12.8  | 18.7  | 19.5  | 20.4  | 23.9  | 21.4  | 34.6  | 21.0  |
| 3.1   | 4.7   | 1.4   | 2.7   | 2.8   | 1.5   | 2.6   | 2.1   | 1.1   |
| 1.0   | 1.5   | 0.5   | 0.4   | 1.0   | 0.7   | 1.6   | 6.3   | 0.9   |
| 2.9   | 3.6   | 1.8   | 7.8   | 1.0   | 7.6   | 7.2   | 2.9   | 3.8   |
| 0.7   | 0.9   | 0.5   | 0.5   | 1.3   | 0.4   | 2.5   | 1.3   | 0.7   |
| 18.3  | 12.9  | 10.7  | 14.9  | 11.9  | 7.8   | 18.1  | 15.0  | 12.9  |
| 135.9 | 86.8  | 102.5 | 120.3 | 90.2  | 110.8 | 133.1 | 134.4 | 120.4 |
| 1.0   | 1.9   | 1.7   | 13.1  | 5.7   | 0.7   | 2.7   | 8.1   | 1.5   |
| 3.5   | 0.2   | 0.5   | 7.4   | 5.6   | 3.4   | 4.4   | 5.6   | 4.1   |

|       |       |       |       |       |       |        |        |       |
|-------|-------|-------|-------|-------|-------|--------|--------|-------|
| 0.8   | 2.9   | 5.3   | 6.6   | 5.8   | 6.0   | 9.4    | 5.8    | 3.8   |
| 23.4  | 17.2  | 19.7  | 25.3  | 21.0  | 20.9  | 33.8   | 31.7   | 30.6  |
| 3.8   | 6.9   | 3.5   | 2.8   | 5.1   | 4.6   | 4.0    | 7.5    | 2.6   |
| 46.8  | 27.2  | 28.1  | 37.6  | 41.7  | 39.3  | 47.1   | 62.6   | 72.7  |
| 126.0 | 67.9  | 69.9  | 75.2  | 77.5  | 79.2  | 109.6  | 96.3   | 85.0  |
| 15.1  | 21.2  | 20.5  | 24.8  | 28.2  | 33.0  | 49.0   | 40.5   | 36.3  |
| 54.4  | 35.9  | 52.9  | 45.4  | 41.4  | 49.9  | 63.3   | 65.2   | 57.1  |
| 37.5  | 21.3  | 21.7  | 19.5  | 23.7  | 20.2  | 34.6   | 45.9   | 25.3  |
| 445.8 | 320.3 | 377.1 | 351.3 | 354.5 | 337.2 | 570.8  | 557.3  | 349.6 |
| 165.2 | 99.4  | 123.5 | 139.9 | 136.3 | 118.4 | 173.5  | 172.0  | 142.6 |
| 3.2   | 0.7   | 4.6   | 2.2   | 0.2   | 1.0   | 8.9    | 10.6   | 3.9   |
| 0.9   | 1.3   | 1.7   | 2.4   | 2.1   | 0.7   | 0.9    | 3.0    | 2.2   |
| 288.6 | 232.3 | 217.3 | 220.0 | 225.5 | 217.7 | 466.8  | 394.7  | 367.4 |
| 10.4  | 17.0  | 18.4  | 18.2  | 8.7   | 15.7  | 14.0   | 23.8   | 15.5  |
| 0.3   | 4.1   | 4.9   | 2.6   | 4.6   | 0.3   | 5.2    | 0.4    | 2.0   |
| 16.7  | 8.9   | 11.6  | 12.4  | 7.8   | 22.1  | 19.0   | 46.4   | 15.7  |
| 30.3  | 19.6  | 18.7  | 24.7  | 22.3  | 29.6  | 40.1   | 61.6   | 29.6  |
| 4.6   | 1.2   | 0.7   | 0.7   | 3.4   | 0.8   | 4.1    | 0.7    | 1.2   |
| 8.5   | 7.9   | 9.7   | 7.1   | 11.8  | 9.3   | 11.6   | 9.8    | 6.6   |
| 7.1   | 25.1  | 19.7  | 16.9  | 20.3  | 5.5   | 26.3   | 31.5   | 36.2  |
| 15.3  | 5.0   | 15.6  | 16.7  | 5.6   | 16.1  | 27.3   | 13.9   | 5.3   |
| 55.1  | 44.0  | 50.6  | 63.7  | 52.3  | 45.3  | 70.3   | 76.9   | 66.9  |
| 345.4 | 326.1 | 367.9 | 408.6 | 414.0 | 408.4 | 600.0  | 688.6  | 516.4 |
| 1.1   | 1.6   | 1.9   | 2.1   | 1.9   | 1.0   | 2.0    | 1.9    | 0.9   |
| 15.9  | 13.4  | 17.6  | 20.3  | 10.3  | 21.2  | 27.3   | 28.1   | 20.0  |
| 941.3 | 616.1 | 749.0 | 742.7 | 783.6 | 862.0 | 1176.5 | 1128.8 | 908.9 |
| 30.9  | 13.9  | 16.1  | 22.1  | 23.6  | 20.8  | 28.5   | 38.3   | 24.4  |
| 17.4  | 11.0  | 9.2   | 5.1   | 11.3  | 10.5  | 14.6   | 18.2   | 7.7   |
| 1.3   | 5.7   | 5.4   | 3.3   | 1.4   | 1.2   | 4.9    | 6.9    | 4.7   |
| 2.7   | 0.3   | 0.7   | 1.9   | 4.7   | 0.6   | 7.5    | 1.3    | 2.4   |
| 0.9   | 1.3   | 1.1   | 0.8   | 0.4   | 0.8   | 1.0    | 1.9    | 1.4   |
| 6.7   | 4.5   | 2.3   | 4.2   | 4.5   | 3.1   | 2.7    | 3.9    | 4.2   |
| 5.0   | 2.9   | 6.9   | 5.1   | 8.2   | 2.5   | 4.9    | 7.6    | 4.9   |
| 0.5   | 0.2   | 1.7   | 1.2   | 0.5   | 2.1   | 0.3    | 3.3    | 2.4   |
| 19.0  | 13.7  | 16.9  | 15.0  | 17.9  | 10.0  | 15.5   | 20.2   | 14.6  |
| 6.2   | 1.6   | 6.0   | 3.1   | 1.3   | 4.3   | 3.0    | 3.6    | 2.4   |
| 7.5   | 1.6   | 8.5   | 7.2   | 5.6   | 3.4   | 8.2    | 11.2   | 6.3   |
| 1.8   | 8.7   | 12.4  | 1.5   | 12.8  | 2.8   | 10.9   | 11.2   | 10.8  |
| 5.3   | 7.2   | 2.8   | 7.5   | 6.6   | 3.5   | 1.3    | 6.2    | 1.2   |
| 91.7  | 19.8  | 24.6  | 26.7  | 27.9  | 30.6  | 40.8   | 64.8   | 32.1  |
| 28.8  | 20.9  | 20.6  | 24.1  | 23.1  | 27.2  | 35.3   | 37.6   | 37.2  |
| 9.4   | 3.8   | 11.7  | 20.9  | 16.3  | 2.9   | 23.7   | 28.3   | 9.3   |
| 1.0   | 0.7   | 5.2   | 0.6   | 0.7   | 0.7   | 2.0    | 2.5    | 0.9   |
| 63.7  | 57.7  | 55.5  | 56.3  | 53.0  | 46.2  | 81.1   | 73.8   | 53.2  |
| 621.5 | 538.3 | 566.4 | 627.8 | 602.4 | 584.5 | 796.9  | 819.4  | 530.9 |
| 5.1   | 6.2   | 1.1   | 4.0   | 5.3   | 10.0  | 7.1    | 7.9    | 0.8   |
| 60.3  | 35.4  | 40.5  | 45.1  | 41.6  | 37.6  | 71.0   | 68.4   | 33.7  |
| 0.5   | 0.5   | 1.2   | 1.2   | 1.0   | 0.6   | 0.5    | 0.4    | 0.3   |
| 29.3  | 11.5  | 24.3  | 13.0  | 36.3  | 18.8  | 30.9   | 29.5   | 52.3  |
| 0.8   | 2.5   | 1.3   | 2.4   | 2.3   | 2.4   | 2.2    | 3.3    | 1.6   |
| 438.7 | 359.1 | 358.6 | 408.7 | 447.4 | 405.0 | 535.0  | 492.8  | 352.3 |
| 66.9  | 36.9  | 42.2  | 46.0  | 46.5  | 47.0  | 59.7   | 79.4   | 60.8  |
| 41.0  | 15.9  | 21.7  | 26.3  | 22.1  | 22.5  | 27.1   | 54.1   | 19.5  |



|       |       |       |       |       |       |       |       |       |
|-------|-------|-------|-------|-------|-------|-------|-------|-------|
| 5.3   | 0.6   | 2.0   | 1.1   | 0.8   | 0.6   | 5.7   | 11.3  | 0.6   |
| 5.8   | 1.7   | 2.4   | 4.0   | 2.2   | 8.2   | 2.0   | 5.1   | 1.6   |
| 2.8   | 0.2   | 4.3   | 3.5   | 0.2   | 4.0   | 2.9   | 6.0   | 1.1   |
| 43.9  | 30.1  | 32.5  | 26.1  | 36.3  | 30.5  | 46.3  | 37.9  | 31.3  |
| 34.2  | 24.0  | 21.4  | 23.6  | 31.4  | 19.1  | 39.3  | 48.7  | 27.7  |
| 2.2   | 2.7   | 1.7   | 2.4   | 3.4   | 2.2   | 4.6   | 4.2   | 2.6   |
| 15.6  | 12.5  | 13.2  | 10.3  | 11.2  | 15.4  | 10.0  | 11.7  | 10.8  |
| 24.0  | 5.3   | 10.8  | 8.7   | 11.7  | 13.0  | 17.5  | 21.2  | 20.4  |
| 2.6   | 2.6   | 2.3   | 9.9   | 1.7   | 6.2   | 3.0   | 9.0   | 8.4   |
| 6.9   | 2.1   | 6.4   | 10.6  | 9.3   | 8.6   | 7.2   | 10.3  | 8.1   |
| 1.6   | 1.5   | 0.5   | 0.9   | 1.8   | 5.6   | 1.2   | 2.9   | 10.1  |
| 0.5   | 0.3   | 0.2   | 0.3   | 0.5   | 0.3   | 1.0   | 0.8   | 0.8   |
| 0.2   | 0.3   | 0.6   | 0.2   | 5.5   | 3.8   | 0.1   | 0.1   | 0.3   |
| 1.3   | 0.8   | 0.5   | 2.0   | 0.9   | 0.4   | 8.9   | 1.3   | 6.7   |
| 5.3   | 3.5   | 3.5   | 6.9   | 5.6   | 3.9   | 7.6   | 4.5   | 5.2   |
| 11.1  | 3.5   | 5.6   | 3.7   | 10.5  | 4.7   | 5.5   | 11.6  | 4.6   |
| 7.5   | 7.4   | 2.5   | 0.7   | 5.1   | 7.3   | 5.1   | 1.2   | 4.0   |
| 0.1   | 0.5   | 1.4   | 0.2   | 1.1   | 0.6   | 0.1   | 1.3   | 1.2   |
| 95.4  | 50.8  | 78.5  | 65.0  | 75.4  | 77.3  | 93.7  | 115.6 | 63.0  |
| 96.5  | 68.1  | 66.2  | 82.5  | 83.2  | 69.4  | 89.9  | 88.4  | 60.6  |
| 268.3 | 204.4 | 135.1 | 181.1 | 149.5 | 112.4 | 239.7 | 331.5 | 263.6 |
| 9.6   | 3.4   | 2.2   | 3.4   | 4.8   | 5.1   | 7.6   | 13.6  | 7.0   |
| 4.5   | 0.6   | 0.5   | 0.2   | 6.1   | 1.4   | 0.9   | 1.0   | 0.7   |
| 2.3   | 2.4   | 2.1   | 1.8   | 2.0   | 1.8   | 3.4   | 1.6   | 2.0   |
| 9.7   | 4.0   | 5.9   | 7.7   | 7.5   | 9.3   | 5.8   | 4.0   | 2.3   |
| 4.5   | 2.9   | 0.4   | 0.4   | 3.2   | 4.2   | 6.8   | 6.8   | 0.8   |
| 1.6   | 1.7   | 1.3   | 2.2   | 2.6   | 2.1   | 3.5   | 3.4   | 10.3  |
| 11.0  | 11.7  | 5.8   | 6.7   | 7.5   | 9.7   | 6.5   | 8.0   | 11.1  |
| 1.6   | 1.4   | 5.2   | 1.8   | 1.1   | 4.5   | 1.7   | 1.5   | 1.0   |
| 11.0  | 9.0   | 19.2  | 16.5  | 23.4  | 17.3  | 19.0  | 10.8  | 14.6  |
| 1.0   | 0.8   | 2.0   | 0.7   | 0.7   | 0.6   | 1.2   | 0.8   | 0.8   |
| 210.7 | 91.8  | 127.3 | 131.4 | 126.7 | 150.1 | 182.7 | 196.8 | 144.9 |
| 21.8  | 16.9  | 19.5  | 8.9   | 23.2  | 12.7  | 20.5  | 20.7  | 21.8  |
| 3.3   | 1.4   | 2.8   | 2.3   | 2.0   | 1.6   | 1.2   | 2.0   | 2.0   |
| 0.5   | 0.5   | 1.3   | 1.6   | 0.5   | 0.9   | 3.2   | 1.3   | 0.7   |
| 1.4   | 0.4   | 0.7   | 0.7   | 1.0   | 0.7   | 2.6   | 0.6   | 0.6   |
| 118.9 | 62.0  | 68.1  | 90.1  | 91.5  | 98.7  | 134.7 | 187.3 | 145.1 |
| 70.5  | 42.7  | 44.9  | 44.2  | 59.6  | 64.4  | 88.2  | 117.1 | 71.0  |
| 1.9   | 2.2   | 4.3   | 7.9   | 2.3   | 3.8   | 2.3   | 11.7  | 1.9   |
| 16.8  | 11.2  | 14.1  | 12.0  | 4.5   | 15.6  | 16.2  | 13.7  | 7.3   |
| 0.8   | 0.3   | 0.4   | 2.0   | 0.8   | 1.8   | 4.0   | 3.0   | 0.5   |
| 339.8 | 190.5 | 220.7 | 202.8 | 252.9 | 237.6 | 368.9 | 459.0 | 255.6 |
| 7.5   | 11.3  | 10.1  | 13.4  | 5.9   | 11.4  | 14.2  | 18.8  | 13.6  |
| 0.8   | 0.6   | 0.7   | 0.5   | 1.1   | 0.6   | 4.2   | 0.8   | 0.7   |
| 18.1  | 17.4  | 13.2  | 17.4  | 9.1   | 19.1  | 27.5  | 29.9  | 16.4  |
| 91.2  | 110.9 | 138.3 | 127.0 | 165.5 | 158.5 | 166.5 | 164.8 | 136.6 |
| 34.2  | 14.8  | 18.3  | 16.9  | 21.2  | 12.4  | 20.5  | 17.8  | 22.2  |
| 0.6   | 0.7   | 0.7   | 0.7   | 0.6   | 1.1   | 0.7   | 1.9   | 0.8   |
| 53.7  | 41.9  | 60.6  | 58.2  | 55.3  | 54.2  | 89.5  | 100.4 | 87.9  |
| 5.0   | 8.6   | 10.8  | 10.7  | 7.6   | 6.4   | 9.1   | 11.0  | 8.2   |
| 2.5   | 8.3   | 2.8   | 3.1   | 2.7   | 8.1   | 5.3   | 4.9   | 3.7   |
| 1.1   | 9.4   | 1.9   | 1.4   | 5.6   | 12.4  | 7.2   | 1.0   | 1.8   |
| 5.8   | 0.5   | 3.1   | 3.1   | 5.8   | 2.9   | 1.0   | 0.4   | 3.3   |

|        |        |        |        |        |        |        |        |        |
|--------|--------|--------|--------|--------|--------|--------|--------|--------|
| 1.6    | 1.8    | 5.5    | 8.0    | 9.9    | 4.7    | 1.5    | 8.4    | 11.4   |
| 136.5  | 59.7   | 87.3   | 76.1   | 83.7   | 105.9  | 91.6   | 106.7  | 97.2   |
| 163.5  | 122.4  | 130.8  | 145.7  | 135.0  | 138.6  | 180.2  | 190.8  | 155.8  |
| 17.3   | 12.9   | 8.8    | 17.4   | 18.0   | 17.0   | 16.6   | 20.8   | 24.7   |
| 0.5    | 0.4    | 0.4    | 0.7    | 0.5    | 0.5    | 1.0    | 1.0    | 0.9    |
| 23.0   | 10.4   | 20.9   | 24.2   | 22.2   | 13.1   | 25.0   | 19.7   | 19.5   |
| 0.2    | 1.0    | 0.3    | 0.3    | 0.5    | 0.3    | 0.4    | 0.8    | 0.6    |
| 0.6    | 0.3    | 0.9    | 0.2    | 0.8    | 0.5    | 0.6    | 2.1    | 1.4    |
| 23.3   | 18.7   | 15.9   | 24.3   | 25.6   | 17.2   | 41.0   | 43.8   | 32.6   |
| 2.1    | 4.9    | 1.8    | 2.1    | 2.3    | 7.1    | 6.5    | 4.8    | 1.8    |
| 0.3    | 0.5    | 0.2    | 0.8    | 0.2    | 0.8    | 3.1    | 0.3    | 2.7    |
| 55.9   | 40.5   | 44.3   | 39.6   | 56.8   | 60.0   | 91.0   | 70.5   | 41.2   |
| 0.2    | 0.2    | 0.1    | 0.3    | 0.1    | 0.0    | 0.1    | 0.1    | 0.4    |
| 0.5    | 0.8    | 0.4    | 0.4    | 1.0    | 0.8    | 0.8    | 0.8    | 0.8    |
| 1.1    | 3.6    | 3.1    | 1.9    | 9.4    | 4.3    | 9.9    | 3.0    | 7.8    |
| 28.4   | 16.9   | 33.0   | 23.0   | 19.8   | 30.1   | 30.3   | 32.4   | 23.7   |
| 947.7  | 716.7  | 873.9  | 858.9  | 899.8  | 896.5  | 1156.8 | 1144.2 | 1256.0 |
| 0.8    | 1.2    | 0.6    | 0.5    | 1.1    | 2.5    | 0.8    | 1.0    | 1.0    |
| 51.0   | 53.9   | 37.4   | 51.6   | 43.8   | 38.4   | 73.2   | 53.5   | 54.8   |
| 6.3    | 7.9    | 1.0    | 9.4    | 5.4    | 6.4    | 1.8    | 2.2    | 6.3    |
| 1.9    | 1.7    | 4.2    | 3.2    | 3.1    | 2.1    | 6.9    | 2.4    | 3.4    |
| 459.7  | 236.8  | 242.8  | 249.5  | 270.6  | 245.5  | 289.7  | 304.0  | 231.2  |
| 379.4  | 345.4  | 379.0  | 388.4  | 390.5  | 315.3  | 399.8  | 493.6  | 350.5  |
| 78.1   | 75.3   | 95.2   | 84.4   | 90.9   | 99.7   | 137.3  | 140.2  | 73.5   |
| 5.8    | 1.3    | 1.0    | 0.5    | 0.7    | 3.6    | 6.6    | 2.0    | 7.3    |
| 0.6    | 0.9    | 0.9    | 0.6    | 1.1    | 3.7    | 2.2    | 1.4    | 0.7    |
| 1.9    | 5.7    | 1.9    | 9.7    | 10.5   | 9.9    | 16.6   | 17.9   | 7.7    |
| 50.6   | 19.5   | 27.6   | 26.2   | 29.9   | 23.7   | 39.1   | 36.2   | 17.4   |
| 236.6  | 145.2  | 182.0  | 174.9  | 174.2  | 164.9  | 219.3  | 211.8  | 198.0  |
| 0.4    | 0.3    | 0.5    | 0.3    | 0.6    | 2.8    | 0.8    | 0.4    | 1.1    |
| 1.1    | 1.0    | 1.3    | 5.7    | 1.3    | 5.9    | 7.0    | 0.5    | 10.3   |
| 14.2   | 1.8    | 2.8    | 0.6    | 4.1    | 1.5    | 9.0    | 12.6   | 1.4    |
| 8.0    | 10.3   | 2.5    | 8.1    | 9.8    | 11.6   | 10.2   | 4.1    | 7.4    |
| 295.9  | 234.7  | 291.2  | 296.0  | 327.4  | 295.9  | 393.6  | 374.2  | 308.5  |
| 1.2    | 1.0    | 1.5    | 1.3    | 0.9    | 11.7   | 1.0    | 0.7    | 2.9    |
| 10.4   | 6.8    | 9.8    | 12.2   | 11.0   | 11.5   | 10.1   | 18.0   | 8.7    |
| 1.0    | 2.1    | 1.4    | 0.1    | 0.2    | 0.6    | 0.5    | 0.3    | 2.2    |
| 0.5    | 0.9    | 1.0    | 0.2    | 0.4    | 0.3    | 0.3    | 0.3    | 0.5    |
| 6.4    | 6.1    | 5.4    | 7.0    | 1.1    | 5.8    | 5.6    | 4.6    | 2.3    |
| 22.7   | 14.3   | 14.9   | 15.1   | 14.5   | 18.4   | 27.8   | 28.2   | 14.3   |
| 1578.9 | 1142.6 | 1250.0 | 1414.7 | 1390.4 | 1318.9 | 1786.8 | 1733.9 | 1233.6 |
| 36.7   | 13.0   | 23.1   | 28.3   | 26.7   | 11.2   | 25.1   | 41.5   | 16.3   |
| 13.5   | 9.6    | 7.3    | 2.2    | 0.9    | 5.3    | 3.1    | 10.0   | 5.9    |
| 5.6    | 5.8    | 8.6    | 6.8    | 5.5    | 5.8    | 8.6    | 8.3    | 7.8    |
| 130.1  | 143.7  | 140.8  | 130.6  | 138.4  | 162.8  | 149.2  | 169.7  | 129.5  |
| 92.6   | 70.7   | 108.4  | 88.6   | 90.7   | 96.4   | 137.7  | 146.3  | 118.8  |
| 6.6    | 12.0   | 16.1   | 11.2   | 5.6    | 12.9   | 15.8   | 22.8   | 19.9   |
| 304.8  | 186.7  | 193.1  | 220.2  | 185.0  | 227.9  | 250.3  | 269.0  | 165.1  |
| 4.1    | 5.3    | 2.0    | 13.7   | 4.0    | 6.5    | 14.8   | 24.8   | 12.3   |
| 13.0   | 16.7   | 13.2   | 15.1   | 15.8   | 22.6   | 23.6   | 27.4   | 27.1   |
| 4.8    | 1.1    | 4.2    | 2.5    | 1.0    | 1.5    | 2.6    | 1.9    | 1.1    |
| 26.7   | 17.1   | 23.7   | 21.2   | 27.4   | 26.5   | 36.9   | 30.0   | 22.2   |
| 2.0    | 2.8    | 9.6    | 5.5    | 9.3    | 3.9    | 5.9    | 4.1    | 7.0    |

|        |        |        |        |        |        |        |        |        |
|--------|--------|--------|--------|--------|--------|--------|--------|--------|
| 21.7   | 19.8   | 22.8   | 27.0   | 26.1   | 29.0   | 38.0   | 28.7   | 25.7   |
| 1.4    | 1.1    | 1.9    | 0.4    | 0.1    | 0.2    | 2.8    | 0.2    | 2.7    |
| 4.1    | 2.1    | 5.2    | 6.7    | 6.5    | 1.0    | 0.9    | 1.5    | 4.0    |
| 6.5    | 5.9    | 12.7   | 1.0    | 10.3   | 12.1   | 15.8   | 10.1   | 8.8    |
| 10.0   | 8.5    | 5.2    | 9.7    | 7.6    | 5.6    | 7.6    | 19.0   | 8.4    |
| 6.4    | 3.4    | 1.7    | 5.3    | 5.3    | 1.6    | 13.9   | 4.7    | 9.3    |
| 8.8    | 7.2    | 5.8    | 4.9    | 7.1    | 7.6    | 10.1   | 10.6   | 8.8    |
| 13.8   | 13.4   | 12.0   | 10.7   | 10.7   | 11.4   | 18.6   | 16.5   | 6.2    |
| 2.7    | 0.5    | 0.2    | 6.1    | 5.6    | 4.5    | 0.3    | 1.2    | 5.0    |
| 0.2    | 0.4    | 1.4    | 1.0    | 0.4    | 1.9    | 0.9    | 0.9    | 1.1    |
| 5.4    | 8.0    | 8.2    | 7.4    | 2.8    | 3.4    | 9.5    | 15.3   | 8.9    |
| 10.0   | 0.9    | 3.0    | 0.7    | 1.0    | 3.9    | 0.9    | 9.8    | 7.9    |
| 6.6    | 5.1    | 1.0    | 5.2    | 5.4    | 0.7    | 5.3    | 10.7   | 5.0    |
| 29.7   | 18.9   | 20.6   | 40.5   | 29.0   | 20.1   | 41.8   | 65.5   | 29.0   |
| 2.9    | 4.9    | 3.3    | 4.1    | 2.4    | 3.9    | 4.4    | 1.5    | 2.6    |
| 1.0    | 1.2    | 2.1    | 0.6    | 0.9    | 1.0    | 4.2    | 2.2    | 1.9    |
| 94.7   | 66.2   | 64.1   | 76.3   | 92.5   | 87.6   | 116.2  | 139.4  | 94.5   |
| 0.3    | 0.5    | 0.7    | 1.0    | 1.0    | 2.2    | 0.8    | 1.2    | 2.3    |
| 43.4   | 35.1   | 37.9   | 29.6   | 40.3   | 48.3   | 56.3   | 71.9   | 40.7   |
| 1.0    | 3.4    | 1.1    | 0.5    | 8.4    | 1.1    | 2.4    | 4.0    | 1.7    |
| 16.7   | 13.1   | 15.0   | 8.8    | 11.4   | 16.1   | 19.0   | 24.7   | 19.6   |
| 1107.1 | 708.6  | 939.3  | 806.4  | 960.2  | 945.0  | 931.6  | 1145.7 | 615.7  |
| 1.6    | 1.1    | 1.5    | 0.8    | 2.1    | 5.0    | 4.1    | 1.6    | 1.0    |
| 3.7    | 7.0    | 10.3   | 10.7   | 8.1    | 12.1   | 17.2   | 14.4   | 9.7    |
| 188.1  | 130.6  | 131.3  | 161.4  | 151.6  | 161.4  | 220.6  | 244.2  | 157.8  |
| 58.2   | 32.1   | 46.1   | 47.0   | 35.2   | 35.6   | 54.5   | 71.1   | 44.7   |
| 32.9   | 14.1   | 18.4   | 17.8   | 13.9   | 19.5   | 27.4   | 25.3   | 21.2   |
| 14.5   | 7.3    | 6.5    | 8.0    | 6.5    | 12.7   | 8.5    | 14.2   | 8.7    |
| 1.2    | 0.7    | 0.8    | 0.3    | 0.9    | 0.4    | 0.4    | 0.8    | 0.4    |
| 8.1    | 2.9    | 6.1    | 5.1    | 1.1    | 4.1    | 6.7    | 5.5    | 2.1    |
| 1.2    | 8.3    | 5.0    | 6.0    | 5.8    | 6.6    | 4.9    | 10.5   | 6.1    |
| 0.7    | 3.6    | 9.0    | 1.0    | 1.9    | 1.0    | 0.6    | 5.3    | 7.6    |
| 0.3    | 0.2    | 0.1    | 2.6    | 3.7    | 0.2    | 0.3    | 0.1    | 0.1    |
| 5.7    | 11.0   | 8.3    | 5.3    | 9.3    | 7.4    | 8.8    | 8.4    | 11.2   |
| 4.2    | 4.3    | 3.3    | 3.2    | 0.1    | 0.3    | 0.3    | 3.1    | 3.3    |
| 12.2   | 12.7   | 11.8   | 11.8   | 16.4   | 13.9   | 14.0   | 18.0   | 19.5   |
| 0.8    | 1.0    | 5.5    | 2.7    | 3.1    | 1.0    | 0.6    | 6.6    | 7.0    |
| 1.0    | 3.9    | 6.1    | 6.1    | 10.5   | 1.9    | 5.5    | 6.3    | 11.5   |
| 18.6   | 5.5    | 20.4   | 9.7    | 15.0   | 17.8   | 13.2   | 30.2   | 15.5   |
| 112.3  | 78.6   | 111.1  | 90.5   | 96.4   | 83.1   | 116.4  | 120.3  | 79.4   |
| 69.0   | 30.2   | 48.0   | 49.0   | 44.8   | 42.8   | 59.2   | 85.7   | 71.4   |
| 4.8    | 3.9    | 3.9    | 0.9    | 1.0    | 1.3    | 6.5    | 8.4    | 5.6    |
| 6.1    | 4.7    | 2.9    | 9.2    | 6.4    | 4.2    | 4.7    | 9.4    | 5.6    |
| 21.3   | 11.8   | 21.6   | 21.8   | 19.5   | 19.5   | 29.8   | 16.5   | 16.7   |
| 18.3   | 8.5    | 13.4   | 14.6   | 12.9   | 15.2   | 17.3   | 28.5   | 11.5   |
| 372.5  | 253.5  | 302.6  | 300.6  | 282.4  | 273.4  | 324.4  | 319.2  | 213.5  |
| 9.5    | 10.3   | 10.5   | 6.7    | 11.7   | 12.3   | 7.7    | 19.3   | 8.6    |
| 1675.5 | 1241.6 | 1301.8 | 1477.9 | 1523.4 | 1378.2 | 2278.5 | 2448.7 | 1426.0 |
| 43.1   | 26.9   | 30.7   | 34.6   | 32.1   | 42.5   | 56.8   | 60.6   | 41.1   |
| 406.0  | 372.6  | 390.8  | 400.2  | 398.8  | 384.7  | 480.1  | 482.6  | 432.9  |
| 29.6   | 20.0   | 21.2   | 19.3   | 34.0   | 27.3   | 36.4   | 44.3   | 27.6   |
| 4.5    | 0.5    | 0.9    | 0.7    | 1.5    | 0.7    | 4.0    | 4.9    | 1.3    |
| 161.0  | 88.5   | 125.0  | 115.4  | 120.2  | 141.3  | 175.2  | 210.3  | 155.5  |

|        |       |       |       |       |        |        |        |       |
|--------|-------|-------|-------|-------|--------|--------|--------|-------|
| 0.8    | 1.1   | 1.1   | 4.8   | 0.4   | 5.8    | 0.6    | 1.2    | 3.1   |
| 0.4    | 0.4   | 0.4   | 0.6   | 4.7   | 0.8    | 1.5    | 3.4    | 0.4   |
| 0.4    | 0.5   | 0.3   | 4.0   | 1.9   | 0.2    | 1.5    | 2.0    | 0.3   |
| 5.0    | 9.9   | 1.4   | 2.9   | 6.0   | 1.2    | 12.2   | 5.6    | 3.7   |
| 14.0   | 3.0   | 5.1   | 6.9   | 11.6  | 12.9   | 12.1   | 14.8   | 8.5   |
| 28.1   | 21.2  | 29.2  | 30.7  | 16.2  | 17.7   | 36.5   | 37.1   | 15.1  |
| 24.2   | 13.4  | 22.6  | 11.9  | 17.2  | 14.6   | 24.0   | 24.4   | 12.2  |
| 2.4    | 3.8   | 4.6   | 1.4   | 2.0   | 1.2    | 2.8    | 8.6    | 2.1   |
| 3.3    | 2.9   | 10.7  | 3.1   | 3.7   | 7.3    | 13.6   | 8.7    | 8.3   |
| 4.9    | 1.3   | 2.2   | 4.3   | 1.7   | 2.4    | 5.2    | 1.4    | 1.0   |
| 2.1    | 1.0   | 7.2   | 2.5   | 6.4   | 2.4    | 9.4    | 10.1   | 2.8   |
| 1.7    | 1.0   | 1.5   | 1.5   | 1.8   | 1.6    | 1.3    | 1.9    | 1.4   |
| 57.0   | 28.8  | 15.9  | 14.5  | 21.3  | 21.6   | 27.0   | 27.4   | 20.6  |
| 1100.3 | 813.1 | 972.4 | 995.1 | 924.9 | 1001.1 | 1129.0 | 1331.7 | 893.0 |
| 12.2   | 8.6   | 8.4   | 11.4  | 9.2   | 5.2    | 9.9    | 1.7    | 7.8   |
| 3.5    | 4.4   | 0.7   | 0.9   | 5.2   | 3.1    | 4.7    | 1.7    | 2.3   |
| 13.5   | 9.9   | 9.7   | 12.7  | 20.0  | 4.1    | 12.3   | 6.0    | 1.7   |
| 30.8   | 19.1  | 24.3  | 27.6  | 24.6  | 27.5   | 36.3   | 46.5   | 28.6  |
| 14.1   | 7.0   | 8.5   | 8.2   | 11.8  | 10.1   | 11.6   | 21.1   | 15.9  |
| 9.0    | 3.6   | 3.3   | 10.1  | 10.4  | 4.7    | 10.2   | 8.6    | 9.3   |
| 11.1   | 32.4  | 19.9  | 27.9  | 26.7  | 27.0   | 40.3   | 24.7   | 33.1  |
| 28.4   | 16.7  | 25.5  | 18.9  | 21.5  | 33.9   | 31.3   | 33.2   | 29.4  |
| 83.9   | 61.6  | 69.2  | 62.8  | 74.2  | 79.8   | 86.6   | 144.3  | 67.1  |
| 48.7   | 42.2  | 54.5  | 44.5  | 51.3  | 48.8   | 62.2   | 83.6   | 42.5  |
| 196.2  | 139.1 | 161.4 | 168.4 | 169.8 | 145.5  | 182.1  | 226.5  | 181.1 |
| 1.5    | 2.5   | 0.6   | 2.4   | 1.1   | 0.8    | 1.7    | 1.2    | 1.5   |
| 0.6    | 0.9   | 1.1   | 0.6   | 1.7   | 0.5    | 0.6    | 0.8    | 0.7   |
| 2.6    | 1.0   | 0.8   | 0.8   | 1.0   | 2.5    | 2.3    | 2.2    | 1.3   |
| 6.7    | 14.3  | 10.5  | 6.3   | 12.1  | 13.7   | 22.8   | 11.3   | 14.4  |
| 1.9    | 6.1   | 3.9   | 3.9   | 6.4   | 7.8    | 2.3    | 12.4   | 7.0   |
| 70.5   | 45.8  | 51.2  | 57.7  | 46.4  | 34.8   | 93.0   | 104.3  | 79.6  |
| 329.9  | 217.8 | 257.6 | 246.9 | 306.9 | 341.1  | 418.9  | 327.4  | 231.5 |
| 24.1   | 6.9   | 12.8  | 13.7  | 11.2  | 10.7   | 12.7   | 23.0   | 14.2  |
| 58.6   | 33.8  | 41.8  | 37.7  | 36.5  | 34.2   | 59.8   | 40.4   | 46.1  |
| 5.4    | 1.4   | 1.3   | 3.8   | 4.3   | 2.7    | 2.8    | 4.8    | 5.0   |
| 0.6    | 0.1   | 0.3   | 0.2   | 0.2   | 0.2    | 5.8    | 0.4    | 2.9   |
| 16.2   | 6.3   | 13.3  | 12.1  | 12.4  | 14.0   | 13.7   | 19.2   | 11.0  |
| 20.4   | 2.7   | 14.6  | 20.1  | 16.7  | 6.1    | 20.3   | 14.1   | 13.9  |
| 77.9   | 49.6  | 60.3  | 65.3  | 59.1  | 59.6   | 82.7   | 93.0   | 56.0  |
| 0.7    | 3.1   | 0.1   | 0.3   | 0.8   | 0.2    | 0.4    | 3.3    | 3.2   |
| 0.5    | 0.3   | 6.0   | 2.3   | 4.3   | 1.9    | 3.7    | 5.6    | 3.0   |
| 102.4  | 16.2  | 23.9  | 34.3  | 39.0  | 36.8   | 40.3   | 74.4   | 32.3  |
| 4.0    | 1.0   | 3.7   | 0.7   | 0.7   | 3.6    | 0.8    | 1.2    | 0.6   |
| 0.7    | 4.0   | 1.7   | 1.3   | 0.8   | 1.4    | 0.9    | 0.8    | 0.2   |
| 1.7    | 7.2   | 9.8   | 8.4   | 4.3   | 1.3    | 4.9    | 13.0   | 6.1   |
| 1.6    | 9.1   | 10.5  | 5.9   | 9.3   | 11.6   | 8.3    | 14.3   | 7.7   |
| 2.1    | 1.9   | 4.0   | 1.0   | 3.7   | 0.4    | 1.8    | 1.8    | 0.6   |
| 46.3   | 44.0  | 44.1  | 32.2  | 43.0  | 37.9   | 51.6   | 68.0   | 34.2  |
| 1.1    | 1.7   | 4.2   | 3.7   | 5.0   | 1.3    | 0.6    | 2.4    | 11.0  |
| 6.1    | 6.8   | 3.4   | 3.2   | 4.7   | 6.4    | 5.5    | 10.0   | 4.9   |
| 23.9   | 11.3  | 12.5  | 9.3   | 9.3   | 13.9   | 17.5   | 31.6   | 9.3   |
| 1.8    | 1.8   | 0.6   | 0.7   | 3.0   | 1.9    | 0.8    | 1.2    | 0.6   |
| 1.6    | 3.0   | 10.7  | 5.9   | 13.6  | 8.3    | 8.0    | 2.9    | 8.7   |

|       |       |       |       |       |       |       |       |       |
|-------|-------|-------|-------|-------|-------|-------|-------|-------|
| 7.0   | 3.1   | 5.7   | 1.3   | 5.6   | 4.4   | 1.7   | 11.6  | 8.0   |
| 12.1  | 5.6   | 7.8   | 5.6   | 4.4   | 5.4   | 12.2  | 5.7   | 7.8   |
| 2.9   | 0.5   | 0.6   | 4.2   | 2.2   | 1.9   | 5.5   | 7.1   | 1.3   |
| 373.5 | 305.8 | 316.7 | 357.9 | 409.8 | 420.5 | 514.5 | 578.1 | 381.2 |
| 70.0  | 59.9  | 82.2  | 80.3  | 74.1  | 56.1  | 95.4  | 88.8  | 75.8  |
| 8.6   | 8.3   | 12.2  | 10.5  | 10.1  | 7.2   | 11.0  | 15.2  | 11.7  |
| 6.2   | 4.9   | 3.1   | 7.3   | 8.6   | 6.8   | 10.9  | 13.2  | 9.1   |
| 0.2   | 0.3   | 0.7   | 2.6   | 1.6   | 2.2   | 5.1   | 0.2   | 0.5   |
| 1.2   | 5.5   | 7.8   | 7.7   | 3.6   | 3.2   | 10.1  | 0.8   | 13.5  |
| 14.0  | 6.6   | 9.3   | 10.4  | 9.1   | 7.7   | 17.2  | 18.8  | 7.4   |
| 4.6   | 4.5   | 3.5   | 2.8   | 2.0   | 3.5   | 2.9   | 6.2   | 5.5   |
| 215.2 | 145.8 | 142.4 | 155.9 | 182.8 | 165.8 | 225.0 | 275.4 | 243.3 |
| 56.3  | 41.7  | 41.6  | 41.1  | 44.6  | 43.7  | 56.4  | 58.7  | 42.7  |
| 182.0 | 81.7  | 111.6 | 106.3 | 115.2 | 110.2 | 135.4 | 135.5 | 95.6  |
| 15.0  | 7.6   | 6.8   | 6.1   | 12.1  | 13.6  | 7.7   | 18.6  | 13.6  |
| 1.1   | 1.0   | 0.5   | 0.2   | 0.4   | 0.4   | 1.2   | 3.7   | 0.4   |
| 14.8  | 18.6  | 15.0  | 10.2  | 14.8  | 12.4  | 23.6  | 16.4  | 15.0  |
| 0.3   | 0.5   | 1.0   | 2.5   | 5.4   | 3.2   | 0.6   | 3.9   | 2.5   |
| 15.3  | 19.2  | 21.9  | 12.2  | 22.7  | 18.2  | 27.5  | 26.9  | 20.1  |
| 21.8  | 9.9   | 17.9  | 20.4  | 15.9  | 13.2  | 24.4  | 20.1  | 18.5  |
| 5.0   | 0.7   | 5.6   | 0.2   | 3.3   | 2.9   | 0.5   | 0.9   | 2.3   |
| 671.7 | 442.3 | 494.7 | 524.6 | 647.7 | 526.0 | 802.3 | 891.3 | 592.9 |
| 1.2   | 6.0   | 2.0   | 2.8   | 1.6   | 1.6   | 3.3   | 6.9   | 5.2   |
| 111.6 | 68.0  | 88.1  | 78.7  | 79.3  | 96.1  | 117.4 | 129.4 | 102.3 |
| 193.6 | 140.6 | 148.4 | 145.4 | 161.1 | 155.4 | 178.5 | 228.4 | 161.1 |
| 11.1  | 14.8  | 7.4   | 7.0   | 14.1  | 10.1  | 12.5  | 16.9  | 13.3  |
| 1.3   | 1.5   | 0.9   | 0.6   | 1.4   | 1.0   | 1.5   | 0.8   | 1.0   |
| 2.8   | 0.5   | 0.8   | 3.9   | 2.4   | 1.3   | 4.1   | 4.5   | 0.3   |
| 5.4   | 10.4  | 4.0   | 3.8   | 5.3   | 2.6   | 7.6   | 2.4   | 9.6   |
| 28.3  | 22.8  | 17.8  | 24.4  | 24.3  | 18.2  | 29.7  | 29.2  | 22.1  |
| 6.7   | 6.1   | 6.5   | 5.9   | 4.4   | 3.5   | 1.5   | 8.4   | 6.9   |
| 0.6   | 0.8   | 3.6   | 1.2   | 2.3   | 1.1   | 0.7   | 2.7   | 4.1   |
| 5.5   | 1.0   | 6.1   | 1.4   | 3.0   | 7.9   | 2.1   | 9.2   | 4.2   |
| 0.5   | 3.3   | 0.8   | 0.9   | 1.4   | 0.7   | 4.4   | 1.7   | 0.2   |
| 4.3   | 5.0   | 4.9   | 0.5   | 2.0   | 3.6   | 4.2   | 5.5   | 3.9   |
| 28.8  | 22.0  | 32.3  | 26.7  | 27.8  | 20.1  | 28.5  | 29.4  | 19.4  |
| 0.9   | 0.5   | 0.5   | 0.7   | 0.9   | 0.8   | 1.1   | 1.6   | 0.5   |
| 0.8   | 1.4   | 0.3   | 1.6   | 1.8   | 0.3   | 3.8   | 1.7   | 0.5   |
| 7.4   | 3.9   | 6.2   | 5.5   | 8.4   | 0.6   | 7.6   | 5.7   | 0.5   |
| 107.0 | 61.2  | 66.1  | 74.0  | 64.1  | 69.3  | 106.0 | 109.6 | 74.5  |
| 5.5   | 2.0   | 6.0   | 1.1   | 5.0   | 3.4   | 9.4   | 11.7  | 4.6   |
| 88.9  | 95.9  | 93.1  | 97.4  | 107.1 | 88.8  | 110.4 | 91.2  | 80.5  |
| 2.9   | 3.2   | 1.0   | 3.9   | 8.5   | 2.8   | 6.0   | 6.7   | 3.6   |
| 8.5   | 2.9   | 7.6   | 1.4   | 5.5   | 4.8   | 10.0  | 9.0   | 6.0   |
| 838.5 | 613.2 | 599.9 | 674.8 | 756.2 | 672.0 | 821.4 | 982.0 | 754.5 |
| 1.1   | 6.1   | 2.1   | 1.1   | 1.0   | 1.9   | 2.8   | 7.5   | 3.2   |
| 17.6  | 34.4  | 26.5  | 40.1  | 35.3  | 33.1  | 47.3  | 43.5  | 43.3  |
| 50.2  | 37.3  | 31.5  | 32.0  | 34.7  | 31.3  | 45.8  | 46.7  | 38.0  |
| 1.3   | 0.4   | 2.0   | 1.4   | 1.9   | 0.9   | 1.8   | 1.5   | 1.0   |
| 5.7   | 8.3   | 8.3   | 9.0   | 4.4   | 14.2  | 9.0   | 23.5  | 20.9  |
| 2.9   | 0.9   | 1.1   | 2.2   | 9.6   | 2.1   | 8.8   | 3.4   | 1.3   |
| 0.5   | 0.4   | 0.5   | 0.6   | 0.4   | 0.7   | 0.8   | 0.4   | 0.5   |
| 11.5  | 16.7  | 12.4  | 9.1   | 8.7   | 10.8  | 7.9   | 9.7   | 8.9   |

|        |        |        |        |        |        |        |        |        |
|--------|--------|--------|--------|--------|--------|--------|--------|--------|
| 6.2    | 6.6    | 1.0    | 1.4    | 1.1    | 3.6    | 1.9    | 1.0    | 1.4    |
| 1.1    | 1.9    | 5.3    | 0.5    | 0.9    | 1.0    | 4.0    | 1.3    | 5.6    |
| 76.2   | 13.9   | 20.1   | 13.1   | 19.4   | 15.4   | 23.3   | 35.0   | 16.2   |
| 5.0    | 0.9    | 1.1    | 4.7    | 6.7    | 0.9    | 5.5    | 7.5    | 1.0    |
| 4.1    | 0.2    | 0.7    | 7.5    | 0.8    | 1.9    | 0.6    | 7.3    | 0.1    |
| 8.2    | 8.5    | 6.8    | 6.5    | 9.3    | 6.5    | 8.0    | 18.2   | 6.4    |
| 9.6    | 2.0    | 1.0    | 1.9    | 5.9    | 10.5   | 21.6   | 6.2    | 5.0    |
| 1.2    | 0.4    | 1.1    | 1.0    | 1.1    | 0.8    | 0.5    | 0.8    | 5.2    |
| 202.7  | 146.5  | 178.5  | 191.4  | 140.0  | 178.9  | 247.5  | 244.7  | 205.4  |
| 0.3    | 5.7    | 2.7    | 0.6    | 0.7    | 0.6    | 3.0    | 5.7    | 6.3    |
| 54.3   | 63.6   | 48.9   | 63.0   | 56.9   | 58.1   | 62.6   | 80.7   | 58.4   |
| 670.7  | 343.7  | 421.1  | 402.0  | 382.1  | 428.6  | 488.0  | 529.9  | 428.7  |
| 3188.4 | 2786.6 | 2741.2 | 2979.1 | 3275.1 | 2884.8 | 3377.2 | 3513.7 | 2750.7 |
| 416.3  | 57.9   | 214.5  | 102.0  | 133.6  | 293.1  | 196.6  | 497.3  | 158.5  |
| 0.3    | 0.6    | 0.9    | 3.0    | 1.6    | 0.2    | 4.6    | 2.3    | 0.8    |
| 8.9    | 5.2    | 5.2    | 3.4    | 4.8    | 1.8    | 9.4    | 7.9    | 1.4    |
| 0.4    | 0.4    | 0.7    | 0.3    | 0.5    | 1.0    | 0.5    | 2.3    | 0.4    |
| 5.4    | 1.3    | 2.2    | 7.9    | 1.4    | 4.6    | 4.9    | 3.3    | 1.4    |
| 0.5    | 0.5    | 0.6    | 0.6    | 0.6    | 0.4    | 0.5    | 0.7    | 0.6    |
| 5.8    | 7.8    | 1.9    | 5.1    | 8.5    | 7.9    | 1.3    | 1.1    | 8.8    |
| 29.8   | 18.7   | 14.1   | 14.0   | 18.1   | 18.2   | 16.2   | 26.4   | 19.5   |
| 10.2   | 12.0   | 12.1   | 10.2   | 7.2    | 9.3    | 10.7   | 19.8   | 14.3   |
| 6.7    | 1.6    | 2.0    | 0.8    | 3.1    | 3.7    | 6.8    | 4.4    | 1.1    |
| 7.9    | 3.9    | 2.9    | 2.4    | 4.2    | 8.7    | 9.4    | 4.6    | 8.3    |
| 7.7    | 10.5   | 2.1    | 7.0    | 5.7    | 9.4    | 12.3   | 12.5   | 7.2    |
| 11.2   | 7.1    | 0.6    | 3.1    | 3.8    | 1.8    | 6.4    | 7.1    | 7.5    |
| 0.8    | 0.9    | 0.3    | 0.7    | 1.3    | 1.1    | 0.5    | 0.4    | 0.9    |
| 0.9    | 0.8    | 6.2    | 3.2    | 5.2    | 5.9    | 6.8    | 5.0    | 3.8    |
| 0.7    | 0.9    | 5.1    | 1.3    | 2.2    | 1.3    | 2.8    | 4.5    | 1.9    |
| 0.7    | 9.2    | 5.8    | 2.0    | 7.9    | 8.7    | 3.3    | 14.9   | 9.2    |
| 3.3    | 9.5    | 3.1    | 10.1   | 5.6    | 10.0   | 1.2    | 5.4    | 7.1    |
| 91.6   | 55.6   | 71.9   | 82.5   | 72.5   | 83.6   | 95.1   | 85.9   | 77.4   |
| 1.2    | 1.1    | 5.9    | 2.4    | 0.4    | 3.9    | 4.2    | 5.2    | 2.9    |
| 5.0    | 6.3    | 4.4    | 5.4    | 5.2    | 1.2    | 4.6    | 4.4    | 4.7    |
| 28.2   | 20.9   | 20.7   | 13.8   | 27.3   | 24.9   | 38.4   | 69.2   | 22.6   |
| 3.0    | 7.6    | 9.2    | 8.7    | 17.1   | 10.3   | 9.8    | 8.8    | 9.3    |
| 1.6    | 0.5    | 0.5    | 0.6    | 0.5    | 0.4    | 0.5    | 0.8    | 0.7    |
| 0.6    | 0.6    | 0.7    | 1.1    | 0.7    | 5.2    | 1.8    | 7.7    | 0.8    |
| 4.4    | 5.3    | 3.8    | 4.0    | 3.7    | 5.3    | 4.7    | 7.6    | 4.4    |
| 0.7    | 4.4    | 2.4    | 2.3    | 4.5    | 4.1    | 1.0    | 4.5    | 2.4    |
| 12.5   | 13.0   | 11.2   | 8.4    | 14.9   | 6.7    | 1.7    | 15.4   | 7.7    |
| 0.7    | 2.4    | 1.7    | 0.5    | 0.3    | 0.8    | 4.4    | 0.7    | 0.4    |
| 11.4   | 2.0    | 15.0   | 2.4    | 3.9    | 2.7    | 8.9    | 12.0   | 6.0    |
| 1.6    | 1.6    | 1.4    | 1.8    | 5.6    | 0.9    | 1.0    | 1.6    | 7.1    |
| 710.3  | 425.8  | 517.7  | 539.9  | 602.3  | 576.7  | 778.6  | 935.4  | 670.4  |
| 123.3  | 111.3  | 116.1  | 135.7  | 130.3  | 116.0  | 174.3  | 164.4  | 122.4  |
| 1.2    | 0.8    | 0.8    | 1.1    | 1.3    | 0.8    | 2.5    | 1.9    | 1.1    |
| 3.5    | 4.3    | 3.4    | 9.3    | 5.8    | 5.5    | 4.3    | 3.6    | 3.9    |
| 2.2    | 2.2    | 2.9    | 4.2    | 3.2    | 1.6    | 5.4    | 3.7    | 3.6    |
| 94.7   | 67.5   | 67.2   | 81.7   | 81.7   | 66.1   | 97.1   | 138.1  | 119.9  |
| 27.5   | 25.4   | 23.9   | 21.9   | 20.0   | 23.9   | 31.8   | 47.6   | 18.9   |
| 188.1  | 178.0  | 121.0  | 149.0  | 154.9  | 147.3  | 214.0  | 211.5  | 186.6  |
| 26.9   | 10.7   | 13.7   | 18.4   | 15.6   | 17.1   | 25.1   | 36.5   | 22.2   |

|       |       |       |       |       |       |       |       |       |
|-------|-------|-------|-------|-------|-------|-------|-------|-------|
| 8.3   | 3.8   | 4.3   | 2.5   | 4.7   | 4.4   | 5.5   | 8.2   | 4.0   |
| 6.9   | 7.9   | 2.3   | 3.4   | 5.7   | 7.3   | 8.6   | 1.2   | 6.0   |
| 0.8   | 0.8   | 1.0   | 1.0   | 0.8   | 5.0   | 0.6   | 2.4   | 2.3   |
| 0.3   | 0.5   | 0.3   | 0.5   | 0.1   | 0.2   | 3.3   | 0.4   | 0.4   |
| 5.9   | 4.0   | 2.7   | 0.5   | 3.1   | 0.6   | 5.4   | 9.7   | 0.9   |
| 13.3  | 18.1  | 10.7  | 15.4  | 17.7  | 12.2  | 15.3  | 15.2  | 12.2  |
| 431.1 | 303.1 | 350.7 | 341.3 | 387.0 | 341.6 | 425.7 | 431.9 | 333.8 |
| 49.0  | 43.3  | 50.4  | 70.4  | 41.6  | 60.9  | 75.6  | 78.8  | 66.8  |
| 0.5   | 2.0   | 0.8   | 0.5   | 1.2   | 1.2   | 2.7   | 1.7   | 1.2   |
| 42.9  | 24.5  | 29.9  | 26.6  | 23.6  | 27.5  | 37.0  | 52.3  | 34.9  |
| 3.0   | 1.8   | 1.5   | 2.1   | 2.8   | 0.3   | 0.5   | 6.7   | 0.4   |
| 1.8   | 1.3   | 1.4   | 0.9   | 1.3   | 1.5   | 1.7   | 2.2   | 1.5   |
| 4.4   | 9.6   | 7.6   | 1.8   | 2.6   | 0.6   | 9.7   | 5.2   | 0.6   |
| 0.9   | 1.1   | 2.1   | 1.5   | 1.2   | 1.2   | 4.4   | 1.0   | 1.0   |
| 8.4   | 10.0  | 10.6  | 5.2   | 11.4  | 7.9   | 11.1  | 15.4  | 16.5  |
| 27.2  | 21.7  | 15.4  | 17.1  | 19.1  | 18.9  | 26.7  | 25.1  | 16.0  |
| 302.5 | 187.8 | 216.7 | 219.8 | 267.4 | 244.2 | 323.0 | 433.3 | 243.9 |
| 0.9   | 1.8   | 4.0   | 2.7   | 3.4   | 6.7   | 2.2   | 6.5   | 5.1   |
| 0.9   | 0.7   | 0.7   | 1.3   | 1.4   | 0.5   | 0.3   | 0.8   | 1.5   |
| 10.4  | 16.0  | 2.6   | 6.1   | 11.6  | 19.2  | 29.5  | 19.7  | 19.0  |
| 0.6   | 1.5   | 1.6   | 1.4   | 1.6   | 1.2   | 0.9   | 1.7   | 1.3   |
| 3.8   | 3.3   | 9.2   | 11.0  | 1.1   | 0.8   | 6.9   | 1.1   | 7.3   |
| 0.4   | 0.9   | 0.3   | 0.6   | 0.6   | 0.6   | 7.0   | 0.9   | 3.1   |
| 0.7   | 2.3   | 1.3   | 0.3   | 1.2   | 1.0   | 0.7   | 0.5   | 1.5   |
| 24.1  | 17.7  | 18.5  | 24.5  | 18.8  | 22.0  | 29.2  | 28.3  | 26.9  |
| 69.8  | 53.1  | 55.9  | 65.3  | 73.9  | 53.5  | 70.4  | 94.7  | 69.6  |
| 245.0 | 145.4 | 155.3 | 177.0 | 187.5 | 167.9 | 242.1 | 288.7 | 195.1 |
| 20.2  | 6.7   | 8.1   | 5.6   | 9.6   | 12.4  | 15.7  | 18.9  | 13.3  |
| 0.9   | 1.1   | 0.8   | 0.6   | 1.5   | 0.6   | 0.6   | 0.8   | 1.5   |
| 0.2   | 7.5   | 3.9   | 5.0   | 4.4   | 0.9   | 2.3   | 5.1   | 5.5   |
| 24.6  | 13.2  | 13.1  | 20.8  | 17.9  | 8.2   | 22.7  | 28.5  | 16.1  |
| 1.8   | 0.7   | 0.5   | 0.7   | 0.9   | 1.4   | 2.9   | 1.2   | 1.3   |
| 2.3   | 4.1   | 8.8   | 7.8   | 7.1   | 5.1   | 6.3   | 3.9   | 6.8   |
| 5.4   | 6.0   | 4.1   | 5.5   | 1.2   | 9.3   | 8.9   | 9.4   | 4.3   |
| 2.1   | 8.1   | 4.8   | 8.3   | 5.4   | 16.3  | 12.2  | 17.7  | 11.8  |
| 31.2  | 11.0  | 28.8  | 31.3  | 23.8  | 21.4  | 34.2  | 41.7  | 33.2  |
| 72.5  | 62.0  | 67.8  | 60.1  | 75.1  | 66.9  | 86.6  | 97.0  | 83.8  |
| 122.2 | 104.0 | 105.8 | 91.6  | 115.2 | 90.5  | 155.5 | 162.7 | 113.6 |
| 245.2 | 207.3 | 272.2 | 272.2 | 269.5 | 240.2 | 309.2 | 352.2 | 273.2 |
| 2.0   | 2.2   | 4.6   | 2.3   | 1.4   | 4.5   | 3.0   | 13.6  | 3.1   |
| 9.1   | 8.0   | 4.9   | 9.0   | 1.4   | 6.0   | 3.1   | 12.2  | 5.3   |
| 1.5   | 0.4   | 1.4   | 0.4   | 1.2   | 1.5   | 1.2   | 1.7   | 3.6   |
| 36.0  | 37.9  | 22.4  | 39.1  | 35.8  | 37.4  | 39.1  | 42.0  | 43.2  |
| 10.6  | 12.3  | 11.2  | 13.3  | 13.4  | 12.3  | 3.8   | 8.4   | 6.2   |
| 11.6  | 1.9   | 4.8   | 1.2   | 1.3   | 1.4   | 2.7   | 2.0   | 10.8  |
| 16.9  | 20.5  | 10.9  | 20.8  | 14.6  | 17.8  | 13.5  | 31.8  | 24.5  |
| 0.2   | 7.0   | 0.6   | 2.1   | 3.2   | 6.8   | 0.7   | 1.0   | 0.5   |
| 20.0  | 19.6  | 19.0  | 20.5  | 26.1  | 24.4  | 20.4  | 18.1  | 30.9  |
| 208.5 | 138.9 | 161.1 | 160.8 | 157.2 | 166.6 | 213.8 | 230.7 | 145.4 |
| 0.3   | 0.3   | 0.5   | 0.4   | 0.4   | 0.3   | 0.5   | 2.5   | 0.9   |
| 1.1   | 1.6   | 1.2   | 2.5   | 5.1   | 2.2   | 1.4   | 2.0   | 2.6   |
| 2.2   | 2.3   | 2.6   | 2.2   | 1.4   | 1.3   | 8.8   | 8.6   | 4.3   |
| 0.2   | 0.1   | 0.4   | 3.3   | 1.5   | 0.2   | 0.5   | 0.3   | 0.9   |

|        |        |        |        |        |        |        |        |        |
|--------|--------|--------|--------|--------|--------|--------|--------|--------|
| 1.2    | 0.4    | 0.8    | 5.1    | 0.3    | 1.2    | 6.8    | 1.3    | 0.7    |
| 1369.5 | 949.0  | 1135.2 | 1167.2 | 1158.1 | 1202.2 | 1299.2 | 1510.2 | 1177.3 |
| 2.1    | 0.8    | 0.1    | 0.9    | 1.9    | 0.3    | 2.8    | 2.9    | 2.0    |
| 4.7    | 4.4    | 5.8    | 4.8    | 5.9    | 6.4    | 4.8    | 9.0    | 4.3    |
| 6.2    | 5.7    | 8.4    | 5.0    | 0.9    | 5.1    | 10.2   | 9.2    | 9.3    |
| 157.5  | 61.5   | 85.4   | 75.5   | 76.4   | 93.9   | 99.0   | 151.6  | 76.7   |
| 0.7    | 0.3    | 0.8    | 0.4    | 0.4    | 0.4    | 0.3    | 0.4    | 1.2    |
| 1.8    | 1.9    | 1.9    | 2.2    | 8.6    | 3.6    | 7.1    | 4.1    | 6.0    |
| 0.9    | 4.1    | 1.2    | 1.7    | 1.4    | 0.8    | 0.7    | 2.3    | 1.8    |
| 5.6    | 0.9    | 2.3    | 5.3    | 6.9    | 2.1    | 2.6    | 11.9   | 1.9    |
| 59.9   | 55.7   | 44.0   | 43.5   | 53.0   | 46.6   | 61.7   | 64.7   | 50.0   |
| 8.9    | 6.5    | 2.0    | 9.4    | 7.9    | 7.4    | 1.4    | 6.6    | 2.0    |
| 2.4    | 0.4    | 0.5    | 0.5    | 1.5    | 0.4    | 1.1    | 1.1    | 1.3    |
| 2.6    | 1.7    | 1.6    | 1.7    | 3.8    | 7.9    | 5.2    | 5.0    | 8.7    |
| 0.2    | 0.7    | 1.8    | 0.6    | 0.8    | 0.1    | 1.3    | 3.4    | 2.1    |
| 46.9   | 28.5   | 31.2   | 40.8   | 42.2   | 42.2   | 52.4   | 49.4   | 9.8    |
| 49.0   | 31.7   | 38.0   | 39.2   | 41.4   | 44.8   | 49.5   | 56.6   | 36.9   |
| 0.9    | 0.6    | 3.3    | 2.1    | 3.0    | 3.6    | 0.5    | 4.9    | 1.0    |
| 4.5    | 0.5    | 1.1    | 0.5    | 0.8    | 1.8    | 2.6    | 0.8    | 1.1    |
| 1.1    | 1.6    | 3.6    | 0.9    | 2.3    | 1.6    | 2.1    | 2.8    | 7.8    |
| 1434.0 | 1089.8 | 1167.7 | 1338.4 | 1298.9 | 1276.8 | 1476.6 | 1658.6 | 1062.3 |
| 3.6    | 1.2    | 1.7    | 0.7    | 3.4    | 5.7    | 1.1    | 3.2    | 1.8    |
| 12.0   | 4.1    | 10.3   | 6.5    | 3.3    | 6.0    | 11.2   | 11.2   | 12.6   |
| 6.3    | 3.2    | 5.3    | 2.3    | 4.5    | 1.3    | 2.6    | 7.1    | 11.1   |
| 24.0   | 10.7   | 30.0   | 15.8   | 21.9   | 19.4   | 25.3   | 17.1   | 22.3   |
| 10.0   | 7.6    | 5.3    | 5.4    | 8.2    | 5.9    | 13.5   | 20.0   | 10.1   |
| 1.9    | 0.6    | 0.6    | 1.0    | 0.9    | 1.7    | 1.7    | 2.0    | 1.5    |
| 369.0  | 290.6  | 303.7  | 326.6  | 358.7  | 320.2  | 408.6  | 384.0  | 285.7  |
| 11.8   | 11.4   | 12.1   | 11.3   | 18.9   | 15.2   | 21.3   | 19.4   | 15.3   |
| 0.6    | 2.8    | 0.5    | 3.5    | 2.3    | 0.5    | 1.4    | 0.5    | 1.3    |
| 73.1   | 61.1   | 73.7   | 60.5   | 77.2   | 79.0   | 97.1   | 112.4  | 80.3   |
| 1.2    | 0.4    | 4.1    | 0.7    | 0.7    | 1.2    | 2.2    | 5.9    | 1.1    |
| 65.2   | 40.8   | 48.4   | 39.9   | 50.0   | 54.3   | 66.4   | 74.3   | 56.2   |
| 1169.7 | 715.4  | 632.3  | 875.4  | 800.7  | 968.1  | 1142.3 | 1488.9 | 589.7  |
| 701.0  | 612.4  | 562.6  | 649.5  | 755.9  | 632.7  | 849.0  | 1029.3 | 681.5  |
| 16.1   | 2.0    | 0.6    | 8.3    | 4.9    | 7.2    | 9.4    | 4.8    | 5.7    |
| 993.3  | 758.7  | 882.2  | 900.1  | 869.8  | 830.5  | 1134.4 | 1069.4 | 882.6  |
| 4.7    | 6.1    | 0.8    | 3.2    | 1.1    | 6.6    | 11.0   | 8.0    | 10.3   |
| 2.0    | 4.4    | 1.6    | 2.3    | 4.1    | 1.0    | 4.0    | 6.1    | 1.0    |
| 55.8   | 25.7   | 32.9   | 39.4   | 37.5   | 32.0   | 53.4   | 57.3   | 46.1   |
| 14.4   | 24.1   | 16.7   | 18.2   | 21.1   | 13.3   | 20.3   | 17.8   | 15.9   |
| 2.3    | 1.0    | 8.4    | 6.6    | 1.9    | 8.3    | 2.3    | 8.3    | 0.6    |
| 1.1    | 1.9    | 1.4    | 4.3    | 2.3    | 1.9    | 1.6    | 0.9    | 1.3    |
| 20.2   | 2.0    | 11.3   | 6.4    | 12.9   | 21.5   | 17.6   | 23.2   | 10.8   |
| 1.0    | 4.1    | 1.1    | 3.7    | 4.3    | 2.5    | 1.6    | 7.7    | 1.3    |
| 447.0  | 236.2  | 260.8  | 314.1  | 267.8  | 260.6  | 379.8  | 439.6  | 216.4  |
| 1.5    | 0.7    | 1.2    | 0.7    | 0.7    | 0.6    | 1.6    | 1.7    | 1.0    |
| 37.4   | 25.6   | 24.6   | 30.9   | 29.8   | 41.3   | 40.3   | 30.6   | 30.0   |
| 25.9   | 5.8    | 10.6   | 13.6   | 10.7   | 17.2   | 16.1   | 30.3   | 11.7   |
| 20.3   | 8.9    | 7.4    | 7.7    | 12.6   | 5.3    | 15.2   | 19.9   | 10.6   |
| 1.1    | 6.6    | 6.3    | 3.1    | 5.5    | 0.4    | 2.5    | 10.0   | 2.3    |
| 1.3    | 0.8    | 1.0    | 3.0    | 0.6    | 1.2    | 1.6    | 2.1    | 0.8    |
| 4.1    | 2.2    | 3.4    | 4.9    | 1.5    | 0.6    | 0.2    | 3.6    | 2.1    |



|        |        |        |        |        |        |        |        |        |
|--------|--------|--------|--------|--------|--------|--------|--------|--------|
| 8.7    | 3.2    | 4.1    | 8.0    | 4.6    | 2.1    | 0.8    | 14.6   | 0.8    |
| 11.1   | 7.3    | 9.8    | 8.2    | 11.3   | 12.7   | 12.7   | 13.7   | 9.5    |
| 132.1  | 98.9   | 112.8  | 104.4  | 110.5  | 137.0  | 161.7  | 157.5  | 175.1  |
| 6.0    | 0.4    | 1.5    | 4.4    | 2.5    | 4.3    | 0.4    | 1.0    | 2.7    |
| 27.8   | 3.0    | 12.5   | 12.4   | 10.4   | 11.1   | 12.4   | 18.1   | 1.9    |
| 1.0    | 3.8    | 5.4    | 1.6    | 2.7    | 3.2    | 4.6    | 0.8    | 1.4    |
| 9.9    | 8.2    | 9.2    | 6.0    | 12.1   | 8.0    | 15.5   | 13.5   | 10.0   |
| 5.1    | 3.6    | 4.8    | 2.8    | 4.6    | 0.4    | 2.0    | 7.2    | 4.2    |
| 845.8  | 681.4  | 789.9  | 841.5  | 784.2  | 791.4  | 944.3  | 968.8  | 813.6  |
| 163.1  | 136.3  | 143.0  | 146.2  | 159.3  | 133.3  | 169.5  | 187.9  | 171.5  |
| 0.2    | 0.4    | 0.2    | 0.1    | 0.6    | 0.8    | 4.0    | 0.3    | 2.4    |
| 6.5    | 9.5    | 6.3    | 8.0    | 5.5    | 9.0    | 10.4   | 4.4    | 6.8    |
| 9.8    | 4.7    | 5.5    | 5.2    | 9.8    | 9.7    | 4.4    | 11.1   | 5.9    |
| 4.6    | 0.5    | 0.4    | 0.3    | 0.5    | 0.6    | 0.5    | 1.5    | 0.5    |
| 2.2    | 1.1    | 1.0    | 1.2    | 5.2    | 1.1    | 3.2    | 9.8    | 0.4    |
| 12.4   | 1.3    | 8.4    | 5.2    | 6.0    | 3.3    | 8.3    | 13.3   | 9.8    |
| 71.6   | 2.5    | 2.3    | 1.4    | 13.1   | 7.2    | 11.8   | 14.7   | 15.1   |
| 0.7    | 0.3    | 0.6    | 0.5    | 1.2    | 0.3    | 0.7    | 0.9    | 1.2    |
| 80.1   | 37.7   | 51.8   | 44.7   | 62.4   | 60.5   | 63.7   | 78.7   | 57.6   |
| 33.5   | 23.2   | 24.7   | 24.3   | 21.2   | 23.4   | 36.0   | 38.8   | 32.7   |
| 43.9   | 17.1   | 12.2   | 27.4   | 30.3   | 23.3   | 57.1   | 34.1   | 24.6   |
| 18.9   | 8.7    | 17.0   | 15.6   | 11.1   | 16.4   | 21.8   | 21.1   | 6.2    |
| 0.3    | 0.7    | 4.6    | 0.8    | 2.3    | 5.0    | 2.8    | 7.0    | 1.0    |
| 7.7    | 1.1    | 0.7    | 1.0    | 2.0    | 3.2    | 10.2   | 7.0    | 2.1    |
| 5.3    | 2.4    | 2.7    | 5.4    | 2.3    | 1.0    | 8.1    | 3.9    | 4.8    |
| 534.7  | 549.4  | 526.7  | 592.5  | 625.8  | 622.2  | 789.2  | 755.3  | 616.4  |
| 0.4    | 2.6    | 1.1    | 0.9    | 0.7    | 0.4    | 2.9    | 0.6    | 0.4    |
| 0.4    | 0.4    | 0.1    | 1.3    | 0.2    | 0.9    | 0.3    | 1.0    | 0.3    |
| 5.2    | 1.5    | 1.2    | 1.5    | 1.3    | 5.1    | 3.0    | 4.9    | 9.7    |
| 139.8  | 68.0   | 72.5   | 76.6   | 66.2   | 70.5   | 100.9  | 99.7   | 88.9   |
| 13.3   | 2.6    | 3.6    | 5.1    | 10.4   | 5.7    | 10.5   | 13.9   | 7.1    |
| 146.4  | 72.9   | 75.9   | 79.7   | 75.0   | 102.0  | 109.9  | 154.8  | 144.5  |
| 0.7    | 6.8    | 0.4    | 4.6    | 6.3    | 0.9    | 6.2    | 3.3    | 0.9    |
| 96.3   | 61.4   | 58.3   | 76.2   | 59.8   | 67.0   | 82.7   | 88.3   | 61.2   |
| 3.0    | 2.2    | 5.2    | 3.9    | 7.7    | 6.5    | 2.9    | 6.2    | 10.5   |
| 7.8    | 6.6    | 8.1    | 5.1    | 6.7    | 7.2    | 9.2    | 15.3   | 9.6    |
| 1214.9 | 1061.9 | 1082.9 | 1106.5 | 1216.9 | 1194.9 | 1475.0 | 1820.4 | 1529.6 |
| 6.5    | 4.3    | 7.3    | 1.4    | 2.2    | 4.4    | 4.6    | 0.7    | 3.9    |
| 30.1   | 29.6   | 35.1   | 36.0   | 36.6   | 30.8   | 47.8   | 44.5   | 24.7   |
| 1.7    | 0.8    | 1.1    | 5.2    | 2.9    | 1.8    | 5.2    | 7.4    | 1.6    |
| 2.5    | 1.1    | 4.1    | 5.2    | 1.4    | 0.9    | 10.1   | 14.0   | 10.8   |
| 8.7    | 2.4    | 12.9   | 9.2    | 17.2   | 5.9    | 4.4    | 16.5   | 11.8   |
| 5.3    | 4.5    | 3.8    | 0.5    | 5.6    | 4.7    | 2.8    | 6.2    | 5.8    |
| 5.1    | 4.9    | 1.4    | 6.5    | 1.5    | 3.7    | 2.0    | 2.2    | 4.3    |
| 42.0   | 27.1   | 32.0   | 28.8   | 37.6   | 34.4   | 42.9   | 69.1   | 45.4   |
| 255.6  | 143.4  | 185.5  | 183.2  | 173.6  | 185.2  | 226.6  | 239.3  | 161.0  |
| 0.8    | 5.5    | 8.8    | 7.1    | 1.5    | 1.5    | 6.2    | 1.1    | 1.6    |
| 103.7  | 82.3   | 104.8  | 99.0   | 109.5  | 125.9  | 148.9  | 170.1  | 106.0  |
| 56.9   | 47.8   | 65.3   | 65.5   | 60.7   | 67.3   | 80.9   | 94.5   | 53.6   |
| 11.1   | 6.8    | 4.2    | 7.4    | 2.8    | 6.1    | 9.2    | 11.2   | 9.4    |
| 0.5    | 0.5    | 0.4    | 0.5    | 0.4    | 1.2    | 0.3    | 0.9    | 0.7    |
| 95.6   | 100.8  | 87.6   | 82.2   | 84.0   | 84.0   | 106.2  | 119.6  | 72.1   |
| 2.3    | 0.3    | 0.4    | 0.4    | 0.4    | 3.8    | 1.4    | 3.0    | 2.3    |

|       |       |       |       |       |       |       |        |       |
|-------|-------|-------|-------|-------|-------|-------|--------|-------|
| 3.9   | 1.8   | 0.9   | 0.7   | 7.0   | 0.9   | 0.7   | 0.5    | 6.9   |
| 2.2   | 0.7   | 0.8   | 0.4   | 0.5   | 0.5   | 0.9   | 0.7    | 0.7   |
| 5.6   | 1.1   | 1.4   | 3.3   | 4.3   | 1.9   | 0.8   | 1.4    | 1.0   |
| 0.7   | 5.2   | 1.8   | 6.9   | 8.0   | 8.0   | 11.5  | 13.4   | 6.1   |
| 8.2   | 1.3   | 1.7   | 4.3   | 4.5   | 1.5   | 2.4   | 2.7    | 5.8   |
| 340.9 | 238.1 | 271.9 | 353.0 | 286.7 | 356.4 | 451.1 | 560.9  | 346.8 |
| 36.8  | 15.4  | 14.5  | 21.6  | 22.7  | 16.5  | 33.1  | 32.2   | 25.8  |
| 2.2   | 1.8   | 1.1   | 0.1   | 0.3   | 2.0   | 1.3   | 5.1    | 2.2   |
| 2.3   | 0.5   | 1.4   | 1.9   | 1.2   | 2.2   | 0.8   | 2.5    | 1.0   |
| 0.4   | 0.8   | 3.1   | 0.3   | 0.5   | 1.6   | 6.3   | 0.8    | 4.0   |
| 528.5 | 574.6 | 715.6 | 754.4 | 713.7 | 812.0 | 897.1 | 1361.5 | 885.8 |
| 1.0   | 0.6   | 3.4   | 4.6   | 0.4   | 3.2   | 5.3   | 0.8    | 0.7   |
| 123.9 | 66.9  | 88.8  | 63.3  | 120.7 | 122.1 | 134.9 | 172.9  | 149.4 |
| 0.2   | 0.5   | 0.2   | 0.5   | 0.6   | 0.5   | 2.9   | 0.2    | 2.3   |
| 62.5  | 43.6  | 43.3  | 50.4  | 37.3  | 48.2  | 54.9  | 63.6   | 50.4  |
| 16.6  | 17.5  | 15.4  | 8.5   | 12.2  | 11.0  | 22.4  | 19.0   | 9.1   |
| 1.4   | 0.8   | 6.5   | 0.9   | 1.0   | 0.9   | 2.2   | 5.2    | 1.0   |
| 56.5  | 30.1  | 42.9  | 39.6  | 40.8  | 48.1  | 70.3  | 83.1   | 55.9  |
| 33.6  | 28.4  | 25.1  | 24.5  | 29.5  | 36.2  | 41.8  | 43.5   | 34.8  |
| 1.8   | 2.0   | 2.5   | 1.2   | 2.0   | 0.9   | 0.9   | 0.8    | 1.7   |
| 72.6  | 46.1  | 44.9  | 70.6  | 58.9  | 48.9  | 65.5  | 77.2   | 53.4  |
| 0.7   | 1.5   | 0.5   | 0.8   | 0.9   | 0.7   | 2.1   | 1.5    | 0.9   |
| 0.3   | 0.5   | 1.2   | 0.3   | 3.7   | 0.3   | 2.5   | 0.9    | 7.0   |
| 46.5  | 60.4  | 58.6  | 69.0  | 50.1  | 47.5  | 68.5  | 59.9   | 59.7  |
| 445.1 | 327.9 | 385.0 | 361.8 | 411.2 | 392.9 | 518.3 | 529.3  | 420.2 |
| 4.7   | 1.2   | 1.5   | 0.8   | 1.4   | 1.5   | 1.1   | 0.7    | 2.3   |
| 0.7   | 0.5   | 0.3   | 0.2   | 0.5   | 0.7   | 4.3   | 2.4    | 0.4   |
| 1.1   | 1.6   | 10.9  | 10.3  | 12.0  | 7.8   | 13.4  | 3.7    | 2.3   |
| 3.4   | 9.5   | 4.9   | 4.7   | 13.1  | 5.6   | 3.4   | 3.1    | 2.3   |
| 5.6   | 1.1   | 4.2   | 1.3   | 2.8   | 9.2   | 4.8   | 3.4    | 10.0  |
| 96.6  | 63.7  | 64.7  | 70.1  | 70.3  | 62.4  | 71.7  | 115.6  | 58.1  |
| 23.6  | 12.7  | 19.1  | 20.1  | 23.8  | 21.1  | 23.8  | 27.7   | 18.6  |
| 60.0  | 64.1  | 54.7  | 60.6  | 49.9  | 65.6  | 83.9  | 88.9   | 58.5  |
| 10.1  | 8.2   | 1.4   | 3.4   | 7.6   | 1.3   | 8.1   | 14.8   | 7.5   |
| 0.7   | 7.9   | 4.7   | 5.2   | 6.8   | 3.0   | 9.5   | 10.0   | 4.3   |
| 39.3  | 17.1  | 28.0  | 34.2  | 30.3  | 40.6  | 33.5  | 49.7   | 38.9  |
| 1.6   | 1.6   | 2.7   | 1.7   | 1.1   | 3.2   | 5.0   | 4.5    | 3.2   |
| 4.6   | 1.6   | 1.9   | 4.5   | 0.4   | 1.7   | 4.7   | 2.4    | 2.0   |
| 114.6 | 63.6  | 101.2 | 78.6  | 76.6  | 94.3  | 94.9  | 116.4  | 66.8  |
| 86.7  | 68.2  | 76.8  | 72.8  | 73.4  | 72.3  | 103.5 | 87.2   | 59.7  |
| 489.9 | 235.0 | 243.0 | 250.8 | 253.3 | 233.6 | 317.4 | 395.0  | 223.2 |
| 5.8   | 2.9   | 3.3   | 2.2   | 7.9   | 6.3   | 7.8   | 6.4    | 6.9   |
| 217.2 | 114.4 | 127.1 | 113.8 | 156.6 | 146.6 | 149.3 | 212.0  | 166.0 |
| 1.7   | 0.5   | 0.4   | 0.4   | 0.8   | 0.7   | 2.2   | 2.0    | 0.6   |
| 78.8  | 41.5  | 58.3  | 47.6  | 52.7  | 58.7  | 78.5  | 105.8  | 48.1  |
| 3.6   | 8.9   | 16.6  | 10.4  | 15.4  | 9.9   | 9.7   | 21.1   | 5.8   |
| 10.7  | 9.9   | 2.9   | 1.5   | 5.9   | 7.0   | 5.5   | 8.0    | 7.7   |
| 2.9   | 0.8   | 1.0   | 3.0   | 4.4   | 5.1   | 6.9   | 5.9    | 5.4   |
| 0.1   | 0.1   | 0.8   | 0.1   | 2.5   | 0.2   | 0.3   | 0.9    | 0.8   |
| 4.2   | 2.4   | 6.6   | 8.8   | 3.1   | 4.5   | 6.4   | 14.1   | 2.9   |
| 4.3   | 0.8   | 0.6   | 2.2   | 4.4   | 4.5   | 8.9   | 1.0    | 3.7   |
| 8.3   | 8.5   | 7.8   | 1.6   | 7.2   | 5.8   | 8.7   | 9.9    | 11.4  |
| 0.6   | 1.9   | 1.0   | 1.3   | 1.3   | 1.0   | 1.8   | 2.2    | 1.3   |

|        |        |        |        |        |        |        |        |        |
|--------|--------|--------|--------|--------|--------|--------|--------|--------|
| 16.6   | 9.4    | 13.5   | 1.8    | 8.6    | 9.7    | 13.3   | 10.7   | 10.7   |
| 6.2    | 1.5    | 1.7    | 2.2    | 1.8    | 1.7    | 8.9    | 5.7    | 3.9    |
| 0.5    | 0.4    | 0.7    | 0.2    | 3.2    | 3.0    | 1.1    | 1.6    | 2.6    |
| 16.8   | 17.3   | 12.3   | 9.9    | 10.1   | 12.7   | 14.8   | 13.5   | 22.9   |
| 25.7   | 37.3   | 36.8   | 40.2   | 37.8   | 33.8   | 42.8   | 37.4   | 40.4   |
| 3.7    | 7.5    | 2.6    | 2.6    | 7.8    | 1.4    | 9.6    | 10.6   | 9.6    |
| 0.4    | 0.5    | 0.4    | 2.4    | 2.4    | 0.5    | 4.8    | 3.7    | 0.8    |
| 0.4    | 0.7    | 1.4    | 0.8    | 0.7    | 0.2    | 0.4    | 1.0    | 0.6    |
| 41.1   | 20.4   | 25.1   | 25.5   | 30.4   | 22.5   | 31.3   | 43.9   | 41.1   |
| 4.7    | 8.5    | 11.3   | 10.9   | 6.2    | 6.2    | 13.4   | 6.7    | 12.3   |
| 12.2   | 1.0    | 1.0    | 6.1    | 1.3    | 1.3    | 1.2    | 1.5    | 1.8    |
| 185.7  | 148.4  | 157.5  | 171.5  | 162.3  | 131.4  | 219.7  | 218.8  | 187.3  |
| 3.8    | 19.7   | 8.2    | 6.2    | 8.6    | 11.0   | 2.8    | 12.2   | 5.0    |
| 2.1    | 1.6    | 2.7    | 2.2    | 2.0    | 1.1    | 0.9    | 2.3    | 3.5    |
| 1.6    | 10.0   | 1.1    | 3.0    | 1.3    | 6.6    | 4.1    | 2.7    | 1.5    |
| 66.5   | 44.5   | 54.8   | 55.6   | 44.6   | 51.6   | 65.4   | 73.4   | 46.4   |
| 61.2   | 48.8   | 49.6   | 47.7   | 58.0   | 45.8   | 68.7   | 91.9   | 55.6   |
| 103.0  | 57.4   | 70.3   | 58.7   | 72.5   | 71.3   | 93.1   | 88.9   | 68.2   |
| 1.1    | 0.8    | 1.3    | 5.1    | 2.2    | 4.5    | 1.2    | 4.2    | 6.7    |
| 97.1   | 68.7   | 82.0   | 85.9   | 79.6   | 75.7   | 131.3  | 95.3   | 94.2   |
| 108.6  | 56.2   | 53.5   | 55.6   | 55.9   | 65.7   | 67.5   | 105.0  | 58.8   |
| 2.3    | 0.8    | 1.0    | 6.9    | 1.6    | 2.3    | 2.0    | 8.7    | 5.0    |
| 26.5   | 12.8   | 15.8   | 18.8   | 16.2   | 22.4   | 28.9   | 29.5   | 34.5   |
| 11.7   | 6.4    | 18.6   | 1.0    | 11.7   | 14.0   | 11.7   | 16.0   | 5.4    |
| 2.5    | 1.9    | 1.7    | 5.0    | 3.2    | 4.2    | 6.6    | 5.1    | 2.8    |
| 9.3    | 10.0   | 7.3    | 14.5   | 6.6    | 9.3    | 14.0   | 12.1   | 6.8    |
| 1.8    | 2.7    | 0.4    | 4.2    | 4.6    | 0.7    | 0.9    | 3.2    | 3.2    |
| 0.5    | 0.9    | 0.3    | 0.5    | 0.3    | 0.4    | 0.7    | 0.6    | 0.3    |
| 618.6  | 559.7  | 604.6  | 591.9  | 629.3  | 571.7  | 694.8  | 741.3  | 557.4  |
| 1.2    | 7.6    | 8.3    | 1.3    | 3.0    | 0.7    | 2.1    | 1.0    | 0.5    |
| 43.2   | 22.6   | 27.9   | 24.9   | 23.4   | 29.8   | 32.5   | 44.7   | 36.8   |
| 0.8    | 0.6    | 0.2    | 7.5    | 0.3    | 0.5    | 1.9    | 6.1    | 4.1    |
| 0.9    | 0.7    | 1.6    | 2.6    | 1.4    | 1.2    | 2.9    | 1.7    | 4.5    |
| 322.3  | 186.8  | 186.6  | 243.6  | 192.1  | 185.4  | 262.6  | 245.3  | 171.4  |
| 75.9   | 32.5   | 47.4   | 52.8   | 50.1   | 60.4   | 84.0   | 87.0   | 55.9   |
| 29.3   | 64.2   | 36.6   | 78.7   | 71.8   | 51.2   | 77.5   | 73.1   | 40.1   |
| 5.0    | 6.8    | 5.2    | 5.1    | 5.8    | 5.4    | 5.3    | 11.2   | 4.2    |
| 0.6    | 1.4    | 0.6    | 0.6    | 0.9    | 0.9    | 2.2    | 1.1    | 1.4    |
| 0.0    | 2.7    | 0.2    | 0.4    | 1.2    | 0.2    | 0.1    | 0.5    | 1.2    |
| 13.6   | 8.0    | 6.8    | 12.0   | 1.9    | 10.7   | 18.5   | 17.7   | 17.0   |
| 171.6  | 89.9   | 113.5  | 118.0  | 105.8  | 105.3  | 161.8  | 250.0  | 128.6  |
| 4770.1 | 4291.9 | 4117.5 | 4619.0 | 4557.2 | 4282.6 | 4995.2 | 5002.8 | 4215.1 |
| 64.2   | 56.5   | 50.3   | 66.7   | 62.0   | 58.8   | 79.3   | 90.4   | 56.4   |
| 656.4  | 445.2  | 480.6  | 525.0  | 530.0  | 537.8  | 632.9  | 766.4  | 470.5  |
| 78.7   | 43.3   | 45.7   | 51.1   | 38.3   | 38.0   | 61.3   | 72.1   | 46.8   |
| 0.7    | 1.1    | 0.2    | 0.2    | 1.5    | 2.9    | 2.3    | 0.7    | 1.3    |
| 24.0   | 14.3   | 19.0   | 20.8   | 26.4   | 14.8   | 29.7   | 25.0   | 15.4   |
| 57.3   | 18.3   | 27.2   | 20.8   | 24.7   | 17.8   | 23.3   | 35.9   | 18.8   |
| 27.0   | 14.4   | 15.2   | 20.8   | 19.3   | 16.7   | 26.2   | 20.8   | 23.8   |
| 8.1    | 19.3   | 10.4   | 17.0   | 14.2   | 11.9   | 12.0   | 7.1    | 14.2   |
| 41.1   | 17.3   | 3.4    | 16.7   | 7.8    | 18.7   | 27.7   | 15.2   | 6.9    |
| 8.5    | 6.3    | 7.3    | 2.4    | 6.0    | 10.7   | 10.3   | 13.8   | 7.3    |
| 0.7    | 0.8    | 0.8    | 1.5    | 1.0    | 5.2    | 2.0    | 1.7    | 0.9    |

|       |       |       |       |       |       |       |       |       |
|-------|-------|-------|-------|-------|-------|-------|-------|-------|
| 59.5  | 45.9  | 62.5  | 65.9  | 54.4  | 59.3  | 80.7  | 85.2  | 95.6  |
| 10.6  | 12.8  | 7.0   | 8.0   | 9.8   | 7.4   | 9.5   | 14.7  | 11.4  |
| 0.7   | 1.0   | 1.5   | 1.2   | 0.5   | 1.8   | 0.5   | 0.8   | 1.4   |
| 0.8   | 3.9   | 0.3   | 0.3   | 2.2   | 4.6   | 3.8   | 0.4   | 1.8   |
| 0.3   | 1.3   | 2.2   | 1.8   | 0.1   | 0.1   | 0.7   | 1.5   | 0.2   |
| 0.9   | 1.6   | 2.7   | 1.0   | 1.3   | 2.3   | 1.9   | 1.4   | 0.5   |
| 168.3 | 20.2  | 49.4  | 38.9  | 49.1  | 50.5  | 65.6  | 86.1  | 48.7  |
| 122.7 | 18.0  | 21.6  | 31.1  | 26.4  | 28.8  | 31.6  | 55.4  | 32.2  |
| 1.7   | 2.2   | 0.7   | 0.9   | 1.6   | 3.6   | 6.9   | 1.7   | 1.6   |
| 219.7 | 124.6 | 176.4 | 181.6 | 192.1 | 178.6 | 258.0 | 238.3 | 147.5 |
| 4.1   | 5.8   | 1.6   | 2.3   | 4.4   | 2.8   | 6.2   | 1.7   | 0.9   |
| 4.4   | 4.7   | 6.7   | 2.8   | 7.5   | 0.5   | 4.6   | 4.9   | 2.1   |
| 19.2  | 3.3   | 9.5   | 11.8  | 13.2  | 19.4  | 15.3  | 22.1  | 9.2   |
| 97.5  | 61.6  | 61.3  | 52.2  | 57.5  | 64.4  | 97.5  | 91.9  | 68.9  |
| 1.6   | 0.4   | 0.4   | 2.9   | 1.6   | 0.7   | 0.5   | 0.4   | 0.4   |
| 0.5   | 3.3   | 5.2   | 0.2   | 2.1   | 0.2   | 0.6   | 7.0   | 0.4   |
| 31.1  | 15.3  | 14.6  | 19.6  | 15.7  | 11.1  | 21.1  | 18.1  | 17.0  |
| 24.7  | 11.9  | 21.4  | 20.7  | 17.2  | 17.7  | 22.0  | 18.6  | 14.6  |
| 1.3   | 1.1   | 2.1   | 1.0   | 2.5   | 1.9   | 1.4   | 1.5   | 1.2   |
| 18.4  | 12.3  | 14.9  | 11.2  | 17.9  | 11.3  | 24.4  | 26.1  | 16.5  |
| 29.5  | 12.2  | 29.1  | 24.0  | 24.5  | 21.0  | 30.8  | 44.7  | 32.9  |
| 10.9  | 15.6  | 11.4  | 10.5  | 14.2  | 7.5   | 15.9  | 14.4  | 14.4  |
| 88.7  | 62.1  | 85.3  | 78.7  | 88.9  | 101.6 | 117.2 | 144.0 | 82.4  |
| 1.1   | 1.7   | 2.2   | 1.2   | 1.9   | 1.9   | 2.0   | 1.1   | 1.4   |
| 3.7   | 2.6   | 0.8   | 0.5   | 0.8   | 1.0   | 0.9   | 0.5   | 2.0   |
| 1.3   | 2.2   | 1.1   | 6.7   | 4.9   | 1.4   | 2.4   | 3.3   | 1.5   |
| 75.9  | 47.3  | 45.1  | 51.7  | 54.4  | 45.5  | 73.9  | 78.9  | 64.0  |
| 100.3 | 64.6  | 59.3  | 78.0  | 60.5  | 82.2  | 67.9  | 90.2  | 78.5  |
| 13.6  | 9.9   | 9.1   | 16.1  | 9.1   | 12.1  | 17.9  | 18.9  | 19.7  |
| 81.2  | 34.1  | 43.1  | 44.8  | 54.8  | 39.4  | 55.9  | 58.3  | 38.7  |
| 4.6   | 2.6   | 1.3   | 6.6   | 10.2  | 6.9   | 1.8   | 6.9   | 5.2   |
| 0.2   | 0.3   | 0.0   | 0.4   | 2.1   | 0.1   | 0.1   | 0.5   | 0.1   |
| 342.2 | 206.0 | 204.4 | 240.6 | 316.6 | 274.4 | 464.7 | 548.0 | 363.2 |
| 1.0   | 1.6   | 0.9   | 2.6   | 1.5   | 2.8   | 1.7   | 2.0   | 7.0   |
| 0.7   | 0.8   | 0.7   | 2.6   | 1.4   | 5.0   | 1.5   | 1.2   | 1.2   |
| 9.3   | 0.5   | 6.6   | 1.0   | 5.6   | 4.8   | 5.9   | 8.7   | 4.3   |
| 43.7  | 40.4  | 28.8  | 28.2  | 29.8  | 29.0  | 46.3  | 59.7  | 35.3  |
| 5.6   | 3.2   | 5.1   | 2.0   | 1.1   | 3.4   | 1.4   | 3.2   | 0.5   |
| 0.5   | 1.6   | 0.7   | 0.6   | 0.3   | 0.7   | 3.4   | 1.2   | 1.9   |
| 4.7   | 4.1   | 0.8   | 4.7   | 6.8   | 5.7   | 4.6   | 4.7   | 4.2   |
| 12.8  | 4.1   | 4.5   | 3.1   | 5.0   | 10.6  | 10.3  | 7.1   | 1.4   |
| 3.6   | 2.3   | 1.2   | 6.9   | 0.5   | 0.8   | 0.3   | 1.0   | 0.9   |
| 2.0   | 1.8   | 2.7   | 0.8   | 0.3   | 2.3   | 2.0   | 3.8   | 0.6   |
| 5.9   | 9.2   | 5.8   | 7.6   | 8.4   | 8.5   | 6.6   | 5.4   | 9.8   |
| 33.7  | 20.5  | 23.6  | 24.7  | 34.1  | 26.8  | 49.2  | 60.7  | 45.4  |
| 42.7  | 43.0  | 30.3  | 36.4  | 27.5  | 38.1  | 47.8  | 55.4  | 42.1  |
| 121.1 | 100.0 | 116.4 | 180.6 | 145.3 | 129.7 | 219.7 | 230.7 | 116.4 |
| 0.6   | 10.8  | 5.9   | 2.8   | 15.5  | 8.4   | 3.8   | 6.2   | 9.8   |
| 0.2   | 0.7   | 0.3   | 0.2   | 0.5   | 6.6   | 1.0   | 1.2   | 0.4   |
| 42.1  | 22.9  | 34.6  | 31.2  | 28.9  | 30.2  | 39.2  | 55.9  | 42.7  |
| 6.2   | 0.9   | 0.5   | 2.7   | 1.0   | 7.2   | 1.4   | 1.7   | 0.6   |
| 0.8   | 0.7   | 0.5   | 1.6   | 1.7   | 0.8   | 0.2   | 2.7   | 4.9   |
| 3.4   | 1.2   | 0.8   | 5.5   | 1.0   | 6.3   | 6.2   | 13.8  | 4.8   |

|       |       |       |       |       |       |       |        |       |
|-------|-------|-------|-------|-------|-------|-------|--------|-------|
| 0.8   | 6.3   | 2.0   | 2.1   | 1.7   | 4.3   | 2.6   | 6.7    | 4.2   |
| 743.7 | 557.4 | 638.6 | 759.5 | 686.1 | 625.1 | 891.4 | 905.5  | 670.3 |
| 37.5  | 38.5  | 41.8  | 31.4  | 36.4  | 31.9  | 50.3  | 69.7   | 35.3  |
| 4.6   | 5.2   | 3.7   | 4.5   | 4.6   | 4.0   | 6.5   | 5.4    | 2.4   |
| 7.2   | 5.6   | 7.9   | 6.0   | 8.2   | 5.6   | 10.4  | 12.6   | 9.2   |
| 398.0 | 209.0 | 244.0 | 272.4 | 253.9 | 297.5 | 383.6 | 406.5  | 265.1 |
| 121.5 | 74.1  | 83.3  | 95.6  | 100.3 | 92.8  | 120.7 | 125.5  | 101.5 |
| 1.8   | 0.4   | 0.3   | 0.2   | 0.6   | 0.7   | 2.4   | 0.4    | 0.2   |
| 0.8   | 0.6   | 0.7   | 1.2   | 0.6   | 1.3   | 1.8   | 0.9    | 0.8   |
| 14.6  | 9.2   | 14.5  | 7.2   | 9.5   | 12.7  | 14.1  | 18.4   | 14.1  |
| 1.3   | 4.0   | 0.9   | 1.8   | 1.3   | 0.5   | 1.2   | 1.1    | 4.3   |
| 0.7   | 1.1   | 1.6   | 8.7   | 1.1   | 3.2   | 1.8   | 3.5    | 4.5   |
| 0.7   | 0.7   | 7.7   | 1.0   | 1.2   | 7.0   | 1.8   | 1.5    | 1.2   |
| 0.6   | 0.5   | 0.6   | 0.3   | 1.0   | 0.8   | 0.7   | 0.5    | 0.9   |
| 0.1   | 0.0   | 0.1   | 1.4   | 1.1   | 1.5   | 2.4   | 0.1    | 0.3   |
| 5.0   | 1.2   | 2.9   | 4.2   | 7.0   | 8.1   | 8.2   | 8.1    | 3.7   |
| 3.6   | 11.1  | 6.3   | 7.1   | 7.4   | 8.3   | 8.3   | 15.3   | 9.5   |
| 17.0  | 7.8   | 11.3  | 19.2  | 9.1   | 12.3  | 23.9  | 21.1   | 17.7  |
| 46.6  | 27.3  | 23.0  | 28.3  | 38.2  | 26.4  | 53.9  | 73.2   | 39.7  |
| 97.9  | 51.2  | 77.4  | 86.7  | 89.4  | 96.4  | 128.6 | 120.1  | 81.6  |
| 42.4  | 39.8  | 35.6  | 40.7  | 41.3  | 39.7  | 54.7  | 53.4   | 43.0  |
| 20.6  | 4.5   | 19.3  | 20.7  | 24.9  | 4.8   | 11.6  | 2.6    | 16.5  |
| 6.1   | 1.8   | 0.7   | 3.0   | 2.1   | 2.7   | 2.4   | 9.8    | 2.4   |
| 29.8  | 2.3   | 5.4   | 0.3   | 3.9   | 4.4   | 3.4   | 1.2    | 2.8   |
| 39.4  | 16.2  | 18.1  | 13.5  | 12.4  | 16.6  | 18.3  | 25.2   | 22.8  |
| 173.9 | 175.3 | 158.3 | 194.6 | 169.3 | 164.6 | 213.1 | 190.1  | 192.6 |
| 3.3   | 2.3   | 3.1   | 1.7   | 0.2   | 0.1   | 3.2   | 3.9    | 0.5   |
| 1.1   | 0.6   | 2.9   | 4.6   | 0.3   | 6.7   | 6.9   | 2.6    | 6.8   |
| 4.1   | 0.7   | 6.4   | 7.9   | 4.5   | 3.1   | 2.1   | 5.0    | 3.6   |
| 1.1   | 0.8   | 0.8   | 0.6   | 1.4   | 0.6   | 1.6   | 0.9    | 0.5   |
| 0.6   | 0.4   | 1.6   | 0.9   | 0.5   | 0.3   | 0.3   | 5.6    | 0.4   |
| 2.7   | 1.8   | 2.7   | 5.2   | 3.4   | 1.6   | 1.5   | 0.9    | 1.5   |
| 2.8   | 0.8   | 2.0   | 0.5   | 0.5   | 1.2   | 0.9   | 1.1    | 0.4   |
| 6.0   | 7.8   | 3.1   | 3.7   | 4.3   | 4.1   | 5.3   | 5.4    | 1.4   |
| 176.4 | 171.0 | 184.6 | 202.8 | 206.1 | 173.9 | 215.2 | 235.7  | 175.2 |
| 1.4   | 5.8   | 1.3   | 2.7   | 2.2   | 3.8   | 15.5  | 12.9   | 2.4   |
| 7.4   | 0.8   | 4.4   | 5.9   | 2.8   | 4.6   | 4.5   | 6.4    | 3.3   |
| 22.0  | 19.3  | 20.0  | 24.3  | 22.0  | 21.2  | 26.3  | 30.8   | 23.0  |
| 7.9   | 8.8   | 1.6   | 5.2   | 7.3   | 2.8   | 3.0   | 3.5    | 6.8   |
| 59.1  | 16.8  | 21.8  | 25.4  | 32.6  | 34.4  | 33.1  | 44.2   | 33.9  |
| 2.1   | 2.3   | 0.7   | 1.1   | 2.3   | 0.9   | 3.8   | 4.7    | 2.8   |
| 23.2  | 22.9  | 35.9  | 34.2  | 31.0  | 21.9  | 51.0  | 44.4   | 30.0  |
| 1.8   | 8.3   | 2.1   | 1.4   | 9.5   | 3.0   | 6.1   | 2.6    | 2.3   |
| 45.6  | 25.4  | 34.6  | 37.3  | 37.8  | 33.0  | 42.2  | 67.8   | 29.5  |
| 901.3 | 578.5 | 758.3 | 705.4 | 787.4 | 787.7 | 996.9 | 1051.2 | 569.6 |
| 17.0  | 13.5  | 6.4   | 15.7  | 8.7   | 14.2  | 13.2  | 19.2   | 10.5  |
| 24.3  | 28.4  | 22.3  | 23.6  | 27.2  | 17.1  | 16.7  | 22.6   | 24.9  |
| 10.2  | 7.6   | 4.3   | 8.5   | 1.1   | 1.1   | 6.2   | 1.4    | 5.5   |
| 6.6   | 1.4   | 3.7   | 1.5   | 0.9   | 5.0   | 1.3   | 2.8    | 1.4   |
| 28.8  | 23.9  | 26.4  | 23.8  | 29.3  | 27.2  | 30.7  | 33.1   | 24.8  |
| 13.4  | 9.5   | 3.7   | 10.5  | 10.0  | 9.1   | 9.6   | 17.1   | 8.9   |
| 379.3 | 275.1 | 325.5 | 335.7 | 311.1 | 317.5 | 489.0 | 574.2  | 399.1 |
| 6.6   | 0.5   | 7.5   | 4.0   | 7.2   | 6.2   | 6.3   | 9.3    | 7.1   |

|       |       |       |       |       |       |       |       |       |
|-------|-------|-------|-------|-------|-------|-------|-------|-------|
| 205.1 | 133.2 | 156.8 | 165.8 | 186.4 | 140.1 | 219.7 | 258.5 | 242.1 |
| 2.9   | 1.1   | 2.4   | 4.9   | 7.1   | 0.9   | 1.1   | 2.0   | 0.7   |
| 1.2   | 4.7   | 0.6   | 5.2   | 3.1   | 5.4   | 0.6   | 0.8   | 0.9   |
| 9.8   | 1.2   | 2.5   | 3.1   | 3.6   | 3.4   | 5.0   | 10.2  | 4.4   |
| 0.5   | 3.6   | 1.0   | 2.2   | 3.6   | 0.7   | 3.7   | 3.0   | 3.8   |
| 0.8   | 6.6   | 4.3   | 4.3   | 6.2   | 7.0   | 8.3   | 11.2  | 5.1   |
| 518.2 | 371.2 | 448.1 | 590.8 | 497.2 | 508.9 | 688.9 | 712.5 | 655.2 |
| 54.0  | 45.4  | 56.8  | 55.8  | 47.4  | 40.2  | 55.4  | 49.3  | 40.4  |
| 119.2 | 32.4  | 56.2  | 55.4  | 40.9  | 64.2  | 60.5  | 80.8  | 56.2  |
| 34.4  | 28.4  | 27.5  | 32.9  | 28.9  | 27.3  | 36.3  | 33.9  | 30.7  |
| 56.4  | 32.7  | 50.5  | 53.4  | 57.6  | 52.5  | 58.5  | 78.2  | 42.8  |
| 3.4   | 10.0  | 8.9   | 3.7   | 7.9   | 11.3  | 5.2   | 5.6   | 7.8   |
| 2.3   | 1.7   | 1.5   | 1.5   | 0.9   | 1.3   | 3.2   | 2.0   | 1.8   |
| 4.2   | 2.9   | 11.7  | 5.2   | 14.5  | 8.0   | 13.2  | 12.4  | 3.9   |
| 42.7  | 29.5  | 22.4  | 25.9  | 22.5  | 29.7  | 30.0  | 33.4  | 28.6  |
| 4.8   | 1.7   | 2.8   | 1.6   | 2.0   | 1.6   | 4.5   | 7.4   | 1.6   |
| 3.1   | 7.9   | 3.9   | 8.7   | 5.3   | 7.4   | 7.3   | 10.4  | 10.8  |
| 5.1   | 3.7   | 6.2   | 5.8   | 9.2   | 2.4   | 4.1   | 1.3   | 7.8   |
| 45.3  | 15.0  | 16.6  | 25.2  | 19.8  | 23.7  | 27.2  | 33.7  | 29.6  |
| 965.5 | 420.8 | 477.5 | 495.9 | 529.0 | 514.6 | 818.0 | 821.5 | 550.8 |
| 9.9   | 13.2  | 8.6   | 3.7   | 11.0  | 4.4   | 13.5  | 8.4   | 2.2   |
| 38.1  | 23.7  | 30.0  | 35.6  | 33.3  | 35.2  | 37.4  | 50.3  | 30.2  |
| 19.9  | 27.1  | 22.6  | 19.9  | 23.3  | 26.5  | 32.2  | 33.8  | 23.8  |
| 431.7 | 231.8 | 361.8 | 336.8 | 291.7 | 355.3 | 490.6 | 450.3 | 309.3 |
| 97.3  | 50.2  | 68.5  | 60.4  | 54.0  | 63.0  | 78.8  | 89.2  | 71.6  |
| 5.7   | 5.3   | 0.6   | 3.7   | 1.2   | 3.5   | 1.4   | 4.1   | 3.0   |
| 3.3   | 1.8   | 1.9   | 2.2   | 1.8   | 3.3   | 1.7   | 5.4   | 2.3   |
| 13.5  | 12.5  | 12.0  | 10.5  | 18.2  | 11.0  | 11.7  | 14.7  | 11.4  |
| 17.9  | 15.6  | 15.5  | 17.8  | 18.0  | 16.7  | 18.5  | 18.2  | 15.6  |
| 2.5   | 1.0   | 1.1   | 1.4   | 2.4   | 0.7   | 2.0   | 6.6   | 1.7   |
| 11.5  | 6.3   | 6.3   | 8.8   | 5.9   | 6.5   | 3.7   | 10.4  | 8.7   |
| 4.3   | 1.9   | 0.1   | 2.3   | 0.7   | 0.1   | 1.2   | 2.9   | 3.4   |
| 5.1   | 0.7   | 4.1   | 5.0   | 2.9   | 3.6   | 3.3   | 10.0  | 4.0   |
| 168.3 | 130.8 | 128.7 | 143.7 | 148.9 | 144.1 | 202.9 | 274.8 | 140.8 |
| 5.9   | 7.7   | 0.6   | 6.0   | 11.1  | 3.7   | 5.8   | 5.9   | 10.1  |
| 12.2  | 11.7  | 2.1   | 9.7   | 1.5   | 10.6  | 5.2   | 5.4   | 6.8   |
| 0.7   | 0.7   | 0.5   | 0.8   | 0.4   | 0.7   | 0.5   | 0.5   | 0.5   |
| 8.5   | 0.4   | 0.3   | 0.3   | 0.3   | 0.2   | 0.9   | 1.3   | 0.4   |
| 6.9   | 6.8   | 4.0   | 5.9   | 5.2   | 3.5   | 8.6   | 4.2   | 4.6   |
| 1.4   | 1.4   | 0.4   | 1.3   | 0.8   | 1.2   | 12.6  | 10.9  | 14.2  |
| 1.9   | 0.5   | 0.8   | 1.5   | 2.4   | 2.5   | 6.3   | 3.1   | 4.0   |
| 1.0   | 1.0   | 1.3   | 0.7   | 0.6   | 0.8   | 0.8   | 1.1   | 0.5   |
| 77.5  | 54.5  | 64.9  | 62.1  | 67.8  | 67.5  | 105.5 | 97.0  | 66.6  |
| 1.2   | 3.0   | 1.1   | 1.5   | 1.9   | 6.0   | 4.9   | 8.3   | 0.9   |
| 12.6  | 12.7  | 6.7   | 17.3  | 17.8  | 14.8  | 12.7  | 28.9  | 15.7  |
| 0.3   | 0.3   | 0.7   | 0.8   | 1.3   | 0.7   | 0.2   | 4.3   | 0.6   |
| 1.2   | 0.9   | 0.7   | 1.3   | 1.1   | 1.9   | 1.2   | 1.4   | 0.8   |
| 76.0  | 55.6  | 76.2  | 65.6  | 59.5  | 66.9  | 89.0  | 94.3  | 61.6  |
| 148.2 | 110.6 | 133.2 | 126.6 | 149.9 | 136.2 | 180.7 | 242.3 | 126.1 |
| 10.0  | 6.8   | 8.7   | 5.7   | 7.4   | 5.0   | 5.4   | 7.2   | 7.4   |
| 16.3  | 11.6  | 1.7   | 9.6   | 11.6  | 6.4   | 9.3   | 6.9   | 11.3  |
| 72.4  | 64.4  | 73.1  | 63.3  | 71.0  | 74.1  | 73.6  | 96.9  | 55.0  |
| 100.3 | 39.9  | 57.3  | 55.9  | 61.4  | 37.8  | 78.9  | 88.3  | 61.8  |

|        |       |        |        |        |        |        |        |        |
|--------|-------|--------|--------|--------|--------|--------|--------|--------|
| 8.3    | 7.5   | 3.0    | 9.0    | 5.0    | 7.3    | 4.2    | 13.4   | 10.5   |
| 14.0   | 7.2   | 10.0   | 7.6    | 9.7    | 9.0    | 2.3    | 15.1   | 12.5   |
| 1.3    | 1.7   | 1.3    | 0.9    | 0.9    | 1.3    | 3.7    | 1.7    | 1.4    |
| 1412.6 | 867.9 | 1004.8 | 1153.7 | 1249.0 | 1070.8 | 1455.6 | 1625.4 | 1011.8 |
| 78.8   | 46.0  | 57.4   | 43.5   | 47.3   | 50.8   | 62.3   | 73.0   | 36.7   |
| 61.0   | 51.2  | 55.5   | 42.5   | 61.0   | 34.1   | 61.2   | 52.9   | 63.0   |
| 28.8   | 22.2  | 12.0   | 20.3   | 15.1   | 20.4   | 22.1   | 19.1   | 15.9   |
| 40.3   | 57.5  | 59.9   | 57.8   | 58.1   | 41.2   | 68.3   | 59.9   | 57.2   |
| 215.8  | 182.5 | 161.7  | 188.1  | 218.3  | 179.7  | 265.5  | 259.8  | 181.7  |
| 0.7    | 0.7   | 0.6    | 0.8    | 0.9    | 0.5    | 6.0    | 0.6    | 0.8    |
| 1.2    | 8.9   | 4.8    | 4.3    | 1.3    | 1.0    | 1.3    | 0.6    | 1.9    |
| 0.4    | 0.8   | 0.6    | 0.5    | 0.1    | 1.2    | 1.4    | 3.1    | 0.2    |
| 4.9    | 0.2   | 1.7    | 0.3    | 4.8    | 1.8    | 0.6    | 5.7    | 0.6    |
| 233.6  | 207.1 | 209.1  | 211.5  | 209.2  | 271.1  | 297.2  | 412.6  | 253.0  |
| 5.3    | 7.9   | 6.8    | 3.5    | 7.8    | 4.1    | 8.8    | 11.5   | 6.9    |
| 3.1    | 2.3   | 7.3    | 3.4    | 5.7    | 6.7    | 7.3    | 5.6    | 6.2    |
| 4.4    | 1.0   | 0.9    | 1.9    | 2.2    | 2.4    | 0.9    | 4.7    | 5.7    |
| 5.7    | 3.7   | 0.8    | 6.6    | 5.6    | 4.7    | 10.0   | 5.7    | 9.2    |
| 48.0   | 44.8  | 37.8   | 52.7   | 51.0   | 43.5   | 76.7   | 76.2   | 78.3   |
| 2.0    | 2.0   | 2.2    | 13.2   | 5.3    | 8.1    | 12.0   | 20.8   | 21.0   |
| 0.2    | 0.4   | 0.2    | 0.2    | 0.3    | 0.3    | 0.3    | 0.3    | 0.4    |
| 10.6   | 6.9   | 2.9    | 8.1    | 4.9    | 4.5    | 8.7    | 9.1    | 1.6    |
| 413.6  | 346.3 | 381.0  | 409.7  | 386.6  | 383.3  | 516.2  | 529.8  | 367.7  |
| 17.3   | 12.3  | 6.5    | 11.5   | 16.5   | 10.0   | 18.8   | 11.8   | 7.7    |
| 23.8   | 17.2  | 20.0   | 18.5   | 23.0   | 20.2   | 28.9   | 27.4   | 19.8   |
| 1.5    | 0.5   | 0.3    | 0.6    | 0.4    | 1.1    | 0.9    | 0.9    | 0.3    |
| 3.9    | 7.8   | 0.9    | 3.3    | 4.3    | 6.0    | 8.5    | 2.2    | 1.0    |
| 95.6   | 53.1  | 69.3   | 55.7   | 62.8   | 60.4   | 75.8   | 89.0   | 65.8   |
| 11.5   | 1.7   | 8.4    | 9.2    | 12.9   | 5.1    | 8.7    | 15.8   | 7.8    |
| 9.0    | 1.8   | 0.8    | 2.3    | 1.0    | 2.9    | 3.2    | 4.3    | 0.5    |
| 2.2    | 1.0   | 0.2    | 3.6    | 1.4    | 0.2    | 3.7    | 6.4    | 0.6    |
| 238.1  | 171.2 | 226.7  | 241.2  | 195.9  | 227.2  | 263.5  | 308.6  | 193.9  |
| 4.5    | 2.9   | 5.3    | 1.2    | 1.1    | 4.6    | 3.5    | 11.6   | 2.0    |
| 15.9   | 15.4  | 12.8   | 10.2   | 13.5   | 14.1   | 15.7   | 15.0   | 14.7   |
| 90.0   | 67.7  | 57.2   | 72.5   | 74.8   | 49.9   | 73.6   | 66.9   | 66.4   |
| 2.7    | 1.5   | 4.7    | 0.6    | 2.6    | 2.0    | 1.1    | 1.1    | 0.2    |
| 8.4    | 6.1   | 3.1    | 6.7    | 6.0    | 4.9    | 1.9    | 6.3    | 1.2    |
| 21.3   | 25.7  | 12.0   | 21.9   | 25.2   | 19.4   | 22.4   | 22.6   | 24.5   |
| 4.3    | 2.0   | 8.8    | 2.9    | 9.1    | 7.7    | 1.9    | 9.3    | 5.8    |
| 22.2   | 17.3  | 20.3   | 20.2   | 20.8   | 15.4   | 18.2   | 25.0   | 17.1   |
| 1.4    | 3.9   | 5.6    | 7.6    | 2.4    | 3.3    | 4.5    | 4.7    | 3.5    |
| 37.8   | 16.3  | 22.1   | 17.0   | 22.3   | 25.4   | 34.6   | 37.0   | 24.9   |
| 2.9    | 3.0   | 0.6    | 0.5    | 4.6    | 0.6    | 7.7    | 5.1    | 0.4    |
| 14.6   | 10.3  | 15.0   | 13.8   | 8.9    | 14.1   | 14.3   | 17.0   | 12.2   |
| 24.0   | 26.5  | 20.7   | 21.0   | 19.2   | 26.3   | 34.5   | 40.9   | 25.0   |
| 7.4    | 1.4   | 1.0    | 0.8    | 9.4    | 1.4    | 3.3    | 2.3    | 0.9    |
| 10.4   | 11.7  | 1.7    | 4.4    | 12.5   | 10.1   | 6.5    | 10.9   | 17.3   |
| 15.3   | 12.7  | 14.4   | 7.6    | 17.7   | 9.0    | 18.8   | 16.7   | 24.0   |
| 2.1    | 0.1   | 3.5    | 2.1    | 0.1    | 0.3    | 1.0    | 0.7    | 1.7    |
| 0.8    | 2.7   | 3.5    | 2.9    | 1.1    | 3.0    | 0.7    | 1.3    | 3.2    |
| 103.8  | 86.8  | 92.6   | 95.9   | 96.0   | 82.4   | 104.3  | 109.0  | 73.7   |
| 45.9   | 38.7  | 33.0   | 34.3   | 39.2   | 38.2   | 48.7   | 55.0   | 31.7   |
| 62.7   | 66.8  | 83.1   | 96.5   | 100.7  | 72.1   | 105.7  | 124.7  | 87.2   |

|        |       |        |        |       |        |        |        |        |
|--------|-------|--------|--------|-------|--------|--------|--------|--------|
| 0.8    | 1.4   | 1.3    | 1.7    | 1.5   | 0.6    | 0.6    | 0.8    | 0.8    |
| 6.0    | 0.4   | 3.7    | 2.3    | 2.4   | 0.3    | 2.1    | 2.5    | 4.3    |
| 21.7   | 12.9  | 12.6   | 8.8    | 16.7  | 10.5   | 11.7   | 11.8   | 14.4   |
| 5.1    | 9.5   | 8.4    | 4.5    | 10.7  | 5.1    | 7.7    | 9.6    | 5.6    |
| 0.7    | 1.3   | 0.8    | 0.3    | 0.5   | 1.2    | 0.9    | 0.5    | 1.0    |
| 155.9  | 108.3 | 136.6  | 134.3  | 154.2 | 154.5  | 180.2  | 208.0  | 139.5  |
| 8.6    | 10.2  | 0.7    | 9.7    | 2.6   | 10.6   | 10.3   | 10.9   | 10.1   |
| 1.0    | 1.6   | 2.3    | 7.6    | 1.7   | 0.9    | 0.6    | 2.3    | 3.0    |
| 0.3    | 5.7   | 2.4    | 0.6    | 0.9   | 1.1    | 0.8    | 1.5    | 1.2    |
| 1.3    | 1.0   | 1.2    | 0.7    | 0.8   | 1.3    | 1.3    | 3.3    | 1.5    |
| 393.0  | 223.7 | 259.4  | 289.3  | 282.1 | 298.3  | 479.5  | 492.8  | 317.8  |
| 71.9   | 36.9  | 50.6   | 42.2   | 44.8  | 45.4   | 67.7   | 77.1   | 49.1   |
| 0.2    | 0.1   | 0.8    | 1.2    | 2.3   | 3.4    | 2.9    | 3.9    | 0.5    |
| 5.6    | 5.7   | 1.1    | 6.2    | 8.6   | 3.1    | 7.6    | 13.4   | 8.3    |
| 7.4    | 7.5   | 1.7    | 3.3    | 2.2   | 1.3    | 5.4    | 6.3    | 2.3    |
| 94.1   | 393.3 | 492.5  | 504.3  | 523.5 | 556.9  | 737.3  | 964.8  | 513.6  |
| 31.0   | 28.6  | 29.7   | 26.9   | 29.2  | 30.4   | 34.2   | 39.5   | 39.5   |
| 5.2    | 1.4   | 3.5    | 1.6    | 6.9   | 3.0    | 5.7    | 1.7    | 5.7    |
| 3.7    | 1.5   | 4.2    | 4.5    | 1.9   | 0.8    | 0.6    | 3.1    | 0.4    |
| 350.5  | 276.7 | 275.2  | 301.7  | 303.5 | 278.7  | 335.5  | 506.1  | 310.0  |
| 705.0  | 550.4 | 628.6  | 669.7  | 676.0 | 653.2  | 920.3  | 912.4  | 656.0  |
| 3.0    | 0.4   | 3.0    | 1.1    | 0.7   | 2.8    | 0.6    | 1.7    | 0.9    |
| 225.5  | 158.1 | 149.8  | 164.0  | 174.9 | 173.0  | 277.7  | 261.1  | 180.3  |
| 0.5    | 0.8   | 0.8    | 0.9    | 0.7   | 0.7    | 0.5    | 4.0    | 4.8    |
| 11.1   | 8.9   | 8.6    | 10.6   | 14.7  | 9.4    | 11.7   | 9.7    | 10.1   |
| 1.1    | 0.8   | 1.1    | 0.3    | 0.4   | 0.4    | 0.6    | 0.9    | 0.4    |
| 2.9    | 0.5   | 1.1    | 4.2    | 0.8   | 1.0    | 1.0    | 1.1    | 1.1    |
| 11.1   | 8.2   | 9.5    | 2.7    | 5.8   | 6.2    | 9.5    | 9.6    | 11.3   |
| 0.4    | 1.5   | 1.4    | 0.8    | 1.5   | 0.9    | 3.9    | 0.3    | 0.9    |
| 1.0    | 0.3   | 3.8    | 1.0    | 1.6   | 0.5    | 6.5    | 0.8    | 1.1    |
| 5.9    | 8.2   | 6.9    | 5.2    | 4.9   | 6.9    | 10.7   | 10.3   | 9.7    |
| 0.2    | 0.3   | 1.0    | 0.3    | 0.4   | 0.2    | 0.3    | 0.3    | 0.2    |
| 5.7    | 2.7   | 2.2    | 0.7    | 8.0   | 7.0    | 5.3    | 3.8    | 3.6    |
| 0.3    | 0.4   | 0.6    | 0.5    | 0.5   | 0.3    | 0.3    | 5.2    | 0.6    |
| 1.1    | 0.6   | 1.0    | 0.5    | 0.3   | 0.7    | 0.7    | 0.7    | 0.8    |
| 15.6   | 9.6   | 12.4   | 12.0   | 12.8  | 11.0   | 16.5   | 17.0   | 15.7   |
| 18.0   | 6.2   | 2.1    | 7.9    | 6.4   | 1.7    | 9.2    | 9.0    | 17.3   |
| 12.5   | 7.0   | 6.2    | 3.6    | 18.1  | 7.6    | 15.2   | 14.5   | 10.8   |
| 88.6   | 43.0  | 36.9   | 49.7   | 63.3  | 65.5   | 51.9   | 71.0   | 75.9   |
| 1258.3 | 870.0 | 1040.7 | 1046.6 | 986.6 | 1040.2 | 1259.3 | 1437.4 | 1030.7 |
| 4.1    | 1.7   | 1.6    | 5.3    | 1.5   | 0.2    | 0.9    | 1.6    | 1.1    |
| 11.9   | 1.3   | 1.1    | 1.0    | 0.6   | 10.4   | 1.2    | 1.5    | 0.7    |
| 13.6   | 18.4  | 20.0   | 20.6   | 24.0  | 11.3   | 23.9   | 18.6   | 17.5   |
| 0.8    | 0.4   | 1.2    | 0.3    | 4.0   | 0.3    | 0.4    | 1.8    | 0.4    |
| 8.3    | 6.0   | 2.8    | 9.4    | 9.4   | 6.2    | 9.9    | 11.7   | 10.6   |
| 15.1   | 7.5   | 10.8   | 12.4   | 15.7  | 7.7    | 18.8   | 14.1   | 16.2   |
| 4.2    | 1.5   | 7.8    | 3.7    | 3.5   | 5.1    | 6.8    | 7.2    | 5.2    |
| 129.4  | 75.4  | 101.4  | 121.6  | 108.5 | 98.1   | 173.6  | 146.8  | 182.0  |
| 9.9    | 8.4   | 7.4    | 7.4    | 7.5   | 5.6    | 16.0   | 6.4    | 9.0    |
| 7.6    | 7.3   | 0.5    | 1.6    | 5.6   | 3.7    | 8.2    | 1.1    | 1.9    |
| 0.8    | 1.1   | 1.6    | 2.9    | 0.8   | 0.6    | 1.9    | 2.3    | 0.6    |
| 1.5    | 3.0   | 8.3    | 6.0    | 7.4   | 4.6    | 7.8    | 11.8   | 4.5    |
| 3.9    | 6.1   | 6.2    | 0.6    | 4.2   | 5.4    | 0.8    | 6.3    | 0.6    |



|        |       |       |       |       |       |        |        |        |
|--------|-------|-------|-------|-------|-------|--------|--------|--------|
| 1.3    | 1.2   | 0.2   | 1.1   | 1.3   | 2.4   | 2.5    | 0.4    | 3.2    |
| 0.2    | 2.5   | 0.1   | 1.0   | 0.4   | 0.2   | 0.2    | 0.8    | 0.6    |
| 9.5    | 11.7  | 12.3  | 11.1  | 16.8  | 18.5  | 20.8   | 22.2   | 17.4   |
| 5.9    | 9.2   | 8.8   | 5.6   | 6.1   | 5.9   | 7.2    | 9.5    | 4.3    |
| 1.4    | 6.5   | 7.0   | 3.8   | 1.3   | 2.0   | 1.1    | 7.8    | 6.9    |
| 913.3  | 633.6 | 691.9 | 725.2 | 892.0 | 861.1 | 1161.4 | 1297.4 | 1091.0 |
| 44.9   | 22.0  | 22.8  | 29.0  | 25.6  | 28.1  | 33.0   | 46.3   | 31.5   |
| 1.1    | 4.3   | 4.2   | 6.1   | 3.5   | 3.9   | 5.9    | 7.4    | 4.2    |
| 658.9  | 427.5 | 474.3 | 546.9 | 532.9 | 539.1 | 720.6  | 752.0  | 600.4  |
| 1199.2 | 718.6 | 915.8 | 867.3 | 886.6 | 996.2 | 1251.1 | 1276.8 | 823.7  |
| 98.5   | 83.0  | 89.3  | 85.8  | 85.2  | 98.0  | 106.8  | 135.4  | 94.1   |
| 1.0    | 5.4   | 1.0   | 1.9   | 5.0   | 1.6   | 2.3    | 7.0    | 1.2    |
| 4.6    | 3.9   | 1.9   | 2.4   | 0.5   | 4.2   | 4.1    | 4.4    | 0.6    |
| 1.3    | 1.1   | 9.1   | 4.1   | 5.6   | 8.9   | 10.2   | 9.8    | 5.7    |
| 1.9    | 1.8   | 3.0   | 6.7   | 2.3   | 3.4   | 14.0   | 6.6    | 1.9    |
| 1.0    | 5.8   | 1.0   | 2.0   | 5.6   | 3.4   | 7.1    | 0.8    | 5.6    |
| 1.2    | 0.8   | 0.7   | 1.0   | 1.3   | 1.1   | 1.0    | 1.4    | 1.3    |
| 12.5   | 4.5   | 11.2  | 4.9   | 9.9   | 10.2  | 17.8   | 19.1   | 4.3    |
| 37.2   | 25.5  | 35.4  | 32.2  | 31.4  | 26.2  | 41.3   | 40.1   | 39.0   |
| 0.8    | 1.6   | 0.7   | 1.2   | 0.8   | 0.8   | 1.8    | 2.5    | 0.2    |
| 4.0    | 8.2   | 4.4   | 2.2   | 7.0   | 5.0   | 1.4    | 1.5    | 4.5    |
| 54.6   | 32.6  | 31.2  | 33.3  | 31.5  | 32.0  | 36.3   | 54.6   | 34.9   |
| 21.6   | 17.5  | 27.9  | 28.1  | 21.8  | 24.3  | 28.2   | 28.7   | 25.4   |
| 32.2   | 21.1  | 21.0  | 37.7  | 28.8  | 22.8  | 31.8   | 35.1   | 26.9   |
| 5.1    | 5.5   | 5.4   | 3.6   | 2.5   | 4.2   | 0.5    | 9.4    | 7.1    |
| 138.2  | 78.3  | 89.3  | 80.1  | 95.9  | 90.8  | 130.3  | 164.2  | 107.9  |
| 10.8   | 2.5   | 7.5   | 11.7  | 10.2  | 5.7   | 5.8    | 8.2    | 3.0    |
| 499.5  | 319.0 | 329.6 | 354.6 | 381.4 | 379.5 | 495.2  | 576.9  | 444.2  |
| 4.0    | 3.4   | 2.7   | 4.4   | 3.5   | 4.6   | 4.9    | 9.6    | 5.4    |
| 87.4   | 13.3  | 19.0  | 20.0  | 20.9  | 20.7  | 39.9   | 45.2   | 35.4   |
| 13.6   | 9.2   | 21.4  | 20.0  | 13.8  | 17.5  | 19.9   | 18.7   | 15.9   |
| 10.0   | 19.4  | 7.2   | 12.2  | 5.4   | 13.8  | 12.8   | 12.0   | 12.6   |
| 12.1   | 17.7  | 22.0  | 13.8  | 14.8  | 19.4  | 16.1   | 21.7   | 22.6   |
| 43.6   | 29.2  | 29.8  | 43.8  | 32.8  | 51.0  | 46.4   | 49.5   | 34.6   |
| 174.7  | 121.0 | 186.9 | 127.6 | 137.5 | 138.5 | 145.5  | 180.0  | 102.4  |
| 401.4  | 332.0 | 411.7 | 398.9 | 419.7 | 442.5 | 522.4  | 546.4  | 452.8  |
| 3.5    | 2.9   | 2.5   | 2.9   | 3.0   | 2.5   | 4.4    | 3.7    | 2.5    |
| 330.2  | 299.6 | 363.8 | 356.5 | 343.4 | 326.2 | 595.9  | 417.4  | 320.0  |
| 1.4    | 0.9   | 7.0   | 0.2   | 3.8   | 1.4   | 1.4    | 0.9    | 7.9    |
| 230.8  | 196.5 | 146.0 | 181.3 | 228.2 | 208.0 | 280.3  | 409.4  | 338.9  |
| 99.2   | 66.8  | 73.0  | 54.9  | 71.8  | 75.1  | 90.4   | 113.2  | 73.7   |
| 0.6    | 0.6   | 0.7   | 0.9   | 0.7   | 0.5   | 0.5    | 0.5    | 0.4    |
| 649.5  | 407.8 | 545.9 | 523.0 | 520.5 | 506.8 | 698.5  | 706.4  | 810.3  |
| 1.4    | 1.5   | 2.3   | 1.2   | 1.4   | 2.2   | 1.7    | 0.9    | 2.3    |
| 5.0    | 4.0   | 6.7   | 0.6   | 1.4   | 2.4   | 0.2    | 3.6    | 0.3    |
| 344.1  | 135.1 | 187.8 | 174.7 | 178.9 | 218.5 | 262.9  | 348.9  | 175.3  |
| 336.9  | 169.0 | 157.6 | 205.6 | 186.3 | 243.0 | 211.0  | 305.1  | 187.1  |
| 73.2   | 54.2  | 57.7  | 61.3  | 61.7  | 60.2  | 61.2   | 67.3   | 59.3   |
| 2.8    | 0.3   | 4.6   | 0.3   | 5.3   | 1.6   | 5.2    | 2.5    | 1.9    |
| 1.5    | 1.0   | 1.4   | 1.8   | 0.9   | 1.5   | 1.4    | 1.1    | 1.4    |
| 9.7    | 4.1   | 8.8   | 7.8   | 2.4   | 3.6   | 6.8    | 11.6   | 8.0    |
| 1.8    | 2.3   | 1.4   | 0.6   | 1.5   | 2.3   | 2.6    | 2.8    | 1.2    |
| 52.6   | 46.1  | 51.8  | 61.3  | 48.4  | 51.4  | 70.8   | 82.4   | 54.5   |

|        |       |        |        |        |        |        |        |        |
|--------|-------|--------|--------|--------|--------|--------|--------|--------|
| 20.9   | 25.0  | 8.8    | 10.7   | 20.5   | 17.7   | 14.1   | 28.6   | 18.5   |
| 24.2   | 12.3  | 11.8   | 18.3   | 22.2   | 19.5   | 24.0   | 33.7   | 23.9   |
| 1334.6 | 911.5 | 894.9  | 883.5  | 1197.3 | 1086.0 | 1652.0 | 1760.1 | 1654.6 |
| 2.4    | 0.6   | 0.1    | 0.5    | 0.7    | 0.8    | 0.3    | 0.2    | 1.6    |
| 0.3    | 0.9   | 0.3    | 0.3    | 0.9    | 0.5    | 0.6    | 0.6    | 0.4    |
| 172.0  | 158.7 | 161.6  | 197.2  | 200.8  | 140.2  | 222.6  | 138.3  | 154.7  |
| 9.1    | 4.1   | 11.8   | 8.8    | 7.0    | 8.4    | 11.9   | 8.4    | 6.1    |
| 9.7    | 8.2   | 10.6   | 6.0    | 12.0   | 9.7    | 5.9    | 2.9    | 9.9    |
| 4.1    | 12.0  | 13.3   | 4.7    | 5.1    | 3.8    | 7.9    | 2.3    | 5.0    |
| 0.9    | 1.0   | 1.0    | 0.6    | 4.9    | 0.6    | 1.2    | 1.0    | 1.2    |
| 14.2   | 18.4  | 10.5   | 24.2   | 17.2   | 11.0   | 13.4   | 18.8   | 1.6    |
| 1.5    | 3.6   | 1.3    | 10.0   | 2.8    | 5.3    | 3.4    | 1.7    | 1.4    |
| 2.1    | 5.2   | 11.6   | 5.3    | 6.9    | 1.9    | 3.7    | 9.5    | 5.2    |
| 8.7    | 4.1   | 3.8    | 2.4    | 2.2    | 7.6    | 9.5    | 2.9    | 6.8    |
| 54.8   | 35.6  | 41.0   | 28.2   | 39.9   | 36.6   | 48.0   | 56.6   | 35.2   |
| 1.8    | 0.8   | 1.0    | 0.8    | 1.8    | 1.6    | 2.4    | 1.1    | 1.2    |
| 10.4   | 3.0   | 1.0    | 2.0    | 4.0    | 5.3    | 5.0    | 7.5    | 4.1    |
| 6.2    | 8.6   | 10.5   | 19.0   | 15.1   | 12.1   | 13.5   | 1.5    | 3.6    |
| 25.1   | 10.4  | 21.2   | 21.5   | 19.5   | 20.1   | 16.2   | 32.5   | 15.9   |
| 30.5   | 36.8  | 28.3   | 31.3   | 32.4   | 27.9   | 28.1   | 39.2   | 23.5   |
| 453.7  | 276.6 | 355.3  | 350.9  | 381.2  | 373.9  | 558.2  | 579.9  | 498.5  |
| 183.7  | 143.8 | 172.1  | 176.4  | 176.2  | 190.3  | 240.6  | 245.5  | 190.1  |
| 15.8   | 8.4   | 10.6   | 21.5   | 20.6   | 17.7   | 27.8   | 28.7   | 12.1   |
| 10.5   | 2.1   | 8.8    | 6.9    | 7.9    | 7.9    | 2.5    | 10.7   | 1.2    |
| 19.0   | 11.6  | 10.7   | 11.8   | 16.5   | 13.3   | 17.0   | 17.8   | 8.7    |
| 1.5    | 1.2   | 5.2    | 7.3    | 0.3    | 1.1    | 7.4    | 5.6    | 0.3    |
| 5.0    | 6.8   | 6.4    | 12.2   | 9.0    | 3.7    | 10.8   | 11.3   | 6.0    |
| 10.2   | 6.3   | 6.5    | 7.4    | 5.4    | 9.8    | 7.6    | 7.9    | 0.6    |
| 624.4  | 254.7 | 288.0  | 327.5  | 327.9  | 350.1  | 420.3  | 526.9  | 317.4  |
| 0.4    | 1.5   | 0.9    | 2.9    | 0.3    | 4.6    | 6.1    | 1.2    | 2.6    |
| 728.3  | 501.1 | 625.7  | 621.8  | 695.6  | 681.1  | 834.2  | 857.1  | 755.1  |
| 71.3   | 48.8  | 77.6   | 63.7   | 63.3   | 85.5   | 88.5   | 111.2  | 68.6   |
| 19.1   | 8.5   | 12.2   | 11.4   | 6.0    | 12.0   | 15.2   | 19.7   | 13.2   |
| 33.8   | 14.1  | 13.9   | 7.8    | 18.7   | 14.6   | 33.4   | 13.9   | 9.8    |
| 0.6    | 0.7   | 1.3    | 1.3    | 1.4    | 3.3    | 1.0    | 1.5    | 1.7    |
| 0.5    | 1.0   | 1.3    | 0.6    | 1.1    | 0.6    | 0.6    | 0.7    | 1.1    |
| 1.3    | 0.8   | 0.7    | 0.9    | 1.3    | 0.8    | 0.3    | 0.4    | 0.7    |
| 2.0    | 0.6   | 0.1    | 0.2    | 0.3    | 0.3    | 0.2    | 0.8    | 2.4    |
| 76.5   | 40.6  | 35.5   | 35.5   | 39.8   | 38.4   | 49.3   | 76.7   | 51.8   |
| 27.8   | 15.7  | 15.6   | 12.7   | 17.1   | 17.6   | 15.6   | 31.0   | 13.0   |
| 628.4  | 444.4 | 564.2  | 591.6  | 503.9  | 559.6  | 693.5  | 758.6  | 695.5  |
| 34.6   | 15.8  | 15.0   | 15.0   | 15.9   | 14.1   | 20.0   | 24.4   | 15.9   |
| 19.8   | 19.9  | 13.9   | 17.3   | 13.3   | 17.8   | 16.5   | 26.2   | 19.9   |
| 0.2    | 1.1   | 0.4    | 1.1    | 2.1    | 0.8    | 3.6    | 1.0    | 1.0    |
| 155.1  | 90.4  | 108.6  | 106.0  | 116.3  | 107.3  | 125.4  | 147.8  | 156.0  |
| 104.1  | 66.5  | 91.8   | 86.0   | 72.4   | 107.1  | 112.9  | 166.3  | 101.1  |
| 312.1  | 211.7 | 255.0  | 273.5  | 258.1  | 231.6  | 317.3  | 288.0  | 243.1  |
| 10.2   | 1.9   | 6.8    | 5.1    | 12.1   | 3.2    | 9.7    | 13.0   | 10.4   |
| 0.7    | 1.4   | 0.8    | 0.5    | 3.7    | 0.7    | 1.0    | 4.7    | 3.0    |
| 1.2    | 0.2   | 0.9    | 0.2    | 1.8    | 0.4    | 0.5    | 2.1    | 0.7    |
| 1456.0 | 966.7 | 1062.0 | 1053.3 | 1178.8 | 1081.1 | 1338.9 | 1397.0 | 1207.6 |
| 287.5  | 141.5 | 200.4  | 180.5  | 196.3  | 221.6  | 253.3  | 370.7  | 216.1  |
| 0.8    | 1.7   | 1.6    | 0.9    | 5.2    | 0.8    | 3.2    | 5.4    | 1.2    |

|        |        |        |        |        |        |        |        |        |
|--------|--------|--------|--------|--------|--------|--------|--------|--------|
| 10.6   | 7.1    | 10.0   | 13.0   | 5.9    | 11.6   | 12.2   | 16.0   | 15.4   |
| 14.6   | 9.6    | 12.0   | 16.2   | 16.9   | 13.2   | 12.3   | 10.6   | 18.5   |
| 167.7  | 107.9  | 148.7  | 144.8  | 136.0  | 137.4  | 187.4  | 172.8  | 111.7  |
| 0.7    | 1.0    | 0.7    | 1.4    | 1.5    | 0.9    | 1.1    | 1.5    | 1.9    |
| 1.1    | 0.3    | 0.8    | 0.3    | 0.9    | 0.9    | 0.8    | 2.6    | 0.4    |
| 2.7    | 0.6    | 1.4    | 0.9    | 3.9    | 2.4    | 4.1    | 2.3    | 6.5    |
| 58.6   | 17.1   | 27.3   | 31.4   | 28.0   | 43.3   | 56.3   | 60.8   | 42.5   |
| 3.6    | 0.6    | 0.5    | 0.4    | 1.0    | 3.5    | 1.0    | 1.2    | 4.2    |
| 3587.6 | 3191.8 | 3009.7 | 3235.3 | 3323.5 | 3150.4 | 3465.9 | 3423.9 | 2230.4 |
| 23.9   | 16.2   | 24.6   | 16.8   | 27.4   | 22.1   | 22.8   | 30.5   | 31.2   |
| 332.8  | 307.1  | 360.7  | 328.1  | 347.3  | 377.9  | 345.3  | 370.5  | 309.8  |
| 188.0  | 101.7  | 129.7  | 123.7  | 138.3  | 140.6  | 160.4  | 216.6  | 144.3  |
| 1.0    | 3.0    | 2.9    | 5.1    | 1.4    | 1.8    | 1.1    | 1.9    | 2.1    |
| 90.3   | 70.0   | 85.2   | 87.3   | 80.1   | 71.2   | 100.6  | 133.6  | 103.0  |
| 2.7    | 2.3    | 6.7    | 2.8    | 4.9    | 1.5    | 5.2    | 11.1   | 7.6    |
| 147.6  | 97.3   | 121.1  | 131.9  | 113.0  | 114.2  | 178.7  | 177.3  | 111.2  |
| 123.7  | 96.3   | 85.9   | 108.3  | 102.2  | 97.4   | 132.8  | 118.7  | 107.5  |
| 1.4    | 4.7    | 1.6    | 9.7    | 2.9    | 1.4    | 2.1    | 3.4    | 6.8    |
| 126.5  | 75.4   | 82.9   | 90.8   | 79.3   | 71.7   | 96.6   | 117.3  | 64.3   |
| 267.7  | 168.4  | 182.5  | 178.6  | 213.7  | 227.2  | 262.2  | 357.1  | 199.8  |
| 1027.8 | 523.9  | 563.7  | 637.7  | 588.7  | 630.7  | 777.4  | 1208.0 | 964.3  |
| 57.0   | 42.7   | 55.0   | 56.7   | 56.7   | 56.0   | 84.5   | 96.4   | 72.7   |
| 3286.8 | 2831.0 | 2813.6 | 2932.5 | 3130.8 | 2964.3 | 3282.8 | 3339.1 | 2172.7 |
| 3773.2 | 3497.0 | 3518.4 | 3816.9 | 3705.4 | 3717.4 | 4197.7 | 4323.0 | 3397.6 |
| 163.2  | 93.4   | 97.2   | 140.4  | 143.6  | 134.0  | 170.0  | 180.5  | 137.0  |
| 260.0  | 142.1  | 187.4  | 182.0  | 170.3  | 183.0  | 228.4  | 258.2  | 170.4  |
| 5.5    | 5.1    | 17.3   | 18.6   | 6.2    | 17.8   | 12.3   | 17.9   | 16.7   |
| 11.6   | 11.3   | 13.7   | 10.1   | 15.6   | 10.8   | 18.5   | 27.7   | 18.4   |
| 1.9    | 10.0   | 5.6    | 4.7    | 8.7    | 4.4    | 15.5   | 22.4   | 15.6   |
| 2.3    | 4.1    | 5.6    | 5.0    | 1.0    | 3.4    | 7.1    | 9.2    | 3.4    |
| 62.9   | 50.9   | 58.1   | 65.4   | 55.1   | 66.5   | 83.7   | 81.3   | 72.9   |
| 8.8    | 3.4    | 4.2    | 7.4    | 5.7    | 3.4    | 11.2   | 13.9   | 7.7    |
| 18.5   | 8.6    | 12.5   | 8.7    | 9.5    | 13.9   | 19.2   | 22.7   | 11.3   |
| 0.3    | 2.8    | 0.5    | 5.7    | 0.8    | 0.6    | 1.7    | 5.2    | 4.4    |
| 12.5   | 17.4   | 13.4   | 14.9   | 14.2   | 13.2   | 20.5   | 21.2   | 17.4   |
| 5.9    | 3.0    | 3.2    | 0.7    | 5.1    | 7.1    | 4.1    | 4.4    | 4.1    |
| 1.0    | 0.9    | 0.7    | 1.4    | 0.7    | 2.2    | 1.0    | 9.5    | 0.8    |
| 12.0   | 1.6    | 7.3    | 9.0    | 11.0   | 2.3    | 7.4    | 14.9   | 8.5    |
| 11.2   | 9.9    | 7.0    | 5.8    | 11.2   | 7.7    | 12.9   | 20.1   | 9.5    |
| 4.4    | 6.9    | 11.1   | 6.7    | 9.7    | 8.2    | 7.8    | 7.6    | 6.0    |
| 109.4  | 61.8   | 79.8   | 76.4   | 77.5   | 89.5   | 125.5  | 156.5  | 90.9   |
| 19.5   | 17.3   | 13.0   | 17.5   | 15.2   | 18.1   | 23.1   | 27.0   | 20.2   |
| 19.6   | 11.8   | 13.5   | 13.9   | 16.7   | 17.2   | 21.3   | 18.9   | 4.3    |
| 0.2    | 0.4    | 0.1    | 0.2    | 0.1    | 0.1    | 0.3    | 0.1    | 0.7    |
| 11.2   | 0.9    | 0.8    | 3.1    | 1.3    | 5.3    | 10.4   | 5.5    | 11.7   |
| 3.5    | 3.4    | 2.5    | 3.6    | 0.8    | 4.9    | 9.2    | 7.1    | 5.0    |
| 7.8    | 8.1    | 15.5   | 8.2    | 11.2   | 11.8   | 15.3   | 28.5   | 9.7    |
| 18.8   | 16.4   | 17.6   | 19.3   | 20.0   | 18.9   | 16.7   | 20.2   | 13.7   |
| 166.3  | 104.8  | 115.0  | 127.8  | 127.1  | 107.5  | 164.8  | 155.5  | 100.3  |
| 0.4    | 0.9    | 0.4    | 3.6    | 0.4    | 0.3    | 0.7    | 0.4    | 0.7    |
| 9.3    | 3.4    | 5.5    | 0.8    | 2.4    | 1.9    | 10.8   | 2.8    | 1.7    |
| 2.8    | 2.5    | 3.3    | 0.9    | 2.1    | 1.1    | 2.2    | 2.2    | 4.9    |
| 0.3    | 0.5    | 0.4    | 0.6    | 0.5    | 3.1    | 0.5    | 0.3    | 0.3    |

|       |       |       |       |       |       |       |       |       |
|-------|-------|-------|-------|-------|-------|-------|-------|-------|
| 1.5   | 0.9   | 0.5   | 0.6   | 0.3   | 1.2   | 2.3   | 1.1   | 1.5   |
| 0.4   | 3.8   | 1.1   | 0.8   | 1.1   | 0.4   | 0.4   | 1.4   | 0.6   |
| 19.2  | 16.2  | 21.5  | 23.8  | 22.7  | 35.5  | 38.4  | 30.7  | 21.5  |
| 12.1  | 8.8   | 9.5   | 5.8   | 1.1   | 11.2  | 6.1   | 12.0  | 6.9   |
| 3.9   | 1.4   | 4.9   | 9.0   | 1.7   | 1.2   | 0.9   | 5.2   | 3.8   |
| 0.7   | 0.4   | 0.6   | 0.9   | 0.6   | 0.4   | 1.8   | 1.0   | 0.4   |
| 4.5   | 3.1   | 3.6   | 6.4   | 1.9   | 1.9   | 4.9   | 5.9   | 0.5   |
| 133.8 | 191.1 | 208.1 | 219.8 | 260.6 | 213.8 | 341.4 | 391.2 | 282.9 |
| 1.1   | 2.5   | 5.2   | 3.0   | 5.4   | 0.6   | 0.7   | 1.0   | 1.3   |
| 18.7  | 7.6   | 10.9  | 13.0  | 2.3   | 2.3   | 13.0  | 3.4   | 1.7   |
| 14.8  | 21.7  | 18.2  | 23.3  | 29.5  | 23.4  | 32.5  | 38.3  | 35.4  |
| 67.2  | 47.6  | 63.8  | 57.8  | 51.0  | 62.1  | 77.3  | 139.2 | 40.9  |
| 83.3  | 69.7  | 74.5  | 84.2  | 76.3  | 81.5  | 94.8  | 122.1 | 73.9  |
| 15.7  | 5.7   | 10.3  | 8.2   | 13.7  | 12.7  | 20.9  | 23.8  | 11.6  |
| 1.1   | 0.9   | 0.4   | 1.2   | 1.6   | 0.8   | 0.6   | 0.5   | 3.0   |
| 0.9   | 0.9   | 0.5   | 0.6   | 1.6   | 1.3   | 1.1   | 0.5   | 0.6   |
| 0.2   | 0.3   | 0.1   | 1.3   | 0.2   | 0.4   | 0.3   | 0.5   | 0.5   |
| 2.4   | 1.7   | 2.8   | 1.1   | 0.9   | 4.9   | 1.1   | 2.8   | 1.0   |
| 15.2  | 4.6   | 4.2   | 1.8   | 7.7   | 3.4   | 4.6   | 15.6  | 5.2   |
| 1.9   | 2.9   | 1.4   | 0.5   | 0.3   | 0.5   | 4.9   | 0.3   | 1.0   |
| 17.9  | 5.5   | 17.9  | 14.5  | 10.7  | 17.1  | 20.5  | 31.9  | 18.3  |
| 0.2   | 0.6   | 0.8   | 0.2   | 0.7   | 0.2   | 7.4   | 5.0   | 0.5   |
| 1.8   | 9.5   | 12.5  | 1.6   | 8.6   | 4.1   | 3.9   | 2.2   | 12.8  |
| 3.8   | 1.5   | 1.6   | 1.4   | 12.4  | 3.6   | 5.5   | 5.4   | 1.2   |
| 1.2   | 1.5   | 6.1   | 2.6   | 5.2   | 4.1   | 5.6   | 5.4   | 1.5   |
| 8.0   | 0.4   | 4.4   | 3.3   | 2.3   | 1.7   | 1.6   | 6.5   | 3.9   |
| 1.5   | 6.4   | 3.0   | 1.3   | 1.2   | 5.8   | 5.9   | 4.7   | 4.5   |
| 9.8   | 5.8   | 6.3   | 2.4   | 9.5   | 8.9   | 7.9   | 10.7  | 10.8  |
| 5.8   | 0.5   | 1.1   | 2.0   | 2.9   | 4.9   | 2.7   | 0.4   | 4.7   |
| 2.5   | 2.0   | 5.1   | 0.7   | 8.7   | 5.7   | 6.4   | 2.6   | 5.8   |
| 7.2   | 9.3   | 7.5   | 3.3   | 7.6   | 2.0   | 20.7  | 7.3   | 4.4   |
| 1.8   | 0.9   | 5.1   | 3.1   | 1.6   | 2.9   | 13.4  | 8.5   | 1.7   |
| 5.1   | 1.6   | 1.6   | 7.1   | 9.0   | 2.5   | 5.3   | 6.1   | 4.1   |
| 47.2  | 20.6  | 24.6  | 28.5  | 27.9  | 26.5  | 41.7  | 56.0  | 34.2  |
| 8.0   | 4.4   | 5.1   | 2.0   | 5.1   | 10.4  | 6.0   | 1.4   | 3.0   |
| 8.4   | 12.4  | 14.3  | 11.8  | 17.5  | 9.1   | 9.4   | 17.5  | 13.1  |
| 14.6  | 25.2  | 21.6  | 28.8  | 14.1  | 25.3  | 34.0  | 26.9  | 29.9  |
| 25.2  | 9.6   | 23.2  | 14.5  | 13.2  | 17.2  | 24.8  | 27.7  | 24.3  |
| 7.3   | 1.6   | 2.5   | 0.9   | 1.2   | 2.2   | 2.2   | 9.6   | 1.9   |
| 4.1   | 21.4  | 11.0  | 14.0  | 7.6   | 2.3   | 6.5   | 16.3  | 7.3   |
| 123.0 | 15.8  | 21.7  | 9.0   | 18.5  | 37.7  | 17.1  | 37.9  | 11.5  |
| 0.5   | 0.7   | 8.5   | 4.6   | 0.9   | 3.1   | 8.0   | 1.3   | 0.9   |
| 0.6   | 0.3   | 0.7   | 0.4   | 0.5   | 0.5   | 0.5   | 0.7   | 0.6   |
| 0.8   | 0.8   | 0.8   | 0.7   | 1.3   | 0.6   | 0.6   | 0.6   | 0.8   |
| 0.5   | 0.5   | 2.9   | 0.9   | 0.4   | 0.2   | 0.4   | 0.5   | 0.4   |
| 3.7   | 0.8   | 4.7   | 3.9   | 1.0   | 5.2   | 4.8   | 7.3   | 6.3   |
| 322.3 | 212.5 | 217.1 | 239.3 | 240.1 | 272.9 | 312.1 | 382.6 | 306.7 |
| 1.6   | 4.2   | 5.6   | 1.4   | 4.0   | 1.8   | 5.8   | 1.9   | 3.5   |
| 37.1  | 36.1  | 43.0  | 36.8  | 44.4  | 45.8  | 43.3  | 48.2  | 36.3  |
| 2.3   | 0.6   | 0.7   | 9.6   | 1.8   | 1.1   | 2.2   | 1.6   | 0.9   |
| 3.6   | 2.0   | 1.4   | 0.3   | 0.5   | 7.2   | 3.0   | 4.2   | 3.6   |
| 0.4   | 2.0   | 2.2   | 1.6   | 1.2   | 4.7   | 1.3   | 2.5   | 0.9   |
| 2.4   | 3.9   | 7.0   | 0.9   | 1.5   | 5.8   | 4.6   | 1.2   | 2.1   |

|       |       |       |       |       |       |       |       |       |
|-------|-------|-------|-------|-------|-------|-------|-------|-------|
| 1.2   | 2.7   | 3.5   | 1.7   | 2.0   | 1.5   | 2.8   | 1.6   | 0.9   |
| 94.8  | 52.9  | 57.6  | 44.8  | 49.5  | 45.7  | 69.2  | 67.9  | 49.9  |
| 103.9 | 48.5  | 77.2  | 96.8  | 82.9  | 78.3  | 101.2 | 100.4 | 63.0  |
| 0.1   | 0.4   | 0.9   | 1.5   | 1.6   | 1.9   | 0.2   | 2.6   | 2.5   |
| 144.7 | 82.2  | 72.6  | 85.2  | 74.0  | 90.8  | 93.6  | 111.9 | 75.8  |
| 2.9   | 0.8   | 1.1   | 0.4   | 0.7   | 4.2   | 0.6   | 2.9   | 0.5   |
| 1.0   | 1.9   | 3.0   | 0.4   | 2.4   | 0.8   | 2.1   | 2.8   | 0.2   |
| 1.4   | 0.7   | 1.0   | 0.5   | 1.4   | 1.8   | 1.7   | 0.8   | 0.7   |
| 14.0  | 4.4   | 11.0  | 10.7  | 2.9   | 3.7   | 11.7  | 17.3  | 5.3   |
| 1.1   | 0.9   | 0.5   | 1.6   | 1.0   | 0.4   | 1.1   | 1.7   | 0.7   |
| 98.4  | 61.5  | 63.7  | 67.6  | 67.6  | 71.4  | 94.4  | 100.8 | 67.1  |
| 0.1   | 0.2   | 1.8   | 0.1   | 0.1   | 0.2   | 0.1   | 0.3   | 2.8   |
| 5.5   | 1.3   | 4.0   | 4.8   | 2.5   | 4.1   | 5.9   | 1.1   | 3.3   |
| 15.9  | 11.5  | 5.4   | 7.6   | 7.8   | 10.8  | 4.9   | 6.8   | 8.7   |
| 11.1  | 3.3   | 16.2  | 3.2   | 12.2  | 11.4  | 11.2  | 9.1   | 12.0  |
| 1.5   | 1.9   | 1.7   | 1.6   | 10.3  | 1.8   | 9.6   | 3.9   | 2.0   |
| 1.0   | 8.2   | 6.4   | 6.3   | 6.8   | 1.5   | 7.9   | 2.9   | 6.6   |
| 1.1   | 2.5   | 2.5   | 1.0   | 2.9   | 1.2   | 1.2   | 8.9   | 0.8   |
| 6.5   | 2.2   | 7.5   | 7.2   | 0.7   | 9.6   | 3.9   | 8.6   | 3.5   |
| 146.0 | 122.6 | 188.7 | 144.9 | 142.1 | 119.6 | 209.8 | 217.5 | 210.3 |
| 1.6   | 6.8   | 5.5   | 7.6   | 2.0   | 5.5   | 10.7  | 5.1   | 8.6   |
| 1.2   | 0.1   | 0.2   | 2.4   | 3.2   | 0.3   | 0.3   | 0.3   | 0.2   |
| 1.0   | 0.6   | 0.9   | 4.7   | 3.2   | 9.0   | 4.6   | 3.5   | 0.7   |
| 0.6   | 1.2   | 1.7   | 1.6   | 4.9   | 2.0   | 4.1   | 1.8   | 1.9   |
| 1.2   | 1.1   | 5.4   | 4.3   | 0.9   | 1.1   | 0.6   | 5.0   | 0.8   |
| 1.6   | 5.8   | 1.0   | 7.2   | 2.2   | 8.6   | 7.5   | 10.9  | 2.3   |
| 377.9 | 263.8 | 272.2 | 362.9 | 290.8 | 306.6 | 391.2 | 501.6 | 423.2 |
| 0.7   | 0.9   | 0.5   | 0.6   | 0.7   | 1.0   | 0.7   | 1.5   | 1.3   |
| 0.1   | 0.1   | 1.3   | 0.2   | 0.1   | 0.8   | 0.1   | 0.9   | 0.3   |
| 9.3   | 10.0  | 1.4   | 5.6   | 0.9   | 0.9   | 12.0  | 1.8   | 5.6   |
| 4.6   | 7.4   | 7.8   | 6.5   | 4.3   | 10.5  | 11.3  | 15.6  | 8.7   |
| 0.4   | 4.9   | 5.4   | 0.9   | 6.7   | 4.4   | 3.0   | 3.3   | 6.4   |
| 0.4   | 0.3   | 0.3   | 0.4   | 1.1   | 0.4   | 0.7   | 0.4   | 0.4   |
| 2.3   | 0.6   | 0.2   | 2.2   | 0.9   | 0.3   | 0.6   | 0.4   | 0.5   |
| 8.3   | 9.0   | 3.7   | 6.2   | 2.8   | 6.9   | 7.6   | 9.8   | 12.4  |
| 0.6   | 1.5   | 0.6   | 0.4   | 6.7   | 0.2   | 0.6   | 2.5   | 2.8   |
| 3.1   | 9.5   | 2.5   | 5.5   | 4.8   | 4.9   | 8.8   | 8.0   | 13.4  |
| 4.4   | 4.1   | 3.0   | 0.2   | 4.4   | 4.8   | 11.3  | 3.8   | 4.1   |
| 0.9   | 2.8   | 6.7   | 4.7   | 4.7   | 1.4   | 12.0  | 8.4   | 4.9   |
| 4.3   | 0.7   | 1.2   | 0.5   | 0.9   | 4.5   | 2.0   | 2.7   | 1.6   |
| 4.7   | 1.1   | 0.5   | 0.6   | 0.7   | 1.4   | 1.0   | 4.0   | 0.9   |
| 6.7   | 1.7   | 1.3   | 5.8   | 5.4   | 6.7   | 10.2  | 11.2  | 7.0   |
| 4.5   | 0.8   | 0.8   | 0.9   | 0.7   | 2.3   | 1.0   | 3.4   | 0.8   |
| 84.2  | 62.4  | 69.3  | 79.2  | 61.7  | 50.3  | 69.0  | 64.6  | 48.4  |
| 2.2   | 5.8   | 10.1  | 2.9   | 10.3  | 3.5   | 2.4   | 8.7   | 8.9   |
| 4.3   | 5.2   | 1.4   | 3.0   | 9.3   | 1.4   | 1.1   | 3.8   | 4.4   |
| 43.3  | 20.5  | 28.3  | 28.9  | 36.6  | 32.7  | 40.3  | 39.5  | 30.0  |
| 2.2   | 6.9   | 4.6   | 5.8   | 0.8   | 3.3   | 5.7   | 7.6   | 4.9   |
| 72.0  | 47.4  | 49.5  | 52.0  | 48.9  | 54.3  | 67.6  | 96.5  | 56.4  |
| 1.3   | 1.1   | 1.1   | 0.7   | 0.6   | 1.7   | 1.6   | 1.5   | 0.5   |
| 5.3   | 2.1   | 0.7   | 1.9   | 0.9   | 1.0   | 3.4   | 4.2   | 1.9   |
| 0.7   | 1.8   | 3.0   | 1.7   | 3.5   | 0.6   | 1.5   | 1.0   | 3.3   |
| 79.6  | 30.3  | 36.5  | 39.7  | 34.7  | 60.2  | 58.3  | 83.7  | 53.5  |

|       |       |       |       |       |       |       |        |       |
|-------|-------|-------|-------|-------|-------|-------|--------|-------|
| 0.3   | 2.2   | 3.9   | 0.2   | 1.7   | 1.2   | 2.5   | 7.0    | 3.5   |
| 0.2   | 1.6   | 2.2   | 10.1  | 0.9   | 1.1   | 1.4   | 1.8    | 2.3   |
| 7.9   | 3.6   | 2.3   | 2.3   | 3.3   | 3.8   | 3.0   | 11.8   | 2.3   |
| 2.5   | 3.2   | 1.6   | 4.7   | 2.1   | 1.7   | 4.3   | 3.4    | 1.7   |
| 3.3   | 1.0   | 0.3   | 0.3   | 0.6   | 5.2   | 1.8   | 4.3    | 3.6   |
| 5.0   | 9.9   | 6.9   | 5.3   | 8.6   | 6.8   | 13.8  | 1.5    | 6.3   |
| 16.9  | 7.0   | 9.5   | 7.0   | 16.2  | 11.8  | 13.8  | 19.9   | 14.6  |
| 8.6   | 4.1   | 2.3   | 1.4   | 1.9   | 5.4   | 3.4   | 2.8    | 0.6   |
| 12.5  | 9.0   | 11.6  | 6.1   | 12.4  | 3.1   | 15.7  | 9.7    | 4.3   |
| 6.2   | 9.0   | 6.8   | 6.4   | 6.5   | 1.4   | 7.2   | 15.0   | 0.9   |
| 2.2   | 5.3   | 4.5   | 6.2   | 4.9   | 5.3   | 1.0   | 2.3    | 0.6   |
| 1.7   | 3.8   | 1.3   | 1.3   | 1.1   | 1.4   | 1.3   | 1.3    | 0.9   |
| 6.7   | 5.6   | 2.4   | 2.7   | 2.1   | 4.4   | 6.9   | 4.5    | 4.9   |
| 2.3   | 1.3   | 0.2   | 0.4   | 4.1   | 4.8   | 2.9   | 0.6    | 3.0   |
| 53.1  | 45.0  | 36.8  | 40.8  | 36.2  | 39.7  | 42.9  | 59.6   | 29.8  |
| 30.5  | 13.1  | 13.4  | 19.3  | 25.0  | 20.7  | 23.2  | 37.3   | 16.5  |
| 2.1   | 8.4   | 1.2   | 7.9   | 7.6   | 2.7   | 2.3   | 1.7    | 2.2   |
| 0.7   | 0.8   | 1.7   | 0.8   | 2.0   | 0.9   | 1.7   | 1.0    | 0.7   |
| 11.1  | 3.3   | 10.7  | 1.9   | 7.9   | 2.4   | 13.6  | 7.6    | 2.3   |
| 2.4   | 3.0   | 2.9   | 2.9   | 1.0   | 1.7   | 1.7   | 1.9    | 0.7   |
| 0.9   | 1.7   | 2.3   | 1.3   | 6.9   | 3.2   | 14.3  | 1.5    | 2.8   |
| 1.5   | 0.6   | 1.6   | 1.7   | 0.8   | 0.7   | 1.4   | 1.2    | 11.3  |
| 49.0  | 0.8   | 6.1   | 1.7   | 1.1   | 7.0   | 0.9   | 8.3    | 1.1   |
| 54.0  | 5.1   | 3.9   | 1.0   | 1.6   | 0.8   | 3.3   | 4.3    | 2.0   |
| 137.5 | 127.2 | 111.1 | 129.9 | 135.7 | 122.3 | 185.2 | 188.8  | 129.2 |
| 4.2   | 1.2   | 4.7   | 1.4   | 4.5   | 1.2   | 9.4   | 3.6    | 1.3   |
| 5.2   | 5.8   | 1.5   | 4.8   | 1.4   | 1.3   | 6.4   | 6.6    | 0.6   |
| 0.4   | 0.3   | 4.7   | 1.6   | 1.1   | 7.4   | 6.5   | 9.3    | 6.3   |
| 3.7   | 10.6  | 9.7   | 6.8   | 1.1   | 8.2   | 9.7   | 2.2    | 6.4   |
| 3.6   | 1.3   | 1.1   | 3.8   | 7.6   | 4.7   | 6.6   | 0.7    | 1.8   |
| 31.3  | 18.8  | 23.4  | 29.4  | 27.4  | 35.7  | 28.7  | 36.8   | 22.0  |
| 109.8 | 94.9  | 105.3 | 107.6 | 99.8  | 101.9 | 131.8 | 120.0  | 84.9  |
| 28.1  | 17.5  | 13.9  | 25.0  | 19.9  | 17.7  | 11.7  | 25.0   | 17.4  |
| 1.1   | 8.1   | 7.1   | 4.5   | 4.8   | 4.1   | 1.9   | 9.1    | 2.9   |
| 7.3   | 19.6  | 12.0  | 18.6  | 15.0  | 11.8  | 18.9  | 16.3   | 21.8  |
| 66.3  | 32.2  | 49.6  | 64.9  | 53.1  | 50.2  | 74.9  | 65.1   | 57.1  |
| 20.7  | 2.0   | 11.2  | 3.7   | 1.2   | 5.1   | 17.6  | 25.2   | 14.6  |
| 60.3  | 44.3  | 51.8  | 55.3  | 49.8  | 41.4  | 68.4  | 76.4   | 61.7  |
| 5.9   | 15.4  | 6.5   | 5.2   | 11.6  | 10.3  | 10.3  | 1.1    | 16.8  |
| 4.7   | 7.4   | 1.6   | 4.8   | 0.8   | 7.7   | 7.2   | 4.6    | 5.5   |
| 6.7   | 17.7  | 7.1   | 13.7  | 16.5  | 3.1   | 11.6  | 20.9   | 10.9  |
| 25.7  | 17.3  | 18.5  | 11.4  | 10.8  | 22.0  | 16.9  | 21.9   | 12.3  |
| 10.0  | 6.7   | 5.1   | 3.7   | 2.5   | 11.0  | 11.5  | 5.8    | 10.6  |
| 5.9   | 4.6   | 1.1   | 8.4   | 4.1   | 7.4   | 2.1   | 4.5    | 9.7   |
| 1.1   | 2.5   | 2.0   | 3.5   | 1.6   | 0.4   | 0.3   | 1.3    | 0.4   |
| 0.3   | 0.1   | 0.3   | 0.2   | 0.9   | 0.2   | 1.1   | 0.1    | 0.3   |
| 5.7   | 6.0   | 4.0   | 11.2  | 0.6   | 3.0   | 3.5   | 0.6    | 1.0   |
| 6.0   | 0.6   | 0.5   | 2.4   | 0.7   | 2.0   | 4.3   | 4.6    | 8.1   |
| 10.8  | 1.4   | 4.1   | 1.9   | 6.8   | 8.3   | 14.1  | 14.5   | 10.7  |
| 850.0 | 609.9 | 720.1 | 659.9 | 720.2 | 683.9 | 848.0 | 1001.2 | 659.1 |
| 896.3 | 599.8 | 774.7 | 636.6 | 749.8 | 658.5 | 819.6 | 865.2  | 587.7 |
| 2.7   | 6.6   | 1.5   | 0.9   | 2.2   | 2.0   | 6.0   | 7.2    | 4.0   |
| 51.6  | 39.1  | 36.0  | 44.7  | 48.7  | 40.7  | 58.8  | 58.9   | 38.5  |

|        |        |        |        |        |        |        |        |        |
|--------|--------|--------|--------|--------|--------|--------|--------|--------|
| 1.0    | 2.4    | 0.5    | 0.3    | 3.6    | 0.8    | 0.8    | 2.6    | 2.4    |
| 532.2  | 610.3  | 684.0  | 704.7  | 781.2  | 707.5  | 928.1  | 966.7  | 770.4  |
| 5.2    | 5.3    | 4.6    | 4.3    | 9.2    | 6.5    | 0.9    | 1.5    | 4.6    |
| 32.9   | 16.8   | 16.6   | 16.5   | 12.4   | 19.6   | 22.0   | 28.7   | 18.1   |
| 6.5    | 5.2    | 7.7    | 0.7    | 5.1    | 9.4    | 1.8    | 8.7    | 7.8    |
| 7.2    | 4.8    | 7.8    | 8.4    | 6.2    | 13.0   | 10.4   | 16.1   | 12.3   |
| 2.5    | 3.1    | 2.3    | 1.7    | 2.2    | 7.4    | 1.7    | 2.5    | 2.6    |
| 62.0   | 44.3   | 48.4   | 39.6   | 38.1   | 33.4   | 45.3   | 49.6   | 49.3   |
| 363.3  | 227.3  | 253.8  | 268.8  | 259.2  | 263.0  | 412.3  | 449.0  | 342.5  |
| 5.9    | 3.0    | 1.2    | 0.8    | 0.9    | 4.5    | 1.7    | 3.6    | 3.1    |
| 1.6    | 7.3    | 1.1    | 8.9    | 2.7    | 1.2    | 1.1    | 6.0    | 9.7    |
| 30.5   | 17.7   | 21.5   | 20.5   | 26.6   | 26.7   | 18.0   | 36.0   | 24.7   |
| 8.1    | 13.1   | 11.8   | 17.1   | 20.9   | 10.9   | 14.6   | 18.4   | 10.5   |
| 3126.6 | 2754.6 | 2598.4 | 2840.7 | 2941.4 | 2833.9 | 3791.6 | 4315.9 | 2793.0 |
| 105.2  | 68.7   | 95.7   | 75.5   | 85.9   | 84.8   | 138.6  | 140.6  | 95.5   |
| 1.4    | 10.6   | 10.3   | 7.7    | 7.9    | 7.7    | 6.6    | 9.7    | 5.9    |
| 46.9   | 20.1   | 30.3   | 36.5   | 30.8   | 26.0   | 53.6   | 34.7   | 41.1   |
| 204.4  | 138.8  | 204.7  | 197.8  | 191.2  | 172.4  | 241.9  | 200.6  | 192.0  |
| 5.5    | 3.8    | 1.8    | 1.2    | 7.5    | 3.9    | 4.5    | 5.2    | 0.5    |
| 1.8    | 3.1    | 3.2    | 2.8    | 1.7    | 3.2    | 1.3    | 0.9    | 3.6    |
| 548.0  | 622.3  | 512.6  | 617.1  | 607.8  | 522.7  | 788.3  | 828.8  | 670.4  |
| 9.7    | 4.3    | 10.2   | 9.7    | 11.0   | 11.3   | 10.6   | 16.3   | 7.0    |
| 7.5    | 1.4    | 2.9    | 1.3    | 5.6    | 6.7    | 5.5    | 6.1    | 1.9    |
| 0.4    | 0.8    | 0.2    | 0.5    | 0.4    | 0.3    | 0.3    | 0.5    | 0.7    |
| 1.6    | 0.4    | 0.7    | 0.3    | 0.4    | 0.4    | 0.4    | 0.7    | 0.6    |
| 0.1    | 0.1    | 0.2    | 0.7    | 0.3    | 0.3    | 0.9    | 0.4    | 0.1    |
| 1.4    | 0.7    | 0.8    | 1.6    | 0.9    | 5.9    | 1.6    | 1.5    | 1.2    |
| 0.7    | 0.9    | 6.6    | 4.3    | 2.1    | 2.3    | 5.8    | 8.2    | 2.9    |
| 0.6    | 0.8    | 0.9    | 0.5    | 0.8    | 0.6    | 0.6    | 0.7    | 0.6    |
| 0.9    | 0.7    | 5.8    | 2.6    | 1.2    | 1.2    | 1.0    | 2.2    | 1.0    |
| 24.5   | 27.4   | 18.7   | 21.3   | 27.3   | 25.1   | 27.4   | 37.9   | 25.7   |
| 13.3   | 10.9   | 10.4   | 13.4   | 11.3   | 7.6    | 14.3   | 17.3   | 12.0   |
| 170.3  | 121.3  | 153.1  | 156.9  | 175.0  | 167.7  | 179.7  | 210.9  | 180.4  |
| 0.6    | 3.0    | 3.1    | 0.4    | 2.5    | 0.8    | 2.7    | 2.0    | 1.3    |
| 22.3   | 23.9   | 27.8   | 37.0   | 29.0   | 32.3   | 37.2   | 45.1   | 26.5   |
| 3.9    | 0.5    | 2.2    | 1.6    | 7.2    | 2.1    | 2.5    | 2.7    | 1.9    |
| 4.8    | 1.2    | 6.1    | 5.1    | 6.4    | 0.6    | 7.3    | 1.7    | 7.9    |
| 2.4    | 0.2    | 0.2    | 1.1    | 0.2    | 0.4    | 2.3    | 0.1    | 1.8    |
| 73.8   | 74.2   | 60.4   | 86.1   | 64.1   | 69.9   | 82.6   | 100.3  | 80.2   |
| 21.5   | 2.7    | 10.4   | 4.0    | 8.3    | 12.3   | 9.7    | 16.5   | 11.0   |
| 15.1   | 5.5    | 5.8    | 8.7    | 9.7    | 7.1    | 8.4    | 7.8    | 9.1    |
| 10.9   | 17.0   | 12.0   | 10.5   | 16.8   | 13.2   | 14.1   | 17.1   | 6.4    |
| 11.0   | 8.7    | 5.5    | 4.0    | 9.3    | 4.4    | 7.5    | 7.7    | 5.3    |
| 12.2   | 5.0    | 2.9    | 3.2    | 5.4    | 4.2    | 5.0    | 5.7    | 6.1    |
| 1.9    | 1.5    | 0.7    | 1.6    | 0.8    | 0.7    | 0.8    | 2.1    | 2.0    |
| 20.8   | 8.9    | 13.6   | 10.4   | 11.3   | 10.9   | 12.3   | 17.7   | 18.4   |
| 4.5    | 6.2    | 8.7    | 1.3    | 5.7    | 6.0    | 6.9    | 2.4    | 6.8    |
| 6.6    | 0.4    | 3.5    | 1.9    | 7.4    | 1.0    | 5.4    | 1.2    | 3.3    |
| 1.3    | 6.7    | 2.0    | 2.4    | 1.8    | 1.6    | 1.9    | 1.5    | 1.9    |
| 84.8   | 51.3   | 61.4   | 70.5   | 65.5   | 71.9   | 101.9  | 100.9  | 71.4   |
| 0.5    | 1.2    | 1.4    | 0.2    | 1.7    | 2.4    | 0.1    | 0.5    | 0.6    |
| 7.3    | 7.2    | 8.6    | 5.9    | 4.9    | 8.8    | 6.3    | 9.1    | 6.5    |
| 0.7    | 6.1    | 2.8    | 3.7    | 8.9    | 11.6   | 1.6    | 10.2   | 8.3    |

|        |        |        |        |        |        |        |        |        |
|--------|--------|--------|--------|--------|--------|--------|--------|--------|
| 2.5    | 3.8    | 2.6    | 2.0    | 2.4    | 2.0    | 0.2    | 3.6    | 0.5    |
| 40.9   | 40.2   | 42.5   | 37.6   | 36.9   | 35.5   | 43.4   | 41.4   | 32.7   |
| 0.3    | 2.4    | 4.7    | 5.0    | 0.4    | 5.5    | 0.7    | 1.7    | 2.1    |
| 3153.8 | 2612.3 | 2584.6 | 2726.6 | 2951.7 | 2817.9 | 3098.0 | 3133.3 | 2587.8 |
| 1.6    | 0.7    | 3.6    | 4.3    | 1.1    | 0.8    | 13.7   | 2.2    | 7.4    |
| 6.0    | 6.7    | 14.5   | 3.0    | 0.3    | 1.2    | 1.2    | 3.7    | 1.6    |
| 4.4    | 7.0    | 6.6    | 6.4    | 4.2    | 6.1    | 1.1    | 4.8    | 5.8    |
| 2.1    | 2.5    | 7.5    | 0.9    | 1.7    | 2.2    | 1.5    | 2.0    | 3.0    |
| 0.1    | 0.3    | 0.1    | 0.2    | 0.4    | 0.1    | 0.6    | 0.2    | 0.1    |
| 8.6    | 11.0   | 1.5    | 3.4    | 3.7    | 5.2    | 1.1    | 9.1    | 6.4    |
| 1.1    | 0.8    | 0.3    | 0.4    | 0.3    | 1.8    | 0.3    | 0.6    | 0.4    |
| 4.7    | 4.6    | 7.3    | 4.0    | 2.6    | 3.3    | 4.4    | 1.8    | 6.4    |
| 3.9    | 6.3    | 6.3    | 5.1    | 1.6    | 7.9    | 2.1    | 5.1    | 3.9    |
| 11.1   | 8.2    | 0.9    | 4.2    | 3.2    | 6.8    | 3.1    | 8.6    | 9.2    |
| 1.1    | 3.6    | 0.5    | 0.5    | 0.3    | 4.2    | 2.4    | 4.3    | 0.3    |
| 46.5   | 38.0   | 32.3   | 44.6   | 43.3   | 43.6   | 44.6   | 47.1   | 50.4   |
| 11.5   | 7.1    | 4.5    | 1.0    | 0.9    | 2.4    | 1.3    | 13.7   | 7.7    |
| 2.3    | 1.3    | 1.1    | 2.0    | 2.1    | 0.7    | 2.2    | 3.2    | 2.3    |
| 0.7    | 1.7    | 1.1    | 0.3    | 2.4    | 1.7    | 1.1    | 1.2    | 0.2    |
| 6.2    | 5.9    | 0.8    | 1.0    | 4.8    | 6.6    | 2.8    | 6.6    | 3.3    |
| 28.8   | 14.2   | 25.0   | 25.7   | 24.2   | 24.2   | 33.8   | 37.5   | 19.5   |
| 16.3   | 14.9   | 17.2   | 11.6   | 12.3   | 21.8   | 9.5    | 15.4   | 9.1    |
| 0.7    | 0.7    | 0.6    | 0.4    | 0.4    | 0.3    | 0.6    | 0.9    | 0.5    |
| 17.8   | 13.9   | 9.9    | 16.5   | 21.5   | 15.6   | 16.7   | 23.2   | 25.4   |
| 0.7    | 0.3    | 2.1    | 7.2    | 0.3    | 4.4    | 0.6    | 2.3    | 0.9    |
| 0.5    | 1.0    | 0.5    | 0.7    | 0.4    | 0.1    | 0.3    | 1.1    | 0.8    |
| 0.5    | 1.3    | 4.6    | 0.7    | 4.3    | 5.5    | 0.5    | 1.6    | 3.7    |
| 52.8   | 52.1   | 74.5   | 61.0   | 71.1   | 76.8   | 80.3   | 65.7   | 59.5   |
| 0.4    | 4.3    | 3.3    | 1.3    | 1.7    | 1.6    | 1.0    | 3.2    | 1.0    |
| 0.7    | 1.4    | 0.5    | 0.7    | 1.3    | 0.9    | 0.6    | 0.6    | 1.3    |
| 68.4   | 31.3   | 40.6   | 36.3   | 45.0   | 50.1   | 47.5   | 47.8   | 49.4   |
| 11.8   | 7.8    | 6.9    | 8.8    | 9.1    | 7.2    | 2.7    | 15.5   | 3.4    |
| 383.0  | 261.4  | 312.7  | 313.6  | 361.4  | 360.6  | 448.8  | 449.8  | 300.3  |
| 104.4  | 88.5   | 104.0  | 122.5  | 110.2  | 124.3  | 131.9  | 173.9  | 93.9   |
| 0.7    | 0.9    | 1.0    | 0.7    | 0.5    | 0.9    | 0.9    | 0.8    | 0.6    |
| 3800.4 | 3213.1 | 3151.8 | 3362.5 | 3350.9 | 3360.5 | 3658.2 | 3890.4 | 3093.5 |
| 0.6    | 2.0    | 1.8    | 1.2    | 0.0    | 1.1    | 0.0    | 0.8    | 1.1    |
| 1.4    | 2.1    | 1.3    | 1.1    | 0.9    | 1.9    | 0.5    | 1.7    | 0.5    |
| 0.6    | 0.4    | 0.6    | 2.6    | 1.3    | 1.0    | 0.6    | 0.4    | 4.1    |
| 63.7   | 37.0   | 50.7   | 47.5   | 49.3   | 37.3   | 52.0   | 64.0   | 25.5   |
| 66.8   | 61.0   | 58.5   | 66.2   | 62.1   | 65.9   | 91.0   | 81.5   | 69.0   |
| 0.5    | 0.5    | 0.3    | 2.1    | 0.6    | 0.7    | 1.0    | 0.3    | 0.7    |
| 76.3   | 38.9   | 44.5   | 39.7   | 37.8   | 31.4   | 45.4   | 64.3   | 40.5   |
| 0.6    | 2.3    | 1.5    | 2.1    | 0.2    | 0.4    | 0.1    | 4.9    | 2.4    |
| 19.1   | 8.8    | 5.2    | 6.3    | 4.9    | 2.4    | 1.2    | 5.7    | 4.6    |
| 11.9   | 10.5   | 10.3   | 4.8    | 9.6    | 9.0    | 9.0    | 8.1    | 6.7    |
| 5.3    | 9.8    | 1.7    | 2.3    | 4.1    | 13.5   | 1.6    | 1.8    | 2.0    |
| 0.9    | 2.5    | 0.3    | 1.2    | 0.5    | 0.4    | 1.0    | 0.9    | 0.6    |
| 53.3   | 28.7   | 30.6   | 29.7   | 35.9   | 27.4   | 38.7   | 33.7   | 25.5   |
| 63.5   | 54.0   | 59.6   | 51.3   | 69.2   | 62.7   | 63.0   | 63.3   | 43.3   |
| 4.1    | 12.0   | 16.1   | 13.5   | 8.5    | 11.2   | 3.1    | 9.3    | 6.0    |
| 9.4    | 17.6   | 5.3    | 11.8   | 6.7    | 17.7   | 2.9    | 16.6   | 10.2   |
| 9.6    | 2.7    | 2.2    | 4.1    | 1.2    | 5.1    | 2.6    | 8.3    | 1.9    |



|       |       |       |       |       |       |       |       |       |
|-------|-------|-------|-------|-------|-------|-------|-------|-------|
| 0.9   | 2.2   | 1.1   | 1.3   | 1.0   | 2.4   | 8.0   | 2.5   | 1.6   |
| 3.6   | 5.3   | 2.0   | 1.0   | 2.9   | 1.2   | 6.5   | 1.9   | 6.5   |
| 0.9   | 3.2   | 1.1   | 0.8   | 2.8   | 2.1   | 3.3   | 7.8   | 3.4   |
| 4.6   | 0.8   | 1.0   | 2.8   | 1.1   | 0.3   | 0.7   | 0.7   | 2.1   |
| 0.5   | 1.1   | 0.3   | 0.6   | 0.4   | 1.2   | 0.4   | 1.1   | 0.7   |
| 8.3   | 8.9   | 6.0   | 4.6   | 9.6   | 12.8  | 11.7  | 14.3  | 6.5   |
| 26.6  | 17.1  | 22.0  | 22.5  | 23.0  | 23.1  | 32.5  | 36.8  | 30.6  |
| 237.1 | 146.9 | 155.3 | 203.5 | 154.1 | 187.0 | 194.0 | 303.0 | 160.2 |
| 14.9  | 23.9  | 21.6  | 11.1  | 20.6  | 25.4  | 31.1  | 32.5  | 24.9  |
| 24.6  | 23.0  | 17.5  | 27.4  | 28.6  | 28.1  | 31.4  | 41.9  | 31.7  |
| 6.0   | 5.0   | 5.6   | 1.0   | 5.8   | 1.5   | 9.5   | 7.6   | 5.7   |
| 3.2   | 4.9   | 3.9   | 4.7   | 10.2  | 2.0   | 5.2   | 10.6  | 5.0   |
| 7.7   | 1.9   | 5.5   | 1.4   | 3.7   | 3.5   | 10.5  | 8.3   | 1.2   |
| 2.5   | 4.7   | 3.6   | 0.3   | 2.1   | 0.5   | 3.2   | 0.2   | 0.1   |
| 0.1   | 0.2   | 1.1   | 0.4   | 5.5   | 1.7   | 3.4   | 3.0   | 0.3   |
| 1.8   | 2.2   | 0.3   | 3.4   | 0.7   | 1.4   | 5.4   | 2.9   | 3.7   |
| 37.3  | 29.2  | 22.1  | 32.7  | 30.8  | 34.3  | 43.6  | 47.1  | 29.7  |
| 54.3  | 40.8  | 36.4  | 28.7  | 36.4  | 32.8  | 51.8  | 55.9  | 38.1  |
| 1.5   | 1.1   | 1.9   | 1.5   | 3.1   | 1.9   | 0.7   | 3.2   | 1.3   |
| 0.2   | 0.7   | 3.0   | 2.1   | 0.3   | 0.4   | 1.2   | 2.8   | 4.8   |
| 0.8   | 2.0   | 0.4   | 4.2   | 1.8   | 0.3   | 3.1   | 3.6   | 4.1   |
| 157.4 | 130.9 | 126.9 | 144.7 | 154.9 | 139.9 | 165.2 | 232.9 | 144.5 |
| 6.9   | 4.7   | 0.4   | 1.6   | 6.9   | 6.0   | 7.1   | 14.6  | 8.0   |
| 19.2  | 10.8  | 12.4  | 10.7  | 13.4  | 15.7  | 18.3  | 17.1  | 12.9  |
| 45.2  | 38.6  | 29.4  | 25.2  | 34.8  | 32.8  | 44.2  | 58.6  | 35.8  |
| 0.1   | 0.9   | 0.2   | 1.9   | 0.6   | 0.2   | 0.3   | 0.4   | 2.1   |
| 1.1   | 6.7   | 4.1   | 2.3   | 3.5   | 4.0   | 1.0   | 0.5   | 5.1   |
| 1.6   | 6.1   | 11.2  | 2.6   | 7.4   | 1.5   | 8.8   | 3.1   | 12.8  |
| 0.8   | 0.4   | 1.3   | 1.6   | 1.0   | 1.2   | 9.1   | 7.2   | 1.0   |
| 21.5  | 12.3  | 10.2  | 9.8   | 11.2  | 7.0   | 19.6  | 16.7  | 16.4  |
| 72.2  | 48.6  | 63.8  | 53.0  | 61.1  | 66.1  | 81.4  | 79.9  | 64.9  |
| 31.4  | 41.9  | 44.5  | 42.5  | 39.8  | 53.4  | 59.2  | 54.7  | 30.0  |
| 1.3   | 9.1   | 1.6   | 2.6   | 1.4   | 10.6  | 1.4   | 4.1   | 1.5   |
| 8.0   | 4.6   | 0.6   | 4.9   | 0.6   | 3.1   | 7.9   | 3.5   | 1.0   |
| 0.4   | 0.2   | 2.6   | 2.8   | 1.0   | 2.8   | 0.5   | 1.8   | 4.5   |
| 0.3   | 0.3   | 0.7   | 0.3   | 0.9   | 0.4   | 0.8   | 1.1   | 0.9   |
| 1.6   | 0.6   | 0.4   | 0.4   | 0.4   | 0.9   | 0.5   | 1.2   | 0.6   |
| 16.1  | 18.0  | 19.2  | 14.7  | 15.2  | 7.5   | 22.3  | 30.2  | 18.3  |
| 13.8  | 10.9  | 7.3   | 9.0   | 12.1  | 10.0  | 14.9  | 17.7  | 15.1  |
| 1.8   | 2.2   | 1.0   | 4.9   | 9.2   | 0.7   | 5.9   | 11.5  | 2.6   |
| 0.9   | 2.8   | 1.9   | 5.0   | 8.1   | 5.0   | 4.6   | 8.5   | 5.9   |
| 12.0  | 13.8  | 13.1  | 15.7  | 16.7  | 14.4  | 24.8  | 23.3  | 16.6  |
| 234.2 | 209.4 | 134.9 | 167.0 | 220.5 | 174.4 | 220.9 | 344.6 | 630.4 |
| 4.3   | 3.5   | 2.3   | 2.2   | 4.3   | 1.2   | 1.9   | 1.9   | 3.6   |
| 4.6   | 2.2   | 0.4   | 2.3   | 4.0   | 6.9   | 7.4   | 10.6  | 3.0   |
| 0.3   | 0.7   | 2.6   | 0.7   | 0.5   | 0.4   | 0.7   | 0.5   | 0.6   |
| 3.0   | 4.7   | 0.5   | 0.4   | 4.9   | 4.0   | 2.4   | 2.2   | 0.2   |
| 119.5 | 83.6  | 91.4  | 85.6  | 97.5  | 99.1  | 129.2 | 154.4 | 114.1 |
| 1.1   | 5.5   | 1.2   | 3.3   | 0.9   | 0.5   | 0.9   | 0.8   | 1.0   |
| 258.2 | 163.8 | 170.0 | 176.5 | 173.9 | 191.7 | 222.9 | 284.9 | 291.6 |
| 25.8  | 11.0  | 21.9  | 19.4  | 21.3  | 13.9  | 25.0  | 35.2  | 16.7  |
| 52.4  | 52.5  | 58.9  | 52.0  | 54.0  | 48.6  | 77.7  | 96.7  | 61.2  |
| 15.0  | 7.4   | 9.9   | 1.7   | 2.2   | 8.7   | 14.9  | 10.3  | 14.2  |

|        |        |        |        |        |        |        |        |        |
|--------|--------|--------|--------|--------|--------|--------|--------|--------|
| 870.2  | 422.3  | 386.0  | 319.8  | 391.9  | 318.3  | 241.1  | 258.3  | 206.9  |
| 1.6    | 2.8    | 0.8    | 1.7    | 2.3    | 3.1    | 1.1    | 2.9    | 3.8    |
| 69.5   | 85.1   | 78.2   | 110.3  | 114.1  | 78.7   | 88.2   | 94.5   | 94.4   |
| 1.6    | 0.5    | 1.6    | 2.8    | 0.1    | 0.1    | 0.1    | 0.1    | 0.5    |
| 6.4    | 7.4    | 7.7    | 11.2   | 7.2    | 10.3   | 7.2    | 11.9   | 9.5    |
| 1.1    | 0.7    | 1.0    | 1.4    | 1.5    | 0.5    | 1.4    | 1.6    | 1.4    |
| 8.2    | 0.4    | 5.9    | 10.7   | 2.9    | 2.8    | 1.4    | 8.8    | 5.7    |
| 1.7    | 2.3    | 0.3    | 5.9    | 7.3    | 8.0    | 1.2    | 9.2    | 1.3    |
| 13.7   | 28.0   | 18.7   | 28.7   | 31.6   | 21.8   | 33.1   | 44.4   | 30.7   |
| 38.5   | 27.7   | 24.0   | 26.7   | 19.5   | 47.2   | 50.9   | 68.5   | 30.2   |
| 0.6    | 3.5    | 1.5    | 2.9    | 0.7    | 0.3    | 2.8    | 3.9    | 2.9    |
| 25.2   | 11.0   | 6.8    | 13.5   | 2.1    | 2.3    | 14.8   | 13.9   | 8.5    |
| 0.8    | 1.4    | 2.7    | 1.4    | 1.2    | 0.8    | 0.6    | 1.4    | 0.9    |
| 2.2    | 0.2    | 1.7    | 0.5    | 0.4    | 1.1    | 0.6    | 1.1    | 1.5    |
| 1.7    | 0.4    | 0.2    | 0.5    | 0.5    | 0.4    | 1.7    | 1.0    | 4.7    |
| 41.8   | 53.5   | 44.3   | 54.8   | 55.0   | 53.9   | 76.8   | 78.0   | 55.0   |
| 1.0    | 2.1    | 6.3    | 4.3    | 1.2    | 1.8    | 2.3    | 0.7    | 1.2    |
| 1.0    | 1.0    | 0.9    | 1.3    | 1.5    | 1.1    | 0.8    | 1.4    | 5.5    |
| 323.1  | 210.4  | 211.3  | 309.2  | 300.9  | 284.6  | 356.2  | 392.2  | 292.7  |
| 141.9  | 94.8   | 109.9  | 104.9  | 96.0   | 115.1  | 150.6  | 193.1  | 123.0  |
| 0.2    | 0.1    | 0.5    | 0.4    | 0.3    | 3.4    | 1.2    | 0.7    | 2.0    |
| 0.4    | 0.4    | 0.5    | 0.2    | 4.5    | 3.7    | 0.5    | 0.5    | 1.1    |
| 4.9    | 4.8    | 3.7    | 5.7    | 6.6    | 6.0    | 7.4    | 11.3   | 9.7    |
| 0.1    | 0.5    | 0.4    | 0.7    | 1.5    | 0.6    | 2.9    | 0.3    | 0.2    |
| 3.1    | 0.7    | 10.9   | 0.5    | 4.1    | 8.2    | 6.6    | 1.7    | 0.6    |
| 16.5   | 20.9   | 11.2   | 16.0   | 19.9   | 16.0   | 29.1   | 33.0   | 15.0   |
| 3.6    | 2.3    | 3.1    | 1.7    | 1.4    | 6.1    | 3.8    | 4.6    | 2.8    |
| 0.8    | 1.4    | 1.2    | 2.2    | 0.8    | 1.7    | 1.3    | 1.5    | 4.1    |
| 0.7    | 1.1    | 0.7    | 1.2    | 1.1    | 0.6    | 0.6    | 1.0    | 0.6    |
| 2890.9 | 3007.7 | 2605.7 | 2694.4 | 2675.1 | 2787.1 | 2943.3 | 3280.7 | 2443.8 |
| 4.4    | 7.5    | 9.9    | 4.3    | 5.7    | 7.4    | 4.0    | 7.7    | 7.0    |
| 2.8    | 4.6    | 2.2    | 7.2    | 6.8    | 1.2    | 7.5    | 7.8    | 7.6    |
| 1.5    | 0.6    | 4.8    | 0.2    | 1.2    | 0.9    | 0.4    | 2.1    | 1.8    |
| 7.0    | 3.8    | 3.7    | 0.7    | 5.9    | 1.1    | 9.0    | 2.0    | 1.7    |
| 0.9    | 1.0    | 0.4    | 0.9    | 0.9    | 0.5    | 0.8    | 0.7    | 2.0    |
| 11.8   | 26.7   | 19.4   | 12.2   | 9.7    | 8.9    | 11.2   | 28.1   | 11.6   |
| 31.7   | 9.4    | 2.0    | 1.3    | 2.9    | 5.0    | 1.5    | 9.5    | 8.5    |
| 35.0   | 50.8   | 39.5   | 47.5   | 47.5   | 46.5   | 49.3   | 54.6   | 58.9   |
| 0.4    | 4.4    | 1.9    | 1.7    | 2.5    | 4.0    | 1.0    | 3.4    | 0.8    |
| 158.6  | 54.8   | 74.8   | 55.4   | 69.3   | 89.8   | 85.8   | 146.8  | 95.7   |
| 122.1  | 25.1   | 66.3   | 51.2   | 41.3   | 61.9   | 62.6   | 122.9  | 70.8   |
| 17.2   | 13.2   | 10.5   | 11.8   | 10.3   | 2.3    | 12.4   | 10.2   | 11.6   |
| 2.7    | 3.4    | 2.9    | 1.6    | 2.0    | 3.1    | 3.5    | 3.2    | 1.6    |
| 432.8  | 257.6  | 303.3  | 313.3  | 329.9  | 315.1  | 521.0  | 525.7  | 338.6  |
| 9.1    | 19.2   | 16.0   | 16.4   | 19.5   | 16.7   | 29.9   | 34.5   | 25.6   |
| 193.6  | 142.6  | 166.8  | 146.1  | 164.1  | 164.1  | 206.1  | 252.1  | 162.4  |
| 14.9   | 13.5   | 11.3   | 15.1   | 11.7   | 15.6   | 15.9   | 26.8   | 17.4   |
| 184.3  | 152.8  | 130.7  | 145.3  | 168.9  | 173.6  | 212.5  | 292.3  | 247.2  |
| 1.0    | 0.3    | 0.3    | 0.7    | 0.6    | 2.4    | 3.6    | 0.9    | 0.8    |
| 10.4   | 10.9   | 11.9   | 14.7   | 11.2   | 17.2   | 16.2   | 25.4   | 23.0   |
| 3.2    | 2.7    | 0.6    | 1.2    | 1.0    | 2.5    | 1.3    | 5.5    | 2.6    |
| 758.6  | 596.0  | 572.8  | 632.1  | 688.2  | 639.4  | 946.0  | 1032.7 | 621.5  |
| 1.9    | 0.4    | 2.7    | 3.5    | 2.5    | 0.2    | 1.0    | 1.9    | 0.6    |

|        |        |        |        |        |        |        |        |        |
|--------|--------|--------|--------|--------|--------|--------|--------|--------|
| 22.8   | 15.8   | 26.1   | 23.3   | 13.2   | 23.8   | 23.3   | 26.3   | 20.8   |
| 21.4   | 28.3   | 17.8   | 24.9   | 26.8   | 16.0   | 28.7   | 23.8   | 33.2   |
| 6.3    | 5.3    | 5.8    | 0.5    | 2.4    | 1.0    | 6.3    | 6.5    | 6.9    |
| 12.0   | 12.4   | 17.7   | 14.4   | 14.4   | 15.4   | 16.1   | 12.5   | 17.3   |
| 4.7    | 5.3    | 0.8    | 5.3    | 2.9    | 1.2    | 3.7    | 5.3    | 4.6    |
| 1.1    | 0.2    | 0.6    | 1.1    | 1.3    | 1.2    | 1.9    | 0.6    | 0.5    |
| 1.1    | 1.6    | 0.6    | 1.1    | 1.1    | 1.4    | 1.0    | 1.1    | 1.0    |
| 96.0   | 84.9   | 106.2  | 92.6   | 101.7  | 103.1  | 123.9  | 119.9  | 87.4   |
| 0.1    | 0.4    | 0.4    | 4.4    | 0.2    | 0.3    | 0.4    | 2.1    | 0.3    |
| 11.2   | 4.3    | 9.1    | 7.1    | 5.4    | 6.5    | 9.7    | 11.5   | 9.1    |
| 0.7    | 0.8    | 5.1    | 0.2    | 0.1    | 0.4    | 1.9    | 0.5    | 1.5    |
| 4.6    | 2.6    | 3.3    | 0.5    | 0.2    | 1.0    | 3.6    | 2.0    | 2.0    |
| 0.9    | 7.0    | 5.1    | 0.8    | 3.7    | 2.9    | 4.2    | 4.8    | 2.1    |
| 0.3    | 0.2    | 1.2    | 3.1    | 0.2    | 0.2    | 7.0    | 2.5    | 2.5    |
| 1.0    | 0.8    | 1.1    | 2.0    | 5.0    | 1.2    | 1.2    | 1.2    | 3.0    |
| 23.0   | 6.4    | 5.5    | 15.3   | 19.8   | 12.7   | 12.5   | 19.3   | 12.4   |
| 85.1   | 77.1   | 64.3   | 59.1   | 52.1   | 46.7   | 84.2   | 85.3   | 69.3   |
| 55.1   | 37.3   | 27.9   | 25.5   | 44.3   | 35.6   | 45.6   | 51.1   | 27.9   |
| 65.2   | 17.7   | 30.5   | 33.5   | 20.2   | 31.4   | 28.7   | 44.2   | 34.0   |
| 6.1    | 2.5    | 13.8   | 15.7   | 7.0    | 8.4    | 4.8    | 25.5   | 8.0    |
| 0.8    | 0.8    | 0.4    | 0.3    | 0.9    | 1.4    | 1.3    | 0.9    | 0.4    |
| 0.4    | 1.3    | 0.4    | 2.3    | 0.3    | 1.1    | 0.7    | 0.6    | 0.2    |
| 1.8    | 2.2    | 2.2    | 2.2    | 2.3    | 3.5    | 2.1    | 2.9    | 2.0    |
| 21.5   | 14.9   | 17.1   | 15.7   | 27.5   | 17.5   | 30.3   | 21.1   | 21.8   |
| 21.5   | 18.2   | 17.5   | 13.6   | 21.9   | 16.1   | 28.9   | 27.5   | 20.4   |
| 26.9   | 14.9   | 17.7   | 19.1   | 10.8   | 18.4   | 20.9   | 24.7   | 19.1   |
| 5.8    | 2.8    | 4.2    | 0.9    | 3.7    | 9.3    | 4.1    | 12.8   | 1.3    |
| 15.9   | 11.3   | 12.8   | 10.7   | 8.1    | 8.6    | 11.5   | 15.4   | 8.3    |
| 1.2    | 7.0    | 1.0    | 1.9    | 10.3   | 4.9    | 7.6    | 3.0    | 6.1    |
| 4594.3 | 3892.1 | 3945.3 | 4116.8 | 4264.8 | 4086.5 | 4813.3 | 5048.8 | 3078.2 |
| 70.0   | 37.9   | 46.1   | 47.8   | 48.1   | 58.6   | 67.8   | 68.8   | 51.2   |
| 1.9    | 6.5    | 9.5    | 5.5    | 8.5    | 7.8    | 9.5    | 3.4    | 6.7    |
| 1.2    | 7.5    | 3.8    | 1.4    | 0.7    | 1.2    | 2.0    | 4.4    | 0.5    |
| 5.4    | 10.5   | 4.7    | 10.2   | 5.0    | 7.8    | 10.8   | 15.6   | 11.8   |
| 41.6   | 29.4   | 38.3   | 43.2   | 35.7   | 46.5   | 68.7   | 58.6   | 44.0   |
| 28.9   | 0.9    | 7.1    | 1.4    | 0.5    | 3.1    | 0.8    | 1.9    | 3.9    |
| 17.3   | 0.4    | 2.0    | 5.2    | 2.8    | 1.6    | 0.8    | 5.0    | 1.5    |
| 1.1    | 1.5    | 1.2    | 0.8    | 0.6    | 0.5    | 1.6    | 1.9    | 0.7    |
| 4.6    | 20.0   | 12.1   | 16.9   | 22.3   | 15.4   | 21.3   | 17.8   | 12.3   |
| 42.1   | 26.3   | 30.8   | 35.3   | 30.7   | 30.0   | 33.0   | 27.1   | 22.8   |
| 0.7    | 5.8    | 5.6    | 0.9    | 0.9    | 0.6    | 5.4    | 6.2    | 2.0    |
| 4.1    | 5.6    | 7.8    | 7.6    | 1.2    | 3.3    | 1.9    | 17.7   | 2.3    |
| 8.2    | 4.0    | 7.2    | 5.5    | 9.2    | 4.7    | 5.4    | 13.4   | 5.5    |
| 0.6    | 0.4    | 0.4    | 0.2    | 0.4    | 3.1    | 0.2    | 0.2    | 0.7    |
| 4.4    | 8.4    | 7.9    | 4.6    | 4.2    | 9.1    | 3.7    | 5.9    | 10.2   |
| 194.4  | 103.8  | 136.4  | 149.0  | 152.8  | 137.5  | 209.0  | 184.5  | 134.3  |
| 106.9  | 100.4  | 92.9   | 129.9  | 120.7  | 92.2   | 131.4  | 99.2   | 57.7   |
| 0.9    | 0.7    | 0.5    | 0.6    | 0.6    | 0.7    | 0.9    | 0.8    | 0.5    |
| 54.2   | 35.9   | 40.2   | 44.6   | 45.2   | 42.5   | 53.2   | 55.1   | 37.0   |
| 2.6    | 0.6    | 1.2    | 1.3    | 0.7    | 2.2    | 0.4    | 3.2    | 2.2    |
| 105.0  | 65.2   | 57.8   | 81.1   | 87.3   | 72.0   | 121.7  | 133.8  | 81.3   |
| 3.6    | 0.3    | 0.7    | 4.6    | 0.5    | 4.6    | 1.1    | 0.3    | 0.6    |
| 4.2    | 12.3   | 7.1    | 14.7   | 14.5   | 7.2    | 9.6    | 21.7   | 14.1   |

|        |       |       |       |        |       |        |        |       |
|--------|-------|-------|-------|--------|-------|--------|--------|-------|
| 136.0  | 58.3  | 61.8  | 84.9  | 62.4   | 77.8  | 74.3   | 98.6   | 67.6  |
| 0.4    | 3.0   | 0.9   | 0.3   | 2.9    | 0.1   | 9.0    | 2.6    | 1.8   |
| 2.5    | 0.6   | 4.1   | 4.0   | 0.3    | 0.1   | 0.3    | 1.0    | 2.6   |
| 276.3  | 208.3 | 223.2 | 267.6 | 268.6  | 289.2 | 371.2  | 390.0  | 272.6 |
| 0.6    | 2.2   | 0.6   | 0.2   | 0.4    | 0.8   | 5.3    | 1.5    | 2.2   |
| 0.3    | 0.3   | 0.7   | 0.2   | 0.3    | 0.4   | 0.9    | 0.9    | 0.2   |
| 11.1   | 6.7   | 8.4   | 3.6   | 5.6    | 8.4   | 8.0    | 9.4    | 5.9   |
| 0.9    | 0.8   | 1.3   | 0.6   | 0.6    | 0.4   | 4.2    | 0.9    | 0.8   |
| 97.4   | 82.1  | 75.2  | 100.0 | 74.9   | 75.7  | 143.1  | 172.4  | 72.9  |
| 134.6  | 70.0  | 89.0  | 96.1  | 108.5  | 105.0 | 166.1  | 212.1  | 130.7 |
| 177.1  | 84.0  | 115.8 | 124.6 | 125.2  | 123.1 | 152.1  | 181.2  | 110.6 |
| 13.7   | 7.0   | 10.6  | 6.6   | 14.9   | 17.0  | 21.6   | 14.5   | 13.9  |
| 32.2   | 17.7  | 18.1  | 4.2   | 21.4   | 21.3  | 33.0   | 44.9   | 12.6  |
| 7.9    | 1.5   | 7.2   | 6.0   | 7.6    | 7.4   | 2.1    | 6.2    | 4.8   |
| 35.9   | 58.5  | 50.4  | 80.8  | 64.8   | 45.7  | 79.8   | 61.4   | 50.1  |
| 1.1    | 2.6   | 1.7   | 2.3   | 1.5    | 8.3   | 1.5    | 2.2    | 3.7   |
| 1.7    | 2.3   | 3.4   | 2.8   | 3.2    | 1.6   | 1.3    | 1.9    | 1.6   |
| 7.6    | 1.2   | 5.0   | 1.3   | 2.5    | 4.4   | 6.1    | 1.2    | 6.4   |
| 25.5   | 15.7  | 12.4  | 15.0  | 18.6   | 18.6  | 20.3   | 27.3   | 17.4  |
| 4.5    | 6.6   | 3.8   | 2.7   | 0.5    | 4.9   | 4.1    | 0.7    | 0.5   |
| 0.9    | 0.4   | 0.7   | 0.3   | 0.4    | 1.7   | 1.4    | 0.4    | 0.4   |
| 3.8    | 5.4   | 3.5   | 3.3   | 8.8    | 3.9   | 5.4    | 1.8    | 7.1   |
| 1.4    | 1.9   | 1.6   | 0.7   | 2.1    | 7.4   | 1.0    | 2.1    | 1.6   |
| 2.1    | 6.2   | 5.0   | 3.4   | 6.0    | 1.1   | 1.4    | 8.2    | 2.2   |
| 18.5   | 23.9  | 19.9  | 11.5  | 26.0   | 17.9  | 17.7   | 17.5   | 22.7  |
| 1.2    | 1.0   | 1.5   | 1.2   | 0.7    | 3.4   | 0.9    | 2.3    | 0.5   |
| 0.2    | 0.2   | 0.6   | 0.7   | 1.4    | 2.9   | 2.6    | 5.9    | 0.7   |
| 32.6   | 28.0  | 27.8  | 23.7  | 25.4   | 26.3  | 41.2   | 53.8   | 31.2  |
| 161.1  | 105.5 | 124.1 | 156.6 | 145.0  | 155.2 | 183.6  | 169.6  | 136.7 |
| 367.9  | 263.6 | 277.2 | 343.6 | 284.3  | 341.2 | 477.1  | 436.3  | 308.2 |
| 139.1  | 44.2  | 51.1  | 53.2  | 59.0   | 60.1  | 79.6   | 117.1  | 60.7  |
| 9.2    | 7.8   | 10.7  | 16.7  | 7.3    | 17.2  | 3.2    | 18.6   | 16.0  |
| 12.1   | 4.7   | 11.8  | 4.2   | 0.8    | 9.0   | 6.9    | 0.9    | 0.7   |
| 14.4   | 11.1  | 13.4  | 17.3  | 10.0   | 16.9  | 24.2   | 24.5   | 21.3  |
| 1063.5 | 957.3 | 949.7 | 865.2 | 1258.9 | 987.0 | 1314.2 | 1362.1 | 761.2 |
| 0.2    | 0.3   | 0.2   | 0.3   | 0.1    | 0.3   | 0.4    | 0.3    | 0.1   |
| 2.9    | 0.6   | 3.7   | 0.3   | 2.1    | 0.3   | 1.7    | 0.3    | 0.7   |
| 1.1    | 1.3   | 1.1   | 4.6   | 1.9    | 3.2   | 0.9    | 1.6    | 1.2   |
| 1.3    | 0.5   | 0.7   | 2.2   | 0.8    | 1.4   | 1.4    | 1.2    | 2.2   |
| 3.5    | 2.6   | 2.2   | 6.3   | 3.9    | 2.1   | 2.0    | 7.6    | 1.8   |
| 3.2    | 4.2   | 3.9   | 2.9   | 6.8    | 1.9   | 3.5    | 1.2    | 0.3   |
| 1.2    | 1.9   | 1.7   | 1.6   | 1.2    | 1.8   | 1.5    | 1.5    | 1.0   |
| 4.0    | 0.8   | 0.4   | 4.7   | 6.8    | 0.9   | 2.3    | 1.6    | 3.7   |
| 495.4  | 352.0 | 404.2 | 422.7 | 432.5  | 391.1 | 539.4  | 506.5  | 304.4 |
| 5.0    | 11.2  | 5.3   | 9.1   | 12.5   | 6.1   | 13.1   | 14.8   | 11.0  |
| 7.0    | 1.6   | 0.4   | 0.7   | 0.6    | 0.5   | 0.8    | 0.8    | 4.4   |
| 31.6   | 28.9  | 36.8  | 35.3  | 32.6   | 30.2  | 48.1   | 48.3   | 33.9  |
| 5.9    | 13.1  | 15.3  | 12.0  | 11.8   | 12.7  | 17.9   | 14.9   | 16.3  |
| 1.0    | 0.4   | 1.0   | 1.3   | 2.1    | 1.0   | 0.9    | 2.2    | 0.9   |
| 85.4   | 43.0  | 59.1  | 59.3  | 54.7   | 68.9  | 80.6   | 96.6   | 65.8  |
| 2.9    | 2.0   | 0.6   | 3.0   | 0.3    | 0.9   | 4.6    | 2.9    | 0.6   |
| 0.8    | 0.5   | 1.0   | 0.5   | 0.7    | 0.5   | 0.3    | 4.2    | 1.1   |
| 0.4    | 0.2   | 0.6   | 1.0   | 0.5    | 0.8   | 0.8    | 0.6    | 2.8   |

|        |        |        |        |        |        |        |        |        |
|--------|--------|--------|--------|--------|--------|--------|--------|--------|
| 5.8    | 3.4    | 0.8    | 3.6    | 1.1    | 0.5    | 1.6    | 2.4    | 0.8    |
| 7.7    | 2.0    | 0.8    | 1.2    | 4.1    | 1.0    | 10.7   | 7.9    | 3.4    |
| 105.0  | 137.1  | 128.0  | 156.8  | 138.7  | 132.9  | 217.9  | 273.9  | 263.1  |
| 138.8  | 82.5   | 90.5   | 106.3  | 105.6  | 89.9   | 131.4  | 123.1  | 86.9   |
| 1361.4 | 1051.2 | 1296.0 | 1367.0 | 1366.6 | 1324.2 | 1673.6 | 1692.7 | 1287.6 |
| 9.8    | 3.3    | 8.3    | 4.9    | 8.6    | 1.2    | 6.3    | 6.1    | 6.9    |
| 0.5    | 0.6    | 0.4    | 2.2    | 0.3    | 0.8    | 0.5    | 0.4    | 0.6    |
| 0.9    | 1.0    | 1.0    | 0.5    | 1.3    | 1.5    | 1.0    | 1.0    | 4.1    |
| 0.7    | 2.2    | 2.2    | 2.2    | 0.8    | 0.6    | 2.6    | 0.7    | 2.2    |
| 2089.8 | 1570.4 | 1210.7 | 1654.2 | 1622.4 | 1486.8 | 2067.5 | 2255.1 | 2057.0 |
| 447.7  | 306.7  | 369.8  | 375.7  | 337.0  | 354.2  | 521.9  | 522.8  | 369.0  |
| 65.7   | 27.2   | 51.4   | 28.9   | 32.3   | 32.4   | 49.3   | 43.9   | 28.1   |
| 3.6    | 1.2    | 3.7    | 2.8    | 3.5    | 4.6    | 1.0    | 8.3    | 0.4    |
| 0.6    | 2.0    | 2.7    | 1.3    | 1.6    | 1.2    | 3.8    | 1.3    | 2.7    |
| 0.9    | 1.0    | 0.8    | 0.5    | 1.4    | 0.8    | 0.8    | 1.0    | 1.1    |
| 0.9    | 2.0    | 1.1    | 0.7    | 0.9    | 1.1    | 2.6    | 1.6    | 2.4    |
| 0.3    | 0.3    | 0.6    | 0.4    | 0.2    | 0.7    | 1.5    | 1.6    | 0.4    |
| 1.6    | 0.8    | 2.2    | 1.1    | 2.1    | 1.7    | 4.3    | 3.7    | 1.0    |
| 0.4    | 0.2    | 0.9    | 1.4    | 0.9    | 0.2    | 2.1    | 0.5    | 2.7    |
| 0.9    | 0.6    | 0.7    | 0.7    | 0.8    | 0.9    | 1.0    | 1.9    | 0.4    |
| 0.9    | 0.3    | 1.2    | 0.5    | 2.6    | 2.0    | 1.2    | 1.4    | 1.5    |
| 7.2    | 8.2    | 3.2    | 1.7    | 8.4    | 4.5    | 6.2    | 5.4    | 2.3    |
| 0.3    | 0.6    | 0.5    | 0.2    | 0.2    | 0.7    | 0.5    | 0.5    | 0.2    |
| 8.4    | 3.3    | 5.2    | 1.6    | 2.9    | 3.4    | 10.1   | 11.8   | 6.0    |
| 1.7    | 0.8    | 0.9    | 1.7    | 1.7    | 1.0    | 1.7    | 1.2    | 1.2    |
| 3.7    | 2.4    | 1.6    | 1.3    | 1.2    | 6.3    | 1.3    | 1.2    | 1.1    |
| 1.0    | 0.2    | 2.1    | 0.8    | 4.3    | 0.6    | 4.4    | 6.6    | 3.7    |
| 0.8    | 0.7    | 6.5    | 1.3    | 2.9    | 0.6    | 2.8    | 1.4    | 5.8    |
| 0.7    | 0.8    | 2.9    | 0.4    | 0.7    | 2.0    | 0.5    | 3.2    | 0.6    |
| 2.0    | 0.5    | 3.0    | 1.5    | 1.5    | 5.5    | 1.9    | 1.8    | 1.6    |
| 1.6    | 0.5    | 0.6    | 0.4    | 1.6    | 0.4    | 1.8    | 0.6    | 0.4    |
| 1.3    | 0.8    | 0.7    | 1.4    | 1.3    | 5.3    | 4.8    | 1.1    | 0.6    |
| 14.2   | 14.0   | 15.3   | 13.8   | 11.5   | 5.8    | 17.9   | 14.1   | 11.2   |
| 10.3   | 10.0   | 11.8   | 12.0   | 17.2   | 13.1   | 8.1    | 13.3   | 12.9   |
| 37.6   | 35.6   | 53.7   | 52.3   | 49.4   | 35.9   | 59.6   | 55.0   | 38.3   |
| 0.1    | 1.2    | 0.5    | 1.2    | 2.5    | 1.2    | 2.3    | 0.4    | 0.3    |
| 19.3   | 31.9   | 26.1   | 11.8   | 24.2   | 9.9    | 28.1   | 23.7   | 27.2   |
| 8.9    | 7.2    | 9.8    | 29.5   | 13.3   | 13.9   | 21.4   | 17.1   | 13.7   |
| 308.5  | 396.9  | 223.6  | 380.6  | 403.2  | 287.1  | 837.5  | 958.6  | 525.0  |
| 0.5    | 0.3    | 0.4    | 0.3    | 1.1    | 0.3    | 1.1    | 1.9    | 0.5    |
| 15.9   | 4.1    | 3.8    | 14.3   | 9.0    | 10.7   | 18.0   | 21.8   | 18.5   |
| 26.5   | 28.3   | 17.3   | 15.0   | 16.2   | 7.9    | 16.1   | 27.5   | 42.7   |
| 1115.5 | 967.4  | 1016.1 | 1063.2 | 1119.4 | 1024.9 | 1276.9 | 1425.5 | 1279.7 |
| 4.6    | 3.2    | 5.2    | 9.0    | 6.6    | 13.0   | 13.2   | 9.1    | 9.6    |
| 9.6    | 6.9    | 9.5    | 4.2    | 8.3    | 9.8    | 13.7   | 9.1    | 9.8    |
| 2855.9 | 2729.9 | 2832.2 | 2795.9 | 2897.6 | 2810.6 | 3199.5 | 3564.8 | 2523.7 |
| 2.6    | 0.9    | 0.8    | 6.7    | 12.4   | 3.3    | 10.5   | 10.4   | 2.2    |
| 2.6    | 7.2    | 3.5    | 6.0    | 4.0    | 1.3    | 4.7    | 1.4    | 6.7    |
| 2.6    | 5.9    | 3.1    | 4.8    | 0.6    | 1.7    | 3.4    | 2.5    | 1.5    |
| 0.2    | 0.8    | 3.7    | 2.8    | 0.7    | 2.4    | 3.8    | 0.9    | 0.8    |
| 201.9  | 126.9  | 136.5  | 150.7  | 143.9  | 143.9  | 191.6  | 176.7  | 125.5  |
| 14.7   | 12.1   | 13.2   | 9.4    | 11.1   | 13.4   | 18.4   | 15.0   | 15.2   |
| 0.3    | 0.5    | 0.6    | 0.7    | 0.5    | 1.5    | 0.6    | 0.4    | 0.3    |

|        |        |        |        |        |        |        |        |        |
|--------|--------|--------|--------|--------|--------|--------|--------|--------|
| 1.8    | 0.7    | 0.3    | 0.4    | 0.4    | 0.7    | 1.3    | 0.9    | 5.8    |
| 43.2   | 41.4   | 30.2   | 25.9   | 28.4   | 39.4   | 36.3   | 60.5   | 19.5   |
| 3.4    | 8.4    | 8.7    | 13.1   | 4.6    | 1.5    | 8.3    | 1.3    | 4.4    |
| 231.0  | 126.6  | 153.0  | 153.3  | 169.1  | 178.1  | 244.7  | 275.5  | 206.6  |
| 6.3    | 6.2    | 1.8    | 6.0    | 11.2   | 2.6    | 1.2    | 1.2    | 5.7    |
| 0.3    | 0.1    | 4.0    | 0.4    | 0.5    | 0.5    | 0.7    | 0.9    | 2.1    |
| 46.0   | 35.0   | 29.7   | 33.0   | 46.9   | 45.3   | 42.7   | 47.5   | 38.7   |
| 150.0  | 20.3   | 21.5   | 15.1   | 25.0   | 22.7   | 25.3   | 45.1   | 19.3   |
| 194.7  | 152.5  | 178.3  | 196.8  | 181.9  | 166.8  | 216.0  | 242.0  | 170.4  |
| 5.9    | 7.1    | 7.8    | 4.8    | 2.8    | 3.4    | 12.5   | 9.7    | 3.7    |
| 154.3  | 99.8   | 117.6  | 131.7  | 134.1  | 159.8  | 171.1  | 216.6  | 149.9  |
| 1.7    | 4.3    | 0.7    | 2.3    | 2.3    | 3.6    | 2.1    | 1.8    | 0.7    |
| 3.6    | 1.8    | 1.5    | 4.1    | 1.6    | 1.0    | 6.2    | 3.0    | 1.7    |
| 261.8  | 19.9   | 33.3   | 28.4   | 32.9   | 40.7   | 50.9   | 97.2   | 47.2   |
| 2.0    | 1.5    | 1.5    | 0.5    | 1.2    | 1.2    | 5.1    | 1.4    | 1.0    |
| 20.3   | 2.7    | 9.8    | 12.7   | 4.3    | 2.0    | 16.7   | 19.2   | 8.5    |
| 22.0   | 22.2   | 8.1    | 25.7   | 27.8   | 16.7   | 31.6   | 42.0   | 23.2   |
| 13.6   | 14.3   | 19.0   | 14.5   | 15.6   | 17.1   | 13.6   | 14.4   | 10.2   |
| 0.3    | 0.3    | 0.7    | 0.3    | 1.0    | 0.4    | 2.1    | 0.6    | 0.5    |
| 10.3   | 9.9    | 5.5    | 6.1    | 4.7    | 10.0   | 7.3    | 14.4   | 12.3   |
| 14.5   | 17.5   | 12.0   | 20.9   | 11.1   | 19.8   | 17.3   | 19.2   | 15.2   |
| 141.9  | 115.4  | 90.3   | 129.9  | 131.4  | 114.9  | 158.8  | 131.4  | 166.5  |
| 337.1  | 264.9  | 202.7  | 279.6  | 370.8  | 277.6  | 489.3  | 581.1  | 504.8  |
| 1.3    | 5.3    | 1.6    | 5.5    | 1.5    | 3.0    | 2.6    | 2.9    | 16.8   |
| 1.6    | 1.1    | 0.7    | 1.2    | 0.6    | 0.4    | 0.8    | 1.7    | 2.6    |
| 0.9    | 4.0    | 3.3    | 0.7    | 0.7    | 2.7    | 5.8    | 4.6    | 4.1    |
| 20.7   | 15.5   | 18.7   | 17.9   | 24.6   | 26.2   | 29.0   | 29.5   | 18.8   |
| 64.6   | 43.0   | 59.4   | 53.9   | 63.3   | 61.8   | 65.0   | 86.6   | 59.8   |
| 36.7   | 35.5   | 30.1   | 37.1   | 44.1   | 29.0   | 58.2   | 63.4   | 40.9   |
| 0.9    | 1.5    | 1.1    | 3.1    | 0.6    | 1.3    | 0.8    | 1.5    | 1.4    |
| 14.0   | 14.3   | 32.6   | 16.5   | 28.7   | 29.5   | 36.8   | 41.9   | 24.3   |
| 63.1   | 46.6   | 59.4   | 59.2   | 61.5   | 73.8   | 101.2  | 108.9  | 65.2   |
| 143.3  | 105.5  | 105.2  | 135.6  | 133.7  | 131.7  | 127.0  | 155.6  | 94.8   |
| 149.3  | 110.7  | 131.8  | 114.1  | 128.6  | 133.8  | 170.7  | 202.9  | 188.2  |
| 3007.4 | 2673.9 | 2731.0 | 3010.9 | 2836.2 | 2786.8 | 3425.8 | 3673.9 | 2575.1 |
| 51.4   | 46.4   | 58.2   | 61.1   | 61.6   | 56.3   | 85.9   | 90.9   | 50.2   |
| 14.7   | 30.5   | 14.7   | 24.9   | 16.5   | 15.0   | 18.7   | 16.7   | 17.0   |
| 89.2   | 40.2   | 50.8   | 58.7   | 53.1   | 64.7   | 88.0   | 97.4   | 66.2   |
| 3628.1 | 2735.9 | 2997.9 | 2985.2 | 3152.2 | 3018.6 | 3544.0 | 3506.7 | 3059.7 |
| 102.9  | 58.4   | 73.5   | 79.9   | 84.5   | 120.4  | 101.8  | 142.6  | 82.9   |
| 436.0  | 360.1  | 395.7  | 401.0  | 397.0  | 369.4  | 568.9  | 558.3  | 412.0  |
| 43.2   | 29.0   | 29.3   | 43.9   | 40.2   | 47.2   | 39.9   | 42.9   | 53.8   |
| 3.6    | 1.0    | 5.3    | 2.3    | 5.2    | 3.5    | 7.7    | 1.1    | 4.5    |
| 140.8  | 84.0   | 130.4  | 125.8  | 126.3  | 116.5  | 159.9  | 150.2  | 175.1  |
| 3919.7 | 3784.9 | 3424.2 | 3675.1 | 3844.9 | 3538.7 | 3954.1 | 3996.6 | 3288.7 |
| 32.5   | 19.5   | 23.1   | 17.9   | 22.1   | 26.7   | 34.3   | 53.4   | 33.9   |
| 7.2    | 1.8    | 3.1    | 8.5    | 11.9   | 5.5    | 11.2   | 12.6   | 6.3    |
| 89.1   | 74.4   | 100.2  | 101.8  | 94.2   | 110.9  | 104.9  | 173.0  | 86.8   |
| 71.0   | 121.6  | 108.9  | 121.5  | 126.2  | 108.6  | 173.2  | 150.7  | 139.4  |
| 9.1    | 10.5   | 9.5    | 5.4    | 10.0   | 4.4    | 14.2   | 9.8    | 13.1   |
| 202.1  | 131.6  | 132.7  | 156.3  | 169.1  | 168.5  | 238.1  | 309.6  | 204.2  |
| 24.8   | 18.4   | 30.0   | 28.3   | 34.1   | 21.3   | 42.3   | 34.6   | 36.9   |
| 344.2  | 231.8  | 235.7  | 248.2  | 230.5  | 265.2  | 290.3  | 294.8  | 187.7  |

|        |        |        |        |        |        |        |        |        |
|--------|--------|--------|--------|--------|--------|--------|--------|--------|
| 1584.5 | 1211.2 | 1292.2 | 1338.6 | 1504.8 | 1347.8 | 1870.5 | 1864.1 | 1451.5 |
| 15.7   | 7.0    | 8.7    | 7.2    | 5.9    | 4.2    | 5.8    | 7.0    | 5.5    |
| 0.4    | 0.6    | 0.4    | 0.5    | 1.0    | 0.6    | 1.1    | 0.4    | 0.7    |
| 410.1  | 246.6  | 220.9  | 247.9  | 292.2  | 256.6  | 362.9  | 462.9  | 310.2  |
| 0.2    | 2.9    | 4.3    | 2.5    | 0.9    | 3.3    | 4.7    | 6.8    | 3.2    |
| 1.1    | 1.5    | 1.1    | 1.0    | 0.9    | 0.9    | 1.2    | 1.1    | 1.1    |
| 5.5    | 2.5    | 1.7    | 3.5    | 2.0    | 1.4    | 3.4    | 3.0    | 4.4    |
| 5.3    | 1.2    | 5.7    | 0.3    | 5.4    | 7.6    | 9.3    | 3.0    | 4.7    |
| 21.1   | 15.5   | 12.0   | 12.5   | 12.7   | 13.4   | 19.7   | 23.3   | 9.0    |
| 0.8    | 0.8    | 0.4    | 0.3    | 0.8    | 0.5    | 0.8    | 1.3    | 0.6    |
| 3.7    | 6.0    | 3.9    | 4.3    | 5.0    | 4.0    | 6.4    | 11.3   | 4.2    |
| 1.6    | 2.9    | 1.1    | 5.0    | 3.5    | 0.6    | 4.4    | 9.3    | 1.3    |
| 0.8    | 4.4    | 9.1    | 1.2    | 2.8    | 0.6    | 2.6    | 1.8    | 0.8    |
| 8.8    | 1.0    | 0.7    | 0.7    | 2.0    | 1.1    | 1.0    | 2.1    | 1.1    |
| 15.0   | 16.8   | 24.0   | 27.1   | 25.6   | 21.7   | 29.1   | 40.7   | 17.4   |
| 11.8   | 12.5   | 12.6   | 15.5   | 12.8   | 11.5   | 17.1   | 5.6    | 10.9   |
| 1186.5 | 953.8  | 909.1  | 1055.5 | 1057.9 | 937.6  | 1205.3 | 1430.6 | 769.9  |
| 567.2  | 447.8  | 417.5  | 490.5  | 542.9  | 501.1  | 683.6  | 871.7  | 623.0  |
| 15.2   | 7.2    | 4.5    | 16.8   | 4.8    | 3.8    | 24.8   | 22.0   | 4.7    |
| 404.4  | 302.2  | 338.2  | 352.9  | 360.1  | 346.2  | 419.1  | 436.7  | 314.8  |
| 3089.9 | 2769.4 | 2878.3 | 2864.5 | 3019.0 | 2806.9 | 2965.6 | 2893.7 | 2375.1 |
| 3.2    | 0.5    | 1.6    | 0.1    | 1.0    | 3.1    | 0.2    | 0.2    | 2.6    |
| 295.1  | 202.4  | 230.5  | 235.4  | 253.6  | 250.5  | 335.3  | 332.3  | 294.6  |
| 364.3  | 212.6  | 275.2  | 251.1  | 314.9  | 370.6  | 429.0  | 817.4  | 287.8  |
| 146.3  | 128.7  | 105.5  | 121.2  | 141.9  | 126.1  | 190.3  | 215.9  | 159.6  |
| 1364.2 | 1111.0 | 1003.4 | 1149.0 | 1297.6 | 1168.4 | 1546.7 | 1824.3 | 1025.2 |
| 0.2    | 4.1    | 2.7    | 0.3    | 2.1    | 2.7    | 0.5    | 2.1    | 0.1    |
| 123.1  | 82.0   | 79.6   | 82.4   | 89.8   | 98.3   | 98.3   | 171.2  | 79.8   |
| 321.2  | 223.4  | 265.4  | 265.6  | 285.7  | 281.8  | 336.1  | 392.7  | 237.2  |
| 14.2   | 15.8   | 11.1   | 13.0   | 14.8   | 11.5   | 19.4   | 19.5   | 15.5   |
| 292.3  | 195.0  | 211.1  | 214.7  | 246.6  | 242.0  | 315.3  | 412.0  | 275.1  |
| 1392.4 | 847.1  | 977.9  | 1021.3 | 1203.1 | 1111.6 | 1415.0 | 1160.8 | 905.1  |
| 102.2  | 62.1   | 71.1   | 67.9   | 74.0   | 93.2   | 100.4  | 115.4  | 96.2   |
| 69.0   | 26.2   | 29.6   | 41.4   | 32.2   | 31.8   | 74.1   | 97.4   | 54.1   |
| 3778.1 | 3202.6 | 3266.7 | 3414.8 | 3481.6 | 3394.2 | 3732.2 | 4017.0 | 3362.4 |
| 1.0    | 0.2    | 0.2    | 0.6    | 3.5    | 2.4    | 3.4    | 0.8    | 1.1    |
| 44.8   | 48.8   | 43.7   | 58.0   | 73.6   | 61.7   | 79.5   | 72.5   | 87.6   |
| 8.5    | 8.9    | 4.1    | 4.2    | 2.9    | 7.3    | 11.7   | 9.2    | 3.8    |
| 269.9  | 207.7  | 230.8  | 247.7  | 243.5  | 231.8  | 297.5  | 292.1  | 179.9  |
| 1.4    | 0.4    | 0.8    | 2.1    | 1.5    | 4.2    | 1.2    | 1.0    | 0.6    |
| 1.2    | 2.1    | 1.7    | 1.3    | 1.7    | 3.3    | 2.9    | 5.3    | 1.0    |
| 24.8   | 21.1   | 21.3   | 13.8   | 19.7   | 22.7   | 30.4   | 29.5   | 19.8   |
| 88.2   | 57.5   | 77.9   | 64.3   | 65.7   | 62.8   | 83.3   | 105.4  | 69.0   |
| 4.9    | 4.5    | 3.2    | 5.0    | 1.7    | 3.6    | 3.9    | 3.7    | 1.9    |
| 7.3    | 10.7   | 7.8    | 4.6    | 10.5   | 3.2    | 11.3   | 14.3   | 6.5    |
| 129.1  | 77.5   | 97.3   | 92.4   | 100.8  | 105.4  | 138.4  | 109.7  | 89.0   |
| 294.9  | 204.0  | 225.6  | 234.0  | 242.8  | 241.6  | 319.1  | 317.6  | 254.6  |
| 106.1  | 104.0  | 107.6  | 114.1  | 99.4   | 80.6   | 152.2  | 166.2  | 94.3   |
| 8.5    | 1.3    | 4.5    | 1.0    | 9.4    | 4.3    | 3.6    | 5.0    | 3.1    |
| 0.2    | 0.6    | 3.3    | 5.6    | 6.3    | 0.2    | 5.8    | 3.7    | 4.7    |
| 174.6  | 242.0  | 267.1  | 307.4  | 303.2  | 314.9  | 407.8  | 427.7  | 248.6  |
| 625.2  | 438.4  | 429.8  | 505.9  | 556.0  | 561.9  | 806.3  | 910.9  | 598.2  |
| 0.3    | 1.0    | 0.4    | 2.1    | 1.5    | 0.3    | 0.3    | 3.1    | 0.5    |

|        |        |        |        |        |        |        |        |        |
|--------|--------|--------|--------|--------|--------|--------|--------|--------|
| 2877.4 | 2400.0 | 2433.4 | 2698.5 | 2655.8 | 2665.2 | 3107.4 | 3123.5 | 2933.6 |
| 0.4    | 0.3    | 0.4    | 0.3    | 0.4    | 0.4    | 0.3    | 0.5    | 0.5    |
| 8.1    | 1.1    | 1.2    | 6.2    | 4.0    | 4.4    | 4.1    | 0.9    | 5.6    |
| 6.0    | 6.0    | 1.3    | 8.7    | 8.6    | 1.3    | 5.7    | 2.0    | 7.7    |
| 11.3   | 11.7   | 13.4   | 10.1   | 12.3   | 10.1   | 8.7    | 3.3    | 7.2    |
| 39.7   | 22.8   | 39.1   | 37.0   | 37.9   | 35.2   | 56.0   | 54.8   | 43.8   |
| 21.8   | 23.3   | 24.7   | 31.9   | 34.4   | 27.8   | 35.5   | 39.3   | 27.5   |
| 1.0    | 1.0    | 1.4    | 0.9    | 1.3    | 1.3    | 0.9    | 2.1    | 0.8    |
| 0.2    | 7.3    | 6.9    | 2.0    | 1.1    | 0.4    | 2.3    | 2.7    | 3.6    |
| 1.4    | 3.0    | 0.8    | 7.7    | 1.0    | 0.7    | 3.2    | 0.4    | 0.9    |
| 90.6   | 71.4   | 63.7   | 66.1   | 78.3   | 62.3   | 112.9  | 95.4   | 68.9   |
| 3.8    | 5.7    | 2.0    | 1.4    | 6.4    | 10.6   | 5.5    | 2.5    | 6.5    |
| 46.6   | 17.0   | 5.7    | 18.0   | 20.7   | 2.6    | 9.1    | 16.1   | 12.5   |
| 93.5   | 45.4   | 51.9   | 52.7   | 57.5   | 60.3   | 87.5   | 70.7   | 57.6   |
| 61.4   | 61.7   | 67.9   | 61.9   | 59.9   | 64.9   | 85.3   | 113.2  | 57.6   |
| 5.4    | 4.4    | 3.7    | 3.4    | 3.3    | 3.6    | 1.9    | 2.6    | 3.2    |
| 1.2    | 5.0    | 0.9    | 7.5    | 5.5    | 9.5    | 3.1    | 6.4    | 7.5    |
| 159.0  | 99.9   | 136.3  | 121.3  | 149.3  | 159.6  | 206.3  | 257.1  | 153.1  |
| 1.1    | 6.6    | 13.9   | 9.0    | 7.5    | 8.6    | 2.8    | 3.5    | 8.1    |
| 12.2   | 14.2   | 8.6    | 10.6   | 10.9   | 13.9   | 16.0   | 13.0   | 8.9    |
| 13.6   | 17.4   | 16.0   | 20.2   | 19.4   | 20.5   | 21.9   | 25.9   | 19.1   |
| 1.9    | 1.0    | 4.2    | 1.6    | 1.1    | 1.5    | 1.9    | 1.8    | 6.1    |
| 7.4    | 7.4    | 7.2    | 8.3    | 9.8    | 12.0   | 6.3    | 11.3   | 3.8    |
| 9.8    | 7.8    | 9.1    | 11.6   | 7.4    | 6.8    | 7.5    | 13.7   | 13.1   |
| 2.6    | 4.5    | 2.3    | 2.3    | 4.1    | 4.1    | 10.1   | 3.9    | 3.6    |
| 0.2    | 0.3    | 0.2    | 0.3    | 0.6    | 5.2    | 1.5    | 2.0    | 1.0    |
| 3.0    | 1.2    | 2.2    | 2.3    | 1.1    | 2.7    | 2.3    | 4.3    | 1.8    |
| 69.3   | 31.1   | 36.0   | 41.4   | 49.0   | 40.2   | 70.9   | 95.0   | 40.4   |
| 25.3   | 24.9   | 12.9   | 21.5   | 24.8   | 17.4   | 30.6   | 32.8   | 22.4   |
| 8.1    | 8.4    | 4.9    | 1.4    | 8.0    | 4.8    | 1.6    | 2.3    | 1.0    |
| 2.9    | 5.2    | 8.8    | 20.6   | 8.7    | 7.4    | 10.6   | 5.5    | 7.9    |
| 9.3    | 10.4   | 2.3    | 7.5    | 7.0    | 2.4    | 14.0   | 5.0    | 6.0    |
| 0.9    | 9.0    | 9.7    | 5.5    | 5.9    | 6.1    | 1.3    | 9.0    | 10.9   |
| 3.0    | 0.6    | 0.7    | 0.2    | 0.4    | 1.8    | 0.7    | 0.7    | 0.6    |
| 0.7    | 2.3    | 1.8    | 0.2    | 0.5    | 0.4    | 0.5    | 0.4    | 0.7    |
| 1.1    | 1.5    | 1.6    | 1.9    | 2.4    | 5.3    | 1.6    | 3.5    | 2.9    |
| 24.8   | 15.8   | 18.6   | 28.5   | 18.7   | 16.2   | 16.2   | 8.1    | 10.9   |
| 0.6    | 1.0    | 0.3    | 0.7    | 0.5    | 0.4    | 1.1    | 0.5    | 0.4    |
| 5.2    | 5.5    | 6.7    | 5.3    | 10.3   | 5.8    | 4.4    | 4.6    | 3.3    |
| 17.0   | 10.8   | 10.4   | 4.8    | 4.1    | 14.3   | 12.8   | 10.3   | 12.9   |
| 2.3    | 1.0    | 2.4    | 0.3    | 5.7    | 1.2    | 1.2    | 1.7    | 6.7    |
| 0.7    | 6.5    | 6.0    | 3.7    | 0.5    | 1.3    | 5.0    | 4.7    | 1.7    |
| 6.6    | 13.8   | 18.9   | 18.3   | 18.5   | 12.4   | 31.3   | 14.9   | 21.2   |
| 4.0    | 3.3    | 0.9    | 3.3    | 3.2    | 1.8    | 2.0    | 6.3    | 1.2    |
| 6.7    | 9.5    | 1.0    | 1.0    | 2.0    | 2.4    | 2.3    | 4.3    | 6.4    |
| 6.7    | 0.6    | 7.6    | 5.1    | 6.2    | 0.4    | 0.8    | 6.6    | 1.1    |
| 50.0   | 24.4   | 49.7   | 52.9   | 45.7   | 38.3   | 66.0   | 60.6   | 41.8   |
| 4.3    | 4.3    | 2.3    | 5.4    | 6.5    | 1.7    | 7.9    | 5.0    | 1.4    |
| 0.9    | 0.7    | 1.0    | 0.7    | 0.6    | 0.7    | 1.5    | 0.9    | 0.9    |
| 1.6    | 1.3    | 4.5    | 0.8    | 1.5    | 1.0    | 2.7    | 1.1    | 0.8    |
| 8.5    | 4.8    | 2.0    | 4.7    | 1.6    | 2.0    | 2.5    | 8.1    | 4.5    |
| 4.2    | 7.8    | 6.7    | 0.9    | 5.1    | 1.6    | 7.9    | 1.5    | 1.3    |
| 1.1    | 1.4    | 2.2    | 4.4    | 1.2    | 1.2    | 1.8    | 1.3    | 1.1    |



|        |        |        |        |        |        |        |        |        |
|--------|--------|--------|--------|--------|--------|--------|--------|--------|
| 0.5    | 0.7    | 0.5    | 0.5    | 0.8    | 0.5    | 0.7    | 0.6    | 0.7    |
| 1.6    | 1.4    | 1.4    | 4.2    | 6.9    | 0.8    | 1.1    | 1.4    | 0.6    |
| 12.3   | 5.5    | 10.8   | 3.3    | 11.1   | 3.9    | 6.8    | 6.2    | 7.8    |
| 0.5    | 1.1    | 0.9    | 1.8    | 0.9    | 2.2    | 1.5    | 1.8    | 1.0    |
| 0.8    | 0.4    | 0.9    | 0.7    | 0.7    | 0.7    | 0.5    | 0.8    | 0.6    |
| 0.4    | 0.8    | 0.3    | 0.4    | 0.4    | 0.5    | 0.4    | 2.3    | 0.7    |
| 6.1    | 4.9    | 7.8    | 9.1    | 5.1    | 9.6    | 7.2    | 0.8    | 8.9    |
| 0.4    | 1.0    | 1.0    | 0.4    | 0.8    | 1.1    | 1.3    | 1.1    | 0.7    |
| 12.5   | 7.2    | 8.9    | 6.4    | 15.3   | 4.6    | 11.9   | 17.4   | 13.7   |
| 38.0   | 29.7   | 26.7   | 24.3   | 29.5   | 31.7   | 35.4   | 38.8   | 34.2   |
| 25.3   | 6.2    | 18.2   | 16.1   | 4.2    | 13.7   | 23.0   | 9.5    | 16.1   |
| 38.2   | 34.2   | 20.3   | 38.8   | 25.4   | 35.5   | 52.8   | 42.0   | 35.1   |
| 2.3    | 1.9    | 5.6    | 1.0    | 2.6    | 5.3    | 1.5    | 4.2    | 1.5    |
| 1549.0 | 1018.1 | 1082.8 | 1187.9 | 1198.0 | 1133.4 | 1434.5 | 1470.6 | 1156.6 |
| 0.2    | 2.6    | 0.3    | 0.1    | 3.4    | 0.4    | 0.2    | 0.5    | 0.5    |
| 22.1   | 15.8   | 14.3   | 13.6   | 15.9   | 19.7   | 25.2   | 25.0   | 10.2   |
| 12.9   | 13.6   | 12.9   | 5.9    | 9.3    | 11.4   | 15.7   | 23.5   | 9.1    |
| 0.4    | 6.0    | 3.2    | 4.3    | 3.7    | 3.1    | 1.0    | 1.9    | 0.4    |
| 25.1   | 14.1   | 26.3   | 28.5   | 20.8   | 20.5   | 32.0   | 35.1   | 22.2   |
| 9.3    | 9.6    | 12.6   | 1.7    | 4.5    | 9.3    | 10.7   | 16.0   | 10.1   |
| 2.9    | 0.5    | 0.6    | 0.6    | 0.6    | 1.2    | 1.3    | 1.6    | 0.6    |
| 2.8    | 7.3    | 6.0    | 5.0    | 9.4    | 9.9    | 7.3    | 2.0    | 4.5    |
| 1.4    | 0.6    | 0.4    | 1.1    | 0.9    | 0.6    | 1.0    | 2.1    | 0.8    |
| 1.0    | 1.9    | 0.6    | 1.1    | 0.5    | 0.4    | 1.1    | 0.9    | 0.6    |
| 20.7   | 14.5   | 13.8   | 13.7   | 5.8    | 7.2    | 17.8   | 10.3   | 12.2   |
| 1.2    | 1.3    | 0.7    | 1.3    | 1.8    | 0.7    | 2.2    | 4.1    | 2.2    |
| 0.9    | 0.8    | 0.7    | 0.7    | 0.8    | 0.9    | 3.0    | 0.8    | 1.5    |
| 22.5   | 14.8   | 16.5   | 14.7   | 5.6    | 9.9    | 11.8   | 23.4   | 16.7   |
| 1.9    | 1.5    | 1.7    | 1.1    | 0.6    | 0.9    | 2.2    | 2.0    | 1.3    |
| 1.5    | 5.4    | 5.3    | 9.5    | 4.8    | 1.2    | 3.8    | 7.1    | 8.1    |
| 1.5    | 0.3    | 0.4    | 1.1    | 0.3    | 0.2    | 0.4    | 1.3    | 1.3    |
| 3.4    | 1.0    | 2.0    | 4.5    | 4.4    | 0.5    | 0.2    | 0.7    | 0.3    |
| 2.0    | 1.6    | 0.5    | 0.9    | 1.0    | 3.7    | 1.5    | 0.8    | 2.2    |
| 8.8    | 14.9   | 10.5   | 11.7   | 20.2   | 9.9    | 12.3   | 15.4   | 10.2   |
| 17.5   | 11.7   | 8.5    | 12.7   | 6.9    | 5.4    | 9.5    | 9.8    | 9.5    |
| 0.9    | 1.5    | 1.0    | 1.8    | 1.0    | 1.3    | 1.4    | 1.9    | 2.3    |
| 9.5    | 6.3    | 6.0    | 7.3    | 11.7   | 7.4    | 9.5    | 6.4    | 9.8    |
| 0.5    | 0.8    | 1.0    | 4.4    | 0.7    | 6.5    | 1.0    | 0.4    | 4.8    |
| 4.5    | 1.4    | 0.9    | 2.8    | 1.0    | 0.7    | 4.8    | 3.4    | 1.2    |
| 8.5    | 7.9    | 9.0    | 8.7    | 13.9   | 3.0    | 7.6    | 12.9   | 12.0   |
| 1.1    | 5.0    | 2.1    | 2.8    | 2.9    | 0.8    | 5.6    | 1.8    | 4.9    |
| 2.0    | 2.2    | 10.3   | 2.7    | 2.1    | 2.4    | 1.7    | 4.1    | 0.8    |
| 1.6    | 2.9    | 3.3    | 0.8    | 3.9    | 3.7    | 1.7    | 0.5    | 1.9    |
| 0.5    | 0.3    | 0.6    | 0.3    | 0.4    | 0.3    | 0.4    | 0.5    | 0.3    |
| 5.2    | 4.1    | 13.4   | 10.8   | 1.7    | 8.7    | 5.3    | 6.8    | 4.8    |
| 7.1    | 4.0    | 6.5    | 8.8    | 8.3    | 6.2    | 8.2    | 5.5    | 12.7   |
| 4.4    | 11.0   | 1.9    | 3.8    | 1.6    | 0.9    | 3.8    | 2.3    | 3.5    |
| 14.3   | 16.5   | 18.3   | 19.6   | 17.0   | 11.8   | 10.3   | 10.4   | 18.7   |
| 0.9    | 1.9    | 3.1    | 6.8    | 7.2    | 0.8    | 5.6    | 5.4    | 2.7    |
| 7.5    | 4.0    | 1.6    | 1.1    | 2.5    | 1.9    | 0.4    | 1.0    | 1.3    |
| 0.8    | 0.5    | 1.0    | 0.3    | 0.4    | 0.3    | 0.9    | 0.4    | 1.6    |
| 148.4  | 106.0  | 101.9  | 110.9  | 128.3  | 88.4   | 141.0  | 148.3  | 112.1  |
| 8.9    | 13.6   | 15.1   | 7.5    | 6.9    | 3.5    | 18.9   | 21.7   | 4.1    |

|        |        |        |        |        |        |        |        |        |
|--------|--------|--------|--------|--------|--------|--------|--------|--------|
| 0.7    | 1.0    | 0.7    | 1.0    | 0.6    | 1.2    | 0.7    | 0.7    | 1.0    |
| 6.0    | 16.5   | 1.7    | 7.7    | 5.8    | 12.8   | 10.0   | 8.0    | 6.5    |
| 0.6    | 1.0    | 5.3    | 3.0    | 5.2    | 0.9    | 0.4    | 1.1    | 0.9    |
| 1.7    | 5.4    | 9.0    | 0.6    | 6.5    | 11.3   | 10.5   | 16.9   | 7.0    |
| 7.5    | 3.5    | 7.1    | 3.2    | 4.3    | 1.7    | 7.2    | 9.6    | 3.2    |
| 0.3    | 3.0    | 2.4    | 0.3    | 0.5    | 0.8    | 0.4    | 0.2    | 0.5    |
| 1.7    | 0.7    | 4.4    | 1.6    | 1.2    | 3.8    | 3.0    | 1.0    | 0.5    |
| 1.0    | 1.3    | 1.9    | 0.9    | 1.7    | 1.6    | 0.9    | 1.7    | 1.7    |
| 4.2    | 1.9    | 7.5    | 6.4    | 2.0    | 4.8    | 4.8    | 12.1   | 3.6    |
| 2.1    | 1.3    | 3.1    | 1.9    | 1.1    | 6.4    | 1.3    | 2.8    | 1.3    |
| 152.5  | 57.6   | 70.9   | 56.8   | 77.3   | 64.5   | 76.2   | 90.2   | 79.8   |
| 6.6    | 0.4    | 5.8    | 4.4    | 4.2    | 13.5   | 7.0    | 11.6   | 7.1    |
| 7.7    | 10.7   | 15.3   | 5.7    | 8.9    | 10.2   | 9.9    | 17.7   | 10.5   |
| 4.2    | 5.4    | 1.0    | 2.7    | 1.9    | 8.4    | 7.1    | 6.9    | 2.3    |
| 0.8    | 0.4    | 1.1    | 0.8    | 1.7    | 1.9    | 1.7    | 1.3    | 0.6    |
| 13.5   | 11.7   | 9.4    | 5.5    | 8.7    | 9.6    | 15.5   | 15.8   | 9.9    |
| 1.5    | 3.3    | 4.7    | 0.6    | 0.5    | 0.5    | 5.8    | 7.9    | 3.7    |
| 21.8   | 27.3   | 21.5   | 33.1   | 28.8   | 24.9   | 23.8   | 29.6   | 27.2   |
| 18.8   | 16.4   | 14.3   | 10.8   | 16.5   | 14.2   | 19.6   | 20.3   | 16.5   |
| 0.9    | 5.7    | 1.7    | 4.5    | 0.7    | 0.8    | 1.2    | 2.0    | 0.5    |
| 1836.9 | 1281.6 | 1560.9 | 1440.3 | 1704.5 | 1692.5 | 2026.0 | 2263.1 | 1886.7 |
| 165.0  | 113.5  | 123.7  | 152.0  | 120.8  | 131.9  | 184.0  | 195.1  | 144.3  |
| 5.6    | 0.2    | 2.4    | 3.1    | 4.4    | 0.9    | 4.8    | 6.9    | 0.7    |
| 11.8   | 7.1    | 1.4    | 6.4    | 8.8    | 6.0    | 5.2    | 8.8    | 12.8   |
| 2.0    | 0.8    | 5.8    | 0.4    | 1.0    | 1.2    | 1.6    | 4.2    | 0.9    |
| 171.1  | 132.4  | 152.2  | 162.6  | 166.3  | 150.5  | 196.4  | 201.1  | 129.3  |
| 3187.0 | 2819.4 | 2795.7 | 2843.4 | 2947.2 | 2905.9 | 3212.8 | 3515.5 | 2887.9 |
| 197.6  | 134.4  | 159.1  | 165.7  | 141.5  | 137.9  | 169.3  | 183.5  | 138.0  |
| 124.9  | 75.8   | 72.2   | 74.0   | 85.2   | 99.3   | 130.2  | 194.5  | 102.5  |
| 38.6   | 29.8   | 18.3   | 27.6   | 34.4   | 29.4   | 53.7   | 48.4   | 31.9   |
| 694.8  | 379.9  | 376.5  | 605.8  | 457.1  | 436.3  | 789.5  | 865.0  | 491.3  |
| 121.1  | 83.5   | 74.6   | 93.4   | 101.3  | 97.1   | 133.5  | 159.0  | 102.7  |
| 258.7  | 188.4  | 220.5  | 221.3  | 217.0  | 213.2  | 319.0  | 346.5  | 249.4  |
| 519.2  | 334.3  | 329.6  | 379.3  | 347.8  | 372.7  | 522.8  | 523.1  | 309.1  |
| 750.7  | 510.9  | 534.2  | 624.4  | 595.0  | 564.9  | 825.0  | 846.0  | 732.0  |
| 946.6  | 671.9  | 837.2  | 887.0  | 927.3  | 947.5  | 1435.2 | 1772.8 | 1044.3 |
| 1147.1 | 732.5  | 882.6  | 931.5  | 874.1  | 886.1  | 1157.3 | 1168.1 | 895.6  |
| 529.4  | 423.7  | 534.2  | 510.4  | 449.2  | 487.0  | 609.1  | 673.6  | 578.8  |
| 1821.6 | 1644.4 | 1564.3 | 1522.2 | 1700.4 | 1651.6 | 1885.6 | 2099.2 | 1547.9 |
| 1705.8 | 1409.8 | 1314.5 | 1581.1 | 1556.3 | 1462.7 | 1658.9 | 2002.6 | 1374.6 |
| 1047.7 | 609.0  | 660.4  | 693.6  | 723.6  | 728.9  | 940.9  | 1024.9 | 651.1  |
| 2735.6 | 2722.6 | 2376.9 | 2861.1 | 2631.9 | 2540.5 | 3558.4 | 3526.7 | 2531.0 |
| 2825.8 | 2719.0 | 2210.7 | 2756.5 | 2906.9 | 2671.1 | 3270.7 | 3300.6 | 2932.9 |
| 22.9   | 8.4    | 19.6   | 15.8   | 13.4   | 20.2   | 28.8   | 35.1   | 25.6   |
| 647.8  | 321.2  | 280.9  | 339.1  | 338.2  | 352.6  | 437.6  | 615.6  | 384.5  |
| 172.7  | 124.4  | 140.3  | 156.5  | 163.2  | 162.0  | 272.7  | 306.3  | 171.9  |
| 3.5    | 6.6    | 4.2    | 8.7    | 2.6    | 4.9    | 8.5    | 10.6   | 3.2    |
| 67.2   | 52.6   | 55.8   | 59.9   | 48.9   | 43.7   | 77.8   | 95.8   | 59.0   |
| 120.3  | 79.0   | 111.7  | 100.7  | 109.8  | 127.8  | 147.3  | 151.2  | 143.3  |
| 74.8   | 54.9   | 76.3   | 70.6   | 74.0   | 63.4   | 91.6   | 101.9  | 57.5   |
| 455.1  | 273.5  | 345.9  | 368.3  | 383.7  | 403.1  | 533.5  | 604.8  | 492.3  |
| 39.4   | 21.6   | 32.6   | 31.4   | 37.6   | 31.0   | 43.5   | 61.4   | 44.5   |
| 136.7  | 74.2   | 116.0  | 108.9  | 121.3  | 141.4  | 189.8  | 238.2  | 118.7  |

|        |        |        |        |        |        |        |        |        |
|--------|--------|--------|--------|--------|--------|--------|--------|--------|
| 210.3  | 201.0  | 210.1  | 276.7  | 208.5  | 231.4  | 305.4  | 344.9  | 328.6  |
| 171.6  | 119.0  | 166.6  | 153.9  | 184.0  | 193.3  | 228.3  | 268.7  | 194.6  |
| 3078.1 | 2255.3 | 2341.1 | 2519.9 | 2670.1 | 2650.1 | 3250.6 | 3207.9 | 2601.9 |
| 10.7   | 1.5    | 5.9    | 5.0    | 7.9    | 2.9    | 3.7    | 7.6    | 5.0    |
| 0.4    | 0.5    | 0.9    | 1.6    | 0.7    | 5.6    | 1.7    | 0.6    | 4.8    |
| 215.3  | 189.6  | 162.8  | 209.9  | 235.0  | 194.8  | 330.2  | 382.7  | 329.2  |
| 170.8  | 151.5  | 164.4  | 190.9  | 182.2  | 181.8  | 245.5  | 263.2  | 203.7  |
| 77.1   | 58.8   | 51.5   | 67.3   | 76.3   | 64.9   | 96.9   | 105.5  | 80.8   |
| 546.6  | 456.8  | 526.5  | 493.3  | 574.0  | 441.1  | 570.1  | 744.5  | 448.8  |
| 13.0   | 16.1   | 14.2   | 9.5    | 16.7   | 16.9   | 15.7   | 25.4   | 8.3    |
| 9.1    | 6.2    | 5.8    | 5.4    | 7.7    | 4.9    | 8.3    | 17.2   | 9.0    |
| 13.9   | 0.8    | 11.0   | 11.1   | 9.0    | 9.7    | 10.1   | 4.8    | 10.0   |
| 244.2  | 166.5  | 129.6  | 168.5  | 180.6  | 157.4  | 234.5  | 315.2  | 226.9  |
| 2023.7 | 948.9  | 1211.2 | 1399.2 | 1331.4 | 1495.3 | 1922.2 | 2249.2 | 1970.6 |
| 1936.8 | 1295.9 | 1438.3 | 1488.3 | 1583.9 | 1686.2 | 2070.4 | 2347.1 | 1711.0 |
| 2638.8 | 2294.4 | 2370.2 | 2399.6 | 2379.4 | 2351.2 | 2593.5 | 2583.9 | 2453.0 |
| 274.3  | 223.7  | 238.1  | 252.6  | 260.5  | 263.0  | 368.8  | 428.0  | 274.0  |
| 3333.5 | 3003.4 | 2898.7 | 3058.4 | 3244.3 | 3098.0 | 3510.7 | 3780.9 | 2975.6 |
| 17.7   | 11.8   | 10.2   | 22.2   | 22.6   | 9.1    | 15.2   | 21.3   | 16.4   |
| 181.7  | 110.9  | 126.4  | 108.4  | 134.9  | 134.4  | 170.2  | 197.0  | 121.0  |
| 106.4  | 92.9   | 78.4   | 108.3  | 69.7   | 82.7   | 116.4  | 84.2   | 139.3  |
| 62.8   | 38.3   | 44.6   | 51.1   | 65.2   | 45.2   | 67.6   | 73.5   | 41.5   |
| 35.7   | 25.5   | 24.4   | 32.2   | 27.2   | 31.4   | 43.5   | 48.5   | 32.7   |
| 3988.7 | 3327.5 | 3407.4 | 3665.5 | 3593.9 | 3533.7 | 3868.1 | 4140.4 | 3303.6 |
| 68.6   | 40.0   | 50.8   | 50.9   | 35.6   | 46.8   | 43.1   | 70.2   | 47.7   |
| 9.0    | 4.6    | 0.9    | 0.2    | 5.1    | 4.6    | 4.2    | 6.1    | 7.9    |
| 1.5    | 1.1    | 0.8    | 0.9    | 1.4    | 1.9    | 1.0    | 0.8    | 1.6    |
| 277.3  | 200.8  | 220.7  | 257.4  | 207.1  | 206.0  | 314.6  | 320.7  | 239.5  |
| 3259.8 | 2582.6 | 2637.0 | 2739.3 | 2787.0 | 2755.7 | 3186.7 | 3184.9 | 2769.1 |
| 272.5  | 185.5  | 217.7  | 254.0  | 223.0  | 243.4  | 329.2  | 351.0  | 263.9  |
| 244.3  | 184.5  | 179.9  | 205.7  | 221.8  | 208.3  | 299.0  | 316.7  | 266.6  |
| 43.5   | 27.8   | 39.4   | 29.6   | 22.9   | 22.3   | 36.3   | 49.4   | 23.8   |
| 119.4  | 67.7   | 54.4   | 62.1   | 83.1   | 72.4   | 120.5  | 148.9  | 125.0  |
| 269.0  | 161.4  | 154.5  | 184.4  | 205.0  | 187.0  | 281.9  | 333.6  | 256.6  |
| 229.7  | 143.0  | 162.9  | 173.7  | 159.0  | 174.8  | 268.3  | 300.7  | 227.6  |
| 4.9    | 5.0    | 5.5    | 2.9    | 2.2    | 3.7    | 4.2    | 5.6    | 4.1    |
| 0.4    | 0.7    | 1.1    | 3.2    | 6.3    | 7.3    | 0.5    | 3.1    | 2.1    |
| 102.5  | 54.3   | 80.5   | 68.9   | 74.6   | 71.2   | 98.4   | 135.6  | 77.1   |
| 17.5   | 6.0    | 10.1   | 7.0    | 1.4    | 6.1    | 5.8    | 13.2   | 7.5    |
| 85.0   | 72.4   | 74.8   | 65.5   | 77.5   | 72.4   | 114.7  | 148.5  | 81.7   |
| 2896.0 | 2425.8 | 2399.0 | 2588.1 | 2703.1 | 2473.4 | 2949.1 | 2971.8 | 2317.3 |
| 54.1   | 22.0   | 27.2   | 28.0   | 26.2   | 30.8   | 34.2   | 59.5   | 21.4   |
| 1844.3 | 990.6  | 1132.3 | 1213.4 | 1167.3 | 1125.9 | 1320.5 | 1465.6 | 988.2  |
| 24.0   | 2.6    | 12.3   | 11.8   | 9.3    | 10.7   | 13.4   | 12.8   | 8.1    |
| 1050.4 | 586.6  | 603.9  | 637.0  | 721.5  | 622.4  | 749.1  | 846.8  | 625.7  |
| 21.8   | 10.1   | 11.9   | 8.3    | 14.3   | 15.9   | 26.8   | 22.2   | 21.0   |
| 64.2   | 38.0   | 46.8   | 52.0   | 39.7   | 48.6   | 61.6   | 69.2   | 52.3   |
| 109.3  | 80.7   | 84.2   | 103.8  | 97.5   | 83.2   | 100.9  | 136.5  | 91.9   |
| 63.4   | 55.4   | 62.6   | 64.7   | 79.1   | 65.6   | 77.8   | 84.4   | 69.6   |
| 133.5  | 97.3   | 126.1  | 128.8  | 129.8  | 111.7  | 151.0  | 156.0  | 115.6  |
| 61.6   | 50.8   | 54.7   | 62.6   | 60.0   | 60.5   | 91.3   | 96.6   | 89.5   |
| 85.0   | 36.5   | 54.6   | 56.2   | 51.8   | 57.1   | 72.1   | 91.5   | 52.8   |
| 82.1   | 34.6   | 45.3   | 41.3   | 47.1   | 48.7   | 68.9   | 90.4   | 41.3   |

|        |        |        |        |        |        |        |        |        |
|--------|--------|--------|--------|--------|--------|--------|--------|--------|
| 70.1   | 38.1   | 36.4   | 41.7   | 45.7   | 51.5   | 63.5   | 75.8   | 47.1   |
| 357.0  | 267.8  | 332.5  | 294.9  | 340.0  | 293.2  | 405.3  | 410.1  | 402.3  |
| 305.0  | 146.1  | 186.5  | 206.2  | 172.9  | 207.7  | 256.4  | 354.6  | 209.2  |
| 16.3   | 7.3    | 2.3    | 7.0    | 2.3    | 3.7    | 4.6    | 10.2   | 4.9    |
| 1.2    | 0.3    | 9.3    | 0.4    | 1.1    | 3.9    | 0.6    | 6.3    | 1.3    |
| 2.6    | 2.5    | 3.1    | 5.7    | 4.4    | 3.0    | 2.1    | 5.6    | 5.8    |
| 762.7  | 530.4  | 644.2  | 617.1  | 694.0  | 597.7  | 805.1  | 843.8  | 551.3  |
| 325.8  | 194.7  | 252.7  | 242.2  | 247.5  | 274.0  | 375.3  | 336.2  | 244.5  |
| 179.4  | 96.4   | 110.9  | 133.3  | 145.8  | 116.6  | 182.9  | 189.5  | 131.5  |
| 367.7  | 223.6  | 238.3  | 287.6  | 253.9  | 344.7  | 496.6  | 592.8  | 433.5  |
| 28.6   | 10.7   | 20.6   | 19.0   | 10.3   | 17.4   | 17.3   | 24.9   | 12.5   |
| 57.8   | 36.0   | 30.8   | 37.2   | 43.1   | 34.8   | 46.9   | 39.4   | 32.4   |
| 67.6   | 36.2   | 39.6   | 47.1   | 35.2   | 42.2   | 48.0   | 58.5   | 44.4   |
| 63.3   | 36.0   | 38.6   | 37.1   | 46.0   | 47.8   | 52.5   | 45.6   | 38.6   |
| 53.1   | 23.3   | 22.1   | 25.0   | 24.5   | 28.6   | 39.8   | 49.1   | 31.3   |
| 116.0  | 105.5  | 127.1  | 102.4  | 109.8  | 108.7  | 173.9  | 165.1  | 105.0  |
| 94.6   | 93.9   | 78.4   | 90.0   | 95.6   | 72.8   | 103.1  | 120.0  | 85.4   |
| 32.5   | 29.1   | 20.9   | 28.8   | 28.0   | 37.3   | 48.4   | 44.0   | 28.8   |
| 92.7   | 34.6   | 49.1   | 43.9   | 64.5   | 66.3   | 90.8   | 116.8  | 84.4   |
| 109.7  | 52.4   | 77.6   | 81.4   | 73.0   | 86.2   | 110.5  | 156.8  | 115.3  |
| 0.5    | 2.4    | 4.8    | 1.2    | 5.5    | 0.8    | 3.8    | 0.6    | 3.9    |
| 92.3   | 57.3   | 60.4   | 65.9   | 67.2   | 59.7   | 95.9   | 122.5  | 78.3   |
| 156.0  | 91.1   | 101.1  | 123.8  | 110.2  | 112.8  | 163.5  | 186.9  | 94.6   |
| 258.4  | 137.1  | 142.9  | 154.1  | 183.4  | 163.7  | 196.0  | 195.8  | 149.0  |
| 187.2  | 105.9  | 130.4  | 156.5  | 141.6  | 147.9  | 168.8  | 197.6  | 169.9  |
| 157.5  | 98.8   | 103.6  | 122.2  | 123.2  | 104.2  | 141.7  | 174.6  | 168.8  |
| 67.0   | 52.7   | 44.6   | 66.8   | 64.9   | 51.1   | 75.4   | 73.0   | 64.8   |
| 174.8  | 100.2  | 110.8  | 107.6  | 117.4  | 143.0  | 147.0  | 208.2  | 135.0  |
| 174.1  | 105.1  | 111.3  | 145.0  | 133.0  | 145.3  | 159.7  | 210.2  | 117.1  |
| 1166.2 | 809.7  | 834.9  | 969.8  | 873.9  | 937.5  | 1442.3 | 1529.7 | 1238.1 |
| 3777.1 | 3464.0 | 3487.1 | 3767.2 | 3680.7 | 3553.0 | 4214.1 | 4221.7 | 3103.0 |
| 34.9   | 14.5   | 26.4   | 20.4   | 28.1   | 22.7   | 40.0   | 44.3   | 34.6   |
| 1071.3 | 687.2  | 750.6  | 785.1  | 887.7  | 753.0  | 1136.8 | 1027.8 | 740.4  |
| 2246.2 | 1795.8 | 1558.5 | 1723.0 | 2098.8 | 1944.7 | 2672.6 | 3095.7 | 2597.6 |
| 147.7  | 76.6   | 93.4   | 100.2  | 86.9   | 97.4   | 139.2  | 171.4  | 89.6   |
| 35.4   | 37.1   | 38.3   | 44.3   | 51.6   | 33.3   | 53.0   | 56.4   | 48.1   |
| 14.8   | 5.3    | 7.5    | 12.9   | 24.7   | 12.1   | 16.1   | 19.5   | 21.4   |
| 155.6  | 90.4   | 89.6   | 99.6   | 96.4   | 84.2   | 192.9  | 159.0  | 102.7  |
| 258.4  | 202.7  | 142.9  | 272.6  | 179.0  | 165.3  | 175.9  | 149.1  | 139.4  |
| 399.1  | 148.7  | 203.1  | 235.0  | 235.2  | 222.5  | 309.0  | 329.4  | 192.7  |
| 57.0   | 52.1   | 46.9   | 43.6   | 43.9   | 45.7   | 65.0   | 58.7   | 45.3   |
| 113.6  | 108.9  | 108.5  | 120.6  | 125.0  | 112.6  | 169.0  | 150.9  | 124.3  |
| 91.1   | 82.2   | 73.9   | 92.3   | 100.0  | 84.2   | 109.2  | 119.4  | 80.0   |
| 173.6  | 124.4  | 156.9  | 142.4  | 256.9  | 165.8  | 219.9  | 266.5  | 193.1  |
| 259.0  | 167.6  | 175.0  | 188.8  | 199.3  | 232.5  | 276.6  | 317.5  | 221.8  |
| 110.6  | 90.6   | 89.9   | 104.3  | 89.6   | 109.8  | 107.1  | 120.1  | 83.5   |
| 194.2  | 138.5  | 170.8  | 188.5  | 201.3  | 174.9  | 231.4  | 244.2  | 132.0  |
| 138.8  | 131.9  | 144.0  | 107.3  | 135.9  | 107.6  | 177.9  | 203.7  | 151.9  |
| 236.0  | 143.9  | 168.3  | 180.3  | 160.3  | 168.1  | 201.4  | 220.2  | 160.5  |
| 147.9  | 94.2   | 131.1  | 112.6  | 114.3  | 133.5  | 138.0  | 208.3  | 110.0  |
| 97.9   | 61.0   | 59.5   | 70.1   | 74.1   | 70.6   | 98.7   | 97.0   | 85.4   |
| 34.7   | 19.7   | 28.4   | 28.0   | 35.3   | 32.5   | 37.4   | 61.4   | 45.9   |
| 22.6   | 17.7   | 14.8   | 27.5   | 18.7   | 20.4   | 27.4   | 46.5   | 22.3   |

|        |        |        |        |        |        |        |        |        |
|--------|--------|--------|--------|--------|--------|--------|--------|--------|
| 61.2   | 31.3   | 46.8   | 57.6   | 57.4   | 45.8   | 62.3   | 66.1   | 46.2   |
| 7.5    | 0.9    | 4.6    | 4.0    | 2.0    | 1.5    | 2.8    | 1.1    | 5.4    |
| 424.8  | 246.2  | 307.8  | 290.8  | 297.0  | 266.8  | 472.8  | 513.1  | 384.4  |
| 20.1   | 11.6   | 16.9   | 8.5    | 12.5   | 9.4    | 22.3   | 25.2   | 12.2   |
| 76.8   | 47.8   | 56.1   | 60.6   | 58.2   | 41.9   | 66.4   | 90.7   | 48.8   |
| 21.1   | 9.2    | 14.0   | 10.0   | 8.5    | 12.8   | 12.4   | 8.3    | 10.0   |
| 115.1  | 101.2  | 124.2  | 115.9  | 141.6  | 116.4  | 177.0  | 189.2  | 133.9  |
| 81.9   | 49.7   | 53.5   | 63.7   | 67.5   | 57.2   | 94.5   | 125.3  | 67.3   |
| 132.8  | 89.5   | 125.9  | 119.1  | 116.1  | 117.8  | 149.7  | 182.3  | 134.6  |
| 7.3    | 3.7    | 3.4    | 6.9    | 1.2    | 7.6    | 6.1    | 3.9    | 5.6    |
| 349.4  | 275.5  | 308.9  | 299.0  | 335.8  | 327.2  | 371.7  | 401.2  | 351.9  |
| 49.3   | 29.4   | 38.7   | 39.2   | 49.1   | 42.4   | 51.4   | 55.8   | 53.3   |
| 198.2  | 148.4  | 139.0  | 147.7  | 181.4  | 166.4  | 238.5  | 289.7  | 229.4  |
| 183.0  | 133.9  | 159.5  | 149.8  | 165.4  | 158.7  | 211.7  | 216.1  | 152.9  |
| 26.5   | 21.1   | 22.3   | 29.3   | 21.0   | 18.1   | 24.7   | 29.1   | 36.5   |
| 477.3  | 404.7  | 478.9  | 555.5  | 510.7  | 482.7  | 737.5  | 890.7  | 833.2  |
| 31.5   | 21.9   | 27.7   | 12.4   | 19.2   | 16.0   | 27.7   | 30.4   | 21.1   |
| 5.3    | 1.2    | 5.5    | 6.9    | 4.3    | 3.4    | 8.6    | 9.4    | 2.7    |
| 25.0   | 26.4   | 26.3   | 33.6   | 32.0   | 25.9   | 34.1   | 51.6   | 30.8   |
| 138.3  | 105.0  | 118.9  | 107.8  | 113.1  | 111.1  | 161.3  | 173.4  | 156.2  |
| 1795.4 | 1348.8 | 1441.6 | 1467.5 | 1709.4 | 1556.3 | 2243.2 | 2084.2 | 1640.5 |
| 204.0  | 136.8  | 162.9  | 155.2  | 148.7  | 146.7  | 206.7  | 187.9  | 134.6  |
| 40.3   | 28.5   | 37.8   | 37.1   | 36.3   | 38.3   | 45.7   | 49.5   | 45.1   |
| 2048.8 | 1395.3 | 1571.0 | 1658.6 | 1861.4 | 1701.1 | 2184.9 | 2075.6 | 1571.5 |
| 74.7   | 56.2   | 68.6   | 61.5   | 78.6   | 63.0   | 90.9   | 94.4   | 75.6   |
| 202.8  | 137.2  | 166.3  | 174.6  | 174.2  | 165.7  | 215.0  | 210.6  | 217.5  |
| 173.9  | 110.5  | 159.5  | 146.6  | 171.9  | 148.2  | 227.1  | 242.0  | 237.9  |
| 44.2   | 53.2   | 32.7   | 57.6   | 48.4   | 36.3   | 58.5   | 65.2   | 36.9   |
| 492.8  | 234.8  | 344.8  | 333.6  | 320.8  | 300.5  | 340.0  | 380.5  | 305.6  |
| 29.9   | 9.9    | 19.7   | 16.9   | 18.4   | 28.8   | 28.2   | 30.0   | 18.8   |
| 5.6    | 8.2    | 6.3    | 0.8    | 9.8    | 7.5    | 3.5    | 5.4    | 2.7    |
| 54.0   | 41.3   | 32.5   | 39.3   | 36.7   | 43.6   | 57.8   | 62.5   | 27.4   |
| 2.0    | 2.7    | 2.7    | 6.5    | 3.6    | 1.6    | 1.0    | 5.8    | 6.0    |
| 25.1   | 17.6   | 18.1   | 18.1   | 17.8   | 23.0   | 30.6   | 28.9   | 23.5   |
| 102.1  | 67.1   | 77.2   | 80.6   | 72.1   | 77.1   | 98.2   | 121.6  | 84.0   |
| 0.4    | 1.2    | 0.6    | 3.0    | 0.9    | 0.6    | 4.4    | 5.3    | 0.4    |
| 65.2   | 50.4   | 59.1   | 61.1   | 54.5   | 55.5   | 73.0   | 110.0  | 48.4   |
| 340.5  | 415.0  | 426.1  | 508.0  | 473.3  | 384.2  | 546.2  | 443.5  | 499.1  |
| 248.8  | 230.3  | 230.2  | 245.9  | 249.4  | 242.4  | 302.3  | 293.0  | 253.6  |
| 116.0  | 64.7   | 87.4   | 84.9   | 81.0   | 73.7   | 111.0  | 130.3  | 71.2   |
| 59.3   | 42.3   | 45.4   | 52.1   | 57.1   | 47.5   | 63.8   | 56.3   | 47.0   |
| 77.1   | 45.5   | 51.7   | 76.4   | 49.1   | 66.1   | 106.0  | 89.8   | 49.9   |
| 86.3   | 62.9   | 67.0   | 86.4   | 78.6   | 84.5   | 84.7   | 95.3   | 73.5   |
| 68.9   | 49.3   | 55.4   | 51.8   | 56.2   | 59.4   | 83.8   | 91.6   | 64.2   |
| 42.6   | 44.5   | 35.5   | 47.9   | 48.9   | 37.8   | 65.5   | 61.6   | 53.5   |
| 102.1  | 81.0   | 97.3   | 84.4   | 98.9   | 105.6  | 127.0  | 144.2  | 80.7   |
| 215.2  | 144.0  | 164.2  | 144.2  | 189.2  | 164.9  | 231.1  | 289.7  | 245.4  |
| 152.2  | 80.1   | 103.3  | 84.2   | 102.3  | 115.0  | 130.8  | 133.2  | 96.3   |
| 239.2  | 129.6  | 155.7  | 175.9  | 175.0  | 176.4  | 222.8  | 278.2  | 192.0  |
| 28.1   | 28.8   | 35.4   | 53.7   | 62.1   | 42.5   | 81.0   | 73.7   | 26.5   |
| 164.6  | 152.1  | 140.2  | 167.7  | 174.4  | 142.1  | 186.7  | 212.3  | 147.8  |
| 59.2   | 30.0   | 38.9   | 47.4   | 35.1   | 41.8   | 59.4   | 50.0   | 39.5   |
| 360.9  | 205.2  | 277.7  | 292.9  | 273.4  | 261.5  | 382.4  | 420.0  | 298.0  |

|        |        |        |        |        |        |        |        |        |
|--------|--------|--------|--------|--------|--------|--------|--------|--------|
| 1367.6 | 800.7  | 919.9  | 1047.9 | 1154.0 | 1136.8 | 1400.9 | 1230.8 | 998.1  |
| 294.7  | 133.6  | 205.0  | 175.9  | 203.8  | 206.8  | 219.5  | 247.3  | 162.2  |
| 52.2   | 27.7   | 28.8   | 27.5   | 36.9   | 36.6   | 45.1   | 66.0   | 45.9   |
| 90.6   | 69.6   | 66.2   | 60.8   | 62.2   | 64.5   | 79.7   | 83.0   | 62.9   |
| 75.5   | 39.4   | 43.3   | 47.3   | 38.3   | 46.0   | 59.1   | 84.4   | 41.0   |
| 71.7   | 40.5   | 36.9   | 44.7   | 44.5   | 31.3   | 46.0   | 52.2   | 42.3   |
| 190.6  | 102.7  | 137.9  | 128.6  | 137.7  | 153.3  | 182.6  | 200.8  | 148.3  |
| 4.8    | 3.1    | 1.2    | 3.2    | 0.4    | 1.2    | 6.2    | 6.9    | 4.9    |
| 102.3  | 75.6   | 72.0   | 67.5   | 73.6   | 67.8   | 100.0  | 127.3  | 77.5   |
| 134.2  | 74.4   | 134.1  | 116.5  | 112.5  | 143.3  | 160.0  | 245.1  | 130.8  |
| 192.8  | 137.4  | 196.0  | 234.0  | 203.9  | 184.3  | 228.6  | 268.3  | 212.8  |
| 125.2  | 75.7   | 94.6   | 109.6  | 94.3   | 94.2   | 150.4  | 140.1  | 105.4  |
| 176.4  | 111.4  | 158.7  | 168.2  | 167.7  | 141.0  | 183.3  | 156.3  | 149.4  |
| 70.9   | 38.8   | 53.3   | 43.7   | 43.7   | 45.6   | 48.7   | 73.0   | 40.4   |
| 388.4  | 195.3  | 244.0  | 271.1  | 244.3  | 277.8  | 349.6  | 409.7  | 285.0  |
| 1772.3 | 1154.0 | 1344.6 | 1316.6 | 1351.0 | 1398.0 | 1792.3 | 1780.3 | 1491.3 |
| 67.5   | 32.3   | 43.6   | 39.7   | 45.3   | 61.0   | 62.6   | 71.7   | 39.2   |
| 170.5  | 81.7   | 115.4  | 125.2  | 102.9  | 123.6  | 153.5  | 225.1  | 170.8  |
| 57.7   | 24.6   | 52.1   | 28.6   | 38.4   | 32.6   | 56.0   | 75.5   | 75.1   |
| 34.4   | 18.9   | 40.7   | 24.6   | 32.3   | 25.0   | 34.6   | 36.8   | 27.1   |
| 59.9   | 45.9   | 45.3   | 50.9   | 52.7   | 39.0   | 60.6   | 59.1   | 45.3   |
| 51.1   | 42.2   | 43.9   | 44.0   | 48.3   | 42.3   | 57.8   | 82.9   | 51.8   |
| 642.7  | 370.0  | 494.3  | 429.4  | 495.0  | 533.8  | 612.2  | 726.5  | 754.3  |
| 143.1  | 79.3   | 90.2   | 113.3  | 102.7  | 109.9  | 140.8  | 177.6  | 107.1  |
| 244.9  | 165.1  | 196.3  | 190.4  | 183.8  | 207.9  | 265.2  | 263.7  | 223.6  |
| 100.6  | 62.4   | 55.4   | 73.5   | 66.5   | 64.1   | 84.0   | 117.2  | 93.7   |
| 253.3  | 121.6  | 189.2  | 174.3  | 190.6  | 225.0  | 262.8  | 333.4  | 222.6  |
| 134.9  | 77.8   | 103.4  | 107.6  | 95.4   | 135.2  | 138.3  | 174.5  | 123.0  |
| 8.5    | 2.1    | 6.7    | 9.2    | 1.0    | 19.0   | 18.4   | 9.8    | 8.7    |
| 69.0   | 48.7   | 59.8   | 68.6   | 66.6   | 54.7   | 70.7   | 89.8   | 60.3   |
| 355.5  | 262.0  | 291.9  | 269.7  | 345.9  | 381.1  | 451.0  | 487.7  | 434.1  |
| 20.8   | 21.5   | 22.3   | 20.3   | 18.4   | 20.1   | 31.1   | 33.9   | 27.1   |
| 45.1   | 29.2   | 25.8   | 36.2   | 28.6   | 15.6   | 45.0   | 39.8   | 22.2   |
| 18.7   | 39.6   | 40.6   | 35.3   | 47.0   | 28.3   | 53.1   | 54.1   | 34.1   |
| 119.2  | 88.4   | 89.6   | 102.8  | 113.6  | 94.4   | 154.7  | 178.0  | 124.4  |
| 39.4   | 38.9   | 33.1   | 37.3   | 39.0   | 37.9   | 48.2   | 64.0   | 44.8   |
| 25.2   | 50.7   | 36.6   | 44.2   | 52.9   | 38.2   | 75.0   | 57.8   | 52.6   |
| 114.8  | 72.7   | 71.7   | 78.3   | 83.7   | 81.9   | 106.8  | 133.8  | 80.4   |
| 57.2   | 36.5   | 48.7   | 50.7   | 60.2   | 49.7   | 54.4   | 57.5   | 32.8   |
| 53.0   | 56.7   | 78.6   | 70.4   | 71.4   | 72.8   | 106.9  | 105.7  | 80.7   |
| 906.5  | 451.4  | 487.3  | 541.7  | 527.3  | 500.2  | 635.5  | 575.9  | 485.3  |
| 37.5   | 35.1   | 33.1   | 32.6   | 25.7   | 30.2   | 31.0   | 42.4   | 32.8   |
| 18.5   | 21.8   | 21.0   | 13.6   | 22.7   | 31.4   | 34.4   | 30.2   | 29.8   |
| 60.3   | 58.6   | 80.4   | 93.8   | 91.9   | 85.1   | 108.6  | 106.9  | 141.4  |
| 337.9  | 237.7  | 258.3  | 262.1  | 250.5  | 253.3  | 303.1  | 326.6  | 257.0  |
| 486.7  | 264.5  | 270.1  | 270.2  | 386.7  | 317.2  | 462.9  | 678.2  | 370.5  |
| 38.6   | 27.0   | 14.2   | 22.8   | 31.3   | 28.8   | 36.4   | 37.9   | 30.0   |
| 26.3   | 21.4   | 27.9   | 29.8   | 24.3   | 18.5   | 32.8   | 34.6   | 37.7   |
| 74.8   | 35.5   | 50.3   | 51.1   | 49.9   | 49.7   | 67.5   | 83.1   | 55.9   |
| 57.7   | 43.5   | 46.0   | 41.3   | 60.4   | 48.1   | 68.2   | 68.6   | 79.3   |
| 550.7  | 352.2  | 421.0  | 400.3  | 429.4  | 452.6  | 564.2  | 552.8  | 403.0  |
| 187.0  | 139.2  | 155.4  | 156.6  | 207.8  | 171.7  | 221.8  | 238.5  | 198.4  |
| 187.4  | 137.5  | 151.2  | 194.0  | 181.5  | 158.7  | 186.8  | 261.8  | 216.6  |

|        |        |        |        |        |        |        |        |        |
|--------|--------|--------|--------|--------|--------|--------|--------|--------|
| 366.1  | 176.6  | 196.0  | 213.1  | 236.5  | 239.8  | 297.1  | 368.5  | 219.5  |
| 37.7   | 50.6   | 51.2   | 55.7   | 54.2   | 43.9   | 68.1   | 61.2   | 43.4   |
| 27.2   | 20.9   | 23.1   | 21.5   | 27.9   | 11.4   | 28.8   | 37.2   | 22.0   |
| 67.5   | 34.1   | 40.8   | 50.8   | 47.1   | 41.6   | 51.0   | 63.6   | 38.9   |
| 7.3    | 7.8    | 5.9    | 8.0    | 9.6    | 13.9   | 11.7   | 11.2   | 11.3   |
| 20.7   | 9.5    | 20.0   | 11.7   | 16.1   | 18.7   | 18.1   | 24.2   | 11.5   |
| 70.8   | 38.9   | 42.0   | 59.3   | 52.6   | 58.6   | 76.5   | 78.1   | 55.9   |
| 280.0  | 206.7  | 224.9  | 248.8  | 263.1  | 257.4  | 329.4  | 392.8  | 238.0  |
| 36.5   | 22.1   | 15.4   | 18.9   | 20.1   | 13.1   | 27.5   | 33.2   | 19.4   |
| 6.3    | 7.2    | 6.3    | 5.5    | 4.0    | 5.8    | 10.3   | 16.7   | 11.7   |
| 156.8  | 94.1   | 136.3  | 157.3  | 122.1  | 125.0  | 160.3  | 182.6  | 188.8  |
| 10.9   | 5.2    | 7.3    | 10.2   | 7.6    | 5.8    | 7.7    | 18.6   | 5.4    |
| 133.3  | 91.7   | 95.8   | 111.5  | 100.4  | 108.9  | 198.1  | 206.2  | 133.9  |
| 230.0  | 197.0  | 154.3  | 206.6  | 174.8  | 170.2  | 223.8  | 233.4  | 153.6  |
| 0.2    | 0.3    | 0.3    | 1.8    | 0.1    | 1.1    | 2.3    | 0.9    | 0.8    |
| 35.8   | 33.7   | 34.5   | 29.7   | 26.5   | 25.0   | 41.6   | 39.7   | 46.2   |
| 41.5   | 28.2   | 27.9   | 25.0   | 31.6   | 26.0   | 43.2   | 43.9   | 33.4   |
| 1542.5 | 548.1  | 655.9  | 576.1  | 651.5  | 659.5  | 777.6  | 775.6  | 573.0  |
| 290.4  | 151.7  | 164.4  | 149.1  | 140.6  | 165.5  | 242.8  | 295.0  | 189.5  |
| 7.2    | 4.5    | 2.9    | 2.9    | 16.0   | 14.5   | 4.7    | 5.4    | 5.7    |
| 2.2    | 5.6    | 5.1    | 3.7    | 1.1    | 2.6    | 1.4    | 5.6    | 2.2    |
| 98.6   | 86.6   | 90.6   | 87.1   | 91.3   | 82.7   | 115.9  | 96.7   | 100.0  |
| 21.1   | 14.9   | 11.9   | 14.4   | 14.8   | 10.0   | 20.9   | 20.8   | 17.9   |
| 2907.5 | 2386.6 | 2475.9 | 2565.3 | 2495.5 | 2497.4 | 2865.2 | 2952.2 | 2609.0 |
| 0.1    | 1.2    | 0.3    | 1.4    | 3.3    | 3.8    | 7.1    | 8.4    | 5.2    |
| 115.9  | 49.0   | 68.8   | 84.4   | 56.2   | 88.1   | 130.5  | 141.0  | 106.7  |
| 106.1  | 68.4   | 72.2   | 106.2  | 92.4   | 84.4   | 91.1   | 113.4  | 93.5   |
| 106.6  | 67.1   | 66.4   | 86.1   | 84.9   | 77.4   | 126.7  | 147.5  | 82.5   |
| 34.4   | 32.6   | 29.4   | 29.1   | 28.7   | 24.4   | 40.4   | 40.9   | 30.5   |
| 190.5  | 143.1  | 179.8  | 135.4  | 144.0  | 142.4  | 190.5  | 230.8  | 153.1  |
| 79.9   | 44.1   | 46.1   | 38.6   | 35.6   | 49.3   | 44.4   | 59.6   | 45.1   |
| 288.5  | 241.1  | 248.1  | 276.2  | 270.2  | 246.4  | 296.9  | 327.3  | 221.3  |
| 41.8   | 26.6   | 26.2   | 31.4   | 24.9   | 27.9   | 39.9   | 65.0   | 45.5   |
| 49.3   | 17.0   | 30.5   | 41.9   | 33.2   | 29.4   | 43.7   | 49.0   | 47.4   |
| 179.5  | 77.9   | 82.7   | 92.9   | 83.6   | 89.3   | 125.5  | 151.7  | 82.5   |
| 362.7  | 110.1  | 120.7  | 138.5  | 138.2  | 129.2  | 189.7  | 192.0  | 63.5   |
| 352.5  | 150.1  | 194.6  | 190.0  | 185.2  | 195.9  | 289.0  | 337.2  | 216.6  |
| 251.0  | 187.3  | 192.5  | 238.4  | 232.1  | 229.5  | 274.1  | 392.4  | 214.4  |
| 91.1   | 65.0   | 101.9  | 90.5   | 68.9   | 97.6   | 133.0  | 156.1  | 121.2  |
| 14.0   | 5.8    | 12.0   | 6.2    | 10.4   | 14.1   | 14.6   | 10.3   | 11.6   |
| 25.1   | 14.8   | 17.1   | 14.9   | 15.8   | 20.1   | 25.4   | 31.7   | 16.2   |
| 30.2   | 11.7   | 13.4   | 14.3   | 14.1   | 16.4   | 20.9   | 34.7   | 17.7   |
| 7.2    | 10.6   | 12.6   | 5.4    | 12.0   | 8.2    | 8.0    | 7.9    | 7.1    |
| 133.8  | 74.1   | 89.0   | 98.3   | 98.0   | 113.3  | 150.6  | 175.9  | 130.1  |
| 101.4  | 71.8   | 68.8   | 81.3   | 70.9   | 68.6   | 97.6   | 122.5  | 69.3   |
| 69.7   | 73.1   | 76.0   | 76.7   | 74.7   | 72.5   | 93.0   | 103.7  | 87.4   |
| 47.4   | 39.9   | 33.9   | 31.5   | 41.3   | 39.6   | 55.5   | 68.8   | 52.6   |
| 119.1  | 105.3  | 87.9   | 91.5   | 119.5  | 107.2  | 156.0  | 211.4  | 144.0  |
| 93.6   | 74.6   | 74.3   | 83.5   | 81.7   | 104.4  | 115.2  | 111.2  | 103.5  |
| 66.3   | 57.3   | 65.2   | 61.3   | 60.6   | 60.5   | 92.3   | 95.6   | 46.2   |
| 894.6  | 347.2  | 387.6  | 404.1  | 408.1  | 409.8  | 606.8  | 808.4  | 353.0  |
| 145.2  | 74.9   | 94.3   | 102.6  | 90.6   | 102.9  | 134.5  | 147.4  | 96.4   |
| 40.4   | 21.4   | 32.8   | 27.5   | 23.8   | 39.1   | 40.1   | 42.3   | 30.3   |

|        |        |        |        |        |        |        |        |        |
|--------|--------|--------|--------|--------|--------|--------|--------|--------|
| 38.5   | 27.3   | 11.9   | 20.5   | 14.2   | 22.5   | 32.5   | 54.9   | 32.1   |
| 26.8   | 26.5   | 18.0   | 21.7   | 20.2   | 20.8   | 25.2   | 39.3   | 27.1   |
| 53.6   | 30.5   | 28.5   | 35.8   | 32.4   | 30.5   | 49.7   | 50.4   | 41.6   |
| 1.0    | 0.3    | 0.5    | 0.2    | 0.1    | 0.6    | 3.3    | 0.6    | 0.2    |
| 0.8    | 2.0    | 4.8    | 1.3    | 3.2    | 2.6    | 9.5    | 2.8    | 3.3    |
| 46.9   | 36.9   | 42.3   | 55.7   | 42.3   | 49.7   | 69.4   | 61.0   | 44.0   |
| 2081.8 | 1296.8 | 1561.2 | 1547.8 | 1706.1 | 1660.3 | 1879.5 | 1907.0 | 1452.2 |
| 467.5  | 441.4  | 505.5  | 500.7  | 503.3  | 476.5  | 608.3  | 594.1  | 378.8  |
| 134.8  | 79.5   | 85.2   | 88.6   | 101.6  | 99.1   | 125.5  | 148.5  | 93.5   |
| 48.8   | 34.2   | 34.5   | 41.6   | 38.0   | 36.5   | 52.0   | 65.5   | 35.3   |
| 233.9  | 137.6  | 184.4  | 193.1  | 192.7  | 193.9  | 228.8  | 254.0  | 153.4  |
| 59.2   | 45.9   | 46.8   | 51.8   | 49.4   | 66.9   | 69.4   | 94.6   | 64.9   |
| 126.5  | 178.1  | 175.9  | 210.6  | 167.1  | 198.1  | 198.9  | 252.7  | 147.5  |
| 21.9   | 8.9    | 10.5   | 16.1   | 20.8   | 12.8   | 16.9   | 19.2   | 19.7   |
| 1.1    | 1.0    | 1.0    | 0.8    | 0.5    | 1.0    | 0.4    | 0.9    | 0.4    |
| 3.0    | 6.4    | 4.5    | 8.6    | 11.7   | 11.7   | 15.2   | 12.1   | 17.7   |
| 59.2   | 41.6   | 35.6   | 35.3   | 44.6   | 37.7   | 58.1   | 58.4   | 41.0   |
| 56.2   | 41.9   | 33.0   | 41.9   | 40.5   | 35.3   | 49.2   | 53.4   | 48.5   |
| 55.4   | 34.8   | 33.3   | 42.1   | 37.8   | 37.1   | 43.7   | 51.5   | 53.6   |
| 68.5   | 22.4   | 30.5   | 33.8   | 30.6   | 25.8   | 46.1   | 58.8   | 36.9   |
| 79.5   | 38.3   | 49.9   | 56.4   | 77.0   | 68.7   | 93.7   | 119.2  | 53.8   |
| 1078.4 | 833.8  | 953.2  | 930.4  | 1073.1 | 1043.9 | 1333.5 | 1251.5 | 1097.7 |
| 65.7   | 47.4   | 57.2   | 46.3   | 53.8   | 63.3   | 94.3   | 105.9  | 62.9   |
| 91.6   | 78.7   | 86.9   | 87.2   | 82.2   | 91.7   | 125.7  | 151.0  | 104.6  |
| 100.1  | 58.0   | 63.1   | 75.2   | 82.6   | 83.4   | 105.9  | 165.6  | 117.3  |
| 95.1   | 66.9   | 84.6   | 83.0   | 77.0   | 80.6   | 108.6  | 134.9  | 90.4   |
| 253.2  | 176.6  | 215.0  | 221.1  | 238.4  | 209.8  | 300.5  | 290.9  | 260.6  |
| 93.8   | 66.5   | 62.6   | 64.8   | 79.6   | 81.6   | 115.5  | 174.0  | 87.1   |
| 24.1   | 6.3    | 14.2   | 8.7    | 9.3    | 12.7   | 11.9   | 16.1   | 14.2   |
| 361.8  | 198.9  | 221.1  | 223.1  | 279.7  | 277.8  | 358.2  | 531.0  | 291.4  |
| 428.9  | 174.8  | 234.9  | 246.3  | 257.2  | 290.4  | 324.1  | 491.5  | 330.2  |
| 97.1   | 48.1   | 58.0   | 59.0   | 48.7   | 70.3   | 84.2   | 136.8  | 50.2   |
| 1.1    | 2.0    | 2.0    | 0.6    | 1.8    | 1.4    | 2.4    | 2.5    | 1.7    |
| 16.7   | 10.7   | 6.0    | 7.3    | 8.9    | 9.9    | 8.0    | 7.2    | 6.4    |
| 79.2   | 54.9   | 46.8   | 59.6   | 70.7   | 60.9   | 102.4  | 132.6  | 71.8   |
| 55.5   | 56.5   | 59.3   | 69.6   | 50.7   | 55.7   | 79.0   | 73.8   | 55.6   |
| 15.9   | 16.3   | 17.8   | 22.3   | 14.2   | 16.7   | 20.7   | 22.6   | 21.2   |
| 2.5    | 2.8    | 2.3    | 0.9    | 0.6    | 7.7    | 4.1    | 1.0    | 2.2    |
| 4.7    | 12.7   | 19.4   | 4.8    | 1.9    | 9.9    | 13.2   | 3.0    | 3.2    |
| 48.7   | 39.9   | 34.0   | 41.0   | 34.2   | 36.0   | 54.4   | 49.1   | 51.8   |
| 68.9   | 53.7   | 56.6   | 51.1   | 45.4   | 45.6   | 66.0   | 78.6   | 41.2   |
| 26.4   | 16.4   | 14.4   | 13.5   | 14.4   | 12.8   | 26.5   | 23.3   | 11.1   |
| 48.4   | 13.0   | 13.5   | 15.2   | 23.5   | 19.6   | 22.3   | 34.8   | 22.9   |
| 56.7   | 28.5   | 51.7   | 44.5   | 54.0   | 47.1   | 69.9   | 67.5   | 50.2   |
| 133.2  | 41.2   | 61.0   | 41.7   | 57.0   | 66.8   | 66.7   | 106.9  | 67.9   |
| 344.0  | 232.7  | 298.4  | 295.1  | 292.3  | 282.5  | 366.6  | 341.9  | 246.0  |
| 23.5   | 14.6   | 15.8   | 16.3   | 20.1   | 20.1   | 30.4   | 36.6   | 22.1   |
| 0.7    | 4.4    | 1.1    | 0.9    | 0.6    | 2.4    | 0.4    | 1.1    | 0.4    |
| 53.8   | 45.0   | 49.0   | 53.0   | 54.7   | 59.2   | 74.1   | 44.0   | 45.8   |
| 2589.6 | 2315.8 | 2347.0 | 2492.4 | 2649.5 | 2687.3 | 3136.8 | 3479.1 | 2422.3 |
| 156.6  | 108.4  | 125.1  | 156.4  | 138.9  | 131.4  | 201.2  | 206.2  | 169.0  |
| 23.7   | 15.8   | 11.3   | 13.3   | 13.9   | 12.3   | 25.5   | 31.2   | 18.2   |
| 2044.7 | 1549.3 | 1763.9 | 1594.3 | 1785.2 | 1714.2 | 2034.9 | 2042.0 | 1652.6 |



|        |        |        |        |        |        |        |        |        |
|--------|--------|--------|--------|--------|--------|--------|--------|--------|
| 46.0   | 25.6   | 28.7   | 29.5   | 35.8   | 30.1   | 45.3   | 68.8   | 45.2   |
| 28.6   | 14.7   | 24.5   | 30.3   | 19.6   | 30.1   | 32.5   | 35.7   | 27.8   |
| 58.4   | 41.0   | 38.9   | 50.4   | 44.1   | 45.2   | 62.1   | 106.3  | 65.1   |
| 113.0  | 86.7   | 97.4   | 113.4  | 106.6  | 106.1  | 148.6  | 171.0  | 127.9  |
| 13.6   | 7.2    | 4.6    | 0.7    | 5.5    | 7.1    | 5.5    | 10.1   | 6.8    |
| 693.6  | 458.4  | 589.3  | 547.2  | 630.4  | 607.7  | 744.9  | 825.7  | 745.6  |
| 70.1   | 52.9   | 57.6   | 63.9   | 89.9   | 44.9   | 64.7   | 71.6   | 42.8   |
| 734.5  | 491.8  | 578.6  | 578.1  | 622.6  | 623.9  | 722.3  | 817.9  | 645.7  |
| 742.5  | 431.8  | 605.8  | 600.9  | 584.7  | 579.4  | 767.0  | 844.7  | 559.4  |
| 14.6   | 14.6   | 2.5    | 1.2    | 15.3   | 10.5   | 14.2   | 3.6    | 3.2    |
| 3422.3 | 2951.2 | 2863.5 | 3082.6 | 3367.0 | 3099.6 | 3770.2 | 4123.5 | 2663.9 |
| 85.9   | 60.4   | 75.2   | 59.3   | 67.8   | 72.4   | 67.2   | 77.9   | 61.9   |
| 15.9   | 8.3    | 10.6   | 12.5   | 11.2   | 15.4   | 21.0   | 26.5   | 4.7    |
| 187.4  | 108.6  | 115.8  | 123.3  | 128.1  | 134.2  | 173.6  | 275.2  | 167.4  |
| 44.6   | 31.3   | 33.1   | 37.2   | 34.8   | 25.6   | 40.7   | 42.4   | 43.6   |
| 8.6    | 4.0    | 6.5    | 6.8    | 11.0   | 4.5    | 8.8    | 9.2    | 4.7    |
| 73.3   | 48.2   | 54.4   | 54.5   | 53.0   | 87.4   | 107.7  | 88.1   | 52.4   |
| 28.0   | 14.2   | 21.9   | 18.7   | 7.8    | 24.2   | 23.0   | 26.9   | 36.8   |
| 24.8   | 18.5   | 11.6   | 18.7   | 29.0   | 20.3   | 34.2   | 45.2   | 28.3   |
| 87.5   | 53.5   | 42.2   | 52.4   | 52.7   | 66.2   | 104.5  | 135.5  | 62.9   |
| 132.8  | 94.0   | 111.8  | 120.0  | 131.4  | 109.9  | 154.7  | 172.0  | 132.3  |
| 305.3  | 189.8  | 275.7  | 249.7  | 263.3  | 286.0  | 352.7  | 408.9  | 305.0  |
| 323.6  | 227.5  | 281.4  | 270.0  | 283.6  | 292.8  | 383.1  | 434.6  | 272.8  |
| 49.9   | 34.0   | 30.4   | 38.6   | 46.8   | 37.0   | 60.9   | 104.5  | 74.2   |
| 176.9  | 27.8   | 18.7   | 24.1   | 19.8   | 29.2   | 42.0   | 58.0   | 27.4   |
| 97.1   | 76.0   | 76.7   | 104.0  | 64.4   | 84.0   | 114.6  | 127.1  | 63.3   |
| 128.3  | 82.3   | 106.0  | 106.7  | 110.2  | 104.1  | 134.6  | 143.3  | 126.3  |
| 165.4  | 77.6   | 88.1   | 103.4  | 122.2  | 117.9  | 149.3  | 177.5  | 130.0  |
| 40.6   | 37.9   | 56.4   | 46.0   | 37.7   | 53.3   | 73.3   | 68.3   | 42.1   |
| 118.1  | 56.0   | 73.2   | 56.8   | 82.2   | 89.1   | 92.5   | 125.3  | 89.4   |
| 126.4  | 79.6   | 88.0   | 100.7  | 94.2   | 85.9   | 127.1  | 133.6  | 80.6   |
| 65.7   | 35.9   | 34.6   | 44.8   | 40.3   | 44.4   | 56.0   | 66.3   | 50.6   |
| 78.8   | 57.4   | 61.2   | 56.9   | 44.9   | 55.8   | 76.8   | 84.0   | 63.6   |
| 13.0   | 4.0    | 5.2    | 6.2    | 6.0    | 7.5    | 10.6   | 6.6    | 7.1    |
| 37.6   | 11.6   | 22.5   | 19.8   | 20.3   | 20.5   | 16.9   | 32.4   | 18.5   |
| 24.8   | 17.8   | 14.8   | 15.7   | 19.2   | 12.7   | 20.1   | 31.0   | 12.6   |
| 165.5  | 92.8   | 103.2  | 100.2  | 100.3  | 105.3  | 131.0  | 146.0  | 90.5   |
| 96.9   | 88.3   | 81.3   | 86.7   | 85.4   | 101.2  | 124.4  | 131.7  | 113.4  |
| 74.9   | 68.0   | 68.3   | 72.6   | 72.7   | 82.2   | 127.3  | 181.3  | 92.6   |
| 151.1  | 69.6   | 103.6  | 82.7   | 91.6   | 110.3  | 104.4  | 137.0  | 108.2  |
| 25.3   | 17.6   | 19.6   | 27.2   | 24.1   | 19.6   | 25.3   | 31.9   | 20.0   |
| 88.0   | 45.4   | 68.3   | 53.6   | 52.6   | 59.6   | 81.6   | 107.3  | 68.7   |
| 84.4   | 63.5   | 81.1   | 70.0   | 96.3   | 96.5   | 96.8   | 117.9  | 80.9   |
| 105.1  | 75.6   | 82.3   | 90.2   | 108.9  | 90.7   | 119.0  | 165.7  | 125.2  |
| 22.7   | 19.0   | 15.6   | 16.8   | 15.4   | 22.6   | 25.2   | 23.9   | 21.9   |
| 1679.2 | 1306.7 | 1438.1 | 1236.1 | 1791.9 | 1707.4 | 1872.7 | 1832.2 | 1415.9 |
| 48.4   | 35.9   | 41.6   | 42.2   | 41.8   | 31.3   | 54.2   | 49.3   | 41.2   |
| 161.2  | 118.9  | 98.9   | 126.3  | 136.3  | 108.8  | 159.5  | 149.4  | 125.6  |
| 33.9   | 25.2   | 16.4   | 30.5   | 26.9   | 20.2   | 24.2   | 40.2   | 20.9   |
| 22.8   | 19.6   | 17.1   | 24.1   | 14.6   | 18.3   | 25.3   | 21.3   | 22.8   |
| 678.5  | 375.0  | 411.9  | 413.8  | 447.5  | 520.2  | 711.4  | 1003.0 | 676.1  |
| 12.6   | 8.6    | 10.9   | 16.0   | 12.4   | 13.6   | 22.8   | 14.9   | 22.6   |
| 755.9  | 278.9  | 324.1  | 437.1  | 387.9  | 475.7  | 739.0  | 1006.9 | 477.6  |

|        |        |        |        |        |        |        |        |        |
|--------|--------|--------|--------|--------|--------|--------|--------|--------|
| 453.4  | 233.3  | 274.0  | 239.0  | 261.2  | 293.5  | 445.4  | 743.2  | 393.8  |
| 255.0  | 86.3   | 103.7  | 102.0  | 111.4  | 88.3   | 129.2  | 132.8  | 100.4  |
| 222.4  | 146.3  | 163.1  | 208.9  | 186.0  | 196.0  | 218.7  | 277.8  | 176.0  |
| 104.0  | 86.9   | 64.4   | 115.0  | 103.9  | 97.7   | 143.2  | 164.5  | 179.7  |
| 45.4   | 28.9   | 26.0   | 36.4   | 38.4   | 32.9   | 36.9   | 50.8   | 32.4   |
| 236.5  | 175.1  | 200.2  | 204.7  | 210.2  | 234.1  | 281.3  | 311.6  | 223.3  |
| 190.0  | 88.9   | 85.2   | 113.0  | 104.4  | 100.3  | 150.8  | 168.3  | 131.2  |
| 172.7  | 100.9  | 108.3  | 130.3  | 129.1  | 128.7  | 189.8  | 195.9  | 172.5  |
| 19.6   | 22.0   | 17.3   | 12.3   | 18.2   | 17.8   | 30.0   | 34.9   | 12.5   |
| 126.6  | 85.5   | 106.3  | 103.7  | 107.4  | 93.5   | 121.4  | 147.0  | 90.1   |
| 44.5   | 31.9   | 28.7   | 31.3   | 30.4   | 31.0   | 64.7   | 51.0   | 36.1   |
| 25.8   | 18.5   | 23.2   | 19.0   | 23.0   | 26.5   | 22.2   | 31.5   | 13.3   |
| 62.1   | 47.9   | 47.1   | 53.7   | 60.8   | 45.5   | 74.1   | 95.1   | 54.5   |
| 175.2  | 93.9   | 110.3  | 98.5   | 109.3  | 118.6  | 162.8  | 181.7  | 117.1  |
| 47.6   | 21.0   | 22.8   | 23.9   | 20.7   | 26.2   | 31.8   | 43.3   | 38.5   |
| 41.3   | 27.1   | 22.3   | 28.2   | 26.4   | 22.6   | 33.2   | 45.6   | 31.0   |
| 6.5    | 2.9    | 1.5    | 1.4    | 1.3    | 1.4    | 6.5    | 1.5    | 5.6    |
| 74.8   | 68.1   | 69.3   | 79.9   | 77.4   | 64.1   | 107.3  | 111.2  | 96.8   |
| 69.1   | 44.9   | 57.8   | 61.1   | 41.7   | 25.8   | 70.2   | 67.6   | 51.1   |
| 99.8   | 101.9  | 67.0   | 94.7   | 105.7  | 86.9   | 120.6  | 116.2  | 94.5   |
| 165.5  | 106.5  | 151.9  | 140.9  | 132.4  | 147.6  | 175.4  | 186.2  | 146.6  |
| 39.9   | 25.7   | 35.0   | 32.7   | 35.8   | 29.4   | 49.5   | 51.8   | 38.7   |
| 115.4  | 51.1   | 69.8   | 72.7   | 71.6   | 82.1   | 106.3  | 134.1  | 68.3   |
| 107.6  | 112.9  | 133.9  | 134.8  | 144.0  | 116.2  | 160.4  | 160.2  | 138.3  |
| 501.8  | 285.8  | 338.8  | 378.6  | 370.9  | 381.5  | 469.7  | 574.3  | 497.0  |
| 2.3    | 4.5    | 0.7    | 0.5    | 0.4    | 1.8    | 2.8    | 2.8    | 4.6    |
| 6.7    | 3.3    | 4.2    | 1.0    | 1.5    | 5.2    | 1.1    | 1.5    | 1.1    |
| 80.7   | 55.4   | 54.6   | 61.8   | 48.8   | 52.7   | 75.3   | 70.8   | 56.5   |
| 18.4   | 3.2    | 19.4   | 12.9   | 2.8    | 13.6   | 24.1   | 18.4   | 17.0   |
| 46.6   | 33.5   | 33.6   | 36.8   | 37.4   | 38.7   | 46.1   | 64.1   | 36.8   |
| 2.7    | 2.0    | 3.6    | 2.1    | 3.1    | 2.0    | 2.4    | 2.7    | 2.9    |
| 53.9   | 39.6   | 48.2   | 53.0   | 49.4   | 38.5   | 67.6   | 78.9   | 40.6   |
| 120.2  | 102.1  | 97.3   | 119.5  | 114.5  | 109.0  | 114.9  | 134.8  | 102.1  |
| 38.0   | 29.5   | 32.7   | 30.3   | 35.6   | 35.4   | 50.6   | 64.7   | 32.6   |
| 12.6   | 12.6   | 14.4   | 8.8    | 12.9   | 10.8   | 7.7    | 13.6   | 9.2    |
| 2769.6 | 2352.0 | 2389.9 | 2573.2 | 2513.5 | 2511.3 | 2847.5 | 2864.4 | 2504.5 |
| 21.2   | 14.1   | 20.1   | 23.6   | 30.2   | 32.3   | 49.4   | 95.6   | 34.6   |
| 40.7   | 41.6   | 46.4   | 45.4   | 54.7   | 62.9   | 60.5   | 92.0   | 53.2   |
| 8.8    | 5.6    | 2.5    | 5.8    | 6.0    | 3.6    | 5.0    | 15.9   | 5.5    |
| 56.1   | 42.4   | 46.8   | 48.4   | 53.7   | 50.8   | 73.1   | 86.2   | 55.2   |
| 12.4   | 6.0    | 7.3    | 9.9    | 10.6   | 7.3    | 14.8   | 20.8   | 11.9   |
| 96.9   | 71.9   | 73.4   | 88.5   | 78.5   | 79.3   | 109.9  | 115.1  | 99.4   |
| 128.3  | 85.0   | 84.8   | 93.9   | 95.5   | 90.2   | 116.8  | 120.2  | 72.7   |
| 104.5  | 64.4   | 75.4   | 90.1   | 84.7   | 80.7   | 111.1  | 115.7  | 89.3   |
| 398.8  | 264.2  | 288.8  | 290.2  | 284.8  | 304.7  | 380.5  | 419.7  | 236.4  |
| 41.4   | 32.3   | 33.6   | 28.0   | 34.0   | 35.3   | 55.9   | 56.3   | 38.5   |
| 18.6   | 2.3    | 10.4   | 12.8   | 10.9   | 13.6   | 15.8   | 13.1   | 13.4   |
| 21.9   | 21.9   | 20.2   | 19.6   | 18.0   | 14.4   | 24.9   | 35.8   | 19.3   |
| 43.8   | 30.5   | 37.4   | 27.0   | 32.5   | 30.5   | 41.8   | 43.6   | 34.8   |
| 72.3   | 51.8   | 51.3   | 61.1   | 57.4   | 55.8   | 72.4   | 85.0   | 51.8   |
| 215.4  | 99.6   | 139.2  | 106.2  | 121.4  | 140.4  | 196.7  | 218.3  | 229.8  |
| 183.0  | 82.8   | 113.8  | 97.2   | 102.3  | 121.7  | 143.3  | 163.9  | 84.1   |
| 62.1   | 32.9   | 43.8   | 41.6   | 45.8   | 33.3   | 56.3   | 56.6   | 51.6   |

|        |        |        |        |        |        |        |        |        |
|--------|--------|--------|--------|--------|--------|--------|--------|--------|
| 23.0   | 15.6   | 19.4   | 16.3   | 22.8   | 22.4   | 38.4   | 49.6   | 36.6   |
| 3.1    | 1.3    | 3.7    | 5.7    | 4.2    | 1.5    | 5.4    | 4.6    | 4.0    |
| 86.8   | 56.7   | 55.4   | 67.3   | 74.6   | 59.4   | 77.6   | 96.3   | 51.6   |
| 8.3    | 1.2    | 4.5    | 5.1    | 3.1    | 8.4    | 7.0    | 14.4   | 6.3    |
| 10.4   | 7.7    | 1.7    | 4.4    | 1.0    | 1.2    | 6.6    | 5.0    | 0.8    |
| 2.2    | 1.1    | 3.3    | 6.3    | 6.0    | 2.8    | 8.4    | 7.8    | 8.6    |
| 5.2    | 11.0   | 3.0    | 7.7    | 6.6    | 8.3    | 11.0   | 11.3   | 1.5    |
| 30.0   | 18.4   | 18.3   | 16.8   | 15.2   | 16.3   | 26.7   | 31.2   | 15.5   |
| 1.0    | 1.0    | 2.0    | 7.2    | 0.9    | 5.1    | 2.4    | 7.9    | 1.2    |
| 1.0    | 12.1   | 1.4    | 1.2    | 4.5    | 1.7    | 1.5    | 2.6    | 0.8    |
| 4242.0 | 3719.1 | 3533.6 | 3587.4 | 4037.0 | 3655.6 | 4710.1 | 4609.8 | 2893.7 |
| 12.7   | 12.3   | 7.8    | 12.4   | 8.4    | 13.0   | 18.0   | 10.0   | 5.9    |
| 36.3   | 27.4   | 31.4   | 29.5   | 30.7   | 35.4   | 44.2   | 53.6   | 39.3   |
| 15.3   | 7.8    | 14.2   | 16.6   | 18.0   | 18.0   | 11.3   | 17.0   | 12.6   |
| 37.1   | 21.5   | 24.8   | 29.6   | 26.9   | 19.8   | 34.2   | 43.4   | 32.6   |
| 59.8   | 23.3   | 48.1   | 36.8   | 39.8   | 44.3   | 43.4   | 33.5   | 29.3   |
| 293.5  | 368.3  | 377.8  | 419.4  | 473.1  | 384.4  | 562.7  | 632.4  | 358.1  |
| 115.6  | 192.5  | 174.7  | 202.1  | 198.6  | 187.6  | 265.4  | 294.1  | 182.8  |
| 87.6   | 57.7   | 67.4   | 76.9   | 72.2   | 71.9   | 91.3   | 88.9   | 80.3   |
| 61.2   | 65.1   | 62.3   | 52.6   | 58.3   | 59.5   | 66.4   | 70.6   | 59.3   |
| 118.5  | 93.0   | 108.6  | 123.2  | 123.5  | 105.1  | 136.6  | 154.7  | 89.9   |
| 75.1   | 56.8   | 67.9   | 86.1   | 73.2   | 74.2   | 101.1  | 128.6  | 85.1   |
| 63.5   | 23.9   | 29.8   | 31.1   | 40.6   | 34.7   | 38.6   | 38.3   | 25.4   |
| 27.2   | 12.7   | 7.3    | 16.9   | 13.2   | 16.6   | 21.8   | 25.4   | 16.0   |
| 171.8  | 107.7  | 132.4  | 168.6  | 140.7  | 134.5  | 200.6  | 193.4  | 170.3  |
| 86.2   | 54.8   | 71.0   | 67.0   | 68.2   | 82.2   | 101.8  | 137.2  | 90.9   |
| 98.5   | 59.3   | 65.3   | 80.2   | 77.2   | 76.1   | 105.9  | 99.6   | 85.8   |
| 105.5  | 84.7   | 92.9   | 109.2  | 104.4  | 102.5  | 130.3  | 149.3  | 123.5  |
| 42.4   | 47.9   | 46.0   | 45.7   | 47.3   | 44.7   | 64.1   | 67.8   | 44.9   |
| 170.0  | 192.0  | 150.3  | 197.0  | 202.0  | 175.8  | 236.1  | 320.9  | 215.6  |
| 290.5  | 237.2  | 355.9  | 314.9  | 322.6  | 367.4  | 427.6  | 444.1  | 366.9  |
| 158.9  | 95.2   | 121.7  | 114.0  | 116.9  | 137.5  | 148.0  | 234.7  | 111.8  |
| 9.6    | 2.6    | 5.7    | 6.4    | 4.2    | 4.5    | 6.5    | 9.4    | 4.4    |
| 12.4   | 4.2    | 3.9    | 0.3    | 0.7    | 6.1    | 5.7    | 5.8    | 4.5    |
| 30.0   | 39.5   | 28.5   | 26.3   | 34.9   | 24.2   | 32.9   | 24.8   | 35.2   |
| 332.7  | 220.2  | 198.7  | 247.3  | 245.7  | 248.0  | 372.1  | 410.9  | 310.5  |
| 105.0  | 38.4   | 53.0   | 60.6   | 69.3   | 59.6   | 112.8  | 109.8  | 68.4   |
| 35.2   | 30.9   | 53.6   | 35.9   | 36.2   | 38.1   | 38.3   | 54.9   | 33.7   |
| 41.4   | 35.0   | 43.6   | 65.3   | 42.4   | 37.8   | 71.8   | 82.6   | 58.8   |
| 23.7   | 32.7   | 31.0   | 33.4   | 30.0   | 26.8   | 46.9   | 42.9   | 37.9   |
| 53.0   | 34.3   | 46.9   | 45.2   | 44.5   | 56.5   | 52.9   | 58.4   | 45.5   |
| 150.7  | 100.5  | 121.0  | 125.8  | 111.9  | 139.2  | 147.3  | 170.2  | 139.2  |
| 49.2   | 67.1   | 53.1   | 68.4   | 63.2   | 54.3   | 71.8   | 95.9   | 70.5   |
| 96.7   | 58.7   | 74.1   | 60.0   | 69.0   | 67.0   | 91.5   | 78.3   | 99.3   |
| 16.9   | 11.2   | 14.6   | 12.2   | 13.1   | 15.6   | 13.5   | 16.5   | 21.6   |
| 957.3  | 532.0  | 648.4  | 764.8  | 731.9  | 706.5  | 962.6  | 1001.5 | 790.5  |
| 7.6    | 0.3    | 1.5    | 4.8    | 1.3    | 1.5    | 4.3    | 6.6    | 6.0    |
| 179.1  | 99.7   | 117.0  | 118.3  | 106.8  | 127.4  | 190.7  | 224.6  | 157.4  |
| 150.5  | 93.6   | 125.8  | 140.3  | 149.9  | 123.8  | 203.7  | 193.9  | 118.9  |
| 37.2   | 26.6   | 26.6   | 34.0   | 28.7   | 30.6   | 39.6   | 42.2   | 34.3   |
| 88.2   | 53.6   | 65.4   | 59.6   | 53.0   | 74.2   | 85.7   | 113.8  | 55.8   |
| 375.9  | 238.6  | 333.4  | 325.5  | 327.0  | 374.8  | 454.7  | 482.0  | 304.7  |
| 3817.8 | 3333.6 | 2920.6 | 3310.7 | 3686.3 | 3545.9 | 3918.3 | 4238.2 | 3670.4 |

|       |       |       |       |       |       |       |        |       |
|-------|-------|-------|-------|-------|-------|-------|--------|-------|
| 238.5 | 156.2 | 225.8 | 218.2 | 200.1 | 247.9 | 280.5 | 352.4  | 221.2 |
| 30.3  | 20.5  | 32.6  | 24.3  | 26.8  | 26.3  | 35.4  | 50.9   | 34.1  |
| 37.8  | 22.5  | 23.8  | 23.5  | 28.1  | 24.0  | 27.8  | 40.0   | 25.1  |
| 137.4 | 98.1  | 149.8 | 114.0 | 107.9 | 120.0 | 182.0 | 189.1  | 167.4 |
| 94.6  | 48.4  | 67.6  | 81.1  | 74.1  | 77.1  | 109.6 | 106.8  | 71.0  |
| 74.8  | 51.8  | 48.2  | 52.0  | 40.2  | 48.9  | 62.0  | 54.9   | 55.5  |
| 124.3 | 98.0  | 104.4 | 107.4 | 120.2 | 109.7 | 162.3 | 194.1  | 145.7 |
| 63.6  | 61.5  | 61.9  | 61.1  | 67.6  | 54.7  | 90.6  | 95.9   | 60.3  |
| 165.4 | 93.3  | 105.9 | 100.6 | 111.5 | 120.9 | 158.0 | 218.8  | 126.3 |
| 22.6  | 21.7  | 31.5  | 20.0  | 18.8  | 18.3  | 40.4  | 54.7   | 20.8  |
| 0.6   | 0.6   | 1.5   | 2.1   | 0.7   | 1.0   | 2.3   | 2.2    | 1.4   |
| 224.9 | 90.2  | 117.3 | 118.8 | 117.4 | 139.8 | 171.3 | 210.3  | 154.5 |
| 91.4  | 56.3  | 40.7  | 55.1  | 61.3  | 61.2  | 85.0  | 129.9  | 75.3  |
| 37.5  | 40.6  | 39.0  | 37.7  | 33.6  | 39.3  | 45.9  | 58.3   | 45.9  |
| 40.7  | 13.2  | 20.1  | 20.7  | 24.3  | 24.7  | 29.9  | 38.0   | 22.8  |
| 596.8 | 490.1 | 382.9 | 514.8 | 581.1 | 486.6 | 817.1 | 1006.2 | 839.4 |
| 47.6  | 40.1  | 42.0  | 42.5  | 46.2  | 46.1  | 61.7  | 80.3   | 49.7  |
| 17.2  | 23.2  | 15.6  | 18.2  | 12.0  | 19.0  | 21.0  | 16.1   | 19.6  |
| 20.0  | 22.5  | 25.4  | 21.8  | 18.6  | 14.9  | 25.0  | 28.7   | 19.5  |
| 238.6 | 162.6 | 165.9 | 193.3 | 215.8 | 197.7 | 239.0 | 289.7  | 207.2 |
| 140.1 | 89.1  | 97.2  | 95.8  | 111.6 | 107.3 | 142.4 | 238.6  | 93.8  |
| 197.7 | 134.8 | 164.8 | 161.9 | 158.5 | 170.1 | 204.7 | 272.1  | 161.2 |
| 169.6 | 122.3 | 161.0 | 163.2 | 142.6 | 159.7 | 230.4 | 308.2  | 171.1 |
| 108.3 | 67.0  | 83.1  | 64.9  | 89.9  | 86.7  | 109.6 | 120.9  | 72.8  |
| 39.5  | 16.3  | 15.3  | 18.2  | 19.4  | 18.5  | 22.2  | 29.2   | 16.2  |
| 233.8 | 129.9 | 131.2 | 146.6 | 155.9 | 165.8 | 189.4 | 262.6  | 160.9 |
| 271.6 | 134.6 | 155.2 | 137.0 | 167.7 | 203.7 | 268.7 | 341.6  | 203.3 |
| 245.1 | 168.0 | 175.7 | 204.9 | 191.6 | 214.5 | 271.5 | 358.3  | 263.4 |
| 39.2  | 24.7  | 24.5  | 29.2  | 29.2  | 26.5  | 36.9  | 44.5   | 34.5  |
| 29.5  | 31.7  | 27.0  | 28.5  | 36.0  | 26.5  | 46.1  | 39.3   | 45.2  |
| 115.0 | 86.6  | 113.9 | 93.8  | 88.5  | 85.9  | 163.9 | 160.5  | 104.9 |
| 74.2  | 61.3  | 62.7  | 65.5  | 70.5  | 72.5  | 76.1  | 118.9  | 65.0  |
| 11.0  | 3.0   | 2.1   | 4.0   | 0.3   | 3.4   | 9.7   | 1.5    | 6.2   |
| 48.1  | 64.3  | 31.3  | 76.0  | 76.3  | 42.2  | 99.9  | 90.8   | 87.5  |
| 12.3  | 11.4  | 7.5   | 6.5   | 4.9   | 7.0   | 11.5  | 14.2   | 8.8   |
| 3.2   | 9.5   | 3.3   | 8.2   | 4.9   | 4.4   | 5.7   | 16.9   | 3.1   |
| 64.3  | 50.1  | 36.3  | 51.3  | 51.2  | 44.4  | 67.0  | 72.4   | 61.0  |
| 26.1  | 14.1  | 13.4  | 17.5  | 13.5  | 18.2  | 28.1  | 24.2   | 18.5  |
| 54.0  | 46.5  | 39.1  | 37.0  | 42.7  | 43.0  | 56.9  | 79.7   | 36.4  |
| 105.6 | 52.0  | 68.9  | 78.5  | 94.0  | 82.9  | 100.6 | 110.5  | 74.6  |
| 84.1  | 54.8  | 55.8  | 69.6  | 71.3  | 59.8  | 82.8  | 103.3  | 57.6  |
| 23.4  | 12.8  | 10.8  | 6.5   | 14.8  | 13.1  | 14.8  | 18.6   | 11.5  |
| 59.1  | 46.3  | 48.1  | 54.1  | 63.6  | 53.8  | 119.6 | 136.3  | 101.1 |
| 4.0   | 3.4   | 2.8   | 4.1   | 4.6   | 0.3   | 3.6   | 6.0    | 2.1   |
| 7.8   | 2.5   | 23.2  | 16.1  | 18.6  | 21.0  | 17.6  | 24.5   | 15.0  |
| 87.5  | 63.6  | 92.3  | 90.8  | 91.7  | 117.2 | 124.9 | 140.1  | 108.2 |
| 138.8 | 69.1  | 106.7 | 112.6 | 89.9  | 108.0 | 178.5 | 225.9  | 104.7 |
| 67.7  | 15.8  | 22.2  | 18.2  | 21.0  | 24.3  | 25.6  | 22.1   | 20.0  |
| 86.7  | 73.0  | 77.4  | 98.1  | 72.0  | 67.9  | 92.4  | 123.8  | 73.3  |
| 8.3   | 5.1   | 3.0   | 5.2   | 5.8   | 5.5   | 8.4   | 11.0   | 9.3   |
| 255.7 | 144.4 | 129.2 | 176.7 | 162.7 | 167.4 | 297.5 | 238.4  | 266.9 |
| 33.4  | 32.7  | 34.7  | 31.5  | 18.5  | 26.8  | 37.6  | 43.8   | 37.3  |
| 4.5   | 1.5   | 0.6   | 3.4   | 3.8   | 1.4   | 5.4   | 0.7    | 0.3   |

|        |        |        |        |        |        |        |        |        |
|--------|--------|--------|--------|--------|--------|--------|--------|--------|
| 17.9   | 14.0   | 19.8   | 20.7   | 12.9   | 26.5   | 17.1   | 20.2   | 23.2   |
| 8.8    | 2.0    | 4.0    | 2.2    | 3.4    | 8.4    | 5.7    | 7.2    | 11.7   |
| 3.0    | 0.4    | 2.2    | 1.7    | 0.4    | 0.8    | 0.8    | 0.5    | 1.0    |
| 16.9   | 12.2   | 18.1   | 10.9   | 20.3   | 19.7   | 29.2   | 34.1   | 19.9   |
| 109.0  | 87.8   | 99.3   | 93.1   | 94.2   | 101.9  | 122.8  | 136.6  | 83.5   |
| 79.5   | 50.9   | 53.8   | 60.9   | 58.0   | 72.0   | 91.9   | 139.7  | 74.1   |
| 26.2   | 14.8   | 14.8   | 13.0   | 14.0   | 15.5   | 17.3   | 21.8   | 13.9   |
| 13.2   | 3.0    | 3.9    | 5.1    | 11.4   | 1.8    | 13.8   | 10.8   | 14.6   |
| 46.4   | 42.5   | 40.5   | 43.5   | 35.8   | 42.4   | 66.8   | 85.6   | 49.7   |
| 150.1  | 91.2   | 95.7   | 97.2   | 108.8  | 104.8  | 168.4  | 221.1  | 107.8  |
| 49.0   | 32.0   | 32.0   | 36.6   | 35.6   | 33.9   | 39.6   | 50.2   | 34.5   |
| 98.1   | 72.5   | 72.4   | 86.8   | 75.6   | 78.1   | 93.0   | 133.4  | 98.7   |
| 105.2  | 90.9   | 68.9   | 90.2   | 103.9  | 91.9   | 171.6  | 212.6  | 141.3  |
| 74.3   | 56.1   | 43.7   | 53.7   | 71.3   | 60.7   | 92.8   | 118.6  | 148.0  |
| 481.3  | 289.7  | 392.4  | 386.5  | 397.3  | 412.1  | 525.8  | 563.5  | 462.1  |
| 240.7  | 154.3  | 160.5  | 185.7  | 210.0  | 217.4  | 253.9  | 309.1  | 194.4  |
| 38.7   | 27.0   | 30.9   | 32.1   | 28.7   | 25.1   | 34.1   | 47.5   | 35.8   |
| 34.5   | 19.1   | 18.1   | 14.4   | 24.5   | 24.9   | 23.5   | 34.8   | 30.6   |
| 58.2   | 50.6   | 54.0   | 57.4   | 58.0   | 51.1   | 64.2   | 96.6   | 48.5   |
| 149.8  | 96.1   | 102.7  | 132.8  | 125.3  | 108.1  | 177.4  | 187.6  | 160.3  |
| 63.4   | 42.7   | 48.8   | 44.4   | 46.8   | 53.8   | 61.3   | 102.2  | 59.4   |
| 126.4  | 128.6  | 126.6  | 150.6  | 141.2  | 169.0  | 191.8  | 278.7  | 172.3  |
| 25.0   | 13.2   | 7.2    | 23.4   | 17.1   | 16.9   | 15.9   | 24.5   | 16.2   |
| 80.6   | 37.0   | 37.7   | 48.3   | 42.2   | 48.4   | 59.8   | 68.8   | 42.5   |
| 17.7   | 11.7   | 12.0   | 13.8   | 16.6   | 17.2   | 21.0   | 24.3   | 20.5   |
| 50.4   | 29.9   | 34.0   | 37.7   | 27.4   | 29.1   | 54.1   | 44.4   | 29.8   |
| 139.6  | 81.5   | 95.7   | 109.5  | 111.1  | 104.7  | 138.2  | 154.8  | 114.5  |
| 163.0  | 110.4  | 105.8  | 123.6  | 120.2  | 128.7  | 188.8  | 215.6  | 160.8  |
| 168.7  | 167.7  | 143.1  | 139.8  | 218.2  | 149.2  | 295.3  | 289.6  | 229.5  |
| 20.1   | 21.4   | 25.6   | 25.1   | 26.1   | 18.3   | 36.9   | 42.3   | 21.5   |
| 47.4   | 30.0   | 30.7   | 26.1   | 30.6   | 29.1   | 45.4   | 44.3   | 29.5   |
| 48.6   | 45.9   | 44.8   | 55.0   | 57.7   | 46.0   | 75.7   | 66.7   | 40.4   |
| 879.0  | 386.6  | 367.7  | 454.6  | 453.1  | 425.9  | 642.2  | 878.5  | 538.5  |
| 126.3  | 57.9   | 83.7   | 92.6   | 96.5   | 73.1   | 103.1  | 124.1  | 93.5   |
| 40.2   | 23.6   | 25.3   | 26.4   | 23.5   | 24.4   | 37.8   | 52.4   | 20.4   |
| 36.4   | 21.6   | 21.5   | 23.5   | 30.2   | 25.0   | 30.7   | 41.1   | 28.7   |
| 35.1   | 26.8   | 17.7   | 25.9   | 32.8   | 28.9   | 36.9   | 47.2   | 28.8   |
| 1.1    | 4.6    | 5.6    | 0.8    | 6.6    | 0.9    | 3.3    | 2.5    | 1.2    |
| 325.1  | 204.8  | 246.6  | 274.4  | 282.3  | 286.2  | 408.6  | 433.9  | 273.8  |
| 3.3    | 5.4    | 7.1    | 6.5    | 6.8    | 5.7    | 4.8    | 6.8    | 11.6   |
| 173.0  | 117.9  | 132.1  | 144.6  | 148.2  | 146.6  | 189.0  | 199.2  | 151.1  |
| 60.6   | 36.6   | 39.7   | 39.9   | 47.4   | 35.9   | 52.5   | 60.8   | 55.2   |
| 90.1   | 44.6   | 67.9   | 54.5   | 77.6   | 68.6   | 83.5   | 97.6   | 43.6   |
| 117.1  | 112.5  | 104.1  | 127.4  | 142.3  | 123.6  | 159.3  | 247.0  | 141.9  |
| 7.6    | 10.2   | 12.7   | 10.7   | 11.0   | 5.9    | 10.1   | 9.2    | 9.3    |
| 195.5  | 135.2  | 157.9  | 162.3  | 162.3  | 175.6  | 233.0  | 272.3  | 189.2  |
| 179.3  | 142.5  | 130.1  | 169.3  | 178.7  | 130.6  | 212.6  | 237.8  | 156.8  |
| 134.7  | 110.0  | 114.7  | 131.2  | 129.0  | 114.2  | 167.6  | 199.5  | 99.9   |
| 44.4   | 26.9   | 28.6   | 32.4   | 36.2   | 31.2   | 49.6   | 60.2   | 34.4   |
| 59.7   | 39.8   | 41.3   | 49.7   | 55.6   | 54.7   | 66.4   | 114.9  | 66.7   |
| 2567.8 | 2299.5 | 2443.3 | 2582.8 | 2706.4 | 2799.7 | 3178.6 | 3571.9 | 2573.8 |
| 20.8   | 15.7   | 14.2   | 14.8   | 20.2   | 14.6   | 26.4   | 29.9   | 19.3   |
| 162.3  | 108.1  | 125.9  | 160.9  | 134.3  | 151.8  | 189.7  | 213.2  | 112.4  |

|        |        |        |        |        |        |        |        |        |
|--------|--------|--------|--------|--------|--------|--------|--------|--------|
| 128.3  | 73.8   | 90.7   | 81.3   | 101.6  | 95.5   | 155.0  | 122.6  | 114.0  |
| 121.3  | 61.2   | 81.9   | 83.5   | 95.4   | 88.0   | 108.3  | 132.6  | 75.1   |
| 62.5   | 41.9   | 42.4   | 42.3   | 47.0   | 46.3   | 68.0   | 82.6   | 48.6   |
| 44.5   | 14.4   | 12.2   | 15.0   | 14.9   | 12.2   | 20.7   | 20.4   | 7.0    |
| 143.7  | 110.3  | 134.3  | 150.2  | 133.6  | 145.5  | 171.8  | 236.0  | 136.1  |
| 5.7    | 2.9    | 9.5    | 5.5    | 9.1    | 9.8    | 19.7   | 10.9   | 3.0    |
| 25.7   | 17.1   | 16.5   | 20.6   | 15.8   | 20.7   | 22.1   | 40.0   | 19.9   |
| 143.7  | 72.3   | 88.3   | 86.5   | 96.7   | 98.7   | 119.4  | 132.3  | 117.4  |
| 40.0   | 15.9   | 31.2   | 28.9   | 29.1   | 24.6   | 42.7   | 48.6   | 25.6   |
| 33.5   | 22.6   | 23.2   | 28.5   | 28.4   | 22.9   | 23.5   | 46.8   | 31.4   |
| 19.8   | 17.9   | 16.3   | 21.1   | 25.9   | 30.4   | 31.9   | 17.2   | 14.7   |
| 62.5   | 20.6   | 21.3   | 20.2   | 23.8   | 20.7   | 23.0   | 34.2   | 31.6   |
| 168.5  | 88.4   | 144.0  | 152.7  | 117.7  | 153.6  | 155.0  | 230.8  | 140.2  |
| 126.2  | 75.8   | 68.9   | 88.8   | 77.9   | 89.4   | 150.1  | 155.9  | 92.4   |
| 87.1   | 34.5   | 30.1   | 27.4   | 19.3   | 21.8   | 37.5   | 40.9   | 38.7   |
| 20.0   | 19.5   | 30.5   | 22.8   | 22.6   | 12.6   | 39.6   | 36.2   | 25.8   |
| 57.2   | 34.0   | 35.5   | 37.3   | 44.7   | 44.9   | 60.9   | 78.3   | 41.1   |
| 28.5   | 12.2   | 18.9   | 13.9   | 7.7    | 20.2   | 25.5   | 23.9   | 12.3   |
| 35.8   | 25.4   | 19.6   | 24.1   | 19.4   | 23.1   | 26.9   | 45.4   | 25.8   |
| 19.3   | 16.6   | 25.2   | 19.4   | 24.5   | 16.9   | 27.2   | 25.9   | 23.1   |
| 23.9   | 62.1   | 42.4   | 53.1   | 49.6   | 41.1   | 69.7   | 74.6   | 73.5   |
| 99.0   | 48.0   | 72.3   | 57.7   | 62.7   | 67.0   | 86.4   | 96.3   | 42.7   |
| 2.5    | 2.2    | 2.1    | 1.9    | 9.7    | 2.5    | 4.0    | 8.4    | 1.6    |
| 247.3  | 132.9  | 185.2  | 173.6  | 205.4  | 221.0  | 257.0  | 311.6  | 208.7  |
| 31.3   | 25.6   | 32.0   | 29.4   | 27.9   | 35.2   | 28.0   | 34.1   | 26.0   |
| 5.7    | 12.0   | 10.8   | 7.0    | 11.9   | 8.3    | 13.5   | 18.2   | 9.5    |
| 131.4  | 67.0   | 67.9   | 87.0   | 89.7   | 74.9   | 100.1  | 129.3  | 90.2   |
| 76.4   | 50.1   | 36.4   | 42.8   | 38.7   | 31.3   | 39.1   | 48.1   | 39.2   |
| 318.3  | 152.7  | 180.6  | 193.6  | 197.6  | 223.2  | 299.2  | 390.5  | 257.9  |
| 71.4   | 33.4   | 31.2   | 32.8   | 49.9   | 39.6   | 56.7   | 95.9   | 43.8   |
| 180.2  | 51.7   | 63.3   | 63.4   | 58.4   | 75.6   | 94.5   | 154.4  | 82.9   |
| 98.1   | 56.8   | 52.1   | 74.6   | 54.5   | 63.8   | 87.5   | 96.5   | 84.3   |
| 77.7   | 76.9   | 58.7   | 72.3   | 67.3   | 49.3   | 80.3   | 91.3   | 84.9   |
| 368.2  | 93.8   | 111.1  | 132.7  | 116.2  | 137.8  | 206.6  | 351.5  | 214.8  |
| 89.8   | 69.7   | 90.8   | 81.0   | 82.8   | 73.5   | 91.5   | 108.1  | 75.1   |
| 29.9   | 18.3   | 27.2   | 21.5   | 21.5   | 18.5   | 42.5   | 30.7   | 24.2   |
| 127.4  | 79.0   | 100.6  | 106.7  | 87.4   | 103.4  | 127.4  | 149.6  | 103.8  |
| 102.2  | 52.7   | 64.7   | 59.0   | 57.1   | 74.2   | 86.1   | 141.0  | 81.2   |
| 2269.9 | 1934.7 | 1942.7 | 2113.4 | 2121.0 | 2104.9 | 2551.5 | 2963.8 | 2197.4 |
| 72.3   | 44.5   | 34.7   | 60.1   | 40.1   | 49.6   | 80.7   | 101.5  | 51.7   |
| 0.5    | 3.2    | 1.7    | 0.6    | 1.1    | 2.3    | 6.1    | 3.2    | 2.7    |
| 3439.6 | 3094.5 | 2917.0 | 3096.8 | 3303.2 | 3053.0 | 3482.4 | 3525.7 | 2823.8 |
| 229.6  | 48.0   | 78.2   | 73.7   | 72.7   | 92.9   | 147.1  | 187.1  | 104.8  |
| 9.5    | 4.5    | 13.0   | 10.1   | 8.3    | 8.3    | 10.3   | 15.2   | 6.6    |
| 127.4  | 80.6   | 96.8   | 93.0   | 90.4   | 110.3  | 146.1  | 172.2  | 111.8  |
| 116.4  | 29.1   | 46.1   | 41.4   | 40.5   | 49.9   | 82.6   | 126.8  | 63.7   |
| 69.4   | 44.2   | 50.3   | 53.2   | 50.1   | 45.6   | 75.3   | 86.6   | 56.1   |
| 2.9    | 0.2    | 0.6    | 0.2    | 0.3    | 1.0    | 0.6    | 0.2    | 2.4    |
| 2.3    | 0.3    | 0.8    | 1.0    | 0.8    | 3.4    | 5.1    | 0.4    | 3.4    |
| 75.2   | 42.5   | 37.9   | 53.6   | 40.7   | 59.9   | 73.4   | 101.7  | 72.4   |
| 87.0   | 54.2   | 78.0   | 64.7   | 82.2   | 78.0   | 104.0  | 184.5  | 81.9   |
| 137.7  | 82.5   | 101.7  | 100.2  | 130.0  | 118.2  | 141.7  | 160.1  | 81.7   |
| 2.8    | 0.1    | 0.3    | 0.1    | 0.5    | 0.1    | 0.5    | 1.7    | 0.7    |

|        |        |        |        |        |        |        |        |        |
|--------|--------|--------|--------|--------|--------|--------|--------|--------|
| 364.9  | 178.0  | 191.0  | 229.8  | 260.1  | 253.1  | 306.4  | 401.5  | 180.1  |
| 32.1   | 22.2   | 26.0   | 14.1   | 28.1   | 18.7   | 44.2   | 57.2   | 44.9   |
| 334.4  | 278.2  | 296.0  | 336.2  | 326.6  | 280.9  | 441.4  | 461.0  | 299.6  |
| 80.5   | 70.3   | 63.7   | 72.3   | 79.1   | 77.0   | 102.9  | 134.3  | 85.5   |
| 92.1   | 61.8   | 58.1   | 76.8   | 77.7   | 82.9   | 110.6  | 130.7  | 75.5   |
| 14.8   | 12.2   | 9.6    | 11.9   | 14.2   | 6.5    | 20.7   | 17.1   | 10.3   |
| 20.8   | 8.8    | 12.4   | 8.6    | 9.9    | 12.3   | 17.7   | 22.6   | 12.1   |
| 757.1  | 532.7  | 627.5  | 639.0  | 681.3  | 692.6  | 876.7  | 1015.6 | 651.9  |
| 28.0   | 23.6   | 20.9   | 33.9   | 26.3   | 27.3   | 39.9   | 42.3   | 39.4   |
| 54.0   | 66.2   | 58.3   | 57.3   | 68.7   | 56.8   | 78.1   | 73.9   | 44.8   |
| 65.7   | 74.5   | 88.6   | 87.8   | 82.8   | 97.7   | 137.2  | 183.9  | 122.4  |
| 100.5  | 101.0  | 125.8  | 147.2  | 140.1  | 138.9  | 201.4  | 260.2  | 159.4  |
| 27.8   | 11.7   | 12.1   | 13.0   | 13.5   | 11.6   | 18.6   | 27.7   | 12.1   |
| 28.3   | 29.5   | 18.6   | 26.2   | 26.5   | 20.7   | 29.4   | 27.7   | 18.6   |
| 7.2    | 9.4    | 7.8    | 6.2    | 6.0    | 10.2   | 12.9   | 10.3   | 9.0    |
| 51.2   | 27.1   | 29.1   | 28.5   | 37.9   | 37.4   | 42.4   | 59.5   | 33.9   |
| 22.5   | 26.4   | 23.0   | 18.3   | 28.7   | 24.9   | 40.3   | 40.8   | 26.3   |
| 325.8  | 176.7  | 209.7  | 218.9  | 240.2  | 250.5  | 340.0  | 431.9  | 219.9  |
| 21.0   | 23.1   | 19.3   | 21.5   | 13.8   | 11.8   | 22.1   | 23.5   | 15.8   |
| 94.9   | 69.8   | 72.9   | 89.8   | 83.3   | 81.1   | 126.2  | 152.9  | 137.9  |
| 9.5    | 0.7    | 1.6    | 2.1    | 7.3    | 5.2    | 12.4   | 12.4   | 8.8    |
| 103.4  | 44.8   | 51.0   | 62.6   | 47.7   | 56.5   | 68.9   | 88.6   | 45.7   |
| 20.3   | 20.9   | 11.2   | 15.8   | 17.4   | 13.2   | 28.5   | 36.6   | 27.7   |
| 39.2   | 32.5   | 28.3   | 27.5   | 39.6   | 32.1   | 39.1   | 65.2   | 25.1   |
| 31.7   | 26.0   | 28.9   | 31.8   | 28.5   | 23.7   | 46.1   | 38.8   | 28.8   |
| 3.7    | 1.5    | 3.4    | 14.6   | 4.6    | 12.9   | 20.3   | 4.2    | 4.8    |
| 56.1   | 31.7   | 53.3   | 44.4   | 53.3   | 53.5   | 73.9   | 72.4   | 47.0   |
| 3.2    | 11.9   | 15.8   | 12.2   | 13.8   | 8.5    | 14.8   | 17.4   | 10.8   |
| 37.9   | 29.5   | 37.3   | 33.2   | 50.3   | 41.7   | 52.5   | 84.0   | 34.2   |
| 86.9   | 37.9   | 43.1   | 56.2   | 63.9   | 63.3   | 80.0   | 104.6  | 54.0   |
| 120.0  | 64.0   | 74.4   | 70.2   | 78.4   | 86.3   | 96.3   | 143.9  | 85.1   |
| 1.6    | 2.2    | 4.2    | 1.7    | 1.3    | 0.8    | 1.3    | 6.5    | 2.1    |
| 110.0  | 71.7   | 66.3   | 92.5   | 85.7   | 80.2   | 134.5  | 117.6  | 110.7  |
| 1313.6 | 1102.7 | 1133.3 | 1154.0 | 1296.8 | 1229.5 | 1562.9 | 1654.5 | 898.9  |
| 220.1  | 120.6  | 139.7  | 134.6  | 146.3  | 158.6  | 200.6  | 232.3  | 184.6  |
| 71.1   | 44.7   | 38.3   | 52.1   | 51.5   | 45.8   | 74.3   | 108.3  | 80.4   |
| 46.8   | 36.2   | 30.2   | 23.1   | 29.4   | 32.9   | 39.2   | 55.3   | 34.9   |
| 33.5   | 25.1   | 32.0   | 25.9   | 33.4   | 30.6   | 52.3   | 45.8   | 39.7   |
| 31.9   | 17.0   | 24.7   | 18.8   | 22.6   | 19.6   | 27.4   | 23.4   | 22.0   |
| 26.7   | 20.8   | 19.9   | 22.8   | 19.6   | 25.3   | 28.1   | 19.7   | 21.0   |
| 86.7   | 81.9   | 62.8   | 80.2   | 81.8   | 75.5   | 99.5   | 153.4  | 109.8  |
| 52.1   | 22.5   | 22.5   | 24.9   | 31.0   | 26.1   | 42.5   | 48.3   | 38.9   |
| 58.5   | 35.3   | 36.0   | 54.0   | 68.7   | 53.6   | 62.5   | 112.6  | 78.2   |
| 4.2    | 3.3    | 0.2    | 1.8    | 4.0    | 2.9    | 0.7    | 7.2    | 2.6    |
| 73.1   | 47.1   | 45.4   | 57.0   | 65.2   | 56.8   | 102.5  | 120.2  | 110.5  |
| 250.1  | 160.3  | 154.4  | 197.5  | 183.1  | 176.2  | 291.3  | 329.8  | 260.6  |
| 4029.8 | 3231.3 | 3411.9 | 3353.8 | 3747.1 | 3495.2 | 4252.2 | 4324.6 | 3516.5 |
| 325.2  | 225.7  | 223.0  | 256.6  | 281.7  | 279.7  | 387.9  | 472.7  | 343.0  |
| 8.0    | 8.6    | 8.0    | 11.4   | 9.1    | 11.4   | 13.1   | 21.8   | 9.6    |
| 20.1   | 16.9   | 23.9   | 22.1   | 21.6   | 13.6   | 32.4   | 29.2   | 16.7   |
| 762.7  | 586.1  | 701.1  | 683.7  | 709.8  | 711.3  | 770.0  | 899.0  | 478.6  |
| 253.4  | 190.5  | 139.5  | 157.0  | 237.9  | 236.1  | 295.5  | 339.8  | 219.1  |
| 78.2   | 59.9   | 85.7   | 78.4   | 66.0   | 81.3   | 109.2  | 118.3  | 65.2   |

|        |        |        |        |        |        |        |        |        |
|--------|--------|--------|--------|--------|--------|--------|--------|--------|
| 0.8    | 10.2   | 7.9    | 5.9    | 7.9    | 8.3    | 5.0    | 9.8    | 9.9    |
| 55.5   | 25.9   | 24.1   | 39.2   | 27.4   | 27.7   | 32.4   | 43.2   | 23.8   |
| 71.0   | 73.5   | 68.2   | 81.5   | 79.3   | 72.6   | 100.0  | 124.5  | 117.9  |
| 12.6   | 12.2   | 14.3   | 16.2   | 8.8    | 11.0   | 17.3   | 26.6   | 14.7   |
| 8.6    | 9.1    | 7.2    | 1.5    | 2.1    | 4.3    | 2.6    | 3.7    | 4.6    |
| 1.0    | 1.1    | 1.1    | 4.1    | 0.3    | 0.8    | 0.7    | 8.2    | 0.7    |
| 110.9  | 78.9   | 91.8   | 125.3  | 111.9  | 105.2  | 131.5  | 174.4  | 112.5  |
| 56.1   | 27.2   | 36.0   | 40.0   | 31.1   | 42.1   | 56.8   | 57.8   | 43.4   |
| 0.7    | 0.9    | 0.6    | 0.4    | 0.9    | 0.7    | 1.1    | 1.2    | 0.7    |
| 26.2   | 16.0   | 21.1   | 25.8   | 26.9   | 18.7   | 31.1   | 36.0   | 25.8   |
| 163.9  | 173.2  | 139.9  | 175.2  | 166.0  | 161.0  | 226.6  | 242.3  | 186.8  |
| 20.4   | 20.0   | 16.1   | 17.4   | 19.7   | 15.1   | 18.5   | 18.2   | 15.3   |
| 17.7   | 26.9   | 20.0   | 20.0   | 18.5   | 19.0   | 19.6   | 25.7   | 5.6    |
| 3.7    | 10.3   | 8.3    | 12.0   | 8.8    | 7.4    | 18.0   | 13.9   | 7.4    |
| 29.0   | 15.5   | 20.4   | 16.0   | 23.6   | 21.2   | 30.3   | 23.6   | 24.4   |
| 4223.5 | 3438.6 | 3546.7 | 3744.6 | 3698.9 | 3651.1 | 4048.8 | 4344.5 | 3408.4 |
| 31.7   | 12.7   | 18.9   | 18.9   | 13.6   | 22.9   | 23.8   | 30.2   | 16.0   |
| 90.9   | 94.8   | 102.5  | 101.7  | 100.3  | 96.4   | 133.3  | 161.1  | 143.0  |
| 50.6   | 23.6   | 24.6   | 32.9   | 15.5   | 19.9   | 27.2   | 29.9   | 19.4   |
| 25.7   | 21.8   | 26.7   | 30.5   | 25.5   | 24.2   | 28.5   | 34.3   | 25.4   |
| 25.6   | 26.6   | 20.2   | 19.7   | 24.0   | 10.6   | 24.3   | 28.5   | 15.2   |
| 0.5    | 3.6    | 0.2    | 0.6    | 0.6    | 0.6    | 2.7    | 0.4    | 0.3    |
| 1.8    | 1.9    | 7.3    | 1.4    | 1.1    | 1.1    | 6.9    | 0.8    | 0.6    |
| 51.1   | 39.2   | 38.5   | 43.8   | 47.0   | 44.7   | 66.6   | 67.1   | 56.6   |
| 2.0    | 1.6    | 0.9    | 1.6    | 1.0    | 0.9    | 1.6    | 1.7    | 0.9    |
| 0.4    | 0.4    | 0.6    | 0.6    | 0.3    | 0.4    | 1.3    | 6.1    | 3.0    |
| 14.3   | 6.1    | 9.3    | 7.4    | 1.3    | 10.4   | 10.9   | 16.0   | 9.4    |
| 239.0  | 158.1  | 142.2  | 143.3  | 192.6  | 170.0  | 198.6  | 240.8  | 175.1  |
| 139.4  | 84.9   | 108.1  | 129.3  | 129.2  | 125.7  | 171.9  | 163.2  | 137.7  |
| 27.5   | 24.3   | 30.3   | 26.3   | 34.2   | 28.9   | 39.8   | 51.0   | 32.8   |
| 88.2   | 32.4   | 53.3   | 54.0   | 42.8   | 64.2   | 73.2   | 53.6   | 41.0   |
| 34.7   | 16.1   | 16.2   | 18.1   | 21.7   | 17.9   | 30.0   | 35.4   | 17.9   |
| 30.8   | 11.6   | 18.2   | 19.1   | 20.2   | 18.0   | 20.6   | 31.1   | 13.5   |
| 9.9    | 9.1    | 5.1    | 7.8    | 7.6    | 4.8    | 8.8    | 4.2    | 9.5    |
| 468.7  | 305.9  | 405.7  | 382.6  | 411.6  | 434.1  | 570.0  | 588.8  | 381.4  |
| 3.7    | 1.9    | 1.7    | 0.3    | 2.0    | 2.5    | 0.8    | 5.4    | 3.0    |
| 70.5   | 38.7   | 44.4   | 47.4   | 40.2   | 42.9   | 70.9   | 71.9   | 39.3   |
| 78.8   | 50.3   | 53.8   | 69.7   | 68.7   | 61.6   | 106.0  | 92.1   | 82.8   |
| 55.3   | 19.4   | 29.1   | 27.2   | 22.9   | 23.3   | 47.6   | 43.9   | 35.3   |
| 243.4  | 113.6  | 180.4  | 172.1  | 171.8  | 158.3  | 191.3  | 196.0  | 246.7  |
| 73.9   | 55.6   | 56.8   | 60.9   | 66.5   | 70.1   | 105.5  | 92.8   | 72.7   |
| 104.6  | 45.4   | 47.1   | 59.6   | 50.7   | 59.2   | 88.2   | 98.6   | 64.2   |
| 142.6  | 164.9  | 156.8  | 202.0  | 202.3  | 179.8  | 285.3  | 283.2  | 222.8  |
| 50.2   | 37.8   | 34.8   | 42.0   | 33.5   | 47.2   | 62.6   | 67.8   | 49.3   |
| 49.9   | 25.5   | 30.7   | 36.2   | 27.5   | 38.5   | 40.7   | 55.9   | 29.5   |
| 217.5  | 137.2  | 181.6  | 170.3  | 184.1  | 188.2  | 195.3  | 224.0  | 161.9  |
| 239.4  | 91.0   | 110.2  | 139.9  | 129.9  | 105.1  | 171.3  | 194.9  | 132.8  |
| 34.8   | 14.3   | 19.9   | 15.6   | 17.9   | 20.2   | 26.3   | 33.6   | 19.1   |
| 537.5  | 474.9  | 588.7  | 595.6  | 580.3  | 598.0  | 773.5  | 881.6  | 545.0  |
| 5.8    | 1.1    | 2.3    | 1.8    | 1.2    | 0.7    | 1.2    | 1.2    | 1.2    |
| 223.0  | 199.3  | 201.1  | 228.3  | 221.2  | 251.4  | 309.1  | 332.1  | 293.8  |
| 179.7  | 130.3  | 118.2  | 130.8  | 125.1  | 98.0   | 148.8  | 137.3  | 149.0  |
| 60.8   | 28.2   | 24.7   | 43.8   | 34.6   | 36.3   | 43.8   | 58.2   | 40.5   |



|        |        |        |        |        |        |        |        |        |
|--------|--------|--------|--------|--------|--------|--------|--------|--------|
| 21.1   | 27.8   | 17.9   | 24.3   | 27.0   | 11.4   | 29.0   | 25.8   | 24.8   |
| 13.3   | 13.6   | 16.2   | 20.0   | 15.9   | 18.1   | 25.4   | 12.7   | 9.3    |
| 1.6    | 1.8    | 3.4    | 1.6    | 2.8    | 1.1    | 1.2    | 3.2    | 1.6    |
| 34.9   | 16.5   | 23.5   | 30.8   | 20.3   | 25.9   | 35.4   | 49.7   | 31.9   |
| 14.5   | 0.9    | 9.8    | 6.8    | 1.2    | 10.2   | 15.1   | 15.9   | 8.5    |
| 58.4   | 33.9   | 34.6   | 41.5   | 41.9   | 43.5   | 48.9   | 57.3   | 35.7   |
| 18.5   | 16.2   | 32.4   | 23.4   | 31.2   | 25.7   | 31.9   | 27.6   | 26.5   |
| 7.1    | 4.5    | 3.5    | 4.7    | 5.0    | 4.7    | 4.4    | 7.1    | 5.2    |
| 1.7    | 1.5    | 0.9    | 2.2    | 2.4    | 2.9    | 2.2    | 5.7    | 5.6    |
| 199.9  | 115.6  | 122.7  | 149.5  | 130.4  | 139.3  | 176.9  | 199.6  | 126.4  |
| 78.7   | 42.0   | 47.2   | 49.4   | 79.6   | 59.6   | 90.4   | 141.4  | 80.0   |
| 42.7   | 27.0   | 42.4   | 31.6   | 38.9   | 40.6   | 40.4   | 52.2   | 29.8   |
| 43.2   | 27.9   | 35.1   | 27.0   | 30.1   | 36.6   | 37.1   | 52.7   | 30.7   |
| 54.1   | 33.5   | 25.4   | 33.4   | 46.5   | 45.4   | 44.6   | 53.0   | 30.8   |
| 0.9    | 1.0    | 1.3    | 0.6    | 1.0    | 0.9    | 0.6    | 0.8    | 1.0    |
| 132.9  | 67.4   | 89.4   | 74.1   | 78.0   | 84.7   | 119.1  | 150.8  | 86.7   |
| 33.0   | 24.5   | 28.2   | 24.3   | 20.8   | 19.3   | 38.6   | 50.1   | 26.9   |
| 978.6  | 842.5  | 767.3  | 836.6  | 915.9  | 872.6  | 1267.4 | 1332.5 | 979.5  |
| 39.5   | 32.1   | 38.0   | 24.8   | 34.5   | 24.2   | 38.6   | 34.2   | 32.8   |
| 405.3  | 260.8  | 272.0  | 320.7  | 292.1  | 342.4  | 429.6  | 562.6  | 315.7  |
| 45.2   | 33.1   | 32.7   | 33.4   | 31.0   | 31.7   | 43.7   | 61.7   | 35.6   |
| 96.7   | 63.5   | 82.8   | 95.7   | 64.8   | 64.0   | 104.2  | 122.2  | 66.2   |
| 141.0  | 85.8   | 88.5   | 93.4   | 118.2  | 91.4   | 129.5  | 170.4  | 87.2   |
| 47.9   | 21.2   | 36.5   | 48.8   | 43.6   | 37.9   | 59.8   | 67.9   | 44.4   |
| 101.4  | 67.3   | 72.5   | 73.8   | 82.2   | 81.3   | 107.9  | 117.4  | 93.2   |
| 2.7    | 13.6   | 23.0   | 15.6   | 21.2   | 22.5   | 17.6   | 35.7   | 12.3   |
| 243.2  | 164.0  | 176.5  | 187.1  | 206.2  | 178.2  | 238.5  | 305.0  | 190.5  |
| 71.6   | 39.0   | 47.1   | 59.2   | 54.1   | 53.1   | 67.2   | 76.1   | 63.8   |
| 39.3   | 46.7   | 56.1   | 57.8   | 50.1   | 42.5   | 57.5   | 66.9   | 49.6   |
| 59.3   | 28.6   | 39.4   | 38.5   | 42.9   | 54.4   | 60.4   | 76.0   | 54.0   |
| 61.5   | 62.6   | 52.9   | 55.8   | 48.0   | 46.7   | 69.3   | 82.6   | 51.2   |
| 19.7   | 21.5   | 17.8   | 22.6   | 21.5   | 21.9   | 31.2   | 25.0   | 15.8   |
| 84.9   | 71.4   | 69.9   | 78.4   | 90.7   | 76.8   | 98.9   | 114.0  | 93.6   |
| 0.9    | 6.9    | 5.8    | 1.0    | 4.9    | 4.7    | 1.6    | 2.7    | 4.8    |
| 73.1   | 46.6   | 43.3   | 46.8   | 53.6   | 52.6   | 88.9   | 88.1   | 71.7   |
| 3559.0 | 2959.9 | 3059.0 | 3261.8 | 3257.4 | 3159.7 | 3540.3 | 3599.5 | 3161.3 |
| 15.2   | 17.5   | 20.2   | 29.1   | 14.5   | 12.8   | 16.6   | 17.4   | 11.2   |
| 10.8   | 14.8   | 11.4   | 17.3   | 13.5   | 10.4   | 17.9   | 16.2   | 22.2   |
| 167.5  | 108.5  | 125.8  | 133.6  | 138.4  | 135.1  | 177.0  | 164.1  | 106.5  |
| 92.8   | 59.3   | 76.7   | 82.8   | 84.6   | 75.6   | 104.9  | 121.7  | 62.3   |
| 9.3    | 8.0    | 1.2    | 1.9    | 7.0    | 1.8    | 4.7    | 7.5    | 5.2    |
| 98.2   | 114.6  | 129.2  | 132.2  | 134.6  | 136.7  | 180.5  | 241.6  | 115.4  |
| 915.2  | 403.1  | 606.2  | 594.0  | 573.2  | 758.2  | 842.1  | 1160.5 | 806.8  |
| 62.3   | 47.0   | 41.3   | 52.0   | 30.0   | 50.7   | 61.5   | 69.9   | 60.9   |
| 15.6   | 7.3    | 9.1    | 11.8   | 7.1    | 10.0   | 16.6   | 20.4   | 11.7   |
| 98.0   | 46.8   | 37.7   | 49.6   | 42.4   | 45.4   | 73.1   | 91.3   | 75.9   |
| 67.3   | 19.5   | 19.9   | 24.8   | 20.8   | 24.0   | 35.4   | 56.2   | 29.8   |
| 9.6    | 0.7    | 0.8    | 0.8    | 2.4    | 3.2    | 2.4    | 2.4    | 0.6    |
| 59.9   | 40.5   | 40.2   | 51.8   | 33.9   | 47.8   | 57.6   | 66.5   | 53.5   |
| 21.2   | 14.3   | 22.3   | 19.6   | 24.8   | 24.7   | 34.0   | 37.6   | 24.5   |
| 189.4  | 119.6  | 128.7  | 137.3  | 175.2  | 141.8  | 209.6  | 270.0  | 222.3  |
| 0.8    | 0.7    | 1.7    | 0.6    | 0.7    | 0.7    | 0.6    | 0.7    | 0.5    |
| 113.6  | 67.7   | 75.2   | 82.6   | 83.7   | 83.6   | 128.4  | 144.8  | 124.0  |

|        |        |        |        |        |        |        |        |        |
|--------|--------|--------|--------|--------|--------|--------|--------|--------|
| 33.1   | 27.6   | 26.5   | 34.9   | 32.6   | 30.9   | 46.3   | 48.0   | 26.7   |
| 87.2   | 55.7   | 69.8   | 74.3   | 67.9   | 62.4   | 86.9   | 94.1   | 66.2   |
| 66.1   | 43.7   | 46.6   | 42.5   | 47.6   | 57.7   | 67.4   | 92.9   | 53.8   |
| 3.5    | 3.0    | 3.1    | 1.0    | 2.8    | 0.5    | 4.9    | 6.6    | 3.2    |
| 21.0   | 15.7   | 23.2   | 11.8   | 17.3   | 23.5   | 25.1   | 27.1   | 29.1   |
| 54.3   | 50.3   | 59.6   | 63.2   | 58.6   | 44.5   | 79.9   | 67.9   | 50.2   |
| 1.0    | 0.4    | 1.2    | 1.9    | 1.4    | 1.1    | 0.9    | 5.8    | 1.3    |
| 1.2    | 2.0    | 9.2    | 9.2    | 2.0    | 1.2    | 2.2    | 9.3    | 6.5    |
| 39.6   | 21.4   | 14.2   | 23.6   | 20.1   | 16.0   | 31.2   | 36.2   | 19.1   |
| 62.3   | 44.5   | 46.9   | 59.9   | 66.5   | 58.6   | 70.2   | 78.0   | 54.0   |
| 36.2   | 19.8   | 20.5   | 29.3   | 23.7   | 25.1   | 31.4   | 36.6   | 33.5   |
| 23.6   | 12.9   | 13.7   | 20.7   | 19.6   | 16.5   | 31.3   | 26.6   | 24.4   |
| 2.6    | 1.4    | 2.3    | 4.7    | 0.4    | 1.0    | 0.4    | 2.9    | 0.8    |
| 57.8   | 33.6   | 29.6   | 33.4   | 44.1   | 33.4   | 43.7   | 64.3   | 41.7   |
| 191.3  | 99.3   | 128.7  | 123.8  | 130.2  | 148.6  | 165.4  | 214.8  | 151.4  |
| 126.5  | 52.5   | 70.2   | 69.9   | 79.7   | 83.6   | 112.6  | 126.1  | 71.1   |
| 0.2    | 0.1    | 2.4    | 0.1    | 0.7    | 1.7    | 1.7    | 0.3    | 0.7    |
| 46.9   | 40.2   | 59.2   | 50.4   | 69.6   | 41.6   | 73.4   | 62.8   | 52.4   |
| 83.7   | 78.2   | 78.0   | 94.7   | 77.5   | 63.1   | 107.8  | 103.7  | 81.0   |
| 67.1   | 27.3   | 29.5   | 42.5   | 34.6   | 31.6   | 47.3   | 47.9   | 32.5   |
| 51.4   | 39.1   | 35.1   | 33.9   | 39.0   | 41.9   | 56.7   | 72.8   | 39.2   |
| 504.0  | 264.1  | 299.0  | 339.3  | 379.6  | 436.6  | 588.4  | 652.3  | 451.9  |
| 37.9   | 12.3   | 7.6    | 9.3    | 10.4   | 19.3   | 13.6   | 19.8   | 17.5   |
| 11.5   | 3.0    | 2.0    | 0.2    | 0.7    | 0.5    | 1.6    | 2.4    | 0.7    |
| 6.4    | 2.2    | 0.5    | 0.6    | 2.6    | 0.7    | 0.7    | 2.0    | 1.8    |
| 11.7   | 9.0    | 10.5   | 9.2    | 7.4    | 11.4   | 12.5   | 9.1    | 7.8    |
| 49.2   | 26.2   | 36.1   | 46.5   | 44.0   | 42.9   | 59.4   | 61.6   | 43.3   |
| 20.2   | 13.9   | 9.8    | 11.6   | 7.4    | 9.3    | 14.2   | 18.5   | 17.0   |
| 6.0    | 9.1    | 4.8    | 5.2    | 7.3    | 7.4    | 8.6    | 16.5   | 11.7   |
| 70.9   | 40.2   | 36.3   | 40.5   | 55.4   | 44.4   | 62.9   | 88.4   | 49.6   |
| 608.8  | 450.6  | 547.7  | 541.1  | 575.5  | 556.0  | 729.2  | 708.8  | 505.2  |
| 66.4   | 37.2   | 37.6   | 38.0   | 43.1   | 39.9   | 60.5   | 79.3   | 49.5   |
| 35.7   | 28.0   | 29.9   | 33.6   | 27.8   | 24.7   | 41.3   | 25.8   | 34.0   |
| 55.2   | 36.8   | 43.5   | 39.4   | 45.2   | 47.5   | 55.5   | 86.6   | 48.1   |
| 37.1   | 20.9   | 17.9   | 26.3   | 28.1   | 26.2   | 31.1   | 26.2   | 17.1   |
| 154.5  | 107.4  | 111.3  | 120.1  | 135.7  | 116.8  | 176.0  | 159.4  | 125.8  |
| 1449.1 | 728.5  | 702.4  | 698.4  | 811.5  | 868.3  | 1138.2 | 1242.9 | 649.4  |
| 247.3  | 158.6  | 191.9  | 176.8  | 189.2  | 224.9  | 227.8  | 299.1  | 378.2  |
| 4388.2 | 4084.4 | 3860.9 | 4628.4 | 4383.7 | 4143.8 | 4665.4 | 4943.9 | 3923.2 |
| 80.2   | 65.3   | 72.5   | 85.0   | 79.7   | 55.4   | 99.5   | 95.7   | 64.1   |
| 10.9   | 7.1    | 12.3   | 16.0   | 10.3   | 10.5   | 8.5    | 14.5   | 10.5   |
| 14.3   | 15.1   | 13.8   | 14.0   | 19.3   | 14.3   | 8.2    | 18.5   | 6.5    |
| 52.3   | 31.8   | 27.8   | 46.1   | 28.3   | 42.8   | 63.6   | 79.9   | 56.6   |
| 71.4   | 36.1   | 45.5   | 42.1   | 50.0   | 45.0   | 63.1   | 75.0   | 61.8   |
| 51.2   | 24.4   | 35.3   | 31.9   | 30.7   | 36.9   | 51.9   | 53.3   | 32.5   |
| 11.5   | 3.6    | 0.7    | 1.0    | 8.5    | 11.3   | 6.9    | 12.5   | 5.5    |
| 38.7   | 28.9   | 28.9   | 38.4   | 32.5   | 36.2   | 40.6   | 47.4   | 33.2   |
| 78.0   | 44.8   | 50.4   | 48.2   | 47.8   | 55.5   | 83.3   | 90.0   | 62.3   |
| 37.5   | 21.0   | 28.2   | 24.1   | 22.2   | 28.2   | 42.4   | 45.4   | 28.8   |
| 55.2   | 47.2   | 45.7   | 54.8   | 43.5   | 46.4   | 52.9   | 68.9   | 49.8   |
| 92.3   | 61.3   | 74.5   | 74.0   | 71.9   | 86.1   | 96.9   | 124.1  | 74.8   |
| 19.7   | 16.2   | 18.2   | 19.1   | 9.2    | 15.2   | 15.4   | 27.2   | 22.5   |
| 64.6   | 51.6   | 55.6   | 59.9   | 67.7   | 67.1   | 87.3   | 96.5   | 64.5   |

|        |        |        |        |        |        |        |        |        |
|--------|--------|--------|--------|--------|--------|--------|--------|--------|
| 389.0  | 369.2  | 447.8  | 446.5  | 453.6  | 471.6  | 565.7  | 669.5  | 408.8  |
| 205.0  | 200.1  | 251.1  | 257.5  | 251.2  | 304.3  | 372.8  | 399.7  | 320.7  |
| 26.8   | 19.1   | 24.4   | 15.2   | 27.1   | 18.8   | 33.1   | 34.5   | 26.8   |
| 33.4   | 15.3   | 24.2   | 18.4   | 20.9   | 24.1   | 30.2   | 44.9   | 21.2   |
| 97.1   | 74.3   | 93.7   | 81.9   | 84.4   | 99.4   | 86.7   | 109.8  | 82.0   |
| 13.9   | 12.5   | 16.6   | 12.6   | 9.5    | 13.2   | 21.5   | 26.4   | 7.9    |
| 53.6   | 41.0   | 38.1   | 36.2   | 35.8   | 35.7   | 38.9   | 47.9   | 33.8   |
| 359.8  | 165.1  | 130.5  | 186.7  | 172.5  | 155.5  | 260.7  | 280.7  | 214.1  |
| 8.7    | 7.2    | 7.5    | 9.4    | 8.8    | 9.4    | 14.2   | 11.3   | 11.3   |
| 24.2   | 19.8   | 20.6   | 25.6   | 26.5   | 17.8   | 30.5   | 42.2   | 28.5   |
| 120.2  | 66.4   | 102.3  | 103.4  | 75.9   | 110.5  | 133.2  | 144.6  | 111.3  |
| 230.8  | 132.0  | 147.7  | 145.9  | 153.0  | 153.4  | 201.6  | 244.5  | 133.7  |
| 21.1   | 16.2   | 15.6   | 17.0   | 20.3   | 17.1   | 24.6   | 17.9   | 21.4   |
| 34.4   | 15.1   | 17.0   | 21.8   | 32.9   | 21.7   | 31.1   | 51.6   | 32.9   |
| 16.5   | 9.0    | 9.8    | 9.9    | 7.1    | 6.9    | 20.8   | 23.5   | 14.5   |
| 31.9   | 21.3   | 21.1   | 24.8   | 17.2   | 29.1   | 36.9   | 64.3   | 25.1   |
| 1.0    | 0.8    | 3.4    | 7.0    | 4.5    | 1.0    | 0.7    | 1.4    | 1.6    |
| 10.8   | 2.3    | 20.9   | 1.0    | 9.3    | 9.0    | 2.3    | 2.4    | 19.8   |
| 28.2   | 36.2   | 38.9   | 28.5   | 33.0   | 45.9   | 57.2   | 56.8   | 41.6   |
| 75.3   | 59.0   | 49.5   | 64.8   | 69.8   | 70.3   | 89.5   | 106.6  | 89.5   |
| 110.0  | 50.8   | 65.5   | 79.2   | 80.2   | 76.3   | 98.5   | 129.7  | 91.2   |
| 1991.5 | 1479.0 | 1504.8 | 1649.5 | 1781.5 | 1631.4 | 2339.1 | 2334.0 | 1986.7 |
| 8.0    | 1.4    | 4.7    | 1.9    | 9.5    | 1.4    | 22.9   | 10.6   | 10.1   |
| 6.1    | 1.2    | 4.4    | 4.6    | 8.0    | 1.0    | 6.0    | 10.1   | 5.5    |
| 19.6   | 20.5   | 22.7   | 32.3   | 21.8   | 27.8   | 33.7   | 34.9   | 23.8   |
| 27.8   | 14.8   | 22.0   | 23.5   | 23.4   | 22.7   | 22.8   | 34.5   | 20.7   |
| 9.6    | 5.4    | 4.3    | 3.9    | 2.0    | 6.4    | 6.9    | 6.8    | 11.7   |
| 129.6  | 98.5   | 113.1  | 104.8  | 102.4  | 119.3  | 167.1  | 177.1  | 112.8  |
| 100.5  | 77.6   | 87.1   | 81.3   | 79.2   | 92.7   | 118.6  | 152.7  | 83.1   |
| 22.9   | 18.6   | 18.9   | 18.5   | 21.7   | 22.5   | 28.6   | 33.5   | 27.4   |
| 57.5   | 30.0   | 46.4   | 42.8   | 38.5   | 39.8   | 50.0   | 68.1   | 53.9   |
| 74.2   | 41.4   | 57.9   | 61.8   | 57.9   | 65.6   | 75.1   | 92.1   | 51.1   |
| 48.1   | 32.7   | 45.7   | 45.5   | 42.8   | 46.7   | 53.0   | 55.3   | 62.3   |
| 26.5   | 28.4   | 20.4   | 32.5   | 18.4   | 23.5   | 30.7   | 36.3   | 41.6   |
| 13.7   | 12.4   | 8.4    | 11.1   | 13.4   | 17.1   | 14.5   | 16.1   | 17.2   |
| 41.5   | 44.4   | 60.3   | 39.9   | 53.1   | 55.4   | 61.0   | 72.4   | 51.4   |
| 68.6   | 28.3   | 38.4   | 35.9   | 33.5   | 35.0   | 70.6   | 68.6   | 43.6   |
| 52.9   | 18.1   | 21.8   | 24.2   | 17.7   | 17.8   | 23.7   | 33.2   | 30.1   |
| 2.7    | 7.8    | 7.4    | 4.4    | 7.5    | 5.3    | 3.3    | 9.5    | 7.1    |
| 35.5   | 18.8   | 23.0   | 20.9   | 16.7   | 29.5   | 39.0   | 25.3   | 22.6   |
| 0.8    | 0.5    | 4.5    | 0.5    | 0.5    | 0.5    | 0.6    | 2.4    | 0.3    |
| 281.8  | 108.7  | 142.4  | 154.9  | 154.6  | 172.8  | 231.7  | 275.2  | 204.1  |
| 42.6   | 42.3   | 35.9   | 45.7   | 47.0   | 40.0   | 52.9   | 100.1  | 59.1   |
| 14.3   | 11.1   | 12.7   | 13.2   | 13.6   | 21.4   | 12.4   | 22.8   | 14.1   |
| 28.7   | 16.0   | 23.3   | 17.0   | 34.6   | 5.9    | 25.8   | 37.7   | 27.3   |
| 1.5    | 0.6    | 2.2    | 0.6    | 1.0    | 5.0    | 2.5    | 6.0    | 1.0    |
| 46.0   | 43.3   | 58.8   | 54.8   | 48.6   | 68.2   | 76.7   | 105.5  | 62.1   |
| 189.6  | 102.7  | 99.8   | 101.2  | 102.4  | 111.6  | 157.9  | 202.8  | 120.0  |
| 23.4   | 25.8   | 27.9   | 38.6   | 29.4   | 40.9   | 32.0   | 56.3   | 33.4   |
| 209.4  | 146.3  | 170.7  | 173.0  | 153.6  | 179.3  | 181.9  | 225.0  | 196.9  |
| 34.4   | 23.6   | 29.2   | 24.8   | 31.6   | 41.5   | 33.8   | 68.3   | 40.8   |
| 19.8   | 22.2   | 16.3   | 22.2   | 24.5   | 13.8   | 29.4   | 28.8   | 31.5   |
| 1063.6 | 798.3  | 830.3  | 906.0  | 1002.3 | 935.3  | 1059.0 | 1380.8 | 952.6  |

|        |        |        |        |        |        |        |        |        |
|--------|--------|--------|--------|--------|--------|--------|--------|--------|
| 51.2   | 36.0   | 44.1   | 39.1   | 33.9   | 35.5   | 63.6   | 61.5   | 75.5   |
| 57.8   | 38.5   | 35.8   | 20.6   | 37.7   | 33.7   | 27.5   | 35.5   | 48.7   |
| 23.7   | 30.1   | 21.5   | 23.5   | 25.4   | 22.2   | 34.1   | 54.3   | 31.9   |
| 157.7  | 110.7  | 132.4  | 130.2  | 128.0  | 121.7  | 175.3  | 180.9  | 136.8  |
| 78.1   | 75.3   | 79.7   | 77.4   | 84.8   | 72.0   | 107.5  | 90.6   | 78.8   |
| 527.5  | 397.4  | 439.6  | 450.3  | 481.5  | 500.3  | 621.6  | 672.9  | 564.4  |
| 52.7   | 35.1   | 55.0   | 61.3   | 56.9   | 48.5   | 68.5   | 75.8   | 51.1   |
| 0.6    | 2.4    | 2.4    | 0.1    | 1.9    | 0.3    | 3.7    | 0.7    | 0.6    |
| 137.4  | 118.7  | 127.7  | 144.4  | 138.0  | 128.4  | 154.4  | 172.9  | 130.9  |
| 109.3  | 128.2  | 107.8  | 132.3  | 135.4  | 112.0  | 170.5  | 192.0  | 131.6  |
| 14.6   | 9.9    | 2.7    | 2.4    | 2.0    | 2.1    | 16.8   | 11.6   | 15.7   |
| 3374.2 | 3239.8 | 3115.5 | 3430.4 | 3534.1 | 3326.9 | 3932.6 | 4163.1 | 2466.6 |
| 21.8   | 25.2   | 22.8   | 26.3   | 26.4   | 16.5   | 33.1   | 37.5   | 23.2   |
| 65.5   | 37.8   | 50.5   | 58.9   | 48.2   | 57.6   | 74.2   | 94.9   | 56.9   |
| 56.7   | 29.0   | 40.7   | 34.7   | 48.6   | 49.3   | 53.0   | 64.6   | 39.2   |
| 43.3   | 18.4   | 15.6   | 22.1   | 21.2   | 19.1   | 18.9   | 28.3   | 21.8   |
| 1.0    | 0.3    | 0.7    | 1.0    | 0.4    | 0.4    | 0.5    | 0.5    | 0.5    |
| 48.7   | 30.4   | 44.3   | 43.8   | 48.6   | 43.2   | 64.4   | 82.3   | 52.1   |
| 26.9   | 21.7   | 16.6   | 17.2   | 23.8   | 24.7   | 48.4   | 52.0   | 31.6   |
| 46.6   | 28.0   | 34.1   | 26.7   | 28.5   | 37.4   | 36.7   | 45.9   | 25.3   |
| 93.9   | 46.2   | 59.9   | 58.4   | 54.2   | 63.0   | 80.5   | 95.8   | 63.5   |
| 20.4   | 20.7   | 18.8   | 14.5   | 16.4   | 21.2   | 32.7   | 33.0   | 23.5   |
| 63.7   | 32.1   | 36.1   | 41.7   | 42.8   | 36.6   | 53.0   | 58.2   | 44.9   |
| 30.6   | 19.6   | 23.3   | 24.3   | 29.0   | 26.4   | 42.5   | 39.8   | 27.4   |
| 69.4   | 30.7   | 46.4   | 43.7   | 41.5   | 55.1   | 59.2   | 52.6   | 49.4   |
| 5.3    | 0.8    | 4.7    | 4.8    | 0.9    | 0.7    | 4.6    | 1.6    | 1.5    |
| 25.4   | 15.3   | 20.8   | 23.5   | 26.6   | 30.6   | 14.2   | 19.9   | 10.6   |
| 53.0   | 31.6   | 38.5   | 40.2   | 41.2   | 45.9   | 56.6   | 77.4   | 33.7   |
| 0.9    | 3.2    | 2.7    | 0.4    | 0.3    | 3.1    | 0.5    | 0.7    | 0.3    |
| 226.7  | 183.9  | 178.3  | 192.3  | 225.3  | 196.6  | 302.8  | 318.7  | 218.7  |
| 46.8   | 21.5   | 28.1   | 39.8   | 35.1   | 39.0   | 54.1   | 77.0   | 30.3   |
| 1.1    | 1.3    | 1.6    | 1.3    | 1.4    | 1.0    | 1.3    | 1.2    | 1.2    |
| 103.0  | 71.5   | 68.1   | 94.7   | 77.6   | 57.3   | 91.3   | 110.3  | 65.4   |
| 193.6  | 115.4  | 138.5  | 134.6  | 164.9  | 152.0  | 223.1  | 201.9  | 142.6  |
| 75.4   | 63.5   | 51.2   | 61.7   | 47.5   | 59.1   | 74.7   | 84.0   | 58.1   |
| 73.2   | 75.3   | 63.0   | 62.1   | 61.6   | 72.6   | 66.8   | 106.7  | 86.6   |
| 131.3  | 75.8   | 85.8   | 90.9   | 96.3   | 115.9  | 136.7  | 139.0  | 116.7  |
| 90.8   | 56.5   | 70.2   | 71.9   | 61.2   | 64.7   | 84.8   | 93.1   | 67.7   |
| 134.1  | 94.7   | 99.8   | 116.3  | 105.5  | 113.3  | 166.3  | 169.9  | 171.1  |
| 84.2   | 131.0  | 170.8  | 206.3  | 119.9  | 168.4  | 188.1  | 216.0  | 140.1  |
| 73.0   | 34.1   | 49.6   | 50.2   | 66.4   | 71.6   | 76.8   | 109.7  | 74.9   |
| 216.3  | 250.5  | 261.5  | 313.7  | 295.1  | 286.0  | 381.3  | 423.7  | 318.7  |
| 69.7   | 49.4   | 61.1   | 66.3   | 68.7   | 65.8   | 88.6   | 133.0  | 96.0   |
| 74.0   | 51.1   | 65.2   | 59.0   | 67.4   | 70.8   | 99.6   | 93.4   | 65.9   |
| 70.3   | 32.4   | 53.6   | 46.4   | 45.8   | 53.5   | 64.7   | 70.6   | 61.8   |
| 601.6  | 369.5  | 450.2  | 563.3  | 501.6  | 540.2  | 666.6  | 702.5  | 593.4  |
| 75.2   | 62.8   | 72.8   | 71.8   | 80.7   | 75.9   | 110.3  | 132.1  | 103.2  |
| 8.8    | 17.8   | 13.4   | 1.6    | 15.8   | 10.4   | 14.3   | 16.7   | 11.7   |
| 36.9   | 19.3   | 43.7   | 34.0   | 36.8   | 18.2   | 50.9   | 58.3   | 46.1   |
| 23.1   | 19.7   | 31.9   | 22.8   | 24.9   | 14.3   | 33.0   | 31.2   | 26.1   |
| 1.4    | 0.4    | 1.3    | 1.0    | 6.7    | 4.8    | 1.4    | 1.3    | 0.5    |
| 119.4  | 80.6   | 63.5   | 82.3   | 97.3   | 82.8   | 114.2  | 123.0  | 97.3   |
| 21.6   | 16.7   | 16.1   | 17.4   | 17.0   | 19.8   | 24.1   | 30.3   | 19.2   |

|        |        |        |        |        |        |        |        |        |
|--------|--------|--------|--------|--------|--------|--------|--------|--------|
| 43.0   | 37.6   | 37.4   | 42.7   | 39.4   | 38.5   | 45.9   | 53.6   | 43.0   |
| 8.8    | 6.6    | 4.4    | 4.7    | 1.6    | 8.2    | 11.2   | 15.5   | 7.0    |
| 39.9   | 38.3   | 39.5   | 43.4   | 43.4   | 32.3   | 64.1   | 50.8   | 33.4   |
| 21.4   | 13.8   | 17.7   | 10.6   | 15.4   | 15.5   | 28.1   | 36.7   | 17.4   |
| 70.8   | 35.1   | 54.6   | 48.6   | 56.8   | 50.1   | 66.3   | 110.1  | 63.7   |
| 33.2   | 29.8   | 20.6   | 27.8   | 31.4   | 30.2   | 57.3   | 64.9   | 44.8   |
| 59.1   | 31.3   | 31.5   | 35.0   | 38.9   | 51.1   | 60.8   | 85.6   | 69.4   |
| 155.2  | 121.8  | 126.5  | 124.2  | 122.3  | 125.6  | 158.0  | 220.1  | 116.7  |
| 61.6   | 40.8   | 32.9   | 48.1   | 53.8   | 45.4   | 70.4   | 111.2  | 58.2   |
| 3.0    | 2.9    | 3.5    | 1.1    | 1.7    | 0.4    | 1.8    | 0.9    | 3.3    |
| 25.6   | 33.2   | 42.2   | 42.8   | 39.6   | 45.7   | 54.6   | 64.0   | 58.0   |
| 6.8    | 2.6    | 5.3    | 7.4    | 5.6    | 10.1   | 13.4   | 10.2   | 8.4    |
| 0.6    | 1.4    | 4.2    | 1.8    | 2.5    | 1.6    | 15.6   | 10.1   | 8.6    |
| 12.0   | 18.3   | 4.9    | 12.6   | 18.4   | 9.4    | 3.9    | 18.9   | 13.3   |
| 34.6   | 14.7   | 24.4   | 27.0   | 28.7   | 26.1   | 37.8   | 41.4   | 31.4   |
| 28.9   | 28.1   | 18.2   | 27.2   | 17.4   | 16.1   | 39.1   | 41.0   | 26.8   |
| 264.3  | 217.9  | 242.8  | 231.0  | 272.6  | 279.6  | 309.0  | 412.2  | 342.2  |
| 48.4   | 26.5   | 33.1   | 30.6   | 25.7   | 33.9   | 55.2   | 57.2   | 30.8   |
| 25.8   | 24.1   | 18.0   | 24.1   | 23.5   | 16.0   | 31.5   | 37.0   | 26.8   |
| 45.2   | 32.1   | 48.4   | 42.4   | 38.6   | 34.1   | 53.9   | 70.3   | 38.9   |
| 25.9   | 16.4   | 28.0   | 33.3   | 22.3   | 23.8   | 32.6   | 38.6   | 28.3   |
| 2248.2 | 1721.5 | 1948.5 | 1983.8 | 2152.6 | 1961.9 | 2036.1 | 2224.7 | 2305.5 |
| 34.4   | 40.1   | 31.5   | 54.1   | 47.9   | 35.4   | 81.9   | 102.1  | 48.6   |
| 2.9    | 2.5    | 6.3    | 4.9    | 13.5   | 7.5    | 13.1   | 13.9   | 5.3    |
| 32.2   | 42.2   | 53.1   | 52.4   | 49.1   | 50.3   | 85.4   | 85.2   | 58.0   |
| 14.6   | 15.7   | 14.5   | 11.3   | 12.8   | 13.3   | 12.2   | 18.0   | 14.6   |
| 8.9    | 12.9   | 18.0   | 12.5   | 16.5   | 15.4   | 11.8   | 16.5   | 16.0   |
| 1.0    | 1.8    | 1.8    | 1.1    | 1.1    | 0.5    | 2.7    | 1.0    | 0.9    |
| 8.8    | 2.0    | 3.2    | 3.4    | 6.8    | 11.6   | 9.5    | 1.7    | 8.8    |
| 1.2    | 1.6    | 0.6    | 2.4    | 0.5    | 3.2    | 0.9    | 6.2    | 3.7    |
| 40.9   | 23.4   | 28.2   | 24.2   | 24.4   | 26.3   | 38.8   | 54.1   | 29.5   |
| 86.3   | 49.2   | 46.4   | 80.4   | 53.2   | 49.0   | 66.6   | 105.3  | 54.1   |
| 45.5   | 17.9   | 20.8   | 12.1   | 25.3   | 21.2   | 31.7   | 30.6   | 29.5   |
| 46.0   | 33.9   | 46.4   | 36.4   | 48.5   | 48.6   | 50.3   | 72.5   | 41.6   |
| 20.3   | 11.8   | 14.7   | 18.9   | 21.6   | 23.4   | 27.4   | 27.5   | 19.6   |
| 53.0   | 36.2   | 47.2   | 37.6   | 34.1   | 42.3   | 52.6   | 53.5   | 35.3   |
| 145.1  | 83.3   | 110.6  | 110.3  | 115.2  | 130.0  | 140.4  | 142.2  | 106.6  |
| 3.6    | 1.4    | 0.6    | 3.2    | 3.1    | 4.6    | 7.6    | 0.6    | 2.2    |
| 1.0    | 0.7    | 0.4    | 0.9    | 1.0    | 0.7    | 4.3    | 1.8    | 1.1    |
| 164.3  | 74.1   | 106.4  | 128.8  | 94.3   | 142.1  | 151.2  | 167.3  | 98.3   |
| 832.0  | 538.0  | 576.4  | 533.5  | 649.1  | 663.2  | 518.6  | 798.2  | 562.9  |
| 70.8   | 49.7   | 47.6   | 56.5   | 50.3   | 57.9   | 71.9   | 78.7   | 77.2   |
| 733.9  | 467.9  | 566.9  | 694.6  | 654.4  | 735.3  | 826.5  | 844.0  | 520.0  |
| 161.2  | 88.3   | 95.3   | 120.4  | 105.7  | 116.0  | 189.8  | 219.9  | 132.0  |
| 73.7   | 58.1   | 60.9   | 66.3   | 74.4   | 70.0   | 93.1   | 97.3   | 75.7   |
| 18.3   | 19.6   | 18.4   | 20.2   | 24.3   | 21.3   | 38.5   | 32.4   | 21.5   |
| 71.0   | 66.3   | 78.4   | 88.7   | 81.2   | 95.2   | 133.7  | 170.0  | 159.4  |
| 48.2   | 24.2   | 31.0   | 30.0   | 21.9   | 30.1   | 38.1   | 39.2   | 25.4   |
| 195.1  | 144.7  | 190.1  | 193.2  | 192.0  | 166.9  | 235.4  | 244.4  | 180.9  |
| 1.6    | 0.6    | 0.9    | 2.8    | 1.1    | 0.7    | 1.5    | 0.7    | 0.5    |
| 6.2    | 3.2    | 1.3    | 0.9    | 4.4    | 3.7    | 7.8    | 10.8   | 9.6    |
| 17.2   | 8.0    | 8.9    | 10.1   | 17.1   | 13.0   | 23.1   | 21.1   | 12.6   |
| 7.4    | 12.8   | 4.8    | 5.4    | 10.2   | 3.8    | 9.4    | 11.8   | 5.7    |

|        |        |        |        |        |        |        |        |        |
|--------|--------|--------|--------|--------|--------|--------|--------|--------|
| 19.6   | 17.6   | 14.0   | 18.2   | 23.1   | 19.8   | 18.1   | 15.2   | 15.1   |
| 1257.7 | 1092.7 | 1231.3 | 1216.0 | 1373.3 | 1375.8 | 1559.1 | 1959.6 | 1108.8 |
| 40.7   | 24.2   | 22.7   | 30.0   | 25.8   | 22.7   | 30.8   | 33.7   | 24.4   |
| 62.4   | 41.8   | 46.5   | 45.4   | 45.9   | 52.6   | 61.4   | 70.7   | 39.8   |
| 25.8   | 29.5   | 20.9   | 25.5   | 20.7   | 20.7   | 26.5   | 37.4   | 30.8   |
| 423.9  | 238.3  | 254.7  | 300.9  | 269.8  | 262.4  | 324.2  | 297.7  | 244.2  |
| 11.1   | 15.7   | 10.4   | 6.2    | 2.4    | 2.7    | 10.6   | 9.3    | 14.0   |
| 48.1   | 32.2   | 27.7   | 39.3   | 31.9   | 42.9   | 53.9   | 83.6   | 36.6   |
| 9.1    | 9.9    | 6.4    | 7.6    | 8.6    | 10.1   | 10.6   | 6.4    | 13.4   |
| 7.6    | 12.1   | 12.0   | 7.2    | 8.8    | 14.7   | 4.9    | 4.1    | 2.8    |
| 1.4    | 2.5    | 2.2    | 2.7    | 1.7    | 0.1    | 3.7    | 1.3    | 4.0    |
| 123.3  | 385.2  | 280.1  | 365.1  | 375.8  | 276.1  | 431.3  | 364.3  | 359.3  |
| 56.7   | 27.7   | 27.9   | 37.2   | 31.6   | 36.8   | 36.0   | 61.0   | 35.7   |
| 53.2   | 24.3   | 32.1   | 33.1   | 37.0   | 36.5   | 48.9   | 68.7   | 41.8   |
| 3.2    | 2.2    | 0.4    | 1.0    | 0.1    | 0.8    | 0.9    | 5.3    | 1.8    |
| 128.2  | 57.4   | 52.3   | 64.2   | 82.0   | 75.6   | 141.0  | 189.9  | 115.0  |
| 42.8   | 30.0   | 24.0   | 35.7   | 29.9   | 33.9   | 45.9   | 62.1   | 36.7   |
| 303.2  | 153.4  | 196.4  | 238.1  | 199.2  | 222.1  | 319.6  | 304.8  | 246.4  |
| 36.5   | 12.8   | 14.9   | 16.7   | 27.4   | 20.7   | 28.9   | 41.6   | 33.7   |
| 17.5   | 9.4    | 13.5   | 16.6   | 17.2   | 13.4   | 26.4   | 23.5   | 17.9   |
| 55.7   | 42.4   | 45.1   | 42.9   | 47.3   | 42.3   | 54.7   | 74.3   | 57.3   |
| 218.4  | 101.0  | 129.4  | 132.6  | 126.8  | 145.5  | 151.5  | 220.7  | 140.0  |
| 2924.8 | 2515.5 | 2439.4 | 2490.2 | 2610.3 | 2501.0 | 2788.2 | 2938.6 | 2254.1 |
| 40.1   | 55.2   | 37.1   | 43.7   | 53.9   | 39.7   | 85.2   | 92.1   | 56.7   |
| 26.0   | 13.2   | 16.5   | 11.9   | 21.7   | 13.3   | 24.5   | 36.6   | 23.0   |
| 3.9    | 5.2    | 4.2    | 5.9    | 6.1    | 3.3    | 6.4    | 10.9   | 2.5    |
| 7.0    | 0.6    | 0.2    | 1.2    | 3.2    | 0.1    | 5.1    | 0.8    | 4.8    |
| 69.8   | 70.7   | 57.3   | 74.5   | 69.7   | 56.9   | 99.2   | 94.4   | 86.2   |
| 40.4   | 31.8   | 18.3   | 30.1   | 26.3   | 32.0   | 51.3   | 48.4   | 33.9   |
| 592.8  | 397.2  | 424.5  | 445.3  | 470.9  | 477.6  | 607.8  | 707.9  | 557.6  |
| 23.1   | 8.5    | 13.6   | 12.5   | 8.4    | 10.2   | 13.3   | 24.3   | 11.5   |
| 47.9   | 41.6   | 44.9   | 46.5   | 48.9   | 42.6   | 67.2   | 71.4   | 40.8   |
| 14.1   | 19.8   | 17.9   | 18.5   | 16.4   | 8.9    | 30.2   | 22.6   | 23.8   |
| 14.1   | 15.2   | 15.7   | 14.6   | 10.5   | 12.1   | 28.6   | 16.9   | 12.4   |
| 32.3   | 16.0   | 19.9   | 20.3   | 23.6   | 19.1   | 27.5   | 44.6   | 29.6   |
| 10.5   | 14.8   | 13.1   | 11.1   | 7.5    | 6.6    | 5.7    | 7.9    | 10.5   |
| 34.0   | 21.5   | 33.2   | 33.5   | 29.3   | 34.4   | 32.4   | 39.7   | 37.1   |
| 7.1    | 0.8    | 7.1    | 1.2    | 5.5    | 4.6    | 9.1    | 10.4   | 1.2    |
| 8.4    | 3.4    | 5.5    | 3.6    | 6.7    | 5.8    | 5.7    | 3.8    | 4.9    |
| 1.3    | 7.3    | 8.2    | 6.8    | 4.7    | 6.3    | 0.8    | 4.6    | 4.9    |
| 1.4    | 3.2    | 0.3    | 3.9    | 3.9    | 2.1    | 3.1    | 4.1    | 2.1    |
| 199.9  | 114.6  | 148.8  | 173.4  | 178.7  | 153.5  | 234.9  | 295.6  | 228.2  |
| 115.4  | 98.7   | 129.8  | 120.4  | 118.8  | 121.4  | 165.9  | 190.4  | 117.4  |
| 133.9  | 47.0   | 59.5   | 73.7   | 71.8   | 90.2   | 104.3  | 123.4  | 85.1   |
| 3.3    | 1.5    | 3.7    | 1.2    | 1.2    | 1.0    | 1.2    | 1.8    | 3.8    |
| 1795.3 | 1545.5 | 1528.1 | 1620.2 | 1862.7 | 1571.9 | 2194.7 | 2200.1 | 2027.8 |
| 17.1   | 13.9   | 11.7   | 14.1   | 26.6   | 18.7   | 16.8   | 22.9   | 16.4   |
| 36.1   | 26.8   | 28.2   | 26.5   | 26.9   | 22.2   | 28.3   | 33.5   | 32.9   |
| 22.6   | 11.2   | 11.0   | 15.1   | 12.3   | 10.8   | 20.5   | 15.5   | 10.5   |
| 20.7   | 19.2   | 25.0   | 21.0   | 24.2   | 31.3   | 35.8   | 58.0   | 26.0   |
| 74.7   | 42.5   | 59.6   | 53.0   | 47.9   | 65.0   | 93.9   | 121.3  | 77.4   |
| 168.5  | 59.7   | 50.5   | 62.5   | 66.7   | 42.8   | 104.5  | 132.7  | 82.9   |
| 40.2   | 27.1   | 33.0   | 30.6   | 24.6   | 33.3   | 34.1   | 58.7   | 29.3   |

|       |       |       |       |       |       |        |        |        |
|-------|-------|-------|-------|-------|-------|--------|--------|--------|
| 105.8 | 75.0  | 88.0  | 96.5  | 103.6 | 108.5 | 119.7  | 169.6  | 122.9  |
| 45.5  | 23.0  | 26.5  | 30.2  | 40.7  | 14.2  | 35.6   | 47.9   | 44.0   |
| 80.3  | 48.5  | 55.1  | 61.7  | 63.3  | 66.2  | 79.0   | 100.1  | 78.8   |
| 46.5  | 12.1  | 20.6  | 9.6   | 15.1  | 12.1  | 18.0   | 33.1   | 19.3   |
| 25.1  | 7.9   | 5.5   | 10.2  | 1.4   | 9.5   | 15.3   | 12.3   | 10.5   |
| 20.9  | 17.7  | 14.2  | 12.6  | 14.7  | 11.9  | 22.3   | 24.7   | 9.9    |
| 115.4 | 44.0  | 53.8  | 54.6  | 63.3  | 56.5  | 97.7   | 128.0  | 84.8   |
| 53.2  | 42.8  | 45.0  | 50.2  | 58.5  | 50.1  | 76.6   | 97.9   | 60.7   |
| 55.5  | 31.2  | 30.1  | 32.7  | 30.8  | 31.2  | 39.7   | 57.1   | 35.9   |
| 82.1  | 62.3  | 51.1  | 59.8  | 48.8  | 59.2  | 39.2   | 71.8   | 48.3   |
| 28.8  | 13.1  | 18.4  | 14.0  | 16.9  | 18.7  | 20.6   | 34.5   | 17.3   |
| 1.7   | 1.7   | 1.0   | 1.5   | 9.5   | 5.0   | 1.7    | 7.0    | 4.2    |
| 153.0 | 92.8  | 109.1 | 100.6 | 105.9 | 113.4 | 132.5  | 148.3  | 101.7  |
| 20.8  | 5.7   | 7.5   | 4.5   | 2.5   | 8.2   | 10.6   | 15.3   | 8.0    |
| 4.7   | 0.8   | 1.5   | 0.3   | 0.3   | 0.7   | 1.5    | 2.1    | 1.6    |
| 16.2  | 11.6  | 16.0  | 12.0  | 9.7   | 9.9   | 17.8   | 25.6   | 15.6   |
| 18.1  | 3.4   | 7.5   | 12.2  | 7.4   | 12.9  | 13.8   | 14.9   | 6.5    |
| 1.3   | 1.0   | 1.2   | 1.0   | 0.9   | 1.1   | 1.1    | 1.5    | 1.0    |
| 357.4 | 249.3 | 279.9 | 305.0 | 295.9 | 295.1 | 329.8  | 371.4  | 247.0  |
| 37.7  | 29.2  | 31.4  | 38.8  | 34.7  | 29.9  | 35.7   | 47.3   | 27.4   |
| 73.4  | 77.8  | 104.3 | 88.0  | 94.2  | 104.9 | 117.9  | 108.2  | 113.5  |
| 4.5   | 1.2   | 0.9   | 7.7   | 1.1   | 6.6   | 9.6    | 9.5    | 5.7    |
| 887.4 | 744.1 | 791.9 | 786.8 | 961.0 | 953.9 | 1381.1 | 1350.9 | 1329.4 |
| 0.7   | 0.8   | 0.8   | 0.8   | 0.6   | 0.8   | 1.2    | 0.6    | 0.5    |
| 73.4  | 46.2  | 56.2  | 55.1  | 63.7  | 66.9  | 76.1   | 77.2   | 55.8   |
| 108.3 | 82.9  | 108.8 | 125.0 | 113.9 | 117.1 | 152.4  | 187.9  | 115.7  |
| 36.4  | 19.9  | 16.8  | 28.4  | 18.6  | 29.9  | 30.2   | 31.0   | 36.4   |
| 30.2  | 20.0  | 22.2  | 26.0  | 30.9  | 24.5  | 32.3   | 33.6   | 20.6   |
| 773.9 | 465.8 | 627.2 | 676.4 | 681.8 | 718.2 | 903.3  | 1084.1 | 714.0  |
| 713.0 | 356.3 | 464.6 | 534.7 | 528.7 | 527.8 | 667.4  | 725.5  | 478.2  |
| 61.6  | 39.8  | 31.0  | 42.2  | 52.5  | 47.1  | 67.7   | 81.0   | 53.0   |
| 56.5  | 45.9  | 37.8  | 48.2  | 43.7  | 35.7  | 61.0   | 55.6   | 44.8   |
| 112.8 | 103.8 | 120.8 | 131.1 | 135.2 | 113.7 | 147.5  | 178.3  | 115.6  |
| 258.9 | 124.2 | 138.1 | 146.9 | 139.6 | 136.9 | 191.2  | 202.8  | 158.0  |
| 65.4  | 48.2  | 56.0  | 48.5  | 48.1  | 48.5  | 88.7   | 87.6   | 49.1   |
| 13.2  | 4.7   | 11.7  | 18.6  | 12.6  | 16.4  | 19.7   | 23.4   | 11.8   |
| 15.4  | 6.1   | 1.3   | 1.3   | 3.9   | 11.1  | 6.0    | 8.3    | 13.9   |
| 10.4  | 7.4   | 6.6   | 4.6   | 10.0  | 11.4  | 14.4   | 20.3   | 10.2   |
| 58.0  | 35.4  | 52.3  | 50.3  | 43.5  | 48.1  | 62.7   | 62.6   | 49.0   |
| 7.4   | 3.7   | 10.8  | 9.7   | 10.3  | 9.6   | 7.1    | 10.6   | 15.1   |
| 1.0   | 2.9   | 1.3   | 3.6   | 1.8   | 3.9   | 16.1   | 4.7    | 3.9    |
| 13.7  | 14.4  | 7.7   | 9.3   | 10.3  | 8.0   | 13.7   | 9.3    | 1.8    |
| 69.1  | 41.4  | 40.3  | 50.1  | 59.3  | 48.5  | 86.1   | 86.8   | 75.7   |
| 41.6  | 28.0  | 20.8  | 35.0  | 35.5  | 28.9  | 54.6   | 65.5   | 52.1   |
| 49.6  | 26.6  | 30.0  | 27.3  | 32.1  | 31.1  | 44.7   | 61.4   | 39.1   |
| 110.4 | 64.6  | 75.2  | 82.7  | 87.7  | 76.5  | 131.1  | 175.1  | 112.2  |
| 33.1  | 28.4  | 26.2  | 27.8  | 29.5  | 20.3  | 29.9   | 36.0   | 35.0   |
| 1.7   | 3.5   | 1.6   | 3.0   | 2.7   | 1.8   | 4.1    | 1.9    | 1.7    |
| 35.5  | 17.9  | 32.4  | 30.3  | 24.5  | 21.2  | 36.7   | 36.2   | 27.0   |
| 3.9   | 4.7   | 0.9   | 1.0   | 3.9   | 2.4   | 1.0    | 0.9    | 3.7    |
| 1.6   | 1.9   | 1.3   | 0.5   | 4.2   | 1.6   | 2.3    | 2.6    | 2.0    |
| 107.8 | 64.6  | 61.8  | 71.5  | 74.0  | 57.8  | 97.9   | 145.4  | 112.3  |
| 3.5   | 3.5   | 2.7   | 2.8   | 1.8   | 5.0   | 2.4    | 1.0    | 1.4    |

|        |        |        |        |        |        |        |        |        |
|--------|--------|--------|--------|--------|--------|--------|--------|--------|
| 24.6   | 16.8   | 18.4   | 15.2   | 26.7   | 22.9   | 26.0   | 32.5   | 14.2   |
| 22.9   | 19.7   | 28.5   | 24.6   | 22.7   | 28.4   | 20.2   | 26.6   | 11.9   |
| 69.3   | 39.1   | 36.6   | 38.9   | 28.0   | 43.4   | 43.4   | 86.0   | 32.1   |
| 13.3   | 7.3    | 7.4    | 1.9    | 11.2   | 7.6    | 9.2    | 1.6    | 0.6    |
| 30.7   | 26.8   | 25.1   | 24.4   | 26.6   | 19.1   | 39.1   | 23.8   | 23.3   |
| 91.0   | 54.5   | 51.2   | 61.5   | 70.8   | 59.7   | 94.1   | 122.9  | 74.4   |
| 11.3   | 30.2   | 22.3   | 21.4   | 27.7   | 26.7   | 28.8   | 28.5   | 20.7   |
| 132.8  | 88.2   | 116.6  | 120.7  | 119.2  | 123.0  | 158.8  | 164.6  | 110.1  |
| 1926.5 | 1370.8 | 1370.9 | 1481.2 | 1660.0 | 1577.4 | 2335.6 | 2603.4 | 1806.0 |
| 28.9   | 18.8   | 23.2   | 15.4   | 20.1   | 21.4   | 27.9   | 27.2   | 15.6   |
| 20.7   | 13.6   | 19.0   | 19.3   | 19.2   | 19.5   | 28.7   | 42.6   | 18.4   |
| 44.8   | 40.7   | 37.9   | 46.9   | 55.0   | 41.6   | 58.2   | 68.0   | 39.8   |
| 4601.8 | 4093.1 | 3929.5 | 4172.8 | 4242.6 | 4072.8 | 4408.6 | 4635.6 | 3328.0 |
| 100.1  | 69.0   | 74.2   | 87.3   | 77.2   | 88.8   | 109.4  | 144.3  | 85.5   |
| 449.4  | 326.0  | 330.8  | 363.3  | 375.5  | 345.1  | 487.6  | 546.3  | 356.5  |
| 7.8    | 16.3   | 16.7   | 21.6   | 15.1   | 18.8   | 13.3   | 21.5   | 11.6   |
| 332.1  | 165.1  | 231.0  | 226.8  | 271.8  | 257.3  | 336.2  | 391.8  | 249.5  |
| 17.8   | 36.7   | 33.2   | 32.0   | 29.2   | 29.5   | 43.9   | 45.3   | 29.7   |
| 47.3   | 38.9   | 37.3   | 37.2   | 44.2   | 50.3   | 52.2   | 63.0   | 54.1   |
| 12.2   | 5.8    | 4.5    | 4.2    | 4.4    | 2.8    | 5.4    | 5.0    | 11.2   |
| 72.5   | 36.7   | 42.7   | 58.2   | 45.0   | 44.2   | 73.7   | 67.7   | 47.1   |
| 27.6   | 15.6   | 11.9   | 10.8   | 15.6   | 10.1   | 14.0   | 21.1   | 15.9   |
| 298.3  | 456.6  | 493.6  | 541.0  | 534.9  | 506.4  | 690.8  | 778.2  | 538.2  |
| 1.3    | 1.7    | 0.8    | 0.8    | 1.1    | 0.8    | 1.5    | 1.2    | 0.9    |
| 8.4    | 6.1    | 11.4   | 1.0    | 2.2    | 8.0    | 10.1   | 19.6   | 10.4   |
| 115.1  | 40.4   | 56.7   | 70.3   | 60.6   | 71.8   | 84.3   | 145.3  | 57.4   |
| 67.3   | 33.4   | 48.0   | 48.8   | 48.1   | 46.3   | 70.1   | 75.5   | 55.7   |
| 73.4   | 56.2   | 59.1   | 81.7   | 62.6   | 66.8   | 99.1   | 93.2   | 72.8   |
| 8.1    | 4.2    | 8.4    | 10.6   | 4.7    | 6.5    | 3.4    | 8.2    | 9.4    |
| 1030.7 | 650.1  | 676.6  | 756.3  | 743.0  | 737.7  | 899.5  | 1206.7 | 727.6  |
| 304.2  | 158.1  | 181.0  | 199.3  | 185.9  | 182.4  | 305.5  | 432.7  | 309.2  |
| 6.6    | 6.6    | 6.4    | 5.9    | 7.6    | 5.8    | 3.8    | 13.5   | 6.8    |
| 102.7  | 68.0   | 77.3   | 76.7   | 100.1  | 82.3   | 105.4  | 138.4  | 68.0   |
| 116.0  | 58.6   | 64.9   | 73.2   | 86.4   | 81.6   | 109.9  | 134.6  | 102.5  |
| 5.5    | 17.4   | 15.8   | 18.1   | 28.8   | 6.5    | 20.1   | 12.2   | 18.4   |
| 9.2    | 10.6   | 9.3    | 17.5   | 13.6   | 12.8   | 12.3   | 17.2   | 11.0   |
| 2.6    | 2.4    | 7.9    | 1.7    | 11.9   | 0.8    | 8.1    | 7.8    | 11.8   |
| 4.5    | 8.7    | 8.4    | 7.6    | 12.8   | 8.7    | 11.6   | 19.2   | 11.5   |
| 93.4   | 47.0   | 61.7   | 50.3   | 60.9   | 68.3   | 68.0   | 120.3  | 62.6   |
| 31.9   | 22.7   | 17.2   | 20.4   | 17.4   | 29.0   | 32.4   | 36.5   | 21.4   |
| 9.0    | 1.3    | 1.2    | 9.0    | 1.2    | 2.2    | 9.9    | 13.0   | 4.3    |
| 13.4   | 6.8    | 9.2    | 2.7    | 1.5    | 7.7    | 0.5    | 5.6    | 3.4    |
| 10.9   | 10.1   | 10.6   | 13.8   | 8.9    | 7.4    | 19.3   | 12.8   | 17.5   |
| 65.4   | 45.4   | 60.9   | 68.2   | 53.2   | 56.8   | 76.4   | 74.7   | 53.8   |
| 10.3   | 6.4    | 10.5   | 8.5    | 11.9   | 9.2    | 9.9    | 11.8   | 8.3    |
| 67.3   | 63.4   | 63.7   | 63.4   | 69.0   | 58.3   | 105.5  | 132.7  | 69.1   |
| 26.1   | 18.3   | 19.7   | 24.5   | 20.9   | 19.8   | 29.6   | 38.0   | 42.4   |
| 21.1   | 23.5   | 18.0   | 22.8   | 22.3   | 23.7   | 25.5   | 32.5   | 19.2   |
| 3.7    | 3.4    | 2.4    | 1.6    | 5.6    | 0.3    | 3.7    | 3.9    | 5.8    |
| 1.6    | 3.9    | 2.4    | 3.1    | 6.6    | 1.6    | 0.6    | 0.8    | 1.3    |
| 0.5    | 4.6    | 7.7    | 0.5    | 5.4    | 3.9    | 1.0    | 9.8    | 0.2    |
| 110.1  | 66.7   | 90.2   | 96.8   | 69.5   | 85.4   | 104.4  | 147.1  | 83.5   |
| 29.8   | 23.3   | 26.9   | 33.3   | 33.6   | 37.2   | 37.0   | 55.8   | 38.2   |



|        |        |        |        |        |        |        |        |        |
|--------|--------|--------|--------|--------|--------|--------|--------|--------|
| 8.6    | 5.2    | 10.1   | 5.2    | 3.2    | 4.0    | 7.8    | 10.3   | 6.7    |
| 56.4   | 32.4   | 42.7   | 40.4   | 39.3   | 31.9   | 62.2   | 52.8   | 41.2   |
| 69.2   | 35.3   | 56.1   | 59.9   | 52.6   | 51.5   | 65.8   | 61.2   | 48.3   |
| 164.9  | 83.7   | 100.7  | 109.4  | 127.3  | 128.3  | 147.1  | 198.8  | 159.7  |
| 767.9  | 489.3  | 443.1  | 513.4  | 598.9  | 578.3  | 667.9  | 1114.6 | 809.1  |
| 18.5   | 6.9    | 26.3   | 17.7   | 23.4   | 30.6   | 31.9   | 47.1   | 25.6   |
| 0.3    | 2.1    | 0.6    | 2.4    | 5.6    | 7.2    | 7.8    | 1.6    | 5.4    |
| 179.8  | 145.3  | 172.5  | 170.8  | 177.7  | 189.0  | 238.1  | 253.3  | 197.0  |
| 682.3  | 357.9  | 364.1  | 405.1  | 487.1  | 457.7  | 690.5  | 918.6  | 403.1  |
| 239.0  | 183.0  | 220.9  | 287.9  | 270.3  | 189.2  | 257.2  | 361.0  | 171.8  |
| 4.6    | 5.1    | 5.6    | 4.3    | 6.5    | 5.0    | 3.3    | 2.0    | 5.7    |
| 53.1   | 63.4   | 65.5   | 91.5   | 64.4   | 81.0   | 109.1  | 128.3  | 96.6   |
| 47.0   | 31.8   | 41.3   | 47.6   | 47.2   | 51.7   | 55.3   | 78.3   | 44.7   |
| 28.4   | 20.5   | 28.4   | 29.9   | 26.8   | 30.1   | 44.5   | 38.2   | 27.7   |
| 3.6    | 0.3    | 3.2    | 3.0    | 3.0    | 3.9    | 3.2    | 7.3    | 4.8    |
| 45.8   | 36.8   | 31.3   | 39.1   | 53.2   | 39.4   | 50.8   | 88.1   | 55.2   |
| 60.2   | 43.1   | 77.0   | 64.2   | 90.8   | 61.5   | 59.1   | 72.7   | 57.0   |
| 1.2    | 4.1    | 1.7    | 0.7    | 3.9    | 3.3    | 3.1    | 5.4    | 3.5    |
| 24.9   | 2.5    | 6.6    | 9.3    | 5.0    | 12.8   | 7.9    | 12.8   | 4.1    |
| 36.3   | 13.2   | 30.9   | 37.1   | 29.8   | 23.7   | 41.7   | 33.5   | 29.3   |
| 94.5   | 42.6   | 78.0   | 92.0   | 70.0   | 89.8   | 112.4  | 150.3  | 115.3  |
| 19.4   | 14.3   | 18.2   | 20.2   | 13.6   | 17.3   | 24.8   | 25.8   | 23.4   |
| 30.6   | 63.6   | 56.5   | 51.4   | 59.8   | 51.1   | 69.5   | 58.5   | 66.3   |
| 18.8   | 6.2    | 4.0    | 2.4    | 3.0    | 7.1    | 8.8    | 2.8    | 6.8    |
| 164.1  | 88.5   | 77.2   | 99.5   | 108.8  | 94.6   | 164.2  | 233.7  | 172.6  |
| 38.2   | 121.7  | 100.1  | 122.0  | 131.1  | 99.1   | 139.0  | 146.9  | 106.4  |
| 215.0  | 176.5  | 182.4  | 178.3  | 199.9  | 188.4  | 264.9  | 339.1  | 238.1  |
| 230.0  | 125.0  | 154.2  | 129.4  | 166.9  | 152.6  | 217.5  | 265.7  | 139.6  |
| 77.0   | 58.2   | 63.8   | 73.0   | 63.6   | 55.5   | 88.9   | 124.8  | 91.6   |
| 64.4   | 40.9   | 47.9   | 49.3   | 57.1   | 54.8   | 73.8   | 99.8   | 52.2   |
| 0.7    | 0.9    | 0.9    | 0.6    | 0.5    | 1.3    | 0.8    | 0.9    | 1.1    |
| 0.6    | 1.4    | 2.7    | 3.2    | 2.8    | 0.3    | 3.5    | 6.3    | 5.2    |
| 6.9    | 2.7    | 9.3    | 7.0    | 5.1    | 8.9    | 7.1    | 3.0    | 0.9    |
| 4.0    | 7.7    | 7.4    | 4.6    | 6.5    | 5.0    | 7.3    | 9.2    | 4.7    |
| 12.1   | 14.1   | 10.7   | 13.4   | 14.1   | 9.5    | 1.0    | 11.2   | 7.7    |
| 0.4    | 0.4    | 3.1    | 4.5    | 0.6    | 0.3    | 0.2    | 0.5    | 0.7    |
| 57.3   | 38.9   | 48.2   | 58.5   | 46.5   | 47.2   | 73.8   | 69.2   | 47.9   |
| 3.7    | 7.1    | 5.6    | 3.4    | 8.1    | 3.3    | 5.7    | 1.8    | 3.5    |
| 60.9   | 34.8   | 36.4   | 33.0   | 34.9   | 33.8   | 53.3   | 63.2   | 35.0   |
| 35.8   | 20.1   | 25.9   | 30.5   | 22.6   | 26.4   | 35.7   | 39.9   | 25.3   |
| 558.8  | 373.4  | 438.4  | 418.4  | 443.8  | 444.6  | 600.7  | 659.5  | 428.9  |
| 15.8   | 7.8    | 7.7    | 5.9    | 8.4    | 4.2    | 21.7   | 22.9   | 9.5    |
| 149.6  | 105.5  | 102.9  | 121.5  | 132.5  | 113.1  | 181.3  | 244.7  | 129.0  |
| 6.7    | 11.2   | 1.6    | 5.2    | 10.9   | 6.8    | 8.8    | 6.9    | 7.0    |
| 0.7    | 5.8    | 1.1    | 0.6    | 0.9    | 0.3    | 4.6    | 0.5    | 3.0    |
| 1.0    | 4.2    | 0.6    | 0.4    | 1.9    | 0.6    | 3.5    | 2.5    | 0.9    |
| 3.5    | 4.6    | 0.6    | 0.5    | 5.9    | 5.8    | 2.9    | 1.6    | 5.7    |
| 14.2   | 9.5    | 10.4   | 3.5    | 6.2    | 6.2    | 11.8   | 13.2   | 8.2    |
| 2.9    | 1.5    | 4.6    | 3.5    | 12.4   | 0.6    | 7.7    | 11.0   | 5.7    |
| 1557.5 | 1276.5 | 1339.4 | 1454.6 | 1565.2 | 1382.4 | 1825.1 | 1807.8 | 1470.4 |
| 4.0    | 2.7    | 2.2    | 0.7    | 3.4    | 2.7    | 5.2    | 1.4    | 1.0    |
| 2.8    | 1.8    | 1.0    | 2.9    | 1.6    | 1.3    | 1.2    | 7.7    | 2.5    |
| 20.4   | 22.8   | 23.0   | 17.4   | 25.0   | 12.2   | 21.1   | 49.0   | 14.7   |

|        |        |        |        |        |        |        |        |        |
|--------|--------|--------|--------|--------|--------|--------|--------|--------|
| 211.8  | 140.8  | 171.1  | 168.8  | 177.0  | 166.0  | 237.3  | 262.9  | 177.7  |
| 45.4   | 24.7   | 23.7   | 27.1   | 28.9   | 16.1   | 33.7   | 44.7   | 24.7   |
| 23.9   | 20.0   | 14.0   | 18.7   | 12.4   | 15.9   | 26.7   | 22.9   | 20.9   |
| 0.6    | 0.8    | 1.5    | 0.6    | 2.1    | 0.9    | 0.6    | 0.6    | 1.1    |
| 4.0    | 3.6    | 0.9    | 5.5    | 10.1   | 1.6    | 0.7    | 3.1    | 8.2    |
| 34.5   | 22.5   | 29.1   | 43.6   | 39.3   | 35.3   | 56.5   | 59.8   | 67.2   |
| 50.9   | 58.3   | 59.4   | 68.0   | 67.4   | 59.2   | 81.1   | 77.9   | 80.6   |
| 15.9   | 11.9   | 13.0   | 13.3   | 11.9   | 12.3   | 16.8   | 22.3   | 13.7   |
| 686.0  | 250.9  | 301.3  | 292.3  | 338.2  | 297.1  | 435.3  | 410.9  | 338.6  |
| 114.1  | 95.1   | 87.3   | 99.8   | 108.0  | 103.3  | 116.1  | 177.5  | 120.6  |
| 171.8  | 77.5   | 116.2  | 119.5  | 111.0  | 136.5  | 182.1  | 230.9  | 98.1   |
| 36.3   | 27.2   | 31.9   | 18.5   | 20.7   | 35.4   | 33.3   | 38.8   | 33.6   |
| 20.2   | 16.5   | 15.8   | 17.2   | 18.0   | 16.1   | 27.9   | 32.2   | 16.0   |
| 15.4   | 13.6   | 18.4   | 12.2   | 6.2    | 3.6    | 15.4   | 3.2    | 9.1    |
| 7.8    | 13.6   | 14.7   | 13.7   | 7.9    | 1.4    | 10.3   | 16.1   | 10.7   |
| 20.2   | 17.6   | 21.8   | 18.7   | 21.9   | 24.1   | 27.3   | 41.3   | 22.7   |
| 17.4   | 14.7   | 10.5   | 10.9   | 13.8   | 16.3   | 16.3   | 18.7   | 14.8   |
| 26.8   | 24.1   | 28.2   | 34.3   | 30.5   | 20.4   | 42.1   | 37.7   | 23.0   |
| 1.2    | 0.5    | 0.9    | 0.4    | 1.3    | 1.2    | 0.5    | 3.4    | 0.2    |
| 82.4   | 76.2   | 78.0   | 85.1   | 79.4   | 61.6   | 97.0   | 94.5   | 67.9   |
| 39.5   | 26.7   | 31.0   | 33.9   | 40.4   | 40.3   | 46.0   | 43.2   | 49.3   |
| 5.8    | 1.5    | 1.0    | 1.5    | 1.4    | 1.6    | 1.3    | 9.6    | 2.1    |
| 0.4    | 0.6    | 0.5    | 0.8    | 0.6    | 0.7    | 0.7    | 0.5    | 0.5    |
| 13.0   | 12.2   | 6.1    | 23.0   | 2.4    | 3.2    | 14.3   | 8.5    | 1.1    |
| 195.7  | 90.4   | 126.7  | 118.3  | 131.9  | 151.7  | 176.5  | 208.8  | 123.9  |
| 16.9   | 2.9    | 8.7    | 10.0   | 12.3   | 4.5    | 15.5   | 11.6   | 7.5    |
| 13.9   | 2.4    | 5.4    | 8.3    | 3.3    | 6.4    | 5.8    | 6.3    | 5.4    |
| 19.5   | 11.9   | 11.3   | 11.0   | 7.4    | 13.2   | 16.8   | 23.3   | 18.8   |
| 27.4   | 13.8   | 20.0   | 21.0   | 18.2   | 11.9   | 30.9   | 32.8   | 27.8   |
| 37.6   | 19.3   | 23.8   | 15.7   | 23.9   | 16.7   | 27.4   | 36.9   | 21.8   |
| 40.1   | 32.3   | 39.5   | 44.2   | 39.4   | 45.3   | 49.6   | 58.9   | 51.8   |
| 17.3   | 10.7   | 8.4    | 12.4   | 12.6   | 17.6   | 21.1   | 22.1   | 13.3   |
| 32.1   | 18.3   | 21.3   | 21.5   | 23.1   | 25.5   | 35.6   | 35.8   | 37.1   |
| 13.4   | 13.5   | 8.5    | 12.9   | 6.8    | 11.4   | 11.8   | 26.3   | 19.5   |
| 20.5   | 12.9   | 9.1    | 11.3   | 8.7    | 10.8   | 13.3   | 10.6   | 8.2    |
| 3166.6 | 2486.1 | 2523.0 | 2672.9 | 2605.0 | 2664.5 | 3228.9 | 3028.0 | 2677.4 |
| 107.6  | 43.0   | 49.8   | 84.0   | 78.7   | 71.0   | 91.4   | 92.6   | 77.0   |
| 16.8   | 10.5   | 9.6    | 15.9   | 11.3   | 7.6    | 20.9   | 22.9   | 9.9    |
| 1.9    | 4.7    | 0.9    | 5.5    | 1.9    | 1.0    | 2.6    | 2.4    | 2.0    |
| 22.7   | 15.6   | 11.9   | 15.2   | 12.5   | 14.0   | 13.0   | 14.2   | 29.7   |
| 0.7    | 2.5    | 1.5    | 2.3    | 0.5    | 0.6    | 3.0    | 4.2    | 5.2    |
| 109.7  | 62.6   | 73.4   | 99.2   | 78.0   | 96.3   | 123.0  | 160.8  | 69.0   |
| 23.9   | 29.3   | 22.0   | 25.7   | 42.0   | 34.1   | 37.6   | 61.9   | 39.1   |
| 6.9    | 8.4    | 10.7   | 9.1    | 5.2    | 7.1    | 12.9   | 13.1   | 6.2    |
| 97.0   | 60.9   | 50.0   | 57.6   | 64.1   | 65.2   | 57.9   | 70.7   | 55.1   |
| 50.8   | 35.1   | 16.0   | 31.0   | 25.9   | 30.1   | 24.6   | 39.6   | 25.4   |
| 18.5   | 16.3   | 11.5   | 15.6   | 20.3   | 9.2    | 24.6   | 20.0   | 17.8   |
| 224.6  | 168.4  | 206.7  | 184.4  | 217.5  | 207.0  | 243.1  | 297.1  | 213.9  |
| 67.4   | 75.1   | 71.1   | 77.3   | 76.1   | 74.7   | 108.1  | 125.1  | 73.2   |
| 11.1   | 4.9    | 8.1    | 4.6    | 14.7   | 6.5    | 11.7   | 13.6   | 8.8    |
| 56.4   | 33.4   | 28.0   | 26.5   | 33.2   | 32.7   | 48.7   | 72.1   | 31.0   |
| 59.7   | 69.7   | 79.8   | 66.7   | 92.5   | 78.0   | 115.2  | 107.6  | 75.1   |
| 2.1    | 1.4    | 2.0    | 3.8    | 1.7    | 3.0    | 7.3    | 2.7    | 4.4    |

|       |       |       |       |       |       |       |       |       |
|-------|-------|-------|-------|-------|-------|-------|-------|-------|
| 8.6   | 2.8   | 9.7   | 10.5  | 11.0  | 5.1   | 5.8   | 13.4  | 1.6   |
| 155.9 | 118.0 | 148.7 | 160.6 | 167.5 | 153.9 | 241.0 | 267.1 | 193.9 |
| 47.9  | 55.8  | 58.9  | 59.8  | 58.3  | 47.6  | 61.7  | 86.4  | 62.6  |
| 45.6  | 30.1  | 33.3  | 42.3  | 37.6  | 40.0  | 58.6  | 61.3  | 43.8  |
| 38.3  | 11.1  | 16.5  | 10.2  | 15.1  | 14.4  | 15.7  | 19.6  | 16.0  |
| 120.0 | 73.5  | 100.6 | 94.6  | 104.5 | 99.0  | 126.7 | 133.6 | 112.9 |
| 5.4   | 0.4   | 4.1   | 0.5   | 0.9   | 1.2   | 2.4   | 4.2   | 3.2   |
| 6.2   | 1.7   | 5.3   | 2.5   | 0.3   | 1.5   | 7.3   | 6.9   | 3.3   |
| 2.2   | 1.1   | 1.4   | 1.5   | 1.1   | 0.3   | 1.1   | 1.8   | 0.9   |
| 2.0   | 2.4   | 1.6   | 3.6   | 0.8   | 2.6   | 2.8   | 2.1   | 2.4   |
| 80.0  | 58.9  | 72.5  | 64.0  | 75.8  | 64.6  | 89.0  | 102.0 | 83.0  |
| 14.0  | 5.8   | 7.6   | 10.6  | 15.4  | 9.1   | 16.4  | 16.5  | 12.6  |
| 186.3 | 121.0 | 121.0 | 136.2 | 123.7 | 129.8 | 191.7 | 202.7 | 136.9 |
| 24.5  | 19.9  | 21.5  | 28.9  | 18.2  | 28.0  | 22.0  | 30.6  | 23.9  |
| 303.3 | 174.1 | 208.4 | 205.7 | 233.3 | 236.3 | 352.2 | 387.3 | 224.2 |
| 2.7   | 1.7   | 6.4   | 2.3   | 1.2   | 1.3   | 1.2   | 4.2   | 2.0   |
| 15.8  | 11.5  | 12.9  | 11.7  | 9.3   | 8.4   | 14.4  | 26.4  | 15.8  |
| 6.0   | 7.9   | 11.6  | 15.0  | 14.1  | 13.0  | 22.0  | 10.9  | 11.0  |
| 1.3   | 9.7   | 3.2   | 2.7   | 1.2   | 6.8   | 3.8   | 10.8  | 5.5   |
| 70.4  | 34.8  | 36.2  | 45.4  | 52.7  | 37.7  | 68.9  | 84.2  | 45.3  |
| 6.2   | 7.0   | 5.1   | 1.2   | 5.4   | 1.9   | 1.8   | 2.3   | 7.4   |
| 49.9  | 24.8  | 30.0  | 31.4  | 34.9  | 31.9  | 45.9  | 62.1  | 44.2  |
| 45.9  | 27.3  | 40.9  | 57.3  | 53.3  | 33.7  | 58.8  | 56.4  | 35.1  |
| 18.9  | 12.1  | 12.2  | 8.6   | 10.2  | 17.0  | 16.8  | 18.3  | 13.7  |
| 22.0  | 12.6  | 17.8  | 11.1  | 17.2  | 16.9  | 17.9  | 28.2  | 12.8  |
| 162.1 | 25.2  | 36.7  | 31.5  | 43.5  | 47.0  | 53.9  | 71.2  | 40.4  |
| 65.9  | 47.0  | 46.3  | 51.9  | 71.5  | 58.4  | 82.7  | 92.6  | 55.4  |
| 5.9   | 10.6  | 6.6   | 10.5  | 5.8   | 9.8   | 12.3  | 11.5  | 6.3   |
| 8.4   | 6.8   | 8.9   | 6.0   | 14.6  | 5.2   | 5.6   | 7.3   | 11.7  |
| 38.6  | 13.1  | 13.8  | 20.2  | 17.7  | 15.1  | 26.9  | 39.5  | 20.8  |
| 84.4  | 39.9  | 55.8  | 48.4  | 46.0  | 43.6  | 67.5  | 84.0  | 43.8  |
| 72.6  | 37.1  | 39.3  | 30.0  | 39.4  | 27.2  | 58.3  | 71.7  | 59.2  |
| 2.3   | 12.0  | 8.3   | 9.6   | 4.3   | 9.5   | 8.9   | 15.6  | 9.4   |
| 21.1  | 22.8  | 19.3  | 24.8  | 18.4  | 15.2  | 18.5  | 28.4  | 29.7  |
| 3.4   | 0.7   | 0.3   | 3.4   | 4.0   | 2.3   | 3.7   | 0.1   | 0.9   |
| 4.5   | 2.5   | 1.6   | 0.5   | 1.6   | 9.9   | 5.6   | 7.7   | 3.3   |
| 18.1  | 8.4   | 6.7   | 7.8   | 8.2   | 10.2  | 18.8  | 24.3  | 11.1  |
| 62.0  | 52.9  | 59.6  | 42.6  | 36.2  | 44.4  | 50.7  | 76.9  | 41.3  |
| 25.3  | 16.4  | 22.8  | 15.5  | 14.5  | 12.6  | 19.9  | 28.8  | 16.2  |
| 29.9  | 51.3  | 55.7  | 65.1  | 59.3  | 75.2  | 99.2  | 57.7  | 49.9  |
| 0.7   | 3.1   | 1.0   | 1.9   | 0.5   | 0.7   | 3.2   | 0.7   | 1.4   |
| 33.0  | 27.3  | 17.8  | 26.3  | 25.3  | 23.7  | 31.2  | 24.6  | 29.5  |
| 31.5  | 27.2  | 24.3  | 33.4  | 39.1  | 20.9  | 44.1  | 47.8  | 44.0  |
| 0.6   | 4.8   | 0.8   | 3.8   | 6.6   | 4.0   | 0.7   | 0.9   | 1.7   |
| 3.0   | 0.9   | 0.6   | 1.1   | 0.6   | 4.2   | 0.5   | 1.3   | 1.9   |
| 44.0  | 20.2  | 31.4  | 35.7  | 32.4  | 36.9  | 37.3  | 62.7  | 23.5  |
| 164.9 | 92.6  | 83.3  | 141.5 | 131.1 | 103.8 | 192.0 | 172.5 | 131.3 |
| 98.0  | 69.8  | 75.2  | 83.8  | 77.2  | 119.8 | 128.3 | 206.0 | 100.2 |
| 18.3  | 12.4  | 9.7   | 9.3   | 14.1  | 14.5  | 18.5  | 13.7  | 12.4  |
| 54.0  | 33.6  | 40.1  | 45.5  | 50.9  | 53.7  | 78.2  | 112.2 | 77.3  |
| 60.2  | 58.5  | 50.8  | 58.6  | 67.8  | 36.1  | 59.9  | 51.2  | 47.1  |
| 5.6   | 0.8   | 0.6   | 0.9   | 0.5   | 3.0   | 2.1   | 3.1   | 4.4   |
| 2.8   | 4.6   | 1.6   | 5.8   | 6.8   | 3.2   | 4.9   | 5.4   | 5.7   |

|       |       |       |       |       |       |       |       |       |
|-------|-------|-------|-------|-------|-------|-------|-------|-------|
| 32.6  | 19.8  | 27.9  | 27.0  | 25.7  | 28.8  | 30.0  | 35.1  | 30.2  |
| 417.8 | 353.6 | 309.0 | 400.6 | 498.6 | 369.9 | 589.9 | 627.5 | 417.0 |
| 63.5  | 30.2  | 33.7  | 30.8  | 44.9  | 56.1  | 63.1  | 109.8 | 44.0  |
| 53.3  | 43.8  | 34.2  | 35.3  | 42.7  | 44.8  | 51.0  | 63.0  | 29.1  |
| 10.8  | 8.3   | 8.0   | 10.0  | 6.1   | 10.5  | 12.5  | 13.3  | 4.8   |
| 224.1 | 138.4 | 176.1 | 204.1 | 200.2 | 189.7 | 241.5 | 259.7 | 201.3 |
| 72.9  | 34.9  | 37.2  | 38.0  | 36.9  | 39.5  | 43.0  | 62.7  | 35.8  |
| 5.3   | 3.0   | 2.5   | 0.5   | 2.7   | 2.4   | 2.3   | 4.7   | 0.9   |
| 34.7  | 25.6  | 26.4  | 27.2  | 35.2  | 32.7  | 41.5  | 60.0  | 36.0  |
| 17.8  | 14.2  | 12.0  | 15.7  | 12.5  | 7.9   | 20.3  | 18.5  | 11.2  |
| 27.7  | 40.4  | 29.5  | 39.1  | 41.0  | 35.7  | 54.4  | 37.7  | 41.6  |
| 27.3  | 21.0  | 27.3  | 30.1  | 14.4  | 13.3  | 21.7  | 30.9  | 26.5  |
| 31.7  | 18.5  | 16.6  | 22.2  | 13.0  | 22.6  | 23.9  | 20.3  | 26.2  |
| 1.1   | 0.5   | 0.7   | 1.0   | 5.3   | 8.1   | 5.6   | 7.6   | 3.2   |
| 56.0  | 44.5  | 51.4  | 50.8  | 59.3  | 41.2  | 75.5  | 68.6  | 42.9  |
| 71.5  | 38.3  | 46.0  | 53.5  | 45.0  | 54.8  | 72.7  | 85.8  | 54.8  |
| 72.5  | 60.5  | 43.8  | 56.8  | 52.5  | 56.5  | 56.9  | 58.4  | 78.5  |
| 7.4   | 8.7   | 6.4   | 8.3   | 6.0   | 9.5   | 22.4  | 15.1  | 10.6  |
| 40.4  | 26.7  | 30.3  | 33.3  | 20.0  | 25.8  | 29.4  | 51.5  | 29.9  |
| 82.2  | 55.3  | 70.5  | 72.4  | 70.6  | 88.7  | 106.3 | 138.9 | 103.7 |
| 11.9  | 14.9  | 2.0   | 9.8   | 8.6   | 10.6  | 25.9  | 23.2  | 18.2  |
| 6.9   | 7.6   | 6.2   | 4.1   | 2.4   | 7.5   | 8.9   | 10.2  | 8.1   |
| 18.3  | 20.7  | 20.9  | 19.5  | 21.5  | 20.3  | 19.2  | 37.7  | 29.6  |
| 1.3   | 1.1   | 6.1   | 1.0   | 0.8   | 1.4   | 3.3   | 4.0   | 0.7   |
| 105.3 | 58.2  | 66.5  | 59.9  | 72.2  | 78.8  | 96.0  | 125.5 | 122.9 |
| 113.0 | 56.8  | 75.0  | 75.0  | 71.2  | 75.2  | 107.3 | 118.8 | 112.6 |
| 20.4  | 12.0  | 6.3   | 11.0  | 10.5  | 7.1   | 17.5  | 24.8  | 12.6  |
| 133.8 | 102.1 | 113.8 | 118.7 | 112.4 | 118.6 | 127.7 | 169.4 | 120.5 |
| 10.7  | 11.8  | 9.6   | 9.8   | 10.5  | 9.7   | 6.0   | 14.0  | 10.6  |
| 201.1 | 164.3 | 184.8 | 207.0 | 200.9 | 202.6 | 270.2 | 296.6 | 200.9 |
| 0.4   | 7.1   | 0.7   | 0.2   | 5.2   | 3.6   | 1.3   | 7.8   | 2.9   |
| 0.2   | 1.6   | 1.8   | 0.4   | 1.9   | 0.2   | 0.4   | 4.0   | 2.4   |
| 568.1 | 358.6 | 383.8 | 394.4 | 422.4 | 362.7 | 456.0 | 474.9 | 288.5 |
| 5.3   | 3.7   | 9.2   | 8.9   | 2.3   | 8.9   | 5.6   | 6.9   | 1.7   |
| 74.6  | 48.3  | 47.6  | 48.1  | 60.5  | 60.0  | 74.4  | 121.4 | 75.6  |
| 10.3  | 3.4   | 1.3   | 5.9   | 6.8   | 10.9  | 15.4  | 13.4  | 4.7   |
| 52.8  | 37.1  | 48.1  | 42.2  | 51.2  | 50.0  | 61.3  | 80.4  | 57.3  |
| 30.7  | 25.8  | 20.8  | 27.3  | 22.5  | 23.1  | 27.3  | 39.4  | 39.2  |
| 36.8  | 17.5  | 17.5  | 30.3  | 15.1  | 15.5  | 31.6  | 17.6  | 16.4  |
| 0.9   | 3.3   | 3.1   | 2.5   | 3.5   | 2.1   | 2.2   | 1.9   | 4.5   |
| 7.4   | 10.3  | 6.3   | 8.0   | 7.5   | 11.1  | 10.8  | 9.1   | 8.0   |
| 20.1  | 14.0  | 16.4  | 11.1  | 23.3  | 14.4  | 21.9  | 26.2  | 17.2  |
| 10.1  | 4.0   | 11.6  | 9.6   | 4.7   | 9.8   | 9.6   | 1.6   | 7.6   |
| 13.4  | 1.7   | 14.1  | 20.4  | 10.9  | 8.6   | 17.7  | 16.0  | 14.4  |
| 455.5 | 272.8 | 414.1 | 416.5 | 352.3 | 433.9 | 601.1 | 643.0 | 291.8 |
| 26.0  | 9.7   | 16.6  | 13.2  | 14.6  | 14.2  | 23.2  | 32.2  | 12.1  |
| 11.9  | 11.7  | 10.7  | 11.5  | 12.1  | 8.8   | 10.6  | 20.7  | 15.6  |
| 70.4  | 56.7  | 56.0  | 63.6  | 62.3  | 63.2  | 91.2  | 87.4  | 54.9  |
| 69.5  | 45.0  | 57.9  | 54.4  | 52.7  | 56.6  | 90.3  | 71.4  | 72.0  |
| 1.9   | 0.5   | 0.4   | 0.5   | 2.0   | 1.9   | 4.1   | 0.5   | 0.4   |
| 15.1  | 3.0   | 1.8   | 2.4   | 1.2   | 3.1   | 17.7  | 15.4  | 0.9   |
| 14.0  | 16.7  | 21.7  | 16.6  | 8.2   | 12.3  | 10.6  | 12.6  | 15.0  |
| 8.7   | 10.4  | 1.9   | 4.5   | 7.7   | 8.5   | 22.5  | 19.3  | 21.0  |

|        |        |        |        |        |        |        |        |        |
|--------|--------|--------|--------|--------|--------|--------|--------|--------|
| 7.7    | 1.0    | 1.0    | 1.0    | 5.9    | 2.5    | 7.4    | 12.9   | 6.1    |
| 83.4   | 62.7   | 76.6   | 72.8   | 77.2   | 86.5   | 100.4  | 110.8  | 68.8   |
| 54.9   | 38.3   | 34.6   | 43.2   | 40.5   | 44.9   | 71.2   | 70.2   | 56.4   |
| 62.2   | 50.5   | 58.6   | 57.3   | 68.1   | 54.7   | 75.3   | 62.0   | 50.5   |
| 0.9    | 3.6    | 2.0    | 0.9    | 2.8    | 0.7    | 2.2    | 3.6    | 2.9    |
| 32.3   | 32.9   | 33.4   | 22.9   | 27.5   | 28.2   | 28.8   | 44.3   | 32.5   |
| 7.2    | 3.1    | 3.8    | 8.5    | 1.6    | 1.9    | 5.1    | 5.4    | 11.0   |
| 50.1   | 34.0   | 50.2   | 54.5   | 47.5   | 48.9   | 73.8   | 109.1  | 46.4   |
| 3022.0 | 2422.5 | 2421.6 | 2518.8 | 2796.6 | 2490.9 | 2847.5 | 3274.7 | 2253.0 |
| 13.9   | 8.9    | 8.5    | 8.7    | 9.4    | 8.9    | 12.8   | 20.4   | 10.7   |
| 31.8   | 34.3   | 32.7   | 40.3   | 49.5   | 37.7   | 53.7   | 66.1   | 37.6   |
| 28.5   | 18.1   | 17.6   | 20.1   | 13.3   | 13.6   | 49.5   | 33.3   | 26.6   |
| 6.3    | 12.0   | 7.7    | 9.3    | 10.1   | 9.0    | 10.1   | 9.1    | 7.5    |
| 12.5   | 6.7    | 12.0   | 12.2   | 8.0    | 12.3   | 19.6   | 20.6   | 10.7   |
| 6.7    | 5.1    | 8.2    | 5.7    | 7.8    | 5.6    | 5.0    | 10.1   | 5.4    |
| 0.3    | 0.6    | 0.3    | 0.7    | 0.7    | 0.3    | 0.3    | 0.4    | 0.2    |
| 0.3    | 0.5    | 2.4    | 2.2    | 3.3    | 0.2    | 2.1    | 0.4    | 1.1    |
| 2293.4 | 2110.9 | 2106.9 | 2166.2 | 2223.1 | 2147.3 | 2386.6 | 2489.4 | 1784.5 |
| 219.0  | 80.3   | 92.1   | 95.2   | 107.4  | 95.9   | 142.0  | 171.1  | 125.9  |
| 22.2   | 21.0   | 18.4   | 17.3   | 21.4   | 16.1   | 22.7   | 31.5   | 27.4   |
| 41.5   | 11.3   | 22.6   | 19.2   | 16.0   | 32.5   | 31.3   | 30.9   | 16.1   |
| 432.0  | 283.1  | 320.3  | 358.4  | 313.1  | 349.3  | 530.1  | 557.3  | 404.9  |
| 21.8   | 30.0   | 24.4   | 43.2   | 32.4   | 30.2   | 31.3   | 32.3   | 37.0   |
| 3.0    | 6.2    | 0.6    | 4.8    | 0.2    | 2.2    | 4.1    | 5.2    | 3.8    |
| 20.6   | 11.4   | 6.8    | 6.6    | 9.4    | 22.6   | 15.3   | 23.4   | 18.5   |
| 9.7    | 3.7    | 7.4    | 0.6    | 3.0    | 5.7    | 1.2    | 4.3    | 1.7    |
| 115.4  | 72.4   | 87.8   | 83.2   | 86.1   | 108.5  | 138.9  | 191.4  | 95.8   |
| 1284.7 | 1084.2 | 1140.5 | 1219.2 | 1247.7 | 1243.6 | 1589.2 | 1936.4 | 1186.6 |
| 23.8   | 18.5   | 8.2    | 27.8   | 32.5   | 23.2   | 30.8   | 29.8   | 25.6   |
| 78.9   | 50.4   | 54.8   | 49.7   | 61.0   | 62.2   | 76.7   | 78.3   | 61.0   |
| 0.7    | 6.3    | 0.4    | 0.5    | 1.9    | 1.6    | 0.7    | 0.7    | 0.5    |
| 55.9   | 26.8   | 41.2   | 29.5   | 35.5   | 41.0   | 47.0   | 48.6   | 35.6   |
| 5.6    | 5.0    | 6.0    | 5.3    | 5.8    | 1.2    | 4.9    | 4.7    | 5.9    |
| 31.7   | 33.1   | 29.5   | 35.0   | 36.6   | 37.9   | 45.1   | 63.5   | 41.8   |
| 32.0   | 17.8   | 16.5   | 18.3   | 19.2   | 17.2   | 22.8   | 28.0   | 22.9   |
| 36.6   | 22.8   | 22.4   | 37.2   | 29.7   | 23.9   | 30.8   | 40.0   | 27.6   |
| 3.3    | 0.8    | 4.2    | 0.6    | 6.5    | 3.9    | 4.7    | 4.1    | 3.6    |
| 89.5   | 54.6   | 63.5   | 62.7   | 59.8   | 85.2   | 87.5   | 160.7  | 79.5   |
| 3227.6 | 2590.1 | 2497.8 | 2761.0 | 3020.4 | 2816.3 | 3544.2 | 3772.8 | 2352.0 |
| 56.7   | 37.0   | 42.3   | 40.5   | 40.0   | 42.9   | 64.7   | 78.7   | 63.2   |
| 122.4  | 76.5   | 97.7   | 123.1  | 105.9  | 118.9  | 147.5  | 200.4  | 98.7   |
| 18.7   | 18.0   | 19.4   | 8.8    | 10.9   | 14.4   | 10.8   | 6.9    | 7.6    |
| 4.2    | 0.4    | 1.2    | 0.6    | 4.3    | 0.6    | 3.8    | 0.9    | 0.3    |
| 3.3    | 0.8    | 3.9    | 1.5    | 0.4    | 5.5    | 2.8    | 7.9    | 4.1    |
| 20.1   | 17.3   | 12.6   | 13.2   | 10.8   | 15.9   | 16.5   | 28.8   | 16.7   |
| 16.4   | 11.4   | 18.6   | 13.5   | 16.5   | 20.8   | 14.1   | 27.7   | 16.7   |
| 1.4    | 0.2    | 1.0    | 4.4    | 2.0    | 1.3    | 0.6    | 4.5    | 2.9    |
| 11.8   | 10.9   | 11.7   | 9.6    | 9.5    | 9.7    | 9.9    | 14.2   | 5.9    |
| 15.8   | 13.8   | 14.0   | 12.1   | 8.7    | 9.7    | 18.8   | 24.8   | 10.4   |
| 6.2    | 1.0    | 6.6    | 5.9    | 2.2    | 2.9    | 7.4    | 8.7    | 3.7    |
| 39.3   | 29.0   | 34.2   | 22.9   | 27.8   | 25.7   | 37.2   | 43.3   | 39.6   |
| 109.4  | 78.8   | 87.8   | 95.2   | 95.1   | 95.9   | 123.6  | 131.1  | 123.6  |
| 59.7   | 34.2   | 38.5   | 43.4   | 43.1   | 50.9   | 66.2   | 89.0   | 49.9   |

|        |        |        |        |        |        |        |        |        |
|--------|--------|--------|--------|--------|--------|--------|--------|--------|
| 26.2   | 14.1   | 21.0   | 20.6   | 29.1   | 24.2   | 33.0   | 32.8   | 34.9   |
| 9.4    | 8.7    | 9.7    | 8.8    | 9.9    | 8.9    | 10.3   | 15.2   | 7.0    |
| 19.2   | 4.4    | 10.8   | 15.3   | 9.4    | 9.7    | 12.3   | 8.3    | 14.0   |
| 3.1    | 3.0    | 1.1    | 2.9    | 1.0    | 5.9    | 4.8    | 1.3    | 4.8    |
| 41.6   | 30.8   | 35.7   | 34.4   | 30.1   | 38.0   | 40.4   | 59.7   | 41.9   |
| 33.2   | 20.0   | 13.9   | 17.8   | 19.2   | 17.5   | 20.6   | 32.5   | 15.9   |
| 250.6  | 161.4  | 176.1  | 190.3  | 218.2  | 177.3  | 259.3  | 275.1  | 226.0  |
| 1032.4 | 731.8  | 839.9  | 842.0  | 836.0  | 851.2  | 1022.8 | 1201.7 | 870.2  |
| 181.5  | 93.3   | 116.6  | 111.4  | 127.0  | 112.9  | 166.6  | 164.9  | 145.9  |
| 8.4    | 11.1   | 10.4   | 13.3   | 4.3    | 6.2    | 15.7   | 15.4   | 10.6   |
| 37.2   | 24.8   | 28.3   | 25.4   | 36.1   | 23.3   | 34.1   | 42.5   | 28.4   |
| 1.0    | 2.7    | 6.3    | 2.6    | 0.8    | 3.9    | 2.9    | 1.1    | 1.7    |
| 337.8  | 259.7  | 235.6  | 267.8  | 321.3  | 272.0  | 396.7  | 508.2  | 339.5  |
| 26.8   | 19.1   | 20.2   | 18.6   | 25.8   | 30.2   | 32.4   | 39.4   | 20.3   |
| 7.8    | 3.6    | 5.1    | 6.5    | 7.5    | 8.8    | 10.8   | 10.2   | 5.7    |
| 41.0   | 33.7   | 33.0   | 39.3   | 34.7   | 41.1   | 46.0   | 56.3   | 35.6   |
| 168.2  | 127.3  | 153.8  | 154.9  | 176.5  | 151.5  | 207.1  | 193.8  | 154.7  |
| 23.4   | 18.3   | 13.3   | 22.5   | 16.0   | 17.8   | 26.0   | 29.8   | 19.7   |
| 92.9   | 61.0   | 71.2   | 85.3   | 73.0   | 81.9   | 108.0  | 129.9  | 86.2   |
| 0.9    | 5.1    | 4.7    | 2.1    | 5.3    | 3.8    | 8.3    | 5.7    | 0.9    |
| 2.2    | 2.6    | 2.9    | 1.0    | 3.9    | 1.7    | 4.4    | 4.8    | 3.7    |
| 6.4    | 6.0    | 6.7    | 5.7    | 4.7    | 8.8    | 10.3   | 5.5    | 8.4    |
| 2731.2 | 2160.8 | 2326.8 | 2308.4 | 2738.3 | 2389.2 | 3145.7 | 3479.4 | 2513.3 |
| 0.2    | 0.3    | 0.4    | 0.7    | 1.2    | 0.6    | 1.9    | 0.7    | 2.6    |
| 0.6    | 0.1    | 2.2    | 0.2    | 0.9    | 0.8    | 2.1    | 3.4    | 0.4    |
| 1.2    | 1.7    | 2.6    | 1.9    | 1.0    | 5.0    | 1.3    | 1.5    | 1.1    |
| 2.4    | 2.3    | 8.9    | 1.6    | 2.3    | 1.1    | 1.4    | 2.5    | 9.0    |
| 4.9    | 10.8   | 1.5    | 9.1    | 7.7    | 2.7    | 12.2   | 2.7    | 5.2    |
| 17.3   | 9.9    | 8.8    | 23.9   | 23.2   | 16.3   | 26.5   | 27.2   | 20.8   |
| 7.7    | 15.4   | 11.1   | 5.4    | 20.4   | 9.7    | 8.7    | 24.0   | 14.6   |
| 71.4   | 68.2   | 76.1   | 82.5   | 78.2   | 83.2   | 99.8   | 115.4  | 86.6   |
| 196.7  | 122.7  | 154.9  | 156.1  | 162.1  | 163.5  | 205.9  | 232.7  | 176.0  |
| 12.7   | 11.1   | 13.2   | 7.2    | 15.5   | 11.0   | 18.9   | 27.8   | 18.8   |
| 3.6    | 0.4    | 1.4    | 0.4    | 4.5    | 2.9    | 1.2    | 2.4    | 2.8    |
| 8.7    | 4.0    | 3.9    | 6.8    | 3.6    | 5.0    | 5.9    | 4.5    | 7.9    |
| 150.4  | 90.1   | 109.3  | 112.1  | 137.9  | 129.3  | 158.2  | 167.4  | 110.1  |
| 132.7  | 111.5  | 114.8  | 121.0  | 100.8  | 127.2  | 127.7  | 155.1  | 139.5  |
| 0.7    | 1.1    | 2.8    | 6.2    | 1.7    | 1.6    | 4.1    | 0.5    | 3.3    |
| 6.9    | 5.5    | 2.1    | 1.2    | 3.1    | 5.1    | 3.0    | 5.1    | 0.5    |
| 8.9    | 15.0   | 13.1   | 14.6   | 15.5   | 14.4   | 29.1   | 27.9   | 29.7   |
| 1.2    | 0.7    | 2.0    | 0.6    | 0.5    | 0.6    | 0.5    | 0.5    | 0.4    |
| 17.4   | 8.8    | 7.1    | 7.6    | 0.3    | 6.8    | 1.8    | 9.0    | 7.5    |
| 32.6   | 15.7   | 30.7   | 20.4   | 19.2   | 21.5   | 28.5   | 26.9   | 25.0   |
| 8.6    | 11.0   | 6.0    | 2.8    | 7.9    | 6.0    | 9.3    | 9.3    | 2.4    |
| 0.6    | 0.9    | 0.3    | 1.0    | 0.4    | 2.5    | 0.6    | 3.5    | 2.5    |
| 13.7   | 1.8    | 11.4   | 6.4    | 11.5   | 11.0   | 17.4   | 13.9   | 15.2   |
| 0.9    | 2.2    | 0.5    | 1.1    | 4.9    | 4.9    | 0.5    | 2.3    | 0.3    |
| 9.2    | 12.8   | 1.6    | 17.2   | 8.7    | 5.9    | 7.8    | 10.5   | 3.0    |
| 45.9   | 38.3   | 42.9   | 44.1   | 47.2   | 41.3   | 60.9   | 65.0   | 47.1   |
| 234.8  | 167.5  | 178.1  | 167.9  | 179.2  | 148.4  | 218.7  | 230.9  | 163.7  |
| 19.0   | 6.6    | 13.0   | 12.1   | 7.6    | 11.7   | 17.8   | 18.0   | 3.1    |
| 0.9    | 0.5    | 1.0    | 3.5    | 0.6    | 3.8    | 1.7    | 1.2    | 0.5    |
| 7.9    | 1.9    | 6.5    | 3.2    | 6.6    | 14.0   | 13.9   | 32.4   | 4.0    |

|        |        |        |        |        |        |        |        |        |
|--------|--------|--------|--------|--------|--------|--------|--------|--------|
| 49.6   | 36.0   | 33.4   | 40.2   | 20.7   | 28.8   | 35.3   | 32.2   | 30.9   |
| 17.2   | 12.4   | 12.7   | 12.7   | 9.5    | 13.3   | 20.2   | 12.3   | 20.1   |
| 138.2  | 94.4   | 118.7  | 115.4  | 127.5  | 117.7  | 150.9  | 195.7  | 118.3  |
| 30.2   | 22.8   | 24.1   | 23.2   | 21.7   | 29.7   | 30.7   | 27.1   | 18.1   |
| 28.5   | 11.8   | 17.5   | 16.6   | 24.1   | 35.9   | 30.2   | 36.4   | 24.3   |
| 15.0   | 25.1   | 14.5   | 16.2   | 22.7   | 16.8   | 9.6    | 26.1   | 12.5   |
| 1.4    | 5.1    | 0.8    | 2.8    | 3.0    | 4.6    | 4.9    | 1.4    | 1.8    |
| 27.6   | 15.2   | 13.7   | 13.0   | 15.4   | 20.7   | 29.1   | 32.2   | 24.6   |
| 3139.0 | 2794.7 | 2746.2 | 2966.2 | 2961.9 | 2847.2 | 3156.2 | 3343.5 | 2421.4 |
| 104.0  | 94.4   | 104.4  | 117.9  | 120.1  | 125.2  | 192.4  | 197.7  | 173.7  |
| 120.9  | 70.2   | 85.1   | 102.2  | 92.5   | 95.8   | 123.1  | 138.7  | 77.9   |
| 0.8    | 0.8    | 4.8    | 0.2    | 0.4    | 2.3    | 0.6    | 0.5    | 1.1    |
| 52.2   | 14.0   | 24.3   | 15.4   | 22.0   | 24.4   | 30.2   | 41.0   | 28.1   |
| 2.8    | 0.2    | 1.3    | 3.2    | 0.4    | 0.5    | 0.4    | 0.3    | 1.6    |
| 24.5   | 18.8   | 21.0   | 17.0   | 19.2   | 25.3   | 34.3   | 50.8   | 18.7   |
| 52.6   | 34.8   | 38.1   | 54.7   | 40.6   | 64.1   | 51.2   | 70.2   | 45.4   |
| 69.2   | 34.5   | 53.5   | 45.2   | 45.4   | 49.9   | 69.2   | 93.1   | 66.9   |
| 1.2    | 4.5    | 12.7   | 11.4   | 6.3    | 2.4    | 6.8    | 10.9   | 9.6    |
| 26.3   | 15.1   | 23.3   | 15.3   | 24.6   | 26.4   | 28.3   | 32.6   | 14.8   |
| 12.5   | 16.0   | 16.0   | 8.7    | 9.2    | 15.0   | 12.4   | 12.9   | 13.9   |
| 245.6  | 167.6  | 167.3  | 184.0  | 184.4  | 168.4  | 273.3  | 316.3  | 158.0  |
| 3.2    | 1.0    | 1.8    | 1.6    | 1.5    | 3.5    | 4.7    | 3.8    | 5.3    |
| 9.0    | 5.7    | 6.3    | 1.4    | 2.4    | 6.1    | 9.6    | 8.8    | 6.4    |
| 16.3   | 19.9   | 18.2   | 21.4   | 23.8   | 15.4   | 21.3   | 35.9   | 19.2   |
| 5.7    | 7.1    | 2.9    | 0.5    | 6.7    | 6.1    | 5.6    | 9.8    | 4.8    |
| 86.9   | 61.7   | 76.6   | 83.5   | 87.9   | 83.0   | 121.8  | 142.3  | 91.1   |
| 16.8   | 21.3   | 19.1   | 18.1   | 12.9   | 13.7   | 22.6   | 19.6   | 22.3   |
| 4.1    | 2.8    | 2.8    | 4.3    | 4.7    | 4.9    | 3.1    | 7.0    | 1.1    |
| 19.2   | 6.4    | 7.9    | 11.9   | 6.0    | 11.2   | 21.8   | 18.9   | 15.9   |
| 7.7    | 7.0    | 7.6    | 7.2    | 7.3    | 5.8    | 8.5    | 17.2   | 3.9    |
| 5.7    | 5.8    | 6.9    | 6.7    | 5.5    | 4.9    | 2.0    | 4.2    | 5.2    |
| 942.5  | 767.2  | 919.6  | 762.1  | 824.0  | 701.8  | 1034.4 | 1103.0 | 707.0  |
| 3556.9 | 3180.3 | 2965.5 | 3173.7 | 3378.9 | 3120.0 | 3965.1 | 4174.9 | 3351.5 |
| 20.2   | 16.4   | 18.5   | 25.1   | 22.3   | 18.7   | 28.7   | 28.9   | 20.5   |
| 8.8    | 6.4    | 8.0    | 15.0   | 5.0    | 6.8    | 17.8   | 11.8   | 15.4   |
| 17.9   | 8.6    | 13.2   | 15.7   | 11.4   | 9.9    | 18.9   | 24.7   | 15.8   |
| 18.6   | 15.2   | 7.5    | 7.0    | 16.9   | 10.0   | 12.2   | 17.1   | 12.9   |
| 1.0    | 0.6    | 0.2    | 0.4    | 0.9    | 1.0    | 0.4    | 0.9    | 0.7    |
| 28.1   | 16.5   | 10.6   | 24.8   | 17.6   | 27.5   | 27.3   | 40.2   | 19.9   |
| 11.2   | 1.3    | 10.0   | 7.7    | 4.7    | 1.8    | 10.5   | 6.2    | 3.2    |
| 24.3   | 10.7   | 9.4    | 14.3   | 15.6   | 14.7   | 11.4   | 15.5   | 9.2    |
| 8.0    | 10.7   | 8.1    | 11.7   | 9.3    | 10.2   | 14.2   | 11.2   | 17.7   |
| 0.9    | 1.9    | 1.2    | 1.1    | 1.1    | 0.8    | 1.2    | 2.7    | 0.8    |
| 11.6   | 1.2    | 5.3    | 4.1    | 1.3    | 3.4    | 11.1   | 11.2   | 10.2   |
| 3.4    | 1.7    | 6.1    | 4.7    | 1.0    | 1.2    | 14.9   | 11.1   | 1.7    |
| 116.3  | 85.4   | 83.1   | 94.9   | 85.4   | 80.7   | 125.7  | 102.0  | 88.1   |
| 1043.7 | 736.6  | 811.3  | 913.9  | 813.0  | 858.7  | 1019.1 | 1171.9 | 778.5  |
| 0.8    | 5.4    | 1.7    | 2.4    | 8.3    | 5.0    | 6.6    | 1.7    | 0.3    |
| 1.1    | 1.1    | 0.6    | 5.0    | 0.5    | 0.4    | 0.7    | 1.0    | 1.2    |
| 17.8   | 16.6   | 18.3   | 15.3   | 12.4   | 9.4    | 19.9   | 17.6   | 12.8   |
| 0.4    | 1.0    | 0.8    | 0.9    | 1.0    | 2.2    | 0.7    | 3.8    | 0.5    |
| 0.2    | 3.8    | 2.6    | 3.7    | 2.6    | 0.1    | 4.7    | 3.5    | 2.3    |
| 23.1   | 14.9   | 20.2   | 20.3   | 21.7   | 19.0   | 26.0   | 24.0   | 18.6   |

|        |       |       |       |       |       |        |        |       |
|--------|-------|-------|-------|-------|-------|--------|--------|-------|
| 1.0    | 6.1   | 2.0   | 3.5   | 14.9  | 9.5   | 3.9    | 7.3    | 11.4  |
| 22.3   | 13.2  | 13.7  | 20.3  | 17.2  | 14.9  | 27.7   | 32.7   | 17.3  |
| 5.7    | 4.7   | 2.9   | 5.6   | 8.8   | 7.4   | 6.7    | 9.3    | 4.3   |
| 67.7   | 34.3  | 42.7  | 49.2  | 32.4  | 39.6  | 77.4   | 67.4   | 57.8  |
| 3.0    | 2.6   | 3.2   | 6.7   | 35.7  | 4.2   | 18.4   | 17.6   | 0.9   |
| 31.4   | 28.6  | 13.9  | 11.3  | 17.6  | 20.8  | 23.7   | 26.5   | 17.9  |
| 189.6  | 142.4 | 167.6 | 167.8 | 158.0 | 166.0 | 215.9  | 225.1  | 180.5 |
| 62.0   | 35.1  | 46.1  | 57.8  | 50.8  | 60.2  | 74.7   | 58.0   | 65.0  |
| 164.0  | 44.7  | 68.2  | 64.9  | 56.3  | 69.1  | 81.8   | 126.6  | 68.2  |
| 940.2  | 452.8 | 563.0 | 553.3 | 563.1 | 605.3 | 781.8  | 991.1  | 527.9 |
| 56.0   | 43.5  | 63.7  | 63.2  | 54.2  | 60.1  | 91.1   | 110.1  | 56.9  |
| 91.4   | 80.9  | 74.3  | 79.7  | 72.5  | 73.3  | 90.1   | 123.6  | 85.5  |
| 48.3   | 28.8  | 26.8  | 29.6  | 34.7  | 28.0  | 37.9   | 76.5   | 42.3  |
| 146.7  | 92.1  | 94.2  | 100.1 | 128.7 | 117.3 | 154.6  | 168.1  | 128.7 |
| 24.5   | 22.3  | 17.5  | 20.7  | 18.1  | 13.7  | 24.5   | 32.7   | 18.3  |
| 286.6  | 245.2 | 219.5 | 266.2 | 295.7 | 246.4 | 348.4  | 446.2  | 433.2 |
| 60.4   | 53.4  | 64.0  | 61.1  | 62.3  | 73.6  | 100.1  | 104.4  | 50.8  |
| 2.5    | 5.0   | 1.9   | 1.5   | 4.7   | 2.0   | 3.4    | 2.4    | 1.9   |
| 3.2    | 1.1   | 3.5   | 1.9   | 4.8   | 3.6   | 2.7    | 5.6    | 0.3   |
| 13.1   | 9.6   | 9.9   | 12.5  | 8.6   | 8.4   | 8.9    | 12.8   | 11.9  |
| 107.6  | 47.8  | 60.9  | 58.1  | 83.6  | 73.1  | 102.4  | 147.2  | 66.8  |
| 7.0    | 2.3   | 3.8   | 6.4   | 5.8   | 7.0   | 6.8    | 5.9    | 4.0   |
| 47.4   | 39.7  | 41.4  | 40.4  | 40.9  | 32.3  | 59.6   | 46.5   | 36.5  |
| 81.4   | 76.2  | 85.9  | 88.6  | 86.9  | 64.9  | 78.7   | 89.8   | 80.5  |
| 0.7    | 1.6   | 2.7   | 4.4   | 0.7   | 1.4   | 0.8    | 1.5    | 3.8   |
| 86.1   | 51.4  | 69.8  | 61.7  | 63.6  | 63.8  | 93.6   | 93.4   | 67.3  |
| 12.0   | 6.5   | 5.1   | 8.3   | 0.3   | 5.5   | 1.9    | 16.2   | 4.7   |
| 6.4    | 4.8   | 3.8   | 4.9   | 5.9   | 3.4   | 4.3    | 8.6    | 7.2   |
| 44.0   | 29.5  | 36.1  | 40.0  | 43.1  | 45.9  | 58.2   | 56.0   | 50.2  |
| 43.4   | 27.9  | 30.3  | 29.8  | 31.1  | 26.8  | 41.8   | 42.2   | 27.0  |
| 62.2   | 43.3  | 42.0  | 43.4  | 49.2  | 52.4  | 63.4   | 97.9   | 52.5  |
| 23.4   | 20.7  | 23.6  | 26.5  | 22.2  | 15.1  | 26.3   | 31.8   | 21.9  |
| 31.5   | 22.1  | 22.9  | 31.9  | 24.9  | 26.8  | 43.6   | 45.5   | 40.1  |
| 109.6  | 82.5  | 95.4  | 99.2  | 101.9 | 99.7  | 118.6  | 124.6  | 116.5 |
| 23.3   | 9.9   | 14.6  | 20.6  | 17.5  | 30.6  | 27.5   | 30.2   | 17.8  |
| 1.3    | 1.2   | 7.7   | 10.9  | 8.8   | 6.9   | 1.4    | 1.6    | 1.2   |
| 130.5  | 57.1  | 61.7  | 65.9  | 76.5  | 74.4  | 86.6   | 134.4  | 84.1  |
| 1026.4 | 564.2 | 802.5 | 744.9 | 819.6 | 818.0 | 1173.8 | 1157.3 | 868.5 |
| 4.5    | 2.8   | 0.6   | 4.8   | 3.0   | 4.2   | 7.9    | 2.2    | 2.0   |
| 0.3    | 0.8   | 1.1   | 0.5   | 1.1   | 2.9   | 0.3    | 0.9    | 1.7   |
| 43.5   | 32.6  | 40.6  | 30.2  | 44.2  | 34.7  | 43.4   | 52.3   | 42.0  |
| 9.3    | 6.3   | 0.9   | 7.7   | 3.0   | 3.1   | 7.0    | 2.2    | 1.1   |
| 354.2  | 216.0 | 277.4 | 283.5 | 289.6 | 285.7 | 377.6  | 367.0  | 339.3 |
| 6.1    | 5.6   | 3.4   | 2.2   | 1.6   | 1.4   | 3.3    | 3.5    | 1.1   |
| 27.2   | 21.4  | 28.1  | 34.9  | 21.2  | 29.0  | 28.9   | 35.1   | 16.3  |
| 3.5    | 2.3   | 1.2   | 1.2   | 5.7   | 2.6   | 1.3    | 1.2    | 1.2   |
| 4.9    | 3.2   | 1.3   | 1.1   | 4.9   | 2.1   | 6.2    | 1.8    | 6.5   |
| 132.0  | 85.1  | 91.7  | 108.5 | 101.2 | 98.0  | 132.8  | 157.9  | 109.6 |
| 18.0   | 10.1  | 17.0  | 15.5  | 14.3  | 17.2  | 21.6   | 25.2   | 20.2  |
| 1.7    | 4.8   | 3.0   | 7.6   | 3.1   | 5.7   | 9.8    | 10.7   | 0.7   |
| 58.8   | 23.1  | 38.7  | 39.0  | 36.4  | 43.5  | 68.0   | 99.8   | 47.4  |
| 35.1   | 25.1  | 19.4  | 23.6  | 22.9  | 33.4  | 33.9   | 57.7   | 38.8  |
| 19.9   | 9.4   | 6.7   | 14.8  | 8.5   | 11.3  | 16.8   | 16.7   | 14.7  |



|        |        |        |        |        |        |        |        |        |
|--------|--------|--------|--------|--------|--------|--------|--------|--------|
| 35.0   | 40.8   | 31.5   | 25.5   | 36.2   | 35.9   | 40.8   | 48.9   | 41.4   |
| 7.1    | 13.5   | 9.8    | 10.4   | 9.1    | 9.5    | 15.5   | 14.9   | 12.0   |
| 4.9    | 1.4    | 6.0    | 2.6    | 7.6    | 3.9    | 6.3    | 6.4    | 3.2    |
| 84.6   | 56.8   | 72.3   | 72.1   | 76.6   | 76.3   | 106.2  | 118.2  | 96.8   |
| 90.0   | 34.5   | 41.0   | 42.6   | 44.5   | 36.0   | 61.8   | 64.8   | 37.0   |
| 1.1    | 6.3    | 1.3    | 2.1    | 2.3    | 3.4    | 0.3    | 1.2    | 1.3    |
| 11.5   | 15.9   | 18.2   | 13.0   | 13.6   | 13.8   | 19.9   | 24.6   | 16.3   |
| 4.9    | 11.4   | 5.2    | 3.2    | 6.0    | 6.9    | 7.2    | 3.8    | 7.2    |
| 0.7    | 1.1    | 0.5    | 2.5    | 0.5    | 0.6    | 0.7    | 0.8    | 0.7    |
| 1.6    | 0.6    | 1.4    | 7.2    | 1.1    | 1.7    | 1.0    | 7.9    | 5.6    |
| 10.9   | 12.5   | 14.8   | 16.6   | 15.1   | 11.9   | 22.0   | 23.4   | 11.8   |
| 44.0   | 23.6   | 22.4   | 28.1   | 29.6   | 29.5   | 36.0   | 46.8   | 30.9   |
| 12.5   | 6.0    | 2.8    | 2.2    | 3.7    | 4.6    | 5.9    | 14.7   | 3.4    |
| 1771.8 | 1177.2 | 1188.0 | 1354.3 | 1436.9 | 1394.4 | 1681.3 | 1932.6 | 1179.1 |
| 4.7    | 1.5    | 2.1    | 1.1    | 1.7    | 1.3    | 10.2   | 1.6    | 10.2   |
| 0.5    | 0.4    | 0.5    | 0.3    | 0.3    | 0.3    | 0.5    | 0.4    | 0.5    |
| 27.9   | 10.2   | 16.9   | 13.5   | 14.1   | 15.0   | 23.8   | 32.5   | 16.7   |
| 77.3   | 72.8   | 67.5   | 97.2   | 97.3   | 61.1   | 140.4  | 97.2   | 124.8  |
| 29.1   | 17.4   | 23.2   | 30.3   | 18.9   | 29.0   | 31.8   | 31.4   | 13.2   |
| 26.2   | 26.1   | 25.1   | 32.4   | 26.4   | 20.7   | 33.6   | 38.5   | 28.3   |
| 288.0  | 205.3  | 246.7  | 260.8  | 252.8  | 253.4  | 320.7  | 326.8  | 232.2  |
| 0.3    | 0.4    | 0.1    | 0.6    | 0.7    | 0.5    | 4.1    | 0.4    | 2.3    |
| 52.5   | 26.9   | 25.3   | 20.0   | 26.4   | 24.0   | 40.2   | 52.7   | 35.7   |
| 90.1   | 42.9   | 45.9   | 42.3   | 43.5   | 51.3   | 69.9   | 105.9  | 66.9   |
| 5.3    | 4.1    | 3.4    | 3.6    | 0.9    | 1.4    | 2.2    | 2.1    | 1.1    |
| 64.6   | 46.9   | 29.3   | 41.9   | 24.6   | 32.8   | 48.2   | 72.8   | 56.1   |
| 54.0   | 29.6   | 32.5   | 32.1   | 36.9   | 32.7   | 48.5   | 71.0   | 35.8   |
| 28.1   | 17.3   | 15.2   | 16.5   | 16.8   | 13.7   | 28.7   | 32.6   | 23.1   |
| 1.7    | 1.0    | 2.5    | 0.6    | 4.0    | 2.8    | 0.4    | 1.1    | 0.3    |
| 202.6  | 87.1   | 108.4  | 122.6  | 123.3  | 127.8  | 169.7  | 218.7  | 131.7  |
| 7.8    | 10.8   | 11.4   | 12.0   | 6.2    | 8.3    | 10.1   | 12.2   | 13.8   |
| 3026.2 | 2300.1 | 2136.0 | 2498.6 | 2492.8 | 2479.2 | 3077.8 | 3209.3 | 2375.9 |
| 41.9   | 26.9   | 25.1   | 23.0   | 24.8   | 25.9   | 37.5   | 35.1   | 32.1   |
| 16.5   | 13.9   | 8.8    | 10.6   | 3.0    | 6.8    | 13.1   | 10.8   | 15.4   |
| 0.9    | 0.7    | 0.4    | 0.5    | 0.7    | 0.5    | 1.3    | 0.5    | 0.5    |
| 833.1  | 500.2  | 661.8  | 688.1  | 687.8  | 720.9  | 876.9  | 978.9  | 593.7  |
| 1613.2 | 1135.2 | 1185.4 | 1212.5 | 1319.5 | 1223.6 | 1829.4 | 1867.2 | 1351.4 |
| 18.9   | 2.0    | 13.2   | 16.9   | 2.2    | 12.3   | 19.7   | 16.8   | 8.8    |
| 6.1    | 6.4    | 4.6    | 5.1    | 3.7    | 6.2    | 5.7    | 3.4    | 8.1    |
| 0.9    | 1.5    | 5.1    | 3.8    | 4.5    | 5.8    | 0.5    | 3.1    | 1.8    |
| 4.6    | 2.4    | 4.7    | 2.0    | 1.9    | 2.3    | 4.0    | 4.2    | 1.3    |
| 5.9    | 6.2    | 6.0    | 12.1   | 7.6    | 5.7    | 12.0   | 18.6   | 8.7    |
| 106.9  | 82.7   | 62.7   | 90.9   | 97.6   | 101.4  | 143.4  | 109.2  | 86.4   |
| 7.6    | 7.7    | 7.5    | 3.3    | 8.0    | 12.1   | 7.0    | 16.9   | 9.9    |
| 8.8    | 6.9    | 4.7    | 5.4    | 2.9    | 5.1    | 7.5    | 12.2   | 3.7    |
| 6.1    | 2.8    | 6.2    | 8.5    | 1.0    | 7.9    | 6.8    | 6.5    | 1.3    |
| 18.1   | 15.4   | 7.3    | 11.8   | 13.2   | 7.2    | 20.0   | 22.1   | 12.8   |
| 181.4  | 149.1  | 157.9  | 179.3  | 169.3  | 196.6  | 212.1  | 311.7  | 276.6  |
| 17.1   | 12.7   | 12.6   | 20.2   | 17.9   | 15.9   | 16.0   | 18.3   | 10.5   |
| 18.2   | 15.1   | 13.8   | 17.2   | 14.1   | 15.2   | 15.9   | 26.7   | 11.0   |
| 1.5    | 1.6    | 1.6    | 0.6    | 11.1   | 0.7    | 0.5    | 1.5    | 1.7    |
| 2.3    | 6.1    | 6.3    | 9.3    | 6.0    | 5.5    | 5.1    | 2.6    | 2.8    |
| 141.8  | 62.8   | 88.0   | 86.8   | 87.1   | 92.6   | 126.4  | 150.7  | 87.2   |

|        |        |        |        |        |        |        |        |        |
|--------|--------|--------|--------|--------|--------|--------|--------|--------|
| 28.9   | 41.1   | 32.4   | 26.4   | 20.6   | 19.7   | 40.4   | 34.2   | 33.2   |
| 176.3  | 111.8  | 166.3  | 147.4  | 155.9  | 141.8  | 216.5  | 244.4  | 179.0  |
| 91.8   | 53.2   | 66.4   | 67.3   | 58.2   | 65.0   | 98.3   | 125.8  | 78.1   |
| 83.2   | 69.3   | 93.5   | 81.1   | 103.0  | 86.8   | 110.8  | 128.9  | 77.6   |
| 1.9    | 1.0    | 6.7    | 2.3    | 1.1    | 0.9    | 1.1    | 1.3    | 1.6    |
| 78.7   | 38.8   | 39.0   | 45.7   | 43.0   | 43.8   | 67.8   | 109.5  | 74.4   |
| 1.9    | 1.3    | 1.1    | 1.5    | 1.2    | 1.6    | 1.8    | 1.9    | 1.1    |
| 350.5  | 235.4  | 252.1  | 258.8  | 233.7  | 250.2  | 265.6  | 377.0  | 279.4  |
| 9.2    | 7.8    | 6.3    | 1.4    | 18.5   | 5.2    | 1.6    | 8.8    | 3.6    |
| 3717.6 | 3159.1 | 2731.4 | 2973.0 | 3278.5 | 3006.8 | 3911.2 | 4174.6 | 3821.4 |
| 28.0   | 20.1   | 23.8   | 24.9   | 24.2   | 18.1   | 21.9   | 29.4   | 31.9   |
| 60.7   | 36.8   | 38.2   | 35.6   | 46.3   | 37.1   | 49.9   | 45.4   | 41.5   |
| 206.4  | 170.5  | 165.0  | 167.4  | 180.4  | 161.6  | 214.5  | 248.6  | 171.8  |
| 4.8    | 8.6    | 7.6    | 2.8    | 6.8    | 7.7    | 7.5    | 8.3    | 7.6    |
| 887.0  | 678.3  | 546.3  | 672.0  | 730.3  | 672.9  | 938.0  | 1170.5 | 767.0  |
| 1.5    | 1.6    | 0.9    | 1.1    | 2.0    | 1.8    | 0.6    | 10.5   | 1.8    |
| 9.7    | 9.0    | 9.1    | 8.5    | 4.3    | 7.7    | 1.5    | 11.0   | 9.9    |
| 21.9   | 18.4   | 19.8   | 18.5   | 23.4   | 21.7   | 18.7   | 28.0   | 21.2   |
| 20.2   | 11.4   | 10.1   | 14.4   | 9.3    | 10.2   | 20.9   | 26.6   | 15.0   |
| 58.2   | 19.1   | 31.5   | 25.2   | 24.0   | 29.2   | 37.0   | 62.1   | 44.9   |
| 29.6   | 19.4   | 16.4   | 15.4   | 18.9   | 20.0   | 30.4   | 25.4   | 31.6   |
| 37.2   | 38.5   | 30.3   | 34.5   | 44.7   | 30.0   | 49.2   | 67.8   | 36.3   |
| 51.4   | 23.5   | 16.3   | 26.6   | 32.3   | 21.3   | 32.8   | 24.6   | 10.7   |
| 31.7   | 23.9   | 28.6   | 31.5   | 35.7   | 34.3   | 52.2   | 58.5   | 37.7   |
| 187.9  | 98.6   | 73.7   | 85.6   | 97.6   | 82.4   | 133.0  | 110.9  | 117.8  |
| 1.0    | 5.7    | 1.9    | 0.5    | 1.6    | 1.1    | 0.6    | 4.7    | 1.3    |
| 34.5   | 24.7   | 25.3   | 26.9   | 23.2   | 35.8   | 43.2   | 43.6   | 20.9   |
| 37.5   | 36.2   | 38.4   | 33.9   | 37.1   | 26.8   | 49.2   | 75.9   | 40.6   |
| 22.5   | 9.1    | 15.7   | 16.7   | 16.2   | 12.7   | 24.3   | 25.7   | 7.9    |
| 74.3   | 36.6   | 55.9   | 66.6   | 46.7   | 52.4   | 87.0   | 119.3  | 61.0   |
| 10.1   | 8.5    | 7.2    | 13.8   | 7.4    | 7.3    | 10.1   | 12.2   | 10.8   |
| 2.6    | 9.3    | 0.9    | 2.1    | 6.8    | 3.8    | 6.3    | 2.9    | 4.4    |
| 54.7   | 18.6   | 29.7   | 34.6   | 25.9   | 25.0   | 41.7   | 61.9   | 27.0   |
| 2.9    | 3.1    | 0.6    | 4.4    | 3.5    | 0.3    | 0.8    | 2.5    | 3.0    |
| 28.6   | 25.9   | 24.5   | 31.0   | 26.8   | 20.9   | 36.2   | 23.6   | 18.2   |
| 5.4    | 1.4    | 1.4    | 1.1    | 2.1    | 1.5    | 4.2    | 1.0    | 1.1    |
| 11.9   | 3.7    | 4.9    | 2.0    | 11.0   | 6.6    | 9.5    | 2.8    | 7.4    |
| 59.1   | 43.9   | 34.1   | 45.6   | 72.0   | 40.2   | 69.5   | 82.4   | 80.6   |
| 6.5    | 10.1   | 12.4   | 14.3   | 16.0   | 10.5   | 26.1   | 20.9   | 7.9    |
| 4.8    | 5.7    | 5.2    | 7.2    | 5.6    | 16.0   | 6.8    | 7.4    | 14.6   |
| 45.0   | 30.3   | 30.5   | 28.8   | 30.0   | 31.5   | 34.5   | 41.3   | 23.2   |
| 3135.4 | 3050.9 | 3055.7 | 3044.7 | 3189.1 | 2864.6 | 3231.5 | 3182.1 | 2135.7 |
| 42.5   | 24.7   | 30.1   | 27.0   | 30.5   | 31.1   | 42.9   | 59.8   | 33.7   |
| 63.2   | 26.0   | 49.9   | 45.8   | 43.8   | 43.5   | 58.6   | 72.0   | 48.8   |
| 38.6   | 18.7   | 28.8   | 31.7   | 24.6   | 34.4   | 31.9   | 59.2   | 22.1   |
| 9.4    | 5.6    | 10.7   | 9.0    | 11.3   | 7.2    | 10.6   | 21.3   | 13.7   |
| 14.9   | 14.1   | 17.2   | 25.9   | 8.9    | 13.4   | 16.8   | 7.9    | 10.8   |
| 0.1    | 0.4    | 0.4    | 0.2    | 0.2    | 0.1    | 1.5    | 2.3    | 0.2    |
| 15.5   | 9.7    | 3.8    | 7.9    | 12.8   | 8.3    | 19.5   | 36.4   | 11.7   |
| 48.4   | 29.2   | 40.4   | 35.5   | 34.1   | 37.7   | 40.3   | 54.1   | 52.6   |
| 683.0  | 637.4  | 629.6  | 682.4  | 820.8  | 730.0  | 855.1  | 945.2  | 675.7  |
| 56.1   | 25.7   | 37.3   | 39.7   | 39.1   | 39.9   | 53.7   | 59.2   | 38.1   |
| 34.0   | 21.7   | 19.6   | 22.2   | 28.0   | 25.8   | 33.9   | 31.3   | 23.7   |

|        |        |        |        |        |        |        |        |        |
|--------|--------|--------|--------|--------|--------|--------|--------|--------|
| 14.5   | 15.1   | 15.5   | 16.5   | 24.5   | 9.3    | 21.8   | 20.1   | 20.2   |
| 15.2   | 13.2   | 7.3    | 13.0   | 13.4   | 12.1   | 20.1   | 24.6   | 19.3   |
| 16.7   | 9.9    | 12.0   | 10.4   | 10.8   | 7.8    | 11.7   | 25.2   | 2.5    |
| 1.9    | 1.9    | 6.4    | 2.2    | 0.6    | 8.0    | 2.5    | 9.6    | 11.2   |
| 7.5    | 4.5    | 4.8    | 6.2    | 8.2    | 4.2    | 7.3    | 6.6    | 7.7    |
| 2.8    | 2.3    | 4.3    | 2.5    | 4.1    | 6.1    | 11.0   | 10.2   | 4.5    |
| 29.8   | 42.3   | 48.5   | 46.4   | 43.5   | 47.1   | 53.2   | 76.7   | 46.2   |
| 0.4    | 1.1    | 3.3    | 4.2    | 2.6    | 3.3    | 0.7    | 1.1    | 0.7    |
| 13.9   | 7.2    | 14.8   | 6.6    | 11.0   | 7.7    | 10.6   | 12.4   | 8.6    |
| 21.9   | 23.6   | 22.8   | 29.5   | 19.5   | 16.5   | 23.3   | 25.1   | 12.8   |
| 33.0   | 19.1   | 6.7    | 12.2   | 10.5   | 17.1   | 18.6   | 19.8   | 9.2    |
| 1.9    | 9.3    | 10.4   | 7.9    | 7.9    | 5.3    | 8.4    | 16.0   | 5.2    |
| 51.2   | 41.6   | 30.6   | 41.4   | 42.6   | 34.7   | 46.5   | 59.4   | 32.9   |
| 314.2  | 200.3  | 207.0  | 219.5  | 245.8  | 224.0  | 308.2  | 330.1  | 268.7  |
| 9.8    | 2.1    | 2.5    | 5.2    | 3.6    | 5.0    | 5.8    | 7.2    | 3.0    |
| 1.9    | 3.8    | 2.0    | 4.3    | 1.7    | 2.4    | 8.9    | 12.7   | 8.0    |
| 0.4    | 0.6    | 1.0    | 0.5    | 5.0    | 1.1    | 2.7    | 3.1    | 0.6    |
| 2.1    | 4.7    | 3.1    | 9.1    | 0.6    | 8.9    | 5.8    | 2.0    | 6.0    |
| 6.7    | 4.1    | 2.2    | 12.6   | 8.7    | 9.9    | 5.8    | 9.6    | 6.8    |
| 68.6   | 40.6   | 46.2   | 46.9   | 48.6   | 53.1   | 73.4   | 102.6  | 66.1   |
| 2.6    | 3.4    | 4.8    | 4.9    | 2.9    | 8.3    | 6.5    | 3.6    | 3.7    |
| 21.0   | 18.5   | 20.8   | 22.1   | 19.4   | 28.5   | 31.5   | 32.5   | 32.4   |
| 10.9   | 13.9   | 9.4    | 6.3    | 6.7    | 6.7    | 8.8    | 16.6   | 13.4   |
| 27.7   | 18.5   | 16.4   | 26.1   | 19.2   | 23.2   | 24.0   | 27.8   | 19.0   |
| 162.0  | 104.5  | 131.6  | 148.2  | 129.7  | 136.8  | 187.6  | 253.8  | 137.0  |
| 0.6    | 1.0    | 0.8    | 0.9    | 1.1    | 0.5    | 1.6    | 4.0    | 0.3    |
| 9.7    | 5.1    | 2.7    | 5.1    | 3.8    | 2.4    | 7.4    | 7.9    | 7.3    |
| 25.0   | 27.6   | 25.1   | 37.7   | 18.9   | 27.9   | 39.2   | 36.7   | 42.2   |
| 9.6    | 7.8    | 9.1    | 16.4   | 12.3   | 10.4   | 16.8   | 17.0   | 12.6   |
| 2022.7 | 1615.8 | 1673.5 | 1977.9 | 1959.8 | 1899.8 | 2435.3 | 2825.8 | 1942.2 |
| 26.9   | 18.9   | 21.8   | 23.7   | 19.4   | 22.8   | 24.8   | 43.8   | 21.4   |
| 22.8   | 19.4   | 18.6   | 22.7   | 15.9   | 15.0   | 28.3   | 36.3   | 17.8   |
| 8.8    | 4.9    | 4.5    | 4.4    | 6.4    | 2.7    | 1.8    | 2.5    | 2.4    |
| 2.7    | 10.4   | 6.6    | 5.3    | 6.7    | 6.9    | 10.3   | 4.2    | 10.3   |
| 8.7    | 6.9    | 9.6    | 12.4   | 8.8    | 9.5    | 9.8    | 16.8   | 11.2   |
| 2.1    | 0.8    | 0.7    | 2.2    | 0.7    | 1.2    | 4.9    | 1.4    | 1.5    |
| 31.6   | 20.2   | 19.8   | 19.0   | 27.4   | 23.4   | 32.5   | 41.7   | 27.8   |
| 1.3    | 4.3    | 3.8    | 0.5    | 4.3    | 6.8    | 3.2    | 0.9    | 4.4    |
| 67.8   | 48.8   | 55.6   | 52.0   | 50.4   | 40.6   | 56.5   | 78.0   | 44.5   |
| 2.4    | 7.0    | 4.3    | 2.3    | 5.2    | 6.8    | 3.8    | 3.3    | 4.4    |
| 48.4   | 49.5   | 57.3   | 47.8   | 56.9   | 54.3   | 68.7   | 81.2   | 48.0   |
| 1350.2 | 927.8  | 972.1  | 1076.9 | 1101.8 | 1087.1 | 1282.3 | 1569.1 | 1398.7 |
| 22.7   | 15.7   | 14.9   | 15.9   | 14.5   | 17.6   | 18.2   | 25.6   | 12.3   |
| 40.8   | 24.1   | 32.0   | 28.6   | 33.1   | 41.9   | 55.4   | 86.6   | 43.3   |
| 420.7  | 324.0  | 332.3  | 328.2  | 436.8  | 392.2  | 506.2  | 687.9  | 452.9  |
| 0.9    | 1.7    | 4.1    | 3.6    | 5.0    | 5.4    | 0.5    | 3.4    | 3.8    |
| 47.5   | 24.8   | 24.0   | 30.8   | 35.3   | 32.3   | 48.6   | 74.0   | 30.5   |
| 17.6   | 14.1   | 10.1   | 12.3   | 16.3   | 15.3   | 23.5   | 32.4   | 18.0   |
| 2.0    | 1.7    | 0.8    | 1.6    | 0.8    | 1.4    | 1.7    | 0.9    | 1.5    |
| 4.2    | 2.6    | 1.3    | 3.2    | 5.2    | 5.5    | 1.3    | 0.8    | 4.1    |
| 349.0  | 235.6  | 296.3  | 283.6  | 273.0  | 336.1  | 394.3  | 467.1  | 380.2  |
| 19.0   | 11.4   | 12.6   | 15.0   | 14.3   | 19.3   | 16.7   | 14.6   | 17.3   |
| 28.8   | 14.0   | 19.0   | 21.6   | 21.6   | 23.8   | 32.5   | 38.5   | 32.7   |

|        |        |        |        |        |        |        |        |        |
|--------|--------|--------|--------|--------|--------|--------|--------|--------|
| 2.2    | 1.2    | 0.6    | 1.1    | 0.7    | 2.2    | 1.0    | 1.8    | 1.4    |
| 9.5    | 1.4    | 0.4    | 0.3    | 0.3    | 0.5    | 2.0    | 4.6    | 4.5    |
| 158.7  | 139.9  | 95.6   | 143.5  | 145.4  | 106.9  | 169.7  | 188.2  | 127.4  |
| 5.6    | 7.2    | 0.9    | 3.8    | 2.1    | 5.0    | 1.0    | 0.6    | 9.4    |
| 0.6    | 1.0    | 1.1    | 1.1    | 0.9    | 1.1    | 0.8    | 1.0    | 0.8    |
| 49.7   | 33.7   | 36.8   | 47.6   | 49.5   | 36.9   | 43.8   | 50.0   | 45.3   |
| 1.6    | 2.2    | 1.8    | 1.8    | 1.5    | 1.6    | 1.6    | 1.4    | 3.2    |
| 20.1   | 9.4    | 11.8   | 22.5   | 18.7   | 8.3    | 21.9   | 19.5   | 13.7   |
| 5.8    | 4.3    | 1.5    | 0.4    | 0.8    | 2.4    | 2.9    | 5.4    | 0.9    |
| 329.7  | 218.3  | 244.1  | 227.5  | 235.3  | 244.3  | 298.8  | 348.4  | 268.4  |
| 8.1    | 7.9    | 5.0    | 1.0    | 6.1    | 7.4    | 9.9    | 2.7    | 12.4   |
| 1.9    | 1.4    | 1.2    | 0.9    | 1.2    | 0.5    | 1.9    | 1.2    | 0.6    |
| 0.9    | 0.7    | 0.7    | 1.1    | 2.0    | 2.0    | 2.1    | 0.8    | 1.6    |
| 69.9   | 48.3   | 45.1   | 60.7   | 71.3   | 49.0   | 77.5   | 74.8   | 62.3   |
| 3.9    | 4.5    | 1.3    | 0.8    | 4.3    | 3.5    | 6.9    | 4.1    | 3.1    |
| 2256.4 | 1857.5 | 1864.8 | 1864.1 | 1877.1 | 1941.0 | 2191.8 | 2320.0 | 1784.9 |
| 75.5   | 50.1   | 61.0   | 67.2   | 74.0   | 58.5   | 78.3   | 80.4   | 43.9   |
| 24.8   | 27.3   | 26.6   | 26.2   | 27.9   | 30.2   | 33.0   | 56.9   | 25.3   |
| 236.7  | 115.2  | 142.2  | 140.8  | 154.2  | 141.2  | 207.3  | 270.5  | 135.9  |
| 79.7   | 42.5   | 63.2   | 48.8   | 47.7   | 59.4   | 57.7   | 79.3   | 57.2   |
| 1.7    | 1.3    | 1.4    | 0.7    | 1.2    | 1.8    | 1.5    | 1.6    | 0.5    |
| 1.0    | 1.3    | 6.6    | 5.9    | 5.9    | 0.5    | 5.3    | 2.0    | 6.3    |
| 14.8   | 15.9   | 15.5   | 10.8   | 7.6    | 14.8   | 12.0   | 18.0   | 10.7   |
| 223.8  | 137.7  | 112.9  | 159.1  | 150.8  | 139.3  | 224.0  | 282.1  | 141.5  |
| 1025.1 | 686.7  | 721.0  | 853.1  | 873.9  | 802.1  | 1250.0 | 1274.4 | 866.5  |
| 2.7    | 1.5    | 8.3    | 3.1    | 9.0    | 2.7    | 1.6    | 6.0    | 9.6    |
| 9.6    | 10.3   | 10.2   | 19.0   | 15.4   | 11.2   | 16.0   | 27.8   | 18.8   |
| 2143.7 | 1796.8 | 1874.0 | 1897.7 | 2240.8 | 2050.3 | 2539.6 | 2760.6 | 2011.8 |
| 8.0    | 7.6    | 10.0   | 8.0    | 5.7    | 5.1    | 7.6    | 7.6    | 0.8    |
| 2.5    | 0.7    | 3.4    | 1.9    | 1.0    | 0.5    | 1.5    | 1.1    | 8.3    |
| 69.8   | 51.5   | 58.7   | 72.5   | 63.6   | 66.2   | 114.3  | 101.4  | 99.8   |
| 15.3   | 10.7   | 18.4   | 18.7   | 19.2   | 12.8   | 29.5   | 33.2   | 25.4   |
| 33.0   | 38.6   | 24.0   | 31.1   | 28.7   | 24.9   | 40.8   | 64.5   | 45.8   |
| 2.7    | 7.6    | 0.2    | 9.3    | 4.6    | 7.0    | 3.9    | 1.5    | 1.8    |
| 1.9    | 0.5    | 1.5    | 0.1    | 0.3    | 2.0    | 0.1    | 2.2    | 2.3    |
| 57.3   | 25.4   | 28.2   | 28.5   | 38.8   | 23.7   | 50.5   | 44.0   | 30.9   |
| 7.6    | 11.3   | 10.0   | 6.6    | 5.4    | 11.8   | 15.2   | 7.6    | 5.8    |
| 16.3   | 10.8   | 11.9   | 8.4    | 9.3    | 9.4    | 14.2   | 7.0    | 10.3   |
| 1.3    | 1.3    | 1.3    | 1.1    | 1.4    | 1.0    | 0.8    | 1.6    | 1.4    |
| 41.6   | 39.4   | 42.5   | 49.9   | 40.5   | 26.8   | 47.3   | 66.1   | 42.2   |
| 5.9    | 6.8    | 11.0   | 14.4   | 6.6    | 6.0    | 8.0    | 7.3    | 5.0    |
| 3.6    | 0.9    | 1.0    | 1.0    | 3.3    | 1.5    | 0.6    | 0.9    | 1.5    |
| 279.1  | 234.6  | 233.5  | 211.2  | 289.3  | 263.0  | 372.6  | 412.5  | 328.1  |
| 138.0  | 71.5   | 63.6   | 85.1   | 86.6   | 79.9   | 152.0  | 174.1  | 128.9  |
| 1.3    | 1.3    | 2.4    | 1.4    | 1.0    | 1.9    | 2.6    | 2.7    | 1.1    |
| 66.9   | 36.4   | 55.1   | 59.5   | 53.5   | 56.5   | 58.4   | 65.2   | 51.1   |
| 34.0   | 26.8   | 26.3   | 28.3   | 33.0   | 25.6   | 32.2   | 45.0   | 25.9   |
| 4.7    | 5.7    | 1.2    | 1.2    | 11.7   | 2.0    | 3.3    | 15.3   | 6.8    |
| 0.8    | 0.9    | 0.6    | 0.7    | 1.5    | 1.1    | 1.4    | 1.1    | 0.9    |
| 50.7   | 20.3   | 33.5   | 30.6   | 33.5   | 31.2   | 96.2   | 106.7  | 49.8   |
| 26.5   | 19.8   | 25.9   | 31.6   | 31.6   | 35.5   | 48.9   | 69.5   | 43.9   |
| 690.6  | 543.3  | 617.2  | 663.4  | 709.7  | 682.5  | 865.8  | 833.6  | 715.4  |
| 50.6   | 26.2   | 31.9   | 27.2   | 34.4   | 24.9   | 21.8   | 48.5   | 26.7   |

|        |        |        |        |        |        |        |        |        |
|--------|--------|--------|--------|--------|--------|--------|--------|--------|
| 0.1    | 0.2    | 0.2    | 0.1    | 0.0    | 0.1    | 0.3    | 0.1    | 0.0    |
| 0.7    | 1.4    | 0.6    | 2.1    | 0.3    | 0.7    | 1.0    | 7.0    | 2.4    |
| 281.5  | 251.6  | 241.9  | 264.6  | 285.5  | 282.1  | 376.7  | 411.0  | 268.3  |
| 2.6    | 1.4    | 3.8    | 6.6    | 5.3    | 2.9    | 10.0   | 5.9    | 3.0    |
| 1.5    | 1.9    | 4.8    | 4.2    | 14.0   | 1.3    | 2.7    | 2.5    | 1.1    |
| 0.9    | 1.1    | 1.2    | 1.3    | 0.9    | 0.7    | 2.6    | 5.3    | 1.9    |
| 1.5    | 3.9    | 1.6    | 1.7    | 2.0    | 3.5    | 7.3    | 1.5    | 2.8    |
| 26.8   | 41.2   | 49.7   | 50.4   | 48.2   | 52.0   | 39.2   | 54.5   | 25.5   |
| 34.1   | 21.3   | 15.1   | 34.4   | 22.3   | 38.9   | 31.4   | 54.4   | 23.3   |
| 236.8  | 166.5  | 192.7  | 178.3  | 202.7  | 190.2  | 250.4  | 270.1  | 205.5  |
| 1.8    | 1.5    | 1.7    | 0.8    | 1.1    | 1.5    | 0.8    | 3.5    | 1.0    |
| 49.0   | 52.3   | 46.5   | 47.4   | 42.5   | 53.5   | 60.2   | 61.1   | 57.3   |
| 1.5    | 0.6    | 1.2    | 1.5    | 6.5    | 6.5    | 2.1    | 1.9    | 1.1    |
| 6.3    | 3.1    | 0.5    | 0.3    | 5.5    | 1.8    | 3.3    | 5.3    | 3.5    |
| 18.7   | 3.6    | 6.4    | 13.0   | 9.9    | 6.8    | 7.5    | 2.0    | 17.5   |
| 12.4   | 3.1    | 2.8    | 7.1    | 3.6    | 4.9    | 22.2   | 8.5    | 2.3    |
| 3.3    | 0.7    | 1.1    | 1.6    | 4.7    | 0.8    | 4.2    | 7.9    | 1.0    |
| 1.9    | 0.9    | 7.5    | 1.5    | 2.3    | 8.9    | 4.6    | 5.2    | 5.3    |
| 0.2    | 0.2    | 0.2    | 0.4    | 0.2    | 0.3    | 0.2    | 0.5    | 0.3    |
| 3.1    | 3.4    | 0.9    | 1.6    | 1.7    | 2.5    | 6.5    | 1.5    | 5.8    |
| 19.2   | 17.8   | 14.5   | 13.9   | 10.7   | 10.6   | 10.8   | 20.4   | 14.6   |
| 17.7   | 8.4    | 14.9   | 5.6    | 11.8   | 15.8   | 11.9   | 17.1   | 11.5   |
| 19.4   | 29.8   | 14.8   | 32.5   | 35.6   | 23.9   | 35.4   | 67.4   | 59.0   |
| 664.0  | 401.4  | 486.2  | 479.6  | 541.7  | 533.3  | 624.2  | 599.2  | 455.5  |
| 30.4   | 16.7   | 17.9   | 19.2   | 14.6   | 16.4   | 22.7   | 36.4   | 21.1   |
| 65.3   | 29.6   | 31.9   | 35.5   | 46.2   | 48.4   | 52.8   | 65.0   | 48.9   |
| 2.0    | 1.0    | 3.2    | 0.2    | 3.9    | 1.2    | 0.2    | 1.2    | 1.9    |
| 1.8    | 10.2   | 6.5    | 1.9    | 7.7    | 1.1    | 7.2    | 7.0    | 3.6    |
| 18.1   | 10.8   | 11.3   | 11.4   | 9.5    | 9.1    | 12.8   | 19.6   | 8.7    |
| 97.9   | 38.9   | 41.3   | 53.0   | 49.6   | 62.6   | 79.9   | 116.0  | 97.6   |
| 150.6  | 132.0  | 135.8  | 134.2  | 137.1  | 138.6  | 184.8  | 226.0  | 159.1  |
| 50.2   | 28.3   | 32.8   | 35.1   | 38.3   | 35.1   | 60.4   | 58.7   | 42.4   |
| 0.8    | 0.2    | 0.3    | 0.6    | 1.6    | 1.1    | 0.8    | 0.3    | 0.3    |
| 3.1    | 1.4    | 1.2    | 3.1    | 5.1    | 4.1    | 1.6    | 5.8    | 5.9    |
| 332.2  | 260.1  | 261.4  | 286.9  | 240.6  | 265.3  | 382.0  | 380.9  | 267.6  |
| 37.2   | 21.6   | 19.5   | 26.9   | 21.9   | 22.6   | 37.5   | 44.4   | 23.6   |
| 3.4    | 0.5    | 0.5    | 1.3    | 0.8    | 1.1    | 1.0    | 0.9    | 0.8    |
| 3044.3 | 2476.6 | 2424.5 | 2603.3 | 2678.5 | 2590.8 | 3185.3 | 3353.2 | 2828.1 |
| 1.2    | 1.7    | 0.3    | 0.5    | 0.6    | 0.8    | 3.0    | 5.8    | 0.4    |
| 73.7   | 30.4   | 25.3   | 30.0   | 35.3   | 32.2   | 49.2   | 68.2   | 38.9   |
| 15.5   | 9.3    | 18.5   | 13.9   | 11.0   | 10.8   | 14.5   | 21.9   | 12.3   |
| 27.6   | 15.8   | 12.5   | 16.0   | 19.6   | 18.2   | 25.2   | 34.2   | 24.2   |
| 1.3    | 0.8    | 2.5    | 3.9    | 0.7    | 1.8    | 9.0    | 1.1    | 1.2    |
| 8.1    | 5.4    | 5.2    | 10.5   | 9.6    | 10.1   | 9.4    | 14.4   | 11.7   |
| 5.6    | 1.0    | 1.9    | 1.3    | 1.6    | 0.9    | 2.8    | 0.8    | 0.3    |
| 2.9    | 1.9    | 1.0    | 0.8    | 1.5    | 8.1    | 2.3    | 2.0    | 0.9    |
| 4.4    | 1.7    | 1.1    | 1.3    | 3.8    | 3.2    | 3.3    | 0.7    | 4.4    |
| 96.7   | 43.5   | 63.8   | 61.7   | 62.5   | 64.0   | 74.6   | 89.9   | 52.1   |
| 138.5  | 36.7   | 59.8   | 81.2   | 53.7   | 74.4   | 85.3   | 128.9  | 89.0   |
| 5.0    | 2.6    | 11.1   | 14.0   | 9.5    | 13.3   | 6.1    | 12.6   | 12.0   |
| 3.5    | 5.5    | 9.2    | 2.4    | 3.8    | 2.5    | 0.3    | 4.1    | 4.6    |
| 52.1   | 35.8   | 58.3   | 50.8   | 56.6   | 43.7   | 57.5   | 64.1   | 60.7   |
| 5.8    | 0.9    | 1.0    | 3.2    | 0.6    | 0.7    | 6.6    | 5.1    | 1.3    |

|        |        |        |        |        |        |        |        |        |
|--------|--------|--------|--------|--------|--------|--------|--------|--------|
| 0.1    | 0.1    | 0.8    | 1.9    | 0.3    | 0.1    | 0.2    | 1.6    | 0.1    |
| 0.8    | 3.8    | 9.1    | 4.0    | 4.0    | 5.4    | 7.1    | 14.2   | 7.9    |
| 3.9    | 8.4    | 15.2   | 10.7   | 6.8    | 4.1    | 10.7   | 9.2    | 3.8    |
| 17.8   | 16.0   | 16.6   | 21.8   | 18.8   | 20.6   | 19.3   | 20.5   | 18.1   |
| 5.1    | 6.7    | 4.2    | 0.9    | 0.9    | 1.0    | 1.5    | 8.6    | 1.3    |
| 103.3  | 75.3   | 94.5   | 102.0  | 94.8   | 127.3  | 131.7  | 127.5  | 121.2  |
| 1.8    | 1.1    | 1.1    | 0.8    | 4.7    | 1.5    | 17.1   | 1.4    | 2.5    |
| 6.5    | 3.8    | 2.2    | 5.0    | 1.1    | 2.9    | 1.3    | 0.4    | 4.0    |
| 0.8    | 2.9    | 3.7    | 0.7    | 0.4    | 2.0    | 5.8    | 1.0    | 2.7    |
| 29.3   | 25.9   | 21.9   | 24.6   | 34.0   | 28.3   | 36.6   | 42.0   | 24.1   |
| 25.2   | 1.5    | 4.3    | 7.5    | 2.5    | 2.4    | 3.2    | 6.7    | 10.7   |
| 2145.3 | 1698.2 | 1704.6 | 1763.8 | 1667.9 | 1655.9 | 1987.5 | 2246.2 | 2102.7 |
| 24.3   | 7.2    | 16.1   | 24.2   | 15.9   | 24.3   | 26.5   | 32.9   | 24.7   |
| 1.9    | 2.6    | 2.1    | 2.0    | 2.1    | 3.6    | 1.7    | 4.4    | 3.1    |
| 0.7    | 1.1    | 0.3    | 0.9    | 4.6    | 1.0    | 1.9    | 0.9    | 5.0    |
| 15.3   | 17.3   | 16.5   | 11.4   | 13.7   | 12.8   | 15.5   | 25.5   | 21.1   |
| 12.5   | 9.3    | 6.8    | 1.6    | 11.0   | 11.3   | 2.4    | 4.8    | 2.0    |
| 1.4    | 1.5    | 1.0    | 0.9    | 3.8    | 1.8    | 1.5    | 8.7    | 2.2    |
| 94.6   | 65.3   | 51.4   | 66.8   | 80.5   | 74.7   | 83.9   | 137.8  | 113.1  |
| 16.3   | 17.1   | 18.8   | 21.8   | 18.5   | 14.9   | 27.2   | 35.1   | 35.1   |
| 8.7    | 5.7    | 7.1    | 5.6    | 1.3    | 7.3    | 6.0    | 6.3    | 3.4    |
| 78.4   | 43.5   | 36.9   | 41.3   | 43.8   | 32.7   | 56.7   | 59.5   | 47.0   |
| 20.6   | 18.5   | 25.3   | 24.9   | 33.7   | 18.4   | 38.7   | 50.5   | 32.1   |
| 8.4    | 13.0   | 8.3    | 14.3   | 6.4    | 6.8    | 10.5   | 9.5    | 15.3   |
| 7.6    | 1.2    | 1.7    | 1.7    | 1.7    | 1.2    | 2.3    | 2.8    | 1.1    |
| 188.1  | 116.3  | 133.9  | 145.3  | 146.3  | 122.2  | 217.1  | 223.1  | 160.0  |
| 245.7  | 172.9  | 222.5  | 243.2  | 234.2  | 226.1  | 285.9  | 307.0  | 202.6  |
| 17.8   | 16.0   | 20.6   | 17.7   | 26.0   | 16.5   | 18.7   | 39.4   | 17.0   |
| 1.5    | 0.6    | 1.2    | 0.5    | 0.8    | 2.0    | 1.2    | 0.6    | 0.8    |
| 226.8  | 164.5  | 192.8  | 208.5  | 185.9  | 200.6  | 247.3  | 349.4  | 192.0  |
| 21.6   | 8.7    | 12.7   | 12.3   | 10.4   | 15.1   | 14.3   | 13.0   | 18.6   |
| 57.2   | 27.3   | 24.6   | 26.8   | 25.4   | 32.7   | 38.0   | 45.8   | 27.1   |
| 6.6    | 10.4   | 6.7    | 6.6    | 4.9    | 6.1    | 9.7    | 6.4    | 13.0   |
| 83.6   | 59.5   | 58.5   | 62.0   | 55.6   | 77.2   | 75.7   | 103.9  | 65.8   |
| 40.9   | 30.2   | 25.4   | 30.3   | 23.8   | 32.7   | 41.0   | 32.0   | 30.9   |
| 79.6   | 54.2   | 50.6   | 58.8   | 64.0   | 61.1   | 78.4   | 110.9  | 76.9   |
| 20.8   | 18.7   | 21.6   | 16.3   | 17.4   | 25.7   | 41.4   | 42.2   | 19.6   |
| 19.7   | 8.0    | 3.4    | 13.8   | 7.6    | 2.3    | 20.5   | 11.4   | 6.7    |
| 11.2   | 9.3    | 9.3    | 8.7    | 7.3    | 1.6    | 1.2    | 14.3   | 8.6    |
| 0.2    | 3.3    | 0.4    | 0.2    | 0.3    | 3.3    | 2.2    | 4.9    | 0.3    |
| 228.2  | 125.1  | 124.5  | 138.1  | 125.5  | 148.7  | 215.2  | 264.6  | 172.6  |
| 23.1   | 17.7   | 21.3   | 20.8   | 23.0   | 15.2   | 28.0   | 25.1   | 34.8   |
| 62.1   | 20.6   | 34.1   | 29.5   | 31.6   | 31.5   | 33.8   | 58.7   | 40.8   |
| 548.3  | 394.0  | 411.1  | 494.0  | 508.7  | 494.2  | 651.4  | 775.9  | 651.4  |
| 27.2   | 37.9   | 30.9   | 33.6   | 38.4   | 34.7   | 49.9   | 63.1   | 32.8   |
| 1.0    | 0.6    | 0.7    | 5.9    | 0.5    | 1.4    | 1.3    | 1.0    | 1.0    |
| 13.3   | 11.6   | 12.4   | 1.7    | 7.1    | 8.0    | 4.6    | 1.6    | 8.1    |
| 1388.5 | 982.7  | 1419.3 | 1277.0 | 1424.3 | 1475.0 | 1540.3 | 1877.3 | 1271.2 |
| 0.5    | 1.2    | 2.0    | 0.9    | 0.8    | 0.4    | 1.0    | 1.3    | 0.3    |
| 4.9    | 1.1    | 6.7    | 3.0    | 3.8    | 0.5    | 1.2    | 10.7   | 5.2    |
| 3836.4 | 3401.4 | 3111.4 | 3450.6 | 3605.4 | 3490.0 | 3658.3 | 3666.0 | 2438.5 |
| 21.0   | 4.4    | 9.8    | 13.1   | 12.0   | 1.8    | 7.1    | 10.4   | 2.8    |
| 5.8    | 7.0    | 0.7    | 0.6    | 1.9    | 1.1    | 4.8    | 5.6    | 3.5    |

|        |        |        |        |        |        |        |        |        |
|--------|--------|--------|--------|--------|--------|--------|--------|--------|
| 7.8    | 16.0   | 6.6    | 3.5    | 10.3   | 7.0    | 9.2    | 13.3   | 3.5    |
| 3.0    | 5.5    | 3.0    | 6.9    | 3.4    | 2.5    | 3.3    | 5.7    | 3.1    |
| 636.1  | 391.4  | 450.3  | 455.7  | 516.7  | 427.3  | 521.7  | 630.6  | 482.5  |
| 12.8   | 9.2    | 6.7    | 13.1   | 10.8   | 6.6    | 10.4   | 7.1    | 4.6    |
| 10.5   | 11.2   | 13.8   | 12.8   | 12.0   | 10.0   | 18.5   | 9.0    | 11.3   |
| 76.8   | 40.6   | 42.1   | 42.8   | 41.7   | 49.7   | 58.0   | 71.7   | 44.4   |
| 24.1   | 20.5   | 22.3   | 23.3   | 22.2   | 16.7   | 26.5   | 31.3   | 20.5   |
| 38.4   | 21.5   | 47.7   | 38.5   | 50.2   | 25.8   | 50.9   | 59.1   | 46.9   |
| 24.5   | 17.8   | 22.9   | 24.5   | 25.2   | 24.2   | 37.3   | 48.1   | 24.2   |
| 70.8   | 66.5   | 51.2   | 51.7   | 70.7   | 80.5   | 88.5   | 114.5  | 96.9   |
| 0.5    | 0.5    | 0.2    | 0.5    | 0.3    | 1.1    | 0.3    | 0.3    | 0.4    |
| 1572.2 | 1055.1 | 1069.3 | 1200.2 | 1322.0 | 1223.3 | 1656.4 | 1876.3 | 1345.5 |
| 21.4   | 14.6   | 10.6   | 10.4   | 10.8   | 16.9   | 27.7   | 20.5   | 18.7   |
| 102.6  | 119.8  | 100.7  | 100.7  | 138.2  | 97.8   | 130.9  | 196.4  | 124.7  |
| 8.9    | 1.9    | 7.0    | 2.4    | 7.7    | 14.1   | 14.2   | 20.6   | 7.3    |
| 29.7   | 20.1   | 25.5   | 19.8   | 28.6   | 24.0   | 31.5   | 36.8   | 24.2   |
| 611.4  | 447.4  | 463.4  | 506.8  | 555.4  | 535.5  | 699.9  | 755.3  | 436.9  |
| 0.3    | 0.2    | 0.3    | 0.4    | 0.3    | 3.7    | 0.7    | 0.8    | 0.6    |
| 26.0   | 25.9   | 26.1   | 23.4   | 29.4   | 38.2   | 28.5   | 38.6   | 36.0   |
| 3650.4 | 3010.4 | 2887.7 | 3320.3 | 3200.5 | 2991.3 | 3706.6 | 3828.1 | 3462.5 |
| 3.9    | 6.3    | 0.8    | 0.9    | 1.1    | 3.6    | 5.7    | 13.3   | 8.6    |
| 978.1  | 546.3  | 658.3  | 692.1  | 771.1  | 708.9  | 1008.3 | 1047.0 | 724.0  |
| 122.0  | 89.7   | 98.7   | 112.1  | 93.3   | 83.3   | 117.5  | 113.1  | 81.8   |
| 3.4    | 1.7    | 0.6    | 0.7    | 5.8    | 1.1    | 0.5    | 4.2    | 0.8    |
| 0.3    | 0.3    | 1.8    | 0.7    | 1.9    | 0.9    | 2.4    | 1.2    | 3.5    |
| 29.1   | 19.9   | 18.4   | 25.1   | 28.5   | 21.2   | 29.8   | 29.4   | 29.2   |
| 538.7  | 382.4  | 536.7  | 551.4  | 570.0  | 525.1  | 784.2  | 742.4  | 441.4  |
| 5.1    | 6.3    | 1.5    | 5.6    | 7.6    | 3.7    | 4.8    | 6.5    | 5.2    |
| 42.3   | 27.0   | 26.0   | 28.8   | 35.2   | 35.2   | 53.6   | 78.7   | 44.7   |
| 9.5    | 12.3   | 10.8   | 15.9   | 7.9    | 8.8    | 12.9   | 11.2   | 9.6    |
| 85.6   | 61.6   | 62.3   | 58.9   | 64.8   | 66.2   | 103.4  | 88.8   | 65.0   |
| 203.5  | 104.7  | 107.6  | 147.3  | 157.2  | 182.1  | 191.3  | 314.4  | 149.5  |
| 5.2    | 6.3    | 6.6    | 5.5    | 2.7    | 8.5    | 3.0    | 8.5    | 1.5    |
| 6.9    | 2.1    | 3.9    | 0.8    | 0.8    | 0.4    | 0.2    | 2.2    | 0.6    |
| 1.2    | 0.6    | 0.8    | 0.5    | 0.4    | 2.3    | 0.6    | 1.5    | 0.7    |
| 6.4    | 8.5    | 8.5    | 10.1   | 12.2   | 9.9    | 13.9   | 22.8   | 11.1   |
| 17.3   | 15.5   | 14.1   | 15.3   | 15.8   | 11.6   | 22.5   | 31.6   | 20.2   |
| 6.8    | 5.0    | 6.1    | 5.8    | 5.5    | 8.8    | 16.6   | 9.6    | 7.0    |
| 6.5    | 1.8    | 6.8    | 0.9    | 6.2    | 7.1    | 6.3    | 8.8    | 2.1    |
| 0.3    | 0.5    | 0.6    | 0.4    | 0.3    | 1.7    | 0.8    | 0.7    | 0.5    |
| 1721.8 | 1234.3 | 1274.6 | 1297.9 | 1561.7 | 1474.1 | 2104.7 | 2154.6 | 1808.5 |
| 60.6   | 32.8   | 42.5   | 51.9   | 43.2   | 46.5   | 58.8   | 71.3   | 42.1   |
| 54.5   | 33.1   | 32.3   | 31.3   | 33.3   | 27.9   | 51.7   | 65.9   | 39.5   |
| 0.7    | 0.7    | 1.3    | 0.6    | 1.7    | 1.7    | 2.8    | 0.6    | 0.8    |
| 0.3    | 0.2    | 0.9    | 0.8    | 0.3    | 0.4    | 0.3    | 0.6    | 3.0    |
| 26.9   | 34.9   | 35.2   | 31.9   | 41.9   | 34.5   | 37.2   | 37.2   | 26.6   |
| 1.7    | 1.9    | 5.4    | 13.0   | 14.0   | 2.8    | 24.3   | 14.4   | 8.6    |
| 42.0   | 26.0   | 28.3   | 26.9   | 33.5   | 26.3   | 29.2   | 33.5   | 22.5   |
| 8.8    | 8.3    | 9.8    | 9.6    | 11.1   | 11.8   | 15.0   | 14.1   | 13.8   |
| 0.4    | 0.8    | 0.8    | 3.5    | 2.0    | 1.9    | 1.0    | 1.3    | 1.4    |
| 1.1    | 9.6    | 1.8    | 0.5    | 0.7    | 7.2    | 2.4    | 1.6    | 11.0   |
| 4.4    | 6.8    | 4.0    | 4.1    | 5.9    | 2.8    | 8.6    | 8.2    | 3.9    |
| 92.6   | 220.3  | 204.6  | 268.2  | 275.6  | 203.6  | 304.3  | 261.0  | 265.6  |

|        |        |        |        |        |        |        |        |        |
|--------|--------|--------|--------|--------|--------|--------|--------|--------|
| 1.4    | 2.6    | 1.4    | 1.1    | 3.5    | 1.4    | 1.0    | 1.2    | 1.1    |
| 6.4    | 1.6    | 8.9    | 0.9    | 11.9   | 13.2   | 3.8    | 10.1   | 9.0    |
| 5.3    | 12.3   | 14.2   | 14.0   | 16.7   | 15.7   | 21.8   | 19.2   | 17.8   |
| 17.7   | 14.9   | 12.8   | 18.1   | 19.4   | 18.4   | 25.1   | 25.9   | 22.2   |
| 7.6    | 8.1    | 5.5    | 9.2    | 4.0    | 7.2    | 6.9    | 8.6    | 7.0    |
| 47.1   | 37.0   | 27.6   | 35.4   | 39.2   | 37.4   | 69.9   | 72.4   | 52.2   |
| 10.4   | 10.7   | 6.5    | 8.1    | 11.1   | 8.7    | 16.2   | 10.3   | 16.0   |
| 0.4    | 8.1    | 9.7    | 5.1    | 6.9    | 6.6    | 11.3   | 3.3    | 10.1   |
| 302.0  | 167.2  | 131.4  | 195.7  | 162.7  | 155.9  | 188.5  | 105.8  | 95.1   |
| 1.5    | 1.1    | 5.7    | 5.1    | 6.6    | 0.7    | 0.8    | 4.9    | 2.9    |
| 6.3    | 7.0    | 8.0    | 7.3    | 0.4    | 3.2    | 5.4    | 11.4   | 2.6    |
| 10.2   | 4.6    | 7.4    | 8.1    | 10.6   | 6.5    | 6.0    | 18.0   | 8.2    |
| 21.7   | 17.2   | 18.3   | 14.2   | 15.7   | 22.0   | 21.6   | 23.4   | 19.8   |
| 90.8   | 71.1   | 76.7   | 70.9   | 70.7   | 77.6   | 88.9   | 124.1  | 105.3  |
| 3.0    | 3.3    | 1.9    | 0.4    | 1.9    | 1.2    | 0.8    | 3.3    | 0.8    |
| 18.4   | 9.6    | 8.6    | 8.4    | 5.5    | 4.7    | 5.4    | 16.1   | 3.7    |
| 37.1   | 20.4   | 20.1   | 19.6   | 25.1   | 14.4   | 34.9   | 28.5   | 28.9   |
| 1817.8 | 1418.0 | 1484.8 | 1621.0 | 1709.8 | 1656.3 | 2205.1 | 2499.7 | 1714.0 |
| 1.6    | 2.0    | 5.4    | 1.2    | 1.1    | 4.4    | 1.2    | 1.3    | 1.8    |
| 49.3   | 3.3    | 0.1    | 3.0    | 0.4    | 2.4    | 1.8    | 0.5    | 0.4    |
| 187.0  | 122.9  | 149.5  | 170.9  | 150.9  | 144.3  | 164.6  | 186.3  | 154.1  |
| 11.4   | 9.1    | 7.2    | 12.0   | 13.5   | 6.9    | 16.4   | 15.6   | 14.6   |
| 1.2    | 6.6    | 3.3    | 3.7    | 1.3    | 1.2    | 7.5    | 4.3    | 4.4    |
| 92.4   | 55.7   | 69.0   | 59.3   | 49.0   | 63.5   | 62.9   | 80.5   | 59.8   |
| 5.6    | 8.1    | 3.3    | 3.8    | 13.0   | 1.5    | 2.8    | 6.9    | 5.9    |
| 6.6    | 0.6    | 1.5    | 1.7    | 1.2    | 0.9    | 3.3    | 1.5    | 7.1    |
| 3.8    | 8.8    | 8.0    | 6.6    | 7.5    | 3.3    | 13.0   | 6.9    | 6.7    |
| 53.4   | 24.7   | 41.1   | 36.1   | 46.1   | 55.7   | 64.3   | 95.5   | 53.3   |
| 5.3    | 8.3    | 7.2    | 5.6    | 4.0    | 4.5    | 9.0    | 4.9    | 4.8    |
| 4.3    | 3.7    | 6.4    | 4.2    | 0.3    | 4.7    | 3.5    | 5.2    | 4.8    |
| 8.2    | 11.9   | 6.7    | 7.5    | 9.8    | 9.4    | 9.8    | 14.1   | 9.7    |
| 8.5    | 2.6    | 1.5    | 1.6    | 2.5    | 5.0    | 2.7    | 1.7    | 5.0    |
| 7.8    | 1.0    | 2.8    | 6.2    | 9.5    | 6.1    | 7.7    | 5.5    | 9.4    |
| 9.0    | 9.1    | 10.6   | 8.6    | 10.5   | 9.9    | 9.0    | 14.1   | 10.6   |
| 3.0    | 4.6    | 13.7   | 4.0    | 8.9    | 4.9    | 2.1    | 6.3    | 6.3    |
| 17.9   | 13.1   | 12.5   | 11.4   | 22.2   | 16.1   | 21.4   | 27.2   | 21.3   |
| 6.1    | 5.7    | 6.6    | 5.4    | 4.2    | 5.9    | 5.6    | 5.2    | 4.0    |
| 7.9    | 4.5    | 3.2    | 3.6    | 4.7    | 7.0    | 15.5   | 14.4   | 10.8   |
| 3.3    | 1.9    | 1.8    | 4.7    | 7.2    | 4.5    | 6.7    | 3.2    | 2.2    |
| 2.4    | 0.6    | 9.5    | 8.5    | 4.7    | 6.4    | 12.5   | 6.3    | 11.1   |
| 13.4   | 11.4   | 11.5   | 10.4   | 11.8   | 14.5   | 19.4   | 20.2   | 19.6   |
| 11.1   | 4.7    | 2.0    | 3.9    | 3.8    | 3.8    | 2.0    | 2.4    | 3.2    |
| 1.2    | 0.9    | 4.4    | 0.8    | 0.7    | 4.0    | 0.4    | 2.0    | 0.9    |
| 11.6   | 1.9    | 0.9    | 1.2    | 3.0    | 5.0    | 6.7    | 6.4    | 1.1    |
| 8.0    | 6.7    | 5.0    | 3.8    | 9.3    | 6.5    | 4.0    | 5.3    | 1.4    |
| 3519.3 | 2548.4 | 2558.1 | 2651.4 | 2852.8 | 2694.8 | 3261.6 | 3369.9 | 2556.9 |
| 19.4   | 10.7   | 8.2    | 15.0   | 13.4   | 18.3   | 23.5   | 33.5   | 16.7   |
| 39.0   | 24.5   | 28.6   | 28.9   | 27.8   | 30.3   | 38.3   | 55.6   | 32.5   |
| 0.9    | 0.9    | 1.1    | 1.1    | 1.0    | 0.8    | 2.3    | 1.0    | 0.7    |
| 13.3   | 1.9    | 2.1    | 4.9    | 1.4    | 4.4    | 1.5    | 2.5    | 11.6   |
| 5.0    | 6.1    | 5.5    | 5.8    | 4.3    | 3.9    | 5.9    | 5.0    | 2.5    |
| 0.3    | 0.9    | 0.2    | 0.9    | 0.2    | 1.0    | 0.4    | 1.1    | 0.5    |
| 4.7    | 7.2    | 8.4    | 6.3    | 4.5    | 4.8    | 11.5   | 8.8    | 10.3   |



|        |        |        |        |        |        |        |        |        |
|--------|--------|--------|--------|--------|--------|--------|--------|--------|
| 94.6   | 58.0   | 77.7   | 69.3   | 75.8   | 65.7   | 65.9   | 89.6   | 47.7   |
| 2.8    | 1.5    | 3.1    | 0.6    | 5.0    | 1.2    | 6.8    | 5.7    | 5.3    |
| 108.1  | 166.5  | 96.4   | 102.7  | 159.6  | 110.2  | 201.7  | 251.5  | 161.1  |
| 351.9  | 248.0  | 276.9  | 309.7  | 316.0  | 295.4  | 428.0  | 465.8  | 486.3  |
| 15.4   | 5.6    | 12.9   | 2.8    | 8.5    | 12.8   | 19.3   | 23.2   | 14.8   |
| 9.7    | 5.0    | 7.4    | 8.8    | 3.8    | 5.9    | 11.5   | 14.5   | 8.5    |
| 23.2   | 9.5    | 20.2   | 18.4   | 18.8   | 12.7   | 21.0   | 25.8   | 15.4   |
| 13.0   | 10.1   | 9.5    | 10.3   | 13.5   | 8.4    | 21.9   | 22.1   | 16.7   |
| 6.0    | 1.7    | 9.2    | 1.3    | 1.5    | 1.1    | 1.6    | 1.2    | 3.0    |
| 93.9   | 61.1   | 66.6   | 71.1   | 72.0   | 70.7   | 77.3   | 108.2  | 63.6   |
| 1.3    | 0.6    | 0.8    | 0.9    | 1.0    | 0.8    | 0.6    | 0.9    | 0.8    |
| 261.6  | 107.9  | 100.5  | 102.3  | 119.9  | 97.7   | 134.0  | 184.1  | 85.8   |
| 39.7   | 27.2   | 42.4   | 25.4   | 34.9   | 40.0   | 60.1   | 55.0   | 38.2   |
| 0.7    | 2.3    | 1.2    | 3.5    | 2.1    | 2.3    | 4.1    | 9.0    | 0.7    |
| 2.8    | 1.2    | 2.0    | 2.8    | 6.4    | 1.6    | 0.9    | 1.5    | 1.8    |
| 4.4    | 9.3    | 5.6    | 6.2    | 6.7    | 9.8    | 2.7    | 15.6   | 7.4    |
| 0.2    | 0.4    | 1.0    | 0.3    | 0.4    | 0.4    | 0.3    | 0.6    | 1.0    |
| 0.2    | 0.3    | 0.1    | 0.2    | 0.5    | 0.3    | 0.4    | 0.5    | 0.2    |
| 157.3  | 88.5   | 87.8   | 89.0   | 137.0  | 101.0  | 153.8  | 177.1  | 141.1  |
| 10.0   | 3.8    | 11.9   | 10.6   | 1.9    | 11.8   | 8.6    | 6.5    | 6.5    |
| 1.0    | 4.9    | 2.2    | 1.3    | 2.0    | 1.8    | 10.1   | 11.2   | 5.1    |
| 13.2   | 12.4   | 15.6   | 16.3   | 17.0   | 14.7   | 21.0   | 28.8   | 16.6   |
| 1.9    | 1.1    | 1.0    | 4.6    | 2.2    | 6.7    | 12.1   | 12.6   | 9.2    |
| 6.6    | 5.5    | 7.0    | 6.1    | 4.8    | 2.8    | 10.9   | 1.2    | 7.0    |
| 41.0   | 29.8   | 17.8   | 29.4   | 29.1   | 28.3   | 40.2   | 45.4   | 49.3   |
| 8.9    | 13.1   | 17.9   | 7.9    | 18.3   | 17.8   | 16.5   | 15.9   | 11.6   |
| 3046.9 | 2600.7 | 2584.5 | 3162.2 | 2790.7 | 2725.3 | 3368.2 | 3591.9 | 2592.6 |
| 48.1   | 38.1   | 36.1   | 33.6   | 34.1   | 28.7   | 54.4   | 55.6   | 29.7   |
| 82.3   | 99.1   | 103.5  | 136.5  | 123.1  | 94.8   | 121.7  | 125.0  | 108.2  |
| 115.0  | 103.6  | 109.4  | 131.1  | 131.2  | 132.8  | 132.8  | 143.8  | 94.1   |
| 104.2  | 68.7   | 71.8   | 67.7   | 78.0   | 71.4   | 108.1  | 113.3  | 72.8   |
| 12.1   | 9.5    | 12.2   | 9.2    | 5.5    | 11.5   | 14.9   | 16.8   | 8.7    |
| 10.5   | 6.3    | 8.3    | 13.8   | 8.3    | 14.0   | 12.6   | 21.1   | 7.5    |
| 1.4    | 2.5    | 1.9    | 2.4    | 2.8    | 2.9    | 3.0    | 3.8    | 2.2    |
| 295.7  | 181.2  | 239.0  | 239.2  | 245.5  | 262.3  | 331.9  | 376.0  | 256.5  |
| 0.0    | 0.0    | 1.1    | 3.2    | 0.1    | 1.2    | 0.3    | 2.0    | 1.1    |
| 7.0    | 0.4    | 3.0    | 0.7    | 2.4    | 2.5    | 1.9    | 6.6    | 0.3    |
| 3.8    | 1.4    | 2.2    | 1.9    | 10.6   | 1.4    | 4.5    | 1.5    | 2.7    |
| 6.9    | 3.3    | 12.1   | 12.6   | 8.7    | 13.8   | 11.5   | 22.5   | 9.4    |
| 88.2   | 39.2   | 46.5   | 51.9   | 70.3   | 45.8   | 71.5   | 139.8  | 46.7   |
| 15.2   | 10.0   | 10.5   | 15.4   | 7.2    | 17.7   | 28.3   | 16.0   | 22.2   |
| 0.2    | 0.3    | 0.3    | 0.5    | 0.3    | 0.8    | 0.4    | 0.6    | 0.3    |
| 2.6    | 1.8    | 9.0    | 6.2    | 3.7    | 7.3    | 1.4    | 4.7    | 7.1    |
| 24.0   | 22.7   | 31.7   | 20.5   | 36.7   | 11.1   | 153.7  | 135.2  | 27.7   |
| 4.5    | 4.9    | 3.4    | 2.1    | 7.8    | 5.5    | 9.3    | 9.8    | 7.9    |
| 12.5   | 28.1   | 15.4   | 24.7   | 20.5   | 10.3   | 16.3   | 13.6   | 21.2   |
| 2.5    | 0.6    | 0.4    | 0.3    | 0.3    | 2.4    | 1.1    | 0.9    | 0.2    |
| 3.6    | 0.5    | 4.3    | 0.8    | 0.9    | 4.5    | 7.7    | 3.5    | 3.3    |
| 1.1    | 4.6    | 2.3    | 1.5    | 2.5    | 1.4    | 9.5    | 9.1    | 3.8    |
| 0.5    | 0.4    | 1.0    | 0.6    | 0.3    | 0.9    | 0.4    | 0.7    | 0.4    |
| 6.1    | 2.3    | 13.2   | 2.4    | 2.4    | 8.6    | 7.6    | 3.2    | 1.5    |
| 8.8    | 9.9    | 9.6    | 6.6    | 20.1   | 14.2   | 24.6   | 19.7   | 24.1   |
| 2.8    | 1.2    | 2.9    | 0.3    | 2.4    | 0.4    | 0.2    | 0.9    | 2.7    |

|       |       |       |       |       |       |       |       |       |
|-------|-------|-------|-------|-------|-------|-------|-------|-------|
| 46.4  | 33.6  | 30.0  | 27.3  | 28.8  | 31.3  | 45.1  | 59.5  | 30.2  |
| 0.2   | 0.2   | 0.9   | 0.6   | 0.3   | 0.6   | 0.2   | 0.8   | 2.3   |
| 0.6   | 0.9   | 2.9   | 0.4   | 2.7   | 1.1   | 2.0   | 0.9   | 5.2   |
| 28.1  | 25.4  | 29.5  | 20.9  | 36.8  | 24.9  | 49.1  | 52.4  | 36.4  |
| 4.2   | 3.5   | 2.1   | 1.1   | 1.3   | 3.2   | 4.5   | 4.7   | 3.0   |
| 76.6  | 41.8  | 51.4  | 70.7  | 53.5  | 65.1  | 77.5  | 115.4 | 49.7  |
| 90.9  | 37.5  | 59.2  | 54.3  | 60.6  | 70.1  | 75.6  | 94.1  | 57.2  |
| 25.5  | 15.4  | 17.0  | 16.8  | 21.9  | 11.3  | 32.9  | 20.8  | 27.4  |
| 5.5   | 2.7   | 8.1   | 1.2   | 1.2   | 4.9   | 3.5   | 7.9   | 5.9   |
| 306.0 | 282.8 | 277.7 | 322.1 | 309.3 | 278.7 | 372.0 | 418.1 | 368.2 |
| 0.6   | 2.1   | 1.1   | 1.0   | 1.2   | 0.9   | 0.6   | 1.2   | 1.0   |
| 160.5 | 144.7 | 98.2  | 116.6 | 154.2 | 121.5 | 192.1 | 246.1 | 186.4 |
| 465.0 | 262.8 | 265.2 | 356.6 | 342.2 | 287.4 | 402.3 | 473.9 | 355.5 |
| 4.7   | 0.6   | 1.8   | 3.7   | 4.0   | 8.6   | 3.7   | 1.2   | 1.8   |
| 4.7   | 0.5   | 7.1   | 8.0   | 3.8   | 4.9   | 8.8   | 12.8  | 0.6   |
| 27.5  | 16.2  | 26.5  | 30.7  | 27.4  | 32.8  | 44.7  | 64.9  | 23.9  |
| 1.3   | 1.3   | 2.6   | 0.2   | 0.1   | 2.1   | 2.5   | 1.3   | 0.3   |
| 75.7  | 77.1  | 82.8  | 98.2  | 91.8  | 89.0  | 126.6 | 177.7 | 130.7 |
| 10.4  | 3.0   | 5.8   | 9.1   | 4.5   | 5.9   | 9.5   | 16.7  | 14.5  |
| 6.9   | 0.9   | 2.6   | 2.2   | 0.8   | 0.8   | 2.2   | 2.0   | 1.2   |
| 1.7   | 9.8   | 6.4   | 2.0   | 5.6   | 7.1   | 2.0   | 5.7   | 6.3   |
| 10.0  | 8.3   | 1.3   | 6.1   | 6.1   | 8.3   | 8.4   | 12.4  | 8.2   |
| 1.0   | 9.0   | 6.8   | 9.7   | 8.6   | 6.2   | 14.3  | 12.9  | 6.2   |
| 4.4   | 6.2   | 6.7   | 1.5   | 4.3   | 0.6   | 7.1   | 3.4   | 4.3   |
| 11.2  | 1.9   | 5.4   | 12.2  | 5.9   | 3.7   | 3.8   | 2.5   | 10.2  |
| 56.7  | 28.5  | 34.7  | 36.7  | 41.0  | 38.2  | 66.3  | 81.5  | 47.9  |
| 28.5  | 21.1  | 23.4  | 22.1  | 29.3  | 33.9  | 43.4  | 54.8  | 36.4  |
| 13.1  | 11.1  | 14.1  | 19.4  | 19.0  | 16.2  | 18.2  | 21.8  | 16.3  |
| 34.7  | 21.3  | 18.7  | 18.5  | 19.3  | 17.0  | 24.7  | 25.6  | 19.6  |
| 0.3   | 0.3   | 2.5   | 0.6   | 0.8   | 0.9   | 2.7   | 5.8   | 5.2   |
| 10.0  | 11.7  | 13.2  | 8.1   | 10.9  | 9.4   | 12.0  | 15.2  | 9.2   |
| 29.6  | 11.6  | 29.9  | 23.2  | 28.1  | 21.4  | 27.5  | 41.3  | 22.4  |
| 17.5  | 2.0   | 8.4   | 9.8   | 24.1  | 20.2  | 5.1   | 16.2  | 3.0   |
| 5.0   | 3.6   | 1.9   | 1.4   | 3.1   | 1.3   | 3.9   | 8.0   | 1.2   |
| 10.4  | 5.0   | 5.4   | 1.8   | 2.8   | 5.4   | 1.2   | 2.5   | 1.4   |
| 1.4   | 2.9   | 1.0   | 1.3   | 8.0   | 1.9   | 1.1   | 1.3   | 4.1   |
| 9.2   | 4.7   | 7.8   | 4.1   | 7.2   | 6.0   | 15.7  | 12.1  | 5.1   |
| 1.0   | 1.4   | 1.6   | 1.6   | 2.3   | 2.0   | 1.6   | 0.7   | 1.0   |
| 0.7   | 6.8   | 8.5   | 1.3   | 4.1   | 4.9   | 1.7   | 0.5   | 3.7   |
| 9.5   | 1.6   | 4.9   | 2.0   | 7.3   | 1.6   | 5.7   | 2.0   | 2.0   |
| 20.8  | 17.4  | 17.1  | 18.5  | 14.7  | 8.3   | 21.9  | 17.2  | 12.5  |
| 0.3   | 0.7   | 0.7   | 1.3   | 0.6   | 0.5   | 0.6   | 0.8   | 0.2   |
| 16.0  | 19.3  | 12.4  | 5.3   | 16.2  | 14.6  | 14.4  | 19.2  | 12.3  |
| 24.2  | 24.7  | 32.8  | 27.5  | 40.9  | 33.4  | 39.9  | 37.8  | 30.6  |
| 48.4  | 33.1  | 42.6  | 45.1  | 35.8  | 44.6  | 43.3  | 59.6  | 49.1  |
| 76.8  | 48.9  | 51.5  | 42.6  | 73.0  | 45.6  | 56.5  | 67.6  | 58.1  |
| 50.3  | 24.1  | 32.8  | 24.5  | 40.4  | 44.3  | 66.7  | 63.6  | 36.4  |
| 35.1  | 22.5  | 32.2  | 24.9  | 32.1  | 28.7  | 38.3  | 51.3  | 20.1  |
| 1.2   | 0.5   | 1.2   | 0.1   | 1.1   | 0.5   | 2.5   | 2.2   | 0.1   |
| 91.2  | 53.0  | 36.5  | 46.1  | 39.2  | 23.8  | 71.6  | 53.5  | 38.3  |
| 212.7 | 177.3 | 184.2 | 167.7 | 232.5 | 175.3 | 265.6 | 268.5 | 257.0 |
| 5.8   | 10.0  | 6.3   | 5.5   | 3.6   | 7.5   | 11.0  | 10.7  | 6.4   |
| 0.9   | 1.3   | 1.0   | 0.7   | 3.8   | 1.8   | 1.4   | 2.0   | 1.0   |

|       |       |       |       |       |       |       |       |       |
|-------|-------|-------|-------|-------|-------|-------|-------|-------|
| 14.9  | 3.0   | 11.2  | 8.9   | 9.5   | 12.1  | 12.3  | 21.7  | 12.3  |
| 0.5   | 0.9   | 0.9   | 2.5   | 1.2   | 5.4   | 2.3   | 1.2   | 0.5   |
| 17.9  | 10.2  | 16.4  | 7.0   | 8.1   | 10.7  | 15.9  | 20.0  | 9.3   |
| 168.0 | 95.7  | 129.5 | 154.4 | 135.8 | 159.2 | 203.4 | 255.2 | 130.1 |
| 10.6  | 5.5   | 3.2   | 0.5   | 3.3   | 7.5   | 5.3   | 6.3   | 3.8   |
| 10.0  | 6.1   | 6.7   | 6.4   | 8.2   | 2.3   | 7.8   | 2.5   | 2.6   |
| 1.1   | 1.0   | 1.0   | 0.4   | 1.1   | 1.1   | 1.5   | 0.5   | 0.9   |
| 2.6   | 1.6   | 4.9   | 1.6   | 1.0   | 0.5   | 5.9   | 1.5   | 2.9   |
| 11.1  | 10.0  | 11.1  | 4.6   | 7.2   | 7.4   | 9.4   | 10.6  | 2.2   |
| 56.2  | 43.3  | 60.5  | 59.2  | 57.7  | 50.4  | 74.3  | 92.6  | 69.5  |
| 51.8  | 24.4  | 34.4  | 33.7  | 30.4  | 41.8  | 51.2  | 78.8  | 32.6  |
| 2.6   | 0.9   | 1.2   | 1.8   | 1.2   | 9.7   | 5.4   | 13.6  | 1.1   |
| 113.4 | 93.8  | 76.4  | 104.1 | 83.0  | 78.5  | 106.4 | 112.8 | 90.8  |
| 796.4 | 654.1 | 737.2 | 687.1 | 748.4 | 712.0 | 958.2 | 975.7 | 578.2 |
| 167.4 | 93.3  | 102.9 | 103.9 | 117.5 | 123.0 | 173.6 | 177.1 | 130.1 |
| 8.3   | 4.1   | 6.1   | 7.7   | 5.2   | 3.4   | 9.3   | 9.5   | 5.1   |
| 0.6   | 3.8   | 1.3   | 1.1   | 0.6   | 1.3   | 1.7   | 2.8   | 2.4   |
| 72.8  | 39.5  | 56.2  | 36.4  | 46.3  | 56.3  | 73.7  | 68.3  | 69.3  |
| 42.8  | 32.4  | 34.3  | 30.6  | 43.2  | 23.8  | 41.1  | 47.0  | 39.8  |
| 7.2   | 2.2   | 8.4   | 6.9   | 5.1   | 4.3   | 12.0  | 7.8   | 5.4   |
| 2.1   | 1.2   | 1.3   | 3.0   | 1.9   | 1.3   | 2.0   | 1.4   | 1.2   |
| 12.3  | 8.2   | 14.0  | 13.6  | 10.7  | 11.4  | 19.8  | 14.7  | 15.6  |
| 3.7   | 4.9   | 4.8   | 6.2   | 6.1   | 5.2   | 6.2   | 2.0   | 4.6   |
| 54.4  | 47.1  | 46.3  | 54.2  | 56.4  | 47.4  | 59.4  | 77.8  | 43.7  |
| 91.4  | 56.8  | 61.9  | 68.4  | 55.5  | 67.4  | 82.1  | 71.9  | 64.7  |
| 9.5   | 9.5   | 9.1   | 11.0  | 6.6   | 17.9  | 9.6   | 15.3  | 6.2   |
| 127.6 | 65.7  | 53.1  | 64.9  | 67.8  | 55.3  | 97.8  | 109.9 | 75.4  |
| 90.3  | 21.7  | 22.7  | 29.8  | 29.8  | 28.0  | 36.2  | 35.6  | 18.8  |
| 0.4   | 1.6   | 3.5   | 0.3   | 0.4   | 3.4   | 6.6   | 2.7   | 4.4   |
| 149.5 | 118.3 | 131.3 | 121.5 | 156.6 | 124.7 | 185.1 | 183.1 | 114.6 |
| 200.9 | 103.8 | 111.9 | 128.9 | 142.2 | 134.5 | 208.5 | 253.3 | 128.5 |
| 241.1 | 177.0 | 192.1 | 200.9 | 199.5 | 201.5 | 309.2 | 314.1 | 193.9 |
| 0.5   | 0.9   | 0.5   | 0.5   | 0.4   | 0.5   | 0.5   | 0.4   | 0.5   |
| 21.6  | 8.5   | 12.8  | 12.0  | 11.7  | 13.8  | 20.2  | 26.8  | 6.5   |
| 52.3  | 26.2  | 27.5  | 18.4  | 16.4  | 20.5  | 28.3  | 27.3  | 30.2  |
| 64.3  | 36.0  | 53.9  | 51.2  | 40.6  | 40.3  | 54.6  | 74.9  | 40.7  |
| 328.6 | 204.0 | 290.1 | 289.2 | 326.6 | 284.3 | 376.7 | 474.9 | 264.4 |
| 2.9   | 0.2   | 0.1   | 3.9   | 1.7   | 1.9   | 3.1   | 0.5   | 0.5   |
| 11.6  | 8.2   | 10.3  | 9.0   | 4.1   | 11.2  | 16.9  | 8.8   | 14.0  |
| 2.6   | 3.5   | 1.1   | 1.5   | 1.5   | 1.0   | 1.6   | 2.4   | 0.6   |
| 5.5   | 0.3   | 1.3   | 0.8   | 3.8   | 1.3   | 4.7   | 0.6   | 4.5   |
| 22.1  | 10.4  | 10.9  | 11.7  | 5.8   | 14.2  | 16.5  | 32.5  | 21.5  |
| 1.5   | 0.7   | 1.0   | 1.5   | 0.8   | 4.5   | 11.4  | 4.1   | 1.1   |
| 15.8  | 6.4   | 19.3  | 18.1  | 10.4  | 14.1  | 19.1  | 18.4  | 15.4  |
| 0.6   | 0.6   | 0.6   | 0.6   | 0.8   | 1.0   | 0.9   | 0.6   | 0.8   |
| 9.4   | 1.6   | 10.1  | 3.0   | 5.2   | 9.5   | 12.4  | 13.8  | 2.6   |
| 66.7  | 39.9  | 51.2  | 48.1  | 57.5  | 57.6  | 73.6  | 67.1  | 46.3  |
| 7.3   | 10.1  | 7.1   | 7.5   | 9.5   | 7.6   | 16.0  | 11.6  | 8.5   |
| 7.8   | 3.6   | 5.2   | 3.6   | 5.6   | 1.8   | 10.9  | 15.0  | 4.1   |
| 4.9   | 5.5   | 3.2   | 8.9   | 4.5   | 8.3   | 12.2  | 10.6  | 10.6  |
| 6.3   | 4.4   | 4.0   | 6.7   | 4.7   | 11.4  | 5.2   | 21.0  | 5.6   |
| 1.2   | 0.7   | 0.5   | 0.7   | 1.2   | 0.8   | 0.9   | 2.5   | 1.2   |
| 9.4   | 13.1  | 11.4  | 7.9   | 9.4   | 11.8  | 10.3  | 11.2  | 10.2  |

|        |        |        |        |        |        |        |        |        |
|--------|--------|--------|--------|--------|--------|--------|--------|--------|
| 10.5   | 10.4   | 7.8    | 7.7    | 10.2   | 8.0    | 10.8   | 12.2   | 7.8    |
| 9.5    | 14.8   | 8.5    | 9.0    | 9.3    | 10.1   | 3.2    | 8.9    | 6.5    |
| 16.8   | 12.6   | 18.6   | 18.8   | 22.6   | 14.5   | 22.6   | 19.0   | 21.6   |
| 7.2    | 8.2    | 7.1    | 9.6    | 8.7    | 1.3    | 6.0    | 9.5    | 12.6   |
| 47.2   | 29.5   | 30.3   | 31.8   | 36.8   | 27.8   | 49.3   | 66.8   | 46.2   |
| 464.9  | 320.7  | 391.1  | 455.8  | 442.3  | 449.7  | 611.1  | 681.7  | 442.8  |
| 1.9    | 0.7    | 3.2    | 1.8    | 7.1    | 6.3    | 2.5    | 4.2    | 3.5    |
| 2594.3 | 2093.2 | 2210.0 | 2372.1 | 2448.6 | 2331.4 | 3118.7 | 3185.2 | 2189.4 |
| 44.5   | 26.9   | 33.5   | 33.8   | 34.2   | 32.5   | 37.4   | 53.7   | 46.2   |
| 1.0    | 0.8    | 7.5    | 0.8    | 1.1    | 7.0    | 2.2    | 3.2    | 0.5    |
| 0.8    | 0.3    | 0.2    | 0.8    | 0.2    | 0.8    | 1.7    | 0.3    | 0.7    |
| 1.1    | 3.1    | 2.0    | 2.2    | 1.0    | 1.8    | 2.3    | 3.3    | 2.7    |
| 8.3    | 12.8   | 2.9    | 4.5    | 11.4   | 3.4    | 8.9    | 14.1   | 8.0    |
| 51.1   | 27.8   | 26.0   | 40.1   | 36.4   | 34.6   | 33.7   | 44.3   | 27.0   |
| 779.6  | 493.6  | 540.0  | 509.4  | 659.2  | 545.0  | 882.8  | 923.1  | 659.0  |
| 23.8   | 13.5   | 17.4   | 25.7   | 14.3   | 22.2   | 35.3   | 39.5   | 26.3   |
| 19.9   | 19.6   | 17.1   | 22.2   | 23.3   | 14.0   | 29.9   | 38.2   | 28.4   |
| 10.1   | 0.5    | 2.8    | 1.8    | 2.4    | 3.3    | 3.8    | 10.2   | 2.7    |
| 1.0    | 4.3    | 1.2    | 1.6    | 4.8    | 0.8    | 6.9    | 6.0    | 2.5    |
| 87.9   | 52.7   | 45.3   | 65.0   | 69.3   | 65.6   | 79.5   | 122.2  | 73.4   |
| 51.3   | 47.7   | 37.8   | 49.1   | 56.0   | 45.2   | 55.1   | 62.4   | 50.7   |
| 95.2   | 91.8   | 115.0  | 115.4  | 117.3  | 118.6  | 153.6  | 184.0  | 118.4  |
| 1.1    | 5.2    | 6.6    | 1.1    | 1.3    | 1.6    | 1.4    | 5.0    | 1.1    |
| 5.2    | 3.7    | 1.6    | 0.6    | 3.7    | 3.5    | 6.1    | 3.4    | 3.3    |
| 0.8    | 5.0    | 0.5    | 6.5    | 0.9    | 2.7    | 7.8    | 7.6    | 1.2    |
| 0.6    | 3.3    | 2.2    | 6.4    | 2.3    | 5.8    | 1.6    | 3.4    | 4.9    |
| 1.1    | 0.7    | 0.3    | 0.8    | 1.2    | 7.0    | 1.0    | 6.9    | 0.7    |
| 3.8    | 4.7    | 4.8    | 4.5    | 5.1    | 0.6    | 4.1    | 9.1    | 5.8    |
| 61.2   | 51.5   | 52.9   | 56.6   | 74.4   | 66.7   | 87.0   | 96.5   | 48.4   |
| 0.5    | 0.3    | 0.4    | 0.7    | 0.4    | 0.3    | 0.4    | 0.4    | 0.3    |
| 6.2    | 6.7    | 0.6    | 3.1    | 1.2    | 1.7    | 4.5    | 10.0   | 4.2    |
| 2511.1 | 1974.1 | 2008.8 | 2267.7 | 2420.4 | 2207.3 | 2868.3 | 2972.1 | 2379.4 |
| 116.2  | 101.2  | 113.7  | 98.9   | 98.7   | 117.1  | 138.6  | 188.8  | 113.1  |
| 27.8   | 16.3   | 28.7   | 20.6   | 30.6   | 29.5   | 31.8   | 37.3   | 26.8   |
| 738.8  | 508.4  | 706.2  | 587.8  | 631.6  | 720.7  | 1113.2 | 1121.0 | 702.6  |
| 1.7    | 4.1    | 5.8    | 4.7    | 1.1    | 2.7    | 2.5    | 6.2    | 1.5    |
| 41.8   | 32.8   | 39.5   | 46.3   | 50.8   | 46.9   | 71.8   | 88.7   | 58.8   |
| 304.9  | 225.2  | 251.0  | 309.9  | 259.3  | 317.9  | 363.0  | 438.3  | 269.9  |
| 1.7    | 4.6    | 5.8    | 12.6   | 6.1    | 7.2    | 2.0    | 2.4    | 2.4    |
| 1.4    | 0.6    | 1.0    | 0.8    | 3.5    | 1.2    | 0.9    | 1.8    | 0.8    |
| 8.5    | 1.8    | 3.8    | 8.6    | 1.3    | 2.0    | 9.7    | 7.3    | 12.1   |
| 24.3   | 16.7   | 17.1   | 26.7   | 15.3   | 12.5   | 20.2   | 26.3   | 17.8   |
| 2.1    | 5.4    | 2.5    | 8.7    | 4.1    | 7.2    | 13.1   | 10.2   | 6.2    |
| 133.0  | 86.0   | 74.0   | 103.3  | 80.4   | 82.2   | 117.9  | 120.4  | 102.2  |
| 2.3    | 15.9   | 15.2   | 10.3   | 19.7   | 19.0   | 17.7   | 23.4   | 17.9   |
| 0.5    | 0.9    | 1.1    | 0.8    | 2.4    | 2.2    | 1.3    | 1.5    | 1.4    |
| 71.7   | 43.1   | 58.4   | 44.9   | 58.4   | 61.2   | 79.2   | 123.3  | 98.8   |
| 8.4    | 0.8    | 0.6    | 1.0    | 1.0    | 1.3    | 3.6    | 1.9    | 1.0    |
| 6.1    | 3.9    | 6.3    | 0.7    | 4.1    | 7.0    | 4.6    | 10.3   | 4.4    |
| 11.4   | 2.3    | 9.0    | 3.6    | 6.7    | 2.0    | 12.0   | 16.3   | 1.2    |
| 11.8   | 1.4    | 4.7    | 12.8   | 9.8    | 3.1    | 1.5    | 15.2   | 11.6   |
| 12.6   | 4.6    | 8.9    | 2.6    | 4.1    | 2.2    | 2.7    | 7.9    | 1.5    |
| 10.2   | 7.1    | 3.4    | 10.0   | 6.3    | 16.0   | 12.1   | 9.0    | 11.1   |

|        |       |       |       |       |       |        |        |        |
|--------|-------|-------|-------|-------|-------|--------|--------|--------|
| 5.6    | 5.3   | 6.1   | 1.3   | 6.6   | 4.9   | 2.5    | 8.8    | 3.2    |
| 35.0   | 20.9  | 28.1  | 25.8  | 26.2  | 24.1  | 39.6   | 28.7   | 33.7   |
| 4.2    | 1.6   | 7.2   | 2.4   | 1.1   | 5.5   | 5.2    | 3.5    | 3.6    |
| 0.9    | 1.0   | 1.9   | 0.6   | 1.2   | 1.3   | 0.8    | 2.1    | 0.6    |
| 39.0   | 20.9  | 22.1  | 26.4  | 27.4  | 37.2  | 27.1   | 47.5   | 31.0   |
| 14.2   | 13.9  | 10.8  | 7.6   | 12.1  | 10.5  | 11.9   | 6.0    | 8.0    |
| 1.9    | 1.7   | 1.3   | 1.8   | 1.6   | 1.5   | 3.9    | 2.7    | 3.3    |
| 62.5   | 47.8  | 52.9  | 47.2  | 42.0  | 52.6  | 65.1   | 72.6   | 41.0   |
| 30.7   | 18.8  | 25.7  | 22.5  | 18.3  | 23.8  | 20.3   | 38.4   | 19.3   |
| 90.0   | 42.6  | 52.7  | 60.1  | 58.4  | 57.9  | 78.9   | 84.0   | 95.2   |
| 1.0    | 0.6   | 0.7   | 0.7   | 0.5   | 0.8   | 1.1    | 0.6    | 1.0    |
| 1.1    | 0.3   | 0.3   | 0.4   | 1.3   | 4.7   | 0.9    | 1.0    | 1.8    |
| 118.3  | 68.5  | 84.3  | 78.6  | 80.0  | 77.9  | 79.8   | 112.2  | 103.4  |
| 11.6   | 2.6   | 10.7  | 9.5   | 7.6   | 7.1   | 8.8    | 9.8    | 7.5    |
| 1.9    | 1.7   | 5.5   | 16.6  | 8.4   | 4.9   | 8.1    | 14.5   | 3.4    |
| 0.3    | 7.6   | 1.3   | 1.4   | 3.5   | 2.9   | 2.1    | 0.6    | 6.6    |
| 122.1  | 106.5 | 120.8 | 124.8 | 128.7 | 94.8  | 129.3  | 134.6  | 123.4  |
| 1.0    | 1.1   | 0.9   | 0.5   | 0.9   | 1.0   | 0.7    | 1.3    | 0.7    |
| 1.4    | 3.5   | 2.4   | 1.4   | 6.8   | 4.9   | 4.6    | 1.4    | 0.8    |
| 1.4    | 3.3   | 2.4   | 5.1   | 2.4   | 1.8   | 7.9    | 2.0    | 1.9    |
| 10.6   | 9.3   | 13.7  | 18.8  | 15.7  | 13.1  | 12.1   | 15.4   | 12.1   |
| 28.3   | 19.9  | 12.5  | 17.9  | 20.0  | 17.0  | 23.0   | 23.9   | 15.3   |
| 197.4  | 109.3 | 123.4 | 116.0 | 132.1 | 110.2 | 180.0  | 169.8  | 120.1  |
| 10.7   | 7.8   | 8.1   | 10.3  | 7.4   | 7.8   | 4.8    | 7.7    | 6.8    |
| 43.1   | 37.9  | 41.4  | 32.2  | 52.2  | 49.4  | 51.0   | 31.8   | 33.5   |
| 1102.1 | 727.9 | 744.0 | 750.7 | 976.9 | 864.1 | 1483.0 | 1591.1 | 1111.2 |
| 11.0   | 10.6  | 1.0   | 6.6   | 7.9   | 1.3   | 0.3    | 1.8    | 10.8   |
| 28.2   | 11.7  | 17.3  | 22.8  | 19.6  | 22.2  | 26.1   | 26.0   | 18.4   |
| 5.1    | 5.9   | 5.4   | 0.3   | 2.5   | 0.9   | 3.0    | 0.7    | 9.4    |
| 0.4    | 3.9   | 4.3   | 2.1   | 3.2   | 3.6   | 4.5    | 0.2    | 3.1    |
| 1.3    | 1.8   | 0.8   | 1.5   | 1.7   | 1.6   | 1.4    | 2.1    | 1.2    |
| 12.6   | 7.6   | 3.4   | 2.2   | 9.5   | 8.3   | 10.3   | 7.9    | 7.0    |
| 9.9    | 7.0   | 3.3   | 7.7   | 8.9   | 10.1  | 12.2   | 9.2    | 8.4    |
| 4.2    | 5.3   | 8.4   | 3.1   | 10.7  | 9.2   | 8.2    | 14.4   | 5.4    |
| 14.8   | 3.5   | 6.4   | 4.9   | 1.2   | 3.4   | 3.6    | 5.5    | 5.5    |
| 198.7  | 89.5  | 112.5 | 139.7 | 118.4 | 139.6 | 199.3  | 261.1  | 203.3  |
| 10.5   | 10.0  | 10.0  | 10.6  | 9.3   | 10.8  | 9.3    | 16.4   | 10.1   |
| 10.6   | 13.0  | 3.1   | 16.0  | 11.5  | 12.5  | 26.4   | 4.6    | 25.8   |
| 0.5    | 1.3   | 0.8   | 1.4   | 0.6   | 0.4   | 0.5    | 0.7    | 1.6    |
| 2.6    | 1.2   | 5.3   | 1.8   | 2.1   | 0.8   | 2.1    | 1.9    | 7.2    |
| 5.7    | 11.7  | 7.7   | 10.2  | 4.7   | 7.2   | 7.4    | 2.1    | 7.0    |
| 4.0    | 0.7   | 4.6   | 6.8   | 8.1   | 5.2   | 4.0    | 8.6    | 1.4    |
| 17.4   | 17.6  | 18.8  | 20.5  | 19.9  | 23.4  | 27.9   | 44.7   | 27.5   |
| 19.4   | 12.5  | 10.3  | 13.5  | 16.2  | 15.4  | 16.1   | 14.9   | 15.6   |
| 4.8    | 14.2  | 9.2   | 5.9   | 11.2  | 7.1   | 13.2   | 16.8   | 8.5    |
| 3.4    | 2.0   | 3.5   | 8.1   | 4.2   | 5.1   | 1.9    | 10.1   | 5.4    |
| 0.4    | 0.4   | 0.9   | 5.8   | 1.3   | 3.5   | 1.5    | 3.3    | 1.6    |
| 8.8    | 7.8   | 8.3   | 7.2   | 12.1  | 6.0   | 9.9    | 15.5   | 6.4    |
| 19.6   | 14.7  | 17.9  | 13.0  | 22.7  | 19.9  | 21.9   | 32.7   | 13.6   |
| 5.8    | 1.9   | 13.1  | 9.2   | 11.2  | 14.5  | 10.6   | 17.9   | 14.0   |
| 78.4   | 52.9  | 48.9  | 59.6  | 72.3  | 49.5  | 65.1   | 63.5   | 52.1   |
| 208.5  | 83.3  | 99.1  | 94.1  | 106.4 | 103.1 | 133.0  | 151.4  | 103.4  |
| 18.1   | 15.1  | 14.2  | 12.2  | 7.1   | 10.7  | 9.0    | 25.6   | 12.2   |

|        |        |        |        |        |        |        |        |        |
|--------|--------|--------|--------|--------|--------|--------|--------|--------|
| 2.7    | 0.6    | 3.0    | 1.6    | 3.7    | 4.7    | 0.9    | 2.4    | 2.0    |
| 2.8    | 5.6    | 5.0    | 1.4    | 1.9    | 1.7    | 1.1    | 2.1    | 1.1    |
| 14.6   | 7.9    | 13.1   | 13.2   | 8.7    | 12.1   | 18.7   | 17.2   | 7.5    |
| 20.9   | 14.0   | 19.3   | 20.8   | 21.6   | 22.9   | 21.3   | 24.4   | 17.2   |
| 131.7  | 94.9   | 113.4  | 106.8  | 112.4  | 108.4  | 164.4  | 163.2  | 84.5   |
| 0.6    | 1.8    | 4.6    | 0.3    | 3.8    | 1.5    | 2.5    | 3.7    | 0.7    |
| 1.1    | 2.2    | 0.9    | 2.2    | 1.2    | 0.9    | 2.6    | 1.2    | 1.1    |
| 0.3    | 0.3    | 0.9    | 0.8    | 0.7    | 0.5    | 1.3    | 0.4    | 0.8    |
| 0.5    | 1.0    | 1.4    | 0.3    | 3.5    | 0.6    | 5.9    | 2.2    | 0.9    |
| 50.6   | 33.7   | 50.9   | 65.1   | 51.6   | 50.9   | 64.3   | 72.1   | 48.2   |
| 130.1  | 204.3  | 232.4  | 249.8  | 300.5  | 283.8  | 427.8  | 518.9  | 266.4  |
| 18.6   | 17.9   | 17.0   | 22.9   | 22.7   | 12.9   | 23.5   | 24.8   | 22.2   |
| 12.0   | 228.9  | 205.6  | 243.9  | 233.8  | 206.8  | 312.3  | 310.5  | 176.1  |
| 17.2   | 11.7   | 18.6   | 15.6   | 6.0    | 12.3   | 10.4   | 21.6   | 21.1   |
| 9.7    | 12.9   | 8.1    | 10.0   | 10.6   | 9.2    | 10.4   | 7.7    | 12.7   |
| 113.8  | 49.7   | 55.4   | 46.4   | 82.5   | 67.1   | 126.7  | 162.3  | 56.7   |
| 155.6  | 152.4  | 166.1  | 149.0  | 169.3  | 124.7  | 196.1  | 175.4  | 145.3  |
| 232.2  | 183.2  | 204.5  | 167.0  | 212.2  | 178.0  | 233.3  | 270.3  | 237.9  |
| 21.9   | 22.3   | 25.3   | 20.7   | 26.1   | 23.0   | 22.2   | 28.3   | 22.4   |
| 1.7    | 1.6    | 1.1    | 7.5    | 7.8    | 1.5    | 1.6    | 9.6    | 16.8   |
| 0.5    | 0.7    | 0.7    | 4.5    | 0.7    | 4.4    | 0.3    | 0.9    | 1.2    |
| 142.7  | 123.6  | 132.2  | 142.0  | 156.5  | 143.6  | 216.0  | 216.6  | 122.0  |
| 128.5  | 149.6  | 131.0  | 157.8  | 140.5  | 139.7  | 227.3  | 211.4  | 211.5  |
| 2.3    | 0.6    | 1.2    | 1.4    | 3.6    | 1.2    | 5.0    | 8.5    | 5.3    |
| 20.8   | 17.2   | 18.0   | 20.0   | 11.2   | 14.2   | 23.4   | 10.7   | 21.3   |
| 0.4    | 0.4    | 1.0    | 0.3    | 0.8    | 0.5    | 2.3    | 1.2    | 0.4    |
| 140.1  | 100.9  | 130.7  | 134.2  | 142.5  | 136.1  | 159.6  | 201.7  | 108.9  |
| 1.2    | 0.8    | 0.8    | 1.3    | 3.5    | 3.4    | 1.3    | 0.8    | 1.4    |
| 21.3   | 15.7   | 20.4   | 12.6   | 27.7   | 17.2   | 26.4   | 23.5   | 18.6   |
| 2533.2 | 2089.2 | 2291.4 | 2241.8 | 2429.5 | 2362.3 | 2837.5 | 3090.5 | 2488.2 |
| 9.3    | 12.9   | 12.2   | 7.4    | 6.9    | 14.9   | 9.5    | 15.8   | 10.3   |
| 60.7   | 37.5   | 33.3   | 59.2   | 45.2   | 36.5   | 71.7   | 64.4   | 37.2   |
| 281.3  | 82.5   | 89.5   | 101.6  | 106.4  | 101.7  | 155.4  | 183.6  | 138.5  |
| 1.4    | 4.8    | 0.4    | 6.4    | 3.3    | 3.9    | 6.9    | 4.9    | 0.7    |
| 1.2    | 4.3    | 1.5    | 6.2    | 8.1    | 1.2    | 9.9    | 4.0    | 2.0    |
| 19.0   | 10.2   | 7.2    | 10.0   | 14.4   | 8.3    | 20.1   | 32.3   | 24.0   |
| 1.5    | 4.0    | 0.9    | 1.1    | 1.8    | 2.0    | 1.1    | 2.8    | 3.5    |
| 71.3   | 55.8   | 67.1   | 74.1   | 73.6   | 67.4   | 90.2   | 85.9   | 58.7   |
| 386.8  | 266.7  | 353.7  | 387.4  | 366.5  | 385.7  | 431.4  | 450.6  | 325.8  |
| 152.1  | 119.1  | 114.6  | 145.3  | 159.2  | 156.4  | 209.2  | 246.6  | 188.6  |
| 0.1    | 0.3    | 0.3    | 1.2    | 0.3    | 2.3    | 1.8    | 0.1    | 1.0    |
| 59.8   | 38.8   | 57.0   | 49.7   | 47.6   | 62.1   | 74.0   | 109.4  | 60.4   |
| 5.2    | 6.6    | 3.9    | 3.2    | 1.0    | 1.0    | 1.3    | 1.3    | 4.5    |
| 7.5    | 3.0    | 1.2    | 3.1    | 3.5    | 0.5    | 7.1    | 7.0    | 6.5    |
| 0.4    | 0.5    | 0.9    | 0.8    | 1.2    | 1.6    | 1.1    | 0.9    | 0.7    |
| 4.4    | 8.5    | 1.7    | 4.8    | 6.3    | 5.8    | 9.7    | 5.5    | 5.0    |
| 1089.4 | 711.5  | 839.8  | 856.8  | 894.1  | 778.5  | 1241.0 | 1199.4 | 914.1  |
| 0.7    | 0.5    | 2.6    | 5.7    | 0.3    | 0.5    | 0.7    | 4.4    | 6.0    |
| 1534.5 | 1521.8 | 1666.7 | 1888.0 | 1791.7 | 1723.1 | 2202.3 | 2135.5 | 1651.1 |
| 24.0   | 22.3   | 21.4   | 22.3   | 20.8   | 22.4   | 27.7   | 43.1   | 21.9   |
| 1.6    | 1.2    | 1.3    | 1.1    | 0.8    | 1.4    | 1.1    | 1.3    | 1.0    |
| 4.8    | 4.6    | 5.0    | 5.2    | 7.8    | 5.5    | 5.1    | 6.5    | 8.7    |
| 10.5   | 6.2    | 2.3    | 9.0    | 9.3    | 5.6    | 0.5    | 7.9    | 4.6    |

|        |        |        |        |        |        |        |        |        |
|--------|--------|--------|--------|--------|--------|--------|--------|--------|
| 7.0    | 6.4    | 7.0    | 7.0    | 6.5    | 0.7    | 7.0    | 11.4   | 2.6    |
| 3.1    | 1.2    | 3.1    | 9.3    | 5.1    | 8.8    | 0.9    | 10.9   | 6.7    |
| 0.6    | 6.0    | 0.7    | 0.4    | 0.9    | 3.7    | 0.4    | 1.2    | 0.6    |
| 8.0    | 5.9    | 5.7    | 3.5    | 5.8    | 4.0    | 7.2    | 4.7    | 0.4    |
| 24.8   | 10.8   | 16.9   | 16.0   | 17.6   | 16.1   | 20.3   | 30.2   | 21.8   |
| 14.8   | 10.8   | 15.6   | 7.8    | 21.2   | 11.4   | 21.6   | 27.1   | 23.7   |
| 2.1    | 3.1    | 2.5    | 1.9    | 2.6    | 1.1    | 1.2    | 3.1    | 1.4    |
| 0.7    | 0.8    | 0.6    | 1.1    | 0.9    | 0.9    | 0.5    | 1.8    | 1.7    |
| 1.3    | 0.9    | 1.2    | 0.9    | 2.0    | 1.1    | 0.9    | 1.6    | 0.8    |
| 0.3    | 0.1    | 0.2    | 0.2    | 0.2    | 0.4    | 0.2    | 0.3    | 0.2    |
| 53.4   | 64.6   | 53.5   | 56.7   | 69.6   | 56.0   | 79.0   | 83.4   | 48.3   |
| 25.1   | 14.4   | 17.0   | 17.0   | 18.5   | 20.2   | 23.4   | 33.3   | 17.7   |
| 0.7    | 0.2    | 0.7    | 1.0    | 0.4    | 0.9    | 0.7    | 5.7    | 0.5    |
| 9.1    | 1.1    | 1.4    | 8.1    | 7.3    | 3.7    | 12.6   | 8.9    | 8.0    |
| 9.4    | 5.5    | 4.3    | 4.0    | 4.3    | 0.9    | 1.0    | 1.2    | 4.2    |
| 47.7   | 31.3   | 28.0   | 49.0   | 41.8   | 31.9   | 59.8   | 59.3   | 42.4   |
| 12.7   | 12.1   | 18.5   | 9.8    | 14.8   | 12.9   | 16.9   | 17.7   | 10.7   |
| 5.1    | 1.9    | 4.2    | 4.3    | 9.6    | 1.3    | 5.0    | 9.6    | 7.2    |
| 7.1    | 0.5    | 3.3    | 4.2    | 4.8    | 5.2    | 9.0    | 10.8   | 8.2    |
| 29.0   | 13.7   | 13.4   | 16.3   | 8.8    | 14.2   | 31.8   | 42.4   | 29.9   |
| 512.0  | 326.2  | 346.9  | 351.5  | 392.7  | 365.6  | 444.4  | 593.5  | 448.2  |
| 47.0   | 15.5   | 37.0   | 27.6   | 25.4   | 28.3   | 36.1   | 55.8   | 23.8   |
| 2778.4 | 1358.0 | 2032.6 | 2180.5 | 2571.5 | 2226.4 | 3029.9 | 2966.5 | 2689.9 |
| 13.0   | 9.6    | 6.8    | 9.2    | 16.8   | 7.6    | 13.4   | 2.9    | 7.8    |
| 4.4    | 5.0    | 11.2   | 11.0   | 8.1    | 7.4    | 17.2   | 15.6   | 14.2   |
| 19.1   | 11.4   | 2.2    | 15.2   | 11.2   | 12.0   | 7.5    | 7.0    | 4.0    |
| 1.8    | 5.8    | 3.4    | 3.9    | 9.4    | 5.2    | 6.7    | 8.3    | 7.1    |
| 12.2   | 1.8    | 5.6    | 7.1    | 1.4    | 2.6    | 9.1    | 20.0   | 9.6    |
| 98.9   | 79.4   | 80.0   | 90.7   | 80.7   | 86.6   | 130.4  | 187.1  | 109.2  |
| 1.5    | 1.4    | 0.6    | 0.6    | 0.9    | 2.4    | 2.2    | 6.1    | 2.2    |
| 1.3    | 1.2    | 1.0    | 0.6    | 1.4    | 0.7    | 0.6    | 1.0    | 1.2    |
| 53.7   | 36.8   | 44.8   | 49.3   | 52.6   | 47.1   | 63.7   | 62.8   | 49.1   |
| 2378.4 | 2132.1 | 1964.9 | 2055.7 | 2418.7 | 2275.1 | 2555.8 | 2864.1 | 2068.1 |
| 1949.9 | 1320.0 | 1490.0 | 1726.8 | 1554.2 | 1577.9 | 2137.6 | 2535.4 | 2079.7 |
| 2.6    | 0.3    | 0.7    | 2.5    | 2.2    | 1.0    | 2.9    | 0.7    | 2.7    |
| 20.7   | 14.9   | 15.4   | 12.1   | 11.9   | 17.9   | 18.1   | 21.6   | 14.9   |
| 15.1   | 10.5   | 13.7   | 19.3   | 17.3   | 14.4   | 13.9   | 21.2   | 16.5   |
| 16.3   | 12.5   | 8.3    | 10.5   | 6.2    | 13.9   | 17.5   | 17.9   | 11.2   |
| 39.6   | 6.2    | 57.9   | 17.9   | 47.0   | 31.8   | 44.1   | 42.6   | 40.3   |
| 340.8  | 344.0  | 439.9  | 275.3  | 427.7  | 261.8  | 196.9  | 251.2  | 211.7  |
| 9.7    | 14.5   | 18.1   | 19.7   | 19.7   | 4.3    | 17.3   | 14.3   | 17.6   |
| 88.5   | 52.7   | 65.0   | 65.9   | 59.6   | 63.7   | 68.1   | 71.1   | 60.1   |
| 4.8    | 4.8    | 0.6    | 2.3    | 4.5    | 2.5    | 2.5    | 3.8    | 1.1    |
| 15.2   | 14.4   | 16.2   | 3.6    | 15.9   | 9.4    | 20.5   | 26.0   | 18.7   |
| 7.9    | 10.4   | 12.9   | 14.6   | 14.7   | 11.2   | 6.6    | 19.8   | 16.3   |
| 6.1    | 8.5    | 1.8    | 3.8    | 4.2    | 1.8    | 1.8    | 4.8    | 2.1    |
| 1.5    | 1.8    | 3.4    | 0.8    | 1.7    | 0.7    | 1.2    | 0.8    | 2.5    |
| 2.9    | 4.5    | 4.5    | 1.0    | 1.7    | 1.3    | 3.3    | 8.7    | 9.5    |
| 5.7    | 3.5    | 1.1    | 4.3    | 0.5    | 5.4    | 8.0    | 8.5    | 6.2    |
| 3.7    | 6.8    | 1.2    | 2.4    | 3.6    | 0.5    | 6.5    | 1.4    | 4.1    |
| 3.8    | 7.2    | 1.1    | 10.2   | 12.2   | 5.1    | 6.0    | 12.3   | 5.4    |
| 0.2    | 0.6    | 0.3    | 0.2    | 0.3    | 0.2    | 0.2    | 0.2    | 0.1    |
| 0.3    | 0.4    | 2.3    | 4.8    | 0.7    | 6.0    | 2.9    | 0.8    | 1.9    |

|        |        |        |        |        |        |        |        |        |
|--------|--------|--------|--------|--------|--------|--------|--------|--------|
| 1.9    | 12.6   | 6.9    | 1.6    | 3.7    | 3.2    | 8.8    | 3.5    | 2.2    |
| 22.9   | 18.2   | 19.1   | 19.4   | 19.9   | 17.5   | 25.1   | 27.7   | 18.9   |
| 6.0    | 4.9    | 5.2    | 0.5    | 1.0    | 6.7    | 8.0    | 8.2    | 2.5    |
| 3315.9 | 2633.6 | 2644.2 | 2882.8 | 2956.7 | 2773.3 | 3495.7 | 3763.2 | 2845.0 |
| 165.8  | 123.9  | 117.0  | 134.8  | 148.0  | 129.7  | 140.7  | 199.8  | 189.3  |
| 5.2    | 7.6    | 5.7    | 10.9   | 1.2    | 0.9    | 2.9    | 13.0   | 8.6    |
| 20.3   | 16.0   | 21.6   | 7.4    | 25.9   | 31.4   | 29.1   | 29.3   | 19.8   |
| 67.3   | 45.4   | 47.6   | 63.5   | 59.9   | 50.8   | 79.3   | 83.7   | 55.5   |
| 144.8  | 83.8   | 97.3   | 93.8   | 114.0  | 95.2   | 192.8  | 220.0  | 150.5  |
| 0.5    | 9.4    | 9.5    | 4.4    | 6.7    | 7.3    | 9.8    | 15.6   | 13.9   |
| 59.8   | 21.0   | 29.4   | 30.7   | 31.1   | 23.1   | 44.2   | 37.5   | 29.8   |
| 1298.6 | 922.6  | 970.1  | 1066.6 | 1146.6 | 1035.4 | 1417.2 | 1476.0 | 1224.1 |
| 6.4    | 0.5    | 2.9    | 0.4    | 3.4    | 4.2    | 1.4    | 3.9    | 1.1    |
| 1.9    | 1.6    | 3.0    | 10.9   | 3.8    | 4.0    | 2.0    | 6.9    | 1.2    |
| 2.9    | 4.6    | 6.1    | 2.3    | 1.0    | 1.4    | 1.9    | 3.8    | 4.5    |
| 726.7  | 647.1  | 579.5  | 638.8  | 727.3  | 661.6  | 850.3  | 1059.5 | 697.4  |
| 55.1   | 25.0   | 21.8   | 32.3   | 41.4   | 30.8   | 29.1   | 52.0   | 27.9   |
| 7.4    | 2.8    | 5.7    | 3.7    | 1.4    | 4.7    | 7.9    | 10.8   | 4.2    |
| 3.9    | 2.9    | 5.5    | 2.1    | 2.1    | 1.2    | 3.3    | 0.5    | 2.9    |
| 1.3    | 1.8    | 2.1    | 1.7    | 7.3    | 0.7    | 8.7    | 1.4    | 2.4    |
| 0.8    | 3.7    | 5.6    | 4.0    | 7.6    | 0.8    | 2.1    | 5.8    | 4.8    |
| 4.8    | 3.6    | 0.8    | 6.7    | 3.4    | 5.0    | 4.1    | 4.7    | 3.3    |
| 0.3    | 0.1    | 0.6    | 0.8    | 0.9    | 2.3    | 0.1    | 0.4    | 0.7    |
| 3.2    | 8.0    | 5.4    | 4.8    | 0.4    | 3.7    | 3.7    | 6.3    | 4.0    |
| 4.7    | 4.9    | 1.8    | 21.8   | 1.0    | 16.8   | 19.3   | 41.6   | 18.6   |
| 24.2   | 20.6   | 24.7   | 20.3   | 18.6   | 26.1   | 29.6   | 33.3   | 16.9   |
| 2.3    | 0.6    | 0.9    | 6.8    | 0.7    | 8.4    | 3.8    | 12.4   | 1.8    |
| 2.1    | 4.1    | 3.5    | 4.1    | 0.7    | 3.4    | 4.7    | 5.5    | 0.4    |
| 3.8    | 2.8    | 0.6    | 4.8    | 4.7    | 6.9    | 4.3    | 2.9    | 7.7    |
| 16.1   | 8.9    | 14.4   | 10.8   | 9.3    | 10.7   | 16.2   | 16.4   | 9.5    |
| 9.1    | 5.9    | 9.1    | 7.1    | 7.6    | 12.0   | 11.8   | 13.4   | 10.6   |
| 2.1    | 7.5    | 3.0    | 5.2    | 7.8    | 5.7    | 3.7    | 8.1    | 6.6    |
| 2.4    | 1.4    | 0.9    | 4.0    | 1.4    | 1.0    | 1.0    | 1.3    | 0.5    |
| 8.9    | 8.8    | 10.0   | 7.4    | 6.2    | 7.3    | 23.2   | 17.5   | 15.6   |
| 1.7    | 1.9    | 0.7    | 0.8    | 2.9    | 6.1    | 3.7    | 8.1    | 4.6    |
| 230.2  | 115.6  | 167.6  | 154.8  | 172.8  | 142.5  | 198.9  | 208.0  | 124.3  |
| 9.3    | 8.5    | 8.4    | 4.4    | 8.8    | 5.4    | 5.8    | 2.1    | 1.1    |
| 1.7    | 1.0    | 1.4    | 1.3    | 0.9    | 1.6    | 0.8    | 0.8    | 3.1    |
| 5.1    | 2.3    | 11.1   | 2.1    | 1.9    | 1.9    | 1.8    | 2.3    | 1.3    |
| 1.7    | 1.6    | 2.1    | 2.6    | 2.9    | 2.1    | 2.4    | 2.0    | 2.6    |
| 7.1    | 7.5    | 6.5    | 7.0    | 5.6    | 2.2    | 4.9    | 8.6    | 1.0    |
| 0.6    | 2.0    | 2.9    | 1.0    | 0.9    | 0.1    | 0.6    | 0.2    | 1.3    |
| 0.7    | 0.6    | 10.8   | 1.9    | 1.8    | 7.7    | 2.0    | 2.1    | 1.3    |
| 6.0    | 3.7    | 3.0    | 2.7    | 2.2    | 2.3    | 3.4    | 3.5    | 2.4    |
| 4.4    | 4.9    | 3.2    | 1.4    | 7.7    | 5.1    | 2.5    | 5.4    | 6.0    |
| 5.1    | 3.6    | 2.4    | 5.5    | 0.7    | 0.4    | 4.4    | 4.0    | 2.7    |
| 1844.4 | 1310.4 | 1399.9 | 1822.3 | 1659.7 | 1677.5 | 2152.4 | 2116.1 | 2138.2 |
| 21.4   | 20.7   | 14.8   | 28.5   | 15.6   | 19.5   | 26.3   | 28.3   | 19.8   |
| 7.2    | 3.7    | 0.2    | 4.0    | 3.4    | 6.3    | 6.7    | 5.0    | 2.5    |
| 3.6    | 6.3    | 3.4    | 3.0    | 5.4    | 3.3    | 4.2    | 2.2    | 5.3    |
| 22.7   | 15.3   | 16.0   | 16.6   | 12.1   | 21.7   | 21.5   | 24.9   | 22.0   |
| 0.4    | 0.5    | 0.4    | 0.5    | 0.3    | 0.7    | 0.5    | 0.7    | 0.5    |
| 0.8    | 1.0    | 0.7    | 0.4    | 0.5    | 0.4    | 0.6    | 0.4    | 1.2    |



|        |       |       |        |       |       |        |        |       |
|--------|-------|-------|--------|-------|-------|--------|--------|-------|
| 18.1   | 23.4  | 21.9  | 30.5   | 22.3  | 17.6  | 29.5   | 34.3   | 21.2  |
| 1.0    | 4.5   | 8.5   | 11.0   | 7.8   | 7.0   | 17.6   | 19.0   | 9.8   |
| 20.8   | 1.8   | 9.7   | 8.6    | 15.6  | 6.4   | 17.2   | 14.4   | 6.5   |
| 244.0  | 130.7 | 127.2 | 146.5  | 161.6 | 118.8 | 239.8  | 230.0  | 181.0 |
| 0.2    | 0.3   | 0.3   | 0.1    | 1.4   | 0.6   | 0.2    | 0.2    | 0.2   |
| 1.2    | 0.9   | 1.2   | 1.4    | 0.8   | 2.2   | 1.1    | 1.5    | 1.3   |
| 9.7    | 7.5   | 7.2   | 2.4    | 1.5   | 0.8   | 0.3    | 2.4    | 0.7   |
| 0.7    | 3.6   | 4.2   | 4.8    | 5.9   | 0.7   | 6.0    | 3.1    | 5.3   |
| 2.5    | 2.2   | 0.1   | 0.2    | 1.0   | 0.1   | 4.0    | 0.3    | 3.3   |
| 2.7    | 3.5   | 0.4   | 0.7    | 1.3   | 5.5   | 0.3    | 0.9    | 0.8   |
| 5.5    | 11.7  | 10.6  | 16.0   | 10.1  | 8.3   | 13.5   | 9.3    | 8.9   |
| 0.7    | 0.4   | 0.4   | 0.4    | 0.4   | 0.5   | 0.5    | 1.0    | 0.4   |
| 0.8    | 4.6   | 0.4   | 0.3    | 1.8   | 1.2   | 0.4    | 1.2    | 2.4   |
| 1.3    | 0.9   | 1.2   | 4.1    | 7.2   | 1.0   | 10.9   | 7.1    | 6.1   |
| 2.0    | 3.2   | 1.6   | 0.6    | 3.1   | 3.9   | 4.6    | 2.0    | 2.8   |
| 2.5    | 0.5   | 0.5   | 0.6    | 0.6   | 0.5   | 0.3    | 2.1    | 0.8   |
| 3.8    | 7.6   | 5.3   | 7.0    | 5.8   | 3.6   | 7.0    | 9.4    | 6.3   |
| 1.2    | 1.1   | 0.8   | 1.0    | 0.6   | 0.3   | 0.8    | 1.3    | 0.6   |
| 11.2   | 4.9   | 5.7   | 10.3   | 1.3   | 8.7   | 14.3   | 8.2    | 6.7   |
| 4.7    | 1.2   | 4.4   | 2.4    | 3.5   | 9.2   | 7.3    | 3.1    | 5.6   |
| 20.8   | 21.5  | 19.7  | 15.9   | 19.0  | 20.3  | 23.1   | 34.8   | 14.3  |
| 2.2    | 4.9   | 4.4   | 2.1    | 1.9   | 3.7   | 4.1    | 1.5    | 3.8   |
| 13.7   | 16.8  | 13.0  | 20.5   | 13.4  | 22.5  | 22.0   | 22.6   | 14.4  |
| 5.1    | 4.8   | 5.2   | 2.9    | 5.1   | 4.3   | 4.6    | 7.5    | 4.0   |
| 6.3    | 12.1  | 4.2   | 3.3    | 8.8   | 1.8   | 6.3    | 2.8    | 10.1  |
| 126.6  | 57.9  | 111.5 | 83.3   | 86.9  | 98.6  | 142.1  | 145.7  | 85.9  |
| 161.8  | 116.6 | 127.4 | 154.3  | 138.0 | 134.1 | 174.0  | 208.6  | 133.3 |
| 15.9   | 16.9  | 10.8  | 16.2   | 13.6  | 19.4  | 18.6   | 18.4   | 19.1  |
| 74.5   | 50.4  | 54.0  | 65.7   | 75.9  | 49.2  | 75.1   | 119.5  | 65.4  |
| 128.4  | 86.7  | 92.4  | 93.3   | 99.2  | 86.1  | 101.7  | 108.8  | 86.3  |
| 189.8  | 165.8 | 226.9 | 221.8  | 257.7 | 227.3 | 323.6  | 321.4  | 189.2 |
| 5.7    | 5.9   | 4.8   | 8.6    | 12.5  | 6.2   | 13.3   | 12.4   | 7.4   |
| 1066.2 | 980.3 | 959.6 | 1077.6 | 974.2 | 774.8 | 1244.1 | 1028.7 | 994.9 |
| 10.6   | 11.4  | 11.4  | 8.5    | 7.0   | 7.9   | 11.1   | 14.8   | 8.0   |
| 144.4  | 76.6  | 98.6  | 103.0  | 100.4 | 107.4 | 161.9  | 189.5  | 97.5  |
| 8.5    | 3.6   | 1.9   | 2.8    | 1.2   | 1.0   | 4.6    | 2.6    | 11.9  |
| 357.7  | 247.3 | 333.1 | 219.9  | 260.2 | 310.8 | 343.4  | 404.6  | 301.6 |
| 5.5    | 6.5   | 7.2   | 9.3    | 4.0   | 5.5   | 6.0    | 2.7    | 4.3   |
| 93.5   | 75.3  | 67.3  | 68.9   | 60.0  | 52.7  | 82.8   | 93.2   | 57.9  |
| 104.3  | 126.3 | 124.7 | 155.4  | 146.2 | 136.4 | 171.6  | 221.6  | 133.5 |
| 20.5   | 18.1  | 18.3  | 26.7   | 17.5  | 15.2  | 23.3   | 31.9   | 20.6  |
| 106.6  | 80.3  | 137.4 | 102.8  | 137.2 | 130.6 | 168.6  | 142.4  | 107.7 |
| 17.2   | 7.7   | 13.7  | 17.3   | 13.5  | 14.3  | 20.6   | 17.2   | 12.8  |
| 19.0   | 8.6   | 20.5  | 22.7   | 9.3   | 28.7  | 27.5   | 24.4   | 14.4  |
| 5.1    | 1.9   | 2.6   | 5.3    | 5.9   | 6.0   | 6.5    | 4.9    | 5.6   |
| 46.4   | 24.3  | 30.1  | 30.7   | 31.9  | 51.8  | 46.4   | 96.5   | 41.2  |
| 14.3   | 14.2  | 12.4  | 9.7    | 14.1  | 19.8  | 10.7   | 17.3   | 8.1   |
| 25.3   | 7.3   | 25.2  | 19.0   | 32.3  | 12.1  | 26.5   | 37.1   | 18.6  |
| 31.4   | 10.8  | 10.0  | 6.0    | 9.3   | 17.7  | 30.3   | 21.2   | 13.4  |
| 1.7    | 2.4   | 1.5   | 3.8    | 2.2   | 1.3   | 4.1    | 2.1    | 1.3   |
| 0.3    | 1.6   | 0.7   | 0.2    | 0.5   | 0.3   | 0.5    | 3.9    | 2.5   |
| 4.0    | 0.4   | 5.0   | 2.7    | 2.5   | 6.4   | 4.5    | 5.5    | 4.4   |
| 5.3    | 6.6   | 5.0   | 5.7    | 2.7   | 4.6   | 7.9    | 7.9    | 8.3   |

|       |       |       |       |       |       |       |       |       |
|-------|-------|-------|-------|-------|-------|-------|-------|-------|
| 4.9   | 1.9   | 9.0   | 1.3   | 3.4   | 7.2   | 1.1   | 2.9   | 11.3  |
| 50.8  | 64.8  | 76.1  | 71.2  | 79.7  | 73.9  | 97.7  | 127.6 | 83.8  |
| 2.2   | 1.3   | 1.9   | 3.0   | 1.6   | 2.6   | 0.7   | 2.7   | 1.5   |
| 0.6   | 2.4   | 1.0   | 0.4   | 3.3   | 0.8   | 3.0   | 3.2   | 4.9   |
| 6.4   | 5.6   | 4.3   | 8.2   | 13.2  | 12.7  | 15.0  | 10.8  | 7.7   |
| 247.4 | 137.3 | 123.3 | 125.6 | 144.4 | 126.8 | 159.2 | 166.5 | 144.0 |
| 0.4   | 0.7   | 0.6   | 0.6   | 1.4   | 0.4   | 1.2   | 0.6   | 0.5   |
| 0.6   | 0.4   | 2.8   | 0.4   | 0.4   | 0.4   | 0.3   | 0.4   | 0.5   |
| 14.4  | 11.0  | 15.1  | 14.8  | 18.3  | 13.9  | 17.3  | 21.6  | 23.5  |
| 53.5  | 34.4  | 23.9  | 28.6  | 35.3  | 27.6  | 44.3  | 37.6  | 28.3  |
| 20.8  | 19.4  | 14.7  | 17.1  | 14.8  | 19.3  | 25.2  | 32.2  | 13.3  |
| 20.7  | 0.6   | 0.7   | 0.7   | 0.8   | 1.4   | 2.4   | 4.2   | 1.5   |
| 0.9   | 2.8   | 1.4   | 1.5   | 1.3   | 0.9   | 1.4   | 1.4   | 1.7   |
| 0.3   | 3.1   | 3.5   | 2.2   | 7.6   | 0.4   | 5.0   | 1.5   | 4.3   |
| 1.2   | 0.8   | 0.7   | 0.3   | 0.7   | 1.6   | 3.9   | 0.5   | 2.2   |
| 45.7  | 56.3  | 63.7  | 77.6  | 74.9  | 66.6  | 104.2 | 91.1  | 62.6  |
| 1.3   | 1.3   | 2.5   | 0.9   | 3.6   | 0.7   | 2.5   | 10.1  | 6.9   |
| 7.8   | 18.7  | 1.6   | 9.7   | 5.0   | 16.6  | 3.5   | 15.9  | 3.1   |
| 23.8  | 16.9  | 12.4  | 20.8  | 15.9  | 19.6  | 23.7  | 29.2  | 17.9  |
| 113.2 | 83.4  | 86.4  | 80.2  | 88.0  | 88.1  | 97.2  | 111.2 | 69.4  |
| 6.6   | 7.9   | 7.6   | 13.7  | 8.9   | 8.7   | 16.1  | 16.4  | 11.0  |
| 0.3   | 0.3   | 0.3   | 0.2   | 0.3   | 0.2   | 0.4   | 0.4   | 0.3   |
| 1.9   | 3.6   | 0.7   | 4.3   | 1.9   | 1.1   | 2.1   | 3.8   | 3.4   |
| 8.3   | 4.8   | 11.7  | 7.0   | 9.7   | 13.3  | 9.5   | 9.8   | 8.6   |
| 4.1   | 6.7   | 5.3   | 7.2   | 1.5   | 1.0   | 1.1   | 4.6   | 0.9   |
| 2.9   | 0.9   | 1.4   | 1.1   | 2.0   | 1.3   | 3.0   | 2.8   | 5.2   |
| 1.2   | 0.7   | 0.8   | 2.1   | 1.7   | 1.8   | 0.7   | 1.8   | 0.7   |
| 46.0  | 49.3  | 40.7  | 40.7  | 62.2  | 53.0  | 66.4  | 71.7  | 59.7  |
| 15.3  | 8.7   | 16.1  | 13.0  | 20.5  | 15.5  | 21.8  | 22.1  | 10.8  |
| 33.0  | 33.5  | 33.4  | 31.4  | 37.2  | 37.5  | 51.5  | 45.6  | 26.9  |
| 244.6 | 153.2 | 215.7 | 218.8 | 227.4 | 267.5 | 443.3 | 406.3 | 211.0 |
| 1.9   | 1.0   | 3.6   | 4.8   | 6.2   | 5.7   | 7.2   | 7.4   | 1.0   |
| 14.1  | 9.6   | 8.0   | 8.2   | 7.0   | 8.9   | 15.3  | 8.7   | 12.7  |
| 21.6  | 33.9  | 36.6  | 38.1  | 33.8  | 23.9  | 56.7  | 45.6  | 37.7  |
| 6.2   | 6.9   | 7.6   | 8.8   | 8.7   | 8.8   | 12.7  | 11.4  | 12.5  |
| 3.6   | 1.2   | 5.7   | 3.8   | 1.1   | 0.9   | 1.4   | 1.6   | 1.6   |
| 4.9   | 1.9   | 2.8   | 6.6   | 9.3   | 9.0   | 4.2   | 7.9   | 2.0   |
| 1.4   | 1.3   | 1.2   | 1.6   | 2.6   | 0.9   | 1.2   | 3.1   | 0.6   |
| 1.9   | 3.8   | 0.9   | 5.4   | 11.2  | 0.8   | 1.1   | 2.0   | 10.7  |
| 7.0   | 6.1   | 6.3   | 3.9   | 6.9   | 3.3   | 10.4  | 9.2   | 8.4   |
| 102.1 | 63.4  | 45.3  | 75.8  | 77.5  | 68.1  | 73.3  | 93.9  | 84.7  |
| 1.1   | 5.7   | 4.0   | 8.2   | 10.9  | 1.8   | 1.5   | 1.7   | 5.8   |
| 21.2  | 13.6  | 15.9  | 15.2  | 8.5   | 15.7  | 16.6  | 23.8  | 17.6  |
| 0.5   | 0.5   | 0.5   | 0.4   | 0.4   | 0.5   | 1.1   | 0.7   | 0.6   |
| 6.2   | 5.4   | 3.9   | 1.2   | 6.7   | 1.9   | 7.4   | 4.2   | 3.0   |
| 63.2  | 36.3  | 34.0  | 44.6  | 48.0  | 39.4  | 64.9  | 79.9  | 53.9  |
| 9.3   | 6.0   | 10.1  | 11.2  | 10.3  | 9.1   | 23.4  | 17.0  | 16.5  |
| 561.6 | 446.6 | 537.1 | 528.8 | 523.1 | 518.5 | 722.6 | 733.5 | 641.1 |
| 13.4  | 18.3  | 8.7   | 19.0  | 8.3   | 13.3  | 18.7  | 21.5  | 16.0  |
| 0.5   | 0.3   | 0.7   | 0.3   | 0.7   | 0.5   | 0.6   | 0.4   | 0.6   |
| 1.9   | 1.3   | 0.8   | 1.0   | 1.1   | 0.8   | 1.0   | 1.2   | 1.6   |
| 1.5   | 0.7   | 4.8   | 1.0   | 2.6   | 1.8   | 1.5   | 7.2   | 1.8   |
| 7.0   | 9.0   | 8.1   | 10.7  | 7.0   | 7.3   | 9.8   | 10.2  | 9.2   |

|        |        |        |        |        |        |        |        |        |
|--------|--------|--------|--------|--------|--------|--------|--------|--------|
| 113.8  | 71.6   | 131.8  | 123.7  | 123.4  | 107.9  | 158.2  | 142.5  | 124.1  |
| 15.3   | 5.0    | 4.4    | 3.4    | 15.3   | 21.3   | 26.0   | 32.6   | 12.6   |
| 1.3    | 1.1    | 0.8    | 0.6    | 0.8    | 4.6    | 0.3    | 0.7    | 0.3    |
| 1.3    | 4.9    | 5.7    | 1.8    | 4.7    | 3.3    | 1.2    | 1.6    | 1.3    |
| 7.2    | 2.1    | 5.2    | 1.7    | 1.3    | 1.3    | 2.2    | 9.7    | 1.0    |
| 476.2  | 280.0  | 312.1  | 340.5  | 361.8  | 380.1  | 584.0  | 738.4  | 466.7  |
| 34.6   | 19.9   | 18.5   | 23.7   | 22.2   | 21.2   | 27.9   | 41.4   | 30.2   |
| 3.1    | 2.1    | 1.3    | 0.9    | 0.5    | 0.3    | 1.3    | 0.5    | 0.6    |
| 6.1    | 5.7    | 2.6    | 3.5    | 4.0    | 5.7    | 0.6    | 7.6    | 6.0    |
| 8.6    | 8.0    | 10.1   | 1.4    | 8.2    | 3.6    | 11.2   | 8.2    | 6.3    |
| 1.8    | 2.8    | 8.1    | 1.8    | 1.9    | 1.6    | 1.4    | 1.6    | 1.0    |
| 5.1    | 10.3   | 9.4    | 9.2    | 4.5    | 8.5    | 9.9    | 16.1   | 12.0   |
| 70.2   | 35.9   | 51.1   | 43.3   | 57.5   | 39.3   | 75.0   | 110.7  | 47.3   |
| 2.7    | 1.0    | 1.1    | 4.6    | 0.9    | 1.3    | 1.1    | 3.9    | 3.7    |
| 0.6    | 0.5    | 5.2    | 0.6    | 5.6    | 2.5    | 5.9    | 10.1   | 3.6    |
| 41.4   | 28.4   | 35.7   | 50.8   | 50.5   | 43.6   | 39.3   | 53.8   | 39.5   |
| 11.5   | 5.1    | 6.8    | 5.4    | 5.8    | 7.0    | 16.8   | 15.3   | 7.7    |
| 1.7    | 11.2   | 0.4    | 5.5    | 9.0    | 5.6    | 1.5    | 0.8    | 0.7    |
| 30.4   | 19.4   | 20.1   | 15.1   | 18.6   | 19.7   | 26.6   | 32.2   | 12.9   |
| 108.5  | 83.3   | 82.0   | 90.7   | 112.6  | 74.0   | 122.9  | 116.8  | 90.4   |
| 377.3  | 261.1  | 310.3  | 326.7  | 348.2  | 323.1  | 525.1  | 460.5  | 430.1  |
| 0.3    | 1.1    | 0.3    | 1.0    | 2.8    | 2.1    | 0.9    | 1.0    | 0.5    |
| 14.4   | 9.7    | 10.5   | 16.3   | 17.0   | 9.8    | 12.1   | 8.4    | 10.9   |
| 1.2    | 0.6    | 0.8    | 0.5    | 0.6    | 0.9    | 0.7    | 0.9    | 0.8    |
| 137.8  | 83.2   | 80.1   | 95.1   | 104.0  | 109.3  | 108.4  | 140.4  | 96.0   |
| 15.7   | 14.1   | 12.2   | 14.0   | 4.1    | 16.4   | 6.3    | 25.7   | 15.7   |
| 5.2    | 1.8    | 5.8    | 1.3    | 3.8    | 0.9    | 5.1    | 1.2    | 3.6    |
| 7.3    | 0.9    | 1.0    | 1.2    | 5.1    | 4.9    | 1.3    | 1.1    | 5.9    |
| 1.5    | 9.1    | 1.7    | 5.7    | 1.4    | 1.4    | 1.7    | 1.4    | 1.8    |
| 6.6    | 2.3    | 2.4    | 7.7    | 5.7    | 8.2    | 9.5    | 8.4    | 4.5    |
| 29.7   | 23.4   | 18.9   | 14.3   | 21.3   | 8.4    | 33.3   | 33.3   | 14.9   |
| 1.3    | 2.3    | 2.3    | 1.3    | 2.9    | 1.6    | 2.0    | 1.9    | 1.1    |
| 4.2    | 2.3    | 12.5   | 5.6    | 10.6   | 6.7    | 4.8    | 2.3    | 5.6    |
| 13.9   | 19.0   | 13.8   | 13.3   | 17.0   | 19.4   | 26.0   | 24.2   | 17.2   |
| 0.9    | 1.0    | 0.2    | 0.9    | 0.5    | 0.4    | 1.7    | 0.4    | 0.6    |
| 50.2   | 49.7   | 55.5   | 45.8   | 51.3   | 43.1   | 58.4   | 72.3   | 55.1   |
| 23.8   | 11.9   | 10.3   | 11.1   | 8.8    | 12.7   | 17.8   | 25.6   | 12.3   |
| 56.0   | 34.9   | 35.8   | 44.6   | 46.5   | 43.4   | 65.0   | 73.5   | 44.9   |
| 25.8   | 14.5   | 20.0   | 17.2   | 14.4   | 12.2   | 20.6   | 26.8   | 22.2   |
| 11.4   | 7.1    | 1.9    | 0.9    | 8.8    | 6.8    | 9.9    | 2.9    | 0.5    |
| 1.3    | 0.7    | 3.4    | 0.2    | 3.1    | 5.4    | 3.4    | 3.5    | 2.6    |
| 2161.7 | 1491.1 | 1753.8 | 1501.9 | 1774.6 | 1785.8 | 1734.5 | 1945.6 | 1389.0 |
| 21.8   | 22.2   | 11.8   | 11.6   | 34.4   | 17.1   | 21.8   | 26.8   | 10.3   |
| 73.6   | 46.3   | 60.0   | 56.8   | 66.2   | 57.8   | 90.9   | 97.9   | 58.6   |
| 3.0    | 2.2    | 0.7    | 0.7    | 0.6    | 0.6    | 0.4    | 0.4    | 0.4    |
| 36.9   | 21.6   | 31.8   | 25.0   | 25.7   | 29.3   | 46.8   | 51.5   | 25.8   |
| 91.3   | 40.2   | 56.7   | 51.5   | 58.7   | 57.4   | 79.1   | 97.1   | 71.9   |
| 7.9    | 12.0   | 9.8    | 12.8   | 9.5    | 16.3   | 12.7   | 16.1   | 14.9   |
| 2.4    | 7.5    | 6.5    | 8.4    | 9.2    | 3.9    | 8.1    | 9.4    | 3.4    |
| 7.1    | 2.0    | 6.2    | 5.7    | 1.2    | 6.3    | 1.7    | 3.7    | 3.4    |
| 4.7    | 7.5    | 2.7    | 5.1    | 11.3   | 1.9    | 7.3    | 5.0    | 10.8   |
| 4.1    | 4.7    | 14.0   | 8.4    | 11.2   | 10.8   | 13.6   | 15.2   | 11.8   |
| 0.4    | 0.4    | 1.0    | 0.8    | 0.2    | 0.4    | 0.1    | 0.5    | 0.4    |

|        |        |       |        |        |        |        |        |        |
|--------|--------|-------|--------|--------|--------|--------|--------|--------|
| 1.0    | 1.2    | 5.8   | 1.9    | 1.8    | 7.6    | 2.7    | 5.5    | 1.9    |
| 1.2    | 0.4    | 4.6   | 3.7    | 4.0    | 0.3    | 7.5    | 1.3    | 2.3    |
| 0.6    | 0.4    | 3.3   | 1.1    | 0.2    | 0.7    | 0.8    | 4.7    | 0.5    |
| 9.6    | 1.6    | 4.2   | 5.1    | 7.3    | 5.4    | 0.6    | 11.7   | 5.9    |
| 17.5   | 15.6   | 17.2  | 11.3   | 13.7   | 14.5   | 15.6   | 19.6   | 13.6   |
| 1.7    | 0.5    | 0.6   | 0.3    | 0.4    | 0.9    | 1.4    | 4.7    | 0.8    |
| 2.7    | 2.9    | 3.1   | 4.1    | 0.8    | 4.9    | 3.8    | 4.1    | 0.9    |
| 0.8    | 0.4    | 1.3   | 0.5    | 0.4    | 0.4    | 0.4    | 0.3    | 0.3    |
| 2.7    | 1.2    | 0.8   | 1.1    | 1.0    | 2.4    | 4.0    | 2.1    | 1.0    |
| 4.8    | 4.3    | 4.6   | 0.5    | 4.1    | 4.1    | 6.6    | 3.4    | 4.6    |
| 2.9    | 8.3    | 9.0   | 1.5    | 2.5    | 6.2    | 6.9    | 4.5    | 1.7    |
| 0.5    | 1.3    | 0.7   | 1.3    | 0.6    | 0.4    | 1.8    | 1.1    | 0.3    |
| 3.8    | 11.5   | 1.7   | 3.6    | 4.8    | 7.8    | 6.1    | 8.6    | 7.6    |
| 2.7    | 1.0    | 1.1   | 1.5    | 2.9    | 1.2    | 2.5    | 2.2    | 1.1    |
| 1.5    | 0.3    | 1.4   | 0.8    | 3.1    | 2.0    | 4.7    | 1.1    | 0.7    |
| 1.2    | 0.2    | 0.1   | 0.3    | 0.3    | 3.8    | 1.1    | 0.8    | 0.3    |
| 17.2   | 33.7   | 26.9  | 26.2   | 32.2   | 44.7   | 48.4   | 45.1   | 39.4   |
| 36.9   | 40.7   | 30.9  | 35.8   | 38.9   | 23.5   | 52.3   | 54.3   | 54.0   |
| 24.0   | 2.8    | 11.6  | 19.9   | 19.0   | 2.7    | 4.5    | 27.5   | 24.9   |
| 0.9    | 1.2    | 1.4   | 1.5    | 0.7    | 3.3    | 2.0    | 1.1    | 0.8    |
| 23.7   | 17.0   | 14.4  | 19.5   | 15.5   | 17.8   | 18.1   | 22.6   | 16.1   |
| 38.5   | 15.7   | 15.4  | 14.7   | 19.2   | 20.4   | 32.0   | 31.6   | 19.5   |
| 24.6   | 13.6   | 18.1  | 18.7   | 22.1   | 19.1   | 33.8   | 39.9   | 25.2   |
| 1.4    | 6.7    | 1.4   | 6.8    | 6.2    | 4.6    | 1.2    | 2.6    | 1.7    |
| 278.2  | 161.3  | 164.6 | 170.8  | 185.0  | 200.1  | 238.0  | 243.7  | 197.1  |
| 0.6    | 1.0    | 2.3   | 0.2    | 0.7    | 2.2    | 0.7    | 0.8    | 2.5    |
| 2.0    | 0.4    | 0.2   | 0.7    | 5.1    | 4.4    | 0.5    | 0.9    | 2.8    |
| 27.6   | 19.3   | 17.7  | 13.6   | 24.9   | 21.0   | 22.3   | 25.6   | 24.6   |
| 1.2    | 0.9    | 0.8   | 0.8    | 1.8    | 0.3    | 0.9    | 0.5    | 0.4    |
| 30.1   | 11.0   | 19.3  | 13.8   | 16.5   | 10.9   | 33.4   | 50.3   | 26.5   |
| 3.8    | 2.1    | 3.6   | 3.4    | 5.2    | 4.1    | 0.6    | 1.2    | 3.2    |
| 7.3    | 1.1    | 4.0   | 0.4    | 7.3    | 6.1    | 6.6    | 9.7    | 10.5   |
| 8.3    | 4.8    | 1.9   | 6.6    | 6.3    | 2.4    | 8.6    | 12.4   | 9.0    |
| 44.6   | 32.5   | 38.7  | 44.4   | 38.8   | 25.7   | 29.1   | 50.0   | 46.5   |
| 3.6    | 9.1    | 14.7  | 13.1   | 15.4   | 8.5    | 17.7   | 16.5   | 18.0   |
| 5.8    | 1.3    | 0.6   | 0.9    | 0.8    | 0.7    | 0.8    | 0.4    | 8.3    |
| 4.8    | 1.3    | 7.3   | 4.3    | 6.0    | 5.0    | 3.3    | 3.3    | 2.2    |
| 21.9   | 16.5   | 10.7  | 11.0   | 9.5    | 15.6   | 21.3   | 21.4   | 11.4   |
| 6.8    | 8.2    | 8.2   | 7.3    | 8.1    | 6.5    | 12.8   | 1.7    | 7.1    |
| 6.8    | 2.2    | 6.5   | 6.4    | 5.8    | 6.5    | 5.2    | 6.6    | 6.2    |
| 0.4    | 0.3    | 0.2   | 0.6    | 0.2    | 0.3    | 0.3    | 1.6    | 0.5    |
| 0.5    | 0.6    | 0.3   | 0.6    | 1.0    | 0.5    | 0.6    | 0.5    | 0.6    |
| 435.2  | 295.8  | 352.9 | 340.9  | 410.6  | 368.3  | 485.6  | 621.2  | 379.8  |
| 4.9    | 8.1    | 2.9   | 0.5    | 3.1    | 2.4    | 6.1    | 2.5    | 3.8    |
| 1.1    | 5.7    | 5.0   | 6.3    | 1.8    | 4.4    | 0.9    | 4.9    | 3.1    |
| 2.0    | 0.2    | 0.8   | 1.5    | 2.1    | 1.6    | 0.4    | 1.4    | 2.3    |
| 9.4    | 3.8    | 1.0   | 1.7    | 6.8    | 1.3    | 1.0    | 1.6    | 1.0    |
| 0.3    | 1.1    | 0.8   | 1.0    | 0.5    | 1.3    | 1.7    | 0.8    | 0.5    |
| 1.3    | 6.2    | 4.8   | 2.3    | 7.0    | 10.0   | 8.2    | 4.0    | 1.2    |
| 4.9    | 6.5    | 7.9   | 9.4    | 8.1    | 0.9    | 2.0    | 8.5    | 2.4    |
| 6.6    | 4.4    | 4.0   | 3.4    | 0.5    | 5.1    | 1.3    | 4.7    | 3.3    |
| 1269.9 | 1008.2 | 989.4 | 1088.4 | 1151.6 | 1117.2 | 1355.3 | 1588.4 | 1150.9 |
| 1.5    | 1.4    | 3.5   | 1.0    | 1.7    | 4.2    | 1.7    | 1.4    | 0.7    |

|       |       |       |       |       |       |       |       |       |
|-------|-------|-------|-------|-------|-------|-------|-------|-------|
| 78.4  | 44.8  | 71.0  | 62.0  | 65.5  | 71.5  | 76.8  | 77.3  | 71.0  |
| 2.8   | 1.6   | 0.6   | 0.2   | 1.1   | 4.4   | 3.8   | 1.7   | 2.3   |
| 28.0  | 24.0  | 19.5  | 19.7  | 26.9  | 24.5  | 17.4  | 26.1  | 23.2  |
| 15.3  | 5.1   | 3.9   | 5.5   | 4.8   | 5.1   | 13.0  | 15.1  | 12.5  |
| 0.4   | 0.2   | 1.9   | 0.9   | 0.8   | 0.5   | 5.6   | 6.8   | 3.1   |
| 9.2   | 9.8   | 8.0   | 6.8   | 15.1  | 2.4   | 9.4   | 2.1   | 15.5  |
| 3.1   | 3.6   | 7.5   | 3.5   | 5.1   | 5.8   | 10.7  | 6.1   | 6.5   |
| 1.6   | 0.5   | 0.4   | 0.2   | 0.2   | 0.5   | 0.4   | 0.3   | 1.7   |
| 1.7   | 1.7   | 2.2   | 1.2   | 1.0   | 1.8   | 1.7   | 2.3   | 1.2   |
| 3.8   | 2.0   | 7.3   | 2.0   | 1.1   | 1.4   | 3.6   | 2.0   | 0.6   |
| 7.1   | 8.1   | 7.3   | 4.7   | 10.1  | 2.2   | 1.3   | 0.5   | 1.2   |
| 4.0   | 5.8   | 6.2   | 9.4   | 4.2   | 8.0   | 9.7   | 7.9   | 2.6   |
| 205.1 | 125.2 | 157.7 | 177.4 | 152.3 | 132.8 | 252.3 | 264.4 | 224.0 |
| 1.6   | 7.7   | 7.8   | 5.7   | 6.0   | 6.3   | 2.7   | 6.1   | 2.4   |
| 1.1   | 1.1   | 1.3   | 1.0   | 2.8   | 1.3   | 1.7   | 3.3   | 1.6   |
| 586.8 | 370.9 | 414.9 | 506.8 | 407.4 | 446.6 | 595.7 | 685.6 | 506.6 |
| 2.5   | 1.1   | 2.3   | 1.4   | 1.2   | 3.3   | 2.3   | 1.9   | 1.8   |
| 9.2   | 7.3   | 5.9   | 6.0   | 5.3   | 3.7   | 10.2  | 15.4  | 10.6  |
| 0.9   | 4.6   | 2.8   | 1.1   | 1.0   | 4.4   | 0.6   | 2.9   | 1.8   |
| 1.1   | 2.7   | 1.2   | 2.0   | 4.9   | 4.2   | 4.6   | 4.5   | 2.7   |
| 4.8   | 4.8   | 5.6   | 4.5   | 3.9   | 1.8   | 13.4  | 2.5   | 8.3   |
| 7.3   | 11.6  | 9.9   | 5.3   | 10.3  | 8.9   | 10.7  | 11.4  | 8.1   |
| 1.5   | 6.3   | 5.7   | 2.4   | 7.3   | 5.4   | 0.5   | 3.0   | 3.1   |
| 1.2   | 1.1   | 0.7   | 1.2   | 0.8   | 0.8   | 0.5   | 0.9   | 0.5   |
| 23.0  | 13.0  | 13.3  | 15.0  | 16.0  | 15.6  | 19.8  | 22.3  | 11.9  |
| 4.2   | 8.0   | 11.2  | 5.8   | 13.1  | 6.8   | 5.6   | 18.6  | 2.3   |
| 5.1   | 5.2   | 0.5   | 0.8   | 4.0   | 5.1   | 2.0   | 0.9   | 5.9   |
| 4.8   | 1.0   | 0.8   | 1.3   | 0.8   | 3.8   | 1.0   | 7.9   | 4.9   |
| 79.6  | 140.9 | 113.2 | 111.6 | 155.6 | 136.6 | 177.3 | 261.7 | 251.4 |
| 40.4  | 33.4  | 31.0  | 24.5  | 42.2  | 28.5  | 52.0  | 44.7  | 24.8  |
| 6.9   | 2.7   | 4.2   | 2.1   | 1.1   | 3.0   | 6.9   | 4.8   | 6.6   |
| 1.4   | 4.0   | 4.8   | 5.0   | 3.9   | 3.2   | 4.0   | 5.7   | 4.0   |
| 7.2   | 9.7   | 1.2   | 5.9   | 1.7   | 1.9   | 5.7   | 7.1   | 5.1   |
| 7.1   | 3.8   | 2.1   | 3.4   | 2.8   | 1.5   | 1.2   | 1.0   | 0.9   |
| 1.3   | 0.4   | 0.6   | 7.2   | 5.8   | 1.3   | 7.4   | 6.2   | 4.7   |
| 62.6  | 27.9  | 34.7  | 44.0  | 39.0  | 35.8  | 53.1  | 71.6  | 34.9  |
| 3.7   | 1.2   | 4.5   | 2.4   | 0.7   | 2.9   | 0.5   | 2.8   | 0.4   |
| 2.2   | 4.1   | 4.5   | 0.8   | 2.7   | 0.3   | 3.5   | 1.3   | 5.5   |
| 0.5   | 0.6   | 0.4   | 0.3   | 0.4   | 0.4   | 0.2   | 0.4   | 0.3   |
| 7.0   | 1.2   | 0.3   | 0.5   | 1.0   | 5.5   | 2.7   | 1.7   | 2.9   |
| 97.0  | 57.4  | 68.4  | 85.6  | 55.9  | 73.9  | 83.1  | 119.7 | 105.8 |
| 23.8  | 13.8  | 8.8   | 15.4  | 14.4  | 12.3  | 14.2  | 20.9  | 11.4  |
| 180.2 | 87.7  | 81.8  | 78.5  | 122.9 | 108.3 | 182.8 | 263.7 | 155.5 |
| 55.5  | 26.4  | 45.8  | 38.7  | 40.7  | 45.6  | 62.0  | 71.6  | 45.5  |
| 3.7   | 0.0   | 0.3   | 0.1   | 0.0   | 0.1   | 0.6   | 0.3   | 1.0   |
| 192.5 | 107.5 | 195.2 | 131.0 | 149.5 | 207.7 | 210.6 | 207.7 | 163.5 |
| 73.3  | 44.4  | 40.1  | 45.4  | 41.3  | 49.0  | 66.1  | 119.3 | 64.9  |
| 36.6  | 19.6  | 18.0  | 19.5  | 16.7  | 22.1  | 34.6  | 30.1  | 16.5  |
| 16.0  | 5.1   | 1.5   | 6.1   | 8.3   | 10.4  | 9.0   | 12.0  | 10.3  |
| 471.1 | 261.5 | 294.6 | 295.3 | 349.3 | 361.3 | 469.2 | 503.8 | 333.6 |
| 21.8  | 17.4  | 15.2  | 21.3  | 20.6  | 16.8  | 40.8  | 44.4  | 37.6  |
| 23.5  | 12.9  | 10.9  | 18.9  | 13.4  | 12.2  | 18.8  | 27.6  | 14.8  |
| 10.5  | 5.9   | 5.6   | 9.6   | 9.2   | 15.8  | 7.6   | 10.1  | 10.0  |

|        |        |        |        |        |        |        |        |        |
|--------|--------|--------|--------|--------|--------|--------|--------|--------|
| 2.3    | 2.7    | 1.4    | 0.9    | 0.6    | 4.1    | 4.4    | 8.0    | 5.5    |
| 53.3   | 34.9   | 39.8   | 28.8   | 43.6   | 37.4   | 57.3   | 75.3   | 34.8   |
| 21.7   | 12.4   | 16.6   | 16.8   | 11.8   | 16.2   | 22.4   | 19.0   | 18.4   |
| 65.8   | 46.5   | 62.4   | 64.4   | 60.9   | 56.9   | 84.3   | 88.1   | 69.0   |
| 9.5    | 3.3    | 9.3    | 9.4    | 15.3   | 6.2    | 15.0   | 14.3   | 15.1   |
| 34.1   | 18.1   | 30.9   | 21.9   | 26.8   | 18.5   | 34.6   | 26.7   | 21.3   |
| 10.4   | 6.8    | 1.6    | 6.9    | 0.9    | 1.2    | 8.3    | 1.2    | 0.6    |
| 2.0    | 10.2   | 5.1    | 9.2    | 5.0    | 2.2    | 4.7    | 3.6    | 4.2    |
| 1.3    | 1.1    | 1.0    | 0.7    | 1.9    | 0.5    | 1.4    | 1.6    | 1.0    |
| 19.4   | 18.0   | 10.9   | 5.6    | 17.9   | 18.9   | 25.5   | 31.2   | 49.7   |
| 145.6  | 140.8  | 154.4  | 154.9  | 176.7  | 143.8  | 176.5  | 205.5  | 160.8  |
| 1.8    | 1.2    | 0.4    | 0.7    | 1.0    | 1.0    | 0.8    | 1.5    | 1.0    |
| 28.6   | 13.9   | 9.8    | 13.5   | 14.8   | 16.4   | 13.8   | 17.0   | 14.9   |
| 3.9    | 0.8    | 1.4    | 1.1    | 1.2    | 1.8    | 1.6    | 7.0    | 1.4    |
| 18.7   | 10.5   | 11.2   | 16.0   | 24.4   | 14.2   | 24.3   | 39.9   | 18.7   |
| 15.9   | 13.9   | 11.3   | 12.1   | 12.3   | 12.5   | 15.9   | 22.2   | 12.3   |
| 0.7    | 0.6    | 0.7    | 0.3    | 3.9    | 0.9    | 0.2    | 0.3    | 2.8    |
| 98.6   | 73.0   | 83.0   | 83.8   | 76.9   | 79.6   | 104.9  | 142.6  | 75.1   |
| 2443.6 | 2006.6 | 2015.6 | 2145.6 | 2292.8 | 2105.7 | 2570.9 | 2556.8 | 2282.3 |
| 4.8    | 3.0    | 4.5    | 0.3    | 3.9    | 4.1    | 5.5    | 8.8    | 3.4    |
| 7.4    | 8.4    | 5.3    | 5.6    | 1.4    | 8.4    | 5.3    | 4.6    | 1.3    |
| 10.1   | 4.2    | 1.4    | 5.6    | 2.5    | 5.2    | 2.3    | 5.5    | 3.3    |
| 27.7   | 17.7   | 16.6   | 24.3   | 19.0   | 18.2   | 18.9   | 34.6   | 28.8   |
| 5.1    | 3.1    | 12.9   | 9.4    | 2.0    | 13.4   | 3.0    | 3.1    | 6.3    |
| 105.7  | 34.9   | 57.6   | 45.1   | 40.3   | 64.0   | 68.3   | 77.2   | 34.8   |
| 18.4   | 14.8   | 14.0   | 14.2   | 2.4    | 17.7   | 10.7   | 21.2   | 2.7    |
| 29.0   | 16.4   | 23.7   | 25.3   | 28.9   | 19.3   | 27.6   | 29.6   | 21.6   |
| 9.2    | 6.6    | 8.8    | 4.6    | 14.0   | 7.8    | 9.8    | 16.2   | 10.8   |
| 25.4   | 17.6   | 19.8   | 28.6   | 20.2   | 18.7   | 21.1   | 34.6   | 31.4   |
| 18.8   | 12.4   | 18.1   | 8.0    | 9.0    | 12.9   | 24.2   | 22.6   | 11.6   |
| 17.6   | 19.0   | 18.4   | 18.8   | 15.1   | 24.5   | 29.0   | 33.9   | 18.4   |
| 31.3   | 14.4   | 12.2   | 19.4   | 15.8   | 22.3   | 19.5   | 45.0   | 24.7   |
| 8.2    | 13.2   | 9.5    | 10.8   | 16.0   | 7.0    | 14.9   | 11.8   | 18.1   |
| 1.6    | 1.4    | 2.5    | 4.2    | 0.5    | 0.4    | 3.7    | 3.1    | 2.8    |
| 43.9   | 21.8   | 29.8   | 24.1   | 25.5   | 29.9   | 37.8   | 44.4   | 39.6   |
| 1.3    | 0.5    | 0.6    | 1.9    | 0.7    | 0.5    | 2.6    | 0.8    | 0.6    |
| 0.8    | 4.3    | 1.5    | 3.7    | 3.8    | 4.0    | 1.4    | 7.4    | 6.3    |
| 81.4   | 40.1   | 54.9   | 55.3   | 53.7   | 54.0   | 77.7   | 70.1   | 68.3   |
| 25.3   | 41.0   | 32.2   | 35.4   | 28.4   | 24.9   | 40.9   | 55.0   | 34.4   |
| 0.6    | 1.8    | 3.4    | 0.4    | 0.7    | 0.4    | 2.3    | 1.2    | 2.7    |
| 274.5  | 125.9  | 123.7  | 147.5  | 154.1  | 149.0  | 188.1  | 289.8  | 134.9  |
| 871.8  | 735.6  | 774.4  | 864.0  | 921.9  | 740.3  | 1112.6 | 1032.3 | 984.9  |
| 98.5   | 61.5   | 60.0   | 73.6   | 74.9   | 85.0   | 95.8   | 99.5   | 101.0  |
| 1.7    | 2.0    | 2.1    | 1.3    | 0.4    | 0.1    | 0.4    | 0.7    | 0.3    |
| 18.6   | 21.9   | 22.0   | 19.8   | 21.4   | 13.5   | 33.8   | 24.0   | 19.9   |
| 28.6   | 30.5   | 30.9   | 40.3   | 28.0   | 28.2   | 65.4   | 47.7   | 57.9   |
| 80.1   | 49.7   | 37.1   | 38.0   | 39.6   | 37.8   | 66.8   | 96.8   | 85.6   |
| 0.3    | 1.8    | 2.4    | 0.5    | 0.4    | 3.3    | 5.1    | 6.2    | 2.1    |
| 5.0    | 9.1    | 2.0    | 1.1    | 8.2    | 7.5    | 9.3    | 7.9    | 0.9    |
| 39.2   | 27.4   | 24.4   | 28.8   | 26.9   | 28.8   | 47.2   | 59.4   | 45.0   |
| 0.7    | 0.7    | 1.1    | 1.5    | 1.1    | 0.7    | 0.3    | 0.8    | 1.1    |
| 20.9   | 12.5   | 14.8   | 12.4   | 12.2   | 12.7   | 22.4   | 21.1   | 15.6   |
| 60.2   | 45.0   | 56.3   | 46.5   | 53.1   | 37.2   | 73.2   | 58.2   | 51.9   |

|        |       |        |        |        |        |        |        |        |
|--------|-------|--------|--------|--------|--------|--------|--------|--------|
| 62.3   | 34.1  | 38.6   | 28.2   | 26.7   | 33.1   | 54.7   | 44.8   | 33.9   |
| 1.0    | 2.6   | 0.1    | 0.7    | 0.3    | 1.3    | 1.4    | 0.6    | 3.4    |
| 14.1   | 5.2   | 7.8    | 6.8    | 11.7   | 11.0   | 13.6   | 8.3    | 9.2    |
| 0.6    | 2.5   | 0.3    | 2.1    | 1.9    | 1.1    | 0.6    | 0.7    | 3.4    |
| 104.8  | 115.6 | 102.6  | 112.5  | 106.3  | 96.9   | 132.0  | 149.9  | 106.4  |
| 26.8   | 18.8  | 25.3   | 18.2   | 21.3   | 28.3   | 39.1   | 56.0   | 29.4   |
| 280.9  | 204.7 | 223.1  | 235.8  | 233.3  | 222.4  | 347.5  | 321.6  | 234.8  |
| 20.2   | 9.1   | 2.6    | 7.2    | 6.4    | 9.6    | 6.4    | 20.1   | 8.6    |
| 98.2   | 61.7  | 65.6   | 86.2   | 60.0   | 76.7   | 103.2  | 111.6  | 72.7   |
| 10.6   | 10.8  | 10.0   | 8.1    | 9.6    | 5.3    | 11.9   | 19.9   | 8.0    |
| 19.5   | 9.3   | 12.4   | 16.8   | 15.6   | 11.7   | 19.2   | 21.7   | 16.3   |
| 114.0  | 51.3  | 65.3   | 56.1   | 64.4   | 56.9   | 87.4   | 77.8   | 48.5   |
| 88.6   | 54.2  | 55.0   | 74.2   | 63.3   | 58.4   | 85.9   | 88.8   | 80.2   |
| 5.2    | 5.2   | 1.3    | 0.7    | 2.8    | 1.1    | 3.2    | 4.6    | 1.2    |
| 139.5  | 135.5 | 131.3  | 131.2  | 135.8  | 149.0  | 170.2  | 183.8  | 159.6  |
| 1165.8 | 934.6 | 1004.9 | 1062.0 | 1131.7 | 1116.5 | 1355.9 | 1447.5 | 1003.5 |
| 25.7   | 23.2  | 24.7   | 34.5   | 22.1   | 24.1   | 28.9   | 39.4   | 26.1   |
| 24.9   | 21.6  | 23.1   | 25.9   | 31.0   | 33.9   | 48.0   | 49.0   | 27.3   |
| 1.0    | 2.1   | 6.3    | 2.4    | 7.1    | 1.8    | 3.7    | 12.3   | 0.8    |
| 49.4   | 15.1  | 28.0   | 21.2   | 27.0   | 22.9   | 42.2   | 52.7   | 23.6   |
| 21.2   | 13.7  | 23.5   | 20.1   | 18.7   | 17.4   | 28.0   | 32.0   | 20.6   |
| 56.4   | 45.7  | 36.9   | 37.3   | 37.8   | 26.3   | 39.3   | 40.4   | 38.0   |
| 56.1   | 36.5  | 39.8   | 50.6   | 48.7   | 50.6   | 82.2   | 71.0   | 43.1   |
| 11.0   | 13.0  | 20.3   | 11.6   | 12.6   | 16.0   | 16.2   | 25.2   | 13.6   |
| 60.3   | 52.0  | 36.0   | 50.2   | 46.8   | 42.5   | 71.6   | 54.3   | 54.6   |
| 8.7    | 8.8   | 0.3    | 4.4    | 7.1    | 7.2    | 10.0   | 6.9    | 3.7    |
| 5.7    | 4.5   | 9.1    | 6.4    | 9.6    | 4.4    | 14.6   | 20.8   | 6.1    |
| 242.6  | 250.7 | 303.3  | 245.1  | 263.1  | 281.8  | 338.2  | 391.6  | 221.7  |
| 15.0   | 2.7   | 3.3    | 2.9    | 7.9    | 6.3    | 2.2    | 16.5   | 12.9   |
| 51.6   | 48.7  | 31.0   | 76.4   | 62.1   | 44.6   | 59.0   | 76.6   | 72.7   |
| 114.1  | 49.3  | 58.5   | 56.5   | 57.2   | 54.2   | 59.8   | 66.6   | 42.4   |
| 1.7    | 6.0   | 1.0    | 3.9    | 2.5    | 11.6   | 7.8    | 7.7    | 1.9    |
| 20.7   | 8.1   | 19.9   | 14.6   | 13.2   | 14.9   | 30.0   | 35.6   | 21.2   |
| 35.5   | 16.3  | 20.3   | 13.1   | 18.2   | 14.1   | 21.8   | 29.4   | 14.8   |
| 99.3   | 80.5  | 72.9   | 96.6   | 115.4  | 73.1   | 111.1  | 114.6  | 95.0   |
| 20.7   | 1.5   | 1.1    | 1.6    | 10.3   | 9.2    | 19.9   | 28.4   | 1.6    |
| 3.4    | 1.7   | 8.5    | 6.0    | 9.5    | 10.7   | 7.7    | 11.0   | 7.9    |
| 18.9   | 12.8  | 9.4    | 15.6   | 10.1   | 10.9   | 19.2   | 15.6   | 16.2   |
| 33.6   | 24.1  | 27.8   | 19.0   | 18.9   | 26.4   | 40.6   | 42.4   | 23.6   |
| 3.1    | 0.8   | 0.5    | 0.3    | 1.3    | 3.4    | 3.1    | 0.8    | 5.1    |
| 12.4   | 8.0   | 4.6    | 4.9    | 10.0   | 6.8    | 7.7    | 11.0   | 1.3    |
| 30.3   | 10.9  | 13.0   | 8.1    | 11.9   | 12.0   | 8.5    | 6.6    | 11.1   |
| 11.0   | 7.7   | 5.4    | 6.8    | 8.6    | 2.9    | 5.2    | 12.2   | 6.0    |
| 139.9  | 98.4  | 97.8   | 111.8  | 97.1   | 109.5  | 157.3  | 192.0  | 124.2  |
| 78.1   | 34.2  | 47.5   | 45.8   | 58.4   | 52.6   | 79.8   | 133.7  | 66.1   |
| 8.1    | 4.8   | 10.5   | 8.4    | 13.1   | 5.3    | 10.2   | 13.3   | 8.3    |
| 3.8    | 0.9   | 4.9    | 1.0    | 1.9    | 1.0    | 2.4    | 1.9    | 1.2    |
| 9.3    | 5.5   | 10.6   | 8.0    | 5.8    | 5.3    | 8.8    | 15.7   | 9.3    |
| 0.2    | 0.7   | 0.2    | 0.9    | 0.2    | 0.8    | 2.9    | 3.3    | 1.2    |
| 248.0  | 165.3 | 202.2  | 198.7  | 205.8  | 184.2  | 249.7  | 279.2  | 201.6  |
| 4.8    | 7.1   | 6.9    | 10.3   | 6.3    | 5.2    | 6.2    | 8.5    | 3.2    |
| 52.4   | 19.6  | 36.5   | 26.2   | 30.4   | 29.5   | 36.5   | 52.9   | 34.2   |
| 3.7    | 10.5  | 17.7   | 18.3   | 13.9   | 11.4   | 18.5   | 26.4   | 13.0   |

|       |       |       |       |       |       |        |        |        |
|-------|-------|-------|-------|-------|-------|--------|--------|--------|
| 11.6  | 4.5   | 10.5  | 8.5   | 13.9  | 14.7  | 13.1   | 13.3   | 7.3    |
| 2.7   | 4.8   | 4.5   | 3.1   | 3.0   | 4.5   | 6.4    | 7.8    | 4.4    |
| 1.0   | 1.1   | 0.9   | 1.4   | 1.1   | 0.5   | 0.8    | 1.2    | 0.7    |
| 3.8   | 4.4   | 5.3   | 4.0   | 1.6   | 1.0   | 6.6    | 2.5    | 7.3    |
| 59.3  | 46.8  | 37.2  | 42.0  | 50.7  | 36.9  | 61.9   | 63.8   | 44.0   |
| 24.9  | 29.9  | 23.0  | 26.5  | 25.1  | 21.8  | 28.7   | 29.5   | 24.3   |
| 5.1   | 0.5   | 0.8   | 1.0   | 3.5   | 2.1   | 1.0    | 1.8    | 0.8    |
| 0.6   | 4.0   | 3.0   | 0.3   | 3.6   | 0.4   | 0.7    | 0.7    | 0.7    |
| 27.4  | 13.1  | 22.8  | 19.7  | 16.0  | 18.6  | 24.2   | 31.0   | 19.8   |
| 168.6 | 188.0 | 161.9 | 140.3 | 139.2 | 136.9 | 169.5  | 211.3  | 181.0  |
| 30.6  | 21.6  | 17.1  | 23.3  | 18.1  | 13.8  | 27.0   | 47.5   | 24.8   |
| 10.0  | 2.1   | 11.6  | 6.5   | 4.1   | 4.4   | 10.0   | 9.3    | 7.6    |
| 14.6  | 4.7   | 6.2   | 4.5   | 7.1   | 6.8   | 9.1    | 13.7   | 13.2   |
| 2.0   | 1.0   | 2.1   | 2.3   | 2.0   | 1.3   | 1.7    | 2.7    | 2.5    |
| 763.5 | 524.2 | 560.5 | 599.3 | 584.3 | 663.1 | 717.5  | 912.9  | 515.2  |
| 4.7   | 0.3   | 0.6   | 4.1   | 3.8   | 2.9   | 7.4    | 7.5    | 3.9    |
| 6.8   | 7.4   | 3.8   | 1.0   | 6.0   | 1.3   | 4.2    | 7.1    | 4.9    |
| 20.9  | 18.0  | 22.0  | 19.6  | 21.0  | 23.7  | 28.4   | 28.4   | 23.7   |
| 10.1  | 2.5   | 6.8   | 3.1   | 4.1   | 5.0   | 7.6    | 14.1   | 3.3    |
| 241.4 | 136.6 | 157.4 | 157.6 | 167.9 | 173.1 | 227.8  | 260.3  | 219.5  |
| 12.5  | 8.7   | 11.4  | 6.7   | 4.6   | 11.5  | 12.2   | 15.3   | 8.5    |
| 7.6   | 0.6   | 4.3   | 4.0   | 5.6   | 0.8   | 4.5    | 5.8    | 5.3    |
| 0.6   | 2.3   | 1.1   | 1.2   | 0.6   | 1.5   | 1.4    | 2.2    | 7.8    |
| 21.0  | 11.5  | 22.4  | 10.7  | 23.1  | 13.8  | 18.6   | 20.0   | 11.8   |
| 3.0   | 0.9   | 1.4   | 1.8   | 2.4   | 1.1   | 1.4    | 3.1    | 0.7    |
| 949.4 | 533.7 | 444.9 | 565.2 | 979.2 | 928.0 | 1529.6 | 1621.2 | 1417.5 |
| 101.5 | 35.0  | 47.4  | 50.9  | 63.9  | 43.0  | 83.5   | 122.1  | 65.0   |
| 13.1  | 4.2   | 4.1   | 4.0   | 7.3   | 13.8  | 3.5    | 6.7    | 3.1    |
| 0.6   | 0.5   | 0.7   | 0.6   | 0.5   | 0.7   | 2.2    | 1.9    | 1.5    |
| 39.0  | 18.5  | 25.1  | 18.8  | 24.6  | 22.2  | 38.2   | 47.4   | 29.5   |
| 95.1  | 56.8  | 62.6  | 60.6  | 71.3  | 63.0  | 83.5   | 88.6   | 64.5   |
| 13.7  | 5.9   | 3.4   | 12.1  | 10.7  | 7.4   | 12.6   | 12.8   | 11.5   |
| 7.3   | 7.1   | 4.0   | 2.0   | 8.8   | 4.5   | 10.0   | 9.6    | 6.9    |
| 7.6   | 2.1   | 2.7   | 4.2   | 2.0   | 0.5   | 7.5    | 8.5    | 4.1    |
| 6.3   | 6.6   | 6.8   | 0.9   | 7.3   | 0.5   | 6.4    | 7.9    | 1.1    |
| 0.9   | 1.0   | 0.5   | 1.0   | 4.0   | 1.7   | 5.2    | 6.8    | 6.0    |
| 48.1  | 44.7  | 41.7  | 38.8  | 44.6  | 42.0  | 65.5   | 82.4   | 53.7   |
| 22.3  | 11.8  | 14.7  | 18.2  | 20.8  | 17.0  | 22.5   | 30.4   | 14.4   |
| 5.0   | 6.4   | 3.5   | 3.3   | 0.4   | 5.0   | 8.5    | 10.4   | 7.3    |
| 5.8   | 4.0   | 1.7   | 3.2   | 1.1   | 3.6   | 4.0    | 1.6    | 3.6    |
| 30.3  | 18.4  | 15.1  | 26.4  | 27.9  | 19.8  | 29.0   | 54.1   | 27.6   |
| 4.2   | 2.6   | 0.4   | 1.7   | 0.7   | 0.3   | 5.8    | 1.9    | 0.6    |
| 1.3   | 4.6   | 1.2   | 0.5   | 4.5   | 0.9   | 1.1    | 1.7    | 2.0    |
| 2.2   | 7.8   | 16.4  | 11.3  | 1.8   | 3.9   | 11.8   | 10.1   | 11.4   |
| 33.7  | 11.7  | 17.1  | 12.8  | 16.9  | 23.1  | 18.3   | 33.7   | 17.7   |
| 1.4   | 6.0   | 2.0   | 1.0   | 6.1   | 1.9   | 1.0    | 1.7    | 5.9    |
| 1.8   | 0.8   | 0.7   | 0.5   | 1.4   | 1.5   | 0.8    | 1.1    | 0.9    |
| 6.0   | 0.6   | 0.8   | 1.9   | 0.1   | 0.8   | 3.6    | 2.3    | 1.2    |
| 1.1   | 1.0   | 0.8   | 1.0   | 0.7   | 1.4   | 1.4    | 1.3    | 0.7    |
| 4.4   | 1.0   | 3.2   | 6.5   | 1.6   | 3.5   | 3.5    | 6.6    | 2.6    |
| 8.8   | 7.6   | 1.8   | 7.1   | 2.0   | 5.8   | 7.9    | 8.2    | 5.5    |
| 0.7   | 0.3   | 0.8   | 0.9   | 0.7   | 1.0   | 4.9    | 1.5    | 0.4    |
| 45.4  | 19.8  | 37.9  | 25.5  | 29.6  | 38.4  | 31.5   | 33.6   | 48.5   |



|       |       |       |       |       |       |       |       |       |
|-------|-------|-------|-------|-------|-------|-------|-------|-------|
| 3.9   | 2.3   | 0.2   | 0.1   | 1.6   | 0.5   | 4.2   | 0.3   | 0.2   |
| 31.1  | 22.1  | 20.5  | 27.6  | 26.5  | 16.7  | 40.1  | 36.2  | 39.9  |
| 26.9  | 16.3  | 12.5  | 21.4  | 20.1  | 18.2  | 20.8  | 36.5  | 15.4  |
| 0.5   | 0.5   | 0.6   | 0.5   | 0.7   | 0.5   | 0.7   | 1.2   | 0.6   |
| 8.4   | 8.9   | 9.6   | 6.0   | 6.2   | 6.1   | 16.4  | 10.8  | 7.6   |
| 5.2   | 3.3   | 0.7   | 5.1   | 2.0   | 3.8   | 4.6   | 5.6   | 6.6   |
| 180.0 | 81.9  | 84.1  | 102.3 | 104.9 | 108.1 | 162.9 | 240.7 | 181.3 |
| 4.8   | 7.1   | 2.2   | 4.2   | 9.8   | 13.4  | 7.3   | 13.3  | 6.2   |
| 0.2   | 0.4   | 0.4   | 3.0   | 1.1   | 3.4   | 2.6   | 5.0   | 1.6   |
| 23.8  | 23.9  | 23.3  | 28.9  | 29.7  | 17.5  | 33.5  | 36.5  | 38.6  |
| 1.4   | 4.6   | 3.8   | 9.2   | 9.0   | 5.5   | 4.2   | 8.3   | 10.5  |
| 4.5   | 1.6   | 1.8   | 1.8   | 1.6   | 3.1   | 9.7   | 2.8   | 6.3   |
| 4.2   | 1.5   | 4.3   | 0.3   | 0.7   | 2.0   | 6.4   | 0.6   | 5.4   |
| 0.3   | 3.9   | 0.9   | 3.7   | 6.9   | 3.5   | 1.3   | 8.4   | 1.0   |
| 60.6  | 40.0  | 45.7  | 41.4  | 40.9  | 42.3  | 56.9  | 61.6  | 52.3  |
| 8.8   | 14.2  | 8.9   | 4.5   | 7.3   | 13.9  | 11.5  | 18.4  | 6.8   |
| 139.7 | 56.1  | 81.5  | 63.8  | 76.8  | 78.1  | 102.4 | 135.2 | 75.4  |
| 9.8   | 12.0  | 1.8   | 1.0   | 2.1   | 4.6   | 2.6   | 8.3   | 1.9   |
| 6.0   | 8.6   | 4.3   | 5.3   | 1.4   | 6.5   | 11.1  | 7.3   | 8.2   |
| 6.7   | 4.1   | 7.9   | 6.7   | 11.9  | 7.3   | 13.1  | 9.9   | 8.7   |
| 61.0  | 32.0  | 31.9  | 39.9  | 40.8  | 40.9  | 55.0  | 59.7  | 44.3  |
| 26.7  | 33.1  | 24.5  | 28.6  | 39.3  | 26.6  | 58.2  | 50.6  | 34.3  |
| 11.8  | 1.6   | 4.6   | 10.1  | 8.1   | 6.4   | 5.0   | 9.9   | 11.0  |
| 9.8   | 1.1   | 2.7   | 1.3   | 7.8   | 1.6   | 13.9  | 10.2  | 3.8   |
| 456.4 | 370.4 | 404.5 | 427.8 | 443.4 | 402.2 | 511.9 | 577.8 | 432.4 |
| 0.3   | 0.3   | 0.5   | 1.6   | 0.4   | 0.5   | 0.4   | 0.5   | 0.3   |
| 40.3  | 38.8  | 33.7  | 35.5  | 35.8  | 30.4  | 44.8  | 56.0  | 39.6  |
| 0.3   | 0.3   | 0.9   | 1.6   | 0.3   | 0.2   | 0.4   | 0.5   | 3.3   |
| 72.4  | 46.9  | 47.3  | 50.6  | 55.2  | 58.5  | 60.1  | 84.8  | 47.6  |
| 2.8   | 0.8   | 3.9   | 4.2   | 4.8   | 0.2   | 8.3   | 1.2   | 2.4   |
| 2.8   | 2.7   | 1.2   | 1.5   | 11.1  | 3.9   | 1.5   | 3.2   | 1.9   |
| 8.7   | 6.3   | 8.9   | 15.3  | 10.6  | 13.2  | 18.0  | 13.3  | 12.8  |
| 10.0  | 1.3   | 0.8   | 1.5   | 3.1   | 2.9   | 1.3   | 6.1   | 2.6   |
| 3.0   | 0.2   | 2.7   | 2.0   | 2.6   | 3.1   | 2.7   | 3.8   | 3.5   |
| 0.9   | 0.3   | 3.7   | 3.3   | 1.9   | 0.9   | 0.9   | 3.7   | 0.3   |
| 327.3 | 236.9 | 263.6 | 284.7 | 273.3 | 268.9 | 372.9 | 392.4 | 281.4 |
| 0.9   | 0.7   | 0.6   | 0.9   | 0.6   | 0.9   | 0.5   | 1.1   | 0.6   |
| 6.3   | 4.8   | 1.3   | 8.6   | 8.1   | 1.0   | 8.5   | 3.5   | 7.2   |
| 3.4   | 12.1  | 17.7  | 6.5   | 11.1  | 14.4  | 9.8   | 14.9  | 7.6   |
| 3.6   | 4.7   | 0.9   | 4.0   | 1.9   | 3.5   | 3.6   | 6.8   | 3.4   |
| 65.1  | 47.4  | 56.6  | 64.3  | 49.8  | 52.7  | 61.5  | 72.5  | 56.0  |
| 86.2  | 47.0  | 47.3  | 72.8  | 40.8  | 54.2  | 71.5  | 134.5 | 44.8  |
| 25.4  | 18.6  | 20.1  | 14.2  | 16.2  | 20.4  | 33.4  | 29.4  | 25.0  |
| 1.6   | 0.3   | 1.2   | 0.9   | 2.1   | 0.9   | 0.4   | 0.8   | 0.5   |
| 10.2  | 2.7   | 5.3   | 8.9   | 7.0   | 8.5   | 11.0  | 22.5  | 11.6  |
| 4.4   | 3.7   | 2.3   | 1.5   | 4.3   | 3.1   | 3.3   | 6.0   | 1.2   |
| 146.4 | 66.7  | 113.6 | 125.8 | 99.3  | 119.6 | 152.7 | 186.3 | 103.7 |
| 36.9  | 13.0  | 16.0  | 14.1  | 28.4  | 17.7  | 32.0  | 44.6  | 24.5  |
| 18.9  | 12.8  | 12.5  | 6.4   | 12.5  | 18.3  | 28.0  | 19.6  | 22.2  |
| 6.8   | 4.2   | 1.9   | 3.6   | 2.7   | 4.3   | 6.9   | 10.9  | 2.1   |
| 73.7  | 65.2  | 63.8  | 62.6  | 44.3  | 26.0  | 62.1  | 87.6  | 53.5  |
| 26.8  | 26.8  | 27.5  | 31.1  | 37.9  | 13.8  | 25.6  | 48.6  | 26.5  |
| 31.7  | 18.9  | 31.2  | 28.7  | 27.8  | 25.1  | 36.4  | 49.4  | 37.5  |

|       |       |       |       |       |       |       |        |       |
|-------|-------|-------|-------|-------|-------|-------|--------|-------|
| 883.7 | 620.6 | 782.2 | 749.4 | 890.8 | 925.9 | 973.4 | 1125.1 | 741.9 |
| 5.1   | 6.2   | 6.1   | 9.7   | 4.8   | 9.0   | 14.2  | 8.6    | 11.8  |
| 2.4   | 0.8   | 0.4   | 0.7   | 2.4   | 0.8   | 0.9   | 0.9    | 0.4   |
| 22.2  | 8.7   | 18.4  | 25.3  | 13.2  | 12.2  | 26.8  | 17.4   | 17.6  |
| 0.5   | 1.0   | 3.0   | 0.9   | 0.5   | 0.8   | 4.8   | 1.1    | 1.5   |
| 0.4   | 0.3   | 0.1   | 0.1   | 0.2   | 0.4   | 4.0   | 0.4    | 0.1   |
| 2.2   | 8.3   | 4.2   | 1.1   | 8.9   | 9.9   | 13.2  | 9.5    | 9.4   |
| 1.5   | 9.8   | 4.6   | 2.7   | 8.7   | 5.1   | 10.1  | 11.9   | 5.8   |
| 5.2   | 9.1   | 3.9   | 4.4   | 0.4   | 3.7   | 9.3   | 0.9    | 5.5   |
| 2.1   | 0.7   | 8.4   | 0.5   | 1.6   | 1.4   | 5.3   | 3.6    | 2.1   |
| 45.7  | 23.5  | 37.9  | 48.4  | 32.5  | 42.2  | 46.6  | 48.1   | 42.0  |
| 9.8   | 11.3  | 4.3   | 10.9  | 9.9   | 7.3   | 9.2   | 10.5   | 9.2   |
| 54.7  | 36.8  | 50.3  | 47.8  | 39.1  | 37.0  | 51.6  | 62.5   | 54.2  |
| 32.3  | 22.3  | 26.9  | 26.9  | 24.3  | 29.7  | 42.8  | 48.4   | 24.5  |
| 2.1   | 9.5   | 3.2   | 6.1   | 3.8   | 7.2   | 10.3  | 8.8    | 4.7   |
| 0.4   | 5.8   | 3.3   | 3.7   | 3.4   | 2.1   | 4.1   | 7.0    | 2.5   |
| 1.5   | 1.3   | 3.0   | 2.4   | 2.6   | 1.0   | 2.4   | 1.6    | 1.6   |
| 1.9   | 3.3   | 4.6   | 0.3   | 2.7   | 3.5   | 2.1   | 4.3    | 3.3   |
| 18.6  | 14.5  | 3.5   | 14.0  | 14.9  | 9.7   | 20.6  | 28.2   | 10.0  |
| 35.0  | 30.4  | 23.1  | 28.4  | 24.8  | 29.1  | 30.5  | 36.2   | 16.8  |
| 32.3  | 32.2  | 26.1  | 33.7  | 31.9  | 31.3  | 37.3  | 54.1   | 70.4  |
| 3.5   | 4.0   | 14.9  | 13.1  | 3.5   | 3.0   | 5.8   | 5.1    | 11.5  |
| 5.1   | 2.0   | 4.7   | 3.4   | 3.4   | 1.6   | 0.7   | 1.3    | 4.2   |
| 3.0   | 2.0   | 1.0   | 2.5   | 1.1   | 1.2   | 4.5   | 7.0    | 10.2  |
| 18.5  | 16.6  | 8.2   | 12.8  | 13.4  | 13.8  | 19.7  | 31.2   | 13.3  |
| 12.4  | 9.3   | 9.3   | 10.8  | 2.8   | 3.3   | 1.4   | 1.6    | 6.7   |
| 35.3  | 26.0  | 26.2  | 25.4  | 25.2  | 19.8  | 41.4  | 37.7   | 29.8  |
| 47.3  | 26.7  | 26.6  | 32.2  | 25.8  | 21.6  | 35.7  | 41.9   | 25.3  |
| 19.7  | 9.7   | 13.3  | 18.4  | 17.8  | 12.3  | 17.2  | 24.3   | 18.2  |
| 297.3 | 172.6 | 233.0 | 223.3 | 222.3 | 231.9 | 295.8 | 365.3  | 226.7 |
| 0.7   | 0.5   | 0.9   | 2.6   | 0.2   | 2.3   | 2.7   | 4.3    | 2.4   |
| 1.5   | 0.9   | 2.8   | 3.0   | 5.0   | 2.8   | 5.3   | 3.7    | 3.8   |
| 0.9   | 2.3   | 3.2   | 0.2   | 0.3   | 2.1   | 0.6   | 0.1    | 2.2   |
| 10.3  | 8.0   | 5.9   | 3.0   | 5.5   | 6.6   | 3.9   | 4.8    | 9.7   |
| 6.4   | 1.8   | 8.5   | 1.6   | 7.3   | 6.6   | 9.7   | 2.8    | 1.2   |
| 10.8  | 9.7   | 4.5   | 6.3   | 8.7   | 3.3   | 9.5   | 11.0   | 9.1   |
| 12.7  | 8.8   | 6.7   | 5.2   | 9.0   | 7.8   | 8.0   | 7.1    | 11.3  |
| 251.4 | 126.6 | 160.9 | 177.5 | 176.8 | 197.3 | 243.5 | 282.1  | 199.0 |
| 1.0   | 1.7   | 0.9   | 3.9   | 2.6   | 0.5   | 0.6   | 4.7    | 1.6   |
| 3.7   | 1.9   | 5.2   | 3.6   | 1.3   | 2.2   | 1.5   | 3.3    | 0.4   |
| 8.3   | 7.2   | 7.1   | 6.2   | 1.3   | 6.0   | 6.8   | 9.9    | 4.6   |
| 14.8  | 19.8  | 11.9  | 13.4  | 17.0  | 10.4  | 14.3  | 18.3   | 15.7  |
| 32.4  | 19.0  | 21.8  | 28.9  | 30.8  | 19.3  | 29.1  | 29.1   | 28.5  |
| 13.2  | 9.7   | 5.5   | 5.8   | 1.7   | 4.4   | 10.9  | 4.3    | 4.6   |
| 6.5   | 6.7   | 5.1   | 1.5   | 1.6   | 1.3   | 2.8   | 2.1    | 3.0   |
| 6.3   | 5.0   | 8.8   | 2.9   | 1.5   | 7.3   | 3.1   | 9.0    | 7.2   |
| 8.5   | 1.6   | 1.1   | 1.7   | 10.6  | 1.6   | 1.2   | 7.5    | 3.9   |
| 8.3   | 0.3   | 3.4   | 4.5   | 0.6   | 1.8   | 5.1   | 3.4    | 3.5   |
| 0.4   | 0.8   | 0.8   | 0.5   | 1.3   | 0.4   | 0.8   | 0.8    | 0.8   |
| 30.7  | 25.3  | 22.8  | 38.4  | 32.8  | 26.9  | 37.0  | 50.4   | 32.9  |
| 5.0   | 0.8   | 0.9   | 0.9   | 2.1   | 4.6   | 4.1   | 7.4    | 2.0   |
| 7.7   | 6.3   | 9.6   | 9.8   | 10.2  | 5.1   | 13.5  | 11.6   | 5.8   |
| 31.0  | 26.0  | 10.8  | 17.2  | 21.7  | 14.1  | 32.7  | 41.4   | 27.8  |

|        |        |        |        |        |        |        |        |        |
|--------|--------|--------|--------|--------|--------|--------|--------|--------|
| 4.8    | 7.2    | 3.9    | 9.4    | 2.7    | 8.2    | 6.0    | 7.4    | 3.7    |
| 6.3    | 3.0    | 0.5    | 3.3    | 7.4    | 4.3    | 5.7    | 4.0    | 5.2    |
| 94.7   | 60.9   | 79.5   | 69.5   | 93.7   | 74.2   | 78.8   | 102.2  | 63.0   |
| 1423.8 | 1859.0 | 1880.2 | 2024.1 | 1850.5 | 2055.2 | 1856.5 | 2202.4 | 1385.5 |
| 3.0    | 1.9    | 1.0    | 1.8    | 1.6    | 7.0    | 2.6    | 2.5    | 1.9    |
| 3.7    | 0.8    | 4.7    | 3.2    | 1.2    | 4.9    | 7.0    | 10.5   | 8.9    |
| 137.8  | 60.2   | 83.0   | 87.8   | 82.3   | 85.0   | 143.2  | 155.8  | 90.8   |
| 3.4    | 3.8    | 9.0    | 3.6    | 5.1    | 7.1    | 8.5    | 13.4   | 9.0    |
| 17.2   | 12.0   | 13.0   | 8.6    | 15.0   | 13.3   | 30.8   | 37.3   | 31.4   |
| 2.5    | 9.4    | 7.5    | 15.7   | 5.7    | 11.3   | 13.8   | 16.1   | 16.2   |
| 2.6    | 2.7    | 5.1    | 2.1    | 2.0    | 0.3    | 4.4    | 0.6    | 2.8    |
| 104.1  | 57.5   | 74.7   | 67.9   | 71.6   | 62.6   | 75.4   | 82.9   | 59.4   |
| 5.6    | 7.1    | 2.0    | 1.7    | 7.3    | 2.4    | 9.5    | 1.1    | 0.2    |
| 180.4  | 107.5  | 110.1  | 115.6  | 121.8  | 141.8  | 152.1  | 204.5  | 134.8  |
| 179.2  | 105.3  | 120.0  | 140.1  | 152.1  | 126.0  | 178.5  | 225.7  | 132.3  |
| 3.8    | 3.3    | 5.1    | 6.2    | 6.0    | 5.7    | 9.4    | 14.9   | 12.0   |
| 6.7    | 6.8    | 5.5    | 7.2    | 4.7    | 4.0    | 2.6    | 2.1    | 5.8    |
| 1.7    | 0.5    | 5.3    | 0.7    | 4.7    | 0.8    | 3.8    | 1.2    | 5.6    |
| 151.4  | 57.5   | 74.7   | 91.4   | 102.5  | 95.8   | 114.9  | 183.6  | 134.4  |
| 4.3    | 0.2    | 1.3    | 2.0    | 2.6    | 0.6    | 0.2    | 1.4    | 0.4    |
| 2.2    | 4.5    | 3.6    | 9.2    | 9.2    | 6.9    | 14.7   | 19.7   | 11.1   |
| 0.4    | 0.6    | 0.5    | 0.6    | 0.7    | 0.9    | 0.3    | 3.3    | 0.4    |
| 2.1    | 2.0    | 3.5    | 1.7    | 4.0    | 8.6    | 2.3    | 1.3    | 1.5    |
| 38.1   | 32.3   | 29.2   | 54.0   | 40.5   | 39.3   | 42.6   | 46.7   | 52.8   |
| 84.5   | 48.8   | 44.5   | 60.5   | 56.1   | 55.5   | 93.4   | 125.6  | 83.2   |
| 29.6   | 16.2   | 11.3   | 17.2   | 22.2   | 19.1   | 32.4   | 26.0   | 22.4   |
| 0.4    | 0.4    | 0.3    | 1.6    | 1.6    | 0.8    | 1.8    | 0.5    | 2.3    |
| 37.8   | 25.2   | 41.2   | 32.7   | 38.9   | 42.1   | 53.2   | 68.2   | 38.2   |
| 15.4   | 15.7   | 3.2    | 10.6   | 13.0   | 13.6   | 27.4   | 26.6   | 18.5   |
| 7.1    | 6.6    | 0.8    | 6.8    | 8.8    | 7.8    | 4.3    | 6.4    | 4.4    |
| 71.6   | 47.6   | 73.2   | 59.1   | 70.3   | 80.7   | 75.1   | 91.8   | 84.5   |
| 0.8    | 0.4    | 1.1    | 8.1    | 0.5    | 8.4    | 4.8    | 1.2    | 1.0    |
| 1.9    | 0.6    | 1.9    | 5.1    | 3.5    | 0.3    | 1.3    | 0.3    | 0.5    |
| 12.4   | 4.9    | 18.3   | 2.3    | 15.2   | 14.0   | 11.9   | 7.6    | 6.6    |
| 11.8   | 15.9   | 12.7   | 8.5    | 20.6   | 8.4    | 9.8    | 20.3   | 6.5    |
| 4.2    | 0.4    | 1.4    | 0.9    | 0.3    | 2.3    | 4.1    | 5.2    | 0.7    |
| 0.8    | 0.5    | 3.1    | 0.3    | 0.8    | 0.7    | 1.2    | 0.3    | 0.7    |
| 14.4   | 11.1   | 7.4    | 14.3   | 5.4    | 18.1   | 11.2   | 12.1   | 13.3   |
| 17.3   | 11.0   | 10.8   | 13.0   | 5.8    | 10.0   | 18.0   | 20.3   | 16.7   |
| 2.7    | 2.4    | 1.6    | 1.5    | 1.9    | 2.1    | 4.4    | 0.3    | 1.5    |
| 53.2   | 26.9   | 46.6   | 41.2   | 40.0   | 46.3   | 48.0   | 59.5   | 33.6   |
| 9.7    | 5.4    | 5.8    | 5.1    | 7.6    | 4.8    | 2.5    | 4.0    | 10.1   |
| 0.4    | 0.4    | 0.4    | 0.4    | 0.4    | 0.5    | 1.0    | 4.3    | 0.6    |
| 0.8    | 0.7    | 1.7    | 0.4    | 0.3    | 0.4    | 0.4    | 0.5    | 0.5    |
| 5.0    | 4.4    | 0.7    | 2.8    | 5.0    | 2.0    | 8.5    | 6.0    | 3.9    |
| 7.5    | 0.9    | 1.4    | 1.0    | 1.8    | 4.5    | 2.7    | 4.9    | 6.0    |
| 0.3    | 0.4    | 0.2    | 0.4    | 0.4    | 2.0    | 1.5    | 0.4    | 0.8    |
| 5.9    | 1.5    | 0.8    | 3.7    | 6.0    | 2.9    | 5.0    | 6.2    | 7.4    |
| 46.1   | 33.4   | 27.3   | 32.7   | 30.7   | 34.4   | 48.5   | 61.2   | 37.9   |
| 2.2    | 4.0    | 4.3    | 1.5    | 4.7    | 5.2    | 6.0    | 7.9    | 3.8    |
| 3.6    | 3.2    | 4.0    | 1.7    | 0.6    | 4.4    | 0.9    | 1.0    | 7.4    |
| 8.9    | 21.0   | 28.0   | 22.2   | 32.1   | 19.1   | 35.3   | 30.7   | 43.8   |
| 3.1    | 1.0    | 1.5    | 0.7    | 0.5    | 8.0    | 4.5    | 7.9    | 2.6    |

|       |       |       |       |       |       |       |       |       |
|-------|-------|-------|-------|-------|-------|-------|-------|-------|
| 304.6 | 268.7 | 219.8 | 226.3 | 248.8 | 238.5 | 359.5 | 384.0 | 257.5 |
| 40.0  | 38.2  | 31.4  | 35.1  | 23.4  | 47.6  | 51.4  | 50.2  | 46.4  |
| 7.1   | 1.7   | 2.3   | 1.4   | 1.5   | 2.1   | 1.4   | 12.6  | 5.1   |
| 43.4  | 27.5  | 31.1  | 33.0  | 28.0  | 29.2  | 37.2  | 47.3  | 33.6  |
| 72.6  | 42.3  | 52.6  | 54.2  | 58.8  | 55.9  | 74.1  | 65.0  | 62.2  |
| 12.7  | 24.9  | 12.9  | 23.7  | 25.7  | 24.1  | 19.3  | 26.3  | 27.9  |
| 9.8   | 5.8   | 6.3   | 3.5   | 4.3   | 5.1   | 0.5   | 6.4   | 0.7   |
| 12.8  | 1.0   | 0.8   | 0.8   | 0.4   | 4.2   | 0.8   | 1.2   | 0.6   |
| 5.3   | 2.5   | 4.0   | 3.1   | 3.5   | 0.7   | 12.4  | 7.5   | 4.8   |
| 5.9   | 5.2   | 4.5   | 2.2   | 7.4   | 2.2   | 7.9   | 5.1   | 4.3   |
| 1.9   | 1.8   | 1.6   | 0.4   | 1.2   | 1.4   | 6.5   | 6.4   | 0.9   |
| 6.1   | 6.8   | 6.0   | 8.5   | 5.3   | 10.1  | 15.9  | 10.6  | 8.6   |
| 89.7  | 78.3  | 76.0  | 102.7 | 83.8  | 81.5  | 100.3 | 130.5 | 75.2  |
| 441.9 | 314.7 | 344.4 | 441.8 | 390.5 | 341.3 | 543.2 | 484.7 | 474.9 |
| 1.5   | 0.3   | 3.0   | 0.2   | 1.9   | 0.3   | 0.8   | 3.3   | 0.1   |
| 4.0   | 1.4   | 0.9   | 1.8   | 1.7   | 0.7   | 2.2   | 8.4   | 1.6   |
| 46.2  | 31.9  | 36.4  | 35.0  | 44.8  | 37.2  | 56.4  | 58.7  | 50.3  |
| 10.6  | 2.4   | 3.1   | 2.2   | 3.6   | 2.8   | 3.1   | 13.2  | 16.7  |
| 15.2  | 7.0   | 12.8  | 1.9   | 16.5  | 13.0  | 10.7  | 15.9  | 7.6   |
| 1.1   | 1.1   | 5.9   | 2.8   | 7.3   | 3.5   | 7.5   | 6.0   | 1.2   |
| 80.1  | 37.3  | 39.1  | 44.3  | 67.0  | 64.1  | 81.6  | 139.7 | 101.6 |
| 0.6   | 2.1   | 3.0   | 6.5   | 8.4   | 5.0   | 7.0   | 2.3   | 4.3   |
| 19.6  | 19.3  | 21.6  | 17.2  | 16.1  | 23.5  | 33.5  | 34.1  | 20.6  |
| 3.4   | 7.1   | 5.5   | 7.4   | 6.2   | 7.0   | 9.1   | 11.2  | 5.3   |
| 1.6   | 0.9   | 0.8   | 0.4   | 1.5   | 1.4   | 1.0   | 2.1   | 0.8   |
| 6.4   | 4.3   | 4.1   | 5.7   | 3.4   | 5.9   | 7.4   | 8.6   | 5.8   |
| 8.5   | 3.9   | 15.3  | 15.7  | 22.7  | 22.6  | 18.1  | 13.9  | 12.7  |
| 8.1   | 6.3   | 10.1  | 9.4   | 10.9  | 6.8   | 11.6  | 13.8  | 5.3   |
| 77.2  | 56.8  | 42.1  | 43.6  | 52.8  | 60.4  | 66.2  | 115.8 | 67.9  |
| 0.3   | 0.1   | 5.0   | 2.4   | 0.3   | 2.1   | 3.4   | 1.4   | 2.2   |
| 31.5  | 18.0  | 10.9  | 22.7  | 18.9  | 12.0  | 31.2  | 27.7  | 22.9  |
| 0.8   | 1.5   | 0.8   | 1.1   | 0.5   | 1.1   | 1.0   | 1.0   | 0.6   |
| 0.7   | 4.1   | 1.6   | 0.6   | 1.1   | 0.6   | 1.2   | 2.4   | 0.7   |
| 28.3  | 16.4  | 25.0  | 19.0  | 15.0  | 23.6  | 27.2  | 32.8  | 17.9  |
| 30.2  | 26.4  | 19.7  | 16.9  | 22.6  | 23.1  | 32.1  | 31.0  | 24.8  |
| 4.3   | 1.2   | 3.3   | 3.1   | 5.8   | 4.0   | 1.7   | 7.9   | 3.5   |
| 0.5   | 1.3   | 0.8   | 1.0   | 0.7   | 0.8   | 1.0   | 0.8   | 0.9   |
| 20.6  | 2.8   | 9.1   | 2.6   | 3.1   | 6.7   | 1.1   | 6.1   | 2.3   |
| 3.9   | 2.2   | 3.4   | 4.0   | 7.8   | 1.7   | 10.0  | 14.9  | 7.0   |
| 7.2   | 16.6  | 14.2  | 15.5  | 16.5  | 15.3  | 19.5  | 12.8  | 13.8  |
| 12.1  | 3.8   | 6.7   | 5.5   | 6.0   | 12.2  | 8.3   | 14.1  | 6.9   |
| 23.1  | 24.7  | 17.8  | 27.0  | 25.4  | 15.4  | 28.6  | 44.6  | 26.7  |
| 94.5  | 55.0  | 69.0  | 72.0  | 70.6  | 72.6  | 89.1  | 117.6 | 83.1  |
| 16.5  | 8.0   | 10.8  | 8.4   | 14.6  | 13.9  | 10.0  | 21.4  | 13.5  |
| 0.9   | 1.4   | 3.1   | 3.0   | 4.8   | 2.2   | 2.0   | 3.1   | 1.0   |
| 29.1  | 4.3   | 4.4   | 7.1   | 5.9   | 9.3   | 2.4   | 6.7   | 4.4   |
| 0.5   | 0.6   | 0.8   | 1.4   | 0.8   | 0.4   | 0.9   | 0.9   | 0.4   |
| 1.3   | 3.6   | 5.1   | 4.6   | 8.1   | 9.0   | 3.7   | 1.7   | 8.3   |
| 70.8  | 50.9  | 64.1  | 61.3  | 58.3  | 58.8  | 71.7  | 84.3  | 110.6 |
| 21.2  | 7.6   | 18.1  | 8.1   | 11.6  | 10.4  | 13.0  | 21.1  | 8.7   |
| 4.8   | 1.0   | 3.0   | 0.6   | 4.0   | 0.7   | 3.0   | 3.8   | 0.9   |
| 10.3  | 22.5  | 18.9  | 19.2  | 19.5  | 19.6  | 37.0  | 29.3  | 17.0  |
| 1.2   | 6.9   | 6.3   | 8.2   | 6.3   | 3.0   | 3.7   | 6.4   | 1.4   |

|       |       |       |       |       |       |        |        |        |
|-------|-------|-------|-------|-------|-------|--------|--------|--------|
| 7.8   | 3.0   | 4.7   | 4.0   | 3.6   | 2.4   | 5.6    | 0.6    | 5.1    |
| 86.2  | 102.5 | 85.3  | 103.4 | 107.6 | 93.4  | 161.1  | 160.1  | 117.6  |
| 28.9  | 22.2  | 22.1  | 29.7  | 25.0  | 21.2  | 39.0   | 26.6   | 22.7   |
| 4.9   | 1.7   | 6.2   | 3.3   | 3.5   | 2.3   | 6.3    | 1.0    | 4.0    |
| 3.9   | 3.3   | 3.7   | 8.1   | 8.7   | 3.6   | 2.5    | 5.7    | 3.0    |
| 0.1   | 0.4   | 0.2   | 0.2   | 0.1   | 0.1   | 0.6    | 0.1    | 0.4    |
| 2.1   | 1.5   | 2.9   | 2.0   | 1.1   | 1.5   | 8.1    | 3.2    | 2.1    |
| 2.3   | 6.0   | 4.4   | 6.9   | 1.2   | 9.5   | 1.7    | 5.0    | 8.4    |
| 14.0  | 11.1  | 14.6  | 16.4  | 19.2  | 14.1  | 12.8   | 22.6   | 16.5   |
| 0.9   | 0.9   | 0.9   | 0.8   | 0.9   | 1.0   | 1.0    | 1.1    | 0.9    |
| 0.7   | 2.2   | 2.0   | 0.7   | 1.1   | 0.4   | 1.3    | 4.9    | 0.4    |
| 3.3   | 12.2  | 6.5   | 5.4   | 6.3   | 3.2   | 9.8    | 6.3    | 7.4    |
| 17.1  | 13.9  | 18.8  | 18.7  | 15.8  | 14.8  | 18.5   | 37.5   | 14.5   |
| 11.6  | 6.9   | 3.4   | 2.0   | 5.5   | 5.9   | 10.3   | 4.4    | 2.6    |
| 6.4   | 5.6   | 2.9   | 4.5   | 7.0   | 7.2   | 8.6    | 9.6    | 5.0    |
| 7.3   | 11.0  | 7.3   | 12.3  | 8.4   | 11.5  | 7.8    | 9.3    | 8.1    |
| 5.8   | 5.5   | 0.4   | 0.9   | 0.3   | 1.8   | 5.1    | 5.1    | 3.3    |
| 0.3   | 1.0   | 1.0   | 0.2   | 2.1   | 0.9   | 2.3    | 1.3    | 0.6    |
| 0.6   | 10.3  | 0.9   | 1.3   | 10.7  | 4.8   | 5.1    | 5.4    | 5.0    |
| 1.6   | 0.8   | 1.5   | 1.0   | 0.8   | 1.3   | 1.3    | 0.8    | 0.6    |
| 0.4   | 0.7   | 0.4   | 0.3   | 2.9   | 0.5   | 0.5    | 6.1    | 0.9    |
| 19.4  | 21.7  | 16.3  | 29.9  | 24.5  | 20.6  | 17.0   | 26.2   | 17.2   |
| 4.5   | 7.6   | 5.3   | 3.4   | 6.4   | 6.2   | 8.9    | 7.9    | 2.9    |
| 4.0   | 3.3   | 1.5   | 5.9   | 4.8   | 4.9   | 5.2    | 13.2   | 3.0    |
| 18.9  | 3.0   | 11.2  | 7.4   | 10.9  | 2.8   | 8.2    | 12.5   | 10.5   |
| 29.4  | 18.6  | 12.6  | 6.4   | 25.3  | 17.4  | 16.5   | 22.9   | 19.6   |
| 48.6  | 24.9  | 36.9  | 30.3  | 21.9  | 34.6  | 49.8   | 47.0   | 32.0   |
| 7.3   | 4.5   | 2.5   | 2.0   | 2.5   | 8.5   | 6.0    | 7.5    | 5.0    |
| 4.1   | 2.0   | 4.4   | 1.8   | 3.0   | 2.8   | 4.9    | 10.0   | 5.0    |
| 397.7 | 446.5 | 450.5 | 504.1 | 543.1 | 497.2 | 683.1  | 659.9  | 447.9  |
| 9.4   | 0.5   | 7.0   | 2.5   | 8.6   | 0.3   | 7.3    | 4.9    | 4.1    |
| 40.3  | 34.7  | 32.3  | 38.9  | 44.8  | 40.2  | 74.9   | 92.6   | 65.3   |
| 0.5   | 0.4   | 1.7   | 2.9   | 0.4   | 2.4   | 2.3    | 0.3    | 3.2    |
| 110.7 | 84.5  | 108.8 | 91.0  | 97.9  | 102.1 | 142.7  | 154.5  | 113.7  |
| 1.2   | 1.6   | 0.9   | 5.6   | 0.8   | 8.9   | 2.4    | 1.2    | 1.3    |
| 0.7   | 1.0   | 1.0   | 1.6   | 0.3   | 3.2   | 1.8    | 1.0    | 1.9    |
| 1.8   | 2.6   | 3.9   | 3.0   | 3.4   | 1.7   | 1.7    | 1.6    | 2.2    |
| 6.0   | 4.5   | 8.2   | 8.3   | 5.5   | 9.8   | 7.9    | 10.3   | 10.1   |
| 0.4   | 0.6   | 0.6   | 0.6   | 0.7   | 0.4   | 0.2    | 0.9    | 0.4    |
| 1.5   | 5.5   | 4.7   | 5.5   | 5.3   | 1.0   | 6.4    | 5.5    | 0.7    |
| 20.6  | 13.0  | 16.7  | 10.2  | 9.4   | 15.6  | 10.5   | 13.4   | 6.8    |
| 8.3   | 9.2   | 3.8   | 10.5  | 3.0   | 8.4   | 7.4    | 13.2   | 6.5    |
| 126.2 | 74.4  | 81.6  | 86.8  | 85.1  | 64.3  | 100.8  | 104.9  | 79.1   |
| 10.3  | 5.6   | 6.7   | 4.2   | 5.8   | 12.7  | 13.0   | 12.8   | 9.5    |
| 0.2   | 0.1   | 0.1   | 0.3   | 0.2   | 0.7   | 2.4    | 0.1    | 3.7    |
| 12.9  | 8.1   | 2.7   | 13.2  | 8.3   | 10.2  | 10.3   | 7.0    | 13.5   |
| 352.4 | 248.7 | 226.7 | 269.3 | 331.5 | 276.6 | 416.2  | 426.9  | 334.7  |
| 209.9 | 130.6 | 200.3 | 180.4 | 186.8 | 148.3 | 211.3  | 241.8  | 193.0  |
| 85.8  | 56.9  | 81.2  | 72.1  | 76.5  | 72.2  | 69.4   | 89.2   | 78.6   |
| 863.6 | 674.4 | 774.4 | 832.5 | 827.5 | 918.6 | 1255.1 | 1451.7 | 1060.0 |
| 7.9   | 1.2   | 6.6   | 0.8   | 0.9   | 0.6   | 9.5    | 4.0    | 8.2    |
| 60.3  | 31.9  | 47.7  | 63.9  | 60.1  | 62.6  | 73.0   | 79.3   | 41.9   |
| 0.4   | 1.0   | 4.7   | 0.5   | 1.0   | 4.5   | 3.6    | 2.6    | 1.8    |

|       |       |       |       |       |       |        |        |       |
|-------|-------|-------|-------|-------|-------|--------|--------|-------|
| 6.8   | 4.7   | 3.2   | 7.9   | 10.9  | 7.6   | 10.9   | 13.1   | 3.9   |
| 516.2 | 764.0 | 674.4 | 809.6 | 946.5 | 753.0 | 1169.5 | 1342.2 | 900.0 |
| 1.0   | 0.9   | 7.2   | 2.9   | 1.3   | 1.5   | 0.7    | 1.0    | 8.4   |
| 1.1   | 5.1   | 2.7   | 8.7   | 10.3  | 9.9   | 1.8    | 16.7   | 5.6   |
| 15.4  | 12.5  | 20.9  | 24.2  | 22.0  | 14.6  | 22.1   | 28.0   | 21.3  |
| 9.8   | 16.6  | 8.5   | 13.8  | 17.4  | 16.2  | 10.1   | 28.0   | 10.5  |
| 0.5   | 0.1   | 0.6   | 0.1   | 0.4   | 0.2   | 0.8    | 0.4    | 0.5   |
| 0.3   | 0.4   | 0.3   | 0.4   | 0.7   | 0.6   | 1.2    | 0.3    | 0.7   |
| 0.6   | 1.0   | 3.9   | 0.3   | 0.4   | 0.7   | 0.3    | 0.2    | 2.2   |
| 1.1   | 1.1   | 1.6   | 4.1   | 1.0   | 0.9   | 1.1    | 0.9    | 0.7   |
| 8.4   | 0.6   | 1.0   | 6.4   | 0.6   | 2.2   | 1.2    | 1.1    | 3.9   |
| 1.5   | 1.0   | 3.2   | 1.4   | 6.2   | 0.7   | 6.8    | 3.5    | 1.1   |
| 0.6   | 0.5   | 0.3   | 0.3   | 0.3   | 0.2   | 0.5    | 0.1    | 0.2   |
| 1.2   | 7.9   | 9.5   | 14.9  | 9.5   | 10.9  | 10.1   | 19.0   | 8.1   |
| 7.8   | 10.8  | 11.3  | 8.0   | 9.7   | 16.7  | 10.4   | 9.9    | 8.5   |
| 1.0   | 0.3   | 0.3   | 1.0   | 1.2   | 1.2   | 1.3    | 2.6    | 1.6   |
| 524.9 | 471.2 | 510.8 | 525.7 | 542.2 | 495.9 | 652.0  | 957.1  | 533.3 |
| 1.3   | 1.1   | 0.6   | 2.2   | 0.9   | 1.2   | 0.1    | 3.3    | 1.2   |
| 163.3 | 104.7 | 119.1 | 143.8 | 144.9 | 128.6 | 144.0  | 163.9  | 115.9 |
| 3.9   | 7.4   | 6.2   | 4.5   | 6.7   | 8.2   | 8.6    | 9.3    | 9.9   |
| 4.7   | 4.1   | 10.0  | 5.8   | 13.4  | 11.5  | 2.6    | 15.1   | 9.4   |
| 6.0   | 8.2   | 2.6   | 3.0   | 2.4   | 4.0   | 5.8    | 10.4   | 3.7   |
| 0.2   | 0.8   | 3.2   | 0.3   | 0.9   | 0.2   | 0.1    | 1.6    | 2.2   |
| 5.1   | 6.9   | 2.5   | 5.9   | 5.0   | 6.4   | 3.0    | 7.2    | 5.3   |
| 0.4   | 0.6   | 0.5   | 0.6   | 0.6   | 0.8   | 1.1    | 0.8    | 0.5   |
| 0.7   | 0.9   | 3.8   | 0.4   | 0.9   | 0.3   | 0.8    | 1.3    | 0.8   |
| 1.6   | 5.3   | 2.5   | 1.7   | 2.7   | 2.6   | 3.1    | 2.0    | 8.1   |
| 0.3   | 0.8   | 3.4   | 2.2   | 0.3   | 3.5   | 5.9    | 4.9    | 0.3   |
| 8.9   | 8.1   | 8.0   | 3.7   | 11.9  | 3.3   | 10.0   | 7.6    | 12.4  |
| 9.1   | 1.4   | 1.2   | 5.2   | 1.0   | 8.8   | 5.5    | 6.5    | 5.5   |
| 2.5   | 1.1   | 4.5   | 6.1   | 6.6   | 6.1   | 5.9    | 6.9    | 4.2   |
| 9.2   | 8.8   | 4.8   | 8.5   | 7.7   | 1.9   | 8.7    | 12.6   | 8.0   |
| 2.7   | 1.8   | 1.0   | 0.1   | 1.0   | 0.2   | 1.1    | 5.9    | 4.1   |
| 13.1  | 15.1  | 10.7  | 9.4   | 20.3  | 18.3  | 13.5   | 21.0   | 15.6  |
| 3.5   | 6.8   | 6.3   | 3.6   | 8.6   | 1.1   | 9.9    | 5.5    | 7.2   |
| 23.2  | 10.1  | 11.1  | 15.0  | 13.6  | 18.1  | 23.6   | 26.4   | 17.4  |
| 11.9  | 11.2  | 15.7  | 7.5   | 7.4   | 8.6   | 12.3   | 6.1    | 11.9  |
| 10.3  | 10.0  | 15.0  | 19.3  | 12.3  | 11.2  | 14.9   | 20.6   | 10.3  |
| 1.5   | 5.5   | 4.2   | 4.9   | 0.6   | 2.7   | 0.5    | 4.4    | 1.1   |
| 15.5  | 11.7  | 9.5   | 18.2  | 15.5  | 16.8  | 17.7   | 18.9   | 13.4  |
| 11.4  | 1.6   | 4.2   | 3.9   | 11.9  | 7.4   | 14.5   | 16.5   | 1.1   |
| 243.8 | 185.3 | 236.9 | 271.3 | 267.5 | 260.7 | 392.9  | 446.3  | 318.5 |
| 11.2  | 9.5   | 10.8  | 12.7  | 2.7   | 12.7  | 8.2    | 4.5    | 2.1   |
| 1.7   | 2.0   | 1.9   | 2.5   | 2.4   | 4.3   | 12.5   | 7.5    | 2.4   |
| 6.2   | 4.9   | 3.1   | 1.9   | 4.5   | 2.3   | 2.2    | 6.1    | 5.5   |
| 0.9   | 1.0   | 0.9   | 1.0   | 1.5   | 1.4   | 1.3    | 1.5    | 1.2   |
| 6.7   | 0.8   | 9.3   | 5.3   | 9.9   | 13.0  | 2.6    | 7.1    | 3.8   |
| 1.3   | 0.5   | 0.5   | 1.1   | 0.6   | 0.3   | 0.3    | 0.5    | 0.4   |
| 2.4   | 1.1   | 1.9   | 4.1   | 0.2   | 0.5   | 3.1    | 0.7    | 1.0   |
| 1.2   | 0.9   | 0.6   | 1.1   | 1.2   | 1.8   | 0.8    | 0.7    | 1.7   |
| 8.6   | 0.9   | 1.4   | 0.9   | 1.4   | 1.0   | 1.1    | 3.0    | 1.2   |
| 7.4   | 7.3   | 5.2   | 6.0   | 9.1   | 7.7   | 11.4   | 6.3    | 5.1   |
| 1.2   | 1.7   | 1.7   | 1.7   | 0.9   | 2.5   | 2.9    | 3.0    | 2.8   |

|        |        |        |        |        |        |        |        |        |
|--------|--------|--------|--------|--------|--------|--------|--------|--------|
| 40.9   | 29.2   | 39.5   | 36.5   | 34.4   | 34.0   | 52.7   | 54.3   | 38.6   |
| 3.1    | 2.6    | 1.3    | 2.0    | 1.9    | 0.4    | 5.6    | 2.6    | 4.9    |
| 25.3   | 10.3   | 17.5   | 16.3   | 17.5   | 20.7   | 25.8   | 29.7   | 20.3   |
| 0.4    | 0.2    | 2.1    | 0.2    | 2.1    | 2.2    | 0.8    | 0.8    | 0.1    |
| 0.1    | 1.0    | 3.1    | 2.4    | 3.0    | 3.4    | 1.1    | 0.8    | 0.1    |
| 2.0    | 1.5    | 1.3    | 1.8    | 1.3    | 1.5    | 1.4    | 1.5    | 1.6    |
| 17.0   | 9.1    | 5.9    | 14.0   | 13.9   | 8.1    | 15.3   | 16.3   | 15.6   |
| 2.0    | 2.1    | 1.3    | 1.3    | 2.2    | 1.8    | 1.8    | 2.2    | 1.0    |
| 16.7   | 16.0   | 12.8   | 17.2   | 18.6   | 12.3   | 15.7   | 20.1   | 15.1   |
| 2505.5 | 2178.2 | 2193.1 | 2376.2 | 2413.2 | 2459.5 | 2766.1 | 2898.1 | 2174.4 |
| 147.1  | 110.7  | 133.4  | 123.7  | 136.9  | 155.7  | 149.8  | 150.2  | 154.7  |
| 29.3   | 21.4   | 22.0   | 28.1   | 30.5   | 19.4   | 21.6   | 32.8   | 31.2   |
| 89.7   | 71.9   | 61.8   | 72.4   | 83.4   | 86.5   | 110.2  | 126.2  | 99.7   |
| 0.7    | 1.7    | 0.6    | 1.0    | 0.3    | 0.6    | 1.3    | 1.0    | 0.9    |
| 1.9    | 2.7    | 5.0    | 3.4    | 0.8    | 2.3    | 10.7   | 6.7    | 1.3    |
| 3.1    | 0.9    | 0.2    | 0.4    | 1.9    | 0.5    | 0.4    | 2.4    | 0.2    |
| 2.4    | 3.1    | 0.1    | 0.4    | 0.6    | 0.4    | 0.2    | 1.3    | 0.2    |
| 199.3  | 185.8  | 239.9  | 230.7  | 246.8  | 216.8  | 321.4  | 389.1  | 233.9  |
| 0.8    | 0.4    | 0.5    | 1.6    | 0.4    | 0.6    | 0.5    | 0.3    | 0.3    |
| 12.5   | 1.3    | 8.0    | 9.7    | 1.5    | 5.2    | 15.1   | 6.9    | 11.5   |
| 2.2    | 0.4    | 1.0    | 1.0    | 3.5    | 1.9    | 0.3    | 1.4    | 1.7    |
| 2.9    | 3.1    | 0.5    | 4.0    | 6.1    | 0.4    | 2.2    | 8.0    | 0.3    |
| 4.5    | 4.8    | 2.7    | 2.1    | 5.3    | 6.8    | 6.9    | 7.0    | 5.4    |
| 435.1  | 245.0  | 284.0  | 314.4  | 344.0  | 358.3  | 472.6  | 585.2  | 379.0  |
| 9.3    | 2.1    | 2.0    | 0.1    | 1.8    | 3.2    | 2.7    | 1.9    | 2.1    |
| 1.3    | 1.4    | 4.0    | 1.3    | 2.0    | 4.4    | 4.8    | 0.7    | 1.0    |
| 3.0    | 0.9    | 6.4    | 2.1    | 4.1    | 0.8    | 1.3    | 4.5    | 1.0    |
| 5.7    | 5.1    | 2.9    | 3.5    | 5.1    | 1.8    | 3.2    | 3.5    | 2.4    |
| 1.6    | 3.8    | 1.2    | 2.3    | 6.9    | 0.5    | 5.3    | 2.0    | 2.9    |
| 30.4   | 10.9   | 12.7   | 10.7   | 13.1   | 5.2    | 26.0   | 22.5   | 15.0   |
| 29.3   | 30.6   | 42.5   | 48.8   | 27.7   | 37.1   | 14.5   | 53.3   | 41.9   |
| 66.3   | 67.2   | 42.1   | 51.3   | 50.2   | 55.3   | 71.9   | 64.1   | 57.6   |
| 1.0    | 5.2    | 2.0    | 0.5    | 4.7    | 3.4    | 5.7    | 7.5    | 1.7    |
| 3.1    | 6.1    | 3.8    | 3.5    | 1.4    | 2.5    | 2.0    | 2.8    | 4.4    |
| 41.7   | 42.1   | 21.4   | 41.1   | 35.3   | 41.2   | 34.0   | 71.4   | 67.5   |
| 6.6    | 3.9    | 4.2    | 9.6    | 4.6    | 6.9    | 7.8    | 6.9    | 6.2    |
| 2.5    | 1.9    | 5.7    | 1.9    | 7.8    | 6.3    | 2.9    | 1.5    | 1.5    |
| 37.6   | 21.9   | 32.1   | 27.1   | 34.3   | 27.6   | 39.2   | 52.3   | 34.0   |
| 10.9   | 7.8    | 15.2   | 6.8    | 12.9   | 6.2    | 13.9   | 14.6   | 11.0   |
| 4.1    | 0.8    | 4.3    | 0.4    | 2.2    | 0.3    | 4.1    | 7.4    | 2.8    |
| 0.8    | 0.7    | 0.7    | 0.5    | 0.4    | 0.5    | 0.5    | 0.4    | 0.7    |
| 3.7    | 12.6   | 12.4   | 12.2   | 8.3    | 8.6    | 4.2    | 9.2    | 10.3   |
| 16.0   | 6.5    | 8.6    | 5.9    | 8.9    | 5.4    | 13.5   | 14.9   | 12.2   |
| 6.9    | 4.4    | 5.8    | 6.8    | 6.5    | 7.4    | 7.4    | 7.2    | 3.7    |
| 0.4    | 0.3    | 0.8    | 0.6    | 0.4    | 1.0    | 0.3    | 0.5    | 1.0    |
| 8.5    | 11.5   | 7.8    | 4.7    | 9.8    | 5.8    | 14.0   | 16.0   | 7.4    |
| 1.5    | 1.3    | 6.8    | 1.1    | 0.9    | 0.9    | 1.2    | 6.5    | 1.3    |
| 11.0   | 8.5    | 3.4    | 1.2    | 8.1    | 3.3    | 4.1    | 6.5    | 18.7   |
| 1.5    | 2.7    | 3.2    | 4.5    | 9.7    | 5.0    | 4.7    | 15.3   | 1.5    |
| 0.6    | 1.4    | 3.5    | 0.8    | 0.6    | 4.9    | 0.5    | 0.7    | 0.9    |
| 11.4   | 14.3   | 10.3   | 9.4    | 14.8   | 10.3   | 13.6   | 25.0   | 10.1   |
| 1.1    | 2.5    | 2.9    | 1.9    | 2.2    | 0.5    | 0.5    | 1.9    | 1.3    |
| 1.5    | 2.3    | 1.2    | 3.7    | 1.1    | 1.0    | 1.7    | 1.2    | 0.5    |

|       |       |       |       |       |       |       |       |       |
|-------|-------|-------|-------|-------|-------|-------|-------|-------|
| 4.6   | 3.3   | 0.5   | 2.3   | 1.7   | 0.8   | 5.2   | 0.5   | 0.2   |
| 1.6   | 2.3   | 1.8   | 1.2   | 2.2   | 2.8   | 2.5   | 1.8   | 1.4   |
| 13.0  | 9.2   | 2.1   | 1.0   | 6.9   | 1.6   | 9.6   | 11.5  | 1.3   |
| 6.7   | 4.0   | 4.2   | 3.0   | 3.7   | 3.1   | 1.4   | 2.2   | 0.7   |
| 6.5   | 0.8   | 1.5   | 5.5   | 2.2   | 2.3   | 5.9   | 2.7   | 1.3   |
| 10.9  | 7.9   | 10.1  | 4.9   | 9.1   | 9.3   | 22.0  | 6.0   | 7.3   |
| 53.7  | 31.4  | 34.1  | 40.0  | 32.7  | 43.0  | 51.5  | 70.1  | 38.2  |
| 8.9   | 10.4  | 9.9   | 9.0   | 2.0   | 4.0   | 20.2  | 15.9  | 12.5  |
| 0.5   | 0.5   | 0.3   | 1.8   | 1.8   | 0.3   | 4.3   | 2.5   | 2.7   |
| 288.5 | 234.4 | 341.6 | 252.0 | 297.3 | 252.0 | 365.4 | 403.4 | 307.4 |
| 0.6   | 0.8   | 0.3   | 1.8   | 2.4   | 0.9   | 0.7   | 0.8   | 1.4   |
| 1.1   | 0.0   | 0.2   | 3.1   | 0.1   | 0.1   | 0.5   | 0.1   | 1.5   |
| 3.8   | 2.8   | 2.0   | 0.5   | 2.6   | 0.6   | 7.5   | 5.7   | 0.6   |
| 3.9   | 1.1   | 5.0   | 6.3   | 2.1   | 3.9   | 3.0   | 3.4   | 0.8   |
| 81.1  | 41.9  | 57.9  | 45.6  | 56.5  | 57.3  | 77.0  | 75.5  | 64.8  |
| 0.6   | 1.3   | 0.4   | 1.0   | 0.4   | 0.6   | 1.2   | 0.9   | 1.0   |
| 8.2   | 11.7  | 9.2   | 7.0   | 5.3   | 11.0  | 15.8  | 5.7   | 10.0  |
| 23.1  | 15.7  | 16.5  | 23.4  | 22.2  | 23.5  | 44.1  | 38.2  | 29.1  |
| 3.2   | 3.2   | 2.3   | 0.3   | 6.3   | 0.4   | 8.3   | 1.0   | 4.1   |
| 7.6   | 3.3   | 6.2   | 3.3   | 5.5   | 5.7   | 8.9   | 13.6  | 7.6   |
| 23.6  | 16.6  | 15.1  | 19.5  | 14.9  | 9.3   | 31.2  | 23.4  | 16.2  |
| 43.1  | 27.9  | 37.3  | 24.9  | 29.1  | 30.2  | 26.6  | 42.8  | 26.6  |
| 29.3  | 20.6  | 15.2  | 15.6  | 17.3  | 15.0  | 20.9  | 39.7  | 24.6  |
| 16.7  | 6.3   | 7.4   | 8.5   | 11.3  | 14.7  | 12.6  | 16.4  | 11.3  |
| 1.8   | 1.0   | 1.0   | 0.8   | 0.8   | 0.4   | 1.3   | 0.6   | 0.7   |
| 0.6   | 2.9   | 0.9   | 5.9   | 4.0   | 6.5   | 7.8   | 6.4   | 5.7   |
| 204.1 | 141.3 | 146.1 | 165.4 | 162.6 | 200.6 | 239.1 | 356.9 | 135.7 |
| 5.9   | 3.7   | 7.0   | 3.7   | 3.2   | 2.8   | 3.8   | 7.5   | 3.9   |
| 0.7   | 0.6   | 0.2   | 0.1   | 0.3   | 0.2   | 0.5   | 0.4   | 0.3   |
| 305.8 | 162.1 | 198.7 | 191.2 | 189.0 | 214.0 | 258.4 | 300.1 | 210.6 |
| 0.6   | 0.2   | 0.3   | 0.2   | 1.4   | 2.1   | 0.2   | 0.2   | 1.9   |
| 11.3  | 15.9  | 9.0   | 8.8   | 12.4  | 8.7   | 13.5  | 21.9  | 23.8  |
| 2.2   | 1.5   | 1.7   | 5.9   | 0.6   | 0.9   | 0.9   | 1.0   | 1.0   |
| 3.2   | 5.7   | 4.3   | 3.1   | 1.0   | 4.3   | 1.3   | 3.5   | 7.1   |
| 39.9  | 38.4  | 36.5  | 52.0  | 42.9  | 27.3  | 59.0  | 36.8  | 41.0  |
| 62.1  | 42.3  | 36.5  | 40.3  | 55.4  | 43.6  | 65.6  | 77.4  | 44.9  |
| 1.2   | 0.9   | 1.0   | 1.3   | 1.2   | 2.2   | 8.4   | 1.3   | 3.8   |
| 5.0   | 5.9   | 6.3   | 7.8   | 8.7   | 5.2   | 3.8   | 9.3   | 9.7   |
| 19.3  | 14.7  | 15.1  | 15.6  | 17.1  | 12.9  | 24.4  | 23.6  | 19.7  |
| 0.5   | 2.5   | 0.5   | 3.9   | 0.2   | 1.1   | 2.2   | 3.9   | 0.8   |
| 1.5   | 0.3   | 1.9   | 4.9   | 2.0   | 6.5   | 0.4   | 0.4   | 0.5   |
| 3.3   | 4.0   | 3.0   | 2.0   | 2.4   | 0.5   | 4.0   | 3.3   | 2.1   |
| 9.4   | 3.9   | 1.8   | 9.5   | 8.2   | 8.5   | 10.0  | 1.8   | 10.7  |
| 5.0   | 1.9   | 1.7   | 1.2   | 4.5   | 9.0   | 0.8   | 2.7   | 2.0   |
| 91.5  | 108.0 | 94.9  | 114.2 | 119.8 | 100.4 | 139.1 | 200.8 | 134.5 |
| 6.2   | 7.6   | 8.0   | 13.1  | 15.8  | 7.6   | 17.6  | 13.7  | 11.4  |
| 16.4  | 13.6  | 11.7  | 7.9   | 12.1  | 16.8  | 20.0  | 13.5  | 14.9  |
| 11.8  | 2.9   | 5.7   | 8.1   | 10.1  | 7.9   | 7.9   | 4.4   | 6.2   |
| 6.0   | 5.2   | 1.2   | 0.8   | 5.2   | 4.1   | 4.0   | 5.8   | 4.5   |
| 11.1  | 3.6   | 5.3   | 6.4   | 3.1   | 6.8   | 8.4   | 6.9   | 2.1   |
| 6.5   | 8.4   | 1.4   | 5.3   | 7.1   | 5.4   | 5.4   | 5.3   | 7.2   |
| 18.4  | 12.6  | 17.6  | 9.8   | 10.1  | 20.1  | 9.1   | 17.1  | 10.1  |
| 16.1  | 10.9  | 9.4   | 12.0  | 11.7  | 11.4  | 23.6  | 21.2  | 13.9  |



|       |       |       |       |       |       |       |       |       |
|-------|-------|-------|-------|-------|-------|-------|-------|-------|
| 1.2   | 6.8   | 5.5   | 0.5   | 1.6   | 0.9   | 5.4   | 1.3   | 0.5   |
| 3.6   | 1.6   | 1.1   | 1.8   | 2.0   | 4.9   | 8.9   | 8.5   | 7.1   |
| 3.0   | 4.5   | 9.5   | 3.0   | 2.6   | 8.0   | 12.0  | 15.6  | 12.5  |
| 0.5   | 1.8   | 2.4   | 4.4   | 0.9   | 0.8   | 3.7   | 1.1   | 1.2   |
| 3.5   | 1.4   | 1.2   | 0.9   | 0.6   | 0.9   | 1.5   | 1.1   | 1.9   |
| 0.6   | 1.3   | 0.9   | 1.4   | 4.1   | 6.2   | 0.8   | 3.1   | 2.5   |
| 31.7  | 10.1  | 14.6  | 14.8  | 24.4  | 18.9  | 18.7  | 27.0  | 23.7  |
| 1.1   | 1.3   | 1.1   | 1.4   | 1.2   | 1.7   | 2.1   | 1.5   | 0.9   |
| 1.0   | 3.6   | 4.8   | 1.7   | 0.4   | 1.0   | 6.5   | 7.5   | 3.4   |
| 12.4  | 4.0   | 3.9   | 7.4   | 6.8   | 6.9   | 4.5   | 10.9  | 12.6  |
| 0.5   | 0.5   | 0.5   | 0.5   | 0.5   | 1.2   | 1.5   | 0.6   | 0.6   |
| 6.9   | 4.4   | 1.3   | 10.9  | 3.2   | 1.9   | 3.5   | 7.8   | 1.7   |
| 2.9   | 2.8   | 2.8   | 1.8   | 1.4   | 9.5   | 1.1   | 6.5   | 2.2   |
| 0.7   | 0.9   | 1.2   | 1.4   | 1.0   | 1.0   | 1.0   | 1.8   | 0.7   |
| 0.4   | 0.3   | 0.2   | 0.2   | 1.6   | 0.2   | 0.7   | 4.1   | 0.5   |
| 5.8   | 5.4   | 5.4   | 1.2   | 0.7   | 5.3   | 11.2  | 8.6   | 4.7   |
| 2.0   | 2.2   | 1.2   | 1.7   | 2.5   | 4.3   | 0.5   | 2.4   | 1.4   |
| 4.0   | 1.6   | 6.1   | 8.9   | 7.9   | 6.5   | 5.4   | 5.8   | 9.2   |
| 0.5   | 0.3   | 6.9   | 7.3   | 9.5   | 3.2   | 3.4   | 0.6   | 5.4   |
| 176.9 | 112.5 | 113.4 | 100.2 | 121.1 | 101.7 | 196.3 | 195.1 | 98.8  |
| 10.3  | 1.2   | 7.7   | 11.3  | 6.0   | 13.7  | 11.2  | 6.7   | 9.9   |
| 9.7   | 5.8   | 5.0   | 2.0   | 3.2   | 0.8   | 10.1  | 10.9  | 2.0   |
| 4.8   | 3.6   | 6.1   | 3.6   | 8.8   | 8.7   | 7.2   | 10.2  | 5.8   |
| 12.4  | 3.5   | 7.8   | 6.8   | 7.3   | 8.3   | 4.0   | 11.7  | 6.4   |
| 1.6   | 1.2   | 1.2   | 1.0   | 1.9   | 0.6   | 1.4   | 0.8   | 1.2   |
| 10.6  | 11.3  | 3.3   | 11.0  | 11.6  | 2.4   | 8.8   | 14.2  | 13.7  |
| 80.3  | 56.5  | 51.1  | 54.9  | 73.0  | 57.0  | 74.3  | 87.6  | 50.0  |
| 4.3   | 6.1   | 3.2   | 6.4   | 6.8   | 5.4   | 4.2   | 4.2   | 5.8   |
| 0.4   | 2.0   | 3.5   | 2.8   | 5.0   | 0.7   | 4.6   | 5.6   | 3.3   |
| 28.9  | 12.1  | 19.8  | 24.3  | 21.9  | 20.6  | 30.3  | 32.5  | 21.9  |
| 3.9   | 3.7   | 4.2   | 2.2   | 4.1   | 4.1   | 2.0   | 0.9   | 0.5   |
| 3.8   | 2.1   | 1.6   | 0.3   | 2.3   | 2.2   | 0.5   | 1.3   | 1.2   |
| 21.9  | 8.2   | 11.7  | 13.2  | 17.6  | 16.9  | 18.5  | 27.1  | 15.3  |
| 6.0   | 4.7   | 5.4   | 4.6   | 4.4   | 2.6   | 4.8   | 8.5   | 3.0   |
| 1.2   | 0.5   | 0.6   | 2.6   | 0.9   | 2.2   | 1.1   | 3.6   | 2.4   |
| 5.6   | 2.9   | 3.3   | 2.1   | 1.5   | 4.0   | 5.8   | 6.2   | 3.0   |
| 0.3   | 1.4   | 1.0   | 0.2   | 0.1   | 0.3   | 0.6   | 2.5   | 0.5   |
| 3.7   | 0.4   | 1.3   | 0.5   | 1.0   | 0.8   | 1.6   | 1.0   | 1.2   |
| 3.1   | 2.7   | 1.7   | 3.5   | 19.4  | 3.3   | 5.6   | 13.1  | 2.5   |
| 164.4 | 121.9 | 137.1 | 162.1 | 150.2 | 139.2 | 192.5 | 196.0 | 134.9 |
| 0.0   | 0.2   | 0.1   | 0.5   | 1.0   | 0.8   | 0.2   | 0.2   | 0.1   |
| 4.9   | 7.6   | 6.0   | 6.8   | 2.3   | 3.4   | 10.8  | 6.0   | 2.4   |
| 5.4   | 1.6   | 2.4   | 1.3   | 1.3   | 0.5   | 0.7   | 3.0   | 2.4   |
| 0.5   | 0.4   | 0.4   | 0.4   | 1.8   | 0.4   | 0.3   | 0.3   | 0.2   |
| 7.9   | 10.5  | 8.6   | 5.1   | 6.9   | 5.0   | 7.0   | 8.6   | 1.6   |
| 187.0 | 66.9  | 73.8  | 84.3  | 77.4  | 70.0  | 88.4  | 106.3 | 69.3  |
| 1.4   | 0.3   | 0.7   | 2.8   | 0.6   | 0.4   | 3.4   | 1.2   | 0.6   |
| 0.3   | 0.9   | 2.4   | 1.6   | 0.4   | 4.2   | 2.9   | 0.2   | 2.9   |
| 1.2   | 2.0   | 1.5   | 1.8   | 0.5   | 2.8   | 6.0   | 1.7   | 2.3   |
| 2.4   | 0.5   | 1.7   | 4.5   | 4.3   | 4.0   | 3.8   | 1.2   | 3.7   |
| 2.2   | 9.3   | 5.5   | 1.6   | 5.9   | 6.0   | 2.0   | 6.6   | 9.2   |
| 0.8   | 0.7   | 1.0   | 1.7   | 1.4   | 0.7   | 0.9   | 1.2   | 1.1   |
| 2.8   | 3.2   | 5.4   | 4.1   | 4.3   | 5.2   | 1.8   | 3.2   | 2.4   |

|       |       |       |       |       |       |       |       |       |
|-------|-------|-------|-------|-------|-------|-------|-------|-------|
| 13.9  | 6.3   | 9.1   | 6.9   | 11.6  | 8.5   | 10.3  | 19.4  | 12.5  |
| 9.1   | 4.8   | 7.4   | 6.1   | 7.9   | 4.8   | 8.1   | 15.3  | 7.1   |
| 0.2   | 0.1   | 1.9   | 0.2   | 0.1   | 0.3   | 2.3   | 0.2   | 0.4   |
| 1.5   | 10.2  | 1.7   | 1.5   | 1.3   | 2.2   | 1.0   | 2.0   | 4.3   |
| 0.6   | 8.3   | 0.7   | 1.4   | 3.9   | 4.3   | 3.9   | 1.8   | 3.4   |
| 0.3   | 1.0   | 0.3   | 0.2   | 5.6   | 0.3   | 0.4   | 0.6   | 1.3   |
| 219.3 | 113.3 | 121.0 | 112.1 | 148.1 | 103.4 | 153.4 | 140.5 | 91.5  |
| 12.1  | 12.8  | 12.0  | 8.9   | 5.6   | 9.7   | 9.9   | 13.0  | 14.0  |
| 6.0   | 1.2   | 4.6   | 2.1   | 3.2   | 2.1   | 8.4   | 7.8   | 0.9   |
| 2.3   | 0.3   | 0.4   | 2.6   | 2.0   | 2.1   | 3.6   | 5.2   | 2.0   |
| 3.0   | 3.4   | 2.7   | 0.6   | 5.9   | 0.7   | 5.0   | 0.6   | 4.9   |
| 3.7   | 6.2   | 2.7   | 3.5   | 4.5   | 5.0   | 10.7  | 6.2   | 3.4   |
| 1.9   | 7.5   | 1.0   | 1.0   | 1.6   | 0.8   | 2.1   | 6.7   | 0.7   |
| 4.1   | 2.0   | 0.4   | 0.2   | 0.5   | 0.2   | 1.3   | 0.3   | 2.7   |
| 2.0   | 0.5   | 0.5   | 0.4   | 4.8   | 1.9   | 3.6   | 0.7   | 0.8   |
| 7.8   | 7.1   | 9.2   | 1.0   | 5.4   | 8.8   | 7.4   | 15.6  | 6.2   |
| 28.6  | 30.4  | 31.2  | 29.5  | 28.6  | 22.4  | 39.7  | 61.4  | 26.1  |
| 0.6   | 2.2   | 4.9   | 4.4   | 0.3   | 0.4   | 0.3   | 2.5   | 0.8   |
| 4.5   | 0.2   | 1.7   | 1.0   | 0.6   | 1.1   | 0.5   | 5.6   | 1.7   |
| 3.5   | 9.6   | 1.2   | 1.4   | 6.8   | 4.9   | 8.7   | 13.1  | 4.3   |
| 1.7   | 1.3   | 2.0   | 0.8   | 1.1   | 6.0   | 2.6   | 1.6   | 1.0   |
| 9.3   | 7.4   | 3.8   | 3.0   | 2.3   | 2.8   | 13.4  | 6.6   | 4.6   |
| 58.7  | 36.0  | 56.5  | 62.1  | 41.2  | 42.9  | 64.9  | 63.3  | 49.9  |
| 5.0   | 2.9   | 3.1   | 0.7   | 2.7   | 0.4   | 3.3   | 0.6   | 6.8   |
| 5.7   | 7.5   | 5.6   | 5.1   | 4.9   | 6.7   | 4.6   | 11.3  | 5.4   |
| 1.1   | 0.4   | 3.4   | 4.2   | 0.3   | 3.1   | 4.0   | 6.2   | 6.2   |
| 24.7  | 19.7  | 14.5  | 28.0  | 18.0  | 18.3  | 15.7  | 16.3  | 10.3  |
| 0.8   | 4.5   | 3.8   | 1.9   | 2.8   | 10.3  | 10.4  | 12.7  | 1.9   |
| 0.7   | 5.6   | 0.7   | 1.3   | 0.9   | 0.9   | 0.4   | 0.6   | 1.0   |
| 8.6   | 14.7  | 8.3   | 9.6   | 7.2   | 15.3  | 7.5   | 10.5  | 10.1  |
| 4.9   | 2.2   | 0.9   | 2.0   | 1.7   | 0.8   | 1.6   | 1.7   | 1.6   |
| 26.3  | 16.9  | 19.2  | 18.7  | 15.3  | 15.1  | 18.2  | 32.9  | 26.7  |
| 0.3   | 0.1   | 0.2   | 0.5   | 0.1   | 0.2   | 0.5   | 0.3   | 0.3   |
| 5.6   | 1.2   | 2.0   | 10.5  | 4.9   | 3.3   | 1.3   | 6.0   | 1.4   |
| 0.8   | 2.1   | 1.6   | 1.2   | 2.2   | 10.0  | 2.5   | 1.9   | 0.5   |
| 3.8   | 0.4   | 2.1   | 3.5   | 2.2   | 0.7   | 9.0   | 6.1   | 0.7   |
| 17.6  | 8.9   | 10.9  | 14.2  | 10.9  | 15.2  | 16.8  | 18.6  | 12.2  |
| 0.5   | 1.1   | 0.6   | 0.4   | 1.0   | 3.5   | 0.8   | 0.3   | 0.8   |
| 3.3   | 5.5   | 5.2   | 1.7   | 6.4   | 5.3   | 1.5   | 8.1   | 0.9   |
| 2.3   | 1.6   | 3.9   | 2.7   | 2.1   | 1.0   | 0.8   | 0.8   | 1.1   |
| 0.4   | 0.5   | 0.4   | 0.4   | 0.6   | 0.4   | 0.5   | 0.5   | 0.5   |
| 6.0   | 1.1   | 4.8   | 1.4   | 0.7   | 6.6   | 9.9   | 4.2   | 0.8   |
| 0.4   | 0.9   | 0.2   | 1.9   | 0.3   | 0.6   | 1.7   | 0.5   | 0.7   |
| 1.2   | 1.3   | 2.0   | 0.2   | 1.2   | 0.3   | 2.4   | 2.0   | 1.5   |
| 1.4   | 0.8   | 0.6   | 6.0   | 1.2   | 0.6   | 4.5   | 0.4   | 2.4   |
| 0.9   | 0.5   | 0.5   | 0.6   | 2.5   | 0.4   | 0.5   | 0.4   | 0.4   |
| 1.6   | 1.8   | 9.1   | 2.3   | 10.5  | 11.0  | 11.3  | 7.6   | 1.4   |
| 83.5  | 44.1  | 72.2  | 66.6  | 65.0  | 58.4  | 95.3  | 108.9 | 102.3 |
| 0.2   | 0.9   | 0.5   | 0.6   | 1.8   | 0.3   | 0.3   | 1.8   | 0.3   |
| 1.1   | 1.3   | 1.8   | 0.8   | 1.3   | 1.4   | 0.6   | 1.0   | 0.8   |
| 72.6  | 51.0  | 70.2  | 80.3  | 79.6  | 61.8  | 98.9  | 92.5  | 89.5  |
| 4.9   | 1.2   | 3.3   | 0.9   | 0.7   | 5.2   | 4.9   | 4.4   | 0.9   |
| 58.9  | 49.7  | 57.1  | 52.2  | 55.9  | 67.3  | 76.5  | 89.0  | 67.7  |

|        |        |        |        |        |        |        |        |        |
|--------|--------|--------|--------|--------|--------|--------|--------|--------|
| 2.0    | 0.5    | 1.0    | 0.3    | 0.6    | 3.2    | 5.5    | 9.9    | 0.2    |
| 0.2    | 0.6    | 0.5    | 0.9    | 0.5    | 1.3    | 0.5    | 0.4    | 0.4    |
| 0.5    | 0.3    | 0.3    | 1.2    | 1.3    | 0.4    | 0.6    | 1.0    | 1.1    |
| 1241.5 | 1352.9 | 1322.2 | 1373.1 | 1478.0 | 1216.2 | 1565.7 | 1593.3 | 1146.7 |
| 12.0   | 5.3    | 10.8   | 8.6    | 0.6    | 7.0    | 4.3    | 10.3   | 5.7    |
| 0.7    | 1.1    | 0.1    | 1.1    | 1.1    | 0.2    | 0.9    | 1.3    | 1.3    |
| 16.7   | 24.3   | 15.1   | 16.5   | 16.6   | 14.2   | 19.7   | 22.5   | 13.6   |
| 1.9    | 2.5    | 6.7    | 5.2    | 1.2    | 5.4    | 1.2    | 1.1    | 3.3    |
| 5.7    | 5.2    | 3.9    | 0.7    | 3.5    | 0.8    | 0.9    | 5.3    | 2.8    |
| 1.1    | 0.4    | 0.4    | 1.1    | 0.4    | 2.0    | 4.3    | 1.0    | 0.4    |
| 14.8   | 9.9    | 9.6    | 12.0   | 10.7   | 9.9    | 15.1   | 22.6   | 10.9   |
| 4.5    | 10.4   | 7.1    | 0.5    | 6.8    | 7.5    | 1.8    | 12.2   | 1.7    |
| 31.9   | 2.6    | 4.3    | 8.9    | 21.1   | 18.5   | 14.4   | 34.0   | 16.9   |
| 32.3   | 17.7   | 21.6   | 19.6   | 24.8   | 14.5   | 21.9   | 26.9   | 26.4   |
| 10.0   | 10.5   | 7.4    | 9.7    | 6.0    | 3.9    | 9.1    | 15.0   | 9.1    |
| 11.1   | 9.1    | 5.9    | 7.6    | 6.2    | 8.5    | 9.4    | 8.6    | 9.4    |
| 16.4   | 13.2   | 14.9   | 14.6   | 15.1   | 17.5   | 15.6   | 23.4   | 18.1   |
| 5.2    | 4.4    | 1.4    | 9.1    | 0.6    | 0.9    | 4.2    | 3.7    | 1.8    |
| 4.1    | 0.1    | 2.0    | 3.6    | 1.4    | 2.5    | 2.3    | 5.9    | 4.0    |
| 0.9    | 0.8    | 0.5    | 0.7    | 0.5    | 1.4    | 1.1    | 1.0    | 0.8    |
| 921.6  | 555.0  | 586.2  | 623.6  | 660.7  | 745.5  | 785.7  | 1172.6 | 718.0  |
| 0.5    | 2.3    | 3.0    | 0.5    | 1.9    | 2.4    | 0.9    | 8.8    | 1.9    |
| 1.0    | 2.5    | 2.9    | 2.7    | 1.3    | 3.4    | 0.9    | 1.8    | 1.3    |
| 44.0   | 41.9   | 35.9   | 37.0   | 38.6   | 40.7   | 34.2   | 51.8   | 55.1   |
| 6.3    | 1.3    | 10.1   | 6.0    | 1.7    | 8.8    | 2.6    | 2.4    | 1.1    |
| 5.1    | 5.8    | 5.1    | 4.4    | 4.4    | 4.3    | 4.5    | 2.0    | 8.0    |
| 0.8    | 1.2    | 0.6    | 1.3    | 3.8    | 0.5    | 0.3    | 4.1    | 0.8    |
| 0.7    | 4.7    | 6.1    | 4.3    | 9.7    | 4.7    | 9.7    | 12.0   | 3.6    |
| 0.2    | 0.1    | 0.3    | 2.4    | 0.4    | 3.9    | 0.4    | 0.5    | 0.2    |
| 3.4    | 0.6    | 6.8    | 6.8    | 7.0    | 0.7    | 5.2    | 5.0    | 1.1    |
| 10.3   | 3.0    | 6.0    | 5.8    | 4.0    | 7.9    | 9.6    | 11.7   | 8.0    |
| 3.3    | 3.8    | 5.8    | 0.6    | 2.8    | 5.3    | 2.0    | 2.3    | 1.3    |
| 3.4    | 0.1    | 3.6    | 1.8    | 2.1    | 3.9    | 5.9    | 5.0    | 4.6    |
| 13.4   | 8.4    | 8.6    | 6.6    | 11.4   | 6.1    | 7.7    | 12.1   | 9.7    |
| 7.3    | 7.0    | 5.7    | 2.1    | 5.8    | 6.1    | 16.2   | 10.3   | 8.0    |
| 1.0    | 7.3    | 5.2    | 2.2    | 11.4   | 2.7    | 5.6    | 16.2   | 9.2    |
| 0.8    | 3.0    | 0.3    | 4.2    | 2.5    | 0.4    | 4.0    | 0.8    | 0.1    |
| 10.6   | 7.7    | 10.2   | 11.1   | 7.9    | 9.2    | 6.2    | 9.1    | 11.5   |
| 1.4    | 4.3    | 4.8    | 0.8    | 1.3    | 0.3    | 10.8   | 3.2    | 0.8    |
| 100.8  | 56.3   | 75.3   | 60.0   | 71.7   | 88.6   | 136.3  | 157.8  | 84.8   |
| 0.9    | 9.2    | 7.2    | 0.9    | 3.1    | 3.2    | 1.2    | 1.1    | 1.0    |
| 2.9    | 1.0    | 0.5    | 3.4    | 2.7    | 2.9    | 1.8    | 1.6    | 1.0    |
| 1.8    | 1.1    | 3.2    | 0.3    | 2.6    | 0.6    | 3.3    | 0.6    | 0.4    |
| 0.7    | 1.4    | 1.8    | 1.3    | 0.9    | 1.3    | 1.7    | 2.0    | 9.9    |
| 11.5   | 12.5   | 17.2   | 16.2   | 12.9   | 14.8   | 15.3   | 13.7   | 25.8   |
| 3.1    | 2.7    | 5.7    | 3.1    | 2.5    | 2.5    | 4.8    | 3.1    | 0.9    |
| 1.2    | 1.0    | 2.1    | 1.0    | 0.4    | 0.5    | 3.9    | 1.2    | 1.9    |
| 39.9   | 28.1   | 27.4   | 34.9   | 25.9   | 32.3   | 36.8   | 40.2   | 42.1   |
| 1.1    | 0.5    | 0.7    | 1.3    | 2.2    | 0.3    | 5.3    | 1.0    | 1.0    |
| 0.5    | 2.7    | 4.4    | 0.6    | 2.6    | 12.3   | 5.1    | 2.2    | 0.8    |
| 5.7    | 0.4    | 4.9    | 4.2    | 7.5    | 6.3    | 6.4    | 4.3    | 3.9    |
| 56.3   | 38.8   | 49.3   | 60.7   | 47.6   | 61.2   | 75.5   | 66.9   | 63.9   |
| 23.9   | 17.6   | 20.7   | 26.1   | 15.7   | 21.5   | 24.1   | 27.7   | 20.6   |

|       |       |       |       |       |       |       |       |       |
|-------|-------|-------|-------|-------|-------|-------|-------|-------|
| 1.2   | 1.5   | 0.6   | 0.6   | 1.0   | 0.7   | 0.9   | 0.8   | 5.3   |
| 0.6   | 1.1   | 0.7   | 0.7   | 1.9   | 1.5   | 2.7   | 2.1   | 4.3   |
| 1.3   | 0.5   | 1.3   | 2.0   | 1.0   | 6.3   | 3.7   | 4.9   | 11.6  |
| 497.9 | 350.7 | 436.5 | 441.6 | 493.4 | 438.5 | 546.9 | 601.6 | 418.4 |
| 7.2   | 3.8   | 4.1   | 4.9   | 7.0   | 10.9  | 8.3   | 2.7   | 5.1   |
| 6.9   | 11.1  | 9.4   | 9.1   | 9.4   | 7.4   | 7.6   | 13.6  | 11.2  |
| 6.9   | 5.4   | 5.8   | 1.9   | 7.2   | 8.0   | 5.4   | 14.8  | 2.9   |
| 11.9  | 6.4   | 7.8   | 8.8   | 11.7  | 3.2   | 9.1   | 2.8   | 6.0   |
| 3.0   | 5.9   | 5.9   | 7.4   | 8.8   | 10.7  | 2.6   | 13.9  | 8.3   |
| 0.3   | 2.2   | 0.8   | 0.8   | 2.8   | 4.3   | 3.3   | 5.8   | 2.8   |
| 3.1   | 8.3   | 1.2   | 1.1   | 1.3   | 2.2   | 1.5   | 12.7  | 1.9   |
| 120.1 | 98.7  | 110.3 | 75.1  | 118.4 | 108.3 | 152.1 | 197.7 | 105.2 |
| 7.3   | 8.2   | 8.2   | 8.6   | 7.5   | 6.6   | 7.4   | 10.7  | 10.0  |
| 0.5   | 0.8   | 0.5   | 0.4   | 0.6   | 0.8   | 0.9   | 0.7   | 0.5   |
| 1.3   | 3.3   | 0.8   | 4.2   | 0.5   | 0.5   | 5.6   | 1.6   | 8.2   |
| 9.8   | 1.9   | 3.1   | 10.5  | 6.4   | 9.3   | 11.2  | 12.7  | 10.2  |
| 22.0  | 8.8   | 28.3  | 22.5  | 33.5  | 23.0  | 37.6  | 38.4  | 20.8  |
| 3.7   | 7.8   | 8.0   | 4.6   | 8.7   | 5.7   | 0.4   | 1.1   | 4.9   |
| 0.5   | 1.0   | 0.8   | 3.8   | 1.2   | 1.1   | 1.5   | 0.6   | 1.1   |
| 2.6   | 1.2   | 3.6   | 0.5   | 0.6   | 0.4   | 1.4   | 1.0   | 0.3   |
| 0.6   | 3.4   | 4.2   | 3.5   | 3.2   | 0.3   | 3.7   | 3.8   | 1.4   |
| 69.6  | 37.2  | 53.6  | 48.6  | 45.4  | 57.3  | 90.4  | 118.8 | 70.6  |
| 0.1   | 2.2   | 3.4   | 3.0   | 3.2   | 3.8   | 2.5   | 2.5   | 2.8   |
| 5.1   | 5.1   | 5.5   | 4.6   | 6.7   | 13.4  | 8.8   | 11.9  | 12.9  |
| 2.1   | 1.4   | 6.8   | 5.0   | 0.8   | 1.5   | 1.8   | 2.2   | 1.6   |
| 626.8 | 426.2 | 376.6 | 481.7 | 533.0 | 481.9 | 689.5 | 685.3 | 450.7 |
| 4.6   | 9.7   | 2.8   | 4.6   | 6.0   | 0.4   | 4.9   | 5.4   | 2.8   |
| 38.1  | 30.4  | 23.0  | 40.5  | 43.8  | 34.8  | 43.8  | 54.8  | 42.8  |
| 6.4   | 6.5   | 1.1   | 6.6   | 5.8   | 4.7   | 9.0   | 8.7   | 3.7   |
| 0.3   | 0.5   | 0.4   | 1.7   | 0.2   | 0.2   | 0.6   | 0.9   | 0.4   |
| 0.4   | 0.3   | 0.5   | 0.3   | 0.9   | 1.0   | 0.3   | 0.6   | 0.2   |
| 4.1   | 5.4   | 0.6   | 2.3   | 4.9   | 0.3   | 0.4   | 8.9   | 2.3   |
| 11.2  | 4.2   | 7.0   | 5.5   | 8.1   | 4.7   | 5.6   | 7.5   | 4.5   |
| 8.8   | 2.9   | 3.8   | 0.9   | 0.5   | 3.5   | 2.3   | 1.0   | 0.9   |
| 6.5   | 3.7   | 5.2   | 3.7   | 2.4   | 5.6   | 6.8   | 7.3   | 1.2   |
| 3.8   | 0.6   | 0.4   | 1.4   | 1.9   | 3.8   | 1.6   | 0.5   | 0.7   |
| 1.8   | 2.0   | 1.6   | 1.9   | 5.4   | 9.5   | 7.4   | 6.8   | 8.3   |
| 131.7 | 128.2 | 98.3  | 119.3 | 153.3 | 114.7 | 159.7 | 197.4 | 159.4 |
| 1.7   | 12.4  | 5.4   | 5.5   | 9.3   | 11.6  | 13.7  | 10.5  | 7.6   |
| 341.3 | 176.7 | 175.6 | 217.7 | 220.5 | 214.3 | 359.7 | 352.7 | 212.7 |
| 2.4   | 1.3   | 1.2   | 1.3   | 2.6   | 5.1   | 1.0   | 1.0   | 0.7   |
| 8.3   | 4.2   | 4.2   | 1.5   | 3.9   | 6.0   | 4.1   | 7.6   | 8.4   |
| 4.9   | 5.5   | 1.5   | 1.2   | 1.2   | 1.4   | 1.1   | 2.3   | 1.1   |
| 2.4   | 0.9   | 2.4   | 0.1   | 1.6   | 3.1   | 0.2   | 2.5   | 3.1   |
| 17.3  | 10.4  | 12.2  | 13.6  | 16.6  | 20.6  | 19.5  | 17.9  | 6.2   |
| 1.0   | 3.0   | 3.9   | 0.5   | 1.0   | 6.9   | 4.7   | 5.7   | 6.5   |
| 51.4  | 37.3  | 34.3  | 39.0  | 40.1  | 42.2  | 50.1  | 58.8  | 35.5  |
| 9.3   | 10.9  | 4.5   | 2.7   | 3.9   | 5.2   | 11.3  | 7.9   | 7.7   |
| 8.5   | 9.2   | 10.3  | 9.3   | 7.8   | 1.9   | 12.5  | 9.8   | 14.7  |
| 5.0   | 11.3  | 1.6   | 5.2   | 4.9   | 2.3   | 5.5   | 4.9   | 2.7   |
| 137.4 | 88.3  | 117.2 | 144.2 | 129.6 | 114.4 | 173.5 | 170.5 | 149.6 |
| 6.2   | 2.6   | 3.0   | 4.0   | 3.5   | 4.7   | 3.2   | 5.0   | 7.2   |
| 1.1   | 2.2   | 1.4   | 8.6   | 4.7   | 2.9   | 1.0   | 11.0  | 6.4   |

|       |       |       |       |       |       |       |       |       |
|-------|-------|-------|-------|-------|-------|-------|-------|-------|
| 8.7   | 15.5  | 11.3  | 8.2   | 13.4  | 17.5  | 19.8  | 28.5  | 13.9  |
| 1.6   | 0.5   | 3.2   | 0.1   | 3.4   | 3.0   | 2.1   | 3.7   | 0.5   |
| 1.4   | 0.5   | 0.2   | 2.2   | 1.8   | 2.1   | 0.3   | 1.4   | 0.5   |
| 34.6  | 30.9  | 23.3  | 17.2  | 35.9  | 24.5  | 31.9  | 33.7  | 22.5  |
| 67.2  | 43.5  | 46.4  | 46.4  | 40.1  | 49.2  | 65.5  | 72.4  | 46.1  |
| 1.5   | 15.4  | 8.4   | 10.0  | 10.9  | 2.6   | 11.7  | 9.9   | 2.4   |
| 3.9   | 1.5   | 3.6   | 6.5   | 0.3   | 0.9   | 3.6   | 3.4   | 3.0   |
| 0.6   | 0.3   | 2.1   | 0.4   | 0.8   | 0.3   | 0.6   | 0.3   | 0.2   |
| 0.8   | 0.3   | 2.5   | 1.3   | 3.1   | 5.7   | 2.6   | 4.7   | 1.3   |
| 10.0  | 6.7   | 11.1  | 10.4  | 8.5   | 7.6   | 11.8  | 8.1   | 13.0  |
| 0.4   | 1.1   | 8.5   | 5.1   | 4.2   | 2.8   | 0.6   | 3.0   | 0.2   |
| 3.6   | 3.8   | 1.5   | 3.0   | 3.7   | 2.8   | 4.7   | 2.8   | 1.5   |
| 15.8  | 9.4   | 10.0  | 9.7   | 12.6  | 11.6  | 26.2  | 16.5  | 13.1  |
| 0.8   | 2.1   | 1.1   | 8.5   | 8.4   | 2.1   | 3.2   | 3.8   | 3.8   |
| 32.7  | 14.0  | 27.7  | 29.4  | 24.5  | 28.8  | 35.5  | 34.2  | 27.0  |
| 190.7 | 138.6 | 173.3 | 192.1 | 154.7 | 125.5 | 192.0 | 158.0 | 157.8 |
| 7.2   | 0.3   | 4.3   | 2.5   | 4.3   | 1.5   | 2.8   | 6.1   | 6.6   |
| 13.5  | 7.3   | 9.3   | 14.7  | 11.4  | 13.5  | 9.5   | 15.2  | 12.2  |
| 12.0  | 4.2   | 9.9   | 14.9  | 14.6  | 3.2   | 15.1  | 13.7  | 2.6   |
| 7.3   | 4.8   | 4.9   | 4.1   | 15.5  | 6.4   | 5.3   | 10.9  | 5.8   |
| 8.4   | 4.6   | 6.3   | 5.7   | 3.8   | 0.4   | 5.9   | 1.5   | 6.9   |
| 2.0   | 1.3   | 3.3   | 3.1   | 1.7   | 1.2   | 0.7   | 8.4   | 0.8   |
| 42.8  | 28.2  | 30.2  | 30.3  | 32.0  | 31.2  | 37.0  | 38.2  | 24.1  |
| 1.3   | 10.8  | 3.7   | 10.7  | 6.0   | 9.6   | 14.7  | 11.2  | 4.5   |
| 6.9   | 8.6   | 4.5   | 6.1   | 6.2   | 5.0   | 0.6   | 2.9   | 2.7   |
| 15.3  | 26.2  | 21.4  | 18.2  | 13.9  | 11.3  | 6.5   | 8.7   | 6.9   |
| 43.9  | 20.4  | 24.3  | 32.8  | 31.3  | 28.7  | 29.2  | 42.3  | 19.7  |
| 0.1   | 2.1   | 5.1   | 4.3   | 1.9   | 0.5   | 2.5   | 0.3   | 0.5   |
| 0.4   | 1.2   | 0.8   | 1.5   | 0.9   | 2.6   | 1.2   | 0.7   | 0.8   |
| 1.5   | 0.4   | 7.8   | 6.0   | 2.4   | 1.7   | 1.7   | 0.9   | 0.9   |
| 21.5  | 23.8  | 13.4  | 23.1  | 12.4  | 21.1  | 20.9  | 21.0  | 25.0  |
| 341.4 | 201.8 | 261.4 | 234.5 | 231.8 | 230.5 | 262.8 | 374.7 | 280.6 |
| 150.4 | 95.6  | 111.8 | 86.6  | 114.3 | 107.0 | 127.1 | 140.5 | 122.1 |
| 2.4   | 1.4   | 1.4   | 0.4   | 2.0   | 1.1   | 1.1   | 3.1   | 1.3   |
| 16.1  | 19.5  | 16.3  | 21.9  | 22.5  | 17.2  | 24.7  | 23.2  | 22.3  |
| 0.5   | 1.2   | 0.7   | 1.7   | 0.8   | 1.2   | 1.0   | 1.1   | 0.6   |
| 1.0   | 1.6   | 1.1   | 0.7   | 1.8   | 1.1   | 5.6   | 1.3   | 1.0   |
| 31.7  | 25.2  | 24.1  | 6.7   | 31.1  | 41.1  | 24.8  | 35.9  | 3.9   |
| 15.7  | 19.8  | 13.4  | 21.2  | 15.1  | 20.4  | 27.7  | 35.8  | 22.9  |
| 0.4   | 4.6   | 2.6   | 1.0   | 3.3   | 2.7   | 0.8   | 2.9   | 2.4   |
| 7.2   | 7.2   | 3.7   | 6.3   | 10.4  | 7.0   | 11.0  | 9.3   | 5.0   |
| 0.6   | 0.5   | 0.3   | 0.5   | 0.2   | 0.8   | 5.1   | 1.1   | 1.1   |
| 62.8  | 50.5  | 48.8  | 38.3  | 51.5  | 50.5  | 64.8  | 60.1  | 72.4  |
| 9.4   | 14.1  | 7.4   | 14.8  | 13.4  | 10.3  | 16.4  | 18.0  | 9.7   |
| 13.1  | 22.7  | 15.4  | 16.3  | 16.4  | 20.5  | 32.7  | 36.9  | 21.1  |
| 3.4   | 2.3   | 5.3   | 0.5   | 2.7   | 5.2   | 1.8   | 5.1   | 2.8   |
| 1.2   | 0.6   | 0.6   | 0.8   | 2.7   | 4.2   | 2.2   | 5.0   | 8.2   |
| 0.0   | 0.1   | 0.5   | 0.2   | 0.1   | 0.1   | 0.2   | 0.7   | 0.1   |
| 0.9   | 6.3   | 1.0   | 2.1   | 0.9   | 1.2   | 0.9   | 2.3   | 1.3   |
| 0.4   | 4.4   | 2.7   | 3.7   | 0.1   | 2.5   | 4.1   | 2.9   | 0.2   |
| 1.9   | 4.2   | 5.3   | 5.8   | 7.8   | 0.7   | 6.0   | 5.6   | 7.5   |
| 15.3  | 45.5  | 46.2  | 54.1  | 54.4  | 37.8  | 68.1  | 64.1  | 49.8  |
| 53.9  | 36.3  | 36.4  | 43.9  | 37.1  | 27.0  | 43.0  | 45.1  | 31.2  |

|       |       |       |       |       |       |       |       |       |
|-------|-------|-------|-------|-------|-------|-------|-------|-------|
| 4.8   | 1.0   | 0.9   | 6.6   | 1.3   | 5.5   | 0.4   | 4.5   | 0.5   |
| 9.2   | 10.0  | 11.3  | 9.2   | 9.3   | 7.7   | 12.7  | 16.5  | 13.6  |
| 0.3   | 0.4   | 0.5   | 3.0   | 2.2   | 1.6   | 0.4   | 0.2   | 0.6   |
| 10.5  | 8.1   | 8.5   | 6.4   | 7.6   | 5.0   | 8.1   | 12.9  | 8.9   |
| 0.3   | 0.3   | 1.6   | 0.5   | 0.5   | 0.4   | 2.1   | 0.5   | 0.3   |
| 11.1  | 3.5   | 1.0   | 6.4   | 7.0   | 8.8   | 7.3   | 2.1   | 1.6   |
| 1.0   | 3.1   | 6.1   | 4.5   | 0.5   | 2.9   | 0.5   | 6.2   | 6.7   |
| 7.6   | 9.6   | 1.1   | 2.7   | 6.2   | 2.9   | 1.8   | 8.2   | 0.8   |
| 8.0   | 12.4  | 7.3   | 11.8  | 10.4  | 9.7   | 11.3  | 11.5  | 12.0  |
| 33.5  | 21.0  | 22.5  | 27.3  | 40.5  | 28.4  | 29.5  | 33.4  | 38.0  |
| 12.5  | 14.3  | 15.3  | 10.3  | 17.1  | 11.5  | 19.7  | 6.8   | 9.1   |
| 5.1   | 0.3   | 1.0   | 2.4   | 3.0   | 4.3   | 2.9   | 3.3   | 0.5   |
| 6.4   | 3.1   | 1.8   | 1.5   | 1.6   | 3.0   | 5.9   | 6.2   | 3.5   |
| 73.9  | 37.6  | 50.9  | 44.5  | 38.0  | 46.4  | 53.7  | 53.8  | 45.1  |
| 5.5   | 0.8   | 3.6   | 0.4   | 0.8   | 6.7   | 0.4   | 0.4   | 4.3   |
| 211.7 | 116.9 | 141.5 | 145.3 | 149.3 | 135.2 | 176.4 | 190.1 | 106.4 |
| 4.1   | 7.0   | 3.6   | 6.5   | 3.2   | 6.0   | 6.2   | 6.7   | 4.1   |
| 40.9  | 22.8  | 23.2  | 20.3  | 23.6  | 22.8  | 34.7  | 25.8  | 22.0  |
| 11.4  | 6.0   | 3.2   | 7.3   | 7.8   | 3.4   | 9.4   | 12.6  | 5.8   |
| 0.2   | 0.4   | 0.8   | 0.1   | 0.2   | 1.2   | 1.7   | 2.6   | 1.7   |
| 1.0   | 0.9   | 0.8   | 2.1   | 2.5   | 2.1   | 3.3   | 2.9   | 1.5   |
| 51.3  | 53.5  | 63.9  | 59.5  | 55.2  | 51.6  | 93.3  | 103.0 | 68.4  |
| 2.5   | 4.3   | 3.4   | 0.5   | 4.7   | 6.0   | 4.4   | 10.3  | 5.2   |
| 5.1   | 13.9  | 3.8   | 6.8   | 11.3  | 2.3   | 4.5   | 12.1  | 11.3  |
| 29.7  | 23.5  | 26.5  | 17.4  | 30.0  | 25.2  | 24.6  | 31.7  | 28.9  |
| 11.3  | 8.1   | 6.2   | 6.1   | 6.2   | 5.3   | 13.3  | 17.6  | 7.6   |
| 0.4   | 1.3   | 0.6   | 0.3   | 0.4   | 1.2   | 2.6   | 1.5   | 2.6   |
| 9.3   | 1.5   | 1.6   | 1.0   | 0.8   | 0.9   | 2.4   | 1.2   | 1.3   |
| 117.1 | 57.9  | 70.3  | 77.1  | 83.5  | 67.6  | 109.2 | 132.3 | 98.6  |
| 36.3  | 31.3  | 34.6  | 40.7  | 40.6  | 39.9  | 48.1  | 35.9  | 22.3  |
| 5.1   | 3.6   | 0.6   | 0.9   | 6.3   | 1.0   | 4.0   | 2.1   | 8.0   |
| 10.0  | 7.5   | 11.8  | 2.0   | 8.4   | 12.4  | 11.9  | 18.7  | 5.2   |
| 3.0   | 5.1   | 3.8   | 1.2   | 1.0   | 0.6   | 0.5   | 0.5   | 3.0   |
| 31.4  | 23.6  | 25.2  | 24.4  | 21.0  | 26.2  | 42.7  | 48.4  | 23.7  |
| 0.1   | 0.2   | 0.3   | 0.2   | 2.8   | 3.7   | 0.4   | 1.1   | 1.5   |
| 0.2   | 2.4   | 0.1   | 0.8   | 0.3   | 0.2   | 0.4   | 0.2   | 0.0   |
| 10.1  | 2.4   | 6.0   | 5.5   | 8.3   | 1.5   | 2.3   | 6.9   | 4.9   |
| 13.6  | 14.4  | 14.3  | 6.4   | 14.6  | 8.4   | 11.0  | 19.5  | 11.6  |
| 0.9   | 0.5   | 2.1   | 0.6   | 2.4   | 0.8   | 3.7   | 0.7   | 2.7   |
| 1.7   | 1.0   | 3.3   | 5.1   | 0.8   | 1.0   | 1.2   | 1.0   | 4.3   |
| 5.8   | 5.4   | 11.0  | 11.5  | 12.2  | 10.6  | 4.1   | 13.1  | 10.4  |
| 10.3  | 2.9   | 5.2   | 9.8   | 7.8   | 4.2   | 4.5   | 7.7   | 6.9   |
| 1.1   | 4.1   | 6.8   | 1.3   | 1.5   | 1.5   | 3.6   | 2.8   | 3.5   |
| 0.8   | 1.3   | 4.9   | 5.0   | 0.7   | 0.6   | 0.6   | 2.1   | 1.0   |
| 0.1   | 0.2   | 0.1   | 0.6   | 0.3   | 0.2   | 0.3   | 2.2   | 0.2   |
| 2.5   | 0.6   | 0.6   | 0.8   | 0.3   | 0.5   | 1.4   | 3.1   | 0.7   |
| 85.9  | 74.1  | 62.1  | 75.3  | 76.5  | 51.6  | 78.8  | 77.8  | 65.3  |
| 5.7   | 0.8   | 4.0   | 3.0   | 2.8   | 2.8   | 7.0   | 7.3   | 5.2   |
| 36.9  | 30.3  | 37.7  | 26.7  | 29.6  | 23.6  | 22.0  | 33.3  | 22.0  |
| 5.3   | 3.7   | 6.4   | 5.9   | 9.4   | 11.4  | 19.7  | 10.8  | 13.4  |
| 23.5  | 11.3  | 12.8  | 11.1  | 12.8  | 10.6  | 19.2  | 23.8  | 15.7  |
| 5.9   | 6.2   | 5.3   | 4.2   | 7.3   | 5.8   | 6.4   | 11.9  | 11.0  |
| 0.4   | 0.2   | 0.5   | 1.6   | 0.4   | 0.8   | 1.7   | 0.3   | 0.8   |

|      |      |      |      |      |      |      |      |      |
|------|------|------|------|------|------|------|------|------|
| 1.5  | 0.6  | 2.8  | 4.5  | 1.7  | 0.7  | 0.5  | 0.7  | 4.0  |
| 1.2  | 1.5  | 1.2  | 0.8  | 2.6  | 4.5  | 6.0  | 2.1  | 1.2  |
| 1.8  | 0.2  | 0.1  | 0.3  | 2.1  | 1.8  | 4.5  | 0.2  | 0.4  |
| 8.5  | 7.6  | 7.0  | 5.0  | 4.8  | 7.1  | 6.1  | 7.0  | 6.1  |
| 8.7  | 12.1 | 7.9  | 9.0  | 9.5  | 8.2  | 8.9  | 12.8 | 12.8 |
| 1.2  | 1.7  | 1.0  | 1.8  | 0.2  | 0.3  | 2.8  | 2.1  | 2.0  |
| 2.1  | 2.7  | 2.3  | 14.9 | 1.4  | 9.8  | 3.4  | 5.1  | 6.6  |
| 0.5  | 2.5  | 1.5  | 2.1  | 1.0  | 5.0  | 6.2  | 2.0  | 1.8  |
| 25.1 | 17.4 | 22.8 | 24.6 | 22.4 | 19.8 | 19.4 | 24.8 | 19.0 |
| 34.6 | 32.4 | 26.2 | 31.6 | 23.4 | 32.2 | 44.3 | 49.5 | 53.7 |
| 9.1  | 4.5  | 8.2  | 1.3  | 7.7  | 7.1  | 4.5  | 14.5 | 7.3  |
| 19.9 | 22.2 | 16.0 | 18.0 | 19.2 | 13.0 | 18.3 | 32.6 | 16.1 |
| 0.7  | 0.2  | 2.9  | 0.2  | 0.6  | 6.1  | 4.9  | 1.4  | 3.5  |
| 4.5  | 0.1  | 3.7  | 0.2  | 2.0  | 2.1  | 6.2  | 5.6  | 1.4  |
| 11.2 | 3.9  | 7.0  | 5.0  | 1.2  | 6.1  | 7.3  | 13.9 | 9.3  |
| 48.6 | 30.2 | 39.1 | 43.2 | 38.2 | 13.3 | 41.3 | 42.0 | 36.8 |
| 0.1  | 2.8  | 3.1  | 0.1  | 0.3  | 0.2  | 3.0  | 3.0  | 4.8  |
| 3.2  | 3.7  | 10.9 | 4.7  | 6.9  | 7.3  | 18.8 | 11.3 | 12.6 |
| 3.6  | 0.4  | 3.2  | 2.1  | 2.1  | 4.0  | 3.6  | 2.1  | 3.7  |
| 0.5  | 1.1  | 1.2  | 1.3  | 1.4  | 1.1  | 1.7  | 0.8  | 0.7  |
| 0.8  | 0.5  | 0.7  | 0.5  | 0.8  | 1.3  | 1.9  | 1.6  | 1.1  |
| 3.9  | 1.9  | 1.4  | 3.7  | 8.0  | 2.1  | 3.3  | 6.9  | 1.3  |
| 17.7 | 7.8  | 8.6  | 4.9  | 6.4  | 5.8  | 6.5  | 14.6 | 8.0  |
| 36.7 | 21.2 | 19.9 | 27.8 | 25.2 | 26.8 | 31.8 | 48.3 | 18.0 |
| 0.8  | 3.3  | 0.9  | 3.3  | 2.9  | 0.8  | 3.7  | 5.0  | 2.6  |
| 5.2  | 10.3 | 8.4  | 9.3  | 9.6  | 7.9  | 9.2  | 13.6 | 12.2 |
| 17.7 | 13.2 | 14.3 | 7.7  | 18.9 | 22.1 | 31.3 | 15.4 | 29.7 |
| 49.0 | 35.3 | 36.6 | 27.8 | 40.6 | 28.2 | 34.8 | 64.6 | 37.4 |
| 0.5  | 0.5  | 4.4  | 0.5  | 1.9  | 5.0  | 6.0  | 1.9  | 0.6  |
| 0.5  | 1.5  | 3.9  | 0.3  | 6.1  | 2.1  | 4.6  | 1.7  | 2.0  |
| 48.9 | 18.2 | 38.1 | 38.5 | 31.9 | 28.1 | 42.4 | 35.2 | 34.4 |
| 13.8 | 10.6 | 11.7 | 16.1 | 14.4 | 6.9  | 19.0 | 22.2 | 11.7 |
| 14.5 | 16.0 | 16.3 | 11.0 | 6.6  | 3.6  | 15.4 | 10.6 | 12.9 |
| 26.2 | 18.2 | 25.7 | 23.9 | 23.2 | 23.6 | 28.4 | 30.3 | 27.5 |
| 15.3 | 6.8  | 8.8  | 9.5  | 9.9  | 9.4  | 10.5 | 8.8  | 7.5  |
| 10.5 | 15.4 | 4.3  | 13.6 | 16.5 | 13.4 | 13.9 | 20.2 | 15.7 |
| 3.1  | 2.6  | 7.8  | 1.0  | 4.7  | 1.3  | 4.2  | 7.6  | 6.8  |
| 7.1  | 6.1  | 9.8  | 8.2  | 6.6  | 1.9  | 2.0  | 6.2  | 5.2  |
| 0.7  | 0.9  | 2.8  | 0.4  | 1.9  | 1.1  | 0.7  | 3.7  | 0.6  |
| 0.4  | 0.3  | 5.7  | 2.0  | 0.6  | 2.8  | 4.3  | 3.7  | 1.2  |
| 4.0  | 6.3  | 1.1  | 2.1  | 5.2  | 5.0  | 3.2  | 2.9  | 7.6  |
| 1.2  | 2.0  | 7.1  | 0.8  | 6.2  | 0.9  | 8.1  | 10.8 | 7.7  |
| 4.0  | 4.3  | 5.5  | 3.8  | 5.4  | 0.2  | 6.9  | 7.0  | 3.7  |
| 4.5  | 4.7  | 3.2  | 9.2  | 4.9  | 12.1 | 13.0 | 24.3 | 15.5 |
| 0.3  | 2.5  | 0.4  | 0.4  | 1.5  | 0.2  | 3.8  | 0.3  | 5.1  |
| 3.0  | 1.3  | 2.9  | 0.7  | 1.8  | 0.9  | 4.9  | 3.6  | 0.6  |
| 0.3  | 0.1  | 1.1  | 1.3  | 0.8  | 1.5  | 0.4  | 0.3  | 0.4  |
| 9.3  | 10.1 | 2.0  | 10.8 | 7.6  | 9.3  | 12.1 | 12.0 | 9.9  |
| 0.7  | 1.4  | 3.0  | 0.9  | 3.4  | 4.7  | 1.0  | 0.7  | 0.8  |
| 21.5 | 16.0 | 16.8 | 16.2 | 18.4 | 11.8 | 22.5 | 19.8 | 13.2 |
| 7.4  | 12.3 | 9.5  | 7.8  | 8.7  | 9.3  | 11.0 | 10.2 | 13.7 |
| 5.6  | 0.7  | 1.8  | 3.8  | 7.0  | 4.3  | 6.3  | 3.9  | 7.3  |
| 0.5  | 3.7  | 1.0  | 5.5  | 6.0  | 12.9 | 5.6  | 6.2  | 2.7  |

|       |       |       |       |       |       |       |       |       |
|-------|-------|-------|-------|-------|-------|-------|-------|-------|
| 0.7   | 3.1   | 2.1   | 4.5   | 0.2   | 0.2   | 1.3   | 2.8   | 3.6   |
| 0.4   | 0.4   | 0.4   | 0.5   | 0.4   | 1.4   | 2.3   | 2.5   | 0.4   |
| 51.0  | 36.9  | 39.9  | 43.3  | 35.6  | 39.8  | 55.0  | 59.6  | 40.5  |
| 13.9  | 9.4   | 8.8   | 10.4  | 9.4   | 11.5  | 26.0  | 35.9  | 15.9  |
| 3.3   | 0.5   | 4.6   | 0.5   | 0.4   | 1.0   | 3.2   | 0.8   | 0.2   |
| 152.1 | 149.7 | 138.8 | 160.8 | 178.4 | 116.9 | 219.2 | 194.1 | 192.4 |
| 0.7   | 0.5   | 0.2   | 0.4   | 0.4   | 0.9   | 0.8   | 0.9   | 0.6   |
| 2.9   | 1.6   | 1.6   | 4.1   | 1.0   | 1.5   | 0.7   | 2.4   | 2.2   |
| 0.7   | 0.8   | 3.5   | 0.8   | 0.3   | 0.7   | 3.2   | 3.2   | 0.3   |
| 0.2   | 1.8   | 0.5   | 1.4   | 4.2   | 2.1   | 2.3   | 2.2   | 0.2   |
| 1.0   | 5.7   | 1.0   | 1.1   | 0.5   | 1.2   | 0.8   | 1.2   | 0.2   |
| 5.3   | 3.4   | 2.8   | 7.5   | 4.4   | 9.0   | 2.8   | 4.7   | 9.7   |
| 6.2   | 8.3   | 5.6   | 19.5  | 11.3  | 6.7   | 6.4   | 10.9  | 3.8   |
| 8.0   | 1.2   | 1.9   | 1.6   | 4.6   | 1.7   | 1.2   | 8.7   | 7.0   |
| 4.8   | 14.3  | 14.2  | 9.3   | 4.1   | 10.0  | 4.8   | 24.9  | 3.3   |
| 0.6   | 3.0   | 0.8   | 0.7   | 4.3   | 0.3   | 2.9   | 3.4   | 1.9   |
| 0.6   | 3.0   | 1.5   | 0.5   | 1.0   | 1.1   | 0.6   | 0.9   | 0.5   |
| 2.5   | 3.2   | 5.2   | 0.8   | 1.8   | 5.2   | 1.5   | 3.6   | 4.7   |
| 2.7   | 2.0   | 1.8   | 3.2   | 8.6   | 1.9   | 13.4  | 3.4   | 7.1   |
| 13.4  | 7.3   | 5.9   | 10.1  | 10.5  | 16.0  | 11.0  | 19.1  | 10.6  |
| 0.4   | 0.3   | 0.3   | 5.5   | 2.2   | 0.2   | 0.7   | 2.0   | 2.1   |
| 0.9   | 1.0   | 0.3   | 1.3   | 3.6   | 2.0   | 0.2   | 0.3   | 3.8   |
| 8.5   | 6.7   | 8.7   | 4.3   | 1.2   | 2.3   | 6.7   | 10.6  | 4.9   |
| 57.8  | 18.6  | 30.7  | 36.3  | 32.5  | 27.3  | 37.2  | 55.3  | 33.1  |
| 2.5   | 0.9   | 2.2   | 0.6   | 4.2   | 0.8   | 6.1   | 1.2   | 0.7   |
| 10.6  | 7.3   | 8.6   | 10.3  | 13.2  | 12.5  | 12.0  | 5.9   | 11.4  |
| 2.2   | 1.7   | 3.7   | 1.2   | 1.7   | 0.6   | 1.9   | 2.5   | 2.8   |
| 1.6   | 0.1   | 1.7   | 0.5   | 0.0   | 1.9   | 1.0   | 2.5   | 1.8   |
| 0.9   | 3.5   | 1.6   | 2.3   | 1.7   | 1.6   | 2.5   | 2.1   | 4.2   |
| 0.2   | 0.4   | 0.2   | 0.2   | 0.3   | 0.2   | 0.4   | 0.4   | 0.1   |
| 0.3   | 3.7   | 1.5   | 1.1   | 0.9   | 3.7   | 0.3   | 3.5   | 1.1   |
| 2.9   | 1.4   | 3.8   | 0.1   | 5.7   | 0.5   | 2.1   | 2.7   | 1.9   |
| 0.6   | 5.2   | 5.9   | 0.5   | 0.4   | 6.8   | 8.5   | 4.7   | 0.5   |
| 1.0   | 0.7   | 0.9   | 3.1   | 0.8   | 2.9   | 0.6   | 0.3   | 3.5   |
| 13.3  | 12.8  | 4.6   | 14.4  | 8.4   | 13.7  | 16.7  | 12.7  | 10.3  |
| 1.1   | 3.6   | 1.1   | 2.9   | 1.1   | 5.6   | 7.1   | 1.4   | 5.6   |
| 2.8   | 2.5   | 2.4   | 12.7  | 5.3   | 9.4   | 2.8   | 12.0  | 2.2   |
| 4.7   | 1.0   | 2.8   | 3.0   | 1.2   | 1.2   | 0.6   | 4.4   | 0.7   |
| 3.5   | 3.7   | 2.8   | 4.3   | 7.9   | 0.8   | 2.1   | 5.8   | 3.3   |
| 4.0   | 1.7   | 0.6   | 0.3   | 0.2   | 4.2   | 2.9   | 2.4   | 2.5   |
| 0.2   | 0.3   | 0.1   | 0.3   | 0.3   | 0.1   | 0.3   | 0.4   | 0.2   |
| 100.1 | 82.5  | 73.5  | 90.5  | 81.6  | 81.4  | 123.1 | 124.8 | 91.9  |
| 5.5   | 9.9   | 2.4   | 2.7   | 2.7   | 7.4   | 2.8   | 5.6   | 2.4   |
| 2.7   | 3.7   | 4.2   | 0.9   | 8.3   | 5.5   | 2.4   | 8.0   | 5.3   |
| 5.3   | 0.9   | 4.7   | 1.1   | 1.2   | 2.5   | 8.0   | 5.0   | 9.2   |
| 2.4   | 2.9   | 0.1   | 0.2   | 0.1   | 1.1   | 2.8   | 3.7   | 2.4   |
| 14.4  | 9.8   | 13.2  | 17.1  | 15.7  | 11.1  | 16.6  | 16.1  | 9.8   |
| 1.9   | 1.4   | 2.8   | 0.5   | 2.5   | 0.4   | 0.1   | 0.3   | 0.8   |
| 5.1   | 2.0   | 2.5   | 4.1   | 3.8   | 3.4   | 5.3   | 2.2   | 0.9   |
| 3.1   | 1.1   | 0.5   | 0.8   | 0.8   | 0.8   | 1.2   | 0.7   | 0.9   |
| 2.1   | 1.1   | 4.9   | 2.9   | 2.0   | 2.0   | 2.2   | 5.0   | 2.0   |
| 2.4   | 1.6   | 5.3   | 4.9   | 1.7   | 6.3   | 6.0   | 3.1   | 0.8   |
| 2.5   | 0.9   | 0.7   | 1.6   | 1.7   | 0.8   | 0.8   | 1.3   | 0.9   |



|       |       |       |       |       |       |       |       |       |
|-------|-------|-------|-------|-------|-------|-------|-------|-------|
| 2.9   | 7.0   | 5.4   | 1.4   | 7.6   | 4.4   | 0.3   | 0.5   | 0.5   |
| 0.4   | 0.9   | 3.0   | 0.5   | 5.0   | 3.3   | 0.5   | 0.6   | 0.9   |
| 6.6   | 1.7   | 4.1   | 1.0   | 1.7   | 0.8   | 2.7   | 1.3   | 4.8   |
| 10.0  | 12.1  | 4.6   | 1.1   | 9.0   | 5.8   | 12.2  | 7.3   | 1.8   |
| 10.8  | 6.3   | 5.8   | 7.8   | 1.0   | 4.8   | 10.3  | 12.5  | 1.2   |
| 92.8  | 52.6  | 82.6  | 88.2  | 98.6  | 100.5 | 123.9 | 132.9 | 68.3  |
| 13.3  | 9.1   | 3.8   | 4.0   | 1.5   | 4.2   | 14.9  | 11.2  | 6.8   |
| 1.6   | 0.9   | 1.0   | 4.6   | 0.8   | 5.2   | 3.9   | 0.7   | 1.3   |
| 2.0   | 2.1   | 5.8   | 6.6   | 5.7   | 7.2   | 10.7  | 16.0  | 2.3   |
| 5.3   | 1.0   | 4.6   | 6.0   | 4.6   | 5.6   | 10.6  | 11.8  | 8.1   |
| 1.4   | 1.7   | 0.7   | 1.7   | 1.7   | 1.6   | 1.8   | 1.1   | 1.0   |
| 373.9 | 303.1 | 344.2 | 358.9 | 346.3 | 367.5 | 404.9 | 402.5 | 319.3 |
| 343.6 | 242.4 | 286.6 | 293.6 | 298.0 | 271.1 | 368.5 | 495.1 | 284.2 |
| 1.0   | 3.6   | 2.4   | 1.2   | 0.3   | 0.6   | 0.4   | 0.9   | 0.2   |
| 141.4 | 93.1  | 158.8 | 140.8 | 82.8  | 159.2 | 140.2 | 115.8 | 128.7 |
| 7.3   | 2.3   | 2.6   | 6.0   | 8.4   | 3.8   | 7.6   | 10.1  | 10.8  |
| 22.2  | 19.7  | 20.9  | 23.9  | 18.7  | 15.1  | 29.1  | 24.9  | 16.4  |
| 233.6 | 166.6 | 183.4 | 176.8 | 193.3 | 169.1 | 233.7 | 275.3 | 222.6 |
| 3.5   | 3.6   | 2.2   | 8.5   | 3.7   | 5.7   | 3.1   | 3.6   | 5.4   |
| 12.6  | 7.6   | 6.5   | 5.1   | 7.0   | 6.0   | 20.4  | 11.1  | 9.7   |
| 16.1  | 14.5  | 19.2  | 25.4  | 18.3  | 14.3  | 27.6  | 23.5  | 19.1  |
| 2.1   | 1.6   | 1.2   | 1.4   | 2.0   | 1.4   | 1.3   | 1.3   | 1.1   |
| 6.6   | 1.8   | 9.5   | 4.5   | 13.0  | 10.7  | 8.6   | 16.0  | 10.1  |
| 0.1   | 0.3   | 1.0   | 0.5   | 2.0   | 0.2   | 3.0   | 0.4   | 0.3   |
| 2.0   | 2.5   | 0.1   | 0.2   | 2.7   | 0.2   | 0.1   | 0.4   | 0.9   |
| 0.7   | 2.0   | 0.3   | 0.6   | 4.3   | 2.3   | 5.5   | 2.4   | 1.2   |
| 7.8   | 8.5   | 15.9  | 7.3   | 15.1  | 18.0  | 13.3  | 15.0  | 6.3   |
| 64.3  | 49.6  | 28.2  | 52.8  | 32.6  | 28.3  | 55.8  | 47.1  | 43.7  |
| 74.0  | 40.3  | 49.9  | 48.6  | 53.0  | 55.6  | 91.5  | 94.3  | 63.1  |
| 47.0  | 20.2  | 23.7  | 28.3  | 34.2  | 22.3  | 40.2  | 48.4  | 53.2  |
| 2.5   | 0.6   | 3.5   | 0.2   | 7.8   | 1.0   | 1.1   | 1.8   | 1.2   |
| 1.9   | 0.9   | 0.6   | 0.6   | 1.2   | 0.7   | 0.6   | 1.0   | 0.9   |
| 88.9  | 64.9  | 70.4  | 78.9  | 70.3  | 70.7  | 113.7 | 108.7 | 63.9  |
| 12.2  | 7.8   | 13.9  | 15.1  | 8.1   | 12.3  | 7.7   | 25.3  | 10.6  |
| 0.4   | 0.3   | 3.1   | 0.1   | 3.2   | 1.1   | 0.6   | 4.2   | 0.2   |
| 148.3 | 104.9 | 116.5 | 135.3 | 114.4 | 96.9  | 176.4 | 169.5 | 108.7 |
| 2.0   | 4.7   | 2.3   | 2.2   | 2.7   | 1.0   | 1.7   | 3.0   | 2.1   |
| 80.5  | 94.1  | 69.3  | 91.8  | 88.2  | 66.8  | 125.5 | 120.4 | 79.6  |
| 2.6   | 0.9   | 2.3   | 0.2   | 2.6   | 0.2   | 1.7   | 0.4   | 0.9   |
| 13.0  | 4.2   | 4.5   | 6.7   | 3.7   | 6.3   | 7.1   | 8.5   | 8.3   |
| 13.5  | 11.1  | 9.0   | 14.0  | 17.8  | 9.5   | 21.5  | 19.9  | 16.5  |
| 1.9   | 1.1   | 7.9   | 6.1   | 8.4   | 14.1  | 16.3  | 22.6  | 6.3   |
| 0.6   | 0.9   | 0.7   | 0.6   | 1.5   | 1.0   | 3.4   | 0.8   | 0.7   |
| 97.9  | 48.2  | 59.9  | 58.3  | 70.2  | 69.5  | 105.0 | 118.1 | 70.7  |
| 0.3   | 4.1   | 2.7   | 4.1   | 6.7   | 3.5   | 2.1   | 5.0   | 3.6   |
| 0.7   | 0.3   | 2.4   | 0.5   | 0.6   | 0.4   | 0.3   | 0.3   | 0.3   |
| 14.5  | 15.0  | 15.1  | 10.2  | 23.2  | 29.5  | 30.6  | 44.4  | 15.1  |
| 676.7 | 341.0 | 385.8 | 418.9 | 487.4 | 511.2 | 746.0 | 929.3 | 679.1 |
| 6.3   | 6.5   | 5.0   | 0.7   | 7.8   | 7.9   | 5.3   | 3.5   | 7.6   |
| 66.0  | 48.1  | 54.2  | 62.1  | 47.6  | 41.4  | 89.5  | 82.6  | 60.9  |
| 1.4   | 1.9   | 0.1   | 1.1   | 0.3   | 1.6   | 1.6   | 0.2   | 1.7   |
| 3.8   | 2.9   | 1.4   | 5.9   | 0.6   | 1.6   | 1.9   | 7.5   | 8.3   |
| 19.1  | 0.5   | 2.6   | 7.0   | 6.5   | 8.6   | 12.7  | 21.9  | 10.3  |

|       |       |       |       |       |       |       |        |       |
|-------|-------|-------|-------|-------|-------|-------|--------|-------|
| 21.9  | 20.1  | 12.5  | 19.7  | 21.6  | 21.2  | 25.0  | 28.6   | 30.4  |
| 4.3   | 0.7   | 0.6   | 3.4   | 1.9   | 2.3   | 11.1  | 4.4    | 3.0   |
| 21.3  | 11.6  | 9.1   | 9.9   | 12.2  | 16.4  | 7.8   | 17.2   | 14.3  |
| 412.0 | 289.4 | 316.7 | 391.5 | 404.7 | 357.5 | 476.7 | 525.9  | 369.6 |
| 7.9   | 7.1   | 4.8   | 4.5   | 8.3   | 15.2  | 7.6   | 24.2   | 13.2  |
| 79.3  | 65.1  | 47.5  | 51.2  | 59.1  | 55.1  | 61.7  | 72.8   | 60.7  |
| 3.2   | 11.5  | 6.3   | 8.6   | 9.2   | 6.6   | 5.8   | 8.5    | 6.2   |
| 25.1  | 20.0  | 28.8  | 22.8  | 33.7  | 25.4  | 43.2  | 56.8   | 30.6  |
| 4.0   | 0.9   | 1.6   | 0.9   | 1.1   | 2.0   | 2.1   | 5.7    | 0.9   |
| 1.6   | 2.8   | 1.2   | 1.2   | 4.8   | 0.8   | 1.4   | 11.1   | 3.5   |
| 1.0   | 0.7   | 1.2   | 1.2   | 0.8   | 0.4   | 1.7   | 1.0    | 0.7   |
| 6.6   | 7.0   | 4.2   | 5.8   | 4.7   | 5.1   | 9.3   | 8.8    | 6.7   |
| 18.9  | 9.6   | 11.7  | 10.0  | 18.2  | 11.2  | 12.9  | 15.9   | 21.4  |
| 4.2   | 2.0   | 2.9   | 4.4   | 10.2  | 3.8   | 6.7   | 7.7    | 2.0   |
| 1.4   | 3.1   | 4.2   | 3.8   | 2.5   | 0.7   | 3.8   | 2.4    | 4.6   |
| 89.3  | 64.5  | 93.6  | 92.6  | 81.8  | 80.3  | 89.4  | 110.8  | 99.4  |
| 4.8   | 15.4  | 5.7   | 5.9   | 5.4   | 3.1   | 6.0   | 1.8    | 1.9   |
| 90.2  | 46.6  | 51.3  | 49.2  | 61.6  | 64.1  | 67.9  | 88.0   | 51.0  |
| 5.3   | 5.9   | 6.2   | 4.8   | 4.3   | 0.8   | 7.8   | 8.1    | 6.4   |
| 0.9   | 3.5   | 1.2   | 0.7   | 0.5   | 2.3   | 1.8   | 2.6    | 0.3   |
| 0.8   | 0.9   | 0.6   | 0.6   | 2.7   | 0.7   | 0.7   | 0.3    | 3.3   |
| 4.7   | 9.8   | 4.9   | 9.9   | 1.3   | 1.2   | 7.7   | 3.2    | 1.1   |
| 12.4  | 12.0  | 9.8   | 11.5  | 3.0   | 8.4   | 16.3  | 13.2   | 9.4   |
| 5.4   | 11.8  | 8.3   | 6.7   | 8.6   | 8.4   | 8.3   | 13.7   | 8.1   |
| 11.0  | 10.8  | 16.7  | 20.3  | 16.3  | 17.2  | 10.7  | 14.9   | 13.1  |
| 0.4   | 1.0   | 1.2   | 1.1   | 0.7   | 0.2   | 4.0   | 1.2    | 5.9   |
| 99.1  | 68.6  | 52.0  | 62.9  | 60.6  | 60.4  | 74.2  | 93.3   | 93.2  |
| 0.7   | 2.5   | 2.9   | 1.2   | 3.6   | 4.8   | 0.6   | 2.1    | 0.2   |
| 34.1  | 25.5  | 37.9  | 34.6  | 32.6  | 40.7  | 57.4  | 68.6   | 35.9  |
| 9.6   | 1.7   | 5.7   | 0.8   | 4.3   | 6.6   | 5.9   | 6.1    | 1.8   |
| 2.1   | 0.5   | 1.9   | 1.3   | 1.8   | 0.9   | 0.7   | 2.4    | 1.4   |
| 0.4   | 0.5   | 0.3   | 0.4   | 7.2   | 2.9   | 0.2   | 0.5    | 2.2   |
| 99.3  | 60.5  | 89.7  | 67.5  | 81.4  | 69.3  | 82.2  | 99.2   | 86.8  |
| 11.3  | 11.3  | 10.2  | 12.9  | 14.9  | 14.4  | 19.5  | 18.3   | 11.6  |
| 21.2  | 25.7  | 23.0  | 18.2  | 24.9  | 17.6  | 27.8  | 24.1   | 15.9  |
| 0.3   | 1.7   | 0.7   | 2.2   | 3.7   | 0.5   | 1.9   | 2.8    | 4.2   |
| 2.8   | 1.4   | 2.9   | 3.0   | 2.8   | 5.6   | 0.6   | 4.3    | 1.3   |
| 3.7   | 7.7   | 1.7   | 1.3   | 1.6   | 2.6   | 7.2   | 6.4    | 4.6   |
| 6.4   | 2.2   | 3.8   | 2.7   | 3.3   | 6.3   | 2.9   | 1.2    | 4.7   |
| 5.7   | 13.7  | 5.5   | 4.4   | 9.5   | 7.4   | 8.6   | 7.8    | 14.7  |
| 231.9 | 106.3 | 153.1 | 161.8 | 164.9 | 172.1 | 217.0 | 286.1  | 148.2 |
| 281.3 | 259.5 | 319.3 | 266.2 | 293.3 | 275.9 | 338.7 | 418.4  | 314.9 |
| 5.1   | 5.0   | 7.1   | 6.1   | 3.0   | 7.6   | 5.2   | 7.9    | 2.2   |
| 12.2  | 11.6  | 10.7  | 10.2  | 15.0  | 11.7  | 14.2  | 12.9   | 9.8   |
| 2.8   | 1.3   | 1.2   | 7.3   | 1.5   | 5.9   | 2.8   | 1.7    | 2.6   |
| 5.3   | 2.9   | 1.6   | 0.6   | 0.8   | 0.4   | 4.4   | 4.2    | 5.0   |
| 22.2  | 21.5  | 21.9  | 26.8  | 23.4  | 27.3  | 26.9  | 31.4   | 12.6  |
| 42.8  | 46.0  | 51.5  | 56.3  | 72.2  | 63.3  | 91.6  | 95.5   | 96.4  |
| 871.9 | 535.4 | 640.8 | 651.8 | 723.3 | 742.6 | 983.1 | 1264.0 | 769.1 |
| 22.2  | 11.6  | 19.8  | 19.3  | 14.1  | 16.8  | 22.8  | 25.9   | 19.6  |
| 5.6   | 4.7   | 4.0   | 2.0   | 2.8   | 0.9   | 5.5   | 1.3    | 3.4   |
| 7.4   | 14.3  | 6.6   | 6.9   | 13.0  | 8.7   | 8.6   | 3.3    | 3.8   |
| 0.4   | 0.5   | 2.4   | 0.5   | 0.2   | 0.7   | 0.2   | 0.6    | 0.2   |

|        |        |        |        |        |        |        |        |        |
|--------|--------|--------|--------|--------|--------|--------|--------|--------|
| 82.0   | 43.7   | 55.8   | 45.3   | 59.7   | 53.6   | 85.3   | 69.5   | 52.4   |
| 6.5    | 6.3    | 4.7    | 3.8    | 4.1    | 5.6    | 3.8    | 3.4    | 5.7    |
| 5.5    | 9.1    | 3.6    | 11.1   | 6.6    | 5.1    | 4.8    | 8.2    | 5.4    |
| 14.2   | 13.7   | 15.6   | 15.4   | 15.6   | 21.1   | 20.6   | 5.2    | 11.5   |
| 7.6    | 3.2    | 8.6    | 3.6    | 5.2    | 6.0    | 5.2    | 1.8    | 6.6    |
| 0.4    | 0.4    | 0.7    | 0.8    | 0.4    | 0.4    | 0.2    | 0.4    | 0.3    |
| 6.7    | 2.1    | 4.6    | 0.3    | 4.9    | 1.4    | 3.5    | 7.3    | 3.9    |
| 138.2  | 79.3   | 118.3  | 136.0  | 92.2   | 96.7   | 125.2  | 156.4  | 100.0  |
| 4.7    | 0.5    | 2.8    | 0.4    | 0.6    | 2.9    | 0.2    | 1.4    | 0.4    |
| 140.6  | 73.3   | 93.7   | 94.2   | 100.9  | 94.4   | 138.0  | 168.5  | 113.7  |
| 0.2    | 7.1    | 1.3    | 0.8    | 0.3    | 0.4    | 1.0    | 1.0    | 0.2    |
| 2.1    | 0.2    | 2.8    | 0.5    | 0.5    | 0.9    | 3.6    | 4.9    | 2.2    |
| 2.9    | 6.8    | 3.0    | 5.7    | 5.4    | 10.4   | 7.2    | 7.1    | 1.6    |
| 9.4    | 10.1   | 7.5    | 8.0    | 15.0   | 11.1   | 8.8    | 15.2   | 6.5    |
| 1.1    | 1.4    | 0.8    | 0.9    | 1.2    | 0.7    | 1.6    | 1.0    | 1.1    |
| 3.9    | 3.1    | 5.9    | 0.6    | 4.7    | 3.8    | 4.6    | 2.3    | 2.2    |
| 2.0    | 0.6    | 0.6    | 6.4    | 1.2    | 0.6    | 4.4    | 5.1    | 3.2    |
| 0.3    | 1.1    | 4.2    | 2.3    | 1.7    | 3.3    | 5.9    | 1.8    | 5.1    |
| 0.6    | 4.0    | 0.6    | 0.3    | 2.2    | 2.3    | 1.1    | 0.4    | 5.9    |
| 1.1    | 1.4    | 0.9    | 0.6    | 0.9    | 1.3    | 1.5    | 1.2    | 1.2    |
| 7.4    | 6.6    | 5.0    | 1.0    | 3.2    | 4.6    | 11.4   | 7.4    | 18.8   |
| 127.9  | 7.0    | 21.9   | 1.3    | 12.1   | 25.7   | 17.3   | 49.2   | 14.1   |
| 16.3   | 3.0    | 15.4   | 14.0   | 13.3   | 10.8   | 18.8   | 14.3   | 3.3    |
| 6.3    | 5.5    | 5.2    | 2.6    | 7.8    | 0.9    | 8.3    | 10.6   | 6.5    |
| 14.8   | 3.1    | 4.9    | 3.0    | 4.4    | 2.9    | 4.4    | 2.0    | 2.1    |
| 4.7    | 3.6    | 1.1    | 5.5    | 4.6    | 7.1    | 5.3    | 10.7   | 7.6    |
| 0.7    | 3.3    | 5.6    | 3.3    | 5.1    | 10.1   | 5.0    | 1.0    | 3.0    |
| 115.7  | 89.0   | 93.1   | 79.0   | 103.7  | 117.2  | 145.9  | 143.7  | 108.5  |
| 7.7    | 3.1    | 6.5    | 6.5    | 6.2    | 9.4    | 12.7   | 7.4    | 13.0   |
| 0.8    | 5.5    | 1.1    | 2.4    | 5.1    | 4.6    | 0.5    | 0.8    | 0.6    |
| 2.1    | 3.1    | 6.6    | 0.9    | 5.1    | 2.4    | 0.4    | 0.9    | 4.7    |
| 6.7    | 9.9    | 9.2    | 8.4    | 6.7    | 8.6    | 6.6    | 9.3    | 8.8    |
| 0.7    | 1.6    | 1.6    | 1.5    | 5.1    | 1.4    | 2.1    | 4.5    | 5.1    |
| 4.3    | 7.5    | 0.8    | 5.2    | 1.2    | 4.3    | 0.7    | 3.3    | 2.5    |
| 6.9    | 3.6    | 9.5    | 2.3    | 3.0    | 1.2    | 5.0    | 3.5    | 0.9    |
| 17.0   | 8.2    | 3.5    | 7.4    | 6.7    | 8.3    | 14.7   | 16.7   | 8.1    |
| 5.6    | 7.5    | 7.4    | 2.4    | 15.5   | 7.0    | 15.7   | 9.9    | 13.4   |
| 12.8   | 11.2   | 8.2    | 16.7   | 11.0   | 17.0   | 15.9   | 17.2   | 13.0   |
| 1828.8 | 1639.5 | 1539.0 | 1676.2 | 1834.9 | 1746.4 | 2526.6 | 2676.5 | 1746.4 |
| 0.5    | 4.4    | 1.0    | 1.3    | 0.4    | 4.7    | 2.5    | 2.0    | 0.7    |
| 8.1    | 10.8   | 7.9    | 5.6    | 11.8   | 4.7    | 9.1    | 7.5    | 16.0   |
| 0.6    | 0.9    | 0.5    | 0.4    | 0.6    | 0.6    | 0.4    | 0.6    | 0.7    |
| 0.7    | 0.9    | 1.1    | 0.7    | 1.2    | 0.6    | 1.9    | 1.3    | 0.5    |
| 11.0   | 8.9    | 8.4    | 7.8    | 4.5    | 10.8   | 7.1    | 10.5   | 9.9    |
| 6.2    | 6.4    | 7.4    | 5.4    | 6.6    | 6.9    | 7.5    | 7.7    | 8.4    |
| 1.0    | 0.4    | 1.8    | 0.5    | 1.3    | 0.5    | 0.4    | 0.5    | 0.4    |
| 0.6    | 0.6    | 0.9    | 2.4    | 2.0    | 2.2    | 0.2    | 3.3    | 1.9    |
| 62.8   | 38.4   | 56.6   | 46.7   | 57.3   | 47.5   | 50.2   | 70.0   | 43.4   |
| 39.2   | 29.5   | 27.9   | 31.5   | 35.4   | 26.6   | 37.3   | 35.7   | 28.8   |
| 25.2   | 9.8    | 9.4    | 13.6   | 13.4   | 22.3   | 17.5   | 20.5   | 22.1   |
| 3.7    | 2.5    | 2.2    | 5.2    | 6.3    | 0.6    | 2.1    | 1.9    | 1.4    |
| 85.5   | 76.3   | 70.2   | 66.9   | 52.3   | 59.6   | 80.6   | 90.6   | 85.6   |
| 2.0    | 5.3    | 1.0    | 7.6    | 2.1    | 5.1    | 4.8    | 5.4    | 1.9    |

|       |       |       |       |       |       |       |       |       |
|-------|-------|-------|-------|-------|-------|-------|-------|-------|
| 2.9   | 5.1   | 3.7   | 1.8   | 0.5   | 4.1   | 5.9   | 6.9   | 5.1   |
| 1.4   | 1.6   | 1.0   | 1.3   | 0.7   | 0.9   | 0.8   | 0.9   | 1.8   |
| 1.5   | 1.2   | 4.6   | 3.7   | 1.6   | 5.2   | 1.5   | 1.3   | 5.5   |
| 4.0   | 4.5   | 2.8   | 8.6   | 5.7   | 3.0   | 6.5   | 6.2   | 14.9  |
| 9.8   | 4.7   | 7.2   | 4.1   | 1.7   | 1.4   | 6.0   | 6.8   | 8.1   |
| 2.3   | 5.6   | 5.3   | 5.3   | 2.5   | 5.9   | 3.4   | 12.3  | 2.7   |
| 1.0   | 2.2   | 4.7   | 3.4   | 8.7   | 2.8   | 2.4   | 7.5   | 5.6   |
| 11.0  | 11.6  | 14.7  | 22.2  | 12.0  | 12.3  | 14.5  | 18.5  | 31.8  |
| 0.1   | 0.2   | 0.3   | 0.3   | 0.1   | 0.2   | 0.6   | 0.6   | 0.5   |
| 0.9   | 1.0   | 0.5   | 0.4   | 3.1   | 0.7   | 1.0   | 2.1   | 0.5   |
| 7.4   | 9.2   | 3.9   | 11.5  | 11.0  | 8.9   | 13.3  | 11.1  | 7.4   |
| 7.2   | 2.5   | 21.3  | 29.6  | 10.8  | 3.1   | 6.7   | 13.1  | 19.5  |
| 3.6   | 4.3   | 5.8   | 4.5   | 4.6   | 3.1   | 4.0   | 2.8   | 2.2   |
| 5.1   | 5.1   | 1.4   | 3.5   | 4.1   | 0.4   | 4.7   | 5.5   | 1.1   |
| 5.1   | 7.5   | 6.6   | 8.1   | 7.6   | 10.5  | 7.1   | 11.2  | 6.0   |
| 4.7   | 1.0   | 2.8   | 4.0   | 2.7   | 2.9   | 2.0   | 4.9   | 4.7   |
| 9.3   | 7.3   | 5.5   | 2.1   | 2.8   | 6.2   | 5.6   | 9.2   | 5.8   |
| 11.8  | 13.5  | 1.6   | 1.7   | 8.0   | 8.6   | 6.1   | 17.3  | 5.0   |
| 10.1  | 1.3   | 21.8  | 1.3   | 6.7   | 7.1   | 9.0   | 13.8  | 8.7   |
| 2.9   | 1.0   | 2.7   | 1.6   | 1.1   | 5.1   | 1.1   | 1.7   | 1.7   |
| 13.5  | 13.5  | 7.0   | 5.8   | 10.1  | 5.7   | 4.7   | 5.7   | 6.2   |
| 9.2   | 8.4   | 1.7   | 1.7   | 2.6   | 0.8   | 4.0   | 1.2   | 5.9   |
| 6.4   | 6.1   | 3.5   | 7.1   | 5.2   | 3.9   | 4.7   | 4.3   | 8.3   |
| 6.3   | 6.1   | 4.4   | 6.1   | 5.2   | 11.5  | 5.7   | 9.5   | 7.0   |
| 6.5   | 2.5   | 4.3   | 5.2   | 9.1   | 1.4   | 7.6   | 7.0   | 1.6   |
| 1.1   | 7.2   | 0.9   | 1.2   | 9.2   | 0.6   | 6.7   | 12.1  | 7.6   |
| 10.0  | 4.7   | 11.3  | 8.6   | 8.3   | 6.7   | 10.6  | 9.9   | 13.0  |
| 3.0   | 14.2  | 8.9   | 4.6   | 3.8   | 12.7  | 5.3   | 9.2   | 5.4   |
| 0.7   | 4.3   | 3.5   | 7.2   | 1.5   | 5.9   | 0.7   | 6.7   | 1.1   |
| 59.2  | 58.9  | 62.9  | 69.6  | 81.6  | 74.5  | 93.1  | 102.4 | 76.7  |
| 4.8   | 4.2   | 6.0   | 2.2   | 5.6   | 6.8   | 6.9   | 6.5   | 5.4   |
| 1.4   | 0.8   | 1.2   | 1.8   | 1.5   | 1.5   | 2.3   | 5.0   | 0.4   |
| 2.1   | 0.2   | 0.6   | 0.2   | 0.4   | 0.7   | 0.7   | 1.4   | 0.9   |
| 4.0   | 1.4   | 1.4   | 1.1   | 1.3   | 5.2   | 4.8   | 2.3   | 1.2   |
| 0.5   | 0.9   | 1.1   | 0.7   | 0.2   | 0.5   | 0.7   | 0.4   | 1.1   |
| 24.1  | 21.8  | 2.4   | 18.0  | 17.0  | 17.0  | 25.1  | 25.5  | 26.2  |
| 15.6  | 28.0  | 18.1  | 34.2  | 16.6  | 26.1  | 22.7  | 21.0  | 25.1  |
| 5.1   | 6.6   | 8.6   | 5.3   | 14.7  | 9.3   | 9.4   | 10.2  | 7.6   |
| 1.7   | 2.3   | 1.5   | 1.9   | 1.3   | 2.8   | 1.3   | 4.9   | 1.3   |
| 0.8   | 7.5   | 5.0   | 2.0   | 6.1   | 4.9   | 1.9   | 7.1   | 6.2   |
| 2.4   | 0.4   | 0.1   | 3.0   | 2.2   | 1.7   | 0.2   | 3.1   | 2.9   |
| 0.3   | 3.8   | 3.4   | 0.3   | 0.2   | 2.5   | 0.3   | 0.4   | 0.2   |
| 1.2   | 2.3   | 1.9   | 4.4   | 6.1   | 1.6   | 1.0   | 0.7   | 1.0   |
| 12.0  | 5.0   | 7.1   | 6.3   | 7.0   | 1.4   | 7.5   | 8.9   | 6.9   |
| 0.7   | 2.0   | 0.5   | 6.0   | 1.1   | 4.0   | 4.3   | 1.4   | 3.4   |
| 12.7  | 15.8  | 18.9  | 7.2   | 15.9  | 10.6  | 7.3   | 13.7  | 8.1   |
| 413.3 | 278.8 | 263.1 | 310.1 | 338.5 | 329.7 | 447.2 | 514.2 | 444.1 |
| 0.6   | 1.5   | 0.7   | 1.1   | 1.1   | 0.5   | 2.5   | 0.7   | 0.6   |
| 7.6   | 1.9   | 5.2   | 1.4   | 1.2   | 4.8   | 8.9   | 9.5   | 7.3   |
| 12.3  | 4.4   | 10.2  | 12.4  | 14.4  | 10.2  | 12.5  | 15.5  | 18.1  |
| 7.5   | 8.1   | 6.0   | 8.1   | 6.5   | 7.9   | 6.3   | 14.4  | 6.3   |
| 0.3   | 6.7   | 2.4   | 3.6   | 3.7   | 4.6   | 2.0   | 6.7   | 4.5   |
| 1.5   | 3.0   | 3.0   | 1.6   | 3.8   | 5.1   | 7.3   | 11.3  | 8.5   |

|       |       |       |       |       |       |       |       |       |
|-------|-------|-------|-------|-------|-------|-------|-------|-------|
| 61.7  | 33.6  | 47.4  | 44.7  | 41.0  | 45.1  | 61.6  | 60.7  | 41.7  |
| 0.8   | 0.5   | 1.1   | 5.3   | 1.1   | 0.7   | 1.9   | 1.8   | 7.1   |
| 5.0   | 2.2   | 3.1   | 1.9   | 4.3   | 1.6   | 4.5   | 3.3   | 0.6   |
| 0.6   | 1.2   | 0.1   | 7.7   | 0.7   | 0.2   | 5.4   | 1.5   | 0.7   |
| 19.3  | 10.6  | 5.1   | 2.2   | 5.2   | 14.9  | 16.9  | 23.3  | 17.9  |
| 0.8   | 5.3   | 9.1   | 3.9   | 3.6   | 5.4   | 3.8   | 5.4   | 3.6   |
| 2.3   | 3.0   | 4.3   | 4.9   | 6.4   | 6.1   | 6.1   | 15.3  | 7.1   |
| 2.4   | 4.6   | 0.8   | 1.7   | 3.8   | 0.3   | 4.2   | 6.1   | 1.8   |
| 16.0  | 10.2  | 11.0  | 2.6   | 12.6  | 14.5  | 17.4  | 14.7  | 12.5  |
| 0.2   | 3.7   | 0.3   | 0.6   | 1.3   | 2.2   | 0.3   | 0.5   | 2.6   |
| 0.1   | 2.3   | 3.3   | 1.7   | 3.3   | 1.8   | 3.0   | 3.6   | 4.3   |
| 4.4   | 3.8   | 1.1   | 6.4   | 6.9   | 2.8   | 1.9   | 4.4   | 4.6   |
| 37.2  | 33.1  | 24.3  | 35.9  | 32.1  | 30.0  | 44.5  | 45.2  | 34.7  |
| 1.5   | 0.2   | 3.9   | 4.8   | 0.3   | 1.3   | 4.6   | 2.8   | 3.1   |
| 317.7 | 178.7 | 214.1 | 211.3 | 216.6 | 209.6 | 254.0 | 298.7 | 257.2 |
| 15.2  | 11.4  | 9.2   | 1.5   | 7.1   | 3.7   | 1.8   | 11.2  | 1.7   |
| 9.9   | 1.5   | 4.7   | 2.8   | 4.9   | 7.2   | 4.3   | 3.0   | 2.6   |
| 4.1   | 4.9   | 7.0   | 3.2   | 3.4   | 6.8   | 4.4   | 10.9  | 3.6   |
| 34.6  | 25.5  | 33.5  | 17.8  | 31.9  | 35.7  | 36.1  | 46.4  | 36.7  |
| 13.3  | 9.5   | 1.5   | 7.4   | 8.8   | 6.9   | 21.3  | 16.8  | 14.1  |
| 2.8   | 1.2   | 1.6   | 3.6   | 0.8   | 2.0   | 1.3   | 1.2   | 2.4   |
| 1.0   | 0.4   | 3.4   | 2.5   | 4.4   | 1.8   | 6.0   | 2.8   | 1.0   |
| 159.8 | 83.0  | 88.3  | 96.7  | 97.5  | 96.1  | 142.0 | 176.7 | 87.0  |
| 1.9   | 7.6   | 8.4   | 1.4   | 1.2   | 3.7   | 1.0   | 1.6   | 7.7   |
| 5.3   | 3.9   | 3.2   | 7.5   | 3.7   | 6.0   | 2.3   | 1.2   | 4.3   |
| 7.8   | 7.2   | 3.5   | 2.1   | 5.7   | 7.3   | 11.3  | 4.4   | 9.5   |
| 4.7   | 2.5   | 0.2   | 2.1   | 2.1   | 2.3   | 0.5   | 3.1   | 3.2   |
| 5.4   | 0.5   | 4.9   | 0.7   | 3.6   | 2.5   | 10.5  | 2.8   | 6.0   |
| 13.9  | 5.6   | 10.7  | 7.5   | 8.4   | 8.5   | 13.6  | 23.3  | 12.4  |
| 9.2   | 5.6   | 6.1   | 2.2   | 1.9   | 5.3   | 10.0  | 13.3  | 1.5   |
| 2.3   | 1.0   | 0.6   | 4.0   | 0.7   | 1.9   | 0.7   | 9.0   | 2.6   |
| 6.2   | 0.5   | 1.3   | 0.8   | 6.7   | 6.2   | 0.8   | 4.7   | 0.5   |
| 17.4  | 17.6  | 19.2  | 27.6  | 17.1  | 17.1  | 29.4  | 26.1  | 22.8  |
| 0.2   | 0.2   | 0.2   | 0.2   | 1.1   | 0.1   | 2.1   | 2.7   | 0.2   |
| 1.2   | 4.5   | 0.7   | 5.6   | 0.9   | 0.4   | 7.9   | 0.8   | 0.5   |
| 24.8  | 22.7  | 13.4  | 18.4  | 24.7  | 20.4  | 31.5  | 23.4  | 17.8  |
| 4.7   | 1.0   | 1.2   | 4.3   | 1.3   | 1.7   | 6.8   | 3.0   | 6.4   |
| 0.2   | 0.8   | 2.3   | 1.4   | 3.7   | 0.5   | 2.7   | 4.4   | 4.2   |
| 0.6   | 0.1   | 4.1   | 0.3   | 2.7   | 0.7   | 0.3   | 0.2   | 0.3   |
| 12.3  | 7.5   | 7.5   | 10.0  | 7.7   | 0.9   | 7.1   | 15.5  | 11.6  |
| 22.7  | 13.1  | 17.3  | 17.3  | 17.5  | 12.2  | 17.1  | 25.1  | 18.6  |
| 6.9   | 1.4   | 1.4   | 10.3  | 3.0   | 0.8   | 9.2   | 1.3   | 1.8   |
| 4.7   | 4.6   | 3.4   | 5.6   | 7.4   | 4.4   | 5.7   | 2.9   | 9.3   |
| 0.4   | 1.2   | 0.3   | 0.6   | 0.8   | 0.4   | 0.7   | 1.1   | 1.9   |
| 0.6   | 1.2   | 4.3   | 2.7   | 0.8   | 6.7   | 5.1   | 5.3   | 4.0   |
| 27.3  | 23.1  | 19.5  | 18.0  | 23.6  | 18.6  | 34.2  | 43.6  | 22.6  |
| 1.6   | 2.3   | 0.2   | 0.2   | 0.7   | 0.3   | 0.3   | 0.6   | 0.4   |
| 20.0  | 14.5  | 29.2  | 19.0  | 26.7  | 16.5  | 25.8  | 30.4  | 24.4  |
| 4.0   | 0.8   | 3.4   | 5.1   | 1.1   | 3.6   | 2.1   | 0.5   | 2.5   |
| 0.5   | 0.3   | 0.2   | 0.3   | 0.3   | 0.7   | 0.4   | 0.3   | 0.5   |
| 0.7   | 1.1   | 0.4   | 1.1   | 1.4   | 2.3   | 1.4   | 2.0   | 0.5   |
| 54.6  | 36.4  | 42.6  | 48.3  | 51.4  | 50.8  | 84.9  | 76.4  | 46.3  |
| 2.1   | 0.4   | 0.4   | 0.6   | 1.1   | 4.7   | 0.4   | 3.5   | 2.7   |

|        |        |        |        |        |        |        |        |        |
|--------|--------|--------|--------|--------|--------|--------|--------|--------|
| 2.3    | 2.5    | 4.2    | 3.5    | 2.0    | 0.4    | 0.5    | 6.4    | 2.4    |
| 8.7    | 0.6    | 2.1    | 2.7    | 1.1    | 4.7    | 8.1    | 6.6    | 5.0    |
| 15.3   | 18.6   | 9.7    | 9.6    | 8.2    | 11.2   | 10.1   | 16.6   | 13.0   |
| 200.2  | 116.7  | 132.4  | 146.1  | 139.9  | 164.3  | 204.0  | 282.2  | 171.7  |
| 12.7   | 11.4   | 15.2   | 16.1   | 12.9   | 13.8   | 21.1   | 35.9   | 21.7   |
| 1.4    | 1.8    | 7.4    | 1.6    | 0.9    | 11.6   | 1.2    | 1.6    | 1.4    |
| 6.9    | 17.3   | 6.6    | 11.8   | 14.5   | 14.7   | 10.0   | 15.1   | 13.3   |
| 2412.2 | 1932.1 | 1688.5 | 2095.8 | 2296.2 | 2054.1 | 2611.3 | 2733.1 | 2598.2 |
| 8.4    | 0.6    | 0.2    | 4.9    | 1.2    | 4.7    | 1.5    | 1.6    | 5.8    |
| 49.2   | 34.9   | 44.9   | 48.8   | 43.6   | 48.8   | 69.5   | 74.9   | 58.6   |
| 1.4    | 0.8    | 0.8    | 0.8    | 1.0    | 6.9    | 1.3    | 1.4    | 0.5    |
| 6.3    | 2.4    | 2.8    | 2.9    | 1.5    | 0.7    | 3.4    | 5.8    | 7.1    |
| 0.3    | 1.6    | 0.3    | 2.7    | 1.6    | 0.2    | 1.9    | 4.0    | 2.9    |
| 4.8    | 1.7    | 0.5    | 0.6    | 4.3    | 3.9    | 1.8    | 1.0    | 0.9    |
| 11.2   | 7.5    | 5.7    | 14.4   | 13.0   | 13.9   | 13.0   | 17.8   | 10.5   |
| 0.8    | 2.1    | 1.6    | 1.3    | 0.3    | 1.7    | 1.4    | 1.9    | 0.3    |
| 5.5    | 1.9    | 2.1    | 1.4    | 1.5    | 1.5    | 6.9    | 2.4    | 2.1    |
| 0.2    | 1.2    | 2.3    | 0.0    | 2.0    | 0.1    | 0.1    | 0.7    | 1.1    |
| 3641.6 | 3163.5 | 3164.2 | 3538.8 | 3255.8 | 3518.4 | 3959.9 | 4070.0 | 3050.2 |
| 0.8    | 1.9    | 1.0    | 0.6    | 0.7    | 0.7    | 1.0    | 0.6    | 1.7    |
| 0.8    | 0.2    | 0.4    | 0.6    | 0.9    | 1.2    | 0.8    | 0.4    | 1.2    |
| 27.5   | 19.4   | 19.6   | 21.5   | 15.1   | 22.5   | 25.7   | 33.0   | 22.3   |
| 1.6    | 2.1    | 1.6    | 1.8    | 1.0    | 0.6    | 6.6    | 1.5    | 0.6    |
| 7.8    | 4.8    | 8.7    | 3.2    | 4.4    | 7.4    | 8.0    | 7.2    | 4.2    |
| 0.6    | 0.5    | 0.3    | 2.1    | 1.8    | 3.1    | 0.3    | 0.6    | 4.8    |
| 1.9    | 0.6    | 1.0    | 1.1    | 1.0    | 3.0    | 7.2    | 3.2    | 2.7    |
| 5.0    | 3.3    | 5.3    | 2.0    | 7.0    | 4.0    | 8.5    | 11.1   | 6.9    |
| 0.9    | 4.6    | 3.9    | 7.6    | 6.0    | 7.0    | 10.1   | 6.5    | 10.8   |
| 0.6    | 3.2    | 5.5    | 6.2    | 1.5    | 7.5    | 3.9    | 8.7    | 9.1    |
| 15.4   | 18.6   | 1.0    | 2.1    | 1.7    | 0.8    | 3.1    | 2.1    | 1.2    |
| 7.2    | 10.8   | 8.2    | 7.4    | 8.3    | 11.8   | 14.6   | 8.1    | 5.6    |
| 6.9    | 2.2    | 4.9    | 5.9    | 4.8    | 6.3    | 7.7    | 0.8    | 4.1    |
| 15.6   | 19.3   | 10.2   | 19.4   | 24.6   | 13.5   | 22.7   | 19.1   | 13.9   |
| 57.1   | 43.5   | 31.7   | 35.3   | 43.6   | 41.1   | 64.0   | 75.4   | 57.2   |
| 2.6    | 1.3    | 4.4    | 1.3    | 1.0    | 1.3    | 9.1    | 2.9    | 7.7    |
| 21.0   | 9.5    | 16.0   | 10.0   | 12.2   | 16.8   | 21.4   | 22.8   | 16.2   |
| 0.5    | 0.2    | 0.3    | 0.5    | 0.3    | 0.5    | 0.8    | 0.5    | 2.6    |
| 68.9   | 40.8   | 48.6   | 47.2   | 49.2   | 44.4   | 54.8   | 52.1   | 40.9   |
| 107.3  | 52.3   | 63.6   | 66.8   | 69.3   | 72.9   | 83.3   | 118.5  | 76.4   |
| 60.8   | 48.0   | 41.5   | 49.3   | 55.2   | 45.3   | 50.6   | 54.5   | 50.3   |
| 7.6    | 4.1    | 5.1    | 4.5    | 7.8    | 5.4    | 4.7    | 8.8    | 6.0    |
| 3.3    | 1.6    | 0.6    | 0.2    | 4.3    | 2.4    | 3.5    | 4.1    | 3.1    |
| 1.5    | 2.8    | 3.9    | 4.6    | 5.2    | 1.9    | 4.0    | 5.8    | 0.5    |
| 1.2    | 1.2    | 1.4    | 0.5    | 0.7    | 0.4    | 0.9    | 1.0    | 0.4    |
| 14.6   | 1.1    | 7.1    | 7.3    | 4.6    | 12.7   | 0.7    | 13.6   | 12.4   |
| 39.4   | 11.5   | 31.8   | 40.3   | 31.4   | 28.1   | 48.3   | 51.5   | 25.5   |
| 6.8    | 8.2    | 10.0   | 3.9    | 7.3    | 7.7    | 11.1   | 12.1   | 4.4    |
| 0.3    | 0.6    | 0.6    | 0.3    | 2.7    | 0.8    | 3.5    | 1.7    | 3.0    |
| 2.8    | 3.1    | 0.6    | 2.2    | 2.1    | 1.2    | 0.3    | 2.4    | 2.6    |
| 133.5  | 137.3  | 133.8  | 156.9  | 139.8  | 134.0  | 131.0  | 140.7  | 141.9  |
| 6.0    | 6.9    | 9.5    | 8.0    | 12.0   | 10.8   | 9.7    | 8.8    | 15.1   |
| 1.2    | 1.1    | 0.7    | 1.1    | 1.5    | 0.9    | 0.7    | 1.1    | 0.5    |
| 35.7   | 21.6   | 27.7   | 36.9   | 44.9   | 44.0   | 46.4   | 69.0   | 43.0   |

|       |       |       |       |       |       |       |       |       |
|-------|-------|-------|-------|-------|-------|-------|-------|-------|
| 2.0   | 0.4   | 0.5   | 1.2   | 0.8   | 1.2   | 3.6   | 1.8   | 1.6   |
| 2.9   | 1.7   | 0.7   | 3.9   | 5.1   | 3.4   | 2.9   | 2.5   | 4.8   |
| 1.1   | 0.9   | 0.3   | 0.4   | 0.9   | 0.3   | 0.8   | 1.0   | 0.3   |
| 6.2   | 1.5   | 7.0   | 15.0  | 13.4  | 4.7   | 11.4  | 5.4   | 13.5  |
| 1.0   | 3.8   | 3.0   | 4.9   | 1.9   | 0.7   | 3.0   | 5.0   | 5.4   |
| 1.1   | 1.2   | 1.3   | 4.1   | 0.9   | 0.8   | 2.1   | 1.5   | 1.4   |
| 6.5   | 4.2   | 6.5   | 4.6   | 4.3   | 8.1   | 10.8  | 8.2   | 12.7  |
| 3.0   | 3.6   | 0.5   | 1.8   | 4.9   | 3.3   | 6.0   | 2.6   | 3.6   |
| 3.3   | 4.2   | 6.2   | 3.4   | 3.8   | 1.1   | 2.4   | 4.0   | 5.4   |
| 0.5   | 0.6   | 0.7   | 4.2   | 2.9   | 1.3   | 0.4   | 0.4   | 2.3   |
| 39.0  | 13.9  | 19.1  | 32.0  | 30.1  | 33.3  | 36.4  | 42.7  | 23.8  |
| 1.1   | 1.7   | 6.8   | 5.5   | 8.0   | 5.7   | 1.1   | 2.7   | 4.9   |
| 9.0   | 4.8   | 9.4   | 1.2   | 6.9   | 1.2   | 5.1   | 4.8   | 8.2   |
| 0.6   | 0.9   | 0.8   | 1.9   | 1.1   | 0.6   | 1.5   | 1.2   | 11.3  |
| 8.5   | 10.6  | 8.0   | 4.9   | 5.6   | 6.5   | 7.9   | 13.6  | 4.7   |
| 6.1   | 5.9   | 1.3   | 2.1   | 1.9   | 5.7   | 7.6   | 6.1   | 5.3   |
| 5.7   | 5.2   | 3.3   | 7.4   | 4.6   | 1.8   | 2.4   | 2.6   | 2.4   |
| 0.4   | 0.8   | 0.4   | 0.3   | 0.6   | 0.4   | 0.9   | 0.6   | 0.5   |
| 3.0   | 0.6   | 0.4   | 0.3   | 0.7   | 3.5   | 0.1   | 0.3   | 0.1   |
| 1.9   | 1.9   | 4.5   | 2.6   | 1.1   | 1.9   | 1.6   | 2.8   | 1.8   |
| 6.3   | 2.4   | 4.1   | 1.8   | 1.5   | 1.1   | 3.3   | 11.6  | 6.7   |
| 3.3   | 2.5   | 14.9  | 3.2   | 6.4   | 3.5   | 4.6   | 5.6   | 4.3   |
| 1.8   | 2.4   | 0.5   | 1.1   | 0.6   | 0.2   | 3.0   | 0.7   | 1.5   |
| 3.0   | 4.4   | 2.5   | 7.6   | 1.7   | 7.1   | 8.1   | 3.3   | 1.1   |
| 6.7   | 1.6   | 0.6   | 0.4   | 0.4   | 0.9   | 3.7   | 3.8   | 0.6   |
| 5.9   | 1.6   | 2.1   | 3.7   | 3.3   | 1.3   | 1.4   | 1.0   | 2.8   |
| 0.5   | 1.0   | 0.5   | 1.5   | 4.0   | 1.6   | 4.9   | 0.6   | 0.7   |
| 26.8  | 25.3  | 28.6  | 32.4  | 26.0  | 25.7  | 27.4  | 35.9  | 27.7  |
| 33.0  | 14.0  | 23.9  | 21.2  | 23.0  | 26.9  | 33.4  | 38.7  | 13.2  |
| 0.6   | 0.8   | 4.3   | 0.3   | 1.0   | 2.9   | 2.5   | 4.3   | 2.0   |
| 10.1  | 7.9   | 8.0   | 10.4  | 6.5   | 10.7  | 12.2  | 14.0  | 7.1   |
| 1.8   | 1.0   | 7.5   | 5.1   | 1.0   | 8.1   | 5.9   | 8.4   | 3.2   |
| 4.9   | 0.5   | 0.1   | 0.4   | 1.5   | 0.8   | 3.8   | 3.4   | 0.7   |
| 90.5  | 42.7  | 73.7  | 81.1  | 78.2  | 76.3  | 114.1 | 127.5 | 76.9  |
| 607.8 | 472.2 | 491.5 | 431.0 | 515.1 | 488.5 | 610.7 | 588.0 | 490.7 |
| 1.7   | 0.5   | 0.4   | 0.6   | 0.4   | 0.4   | 1.2   | 1.3   | 0.9   |
| 9.3   | 5.2   | 10.2  | 5.7   | 11.6  | 11.7  | 13.9  | 14.0  | 8.4   |
| 29.9  | 25.2  | 33.0  | 29.6  | 28.3  | 32.0  | 36.8  | 42.6  | 30.5  |
| 30.4  | 26.8  | 24.1  | 37.1  | 18.9  | 22.2  | 35.1  | 35.7  | 15.1  |
| 48.6  | 26.2  | 35.9  | 29.2  | 35.1  | 29.6  | 42.1  | 53.7  | 28.4  |
| 59.2  | 37.9  | 41.6  | 81.6  | 66.5  | 35.4  | 49.6  | 77.0  | 68.8  |
| 0.4   | 0.2   | 1.0   | 1.0   | 1.8   | 0.4   | 0.5   | 0.3   | 0.2   |
| 12.7  | 7.8   | 5.2   | 4.2   | 6.1   | 13.1  | 14.1  | 8.2   | 8.3   |
| 84.4  | 107.2 | 87.2  | 80.3  | 76.3  | 84.5  | 77.8  | 88.4  | 68.9  |
| 24.9  | 12.4  | 10.3  | 16.1  | 3.3   | 7.6   | 4.1   | 12.5  | 3.8   |
| 1.7   | 6.8   | 4.3   | 11.8  | 7.2   | 8.5   | 13.5  | 6.8   | 9.6   |
| 28.2  | 19.2  | 24.5  | 34.3  | 22.6  | 26.6  | 36.5  | 26.2  | 17.6  |
| 3.8   | 0.1   | 0.6   | 0.4   | 0.6   | 0.1   | 0.2   | 0.7   | 3.7   |
| 6.4   | 18.3  | 5.0   | 1.2   | 10.3  | 7.0   | 6.9   | 12.7  | 4.8   |
| 2.0   | 9.3   | 3.1   | 9.5   | 14.2  | 2.9   | 13.1  | 2.7   | 14.9  |
| 3.6   | 4.6   | 4.2   | 4.8   | 4.2   | 1.0   | 7.9   | 0.5   | 3.4   |
| 4.2   | 4.7   | 2.2   | 2.2   | 4.7   | 3.3   | 4.0   | 4.1   | 3.5   |
| 0.3   | 0.6   | 1.3   | 0.6   | 0.1   | 0.2   | 2.2   | 0.2   | 2.5   |

|       |       |       |       |       |       |       |       |       |
|-------|-------|-------|-------|-------|-------|-------|-------|-------|
| 24.9  | 16.8  | 25.8  | 22.7  | 10.5  | 18.3  | 38.3  | 42.7  | 16.4  |
| 36.3  | 16.9  | 10.0  | 8.3   | 15.0  | 6.8   | 21.7  | 31.0  | 15.0  |
| 1.6   | 0.6   | 2.6   | 3.3   | 9.0   | 2.0   | 1.4   | 5.1   | 3.1   |
| 19.2  | 15.5  | 22.5  | 13.6  | 14.7  | 13.9  | 17.0  | 26.7  | 19.1  |
| 0.8   | 5.0   | 0.6   | 5.1   | 3.2   | 2.9   | 9.0   | 0.9   | 1.4   |
| 0.8   | 0.8   | 0.3   | 0.3   | 4.8   | 1.6   | 0.7   | 4.3   | 3.5   |
| 2.8   | 0.6   | 2.4   | 0.6   | 0.1   | 1.4   | 2.4   | 0.6   | 3.3   |
| 9.1   | 5.1   | 10.4  | 11.8  | 12.2  | 8.5   | 18.3  | 17.5  | 17.3  |
| 0.7   | 1.0   | 1.6   | 0.4   | 1.0   | 0.5   | 0.4   | 0.9   | 1.0   |
| 43.4  | 24.8  | 33.3  | 26.0  | 28.1  | 35.0  | 54.8  | 59.9  | 36.7  |
| 29.3  | 19.6  | 21.7  | 22.4  | 31.5  | 29.7  | 22.4  | 33.0  | 25.9  |
| 4.9   | 3.5   | 0.6   | 5.3   | 5.1   | 6.8   | 2.8   | 5.2   | 6.9   |
| 3.9   | 5.4   | 8.8   | 3.6   | 3.0   | 0.3   | 4.5   | 3.8   | 4.7   |
| 98.5  | 61.7  | 61.2  | 80.8  | 79.9  | 65.2  | 112.3 | 99.1  | 95.8  |
| 7.8   | 0.4   | 5.7   | 4.9   | 1.7   | 2.8   | 7.9   | 5.4   | 4.3   |
| 1.5   | 3.4   | 0.6   | 1.0   | 0.7   | 1.0   | 0.9   | 5.0   | 1.7   |
| 5.2   | 0.8   | 1.9   | 0.2   | 1.0   | 0.8   | 2.2   | 2.8   | 4.6   |
| 0.1   | 1.5   | 0.1   | 1.3   | 2.2   | 1.1   | 3.0   | 1.7   | 3.5   |
| 0.6   | 1.9   | 0.4   | 1.7   | 0.3   | 4.0   | 5.4   | 4.0   | 0.6   |
| 2.4   | 1.4   | 2.8   | 4.7   | 6.0   | 0.2   | 4.1   | 1.7   | 1.8   |
| 36.3  | 25.7  | 35.0  | 39.4  | 30.2  | 34.7  | 46.0  | 42.3  | 36.9  |
| 1.7   | 1.5   | 1.1   | 6.8   | 5.0   | 6.2   | 7.3   | 6.1   | 1.1   |
| 0.9   | 3.3   | 0.9   | 1.1   | 5.6   | 2.5   | 0.6   | 1.9   | 3.9   |
| 35.9  | 19.3  | 17.2  | 21.4  | 16.7  | 21.9  | 37.2  | 44.0  | 14.2  |
| 3.9   | 7.1   | 0.9   | 1.8   | 1.1   | 1.4   | 3.2   | 4.3   | 3.0   |
| 4.9   | 1.0   | 1.6   | 3.8   | 5.1   | 1.8   | 1.4   | 1.9   | 1.3   |
| 8.8   | 6.4   | 1.8   | 8.6   | 1.8   | 7.1   | 0.7   | 5.5   | 9.4   |
| 0.5   | 1.3   | 1.5   | 1.7   | 8.6   | 3.6   | 1.0   | 1.4   | 0.7   |
| 1.1   | 2.7   | 0.9   | 2.3   | 1.2   | 2.2   | 1.6   | 2.1   | 2.8   |
| 35.6  | 31.7  | 29.5  | 28.8  | 23.4  | 25.2  | 43.5  | 38.5  | 30.2  |
| 6.8   | 7.7   | 8.3   | 6.9   | 13.0  | 12.3  | 6.2   | 9.3   | 6.6   |
| 7.6   | 4.1   | 7.0   | 5.5   | 9.0   | 1.9   | 7.9   | 8.8   | 5.4   |
| 3.4   | 16.2  | 9.3   | 12.9  | 16.9  | 17.8  | 23.9  | 29.1  | 21.3  |
| 2.4   | 0.2   | 2.2   | 2.3   | 2.2   | 2.5   | 4.0   | 0.7   | 2.2   |
| 0.7   | 1.1   | 7.1   | 7.2   | 9.4   | 7.2   | 9.9   | 5.7   | 3.3   |
| 12.4  | 3.6   | 6.0   | 7.1   | 3.8   | 4.0   | 9.1   | 7.3   | 3.5   |
| 0.3   | 0.4   | 0.3   | 1.1   | 0.2   | 0.2   | 0.5   | 0.2   | 1.2   |
| 191.4 | 172.5 | 156.7 | 197.5 | 180.3 | 177.0 | 323.6 | 372.8 | 226.8 |
| 2.1   | 2.4   | 1.1   | 0.2   | 3.2   | 3.4   | 2.0   | 0.4   | 4.4   |
| 8.0   | 8.8   | 1.2   | 7.2   | 8.7   | 9.8   | 8.7   | 7.3   | 12.1  |
| 18.6  | 16.2  | 14.8  | 19.9  | 22.2  | 16.0  | 15.2  | 17.5  | 18.4  |
| 146.4 | 129.6 | 146.7 | 173.8 | 158.3 | 128.7 | 188.5 | 233.9 | 151.6 |
| 1.4   | 4.1   | 3.5   | 1.3   | 0.5   | 1.3   | 0.2   | 1.6   | 1.7   |
| 1.0   | 0.8   | 0.5   | 5.3   | 2.9   | 5.4   | 2.6   | 4.1   | 1.5   |
| 151.5 | 90.9  | 134.5 | 125.7 | 118.9 | 138.1 | 167.2 | 199.8 | 138.8 |
| 2.5   | 4.4   | 4.6   | 3.5   | 0.2   | 6.8   | 6.1   | 6.5   | 2.5   |
| 3.9   | 0.2   | 0.4   | 3.9   | 2.7   | 0.2   | 2.4   | 4.7   | 0.4   |
| 0.6   | 0.8   | 0.4   | 0.4   | 0.7   | 1.0   | 0.3   | 0.6   | 0.4   |
| 0.4   | 0.7   | 3.4   | 0.4   | 1.4   | 0.9   | 0.5   | 0.7   | 0.3   |
| 24.7  | 23.0  | 19.2  | 20.3  | 14.7  | 17.3  | 29.3  | 34.2  | 18.9  |
| 4.4   | 4.1   | 13.6  | 8.9   | 6.2   | 4.5   | 10.6  | 2.4   | 4.1   |
| 2.4   | 1.6   | 1.4   | 0.9   | 1.0   | 1.9   | 0.9   | 0.7   | 2.6   |
| 6.1   | 4.5   | 5.0   | 0.8   | 3.5   | 0.6   | 5.7   | 6.8   | 4.6   |



|       |       |       |       |       |       |       |       |       |
|-------|-------|-------|-------|-------|-------|-------|-------|-------|
| 1.3   | 0.1   | 2.3   | 0.6   | 1.5   | 0.6   | 3.0   | 3.5   | 3.4   |
| 415.1 | 192.4 | 255.9 | 376.8 | 308.2 | 214.6 | 350.5 | 285.3 | 228.6 |
| 7.0   | 1.3   | 1.4   | 0.8   | 3.9   | 0.7   | 7.5   | 5.2   | 4.6   |
| 2.4   | 6.8   | 7.3   | 2.6   | 4.4   | 4.7   | 11.3  | 10.4  | 7.0   |
| 2.3   | 3.0   | 2.6   | 4.3   | 2.1   | 0.6   | 1.4   | 3.8   | 1.9   |
| 6.8   | 3.2   | 4.0   | 2.1   | 4.4   | 5.0   | 3.7   | 3.2   | 2.9   |
| 0.6   | 0.7   | 4.3   | 5.8   | 3.2   | 4.3   | 4.2   | 6.3   | 0.3   |
| 60.1  | 32.8  | 36.5  | 37.9  | 45.3  | 41.9  | 58.8  | 61.3  | 36.3  |
| 10.6  | 7.9   | 8.4   | 4.9   | 7.1   | 5.1   | 10.9  | 11.2  | 13.1  |
| 0.6   | 0.5   | 3.3   | 0.2   | 0.3   | 2.9   | 0.4   | 0.2   | 0.7   |
| 16.0  | 12.2  | 10.6  | 16.4  | 21.5  | 17.5  | 6.4   | 17.5  | 13.6  |
| 7.5   | 7.6   | 7.3   | 8.1   | 5.9   | 10.5  | 11.7  | 22.6  | 10.4  |
| 0.4   | 0.5   | 0.8   | 0.6   | 1.3   | 0.8   | 1.5   | 0.9   | 0.5   |
| 5.9   | 4.0   | 2.0   | 10.4  | 3.6   | 7.0   | 4.2   | 13.8  | 6.4   |
| 6.8   | 11.0  | 5.7   | 1.4   | 7.0   | 7.3   | 10.8  | 1.5   | 1.5   |
| 12.4  | 11.0  | 14.5  | 12.6  | 13.6  | 9.7   | 17.8  | 16.3  | 8.1   |
| 0.9   | 1.1   | 2.4   | 0.5   | 3.5   | 3.2   | 1.2   | 1.1   | 2.6   |
| 0.6   | 2.5   | 3.3   | 3.8   | 2.2   | 3.3   | 1.7   | 2.8   | 1.9   |
| 0.7   | 1.0   | 0.7   | 0.4   | 0.8   | 1.0   | 0.7   | 1.0   | 1.1   |
| 7.1   | 2.0   | 2.8   | 4.1   | 5.1   | 4.7   | 7.4   | 7.4   | 6.1   |
| 0.4   | 0.5   | 2.5   | 0.2   | 2.6   | 0.5   | 4.6   | 1.1   | 3.7   |
| 54.6  | 27.0  | 38.5  | 36.8  | 34.8  | 34.7  | 37.3  | 59.0  | 31.2  |
| 18.1  | 18.3  | 10.7  | 13.2  | 14.6  | 13.3  | 12.1  | 21.2  | 11.4  |
| 1.8   | 0.7   | 0.8   | 1.0   | 0.3   | 1.3   | 2.6   | 1.2   | 0.6   |
| 2.1   | 3.6   | 1.4   | 1.1   | 2.5   | 3.2   | 6.3   | 3.2   | 1.3   |
| 1.2   | 0.5   | 1.1   | 0.9   | 0.9   | 3.7   | 5.1   | 2.1   | 0.7   |
| 1.3   | 1.9   | 2.5   | 4.2   | 0.6   | 1.2   | 1.0   | 2.1   | 0.6   |
| 0.9   | 0.1   | 3.8   | 2.0   | 2.6   | 5.2   | 3.7   | 3.2   | 0.3   |
| 1.0   | 6.5   | 0.4   | 5.8   | 2.6   | 0.7   | 6.5   | 4.1   | 6.4   |
| 5.3   | 3.6   | 8.1   | 2.6   | 4.1   | 6.7   | 6.9   | 4.3   | 4.7   |
| 1.0   | 0.6   | 0.8   | 0.5   | 5.4   | 1.0   | 0.9   | 2.2   | 0.5   |
| 3.7   | 0.4   | 0.3   | 2.4   | 2.4   | 2.5   | 0.2   | 0.4   | 2.6   |
| 0.2   | 0.1   | 3.1   | 0.4   | 0.3   | 0.1   | 1.0   | 0.2   | 0.1   |
| 4.6   | 5.4   | 5.6   | 1.3   | 1.2   | 2.0   | 1.7   | 1.3   | 4.1   |
| 2.3   | 1.4   | 1.3   | 1.1   | 2.2   | 1.9   | 1.7   | 1.2   | 1.3   |
| 2.5   | 1.5   | 1.5   | 4.4   | 2.0   | 1.5   | 3.8   | 3.8   | 12.2  |
| 0.5   | 0.6   | 1.1   | 0.7   | 0.8   | 3.0   | 0.5   | 1.3   | 1.1   |
| 5.9   | 4.0   | 0.5   | 8.7   | 2.6   | 1.0   | 4.2   | 24.6  | 1.4   |
| 1.5   | 10.9  | 5.1   | 5.1   | 3.4   | 3.1   | 3.3   | 3.0   | 0.8   |
| 1.3   | 1.9   | 1.8   | 3.0   | 2.1   | 2.8   | 2.4   | 2.6   | 6.0   |
| 5.1   | 0.6   | 1.2   | 4.2   | 1.1   | 1.2   | 4.7   | 3.7   | 3.9   |
| 9.0   | 12.8  | 4.1   | 10.5  | 4.9   | 3.2   | 12.0  | 10.5  | 3.6   |
| 1.2   | 0.8   | 5.8   | 1.0   | 5.7   | 6.4   | 6.2   | 5.6   | 0.3   |
| 3.9   | 2.0   | 0.4   | 0.3   | 1.7   | 3.7   | 4.4   | 2.9   | 1.7   |
| 2.4   | 0.7   | 4.0   | 2.3   | 3.7   | 0.4   | 0.5   | 4.1   | 2.5   |
| 0.3   | 0.7   | 0.3   | 2.5   | 3.6   | 2.4   | 1.4   | 2.2   | 4.9   |
| 8.5   | 2.4   | 6.0   | 6.8   | 6.7   | 6.8   | 8.2   | 8.9   | 10.8  |
| 0.7   | 0.2   | 1.4   | 0.8   | 2.3   | 3.2   | 3.9   | 0.2   | 0.1   |
| 22.1  | 19.1  | 19.2  | 18.6  | 21.5  | 17.7  | 23.5  | 25.5  | 25.1  |
| 93.7  | 46.1  | 62.6  | 86.3  | 36.6  | 94.1  | 122.8 | 186.1 | 91.9  |
| 1.2   | 2.7   | 3.6   | 5.6   | 3.1   | 6.6   | 4.3   | 3.7   | 2.8   |
| 9.5   | 2.7   | 7.0   | 6.0   | 0.5   | 0.4   | 4.7   | 0.4   | 3.0   |
| 1.3   | 0.3   | 0.4   | 0.5   | 0.3   | 1.0   | 4.5   | 0.4   | 0.2   |

|       |       |       |       |       |       |       |       |       |
|-------|-------|-------|-------|-------|-------|-------|-------|-------|
| 6.7   | 14.3  | 5.2   | 5.9   | 2.0   | 1.0   | 3.6   | 3.1   | 5.3   |
| 0.2   | 0.3   | 0.6   | 0.4   | 0.1   | 2.5   | 0.9   | 0.3   | 0.2   |
| 13.7  | 12.2  | 18.0  | 11.8  | 9.4   | 8.1   | 11.0  | 12.2  | 12.6  |
| 5.1   | 3.5   | 1.7   | 3.0   | 1.3   | 5.1   | 3.9   | 9.8   | 2.6   |
| 5.5   | 5.4   | 3.5   | 0.6   | 3.8   | 3.6   | 0.8   | 1.5   | 1.0   |
| 6.8   | 5.1   | 3.8   | 2.6   | 5.9   | 6.9   | 7.9   | 7.5   | 2.9   |
| 1.5   | 6.4   | 5.8   | 2.5   | 3.5   | 1.1   | 2.4   | 4.7   | 2.9   |
| 12.1  | 6.6   | 2.9   | 10.1  | 10.1  | 4.9   | 17.4  | 8.0   | 10.5  |
| 2.4   | 0.7   | 0.2   | 0.7   | 5.3   | 0.4   | 0.2   | 0.2   | 1.7   |
| 4.4   | 5.5   | 5.9   | 0.9   | 4.8   | 6.5   | 6.3   | 9.5   | 7.1   |
| 4.3   | 0.1   | 0.2   | 0.1   | 0.2   | 1.0   | 0.5   | 0.6   | 0.4   |
| 1.8   | 5.8   | 0.8   | 2.5   | 0.8   | 2.7   | 0.9   | 6.6   | 1.0   |
| 4.0   | 6.8   | 5.6   | 6.9   | 5.0   | 3.2   | 6.2   | 5.1   | 6.6   |
| 4.0   | 5.2   | 0.3   | 0.2   | 4.3   | 3.8   | 3.1   | 4.1   | 4.3   |
| 0.1   | 1.6   | 0.2   | 0.4   | 0.2   | 0.2   | 0.5   | 0.9   | 0.2   |
| 8.4   | 6.6   | 6.7   | 2.2   | 5.3   | 10.0  | 4.7   | 1.2   | 2.7   |
| 0.4   | 0.2   | 2.2   | 3.9   | 2.8   | 1.2   | 0.2   | 3.4   | 2.2   |
| 7.8   | 2.6   | 3.4   | 8.8   | 3.4   | 2.7   | 2.8   | 10.7  | 6.0   |
| 15.4  | 10.5  | 9.3   | 11.9  | 10.9  | 14.1  | 16.1  | 25.1  | 14.6  |
| 7.3   | 6.4   | 3.6   | 9.3   | 6.9   | 10.3  | 5.8   | 12.1  | 7.4   |
| 104.2 | 79.3  | 55.1  | 60.8  | 79.5  | 54.4  | 88.5  | 123.5 | 88.4  |
| 7.9   | 6.0   | 0.5   | 5.2   | 6.5   | 0.5   | 6.9   | 9.5   | 10.4  |
| 11.0  | 10.8  | 13.0  | 9.8   | 14.2  | 6.4   | 16.1  | 13.4  | 12.8  |
| 9.8   | 2.3   | 7.8   | 12.5  | 2.3   | 2.4   | 9.8   | 24.4  | 1.3   |
| 1.2   | 4.9   | 1.1   | 1.5   | 2.5   | 1.0   | 2.2   | 1.6   | 4.6   |
| 2.3   | 3.2   | 1.5   | 1.0   | 2.8   | 0.7   | 1.5   | 1.0   | 2.3   |
| 8.6   | 5.1   | 3.6   | 1.1   | 1.6   | 8.1   | 5.4   | 2.0   | 3.3   |
| 73.0  | 8.1   | 10.3  | 11.0  | 12.9  | 12.0  | 13.9  | 20.1  | 16.3  |
| 2.5   | 0.2   | 0.6   | 0.4   | 1.2   | 5.0   | 1.3   | 4.6   | 2.3   |
| 14.1  | 10.3  | 11.2  | 2.1   | 9.1   | 4.9   | 7.8   | 19.6  | 3.9   |
| 104.3 | 90.5  | 80.5  | 72.5  | 117.6 | 68.6  | 124.5 | 120.3 | 99.6  |
| 5.4   | 2.7   | 2.8   | 1.2   | 0.3   | 7.1   | 4.1   | 1.9   | 5.4   |
| 0.6   | 0.2   | 3.3   | 1.1   | 3.8   | 5.4   | 7.2   | 0.6   | 5.3   |
| 0.4   | 2.5   | 1.8   | 0.5   | 1.2   | 0.5   | 4.3   | 5.9   | 5.7   |
| 4.6   | 0.4   | 2.7   | 0.6   | 1.3   | 5.0   | 6.6   | 0.2   | 0.3   |
| 4.6   | 1.9   | 6.0   | 0.4   | 0.4   | 1.2   | 1.5   | 3.0   | 0.8   |
| 0.6   | 4.3   | 0.9   | 0.9   | 4.6   | 6.1   | 7.5   | 1.3   | 0.9   |
| 486.3 | 322.9 | 349.5 | 412.0 | 358.7 | 373.9 | 545.9 | 567.9 | 314.8 |
| 0.7   | 7.3   | 5.1   | 3.4   | 1.6   | 0.7   | 1.0   | 6.7   | 1.3   |
| 8.2   | 8.3   | 10.4  | 10.3  | 4.4   | 11.5  | 11.1  | 5.7   | 13.1  |
| 8.9   | 6.1   | 0.2   | 0.2   | 0.1   | 0.5   | 4.0   | 0.3   | 4.7   |
| 0.5   | 1.1   | 0.3   | 0.2   | 0.1   | 0.4   | 0.2   | 1.4   | 1.7   |
| 46.6  | 23.8  | 25.7  | 40.4  | 25.0  | 28.4  | 38.7  | 34.9  | 25.5  |
| 4.9   | 4.4   | 4.5   | 0.9   | 2.9   | 5.0   | 1.2   | 4.2   | 3.9   |
| 0.3   | 0.7   | 0.7   | 0.9   | 0.5   | 0.4   | 0.9   | 1.6   | 0.7   |
| 45.5  | 22.8  | 35.6  | 36.4  | 29.5  | 32.7  | 45.5  | 53.5  | 20.6  |
| 8.8   | 7.7   | 4.5   | 5.4   | 6.7   | 6.9   | 9.2   | 8.9   | 9.3   |
| 2.0   | 4.3   | 1.1   | 0.7   | 1.4   | 1.8   | 1.1   | 2.8   | 4.8   |
| 146.4 | 120.6 | 129.3 | 133.9 | 128.9 | 132.5 | 161.7 | 157.1 | 153.3 |
| 7.9   | 2.9   | 0.5   | 0.7   | 0.6   | 1.4   | 2.9   | 3.8   | 1.5   |
| 10.0  | 16.8  | 12.0  | 4.6   | 13.9  | 19.6  | 5.3   | 6.4   | 7.4   |
| 2.1   | 2.1   | 4.2   | 8.1   | 8.7   | 7.3   | 5.8   | 2.0   | 6.9   |
| 1.2   | 5.9   | 1.4   | 1.4   | 0.8   | 2.5   | 1.4   | 1.2   | 5.0   |

|        |       |       |       |       |       |       |       |       |
|--------|-------|-------|-------|-------|-------|-------|-------|-------|
| 58.7   | 35.5  | 57.4  | 69.2  | 47.8  | 44.9  | 68.6  | 88.3  | 59.3  |
| 1.4    | 0.7   | 1.3   | 0.3   | 4.0   | 3.2   | 6.7   | 6.6   | 5.6   |
| 236.7  | 96.1  | 155.4 | 155.5 | 150.2 | 170.8 | 204.3 | 242.5 | 185.5 |
| 4.6    | 4.8   | 6.3   | 5.6   | 5.5   | 5.0   | 5.3   | 3.5   | 4.4   |
| 0.9    | 3.6   | 3.7   | 0.3   | 0.5   | 0.6   | 1.7   | 0.8   | 1.0   |
| 56.6   | 29.6  | 27.4  | 49.1  | 53.0  | 36.2  | 40.8  | 64.4  | 39.8  |
| 3.8    | 0.4   | 3.0   | 0.8   | 0.6   | 0.7   | 5.7   | 0.8   | 2.9   |
| 2.5    | 0.6   | 4.7   | 3.4   | 1.5   | 6.6   | 3.8   | 3.7   | 2.1   |
| 2.3    | 0.3   | 2.5   | 0.3   | 2.6   | 2.3   | 0.8   | 3.5   | 0.7   |
| 2.8    | 1.8   | 3.0   | 13.7  | 11.2  | 11.2  | 1.8   | 5.6   | 10.8  |
| 4.0    | 9.7   | 7.6   | 15.7  | 9.8   | 18.6  | 13.7  | 25.6  | 8.4   |
| 92.8   | 58.0  | 60.5  | 57.8  | 63.9  | 83.4  | 77.4  | 112.1 | 55.5  |
| 0.9    | 0.5   | 0.5   | 2.7   | 0.5   | 0.7   | 3.5   | 1.0   | 0.6   |
| 3.6    | 6.0   | 3.0   | 0.7   | 6.6   | 0.8   | 1.0   | 3.7   | 1.4   |
| 6.5    | 4.0   | 3.6   | 3.0   | 14.3  | 4.3   | 3.2   | 3.0   | 3.6   |
| 0.7    | 0.4   | 4.0   | 2.3   | 0.4   | 2.3   | 2.0   | 2.0   | 0.8   |
| 13.6   | 12.6  | 6.8   | 13.4  | 11.0  | 14.9  | 20.5  | 26.1  | 11.6  |
| 0.7    | 1.9   | 0.4   | 1.6   | 0.7   | 0.9   | 1.0   | 0.8   | 3.5   |
| 36.9   | 22.3  | 20.3  | 26.4  | 23.6  | 29.4  | 36.5  | 77.0  | 45.3  |
| 15.1   | 17.7  | 11.2  | 9.9   | 15.7  | 17.3  | 25.1  | 28.3  | 27.3  |
| 61.6   | 24.2  | 30.0  | 25.6  | 35.0  | 27.5  | 27.5  | 29.8  | 49.0  |
| 1031.9 | 332.5 | 372.9 | 386.2 | 393.3 | 432.2 | 487.8 | 675.8 | 400.6 |
| 153.5  | 104.0 | 109.1 | 114.9 | 117.2 | 112.0 | 161.0 | 170.2 | 113.7 |
| 3.5    | 1.2   | 0.2   | 0.7   | 0.2   | 0.6   | 0.5   | 0.3   | 0.8   |
| 10.9   | 17.0  | 23.4  | 18.9  | 14.9  | 12.5  | 20.0  | 22.5  | 16.0  |
| 5.4    | 2.6   | 6.9   | 0.9   | 2.3   | 0.7   | 9.6   | 0.4   | 0.8   |
| 6.8    | 1.9   | 1.5   | 9.3   | 10.8  | 4.0   | 6.0   | 10.9  | 10.0  |
| 379.7  | 324.4 | 449.2 | 432.3 | 437.7 | 437.5 | 554.9 | 566.4 | 443.0 |
| 2.6    | 0.3   | 3.7   | 4.9   | 1.4   | 3.3   | 4.5   | 4.2   | 1.0   |
| 1.8    | 5.7   | 1.1   | 0.8   | 5.9   | 6.2   | 3.8   | 5.4   | 5.6   |
| 3.2    | 10.7  | 5.3   | 10.2  | 7.6   | 2.7   | 1.8   | 6.7   | 5.5   |
| 597.2  | 370.9 | 461.1 | 460.9 | 475.7 | 472.3 | 628.0 | 715.1 | 472.4 |
| 154.9  | 131.4 | 164.3 | 167.5 | 184.8 | 156.4 | 229.9 | 187.1 | 159.5 |
| 11.3   | 24.1  | 14.4  | 18.2  | 19.8  | 14.0  | 20.3  | 13.1  | 6.9   |
| 0.4    | 0.2   | 0.2   | 1.2   | 2.0   | 0.2   | 2.0   | 0.4   | 0.6   |
| 3.6    | 1.5   | 4.8   | 5.5   | 5.1   | 0.7   | 2.5   | 4.7   | 4.0   |
| 30.9   | 19.3  | 22.1  | 33.8  | 37.0  | 31.8  | 35.3  | 54.4  | 30.5  |
| 7.5    | 6.3   | 6.5   | 7.4   | 9.5   | 8.4   | 13.5  | 9.4   | 12.3  |
| 2.1    | 7.0   | 5.2   | 7.4   | 8.0   | 5.5   | 5.4   | 10.2  | 3.7   |
| 6.0    | 4.3   | 7.3   | 10.0  | 9.5   | 5.9   | 11.3  | 1.5   | 8.5   |
| 33.5   | 26.6  | 34.7  | 24.4  | 19.3  | 33.4  | 40.8  | 52.8  | 25.0  |
| 381.5  | 275.4 | 340.2 | 332.1 | 336.6 | 334.3 | 428.4 | 398.4 | 278.1 |
| 9.4    | 16.4  | 14.2  | 14.0  | 17.1  | 19.2  | 20.8  | 25.2  | 16.4  |
| 61.2   | 55.7  | 88.2  | 67.1  | 71.5  | 70.2  | 90.7  | 113.4 | 63.3  |
| 0.4    | 0.6   | 5.7   | 1.1   | 1.0   | 0.3   | 5.6   | 1.2   | 1.0   |
| 0.7    | 4.6   | 0.2   | 0.6   | 0.8   | 0.9   | 0.5   | 0.4   | 0.8   |
| 6.8    | 1.8   | 2.6   | 7.3   | 8.3   | 2.9   | 5.2   | 10.8  | 10.4  |
| 0.5    | 0.7   | 1.6   | 0.8   | 0.4   | 0.6   | 0.6   | 1.0   | 2.0   |
| 0.6    | 0.2   | 5.0   | 2.5   | 1.9   | 2.6   | 3.8   | 0.4   | 1.2   |
| 4.4    | 2.6   | 2.5   | 6.6   | 5.7   | 4.0   | 5.9   | 4.1   | 0.5   |
| 1.5    | 0.4   | 3.8   | 0.3   | 0.8   | 3.1   | 6.0   | 5.3   | 4.0   |
| 6.5    | 9.8   | 9.0   | 1.0   | 8.5   | 4.4   | 4.4   | 7.9   | 4.6   |
| 45.4   | 24.9  | 34.9  | 28.5  | 29.4  | 19.2  | 36.1  | 37.7  | 27.1  |

|        |       |       |       |       |       |        |        |       |
|--------|-------|-------|-------|-------|-------|--------|--------|-------|
| 3.2    | 3.2   | 1.9   | 1.9   | 0.5   | 0.7   | 3.1    | 3.2    | 1.1   |
| 33.4   | 19.2  | 15.5  | 21.2  | 14.7  | 13.0  | 20.8   | 14.6   | 18.5  |
| 0.5    | 0.4   | 3.1   | 4.7   | 0.5   | 1.6   | 2.5    | 0.9    | 3.6   |
| 69.7   | 56.2  | 56.3  | 53.9  | 51.7  | 52.3  | 75.7   | 85.8   | 42.8  |
| 86.8   | 61.9  | 48.9  | 61.1  | 56.4  | 55.7  | 65.6   | 66.5   | 54.0  |
| 244.7  | 33.4  | 31.8  | 35.1  | 44.3  | 30.2  | 42.3   | 51.6   | 38.2  |
| 2.2    | 7.6   | 7.3   | 1.5   | 2.7   | 5.7   | 2.5    | 11.2   | 8.2   |
| 0.7    | 0.6   | 0.4   | 0.7   | 0.5   | 0.5   | 0.4    | 0.6    | 0.5   |
| 3.4    | 3.4   | 11.2  | 4.8   | 3.5   | 0.7   | 5.2    | 4.8    | 10.4  |
| 9.6    | 3.2   | 3.5   | 7.3   | 5.8   | 9.9   | 3.4    | 14.4   | 5.9   |
| 5.0    | 1.9   | 5.7   | 9.1   | 4.8   | 6.6   | 4.2    | 1.0    | 6.1   |
| 542.6  | 333.1 | 423.0 | 410.9 | 426.4 | 473.1 | 516.0  | 630.3  | 464.2 |
| 6.3    | 1.6   | 5.5   | 7.1   | 3.2   | 7.7   | 7.8    | 4.6    | 11.4  |
| 1.3    | 0.7   | 2.3   | 0.4   | 2.7   | 2.0   | 2.9    | 1.0    | 2.0   |
| 6.0    | 6.3   | 5.8   | 0.8   | 0.7   | 1.3   | 3.3    | 7.9    | 0.7   |
| 0.5    | 2.4   | 1.7   | 1.7   | 0.2   | 3.1   | 2.7    | 3.9    | 1.2   |
| 9.8    | 7.5   | 4.0   | 4.2   | 5.4   | 5.2   | 2.0    | 10.5   | 10.2  |
| 1.0    | 3.6   | 3.8   | 1.1   | 1.0   | 5.5   | 7.1    | 6.8    | 0.8   |
| 1.0    | 0.4   | 0.9   | 0.3   | 0.6   | 0.6   | 0.5    | 0.4    | 0.3   |
| 44.6   | 24.7  | 30.0  | 45.3  | 52.9  | 37.6  | 47.4   | 58.2   | 17.9  |
| 7.2    | 10.3  | 5.5   | 7.5   | 4.2   | 11.3  | 9.9    | 11.9   | 11.2  |
| 3.4    | 0.7   | 0.9   | 6.4   | 1.2   | 2.8   | 2.9    | 7.9    | 3.6   |
| 0.6    | 1.1   | 0.7   | 1.6   | 0.7   | 0.9   | 1.7    | 2.1    | 1.2   |
| 4.4    | 1.5   | 1.0   | 2.4   | 2.7   | 1.4   | 5.0    | 3.7    | 2.8   |
| 6.3    | 0.8   | 1.3   | 1.9   | 5.2   | 5.4   | 0.6    | 5.2    | 4.4   |
| 4.1    | 2.7   | 2.5   | 3.2   | 2.8   | 2.5   | 1.7    | 4.0    | 4.8   |
| 2.3    | 1.3   | 1.2   | 1.9   | 0.9   | 0.7   | 1.1    | 5.8    | 1.1   |
| 4.9    | 0.4   | 4.4   | 3.8   | 5.1   | 0.8   | 5.7    | 7.1    | 1.8   |
| 0.2    | 1.0   | 0.4   | 0.9   | 6.4   | 8.3   | 5.4    | 4.5    | 0.2   |
| 19.9   | 10.1  | 13.9  | 13.3  | 17.9  | 12.1  | 13.1   | 14.7   | 10.7  |
| 4.8    | 10.1  | 25.9  | 17.4  | 22.9  | 12.6  | 23.1   | 36.5   | 31.0  |
| 14.1   | 8.3   | 4.2   | 6.6   | 9.7   | 12.7  | 8.4    | 11.6   | 5.1   |
| 672.5  | 495.9 | 601.4 | 636.0 | 581.8 | 641.3 | 808.1  | 769.2  | 615.2 |
| 7.6    | 6.3   | 8.0   | 4.6   | 5.2   | 2.5   | 9.6    | 14.9   | 2.3   |
| 0.2    | 2.0   | 1.6   | 0.1   | 2.8   | 1.2   | 0.1    | 3.5    | 3.7   |
| 1.0    | 0.3   | 0.5   | 0.1   | 0.7   | 0.5   | 3.2    | 1.0    | 0.6   |
| 48.3   | 24.9  | 40.1  | 46.4  | 36.2  | 42.5  | 60.8   | 64.9   | 52.6  |
| 5.6    | 3.0   | 9.7   | 3.6   | 1.1   | 3.7   | 11.5   | 6.1    | 6.3   |
| 23.6   | 18.6  | 12.7  | 12.0  | 19.6  | 21.2  | 12.7   | 26.6   | 34.9  |
| 13.8   | 17.7  | 16.1  | 16.3  | 22.3  | 13.7  | 25.1   | 31.1   | 27.1  |
| 2.1    | 7.7   | 2.9   | 5.2   | 8.0   | 2.3   | 4.0    | 1.5    | 2.7   |
| 210.7  | 151.9 | 165.6 | 165.2 | 168.4 | 169.4 | 190.4  | 236.4  | 183.5 |
| 60.6   | 44.6  | 47.1  | 50.9  | 62.5  | 61.9  | 80.3   | 126.5  | 53.1  |
| 1058.1 | 752.9 | 863.8 | 858.8 | 926.3 | 871.5 | 1033.9 | 1109.7 | 834.8 |
| 30.1   | 6.9   | 13.0  | 14.6  | 16.2  | 14.3  | 18.5   | 29.3   | 10.7  |
| 266.9  | 202.7 | 230.5 | 214.5 | 246.3 | 221.0 | 314.5  | 309.4  | 239.7 |
| 36.2   | 29.6  | 25.3  | 31.4  | 29.5  | 38.7  | 37.5   | 41.1   | 35.0  |
| 5.4    | 6.5   | 1.4   | 5.2   | 9.4   | 1.0   | 4.0    | 1.9    | 1.6   |
| 0.9    | 1.1   | 0.9   | 0.6   | 0.8   | 0.7   | 0.6    | 0.9    | 1.5   |
| 9.9    | 3.8   | 1.1   | 0.6   | 0.3   | 4.4   | 6.1    | 0.3    | 2.8   |
| 0.2    | 0.9   | 0.3   | 0.3   | 0.2   | 0.5   | 1.0    | 0.8    | 0.6   |
| 2.7    | 0.3   | 0.3   | 2.1   | 0.4   | 2.2   | 1.6    | 0.1    | 3.8   |
| 22.9   | 9.9   | 11.3  | 13.1  | 14.9  | 14.6  | 14.7   | 21.3   | 29.6  |

|        |        |        |        |        |        |        |        |        |
|--------|--------|--------|--------|--------|--------|--------|--------|--------|
| 17.5   | 16.6   | 18.8   | 12.7   | 16.0   | 9.3    | 18.8   | 22.4   | 17.2   |
| 4.4    | 1.4    | 2.0    | 7.8    | 1.3    | 2.6    | 1.3    | 1.5    | 2.8    |
| 5.0    | 5.0    | 10.2   | 8.0    | 5.9    | 4.5    | 0.8    | 7.3    | 4.0    |
| 4.7    | 4.6    | 0.4    | 2.9    | 2.1    | 2.9    | 3.7    | 7.9    | 5.7    |
| 14.4   | 17.2   | 19.0   | 17.1   | 20.1   | 12.0   | 15.6   | 6.2    | 3.3    |
| 2.8    | 0.2    | 0.6    | 0.2    | 0.3    | 0.5    | 0.1    | 0.1    | 0.3    |
| 3.1    | 1.0    | 3.4    | 2.8    | 2.3    | 4.5    | 1.5    | 3.7    | 1.7    |
| 169.5  | 108.3  | 90.1   | 97.4   | 122.2  | 109.2  | 148.6  | 185.0  | 134.5  |
| 0.4    | 1.0    | 0.5    | 1.3    | 0.5    | 0.9    | 0.4    | 1.4    | 1.4    |
| 2.4    | 0.7    | 2.6    | 7.9    | 6.0    | 8.8    | 7.5    | 7.9    | 7.9    |
| 136.8  | 99.0   | 114.8  | 115.0  | 112.8  | 110.2  | 147.5  | 127.2  | 109.8  |
| 0.8    | 1.9    | 1.2    | 1.3    | 0.9    | 3.8    | 1.7    | 1.3    | 2.2    |
| 1.2    | 6.9    | 0.6    | 1.0    | 3.0    | 5.1    | 2.6    | 5.1    | 3.8    |
| 1.2    | 0.6    | 1.3    | 0.5    | 1.2    | 2.5    | 1.1    | 1.1    | 0.9    |
| 1.9    | 1.8    | 2.1    | 3.5    | 1.6    | 1.1    | 2.0    | 2.2    | 1.4    |
| 2.4    | 1.6    | 6.6    | 4.0    | 2.2    | 1.4    | 12.4   | 7.2    | 5.1    |
| 1.6    | 2.8    | 2.4    | 2.6    | 1.3    | 0.8    | 1.0    | 1.4    | 2.9    |
| 4.3    | 2.5    | 1.0    | 2.0    | 1.1    | 1.6    | 4.2    | 4.8    | 3.7    |
| 0.5    | 1.1    | 0.4    | 0.4    | 1.1    | 4.3    | 0.8    | 0.6    | 0.8    |
| 94.8   | 56.1   | 57.7   | 43.0   | 45.0   | 46.6   | 70.5   | 69.1   | 45.2   |
| 1.9    | 0.8    | 1.4    | 1.5    | 0.9    | 1.3    | 2.1    | 1.4    | 0.3    |
| 62.6   | 31.2   | 33.4   | 40.1   | 46.2   | 37.4   | 47.9   | 49.5   | 45.5   |
| 1.2    | 4.3    | 1.6    | 4.2    | 0.4    | 1.0    | 0.5    | 7.8    | 0.4    |
| 3.2    | 1.7    | 4.2    | 0.6    | 0.9    | 0.9    | 1.1    | 2.7    | 1.6    |
| 6.0    | 0.7    | 5.0    | 8.1    | 5.1    | 9.6    | 6.6    | 6.8    | 8.1    |
| 1541.0 | 1458.8 | 1200.4 | 1432.2 | 1556.7 | 1310.9 | 2114.7 | 2064.2 | 1788.2 |
| 0.7    | 0.6    | 0.7    | 0.5    | 1.1    | 1.3    | 1.1    | 0.9    | 8.2    |
| 3.6    | 5.3    | 5.0    | 8.9    | 3.8    | 7.0    | 2.4    | 4.8    | 7.3    |
| 1.3    | 5.0    | 4.1    | 1.0    | 0.8    | 1.3    | 1.0    | 6.8    | 3.9    |
| 0.3    | 0.5    | 3.0    | 0.8    | 2.0    | 0.4    | 0.3    | 0.2    | 0.2    |
| 26.5   | 20.1   | 16.2   | 19.6   | 21.7   | 23.0   | 29.0   | 28.4   | 24.7   |
| 352.2  | 285.4  | 217.0  | 203.4  | 313.1  | 302.3  | 506.1  | 592.3  | 493.1  |
| 21.0   | 25.4   | 25.9   | 19.7   | 28.7   | 20.0   | 33.1   | 46.8   | 25.9   |
| 2.4    | 5.6    | 9.1    | 6.9    | 6.8    | 9.7    | 6.3    | 12.3   | 6.7    |
| 1.0    | 3.4    | 1.3    | 2.2    | 0.9    | 1.2    | 4.2    | 6.5    | 0.3    |
| 8.2    | 4.1    | 5.0    | 5.7    | 6.3    | 5.5    | 7.6    | 13.8   | 4.9    |
| 0.3    | 2.2    | 3.3    | 0.2    | 1.7    | 0.3    | 0.6    | 2.7    | 1.3    |
| 19.6   | 24.5   | 17.5   | 22.0   | 23.2   | 26.0   | 66.7   | 46.4   | 35.2   |
| 1.3    | 5.8    | 2.5    | 0.8    | 6.4    | 5.8    | 10.7   | 4.9    | 4.9    |
| 3.8    | 3.6    | 1.9    | 3.9    | 13.6   | 1.6    | 11.6   | 3.7    | 2.3    |
| 0.9    | 1.6    | 1.8    | 0.7    | 3.2    | 0.9    | 7.2    | 2.1    | 2.8    |
| 4.1    | 0.9    | 1.1    | 3.8    | 1.7    | 2.3    | 1.5    | 8.5    | 2.3    |
| 2.4    | 2.4    | 1.4    | 0.3    | 0.2    | 0.2    | 3.3    | 7.3    | 5.5    |
| 78.0   | 40.7   | 56.4   | 59.8   | 52.9   | 48.7   | 88.5   | 68.4   | 58.0   |
| 7.0    | 4.2    | 4.8    | 0.4    | 3.3    | 6.3    | 10.3   | 9.1    | 2.5    |
| 0.4    | 1.1    | 3.7    | 0.3    | 1.7    | 2.8    | 1.0    | 0.6    | 3.8    |
| 11.8   | 7.9    | 8.1    | 6.6    | 12.3   | 6.3    | 11.9   | 1.6    | 10.5   |
| 0.7    | 0.4    | 1.2    | 1.3    | 1.3    | 3.9    | 1.3    | 1.2    | 2.1    |
| 1.0    | 0.5    | 2.7    | 1.1    | 1.5    | 0.6    | 0.5    | 2.4    | 1.4    |
| 30.4   | 31.2   | 19.1   | 38.3   | 22.7   | 29.5   | 22.0   | 20.4   | 20.6   |
| 2.6    | 2.4    | 4.6    | 1.0    | 4.4    | 2.5    | 0.7    | 2.5    | 0.5    |
| 6.9    | 3.5    | 1.7    | 4.0    | 4.0    | 3.7    | 5.9    | 4.2    | 6.6    |
| 6.1    | 3.3    | 3.1    | 3.1    | 5.3    | 2.1    | 6.2    | 4.7    | 2.2    |

|       |       |       |       |       |       |       |        |       |
|-------|-------|-------|-------|-------|-------|-------|--------|-------|
| 3.3   | 6.7   | 2.8   | 3.1   | 1.8   | 1.6   | 2.4   | 1.6    | 4.6   |
| 11.9  | 3.7   | 6.5   | 8.0   | 14.6  | 13.1  | 17.6  | 13.8   | 4.5   |
| 5.2   | 4.5   | 4.8   | 4.2   | 9.1   | 4.9   | 7.8   | 5.9    | 10.3  |
| 0.3   | 0.6   | 0.2   | 0.3   | 0.3   | 0.4   | 2.2   | 0.8    | 0.1   |
| 6.4   | 8.1   | 6.8   | 6.4   | 8.0   | 8.1   | 6.4   | 8.7    | 5.4   |
| 2.7   | 10.5  | 8.2   | 9.5   | 5.6   | 11.1  | 13.1  | 11.4   | 6.9   |
| 17.1  | 13.8  | 14.3  | 10.0  | 12.7  | 10.2  | 9.8   | 15.0   | 13.1  |
| 12.7  | 15.4  | 10.5  | 13.4  | 15.7  | 9.0   | 20.5  | 13.1   | 12.6  |
| 0.4   | 0.5   | 0.4   | 0.4   | 0.6   | 3.0   | 3.3   | 3.3    | 1.0   |
| 12.2  | 8.4   | 14.3  | 5.4   | 9.5   | 4.6   | 18.5  | 14.2   | 6.3   |
| 317.1 | 203.0 | 199.1 | 275.4 | 266.8 | 208.4 | 301.2 | 305.9  | 324.7 |
| 47.2  | 46.6  | 51.9  | 56.7  | 60.0  | 39.9  | 69.0  | 60.3   | 59.0  |
| 2.3   | 1.2   | 2.2   | 2.0   | 2.0   | 1.7   | 1.5   | 1.5    | 2.0   |
| 138.7 | 136.6 | 89.9  | 108.8 | 129.8 | 75.8  | 162.3 | 98.2   | 154.4 |
| 621.3 | 672.3 | 402.8 | 367.8 | 631.5 | 533.1 | 957.2 | 1113.5 | 827.1 |
| 4.6   | 3.5   | 2.9   | 2.3   | 3.9   | 3.7   | 1.5   | 3.9    | 2.7   |
| 0.5   | 1.1   | 0.2   | 0.5   | 0.8   | 2.9   | 1.9   | 1.0    | 0.6   |
| 81.6  | 34.3  | 98.5  | 89.0  | 115.4 | 103.0 | 158.6 | 169.1  | 109.3 |
| 9.6   | 1.3   | 1.4   | 4.4   | 6.5   | 8.6   | 7.6   | 20.6   | 7.0   |
| 93.3  | 71.7  | 74.1  | 88.1  | 95.7  | 85.1  | 102.6 | 114.9  | 102.3 |
| 1.1   | 1.8   | 1.0   | 0.8   | 1.7   | 1.4   | 0.5   | 1.1    | 0.9   |
| 5.4   | 1.3   | 0.8   | 0.7   | 5.4   | 4.9   | 5.7   | 8.2    | 12.5  |
| 152.0 | 95.9  | 98.6  | 108.6 | 83.6  | 117.6 | 168.7 | 143.0  | 107.9 |
| 5.5   | 6.9   | 6.8   | 6.3   | 1.7   | 1.9   | 4.4   | 3.6    | 1.2   |
| 1.5   | 4.0   | 1.1   | 1.1   | 1.6   | 1.2   | 0.9   | 5.9    | 0.9   |
| 7.9   | 3.7   | 1.4   | 1.2   | 1.5   | 1.9   | 5.0   | 1.6    | 5.2   |
| 630.3 | 440.9 | 509.7 | 522.5 | 542.3 | 522.8 | 734.5 | 761.4  | 537.1 |
| 96.7  | 65.2  | 94.6  | 81.9  | 88.8  | 90.7  | 122.9 | 137.0  | 100.2 |
| 8.5   | 10.3  | 8.5   | 9.9   | 7.2   | 8.4   | 10.2  | 11.8   | 11.5  |
| 13.8  | 19.7  | 16.6  | 10.6  | 15.9  | 11.7  | 19.0  | 25.0   | 12.9  |
| 4.6   | 1.9   | 7.6   | 4.5   | 6.2   | 1.2   | 2.9   | 6.3    | 1.0   |
| 0.7   | 1.4   | 0.8   | 0.7   | 1.1   | 0.6   | 1.4   | 1.3    | 1.2   |
| 7.4   | 6.4   | 0.7   | 1.9   | 4.3   | 6.0   | 2.6   | 2.4    | 5.5   |
| 2.1   | 0.7   | 1.2   | 1.6   | 4.3   | 7.5   | 0.3   | 4.7    | 1.4   |
| 0.8   | 1.4   | 6.3   | 4.3   | 9.1   | 6.7   | 7.9   | 4.2    | 1.5   |
| 0.2   | 0.6   | 0.6   | 4.2   | 0.5   | 2.6   | 3.8   | 5.7    | 1.9   |
| 1.3   | 2.0   | 1.0   | 4.2   | 3.1   | 0.2   | 1.2   | 0.3    | 0.2   |
| 12.6  | 6.1   | 14.2  | 10.6  | 7.6   | 10.6  | 10.6  | 10.3   | 5.6   |
| 3.2   | 4.0   | 4.2   | 3.4   | 2.0   | 2.0   | 5.3   | 3.9    | 5.7   |
| 18.8  | 8.8   | 13.4  | 5.3   | 13.8  | 7.4   | 11.4  | 12.8   | 7.9   |
| 1.2   | 0.4   | 0.6   | 0.4   | 0.8   | 0.6   | 0.7   | 1.5    | 0.6   |
| 5.5   | 4.5   | 7.6   | 4.9   | 9.6   | 7.1   | 4.6   | 1.5    | 10.5  |
| 6.3   | 2.5   | 1.8   | 0.7   | 0.6   | 1.5   | 1.6   | 1.4    | 1.2   |
| 0.4   | 0.8   | 2.2   | 3.0   | 0.5   | 0.3   | 0.4   | 1.4    | 2.6   |
| 1.8   | 0.5   | 4.1   | 0.7   | 0.3   | 5.2   | 0.7   | 5.4    | 0.6   |
| 4.1   | 0.7   | 4.7   | 3.7   | 1.0   | 3.1   | 7.0   | 1.6    | 4.1   |
| 1.1   | 5.7   | 3.4   | 1.3   | 6.9   | 1.8   | 10.3  | 4.4    | 1.1   |
| 9.0   | 9.8   | 6.7   | 4.4   | 16.1  | 7.0   | 13.3  | 17.8   | 14.6  |
| 3.5   | 4.2   | 4.1   | 3.4   | 1.8   | 8.4   | 2.1   | 2.5    | 2.7   |
| 0.5   | 1.4   | 3.2   | 4.6   | 1.8   | 1.3   | 3.2   | 2.4    | 2.8   |
| 6.8   | 0.6   | 0.5   | 3.3   | 0.5   | 0.4   | 2.2   | 6.0    | 4.2   |
| 41.1  | 34.7  | 17.4  | 22.0  | 29.3  | 21.6  | 35.0  | 33.9   | 34.5  |
| 17.7  | 10.5  | 18.5  | 11.6  | 17.1  | 16.7  | 26.1  | 27.7   | 22.9  |

|       |       |       |       |       |       |       |       |       |
|-------|-------|-------|-------|-------|-------|-------|-------|-------|
| 1.0   | 3.6   | 4.0   | 0.8   | 0.5   | 4.5   | 5.1   | 5.3   | 3.4   |
| 0.3   | 0.2   | 0.3   | 0.2   | 0.3   | 0.3   | 0.2   | 0.3   | 0.2   |
| 1.5   | 1.5   | 1.5   | 1.1   | 1.4   | 0.9   | 1.3   | 1.4   | 3.2   |
| 1.4   | 2.4   | 1.4   | 1.2   | 11.5  | 1.0   | 2.5   | 1.8   | 2.1   |
| 0.7   | 1.9   | 0.5   | 0.8   | 1.2   | 0.6   | 2.2   | 0.7   | 1.0   |
| 3.5   | 3.5   | 3.6   | 1.1   | 0.9   | 1.2   | 8.8   | 11.5  | 4.7   |
| 10.2  | 5.2   | 8.1   | 9.3   | 7.3   | 6.5   | 13.6  | 13.6  | 10.8  |
| 0.6   | 2.0   | 0.5   | 1.1   | 0.5   | 1.0   | 0.6   | 1.3   | 0.5   |
| 7.0   | 1.2   | 1.1   | 1.9   | 1.1   | 1.2   | 1.9   | 2.2   | 6.2   |
| 5.7   | 4.1   | 0.9   | 1.1   | 8.6   | 1.6   | 3.7   | 1.2   | 0.7   |
| 1.0   | 3.6   | 0.6   | 1.5   | 0.7   | 0.7   | 2.4   | 5.2   | 1.7   |
| 0.9   | 0.9   | 0.8   | 1.4   | 1.1   | 2.6   | 2.9   | 1.5   | 1.5   |
| 2.0   | 0.1   | 4.0   | 0.1   | 0.1   | 2.2   | 0.4   | 1.0   | 0.4   |
| 0.4   | 0.8   | 3.8   | 1.6   | 3.4   | 2.4   | 5.6   | 6.4   | 3.6   |
| 6.2   | 8.3   | 3.9   | 6.9   | 1.1   | 7.8   | 7.2   | 7.0   | 6.6   |
| 87.7  | 3.6   | 5.3   | 7.8   | 6.6   | 7.5   | 11.5  | 11.1  | 2.0   |
| 1.1   | 0.8   | 0.9   | 0.6   | 0.8   | 1.6   | 1.9   | 2.8   | 2.5   |
| 4.7   | 4.0   | 7.9   | 1.2   | 3.8   | 4.8   | 3.5   | 7.3   | 3.1   |
| 2.8   | 0.1   | 3.2   | 0.3   | 0.2   | 1.8   | 1.4   | 1.3   | 0.5   |
| 149.6 | 127.4 | 145.4 | 127.5 | 120.8 | 122.6 | 152.9 | 143.0 | 163.9 |
| 3.1   | 1.8   | 2.4   | 1.4   | 3.4   | 3.7   | 4.5   | 5.3   | 2.9   |
| 4.1   | 3.5   | 4.9   | 3.7   | 4.4   | 4.6   | 1.9   | 5.0   | 1.1   |
| 0.8   | 1.1   | 0.9   | 0.8   | 1.4   | 0.4   | 3.4   | 2.0   | 0.5   |
| 14.2  | 2.3   | 2.8   | 7.2   | 5.6   | 1.3   | 2.3   | 6.2   | 2.5   |
| 0.4   | 1.7   | 1.6   | 0.4   | 0.5   | 2.3   | 0.3   | 2.2   | 0.5   |
| 1.6   | 2.2   | 1.1   | 6.2   | 1.9   | 2.0   | 2.1   | 1.1   | 1.5   |
| 276.6 | 101.8 | 112.9 | 104.8 | 100.5 | 166.0 | 212.5 | 373.8 | 144.0 |
| 63.2  | 40.1  | 41.2  | 46.0  | 48.2  | 49.0  | 67.9  | 70.0  | 64.6  |
| 0.7   | 1.0   | 4.2   | 8.1   | 2.3   | 1.9   | 2.2   | 10.6  | 2.2   |
| 5.1   | 4.6   | 0.7   | 0.4   | 6.6   | 7.8   | 5.1   | 8.5   | 8.7   |
| 5.2   | 9.2   | 7.2   | 3.5   | 8.2   | 10.9  | 12.1  | 13.0  | 12.2  |
| 1.1   | 6.6   | 0.5   | 0.8   | 1.6   | 2.7   | 0.3   | 0.3   | 0.6   |
| 14.9  | 8.6   | 8.3   | 9.7   | 5.7   | 17.6  | 10.8  | 1.8   | 10.1  |
| 0.5   | 4.0   | 4.0   | 1.9   | 4.6   | 4.2   | 0.9   | 3.8   | 2.8   |
| 311.8 | 230.9 | 262.1 | 275.6 | 294.1 | 276.2 | 403.0 | 404.8 | 409.9 |
| 2.7   | 2.3   | 2.0   | 3.9   | 2.3   | 3.0   | 3.2   | 1.7   | 8.9   |
| 5.6   | 7.6   | 1.7   | 2.6   | 9.1   | 7.0   | 4.3   | 17.6  | 14.1  |
| 4.5   | 1.2   | 1.1   | 0.8   | 1.3   | 1.1   | 1.0   | 2.6   | 1.2   |
| 7.6   | 8.7   | 1.6   | 4.9   | 4.2   | 2.4   | 6.7   | 11.1  | 7.7   |
| 1.4   | 0.3   | 0.6   | 0.3   | 0.2   | 0.1   | 3.0   | 2.2   | 3.2   |
| 2.0   | 1.9   | 1.3   | 0.2   | 1.0   | 3.4   | 2.4   | 0.5   | 0.7   |
| 0.7   | 0.6   | 1.4   | 0.4   | 0.3   | 0.4   | 1.0   | 1.2   | 0.7   |
| 0.7   | 1.1   | 0.5   | 0.8   | 0.9   | 0.6   | 0.7   | 1.0   | 1.0   |
| 0.1   | 0.1   | 1.2   | 2.1   | 1.6   | 0.5   | 0.7   | 0.1   | 0.9   |
| 4.5   | 8.3   | 5.0   | 10.8  | 7.3   | 4.4   | 15.0  | 17.7  | 15.1  |
| 9.3   | 7.2   | 4.4   | 4.7   | 9.3   | 5.4   | 6.7   | 18.9  | 9.3   |
| 1.7   | 1.9   | 0.4   | 6.0   | 3.2   | 2.7   | 2.9   | 5.4   | 4.8   |
| 14.5  | 5.2   | 9.7   | 9.5   | 10.4  | 5.3   | 6.9   | 8.7   | 4.9   |
| 3.3   | 1.9   | 10.9  | 7.4   | 5.0   | 2.9   | 10.4  | 13.4  | 6.7   |
| 1.0   | 1.4   | 0.7   | 1.6   | 8.5   | 1.9   | 1.6   | 1.5   | 0.6   |
| 1.0   | 1.8   | 1.9   | 2.8   | 1.2   | 7.5   | 12.2  | 2.4   | 1.0   |
| 5.6   | 2.2   | 1.8   | 2.1   | 7.5   | 8.6   | 6.8   | 6.7   | 9.3   |
| 26.3  | 25.9  | 20.1  | 24.5  | 27.0  | 20.2  | 27.0  | 25.0  | 26.3  |

|        |        |        |        |        |        |        |        |        |
|--------|--------|--------|--------|--------|--------|--------|--------|--------|
| 8.2    | 3.9    | 6.1    | 6.9    | 1.8    | 3.6    | 3.1    | 13.0   | 10.2   |
| 2.7    | 1.4    | 0.5    | 4.3    | 2.5    | 1.0    | 0.7    | 4.7    | 0.9    |
| 6.7    | 5.0    | 2.1    | 0.8    | 3.4    | 4.5    | 0.4    | 3.3    | 0.9    |
| 19.0   | 35.3   | 20.4   | 21.2   | 33.5   | 27.7   | 16.3   | 24.1   | 25.8   |
| 1.7    | 1.0    | 0.2    | 0.8    | 2.3    | 2.4    | 3.3    | 5.4    | 2.9    |
| 3.4    | 8.4    | 4.5    | 10.6   | 11.9   | 4.7    | 4.4    | 22.0   | 8.1    |
| 6.3    | 7.8    | 5.3    | 6.5    | 9.0    | 8.0    | 11.7   | 11.0   | 9.6    |
| 463.0  | 254.8  | 289.2  | 290.8  | 321.7  | 284.8  | 406.7  | 449.3  | 280.5  |
| 407.8  | 356.9  | 301.0  | 429.5  | 354.3  | 340.3  | 495.2  | 469.2  | 414.3  |
| 1.2    | 1.4    | 1.4    | 1.0    | 1.6    | 1.2    | 1.4    | 2.1    | 1.6    |
| 29.5   | 34.8   | 32.7   | 26.4   | 35.6   | 32.2   | 41.5   | 47.2   | 33.7   |
| 0.9    | 3.5    | 0.7    | 1.2    | 0.4    | 3.8    | 1.0    | 1.1    | 1.0    |
| 12.5   | 10.0   | 7.5    | 10.4   | 5.5    | 14.9   | 12.6   | 15.6   | 9.9    |
| 10.2   | 2.6    | 3.9    | 6.3    | 7.9    | 4.8    | 4.6    | 7.4    | 9.0    |
| 22.9   | 10.4   | 19.4   | 13.0   | 23.0   | 17.6   | 39.1   | 45.9   | 24.2   |
| 0.9    | 0.8    | 0.6    | 0.6    | 1.5    | 3.3    | 3.6    | 1.4    | 1.1    |
| 7.6    | 8.4    | 10.8   | 12.6   | 5.3    | 6.1    | 17.0   | 19.8   | 16.4   |
| 0.8    | 2.0    | 8.6    | 2.7    | 6.4    | 1.0    | 1.6    | 7.0    | 1.8    |
| 0.4    | 2.6    | 0.3    | 0.8    | 2.3    | 0.9    | 0.6    | 1.0    | 0.7    |
| 14.6   | 7.3    | 17.8   | 9.6    | 16.7   | 2.6    | 18.5   | 10.5   | 2.7    |
| 0.2    | 0.3    | 1.5    | 1.2    | 0.4    | 0.6    | 0.4    | 0.7    | 0.7    |
| 11.1   | 19.3   | 14.3   | 13.2   | 27.2   | 14.3   | 23.7   | 24.9   | 34.4   |
| 8.6    | 8.1    | 11.2   | 1.6    | 3.8    | 3.6    | 0.4    | 13.6   | 0.2    |
| 8.3    | 20.9   | 15.3   | 14.3   | 17.8   | 13.9   | 20.6   | 18.1   | 17.4   |
| 1.3    | 10.9   | 3.4    | 4.0    | 4.8    | 5.6    | 3.3    | 7.8    | 2.3    |
| 0.4    | 0.8    | 1.1    | 0.3    | 0.7    | 0.5    | 0.4    | 0.4    | 1.5    |
| 4.9    | 6.5    | 7.2    | 7.1    | 5.7    | 7.5    | 7.9    | 10.5   | 6.3    |
| 24.1   | 5.0    | 8.2    | 21.7   | 17.9   | 9.3    | 26.6   | 23.2   | 18.7   |
| 10.7   | 25.6   | 21.7   | 25.6   | 19.7   | 24.7   | 36.0   | 35.4   | 39.8   |
| 640.1  | 471.5  | 463.5  | 477.4  | 598.7  | 392.6  | 757.4  | 845.2  | 564.3  |
| 22.7   | 13.3   | 22.4   | 15.9   | 19.8   | 16.9   | 20.7   | 19.3   | 9.5    |
| 7.5    | 1.1    | 2.1    | 4.0    | 1.5    | 2.4    | 2.1    | 5.3    | 1.1    |
| 150.1  | 209.7  | 187.3  | 247.0  | 219.2  | 173.0  | 321.2  | 449.9  | 346.3  |
| 9.1    | 4.9    | 5.8    | 9.6    | 1.5    | 6.0    | 5.1    | 10.7   | 4.5    |
| 0.4    | 0.3    | 0.9    | 2.4    | 0.7    | 6.4    | 0.7    | 1.1    | 0.1    |
| 34.5   | 22.7   | 26.2   | 25.1   | 32.7   | 28.5   | 32.2   | 45.6   | 26.8   |
| 11.3   | 15.2   | 14.2   | 15.1   | 13.8   | 7.7    | 8.0    | 8.6    | 10.7   |
| 1.4    | 1.7    | 6.7    | 0.7    | 2.2    | 0.5    | 3.4    | 0.4    | 0.8    |
| 8.1    | 8.3    | 7.1    | 8.0    | 10.5   | 7.0    | 7.8    | 12.4   | 6.8    |
| 1234.3 | 1078.4 | 1067.3 | 1052.5 | 1303.7 | 1203.3 | 1523.3 | 1641.9 | 1256.7 |
| 0.2    | 2.8    | 1.1    | 3.0    | 1.7    | 3.6    | 5.9    | 4.5    | 0.8    |
| 0.3    | 1.5    | 0.3    | 0.3    | 0.5    | 0.7    | 3.7    | 5.6    | 3.0    |
| 4.4    | 0.4    | 5.4    | 2.8    | 3.7    | 0.5    | 3.5    | 4.2    | 1.7    |
| 0.9    | 7.8    | 1.2    | 0.7    | 5.6    | 4.0    | 5.8    | 0.5    | 4.2    |
| 2883.3 | 2714.4 | 2512.0 | 2791.0 | 2854.4 | 2672.9 | 3430.0 | 3719.5 | 2530.2 |
| 26.5   | 12.4   | 18.8   | 18.1   | 16.8   | 15.8   | 21.7   | 38.3   | 24.6   |
| 10.8   | 20.8   | 10.4   | 9.1    | 16.0   | 8.8    | 20.5   | 16.8   | 10.0   |
| 34.8   | 43.0   | 34.2   | 18.2   | 24.5   | 30.8   | 35.1   | 41.5   | 22.1   |
| 137.6  | 93.3   | 100.7  | 102.4  | 105.5  | 96.3   | 140.6  | 148.5  | 101.0  |
| 595.3  | 283.3  | 287.1  | 309.0  | 301.1  | 294.1  | 361.7  | 357.5  | 263.7  |
| 1.6    | 1.6    | 0.3    | 0.2    | 3.8    | 3.5    | 6.6    | 10.2   | 5.2    |
| 2.9    | 0.9    | 1.5    | 6.5    | 3.8    | 1.3    | 1.4    | 1.4    | 5.4    |
| 0.3    | 1.5    | 0.2    | 3.0    | 2.5    | 0.1    | 4.4    | 1.6    | 3.0    |



|        |       |       |       |        |       |        |        |        |
|--------|-------|-------|-------|--------|-------|--------|--------|--------|
| 6.2    | 5.7   | 1.2   | 4.4   | 8.6    | 6.7   | 9.5    | 11.5   | 5.0    |
| 21.1   | 18.0  | 12.8  | 8.1   | 18.9   | 30.9  | 21.7   | 25.3   | 22.4   |
| 101.3  | 106.9 | 68.0  | 44.3  | 106.6  | 76.5  | 137.7  | 66.4   | 119.2  |
| 1.5    | 0.2   | 0.4   | 0.4   | 0.1    | 0.1   | 2.4    | 1.4    | 0.3    |
| 2.9    | 0.9   | 0.8   | 0.3   | 4.2    | 1.5   | 1.0    | 5.2    | 4.5    |
| 1.6    | 3.0   | 1.6   | 3.3   | 1.1    | 1.7   | 4.4    | 9.4    | 6.1    |
| 1.4    | 2.5   | 0.4   | 5.1   | 0.5    | 2.6   | 1.2    | 0.8    | 0.9    |
| 4.1    | 9.2   | 4.5   | 5.9   | 16.1   | 8.7   | 13.3   | 7.7    | 10.2   |
| 10.9   | 5.5   | 9.0   | 7.9   | 14.3   | 8.1   | 15.5   | 12.0   | 11.1   |
| 4.9    | 1.9   | 5.0   | 5.7   | 4.5    | 8.3   | 2.3    | 1.3    | 6.1    |
| 8.6    | 10.6  | 4.2   | 7.0   | 7.2    | 7.3   | 7.4    | 10.2   | 12.3   |
| 1.3    | 2.8   | 0.9   | 4.0   | 0.4    | 3.3   | 1.0    | 0.7    | 0.2    |
| 35.5   | 13.0  | 25.9  | 14.6  | 17.8   | 21.6  | 13.2   | 8.2    | 16.9   |
| 1.1    | 0.6   | 0.6   | 0.3   | 0.5    | 3.8   | 0.4    | 0.9    | 0.8    |
| 1.1    | 1.0   | 4.9   | 0.8   | 3.7    | 2.4   | 3.6    | 3.6    | 2.6    |
| 32.9   | 24.6  | 17.1  | 21.5  | 23.1   | 18.0  | 29.9   | 32.8   | 40.7   |
| 4.6    | 1.1   | 6.1   | 1.2   | 0.8    | 1.4   | 1.9    | 4.2    | 0.9    |
| 123.3  | 91.5  | 75.3  | 80.7  | 107.4  | 112.5 | 141.3  | 146.3  | 102.5  |
| 27.3   | 19.2  | 26.0  | 33.5  | 33.3   | 41.4  | 41.8   | 56.0   | 38.3   |
| 6.1    | 5.2   | 0.5   | 5.6   | 4.3    | 4.2   | 0.6    | 8.6    | 5.3    |
| 6.8    | 0.2   | 3.3   | 5.1   | 4.1    | 3.1   | 7.0    | 9.2    | 4.4    |
| 35.9   | 23.1  | 34.9  | 28.8  | 26.4   | 24.8  | 25.7   | 47.9   | 21.0   |
| 2.8    | 2.1   | 4.1   | 1.2   | 3.0    | 0.6   | 1.6    | 1.5    | 12.1   |
| 3.8    | 9.6   | 5.3   | 2.9   | 6.6    | 7.3   | 5.5    | 11.1   | 9.5    |
| 32.7   | 33.6  | 44.1  | 27.8  | 33.1   | 29.8  | 47.7   | 56.0   | 30.7   |
| 5.7    | 5.8   | 6.1   | 5.3   | 5.5    | 7.7   | 9.0    | 2.7    | 8.6    |
| 13.7   | 11.0  | 7.6   | 4.2   | 7.6    | 8.0   | 13.1   | 13.8   | 7.8    |
| 1.4    | 2.7   | 1.1   | 0.7   | 0.7    | 0.7   | 0.8    | 3.0    | 4.6    |
| 0.8    | 2.5   | 5.4   | 5.0   | 4.7    | 3.7   | 4.3    | 6.1    | 2.9    |
| 327.7  | 210.5 | 157.8 | 288.0 | 225.5  | 177.8 | 341.0  | 357.8  | 282.9  |
| 0.6    | 0.8   | 0.8   | 0.7   | 0.9    | 0.7   | 0.8    | 1.0    | 0.9    |
| 9.4    | 0.6   | 1.1   | 3.9   | 1.4    | 3.5   | 2.0    | 3.6    | 1.6    |
| 9.1    | 4.2   | 9.8   | 0.6   | 2.1    | 7.3   | 9.5    | 3.4    | 0.9    |
| 7.1    | 4.5   | 1.7   | 2.6   | 5.4    | 5.4   | 7.4    | 7.8    | 8.2    |
| 1.5    | 1.0   | 5.2   | 0.7   | 2.8    | 0.5   | 1.4    | 4.3    | 4.7    |
| 63.1   | 28.1  | 20.7  | 18.2  | 27.5   | 7.5   | 23.5   | 32.2   | 15.6   |
| 2.5    | 2.4   | 2.2   | 0.3   | 4.8    | 4.6   | 1.3    | 4.2    | 0.3    |
| 0.6    | 0.8   | 1.1   | 0.5   | 0.6    | 0.5   | 0.4    | 0.7    | 0.5    |
| 18.7   | 8.5   | 7.9   | 7.9   | 19.0   | 12.2  | 9.8    | 13.6   | 10.2   |
| 7.2    | 8.0   | 4.3   | 0.6   | 0.8    | 1.4   | 10.1   | 10.0   | 11.4   |
| 1692.7 | 810.8 | 714.0 | 793.3 | 1057.4 | 887.1 | 1633.1 | 1856.9 | 1503.1 |
| 2.4    | 6.6   | 1.7   | 2.3   | 2.1    | 1.6   | 0.9    | 2.9    | 1.9    |
| 0.5    | 0.4   | 0.4   | 1.7   | 0.5    | 0.4   | 0.4    | 0.6    | 0.4    |
| 1.0    | 0.8   | 0.9   | 2.6   | 0.4    | 0.7   | 2.4    | 4.0    | 0.4    |
| 22.6   | 19.6  | 17.4  | 17.7  | 23.2   | 18.5  | 31.7   | 36.0   | 11.7   |
| 1.7    | 0.6   | 3.7   | 2.4   | 2.8    | 2.2   | 2.1    | 2.7    | 1.6    |
| 1.1    | 1.7   | 1.5   | 1.0   | 1.3    | 1.2   | 3.5    | 2.0    | 2.5    |
| 3.3    | 3.0   | 11.2  | 1.6   | 8.3    | 5.6   | 14.1   | 18.9   | 3.1    |
| 2.8    | 2.0   | 1.2   | 0.9   | 1.2    | 0.7   | 2.5    | 2.4    | 1.6    |
| 1.8    | 1.4   | 1.0   | 1.2   | 1.9    | 1.5   | 1.9    | 2.7    | 4.2    |
| 7.2    | 5.8   | 7.1   | 4.7   | 11.1   | 5.0   | 5.4    | 8.4    | 6.8    |
| 6.3    | 15.7  | 3.2   | 8.9   | 3.3    | 3.1   | 3.8    | 9.8    | 2.2    |
| 13.6   | 17.3  | 11.5  | 4.6   | 10.8   | 13.9  | 10.5   | 12.6   | 10.1   |

|       |       |       |       |       |       |       |       |       |
|-------|-------|-------|-------|-------|-------|-------|-------|-------|
| 76.9  | 65.4  | 63.7  | 61.5  | 60.6  | 62.8  | 89.3  | 100.1 | 76.6  |
| 2.4   | 0.7   | 1.1   | 0.6   | 0.7   | 1.2   | 3.7   | 0.6   | 1.4   |
| 7.9   | 9.7   | 10.1  | 6.7   | 5.7   | 0.7   | 6.8   | 6.1   | 7.7   |
| 8.1   | 3.2   | 6.2   | 7.7   | 11.9  | 7.4   | 7.6   | 2.2   | 8.4   |
| 0.4   | 0.3   | 0.3   | 0.3   | 0.4   | 0.4   | 0.5   | 1.4   | 0.3   |
| 1.8   | 2.8   | 2.6   | 1.7   | 2.8   | 5.3   | 3.7   | 1.1   | 2.4   |
| 11.3  | 10.8  | 7.3   | 6.1   | 13.1  | 10.1  | 11.9  | 12.8  | 7.3   |
| 6.0   | 0.2   | 1.5   | 4.2   | 0.6   | 0.7   | 7.1   | 7.2   | 2.9   |
| 279.5 | 189.9 | 227.7 | 215.3 | 262.4 | 209.5 | 330.3 | 304.8 | 242.9 |
| 1.7   | 4.0   | 9.2   | 1.0   | 1.6   | 1.1   | 9.8   | 1.6   | 3.5   |
| 79.4  | 57.5  | 59.0  | 67.2  | 72.0  | 58.2  | 78.8  | 103.8 | 80.6  |
| 6.2   | 22.4  | 17.3  | 16.7  | 17.1  | 22.6  | 25.4  | 26.6  | 17.0  |
| 0.7   | 3.4   | 3.4   | 4.2   | 8.4   | 5.2   | 6.9   | 7.7   | 5.5   |
| 1.5   | 4.3   | 3.6   | 4.1   | 1.2   | 2.6   | 4.5   | 7.1   | 5.9   |
| 0.8   | 1.3   | 3.4   | 1.4   | 1.5   | 3.1   | 0.9   | 2.2   | 1.0   |
| 0.9   | 0.4   | 0.8   | 1.1   | 0.5   | 0.5   | 1.0   | 1.8   | 0.6   |
| 1.4   | 0.7   | 0.5   | 0.7   | 1.2   | 0.7   | 4.0   | 1.1   | 3.4   |
| 17.0  | 20.7  | 19.9  | 15.8  | 23.0  | 21.5  | 18.9  | 29.9  | 17.9  |
| 11.5  | 11.8  | 3.2   | 11.9  | 11.6  | 3.4   | 4.2   | 17.0  | 2.9   |
| 445.9 | 313.5 | 362.5 | 401.8 | 378.0 | 357.0 | 456.5 | 527.2 | 365.5 |
| 0.6   | 0.8   | 1.7   | 0.6   | 1.4   | 1.1   | 1.4   | 0.9   | 1.3   |
| 6.5   | 7.9   | 17.0  | 9.6   | 9.6   | 19.3  | 17.4  | 22.3  | 13.6  |
| 1.6   | 1.1   | 1.0   | 0.4   | 1.7   | 1.1   | 0.4   | 0.7   | 0.6   |
| 44.7  | 44.0  | 30.2  | 41.5  | 37.9  | 46.0  | 43.6  | 38.1  | 43.2  |
| 259.6 | 124.6 | 152.5 | 165.1 | 151.8 | 179.8 | 191.4 | 241.9 | 167.6 |
| 12.3  | 1.8   | 1.3   | 4.1   | 15.0  | 4.9   | 3.3   | 6.0   | 11.8  |
| 47.3  | 35.9  | 39.0  | 36.6  | 47.1  | 35.4  | 59.1  | 60.7  | 50.4  |
| 1.3   | 1.3   | 6.9   | 6.7   | 3.2   | 3.8   | 7.9   | 4.4   | 7.5   |
| 1.7   | 3.5   | 5.8   | 6.5   | 3.8   | 6.3   | 6.8   | 7.1   | 2.5   |
| 1.5   | 0.3   | 5.9   | 0.3   | 0.9   | 3.7   | 0.5   | 3.0   | 2.2   |
| 2.0   | 1.2   | 0.3   | 3.6   | 3.4   | 0.4   | 0.2   | 0.4   | 0.7   |
| 3.8   | 4.7   | 2.8   | 0.1   | 0.9   | 1.8   | 1.0   | 1.7   | 0.4   |
| 14.1  | 17.0  | 8.5   | 7.4   | 11.3  | 13.2  | 10.0  | 12.5  | 16.6  |
| 0.8   | 0.9   | 0.7   | 0.4   | 0.5   | 0.2   | 0.2   | 0.3   | 0.3   |
| 1.0   | 1.0   | 1.1   | 0.5   | 3.2   | 1.1   | 1.3   | 2.1   | 3.8   |
| 2.8   | 5.4   | 6.3   | 0.8   | 5.2   | 3.0   | 7.7   | 9.1   | 0.2   |
| 0.5   | 0.2   | 0.3   | 0.2   | 0.4   | 0.4   | 0.1   | 1.0   | 0.4   |
| 25.9  | 21.1  | 19.8  | 22.0  | 19.4  | 22.9  | 19.7  | 52.4  | 23.1  |
| 6.5   | 0.4   | 1.8   | 2.2   | 2.2   | 1.6   | 1.8   | 6.9   | 1.2   |
| 6.5   | 3.4   | 8.6   | 1.2   | 4.8   | 2.1   | 2.8   | 5.2   | 1.4   |
| 5.1   | 10.3  | 14.8  | 18.4  | 18.3  | 19.7  | 19.1  | 23.5  | 19.3  |
| 8.8   | 11.1  | 15.3  | 13.0  | 13.8  | 8.4   | 11.9  | 14.3  | 8.7   |
| 0.2   | 0.4   | 0.1   | 2.1   | 4.0   | 2.5   | 0.6   | 2.1   | 0.1   |
| 4.2   | 4.1   | 5.6   | 1.3   | 6.7   | 1.2   | 1.2   | 0.7   | 1.1   |
| 52.2  | 25.7  | 37.2  | 34.1  | 32.0  | 39.4  | 52.7  | 57.8  | 26.0  |
| 7.0   | 3.2   | 2.8   | 3.3   | 1.2   | 2.0   | 0.9   | 3.0   | 0.5   |
| 8.8   | 3.1   | 5.3   | 0.4   | 7.0   | 5.0   | 4.2   | 1.8   | 6.4   |
| 1.2   | 8.6   | 1.1   | 1.9   | 0.9   | 2.1   | 4.6   | 1.5   | 1.1   |
| 7.3   | 10.4  | 6.8   | 12.4  | 9.9   | 8.4   | 7.6   | 6.5   | 7.7   |
| 0.7   | 0.2   | 1.0   | 4.5   | 0.4   | 1.3   | 0.2   | 0.7   | 2.7   |
| 5.9   | 6.8   | 9.2   | 2.4   | 7.5   | 4.5   | 1.0   | 8.0   | 6.7   |
| 2.9   | 3.0   | 4.8   | 4.3   | 4.4   | 1.8   | 3.3   | 5.1   | 1.0   |
| 2.1   | 7.0   | 4.7   | 9.2   | 7.8   | 10.9  | 8.3   | 9.2   | 6.7   |

|       |       |       |       |       |       |       |       |       |
|-------|-------|-------|-------|-------|-------|-------|-------|-------|
| 2.0   | 0.5   | 0.7   | 0.3   | 4.1   | 0.6   | 0.9   | 1.4   | 0.6   |
| 5.9   | 1.6   | 4.3   | 5.7   | 3.3   | 1.4   | 0.9   | 5.8   | 1.6   |
| 3.9   | 4.2   | 0.7   | 1.1   | 0.7   | 2.8   | 1.5   | 2.4   | 1.3   |
| 4.5   | 3.0   | 0.5   | 2.7   | 0.4   | 3.7   | 5.1   | 4.8   | 1.0   |
| 466.9 | 272.4 | 315.5 | 302.8 | 326.8 | 341.0 | 367.2 | 554.9 | 371.5 |
| 139.5 | 128.4 | 162.8 | 133.2 | 148.0 | 157.1 | 186.6 | 218.1 | 136.5 |
| 0.4   | 1.7   | 6.0   | 3.9   | 2.1   | 6.7   | 1.8   | 2.7   | 2.6   |
| 5.6   | 3.3   | 2.4   | 4.4   | 10.9  | 3.0   | 1.2   | 5.2   | 5.6   |
| 8.2   | 5.6   | 3.3   | 5.0   | 6.1   | 4.1   | 1.5   | 12.3  | 9.7   |
| 10.9  | 1.8   | 8.8   | 14.5  | 2.4   | 5.0   | 13.5  | 4.0   | 8.2   |
| 0.6   | 0.8   | 0.6   | 0.8   | 1.1   | 3.2   | 1.7   | 0.7   | 1.4   |
| 12.3  | 6.0   | 11.8  | 14.7  | 15.1  | 8.5   | 16.5  | 7.0   | 2.3   |
| 1.2   | 2.1   | 1.1   | 3.4   | 1.5   | 4.3   | 5.8   | 2.0   | 4.3   |
| 0.6   | 0.8   | 0.3   | 0.2   | 0.5   | 0.4   | 0.4   | 0.8   | 0.3   |
| 52.9  | 29.7  | 26.0  | 34.7  | 29.1  | 35.1  | 36.3  | 40.1  | 50.0  |
| 1.3   | 1.2   | 5.9   | 3.6   | 4.0   | 3.4   | 1.2   | 2.0   | 1.1   |
| 126.3 | 78.3  | 84.1  | 86.6  | 99.8  | 101.1 | 121.5 | 163.3 | 98.5  |
| 0.7   | 0.6   | 2.2   | 1.1   | 4.7   | 0.7   | 5.6   | 8.2   | 0.3   |
| 4.0   | 9.5   | 6.3   | 9.9   | 4.3   | 5.6   | 6.3   | 9.2   | 9.7   |
| 11.2  | 1.0   | 1.7   | 5.4   | 6.4   | 1.8   | 7.8   | 3.6   | 3.3   |
| 0.6   | 0.9   | 0.6   | 0.6   | 0.9   | 0.6   | 1.0   | 0.8   | 0.8   |
| 1.8   | 3.8   | 2.9   | 4.6   | 5.7   | 4.0   | 1.9   | 3.6   | 0.7   |
| 12.3  | 5.6   | 6.0   | 8.4   | 7.4   | 10.7  | 6.6   | 11.1  | 11.5  |
| 5.1   | 2.9   | 2.7   | 3.8   | 3.0   | 1.0   | 4.3   | 3.2   | 0.3   |
| 0.6   | 0.9   | 0.4   | 0.6   | 3.4   | 0.3   | 0.4   | 0.8   | 0.9   |
| 18.7  | 20.1  | 18.9  | 17.7  | 18.8  | 13.7  | 18.1  | 25.8  | 22.1  |
| 9.4   | 9.2   | 6.9   | 7.5   | 5.8   | 5.2   | 4.9   | 5.2   | 6.9   |
| 16.8  | 21.5  | 5.0   | 12.6  | 11.0  | 8.0   | 12.5  | 11.6  | 16.6  |
| 1.2   | 1.2   | 1.3   | 2.1   | 0.6   | 1.9   | 1.4   | 7.2   | 0.9   |
| 3.2   | 1.1   | 1.1   | 0.2   | 2.0   | 0.3   | 1.1   | 2.0   | 0.7   |
| 2.6   | 6.1   | 1.8   | 5.5   | 3.7   | 5.0   | 0.7   | 9.6   | 5.4   |
| 2.5   | 1.3   | 1.0   | 3.6   | 1.1   | 1.1   | 0.7   | 0.8   | 1.0   |
| 13.5  | 6.8   | 8.7   | 14.9  | 24.7  | 2.9   | 26.5  | 25.1  | 17.3  |
| 3.1   | 4.2   | 2.0   | 2.8   | 0.6   | 2.6   | 5.0   | 5.6   | 1.5   |
| 0.9   | 0.7   | 0.6   | 0.5   | 1.0   | 0.9   | 3.1   | 1.3   | 1.5   |
| 2.3   | 2.4   | 1.6   | 1.9   | 1.9   | 2.2   | 2.1   | 3.1   | 1.6   |
| 0.2   | 0.7   | 0.4   | 0.4   | 2.6   | 1.2   | 0.3   | 2.7   | 0.6   |
| 7.7   | 1.2   | 10.6  | 12.3  | 8.8   | 9.0   | 12.5  | 8.7   | 1.2   |
| 0.6   | 0.2   | 0.7   | 0.4   | 0.6   | 0.5   | 0.3   | 0.3   | 0.3   |
| 14.3  | 12.0  | 6.1   | 10.1  | 9.9   | 11.6  | 9.5   | 20.2  | 17.0  |
| 2.0   | 1.4   | 2.4   | 2.2   | 1.7   | 1.2   | 1.7   | 2.1   | 1.2   |
| 10.0  | 11.1  | 7.7   | 9.9   | 5.6   | 6.6   | 8.3   | 10.6  | 10.2  |
| 21.0  | 29.5  | 20.7  | 20.1  | 31.0  | 23.5  | 23.1  | 28.5  | 27.6  |
| 5.3   | 5.7   | 2.0   | 7.3   | 1.5   | 0.8   | 3.5   | 7.5   | 3.7   |
| 20.4  | 19.9  | 13.6  | 7.6   | 4.9   | 17.3  | 20.9  | 20.6  | 14.0  |
| 1.2   | 1.0   | 0.6   | 1.1   | 0.2   | 2.0   | 2.5   | 0.3   | 1.5   |
| 8.1   | 5.8   | 2.7   | 6.7   | 3.6   | 5.4   | 8.3   | 12.3  | 7.6   |
| 3.1   | 3.1   | 1.0   | 2.5   | 3.6   | 3.0   | 1.4   | 2.6   | 3.4   |
| 19.4  | 23.0  | 22.3  | 22.3  | 25.9  | 19.7  | 32.3  | 39.2  | 22.6  |
| 33.4  | 22.6  | 31.0  | 30.7  | 26.4  | 39.3  | 58.4  | 68.6  | 34.4  |
| 1.8   | 0.8   | 2.3   | 0.2   | 1.6   | 1.0   | 3.1   | 0.2   | 0.2   |
| 56.4  | 31.7  | 27.0  | 39.9  | 39.8  | 26.7  | 60.6  | 50.7  | 40.6  |
| 11.3  | 3.3   | 6.0   | 7.1   | 3.6   | 8.0   | 0.7   | 10.2  | 0.9   |

|       |      |      |      |      |      |      |       |      |
|-------|------|------|------|------|------|------|-------|------|
| 101.0 | 52.6 | 87.0 | 97.6 | 96.3 | 91.6 | 87.3 | 113.4 | 81.3 |
| 1.2   | 1.4  | 6.5  | 4.4  | 8.1  | 5.9  | 4.7  | 4.5   | 4.9  |
| 0.3   | 0.5  | 0.5  | 0.8  | 0.5  | 0.6  | 1.2  | 1.5   | 1.2  |
| 18.6  | 12.7 | 8.6  | 9.3  | 12.5 | 7.3  | 11.9 | 17.2  | 9.1  |
| 62.4  | 42.8 | 43.8 | 51.4 | 47.8 | 55.9 | 74.0 | 71.6  | 47.8 |
| 13.0  | 11.3 | 5.4  | 10.7 | 16.3 | 8.8  | 10.8 | 14.8  | 12.2 |
| 3.1   | 4.5  | 2.0  | 1.3  | 2.4  | 0.9  | 2.2  | 7.8   | 5.0  |
| 10.9  | 10.7 | 2.9  | 4.9  | 11.5 | 4.8  | 13.2 | 16.6  | 1.7  |
| 1.7   | 3.3  | 1.6  | 1.2  | 3.3  | 3.8  | 2.3  | 3.7   | 2.6  |
| 47.5  | 37.8 | 27.7 | 38.2 | 48.0 | 38.6 | 77.4 | 52.1  | 34.4 |
| 20.7  | 12.6 | 13.2 | 19.1 | 11.2 | 11.7 | 16.6 | 15.5  | 21.3 |
| 1.1   | 2.1  | 2.1  | 3.2  | 0.9  | 0.6  | 5.2  | 12.1  | 2.5  |
| 1.3   | 0.6  | 2.9  | 4.9  | 4.4  | 0.9  | 1.3  | 10.2  | 1.1  |
| 9.3   | 0.7  | 4.4  | 8.5  | 1.6  | 10.3 | 6.9  | 10.1  | 3.0  |
| 3.0   | 3.1  | 1.2  | 7.6  | 7.2  | 0.9  | 4.8  | 5.5   | 3.1  |
| 1.9   | 1.0  | 0.4  | 1.3  | 0.5  | 1.8  | 2.1  | 1.6   | 1.4  |
| 52.1  | 36.9 | 36.6 | 31.8 | 34.2 | 37.0 | 47.0 | 42.2  | 43.9 |
| 2.1   | 3.5  | 1.2  | 0.9  | 1.9  | 0.9  | 0.8  | 3.8   | 1.2  |
| 0.4   | 0.4  | 0.4  | 0.5  | 0.9  | 0.4  | 0.3  | 3.3   | 0.3  |
| 0.9   | 2.6  | 0.7  | 2.2  | 2.0  | 0.8  | 0.7  | 0.9   | 2.1  |
| 0.9   | 1.9  | 2.4  | 3.8  | 0.5  | 2.4  | 0.2  | 1.5   | 0.3  |
| 4.9   | 9.7  | 10.0 | 1.3  | 4.6  | 10.9 | 8.3  | 17.9  | 5.8  |
| 11.1  | 13.0 | 6.3  | 8.1  | 12.2 | 8.3  | 13.4 | 18.0  | 6.0  |
| 1.9   | 0.8  | 1.5  | 4.1  | 4.8  | 3.1  | 3.5  | 4.3   | 5.4  |
| 46.6  | 29.4 | 24.5 | 25.4 | 32.4 | 31.6 | 49.7 | 67.8  | 45.8 |
| 1.3   | 1.0  | 1.7  | 1.7  | 1.3  | 1.2  | 1.3  | 1.0   | 0.9  |
| 13.0  | 7.4  | 11.6 | 16.4 | 18.9 | 7.1  | 11.7 | 13.0  | 21.7 |
| 12.0  | 10.5 | 6.0  | 7.3  | 10.6 | 10.2 | 10.0 | 9.8   | 2.9  |
| 0.5   | 1.8  | 0.8  | 0.2  | 0.7  | 0.2  | 0.6  | 0.4   | 0.7  |
| 0.9   | 0.8  | 2.9  | 1.2  | 0.7  | 0.6  | 1.8  | 0.4   | 0.8  |
| 2.6   | 3.5  | 3.9  | 1.9  | 5.2  | 2.1  | 5.1  | 2.4   | 2.9  |
| 0.2   | 0.6  | 0.3  | 0.7  | 0.5  | 0.9  | 0.6  | 1.1   | 0.3  |
| 10.9  | 7.5  | 15.9 | 8.9  | 14.2 | 6.2  | 12.2 | 9.9   | 7.5  |
| 1.8   | 4.1  | 0.5  | 1.0  | 1.6  | 3.4  | 0.3  | 0.2   | 1.3  |
| 2.9   | 3.6  | 0.2  | 3.0  | 3.4  | 3.4  | 8.8  | 5.1   | 4.7  |
| 0.6   | 4.6  | 4.1  | 8.6  | 1.0  | 0.8  | 0.4  | 3.0   | 0.3  |
| 1.1   | 0.5  | 0.9  | 2.0  | 0.5  | 4.9  | 0.9  | 8.2   | 1.0  |
| 0.6   | 0.8  | 1.1  | 0.7  | 1.4  | 0.4  | 0.8  | 1.9   | 0.5  |
| 1.0   | 1.3  | 1.4  | 2.1  | 0.9  | 1.5  | 2.0  | 1.3   | 1.1  |
| 5.7   | 5.5  | 2.4  | 7.1  | 3.8  | 3.9  | 1.7  | 2.8   | 5.1  |
| 2.9   | 1.2  | 3.2  | 1.9  | 4.1  | 2.1  | 3.2  | 7.4   | 0.6  |
| 15.2  | 13.5 | 10.2 | 11.6 | 8.8  | 9.0  | 7.7  | 19.3  | 15.8 |
| 0.4   | 0.3  | 0.9  | 0.9  | 0.4  | 0.6  | 0.8  | 1.5   | 0.6  |
| 0.5   | 1.7  | 0.4  | 1.1  | 0.5  | 0.5  | 0.4  | 0.5   | 0.3  |
| 4.9   | 6.8  | 6.9  | 8.9  | 9.6  | 5.0  | 7.0  | 9.0   | 6.0  |
| 0.7   | 1.3  | 0.8  | 1.0  | 0.7  | 1.0  | 1.7  | 0.7   | 0.7  |
| 8.0   | 11.0 | 7.3  | 8.1  | 7.1  | 5.3  | 5.4  | 13.5  | 6.2  |
| 3.6   | 8.2  | 2.0  | 3.1  | 4.2  | 2.2  | 4.4  | 2.2   | 3.9  |
| 3.9   | 2.1  | 2.0  | 0.2  | 3.9  | 2.0  | 0.3  | 2.3   | 1.5  |
| 2.3   | 6.5  | 3.7  | 10.2 | 1.4  | 2.3  | 9.0  | 6.8   | 2.0  |
| 17.1  | 13.2 | 20.2 | 7.1  | 14.5 | 12.6 | 14.3 | 22.5  | 9.2  |
| 1.4   | 0.1  | 4.1  | 3.4  | 1.3  | 0.3  | 0.4  | 7.7   | 1.8  |
| 1.9   | 1.4  | 5.8  | 2.1  | 1.5  | 1.1  | 1.3  | 1.6   | 2.0  |

|      |      |      |      |      |      |      |      |      |
|------|------|------|------|------|------|------|------|------|
| 0.2  | 0.4  | 0.4  | 3.2  | 0.3  | 5.3  | 1.5  | 0.8  | 4.5  |
| 1.4  | 2.8  | 1.1  | 7.9  | 1.1  | 8.4  | 2.0  | 6.8  | 1.3  |
| 7.9  | 9.1  | 7.9  | 3.2  | 1.3  | 1.9  | 12.6 | 15.1 | 11.7 |
| 20.7 | 11.4 | 4.7  | 12.5 | 10.8 | 13.8 | 11.7 | 6.3  | 15.1 |
| 0.3  | 4.3  | 3.1  | 0.4  | 0.5  | 3.6  | 3.3  | 3.3  | 1.6  |
| 4.9  | 9.7  | 2.0  | 0.8  | 4.7  | 4.9  | 8.7  | 6.7  | 4.2  |
| 11.3 | 5.3  | 7.5  | 4.5  | 7.4  | 4.6  | 5.9  | 10.7 | 4.8  |
| 7.6  | 1.5  | 4.1  | 1.1  | 3.1  | 1.8  | 2.1  | 1.0  | 0.7  |
| 11.0 | 11.4 | 14.9 | 16.4 | 8.0  | 13.2 | 12.5 | 20.8 | 12.7 |
| 6.3  | 9.7  | 9.1  | 11.5 | 11.6 | 7.0  | 12.4 | 11.4 | 8.5  |
| 2.5  | 3.8  | 2.1  | 2.4  | 2.0  | 3.9  | 0.6  | 2.5  | 4.0  |
| 1.0  | 3.9  | 2.4  | 3.7  | 9.5  | 7.7  | 7.8  | 7.1  | 5.8  |
| 5.7  | 0.9  | 3.0  | 1.7  | 1.2  | 1.2  | 5.4  | 2.1  | 1.3  |
| 0.9  | 1.1  | 0.6  | 3.5  | 0.7  | 1.4  | 1.6  | 0.9  | 0.5  |
| 4.7  | 5.6  | 3.1  | 4.9  | 2.7  | 0.5  | 6.9  | 6.2  | 4.5  |
| 9.5  | 8.7  | 6.4  | 5.9  | 4.9  | 6.2  | 10.0 | 7.0  | 12.4 |
| 0.5  | 0.1  | 2.8  | 0.2  | 0.2  | 0.3  | 0.1  | 0.5  | 0.2  |
| 4.9  | 6.5  | 9.2  | 1.6  | 7.4  | 3.4  | 2.9  | 11.4 | 1.8  |
| 1.5  | 3.3  | 2.0  | 1.3  | 1.3  | 2.3  | 1.3  | 2.5  | 1.3  |
| 1.1  | 2.6  | 1.3  | 1.4  | 1.1  | 1.0  | 1.1  | 1.6  | 0.9  |
| 4.8  | 6.4  | 5.7  | 5.1  | 5.5  | 5.2  | 6.1  | 14.7 | 8.2  |
| 1.7  | 0.6  | 0.9  | 0.5  | 1.6  | 5.0  | 0.8  | 2.6  | 4.5  |
| 3.4  | 2.0  | 0.1  | 0.5  | 0.2  | 4.7  | 3.1  | 3.5  | 2.1  |
| 0.3  | 0.5  | 0.5  | 0.7  | 0.4  | 0.1  | 2.8  | 2.9  | 3.1  |
| 0.5  | 2.1  | 8.2  | 3.3  | 5.3  | 2.0  | 2.2  | 4.0  | 0.8  |
| 5.6  | 4.1  | 5.0  | 0.7  | 9.1  | 0.8  | 10.6 | 13.8 | 0.9  |
| 6.0  | 1.0  | 2.4  | 1.2  | 7.2  | 1.3  | 8.9  | 1.1  | 5.7  |
| 4.3  | 3.0  | 2.0  | 3.7  | 3.2  | 0.3  | 6.9  | 3.4  | 4.2  |
| 7.5  | 6.3  | 5.2  | 4.3  | 1.3  | 4.5  | 10.3 | 3.8  | 8.7  |
| 2.6  | 0.9  | 4.8  | 0.3  | 4.9  | 6.0  | 10.2 | 5.3  | 0.8  |
| 1.2  | 6.0  | 2.8  | 0.3  | 0.3  | 1.0  | 6.5  | 1.5  | 0.3  |
| 4.5  | 7.8  | 3.7  | 4.8  | 5.9  | 7.9  | 7.7  | 7.5  | 5.9  |
| 11.7 | 12.8 | 2.2  | 10.8 | 9.0  | 7.5  | 10.6 | 12.0 | 10.8 |
| 0.1  | 0.2  | 0.1  | 0.1  | 0.6  | 0.2  | 0.2  | 2.6  | 0.4  |
| 5.3  | 6.5  | 1.8  | 1.1  | 3.8  | 1.9  | 8.6  | 7.5  | 8.7  |
| 0.7  | 1.8  | 0.8  | 4.3  | 2.9  | 3.9  | 0.8  | 0.3  | 0.5  |
| 1.5  | 1.9  | 1.2  | 3.8  | 1.5  | 1.1  | 4.9  | 4.0  | 0.4  |
| 14.7 | 8.3  | 9.1  | 5.1  | 9.4  | 1.1  | 9.1  | 9.3  | 1.4  |
| 5.3  | 0.8  | 0.5  | 0.7  | 1.1  | 0.9  | 0.9  | 1.6  | 0.8  |
| 0.6  | 1.6  | 1.6  | 1.2  | 1.1  | 0.4  | 0.6  | 0.6  | 0.8  |
| 1.0  | 1.1  | 2.8  | 0.6  | 0.4  | 0.7  | 3.0  | 6.2  | 0.7  |
| 5.2  | 4.7  | 3.5  | 0.2  | 2.1  | 0.2  | 2.2  | 5.1  | 2.0  |
| 5.9  | 1.1  | 1.5  | 2.6  | 1.9  | 2.2  | 1.9  | 3.6  | 3.6  |
| 2.3  | 0.5  | 4.8  | 0.5  | 2.3  | 1.4  | 0.9  | 2.2  | 2.7  |
| 0.2  | 0.2  | 2.9  | 2.2  | 3.7  | 0.6  | 4.6  | 3.4  | 4.1  |
| 0.9  | 1.8  | 5.3  | 0.5  | 1.2  | 1.7  | 1.7  | 2.4  | 1.0  |
| 5.8  | 1.7  | 0.8  | 4.3  | 1.1  | 1.3  | 1.5  | 5.2  | 1.2  |
| 0.7  | 0.8  | 0.9  | 0.6  | 0.9  | 1.0  | 0.7  | 0.7  | 1.0  |
| 0.4  | 0.6  | 1.0  | 1.0  | 0.5  | 0.8  | 1.3  | 1.0  | 1.6  |
| 13.3 | 16.6 | 15.9 | 7.5  | 8.8  | 12.0 | 21.1 | 14.6 | 10.1 |
| 7.2  | 9.1  | 10.1 | 10.9 | 11.3 | 5.9  | 10.3 | 10.2 | 13.0 |
| 0.7  | 0.1  | 1.8  | 1.7  | 0.5  | 1.0  | 2.2  | 2.5  | 4.2  |
| 1.5  | 1.9  | 1.6  | 2.0  | 2.1  | 1.2  | 3.8  | 2.1  | 1.5  |

|       |       |       |       |       |       |       |       |       |
|-------|-------|-------|-------|-------|-------|-------|-------|-------|
| 0.6   | 1.5   | 2.7   | 0.2   | 4.0   | 0.2   | 1.2   | 1.7   | 0.6   |
| 1.1   | 2.4   | 0.4   | 0.3   | 0.4   | 0.2   | 0.4   | 0.5   | 0.8   |
| 0.3   | 0.6   | 0.4   | 0.3   | 0.2   | 0.2   | 1.0   | 0.3   | 2.4   |
| 2.9   | 5.5   | 5.4   | 11.0  | 3.0   | 2.9   | 8.3   | 2.0   | 4.8   |
| 4.4   | 1.3   | 1.4   | 1.0   | 1.1   | 1.3   | 0.7   | 1.1   | 0.9   |
| 2.6   | 1.8   | 1.6   | 1.9   | 1.4   | 5.3   | 4.1   | 7.9   | 2.0   |
| 7.7   | 8.1   | 2.0   | 11.7  | 5.9   | 7.1   | 11.7  | 14.2  | 2.3   |
| 0.2   | 0.3   | 0.6   | 0.3   | 0.4   | 0.5   | 1.2   | 1.5   | 6.1   |
| 3.8   | 0.8   | 3.8   | 5.0   | 0.5   | 3.9   | 7.8   | 5.6   | 0.9   |
| 83.0  | 33.2  | 52.3  | 37.8  | 53.4  | 54.1  | 61.3  | 103.0 | 55.9  |
| 0.2   | 2.3   | 0.8   | 0.3   | 0.1   | 1.7   | 0.6   | 0.8   | 1.6   |
| 66.6  | 47.2  | 40.6  | 52.0  | 57.6  | 48.1  | 63.4  | 65.4  | 89.1  |
| 1.1   | 9.1   | 8.0   | 8.1   | 8.9   | 7.0   | 5.0   | 2.1   | 8.7   |
| 5.1   | 1.0   | 0.9   | 0.8   | 0.5   | 0.5   | 1.2   | 2.4   | 7.0   |
| 8.2   | 3.1   | 6.2   | 7.0   | 7.3   | 5.4   | 8.6   | 7.2   | 6.4   |
| 0.8   | 3.7   | 2.3   | 0.2   | 5.0   | 5.6   | 4.4   | 2.7   | 3.3   |
| 3.5   | 0.9   | 1.1   | 1.1   | 1.4   | 0.6   | 0.8   | 1.4   | 1.7   |
| 1.7   | 1.5   | 0.7   | 0.6   | 0.3   | 1.2   | 5.6   | 1.0   | 2.7   |
| 0.4   | 5.6   | 4.3   | 1.0   | 0.3   | 2.4   | 4.4   | 3.9   | 2.4   |
| 4.9   | 5.7   | 4.8   | 1.5   | 4.3   | 3.3   | 8.2   | 4.2   | 5.4   |
| 1.2   | 0.5   | 0.4   | 1.5   | 0.3   | 1.3   | 0.6   | 2.0   | 0.7   |
| 7.8   | 11.3  | 4.6   | 1.7   | 2.2   | 7.3   | 5.7   | 0.7   | 3.1   |
| 1.7   | 1.7   | 9.7   | 1.7   | 9.3   | 11.0  | 9.2   | 1.3   | 8.0   |
| 0.8   | 3.5   | 1.0   | 0.5   | 3.8   | 2.2   | 7.9   | 0.8   | 2.9   |
| 5.1   | 0.4   | 0.2   | 0.4   | 1.5   | 0.5   | 0.6   | 0.4   | 0.3   |
| 1.0   | 0.4   | 2.2   | 0.6   | 4.9   | 0.4   | 0.5   | 0.8   | 0.5   |
| 11.2  | 5.6   | 5.7   | 4.4   | 8.0   | 6.1   | 14.0  | 3.9   | 11.9  |
| 21.8  | 17.9  | 27.4  | 18.9  | 31.9  | 31.6  | 31.5  | 41.4  | 13.5  |
| 28.5  | 22.1  | 16.6  | 6.2   | 25.0  | 25.8  | 41.3  | 49.5  | 37.0  |
| 4.2   | 3.1   | 12.9  | 19.1  | 9.9   | 8.8   | 4.0   | 6.6   | 7.6   |
| 0.7   | 2.4   | 1.4   | 0.5   | 0.4   | 0.7   | 1.1   | 1.1   | 0.7   |
| 0.8   | 0.5   | 1.7   | 1.2   | 1.3   | 4.0   | 2.0   | 3.9   | 1.6   |
| 1.1   | 0.4   | 1.0   | 3.2   | 0.7   | 1.3   | 2.9   | 2.1   | 0.8   |
| 9.0   | 7.5   | 6.7   | 5.3   | 10.1  | 5.2   | 5.6   | 7.4   | 7.7   |
| 0.5   | 0.4   | 0.9   | 0.2   | 0.9   | 0.4   | 2.0   | 3.5   | 0.4   |
| 2.1   | 6.9   | 0.4   | 4.2   | 0.6   | 3.4   | 1.7   | 1.9   | 0.7   |
| 0.3   | 0.3   | 0.3   | 0.2   | 0.2   | 0.2   | 0.4   | 0.3   | 0.3   |
| 14.3  | 12.5  | 8.2   | 12.2  | 4.6   | 1.9   | 10.7  | 15.0  | 14.1  |
| 9.9   | 4.5   | 9.1   | 11.7  | 10.5  | 8.7   | 7.5   | 16.0  | 5.1   |
| 0.1   | 0.4   | 3.1   | 1.3   | 0.2   | 0.3   | 0.9   | 0.3   | 0.4   |
| 10.2  | 9.5   | 10.3  | 11.6  | 9.7   | 11.1  | 13.7  | 11.9  | 6.1   |
| 149.6 | 146.7 | 161.5 | 188.2 | 166.6 | 129.2 | 235.2 | 194.1 | 190.6 |
| 5.6   | 12.1  | 6.0   | 6.8   | 7.6   | 6.2   | 8.1   | 6.1   | 4.8   |
| 13.2  | 2.4   | 11.9  | 11.9  | 17.6  | 10.9  | 13.2  | 15.6  | 12.0  |
| 0.4   | 1.0   | 0.4   | 0.2   | 0.2   | 0.2   | 3.6   | 0.3   | 0.2   |
| 3.0   | 0.4   | 3.8   | 2.3   | 1.3   | 0.7   | 0.7   | 1.0   | 0.8   |
| 13.6  | 11.4  | 11.0  | 7.4   | 8.6   | 10.0  | 10.9  | 17.6  | 13.8  |
| 12.3  | 2.1   | 10.6  | 2.8   | 5.8   | 2.0   | 1.5   | 7.5   | 1.0   |
| 105.8 | 95.4  | 85.4  | 99.4  | 102.5 | 109.4 | 108.1 | 123.6 | 98.6  |
| 0.4   | 0.4   | 0.5   | 0.5   | 0.5   | 0.7   | 0.6   | 0.2   | 0.3   |
| 1.8   | 5.6   | 0.9   | 1.3   | 2.1   | 0.7   | 2.4   | 1.7   | 4.3   |
| 1.2   | 1.0   | 1.3   | 1.3   | 0.9   | 1.5   | 0.7   | 1.3   | 1.1   |
| 6.3   | 5.2   | 7.0   | 5.2   | 8.0   | 6.1   | 4.3   | 5.4   | 0.7   |

|      |      |      |      |      |      |       |       |      |
|------|------|------|------|------|------|-------|-------|------|
| 4.8  | 1.5  | 10.6 | 3.5  | 1.9  | 7.7  | 11.3  | 14.4  | 2.6  |
| 5.0  | 3.6  | 16.0 | 4.1  | 11.2 | 9.1  | 18.2  | 6.8   | 17.4 |
| 5.0  | 3.3  | 3.6  | 2.4  | 1.3  | 3.6  | 4.0   | 1.5   | 5.9  |
| 1.1  | 1.3  | 0.3  | 1.1  | 1.2  | 0.7  | 1.5   | 9.2   | 1.4  |
| 1.5  | 2.5  | 1.5  | 2.4  | 1.1  | 1.3  | 1.6   | 1.8   | 1.4  |
| 4.2  | 1.0  | 2.4  | 1.9  | 4.6  | 0.7  | 1.1   | 1.8   | 6.2  |
| 1.4  | 2.4  | 2.8  | 1.3  | 1.1  | 1.2  | 1.5   | 1.1   | 1.9  |
| 49.2 | 30.1 | 25.8 | 33.3 | 44.7 | 35.8 | 63.9  | 54.4  | 35.4 |
| 0.7  | 0.7  | 1.1  | 2.7  | 6.1  | 3.2  | 6.3   | 5.1   | 3.3  |
| 1.3  | 5.7  | 0.5  | 3.5  | 5.2  | 6.6  | 1.0   | 1.4   | 9.2  |
| 11.0 | 6.3  | 3.6  | 11.3 | 4.8  | 9.3  | 15.3  | 18.0  | 15.3 |
| 15.1 | 5.7  | 2.4  | 5.5  | 0.9  | 7.0  | 11.1  | 9.1   | 13.8 |
| 16.9 | 2.6  | 1.9  | 1.9  | 0.5  | 6.6  | 2.6   | 2.3   | 1.3  |
| 0.2  | 0.2  | 0.2  | 0.8  | 0.2  | 0.4  | 0.3   | 0.3   | 0.2  |
| 52.7 | 59.2 | 55.7 | 60.0 | 54.5 | 54.0 | 73.0  | 75.1  | 62.8 |
| 82.2 | 59.9 | 90.3 | 73.3 | 84.9 | 80.5 | 106.6 | 108.5 | 96.9 |
| 0.9  | 0.5  | 4.4  | 0.6  | 2.6  | 2.4  | 2.6   | 0.2   | 0.3  |
| 2.4  | 0.9  | 4.6  | 2.3  | 5.0  | 1.1  | 5.3   | 4.0   | 4.6  |
| 0.7  | 2.8  | 2.7  | 1.1  | 3.0  | 0.8  | 1.0   | 1.6   | 3.5  |
| 1.7  | 1.9  | 0.9  | 7.9  | 5.0  | 1.0  | 2.0   | 3.7   | 1.1  |
| 0.7  | 0.1  | 0.6  | 0.1  | 0.3  | 0.7  | 0.2   | 0.1   | 0.1  |
| 16.3 | 7.5  | 7.2  | 8.6  | 12.2 | 8.0  | 6.7   | 5.1   | 12.7 |
| 23.2 | 15.5 | 9.0  | 13.6 | 20.8 | 26.9 | 24.7  | 38.7  | 15.9 |
| 4.5  | 9.4  | 10.5 | 10.7 | 9.7  | 7.6  | 15.3  | 9.2   | 18.7 |
| 2.3  | 1.1  | 5.1  | 1.1  | 0.4  | 0.6  | 2.1   | 5.4   | 0.5  |
| 21.0 | 8.3  | 17.5 | 11.0 | 17.6 | 12.0 | 11.1  | 23.1  | 13.5 |
| 2.2  | 0.3  | 5.4  | 1.6  | 0.6  | 2.0  | 1.6   | 2.6   | 0.8  |
| 1.3  | 1.1  | 1.8  | 1.2  | 1.8  | 1.1  | 1.7   | 2.6   | 1.5  |
| 0.2  | 0.3  | 0.3  | 0.3  | 0.4  | 1.9  | 2.0   | 0.7   | 1.2  |
| 3.8  | 12.2 | 3.5  | 7.4  | 2.9  | 1.8  | 5.4   | 6.4   | 5.7  |
| 19.1 | 12.4 | 6.5  | 23.7 | 21.4 | 15.7 | 12.4  | 20.5  | 14.0 |
| 8.1  | 3.6  | 2.5  | 4.8  | 2.3  | 5.1  | 1.2   | 4.5   | 2.8  |
| 1.4  | 1.9  | 1.1  | 10.1 | 1.5  | 6.7  | 11.3  | 1.3   | 7.2  |
| 1.9  | 4.9  | 3.5  | 4.9  | 3.5  | 2.3  | 2.8   | 7.3   | 3.1  |
| 17.9 | 16.6 | 18.0 | 3.7  | 9.7  | 14.8 | 17.0  | 11.8  | 10.5 |
| 27.9 | 15.1 | 29.6 | 24.0 | 31.0 | 21.3 | 37.0  | 38.3  | 19.6 |
| 1.9  | 0.3  | 0.3  | 0.4  | 0.2  | 0.2  | 0.5   | 0.7   | 0.3  |
| 38.2 | 31.2 | 26.4 | 36.1 | 27.2 | 27.1 | 29.2  | 38.4  | 32.8 |
| 0.3  | 3.3  | 8.7  | 3.2  | 4.6  | 3.3  | 1.4   | 3.8   | 0.3  |
| 0.9  | 1.1  | 5.8  | 3.7  | 2.9  | 5.9  | 2.3   | 6.0   | 4.6  |
| 4.1  | 4.7  | 2.9  | 1.3  | 1.8  | 1.2  | 1.0   | 3.2   | 1.7  |
| 2.2  | 7.6  | 7.0  | 9.0  | 0.5  | 4.1  | 1.5   | 6.4   | 1.8  |
| 1.0  | 1.6  | 0.6  | 0.8  | 1.0  | 0.9  | 1.6   | 1.7   | 1.0  |
| 1.8  | 3.4  | 1.5  | 1.9  | 2.3  | 1.4  | 4.0   | 1.1   | 1.8  |
| 0.7  | 1.6  | 3.5  | 1.6  | 9.5  | 1.9  | 1.2   | 1.4   | 0.7  |
| 1.1  | 5.1  | 4.2  | 0.8  | 5.6  | 3.3  | 3.3   | 3.5   | 6.3  |
| 4.5  | 1.9  | 0.5  | 3.7  | 0.5  | 0.4  | 3.3   | 0.8   | 2.3  |
| 6.5  | 3.8  | 4.7  | 3.7  | 7.4  | 2.5  | 6.0   | 8.2   | 3.7  |
| 1.1  | 0.7  | 0.3  | 0.3  | 2.1  | 0.7  | 0.2   | 3.0   | 1.0  |
| 10.0 | 1.8  | 4.5  | 2.2  | 1.4  | 2.0  | 11.6  | 9.0   | 11.8 |
| 1.6  | 3.9  | 4.6  | 2.5  | 0.3  | 1.0  | 1.0   | 7.2   | 3.1  |
| 74.5 | 41.7 | 49.5 | 52.6 | 57.3 | 44.7 | 78.2  | 90.0  | 57.9 |
| 0.3  | 0.3  | 0.2  | 0.3  | 0.5  | 0.3  | 0.3   | 0.3   | 0.3  |

|       |      |       |       |       |       |       |       |       |
|-------|------|-------|-------|-------|-------|-------|-------|-------|
| 0.8   | 0.3  | 2.4   | 0.5   | 1.0   | 0.2   | 2.6   | 0.9   | 1.1   |
| 54.0  | 20.1 | 25.3  | 28.2  | 26.0  | 38.0  | 48.3  | 56.7  | 40.8  |
| 164.0 | 93.6 | 131.8 | 123.8 | 144.7 | 117.4 | 163.8 | 156.6 | 116.4 |
| 2.0   | 1.0  | 0.9   | 1.8   | 6.5   | 6.6   | 5.0   | 1.1   | 1.0   |
| 72.0  | 39.5 | 40.0  | 55.1  | 57.0  | 57.9  | 79.3  | 112.1 | 55.6  |
| 1.6   | 3.3  | 0.8   | 0.4   | 0.7   | 3.6   | 0.3   | 0.4   | 0.8   |
| 3.6   | 2.6  | 3.6   | 4.4   | 9.5   | 2.2   | 11.3  | 11.1  | 6.2   |
| 55.4  | 38.8 | 65.4  | 48.1  | 59.2  | 48.1  | 73.7  | 75.9  | 52.9  |
| 5.1   | 1.5  | 2.0   | 4.4   | 11.1  | 9.2   | 4.3   | 10.3  | 7.5   |
| 6.7   | 1.0  | 1.2   | 0.5   | 4.3   | 5.7   | 2.9   | 0.6   | 7.5   |
| 0.5   | 3.4  | 1.2   | 0.3   | 0.6   | 1.9   | 0.9   | 2.5   | 1.7   |
| 1.9   | 1.2  | 0.8   | 1.1   | 5.0   | 5.5   | 1.3   | 1.9   | 3.0   |
| 83.3  | 52.9 | 86.9  | 67.9  | 59.0  | 65.5  | 79.2  | 119.8 | 63.1  |
| 1.9   | 1.9  | 5.7   | 7.3   | 2.0   | 8.8   | 7.8   | 2.0   | 11.6  |
| 13.0  | 6.5  | 11.5  | 9.1   | 6.8   | 7.9   | 10.4  | 15.6  | 9.1   |
| 0.9   | 1.6  | 1.6   | 0.9   | 1.0   | 1.3   | 1.3   | 0.7   | 3.1   |
| 1.8   | 2.1  | 2.0   | 0.3   | 2.9   | 0.2   | 2.8   | 0.2   | 3.3   |
| 1.5   | 3.5  | 2.3   | 2.2   | 1.3   | 2.6   | 4.1   | 6.6   | 2.2   |
| 15.9  | 11.8 | 6.2   | 3.2   | 12.8  | 2.2   | 3.0   | 3.1   | 18.6  |
| 126.0 | 10.8 | 20.3  | 8.1   | 11.0  | 33.3  | 18.9  | 58.1  | 21.4  |
| 2.7   | 3.8  | 6.4   | 1.7   | 3.7   | 0.5   | 5.6   | 1.3   | 1.2   |
| 3.1   | 3.9  | 4.9   | 6.1   | 3.6   | 0.8   | 6.9   | 8.1   | 4.9   |
| 6.1   | 9.5  | 5.6   | 5.4   | 4.5   | 10.2  | 9.8   | 2.5   | 7.8   |
| 4.3   | 2.2  | 1.9   | 10.7  | 9.3   | 1.9   | 2.0   | 1.4   | 0.7   |
| 1.1   | 6.6  | 5.1   | 2.6   | 5.9   | 2.7   | 2.1   | 3.1   | 5.2   |
| 3.3   | 8.1  | 4.3   | 6.0   | 7.9   | 7.1   | 12.2  | 12.9  | 7.1   |
| 4.2   | 1.9  | 4.9   | 1.3   | 0.7   | 6.6   | 6.3   | 1.7   | 4.7   |
| 2.9   | 1.1  | 1.6   | 2.1   | 0.9   | 0.9   | 1.0   | 0.8   | 2.6   |
| 7.4   | 2.5  | 3.6   | 6.2   | 7.8   | 1.3   | 4.4   | 10.5  | 3.9   |
| 8.3   | 5.1  | 1.1   | 2.1   | 1.6   | 0.6   | 3.3   | 13.9  | 2.2   |
| 2.4   | 6.6  | 4.2   | 6.8   | 1.4   | 2.8   | 4.8   | 8.6   | 6.8   |
| 2.5   | 15.1 | 2.3   | 2.2   | 3.8   | 2.5   | 2.9   | 9.6   | 3.9   |
| 4.0   | 6.6  | 5.5   | 1.8   | 5.6   | 6.6   | 5.4   | 6.0   | 0.5   |
| 1.9   | 1.5  | 4.4   | 2.8   | 8.2   | 1.8   | 5.0   | 1.2   | 2.5   |
| 3.6   | 2.7  | 3.7   | 0.6   | 2.4   | 0.3   | 0.8   | 1.4   | 0.6   |
| 9.7   | 3.7  | 6.2   | 2.5   | 7.2   | 1.9   | 10.8  | 7.2   | 9.6   |
| 5.5   | 0.9  | 0.8   | 3.8   | 4.9   | 1.0   | 2.3   | 1.2   | 1.5   |
| 10.0  | 16.8 | 6.4   | 15.4  | 10.5  | 6.9   | 16.4  | 15.3  | 22.3  |
| 0.7   | 1.2  | 1.7   | 3.4   | 3.3   | 5.1   | 5.4   | 4.5   | 2.7   |
| 10.2  | 9.4  | 12.5  | 4.9   | 9.2   | 9.5   | 11.6  | 14.8  | 3.8   |
| 11.3  | 6.3  | 6.0   | 5.7   | 5.2   | 8.8   | 10.3  | 12.6  | 10.6  |
| 15.1  | 19.5 | 20.6  | 14.7  | 13.8  | 13.8  | 26.5  | 34.2  | 26.1  |
| 10.0  | 1.6  | 5.5   | 0.7   | 8.6   | 5.8   | 6.6   | 5.6   | 1.2   |
| 9.9   | 4.9  | 5.9   | 4.5   | 10.3  | 4.3   | 11.3  | 12.1  | 8.3   |
| 110.3 | 41.4 | 38.6  | 52.6  | 41.5  | 59.5  | 74.5  | 95.6  | 62.0  |
| 5.6   | 3.8  | 6.1   | 7.5   | 7.1   | 5.3   | 4.7   | 8.7   | 3.6   |
| 2.5   | 2.1  | 4.4   | 0.4   | 4.1   | 4.9   | 2.4   | 0.2   | 3.0   |
| 2.8   | 0.7  | 1.2   | 0.5   | 0.2   | 0.9   | 0.9   | 0.1   | 0.2   |
| 1.2   | 6.0  | 1.6   | 2.6   | 1.8   | 1.1   | 2.2   | 1.4   | 2.6   |
| 5.3   | 12.1 | 3.4   | 5.2   | 9.2   | 5.2   | 5.6   | 7.0   | 4.8   |
| 0.5   | 0.4  | 0.6   | 3.0   | 0.3   | 2.2   | 0.4   | 0.6   | 0.3   |
| 108.8 | 58.7 | 79.1  | 96.2  | 105.2 | 107.1 | 148.6 | 158.1 | 88.7  |
| 1.5   | 1.3  | 1.1   | 0.9   | 4.1   | 1.7   | 2.0   | 4.0   | 1.0   |



|       |       |       |       |       |       |       |       |       |
|-------|-------|-------|-------|-------|-------|-------|-------|-------|
| 122.9 | 64.0  | 69.4  | 75.5  | 72.4  | 75.8  | 121.1 | 122.4 | 147.9 |
| 9.8   | 3.6   | 10.7  | 10.7  | 3.9   | 12.3  | 14.3  | 11.5  | 2.8   |
| 0.5   | 0.4   | 0.5   | 0.3   | 2.5   | 0.8   | 0.4   | 0.7   | 0.7   |
| 1.0   | 1.1   | 2.0   | 0.6   | 3.9   | 1.1   | 6.4   | 1.3   | 5.8   |
| 124.7 | 68.9  | 77.3  | 89.7  | 84.5  | 99.3  | 128.0 | 169.3 | 93.4  |
| 5.7   | 5.3   | 6.5   | 0.7   | 3.6   | 7.0   | 5.2   | 6.6   | 3.7   |
| 34.6  | 18.4  | 22.1  | 22.8  | 25.1  | 25.8  | 29.8  | 26.8  | 20.2  |
| 21.1  | 16.4  | 16.8  | 12.4  | 15.2  | 19.6  | 15.8  | 22.2  | 22.9  |
| 15.2  | 12.0  | 8.6   | 9.0   | 16.5  | 13.7  | 9.6   | 17.4  | 11.0  |
| 11.7  | 7.0   | 9.5   | 8.4   | 7.9   | 7.8   | 15.0  | 18.8  | 9.4   |
| 0.8   | 5.8   | 4.1   | 8.2   | 5.5   | 1.3   | 8.2   | 5.9   | 5.8   |
| 2.7   | 2.2   | 8.4   | 2.0   | 2.5   | 8.8   | 3.6   | 6.1   | 4.2   |
| 0.7   | 3.1   | 2.3   | 0.7   | 0.7   | 0.8   | 3.4   | 0.7   | 0.6   |
| 0.4   | 0.5   | 2.1   | 1.5   | 4.4   | 4.1   | 0.5   | 1.5   | 0.2   |
| 0.7   | 1.2   | 9.1   | 0.8   | 4.0   | 8.7   | 1.8   | 5.0   | 1.0   |
| 77.7  | 54.7  | 68.7  | 78.2  | 59.5  | 58.7  | 88.5  | 90.2  | 61.4  |
| 1.8   | 0.9   | 0.8   | 0.5   | 1.8   | 0.2   | 0.8   | 0.6   | 1.0   |
| 23.0  | 20.6  | 34.1  | 22.8  | 31.3  | 19.9  | 38.5  | 44.5  | 22.5  |
| 1.9   | 0.4   | 2.2   | 2.5   | 4.6   | 0.9   | 1.7   | 2.9   | 4.8   |
| 7.6   | 8.3   | 6.7   | 9.5   | 10.9  | 7.9   | 6.1   | 2.0   | 9.3   |
| 0.2   | 0.3   | 0.1   | 0.3   | 0.1   | 0.4   | 0.2   | 0.1   | 0.3   |
| 0.6   | 0.3   | 1.6   | 1.4   | 4.4   | 0.5   | 1.9   | 1.0   | 0.3   |
| 30.6  | 35.0  | 39.5  | 52.0  | 29.4  | 41.1  | 37.1  | 61.9  | 32.7  |
| 216.7 | 96.5  | 112.5 | 118.0 | 119.0 | 158.0 | 197.2 | 197.6 | 93.7  |
| 0.8   | 6.6   | 0.8   | 0.9   | 0.9   | 0.4   | 0.7   | 1.2   | 0.3   |
| 8.2   | 8.4   | 3.3   | 6.1   | 7.1   | 3.5   | 9.3   | 10.7  | 5.3   |
| 0.7   | 2.6   | 0.9   | 2.0   | 1.0   | 1.5   | 5.9   | 1.4   | 2.0   |
| 3.6   | 9.6   | 13.6  | 14.7  | 15.1  | 13.4  | 15.9  | 10.8  | 14.4  |
| 0.4   | 1.2   | 6.4   | 0.2   | 2.8   | 0.5   | 2.6   | 1.1   | 0.1   |
| 1.6   | 3.5   | 3.0   | 1.6   | 0.6   | 3.2   | 1.5   | 5.2   | 2.9   |
| 0.7   | 1.5   | 1.5   | 1.1   | 2.2   | 1.7   | 0.8   | 1.5   | 0.8   |
| 46.1  | 32.2  | 33.5  | 43.4  | 37.4  | 34.4  | 57.0  | 64.8  | 33.7  |
| 7.4   | 10.7  | 1.0   | 2.8   | 6.3   | 1.2   | 2.1   | 5.2   | 10.3  |
| 1.5   | 0.3   | 3.1   | 3.8   | 0.2   | 1.0   | 0.2   | 0.2   | 0.1   |
| 534.5 | 376.1 | 445.2 | 448.9 | 468.8 | 488.0 | 619.3 | 653.8 | 473.3 |
| 4.9   | 4.9   | 7.9   | 3.2   | 5.7   | 5.9   | 5.2   | 6.5   | 4.7   |
| 0.3   | 0.4   | 0.2   | 3.8   | 2.2   | 3.5   | 3.7   | 1.8   | 1.7   |
| 3.8   | 3.2   | 5.3   | 3.5   | 3.7   | 3.3   | 2.4   | 3.4   | 3.3   |
| 0.4   | 6.3   | 4.7   | 0.6   | 1.3   | 3.2   | 0.7   | 3.0   | 6.9   |
| 32.6  | 20.1  | 22.9  | 19.0  | 30.5  | 26.2  | 30.0  | 37.9  | 28.7  |
| 2.2   | 5.6   | 5.5   | 7.2   | 7.3   | 1.5   | 8.1   | 1.4   | 1.2   |
| 0.9   | 3.3   | 1.5   | 1.4   | 1.7   | 3.5   | 1.0   | 1.1   | 2.1   |
| 97.3  | 60.4  | 77.0  | 83.2  | 79.1  | 94.6  | 107.8 | 138.6 | 79.0  |
| 1.9   | 0.2   | 0.5   | 0.5   | 0.3   | 0.5   | 0.6   | 0.1   | 4.2   |
| 2.7   | 1.5   | 6.6   | 3.2   | 4.5   | 0.9   | 1.5   | 4.0   | 5.4   |
| 0.5   | 3.2   | 0.1   | 0.2   | 0.7   | 0.1   | 4.1   | 3.9   | 6.2   |
| 3.3   | 8.3   | 5.7   | 0.8   | 0.4   | 1.1   | 1.5   | 3.2   | 6.7   |
| 16.2  | 14.3  | 9.5   | 9.1   | 7.7   | 10.7  | 15.5  | 14.9  | 15.4  |
| 0.9   | 0.6   | 0.6   | 1.0   | 0.5   | 0.4   | 1.5   | 0.5   | 1.3   |
| 2.8   | 3.7   | 4.9   | 3.9   | 2.2   | 5.8   | 16.0  | 1.0   | 5.5   |
| 10.5  | 3.6   | 1.1   | 0.6   | 3.5   | 1.4   | 4.9   | 4.6   | 6.2   |
| 5.0   | 0.5   | 1.7   | 4.4   | 1.2   | 4.8   | 4.2   | 5.2   | 1.6   |
| 2.3   | 0.7   | 3.3   | 2.9   | 6.1   | 0.5   | 5.7   | 2.7   | 5.0   |

|       |       |       |       |       |       |       |       |       |
|-------|-------|-------|-------|-------|-------|-------|-------|-------|
| 193.7 | 172.9 | 214.4 | 257.7 | 205.6 | 184.0 | 305.5 | 213.9 | 201.6 |
| 11.4  | 8.1   | 10.8  | 10.0  | 14.0  | 4.7   | 10.2  | 13.7  | 5.4   |
| 9.5   | 9.8   | 10.7  | 8.3   | 8.4   | 7.6   | 11.7  | 13.8  | 8.2   |
| 37.7  | 34.0  | 38.6  | 39.6  | 34.4  | 32.5  | 50.0  | 42.5  | 28.4  |
| 1.7   | 0.8   | 1.2   | 0.8   | 1.0   | 1.9   | 1.3   | 1.2   | 1.3   |
| 1.2   | 0.4   | 0.3   | 0.4   | 0.2   | 1.3   | 1.4   | 0.3   | 0.8   |
| 11.9  | 2.1   | 1.8   | 8.2   | 10.5  | 12.2  | 1.7   | 3.5   | 5.0   |
| 69.1  | 10.6  | 23.3  | 13.0  | 12.0  | 26.5  | 21.5  | 21.2  | 16.0  |
| 4.4   | 3.0   | 0.9   | 3.6   | 5.5   | 5.0   | 6.1   | 5.7   | 5.8   |
| 4.7   | 5.2   | 6.4   | 10.3  | 7.9   | 1.4   | 17.1  | 14.4  | 6.0   |
| 2.0   | 4.4   | 1.7   | 1.9   | 7.5   | 8.5   | 4.6   | 1.2   | 1.8   |
| 1.0   | 0.3   | 2.8   | 1.2   | 0.6   | 0.9   | 5.6   | 4.3   | 1.2   |
| 26.0  | 15.0  | 21.3  | 20.9  | 23.4  | 28.4  | 27.7  | 35.6  | 57.8  |
| 20.8  | 12.0  | 9.7   | 21.5  | 7.6   | 9.6   | 8.3   | 13.7  | 9.4   |
| 5.4   | 5.4   | 2.2   | 2.9   | 0.9   | 3.8   | 4.1   | 1.0   | 4.5   |
| 0.8   | 0.7   | 0.3   | 0.3   | 0.4   | 0.6   | 0.5   | 0.5   | 0.6   |
| 2.2   | 2.7   | 3.2   | 4.0   | 7.4   | 0.7   | 2.2   | 1.4   | 7.5   |
| 2.9   | 3.3   | 3.0   | 3.0   | 5.9   | 15.3  | 3.2   | 12.2  | 2.8   |
| 125.6 | 93.8  | 131.0 | 109.9 | 117.9 | 113.0 | 147.5 | 172.0 | 94.1  |
| 5.5   | 6.6   | 1.4   | 3.3   | 6.2   | 1.0   | 6.4   | 6.7   | 5.2   |
| 50.7  | 31.2  | 42.0  | 31.6  | 40.7  | 56.0  | 59.4  | 63.7  | 71.0  |
| 7.0   | 5.2   | 4.6   | 1.7   | 1.1   | 6.0   | 6.3   | 8.2   | 4.6   |
| 0.8   | 1.2   | 0.8   | 1.5   | 1.4   | 1.0   | 1.5   | 2.0   | 0.6   |
| 4.6   | 6.7   | 2.0   | 7.0   | 12.6  | 8.7   | 11.2  | 12.2  | 8.0   |
| 0.6   | 1.0   | 0.6   | 1.1   | 1.0   | 1.1   | 1.0   | 0.7   | 4.0   |
| 0.4   | 1.3   | 8.2   | 1.6   | 0.7   | 1.7   | 1.6   | 4.9   | 0.7   |
| 13.5  | 10.2  | 12.9  | 11.2  | 6.5   | 11.3  | 18.7  | 12.9  | 11.2  |
| 1.2   | 2.1   | 1.2   | 0.6   | 1.2   | 4.7   | 5.9   | 2.4   | 1.6   |
| 3.1   | 11.2  | 11.8  | 11.9  | 3.9   | 10.6  | 13.9  | 5.4   | 3.9   |
| 0.6   | 4.2   | 0.7   | 0.9   | 0.4   | 0.4   | 4.1   | 0.5   | 0.9   |
| 0.1   | 0.2   | 0.4   | 0.2   | 1.1   | 0.8   | 4.2   | 1.5   | 0.2   |
| 4.3   | 0.5   | 1.0   | 1.1   | 2.5   | 0.8   | 1.2   | 1.8   | 7.9   |
| 39.9  | 31.1  | 38.4  | 31.6  | 45.4  | 25.2  | 54.4  | 25.6  | 44.8  |
| 33.8  | 24.9  | 23.5  | 30.7  | 30.2  | 36.4  | 35.1  | 47.0  | 36.1  |
| 10.1  | 15.9  | 11.6  | 15.2  | 16.6  | 18.8  | 16.1  | 17.0  | 11.7  |
| 32.4  | 23.0  | 18.1  | 19.9  | 20.5  | 17.2  | 28.7  | 28.2  | 17.3  |
| 131.8 | 83.8  | 104.8 | 141.9 | 127.5 | 146.3 | 163.4 | 251.5 | 148.4 |
| 12.5  | 11.4  | 12.6  | 12.4  | 10.8  | 6.4   | 8.0   | 1.7   | 1.2   |
| 19.5  | 20.9  | 15.5  | 21.9  | 28.2  | 23.5  | 32.8  | 24.7  | 15.1  |
| 0.9   | 3.0   | 4.1   | 1.3   | 0.9   | 0.8   | 1.5   | 1.3   | 0.7   |
| 98.1  | 32.6  | 40.7  | 53.4  | 32.8  | 61.3  | 57.8  | 66.1  | 30.8  |
| 8.0   | 10.1  | 11.4  | 14.1  | 7.4   | 9.1   | 11.4  | 11.4  | 15.0  |
| 8.0   | 5.4   | 3.2   | 2.9   | 5.0   | 5.0   | 7.2   | 4.3   | 8.4   |
| 3.2   | 4.8   | 4.6   | 0.5   | 4.2   | 1.0   | 3.2   | 1.8   | 2.5   |
| 1.5   | 3.6   | 1.5   | 1.6   | 2.7   | 1.6   | 1.8   | 12.2  | 4.6   |
| 40.2  | 22.1  | 26.1  | 26.6  | 30.4  | 21.9  | 29.0  | 39.2  | 25.8  |
| 114.9 | 7.8   | 5.9   | 8.9   | 7.2   | 3.2   | 10.2  | 7.5   | 5.6   |
| 6.6   | 4.0   | 6.6   | 4.3   | 7.4   | 7.4   | 8.9   | 11.8  | 4.0   |
| 1.8   | 1.1   | 2.1   | 1.8   | 1.2   | 1.2   | 1.9   | 2.0   | 1.4   |
| 6.2   | 2.5   | 3.3   | 0.7   | 0.9   | 0.9   | 4.6   | 0.7   | 0.8   |
| 3.9   | 4.8   | 1.8   | 4.5   | 1.1   | 4.6   | 0.7   | 1.3   | 2.6   |
| 1.9   | 2.6   | 2.0   | 5.0   | 2.8   | 3.7   | 3.1   | 1.1   | 0.8   |
| 0.2   | 0.3   | 0.9   | 1.1   | 0.2   | 0.3   | 0.5   | 0.3   | 1.9   |

|       |       |       |       |       |       |       |       |       |
|-------|-------|-------|-------|-------|-------|-------|-------|-------|
| 2.5   | 6.1   | 3.7   | 2.6   | 0.8   | 0.6   | 1.7   | 2.3   | 6.0   |
| 103.2 | 4.0   | 5.7   | 1.4   | 11.4  | 0.9   | 8.5   | 5.7   | 8.7   |
| 0.7   | 0.6   | 1.4   | 0.9   | 1.4   | 1.0   | 1.3   | 1.3   | 0.8   |
| 2.7   | 2.9   | 0.3   | 0.3   | 1.8   | 5.2   | 4.6   | 2.7   | 5.2   |
| 5.5   | 7.9   | 0.8   | 0.7   | 5.1   | 5.8   | 1.0   | 1.2   | 7.0   |
| 1.8   | 1.5   | 1.8   | 1.8   | 2.9   | 2.6   | 1.7   | 2.2   | 2.4   |
| 0.6   | 0.2   | 0.3   | 0.2   | 0.1   | 0.4   | 0.2   | 0.7   | 0.3   |
| 2.4   | 9.9   | 3.6   | 2.0   | 3.0   | 6.9   | 2.8   | 7.4   | 0.5   |
| 1.0   | 1.2   | 1.2   | 5.1   | 0.9   | 0.8   | 1.4   | 0.9   | 1.5   |
| 1.0   | 2.3   | 3.7   | 0.7   | 2.2   | 7.9   | 8.6   | 4.9   | 8.2   |
| 7.8   | 2.2   | 1.2   | 0.6   | 1.0   | 1.1   | 0.6   | 4.9   | 2.2   |
| 6.2   | 0.8   | 1.5   | 3.1   | 7.0   | 1.3   | 5.1   | 1.0   | 4.3   |
| 2.7   | 1.4   | 2.1   | 1.5   | 2.2   | 3.1   | 1.2   | 4.1   | 2.1   |
| 0.7   | 0.5   | 1.0   | 0.8   | 0.8   | 0.8   | 1.0   | 1.1   | 1.0   |
| 4.1   | 1.3   | 4.3   | 2.4   | 2.0   | 0.2   | 1.8   | 1.1   | 4.1   |
| 0.2   | 0.4   | 0.4   | 0.1   | 1.1   | 0.6   | 0.4   | 0.4   | 0.1   |
| 1.3   | 4.2   | 5.7   | 1.2   | 4.9   | 8.6   | 1.6   | 7.6   | 1.7   |
| 0.4   | 0.3   | 0.1   | 0.3   | 0.3   | 0.7   | 0.2   | 0.2   | 0.8   |
| 1.3   | 1.9   | 1.8   | 1.3   | 2.3   | 0.7   | 3.2   | 1.9   | 0.8   |
| 317.8 | 94.5  | 161.3 | 136.6 | 144.6 | 202.6 | 225.0 | 322.7 | 234.2 |
| 5.0   | 0.4   | 3.3   | 0.3   | 2.5   | 0.5   | 6.7   | 0.5   | 4.3   |
| 0.5   | 1.9   | 3.7   | 1.1   | 1.3   | 0.9   | 1.0   | 1.8   | 1.3   |
| 0.2   | 0.4   | 0.3   | 0.3   | 0.3   | 0.5   | 0.3   | 0.4   | 0.3   |
| 0.3   | 0.2   | 0.3   | 0.2   | 0.5   | 0.3   | 0.6   | 0.3   | 0.5   |
| 2.5   | 1.9   | 0.7   | 2.1   | 0.1   | 0.2   | 3.5   | 0.2   | 0.8   |
| 0.4   | 0.3   | 1.0   | 1.0   | 7.3   | 0.3   | 0.3   | 2.8   | 0.4   |
| 8.5   | 10.9  | 2.1   | 4.6   | 0.8   | 2.0   | 3.2   | 3.8   | 8.8   |
| 0.6   | 0.6   | 9.1   | 8.8   | 3.1   | 0.7   | 1.8   | 0.6   | 0.4   |
| 0.1   | 0.7   | 1.0   | 6.7   | 1.1   | 1.8   | 3.4   | 2.3   | 2.1   |
| 0.5   | 0.6   | 0.3   | 0.2   | 0.5   | 2.2   | 0.2   | 0.2   | 0.4   |
| 513.2 | 445.6 | 320.5 | 381.8 | 471.2 | 376.9 | 549.6 | 829.2 | 922.3 |
| 0.4   | 2.3   | 1.3   | 0.8   | 3.2   | 0.7   | 0.1   | 1.7   | 0.2   |
| 40.8  | 27.9  | 26.0  | 32.8  | 28.6  | 30.7  | 53.3  | 39.6  | 31.2  |
| 1.6   | 1.4   | 2.1   | 2.7   | 2.9   | 6.5   | 9.6   | 2.2   | 1.6   |
| 7.9   | 1.3   | 3.6   | 0.8   | 1.1   | 6.0   | 1.1   | 3.0   | 2.3   |
| 30.3  | 24.3  | 27.9  | 17.6  | 25.0  | 21.8  | 36.6  | 31.0  | 24.3  |
| 0.2   | 0.6   | 0.5   | 0.3   | 0.5   | 0.3   | 0.7   | 0.3   | 0.2   |
| 181.5 | 117.2 | 160.1 | 149.3 | 153.9 | 153.6 | 190.5 | 210.0 | 122.2 |
| 40.6  | 25.8  | 35.3  | 41.7  | 41.3  | 34.1  | 64.1  | 58.8  | 34.9  |
| 3.7   | 1.7   | 0.7   | 0.4   | 0.4   | 0.7   | 0.3   | 0.4   | 1.0   |
| 14.0  | 17.0  | 12.2  | 4.2   | 9.7   | 10.9  | 18.0  | 10.4  | 8.8   |
| 0.5   | 0.4   | 0.3   | 0.4   | 0.7   | 0.2   | 0.4   | 0.4   | 0.2   |
| 5.3   | 4.9   | 4.8   | 3.3   | 3.2   | 6.5   | 6.2   | 10.8  | 5.8   |
| 0.1   | 0.1   | 0.3   | 0.3   | 0.2   | 0.1   | 2.7   | 1.3   | 0.2   |
| 398.0 | 315.9 | 317.9 | 308.0 | 386.6 | 364.6 | 425.1 | 504.3 | 312.5 |
| 13.0  | 4.8   | 11.1  | 8.8   | 15.3  | 16.3  | 16.3  | 19.3  | 16.3  |
| 1.1   | 0.7   | 0.9   | 1.2   | 0.6   | 0.8   | 0.7   | 1.0   | 1.0   |
| 8.6   | 6.7   | 1.1   | 5.6   | 6.1   | 1.2   | 5.6   | 7.6   | 1.5   |
| 4.2   | 5.9   | 5.7   | 4.2   | 3.3   | 1.0   | 4.6   | 6.1   | 2.0   |
| 7.9   | 4.4   | 6.5   | 8.4   | 9.0   | 9.4   | 17.6  | 18.2  | 8.1   |
| 2.0   | 0.9   | 0.6   | 1.0   | 1.3   | 0.8   | 6.7   | 0.7   | 1.9   |
| 14.2  | 4.4   | 7.7   | 3.5   | 6.3   | 1.9   | 9.8   | 10.1  | 6.5   |
| 6.6   | 1.1   | 5.4   | 3.3   | 5.4   | 4.7   | 6.5   | 7.4   | 4.2   |

|       |       |       |       |       |       |       |       |       |
|-------|-------|-------|-------|-------|-------|-------|-------|-------|
| 0.4   | 0.6   | 0.4   | 1.5   | 0.5   | 0.9   | 0.4   | 0.5   | 0.5   |
| 16.7  | 25.5  | 15.1  | 21.6  | 4.9   | 12.8  | 21.5  | 24.3  | 13.2  |
| 157.4 | 109.6 | 103.6 | 114.9 | 137.3 | 139.2 | 150.6 | 166.5 | 157.9 |
| 3.0   | 0.9   | 7.4   | 10.0  | 10.1  | 1.0   | 8.7   | 16.1  | 1.6   |
| 8.4   | 11.0  | 9.1   | 8.9   | 13.0  | 11.1  | 13.1  | 14.7  | 6.5   |
| 1.7   | 9.7   | 6.2   | 0.8   | 1.7   | 1.6   | 7.1   | 1.8   | 1.0   |
| 236.3 | 103.2 | 135.3 | 158.0 | 139.2 | 123.0 | 190.6 | 220.8 | 123.7 |
| 0.3   | 1.2   | 4.1   | 3.8   | 4.9   | 3.5   | 4.7   | 0.6   | 5.1   |
| 12.0  | 6.1   | 8.3   | 17.3  | 11.7  | 9.2   | 14.5  | 12.3  | 7.2   |
| 37.1  | 51.6  | 28.9  | 34.1  | 47.5  | 35.2  | 46.1  | 51.2  | 64.4  |
| 0.2   | 0.2   | 0.4   | 3.2   | 0.9   | 0.3   | 3.1   | 3.3   | 2.2   |
| 72.8  | 23.5  | 27.0  | 27.6  | 34.0  | 31.6  | 39.2  | 48.0  | 27.5  |
| 10.7  | 2.6   | 5.7   | 6.3   | 3.0   | 4.6   | 8.8   | 2.7   | 1.9   |
| 11.5  | 1.7   | 10.7  | 3.2   | 16.7  | 12.2  | 10.8  | 4.6   | 12.9  |
| 8.2   | 8.7   | 3.5   | 10.9  | 10.2  | 3.5   | 13.0  | 5.1   | 3.8   |
| 3.0   | 8.9   | 5.6   | 3.2   | 5.8   | 4.8   | 4.0   | 1.0   | 3.6   |
| 1.6   | 1.4   | 1.0   | 0.1   | 2.4   | 0.1   | 3.1   | 2.4   | 0.1   |
| 3.9   | 7.3   | 4.4   | 4.1   | 6.6   | 1.3   | 10.4  | 10.6  | 3.1   |
| 0.8   | 0.9   | 4.4   | 0.9   | 0.9   | 2.3   | 3.6   | 4.7   | 4.6   |
| 25.2  | 19.8  | 15.8  | 10.3  | 9.4   | 16.6  | 15.5  | 28.3  | 9.8   |
| 5.3   | 3.1   | 5.1   | 5.6   | 4.0   | 5.7   | 4.3   | 1.8   | 5.2   |
| 2.3   | 2.8   | 10.5  | 9.1   | 2.7   | 12.3  | 2.9   | 10.4  | 2.3   |
| 0.7   | 0.4   | 0.3   | 0.4   | 0.5   | 0.8   | 0.4   | 1.0   | 0.8   |
| 21.1  | 9.0   | 10.6  | 17.0  | 20.0  | 11.4  | 15.3  | 21.2  | 14.5  |
| 611.9 | 382.0 | 464.4 | 474.6 | 473.8 | 480.3 | 662.9 | 726.2 | 480.8 |
| 1.9   | 0.4   | 1.8   | 3.4   | 0.4   | 5.0   | 1.6   | 3.2   | 5.7   |
| 55.2  | 42.0  | 43.7  | 33.6  | 15.7  | 54.5  | 30.0  | 71.5  | 53.0  |
| 1.4   | 6.6   | 3.9   | 1.8   | 1.6   | 0.7   | 1.1   | 2.1   | 5.7   |
| 374.0 | 358.5 | 206.4 | 286.6 | 431.4 | 297.0 | 564.3 | 551.4 | 935.8 |
| 3.9   | 1.2   | 3.2   | 0.8   | 2.8   | 2.6   | 3.5   | 2.6   | 0.8   |
| 0.4   | 0.5   | 1.3   | 0.3   | 0.3   | 0.6   | 0.6   | 0.4   | 1.2   |
| 0.1   | 0.7   | 0.2   | 3.1   | 0.4   | 0.5   | 0.3   | 0.4   | 0.7   |
| 19.7  | 16.7  | 22.3  | 25.2  | 14.0  | 2.7   | 34.5  | 24.5  | 21.8  |
| 46.7  | 67.9  | 39.0  | 59.7  | 79.8  | 59.6  | 76.8  | 49.9  | 66.6  |
| 16.1  | 19.8  | 17.3  | 20.6  | 20.8  | 21.0  | 27.0  | 50.1  | 31.0  |
| 0.4   | 0.2   | 0.2   | 1.6   | 1.2   | 0.4   | 0.4   | 0.3   | 0.2   |
| 5.8   | 3.9   | 7.8   | 3.1   | 4.5   | 6.6   | 3.0   | 9.0   | 8.9   |
| 4.7   | 3.8   | 1.6   | 1.1   | 5.3   | 0.8   | 1.5   | 11.8  | 3.5   |
| 0.6   | 0.5   | 0.9   | 0.4   | 0.6   | 1.0   | 1.5   | 1.9   | 1.1   |
| 3.7   | 0.7   | 0.3   | 3.2   | 6.9   | 0.7   | 2.3   | 0.5   | 0.6   |
| 10.5  | 5.8   | 18.1  | 14.9  | 20.2  | 13.5  | 14.2  | 14.9  | 10.3  |
| 0.8   | 6.0   | 1.3   | 3.0   | 4.5   | 5.6   | 3.0   | 8.0   | 4.3   |
| 1.8   | 1.5   | 4.1   | 1.1   | 1.3   | 5.1   | 1.0   | 1.5   | 1.4   |
| 1.7   | 2.6   | 1.5   | 1.2   | 0.9   | 1.8   | 1.7   | 3.4   | 1.9   |
| 2.7   | 1.0   | 2.2   | 1.2   | 0.9   | 1.9   | 3.2   | 2.1   | 5.4   |
| 5.0   | 1.6   | 2.2   | 5.3   | 9.4   | 1.9   | 17.0  | 9.6   | 13.7  |
| 0.5   | 1.2   | 0.8   | 1.5   | 1.6   | 0.7   | 1.3   | 1.4   | 0.4   |
| 0.6   | 5.0   | 0.7   | 3.8   | 4.6   | 1.1   | 0.9   | 2.3   | 0.8   |
| 0.3   | 1.4   | 2.9   | 6.7   | 2.7   | 4.4   | 3.7   | 5.6   | 4.9   |
| 350.7 | 124.4 | 120.9 | 119.2 | 142.9 | 86.1  | 137.9 | 127.4 | 145.2 |
| 6.5   | 7.4   | 14.5  | 10.7  | 16.8  | 19.1  | 16.4  | 32.4  | 27.8  |
| 20.4  | 15.3  | 18.6  | 6.2   | 15.9  | 17.8  | 18.9  | 22.1  | 16.0  |
| 392.0 | 272.0 | 306.0 | 317.9 | 340.1 | 327.0 | 475.2 | 584.8 | 326.1 |

|       |       |       |       |       |       |       |       |       |
|-------|-------|-------|-------|-------|-------|-------|-------|-------|
| 8.6   | 3.0   | 3.8   | 1.1   | 0.9   | 1.5   | 1.7   | 1.9   | 0.6   |
| 0.7   | 1.6   | 1.5   | 0.5   | 1.2   | 0.7   | 2.1   | 0.6   | 1.7   |
| 13.5  | 5.4   | 9.2   | 1.0   | 5.4   | 1.2   | 1.5   | 7.3   | 5.6   |
| 0.9   | 0.7   | 1.2   | 1.2   | 1.2   | 0.9   | 0.6   | 0.8   | 0.8   |
| 25.6  | 14.1  | 14.7  | 13.5  | 15.2  | 13.4  | 10.5  | 21.0  | 16.4  |
| 1.2   | 1.9   | 0.9   | 0.8   | 0.6   | 0.9   | 0.5   | 0.8   | 0.9   |
| 0.8   | 2.6   | 3.2   | 1.4   | 0.4   | 5.0   | 0.8   | 3.8   | 3.6   |
| 8.7   | 9.2   | 9.3   | 9.1   | 6.7   | 11.8  | 16.4  | 13.1  | 10.3  |
| 0.6   | 5.8   | 3.8   | 0.6   | 1.1   | 4.5   | 0.3   | 5.0   | 0.4   |
| 0.6   | 0.7   | 0.4   | 1.0   | 4.7   | 3.8   | 5.7   | 2.2   | 0.4   |
| 1.3   | 1.8   | 2.4   | 11.4  | 1.5   | 1.1   | 2.1   | 1.9   | 1.6   |
| 1.3   | 1.6   | 1.9   | 2.9   | 5.6   | 7.0   | 2.2   | 1.0   | 2.2   |
| 0.8   | 0.5   | 0.7   | 0.6   | 0.9   | 0.3   | 0.5   | 0.5   | 0.9   |
| 1.7   | 1.6   | 8.5   | 1.1   | 1.1   | 3.8   | 16.0  | 2.2   | 1.4   |
| 1.2   | 1.4   | 1.3   | 2.4   | 1.2   | 1.7   | 0.8   | 1.2   | 3.2   |
| 0.6   | 1.3   | 1.3   | 2.6   | 3.0   | 2.4   | 8.5   | 7.4   | 2.8   |
| 51.1  | 41.4  | 54.0  | 51.6  | 64.7  | 57.6  | 85.6  | 111.1 | 56.3  |
| 0.5   | 1.3   | 1.0   | 0.4   | 2.9   | 0.3   | 2.3   | 0.8   | 1.0   |
| 10.6  | 13.6  | 0.7   | 4.7   | 8.2   | 13.6  | 9.6   | 14.2  | 2.9   |
| 203.2 | 93.1  | 120.9 | 126.6 | 125.9 | 127.4 | 203.9 | 198.3 | 155.5 |
| 49.3  | 37.9  | 39.5  | 37.4  | 35.7  | 44.7  | 43.4  | 42.5  | 29.6  |
| 1.3   | 3.5   | 1.4   | 5.9   | 2.9   | 4.8   | 4.6   | 3.6   | 0.9   |
| 27.3  | 21.5  | 18.5  | 28.5  | 19.3  | 17.3  | 33.3  | 34.3  | 27.2  |
| 2.7   | 14.1  | 11.6  | 7.5   | 15.8  | 3.4   | 2.6   | 5.8   | 2.6   |
| 10.4  | 2.4   | 9.9   | 2.3   | 3.7   | 7.8   | 17.6  | 14.2  | 9.1   |
| 0.6   | 2.3   | 1.3   | 0.2   | 2.0   | 2.3   | 0.6   | 5.1   | 0.3   |
| 8.3   | 4.9   | 2.7   | 0.4   | 2.4   | 1.3   | 6.5   | 2.5   | 7.7   |
| 67.2  | 22.1  | 27.5  | 32.6  | 35.1  | 32.4  | 46.6  | 57.3  | 32.6  |
| 10.9  | 12.9  | 18.1  | 7.5   | 12.6  | 13.5  | 16.4  | 15.7  | 13.9  |
| 1.5   | 1.9   | 2.9   | 7.8   | 0.8   | 0.6   | 4.6   | 3.6   | 9.5   |
| 10.2  | 12.8  | 7.4   | 15.9  | 5.4   | 9.8   | 14.3  | 4.6   | 14.9  |
| 378.7 | 272.9 | 283.8 | 328.6 | 248.7 | 266.1 | 344.1 | 390.0 | 328.9 |
| 0.3   | 0.9   | 1.3   | 0.3   | 0.1   | 0.3   | 1.0   | 1.8   | 1.8   |
| 146.0 | 91.9  | 99.5  | 108.1 | 108.8 | 95.3  | 143.7 | 124.3 | 125.1 |
| 4.3   | 5.7   | 5.3   | 6.0   | 3.7   | 8.2   | 7.8   | 10.2  | 7.4   |
| 2.3   | 1.8   | 1.8   | 5.0   | 3.3   | 0.6   | 3.7   | 3.0   | 4.4   |
| 21.0  | 13.7  | 16.5  | 17.6  | 19.6  | 18.8  | 25.5  | 20.2  | 25.9  |
| 2.7   | 0.3   | 5.7   | 2.4   | 2.1   | 3.5   | 4.6   | 5.6   | 3.4   |
| 20.0  | 23.0  | 13.3  | 15.6  | 16.8  | 14.6  | 22.1  | 24.9  | 25.6  |
| 12.7  | 11.6  | 13.1  | 10.4  | 11.5  | 15.2  | 25.3  | 26.0  | 14.1  |
| 1.1   | 6.5   | 8.5   | 11.0  | 10.4  | 5.1   | 5.8   | 1.8   | 11.2  |
| 9.9   | 6.8   | 6.0   | 2.7   | 6.9   | 5.5   | 11.5  | 12.1  | 13.5  |
| 108.9 | 67.9  | 37.0  | 70.5  | 40.9  | 65.0  | 92.4  | 95.7  | 93.8  |
| 12.4  | 9.0   | 4.5   | 4.7   | 10.0  | 4.9   | 11.0  | 10.0  | 0.3   |
| 0.4   | 0.2   | 1.1   | 2.9   | 0.3   | 0.4   | 0.8   | 3.9   | 3.6   |
| 2.3   | 0.4   | 2.5   | 5.4   | 1.3   | 0.2   | 2.7   | 6.3   | 3.5   |
| 0.9   | 0.3   | 0.7   | 1.0   | 0.9   | 0.6   | 1.4   | 1.7   | 0.7   |
| 31.3  | 23.5  | 18.4  | 25.5  | 25.5  | 18.4  | 25.1  | 34.3  | 28.9  |
| 0.7   | 1.2   | 0.6   | 0.8   | 0.5   | 1.0   | 3.8   | 3.3   | 1.4   |
| 0.6   | 6.9   | 3.8   | 5.5   | 0.7   | 3.9   | 0.5   | 3.8   | 0.2   |
| 1.8   | 1.5   | 0.8   | 1.9   | 3.0   | 1.9   | 7.4   | 2.5   | 2.1   |
| 1.4   | 2.7   | 0.2   | 0.5   | 0.6   | 4.3   | 0.9   | 1.0   | 2.1   |
| 116.0 | 109.5 | 119.2 | 124.1 | 145.4 | 156.4 | 163.4 | 163.4 | 118.7 |

|       |       |       |       |       |       |       |       |       |
|-------|-------|-------|-------|-------|-------|-------|-------|-------|
| 2.0   | 1.4   | 2.0   | 1.4   | 0.8   | 1.1   | 4.8   | 3.1   | 2.2   |
| 35.7  | 31.4  | 59.7  | 30.4  | 45.9  | 36.9  | 51.8  | 49.0  | 34.2  |
| 11.4  | 8.3   | 10.1  | 4.7   | 2.2   | 2.0   | 9.0   | 4.2   | 7.8   |
| 579.5 | 353.9 | 501.6 | 459.6 | 467.0 | 431.4 | 594.6 | 640.7 | 501.7 |
| 81.7  | 44.0  | 63.0  | 56.8  | 56.9  | 45.9  | 72.8  | 85.0  | 41.3  |
| 9.3   | 0.8   | 1.0   | 1.6   | 1.8   | 1.3   | 8.1   | 1.9   | 2.2   |
| 5.0   | 3.2   | 8.3   | 3.7   | 7.1   | 5.2   | 0.9   | 6.1   | 5.0   |
| 0.1   | 0.4   | 0.1   | 0.2   | 0.4   | 0.1   | 0.1   | 1.5   | 0.1   |
| 3.3   | 3.2   | 1.1   | 1.3   | 0.9   | 1.5   | 1.2   | 0.5   | 0.4   |
| 1.2   | 3.2   | 0.5   | 1.3   | 0.9   | 1.0   | 1.2   | 0.8   | 0.6   |
| 21.8  | 19.5  | 18.0  | 19.2  | 17.9  | 15.4  | 18.0  | 23.5  | 22.5  |
| 1.5   | 5.1   | 3.6   | 8.6   | 1.1   | 1.1   | 2.6   | 1.3   | 2.1   |
| 76.7  | 44.3  | 62.3  | 57.3  | 54.5  | 41.9  | 60.6  | 74.0  | 57.8  |
| 6.9   | 12.3  | 11.3  | 5.6   | 14.6  | 5.4   | 14.5  | 10.3  | 3.4   |
| 6.5   | 9.6   | 1.7   | 9.8   | 11.3  | 7.4   | 10.3  | 4.0   | 8.4   |
| 0.6   | 2.3   | 0.7   | 0.4   | 0.5   | 3.0   | 0.1   | 0.3   | 0.5   |
| 0.4   | 0.6   | 0.6   | 0.3   | 0.8   | 0.9   | 0.3   | 0.3   | 0.3   |
| 3.8   | 2.4   | 0.4   | 4.9   | 5.0   | 5.2   | 0.5   | 5.7   | 3.0   |
| 2.1   | 8.9   | 2.2   | 2.1   | 3.4   | 8.8   | 1.8   | 2.4   | 0.8   |
| 0.3   | 1.5   | 0.2   | 0.4   | 0.8   | 1.2   | 0.5   | 1.3   | 1.0   |
| 1.9   | 7.2   | 1.2   | 1.0   | 1.0   | 6.1   | 1.3   | 1.4   | 0.6   |
| 1.1   | 9.2   | 3.4   | 6.5   | 6.5   | 2.8   | 3.2   | 7.2   | 4.1   |
| 0.4   | 0.8   | 5.5   | 0.2   | 3.1   | 3.6   | 2.9   | 7.4   | 3.6   |
| 13.8  | 6.6   | 3.8   | 5.6   | 9.4   | 5.3   | 14.1  | 9.1   | 11.4  |
| 32.9  | 35.7  | 36.6  | 44.3  | 45.5  | 41.3  | 42.4  | 47.7  | 47.9  |
| 264.0 | 158.7 | 119.3 | 170.1 | 169.9 | 123.3 | 264.9 | 346.8 | 190.1 |
| 4.1   | 0.2   | 2.7   | 0.7   | 0.9   | 0.6   | 1.5   | 2.7   | 1.0   |
| 2.1   | 1.6   | 8.5   | 1.5   | 1.7   | 2.1   | 0.9   | 1.9   | 1.6   |
| 6.3   | 0.5   | 1.1   | 3.9   | 7.7   | 1.5   | 0.7   | 4.5   | 1.2   |
| 15.2  | 15.9  | 21.7  | 13.9  | 19.9  | 16.8  | 27.8  | 40.4  | 16.4  |
| 10.0  | 5.3   | 11.0  | 0.6   | 3.4   | 4.9   | 13.1  | 7.0   | 7.6   |
| 0.8   | 0.7   | 0.6   | 0.7   | 0.8   | 0.6   | 1.2   | 1.2   | 1.3   |
| 542.9 | 504.9 | 437.1 | 476.3 | 488.5 | 445.9 | 734.4 | 897.9 | 658.2 |
| 0.8   | 3.8   | 2.2   | 1.9   | 2.2   | 2.5   | 3.4   | 3.7   | 1.6   |
| 1.2   | 0.4   | 5.7   | 1.0   | 0.4   | 1.3   | 1.1   | 0.9   | 1.1   |
| 0.8   | 0.7   | 0.4   | 0.5   | 0.7   | 6.2   | 1.2   | 1.3   | 0.3   |
| 2.7   | 0.7   | 0.7   | 6.1   | 3.4   | 3.1   | 0.8   | 1.6   | 1.1   |
| 8.6   | 1.6   | 11.9  | 7.1   | 5.9   | 10.5  | 5.2   | 9.6   | 5.8   |
| 0.7   | 2.9   | 0.4   | 0.5   | 0.5   | 3.1   | 3.3   | 6.4   | 1.1   |
| 2.8   | 0.4   | 1.4   | 2.8   | 5.7   | 1.2   | 2.2   | 3.9   | 1.1   |
| 11.5  | 8.8   | 14.1  | 9.0   | 9.5   | 9.4   | 13.4  | 15.1  | 8.0   |
| 0.7   | 0.6   | 0.3   | 0.2   | 0.2   | 0.9   | 0.3   | 0.9   | 0.2   |
| 296.1 | 217.6 | 186.8 | 246.2 | 334.2 | 248.0 | 430.8 | 456.2 | 484.5 |
| 0.6   | 0.4   | 2.5   | 0.1   | 0.7   | 0.2   | 0.5   | 4.4   | 1.3   |
| 1.9   | 0.3   | 0.5   | 0.1   | 2.9   | 1.3   | 0.6   | 1.0   | 0.6   |
| 14.7  | 27.8  | 21.0  | 22.4  | 16.4  | 15.0  | 21.8  | 25.7  | 19.4  |
| 15.1  | 12.8  | 18.3  | 26.4  | 16.5  | 17.8  | 27.2  | 14.9  | 14.8  |
| 5.1   | 0.4   | 8.0   | 3.8   | 4.1   | 4.3   | 8.6   | 1.8   | 9.8   |
| 0.7   | 4.2   | 4.3   | 2.6   | 2.8   | 4.8   | 0.4   | 3.1   | 3.6   |
| 0.7   | 8.1   | 0.7   | 0.8   | 1.1   | 6.8   | 1.3   | 6.8   | 1.6   |
| 6.4   | 15.0  | 4.8   | 8.5   | 5.1   | 12.0  | 5.7   | 5.9   | 10.2  |
| 4.0   | 3.8   | 3.7   | 4.5   | 3.4   | 2.2   | 3.7   | 3.9   | 2.3   |
| 1.4   | 2.4   | 1.0   | 1.0   | 2.2   | 2.4   | 2.2   | 3.0   | 2.0   |

|        |        |        |        |        |        |        |        |        |
|--------|--------|--------|--------|--------|--------|--------|--------|--------|
| 1.5    | 8.7    | 1.2    | 3.3    | 7.8    | 2.3    | 1.1    | 11.4   | 3.4    |
| 0.3    | 0.7    | 0.9    | 0.4    | 2.0    | 1.0    | 0.4    | 1.5    | 1.3    |
| 1.2    | 1.1    | 1.3    | 1.6    | 1.7    | 0.8    | 2.4    | 2.4    | 1.1    |
| 4.8    | 4.3    | 6.9    | 4.3    | 6.8    | 7.5    | 13.2   | 14.0   | 4.1    |
| 1.3    | 0.8    | 0.6    | 0.3    | 0.4    | 0.6    | 0.4    | 0.5    | 0.3    |
| 0.7    | 0.9    | 2.3    | 3.1    | 1.2    | 2.1    | 1.2    | 2.3    | 0.3    |
| 1.2    | 1.4    | 0.6    | 0.6    | 0.5    | 0.5    | 0.8    | 1.4    | 0.7    |
| 4.6    | 8.8    | 3.4    | 2.9    | 5.8    | 6.7    | 9.4    | 3.1    | 7.7    |
| 1.2    | 2.1    | 2.1    | 1.0    | 6.8    | 10.0   | 8.9    | 3.0    | 6.9    |
| 269.0  | 175.5  | 220.7  | 201.7  | 186.3  | 183.2  | 248.8  | 279.4  | 204.2  |
| 0.6    | 3.3    | 2.6    | 2.7    | 2.9    | 2.9    | 6.9    | 4.6    | 3.2    |
| 5.5    | 6.6    | 4.8    | 3.5    | 4.1    | 5.6    | 6.8    | 0.9    | 5.0    |
| 102.8  | 42.3   | 88.7   | 84.6   | 67.0   | 63.4   | 102.1  | 106.8  | 58.6   |
| 0.3    | 0.4    | 1.3    | 0.4    | 0.4    | 0.5    | 0.7    | 1.1    | 0.5    |
| 13.9   | 14.0   | 10.4   | 5.4    | 10.8   | 20.3   | 16.7   | 18.5   | 3.0    |
| 1.2    | 5.3    | 1.0    | 2.2    | 3.1    | 0.1    | 4.7    | 4.2    | 1.8    |
| 7.6    | 8.8    | 8.1    | 9.2    | 4.7    | 11.9   | 7.2    | 7.1    | 4.4    |
| 1855.2 | 1469.3 | 1691.9 | 1709.5 | 1711.0 | 1638.2 | 2107.0 | 2120.2 | 1926.4 |
| 1.4    | 2.0    | 7.0    | 2.1    | 8.0    | 5.1    | 2.2    | 2.0    | 2.0    |
| 2.0    | 1.0    | 4.8    | 0.6    | 3.6    | 2.3    | 4.6    | 8.6    | 4.9    |
| 12.7   | 12.4   | 12.0   | 9.6    | 7.3    | 9.0    | 18.3   | 20.6   | 12.7   |
| 0.6    | 0.3    | 3.1    | 0.6    | 0.7    | 2.6    | 0.4    | 1.4    | 0.5    |
| 30.8   | 21.4   | 20.8   | 20.9   | 17.9   | 25.1   | 37.1   | 60.3   | 27.0   |
| 8.4    | 1.0    | 4.0    | 3.2    | 7.1    | 4.4    | 6.1    | 12.2   | 3.9    |
| 696.5  | 448.9  | 581.4  | 619.3  | 602.2  | 596.9  | 827.1  | 889.1  | 580.0  |
| 10.1   | 9.1    | 7.2    | 3.7    | 11.9   | 3.5    | 11.3   | 12.5   | 0.7    |
| 0.6    | 0.8    | 0.5    | 0.9    | 0.6    | 1.4    | 1.1    | 1.7    | 0.7    |
| 5.4    | 7.8    | 4.1    | 5.9    | 9.2    | 6.6    | 5.2    | 7.7    | 4.7    |
| 2.6    | 1.9    | 3.9    | 4.5    | 3.4    | 6.4    | 7.3    | 4.2    | 3.0    |
| 0.1    | 0.2    | 0.2    | 1.6    | 2.4    | 2.1    | 0.2    | 3.8    | 0.1    |
| 26.0   | 19.7   | 20.9   | 12.7   | 20.5   | 22.9   | 16.8   | 28.6   | 12.7   |
| 0.7    | 0.5    | 0.8    | 0.8    | 0.6    | 0.7    | 0.9    | 0.8    | 1.2    |
| 30.8   | 23.8   | 25.8   | 22.8   | 26.8   | 17.3   | 38.7   | 35.3   | 26.7   |
| 26.7   | 17.5   | 16.4   | 22.3   | 13.0   | 19.8   | 20.4   | 24.7   | 22.5   |
| 1.3    | 0.7    | 3.9    | 1.4    | 1.5    | 0.5    | 0.5    | 0.5    | 0.4    |
| 3.2    | 7.1    | 2.1    | 1.8    | 1.2    | 7.5    | 3.1    | 10.5   | 2.3    |
| 77.8   | 62.7   | 66.0   | 70.3   | 74.9   | 45.2   | 78.8   | 91.9   | 113.9  |
| 0.6    | 1.2    | 1.7    | 1.0    | 1.7    | 1.4    | 1.0    | 1.2    | 1.7    |
| 10.1   | 8.2    | 6.8    | 5.8    | 4.1    | 3.9    | 4.2    | 7.0    | 6.9    |
| 3.3    | 3.2    | 2.3    | 1.6    | 2.3    | 3.7    | 4.0    | 5.4    | 2.3    |
| 34.2   | 22.1   | 16.7   | 24.7   | 19.6   | 21.7   | 20.9   | 54.2   | 26.4   |
| 4.4    | 1.5    | 4.8    | 3.8    | 3.2    | 0.4    | 7.9    | 2.0    | 1.0    |
| 4.8    | 3.2    | 5.7    | 0.6    | 1.9    | 5.1    | 4.3    | 2.1    | 2.5    |
| 0.2    | 0.2    | 0.5    | 1.2    | 0.8    | 3.1    | 2.4    | 0.6    | 0.1    |
| 4.8    | 0.5    | 2.0    | 0.2    | 1.9    | 2.2    | 2.8    | 0.2    | 0.2    |
| 41.1   | 30.5   | 33.5   | 31.9   | 32.6   | 47.9   | 33.0   | 49.2   | 29.0   |
| 0.3    | 2.1    | 0.7    | 5.2    | 0.6    | 1.2    | 2.8    | 3.3    | 1.7    |
| 15.3   | 14.1   | 6.7    | 20.3   | 26.3   | 14.7   | 29.7   | 27.0   | 11.5   |
| 7.4    | 4.4    | 2.2    | 7.0    | 1.6    | 1.2    | 2.5    | 4.6    | 5.7    |
| 0.4    | 1.4    | 1.1    | 1.2    | 1.3    | 1.3    | 1.5    | 0.9    | 0.5    |
| 1.1    | 1.1    | 1.0    | 0.6    | 0.7    | 0.3    | 4.1    | 0.5    | 1.0    |
| 0.9    | 0.4    | 2.6    | 0.7    | 1.2    | 0.5    | 1.6    | 1.8    | 4.2    |
| 88.9   | 63.9   | 85.7   | 73.2   | 88.0   | 80.1   | 115.4  | 183.8  | 114.0  |

|        |       |       |       |       |       |        |        |        |
|--------|-------|-------|-------|-------|-------|--------|--------|--------|
| 6.5    | 7.6   | 1.3   | 1.4   | 9.9   | 5.7   | 11.4   | 9.2    | 5.0    |
| 7.9    | 13.2  | 4.9   | 11.9  | 14.8  | 15.7  | 13.4   | 17.4   | 8.2    |
| 3.0    | 2.1   | 1.1   | 8.0   | 8.0   | 11.6  | 5.0    | 5.4    | 9.2    |
| 0.6    | 0.7   | 0.5   | 0.6   | 0.7   | 1.0   | 0.8    | 1.0    | 0.9    |
| 0.5    | 0.3   | 0.8   | 0.7   | 0.5   | 0.4   | 1.2    | 0.9    | 1.0    |
| 4.2    | 1.0   | 1.1   | 0.8   | 0.4   | 3.8   | 3.4    | 4.6    | 2.1    |
| 69.6   | 77.7  | 54.7  | 68.5  | 89.1  | 60.7  | 106.2  | 83.7   | 155.6  |
| 15.8   | 10.2  | 12.0  | 10.0  | 13.0  | 12.2  | 20.1   | 22.0   | 19.3   |
| 1.8    | 1.6   | 1.2   | 1.0   | 6.5   | 1.7   | 12.7   | 4.9    | 1.0    |
| 1.8    | 1.9   | 2.3   | 11.3  | 2.0   | 2.0   | 1.7    | 3.0    | 2.8    |
| 11.0   | 9.4   | 6.5   | 3.9   | 8.8   | 7.0   | 11.3   | 15.7   | 17.7   |
| 2.5    | 1.3   | 5.2   | 0.9   | 2.5   | 0.4   | 5.7    | 2.7    | 6.6    |
| 1.6    | 1.3   | 2.5   | 0.6   | 2.1   | 4.6   | 5.2    | 8.7    | 6.1    |
| 2.2    | 0.3   | 2.6   | 0.4   | 0.3   | 0.2   | 1.2    | 1.2    | 0.1    |
| 9.9    | 3.3   | 4.2   | 10.8  | 12.2  | 11.2  | 12.4   | 13.5   | 8.9    |
| 0.5    | 3.4   | 1.6   | 2.9   | 1.7   | 0.6   | 1.0    | 2.8    | 1.5    |
| 35.0   | 21.5  | 11.5  | 20.7  | 19.8  | 21.4  | 29.7   | 39.5   | 29.2   |
| 127.4  | 113.4 | 72.4  | 125.8 | 184.5 | 131.2 | 197.0  | 241.6  | 160.2  |
| 12.1   | 10.1  | 3.6   | 8.0   | 11.1  | 11.8  | 7.8    | 20.8   | 13.0   |
| 27.8   | 11.1  | 17.8  | 24.3  | 16.7  | 25.7  | 31.2   | 33.0   | 16.9   |
| 2.5    | 0.5   | 0.7   | 1.7   | 1.8   | 0.4   | 0.9    | 5.1    | 0.9    |
| 1.4    | 0.8   | 4.7   | 0.9   | 1.1   | 1.3   | 11.6   | 1.9    | 0.8    |
| 15.7   | 2.6   | 1.5   | 6.5   | 13.7  | 12.6  | 8.4    | 18.8   | 8.4    |
| 22.3   | 17.5  | 16.7  | 13.5  | 19.3  | 19.3  | 22.6   | 34.1   | 22.7   |
| 10.3   | 12.6  | 6.9   | 19.8  | 16.7  | 8.5   | 12.7   | 23.0   | 19.1   |
| 1.1    | 7.0   | 12.7  | 4.5   | 4.4   | 0.5   | 11.8   | 1.5    | 0.9    |
| 1027.9 | 779.6 | 959.5 | 931.9 | 934.7 | 894.7 | 1243.9 | 1341.6 | 1343.4 |
| 9.5    | 7.0   | 2.6   | 4.0   | 7.1   | 3.3   | 7.4    | 3.8    | 7.2    |
| 5.2    | 7.0   | 3.0   | 15.1  | 3.8   | 8.2   | 4.1    | 9.1    | 7.9    |
| 8.3    | 7.8   | 3.0   | 6.3   | 11.6  | 5.4   | 5.2    | 3.1    | 3.1    |
| 0.4    | 1.0   | 3.5   | 0.4   | 1.7   | 0.6   | 0.6    | 1.6    | 0.4    |
| 5.8    | 2.6   | 6.8   | 8.1   | 1.9   | 3.8   | 4.7    | 5.9    | 7.3    |
| 11.8   | 8.3   | 13.8  | 7.6   | 12.5  | 8.9   | 10.7   | 14.4   | 6.6    |
| 58.5   | 43.5  | 10.5  | 23.8  | 21.5  | 26.1  | 42.5   | 49.7   | 28.5   |
| 19.3   | 7.7   | 12.1  | 15.9  | 17.4  | 18.0  | 38.5   | 22.1   | 21.9   |
| 12.0   | 17.8  | 9.0   | 17.2  | 11.9  | 16.5  | 11.9   | 23.9   | 18.2   |
| 1.7    | 1.3   | 0.9   | 1.1   | 0.5   | 0.7   | 1.5    | 0.9    | 0.4    |
| 37.9   | 15.4  | 21.6  | 23.5  | 23.3  | 22.9  | 34.0   | 36.9   | 29.2   |
| 26.8   | 17.6  | 11.0  | 18.6  | 29.0  | 15.9  | 35.7   | 19.5   | 22.2   |
| 8.6    | 10.9  | 1.9   | 8.4   | 8.3   | 9.4   | 10.9   | 12.1   | 9.8    |
| 184.8  | 141.9 | 175.7 | 192.6 | 160.2 | 160.4 | 225.0  | 213.8  | 179.4  |
| 4.9    | 2.9   | 4.2   | 2.7   | 0.2   | 0.1   | 3.8    | 4.6    | 0.3    |
| 0.7    | 2.2   | 2.8   | 0.5   | 4.1   | 0.4   | 0.2    | 0.9    | 0.9    |
| 27.1   | 13.0  | 17.5  | 8.1   | 9.2   | 15.8  | 16.4   | 16.1   | 14.5   |
| 0.8    | 1.6   | 1.3   | 0.5   | 2.7   | 1.0   | 1.8    | 0.9    | 1.6    |
| 3.3    | 4.2   | 2.9   | 4.1   | 4.4   | 2.8   | 4.3    | 3.9    | 4.6    |
| 6.5    | 1.0   | 4.0   | 7.3   | 1.3   | 5.0   | 1.1    | 0.6    | 4.1    |
| 9.0    | 8.3   | 11.7  | 10.8  | 16.4  | 13.3  | 21.0   | 17.6   | 16.3   |
| 1.5    | 2.0   | 2.3   | 0.9   | 1.8   | 2.2   | 1.2    | 2.2    | 3.2    |
| 500.0  | 378.7 | 249.5 | 465.8 | 401.8 | 297.2 | 470.1  | 565.5  | 723.1  |
| 0.3    | 0.2   | 1.1   | 0.2   | 2.3   | 1.1   | 0.6    | 2.8    | 0.4    |
| 3.9    | 8.8   | 0.7   | 1.7   | 3.6   | 3.9   | 1.3    | 2.3    | 1.3    |
| 2.2    | 3.5   | 2.1   | 4.1   | 5.2   | 0.3   | 1.3    | 11.0   | 5.0    |



|        |        |        |        |        |        |        |        |        |
|--------|--------|--------|--------|--------|--------|--------|--------|--------|
| 17.9   | 17.4   | 13.0   | 21.4   | 18.9   | 14.9   | 19.3   | 30.5   | 22.6   |
| 1.2    | 0.5    | 2.8    | 3.0    | 0.5    | 1.7    | 1.0    | 4.9    | 1.5    |
| 0.8    | 0.3    | 2.9    | 0.7    | 0.5    | 0.3    | 0.6    | 0.8    | 0.6    |
| 4.8    | 3.3    | 7.2    | 7.2    | 10.1   | 6.8    | 9.0    | 9.3    | 6.9    |
| 2.2    | 0.9    | 0.6    | 0.2    | 6.3    | 2.1    | 0.4    | 5.1    | 1.7    |
| 0.9    | 0.4    | 0.7    | 0.5    | 0.4    | 0.3    | 0.8    | 0.6    | 0.4    |
| 2.2    | 5.7    | 3.3    | 6.7    | 4.6    | 6.0    | 5.9    | 6.4    | 5.3    |
| 13.1   | 20.0   | 16.3   | 26.0   | 11.4   | 13.6   | 13.7   | 32.7   | 26.3   |
| 11.2   | 2.5    | 1.7    | 10.2   | 1.8    | 9.9    | 8.7    | 1.5    | 9.2    |
| 1.1    | 4.3    | 0.2    | 0.3    | 3.3    | 4.0    | 0.8    | 1.2    | 4.7    |
| 85.3   | 88.4   | 74.2   | 37.3   | 79.8   | 68.4   | 123.9  | 80.5   | 93.2   |
| 3.1    | 2.6    | 3.9    | 4.5    | 5.3    | 4.1    | 3.8    | 4.5    | 0.5    |
| 3.9    | 1.8    | 0.7    | 0.6    | 5.9    | 2.4    | 0.9    | 1.0    | 0.6    |
| 0.7    | 0.9    | 1.0    | 1.0    | 1.5    | 1.1    | 1.7    | 5.1    | 1.0    |
| 9.3    | 6.7    | 9.0    | 14.8   | 4.9    | 4.2    | 6.2    | 12.0   | 5.2    |
| 3672.8 | 3423.9 | 3106.6 | 3385.2 | 3426.1 | 3240.6 | 3598.7 | 3709.7 | 2701.4 |
| 10.5   | 2.0    | 1.8    | 1.9    | 5.5    | 1.8    | 1.6    | 8.2    | 2.0    |
| 7.7    | 8.0    | 1.4    | 4.9    | 2.2    | 2.6    | 8.2    | 8.3    | 3.7    |
| 0.4    | 5.2    | 2.1    | 1.9    | 4.2    | 4.0    | 6.6    | 9.3    | 1.3    |
| 0.5    | 1.0    | 0.4    | 3.9    | 0.2    | 0.4    | 0.5    | 0.3    | 0.4    |
| 21.8   | 9.9    | 6.1    | 7.4    | 11.5   | 8.5    | 16.4   | 18.1   | 8.0    |
| 0.6    | 0.3    | 0.4    | 0.2    | 0.4    | 0.6    | 2.4    | 1.2    | 0.5    |
| 5.6    | 7.6    | 10.7   | 6.4    | 12.9   | 4.6    | 3.7    | 10.5   | 6.5    |
| 6.6    | 9.2    | 2.1    | 12.5   | 9.7    | 10.2   | 17.8   | 12.1   | 17.0   |
| 38.5   | 50.5   | 40.4   | 63.7   | 36.7   | 43.7   | 49.2   | 44.6   | 48.5   |
| 262.0  | 179.0  | 193.3  | 216.1  | 235.8  | 226.3  | 309.7  | 394.3  | 437.4  |
| 0.4    | 0.3    | 4.3    | 0.3    | 0.4    | 0.9    | 1.1    | 1.0    | 4.2    |
| 2.6    | 12.3   | 3.2    | 2.3    | 5.6    | 2.8    | 3.6    | 9.6    | 2.7    |
| 4.6    | 2.5    | 0.9    | 1.5    | 1.3    | 4.0    | 0.9    | 1.1    | 1.3    |
| 4.5    | 0.8    | 0.3    | 4.5    | 2.1    | 3.0    | 4.2    | 3.5    | 5.5    |
| 3.8    | 6.3    | 3.1    | 1.3    | 2.1    | 2.7    | 2.1    | 5.8    | 1.9    |
| 1.0    | 1.1    | 0.6    | 0.8    | 1.4    | 1.7    | 1.0    | 1.0    | 0.7    |
| 0.7    | 4.0    | 0.7    | 5.8    | 4.2    | 2.4    | 4.4    | 5.1    | 4.1    |
| 25.7   | 27.7   | 24.0   | 28.7   | 27.8   | 23.3   | 41.2   | 45.6   | 37.3   |
| 2.5    | 2.2    | 2.7    | 1.7    | 0.5    | 6.9    | 0.2    | 1.2    | 3.1    |
| 4.1    | 5.4    | 1.9    | 1.3    | 7.4    | 6.0    | 9.4    | 5.8    | 7.6    |
| 77.4   | 31.0   | 38.8   | 40.5   | 56.1   | 44.7   | 46.0   | 64.7   | 27.4   |
| 4.6    | 6.3    | 8.2    | 1.0    | 11.3   | 5.1    | 4.1    | 7.3    | 6.2    |
| 2.1    | 1.4    | 0.9    | 1.3    | 1.9    | 0.7    | 0.8    | 10.6   | 1.1    |
| 0.6    | 0.5    | 1.4    | 0.3    | 0.6    | 6.3    | 1.1    | 2.2    | 0.7    |
| 0.6    | 5.8    | 4.1    | 1.7    | 10.5   | 2.9    | 6.5    | 15.2   | 6.9    |
| 1.1    | 1.8    | 0.3    | 1.1    | 0.7    | 1.4    | 0.7    | 0.5    | 0.6    |
| 3.0    | 2.9    | 1.6    | 0.6    | 0.5    | 0.5    | 0.7    | 0.8    | 0.8    |
| 1.3    | 1.1    | 1.7    | 9.0    | 1.9    | 5.8    | 1.7    | 10.2   | 1.5    |
| 167.2  | 129.4  | 149.9  | 157.3  | 165.2  | 143.1  | 194.2  | 208.1  | 180.7  |
| 3.8    | 1.4    | 1.8    | 7.3    | 2.8    | 2.8    | 5.7    | 1.2    | 1.1    |
| 0.8    | 2.0    | 0.6    | 1.2    | 2.8    | 6.3    | 4.3    | 1.4    | 0.8    |
| 32.6   | 20.6   | 29.4   | 9.6    | 11.0   | 24.4   | 39.5   | 26.6   | 19.9   |
| 1.2    | 0.2    | 2.0    | 1.2    | 1.7    | 0.5    | 0.4    | 0.8    | 5.1    |
| 25.4   | 19.9   | 19.5   | 21.1   | 16.8   | 17.8   | 17.3   | 19.6   | 13.4   |
| 0.5    | 0.2    | 1.1    | 0.5    | 1.0    | 0.5    | 0.3    | 0.5    | 1.1    |
| 3.4    | 5.8    | 5.7    | 3.2    | 0.6    | 3.8    | 0.7    | 0.4    | 0.7    |
| 5.7    | 6.0    | 5.5    | 6.8    | 6.0    | 6.3    | 7.2    | 16.3   | 9.9    |

|        |        |        |        |        |        |        |        |        |
|--------|--------|--------|--------|--------|--------|--------|--------|--------|
| 35.9   | 13.6   | 12.7   | 25.1   | 22.6   | 20.7   | 32.0   | 33.3   | 14.1   |
| 55.6   | 29.7   | 45.8   | 40.0   | 42.8   | 44.4   | 62.3   | 98.1   | 56.4   |
| 7.0    | 3.1    | 6.2    | 1.9    | 3.9    | 5.3    | 9.5    | 10.2   | 0.8    |
| 0.6    | 6.8    | 1.0    | 4.8    | 1.2    | 0.9    | 5.5    | 1.8    | 1.1    |
| 0.1    | 0.6    | 2.2    | 0.1    | 1.3    | 0.1    | 0.2    | 0.1    | 2.0    |
| 9.8    | 10.8   | 9.4    | 8.7    | 9.6    | 9.4    | 10.6   | 10.2   | 8.0    |
| 0.6    | 1.2    | 0.6    | 0.7    | 0.9    | 0.6    | 0.9    | 1.6    | 1.2    |
| 0.5    | 0.2    | 2.0    | 0.2    | 0.7    | 0.6    | 4.2    | 0.3    | 1.1    |
| 1.0    | 2.7    | 2.8    | 2.2    | 4.8    | 0.7    | 2.3    | 3.3    | 1.0    |
| 67.6   | 29.5   | 31.9   | 30.5   | 34.7   | 44.4   | 70.4   | 69.2   | 48.9   |
| 12.4   | 4.2    | 10.8   | 11.2   | 6.1    | 8.2    | 10.8   | 11.3   | 7.6    |
| 5.8    | 11.2   | 7.8    | 1.9    | 5.3    | 6.9    | 5.8    | 12.4   | 3.7    |
| 55.3   | 50.6   | 51.7   | 50.7   | 60.8   | 56.6   | 76.9   | 72.4   | 53.2   |
| 9.2    | 9.4    | 8.5    | 5.7    | 9.8    | 4.4    | 11.2   | 11.5   | 13.9   |
| 1.6    | 3.9    | 0.6    | 5.2    | 6.6    | 5.8    | 6.8    | 1.1    | 1.4    |
| 0.9    | 0.7    | 0.5    | 0.3    | 0.9    | 0.4    | 0.2    | 2.3    | 1.2    |
| 1.5    | 0.1    | 1.4    | 0.5    | 3.3    | 1.0    | 0.3    | 0.5    | 0.3    |
| 0.7    | 0.9    | 2.3    | 6.5    | 8.6    | 1.5    | 8.7    | 10.1   | 10.2   |
| 0.4    | 1.9    | 1.4    | 0.2    | 1.2    | 5.2    | 4.5    | 0.9    | 0.4    |
| 8.0    | 9.1    | 7.3    | 8.7    | 4.6    | 4.9    | 4.6    | 8.2    | 6.3    |
| 32.4   | 26.8   | 33.0   | 32.4   | 29.7   | 30.1   | 33.5   | 54.3   | 25.8   |
| 71.2   | 57.7   | 73.7   | 84.9   | 79.2   | 67.7   | 88.2   | 133.7  | 67.3   |
| 0.6    | 1.9    | 1.7    | 1.3    | 2.5    | 4.6    | 1.3    | 1.6    | 1.9    |
| 2.2    | 1.0    | 3.8    | 6.1    | 3.4    | 5.8    | 8.1    | 1.3    | 3.7    |
| 3.5    | 1.7    | 2.8    | 0.7    | 0.2    | 0.3    | 0.8    | 0.4    | 2.5    |
| 16.4   | 9.9    | 8.8    | 10.0   | 19.7   | 14.2   | 14.6   | 20.8   | 19.0   |
| 0.8    | 0.4    | 2.9    | 4.0    | 5.9    | 1.3    | 4.7    | 2.5    | 0.6    |
| 0.5    | 0.6    | 0.6    | 0.4    | 0.3    | 1.0    | 1.0    | 0.5    | 0.2    |
| 0.7    | 0.8    | 4.6    | 0.5    | 1.0    | 0.4    | 1.1    | 1.0    | 4.8    |
| 16.4   | 10.3   | 16.3   | 13.9   | 13.2   | 16.2   | 17.2   | 17.2   | 17.0   |
| 2325.1 | 2204.1 | 1997.5 | 2177.1 | 2433.7 | 2105.6 | 2591.8 | 2861.5 | 1054.2 |
| 5.4    | 3.8    | 4.2    | 4.6    | 5.9    | 4.7    | 7.3    | 10.7   | 6.7    |
| 10.0   | 9.2    | 7.7    | 5.7    | 3.8    | 7.3    | 8.3    | 13.8   | 5.3    |
| 0.8    | 5.7    | 6.0    | 1.8    | 2.0    | 3.2    | 1.9    | 1.5    | 2.5    |
| 0.6    | 0.4    | 1.8    | 1.2    | 5.5    | 0.1    | 0.9    | 3.9    | 0.2    |
| 11.9   | 5.1    | 7.2    | 17.1   | 7.4    | 5.7    | 7.9    | 14.4   | 7.6    |
| 3.5    | 5.2    | 1.5    | 0.7    | 4.5    | 1.4    | 4.9    | 7.2    | 0.3    |
| 52.0   | 38.7   | 22.8   | 34.4   | 39.2   | 27.7   | 37.7   | 54.1   | 30.2   |
| 5.9    | 7.9    | 8.0    | 12.1   | 11.6   | 9.8    | 7.2    | 11.5   | 5.4    |
| 24.6   | 16.6   | 14.8   | 21.7   | 11.5   | 14.9   | 26.9   | 29.0   | 20.9   |
| 6.0    | 1.1    | 0.9    | 1.2    | 1.0    | 1.2    | 2.8    | 1.2    | 0.8    |
| 4.0    | 9.8    | 5.3    | 6.8    | 6.1    | 3.5    | 10.2   | 3.0    | 11.8   |
| 91.7   | 21.5   | 29.2   | 27.4   | 33.0   | 28.9   | 28.8   | 38.6   | 21.2   |
| 2.1    | 1.2    | 0.7    | 5.2    | 5.3    | 8.2    | 5.0    | 6.8    | 3.0    |
| 14.5   | 13.7   | 14.3   | 17.7   | 7.9    | 14.6   | 11.6   | 21.4   | 15.4   |
| 7.9    | 4.7    | 6.4    | 4.6    | 4.5    | 6.0    | 7.1    | 7.9    | 5.4    |
| 10.1   | 13.1   | 8.5    | 7.5    | 8.0    | 8.3    | 8.6    | 20.3   | 10.0   |
| 94.8   | 62.5   | 88.9   | 86.0   | 90.1   | 79.0   | 162.4  | 166.4  | 101.6  |
| 6.8    | 5.6    | 5.5    | 5.3    | 7.8    | 5.5    | 5.4    | 8.0    | 5.6    |
| 100.7  | 81.4   | 90.3   | 108.7  | 98.2   | 97.2   | 125.2  | 127.7  | 104.3  |
| 0.8    | 1.3    | 1.1    | 1.2    | 1.2    | 7.8    | 1.1    | 6.5    | 2.6    |
| 1300.8 | 1258.2 | 1228.7 | 1385.4 | 1412.7 | 1307.1 | 1577.9 | 1666.0 | 1061.4 |
| 0.4    | 1.0    | 0.7    | 0.7    | 0.9    | 0.9    | 0.8    | 0.8    | 1.1    |

|        |       |        |        |        |        |        |        |        |
|--------|-------|--------|--------|--------|--------|--------|--------|--------|
| 6.2    | 5.7   | 5.7    | 5.8    | 8.4    | 10.9   | 17.7   | 19.1   | 16.0   |
| 6.0    | 1.6   | 7.9    | 6.7    | 5.5    | 8.0    | 2.0    | 5.0    | 1.3    |
| 1367.2 | 979.2 | 1001.9 | 1199.7 | 1276.3 | 1244.4 | 1634.9 | 2128.2 | 1394.6 |
| 68.8   | 59.4  | 67.9   | 76.9   | 64.0   | 60.1   | 78.9   | 95.4   | 73.6   |
| 4.4    | 7.7   | 12.3   | 20.8   | 15.6   | 11.5   | 5.5    | 7.6    | 7.5    |
| 3.0    | 4.0   | 5.1    | 3.0    | 5.5    | 4.4    | 2.1    | 5.6    | 4.5    |
| 1.2    | 1.2   | 1.2    | 1.2    | 1.5    | 1.6    | 1.2    | 2.0    | 2.9    |
| 95.3   | 56.2  | 60.0   | 75.7   | 66.8   | 69.0   | 102.3  | 110.8  | 81.0   |
| 6.6    | 2.9   | 6.5    | 4.5    | 10.2   | 1.4    | 13.4   | 4.4    | 9.3    |
| 3.9    | 0.5   | 4.4    | 5.1    | 0.7    | 4.2    | 0.8    | 5.6    | 3.6    |
| 165.5  | 100.7 | 102.8  | 112.2  | 101.3  | 117.0  | 140.6  | 151.1  | 103.0  |
| 9.1    | 9.0   | 11.6   | 9.3    | 7.7    | 11.0   | 17.3   | 12.1   | 12.2   |
| 42.2   | 26.1  | 41.2   | 32.5   | 46.8   | 50.7   | 44.9   | 109.5  | 35.7   |
| 8.5    | 10.8  | 5.3    | 8.5    | 9.3    | 9.1    | 9.9    | 1.9    | 11.4   |
| 10.0   | 7.8   | 8.0    | 7.1    | 8.1    | 12.0   | 8.1    | 16.1   | 6.8    |
| 1.8    | 0.7   | 2.3    | 3.1    | 1.9    | 0.8    | 0.5    | 4.1    | 0.6    |
| 0.2    | 1.2   | 0.6    | 0.7    | 1.0    | 1.4    | 1.9    | 0.4    | 1.2    |
| 35.9   | 21.1  | 21.1   | 25.4   | 23.3   | 25.9   | 33.0   | 43.6   | 29.0   |
| 4.2    | 4.1   | 2.3    | 6.8    | 8.8    | 4.8    | 1.3    | 4.1    | 1.4    |
| 25.0   | 22.9  | 26.3   | 26.7   | 27.4   | 24.5   | 35.2   | 33.1   | 27.3   |
| 6.2    | 15.7  | 27.3   | 16.7   | 20.4   | 22.1   | 17.6   | 22.5   | 28.5   |
| 0.6    | 0.8   | 2.7    | 1.0    | 1.2    | 0.7    | 0.9    | 1.8    | 1.1    |
| 16.4   | 13.5  | 9.1    | 12.0   | 9.9    | 12.7   | 20.0   | 16.2   | 13.7   |
| 3.3    | 6.2   | 8.0    | 0.5    | 8.7    | 2.1    | 6.5    | 4.2    | 2.9    |
| 0.3    | 0.3   | 3.4    | 0.4    | 0.2    | 2.1    | 0.6    | 0.6    | 0.6    |
| 6.4    | 3.1   | 7.5    | 4.7    | 3.8    | 3.0    | 2.9    | 0.8    | 3.3    |
| 5.5    | 1.5   | 2.4    | 8.4    | 2.6    | 8.8    | 10.9   | 3.8    | 1.9    |
| 21.0   | 40.1  | 17.1   | 27.5   | 9.5    | 6.4    | 8.6    | 8.2    | 34.4   |
| 7.9    | 7.3   | 7.5    | 2.4    | 0.6    | 4.0    | 10.4   | 3.2    | 2.8    |
| 0.8    | 1.3   | 1.9    | 0.9    | 4.9    | 3.3    | 3.8    | 5.3    | 3.6    |
| 3.6    | 2.3   | 1.0    | 1.3    | 1.3    | 2.1    | 0.4    | 2.3    | 0.8    |
| 3.1    | 6.9   | 0.6    | 5.1    | 4.3    | 5.8    | 7.3    | 6.3    | 8.8    |
| 7.3    | 13.4  | 2.0    | 0.6    | 4.8    | 3.7    | 6.8    | 4.9    | 5.2    |
| 0.8    | 3.5   | 3.1    | 0.1    | 4.8    | 0.3    | 2.3    | 5.3    | 1.0    |
| 3.4    | 1.5   | 2.1    | 4.2    | 1.9    | 0.5    | 3.5    | 0.5    | 0.4    |
| 0.0    | 1.4   | 2.2    | 0.1    | 0.2    | 3.8    | 0.1    | 0.3    | 3.4    |
| 3.1    | 1.9   | 0.9    | 3.2    | 3.8    | 5.9    | 1.3    | 3.2    | 2.6    |
| 41.1   | 25.6  | 25.8   | 25.2   | 34.0   | 30.7   | 43.7   | 62.9   | 35.9   |
| 64.4   | 36.3  | 50.1   | 42.8   | 56.0   | 55.8   | 73.1   | 78.4   | 44.3   |
| 6.4    | 0.4   | 0.2    | 0.2    | 0.2    | 0.1    | 0.7    | 0.4    | 3.0    |
| 8.1    | 6.2   | 6.5    | 3.8    | 0.4    | 2.1    | 5.6    | 7.9    | 4.8    |
| 1.9    | 6.7   | 0.8    | 1.1    | 4.9    | 2.4    | 5.3    | 8.4    | 2.4    |
| 0.8    | 1.1   | 1.1    | 5.2    | 2.5    | 0.3    | 0.5    | 5.2    | 1.4    |
| 1.0    | 0.6   | 1.1    | 1.6    | 1.4    | 1.3    | 2.4    | 1.9    | 2.4    |
| 6.3    | 1.2   | 8.6    | 7.3    | 4.2    | 5.7    | 1.3    | 5.6    | 4.7    |
| 1.1    | 1.5   | 4.9    | 2.1    | 1.4    | 2.3    | 1.4    | 1.8    | 1.0    |
| 1.0    | 0.6   | 6.2    | 3.0    | 3.1    | 6.7    | 4.1    | 2.1    | 0.6    |
| 0.1    | 0.3   | 0.2    | 0.4    | 0.4    | 0.1    | 1.3    | 0.2    | 0.4    |
| 0.8    | 2.7   | 0.3    | 0.4    | 0.2    | 0.6    | 0.2    | 0.6    | 0.6    |
| 12.5   | 8.1   | 8.2    | 5.1    | 6.6    | 9.0    | 7.2    | 6.1    | 4.8    |
| 10.4   | 7.0   | 7.8    | 10.2   | 8.6    | 11.0   | 19.8   | 14.4   | 7.3    |
| 10.4   | 3.2   | 9.1    | 6.9    | 6.3    | 7.6    | 11.1   | 13.1   | 7.6    |
| 21.2   | 13.7  | 16.5   | 10.7   | 14.6   | 19.2   | 27.5   | 19.9   | 27.3   |

|      |      |      |      |      |      |      |      |      |
|------|------|------|------|------|------|------|------|------|
| 8.6  | 4.3  | 9.3  | 7.7  | 1.9  | 6.7  | 10.5 | 16.1 | 10.2 |
| 44.8 | 24.2 | 31.1 | 37.2 | 34.1 | 35.5 | 56.2 | 60.9 | 37.3 |
| 7.5  | 2.6  | 3.8  | 1.5  | 4.6  | 2.9  | 2.3  | 11.8 | 1.4  |
| 2.8  | 1.4  | 1.1  | 0.7  | 1.8  | 2.1  | 2.0  | 7.4  | 0.9  |
| 0.3  | 0.7  | 0.4  | 0.3  | 0.3  | 0.4  | 0.5  | 0.3  | 0.6  |
| 12.7 | 6.7  | 6.0  | 14.7 | 7.9  | 8.8  | 14.8 | 28.4 | 12.6 |
| 11.8 | 9.2  | 12.2 | 11.8 | 14.3 | 10.2 | 9.3  | 19.5 | 3.0  |
| 8.8  | 4.6  | 6.2  | 2.8  | 6.9  | 4.3  | 3.0  | 7.3  | 5.4  |
| 4.1  | 7.4  | 8.3  | 8.8  | 9.1  | 5.6  | 3.6  | 8.7  | 6.2  |
| 36.0 | 24.8 | 26.5 | 22.7 | 28.0 | 23.8 | 47.8 | 32.7 | 29.8 |
| 0.3  | 0.2  | 0.2  | 0.2  | 0.3  | 0.7  | 1.6  | 1.8  | 1.7  |
| 13.5 | 11.0 | 1.7  | 1.7  | 8.6  | 5.2  | 7.4  | 6.6  | 7.2  |
| 6.7  | 5.1  | 10.7 | 3.1  | 4.7  | 1.1  | 7.5  | 11.5 | 3.3  |
| 6.4  | 2.0  | 1.7  | 10.0 | 9.3  | 4.2  | 11.7 | 8.8  | 1.8  |
| 7.7  | 4.3  | 6.2  | 3.5  | 4.8  | 12.3 | 8.6  | 12.7 | 13.7 |
| 5.8  | 8.0  | 7.5  | 1.2  | 9.1  | 0.9  | 2.6  | 3.9  | 6.6  |
| 6.1  | 5.0  | 6.0  | 3.4  | 5.4  | 4.9  | 5.1  | 5.4  | 6.2  |
| 66.9 | 55.1 | 59.2 | 61.7 | 65.8 | 65.2 | 77.3 | 83.6 | 70.8 |
| 1.4  | 10.4 | 1.7  | 7.0  | 10.0 | 7.7  | 5.3  | 0.8  | 4.1  |
| 6.1  | 8.7  | 3.7  | 5.8  | 4.4  | 2.3  | 3.3  | 4.2  | 4.7  |
| 2.4  | 0.2  | 0.3  | 0.4  | 0.6  | 0.3  | 0.3  | 0.1  | 0.3  |
| 6.1  | 6.3  | 3.6  | 5.8  | 6.7  | 5.4  | 6.8  | 6.4  | 1.5  |
| 14.9 | 3.9  | 4.6  | 6.6  | 6.2  | 6.1  | 12.3 | 10.5 | 11.9 |
| 0.9  | 2.2  | 0.9  | 1.1  | 1.8  | 4.1  | 1.0  | 2.8  | 0.9  |
| 4.4  | 3.0  | 3.8  | 2.0  | 3.6  | 2.5  | 2.7  | 0.7  | 4.9  |
| 1.4  | 1.6  | 3.3  | 6.2  | 3.9  | 0.6  | 0.9  | 0.8  | 0.6  |
| 4.4  | 7.9  | 3.2  | 5.3  | 8.5  | 7.4  | 10.9 | 6.5  | 0.6  |
| 10.1 | 5.1  | 0.9  | 10.6 | 8.4  | 1.3  | 10.7 | 6.4  | 9.5  |
| 0.7  | 2.1  | 1.5  | 2.4  | 3.4  | 4.0  | 0.5  | 1.1  | 0.5  |
| 0.5  | 2.4  | 0.2  | 3.5  | 0.5  | 0.4  | 1.6  | 0.7  | 0.2  |
| 1.4  | 0.4  | 1.1  | 0.3  | 0.5  | 0.7  | 1.4  | 1.4  | 0.5  |
| 9.2  | 10.4 | 8.7  | 6.3  | 5.0  | 7.0  | 5.9  | 9.3  | 9.2  |
| 5.7  | 1.0  | 5.0  | 1.0  | 2.9  | 2.8  | 6.6  | 5.9  | 1.2  |
| 0.5  | 0.2  | 0.1  | 0.4  | 1.8  | 0.3  | 0.3  | 0.2  | 1.4  |
| 12.8 | 12.2 | 0.9  | 6.9  | 5.3  | 9.1  | 9.4  | 13.1 | 11.8 |
| 2.9  | 1.8  | 0.2  | 1.1  | 2.7  | 3.0  | 2.4  | 0.4  | 1.1  |
| 1.1  | 2.9  | 3.2  | 5.0  | 0.2  | 0.1  | 5.6  | 3.9  | 5.2  |
| 26.7 | 24.5 | 5.4  | 7.5  | 16.4 | 8.1  | 14.2 | 3.7  | 18.4 |
| 23.3 | 18.1 | 21.1 | 26.1 | 14.5 | 17.1 | 21.4 | 26.7 | 19.0 |
| 1.1  | 0.7  | 2.6  | 1.1  | 4.8  | 5.6  | 0.7  | 2.9  | 0.8  |
| 1.1  | 0.4  | 2.7  | 4.9  | 0.5  | 0.6  | 4.8  | 1.4  | 0.2  |
| 1.5  | 3.1  | 0.8  | 0.4  | 0.7  | 0.6  | 0.9  | 2.5  | 0.9  |
| 1.2  | 1.5  | 1.6  | 1.1  | 8.7  | 2.0  | 12.6 | 12.1 | 5.9  |
| 2.9  | 0.3  | 3.2  | 0.4  | 4.0  | 0.4  | 2.5  | 2.6  | 1.1  |
| 26.2 | 14.1 | 7.1  | 13.0 | 9.3  | 11.8 | 15.6 | 20.3 | 16.9 |
| 0.6  | 1.2  | 0.7  | 0.6  | 0.6  | 0.5  | 0.8  | 1.3  | 0.6  |
| 6.6  | 2.3  | 5.9  | 6.6  | 2.0  | 15.6 | 7.7  | 18.3 | 11.3 |
| 3.6  | 1.1  | 6.6  | 5.9  | 1.1  | 2.9  | 3.8  | 1.2  | 0.6  |
| 1.4  | 1.1  | 0.7  | 0.6  | 1.5  | 4.5  | 0.8  | 3.6  | 4.7  |
| 7.3  | 7.1  | 1.7  | 14.5 | 18.1 | 7.9  | 14.6 | 16.6 | 15.2 |
| 13.7 | 12.1 | 19.2 | 21.6 | 10.8 | 11.9 | 13.0 | 26.7 | 15.7 |
| 11.6 | 6.9  | 3.6  | 1.1  | 3.5  | 10.1 | 4.7  | 3.1  | 6.0  |
| 0.2  | 0.5  | 4.4  | 0.2  | 1.1  | 1.6  | 8.3  | 3.7  | 3.9  |

|      |      |      |      |      |      |      |      |      |
|------|------|------|------|------|------|------|------|------|
| 10.8 | 7.7  | 6.3  | 8.9  | 5.1  | 9.1  | 11.6 | 15.8 | 16.3 |
| 11.0 | 7.4  | 14.0 | 12.3 | 15.0 | 3.5  | 20.3 | 22.1 | 9.9  |
| 21.8 | 12.4 | 16.8 | 18.4 | 25.2 | 15.3 | 29.0 | 34.5 | 20.3 |
| 18.3 | 19.2 | 12.7 | 13.2 | 14.4 | 14.6 | 17.8 | 23.8 | 23.2 |
| 0.4  | 2.6  | 0.6  | 0.4  | 0.3  | 0.1  | 0.3  | 0.6  | 0.3  |
| 2.2  | 5.4  | 2.3  | 2.9  | 2.4  | 4.9  | 4.4  | 5.8  | 8.5  |
| 18.8 | 14.2 | 15.0 | 21.9 | 21.8 | 23.5 | 19.7 | 19.7 | 21.2 |
| 8.3  | 5.2  | 3.5  | 4.6  | 7.6  | 7.5  | 10.7 | 6.2  | 6.3  |
| 3.2  | 1.8  | 1.3  | 7.3  | 1.7  | 4.0  | 10.3 | 7.4  | 1.1  |
| 15.3 | 8.7  | 8.6  | 10.3 | 11.1 | 9.6  | 15.5 | 16.5 | 13.8 |
| 11.7 | 8.8  | 4.5  | 7.7  | 5.4  | 9.8  | 7.1  | 11.3 | 9.9  |
| 7.2  | 1.5  | 8.5  | 4.2  | 1.3  | 9.5  | 2.4  | 2.8  | 2.0  |
| 5.6  | 2.4  | 7.8  | 4.1  | 0.3  | 0.8  | 2.9  | 6.0  | 9.6  |
| 5.7  | 0.4  | 6.9  | 4.2  | 6.9  | 5.5  | 9.5  | 9.8  | 4.1  |
| 12.2 | 13.6 | 11.2 | 10.0 | 10.2 | 11.6 | 8.7  | 13.6 | 12.4 |
| 10.8 | 10.8 | 9.6  | 5.3  | 11.3 | 8.6  | 20.4 | 12.8 | 13.0 |
| 0.8  | 0.4  | 0.6  | 0.6  | 1.6  | 0.5  | 0.8  | 1.7  | 1.1  |
| 33.8 | 15.2 | 12.1 | 20.3 | 18.3 | 14.9 | 19.5 | 22.4 | 19.9 |
| 0.4  | 1.3  | 0.3  | 0.5  | 0.1  | 0.2  | 0.9  | 1.7  | 3.3  |
| 5.5  | 6.4  | 7.1  | 3.7  | 6.1  | 4.0  | 11.1 | 10.0 | 6.2  |
| 1.2  | 4.5  | 1.2  | 0.8  | 3.4  | 1.2  | 1.3  | 2.5  | 0.9  |
| 5.7  | 2.9  | 3.3  | 2.5  | 3.7  | 0.8  | 4.9  | 2.3  | 4.0  |
| 0.5  | 2.0  | 3.3  | 1.0  | 5.2  | 0.9  | 0.4  | 0.6  | 0.9  |
| 24.5 | 18.1 | 13.1 | 16.5 | 16.3 | 23.4 | 28.5 | 48.6 | 46.5 |
| 45.0 | 16.1 | 19.0 | 14.8 | 29.5 | 23.4 | 43.3 | 55.5 | 46.9 |
| 23.6 | 25.0 | 40.9 | 26.2 | 40.4 | 28.9 | 62.4 | 61.0 | 42.9 |
| 0.2  | 0.3  | 1.9  | 0.3  | 0.2  | 1.1  | 0.1  | 0.3  | 0.2  |
| 26.6 | 16.7 | 7.0  | 13.2 | 21.2 | 16.8 | 6.8  | 28.1 | 20.2 |
| 0.6  | 1.0  | 2.5  | 0.3  | 0.3  | 0.4  | 4.9  | 2.8  | 3.0  |
| 1.1  | 0.5  | 0.6  | 0.6  | 0.5  | 0.8  | 0.8  | 1.9  | 3.0  |
| 15.9 | 11.6 | 14.0 | 17.5 | 20.9 | 8.3  | 19.1 | 23.1 | 14.7 |
| 0.6  | 2.3  | 4.2  | 0.8  | 2.7  | 4.8  | 1.7  | 4.1  | 1.0  |
| 28.0 | 15.8 | 16.8 | 14.2 | 17.6 | 20.0 | 23.3 | 36.9 | 25.9 |
| 1.2  | 5.6  | 5.5  | 2.1  | 1.4  | 3.4  | 4.7  | 3.4  | 5.2  |
| 9.4  | 14.0 | 7.4  | 7.7  | 9.6  | 9.1  | 10.3 | 13.1 | 8.5  |
| 11.2 | 12.2 | 10.7 | 13.3 | 11.3 | 13.5 | 12.0 | 16.8 | 11.6 |
| 6.7  | 11.3 | 9.1  | 6.4  | 9.0  | 9.4  | 10.1 | 14.0 | 10.8 |
| 7.7  | 5.4  | 6.6  | 7.6  | 11.7 | 8.2  | 8.7  | 12.1 | 11.5 |
| 5.6  | 4.7  | 14.3 | 1.5  | 1.8  | 1.4  | 2.1  | 12.3 | 9.6  |
| 4.1  | 5.9  | 1.2  | 3.6  | 4.8  | 12.2 | 3.7  | 6.5  | 2.3  |
| 28.3 | 17.0 | 20.4 | 23.2 | 22.5 | 19.5 | 39.4 | 20.2 | 22.1 |
| 4.9  | 1.0  | 1.8  | 1.4  | 4.2  | 1.8  | 1.0  | 0.8  | 3.6  |
| 9.9  | 5.8  | 14.6 | 8.9  | 9.7  | 5.9  | 10.9 | 9.8  | 4.1  |
| 4.0  | 1.0  | 8.4  | 7.6  | 5.7  | 2.7  | 3.5  | 10.9 | 5.4  |
| 4.3  | 6.1  | 1.5  | 5.0  | 1.7  | 5.2  | 1.1  | 11.0 | 4.1  |
| 27.1 | 13.7 | 23.6 | 24.7 | 26.9 | 17.2 | 26.3 | 43.8 | 21.9 |
| 0.6  | 0.7  | 1.1  | 4.6  | 5.4  | 3.2  | 4.8  | 8.0  | 0.9  |
| 1.5  | 5.8  | 1.5  | 2.1  | 1.8  | 1.5  | 3.1  | 6.6  | 0.6  |
| 8.2  | 5.2  | 3.5  | 3.3  | 8.5  | 3.6  | 9.4  | 9.5  | 4.2  |
| 2.3  | 6.9  | 3.1  | 2.2  | 7.0  | 5.3  | 7.6  | 5.1  | 5.5  |
| 30.7 | 22.2 | 21.8 | 22.2 | 17.0 | 21.0 | 28.0 | 32.9 | 25.9 |
| 8.0  | 0.6  | 3.1  | 0.5  | 2.1  | 1.8  | 1.4  | 0.6  | 0.6  |
| 18.3 | 6.6  | 8.2  | 12.9 | 5.8  | 11.7 | 14.6 | 18.0 | 12.9 |

|       |       |       |       |       |       |       |       |       |
|-------|-------|-------|-------|-------|-------|-------|-------|-------|
| 0.8   | 1.0   | 1.0   | 0.3   | 1.1   | 0.9   | 0.7   | 0.7   | 0.3   |
| 4.4   | 0.6   | 2.2   | 4.4   | 4.2   | 2.9   | 3.1   | 6.0   | 3.0   |
| 4.4   | 6.2   | 7.2   | 11.2  | 7.0   | 1.4   | 7.6   | 9.4   | 13.4  |
| 3.6   | 1.6   | 4.8   | 4.6   | 8.1   | 5.3   | 8.8   | 8.7   | 6.6   |
| 0.3   | 1.8   | 3.8   | 0.8   | 0.7   | 2.9   | 2.7   | 5.0   | 4.2   |
| 19.2  | 13.1  | 14.1  | 10.7  | 19.6  | 14.1  | 27.1  | 26.8  | 26.9  |
| 0.9   | 5.8   | 5.0   | 1.0   | 0.8   | 1.5   | 3.8   | 1.4   | 1.0   |
| 0.9   | 2.4   | 0.8   | 1.7   | 0.8   | 0.8   | 2.0   | 4.9   | 1.0   |
| 8.9   | 6.7   | 6.0   | 9.3   | 10.1  | 9.6   | 3.5   | 11.9  | 4.3   |
| 6.0   | 6.2   | 6.0   | 3.0   | 3.7   | 0.8   | 6.8   | 8.3   | 2.6   |
| 5.1   | 1.1   | 4.5   | 1.7   | 1.2   | 1.3   | 8.3   | 1.3   | 0.9   |
| 3.1   | 2.0   | 1.3   | 2.3   | 6.3   | 0.6   | 3.5   | 1.0   | 0.6   |
| 1.5   | 0.9   | 11.9  | 1.1   | 0.7   | 1.0   | 1.3   | 5.7   | 0.4   |
| 2.3   | 0.6   | 1.2   | 2.9   | 1.0   | 1.2   | 3.8   | 1.1   | 1.3   |
| 5.1   | 4.1   | 6.9   | 4.6   | 4.8   | 0.1   | 8.6   | 7.7   | 7.0   |
| 5.0   | 1.3   | 11.9  | 1.7   | 5.6   | 6.7   | 9.4   | 2.8   | 3.4   |
| 3.5   | 0.9   | 4.0   | 3.8   | 1.5   | 1.1   | 1.3   | 1.7   | 4.9   |
| 18.2  | 12.8  | 10.4  | 12.4  | 14.4  | 16.4  | 23.7  | 29.4  | 17.2  |
| 4.0   | 1.1   | 2.5   | 2.4   | 7.5   | 2.9   | 5.2   | 10.8  | 7.8   |
| 5.6   | 4.5   | 6.5   | 6.3   | 3.4   | 3.1   | 4.8   | 7.1   | 3.7   |
| 14.4  | 11.7  | 6.8   | 12.3  | 12.3  | 2.5   | 15.6  | 15.6  | 1.6   |
| 0.3   | 0.6   | 1.0   | 2.4   | 0.3   | 0.5   | 0.6   | 0.4   | 0.6   |
| 3.9   | 1.9   | 6.7   | 2.7   | 6.1   | 0.9   | 6.8   | 3.6   | 3.8   |
| 6.3   | 2.1   | 1.2   | 0.7   | 7.6   | 3.4   | 2.6   | 5.4   | 5.1   |
| 53.9  | 32.1  | 29.9  | 41.0  | 46.1  | 38.9  | 63.5  | 61.5  | 51.8  |
| 236.9 | 176.4 | 188.2 | 240.2 | 211.8 | 163.8 | 275.8 | 337.6 | 207.8 |
| 0.8   | 2.3   | 3.0   | 2.1   | 1.2   | 0.6   | 2.4   | 5.1   | 0.6   |
| 0.5   | 0.8   | 1.5   | 1.9   | 2.5   | 0.7   | 1.1   | 1.1   | 1.1   |
| 3.3   | 2.7   | 6.1   | 9.1   | 6.3   | 7.7   | 4.2   | 13.8  | 6.8   |
| 9.5   | 7.7   | 1.3   | 1.4   | 1.1   | 4.7   | 1.5   | 0.6   | 2.0   |
| 71.9  | 21.3  | 22.7  | 30.9  | 30.6  | 21.5  | 35.8  | 65.6  | 25.4  |
| 79.8  | 33.7  | 37.3  | 29.7  | 40.1  | 50.5  | 58.7  | 77.3  | 51.2  |
| 5.4   | 3.7   | 0.9   | 4.5   | 9.1   | 3.1   | 8.0   | 6.4   | 12.7  |
| 22.4  | 11.4  | 11.2  | 12.4  | 12.6  | 7.7   | 22.7  | 24.1  | 15.8  |
| 34.4  | 16.7  | 22.1  | 22.0  | 25.8  | 21.5  | 28.2  | 37.4  | 33.6  |
| 3.1   | 1.3   | 1.3   | 1.5   | 2.3   | 4.2   | 1.6   | 1.9   | 1.1   |
| 8.5   | 7.1   | 5.7   | 2.2   | 0.8   | 1.4   | 6.1   | 1.9   | 1.4   |
| 6.7   | 6.4   | 7.3   | 6.7   | 6.8   | 6.2   | 5.7   | 13.6  | 7.8   |
| 2.3   | 0.9   | 5.2   | 1.3   | 2.7   | 1.8   | 1.6   | 1.6   | 4.5   |
| 9.4   | 11.9  | 1.2   | 6.4   | 11.3  | 9.0   | 12.0  | 12.1  | 7.8   |
| 2.0   | 7.6   | 1.0   | 6.5   | 4.1   | 0.6   | 6.6   | 1.9   | 4.8   |
| 0.8   | 0.8   | 1.8   | 1.3   | 0.9   | 0.5   | 2.0   | 0.7   | 1.4   |
| 5.9   | 3.4   | 7.4   | 8.1   | 5.0   | 2.4   | 2.9   | 1.2   | 4.9   |
| 20.0  | 20.1  | 15.7  | 32.6  | 29.1  | 8.4   | 28.5  | 22.2  | 28.9  |
| 4.0   | 3.3   | 5.8   | 7.0   | 5.6   | 7.7   | 8.8   | 8.0   | 10.3  |
| 21.2  | 11.7  | 11.1  | 14.1  | 14.9  | 11.4  | 35.6  | 32.2  | 22.4  |
| 1.1   | 1.3   | 2.6   | 0.2   | 3.6   | 2.4   | 0.2   | 1.7   | 1.7   |
| 10.7  | 9.7   | 8.5   | 7.7   | 8.0   | 6.4   | 5.1   | 16.0  | 5.3   |
| 9.6   | 6.9   | 2.3   | 2.0   | 11.8  | 5.3   | 12.8  | 4.5   | 10.4  |
| 0.3   | 3.7   | 4.8   | 0.7   | 1.3   | 1.6   | 2.8   | 4.4   | 2.9   |
| 2.9   | 2.5   | 0.1   | 0.1   | 0.2   | 0.2   | 0.3   | 0.3   | 0.2   |
| 3.8   | 3.6   | 0.8   | 7.2   | 3.7   | 4.4   | 5.0   | 4.9   | 3.2   |
| 6.8   | 1.3   | 1.8   | 5.1   | 6.2   | 6.3   | 9.1   | 5.3   | 0.6   |

|        |        |        |        |        |        |        |        |        |
|--------|--------|--------|--------|--------|--------|--------|--------|--------|
| 7.8    | 0.4    | 3.2    | 2.2    | 3.3    | 1.8    | 4.6    | 5.4    | 4.4    |
| 3.9    | 7.5    | 2.7    | 0.8    | 1.3    | 4.9    | 6.5    | 3.2    | 3.6    |
| 57.3   | 65.6   | 38.6   | 44.0   | 57.5   | 47.3   | 54.3   | 90.5   | 64.1   |
| 9.6    | 6.2    | 5.6    | 6.6    | 7.0    | 6.5    | 8.9    | 15.4   | 14.2   |
| 1.1    | 0.7    | 1.1    | 0.2    | 3.1    | 2.8    | 0.8    | 5.6    | 2.2    |
| 9.1    | 4.2    | 7.3    | 8.3    | 3.1    | 4.1    | 5.8    | 12.3   | 9.1    |
| 74.1   | 66.8   | 57.2   | 74.1   | 75.4   | 65.9   | 98.2   | 128.4  | 79.2   |
| 9.5    | 11.6   | 21.0   | 15.7   | 14.0   | 9.8    | 19.0   | 25.3   | 12.0   |
| 0.4    | 1.7    | 3.6    | 0.3    | 0.4    | 0.2    | 1.6    | 0.1    | 0.2    |
| 1.3    | 1.9    | 1.8    | 1.8    | 1.5    | 2.7    | 3.4    | 1.8    | 2.4    |
| 2.7    | 3.4    | 2.9    | 2.3    | 3.2    | 2.4    | 9.6    | 17.5   | 1.6    |
| 6.9    | 0.4    | 4.1    | 1.7    | 4.9    | 1.8    | 9.9    | 10.3   | 4.2    |
| 27.0   | 16.8   | 16.6   | 15.5   | 26.2   | 19.1   | 16.6   | 19.2   | 20.0   |
| 46.4   | 30.7   | 40.7   | 57.4   | 46.6   | 51.5   | 43.0   | 72.8   | 35.9   |
| 15.9   | 18.1   | 12.1   | 15.4   | 10.5   | 22.0   | 16.3   | 31.1   | 23.8   |
| 482.9  | 375.3  | 419.2  | 414.1  | 464.7  | 386.2  | 620.9  | 652.8  | 409.5  |
| 338.3  | 219.4  | 252.5  | 293.9  | 273.7  | 262.9  | 433.1  | 478.1  | 277.1  |
| 906.3  | 786.8  | 769.6  | 803.6  | 856.1  | 926.2  | 1179.1 | 1292.7 | 902.4  |
| 1596.8 | 1225.9 | 1325.9 | 1318.4 | 1575.6 | 1539.5 | 1777.7 | 1987.5 | 1350.2 |
| 2363.4 | 1867.4 | 1840.3 | 2119.4 | 2140.1 | 2032.9 | 2596.8 | 2643.3 | 1779.8 |
| 2.9    | 14.4   | 5.9    | 6.9    | 7.3    | 7.7    | 16.0   | 13.9   | 7.7    |
| 595.7  | 427.6  | 458.0  | 492.1  | 490.6  | 475.8  | 659.6  | 706.2  | 485.8  |
| 3.9    | 1.9    | 2.1    | 2.7    | 4.5    | 1.1    | 2.1    | 4.1    | 6.7    |
| 1009.0 | 681.9  | 748.7  | 705.5  | 851.3  | 866.0  | 993.5  | 1309.3 | 749.0  |
| 704.2  | 443.2  | 554.9  | 573.8  | 579.5  | 576.3  | 760.2  | 979.9  | 500.6  |
| 661.1  | 368.3  | 436.6  | 439.8  | 455.8  | 438.3  | 654.3  | 621.7  | 543.2  |
| 270.9  | 171.7  | 220.7  | 199.1  | 232.6  | 211.3  | 270.1  | 322.1  | 192.8  |
| 0.3    | 0.4    | 2.4    | 1.0    | 1.0    | 3.0    | 0.9    | 0.5    | 1.1    |
| 178.5  | 116.8  | 122.2  | 143.5  | 149.1  | 149.8  | 167.3  | 184.2  | 125.5  |
| 341.0  | 164.8  | 182.4  | 203.2  | 283.0  | 239.3  | 274.2  | 234.5  | 145.7  |
| 274.2  | 213.5  | 205.8  | 182.5  | 282.5  | 199.3  | 371.0  | 357.5  | 237.6  |
| 707.0  | 577.8  | 598.8  | 660.1  | 714.6  | 698.5  | 830.5  | 894.6  | 675.4  |
| 582.0  | 474.4  | 470.6  | 526.7  | 573.8  | 508.1  | 754.9  | 848.7  | 549.0  |
| 187.1  | 80.5   | 110.0  | 95.6   | 100.8  | 103.0  | 138.0  | 133.8  | 85.9   |
| 32.2   | 21.5   | 31.5   | 20.4   | 29.6   | 24.4   | 37.5   | 50.0   | 26.2   |
| 545.1  | 383.2  | 394.5  | 469.5  | 453.1  | 396.3  | 591.0  | 570.3  | 355.7  |
| 196.1  | 159.3  | 156.9  | 210.9  | 164.8  | 176.7  | 238.8  | 216.0  | 144.0  |
| 70.5   | 42.9   | 45.0   | 48.0   | 46.7   | 54.0   | 71.6   | 89.9   | 63.9   |
| 99.0   | 46.2   | 44.4   | 57.1   | 66.0   | 70.1   | 77.6   | 117.6  | 60.2   |
| 4464.0 | 4027.1 | 3843.7 | 4035.5 | 4279.5 | 3984.6 | 4612.5 | 4749.8 | 3078.6 |
| 209.0  | 226.1  | 204.0  | 276.1  | 220.5  | 224.8  | 409.9  | 422.5  | 315.5  |
| 230.8  | 141.3  | 155.1  | 178.8  | 155.2  | 161.2  | 221.4  | 272.8  | 147.6  |
| 85.6   | 50.4   | 53.4   | 72.2   | 66.2   | 52.7   | 82.4   | 118.9  | 72.3   |
| 390.3  | 220.4  | 227.7  | 254.4  | 280.8  | 270.6  | 376.7  | 407.2  | 278.1  |
| 342.5  | 395.9  | 323.5  | 368.6  | 522.5  | 357.1  | 722.5  | 768.5  | 660.8  |
| 489.0  | 282.9  | 313.5  | 309.5  | 338.7  | 326.6  | 397.0  | 448.3  | 368.7  |
| 2383.3 | 1857.4 | 2027.0 | 2154.8 | 2341.9 | 2160.3 | 2936.7 | 2833.4 | 2052.5 |
| 377.4  | 250.7  | 282.0  | 283.7  | 324.7  | 299.7  | 381.8  | 392.3  | 326.8  |
| 223.4  | 141.5  | 197.0  | 171.0  | 189.1  | 191.0  | 245.0  | 244.0  | 243.0  |
| 246.2  | 214.6  | 244.2  | 248.4  | 237.0  | 239.5  | 282.2  | 262.7  | 286.0  |
| 115.0  | 92.6   | 86.0   | 87.0   | 90.3   | 104.6  | 116.6  | 135.6  | 83.5   |
| 1059.0 | 515.9  | 659.2  | 583.6  | 708.2  | 660.9  | 799.2  | 830.3  | 691.0  |
| 2226.2 | 1789.5 | 1712.0 | 1875.1 | 2019.5 | 1847.0 | 2437.4 | 2643.9 | 1788.8 |

|        |       |        |        |        |        |        |        |        |
|--------|-------|--------|--------|--------|--------|--------|--------|--------|
| 189.8  | 132.9 | 158.0  | 155.7  | 174.4  | 168.2  | 262.6  | 233.7  | 175.3  |
| 1223.8 | 885.2 | 1082.2 | 1011.4 | 1201.2 | 1119.3 | 1520.1 | 1537.9 | 1158.7 |
| 1196.1 | 862.1 | 835.5  | 974.7  | 978.8  | 813.3  | 1044.8 | 1298.8 | 905.9  |
| 1.2    | 0.9   | 2.2    | 1.6    | 1.6    | 4.1    | 1.3    | 1.9    | 1.5    |
| 223.9  | 152.0 | 140.7  | 167.2  | 178.6  | 162.9  | 183.1  | 290.0  | 182.1  |
| 200.0  | 103.7 | 123.6  | 107.4  | 150.9  | 139.6  | 202.3  | 205.1  | 105.1  |
| 74.8   | 56.4  | 67.4   | 52.1   | 60.2   | 64.7   | 96.0   | 116.2  | 68.8   |
| 495.6  | 279.7 | 298.2  | 344.2  | 350.1  | 337.3  | 478.7  | 569.9  | 371.7  |
| 3.7    | 1.8   | 0.7    | 0.9    | 4.8    | 0.4    | 0.9    | 2.4    | 3.1    |
| 4.7    | 1.3   | 1.6    | 1.7    | 1.1    | 0.9    | 1.2    | 1.3    | 1.8    |
| 8.3    | 10.3  | 9.4    | 1.6    | 9.0    | 7.0    | 2.1    | 1.1    | 1.5    |
| 86.1   | 60.3  | 69.6   | 78.9   | 76.1   | 67.2   | 102.2  | 96.7   | 83.4   |
| 50.5   | 32.1  | 31.7   | 28.5   | 29.5   | 26.3   | 52.7   | 43.3   | 28.1   |
| 1.7    | 0.9   | 3.2    | 0.8    | 0.8    | 4.9    | 1.0    | 3.7    | 0.5    |
| 630.3  | 354.3 | 384.0  | 447.7  | 420.5  | 454.2  | 535.6  | 658.2  | 437.5  |
| 1037.8 | 883.4 | 918.4  | 1007.1 | 1079.9 | 1008.0 | 1166.8 | 1256.8 | 753.7  |
| 174.4  | 97.4  | 110.5  | 128.6  | 106.7  | 97.5   | 137.3  | 149.6  | 98.5   |
| 216.6  | 77.5  | 72.2   | 102.8  | 72.1   | 89.5   | 124.8  | 144.2  | 107.1  |
| 929.0  | 606.2 | 709.0  | 733.4  | 744.0  | 825.8  | 978.1  | 919.1  | 628.3  |
| 844.6  | 557.6 | 605.4  | 659.4  | 699.3  | 714.3  | 946.6  | 1346.8 | 731.0  |
| 1148.1 | 886.3 | 892.8  | 982.7  | 1165.5 | 984.3  | 1412.4 | 1400.0 | 1080.9 |
| 798.9  | 423.0 | 450.4  | 418.2  | 535.8  | 513.2  | 576.5  | 829.1  | 421.3  |
| 1181.1 | 708.6 | 735.2  | 959.3  | 995.2  | 833.6  | 859.1  | 1197.2 | 616.9  |
| 147.0  | 121.4 | 127.5  | 141.3  | 142.7  | 154.3  | 194.6  | 244.0  | 172.0  |
| 60.2   | 54.8  | 57.1   | 59.1   | 52.8   | 52.5   | 57.5   | 70.8   | 51.9   |
| 174.8  | 144.4 | 163.8  | 154.6  | 176.8  | 174.3  | 211.3  | 306.0  | 178.6  |
| 584.2  | 395.5 | 424.7  | 485.7  | 448.7  | 443.5  | 517.4  | 590.0  | 458.7  |
| 76.7   | 48.0  | 54.2   | 67.2   | 57.3   | 51.2   | 70.0   | 89.8   | 74.7   |
| 207.1  | 139.7 | 160.8  | 178.0  | 203.2  | 186.3  | 214.1  | 232.2  | 134.2  |
| 39.3   | 32.0  | 25.5   | 35.7   | 24.3   | 30.1   | 42.9   | 44.1   | 27.6   |
| 98.3   | 61.0  | 66.7   | 82.2   | 68.9   | 64.1   | 96.9   | 83.6   | 52.8   |
| 79.5   | 44.3  | 65.5   | 74.5   | 66.2   | 63.9   | 81.1   | 83.8   | 69.5   |
| 566.6  | 307.5 | 446.7  | 443.5  | 416.1  | 435.2  | 576.0  | 609.8  | 408.3  |
| 64.0   | 33.9  | 51.2   | 40.9   | 50.5   | 38.2   | 68.8   | 64.7   | 52.2   |
| 197.8  | 108.2 | 168.4  | 125.9  | 139.2  | 145.5  | 180.8  | 201.6  | 189.9  |
| 44.8   | 36.4  | 45.1   | 43.1   | 50.2   | 49.6   | 51.1   | 57.4   | 42.0   |
| 145.4  | 68.6  | 107.1  | 108.9  | 107.4  | 128.7  | 135.5  | 166.7  | 119.5  |
| 424.0  | 224.6 | 284.3  | 326.6  | 292.9  | 290.9  | 391.8  | 363.3  | 252.6  |
| 117.8  | 74.9  | 89.8   | 95.1   | 86.3   | 85.5   | 110.0  | 128.3  | 92.1   |
| 39.3   | 40.5  | 28.8   | 35.4   | 28.3   | 28.9   | 40.9   | 37.7   | 41.8   |
| 349.0  | 285.9 | 342.2  | 365.8  | 318.0  | 334.6  | 398.1  | 435.2  | 395.3  |
| 93.6   | 46.8  | 60.4   | 37.8   | 48.8   | 58.4   | 65.8   | 72.2   | 64.1   |
| 104.6  | 118.1 | 84.8   | 102.8  | 128.4  | 116.4  | 162.2  | 165.2  | 112.2  |
| 449.7  | 350.9 | 370.4  | 283.1  | 365.4  | 363.5  | 507.7  | 480.3  | 299.4  |
| 104.6  | 71.8  | 76.0   | 83.3   | 97.5   | 87.2   | 102.4  | 132.6  | 104.8  |
| 96.4   | 73.6  | 91.9   | 69.5   | 78.0   | 78.6   | 93.8   | 95.0   | 76.4   |
| 420.1  | 277.4 | 242.2  | 280.6  | 354.3  | 277.0  | 369.2  | 433.7  | 310.0  |
| 931.4  | 722.9 | 784.8  | 782.9  | 949.2  | 958.8  | 1310.0 | 1660.5 | 908.9  |
| 542.1  | 289.4 | 348.9  | 315.0  | 303.8  | 389.3  | 474.3  | 583.0  | 438.4  |
| 530.0  | 343.5 | 385.0  | 368.4  | 469.5  | 408.7  | 577.1  | 653.9  | 493.0  |
| 98.2   | 67.8  | 79.2   | 75.6   | 78.9   | 89.2   | 130.0  | 167.1  | 89.8   |
| 173.8  | 112.2 | 168.8  | 153.8  | 177.7  | 171.8  | 283.5  | 297.9  | 152.7  |
| 334.0  | 282.7 | 262.5  | 296.0  | 271.9  | 247.3  | 349.0  | 332.7  | 229.5  |



|        |       |       |        |        |        |        |        |        |
|--------|-------|-------|--------|--------|--------|--------|--------|--------|
| 614.9  | 545.4 | 605.7 | 570.5  | 634.3  | 647.2  | 771.6  | 811.7  | 584.9  |
| 123.5  | 101.2 | 106.9 | 114.5  | 121.7  | 105.9  | 126.8  | 166.9  | 145.9  |
| 626.3  | 408.6 | 539.3 | 523.5  | 564.7  | 630.1  | 739.0  | 837.5  | 554.9  |
| 90.3   | 43.4  | 42.3  | 59.7   | 67.1   | 46.9   | 60.1   | 86.4   | 58.4   |
| 265.9  | 307.6 | 394.4 | 403.4  | 412.0  | 414.9  | 436.1  | 560.6  | 359.1  |
| 517.9  | 380.6 | 368.6 | 361.9  | 494.9  | 416.3  | 563.0  | 733.0  | 563.8  |
| 59.8   | 32.7  | 32.7  | 30.9   | 31.5   | 37.5   | 46.9   | 57.9   | 37.9   |
| 200.4  | 128.8 | 143.0 | 169.4  | 150.6  | 178.1  | 236.2  | 322.4  | 212.1  |
| 215.4  | 134.7 | 168.2 | 183.6  | 198.7  | 189.0  | 219.0  | 280.7  | 228.4  |
| 372.4  | 304.8 | 262.9 | 304.0  | 371.9  | 308.3  | 404.6  | 561.2  | 376.5  |
| 255.6  | 120.8 | 179.9 | 168.0  | 161.5  | 162.5  | 178.2  | 200.8  | 213.0  |
| 149.8  | 57.3  | 57.9  | 73.2   | 66.2   | 76.6   | 83.9   | 67.3   | 72.0   |
| 202.4  | 153.3 | 159.8 | 169.0  | 168.4  | 160.7  | 281.0  | 261.4  | 180.1  |
| 160.0  | 154.7 | 141.1 | 161.4  | 183.4  | 163.0  | 230.0  | 303.1  | 206.1  |
| 185.0  | 132.7 | 186.8 | 174.9  | 177.6  | 180.0  | 242.0  | 249.2  | 181.2  |
| 396.5  | 247.7 | 236.8 | 290.8  | 313.5  | 312.7  | 426.9  | 445.0  | 325.3  |
| 61.8   | 23.0  | 28.2  | 29.1   | 26.1   | 29.7   | 41.0   | 63.2   | 55.2   |
| 6.2    | 6.5   | 5.3   | 0.6    | 7.2    | 5.4    | 7.8    | 9.0    | 9.5    |
| 41.1   | 14.1  | 14.3  | 20.9   | 20.0   | 20.2   | 27.8   | 33.4   | 29.1   |
| 109.2  | 28.8  | 44.0  | 47.2   | 51.7   | 51.9   | 68.4   | 80.2   | 43.5   |
| 617.1  | 303.0 | 355.3 | 343.7  | 321.7  | 393.0  | 464.8  | 525.4  | 443.5  |
| 76.1   | 40.8  | 48.4  | 52.7   | 40.9   | 49.7   | 80.9   | 99.6   | 81.7   |
| 83.4   | 55.9  | 72.5  | 71.5   | 77.7   | 73.1   | 99.8   | 94.4   | 76.2   |
| 59.2   | 60.9  | 54.6  | 57.7   | 57.7   | 61.6   | 77.8   | 73.4   | 69.3   |
| 84.6   | 58.7  | 82.1  | 86.8   | 85.5   | 67.4   | 115.6  | 110.6  | 74.5   |
| 403.2  | 159.4 | 177.3 | 201.5  | 238.8  | 229.9  | 289.6  | 362.1  | 211.1  |
| 90.0   | 53.9  | 51.6  | 49.3   | 43.9   | 54.0   | 71.0   | 89.0   | 47.6   |
| 320.1  | 124.4 | 162.7 | 184.3  | 201.6  | 180.4  | 308.8  | 339.9  | 249.2  |
| 1036.1 | 729.0 | 893.7 | 873.0  | 891.6  | 967.5  | 1076.7 | 1233.6 | 885.6  |
| 142.1  | 91.9  | 113.0 | 120.0  | 126.1  | 123.9  | 165.5  | 183.7  | 155.6  |
| 85.4   | 101.8 | 90.5  | 101.9  | 99.8   | 98.9   | 123.7  | 145.4  | 98.2   |
| 70.6   | 24.5  | 32.9  | 36.5   | 28.7   | 28.8   | 51.1   | 51.8   | 23.1   |
| 460.9  | 443.1 | 477.2 | 517.4  | 518.8  | 523.3  | 640.3  | 706.1  | 595.4  |
| 273.9  | 180.3 | 190.4 | 211.0  | 223.3  | 189.4  | 255.0  | 257.6  | 213.1  |
| 183.6  | 146.0 | 197.2 | 186.1  | 192.0  | 210.7  | 235.9  | 232.2  | 147.0  |
| 59.2   | 42.2  | 37.5  | 31.4   | 35.9   | 42.5   | 65.8   | 80.8   | 69.0   |
| 46.2   | 45.8  | 41.5  | 41.7   | 75.5   | 53.6   | 73.1   | 102.4  | 73.7   |
| 121.5  | 94.8  | 104.2 | 109.3  | 98.2   | 80.2   | 142.5  | 149.5  | 98.7   |
| 879.0  | 584.9 | 556.7 | 592.3  | 722.8  | 674.2  | 1058.2 | 1254.0 | 573.1  |
| 728.2  | 460.3 | 593.2 | 519.3  | 522.8  | 540.7  | 795.8  | 677.3  | 583.7  |
| 38.2   | 18.2  | 27.5  | 30.0   | 26.4   | 33.1   | 43.8   | 55.5   | 32.5   |
| 1114.3 | 965.9 | 983.3 | 1099.7 | 1142.1 | 1189.1 | 1449.5 | 1704.6 | 1276.8 |
| 82.7   | 39.0  | 43.6  | 51.8   | 44.9   | 42.8   | 72.0   | 89.9   | 79.1   |
| 389.9  | 181.8 | 204.6 | 242.4  | 211.1  | 227.7  | 325.6  | 434.6  | 221.7  |
| 191.3  | 143.1 | 133.2 | 159.0  | 181.7  | 174.3  | 268.0  | 306.9  | 239.4  |
| 226.6  | 113.0 | 131.0 | 150.1  | 132.1  | 147.0  | 181.4  | 212.3  | 109.5  |
| 0.3    | 0.9   | 1.2   | 1.5    | 0.5    | 0.7    | 2.6    | 3.2    | 1.2    |
| 656.0  | 403.9 | 464.9 | 488.9  | 529.2  | 496.7  | 683.2  | 706.6  | 520.7  |
| 445.2  | 363.3 | 414.6 | 392.3  | 363.9  | 319.2  | 338.4  | 363.6  | 245.4  |
| 24.1   | 18.2  | 12.1  | 22.6   | 18.4   | 24.7   | 32.3   | 40.7   | 30.2   |
| 68.8   | 17.6  | 41.3  | 41.1   | 46.8   | 42.4   | 69.5   | 96.7   | 54.7   |
| 138.8  | 116.5 | 115.9 | 122.6  | 158.2  | 146.7  | 207.6  | 262.5  | 164.5  |
| 50.8   | 45.1  | 40.7  | 51.6   | 48.0   | 40.5   | 76.8   | 57.2   | 66.7   |

|        |        |        |        |        |        |        |        |        |
|--------|--------|--------|--------|--------|--------|--------|--------|--------|
| 321.2  | 276.8  | 305.7  | 325.0  | 352.2  | 321.3  | 405.9  | 465.9  | 264.5  |
| 141.1  | 111.4  | 123.9  | 126.9  | 134.5  | 124.5  | 160.6  | 170.6  | 147.6  |
| 29.2   | 16.2   | 20.8   | 17.7   | 26.8   | 12.3   | 26.2   | 28.5   | 19.9   |
| 30.9   | 15.2   | 14.0   | 18.6   | 30.7   | 24.1   | 25.7   | 25.1   | 18.0   |
| 52.0   | 40.3   | 44.5   | 37.5   | 34.4   | 40.9   | 59.3   | 52.3   | 45.7   |
| 174.6  | 130.6  | 148.8  | 175.7  | 155.6  | 157.0  | 207.4  | 218.4  | 133.0  |
| 183.8  | 115.4  | 127.3  | 145.2  | 145.8  | 164.3  | 219.2  | 260.4  | 199.1  |
| 0.6    | 1.3    | 5.4    | 2.1    | 2.6    | 0.8    | 0.6    | 2.7    | 2.2    |
| 226.2  | 132.2  | 141.2  | 180.0  | 164.2  | 171.0  | 348.3  | 297.6  | 206.2  |
| 152.8  | 92.5   | 89.6   | 128.3  | 105.0  | 103.3  | 145.4  | 192.7  | 87.8   |
| 226.6  | 185.9  | 194.3  | 225.5  | 228.0  | 224.2  | 307.7  | 428.8  | 220.5  |
| 2457.9 | 1905.5 | 1883.3 | 2072.1 | 2311.2 | 2170.3 | 2784.4 | 2991.4 | 2462.3 |
| 217.6  | 99.8   | 133.5  | 137.2  | 127.0  | 123.2  | 194.0  | 177.9  | 126.1  |
| 69.9   | 57.4   | 51.8   | 58.9   | 46.6   | 55.5   | 78.6   | 92.8   | 60.4   |
| 480.4  | 427.6  | 498.7  | 515.8  | 567.6  | 518.8  | 666.8  | 691.3  | 472.0  |
| 26.7   | 8.3    | 11.1   | 12.9   | 8.9    | 21.0   | 6.9    | 50.9   | 15.6   |
| 17.5   | 15.1   | 23.8   | 25.8   | 29.3   | 21.4   | 33.4   | 41.4   | 31.6   |
| 109.5  | 70.8   | 94.6   | 86.6   | 85.5   | 96.1   | 153.9  | 137.7  | 102.2  |
| 45.0   | 31.6   | 33.0   | 22.8   | 34.0   | 28.3   | 38.6   | 47.8   | 25.9   |
| 103.7  | 80.7   | 76.5   | 95.4   | 85.0   | 89.6   | 118.3  | 135.2  | 96.6   |
| 79.9   | 53.5   | 55.2   | 60.7   | 52.5   | 58.3   | 75.6   | 110.5  | 76.2   |
| 64.9   | 42.2   | 50.1   | 49.9   | 53.1   | 58.0   | 65.2   | 86.9   | 65.3   |
| 300.9  | 185.9  | 222.3  | 203.8  | 245.4  | 212.3  | 276.1  | 262.8  | 224.6  |
| 896.3  | 716.5  | 781.9  | 781.9  | 853.0  | 847.7  | 986.8  | 1111.7 | 772.7  |
| 253.7  | 140.9  | 175.8  | 172.6  | 193.3  | 196.0  | 241.4  | 248.3  | 131.1  |
| 277.1  | 176.0  | 231.9  | 197.3  | 218.7  | 237.4  | 301.1  | 328.0  | 181.2  |
| 45.0   | 29.6   | 28.8   | 29.4   | 31.9   | 31.7   | 43.4   | 59.6   | 34.6   |
| 222.9  | 105.3  | 133.1  | 133.1  | 125.5  | 146.3  | 186.6  | 228.3  | 143.9  |
| 61.1   | 35.9   | 41.2   | 39.3   | 40.2   | 44.3   | 71.8   | 73.4   | 45.7   |
| 0.4    | 0.3    | 0.3    | 0.4    | 0.3    | 0.4    | 0.4    | 0.4    | 0.4    |
| 9.8    | 6.0    | 2.3    | 4.4    | 12.7   | 12.3   | 10.3   | 9.8    | 5.2    |
| 139.6  | 91.6   | 90.5   | 123.6  | 108.1  | 80.5   | 111.1  | 139.0  | 111.5  |
| 114.9  | 90.7   | 83.0   | 104.9  | 109.1  | 99.3   | 122.1  | 127.3  | 124.0  |
| 81.0   | 64.5   | 80.9   | 82.9   | 75.2   | 68.5   | 108.0  | 118.8  | 81.4   |
| 57.3   | 44.3   | 43.2   | 43.6   | 46.0   | 40.1   | 73.2   | 99.5   | 63.7   |
| 144.8  | 106.6  | 118.5  | 112.4  | 135.9  | 120.7  | 151.4  | 157.2  | 110.0  |
| 33.1   | 28.3   | 33.3   | 43.8   | 38.5   | 45.4   | 43.5   | 44.4   | 30.1   |
| 0.4    | 0.6    | 0.8    | 1.4    | 1.0    | 1.1    | 0.8    | 0.9    | 1.2    |
| 518.9  | 383.9  | 428.4  | 472.8  | 499.3  | 451.4  | 605.4  | 623.9  | 395.1  |
| 174.8  | 103.4  | 98.7   | 104.4  | 106.2  | 114.7  | 157.6  | 166.2  | 122.4  |
| 387.4  | 217.9  | 208.6  | 256.6  | 260.5  | 242.0  | 391.1  | 427.0  | 263.5  |
| 280.2  | 165.5  | 185.2  | 209.0  | 189.3  | 221.7  | 342.9  | 511.4  | 298.8  |
| 28.9   | 18.5   | 21.8   | 25.6   | 26.4   | 27.1   | 37.3   | 38.3   | 29.8   |
| 52.4   | 28.3   | 36.8   | 34.2   | 37.8   | 38.7   | 53.1   | 51.4   | 35.6   |
| 25.4   | 19.7   | 26.5   | 22.6   | 29.9   | 24.3   | 23.1   | 49.2   | 26.4   |
| 32.7   | 24.4   | 22.0   | 25.4   | 31.4   | 28.5   | 32.1   | 49.7   | 25.5   |
| 272.3  | 153.3  | 175.0  | 184.2  | 183.0  | 180.0  | 267.9  | 325.0  | 295.1  |
| 575.1  | 293.9  | 310.0  | 336.1  | 348.8  | 328.6  | 462.7  | 505.7  | 368.4  |
| 297.3  | 150.8  | 188.0  | 216.7  | 214.7  | 231.1  | 310.6  | 429.4  | 364.6  |
| 252.0  | 167.6  | 198.9  | 209.0  | 225.0  | 222.0  | 305.0  | 301.8  | 287.2  |
| 235.2  | 157.0  | 212.9  | 212.3  | 201.6  | 215.3  | 287.2  | 339.9  | 188.2  |
| 396.2  | 269.7  | 338.5  | 368.5  | 343.9  | 355.1  | 507.1  | 488.4  | 437.6  |
| 171.4  | 94.4   | 119.2  | 102.3  | 101.5  | 128.7  | 134.2  | 171.6  | 132.9  |

|        |        |        |        |        |        |        |        |        |
|--------|--------|--------|--------|--------|--------|--------|--------|--------|
| 168.4  | 96.1   | 118.4  | 134.0  | 124.9  | 123.6  | 174.2  | 185.1  | 186.1  |
| 67.3   | 46.2   | 43.7   | 48.7   | 44.2   | 42.9   | 67.8   | 74.0   | 59.2   |
| 406.6  | 340.0  | 365.9  | 398.7  | 444.9  | 456.8  | 620.6  | 960.9  | 605.5  |
| 50.5   | 78.2   | 80.5   | 88.3   | 83.8   | 82.6   | 122.7  | 110.1  | 77.2   |
| 604.0  | 436.6  | 469.7  | 458.3  | 561.2  | 453.7  | 634.0  | 655.6  | 432.0  |
| 950.2  | 677.6  | 621.6  | 801.0  | 712.7  | 626.9  | 908.7  | 878.0  | 771.2  |
| 342.0  | 241.6  | 291.2  | 318.2  | 308.4  | 316.8  | 389.5  | 536.8  | 292.5  |
| 29.1   | 17.1   | 20.1   | 21.0   | 18.8   | 25.1   | 27.0   | 43.0   | 19.4   |
| 20.0   | 17.9   | 24.7   | 25.1   | 25.3   | 18.3   | 35.5   | 54.5   | 30.6   |
| 40.0   | 28.3   | 39.7   | 35.7   | 28.6   | 32.3   | 40.3   | 59.0   | 28.0   |
| 302.1  | 213.3  | 251.5  | 262.9  | 256.0  | 230.5  | 307.0  | 329.4  | 234.2  |
| 50.3   | 24.9   | 32.1   | 38.6   | 31.0   | 48.9   | 48.1   | 44.1   | 29.5   |
| 51.5   | 34.0   | 22.4   | 32.2   | 26.2   | 35.9   | 33.0   | 36.2   | 45.2   |
| 649.5  | 426.9  | 462.6  | 486.0  | 513.4  | 486.4  | 651.6  | 632.7  | 640.7  |
| 1411.7 | 987.0  | 983.9  | 1027.1 | 1190.2 | 1008.7 | 1332.2 | 1415.3 | 1184.3 |
| 57.9   | 39.5   | 38.4   | 50.1   | 30.3   | 36.5   | 52.4   | 60.6   | 40.3   |
| 22.3   | 27.1   | 38.7   | 31.6   | 25.5   | 24.6   | 49.8   | 39.8   | 30.8   |
| 90.6   | 73.8   | 68.8   | 74.5   | 77.9   | 77.9   | 104.4  | 119.4  | 99.6   |
| 35.1   | 9.0    | 30.1   | 19.4   | 24.3   | 22.6   | 31.4   | 33.2   | 26.5   |
| 351.4  | 271.9  | 315.4  | 323.9  | 328.0  | 334.2  | 442.7  | 493.4  | 290.2  |
| 378.1  | 315.9  | 335.7  | 353.6  | 399.9  | 374.8  | 563.1  | 631.0  | 356.1  |
| 673.9  | 438.1  | 493.4  | 487.5  | 549.0  | 508.8  | 647.0  | 611.4  | 451.8  |
| 41.4   | 32.3   | 24.7   | 34.4   | 40.4   | 28.6   | 40.0   | 36.9   | 42.2   |
| 35.9   | 31.9   | 29.0   | 28.2   | 24.2   | 20.5   | 39.9   | 38.0   | 25.3   |
| 13.8   | 17.1   | 18.2   | 8.8    | 10.4   | 14.9   | 20.8   | 8.2    | 18.2   |
| 337.7  | 240.5  | 273.8  | 268.0  | 316.9  | 316.0  | 374.2  | 449.1  | 294.3  |
| 68.3   | 82.8   | 64.5   | 72.7   | 77.2   | 61.6   | 115.8  | 115.3  | 72.9   |
| 138.5  | 155.9  | 209.7  | 235.2  | 204.0  | 201.2  | 259.6  | 302.9  | 159.0  |
| 98.9   | 70.8   | 60.3   | 65.2   | 74.8   | 66.3   | 95.4   | 138.7  | 101.4  |
| 479.4  | 371.6  | 351.9  | 403.4  | 398.3  | 404.3  | 518.9  | 638.1  | 518.5  |
| 175.4  | 137.4  | 142.6  | 166.7  | 147.9  | 116.0  | 169.5  | 193.6  | 141.2  |
| 258.5  | 123.8  | 158.6  | 135.3  | 166.1  | 143.1  | 224.7  | 217.7  | 196.0  |
| 223.5  | 147.5  | 152.8  | 161.3  | 192.5  | 191.8  | 264.1  | 366.6  | 185.0  |
| 293.3  | 242.2  | 257.7  | 261.5  | 322.5  | 263.9  | 379.8  | 384.9  | 272.0  |
| 317.0  | 132.7  | 180.8  | 171.9  | 171.8  | 175.4  | 260.7  | 313.6  | 213.4  |
| 147.4  | 77.5   | 80.0   | 83.9   | 80.7   | 79.6   | 146.2  | 180.6  | 124.3  |
| 410.4  | 265.4  | 282.9  | 290.8  | 316.0  | 304.3  | 381.6  | 453.4  | 340.1  |
| 161.2  | 125.9  | 149.5  | 155.2  | 174.0  | 146.9  | 217.9  | 187.3  | 150.0  |
| 6.1    | 2.5    | 4.4    | 5.3    | 8.8    | 3.6    | 7.4    | 5.9    | 4.7    |
| 19.4   | 7.7    | 11.5   | 11.6   | 12.3   | 14.7   | 22.0   | 26.5   | 16.5   |
| 0.2    | 0.1    | 1.5    | 1.8    | 2.0    | 4.4    | 0.1    | 2.4    | 0.2    |
| 32.4   | 13.9   | 15.4   | 15.0   | 18.3   | 13.0   | 23.9   | 24.7   | 15.6   |
| 162.0  | 121.4  | 140.7  | 145.6  | 146.7  | 137.5  | 172.0  | 190.1  | 153.9  |
| 651.5  | 471.9  | 480.9  | 486.0  | 611.6  | 607.0  | 787.2  | 1011.4 | 697.7  |
| 390.2  | 246.8  | 289.1  | 308.2  | 329.7  | 306.2  | 339.3  | 387.0  | 267.2  |
| 427.0  | 256.6  | 294.8  | 285.8  | 321.5  | 302.2  | 389.8  | 432.2  | 308.0  |
| 355.9  | 205.7  | 247.7  | 228.4  | 239.5  | 236.6  | 337.9  | 368.4  | 318.8  |
| 387.7  | 286.8  | 362.2  | 386.0  | 410.3  | 390.0  | 502.1  | 486.8  | 311.3  |
| 175.9  | 123.0  | 128.6  | 116.9  | 140.8  | 128.0  | 206.0  | 193.0  | 151.7  |
| 1217.4 | 971.7  | 1146.6 | 1206.8 | 1213.3 | 1216.2 | 1443.3 | 1561.2 | 1105.4 |
| 1986.1 | 1662.6 | 1721.7 | 1787.7 | 1962.3 | 1894.7 | 2020.9 | 2194.1 | 1597.4 |
| 255.4  | 169.6  | 215.4  | 198.3  | 213.8  | 210.1  | 267.3  | 317.1  | 174.1  |
| 78.0   | 46.7   | 55.1   | 57.5   | 59.8   | 60.7   | 90.1   | 86.4   | 60.0   |

|        |       |       |       |       |       |        |        |        |
|--------|-------|-------|-------|-------|-------|--------|--------|--------|
| 1.2    | 6.3   | 5.8   | 4.9   | 7.2   | 8.8   | 12.3   | 13.9   | 6.7    |
| 18.0   | 20.2  | 24.4  | 28.8  | 20.2  | 21.9  | 40.0   | 50.5   | 27.2   |
| 111.4  | 90.6  | 87.5  | 108.6 | 109.2 | 102.2 | 119.4  | 107.7  | 94.2   |
| 449.5  | 343.1 | 357.6 | 361.5 | 423.6 | 337.4 | 505.9  | 447.6  | 303.3  |
| 133.6  | 72.8  | 73.7  | 78.0  | 82.4  | 80.9  | 136.9  | 144.2  | 81.1   |
| 124.3  | 68.7  | 77.6  | 86.1  | 93.9  | 80.5  | 93.0   | 133.5  | 80.8   |
| 191.3  | 110.0 | 109.4 | 122.0 | 110.4 | 126.7 | 192.3  | 217.6  | 132.3  |
| 1301.2 | 703.6 | 846.6 | 866.5 | 938.4 | 897.8 | 1143.5 | 1224.7 | 974.5  |
| 14.1   | 4.1   | 10.3  | 9.3   | 12.2  | 11.5  | 7.8    | 18.8   | 14.4   |
| 144.3  | 131.2 | 136.5 | 158.4 | 129.1 | 161.4 | 206.4  | 283.0  | 232.1  |
| 105.4  | 48.2  | 50.2  | 51.6  | 62.5  | 56.0  | 94.6   | 110.6  | 65.7   |
| 267.6  | 168.3 | 219.2 | 221.4 | 211.5 | 205.4 | 258.4  | 250.5  | 165.6  |
| 186.0  | 157.5 | 204.8 | 189.8 | 214.7 | 216.6 | 241.6  | 254.2  | 167.3  |
| 553.5  | 433.6 | 493.8 | 608.0 | 583.1 | 573.8 | 745.4  | 923.9  | 485.0  |
| 236.1  | 189.7 | 215.4 | 204.2 | 236.3 | 234.8 | 293.5  | 331.6  | 182.1  |
| 71.4   | 54.7  | 53.9  | 48.2  | 55.1  | 56.0  | 65.9   | 79.8   | 52.3   |
| 963.6  | 689.2 | 660.1 | 766.1 | 838.4 | 730.0 | 1122.8 | 1280.5 | 1060.9 |
| 574.9  | 315.1 | 404.5 | 508.8 | 463.5 | 436.8 | 496.9  | 513.7  | 263.6  |
| 225.8  | 155.4 | 164.9 | 160.1 | 168.2 | 209.3 | 250.0  | 286.4  | 169.8  |
| 119.3  | 61.4  | 68.1  | 69.6  | 88.7  | 95.1  | 131.8  | 215.0  | 134.1  |
| 102.2  | 64.8  | 67.9  | 75.9  | 82.2  | 80.8  | 114.3  | 176.0  | 92.1   |
| 175.1  | 102.9 | 110.0 | 120.2 | 105.5 | 111.1 | 160.8  | 208.1  | 126.4  |
| 100.2  | 89.1  | 107.0 | 118.9 | 109.7 | 127.0 | 157.1  | 189.5  | 136.4  |
| 25.1   | 22.8  | 21.3  | 24.2  | 32.4  | 22.9  | 28.1   | 24.0   | 30.0   |
| 158.0  | 153.6 | 151.1 | 151.2 | 186.6 | 153.5 | 192.5  | 199.4  | 146.5  |
| 74.0   | 52.0  | 64.9  | 61.9  | 60.9  | 58.4  | 91.9   | 71.7   | 56.5   |
| 70.4   | 54.0  | 74.3  | 78.2  | 89.0  | 84.4  | 86.8   | 95.8   | 82.0   |
| 269.0  | 136.7 | 201.6 | 210.8 | 196.4 | 212.6 | 267.4  | 300.4  | 185.5  |
| 201.2  | 145.2 | 170.6 | 154.1 | 165.7 | 170.7 | 200.9  | 209.4  | 176.8  |
| 98.8   | 74.7  | 86.8  | 85.5  | 88.3  | 84.9  | 141.8  | 107.3  | 96.9   |
| 13.8   | 21.3  | 35.4  | 31.1  | 36.8  | 42.4  | 44.7   | 69.3   | 57.9   |
| 7.1    | 11.0  | 13.5  | 12.5  | 13.2  | 13.3  | 11.3   | 23.2   | 17.4   |
| 1.6    | 2.0   | 2.6   | 13.9  | 16.7  | 8.4   | 18.6   | 29.5   | 17.1   |
| 4.1    | 7.6   | 0.9   | 5.3   | 6.7   | 6.8   | 4.9    | 11.5   | 3.9    |
| 0.9    | 2.2   | 6.9   | 8.0   | 6.9   | 11.1  | 13.1   | 18.6   | 9.2    |
| 400.4  | 291.1 | 339.1 | 339.4 | 396.5 | 367.0 | 491.0  | 497.8  | 397.7  |
| 0.6    | 0.3   | 0.4   | 0.3   | 0.2   | 0.3   | 0.6    | 0.4    | 0.7    |
| 408.6  | 268.7 | 313.5 | 316.8 | 346.4 | 339.6 | 457.0  | 634.5  | 346.2  |
| 59.2   | 37.4  | 49.9  | 51.0  | 55.8  | 43.1  | 63.8   | 67.2   | 72.1   |
| 8.2    | 5.0   | 6.6   | 0.5   | 7.0   | 4.1   | 2.3    | 5.7    | 6.3    |
| 4.2    | 2.3   | 3.8   | 3.7   | 2.9   | 1.7   | 1.0    | 0.8    | 0.4    |
| 818.1  | 674.0 | 762.6 | 878.3 | 819.6 | 895.5 | 1048.7 | 1423.2 | 693.8  |
| 241.6  | 160.8 | 186.7 | 201.9 | 183.8 | 218.8 | 231.1  | 260.3  | 193.7  |
| 337.0  | 270.1 | 290.0 | 302.5 | 316.7 | 292.1 | 463.6  | 442.1  | 320.2  |
| 548.7  | 384.3 | 442.1 | 432.4 | 413.8 | 411.6 | 511.3  | 507.3  | 352.8  |
| 669.7  | 409.9 | 432.2 | 436.4 | 511.1 | 503.8 | 699.9  | 727.4  | 385.9  |
| 44.9   | 23.3  | 14.3  | 35.9  | 22.8  | 23.2  | 39.8   | 50.0   | 26.4   |
| 116.5  | 96.8  | 98.9  | 112.0 | 105.3 | 114.2 | 170.0  | 171.3  | 113.6  |
| 269.4  | 175.8 | 207.3 | 217.1 | 229.2 | 241.4 | 331.1  | 357.8  | 225.6  |
| 2.3    | 3.5   | 0.5   | 3.2   | 7.3   | 4.9   | 1.2    | 6.7    | 1.6    |
| 209.5  | 111.8 | 130.3 | 146.8 | 154.8 | 143.5 | 198.3  | 259.3  | 139.4  |
| 71.8   | 26.8  | 45.3  | 47.2  | 42.5  | 34.6  | 52.3   | 53.8   | 42.5   |
| 107.1  | 61.5  | 59.6  | 71.7  | 111.0 | 66.4  | 145.6  | 109.4  | 83.2   |

|       |       |       |       |       |       |       |       |       |
|-------|-------|-------|-------|-------|-------|-------|-------|-------|
| 162.9 | 86.1  | 125.8 | 91.9  | 94.2  | 111.4 | 117.6 | 170.8 | 151.6 |
| 82.5  | 75.3  | 76.0  | 84.0  | 86.9  | 76.9  | 92.6  | 127.2 | 86.6  |
| 121.9 | 96.9  | 84.1  | 97.3  | 94.8  | 92.3  | 185.5 | 156.1 | 119.2 |
| 69.0  | 56.3  | 56.5  | 58.2  | 69.1  | 59.4  | 77.7  | 73.4  | 70.3  |
| 239.5 | 177.0 | 193.5 | 196.2 | 192.7 | 194.4 | 238.1 | 249.6 | 224.5 |
| 90.7  | 64.4  | 58.7  | 66.7  | 78.3  | 55.2  | 88.0  | 83.7  | 50.0  |
| 655.0 | 353.4 | 455.3 | 435.0 | 464.8 | 503.2 | 569.8 | 722.0 | 361.8 |
| 741.3 | 549.5 | 556.3 | 591.7 | 656.8 | 644.0 | 734.0 | 802.9 | 550.9 |
| 417.7 | 294.5 | 355.1 | 386.1 | 384.4 | 382.6 | 517.4 | 646.3 | 503.3 |
| 244.4 | 178.2 | 215.0 | 191.3 | 210.3 | 233.6 | 296.6 | 343.9 | 194.1 |
| 58.4  | 44.7  | 44.6  | 57.4  | 47.0  | 49.8  | 61.8  | 73.1  | 58.0  |
| 54.3  | 33.2  | 27.9  | 35.7  | 39.2  | 33.5  | 59.0  | 68.2  | 43.6  |
| 26.3  | 15.9  | 16.1  | 17.6  | 17.6  | 11.7  | 29.8  | 24.9  | 24.5  |
| 99.9  | 70.8  | 78.9  | 85.8  | 76.8  | 62.6  | 106.5 | 145.3 | 70.2  |
| 12.6  | 10.4  | 9.1   | 15.6  | 2.5   | 13.5  | 10.0  | 12.6  | 13.6  |
| 593.4 | 357.9 | 453.3 | 442.1 | 462.5 | 443.6 | 595.4 | 571.4 | 459.8 |
| 226.6 | 146.1 | 181.3 | 147.5 | 225.8 | 144.4 | 228.7 | 233.3 | 161.4 |
| 39.2  | 43.9  | 51.1  | 57.2  | 46.4  | 63.6  | 67.9  | 94.7  | 67.5  |
| 120.7 | 79.7  | 97.3  | 94.5  | 116.2 | 113.8 | 136.1 | 128.2 | 102.5 |
| 68.8  | 37.2  | 37.8  | 64.4  | 42.3  | 41.6  | 57.8  | 61.4  | 70.5  |
| 490.6 | 318.0 | 371.8 | 397.0 | 426.5 | 407.8 | 562.6 | 645.6 | 441.4 |
| 37.2  | 24.5  | 22.0  | 24.8  | 25.6  | 26.7  | 45.5  | 53.0  | 44.2  |
| 528.6 | 257.5 | 308.7 | 331.9 | 324.0 | 373.5 | 381.8 | 530.0 | 367.9 |
| 277.4 | 247.5 | 254.4 | 298.6 | 309.8 | 281.3 | 350.1 | 471.2 | 321.0 |
| 19.6  | 12.2  | 8.7   | 7.4   | 12.0  | 12.9  | 18.4  | 28.4  | 13.8  |
| 3.7   | 0.4   | 4.2   | 0.6   | 2.5   | 1.4   | 3.2   | 0.8   | 1.4   |
| 92.9  | 54.6  | 61.1  | 47.9  | 50.4  | 42.8  | 61.8  | 64.6  | 50.1  |
| 298.9 | 210.9 | 236.8 | 259.1 | 270.2 | 296.7 | 343.3 | 412.3 | 253.5 |
| 76.7  | 51.6  | 60.7  | 50.2  | 50.0  | 44.5  | 56.7  | 76.3  | 52.3  |
| 148.6 | 110.0 | 124.3 | 131.3 | 127.5 | 117.0 | 175.2 | 201.4 | 112.9 |
| 124.9 | 114.4 | 123.6 | 137.3 | 141.1 | 156.2 | 183.2 | 287.2 | 142.0 |
| 77.2  | 67.3  | 81.0  | 89.9  | 104.1 | 94.7  | 131.1 | 186.1 | 100.3 |
| 437.9 | 253.0 | 298.5 | 276.7 | 277.8 | 314.2 | 345.3 | 344.8 | 273.4 |
| 183.3 | 119.6 | 143.9 | 144.5 | 145.8 | 131.8 | 179.3 | 187.5 | 128.4 |
| 176.7 | 75.6  | 83.7  | 98.6  | 113.5 | 111.0 | 178.8 | 221.7 | 94.6  |
| 15.3  | 1.4   | 7.0   | 1.5   | 5.0   | 3.9   | 4.5   | 5.5   | 3.2   |
| 60.4  | 27.6  | 29.8  | 34.6  | 32.2  | 23.9  | 39.1  | 35.3  | 29.4  |
| 66.7  | 35.4  | 49.0  | 53.9  | 49.2  | 48.2  | 78.6  | 86.3  | 61.0  |
| 251.1 | 158.7 | 206.6 | 226.6 | 258.8 | 218.1 | 296.8 | 328.2 | 202.3 |
| 86.7  | 60.2  | 76.7  | 83.5  | 71.0  | 78.0  | 99.5  | 109.4 | 101.8 |
| 304.6 | 184.3 | 214.5 | 250.3 | 225.6 | 258.7 | 382.5 | 374.0 | 237.2 |
| 49.1  | 41.2  | 48.9  | 52.6  | 46.3  | 42.5  | 55.6  | 57.6  | 33.6  |
| 379.4 | 191.8 | 243.5 | 242.1 | 234.7 | 257.0 | 299.1 | 303.1 | 201.6 |
| 85.2  | 74.5  | 68.4  | 71.9  | 82.1  | 67.5  | 90.8  | 117.5 | 78.8  |
| 2.6   | 11.5  | 2.7   | 3.9   | 7.1   | 1.1   | 5.0   | 5.9   | 9.5   |
| 58.1  | 44.5  | 51.4  | 62.7  | 70.7  | 48.8  | 85.5  | 94.7  | 72.9  |
| 190.0 | 161.4 | 171.7 | 205.1 | 216.6 | 182.7 | 262.8 | 258.0 | 243.2 |
| 119.3 | 115.9 | 105.5 | 133.2 | 135.0 | 109.1 | 164.8 | 230.1 | 183.3 |
| 129.5 | 93.7  | 102.0 | 120.3 | 111.6 | 116.4 | 178.9 | 280.7 | 156.4 |
| 104.9 | 70.2  | 88.2  | 97.9  | 85.9  | 86.0  | 111.4 | 111.2 | 109.7 |
| 602.2 | 587.7 | 564.7 | 624.3 | 641.0 | 659.2 | 855.6 | 798.2 | 545.8 |
| 66.8  | 40.6  | 42.2  | 42.7  | 56.9  | 50.4  | 48.9  | 59.1  | 35.7  |
| 33.1  | 22.0  | 27.4  | 25.3  | 22.3  | 29.2  | 21.6  | 27.6  | 24.0  |

|        |        |        |        |        |        |        |        |        |
|--------|--------|--------|--------|--------|--------|--------|--------|--------|
| 97.4   | 71.3   | 96.9   | 82.9   | 105.4  | 94.7   | 103.7  | 97.7   | 54.0   |
| 186.8  | 102.3  | 140.5  | 131.0  | 160.6  | 153.5  | 233.8  | 239.2  | 155.9  |
| 797.2  | 529.5  | 654.0  | 610.0  | 700.8  | 691.5  | 817.7  | 847.8  | 511.6  |
| 120.6  | 73.4   | 93.1   | 108.5  | 90.8   | 71.2   | 92.8   | 81.7   | 66.6   |
| 87.8   | 47.8   | 86.8   | 96.7   | 81.0   | 81.2   | 95.1   | 109.6  | 62.8   |
| 58.9   | 44.0   | 42.3   | 40.5   | 45.4   | 31.3   | 66.7   | 67.1   | 55.2   |
| 157.2  | 85.7   | 103.1  | 111.3  | 114.4  | 107.6  | 134.8  | 127.4  | 146.7  |
| 137.0  | 89.2   | 97.6   | 102.5  | 108.7  | 108.7  | 140.3  | 198.3  | 109.8  |
| 156.4  | 92.6   | 102.1  | 127.5  | 142.2  | 138.1  | 186.2  | 198.3  | 135.8  |
| 85.2   | 58.5   | 65.4   | 61.2   | 76.3   | 89.1   | 123.4  | 131.4  | 78.4   |
| 235.4  | 122.3  | 123.9  | 168.9  | 137.1  | 138.4  | 199.7  | 239.6  | 183.3  |
| 149.0  | 77.7   | 110.0  | 114.0  | 108.5  | 117.4  | 141.3  | 162.0  | 111.1  |
| 13.2   | 17.1   | 8.7    | 9.6    | 18.2   | 18.1   | 14.0   | 14.0   | 17.7   |
| 128.5  | 102.0  | 88.9   | 88.2   | 122.2  | 89.4   | 175.7  | 263.6  | 149.8  |
| 192.0  | 105.3  | 130.8  | 119.2  | 124.5  | 125.9  | 198.4  | 226.9  | 132.3  |
| 2.3    | 2.5    | 4.1    | 0.2    | 2.7    | 3.0    | 0.7    | 3.6    | 2.3    |
| 71.3   | 38.2   | 45.3   | 35.6   | 39.5   | 55.5   | 56.1   | 60.1   | 55.8   |
| 134.9  | 98.5   | 105.2  | 114.6  | 104.3  | 88.5   | 106.8  | 138.5  | 128.5  |
| 99.5   | 59.5   | 46.3   | 55.3   | 88.0   | 59.4   | 76.9   | 128.1  | 115.3  |
| 26.3   | 19.8   | 19.7   | 25.2   | 29.7   | 15.6   | 31.9   | 34.4   | 17.8   |
| 74.1   | 76.9   | 74.4   | 78.7   | 87.2   | 75.6   | 99.8   | 100.8  | 100.1  |
| 20.1   | 34.0   | 22.1   | 29.3   | 30.8   | 28.9   | 37.7   | 51.0   | 41.3   |
| 10.7   | 17.4   | 10.5   | 6.8    | 12.4   | 9.7    | 15.5   | 11.7   | 17.2   |
| 252.9  | 172.4  | 183.3  | 178.3  | 244.7  | 208.5  | 278.9  | 344.1  | 180.7  |
| 136.0  | 53.3   | 65.7   | 54.2   | 66.9   | 78.3   | 88.8   | 147.1  | 115.2  |
| 649.2  | 299.8  | 363.4  | 385.9  | 431.5  | 412.8  | 553.2  | 565.0  | 413.1  |
| 101.7  | 52.2   | 63.8   | 63.0   | 56.5   | 58.8   | 86.2   | 110.5  | 53.7   |
| 127.3  | 54.5   | 62.3   | 59.9   | 74.2   | 64.9   | 105.8  | 126.9  | 109.1  |
| 122.2  | 34.4   | 49.8   | 49.2   | 58.0   | 72.5   | 81.1   | 127.5  | 74.6   |
| 1641.1 | 1069.8 | 1078.9 | 1195.3 | 1278.9 | 1243.5 | 1670.9 | 1749.4 | 1256.4 |
| 160.7  | 118.0  | 165.5  | 153.6  | 177.9  | 166.1  | 197.3  | 200.8  | 154.7  |
| 189.4  | 110.3  | 154.5  | 146.9  | 137.3  | 151.0  | 176.5  | 176.5  | 141.2  |
| 82.1   | 68.0   | 82.8   | 78.0   | 80.7   | 77.9   | 106.4  | 101.0  | 93.6   |
| 249.4  | 216.4  | 318.1  | 306.5  | 317.8  | 321.1  | 457.9  | 446.7  | 323.5  |
| 78.9   | 32.4   | 44.0   | 37.1   | 41.3   | 41.0   | 56.9   | 77.6   | 54.2   |
| 237.5  | 147.3  | 150.9  | 183.3  | 166.1  | 152.1  | 224.8  | 234.4  | 172.1  |
| 213.5  | 130.2  | 164.9  | 184.9  | 187.6  | 193.1  | 254.4  | 312.3  | 194.6  |
| 208.6  | 153.1  | 157.9  | 182.4  | 195.0  | 189.3  | 248.8  | 304.2  | 209.1  |
| 36.7   | 19.4   | 37.5   | 45.7   | 37.0   | 38.0   | 58.9   | 54.0   | 46.0   |
| 93.0   | 63.4   | 72.6   | 75.8   | 93.7   | 70.3   | 109.0  | 142.3  | 105.4  |
| 260.7  | 230.1  | 240.5  | 225.5  | 270.4  | 228.2  | 309.3  | 339.4  | 246.7  |
| 24.0   | 9.2    | 19.7   | 25.0   | 12.6   | 23.2   | 36.9   | 36.3   | 32.8   |
| 76.9   | 56.8   | 65.5   | 68.2   | 57.5   | 62.7   | 81.6   | 81.1   | 77.8   |
| 274.6  | 213.7  | 266.9  | 248.7  | 272.6  | 274.9  | 349.8  | 392.8  | 289.7  |
| 74.2   | 48.2   | 67.8   | 69.4   | 62.3   | 68.5   | 66.8   | 89.2   | 68.6   |
| 659.8  | 419.1  | 503.7  | 577.7  | 629.9  | 598.2  | 813.6  | 950.1  | 691.1  |
| 310.6  | 131.0  | 176.2  | 166.0  | 215.4  | 207.6  | 386.8  | 429.3  | 196.9  |
| 347.5  | 187.7  | 273.0  | 247.3  | 275.2  | 259.4  | 258.8  | 295.9  | 187.1  |
| 205.6  | 130.2  | 176.2  | 183.1  | 176.4  | 193.3  | 250.0  | 247.8  | 202.4  |
| 51.7   | 40.4   | 30.9   | 36.7   | 30.2   | 31.5   | 52.7   | 42.0   | 22.3   |
| 61.6   | 73.3   | 70.1   | 80.7   | 85.6   | 86.3   | 70.2   | 103.0  | 59.2   |
| 166.6  | 85.4   | 105.1  | 105.3  | 99.9   | 102.5  | 155.0  | 192.4  | 112.2  |
| 69.8   | 65.9   | 76.3   | 78.4   | 76.0   | 55.4   | 87.4   | 81.5   | 60.4   |

|       |       |       |       |       |       |       |       |       |
|-------|-------|-------|-------|-------|-------|-------|-------|-------|
| 24.6  | 23.0  | 15.1  | 34.2  | 22.7  | 22.6  | 38.8  | 39.8  | 26.7  |
| 188.5 | 140.1 | 154.4 | 133.7 | 167.6 | 172.6 | 228.1 | 241.4 | 191.3 |
| 38.7  | 26.4  | 38.1  | 39.4  | 38.8  | 38.0  | 48.5  | 70.6  | 36.7  |
| 21.3  | 13.8  | 14.3  | 13.9  | 20.2  | 19.7  | 26.0  | 38.0  | 24.6  |
| 36.1  | 22.6  | 25.0  | 31.2  | 29.6  | 38.0  | 50.0  | 65.2  | 31.7  |
| 66.2  | 49.9  | 41.1  | 38.9  | 60.7  | 43.9  | 98.0  | 94.3  | 46.2  |
| 122.6 | 89.1  | 147.7 | 166.0 | 140.3 | 124.5 | 187.1 | 222.9 | 123.8 |
| 301.5 | 217.8 | 262.2 | 246.5 | 271.1 | 251.8 | 300.8 | 381.8 | 252.7 |
| 180.1 | 116.3 | 121.7 | 142.9 | 138.8 | 139.7 | 190.2 | 186.8 | 113.6 |
| 110.0 | 75.7  | 79.9  | 84.9  | 105.9 | 101.5 | 109.5 | 123.1 | 98.8  |
| 104.4 | 62.3  | 55.1  | 49.1  | 69.7  | 78.9  | 88.9  | 118.7 | 66.2  |
| 55.2  | 33.9  | 44.9  | 42.0  | 45.4  | 50.3  | 63.6  | 84.7  | 53.3  |
| 77.4  | 36.7  | 53.0  | 46.4  | 60.3  | 45.6  | 67.3  | 69.5  | 44.5  |
| 93.2  | 93.5  | 111.5 | 125.1 | 111.6 | 112.9 | 140.8 | 162.4 | 113.7 |
| 80.5  | 81.1  | 78.0  | 95.0  | 106.0 | 95.1  | 121.5 | 150.5 | 92.8  |
| 651.6 | 438.0 | 553.4 | 515.5 | 565.7 | 607.6 | 709.0 | 730.5 | 410.6 |
| 43.4  | 23.2  | 25.7  | 30.5  | 34.5  | 38.4  | 46.5  | 54.6  | 42.8  |
| 66.1  | 40.1  | 41.8  | 52.7  | 51.4  | 48.6  | 68.0  | 67.6  | 63.2  |
| 175.2 | 135.6 | 157.5 | 184.9 | 139.4 | 165.9 | 171.8 | 171.5 | 159.5 |
| 27.7  | 18.3  | 32.1  | 22.2  | 11.7  | 24.1  | 27.6  | 30.0  | 16.7  |
| 306.4 | 221.6 | 235.1 | 227.8 | 279.4 | 223.8 | 311.4 | 333.8 | 317.1 |
| 136.5 | 48.2  | 55.1  | 65.8  | 44.9  | 79.2  | 80.4  | 94.5  | 74.8  |
| 103.4 | 41.7  | 54.7  | 44.3  | 55.2  | 48.0  | 70.4  | 98.2  | 49.5  |
| 29.0  | 19.8  | 21.7  | 16.2  | 25.2  | 19.0  | 20.5  | 32.7  | 13.0  |
| 54.3  | 32.3  | 43.8  | 38.8  | 39.3  | 49.5  | 66.0  | 60.6  | 44.1  |
| 185.5 | 108.3 | 92.7  | 112.8 | 132.9 | 128.2 | 147.4 | 237.6 | 216.7 |
| 192.3 | 129.1 | 92.8  | 99.1  | 105.2 | 105.1 | 142.2 | 168.3 | 112.3 |
| 14.6  | 18.2  | 13.0  | 23.9  | 19.2  | 24.1  | 27.7  | 25.8  | 23.1  |
| 121.6 | 110.1 | 144.1 | 142.8 | 163.9 | 128.2 | 193.3 | 202.8 | 161.7 |
| 15.6  | 4.8   | 1.6   | 2.5   | 5.2   | 2.5   | 8.5   | 3.4   | 1.0   |
| 56.7  | 24.5  | 27.3  | 28.1  | 27.2  | 30.0  | 39.8  | 49.6  | 34.4  |
| 342.2 | 242.6 | 257.5 | 278.9 | 266.9 | 202.4 | 402.6 | 366.1 | 286.0 |
| 222.0 | 147.4 | 157.0 | 151.9 | 160.2 | 201.2 | 215.1 | 256.1 | 167.2 |
| 27.6  | 15.7  | 15.6  | 15.3  | 23.8  | 19.2  | 30.1  | 40.9  | 24.6  |
| 142.8 | 116.7 | 122.9 | 117.7 | 138.8 | 127.9 | 127.3 | 228.2 | 153.7 |
| 366.5 | 304.1 | 307.8 | 340.6 | 380.4 | 350.7 | 388.4 | 498.7 | 386.4 |
| 53.8  | 31.1  | 39.1  | 59.5  | 39.4  | 44.7  | 73.4  | 86.2  | 46.5  |
| 3.6   | 1.4   | 0.3   | 7.8   | 5.5   | 1.1   | 1.0   | 5.4   | 1.3   |
| 306.5 | 230.8 | 296.8 | 286.9 | 323.5 | 284.2 | 373.1 | 455.3 | 281.0 |
| 360.3 | 247.7 | 285.8 | 298.5 | 276.3 | 280.3 | 360.2 | 338.3 | 311.2 |
| 267.1 | 182.7 | 183.6 | 249.6 | 231.3 | 212.1 | 336.2 | 403.8 | 218.8 |
| 14.3  | 14.5  | 11.8  | 16.7  | 13.4  | 13.5  | 15.9  | 20.1  | 15.9  |
| 652.5 | 437.7 | 445.6 | 496.5 | 562.4 | 498.1 | 796.7 | 726.2 | 476.3 |
| 192.9 | 86.2  | 126.3 | 117.0 | 119.8 | 155.6 | 179.6 | 202.0 | 145.4 |
| 59.5  | 38.6  | 54.2  | 79.6  | 47.0  | 53.3  | 82.0  | 57.8  | 54.9  |
| 285.1 | 180.7 | 232.7 | 241.4 | 290.4 | 287.1 | 388.0 | 419.9 | 222.8 |
| 108.4 | 111.1 | 81.0  | 99.5  | 115.7 | 83.1  | 114.2 | 151.0 | 92.0  |
| 196.5 | 101.7 | 119.7 | 136.0 | 123.5 | 134.0 | 199.0 | 213.7 | 110.6 |
| 7.9   | 6.5   | 5.5   | 10.3  | 9.6   | 10.3  | 9.0   | 19.9  | 4.9   |
| 35.7  | 21.4  | 28.1  | 23.4  | 27.8  | 26.8  | 42.1  | 55.0  | 31.5  |
| 56.5  | 46.9  | 40.6  | 53.5  | 73.4  | 36.3  | 65.9  | 49.7  | 37.5  |
| 297.1 | 260.9 | 278.8 | 278.1 | 307.7 | 311.5 | 380.2 | 371.9 | 412.8 |
| 30.7  | 24.5  | 34.5  | 21.5  | 33.9  | 32.8  | 40.8  | 48.4  | 35.7  |

|        |        |        |        |        |        |        |        |        |
|--------|--------|--------|--------|--------|--------|--------|--------|--------|
| 156.3  | 134.0  | 122.7  | 131.8  | 154.9  | 159.6  | 199.3  | 227.3  | 147.2  |
| 32.8   | 30.6   | 12.3   | 14.4   | 14.5   | 16.3   | 29.5   | 39.5   | 28.5   |
| 41.1   | 49.1   | 30.4   | 26.4   | 32.0   | 43.2   | 47.9   | 60.3   | 43.4   |
| 19.0   | 15.1   | 18.0   | 17.5   | 17.9   | 18.1   | 31.8   | 35.5   | 24.4   |
| 0.4    | 0.6    | 4.3    | 1.4    | 0.4    | 3.8    | 3.8    | 0.7    | 0.7    |
| 42.3   | 42.2   | 47.3   | 41.2   | 52.9   | 38.0   | 58.2   | 67.6   | 37.9   |
| 29.7   | 14.8   | 11.6   | 16.9   | 14.1   | 12.1   | 14.3   | 20.6   | 17.0   |
| 197.6  | 139.8  | 147.4  | 163.1  | 151.3  | 166.1  | 214.4  | 271.7  | 200.7  |
| 387.4  | 315.7  | 337.2  | 342.5  | 388.9  | 326.5  | 420.7  | 407.4  | 363.8  |
| 235.6  | 125.7  | 187.6  | 197.9  | 193.1  | 185.4  | 235.0  | 232.1  | 211.4  |
| 521.0  | 357.8  | 427.2  | 413.6  | 426.4  | 389.1  | 534.1  | 536.5  | 535.5  |
| 490.0  | 304.0  | 320.5  | 340.5  | 366.4  | 361.6  | 528.4  | 598.1  | 569.2  |
| 1631.9 | 1389.3 | 1398.5 | 1708.2 | 1601.9 | 1673.9 | 1759.2 | 2215.8 | 1114.7 |
| 127.9  | 68.5   | 67.9   | 86.2   | 82.9   | 88.8   | 80.5   | 109.4  | 74.1   |
| 204.6  | 141.4  | 118.4  | 170.0  | 164.5  | 114.9  | 155.7  | 181.1  | 119.6  |
| 93.6   | 63.6   | 58.3   | 73.3   | 73.0   | 80.5   | 85.2   | 131.7  | 69.0   |
| 328.7  | 282.4  | 333.6  | 363.6  | 351.6  | 366.7  | 498.4  | 534.5  | 360.4  |
| 66.3   | 48.7   | 41.1   | 51.8   | 52.6   | 62.8   | 82.4   | 124.9  | 84.8   |
| 52.4   | 33.1   | 25.3   | 40.2   | 31.4   | 34.3   | 49.4   | 77.7   | 66.6   |
| 39.4   | 27.2   | 29.6   | 32.6   | 39.0   | 35.8   | 43.2   | 78.8   | 58.0   |
| 130.3  | 78.7   | 96.8   | 110.6  | 104.0  | 110.8  | 140.9  | 161.6  | 127.8  |
| 98.7   | 54.0   | 81.7   | 69.4   | 60.7   | 67.6   | 108.7  | 78.4   | 85.2   |
| 883.3  | 653.8  | 736.3  | 783.0  | 830.7  | 833.3  | 1000.1 | 1210.6 | 927.1  |
| 352.8  | 182.8  | 229.5  | 250.0  | 259.6  | 295.9  | 466.3  | 519.2  | 310.2  |
| 61.8   | 55.2   | 43.0   | 65.6   | 74.1   | 47.7   | 74.1   | 105.6  | 105.4  |
| 245.0  | 244.8  | 281.9  | 308.8  | 320.3  | 324.5  | 365.2  | 474.4  | 313.8  |
| 80.5   | 29.7   | 23.0   | 33.0   | 22.8   | 31.4   | 33.9   | 47.2   | 30.7   |
| 979.8  | 702.7  | 677.5  | 846.1  | 784.2  | 736.6  | 1296.7 | 1262.3 | 996.7  |
| 626.2  | 475.1  | 483.7  | 483.4  | 593.1  | 539.6  | 688.2  | 715.6  | 536.6  |
| 5.6    | 3.5    | 4.1    | 4.7    | 6.4    | 5.5    | 1.1    | 6.5    | 6.0    |
| 94.0   | 57.5   | 62.6   | 67.7   | 66.6   | 70.3   | 90.6   | 94.6   | 68.5   |
| 154.9  | 108.4  | 109.3  | 121.4  | 159.0  | 135.2  | 174.9  | 242.3  | 148.0  |
| 125.7  | 110.0  | 108.2  | 101.8  | 105.8  | 89.1   | 125.4  | 133.5  | 103.0  |
| 261.3  | 184.3  | 215.8  | 233.7  | 230.8  | 234.7  | 320.0  | 353.0  | 243.8  |
| 134.9  | 132.0  | 147.8  | 158.3  | 175.9  | 164.0  | 218.4  | 252.4  | 190.1  |
| 1731.3 | 1135.3 | 1213.0 | 1212.8 | 1399.6 | 1282.1 | 1665.9 | 1760.1 | 1145.8 |
| 156.6  | 93.3   | 121.0  | 135.9  | 115.7  | 131.0  | 167.8  | 173.3  | 137.6  |
| 61.9   | 44.6   | 60.4   | 53.9   | 65.0   | 57.3   | 88.3   | 83.8   | 66.3   |
| 201.4  | 136.4  | 147.9  | 138.9  | 154.8  | 131.9  | 198.7  | 207.3  | 226.8  |
| 83.2   | 50.1   | 65.3   | 46.0   | 52.5   | 54.9   | 66.6   | 92.8   | 65.0   |
| 84.2   | 51.7   | 53.0   | 54.2   | 54.4   | 56.8   | 71.5   | 90.8   | 66.8   |
| 83.2   | 66.9   | 89.5   | 93.3   | 98.3   | 79.4   | 108.2  | 104.3  | 77.9   |
| 203.3  | 166.2  | 183.9  | 223.1  | 202.6  | 165.2  | 222.2  | 267.1  | 250.0  |
| 36.2   | 20.9   | 26.5   | 27.9   | 33.6   | 31.8   | 42.1   | 48.3   | 34.8   |
| 34.5   | 18.2   | 27.4   | 31.8   | 29.4   | 26.8   | 50.9   | 33.1   | 45.0   |
| 5.5    | 1.9    | 3.0    | 1.1    | 1.4    | 0.9    | 0.7    | 0.6    | 1.1    |
| 92.1   | 34.9   | 58.0   | 53.6   | 48.4   | 77.2   | 79.8   | 113.0  | 81.3   |
| 162.9  | 104.8  | 141.1  | 174.5  | 142.7  | 136.8  | 184.8  | 196.3  | 145.8  |
| 2235.9 | 2128.3 | 2084.7 | 2238.0 | 2401.5 | 2287.9 | 2845.8 | 2914.4 | 2657.6 |
| 112.4  | 68.0   | 114.4  | 95.5   | 123.8  | 109.9  | 164.1  | 107.7  | 132.9  |
| 87.9   | 64.6   | 66.6   | 86.0   | 66.7   | 54.5   | 108.0  | 117.7  | 73.7   |
| 157.8  | 104.8  | 119.1  | 118.1  | 130.2  | 123.5  | 159.8  | 165.8  | 175.8  |
| 79.3   | 46.9   | 64.3   | 48.4   | 54.7   | 40.9   | 77.0   | 117.6  | 62.0   |



|        |       |       |       |       |       |        |        |       |
|--------|-------|-------|-------|-------|-------|--------|--------|-------|
| 80.6   | 63.3  | 70.3  | 36.4  | 74.1  | 60.3  | 72.5   | 67.1   | 73.4  |
| 1.2    | 1.2   | 0.4   | 0.8   | 1.9   | 1.0   | 7.4    | 1.3    | 2.8   |
| 1115.8 | 637.8 | 778.8 | 801.9 | 825.1 | 845.9 | 1166.1 | 1170.2 | 983.5 |
| 24.9   | 23.7  | 22.4  | 26.1  | 34.0  | 14.3  | 28.5   | 24.2   | 22.4  |
| 202.6  | 137.4 | 190.8 | 206.5 | 198.9 | 205.1 | 251.6  | 296.7  | 152.8 |
| 27.8   | 20.1  | 21.4  | 19.4  | 20.6  | 23.6  | 35.2   | 50.4   | 39.1  |
| 133.3  | 52.4  | 80.4  | 72.5  | 84.2  | 91.8  | 100.5  | 138.9  | 72.3  |
| 338.7  | 185.0 | 257.7 | 242.5 | 259.2 | 275.0 | 338.4  | 412.9  | 220.0 |
| 420.1  | 228.7 | 266.8 | 298.5 | 383.8 | 360.2 | 559.1  | 684.2  | 512.0 |
| 114.7  | 75.2  | 87.4  | 97.4  | 99.7  | 87.9  | 119.9  | 111.1  | 96.2  |
| 115.0  | 92.4  | 79.1  | 84.8  | 96.2  | 83.1  | 125.9  | 145.0  | 106.9 |
| 57.8   | 37.5  | 32.2  | 41.1  | 39.6  | 29.6  | 53.1   | 55.6   | 41.7  |
| 85.5   | 66.5  | 73.1  | 76.9  | 84.6  | 70.6  | 89.0   | 110.3  | 84.3  |
| 34.7   | 16.3  | 24.0  | 30.3  | 36.0  | 32.6  | 43.0   | 69.6   | 31.6  |
| 49.4   | 28.5  | 20.4  | 45.0  | 23.5  | 48.4  | 41.4   | 64.0   | 7.2   |
| 38.7   | 31.1  | 22.9  | 28.4  | 32.3  | 27.0  | 46.8   | 36.2   | 27.0  |
| 87.9   | 48.9  | 49.4  | 70.5  | 75.7  | 54.6  | 96.8   | 142.1  | 81.5  |
| 180.8  | 96.9  | 105.5 | 119.7 | 119.6 | 127.3 | 184.6  | 215.4  | 119.3 |
| 150.5  | 100.7 | 100.7 | 110.2 | 107.1 | 98.6  | 133.6  | 147.5  | 112.9 |
| 801.3  | 388.7 | 605.3 | 581.3 | 554.3 | 650.4 | 730.8  | 723.4  | 455.0 |
| 298.7  | 185.0 | 155.5 | 183.2 | 164.6 | 202.5 | 257.6  | 318.0  | 231.6 |
| 140.2  | 119.1 | 134.2 | 146.3 | 159.7 | 150.6 | 190.1  | 245.2  | 169.1 |
| 193.0  | 142.7 | 147.0 | 143.4 | 152.0 | 160.8 | 173.6  | 172.4  | 147.8 |
| 404.1  | 281.8 | 296.5 | 358.7 | 371.4 | 345.8 | 486.5  | 615.6  | 500.3 |
| 38.4   | 23.4  | 32.0  | 30.7  | 27.6  | 31.1  | 35.6   | 31.6   | 26.3  |
| 194.2  | 158.3 | 166.5 | 178.6 | 217.7 | 180.7 | 225.3  | 334.6  | 199.8 |
| 20.2   | 21.6  | 18.8  | 28.8  | 20.3  | 22.7  | 23.9   | 31.8   | 17.9  |
| 706.1  | 525.1 | 624.1 | 702.4 | 651.1 | 665.9 | 868.1  | 913.8  | 844.2 |
| 70.5   | 56.8  | 56.3  | 74.0  | 67.4  | 63.8  | 88.0   | 104.2  | 75.7  |
| 187.8  | 152.1 | 194.0 | 177.7 | 203.8 | 185.0 | 252.7  | 242.5  | 147.9 |
| 246.7  | 209.5 | 207.8 | 218.7 | 229.1 | 204.8 | 209.7  | 215.6  | 229.6 |
| 114.8  | 76.7  | 97.2  | 97.1  | 106.0 | 113.5 | 124.0  | 128.7  | 84.1  |
| 190.8  | 142.4 | 129.3 | 171.1 | 146.4 | 139.5 | 210.7  | 238.5  | 170.5 |
| 104.8  | 54.4  | 55.4  | 56.6  | 60.3  | 75.0  | 99.5   | 94.3   | 46.4  |
| 32.5   | 31.2  | 18.4  | 27.1  | 26.6  | 22.1  | 33.6   | 33.3   | 26.9  |
| 31.3   | 20.7  | 20.0  | 18.2  | 27.8  | 29.3  | 41.7   | 28.1   | 41.9  |
| 46.6   | 29.9  | 33.0  | 33.2  | 53.7  | 43.0  | 47.2   | 56.1   | 39.5  |
| 65.8   | 37.8  | 39.6  | 43.8  | 42.5  | 47.9  | 65.4   | 73.0   | 53.3  |
| 109.6  | 76.9  | 95.3  | 86.6  | 111.6 | 97.1  | 131.1  | 170.5  | 107.8 |
| 654.0  | 384.0 | 411.8 | 448.7 | 565.1 | 463.7 | 793.1  | 866.8  | 544.1 |
| 257.2  | 183.7 | 213.4 | 209.0 | 208.9 | 179.7 | 264.7  | 250.5  | 211.8 |
| 63.9   | 46.5  | 45.3  | 57.4  | 59.0  | 44.0  | 74.2   | 100.0  | 74.4  |
| 17.1   | 25.0  | 18.6  | 14.1  | 15.6  | 15.2  | 18.5   | 32.7   | 12.5  |
| 36.2   | 10.1  | 4.3   | 7.5   | 9.4   | 17.9  | 27.6   | 21.9   | 16.7  |
| 378.1  | 205.5 | 265.4 | 307.9 | 278.1 | 244.2 | 441.3  | 367.0  | 329.8 |
| 26.8   | 19.5  | 29.2  | 21.2  | 22.1  | 24.8  | 39.9   | 52.9   | 25.7  |
| 149.0  | 96.5  | 100.6 | 127.8 | 121.4 | 115.1 | 175.3  | 186.0  | 149.2 |
| 97.5   | 74.3  | 95.1  | 92.4  | 64.5  | 84.3  | 93.0   | 141.8  | 113.8 |
| 17.4   | 11.8  | 10.7  | 14.5  | 16.1  | 13.7  | 20.4   | 19.6   | 10.6  |
| 592.3  | 606.6 | 633.7 | 681.9 | 706.7 | 610.1 | 933.0  | 904.9  | 632.9 |
| 130.5  | 108.6 | 123.4 | 129.8 | 137.4 | 129.8 | 179.4  | 218.3  | 122.5 |
| 57.0   | 35.4  | 38.9  | 47.3  | 40.8  | 39.3  | 50.4   | 51.1   | 41.4  |
| 163.8  | 74.8  | 100.8 | 101.4 | 111.8 | 132.6 | 170.9  | 191.5  | 136.8 |

|       |       |       |       |       |       |       |       |       |
|-------|-------|-------|-------|-------|-------|-------|-------|-------|
| 13.1  | 10.7  | 11.5  | 12.8  | 9.3   | 5.4   | 7.1   | 17.1  | 6.0   |
| 18.7  | 15.3  | 12.3  | 8.6   | 14.3  | 14.6  | 16.9  | 24.1  | 12.1  |
| 142.7 | 136.3 | 221.2 | 224.4 | 198.9 | 194.3 | 239.9 | 260.5 | 157.8 |
| 48.6  | 40.7  | 49.4  | 47.3  | 45.6  | 43.3  | 53.7  | 60.7  | 44.1  |
| 120.1 | 87.8  | 98.2  | 105.8 | 111.3 | 113.2 | 132.3 | 182.0 | 105.9 |
| 63.0  | 53.6  | 61.2  | 69.1  | 63.8  | 62.1  | 94.8  | 120.5 | 101.2 |
| 95.6  | 84.0  | 98.0  | 105.0 | 90.1  | 105.9 | 155.9 | 144.9 | 112.3 |
| 148.0 | 89.0  | 96.4  | 90.3  | 102.3 | 111.0 | 172.5 | 159.6 | 84.7  |
| 20.8  | 26.9  | 18.6  | 23.8  | 27.5  | 26.1  | 30.2  | 44.1  | 26.7  |
| 3.7   | 0.9   | 2.8   | 5.7   | 4.9   | 1.5   | 3.1   | 5.1   | 1.1   |
| 75.3  | 52.1  | 61.9  | 65.2  | 65.4  | 74.6  | 101.6 | 166.6 | 89.4  |
| 80.0  | 46.7  | 66.6  | 59.2  | 59.2  | 74.7  | 94.5  | 111.5 | 57.0  |
| 78.0  | 38.5  | 53.4  | 56.7  | 58.2  | 50.1  | 59.7  | 92.8  | 60.9  |
| 48.4  | 61.1  | 91.7  | 82.5  | 74.8  | 84.8  | 108.1 | 99.0  | 52.2  |
| 50.4  | 13.5  | 23.0  | 22.9  | 20.7  | 20.0  | 23.3  | 35.1  | 17.6  |
| 87.7  | 63.2  | 77.6  | 78.1  | 80.4  | 79.8  | 106.5 | 112.1 | 88.3  |
| 120.3 | 61.8  | 103.1 | 103.8 | 94.3  | 115.1 | 158.7 | 144.1 | 93.3  |
| 48.0  | 37.2  | 23.8  | 23.3  | 25.3  | 28.7  | 40.5  | 46.7  | 35.4  |
| 267.0 | 192.2 | 216.4 | 241.2 | 220.8 | 237.2 | 285.9 | 269.3 | 246.2 |
| 60.5  | 37.9  | 39.7  | 41.0  | 39.8  | 40.1  | 55.2  | 81.1  | 40.7  |
| 37.6  | 25.4  | 24.1  | 28.4  | 28.7  | 38.3  | 53.6  | 61.8  | 37.6  |
| 198.6 | 171.8 | 183.8 | 178.7 | 205.4 | 229.0 | 262.6 | 215.3 | 169.7 |
| 39.1  | 26.4  | 31.9  | 31.2  | 29.3  | 31.1  | 47.6  | 49.6  | 33.0  |
| 70.4  | 74.3  | 67.1  | 54.2  | 50.4  | 58.9  | 74.0  | 91.2  | 71.9  |
| 239.3 | 155.2 | 203.7 | 198.8 | 187.9 | 237.2 | 322.3 | 286.7 | 238.3 |
| 159.3 | 446.2 | 319.5 | 472.5 | 373.2 | 232.0 | 487.2 | 303.2 | 333.2 |
| 22.4  | 17.1  | 25.5  | 24.6  | 19.0  | 24.0  | 32.3  | 31.4  | 28.3  |
| 23.4  | 12.4  | 16.2  | 16.7  | 15.6  | 18.5  | 25.7  | 33.9  | 24.2  |
| 41.2  | 24.7  | 18.2  | 34.9  | 25.3  | 23.8  | 32.6  | 35.0  | 31.1  |
| 157.3 | 81.8  | 116.7 | 111.1 | 117.8 | 135.5 | 145.6 | 263.3 | 112.7 |
| 61.5  | 48.9  | 68.4  | 50.7  | 64.9  | 69.1  | 65.2  | 85.2  | 48.8  |
| 110.6 | 73.5  | 100.1 | 98.6  | 94.7  | 87.6  | 107.0 | 104.4 | 87.0  |
| 152.6 | 98.6  | 128.4 | 128.1 | 135.6 | 153.7 | 165.8 | 231.4 | 132.2 |
| 135.4 | 116.9 | 122.3 | 142.2 | 108.6 | 126.8 | 151.4 | 134.1 | 117.9 |
| 14.0  | 15.2  | 10.5  | 8.9   | 11.8  | 12.8  | 16.8  | 16.5  | 9.9   |
| 13.1  | 13.7  | 18.6  | 15.5  | 16.4  | 18.6  | 16.7  | 29.2  | 17.3  |
| 639.3 | 487.3 | 467.7 | 522.1 | 612.1 | 520.6 | 751.4 | 795.0 | 502.0 |
| 123.2 | 89.2  | 111.8 | 107.0 | 109.3 | 101.7 | 129.6 | 101.7 | 64.8  |
| 9.4   | 9.0   | 7.3   | 5.6   | 6.8   | 9.1   | 13.6  | 20.5  | 6.0   |
| 93.8  | 58.7  | 68.3  | 68.6  | 70.0  | 77.9  | 86.1  | 135.3 | 82.0  |
| 58.0  | 36.5  | 49.9  | 50.6  | 47.4  | 45.0  | 64.9  | 77.6  | 74.5  |
| 35.9  | 17.0  | 13.2  | 12.4  | 13.2  | 18.1  | 20.9  | 20.9  | 26.0  |
| 18.4  | 9.3   | 10.8  | 12.6  | 7.8   | 7.0   | 15.3  | 16.7  | 11.2  |
| 92.3  | 74.6  | 86.9  | 65.0  | 88.6  | 80.4  | 118.8 | 153.5 | 84.6  |
| 125.1 | 83.1  | 123.6 | 106.2 | 107.1 | 109.8 | 173.1 | 169.7 | 93.0  |
| 40.1  | 27.4  | 29.6  | 53.4  | 36.7  | 34.4  | 46.9  | 53.7  | 33.4  |
| 1.2   | 2.4   | 4.2   | 3.4   | 5.3   | 3.9   | 4.4   | 1.0   | 3.6   |
| 108.2 | 55.8  | 60.2  | 68.7  | 69.1  | 80.5  | 114.3 | 151.9 | 133.7 |
| 11.3  | 17.8  | 17.3  | 14.0  | 19.4  | 16.1  | 30.5  | 24.4  | 17.0  |
| 184.1 | 62.1  | 86.0  | 100.1 | 92.0  | 129.0 | 149.3 | 209.4 | 84.0  |
| 220.8 | 149.3 | 126.4 | 121.0 | 197.2 | 165.0 | 228.8 | 292.0 | 196.3 |
| 80.5  | 52.4  | 59.6  | 60.1  | 46.1  | 61.5  | 64.8  | 80.0  | 59.5  |
| 445.8 | 228.4 | 371.9 | 293.3 | 326.8 | 358.9 | 437.7 | 527.6 | 311.1 |

|        |       |        |        |        |        |        |        |        |
|--------|-------|--------|--------|--------|--------|--------|--------|--------|
| 38.0   | 21.6  | 28.7   | 31.6   | 27.2   | 35.5   | 34.7   | 48.1   | 42.4   |
| 22.0   | 37.3  | 36.7   | 48.8   | 38.3   | 29.0   | 59.0   | 47.2   | 29.1   |
| 236.5  | 167.7 | 167.6  | 179.0  | 197.0  | 179.2  | 252.3  | 267.7  | 181.9  |
| 74.5   | 39.0  | 48.5   | 37.5   | 51.0   | 39.6   | 48.5   | 68.4   | 38.4   |
| 272.1  | 157.8 | 163.3  | 164.6  | 207.3  | 230.6  | 230.2  | 301.0  | 170.5  |
| 58.5   | 42.9  | 53.9   | 49.3   | 47.2   | 54.7   | 70.6   | 96.4   | 63.6   |
| 53.0   | 46.4  | 47.7   | 51.1   | 41.9   | 58.2   | 66.8   | 70.0   | 50.9   |
| 36.4   | 15.4  | 22.9   | 20.8   | 28.9   | 23.2   | 38.1   | 52.7   | 27.3   |
| 1.9    | 12.1  | 2.2    | 9.8    | 2.8    | 1.4    | 2.0    | 2.9    | 2.3    |
| 161.1  | 119.2 | 95.0   | 132.3  | 107.1  | 88.6   | 127.3  | 147.1  | 97.6   |
| 97.2   | 67.4  | 80.1   | 79.6   | 91.3   | 77.9   | 98.3   | 130.0  | 89.2   |
| 49.7   | 39.8  | 39.1   | 48.7   | 41.5   | 55.8   | 79.3   | 94.3   | 61.8   |
| 163.4  | 69.9  | 98.9   | 99.2   | 92.1   | 102.3  | 142.0  | 176.5  | 135.6  |
| 387.1  | 198.4 | 176.7  | 201.7  | 211.2  | 251.8  | 307.7  | 413.7  | 214.6  |
| 173.7  | 151.9 | 147.5  | 192.0  | 182.9  | 186.5  | 204.5  | 274.7  | 191.5  |
| 65.5   | 40.2  | 36.2   | 50.4   | 53.6   | 47.9   | 66.7   | 90.0   | 65.9   |
| 1.1    | 2.3   | 3.3    | 3.4    | 0.6    | 3.9    | 2.8    | 2.8    | 0.1    |
| 342.6  | 217.8 | 254.8  | 217.7  | 239.2  | 231.9  | 310.3  | 344.0  | 189.0  |
| 129.0  | 95.9  | 131.1  | 133.6  | 129.5  | 124.5  | 183.8  | 173.2  | 162.1  |
| 226.2  | 161.5 | 183.5  | 209.6  | 276.9  | 209.3  | 320.7  | 392.1  | 211.7  |
| 1346.8 | 998.1 | 1095.4 | 1147.7 | 1273.5 | 1103.8 | 1497.3 | 1413.1 | 1180.6 |
| 415.8  | 204.4 | 272.4  | 209.2  | 233.4  | 254.5  | 358.5  | 435.2  | 193.8  |
| 185.8  | 140.5 | 133.7  | 157.6  | 138.1  | 144.4  | 193.2  | 207.4  | 171.8  |
| 81.2   | 58.2  | 70.1   | 74.8   | 66.3   | 77.2   | 90.5   | 128.0  | 73.9   |
| 130.2  | 97.5  | 98.5   | 116.2  | 101.8  | 82.4   | 131.9  | 128.8  | 119.1  |
| 4.0    | 1.6   | 4.2    | 2.0    | 0.2    | 0.3    | 2.4    | 0.4    | 0.2    |
| 95.6   | 77.0  | 74.8   | 61.3   | 64.6   | 83.9   | 94.6   | 86.0   | 61.6   |
| 55.2   | 23.5  | 23.5   | 36.2   | 28.7   | 33.4   | 37.2   | 41.3   | 32.1   |
| 72.3   | 55.6  | 53.5   | 66.3   | 65.7   | 68.3   | 85.7   | 87.4   | 66.5   |
| 155.8  | 123.5 | 126.6  | 126.8  | 151.6  | 133.0  | 167.5  | 170.0  | 125.9  |
| 136.0  | 109.8 | 147.6  | 131.4  | 129.8  | 154.0  | 155.3  | 144.7  | 94.9   |
| 51.2   | 52.0  | 49.6   | 48.0   | 47.0   | 58.3   | 77.1   | 41.0   | 41.4   |
| 2.6    | 3.5   | 4.8    | 0.5    | 0.3    | 3.1    | 3.7    | 0.3    | 4.9    |
| 42.3   | 29.7  | 39.7   | 42.1   | 31.9   | 41.6   | 58.9   | 57.1   | 41.2   |
| 45.8   | 58.8  | 57.9   | 71.3   | 79.3   | 76.7   | 89.1   | 104.7  | 68.3   |
| 39.7   | 22.0  | 32.5   | 29.5   | 25.3   | 24.6   | 43.7   | 47.0   | 43.9   |
| 194.3  | 156.4 | 165.6  | 176.8  | 185.0  | 175.1  | 202.4  | 232.0  | 138.4  |
| 44.1   | 38.9  | 48.0   | 37.4   | 43.3   | 49.4   | 53.1   | 73.6   | 39.2   |
| 201.4  | 115.4 | 153.8  | 149.9  | 156.4  | 155.4  | 166.9  | 225.1  | 133.4  |
| 21.9   | 6.0   | 10.7   | 1.1    | 5.1    | 4.7    | 8.2    | 13.0   | 5.0    |
| 32.2   | 50.6  | 53.7   | 57.5   | 47.9   | 63.9   | 84.7   | 70.1   | 53.5   |
| 24.1   | 8.9   | 39.2   | 15.3   | 24.4   | 21.0   | 38.8   | 29.5   | 24.0   |
| 83.0   | 64.8  | 62.5   | 61.8   | 67.9   | 68.8   | 85.3   | 106.9  | 76.1   |
| 1.2    | 6.1   | 6.5    | 3.7    | 1.3    | 0.6    | 6.1    | 2.3    | 7.5    |
| 476.6  | 453.3 | 450.4  | 515.4  | 611.3  | 537.3  | 699.0  | 763.8  | 719.6  |
| 162.5  | 139.9 | 91.9   | 113.4  | 117.6  | 121.3  | 193.8  | 175.8  | 124.9  |
| 168.0  | 161.4 | 159.9  | 160.9  | 205.9  | 152.4  | 182.2  | 218.9  | 164.8  |
| 212.6  | 101.4 | 122.3  | 128.2  | 147.0  | 140.2  | 236.8  | 238.3  | 112.1  |
| 127.9  | 65.8  | 69.0   | 71.0   | 68.3   | 78.4   | 73.8   | 96.6   | 85.6   |
| 101.7  | 88.9  | 75.2   | 71.7   | 98.0   | 85.5   | 112.0  | 149.3  | 89.4   |
| 195.7  | 126.8 | 122.8  | 149.0  | 155.5  | 143.2  | 220.1  | 243.3  | 215.3  |
| 231.4  | 121.1 | 116.2  | 134.8  | 140.7  | 141.7  | 215.2  | 199.6  | 187.8  |
| 288.2  | 218.9 | 208.4  | 274.8  | 298.2  | 277.9  | 320.8  | 339.2  | 210.7  |

|       |       |       |       |       |       |       |       |       |
|-------|-------|-------|-------|-------|-------|-------|-------|-------|
| 2.9   | 3.5   | 5.0   | 8.0   | 6.1   | 7.8   | 7.6   | 5.9   | 2.0   |
| 223.1 | 150.2 | 174.7 | 179.1 | 166.9 | 183.4 | 230.2 | 228.1 | 163.4 |
| 147.6 | 101.8 | 98.9  | 124.7 | 94.4  | 118.7 | 194.2 | 211.1 | 193.6 |
| 99.8  | 80.1  | 76.7  | 110.1 | 102.2 | 76.4  | 122.5 | 132.8 | 118.9 |
| 297.3 | 153.0 | 132.3 | 150.1 | 166.1 | 140.9 | 204.0 | 204.6 | 166.6 |
| 71.7  | 63.7  | 62.3  | 69.2  | 67.5  | 68.8  | 100.4 | 152.7 | 76.4  |
| 50.0  | 30.2  | 24.2  | 29.4  | 31.7  | 38.8  | 40.4  | 59.8  | 49.9  |
| 40.9  | 22.6  | 28.7  | 33.2  | 34.7  | 34.4  | 48.1  | 64.8  | 47.8  |
| 232.0 | 202.1 | 207.6 | 206.4 | 290.9 | 220.8 | 300.3 | 381.4 | 379.3 |
| 190.9 | 105.4 | 111.0 | 158.4 | 172.4 | 145.8 | 219.1 | 237.7 | 184.5 |
| 40.1  | 31.5  | 37.5  | 42.4  | 49.6  | 41.3  | 54.9  | 75.8  | 39.1  |
| 29.1  | 13.6  | 14.0  | 15.8  | 17.9  | 14.6  | 18.2  | 21.2  | 19.1  |
| 33.4  | 26.9  | 36.4  | 31.9  | 30.6  | 32.0  | 45.0  | 52.0  | 35.7  |
| 239.8 | 182.3 | 217.2 | 246.1 | 233.2 | 244.9 | 318.2 | 385.4 | 249.0 |
| 36.2  | 23.0  | 14.0  | 25.1  | 25.8  | 24.6  | 46.0  | 45.6  | 48.0  |
| 61.2  | 48.6  | 48.6  | 52.5  | 50.0  | 54.2  | 74.4  | 83.7  | 63.7  |
| 9.8   | 6.2   | 8.5   | 8.4   | 1.0   | 5.9   | 2.8   | 19.9  | 7.2   |
| 212.8 | 163.3 | 153.4 | 161.0 | 153.9 | 150.4 | 146.3 | 198.2 | 166.5 |
| 279.4 | 174.8 | 245.8 | 241.0 | 254.3 | 255.1 | 368.7 | 377.0 | 286.9 |
| 67.7  | 27.0  | 36.9  | 33.0  | 34.1  | 33.6  | 51.0  | 70.3  | 36.5  |
| 20.4  | 8.0   | 5.8   | 8.0   | 14.9  | 8.2   | 9.2   | 5.3   | 16.5  |
| 29.4  | 32.3  | 26.4  | 22.8  | 38.7  | 24.1  | 42.0  | 63.1  | 41.5  |
| 104.6 | 64.1  | 76.7  | 69.2  | 64.1  | 71.4  | 86.8  | 89.3  | 62.8  |
| 14.9  | 7.4   | 7.7   | 6.6   | 20.0  | 3.5   | 4.5   | 10.9  | 15.1  |
| 35.8  | 23.4  | 24.5  | 26.5  | 17.1  | 27.5  | 45.2  | 19.2  | 22.2  |
| 66.5  | 37.0  | 50.4  | 69.6  | 56.5  | 55.3  | 87.2  | 75.9  | 62.3  |
| 17.4  | 19.9  | 22.9  | 20.4  | 23.6  | 20.7  | 19.4  | 30.8  | 23.6  |
| 48.7  | 61.4  | 50.3  | 61.1  | 58.9  | 50.4  | 82.3  | 96.6  | 72.5  |
| 111.9 | 98.0  | 102.4 | 100.3 | 114.2 | 123.9 | 137.0 | 139.5 | 93.3  |
| 19.2  | 15.6  | 21.1  | 20.6  | 19.4  | 17.2  | 27.6  | 17.8  | 20.1  |
| 69.2  | 64.5  | 71.9  | 74.6  | 72.8  | 72.4  | 106.4 | 120.0 | 76.1  |
| 8.3   | 8.3   | 5.2   | 10.5  | 11.4  | 12.9  | 8.5   | 11.7  | 11.8  |
| 39.1  | 21.2  | 21.7  | 17.8  | 22.2  | 27.6  | 30.0  | 50.7  | 26.0  |
| 34.1  | 27.6  | 32.6  | 33.6  | 35.0  | 35.2  | 54.1  | 40.2  | 36.5  |
| 46.5  | 35.6  | 40.3  | 39.6  | 52.5  | 38.4  | 51.1  | 66.8  | 47.2  |
| 35.3  | 17.9  | 18.6  | 19.6  | 19.8  | 19.8  | 29.0  | 25.5  | 17.7  |
| 30.9  | 30.8  | 36.8  | 34.2  | 31.6  | 24.5  | 33.3  | 36.8  | 36.5  |
| 151.7 | 92.3  | 112.5 | 147.4 | 127.6 | 115.4 | 161.9 | 214.7 | 119.3 |
| 54.6  | 34.3  | 31.2  | 33.3  | 37.6  | 40.2  | 47.3  | 71.8  | 46.7  |
| 13.1  | 6.5   | 18.0  | 6.2   | 15.6  | 18.2  | 11.6  | 5.7   | 9.6   |
| 17.9  | 9.7   | 12.1  | 12.7  | 10.5  | 11.4  | 18.4  | 17.9  | 17.7  |
| 78.5  | 57.3  | 62.6  | 62.9  | 67.1  | 63.2  | 81.4  | 89.7  | 63.7  |
| 109.8 | 86.5  | 82.4  | 106.0 | 106.5 | 101.9 | 119.7 | 162.4 | 101.7 |
| 28.6  | 23.4  | 18.1  | 24.1  | 25.7  | 27.6  | 43.8  | 36.3  | 33.3  |
| 316.1 | 195.4 | 236.8 | 246.0 | 319.8 | 250.3 | 384.1 | 429.2 | 305.5 |
| 86.4  | 76.6  | 75.8  | 78.2  | 77.2  | 86.1  | 123.9 | 157.8 | 76.3  |
| 244.3 | 136.6 | 184.7 | 140.5 | 169.2 | 153.6 | 210.6 | 186.7 | 137.1 |
| 18.5  | 16.7  | 15.6  | 17.4  | 19.8  | 15.0  | 25.1  | 27.5  | 15.0  |
| 102.8 | 65.6  | 85.0  | 73.7  | 74.4  | 85.1  | 121.9 | 121.5 | 83.8  |
| 92.7  | 106.5 | 64.6  | 76.8  | 88.2  | 62.9  | 98.2  | 121.7 | 67.5  |
| 147.0 | 163.2 | 198.0 | 191.9 | 201.9 | 218.5 | 280.5 | 331.8 | 190.8 |
| 48.7  | 38.2  | 33.5  | 42.7  | 32.4  | 39.7  | 50.5  | 50.3  | 39.1  |
| 73.5  | 76.1  | 60.5  | 65.1  | 54.6  | 75.4  | 89.2  | 82.8  | 52.8  |

|       |       |       |       |       |       |       |       |       |
|-------|-------|-------|-------|-------|-------|-------|-------|-------|
| 339.9 | 228.6 | 246.6 | 266.9 | 311.1 | 280.9 | 408.7 | 424.2 | 353.2 |
| 33.6  | 24.3  | 29.7  | 36.5  | 34.4  | 27.7  | 29.7  | 43.1  | 36.2  |
| 91.9  | 42.3  | 63.9  | 65.1  | 45.1  | 50.5  | 88.5  | 74.0  | 50.1  |
| 103.7 | 47.9  | 55.9  | 60.3  | 74.7  | 77.3  | 100.6 | 156.9 | 83.7  |
| 522.2 | 167.8 | 239.2 | 255.2 | 213.9 | 285.9 | 323.0 | 460.4 | 267.3 |
| 202.6 | 153.2 | 171.7 | 189.6 | 172.3 | 182.9 | 213.9 | 264.0 | 147.1 |
| 67.5  | 35.2  | 42.9  | 49.8  | 45.5  | 40.8  | 64.4  | 62.3  | 33.7  |
| 212.0 | 172.0 | 184.5 | 202.1 | 183.4 | 209.1 | 230.1 | 287.9 | 244.7 |
| 68.9  | 33.9  | 40.4  | 47.9  | 35.1  | 46.7  | 57.4  | 73.1  | 54.8  |
| 40.5  | 21.2  | 32.0  | 25.8  | 33.1  | 27.6  | 45.0  | 40.4  | 37.8  |
| 12.8  | 6.8   | 13.8  | 10.1  | 11.8  | 9.9   | 19.0  | 16.8  | 15.1  |
| 1.1   | 1.4   | 3.5   | 5.4   | 1.4   | 5.7   | 1.4   | 6.3   | 2.1   |
| 91.8  | 83.0  | 60.5  | 73.4  | 92.2  | 92.4  | 116.6 | 140.1 | 118.1 |
| 57.4  | 68.3  | 61.4  | 76.7  | 71.1  | 64.1  | 108.1 | 102.6 | 87.0  |
| 5.9   | 5.6   | 3.5   | 0.4   | 4.3   | 2.0   | 5.1   | 1.5   | 1.1   |
| 49.8  | 23.0  | 25.9  | 33.1  | 25.6  | 31.2  | 42.7  | 56.3  | 26.0  |
| 192.8 | 130.4 | 182.9 | 145.2 | 151.7 | 162.3 | 204.0 | 226.2 | 184.4 |
| 328.1 | 214.6 | 257.3 | 276.8 | 278.6 | 295.2 | 395.4 | 430.7 | 279.6 |
| 161.1 | 99.6  | 127.0 | 117.7 | 148.4 | 157.5 | 169.5 | 243.1 | 178.1 |
| 407.1 | 385.2 | 393.9 | 424.1 | 436.2 | 413.9 | 556.5 | 712.1 | 537.6 |
| 62.6  | 39.4  | 44.7  | 53.2  | 60.8  | 40.2  | 51.4  | 59.9  | 33.0  |
| 77.1  | 56.4  | 49.7  | 78.2  | 92.2  | 41.0  | 90.1  | 90.5  | 68.9  |
| 258.4 | 125.8 | 171.7 | 159.1 | 171.3 | 203.8 | 211.9 | 324.5 | 152.2 |
| 55.2  | 50.1  | 40.9  | 48.4  | 42.6  | 38.3  | 55.5  | 52.3  | 53.2  |
| 572.8 | 429.3 | 486.7 | 504.4 | 494.9 | 518.3 | 678.7 | 701.0 | 525.0 |
| 1.8   | 0.1   | 0.4   | 2.9   | 1.4   | 3.1   | 0.3   | 0.3   | 0.1   |
| 1.1   | 0.9   | 5.0   | 1.7   | 4.2   | 2.9   | 1.8   | 7.7   | 3.4   |
| 70.2  | 38.1  | 54.5  | 44.9  | 66.8  | 55.5  | 72.2  | 101.1 | 63.2  |
| 68.1  | 55.8  | 63.8  | 67.6  | 59.3  | 63.8  | 68.4  | 91.1  | 57.2  |
| 159.9 | 97.7  | 126.1 | 122.4 | 137.0 | 140.4 | 159.4 | 180.2 | 147.9 |
| 163.4 | 97.8  | 115.2 | 127.5 | 123.5 | 122.9 | 181.8 | 180.8 | 124.5 |
| 199.7 | 163.2 | 213.3 | 182.2 | 241.8 | 219.3 | 214.5 | 255.3 | 194.1 |
| 16.6  | 19.5  | 25.6  | 31.5  | 20.1  | 26.5  | 33.3  | 31.8  | 34.1  |
| 36.6  | 15.7  | 19.3  | 14.0  | 23.5  | 14.7  | 18.9  | 25.4  | 22.9  |
| 351.5 | 225.2 | 205.5 | 242.0 | 222.2 | 209.4 | 306.9 | 327.1 | 207.4 |
| 74.6  | 45.7  | 70.5  | 64.2  | 63.6  | 68.5  | 74.4  | 96.5  | 82.6  |
| 21.8  | 9.4   | 20.3  | 17.0  | 24.0  | 20.2  | 25.1  | 28.2  | 16.9  |
| 48.8  | 23.6  | 38.3  | 31.8  | 29.4  | 26.2  | 27.1  | 41.5  | 38.8  |
| 50.0  | 48.3  | 54.3  | 59.0  | 55.2  | 58.4  | 88.5  | 75.7  | 49.4  |
| 218.2 | 137.9 | 174.9 | 196.7 | 185.6 | 202.1 | 224.5 | 350.8 | 177.8 |
| 93.4  | 72.5  | 87.7  | 88.1  | 91.8  | 96.5  | 108.9 | 111.7 | 82.1  |
| 14.2  | 6.4   | 7.1   | 6.9   | 6.5   | 7.8   | 13.3  | 13.1  | 1.4   |
| 37.9  | 30.1  | 32.2  | 37.1  | 30.4  | 28.4  | 42.5  | 46.5  | 29.5  |
| 35.1  | 27.6  | 29.1  | 34.2  | 26.3  | 25.8  | 42.9  | 38.3  | 40.0  |
| 17.9  | 13.8  | 11.9  | 28.0  | 18.2  | 22.1  | 24.6  | 35.7  | 17.5  |
| 186.4 | 88.1  | 130.7 | 143.8 | 132.7 | 140.8 | 170.4 | 173.3 | 121.2 |
| 28.3  | 19.8  | 23.5  | 28.0  | 22.7  | 18.2  | 29.1  | 36.1  | 19.8  |
| 29.1  | 34.2  | 21.5  | 24.5  | 33.4  | 30.4  | 31.9  | 70.0  | 42.3  |
| 171.5 | 83.0  | 122.1 | 114.5 | 124.9 | 141.5 | 164.8 | 183.0 | 112.4 |
| 143.9 | 97.8  | 122.9 | 135.3 | 141.9 | 120.8 | 170.4 | 210.5 | 143.0 |
| 632.1 | 398.5 | 489.7 | 494.9 | 543.2 | 442.3 | 617.6 | 582.9 | 426.8 |
| 371.0 | 242.5 | 274.3 | 296.8 | 317.9 | 258.3 | 393.7 | 395.4 | 248.9 |
| 363.6 | 307.3 | 341.0 | 348.3 | 399.9 | 354.9 | 458.4 | 462.8 | 369.2 |

|       |       |       |       |       |       |       |       |       |
|-------|-------|-------|-------|-------|-------|-------|-------|-------|
| 45.3  | 62.2  | 50.6  | 58.1  | 69.4  | 56.7  | 56.0  | 55.6  | 48.4  |
| 164.8 | 87.2  | 123.1 | 117.2 | 140.2 | 125.2 | 157.2 | 178.6 | 122.5 |
| 11.5  | 11.8  | 7.0   | 12.4  | 9.2   | 10.3  | 17.7  | 18.7  | 16.5  |
| 49.8  | 91.4  | 80.9  | 99.1  | 93.7  | 76.8  | 126.2 | 162.3 | 111.9 |
| 167.9 | 133.3 | 147.9 | 144.8 | 142.0 | 145.4 | 247.8 | 264.0 | 148.7 |
| 1.7   | 1.2   | 0.6   | 1.9   | 0.8   | 3.3   | 8.5   | 7.1   | 6.8   |
| 24.6  | 21.9  | 23.3  | 22.5  | 30.4  | 18.8  | 32.6  | 25.0  | 22.4  |
| 145.2 | 111.7 | 116.7 | 120.4 | 110.7 | 115.4 | 164.8 | 137.5 | 118.1 |
| 75.3  | 53.5  | 52.1  | 60.8  | 50.4  | 44.3  | 80.0  | 88.2  | 70.5  |
| 63.0  | 34.3  | 40.9  | 39.1  | 47.4  | 44.4  | 50.5  | 64.2  | 35.4  |
| 137.2 | 71.4  | 93.1  | 165.8 | 127.1 | 95.4  | 200.3 | 224.0 | 187.4 |
| 161.3 | 80.9  | 147.4 | 127.2 | 139.4 | 144.6 | 153.1 | 203.5 | 118.7 |
| 78.1  | 38.5  | 39.0  | 43.9  | 39.3  | 46.2  | 60.5  | 64.2  | 29.8  |
| 73.1  | 60.6  | 51.2  | 63.1  | 70.5  | 69.2  | 84.2  | 89.2  | 59.5  |
| 26.1  | 21.9  | 33.1  | 36.1  | 34.3  | 37.5  | 73.9  | 77.3  | 53.8  |
| 222.2 | 165.2 | 186.5 | 194.5 | 236.7 | 223.9 | 291.9 | 323.4 | 279.3 |
| 213.5 | 156.9 | 177.1 | 170.0 | 193.5 | 203.4 | 239.3 | 293.3 | 184.7 |
| 32.0  | 21.5  | 15.6  | 22.7  | 31.3  | 33.2  | 43.7  | 57.1  | 45.6  |
| 190.9 | 124.1 | 146.4 | 138.5 | 138.9 | 151.8 | 185.0 | 195.5 | 160.9 |
| 47.2  | 25.5  | 26.3  | 28.6  | 30.9  | 27.7  | 26.5  | 59.9  | 29.4  |
| 112.0 | 54.7  | 56.3  | 75.7  | 73.1  | 69.8  | 113.7 | 112.6 | 66.7  |
| 29.6  | 25.0  | 19.3  | 30.3  | 20.5  | 25.4  | 26.7  | 32.9  | 22.9  |
| 56.8  | 47.7  | 38.6  | 56.4  | 58.1  | 47.9  | 78.2  | 90.4  | 61.4  |
| 99.3  | 64.4  | 66.9  | 75.9  | 95.3  | 78.7  | 111.5 | 116.8 | 82.4  |
| 106.7 | 59.3  | 69.7  | 93.2  | 87.4  | 80.4  | 107.2 | 149.5 | 77.1  |
| 22.7  | 12.1  | 12.4  | 7.0   | 13.4  | 16.4  | 23.5  | 33.5  | 15.6  |
| 72.6  | 44.6  | 43.9  | 58.8  | 47.2  | 56.5  | 72.9  | 71.1  | 48.9  |
| 19.9  | 9.3   | 24.7  | 20.3  | 13.3  | 15.1  | 20.8  | 20.9  | 20.9  |
| 49.5  | 28.0  | 37.4  | 39.2  | 41.0  | 36.4  | 50.4  | 60.8  | 57.1  |
| 17.3  | 40.1  | 26.3  | 30.8  | 34.0  | 24.1  | 33.4  | 38.0  | 34.3  |
| 53.3  | 15.1  | 10.8  | 18.1  | 22.1  | 15.5  | 23.4  | 27.7  | 18.3  |
| 155.9 | 78.3  | 109.5 | 98.5  | 110.3 | 116.7 | 159.4 | 196.7 | 120.1 |
| 73.9  | 59.4  | 75.8  | 68.9  | 64.1  | 75.3  | 93.1  | 113.5 | 71.6  |
| 336.3 | 170.4 | 214.7 | 192.9 | 214.5 | 220.0 | 259.2 | 302.5 | 197.2 |
| 90.1  | 50.1  | 67.6  | 68.6  | 68.7  | 75.6  | 98.0  | 93.3  | 67.9  |
| 405.0 | 279.7 | 322.7 | 359.7 | 371.1 | 317.6 | 437.1 | 418.6 | 308.2 |
| 42.8  | 39.6  | 65.1  | 84.1  | 77.5  | 92.9  | 108.5 | 128.5 | 125.2 |
| 96.3  | 36.8  | 58.3  | 64.5  | 56.6  | 54.1  | 80.1  | 91.2  | 73.8  |
| 120.6 | 52.0  | 76.0  | 67.3  | 67.5  | 86.6  | 92.0  | 149.5 | 101.4 |
| 72.9  | 54.7  | 52.8  | 48.4  | 65.3  | 59.7  | 87.0  | 103.0 | 66.1  |
| 52.1  | 23.2  | 23.5  | 33.0  | 28.8  | 27.8  | 45.6  | 53.6  | 43.6  |
| 57.7  | 48.2  | 44.6  | 69.2  | 64.6  | 65.7  | 84.9  | 54.1  | 65.4  |
| 98.3  | 54.8  | 50.4  | 69.9  | 69.8  | 67.5  | 83.3  | 115.5 | 81.1  |
| 72.9  | 56.7  | 52.0  | 56.5  | 58.3  | 52.3  | 61.3  | 70.1  | 58.2  |
| 172.7 | 133.9 | 146.4 | 156.9 | 161.5 | 166.4 | 196.1 | 184.9 | 113.7 |
| 1.8   | 2.0   | 0.3   | 1.1   | 0.2   | 0.1   | 1.8   | 0.8   | 0.0   |
| 135.3 | 94.4  | 102.7 | 128.3 | 149.1 | 120.6 | 171.9 | 233.6 | 143.0 |
| 64.2  | 36.1  | 34.5  | 55.0  | 44.6  | 33.3  | 60.1  | 72.6  | 52.5  |
| 74.4  | 52.5  | 67.6  | 63.7  | 50.7  | 60.2  | 68.9  | 89.3  | 42.5  |
| 42.6  | 27.7  | 27.5  | 29.6  | 25.0  | 30.7  | 46.6  | 66.7  | 30.1  |
| 109.3 | 101.8 | 101.3 | 82.1  | 98.6  | 86.6  | 127.2 | 106.4 | 68.4  |
| 48.2  | 39.5  | 44.6  | 36.2  | 34.4  | 32.7  | 47.5  | 54.8  | 37.5  |
| 239.4 | 89.4  | 115.6 | 100.4 | 120.2 | 113.5 | 159.4 | 162.6 | 113.6 |

|       |       |       |       |       |       |       |       |       |
|-------|-------|-------|-------|-------|-------|-------|-------|-------|
| 209.3 | 172.1 | 213.0 | 222.4 | 238.3 | 220.3 | 321.4 | 396.5 | 239.0 |
| 109.4 | 82.5  | 60.4  | 80.9  | 79.6  | 79.5  | 121.5 | 115.5 | 91.9  |
| 25.3  | 18.6  | 29.8  | 26.4  | 30.7  | 21.6  | 29.2  | 30.5  | 22.0  |
| 91.7  | 43.3  | 41.2  | 41.1  | 28.7  | 37.2  | 41.3  | 56.9  | 48.4  |
| 42.5  | 34.6  | 39.9  | 45.7  | 37.1  | 30.9  | 49.4  | 52.2  | 36.3  |
| 23.3  | 10.9  | 15.6  | 18.8  | 14.1  | 13.3  | 16.5  | 22.2  | 16.0  |
| 93.3  | 63.7  | 76.0  | 65.7  | 72.8  | 69.7  | 107.3 | 111.3 | 67.5  |
| 545.2 | 414.5 | 478.2 | 503.1 | 466.6 | 514.0 | 570.3 | 555.0 | 430.3 |
| 323.0 | 313.7 | 381.8 | 433.7 | 401.0 | 384.3 | 492.1 | 473.1 | 355.6 |
| 220.8 | 130.8 | 131.2 | 144.6 | 164.7 | 168.9 | 190.1 | 248.8 | 163.1 |
| 207.6 | 113.8 | 184.4 | 180.5 | 202.1 | 196.8 | 252.5 | 252.0 | 279.7 |
| 57.2  | 40.6  | 55.9  | 48.7  | 53.0  | 57.7  | 52.9  | 75.7  | 55.1  |
| 108.2 | 64.4  | 92.8  | 95.7  | 81.0  | 112.3 | 119.3 | 138.2 | 128.4 |
| 26.0  | 13.6  | 24.0  | 18.8  | 18.5  | 17.8  | 26.6  | 30.6  | 21.8  |
| 590.7 | 354.5 | 419.3 | 465.9 | 461.0 | 469.5 | 615.8 | 583.3 | 465.9 |
| 65.2  | 18.4  | 30.5  | 36.4  | 37.1  | 41.8  | 47.7  | 59.9  | 50.6  |
| 41.7  | 24.0  | 36.8  | 39.5  | 32.0  | 29.9  | 39.3  | 39.1  | 28.7  |
| 399.5 | 234.2 | 239.5 | 264.3 | 308.4 | 311.1 | 386.8 | 620.5 | 272.5 |
| 157.6 | 117.8 | 143.5 | 129.4 | 139.8 | 124.0 | 158.9 | 157.9 | 107.8 |
| 89.1  | 65.5  | 73.4  | 93.3  | 102.2 | 88.9  | 105.7 | 126.2 | 101.8 |
| 65.8  | 40.2  | 36.6  | 38.9  | 40.3  | 39.9  | 75.1  | 69.3  | 65.2  |
| 74.2  | 66.8  | 72.1  | 64.0  | 72.8  | 71.1  | 103.4 | 104.2 | 87.4  |
| 131.8 | 67.9  | 92.6  | 83.9  | 80.0  | 77.1  | 90.0  | 131.5 | 109.1 |
| 65.7  | 42.7  | 52.1  | 42.1  | 49.7  | 55.3  | 74.8  | 82.7  | 91.9  |
| 0.5   | 3.4   | 0.9   | 0.2   | 0.8   | 1.3   | 1.3   | 5.7   | 1.7   |
| 9.2   | 3.3   | 9.7   | 12.6  | 9.1   | 2.7   | 6.0   | 12.3  | 1.2   |
| 81.0  | 38.8  | 58.1  | 55.3  | 48.8  | 53.9  | 82.8  | 75.8  | 59.3  |
| 59.3  | 36.9  | 35.2  | 47.3  | 54.3  | 34.4  | 58.0  | 74.9  | 48.3  |
| 107.0 | 59.5  | 63.3  | 71.4  | 85.4  | 82.9  | 103.6 | 145.6 | 65.9  |
| 116.4 | 80.9  | 67.3  | 99.7  | 99.7  | 84.3  | 138.5 | 170.9 | 91.2  |
| 15.8  | 16.6  | 15.8  | 18.6  | 18.3  | 15.7  | 28.2  | 33.1  | 25.5  |
| 797.4 | 612.6 | 694.1 | 669.8 | 718.6 | 692.5 | 944.4 | 917.2 | 732.4 |
| 98.8  | 134.0 | 109.2 | 121.4 | 128.6 | 107.1 | 138.6 | 154.1 | 122.9 |
| 221.9 | 110.7 | 124.8 | 122.2 | 125.6 | 129.3 | 178.5 | 208.6 | 152.5 |
| 78.8  | 96.1  | 84.4  | 88.0  | 82.3  | 92.1  | 117.8 | 139.2 | 77.1  |
| 90.8  | 97.9  | 77.8  | 88.5  | 90.5  | 78.4  | 104.5 | 111.5 | 101.3 |
| 180.4 | 105.9 | 140.2 | 137.2 | 148.1 | 162.0 | 215.0 | 262.6 | 224.6 |
| 61.3  | 39.0  | 45.2  | 44.7  | 42.0  | 47.0  | 52.8  | 72.2  | 32.8  |
| 16.3  | 2.0   | 11.4  | 6.8   | 8.9   | 12.7  | 9.5   | 17.8  | 10.2  |
| 27.1  | 17.4  | 14.0  | 15.7  | 16.2  | 22.9  | 24.5  | 33.0  | 26.5  |
| 33.7  | 17.0  | 24.4  | 24.2  | 18.9  | 24.2  | 32.2  | 49.1  | 16.9  |
| 48.3  | 25.9  | 30.1  | 28.4  | 34.7  | 35.6  | 48.6  | 47.3  | 38.6  |
| 2.9   | 5.3   | 0.7   | 4.5   | 7.2   | 1.3   | 4.0   | 0.8   | 8.5   |
| 359.9 | 321.2 | 350.6 | 357.2 | 379.4 | 363.1 | 511.3 | 454.3 | 371.3 |
| 125.0 | 74.8  | 104.8 | 80.6  | 109.9 | 99.5  | 141.4 | 158.6 | 105.5 |
| 136.2 | 89.0  | 79.3  | 94.6  | 82.2  | 110.5 | 158.4 | 171.3 | 114.6 |
| 139.3 | 85.4  | 103.6 | 106.7 | 107.6 | 124.6 | 154.7 | 166.8 | 134.0 |
| 33.9  | 22.7  | 27.8  | 42.4  | 36.7  | 29.1  | 43.8  | 44.9  | 30.6  |
| 211.6 | 165.3 | 199.8 | 181.3 | 228.5 | 230.3 | 304.2 | 373.7 | 225.3 |
| 66.9  | 35.4  | 37.0  | 49.0  | 55.1  | 70.2  | 94.1  | 116.8 | 80.5  |
| 17.8  | 22.9  | 10.4  | 13.8  | 4.7   | 11.0  | 18.1  | 16.5  | 11.7  |
| 4.6   | 5.9   | 2.3   | 1.4   | 1.0   | 2.2   | 1.6   | 5.0   | 2.6   |
| 94.2  | 70.9  | 78.7  | 86.0  | 94.1  | 73.0  | 116.4 | 113.6 | 84.9  |

|        |       |        |        |        |        |        |        |        |
|--------|-------|--------|--------|--------|--------|--------|--------|--------|
| 29.2   | 12.4  | 12.9   | 18.5   | 15.9   | 19.4   | 28.0   | 39.2   | 25.7   |
| 28.1   | 24.8  | 21.1   | 28.0   | 23.4   | 22.3   | 28.2   | 38.1   | 32.5   |
| 81.5   | 60.3  | 69.6   | 77.2   | 57.9   | 57.9   | 72.9   | 121.2  | 73.4   |
| 278.7  | 165.1 | 197.5  | 223.5  | 206.7  | 210.6  | 345.3  | 362.7  | 190.8  |
| 172.2  | 85.7  | 94.5   | 148.7  | 100.6  | 91.2   | 146.0  | 191.9  | 95.2   |
| 143.5  | 88.8  | 121.0  | 113.1  | 114.6  | 135.4  | 178.4  | 191.5  | 121.5  |
| 47.6   | 19.2  | 21.2   | 27.9   | 29.3   | 33.3   | 44.8   | 39.4   | 22.2   |
| 94.0   | 58.2  | 74.5   | 85.2   | 84.7   | 57.6   | 116.4  | 127.5  | 94.3   |
| 5.8    | 4.7   | 5.2    | 5.1    | 6.9    | 1.8    | 5.0    | 8.5    | 8.8    |
| 60.7   | 56.4  | 65.3   | 66.8   | 54.5   | 62.8   | 92.9   | 92.0   | 73.4   |
| 77.1   | 43.7  | 59.1   | 79.4   | 55.0   | 61.4   | 84.4   | 77.2   | 51.4   |
| 25.5   | 14.0  | 14.5   | 11.5   | 17.2   | 16.0   | 28.3   | 43.3   | 22.0   |
| 7.5    | 12.6  | 8.2    | 10.1   | 14.6   | 13.9   | 18.3   | 21.9   | 13.0   |
| 47.6   | 35.9  | 42.3   | 41.2   | 43.6   | 42.1   | 50.2   | 65.1   | 46.2   |
| 113.6  | 76.8  | 82.5   | 94.7   | 107.7  | 104.8  | 145.3  | 175.5  | 107.6  |
| 114.1  | 61.9  | 80.0   | 89.0   | 77.4   | 84.1   | 122.2  | 116.1  | 76.8   |
| 51.5   | 37.5  | 41.1   | 47.4   | 51.4   | 34.9   | 65.1   | 67.7   | 43.7   |
| 52.4   | 55.0  | 45.2   | 66.7   | 74.8   | 73.4   | 104.0  | 91.1   | 61.3   |
| 48.2   | 30.4  | 40.8   | 36.1   | 40.1   | 43.7   | 47.4   | 52.9   | 47.6   |
| 9.9    | 2.0   | 2.5    | 1.8    | 2.2    | 2.4    | 2.8    | 2.8    | 0.7    |
| 120.4  | 81.0  | 97.0   | 105.0  | 109.5  | 115.2  | 138.7  | 170.2  | 142.0  |
| 2.2    | 1.5   | 1.1    | 0.9    | 1.1    | 4.9    | 4.0    | 4.3    | 1.6    |
| 74.7   | 38.8  | 42.6   | 54.7   | 52.4   | 43.0   | 63.1   | 72.4   | 48.5   |
| 76.1   | 49.0  | 54.5   | 60.6   | 57.8   | 51.9   | 57.8   | 80.2   | 66.9   |
| 82.5   | 62.2  | 58.8   | 70.9   | 67.0   | 59.0   | 79.6   | 100.0  | 62.1   |
| 29.7   | 26.3  | 27.5   | 29.8   | 25.7   | 22.9   | 39.7   | 44.0   | 37.7   |
| 134.3  | 58.4  | 74.5   | 78.8   | 93.8   | 92.2   | 103.1  | 132.5  | 66.5   |
| 19.9   | 15.5  | 10.9   | 11.7   | 12.5   | 19.2   | 16.5   | 19.9   | 11.6   |
| 49.1   | 27.1  | 40.3   | 35.3   | 30.7   | 28.2   | 24.9   | 33.8   | 34.0   |
| 43.7   | 54.2  | 56.0   | 53.7   | 61.0   | 53.3   | 67.0   | 85.5   | 51.8   |
| 123.1  | 79.0  | 116.8  | 117.9  | 107.7  | 106.1  | 134.1  | 104.0  | 122.0  |
| 188.2  | 146.3 | 183.2  | 174.9  | 189.6  | 175.9  | 268.0  | 304.7  | 215.0  |
| 71.2   | 59.3  | 53.8   | 78.8   | 63.6   | 56.0   | 97.6   | 85.9   | 78.4   |
| 54.4   | 40.0  | 36.0   | 38.3   | 29.5   | 40.0   | 57.7   | 68.9   | 42.4   |
| 33.4   | 22.5  | 22.1   | 32.7   | 34.3   | 27.0   | 48.3   | 53.2   | 48.2   |
| 2126.1 | 948.4 | 1420.7 | 1206.3 | 1341.1 | 1222.3 | 1492.8 | 1567.3 | 1103.8 |
| 28.7   | 41.4  | 41.7   | 42.7   | 30.5   | 29.0   | 63.2   | 63.8   | 38.2   |
| 25.5   | 25.1  | 24.2   | 31.8   | 29.4   | 30.1   | 48.3   | 48.0   | 35.7   |
| 20.4   | 20.1  | 16.0   | 16.1   | 17.9   | 12.4   | 23.9   | 17.2   | 14.4   |
| 51.0   | 47.5  | 49.1   | 63.3   | 59.5   | 64.0   | 80.4   | 82.7   | 56.4   |
| 20.1   | 14.1  | 20.2   | 20.1   | 23.6   | 21.0   | 25.6   | 22.2   | 19.8   |
| 13.3   | 6.7   | 2.3    | 4.9    | 2.4    | 1.8    | 18.3   | 16.6   | 8.1    |
| 28.0   | 26.6  | 19.5   | 30.3   | 29.3   | 31.2   | 47.3   | 43.7   | 28.1   |
| 148.6  | 64.9  | 77.1   | 83.8   | 86.8   | 95.0   | 119.3  | 148.1  | 90.0   |
| 258.1  | 117.0 | 149.2  | 162.5  | 196.7  | 171.8  | 249.3  | 314.0  | 172.8  |
| 84.9   | 60.1  | 65.6   | 66.2   | 64.2   | 65.5   | 85.8   | 88.7   | 75.4   |
| 98.9   | 70.6  | 69.6   | 60.7   | 63.2   | 61.0   | 63.7   | 104.0  | 78.5   |
| 54.5   | 29.5  | 45.1   | 47.7   | 48.8   | 42.5   | 67.8   | 73.6   | 57.9   |
| 21.4   | 18.9  | 7.8    | 12.9   | 10.9   | 2.2    | 21.7   | 14.9   | 18.9   |
| 203.6  | 140.6 | 147.4  | 150.1  | 195.1  | 181.0  | 184.2  | 202.4  | 135.3  |
| 184.1  | 166.1 | 212.9  | 205.1  | 213.3  | 234.6  | 276.9  | 332.3  | 230.1  |
| 416.8  | 367.1 | 350.3  | 402.9  | 412.5  | 412.3  | 491.2  | 608.3  | 399.3  |
| 21.8   | 26.8  | 22.2   | 26.9   | 19.2   | 19.3   | 28.8   | 29.4   | 29.6   |



|       |       |       |       |       |       |       |       |       |
|-------|-------|-------|-------|-------|-------|-------|-------|-------|
| 1.8   | 3.3   | 0.9   | 1.8   | 3.8   | 1.0   | 0.3   | 0.3   | 0.7   |
| 2.3   | 1.7   | 1.0   | 2.2   | 1.4   | 1.6   | 1.1   | 3.1   | 1.6   |
| 22.7  | 16.5  | 17.9  | 17.2  | 15.4  | 25.2  | 24.8  | 21.1  | 16.1  |
| 97.2  | 62.7  | 67.6  | 66.2  | 63.2  | 67.7  | 107.9 | 95.9  | 75.2  |
| 8.4   | 2.8   | 8.4   | 2.0   | 2.4   | 4.5   | 3.2   | 7.1   | 3.5   |
| 55.1  | 26.3  | 38.1  | 28.4  | 23.9  | 30.3  | 58.5  | 48.7  | 32.9  |
| 84.1  | 44.0  | 50.9  | 55.3  | 57.9  | 61.5  | 94.4  | 135.4 | 83.6  |
| 81.3  | 50.3  | 56.6  | 54.3  | 73.7  | 74.9  | 119.0 | 136.6 | 69.9  |
| 97.1  | 70.3  | 76.5  | 80.4  | 81.1  | 78.1  | 108.6 | 118.3 | 97.6  |
| 22.5  | 25.9  | 19.8  | 17.9  | 17.2  | 18.0  | 33.8  | 24.3  | 25.0  |
| 57.2  | 53.8  | 41.7  | 51.2  | 52.9  | 38.7  | 67.6  | 70.2  | 44.3  |
| 111.1 | 100.7 | 92.9  | 107.2 | 110.6 | 88.1  | 125.4 | 105.9 | 78.4  |
| 24.5  | 31.1  | 26.1  | 29.6  | 30.0  | 22.2  | 32.8  | 41.0  | 53.5  |
| 41.9  | 33.1  | 40.4  | 50.5  | 39.6  | 37.5  | 43.9  | 56.1  | 39.9  |
| 63.6  | 34.1  | 48.8  | 41.2  | 53.7  | 53.6  | 61.8  | 84.6  | 56.0  |
| 417.8 | 258.4 | 312.1 | 370.7 | 314.5 | 361.4 | 503.8 | 571.4 | 380.0 |
| 124.5 | 111.5 | 122.3 | 127.3 | 136.4 | 126.6 | 172.7 | 164.9 | 104.2 |
| 114.0 | 60.0  | 70.9  | 71.6  | 79.7  | 85.4  | 72.0  | 77.8  | 72.3  |
| 23.7  | 11.3  | 14.4  | 15.3  | 16.7  | 13.0  | 24.4  | 37.5  | 22.5  |
| 26.2  | 22.1  | 14.7  | 15.1  | 18.3  | 10.0  | 18.6  | 20.6  | 21.2  |
| 40.1  | 26.6  | 41.3  | 25.0  | 28.9  | 34.6  | 38.2  | 43.8  | 26.6  |
| 12.8  | 10.5  | 10.8  | 6.1   | 7.7   | 9.8   | 12.8  | 7.2   | 9.4   |
| 2.9   | 2.8   | 5.5   | 7.4   | 2.5   | 1.4   | 2.1   | 3.7   | 1.1   |
| 286.3 | 163.3 | 190.0 | 242.5 | 196.0 | 212.3 | 320.0 | 308.5 | 280.5 |
| 541.6 | 337.6 | 391.1 | 384.1 | 430.0 | 426.7 | 495.8 | 518.8 | 431.7 |
| 188.1 | 136.3 | 224.7 | 197.2 | 187.1 | 204.6 | 233.5 | 316.3 | 162.2 |
| 90.4  | 64.0  | 69.3  | 69.9  | 78.6  | 70.2  | 113.8 | 113.8 | 105.7 |
| 21.1  | 11.0  | 15.7  | 11.7  | 17.6  | 23.0  | 29.1  | 23.8  | 14.3  |
| 180.2 | 83.4  | 112.7 | 111.0 | 91.7  | 114.9 | 163.2 | 166.0 | 98.0  |
| 45.0  | 44.0  | 41.8  | 37.5  | 50.0  | 52.4  | 50.4  | 45.1  | 58.0  |
| 67.2  | 56.5  | 55.4  | 50.7  | 55.4  | 57.1  | 97.0  | 89.4  | 72.4  |
| 6.5   | 4.7   | 0.6   | 7.3   | 8.6   | 6.5   | 0.9   | 5.5   | 1.0   |
| 128.9 | 80.4  | 89.7  | 96.1  | 107.8 | 89.5  | 122.2 | 150.6 | 111.3 |
| 57.2  | 102.8 | 52.3  | 117.2 | 102.2 | 60.8  | 61.1  | 157.8 | 155.0 |
| 1.1   | 1.0   | 2.8   | 2.3   | 1.7   | 1.0   | 10.1  | 7.0   | 3.7   |
| 0.5   | 3.4   | 0.8   | 4.0   | 1.4   | 2.5   | 0.5   | 5.9   | 0.5   |
| 99.6  | 91.8  | 97.9  | 93.9  | 119.1 | 109.9 | 135.3 | 128.3 | 87.5  |
| 60.2  | 44.3  | 35.4  | 33.7  | 42.1  | 44.9  | 56.1  | 58.7  | 41.0  |
| 5.8   | 3.6   | 9.6   | 4.3   | 2.4   | 2.7   | 4.4   | 7.8   | 4.0   |
| 250.2 | 147.4 | 195.6 | 196.1 | 200.0 | 200.9 | 275.9 | 286.7 | 156.0 |
| 65.5  | 41.8  | 42.5  | 49.9  | 46.4  | 48.6  | 60.8  | 82.5  | 52.0  |
| 81.8  | 43.3  | 42.5  | 43.9  | 60.0  | 52.2  | 76.8  | 99.4  | 45.4  |
| 95.0  | 39.4  | 39.2  | 47.4  | 45.6  | 54.6  | 70.8  | 114.2 | 62.0  |
| 103.7 | 30.2  | 56.8  | 41.7  | 49.4  | 75.9  | 72.0  | 134.0 | 41.3  |
| 78.4  | 29.6  | 42.1  | 39.0  | 35.2  | 44.9  | 69.8  | 89.2  | 46.9  |
| 135.3 | 144.3 | 115.3 | 137.2 | 166.4 | 145.4 | 173.7 | 224.8 | 217.9 |
| 69.9  | 44.4  | 68.8  | 62.0  | 66.8  | 57.1  | 87.6  | 81.0  | 52.0  |
| 31.6  | 29.9  | 24.4  | 26.9  | 29.7  | 30.8  | 33.4  | 55.0  | 62.3  |
| 19.9  | 29.2  | 27.8  | 21.1  | 34.5  | 36.4  | 38.8  | 35.0  | 27.3  |
| 8.3   | 6.5   | 9.8   | 4.5   | 5.8   | 5.5   | 10.8  | 9.6   | 8.9   |
| 40.3  | 47.3  | 53.4  | 57.1  | 40.1  | 50.2  | 76.9  | 62.1  | 40.2  |
| 10.3  | 8.4   | 4.9   | 10.5  | 4.3   | 4.8   | 10.9  | 14.7  | 11.4  |
| 126.6 | 90.9  | 98.4  | 84.5  | 92.5  | 107.3 | 137.6 | 165.7 | 127.9 |

|       |       |       |       |       |       |       |       |       |
|-------|-------|-------|-------|-------|-------|-------|-------|-------|
| 86.9  | 63.6  | 70.9  | 79.0  | 71.5  | 76.4  | 101.0 | 92.8  | 86.8  |
| 81.9  | 49.8  | 51.0  | 53.4  | 53.3  | 71.9  | 72.1  | 104.7 | 49.8  |
| 5.3   | 0.5   | 5.5   | 1.2   | 1.2   | 6.0   | 2.1   | 1.7   | 4.9   |
| 143.2 | 85.8  | 91.5  | 90.4  | 120.7 | 112.4 | 175.5 | 210.2 | 177.5 |
| 100.4 | 52.7  | 71.7  | 61.6  | 60.5  | 57.5  | 96.0  | 124.0 | 66.7  |
| 85.6  | 61.9  | 88.7  | 90.3  | 77.9  | 67.5  | 101.9 | 95.7  | 77.0  |
| 117.3 | 56.9  | 74.8  | 80.6  | 77.4  | 102.1 | 119.9 | 140.1 | 175.2 |
| 88.3  | 45.7  | 51.3  | 46.0  | 61.8  | 62.3  | 54.7  | 93.0  | 57.8  |
| 2.4   | 1.4   | 0.6   | 1.1   | 1.6   | 1.0   | 1.0   | 1.4   | 1.6   |
| 3.0   | 5.1   | 3.7   | 3.0   | 3.9   | 0.2   | 4.1   | 0.7   | 3.9   |
| 48.8  | 25.3  | 50.6  | 42.2  | 44.2  | 50.1  | 56.2  | 68.7  | 38.0  |
| 100.5 | 52.8  | 60.9  | 65.4  | 48.0  | 61.5  | 75.8  | 99.4  | 53.3  |
| 55.4  | 37.9  | 33.8  | 31.4  | 38.8  | 46.5  | 55.4  | 80.1  | 46.0  |
| 284.9 | 142.0 | 191.1 | 202.9 | 210.1 | 221.6 | 265.5 | 288.3 | 242.0 |
| 16.7  | 8.0   | 7.8   | 7.4   | 11.6  | 8.7   | 15.7  | 16.7  | 9.5   |
| 19.1  | 6.5   | 10.2  | 14.5  | 10.0  | 15.1  | 15.5  | 16.2  | 7.2   |
| 98.5  | 55.4  | 75.1  | 60.9  | 71.2  | 65.5  | 77.3  | 91.6  | 68.9  |
| 152.8 | 104.7 | 121.5 | 114.0 | 137.1 | 129.4 | 165.5 | 194.1 | 201.8 |
| 35.8  | 23.3  | 24.4  | 25.5  | 24.1  | 20.7  | 29.8  | 29.1  | 33.5  |
| 242.8 | 142.0 | 119.0 | 150.1 | 197.0 | 194.4 | 259.8 | 385.0 | 236.9 |
| 0.3   | 0.5   | 0.3   | 0.6   | 3.8   | 0.8   | 6.2   | 6.0   | 3.0   |
| 0.1   | 0.4   | 0.2   | 0.3   | 0.5   | 0.1   | 0.8   | 0.1   | 2.4   |
| 71.7  | 66.0  | 96.0  | 81.8  | 74.3  | 79.2  | 110.5 | 124.8 | 79.3  |
| 299.1 | 134.7 | 158.4 | 165.2 | 192.0 | 201.8 | 263.7 | 364.8 | 221.2 |
| 42.1  | 34.1  | 44.9  | 45.1  | 50.4  | 46.8  | 59.5  | 63.1  | 47.3  |
| 38.4  | 39.2  | 39.3  | 32.4  | 35.0  | 38.1  | 50.4  | 59.3  | 38.6  |
| 147.4 | 96.0  | 113.1 | 111.4 | 131.2 | 110.9 | 155.5 | 194.1 | 125.8 |
| 10.6  | 6.5   | 1.6   | 2.5   | 1.7   | 0.8   | 13.9  | 1.3   | 5.2   |
| 42.0  | 24.8  | 29.8  | 31.7  | 31.5  | 40.9  | 59.4  | 66.5  | 42.0  |
| 205.5 | 126.3 | 136.8 | 141.6 | 168.7 | 175.3 | 242.2 | 347.9 | 253.2 |
| 62.6  | 48.3  | 45.0  | 54.2  | 56.7  | 49.5  | 71.4  | 63.4  | 54.3  |
| 214.2 | 171.0 | 186.4 | 167.6 | 173.3 | 176.2 | 240.2 | 271.2 | 151.4 |
| 138.9 | 142.6 | 154.5 | 166.2 | 179.2 | 181.5 | 218.9 | 221.9 | 182.0 |
| 58.6  | 39.0  | 51.4  | 55.8  | 61.8  | 47.2  | 58.9  | 80.5  | 57.8  |
| 51.6  | 51.3  | 42.8  | 45.5  | 55.2  | 40.5  | 65.1  | 68.9  | 59.3  |
| 19.0  | 14.1  | 15.1  | 14.2  | 16.7  | 27.9  | 24.4  | 28.0  | 20.1  |
| 96.9  | 60.9  | 60.2  | 59.7  | 66.4  | 53.6  | 70.8  | 101.9 | 61.6  |
| 10.4  | 6.0   | 0.3   | 3.4   | 3.9   | 2.8   | 0.6   | 1.0   | 0.4   |
| 9.7   | 2.6   | 0.7   | 3.0   | 4.8   | 1.1   | 1.2   | 2.3   | 5.8   |
| 93.9  | 41.6  | 46.4  | 44.3  | 44.0  | 63.6  | 85.7  | 101.4 | 51.8  |
| 19.1  | 22.7  | 15.1  | 20.1  | 17.0  | 17.8  | 23.6  | 26.7  | 17.5  |
| 33.0  | 15.8  | 19.7  | 19.5  | 25.1  | 27.8  | 33.9  | 63.8  | 22.1  |
| 13.2  | 8.9   | 10.3  | 10.9  | 12.6  | 10.1  | 13.8  | 18.0  | 8.9   |
| 45.2  | 46.9  | 54.3  | 60.4  | 63.5  | 43.2  | 71.2  | 65.2  | 22.5  |
| 60.9  | 62.1  | 57.5  | 54.7  | 54.6  | 53.3  | 71.2  | 77.4  | 55.2  |
| 134.3 | 94.2  | 103.6 | 110.2 | 110.1 | 121.0 | 130.7 | 147.6 | 97.2  |
| 197.2 | 120.0 | 185.4 | 194.0 | 205.5 | 188.8 | 250.2 | 238.6 | 230.8 |
| 41.1  | 27.7  | 30.2  | 36.6  | 36.9  | 28.4  | 42.0  | 39.2  | 40.5  |
| 22.9  | 31.7  | 27.0  | 26.1  | 23.9  | 32.6  | 23.9  | 45.6  | 21.6  |
| 55.9  | 31.6  | 44.7  | 31.9  | 40.3  | 29.4  | 76.4  | 48.1  | 41.3  |
| 41.9  | 15.7  | 30.4  | 21.3  | 26.4  | 22.7  | 32.0  | 43.6  | 41.0  |
| 47.0  | 38.0  | 47.0  | 45.3  | 43.6  | 43.2  | 51.9  | 54.8  | 36.6  |
| 70.5  | 55.7  | 61.7  | 66.7  | 73.6  | 69.5  | 85.0  | 104.4 | 64.4  |

|       |       |       |       |       |       |       |       |       |
|-------|-------|-------|-------|-------|-------|-------|-------|-------|
| 20.3  | 10.3  | 16.6  | 14.4  | 9.0   | 26.4  | 33.8  | 32.6  | 16.6  |
| 74.0  | 51.9  | 63.5  | 90.7  | 61.6  | 69.4  | 75.2  | 96.3  | 56.0  |
| 57.8  | 13.5  | 21.9  | 30.6  | 14.9  | 18.1  | 26.3  | 37.9  | 23.6  |
| 22.4  | 28.9  | 28.7  | 32.7  | 24.6  | 44.1  | 57.9  | 31.4  | 31.2  |
| 69.0  | 62.3  | 70.2  | 78.4  | 70.8  | 74.7  | 92.7  | 113.6 | 84.0  |
| 83.7  | 53.0  | 61.9  | 64.3  | 65.2  | 61.1  | 89.0  | 112.0 | 125.2 |
| 135.9 | 99.7  | 123.3 | 135.1 | 126.6 | 114.1 | 164.0 | 200.1 | 112.7 |
| 75.8  | 44.6  | 58.7  | 51.9  | 48.2  | 59.6  | 72.7  | 105.9 | 51.8  |
| 51.6  | 26.1  | 31.9  | 33.1  | 33.2  | 36.5  | 38.1  | 55.0  | 31.3  |
| 103.5 | 73.7  | 68.2  | 68.6  | 76.4  | 66.3  | 101.0 | 113.9 | 65.1  |
| 136.7 | 137.8 | 126.6 | 136.1 | 138.8 | 137.5 | 185.6 | 213.2 | 251.0 |
| 391.7 | 241.6 | 273.0 | 287.6 | 296.4 | 269.5 | 368.1 | 375.0 | 222.0 |
| 122.2 | 82.8  | 97.3  | 100.8 | 111.3 | 123.9 | 144.8 | 137.6 | 86.7  |
| 3.1   | 1.5   | 0.6   | 2.4   | 0.9   | 0.5   | 1.1   | 0.4   | 0.8   |
| 63.8  | 86.9  | 77.9  | 104.7 | 104.3 | 77.4  | 115.1 | 87.8  | 59.4  |
| 178.4 | 99.6  | 147.3 | 153.5 | 164.3 | 153.0 | 234.9 | 261.2 | 119.6 |
| 20.5  | 11.8  | 13.6  | 7.9   | 3.6   | 6.3   | 7.4   | 18.8  | 5.3   |
| 12.7  | 7.8   | 2.0   | 10.0  | 13.9  | 5.7   | 10.2  | 10.3  | 5.6   |
| 86.1  | 50.3  | 67.1  | 59.5  | 51.3  | 58.5  | 99.3  | 92.5  | 91.9  |
| 31.1  | 20.1  | 23.0  | 20.7  | 18.3  | 19.6  | 29.1  | 38.5  | 34.5  |
| 250.1 | 106.8 | 150.4 | 162.3 | 159.9 | 202.1 | 234.8 | 368.7 | 191.7 |
| 20.7  | 6.1   | 8.1   | 11.7  | 9.7   | 9.0   | 11.7  | 17.2  | 13.2  |
| 28.2  | 34.0  | 36.8  | 38.0  | 37.1  | 37.2  | 41.1  | 46.2  | 28.4  |
| 28.4  | 20.2  | 24.7  | 24.9  | 25.1  | 19.9  | 35.9  | 28.8  | 21.2  |
| 22.3  | 11.9  | 14.0  | 10.8  | 8.0   | 13.4  | 21.8  | 33.4  | 17.2  |
| 51.4  | 36.5  | 36.8  | 40.4  | 45.8  | 47.7  | 45.8  | 51.2  | 47.0  |
| 96.6  | 71.8  | 78.2  | 82.8  | 85.0  | 80.2  | 95.9  | 125.8 | 85.8  |
| 201.0 | 166.9 | 200.9 | 219.5 | 227.7 | 208.4 | 260.2 | 288.9 | 244.9 |
| 0.2   | 1.0   | 1.3   | 0.3   | 0.3   | 0.6   | 0.7   | 0.9   | 0.9   |
| 25.6  | 19.9  | 14.4  | 13.9  | 18.1  | 16.2  | 25.7  | 33.3  | 22.5  |
| 42.4  | 25.3  | 43.0  | 32.1  | 39.6  | 33.5  | 40.0  | 42.7  | 41.5  |
| 95.8  | 58.0  | 106.0 | 95.8  | 90.9  | 105.1 | 114.0 | 176.0 | 112.7 |
| 40.2  | 29.6  | 24.5  | 36.3  | 38.0  | 29.2  | 46.3  | 56.5  | 38.7  |
| 112.7 | 60.5  | 71.5  | 88.0  | 70.7  | 80.7  | 88.1  | 112.0 | 65.3  |
| 40.5  | 50.8  | 58.6  | 68.2  | 46.4  | 50.6  | 56.0  | 77.9  | 47.9  |
| 55.1  | 31.6  | 41.0  | 50.2  | 47.4  | 48.8  | 61.1  | 67.6  | 50.8  |
| 27.8  | 21.6  | 30.1  | 27.0  | 13.4  | 20.1  | 34.1  | 58.7  | 26.9  |
| 98.2  | 80.8  | 104.6 | 104.6 | 101.8 | 101.2 | 132.3 | 134.7 | 136.9 |
| 24.7  | 21.8  | 30.4  | 18.7  | 21.8  | 20.0  | 33.7  | 46.4  | 28.2  |
| 14.8  | 8.4   | 13.2  | 11.3  | 11.1  | 15.7  | 15.1  | 24.2  | 12.2  |
| 12.3  | 11.4  | 18.2  | 14.7  | 15.7  | 12.7  | 26.8  | 27.3  | 22.7  |
| 90.9  | 60.4  | 57.9  | 58.9  | 74.8  | 63.1  | 78.6  | 97.1  | 77.5  |
| 0.1   | 0.1   | 0.1   | 0.3   | 1.0   | 0.7   | 0.5   | 0.1   | 4.4   |
| 5.3   | 4.0   | 3.7   | 2.8   | 4.2   | 3.3   | 8.7   | 14.8  | 7.6   |
| 2.1   | 7.4   | 0.8   | 3.7   | 8.0   | 0.9   | 1.2   | 2.6   | 4.2   |
| 5.8   | 12.2  | 10.8  | 17.9  | 13.5  | 8.5   | 11.6  | 15.0  | 7.9   |
| 15.7  | 9.2   | 8.6   | 4.8   | 11.8  | 8.5   | 11.8  | 22.2  | 12.6  |
| 168.1 | 76.1  | 97.8  | 110.0 | 104.2 | 102.4 | 134.1 | 163.5 | 120.3 |
| 31.2  | 28.1  | 17.6  | 33.2  | 21.1  | 23.8  | 29.2  | 46.4  | 30.4  |
| 5.4   | 6.6   | 8.1   | 11.3  | 11.8  | 9.4   | 14.3  | 9.6   | 11.3  |
| 21.2  | 6.9   | 11.5  | 9.5   | 10.1  | 12.3  | 14.0  | 21.9  | 18.5  |
| 83.1  | 43.6  | 62.3  | 73.7  | 70.9  | 48.8  | 77.3  | 82.4  | 58.4  |
| 9.5   | 8.0   | 7.2   | 8.7   | 4.5   | 8.0   | 6.1   | 16.4  | 8.7   |

|       |       |       |       |       |       |       |       |       |
|-------|-------|-------|-------|-------|-------|-------|-------|-------|
| 5.9   | 1.5   | 12.0  | 1.5   | 6.4   | 8.3   | 12.1  | 12.0  | 12.3  |
| 24.0  | 13.8  | 13.2  | 20.6  | 20.4  | 20.3  | 28.7  | 24.6  | 12.2  |
| 35.7  | 15.8  | 24.5  | 21.7  | 23.3  | 19.4  | 31.6  | 45.2  | 27.0  |
| 2.0   | 3.9   | 5.1   | 1.6   | 4.8   | 13.6  | 2.4   | 7.6   | 8.5   |
| 29.5  | 14.9  | 17.0  | 14.3  | 22.2  | 18.1  | 29.4  | 46.6  | 24.7  |
| 15.3  | 11.2  | 12.4  | 13.3  | 7.7   | 15.4  | 16.4  | 14.1  | 14.2  |
| 9.2   | 7.6   | 8.9   | 6.6   | 10.1  | 9.3   | 11.7  | 15.0  | 11.7  |
| 10.1  | 2.1   | 14.7  | 5.1   | 10.5  | 1.7   | 11.1  | 10.8  | 11.3  |
| 45.0  | 31.1  | 38.2  | 36.8  | 47.1  | 49.0  | 70.3  | 110.1 | 56.7  |
| 1.0   | 1.9   | 2.6   | 1.0   | 1.8   | 2.0   | 2.5   | 2.7   | 4.0   |
| 39.4  | 47.7  | 38.6  | 50.4  | 43.4  | 44.1  | 63.3  | 59.7  | 43.9  |
| 119.3 | 48.6  | 57.4  | 44.3  | 62.9  | 78.7  | 83.2  | 105.4 | 95.1  |
| 24.4  | 26.0  | 22.3  | 26.1  | 25.1  | 23.8  | 32.1  | 41.0  | 17.8  |
| 17.3  | 7.2   | 8.6   | 34.2  | 13.5  | 9.3   | 12.1  | 12.8  | 10.1  |
| 12.8  | 3.1   | 8.9   | 9.6   | 11.2  | 10.1  | 10.4  | 20.4  | 11.5  |
| 349.0 | 267.9 | 260.1 | 281.6 | 303.9 | 313.7 | 537.4 | 759.2 | 356.6 |
| 1.7   | 1.0   | 1.1   | 1.3   | 1.3   | 1.8   | 2.9   | 3.8   | 1.2   |
| 14.6  | 6.3   | 19.3  | 19.4  | 10.9  | 16.9  | 14.6  | 19.2  | 21.0  |
| 10.6  | 8.6   | 12.4  | 11.5  | 12.4  | 6.4   | 15.9  | 18.1  | 15.5  |
| 94.2  | 47.6  | 58.7  | 51.5  | 75.4  | 52.3  | 79.7  | 72.9  | 46.8  |
| 43.6  | 20.3  | 29.3  | 26.1  | 23.8  | 33.0  | 27.8  | 42.2  | 27.6  |
| 138.6 | 75.2  | 101.5 | 114.6 | 123.7 | 115.7 | 146.4 | 178.3 | 86.5  |
| 104.7 | 85.1  | 86.9  | 94.2  | 98.0  | 89.5  | 128.9 | 147.8 | 90.2  |
| 26.9  | 29.3  | 18.6  | 25.8  | 25.2  | 22.6  | 30.3  | 30.2  | 27.2  |
| 1.2   | 3.2   | 1.3   | 1.4   | 2.2   | 3.4   | 13.6  | 12.8  | 3.6   |
| 52.1  | 38.0  | 39.4  | 42.2  | 40.0  | 37.7  | 59.9  | 51.3  | 49.6  |
| 22.3  | 21.0  | 31.0  | 17.9  | 26.7  | 28.9  | 43.0  | 50.1  | 35.6  |
| 84.6  | 70.4  | 61.0  | 75.4  | 83.0  | 64.8  | 105.0 | 142.1 | 99.4  |
| 1.5   | 2.3   | 2.0   | 1.9   | 1.4   | 1.8   | 2.1   | 2.9   | 0.8   |
| 21.4  | 12.0  | 13.5  | 9.3   | 8.6   | 16.1  | 4.6   | 10.6  | 5.1   |
| 26.5  | 41.1  | 32.6  | 39.5  | 43.7  | 34.5  | 46.9  | 40.3  | 36.9  |
| 58.9  | 32.6  | 45.2  | 43.2  | 48.0  | 48.4  | 60.5  | 86.4  | 49.0  |
| 1.1   | 0.9   | 2.8   | 1.4   | 1.3   | 0.6   | 0.8   | 2.6   | 7.8   |
| 79.1  | 51.7  | 50.5  | 57.2  | 58.6  | 50.7  | 73.9  | 82.7  | 54.3  |
| 22.2  | 19.1  | 11.6  | 15.3  | 21.1  | 19.6  | 25.2  | 31.4  | 19.7  |
| 41.4  | 27.3  | 36.5  | 33.0  | 28.2  | 36.5  | 40.5  | 54.8  | 36.1  |
| 3.0   | 2.3   | 0.5   | 1.8   | 1.8   | 0.9   | 0.5   | 1.9   | 4.7   |
| 82.9  | 58.6  | 59.3  | 55.2  | 54.4  | 52.1  | 73.4  | 84.9  | 54.3  |
| 62.5  | 39.2  | 45.7  | 47.0  | 38.6  | 53.1  | 65.0  | 75.0  | 43.6  |
| 4.4   | 6.0   | 7.4   | 5.6   | 5.5   | 5.8   | 14.4  | 14.1  | 9.3   |
| 48.3  | 42.4  | 46.1  | 51.2  | 59.0  | 41.1  | 74.5  | 73.2  | 52.8  |
| 48.0  | 27.5  | 28.2  | 30.1  | 32.6  | 32.4  | 36.5  | 33.2  | 29.3  |
| 89.1  | 28.8  | 75.7  | 52.8  | 55.6  | 80.3  | 86.8  | 127.1 | 81.7  |
| 37.5  | 103.8 | 106.7 | 124.9 | 129.8 | 103.8 | 182.3 | 156.2 | 143.0 |
| 55.4  | 18.3  | 29.9  | 26.2  | 23.5  | 31.2  | 52.1  | 72.0  | 36.7  |
| 79.6  | 33.1  | 42.2  | 53.4  | 45.4  | 45.8  | 70.6  | 61.3  | 59.4  |
| 19.3  | 16.5  | 16.5  | 17.8  | 22.7  | 25.0  | 28.5  | 26.8  | 23.3  |
| 66.7  | 30.1  | 51.2  | 43.4  | 50.1  | 40.9  | 86.3  | 81.9  | 50.0  |
| 0.3   | 1.0   | 0.4   | 2.4   | 1.9   | 1.6   | 1.2   | 4.4   | 0.8   |
| 2.6   | 1.5   | 0.5   | 0.6   | 1.2   | 0.9   | 0.9   | 2.4   | 1.7   |
| 373.6 | 201.0 | 201.0 | 242.4 | 228.1 | 239.6 | 352.9 | 399.1 | 264.1 |
| 387.9 | 238.3 | 319.9 | 297.2 | 333.4 | 341.8 | 450.4 | 465.7 | 323.2 |
| 40.0  | 25.7  | 27.7  | 30.7  | 19.1  | 38.0  | 42.2  | 33.8  | 43.0  |

|       |       |       |       |       |       |       |       |       |
|-------|-------|-------|-------|-------|-------|-------|-------|-------|
| 50.8  | 34.8  | 44.9  | 48.0  | 53.9  | 51.3  | 75.8  | 95.3  | 38.0  |
| 54.7  | 38.2  | 53.1  | 52.1  | 45.6  | 54.5  | 49.4  | 78.0  | 42.1  |
| 0.3   | 0.4   | 1.2   | 0.4   | 0.4   | 0.3   | 0.8   | 2.5   | 0.6   |
| 43.7  | 22.8  | 21.5  | 14.3  | 27.4  | 27.9  | 38.8  | 60.1  | 48.8  |
| 15.9  | 5.4   | 10.0  | 7.6   | 10.0  | 10.3  | 14.5  | 17.9  | 12.4  |
| 21.7  | 18.1  | 20.1  | 16.8  | 22.7  | 19.8  | 21.5  | 21.8  | 20.5  |
| 29.2  | 26.9  | 30.4  | 28.6  | 37.1  | 34.3  | 33.2  | 40.1  | 22.8  |
| 63.2  | 59.0  | 46.1  | 40.3  | 56.2  | 50.2  | 70.9  | 125.1 | 79.7  |
| 0.7   | 0.5   | 0.6   | 0.8   | 1.0   | 0.5   | 1.0   | 0.5   | 0.5   |
| 43.9  | 9.9   | 21.0  | 15.5  | 17.3  | 25.3  | 33.5  | 46.6  | 21.6  |
| 52.3  | 34.1  | 27.4  | 32.1  | 37.8  | 34.2  | 53.7  | 60.9  | 42.7  |
| 33.4  | 21.7  | 19.5  | 19.1  | 18.0  | 29.6  | 29.4  | 30.2  | 20.1  |
| 8.0   | 8.7   | 11.4  | 11.4  | 6.6   | 4.7   | 12.2  | 13.1  | 7.1   |
| 2.0   | 8.3   | 5.8   | 6.7   | 2.2   | 4.5   | 4.1   | 1.4   | 3.8   |
| 172.5 | 96.9  | 116.1 | 110.8 | 134.3 | 101.5 | 207.4 | 226.4 | 161.8 |
| 374.0 | 247.8 | 303.2 | 302.0 | 316.8 | 327.0 | 421.1 | 568.4 | 327.5 |
| 46.3  | 34.2  | 39.4  | 49.1  | 32.8  | 40.9  | 50.7  | 64.3  | 43.7  |
| 0.7   | 6.0   | 5.8   | 0.2   | 0.7   | 0.8   | 5.5   | 6.3   | 7.5   |
| 98.9  | 48.6  | 37.0  | 32.1  | 69.1  | 49.0  | 80.1  | 135.6 | 56.3  |
| 151.5 | 78.4  | 118.3 | 103.5 | 117.6 | 107.4 | 145.9 | 167.1 | 133.0 |
| 210.7 | 92.8  | 115.0 | 129.8 | 109.9 | 133.6 | 168.2 | 235.6 | 145.3 |
| 62.8  | 37.9  | 42.7  | 51.0  | 41.7  | 45.9  | 75.7  | 80.1  | 52.2  |
| 88.9  | 77.6  | 103.2 | 117.5 | 103.0 | 109.5 | 149.7 | 156.2 | 100.6 |
| 33.4  | 38.0  | 29.5  | 42.4  | 39.4  | 26.2  | 27.7  | 46.4  | 39.2  |
| 1.6   | 5.7   | 1.5   | 0.5   | 3.6   | 7.8   | 6.6   | 4.5   | 7.0   |
| 351.0 | 230.7 | 256.9 | 261.7 | 280.3 | 268.3 | 327.2 | 362.3 | 247.4 |
| 80.4  | 73.3  | 70.7  | 72.2  | 102.3 | 86.9  | 109.3 | 136.1 | 123.0 |
| 48.0  | 41.3  | 37.1  | 33.0  | 33.9  | 30.9  | 56.6  | 60.9  | 29.4  |
| 40.6  | 38.5  | 22.1  | 35.0  | 39.8  | 36.7  | 47.1  | 53.4  | 37.7  |
| 94.2  | 69.9  | 83.7  | 80.1  | 85.1  | 73.0  | 109.0 | 122.3 | 86.4  |
| 84.8  | 75.4  | 73.3  | 102.1 | 98.2  | 71.0  | 89.6  | 125.0 | 110.7 |
| 0.5   | 2.2   | 1.1   | 0.4   | 3.8   | 2.8   | 1.1   | 3.4   | 4.0   |
| 31.2  | 29.6  | 29.5  | 18.7  | 33.4  | 31.0  | 42.1  | 51.6  | 33.3  |
| 3.3   | 4.3   | 2.3   | 2.7   | 2.4   | 3.0   | 0.2   | 2.3   | 0.6   |
| 23.3  | 14.3  | 16.7  | 22.6  | 15.4  | 19.7  | 38.5  | 47.3  | 13.7  |
| 101.4 | 86.5  | 95.9  | 81.4  | 88.5  | 82.1  | 140.2 | 150.6 | 109.8 |
| 38.6  | 19.6  | 26.1  | 35.1  | 32.7  | 31.6  | 41.6  | 58.3  | 34.6  |
| 154.5 | 133.5 | 127.2 | 131.5 | 129.1 | 151.4 | 187.6 | 194.3 | 141.9 |
| 70.8  | 53.3  | 43.2  | 48.2  | 75.1  | 41.6  | 81.8  | 88.5  | 59.1  |
| 43.3  | 16.6  | 17.9  | 12.5  | 25.2  | 11.6  | 25.1  | 33.2  | 22.4  |
| 71.0  | 48.1  | 43.2  | 58.2  | 63.6  | 53.6  | 68.8  | 73.6  | 69.4  |
| 97.1  | 36.7  | 39.5  | 45.5  | 49.4  | 61.4  | 59.9  | 83.6  | 62.0  |
| 55.8  | 35.7  | 28.7  | 29.2  | 35.6  | 33.8  | 52.5  | 42.7  | 22.9  |
| 99.6  | 57.5  | 66.4  | 70.8  | 82.4  | 87.9  | 128.8 | 224.9 | 86.4  |
| 63.2  | 52.5  | 41.3  | 55.3  | 54.6  | 49.7  | 86.3  | 95.7  | 67.3  |
| 28.5  | 36.1  | 36.5  | 34.6  | 31.7  | 34.8  | 50.6  | 43.4  | 39.4  |
| 36.3  | 42.8  | 52.3  | 42.0  | 40.1  | 46.9  | 54.4  | 65.2  | 36.1  |
| 133.6 | 87.9  | 107.6 | 108.9 | 110.6 | 113.1 | 132.2 | 170.0 | 103.6 |
| 47.5  | 29.6  | 38.4  | 36.1  | 37.8  | 44.7  | 57.6  | 59.2  | 39.6  |
| 121.0 | 69.8  | 62.9  | 72.6  | 70.3  | 61.0  | 95.3  | 118.2 | 59.9  |
| 7.6   | 10.8  | 1.1   | 5.6   | 5.9   | 11.0  | 8.9   | 10.3  | 5.9   |
| 117.3 | 57.7  | 64.7  | 68.2  | 75.2  | 67.3  | 118.0 | 139.2 | 80.5  |
| 72.4  | 51.8  | 47.5  | 54.9  | 68.5  | 50.7  | 70.4  | 71.0  | 64.7  |

|       |       |       |       |       |       |       |       |       |
|-------|-------|-------|-------|-------|-------|-------|-------|-------|
| 72.1  | 41.0  | 38.0  | 54.7  | 64.1  | 43.3  | 75.7  | 58.6  | 43.4  |
| 69.8  | 21.5  | 21.1  | 28.2  | 28.9  | 20.5  | 34.9  | 30.0  | 23.0  |
| 54.1  | 37.4  | 28.6  | 33.4  | 44.4  | 36.4  | 65.9  | 117.1 | 76.2  |
| 106.0 | 83.5  | 86.4  | 98.6  | 103.6 | 91.8  | 140.5 | 179.0 | 108.2 |
| 3.7   | 3.7   | 1.2   | 2.3   | 2.9   | 3.2   | 2.8   | 3.4   | 0.4   |
| 51.7  | 35.0  | 21.9  | 32.3  | 34.5  | 24.6  | 37.5  | 56.9  | 41.8  |
| 46.3  | 27.0  | 21.2  | 17.2  | 25.7  | 32.6  | 51.6  | 45.5  | 29.3  |
| 41.4  | 25.8  | 20.5  | 30.8  | 30.0  | 24.2  | 43.5  | 33.6  | 27.3  |
| 24.1  | 13.6  | 23.6  | 21.2  | 25.1  | 25.2  | 36.4  | 49.5  | 26.8  |
| 50.7  | 35.8  | 40.5  | 47.0  | 47.1  | 52.2  | 60.5  | 76.8  | 52.8  |
| 95.5  | 63.8  | 71.9  | 72.7  | 72.5  | 62.3  | 81.8  | 47.5  | 88.6  |
| 91.5  | 65.3  | 74.8  | 74.8  | 80.6  | 78.6  | 117.6 | 137.0 | 77.7  |
| 24.4  | 26.1  | 25.5  | 28.1  | 20.5  | 31.7  | 41.6  | 36.6  | 32.1  |
| 7.5   | 10.1  | 1.3   | 6.2   | 7.6   | 9.9   | 16.5  | 11.5  | 12.9  |
| 24.2  | 30.9  | 35.6  | 33.8  | 40.8  | 34.6  | 42.6  | 45.9  | 37.2  |
| 111.2 | 84.6  | 94.2  | 104.2 | 115.7 | 116.7 | 162.6 | 208.5 | 112.3 |
| 43.7  | 44.1  | 41.3  | 40.8  | 43.9  | 44.4  | 46.7  | 65.5  | 40.4  |
| 51.0  | 35.4  | 34.5  | 48.6  | 39.5  | 59.4  | 69.3  | 75.2  | 74.4  |
| 26.4  | 21.9  | 28.9  | 25.2  | 37.2  | 50.9  | 41.2  | 46.9  | 57.1  |
| 18.4  | 12.2  | 16.3  | 17.6  | 13.7  | 16.7  | 24.2  | 37.3  | 14.2  |
| 58.7  | 39.3  | 52.3  | 48.1  | 54.4  | 49.7  | 68.0  | 86.9  | 47.9  |
| 95.6  | 93.4  | 108.3 | 95.5  | 116.0 | 102.1 | 132.1 | 128.2 | 88.5  |
| 1.5   | 0.7   | 3.3   | 1.3   | 4.8   | 2.6   | 3.7   | 9.2   | 1.3   |
| 159.4 | 70.1  | 124.2 | 112.8 | 104.5 | 127.9 | 152.2 | 163.3 | 173.4 |
| 57.6  | 56.5  | 61.5  | 61.8  | 50.4  | 51.2  | 82.7  | 83.1  | 59.5  |
| 58.6  | 41.2  | 42.7  | 64.4  | 66.0  | 53.5  | 80.3  | 60.5  | 67.4  |
| 63.3  | 44.6  | 54.6  | 59.7  | 50.0  | 54.2  | 80.5  | 99.5  | 75.8  |
| 32.5  | 22.4  | 25.9  | 21.4  | 22.9  | 27.2  | 35.5  | 35.6  | 26.4  |
| 84.7  | 47.9  | 52.9  | 57.6  | 63.6  | 68.6  | 80.5  | 79.5  | 69.3  |
| 0.9   | 2.7   | 1.0   | 1.8   | 6.4   | 3.9   | 1.2   | 3.0   | 0.9   |
| 78.8  | 53.1  | 61.2  | 68.9  | 54.4  | 62.7  | 88.2  | 96.9  | 63.8  |
| 92.8  | 18.1  | 24.9  | 25.7  | 30.0  | 20.9  | 39.7  | 32.1  | 22.4  |
| 190.2 | 88.3  | 123.1 | 108.1 | 113.7 | 140.3 | 146.0 | 168.8 | 112.5 |
| 27.8  | 19.2  | 17.3  | 15.6  | 19.8  | 24.0  | 36.6  | 34.6  | 20.6  |
| 73.8  | 58.6  | 59.7  | 67.7  | 72.5  | 72.2  | 92.7  | 76.6  | 61.2  |
| 80.5  | 48.1  | 74.2  | 69.6  | 72.5  | 83.0  | 103.7 | 100.5 | 80.0  |
| 242.2 | 129.5 | 181.4 | 180.7 | 182.2 | 191.5 | 216.2 | 236.3 | 153.5 |
| 56.4  | 32.3  | 36.0  | 45.4  | 37.4  | 38.6  | 57.5  | 68.5  | 35.5  |
| 12.2  | 12.5  | 7.5   | 7.6   | 5.2   | 3.2   | 6.4   | 3.4   | 1.0   |
| 1.0   | 1.2   | 5.6   | 1.5   | 4.4   | 0.8   | 1.4   | 0.8   | 1.7   |
| 75.3  | 54.0  | 61.4  | 64.8  | 62.3  | 60.4  | 85.6  | 87.3  | 63.1  |
| 138.0 | 84.4  | 98.8  | 114.8 | 103.1 | 114.5 | 143.5 | 176.7 | 132.8 |
| 0.7   | 1.6   | 1.2   | 1.3   | 1.5   | 0.7   | 0.5   | 1.1   | 2.2   |
| 1.5   | 3.7   | 2.1   | 2.2   | 1.9   | 2.4   | 3.2   | 3.0   | 3.1   |
| 33.3  | 19.7  | 26.8  | 19.4  | 15.7  | 22.8  | 25.2  | 35.5  | 25.3  |
| 178.7 | 87.9  | 102.1 | 111.7 | 99.0  | 115.9 | 140.9 | 177.2 | 107.1 |
| 47.1  | 51.1  | 50.7  | 58.7  | 60.9  | 60.9  | 79.9  | 95.0  | 85.3  |
| 121.9 | 86.7  | 59.3  | 69.0  | 98.4  | 101.1 | 111.1 | 133.1 | 81.5  |
| 222.3 | 115.9 | 158.6 | 153.8 | 178.2 | 175.5 | 219.7 | 244.1 | 146.4 |
| 27.2  | 16.8  | 22.2  | 30.9  | 20.6  | 25.3  | 31.3  | 41.1  | 23.6  |
| 30.1  | 21.1  | 34.8  | 31.3  | 28.5  | 30.8  | 43.5  | 34.6  | 29.9  |
| 44.2  | 33.9  | 38.3  | 39.5  | 38.7  | 43.4  | 56.6  | 54.3  | 46.5  |
| 67.6  | 50.9  | 48.6  | 47.8  | 57.1  | 56.2  | 55.1  | 75.8  | 53.0  |

|       |       |       |       |       |       |       |       |       |
|-------|-------|-------|-------|-------|-------|-------|-------|-------|
| 23.1  | 16.4  | 18.9  | 24.2  | 22.2  | 24.5  | 23.4  | 27.2  | 21.0  |
| 3.2   | 1.9   | 1.4   | 0.8   | 1.6   | 1.3   | 7.0   | 1.0   | 0.9   |
| 63.2  | 62.6  | 47.2  | 62.8  | 59.4  | 56.3  | 69.6  | 109.6 | 59.2  |
| 68.9  | 44.5  | 43.0  | 49.0  | 49.5  | 45.1  | 69.9  | 65.0  | 42.9  |
| 20.5  | 10.2  | 10.1  | 17.1  | 12.8  | 16.4  | 19.5  | 23.1  | 12.3  |
| 197.4 | 103.3 | 125.1 | 136.5 | 124.2 | 132.8 | 168.4 | 217.1 | 93.8  |
| 1.0   | 0.8   | 3.6   | 1.6   | 1.3   | 1.5   | 1.9   | 1.5   | 8.8   |
| 57.6  | 78.6  | 53.9  | 49.0  | 88.8  | 56.2  | 91.2  | 126.1 | 111.8 |
| 457.9 | 314.7 | 402.1 | 388.1 | 385.5 | 422.3 | 533.2 | 574.3 | 386.6 |
| 82.6  | 25.2  | 31.5  | 26.8  | 39.8  | 23.4  | 56.5  | 50.4  | 29.7  |
| 122.6 | 83.2  | 86.2  | 100.9 | 92.8  | 123.6 | 121.2 | 171.8 | 79.9  |
| 40.7  | 6.1   | 25.0  | 23.9  | 16.7  | 30.5  | 55.3  | 49.4  | 28.1  |
| 5.1   | 1.9   | 2.7   | 3.0   | 6.9   | 4.4   | 4.0   | 3.4   | 1.8   |
| 52.3  | 35.6  | 39.5  | 36.7  | 35.4  | 38.6  | 45.8  | 51.9  | 40.4  |
| 38.0  | 35.5  | 19.6  | 43.0  | 43.3  | 17.1  | 41.0  | 51.2  | 32.2  |
| 137.2 | 82.1  | 84.6  | 91.3  | 100.4 | 87.2  | 114.9 | 157.7 | 91.5  |
| 2.0   | 7.0   | 6.0   | 2.1   | 12.8  | 6.4   | 10.6  | 6.6   | 6.8   |
| 29.3  | 4.7   | 13.1  | 9.1   | 18.9  | 14.8  | 16.1  | 17.2  | 12.1  |
| 397.7 | 162.0 | 168.5 | 194.4 | 179.6 | 190.7 | 211.9 | 320.0 | 136.0 |
| 189.5 | 144.8 | 198.6 | 169.7 | 182.1 | 180.1 | 223.3 | 229.8 | 204.5 |
| 10.4  | 5.4   | 9.6   | 12.9  | 10.9  | 9.7   | 15.9  | 17.8  | 9.7   |
| 1.9   | 5.1   | 1.0   | 9.6   | 0.8   | 0.7   | 0.9   | 0.7   | 1.8   |
| 93.5  | 41.1  | 37.1  | 31.4  | 48.6  | 43.2  | 53.4  | 72.8  | 39.2  |
| 89.8  | 60.7  | 83.9  | 83.9  | 88.3  | 84.7  | 105.0 | 139.0 | 84.4  |
| 58.2  | 45.5  | 50.4  | 69.8  | 79.8  | 54.8  | 113.5 | 127.6 | 72.9  |
| 16.9  | 21.7  | 18.5  | 21.0  | 19.0  | 16.4  | 25.3  | 24.8  | 17.3  |
| 73.4  | 48.4  | 53.1  | 69.2  | 74.7  | 70.1  | 93.8  | 135.1 | 93.6  |
| 26.6  | 28.1  | 25.2  | 30.3  | 34.9  | 25.0  | 41.3  | 42.1  | 34.4  |
| 84.3  | 47.1  | 49.9  | 64.6  | 47.5  | 63.1  | 118.4 | 144.3 | 46.8  |
| 98.9  | 44.1  | 34.1  | 46.6  | 50.0  | 47.1  | 64.0  | 95.2  | 78.4  |
| 43.7  | 21.5  | 28.9  | 30.4  | 28.4  | 42.0  | 45.6  | 62.1  | 32.0  |
| 1.5   | 7.7   | 17.6  | 9.0   | 3.6   | 10.6  | 1.6   | 1.7   | 8.3   |
| 205.4 | 104.6 | 122.6 | 124.7 | 176.2 | 157.1 | 212.6 | 280.9 | 134.2 |
| 147.9 | 104.6 | 159.2 | 165.2 | 161.0 | 165.8 | 199.9 | 284.3 | 153.9 |
| 42.2  | 23.5  | 32.3  | 35.4  | 29.0  | 34.4  | 40.3  | 47.6  | 33.2  |
| 12.4  | 15.2  | 15.9  | 14.1  | 18.4  | 11.5  | 15.7  | 14.7  | 10.9  |
| 26.2  | 2.0   | 10.5  | 6.0   | 16.1  | 12.6  | 15.2  | 14.7  | 15.1  |
| 0.7   | 0.5   | 0.8   | 0.8   | 0.7   | 0.6   | 0.5   | 0.5   | 0.8   |
| 22.7  | 13.0  | 18.3  | 12.4  | 22.5  | 17.1  | 20.8  | 29.5  | 23.4  |
| 121.3 | 92.6  | 105.1 | 89.3  | 102.3 | 116.5 | 149.8 | 190.3 | 96.4  |
| 7.7   | 13.5  | 10.5  | 7.1   | 10.6  | 6.3   | 7.7   | 8.2   | 7.4   |
| 114.9 | 97.5  | 86.6  | 104.3 | 108.8 | 94.8  | 129.7 | 169.8 | 104.2 |
| 134.2 | 83.4  | 91.2  | 113.1 | 113.2 | 74.8  | 111.1 | 144.7 | 135.7 |
| 115.1 | 76.1  | 90.3  | 97.6  | 98.3  | 103.9 | 119.9 | 158.6 | 116.5 |
| 34.3  | 25.9  | 39.8  | 35.9  | 29.3  | 31.1  | 49.3  | 45.2  | 33.3  |
| 19.2  | 14.8  | 4.2   | 4.8   | 28.6  | 42.6  | 26.4  | 38.1  | 48.9  |
| 78.6  | 69.7  | 68.4  | 82.4  | 81.6  | 74.5  | 94.0  | 83.4  | 70.8  |
| 23.4  | 18.8  | 20.0  | 19.7  | 29.7  | 12.5  | 40.6  | 28.8  | 25.7  |
| 96.1  | 44.4  | 77.4  | 79.2  | 74.4  | 69.0  | 76.6  | 88.9  | 64.5  |
| 28.2  | 30.9  | 22.0  | 27.2  | 25.3  | 33.0  | 47.6  | 58.9  | 29.0  |
| 25.3  | 10.7  | 11.3  | 22.8  | 6.0   | 20.0  | 23.2  | 20.6  | 12.6  |
| 10.2  | 9.3   | 11.6  | 10.0  | 12.8  | 13.2  | 13.8  | 16.0  | 11.6  |
| 8.0   | 0.4   | 10.1  | 6.4   | 4.9   | 10.1  | 7.3   | 11.4  | 7.6   |

|       |       |       |       |       |       |       |       |       |
|-------|-------|-------|-------|-------|-------|-------|-------|-------|
| 15.1  | 4.6   | 11.0  | 18.0  | 10.2  | 13.6  | 5.6   | 1.6   | 15.0  |
| 23.1  | 8.8   | 16.2  | 10.1  | 13.6  | 13.0  | 23.8  | 32.6  | 13.3  |
| 43.9  | 19.2  | 28.3  | 30.4  | 36.9  | 23.3  | 46.8  | 53.6  | 29.4  |
| 140.2 | 95.2  | 112.1 | 109.9 | 121.2 | 132.3 | 171.1 | 269.3 | 136.0 |
| 104.6 | 82.5  | 65.0  | 70.1  | 91.3  | 83.1  | 154.4 | 182.1 | 219.4 |
| 6.1   | 7.2   | 7.3   | 8.4   | 7.5   | 9.3   | 8.7   | 8.9   | 6.9   |
| 8.1   | 33.5  | 30.1  | 19.6  | 28.9  | 25.5  | 41.9  | 32.9  | 24.2  |
| 41.1  | 28.8  | 31.4  | 39.4  | 37.7  | 41.5  | 49.0  | 48.6  | 45.8  |
| 205.1 | 147.8 | 146.7 | 168.7 | 168.3 | 148.1 | 203.6 | 205.0 | 184.8 |
| 32.8  | 44.5  | 35.8  | 41.6  | 44.3  | 42.0  | 65.2  | 79.5  | 47.3  |
| 118.0 | 66.0  | 74.0  | 84.8  | 82.2  | 93.6  | 127.9 | 165.3 | 89.3  |
| 106.2 | 42.5  | 48.5  | 48.3  | 57.9  | 57.6  | 73.8  | 88.7  | 62.4  |
| 4.0   | 2.0   | 1.9   | 7.0   | 14.5  | 13.1  | 5.4   | 9.8   | 14.4  |
| 12.8  | 8.7   | 5.4   | 0.8   | 3.9   | 1.7   | 11.9  | 18.4  | 9.1   |
| 468.7 | 330.7 | 378.6 | 394.0 | 441.8 | 418.3 | 607.3 | 663.1 | 516.9 |
| 1.1   | 1.0   | 1.2   | 0.3   | 2.7   | 2.2   | 2.5   | 5.4   | 1.0   |
| 156.7 | 88.0  | 104.1 | 104.3 | 120.9 | 111.0 | 167.7 | 180.0 | 147.4 |
| 74.1  | 55.3  | 58.4  | 63.5  | 62.4  | 57.6  | 86.2  | 73.5  | 58.9  |
| 22.3  | 7.1   | 11.2  | 7.9   | 9.1   | 11.8  | 13.2  | 17.3  | 3.5   |
| 48.6  | 20.5  | 24.5  | 19.9  | 21.2  | 20.2  | 24.4  | 12.9  | 25.8  |
| 33.1  | 22.4  | 26.1  | 27.9  | 29.7  | 17.4  | 32.0  | 40.2  | 28.7  |
| 52.2  | 26.6  | 34.1  | 38.3  | 39.5  | 38.7  | 43.7  | 66.6  | 36.2  |
| 14.1  | 0.2   | 1.3   | 0.3   | 1.7   | 2.2   | 0.9   | 5.8   | 4.6   |
| 66.2  | 61.5  | 59.9  | 64.7  | 75.4  | 65.5  | 88.0  | 72.7  | 69.2  |
| 291.9 | 202.1 | 201.2 | 251.7 | 254.8 | 238.0 | 372.7 | 288.2 | 374.6 |
| 88.9  | 81.1  | 91.9  | 110.5 | 108.7 | 85.7  | 124.6 | 131.4 | 99.0  |
| 296.4 | 204.2 | 298.7 | 226.7 | 308.3 | 267.4 | 301.9 | 329.8 | 215.5 |
| 6.7   | 2.5   | 0.5   | 4.2   | 5.0   | 5.1   | 7.8   | 10.1  | 3.8   |
| 34.2  | 24.4  | 24.0  | 25.7  | 32.7  | 26.7  | 37.5  | 43.8  | 31.7  |
| 15.4  | 11.4  | 8.4   | 9.2   | 8.1   | 6.9   | 7.0   | 10.7  | 11.0  |
| 20.3  | 24.7  | 15.8  | 10.3  | 16.0  | 13.2  | 18.7  | 12.8  | 20.0  |
| 17.0  | 14.0  | 5.5   | 12.1  | 5.6   | 8.4   | 4.5   | 13.7  | 2.0   |
| 2.9   | 9.4   | 0.8   | 1.9   | 6.3   | 10.3  | 3.5   | 3.0   | 1.6   |
| 89.1  | 61.4  | 58.2  | 67.5  | 74.1  | 61.6  | 101.1 | 116.8 | 69.9  |
| 258.9 | 206.0 | 217.8 | 243.5 | 240.4 | 228.2 | 281.1 | 329.9 | 253.3 |
| 75.6  | 42.8  | 53.7  | 52.3  | 64.0  | 71.9  | 97.1  | 126.1 | 85.1  |
| 61.4  | 46.4  | 47.9  | 40.2  | 40.5  | 48.1  | 49.1  | 69.4  | 36.2  |
| 1.7   | 6.5   | 3.5   | 6.7   | 0.5   | 7.0   | 3.4   | 2.9   | 4.2   |
| 176.4 | 119.9 | 136.6 | 155.2 | 141.7 | 139.2 | 210.4 | 243.3 | 214.5 |
| 51.8  | 32.8  | 39.8  | 57.1  | 54.8  | 47.1  | 60.9  | 69.0  | 47.8  |
| 76.9  | 43.9  | 69.0  | 52.6  | 72.2  | 75.2  | 104.3 | 132.8 | 53.7  |
| 107.0 | 83.3  | 86.0  | 108.7 | 83.3  | 87.8  | 93.7  | 172.1 | 90.3  |
| 59.9  | 58.9  | 59.4  | 81.3  | 65.4  | 77.8  | 93.4  | 129.4 | 55.5  |
| 81.8  | 58.0  | 82.0  | 65.3  | 89.0  | 56.2  | 75.0  | 97.2  | 60.2  |
| 145.7 | 122.5 | 136.1 | 125.6 | 137.0 | 145.8 | 157.4 | 210.4 | 136.8 |
| 74.4  | 65.1  | 60.4  | 47.6  | 42.0  | 52.3  | 107.3 | 64.9  | 111.9 |
| 11.7  | 4.1   | 6.0   | 3.9   | 3.9   | 5.6   | 9.0   | 8.4   | 5.5   |
| 68.6  | 76.1  | 104.3 | 96.7  | 102.4 | 105.9 | 165.3 | 149.1 | 131.7 |
| 34.7  | 17.6  | 27.0  | 29.9  | 37.9  | 29.4  | 39.0  | 31.2  | 23.6  |
| 113.7 | 57.5  | 79.1  | 81.4  | 74.5  | 77.2  | 103.3 | 106.2 | 88.5  |
| 36.0  | 12.2  | 20.2  | 30.5  | 25.0  | 20.8  | 19.2  | 36.5  | 21.5  |
| 46.2  | 50.6  | 46.0  | 57.3  | 54.2  | 43.1  | 70.4  | 70.7  | 49.8  |
| 21.1  | 16.5  | 19.7  | 15.3  | 17.3  | 12.2  | 22.8  | 27.1  | 19.0  |



|       |       |       |       |       |       |       |       |       |
|-------|-------|-------|-------|-------|-------|-------|-------|-------|
| 107.4 | 68.1  | 79.9  | 75.0  | 79.9  | 74.8  | 95.2  | 111.7 | 91.3  |
| 98.2  | 54.2  | 56.2  | 59.5  | 60.7  | 56.7  | 73.4  | 88.1  | 58.3  |
| 19.6  | 14.2  | 19.3  | 22.8  | 27.9  | 24.8  | 32.3  | 30.3  | 21.1  |
| 138.8 | 54.7  | 75.0  | 87.5  | 80.4  | 75.1  | 100.9 | 123.4 | 90.6  |
| 22.3  | 19.8  | 11.9  | 19.2  | 19.5  | 21.3  | 33.5  | 37.2  | 26.5  |
| 11.0  | 2.0   | 8.0   | 1.1   | 1.8   | 3.2   | 3.4   | 8.4   | 1.2   |
| 24.2  | 19.0  | 30.7  | 23.8  | 23.6  | 19.7  | 24.2  | 26.7  | 24.7  |
| 7.6   | 0.8   | 1.1   | 0.2   | 5.7   | 0.3   | 7.0   | 8.7   | 1.1   |
| 33.4  | 29.9  | 30.8  | 32.3  | 34.8  | 34.0  | 43.0  | 45.2  | 28.2  |
| 38.3  | 25.9  | 21.8  | 26.4  | 38.4  | 26.3  | 54.9  | 50.6  | 51.2  |
| 1.5   | 1.1   | 0.6   | 0.8   | 1.0   | 1.1   | 1.9   | 1.7   | 1.5   |
| 0.8   | 4.2   | 7.0   | 4.3   | 4.6   | 1.4   | 4.6   | 5.8   | 7.1   |
| 61.0  | 24.3  | 50.6  | 42.3  | 37.3  | 56.4  | 57.2  | 55.0  | 54.3  |
| 0.5   | 2.0   | 1.9   | 1.8   | 0.3   | 0.1   | 0.4   | 1.0   | 2.4   |
| 10.7  | 8.0   | 7.6   | 7.9   | 7.7   | 8.1   | 11.1  | 17.6  | 8.0   |
| 11.2  | 4.1   | 7.4   | 8.8   | 0.8   | 4.7   | 2.3   | 2.3   | 8.2   |
| 58.5  | 29.3  | 42.4  | 30.5  | 33.7  | 31.8  | 45.4  | 45.6  | 26.1  |
| 222.5 | 133.3 | 161.6 | 177.9 | 174.0 | 162.2 | 197.0 | 215.6 | 141.2 |
| 124.7 | 90.2  | 85.0  | 80.1  | 99.9  | 97.0  | 124.3 | 125.0 | 143.2 |
| 80.8  | 58.6  | 65.2  | 76.3  | 73.7  | 58.7  | 103.0 | 111.2 | 97.9  |
| 57.4  | 57.1  | 59.1  | 57.9  | 61.3  | 57.3  | 93.6  | 94.9  | 81.0  |
| 34.3  | 30.7  | 21.9  | 27.1  | 33.9  | 23.6  | 42.4  | 34.2  | 25.8  |
| 22.0  | 21.4  | 15.1  | 20.9  | 14.9  | 20.4  | 27.2  | 30.6  | 24.5  |
| 23.7  | 14.2  | 4.7   | 14.5  | 19.2  | 13.0  | 17.4  | 14.9  | 1.3   |
| 62.0  | 31.9  | 38.0  | 47.7  | 45.1  | 22.8  | 56.9  | 58.8  | 41.8  |
| 133.2 | 91.2  | 102.5 | 121.8 | 138.1 | 133.8 | 190.4 | 266.2 | 162.1 |
| 0.3   | 0.3   | 0.3   | 1.4   | 3.4   | 2.0   | 2.9   | 0.7   | 1.6   |
| 2.6   | 2.0   | 1.9   | 2.0   | 1.9   | 1.8   | 9.6   | 3.0   | 1.7   |
| 121.7 | 90.6  | 120.2 | 101.4 | 111.1 | 121.8 | 148.5 | 165.5 | 108.5 |
| 11.8  | 3.9   | 0.3   | 2.6   | 3.5   | 0.4   | 2.6   | 0.9   | 0.3   |
| 201.8 | 97.8  | 116.7 | 111.4 | 189.2 | 205.8 | 317.5 | 349.3 | 157.0 |
| 61.3  | 48.2  | 64.0  | 55.8  | 62.1  | 58.9  | 76.8  | 80.4  | 81.4  |
| 19.6  | 12.9  | 13.1  | 9.4   | 11.8  | 10.0  | 21.9  | 28.5  | 15.5  |
| 8.7   | 5.4   | 10.5  | 6.5   | 6.1   | 2.4   | 8.1   | 2.3   | 4.7   |
| 28.4  | 12.5  | 6.5   | 11.6  | 14.1  | 13.9  | 21.1  | 16.6  | 18.7  |
| 0.8   | 2.4   | 4.6   | 0.2   | 0.7   | 0.9   | 1.2   | 0.8   | 0.8   |
| 19.1  | 22.1  | 15.4  | 20.1  | 23.2  | 20.5  | 20.1  | 27.3  | 7.0   |
| 292.7 | 136.3 | 191.6 | 142.2 | 181.7 | 191.0 | 230.6 | 288.3 | 155.5 |
| 127.9 | 37.5  | 61.9  | 55.0  | 63.5  | 58.1  | 82.2  | 88.0  | 63.1  |
| 131.4 | 101.2 | 142.2 | 174.9 | 198.5 | 187.3 | 209.0 | 326.0 | 150.5 |
| 24.9  | 11.1  | 11.6  | 17.1  | 16.5  | 18.7  | 10.0  | 19.2  | 13.8  |
| 91.4  | 58.6  | 61.1  | 75.8  | 64.8  | 73.0  | 97.3  | 127.2 | 73.8  |
| 34.5  | 44.0  | 42.2  | 48.4  | 46.2  | 45.7  | 49.6  | 54.8  | 45.8  |
| 208.2 | 113.3 | 120.5 | 130.3 | 138.4 | 124.6 | 172.3 | 211.9 | 155.0 |
| 84.5  | 75.7  | 64.1  | 76.8  | 74.2  | 73.9  | 111.8 | 114.4 | 72.5  |
| 247.6 | 141.8 | 170.1 | 186.4 | 195.3 | 180.7 | 218.3 | 194.7 | 190.3 |
| 129.3 | 74.3  | 95.3  | 95.6  | 91.5  | 83.9  | 136.0 | 164.6 | 69.4  |
| 154.2 | 175.4 | 230.5 | 211.8 | 244.0 | 262.8 | 297.7 | 322.5 | 233.4 |
| 31.7  | 24.2  | 22.7  | 28.7  | 27.1  | 22.5  | 27.1  | 23.8  | 19.6  |
| 39.9  | 47.4  | 41.1  | 36.4  | 47.9  | 57.3  | 97.1  | 72.5  | 44.0  |
| 30.6  | 29.7  | 33.6  | 31.4  | 28.2  | 37.4  | 39.4  | 56.2  | 31.1  |
| 133.5 | 78.8  | 83.3  | 93.0  | 90.0  | 104.0 | 134.8 | 136.0 | 93.4  |
| 8.9   | 0.9   | 2.3   | 6.1   | 1.0   | 4.9   | 3.7   | 1.3   | 7.3   |

|       |       |       |       |       |       |       |       |       |
|-------|-------|-------|-------|-------|-------|-------|-------|-------|
| 115.2 | 74.1  | 94.7  | 79.8  | 93.7  | 88.3  | 116.7 | 158.6 | 86.9  |
| 0.3   | 0.6   | 0.5   | 0.5   | 0.3   | 0.5   | 0.6   | 0.3   | 0.6   |
| 45.4  | 26.2  | 25.6  | 34.3  | 35.5  | 25.3  | 51.7  | 49.8  | 40.3  |
| 1.2   | 3.2   | 10.5  | 3.5   | 1.3   | 5.4   | 5.5   | 2.7   | 1.9   |
| 78.5  | 58.8  | 57.6  | 75.0  | 79.9  | 55.8  | 96.3  | 110.8 | 143.2 |
| 10.7  | 3.1   | 6.0   | 6.7   | 6.3   | 2.4   | 12.3  | 17.2  | 14.1  |
| 1.7   | 8.7   | 4.6   | 5.3   | 12.2  | 3.5   | 1.1   | 2.3   | 9.2   |
| 1.8   | 0.7   | 0.4   | 0.3   | 1.4   | 1.6   | 1.5   | 1.0   | 0.5   |
| 45.0  | 38.3  | 41.7  | 41.4  | 47.7  | 44.8  | 48.9  | 44.7  | 37.7  |
| 19.2  | 22.4  | 26.3  | 25.4  | 28.0  | 28.8  | 31.8  | 33.0  | 37.0  |
| 18.4  | 9.9   | 17.9  | 16.4  | 17.3  | 19.6  | 21.4  | 29.1  | 13.6  |
| 6.9   | 2.2   | 6.3   | 7.0   | 3.2   | 1.3   | 0.8   | 1.8   | 2.6   |
| 66.5  | 66.5  | 62.0  | 69.0  | 62.5  | 61.7  | 90.4  | 115.3 | 61.6  |
| 52.3  | 47.1  | 56.2  | 62.1  | 57.4  | 55.8  | 77.4  | 110.8 | 68.4  |
| 56.5  | 41.1  | 35.6  | 44.8  | 56.9  | 44.6  | 56.9  | 62.4  | 50.5  |
| 324.3 | 299.4 | 282.2 | 323.1 | 342.4 | 338.3 | 450.0 | 600.5 | 372.0 |
| 52.1  | 39.4  | 44.9  | 52.3  | 62.9  | 43.6  | 66.9  | 81.5  | 81.6  |
| 9.7   | 1.7   | 2.0   | 8.9   | 2.5   | 3.3   | 15.0  | 14.2  | 6.5   |
| 36.9  | 24.8  | 26.0  | 33.5  | 26.6  | 29.3  | 41.2  | 53.0  | 34.2  |
| 40.7  | 33.3  | 58.1  | 50.4  | 38.0  | 48.2  | 66.7  | 78.0  | 29.2  |
| 1.3   | 0.9   | 0.5   | 2.2   | 0.9   | 3.5   | 2.0   | 0.6   | 3.2   |
| 30.3  | 18.0  | 24.2  | 20.7  | 21.2  | 15.1  | 33.6  | 48.5  | 24.8  |
| 15.8  | 26.1  | 31.2  | 31.7  | 42.5  | 36.8  | 39.1  | 46.3  | 35.6  |
| 89.2  | 57.2  | 51.3  | 59.1  | 64.6  | 55.7  | 100.2 | 117.6 | 71.9  |
| 38.6  | 13.1  | 15.2  | 33.6  | 14.8  | 18.8  | 29.0  | 41.2  | 25.8  |
| 118.1 | 48.2  | 60.4  | 61.3  | 64.1  | 72.7  | 106.2 | 126.3 | 94.9  |
| 2.7   | 1.3   | 4.1   | 0.5   | 0.7   | 0.7   | 0.9   | 1.8   | 2.1   |
| 2.8   | 3.8   | 5.2   | 1.0   | 7.4   | 3.7   | 6.1   | 4.6   | 0.7   |
| 253.0 | 217.6 | 232.9 | 208.2 | 275.6 | 245.8 | 296.6 | 451.7 | 295.0 |
| 199.4 | 162.3 | 200.1 | 208.9 | 228.1 | 188.6 | 330.8 | 339.9 | 243.0 |
| 43.5  | 36.6  | 31.0  | 29.7  | 37.6  | 31.8  | 37.9  | 64.3  | 44.0  |
| 15.4  | 19.8  | 19.7  | 18.4  | 20.7  | 16.7  | 22.3  | 31.2  | 18.4  |
| 129.7 | 81.2  | 96.0  | 103.4 | 86.2  | 75.9  | 124.4 | 89.5  | 86.7  |
| 54.9  | 31.4  | 37.4  | 39.5  | 37.7  | 40.6  | 64.8  | 101.6 | 53.2  |
| 1.8   | 4.8   | 1.1   | 6.8   | 3.8   | 7.3   | 8.6   | 8.3   | 5.4   |
| 43.6  | 28.6  | 32.3  | 30.1  | 43.7  | 29.9  | 35.8  | 59.9  | 37.0  |
| 35.3  | 24.3  | 34.0  | 34.4  | 35.5  | 34.9  | 46.3  | 62.8  | 40.7  |
| 1.2   | 1.9   | 2.0   | 1.7   | 3.8   | 1.7   | 1.0   | 5.4   | 1.0   |
| 5.3   | 3.5   | 5.3   | 3.3   | 6.3   | 4.8   | 6.7   | 11.7  | 6.3   |
| 28.6  | 16.4  | 15.4  | 21.5  | 23.4  | 18.2  | 24.1  | 22.7  | 14.3  |
| 1.2   | 7.5   | 10.7  | 8.0   | 6.6   | 1.4   | 5.6   | 11.1  | 9.3   |
| 29.1  | 20.1  | 20.1  | 18.6  | 23.9  | 21.8  | 27.8  | 46.8  | 26.2  |
| 57.1  | 52.7  | 50.6  | 63.8  | 51.5  | 44.0  | 69.3  | 78.4  | 51.8  |
| 160.9 | 145.1 | 148.5 | 141.9 | 149.0 | 159.0 | 181.3 | 224.2 | 141.9 |
| 63.7  | 42.6  | 53.7  | 42.7  | 53.8  | 60.8  | 83.1  | 106.5 | 101.2 |
| 41.2  | 30.5  | 31.7  | 34.2  | 47.0  | 47.5  | 59.9  | 93.9  | 61.2  |
| 1.7   | 0.5   | 1.1   | 1.8   | 0.2   | 7.0   | 0.8   | 1.2   | 0.8   |
| 59.6  | 43.2  | 53.0  | 53.9  | 50.7  | 52.4  | 81.8  | 71.1  | 57.7  |
| 5.3   | 5.7   | 4.3   | 3.1   | 6.5   | 0.7   | 4.0   | 3.9   | 5.8   |
| 47.9  | 29.7  | 29.8  | 31.5  | 31.7  | 28.7  | 38.5  | 48.6  | 41.0  |
| 14.4  | 5.0   | 0.9   | 11.3  | 13.8  | 12.0  | 15.7  | 18.9  | 13.3  |
| 62.8  | 28.1  | 39.3  | 33.7  | 41.2  | 42.1  | 51.4  | 68.9  | 40.0  |
| 49.0  | 37.6  | 35.9  | 38.9  | 39.6  | 47.9  | 55.3  | 54.5  | 46.2  |

|       |       |       |       |       |       |       |       |       |
|-------|-------|-------|-------|-------|-------|-------|-------|-------|
| 26.5  | 14.6  | 24.8  | 17.4  | 12.7  | 15.8  | 23.6  | 28.2  | 19.5  |
| 57.1  | 35.7  | 47.1  | 37.5  | 41.5  | 40.4  | 54.8  | 46.6  | 24.7  |
| 83.3  | 43.8  | 42.3  | 53.7  | 53.7  | 55.8  | 60.8  | 90.2  | 56.6  |
| 52.4  | 27.9  | 45.9  | 42.8  | 34.9  | 43.3  | 68.2  | 87.3  | 54.2  |
| 11.5  | 6.9   | 4.3   | 0.8   | 5.3   | 4.1   | 10.8  | 9.2   | 7.1   |
| 1.2   | 1.2   | 0.5   | 1.4   | 1.2   | 1.3   | 0.7   | 0.8   | 0.9   |
| 145.4 | 122.3 | 144.7 | 140.7 | 140.7 | 134.3 | 172.5 | 182.9 | 154.5 |
| 71.1  | 72.0  | 57.9  | 104.8 | 66.8  | 81.0  | 124.8 | 114.2 | 94.3  |
| 11.4  | 8.6   | 9.2   | 1.7   | 2.1   | 7.2   | 13.5  | 17.1  | 7.8   |
| 0.5   | 0.6   | 2.1   | 0.6   | 6.2   | 2.8   | 4.1   | 2.1   | 0.7   |
| 1.2   | 2.3   | 0.1   | 1.6   | 1.8   | 0.1   | 0.2   | 0.4   | 0.2   |
| 0.7   | 4.6   | 7.6   | 4.7   | 6.3   | 7.2   | 10.4  | 1.2   | 3.5   |
| 53.4  | 32.3  | 35.9  | 35.1  | 34.9  | 38.1  | 59.4  | 58.4  | 44.4  |
| 28.7  | 17.5  | 19.8  | 14.7  | 18.0  | 15.3  | 21.4  | 22.6  | 12.6  |
| 93.8  | 85.5  | 69.7  | 75.1  | 75.4  | 78.3  | 102.9 | 120.8 | 95.3  |
| 46.5  | 14.2  | 18.6  | 27.1  | 20.7  | 18.6  | 41.9  | 37.4  | 24.4  |
| 32.4  | 20.2  | 26.0  | 33.2  | 31.1  | 26.8  | 33.1  | 40.1  | 31.4  |
| 236.6 | 160.8 | 193.5 | 213.8 | 201.7 | 206.0 | 263.9 | 284.0 | 201.0 |
| 74.1  | 41.2  | 49.9  | 60.1  | 51.3  | 54.4  | 67.5  | 81.3  | 62.9  |
| 66.0  | 53.0  | 48.1  | 51.2  | 55.4  | 53.9  | 78.8  | 83.8  | 44.9  |
| 140.3 | 109.6 | 115.5 | 111.6 | 144.3 | 100.4 | 164.4 | 197.7 | 161.3 |
| 56.4  | 48.2  | 59.1  | 53.7  | 52.1  | 57.5  | 72.0  | 69.9  | 52.6  |
| 7.7   | 1.1   | 4.6   | 0.4   | 0.7   | 5.6   | 6.9   | 8.3   | 4.9   |
| 14.2  | 1.1   | 0.7   | 3.2   | 7.5   | 7.9   | 10.0  | 16.4  | 7.7   |
| 28.5  | 16.7  | 14.4  | 18.0  | 25.7  | 25.8  | 31.8  | 38.3  | 17.4  |
| 47.5  | 57.8  | 48.0  | 49.9  | 48.1  | 42.9  | 67.9  | 76.9  | 69.3  |
| 91.4  | 62.0  | 73.5  | 76.3  | 80.8  | 76.0  | 98.8  | 134.4 | 79.5  |
| 1.5   | 7.4   | 0.9   | 9.1   | 6.4   | 7.7   | 5.5   | 1.2   | 6.1   |
| 24.3  | 19.0  | 28.2  | 26.4  | 24.9  | 22.9  | 39.5  | 43.0  | 32.0  |
| 372.1 | 226.7 | 292.9 | 279.4 | 279.7 | 265.9 | 357.0 | 378.5 | 205.7 |
| 6.9   | 10.5  | 10.9  | 13.2  | 3.3   | 13.5  | 13.0  | 10.2  | 8.6   |
| 136.9 | 114.5 | 160.5 | 132.2 | 124.8 | 140.5 | 142.6 | 167.8 | 150.5 |
| 5.4   | 3.9   | 1.0   | 7.2   | 1.0   | 5.8   | 9.4   | 1.6   | 3.5   |
| 66.9  | 32.1  | 34.0  | 42.6  | 42.0  | 49.3  | 80.8  | 67.4  | 55.2  |
| 219.9 | 229.4 | 293.9 | 295.5 | 286.7 | 298.0 | 397.2 | 471.7 | 298.2 |
| 24.6  | 15.4  | 28.4  | 18.6  | 15.8  | 25.7  | 25.0  | 26.7  | 27.0  |
| 26.7  | 21.6  | 21.3  | 18.3  | 22.9  | 12.6  | 24.1  | 23.2  | 24.9  |
| 46.6  | 24.3  | 26.8  | 27.5  | 30.3  | 15.8  | 35.4  | 31.8  | 20.8  |
| 38.4  | 29.6  | 33.4  | 42.1  | 41.8  | 39.9  | 54.7  | 51.6  | 31.0  |
| 7.6   | 1.1   | 0.8   | 4.0   | 4.4   | 0.8   | 1.2   | 1.9   | 4.2   |
| 52.7  | 35.6  | 39.9  | 39.0  | 37.3  | 41.5  | 55.8  | 57.4  | 50.1  |
| 7.6   | 0.6   | 1.3   | 4.0   | 3.1   | 3.7   | 1.8   | 7.6   | 7.0   |
| 57.6  | 32.0  | 38.2  | 34.9  | 41.4  | 39.6  | 67.3  | 85.0  | 61.2  |
| 0.7   | 0.3   | 0.5   | 2.0   | 0.5   | 1.1   | 0.8   | 0.4   | 0.9   |
| 2.1   | 0.5   | 2.7   | 0.2   | 2.0   | 0.6   | 0.4   | 3.6   | 2.1   |
| 51.3  | 50.7  | 48.9  | 50.1  | 45.9  | 47.1  | 63.3  | 80.3  | 86.1  |
| 5.7   | 21.2  | 21.6  | 20.8  | 14.8  | 14.6  | 18.7  | 21.1  | 21.8  |
| 1.6   | 1.8   | 2.0   | 1.2   | 5.4   | 1.4   | 8.9   | 14.2  | 2.8   |
| 13.3  | 8.7   | 15.4  | 13.9  | 7.1   | 8.9   | 11.4  | 15.6  | 8.2   |
| 37.1  | 12.4  | 18.9  | 12.3  | 19.8  | 20.3  | 27.4  | 28.3  | 19.7  |
| 2.4   | 9.5   | 10.2  | 10.2  | 3.9   | 2.4   | 11.7  | 11.1  | 2.7   |
| 30.2  | 16.9  | 15.0  | 21.0  | 21.4  | 19.8  | 30.4  | 45.4  | 33.2  |
| 104.3 | 57.6  | 67.3  | 76.6  | 73.2  | 86.7  | 88.8  | 101.4 | 104.0 |

|       |       |       |       |       |       |       |       |       |
|-------|-------|-------|-------|-------|-------|-------|-------|-------|
| 15.5  | 9.8   | 13.2  | 11.6  | 11.9  | 10.4  | 14.8  | 18.0  | 11.9  |
| 29.0  | 17.7  | 22.0  | 17.5  | 21.8  | 18.5  | 28.3  | 33.4  | 22.8  |
| 47.0  | 43.6  | 51.9  | 47.0  | 44.1  | 55.3  | 60.3  | 63.1  | 47.5  |
| 41.7  | 35.2  | 44.6  | 38.6  | 41.0  | 35.8  | 51.2  | 62.4  | 32.4  |
| 2.1   | 3.4   | 0.9   | 4.2   | 1.1   | 0.3   | 4.2   | 4.2   | 3.2   |
| 127.2 | 93.4  | 114.9 | 113.2 | 123.4 | 134.7 | 171.8 | 217.8 | 108.3 |
| 64.7  | 39.6  | 48.7  | 57.1  | 52.3  | 53.0  | 78.3  | 75.0  | 52.0  |
| 21.1  | 11.6  | 13.1  | 13.2  | 11.4  | 16.9  | 15.7  | 28.0  | 16.2  |
| 9.3   | 6.5   | 16.8  | 7.7   | 21.4  | 1.8   | 14.6  | 27.6  | 4.4   |
| 15.3  | 15.4  | 17.4  | 12.3  | 14.4  | 16.8  | 21.0  | 27.6  | 13.2  |
| 52.2  | 39.9  | 51.2  | 40.1  | 39.8  | 46.1  | 60.7  | 60.0  | 36.0  |
| 3.6   | 2.9   | 3.3   | 2.5   | 4.1   | 3.6   | 1.0   | 4.7   | 3.4   |
| 0.8   | 7.5   | 11.5  | 0.8   | 11.3  | 8.5   | 0.7   | 1.4   | 1.0   |
| 18.9  | 19.4  | 22.8  | 16.5  | 19.8  | 25.7  | 27.8  | 30.6  | 29.2  |
| 81.9  | 49.1  | 64.6  | 54.1  | 58.8  | 75.3  | 88.1  | 98.7  | 56.4  |
| 11.9  | 5.7   | 15.5  | 15.9  | 10.8  | 12.0  | 28.5  | 22.5  | 21.6  |
| 49.2  | 30.0  | 27.3  | 37.7  | 32.6  | 27.8  | 45.4  | 47.8  | 34.0  |
| 17.6  | 18.2  | 20.5  | 20.6  | 22.2  | 18.2  | 34.2  | 33.5  | 23.9  |
| 14.3  | 25.5  | 25.6  | 16.8  | 37.8  | 25.3  | 34.8  | 30.1  | 25.3  |
| 112.3 | 74.4  | 100.2 | 97.9  | 110.6 | 115.2 | 137.7 | 178.2 | 88.0  |
| 85.9  | 50.6  | 46.6  | 61.8  | 67.1  | 56.5  | 55.4  | 51.1  | 54.8  |
| 232.4 | 121.1 | 163.5 | 163.9 | 144.6 | 172.8 | 187.5 | 194.6 | 159.1 |
| 63.5  | 36.1  | 42.8  | 52.5  | 56.2  | 30.4  | 77.8  | 64.0  | 73.8  |
| 21.3  | 11.0  | 8.9   | 10.2  | 11.9  | 9.1   | 19.3  | 21.4  | 15.0  |
| 7.0   | 3.6   | 2.6   | 7.4   | 1.8   | 4.1   | 3.5   | 5.7   | 4.3   |
| 24.5  | 8.1   | 13.9  | 14.8  | 13.6  | 17.3  | 21.7  | 22.6  | 17.5  |
| 2.9   | 8.3   | 5.6   | 5.6   | 8.4   | 12.9  | 13.2  | 24.3  | 11.9  |
| 16.5  | 8.1   | 14.9  | 12.9  | 12.1  | 18.3  | 18.6  | 27.0  | 20.7  |
| 47.5  | 40.3  | 44.7  | 54.7  | 39.4  | 47.9  | 64.6  | 65.6  | 48.8  |
| 16.9  | 16.1  | 16.0  | 14.6  | 16.6  | 15.5  | 14.6  | 15.9  | 13.6  |
| 18.5  | 11.6  | 14.7  | 15.5  | 8.5   | 6.8   | 18.4  | 23.1  | 11.2  |
| 34.5  | 19.4  | 22.6  | 24.1  | 28.8  | 19.9  | 25.2  | 15.3  | 16.5  |
| 2.3   | 3.4   | 1.5   | 1.5   | 1.3   | 5.7   | 2.3   | 5.7   | 4.4   |
| 12.8  | 21.3  | 17.0  | 19.3  | 19.7  | 11.3  | 33.4  | 21.9  | 16.1  |
| 9.6   | 1.3   | 9.1   | 2.1   | 0.8   | 1.4   | 2.7   | 8.4   | 1.7   |
| 2.1   | 3.1   | 0.2   | 1.7   | 7.8   | 3.5   | 6.3   | 5.7   | 3.5   |
| 128.1 | 83.9  | 90.3  | 100.9 | 121.8 | 114.0 | 156.6 | 180.2 | 125.5 |
| 145.0 | 91.0  | 96.4  | 119.4 | 123.7 | 123.3 | 146.4 | 209.6 | 132.1 |
| 8.1   | 8.4   | 9.8   | 11.5  | 8.7   | 11.5  | 11.1  | 10.4  | 8.9   |
| 39.1  | 21.3  | 22.2  | 19.5  | 14.7  | 18.5  | 28.5  | 38.3  | 27.2  |
| 0.1   | 0.2   | 0.3   | 1.0   | 0.3   | 0.3   | 0.9   | 1.2   | 0.6   |
| 15.5  | 4.3   | 0.6   | 7.0   | 4.2   | 8.9   | 12.6  | 16.9  | 6.6   |
| 50.0  | 66.1  | 58.2  | 69.3  | 67.0  | 50.5  | 85.7  | 87.9  | 62.8  |
| 7.7   | 7.7   | 9.1   | 9.1   | 5.8   | 5.2   | 8.0   | 1.9   | 4.5   |
| 116.7 | 65.7  | 82.0  | 84.3  | 83.8  | 82.7  | 104.6 | 149.1 | 84.8  |
| 23.1  | 12.0  | 22.0  | 19.3  | 21.3  | 19.9  | 34.7  | 31.0  | 23.1  |
| 3.4   | 5.0   | 5.0   | 1.2   | 4.5   | 0.7   | 3.7   | 4.9   | 3.0   |
| 68.3  | 42.6  | 58.4  | 50.3  | 38.2  | 63.4  | 80.9  | 107.0 | 71.0  |
| 13.3  | 16.6  | 15.1  | 15.4  | 19.8  | 22.5  | 24.9  | 24.3  | 15.8  |
| 0.5   | 2.3   | 0.6   | 0.6   | 2.3   | 0.2   | 0.3   | 1.9   | 0.5   |
| 77.1  | 56.8  | 64.5  | 63.4  | 64.3  | 67.7  | 101.7 | 117.5 | 62.6  |
| 10.8  | 11.9  | 5.5   | 13.1  | 7.8   | 12.5  | 13.3  | 15.6  | 8.7   |
| 31.4  | 18.2  | 25.0  | 27.0  | 37.7  | 32.7  | 28.8  | 65.0  | 42.1  |

|       |       |       |       |       |       |       |        |       |
|-------|-------|-------|-------|-------|-------|-------|--------|-------|
| 32.8  | 15.4  | 17.8  | 26.0  | 29.4  | 24.9  | 30.6  | 44.3   | 22.2  |
| 846.7 | 540.3 | 578.7 | 640.9 | 696.1 | 641.6 | 932.2 | 1013.4 | 665.9 |
| 19.0  | 10.8  | 12.8  | 12.7  | 21.3  | 19.9  | 25.4  | 51.0   | 19.6  |
| 3.1   | 3.0   | 3.7   | 2.5   | 2.4   | 5.0   | 3.5   | 0.5    | 2.6   |
| 94.7  | 67.3  | 76.6  | 83.7  | 73.1  | 90.7  | 118.5 | 135.4  | 75.0  |
| 44.7  | 23.4  | 26.4  | 23.7  | 39.7  | 36.1  | 41.9  | 51.6   | 37.1  |
| 209.4 | 137.3 | 151.7 | 138.7 | 162.1 | 149.6 | 211.6 | 230.5  | 117.1 |
| 120.1 | 93.5  | 135.3 | 138.9 | 120.2 | 114.3 | 179.6 | 134.9  | 104.1 |
| 11.2  | 5.9   | 12.6  | 12.3  | 12.3  | 19.1  | 15.2  | 14.3   | 14.2  |
| 5.3   | 4.9   | 7.6   | 7.2   | 4.9   | 6.8   | 8.4   | 6.2    | 3.8   |
| 14.8  | 9.3   | 10.3  | 11.6  | 8.0   | 8.6   | 6.8   | 17.9   | 14.0  |
| 36.2  | 26.7  | 26.6  | 25.2  | 29.1  | 37.5  | 48.6  | 57.3   | 59.0  |
| 7.3   | 9.4   | 6.1   | 6.3   | 5.9   | 7.1   | 5.9   | 10.2   | 8.9   |
| 33.2  | 24.6  | 14.3  | 28.0  | 32.1  | 23.2  | 30.6  | 34.4   | 22.1  |
| 44.0  | 13.9  | 21.8  | 24.4  | 27.4  | 22.8  | 24.8  | 43.1   | 22.0  |
| 59.2  | 42.4  | 52.0  | 55.1  | 59.5  | 48.8  | 91.2  | 94.8   | 53.3  |
| 7.3   | 5.1   | 6.4   | 0.9   | 7.8   | 6.1   | 1.4   | 6.6    | 7.5   |
| 14.5  | 15.3  | 20.6  | 28.0  | 17.1  | 23.4  | 14.8  | 21.8   | 16.5  |
| 6.2   | 3.0   | 1.9   | 6.3   | 3.4   | 1.6   | 3.0   | 7.1    | 9.4   |
| 54.8  | 31.5  | 32.5  | 41.2  | 45.2  | 44.1  | 62.6  | 72.0   | 42.6  |
| 58.7  | 22.7  | 21.5  | 17.8  | 22.8  | 30.9  | 43.7  | 137.2  | 55.3  |
| 9.6   | 28.2  | 27.5  | 36.1  | 32.5  | 23.9  | 50.0  | 42.7   | 39.1  |
| 28.1  | 21.0  | 22.5  | 22.6  | 27.7  | 18.0  | 39.1  | 37.7   | 23.0  |
| 8.7   | 3.6   | 4.0   | 0.9   | 0.6   | 3.8   | 6.1   | 3.4    | 7.7   |
| 22.2  | 10.6  | 23.1  | 30.2  | 21.4  | 14.0  | 20.5  | 35.2   | 18.2  |
| 37.4  | 28.9  | 27.8  | 35.5  | 31.7  | 42.4  | 45.6  | 55.8   | 30.9  |
| 13.9  | 13.9  | 9.5   | 9.2   | 13.2  | 11.0  | 18.1  | 16.7   | 19.2  |
| 1.1   | 3.2   | 2.8   | 2.3   | 1.3   | 8.9   | 1.4   | 3.5    | 6.4   |
| 43.2  | 45.9  | 53.1  | 57.3  | 57.3  | 38.4  | 74.6  | 63.7   | 47.6  |
| 99.5  | 61.6  | 70.0  | 70.8  | 83.4  | 77.4  | 95.3  | 109.9  | 67.0  |
| 37.5  | 22.1  | 28.4  | 34.1  | 34.5  | 39.9  | 38.4  | 54.2   | 33.5  |
| 2.8   | 1.7   | 2.2   | 9.2   | 2.6   | 1.4   | 3.0   | 7.7    | 2.8   |
| 100.5 | 64.6  | 72.1  | 77.0  | 92.9  | 87.3  | 124.0 | 113.6  | 80.0  |
| 5.1   | 4.5   | 5.9   | 4.2   | 11.0  | 3.3   | 10.3  | 11.2   | 4.7   |
| 16.3  | 16.9  | 18.6  | 23.2  | 20.4  | 11.4  | 26.6  | 27.9   | 14.9  |
| 18.7  | 23.2  | 25.4  | 23.4  | 16.8  | 21.7  | 23.6  | 23.6   | 25.7  |
| 23.6  | 5.8   | 26.2  | 8.7   | 10.1  | 23.5  | 27.0  | 39.1   | 11.5  |
| 798.0 | 686.3 | 731.6 | 833.3 | 826.5 | 713.0 | 981.0 | 919.8  | 858.0 |
| 58.3  | 46.1  | 53.9  | 48.8  | 39.2  | 48.0  | 58.3  | 59.6   | 59.8  |
| 3.0   | 1.5   | 2.9   | 11.0  | 7.7   | 0.9   | 1.5   | 1.4    | 2.9   |
| 26.3  | 23.1  | 19.2  | 23.8  | 24.2  | 15.6  | 22.4  | 31.8   | 24.5  |
| 8.6   | 9.5   | 16.6  | 10.8  | 21.8  | 11.7  | 16.7  | 30.3   | 11.0  |
| 3.8   | 1.0   | 2.9   | 2.8   | 3.3   | 4.6   | 5.7   | 9.8    | 7.3   |
| 66.8  | 50.4  | 55.7  | 66.1  | 64.0  | 60.0  | 92.4  | 112.6  | 92.5  |
| 74.7  | 45.6  | 63.0  | 79.6  | 62.9  | 63.0  | 91.2  | 62.5   | 67.5  |
| 21.3  | 16.8  | 16.2  | 13.7  | 12.7  | 17.7  | 18.1  | 35.3   | 14.9  |
| 16.8  | 15.4  | 17.9  | 14.4  | 17.0  | 20.0  | 24.3  | 31.9   | 18.7  |
| 22.4  | 10.6  | 14.5  | 17.8  | 16.6  | 19.5  | 18.9  | 26.0   | 19.8  |
| 48.7  | 29.5  | 35.7  | 39.3  | 29.1  | 50.6  | 52.5  | 54.2   | 51.1  |
| 8.0   | 1.3   | 8.7   | 4.6   | 9.9   | 8.3   | 9.3   | 15.6   | 6.4   |
| 36.3  | 20.0  | 25.6  | 20.7  | 24.6  | 26.0  | 38.0  | 53.2   | 18.3  |
| 33.3  | 24.7  | 23.3  | 31.7  | 24.1  | 31.9  | 28.4  | 51.7   | 24.9  |
| 26.9  | 32.1  | 26.7  | 28.2  | 28.5  | 28.6  | 46.8  | 23.1   | 28.1  |

|       |       |       |       |       |       |       |       |       |
|-------|-------|-------|-------|-------|-------|-------|-------|-------|
| 95.4  | 49.7  | 61.7  | 83.1  | 73.0  | 88.5  | 100.3 | 136.8 | 71.1  |
| 13.0  | 13.5  | 16.5  | 12.4  | 15.2  | 10.8  | 20.6  | 17.2  | 11.9  |
| 126.3 | 67.1  | 73.0  | 84.6  | 108.0 | 92.9  | 139.8 | 158.5 | 114.2 |
| 92.2  | 39.5  | 64.8  | 53.9  | 75.3  | 76.7  | 89.3  | 89.4  | 61.3  |
| 17.1  | 10.0  | 12.1  | 11.7  | 7.8   | 15.2  | 21.3  | 19.7  | 9.6   |
| 377.4 | 277.7 | 270.6 | 301.6 | 322.7 | 294.9 | 354.6 | 373.8 | 241.1 |
| 25.6  | 19.7  | 22.2  | 14.6  | 22.3  | 23.9  | 31.5  | 40.3  | 27.7  |
| 21.9  | 4.8   | 1.0   | 6.2   | 7.3   | 2.1   | 1.8   | 12.2  | 2.0   |
| 15.6  | 9.0   | 13.0  | 8.6   | 12.2  | 9.6   | 15.3  | 24.6  | 12.9  |
| 61.8  | 54.2  | 44.2  | 42.2  | 55.4  | 48.4  | 73.6  | 66.2  | 36.9  |
| 0.5   | 0.6   | 0.7   | 0.4   | 0.4   | 1.1   | 0.5   | 0.9   | 0.6   |
| 189.7 | 154.8 | 143.3 | 179.4 | 176.2 | 176.8 | 216.2 | 359.4 | 216.3 |
| 118.5 | 118.1 | 115.8 | 121.0 | 129.7 | 114.3 | 141.9 | 126.0 | 107.5 |
| 20.2  | 13.5  | 6.3   | 12.9  | 9.6   | 15.8  | 20.1  | 19.4  | 16.6  |
| 5.7   | 3.9   | 5.9   | 7.2   | 6.6   | 3.2   | 13.4  | 12.3  | 1.2   |
| 169.8 | 64.1  | 81.4  | 80.5  | 77.4  | 91.2  | 137.3 | 190.0 | 99.0  |
| 86.8  | 60.1  | 84.2  | 77.7  | 101.9 | 88.8  | 106.8 | 84.0  | 100.9 |
| 59.8  | 29.1  | 37.3  | 52.0  | 47.9  | 48.0  | 66.7  | 73.7  | 58.2  |
| 102.2 | 59.5  | 74.6  | 68.6  | 90.5  | 90.0  | 123.4 | 152.8 | 83.2  |
| 0.8   | 0.8   | 0.7   | 0.7   | 0.9   | 0.7   | 0.6   | 0.9   | 1.0   |
| 15.1  | 11.9  | 17.3  | 7.8   | 12.5  | 1.9   | 10.4  | 16.4  | 14.2  |
| 80.6  | 53.5  | 60.9  | 78.4  | 76.2  | 55.5  | 87.2  | 81.5  | 72.5  |
| 3.0   | 1.8   | 13.4  | 2.7   | 1.9   | 8.9   | 3.8   | 8.7   | 13.7  |
| 66.4  | 29.7  | 38.6  | 45.4  | 43.8  | 40.5  | 55.5  | 62.3  | 58.5  |
| 29.5  | 21.1  | 15.1  | 21.2  | 24.2  | 16.9  | 29.3  | 12.2  | 17.3  |
| 5.6   | 6.1   | 9.0   | 5.8   | 5.3   | 8.3   | 1.3   | 13.2  | 6.3   |
| 7.9   | 6.4   | 10.2  | 6.2   | 12.3  | 13.2  | 3.4   | 6.7   | 9.3   |
| 15.8  | 21.3  | 15.5  | 26.1  | 19.5  | 26.2  | 28.0  | 40.8  | 22.0  |
| 320.4 | 141.9 | 190.0 | 166.1 | 197.5 | 198.5 | 264.4 | 261.3 | 188.7 |
| 93.6  | 54.7  | 71.1  | 70.0  | 74.4  | 89.4  | 125.1 | 99.6  | 74.8  |
| 80.7  | 45.9  | 47.9  | 60.6  | 60.4  | 52.9  | 79.3  | 106.7 | 64.3  |
| 44.3  | 31.5  | 32.3  | 38.7  | 33.5  | 35.4  | 38.1  | 39.6  | 30.9  |
| 13.7  | 16.3  | 16.9  | 20.9  | 16.6  | 16.6  | 27.5  | 19.8  | 26.0  |
| 47.8  | 31.9  | 45.0  | 43.5  | 46.5  | 53.7  | 70.5  | 101.0 | 57.0  |
| 73.6  | 22.8  | 18.6  | 30.5  | 35.3  | 34.2  | 29.2  | 47.1  | 29.9  |
| 9.3   | 5.3   | 6.9   | 3.2   | 6.8   | 7.0   | 10.8  | 10.5  | 5.9   |
| 0.5   | 0.4   | 0.5   | 0.1   | 0.8   | 0.8   | 0.8   | 0.5   | 0.7   |
| 78.4  | 55.1  | 61.6  | 77.2  | 57.4  | 88.0  | 87.7  | 73.8  | 65.1  |
| 1.0   | 2.6   | 0.3   | 4.4   | 0.2   | 2.1   | 0.8   | 0.2   | 0.3   |
| 71.6  | 38.9  | 40.1  | 43.6  | 45.1  | 38.2  | 58.9  | 71.3  | 39.9  |
| 8.1   | 12.2  | 15.0  | 6.3   | 4.3   | 9.7   | 13.4  | 6.8   | 8.9   |
| 0.9   | 0.7   | 0.3   | 0.9   | 3.8   | 0.5   | 3.2   | 2.6   | 0.7   |
| 2.6   | 2.1   | 1.8   | 0.6   | 0.2   | 0.8   | 3.2   | 1.7   | 0.9   |
| 155.8 | 99.2  | 156.0 | 166.8 | 162.7 | 184.5 | 238.1 | 293.7 | 160.9 |
| 11.6  | 8.9   | 2.3   | 2.8   | 5.1   | 3.4   | 4.5   | 14.6  | 2.5   |
| 13.8  | 8.7   | 7.7   | 9.5   | 8.8   | 11.5  | 12.1  | 18.3  | 13.7  |
| 0.4   | 0.1   | 0.9   | 1.1   | 0.4   | 6.3   | 6.9   | 3.5   | 4.2   |
| 141.8 | 46.4  | 51.2  | 56.1  | 63.1  | 57.0  | 101.6 | 141.5 | 76.0  |
| 8.4   | 8.3   | 8.1   | 4.3   | 9.7   | 5.1   | 10.5  | 11.7  | 7.6   |
| 22.5  | 20.2  | 23.9  | 26.2  | 28.8  | 29.4  | 23.6  | 33.9  | 22.2  |
| 224.9 | 91.6  | 110.8 | 118.9 | 137.1 | 134.1 | 170.5 | 198.2 | 173.2 |
| 3.6   | 2.7   | 5.7   | 4.5   | 2.8   | 2.5   | 6.7   | 9.0   | 5.4   |
| 92.2  | 70.9  | 79.8  | 89.6  | 82.5  | 76.1  | 93.0  | 135.2 | 79.0  |

|       |       |       |       |       |       |       |       |       |
|-------|-------|-------|-------|-------|-------|-------|-------|-------|
| 22.0  | 11.5  | 12.4  | 13.7  | 11.2  | 9.7   | 18.5  | 15.2  | 14.5  |
| 67.8  | 41.9  | 43.0  | 39.7  | 53.9  | 52.8  | 63.4  | 90.1  | 48.2  |
| 10.4  | 10.1  | 7.2   | 9.5   | 6.0   | 2.3   | 1.0   | 11.4  | 14.7  |
| 21.5  | 8.7   | 20.4  | 9.2   | 7.3   | 11.9  | 22.8  | 24.4  | 16.2  |
| 269.7 | 143.6 | 181.9 | 188.7 | 164.7 | 181.4 | 257.9 | 268.9 | 178.2 |
| 7.9   | 11.0  | 11.4  | 9.1   | 16.9  | 23.2  | 18.2  | 16.1  | 16.7  |
| 7.1   | 8.2   | 5.9   | 1.9   | 1.5   | 1.6   | 20.1  | 3.1   | 16.5  |
| 151.0 | 74.6  | 90.5  | 87.1  | 77.2  | 86.2  | 108.9 | 115.5 | 87.1  |
| 34.5  | 29.9  | 30.0  | 31.1  | 33.7  | 33.6  | 54.2  | 41.2  | 41.8  |
| 1.2   | 10.9  | 6.2   | 6.6   | 8.9   | 6.3   | 6.4   | 3.6   | 10.6  |
| 99.6  | 77.3  | 101.5 | 111.3 | 105.1 | 131.4 | 147.0 | 131.8 | 84.4  |
| 50.1  | 32.8  | 28.5  | 37.3  | 33.5  | 36.7  | 52.0  | 56.2  | 37.7  |
| 10.1  | 19.8  | 19.3  | 29.3  | 22.6  | 19.1  | 30.9  | 15.2  | 20.1  |
| 86.4  | 72.7  | 77.9  | 76.7  | 92.1  | 75.8  | 117.9 | 137.0 | 83.0  |
| 0.7   | 4.0   | 3.0   | 0.6   | 0.7   | 0.6   | 0.7   | 5.5   | 0.9   |
| 21.9  | 22.5  | 14.1  | 36.4  | 29.6  | 20.5  | 27.1  | 29.2  | 16.9  |
| 0.4   | 0.6   | 4.5   | 1.1   | 1.6   | 1.6   | 6.4   | 1.7   | 1.5   |
| 0.8   | 0.5   | 1.3   | 1.0   | 0.9   | 0.6   | 0.9   | 0.9   | 0.6   |
| 9.6   | 11.4  | 11.6  | 15.3  | 15.5  | 5.2   | 8.7   | 13.8  | 5.0   |
| 33.8  | 15.2  | 19.5  | 17.4  | 25.5  | 18.0  | 16.7  | 23.6  | 22.7  |
| 44.6  | 33.0  | 50.5  | 48.8  | 37.8  | 31.7  | 51.5  | 39.3  | 35.3  |
| 64.7  | 41.6  | 42.4  | 32.0  | 57.4  | 49.0  | 55.7  | 87.7  | 61.6  |
| 48.6  | 42.4  | 55.8  | 50.7  | 63.9  | 66.7  | 74.1  | 75.8  | 47.4  |
| 18.3  | 11.0  | 7.9   | 13.0  | 14.6  | 8.1   | 20.7  | 20.7  | 13.0  |
| 3.7   | 2.3   | 1.3   | 5.5   | 2.1   | 9.9   | 1.0   | 1.7   | 2.9   |
| 3.4   | 6.0   | 4.8   | 1.0   | 0.3   | 2.1   | 6.8   | 6.2   | 2.0   |
| 0.5   | 0.7   | 0.5   | 2.4   | 0.7   | 0.5   | 0.4   | 0.4   | 0.5   |
| 2.4   | 6.9   | 2.7   | 4.5   | 8.1   | 5.1   | 9.2   | 3.4   | 8.1   |
| 28.2  | 21.4  | 26.0  | 31.3  | 25.3  | 34.0  | 38.5  | 40.5  | 23.8  |
| 3.5   | 2.4   | 0.6   | 5.2   | 0.5   | 5.4   | 6.1   | 0.3   | 0.8   |
| 21.7  | 36.5  | 25.9  | 20.9  | 24.0  | 31.9  | 32.7  | 45.5  | 31.8  |
| 10.3  | 0.3   | 4.4   | 2.1   | 5.2   | 7.7   | 8.2   | 9.0   | 5.7   |
| 42.2  | 34.3  | 26.4  | 25.3  | 35.2  | 23.5  | 36.3  | 27.6  | 25.3  |
| 22.5  | 33.7  | 26.3  | 32.9  | 40.0  | 30.6  | 51.1  | 67.0  | 26.6  |
| 5.1   | 2.5   | 6.1   | 2.3   | 14.0  | 8.7   | 12.7  | 6.7   | 8.3   |
| 34.9  | 37.2  | 24.8  | 29.5  | 29.3  | 23.4  | 52.9  | 49.1  | 41.3  |
| 1.4   | 8.2   | 3.8   | 1.3   | 4.7   | 1.6   | 2.2   | 2.5   | 4.2   |
| 28.4  | 23.1  | 21.4  | 14.8  | 23.6  | 22.8  | 29.6  | 22.6  | 26.1  |
| 6.8   | 1.3   | 0.3   | 0.5   | 0.5   | 0.8   | 1.1   | 0.7   | 4.9   |
| 44.0  | 20.8  | 32.6  | 31.8  | 31.2  | 29.3  | 46.2  | 43.2  | 35.6  |
| 2.3   | 1.8   | 1.7   | 4.8   | 1.2   | 1.4   | 6.9   | 1.2   | 6.6   |
| 16.0  | 10.0  | 14.7  | 13.7  | 14.6  | 12.6  | 19.8  | 25.0  | 17.0  |
| 1.5   | 5.5   | 7.0   | 3.3   | 5.2   | 1.3   | 9.8   | 3.9   | 9.0   |
| 0.6   | 8.4   | 0.8   | 1.7   | 0.8   | 1.8   | 0.8   | 5.3   | 4.6   |
| 24.1  | 19.8  | 22.8  | 10.4  | 22.0  | 8.0   | 24.3  | 27.7  | 19.7  |
| 30.0  | 23.7  | 27.8  | 29.9  | 34.9  | 47.5  | 45.1  | 66.8  | 40.2  |
| 31.9  | 25.0  | 16.9  | 19.6  | 17.8  | 23.7  | 27.6  | 30.0  | 31.6  |
| 21.4  | 16.7  | 4.8   | 3.8   | 16.5  | 15.4  | 26.3  | 13.1  | 20.1  |
| 28.2  | 20.5  | 28.2  | 28.9  | 30.2  | 31.3  | 40.9  | 50.3  | 29.1  |
| 32.8  | 24.9  | 20.6  | 29.8  | 30.2  | 29.6  | 37.1  | 31.0  | 35.4  |
| 16.8  | 10.0  | 10.5  | 13.9  | 11.6  | 6.7   | 15.3  | 14.5  | 12.4  |
| 315.6 | 328.7 | 399.3 | 359.3 | 338.7 | 361.4 | 563.4 | 714.7 | 422.5 |
| 3.9   | 10.3  | 8.8   | 11.7  | 11.7  | 10.0  | 13.7  | 11.6  | 9.8   |

|       |       |       |       |       |       |       |       |       |
|-------|-------|-------|-------|-------|-------|-------|-------|-------|
| 19.2  | 6.9   | 14.1  | 15.4  | 16.6  | 13.2  | 19.7  | 27.1  | 11.6  |
| 0.5   | 1.1   | 0.9   | 0.4   | 1.1   | 0.5   | 1.5   | 1.0   | 1.6   |
| 10.4  | 12.6  | 12.8  | 9.5   | 24.1  | 10.6  | 25.2  | 28.3  | 12.6  |
| 2.0   | 0.8   | 1.6   | 3.8   | 4.6   | 5.6   | 7.9   | 7.0   | 3.9   |
| 27.4  | 27.6  | 29.8  | 23.7  | 27.8  | 27.1  | 32.3  | 51.9  | 25.0  |
| 3.0   | 0.3   | 0.5   | 1.4   | 0.5   | 1.9   | 1.6   | 0.7   | 1.4   |
| 1.0   | 1.5   | 1.1   | 1.4   | 0.8   | 3.5   | 0.4   | 0.5   | 1.1   |
| 40.2  | 29.0  | 27.0  | 32.3  | 35.5  | 31.9  | 43.3  | 42.1  | 31.7  |
| 105.0 | 68.1  | 89.6  | 78.1  | 90.6  | 85.4  | 111.4 | 133.1 | 81.7  |
| 35.6  | 11.8  | 18.7  | 34.2  | 10.1  | 19.6  | 34.0  | 27.0  | 15.7  |
| 1.3   | 1.3   | 1.3   | 0.7   | 1.2   | 5.9   | 1.2   | 4.7   | 5.2   |
| 37.0  | 31.1  | 11.2  | 20.5  | 21.1  | 19.5  | 29.4  | 48.5  | 40.2  |
| 1.1   | 3.1   | 2.6   | 2.6   | 2.7   | 0.8   | 2.2   | 2.5   | 5.2   |
| 3.5   | 4.7   | 1.4   | 10.0  | 12.0  | 18.7  | 13.2  | 18.4  | 8.7   |
| 4.0   | 1.3   | 1.8   | 4.7   | 4.8   | 6.5   | 5.3   | 10.5  | 1.0   |
| 5.4   | 1.5   | 7.2   | 0.9   | 5.6   | 8.5   | 0.7   | 7.4   | 0.3   |
| 40.8  | 38.8  | 34.8  | 40.0  | 27.4  | 35.3  | 37.7  | 55.2  | 19.1  |
| 5.1   | 2.2   | 4.8   | 3.7   | 1.7   | 0.9   | 2.1   | 2.6   | 2.3   |
| 9.9   | 14.3  | 11.9  | 11.0  | 17.8  | 14.4  | 23.3  | 20.2  | 6.5   |
| 2.9   | 4.7   | 4.4   | 4.1   | 5.2   | 3.8   | 3.7   | 5.6   | 2.6   |
| 5.5   | 1.8   | 2.6   | 6.5   | 1.7   | 0.9   | 7.9   | 9.5   | 6.3   |
| 10.2  | 17.4  | 14.2  | 16.8  | 13.0  | 18.8  | 14.3  | 30.1  | 18.7  |
| 13.6  | 13.4  | 14.2  | 15.6  | 10.1  | 10.0  | 18.1  | 21.2  | 16.7  |
| 3.1   | 5.5   | 5.9   | 6.0   | 6.0   | 2.0   | 6.1   | 9.2   | 5.1   |
| 14.0  | 10.2  | 16.5  | 9.9   | 7.3   | 4.4   | 1.2   | 1.3   | 4.4   |
| 154.1 | 31.9  | 75.9  | 66.0  | 53.3  | 90.1  | 94.3  | 181.5 | 91.1  |
| 8.9   | 1.8   | 2.0   | 1.6   | 1.6   | 3.6   | 7.5   | 11.5  | 7.1   |
| 0.8   | 1.1   | 2.6   | 1.2   | 0.8   | 1.0   | 2.2   | 0.8   | 0.9   |
| 28.2  | 19.9  | 20.3  | 33.4  | 28.7  | 32.3  | 31.2  | 44.2  | 27.0  |
| 14.4  | 14.7  | 19.5  | 16.3  | 13.2  | 13.1  | 2.7   | 23.2  | 19.1  |
| 60.3  | 23.8  | 34.0  | 39.7  | 30.4  | 37.1  | 38.6  | 52.0  | 38.9  |
| 5.8   | 2.2   | 3.1   | 2.8   | 3.0   | 2.0   | 11.0  | 8.2   | 3.6   |
| 37.1  | 17.7  | 23.4  | 25.6  | 25.9  | 27.6  | 31.5  | 27.5  | 22.9  |
| 32.9  | 17.1  | 26.5  | 17.4  | 21.1  | 26.0  | 33.8  | 36.3  | 28.0  |
| 417.1 | 312.9 | 302.3 | 340.2 | 348.0 | 313.2 | 427.5 | 521.1 | 346.2 |
| 71.6  | 56.8  | 76.9  | 68.6  | 96.7  | 55.3  | 82.5  | 105.9 | 72.0  |
| 48.5  | 34.4  | 38.0  | 35.6  | 56.9  | 42.4  | 59.6  | 82.5  | 92.1  |
| 4.7   | 5.5   | 1.9   | 3.0   | 6.3   | 6.2   | 3.8   | 5.4   | 7.1   |
| 53.2  | 39.1  | 41.0  | 41.1  | 51.3  | 36.5  | 48.2  | 48.0  | 41.3  |
| 34.0  | 30.8  | 32.9  | 29.8  | 25.2  | 32.6  | 41.4  | 48.9  | 26.1  |
| 37.6  | 24.2  | 15.8  | 26.2  | 29.2  | 26.7  | 33.4  | 37.6  | 36.4  |
| 76.3  | 41.4  | 56.0  | 50.9  | 71.0  | 61.5  | 99.9  | 103.3 | 55.5  |
| 124.8 | 88.6  | 92.1  | 125.7 | 120.6 | 131.8 | 181.4 | 226.7 | 186.6 |
| 63.1  | 31.4  | 37.8  | 44.0  | 44.2  | 46.2  | 59.8  | 96.4  | 47.8  |
| 25.2  | 16.4  | 23.1  | 10.7  | 10.3  | 17.7  | 18.3  | 24.6  | 16.5  |
| 24.7  | 19.4  | 13.1  | 20.1  | 14.1  | 11.7  | 23.4  | 22.5  | 13.1  |
| 5.1   | 0.9   | 1.1   | 6.1   | 4.9   | 0.9   | 6.2   | 6.7   | 5.7   |
| 1.5   | 1.7   | 7.4   | 1.0   | 3.8   | 5.8   | 1.2   | 4.8   | 0.5   |
| 26.7  | 13.1  | 13.5  | 20.1  | 11.4  | 15.1  | 23.3  | 20.2  | 17.5  |
| 8.8   | 7.4   | 10.0  | 9.5   | 13.0  | 11.1  | 8.6   | 16.7  | 7.3   |
| 43.2  | 21.4  | 20.1  | 23.7  | 30.3  | 24.9  | 28.4  | 48.1  | 20.7  |
| 35.3  | 29.0  | 23.5  | 30.3  | 31.7  | 34.6  | 39.7  | 54.4  | 31.1  |
| 7.7   | 3.2   | 5.9   | 5.4   | 8.4   | 4.0   | 6.7   | 5.5   | 4.1   |



|       |       |       |       |       |       |       |       |       |
|-------|-------|-------|-------|-------|-------|-------|-------|-------|
| 16.9  | 7.2   | 11.6  | 9.8   | 9.1   | 15.6  | 12.5  | 12.4  | 14.7  |
| 1.7   | 1.6   | 1.8   | 2.3   | 2.1   | 1.5   | 1.1   | 2.5   | 1.8   |
| 11.5  | 10.6  | 9.2   | 5.3   | 1.6   | 2.2   | 3.5   | 2.4   | 1.4   |
| 42.7  | 28.4  | 34.4  | 29.6  | 29.3  | 31.7  | 45.5  | 56.9  | 48.9  |
| 1.4   | 5.9   | 4.6   | 1.3   | 9.1   | 0.8   | 3.9   | 2.3   | 5.2   |
| 1.6   | 8.4   | 4.0   | 8.3   | 10.6  | 10.7  | 8.8   | 1.6   | 6.6   |
| 57.4  | 26.2  | 31.4  | 33.4  | 47.7  | 35.4  | 55.9  | 98.9  | 50.7  |
| 1.3   | 1.8   | 1.5   | 1.5   | 1.7   | 1.7   | 3.7   | 2.2   | 0.9   |
| 44.3  | 37.4  | 37.8  | 40.2  | 31.7  | 52.6  | 64.0  | 72.0  | 40.8  |
| 7.2   | 7.5   | 4.4   | 3.3   | 7.7   | 4.2   | 7.6   | 3.8   | 6.0   |
| 9.1   | 4.9   | 0.9   | 4.9   | 1.0   | 3.0   | 1.5   | 8.6   | 5.3   |
| 22.7  | 21.3  | 20.6  | 23.8  | 30.2  | 21.6  | 30.3  | 40.6  | 25.1  |
| 6.5   | 7.4   | 1.2   | 1.1   | 6.0   | 1.4   | 0.6   | 1.6   | 1.0   |
| 132.9 | 92.1  | 78.2  | 105.1 | 118.6 | 98.6  | 166.1 | 199.7 | 172.0 |
| 72.9  | 49.0  | 63.6  | 56.7  | 64.1  | 73.8  | 74.5  | 92.5  | 72.0  |
| 0.9   | 0.4   | 1.3   | 0.6   | 1.1   | 0.3   | 0.4   | 1.0   | 0.5   |
| 48.0  | 31.9  | 42.1  | 48.5  | 48.8  | 46.8  | 60.7  | 57.8  | 39.0  |
| 1.1   | 1.0   | 0.7   | 0.8   | 1.7   | 1.0   | 1.9   | 1.0   | 1.3   |
| 2.1   | 10.5  | 14.2  | 15.0  | 15.8  | 19.6  | 22.7  | 26.1  | 20.1  |
| 0.7   | 4.8   | 4.9   | 2.9   | 1.0   | 4.1   | 0.3   | 1.5   | 0.5   |
| 3.7   | 2.1   | 2.5   | 0.4   | 6.9   | 5.1   | 0.4   | 1.1   | 5.5   |
| 5.8   | 1.5   | 6.8   | 0.5   | 1.7   | 4.6   | 1.5   | 7.0   | 5.2   |
| 15.1  | 10.9  | 10.4  | 17.0  | 12.9  | 6.5   | 16.7  | 13.4  | 20.2  |
| 50.6  | 45.7  | 49.8  | 49.6  | 53.9  | 52.1  | 76.4  | 77.4  | 67.8  |
| 8.2   | 7.3   | 6.0   | 4.1   | 0.9   | 3.9   | 4.1   | 6.8   | 3.1   |
| 0.4   | 0.9   | 0.5   | 0.5   | 2.0   | 0.3   | 2.5   | 4.2   | 4.2   |
| 17.1  | 17.7  | 14.4  | 24.9  | 18.2  | 19.5  | 27.2  | 29.8  | 22.7  |
| 20.6  | 14.4  | 17.6  | 12.7  | 13.4  | 16.6  | 26.1  | 24.2  | 26.4  |
| 0.3   | 0.3   | 0.5   | 0.6   | 3.5   | 1.6   | 0.8   | 0.3   | 0.1   |
| 1.1   | 0.4   | 0.8   | 2.8   | 0.3   | 1.4   | 0.4   | 0.9   | 0.7   |
| 0.8   | 3.7   | 0.6   | 0.7   | 3.4   | 0.8   | 0.5   | 4.3   | 0.6   |
| 4.3   | 6.5   | 4.5   | 4.3   | 7.0   | 8.4   | 7.6   | 4.5   | 1.8   |
| 7.5   | 2.6   | 4.0   | 2.8   | 11.4  | 3.9   | 16.4  | 9.0   | 2.0   |
| 68.5  | 51.9  | 61.9  | 63.4  | 72.5  | 56.0  | 93.5  | 131.1 | 76.4  |
| 40.7  | 45.8  | 54.7  | 57.0  | 59.7  | 58.0  | 80.9  | 64.9  | 69.5  |
| 74.2  | 60.9  | 69.7  | 96.3  | 67.5  | 83.4  | 87.4  | 117.0 | 60.1  |
| 24.0  | 16.6  | 21.7  | 18.9  | 17.6  | 23.6  | 31.3  | 51.6  | 21.5  |
| 0.9   | 1.1   | 3.0   | 4.3   | 2.0   | 2.8   | 4.7   | 1.0   | 7.6   |
| 15.6  | 13.9  | 13.3  | 19.4  | 22.7  | 16.9  | 14.8  | 19.2  | 15.2  |
| 14.2  | 17.0  | 10.9  | 11.8  | 10.2  | 12.7  | 13.3  | 26.2  | 11.0  |
| 16.7  | 11.7  | 15.4  | 22.2  | 21.4  | 15.7  | 24.5  | 27.5  | 18.3  |
| 1.2   | 0.8   | 0.9   | 1.5   | 1.9   | 1.4   | 2.1   | 1.8   | 1.6   |
| 10.7  | 5.1   | 1.2   | 8.3   | 4.3   | 4.8   | 8.6   | 3.4   | 5.0   |
| 84.2  | 72.2  | 66.4  | 74.9  | 67.3  | 73.7  | 78.6  | 90.6  | 64.4  |
| 35.7  | 29.0  | 29.1  | 26.9  | 33.5  | 28.7  | 34.5  | 44.1  | 27.1  |
| 374.1 | 253.9 | 250.6 | 320.7 | 305.8 | 290.9 | 408.2 | 441.1 | 331.5 |
| 22.8  | 1.7   | 9.4   | 14.5  | 1.2   | 4.1   | 11.8  | 17.9  | 4.0   |
| 30.4  | 12.8  | 14.9  | 14.0  | 12.5  | 21.4  | 21.1  | 42.6  | 20.7  |
| 0.8   | 3.1   | 1.4   | 0.6   | 3.2   | 2.2   | 0.5   | 2.2   | 4.6   |
| 104.4 | 70.8  | 78.0  | 96.4  | 92.9  | 76.9  | 115.5 | 116.2 | 89.3  |
| 6.2   | 0.8   | 1.0   | 1.6   | 1.8   | 1.4   | 2.9   | 2.3   | 1.6   |
| 556.3 | 116.2 | 196.8 | 151.0 | 208.8 | 267.7 | 260.2 | 534.9 | 256.2 |
| 38.5  | 17.1  | 20.7  | 33.4  | 26.6  | 27.6  | 44.1  | 33.4  | 28.1  |

|       |       |       |       |       |       |       |       |       |
|-------|-------|-------|-------|-------|-------|-------|-------|-------|
| 14.2  | 14.5  | 10.9  | 10.2  | 15.2  | 14.9  | 11.7  | 13.3  | 16.5  |
| 32.3  | 20.7  | 21.5  | 20.7  | 21.1  | 21.1  | 24.0  | 34.4  | 15.2  |
| 11.6  | 6.0   | 1.9   | 1.7   | 8.3   | 11.5  | 12.4  | 8.4   | 18.1  |
| 37.7  | 21.7  | 17.6  | 24.7  | 32.2  | 22.9  | 43.2  | 37.5  | 24.9  |
| 3.1   | 2.6   | 2.8   | 1.6   | 2.9   | 1.8   | 2.4   | 3.9   | 2.7   |
| 135.5 | 74.6  | 75.0  | 91.7  | 90.3  | 75.2  | 116.8 | 112.0 | 80.7  |
| 10.0  | 11.8  | 5.4   | 6.7   | 7.0   | 8.2   | 7.3   | 10.3  | 10.2  |
| 0.3   | 6.4   | 4.4   | 3.1   | 2.5   | 1.7   | 0.4   | 3.9   | 1.5   |
| 20.8  | 15.0  | 17.0  | 14.6  | 14.0  | 15.2  | 15.4  | 17.5  | 16.9  |
| 42.5  | 27.0  | 17.5  | 15.9  | 24.6  | 20.9  | 30.9  | 30.5  | 28.2  |
| 6.8   | 4.2   | 2.1   | 3.1   | 5.4   | 8.0   | 8.6   | 8.3   | 4.7   |
| 1.5   | 0.6   | 0.7   | 1.9   | 0.7   | 0.5   | 2.8   | 4.0   | 2.6   |
| 9.3   | 8.1   | 8.6   | 3.7   | 3.5   | 8.7   | 2.0   | 13.6  | 4.2   |
| 8.4   | 9.4   | 9.7   | 10.9  | 12.0  | 12.6  | 18.4  | 19.4  | 11.4  |
| 50.7  | 32.9  | 31.3  | 38.6  | 34.1  | 38.1  | 47.0  | 66.7  | 40.4  |
| 40.0  | 21.3  | 17.4  | 14.8  | 25.9  | 15.4  | 22.5  | 26.9  | 22.7  |
| 23.3  | 15.3  | 17.7  | 18.6  | 14.8  | 15.3  | 31.4  | 33.4  | 18.3  |
| 2.5   | 5.2   | 0.9   | 1.9   | 0.5   | 0.9   | 6.3   | 0.6   | 4.2   |
| 233.0 | 124.4 | 153.8 | 144.6 | 179.1 | 150.3 | 169.6 | 196.2 | 156.5 |
| 4.6   | 4.0   | 0.7   | 2.5   | 0.9   | 10.3  | 9.9   | 8.1   | 9.7   |
| 24.3  | 16.3  | 12.4  | 17.9  | 11.9  | 20.1  | 17.2  | 30.5  | 18.5  |
| 1.3   | 2.0   | 0.8   | 1.7   | 0.8   | 1.9   | 0.9   | 2.7   | 0.9   |
| 34.7  | 26.2  | 17.0  | 34.2  | 36.3  | 35.5  | 54.9  | 47.6  | 36.6  |
| 2.7   | 3.4   | 5.2   | 0.2   | 4.2   | 0.2   | 3.8   | 5.7   | 3.1   |
| 52.0  | 24.0  | 14.6  | 30.5  | 34.7  | 23.2  | 40.7  | 54.3  | 32.4  |
| 27.4  | 20.3  | 11.6  | 28.8  | 24.0  | 30.6  | 38.4  | 33.1  | 22.5  |
| 25.3  | 11.8  | 18.5  | 14.9  | 15.8  | 13.9  | 23.2  | 37.1  | 19.4  |
| 6.5   | 2.3   | 2.0   | 8.7   | 1.5   | 7.7   | 4.5   | 14.4  | 2.5   |
| 3.0   | 1.1   | 1.0   | 3.7   | 1.5   | 3.7   | 0.4   | 4.5   | 2.9   |
| 3.2   | 2.5   | 6.7   | 7.8   | 5.6   | 7.0   | 7.2   | 4.6   | 5.5   |
| 52.8  | 25.2  | 28.0  | 33.4  | 36.3  | 28.6  | 52.3  | 47.8  | 28.5  |
| 168.3 | 104.0 | 123.4 | 117.0 | 142.9 | 136.3 | 155.2 | 189.2 | 109.8 |
| 8.0   | 0.6   | 7.3   | 5.7   | 1.4   | 1.2   | 7.2   | 1.2   | 7.6   |
| 351.0 | 291.5 | 407.2 | 358.6 | 357.5 | 454.2 | 423.6 | 556.5 | 419.3 |
| 14.5  | 3.0   | 2.1   | 8.9   | 12.3  | 11.2  | 10.7  | 20.6  | 9.1   |
| 12.5  | 3.9   | 11.6  | 14.8  | 6.8   | 12.0  | 17.2  | 20.0  | 13.4  |
| 0.9   | 0.9   | 1.2   | 0.6   | 0.7   | 1.2   | 0.9   | 1.0   | 1.2   |
| 0.9   | 1.6   | 0.5   | 1.4   | 1.1   | 3.1   | 4.1   | 1.8   | 5.0   |
| 16.7  | 18.7  | 12.0  | 12.2  | 12.0  | 16.7  | 18.7  | 25.1  | 16.7  |
| 53.3  | 49.8  | 51.1  | 56.9  | 52.7  | 48.6  | 78.8  | 87.3  | 56.9  |
| 6.3   | 6.7   | 0.6   | 4.2   | 1.0   | 6.6   | 8.4   | 2.6   | 2.7   |
| 177.2 | 110.6 | 117.0 | 127.6 | 135.0 | 146.6 | 176.4 | 228.2 | 130.5 |
| 69.6  | 45.0  | 50.7  | 55.3  | 52.8  | 69.3  | 66.3  | 69.4  | 41.4  |
| 105.1 | 52.3  | 69.3  | 68.4  | 73.7  | 77.7  | 86.2  | 114.1 | 61.2  |
| 0.8   | 0.4   | 0.5   | 0.5   | 3.0   | 0.7   | 4.2   | 4.6   | 1.3   |
| 5.2   | 8.2   | 1.9   | 1.4   | 1.8   | 8.7   | 6.9   | 3.4   | 6.5   |
| 52.4  | 15.6  | 20.0  | 26.1  | 25.2  | 21.6  | 29.8  | 46.7  | 32.2  |
| 6.5   | 1.3   | 2.1   | 6.9   | 1.9   | 6.2   | 2.3   | 6.4   | 3.6   |
| 7.0   | 0.3   | 5.5   | 4.8   | 6.0   | 6.6   | 7.8   | 10.9  | 1.1   |
| 2.6   | 2.5   | 0.5   | 1.6   | 1.8   | 0.4   | 1.0   | 0.7   | 2.0   |
| 0.1   | 0.1   | 1.1   | 0.2   | 1.3   | 0.1   | 0.2   | 0.2   | 0.3   |
| 23.4  | 9.1   | 5.7   | 9.3   | 5.9   | 13.9  | 14.9  | 19.4  | 11.5  |
| 12.1  | 13.9  | 3.2   | 15.2  | 8.3   | 10.1  | 7.6   | 19.7  | 19.9  |

|       |       |       |       |       |       |       |       |       |
|-------|-------|-------|-------|-------|-------|-------|-------|-------|
| 2.6   | 11.0  | 2.6   | 1.5   | 3.8   | 2.2   | 6.9   | 15.1  | 2.2   |
| 36.9  | 39.5  | 30.7  | 31.3  | 36.7  | 35.2  | 40.9  | 60.8  | 37.0  |
| 5.0   | 4.3   | 3.1   | 2.8   | 0.5   | 4.6   | 5.1   | 4.8   | 3.0   |
| 71.8  | 70.6  | 62.1  | 63.4  | 71.3  | 64.8  | 84.8  | 98.0  | 79.3  |
| 0.7   | 3.4   | 4.3   | 6.4   | 2.9   | 3.0   | 1.7   | 5.5   | 0.5   |
| 12.7  | 19.7  | 14.2  | 14.4  | 16.0  | 14.0  | 22.4  | 14.3  | 21.0  |
| 6.9   | 8.1   | 8.7   | 9.7   | 8.1   | 10.8  | 9.7   | 10.7  | 11.5  |
| 1.7   | 10.4  | 12.8  | 5.2   | 12.4  | 9.1   | 20.8  | 21.6  | 25.1  |
| 18.0  | 16.7  | 25.3  | 27.3  | 19.9  | 26.8  | 21.6  | 29.0  | 28.4  |
| 0.2   | 2.9   | 0.2   | 0.3   | 0.1   | 2.3   | 2.4   | 4.5   | 0.2   |
| 13.9  | 14.9  | 10.7  | 15.1  | 11.2  | 13.0  | 13.3  | 13.1  | 17.8  |
| 1.2   | 0.6   | 1.6   | 4.2   | 1.4   | 7.3   | 2.5   | 2.2   | 1.2   |
| 78.5  | 72.4  | 84.4  | 91.4  | 70.7  | 73.6  | 97.7  | 92.2  | 59.4  |
| 41.5  | 26.9  | 19.1  | 35.6  | 33.0  | 32.5  | 38.0  | 37.2  | 41.2  |
| 25.2  | 15.3  | 22.1  | 18.5  | 26.4  | 23.4  | 32.3  | 29.8  | 25.0  |
| 56.6  | 22.1  | 25.2  | 16.6  | 20.7  | 26.6  | 25.8  | 48.0  | 28.9  |
| 12.6  | 14.7  | 9.7   | 14.0  | 10.9  | 10.9  | 12.0  | 13.0  | 11.4  |
| 21.3  | 14.5  | 10.4  | 10.8  | 5.5   | 11.4  | 19.4  | 11.8  | 10.2  |
| 25.9  | 42.2  | 42.1  | 41.2  | 40.8  | 27.1  | 74.3  | 79.5  | 63.6  |
| 28.0  | 17.4  | 21.1  | 21.0  | 21.6  | 17.9  | 28.5  | 26.6  | 20.0  |
| 11.5  | 12.2  | 7.6   | 4.8   | 2.5   | 10.5  | 2.7   | 9.8   | 11.4  |
| 8.3   | 8.5   | 3.4   | 9.2   | 9.1   | 17.7  | 13.7  | 15.4  | 6.6   |
| 8.7   | 6.6   | 6.8   | 3.6   | 10.9  | 8.3   | 10.9  | 12.9  | 7.8   |
| 46.3  | 33.3  | 32.6  | 46.6  | 37.3  | 38.1  | 34.3  | 71.1  | 40.0  |
| 0.4   | 5.6   | 1.9   | 3.1   | 1.5   | 0.8   | 2.9   | 10.1  | 4.8   |
| 28.5  | 19.3  | 17.2  | 17.5  | 22.0  | 23.2  | 22.4  | 31.8  | 25.2  |
| 7.3   | 8.9   | 4.2   | 4.1   | 10.4  | 8.7   | 10.2  | 9.2   | 8.6   |
| 18.7  | 9.5   | 13.5  | 10.9  | 12.3  | 10.6  | 20.5  | 12.0  | 24.0  |
| 2.8   | 0.6   | 0.7   | 2.8   | 2.1   | 2.5   | 1.9   | 2.0   | 2.0   |
| 31.5  | 36.0  | 27.6  | 24.2  | 33.2  | 24.5  | 44.4  | 31.2  | 28.4  |
| 7.5   | 17.4  | 20.6  | 9.2   | 29.4  | 28.8  | 23.1  | 28.3  | 11.0  |
| 40.8  | 24.7  | 23.0  | 25.7  | 19.4  | 20.0  | 37.7  | 37.6  | 27.2  |
| 0.5   | 1.1   | 0.5   | 1.2   | 0.9   | 0.5   | 0.6   | 3.2   | 0.7   |
| 0.5   | 0.1   | 1.4   | 0.3   | 0.2   | 2.0   | 0.1   | 0.6   | 2.3   |
| 14.8  | 7.9   | 5.5   | 9.8   | 8.2   | 11.5  | 12.1  | 25.3  | 16.9  |
| 8.2   | 7.0   | 7.2   | 4.0   | 4.9   | 3.4   | 6.2   | 5.7   | 2.9   |
| 71.2  | 45.1  | 50.9  | 49.4  | 47.0  | 41.9  | 71.5  | 50.4  | 42.2  |
| 1.0   | 0.8   | 4.3   | 6.7   | 1.5   | 4.2   | 2.2   | 10.3  | 6.6   |
| 39.0  | 30.5  | 43.0  | 53.6  | 42.8  | 40.6  | 52.6  | 61.5  | 52.8  |
| 222.7 | 131.5 | 142.6 | 157.9 | 162.6 | 147.1 | 216.7 | 231.8 | 140.7 |
| 61.7  | 32.9  | 61.8  | 41.6  | 45.8  | 45.7  | 69.0  | 99.7  | 70.7  |
| 0.2   | 0.4   | 0.6   | 0.2   | 0.4   | 2.8   | 0.4   | 0.7   | 5.2   |
| 0.9   | 0.9   | 0.8   | 0.5   | 1.1   | 1.0   | 0.7   | 0.7   | 0.7   |
| 27.4  | 9.6   | 18.1  | 20.6  | 21.0  | 19.7  | 28.5  | 30.7  | 21.6  |
| 6.5   | 0.6   | 4.0   | 2.7   | 2.9   | 0.8   | 4.4   | 0.3   | 5.1   |
| 7.9   | 0.6   | 3.8   | 3.2   | 1.0   | 2.1   | 5.3   | 1.5   | 0.5   |
| 1.3   | 3.0   | 4.5   | 2.4   | 13.8  | 4.7   | 1.8   | 1.6   | 2.4   |
| 24.1  | 13.1  | 14.8  | 15.9  | 17.4  | 17.2  | 30.2  | 26.9  | 27.6  |
| 1.9   | 1.1   | 0.8   | 2.2   | 1.2   | 1.3   | 1.5   | 1.5   | 1.4   |
| 0.4   | 0.6   | 1.0   | 1.5   | 1.1   | 7.8   | 2.0   | 1.1   | 1.6   |
| 2.1   | 5.6   | 4.0   | 3.2   | 0.6   | 2.4   | 3.7   | 1.0   | 1.3   |
| 22.8  | 19.0  | 22.3  | 22.2  | 25.6  | 18.2  | 24.0  | 47.7  | 34.6  |
| 41.3  | 32.6  | 32.4  | 36.5  | 34.8  | 29.2  | 54.1  | 54.1  | 41.5  |

|       |       |       |       |       |       |       |       |       |
|-------|-------|-------|-------|-------|-------|-------|-------|-------|
| 17.8  | 15.4  | 11.8  | 11.8  | 9.7   | 11.3  | 18.6  | 25.7  | 13.8  |
| 100.0 | 56.6  | 55.1  | 65.2  | 84.2  | 77.3  | 78.6  | 65.1  | 68.1  |
| 32.8  | 45.7  | 43.8  | 47.2  | 59.9  | 39.8  | 50.1  | 41.6  | 40.5  |
| 2.2   | 5.4   | 0.3   | 3.8   | 1.0   | 1.3   | 5.5   | 1.8   | 3.0   |
| 10.7  | 17.7  | 11.5  | 25.4  | 16.5  | 25.6  | 26.4  | 39.4  | 28.2  |
| 8.0   | 6.8   | 6.2   | 16.5  | 8.0   | 7.1   | 13.0  | 11.5  | 5.9   |
| 7.5   | 16.0  | 15.6  | 17.2  | 17.3  | 12.2  | 20.9  | 18.7  | 18.2  |
| 2.2   | 2.2   | 0.4   | 0.8   | 1.0   | 1.0   | 2.0   | 1.7   | 0.5   |
| 7.6   | 11.1  | 6.8   | 5.5   | 9.5   | 10.0  | 8.8   | 10.5  | 11.6  |
| 7.7   | 3.9   | 10.3  | 1.0   | 10.8  | 7.6   | 8.2   | 13.4  | 8.1   |
| 16.4  | 12.5  | 11.0  | 14.0  | 15.9  | 15.4  | 22.4  | 24.8  | 24.7  |
| 7.3   | 1.3   | 2.2   | 7.2   | 9.5   | 5.9   | 8.1   | 14.8  | 4.9   |
| 54.6  | 34.7  | 42.2  | 48.5  | 52.8  | 51.8  | 68.6  | 90.4  | 55.6  |
| 30.5  | 17.5  | 18.1  | 23.8  | 27.5  | 18.9  | 33.0  | 40.3  | 30.6  |
| 13.5  | 4.8   | 5.2   | 2.3   | 8.2   | 11.7  | 11.4  | 6.5   | 3.0   |
| 59.7  | 52.6  | 41.4  | 50.1  | 35.1  | 50.0  | 51.9  | 71.2  | 69.4  |
| 58.9  | 43.3  | 48.3  | 41.7  | 48.2  | 53.0  | 74.7  | 77.5  | 47.8  |
| 88.3  | 67.9  | 60.5  | 74.0  | 63.0  | 59.5  | 79.6  | 72.8  | 78.3  |
| 84.2  | 60.5  | 64.0  | 85.9  | 68.5  | 67.5  | 101.1 | 128.2 | 83.3  |
| 160.8 | 161.3 | 152.2 | 183.8 | 169.8 | 156.1 | 243.8 | 258.3 | 152.1 |
| 25.9  | 13.2  | 13.0  | 15.3  | 20.0  | 18.8  | 20.1  | 25.8  | 25.2  |
| 1.5   | 1.4   | 1.3   | 1.2   | 1.4   | 1.1   | 1.9   | 1.8   | 1.2   |
| 4.0   | 3.5   | 2.4   | 3.5   | 1.1   | 2.9   | 2.6   | 5.1   | 4.8   |
| 1.2   | 0.8   | 0.7   | 0.7   | 2.8   | 0.9   | 0.9   | 2.3   | 1.3   |
| 0.6   | 1.3   | 4.8   | 7.4   | 7.7   | 7.5   | 4.9   | 8.6   | 8.9   |
| 19.1  | 12.8  | 9.1   | 12.0  | 15.8  | 17.9  | 28.6  | 29.3  | 17.5  |
| 10.5  | 6.3   | 1.0   | 7.5   | 7.1   | 12.3  | 8.9   | 13.2  | 8.7   |
| 73.0  | 35.9  | 37.6  | 40.8  | 35.7  | 48.0  | 53.7  | 67.8  | 38.1  |
| 3.4   | 0.6   | 0.3   | 0.3   | 4.4   | 3.5   | 0.7   | 2.5   | 0.6   |
| 18.0  | 7.4   | 9.0   | 11.7  | 17.2  | 13.2  | 17.0  | 26.0  | 17.4  |
| 1.9   | 0.6   | 1.5   | 1.6   | 1.8   | 1.3   | 1.9   | 1.9   | 0.5   |
| 17.0  | 7.1   | 12.3  | 14.0  | 8.9   | 8.6   | 13.6  | 26.2  | 16.4  |
| 7.3   | 1.1   | 1.8   | 1.0   | 0.9   | 6.6   | 6.6   | 7.5   | 0.8   |
| 62.6  | 155.8 | 163.7 | 193.1 | 172.2 | 129.8 | 188.6 | 189.9 | 145.5 |
| 7.6   | 8.7   | 6.2   | 12.1  | 7.5   | 11.6  | 9.1   | 11.0  | 10.1  |
| 19.1  | 15.4  | 14.7  | 17.1  | 11.6  | 16.0  | 22.0  | 23.5  | 12.6  |
| 1.5   | 1.4   | 1.3   | 1.6   | 1.0   | 1.4   | 1.5   | 1.8   | 2.4   |
| 0.3   | 3.9   | 2.6   | 2.4   | 4.4   | 4.1   | 2.6   | 3.9   | 2.1   |
| 2.8   | 0.4   | 4.2   | 2.9   | 3.1   | 2.6   | 4.5   | 0.5   | 5.8   |
| 21.1  | 13.0  | 11.3  | 7.5   | 10.3  | 11.2  | 9.0   | 10.2  | 6.7   |
| 38.2  | 24.6  | 30.0  | 32.5  | 26.0  | 40.6  | 47.2  | 80.0  | 44.4  |
| 3.9   | 7.7   | 5.2   | 9.0   | 1.6   | 7.5   | 6.6   | 13.3  | 3.0   |
| 8.2   | 8.3   | 11.3  | 9.5   | 9.9   | 10.8  | 8.4   | 18.1  | 15.2  |
| 61.5  | 56.5  | 58.5  | 52.2  | 56.7  | 52.3  | 70.5  | 60.7  | 58.3  |
| 45.5  | 29.8  | 33.4  | 31.6  | 41.3  | 26.2  | 45.9  | 55.8  | 38.1  |
| 18.2  | 2.5   | 11.7  | 11.0  | 11.9  | 5.2   | 21.3  | 18.1  | 16.6  |
| 111.1 | 99.2  | 124.5 | 123.6 | 130.3 | 126.2 | 167.4 | 196.6 | 122.6 |
| 1.2   | 3.7   | 1.9   | 0.8   | 4.0   | 4.6   | 0.8   | 0.7   | 0.8   |
| 59.2  | 38.2  | 30.4  | 39.3  | 43.5  | 44.1  | 46.1  | 62.4  | 44.3  |
| 1.2   | 6.5   | 7.9   | 3.9   | 3.7   | 1.9   | 1.8   | 7.7   | 4.8   |
| 40.1  | 22.3  | 29.1  | 31.6  | 32.4  | 29.6  | 41.2  | 8.6   | 25.5  |
| 0.1   | 1.4   | 1.3   | 3.5   | 1.2   | 1.5   | 1.2   | 4.8   | 1.4   |
| 236.5 | 174.9 | 163.0 | 207.4 | 180.7 | 190.0 | 224.5 | 278.2 | 206.6 |

|        |        |        |        |        |        |        |        |        |
|--------|--------|--------|--------|--------|--------|--------|--------|--------|
| 2.9    | 8.5    | 8.9    | 3.9    | 1.5    | 1.2    | 6.7    | 13.0   | 11.5   |
| 31.5   | 20.4   | 30.7   | 21.6   | 25.6   | 31.1   | 39.5   | 40.9   | 22.6   |
| 33.2   | 29.9   | 25.4   | 36.8   | 38.2   | 30.3   | 47.4   | 48.2   | 36.5   |
| 0.7    | 0.9    | 0.9    | 1.6    | 1.9    | 0.9    | 1.7    | 2.1    | 5.9    |
| 9.0    | 3.3    | 13.0   | 11.4   | 8.7    | 7.8    | 6.6    | 8.9    | 8.2    |
| 1.6    | 0.5    | 0.9    | 0.9    | 1.2    | 1.4    | 0.6    | 0.7    | 0.7    |
| 9.0    | 1.3    | 5.5    | 9.8    | 1.6    | 3.9    | 10.3   | 16.9   | 2.1    |
| 25.2   | 24.9   | 23.5   | 24.6   | 21.5   | 20.5   | 36.1   | 33.2   | 15.8   |
| 9.8    | 0.8    | 3.8    | 0.5    | 6.7    | 8.7    | 9.0    | 8.2    | 7.3    |
| 0.9    | 3.3    | 1.0    | 2.1    | 1.9    | 2.2    | 1.5    | 1.9    | 5.4    |
| 4.8    | 5.9    | 7.3    | 3.9    | 1.9    | 3.9    | 4.2    | 1.2    | 5.2    |
| 3.0    | 0.5    | 0.4    | 2.7    | 1.5    | 0.6    | 5.0    | 0.9    | 1.0    |
| 0.3    | 2.6    | 1.9    | 1.7    | 0.3    | 0.6    | 4.8    | 2.8    | 6.0    |
| 2.6    | 6.1    | 7.3    | 1.7    | 6.3    | 1.5    | 2.2    | 1.8    | 1.2    |
| 8.0    | 11.7   | 5.4    | 10.1   | 10.8   | 8.0    | 9.8    | 9.5    | 9.7    |
| 48.1   | 33.8   | 36.2   | 45.3   | 41.9   | 43.2   | 64.8   | 85.0   | 39.7   |
| 7.4    | 82.5   | 75.3   | 78.5   | 89.4   | 55.9   | 107.5  | 85.0   | 67.1   |
| 188.0  | 119.4  | 123.6  | 163.3  | 152.2  | 156.3  | 173.1  | 214.1  | 140.1  |
| 9.4    | 8.4    | 8.7    | 6.3    | 8.9    | 8.4    | 7.7    | 11.7   | 8.2    |
| 11.5   | 3.7    | 2.0    | 9.5    | 6.2    | 9.5    | 7.2    | 6.4    | 12.7   |
| 22.0   | 15.5   | 21.3   | 22.4   | 17.4   | 24.8   | 35.9   | 67.0   | 31.1   |
| 3.6    | 4.6    | 1.0    | 5.1    | 1.5    | 3.8    | 4.4    | 8.5    | 1.0    |
| 3.6    | 0.2    | 1.0    | 1.7    | 0.5    | 2.0    | 4.4    | 0.8    | 0.9    |
| 8.0    | 1.0    | 0.8    | 5.3    | 6.0    | 9.5    | 8.0    | 6.8    | 3.0    |
| 11.5   | 6.8    | 9.6    | 7.1    | 8.1    | 9.8    | 7.3    | 13.1   | 6.7    |
| 97.4   | 63.0   | 53.7   | 67.3   | 78.0   | 60.6   | 80.5   | 91.4   | 85.4   |
| 131.9  | 126.6  | 115.9  | 127.6  | 132.5  | 140.7  | 187.8  | 204.1  | 122.5  |
| 3.4    | 0.6    | 0.4    | 0.8    | 0.6    | 3.6    | 2.4    | 1.0    | 0.5    |
| 4.8    | 1.0    | 0.9    | 0.4    | 1.0    | 0.9    | 3.6    | 1.6    | 1.1    |
| 19.0   | 13.8   | 8.5    | 10.5   | 12.2   | 10.9   | 14.0   | 12.7   | 13.2   |
| 9.2    | 10.0   | 5.8    | 16.7   | 11.9   | 6.5    | 10.2   | 9.0    | 9.1    |
| 6.3    | 12.0   | 3.6    | 4.3    | 9.0    | 5.4    | 7.2    | 5.3    | 5.7    |
| 1.4    | 1.3    | 0.9    | 1.1    | 1.2    | 1.0    | 1.1    | 5.1    | 1.3    |
| 38.5   | 61.0   | 44.6   | 61.0   | 63.6   | 56.0   | 85.1   | 90.8   | 63.6   |
| 15.9   | 17.3   | 11.0   | 16.9   | 19.2   | 11.6   | 26.4   | 24.5   | 20.7   |
| 34.3   | 17.7   | 13.6   | 13.5   | 17.3   | 18.9   | 24.1   | 38.1   | 21.3   |
| 10.2   | 2.5    | 9.6    | 7.3    | 10.3   | 16.0   | 8.3    | 10.1   | 5.5    |
| 2.9    | 18.1   | 6.6    | 7.3    | 8.8    | 6.8    | 3.2    | 4.7    | 12.2   |
| 9.4    | 4.0    | 4.2    | 8.8    | 11.0   | 9.7    | 13.4   | 18.2   | 12.4   |
| 22.2   | 16.6   | 24.0   | 28.1   | 29.8   | 8.4    | 31.1   | 22.3   | 27.3   |
| 4.3    | 0.6    | 6.1    | 7.6    | 1.1    | 4.3    | 1.4    | 9.5    | 4.6    |
| 30.7   | 20.2   | 16.4   | 21.7   | 18.5   | 25.9   | 30.8   | 32.7   | 28.6   |
| 61.9   | 40.4   | 40.6   | 49.5   | 52.7   | 44.3   | 56.1   | 65.1   | 47.7   |
| 0.4    | 0.1    | 0.5    | 2.2    | 0.4    | 0.2    | 0.3    | 0.2    | 0.7    |
| 23.5   | 16.2   | 12.6   | 7.9    | 9.8    | 11.5   | 15.4   | 25.3   | 20.8   |
| 9.3    | 4.4    | 3.8    | 0.7    | 4.0    | 4.6    | 7.7    | 9.9    | 7.9    |
| 2780.7 | 2196.0 | 2210.2 | 2353.7 | 2714.2 | 2463.5 | 3024.0 | 3049.9 | 2713.2 |
| 181.1  | 66.6   | 84.6   | 87.1   | 69.7   | 62.5   | 75.7   | 76.4   | 58.1   |
| 2.8    | 1.8    | 0.3    | 0.9    | 1.0    | 2.3    | 2.5    | 0.9    | 4.0    |
| 30.4   | 16.0   | 18.8   | 32.9   | 19.8   | 22.5   | 29.9   | 31.3   | 22.7   |
| 9.9    | 1.3    | 10.8   | 1.1    | 5.0    | 6.7    | 3.9    | 2.3    | 1.3    |
| 53.1   | 31.4   | 31.5   | 33.7   | 38.0   | 28.8   | 56.6   | 50.8   | 41.3   |
| 2.5    | 0.9    | 0.9    | 0.3    | 0.5    | 0.5    | 0.9    | 1.1    | 0.6    |

|       |       |       |       |       |       |       |       |       |
|-------|-------|-------|-------|-------|-------|-------|-------|-------|
| 48.2  | 37.8  | 32.5  | 30.4  | 29.8  | 37.8  | 38.5  | 46.3  | 46.4  |
| 18.4  | 20.5  | 20.0  | 17.7  | 23.3  | 21.7  | 28.4  | 31.8  | 18.4  |
| 7.9   | 8.3   | 1.3   | 1.8   | 12.1  | 7.9   | 10.4  | 4.2   | 6.0   |
| 2.4   | 3.8   | 0.8   | 0.2   | 1.0   | 0.7   | 0.8   | 0.7   | 0.8   |
| 0.9   | 2.7   | 5.2   | 1.7   | 2.9   | 4.7   | 0.5   | 5.2   | 0.7   |
| 16.1  | 8.5   | 6.7   | 11.4  | 11.7  | 14.5  | 15.9  | 17.8  | 16.1  |
| 1.5   | 1.4   | 1.1   | 1.4   | 1.7   | 2.4   | 5.5   | 5.8   | 1.1   |
| 0.6   | 0.9   | 0.8   | 0.8   | 1.2   | 4.3   | 1.1   | 1.3   | 1.9   |
| 0.5   | 0.1   | 0.5   | 0.1   | 1.2   | 0.2   | 1.1   | 0.2   | 0.2   |
| 2.2   | 3.8   | 2.4   | 1.9   | 3.5   | 0.3   | 3.0   | 0.3   | 2.7   |
| 9.9   | 15.7  | 20.6  | 12.2  | 18.0  | 11.8  | 25.5  | 22.2  | 14.9  |
| 0.7   | 0.2   | 2.0   | 0.9   | 0.2   | 0.5   | 4.7   | 0.9   | 4.9   |
| 34.5  | 33.4  | 26.2  | 33.0  | 32.8  | 20.8  | 37.4  | 42.7  | 31.8  |
| 0.4   | 0.4   | 0.2   | 0.2   | 0.1   | 0.4   | 0.5   | 0.6   | 0.2   |
| 17.5  | 29.9  | 28.0  | 34.3  | 25.8  | 22.6  | 39.6  | 47.9  | 27.7  |
| 44.1  | 25.0  | 28.1  | 40.5  | 30.7  | 33.7  | 32.6  | 46.7  | 27.6  |
| 40.1  | 30.8  | 27.3  | 31.6  | 35.7  | 28.8  | 36.2  | 47.5  | 39.4  |
| 5.9   | 3.5   | 1.3   | 1.2   | 6.2   | 6.3   | 7.5   | 5.0   | 8.3   |
| 170.5 | 152.2 | 128.5 | 165.3 | 180.7 | 168.1 | 244.5 | 332.5 | 224.9 |
| 0.8   | 4.8   | 0.6   | 0.4   | 2.7   | 0.4   | 1.1   | 1.7   | 0.7   |
| 0.9   | 4.0   | 2.0   | 5.4   | 3.7   | 5.2   | 7.1   | 10.8  | 0.6   |
| 0.5   | 1.2   | 0.4   | 0.4   | 2.3   | 0.5   | 0.3   | 0.6   | 2.3   |
| 0.2   | 0.3   | 0.2   | 0.4   | 0.3   | 0.2   | 0.2   | 0.3   | 0.3   |
| 9.1   | 13.8  | 13.7  | 11.1  | 7.6   | 11.3  | 2.3   | 13.6  | 12.9  |
| 18.4  | 5.3   | 4.5   | 6.2   | 8.0   | 10.0  | 13.4  | 15.0  | 11.5  |
| 6.9   | 0.7   | 1.4   | 0.7   | 6.0   | 5.2   | 5.8   | 9.6   | 6.0   |
| 4.0   | 6.5   | 0.2   | 0.3   | 2.9   | 2.8   | 6.1   | 2.8   | 1.8   |
| 1.3   | 0.5   | 0.8   | 0.4   | 0.6   | 0.6   | 1.1   | 1.3   | 0.7   |
| 7.6   | 2.0   | 3.0   | 5.4   | 2.3   | 6.0   | 2.1   | 4.9   | 2.1   |
| 256.1 | 191.7 | 244.4 | 245.5 | 245.7 | 262.1 | 338.5 | 331.8 | 231.0 |
| 13.6  | 17.2  | 12.7  | 9.2   | 16.9  | 14.6  | 10.3  | 13.2  | 20.0  |
| 21.2  | 12.5  | 14.1  | 10.3  | 15.2  | 11.5  | 30.2  | 39.4  | 33.9  |
| 17.6  | 12.6  | 12.0  | 16.4  | 14.3  | 10.1  | 12.7  | 14.2  | 16.0  |
| 17.4  | 18.1  | 11.6  | 16.2  | 16.6  | 13.6  | 25.3  | 33.6  | 19.9  |
| 0.4   | 1.3   | 0.7   | 2.9   | 2.4   | 2.0   | 4.1   | 2.3   | 5.4   |
| 2.8   | 4.0   | 1.3   | 1.8   | 4.2   | 1.0   | 0.2   | 0.8   | 0.4   |
| 16.9  | 11.2  | 7.2   | 11.7  | 15.8  | 14.3  | 18.0  | 31.4  | 17.2  |
| 343.2 | 307.8 | 351.1 | 371.1 | 396.0 | 403.5 | 486.4 | 535.7 | 349.1 |
| 21.8  | 23.9  | 39.6  | 26.1  | 38.6  | 28.7  | 16.6  | 5.0   | 6.7   |
| 17.3  | 11.0  | 14.8  | 10.2  | 13.8  | 13.5  | 16.3  | 14.3  | 3.3   |
| 95.9  | 65.8  | 66.7  | 66.2  | 78.7  | 70.5  | 94.9  | 107.6 | 98.3  |
| 11.8  | 3.7   | 1.0   | 9.5   | 4.0   | 5.5   | 1.3   | 9.9   | 10.1  |
| 7.9   | 12.0  | 8.5   | 3.0   | 10.0  | 11.4  | 11.2  | 6.0   | 10.9  |
| 7.5   | 7.5   | 1.3   | 3.5   | 0.9   | 0.9   | 5.6   | 10.4  | 10.4  |
| 6.8   | 9.4   | 8.4   | 3.3   | 5.6   | 8.2   | 9.3   | 8.7   | 7.3   |
| 0.9   | 0.6   | 4.4   | 7.2   | 9.6   | 10.4  | 3.5   | 8.2   | 0.8   |
| 3.1   | 1.2   | 1.5   | 5.4   | 10.8  | 1.4   | 10.8  | 12.7  | 1.9   |
| 252.4 | 186.2 | 186.5 | 250.7 | 218.8 | 213.5 | 247.8 | 261.8 | 268.0 |
| 89.7  | 60.3  | 71.1  | 73.1  | 75.0  | 58.3  | 103.4 | 126.1 | 52.4  |
| 36.7  | 29.7  | 30.2  | 40.6  | 40.8  | 43.7  | 54.5  | 57.1  | 44.4  |
| 406.7 | 283.5 | 321.1 | 337.8 | 362.9 | 360.4 | 482.8 | 583.9 | 327.0 |
| 4.5   | 1.0   | 1.3   | 1.0   | 1.4   | 0.6   | 7.8   | 0.6   | 0.7   |
| 26.9  | 25.8  | 29.6  | 33.9  | 29.1  | 33.7  | 32.9  | 31.4  | 34.4  |

|       |       |       |       |       |       |       |       |       |
|-------|-------|-------|-------|-------|-------|-------|-------|-------|
| 9.4   | 10.3  | 9.0   | 8.4   | 11.8  | 9.8   | 19.0  | 11.4  | 9.8   |
| 2.0   | 0.8   | 9.6   | 0.9   | 6.0   | 6.4   | 4.1   | 5.0   | 4.0   |
| 6.9   | 10.5  | 8.6   | 10.6  | 5.0   | 4.5   | 8.1   | 1.5   | 8.7   |
| 0.8   | 9.6   | 7.6   | 0.7   | 1.0   | 1.0   | 1.4   | 2.7   | 0.8   |
| 67.0  | 37.8  | 33.5  | 38.6  | 45.3  | 39.3  | 46.5  | 52.1  | 48.9  |
| 1.5   | 4.2   | 2.6   | 4.5   | 2.3   | 5.2   | 9.8   | 6.8   | 1.4   |
| 25.0  | 7.4   | 22.0  | 20.4  | 21.4  | 18.3  | 28.4  | 32.2  | 14.0  |
| 1.5   | 1.0   | 0.5   | 1.4   | 4.3   | 3.3   | 1.8   | 0.6   | 0.5   |
| 0.8   | 1.6   | 2.8   | 8.3   | 4.1   | 1.1   | 1.3   | 2.8   | 1.7   |
| 4.5   | 3.1   | 4.9   | 1.8   | 1.4   | 1.3   | 2.9   | 1.6   | 2.0   |
| 18.2  | 34.0  | 33.5  | 26.5  | 24.9  | 26.7  | 46.2  | 21.2  | 32.6  |
| 28.5  | 13.9  | 14.5  | 20.3  | 22.0  | 17.5  | 17.5  | 18.4  | 20.3  |
| 5.6   | 4.1   | 3.2   | 4.7   | 6.5   | 5.9   | 5.9   | 5.5   | 5.2   |
| 0.4   | 0.5   | 0.4   | 0.4   | 0.4   | 0.4   | 0.5   | 0.5   | 1.2   |
| 3.7   | 1.2   | 0.9   | 3.0   | 1.0   | 2.4   | 3.3   | 1.4   | 5.1   |
| 1.5   | 1.8   | 0.9   | 1.0   | 1.5   | 1.2   | 1.5   | 1.3   | 1.5   |
| 32.4  | 22.5  | 17.2  | 27.8  | 22.7  | 25.3  | 28.3  | 31.3  | 33.6  |
| 1.7   | 1.3   | 1.0   | 0.9   | 1.3   | 0.5   | 1.2   | 1.1   | 0.7   |
| 1.4   | 1.3   | 3.2   | 1.1   | 4.7   | 4.4   | 6.0   | 1.5   | 1.8   |
| 0.6   | 3.9   | 1.5   | 0.7   | 3.4   | 3.7   | 0.9   | 0.8   | 0.7   |
| 4.3   | 3.0   | 7.2   | 4.1   | 4.5   | 4.9   | 9.2   | 6.0   | 9.0   |
| 60.2  | 27.8  | 42.2  | 49.5  | 38.0  | 38.7  | 55.1  | 65.0  | 34.5  |
| 8.0   | 6.3   | 10.6  | 8.3   | 5.3   | 10.7  | 11.9  | 11.0  | 8.5   |
| 0.3   | 0.8   | 5.5   | 4.3   | 3.3   | 0.9   | 5.9   | 5.7   | 1.1   |
| 9.2   | 6.4   | 9.7   | 6.7   | 8.0   | 8.5   | 12.8  | 15.3  | 9.3   |
| 12.4  | 9.9   | 4.5   | 1.5   | 3.7   | 10.1  | 9.3   | 2.8   | 1.3   |
| 31.4  | 17.5  | 15.2  | 27.7  | 24.6  | 31.2  | 41.1  | 42.8  | 31.0  |
| 13.3  | 1.8   | 1.4   | 10.6  | 5.4   | 5.1   | 1.7   | 6.0   | 1.8   |
| 207.7 | 127.9 | 158.1 | 163.9 | 146.2 | 181.4 | 277.9 | 350.5 | 205.2 |
| 1.7   | 3.6   | 4.8   | 0.9   | 3.2   | 3.1   | 5.5   | 5.7   | 5.8   |
| 2.6   | 0.8   | 0.9   | 1.4   | 1.1   | 1.0   | 1.4   | 1.4   | 2.0   |
| 0.6   | 0.9   | 1.1   | 0.5   | 0.8   | 0.6   | 0.6   | 0.5   | 0.7   |
| 16.6  | 18.3  | 13.7  | 18.0  | 20.2  | 23.1  | 20.1  | 23.6  | 23.4  |
| 10.1  | 2.0   | 8.3   | 0.5   | 2.8   | 1.3   | 13.3  | 6.0   | 1.7   |
| 162.5 | 36.4  | 106.1 | 68.0  | 91.6  | 134.6 | 111.1 | 210.9 | 108.5 |
| 2.0   | 0.5   | 5.1   | 7.1   | 3.1   | 5.4   | 4.3   | 8.5   | 5.8   |
| 9.7   | 16.0  | 15.6  | 18.6  | 21.5  | 13.9  | 23.9  | 36.6  | 17.4  |
| 5.4   | 5.3   | 5.6   | 6.9   | 4.6   | 2.5   | 4.0   | 5.4   | 6.0   |
| 7.3   | 1.2   | 5.6   | 2.3   | 1.9   | 8.7   | 3.3   | 11.0  | 3.8   |
| 34.8  | 17.1  | 24.0  | 19.9  | 25.7  | 21.5  | 38.5  | 28.1  | 30.9  |
| 119.8 | 68.4  | 86.6  | 97.5  | 86.4  | 90.4  | 138.3 | 121.4 | 112.0 |
| 18.4  | 0.2   | 7.2   | 2.8   | 3.5   | 3.8   | 0.5   | 5.7   | 5.4   |
| 14.5  | 7.9   | 6.4   | 8.7   | 8.8   | 7.6   | 11.4  | 12.0  | 8.7   |
| 29.1  | 19.8  | 22.5  | 20.1  | 23.4  | 19.3  | 19.4  | 31.3  | 18.4  |
| 3.1   | 13.7  | 8.0   | 1.6   | 11.9  | 12.0  | 4.9   | 14.1  | 12.6  |
| 0.8   | 0.8   | 1.9   | 1.2   | 4.2   | 5.1   | 4.5   | 4.9   | 9.3   |
| 47.9  | 37.5  | 29.3  | 41.3  | 25.1  | 22.8  | 40.7  | 33.8  | 41.9  |
| 64.7  | 158.0 | 140.7 | 162.0 | 166.3 | 162.4 | 233.1 | 213.7 | 158.3 |
| 1.8   | 3.3   | 6.2   | 4.4   | 7.4   | 8.8   | 12.3  | 12.0  | 7.2   |
| 1.5   | 0.3   | 0.6   | 0.1   | 0.2   | 1.1   | 0.5   | 0.6   | 0.4   |
| 43.8  | 40.8  | 35.9  | 46.0  | 39.0  | 22.9  | 74.6  | 49.5  | 46.9  |
| 10.6  | 8.8   | 9.7   | 5.3   | 11.1  | 6.4   | 10.6  | 6.3   | 2.9   |
| 27.5  | 24.3  | 33.3  | 35.5  | 31.5  | 28.7  | 40.9  | 47.5  | 35.2  |

|       |       |       |       |       |       |       |       |       |
|-------|-------|-------|-------|-------|-------|-------|-------|-------|
| 11.1  | 9.7   | 13.5  | 7.0   | 13.6  | 5.7   | 15.5  | 15.9  | 12.2  |
| 2.4   | 0.7   | 1.2   | 3.9   | 0.4   | 6.7   | 0.9   | 6.9   | 2.4   |
| 1.7   | 1.1   | 0.8   | 0.7   | 1.7   | 1.7   | 1.6   | 1.9   | 1.4   |
| 0.5   | 0.7   | 0.3   | 0.3   | 0.4   | 0.7   | 0.8   | 0.4   | 0.6   |
| 13.8  | 12.3  | 18.1  | 16.9  | 17.5  | 19.8  | 19.6  | 17.7  | 17.4  |
| 37.1  | 18.2  | 19.6  | 19.0  | 21.8  | 23.8  | 26.0  | 33.1  | 21.4  |
| 30.2  | 26.6  | 10.9  | 29.8  | 23.2  | 23.3  | 15.3  | 26.7  | 30.4  |
| 39.0  | 36.7  | 34.8  | 32.7  | 36.5  | 34.9  | 40.3  | 66.1  | 31.5  |
| 21.1  | 17.6  | 14.0  | 11.4  | 22.0  | 14.0  | 12.0  | 18.2  | 26.2  |
| 3.1   | 1.3   | 1.0   | 3.1   | 1.0   | 0.8   | 5.6   | 0.9   | 7.7   |
| 0.9   | 0.3   | 5.8   | 0.2   | 2.9   | 1.1   | 5.3   | 6.2   | 4.3   |
| 15.1  | 14.8  | 15.1  | 19.5  | 12.3  | 17.3  | 17.9  | 17.7  | 20.6  |
| 2.6   | 2.5   | 8.9   | 4.0   | 3.8   | 8.4   | 4.3   | 1.3   | 1.7   |
| 15.9  | 10.2  | 10.8  | 8.4   | 4.8   | 11.7  | 11.3  | 11.0  | 13.2  |
| 27.9  | 18.5  | 22.9  | 30.2  | 25.5  | 14.0  | 30.6  | 24.3  | 31.2  |
| 1.4   | 4.3   | 4.3   | 3.6   | 4.3   | 4.5   | 0.8   | 0.4   | 4.6   |
| 33.1  | 20.5  | 25.7  | 23.9  | 24.5  | 24.3  | 32.6  | 23.9  | 37.9  |
| 4.7   | 6.3   | 6.1   | 2.8   | 4.6   | 11.1  | 7.9   | 6.2   | 5.0   |
| 12.7  | 13.9  | 12.2  | 7.5   | 17.5  | 18.6  | 20.8  | 14.1  | 15.6  |
| 0.8   | 0.9   | 0.3   | 0.7   | 0.5   | 0.8   | 0.7   | 1.4   | 0.3   |
| 0.5   | 0.1   | 0.2   | 0.2   | 0.7   | 0.3   | 0.2   | 0.3   | 1.0   |
| 3.8   | 6.6   | 3.5   | 1.6   | 4.6   | 1.7   | 6.3   | 3.1   | 3.8   |
| 18.9  | 6.0   | 13.7  | 9.3   | 18.6  | 16.3  | 4.9   | 20.0  | 9.1   |
| 0.3   | 2.2   | 5.5   | 1.2   | 6.6   | 0.4   | 6.7   | 6.7   | 0.5   |
| 13.5  | 14.4  | 13.5  | 22.4  | 17.9  | 18.2  | 15.3  | 11.3  | 18.4  |
| 20.1  | 17.4  | 23.2  | 26.9  | 25.5  | 28.2  | 28.9  | 39.2  | 28.2  |
| 4.4   | 2.6   | 3.5   | 4.4   | 6.8   | 9.2   | 6.1   | 8.4   | 7.4   |
| 0.9   | 5.5   | 6.0   | 3.3   | 0.8   | 0.7   | 0.7   | 8.8   | 0.9   |
| 4.0   | 1.0   | 0.2   | 0.7   | 0.4   | 3.2   | 1.1   | 1.4   | 0.9   |
| 20.0  | 29.2  | 21.5  | 26.8  | 36.4  | 28.2  | 39.4  | 26.3  | 28.9  |
| 13.5  | 9.8   | 12.6  | 15.3  | 11.0  | 8.2   | 15.3  | 20.5  | 11.7  |
| 2.1   | 7.7   | 2.4   | 1.8   | 1.5   | 1.2   | 3.4   | 2.3   | 1.0   |
| 16.7  | 15.7  | 15.1  | 16.1  | 15.9  | 18.0  | 20.8  | 22.4  | 14.9  |
| 0.2   | 0.4   | 0.2   | 1.3   | 1.5   | 0.2   | 0.6   | 1.2   | 2.9   |
| 0.8   | 0.9   | 0.5   | 0.7   | 0.5   | 0.4   | 0.9   | 1.6   | 0.3   |
| 31.9  | 23.5  | 30.1  | 32.8  | 26.9  | 31.5  | 38.8  | 44.9  | 33.1  |
| 135.9 | 70.9  | 90.1  | 99.9  | 111.5 | 100.8 | 122.1 | 149.2 | 118.4 |
| 7.0   | 4.3   | 1.5   | 5.6   | 1.3   | 2.6   | 1.7   | 5.7   | 6.1   |
| 98.9  | 61.0  | 64.2  | 69.1  | 62.0  | 60.8  | 96.4  | 87.8  | 64.7  |
| 1.1   | 1.1   | 1.6   | 0.7   | 1.2   | 0.8   | 1.0   | 1.7   | 1.9   |
| 6.2   | 4.9   | 12.7  | 3.1   | 6.4   | 5.5   | 10.8  | 13.5  | 7.2   |
| 5.7   | 16.0  | 12.8  | 12.6  | 14.5  | 10.4  | 7.6   | 10.7  | 14.1  |
| 10.6  | 13.4  | 13.0  | 8.7   | 15.7  | 13.4  | 15.3  | 21.1  | 15.2  |
| 48.8  | 36.4  | 36.6  | 36.8  | 37.9  | 33.2  | 49.4  | 65.7  | 40.9  |
| 32.3  | 24.8  | 26.7  | 31.4  | 36.5  | 30.0  | 42.8  | 42.7  | 30.6  |
| 245.2 | 86.4  | 117.3 | 118.4 | 154.2 | 179.2 | 216.4 | 205.8 | 138.4 |
| 4.0   | 8.8   | 9.0   | 8.9   | 3.1   | 4.0   | 5.6   | 9.2   | 3.9   |
| 218.4 | 233.0 | 355.4 | 205.1 | 253.5 | 277.9 | 464.7 | 548.6 | 291.3 |
| 23.0  | 30.7  | 19.1  | 19.8  | 20.1  | 18.7  | 30.2  | 26.9  | 18.1  |
| 56.3  | 49.0  | 28.6  | 55.2  | 71.5  | 54.0  | 59.5  | 70.8  | 54.9  |
| 8.2   | 6.6   | 7.4   | 3.5   | 6.3   | 13.6  | 9.8   | 14.9  | 10.5  |
| 2.0   | 1.2   | 0.9   | 1.1   | 3.4   | 2.6   | 3.6   | 0.9   | 1.8   |
| 18.6  | 17.9  | 12.7  | 18.1  | 12.0  | 22.8  | 27.4  | 34.2  | 21.8  |



|       |       |       |       |       |       |       |       |       |
|-------|-------|-------|-------|-------|-------|-------|-------|-------|
| 4.8   | 6.8   | 7.9   | 1.3   | 8.0   | 4.1   | 12.3  | 13.5  | 6.1   |
| 60.2  | 34.5  | 40.1  | 43.0  | 53.6  | 48.3  | 64.1  | 80.6  | 54.1  |
| 1.8   | 0.6   | 1.3   | 0.7   | 3.9   | 0.8   | 0.2   | 1.0   | 0.2   |
| 55.3  | 39.5  | 44.5  | 43.1  | 35.2  | 55.7  | 64.1  | 72.6  | 43.8  |
| 0.2   | 0.4   | 0.4   | 2.2   | 1.9   | 0.6   | 0.2   | 0.7   | 1.9   |
| 374.6 | 196.6 | 205.6 | 243.9 | 266.9 | 276.9 | 346.4 | 521.7 | 245.6 |
| 5.9   | 3.8   | 0.7   | 1.4   | 1.6   | 1.0   | 0.7   | 0.4   | 2.6   |
| 4.0   | 3.7   | 3.6   | 2.2   | 5.1   | 3.9   | 3.0   | 3.3   | 3.9   |
| 1.1   | 2.2   | 1.1   | 0.5   | 1.0   | 4.1   | 3.4   | 0.2   | 0.7   |
| 0.1   | 0.3   | 0.6   | 0.3   | 0.6   | 0.3   | 0.2   | 0.2   | 0.1   |
| 3.9   | 5.4   | 3.3   | 0.4   | 0.5   | 0.2   | 5.2   | 1.4   | 2.9   |
| 600.4 | 382.6 | 427.2 | 444.4 | 457.3 | 434.3 | 592.1 | 670.4 | 564.9 |
| 152.6 | 145.9 | 169.0 | 191.8 | 185.0 | 184.2 | 227.0 | 272.3 | 165.9 |
| 0.7   | 1.5   | 2.0   | 3.7   | 1.9   | 5.4   | 4.7   | 8.1   | 3.9   |
| 1.8   | 0.8   | 1.1   | 1.2   | 3.1   | 1.0   | 1.8   | 1.3   | 5.8   |
| 1.2   | 1.5   | 9.6   | 5.4   | 1.6   | 0.7   | 2.4   | 1.1   | 1.0   |
| 4.9   | 0.4   | 2.6   | 6.0   | 0.4   | 3.0   | 2.6   | 5.4   | 0.2   |
| 3.2   | 0.4   | 2.9   | 2.2   | 2.5   | 5.0   | 1.9   | 1.1   | 1.8   |
| 50.2  | 58.2  | 42.4  | 43.1  | 41.3  | 34.8  | 27.7  | 47.7  | 48.5  |
| 1.3   | 0.5   | 0.4   | 1.5   | 0.2   | 2.2   | 0.8   | 0.2   | 3.1   |
| 2.4   | 0.1   | 1.7   | 3.1   | 0.8   | 0.8   | 0.1   | 0.6   | 1.2   |
| 0.9   | 0.8   | 3.4   | 0.1   | 0.2   | 0.0   | 0.6   | 0.1   | 0.6   |
| 1.8   | 11.5  | 5.6   | 5.2   | 6.3   | 1.2   | 4.2   | 6.6   | 3.2   |
| 1.5   | 1.1   | 1.4   | 2.8   | 3.7   | 4.6   | 3.1   | 4.6   | 2.9   |
| 69.5  | 35.1  | 51.1  | 41.4  | 63.6  | 39.3  | 94.3  | 52.1  | 53.3  |
| 96.4  | 59.9  | 75.7  | 74.5  | 75.9  | 87.2  | 115.4 | 107.3 | 80.3  |
| 6.7   | 8.3   | 11.9  | 13.6  | 7.8   | 13.7  | 22.6  | 30.0  | 13.6  |
| 8.3   | 6.5   | 4.5   | 8.0   | 1.3   | 1.4   | 4.3   | 9.7   | 3.4   |
| 3.2   | 1.0   | 4.1   | 1.1   | 4.8   | 7.3   | 5.2   | 10.5  | 1.6   |
| 3.2   | 1.9   | 4.8   | 1.0   | 3.9   | 4.4   | 0.8   | 10.8  | 0.9   |
| 2.6   | 12.6  | 8.6   | 5.0   | 1.9   | 6.8   | 4.1   | 5.9   | 8.4   |
| 167.1 | 119.7 | 132.9 | 134.9 | 139.0 | 145.5 | 179.7 | 195.1 | 129.2 |
| 195.0 | 106.6 | 134.6 | 127.1 | 145.9 | 167.0 | 226.4 | 297.5 | 193.5 |
| 13.0  | 9.8   | 21.3  | 22.8  | 13.4  | 17.6  | 22.2  | 23.5  | 18.5  |
| 4.2   | 2.6   | 4.4   | 0.7   | 4.1   | 0.4   | 3.3   | 5.8   | 0.1   |
| 14.7  | 11.8  | 16.5  | 12.3  | 14.8  | 17.2  | 13.4  | 20.7  | 13.1  |
| 9.9   | 3.0   | 16.0  | 2.2   | 7.1   | 4.3   | 2.4   | 11.7  | 3.7   |
| 0.6   | 0.9   | 2.9   | 2.0   | 5.1   | 0.9   | 0.6   | 4.6   | 0.9   |
| 122.8 | 71.2  | 88.3  | 103.9 | 74.4  | 98.6  | 89.8  | 90.6  | 55.1  |
| 29.4  | 25.0  | 23.9  | 25.6  | 23.3  | 28.7  | 52.9  | 32.5  | 27.0  |
| 21.6  | 11.3  | 16.3  | 15.7  | 13.5  | 14.9  | 17.7  | 18.1  | 12.5  |
| 13.6  | 11.1  | 11.5  | 8.9   | 14.0  | 12.5  | 15.2  | 18.3  | 18.1  |
| 0.3   | 4.9   | 1.6   | 2.5   | 2.9   | 1.7   | 1.7   | 2.7   | 0.1   |
| 4.1   | 0.6   | 1.2   | 0.9   | 0.3   | 0.9   | 0.3   | 0.8   | 0.4   |
| 60.8  | 22.0  | 26.1  | 28.3  | 33.2  | 28.4  | 41.1  | 54.3  | 58.6  |
| 2.7   | 0.8   | 2.5   | 3.2   | 1.2   | 0.4   | 0.4   | 0.7   | 0.3   |
| 1.9   | 0.9   | 0.2   | 0.2   | 1.8   | 0.4   | 0.6   | 0.3   | 1.9   |
| 3.7   | 2.4   | 1.1   | 0.1   | 1.0   | 4.8   | 2.8   | 4.1   | 4.8   |
| 19.4  | 8.5   | 19.9  | 13.6  | 10.6  | 12.7  | 23.4  | 25.3  | 20.8  |
| 8.5   | 9.0   | 14.0  | 8.0   | 9.5   | 12.0  | 3.7   | 5.9   | 2.4   |
| 235.0 | 117.1 | 165.9 | 157.8 | 156.9 | 181.2 | 228.7 | 303.3 | 161.5 |
| 99.9  | 66.7  | 65.9  | 76.8  | 104.8 | 80.6  | 122.6 | 159.4 | 141.9 |
| 6.4   | 12.9  | 7.2   | 5.4   | 9.4   | 10.8  | 10.5  | 11.1  | 8.0   |

|       |      |      |      |      |      |       |       |      |
|-------|------|------|------|------|------|-------|-------|------|
| 88.1  | 54.4 | 66.7 | 54.5 | 63.1 | 60.2 | 86.4  | 104.0 | 87.3 |
| 44.0  | 35.8 | 27.6 | 34.5 | 41.5 | 33.4 | 57.3  | 47.2  | 30.8 |
| 1.6   | 1.3  | 0.8  | 1.0  | 0.9  | 0.8  | 3.8   | 0.5   | 4.2  |
| 1.2   | 2.9  | 0.3  | 1.0  | 0.2  | 0.9  | 1.2   | 1.9   | 2.9  |
| 0.5   | 0.8  | 0.4  | 0.6  | 3.1  | 1.6  | 1.9   | 3.2   | 1.2  |
| 18.6  | 9.5  | 15.0 | 17.1 | 5.6  | 14.8 | 20.5  | 20.7  | 15.0 |
| 20.0  | 10.8 | 6.3  | 3.4  | 5.7  | 6.3  | 5.8   | 11.4  | 14.3 |
| 102.7 | 69.5 | 55.1 | 71.6 | 89.3 | 63.1 | 101.2 | 126.8 | 72.8 |
| 0.9   | 0.6  | 2.3  | 1.9  | 0.7  | 1.2  | 2.6   | 3.9   | 1.3  |
| 55.5  | 22.3 | 24.3 | 31.8 | 22.8 | 34.1 | 42.8  | 50.7  | 37.2 |
| 17.4  | 24.3 | 14.4 | 15.9 | 17.7 | 14.6 | 18.0  | 22.6  | 16.8 |
| 21.3  | 16.0 | 13.5 | 13.3 | 3.4  | 19.9 | 22.9  | 23.4  | 22.7 |
| 3.2   | 4.5  | 6.2  | 2.3  | 4.3  | 6.6  | 3.5   | 9.8   | 3.7  |
| 2.5   | 1.2  | 2.6  | 7.5  | 2.3  | 6.7  | 6.3   | 2.0   | 3.1  |
| 0.1   | 0.1  | 0.1  | 0.3  | 0.2  | 0.1  | 0.3   | 0.2   | 2.8  |
| 18.4  | 9.5  | 10.9 | 7.0  | 7.7  | 18.4 | 20.0  | 18.8  | 11.2 |
| 54.6  | 28.3 | 25.1 | 35.3 | 33.2 | 44.0 | 47.4  | 41.4  | 29.1 |
| 28.6  | 22.3 | 26.9 | 31.2 | 26.0 | 24.2 | 39.6  | 32.4  | 22.1 |
| 4.4   | 7.8  | 6.0  | 5.5  | 12.5 | 9.2  | 8.8   | 2.2   | 8.7  |
| 5.6   | 7.1  | 2.6  | 2.5  | 3.8  | 10.1 | 1.5   | 5.5   | 2.2  |
| 0.8   | 0.5  | 3.9  | 0.9  | 0.5  | 1.4  | 1.0   | 1.2   | 0.8  |
| 1.2   | 0.6  | 1.0  | 1.4  | 0.7  | 0.8  | 3.3   | 1.5   | 6.0  |
| 5.7   | 3.9  | 2.4  | 1.8  | 1.8  | 13.0 | 3.5   | 24.3  | 11.6 |
| 17.8  | 2.0  | 4.9  | 7.5  | 8.5  | 6.9  | 15.6  | 16.2  | 6.0  |
| 0.3   | 0.3  | 0.4  | 0.4  | 0.3  | 0.3  | 1.1   | 0.5   | 0.4  |
| 1.4   | 0.7  | 0.7  | 0.6  | 1.3  | 0.7  | 1.4   | 0.8   | 0.9  |
| 46.1  | 27.5 | 21.3 | 31.2 | 18.5 | 36.3 | 26.9  | 48.6  | 34.0 |
| 3.4   | 0.9  | 4.6  | 1.2  | 3.7  | 9.6  | 3.6   | 15.1  | 1.5  |
| 11.0  | 13.5 | 17.4 | 18.8 | 13.8 | 13.3 | 22.6  | 17.2  | 19.7 |
| 4.7   | 2.5  | 1.1  | 1.1  | 1.1  | 2.6  | 1.5   | 1.6   | 4.8  |
| 39.4  | 31.4 | 33.8 | 34.9 | 36.3 | 42.0 | 49.4  | 64.6  | 52.1 |
| 0.6   | 2.3  | 2.5  | 0.2  | 2.7  | 4.2  | 1.4   | 1.2   | 0.7  |
| 0.7   | 9.3  | 0.7  | 4.8  | 1.6  | 3.7  | 2.1   | 1.6   | 2.3  |
| 21.5  | 0.1  | 3.3  | 1.7  | 2.0  | 2.7  | 2.3   | 5.7   | 0.5  |
| 40.2  | 40.0 | 37.4 | 31.3 | 48.0 | 35.4 | 33.3  | 51.9  | 36.7 |
| 0.6   | 0.6  | 1.4  | 1.5  | 1.6  | 8.0  | 0.8   | 2.2   | 1.2  |
| 15.9  | 16.3 | 13.6 | 16.1 | 19.7 | 21.1 | 17.8  | 36.2  | 21.1 |
| 23.8  | 10.8 | 8.2  | 9.0  | 13.9 | 12.6 | 20.5  | 28.3  | 29.4 |
| 6.5   | 2.2  | 1.2  | 1.3  | 2.8  | 9.2  | 8.9   | 7.7   | 6.7  |
| 37.1  | 35.3 | 43.7 | 52.5 | 54.1 | 52.9 | 63.3  | 47.3  | 31.2 |
| 4.1   | 5.5  | 6.7  | 1.2  | 6.2  | 6.7  | 8.9   | 8.9   | 8.8  |
| 5.4   | 11.1 | 0.5  | 1.8  | 4.5  | 5.9  | 2.5   | 3.2   | 0.9  |
| 1.5   | 0.5  | 0.5  | 3.7  | 1.0  | 3.3  | 0.5   | 1.4   | 0.8  |
| 6.7   | 11.2 | 14.0 | 12.9 | 1.0  | 2.7  | 2.4   | 8.4   | 1.7  |
| 3.6   | 7.4  | 4.4  | 7.1  | 1.1  | 7.0  | 7.3   | 4.6   | 5.2  |
| 0.4   | 0.5  | 0.4  | 0.8  | 0.8  | 0.2  | 2.0   | 1.1   | 1.1  |
| 4.5   | 7.4  | 4.9  | 6.2  | 14.2 | 5.1  | 6.1   | 4.8   | 10.1 |
| 16.3  | 15.0 | 11.2 | 7.7  | 15.5 | 5.3  | 11.8  | 23.2  | 16.6 |
| 6.6   | 1.0  | 3.4  | 0.9  | 0.3  | 0.4  | 1.3   | 0.4   | 1.4  |
| 11.1  | 5.1  | 11.5 | 7.7  | 10.5 | 8.1  | 9.9   | 21.8  | 10.4 |
| 0.6   | 1.0  | 1.0  | 1.0  | 0.5  | 0.5  | 2.8   | 0.6   | 1.1  |
| 17.3  | 16.7 | 12.4 | 7.6  | 11.5 | 9.2  | 15.2  | 15.6  | 12.3 |
| 39.9  | 26.6 | 24.9 | 23.0 | 23.8 | 32.3 | 30.5  | 44.4  | 25.7 |

|       |       |      |       |       |       |       |       |       |
|-------|-------|------|-------|-------|-------|-------|-------|-------|
| 3.1   | 2.5   | 2.3  | 4.2   | 0.3   | 2.8   | 4.7   | 6.1   | 0.6   |
| 41.8  | 17.5  | 31.1 | 21.1  | 24.5  | 23.5  | 22.6  | 28.7  | 21.8  |
| 64.4  | 36.3  | 43.1 | 42.7  | 44.0  | 44.4  | 58.7  | 54.9  | 38.4  |
| 1.6   | 0.9   | 0.5  | 0.8   | 0.8   | 1.1   | 1.3   | 0.2   | 0.5   |
| 28.5  | 15.0  | 11.4 | 13.3  | 15.2  | 20.8  | 30.8  | 49.5  | 27.4  |
| 4.9   | 6.3   | 3.8  | 7.5   | 6.2   | 7.9   | 6.3   | 7.0   | 7.1   |
| 31.8  | 12.3  | 5.6  | 11.5  | 20.2  | 17.0  | 12.8  | 30.6  | 18.4  |
| 18.0  | 9.6   | 20.0 | 17.6  | 18.8  | 12.1  | 19.6  | 24.4  | 23.6  |
| 17.6  | 6.0   | 14.9 | 3.3   | 24.9  | 2.1   | 12.7  | 3.0   | 19.7  |
| 4.1   | 1.4   | 1.1  | 1.0   | 0.6   | 0.8   | 0.9   | 10.3  | 1.7   |
| 135.1 | 64.4  | 85.2 | 90.0  | 100.2 | 94.1  | 138.8 | 231.9 | 96.2  |
| 2.8   | 7.1   | 9.4  | 11.2  | 2.6   | 6.7   | 5.5   | 4.5   | 1.5   |
| 59.4  | 49.3  | 49.4 | 56.7  | 53.6  | 50.1  | 64.4  | 83.3  | 45.9  |
| 0.9   | 0.3   | 0.7  | 0.4   | 5.9   | 1.8   | 2.5   | 5.3   | 2.1   |
| 23.7  | 18.6  | 19.7 | 13.3  | 20.9  | 20.4  | 18.3  | 19.7  | 21.2  |
| 0.5   | 0.5   | 0.6  | 0.5   | 0.7   | 0.6   | 0.3   | 0.6   | 0.6   |
| 27.9  | 16.5  | 19.2 | 16.8  | 21.2  | 15.9  | 24.5  | 26.1  | 20.2  |
| 12.2  | 16.1  | 2.6  | 8.5   | 8.0   | 5.2   | 7.6   | 7.8   | 5.7   |
| 175.4 | 64.5  | 79.3 | 87.5  | 72.6  | 83.4  | 160.6 | 120.6 | 83.8  |
| 10.8  | 7.7   | 1.2  | 5.2   | 5.1   | 8.1   | 11.1  | 15.3  | 16.1  |
| 4.8   | 15.4  | 9.0  | 12.3  | 16.2  | 12.4  | 12.8  | 15.2  | 16.2  |
| 7.9   | 3.1   | 5.8  | 1.0   | 2.8   | 1.4   | 6.5   | 9.1   | 0.8   |
| 7.0   | 4.5   | 7.8  | 7.0   | 9.3   | 8.8   | 9.9   | 8.6   | 3.7   |
| 23.8  | 60.2  | 71.8 | 67.1  | 58.3  | 98.6  | 107.2 | 101.0 | 64.6  |
| 11.6  | 8.8   | 9.2  | 11.0  | 10.9  | 7.8   | 7.6   | 10.5  | 13.2  |
| 0.7   | 0.2   | 1.2  | 0.6   | 0.3   | 0.6   | 0.8   | 5.6   | 0.5   |
| 63.0  | 41.4  | 34.3 | 49.7  | 46.0  | 52.0  | 91.2  | 123.3 | 83.0  |
| 1.5   | 0.6   | 2.8  | 0.7   | 5.9   | 9.5   | 0.7   | 11.4  | 2.1   |
| 14.1  | 6.7   | 8.4  | 3.1   | 10.9  | 4.7   | 9.1   | 7.6   | 3.3   |
| 9.5   | 10.4  | 6.6  | 4.5   | 7.0   | 13.2  | 8.5   | 12.6  | 15.3  |
| 1.4   | 1.9   | 1.5  | 0.9   | 2.5   | 2.8   | 1.7   | 1.1   | 0.5   |
| 0.4   | 0.4   | 1.0  | 0.5   | 0.3   | 0.5   | 0.4   | 0.6   | 0.8   |
| 1.3   | 0.2   | 1.0  | 1.0   | 0.4   | 1.5   | 0.5   | 0.8   | 0.2   |
| 19.4  | 17.0  | 5.7  | 5.9   | 16.7  | 21.4  | 19.1  | 29.5  | 5.2   |
| 13.4  | 4.7   | 9.5  | 7.9   | 15.9  | 15.1  | 8.9   | 8.3   | 14.6  |
| 6.2   | 1.2   | 1.7  | 3.3   | 4.3   | 5.6   | 5.2   | 5.6   | 5.5   |
| 7.0   | 5.0   | 5.6  | 6.5   | 10.8  | 15.3  | 9.4   | 14.4  | 6.2   |
| 63.5  | 56.3  | 50.5 | 37.4  | 47.8  | 48.1  | 52.9  | 67.3  | 64.9  |
| 16.9  | 11.3  | 10.8 | 9.2   | 6.0   | 8.8   | 16.2  | 16.2  | 5.2   |
| 12.2  | 11.7  | 10.2 | 9.3   | 10.1  | 18.8  | 18.7  | 16.5  | 14.9  |
| 1.0   | 0.4   | 0.5  | 0.5   | 0.6   | 0.6   | 0.7   | 1.0   | 0.6   |
| 0.4   | 0.2   | 0.4  | 0.3   | 0.2   | 0.2   | 0.4   | 0.6   | 0.2   |
| 6.6   | 1.2   | 0.3  | 0.9   | 5.3   | 1.0   | 5.6   | 11.4  | 4.5   |
| 3.4   | 7.9   | 9.1  | 6.0   | 3.9   | 2.1   | 12.4  | 16.3  | 9.6   |
| 6.6   | 2.0   | 5.3  | 5.0   | 5.2   | 3.2   | 5.3   | 11.7  | 2.1   |
| 63.8  | 28.0  | 24.8 | 41.9  | 26.4  | 26.4  | 39.8  | 53.9  | 30.2  |
| 14.3  | 5.9   | 8.3  | 11.6  | 2.1   | 10.0  | 7.0   | 10.6  | 7.9   |
| 174.2 | 106.8 | 97.8 | 134.1 | 135.3 | 119.5 | 183.4 | 176.8 | 138.1 |
| 12.7  | 15.3  | 8.7  | 14.8  | 19.3  | 10.6  | 11.7  | 17.6  | 12.5  |
| 45.9  | 20.5  | 32.1 | 23.7  | 33.9  | 40.5  | 50.5  | 62.9  | 30.7  |
| 0.1   | 1.0   | 3.2  | 2.7   | 0.1   | 0.4   | 0.2   | 0.7   | 0.5   |
| 22.5  | 3.3   | 4.5  | 5.5   | 4.3   | 6.2   | 10.9  | 18.0  | 11.6  |
| 39.8  | 21.2  | 28.4 | 27.8  | 23.9  | 19.6  | 37.5  | 42.9  | 25.2  |

|       |       |       |       |       |       |       |       |       |
|-------|-------|-------|-------|-------|-------|-------|-------|-------|
| 0.6   | 4.5   | 1.3   | 0.5   | 1.7   | 0.2   | 3.7   | 2.2   | 3.8   |
| 0.9   | 1.1   | 0.3   | 1.7   | 0.3   | 1.9   | 0.6   | 1.0   | 0.7   |
| 15.9  | 15.5  | 10.9  | 13.5  | 16.4  | 16.0  | 23.8  | 29.1  | 23.6  |
| 0.9   | 1.5   | 0.9   | 0.7   | 6.9   | 0.8   | 2.3   | 2.1   | 2.5   |
| 28.0  | 22.4  | 33.0  | 30.9  | 27.4  | 27.5  | 33.5  | 49.2  | 23.8  |
| 3.8   | 4.4   | 3.0   | 0.3   | 3.4   | 3.1   | 0.8   | 6.0   | 4.0   |
| 0.7   | 0.9   | 1.5   | 1.3   | 0.9   | 1.2   | 6.2   | 1.3   | 1.6   |
| 151.8 | 102.4 | 120.5 | 127.6 | 132.4 | 130.3 | 159.8 | 187.9 | 121.1 |
| 12.8  | 5.9   | 0.5   | 1.8   | 1.8   | 6.3   | 1.0   | 6.9   | 2.0   |
| 9.5   | 13.3  | 6.8   | 11.7  | 11.2  | 11.2  | 11.3  | 7.0   | 10.7  |
| 22.2  | 8.6   | 15.1  | 16.7  | 19.4  | 21.3  | 19.1  | 13.7  | 17.9  |
| 2.6   | 7.2   | 2.0   | 1.3   | 2.0   | 3.8   | 6.1   | 3.3   | 1.3   |
| 305.4 | 174.5 | 198.3 | 220.4 | 232.8 | 233.1 | 298.4 | 359.6 | 262.7 |
| 6.6   | 0.9   | 1.1   | 0.5   | 0.9   | 1.2   | 1.4   | 2.0   | 0.6   |
| 0.9   | 5.1   | 2.6   | 2.0   | 2.0   | 6.8   | 7.5   | 1.1   | 6.1   |
| 2.6   | 4.2   | 0.5   | 0.7   | 3.9   | 0.7   | 1.5   | 7.4   | 2.7   |
| 2.3   | 4.7   | 2.1   | 4.9   | 1.5   | 1.0   | 4.7   | 8.3   | 3.5   |
| 80.0  | 40.3  | 62.6  | 61.8  | 50.3  | 70.3  | 69.2  | 93.4  | 63.0  |
| 2.0   | 7.9   | 6.5   | 9.2   | 12.6  | 11.6  | 16.9  | 15.3  | 9.9   |
| 0.8   | 2.2   | 7.7   | 5.2   | 1.4   | 1.8   | 4.9   | 7.1   | 3.1   |
| 14.5  | 22.1  | 21.4  | 19.1  | 26.2  | 26.9  | 35.9  | 31.3  | 22.8  |
| 6.7   | 9.0   | 7.2   | 6.7   | 7.9   | 2.2   | 8.0   | 7.6   | 8.1   |
| 2.1   | 0.2   | 1.2   | 0.4   | 2.3   | 0.1   | 0.2   | 0.5   | 2.4   |
| 1.0   | 0.4   | 0.4   | 1.2   | 2.7   | 0.8   | 7.3   | 1.0   | 3.9   |
| 1.0   | 2.4   | 0.7   | 6.0   | 0.9   | 0.6   | 6.7   | 1.1   | 2.6   |
| 2.2   | 8.5   | 3.3   | 9.8   | 5.9   | 6.9   | 6.1   | 6.6   | 3.8   |
| 29.7  | 14.3  | 22.2  | 22.6  | 26.2  | 27.4  | 31.5  | 40.5  | 30.5  |
| 2.0   | 2.7   | 11.9  | 3.5   | 6.0   | 5.3   | 5.3   | 14.6  | 8.3   |
| 8.0   | 6.6   | 5.9   | 6.2   | 6.9   | 8.2   | 9.9   | 6.4   | 5.4   |
| 381.7 | 5.4   | 11.4  | 12.3  | 12.0  | 13.4  | 30.3  | 59.4  | 22.0  |
| 0.6   | 4.8   | 1.3   | 2.3   | 1.2   | 1.4   | 14.9  | 2.3   | 1.5   |
| 0.9   | 1.3   | 0.7   | 5.1   | 0.9   | 1.2   | 0.8   | 1.9   | 1.1   |
| 1.3   | 2.8   | 1.4   | 2.6   | 2.9   | 1.9   | 12.1  | 14.1  | 6.3   |
| 2.3   | 0.4   | 0.1   | 0.5   | 0.2   | 0.7   | 0.5   | 0.5   | 2.2   |
| 5.7   | 5.5   | 5.4   | 7.7   | 4.4   | 8.8   | 9.8   | 15.3  | 9.5   |
| 2.3   | 0.6   | 4.5   | 2.8   | 7.9   | 4.0   | 3.0   | 2.6   | 1.6   |
| 4.9   | 0.2   | 0.2   | 4.9   | 0.1   | 2.6   | 1.9   | 11.7  | 3.7   |
| 8.1   | 1.8   | 4.5   | 0.4   | 6.6   | 5.7   | 6.2   | 3.2   | 7.2   |
| 1.2   | 0.4   | 5.8   | 7.3   | 3.6   | 2.7   | 1.8   | 0.9   | 7.9   |
| 3.1   | 6.4   | 5.0   | 2.4   | 0.6   | 7.5   | 3.2   | 5.2   | 3.9   |
| 68.3  | 53.2  | 57.9  | 54.7  | 61.1  | 57.2  | 84.7  | 100.4 | 63.9  |
| 8.5   | 3.9   | 6.3   | 8.3   | 4.8   | 11.4  | 19.4  | 5.5   | 3.5   |
| 8.8   | 46.0  | 41.1  | 61.9  | 51.9  | 40.1  | 73.9  | 76.4  | 42.8  |
| 0.9   | 1.3   | 5.5   | 1.2   | 5.7   | 1.5   | 3.2   | 2.2   | 2.6   |
| 1.4   | 0.7   | 1.0   | 1.5   | 4.6   | 3.5   | 3.5   | 1.8   | 1.6   |
| 4.2   | 0.5   | 1.4   | 2.8   | 0.5   | 2.1   | 6.1   | 5.9   | 3.9   |
| 12.1  | 18.5  | 14.1  | 21.8  | 22.8  | 16.6  | 30.2  | 27.0  | 19.1  |
| 23.9  | 13.7  | 12.5  | 14.4  | 15.2  | 19.6  | 21.3  | 15.5  | 14.3  |
| 17.7  | 14.5  | 8.3   | 13.8  | 16.5  | 9.9   | 14.9  | 14.7  | 15.0  |
| 0.3   | 0.5   | 0.2   | 0.6   | 0.3   | 0.2   | 0.5   | 0.5   | 0.2   |
| 25.5  | 17.6  | 14.3  | 18.9  | 17.3  | 21.0  | 24.4  | 30.6  | 16.0  |
| 10.6  | 4.3   | 10.5  | 13.5  | 9.6   | 11.5  | 15.4  | 18.4  | 13.7  |
| 0.7   | 0.9   | 5.9   | 1.2   | 0.5   | 0.7   | 0.6   | 0.7   | 1.1   |

|       |       |       |       |       |       |       |       |       |
|-------|-------|-------|-------|-------|-------|-------|-------|-------|
| 62.4  | 21.7  | 38.9  | 26.5  | 34.8  | 30.1  | 57.4  | 66.3  | 44.2  |
| 0.4   | 0.9   | 0.3   | 0.8   | 0.9   | 1.1   | 4.1   | 5.4   | 0.7   |
| 1.5   | 1.1   | 1.9   | 4.2   | 3.8   | 2.9   | 1.5   | 2.0   | 2.1   |
| 29.6  | 18.3  | 23.7  | 22.5  | 17.8  | 25.5  | 39.8  | 32.2  | 28.7  |
| 76.4  | 54.7  | 66.4  | 69.0  | 74.7  | 70.6  | 111.8 | 109.9 | 66.3  |
| 31.2  | 9.7   | 10.9  | 11.0  | 17.8  | 19.5  | 31.8  | 47.1  | 19.4  |
| 0.3   | 2.4   | 0.1   | 0.8   | 0.1   | 0.1   | 0.7   | 0.3   | 0.4   |
| 323.5 | 134.5 | 178.8 | 166.2 | 173.3 | 194.2 | 237.2 | 290.8 | 208.6 |
| 1.9   | 5.6   | 2.8   | 1.2   | 2.0   | 4.9   | 3.6   | 7.1   | 2.4   |
| 4.8   | 11.8  | 6.1   | 9.9   | 5.9   | 8.4   | 5.3   | 6.6   | 9.4   |
| 7.8   | 11.0  | 6.1   | 7.4   | 1.6   | 7.3   | 6.8   | 9.7   | 11.6  |
| 20.4  | 11.9  | 20.3  | 14.2  | 24.8  | 18.0  | 20.3  | 24.9  | 16.3  |
| 1.5   | 3.4   | 3.6   | 5.1   | 2.5   | 3.2   | 13.6  | 5.1   | 3.5   |
| 17.4  | 13.0  | 2.3   | 16.4  | 15.3  | 20.1  | 17.6  | 23.1  | 18.6  |
| 0.6   | 0.3   | 0.5   | 0.1   | 0.8   | 5.4   | 2.0   | 0.3   | 2.8   |
| 60.6  | 47.7  | 56.4  | 59.4  | 49.5  | 50.2  | 82.3  | 110.7 | 51.9  |
| 1.2   | 0.7   | 1.2   | 1.9   | 1.7   | 4.7   | 2.2   | 1.2   | 0.6   |
| 2.4   | 1.9   | 4.0   | 1.4   | 2.0   | 9.8   | 4.8   | 7.8   | 4.8   |
| 9.1   | 12.0  | 8.2   | 10.2  | 11.2  | 2.7   | 12.4  | 19.8  | 9.6   |
| 21.6  | 13.4  | 15.6  | 19.5  | 21.3  | 24.1  | 23.5  | 50.4  | 20.5  |
| 25.6  | 16.9  | 15.4  | 23.3  | 10.8  | 10.7  | 17.0  | 15.7  | 9.3   |
| 258.0 | 242.9 | 256.2 | 284.2 | 257.1 | 288.3 | 395.9 | 529.9 | 389.5 |
| 4.7   | 6.1   | 1.0   | 7.1   | 1.9   | 6.1   | 6.2   | 10.0  | 2.2   |
| 1.7   | 8.6   | 10.0  | 5.4   | 9.7   | 6.6   | 10.0  | 8.3   | 11.6  |
| 1.2   | 1.0   | 0.5   | 0.5   | 1.2   | 3.3   | 0.3   | 0.7   | 0.5   |
| 18.3  | 12.0  | 15.1  | 12.4  | 22.9  | 10.9  | 18.9  | 16.4  | 14.5  |
| 7.0   | 10.9  | 16.3  | 10.7  | 11.4  | 8.5   | 20.0  | 11.6  | 15.6  |
| 47.7  | 62.0  | 50.7  | 62.9  | 66.4  | 63.4  | 73.0  | 69.1  | 63.0  |
| 4.8   | 3.9   | 2.2   | 3.0   | 1.4   | 4.4   | 0.1   | 2.9   | 0.3   |
| 0.7   | 1.9   | 1.8   | 4.4   | 4.8   | 0.6   | 1.3   | 3.6   | 0.3   |
| 0.5   | 0.5   | 2.0   | 2.2   | 4.0   | 1.8   | 1.0   | 6.2   | 3.1   |
| 11.7  | 11.0  | 13.4  | 11.9  | 15.9  | 18.8  | 20.4  | 33.3  | 16.6  |
| 14.4  | 11.1  | 13.2  | 11.1  | 9.2   | 10.6  | 28.4  | 18.7  | 16.5  |
| 18.2  | 16.6  | 12.9  | 22.9  | 23.2  | 16.2  | 33.5  | 28.2  | 19.0  |
| 22.6  | 16.6  | 17.5  | 25.1  | 21.0  | 9.3   | 32.0  | 28.5  | 23.4  |
| 172.4 | 108.0 | 155.1 | 137.5 | 198.8 | 106.1 | 174.7 | 332.8 | 153.3 |
| 32.4  | 14.0  | 12.5  | 17.7  | 12.7  | 17.1  | 26.9  | 42.0  | 38.4  |
| 4.2   | 2.9   | 5.8   | 5.9   | 5.2   | 0.2   | 4.1   | 2.4   | 5.2   |
| 63.1  | 30.7  | 24.2  | 24.7  | 24.1  | 33.3  | 41.5  | 46.9  | 23.0  |
| 1.3   | 0.7   | 2.5   | 2.5   | 1.1   | 5.7   | 6.5   | 6.4   | 1.0   |
| 0.2   | 0.3   | 0.8   | 0.7   | 4.4   | 1.0   | 0.3   | 0.7   | 0.4   |
| 80.4  | 100.2 | 52.2  | 78.2  | 50.6  | 60.2  | 98.6  | 96.7  | 83.4  |
| 28.4  | 14.4  | 22.4  | 8.3   | 21.5  | 20.4  | 15.0  | 13.5  | 25.9  |
| 33.2  | 13.4  | 14.2  | 15.8  | 17.5  | 19.2  | 23.6  | 31.3  | 16.2  |
| 0.3   | 1.0   | 0.3   | 0.2   | 0.8   | 0.3   | 0.7   | 0.7   | 0.7   |
| 8.7   | 15.4  | 7.6   | 8.6   | 12.0  | 13.6  | 15.3  | 4.0   | 11.6  |
| 17.6  | 11.9  | 15.6  | 8.8   | 6.8   | 11.9  | 6.8   | 15.3  | 12.3  |
| 3.5   | 0.3   | 1.5   | 0.8   | 3.6   | 0.5   | 5.0   | 3.1   | 4.5   |
| 0.4   | 0.9   | 2.4   | 3.6   | 1.9   | 4.8   | 1.3   | 1.8   | 1.0   |
| 195.3 | 107.8 | 106.9 | 132.0 | 116.6 | 130.8 | 145.2 | 178.4 | 104.3 |
| 0.2   | 0.1   | 0.1   | 2.5   | 0.3   | 0.1   | 2.2   | 4.1   | 0.3   |
| 0.9   | 5.4   | 0.6   | 0.8   | 0.2   | 4.8   | 5.0   | 1.0   | 4.7   |
| 265.8 | 164.2 | 192.5 | 221.2 | 187.3 | 174.4 | 228.4 | 251.2 | 199.7 |

|       |       |       |       |       |       |       |       |       |
|-------|-------|-------|-------|-------|-------|-------|-------|-------|
| 2.3   | 1.2   | 3.1   | 3.0   | 9.0   | 2.6   | 11.2  | 10.8  | 2.5   |
| 3.5   | 5.0   | 1.6   | 4.2   | 1.3   | 0.3   | 5.8   | 1.7   | 0.7   |
| 21.8  | 10.6  | 10.8  | 19.8  | 19.3  | 13.2  | 17.8  | 15.9  | 12.4  |
| 0.7   | 1.1   | 0.7   | 0.4   | 0.3   | 0.8   | 0.6   | 0.8   | 0.7   |
| 3.7   | 1.1   | 0.7   | 2.6   | 1.4   | 0.5   | 4.4   | 5.8   | 0.5   |
| 7.6   | 15.6  | 17.2  | 12.8  | 18.6  | 16.9  | 34.5  | 40.5  | 20.2  |
| 700.5 | 373.2 | 423.1 | 362.4 | 455.5 | 412.6 | 651.7 | 687.3 | 470.0 |
| 104.3 | 35.6  | 61.9  | 51.6  | 65.6  | 74.3  | 100.4 | 89.3  | 48.5  |
| 18.4  | 8.8   | 10.9  | 13.9  | 11.4  | 8.2   | 11.2  | 10.6  | 16.5  |
| 88.9  | 48.5  | 60.3  | 52.6  | 49.9  | 59.2  | 69.8  | 91.3  | 67.6  |
| 1.6   | 1.5   | 1.4   | 8.2   | 1.1   | 7.7   | 3.0   | 4.1   | 6.1   |
| 0.7   | 1.6   | 1.0   | 1.3   | 2.8   | 0.9   | 1.4   | 1.9   | 2.0   |
| 2.3   | 3.1   | 0.1   | 1.2   | 3.1   | 4.0   | 4.0   | 4.6   | 1.8   |
| 28.2  | 16.4  | 15.8  | 19.2  | 9.9   | 15.8  | 21.5  | 31.3  | 16.4  |
| 2.8   | 9.4   | 11.7  | 6.4   | 10.1  | 15.2  | 18.4  | 7.8   | 10.9  |
| 8.4   | 12.4  | 11.1  | 10.0  | 13.5  | 11.1  | 7.4   | 18.7  | 7.8   |
| 1.5   | 1.4   | 0.7   | 5.3   | 1.1   | 1.0   | 1.6   | 1.9   | 1.6   |
| 7.5   | 9.4   | 10.4  | 1.9   | 12.2  | 6.2   | 10.4  | 14.7  | 4.8   |
| 0.5   | 0.5   | 1.3   | 0.5   | 0.9   | 3.8   | 5.6   | 2.9   | 4.8   |
| 35.2  | 24.7  | 23.6  | 34.6  | 35.1  | 34.6  | 28.6  | 51.9  | 26.9  |
| 0.9   | 2.4   | 2.9   | 11.0  | 13.3  | 0.9   | 1.2   | 9.8   | 1.2   |
| 13.0  | 8.8   | 6.5   | 3.1   | 3.6   | 10.2  | 13.7  | 26.5  | 3.1   |
| 15.2  | 12.8  | 8.6   | 8.2   | 19.3  | 19.6  | 17.1  | 12.6  | 11.9  |
| 7.1   | 1.8   | 2.6   | 6.9   | 9.6   | 5.8   | 10.6  | 7.9   | 1.5   |
| 4.0   | 8.9   | 6.8   | 3.2   | 6.6   | 8.1   | 9.8   | 6.0   | 5.6   |
| 3.7   | 6.8   | 0.3   | 4.2   | 1.5   | 0.6   | 1.6   | 3.0   | 9.4   |
| 18.9  | 4.1   | 17.2  | 10.9  | 18.3  | 12.2  | 24.2  | 25.8  | 16.2  |
| 7.9   | 5.2   | 9.2   | 0.7   | 7.1   | 0.7   | 13.9  | 8.8   | 8.8   |
| 1.9   | 1.4   | 4.3   | 5.6   | 2.7   | 4.0   | 0.4   | 4.2   | 0.8   |
| 0.4   | 0.4   | 0.4   | 0.4   | 0.3   | 0.3   | 0.4   | 0.4   | 0.2   |
| 13.3  | 7.1   | 5.6   | 12.9  | 9.0   | 9.7   | 10.6  | 15.9  | 9.8   |
| 0.6   | 7.9   | 3.1   | 0.8   | 6.5   | 0.4   | 3.9   | 4.9   | 1.7   |
| 46.8  | 68.3  | 73.2  | 88.3  | 84.9  | 70.4  | 104.9 | 125.9 | 76.9  |
| 3.0   | 4.4   | 4.7   | 1.3   | 2.0   | 2.4   | 6.1   | 3.3   | 7.1   |
| 10.2  | 7.7   | 4.8   | 9.4   | 10.1  | 6.5   | 5.6   | 1.9   | 7.9   |
| 0.6   | 1.4   | 0.8   | 0.6   | 1.2   | 2.8   | 0.6   | 2.9   | 0.7   |
| 0.5   | 3.1   | 0.2   | 4.1   | 0.7   | 3.7   | 3.7   | 3.2   | 1.9   |
| 10.2  | 22.2  | 18.7  | 24.0  | 25.3  | 21.2  | 21.4  | 20.8  | 19.7  |
| 7.8   | 8.3   | 10.2  | 8.0   | 2.7   | 7.3   | 3.5   | 10.7  | 7.7   |
| 27.7  | 15.7  | 17.6  | 13.8  | 21.5  | 17.8  | 23.4  | 43.8  | 24.1  |
| 0.6   | 1.1   | 0.8   | 1.3   | 0.7   | 1.0   | 0.6   | 1.1   | 1.1   |
| 4.5   | 1.1   | 1.2   | 4.0   | 0.8   | 2.7   | 5.3   | 3.2   | 1.3   |
| 50.5  | 45.5  | 47.0  | 48.9  | 48.9  | 49.3  | 76.8  | 97.5  | 49.0  |
| 5.6   | 6.1   | 5.7   | 7.1   | 4.4   | 9.4   | 4.5   | 9.0   | 11.0  |
| 7.6   | 4.2   | 3.1   | 5.6   | 5.9   | 5.8   | 7.3   | 9.7   | 6.6   |
| 46.4  | 17.0  | 18.9  | 23.3  | 24.9  | 21.1  | 37.0  | 51.2  | 24.8  |
| 73.5  | 27.2  | 32.0  | 28.0  | 38.9  | 40.4  | 51.1  | 68.7  | 45.6  |
| 61.2  | 93.0  | 80.8  | 91.7  | 90.6  | 82.3  | 93.6  | 99.7  | 86.9  |
| 10.1  | 15.0  | 10.5  | 3.6   | 15.9  | 16.1  | 17.0  | 21.4  | 14.5  |
| 10.4  | 1.5   | 5.8   | 12.2  | 6.4   | 10.7  | 7.9   | 15.5  | 15.9  |
| 1.5   | 1.3   | 1.2   | 5.1   | 1.8   | 1.7   | 0.9   | 2.4   | 2.1   |
| 10.4  | 13.1  | 10.4  | 11.2  | 12.5  | 15.2  | 13.3  | 20.7  | 12.1  |
| 3.6   | 9.0   | 10.6  | 2.8   | 17.9  | 18.4  | 13.3  | 9.1   | 1.0   |

|       |       |       |       |       |       |       |       |       |
|-------|-------|-------|-------|-------|-------|-------|-------|-------|
| 0.9   | 4.1   | 0.8   | 2.1   | 1.0   | 2.2   | 5.4   | 0.5   | 2.7   |
| 0.2   | 1.8   | 0.3   | 2.8   | 1.8   | 2.0   | 2.8   | 2.6   | 3.8   |
| 262.4 | 195.1 | 217.7 | 225.5 | 215.5 | 190.5 | 272.9 | 259.5 | 203.7 |
| 1.6   | 0.5   | 1.0   | 1.1   | 0.5   | 0.9   | 0.7   | 1.7   | 0.7   |
| 12.0  | 8.0   | 11.7  | 12.7  | 15.3  | 11.0  | 20.1  | 14.6  | 11.3  |
| 19.1  | 15.2  | 15.3  | 17.5  | 15.1  | 9.3   | 18.7  | 29.0  | 15.6  |
| 7.6   | 6.0   | 5.2   | 4.4   | 2.0   | 13.1  | 4.0   | 0.6   | 4.0   |
| 6.2   | 4.2   | 1.3   | 5.0   | 4.3   | 5.1   | 6.8   | 6.8   | 7.7   |
| 1.4   | 3.0   | 3.7   | 4.1   | 1.6   | 1.4   | 5.4   | 3.6   | 3.0   |
| 32.7  | 15.4  | 21.2  | 20.0  | 30.5  | 27.6  | 39.9  | 43.0  | 22.0  |
| 2.9   | 1.1   | 8.3   | 11.0  | 2.5   | 9.8   | 16.1  | 9.0   | 13.0  |
| 20.0  | 40.2  | 32.6  | 37.1  | 41.5  | 41.5  | 51.2  | 58.2  | 49.0  |
| 98.6  | 67.6  | 73.4  | 82.9  | 75.0  | 62.0  | 94.5  | 96.2  | 90.0  |
| 9.0   | 5.5   | 10.8  | 9.9   | 2.7   | 9.0   | 10.3  | 10.8  | 7.4   |
| 6.6   | 3.1   | 12.3  | 1.2   | 2.3   | 1.0   | 2.7   | 2.6   | 3.4   |
| 247.8 | 165.1 | 186.9 | 179.0 | 204.8 | 175.5 | 213.5 | 228.4 | 184.7 |
| 1.6   | 10.9  | 2.2   | 1.8   | 2.9   | 1.0   | 10.3  | 2.1   | 4.4   |
| 5.7   | 3.7   | 6.1   | 3.3   | 7.6   | 6.6   | 6.8   | 9.0   | 5.4   |
| 3.9   | 2.6   | 2.6   | 6.3   | 6.7   | 8.9   | 1.4   | 4.0   | 2.9   |
| 3.8   | 5.8   | 3.6   | 8.4   | 6.4   | 3.8   | 9.9   | 5.1   | 3.9   |
| 5.4   | 4.7   | 0.5   | 2.7   | 1.2   | 5.2   | 10.9  | 8.9   | 0.5   |
| 1.3   | 1.1   | 0.8   | 7.1   | 2.2   | 0.6   | 3.0   | 8.4   | 5.4   |
| 0.5   | 10.3  | 0.2   | 0.4   | 0.6   | 5.0   | 1.2   | 3.7   | 1.0   |
| 5.8   | 2.5   | 1.7   | 0.3   | 0.7   | 0.3   | 0.6   | 3.1   | 0.4   |
| 4.5   | 3.9   | 6.1   | 3.7   | 2.8   | 1.4   | 4.3   | 5.8   | 0.4   |
| 1.3   | 1.4   | 1.3   | 1.1   | 1.5   | 1.1   | 1.2   | 1.6   | 1.7   |
| 6.0   | 1.8   | 0.9   | 10.2  | 5.0   | 6.2   | 10.5  | 4.8   | 9.8   |
| 0.9   | 2.7   | 4.2   | 5.4   | 1.2   | 1.2   | 3.2   | 6.2   | 0.9   |
| 7.0   | 6.0   | 2.0   | 6.0   | 2.1   | 1.9   | 1.7   | 9.8   | 5.8   |
| 12.3  | 7.5   | 2.8   | 8.9   | 8.3   | 6.7   | 14.8  | 9.8   | 7.2   |
| 0.2   | 0.2   | 1.8   | 0.6   | 0.3   | 0.5   | 0.7   | 0.2   | 0.3   |
| 1.8   | 2.6   | 1.4   | 0.7   | 1.7   | 2.0   | 1.8   | 2.1   | 2.8   |
| 12.5  | 4.2   | 0.5   | 8.2   | 5.6   | 8.0   | 3.2   | 9.0   | 9.9   |
| 4.6   | 1.1   | 0.9   | 2.9   | 3.8   | 6.6   | 7.9   | 2.6   | 5.1   |
| 1.1   | 4.4   | 10.3  | 6.4   | 1.3   | 5.4   | 5.4   | 6.5   | 5.0   |
| 0.5   | 0.2   | 1.5   | 0.1   | 1.4   | 0.1   | 0.4   | 2.3   | 0.3   |
| 8.2   | 2.5   | 8.2   | 6.9   | 7.4   | 1.3   | 9.5   | 10.0  | 9.9   |
| 14.9  | 10.4  | 16.1  | 10.7  | 9.6   | 4.5   | 11.5  | 14.7  | 12.8  |
| 0.7   | 0.8   | 1.2   | 0.6   | 2.1   | 2.4   | 0.9   | 3.8   | 1.1   |
| 19.5  | 16.5  | 21.0  | 19.6  | 13.9  | 20.0  | 22.0  | 17.9  | 14.9  |
| 6.8   | 1.3   | 0.5   | 1.4   | 1.5   | 3.3   | 2.9   | 1.8   | 0.9   |
| 11.5  | 14.2  | 15.0  | 8.4   | 13.6  | 9.5   | 14.8  | 14.5  | 15.1  |
| 7.6   | 5.2   | 10.3  | 1.4   | 10.6  | 7.5   | 11.1  | 10.3  | 10.2  |
| 11.2  | 1.8   | 11.7  | 2.7   | 8.9   | 6.8   | 4.2   | 7.6   | 0.6   |
| 16.9  | 3.4   | 6.4   | 11.2  | 2.7   | 2.3   | 11.9  | 10.5  | 6.3   |
| 5.8   | 5.9   | 3.1   | 3.3   | 3.7   | 6.6   | 3.8   | 4.3   | 3.2   |
| 10.2  | 14.7  | 11.6  | 16.5  | 19.4  | 17.2  | 14.9  | 17.3  | 12.1  |
| 1.6   | 4.1   | 3.6   | 4.8   | 4.0   | 1.1   | 5.7   | 0.8   | 2.3   |
| 0.2   | 0.4   | 0.3   | 0.2   | 2.1   | 0.4   | 0.4   | 0.7   | 1.6   |
| 40.2  | 16.9  | 22.3  | 25.9  | 16.0  | 19.9  | 23.0  | 26.8  | 16.8  |
| 2.5   | 2.5   | 1.1   | 6.1   | 2.9   | 4.7   | 2.6   | 3.7   | 5.1   |
| 5.2   | 8.7   | 10.3  | 10.0  | 9.9   | 11.2  | 12.6  | 16.0  | 8.6   |
| 0.5   | 6.9   | 3.3   | 5.6   | 3.4   | 6.8   | 11.1  | 5.3   | 5.8   |

|      |      |      |      |      |      |       |       |      |
|------|------|------|------|------|------|-------|-------|------|
| 2.9  | 8.0  | 8.5  | 14.6 | 10.5 | 12.9 | 13.9  | 16.0  | 10.8 |
| 12.8 | 9.6  | 5.4  | 15.6 | 13.2 | 9.9  | 12.3  | 14.2  | 11.7 |
| 0.1  | 0.1  | 0.2  | 1.2  | 2.1  | 0.2  | 0.3   | 0.2   | 0.7  |
| 11.3 | 1.9  | 1.3  | 1.3  | 3.0  | 3.3  | 1.0   | 14.4  | 5.8  |
| 1.4  | 2.3  | 1.4  | 4.5  | 2.3  | 3.0  | 2.9   | 2.0   | 2.8  |
| 6.8  | 10.1 | 2.0  | 8.0  | 11.3 | 1.3  | 8.6   | 16.9  | 8.3  |
| 66.4 | 44.4 | 50.9 | 49.8 | 60.9 | 39.0 | 71.4  | 92.4  | 59.1 |
| 9.3  | 12.6 | 11.3 | 9.8  | 11.8 | 12.3 | 8.4   | 11.3  | 4.7  |
| 1.4  | 1.7  | 0.7  | 1.8  | 2.3  | 3.6  | 0.7   | 0.8   | 4.8  |
| 3.6  | 9.3  | 1.9  | 3.7  | 13.9 | 2.1  | 8.1   | 11.3  | 11.0 |
| 2.3  | 1.2  | 7.3  | 8.6  | 0.8  | 1.4  | 3.3   | 1.2   | 9.3  |
| 0.8  | 1.2  | 4.0  | 3.1  | 5.8  | 5.1  | 3.5   | 6.5   | 1.5  |
| 15.2 | 10.6 | 13.3 | 7.4  | 13.0 | 9.1  | 19.1  | 16.9  | 2.7  |
| 0.4  | 0.5  | 0.4  | 0.7  | 0.5  | 0.3  | 0.6   | 0.5   | 0.4  |
| 1.8  | 1.4  | 4.0  | 2.3  | 3.9  | 2.0  | 4.5   | 4.5   | 0.8  |
| 1.1  | 1.1  | 0.6  | 1.8  | 0.7  | 0.9  | 4.6   | 0.5   | 7.8  |
| 9.0  | 4.9  | 6.5  | 4.2  | 9.1  | 7.6  | 6.0   | 11.4  | 8.4  |
| 1.1  | 1.2  | 3.0  | 1.0  | 1.1  | 1.5  | 1.9   | 2.0   | 2.2  |
| 2.6  | 2.7  | 3.1  | 1.0  | 0.4  | 0.6  | 0.6   | 4.3   | 3.3  |
| 69.0 | 69.8 | 79.6 | 96.2 | 69.1 | 76.7 | 111.1 | 117.1 | 88.5 |
| 61.4 | 40.6 | 35.4 | 61.1 | 56.3 | 56.3 | 59.0  | 115.4 | 46.0 |
| 5.2  | 1.4  | 2.3  | 1.8  | 1.3  | 0.9  | 6.4   | 4.9   | 2.0  |
| 6.1  | 7.8  | 6.0  | 5.6  | 10.6 | 7.3  | 13.4  | 13.2  | 13.5 |
| 0.8  | 2.1  | 7.4  | 3.6  | 0.6  | 2.2  | 3.9   | 10.7  | 9.7  |
| 4.2  | 10.4 | 8.2  | 11.8 | 15.4 | 13.2 | 3.8   | 1.4   | 3.3  |
| 3.1  | 1.8  | 2.1  | 2.9  | 0.8  | 4.0  | 1.3   | 4.7   | 2.8  |
| 0.8  | 0.7  | 2.5  | 0.9  | 6.8  | 0.9  | 5.5   | 1.0   | 2.5  |
| 6.3  | 18.5 | 12.6 | 15.0 | 7.7  | 7.6  | 1.6   | 4.9   | 17.0 |
| 0.3  | 0.2  | 0.1  | 0.1  | 2.0  | 3.1  | 3.7   | 0.3   | 0.9  |
| 4.4  | 4.3  | 0.2  | 4.3  | 2.7  | 0.4  | 6.9   | 6.7   | 3.6  |
| 33.4 | 26.2 | 32.6 | 30.6 | 29.6 | 42.1 | 54.5  | 63.1  | 39.0 |
| 0.1  | 0.1  | 0.7  | 1.4  | 0.1  | 4.4  | 0.1   | 0.1   | 0.1  |
| 1.4  | 1.3  | 6.4  | 1.1  | 4.0  | 4.8  | 4.2   | 2.8   | 4.7  |
| 1.1  | 1.1  | 5.3  | 1.7  | 2.1  | 0.9  | 2.2   | 14.8  | 1.4  |
| 0.6  | 0.7  | 0.5  | 5.7  | 1.2  | 1.1  | 8.1   | 2.8   | 0.8  |
| 18.0 | 9.8  | 19.3 | 14.0 | 10.8 | 9.0  | 13.1  | 13.2  | 7.8  |
| 15.9 | 5.7  | 11.9 | 12.6 | 12.4 | 7.0  | 11.8  | 13.6  | 16.5 |
| 9.9  | 5.9  | 11.1 | 7.2  | 4.6  | 4.7  | 1.8   | 1.9   | 5.7  |
| 0.9  | 3.1  | 1.3  | 3.7  | 1.0  | 0.9  | 8.8   | 1.6   | 0.4  |
| 2.0  | 4.1  | 1.9  | 2.3  | 3.4  | 3.4  | 3.5   | 0.4   | 3.1  |
| 10.9 | 2.0  | 2.1  | 2.2  | 9.4  | 2.0  | 3.3   | 9.8   | 13.7 |
| 17.1 | 14.3 | 7.7  | 14.2 | 14.6 | 5.1  | 6.2   | 20.6  | 12.0 |
| 10.8 | 8.5  | 0.9  | 12.2 | 10.4 | 10.0 | 18.7  | 26.3  | 9.6  |
| 42.5 | 22.2 | 21.9 | 27.7 | 21.7 | 21.7 | 34.6  | 49.5  | 34.1 |
| 6.8  | 4.0  | 6.2  | 0.7  | 9.9  | 7.9  | 5.7   | 7.4   | 6.7  |
| 3.1  | 1.9  | 2.4  | 2.8  | 4.0  | 3.1  | 3.5   | 3.9   | 3.7  |
| 0.1  | 1.3  | 1.4  | 0.1  | 3.1  | 0.7  | 0.8   | 1.3   | 0.9  |
| 4.5  | 5.8  | 6.8  | 5.1  | 6.6  | 8.0  | 6.7   | 9.1   | 6.4  |
| 4.5  | 1.7  | 8.9  | 14.5 | 12.7 | 10.5 | 8.7   | 5.7   | 12.4 |
| 1.2  | 3.0  | 7.3  | 0.8  | 1.1  | 0.6  | 3.4   | 9.8   | 1.1  |
| 16.8 | 12.9 | 16.5 | 12.0 | 11.6 | 7.7  | 10.4  | 22.6  | 13.9 |
| 2.6  | 2.7  | 2.3  | 0.8  | 1.8  | 0.8  | 2.3   | 0.6   | 0.8  |
| 1.3  | 0.5  | 2.0  | 2.9  | 2.1  | 0.6  | 4.8   | 6.1   | 3.0  |



|      |      |      |      |       |      |       |       |       |
|------|------|------|------|-------|------|-------|-------|-------|
| 27.5 | 16.7 | 15.7 | 15.0 | 14.9  | 18.0 | 26.6  | 24.8  | 15.8  |
| 39.3 | 32.4 | 38.9 | 46.8 | 57.6  | 39.7 | 42.4  | 64.3  | 50.8  |
| 29.9 | 40.2 | 30.0 | 36.9 | 45.2  | 55.7 | 67.7  | 72.0  | 46.7  |
| 69.1 | 30.1 | 42.3 | 46.8 | 51.6  | 43.6 | 71.6  | 73.5  | 41.5  |
| 1.5  | 1.9  | 0.8  | 0.2  | 0.4   | 1.3  | 0.6   | 0.3   | 0.1   |
| 28.8 | 20.1 | 23.0 | 25.9 | 21.6  | 17.6 | 23.7  | 31.7  | 20.5  |
| 3.0  | 2.3  | 14.7 | 3.2  | 4.8   | 2.1  | 17.0  | 9.8   | 8.4   |
| 0.2  | 0.3  | 0.3  | 0.5  | 1.1   | 0.8  | 1.1   | 1.7   | 0.5   |
| 4.4  | 3.5  | 0.2  | 2.6  | 3.2   | 4.4  | 7.4   | 8.6   | 5.7   |
| 0.4  | 3.4  | 0.1  | 6.4  | 0.7   | 2.8  | 5.2   | 2.1   | 3.4   |
| 1.3  | 1.8  | 5.5  | 1.3  | 1.0   | 5.1  | 3.6   | 2.2   | 0.5   |
| 34.8 | 26.5 | 34.4 | 33.8 | 21.5  | 32.7 | 38.0  | 50.1  | 32.0  |
| 1.7  | 1.6  | 1.1  | 0.4  | 0.6   | 1.2  | 0.8   | 1.0   | 1.0   |
| 7.6  | 0.4  | 8.4  | 9.3  | 12.1  | 9.9  | 13.2  | 13.5  | 5.8   |
| 7.3  | 6.0  | 2.4  | 4.6  | 9.1   | 7.2  | 7.2   | 12.7  | 8.4   |
| 78.1 | 51.2 | 56.2 | 61.9 | 64.4  | 65.7 | 77.9  | 90.7  | 65.7  |
| 45.6 | 30.1 | 40.7 | 30.7 | 32.0  | 45.5 | 65.5  | 70.9  | 40.0  |
| 0.5  | 1.0  | 1.0  | 1.1  | 1.1   | 0.8  | 1.0   | 1.0   | 1.1   |
| 10.4 | 8.4  | 10.6 | 9.8  | 9.9   | 10.8 | 14.1  | 16.8  | 13.0  |
| 27.0 | 20.8 | 26.2 | 29.8 | 26.6  | 28.5 | 34.9  | 35.2  | 29.1  |
| 1.9  | 0.6  | 1.9  | 3.6  | 2.9   | 5.0  | 6.6   | 9.5   | 5.5   |
| 0.6  | 1.1  | 7.3  | 1.0  | 0.9   | 0.7  | 6.3   | 1.6   | 0.4   |
| 2.9  | 5.8  | 7.9  | 5.8  | 1.3   | 1.3  | 7.1   | 8.2   | 10.5  |
| 47.1 | 41.2 | 29.2 | 34.8 | 43.9  | 22.8 | 45.3  | 48.7  | 42.2  |
| 3.4  | 0.3  | 3.1  | 2.0  | 0.3   | 0.9  | 0.6   | 1.0   | 0.6   |
| 0.5  | 0.6  | 0.9  | 2.3  | 0.8   | 1.6  | 0.5   | 0.7   | 0.4   |
| 7.4  | 1.5  | 1.1  | 4.3  | 2.4   | 1.1  | 7.5   | 9.8   | 6.4   |
| 14.1 | 8.9  | 2.0  | 7.1  | 14.0  | 12.6 | 13.2  | 15.8  | 10.6  |
| 86.9 | 69.2 | 74.4 | 96.7 | 101.6 | 85.8 | 110.0 | 129.7 | 102.9 |
| 9.9  | 8.0  | 4.8  | 4.7  | 5.9   | 3.9  | 8.7   | 15.2  | 9.3   |
| 19.1 | 8.9  | 9.2  | 15.5 | 9.8   | 10.0 | 13.9  | 18.2  | 11.5  |
| 0.4  | 1.2  | 0.5  | 5.5  | 0.4   | 0.4  | 0.3   | 0.5   | 1.2   |
| 0.4  | 0.3  | 0.7  | 0.2  | 0.3   | 0.7  | 0.2   | 1.1   | 0.4   |
| 0.6  | 0.7  | 0.4  | 0.5  | 0.5   | 0.7  | 0.5   | 0.6   | 0.5   |
| 32.0 | 30.2 | 27.1 | 21.7 | 26.2  | 32.0 | 36.6  | 44.3  | 33.5  |
| 85.8 | 38.6 | 62.4 | 61.0 | 64.7  | 72.3 | 69.8  | 64.1  | 52.7  |
| 1.2  | 1.0  | 2.8  | 0.7  | 5.1   | 0.8  | 0.8   | 6.9   | 1.9   |
| 7.3  | 6.0  | 8.0  | 5.3  | 5.6   | 2.9  | 4.6   | 2.8   | 8.1   |
| 0.5  | 0.2  | 0.8  | 2.3  | 2.7   | 1.9  | 0.8   | 2.1   | 0.4   |
| 14.2 | 10.7 | 11.7 | 13.9 | 17.7  | 8.7  | 25.8  | 21.3  | 21.5  |
| 0.5  | 2.9  | 0.3  | 1.0  | 0.4   | 1.0  | 3.7   | 0.9   | 0.8   |
| 0.5  | 0.4  | 3.3  | 0.2  | 1.6   | 2.5  | 0.3   | 2.4   | 0.1   |
| 0.2  | 0.2  | 0.5  | 0.5  | 4.7   | 0.9  | 0.5   | 1.0   | 0.5   |
| 26.1 | 25.3 | 16.1 | 31.9 | 32.8  | 48.8 | 52.0  | 45.8  | 32.3  |
| 2.2  | 1.4  | 2.2  | 1.1  | 1.7   | 1.0  | 2.3   | 18.8  | 2.1   |
| 17.3 | 15.0 | 15.3 | 16.4 | 15.0  | 17.7 | 29.9  | 46.3  | 13.7  |
| 10.5 | 14.2 | 13.0 | 22.9 | 19.9  | 12.9 | 25.5  | 20.3  | 32.6  |
| 10.8 | 7.4  | 19.7 | 15.5 | 11.5  | 17.8 | 27.7  | 28.1  | 17.4  |
| 10.5 | 5.4  | 4.6  | 6.0  | 4.2   | 1.4  | 4.5   | 11.5  | 6.9   |
| 0.2  | 1.9  | 0.2  | 0.3  | 1.9   | 0.6  | 0.6   | 7.9   | 4.8   |
| 1.2  | 1.9  | 3.6  | 2.1  | 2.4   | 0.3  | 1.6   | 0.6   | 6.6   |
| 0.4  | 0.9  | 1.2  | 1.1  | 0.7   | 2.4  | 1.0   | 0.3   | 0.2   |
| 10.0 | 12.6 | 9.6  | 9.4  | 9.9   | 10.8 | 7.6   | 8.1   | 11.3  |

|       |       |       |       |       |       |       |       |       |
|-------|-------|-------|-------|-------|-------|-------|-------|-------|
| 1.5   | 2.3   | 3.3   | 4.8   | 0.2   | 2.6   | 3.4   | 1.8   | 1.3   |
| 6.1   | 4.8   | 1.9   | 2.2   | 6.9   | 3.0   | 7.8   | 5.7   | 7.0   |
| 4.7   | 0.6   | 5.1   | 4.5   | 3.0   | 1.7   | 4.9   | 6.2   | 3.6   |
| 42.4  | 49.1  | 35.8  | 41.4  | 41.3  | 48.4  | 61.1  | 70.9  | 44.6  |
| 3.4   | 0.4   | 0.3   | 0.4   | 1.0   | 0.6   | 0.8   | 0.4   | 1.1   |
| 7.2   | 1.1   | 1.0   | 1.9   | 1.6   | 2.1   | 5.9   | 5.7   | 4.2   |
| 9.0   | 1.8   | 5.6   | 1.1   | 1.4   | 5.1   | 2.2   | 12.2  | 2.1   |
| 5.7   | 1.2   | 1.0   | 2.4   | 1.5   | 3.5   | 1.0   | 2.5   | 2.0   |
| 2.7   | 2.3   | 4.6   | 1.7   | 14.6  | 1.3   | 1.9   | 3.3   | 3.2   |
| 0.5   | 5.7   | 1.1   | 1.8   | 5.8   | 1.6   | 6.3   | 6.9   | 3.9   |
| 0.6   | 1.4   | 7.2   | 0.3   | 4.2   | 0.2   | 3.9   | 0.4   | 0.2   |
| 3.5   | 1.6   | 0.3   | 4.3   | 0.4   | 3.4   | 3.1   | 3.3   | 0.4   |
| 208.2 | 144.5 | 185.6 | 160.3 | 188.0 | 187.5 | 270.5 | 244.1 | 203.0 |
| 0.8   | 0.4   | 0.3   | 0.4   | 0.6   | 0.3   | 0.4   | 0.4   | 0.3   |
| 51.5  | 46.5  | 47.7  | 49.0  | 44.0  | 51.5  | 66.9  | 78.7  | 45.2  |
| 0.9   | 0.8   | 2.0   | 1.2   | 0.9   | 0.7   | 0.9   | 1.4   | 0.8   |
| 1.8   | 1.8   | 1.1   | 2.3   | 0.8   | 0.9   | 10.3  | 15.5  | 0.8   |
| 1.0   | 1.7   | 0.6   | 3.9   | 3.7   | 4.3   | 3.5   | 6.6   | 0.4   |
| 1.1   | 1.0   | 1.1   | 1.0   | 1.1   | 1.1   | 1.0   | 2.4   | 1.1   |
| 0.6   | 1.3   | 0.6   | 0.5   | 3.4   | 0.4   | 1.5   | 5.1   | 0.6   |
| 1.6   | 1.3   | 1.1   | 0.5   | 7.2   | 5.9   | 1.7   | 7.1   | 0.8   |
| 1.3   | 1.7   | 3.4   | 1.0   | 1.1   | 1.4   | 0.4   | 1.3   | 0.6   |
| 1.9   | 6.6   | 1.6   | 5.8   | 1.3   | 8.8   | 8.1   | 6.5   | 9.6   |
| 5.1   | 5.7   | 0.9   | 7.4   | 7.5   | 5.8   | 7.3   | 10.8  | 8.7   |
| 4.7   | 4.0   | 6.1   | 0.7   | 9.4   | 0.4   | 4.5   | 4.9   | 1.0   |
| 0.8   | 4.2   | 2.2   | 4.4   | 2.3   | 1.9   | 1.4   | 6.0   | 1.1   |
| 5.6   | 1.4   | 10.3  | 7.2   | 6.5   | 8.5   | 6.5   | 13.3  | 1.8   |
| 10.7  | 7.3   | 9.2   | 11.5  | 10.9  | 10.4  | 16.6  | 17.3  | 18.8  |
| 1.5   | 1.8   | 0.6   | 1.3   | 0.9   | 1.1   | 2.4   | 11.6  | 3.2   |
| 1.1   | 4.8   | 1.4   | 1.1   | 1.2   | 3.3   | 3.4   | 1.3   | 4.5   |
| 5.7   | 2.0   | 3.7   | 0.6   | 6.1   | 0.5   | 4.4   | 7.7   | 2.3   |
| 6.7   | 1.1   | 4.7   | 0.3   | 5.4   | 5.1   | 3.2   | 3.4   | 0.3   |
| 1.0   | 0.6   | 0.5   | 0.3   | 0.4   | 1.4   | 1.4   | 0.5   | 0.8   |
| 10.2  | 6.8   | 1.2   | 4.9   | 3.2   | 2.0   | 2.0   | 3.8   | 1.6   |
| 8.8   | 14.5  | 10.2  | 6.4   | 8.4   | 7.2   | 5.8   | 10.6  | 5.2   |
| 3.7   | 1.6   | 2.3   | 4.4   | 6.9   | 4.8   | 1.7   | 4.9   | 5.0   |
| 28.0  | 14.9  | 18.6  | 14.3  | 19.3  | 14.9  | 29.0  | 20.0  | 20.8  |
| 9.5   | 8.6   | 9.1   | 6.1   | 11.6  | 14.9  | 9.1   | 12.9  | 10.1  |
| 6.6   | 6.5   | 5.3   | 5.3   | 9.3   | 4.8   | 5.9   | 8.3   | 4.7   |
| 16.4  | 9.1   | 13.6  | 14.3  | 27.6  | 19.5  | 22.0  | 25.7  | 11.6  |
| 194.3 | 94.2  | 111.2 | 119.5 | 135.3 | 123.4 | 183.2 | 199.2 | 112.7 |
| 10.8  | 9.7   | 7.2   | 9.8   | 7.6   | 6.3   | 13.3  | 14.3  | 9.4   |
| 0.7   | 1.1   | 1.1   | 0.5   | 0.8   | 0.8   | 0.9   | 1.0   | 0.4   |
| 0.5   | 0.3   | 0.8   | 4.0   | 0.6   | 0.5   | 1.0   | 1.0   | 0.5   |
| 7.5   | 13.7  | 5.5   | 5.3   | 7.2   | 3.9   | 14.8  | 10.5  | 2.7   |
| 1.0   | 7.7   | 0.7   | 6.5   | 0.9   | 1.1   | 7.0   | 0.6   | 6.2   |
| 11.5  | 8.6   | 10.0  | 13.3  | 10.0  | 7.0   | 10.4  | 16.6  | 6.5   |
| 40.9  | 29.1  | 21.7  | 24.5  | 15.0  | 18.1  | 38.0  | 50.0  | 38.3  |
| 6.6   | 5.2   | 5.4   | 13.3  | 6.1   | 6.5   | 8.5   | 4.0   | 7.1   |
| 27.6  | 34.2  | 33.9  | 37.6  | 34.0  | 27.2  | 41.3  | 42.6  | 34.7  |
| 2.7   | 2.3   | 2.5   | 1.0   | 2.4   | 2.0   | 1.8   | 3.4   | 2.0   |
| 0.6   | 0.7   | 0.5   | 2.2   | 4.3   | 0.8   | 0.9   | 0.9   | 5.3   |
| 7.5   | 1.5   | 3.0   | 2.9   | 2.6   | 3.5   | 1.8   | 2.2   | 1.4   |

|       |       |       |       |       |       |       |       |       |
|-------|-------|-------|-------|-------|-------|-------|-------|-------|
| 11.1  | 6.9   | 7.1   | 5.1   | 9.4   | 10.7  | 8.9   | 4.1   | 8.5   |
| 22.2  | 11.3  | 11.7  | 13.9  | 14.5  | 7.8   | 17.1  | 23.8  | 11.7  |
| 4.2   | 5.1   | 1.5   | 3.6   | 5.9   | 2.4   | 2.8   | 3.5   | 3.6   |
| 0.5   | 0.5   | 1.2   | 1.8   | 0.8   | 1.4   | 0.9   | 1.2   | 0.4   |
| 2.8   | 4.2   | 2.0   | 1.6   | 1.4   | 0.9   | 1.7   | 0.9   | 0.8   |
| 14.3  | 3.7   | 3.3   | 5.9   | 7.5   | 4.2   | 12.2  | 11.8  | 13.0  |
| 6.3   | 8.7   | 7.7   | 11.6  | 10.1  | 6.9   | 14.7  | 16.6  | 2.2   |
| 33.2  | 33.6  | 52.5  | 29.8  | 38.2  | 32.6  | 51.6  | 33.7  | 46.8  |
| 27.7  | 17.3  | 18.4  | 19.2  | 22.3  | 21.1  | 32.8  | 39.7  | 23.4  |
| 5.9   | 3.0   | 7.9   | 3.7   | 5.1   | 3.9   | 10.0  | 6.0   | 6.9   |
| 1.3   | 0.2   | 0.1   | 0.2   | 3.0   | 0.3   | 6.3   | 0.5   | 1.6   |
| 0.8   | 2.2   | 4.6   | 3.8   | 1.1   | 5.4   | 1.8   | 7.2   | 1.3   |
| 37.0  | 18.4  | 24.3  | 24.2  | 17.3  | 30.3  | 24.6  | 29.4  | 21.0  |
| 1.2   | 0.7   | 1.5   | 0.7   | 7.4   | 12.3  | 0.6   | 5.7   | 3.8   |
| 9.5   | 2.2   | 7.1   | 10.9  | 6.2   | 1.2   | 14.5  | 12.1  | 7.0   |
| 9.5   | 16.5  | 14.5  | 9.8   | 16.9  | 18.8  | 17.0  | 28.5  | 12.3  |
| 10.5  | 23.0  | 13.2  | 15.3  | 16.3  | 15.4  | 21.1  | 25.8  | 20.4  |
| 12.6  | 5.6   | 12.8  | 8.0   | 7.5   | 8.1   | 7.8   | 11.0  | 7.5   |
| 1.9   | 4.5   | 11.5  | 12.0  | 11.2  | 9.2   | 16.2  | 10.5  | 2.5   |
| 322.7 | 189.2 | 243.0 | 222.5 | 222.1 | 249.9 | 286.4 | 324.9 | 182.3 |
| 1.5   | 1.0   | 0.8   | 1.2   | 1.3   | 1.2   | 1.7   | 1.1   | 1.2   |
| 0.6   | 4.8   | 1.3   | 1.1   | 1.4   | 0.6   | 5.6   | 1.5   | 0.8   |
| 1.2   | 5.8   | 0.7   | 1.2   | 1.1   | 3.2   | 1.4   | 1.2   | 3.3   |
| 1.4   | 2.5   | 7.5   | 1.0   | 4.0   | 0.5   | 4.8   | 4.8   | 1.2   |
| 25.6  | 13.0  | 9.6   | 13.7  | 12.6  | 15.3  | 22.9  | 22.7  | 18.2  |
| 1.2   | 2.0   | 0.7   | 9.2   | 3.1   | 8.7   | 4.6   | 3.7   | 0.5   |
| 3.0   | 0.7   | 0.5   | 0.4   | 0.7   | 0.3   | 1.6   | 1.3   | 0.9   |
| 1.5   | 1.4   | 2.0   | 1.6   | 1.0   | 2.6   | 0.8   | 10.4  | 0.7   |
| 130.8 | 49.6  | 65.9  | 75.1  | 55.4  | 69.5  | 110.8 | 96.9  | 72.3  |
| 0.3   | 0.3   | 0.2   | 0.3   | 0.2   | 2.5   | 0.4   | 0.4   | 0.6   |
| 12.3  | 7.2   | 15.7  | 15.8  | 16.9  | 3.2   | 15.6  | 18.0  | 13.2  |
| 0.8   | 2.2   | 0.5   | 0.9   | 0.8   | 1.6   | 2.1   | 2.1   | 1.2   |
| 0.6   | 0.8   | 3.8   | 4.3   | 3.1   | 0.8   | 11.3  | 7.2   | 6.8   |
| 15.8  | 8.4   | 12.5  | 9.2   | 11.8  | 7.8   | 12.4  | 16.0  | 7.5   |
| 1.0   | 0.9   | 0.6   | 1.0   | 0.8   | 0.8   | 0.6   | 0.9   | 0.8   |
| 1.4   | 0.5   | 0.7   | 0.6   | 3.9   | 0.5   | 2.5   | 2.2   | 0.8   |
| 15.5  | 16.8  | 8.9   | 18.9  | 22.1  | 24.7  | 33.8  | 35.8  | 17.2  |
| 237.5 | 115.6 | 134.3 | 178.7 | 159.6 | 181.8 | 200.9 | 245.9 | 160.3 |
| 2.3   | 5.0   | 3.0   | 8.3   | 1.8   | 2.1   | 4.4   | 13.0  | 4.2   |
| 6.8   | 2.8   | 3.5   | 3.0   | 3.9   | 2.8   | 4.9   | 4.3   | 4.0   |
| 1.0   | 0.7   | 1.2   | 0.5   | 1.6   | 0.9   | 1.0   | 1.1   | 3.3   |
| 0.5   | 0.8   | 1.2   | 0.7   | 0.5   | 1.0   | 1.2   | 0.8   | 0.7   |
| 31.8  | 26.3  | 41.6  | 38.1  | 35.6  | 39.0  | 48.0  | 46.7  | 32.8  |
| 0.5   | 1.6   | 0.7   | 1.3   | 0.6   | 0.5   | 1.2   | 2.3   | 1.5   |
| 0.3   | 1.5   | 1.9   | 1.9   | 2.5   | 3.9   | 1.1   | 0.4   | 1.6   |
| 0.1   | 0.2   | 1.9   | 0.4   | 0.5   | 0.1   | 0.1   | 0.2   | 2.2   |
| 1.1   | 4.6   | 0.3   | 2.0   | 4.7   | 3.1   | 5.8   | 4.5   | 2.6   |
| 0.5   | 3.1   | 0.4   | 1.7   | 0.5   | 2.2   | 2.1   | 0.4   | 0.9   |
| 0.4   | 0.8   | 1.1   | 0.4   | 0.8   | 0.4   | 0.5   | 0.6   | 0.3   |
| 4.1   | 1.4   | 1.1   | 6.4   | 1.1   | 1.7   | 2.2   | 1.0   | 0.5   |
| 4.2   | 2.0   | 2.6   | 3.0   | 6.8   | 2.9   | 6.1   | 5.0   | 9.8   |
| 2.9   | 3.6   | 0.3   | 3.8   | 2.2   | 3.9   | 1.1   | 5.7   | 1.2   |
| 0.9   | 0.6   | 0.6   | 1.3   | 0.9   | 1.2   | 1.3   | 1.3   | 1.8   |

|       |       |       |       |       |       |       |        |        |
|-------|-------|-------|-------|-------|-------|-------|--------|--------|
| 6.6   | 3.9   | 6.0   | 6.7   | 4.7   | 5.5   | 8.1   | 5.7    | 3.7    |
| 1.8   | 1.7   | 1.6   | 2.9   | 1.3   | 2.6   | 2.0   | 4.1    | 0.4    |
| 0.3   | 2.2   | 0.4   | 4.5   | 0.5   | 0.3   | 0.6   | 0.3    | 3.3    |
| 2.5   | 1.9   | 1.6   | 1.5   | 2.3   | 1.3   | 3.0   | 1.7    | 1.3    |
| 0.9   | 1.5   | 1.3   | 5.0   | 1.1   | 0.7   | 0.6   | 1.9    | 0.8    |
| 7.0   | 1.0   | 10.4  | 8.6   | 3.9   | 6.2   | 5.9   | 12.6   | 7.0    |
| 2.8   | 4.4   | 4.1   | 5.9   | 6.2   | 0.6   | 5.2   | 5.1    | 3.1    |
| 3.3   | 5.3   | 5.7   | 0.7   | 0.3   | 0.8   | 1.9   | 3.8    | 3.2    |
| 5.5   | 5.4   | 11.5  | 1.5   | 2.3   | 4.4   | 4.2   | 7.9    | 10.4   |
| 32.6  | 19.5  | 30.1  | 21.0  | 24.6  | 27.3  | 44.5  | 51.4   | 26.6   |
| 3.8   | 4.8   | 5.7   | 6.3   | 0.8   | 6.6   | 6.4   | 5.8    | 0.9    |
| 4.0   | 5.4   | 6.3   | 0.5   | 2.9   | 8.2   | 3.8   | 8.8    | 7.3    |
| 4.2   | 0.9   | 4.1   | 3.0   | 2.1   | 4.4   | 5.0   | 0.3    | 5.1    |
| 6.9   | 6.0   | 6.0   | 2.9   | 1.3   | 1.3   | 3.0   | 14.2   | 5.8    |
| 125.3 | 94.4  | 122.9 | 127.4 | 137.7 | 132.2 | 186.1 | 191.1  | 157.9  |
| 742.0 | 680.6 | 636.7 | 613.4 | 932.4 | 643.6 | 854.4 | 1004.4 | 1005.8 |
| 0.5   | 0.3   | 0.2   | 2.1   | 3.3   | 0.5   | 4.0   | 0.9    | 0.6    |
| 0.6   | 0.8   | 5.9   | 0.6   | 0.7   | 0.8   | 3.9   | 1.0    | 1.0    |
| 7.0   | 2.1   | 4.3   | 6.3   | 9.1   | 1.3   | 16.1  | 5.5    | 10.1   |
| 0.6   | 0.4   | 4.1   | 0.6   | 0.5   | 2.3   | 4.0   | 6.7    | 0.8    |
| 0.6   | 0.5   | 0.6   | 0.5   | 0.5   | 0.5   | 0.4   | 0.5    | 0.4    |
| 1.2   | 5.6   | 5.6   | 1.5   | 3.9   | 0.5   | 5.4   | 3.2    | 0.5    |
| 3.7   | 6.2   | 5.6   | 7.2   | 6.6   | 4.7   | 5.7   | 8.7    | 9.8    |
| 22.4  | 8.3   | 11.7  | 10.1  | 6.4   | 11.2  | 12.6  | 18.6   | 9.4    |
| 1.1   | 1.3   | 1.0   | 1.6   | 1.4   | 1.1   | 1.6   | 1.3    | 0.9    |
| 8.8   | 8.3   | 8.9   | 2.7   | 9.6   | 1.1   | 4.2   | 4.1    | 4.4    |
| 3.2   | 4.7   | 3.1   | 3.2   | 3.8   | 4.3   | 6.5   | 7.9    | 5.4    |
| 17.0  | 6.0   | 12.3  | 2.8   | 12.4  | 14.7  | 14.7  | 12.1   | 10.7   |
| 6.2   | 2.5   | 5.8   | 4.0   | 3.0   | 3.0   | 0.9   | 1.0    | 1.3    |
| 0.8   | 0.3   | 0.8   | 0.2   | 0.8   | 0.5   | 0.9   | 0.6    | 0.8    |
| 8.0   | 2.9   | 6.0   | 3.3   | 10.0  | 9.7   | 9.7   | 12.9   | 8.3    |
| 13.3  | 13.9  | 7.6   | 8.3   | 8.2   | 4.6   | 13.6  | 15.7   | 12.4   |
| 1.3   | 6.3   | 5.5   | 8.5   | 7.9   | 1.0   | 8.0   | 8.2    | 1.0    |
| 2.2   | 6.0   | 3.6   | 6.4   | 3.1   | 5.8   | 10.4  | 7.4    | 3.7    |
| 5.7   | 10.2  | 5.7   | 5.9   | 9.7   | 7.3   | 11.2  | 8.4    | 7.1    |
| 3.1   | 0.6   | 0.9   | 0.8   | 1.2   | 4.5   | 1.2   | 1.6    | 2.3    |
| 200.7 | 87.6  | 99.4  | 97.9  | 102.4 | 115.4 | 185.3 | 247.1  | 100.4  |
| 1.1   | 0.6   | 0.5   | 1.0   | 0.9   | 0.9   | 1.3   | 1.6    | 0.7    |
| 8.9   | 4.3   | 3.8   | 1.6   | 4.4   | 6.0   | 5.9   | 14.1   | 10.4   |
| 2.3   | 2.3   | 1.7   | 2.1   | 3.9   | 2.0   | 2.4   | 0.1    | 2.4    |
| 0.7   | 0.9   | 2.7   | 2.0   | 0.8   | 5.3   | 4.1   | 0.5    | 0.6    |
| 0.3   | 0.1   | 0.3   | 5.0   | 2.8   | 1.6   | 0.5   | 0.4    | 2.6    |
| 44.1  | 26.6  | 35.3  | 52.2  | 60.9  | 56.7  | 69.6  | 134.6  | 55.1   |
| 1.2   | 6.4   | 1.4   | 5.7   | 3.9   | 6.0   | 3.9   | 4.7    | 5.8    |
| 3.1   | 2.9   | 7.8   | 3.0   | 9.7   | 4.5   | 5.7   | 11.4   | 2.2    |
| 2.2   | 2.1   | 2.6   | 2.3   | 2.2   | 3.3   | 3.0   | 3.9    | 0.4    |
| 8.4   | 1.3   | 0.9   | 1.1   | 1.0   | 2.8   | 10.9  | 0.7    | 5.2    |
| 3.7   | 6.6   | 10.6  | 13.4  | 16.9  | 9.8   | 19.5  | 21.0   | 8.6    |
| 6.6   | 2.4   | 5.4   | 3.0   | 0.3   | 1.7   | 4.3   | 6.5    | 4.0    |
| 8.3   | 8.7   | 9.2   | 8.4   | 5.1   | 9.5   | 10.3  | 11.9   | 9.5    |
| 2.7   | 1.1   | 1.3   | 1.3   | 1.5   | 1.3   | 2.5   | 0.8    | 1.6    |
| 0.5   | 0.7   | 2.9   | 1.0   | 2.0   | 0.5   | 0.8   | 5.3    | 0.9    |
| 1.7   | 1.9   | 1.4   | 0.6   | 1.0   | 4.4   | 1.5   | 3.4    | 1.0    |

|       |       |       |       |       |       |       |       |       |
|-------|-------|-------|-------|-------|-------|-------|-------|-------|
| 2.3   | 2.5   | 5.0   | 6.5   | 3.4   | 6.9   | 7.9   | 13.6  | 2.0   |
| 1.4   | 5.4   | 4.6   | 3.9   | 6.8   | 4.7   | 4.2   | 3.0   | 0.9   |
| 29.6  | 13.8  | 21.0  | 14.4  | 21.2  | 12.7  | 22.1  | 21.2  | 23.3  |
| 3.5   | 1.2   | 4.7   | 0.8   | 1.4   | 0.6   | 3.5   | 2.2   | 1.0   |
| 2.0   | 1.1   | 0.6   | 1.1   | 0.3   | 0.7   | 1.5   | 0.5   | 0.1   |
| 1.1   | 9.4   | 1.6   | 1.2   | 1.0   | 1.1   | 0.9   | 1.2   | 0.6   |
| 2.8   | 10.2  | 1.3   | 1.4   | 10.0  | 2.0   | 1.7   | 3.1   | 2.5   |
| 13.3  | 9.7   | 1.4   | 12.5  | 7.9   | 5.4   | 10.8  | 8.9   | 7.0   |
| 6.5   | 6.2   | 4.3   | 3.0   | 2.9   | 3.4   | 3.6   | 11.2  | 4.8   |
| 0.8   | 1.0   | 1.1   | 0.6   | 0.7   | 1.1   | 0.9   | 1.6   | 1.1   |
| 4.3   | 8.3   | 6.3   | 3.6   | 8.9   | 7.0   | 1.5   | 1.4   | 5.6   |
| 7.5   | 3.4   | 5.0   | 4.9   | 3.7   | 4.3   | 5.7   | 7.6   | 8.2   |
| 2.3   | 1.8   | 3.3   | 0.4   | 3.6   | 0.3   | 5.3   | 4.6   | 2.9   |
| 10.2  | 6.7   | 6.9   | 4.9   | 1.2   | 1.0   | 7.7   | 10.3  | 8.3   |
| 5.6   | 2.7   | 3.6   | 7.0   | 7.4   | 1.9   | 0.8   | 5.6   | 11.1  |
| 0.5   | 0.5   | 0.4   | 0.4   | 0.3   | 0.4   | 0.4   | 0.6   | 0.5   |
| 6.9   | 9.3   | 7.9   | 7.5   | 13.3  | 7.6   | 7.9   | 11.2  | 10.2  |
| 1.5   | 1.3   | 1.4   | 1.3   | 1.8   | 2.4   | 8.1   | 4.2   | 3.3   |
| 0.3   | 3.9   | 3.0   | 0.5   | 0.4   | 0.2   | 1.1   | 0.6   | 3.6   |
| 1.6   | 1.9   | 4.3   | 8.8   | 1.8   | 1.3   | 2.8   | 2.4   | 2.2   |
| 14.3  | 15.9  | 9.9   | 11.2  | 12.9  | 9.6   | 3.1   | 5.1   | 6.2   |
| 1.1   | 3.4   | 4.0   | 3.2   | 3.0   | 1.1   | 0.7   | 1.3   | 1.0   |
| 3.1   | 3.0   | 1.5   | 3.9   | 0.3   | 1.9   | 3.3   | 5.6   | 0.8   |
| 333.6 | 215.0 | 263.3 | 300.6 | 316.6 | 236.9 | 361.8 | 409.0 | 278.8 |
| 18.1  | 16.9  | 14.3  | 18.0  | 13.6  | 21.8  | 20.8  | 20.8  | 14.1  |
| 6.1   | 5.7   | 6.7   | 1.2   | 6.9   | 2.3   | 7.9   | 8.3   | 9.6   |
| 7.3   | 7.9   | 12.8  | 12.2  | 9.8   | 6.5   | 3.1   | 7.9   | 7.4   |
| 15.6  | 26.6  | 29.7  | 34.1  | 29.7  | 24.9  | 40.7  | 46.5  | 28.3  |
| 7.2   | 5.8   | 5.6   | 1.4   | 3.0   | 1.4   | 11.4  | 8.0   | 8.9   |
| 7.9   | 2.1   | 7.5   | 6.6   | 3.9   | 5.5   | 10.1  | 10.8  | 10.9  |
| 1.0   | 3.8   | 3.8   | 3.5   | 1.2   | 1.8   | 6.1   | 3.2   | 6.1   |
| 2.8   | 3.5   | 2.5   | 6.6   | 1.3   | 0.2   | 3.0   | 1.1   | 3.1   |
| 14.2  | 13.3  | 8.8   | 16.1  | 26.2  | 12.8  | 15.2  | 17.6  | 9.2   |
| 155.8 | 89.1  | 87.9  | 96.3  | 93.4  | 94.9  | 147.1 | 184.8 | 129.5 |
| 0.7   | 1.0   | 3.4   | 1.5   | 0.9   | 1.1   | 1.4   | 2.0   | 0.9   |
| 15.0  | 15.3  | 22.1  | 17.1  | 5.5   | 20.1  | 14.3  | 21.9  | 13.9  |
| 5.3   | 6.8   | 9.8   | 11.1  | 11.8  | 10.7  | 12.7  | 15.3  | 8.3   |
| 0.4   | 1.7   | 0.4   | 0.5   | 1.1   | 2.0   | 0.3   | 3.1   | 1.8   |
| 38.5  | 31.2  | 36.3  | 29.9  | 42.1  | 29.5  | 44.9  | 66.3  | 26.6  |
| 72.6  | 29.7  | 22.7  | 24.8  | 21.4  | 26.5  | 38.7  | 35.1  | 33.9  |
| 2.5   | 4.9   | 6.2   | 2.3   | 1.5   | 2.9   | 3.6   | 3.8   | 4.2   |
| 134.2 | 95.4  | 87.1  | 79.6  | 89.9  | 81.0  | 108.1 | 145.6 | 78.2  |
| 34.2  | 12.9  | 28.1  | 30.5  | 18.4  | 33.2  | 30.7  | 40.9  | 12.3  |
| 732.6 | 448.8 | 576.1 | 566.5 | 504.2 | 586.2 | 713.2 | 700.7 | 525.3 |
| 10.2  | 5.2   | 7.7   | 7.4   | 11.0  | 8.2   | 12.7  | 13.2  | 10.3  |
| 0.8   | 0.3   | 0.4   | 0.9   | 0.9   | 1.1   | 4.5   | 3.6   | 0.8   |
| 32.2  | 20.7  | 26.6  | 22.6  | 24.2  | 10.6  | 23.3  | 33.8  | 27.1  |
| 0.8   | 0.8   | 0.6   | 0.7   | 0.6   | 0.8   | 2.2   | 1.7   | 0.8   |
| 2.0   | 1.5   | 0.6   | 0.3   | 1.0   | 2.5   | 1.0   | 4.1   | 2.0   |
| 6.1   | 9.3   | 6.7   | 8.2   | 8.8   | 7.7   | 11.7  | 8.0   | 7.8   |
| 0.3   | 3.0   | 0.6   | 1.9   | 3.0   | 0.3   | 5.8   | 0.2   | 2.3   |
| 3.6   | 4.4   | 4.1   | 7.2   | 0.5   | 4.4   | 7.4   | 3.8   | 1.8   |
| 0.9   | 2.6   | 1.0   | 1.0   | 1.0   | 2.1   | 4.6   | 1.5   | 0.9   |

|       |       |       |       |       |       |       |       |       |
|-------|-------|-------|-------|-------|-------|-------|-------|-------|
| 34.1  | 28.1  | 16.6  | 31.2  | 29.4  | 22.9  | 50.6  | 63.1  | 41.2  |
| 2.2   | 7.2   | 9.7   | 3.1   | 2.8   | 3.1   | 2.1   | 1.6   | 1.2   |
| 0.4   | 0.2   | 0.5   | 0.5   | 0.9   | 0.2   | 5.2   | 1.7   | 1.6   |
| 0.8   | 0.3   | 5.2   | 0.8   | 0.7   | 5.6   | 5.0   | 0.8   | 0.3   |
| 0.6   | 0.9   | 1.9   | 1.5   | 0.8   | 1.0   | 3.0   | 0.7   | 0.8   |
| 8.4   | 0.8   | 4.5   | 0.3   | 7.5   | 0.5   | 0.6   | 0.8   | 0.6   |
| 4.6   | 0.3   | 3.4   | 0.2   | 6.6   | 5.9   | 2.4   | 3.4   | 2.7   |
| 6.3   | 0.4   | 6.3   | 3.6   | 10.0  | 2.5   | 7.1   | 6.9   | 10.3  |
| 4.1   | 7.0   | 9.2   | 13.8  | 11.3  | 15.8  | 19.3  | 15.8  | 8.7   |
| 3.4   | 3.7   | 4.2   | 0.6   | 3.2   | 0.7   | 3.7   | 5.8   | 1.9   |
| 3.6   | 12.1  | 8.3   | 13.6  | 4.3   | 10.2  | 11.0  | 3.3   | 15.7  |
| 1.7   | 5.3   | 0.8   | 1.0   | 4.7   | 0.9   | 2.2   | 2.3   | 0.9   |
| 1.2   | 1.9   | 5.8   | 2.0   | 0.9   | 1.2   | 0.8   | 1.0   | 1.5   |
| 5.0   | 3.6   | 10.2  | 7.2   | 2.4   | 4.6   | 1.7   | 7.7   | 10.3  |
| 51.9  | 38.9  | 51.7  | 43.6  | 37.1  | 44.7  | 39.7  | 54.6  | 45.8  |
| 19.5  | 11.6  | 13.3  | 14.2  | 10.1  | 12.2  | 14.4  | 21.3  | 11.7  |
| 6.8   | 2.3   | 3.9   | 3.5   | 3.3   | 3.3   | 6.2   | 9.2   | 7.4   |
| 0.7   | 1.6   | 1.1   | 0.9   | 0.7   | 0.8   | 1.0   | 1.3   | 0.8   |
| 2.1   | 2.0   | 1.9   | 2.7   | 1.8   | 2.3   | 3.4   | 2.6   | 0.7   |
| 1.2   | 1.7   | 0.3   | 0.7   | 1.2   | 3.0   | 1.1   | 1.2   | 4.3   |
| 1.2   | 0.8   | 0.7   | 0.6   | 3.3   | 0.5   | 0.9   | 1.8   | 1.4   |
| 8.6   | 1.0   | 1.9   | 1.3   | 1.8   | 1.3   | 1.4   | 1.0   | 1.3   |
| 0.6   | 4.6   | 3.5   | 7.2   | 0.9   | 1.3   | 4.7   | 6.9   | 5.7   |
| 3.0   | 8.2   | 2.7   | 4.6   | 4.1   | 9.2   | 3.6   | 5.7   | 0.6   |
| 18.7  | 20.0  | 19.0  | 16.6  | 19.4  | 18.9  | 30.1  | 38.2  | 16.0  |
| 158.0 | 77.9  | 123.7 | 105.7 | 94.5  | 104.7 | 143.6 | 143.0 | 126.1 |
| 127.8 | 152.9 | 157.1 | 204.8 | 217.6 | 204.2 | 334.1 | 348.9 | 235.5 |
| 1.7   | 0.8   | 1.4   | 1.4   | 4.8   | 3.7   | 1.8   | 1.1   | 0.7   |
| 3.8   | 1.5   | 1.0   | 0.7   | 1.8   | 1.5   | 1.2   | 1.2   | 1.7   |
| 2.2   | 2.1   | 0.6   | 0.5   | 2.3   | 0.8   | 0.2   | 1.8   | 0.4   |
| 304.5 | 183.0 | 263.1 | 244.9 | 283.6 | 255.2 | 315.7 | 346.4 | 242.7 |
| 0.7   | 2.9   | 0.6   | 7.8   | 5.0   | 1.6   | 8.8   | 4.7   | 7.9   |
| 0.3   | 0.9   | 0.7   | 0.7   | 0.2   | 3.1   | 0.6   | 1.0   | 2.3   |
| 0.8   | 7.6   | 4.5   | 5.4   | 6.3   | 2.2   | 12.1  | 9.6   | 7.5   |
| 147.5 | 84.3  | 115.9 | 111.9 | 115.4 | 125.7 | 141.7 | 189.3 | 117.3 |
| 3.4   | 0.9   | 1.3   | 1.3   | 1.0   | 0.8   | 1.4   | 2.8   | 1.3   |
| 16.6  | 6.6   | 17.0  | 9.1   | 8.0   | 6.7   | 13.3  | 10.4  | 9.6   |
| 1.6   | 0.5   | 0.2   | 2.3   | 0.6   | 0.4   | 0.8   | 1.6   | 0.3   |
| 0.7   | 0.6   | 0.4   | 0.5   | 0.5   | 0.1   | 1.6   | 5.6   | 1.6   |
| 1.7   | 3.1   | 0.1   | 1.2   | 0.2   | 1.8   | 4.0   | 1.9   | 1.9   |
| 1.0   | 1.4   | 1.2   | 0.3   | 1.1   | 1.8   | 15.4  | 3.7   | 1.1   |
| 19.1  | 3.8   | 2.8   | 10.7  | 8.5   | 9.5   | 14.1  | 2.2   | 7.3   |
| 39.0  | 25.4  | 27.8  | 28.6  | 28.0  | 34.5  | 36.6  | 41.0  | 26.4  |
| 1.4   | 1.3   | 1.4   | 1.3   | 1.4   | 1.4   | 1.7   | 3.7   | 5.1   |
| 60.5  | 49.8  | 47.8  | 52.7  | 56.1  | 64.3  | 73.5  | 91.1  | 53.5  |
| 2.0   | 0.9   | 2.4   | 1.5   | 2.0   | 2.0   | 2.1   | 2.5   | 2.3   |
| 12.2  | 10.6  | 9.2   | 5.4   | 8.8   | 12.2  | 9.1   | 13.0  | 12.4  |
| 0.6   | 5.0   | 1.5   | 0.9   | 3.9   | 4.8   | 3.0   | 2.7   | 4.0   |
| 2.0   | 4.3   | 9.1   | 8.3   | 5.4   | 6.1   | 0.9   | 2.7   | 5.9   |
| 1.2   | 0.6   | 3.2   | 1.2   | 0.2   | 2.3   | 0.9   | 1.7   | 0.9   |
| 0.4   | 1.9   | 2.8   | 0.5   | 0.9   | 5.6   | 8.1   | 1.8   | 0.5   |
| 37.5  | 34.1  | 37.0  | 43.1  | 39.1  | 33.3  | 40.5  | 52.0  | 32.1  |
| 5.3   | 4.4   | 5.1   | 5.4   | 4.0   | 7.3   | 7.2   | 8.5   | 7.4   |

|       |      |      |      |      |       |       |       |      |
|-------|------|------|------|------|-------|-------|-------|------|
| 3.6   | 6.1  | 1.2  | 0.6  | 0.4  | 0.6   | 0.8   | 0.9   | 0.3  |
| 25.7  | 19.3 | 26.3 | 20.2 | 26.8 | 26.1  | 37.5  | 33.9  | 29.4 |
| 0.3   | 0.6  | 1.9  | 4.4  | 0.9  | 4.2   | 4.1   | 5.1   | 4.4  |
| 0.3   | 3.0  | 1.5  | 0.3  | 0.3  | 0.4   | 0.4   | 0.5   | 0.3  |
| 0.9   | 1.4  | 3.2  | 0.3  | 0.8  | 2.7   | 7.1   | 1.9   | 0.2  |
| 1.6   | 0.9  | 7.3  | 1.0  | 4.7  | 1.1   | 2.4   | 4.0   | 2.7  |
| 0.7   | 2.5  | 4.4  | 2.3  | 6.4  | 10.0  | 4.4   | 2.3   | 3.6  |
| 2.6   | 9.8  | 2.1  | 3.1  | 3.0  | 8.6   | 5.6   | 11.0  | 1.5  |
| 0.9   | 0.5  | 0.4  | 0.6  | 1.4  | 0.7   | 0.7   | 0.5   | 7.6  |
| 0.4   | 0.8  | 0.7  | 0.5  | 1.1  | 0.7   | 4.0   | 0.6   | 1.3  |
| 0.9   | 0.8  | 3.4  | 0.9  | 1.6  | 3.8   | 0.8   | 0.6   | 0.6  |
| 2.7   | 4.7  | 2.3  | 1.0  | 2.1  | 2.1   | 2.4   | 1.4   | 11.9 |
| 6.6   | 1.8  | 5.2  | 3.2  | 6.7  | 4.4   | 5.4   | 10.6  | 5.7  |
| 7.3   | 11.1 | 6.9  | 9.6  | 7.2  | 6.6   | 8.8   | 15.4  | 11.4 |
| 5.2   | 11.1 | 7.2  | 8.2  | 12.1 | 9.4   | 9.5   | 11.5  | 8.5  |
| 13.9  | 16.0 | 12.8 | 14.4 | 6.0  | 9.8   | 23.2  | 19.7  | 11.9 |
| 6.4   | 11.8 | 5.6  | 3.6  | 8.2  | 2.2   | 11.0  | 4.3   | 8.7  |
| 0.7   | 5.9  | 10.0 | 1.6  | 2.5  | 6.3   | 11.2  | 2.5   | 2.7  |
| 89.3  | 55.1 | 74.8 | 88.6 | 74.3 | 116.6 | 115.1 | 128.6 | 86.7 |
| 3.8   | 5.0  | 0.9  | 5.9  | 16.9 | 3.9   | 8.2   | 6.9   | 9.1  |
| 121.8 | 65.6 | 88.3 | 96.0 | 84.3 | 74.5  | 107.0 | 90.6  | 80.4 |
| 6.0   | 3.0  | 5.8  | 4.0  | 2.6  | 5.5   | 9.6   | 8.1   | 8.8  |
| 6.0   | 4.8  | 0.9  | 7.5  | 2.7  | 8.2   | 4.6   | 12.1  | 2.5  |
| 8.9   | 5.3  | 3.4  | 3.8  | 3.4  | 4.8   | 5.0   | 7.3   | 6.3  |
| 1.8   | 10.8 | 7.5  | 8.1  | 4.2  | 4.7   | 7.4   | 6.9   | 1.7  |
| 0.8   | 1.7  | 2.0  | 1.1  | 1.2  | 3.4   | 0.9   | 1.8   | 1.0  |
| 4.8   | 5.5  | 3.8  | 0.9  | 5.0  | 5.6   | 5.0   | 4.4   | 5.9  |
| 0.5   | 1.6  | 0.8  | 0.3  | 0.8  | 1.1   | 3.6   | 0.8   | 0.1  |
| 7.5   | 1.4  | 12.8 | 1.0  | 7.1  | 1.3   | 4.1   | 1.3   | 2.3  |
| 3.4   | 0.8  | 3.4  | 5.9  | 5.2  | 0.7   | 8.4   | 10.2  | 1.5  |
| 0.2   | 2.1  | 0.6  | 0.4  | 0.2  | 2.1   | 0.1   | 2.3   | 0.2  |
| 9.3   | 4.0  | 9.8  | 5.6  | 7.3  | 4.7   | 15.2  | 11.7  | 9.2  |
| 10.1  | 3.7  | 1.4  | 0.4  | 7.3  | 2.0   | 7.4   | 7.6   | 7.4  |
| 14.6  | 12.9 | 7.5  | 10.8 | 8.6  | 10.1  | 14.2  | 12.6  | 7.7  |
| 2.6   | 1.9  | 1.0  | 0.1  | 1.6  | 0.2   | 0.2   | 0.6   | 2.1  |
| 17.1  | 11.9 | 11.7 | 15.7 | 10.3 | 9.1   | 8.0   | 15.5  | 13.4 |
| 2.3   | 2.0  | 1.3  | 1.3  | 1.1  | 1.0   | 3.0   | 2.8   | 5.5  |
| 78.1  | 78.5 | 60.0 | 56.9 | 61.4 | 55.4  | 83.0  | 118.4 | 78.0 |
| 16.9  | 8.8  | 16.6 | 12.8 | 11.1 | 15.4  | 13.6  | 21.1  | 11.7 |
| 0.7   | 1.1  | 1.0  | 0.8  | 1.2  | 0.9   | 1.1   | 1.2   | 0.8  |
| 2.1   | 4.8  | 0.8  | 3.3  | 2.3  | 0.9   | 6.1   | 2.6   | 5.9  |
| 1.1   | 1.4  | 0.9  | 1.5  | 0.4  | 1.3   | 0.7   | 1.3   | 1.1  |
| 9.8   | 13.5 | 14.8 | 16.3 | 3.6  | 11.3  | 17.3  | 15.6  | 16.3 |
| 8.2   | 3.3  | 12.8 | 6.6  | 3.3  | 6.2   | 1.2   | 12.0  | 4.6  |
| 2.5   | 1.6  | 2.7  | 1.9  | 1.9  | 7.1   | 1.4   | 17.6  | 3.6  |
| 3.8   | 8.2  | 3.7  | 2.6  | 4.0  | 4.0   | 0.4   | 5.6   | 6.8  |
| 5.7   | 4.6  | 13.6 | 7.0  | 2.9  | 7.1   | 6.1   | 14.7  | 19.1 |
| 4.6   | 2.9  | 1.7  | 2.4  | 2.1  | 4.7   | 2.7   | 2.1   | 2.1  |
| 1.2   | 3.1  | 2.0  | 1.0  | 0.7  | 0.8   | 5.9   | 0.9   | 3.5  |
| 6.6   | 1.3  | 4.2  | 4.5  | 0.3  | 2.0   | 5.0   | 4.1   | 2.8  |
| 24.2  | 13.4 | 20.2 | 21.8 | 29.2 | 18.7  | 25.0  | 22.7  | 15.6 |
| 23.0  | 13.7 | 13.4 | 14.1 | 17.0 | 18.2  | 25.3  | 29.8  | 15.9 |
| 2.3   | 3.8  | 4.2  | 1.2  | 1.4  | 0.7   | 6.5   | 2.2   | 2.3  |

|       |       |       |       |       |       |       |       |       |
|-------|-------|-------|-------|-------|-------|-------|-------|-------|
| 6.5   | 0.4   | 5.0   | 5.0   | 0.2   | 8.2   | 0.6   | 5.8   | 1.1   |
| 0.1   | 3.1   | 0.3   | 0.4   | 0.4   | 0.2   | 0.5   | 0.4   | 0.3   |
| 64.3  | 45.0  | 52.6  | 39.7  | 43.3  | 54.4  | 72.3  | 90.4  | 51.8  |
| 1.1   | 0.1   | 0.3   | 0.4   | 0.2   | 1.2   | 0.2   | 2.0   | 0.2   |
| 4.6   | 4.0   | 3.6   | 1.2   | 4.5   | 6.1   | 7.9   | 9.5   | 1.2   |
| 2.7   | 5.0   | 1.0   | 0.4   | 0.2   | 3.0   | 5.6   | 3.4   | 1.9   |
| 2.7   | 2.4   | 0.5   | 6.2   | 5.7   | 1.8   | 5.9   | 6.3   | 3.5   |
| 18.9  | 18.8  | 19.6  | 16.8  | 17.7  | 22.1  | 27.3  | 30.5  | 18.7  |
| 54.4  | 31.3  | 37.4  | 35.0  | 42.4  | 37.9  | 57.3  | 53.0  | 49.3  |
| 1.8   | 6.3   | 1.3   | 8.6   | 0.2   | 6.4   | 3.2   | 12.5  | 3.9   |
| 0.5   | 1.9   | 0.5   | 1.6   | 0.5   | 0.7   | 1.0   | 1.0   | 3.5   |
| 97.8  | 62.3  | 85.9  | 68.1  | 57.8  | 105.1 | 116.5 | 106.4 | 119.6 |
| 8.2   | 1.4   | 3.3   | 7.6   | 8.1   | 5.2   | 6.7   | 8.4   | 6.3   |
| 3.6   | 3.3   | 0.9   | 1.5   | 4.8   | 1.8   | 0.9   | 4.6   | 0.5   |
| 10.3  | 8.5   | 5.7   | 5.2   | 7.3   | 10.9  | 15.1  | 5.6   | 7.7   |
| 18.5  | 6.9   | 3.4   | 11.3  | 12.2  | 2.2   | 16.3  | 23.3  | 11.8  |
| 61.4  | 56.8  | 62.5  | 56.8  | 57.3  | 46.3  | 74.7  | 64.8  | 65.4  |
| 9.7   | 16.7  | 16.6  | 8.1   | 14.8  | 18.1  | 18.5  | 21.8  | 14.8  |
| 294.2 | 208.6 | 213.8 | 259.4 | 272.2 | 291.4 | 389.9 | 533.4 | 265.0 |
| 127.3 | 52.8  | 60.6  | 55.1  | 60.7  | 68.3  | 93.5  | 104.1 | 74.4  |
| 13.1  | 2.9   | 5.1   | 8.6   | 7.9   | 11.1  | 5.7   | 10.1  | 1.1   |
| 57.7  | 52.0  | 57.1  | 47.3  | 50.3  | 43.5  | 58.1  | 47.4  | 52.9  |
| 2.9   | 1.1   | 3.1   | 2.9   | 2.5   | 3.0   | 3.0   | 13.2  | 6.4   |
| 53.1  | 46.2  | 49.0  | 46.6  | 49.2  | 49.7  | 74.9  | 78.1  | 59.8  |
| 6.3   | 14.1  | 4.0   | 10.5  | 2.2   | 4.8   | 8.4   | 7.5   | 9.4   |
| 123.0 | 74.8  | 85.3  | 86.4  | 104.0 | 53.7  | 135.4 | 98.4  | 97.8  |
| 4.4   | 16.9  | 2.8   | 5.4   | 4.0   | 7.6   | 7.3   | 2.5   | 14.9  |
| 33.4  | 28.0  | 24.7  | 22.7  | 39.6  | 22.3  | 32.8  | 34.4  | 33.8  |
| 1.7   | 2.9   | 3.1   | 3.0   | 3.4   | 2.6   | 11.5  | 5.3   | 2.5   |
| 1.6   | 3.1   | 1.1   | 3.3   | 2.8   | 3.7   | 4.4   | 5.9   | 0.6   |
| 101.2 | 68.4  | 84.6  | 94.6  | 98.0  | 83.4  | 125.2 | 120.1 | 71.1  |
| 0.4   | 2.8   | 0.8   | 1.0   | 0.2   | 0.4   | 0.6   | 0.7   | 0.2   |
| 194.2 | 147.3 | 137.7 | 151.0 | 166.2 | 158.8 | 224.1 | 275.0 | 146.9 |
| 1.9   | 3.5   | 0.6   | 5.7   | 0.6   | 1.1   | 4.9   | 1.9   | 1.0   |
| 91.2  | 55.3  | 65.3  | 79.0  | 64.4  | 57.5  | 88.4  | 98.6  | 73.7  |
| 16.9  | 12.6  | 12.3  | 13.2  | 13.3  | 14.7  | 15.9  | 20.6  | 14.1  |
| 0.3   | 2.1   | 0.3   | 0.3   | 0.4   | 0.5   | 0.5   | 1.0   | 1.1   |
| 61.8  | 47.5  | 60.9  | 34.9  | 46.4  | 76.1  | 51.5  | 62.4  | 58.6  |
| 126.6 | 28.8  | 44.9  | 35.6  | 43.9  | 38.9  | 67.4  | 78.8  | 53.6  |
| 31.3  | 18.6  | 21.5  | 23.1  | 31.5  | 22.6  | 35.0  | 18.8  | 22.8  |
| 0.6   | 0.8   | 0.7   | 0.7   | 0.6   | 0.8   | 0.7   | 1.6   | 1.5   |
| 9.1   | 6.5   | 10.0  | 14.0  | 6.4   | 11.2  | 8.4   | 20.6  | 10.8  |
| 11.8  | 13.3  | 19.6  | 18.2  | 15.2  | 13.2  | 14.4  | 25.7  | 10.6  |
| 1.4   | 1.3   | 4.3   | 1.1   | 5.8   | 0.6   | 1.6   | 1.9   | 0.9   |
| 1.8   | 8.8   | 4.3   | 5.9   | 5.0   | 6.0   | 3.4   | 5.5   | 1.9   |
| 113.1 | 48.6  | 45.7  | 54.6  | 60.7  | 54.5  | 81.3  | 97.5  | 56.5  |
| 1.4   | 5.4   | 7.0   | 5.6   | 4.2   | 5.8   | 3.8   | 7.4   | 4.2   |
| 46.4  | 26.2  | 39.9  | 34.8  | 33.7  | 41.5  | 50.7  | 75.9  | 35.5  |
| 13.0  | 9.9   | 10.5  | 8.1   | 9.5   | 9.8   | 18.0  | 19.9  | 15.2  |
| 1.0   | 0.3   | 0.1   | 0.1   | 0.1   | 1.0   | 0.3   | 0.1   | 0.2   |
| 71.5  | 29.0  | 47.2  | 40.6  | 35.8  | 44.8  | 60.5  | 68.5  | 43.3  |
| 3.7   | 3.8   | 0.4   | 0.5   | 1.8   | 3.0   | 4.0   | 2.6   | 2.3   |
| 45.9  | 27.0  | 32.6  | 29.5  | 34.1  | 32.3  | 51.9  | 55.3  | 33.9  |



|       |       |       |       |       |       |       |       |       |
|-------|-------|-------|-------|-------|-------|-------|-------|-------|
| 14.4  | 9.3   | 8.2   | 10.5  | 8.8   | 4.6   | 11.8  | 13.6  | 8.1   |
| 0.6   | 0.6   | 3.3   | 2.1   | 3.5   | 0.5   | 2.0   | 6.2   | 0.8   |
| 10.8  | 0.6   | 9.6   | 1.7   | 9.3   | 4.4   | 13.9  | 7.8   | 6.2   |
| 2.8   | 2.6   | 5.8   | 1.2   | 2.3   | 1.1   | 7.7   | 1.8   | 6.5   |
| 1.0   | 1.2   | 1.5   | 0.9   | 2.1   | 0.9   | 1.5   | 4.1   | 1.1   |
| 3.5   | 4.1   | 6.1   | 6.8   | 4.1   | 7.2   | 0.7   | 1.3   | 1.8   |
| 15.3  | 18.6  | 11.4  | 11.2  | 15.9  | 18.6  | 12.3  | 18.2  | 13.0  |
| 5.1   | 8.2   | 6.4   | 4.8   | 6.4   | 2.8   | 9.1   | 6.5   | 7.5   |
| 0.7   | 1.2   | 0.4   | 0.2   | 6.0   | 0.3   | 0.1   | 4.4   | 0.2   |
| 0.4   | 3.1   | 2.7   | 0.6   | 2.4   | 1.6   | 0.3   | 1.2   | 4.2   |
| 2.3   | 0.2   | 1.8   | 0.2   | 0.5   | 0.1   | 2.6   | 1.9   | 0.1   |
| 0.2   | 0.1   | 0.8   | 1.4   | 0.2   | 0.4   | 0.3   | 3.3   | 0.4   |
| 32.6  | 28.5  | 29.5  | 26.7  | 33.2  | 31.6  | 43.4  | 53.1  | 27.7  |
| 206.0 | 115.3 | 153.7 | 168.4 | 173.9 | 178.9 | 194.1 | 198.8 | 187.3 |
| 1.5   | 0.7   | 1.3   | 0.9   | 1.2   | 1.0   | 3.9   | 1.0   | 0.6   |
| 3.8   | 7.2   | 4.0   | 6.2   | 0.9   | 4.0   | 8.6   | 9.1   | 2.3   |
| 7.4   | 10.7  | 9.6   | 7.5   | 9.1   | 5.1   | 1.5   | 6.1   | 11.3  |
| 0.5   | 3.5   | 4.5   | 10.3  | 1.8   | 10.8  | 9.2   | 12.1  | 8.8   |
| 1.1   | 0.8   | 0.5   | 3.4   | 0.7   | 2.8   | 0.2   | 4.0   | 0.3   |
| 3.5   | 3.0   | 2.0   | 2.5   | 13.2  | 10.6  | 9.3   | 9.8   | 3.7   |
| 108.8 | 64.8  | 58.4  | 53.8  | 73.7  | 77.6  | 83.9  | 120.6 | 99.7  |
| 30.5  | 13.8  | 22.7  | 19.4  | 19.2  | 17.0  | 25.2  | 33.9  | 27.5  |
| 12.9  | 10.1  | 3.3   | 1.4   | 7.3   | 7.9   | 10.9  | 5.3   | 11.7  |
| 3.0   | 0.5   | 2.3   | 0.5   | 2.9   | 4.0   | 4.7   | 0.5   | 1.2   |
| 30.9  | 20.6  | 21.6  | 20.1  | 19.5  | 22.8  | 33.3  | 33.9  | 32.1  |
| 8.2   | 4.4   | 7.1   | 1.6   | 5.8   | 7.8   | 1.1   | 2.0   | 3.2   |
| 0.7   | 7.1   | 2.5   | 4.9   | 1.5   | 5.1   | 6.5   | 1.5   | 1.3   |
| 0.4   | 0.5   | 1.0   | 0.8   | 0.8   | 3.2   | 0.7   | 1.8   | 1.8   |
| 1.1   | 0.4   | 0.3   | 0.6   | 0.4   | 1.2   | 0.8   | 0.9   | 1.9   |
| 6.3   | 1.5   | 4.9   | 4.2   | 8.5   | 4.4   | 12.0  | 6.6   | 9.1   |
| 13.5  | 18.3  | 17.1  | 20.4  | 18.9  | 18.4  | 24.8  | 26.6  | 15.1  |
| 2.0   | 1.6   | 14.3  | 2.5   | 2.2   | 8.5   | 12.3  | 16.9  | 3.1   |
| 1.0   | 1.7   | 0.8   | 1.8   | 1.6   | 0.9   | 1.7   | 2.0   | 2.1   |
| 0.9   | 0.9   | 2.5   | 3.0   | 5.5   | 0.4   | 4.6   | 0.4   | 2.9   |
| 0.1   | 2.4   | 2.4   | 1.3   | 0.4   | 1.3   | 2.1   | 3.9   | 0.2   |
| 1.6   | 1.2   | 3.4   | 1.6   | 5.0   | 3.6   | 3.6   | 9.0   | 1.8   |
| 2.3   | 1.6   | 2.4   | 0.5   | 0.6   | 0.8   | 6.6   | 2.8   | 3.3   |
| 2.1   | 5.3   | 5.3   | 3.3   | 3.6   | 1.6   | 2.1   | 1.7   | 7.8   |
| 8.3   | 8.5   | 0.4   | 0.6   | 4.3   | 1.1   | 0.7   | 8.9   | 0.8   |
| 1.3   | 1.2   | 0.9   | 3.3   | 0.8   | 1.2   | 0.8   | 1.0   | 3.1   |
| 137.8 | 35.5  | 54.0  | 50.3  | 46.7  | 76.1  | 80.4  | 115.4 | 45.3  |
| 0.4   | 0.6   | 0.5   | 0.6   | 0.4   | 0.2   | 0.6   | 0.4   | 0.1   |
| 0.6   | 0.5   | 0.4   | 0.4   | 0.5   | 0.7   | 1.1   | 3.0   | 0.4   |
| 3.0   | 10.9  | 7.9   | 2.3   | 3.8   | 3.2   | 2.3   | 4.0   | 4.3   |
| 3.4   | 2.1   | 4.8   | 0.3   | 11.1  | 7.1   | 6.4   | 2.9   | 5.4   |
| 0.3   | 0.2   | 0.3   | 0.7   | 1.2   | 0.8   | 0.9   | 0.4   | 3.5   |
| 2.4   | 4.7   | 2.6   | 1.3   | 2.1   | 1.2   | 9.4   | 8.8   | 3.2   |
| 16.0  | 7.4   | 5.4   | 7.9   | 8.1   | 9.9   | 9.1   | 14.1  | 9.0   |
| 1.5   | 1.8   | 0.7   | 1.5   | 1.4   | 0.9   | 3.8   | 3.0   | 2.0   |
| 1.9   | 4.7   | 0.8   | 0.8   | 0.6   | 1.5   | 0.8   | 0.6   | 0.4   |
| 10.8  | 12.6  | 3.2   | 8.5   | 10.1  | 1.2   | 5.2   | 8.7   | 6.3   |
| 2.1   | 2.0   | 0.8   | 0.9   | 1.4   | 1.2   | 1.5   | 4.8   | 1.9   |
| 1.0   | 0.2   | 0.3   | 0.1   | 0.4   | 1.1   | 1.3   | 1.0   | 0.8   |

|        |       |       |       |       |       |        |        |       |
|--------|-------|-------|-------|-------|-------|--------|--------|-------|
| 2.7    | 0.4   | 1.4   | 1.1   | 1.1   | 0.6   | 4.1    | 5.3    | 0.4   |
| 3.0    | 1.0   | 0.8   | 4.7   | 0.4   | 2.6   | 0.6    | 1.6    | 2.0   |
| 3.9    | 4.6   | 2.8   | 6.3   | 7.6   | 3.0   | 2.9    | 3.0    | 3.8   |
| 0.9    | 0.3   | 0.7   | 2.5   | 1.1   | 0.3   | 3.8    | 0.6    | 0.7   |
| 7.0    | 9.3   | 4.0   | 6.6   | 7.5   | 8.8   | 4.3    | 7.3    | 4.7   |
| 4.7    | 2.7   | 5.7   | 1.0   | 1.5   | 0.4   | 2.7    | 2.9    | 1.6   |
| 0.4    | 0.5   | 1.6   | 1.9   | 2.4   | 0.2   | 4.9    | 1.4    | 2.5   |
| 0.8    | 0.2   | 0.8   | 2.1   | 5.2   | 0.1   | 0.8    | 1.2    | 0.2   |
| 0.1    | 0.1   | 0.4   | 0.0   | 0.2   | 0.2   | 0.5    | 0.4    | 0.2   |
| 16.0   | 17.5  | 13.6  | 20.0  | 17.4  | 18.1  | 19.2   | 22.9   | 17.5  |
| 7.6    | 14.9  | 15.1  | 13.4  | 14.9  | 14.5  | 16.9   | 18.4   | 9.8   |
| 49.0   | 34.5  | 32.1  | 38.2  | 45.4  | 41.7  | 49.2   | 69.6   | 57.5  |
| 10.8   | 9.0   | 7.6   | 14.1  | 8.9   | 4.9   | 15.9   | 14.4   | 3.6   |
| 5.2    | 4.7   | 6.3   | 5.1   | 4.7   | 4.8   | 5.3    | 2.5    | 3.0   |
| 3.1    | 7.2   | 1.7   | 2.3   | 7.1   | 0.7   | 2.3    | 1.7    | 3.6   |
| 1.9    | 3.2   | 2.4   | 1.2   | 2.1   | 5.9   | 1.5    | 5.1    | 2.6   |
| 0.8    | 0.3   | 0.8   | 0.2   | 1.7   | 0.8   | 1.6    | 4.5    | 1.4   |
| 1.7    | 3.2   | 2.2   | 2.7   | 1.6   | 1.8   | 3.8    | 1.9    | 2.0   |
| 1.1    | 0.3   | 0.4   | 0.5   | 0.8   | 3.5   | 1.0    | 0.8    | 0.4   |
| 1.1    | 4.9   | 2.9   | 1.4   | 1.9   | 1.4   | 1.0    | 1.3    | 0.8   |
| 2.1    | 2.8   | 1.6   | 4.5   | 9.0   | 3.0   | 9.7    | 2.3    | 6.0   |
| 0.1    | 0.1   | 0.4   | 0.6   | 0.2   | 2.2   | 3.2    | 0.2    | 0.5   |
| 2.2    | 0.8   | 0.4   | 3.9   | 7.3   | 7.8   | 3.1    | 7.6    | 8.0   |
| 5.0    | 6.9   | 1.9   | 1.7   | 2.5   | 2.1   | 2.1    | 3.4    | 3.9   |
| 6.7    | 12.6  | 8.5   | 6.9   | 8.2   | 7.3   | 8.6    | 12.1   | 11.6  |
| 2.5    | 2.9   | 3.3   | 3.4   | 3.2   | 3.6   | 0.5    | 1.1    | 1.9   |
| 6.8    | 1.8   | 3.4   | 2.5   | 1.8   | 2.5   | 0.7    | 3.9    | 3.8   |
| 124.8  | 74.5  | 60.0  | 80.7  | 70.7  | 60.8  | 95.4   | 90.6   | 69.0  |
| 3.8    | 5.9   | 2.5   | 3.0   | 5.9   | 7.6   | 3.5    | 13.0   | 3.3   |
| 1.0    | 3.4   | 1.4   | 5.1   | 3.1   | 0.3   | 1.7    | 0.6    | 0.8   |
| 8.2    | 6.7   | 6.5   | 4.3   | 1.4   | 1.1   | 2.7    | 1.4    | 3.3   |
| 0.3    | 0.4   | 1.3   | 3.8   | 1.1   | 4.2   | 5.3    | 0.8    | 0.2   |
| 0.6    | 0.2   | 0.5   | 1.5   | 2.3   | 2.2   | 0.9    | 0.4    | 3.8   |
| 1.9    | 1.2   | 4.0   | 1.0   | 1.0   | 1.1   | 7.9    | 2.0    | 1.7   |
| 6.7    | 1.1   | 1.4   | 4.8   | 6.4   | 3.4   | 11.4   | 13.0   | 8.3   |
| 1023.5 | 679.0 | 797.1 | 773.0 | 910.3 | 753.5 | 1104.1 | 1139.9 | 723.0 |
| 129.4  | 91.9  | 102.5 | 124.1 | 114.4 | 141.7 | 169.8  | 220.5  | 149.1 |
| 8.3    | 4.8   | 7.2   | 5.2   | 1.4   | 4.4   | 2.3    | 8.7    | 2.3   |
| 6.8    | 5.3   | 6.5   | 4.1   | 4.2   | 5.6   | 11.7   | 5.8    | 11.8  |
| 0.9    | 3.1   | 0.8   | 1.1   | 1.2   | 0.9   | 2.9    | 8.4    | 6.5   |
| 6.4    | 4.6   | 4.9   | 4.2   | 1.0   | 3.1   | 3.0    | 7.3    | 3.6   |
| 1.7    | 2.9   | 3.4   | 3.4   | 6.0   | 2.2   | 9.7    | 3.9    | 5.4   |
| 1.2    | 1.3   | 0.5   | 0.6   | 0.6   | 2.0   | 1.7    | 1.0    | 0.5   |
| 3.8    | 1.6   | 2.7   | 3.1   | 3.3   | 4.7   | 8.5    | 4.3    | 4.9   |
| 5.2    | 8.7   | 3.7   | 7.2   | 5.3   | 5.1   | 5.3    | 8.0    | 6.7   |
| 9.3    | 7.5   | 3.8   | 5.1   | 7.9   | 0.3   | 6.3    | 10.2   | 4.9   |
| 3.0    | 1.2   | 6.8   | 4.6   | 10.4  | 1.0   | 5.7    | 4.2    | 5.2   |
| 0.8    | 0.5   | 0.1   | 0.3   | 0.7   | 0.5   | 0.3    | 0.2    | 0.6   |
| 2.0    | 8.1   | 3.1   | 2.7   | 5.5   | 6.0   | 0.6    | 0.8    | 5.8   |
| 1.9    | 0.5   | 0.8   | 1.4   | 0.3   | 0.7   | 0.4    | 0.6    | 0.9   |
| 2.3    | 6.3   | 6.9   | 5.4   | 2.3   | 1.6   | 7.2    | 11.8   | 5.1   |
| 3.5    | 0.4   | 4.6   | 2.3   | 2.8   | 1.6   | 1.6    | 5.2    | 3.5   |
| 8.9    | 0.5   | 1.4   | 0.8   | 5.9   | 15.9  | 14.5   | 14.5   | 9.9   |

|       |       |       |       |       |       |       |       |       |
|-------|-------|-------|-------|-------|-------|-------|-------|-------|
| 0.9   | 0.9   | 1.1   | 0.9   | 1.1   | 1.0   | 0.6   | 1.2   | 0.8   |
| 1.0   | 2.9   | 1.0   | 2.8   | 5.9   | 3.8   | 0.9   | 7.1   | 4.0   |
| 1.4   | 2.0   | 0.2   | 0.6   | 0.4   | 0.0   | 0.2   | 1.1   | 0.5   |
| 16.7  | 14.6  | 10.8  | 11.9  | 14.7  | 6.2   | 19.9  | 18.2  | 10.6  |
| 13.3  | 10.7  | 8.1   | 9.2   | 1.6   | 5.7   | 12.7  | 7.2   | 9.5   |
| 16.7  | 14.1  | 14.3  | 15.6  | 12.9  | 13.5  | 12.2  | 14.2  | 12.5  |
| 0.5   | 1.2   | 0.3   | 0.6   | 0.7   | 0.5   | 0.2   | 0.3   | 1.1   |
| 0.2   | 3.0   | 0.6   | 0.2   | 0.5   | 4.3   | 4.7   | 2.2   | 1.1   |
| 411.5 | 249.5 | 377.2 | 326.3 | 336.3 | 400.4 | 413.5 | 471.7 | 361.6 |
| 3.6   | 3.9   | 2.8   | 1.7   | 3.2   | 5.8   | 3.1   | 4.7   | 0.3   |
| 701.4 | 335.9 | 392.0 | 436.2 | 406.7 | 425.4 | 537.7 | 551.4 | 523.1 |
| 3.2   | 6.5   | 0.5   | 0.9   | 5.2   | 1.7   | 5.1   | 3.4   | 2.8   |
| 0.8   | 1.6   | 2.4   | 1.3   | 1.0   | 1.1   | 1.3   | 1.7   | 1.4   |
| 3.4   | 1.1   | 2.6   | 1.1   | 5.6   | 2.6   | 2.4   | 1.4   | 3.2   |
| 1.6   | 0.5   | 1.0   | 2.9   | 3.3   | 1.9   | 2.1   | 1.0   | 0.7   |
| 9.8   | 6.8   | 5.1   | 4.0   | 4.3   | 4.6   | 1.8   | 6.4   | 4.4   |
| 4.7   | 5.4   | 2.5   | 4.5   | 8.6   | 8.3   | 6.9   | 8.0   | 6.0   |
| 6.6   | 7.1   | 6.4   | 0.4   | 6.0   | 0.6   | 1.2   | 6.4   | 2.4   |
| 0.3   | 0.1   | 0.1   | 0.3   | 0.2   | 0.3   | 0.1   | 1.5   | 1.8   |
| 11.7  | 9.4   | 11.8  | 10.9  | 11.9  | 13.8  | 9.5   | 14.4  | 8.9   |
| 2.7   | 5.7   | 2.7   | 2.0   | 1.4   | 6.8   | 1.1   | 1.9   | 7.2   |
| 1.5   | 0.6   | 2.9   | 0.7   | 0.9   | 0.7   | 0.4   | 1.3   | 0.5   |
| 3.4   | 5.9   | 0.6   | 3.7   | 17.0  | 9.1   | 6.1   | 2.1   | 2.3   |
| 4.3   | 8.5   | 2.6   | 1.2   | 4.8   | 12.9  | 2.1   | 19.9  | 6.0   |
| 5.0   | 3.4   | 3.8   | 3.2   | 5.2   | 3.2   | 7.4   | 5.9   | 2.9   |
| 0.6   | 0.3   | 1.9   | 0.8   | 3.0   | 3.1   | 0.4   | 0.7   | 0.3   |
| 3.3   | 7.9   | 7.6   | 9.2   | 1.3   | 4.9   | 1.8   | 4.6   | 1.6   |
| 8.2   | 2.8   | 6.3   | 1.4   | 1.2   | 1.1   | 1.2   | 11.3  | 9.1   |
| 1.6   | 4.4   | 10.3  | 2.1   | 5.8   | 4.6   | 3.8   | 8.1   | 1.0   |
| 1.2   | 0.6   | 0.7   | 0.9   | 0.9   | 0.9   | 0.8   | 2.1   | 2.8   |
| 0.6   | 0.7   | 4.4   | 5.1   | 4.8   | 6.4   | 9.4   | 10.1  | 0.8   |
| 1.1   | 1.3   | 0.6   | 0.5   | 0.7   | 0.9   | 0.7   | 4.8   | 1.1   |
| 19.9  | 14.9  | 15.3  | 14.3  | 13.4  | 14.6  | 24.2  | 16.3  | 17.4  |
| 43.7  | 26.4  | 30.4  | 25.6  | 30.4  | 22.0  | 37.0  | 29.2  | 27.1  |
| 1.1   | 7.3   | 1.0   | 5.5   | 1.1   | 2.8   | 2.1   | 0.9   | 2.6   |
| 26.3  | 11.4  | 11.9  | 18.8  | 19.0  | 18.1  | 17.3  | 26.1  | 13.8  |
| 0.7   | 9.6   | 1.8   | 1.0   | 0.8   | 1.5   | 3.2   | 6.3   | 0.8   |
| 0.7   | 0.2   | 0.4   | 0.2   | 0.1   | 0.8   | 3.2   | 0.9   | 0.8   |
| 1.2   | 0.8   | 6.4   | 1.5   | 9.1   | 5.1   | 1.3   | 1.9   | 8.9   |
| 3.7   | 0.2   | 0.5   | 2.6   | 2.9   | 1.3   | 0.4   | 0.5   | 3.0   |
| 0.4   | 1.0   | 0.6   | 0.6   | 1.3   | 0.5   | 1.9   | 2.3   | 1.6   |
| 4.6   | 1.8   | 1.6   | 5.5   | 8.9   | 9.2   | 1.6   | 2.3   | 0.6   |
| 436.1 | 234.1 | 285.7 | 293.2 | 250.9 | 363.1 | 324.5 | 502.6 | 240.6 |
| 165.1 | 105.7 | 91.1  | 99.6  | 100.8 | 99.7  | 128.3 | 162.9 | 119.6 |
| 33.6  | 15.3  | 21.8  | 19.0  | 22.5  | 20.1  | 32.0  | 58.0  | 24.5  |
| 3.4   | 3.4   | 0.9   | 3.0   | 1.6   | 7.4   | 1.0   | 9.3   | 0.8   |
| 2.9   | 7.2   | 4.7   | 2.8   | 2.9   | 0.5   | 2.4   | 2.9   | 8.9   |
| 2.5   | 4.6   | 6.4   | 12.3  | 9.8   | 9.2   | 2.7   | 7.0   | 5.0   |
| 6.3   | 2.7   | 3.2   | 5.5   | 4.7   | 6.7   | 7.4   | 6.9   | 2.9   |
| 0.7   | 2.8   | 4.5   | 0.1   | 5.9   | 5.3   | 5.2   | 0.9   | 0.8   |
| 0.3   | 0.4   | 0.4   | 0.5   | 0.5   | 0.3   | 0.4   | 0.9   | 0.8   |
| 36.6  | 12.8  | 22.2  | 24.8  | 25.9  | 32.9  | 32.2  | 53.1  | 36.5  |
| 217.0 | 102.2 | 123.3 | 134.3 | 137.0 | 136.2 | 206.7 | 227.7 | 155.2 |

|        |        |        |        |        |        |        |        |        |
|--------|--------|--------|--------|--------|--------|--------|--------|--------|
| 58.3   | 34.3   | 43.2   | 42.2   | 43.6   | 39.3   | 66.7   | 86.7   | 48.7   |
| 15.1   | 8.4    | 8.8    | 13.7   | 6.8    | 7.0    | 13.8   | 20.7   | 5.9    |
| 37.9   | 29.1   | 34.6   | 41.4   | 44.7   | 29.2   | 50.7   | 43.0   | 35.8   |
| 24.1   | 5.9    | 15.4   | 23.0   | 1.8    | 7.0    | 26.2   | 31.3   | 12.9   |
| 128.8  | 71.1   | 82.0   | 85.8   | 88.7   | 84.6   | 127.1  | 127.1  | 58.6   |
| 7.1    | 2.9    | 3.5    | 0.6    | 4.5    | 3.5    | 3.6    | 7.5    | 4.5    |
| 16.0   | 7.8    | 16.0   | 13.7   | 8.3    | 16.1   | 14.8   | 13.6   | 10.2   |
| 1305.1 | 1200.7 | 1197.6 | 1294.5 | 1224.0 | 1198.9 | 1344.5 | 1632.1 | 851.6  |
| 5.4    | 4.3    | 2.8    | 6.8    | 5.7    | 6.6    | 5.6    | 8.9    | 5.4    |
| 20.4   | 10.4   | 10.6   | 10.3   | 13.7   | 9.5    | 12.2   | 12.1   | 7.0    |
| 124.2  | 125.9  | 101.0  | 141.7  | 167.2  | 130.5  | 232.3  | 251.4  | 170.7  |
| 8.7    | 2.4    | 4.9    | 1.0    | 3.5    | 4.9    | 5.1    | 9.0    | 3.9    |
| 135.6  | 114.7  | 132.1  | 115.2  | 134.8  | 115.5  | 168.4  | 174.3  | 138.9  |
| 432.6  | 263.9  | 284.6  | 331.4  | 317.7  | 302.6  | 352.7  | 467.3  | 343.6  |
| 187.4  | 175.8  | 215.8  | 219.5  | 229.9  | 208.4  | 301.1  | 291.3  | 252.9  |
| 2.6    | 0.7    | 2.3    | 3.0    | 1.8    | 2.1    | 1.5    | 2.9    | 10.6   |
| 17.6   | 18.2   | 13.5   | 11.2   | 13.8   | 15.1   | 25.0   | 25.4   | 21.3   |
| 65.2   | 54.0   | 43.4   | 53.4   | 64.1   | 56.7   | 67.6   | 93.3   | 55.1   |
| 34.0   | 25.5   | 33.0   | 32.0   | 28.5   | 31.6   | 39.4   | 45.5   | 31.8   |
| 6.2    | 2.8    | 9.9    | 9.2    | 9.0    | 9.3    | 11.3   | 21.4   | 14.6   |
| 22.8   | 8.4    | 17.2   | 13.5   | 12.5   | 15.7   | 17.6   | 24.3   | 15.0   |
| 40.0   | 34.8   | 30.8   | 30.0   | 38.7   | 25.4   | 47.4   | 39.3   | 45.7   |
| 4.3    | 2.1    | 5.6    | 4.2    | 6.5    | 3.6    | 5.1    | 4.9    | 3.6    |
| 1.0    | 1.2    | 7.4    | 3.7    | 4.8    | 0.4    | 1.1    | 2.9    | 0.6    |
| 0.8    | 1.6    | 0.8    | 4.7    | 8.7    | 0.7    | 4.0    | 4.0    | 1.6    |
| 1601.3 | 1098.6 | 1249.6 | 1205.9 | 1260.5 | 1314.6 | 1679.6 | 1947.8 | 1190.6 |
| 14.8   | 13.9   | 11.1   | 16.7   | 12.2   | 12.4   | 16.6   | 17.8   | 15.9   |
| 11.3   | 20.4   | 18.4   | 3.5    | 9.3    | 15.2   | 40.1   | 33.3   | 30.3   |
| 10.0   | 15.2   | 9.6    | 15.7   | 14.5   | 5.1    | 13.8   | 22.1   | 7.9    |
| 332.2  | 253.7  | 247.8  | 290.2  | 286.7  | 233.1  | 414.7  | 403.8  | 316.7  |
| 10.5   | 7.0    | 6.8    | 8.4    | 12.0   | 14.0   | 7.9    | 6.9    | 12.4   |
| 602.3  | 460.4  | 593.3  | 567.8  | 605.3  | 634.2  | 684.3  | 774.1  | 529.0  |
| 11.4   | 7.6    | 13.1   | 8.9    | 12.5   | 17.4   | 12.9   | 22.0   | 7.6    |
| 40.4   | 26.2   | 35.1   | 31.6   | 35.9   | 30.6   | 47.3   | 41.4   | 24.0   |
| 6.9    | 4.0    | 3.0    | 4.4    | 0.4    | 7.2    | 4.8    | 7.7    | 3.6    |
| 5.6    | 0.4    | 0.9    | 0.9    | 0.6    | 1.1    | 1.1    | 1.0    | 7.3    |
| 6.9    | 1.8    | 2.0    | 5.8    | 1.5    | 4.4    | 1.5    | 1.0    | 7.7    |
| 0.2    | 0.1    | 0.5    | 0.3    | 0.3    | 0.2    | 0.6    | 0.9    | 0.2    |
| 70.3   | 31.4   | 42.8   | 44.8   | 42.9   | 48.1   | 69.1   | 55.8   | 60.6   |
| 72.1   | 45.2   | 51.7   | 55.6   | 56.6   | 71.6   | 75.9   | 80.0   | 36.5   |
| 11.4   | 13.0   | 8.4    | 3.8    | 10.8   | 8.3    | 2.0    | 8.1    | 12.3   |
| 11.1   | 1.2    | 0.7    | 1.2    | 1.5    | 0.4    | 9.5    | 6.4    | 4.1    |
| 4.1    | 5.8    | 4.2    | 7.9    | 5.3    | 6.1    | 3.7    | 5.2    | 9.1    |
| 4.2    | 2.8    | 0.7    | 7.4    | 0.8    | 5.2    | 0.9    | 0.3    | 0.5    |
| 0.5    | 2.5    | 2.8    | 3.2    | 4.5    | 3.8    | 5.2    | 2.3    | 2.3    |
| 170.1  | 99.9   | 114.7  | 111.0  | 119.3  | 126.6  | 157.1  | 207.6  | 138.5  |
| 22.5   | 32.1   | 40.4   | 31.4   | 41.1   | 41.3   | 44.2   | 54.8   | 38.7   |
| 1.7    | 0.9    | 1.3    | 3.0    | 3.3    | 1.9    | 1.0    | 0.9    | 2.2    |
| 1.1    | 0.2    | 2.6    | 0.6    | 0.8    | 1.1    | 2.4    | 0.7    | 4.2    |
| 12.0   | 6.1    | 5.6    | 4.8    | 10.2   | 7.3    | 11.8   | 7.8    | 11.7   |
| 15.5   | 16.3   | 13.8   | 20.0   | 20.4   | 14.5   | 25.8   | 30.7   | 17.3   |
| 6.7    | 5.5    | 4.5    | 8.1    | 4.2    | 4.3    | 6.4    | 8.1    | 4.8    |
| 59.6   | 40.6   | 38.4   | 36.7   | 40.4   | 41.3   | 62.1   | 64.8   | 50.7   |

|       |       |       |       |       |       |       |       |       |
|-------|-------|-------|-------|-------|-------|-------|-------|-------|
| 12.9  | 8.2   | 11.3  | 5.8   | 12.6  | 10.9  | 14.9  | 14.1  | 10.0  |
| 16.8  | 10.3  | 20.5  | 17.7  | 15.2  | 14.3  | 28.3  | 23.3  | 8.9   |
| 544.0 | 307.8 | 388.3 | 355.4 | 416.6 | 402.4 | 478.7 | 560.5 | 455.1 |
| 3.3   | 4.0   | 6.1   | 6.5   | 5.8   | 5.5   | 5.5   | 6.9   | 4.9   |
| 36.6  | 14.6  | 22.1  | 17.4  | 22.7  | 17.7  | 25.4  | 45.5  | 27.5  |
| 16.5  | 9.5   | 8.1   | 12.6  | 6.3   | 11.8  | 17.8  | 13.2  | 11.4  |
| 4.8   | 1.0   | 3.6   | 1.6   | 4.1   | 1.2   | 12.1  | 9.6   | 2.7   |
| 3.9   | 9.6   | 9.5   | 8.2   | 7.5   | 7.1   | 5.6   | 8.5   | 9.0   |
| 7.4   | 0.6   | 1.2   | 1.1   | 2.9   | 1.1   | 1.3   | 0.8   | 2.7   |
| 8.4   | 0.7   | 3.1   | 0.4   | 2.2   | 4.1   | 8.1   | 5.3   | 3.4   |
| 19.8  | 7.3   | 8.5   | 12.5  | 7.5   | 18.2  | 13.5  | 21.4  | 20.0  |
| 25.7  | 15.6  | 19.3  | 16.0  | 20.0  | 18.1  | 29.3  | 27.8  | 13.8  |
| 15.9  | 7.4   | 3.0   | 15.9  | 13.3  | 5.6   | 7.5   | 12.0  | 17.6  |
| 3.7   | 2.8   | 2.2   | 1.2   | 1.5   | 4.0   | 2.9   | 8.1   | 5.0   |
| 113.0 | 94.7  | 107.9 | 93.8  | 105.0 | 90.3  | 114.7 | 162.8 | 90.4  |
| 50.1  | 24.7  | 34.0  | 38.8  | 32.3  | 38.6  | 53.3  | 68.9  | 39.9  |
| 44.2  | 53.7  | 42.2  | 42.0  | 42.0  | 35.2  | 70.2  | 54.1  | 60.1  |
| 46.7  | 17.8  | 20.3  | 22.8  | 25.4  | 28.2  | 35.7  | 41.4  | 24.3  |
| 41.3  | 22.4  | 22.7  | 33.1  | 27.8  | 32.2  | 28.0  | 33.9  | 25.6  |
| 43.6  | 21.9  | 34.4  | 29.8  | 31.3  | 40.7  | 59.0  | 73.5  | 39.5  |
| 4.6   | 5.6   | 4.1   | 5.0   | 1.3   | 3.5   | 5.9   | 6.7   | 5.6   |
| 1.8   | 5.2   | 2.2   | 1.6   | 1.2   | 2.2   | 2.0   | 4.8   | 2.4   |
| 7.9   | 6.6   | 4.3   | 4.3   | 11.1  | 5.2   | 10.4  | 10.1  | 1.8   |
| 5.1   | 0.6   | 8.1   | 4.5   | 6.3   | 5.4   | 7.4   | 8.5   | 5.3   |
| 84.0  | 62.9  | 57.2  | 62.7  | 75.4  | 63.7  | 92.1  | 112.6 | 83.1  |
| 9.7   | 8.7   | 15.7  | 10.6  | 2.2   | 14.8  | 6.8   | 8.8   | 1.9   |
| 9.5   | 10.7  | 8.1   | 9.7   | 11.6  | 9.9   | 13.1  | 28.3  | 11.8  |
| 3.3   | 3.6   | 8.0   | 7.2   | 9.4   | 9.0   | 8.9   | 7.6   | 3.4   |
| 10.5  | 8.3   | 6.3   | 2.4   | 6.9   | 6.1   | 8.9   | 8.4   | 10.4  |
| 0.9   | 1.2   | 1.3   | 1.2   | 0.6   | 4.2   | 0.6   | 0.6   | 0.6   |
| 5.0   | 2.9   | 0.7   | 4.3   | 0.8   | 5.8   | 0.8   | 2.4   | 2.8   |
| 65.5  | 190.9 | 159.0 | 228.4 | 247.6 | 134.9 | 268.1 | 212.6 | 157.5 |
| 103.0 | 69.5  | 70.7  | 79.1  | 86.8  | 90.2  | 130.6 | 165.1 | 123.9 |
| 63.5  | 31.1  | 46.8  | 42.8  | 40.1  | 50.8  | 59.9  | 50.2  | 30.8  |
| 1.0   | 2.0   | 1.0   | 2.7   | 0.5   | 0.5   | 1.1   | 11.5  | 5.6   |
| 4.7   | 3.5   | 3.4   | 2.2   | 2.6   | 6.4   | 2.1   | 1.4   | 1.0   |
| 0.9   | 0.3   | 0.5   | 0.6   | 0.6   | 0.4   | 3.0   | 1.1   | 0.6   |
| 23.7  | 27.4  | 29.4  | 27.1  | 21.1  | 20.4  | 21.7  | 40.3  | 20.9  |
| 0.5   | 1.0   | 0.5   | 0.6   | 0.3   | 0.6   | 0.3   | 0.5   | 0.5   |
| 116.7 | 64.4  | 76.8  | 85.0  | 103.1 | 101.5 | 141.8 | 174.4 | 112.1 |
| 39.4  | 34.3  | 39.2  | 36.8  | 37.5  | 38.1  | 57.7  | 53.7  | 38.7  |
| 0.5   | 0.4   | 0.3   | 0.6   | 0.7   | 0.5   | 1.0   | 0.7   | 0.3   |
| 0.7   | 3.8   | 0.7   | 2.8   | 3.9   | 4.5   | 5.6   | 10.4  | 3.8   |
| 6.6   | 18.7  | 13.0  | 19.5  | 16.7  | 14.4  | 22.8  | 22.1  | 15.9  |
| 3.0   | 3.1   | 2.8   | 3.8   | 5.7   | 2.5   | 4.4   | 4.6   | 4.3   |
| 6.4   | 4.2   | 4.8   | 6.5   | 0.8   | 0.6   | 4.7   | 7.0   | 5.7   |
| 2.0   | 9.8   | 1.7   | 3.5   | 5.2   | 12.0  | 10.5  | 2.2   | 6.5   |
| 1.3   | 1.1   | 0.9   | 0.7   | 0.3   | 0.9   | 0.8   | 0.8   | 0.7   |
| 53.1  | 38.4  | 44.7  | 37.7  | 48.8  | 47.6  | 61.1  | 39.1  | 41.0  |
| 0.3   | 2.2   | 3.3   | 3.4   | 1.2   | 1.6   | 1.2   | 0.3   | 2.6   |
| 5.4   | 6.9   | 4.8   | 5.0   | 7.5   | 2.0   | 8.6   | 13.2  | 8.1   |
| 10.1  | 19.1  | 16.8  | 13.6  | 17.4  | 15.4  | 26.8  | 37.7  | 22.3  |
| 2.8   | 3.5   | 0.2   | 2.2   | 2.2   | 0.4   | 0.5   | 0.1   | 0.7   |

|       |      |       |       |       |       |       |       |       |
|-------|------|-------|-------|-------|-------|-------|-------|-------|
| 43.0  | 17.4 | 15.8  | 19.3  | 20.3  | 15.8  | 24.0  | 28.2  | 18.1  |
| 10.2  | 22.4 | 24.6  | 32.0  | 31.6  | 28.2  | 31.9  | 32.8  | 33.6  |
| 8.4   | 7.2  | 8.8   | 1.8   | 3.0   | 2.7   | 2.6   | 7.0   | 4.4   |
| 1.9   | 4.4  | 10.1  | 0.7   | 2.1   | 2.3   | 5.5   | 5.3   | 4.8   |
| 43.6  | 51.2 | 51.9  | 59.3  | 59.4  | 57.3  | 74.9  | 88.0  | 69.8  |
| 95.3  | 74.7 | 73.2  | 93.9  | 75.5  | 99.0  | 110.8 | 150.9 | 89.2  |
| 26.5  | 18.4 | 21.4  | 16.0  | 17.4  | 20.4  | 20.1  | 29.1  | 11.4  |
| 4.8   | 2.5  | 4.6   | 2.0   | 7.3   | 9.6   | 2.7   | 6.1   | 3.5   |
| 25.4  | 16.7 | 6.9   | 15.9  | 25.0  | 30.2  | 30.2  | 8.4   | 16.0  |
| 31.3  | 12.4 | 21.5  | 22.1  | 27.4  | 17.4  | 29.4  | 28.7  | 21.8  |
| 6.2   | 7.7  | 2.4   | 5.1   | 16.3  | 10.8  | 15.7  | 6.3   | 15.7  |
| 11.1  | 10.1 | 8.5   | 4.4   | 8.9   | 6.1   | 10.7  | 11.2  | 10.5  |
| 8.0   | 4.7  | 7.6   | 6.5   | 9.5   | 9.9   | 7.6   | 2.7   | 6.5   |
| 0.5   | 0.2  | 0.2   | 1.4   | 0.3   | 0.2   | 1.0   | 4.5   | 0.4   |
| 46.6  | 33.1 | 34.5  | 18.8  | 31.3  | 38.5  | 50.8  | 46.4  | 40.6  |
| 0.1   | 0.4  | 2.4   | 0.5   | 2.9   | 0.2   | 2.1   | 3.5   | 1.7   |
| 114.1 | 78.4 | 116.0 | 96.5  | 121.4 | 104.3 | 124.5 | 165.2 | 111.3 |
| 116.1 | 52.8 | 60.2  | 64.0  | 59.2  | 63.0  | 82.6  | 93.4  | 72.3  |
| 7.8   | 0.6  | 0.9   | 6.4   | 10.1  | 5.6   | 10.0  | 11.3  | 0.9   |
| 2.4   | 7.5  | 13.7  | 6.4   | 10.6  | 3.2   | 8.2   | 6.4   | 6.5   |
| 3.6   | 3.9  | 6.7   | 3.5   | 4.7   | 9.7   | 0.8   | 3.1   | 6.1   |
| 38.4  | 22.3 | 25.1  | 39.9  | 40.0  | 33.8  | 27.8  | 27.7  | 32.3  |
| 37.8  | 30.4 | 36.1  | 39.2  | 30.1  | 45.3  | 45.9  | 63.1  | 42.8  |
| 2.2   | 7.7  | 4.7   | 8.7   | 2.8   | 1.5   | 2.3   | 14.0  | 2.1   |
| 1.3   | 0.4  | 0.3   | 1.6   | 1.2   | 0.6   | 0.4   | 0.6   | 0.4   |
| 16.9  | 17.5 | 8.4   | 10.4  | 17.8  | 1.9   | 15.3  | 12.6  | 12.9  |
| 2.1   | 6.1  | 5.9   | 4.0   | 14.1  | 9.9   | 5.2   | 8.3   | 7.0   |
| 124.5 | 85.7 | 106.3 | 123.0 | 115.7 | 113.1 | 175.5 | 146.7 | 113.1 |
| 0.2   | 1.0  | 0.2   | 0.4   | 4.0   | 0.4   | 1.2   | 0.7   | 1.5   |
| 11.0  | 2.8  | 5.1   | 5.8   | 4.0   | 1.5   | 2.5   | 1.7   | 7.4   |
| 1.8   | 0.9  | 1.6   | 2.2   | 2.3   | 1.5   | 1.7   | 1.7   | 4.3   |
| 18.4  | 2.0  | 17.0  | 13.8  | 13.1  | 15.2  | 10.1  | 16.5  | 16.1  |
| 1.6   | 6.9  | 1.2   | 0.8   | 4.4   | 4.9   | 1.5   | 1.9   | 1.7   |
| 1.4   | 4.9  | 1.4   | 1.3   | 0.5   | 0.5   | 1.1   | 1.9   | 0.9   |
| 2.7   | 1.1  | 2.8   | 0.6   | 3.5   | 0.9   | 1.4   | 0.3   | 0.2   |
| 12.4  | 6.1  | 5.4   | 10.5  | 6.0   | 6.4   | 4.9   | 14.3  | 4.9   |
| 5.9   | 0.9  | 0.8   | 0.5   | 0.9   | 0.4   | 1.4   | 1.3   | 2.5   |
| 26.9  | 18.0 | 28.1  | 22.6  | 17.0  | 25.3  | 44.6  | 45.8  | 36.9  |
| 11.3  | 5.0  | 12.9  | 6.0   | 6.0   | 15.3  | 16.6  | 16.1  | 12.9  |
| 1.5   | 4.8  | 6.6   | 1.1   | 1.9   | 1.9   | 2.7   | 0.7   | 5.5   |
| 70.4  | 52.5 | 48.1  | 59.9  | 55.2  | 58.6  | 72.9  | 61.9  | 53.4  |
| 1.3   | 9.6  | 8.0   | 9.0   | 5.8   | 6.5   | 2.7   | 4.6   | 5.4   |
| 1.0   | 2.5  | 7.1   | 4.5   | 1.9   | 2.2   | 4.4   | 2.6   | 2.2   |
| 5.1   | 5.5  | 4.1   | 6.1   | 4.1   | 3.7   | 6.0   | 6.3   | 6.5   |
| 0.2   | 1.7  | 0.3   | 0.5   | 0.3   | 0.3   | 0.5   | 0.4   | 0.6   |
| 12.6  | 11.0 | 5.5   | 1.8   | 6.9   | 5.5   | 6.9   | 9.6   | 7.1   |
| 7.7   | 4.0  | 6.3   | 7.1   | 5.3   | 4.1   | 7.6   | 7.6   | 6.2   |
| 0.2   | 1.9  | 0.2   | 1.1   | 0.6   | 1.1   | 0.5   | 0.7   | 0.6   |
| 115.1 | 62.0 | 89.9  | 76.5  | 90.4  | 86.0  | 118.2 | 136.7 | 98.3  |
| 2.9   | 3.1  | 4.5   | 1.3   | 3.8   | 1.3   | 4.0   | 2.4   | 2.8   |
| 9.5   | 6.3  | 2.5   | 2.3   | 8.1   | 2.8   | 9.2   | 7.2   | 2.6   |
| 1.6   | 0.9  | 0.6   | 1.0   | 0.9   | 0.7   | 1.3   | 0.7   | 0.5   |
| 71.3  | 48.9 | 56.8  | 46.9  | 58.2  | 47.0  | 73.1  | 77.4  | 60.1  |

|      |      |      |      |      |      |      |      |      |
|------|------|------|------|------|------|------|------|------|
| 1.4  | 7.8  | 1.5  | 1.7  | 0.9  | 1.5  | 1.9  | 1.1  | 1.8  |
| 79.3 | 50.8 | 45.7 | 44.8 | 60.0 | 56.3 | 89.4 | 93.8 | 54.8 |
| 6.1  | 9.5  | 7.3  | 5.4  | 7.8  | 11.4 | 11.2 | 11.9 | 4.6  |
| 4.5  | 7.0  | 8.2  | 4.7  | 3.6  | 6.8  | 10.3 | 12.6 | 9.1  |
| 3.3  | 9.4  | 4.7  | 6.0  | 11.0 | 6.6  | 3.7  | 7.4  | 10.2 |
| 3.8  | 10.2 | 1.4  | 4.3  | 1.2  | 2.5  | 9.0  | 3.8  | 2.7  |
| 0.7  | 0.5  | 1.0  | 2.2  | 1.0  | 0.9  | 2.5  | 0.6  | 0.9  |
| 1.3  | 2.1  | 1.2  | 2.0  | 4.4  | 1.4  | 4.5  | 1.4  | 5.6  |
| 4.8  | 5.4  | 3.4  | 1.6  | 5.9  | 3.5  | 3.4  | 6.4  | 6.3  |
| 7.1  | 5.9  | 4.1  | 7.3  | 4.9  | 3.9  | 5.2  | 3.6  | 3.1  |
| 4.8  | 3.6  | 7.4  | 4.5  | 7.9  | 10.1 | 2.0  | 6.0  | 8.0  |
| 10.0 | 5.9  | 1.4  | 1.5  | 0.9  | 1.3  | 11.3 | 5.5  | 2.9  |
| 3.0  | 1.9  | 2.0  | 5.4  | 5.5  | 6.4  | 4.1  | 4.8  | 4.1  |
| 0.8  | 1.1  | 0.8  | 0.5  | 1.0  | 1.1  | 1.0  | 2.9  | 0.6  |
| 1.3  | 0.6  | 1.7  | 0.9  | 2.5  | 1.5  | 0.8  | 1.4  | 1.2  |
| 10.1 | 8.6  | 4.5  | 9.1  | 14.2 | 10.8 | 10.0 | 8.9  | 8.6  |
| 0.1  | 0.2  | 0.2  | 2.5  | 0.3  | 3.1  | 0.4  | 0.9  | 0.1  |
| 9.0  | 11.6 | 9.8  | 16.0 | 7.7  | 9.2  | 15.8 | 21.0 | 8.9  |
| 6.5  | 14.9 | 12.6 | 1.4  | 12.0 | 14.8 | 4.4  | 10.1 | 14.3 |
| 1.2  | 2.5  | 1.5  | 7.9  | 2.1  | 2.4  | 6.8  | 5.9  | 2.7  |
| 11.7 | 9.9  | 18.0 | 10.4 | 13.4 | 8.9  | 14.7 | 7.5  | 13.7 |
| 1.0  | 5.4  | 1.9  | 6.3  | 1.0  | 1.4  | 0.7  | 1.1  | 7.2  |
| 0.9  | 0.3  | 0.6  | 0.3  | 0.5  | 1.2  | 0.8  | 2.0  | 0.3  |
| 1.7  | 3.2  | 3.6  | 2.4  | 0.6  | 1.5  | 0.3  | 7.3  | 2.7  |
| 2.8  | 4.0  | 12.3 | 12.8 | 0.7  | 6.1  | 8.2  | 6.7  | 7.4  |
| 9.9  | 11.0 | 12.1 | 11.4 | 8.7  | 8.8  | 6.4  | 16.1 | 8.8  |
| 1.3  | 0.8  | 0.6  | 0.4  | 1.0  | 2.1  | 2.3  | 0.9  | 2.5  |
| 1.9  | 2.9  | 2.0  | 1.6  | 7.8  | 1.4  | 3.2  | 2.7  | 3.1  |
| 44.4 | 36.7 | 40.1 | 28.8 | 30.9 | 33.3 | 32.8 | 40.7 | 39.6 |
| 0.8  | 0.4  | 1.2  | 0.5  | 1.5  | 1.2  | 0.5  | 0.9  | 1.6  |
| 3.0  | 1.7  | 8.7  | 2.8  | 2.7  | 11.4 | 3.1  | 13.5 | 2.7  |
| 1.2  | 2.3  | 2.4  | 2.4  | 6.6  | 0.2  | 4.8  | 3.1  | 1.4  |
| 1.3  | 2.9  | 0.2  | 3.0  | 0.2  | 2.1  | 0.9  | 0.2  | 1.4  |
| 15.1 | 3.8  | 10.1 | 5.0  | 5.9  | 9.3  | 4.1  | 6.4  | 11.0 |
| 8.7  | 6.9  | 6.4  | 5.6  | 2.0  | 1.6  | 5.2  | 8.0  | 3.9  |
| 1.8  | 0.8  | 1.0  | 0.8  | 0.7  | 1.3  | 1.6  | 1.2  | 1.2  |
| 9.8  | 9.2  | 9.3  | 15.0 | 14.5 | 3.2  | 14.5 | 23.1 | 8.5  |
| 0.7  | 0.5  | 0.4  | 0.4  | 0.7  | 0.8  | 0.5  | 0.8  | 0.5  |
| 6.4  | 3.9  | 1.0  | 0.5  | 1.0  | 1.8  | 1.2  | 0.9  | 1.0  |
| 3.7  | 5.7  | 0.5  | 1.7  | 1.3  | 2.5  | 1.1  | 0.7  | 9.1  |
| 24.9 | 16.2 | 16.0 | 14.2 | 20.3 | 23.1 | 26.8 | 33.6 | 20.3 |
| 9.1  | 7.1  | 10.2 | 8.2  | 13.6 | 8.9  | 5.6  | 8.3  | 2.1  |
| 7.8  | 6.5  | 7.9  | 3.8  | 6.4  | 8.7  | 3.6  | 7.9  | 4.8  |
| 2.7  | 2.1  | 0.6  | 4.6  | 4.6  | 2.8  | 2.7  | 1.1  | 0.9  |
| 12.5 | 10.8 | 8.4  | 12.2 | 8.2  | 11.8 | 11.2 | 31.3 | 11.7 |
| 1.3  | 1.0  | 1.2  | 0.6  | 0.7  | 1.4  | 0.9  | 0.9  | 1.1  |
| 19.6 | 13.8 | 25.3 | 23.5 | 20.8 | 20.2 | 30.3 | 30.2 | 20.2 |
| 36.9 | 20.4 | 27.7 | 33.3 | 29.7 | 24.8 | 34.7 | 43.4 | 36.9 |
| 5.5  | 2.9  | 2.5  | 3.6  | 3.8  | 3.3  | 1.3  | 9.5  | 2.2  |
| 4.0  | 3.4  | 1.3  | 3.2  | 1.8  | 3.9  | 3.5  | 5.6  | 4.6  |
| 0.9  | 0.8  | 0.4  | 0.6  | 0.4  | 1.4  | 0.3  | 1.2  | 2.3  |
| 2.1  | 1.2  | 2.9  | 1.3  | 3.0  | 3.6  | 3.1  | 1.1  | 1.0  |
| 14.1 | 13.3 | 9.3  | 12.3 | 9.5  | 15.5 | 16.5 | 15.6 | 4.5  |

|       |      |      |      |      |      |      |       |      |
|-------|------|------|------|------|------|------|-------|------|
| 8.6   | 6.8  | 11.2 | 2.4  | 11.2 | 8.1  | 6.0  | 14.7  | 2.6  |
| 4.1   | 0.8  | 0.7  | 0.8  | 0.8  | 3.1  | 0.2  | 1.1   | 1.4  |
| 1.3   | 1.5  | 2.4  | 0.7  | 2.8  | 0.9  | 1.7  | 1.2   | 1.1  |
| 1.6   | 1.4  | 0.8  | 0.9  | 1.1  | 0.9  | 1.1  | 2.8   | 1.5  |
| 3.5   | 5.9  | 2.0  | 2.1  | 0.6  | 2.8  | 3.9  | 6.4   | 0.3  |
| 1.1   | 3.5  | 4.0  | 0.3  | 1.2  | 2.2  | 3.2  | 4.6   | 6.0  |
| 6.1   | 2.6  | 3.8  | 2.2  | 3.5  | 3.1  | 5.1  | 7.5   | 2.4  |
| 9.8   | 18.4 | 9.3  | 13.9 | 10.0 | 30.3 | 6.5  | 3.1   | 9.3  |
| 18.1  | 11.8 | 7.9  | 9.5  | 14.3 | 8.6  | 17.7 | 31.8  | 13.3 |
| 4.9   | 6.5  | 4.5  | 9.1  | 2.1  | 1.6  | 7.8  | 2.1   | 2.4  |
| 27.0  | 13.5 | 19.9 | 22.4 | 15.5 | 19.8 | 20.3 | 27.4  | 25.0 |
| 1.4   | 3.2  | 6.1  | 3.3  | 5.0  | 3.7  | 6.3  | 11.3  | 0.5  |
| 0.3   | 3.9  | 0.3  | 0.5  | 1.0  | 0.8  | 2.2  | 1.0   | 0.4  |
| 1.9   | 9.3  | 0.5  | 10.0 | 4.8  | 8.1  | 4.9  | 3.0   | 8.6  |
| 3.8   | 11.1 | 3.6  | 6.1  | 4.8  | 3.6  | 15.6 | 8.0   | 5.6  |
| 4.6   | 4.8  | 6.0  | 2.8  | 2.4  | 14.2 | 12.6 | 10.6  | 4.7  |
| 13.5  | 19.3 | 15.3 | 23.9 | 13.6 | 14.3 | 12.4 | 9.1   | 12.9 |
| 7.0   | 5.1  | 5.8  | 5.4  | 9.8  | 6.3  | 10.1 | 10.4  | 12.0 |
| 2.0   | 1.2  | 1.4  | 3.3  | 0.6  | 0.5  | 1.3  | 0.8   | 0.4  |
| 0.3   | 1.8  | 2.3  | 0.2  | 4.9  | 1.3  | 1.9  | 2.9   | 2.0  |
| 0.4   | 0.4  | 1.5  | 3.4  | 0.6  | 1.1  | 0.4  | 4.0   | 1.0  |
| 9.0   | 6.0  | 2.3  | 0.2  | 3.6  | 6.6  | 4.4  | 3.2   | 4.8  |
| 1.0   | 3.8  | 3.0  | 3.2  | 1.6  | 2.3  | 2.8  | 0.5   | 1.5  |
| 7.7   | 6.4  | 8.0  | 3.5  | 0.9  | 3.7  | 6.9  | 9.3   | 3.1  |
| 0.5   | 0.7  | 0.5  | 0.9  | 0.3  | 0.8  | 1.1  | 0.3   | 0.9  |
| 6.2   | 3.2  | 1.2  | 7.4  | 6.5  | 1.0  | 4.7  | 4.8   | 6.7  |
| 0.1   | 2.6  | 5.3  | 0.5  | 3.3  | 3.7  | 5.6  | 4.5   | 4.1  |
| 1.0   | 0.2  | 0.5  | 5.9  | 1.6  | 1.0  | 0.4  | 1.7   | 0.3  |
| 17.9  | 14.5 | 16.4 | 15.9 | 3.0  | 28.2 | 14.7 | 7.3   | 7.8  |
| 1.1   | 3.7  | 4.0  | 6.4  | 3.2  | 3.3  | 6.5  | 7.9   | 0.7  |
| 1.5   | 3.2  | 0.6  | 0.7  | 0.4  | 0.8  | 1.9  | 0.8   | 1.1  |
| 0.8   | 0.7  | 1.4  | 1.1  | 1.0  | 6.0  | 1.3  | 1.4   | 1.2  |
| 1.7   | 1.9  | 2.2  | 1.9  | 1.6  | 1.7  | 2.7  | 2.5   | 1.8  |
| 2.0   | 7.7  | 1.2  | 1.0  | 1.7  | 7.3  | 1.8  | 0.8   | 2.0  |
| 1.1   | 2.8  | 1.2  | 0.6  | 4.8  | 0.1  | 0.4  | 1.7   | 0.1  |
| 0.5   | 0.8  | 1.7  | 0.6  | 2.4  | 1.3  | 1.4  | 1.6   | 2.0  |
| 0.9   | 1.6  | 0.9  | 2.2  | 1.2  | 0.7  | 9.0  | 1.5   | 6.9  |
| 24.6  | 20.9 | 12.6 | 14.8 | 18.4 | 25.7 | 26.8 | 28.8  | 14.8 |
| 0.8   | 3.3  | 5.0  | 1.5  | 4.4  | 5.4  | 4.4  | 3.6   | 1.8  |
| 20.2  | 15.2 | 15.9 | 20.3 | 16.0 | 4.0  | 18.7 | 23.6  | 16.3 |
| 48.4  | 36.5 | 38.1 | 33.6 | 55.6 | 45.2 | 48.6 | 64.0  | 35.0 |
| 101.6 | 81.7 | 72.0 | 85.5 | 69.9 | 88.6 | 90.6 | 118.0 | 76.5 |
| 70.8  | 56.0 | 71.5 | 68.3 | 62.9 | 79.3 | 92.3 | 110.3 | 68.6 |
| 3.0   | 9.5  | 7.0  | 11.7 | 10.4 | 4.4  | 2.4  | 3.9   | 9.8  |
| 21.5  | 20.9 | 24.6 | 18.7 | 23.8 | 26.3 | 24.0 | 45.9  | 25.8 |
| 49.4  | 38.0 | 44.0 | 40.9 | 65.1 | 44.9 | 68.0 | 97.1  | 61.6 |
| 32.9  | 22.7 | 22.4 | 20.7 | 22.5 | 29.1 | 31.0 | 29.9  | 24.9 |
| 6.3   | 3.6  | 6.9  | 2.9  | 3.4  | 0.6  | 5.4  | 6.7   | 0.6  |
| 44.6  | 41.2 | 35.7 | 28.7 | 57.1 | 43.9 | 74.9 | 50.6  | 44.0 |
| 9.5   | 4.7  | 0.5  | 5.5  | 3.9  | 1.1  | 6.9  | 2.1   | 0.5  |
| 0.5   | 0.4  | 1.2  | 0.9  | 0.6  | 0.4  | 0.7  | 0.7   | 0.6  |
| 2.8   | 1.4  | 1.5  | 1.6  | 1.6  | 2.2  | 2.4  | 2.4   | 1.3  |
| 5.0   | 0.5  | 3.5  | 0.6  | 5.6  | 6.0  | 4.1  | 5.8   | 0.7  |



|       |       |       |       |       |       |       |       |       |
|-------|-------|-------|-------|-------|-------|-------|-------|-------|
| 7.2   | 4.8   | 6.6   | 6.7   | 8.3   | 8.7   | 6.4   | 11.8  | 9.1   |
| 2.9   | 5.3   | 4.1   | 0.8   | 2.7   | 2.7   | 4.9   | 5.3   | 0.7   |
| 40.4  | 28.6  | 26.6  | 27.3  | 41.9  | 44.3  | 46.7  | 54.3  | 47.9  |
| 10.2  | 11.4  | 4.5   | 13.6  | 9.5   | 4.2   | 12.1  | 13.8  | 4.7   |
| 2.2   | 0.5   | 4.3   | 3.8   | 0.4   | 3.5   | 5.4   | 3.1   | 2.0   |
| 74.0  | 48.8  | 53.1  | 55.8  | 62.1  | 44.6  | 71.8  | 77.3  | 64.5  |
| 5.1   | 2.6   | 5.6   | 4.5   | 4.8   | 4.3   | 6.1   | 5.4   | 5.2   |
| 25.7  | 11.9  | 15.0  | 16.4  | 14.9  | 14.1  | 26.3  | 28.8  | 21.0  |
| 2.2   | 1.5   | 3.8   | 2.4   | 3.1   | 3.9   | 2.8   | 9.3   | 3.3   |
| 6.9   | 7.2   | 7.8   | 6.0   | 8.6   | 12.2  | 10.7  | 9.6   | 6.6   |
| 0.3   | 1.2   | 0.3   | 0.3   | 3.1   | 0.1   | 2.2   | 1.6   | 3.3   |
| 1.7   | 0.3   | 2.4   | 1.3   | 1.6   | 0.2   | 2.6   | 0.7   | 0.4   |
| 8.2   | 4.1   | 7.7   | 4.6   | 9.0   | 7.4   | 8.4   | 7.3   | 12.7  |
| 152.6 | 108.0 | 109.5 | 118.9 | 121.7 | 113.9 | 142.8 | 168.6 | 108.9 |
| 57.5  | 45.7  | 55.1  | 52.1  | 49.6  | 33.8  | 68.7  | 76.9  | 47.5  |
| 205.4 | 157.9 | 151.0 | 165.0 | 187.7 | 164.0 | 236.9 | 253.2 | 152.0 |
| 4.4   | 4.5   | 3.3   | 1.2   | 1.8   | 1.1   | 2.7   | 4.6   | 2.7   |
| 13.3  | 13.7  | 10.9  | 11.7  | 9.8   | 12.6  | 15.0  | 15.9  | 10.2  |
| 65.8  | 35.2  | 40.0  | 58.1  | 46.8  | 60.0  | 59.0  | 72.4  | 49.7  |
| 49.4  | 32.1  | 37.6  | 32.3  | 49.0  | 38.3  | 42.3  | 48.3  | 30.2  |
| 8.8   | 6.8   | 6.6   | 11.9  | 4.6   | 10.7  | 4.0   | 13.5  | 3.3   |
| 16.8  | 11.4  | 11.6  | 9.5   | 12.9  | 8.6   | 11.2  | 18.3  | 17.5  |
| 19.3  | 28.3  | 16.1  | 22.7  | 17.4  | 18.1  | 22.8  | 26.5  | 30.5  |
| 59.7  | 25.8  | 31.6  | 35.8  | 32.7  | 28.7  | 45.4  | 48.7  | 36.5  |
| 1.0   | 1.9   | 1.7   | 2.9   | 2.1   | 0.3   | 1.0   | 0.7   | 2.0   |
| 4.9   | 2.3   | 2.7   | 2.9   | 9.5   | 2.6   | 18.3  | 9.0   | 2.4   |
| 56.1  | 51.1  | 69.4  | 53.5  | 69.6  | 70.8  | 83.8  | 70.1  | 66.3  |
| 2.6   | 3.7   | 2.0   | 1.2   | 3.4   | 1.4   | 1.9   | 1.5   | 0.7   |
| 78.4  | 44.0  | 48.4  | 58.1  | 54.1  | 72.0  | 69.9  | 105.0 | 66.3  |
| 61.6  | 32.9  | 36.1  | 38.5  | 42.9  | 32.1  | 50.5  | 63.8  | 34.9  |
| 1.2   | 0.5   | 0.3   | 0.6   | 0.2   | 0.5   | 0.6   | 1.1   | 0.4   |
| 3.3   | 2.3   | 1.9   | 1.7   | 2.0   | 4.1   | 4.5   | 10.0  | 0.9   |
| 0.6   | 0.5   | 1.8   | 0.8   | 0.5   | 0.1   | 0.4   | 0.4   | 0.4   |
| 3.9   | 0.5   | 4.4   | 4.4   | 1.8   | 0.6   | 0.7   | 2.4   | 0.6   |
| 29.4  | 21.2  | 19.1  | 16.4  | 26.9  | 27.1  | 32.6  | 35.7  | 33.2  |
| 9.7   | 4.2   | 5.0   | 5.2   | 11.2  | 4.4   | 2.0   | 11.3  | 12.1  |
| 1.8   | 1.1   | 1.9   | 2.9   | 6.1   | 2.2   | 2.8   | 11.0  | 2.9   |
| 6.7   | 7.7   | 5.9   | 7.0   | 2.8   | 8.0   | 7.9   | 10.5  | 9.1   |
| 0.9   | 0.9   | 0.6   | 1.1   | 1.1   | 3.0   | 4.5   | 3.9   | 5.9   |
| 14.0  | 17.3  | 12.2  | 12.2  | 11.6  | 14.9  | 21.7  | 16.9  | 18.7  |
| 2.7   | 2.2   | 7.6   | 7.1   | 11.6  | 7.5   | 10.5  | 6.6   | 3.4   |
| 13.6  | 8.0   | 13.0  | 11.2  | 5.2   | 11.3  | 3.3   | 13.6  | 10.7  |
| 1.3   | 0.7   | 5.5   | 1.8   | 3.0   | 3.7   | 0.3   | 1.3   | 0.9   |
| 9.5   | 8.0   | 8.2   | 2.3   | 6.0   | 5.5   | 7.7   | 12.9  | 8.9   |
| 71.8  | 34.0  | 48.9  | 49.5  | 56.6  | 55.7  | 70.2  | 103.8 | 59.8  |
| 5.1   | 5.3   | 5.8   | 8.9   | 3.4   | 2.9   | 4.3   | 8.1   | 2.5   |
| 162.7 | 102.8 | 116.7 | 122.7 | 116.0 | 108.7 | 130.2 | 145.1 | 110.9 |
| 5.3   | 5.9   | 1.5   | 0.8   | 4.0   | 1.7   | 10.3  | 12.5  | 4.5   |
| 76.9  | 61.1  | 73.1  | 68.2  | 76.8  | 64.0  | 86.0  | 90.9  | 63.0  |
| 42.0  | 27.5  | 16.7  | 28.5  | 40.1  | 34.3  | 47.9  | 33.8  | 31.8  |
| 18.3  | 10.9  | 35.5  | 21.9  | 21.9  | 26.9  | 27.6  | 25.3  | 11.4  |
| 3.4   | 0.8   | 1.7   | 2.5   | 0.8   | 0.9   | 0.7   | 4.3   | 2.2   |
| 504.7 | 260.2 | 347.0 | 335.4 | 395.7 | 406.0 | 504.1 | 624.4 | 371.0 |

|       |       |       |       |       |       |       |       |       |
|-------|-------|-------|-------|-------|-------|-------|-------|-------|
| 0.8   | 0.6   | 0.3   | 0.3   | 0.7   | 0.3   | 0.3   | 0.5   | 0.8   |
| 364.2 | 244.8 | 265.5 | 285.1 | 364.3 | 303.8 | 388.7 | 482.9 | 267.1 |
| 50.1  | 40.2  | 48.6  | 31.9  | 53.9  | 39.3  | 57.1  | 67.7  | 41.0  |
| 93.3  | 41.9  | 43.3  | 47.4  | 44.5  | 56.8  | 73.3  | 110.0 | 76.7  |
| 21.0  | 17.3  | 17.8  | 21.5  | 38.2  | 15.7  | 37.2  | 33.0  | 33.2  |
| 3.4   | 1.8   | 0.4   | 0.6   | 0.7   | 0.7   | 1.1   | 1.7   | 1.0   |
| 28.6  | 21.5  | 21.1  | 28.5  | 31.0  | 24.3  | 29.5  | 38.2  | 23.1  |
| 19.3  | 8.9   | 6.5   | 10.1  | 10.6  | 11.7  | 5.6   | 8.6   | 6.4   |
| 14.5  | 8.0   | 12.3  | 5.1   | 10.7  | 8.5   | 10.3  | 12.8  | 13.0  |
| 782.3 | 557.2 | 600.0 | 649.9 | 720.5 | 696.2 | 898.8 | 946.2 | 599.0 |
| 30.8  | 21.8  | 26.3  | 27.2  | 17.3  | 29.9  | 36.3  | 42.6  | 23.8  |
| 93.5  | 75.7  | 89.8  | 79.6  | 76.6  | 72.1  | 95.1  | 118.3 | 74.2  |
| 7.2   | 4.0   | 6.2   | 0.9   | 5.2   | 11.3  | 0.8   | 4.6   | 1.3   |
| 471.1 | 313.8 | 356.7 | 421.4 | 397.4 | 367.7 | 513.1 | 532.6 | 385.0 |
| 82.1  | 110.9 | 102.7 | 130.4 | 127.6 | 112.7 | 182.8 | 228.4 | 187.8 |
| 117.0 | 82.6  | 78.3  | 79.2  | 93.7  | 72.2  | 125.6 | 122.8 | 123.9 |
| 31.5  | 24.1  | 35.2  | 37.7  | 38.8  | 27.1  | 50.2  | 52.8  | 33.9  |
| 7.1   | 6.9   | 2.8   | 0.8   | 8.0   | 1.0   | 0.8   | 4.1   | 2.8   |
| 11.2  | 7.0   | 7.6   | 10.6  | 7.0   | 12.8  | 9.6   | 21.3  | 7.1   |
| 35.8  | 37.2  | 34.2  | 43.8  | 37.3  | 35.2  | 47.3  | 43.2  | 37.4  |
| 74.3  | 77.7  | 78.5  | 79.6  | 78.4  | 80.8  | 86.0  | 76.8  | 67.9  |
| 1.0   | 1.1   | 2.1   | 1.1   | 1.0   | 1.5   | 3.1   | 0.7   | 0.6   |
| 4.6   | 0.3   | 2.1   | 1.6   | 3.3   | 6.1   | 4.6   | 7.7   | 2.3   |
| 122.5 | 82.9  | 95.5  | 103.1 | 92.4  | 118.9 | 141.4 | 176.7 | 110.4 |
| 0.4   | 0.3   | 0.9   | 0.9   | 1.2   | 0.8   | 1.1   | 0.9   | 0.9   |
| 17.8  | 7.4   | 11.7  | 10.4  | 17.6  | 14.1  | 15.9  | 11.4  | 13.3  |
| 0.4   | 1.0   | 1.0   | 3.1   | 0.9   | 1.3   | 1.9   | 0.5   | 0.4   |
| 1.2   | 5.5   | 0.9   | 3.6   | 9.4   | 3.2   | 2.5   | 2.8   | 1.1   |
| 1.1   | 1.1   | 1.2   | 2.9   | 1.1   | 2.0   | 2.3   | 1.3   | 4.1   |
| 1.2   | 1.4   | 3.0   | 3.0   | 3.4   | 5.3   | 2.3   | 2.1   | 4.8   |
| 3.3   | 1.9   | 3.8   | 1.5   | 3.4   | 2.3   | 2.7   | 7.8   | 2.6   |
| 0.5   | 1.4   | 0.5   | 0.8   | 0.7   | 0.3   | 0.8   | 0.4   | 0.5   |
| 1.3   | 1.4   | 3.2   | 1.0   | 1.2   | 1.5   | 1.2   | 3.3   | 5.5   |
| 12.1  | 12.8  | 2.3   | 11.9  | 7.6   | 13.7  | 14.1  | 13.3  | 14.2  |
| 0.5   | 0.3   | 0.6   | 0.3   | 3.7   | 1.2   | 0.9   | 0.8   | 0.5   |
| 1.1   | 2.1   | 1.8   | 2.9   | 2.5   | 1.0   | 1.8   | 0.6   | 0.4   |
| 40.9  | 12.6  | 40.4  | 32.4  | 29.0  | 32.9  | 30.5  | 43.3  | 25.4  |
| 13.9  | 8.5   | 13.9  | 16.0  | 15.9  | 13.0  | 16.7  | 23.7  | 10.0  |
| 0.8   | 6.6   | 2.6   | 1.3   | 3.5   | 2.4   | 1.9   | 5.0   | 5.5   |
| 17.6  | 13.5  | 10.8  | 9.9   | 16.6  | 9.0   | 10.0  | 15.0  | 13.0  |
| 10.8  | 13.8  | 7.4   | 13.1  | 10.5  | 10.8  | 7.7   | 8.7   | 8.5   |
| 12.1  | 4.8   | 1.0   | 1.7   | 8.6   | 8.3   | 9.3   | 2.1   | 9.8   |
| 6.5   | 4.0   | 0.8   | 4.0   | 0.3   | 4.7   | 1.6   | 2.4   | 3.6   |
| 22.4  | 24.8  | 18.3  | 17.6  | 12.0  | 25.4  | 27.0  | 23.3  | 19.5  |
| 1.0   | 1.1   | 0.7   | 1.0   | 0.5   | 1.3   | 0.9   | 2.4   | 3.1   |
| 13.6  | 2.2   | 1.5   | 3.9   | 6.1   | 7.7   | 10.8  | 2.8   | 8.2   |
| 14.9  | 20.1  | 13.2  | 14.5  | 16.5  | 12.6  | 19.6  | 18.2  | 15.9  |
| 0.7   | 0.7   | 0.5   | 1.0   | 0.7   | 0.6   | 1.2   | 1.1   | 0.7   |
| 14.8  | 22.2  | 14.7  | 8.1   | 17.2  | 14.6  | 25.6  | 37.6  | 19.9  |
| 8.5   | 4.2   | 8.1   | 3.5   | 0.9   | 6.6   | 4.5   | 0.5   | 6.9   |
| 3.9   | 4.0   | 3.5   | 6.8   | 4.8   | 3.9   | 8.1   | 2.3   | 5.4   |
| 0.5   | 0.7   | 0.5   | 0.3   | 1.3   | 0.4   | 0.5   | 2.4   | 3.8   |
| 9.7   | 13.1  | 24.2  | 13.5  | 14.2  | 14.6  | 17.1  | 20.1  | 17.1  |

|      |      |      |      |      |      |      |      |      |
|------|------|------|------|------|------|------|------|------|
| 8.0  | 5.5  | 5.1  | 8.5  | 7.4  | 7.6  | 6.8  | 10.6 | 2.8  |
| 13.2 | 4.1  | 7.6  | 4.3  | 1.6  | 6.0  | 10.4 | 10.1 | 9.6  |
| 4.1  | 0.3  | 1.1  | 0.6  | 4.4  | 4.8  | 8.8  | 6.6  | 4.2  |
| 1.2  | 1.8  | 0.4  | 0.3  | 0.5  | 2.1  | 1.7  | 6.5  | 0.4  |
| 46.5 | 26.7 | 23.4 | 27.3 | 24.2 | 27.4 | 42.0 | 55.6 | 27.4 |
| 0.6  | 0.6  | 1.9  | 0.8  | 1.0  | 2.4  | 1.0  | 1.0  | 3.9  |
| 1.3  | 1.2  | 1.2  | 1.5  | 0.5  | 1.4  | 1.5  | 1.5  | 1.4  |
| 19.1 | 12.0 | 14.5 | 12.6 | 14.6 | 13.6 | 18.4 | 12.9 | 15.1 |
| 13.3 | 12.9 | 4.4  | 9.0  | 5.1  | 7.9  | 12.0 | 13.0 | 7.7  |
| 3.3  | 5.5  | 0.8  | 2.3  | 0.6  | 1.1  | 0.9  | 5.6  | 3.5  |
| 3.7  | 2.5  | 1.2  | 0.9  | 3.0  | 2.7  | 3.5  | 4.4  | 4.4  |
| 7.8  | 5.4  | 6.8  | 12.0 | 9.1  | 8.1  | 10.0 | 6.8  | 15.3 |
| 2.6  | 4.3  | 5.0  | 4.3  | 1.9  | 5.4  | 1.2  | 6.3  | 5.3  |
| 1.4  | 1.0  | 4.2  | 0.6  | 8.1  | 5.6  | 1.6  | 1.1  | 0.4  |
| 0.9  | 1.1  | 5.0  | 1.2  | 8.9  | 5.3  | 9.4  | 10.8 | 5.2  |
| 1.4  | 0.4  | 4.0  | 2.5  | 3.7  | 0.4  | 0.5  | 3.5  | 3.3  |
| 13.3 | 7.5  | 5.9  | 10.3 | 8.7  | 6.9  | 5.0  | 8.5  | 4.0  |
| 8.6  | 2.6  | 11.5 | 11.1 | 2.3  | 13.4 | 5.7  | 5.9  | 1.6  |
| 0.5  | 3.0  | 4.7  | 0.3  | 4.5  | 1.5  | 4.5  | 4.4  | 4.8  |
| 22.7 | 17.3 | 21.3 | 16.7 | 19.4 | 15.2 | 30.8 | 25.1 | 16.0 |
| 0.7  | 1.3  | 0.5  | 0.8  | 0.6  | 0.4  | 1.2  | 2.0  | 0.8  |
| 3.0  | 1.9  | 0.9  | 2.1  | 2.3  | 0.7  | 1.3  | 1.3  | 1.1  |
| 1.3  | 1.9  | 8.7  | 9.1  | 8.3  | 9.5  | 1.4  | 9.3  | 11.3 |
| 0.6  | 1.4  | 4.1  | 1.0  | 1.1  | 4.6  | 7.8  | 0.8  | 0.5  |
| 1.6  | 2.1  | 1.8  | 1.6  | 1.0  | 1.0  | 1.4  | 2.6  | 1.8  |
| 10.4 | 10.8 | 8.3  | 11.5 | 5.5  | 10.5 | 13.8 | 5.6  | 21.8 |
| 0.6  | 1.3  | 0.7  | 1.0  | 1.6  | 3.3  | 0.8  | 1.2  | 0.9  |
| 11.8 | 4.9  | 7.0  | 7.7  | 6.5  | 3.1  | 3.0  | 8.3  | 5.2  |
| 29.3 | 24.4 | 18.0 | 24.2 | 17.9 | 20.7 | 21.7 | 39.2 | 32.8 |
| 1.0  | 5.6  | 1.9  | 1.1  | 5.9  | 10.4 | 6.4  | 4.8  | 7.5  |
| 3.7  | 2.7  | 1.3  | 1.2  | 2.5  | 3.0  | 5.5  | 8.2  | 2.4  |
| 0.6  | 1.8  | 5.8  | 1.0  | 1.2  | 1.1  | 0.5  | 3.9  | 1.9  |
| 9.0  | 5.8  | 4.4  | 9.9  | 8.6  | 3.5  | 4.9  | 9.5  | 10.4 |
| 1.6  | 0.5  | 1.0  | 2.3  | 0.4  | 1.1  | 2.1  | 1.1  | 1.8  |
| 1.6  | 2.4  | 12.2 | 9.5  | 6.4  | 1.1  | 1.6  | 1.5  | 7.2  |
| 1.9  | 6.1  | 4.9  | 4.1  | 3.5  | 6.0  | 1.4  | 9.1  | 5.1  |
| 1.7  | 0.6  | 0.4  | 0.5  | 0.4  | 0.6  | 1.1  | 1.7  | 0.7  |
| 3.1  | 5.6  | 7.6  | 6.4  | 11.3 | 7.9  | 8.5  | 10.2 | 4.8  |
| 4.5  | 5.7  | 3.0  | 4.6  | 5.4  | 1.6  | 7.3  | 7.0  | 8.1  |
| 15.1 | 8.6  | 15.7 | 19.8 | 10.6 | 10.9 | 7.1  | 22.4 | 11.4 |
| 0.6  | 1.4  | 8.4  | 8.3  | 4.5  | 7.8  | 12.4 | 3.2  | 6.3  |
| 0.4  | 0.5  | 0.3  | 2.7  | 0.7  | 0.3  | 0.7  | 0.7  | 0.6  |
| 2.1  | 2.2  | 0.5  | 3.8  | 1.1  | 1.7  | 3.5  | 2.2  | 0.6  |
| 3.3  | 0.7  | 4.7  | 5.2  | 2.5  | 4.5  | 4.9  | 2.0  | 5.6  |
| 1.6  | 1.3  | 4.1  | 0.5  | 1.2  | 0.5  | 1.6  | 1.5  | 1.3  |
| 4.7  | 2.8  | 1.2  | 3.8  | 4.1  | 0.7  | 0.9  | 6.1  | 4.9  |
| 1.5  | 0.5  | 1.8  | 0.6  | 0.9  | 0.7  | 1.4  | 1.2  | 0.3  |
| 1.0  | 4.3  | 2.8  | 1.3  | 12.7 | 5.4  | 1.7  | 1.4  | 1.3  |
| 8.1  | 15.2 | 10.7 | 10.9 | 10.0 | 13.5 | 10.4 | 14.2 | 8.6  |
| 1.7  | 1.4  | 2.6  | 2.0  | 2.2  | 3.4  | 2.3  | 1.0  | 1.9  |
| 2.8  | 2.6  | 5.2  | 1.7  | 5.8  | 3.4  | 8.9  | 17.0 | 2.4  |
| 0.2  | 1.2  | 0.6  | 0.4  | 1.9  | 0.8  | 0.4  | 0.4  | 4.6  |
| 0.9  | 1.2  | 3.0  | 0.5  | 1.7  | 1.2  | 1.6  | 1.8  | 0.9  |

|       |       |       |       |       |       |       |       |       |
|-------|-------|-------|-------|-------|-------|-------|-------|-------|
| 2.2   | 1.2   | 1.7   | 0.7   | 0.4   | 0.8   | 0.8   | 0.5   | 0.8   |
| 1.1   | 1.1   | 1.1   | 0.5   | 0.5   | 0.8   | 0.5   | 0.6   | 0.8   |
| 1.0   | 1.1   | 0.9   | 0.5   | 1.1   | 0.4   | 1.6   | 0.8   | 0.3   |
| 0.9   | 0.9   | 0.7   | 0.4   | 1.4   | 0.9   | 0.9   | 4.6   | 2.1   |
| 1.1   | 4.2   | 2.6   | 0.6   | 2.6   | 5.4   | 8.7   | 5.1   | 1.5   |
| 0.4   | 1.7   | 4.9   | 0.8   | 3.4   | 3.1   | 0.7   | 0.9   | 0.8   |
| 1.8   | 0.5   | 0.5   | 1.3   | 6.3   | 0.6   | 0.5   | 1.0   | 0.5   |
| 9.2   | 6.1   | 5.4   | 13.1  | 7.8   | 8.4   | 7.5   | 18.2  | 16.4  |
| 1.0   | 1.0   | 1.6   | 0.3   | 1.1   | 1.2   | 1.7   | 0.6   | 1.8   |
| 0.9   | 8.7   | 2.4   | 7.1   | 6.9   | 0.9   | 0.4   | 1.7   | 1.7   |
| 9.2   | 8.5   | 7.9   | 5.0   | 12.5  | 12.9  | 14.2  | 12.4  | 9.4   |
| 5.0   | 2.3   | 4.7   | 3.3   | 4.9   | 7.0   | 8.8   | 14.3  | 8.0   |
| 0.7   | 1.8   | 1.4   | 7.5   | 0.6   | 4.7   | 3.8   | 0.2   | 4.2   |
| 2.3   | 2.4   | 8.0   | 7.8   | 2.9   | 1.5   | 11.3  | 9.6   | 12.0  |
| 1.8   | 10.3  | 1.7   | 1.2   | 6.2   | 5.2   | 12.0  | 9.7   | 10.9  |
| 2.3   | 2.0   | 2.6   | 1.9   | 3.8   | 2.0   | 2.2   | 2.6   | 1.5   |
| 1.1   | 2.2   | 0.9   | 2.6   | 1.2   | 1.0   | 1.5   | 2.4   | 1.2   |
| 0.5   | 1.4   | 1.7   | 4.1   | 3.7   | 4.5   | 3.2   | 11.6  | 3.7   |
| 12.9  | 13.3  | 9.9   | 9.4   | 10.7  | 11.2  | 12.0  | 12.8  | 13.3  |
| 2.4   | 5.1   | 11.5  | 3.7   | 2.7   | 6.8   | 4.6   | 6.4   | 4.1   |
| 0.5   | 1.1   | 0.8   | 2.8   | 1.0   | 0.6   | 2.3   | 0.5   | 0.4   |
| 511.0 | 283.6 | 310.3 | 338.7 | 386.7 | 362.2 | 526.2 | 517.9 | 408.3 |
| 2.3   | 3.5   | 2.1   | 7.6   | 6.3   | 7.8   | 9.3   | 8.6   | 10.4  |
| 0.5   | 1.1   | 1.1   | 1.2   | 0.5   | 0.8   | 0.5   | 1.3   | 1.5   |
| 0.3   | 0.4   | 4.8   | 1.1   | 0.7   | 1.5   | 1.5   | 1.4   | 1.2   |
| 0.6   | 1.8   | 0.7   | 1.3   | 1.6   | 0.8   | 3.5   | 0.9   | 1.2   |
| 6.3   | 7.1   | 4.2   | 3.4   | 7.2   | 4.8   | 3.9   | 4.7   | 5.3   |
| 11.4  | 3.8   | 4.9   | 5.3   | 11.3  | 5.6   | 4.9   | 17.5  | 3.3   |
| 4.9   | 1.4   | 2.4   | 1.4   | 1.0   | 1.2   | 10.8  | 2.4   | 1.9   |
| 1.6   | 1.3   | 2.0   | 0.7   | 1.2   | 1.3   | 4.4   | 1.8   | 1.6   |
| 6.7   | 3.3   | 2.6   | 7.9   | 0.8   | 3.8   | 2.7   | 2.7   | 7.9   |
| 2.4   | 8.3   | 6.7   | 7.5   | 5.6   | 5.3   | 2.8   | 4.0   | 4.4   |
| 3.6   | 6.0   | 3.4   | 3.0   | 6.4   | 4.9   | 6.1   | 5.9   | 0.8   |
| 0.9   | 0.7   | 3.2   | 0.7   | 1.4   | 0.4   | 0.5   | 1.7   | 1.2   |
| 6.6   | 8.2   | 4.2   | 6.3   | 9.1   | 2.2   | 8.8   | 8.2   | 8.9   |
| 0.7   | 0.7   | 0.7   | 0.8   | 6.2   | 1.0   | 1.0   | 0.9   | 4.8   |
| 6.7   | 0.4   | 1.1   | 2.6   | 1.5   | 2.6   | 0.4   | 4.7   | 3.9   |
| 2.3   | 0.4   | 2.7   | 0.7   | 0.4   | 4.9   | 5.2   | 3.7   | 0.4   |
| 0.5   | 1.0   | 1.4   | 0.4   | 0.6   | 0.4   | 0.3   | 0.2   | 0.3   |
| 9.1   | 5.9   | 7.4   | 6.2   | 6.0   | 12.1  | 4.4   | 10.9  | 6.7   |
| 0.4   | 0.3   | 1.3   | 0.7   | 0.4   | 0.5   | 0.6   | 0.7   | 0.7   |
| 0.9   | 1.8   | 1.0   | 1.1   | 2.0   | 0.9   | 2.5   | 6.9   | 1.1   |
| 12.8  | 15.8  | 13.0  | 12.1  | 9.3   | 11.1  | 15.9  | 19.3  | 20.0  |
| 0.8   | 0.4   | 0.3   | 0.3   | 2.6   | 3.3   | 0.8   | 1.2   | 6.0   |
| 4.0   | 2.4   | 2.1   | 4.3   | 8.1   | 1.4   | 1.7   | 4.0   | 11.4  |
| 15.3  | 11.6  | 8.7   | 8.6   | 10.2  | 6.1   | 6.4   | 7.6   | 6.7   |
| 1.3   | 0.5   | 0.4   | 0.4   | 0.4   | 0.8   | 0.5   | 0.7   | 1.8   |
| 13.3  | 19.9  | 10.6  | 13.6  | 11.8  | 12.2  | 18.4  | 21.4  | 13.3  |
| 5.9   | 1.2   | 1.5   | 0.7   | 0.9   | 2.2   | 5.4   | 1.8   | 1.2   |
| 5.1   | 15.2  | 10.6  | 2.3   | 8.2   | 12.8  | 12.4  | 16.2  | 10.2  |
| 4.6   | 0.6   | 1.4   | 1.9   | 0.9   | 1.7   | 0.5   | 3.4   | 2.4   |
| 0.3   | 0.2   | 0.5   | 0.7   | 0.6   | 0.5   | 0.4   | 0.3   | 0.2   |
| 3.9   | 2.4   | 2.0   | 4.7   | 8.2   | 2.8   | 6.5   | 5.6   | 7.1   |

|       |       |       |       |       |       |       |        |       |
|-------|-------|-------|-------|-------|-------|-------|--------|-------|
| 10.5  | 8.8   | 2.5   | 5.8   | 4.2   | 1.3   | 1.5   | 8.9    | 6.3   |
| 8.7   | 9.3   | 1.5   | 9.2   | 2.9   | 5.3   | 1.2   | 7.3    | 5.3   |
| 14.6  | 14.8  | 6.4   | 8.4   | 10.4  | 14.4  | 11.1  | 16.3   | 3.3   |
| 3.5   | 6.0   | 1.1   | 6.5   | 1.9   | 2.8   | 5.6   | 7.9    | 2.2   |
| 0.6   | 0.6   | 0.4   | 0.4   | 0.3   | 0.5   | 0.5   | 0.4    | 0.5   |
| 65.4  | 8.9   | 34.0  | 33.8  | 56.2  | 23.4  | 43.3  | 51.9   | 47.7  |
| 172.3 | 108.1 | 106.3 | 132.3 | 145.4 | 149.3 | 196.7 | 184.0  | 175.4 |
| 0.1   | 0.1   | 0.4   | 0.4   | 3.0   | 0.1   | 1.9   | 0.5    | 0.4   |
| 14.5  | 7.3   | 6.5   | 10.6  | 4.5   | 4.3   | 16.9  | 11.4   | 14.8  |
| 11.8  | 6.3   | 4.5   | 7.2   | 5.7   | 3.7   | 7.3   | 2.5    | 4.7   |
| 84.3  | 60.1  | 61.1  | 74.4  | 78.4  | 67.2  | 107.9 | 109.9  | 85.0  |
| 1.4   | 1.0   | 0.9   | 0.8   | 1.6   | 1.4   | 1.1   | 1.5    | 0.9   |
| 138.5 | 69.9  | 76.0  | 67.3  | 80.8  | 98.6  | 115.0 | 185.6  | 125.8 |
| 12.7  | 9.3   | 12.7  | 8.0   | 14.6  | 12.5  | 14.8  | 17.5   | 9.2   |
| 16.6  | 13.0  | 2.3   | 15.1  | 12.9  | 7.1   | 24.2  | 31.5   | 17.1  |
| 183.3 | 178.1 | 165.3 | 200.9 | 196.1 | 176.2 | 283.9 | 325.7  | 230.6 |
| 0.4   | 1.3   | 5.7   | 2.3   | 1.1   | 0.3   | 4.6   | 2.7    | 1.3   |
| 26.3  | 26.0  | 18.8  | 23.7  | 19.8  | 18.7  | 36.9  | 37.1   | 32.3  |
| 0.8   | 4.5   | 0.8   | 0.9   | 0.6   | 0.8   | 1.0   | 0.5    | 1.1   |
| 51.3  | 19.7  | 32.8  | 38.5  | 31.2  | 36.1  | 39.1  | 56.8   | 39.9  |
| 12.2  | 3.9   | 4.3   | 14.2  | 7.7   | 1.6   | 1.4   | 1.1    | 1.9   |
| 842.6 | 556.9 | 655.7 | 699.9 | 739.7 | 775.9 | 917.4 | 1324.5 | 961.0 |
| 4.5   | 5.5   | 2.6   | 10.0  | 8.1   | 12.7  | 1.4   | 5.4    | 12.4  |
| 229.8 | 139.0 | 170.3 | 160.4 | 202.1 | 171.6 | 251.1 | 246.4  | 203.8 |
| 350.2 | 180.8 | 224.1 | 294.2 | 249.6 | 253.2 | 339.2 | 354.4  | 264.8 |
| 1.3   | 0.2   | 0.2   | 0.2   | 0.6   | 1.9   | 0.2   | 0.2    | 0.1   |
| 1.1   | 1.9   | 3.6   | 7.2   | 1.4   | 0.9   | 8.1   | 3.4    | 4.3   |
| 17.8  | 10.9  | 13.0  | 19.9  | 19.5  | 15.9  | 21.3  | 23.3   | 18.0  |
| 0.3   | 0.2   | 0.2   | 1.8   | 0.2   | 1.1   | 0.9   | 0.2    | 0.3   |
| 3.1   | 1.9   | 2.7   | 1.0   | 1.2   | 3.3   | 0.5   | 0.7    | 0.7   |
| 11.6  | 8.7   | 11.8  | 12.8  | 12.4  | 9.7   | 14.3  | 20.6   | 16.8  |
| 2.7   | 4.1   | 7.4   | 5.6   | 6.6   | 8.1   | 4.7   | 10.1   | 7.0   |
| 0.8   | 0.6   | 0.6   | 2.3   | 3.6   | 0.4   | 3.5   | 0.4    | 0.3   |
| 5.2   | 5.7   | 3.4   | 9.3   | 11.2  | 1.8   | 3.7   | 8.8    | 1.9   |
| 5.5   | 10.5  | 1.7   | 2.9   | 6.1   | 3.0   | 7.6   | 10.4   | 4.1   |
| 11.0  | 7.4   | 6.8   | 9.6   | 10.4  | 6.5   | 8.1   | 12.5   | 8.0   |
| 214.6 | 128.7 | 140.3 | 171.0 | 141.5 | 171.3 | 192.3 | 235.8  | 157.7 |
| 14.0  | 0.6   | 1.3   | 0.6   | 0.8   | 1.0   | 1.0   | 1.2    | 1.3   |
| 5.7   | 4.7   | 4.2   | 2.6   | 3.3   | 5.8   | 8.4   | 10.9   | 2.1   |
| 529.1 | 292.2 | 329.3 | 379.2 | 352.0 | 365.9 | 425.7 | 584.3  | 437.7 |
| 10.8  | 7.9   | 6.0   | 8.9   | 7.9   | 4.6   | 8.8   | 14.2   | 9.0   |
| 1.5   | 1.2   | 1.0   | 0.6   | 0.7   | 1.4   | 5.4   | 2.0    | 0.6   |
| 4.5   | 1.5   | 4.5   | 0.3   | 5.0   | 3.0   | 5.1   | 2.0    | 8.8   |
| 0.4   | 0.4   | 0.5   | 0.6   | 0.4   | 0.4   | 0.4   | 0.5    | 0.5   |
| 1.1   | 3.0   | 2.4   | 3.0   | 1.7   | 2.1   | 1.4   | 2.6    | 1.7   |
| 8.6   | 7.8   | 9.0   | 6.7   | 8.8   | 1.1   | 4.2   | 8.2    | 4.2   |
| 2.1   | 3.1   | 7.2   | 1.1   | 2.2   | 1.7   | 1.4   | 1.7    | 3.5   |
| 13.8  | 9.2   | 13.2  | 14.4  | 6.5   | 8.5   | 9.4   | 10.6   | 10.3  |
| 4.3   | 5.3   | 5.9   | 1.1   | 6.7   | 3.6   | 1.3   | 2.8    | 3.9   |
| 10.5  | 8.0   | 7.1   | 8.0   | 8.9   | 9.8   | 4.1   | 19.6   | 9.9   |
| 1.3   | 0.7   | 1.5   | 1.3   | 1.0   | 1.0   | 1.2   | 8.3    | 1.2   |
| 13.2  | 16.4  | 11.0  | 8.5   | 13.5  | 8.4   | 10.9  | 14.0   | 14.2  |
| 9.0   | 14.0  | 7.1   | 9.5   | 3.2   | 0.8   | 3.9   | 10.9   | 10.8  |

|        |        |        |        |        |        |        |        |        |
|--------|--------|--------|--------|--------|--------|--------|--------|--------|
| 8.5    | 7.3    | 9.6    | 10.4   | 10.3   | 9.0    | 12.0   | 8.1    | 6.0    |
| 3.5    | 6.8    | 1.3    | 5.6    | 9.2    | 5.5    | 9.9    | 7.6    | 4.2    |
| 0.9    | 0.8    | 0.6    | 2.0    | 7.3    | 2.0    | 3.6    | 1.3    | 0.7    |
| 3.7    | 1.9    | 2.9    | 1.0    | 1.2    | 8.8    | 6.7    | 1.9    | 4.0    |
| 0.7    | 0.4    | 2.5    | 0.1    | 0.4    | 2.4    | 0.4    | 6.1    | 3.3    |
| 281.2  | 228.4  | 217.7  | 255.0  | 246.7  | 219.3  | 269.0  | 274.1  | 224.2  |
| 92.0   | 66.9   | 56.1   | 69.3   | 75.0   | 61.0   | 95.3   | 101.3  | 65.2   |
| 155.4  | 104.9  | 142.6  | 135.9  | 132.2  | 111.9  | 238.6  | 184.5  | 125.7  |
| 872.9  | 511.5  | 708.5  | 839.5  | 682.6  | 812.8  | 1031.7 | 1253.2 | 767.0  |
| 2850.0 | 1954.1 | 2000.1 | 2184.4 | 2226.1 | 2106.5 | 3023.0 | 3095.0 | 2777.2 |
| 1155.7 | 639.2  | 716.9  | 781.8  | 796.0  | 819.1  | 995.0  | 1136.3 | 754.5  |
| 31.1   | 20.9   | 12.3   | 23.2   | 24.0   | 21.6   | 18.0   | 42.4   | 24.1   |
| 155.2  | 115.7  | 99.6   | 131.5  | 145.4  | 102.8  | 169.7  | 185.8  | 177.8  |
| 178.3  | 137.8  | 134.1  | 144.0  | 149.9  | 119.4  | 193.6  | 175.3  | 156.4  |
| 34.9   | 26.3   | 32.4   | 40.1   | 37.6   | 28.1   | 51.9   | 69.1   | 62.2   |
| 661.3  | 446.4  | 560.1  | 540.6  | 610.8  | 587.1  | 780.5  | 813.0  | 682.5  |
| 230.5  | 125.6  | 135.3  | 144.5  | 164.8  | 143.6  | 206.6  | 295.1  | 174.8  |
| 397.5  | 289.5  | 303.1  | 350.2  | 300.8  | 316.3  | 418.3  | 525.2  | 360.4  |
| 126.4  | 49.8   | 73.7   | 69.8   | 64.9   | 74.9   | 94.4   | 113.6  | 65.3   |
| 91.3   | 35.5   | 39.7   | 52.7   | 52.3   | 53.8   | 65.8   | 86.9   | 69.8   |
| 154.1  | 98.3   | 85.4   | 106.9  | 58.9   | 74.9   | 130.9  | 152.3  | 88.4   |
| 145.0  | 87.3   | 92.9   | 97.7   | 95.4   | 96.5   | 125.2  | 109.5  | 94.8   |
| 737.7  | 476.5  | 472.9  | 536.3  | 563.8  | 457.3  | 664.0  | 670.3  | 464.8  |
| 10.7   | 8.5    | 17.7   | 9.9    | 11.4   | 8.6    | 19.0   | 8.9    | 19.8   |
| 108.5  | 101.0  | 98.1   | 113.1  | 104.8  | 77.0   | 130.2  | 127.2  | 101.9  |
| 3.3    | 3.7    | 4.8    | 0.9    | 5.6    | 5.4    | 0.2    | 0.5    | 2.1    |
| 253.1  | 284.5  | 258.5  | 313.1  | 339.9  | 262.1  | 437.1  | 491.7  | 411.6  |
| 662.1  | 490.5  | 463.9  | 509.7  | 595.4  | 570.8  | 780.2  | 925.3  | 939.3  |
| 917.0  | 832.9  | 885.6  | 1000.5 | 915.8  | 917.2  | 1080.0 | 1143.5 | 1073.5 |
| 358.9  | 227.0  | 229.9  | 229.1  | 251.5  | 263.9  | 325.8  | 262.1  | 232.4  |
| 12.1   | 20.6   | 16.5   | 20.8   | 20.4   | 25.8   | 28.0   | 40.8   | 20.9   |
| 29.6   | 23.8   | 15.5   | 32.5   | 26.0   | 25.0   | 37.4   | 37.5   | 30.2   |
| 64.8   | 33.2   | 47.0   | 55.9   | 55.5   | 34.9   | 63.0   | 67.2   | 41.4   |
| 53.4   | 42.8   | 48.7   | 30.8   | 47.7   | 46.8   | 59.3   | 66.5   | 36.9   |
| 77.4   | 70.3   | 65.6   | 75.3   | 69.5   | 67.3   | 73.2   | 104.4  | 62.8   |
| 121.9  | 54.9   | 35.4   | 68.7   | 75.6   | 30.5   | 70.9   | 136.2  | 32.6   |
| 106.6  | 62.1   | 86.6   | 74.6   | 70.3   | 83.1   | 101.9  | 157.8  | 87.5   |
| 41.8   | 24.8   | 31.6   | 29.2   | 25.8   | 33.9   | 38.1   | 41.9   | 33.9   |
| 179.2  | 145.6  | 163.8  | 176.2  | 157.4  | 163.8  | 246.6  | 248.2  | 132.8  |
| 88.1   | 38.9   | 36.4   | 52.1   | 48.0   | 52.9   | 62.5   | 74.4   | 51.4   |
| 340.0  | 166.5  | 235.6  | 236.1  | 212.9  | 237.5  | 356.0  | 432.0  | 272.1  |
| 234.5  | 115.9  | 138.2  | 141.1  | 146.5  | 179.3  | 205.9  | 261.5  | 167.8  |
| 23.3   | 17.7   | 14.0   | 10.4   | 14.5   | 14.0   | 22.2   | 22.6   | 10.4   |
| 221.2  | 121.4  | 155.3  | 164.9  | 161.0  | 175.3  | 248.3  | 351.7  | 189.4  |
| 32.6   | 32.5   | 29.9   | 34.7   | 30.7   | 24.4   | 40.4   | 65.8   | 41.6   |
| 32.2   | 23.6   | 26.6   | 23.9   | 26.0   | 28.0   | 27.1   | 30.1   | 22.3   |
| 160.5  | 122.6  | 113.9  | 121.8  | 113.2  | 99.8   | 153.2  | 160.3  | 100.3  |
| 87.8   | 61.7   | 69.9   | 72.5   | 77.7   | 84.5   | 120.4  | 119.8  | 89.2   |
| 97.1   | 75.0   | 61.2   | 72.6   | 78.1   | 72.9   | 113.0  | 140.1  | 106.3  |
| 174.5  | 98.9   | 115.7  | 116.5  | 139.3  | 113.4  | 151.5  | 129.5  | 112.0  |
| 194.6  | 119.6  | 168.3  | 177.0  | 179.9  | 197.2  | 244.7  | 254.7  | 180.5  |
| 151.2  | 76.6   | 107.0  | 114.2  | 109.3  | 123.3  | 180.0  | 198.7  | 129.6  |
| 111.6  | 65.2   | 70.5   | 86.6   | 85.0   | 83.3   | 118.1  | 121.3  | 77.7   |

|       |       |       |       |       |       |       |       |       |
|-------|-------|-------|-------|-------|-------|-------|-------|-------|
| 100.9 | 69.4  | 100.0 | 99.3  | 83.8  | 69.3  | 118.0 | 131.1 | 84.8  |
| 231.6 | 180.2 | 232.7 | 244.8 | 219.3 | 234.5 | 248.1 | 253.5 | 206.2 |
| 215.1 | 98.5  | 144.4 | 133.0 | 158.3 | 165.7 | 226.6 | 232.1 | 146.5 |
| 144.9 | 91.6  | 118.3 | 109.5 | 138.3 | 121.1 | 142.0 | 219.9 | 133.4 |
| 34.6  | 8.1   | 16.1  | 9.2   | 9.2   | 15.8  | 16.3  | 29.7  | 8.9   |
| 42.1  | 5.4   | 14.8  | 16.8  | 21.7  | 26.8  | 29.5  | 40.5  | 23.1  |
| 6.2   | 5.9   | 2.7   | 3.7   | 4.0   | 1.1   | 2.8   | 9.5   | 2.0   |
| 4.3   | 6.2   | 2.1   | 3.1   | 5.4   | 3.3   | 8.1   | 9.0   | 3.5   |
| 3.2   | 3.0   | 0.6   | 0.7   | 2.6   | 0.7   | 0.8   | 1.3   | 1.0   |
| 90.6  | 35.5  | 55.1  | 57.7  | 45.5  | 53.1  | 82.7  | 82.9  | 50.1  |
| 5.0   | 6.5   | 7.7   | 9.3   | 6.0   | 3.7   | 5.8   | 4.4   | 2.0   |
| 1.0   | 0.5   | 1.1   | 7.5   | 2.9   | 1.4   | 4.7   | 7.0   | 3.2   |
| 224.3 | 221.3 | 180.2 | 210.2 | 261.4 | 226.3 | 347.5 | 418.9 | 254.9 |
| 478.5 | 439.0 | 443.1 | 494.4 | 523.2 | 495.5 | 686.9 | 768.6 | 539.8 |
| 15.5  | 17.4  | 7.7   | 10.3  | 14.9  | 8.4   | 10.6  | 16.0  | 14.5  |
| 105.4 | 94.5  | 54.1  | 87.7  | 84.1  | 69.6  | 125.8 | 130.4 | 106.4 |
| 132.3 | 106.0 | 136.4 | 154.2 | 123.7 | 132.2 | 177.5 | 202.5 | 125.7 |
| 80.9  | 67.7  | 80.8  | 84.3  | 79.8  | 93.9  | 127.6 | 147.8 | 100.7 |
| 23.5  | 19.9  | 27.9  | 29.6  | 27.3  | 23.3  | 20.8  | 46.0  | 16.7  |
| 30.5  | 22.1  | 24.7  | 25.3  | 20.9  | 17.5  | 27.4  | 36.6  | 23.1  |
| 656.2 | 303.9 | 343.0 | 336.9 | 368.2 | 392.6 | 552.0 | 607.4 | 373.9 |
| 261.2 | 170.9 | 146.2 | 161.7 | 220.4 | 193.2 | 345.8 | 400.7 | 319.3 |
| 22.4  | 20.6  | 22.6  | 22.2  | 17.7  | 20.8  | 14.7  | 29.7  | 15.6  |
| 123.3 | 123.5 | 138.3 | 135.5 | 133.8 | 135.1 | 198.8 | 197.8 | 94.3  |
| 173.2 | 176.0 | 161.0 | 205.1 | 192.1 | 180.6 | 241.4 | 259.1 | 214.1 |
| 50.8  | 6.4   | 54.6  | 48.3  | 31.2  | 26.5  | 24.3  | 34.0  | 28.9  |
| 130.1 | 101.5 | 118.8 | 83.3  | 102.3 | 114.0 | 120.0 | 103.9 | 92.7  |
| 5.6   | 7.0   | 2.4   | 9.2   | 2.1   | 2.5   | 7.2   | 10.6  | 4.8   |
| 54.8  | 42.7  | 35.5  | 46.8  | 51.1  | 40.3  | 60.5  | 69.8  | 60.8  |
| 119.5 | 85.8  | 93.9  | 82.6  | 119.2 | 100.2 | 131.3 | 129.5 | 85.9  |
| 30.5  | 27.8  | 35.2  | 36.8  | 27.9  | 30.2  | 38.6  | 40.7  | 18.1  |
| 107.5 | 44.3  | 72.3  | 64.8  | 63.6  | 73.5  | 94.2  | 92.0  | 56.6  |
| 30.5  | 21.0  | 30.9  | 32.5  | 28.8  | 21.6  | 29.3  | 33.2  | 30.0  |
| 57.7  | 18.5  | 28.7  | 34.3  | 24.6  | 18.3  | 29.7  | 38.1  | 19.4  |
| 115.5 | 70.3  | 95.4  | 74.8  | 104.5 | 99.6  | 134.4 | 163.9 | 114.4 |
| 45.3  | 31.5  | 32.4  | 39.1  | 32.1  | 30.7  | 34.8  | 43.5  | 37.0  |
| 18.9  | 14.3  | 9.9   | 14.4  | 10.6  | 7.5   | 13.6  | 17.1  | 18.7  |
| 19.6  | 9.5   | 11.6  | 10.0  | 12.0  | 9.8   | 21.3  | 23.2  | 18.3  |
| 1.6   | 2.4   | 1.5   | 11.4  | 2.2   | 10.1  | 6.3   | 2.4   | 1.7   |
| 9.7   | 26.0  | 19.1  | 21.6  | 15.7  | 17.5  | 27.2  | 31.5  | 22.3  |
| 146.7 | 97.4  | 115.1 | 115.5 | 130.3 | 122.6 | 194.3 | 212.0 | 125.5 |
| 2.7   | 4.5   | 11.2  | 3.2   | 3.8   | 6.9   | 6.0   | 13.0  | 4.6   |
| 75.8  | 21.4  | 26.5  | 25.8  | 28.0  | 29.2  | 40.1  | 52.7  | 52.4  |
| 43.9  | 37.1  | 35.4  | 43.9  | 48.2  | 38.1  | 63.0  | 59.9  | 44.1  |
| 26.4  | 36.4  | 24.1  | 32.0  | 32.1  | 22.1  | 37.0  | 27.1  | 45.4  |
| 39.4  | 26.2  | 28.4  | 36.8  | 28.3  | 33.6  | 36.5  | 45.6  | 41.2  |
| 2.9   | 0.9   | 0.6   | 1.1   | 1.8   | 0.7   | 1.7   | 2.8   | 0.8   |
| 57.8  | 25.8  | 37.3  | 38.9  | 61.2  | 32.1  | 72.2  | 71.8  | 53.9  |
| 90.5  | 71.4  | 66.7  | 70.9  | 79.3  | 75.0  | 85.1  | 97.2  | 56.0  |
| 115.5 | 76.3  | 52.5  | 76.3  | 94.2  | 75.8  | 112.9 | 147.0 | 105.2 |
| 12.2  | 14.9  | 10.2  | 14.3  | 16.6  | 16.2  | 20.7  | 18.2  | 12.2  |
| 327.6 | 259.5 | 276.3 | 283.4 | 321.2 | 319.0 | 418.9 | 590.8 | 254.2 |
| 48.5  | 29.4  | 39.9  | 37.7  | 47.4  | 29.4  | 39.2  | 49.7  | 38.6  |

|        |        |        |        |        |        |        |        |        |
|--------|--------|--------|--------|--------|--------|--------|--------|--------|
| 32.5   | 14.2   | 23.4   | 22.3   | 20.2   | 16.0   | 22.6   | 32.5   | 24.2   |
| 38.5   | 31.9   | 34.8   | 30.9   | 36.8   | 50.8   | 54.4   | 63.0   | 48.1   |
| 100.8  | 61.7   | 67.4   | 67.1   | 67.6   | 77.2   | 112.4  | 122.9  | 89.1   |
| 0.5    | 0.8    | 0.5    | 0.3    | 0.4    | 0.3    | 0.4    | 0.4    | 0.3    |
| 523.4  | 261.9  | 294.3  | 355.2  | 347.3  | 254.7  | 438.8  | 399.8  | 323.5  |
| 1.0    | 0.6    | 0.8    | 0.9    | 0.9    | 2.7    | 6.4    | 1.2    | 1.4    |
| 107.9  | 84.0   | 91.9   | 108.8  | 126.4  | 105.4  | 155.0  | 165.7  | 125.0  |
| 126.8  | 99.1   | 114.8  | 121.4  | 101.5  | 141.5  | 166.2  | 282.3  | 125.4  |
| 8.9    | 4.7    | 4.7    | 1.1    | 6.9    | 2.1    | 1.3    | 9.6    | 6.7    |
| 192.3  | 173.1  | 208.7  | 185.5  | 249.2  | 191.0  | 338.1  | 329.5  | 225.5  |
| 13.3   | 4.2    | 4.7    | 0.7    | 3.3    | 5.1    | 5.9    | 2.4    | 4.5    |
| 77.3   | 12.2   | 15.4   | 22.2   | 19.7   | 13.7   | 15.2   | 23.6   | 25.7   |
| 1.7    | 2.1    | 0.6    | 1.7    | 1.3    | 0.7    | 0.4    | 1.2    | 0.9    |
| 31.5   | 19.8   | 21.0   | 21.3   | 16.3   | 21.0   | 29.0   | 31.8   | 22.4   |
| 276.9  | 223.1  | 264.9  | 290.3  | 309.0  | 295.7  | 399.9  | 425.4  | 332.8  |
| 212.2  | 86.7   | 102.2  | 111.8  | 116.9  | 127.8  | 180.5  | 221.5  | 103.2  |
| 229.2  | 98.8   | 130.4  | 128.7  | 137.4  | 144.5  | 172.9  | 287.0  | 141.7  |
| 70.3   | 36.0   | 41.6   | 43.5   | 50.2   | 51.8   | 55.0   | 82.3   | 47.6   |
| 237.0  | 173.8  | 218.1  | 207.4  | 243.0  | 227.4  | 244.0  | 308.6  | 213.9  |
| 6.7    | 0.9    | 1.0    | 1.1    | 0.4    | 1.9    | 4.2    | 0.6    | 1.0    |
| 55.9   | 17.0   | 40.8   | 43.6   | 41.9   | 44.7   | 51.2   | 74.5   | 34.8   |
| 13.6   | 11.1   | 9.3    | 5.9    | 16.7   | 9.7    | 6.2    | 14.0   | 6.5    |
| 16.8   | 17.0   | 10.4   | 14.0   | 17.7   | 13.6   | 16.3   | 20.9   | 13.8   |
| 47.9   | 30.1   | 40.7   | 35.8   | 36.2   | 40.3   | 73.1   | 58.3   | 39.0   |
| 299.6  | 231.0  | 235.3  | 252.5  | 233.0  | 244.7  | 310.9  | 371.7  | 269.0  |
| 60.0   | 49.7   | 47.6   | 44.8   | 61.3   | 57.2   | 78.9   | 56.9   | 56.9   |
| 38.3   | 31.4   | 37.5   | 33.6   | 32.8   | 28.7   | 40.3   | 40.5   | 29.2   |
| 37.4   | 16.4   | 43.9   | 24.7   | 32.6   | 25.4   | 44.4   | 54.0   | 34.8   |
| 9.4    | 8.6    | 10.6   | 6.1    | 3.3    | 3.4    | 17.2   | 20.5   | 11.7   |
| 3.2    | 3.0    | 3.3    | 2.0    | 2.1    | 2.0    | 2.0    | 2.2    | 2.7    |
| 18.0   | 16.2   | 18.3   | 13.1   | 6.0    | 16.5   | 22.4   | 28.6   | 22.8   |
| 76.4   | 106.4  | 126.3  | 128.5  | 109.5  | 105.2  | 153.0  | 161.6  | 116.8  |
| 14.7   | 12.5   | 13.0   | 11.2   | 8.6    | 5.6    | 8.9    | 11.9   | 9.5    |
| 32.7   | 22.5   | 22.1   | 20.5   | 33.2   | 30.8   | 24.6   | 51.8   | 35.7   |
| 3076.7 | 2498.2 | 2586.3 | 2593.0 | 2778.2 | 2602.8 | 3224.8 | 3260.5 | 2525.8 |
| 3.0    | 0.3    | 0.9    | 0.3    | 0.9    | 0.9    | 0.3    | 0.9    | 0.5    |
| 0.6    | 1.2    | 1.4    | 4.0    | 2.5    | 7.0    | 1.9    | 1.3    | 1.6    |
| 169.8  | 147.4  | 170.6  | 184.4  | 175.4  | 148.2  | 229.3  | 227.5  | 160.0  |
| 15.1   | 10.0   | 2.0    | 7.6    | 14.4   | 8.9    | 15.1   | 17.4   | 2.4    |
| 10.6   | 13.7   | 7.2    | 10.1   | 7.5    | 12.2   | 11.3   | 5.7    | 8.6    |
| 184.3  | 154.6  | 154.4  | 179.8  | 189.7  | 179.6  | 235.9  | 311.2  | 186.2  |
| 20.0   | 20.8   | 26.9   | 21.0   | 25.6   | 18.1   | 31.9   | 24.0   | 19.9   |
| 15.5   | 6.3    | 7.7    | 8.5    | 14.1   | 10.8   | 18.0   | 11.4   | 14.9   |
| 7.6    | 8.0    | 5.9    | 9.2    | 7.1    | 9.3    | 8.3    | 6.0    | 7.0    |
| 7.2    | 5.5    | 6.7    | 11.8   | 5.9    | 3.0    | 6.4    | 13.6   | 8.9    |
| 64.9   | 52.5   | 56.0   | 59.2   | 84.9   | 56.8   | 94.4   | 107.5  | 50.8   |
| 935.9  | 647.4  | 724.3  | 787.6  | 850.8  | 747.0  | 941.7  | 904.2  | 679.1  |
| 240.3  | 179.1  | 187.8  | 224.4  | 173.2  | 198.7  | 246.5  | 247.6  | 167.2  |
| 31.8   | 18.1   | 13.2   | 21.6   | 19.6   | 21.7   | 29.9   | 31.0   | 18.3   |
| 263.8  | 277.8  | 277.3  | 327.9  | 332.3  | 328.0  | 359.5  | 520.8  | 298.2  |
| 0.4    | 3.2    | 1.1    | 0.6    | 2.1    | 3.2    | 0.6    | 0.3    | 1.0    |
| 1.7    | 2.4    | 6.9    | 7.5    | 1.6    | 1.2    | 7.7    | 1.8    | 4.6    |
| 1.0    | 1.5    | 0.3    | 0.5    | 0.3    | 0.6    | 4.1    | 1.9    | 0.5    |



|       |        |        |        |        |        |        |        |        |
|-------|--------|--------|--------|--------|--------|--------|--------|--------|
| 10.7  | 7.0    | 3.8    | 7.0    | 7.0    | 4.5    | 13.4   | 17.3   | 11.4   |
| 14.0  | 11.3   | 10.7   | 14.8   | 10.8   | 11.3   | 12.2   | 5.7    | 7.5    |
| 37.1  | 26.0   | 35.4   | 34.3   | 27.2   | 34.0   | 48.6   | 51.7   | 28.2   |
| 119.1 | 82.8   | 90.0   | 98.7   | 103.6  | 96.7   | 119.4  | 108.9  | 96.7   |
| 1.1   | 0.2    | 0.8    | 0.6    | 0.2    | 0.3    | 0.3    | 0.7    | 0.3    |
| 11.4  | 16.7   | 5.5    | 13.6   | 20.4   | 20.3   | 10.9   | 11.6   | 15.8   |
| 28.3  | 19.1   | 22.4   | 16.4   | 21.9   | 19.1   | 19.1   | 22.6   | 15.6   |
| 15.4  | 13.8   | 13.6   | 12.5   | 11.3   | 11.0   | 14.6   | 19.7   | 16.2   |
| 39.5  | 30.2   | 20.3   | 33.8   | 41.1   | 35.2   | 54.4   | 69.9   | 49.7   |
| 105.3 | 87.9   | 77.3   | 99.8   | 103.3  | 87.8   | 122.9  | 139.6  | 140.9  |
| 394.0 | 267.8  | 334.9  | 337.6  | 352.9  | 375.0  | 486.4  | 560.3  | 365.9  |
| 20.2  | 14.0   | 19.3   | 13.9   | 16.9   | 20.1   | 28.8   | 28.8   | 12.7   |
| 5.1   | 8.9    | 7.0    | 11.5   | 1.5    | 10.9   | 5.9    | 9.7    | 1.8    |
| 28.4  | 12.7   | 20.1   | 28.1   | 21.4   | 29.5   | 24.1   | 27.6   | 15.8   |
| 62.8  | 54.0   | 54.2   | 89.2   | 72.8   | 50.9   | 67.7   | 105.8  | 56.2   |
| 12.6  | 13.5   | 10.1   | 12.2   | 8.3    | 9.0    | 11.3   | 17.3   | 13.7   |
| 5.0   | 5.6    | 9.4    | 4.4    | 6.4    | 2.6    | 7.4    | 1.1    | 6.0    |
| 1.5   | 2.5    | 1.1    | 1.3    | 4.5    | 1.1    | 7.5    | 1.0    | 6.2    |
| 41.8  | 21.4   | 32.7   | 37.0   | 24.1   | 42.7   | 41.5   | 58.7   | 33.5   |
| 21.7  | 14.7   | 21.1   | 17.8   | 12.9   | 17.7   | 17.6   | 27.9   | 21.6   |
| 222.1 | 136.4  | 207.6  | 203.0  | 177.0  | 224.8  | 227.4  | 256.2  | 177.3  |
| 4.4   | 6.7    | 0.3    | 3.4    | 4.9    | 0.6    | 8.6    | 3.6    | 2.4    |
| 216.2 | 102.7  | 186.5  | 193.6  | 105.8  | 199.1  | 217.1  | 249.3  | 202.5  |
| 27.5  | 23.4   | 23.9   | 20.8   | 17.8   | 21.6   | 22.6   | 26.4   | 20.2   |
| 7.6   | 4.1    | 3.9    | 2.3    | 4.8    | 3.4    | 4.7    | 7.3    | 3.4    |
| 189.2 | 127.4  | 139.9  | 173.8  | 191.8  | 198.7  | 274.2  | 326.4  | 192.3  |
| 22.3  | 20.0   | 15.6   | 18.5   | 11.9   | 1.9    | 26.5   | 22.5   | 12.5   |
| 170.3 | 110.1  | 139.3  | 145.1  | 131.5  | 138.4  | 182.1  | 189.3  | 168.8  |
| 16.3  | 6.0    | 14.9   | 1.9    | 14.2   | 4.7    | 1.7    | 1.6    | 1.4    |
| 24.4  | 16.8   | 13.6   | 13.9   | 21.6   | 19.9   | 19.7   | 27.3   | 23.4   |
| 42.8  | 29.7   | 30.4   | 30.3   | 33.0   | 28.4   | 32.1   | 48.8   | 43.2   |
| 8.2   | 0.9    | 1.2    | 3.0    | 5.3    | 0.6    | 0.8    | 1.4    | 6.3    |
| 6.2   | 8.0    | 9.9    | 12.1   | 7.6    | 10.3   | 4.5    | 8.1    | 6.4    |
| 5.2   | 14.6   | 6.0    | 11.0   | 16.7   | 21.9   | 26.7   | 47.1   | 16.9   |
| 8.3   | 3.0    | 0.6    | 0.9    | 0.7    | 0.8    | 4.2    | 0.9    | 0.4    |
| 6.4   | 12.1   | 7.9    | 8.4    | 4.0    | 8.0    | 16.5   | 14.1   | 10.2   |
| 3.6   | 1.5    | 1.4    | 3.7    | 3.5    | 2.1    | 11.3   | 2.6    | 5.3    |
| 126.3 | 75.9   | 124.8  | 120.6  | 114.0  | 129.5  | 147.8  | 149.9  | 121.5  |
| 10.8  | 3.0    | 3.2    | 1.8    | 6.8    | 4.0    | 1.1    | 8.1    | 2.7    |
| 0.4   | 1.2    | 1.2    | 0.3    | 0.9    | 3.4    | 2.2    | 1.8    | 0.3    |
| 8.8   | 10.9   | 6.3    | 4.8    | 7.4    | 5.1    | 7.2    | 2.1    | 1.2    |
| 5.8   | 3.1    | 1.9    | 1.3    | 5.2    | 1.2    | 3.0    | 1.4    | 1.4    |
| 120.5 | 63.0   | 79.9   | 77.7   | 75.2   | 84.0   | 112.7  | 122.6  | 77.8   |
| 15.5  | 14.7   | 19.8   | 9.3    | 15.4   | 8.9    | 14.0   | 11.1   | 15.8   |
| 1.9   | 4.5    | 1.8    | 3.9    | 8.3    | 3.6    | 3.0    | 13.9   | 2.4    |
| 14.9  | 1.1    | 2.9    | 2.5    | 1.4    | 6.2    | 14.8   | 12.0   | 2.6    |
| 9.1   | 7.4    | 6.3    | 7.6    | 11.4   | 9.2    | 9.6    | 8.9    | 4.2    |
| 2.8   | 3.3    | 3.5    | 0.4    | 0.6    | 5.4    | 6.8    | 1.6    | 1.4    |
| 770.2 | 1183.9 | 1354.7 | 1348.4 | 1556.3 | 1440.3 | 2091.8 | 2329.5 | 1514.7 |
| 194.0 | 108.0  | 145.4  | 143.5  | 141.8  | 162.8  | 157.8  | 183.2  | 125.7  |
| 52.9  | 28.1   | 41.3   | 34.4   | 32.5   | 48.7   | 60.1   | 62.8   | 36.9   |
| 1.0   | 2.3    | 0.8    | 1.0    | 1.2    | 1.4    | 10.2   | 6.2    | 1.4    |
| 39.5  | 13.1   | 18.6   | 16.3   | 16.6   | 20.2   | 24.7   | 32.2   | 23.2   |

|        |        |        |        |        |        |        |        |        |
|--------|--------|--------|--------|--------|--------|--------|--------|--------|
| 4.3    | 11.2   | 11.3   | 7.7    | 8.6    | 8.0    | 11.7   | 11.5   | 6.8    |
| 7.7    | 3.2    | 4.2    | 4.2    | 5.8    | 5.6    | 8.8    | 11.2   | 6.7    |
| 3.9    | 0.4    | 0.3    | 7.0    | 2.7    | 1.7    | 1.7    | 1.3    | 0.5    |
| 5.4    | 2.8    | 0.4    | 1.9    | 4.9    | 5.8    | 3.4    | 9.2    | 2.1    |
| 1.2    | 1.7    | 7.0    | 3.6    | 1.0    | 2.5    | 4.9    | 0.6    | 5.0    |
| 97.8   | 68.2   | 76.9   | 67.8   | 90.8   | 68.4   | 97.8   | 141.6  | 102.1  |
| 21.2   | 16.2   | 16.2   | 22.1   | 29.0   | 13.2   | 23.4   | 31.4   | 20.5   |
| 9.9    | 11.0   | 9.4    | 15.5   | 11.9   | 12.1   | 17.2   | 20.1   | 5.1    |
| 585.9  | 308.6  | 447.1  | 490.8  | 462.0  | 484.8  | 586.7  | 549.5  | 462.5  |
| 603.5  | 405.0  | 498.9  | 497.6  | 506.6  | 510.7  | 496.8  | 594.5  | 410.5  |
| 161.5  | 113.6  | 144.3  | 128.6  | 147.3  | 142.7  | 186.3  | 177.9  | 124.6  |
| 1669.2 | 1312.5 | 1403.2 | 1580.7 | 1627.0 | 1625.8 | 2005.6 | 2335.0 | 1610.8 |
| 322.2  | 233.4  | 282.7  | 284.4  | 307.5  | 241.4  | 443.1  | 456.9  | 319.6  |
| 121.6  | 90.0   | 85.3   | 101.5  | 104.7  | 81.7   | 105.2  | 109.5  | 95.3   |
| 19.7   | 9.2    | 15.1   | 14.1   | 10.3   | 18.5   | 26.2   | 29.7   | 13.5   |
| 36.4   | 11.0   | 25.1   | 15.8   | 24.1   | 26.3   | 27.5   | 46.4   | 34.6   |
| 1.6    | 5.6    | 4.2    | 9.5    | 3.2    | 1.7    | 3.3    | 1.5    | 5.1    |
| 11.7   | 11.0   | 15.2   | 14.9   | 10.6   | 10.9   | 15.2   | 21.8   | 13.0   |
| 186.3  | 83.3   | 120.5  | 121.3  | 109.2  | 132.6  | 172.1  | 198.4  | 120.2  |
| 2001.9 | 1633.3 | 1663.8 | 1755.3 | 2055.8 | 1795.9 | 2290.0 | 2307.9 | 2064.3 |
| 15.7   | 14.4   | 16.1   | 9.8    | 10.1   | 11.3   | 16.5   | 19.1   | 13.4   |
| 205.4  | 106.8  | 134.6  | 132.1  | 160.5  | 137.7  | 179.8  | 235.9  | 121.8  |
| 14.3   | 11.1   | 7.5    | 15.3   | 8.8    | 6.0    | 12.5   | 20.0   | 10.1   |
| 96.7   | 76.1   | 75.8   | 81.0   | 79.9   | 87.5   | 106.9  | 112.0  | 72.0   |
| 28.8   | 8.8    | 9.7    | 21.3   | 19.5   | 16.8   | 16.1   | 18.9   | 18.1   |
| 91.1   | 47.4   | 49.8   | 46.6   | 55.2   | 54.6   | 76.0   | 77.9   | 60.3   |
| 11.8   | 9.8    | 10.4   | 9.9    | 6.8    | 2.3    | 12.0   | 13.4   | 10.5   |
| 119.7  | 102.9  | 118.2  | 76.3   | 157.4  | 119.5  | 130.9  | 135.7  | 171.7  |
| 33.2   | 20.7   | 22.6   | 25.8   | 27.1   | 19.8   | 31.2   | 40.5   | 10.2   |
| 25.5   | 17.0   | 3.3    | 13.5   | 19.3   | 12.0   | 14.2   | 17.0   | 14.4   |
| 170.1  | 111.8  | 119.3  | 137.5  | 121.3  | 124.1  | 180.1  | 168.9  | 119.9  |
| 266.9  | 159.9  | 197.2  | 206.9  | 195.1  | 191.5  | 284.4  | 305.6  | 206.7  |
| 11.1   | 10.2   | 13.8   | 13.7   | 10.0   | 4.3    | 11.4   | 2.4    | 10.5   |
| 1.2    | 1.1    | 1.4    | 1.2    | 1.2    | 0.7    | 1.0    | 2.2    | 0.9    |
| 8.7    | 9.8    | 8.8    | 14.6   | 9.3    | 5.4    | 12.5   | 9.0    | 1.3    |
| 7.9    | 10.8   | 1.4    | 8.5    | 3.6    | 7.1    | 7.6    | 2.9    | 5.9    |
| 8.5    | 13.2   | 11.4   | 7.3    | 5.4    | 2.4    | 7.9    | 16.0   | 16.7   |
| 11.8   | 16.7   | 14.6   | 21.0   | 16.7   | 22.0   | 24.4   | 38.3   | 14.0   |
| 3.9    | 1.6    | 2.2    | 0.9    | 1.2    | 0.3    | 5.6    | 2.4    | 8.1    |
| 2.0    | 0.4    | 0.4    | 0.7    | 0.8    | 1.0    | 0.6    | 1.1    | 0.4    |
| 0.5    | 0.2    | 0.3    | 0.3    | 0.3    | 0.5    | 0.3    | 0.3    | 0.5    |
| 0.4    | 0.3    | 0.6    | 0.5    | 0.4    | 0.4    | 0.6    | 0.6    | 0.4    |
| 10.2   | 6.9    | 4.3    | 9.0    | 3.1    | 5.2    | 11.5   | 4.9    | 5.6    |
| 0.7    | 0.5    | 0.6    | 1.1    | 0.9    | 1.0    | 1.2    | 1.6    | 0.9    |
| 182.6  | 129.5  | 151.0  | 154.5  | 155.0  | 169.0  | 197.8  | 240.0  | 167.5  |
| 483.4  | 303.5  | 312.8  | 359.4  | 372.3  | 356.0  | 426.2  | 502.0  | 300.1  |
| 98.0   | 51.9   | 64.2   | 85.4   | 93.3   | 77.5   | 107.0  | 139.6  | 69.7   |
| 6.7    | 5.7    | 2.0    | 1.0    | 6.2    | 0.9    | 9.3    | 10.8   | 1.7    |
| 5.2    | 5.8    | 1.0    | 0.6    | 5.0    | 4.0    | 5.1    | 3.9    | 0.6    |
| 1.9    | 3.4    | 2.1    | 2.6    | 0.3    | 0.3    | 3.7    | 0.7    | 0.6    |
| 9.7    | 2.8    | 6.4    | 5.3    | 6.7    | 5.0    | 2.0    | 7.4    | 2.8    |
| 309.1  | 218.1  | 243.4  | 267.7  | 220.6  | 201.8  | 316.7  | 315.8  | 274.8  |
| 5.0    | 6.0    | 2.5    | 4.4    | 1.6    | 3.4    | 8.6    | 3.2    | 3.3    |

|        |        |        |        |        |        |        |        |        |
|--------|--------|--------|--------|--------|--------|--------|--------|--------|
| 120.2  | 66.4   | 60.0   | 79.6   | 74.2   | 92.4   | 90.8   | 122.2  | 90.4   |
| 31.8   | 24.9   | 6.8    | 17.4   | 8.8    | 14.0   | 20.6   | 22.8   | 24.4   |
| 46.2   | 33.5   | 31.5   | 36.1   | 38.6   | 40.1   | 44.9   | 61.8   | 38.6   |
| 40.1   | 31.8   | 32.9   | 27.9   | 31.7   | 29.8   | 26.9   | 37.6   | 21.7   |
| 33.0   | 13.9   | 21.1   | 21.2   | 16.1   | 22.9   | 30.1   | 30.2   | 30.5   |
| 541.3  | 360.5  | 410.8  | 384.8  | 411.1  | 383.9  | 492.9  | 571.1  | 333.9  |
| 17.4   | 9.6    | 16.2   | 14.7   | 24.5   | 17.2   | 23.5   | 35.2   | 17.3   |
| 276.4  | 173.6  | 217.1  | 220.5  | 235.7  | 219.1  | 277.7  | 355.9  | 210.2  |
| 65.3   | 34.2   | 37.5   | 31.4   | 38.7   | 30.6   | 72.2   | 80.1   | 54.6   |
| 327.9  | 178.9  | 232.5  | 237.1  | 235.8  | 251.0  | 290.9  | 416.2  | 275.5  |
| 101.5  | 46.5   | 52.0   | 53.2   | 59.3   | 53.9   | 86.8   | 89.5   | 64.3   |
| 117.4  | 53.5   | 83.6   | 60.0   | 79.0   | 80.5   | 105.4  | 100.5  | 73.3   |
| 118.9  | 119.0  | 83.6   | 109.6  | 135.4  | 103.5  | 118.6  | 120.7  | 141.2  |
| 3.0    | 7.7    | 2.0    | 7.7    | 2.4    | 2.3    | 4.7    | 8.5    | 8.5    |
| 4.7    | 2.0    | 5.0    | 2.4    | 1.5    | 0.3    | 3.2    | 2.4    | 2.2    |
| 185.5  | 133.3  | 120.8  | 153.8  | 147.3  | 125.4  | 223.5  | 246.5  | 189.6  |
| 75.4   | 23.1   | 40.8   | 35.0   | 31.9   | 31.8   | 57.8   | 71.9   | 35.4   |
| 131.1  | 105.0  | 73.5   | 81.3   | 98.5   | 98.3   | 128.4  | 184.2  | 93.3   |
| 41.1   | 20.1   | 27.3   | 22.4   | 28.6   | 32.3   | 40.0   | 58.9   | 25.6   |
| 44.6   | 25.8   | 37.8   | 21.4   | 27.2   | 27.4   | 32.1   | 41.6   | 31.9   |
| 74.5   | 36.6   | 46.7   | 55.1   | 67.3   | 42.9   | 66.8   | 71.0   | 65.9   |
| 0.7    | 0.4    | 0.4    | 0.7    | 0.6    | 0.6    | 0.6    | 0.9    | 0.9    |
| 22.2   | 32.3   | 21.0   | 21.0   | 21.7   | 21.9   | 20.7   | 23.2   | 25.8   |
| 29.6   | 32.8   | 28.9   | 36.2   | 36.6   | 27.1   | 37.3   | 35.5   | 28.5   |
| 63.2   | 54.3   | 63.5   | 50.7   | 56.6   | 54.2   | 81.5   | 91.6   | 49.6   |
| 163.0  | 105.4  | 118.8  | 115.0  | 133.6  | 126.0  | 179.7  | 179.0  | 125.4  |
| 4.6    | 3.3    | 5.4    | 4.3    | 7.1    | 0.4    | 10.3   | 3.0    | 4.5    |
| 111.7  | 77.4   | 89.3   | 90.4   | 100.5  | 108.5  | 142.1  | 191.2  | 110.8  |
| 53.3   | 39.3   | 36.1   | 34.9   | 42.4   | 38.8   | 52.2   | 56.9   | 34.7   |
| 25.6   | 11.2   | 13.1   | 18.3   | 19.2   | 12.8   | 24.8   | 35.5   | 35.6   |
| 113.2  | 79.0   | 60.4   | 90.2   | 72.6   | 81.4   | 108.9  | 150.4  | 91.6   |
| 16.6   | 7.8    | 6.2    | 5.9    | 7.6    | 6.9    | 15.1   | 17.8   | 7.3    |
| 1.1    | 1.4    | 5.1    | 6.3    | 0.4    | 9.1    | 1.6    | 2.2    | 14.8   |
| 597.7  | 303.5  | 437.7  | 447.3  | 334.8  | 391.1  | 419.6  | 421.2  | 554.1  |
| 43.3   | 24.2   | 24.7   | 21.3   | 19.7   | 34.1   | 37.7   | 38.2   | 32.8   |
| 21.1   | 10.4   | 10.2   | 9.4    | 12.4   | 9.0    | 24.3   | 23.5   | 22.3   |
| 48.8   | 36.4   | 27.1   | 39.9   | 36.4   | 32.5   | 59.0   | 69.5   | 53.6   |
| 52.6   | 41.4   | 38.5   | 64.7   | 53.8   | 57.2   | 67.6   | 94.8   | 49.5   |
| 63.5   | 50.5   | 53.3   | 63.1   | 56.1   | 55.3   | 82.6   | 79.4   | 61.3   |
| 10.9   | 19.0   | 16.3   | 25.0   | 23.2   | 22.3   | 26.5   | 42.3   | 22.8   |
| 41.6   | 42.8   | 53.1   | 45.1   | 47.9   | 51.1   | 41.8   | 58.8   | 33.1   |
| 1591.4 | 1165.5 | 1248.1 | 1269.3 | 1321.0 | 1333.9 | 1623.1 | 1792.5 | 1047.1 |
| 95.6   | 63.4   | 69.2   | 93.5   | 85.6   | 79.9   | 115.9  | 146.8  | 72.9   |
| 154.5  | 129.1  | 159.4  | 177.3  | 153.6  | 166.0  | 173.0  | 164.6  | 129.6  |
| 12.9   | 7.2    | 9.9    | 11.8   | 12.0   | 16.2   | 15.1   | 16.1   | 9.5    |
| 43.8   | 25.3   | 29.4   | 21.2   | 18.0   | 5.0    | 34.4   | 28.0   | 14.7   |
| 61.4   | 52.0   | 61.2   | 50.0   | 74.6   | 84.5   | 95.5   | 137.0  | 71.7   |
| 52.3   | 25.6   | 32.8   | 36.8   | 37.8   | 37.1   | 45.9   | 83.5   | 31.5   |
| 36.9   | 20.1   | 20.5   | 28.8   | 37.2   | 24.7   | 54.2   | 70.0   | 40.4   |
| 46.0   | 31.3   | 41.3   | 59.2   | 55.9   | 40.3   | 55.3   | 68.3   | 31.0   |
| 2.3    | 2.1    | 1.9    | 2.0    | 2.3    | 7.8    | 1.9    | 3.4    | 5.7    |
| 28.6   | 20.5   | 20.7   | 28.5   | 25.6   | 32.3   | 33.1   | 29.9   | 19.7   |
| 140.4  | 64.8   | 56.1   | 80.4   | 70.3   | 64.9   | 109.4  | 143.6  | 94.9   |

|        |        |        |        |        |        |        |        |        |
|--------|--------|--------|--------|--------|--------|--------|--------|--------|
| 92.5   | 59.8   | 46.1   | 49.0   | 56.4   | 73.1   | 76.9   | 100.3  | 61.6   |
| 18.8   | 11.2   | 14.7   | 10.9   | 11.1   | 13.4   | 15.2   | 17.2   | 12.5   |
| 44.6   | 41.2   | 39.0   | 34.4   | 48.1   | 30.9   | 42.1   | 42.6   | 34.6   |
| 41.1   | 44.3   | 37.3   | 27.2   | 53.4   | 30.0   | 43.6   | 45.0   | 33.1   |
| 2497.9 | 1831.8 | 1825.2 | 2005.9 | 2359.4 | 1945.9 | 2279.0 | 2561.1 | 1706.4 |
| 14.1   | 25.8   | 16.8   | 29.9   | 20.0   | 17.4   | 40.4   | 35.2   | 23.3   |
| 4.4    | 5.9    | 1.2    | 1.6    | 1.5    | 1.5    | 8.4    | 7.7    | 4.6    |
| 35.2   | 25.5   | 21.4   | 24.9   | 18.4   | 22.2   | 31.8   | 22.4   | 16.0   |
| 4.0    | 0.5    | 5.8    | 2.7    | 2.9    | 6.0    | 0.8    | 1.5    | 0.6    |
| 0.4    | 1.0    | 3.1    | 0.1    | 0.5    | 0.7    | 0.6    | 0.4    | 0.5    |
| 154.7  | 75.6   | 108.6  | 110.9  | 127.5  | 138.7  | 195.3  | 194.3  | 153.6  |
| 4064.5 | 3731.0 | 3546.0 | 3864.7 | 3965.5 | 3744.1 | 4143.0 | 4330.6 | 3269.8 |
| 25.0   | 8.0    | 9.3    | 16.8   | 19.5   | 17.9   | 26.8   | 43.1   | 15.7   |
| 48.1   | 34.8   | 45.6   | 32.9   | 40.4   | 42.7   | 53.7   | 53.1   | 43.3   |
| 10.2   | 0.8    | 0.9    | 1.3    | 9.1    | 2.6    | 3.3    | 1.8    | 0.5    |
| 139.2  | 84.1   | 75.9   | 104.7  | 105.7  | 82.9   | 167.9  | 175.9  | 119.2  |
| 32.1   | 32.5   | 32.4   | 34.9   | 37.2   | 33.4   | 58.9   | 58.2   | 41.6   |
| 234.4  | 134.1  | 154.0  | 160.1  | 170.2  | 169.8  | 201.3  | 253.5  | 127.8  |
| 38.9   | 10.8   | 15.0   | 19.8   | 13.6   | 17.1   | 21.0   | 33.0   | 19.5   |
| 178.3  | 69.0   | 72.2   | 81.1   | 91.7   | 83.4   | 100.7  | 113.3  | 67.8   |
| 63.4   | 42.7   | 34.3   | 56.5   | 60.9   | 50.1   | 91.0   | 68.5   | 52.0   |
| 125.9  | 100.9  | 95.2   | 107.5  | 131.7  | 116.4  | 150.1  | 194.6  | 139.2  |
| 30.1   | 25.0   | 33.2   | 34.3   | 30.9   | 28.4   | 40.1   | 45.7   | 36.4   |
| 47.0   | 29.8   | 28.6   | 28.3   | 36.0   | 25.8   | 44.7   | 39.9   | 34.5   |
| 26.9   | 21.5   | 11.9   | 6.7    | 10.3   | 15.3   | 16.7   | 18.6   | 17.6   |
| 18.3   | 8.6    | 13.8   | 14.9   | 18.0   | 17.5   | 27.9   | 27.0   | 16.5   |
| 33.2   | 29.7   | 21.9   | 24.1   | 24.6   | 31.8   | 44.0   | 66.4   | 30.0   |
| 3.8    | 6.7    | 8.2    | 5.6    | 3.9    | 12.0   | 12.8   | 8.5    | 2.0    |
| 72.4   | 35.8   | 40.0   | 60.4   | 50.9   | 50.9   | 79.4   | 101.7  | 67.2   |
| 1.1    | 0.8    | 1.2    | 0.9    | 1.3    | 0.9    | 5.4    | 1.4    | 0.7    |
| 170.8  | 143.2  | 143.2  | 137.9  | 165.8  | 143.3  | 191.6  | 189.9  | 121.9  |
| 114.9  | 72.0   | 99.3   | 82.6   | 81.1   | 81.4   | 108.4  | 127.6  | 85.1   |
| 123.8  | 89.3   | 95.5   | 94.8   | 109.9  | 98.3   | 168.4  | 175.7  | 106.4  |
| 92.6   | 40.2   | 46.9   | 76.1   | 71.1   | 62.4   | 104.7  | 90.7   | 75.5   |
| 146.6  | 82.7   | 90.0   | 116.7  | 91.1   | 104.0  | 140.8  | 141.7  | 96.8   |
| 65.8   | 41.1   | 45.8   | 52.2   | 63.0   | 63.5   | 79.2   | 62.6   | 65.5   |
| 85.7   | 65.1   | 63.5   | 66.2   | 76.1   | 64.7   | 113.9  | 116.9  | 67.2   |
| 38.6   | 20.5   | 24.8   | 31.7   | 24.9   | 30.7   | 38.0   | 38.3   | 26.7   |
| 54.1   | 31.8   | 31.1   | 37.7   | 38.4   | 42.8   | 56.2   | 74.1   | 59.0   |
| 38.1   | 20.6   | 22.8   | 22.3   | 24.2   | 26.9   | 27.3   | 34.3   | 22.3   |
| 579.9  | 449.7  | 493.0  | 509.5  | 575.7  | 566.7  | 680.9  | 738.9  | 497.2  |
| 1.3    | 1.1    | 1.1    | 4.2    | 1.1    | 5.1    | 1.8    | 1.3    | 1.6    |
| 267.1  | 155.1  | 220.5  | 205.7  | 215.5  | 214.4  | 301.1  | 385.0  | 239.7  |
| 56.5   | 33.4   | 34.3   | 40.3   | 37.3   | 50.9   | 41.1   | 69.7   | 36.7   |
| 3.9    | 19.0   | 8.1    | 3.9    | 2.3    | 13.8   | 1.8    | 3.5    | 2.9    |
| 9.2    | 1.1    | 6.0    | 8.1    | 8.4    | 8.7    | 3.4    | 19.2   | 3.1    |
| 17.1   | 14.2   | 12.3   | 11.1   | 8.0    | 15.8   | 25.1   | 29.3   | 12.3   |
| 52.1   | 40.1   | 48.5   | 53.7   | 42.1   | 50.4   | 65.2   | 89.1   | 44.1   |
| 5.3    | 8.7    | 2.3    | 4.1    | 3.2    | 3.1    | 10.9   | 4.7    | 4.5    |
| 46.0   | 34.7   | 39.3   | 36.5   | 32.1   | 28.2   | 54.9   | 45.9   | 30.1   |
| 12.0   | 11.2   | 23.6   | 24.9   | 16.8   | 16.9   | 33.7   | 35.4   | 27.4   |
| 28.8   | 25.9   | 19.9   | 30.2   | 33.0   | 30.3   | 35.8   | 58.9   | 35.6   |
| 100.6  | 89.5   | 107.3  | 112.1  | 87.2   | 106.1  | 163.4  | 160.5  | 86.6   |

|        |        |        |        |        |        |        |        |        |
|--------|--------|--------|--------|--------|--------|--------|--------|--------|
| 13.2   | 11.8   | 10.5   | 9.1    | 14.4   | 16.2   | 13.6   | 18.4   | 12.0   |
| 25.0   | 15.3   | 10.5   | 12.4   | 15.9   | 13.4   | 11.4   | 25.9   | 12.7   |
| 73.9   | 28.2   | 36.5   | 50.0   | 46.9   | 47.6   | 58.7   | 90.0   | 47.3   |
| 11.9   | 2.6    | 7.1    | 4.1    | 11.1   | 12.9   | 10.5   | 13.0   | 10.0   |
| 217.8  | 111.0  | 118.2  | 117.9  | 112.7  | 131.6  | 166.5  | 246.3  | 183.7  |
| 44.4   | 25.9   | 23.4   | 43.5   | 28.4   | 36.4   | 37.2   | 53.1   | 18.7   |
| 11.3   | 10.6   | 7.0    | 2.6    | 4.1    | 2.0    | 6.4    | 7.3    | 12.8   |
| 293.1  | 200.5  | 196.5  | 245.9  | 243.4  | 240.5  | 383.8  | 462.8  | 245.8  |
| 31.0   | 21.1   | 21.3   | 25.3   | 26.2   | 14.1   | 32.4   | 30.0   | 21.4   |
| 33.8   | 21.9   | 29.5   | 28.7   | 25.3   | 33.6   | 37.8   | 48.5   | 34.3   |
| 52.0   | 40.5   | 35.3   | 34.5   | 36.8   | 40.0   | 43.5   | 80.1   | 37.5   |
| 40.4   | 44.5   | 48.8   | 57.2   | 43.0   | 41.9   | 61.3   | 50.8   | 43.4   |
| 0.9    | 0.5    | 1.6    | 0.6    | 1.6    | 1.6    | 2.0    | 0.9    | 1.1    |
| 247.9  | 215.9  | 224.5  | 219.9  | 213.4  | 198.8  | 275.7  | 314.7  | 180.0  |
| 0.6    | 0.5    | 1.4    | 0.5    | 0.6    | 0.5    | 1.0    | 0.7    | 0.5    |
| 116.5  | 99.6   | 81.5   | 111.2  | 107.2  | 109.1  | 134.5  | 133.3  | 108.6  |
| 35.8   | 34.3   | 56.3   | 46.4   | 62.4   | 50.5   | 43.4   | 80.2   | 39.5   |
| 18.4   | 17.7   | 10.6   | 15.7   | 13.4   | 4.5    | 8.1    | 21.0   | 15.8   |
| 21.6   | 9.7    | 12.4   | 21.1   | 13.5   | 16.1   | 21.8   | 27.8   | 17.9   |
| 7.9    | 12.4   | 12.7   | 13.9   | 15.6   | 7.0    | 12.8   | 19.1   | 16.7   |
| 23.4   | 6.9    | 12.5   | 13.9   | 16.4   | 8.1    | 21.6   | 16.5   | 12.4   |
| 43.0   | 42.8   | 47.7   | 59.8   | 46.9   | 43.9   | 71.3   | 73.0   | 45.2   |
| 7.9    | 5.4    | 9.4    | 1.4    | 5.4    | 5.6    | 11.3   | 2.1    | 12.9   |
| 3.1    | 4.4    | 8.9    | 8.2    | 20.6   | 15.9   | 4.4    | 19.9   | 7.4    |
| 41.5   | 50.8   | 29.6   | 62.0   | 64.3   | 39.7   | 66.2   | 55.9   | 56.3   |
| 63.7   | 24.7   | 32.3   | 33.3   | 35.6   | 33.1   | 56.4   | 63.4   | 38.3   |
| 12.9   | 8.4    | 10.0   | 9.1    | 4.9    | 8.3    | 15.0   | 6.3    | 3.4    |
| 5.1    | 1.2    | 2.5    | 6.4    | 8.3    | 5.9    | 5.3    | 2.3    | 5.5    |
| 19.2   | 2.7    | 6.3    | 16.0   | 20.7   | 17.4   | 20.5   | 24.1   | 3.7    |
| 45.0   | 17.3   | 24.7   | 22.9   | 16.8   | 21.6   | 38.4   | 45.8   | 35.7   |
| 1.6    | 1.1    | 1.1    | 1.0    | 1.7    | 1.4    | 1.3    | 1.4    | 1.4    |
| 28.7   | 32.1   | 35.5   | 37.9   | 41.3   | 44.4   | 53.7   | 58.8   | 39.0   |
| 0.3    | 0.6    | 3.1    | 1.7    | 3.9    | 0.1    | 4.1    | 0.7    | 0.7    |
| 91.6   | 59.7   | 52.1   | 68.1   | 72.4   | 63.6   | 62.9   | 74.9   | 53.4   |
| 8.9    | 14.4   | 21.1   | 21.2   | 16.8   | 9.9    | 22.7   | 20.4   | 13.4   |
| 63.8   | 47.2   | 37.1   | 49.5   | 42.3   | 46.6   | 41.9   | 61.1   | 50.5   |
| 17.9   | 24.6   | 30.2   | 23.3   | 22.9   | 25.9   | 32.1   | 26.6   | 14.1   |
| 54.0   | 29.2   | 32.0   | 39.3   | 32.6   | 36.4   | 32.5   | 41.1   | 31.8   |
| 3.0    | 2.6    | 12.5   | 2.6    | 6.7    | 2.0    | 10.8   | 12.2   | 4.5    |
| 75.1   | 73.7   | 64.7   | 88.0   | 77.9   | 66.2   | 105.9  | 114.2  | 71.4   |
| 66.6   | 22.9   | 34.8   | 28.6   | 19.7   | 47.1   | 53.1   | 70.7   | 44.4   |
| 34.6   | 18.9   | 12.0   | 6.0    | 22.5   | 17.7   | 23.4   | 24.3   | 16.3   |
| 100.9  | 46.6   | 59.6   | 54.7   | 69.4   | 52.5   | 87.4   | 72.8   | 64.7   |
| 22.7   | 20.3   | 14.8   | 14.5   | 19.6   | 20.3   | 22.3   | 23.5   | 23.6   |
| 0.2    | 1.0    | 0.2    | 1.0    | 0.4    | 0.6    | 1.2    | 4.2    | 1.1    |
| 0.6    | 0.4    | 0.6    | 0.5    | 0.4    | 0.4    | 1.3    | 0.6    | 0.5    |
| 0.3    | 3.7    | 3.1    | 2.1    | 0.9    | 0.8    | 0.5    | 3.5    | 0.2    |
| 4.2    | 9.5    | 7.3    | 2.4    | 5.5    | 3.7    | 4.9    | 3.1    | 10.9   |
| 39.4   | 31.8   | 37.2   | 34.9   | 33.7   | 40.4   | 49.5   | 57.1   | 32.8   |
| 38.2   | 27.8   | 23.2   | 22.2   | 29.4   | 31.3   | 40.1   | 46.2   | 30.2   |
| 23.3   | 11.5   | 5.4    | 12.3   | 27.2   | 26.0   | 31.4   | 21.9   | 31.2   |
| 2419.8 | 1858.9 | 1779.3 | 1935.6 | 2247.3 | 2044.7 | 3264.1 | 3339.6 | 2490.5 |
| 28.2   | 11.0   | 12.0   | 17.7   | 16.4   | 11.6   | 19.4   | 26.7   | 9.7    |

|        |        |        |        |        |        |        |        |        |
|--------|--------|--------|--------|--------|--------|--------|--------|--------|
| 214.6  | 147.9  | 129.5  | 181.1  | 182.0  | 157.6  | 216.5  | 190.3  | 172.8  |
| 59.6   | 24.8   | 51.0   | 36.2   | 42.8   | 27.3   | 51.0   | 72.8   | 64.6   |
| 30.5   | 8.7    | 24.2   | 18.6   | 22.2   | 15.0   | 29.7   | 31.4   | 31.3   |
| 544.9  | 358.1  | 330.4  | 342.0  | 383.3  | 417.0  | 463.3  | 668.9  | 460.5  |
| 34.9   | 18.4   | 25.4   | 26.3   | 27.6   | 28.2   | 25.3   | 47.4   | 21.5   |
| 1.0    | 1.1    | 4.7    | 0.9    | 4.6    | 1.5    | 0.9    | 1.8    | 1.1    |
| 13.6   | 12.9   | 11.4   | 9.3    | 13.0   | 9.5    | 21.4   | 24.7   | 19.1   |
| 0.6    | 0.4    | 1.1    | 0.4    | 0.5    | 0.7    | 0.4    | 0.7    | 0.6    |
| 1.4    | 2.2    | 3.1    | 1.5    | 4.2    | 1.3    | 1.3    | 1.0    | 1.9    |
| 15.3   | 10.3   | 7.0    | 6.4    | 6.8    | 7.3    | 7.4    | 2.0    | 6.2    |
| 22.9   | 13.4   | 19.0   | 26.1   | 17.1   | 16.9   | 20.9   | 33.0   | 18.3   |
| 72.3   | 53.6   | 70.2   | 69.9   | 71.2   | 70.3   | 83.1   | 109.6  | 66.5   |
| 1.6    | 1.0    | 1.0    | 0.6    | 4.1    | 1.2    | 4.2    | 5.5    | 1.7    |
| 41.3   | 37.7   | 42.6   | 48.3   | 45.2   | 52.4   | 70.5   | 73.8   | 44.4   |
| 82.9   | 52.0   | 56.2   | 64.7   | 54.7   | 64.5   | 73.1   | 85.3   | 65.7   |
| 13.6   | 7.0    | 8.6    | 6.8    | 13.6   | 4.0    | 19.4   | 9.8    | 11.6   |
| 62.5   | 44.1   | 38.1   | 45.8   | 44.7   | 38.7   | 50.0   | 62.0   | 42.2   |
| 18.3   | 4.4    | 6.0    | 6.7    | 5.5    | 3.9    | 3.2    | 4.4    | 2.5    |
| 254.6  | 0.1    | 0.1    | 0.0    | 0.2    | 0.3    | 0.1    | 2.9    | 0.5    |
| 28.3   | 10.7   | 18.0   | 17.2   | 21.8   | 23.7   | 24.4   | 32.0   | 21.8   |
| 21.6   | 27.0   | 20.1   | 24.3   | 26.7   | 30.3   | 28.0   | 26.7   | 22.7   |
| 2.3    | 0.9    | 3.8    | 4.4    | 0.5    | 2.2    | 2.3    | 2.1    | 9.2    |
| 18.5   | 5.0    | 5.3    | 14.3   | 17.6   | 12.0   | 18.4   | 18.0   | 15.5   |
| 11.2   | 7.5    | 14.0   | 6.3    | 8.4    | 5.6    | 9.5    | 14.2   | 8.2    |
| 17.8   | 13.4   | 16.6   | 10.8   | 17.7   | 13.2   | 19.3   | 23.3   | 15.0   |
| 30.7   | 20.9   | 23.3   | 16.7   | 10.9   | 15.1   | 37.7   | 34.7   | 20.1   |
| 13.6   | 12.0   | 9.9    | 8.0    | 13.0   | 13.1   | 25.4   | 35.2   | 8.6    |
| 48.6   | 38.1   | 34.3   | 31.9   | 49.9   | 38.7   | 72.0   | 101.9  | 58.9   |
| 1.1    | 2.3    | 1.2    | 1.2    | 4.7    | 1.4    | 2.1    | 2.6    | 0.8    |
| 50.1   | 31.1   | 35.4   | 47.5   | 36.3   | 38.7   | 60.9   | 49.0   | 54.6   |
| 1095.2 | 1044.2 | 1121.9 | 1197.6 | 1183.1 | 1267.4 | 1342.4 | 1560.1 | 1145.5 |
| 6.9    | 6.3    | 1.0    | 8.1    | 4.9    | 4.4    | 2.0    | 2.7    | 4.2    |
| 13.5   | 7.1    | 9.2    | 8.8    | 8.1    | 9.2    | 8.4    | 13.5   | 7.1    |
| 89.4   | 22.5   | 44.5   | 49.0   | 33.5   | 49.3   | 76.6   | 58.3   | 31.5   |
| 178.2  | 134.0  | 160.0  | 141.0  | 142.2  | 161.8  | 257.3  | 212.5  | 164.3  |
| 4.2    | 2.7    | 7.4    | 9.0    | 12.6   | 13.8   | 10.0   | 16.8   | 17.7   |
| 10.0   | 19.3   | 12.1   | 9.9    | 10.0   | 17.1   | 23.5   | 20.5   | 8.8    |
| 4.5    | 2.7    | 1.6    | 2.0    | 2.1    | 3.5    | 1.3    | 1.4    | 1.6    |
| 361.0  | 241.5  | 279.7  | 293.9  | 288.1  | 282.2  | 382.5  | 455.1  | 427.4  |
| 366.4  | 228.3  | 316.4  | 342.1  | 302.9  | 340.0  | 417.5  | 424.5  | 286.7  |
| 17.2   | 11.4   | 6.9    | 15.3   | 12.3   | 9.9    | 15.9   | 18.3   | 21.3   |
| 113.3  | 63.8   | 63.4   | 74.2   | 61.0   | 59.6   | 65.0   | 97.5   | 59.8   |
| 9.2    | 6.2    | 6.3    | 7.3    | 7.0    | 12.2   | 10.4   | 10.0   | 9.1    |
| 1.1    | 6.8    | 1.6    | 1.6    | 1.8    | 1.0    | 2.2    | 2.0    | 0.8    |
| 72.6   | 36.0   | 33.5   | 44.5   | 32.8   | 28.8   | 46.7   | 55.8   | 47.7   |
| 143.7  | 103.0  | 116.8  | 92.5   | 104.3  | 98.5   | 115.0  | 130.5  | 71.6   |
| 49.9   | 35.2   | 32.3   | 42.1   | 26.1   | 40.6   | 60.5   | 73.9   | 58.3   |
| 74.1   | 22.6   | 37.8   | 33.3   | 42.0   | 26.4   | 57.2   | 53.4   | 38.1   |
| 21.7   | 15.1   | 14.0   | 16.6   | 12.6   | 10.3   | 17.8   | 22.1   | 10.1   |
| 226.0  | 144.8  | 198.6  | 164.8  | 198.2  | 232.4  | 312.8  | 360.7  | 252.4  |
| 209.1  | 211.5  | 134.8  | 189.2  | 210.6  | 160.6  | 218.0  | 250.8  | 313.3  |
| 2.5    | 1.2    | 1.9    | 2.4    | 3.3    | 2.9    | 1.9    | 1.8    | 5.2    |
| 16.1   | 9.0    | 14.2   | 10.3   | 17.3   | 13.5   | 12.2   | 15.0   | 15.3   |

|       |       |       |       |       |       |       |       |       |
|-------|-------|-------|-------|-------|-------|-------|-------|-------|
| 28.4  | 18.6  | 26.4  | 23.6  | 38.5  | 26.6  | 44.2  | 51.1  | 19.4  |
| 11.4  | 4.3   | 11.0  | 3.0   | 8.6   | 6.1   | 13.5  | 12.3  | 1.7   |
| 1.1   | 4.3   | 3.7   | 2.1   | 2.8   | 1.8   | 0.7   | 2.3   | 1.7   |
| 23.3  | 7.3   | 16.0  | 20.3  | 15.9  | 13.6  | 28.4  | 26.1  | 32.4  |
| 0.4   | 0.3   | 1.7   | 2.6   | 0.1   | 0.4   | 8.2   | 0.9   | 1.9   |
| 43.3  | 34.5  | 44.8  | 45.7  | 60.9  | 39.3  | 78.6  | 83.8  | 41.7  |
| 995.9 | 661.6 | 660.4 | 757.5 | 842.1 | 718.9 | 878.3 | 982.5 | 987.7 |
| 52.0  | 45.3  | 50.9  | 50.3  | 74.7  | 34.1  | 93.3  | 50.0  | 52.9  |
| 58.4  | 56.3  | 57.6  | 53.7  | 59.1  | 51.5  | 80.5  | 76.6  | 69.7  |
| 0.7   | 0.3   | 0.3   | 0.6   | 0.4   | 0.7   | 1.2   | 0.5   | 0.6   |
| 4.5   | 3.3   | 4.7   | 10.0  | 14.5  | 6.6   | 21.9  | 11.7  | 10.3  |
| 46.6  | 36.4  | 41.2  | 44.0  | 35.0  | 38.5  | 48.9  | 61.5  | 31.7  |
| 28.1  | 10.8  | 6.7   | 9.3   | 7.9   | 6.3   | 11.8  | 6.6   | 5.4   |
| 9.0   | 13.3  | 18.0  | 19.8  | 14.6  | 17.3  | 21.7  | 26.9  | 17.5  |
| 16.8  | 13.6  | 21.8  | 24.9  | 13.9  | 20.7  | 31.3  | 26.4  | 21.8  |
| 2.4   | 1.9   | 0.9   | 0.9   | 0.6   | 1.0   | 1.2   | 9.6   | 0.7   |
| 45.9  | 62.2  | 49.3  | 60.2  | 61.3  | 47.2  | 78.1  | 71.5  | 51.8  |
| 109.8 | 35.5  | 53.6  | 57.7  | 63.7  | 74.1  | 118.9 | 131.0 | 109.8 |
| 29.5  | 22.3  | 27.1  | 33.3  | 36.3  | 26.7  | 36.4  | 44.4  | 41.5  |
| 45.7  | 21.3  | 20.6  | 22.1  | 28.2  | 24.4  | 30.8  | 49.8  | 32.6  |
| 72.8  | 45.4  | 51.2  | 57.0  | 61.6  | 57.0  | 81.8  | 78.1  | 43.4  |
| 29.7  | 36.9  | 37.2  | 32.0  | 38.3  | 29.9  | 51.9  | 56.8  | 46.1  |
| 1.6   | 1.2   | 0.5   | 0.6   | 3.2   | 0.9   | 1.0   | 2.1   | 1.0   |
| 11.6  | 2.8   | 1.6   | 4.6   | 5.3   | 3.2   | 0.5   | 8.2   | 1.5   |
| 253.7 | 146.4 | 193.8 | 179.4 | 186.6 | 215.1 | 263.1 | 336.6 | 277.0 |
| 49.9  | 21.8  | 37.9  | 43.4  | 34.1  | 24.9  | 35.8  | 64.4  | 39.8  |
| 195.6 | 117.4 | 111.6 | 159.2 | 157.5 | 159.3 | 198.0 | 218.4 | 142.3 |
| 5.9   | 1.7   | 0.7   | 0.8   | 2.5   | 2.8   | 3.1   | 4.5   | 1.1   |
| 134.4 | 75.1  | 88.1  | 121.5 | 94.0  | 103.5 | 143.8 | 182.5 | 180.6 |
| 5.9   | 5.0   | 5.6   | 7.6   | 7.4   | 9.1   | 10.4  | 8.3   | 14.2  |
| 1.6   | 1.7   | 2.6   | 3.7   | 2.3   | 3.4   | 4.3   | 3.1   | 6.6   |
| 1.3   | 0.8   | 0.8   | 0.3   | 0.3   | 0.7   | 0.3   | 0.8   | 0.8   |
| 2.6   | 4.1   | 2.2   | 5.2   | 8.7   | 5.4   | 4.4   | 7.6   | 2.1   |
| 77.8  | 68.8  | 66.8  | 80.5  | 75.5  | 81.9  | 74.7  | 94.8  | 79.0  |
| 0.8   | 1.9   | 2.0   | 3.5   | 1.2   | 1.0   | 1.8   | 1.5   | 1.0   |
| 9.9   | 2.0   | 11.5  | 2.0   | 10.7  | 2.5   | 5.8   | 2.5   | 2.3   |
| 2.6   | 1.9   | 4.5   | 1.2   | 3.0   | 1.0   | 1.1   | 2.6   | 1.7   |
| 65.7  | 59.6  | 68.5  | 62.2  | 73.8  | 55.9  | 75.7  | 99.8  | 70.0  |
| 139.2 | 97.5  | 112.4 | 111.5 | 104.8 | 101.2 | 160.3 | 151.1 | 147.6 |
| 11.6  | 18.3  | 10.2  | 17.1  | 19.7  | 10.2  | 24.5  | 18.9  | 13.7  |
| 7.9   | 5.3   | 7.6   | 7.2   | 9.7   | 3.2   | 10.0  | 7.2   | 7.7   |
| 97.2  | 42.4  | 75.1  | 72.9  | 66.0  | 74.2  | 144.1 | 151.0 | 87.5  |
| 34.3  | 14.8  | 19.5  | 16.9  | 17.8  | 16.5  | 25.3  | 23.1  | 18.1  |
| 31.4  | 25.5  | 25.5  | 24.3  | 28.3  | 27.7  | 30.8  | 40.6  | 27.6  |
| 5.2   | 13.3  | 2.2   | 7.7   | 9.2   | 2.1   | 10.3  | 16.7  | 1.5   |
| 16.3  | 15.2  | 13.3  | 19.2  | 8.7   | 15.4  | 4.3   | 17.7  | 15.1  |
| 17.9  | 17.4  | 14.8  | 12.8  | 7.3   | 14.4  | 21.9  | 13.5  | 8.3   |
| 0.2   | 0.4   | 0.2   | 0.6   | 0.6   | 0.8   | 0.8   | 0.4   | 0.5   |
| 9.0   | 6.1   | 7.5   | 6.5   | 2.3   | 7.0   | 8.8   | 14.6  | 7.7   |
| 40.5  | 41.4  | 31.6  | 29.0  | 46.5  | 44.3  | 63.7  | 57.8  | 37.4  |
| 4.5   | 5.0   | 4.0   | 7.3   | 5.9   | 7.9   | 5.1   | 7.4   | 3.7   |
| 10.7  | 10.8  | 15.9  | 12.5  | 12.1  | 8.8   | 14.4  | 15.8  | 15.0  |
| 99.0  | 47.3  | 70.3  | 76.3  | 69.9  | 67.7  | 110.0 | 86.1  | 58.5  |

|       |       |       |       |       |       |       |       |       |
|-------|-------|-------|-------|-------|-------|-------|-------|-------|
| 26.6  | 23.3  | 20.5  | 26.4  | 24.5  | 17.7  | 29.6  | 34.4  | 24.8  |
| 125.9 | 74.5  | 80.1  | 88.7  | 100.5 | 93.8  | 121.7 | 159.7 | 112.8 |
| 68.1  | 15.5  | 12.1  | 12.7  | 10.9  | 7.8   | 11.4  | 0.8   | 14.2  |
| 1.1   | 1.0   | 3.7   | 3.0   | 2.4   | 0.8   | 0.3   | 3.4   | 1.2   |
| 20.1  | 9.1   | 21.3  | 13.0  | 12.4  | 15.5  | 21.1  | 17.1  | 9.8   |
| 1.0   | 0.5   | 0.8   | 0.6   | 0.6   | 0.4   | 1.4   | 1.5   | 0.4   |
| 13.8  | 22.7  | 17.8  | 24.1  | 21.6  | 11.0  | 12.3  | 25.8  | 21.3  |
| 80.1  | 48.5  | 68.6  | 80.8  | 76.4  | 70.0  | 89.2  | 103.3 | 77.5  |
| 1.6   | 1.0   | 0.5   | 0.5   | 0.5   | 0.5   | 0.6   | 0.5   | 2.3   |
| 0.6   | 1.2   | 0.7   | 1.2   | 0.9   | 1.1   | 0.6   | 1.3   | 0.6   |
| 1.3   | 1.4   | 0.5   | 1.0   | 0.7   | 1.5   | 2.4   | 7.5   | 2.3   |
| 148.5 | 85.9  | 96.2  | 100.0 | 105.1 | 106.5 | 142.1 | 147.1 | 105.5 |
| 201.7 | 123.2 | 111.6 | 124.2 | 140.2 | 132.7 | 182.6 | 186.9 | 171.6 |
| 0.7   | 0.8   | 1.1   | 0.9   | 0.8   | 1.3   | 2.2   | 1.9   | 1.7   |
| 82.6  | 51.3  | 82.8  | 58.9  | 53.8  | 50.4  | 40.0  | 82.4  | 68.3  |
| 70.4  | 35.4  | 27.7  | 32.7  | 39.0  | 34.6  | 57.7  | 55.8  | 46.3  |
| 17.2  | 11.4  | 26.4  | 17.9  | 29.0  | 18.7  | 13.9  | 32.4  | 13.5  |
| 12.0  | 9.9   | 8.2   | 11.9  | 12.7  | 5.4   | 7.0   | 5.2   | 7.4   |
| 6.5   | 15.9  | 23.2  | 10.1  | 11.8  | 11.0  | 22.3  | 19.5  | 12.8  |
| 9.4   | 11.8  | 10.3  | 13.7  | 8.4   | 8.3   | 19.7  | 28.6  | 18.8  |
| 45.2  | 19.3  | 27.9  | 29.7  | 34.5  | 24.4  | 37.4  | 44.2  | 29.0  |
| 1.3   | 0.4   | 0.4   | 2.0   | 0.3   | 5.2   | 4.1   | 1.8   | 3.1   |
| 249.1 | 227.0 | 215.3 | 269.8 | 278.6 | 200.8 | 329.2 | 382.1 | 287.1 |
| 11.2  | 9.5   | 4.3   | 6.2   | 6.1   | 5.9   | 11.0  | 8.7   | 13.0  |
| 1.4   | 0.6   | 4.6   | 5.7   | 5.2   | 6.8   | 1.0   | 0.6   | 1.0   |
| 17.2  | 7.2   | 16.7  | 11.2  | 15.9  | 13.1  | 19.3  | 17.9  | 16.3  |
| 33.3  | 20.2  | 23.0  | 26.6  | 26.7  | 24.7  | 24.3  | 40.1  | 26.3  |
| 56.2  | 38.7  | 38.2  | 43.0  | 41.3  | 38.2  | 63.3  | 67.5  | 50.0  |
| 54.4  | 36.0  | 36.7  | 33.7  | 32.4  | 39.3  | 60.3  | 62.1  | 47.5  |
| 26.7  | 15.9  | 18.6  | 28.2  | 25.4  | 21.8  | 30.3  | 35.7  | 29.2  |
| 146.8 | 93.2  | 123.2 | 118.7 | 138.8 | 127.6 | 143.4 | 208.7 | 111.1 |
| 45.6  | 27.2  | 37.5  | 30.9  | 42.0  | 37.4  | 44.6  | 58.5  | 35.6  |
| 3.6   | 4.7   | 2.5   | 3.2   | 3.0   | 0.8   | 4.6   | 1.1   | 7.5   |
| 5.3   | 1.5   | 3.3   | 0.6   | 1.0   | 1.1   | 7.7   | 2.8   | 4.7   |
| 4.8   | 1.6   | 9.6   | 6.4   | 7.2   | 2.7   | 1.2   | 6.8   | 3.6   |
| 23.9  | 20.2  | 25.2  | 13.4  | 16.2  | 21.1  | 26.7  | 34.0  | 15.7  |
| 252.4 | 158.0 | 211.4 | 184.1 | 227.6 | 228.6 | 285.3 | 359.1 | 223.6 |
| 373.3 | 229.5 | 270.9 | 255.9 | 317.0 | 330.7 | 421.1 | 535.6 | 385.1 |
| 137.1 | 73.8  | 87.5  | 95.4  | 91.0  | 120.7 | 157.0 | 186.6 | 110.4 |
| 9.1   | 7.0   | 9.5   | 8.9   | 13.2  | 10.6  | 11.7  | 17.5  | 5.8   |
| 108.8 | 61.2  | 79.8  | 82.1  | 95.9  | 94.3  | 110.2 | 153.0 | 71.1  |
| 13.4  | 11.6  | 8.3   | 16.1  | 14.7  | 16.1  | 19.2  | 23.7  | 10.4  |
| 48.0  | 28.6  | 28.9  | 34.2  | 37.1  | 34.3  | 50.6  | 48.9  | 32.9  |
| 1.5   | 3.4   | 10.1  | 1.8   | 9.6   | 9.1   | 18.2  | 8.2   | 2.6   |
| 4.9   | 4.7   | 0.8   | 7.0   | 6.4   | 0.7   | 3.8   | 1.5   | 5.6   |
| 66.0  | 68.1  | 66.9  | 72.7  | 79.2  | 73.3  | 112.4 | 108.7 | 79.9  |
| 47.2  | 38.9  | 39.8  | 50.8  | 47.3  | 50.2  | 59.5  | 64.2  | 43.3  |
| 8.8   | 6.0   | 8.1   | 7.4   | 6.4   | 6.8   | 11.2  | 14.0  | 3.8   |
| 486.0 | 309.8 | 371.7 | 414.9 | 401.7 | 384.1 | 541.1 | 527.9 | 433.3 |
| 13.5  | 6.1   | 10.1  | 12.0  | 7.2   | 10.1  | 17.6  | 20.8  | 15.8  |
| 0.7   | 1.1   | 0.6   | 0.7   | 0.8   | 0.6   | 0.3   | 0.7   | 0.5   |
| 7.5   | 8.3   | 12.0  | 6.1   | 2.7   | 11.5  | 7.4   | 12.4  | 4.5   |
| 5.1   | 3.0   | 1.1   | 3.0   | 3.0   | 0.5   | 5.1   | 12.4  | 2.5   |



|       |       |       |       |       |       |       |       |       |
|-------|-------|-------|-------|-------|-------|-------|-------|-------|
| 59.5  | 47.4  | 57.5  | 61.0  | 56.7  | 69.1  | 69.3  | 77.9  | 52.9  |
| 5.6   | 8.1   | 1.0   | 5.5   | 5.3   | 3.3   | 4.3   | 13.5  | 7.0   |
| 6.2   | 0.8   | 4.3   | 1.4   | 0.5   | 0.8   | 7.9   | 1.0   | 1.0   |
| 0.5   | 0.9   | 0.7   | 0.4   | 0.3   | 0.9   | 0.4   | 0.5   | 0.7   |
| 59.6  | 52.6  | 42.0  | 47.4  | 62.9  | 50.1  | 81.3  | 82.9  | 59.8  |
| 1.9   | 1.6   | 8.1   | 8.5   | 2.1   | 13.1  | 2.5   | 1.6   | 2.4   |
| 10.2  | 13.1  | 10.1  | 8.9   | 10.1  | 12.3  | 16.2  | 11.7  | 7.0   |
| 0.5   | 0.5   | 1.0   | 1.2   | 0.8   | 1.5   | 2.6   | 0.8   | 0.6   |
| 19.6  | 12.2  | 17.2  | 18.7  | 13.4  | 10.9  | 21.0  | 34.0  | 20.7  |
| 0.9   | 4.5   | 5.9   | 0.3   | 0.5   | 1.2   | 4.2   | 1.1   | 3.5   |
| 0.6   | 0.7   | 0.5   | 0.8   | 1.1   | 0.7   | 0.8   | 7.1   | 0.6   |
| 2.9   | 5.1   | 1.9   | 1.3   | 0.3   | 0.8   | 9.8   | 3.2   | 3.8   |
| 107.6 | 54.9  | 59.6  | 86.6  | 87.5  | 66.6  | 95.9  | 111.0 | 79.5  |
| 176.5 | 122.1 | 152.2 | 153.3 | 162.8 | 142.9 | 213.4 | 180.0 | 160.0 |
| 7.4   | 8.8   | 8.2   | 5.3   | 9.6   | 11.2  | 11.4  | 0.9   | 1.5   |
| 269.2 | 315.1 | 260.8 | 322.1 | 343.0 | 322.9 | 359.7 | 448.1 | 342.2 |
| 1.0   | 1.5   | 1.5   | 1.7   | 1.6   | 2.1   | 3.5   | 10.6  | 1.7   |
| 2.6   | 1.9   | 3.1   | 1.3   | 2.4   | 1.2   | 4.5   | 5.9   | 10.5  |
| 38.5  | 27.1  | 31.3  | 22.0  | 21.6  | 20.7  | 22.0  | 20.1  | 27.6  |
| 2.3   | 2.4   | 0.3   | 0.1   | 0.7   | 2.3   | 0.5   | 0.4   | 0.3   |
| 2.2   | 1.0   | 1.7   | 1.9   | 2.5   | 1.0   | 1.9   | 1.4   | 2.4   |
| 1.5   | 0.3   | 1.9   | 3.1   | 3.8   | 1.1   | 0.7   | 2.8   | 3.1   |
| 4.3   | 2.4   | 6.1   | 5.9   | 7.3   | 4.4   | 6.0   | 10.6  | 4.6   |
| 128.8 | 90.5  | 85.0  | 97.1  | 99.7  | 77.1  | 126.9 | 107.9 | 96.6  |
| 1.6   | 0.7   | 0.6   | 0.6   | 0.5   | 1.1   | 0.8   | 0.9   | 0.8   |
| 490.8 | 389.8 | 464.1 | 393.6 | 457.7 | 455.2 | 607.2 | 625.1 | 670.9 |
| 12.4  | 2.5   | 5.0   | 3.1   | 1.1   | 1.6   | 3.6   | 1.7   | 2.5   |
| 5.8   | 2.7   | 6.4   | 8.0   | 4.0   | 6.9   | 2.3   | 8.1   | 4.4   |
| 14.7  | 5.4   | 5.4   | 6.7   | 8.7   | 10.5  | 15.2  | 16.4  | 4.7   |
| 34.9  | 25.1  | 33.3  | 31.2  | 32.4  | 33.1  | 36.3  | 35.6  | 34.3  |
| 7.1   | 5.8   | 4.1   | 2.0   | 7.0   | 4.2   | 1.2   | 1.5   | 2.9   |
| 0.9   | 0.8   | 0.7   | 1.4   | 0.7   | 0.9   | 0.7   | 0.8   | 0.7   |
| 0.9   | 1.0   | 0.5   | 0.9   | 0.8   | 0.3   | 1.5   | 1.2   | 1.1   |
| 2.8   | 0.8   | 0.8   | 1.1   | 2.6   | 0.7   | 0.8   | 1.1   | 2.3   |
| 0.7   | 0.5   | 0.5   | 0.5   | 0.3   | 0.8   | 0.3   | 0.4   | 0.5   |
| 2.1   | 3.5   | 1.3   | 1.3   | 6.4   | 2.1   | 7.5   | 1.9   | 1.8   |
| 6.7   | 6.1   | 6.4   | 4.8   | 5.1   | 0.6   | 3.8   | 2.8   | 7.7   |
| 0.8   | 3.3   | 5.3   | 3.9   | 4.0   | 1.6   | 0.8   | 9.2   | 1.1   |
| 14.6  | 10.9  | 12.1  | 14.6  | 15.4  | 11.4  | 18.3  | 18.3  | 13.8  |
| 1.3   | 3.0   | 0.8   | 1.4   | 4.2   | 1.0   | 1.1   | 0.9   | 1.0   |
| 6.0   | 3.0   | 2.1   | 1.1   | 0.4   | 0.2   | 3.1   | 2.4   | 1.3   |
| 31.7  | 34.5  | 33.5  | 32.7  | 35.6  | 30.1  | 39.9  | 42.5  | 44.1  |
| 13.4  | 1.7   | 4.1   | 7.3   | 1.4   | 2.7   | 2.3   | 1.7   | 10.8  |
| 1.2   | 1.6   | 1.0   | 1.8   | 0.5   | 0.6   | 1.2   | 6.2   | 5.8   |
| 1.5   | 3.1   | 8.0   | 12.9  | 6.5   | 7.6   | 7.6   | 12.4  | 4.3   |
| 2.6   | 9.8   | 1.3   | 6.6   | 4.0   | 1.2   | 12.4  | 9.8   | 1.6   |
| 1.8   | 4.2   | 1.8   | 0.6   | 3.6   | 3.4   | 0.3   | 0.7   | 2.5   |
| 61.8  | 51.1  | 47.9  | 54.0  | 51.4  | 39.4  | 72.0  | 96.9  | 79.9  |
| 0.5   | 0.7   | 0.5   | 1.0   | 2.8   | 0.6   | 2.3   | 0.8   | 0.4   |
| 11.7  | 12.8  | 4.0   | 1.8   | 4.0   | 8.4   | 5.3   | 10.4  | 11.8  |
| 1.2   | 1.2   | 0.4   | 1.8   | 5.3   | 0.6   | 0.9   | 0.4   | 2.0   |
| 94.9  | 43.6  | 49.0  | 56.2  | 67.3  | 56.3  | 80.8  | 115.8 | 80.5  |
| 83.3  | 36.3  | 65.0  | 39.9  | 57.8  | 73.5  | 81.0  | 97.2  | 56.3  |

|       |       |       |       |       |       |       |       |       |
|-------|-------|-------|-------|-------|-------|-------|-------|-------|
| 86.2  | 71.0  | 90.6  | 82.5  | 77.5  | 78.1  | 113.3 | 121.5 | 73.9  |
| 5.1   | 6.4   | 6.4   | 6.1   | 9.9   | 9.1   | 6.5   | 8.9   | 4.8   |
| 15.5  | 2.2   | 8.5   | 7.4   | 1.3   | 15.7  | 3.6   | 2.8   | 3.8   |
| 8.1   | 25.4  | 21.6  | 33.8  | 30.7  | 14.3  | 31.9  | 31.5  | 29.3  |
| 20.0  | 17.9  | 17.6  | 21.7  | 20.2  | 14.9  | 19.3  | 26.7  | 18.0  |
| 9.1   | 17.7  | 11.4  | 12.0  | 12.7  | 11.3  | 12.5  | 9.8   | 7.4   |
| 21.8  | 13.7  | 11.9  | 15.1  | 11.9  | 16.0  | 19.1  | 30.5  | 10.4  |
| 0.7   | 0.4   | 0.8   | 0.8   | 0.6   | 0.7   | 0.5   | 0.9   | 0.8   |
| 46.0  | 31.3  | 42.8  | 29.0  | 36.0  | 33.7  | 35.8  | 36.1  | 28.1  |
| 4.6   | 2.8   | 1.6   | 16.3  | 7.5   | 3.5   | 3.0   | 10.6  | 2.7   |
| 15.4  | 22.8  | 19.3  | 25.6  | 15.1  | 18.1  | 29.2  | 28.9  | 13.5  |
| 70.3  | 42.5  | 53.9  | 50.0  | 49.2  | 40.6  | 62.5  | 65.6  | 66.3  |
| 2.2   | 2.0   | 0.7   | 5.5   | 0.8   | 2.8   | 6.6   | 9.3   | 2.6   |
| 104.7 | 28.7  | 47.5  | 49.7  | 39.7  | 59.4  | 80.9  | 120.0 | 55.2  |
| 31.4  | 21.6  | 24.7  | 22.1  | 29.8  | 24.5  | 40.0  | 47.7  | 28.4  |
| 26.4  | 16.0  | 13.3  | 18.3  | 20.7  | 23.4  | 19.7  | 17.2  | 17.4  |
| 101.7 | 51.6  | 72.3  | 85.4  | 63.6  | 101.2 | 169.7 | 221.8 | 147.2 |
| 65.1  | 35.8  | 38.0  | 34.3  | 37.1  | 52.6  | 66.1  | 76.1  | 40.2  |
| 5.0   | 1.8   | 5.6   | 4.8   | 5.7   | 2.7   | 5.3   | 7.5   | 1.4   |
| 1.7   | 3.7   | 6.6   | 4.0   | 4.9   | 1.3   | 11.8  | 16.5  | 3.4   |
| 241.0 | 134.9 | 146.1 | 158.5 | 156.4 | 147.8 | 190.0 | 208.3 | 152.9 |
| 103.7 | 104.7 | 121.6 | 97.4  | 136.6 | 111.7 | 151.3 | 153.9 | 135.3 |
| 60.6  | 56.7  | 75.8  | 63.6  | 65.6  | 63.6  | 93.9  | 103.5 | 55.0  |
| 3.1   | 4.2   | 2.1   | 5.2   | 4.7   | 1.9   | 3.1   | 11.1  | 1.6   |
| 21.5  | 19.3  | 21.8  | 20.8  | 26.3  | 21.9  | 24.0  | 34.3  | 26.3  |
| 182.0 | 96.4  | 145.6 | 143.2 | 139.4 | 148.3 | 180.2 | 211.8 | 180.4 |
| 54.3  | 36.2  | 53.9  | 51.1  | 46.0  | 44.1  | 46.5  | 46.9  | 50.5  |
| 144.5 | 129.3 | 131.6 | 141.1 | 133.9 | 135.6 | 174.3 | 190.5 | 119.7 |
| 15.7  | 10.5  | 13.3  | 11.1  | 13.8  | 9.8   | 15.0  | 17.4  | 9.4   |
| 5.0   | 2.1   | 6.8   | 4.6   | 6.0   | 9.8   | 10.4  | 10.3  | 2.3   |
| 1.3   | 4.1   | 4.1   | 0.3   | 0.3   | 1.3   | 2.0   | 0.5   | 4.5   |
| 114.6 | 49.4  | 57.5  | 56.9  | 72.7  | 57.0  | 81.9  | 92.7  | 73.5  |
| 3.2   | 3.2   | 4.8   | 3.5   | 9.1   | 1.2   | 4.3   | 0.9   | 3.3   |
| 127.5 | 63.2  | 87.4  | 115.1 | 84.4  | 80.5  | 119.2 | 119.3 | 87.7  |
| 3.7   | 1.5   | 3.3   | 5.0   | 0.7   | 5.0   | 0.8   | 4.0   | 1.3   |
| 97.8  | 40.2  | 50.3  | 61.4  | 54.2  | 67.8  | 80.2  | 101.0 | 60.9  |
| 2.4   | 6.2   | 4.6   | 3.7   | 5.6   | 1.7   | 3.7   | 4.7   | 1.4   |
| 0.6   | 0.9   | 3.6   | 3.7   | 0.7   | 5.7   | 0.3   | 4.4   | 3.0   |
| 69.7  | 66.3  | 60.2  | 58.7  | 63.1  | 53.8  | 81.2  | 82.0  | 66.8  |
| 0.7   | 1.8   | 0.9   | 4.3   | 1.3   | 1.0   | 1.1   | 1.5   | 0.7   |
| 11.9  | 8.7   | 16.6  | 4.3   | 13.6  | 17.9  | 13.3  | 14.8  | 14.1  |
| 6.1   | 7.1   | 1.2   | 4.5   | 8.0   | 5.5   | 1.3   | 8.4   | 8.1   |
| 38.8  | 20.0  | 22.2  | 27.4  | 26.9  | 18.0  | 30.1  | 34.8  | 21.3  |
| 140.8 | 100.0 | 90.2  | 92.7  | 114.6 | 113.2 | 143.0 | 205.2 | 123.6 |
| 6.9   | 8.4   | 5.9   | 6.3   | 7.6   | 4.3   | 12.9  | 11.9  | 6.3   |
| 1.5   | 3.6   | 3.3   | 3.5   | 5.0   | 2.0   | 3.6   | 4.9   | 2.9   |
| 38.6  | 23.1  | 33.3  | 29.3  | 35.3  | 40.8  | 43.4  | 51.9  | 47.5  |
| 10.5  | 1.7   | 10.8  | 5.3   | 1.4   | 2.2   | 11.1  | 15.0  | 9.5   |
| 1.3   | 0.8   | 1.8   | 0.3   | 3.0   | 1.9   | 2.4   | 2.8   | 3.2   |
| 94.4  | 81.6  | 93.4  | 97.2  | 104.0 | 101.0 | 124.6 | 154.4 | 87.4  |
| 282.6 | 222.7 | 217.7 | 239.5 | 253.3 | 218.7 | 316.2 | 317.0 | 277.9 |
| 10.3  | 7.9   | 5.0   | 5.2   | 7.5   | 8.5   | 14.1  | 13.0  | 13.5  |
| 38.2  | 13.1  | 15.1  | 15.2  | 17.2  | 22.6  | 22.4  | 26.4  | 18.7  |

|       |      |       |       |       |       |       |       |       |
|-------|------|-------|-------|-------|-------|-------|-------|-------|
| 57.1  | 34.1 | 26.0  | 32.2  | 32.3  | 30.5  | 55.5  | 67.2  | 44.5  |
| 5.7   | 13.4 | 11.0  | 9.6   | 15.6  | 6.3   | 18.7  | 19.0  | 9.9   |
| 6.9   | 9.4  | 5.5   | 4.3   | 2.4   | 10.2  | 15.4  | 6.1   | 9.7   |
| 4.1   | 1.7  | 0.2   | 0.7   | 0.5   | 0.1   | 0.4   | 3.1   | 1.2   |
| 157.0 | 76.9 | 113.1 | 109.9 | 97.9  | 108.8 | 122.8 | 193.7 | 106.7 |
| 141.4 | 93.7 | 118.0 | 115.8 | 106.7 | 120.3 | 142.0 | 198.4 | 110.0 |
| 15.0  | 14.1 | 14.3  | 10.6  | 20.4  | 19.4  | 24.5  | 31.2  | 26.7  |
| 56.5  | 68.2 | 54.1  | 56.6  | 69.8  | 80.4  | 59.7  | 89.9  | 66.4  |
| 3.2   | 10.4 | 1.0   | 3.7   | 1.7   | 7.8   | 4.8   | 1.1   | 0.7   |
| 6.5   | 3.2  | 11.6  | 12.6  | 9.4   | 10.4  | 9.0   | 4.6   | 8.2   |
| 1.4   | 2.6  | 1.1   | 4.9   | 2.7   | 0.9   | 0.2   | 0.4   | 0.6   |
| 5.9   | 3.9  | 20.8  | 20.9  | 35.0  | 15.7  | 23.1  | 29.6  | 27.4  |
| 13.7  | 9.7  | 12.2  | 10.0  | 8.1   | 8.8   | 4.3   | 11.2  | 15.3  |
| 29.3  | 10.6 | 10.3  | 14.2  | 12.4  | 9.0   | 10.3  | 10.3  | 7.0   |
| 0.1   | 0.6  | 2.4   | 2.5   | 3.1   | 2.0   | 1.3   | 1.0   | 0.2   |
| 1.7   | 8.7  | 5.0   | 6.0   | 5.5   | 0.9   | 4.0   | 7.9   | 9.9   |
| 2.1   | 1.1  | 5.7   | 0.7   | 4.1   | 0.5   | 3.7   | 0.7   | 3.2   |
| 60.7  | 39.7 | 43.8  | 51.3  | 54.0  | 37.8  | 63.5  | 67.9  | 48.6  |
| 1.8   | 0.4  | 1.4   | 2.3   | 1.7   | 1.0   | 2.6   | 1.0   | 1.2   |
| 2.2   | 0.7  | 1.1   | 0.5   | 3.8   | 0.6   | 4.6   | 5.1   | 1.1   |
| 3.1   | 0.6  | 3.5   | 0.9   | 4.3   | 0.6   | 0.4   | 3.3   | 3.0   |
| 6.9   | 0.3  | 1.6   | 3.8   | 1.9   | 1.2   | 7.3   | 3.5   | 4.7   |
| 5.2   | 4.1  | 3.9   | 5.1   | 4.8   | 3.1   | 1.2   | 7.5   | 3.2   |
| 1.1   | 1.7  | 1.0   | 2.1   | 4.8   | 7.3   | 3.3   | 5.9   | 6.1   |
| 110.6 | 87.5 | 75.7  | 82.9  | 98.8  | 66.2  | 143.3 | 126.5 | 98.6  |
| 19.1  | 9.6  | 8.5   | 22.0  | 12.0  | 7.0   | 12.1  | 24.9  | 13.2  |
| 15.2  | 12.2 | 10.8  | 11.8  | 18.4  | 9.4   | 17.6  | 22.1  | 12.7  |
| 6.5   | 13.7 | 3.7   | 12.7  | 11.0  | 10.2  | 5.1   | 15.7  | 13.4  |
| 6.1   | 5.6  | 3.6   | 6.2   | 6.0   | 6.6   | 9.4   | 8.3   | 10.8  |
| 24.1  | 22.1 | 16.6  | 11.5  | 24.2  | 14.5  | 24.4  | 32.1  | 26.3  |
| 0.9   | 5.7  | 0.2   | 5.4   | 1.7   | 3.6   | 0.9   | 3.1   | 0.7   |
| 1.1   | 1.0  | 0.7   | 0.9   | 2.0   | 3.9   | 8.6   | 5.6   | 0.7   |
| 109.3 | 89.4 | 108.1 | 114.2 | 75.7  | 105.0 | 143.8 | 111.8 | 102.5 |
| 44.7  | 27.0 | 25.8  | 32.3  | 32.1  | 26.7  | 41.1  | 43.4  | 25.7  |
| 40.1  | 29.5 | 28.7  | 23.1  | 27.3  | 33.4  | 36.3  | 52.9  | 30.8  |
| 20.3  | 7.1  | 6.6   | 12.6  | 10.7  | 9.9   | 16.4  | 22.2  | 13.3  |
| 0.6   | 1.0  | 3.4   | 0.3   | 0.7   | 3.4   | 0.6   | 0.5   | 0.6   |
| 31.9  | 27.2 | 30.3  | 26.2  | 30.1  | 21.5  | 48.2  | 42.1  | 28.8  |
| 23.2  | 11.5 | 12.5  | 14.0  | 9.1   | 14.4  | 26.4  | 30.6  | 19.7  |
| 3.8   | 1.1  | 2.2   | 1.1   | 1.6   | 1.9   | 3.4   | 2.0   | 9.6   |
| 1.6   | 1.4  | 1.7   | 1.1   | 1.5   | 1.0   | 1.6   | 1.1   | 1.0   |
| 28.7  | 41.3 | 35.8  | 33.1  | 34.0  | 25.0  | 40.1  | 55.6  | 29.0  |
| 46.6  | 37.9 | 24.5  | 36.2  | 34.0  | 29.9  | 44.2  | 57.4  | 49.1  |
| 15.2  | 3.4  | 9.9   | 7.6   | 7.4   | 7.6   | 13.4  | 16.0  | 11.0  |
| 1.1   | 0.5  | 1.0   | 0.2   | 0.1   | 0.2   | 0.5   | 3.2   | 1.4   |
| 95.0  | 52.8 | 51.0  | 53.9  | 55.2  | 72.1  | 84.4  | 121.7 | 95.6  |
| 160.9 | 55.9 | 56.2  | 73.2  | 104.0 | 69.6  | 116.6 | 161.4 | 88.5  |
| 2.9   | 7.7  | 6.8   | 6.6   | 8.3   | 8.0   | 3.6   | 5.6   | 5.2   |
| 86.1  | 37.5 | 68.8  | 51.6  | 60.0  | 69.3  | 91.9  | 99.0  | 72.1  |
| 45.0  | 19.2 | 33.4  | 28.1  | 29.4  | 28.9  | 39.1  | 38.2  | 33.0  |
| 17.0  | 6.8  | 11.5  | 11.8  | 9.7   | 16.3  | 13.9  | 21.1  | 11.1  |
| 120.5 | 67.2 | 82.8  | 106.7 | 100.1 | 84.7  | 107.1 | 153.7 | 146.4 |
| 3.5   | 4.7  | 0.9   | 5.6   | 0.4   | 1.1   | 5.7   | 2.1   | 2.6   |

|       |       |       |       |       |       |        |        |        |
|-------|-------|-------|-------|-------|-------|--------|--------|--------|
| 1.1   | 7.0   | 2.6   | 1.6   | 11.6  | 1.9   | 1.1    | 1.5    | 0.9    |
| 726.9 | 436.7 | 557.4 | 546.9 | 583.4 | 528.6 | 698.7  | 662.9  | 446.7  |
| 3.6   | 1.1   | 6.0   | 1.5   | 5.4   | 5.3   | 8.2    | 5.1    | 8.0    |
| 7.3   | 5.1   | 1.2   | 1.6   | 10.0  | 5.1   | 7.7    | 9.8    | 7.1    |
| 5.8   | 2.0   | 8.0   | 6.0   | 8.9   | 3.2   | 4.4    | 7.7    | 2.2    |
| 472.6 | 287.5 | 367.1 | 415.3 | 391.5 | 437.2 | 523.6  | 613.9  | 605.6  |
| 7.8   | 13.8  | 8.5   | 4.4   | 9.0   | 9.6   | 13.4   | 11.9   | 9.0    |
| 5.7   | 1.0   | 8.6   | 7.0   | 10.5  | 6.4   | 8.2    | 6.5    | 6.6    |
| 11.5  | 7.7   | 9.4   | 4.8   | 12.0  | 4.4   | 4.3    | 12.7   | 5.4    |
| 15.1  | 20.4  | 10.9  | 17.0  | 21.2  | 24.0  | 19.4   | 28.6   | 19.6   |
| 11.1  | 2.4   | 14.1  | 14.1  | 10.0  | 14.3  | 12.4   | 10.7   | 12.6   |
| 9.4   | 1.5   | 0.7   | 1.6   | 0.7   | 1.8   | 2.2    | 2.0    | 0.9    |
| 14.1  | 7.3   | 8.9   | 8.5   | 8.3   | 14.9  | 12.4   | 19.1   | 6.9    |
| 10.5  | 3.8   | 4.1   | 6.0   | 6.1   | 5.3   | 8.2    | 16.0   | 5.9    |
| 1.1   | 2.0   | 0.8   | 4.7   | 0.6   | 1.5   | 8.0    | 2.0    | 3.4    |
| 4.5   | 1.2   | 1.1   | 0.9   | 0.8   | 1.4   | 4.3    | 1.2    | 0.4    |
| 0.3   | 0.2   | 2.1   | 3.7   | 2.7   | 0.5   | 3.4    | 1.7    | 0.4    |
| 41.5  | 27.4  | 39.4  | 34.3  | 29.9  | 36.1  | 57.4   | 53.1   | 43.1   |
| 947.3 | 852.8 | 702.9 | 790.7 | 959.8 | 877.4 | 1169.1 | 1794.2 | 1119.0 |
| 238.6 | 211.3 | 235.6 | 261.2 | 235.1 | 259.5 | 286.6  | 357.3  | 228.4  |
| 765.3 | 484.3 | 570.9 | 580.0 | 626.7 | 593.2 | 683.5  | 701.9  | 629.0  |
| 24.5  | 13.8  | 25.1  | 21.0  | 18.4  | 16.3  | 34.3   | 34.7   | 22.6   |
| 63.1  | 18.5  | 31.1  | 29.1  | 18.8  | 37.9  | 42.6   | 51.2   | 34.8   |
| 26.7  | 11.9  | 14.2  | 11.4  | 11.8  | 10.9  | 16.0   | 33.7   | 11.7   |
| 16.7  | 19.8  | 2.1   | 7.8   | 19.4  | 3.7   | 17.3   | 8.6    | 8.3    |
| 10.1  | 5.0   | 8.1   | 6.1   | 7.1   | 6.2   | 9.8    | 7.8    | 5.6    |
| 17.1  | 20.6  | 15.8  | 15.1  | 22.7  | 16.8  | 14.5   | 10.3   | 10.1   |
| 31.2  | 16.0  | 16.9  | 21.3  | 22.2  | 28.5  | 36.1   | 46.0   | 24.0   |
| 34.6  | 10.6  | 11.7  | 23.5  | 2.1   | 8.9   | 20.0   | 17.8   | 14.1   |
| 14.5  | 10.8  | 12.0  | 5.4   | 8.5   | 11.7  | 7.2    | 10.5   | 16.5   |
| 23.5  | 25.4  | 15.1  | 13.2  | 17.1  | 11.6  | 12.2   | 16.0   | 14.2   |
| 92.4  | 68.2  | 81.9  | 81.5  | 103.7 | 97.7  | 138.8  | 162.0  | 113.8  |
| 292.2 | 115.0 | 168.0 | 141.9 | 176.5 | 184.4 | 239.8  | 272.1  | 164.6  |
| 23.4  | 15.2  | 11.6  | 14.5  | 12.5  | 16.6  | 20.3   | 23.0   | 21.2   |
| 0.5   | 0.3   | 0.2   | 0.3   | 0.8   | 3.2   | 1.1    | 2.4    | 0.3    |
| 9.2   | 5.2   | 7.4   | 3.6   | 5.9   | 4.5   | 5.7    | 4.9    | 5.4    |
| 1.4   | 4.3   | 3.7   | 2.0   | 2.6   | 1.8   | 4.5    | 0.7    | 0.8    |
| 3.5   | 0.3   | 1.2   | 2.1   | 1.5   | 3.3   | 3.6    | 5.8    | 0.9    |
| 57.4  | 48.5  | 48.8  | 61.5  | 64.0  | 51.4  | 95.5   | 80.1   | 96.5   |
| 52.9  | 46.7  | 57.7  | 39.0  | 57.9  | 49.6  | 58.8   | 71.7   | 56.2   |
| 14.2  | 5.9   | 6.8   | 11.2  | 12.5  | 16.1  | 16.8   | 18.3   | 6.4    |
| 1.5   | 2.6   | 2.6   | 4.4   | 3.0   | 1.2   | 0.9    | 4.4    | 1.7    |
| 2.2   | 3.1   | 2.6   | 0.4   | 0.8   | 3.5   | 4.0    | 1.2    | 3.3    |
| 0.2   | 0.6   | 0.3   | 0.2   | 0.2   | 0.2   | 0.5    | 0.2    | 0.3    |
| 34.0  | 13.5  | 26.5  | 32.1  | 23.5  | 23.4  | 36.3   | 25.9   | 18.9   |
| 0.8   | 8.7   | 4.4   | 7.8   | 6.5   | 6.0   | 4.0    | 5.4    | 6.2    |
| 83.7  | 69.7  | 66.5  | 101.0 | 100.0 | 92.9  | 138.2  | 107.5  | 104.2  |
| 3.4   | 0.6   | 5.8   | 2.9   | 6.6   | 0.9   | 4.3    | 2.5    | 1.0    |
| 0.8   | 0.9   | 1.0   | 0.6   | 0.9   | 0.7   | 0.9    | 2.0    | 1.5    |
| 0.5   | 1.1   | 1.0   | 0.4   | 0.9   | 1.0   | 0.6    | 0.6    | 1.7    |
| 42.0  | 40.7  | 44.5  | 48.1  | 48.6  | 52.8  | 77.0   | 97.3   | 49.4   |
| 45.5  | 30.3  | 39.6  | 32.9  | 41.6  | 35.4  | 43.9   | 51.5   | 45.1   |
| 32.6  | 15.9  | 22.6  | 31.9  | 36.4  | 27.4  | 63.2   | 60.7   | 40.4   |

|       |      |      |      |      |      |      |       |       |
|-------|------|------|------|------|------|------|-------|-------|
| 2.0   | 1.7  | 2.5  | 1.8  | 1.9  | 2.1  | 9.6  | 4.0   | 6.8   |
| 24.2  | 23.6 | 28.0 | 32.2 | 27.4 | 22.1 | 36.3 | 58.7  | 33.3  |
| 8.7   | 7.2  | 8.2  | 12.9 | 5.3  | 13.9 | 14.6 | 12.2  | 5.6   |
| 2.0   | 0.9  | 3.4  | 6.9  | 7.9  | 2.1  | 5.9  | 1.0   | 9.5   |
| 26.1  | 22.7 | 28.3 | 29.9 | 42.8 | 29.5 | 37.5 | 40.1  | 23.6  |
| 9.5   | 8.1  | 9.0  | 8.7  | 11.0 | 9.1  | 15.9 | 19.3  | 11.7  |
| 5.0   | 10.9 | 1.7  | 5.1  | 2.6  | 9.3  | 9.7  | 11.1  | 2.4   |
| 2.5   | 0.4  | 8.0  | 1.9  | 1.1  | 3.9  | 2.9  | 6.5   | 1.1   |
| 6.3   | 3.7  | 0.5  | 3.4  | 2.8  | 3.8  | 2.5  | 3.3   | 0.8   |
| 3.5   | 4.0  | 3.0  | 4.5  | 2.7  | 0.6  | 6.4  | 2.5   | 7.0   |
| 28.3  | 14.7 | 20.9 | 21.2 | 23.4 | 24.6 | 28.1 | 31.7  | 22.7  |
| 13.2  | 10.6 | 5.6  | 4.6  | 9.2  | 8.9  | 12.6 | 13.1  | 11.5  |
| 23.1  | 14.8 | 18.6 | 13.5 | 20.4 | 12.7 | 26.7 | 27.4  | 24.6  |
| 9.8   | 2.9  | 1.0  | 5.4  | 6.8  | 5.9  | 2.8  | 2.8   | 3.2   |
| 103.9 | 82.5 | 70.8 | 49.6 | 93.2 | 59.3 | 87.9 | 104.5 | 133.9 |
| 25.3  | 33.1 | 31.5 | 30.3 | 33.2 | 29.7 | 41.9 | 51.6  | 41.7  |
| 0.9   | 1.1  | 0.9  | 0.7  | 0.9  | 3.2  | 0.7  | 0.9   | 0.6   |
| 12.1  | 7.0  | 12.6 | 8.5  | 10.6 | 11.4 | 13.5 | 16.7  | 14.2  |
| 18.5  | 10.3 | 13.4 | 11.7 | 16.5 | 17.8 | 28.3 | 29.5  | 18.6  |
| 6.0   | 2.4  | 4.3  | 5.2  | 3.7  | 6.1  | 9.4  | 5.8   | 7.7   |
| 1.9   | 1.8  | 0.6  | 4.1  | 0.8  | 0.5  | 1.5  | 3.2   | 0.6   |
| 4.6   | 3.7  | 7.7  | 3.7  | 4.8  | 5.5  | 5.7  | 10.3  | 4.9   |
| 1.8   | 0.1  | 0.3  | 0.1  | 0.1  | 1.6  | 0.3  | 0.6   | 1.4   |
| 0.3   | 0.7  | 0.7  | 0.9  | 0.2  | 1.3  | 0.4  | 4.6   | 0.6   |
| 0.9   | 0.9  | 5.2  | 1.1  | 4.1  | 6.0  | 7.3  | 4.5   | 2.3   |
| 7.4   | 5.4  | 3.9  | 3.7  | 6.0  | 1.1  | 8.7  | 6.8   | 7.5   |
| 5.8   | 6.3  | 2.6  | 1.2  | 4.7  | 2.0  | 6.4  | 7.1   | 4.9   |
| 1.1   | 0.6  | 6.6  | 0.3  | 3.0  | 2.2  | 0.8  | 1.0   | 0.5   |
| 8.0   | 7.7  | 5.0  | 1.6  | 2.7  | 5.8  | 4.7  | 1.6   | 2.6   |
| 11.2  | 10.6 | 20.0 | 12.9 | 11.2 | 17.6 | 9.8  | 25.8  | 21.3  |
| 12.1  | 8.6  | 4.5  | 12.1 | 6.4  | 5.3  | 1.8  | 6.8   | 1.7   |
| 3.4   | 4.1  | 1.2  | 2.4  | 1.4  | 5.0  | 2.4  | 2.8   | 1.3   |
| 58.0  | 64.2 | 59.5 | 47.5 | 85.9 | 75.2 | 90.9 | 108.6 | 88.6  |
| 1.1   | 0.6  | 0.8  | 2.9  | 0.7  | 0.9  | 1.0  | 5.0   | 0.7   |
| 0.2   | 0.2  | 0.1  | 0.6  | 0.1  | 0.1  | 0.1  | 0.1   | 0.3   |
| 5.4   | 2.0  | 4.0  | 1.0  | 1.3  | 6.1  | 2.6  | 2.6   | 4.2   |
| 11.5  | 9.3  | 15.2 | 13.2 | 7.9  | 13.1 | 13.9 | 18.9  | 23.0  |
| 23.2  | 11.7 | 17.7 | 17.1 | 15.3 | 18.5 | 22.4 | 23.4  | 7.9   |
| 4.3   | 7.7  | 4.0  | 1.3  | 1.3  | 3.2  | 0.6  | 3.2   | 1.2   |
| 19.7  | 20.9 | 10.8 | 11.6 | 18.9 | 11.8 | 10.5 | 18.3  | 3.7   |
| 23.6  | 8.3  | 8.8  | 7.4  | 10.0 | 15.1 | 8.1  | 19.1  | 18.5  |
| 4.7   | 3.3  | 5.3  | 0.6  | 2.6  | 4.4  | 6.4  | 0.8   | 4.4   |
| 10.2  | 9.6  | 10.5 | 11.9 | 15.7 | 7.7  | 16.6 | 9.3   | 13.3  |
| 5.6   | 0.3  | 3.8  | 0.3  | 1.0  | 0.4  | 0.3  | 0.1   | 2.2   |
| 9.6   | 6.6  | 4.4  | 5.5  | 8.3  | 5.1  | 10.8 | 12.5  | 9.0   |
| 1.7   | 5.2  | 6.9  | 5.6  | 4.5  | 6.3  | 2.8  | 7.3   | 5.1   |
| 15.0  | 8.8  | 8.2  | 9.2  | 9.8  | 7.0  | 15.1 | 17.7  | 7.2   |
| 3.8   | 2.4  | 6.4  | 2.0  | 5.0  | 2.4  | 2.0  | 4.9   | 8.0   |
| 0.3   | 0.3  | 1.0  | 0.1  | 0.7  | 0.3  | 0.5  | 1.8   | 0.2   |
| 0.6   | 1.3  | 0.5  | 1.3  | 1.3  | 1.2  | 1.4  | 1.1   | 0.6   |
| 7.5   | 11.3 | 2.3  | 1.7  | 8.5  | 12.1 | 3.5  | 6.0   | 2.5   |
| 1.8   | 8.0  | 7.0  | 4.2  | 5.7  | 5.0  | 9.5  | 9.1   | 9.1   |
| 19.3  | 5.9  | 7.4  | 9.4  | 11.4 | 4.7  | 13.1 | 19.4  | 7.8   |

|      |      |      |      |      |      |       |       |      |
|------|------|------|------|------|------|-------|-------|------|
| 28.1 | 11.4 | 21.9 | 17.3 | 18.4 | 23.1 | 38.4  | 38.6  | 20.7 |
| 8.6  | 10.1 | 1.8  | 3.8  | 8.8  | 1.1  | 1.9   | 14.0  | 3.9  |
| 2.1  | 1.8  | 1.9  | 1.3  | 0.1  | 3.1  | 2.1   | 1.0   | 3.3  |
| 4.1  | 7.4  | 7.2  | 6.1  | 3.7  | 6.0  | 6.2   | 12.2  | 6.8  |
| 0.4  | 0.1  | 0.4  | 0.4  | 3.6  | 0.4  | 1.8   | 0.1   | 0.5  |
| 4.8  | 1.4  | 10.4 | 2.9  | 5.7  | 0.9  | 0.9   | 3.9   | 1.9  |
| 0.9  | 9.9  | 4.6  | 1.0  | 4.5  | 4.3  | 2.1   | 4.9   | 4.8  |
| 0.5  | 0.8  | 0.3  | 1.4  | 0.8  | 0.4  | 0.5   | 2.1   | 4.8  |
| 2.2  | 3.1  | 3.2  | 1.3  | 4.5  | 1.7  | 6.6   | 3.1   | 3.3  |
| 36.5 | 26.6 | 19.5 | 25.6 | 23.3 | 20.3 | 38.7  | 36.2  | 16.7 |
| 1.2  | 9.2  | 4.3  | 2.0  | 2.6  | 0.7  | 6.3   | 11.8  | 1.2  |
| 18.8 | 13.6 | 24.9 | 28.3 | 31.4 | 34.0 | 51.6  | 70.0  | 39.6 |
| 0.2  | 0.1  | 0.3  | 0.1  | 0.4  | 0.1  | 0.3   | 0.2   | 0.5  |
| 3.6  | 0.9  | 0.9  | 1.0  | 0.7  | 2.3  | 0.4   | 0.7   | 1.6  |
| 0.2  | 0.3  | 0.3  | 0.3  | 0.5  | 0.2  | 1.1   | 0.1   | 0.3  |
| 25.0 | 32.3 | 25.1 | 22.1 | 33.9 | 22.5 | 39.1  | 37.3  | 21.9 |
| 11.1 | 2.3  | 22.5 | 2.6  | 13.2 | 14.8 | 2.3   | 21.3  | 11.9 |
| 13.3 | 10.0 | 13.1 | 12.7 | 12.8 | 11.2 | 15.7  | 23.6  | 16.1 |
| 2.6  | 2.5  | 2.4  | 2.3  | 3.8  | 3.5  | 5.0   | 5.2   | 1.3  |
| 1.9  | 0.7  | 0.5  | 0.9  | 3.5  | 4.3  | 0.9   | 3.1   | 1.1  |
| 98.5 | 62.1 | 71.2 | 80.6 | 81.4 | 73.0 | 115.5 | 159.5 | 90.3 |
| 16.3 | 7.4  | 22.4 | 12.8 | 16.9 | 20.6 | 11.4  | 11.5  | 7.3  |
| 3.6  | 7.1  | 0.6  | 7.6  | 7.3  | 4.5  | 7.6   | 13.1  | 5.5  |
| 4.0  | 2.8  | 0.4  | 2.2  | 4.2  | 2.4  | 1.5   | 5.3   | 6.7  |
| 0.5  | 0.1  | 0.2  | 0.9  | 2.1  | 0.5  | 3.8   | 0.8   | 0.7  |
| 12.6 | 9.8  | 12.4 | 10.8 | 11.8 | 12.4 | 16.4  | 16.3  | 9.5  |
| 5.4  | 4.7  | 5.7  | 2.6  | 1.7  | 4.2  | 4.0   | 7.3   | 3.7  |
| 0.6  | 1.1  | 1.2  | 0.7  | 2.0  | 1.5  | 4.2   | 1.1   | 1.1  |
| 7.3  | 1.2  | 2.0  | 2.1  | 2.3  | 0.9  | 1.9   | 7.9   | 2.0  |
| 20.4 | 27.8 | 22.2 | 28.9 | 35.7 | 27.9 | 21.7  | 35.8  | 27.8 |
| 1.9  | 2.3  | 0.4  | 1.6  | 0.4  | 2.8  | 1.3   | 1.0   | 1.0  |
| 23.1 | 17.8 | 16.6 | 23.9 | 23.3 | 32.6 | 39.2  | 35.8  | 33.7 |
| 6.1  | 0.1  | 3.4  | 1.1  | 4.5  | 2.8  | 4.9   | 4.3   | 3.5  |
| 10.4 | 7.6  | 9.2  | 6.8  | 8.7  | 10.9 | 17.1  | 11.2  | 9.4  |
| 7.2  | 6.8  | 2.2  | 2.5  | 2.0  | 5.4  | 3.6   | 9.7   | 5.0  |
| 0.9  | 1.1  | 0.1  | 0.5  | 2.4  | 0.8  | 0.5   | 0.6   | 1.1  |
| 11.6 | 15.4 | 13.3 | 11.1 | 17.0 | 12.4 | 18.1  | 24.2  | 14.4 |
| 10.3 | 1.1  | 4.5  | 1.5  | 4.2  | 1.0  | 3.8   | 8.9   | 10.2 |
| 29.8 | 18.2 | 15.5 | 15.7 | 19.2 | 17.3 | 24.2  | 32.2  | 16.6 |
| 1.2  | 4.3  | 5.0  | 2.7  | 2.2  | 1.4  | 0.8   | 0.9   | 0.6  |
| 12.0 | 8.3  | 4.9  | 11.5 | 6.5  | 3.2  | 7.4   | 9.8   | 8.7  |
| 0.8  | 0.4  | 0.2  | 0.2  | 1.8  | 0.2  | 1.7   | 1.5   | 0.1  |
| 18.3 | 13.6 | 15.1 | 9.4  | 17.3 | 16.3 | 26.8  | 36.2  | 14.8 |
| 33.8 | 17.3 | 35.3 | 32.1 | 41.6 | 15.2 | 27.1  | 35.2  | 23.7 |
| 20.4 | 15.5 | 8.9  | 15.3 | 15.1 | 20.8 | 25.6  | 35.3  | 15.3 |
| 4.6  | 0.8  | 5.1  | 5.5  | 7.0  | 1.1  | 3.6   | 1.9   | 7.7  |
| 1.0  | 2.1  | 0.2  | 0.8  | 1.0  | 1.5  | 1.3   | 5.0   | 1.8  |
| 2.1  | 1.5  | 7.9  | 0.6  | 0.9  | 0.7  | 0.8   | 1.0   | 1.0  |
| 10.4 | 12.2 | 9.7  | 11.0 | 9.2  | 10.6 | 13.6  | 14.0  | 11.5 |
| 0.8  | 3.4  | 4.6  | 5.9  | 6.1  | 6.8  | 3.0   | 4.4   | 4.3  |
| 16.0 | 12.1 | 15.4 | 16.7 | 12.6 | 11.7 | 19.7  | 8.8   | 16.7 |
| 43.6 | 22.8 | 25.2 | 27.6 | 34.1 | 38.3 | 50.6  | 67.7  | 48.9 |
| 9.1  | 10.4 | 9.8  | 7.1  | 9.6  | 7.4  | 14.0  | 16.1  | 6.4  |

|       |       |       |       |       |       |       |       |       |
|-------|-------|-------|-------|-------|-------|-------|-------|-------|
| 5.8   | 3.4   | 3.0   | 1.7   | 2.5   | 0.8   | 2.8   | 4.4   | 0.3   |
| 0.6   | 1.9   | 1.0   | 0.8   | 0.7   | 0.7   | 0.9   | 2.0   | 4.2   |
| 0.9   | 1.1   | 3.1   | 3.2   | 2.5   | 1.0   | 1.2   | 0.2   | 0.8   |
| 0.9   | 1.2   | 0.5   | 1.5   | 0.7   | 1.5   | 1.5   | 1.1   | 1.5   |
| 4.9   | 7.0   | 6.4   | 4.0   | 2.7   | 5.6   | 3.5   | 4.8   | 7.0   |
| 8.2   | 10.9  | 12.0  | 10.2  | 10.4  | 6.9   | 14.0  | 13.5  | 8.9   |
| 2.3   | 8.0   | 11.8  | 8.5   | 8.6   | 8.5   | 10.3  | 5.1   | 11.2  |
| 0.5   | 0.3   | 0.6   | 0.4   | 0.4   | 5.3   | 0.2   | 4.2   | 1.3   |
| 3.8   | 0.8   | 4.0   | 2.3   | 0.8   | 2.7   | 5.3   | 3.5   | 2.3   |
| 20.8  | 19.9  | 20.9  | 16.2  | 19.1  | 21.1  | 19.4  | 28.7  | 21.9  |
| 4.3   | 4.6   | 9.7   | 8.4   | 1.8   | 6.7   | 12.2  | 11.4  | 4.9   |
| 23.3  | 19.9  | 21.1  | 5.7   | 20.7  | 24.7  | 20.7  | 31.3  | 16.3  |
| 1.7   | 8.2   | 5.6   | 6.0   | 8.4   | 6.0   | 8.6   | 11.8  | 7.4   |
| 4.6   | 1.9   | 1.5   | 1.9   | 5.0   | 4.0   | 5.6   | 1.2   | 7.1   |
| 255.2 | 173.8 | 203.6 | 177.2 | 189.1 | 206.4 | 242.0 | 299.3 | 231.8 |
| 0.4   | 0.2   | 2.4   | 2.1   | 1.2   | 1.1   | 0.5   | 3.6   | 1.6   |
| 54.0  | 45.9  | 33.9  | 45.9  | 56.0  | 38.6  | 69.2  | 72.0  | 56.5  |
| 5.1   | 3.7   | 4.8   | 3.4   | 4.7   | 3.5   | 6.1   | 6.1   | 2.9   |
| 210.2 | 174.9 | 195.2 | 195.5 | 214.8 | 198.2 | 246.7 | 260.7 | 213.3 |
| 84.6  | 74.3  | 81.4  | 70.8  | 78.6  | 83.3  | 98.2  | 91.5  | 83.0  |
| 4.5   | 1.8   | 4.8   | 8.0   | 9.0   | 4.8   | 7.7   | 3.0   | 1.4   |
| 106.9 | 73.8  | 95.0  | 93.7  | 91.9  | 86.8  | 115.8 | 140.6 | 81.9  |
| 11.8  | 10.7  | 7.0   | 8.0   | 8.8   | 6.9   | 8.2   | 9.0   | 14.1  |
| 295.4 | 250.4 | 223.8 | 258.6 | 265.3 | 266.2 | 362.9 | 337.6 | 283.1 |
| 51.1  | 38.8  | 32.1  | 44.0  | 59.6  | 40.3  | 54.1  | 77.5  | 57.7  |
| 183.0 | 159.8 | 171.0 | 181.7 | 196.0 | 177.9 | 225.3 | 239.0 | 221.1 |
| 14.0  | 7.2   | 9.0   | 7.6   | 11.2  | 13.0  | 13.9  | 14.8  | 11.0  |
| 42.8  | 42.3  | 42.1  | 44.0  | 47.4  | 42.6  | 44.7  | 64.4  | 35.1  |
| 55.9  | 61.3  | 76.0  | 69.1  | 77.1  | 71.2  | 101.4 | 72.6  | 93.5  |
| 25.6  | 16.9  | 20.7  | 18.6  | 23.3  | 16.6  | 28.7  | 32.2  | 22.9  |
| 23.0  | 18.1  | 14.5  | 19.3  | 13.0  | 15.1  | 15.2  | 24.2  | 6.3   |
| 50.1  | 25.5  | 23.1  | 27.8  | 30.9  | 26.6  | 43.7  | 51.8  | 37.3  |
| 12.2  | 9.6   | 9.2   | 9.2   | 9.8   | 8.7   | 23.0  | 26.1  | 16.5  |
| 93.7  | 64.5  | 69.8  | 78.6  | 82.8  | 74.6  | 102.7 | 163.3 | 86.4  |
| 22.9  | 11.0  | 10.6  | 10.1  | 11.7  | 5.8   | 13.6  | 2.9   | 9.6   |
| 115.8 | 76.0  | 82.6  | 96.3  | 84.5  | 87.3  | 126.2 | 133.5 | 123.2 |
| 3.2   | 0.9   | 5.0   | 0.8   | 2.3   | 0.9   | 2.0   | 7.4   | 1.5   |
| 181.2 | 140.0 | 165.0 | 171.2 | 184.5 | 171.3 | 220.4 | 264.4 | 182.8 |
| 318.2 | 184.3 | 184.8 | 202.7 | 211.4 | 166.3 | 248.8 | 262.0 | 213.5 |
| 17.4  | 20.5  | 19.9  | 16.6  | 23.4  | 15.5  | 21.8  | 25.9  | 20.7  |
| 17.2  | 8.8   | 27.1  | 20.2  | 16.2  | 11.5  | 20.4  | 22.2  | 14.3  |
| 14.5  | 16.1  | 10.0  | 14.3  | 12.1  | 11.5  | 18.3  | 17.5  | 15.4  |
| 9.0   | 13.0  | 14.7  | 7.9   | 11.8  | 12.3  | 8.5   | 12.1  | 9.1   |
| 31.9  | 19.9  | 17.9  | 15.8  | 23.3  | 18.1  | 26.7  | 40.9  | 23.9  |
| 1.9   | 2.0   | 6.1   | 3.1   | 6.3   | 2.2   | 2.3   | 3.0   | 1.4   |
| 30.7  | 28.2  | 24.6  | 27.3  | 29.3  | 28.6  | 33.2  | 37.2  | 40.7  |
| 69.1  | 64.5  | 58.9  | 77.9  | 92.3  | 74.4  | 116.3 | 118.2 | 81.1  |
| 145.0 | 97.9  | 97.3  | 94.5  | 97.6  | 95.0  | 157.0 | 150.4 | 119.3 |
| 316.7 | 204.7 | 220.9 | 216.2 | 220.8 | 190.7 | 274.2 | 282.9 | 185.4 |
| 78.5  | 70.7  | 55.0  | 75.4  | 77.6  | 51.6  | 98.9  | 88.6  | 77.2  |
| 100.4 | 70.8  | 58.6  | 86.2  | 97.2  | 86.5  | 109.5 | 107.8 | 88.6  |
| 18.9  | 9.0   | 8.2   | 14.5  | 9.0   | 13.7  | 19.0  | 27.4  | 16.3  |
| 4.4   | 13.6  | 8.5   | 9.0   | 12.5  | 13.9  | 10.5  | 9.7   | 13.5  |

|       |       |       |       |       |       |        |        |       |
|-------|-------|-------|-------|-------|-------|--------|--------|-------|
| 34.4  | 13.5  | 15.4  | 17.8  | 17.3  | 10.8  | 22.3   | 15.6   | 20.9  |
| 111.9 | 73.5  | 94.4  | 97.8  | 104.6 | 98.1  | 153.0  | 146.2  | 100.2 |
| 89.0  | 63.6  | 87.6  | 73.0  | 85.6  | 91.6  | 109.2  | 117.8  | 98.8  |
| 41.3  | 34.7  | 31.4  | 29.1  | 40.7  | 31.7  | 41.8   | 43.6   | 27.7  |
| 56.3  | 33.7  | 29.7  | 42.2  | 39.8  | 29.4  | 55.3   | 51.9   | 30.3  |
| 19.1  | 16.0  | 9.5   | 7.4   | 13.0  | 14.4  | 3.5    | 22.4   | 9.4   |
| 3.0   | 15.1  | 10.4  | 3.5   | 11.2  | 5.3   | 2.2    | 9.2    | 12.9  |
| 51.8  | 37.8  | 41.2  | 51.2  | 48.0  | 47.2  | 57.3   | 56.3   | 40.9  |
| 83.1  | 49.8  | 56.1  | 70.7  | 57.8  | 68.6  | 94.2   | 104.2  | 72.8  |
| 73.9  | 52.7  | 58.3  | 64.0  | 77.7  | 60.6  | 107.9  | 110.2  | 82.0  |
| 0.5   | 1.5   | 0.9   | 1.6   | 0.8   | 2.9   | 3.2    | 3.7    | 2.2   |
| 57.5  | 31.3  | 29.4  | 40.0  | 34.7  | 37.0  | 41.9   | 38.7   | 39.5  |
| 74.4  | 90.3  | 86.6  | 81.3  | 96.7  | 78.9  | 145.1  | 131.8  | 85.2  |
| 543.0 | 352.0 | 423.3 | 469.9 | 471.3 | 433.1 | 640.3  | 704.1  | 332.0 |
| 36.5  | 18.4  | 20.8  | 21.8  | 24.2  | 27.8  | 28.7   | 45.0   | 27.8  |
| 51.4  | 37.9  | 39.9  | 46.0  | 42.8  | 42.9  | 59.6   | 73.0   | 53.4  |
| 18.9  | 14.8  | 16.6  | 17.4  | 17.4  | 14.1  | 14.9   | 19.2   | 17.4  |
| 11.3  | 9.0   | 5.0   | 6.7   | 11.6  | 5.7   | 14.3   | 13.1   | 8.6   |
| 66.9  | 42.1  | 31.6  | 58.3  | 44.6  | 37.8  | 57.5   | 52.7   | 36.1  |
| 0.6   | 0.6   | 0.3   | 0.6   | 0.7   | 0.6   | 0.3    | 0.3    | 1.0   |
| 88.0  | 60.2  | 66.3  | 70.7  | 65.6  | 84.3  | 90.5   | 132.1  | 66.7  |
| 108.8 | 74.9  | 86.5  | 90.4  | 89.3  | 90.1  | 123.9  | 130.8  | 108.2 |
| 49.2  | 39.6  | 48.0  | 40.3  | 43.4  | 50.8  | 65.0   | 70.6   | 44.4  |
| 49.4  | 39.0  | 45.8  | 43.3  | 52.1  | 42.9  | 48.3   | 70.1   | 48.4  |
| 7.1   | 6.3   | 5.3   | 5.5   | 11.1  | 7.8   | 8.4    | 6.0    | 7.2   |
| 36.9  | 41.3  | 39.6  | 47.9  | 53.8  | 33.3  | 61.2   | 66.3   | 41.5  |
| 7.7   | 2.0   | 0.4   | 1.2   | 4.5   | 1.1   | 1.2    | 1.0    | 1.2   |
| 43.5  | 34.8  | 41.0  | 44.4  | 47.8  | 39.7  | 62.9   | 56.7   | 32.6  |
| 227.2 | 151.1 | 149.0 | 164.2 | 168.2 | 146.2 | 188.6  | 244.2  | 163.2 |
| 11.4  | 10.6  | 9.8   | 9.0   | 17.0  | 2.8   | 21.4   | 17.7   | 16.3  |
| 46.6  | 29.9  | 29.5  | 30.3  | 33.7  | 31.8  | 37.1   | 47.7   | 34.3  |
| 133.5 | 68.6  | 66.7  | 67.0  | 81.3  | 67.8  | 104.0  | 114.3  | 80.6  |
| 33.6  | 15.8  | 25.8  | 26.7  | 32.8  | 19.2  | 31.8   | 32.2   | 34.7  |
| 42.5  | 62.7  | 41.9  | 58.7  | 53.1  | 56.5  | 63.1   | 53.6   | 64.1  |
| 77.8  | 39.9  | 58.8  | 55.4  | 57.9  | 51.0  | 72.4   | 118.4  | 56.2  |
| 59.9  | 66.9  | 65.9  | 62.9  | 70.7  | 63.7  | 79.0   | 90.1   | 77.2  |
| 18.9  | 10.5  | 8.8   | 15.0  | 16.5  | 14.2  | 22.1   | 19.9   | 15.2  |
| 28.6  | 31.1  | 35.1  | 31.5  | 38.1  | 35.5  | 33.2   | 49.8   | 33.7  |
| 218.7 | 188.0 | 206.6 | 223.0 | 245.5 | 219.0 | 310.0  | 283.1  | 246.3 |
| 47.6  | 47.0  | 45.7  | 44.8  | 62.6  | 34.4  | 43.4   | 51.7   | 40.4  |
| 70.2  | 44.8  | 57.2  | 52.9  | 56.6  | 56.0  | 68.5   | 85.3   | 69.7  |
| 955.9 | 639.4 | 736.3 | 746.4 | 813.9 | 784.7 | 1170.3 | 1194.2 | 791.4 |
| 98.6  | 56.5  | 60.4  | 65.4  | 57.4  | 52.6  | 75.6   | 74.9   | 53.2  |
| 203.9 | 121.0 | 135.8 | 131.7 | 166.6 | 143.6 | 213.6  | 236.1  | 144.4 |
| 43.0  | 33.5  | 30.8  | 37.9  | 43.0  | 37.1  | 48.1   | 65.5   | 36.7  |
| 37.3  | 19.0  | 16.6  | 37.0  | 26.1  | 28.3  | 31.2   | 42.3   | 30.6  |
| 96.2  | 36.9  | 36.9  | 55.2  | 41.7  | 50.6  | 67.0   | 69.1   | 61.5  |
| 92.3  | 59.9  | 71.9  | 61.8  | 71.0  | 62.6  | 94.1   | 102.0  | 74.1  |
| 180.8 | 171.1 | 194.5 | 193.6 | 188.4 | 187.3 | 239.7  | 256.9  | 197.4 |
| 76.3  | 64.5  | 99.3  | 83.8  | 66.5  | 80.2  | 107.5  | 111.1  | 89.3  |
| 41.2  | 27.4  | 31.5  | 33.3  | 26.9  | 37.6  | 43.5   | 56.2   | 29.3  |
| 100.8 | 61.0  | 78.9  | 94.2  | 77.7  | 74.3  | 105.8  | 96.6   | 85.7  |
| 27.5  | 17.5  | 18.8  | 15.1  | 23.5  | 22.0  | 37.2   | 24.2   | 22.7  |



|        |       |        |        |        |        |        |        |        |
|--------|-------|--------|--------|--------|--------|--------|--------|--------|
| 1.4    | 0.8   | 1.7    | 1.7    | 3.3    | 2.7    | 6.5    | 0.3    | 1.1    |
| 49.1   | 28.7  | 37.3   | 57.3   | 40.2   | 58.4   | 82.7   | 85.3   | 45.7   |
| 88.6   | 71.0  | 56.5   | 60.6   | 63.1   | 66.2   | 68.0   | 72.3   | 61.7   |
| 9.1    | 9.9   | 1.4    | 2.3    | 13.4   | 2.0    | 12.5   | 15.7   | 8.1    |
| 62.6   | 21.3  | 26.8   | 42.4   | 26.7   | 30.6   | 41.3   | 41.8   | 40.2   |
| 78.5   | 64.3  | 43.4   | 51.5   | 66.5   | 53.5   | 83.7   | 85.1   | 61.9   |
| 187.7  | 132.7 | 104.8  | 149.1  | 170.4  | 136.6  | 201.4  | 194.1  | 158.9  |
| 41.7   | 34.8  | 29.3   | 32.3   | 33.5   | 19.8   | 32.7   | 40.5   | 31.4   |
| 15.7   | 14.5  | 16.3   | 24.0   | 16.0   | 14.7   | 29.6   | 28.7   | 17.5   |
| 42.7   | 28.2  | 29.3   | 26.7   | 34.9   | 34.6   | 43.0   | 52.2   | 39.5   |
| 251.0  | 140.5 | 168.1  | 165.0  | 185.1  | 178.0  | 236.1  | 258.7  | 196.2  |
| 218.5  | 138.2 | 155.7  | 150.4  | 161.0  | 133.9  | 178.0  | 179.1  | 127.2  |
| 51.2   | 45.2  | 35.2   | 39.9   | 47.2   | 30.0   | 58.2   | 56.7   | 44.5   |
| 34.1   | 24.7  | 21.0   | 21.0   | 26.5   | 31.8   | 36.6   | 34.7   | 24.4   |
| 18.9   | 14.4  | 11.7   | 16.3   | 17.9   | 13.6   | 24.0   | 32.2   | 27.2   |
| 6.3    | 0.4   | 1.5    | 2.1    | 2.0    | 0.8    | 4.4    | 3.1    | 2.8    |
| 7.8    | 2.1   | 2.9    | 4.6    | 8.3    | 1.8    | 2.3    | 10.4   | 3.4    |
| 31.4   | 43.5  | 27.6   | 27.3   | 36.1   | 24.9   | 46.1   | 64.8   | 38.1   |
| 103.1  | 58.4  | 71.2   | 76.1   | 76.7   | 71.2   | 87.7   | 94.1   | 83.5   |
| 50.3   | 43.7  | 47.4   | 48.8   | 48.3   | 46.2   | 55.6   | 65.2   | 61.7   |
| 52.4   | 38.4  | 47.3   | 41.3   | 44.9   | 46.5   | 62.0   | 68.7   | 40.5   |
| 139.9  | 116.8 | 118.2  | 120.7  | 127.9  | 111.7  | 151.0  | 150.7  | 112.5  |
| 8.7    | 6.2   | 3.6    | 5.4    | 6.5    | 8.4    | 9.5    | 14.4   | 11.7   |
| 345.2  | 270.6 | 338.5  | 343.0  | 341.7  | 316.3  | 439.9  | 404.9  | 361.3  |
| 1246.2 | 931.3 | 1061.2 | 1057.0 | 1074.8 | 1031.2 | 1377.0 | 1181.7 | 1072.7 |
| 0.6    | 1.3   | 1.9    | 6.6    | 5.1    | 3.1    | 7.2    | 6.1    | 4.7    |
| 11.9   | 17.6  | 13.6   | 12.6   | 15.9   | 15.1   | 19.0   | 22.5   | 18.2   |
| 475.2  | 306.6 | 299.3  | 313.5  | 314.9  | 284.4  | 337.8  | 390.0  | 261.1  |
| 0.8    | 0.7   | 0.8    | 0.7    | 0.3    | 2.3    | 0.4    | 0.4    | 2.3    |
| 15.9   | 24.2  | 15.2   | 20.2   | 19.7   | 13.9   | 9.1    | 15.2   | 19.7   |
| 9.7    | 9.8   | 7.7    | 12.2   | 14.6   | 14.2   | 16.5   | 18.1   | 17.5   |
| 21.8   | 15.1  | 15.0   | 17.5   | 18.8   | 16.7   | 25.5   | 31.1   | 21.8   |
| 123.0  | 87.1  | 94.3   | 103.2  | 92.9   | 104.3  | 102.7  | 149.5  | 114.0  |
| 1.5    | 0.9   | 1.2    | 0.9    | 2.6    | 0.7    | 1.2    | 1.1    | 1.3    |
| 60.2   | 46.6  | 31.9   | 48.4   | 44.6   | 38.4   | 70.4   | 62.9   | 66.1   |
| 4.6    | 0.4   | 6.4    | 2.9    | 4.2    | 4.3    | 3.3    | 3.4    | 1.6    |
| 9.7    | 6.8   | 11.3   | 10.2   | 6.4    | 3.7    | 5.8    | 5.3    | 6.3    |
| 50.9   | 30.7  | 39.8   | 45.2   | 43.3   | 32.7   | 59.8   | 61.4   | 46.8   |
| 21.1   | 13.4  | 14.1   | 11.8   | 15.1   | 14.2   | 19.1   | 19.6   | 16.7   |
| 37.7   | 26.7  | 23.1   | 25.8   | 27.9   | 25.5   | 36.1   | 38.0   | 27.1   |
| 46.3   | 25.3  | 18.7   | 28.1   | 21.1   | 18.1   | 35.4   | 31.0   | 25.8   |
| 34.7   | 34.4  | 27.3   | 42.0   | 41.7   | 34.8   | 57.8   | 62.7   | 35.1   |
| 27.1   | 4.9   | 18.3   | 12.9   | 4.7    | 27.5   | 31.7   | 28.7   | 13.4   |
| 39.7   | 16.6  | 22.7   | 32.2   | 26.3   | 25.0   | 40.7   | 46.9   | 38.9   |
| 29.0   | 16.4  | 23.3   | 16.6   | 16.8   | 17.9   | 29.5   | 26.8   | 17.1   |
| 24.0   | 25.9  | 23.2   | 23.9   | 25.1   | 23.5   | 41.0   | 54.8   | 30.4   |
| 230.7  | 138.3 | 161.1  | 180.5  | 198.6  | 153.7  | 228.9  | 196.4  | 186.3  |
| 4.7    | 4.9   | 7.1    | 4.9    | 6.2    | 5.8    | 7.3    | 7.2    | 6.8    |
| 0.2    | 2.5   | 4.1    | 3.9    | 4.9    | 1.3    | 0.9    | 3.3    | 3.6    |
| 9.3    | 14.1  | 23.5   | 24.5   | 19.2   | 25.2   | 27.6   | 21.9   | 16.3   |
| 2.0    | 1.4   | 0.5    | 3.2    | 3.1    | 0.9    | 1.8    | 2.3    | 2.1    |
| 58.3   | 34.7  | 40.7   | 49.9   | 49.1   | 45.5   | 77.0   | 79.8   | 49.3   |
| 17.3   | 15.8  | 13.5   | 21.2   | 16.9   | 15.4   | 23.7   | 38.1   | 20.7   |

|        |        |        |        |        |        |        |        |        |
|--------|--------|--------|--------|--------|--------|--------|--------|--------|
| 21.1   | 24.4   | 20.2   | 24.8   | 25.3   | 22.1   | 28.0   | 29.9   | 28.4   |
| 58.3   | 64.0   | 74.6   | 71.5   | 63.7   | 79.1   | 85.6   | 109.5  | 67.4   |
| 21.2   | 15.7   | 15.3   | 16.1   | 18.9   | 15.9   | 18.2   | 20.6   | 18.3   |
| 29.3   | 21.6   | 20.4   | 23.2   | 20.8   | 21.4   | 21.1   | 25.5   | 15.3   |
| 6.0    | 3.7    | 4.6    | 4.4    | 5.3    | 2.1    | 8.9    | 14.5   | 10.0   |
| 26.8   | 27.3   | 32.7   | 19.0   | 25.8   | 20.4   | 37.5   | 48.3   | 32.9   |
| 31.1   | 19.9   | 19.6   | 22.4   | 28.0   | 23.8   | 32.1   | 25.3   | 28.6   |
| 43.9   | 28.7   | 33.4   | 33.1   | 37.1   | 29.1   | 42.4   | 49.4   | 30.4   |
| 0.7    | 0.7    | 0.3    | 0.3    | 0.1    | 1.6    | 0.7    | 1.0    | 0.4    |
| 15.8   | 13.7   | 11.9   | 17.6   | 12.9   | 15.0   | 22.7   | 26.6   | 13.0   |
| 45.6   | 22.9   | 31.5   | 27.9   | 28.6   | 22.9   | 45.9   | 43.1   | 33.8   |
| 9.8    | 7.9    | 1.4    | 6.8    | 7.6    | 5.5    | 10.6   | 10.9   | 9.0    |
| 163.2  | 165.4  | 157.6  | 156.4  | 187.1  | 186.7  | 222.4  | 252.1  | 130.1  |
| 88.0   | 88.6   | 98.0   | 96.6   | 96.3   | 122.4  | 130.1  | 121.2  | 105.1  |
| 25.1   | 21.1   | 12.0   | 17.9   | 19.5   | 16.0   | 26.2   | 26.6   | 23.4   |
| 13.8   | 12.7   | 11.7   | 15.3   | 10.5   | 7.2    | 11.5   | 15.5   | 9.4    |
| 11.3   | 14.2   | 18.4   | 20.0   | 15.3   | 11.1   | 19.4   | 20.7   | 16.9   |
| 92.8   | 56.7   | 46.8   | 63.1   | 71.8   | 69.1   | 74.1   | 83.4   | 53.6   |
| 36.5   | 12.2   | 25.2   | 30.2   | 32.9   | 23.6   | 30.8   | 33.2   | 21.4   |
| 5.2    | 4.5    | 11.0   | 13.4   | 9.5    | 1.6    | 9.6    | 12.4   | 9.1    |
| 56.5   | 41.9   | 49.5   | 37.5   | 47.8   | 58.4   | 56.5   | 56.7   | 44.5   |
| 93.6   | 79.8   | 108.5  | 106.0  | 88.9   | 100.2  | 120.5  | 127.7  | 97.5   |
| 30.5   | 11.2   | 11.4   | 12.1   | 12.7   | 14.4   | 18.0   | 25.5   | 15.5   |
| 42.5   | 47.4   | 46.3   | 48.1   | 48.3   | 57.6   | 76.6   | 63.2   | 51.1   |
| 19.5   | 26.9   | 23.8   | 18.9   | 23.0   | 28.8   | 21.9   | 38.2   | 26.8   |
| 75.2   | 60.0   | 66.7   | 67.0   | 73.6   | 69.5   | 98.4   | 81.4   | 72.5   |
| 51.9   | 39.3   | 34.3   | 39.3   | 36.0   | 34.0   | 50.2   | 46.3   | 37.8   |
| 60.2   | 52.9   | 65.3   | 51.0   | 46.7   | 54.5   | 63.3   | 83.4   | 69.9   |
| 19.3   | 11.5   | 5.1    | 12.0   | 12.7   | 3.1    | 15.6   | 13.4   | 12.0   |
| 19.0   | 3.6    | 8.6    | 10.3   | 15.3   | 6.7    | 15.7   | 15.1   | 8.7    |
| 2.5    | 14.2   | 5.1    | 7.1    | 10.4   | 6.8    | 10.3   | 9.7    | 16.9   |
| 18.5   | 7.1    | 13.7   | 9.3    | 15.7   | 13.2   | 13.7   | 3.5    | 3.0    |
| 131.3  | 106.2  | 87.1   | 119.5  | 115.7  | 117.0  | 147.5  | 134.3  | 122.5  |
| 214.6  | 155.3  | 153.2  | 159.1  | 174.4  | 166.3  | 185.5  | 220.3  | 164.5  |
| 309.9  | 198.9  | 238.0  | 230.9  | 217.6  | 201.5  | 282.3  | 247.0  | 230.2  |
| 29.8   | 39.3   | 39.9   | 37.1   | 42.9   | 38.0   | 51.0   | 54.5   | 42.9   |
| 40.9   | 18.1   | 10.7   | 20.4   | 13.9   | 18.0   | 16.2   | 25.7   | 34.9   |
| 21.6   | 12.6   | 14.7   | 14.7   | 19.0   | 13.2   | 17.1   | 32.7   | 20.4   |
| 20.9   | 5.6    | 18.7   | 16.2   | 30.3   | 19.1   | 18.6   | 20.9   | 10.1   |
| 63.4   | 282.6  | 275.5  | 314.4  | 359.4  | 276.3  | 410.9  | 446.4  | 255.7  |
| 18.7   | 46.5   | 51.0   | 61.2   | 54.0   | 41.8   | 65.5   | 55.5   | 39.9   |
| 3.8    | 3.0    | 3.0    | 3.5    | 4.5    | 4.9    | 3.1    | 0.7    | 2.8    |
| 7.1    | 1.3    | 7.7    | 1.2    | 1.5    | 8.1    | 2.9    | 8.9    | 1.7    |
| 7.5    | 8.0    | 3.1    | 7.3    | 11.4   | 5.0    | 8.6    | 8.8    | 5.1    |
| 6.8    | 5.4    | 6.0    | 6.9    | 4.8    | 4.6    | 6.0    | 4.9    | 7.9    |
| 4.8    | 4.5    | 1.4    | 3.5    | 3.0    | 5.4    | 2.6    | 4.0    | 5.6    |
| 2.5    | 4.9    | 4.2    | 5.5    | 5.6    | 5.6    | 6.6    | 7.1    | 3.9    |
| 68.9   | 102.9  | 53.1   | 70.7   | 65.0   | 83.3   | 98.5   | 116.5  | 134.2  |
| 46.4   | 17.0   | 17.7   | 26.5   | 16.8   | 23.4   | 40.5   | 47.6   | 34.4   |
| 26.7   | 25.9   | 20.9   | 28.5   | 29.2   | 26.8   | 28.3   | 38.6   | 37.3   |
| 1570.6 | 1111.9 | 1152.9 | 1199.4 | 1350.8 | 1219.3 | 1767.5 | 1937.4 | 1345.6 |
| 25.1   | 18.9   | 10.1   | 20.8   | 21.1   | 12.5   | 29.7   | 24.6   | 26.3   |
| 163.0  | 91.3   | 94.7   | 99.3   | 108.8  | 89.1   | 130.0  | 123.1  | 125.3  |

|       |       |       |       |       |       |       |       |       |
|-------|-------|-------|-------|-------|-------|-------|-------|-------|
| 112.4 | 85.2  | 69.3  | 103.8 | 98.5  | 103.6 | 125.6 | 119.4 | 103.2 |
| 223.2 | 143.6 | 185.8 | 111.0 | 200.3 | 129.2 | 230.6 | 260.0 | 181.0 |
| 25.6  | 17.3  | 17.4  | 22.7  | 17.2  | 23.0  | 28.6  | 39.9  | 29.8  |
| 149.3 | 46.4  | 51.3  | 63.8  | 66.3  | 67.1  | 77.0  | 109.5 | 46.7  |
| 31.6  | 16.3  | 11.7  | 24.8  | 14.1  | 13.1  | 22.3  | 21.0  | 12.6  |
| 4.4   | 6.0   | 5.6   | 10.0  | 11.4  | 5.9   | 11.1  | 11.6  | 7.3   |
| 20.4  | 16.0  | 15.3  | 15.0  | 16.2  | 12.1  | 19.5  | 13.3  | 5.6   |
| 10.8  | 9.2   | 9.1   | 9.1   | 6.5   | 10.3  | 10.2  | 12.4  | 7.7   |
| 29.9  | 25.0  | 24.7  | 33.3  | 30.9  | 29.1  | 36.4  | 40.1  | 29.3  |
| 637.1 | 487.7 | 493.5 | 519.1 | 614.8 | 538.8 | 768.9 | 924.2 | 623.5 |
| 145.1 | 124.3 | 138.2 | 134.9 | 152.7 | 130.8 | 177.0 | 160.5 | 165.4 |
| 106.5 | 79.4  | 89.3  | 74.5  | 94.4  | 92.6  | 126.0 | 136.2 | 108.0 |
| 79.7  | 48.8  | 58.5  | 61.4  | 68.5  | 49.9  | 79.9  | 78.1  | 58.6  |
| 1.3   | 1.3   | 0.6   | 0.8   | 0.4   | 0.4   | 0.7   | 0.6   | 2.3   |
| 158.2 | 134.9 | 145.6 | 162.1 | 161.8 | 136.7 | 166.4 | 208.3 | 159.6 |
| 27.6  | 24.0  | 16.8  | 21.7  | 22.7  | 21.4  | 33.8  | 29.5  | 24.4  |
| 83.9  | 34.8  | 44.1  | 43.6  | 44.1  | 51.9  | 51.7  | 83.4  | 56.5  |
| 116.8 | 77.6  | 91.9  | 88.0  | 89.4  | 85.5  | 137.3 | 128.2 | 108.1 |
| 11.6  | 19.6  | 34.3  | 21.6  | 33.6  | 22.3  | 51.9  | 33.4  | 17.4  |
| 58.7  | 57.3  | 51.7  | 47.7  | 53.8  | 47.7  | 72.5  | 77.6  | 40.2  |
| 6.6   | 0.7   | 3.1   | 5.5   | 0.6   | 2.5   | 1.9   | 0.6   | 0.6   |
| 1.9   | 2.1   | 2.3   | 0.8   | 0.9   | 1.8   | 3.0   | 2.3   | 2.4   |
| 162.1 | 111.2 | 153.7 | 148.5 | 154.4 | 151.0 | 206.0 | 232.7 | 186.6 |
| 61.5  | 50.9  | 67.9  | 57.5  | 62.9  | 60.4  | 68.0  | 77.0  | 59.6  |
| 11.5  | 7.5   | 8.2   | 4.0   | 6.1   | 6.5   | 14.0  | 18.3  | 11.6  |
| 16.4  | 11.1  | 12.0  | 12.4  | 9.8   | 19.2  | 18.9  | 30.2  | 10.8  |
| 0.1   | 0.1   | 0.9   | 0.9   | 0.3   | 0.6   | 0.2   | 2.4   | 0.1   |
| 1.1   | 4.2   | 5.4   | 6.2   | 0.7   | 6.4   | 1.0   | 0.4   | 0.4   |
| 79.7  | 55.4  | 61.8  | 68.3  | 62.0  | 55.5  | 69.6  | 72.2  | 74.1  |
| 53.9  | 32.2  | 35.9  | 44.1  | 37.3  | 29.0  | 49.7  | 44.1  | 45.2  |
| 112.5 | 62.7  | 62.6  | 73.5  | 81.1  | 68.7  | 120.3 | 128.9 | 105.7 |
| 75.5  | 49.8  | 78.8  | 71.8  | 76.7  | 77.3  | 103.6 | 112.3 | 88.7  |
| 202.7 | 148.2 | 154.7 | 154.3 | 181.3 | 157.4 | 229.4 | 201.2 | 180.8 |
| 29.8  | 15.1  | 21.9  | 16.9  | 20.0  | 20.3  | 12.8  | 23.8  | 18.6  |
| 271.1 | 155.1 | 157.2 | 157.2 | 192.8 | 176.7 | 256.3 | 280.4 | 186.9 |
| 844.1 | 567.5 | 648.2 | 681.6 | 654.3 | 652.5 | 748.7 | 715.7 | 453.4 |
| 17.8  | 16.3  | 13.2  | 17.0  | 15.2  | 16.8  | 19.8  | 19.0  | 19.8  |
| 65.4  | 60.8  | 40.5  | 66.7  | 71.0  | 36.4  | 49.9  | 85.3  | 70.6  |
| 51.1  | 33.7  | 25.6  | 29.6  | 45.9  | 32.4  | 65.3  | 75.6  | 57.3  |
| 18.6  | 10.7  | 12.3  | 13.1  | 12.3  | 7.0   | 8.8   | 7.0   | 5.8   |
| 1.4   | 7.5   | 4.9   | 5.5   | 9.5   | 7.2   | 6.7   | 9.1   | 5.3   |
| 12.8  | 11.3  | 11.3  | 11.9  | 10.7  | 13.0  | 15.4  | 19.3  | 17.0  |
| 5.4   | 5.7   | 8.9   | 3.7   | 7.4   | 8.9   | 7.2   | 9.4   | 10.4  |
| 0.4   | 0.5   | 0.2   | 1.2   | 1.0   | 0.4   | 0.4   | 0.7   | 0.4   |
| 52.5  | 22.6  | 23.0  | 18.5  | 17.2  | 17.4  | 18.9  | 21.8  | 20.9  |
| 87.4  | 69.4  | 55.6  | 75.7  | 63.0  | 52.9  | 90.9  | 112.1 | 86.6  |
| 13.9  | 25.3  | 25.8  | 25.9  | 25.8  | 28.5  | 44.2  | 44.4  | 31.9  |
| 34.4  | 32.6  | 31.9  | 28.1  | 27.4  | 27.7  | 31.3  | 27.2  | 23.8  |
| 144.6 | 103.7 | 118.7 | 111.4 | 146.7 | 118.2 | 172.0 | 184.0 | 163.8 |
| 19.4  | 17.1  | 15.8  | 14.9  | 20.6  | 14.7  | 21.5  | 24.6  | 21.9  |
| 13.4  | 10.2  | 16.7  | 11.7  | 10.2  | 14.7  | 11.8  | 13.9  | 9.0   |
| 42.1  | 61.5  | 69.5  | 78.7  | 58.1  | 61.1  | 85.7  | 93.4  | 57.4  |
| 169.1 | 101.4 | 123.2 | 119.9 | 142.3 | 117.6 | 189.1 | 170.8 | 137.0 |

|       |       |       |       |       |       |       |       |       |
|-------|-------|-------|-------|-------|-------|-------|-------|-------|
| 105.3 | 74.5  | 78.1  | 82.9  | 69.9  | 64.6  | 100.4 | 87.5  | 82.0  |
| 216.6 | 156.8 | 172.5 | 158.5 | 157.9 | 154.1 | 196.6 | 230.2 | 150.8 |
| 33.6  | 28.0  | 27.4  | 30.7  | 40.3  | 33.3  | 40.4  | 51.0  | 27.4  |
| 54.5  | 35.5  | 41.4  | 46.8  | 41.6  | 44.5  | 63.8  | 64.1  | 48.5  |
| 103.3 | 67.8  | 67.2  | 79.3  | 82.0  | 84.2  | 138.2 | 150.0 | 86.8  |
| 160.6 | 123.5 | 135.8 | 145.7 | 165.0 | 136.0 | 186.7 | 193.9 | 147.5 |
| 95.4  | 78.0  | 89.0  | 97.4  | 97.4  | 87.0  | 114.8 | 112.6 | 100.8 |
| 219.7 | 164.1 | 176.0 | 183.6 | 198.5 | 199.8 | 240.6 | 226.2 | 206.2 |
| 70.8  | 67.5  | 55.0  | 64.3  | 75.4  | 53.3  | 78.1  | 82.1  | 74.1  |
| 267.7 | 170.8 | 188.5 | 193.5 | 211.9 | 203.5 | 283.8 | 260.3 | 237.0 |
| 104.6 | 57.4  | 75.6  | 76.9  | 91.3  | 82.8  | 105.6 | 131.8 | 77.5  |
| 11.8  | 14.9  | 11.1  | 12.6  | 14.1  | 6.1   | 7.6   | 13.2  | 5.4   |
| 66.5  | 44.6  | 56.9  | 48.7  | 52.6  | 55.5  | 73.1  | 85.2  | 50.7  |
| 17.2  | 21.5  | 15.6  | 17.1  | 15.7  | 20.7  | 20.4  | 25.1  | 23.3  |
| 17.3  | 15.1  | 18.1  | 19.0  | 20.0  | 20.3  | 27.4  | 34.1  | 24.0  |
| 0.2   | 1.5   | 1.6   | 2.1   | 0.3   | 2.1   | 0.4   | 0.8   | 1.1   |
| 39.4  | 27.7  | 38.4  | 26.4  | 37.3  | 36.6  | 44.6  | 54.7  | 30.0  |
| 42.7  | 19.8  | 26.5  | 40.0  | 24.1  | 23.0  | 29.8  | 40.6  | 23.6  |
| 4.2   | 1.8   | 2.7   | 2.1   | 2.5   | 1.5   | 1.9   | 8.8   | 2.7   |
| 232.7 | 184.0 | 181.7 | 208.4 | 198.6 | 175.4 | 247.8 | 241.5 | 182.3 |
| 285.0 | 220.3 | 234.0 | 217.6 | 218.3 | 218.2 | 283.6 | 301.3 | 207.9 |
| 55.1  | 29.2  | 35.8  | 36.4  | 36.6  | 48.1  | 63.5  | 82.7  | 66.9  |
| 29.0  | 22.7  | 26.0  | 21.1  | 22.2  | 27.5  | 36.5  | 48.6  | 29.9  |
| 99.8  | 80.1  | 87.6  | 92.1  | 88.1  | 82.7  | 113.6 | 118.3 | 85.5  |
| 101.9 | 84.9  | 87.3  | 75.1  | 96.4  | 73.2  | 124.9 | 129.2 | 91.7  |
| 199.4 | 149.5 | 184.6 | 180.6 | 189.4 | 193.2 | 196.9 | 251.5 | 191.8 |
| 116.3 | 77.4  | 82.4  | 81.9  | 102.1 | 90.6  | 114.2 | 120.5 | 79.9  |
| 38.8  | 26.4  | 35.1  | 36.7  | 26.3  | 28.9  | 44.9  | 46.1  | 33.0  |
| 132.9 | 70.2  | 110.1 | 119.7 | 95.7  | 128.7 | 148.0 | 151.5 | 92.2  |
| 75.2  | 50.8  | 54.0  | 67.6  | 70.5  | 49.7  | 88.4  | 80.0  | 74.0  |
| 114.8 | 87.0  | 97.3  | 96.1  | 103.2 | 92.2  | 127.8 | 137.3 | 115.8 |
| 408.8 | 284.0 | 301.5 | 327.0 | 345.0 | 271.8 | 413.4 | 430.4 | 384.5 |
| 22.7  | 17.9  | 17.4  | 19.3  | 18.0  | 17.6  | 20.7  | 22.6  | 19.7  |
| 29.8  | 16.6  | 17.5  | 21.4  | 23.0  | 18.1  | 27.9  | 38.2  | 20.8  |
| 89.0  | 59.9  | 66.6  | 68.2  | 74.9  | 66.3  | 87.6  | 112.4 | 90.5  |
| 108.4 | 63.2  | 69.0  | 71.2  | 69.6  | 84.4  | 130.1 | 128.4 | 102.7 |
| 49.4  | 31.6  | 33.5  | 34.3  | 45.7  | 45.0  | 64.1  | 68.0  | 73.4  |
| 47.4  | 26.3  | 30.2  | 50.8  | 52.8  | 42.3  | 48.8  | 53.5  | 61.2  |
| 1.0   | 0.6   | 0.5   | 4.8   | 0.8   | 0.9   | 0.8   | 3.5   | 2.6   |
| 5.0   | 5.8   | 6.7   | 1.4   | 4.7   | 6.1   | 6.2   | 6.7   | 0.9   |
| 113.9 | 98.5  | 108.0 | 113.3 | 145.3 | 117.8 | 214.1 | 237.9 | 149.0 |
| 30.8  | 19.5  | 22.2  | 23.0  | 26.1  | 20.4  | 30.6  | 48.9  | 27.2  |
| 52.7  | 38.7  | 32.4  | 42.8  | 48.6  | 37.4  | 50.5  | 65.0  | 51.7  |
| 29.5  | 23.8  | 22.5  | 23.8  | 25.5  | 29.4  | 44.1  | 35.2  | 31.5  |
| 137.2 | 125.2 | 162.1 | 163.1 | 183.0 | 78.2  | 173.4 | 185.9 | 190.0 |
| 11.3  | 15.1  | 16.0  | 14.2  | 25.9  | 15.7  | 23.2  | 25.7  | 19.2  |
| 53.2  | 49.9  | 54.6  | 61.2  | 66.8  | 62.4  | 77.4  | 71.8  | 58.4  |
| 67.8  | 46.3  | 44.1  | 61.0  | 64.9  | 49.3  | 64.0  | 60.4  | 63.9  |
| 89.0  | 53.9  | 59.3  | 59.4  | 55.3  | 63.4  | 104.1 | 97.7  | 53.6  |
| 234.4 | 156.0 | 160.8 | 173.7 | 234.1 | 161.3 | 245.9 | 260.0 | 160.1 |
| 120.1 | 112.3 | 90.7  | 91.3  | 107.1 | 82.7  | 111.8 | 131.7 | 99.7  |
| 138.6 | 99.7  | 86.9  | 117.6 | 90.3  | 105.0 | 123.0 | 144.6 | 111.3 |
| 549.7 | 374.5 | 406.8 | 438.9 | 452.8 | 429.9 | 621.3 | 706.9 | 558.3 |

|       |       |       |       |       |       |       |       |       |
|-------|-------|-------|-------|-------|-------|-------|-------|-------|
| 27.6  | 24.7  | 20.7  | 25.7  | 28.5  | 23.5  | 35.5  | 33.5  | 33.6  |
| 1.3   | 1.7   | 1.7   | 0.8   | 7.1   | 10.7  | 1.4   | 7.4   | 9.6   |
| 2.7   | 1.2   | 8.2   | 4.5   | 2.4   | 0.9   | 7.3   | 1.8   | 1.0   |
| 182.7 | 163.9 | 195.5 | 207.7 | 211.3 | 193.8 | 286.8 | 230.6 | 195.6 |
| 31.6  | 32.7  | 26.7  | 34.6  | 32.7  | 31.4  | 50.7  | 53.4  | 35.3  |
| 3.9   | 1.2   | 1.6   | 0.7   | 0.7   | 2.5   | 0.7   | 4.0   | 3.7   |
| 69.7  | 60.6  | 65.2  | 52.0  | 57.0  | 58.5  | 102.5 | 86.1  | 65.7  |
| 46.2  | 46.1  | 44.9  | 55.5  | 48.6  | 49.5  | 56.5  | 68.6  | 58.6  |
| 14.2  | 13.1  | 10.1  | 16.9  | 11.3  | 15.2  | 14.0  | 18.0  | 15.5  |
| 30.3  | 22.9  | 20.3  | 35.6  | 36.5  | 30.9  | 44.1  | 46.6  | 32.8  |
| 82.0  | 74.9  | 78.5  | 101.5 | 83.6  | 75.1  | 114.2 | 113.6 | 76.8  |
| 150.1 | 172.8 | 166.1 | 203.6 | 190.5 | 172.7 | 250.6 | 228.2 | 213.0 |
| 17.6  | 6.1   | 5.2   | 5.1   | 6.1   | 7.1   | 1.7   | 6.7   | 7.7   |
| 252.4 | 206.4 | 232.8 | 224.9 | 216.7 | 210.4 | 258.2 | 303.9 | 203.9 |
| 165.0 | 108.8 | 143.9 | 149.9 | 151.3 | 164.4 | 174.6 | 229.6 | 159.5 |
| 250.0 | 204.9 | 254.4 | 223.3 | 259.3 | 226.9 | 344.1 | 347.6 | 213.0 |
| 62.5  | 55.2  | 54.2  | 61.7  | 68.0  | 62.1  | 90.4  | 75.3  | 62.0  |
| 23.1  | 20.4  | 19.1  | 22.8  | 20.7  | 20.1  | 21.8  | 23.9  | 22.8  |
| 129.7 | 89.1  | 85.1  | 82.6  | 94.4  | 88.5  | 111.9 | 123.3 | 99.8  |
| 49.8  | 40.3  | 40.2  | 31.4  | 44.5  | 45.1  | 61.9  | 74.1  | 52.9  |
| 100.4 | 31.9  | 47.6  | 49.9  | 42.5  | 58.0  | 82.1  | 122.8 | 91.1  |
| 147.7 | 145.6 | 136.9 | 139.7 | 173.0 | 130.2 | 191.4 | 170.9 | 135.0 |
| 55.5  | 37.5  | 40.4  | 56.6  | 58.4  | 44.0  | 45.9  | 76.5  | 47.9  |
| 210.7 | 108.7 | 119.1 | 158.8 | 133.0 | 133.2 | 170.6 | 244.3 | 163.4 |
| 5.8   | 1.9   | 2.6   | 0.4   | 4.5   | 1.1   | 5.1   | 4.6   | 3.1   |
| 22.0  | 15.5  | 24.1  | 18.1  | 18.8  | 22.7  | 25.1  | 26.1  | 25.6  |
| 105.1 | 90.1  | 83.4  | 80.0  | 83.5  | 65.8  | 98.5  | 112.5 | 83.7  |
| 84.2  | 74.1  | 47.5  | 54.3  | 65.4  | 55.9  | 74.3  | 98.8  | 65.1  |
| 182.3 | 150.5 | 163.3 | 168.0 | 170.6 | 139.4 | 202.9 | 249.5 | 146.4 |
| 72.6  | 45.9  | 52.7  | 55.3  | 54.1  | 47.3  | 61.1  | 74.2  | 64.9  |
| 184.4 | 137.8 | 114.7 | 155.2 | 159.4 | 141.2 | 155.5 | 218.8 | 200.6 |
| 90.6  | 68.1  | 67.3  | 71.1  | 65.8  | 76.2  | 81.5  | 85.8  | 73.8  |
| 1.6   | 9.0   | 5.5   | 2.7   | 4.4   | 5.2   | 2.0   | 8.7   | 5.6   |
| 58.9  | 29.5  | 41.4  | 41.2  | 42.2  | 44.0  | 59.5  | 66.0  | 53.2  |
| 6.4   | 5.1   | 11.8  | 16.2  | 10.1  | 8.2   | 14.1  | 16.5  | 12.3  |
| 40.4  | 28.0  | 25.5  | 23.3  | 37.0  | 33.3  | 56.3  | 58.4  | 53.1  |
| 43.6  | 19.3  | 27.2  | 28.1  | 26.3  | 34.0  | 45.4  | 49.8  | 26.8  |
| 1.6   | 5.0   | 4.4   | 2.1   | 2.2   | 4.3   | 3.8   | 8.3   | 4.1   |
| 137.9 | 105.6 | 113.7 | 109.4 | 113.9 | 95.6  | 165.2 | 152.0 | 174.1 |
| 31.3  | 17.0  | 22.0  | 26.3  | 20.3  | 24.8  | 33.1  | 35.3  | 26.7  |
| 135.6 | 106.3 | 104.7 | 118.8 | 150.0 | 113.9 | 134.6 | 151.1 | 132.9 |
| 64.8  | 34.4  | 45.5  | 45.8  | 38.1  | 47.9  | 81.3  | 69.8  | 65.8  |
| 18.7  | 13.5  | 12.4  | 13.4  | 17.7  | 10.9  | 28.3  | 31.7  | 29.4  |
| 10.3  | 5.4   | 9.4   | 7.9   | 7.1   | 4.2   | 9.1   | 12.9  | 3.2   |
| 144.6 | 47.3  | 63.3  | 92.1  | 56.8  | 83.0  | 130.3 | 128.7 | 55.6  |
| 178.5 | 120.6 | 132.1 | 148.2 | 168.1 | 148.0 | 201.2 | 220.5 | 144.1 |
| 39.7  | 39.7  | 42.5  | 43.6  | 43.8  | 42.0  | 52.9  | 61.7  | 51.3  |
| 5.7   | 1.3   | 1.3   | 1.6   | 1.5   | 0.8   | 1.5   | 6.9   | 2.1   |
| 24.6  | 18.3  | 14.4  | 16.7  | 22.3  | 15.4  | 35.0  | 36.6  | 21.0  |
| 8.9   | 8.5   | 7.2   | 13.3  | 10.0  | 8.6   | 16.3  | 17.2  | 13.1  |
| 38.7  | 23.9  | 26.6  | 31.1  | 32.7  | 30.5  | 46.6  | 39.8  | 37.3  |
| 103.6 | 51.2  | 64.5  | 60.4  | 62.3  | 54.4  | 87.3  | 81.5  | 65.8  |
| 31.2  | 19.7  | 22.8  | 20.4  | 33.7  | 24.0  | 40.4  | 34.6  | 21.5  |

|       |       |       |       |       |       |       |       |       |
|-------|-------|-------|-------|-------|-------|-------|-------|-------|
| 55.6  | 41.5  | 47.7  | 42.6  | 52.4  | 40.8  | 65.2  | 78.8  | 68.0  |
| 48.4  | 38.3  | 28.6  | 35.5  | 42.9  | 36.6  | 46.1  | 44.3  | 40.5  |
| 24.2  | 21.1  | 26.2  | 20.0  | 16.0  | 21.0  | 28.1  | 25.2  | 18.6  |
| 41.9  | 34.8  | 34.7  | 36.5  | 36.4  | 28.6  | 42.0  | 49.7  | 35.1  |
| 24.7  | 18.1  | 21.8  | 14.9  | 19.1  | 19.7  | 25.4  | 29.9  | 18.5  |
| 60.8  | 40.0  | 45.4  | 41.3  | 45.3  | 51.5  | 51.3  | 73.0  | 58.9  |
| 331.3 | 255.4 | 259.6 | 272.2 | 289.1 | 271.4 | 345.0 | 375.4 | 295.3 |
| 106.0 | 51.6  | 76.0  | 59.6  | 74.6  | 72.8  | 87.0  | 104.2 | 78.3  |
| 117.7 | 111.4 | 111.3 | 98.0  | 111.2 | 104.8 | 131.2 | 137.2 | 124.0 |
| 140.5 | 110.7 | 107.6 | 136.8 | 127.6 | 100.0 | 130.4 | 123.3 | 95.9  |
| 214.3 | 166.5 | 181.5 | 180.7 | 187.2 | 172.7 | 277.4 | 305.8 | 219.2 |
| 5.9   | 5.1   | 0.3   | 7.1   | 3.4   | 4.8   | 0.8   | 3.0   | 2.1   |
| 46.5  | 27.7  | 34.3  | 33.7  | 37.0  | 34.6  | 47.3  | 55.8  | 47.1  |
| 129.2 | 96.0  | 92.4  | 99.8  | 96.6  | 78.1  | 124.7 | 113.0 | 105.2 |
| 16.0  | 12.0  | 10.2  | 10.1  | 14.7  | 12.5  | 18.2  | 20.1  | 13.8  |
| 31.6  | 29.2  | 29.3  | 40.6  | 33.8  | 30.2  | 57.6  | 42.7  | 41.9  |
| 291.0 | 215.2 | 251.7 | 202.6 | 278.3 | 256.7 | 328.0 | 374.3 | 270.5 |
| 36.3  | 18.0  | 17.9  | 26.3  | 19.9  | 22.7  | 29.2  | 37.0  | 27.1  |
| 129.4 | 67.4  | 88.9  | 82.4  | 106.1 | 85.4  | 116.1 | 132.8 | 111.6 |
| 24.8  | 22.7  | 22.1  | 27.7  | 14.9  | 19.6  | 30.6  | 35.9  | 25.7  |
| 27.9  | 10.8  | 20.2  | 18.3  | 19.6  | 10.7  | 19.5  | 16.4  | 15.4  |
| 6.3   | 5.3   | 3.1   | 0.8   | 0.9   | 0.7   | 8.8   | 1.3   | 4.8   |
| 14.4  | 9.5   | 16.4  | 22.6  | 18.1  | 14.4  | 22.1  | 26.5  | 17.5  |
| 5.6   | 7.0   | 1.3   | 1.9   | 1.6   | 6.9   | 5.7   | 5.7   | 7.7   |
| 51.9  | 27.6  | 27.1  | 33.4  | 45.6  | 41.4  | 50.4  | 61.4  | 22.4  |
| 30.7  | 34.4  | 30.1  | 37.2  | 37.3  | 31.1  | 41.0  | 48.9  | 35.6  |
| 123.4 | 61.7  | 52.4  | 75.7  | 71.5  | 64.5  | 90.8  | 91.0  | 72.0  |
| 305.0 | 195.9 | 269.0 | 246.6 | 277.0 | 259.3 | 344.9 | 365.0 | 266.9 |
| 9.5   | 15.7  | 12.9  | 11.6  | 10.7  | 11.1  | 12.7  | 16.1  | 10.7  |
| 93.6  | 68.3  | 70.4  | 60.5  | 75.2  | 55.3  | 106.0 | 105.0 | 80.5  |
| 4.9   | 6.6   | 3.2   | 4.5   | 6.4   | 3.8   | 6.9   | 5.2   | 4.1   |
| 61.4  | 45.0  | 55.8  | 56.3  | 58.6  | 57.4  | 76.9  | 86.8  | 57.0  |
| 19.6  | 15.0  | 11.0  | 17.3  | 19.8  | 8.4   | 19.2  | 21.7  | 20.9  |
| 28.5  | 21.4  | 18.5  | 25.2  | 21.6  | 15.4  | 20.3  | 37.4  | 26.6  |
| 51.0  | 76.6  | 55.5  | 44.4  | 57.8  | 42.8  | 84.2  | 90.1  | 81.2  |
| 98.9  | 62.4  | 71.1  | 61.4  | 79.5  | 73.2  | 111.5 | 112.6 | 108.5 |
| 57.8  | 60.7  | 68.2  | 73.6  | 79.5  | 73.0  | 117.2 | 122.5 | 59.2  |
| 11.9  | 4.3   | 5.2   | 9.4   | 6.3   | 4.9   | 10.2  | 14.6  | 8.7   |
| 48.5  | 28.5  | 41.0  | 42.2  | 43.4  | 44.2  | 40.7  | 34.4  | 46.0  |
| 25.5  | 11.5  | 19.7  | 20.7  | 16.7  | 21.2  | 27.8  | 39.9  | 25.1  |
| 27.8  | 23.6  | 30.4  | 29.8  | 34.4  | 26.0  | 35.2  | 36.9  | 28.0  |
| 0.8   | 4.7   | 1.0   | 5.0   | 1.1   | 2.9   | 5.1   | 0.7   | 3.6   |
| 4.1   | 2.3   | 0.7   | 1.8   | 3.1   | 4.8   | 4.0   | 3.5   | 4.8   |
| 32.0  | 56.3  | 37.2  | 41.5  | 51.7  | 55.9  | 63.0  | 87.0  | 68.7  |
| 73.2  | 58.5  | 40.7  | 61.9  | 55.1  | 52.3  | 60.1  | 77.5  | 59.2  |
| 8.8   | 8.2   | 9.0   | 8.7   | 12.1  | 8.7   | 11.5  | 20.2  | 15.8  |
| 3.3   | 6.8   | 7.3   | 6.6   | 8.8   | 8.5   | 11.1  | 15.0  | 8.9   |
| 3.3   | 7.0   | 5.8   | 2.2   | 7.4   | 4.3   | 6.9   | 4.7   | 2.3   |
| 5.1   | 7.0   | 4.7   | 2.7   | 10.8  | 6.5   | 9.4   | 23.1  | 14.6  |
| 37.7  | 37.6  | 49.8  | 36.9  | 48.2  | 45.6  | 67.2  | 76.5  | 62.9  |
| 79.2  | 47.0  | 54.6  | 53.0  | 63.7  | 43.4  | 61.0  | 52.8  | 54.3  |
| 62.5  | 38.6  | 37.5  | 37.4  | 41.4  | 34.7  | 71.4  | 73.8  | 46.5  |
| 54.8  | 57.1  | 41.9  | 38.9  | 48.7  | 15.6  | 80.6  | 41.0  | 25.1  |

|       |       |       |       |       |       |       |       |       |
|-------|-------|-------|-------|-------|-------|-------|-------|-------|
| 75.8  | 37.0  | 41.1  | 47.6  | 48.9  | 47.1  | 68.7  | 72.3  | 56.1  |
| 76.3  | 43.6  | 49.2  | 54.3  | 58.8  | 52.1  | 81.1  | 85.2  | 42.3  |
| 49.5  | 24.5  | 18.4  | 24.8  | 26.6  | 15.5  | 27.9  | 20.4  | 26.9  |
| 17.7  | 17.0  | 13.6  | 21.4  | 16.6  | 16.8  | 21.7  | 19.1  | 18.7  |
| 201.0 | 100.7 | 120.3 | 132.4 | 112.4 | 152.1 | 192.0 | 280.0 | 180.6 |
| 15.4  | 21.3  | 9.0   | 2.3   | 13.5  | 17.0  | 22.2  | 11.9  | 20.0  |
| 16.6  | 14.1  | 15.2  | 13.1  | 17.1  | 13.1  | 16.1  | 19.8  | 20.6  |
| 35.8  | 33.0  | 35.9  | 38.3  | 40.1  | 34.4  | 48.3  | 52.7  | 32.4  |
| 56.7  | 30.9  | 28.4  | 32.8  | 30.4  | 32.2  | 48.2  | 52.2  | 37.5  |
| 73.9  | 45.3  | 61.9  | 72.6  | 67.5  | 75.4  | 101.4 | 100.8 | 60.0  |
| 45.2  | 36.2  | 31.6  | 22.7  | 28.4  | 32.2  | 44.6  | 34.5  | 32.2  |
| 134.8 | 95.1  | 101.2 | 97.7  | 109.0 | 107.2 | 132.9 | 135.4 | 90.8  |
| 53.4  | 48.4  | 56.9  | 50.7  | 51.5  | 36.9  | 71.8  | 74.6  | 50.8  |
| 311.7 | 225.7 | 228.5 | 276.5 | 263.8 | 220.6 | 321.3 | 337.8 | 230.3 |
| 37.8  | 27.5  | 29.1  | 27.2  | 35.3  | 24.3  | 42.2  | 47.1  | 30.2  |
| 29.1  | 16.3  | 23.5  | 19.7  | 13.1  | 15.2  | 33.1  | 30.5  | 16.1  |
| 153.9 | 119.5 | 138.0 | 187.0 | 152.4 | 118.3 | 193.7 | 201.7 | 152.2 |
| 65.0  | 30.2  | 28.5  | 39.9  | 31.1  | 37.8  | 48.3  | 58.2  | 45.0  |
| 21.4  | 27.9  | 22.7  | 29.5  | 11.8  | 19.6  | 36.7  | 31.0  | 26.9  |
| 72.3  | 37.3  | 43.6  | 44.6  | 60.3  | 38.6  | 82.5  | 81.7  | 49.5  |
| 33.5  | 28.8  | 38.9  | 33.3  | 35.4  | 35.2  | 53.5  | 52.9  | 36.5  |
| 7.1   | 6.0   | 4.4   | 6.2   | 5.0   | 4.6   | 10.9  | 7.4   | 5.2   |
| 4.5   | 3.5   | 0.4   | 5.2   | 7.7   | 4.5   | 7.7   | 6.4   | 8.0   |
| 19.7  | 18.3  | 12.1  | 18.4  | 17.9  | 20.4  | 19.0  | 21.1  | 21.9  |
| 161.9 | 134.1 | 141.9 | 141.7 | 138.7 | 137.5 | 189.5 | 211.6 | 148.7 |
| 77.4  | 64.2  | 64.6  | 71.6  | 74.4  | 63.5  | 115.5 | 115.7 | 73.6  |
| 178.0 | 99.7  | 132.0 | 118.7 | 133.7 | 138.5 | 178.7 | 181.7 | 117.1 |
| 69.1  | 32.2  | 40.1  | 34.6  | 38.8  | 48.3  | 47.6  | 76.3  | 42.3  |
| 44.4  | 42.2  | 39.1  | 58.9  | 38.2  | 33.6  | 43.1  | 40.3  | 54.3  |
| 54.5  | 40.6  | 40.1  | 44.7  | 46.7  | 46.2  | 57.9  | 64.6  | 52.1  |
| 61.1  | 48.8  | 42.3  | 60.5  | 47.2  | 52.9  | 56.9  | 69.3  | 82.0  |
| 5.7   | 4.3   | 6.7   | 0.3   | 1.3   | 7.9   | 6.9   | 6.5   | 7.9   |
| 92.4  | 67.3  | 68.4  | 64.5  | 61.9  | 64.7  | 100.6 | 114.6 | 75.2  |
| 113.5 | 68.0  | 74.7  | 76.1  | 81.8  | 73.4  | 99.0  | 104.4 | 95.0  |
| 16.6  | 8.2   | 13.2  | 8.8   | 15.2  | 13.6  | 20.7  | 26.7  | 10.3  |
| 27.9  | 36.9  | 26.6  | 30.0  | 32.6  | 32.9  | 26.8  | 43.5  | 32.7  |
| 75.7  | 47.8  | 49.2  | 53.6  | 49.7  | 48.6  | 77.1  | 80.0  | 57.5  |
| 14.4  | 9.3   | 16.0  | 12.2  | 17.3  | 13.6  | 18.3  | 16.8  | 17.3  |
| 67.8  | 50.9  | 38.5  | 60.4  | 58.8  | 48.2  | 52.9  | 67.2  | 60.2  |
| 174.6 | 157.9 | 162.2 | 177.7 | 191.7 | 183.7 | 223.0 | 231.9 | 150.3 |
| 3.5   | 8.3   | 9.2   | 10.0  | 5.8   | 1.7   | 5.8   | 11.4  | 3.3   |
| 61.3  | 41.8  | 29.2  | 41.9  | 48.8  | 50.3  | 67.3  | 59.3  | 47.1  |
| 20.0  | 23.1  | 20.3  | 23.4  | 24.7  | 15.8  | 18.8  | 32.8  | 27.8  |
| 84.1  | 67.0  | 62.7  | 53.9  | 71.4  | 57.0  | 80.4  | 85.1  | 59.4  |
| 8.7   | 1.2   | 5.9   | 6.2   | 2.7   | 6.0   | 10.9  | 15.4  | 12.6  |
| 17.0  | 22.0  | 19.0  | 19.2  | 21.8  | 26.8  | 30.3  | 42.1  | 16.1  |
| 6.9   | 9.8   | 4.4   | 8.1   | 7.4   | 7.1   | 4.7   | 6.8   | 9.0   |
| 84.5  | 36.0  | 46.6  | 46.8  | 54.8  | 50.2  | 88.0  | 144.6 | 56.8  |
| 20.6  | 10.8  | 19.6  | 12.0  | 14.7  | 14.5  | 22.6  | 27.4  | 21.3  |
| 61.7  | 57.4  | 45.9  | 55.2  | 55.7  | 51.6  | 69.9  | 67.9  | 63.3  |
| 13.2  | 5.7   | 6.1   | 0.7   | 15.5  | 5.9   | 9.5   | 11.7  | 4.8   |
| 37.2  | 39.2  | 31.4  | 44.1  | 40.2  | 29.1  | 50.5  | 44.8  | 41.3  |
| 65.9  | 69.5  | 56.3  | 83.8  | 54.5  | 53.9  | 93.8  | 106.5 | 89.6  |

|       |      |       |       |       |       |       |       |       |
|-------|------|-------|-------|-------|-------|-------|-------|-------|
| 4.4   | 2.2  | 1.7   | 0.7   | 4.8   | 3.3   | 0.9   | 0.2   | 0.7   |
| 33.2  | 22.7 | 22.4  | 24.1  | 31.9  | 28.5  | 42.1  | 51.7  | 30.4  |
| 46.3  | 26.9 | 29.0  | 26.8  | 28.9  | 27.7  | 50.0  | 53.4  | 44.7  |
| 160.4 | 95.5 | 129.7 | 114.2 | 145.8 | 144.7 | 202.9 | 196.3 | 147.0 |
| 13.1  | 5.0  | 2.9   | 2.7   | 8.8   | 3.2   | 6.7   | 4.1   | 2.1   |
| 72.0  | 41.8 | 50.4  | 59.9  | 60.3  | 54.4  | 84.9  | 102.5 | 74.0  |
| 1.7   | 2.1  | 3.2   | 2.7   | 2.1   | 1.5   | 1.9   | 1.7   | 3.6   |
| 30.5  | 29.7 | 28.9  | 25.8  | 24.1  | 32.9  | 18.2  | 28.1  | 28.4  |
| 41.2  | 28.7 | 38.0  | 42.9  | 36.2  | 39.8  | 44.9  | 45.1  | 50.9  |

---



| Batch.2 | V€Batch.2 | V€Batch.2 | Tr Batch.2 | Tr Batch.2 | Tr Batch.2 | Tr Batch.5 | G€Batch.5 | V€Batch.4 | V€Batch.4 | V€ |
|---------|-----------|-----------|------------|------------|------------|------------|-----------|-----------|-----------|----|
| 348.6   | 306.0     | 304.1     | 246.7      | 109.1      | 941.6      | 773.0      | 396.1     | 553.8     |           |    |
| 333.8   | 290.1     | 270.3     | 188.9      | 99.3       | 537.5      | 313.3      | 89.5      | 99.3      |           |    |
| 50.9    | 27.2      | 50.7      | 94.7       | 10.8       | 50.7       | 29.3       | 25.1      | 11.0      |           |    |
| 153.1   | 139.8     | 126.2     | 121.1      | 46.4       | 131.2      | 84.8       | 71.6      | 116.0     |           |    |
| 4.0     | 5.2       | 9.0       | 3.6        | 4.2        | 1.3        | 1.1        | 3.8       | 4.9       |           |    |
| 46.2    | 23.2      | 16.9      | 14.2       | 6.9        | 54.3       | 47.4       | 9.9       | 10.3      |           |    |
| 17.7    | 18.7      | 13.5      | 6.7        | 8.2        | 21.9       | 8.4        | 16.2      | 13.3      |           |    |
| 10.7    | 10.4      | 4.0       | 19.4       | 1.7        | 26.6       | 11.8       | 1.4       | 12.1      |           |    |
| 201.8   | 125.0     | 249.4     | 1194.3     | 221.4      | 43.9       | 50.8       | 1.2       | 3.1       |           |    |
| 25.7    | 32.8      | 23.5      | 19.5       | 8.1        | 13.9       | 11.8       | 8.7       | 0.9       |           |    |
| 5.2     | 11.6      | 11.3      | 10.2       | 9.4        | 21.8       | 6.7        | 109.5     | 140.0     |           |    |
| 176.7   | 146.8     | 133.5     | 118.1      | 52.3       | 424.0      | 275.8      | 133.3     | 183.5     |           |    |
| 17.8    | 15.5      | 14.5      | 10.5       | 13.2       | 44.8       | 28.4       | 28.2      | 26.9      |           |    |
| 89.8    | 80.1      | 81.3      | 55.3       | 30.5       | 546.8      | 334.5      | 66.4      | 105.3     |           |    |
| 56.9    | 41.2      | 52.2      | 34.1       | 19.7       | 314.9      | 178.6      | 49.8      | 52.2      |           |    |
| 100.5   | 88.0      | 93.3      | 94.0       | 31.9       | 396.3      | 291.4      | 62.3      | 75.5      |           |    |
| 15.7    | 20.4      | 23.0      | 17.2       | 10.2       | 41.1       | 30.6       | 6.7       | 10.8      |           |    |
| 145.1   | 126.7     | 108.9     | 62.4       | 30.1       | 78.5       | 22.4       | 38.9      | 49.0      |           |    |
| 136.5   | 104.8     | 161.0     | 103.5      | 69.3       | 167.9      | 74.8       | 33.2      | 52.3      |           |    |
| 65.5    | 55.3      | 48.7      | 28.7       | 15.0       | 122.2      | 50.7       | 119.1     | 132.2     |           |    |
| 1221.0  | 1290.5    | 1222.1    | 1180.4     | 525.1      | 1420.4     | 783.9      | 225.8     | 308.9     |           |    |
| 1498.5  | 1066.4    | 1072.6    | 888.9      | 377.9      | 4730.0     | 3314.7     | 983.3     | 1624.4    |           |    |
| 5989.6  | 5420.8    | 4913.6    | 4825.3     | 2562.1     | 6961.8     | 6184.1     | 1934.3    | 2608.3    |           |    |
| 8361.4  | 7661.1    | 7387.0    | 7246.3     | 3986.2     | 9739.0     | 8445.1     | 2062.0    | 2305.0    |           |    |
| 4127.3  | 3483.1    | 3943.4    | 3485.7     | 1622.2     | 7608.3     | 5868.3     | 1667.0    | 1586.6    |           |    |
| 1990.0  | 1655.5    | 1856.8    | 2240.5     | 757.9      | 4205.4     | 3037.1     | 563.7     | 655.4     |           |    |
| 4559.0  | 4334.6    | 3728.5    | 2920.2     | 1520.9     | 6139.6     | 4839.8     | 689.5     | 1057.2    |           |    |
| 2325.0  | 2203.0    | 2274.3    | 1787.7     | 753.8      | 4596.3     | 3628.9     | 848.7     | 1009.1    |           |    |
| 1476.9  | 1298.9    | 1189.8    | 1017.0     | 343.9      | 846.4      | 482.0      | 487.4     | 582.3     |           |    |
| 2925.0  | 2584.5    | 2473.2    | 2267.9     | 1177.2     | 3245.3     | 2643.5     | 1124.1    | 1339.8    |           |    |
| 7267.0  | 6011.7    | 5688.9    | 4790.2     | 2578.6     | 8790.3     | 7254.0     | 998.0     | 1587.2    |           |    |
| 1081.9  | 938.4     | 797.4     | 472.7      | 361.2      | 1552.6     | 1204.4     | 389.5     | 446.2     |           |    |
| 6076.2  | 5775.9    | 5354.4    | 4947.7     | 3224.6     | 7446.5     | 6983.3     | 1392.3    | 1822.2    |           |    |
| 7458.9  | 6613.0    | 6336.5    | 5781.3     | 3200.8     | 11268.7    | 8702.0     | 1071.2    | 1514.7    |           |    |
| 1884.6  | 1903.7    | 1904.0    | 1623.4     | 599.7      | 2769.9     | 2301.8     | 459.4     | 596.2     |           |    |
| 3098.1  | 3047.0    | 2748.7    | 2317.2     | 1154.5     | 4318.3     | 3369.1     | 325.0     | 423.2     |           |    |
| 5558.5  | 5778.4    | 5031.3    | 4513.7     | 2556.3     | 8592.1     | 6978.2     | 1334.5    | 2196.5    |           |    |
| 9295.4  | 7976.2    | 7866.1    | 7525.9     | 4770.5     | 10627.3    | 9150.2     | 1187.9    | 1254.8    |           |    |
| 7775.3  | 6814.2    | 6548.6    | 6060.5     | 3760.1     | 10613.8    | 8762.9     | 1772.4    | 2043.4    |           |    |
| 4557.5  | 3761.2    | 3671.1    | 2906.7     | 1297.3     | 7776.6     | 6330.9     | 2854.1    | 3013.8    |           |    |
| 1195.5  | 939.2     | 811.3     | 717.0      | 284.1      | 2430.2     | 1787.1     | 488.7     | 604.3     |           |    |
| 6397.2  | 5620.8    | 5071.9    | 4442.2     | 3623.9     | 7659.2     | 7241.8     | 2843.2    | 3922.1    |           |    |
| 7087.4  | 6699.2    | 6397.7    | 6130.9     | 3503.9     | 8050.3     | 6747.1     | 1988.9    | 1945.7    |           |    |
| 2314.5  | 2006.0    | 2026.4    | 1862.0     | 966.4      | 4558.3     | 3384.5     | 612.5     | 782.1     |           |    |
| 5746.6  | 4837.0    | 4343.2    | 4064.2     | 2373.1     | 4665.9     | 3275.1     | 1708.2    | 1910.6    |           |    |
| 7292.3  | 6243.3    | 5841.8    | 5560.1     | 3343.1     | 8447.8     | 7309.4     | 1441.8    | 2095.1    |           |    |
| 6434.2  | 5845.1    | 5319.8    | 5159.8     | 2994.7     | 9008.1     | 7420.7     | 1300.7    | 1823.4    |           |    |
| 2376.8  | 2245.4    | 2672.5    | 2614.0     | 1143.1     | 1257.5     | 997.5      | 630.7     | 801.8     |           |    |
| 2050.3  | 1833.9    | 1825.5    | 1249.1     | 579.0      | 2456.5     | 1733.8     | 448.3     | 816.7     |           |    |
| 6912.6  | 6470.6    | 6569.2    | 6243.5     | 3625.9     | 8632.6     | 8080.9     | 4777.2    | 5502.1    |           |    |
| 4808.9  | 4139.2    | 4082.7    | 3142.6     | 2046.0     | 5302.3     | 3957.5     | 940.4     | 1233.7    |           |    |
| 8191.1  | 8095.7    | 7453.3    | 6753.8     | 3544.4     | 8083.4     | 3124.8     | 2082.8    | 2306.9    |           |    |

|        |        |        |        |        |         |        |        |        |
|--------|--------|--------|--------|--------|---------|--------|--------|--------|
| 8106.8 | 7306.5 | 6970.9 | 6471.5 | 3778.9 | 10615.6 | 8719.7 | 2177.4 | 2723.8 |
| 3595.3 | 3486.7 | 3078.0 | 3228.7 | 1567.4 | 4496.9  | 3399.0 | 814.6  | 824.4  |
| 6044.6 | 5347.7 | 5494.3 | 4985.7 | 3055.9 | 7868.3  | 5956.1 | 1303.6 | 1531.7 |
| 243.8  | 233.8  | 266.9  | 222.3  | 70.9   | 625.0   | 462.3  | 151.1  | 204.6  |
| 3839.6 | 3422.8 | 3603.9 | 3955.2 | 1609.3 | 6705.7  | 5105.4 | 1551.7 | 1327.2 |
| 2075.7 | 2375.1 | 2262.6 | 1596.8 | 905.0  | 3795.9  | 2915.9 | 557.8  | 673.6  |
| 7078.5 | 6615.0 | 6184.4 | 5768.8 | 3271.8 | 6727.7  | 5893.3 | 1821.7 | 2269.8 |
| 2951.4 | 2502.0 | 2486.1 | 1862.2 | 979.5  | 3502.9  | 2794.8 | 555.6  | 699.7  |
| 2016.9 | 1905.0 | 1686.6 | 1386.0 | 503.8  | 2177.1  | 1498.0 | 444.8  | 687.9  |
| 3391.9 | 2733.1 | 2552.5 | 2124.4 | 923.2  | 3190.5  | 2656.4 | 608.9  | 905.8  |
| 891.0  | 882.0  | 806.5  | 713.3  | 358.1  | 1404.9  | 1019.9 | 203.1  | 353.9  |
| 4024.1 | 4244.3 | 3479.5 | 2653.1 | 763.4  | 5401.6  | 3750.0 | 680.4  | 917.5  |
| 1661.4 | 1525.8 | 1352.7 | 898.5  | 509.8  | 2043.4  | 1272.6 | 636.0  | 787.1  |
| 968.2  | 762.7  | 715.4  | 628.2  | 252.7  | 729.2   | 500.7  | 296.9  | 370.5  |
| 1938.4 | 1857.0 | 1489.6 | 1172.0 | 448.9  | 2236.2  | 2155.2 | 489.8  | 788.4  |
| 1361.0 | 1297.5 | 1375.8 | 1408.4 | 475.5  | 2023.8  | 1428.9 | 305.7  | 374.5  |
| 3570.6 | 3357.6 | 2936.4 | 2593.1 | 1466.0 | 3169.9  | 2343.7 | 879.1  | 1200.2 |
| 280.3  | 220.5  | 258.5  | 199.6  | 95.1   | 335.9   | 190.4  | 340.1  | 574.7  |
| 630.1  | 515.2  | 697.2  | 803.4  | 189.8  | 3651.0  | 2836.2 | 232.2  | 233.7  |
| 234.3  | 194.1  | 189.1  | 193.7  | 74.5   | 567.2   | 418.1  | 101.7  | 85.4   |
| 4329.7 | 3715.5 | 3490.5 | 3099.9 | 1099.9 | 1987.4  | 1378.4 | 546.3  | 623.4  |
| 596.3  | 434.4  | 520.4  | 440.0  | 197.4  | 776.2   | 527.0  | 186.3  | 264.7  |
| 396.1  | 395.3  | 430.1  | 521.7  | 182.1  | 689.8   | 543.8  | 53.4   | 47.2   |
| 694.4  | 599.1  | 533.2  | 488.1  | 239.6  | 1849.2  | 1912.2 | 983.0  | 978.2  |
| 660.7  | 617.8  | 694.3  | 669.8  | 245.9  | 856.7   | 584.5  | 30.5   | 29.7   |
| 3682.2 | 3180.1 | 2789.9 | 2384.7 | 1140.8 | 3040.1  | 1734.0 | 1082.5 | 1359.6 |
| 2409.2 | 2665.9 | 2425.9 | 2276.8 | 1151.0 | 1797.3  | 1349.8 | 288.9  | 382.3  |
| 3590.9 | 3237.0 | 3349.5 | 3164.0 | 1320.4 | 3604.1  | 2387.9 | 736.8  | 1163.8 |
| 1652.4 | 1257.6 | 1304.1 | 1241.0 | 459.6  | 2256.4  | 1406.6 | 311.3  | 359.1  |
| 6463.2 | 6183.7 | 5367.6 | 5548.1 | 3711.2 | 7806.4  | 7229.5 | 2145.4 | 2544.9 |
| 7414.7 | 6563.1 | 6365.3 | 6188.2 | 3354.0 | 10513.2 | 9322.8 | 3515.9 | 4031.3 |
| 6925.8 | 5627.2 | 5505.2 | 5283.7 | 3776.2 | 7998.2  | 6493.9 | 1402.6 | 1654.1 |
| 6367.0 | 5795.0 | 5615.2 | 5310.9 | 2676.3 | 7297.9  | 5297.6 | 1855.6 | 2586.5 |
| 2414.5 | 1614.0 | 1607.6 | 1325.7 | 475.3  | 3588.6  | 2456.6 | 1549.3 | 1699.8 |
| 684.1  | 610.2  | 573.2  | 586.8  | 227.6  | 944.2   | 662.8  | 157.0  | 137.4  |
| 1200.0 | 1141.8 | 1066.4 | 957.3  | 312.8  | 2223.6  | 1407.6 | 328.8  | 429.9  |
| 1989.4 | 1539.1 | 1587.2 | 1463.1 | 456.2  | 4259.8  | 3367.2 | 1078.0 | 1547.0 |
| 273.1  | 256.6  | 265.7  | 246.1  | 91.0   | 332.9   | 213.6  | 24.7   | 44.5   |
| 229.1  | 168.0  | 228.0  | 189.3  | 80.9   | 388.2   | 251.5  | 131.0  | 98.8   |
| 793.1  | 727.2  | 687.8  | 811.0  | 251.5  | 1253.5  | 814.4  | 40.4   | 78.5   |
| 1661.5 | 1145.8 | 1195.7 | 729.7  | 282.2  | 1928.1  | 1382.7 | 683.9  | 819.7  |
| 1715.0 | 1542.0 | 1539.5 | 968.4  | 597.8  | 4158.7  | 3378.5 | 334.1  | 393.0  |
| 3674.0 | 3369.3 | 3289.7 | 2911.8 | 1265.7 | 5163.8  | 4439.9 | 465.0  | 573.8  |
| 601.7  | 572.9  | 590.5  | 473.7  | 216.4  | 1362.6  | 1008.5 | 646.8  | 610.8  |
| 367.2  | 354.1  | 366.5  | 455.4  | 135.6  | 561.4   | 311.3  | 168.0  | 140.4  |
| 6366.3 | 5329.7 | 4920.9 | 4383.4 | 2599.5 | 6693.2  | 5402.6 | 1376.8 | 1751.4 |
| 1063.1 | 807.0  | 735.9  | 639.7  | 247.1  | 1301.3  | 709.3  | 230.9  | 270.3  |
| 2204.7 | 2466.7 | 2108.9 | 2036.4 | 819.0  | 3425.1  | 2321.1 | 665.6  | 797.4  |
| 3241.1 | 2895.3 | 2642.7 | 2162.7 | 1078.6 | 4658.4  | 4036.8 | 1300.1 | 1979.3 |
| 3929.7 | 3357.5 | 3375.3 | 3233.2 | 1258.7 | 7778.0  | 6760.7 | 1507.7 | 1548.6 |
| 6943.4 | 6350.3 | 5774.0 | 5632.2 | 3110.1 | 7672.4  | 6277.9 | 2270.9 | 2617.4 |
| 923.1  | 831.3  | 787.7  | 687.7  | 236.7  | 1379.1  | 709.2  | 316.0  | 452.4  |
| 1219.5 | 1180.5 | 1156.1 | 1300.0 | 400.7  | 2632.6  | 1855.8 | 466.4  | 700.0  |

|        |        |        |        |        |         |        |        |        |
|--------|--------|--------|--------|--------|---------|--------|--------|--------|
| 2122.7 | 2026.0 | 1931.0 | 1542.2 | 713.1  | 4225.5  | 3249.7 | 586.2  | 630.7  |
| 2458.8 | 2334.7 | 2145.2 | 1770.1 | 987.6  | 4962.0  | 4136.6 | 754.8  | 938.3  |
| 2028.9 | 2001.2 | 1839.1 | 1817.9 | 674.6  | 3325.9  | 2735.3 | 954.0  | 1132.7 |
| 8379.4 | 7480.8 | 7003.9 | 7242.2 | 4090.4 | 8319.7  | 6875.5 | 2616.3 | 3207.1 |
| 4869.0 | 4142.4 | 4385.2 | 4144.1 | 1949.3 | 7533.8  | 6214.7 | 818.7  | 909.1  |
| 1106.5 | 987.4  | 1031.8 | 1195.5 | 410.6  | 2091.9  | 1831.7 | 152.2  | 240.4  |
| 4689.9 | 3834.1 | 4072.8 | 3667.2 | 2103.9 | 7316.0  | 5884.6 | 434.5  | 491.9  |
| 9223.2 | 8374.0 | 8246.0 | 7913.5 | 5175.3 | 10308.0 | 9072.1 | 1694.3 | 1895.0 |
| 1900.9 | 1905.9 | 1776.4 | 1553.9 | 763.0  | 3115.2  | 2585.5 | 563.8  | 722.0  |
| 4941.3 | 3904.1 | 3755.3 | 3819.7 | 1631.6 | 3615.5  | 2734.3 | 942.2  | 1231.2 |
| 9897.4 | 8795.6 | 8090.8 | 7839.2 | 5355.4 | 10751.5 | 9162.6 | 3191.1 | 4088.7 |
| 1188.8 | 1200.0 | 987.1  | 859.4  | 360.4  | 2697.4  | 2033.1 | 320.6  | 391.1  |
| 1802.5 | 1446.5 | 1451.5 | 1182.9 | 447.9  | 3037.4  | 2187.4 | 385.8  | 495.7  |
| 1180.7 | 1205.6 | 1202.8 | 1007.7 | 560.0  | 1612.2  | 1000.6 | 302.8  | 439.6  |
| 6725.3 | 6298.7 | 5868.5 | 5638.0 | 3439.0 | 10517.1 | 8512.3 | 2829.1 | 2851.2 |
| 716.4  | 547.6  | 603.0  | 515.7  | 160.0  | 1098.3  | 795.5  | 298.1  | 358.6  |
| 2088.9 | 2022.4 | 1928.2 | 1872.8 | 596.9  | 3766.0  | 2862.7 | 968.3  | 1203.6 |
| 1476.7 | 1473.6 | 1524.6 | 1966.9 | 527.6  | 1792.4  | 911.7  | 67.1   | 95.0   |
| 536.8  | 402.7  | 457.4  | 599.0  | 161.0  | 1524.6  | 1444.1 | 99.7   | 125.2  |
| 178.0  | 169.7  | 187.6  | 164.4  | 55.7   | 288.6   | 227.3  | 20.4   | 29.5   |
| 1239.0 | 1264.7 | 967.5  | 1162.6 | 282.6  | 1428.1  | 977.5  | 162.8  | 209.4  |
| 2620.9 | 2675.5 | 2427.2 | 2417.7 | 694.9  | 4761.7  | 4037.2 | 337.2  | 516.9  |
| 995.0  | 922.8  | 1110.4 | 1149.6 | 290.1  | 2356.6  | 1891.7 | 1.5    | 1.2    |
| 270.2  | 191.3  | 114.9  | 122.5  | 64.1   | 3424.0  | 1845.4 | 310.0  | 400.0  |
| 345.5  | 298.7  | 265.5  | 146.3  | 89.0   | 1408.4  | 1223.8 | 94.4   | 111.7  |
| 1719.7 | 1456.8 | 1632.3 | 1462.7 | 565.6  | 3009.5  | 2080.7 | 146.2  | 281.4  |
| 452.3  | 303.1  | 306.2  | 292.5  | 114.7  | 590.2   | 406.1  | 268.2  | 395.9  |
| 1311.7 | 1116.4 | 1109.6 | 1013.1 | 372.3  | 1829.4  | 1197.0 | 349.8  | 546.3  |
| 371.9  | 455.1  | 405.1  | 423.0  | 168.2  | 595.0   | 434.2  | 290.7  | 485.9  |
| 409.1  | 337.6  | 393.8  | 291.6  | 100.7  | 438.5   | 278.7  | 413.0  | 496.3  |
| 1122.2 | 1100.6 | 1201.1 | 1030.5 | 397.2  | 1988.7  | 1529.4 | 233.2  | 351.1  |
| 1956.4 | 1464.8 | 1444.1 | 1033.5 | 532.5  | 4125.6  | 2890.4 | 329.7  | 479.3  |
| 4718.0 | 3855.5 | 3793.6 | 3236.6 | 1037.8 | 5732.9  | 4221.2 | 671.2  | 966.7  |
| 1502.4 | 1328.6 | 1383.2 | 1104.4 | 492.9  | 3376.0  | 2751.0 | 425.9  | 550.8  |
| 557.7  | 324.1  | 341.1  | 197.0  | 131.2  | 876.1   | 591.6  | 213.0  | 310.4  |
| 623.6  | 519.0  | 503.8  | 312.1  | 174.0  | 2933.0  | 1395.3 | 664.8  | 784.6  |
| 4043.4 | 3859.8 | 4105.3 | 4338.1 | 1595.4 | 4728.9  | 3384.6 | 2543.3 | 3172.3 |
| 639.9  | 523.7  | 612.5  | 645.9  | 227.2  | 782.7   | 541.7  | 162.9  | 261.1  |
| 293.4  | 173.3  | 175.4  | 96.9   | 39.0   | 784.7   | 747.7  | 137.1  | 171.2  |
| 473.9  | 459.9  | 296.2  | 209.5  | 116.8  | 839.6   | 439.7  | 245.2  | 252.4  |
| 1098.7 | 1280.7 | 757.6  | 458.4  | 424.0  | 4218.8  | 3409.4 | 2077.5 | 2169.8 |
| 709.4  | 646.7  | 593.6  | 643.5  | 285.6  | 1324.1  | 1065.1 | 374.6  | 479.0  |
| 709.9  | 645.1  | 573.0  | 496.8  | 178.0  | 923.6   | 540.7  | 441.7  | 614.2  |
| 849.8  | 645.1  | 620.9  | 586.0  | 237.7  | 1749.6  | 1345.0 | 249.3  | 374.9  |
| 218.7  | 167.7  | 162.2  | 112.3  | 52.0   | 337.5   | 244.1  | 143.5  | 179.6  |
| 175.9  | 140.1  | 85.5   | 40.5   | 36.6   | 355.3   | 262.5  | 293.5  | 373.1  |
| 1392.6 | 1392.2 | 1485.9 | 1314.1 | 337.9  | 1627.1  | 945.6  | 305.6  | 603.5  |
| 2432.1 | 3027.6 | 2689.8 | 2983.3 | 1206.7 | 2993.0  | 2188.3 | 630.9  | 817.8  |
| 1559.2 | 1566.6 | 1590.7 | 1339.3 | 488.8  | 2129.4  | 1182.9 | 298.2  | 419.5  |
| 5357.8 | 4833.3 | 4786.4 | 4029.9 | 1732.1 | 6293.7  | 5292.4 | 998.3  | 1281.6 |
| 293.8  | 226.2  | 307.4  | 368.7  | 133.0  | 380.0   | 195.9  | 75.2   | 109.9  |
| 367.6  | 296.0  | 342.8  | 463.3  | 123.8  | 647.6   | 478.6  | 101.8  | 104.2  |
| 468.8  | 490.6  | 360.4  | 462.7  | 215.1  | 1053.1  | 643.3  | 815.4  | 1243.3 |

|        |        |        |        |        |        |        |        |        |
|--------|--------|--------|--------|--------|--------|--------|--------|--------|
| 1793.3 | 2005.0 | 1834.9 | 1604.0 | 783.3  | 3066.5 | 2598.5 | 1349.5 | 1612.9 |
| 833.7  | 697.9  | 781.6  | 613.2  | 401.7  | 200.1  | 169.4  | 141.9  | 145.4  |
| 9393.8 | 8754.5 | 8273.1 | 7991.0 | 5393.5 | 9623.3 | 8396.6 | 3052.6 | 3483.9 |
| 5877.7 | 5054.4 | 4706.9 | 4072.4 | 1626.2 | 4431.3 | 3038.9 | 1120.4 | 1196.7 |
| 183.4  | 160.7  | 87.1   | 32.6   | 26.1   | 309.3  | 204.3  | 130.3  | 241.4  |
| 836.4  | 897.0  | 600.9  | 297.7  | 222.1  | 1683.3 | 990.9  | 218.5  | 335.4  |
| 134.3  | 110.8  | 71.7   | 34.9   | 21.4   | 203.2  | 86.2   | 198.7  | 234.1  |
| 1462.1 | 1283.4 | 1193.2 | 975.2  | 159.5  | 4244.2 | 3030.3 | 667.5  | 1006.9 |
| 2654.4 | 2247.0 | 2207.0 | 1734.2 | 532.8  | 6760.1 | 5122.7 | 543.9  | 839.3  |
| 2366.0 | 1730.1 | 1701.9 | 1393.0 | 363.6  | 6073.6 | 4006.8 | 1406.4 | 1643.4 |
| 1025.2 | 736.9  | 721.6  | 533.0  | 105.5  | 2115.1 | 1330.7 | 1186.2 | 1268.5 |
| 1917.8 | 1775.7 | 1795.3 | 1463.6 | 578.0  | 6985.5 | 6144.5 | 1123.8 | 1315.9 |
| 417.2  | 410.5  | 507.5  | 466.0  | 220.6  | 715.2  | 450.6  | 253.3  | 285.8  |
| 746.7  | 585.3  | 451.3  | 253.1  | 180.3  | 949.0  | 572.8  | 627.1  | 1071.2 |
| 1247.3 | 1157.4 | 1003.4 | 1087.8 | 483.4  | 2169.5 | 1817.5 | 950.1  | 1355.0 |
| 61.1   | 64.3   | 50.3   | 29.7   | 29.6   | 51.6   | 31.7   | 16.7   | 1.3    |
| 3738.7 | 3498.0 | 3663.1 | 3859.0 | 1781.7 | 6799.1 | 4195.7 | 1032.5 | 1264.4 |
| 112.1  | 100.7  | 68.0   | 67.8   | 24.5   | 132.8  | 67.7   | 31.9   | 32.2   |
| 113.8  | 100.5  | 92.9   | 46.1   | 39.0   | 124.2  | 79.6   | 3.8    | 2.5    |
| 7455.9 | 6703.6 | 6238.1 | 4958.7 | 3423.5 | 8130.1 | 6811.4 | 1732.9 | 2088.9 |
| 6293.5 | 5694.6 | 5002.2 | 5863.7 | 2959.5 | 7519.3 | 5973.7 | 1996.6 | 2372.8 |
| 3081.6 | 2444.7 | 2232.0 | 1967.4 | 900.1  | 2189.6 | 1692.4 | 316.3  | 385.6  |
| 1301.1 | 957.9  | 1075.3 | 730.2  | 317.4  | 4487.0 | 3958.8 | 737.7  | 1038.9 |
| 1529.2 | 1411.1 | 1190.6 | 1207.4 | 630.4  | 5287.4 | 3561.2 | 1434.1 | 1731.3 |
| 1013.2 | 902.8  | 869.3  | 662.2  | 195.4  | 2685.1 | 1930.0 | 586.4  | 886.6  |
| 738.0  | 752.5  | 722.1  | 778.1  | 380.4  | 2507.6 | 1281.2 | 656.9  | 748.3  |
| 5684.1 | 5062.4 | 4881.6 | 3585.4 | 2328.6 | 4221.2 | 3287.0 | 1589.6 | 2275.3 |
| 2498.6 | 2388.7 | 2353.5 | 1669.9 | 804.6  | 2317.1 | 1528.0 | 1586.8 | 1246.8 |
| 569.5  | 446.9  | 447.1  | 307.5  | 154.6  | 765.3  | 398.7  | 991.4  | 1016.7 |
| 5867.7 | 4804.3 | 4775.2 | 4942.4 | 2980.3 | 5604.7 | 5168.4 | 471.0  | 553.3  |
| 703.3  | 682.3  | 588.5  | 362.5  | 202.3  | 875.5  | 485.4  | 130.2  | 173.4  |
| 1035.0 | 1069.0 | 1063.6 | 949.6  | 334.4  | 3280.7 | 2203.7 | 475.2  | 668.1  |
| 1993.0 | 1690.3 | 1551.4 | 1644.9 | 665.5  | 5952.8 | 4884.8 | 1573.9 | 1735.6 |
| 444.1  | 409.0  | 591.3  | 580.6  | 149.6  | 594.0  | 310.2  | 364.7  | 430.0  |
| 6.0    | 0.8    | 6.6    | 4.9    | 4.2    | 9.2    | 0.6    | 2.9    | 0.3    |
| 729.0  | 599.4  | 811.7  | 832.1  | 197.2  | 1076.9 | 689.4  | 525.9  | 560.8  |
| 442.8  | 474.4  | 525.4  | 676.5  | 167.6  | 1659.9 | 1262.5 | 217.0  | 262.6  |
| 2231.3 | 2061.7 | 2234.9 | 2719.9 | 865.3  | 3546.8 | 2154.8 | 525.6  | 794.4  |
| 1227.1 | 925.8  | 1030.9 | 1336.3 | 326.1  | 1597.8 | 1158.0 | 384.4  | 500.2  |
| 312.0  | 272.2  | 482.1  | 721.2  | 182.3  | 929.9  | 576.3  | 741.5  | 1210.8 |
| 31.6   | 24.9   | 1.6    | 16.6   | 2.2    | 132.0  | 109.0  | 21.9   | 22.6   |
| 41.8   | 39.5   | 44.8   | 29.3   | 10.5   | 106.0  | 41.2   | 30.7   | 62.5   |
| 2431.6 | 2196.9 | 2009.6 | 1697.2 | 966.7  | 2017.5 | 1566.4 | 516.1  | 883.1  |
| 7000.1 | 7047.1 | 6178.4 | 5684.1 | 3686.4 | 6729.7 | 5811.7 | 2423.3 | 3022.0 |
| 700.0  | 672.1  | 584.1  | 339.1  | 156.6  | 2504.9 | 1946.5 | 469.0  | 716.8  |
| 117.1  | 116.8  | 88.7   | 66.5   | 33.5   | 342.3  | 156.7  | 54.5   | 53.5   |
| 1672.0 | 1490.7 | 1388.4 | 990.4  | 661.7  | 2951.7 | 2402.6 | 576.8  | 702.7  |
| 518.2  | 421.3  | 434.0  | 214.9  | 169.5  | 476.8  | 236.1  | 185.1  | 252.5  |
| 3233.2 | 2640.9 | 2542.4 | 1486.0 | 632.2  | 4050.6 | 3320.8 | 807.7  | 673.3  |
| 6957.0 | 6066.9 | 5602.4 | 4118.4 | 2203.1 | 7902.7 | 6543.1 | 2234.9 | 2808.0 |
| 4012.2 | 3889.6 | 3608.0 | 3546.6 | 1675.7 | 3730.1 | 2671.8 | 1314.0 | 2483.0 |
| 2063.5 | 1942.2 | 1830.8 | 1490.7 | 700.4  | 4167.2 | 3484.8 | 560.5  | 660.8  |
| 582.8  | 510.0  | 491.5  | 398.9  | 177.4  | 1144.5 | 747.7  | 154.6  | 235.1  |

|        |        |        |        |        |         |         |        |        |
|--------|--------|--------|--------|--------|---------|---------|--------|--------|
| 268.8  | 204.7  | 160.8  | 152.4  | 71.9   | 527.5   | 286.0   | 117.3  | 172.7  |
| 128.9  | 133.6  | 127.1  | 78.9   | 51.7   | 178.2   | 87.1    | 11.5   | 13.3   |
| 2669.8 | 2450.3 | 2407.6 | 2637.4 | 919.1  | 2608.1  | 1953.4  | 82.2   | 112.0  |
| 477.5  | 501.4  | 461.2  | 334.3  | 163.1  | 865.0   | 559.4   | 147.0  | 203.9  |
| 71.4   | 61.6   | 69.7   | 49.9   | 21.0   | 122.1   | 86.2    | 45.3   | 58.6   |
| 5789.2 | 4960.0 | 4710.6 | 4473.8 | 2615.0 | 6341.0  | 5629.6  | 2211.6 | 3429.4 |
| 267.7  | 241.7  | 336.2  | 327.6  | 110.9  | 437.7   | 358.2   | 77.8   | 67.5   |
| 1725.3 | 1252.1 | 1476.6 | 1825.8 | 450.5  | 1575.0  | 1193.7  | 553.0  | 545.7  |
| 1117.5 | 891.9  | 1042.0 | 1367.5 | 413.7  | 1504.1  | 1164.9  | 311.9  | 341.8  |
| 3433.1 | 3211.3 | 3123.6 | 2458.5 | 1348.1 | 3913.2  | 3087.3  | 1521.1 | 1918.5 |
| 600.7  | 596.3  | 539.7  | 436.9  | 206.1  | 1020.7  | 714.1   | 196.5  | 332.9  |
| 186.6  | 171.5  | 331.8  | 218.8  | 100.0  | 374.9   | 157.7   | 252.5  | 366.5  |
| 96.7   | 72.0   | 84.6   | 66.2   | 31.6   | 430.1   | 263.6   | 310.6  | 374.6  |
| 308.5  | 287.1  | 256.0  | 178.7  | 120.5  | 987.7   | 507.6   | 510.0  | 808.1  |
| 1016.8 | 946.1  | 859.1  | 606.8  | 284.1  | 2240.5  | 1658.8  | 368.7  | 521.3  |
| 521.3  | 416.6  | 303.4  | 170.3  | 109.2  | 2623.9  | 1700.9  | 336.8  | 381.9  |
| 1422.5 | 1208.1 | 1099.4 | 889.7  | 415.8  | 2007.2  | 1599.2  | 835.1  | 1277.1 |
| 197.3  | 190.3  | 150.7  | 115.4  | 64.1   | 775.7   | 589.7   | 465.8  | 440.7  |
| 121.0  | 84.2   | 87.6   | 44.0   | 22.9   | 202.0   | 208.3   | 41.6   | 52.6   |
| 4747.8 | 4478.5 | 4357.6 | 3647.2 | 2252.8 | 6544.7  | 5614.6  | 488.0  | 877.7  |
| 146.2  | 133.9  | 128.5  | 183.0  | 52.2   | 2651.1  | 2445.7  | 575.2  | 660.7  |
| 6052.4 | 5043.7 | 5130.7 | 4980.7 | 2669.2 | 7087.4  | 6164.7  | 958.2  | 1118.1 |
| 67.5   | 56.4   | 58.7   | 83.3   | 24.0   | 1036.0  | 840.5   | 325.7  | 541.8  |
| 283.5  | 174.2  | 233.7  | 81.9   | 48.8   | 441.9   | 423.7   | 302.6  | 460.6  |
| 654.6  | 509.6  | 580.1  | 435.6  | 225.5  | 1816.2  | 1262.6  | 575.1  | 965.5  |
| 1463.5 | 1116.4 | 1090.9 | 765.2  | 413.3  | 1729.6  | 1364.1  | 271.7  | 456.4  |
| 739.8  | 830.1  | 848.4  | 722.9  | 353.7  | 1645.4  | 990.8   | 319.7  | 346.8  |
| 504.5  | 394.0  | 442.4  | 344.3  | 154.9  | 827.1   | 466.1   | 378.5  | 504.9  |
| 885.3  | 870.4  | 940.4  | 913.8  | 270.5  | 1671.0  | 857.3   | 112.1  | 194.7  |
| 2121.3 | 1743.9 | 1769.9 | 1493.8 | 621.0  | 3888.8  | 2928.8  | 708.9  | 947.2  |
| 755.9  | 642.9  | 553.0  | 495.0  | 161.0  | 762.4   | 468.6   | 472.0  | 549.4  |
| 2450.0 | 2215.1 | 2495.1 | 2919.9 | 1086.8 | 2385.4  | 1858.3  | 1410.1 | 1527.4 |
| 8363.9 | 7752.5 | 6963.4 | 6914.9 | 3755.9 | 8939.2  | 7310.2  | 2916.9 | 3440.8 |
| 7415.9 | 6964.7 | 6715.3 | 6236.3 | 3707.8 | 11940.4 | 10411.4 | 2312.4 | 3360.2 |
| 3372.0 | 3298.0 | 2932.6 | 2573.6 | 1245.1 | 5666.5  | 4244.5  | 1408.8 | 1579.8 |
| 66.1   | 44.3   | 52.8   | 33.2   | 23.8   | 132.2   | 99.6    | 72.8   | 115.2  |
| 294.7  | 284.3  | 293.4  | 249.5  | 122.6  | 247.0   | 159.9   | 160.9  | 200.9  |
| 238.3  | 247.6  | 263.0  | 169.5  | 93.6   | 247.7   | 169.6   | 242.5  | 286.4  |
| 863.3  | 832.3  | 813.3  | 542.5  | 254.1  | 1241.5  | 536.7   | 239.4  | 342.7  |
| 1896.0 | 1727.1 | 1740.2 | 1338.5 | 590.4  | 2928.1  | 1842.3  | 719.5  | 755.0  |
| 6.7    | 8.7    | 5.3    | 3.3    | 1.8    | 19.0    | 15.1    | 3.6    | 18.2   |
| 5435.4 | 4958.3 | 4534.8 | 4764.7 | 2951.6 | 5838.9  | 4873.0  | 2149.2 | 2367.4 |
| 3957.1 | 3756.7 | 3529.0 | 2391.4 | 1172.7 | 2888.0  | 2161.1  | 390.0  | 633.1  |
| 488.7  | 156.3  | 190.0  | 82.2   | 33.2   | 269.9   | 135.8   | 255.1  | 361.7  |
| 1839.5 | 1765.2 | 1634.9 | 1357.9 | 449.9  | 2453.3  | 2054.8  | 276.3  | 369.2  |
| 1898.7 | 1645.5 | 1655.4 | 1400.0 | 418.2  | 1984.3  | 1204.7  | 132.5  | 242.3  |
| 629.8  | 528.8  | 546.5  | 782.9  | 112.2  | 426.4   | 242.1   | 70.3   | 130.1  |
| 710.9  | 590.8  | 618.9  | 831.8  | 171.3  | 526.2   | 356.5   | 143.8  | 149.7  |
| 1322.5 | 1168.9 | 1176.0 | 1328.8 | 390.0  | 863.1   | 562.9   | 142.8  | 222.7  |
| 1153.8 | 1262.9 | 1374.2 | 1642.9 | 551.8  | 1780.1  | 1430.1  | 39.5   | 60.5   |
| 1386.0 | 1095.5 | 1015.8 | 820.8  | 476.6  | 701.3   | 658.7   | 330.9  | 444.8  |
| 6604.2 | 5856.2 | 5792.2 | 5759.6 | 3105.1 | 8807.0  | 8103.9  | 1802.4 | 2122.5 |
| 2.1    | 1.9    | 0.6    | 1.9    | 0.9    | 1491.3  | 814.3   | 682.7  | 777.3  |

|         |        |        |        |        |         |        |        |        |
|---------|--------|--------|--------|--------|---------|--------|--------|--------|
| 1654.8  | 1774.7 | 1566.0 | 1059.1 | 635.4  | 874.9   | 622.1  | 289.4  | 362.9  |
| 5329.9  | 5875.3 | 5122.6 | 4381.6 | 3057.8 | 4172.0  | 3171.5 | 1024.9 | 1350.0 |
| 341.2   | 310.7  | 270.0  | 181.2  | 102.1  | 849.3   | 468.9  | 213.1  | 240.6  |
| 1238.3  | 1116.4 | 993.0  | 685.0  | 429.7  | 3066.3  | 2171.3 | 441.8  | 659.2  |
| 10334.6 | 9702.7 | 9179.5 | 8731.8 | 6780.5 | 9133.0  | 8162.1 | 2221.1 | 2708.5 |
| 142.4   | 137.1  | 145.9  | 164.3  | 60.0   | 232.6   | 104.4  | 148.0  | 206.9  |
| 208.7   | 175.4  | 228.4  | 275.6  | 104.0  | 558.1   | 325.1  | 54.0   | 100.0  |
| 1372.4  | 922.0  | 1008.5 | 935.6  | 287.3  | 1210.0  | 748.6  | 342.5  | 502.7  |
| 1319.9  | 723.5  | 747.0  | 511.4  | 214.3  | 1861.2  | 949.6  | 529.0  | 743.0  |
| 1159.8  | 926.1  | 948.4  | 772.2  | 370.2  | 2480.9  | 1677.3 | 529.2  | 639.1  |
| 245.9   | 204.3  | 199.7  | 145.6  | 86.9   | 260.9   | 162.0  | 81.1   | 106.0  |
| 5998.0  | 5313.9 | 6077.4 | 8174.2 | 3308.4 | 9939.9  | 9031.1 | 2590.3 | 2679.9 |
| 641.3   | 690.6  | 867.7  | 801.1  | 273.1  | 2438.6  | 1686.7 | 149.6  | 265.7  |
| 5311.4  | 4606.1 | 4586.3 | 4795.8 | 1901.3 | 9350.6  | 7654.6 | 985.0  | 1299.6 |
| 1653.5  | 1509.9 | 1464.3 | 1378.1 | 428.8  | 1607.7  | 915.3  | 256.6  | 315.0  |
| 79.0    | 74.3   | 60.2   | 43.7   | 23.6   | 881.8   | 493.2  | 318.4  | 415.9  |
| 1196.6  | 1066.1 | 987.6  | 531.6  | 251.8  | 1889.9  | 1104.7 | 190.3  | 198.5  |
| 2433.2  | 2093.9 | 1869.7 | 1284.2 | 717.7  | 4153.9  | 2824.9 | 1415.8 | 1562.8 |
| 474.6   | 311.3  | 338.8  | 215.5  | 103.5  | 968.7   | 610.1  | 166.5  | 203.4  |
| 408.5   | 281.7  | 313.5  | 208.9  | 62.2   | 627.3   | 283.0  | 91.0   | 142.7  |
| 520.7   | 478.4  | 453.0  | 321.6  | 117.2  | 1080.4  | 585.3  | 242.9  | 378.4  |
| 484.0   | 410.7  | 436.5  | 295.6  | 119.5  | 843.9   | 523.1  | 120.8  | 201.8  |
| 483.6   | 430.7  | 423.5  | 338.7  | 166.3  | 1023.3  | 827.6  | 265.7  | 234.1  |
| 172.7   | 181.3  | 104.9  | 128.5  | 52.6   | 401.3   | 250.1  | 172.5  | 225.9  |
| 198.5   | 223.4  | 172.1  | 155.7  | 90.5   | 715.2   | 568.0  | 144.4  | 373.6  |
| 708.4   | 707.9  | 669.3  | 360.8  | 217.7  | 242.1   | 175.6  | 4.5    | 7.0    |
| 8908.3  | 7321.0 | 7993.9 | 6818.3 | 3773.4 | 10329.7 | 8177.8 | 2499.0 | 2747.5 |
| 494.1   | 474.3  | 481.0  | 659.6  | 198.0  | 1352.3  | 967.3  | 368.5  | 395.4  |
| 685.7   | 718.3  | 734.8  | 982.9  | 313.2  | 2224.3  | 1723.0 | 482.3  | 755.3  |
| 93.6    | 59.9   | 67.5   | 56.1   | 12.9   | 175.1   | 126.6  | 71.8   | 94.8   |
| 84.4    | 83.6   | 81.7   | 67.0   | 26.7   | 109.8   | 70.8   | 71.5   | 84.3   |
| 1024.6  | 1098.4 | 990.9  | 608.1  | 389.3  | 2516.6  | 2452.0 | 178.2  | 243.6  |
| 214.1   | 147.9  | 129.3  | 102.2  | 46.0   | 137.8   | 113.3  | 90.3   | 131.7  |
| 163.5   | 159.4  | 99.2   | 87.7   | 46.9   | 402.7   | 290.0  | 20.9   | 23.8   |
| 419.3   | 395.9  | 278.4  | 241.2  | 78.3   | 731.5   | 392.7  | 59.3   | 61.7   |
| 3268.8  | 2070.3 | 2091.1 | 1132.8 | 715.7  | 6179.0  | 5601.2 | 1396.8 | 1619.2 |
| 3856.3  | 3269.0 | 3081.0 | 2093.3 | 1087.8 | 4159.4  | 3403.7 | 1396.2 | 2040.0 |
| 1278.2  | 1274.4 | 1125.7 | 917.5  | 472.9  | 2846.0  | 1654.0 | 402.9  | 542.0  |
| 2288.0  | 997.7  | 1125.6 | 532.2  | 268.2  | 3760.2  | 2702.5 | 1186.1 | 1223.2 |
| 2756.6  | 2327.2 | 2809.8 | 2197.4 | 652.3  | 2956.6  | 1569.4 | 503.4  | 492.2  |
| 2795.0  | 2477.6 | 2719.2 | 2576.8 | 927.5  | 3696.9  | 2660.7 | 419.3  | 554.2  |
| 1831.9  | 1837.6 | 1646.1 | 1267.3 | 446.3  | 1536.1  | 830.3  | 404.8  | 626.6  |
| 2164.2  | 1661.9 | 2946.3 | 3315.1 | 1158.8 | 3030.2  | 2771.9 | 968.0  | 1012.5 |
| 5274.4  | 5032.3 | 4463.7 | 4184.4 | 2292.9 | 6635.2  | 4598.4 | 3130.6 | 4103.5 |
| 6301.2  | 5817.4 | 5514.7 | 5505.9 | 3302.8 | 9098.7  | 7957.5 | 2417.4 | 2515.2 |
| 2094.3  | 1741.9 | 1798.3 | 2423.0 | 676.1  | 2372.8  | 2155.3 | 387.3  | 535.8  |
| 808.2   | 759.6  | 627.9  | 443.5  | 231.3  | 614.3   | 362.5  | 79.8   | 75.3   |
| 13.7    | 7.0    | 8.1    | 3.7    | 3.7    | 4.0     | 5.1    | 5.6    | 4.0    |
| 11.0    | 8.3    | 7.6    | 14.1   | 5.1    | 21.4    | 17.9   | 12.5   | 19.2   |
| 3185.3  | 2416.5 | 2623.3 | 2270.2 | 1071.3 | 3779.2  | 3353.4 | 941.1  | 1037.0 |
| 836.2   | 657.5  | 820.3  | 981.0  | 264.1  | 785.4   | 387.3  | 153.9  | 270.0  |
| 1541.9  | 1361.0 | 1581.0 | 2024.2 | 572.2  | 2379.9  | 1824.0 | 185.3  | 305.9  |
| 416.7   | 448.1  | 327.7  | 339.6  | 156.5  | 1894.3  | 1574.8 | 344.2  | 403.7  |

|         |         |        |        |        |         |         |        |        |
|---------|---------|--------|--------|--------|---------|---------|--------|--------|
| 4997.0  | 4334.0  | 4719.9 | 5163.7 | 2192.1 | 7641.7  | 5378.4  | 188.2  | 235.8  |
| 693.6   | 621.8   | 716.2  | 607.5  | 267.4  | 2497.4  | 1854.7  | 170.0  | 178.8  |
| 2979.3  | 2490.4  | 2435.7 | 1792.5 | 1018.9 | 4084.5  | 3283.6  | 753.8  | 990.4  |
| 332.7   | 339.3   | 399.8  | 308.7  | 129.3  | 489.6   | 318.2   | 342.0  | 354.5  |
| 2599.3  | 2121.9  | 1865.9 | 1806.9 | 639.5  | 1577.8  | 1261.4  | 764.6  | 816.8  |
| 6.8     | 1.2     | 1.6    | 1.9    | 6.5    | 5.8     | 8.8     | 6.0    | 7.0    |
| 259.8   | 195.9   | 329.4  | 334.1  | 65.6   | 148.6   | 47.9    | 85.3   | 126.1  |
| 1912.5  | 1370.4  | 1986.1 | 2334.9 | 606.9  | 2149.7  | 1499.5  | 470.3  | 610.2  |
| 1099.0  | 1275.8  | 1730.4 | 1962.1 | 587.8  | 1423.3  | 1056.1  | 300.6  | 323.4  |
| 3733.5  | 2718.1  | 4300.2 | 4326.8 | 1167.6 | 6015.6  | 4408.7  | 520.0  | 918.2  |
| 1946.8  | 1149.0  | 2886.4 | 3012.6 | 358.8  | 3324.4  | 2782.5  | 271.9  | 345.0  |
| 10754.2 | 9639.3  | 9042.3 | 7769.3 | 5819.0 | 12203.9 | 10815.7 | 4275.8 | 5266.3 |
| 1782.0  | 1610.8  | 1923.4 | 2516.4 | 839.4  | 1126.0  | 754.8   | 296.7  | 320.6  |
| 2528.6  | 2073.2  | 1958.6 | 1860.3 | 683.2  | 1420.3  | 989.5   | 1316.2 | 1452.7 |
| 1759.3  | 1342.0  | 1319.6 | 1052.2 | 463.5  | 1518.7  | 999.8   | 1482.9 | 1705.4 |
| 208.2   | 169.2   | 153.9  | 100.7  | 53.9   | 525.3   | 345.1   | 125.8  | 138.7  |
| 5167.5  | 4970.9  | 5035.1 | 4318.9 | 2119.0 | 5982.9  | 3645.6  | 1083.3 | 1390.3 |
| 8075.0  | 7446.0  | 7210.7 | 6632.5 | 4143.0 | 10344.4 | 8295.9  | 1500.7 | 1812.9 |
| 1110.4  | 815.1   | 812.6  | 538.7  | 315.1  | 629.9   | 371.4   | 93.1   | 132.1  |
| 8205.4  | 7327.3  | 6464.8 | 6694.6 | 3808.9 | 7512.6  | 5902.1  | 2384.0 | 2995.5 |
| 485.3   | 399.7   | 515.7  | 467.4  | 171.8  | 1294.1  | 861.9   | 421.0  | 582.8  |
| 344.4   | 224.8   | 316.1  | 247.0  | 83.7   | 478.4   | 278.5   | 393.9  | 538.6  |
| 2963.3  | 2625.2  | 2512.1 | 2534.1 | 1083.0 | 3042.9  | 2074.1  | 467.1  | 510.5  |
| 275.9   | 221.2   | 243.0  | 182.1  | 59.8   | 407.9   | 202.1   | 166.8  | 218.3  |
| 488.8   | 554.4   | 476.9  | 233.3  | 209.8  | 1827.8  | 1323.8  | 525.1  | 673.7  |
| 487.6   | 376.2   | 480.0  | 572.6  | 167.9  | 815.5   | 709.0   | 164.9  | 236.1  |
| 537.5   | 532.4   | 484.9  | 323.2  | 160.6  | 716.0   | 454.4   | 129.7  | 152.1  |
| 11512.5 | 10028.5 | 9114.4 | 8574.9 | 6373.5 | 12066.5 | 10432.9 | 3411.0 | 4789.4 |
| 2483.3  | 2623.3  | 2386.3 | 2050.6 | 1159.9 | 4328.2  | 4134.7  | 608.3  | 903.3  |
| 9787.9  | 8277.7  | 7650.5 | 6934.1 | 5180.6 | 9519.0  | 8379.5  | 3143.1 | 3796.1 |
| 1650.2  | 1479.7  | 1559.8 | 1547.2 | 620.1  | 2976.5  | 1800.6  | 524.5  | 610.1  |
| 471.5   | 485.4   | 599.0  | 476.7  | 131.9  | 667.6   | 420.3   | 57.4   | 77.2   |
| 5370.3  | 4978.9  | 4176.8 | 3167.1 | 2261.1 | 5312.3  | 4261.3  | 1407.4 | 1727.4 |
| 4221.0  | 3982.1  | 3929.9 | 3729.0 | 1789.8 | 3610.0  | 2218.1  | 936.7  | 1186.7 |
| 4212.8  | 4003.5  | 3406.9 | 3199.3 | 1585.7 | 3131.6  | 2510.2  | 14.5   | 22.5   |
| 404.1   | 410.4   | 341.1  | 375.4  | 85.2   | 777.9   | 472.9   | 213.5  | 309.7  |
| 4454.7  | 4062.6  | 3692.2 | 3358.3 | 1617.8 | 4834.8  | 4106.7  | 966.5  | 1260.7 |
| 211.8   | 238.8   | 194.0  | 73.9   | 94.3   | 426.0   | 204.8   | 29.4   | 57.6   |
| 2503.7  | 1900.7  | 1970.5 | 1606.4 | 706.9  | 2684.2  | 1307.8  | 485.2  | 693.2  |
| 1575.3  | 1392.9  | 1336.0 | 1256.8 | 582.6  | 2133.3  | 1607.6  | 206.7  | 366.4  |
| 829.4   | 746.9   | 797.8  | 624.6  | 282.5  | 3795.0  | 2838.1  | 517.3  | 590.6  |
| 86.8    | 80.4    | 305.6  | 332.8  | 185.0  | 101.0   | 62.9    | 307.0  | 481.3  |
| 114.5   | 140.1   | 661.8  | 730.5  | 487.4  | 479.1   | 491.4   | 886.7  | 935.4  |
| 2481.9  | 2501.2  | 2397.2 | 2405.2 | 848.5  | 3118.4  | 2502.0  | 200.7  | 313.2  |
| 10557.5 | 9215.9  | 8899.8 | 7965.2 | 5526.1 | 10592.5 | 8889.4  | 1292.7 | 1959.3 |
| 4.1     | 3.4     | 2.9    | 12.1   | 1.1    | 3.6     | 1.4     | 3.7    | 2.9    |
| 113.4   | 123.6   | 110.0  | 132.5  | 55.8   | 165.8   | 81.9    | 49.1   | 71.2   |
| 1490.6  | 1219.3  | 1237.0 | 975.5  | 484.6  | 944.4   | 559.7   | 405.5  | 603.9  |
| 221.8   | 236.7   | 159.0  | 119.6  | 51.6   | 548.9   | 355.2   | 78.0   | 78.7   |
| 271.4   | 257.2   | 269.1  | 153.5  | 72.1   | 992.4   | 623.0   | 193.6  | 177.2  |
| 4013.4  | 3901.8  | 3533.1 | 3215.4 | 1802.7 | 6044.7  | 5190.5  | 706.8  | 866.0  |
| 226.0   | 214.7   | 260.0  | 272.3  | 71.0   | 106.1   | 38.0    | 47.0   | 71.8   |
| 700.8   | 525.4   | 709.7  | 804.8  | 235.1  | 849.3   | 701.9   | 76.9   | 165.4  |

|        |        |        |        |        |        |        |        |        |
|--------|--------|--------|--------|--------|--------|--------|--------|--------|
| 672.7  | 760.4  | 939.5  | 1157.3 | 387.6  | 958.8  | 624.1  | 140.2  | 170.9  |
| 1538.1 | 1272.2 | 1353.3 | 1365.6 | 569.2  | 2243.9 | 1732.4 | 999.4  | 1135.9 |
| 1039.4 | 1148.5 | 1102.2 | 984.2  | 469.2  | 2207.8 | 1722.3 | 517.8  | 596.9  |
| 3464.9 | 2833.5 | 2556.1 | 1973.1 | 888.4  | 1565.4 | 922.0  | 901.3  | 1064.5 |
| 646.0  | 678.0  | 723.6  | 569.6  | 241.9  | 1634.8 | 1450.2 | 215.6  | 235.9  |
| 353.9  | 363.5  | 344.6  | 349.9  | 106.8  | 415.4  | 339.6  | 99.7   | 160.7  |
| 533.2  | 505.9  | 561.0  | 519.8  | 174.3  | 703.5  | 541.9  | 144.2  | 201.4  |
| 1700.1 | 1913.7 | 1570.9 | 1881.5 | 872.5  | 1752.0 | 1261.9 | 279.2  | 446.7  |
| 637.1  | 683.0  | 803.0  | 877.0  | 266.2  | 1506.5 | 1055.3 | 371.3  | 491.0  |
| 498.6  | 387.5  | 372.5  | 315.4  | 151.1  | 651.0  | 333.9  | 675.8  | 726.6  |
| 4949.3 | 4687.5 | 4289.1 | 2963.3 | 2146.6 | 7362.0 | 6075.7 | 883.1  | 1434.6 |
| 270.2  | 257.2  | 233.7  | 180.9  | 70.4   | 161.2  | 144.0  | 73.4   | 93.5   |
| 70.1   | 70.9   | 70.8   | 35.5   | 28.6   | 49.8   | 22.2   | 26.4   | 21.2   |
| 92.8   | 101.2  | 99.9   | 85.8   | 32.2   | 65.6   | 48.5   | 13.0   | 33.7   |
| 222.7  | 188.6  | 182.5  | 149.2  | 63.7   | 183.5  | 140.7  | 40.6   | 78.2   |
| 4842.6 | 4361.0 | 4002.2 | 4087.7 | 1734.0 | 6326.3 | 5135.0 | 1151.6 | 1255.7 |
| 560.1  | 598.5  | 534.3  | 446.3  | 277.2  | 1215.4 | 733.7  | 238.1  | 305.5  |
| 974.9  | 981.0  | 1025.5 | 845.7  | 380.3  | 1463.5 | 803.5  | 416.1  | 563.0  |
| 272.5  | 188.8  | 269.2  | 219.3  | 96.4   | 394.9  | 245.3  | 122.2  | 150.2  |
| 154.1  | 164.3  | 174.1  | 113.3  | 77.4   | 577.7  | 381.1  | 603.7  | 751.7  |
| 1545.1 | 1349.1 | 1378.2 | 1283.4 | 556.6  | 2512.3 | 2036.4 | 793.5  | 1130.0 |
| 136.6  | 149.0  | 118.7  | 104.9  | 33.3   | 492.6  | 407.8  | 111.7  | 139.3  |
| 1.1    | 1.8    | 4.6    | 0.3    | 0.3    | 5.1    | 0.6    | 3.5    | 5.6    |
| 901.2  | 804.3  | 783.2  | 673.3  | 251.4  | 550.6  | 255.7  | 419.2  | 555.5  |
| 463.5  | 454.4  | 472.1  | 526.4  | 163.0  | 1017.9 | 569.6  | 189.5  | 275.1  |
| 746.7  | 639.5  | 691.8  | 883.1  | 219.0  | 1406.2 | 928.4  | 306.2  | 432.5  |
| 6532.1 | 6122.8 | 5968.9 | 5200.7 | 2431.6 | 8083.7 | 5069.1 | 1162.1 | 1427.6 |
| 4185.1 | 3901.0 | 3973.1 | 3757.9 | 1727.6 | 6519.2 | 4963.6 | 666.5  | 976.5  |
| 2034.0 | 1747.3 | 1726.6 | 1238.0 | 724.4  | 1546.5 | 903.3  | 1152.5 | 941.4  |
| 6678.0 | 6720.6 | 6627.8 | 5580.7 | 3081.8 | 9469.1 | 8222.9 | 299.8  | 367.2  |
| 3603.4 | 3563.4 | 3590.8 | 3437.7 | 1673.2 | 6574.8 | 5436.6 | 400.3  | 718.0  |
| 177.5  | 149.3  | 201.0  | 186.4  | 54.5   | 261.4  | 126.8  | 71.9   | 79.0   |
| 1659.5 | 1666.1 | 1696.1 | 1567.3 | 817.4  | 3019.5 | 1860.8 | 298.4  | 275.1  |
| 2225.9 | 2154.9 | 2222.8 | 2054.2 | 920.5  | 5782.7 | 5003.9 | 570.9  | 707.9  |
| 5464.8 | 5047.1 | 4872.5 | 4941.0 | 2212.1 | 4663.7 | 3481.9 | 1095.3 | 1353.6 |
| 995.3  | 1199.1 | 807.1  | 1382.2 | 610.5  | 1712.7 | 1465.2 | 28.1   | 47.2   |
| 42.8   | 45.4   | 26.7   | 20.7   | 7.3    | 48.4   | 16.7   | 6.7    | 9.3    |
| 1366.8 | 1439.2 | 1571.3 | 1395.6 | 509.1  | 1521.8 | 1082.4 | 194.6  | 341.6  |
| 5153.6 | 4762.7 | 5012.9 | 4425.9 | 1604.0 | 4781.7 | 3661.2 | 490.6  | 564.7  |
| 2475.1 | 2390.8 | 2444.6 | 2349.0 | 1066.1 | 2394.6 | 2129.6 | 327.7  | 392.6  |
| 977.6  | 1193.2 | 1121.3 | 813.0  | 407.0  | 2030.8 | 1705.5 | 251.0  | 270.4  |
| 239.9  | 214.9  | 230.5  | 121.6  | 86.3   | 171.3  | 159.8  | 16.9   | 17.3   |
| 2225.9 | 1488.1 | 1670.8 | 1189.0 | 458.5  | 2340.4 | 1228.3 | 426.3  | 693.9  |
| 4220.7 | 3574.4 | 3256.3 | 2065.7 | 1674.4 | 4036.9 | 3071.9 | 675.3  | 715.6  |
| 1360.9 | 1217.6 | 1178.5 | 662.7  | 396.8  | 1139.8 | 954.3  | 127.1  | 321.8  |
| 5790.8 | 4648.4 | 4423.8 | 3868.1 | 1838.7 | 5379.2 | 3202.6 | 3749.7 | 4121.8 |
| 745.0  | 620.3  | 574.9  | 597.3  | 175.2  | 894.2  | 783.4  | 108.7  | 151.4  |
| 272.8  | 237.6  | 218.7  | 223.8  | 75.9   | 315.5  | 238.0  | 78.4   | 97.6   |
| 2342.8 | 2426.4 | 2078.8 | 2009.3 | 848.0  | 3796.1 | 3608.7 | 144.6  | 345.0  |
| 1061.8 | 899.1  | 874.2  | 692.0  | 179.0  | 2313.4 | 1481.8 | 293.2  | 416.6  |
| 1939.2 | 2009.0 | 1877.1 | 1617.7 | 715.5  | 4670.0 | 3349.6 | 499.3  | 613.3  |
| 1009.3 | 1022.6 | 990.1  | 835.4  | 309.1  | 994.6  | 665.7  | 194.7  | 209.3  |
| 2412.1 | 2210.2 | 2057.0 | 1960.1 | 741.5  | 2855.1 | 2356.1 | 515.5  | 498.8  |



|        |        |        |        |        |         |         |        |        |
|--------|--------|--------|--------|--------|---------|---------|--------|--------|
| 3026.7 | 2575.9 | 2213.0 | 1896.2 | 1027.9 | 2113.6  | 1884.9  | 948.4  | 1250.3 |
| 80.2   | 77.2   | 62.2   | 60.3   | 25.4   | 1651.9  | 1232.1  | 73.0   | 105.4  |
| 225.8  | 211.1  | 275.2  | 399.3  | 69.2   | 121.0   | 80.2    | 101.2  | 205.1  |
| 442.6  | 483.2  | 416.8  | 613.6  | 182.2  | 291.4   | 264.3   | 105.9  | 161.5  |
| 1045.1 | 829.8  | 711.0  | 650.7  | 163.0  | 588.4   | 259.2   | 194.2  | 244.7  |
| 1241.1 | 1067.4 | 904.7  | 728.8  | 236.9  | 1340.7  | 791.8   | 188.6  | 280.7  |
| 1423.4 | 1273.1 | 1287.8 | 1230.2 | 463.3  | 2583.1  | 1835.7  | 142.7  | 157.9  |
| 608.6  | 568.9  | 525.5  | 379.4  | 167.1  | 1470.5  | 1110.3  | 156.9  | 202.1  |
| 128.8  | 119.2  | 93.0   | 198.7  | 52.9   | 542.0   | 405.7   | 30.8   | 17.6   |
| 456.5  | 367.0  | 451.6  | 540.7  | 162.0  | 1728.9  | 1381.1  | 209.4  | 231.0  |
| 25.1   | 5.5    | 7.7    | 14.2   | 0.8    | 113.8   | 51.4    | 38.7   | 28.7   |
| 43.3   | 26.7   | 30.2   | 29.9   | 8.1    | 1236.8  | 802.1   | 37.7   | 65.9   |
| 15.9   | 22.1   | 13.2   | 2.7    | 7.1    | 58.9    | 56.9    | 3.0    | 6.2    |
| 6974.2 | 6558.2 | 6434.1 | 5533.1 | 3036.7 | 9466.9  | 7626.0  | 1469.6 | 1727.6 |
| 5717.1 | 4465.9 | 4464.9 | 3941.8 | 2234.3 | 5100.4  | 3709.2  | 1267.9 | 1329.9 |
| 302.0  | 260.6  | 249.3  | 211.2  | 91.9   | 1489.5  | 1078.1  | 70.6   | 142.9  |
| 1666.2 | 1542.6 | 1585.5 | 1693.2 | 589.2  | 3720.9  | 2877.7  | 577.8  | 811.5  |
| 339.8  | 359.5  | 235.8  | 209.2  | 95.9   | 590.8   | 345.9   | 111.3  | 115.3  |
| 1207.5 | 797.7  | 865.1  | 575.6  | 403.7  | 1593.1  | 1309.9  | 51.2   | 64.8   |
| 3345.4 | 3194.7 | 3200.0 | 2558.7 | 1468.9 | 2282.9  | 1813.5  | 209.5  | 319.1  |
| 6866.5 | 5841.7 | 5146.3 | 3461.5 | 2394.9 | 3652.1  | 2547.2  | 386.5  | 476.5  |
| 126.1  | 98.2   | 111.9  | 150.0  | 46.2   | 112.1   | 31.7    | 68.7   | 74.9   |
| 661.2  | 528.0  | 567.0  | 623.5  | 245.6  | 1442.6  | 908.2   | 261.4  | 303.4  |
| 352.1  | 352.0  | 374.1  | 407.1  | 155.7  | 1188.5  | 604.6   | 127.7  | 192.7  |
| 287.4  | 156.5  | 326.3  | 724.3  | 174.3  | 1242.3  | 856.6   | 191.9  | 202.0  |
| 285.2  | 282.6  | 440.0  | 1070.4 | 179.6  | 1064.9  | 699.7   | 144.2  | 200.4  |
| 176.4  | 129.8  | 128.0  | 82.8   | 44.5   | 209.6   | 109.4   | 217.9  | 335.9  |
| 21.1   | 22.8   | 21.7   | 11.8   | 6.5    | 1973.6  | 954.9   | 37.3   | 46.4   |
| 242.9  | 195.1  | 295.1  | 603.0  | 107.0  | 963.9   | 612.4   | 147.1  | 186.6  |
| 5342.9 | 4878.4 | 4477.3 | 4092.8 | 2155.9 | 4821.4  | 3410.2  | 2311.3 | 2625.0 |
| 9650.7 | 8085.8 | 7589.8 | 7505.7 | 4548.1 | 12451.4 | 12024.4 | 1909.8 | 2363.1 |
| 283.2  | 197.9  | 210.3  | 204.3  | 45.2   | 476.9   | 261.2   | 406.8  | 578.7  |
| 17.6   | 7.7    | 5.8    | 8.6    | 3.8    | 34.8    | 18.2    | 7.0    | 6.2    |
| 1207.7 | 901.5  | 807.0  | 797.9  | 271.9  | 1480.8  | 1021.0  | 420.6  | 518.5  |
| 20.2   | 14.3   | 18.6   | 8.7    | 0.6    | 12.5    | 15.5    | 1.6    | 2.2    |
| 914.6  | 730.4  | 553.4  | 226.5  | 210.6  | 1148.8  | 991.2   | 142.9  | 217.3  |
| 486.9  | 447.3  | 534.6  | 607.8  | 207.0  | 814.6   | 536.3   | 247.9  | 408.0  |
| 9140.0 | 8068.4 | 7589.1 | 7307.8 | 5052.2 | 8925.5  | 7937.2  | 2206.0 | 2462.3 |
| 2295.0 | 2274.2 | 2257.7 | 1522.3 | 898.2  | 2452.5  | 1549.1  | 294.6  | 431.4  |
| 104.2  | 52.7   | 41.7   | 25.7   | 12.1   | 82.1    | 61.5    | 105.5  | 128.0  |
| 9822.4 | 8333.3 | 7767.8 | 6987.1 | 4323.3 | 11804.6 | 9534.5  | 3197.2 | 3921.1 |
| 5376.3 | 5075.1 | 4816.4 | 4780.2 | 2264.8 | 7096.9  | 6154.8  | 992.6  | 1161.3 |
| 2.1    | 1.0    | 9.1    | 3.0    | 0.7    | 3.4     | 5.2     | 3.7    | 2.2    |
| 4.3    | 14.8   | 3.5    | 4.2    | 1.4    | 2.2     | 8.5     | 20.8   | 20.3   |
| 181.3  | 157.5  | 151.9  | 126.3  | 65.4   | 201.9   | 127.9   | 180.0  | 184.9  |
| 336.3  | 353.3  | 347.0  | 254.0  | 129.5  | 872.0   | 564.8   | 248.4  | 315.8  |
| 1527.5 | 1357.3 | 1230.4 | 729.4  | 335.1  | 3422.4  | 2850.0  | 778.6  | 1045.4 |
| 2312.6 | 1563.4 | 1156.3 | 1109.6 | 700.4  | 2806.7  | 1732.3  | 1552.4 | 2028.7 |
| 2837.6 | 2651.3 | 2583.0 | 2285.5 | 1140.9 | 5385.3  | 3952.4  | 1260.6 | 1385.7 |
| 704.8  | 664.0  | 551.7  | 678.4  | 222.7  | 1090.5  | 827.8   | 226.2  | 326.0  |
| 222.4  | 163.0  | 179.1  | 170.2  | 47.8   | 277.9   | 219.5   | 268.5  | 369.6  |
| 238.9  | 212.9  | 188.3  | 137.2  | 59.3   | 187.0   | 162.5   | 157.4  | 228.0  |
| 2748.9 | 2060.5 | 1935.5 | 1539.8 | 793.5  | 1636.7  | 1168.6  | 738.4  | 785.9  |

|        |        |        |        |        |         |        |        |        |
|--------|--------|--------|--------|--------|---------|--------|--------|--------|
| 6181.4 | 5599.3 | 5215.3 | 5030.0 | 2755.0 | 8286.1  | 6891.9 | 1681.2 | 2152.3 |
| 1113.9 | 1028.4 | 911.1  | 600.0  | 317.2  | 1469.5  | 761.9  | 443.8  | 595.8  |
| 374.4  | 276.4  | 299.2  | 465.9  | 120.8  | 2.8     | 2.5    | 0.5    | 1.4    |
| 39.9   | 11.6   | 12.1   | 9.8    | 1.3    | 3.7     | 1.0    | 8.9    | 13.9   |
| 1231.8 | 1338.9 | 1100.2 | 982.0  | 369.8  | 3.1     | 16.2   | 3.1    | 8.0    |
| 416.3  | 300.7  | 320.5  | 260.2  | 111.1  | 817.0   | 401.7  | 123.5  | 186.5  |
| 1528.8 | 1404.4 | 1501.8 | 1380.7 | 666.8  | 1279.0  | 823.6  | 230.8  | 287.5  |
| 463.4  | 524.9  | 473.3  | 433.0  | 154.7  | 1337.1  | 711.7  | 227.3  | 264.9  |
| 734.5  | 602.4  | 617.5  | 528.2  | 242.5  | 2028.3  | 1453.3 | 259.0  | 284.3  |
| 1240.5 | 1206.5 | 1455.3 | 1760.1 | 602.8  | 3532.5  | 3369.9 | 394.8  | 531.7  |
| 1044.4 | 837.3  | 1051.8 | 814.0  | 343.2  | 3976.8  | 2568.1 | 319.6  | 242.3  |
| 4999.7 | 4571.8 | 4024.0 | 4407.6 | 2403.8 | 3353.3  | 2726.9 | 499.0  | 647.9  |
| 307.9  | 315.4  | 352.5  | 514.1  | 184.2  | 1041.6  | 864.7  | 273.2  | 422.0  |
| 29.5   | 23.7   | 15.5   | 19.0   | 7.9    | 31.8    | 37.1   | 32.9   | 45.0   |
| 9393.0 | 8773.5 | 8165.9 | 7798.2 | 4963.9 | 11271.6 | 9275.2 | 2763.8 | 2494.9 |
| 969.0  | 908.5  | 847.3  | 703.7  | 375.4  | 1649.7  | 1033.7 | 1125.8 | 1213.5 |
| 186.0  | 152.4  | 155.1  | 144.1  | 54.3   | 1006.5  | 598.8  | 52.1   | 83.1   |
| 4311.4 | 3750.8 | 3243.6 | 2844.9 | 1241.8 | 4833.1  | 4199.2 | 2068.5 | 2454.7 |
| 2267.9 | 1769.3 | 1535.2 | 1268.0 | 393.7  | 4603.6  | 4385.4 | 216.8  | 225.7  |
| 1409.3 | 973.0  | 856.0  | 676.6  | 216.5  | 3103.6  | 3256.3 | 272.0  | 250.2  |
| 370.7  | 391.5  | 483.8  | 665.1  | 178.5  | 1479.8  | 1334.4 | 164.2  | 301.1  |
| 638.0  | 561.3  | 618.5  | 849.8  | 231.0  | 1404.4  | 946.4  | 318.5  | 424.3  |
| 1959.9 | 1796.3 | 1720.9 | 2424.2 | 775.4  | 3149.0  | 2734.8 | 798.2  | 980.7  |
| 362.2  | 313.9  | 285.7  | 163.2  | 74.3   | 1889.9  | 1299.1 | 49.4   | 89.8   |
| 184.3  | 171.3  | 131.2  | 77.0   | 33.3   | 694.2   | 340.1  | 27.2   | 35.5   |
| 113.5  | 123.5  | 103.4  | 75.7   | 52.8   | 55.1    | 40.0   | 14.8   | 16.4   |
| 1605.8 | 1504.8 | 1404.5 | 909.7  | 572.4  | 2293.8  | 1595.7 | 341.2  | 503.9  |
| 1091.2 | 1122.6 | 1284.1 | 1561.2 | 511.6  | 1281.0  | 1117.0 | 566.7  | 621.0  |
| 1276.5 | 1239.9 | 1319.5 | 1646.8 | 581.2  | 1639.9  | 1322.9 | 339.3  | 501.9  |
| 3948.7 | 3796.2 | 3044.2 | 2332.6 | 1434.4 | 2418.4  | 1580.7 | 861.2  | 985.3  |
| 181.8  | 158.7  | 166.8  | 132.8  | 76.9   | 203.4   | 104.2  | 80.1   | 150.4  |
| 861.6  | 657.8  | 713.1  | 488.5  | 231.2  | 1038.8  | 796.5  | 636.2  | 758.9  |
| 4993.4 | 4675.7 | 4200.6 | 3938.2 | 2111.9 | 6130.5  | 4438.4 | 3299.5 | 4340.0 |
| 152.9  | 133.6  | 135.5  | 63.5   | 58.0   | 1319.3  | 734.6  | 259.9  | 350.7  |
| 1030.7 | 803.6  | 936.6  | 345.7  | 241.5  | 3788.4  | 2354.8 | 199.1  | 304.4  |
| 772.5  | 486.7  | 589.8  | 250.6  | 149.9  | 3461.2  | 2069.6 | 190.4  | 252.0  |
| 593.3  | 476.7  | 552.9  | 238.3  | 128.7  | 3335.9  | 2014.7 | 214.1  | 273.6  |
| 18.7   | 14.5   | 7.7    | 8.3    | 5.2    | 11.1    | 1.1    | 1.6    | 12.9   |
| 975.0  | 809.9  | 763.6  | 738.2  | 276.1  | 1033.3  | 616.4  | 196.1  | 290.7  |
| 196.1  | 141.0  | 132.4  | 90.6   | 52.0   | 376.2   | 194.0  | 38.3   | 55.9   |
| 1871.9 | 1897.0 | 1889.9 | 2036.9 | 534.9  | 3702.5  | 2708.5 | 390.1  | 549.7  |
| 1156.8 | 921.3  | 896.5  | 687.5  | 343.9  | 1892.2  | 1527.9 | 514.0  | 590.4  |
| 537.6  | 437.3  | 491.1  | 350.1  | 172.4  | 564.1   | 339.1  | 198.4  | 173.4  |
| 1838.2 | 1398.9 | 1556.8 | 1105.7 | 361.6  | 2507.9  | 1363.0 | 262.3  | 503.0  |
| 1616.5 | 1129.9 | 1349.8 | 1028.7 | 329.0  | 2307.1  | 1270.9 | 239.4  | 344.0  |
| 1278.9 | 1124.6 | 1276.4 | 1067.1 | 364.8  | 1892.6  | 1180.6 | 152.6  | 215.6  |
| 596.2  | 596.7  | 594.6  | 479.6  | 194.6  | 760.4   | 549.7  | 48.6   | 68.8   |
| 2647.3 | 2460.4 | 2619.1 | 2433.5 | 837.8  | 3042.3  | 2207.8 | 303.8  | 482.4  |
| 450.7  | 389.5  | 365.4  | 334.3  | 131.2  | 1407.6  | 953.6  | 414.9  | 551.7  |
| 202.5  | 129.8  | 91.4   | 59.1   | 46.9   | 2413.3  | 3049.5 | 191.0  | 218.7  |
| 375.2  | 317.7  | 237.7  | 103.4  | 87.2   | 1638.4  | 1543.0 | 309.1  | 299.6  |
| 648.3  | 601.6  | 722.6  | 1046.8 | 286.6  | 1124.4  | 701.4  | 588.2  | 618.7  |
| 1642.1 | 1351.7 | 1408.1 | 1250.5 | 479.7  | 2577.7  | 1918.2 | 414.3  | 414.8  |

|        |        |        |        |        |         |        |        |        |
|--------|--------|--------|--------|--------|---------|--------|--------|--------|
| 2086.0 | 1756.3 | 1510.9 | 1140.6 | 608.4  | 2581.4  | 1752.1 | 442.7  | 717.5  |
| 433.4  | 381.7  | 290.6  | 268.2  | 123.7  | 416.1   | 242.8  | 310.2  | 528.4  |
| 1963.1 | 1818.5 | 1693.8 | 1154.2 | 550.4  | 1255.0  | 705.4  | 510.0  | 846.0  |
| 1370.2 | 1082.1 | 1121.9 | 878.9  | 213.8  | 1467.9  | 1150.3 | 1613.6 | 1989.5 |
| 18.2   | 26.9   | 14.1   | 12.7   | 0.9    | 40.0    | 34.6   | 20.5   | 9.4    |
| 851.6  | 881.5  | 850.5  | 847.0  | 330.6  | 1086.4  | 950.2  | 635.2  | 824.6  |
| 37.2   | 31.6   | 29.2   | 44.3   | 17.2   | 261.0   | 87.4   | 263.2  | 512.4  |
| 48.2   | 45.0   | 34.1   | 28.8   | 18.7   | 322.3   | 178.0  | 349.1  | 444.8  |
| 52.8   | 77.0   | 41.5   | 62.7   | 31.4   | 527.6   | 234.3  | 507.2  | 787.5  |
| 783.4  | 606.0  | 541.8  | 306.2  | 112.5  | 722.1   | 447.3  | 182.1  | 227.7  |
| 2108.6 | 1620.3 | 1427.8 | 1044.7 | 616.3  | 4622.5  | 3830.7 | 18.5   | 17.5   |
| 3065.3 | 2845.8 | 2505.5 | 1928.8 | 1283.8 | 3371.9  | 2334.0 | 423.5  | 496.1  |
| 2104.9 | 2028.1 | 1843.8 | 1368.1 | 713.4  | 3006.7  | 2219.2 | 307.8  | 369.1  |
| 35.8   | 24.7   | 31.7   | 23.3   | 7.4    | 1267.6  | 906.8  | 581.3  | 658.2  |
| 545.3  | 614.0  | 562.6  | 525.1  | 217.7  | 1551.7  | 1111.7 | 78.5   | 115.6  |
| 244.9  | 208.5  | 236.8  | 177.4  | 48.2   | 518.2   | 275.4  | 160.9  | 202.6  |
| 365.0  | 383.4  | 353.6  | 260.2  | 121.2  | 704.3   | 313.2  | 190.7  | 195.5  |
| 1145.5 | 895.6  | 956.9  | 849.6  | 318.5  | 2990.3  | 2471.1 | 155.5  | 304.4  |
| 360.6  | 318.1  | 326.7  | 212.2  | 71.5   | 695.3   | 444.9  | 131.9  | 182.7  |
| 2365.3 | 2243.2 | 2031.6 | 1560.5 | 681.1  | 4851.8  | 3448.1 | 1001.3 | 1133.3 |
| 2508.3 | 2401.4 | 2212.6 | 1603.7 | 970.3  | 4561.1  | 3685.1 | 1374.3 | 2234.0 |
| 814.7  | 835.6  | 989.3  | 1191.4 | 292.0  | 1406.1  | 1034.3 | 212.5  | 299.3  |
| 911.0  | 760.4  | 815.3  | 791.3  | 363.4  | 1728.1  | 1691.8 | 52.5   | 98.0   |
| 247.5  | 308.6  | 316.1  | 263.5  | 107.2  | 340.6   | 271.3  | 27.1   | 40.8   |
| 87.7   | 36.6   | 40.9   | 40.8   | 14.3   | 149.7   | 97.4   | 20.1   | 34.8   |
| 528.9  | 698.1  | 608.2  | 691.1  | 201.6  | 754.5   | 455.0  | 102.5  | 109.4  |
| 140.8  | 129.9  | 117.5  | 106.6  | 38.5   | 917.6   | 560.2  | 520.6  | 708.0  |
| 327.4  | 292.8  | 241.8  | 225.9  | 93.0   | 1908.4  | 1515.6 | 892.0  | 1045.7 |
| 7529.2 | 7227.2 | 6196.7 | 5414.8 | 3889.3 | 9826.6  | 8438.9 | 171.6  | 158.4  |
| 812.8  | 820.0  | 769.2  | 796.4  | 269.0  | 2104.0  | 1223.3 | 117.9  | 245.3  |
| 579.9  | 497.5  | 466.2  | 325.1  | 172.5  | 2222.1  | 1800.7 | 67.9   | 89.4   |
| 8557.4 | 7619.7 | 7103.5 | 7044.5 | 4851.2 | 8720.3  | 7523.5 | 3225.6 | 5078.4 |
| 269.9  | 379.9  | 259.9  | 102.9  | 90.6   | 677.9   | 547.8  | 66.5   | 89.9   |
| 91.7   | 119.1  | 101.5  | 51.9   | 38.6   | 232.9   | 108.2  | 158.8  | 176.2  |
| 157.5  | 131.7  | 155.6  | 73.0   | 30.1   | 447.2   | 232.4  | 188.0  | 281.1  |
| 1534.7 | 1599.8 | 1680.2 | 1769.6 | 706.9  | 2448.3  | 1794.3 | 220.2  | 299.6  |
| 329.8  | 366.2  | 285.8  | 178.8  | 101.8  | 358.3   | 295.1  | 67.6   | 88.5   |
| 256.3  | 189.0  | 232.3  | 265.5  | 102.3  | 350.9   | 150.0  | 104.4  | 138.7  |
| 68.4   | 60.7   | 41.6   | 44.7   | 23.0   | 145.7   | 127.4  | 35.3   | 57.6   |
| 277.9  | 188.4  | 411.3  | 740.1  | 106.3  | 620.9   | 250.8  | 175.5  | 242.1  |
| 259.9  | 224.0  | 135.9  | 38.8   | 101.1  | 1795.4  | 1117.8 | 1.7    | 6.3    |
| 400.9  | 259.2  | 261.5  | 105.7  | 61.7   | 346.6   | 146.6  | 80.3   | 129.3  |
| 11.9   | 7.1    | 32.1   | 50.0   | 3.2    | 31.4    | 9.0    | 18.3   | 4.4    |
| 4.9    | 7.7    | 21.5   | 15.8   | 0.9    | 28.6    | 1.4    | 24.9   | 7.8    |
| 448.6  | 324.0  | 432.5  | 443.5  | 188.5  | 988.1   | 824.6  | 209.5  | 302.9  |
| 966.4  | 885.4  | 1067.2 | 1250.1 | 391.1  | 1335.6  | 996.7  | 898.2  | 1101.2 |
| 86.6   | 70.7   | 73.2   | 76.6   | 10.0   | 44.4    | 16.6   | 106.4  | 195.1  |
| 9102.1 | 8321.7 | 8041.1 | 7586.6 | 5274.1 | 10386.5 | 8149.7 | 3468.2 | 4313.4 |
| 110.0  | 104.1  | 101.1  | 79.8   | 48.8   | 924.3   | 462.9  | 81.2   | 109.6  |
| 960.2  | 843.4  | 650.3  | 403.4  | 223.8  | 1135.1  | 623.9  | 246.7  | 335.1  |
| 526.3  | 402.8  | 375.9  | 351.1  | 114.8  | 624.6   | 366.6  | 152.9  | 180.8  |
| 214.1  | 225.6  | 183.3  | 205.7  | 84.1   | 431.0   | 378.4  | 60.0   | 82.9   |
| 1247.7 | 1376.1 | 1311.7 | 935.4  | 457.4  | 1740.9  | 1179.3 | 180.8  | 271.3  |

|        |        |        |        |        |        |        |        |        |
|--------|--------|--------|--------|--------|--------|--------|--------|--------|
| 176.4  | 88.2   | 109.5  | 43.1   | 32.2   | 497.0  | 314.6  | 152.3  | 155.1  |
| 70.6   | 97.3   | 71.4   | 84.2   | 30.7   | 175.6  | 120.5  | 37.7   | 65.4   |
| 232.5  | 251.6  | 246.0  | 339.3  | 101.4  | 479.0  | 371.0  | 158.8  | 223.8  |
| 564.8  | 533.1  | 456.6  | 173.9  | 171.7  | 386.5  | 204.1  | 0.8    | 1.1    |
| 677.5  | 674.0  | 630.6  | 689.0  | 382.9  | 1330.1 | 928.4  | 244.6  | 243.0  |
| 327.8  | 354.7  | 265.8  | 244.5  | 108.4  | 206.4  | 95.2   | 126.3  | 189.9  |
| 236.3  | 237.9  | 209.4  | 173.4  | 119.9  | 156.3  | 82.0   | 104.5  | 172.9  |
| 0.6    | 12.0   | 1.1    | 0.7    | 0.1    | 7.0    | 8.6    | 0.2    | 0.5    |
| 411.5  | 382.9  | 411.1  | 415.9  | 153.6  | 1954.5 | 1837.9 | 72.0   | 76.6   |
| 1351.6 | 1102.1 | 977.8  | 672.4  | 310.6  | 1344.6 | 795.2  | 288.0  | 414.3  |
| 412.9  | 377.0  | 329.9  | 159.5  | 95.5   | 770.9  | 533.6  | 295.1  | 280.0  |
| 2346.2 | 1846.6 | 1901.1 | 1253.6 | 707.8  | 2767.9 | 1534.8 | 769.6  | 1042.4 |
| 227.5  | 192.5  | 199.9  | 118.2  | 61.5   | 359.7  | 272.9  | 257.2  | 306.7  |
| 2500.8 | 2181.6 | 2617.5 | 1970.3 | 1049.1 | 2622.3 | 2096.5 | 487.2  | 807.9  |
| 36.3   | 15.4   | 24.0   | 8.3    | 10.5   | 45.3   | 14.0   | 8.4    | 14.2   |
| 433.3  | 332.3  | 354.4  | 272.5  | 75.4   | 246.7  | 180.1  | 144.9  | 193.2  |
| 2378.7 | 2397.8 | 2284.6 | 2171.2 | 753.9  | 2571.5 | 2018.0 | 529.3  | 672.8  |
| 73.8   | 36.1   | 25.7   | 16.8   | 10.7   | 35.0   | 24.6   | 67.0   | 103.5  |
| 149.4  | 113.1  | 97.5   | 73.0   | 31.3   | 104.2  | 46.1   | 169.9  | 205.6  |
| 388.8  | 349.0  | 358.7  | 292.3  | 109.7  | 553.9  | 382.1  | 136.3  | 212.5  |
| 238.0  | 248.9  | 194.7  | 188.1  | 47.8   | 260.5  | 174.9  | 139.3  | 195.0  |
| 551.9  | 425.4  | 343.0  | 279.7  | 104.0  | 1061.0 | 652.7  | 312.4  | 279.1  |
| 2925.2 | 2484.7 | 2446.9 | 2175.1 | 1052.7 | 4202.0 | 3020.8 | 508.2  | 615.3  |
| 766.5  | 706.6  | 668.6  | 575.3  | 249.9  | 2201.4 | 1727.1 | 469.7  | 684.4  |
| 758.6  | 567.3  | 574.9  | 383.1  | 196.6  | 902.4  | 637.5  | 632.2  | 697.8  |
| 164.4  | 148.6  | 104.4  | 67.0   | 54.9   | 249.2  | 103.7  | 470.6  | 610.7  |
| 57.7   | 51.2   | 36.9   | 23.9   | 10.8   | 51.0   | 27.5   | 267.7  | 318.0  |
| 261.5  | 260.4  | 230.8  | 218.1  | 89.2   | 249.9  | 117.0  | 60.1   | 76.3   |
| 182.4  | 138.9  | 155.5  | 107.3  | 30.9   | 181.1  | 107.2  | 19.0   | 32.2   |
| 1566.9 | 1267.2 | 1245.5 | 1009.3 | 503.6  | 2814.8 | 1987.7 | 304.2  | 381.8  |
| 122.5  | 103.0  | 116.8  | 74.0   | 17.4   | 106.6  | 64.0   | 40.4   | 63.1   |
| 657.6  | 688.4  | 660.8  | 487.4  | 235.4  | 1465.3 | 1085.1 | 193.7  | 275.9  |
| 307.7  | 199.8  | 357.9  | 241.6  | 90.4   | 893.2  | 402.3  | 118.1  | 161.4  |
| 2840.8 | 2667.4 | 2630.7 | 2243.6 | 1162.3 | 2941.4 | 2662.9 | 257.8  | 379.4  |
| 556.6  | 405.8  | 461.8  | 415.8  | 121.3  | 922.1  | 556.0  | 327.5  | 417.4  |
| 7496.3 | 6584.9 | 6112.9 | 5838.6 | 3892.4 | 7329.8 | 6149.7 | 3205.9 | 4524.7 |
| 1441.4 | 1348.0 | 1361.1 | 970.9  | 451.4  | 2651.5 | 2237.0 | 134.9  | 183.6  |
| 1222.9 | 1104.2 | 1082.1 | 756.7  | 393.7  | 1968.1 | 1503.4 | 726.6  | 966.9  |
| 300.1  | 289.8  | 256.2  | 182.0  | 81.1   | 817.7  | 478.2  | 621.0  | 559.7  |
| 8570.3 | 7856.0 | 7473.4 | 6662.8 | 3807.7 | 8648.3 | 7025.9 | 2019.8 | 2405.5 |
| 122.4  | 103.3  | 89.7   | 94.4   | 39.5   | 1113.4 | 678.7  | 212.9  | 335.4  |
| 1354.0 | 1267.1 | 1243.4 | 1376.1 | 484.9  | 1930.4 | 1373.9 | 279.5  | 404.3  |
| 2610.4 | 2435.6 | 2418.2 | 2618.4 | 1018.0 | 3989.8 | 3217.0 | 310.7  | 464.1  |
| 1122.5 | 1148.3 | 1075.5 | 1210.1 | 503.8  | 2491.9 | 1801.2 | 359.1  | 461.4  |
| 181.3  | 180.7  | 189.3  | 198.0  | 73.7   | 286.2  | 248.6  | 70.9   | 153.5  |
| 436.8  | 444.5  | 445.7  | 569.5  | 198.1  | 585.0  | 448.0  | 98.8   | 183.1  |
| 385.0  | 246.7  | 266.8  | 164.1  | 50.3   | 213.8  | 86.7   | 179.7  | 231.3  |
| 155.2  | 116.3  | 112.6  | 123.8  | 46.6   | 155.0  | 82.0   | 143.3  | 183.4  |
| 2057.2 | 2046.4 | 1873.8 | 1902.3 | 687.7  | 1462.9 | 970.1  | 301.6  | 512.3  |
| 1038.6 | 973.0  | 955.9  | 951.2  | 261.8  | 604.4  | 307.1  | 277.2  | 509.9  |
| 3419.7 | 3442.3 | 3114.3 | 2323.3 | 1453.9 | 4182.6 | 3529.6 | 1.6    | 2.2    |
| 3291.6 | 3706.7 | 3145.5 | 2078.5 | 1652.6 | 1336.8 | 833.7  | 957.8  | 1322.6 |
| 11.1   | 1.4    | 2.6    | 0.8    | 1.4    | 71.8   | 34.1   | 0.9    | 0.6    |

|        |        |        |        |        |        |        |        |        |
|--------|--------|--------|--------|--------|--------|--------|--------|--------|
| 132.7  | 75.1   | 63.6   | 22.7   | 18.6   | 2599.0 | 1244.7 | 17.9   | 33.5   |
| 157.3  | 94.4   | 99.9   | 19.6   | 31.7   | 2902.9 | 2590.7 | 9.8    | 13.7   |
| 259.0  | 170.2  | 140.6  | 29.6   | 9.1    | 2401.5 | 1796.3 | 3.7    | 3.6    |
| 821.0  | 909.0  | 887.5  | 618.9  | 296.9  | 1557.7 | 1153.8 | 423.2  | 593.6  |
| 4376.8 | 4165.3 | 3911.3 | 3121.7 | 1768.7 | 4646.5 | 2990.2 | 1564.4 | 1464.3 |
| 1347.6 | 1263.3 | 1339.7 | 981.3  | 487.2  | 1889.6 | 1441.9 | 763.3  | 741.9  |
| 4972.7 | 4718.0 | 4281.7 | 2634.7 | 1388.9 | 5780.3 | 4354.5 | 610.7  | 997.0  |
| 672.1  | 791.6  | 649.2  | 529.7  | 304.8  | 845.9  | 387.9  | 301.0  | 245.4  |
| 94.1   | 115.6  | 80.5   | 18.6   | 19.3   | 195.6  | 97.4   | 63.6   | 78.7   |
| 75.7   | 101.0  | 61.3   | 19.5   | 21.3   | 210.2  | 67.8   | 19.5   | 23.0   |
| 262.7  | 291.9  | 377.7  | 232.5  | 107.6  | 1433.2 | 977.5  | 351.6  | 442.4  |
| 2498.2 | 2151.5 | 2092.8 | 1260.3 | 719.0  | 3297.2 | 2226.9 | 2230.3 | 2836.6 |
| 1287.7 | 1317.7 | 1095.9 | 802.0  | 259.6  | 600.3  | 244.8  | 292.7  | 435.1  |
| 1825.8 | 1899.9 | 1830.0 | 1488.5 | 773.5  | 1838.1 | 1053.3 | 258.2  | 523.7  |
| 137.9  | 60.3   | 71.9   | 28.2   | 18.7   | 564.7  | 156.2  | 50.7   | 68.7   |
| 268.5  | 50.9   | 54.2   | 52.6   | 21.6   | 2377.3 | 519.0  | 125.0  | 125.7  |
| 67.1   | 53.8   | 59.2   | 33.1   | 21.6   | 94.8   | 56.2   | 32.4   | 50.4   |
| 305.6  | 228.8  | 235.8  | 90.3   | 88.0   | 996.9  | 567.7  | 281.6  | 329.9  |
| 193.4  | 115.2  | 106.4  | 107.0  | 43.6   | 435.7  | 342.1  | 89.1   | 95.0   |
| 291.2  | 247.6  | 286.8  | 181.1  | 84.2   | 163.6  | 100.8  | 144.4  | 168.7  |
| 1327.3 | 1277.7 | 1305.4 | 888.4  | 491.2  | 1417.2 | 930.4  | 746.4  | 972.8  |
| 384.4  | 403.5  | 389.4  | 227.6  | 126.8  | 536.6  | 329.5  | 92.0   | 131.0  |
| 23.5   | 14.0   | 17.7   | 1.7    | 4.6    | 94.1   | 34.3   | 186.7  | 299.9  |
| 277.2  | 342.0  | 188.3  | 20.6   | 63.3   | 4432.7 | 3903.7 | 1181.2 | 1224.6 |
| 499.4  | 524.3  | 492.6  | 452.0  | 149.7  | 181.5  | 140.0  | 51.2   | 56.4   |
| 181.7  | 216.4  | 189.7  | 221.2  | 57.9   | 388.9  | 329.2  | 65.3   | 96.5   |
| 4827.1 | 3829.1 | 3444.3 | 2128.9 | 1344.9 | 6719.1 | 5840.9 | 471.1  | 672.2  |
| 1082.6 | 1068.4 | 946.1  | 676.2  | 439.4  | 1516.5 | 1021.2 | 352.4  | 550.8  |
| 1141.2 | 757.2  | 859.8  | 589.3  | 263.1  | 2554.2 | 1475.9 | 405.4  | 544.0  |
| 4.5    | 2.7    | 2.0    | 13.5   | 0.9    | 503.0  | 324.1  | 2.3    | 4.1    |
| 1823.8 | 1541.9 | 1431.4 | 1354.3 | 541.6  | 1655.3 | 1333.9 | 125.4  | 127.3  |
| 1333.3 | 1298.0 | 1417.6 | 1374.0 | 463.3  | 1415.2 | 1053.5 | 53.8   | 64.7   |
| 807.5  | 577.6  | 540.9  | 259.8  | 125.3  | 542.1  | 345.5  | 462.8  | 598.3  |
| 12.1   | 11.3   | 15.0   | 4.9    | 4.8    | 6.7    | 7.8    | 150.2  | 246.4  |
| 401.7  | 439.7  | 399.2  | 366.8  | 114.5  | 683.9  | 361.6  | 118.3  | 160.8  |
| 338.9  | 150.3  | 249.2  | 156.3  | 111.7  | 689.3  | 504.6  | 65.5   | 86.0   |
| 2437.3 | 2248.5 | 2073.2 | 2227.6 | 907.7  | 3253.1 | 2228.3 | 314.6  | 372.7  |
| 2545.0 | 2107.2 | 2368.1 | 2584.5 | 1109.9 | 1133.8 | 694.5  | 517.5  | 634.5  |
| 1442.8 | 1483.7 | 1723.1 | 1717.7 | 506.3  | 1266.1 | 998.8  | 88.6   | 149.6  |
| 13.2   | 8.3    | 12.3   | 11.4   | 0.9    | 108.0  | 128.8  | 3.6    | 3.4    |
| 22.9   | 5.7    | 5.8    | 13.8   | 3.1    | 36.6   | 27.9   | 4.1    | 5.3    |
| 19.1   | 17.7   | 15.1   | 13.6   | 9.5    | 48.8   | 36.3   | 17.4   | 21.3   |
| 7.2    | 2.1    | 13.7   | 10.6   | 0.6    | 92.9   | 92.9   | 1.4    | 6.1    |
| 234.2  | 212.7  | 212.1  | 110.5  | 40.4   | 261.8  | 136.8  | 17.4   | 46.1   |
| 553.8  | 490.2  | 490.4  | 251.2  | 145.4  | 758.3  | 500.2  | 88.0   | 190.1  |
| 572.4  | 569.7  | 559.9  | 325.1  | 191.7  | 1139.6 | 736.1  | 71.0   | 129.8  |
| 5660.0 | 5250.9 | 4968.4 | 5155.3 | 2540.0 | 8197.4 | 6931.1 | 1783.6 | 2202.3 |
| 309.6  | 319.1  | 326.4  | 282.7  | 94.6   | 579.7  | 392.6  | 177.9  | 266.8  |
| 648.3  | 496.2  | 492.0  | 310.6  | 156.3  | 454.9  | 262.9  | 288.8  | 386.4  |
| 851.1  | 766.3  | 846.4  | 731.5  | 269.5  | 1214.8 | 951.7  | 127.1  | 177.1  |
| 168.8  | 163.8  | 159.7  | 175.3  | 76.8   | 321.0  | 320.3  | 61.4   | 73.4   |
| 52.2   | 40.4   | 52.8   | 51.8   | 17.6   | 63.8   | 35.1   | 31.1   | 43.1   |
| 3831.4 | 3674.2 | 3654.6 | 3864.5 | 1639.9 | 3867.7 | 3005.9 | 242.7  | 350.5  |

|        |        |        |        |       |        |        |       |       |
|--------|--------|--------|--------|-------|--------|--------|-------|-------|
| 2612.4 | 1954.0 | 1752.8 | 2290.5 | 730.1 | 1744.5 | 1255.1 | 168.2 | 271.6 |
| 153.5  | 92.2   | 97.8   | 30.0   | 51.0  | 453.0  | 169.5  | 1.7   | 1.2   |
| 213.5  | 231.8  | 247.8  | 49.1   | 90.0  | 762.0  | 304.8  | 0.7   | 2.5   |
| 490.1  | 488.7  | 444.7  | 615.4  | 149.3 | 784.9  | 503.9  | 94.3  | 112.2 |
| 327.4  | 271.7  | 273.5  | 338.0  | 74.2  | 382.4  | 404.2  | 104.1 | 147.0 |
| 1082.0 | 1071.9 | 931.6  | 1129.0 | 289.9 | 1271.0 | 835.1  | 121.4 | 213.5 |
| 108.8  | 58.2   | 74.3   | 47.2   | 19.4  | 125.3  | 68.6   | 237.1 | 265.4 |
| 305.7  | 213.9  | 188.4  | 159.4  | 90.2  | 548.1  | 463.4  | 564.0 | 710.1 |
| 113.9  | 98.2   | 152.0  | 369.4  | 36.3  | 44.0   | 8.4    | 2.3   | 17.9  |
| 465.1  | 447.5  | 692.4  | 916.9  | 230.6 | 334.8  | 245.8  | 22.3  | 34.7  |
| 14.8   | 12.8   | 16.6   | 7.2    | 9.2   | 78.3   | 104.7  | 1.4   | 15.0  |
| 1014.7 | 910.1  | 881.5  | 748.3  | 365.5 | 2140.2 | 1679.6 | 511.0 | 673.5 |
| 1390.2 | 1072.6 | 1086.6 | 794.7  | 362.6 | 2324.5 | 1602.5 | 347.7 | 332.6 |
| 263.8  | 227.3  | 286.5  | 280.7  | 95.8  | 744.0  | 445.6  | 168.9 | 195.4 |
| 1083.5 | 941.6  | 867.8  | 735.1  | 298.4 | 1985.8 | 1504.3 | 290.3 | 403.1 |
| 706.8  | 564.7  | 601.9  | 670.0  | 247.4 | 2113.9 | 1343.5 | 241.6 | 262.9 |
| 1360.8 | 1368.8 | 1462.5 | 1282.7 | 473.2 | 2684.3 | 2074.3 | 133.6 | 158.1 |
| 358.7  | 339.0  | 316.8  | 382.3  | 146.6 | 758.6  | 511.8  | 252.9 | 340.7 |
| 1153.5 | 1085.0 | 1169.1 | 1309.2 | 367.2 | 656.2  | 440.6  | 129.2 | 164.0 |
| 2510.9 | 2213.1 | 2277.3 | 2310.7 | 933.3 | 2344.2 | 1788.2 | 295.7 | 354.1 |
| 277.6  | 273.3  | 362.9  | 341.1  | 112.8 | 219.1  | 145.5  | 20.2  | 29.3  |
| 68.6   | 37.8   | 61.6   | 33.9   | 24.9  | 62.8   | 30.2   | 38.3  | 103.5 |
| 313.0  | 314.3  | 254.1  | 198.6  | 74.0  | 471.5  | 337.9  | 111.8 | 147.4 |
| 497.6  | 518.7  | 422.8  | 311.6  | 147.5 | 350.6  | 231.3  | 214.6 | 228.0 |
| 23.1   | 11.4   | 23.1   | 6.1    | 7.5   | 3.7    | 9.3    | 11.4  | 32.4  |
| 249.1  | 203.6  | 170.3  | 70.9   | 69.5  | 703.0  | 514.4  | 154.2 | 95.4  |
| 19.5   | 12.1   | 14.2   | 12.2   | 1.5   | 10.7   | 10.6   | 26.8  | 40.6  |
| 100.6  | 102.7  | 92.2   | 65.3   | 35.1  | 686.8  | 282.2  | 83.5  | 128.8 |
| 168.0  | 208.5  | 159.8  | 135.7  | 91.1  | 1296.9 | 841.0  | 180.8 | 283.6 |
| 326.8  | 310.2  | 283.3  | 194.0  | 109.6 | 473.1  | 263.7  | 113.5 | 136.5 |
| 185.2  | 152.9  | 165.0  | 121.3  | 65.1  | 374.2  | 165.7  | 65.1  | 109.3 |
| 488.2  | 457.7  | 472.3  | 470.4  | 167.6 | 604.4  | 351.0  | 123.6 | 151.1 |
| 319.9  | 367.4  | 386.7  | 423.5  | 167.6 | 308.4  | 401.0  | 295.8 | 420.5 |
| 263.3  | 293.7  | 272.5  | 229.0  | 99.8  | 660.8  | 270.0  | 351.6 | 487.1 |
| 594.9  | 329.2  | 545.3  | 366.5  | 155.7 | 2441.9 | 2236.0 | 274.5 | 325.0 |
| 653.3  | 573.1  | 589.4  | 514.1  | 176.3 | 839.5  | 492.9  | 146.1 | 162.6 |
| 666.0  | 657.4  | 591.5  | 583.3  | 186.4 | 1416.9 | 847.5  | 69.9  | 102.2 |
| 1452.2 | 1135.5 | 1163.5 | 861.2  | 380.8 | 1666.5 | 1066.2 | 320.7 | 418.7 |
| 1283.0 | 1164.0 | 1263.7 | 942.3  | 409.6 | 2161.6 | 1591.6 | 339.1 | 457.0 |
| 315.7  | 340.9  | 291.8  | 181.4  | 109.9 | 1052.8 | 741.3  | 295.7 | 258.1 |
| 618.9  | 707.9  | 658.3  | 525.0  | 276.8 | 6344.8 | 5483.6 | 510.9 | 581.2 |
| 1870.0 | 1807.2 | 1750.9 | 782.9  | 600.4 | 2095.5 | 1123.3 | 287.2 | 562.5 |
| 25.8   | 40.6   | 5.8    | 17.3   | 2.1   | 128.3  | 51.1   | 42.7  | 60.8  |
| 170.6  | 182.7  | 134.9  | 66.7   | 49.2  | 793.3  | 750.0  | 133.6 | 215.0 |
| 20.8   | 25.1   | 11.2   | 18.4   | 11.6  | 30.4   | 29.8   | 20.4  | 23.1  |
| 52.1   | 32.4   | 21.9   | 21.2   | 7.2   | 195.8  | 198.4  | 53.1  | 75.5  |
| 348.7  | 348.0  | 354.2  | 253.9  | 120.4 | 313.8  | 188.5  | 157.5 | 230.4 |
| 117.2  | 91.2   | 122.5  | 114.6  | 24.6  | 116.0  | 75.7   | 60.4  | 75.9  |
| 1420.1 | 1457.6 | 1441.5 | 981.1  | 599.1 | 2500.4 | 1969.6 | 168.2 | 224.7 |
| 1512.6 | 1399.8 | 1318.6 | 1420.0 | 368.3 | 3297.5 | 2135.6 | 260.0 | 525.9 |
| 128.3  | 113.0  | 115.7  | 71.8   | 21.8  | 101.8  | 63.4   | 131.5 | 127.3 |
| 161.5  | 200.3  | 205.3  | 147.1  | 90.3  | 432.3  | 205.7  | 32.5  | 54.9  |
| 24.0   | 31.6   | 25.7   | 28.0   | 11.6  | 57.0   | 19.0   | 55.6  | 41.9  |

|        |        |        |        |        |         |         |        |        |
|--------|--------|--------|--------|--------|---------|---------|--------|--------|
| 232.9  | 243.4  | 203.2  | 169.0  | 76.7   | 777.7   | 378.5   | 117.1  | 131.6  |
| 2852.7 | 2714.4 | 2630.6 | 2027.2 | 1047.1 | 2986.8  | 2193.3  | 37.2   | 51.7   |
| 722.4  | 666.3  | 559.6  | 393.5  | 246.9  | 1481.7  | 947.0   | 640.5  | 702.7  |
| 6827.7 | 6362.8 | 6498.5 | 7000.7 | 3320.5 | 10884.5 | 8480.3  | 3349.3 | 3980.4 |
| 710.2  | 747.7  | 661.1  | 855.8  | 221.7  | 1347.1  | 949.4   | 92.3   | 142.8  |
| 130.0  | 93.7   | 109.7  | 114.4  | 46.7   | 213.6   | 187.0   | 45.9   | 63.8   |
| 692.3  | 607.5  | 633.1  | 756.2  | 316.7  | 2444.4  | 2198.4  | 327.7  | 418.9  |
| 507.5  | 376.4  | 399.4  | 278.3  | 133.7  | 650.7   | 493.9   | 341.6  | 283.1  |
| 1347.4 | 1131.2 | 1091.6 | 830.1  | 292.2  | 1690.5  | 1185.3  | 480.9  | 623.4  |
| 848.3  | 878.3  | 861.6  | 775.5  | 304.3  | 1355.6  | 1078.9  | 205.5  | 322.3  |
| 154.2  | 83.9   | 76.0   | 47.7   | 22.1   | 110.0   | 62.9    | 35.2   | 71.0   |
| 1066.5 | 1019.1 | 855.6  | 647.3  | 209.2  | 1112.8  | 904.0   | 186.3  | 240.2  |
| 1414.3 | 1061.0 | 1015.6 | 744.9  | 276.0  | 1558.0  | 1073.2  | 709.6  | 766.6  |
| 1552.7 | 1412.6 | 1484.9 | 1227.0 | 590.9  | 2221.4  | 1579.1  | 351.8  | 390.1  |
| 60.4   | 54.7   | 64.5   | 71.8   | 29.4   | 70.7    | 36.4    | 24.5   | 37.8   |
| 270.9  | 196.3  | 209.2  | 213.7  | 60.8   | 227.0   | 172.2   | 72.9   | 71.9   |
| 164.6  | 150.3  | 186.9  | 137.5  | 55.2   | 159.1   | 116.7   | 60.2   | 75.3   |
| 6174.1 | 5123.3 | 4974.6 | 4304.0 | 2509.0 | 6868.9  | 4568.5  | 1006.4 | 1173.3 |
| 619.8  | 584.6  | 648.3  | 468.2  | 186.0  | 1808.3  | 1256.4  | 163.3  | 126.3  |
| 265.2  | 210.8  | 250.3  | 192.9  | 83.3   | 591.9   | 333.9   | 49.1   | 43.5   |
| 430.3  | 373.6  | 316.2  | 313.1  | 161.2  | 924.4   | 523.8   | 192.5  | 282.7  |
| 12.1   | 8.2    | 3.1    | 21.6   | 1.4    | 2.2     | 9.8     | 36.7   | 64.0   |
| 42.7   | 34.5   | 42.2   | 64.4   | 9.1    | 6.7     | 1.6     | 108.1  | 142.2  |
| 309.9  | 306.4  | 277.9  | 209.4  | 54.5   | 206.1   | 111.8   | 63.2   | 71.2   |
| 1357.3 | 1339.4 | 1330.6 | 1321.4 | 455.1  | 1186.9  | 866.3   | 395.2  | 387.0  |
| 1795.7 | 1591.9 | 1390.6 | 1567.1 | 517.7  | 2275.5  | 1356.1  | 707.5  | 824.8  |
| 2315.1 | 2176.1 | 2007.5 | 1921.8 | 745.5  | 2600.7  | 1926.6  | 1101.1 | 1887.8 |
| 1871.8 | 1853.3 | 1800.8 | 1454.8 | 781.6  | 2493.0  | 1745.8  | 371.0  | 495.9  |
| 369.3  | 100.1  | 80.5   | 45.9   | 35.9   | 3631.2  | 3157.8  | 386.9  | 573.6  |
| 175.2  | 150.4  | 105.9  | 84.3   | 22.6   | 3657.5  | 3347.4  | 361.5  | 682.0  |
| 327.5  | 298.5  | 283.7  | 266.9  | 77.4   | 508.2   | 313.1   | 188.9  | 213.1  |
| 511.0  | 425.9  | 440.9  | 386.8  | 152.3  | 492.2   | 292.0   | 441.5  | 526.7  |
| 81.3   | 37.9   | 54.9   | 30.4   | 15.5   | 113.9   | 70.4    | 206.4  | 340.5  |
| 72.5   | 45.2   | 94.6   | 73.0   | 28.6   | 106.2   | 53.6    | 152.5  | 163.1  |
| 36.9   | 19.2   | 45.0   | 50.1   | 7.4    | 33.7    | 47.1    | 119.7  | 141.5  |
| 7.5    | 3.9    | 15.1   | 6.9    | 0.8    | 53.2    | 45.2    | 5.1    | 5.7    |
| 170.6  | 160.3  | 170.3  | 121.6  | 65.2   | 610.8   | 579.2   | 74.9   | 93.2   |
| 2467.9 | 2113.1 | 2017.0 | 1369.7 | 760.4  | 5670.6  | 4424.0  | 1626.8 | 1881.5 |
| 864.1  | 691.3  | 816.5  | 746.9  | 292.8  | 3715.7  | 3012.3  | 166.8  | 160.7  |
| 539.6  | 714.9  | 650.8  | 397.8  | 311.9  | 1570.4  | 1045.4  | 219.6  | 232.4  |
| 4950.5 | 4574.1 | 4446.3 | 4363.8 | 1709.6 | 9192.5  | 8326.0  | 2262.1 | 2774.7 |
| 843.8  | 792.5  | 723.9  | 664.8  | 295.3  | 1621.3  | 1194.8  | 300.9  | 405.5  |
| 1925.7 | 1734.5 | 1659.5 | 1491.3 | 609.4  | 1274.7  | 1125.9  | 398.5  | 416.7  |
| 7994.7 | 7403.7 | 6887.9 | 6784.4 | 4043.0 | 11936.5 | 10137.6 | 3430.7 | 4311.7 |
| 5945.3 | 5546.5 | 4963.3 | 4555.3 | 2131.1 | 11160.6 | 9169.3  | 1090.2 | 1321.6 |
| 959.2  | 773.3  | 853.4  | 649.0  | 187.8  | 970.7   | 648.1   | 451.8  | 669.2  |
| 664.9  | 637.9  | 687.5  | 528.5  | 204.7  | 1141.0  | 854.8   | 161.2  | 241.5  |
| 34.8   | 33.6   | 43.8   | 34.4   | 16.2   | 41.0    | 17.2    | 23.5   | 23.6   |
| 12.3   | 2.9    | 10.8   | 7.0    | 0.5    | 1.2     | 10.8    | 16.8   | 2.3    |
| 1868.0 | 1922.9 | 2210.9 | 2307.1 | 951.5  | 1914.6  | 1581.3  | 418.5  | 504.7  |
| 595.9  | 478.3  | 408.6  | 413.2  | 140.7  | 787.3   | 509.9   | 252.2  | 427.9  |
| 3.9    | 4.0    | 7.5    | 2.0    | 1.5    | 10.4    | 5.6     | 7.9    | 15.0   |
| 4653.4 | 3431.1 | 4985.7 | 5054.2 | 1345.1 | 7033.6  | 6429.6  | 156.4  | 205.2  |

|         |        |        |        |        |         |        |        |        |
|---------|--------|--------|--------|--------|---------|--------|--------|--------|
| 1062.2  | 793.5  | 915.3  | 620.6  | 220.1  | 2271.9  | 1300.8 | 366.0  | 378.7  |
| 3771.4  | 3059.9 | 3208.4 | 2577.3 | 1129.7 | 4631.7  | 4015.1 | 1431.8 | 1519.4 |
| 19.5    | 24.1   | 21.5   | 14.5   | 7.1    | 14.0    | 10.0   | 33.3   | 11.3   |
| 196.8   | 144.5  | 169.6  | 160.4  | 61.5   | 368.2   | 236.6  | 213.8  | 270.1  |
| 372.4   | 294.8  | 353.1  | 295.4  | 106.4  | 652.3   | 436.5  | 90.9   | 111.4  |
| 1244.3  | 1431.8 | 1253.3 | 987.3  | 535.6  | 2359.1  | 1230.7 | 17.2   | 24.6   |
| 2885.3  | 2640.3 | 2437.4 | 1937.3 | 1005.0 | 3835.1  | 3127.4 | 721.4  | 957.7  |
| 4078.3  | 3273.3 | 3412.7 | 2895.0 | 1507.6 | 2616.1  | 2170.6 | 394.8  | 354.8  |
| 1394.2  | 1460.5 | 1752.0 | 1410.9 | 828.6  | 1614.5  | 1111.5 | 301.8  | 286.5  |
| 94.5    | 68.6   | 61.2   | 90.4   | 20.4   | 123.1   | 62.0   | 99.8   | 128.9  |
| 3300.4  | 2583.9 | 2422.0 | 1609.5 | 629.6  | 5079.8  | 3565.2 | 952.2  | 1396.6 |
| 141.9   | 146.3  | 79.9   | 42.0   | 29.2   | 61.3    | 47.9   | 3.8    | 5.1    |
| 143.4   | 114.1  | 58.4   | 40.4   | 29.1   | 40.7    | 29.7   | 6.1    | 14.6   |
| 122.3   | 77.6   | 48.8   | 19.3   | 20.9   | 58.8    | 48.9   | 0.6    | 1.1    |
| 2671.1  | 1793.6 | 2077.9 | 1878.2 | 732.9  | 2768.6  | 1955.5 | 270.3  | 298.6  |
| 118.6   | 96.6   | 135.3  | 99.3   | 35.9   | 326.0   | 192.7  | 178.9  | 294.0  |
| 2.1     | 2.2    | 8.5    | 5.3    | 0.4    | 34.6    | 13.1   | 16.8   | 6.4    |
| 283.5   | 280.6  | 321.9  | 225.5  | 134.9  | 468.2   | 307.8  | 195.0  | 194.8  |
| 714.2   | 583.0  | 621.5  | 644.0  | 186.2  | 527.1   | 409.7  | 297.7  | 431.2  |
| 157.2   | 166.0  | 104.2  | 48.7   | 45.6   | 1162.3  | 839.8  | 173.3  | 246.6  |
| 286.3   | 294.9  | 267.9  | 117.0  | 89.9   | 2267.9  | 1354.4 | 451.0  | 721.2  |
| 27.1    | 27.2   | 11.7   | 1.2    | 8.5    | 7339.6  | 5845.7 | 167.4  | 214.8  |
| 1814.8  | 1744.5 | 1795.8 | 1382.6 | 624.7  | 3258.2  | 2621.1 | 25.9   | 27.1   |
| 1417.1  | 1296.7 | 1246.5 | 979.1  | 493.7  | 4363.9  | 3248.9 | 256.2  | 486.4  |
| 1351.0  | 1081.9 | 953.7  | 507.2  | 337.9  | 1053.5  | 1520.6 | 90.6   | 150.5  |
| 1590.5  | 1770.6 | 1474.0 | 926.5  | 574.7  | 753.9   | 643.0  | 140.9  | 212.4  |
| 10237.7 | 8828.8 | 8585.2 | 7162.7 | 5638.5 | 11185.8 | 9361.7 | 4649.5 | 5595.6 |
| 43.3    | 35.7   | 56.5   | 65.9   | 18.5   | 41.5    | 21.3   | 11.0   | 16.2   |
| 36.9    | 47.7   | 60.4   | 86.4   | 4.9    | 25.8    | 9.1    | 6.1    | 1.3    |
| 597.8   | 596.7  | 624.8  | 682.0  | 202.6  | 273.1   | 198.2  | 62.2   | 79.7   |
| 191.2   | 214.2  | 210.5  | 176.3  | 74.9   | 222.4   | 144.7  | 22.2   | 36.2   |
| 773.5   | 721.0  | 776.1  | 773.0  | 242.7  | 890.5   | 659.9  | 169.0  | 179.5  |
| 171.9   | 148.6  | 131.4  | 114.4  | 48.8   | 107.7   | 56.7   | 33.8   | 38.7   |
| 964.1   | 871.1  | 1304.9 | 1340.1 | 498.9  | 2120.7  | 1758.8 | 19.0   | 48.6   |
| 846.7   | 926.1  | 835.1  | 868.4  | 339.9  | 1094.9  | 890.2  | 218.1  | 316.3  |
| 428.7   | 509.2  | 475.9  | 481.9  | 167.9  | 583.8   | 400.3  | 166.2  | 217.8  |
| 2745.1  | 2356.5 | 2180.1 | 1531.7 | 723.8  | 2355.3  | 1401.8 | 414.8  | 530.7  |
| 805.5   | 747.8  | 777.0  | 535.9  | 209.0  | 1051.1  | 837.4  | 74.6   | 131.3  |
| 1446.4  | 1206.8 | 1300.1 | 987.9  | 381.9  | 2183.5  | 2001.9 | 272.6  | 252.8  |
| 2486.6  | 2200.2 | 2325.9 | 2007.5 | 862.2  | 2761.5  | 2343.1 | 945.0  | 1061.3 |
| 372.2   | 296.5  | 297.8  | 189.2  | 85.5   | 1406.1  | 926.9  | 206.8  | 426.9  |
| 58.4    | 47.5   | 30.4   | 26.8   | 9.5    | 118.5   | 60.1   | 48.2   | 118.3  |
| 56.7    | 48.2   | 32.8   | 9.2    | 16.4   | 31.0    | 14.6   | 2.6    | 7.1    |
| 154.4   | 191.5  | 105.5  | 34.5   | 54.7   | 119.1   | 54.5   | 43.4   | 38.3   |
| 24.6    | 29.9   | 31.9   | 24.6   | 12.1   | 129.0   | 73.3   | 103.8  | 87.8   |
| 40.6    | 50.1   | 53.1   | 31.3   | 20.0   | 329.1   | 154.3  | 143.8  | 203.1  |
| 53.7    | 57.3   | 49.3   | 56.9   | 16.1   | 109.7   | 59.7   | 16.1   | 22.6   |
| 191.4   | 165.1  | 156.2  | 82.9   | 74.7   | 238.2   | 131.6  | 67.0   | 84.0   |
| 276.3   | 206.1  | 281.4  | 99.7   | 94.8   | 1537.4  | 1413.3 | 38.0   | 42.7   |
| 237.0   | 222.9  | 193.4  | 131.7  | 64.6   | 275.9   | 211.1  | 100.3  | 92.0   |
| 2926.2  | 3226.7 | 2815.3 | 2268.8 | 1103.6 | 4687.5  | 4288.4 | 839.8  | 1416.3 |
| 5321.7  | 5071.6 | 4828.9 | 4722.4 | 2482.7 | 7726.7  | 5966.1 | 984.3  | 1245.2 |
| 779.1   | 630.5  | 741.2  | 573.4  | 252.4  | 2075.5  | 1199.7 | 168.3  | 143.9  |



|        |        |        |        |        |        |        |        |        |
|--------|--------|--------|--------|--------|--------|--------|--------|--------|
| 79.5   | 63.8   | 48.7   | 38.1   | 18.4   | 79.6   | 25.9   | 51.5   | 75.3   |
| 272.7  | 280.4  | 234.9  | 188.9  | 105.6  | 331.4  | 257.4  | 67.9   | 71.1   |
| 4538.0 | 3876.5 | 3482.0 | 2812.9 | 1373.1 | 4294.0 | 3268.5 | 1694.7 | 2173.5 |
| 2022.2 | 1770.4 | 2002.1 | 1366.1 | 807.8  | 1993.8 | 1500.7 | 51.3   | 66.6   |
| 16.3   | 5.5    | 14.4   | 14.0   | 7.2    | 5209.1 | 4561.8 | 15.5   | 22.2   |
| 13.0   | 0.9    | 17.5   | 0.7    | 2.2    | 2446.6 | 2189.8 | 14.1   | 27.7   |
| 960.7  | 985.1  | 1089.0 | 967.0  | 416.8  | 2516.3 | 1895.3 | 386.3  | 369.2  |
| 2410.5 | 2399.5 | 2531.4 | 2409.4 | 1095.9 | 4826.3 | 3576.8 | 350.8  | 491.5  |
| 24.3   | 26.1   | 30.8   | 27.7   | 7.1    | 355.2  | 186.7  | 12.4   | 14.4   |
| 28.2   | 3.0    | 24.9   | 31.9   | 6.9    | 193.1  | 98.3   | 14.9   | 17.3   |
| 2029.7 | 1842.3 | 1799.8 | 1658.1 | 832.1  | 2529.0 | 2336.7 | 132.9  | 216.6  |
| 185.3  | 228.9  | 197.0  | 194.7  | 106.2  | 531.2  | 410.0  | 4.4    | 19.4   |
| 33.8   | 24.5   | 30.4   | 33.7   | 6.9    | 65.7   | 34.6   | 2.1    | 2.5    |
| 46.5   | 31.3   | 54.3   | 22.1   | 15.2   | 68.2   | 54.8   | 36.3   | 42.0   |
| 311.3  | 243.3  | 306.9  | 159.9  | 85.8   | 507.6  | 372.0  | 88.6   | 135.4  |
| 15.7   | 17.8   | 10.3   | 16.0   | 2.7    | 32.0   | 21.9   | 7.4    | 2.1    |
| 1191.5 | 1138.9 | 1128.2 | 986.5  | 486.4  | 2502.5 | 1711.5 | 218.6  | 366.7  |
| 625.7  | 606.2  | 632.2  | 550.7  | 211.9  | 761.5  | 425.7  | 93.9   | 140.6  |
| 1636.0 | 1638.0 | 1465.7 | 1253.2 | 791.9  | 1753.1 | 1330.1 | 538.7  | 719.1  |
| 374.5  | 422.2  | 348.3  | 240.0  | 101.0  | 927.2  | 559.4  | 159.8  | 297.9  |
| 191.5  | 51.8   | 68.5   | 23.0   | 23.5   | 294.8  | 297.8  | 20.9   | 20.5   |
| 812.5  | 676.4  | 568.4  | 306.4  | 135.1  | 791.0  | 645.9  | 72.8   | 123.7  |
| 1565.8 | 1457.1 | 1312.2 | 874.5  | 419.8  | 2010.3 | 1312.6 | 268.2  | 339.2  |
| 540.8  | 488.4  | 532.6  | 586.1  | 197.8  | 1682.8 | 1134.3 | 289.3  | 286.4  |
| 47.7   | 53.6   | 39.0   | 52.9   | 18.9   | 120.0  | 79.5   | 24.7   | 26.0   |
| 722.6  | 637.6  | 659.8  | 622.3  | 201.2  | 1719.2 | 1263.0 | 392.3  | 478.5  |
| 1028.1 | 803.9  | 999.0  | 811.6  | 261.7  | 920.3  | 518.2  | 275.0  | 350.8  |
| 1160.2 | 1163.8 | 952.4  | 707.8  | 457.7  | 649.2  | 392.5  | 165.3  | 235.5  |
| 23.5   | 13.8   | 7.0    | 19.5   | 0.8    | 770.6  | 441.9  | 10.3   | 18.3   |
| 227.2  | 188.4  | 211.4  | 91.1   | 73.9   | 158.8  | 70.3   | 504.0  | 590.8  |
| 202.7  | 187.5  | 134.9  | 96.9   | 60.9   | 282.8  | 167.4  | 260.0  | 370.7  |
| 1309.0 | 1293.9 | 1225.1 | 1400.4 | 488.9  | 1348.0 | 1025.0 | 333.8  | 458.5  |
| 1221.4 | 1131.7 | 1089.8 | 1147.1 | 457.3  | 1476.2 | 1134.6 | 199.5  | 256.5  |
| 173.3  | 85.9   | 111.7  | 84.2   | 33.7   | 172.4  | 156.7  | 87.9   | 80.7   |
| 91.8   | 92.5   | 93.6   | 76.2   | 35.1   | 93.7   | 66.8   | 62.0   | 80.7   |
| 17.2   | 10.4   | 32.4   | 3.5    | 5.4    | 38.6   | 21.2   | 36.4   | 48.4   |
| 625.4  | 472.2  | 481.0  | 445.3  | 240.5  | 813.7  | 550.1  | 170.9  | 262.6  |
| 176.9  | 183.6  | 166.3  | 121.9  | 65.0   | 301.7  | 159.1  | 82.5   | 108.5  |
| 1864.2 | 1877.2 | 1747.1 | 1977.3 | 892.1  | 3823.6 | 3010.1 | 469.8  | 735.7  |
| 1026.8 | 1018.7 | 1074.8 | 1226.1 | 436.0  | 2614.1 | 1731.8 | 338.7  | 583.0  |
| 241.0  | 190.0  | 169.9  | 117.6  | 63.9   | 1126.2 | 755.7  | 520.8  | 724.2  |
| 213.8  | 155.6  | 179.8  | 118.0  | 63.8   | 803.9  | 383.5  | 401.0  | 458.5  |
| 140.8  | 221.1  | 152.8  | 113.9  | 71.2   | 181.3  | 133.4  | 11.5   | 24.2   |
| 129.1  | 148.0  | 147.3  | 81.5   | 42.6   | 150.5  | 83.1   | 9.5    | 30.2   |
| 281.2  | 245.3  | 201.7  | 151.8  | 62.7   | 351.7  | 194.2  | 130.0  | 249.9  |
| 227.1  | 167.4  | 167.3  | 111.7  | 69.4   | 319.3  | 198.4  | 144.9  | 179.1  |
| 634.5  | 601.1  | 790.9  | 623.5  | 264.8  | 874.5  | 638.6  | 116.2  | 195.6  |
| 51.4   | 19.7   | 21.5   | 30.8   | 6.9    | 25.3   | 1.5    | 21.1   | 18.3   |
| 775.9  | 718.6  | 857.3  | 979.2  | 219.7  | 562.8  | 275.8  | 178.5  | 234.2  |
| 75.7   | 54.9   | 74.9   | 51.0   | 22.4   | 93.7   | 48.5   | 73.4   | 41.9   |
| 121.7  | 125.0  | 144.9  | 149.9  | 35.8   | 171.5  | 99.1   | 39.8   | 48.2   |
| 1615.5 | 1419.6 | 1319.5 | 1395.1 | 576.8  | 2036.6 | 1445.9 | 463.8  | 450.6  |
| 10.5   | 16.6   | 7.1    | 6.3    | 4.2    | 11.9   | 5.3    | 4.0    | 0.6    |

|        |        |        |        |        |        |        |        |        |
|--------|--------|--------|--------|--------|--------|--------|--------|--------|
| 190.0  | 73.9   | 88.9   | 100.6  | 57.6   | 801.0  | 363.2  | 122.8  | 107.7  |
| 3.7    | 2.8    | 12.8   | 4.3    | 3.9    | 1.0    | 1.3    | 12.8   | 10.3   |
| 1905.8 | 1576.3 | 2016.5 | 2140.9 | 697.3  | 2134.6 | 1555.7 | 336.7  | 487.5  |
| 510.4  | 464.6  | 499.0  | 434.3  | 152.3  | 890.0  | 597.3  | 353.2  | 438.6  |
| 717.3  | 637.4  | 616.8  | 485.3  | 209.4  | 976.8  | 602.4  | 185.2  | 244.3  |
| 771.9  | 734.0  | 568.7  | 451.4  | 228.0  | 659.4  | 336.0  | 452.6  | 678.8  |
| 643.2  | 535.7  | 580.3  | 648.6  | 136.2  | 1793.8 | 1137.7 | 250.5  | 317.1  |
| 79.2   | 105.7  | 85.9   | 45.0   | 29.8   | 89.6   | 59.3   | 20.0   | 54.5   |
| 1124.2 | 1212.8 | 1245.7 | 1022.0 | 534.9  | 3097.4 | 2636.1 | 557.5  | 737.9  |
| 43.0   | 21.0   | 23.2   | 18.4   | 14.4   | 43.7   | 24.2   | 15.3   | 16.0   |
| 266.7  | 257.4  | 260.7  | 272.3  | 82.5   | 125.0  | 100.0  | 94.9   | 105.4  |
| 465.7  | 474.5  | 436.8  | 596.0  | 226.6  | 302.6  | 290.0  | 125.8  | 190.3  |
| 2192.8 | 2711.3 | 1971.3 | 2116.4 | 830.0  | 3432.6 | 1833.5 | 548.3  | 884.6  |
| 1605.8 | 1483.5 | 1358.4 | 1310.0 | 517.5  | 1994.3 | 1186.0 | 749.5  | 787.1  |
| 1496.0 | 1278.3 | 1589.8 | 2556.8 | 579.1  | 187.8  | 150.2  | 11.6   | 27.3   |
| 757.3  | 532.1  | 604.2  | 448.0  | 201.8  | 766.2  | 451.4  | 2091.7 | 2385.1 |
| 165.3  | 136.3  | 194.0  | 165.1  | 83.6   | 99.3   | 52.4   | 5.3    | 15.7   |
| 3586.1 | 2920.2 | 2920.3 | 2517.0 | 1128.6 | 3610.3 | 2207.3 | 801.5  | 950.6  |
| 705.0  | 679.0  | 700.0  | 446.0  | 258.8  | 1723.4 | 993.8  | 277.2  | 288.7  |
| 73.5   | 51.2   | 39.8   | 54.1   | 17.2   | 276.9  | 142.4  | 37.6   | 37.7   |
| 130.3  | 130.9  | 107.1  | 89.4   | 25.6   | 1352.5 | 835.4  | 34.8   | 89.0   |
| 245.2  | 234.8  | 234.0  | 217.7  | 81.2   | 152.8  | 114.0  | 54.1   | 83.1   |
| 339.4  | 306.2  | 350.3  | 256.7  | 123.9  | 329.5  | 235.5  | 57.1   | 85.7   |
| 138.4  | 102.9  | 99.1   | 104.9  | 30.3   | 138.7  | 90.6   | 59.0   | 74.4   |
| 30.1   | 46.7   | 93.8   | 43.6   | 34.7   | 296.8  | 228.1  | 194.8  | 317.5  |
| 362.6  | 343.5  | 350.9  | 386.9  | 117.7  | 2177.9 | 1411.4 | 536.1  | 789.9  |
| 202.4  | 176.0  | 175.8  | 225.2  | 44.5   | 797.1  | 549.9  | 421.4  | 780.1  |
| 4048.9 | 3599.0 | 3377.7 | 2258.8 | 975.8  | 2518.8 | 1981.3 | 3141.8 | 3735.6 |
| 72.7   | 41.2   | 59.1   | 26.9   | 13.7   | 101.9  | 56.0   | 113.1  | 127.4  |
| 4.5    | 6.3    | 4.4    | 3.0    | 7.1    | 4.6    | 4.6    | 7.1    | 1.7    |
| 820.6  | 745.1  | 675.7  | 457.7  | 226.6  | 1133.1 | 792.6  | 553.3  | 746.3  |
| 396.0  | 260.5  | 301.2  | 166.5  | 79.2   | 421.4  | 182.0  | 68.6   | 100.6  |
| 879.6  | 815.3  | 815.1  | 582.5  | 338.9  | 1116.3 | 912.2  | 376.3  | 442.2  |
| 9805.5 | 8867.2 | 8536.0 | 7921.4 | 4803.8 | 9315.4 | 8312.0 | 1591.9 | 1786.8 |
| 236.1  | 230.8  | 211.8  | 207.4  | 87.7   | 864.6  | 559.1  | 40.3   | 76.1   |
| 194.2  | 171.7  | 246.1  | 190.4  | 67.6   | 724.8  | 440.5  | 41.7   | 42.8   |
| 263.9  | 252.6  | 259.3  | 227.5  | 88.4   | 808.3  | 634.5  | 84.7   | 93.5   |
| 1042.8 | 868.9  | 959.0  | 865.6  | 324.8  | 1343.7 | 899.7  | 125.4  | 265.6  |
| 443.2  | 249.0  | 283.9  | 212.7  | 46.6   | 1072.9 | 1254.5 | 53.1   | 63.0   |
| 379.3  | 355.6  | 323.4  | 223.1  | 171.3  | 1640.5 | 1169.5 | 270.3  | 360.8  |
| 288.6  | 395.9  | 349.4  | 364.1  | 156.1  | 836.9  | 782.5  | 114.4  | 174.2  |
| 332.0  | 267.5  | 347.3  | 228.9  | 93.5   | 1295.4 | 823.6  | 68.5   | 111.5  |
| 1169.6 | 1107.1 | 1115.0 | 1017.0 | 497.6  | 1774.1 | 1148.3 | 901.9  | 1060.0 |
| 47.5   | 35.2   | 25.6   | 17.6   | 21.6   | 128.3  | 93.1   | 131.2  | 161.2  |
| 264.6  | 284.2  | 230.2  | 151.2  | 54.4   | 393.7  | 210.6  | 208.1  | 367.7  |
| 26.9   | 24.9   | 27.8   | 25.4   | 14.6   | 81.1   | 102.7  | 72.2   | 125.1  |
| 120.1  | 111.7  | 108.4  | 67.7   | 31.4   | 169.8  | 77.6   | 76.6   | 102.1  |
| 1212.4 | 1061.6 | 1015.5 | 823.6  | 374.5  | 611.2  | 286.3  | 113.6  | 136.9  |
| 659.2  | 620.4  | 590.1  | 405.9  | 212.8  | 372.3  | 224.8  | 86.8   | 75.1   |
| 215.2  | 222.5  | 166.1  | 51.5   | 52.4   | 315.8  | 198.2  | 305.0  | 236.7  |
| 293.3  | 268.1  | 302.2  | 235.0  | 79.4   | 529.0  | 376.3  | 246.4  | 336.8  |
| 449.2  | 436.8  | 492.8  | 405.9  | 147.5  | 628.3  | 486.7  | 48.9   | 71.8   |
| 46.2   | 48.9   | 54.9   | 80.7   | 41.6   | 518.0  | 404.7  | 1247.2 | 1402.7 |

|         |        |        |        |        |         |         |        |        |
|---------|--------|--------|--------|--------|---------|---------|--------|--------|
| 7423.6  | 6425.9 | 6498.2 | 6577.6 | 3868.3 | 1561.8  | 976.2   | 41.9   | 38.0   |
| 1.0     | 7.9    | 5.3    | 0.9    | 5.6    | 53.9    | 33.0    | 68.9   | 207.7  |
| 1.1     | 2.0    | 6.9    | 1.4    | 1.0    | 371.8   | 324.0   | 75.2   | 170.4  |
| 10732.2 | 9645.7 | 8731.0 | 8532.2 | 6268.0 | 11661.7 | 10620.7 | 3693.7 | 4125.3 |
| 36.0    | 20.1   | 23.2   | 5.9    | 4.7    | 79.1    | 39.1    | 9.3    | 9.4    |
| 93.4    | 80.9   | 55.7   | 36.7   | 26.2   | 232.9   | 87.5    | 1.5    | 11.5   |
| 309.1   | 330.5  | 359.4  | 261.4  | 120.8  | 388.2   | 297.4   | 275.5  | 403.6  |
| 783.5   | 691.2  | 545.6  | 313.2  | 241.4  | 3214.9  | 2178.3  | 379.7  | 516.7  |
| 483.6   | 429.9  | 488.9  | 430.2  | 167.3  | 770.2   | 590.4   | 88.3   | 111.6  |
| 679.3   | 551.3  | 607.4  | 461.0  | 148.3  | 1026.7  | 595.2   | 134.8  | 251.5  |
| 137.5   | 146.6  | 161.8  | 174.6  | 59.9   | 538.5   | 436.3   | 9.6    | 15.5   |
| 525.6   | 539.6  | 532.7  | 450.9  | 168.7  | 1026.8  | 784.7   | 75.8   | 95.6   |
| 1.9     | 4.2    | 2.4    | 1.5    | 0.5    | 64.7    | 7.8     | 1.0    | 1.7    |
| 67.2    | 72.0   | 59.3   | 70.6   | 26.7   | 126.2   | 76.5    | 45.8   | 64.5   |
| 491.0   | 452.7  | 405.1  | 288.4  | 201.5  | 372.2   | 208.9   | 75.7   | 106.5  |
| 1930.0  | 1927.5 | 1745.7 | 979.2  | 694.9  | 5941.9  | 4817.7  | 1217.1 | 1256.0 |
| 8.0     | 8.4    | 10.4   | 11.1   | 5.2    | 10.7    | 10.7    | 5.4    | 5.0    |
| 906.1   | 1024.3 | 994.1  | 777.7  | 382.4  | 1244.1  | 748.3   | 279.1  | 452.8  |
| 460.0   | 454.2  | 392.3  | 319.0  | 106.7  | 456.9   | 220.7   | 354.8  | 390.1  |
| 48.4    | 16.4   | 14.5   | 10.9   | 4.2    | 304.1   | 203.3   | 49.9   | 63.6   |
| 329.3   | 365.2  | 344.1  | 268.7  | 102.6  | 163.1   | 89.2    | 174.4  | 211.4  |
| 184.0   | 178.1  | 198.3  | 121.4  | 44.1   | 110.3   | 72.6    | 48.0   | 88.4   |
| 339.2   | 382.7  | 331.5  | 208.7  | 134.0  | 276.6   | 148.8   | 53.2   | 92.1   |
| 84.5    | 90.1   | 89.6   | 55.2   | 26.4   | 99.2    | 58.0    | 26.9   | 26.6   |
| 304.8   | 335.2  | 285.7  | 215.0  | 110.4  | 181.3   | 114.4   | 24.6   | 47.0   |
| 3.3     | 2.7    | 2.7    | 15.3   | 1.0    | 25.8    | 39.6    | 2.8    | 3.9    |
| 13.8    | 2.4    | 19.7   | 17.6   | 2.4    | 4.8     | 12.7    | 14.8   | 25.2   |
| 2823.9  | 2618.1 | 2914.6 | 3119.2 | 1081.4 | 3025.4  | 2808.5  | 882.6  | 1032.7 |
| 228.7   | 229.3  | 201.3  | 243.4  | 99.0   | 509.6   | 527.1   | 90.0   | 98.2   |
| 303.9   | 310.4  | 264.0  | 273.6  | 70.9   | 431.5   | 239.4   | 93.2   | 192.4  |
| 443.4   | 345.2  | 380.5  | 282.8  | 86.1   | 335.2   | 247.1   | 102.8  | 134.0  |
| 1913.3  | 1764.9 | 1852.8 | 1589.4 | 564.6  | 1366.0  | 941.0   | 348.5  | 366.5  |
| 989.8   | 824.4  | 866.4  | 696.4  | 253.7  | 972.2   | 714.7   | 149.9  | 201.5  |
| 1584.0  | 1670.5 | 1512.5 | 1057.6 | 504.8  | 1311.0  | 784.3   | 222.6  | 213.9  |
| 116.7   | 94.0   | 82.2   | 77.8   | 31.6   | 415.0   | 307.4   | 113.6  | 136.6  |
| 42.0    | 43.1   | 59.6   | 41.2   | 10.3   | 139.7   | 53.2    | 31.6   | 31.7   |
| 414.3   | 389.2  | 326.3  | 415.5  | 126.3  | 2349.0  | 2350.8  | 472.2  | 664.1  |
| 1158.8  | 1115.8 | 1227.0 | 1113.0 | 410.7  | 5857.5  | 4534.6  | 410.5  | 483.3  |
| 351.3   | 214.2  | 400.4  | 347.1  | 88.5   | 1215.7  | 616.0   | 82.1   | 86.5   |
| 36.6    | 4.6    | 33.0   | 10.4   | 6.8    | 114.6   | 55.7    | 4.1    | 18.8   |
| 118.8   | 130.6  | 325.8  | 500.4  | 100.6  | 403.3   | 269.7   | 6.0    | 6.2    |
| 736.6   | 622.9  | 1012.2 | 1109.3 | 236.3  | 1727.1  | 1447.5  | 209.9  | 252.9  |
| 1733.4  | 1470.7 | 2972.7 | 2278.7 | 720.2  | 4305.3  | 3017.9  | 292.2  | 627.7  |
| 780.4   | 657.2  | 693.4  | 605.6  | 235.5  | 597.4   | 319.2   | 89.1   | 126.0  |
| 1510.9  | 1336.6 | 1389.3 | 1277.8 | 649.2  | 4199.1  | 3723.7  | 313.4  | 344.7  |
| 434.8   | 432.0  | 813.4  | 1373.4 | 290.8  | 1780.4  | 1886.0  | 429.1  | 524.7  |
| 1917.5  | 1805.0 | 1794.9 | 1636.3 | 720.7  | 1731.3  | 1213.7  | 287.1  | 382.6  |
| 268.8   | 229.1  | 297.5  | 266.6  | 104.7  | 215.7   | 147.3   | 91.4   | 113.3  |
| 67.0    | 44.9   | 52.3   | 33.4   | 24.2   | 577.1   | 303.0   | 66.9   | 100.6  |
| 970.7   | 848.5  | 988.7  | 1151.4 | 442.3  | 883.8   | 714.8   | 330.5  | 467.3  |
| 528.2   | 465.6  | 429.1  | 252.9  | 129.2  | 1081.0  | 452.5   | 138.2  | 196.2  |
| 933.6   | 958.1  | 889.0  | 561.7  | 262.2  | 3649.9  | 1931.8  | 215.0  | 245.5  |
| 2235.8  | 2021.6 | 1920.8 | 1733.0 | 652.1  | 1369.5  | 908.6   | 178.7  | 268.9  |

|        |        |        |        |        |         |        |        |        |
|--------|--------|--------|--------|--------|---------|--------|--------|--------|
| 3028.3 | 2566.0 | 2670.3 | 2311.4 | 1045.2 | 2098.4  | 1489.1 | 457.3  | 547.2  |
| 191.1  | 154.8  | 153.2  | 102.3  | 63.8   | 1075.9  | 932.6  | 153.7  | 153.0  |
| 128.5  | 107.2  | 126.8  | 115.3  | 44.1   | 393.2   | 234.3  | 195.5  | 352.3  |
| 51.8   | 39.0   | 37.2   | 3.8    | 9.9    | 703.7   | 471.6  | 60.1   | 80.9   |
| 776.5  | 614.7  | 540.4  | 366.5  | 199.1  | 961.2   | 702.8  | 452.8  | 401.6  |
| 275.3  | 209.7  | 202.1  | 170.4  | 80.6   | 266.9   | 161.9  | 327.4  | 281.4  |
| 373.8  | 315.2  | 317.0  | 183.0  | 92.2   | 1095.9  | 608.1  | 223.8  | 273.8  |
| 794.0  | 840.2  | 752.5  | 439.2  | 239.4  | 1536.4  | 978.2  | 128.2  | 167.9  |
| 108.2  | 90.9   | 93.5   | 34.4   | 34.9   | 1224.6  | 1081.8 | 24.0   | 31.6   |
| 668.0  | 403.0  | 495.3  | 314.7  | 132.9  | 1159.5  | 920.7  | 221.0  | 439.5  |
| 564.0  | 514.0  | 530.4  | 473.0  | 214.3  | 2676.1  | 2128.9 | 285.6  | 446.7  |
| 462.0  | 352.9  | 378.1  | 328.6  | 129.4  | 1839.4  | 836.7  | 188.1  | 235.2  |
| 1738.5 | 1548.8 | 1755.6 | 1337.8 | 625.6  | 2244.9  | 1684.3 | 435.1  | 499.3  |
| 8762.0 | 8178.6 | 7551.6 | 7064.3 | 5001.3 | 10223.1 | 8542.0 | 4044.9 | 4423.5 |
| 598.0  | 544.8  | 595.8  | 504.9  | 148.9  | 495.1   | 368.5  | 178.2  | 261.3  |
| 287.0  | 344.2  | 226.2  | 205.1  | 90.0   | 336.0   | 188.8  | 65.5   | 92.7   |
| 2.3    | 0.9    | 1.6    | 0.8    | 0.7    | 1.8     | 2.1    | 1.7    | 1.0    |
| 13.3   | 8.9    | 0.9    | 9.4    | 1.8    | 22.2    | 2.5    | 7.5    | 4.1    |
| 5.5    | 4.2    | 5.1    | 2.0    | 1.7    | 32.0    | 3.4    | 4.7    | 4.1    |
| 417.1  | 380.4  | 424.3  | 315.8  | 131.9  | 923.8   | 822.4  | 116.6  | 149.5  |
| 689.0  | 622.2  | 578.6  | 655.4  | 164.0  | 1481.1  | 1153.1 | 316.8  | 383.1  |
| 1158.8 | 942.9  | 1064.1 | 1517.0 | 803.7  | 1895.1  | 1370.0 | 314.6  | 504.3  |
| 269.1  | 299.9  | 291.2  | 324.4  | 114.6  | 1234.9  | 873.3  | 99.4   | 153.2  |
| 2402.4 | 1808.6 | 2186.6 | 2908.1 | 1071.8 | 1112.7  | 1014.8 | 363.5  | 461.4  |
| 705.1  | 706.7  | 693.7  | 590.2  | 217.2  | 1685.0  | 1239.4 | 187.5  | 248.5  |
| 504.5  | 446.5  | 435.9  | 397.8  | 139.0  | 411.8   | 234.1  | 117.6  | 191.3  |
| 274.8  | 312.2  | 235.6  | 109.5  | 117.8  | 1186.0  | 1005.9 | 15.8   | 18.5   |
| 40.5   | 58.1   | 50.7   | 38.2   | 33.2   | 4904.6  | 3265.4 | 36.1   | 29.1   |
| 356.0  | 223.5  | 274.0  | 341.5  | 120.3  | 892.1   | 514.9  | 104.6  | 129.9  |
| 16.2   | 26.9   | 17.4   | 8.2    | 7.1    | 659.3   | 559.2  | 510.2  | 414.6  |
| 423.0  | 345.1  | 361.6  | 227.4  | 124.2  | 240.9   | 125.8  | 121.1  | 140.2  |
| 16.5   | 10.0   | 13.3   | 1.2    | 0.7    | 18.6    | 31.6   | 71.6   | 52.9   |
| 431.6  | 303.2  | 322.4  | 269.6  | 91.5   | 405.0   | 214.6  | 193.4  | 241.3  |
| 500.5  | 471.0  | 470.5  | 499.3  | 165.7  | 861.5   | 601.8  | 91.9   | 149.3  |
| 122.3  | 112.9  | 120.2  | 115.7  | 39.2   | 258.1   | 177.3  | 21.3   | 38.2   |
| 261.5  | 158.9  | 208.1  | 107.7  | 39.1   | 317.3   | 165.1  | 76.7   | 74.6   |
| 1219.2 | 1270.5 | 1195.4 | 1098.3 | 398.9  | 1579.3  | 1229.6 | 295.7  | 447.0  |
| 1152.6 | 890.3  | 879.0  | 626.1  | 434.1  | 1108.6  | 672.3  | 208.6  | 215.3  |
| 303.0  | 301.4  | 384.2  | 444.3  | 104.4  | 1080.6  | 791.9  | 147.4  | 155.0  |
| 1394.7 | 1421.6 | 1117.4 | 852.9  | 387.1  | 1764.9  | 1170.2 | 249.8  | 298.6  |
| 870.2  | 871.5  | 817.1  | 731.5  | 356.6  | 1349.1  | 954.1  | 467.2  | 486.1  |
| 795.1  | 676.4  | 773.8  | 896.6  | 369.9  | 1670.2  | 1281.4 | 451.5  | 540.6  |
| 191.1  | 196.1  | 180.5  | 229.9  | 48.7   | 611.1   | 614.0  | 54.3   | 78.0   |
| 467.1  | 403.7  | 452.2  | 316.4  | 179.3  | 973.1   | 614.1  | 402.8  | 468.7  |
| 1139.1 | 907.9  | 892.4  | 630.8  | 218.6  | 1331.1  | 750.0  | 185.9  | 233.4  |
| 2031.3 | 1709.4 | 1707.6 | 1407.9 | 600.7  | 2799.0  | 1861.4 | 348.0  | 536.9  |
| 25.4   | 16.0   | 20.3   | 14.6   | 15.5   | 19.2    | 6.5    | 12.6   | 11.2   |
| 301.6  | 260.8  | 243.6  | 167.2  | 81.3   | 383.9   | 258.9  | 416.9  | 486.3  |
| 1584.4 | 1502.5 | 1176.0 | 1315.7 | 695.0  | 1331.6  | 784.3  | 617.1  | 667.8  |
| 1042.7 | 1000.1 | 950.8  | 489.9  | 261.0  | 1730.6  | 809.2  | 219.2  | 260.2  |
| 618.5  | 558.7  | 519.8  | 285.8  | 141.9  | 998.7   | 363.9  | 231.1  | 401.4  |
| 6673.8 | 5249.4 | 5094.6 | 4741.7 | 2667.9 | 7642.2  | 6461.8 | 1907.6 | 2551.5 |
| 131.2  | 118.7  | 137.5  | 190.7  | 53.3   | 849.9   | 581.8  | 84.2   | 143.6  |

|        |        |        |        |        |        |        |        |        |
|--------|--------|--------|--------|--------|--------|--------|--------|--------|
| 2927.8 | 2603.1 | 2765.8 | 2238.5 | 1063.7 | 4260.8 | 3638.1 | 471.3  | 568.3  |
| 269.6  | 285.6  | 260.4  | 175.0  | 45.2   | 765.6  | 488.7  | 85.2   | 190.8  |
| 215.2  | 178.5  | 147.9  | 192.1  | 39.5   | 312.5  | 176.3  | 39.2   | 137.9  |
| 139.2  | 84.9   | 114.9  | 101.9  | 34.9   | 211.0  | 111.7  | 125.8  | 182.1  |
| 362.1  | 324.6  | 275.1  | 266.2  | 119.5  | 617.7  | 325.4  | 68.8   | 101.7  |
| 211.7  | 157.2  | 164.6  | 181.1  | 62.4   | 320.7  | 212.8  | 27.9   | 64.6   |
| 125.1  | 102.8  | 100.6  | 99.5   | 30.2   | 80.9   | 38.8   | 21.4   | 40.3   |
| 881.7  | 822.5  | 828.2  | 794.7  | 272.5  | 249.9  | 127.1  | 3.1    | 4.9    |
| 4099.5 | 3784.6 | 3614.3 | 3521.5 | 1936.8 | 2696.1 | 1908.0 | 5.3    | 12.5   |
| 675.4  | 590.1  | 605.2  | 387.2  | 198.9  | 496.7  | 260.7  | 62.0   | 97.2   |
| 259.8  | 205.4  | 179.2  | 171.8  | 64.7   | 917.7  | 602.8  | 123.0  | 203.7  |
| 399.7  | 335.7  | 345.2  | 335.3  | 139.3  | 490.1  | 406.6  | 199.1  | 307.8  |
| 1367.0 | 994.8  | 964.2  | 794.4  | 279.6  | 2100.4 | 1983.1 | 668.5  | 1033.3 |
| 150.1  | 129.0  | 106.4  | 94.4   | 36.8   | 216.6  | 207.7  | 96.5   | 120.0  |
| 1040.5 | 958.3  | 1008.4 | 1116.3 | 307.4  | 1600.2 | 1286.1 | 170.2  | 240.6  |
| 1.9    | 2.0    | 7.6    | 7.7    | 1.5    | 2.9    | 9.5    | 1.0    | 2.2    |
| 87.8   | 90.5   | 77.5   | 135.0  | 34.7   | 83.3   | 53.5   | 87.0   | 195.4  |
| 128.7  | 115.7  | 106.9  | 200.2  | 61.0   | 181.2  | 136.8  | 146.7  | 246.6  |
| 6893.8 | 5705.1 | 5289.1 | 4692.2 | 2887.3 | 8975.7 | 7801.8 | 2931.2 | 4259.7 |
| 126.4  | 97.5   | 102.4  | 74.7   | 17.7   | 135.4  | 15.9   | 156.9  | 277.1  |
| 437.4  | 357.9  | 341.5  | 190.1  | 88.9   | 1309.4 | 714.2  | 275.7  | 346.0  |
| 1748.0 | 1888.0 | 1637.6 | 1266.5 | 617.3  | 4133.3 | 3263.1 | 901.3  | 1158.8 |
| 726.6  | 635.4  | 697.1  | 635.4  | 277.3  | 1505.8 | 1167.4 | 297.2  | 479.7  |
| 1234.8 | 1021.1 | 872.1  | 365.5  | 228.6  | 1349.1 | 681.0  | 297.4  | 371.7  |
| 36.6   | 32.3   | 20.6   | 32.2   | 12.8   | 71.2   | 85.2   | 27.5   | 43.6   |
| 61.2   | 52.6   | 45.9   | 36.5   | 13.0   | 61.3   | 59.3   | 46.7   | 82.8   |
| 1429.6 | 1330.6 | 1463.8 | 1633.5 | 583.5  | 1603.8 | 1064.0 | 1099.0 | 1367.6 |
| 223.5  | 182.0  | 231.7  | 224.1  | 40.0   | 74.0   | 50.1   | 124.9  | 167.2  |
| 716.1  | 720.8  | 827.5  | 921.0  | 334.5  | 514.8  | 383.8  | 143.8  | 215.2  |
| 383.3  | 330.7  | 258.7  | 157.4  | 106.5  | 973.7  | 486.3  | 265.3  | 271.4  |
| 166.4  | 163.0  | 136.5  | 85.2   | 50.9   | 108.0  | 69.2   | 97.5   | 118.7  |
| 346.5  | 382.5  | 343.4  | 254.1  | 135.3  | 459.3  | 305.5  | 155.9  | 230.1  |
| 296.0  | 238.6  | 196.8  | 80.0   | 63.9   | 904.2  | 644.5  | 3.3    | 11.1   |
| 753.3  | 946.3  | 748.8  | 485.0  | 238.5  | 451.7  | 264.0  | 509.3  | 608.8  |
| 134.4  | 219.5  | 281.9  | 146.1  | 89.4   | 94.3   | 45.5   | 46.7   | 63.3   |
| 421.8  | 384.5  | 384.1  | 408.5  | 129.9  | 543.5  | 332.9  | 65.7   | 100.1  |
| 2403.7 | 1914.2 | 1659.8 | 1258.8 | 611.0  | 3204.3 | 2283.3 | 706.2  | 758.4  |
| 351.7  | 275.2  | 299.6  | 207.7  | 135.6  | 674.5  | 528.7  | 137.1  | 120.2  |
| 372.0  | 409.0  | 347.4  | 283.7  | 164.0  | 806.4  | 615.2  | 172.9  | 228.5  |
| 190.9  | 146.6  | 190.2  | 174.2  | 85.3   | 824.3  | 423.6  | 30.5   | 39.3   |
| 223.3  | 179.9  | 187.4  | 171.0  | 85.0   | 1173.5 | 740.3  | 55.6   | 83.3   |
| 1012.3 | 913.7  | 957.6  | 971.7  | 324.0  | 1321.0 | 1180.1 | 193.8  | 206.8  |
| 1946.2 | 1326.6 | 1386.1 | 1266.2 | 418.0  | 2671.4 | 1670.0 | 245.7  | 335.0  |
| 1153.7 | 1100.8 | 1188.7 | 1460.3 | 463.4  | 1600.4 | 1223.1 | 145.7  | 174.0  |
| 201.9  | 202.9  | 194.7  | 142.1  | 73.5   | 390.7  | 137.9  | 48.2   | 53.1   |
| 4787.3 | 3797.6 | 3695.7 | 2899.9 | 1351.9 | 4373.6 | 3477.5 | 827.8  | 963.2  |
| 103.8  | 116.9  | 67.3   | 37.2   | 39.9   | 2140.5 | 1660.4 | 73.9   | 72.7   |
| 258.7  | 247.5  | 222.1  | 163.0  | 85.4   | 784.7  | 651.2  | 53.5   | 87.6   |
| 136.3  | 115.2  | 141.6  | 54.5   | 45.0   | 102.9  | 81.0   | 38.4   | 33.2   |
| 179.2  | 156.3  | 222.4  | 94.2   | 45.3   | 233.5  | 122.7  | 13.3   | 21.3   |
| 78.7   | 93.5   | 111.8  | 125.9  | 52.7   | 217.8  | 164.8  | 49.9   | 73.2   |
| 350.5  | 357.8  | 410.4  | 467.7  | 147.1  | 1095.5 | 653.1  | 295.4  | 336.5  |
| 1097.5 | 1029.1 | 944.7  | 966.8  | 420.2  | 798.5  | 478.5  | 296.6  | 354.8  |

|         |        |        |        |        |         |         |        |        |
|---------|--------|--------|--------|--------|---------|---------|--------|--------|
| 337.5   | 186.9  | 210.3  | 140.5  | 54.5   | 521.4   | 351.3   | 160.9  | 174.9  |
| 1450.6  | 1299.0 | 1324.6 | 1008.0 | 449.6  | 4292.3  | 2939.6  | 457.2  | 638.0  |
| 1599.1  | 1368.5 | 1319.4 | 728.3  | 735.0  | 1567.0  | 1248.8  | 284.1  | 285.8  |
| 1545.7  | 1431.6 | 1550.7 | 1632.2 | 678.5  | 1223.4  | 1066.1  | 723.1  | 915.2  |
| 659.8   | 739.1  | 721.8  | 449.6  | 209.8  | 1416.9  | 825.0   | 122.9  | 184.9  |
| 5736.3  | 4833.8 | 4939.8 | 5017.7 | 2728.5 | 8421.4  | 7033.3  | 886.9  | 1209.0 |
| 261.3   | 264.9  | 214.6  | 188.3  | 120.4  | 188.5   | 70.5    | 50.9   | 89.1   |
| 1677.8  | 1603.3 | 1540.0 | 1800.0 | 750.2  | 4620.3  | 3580.5  | 873.1  | 920.5  |
| 1392.5  | 1087.8 | 1279.7 | 1323.3 | 437.4  | 2724.2  | 2475.0  | 298.4  | 400.0  |
| 850.1   | 757.7  | 747.9  | 576.1  | 259.1  | 2039.9  | 1496.7  | 254.2  | 342.3  |
| 1208.9  | 1246.8 | 1375.8 | 1566.9 | 548.8  | 1658.3  | 1294.8  | 103.1  | 127.6  |
| 10076.5 | 8468.9 | 7596.9 | 6014.3 | 5157.2 | 11812.9 | 10062.0 | 2909.2 | 3238.0 |
| 4921.9  | 4482.5 | 4289.9 | 3589.2 | 2184.3 | 5067.7  | 4727.5  | 921.6  | 1159.9 |
| 147.2   | 162.4  | 160.3  | 111.7  | 57.4   | 182.2   | 88.8    | 253.0  | 344.2  |
| 1962.5  | 1767.2 | 1718.0 | 1234.5 | 748.2  | 2158.6  | 2338.2  | 42.6   | 46.6   |
| 5893.4  | 5419.7 | 5529.2 | 5232.8 | 2973.8 | 5435.6  | 3305.1  | 914.5  | 1099.1 |
| 28.5    | 43.9   | 17.5   | 21.7   | 10.1   | 222.3   | 222.9   | 22.9   | 14.7   |
| 115.9   | 58.1   | 66.6   | 66.8   | 31.8   | 415.3   | 490.1   | 32.7   | 30.2   |
| 456.3   | 465.1  | 537.0  | 533.2  | 157.1  | 924.5   | 571.7   | 33.2   | 61.9   |
| 156.1   | 180.8  | 154.6  | 169.9  | 48.9   | 265.4   | 130.7   | 45.8   | 26.6   |
| 619.2   | 619.5  | 461.7  | 180.6  | 181.5  | 976.8   | 491.8   | 34.6   | 60.8   |
| 1868.8  | 1454.8 | 1605.1 | 1487.1 | 635.1  | 2043.2  | 2098.3  | 185.7  | 200.6  |
| 282.9   | 313.1  | 349.8  | 332.6  | 124.8  | 359.4   | 274.2   | 44.7   | 61.7   |
| 1361.3  | 1205.9 | 1300.0 | 1319.1 | 504.8  | 1049.1  | 942.0   | 182.5  | 198.3  |
| 679.1   | 613.9  | 506.8  | 260.2  | 220.7  | 1813.6  | 1126.5  | 128.4  | 147.6  |
| 14.7    | 6.7    | 9.2    | 4.5    | 3.2    | 7.8     | 1.6     | 1.6    | 1.1    |
| 119.0   | 92.3   | 89.5   | 48.3   | 37.5   | 604.6   | 256.9   | 128.7  | 140.2  |
| 557.5   | 477.0  | 484.2  | 339.5  | 184.4  | 1402.0  | 1025.4  | 389.5  | 558.5  |
| 165.5   | 163.0  | 131.3  | 140.6  | 51.4   | 307.4   | 172.3   | 137.8  | 169.9  |
| 1723.7  | 1472.2 | 1424.6 | 1207.4 | 553.2  | 1078.3  | 610.4   | 91.2   | 95.2   |
| 156.9   | 92.1   | 110.1  | 56.2   | 27.8   | 82.3    | 61.8    | 6.9    | 6.2    |
| 482.4   | 345.5  | 347.3  | 156.8  | 64.7   | 350.5   | 251.9   | 1.2    | 0.3    |
| 642.9   | 497.7  | 532.7  | 219.4  | 101.0  | 366.6   | 163.7   | 3.9    | 2.7    |
| 164.9   | 136.2  | 131.1  | 65.4   | 41.0   | 638.7   | 338.1   | 206.7  | 168.1  |
| 1545.9  | 1530.2 | 1401.1 | 678.9  | 399.6  | 1709.9  | 1367.5  | 461.4  | 634.1  |
| 159.0   | 176.9  | 153.8  | 112.4  | 55.8   | 483.8   | 331.9   | 139.3  | 189.3  |
| 52.9    | 71.5   | 60.8   | 33.6   | 4.2    | 256.3   | 144.8   | 6.4    | 35.4   |
| 231.1   | 210.4  | 165.2  | 219.9  | 68.8   | 508.1   | 383.2   | 215.1  | 220.3  |
| 967.3   | 1064.4 | 1007.4 | 1029.9 | 503.0  | 1300.5  | 1527.8  | 338.4  | 434.5  |
| 548.2   | 548.9  | 566.0  | 584.4  | 223.4  | 806.0   | 583.4   | 48.2   | 94.7   |
| 35.7    | 34.1   | 73.7   | 42.8   | 21.2   | 19.6    | 19.6    | 88.6   | 137.9  |
| 85.7    | 79.8   | 342.3  | 134.4  | 47.2   | 71.6    | 44.5    | 136.0  | 248.0  |
| 60.4    | 34.8   | 223.4  | 61.6   | 34.7   | 32.5    | 29.5    | 372.5  | 373.6  |
| 278.4   | 271.1  | 266.7  | 249.2  | 130.9  | 650.0   | 482.4   | 136.7  | 134.3  |
| 717.8   | 747.7  | 878.3  | 647.1  | 238.3  | 1084.7  | 897.2   | 117.3  | 87.0   |
| 824.6   | 701.4  | 765.3  | 747.4  | 251.0  | 871.2   | 536.9   | 216.1  | 260.7  |
| 3606.6  | 3203.3 | 4166.2 | 4990.7 | 2188.2 | 5812.7  | 4615.0  | 248.7  | 292.4  |
| 775.8   | 675.3  | 613.6  | 389.0  | 223.0  | 1139.5  | 800.6   | 120.7  | 207.7  |
| 146.8   | 139.0  | 151.0  | 92.6   | 37.4   | 560.3   | 301.7   | 49.6   | 48.7   |
| 165.3   | 213.8  | 203.2  | 158.0  | 59.1   | 659.3   | 482.3   | 28.3   | 24.8   |
| 841.8   | 641.4  | 693.9  | 699.1  | 217.2  | 799.2   | 414.0   | 113.4  | 150.9  |
| 505.0   | 411.9  | 417.3  | 322.0  | 96.3   | 503.1   | 473.2   | 75.0   | 95.3   |
| 1162.4  | 1074.3 | 1119.3 | 1204.6 | 379.9  | 1835.1  | 1433.0  | 192.8  | 219.4  |

|        |        |        |        |        |        |        |        |        |
|--------|--------|--------|--------|--------|--------|--------|--------|--------|
| 23.6   | 7.2    | 25.0   | 0.8    | 11.3   | 22.1   | 9.2    | 21.6   | 51.9   |
| 177.9  | 185.2  | 165.8  | 113.8  | 56.2   | 445.6  | 246.1  | 138.2  | 202.3  |
| 173.6  | 110.3  | 106.1  | 77.1   | 33.3   | 162.7  | 115.1  | 95.7   | 155.2  |
| 2.6    | 1.1    | 3.2    | 0.9    | 3.0    | 2.8    | 1.4    | 2.4    | 2.8    |
| 945.8  | 708.9  | 704.8  | 548.5  | 234.8  | 417.3  | 272.8  | 163.1  | 207.1  |
| 173.3  | 154.9  | 133.0  | 127.1  | 42.8   | 174.8  | 94.9   | 111.7  | 190.1  |
| 358.6  | 317.1  | 294.7  | 242.5  | 108.3  | 1000.5 | 455.6  | 170.9  | 261.9  |
| 105.8  | 88.2   | 70.9   | 32.2   | 21.7   | 719.0  | 492.7  | 7.6    | 29.5   |
| 125.4  | 139.4  | 115.1  | 134.7  | 34.4   | 210.2  | 116.8  | 368.7  | 658.3  |
| 66.7   | 51.2   | 53.5   | 46.9   | 16.6   | 78.7   | 37.9   | 267.3  | 320.4  |
| 1268.9 | 1194.3 | 1094.0 | 1130.5 | 482.8  | 1550.6 | 1272.4 | 126.5  | 168.3  |
| 78.8   | 94.7   | 66.0   | 63.3   | 38.7   | 725.5  | 729.1  | 17.3   | 25.5   |
| 3.6    | 11.5   | 9.6    | 13.2   | 8.1    | 5562.3 | 4539.3 | 1895.4 | 2044.4 |
| 686.5  | 599.6  | 510.3  | 369.1  | 167.9  | 1833.6 | 1287.5 | 232.1  | 410.8  |
| 926.6  | 1106.2 | 977.7  | 913.6  | 452.5  | 2690.6 | 2089.0 | 279.9  | 331.1  |
| 1819.0 | 1884.3 | 1804.0 | 1915.2 | 709.0  | 2586.8 | 1783.6 | 186.2  | 340.9  |
| 1.5    | 1.1    | 1.0    | 5.3    | 4.6    | 52.7   | 16.5   | 14.6   | 7.8    |
| 26.1   | 22.4   | 17.0   | 13.2   | 1.7    | 762.3  | 452.3  | 1.7    | 1.7    |
| 259.2  | 239.3  | 252.7  | 156.8  | 83.0   | 1255.8 | 927.1  | 22.9   | 9.0    |
| 180.8  | 196.2  | 221.5  | 260.3  | 96.4   | 248.4  | 208.1  | 23.8   | 32.8   |
| 203.3  | 177.9  | 203.9  | 257.7  | 90.1   | 462.0  | 351.7  | 77.5   | 80.4   |
| 670.1  | 608.7  | 576.1  | 722.8  | 248.7  | 1125.6 | 955.6  | 100.7  | 129.9  |
| 200.7  | 214.0  | 306.5  | 267.8  | 143.8  | 325.6  | 218.7  | 234.0  | 213.2  |
| 209.3  | 241.8  | 353.5  | 289.0  | 193.0  | 324.6  | 297.3  | 128.9  | 141.6  |
| 394.0  | 404.5  | 667.1  | 569.3  | 317.4  | 699.6  | 685.4  | 328.4  | 457.1  |
| 1293.8 | 1436.1 | 1267.4 | 918.8  | 397.0  | 1018.4 | 687.7  | 276.0  | 419.8  |
| 1411.7 | 1597.4 | 1294.8 | 975.9  | 534.5  | 1527.3 | 1172.7 | 304.7  | 384.5  |
| 7621.4 | 6938.8 | 6325.8 | 6236.3 | 3878.5 | 9096.4 | 7874.9 | 2861.3 | 3842.8 |
| 1443.0 | 882.3  | 1015.5 | 1746.7 | 395.5  | 3348.5 | 1877.5 | 9.4    | 21.6   |
| 433.7  | 485.4  | 350.1  | 271.8  | 134.0  | 1674.2 | 1333.4 | 6.7    | 2.6    |
| 36.7   | 18.6   | 11.6   | 4.3    | 1.3    | 55.9   | 60.2   | 166.7  | 252.2  |
| 465.9  | 517.4  | 435.8  | 931.4  | 284.4  | 1201.0 | 1100.7 | 305.5  | 502.7  |
| 101.5  | 75.1   | 60.1   | 157.2  | 33.4   | 240.4  | 265.2  | 283.2  | 366.7  |
| 434.0  | 404.7  | 451.9  | 324.3  | 159.5  | 1304.8 | 948.3  | 103.8  | 172.7  |
| 2367.8 | 2056.7 | 2387.3 | 2220.5 | 766.6  | 3315.5 | 2520.1 | 580.5  | 785.1  |
| 139.4  | 115.6  | 114.5  | 112.1  | 61.2   | 219.5  | 105.4  | 127.3  | 192.7  |
| 293.9  | 193.0  | 191.6  | 102.4  | 72.0   | 529.8  | 380.3  | 139.8  | 185.0  |
| 315.5  | 309.0  | 302.2  | 193.6  | 124.5  | 519.7  | 282.5  | 169.2  | 241.9  |
| 2104.9 | 2097.8 | 2775.0 | 1974.9 | 1020.0 | 5360.6 | 4308.3 | 787.2  | 1218.6 |
| 53.3   | 52.1   | 37.8   | 28.9   | 26.0   | 279.5  | 133.2  | 78.5   | 80.5   |
| 436.4  | 463.6  | 363.0  | 254.4  | 142.1  | 974.3  | 455.9  | 163.6  | 208.9  |
| 71.4   | 87.9   | 65.3   | 41.1   | 18.1   | 42.3   | 6.9    | 44.4   | 41.5   |
| 621.4  | 663.3  | 497.4  | 401.8  | 257.1  | 979.8  | 565.7  | 172.6  | 250.8  |
| 236.2  | 304.2  | 242.2  | 167.8  | 105.9  | 768.8  | 608.8  | 82.1   | 114.1  |
| 1590.5 | 1474.6 | 1669.3 | 1408.9 | 567.6  | 1593.1 | 1160.1 | 274.5  | 354.7  |
| 323.4  | 201.8  | 244.5  | 218.2  | 67.7   | 191.3  | 132.0  | 113.3  | 157.9  |
| 455.2  | 333.9  | 397.5  | 432.9  | 113.6  | 506.4  | 322.0  | 215.0  | 311.8  |
| 91.9   | 91.0   | 92.5   | 106.4  | 36.3   | 151.8  | 127.8  | 53.3   | 104.1  |
| 209.2  | 188.7  | 155.3  | 139.2  | 47.6   | 216.1  | 137.0  | 111.0  | 141.5  |
| 487.0  | 521.4  | 485.8  | 434.1  | 152.3  | 1292.0 | 853.5  | 113.5  | 117.7  |
| 264.5  | 249.8  | 211.7  | 198.4  | 59.7   | 814.8  | 427.4  | 552.9  | 696.6  |
| 346.6  | 416.4  | 313.9  | 299.9  | 112.1  | 1466.0 | 1128.4 | 248.2  | 321.0  |
| 473.9  | 575.6  | 532.3  | 510.6  | 197.3  | 2907.8 | 2419.8 | 573.8  | 710.4  |

|        |        |        |        |       |        |        |        |        |
|--------|--------|--------|--------|-------|--------|--------|--------|--------|
| 19.0   | 25.4   | 29.5   | 14.6   | 5.9   | 170.7  | 125.6  | 9.2    | 19.1   |
| 506.9  | 467.1  | 466.2  | 336.1  | 255.7 | 1069.6 | 593.4  | 46.2   | 32.0   |
| 60.2   | 40.2   | 71.5   | 122.8  | 21.7  | 105.5  | 34.6   | 26.1   | 18.2   |
| 284.2  | 295.7  | 454.4  | 384.2  | 122.9 | 647.3  | 363.0  | 15.5   | 17.9   |
| 954.2  | 720.1  | 994.7  | 1192.3 | 380.0 | 1263.9 | 976.4  | 140.9  | 209.5  |
| 689.5  | 576.8  | 640.8  | 485.6  | 204.7 | 823.1  | 586.3  | 147.8  | 162.4  |
| 873.5  | 878.1  | 827.1  | 573.6  | 312.0 | 892.1  | 420.2  | 155.5  | 236.1  |
| 1466.6 | 1216.7 | 1039.5 | 811.5  | 466.1 | 1898.1 | 1123.9 | 894.1  | 998.5  |
| 1266.7 | 1101.7 | 1327.5 | 1149.6 | 364.9 | 2276.2 | 1748.1 | 148.7  | 275.1  |
| 359.5  | 293.3  | 241.1  | 89.9   | 102.3 | 2296.1 | 1302.5 | 111.1  | 151.2  |
| 121.7  | 120.2  | 102.4  | 59.9   | 59.0  | 243.2  | 218.6  | 27.2   | 36.7   |
| 13.0   | 29.0   | 16.1   | 18.5   | 0.7   | 55.6   | 45.1   | 40.9   | 40.1   |
| 85.3   | 73.6   | 58.4   | 81.4   | 20.4  | 167.4  | 121.7  | 95.7   | 159.9  |
| 108.4  | 55.5   | 75.0   | 32.2   | 26.2  | 282.4  | 207.0  | 171.5  | 214.4  |
| 419.0  | 412.4  | 593.6  | 573.5  | 199.3 | 2375.2 | 1858.0 | 360.1  | 467.6  |
| 369.2  | 357.4  | 303.7  | 291.0  | 101.4 | 251.8  | 189.3  | 101.3  | 196.7  |
| 309.1  | 309.7  | 320.0  | 345.7  | 126.5 | 197.4  | 151.1  | 58.5   | 109.9  |
| 263.9  | 262.0  | 201.9  | 147.8  | 77.7  | 227.0  | 99.1   | 169.9  | 222.0  |
| 483.0  | 491.7  | 414.1  | 302.1  | 175.7 | 637.9  | 544.3  | 338.8  | 594.4  |
| 626.9  | 526.8  | 433.2  | 136.2  | 140.5 | 1194.0 | 319.4  | 123.7  | 135.5  |
| 411.6  | 384.6  | 436.9  | 461.6  | 108.3 | 436.4  | 209.2  | 109.9  | 153.1  |
| 149.9  | 148.1  | 155.7  | 138.0  | 45.6  | 182.3  | 131.3  | 33.8   | 43.2   |
| 758.7  | 616.9  | 650.9  | 594.4  | 229.8 | 1189.5 | 848.1  | 40.5   | 70.5   |
| 1491.2 | 1317.6 | 1242.4 | 880.6  | 549.1 | 1631.5 | 1047.4 | 212.0  | 224.0  |
| 240.5  | 202.7  | 146.0  | 109.8  | 40.5  | 231.7  | 119.8  | 63.9   | 80.7   |
| 245.4  | 225.2  | 211.1  | 191.7  | 72.7  | 360.2  | 261.2  | 130.5  | 155.0  |
| 721.5  | 558.8  | 480.2  | 445.3  | 190.3 | 2179.9 | 1594.5 | 1127.3 | 1465.7 |
| 85.1   | 76.7   | 51.8   | 46.4   | 15.6  | 121.1  | 59.3   | 23.4   | 26.6   |
| 74.1   | 87.4   | 66.4   | 31.8   | 20.3  | 279.8  | 152.1  | 15.4   | 20.6   |
| 1.6    | 13.2   | 3.2    | 3.1    | 7.7   | 1692.5 | 1173.6 | 3.9    | 14.0   |
| 12.6   | 10.1   | 17.2   | 17.4   | 5.7   | 4018.8 | 3258.4 | 17.8   | 8.4    |
| 181.2  | 192.8  | 163.8  | 112.0  | 52.5  | 406.8  | 327.6  | 234.7  | 288.3  |
| 118.7  | 132.2  | 89.2   | 63.5   | 28.5  | 214.3  | 167.1  | 245.3  | 320.5  |
| 85.6   | 88.7   | 65.0   | 53.1   | 22.8  | 271.7  | 197.8  | 124.1  | 160.3  |
| 1882.1 | 1986.0 | 1854.8 | 1441.9 | 687.4 | 1585.9 | 1195.8 | 196.9  | 226.8  |
| 1320.9 | 1268.2 | 944.5  | 648.9  | 248.0 | 1420.7 | 719.3  | 453.7  | 575.1  |
| 261.5  | 249.9  | 249.6  | 133.1  | 75.7  | 367.6  | 192.6  | 115.7  | 121.4  |
| 70.5   | 42.6   | 41.4   | 21.8   | 14.7  | 56.9   | 31.3   | 90.8   | 116.1  |
| 398.8  | 432.3  | 391.0  | 327.4  | 138.3 | 737.4  | 425.3  | 297.6  | 447.6  |
| 292.4  | 146.6  | 139.8  | 113.5  | 57.2  | 695.8  | 665.5  | 50.1   | 69.6   |
| 581.5  | 527.3  | 557.4  | 509.1  | 194.3 | 895.2  | 540.7  | 102.7  | 131.4  |
| 48.5   | 21.6   | 33.2   | 51.0   | 8.0   | 93.8   | 66.8   | 55.8   | 67.4   |
| 20.3   | 19.9   | 16.4   | 34.5   | 6.5   | 52.8   | 34.0   | 21.8   | 22.9   |
| 80.6   | 80.7   | 100.2  | 185.0  | 46.6  | 620.1  | 361.4  | 151.5  | 237.4  |
| 152.0  | 100.9  | 140.0  | 200.2  | 43.5  | 357.7  | 275.5  | 162.9  | 243.5  |
| 458.1  | 260.6  | 346.8  | 307.7  | 107.1 | 526.7  | 389.3  | 331.9  | 510.1  |
| 630.7  | 205.0  | 269.5  | 105.9  | 100.8 | 549.0  | 236.2  | 78.1   | 103.8  |
| 988.4  | 875.3  | 1146.2 | 1383.5 | 354.0 | 960.9  | 551.2  | 56.2   | 82.5   |
| 1667.8 | 1402.5 | 1344.6 | 1531.5 | 415.3 | 634.0  | 352.2  | 13.6   | 11.4   |
| 710.3  | 688.4  | 631.1  | 408.1  | 212.5 | 1728.5 | 1189.4 | 422.8  | 721.0  |
| 65.3   | 66.4   | 45.1   | 44.2   | 8.9   | 59.2   | 28.0   | 6.2    | 20.8   |
| 1447.0 | 1253.7 | 1053.4 | 787.9  | 218.1 | 1163.6 | 556.9  | 567.8  | 953.6  |
| 2.7    | 12.2   | 1.9    | 1.8    | 5.2   | 0.9    | 1.6    | 0.9    | 0.4    |



|        |        |        |        |        |        |        |        |        |
|--------|--------|--------|--------|--------|--------|--------|--------|--------|
| 3.0    | 0.6    | 4.3    | 5.0    | 2.4    | 0.3    | 0.1    | 0.2    | 0.4    |
| 2016.4 | 1889.3 | 2030.2 | 1725.1 | 697.9  | 1199.8 | 775.6  | 125.6  | 209.0  |
| 263.9  | 232.0  | 203.1  | 165.1  | 69.6   | 431.0  | 308.3  | 214.3  | 207.0  |
| 42.3   | 52.6   | 60.7   | 43.5   | 1.2    | 71.9   | 11.6   | 40.5   | 31.8   |
| 163.0  | 146.5  | 121.9  | 153.3  | 37.1   | 226.4  | 147.4  | 103.1  | 99.9   |
| 51.3   | 52.1   | 46.8   | 32.5   | 20.5   | 170.6  | 147.3  | 71.3   | 89.3   |
| 18.1   | 27.3   | 22.5   | 16.0   | 8.1    | 63.1   | 40.9   | 14.6   | 27.1   |
| 459.3  | 456.1  | 478.0  | 441.0  | 140.5  | 774.2  | 374.6  | 107.8  | 107.6  |
| 173.3  | 239.5  | 146.1  | 61.4   | 44.0   | 247.4  | 193.9  | 69.3   | 79.1   |
| 250.5  | 335.7  | 260.7  | 98.9   | 96.5   | 380.5  | 373.1  | 31.4   | 24.4   |
| 3162.9 | 3111.5 | 2740.2 | 1950.4 | 940.1  | 5481.2 | 4428.3 | 1758.5 | 2014.3 |
| 289.5  | 222.8  | 222.8  | 97.9   | 62.5   | 329.0  | 125.5  | 96.7   | 90.4   |
| 860.9  | 719.6  | 643.7  | 439.0  | 231.2  | 724.4  | 470.1  | 131.7  | 188.5  |
| 3550.2 | 3207.9 | 2707.5 | 1702.1 | 1171.4 | 4356.6 | 3468.4 | 630.3  | 880.6  |
| 563.5  | 552.4  | 582.5  | 690.6  | 226.0  | 1298.9 | 953.5  | 238.7  | 352.3  |
| 36.1   | 35.5   | 39.7   | 24.5   | 13.2   | 70.6   | 44.3   | 15.2   | 25.1   |
| 689.6  | 763.7  | 731.2  | 485.6  | 291.3  | 2244.9 | 1819.6 | 391.3  | 585.0  |
| 2474.1 | 2357.3 | 2919.7 | 2674.9 | 1196.4 | 1899.2 | 1262.6 | 420.0  | 532.3  |
| 2162.7 | 2022.6 | 1782.9 | 1212.4 | 860.8  | 4078.2 | 3898.1 | 665.7  | 728.6  |
| 408.8  | 333.9  | 377.3  | 488.7  | 168.2  | 329.5  | 217.9  | 61.8   | 67.9   |
| 812.1  | 778.0  | 618.6  | 325.0  | 180.8  | 673.6  | 304.9  | 370.1  | 561.5  |
| 120.4  | 120.6  | 107.0  | 116.0  | 34.8   | 642.7  | 455.9  | 246.2  | 271.9  |
| 17.6   | 17.2   | 12.7   | 6.2    | 4.3    | 24.3   | 15.2   | 14.2   | 19.0   |
| 389.7  | 364.3  | 321.3  | 185.8  | 161.4  | 494.1  | 388.7  | 102.1  | 105.2  |
| 227.3  | 225.2  | 235.2  | 207.9  | 55.0   | 136.5  | 102.0  | 116.4  | 174.6  |
| 526.9  | 515.0  | 571.3  | 569.4  | 199.7  | 602.8  | 431.8  | 99.9   | 118.3  |
| 833.5  | 723.0  | 678.3  | 650.1  | 285.0  | 1577.4 | 1058.7 | 348.5  | 442.8  |
| 805.5  | 646.4  | 640.9  | 630.1  | 323.8  | 516.1  | 288.3  | 195.1  | 317.4  |
| 747.8  | 652.2  | 718.4  | 646.8  | 203.5  | 1266.0 | 820.3  | 283.1  | 265.1  |
| 543.6  | 596.6  | 531.5  | 513.2  | 217.4  | 910.8  | 529.8  | 213.1  | 342.7  |
| 955.4  | 1042.9 | 812.3  | 534.0  | 344.7  | 357.9  | 225.5  | 107.6  | 113.9  |
| 92.7   | 90.7   | 90.3   | 58.0   | 36.8   | 110.5  | 57.8   | 90.8   | 121.5  |
| 205.0  | 219.7  | 208.3  | 177.8  | 57.6   | 265.9  | 215.5  | 50.9   | 85.5   |
| 91.2   | 86.1   | 94.5   | 78.6   | 30.4   | 82.4   | 54.3   | 44.8   | 51.8   |
| 651.9  | 607.3  | 567.4  | 385.0  | 196.5  | 734.7  | 444.2  | 213.0  | 361.0  |
| 392.8  | 336.5  | 378.7  | 397.3  | 138.4  | 576.9  | 442.7  | 246.3  | 327.6  |
| 273.3  | 278.8  | 350.4  | 388.4  | 129.4  | 563.9  | 417.0  | 97.2   | 110.7  |
| 494.2  | 412.6  | 435.4  | 347.7  | 169.8  | 187.2  | 92.9   | 77.0   | 113.7  |
| 781.4  | 677.7  | 612.3  | 536.5  | 263.2  | 282.1  | 177.8  | 177.1  | 222.6  |
| 313.7  | 235.2  | 285.1  | 336.3  | 93.2   | 1016.7 | 677.7  | 259.7  | 349.5  |
| 1636.7 | 1265.7 | 1469.7 | 1293.1 | 457.2  | 3496.4 | 3337.8 | 396.9  | 531.9  |
| 7.1    | 14.0   | 26.4   | 17.2   | 10.4   | 194.1  | 138.4  | 23.3   | 35.0   |
| 1891.4 | 1941.3 | 1717.7 | 1711.1 | 701.5  | 1152.2 | 762.5  | 386.5  | 497.7  |
| 46.1   | 47.3   | 32.2   | 4.5    | 22.0   | 70.6   | 30.0   | 37.3   | 41.6   |
| 444.8  | 582.2  | 551.4  | 568.6  | 184.6  | 823.0  | 628.8  | 91.8   | 133.6  |
| 5.4    | 6.2    | 3.2    | 2.6    | 3.1    | 7.2    | 7.0    | 0.9    | 1.4    |
| 128.7  | 143.5  | 202.0  | 104.8  | 77.1   | 172.9  | 104.7  | 223.9  | 217.0  |
| 135.9  | 130.9  | 207.8  | 106.4  | 89.6   | 229.3  | 125.6  | 277.0  | 298.6  |
| 5.4    | 5.1    | 7.0    | 2.4    | 4.4    | 32.4   | 38.5   | 2.6    | 2.6    |
| 30.1   | 6.9    | 18.8   | 22.4   | 4.6    | 15.7   | 8.0    | 11.0   | 25.8   |
| 187.9  | 174.3  | 147.4  | 129.8  | 30.0   | 301.8  | 263.1  | 89.0   | 161.7  |
| 428.0  | 569.5  | 445.6  | 281.8  | 156.4  | 1530.8 | 1691.3 | 113.3  | 131.8  |
| 53.3   | 51.2   | 53.3   | 46.1   | 30.8   | 38.4   | 5.9    | 60.2   | 90.2   |

|        |        |        |        |        |        |        |        |        |
|--------|--------|--------|--------|--------|--------|--------|--------|--------|
| 405.5  | 376.9  | 383.2  | 371.2  | 158.2  | 804.5  | 473.9  | 95.4   | 87.2   |
| 1321.0 | 1536.5 | 1399.0 | 965.1  | 514.4  | 1728.3 | 1264.1 | 124.5  | 198.4  |
| 125.1  | 89.9   | 112.8  | 121.0  | 30.2   | 272.9  | 140.3  | 129.4  | 171.3  |
| 167.1  | 157.9  | 187.4  | 198.0  | 59.8   | 354.1  | 261.0  | 208.1  | 262.3  |
| 415.3  | 288.0  | 299.9  | 138.7  | 66.9   | 231.0  | 65.8   | 151.4  | 219.2  |
| 169.2  | 96.0   | 117.5  | 62.6   | 37.3   | 167.5  | 72.2   | 112.5  | 151.5  |
| 2331.4 | 2278.5 | 2036.8 | 1790.7 | 795.3  | 1886.9 | 1432.7 | 236.7  | 332.6  |
| 836.9  | 703.6  | 749.2  | 609.0  | 278.4  | 2817.5 | 2314.5 | 311.5  | 522.9  |
| 358.6  | 221.4  | 310.3  | 406.0  | 76.4   | 271.4  | 166.3  | 226.7  | 301.1  |
| 61.0   | 27.9   | 65.5   | 22.2   | 23.6   | 56.8   | 31.6   | 97.1   | 37.5   |
| 806.6  | 925.4  | 896.4  | 1206.1 | 369.8  | 1185.3 | 792.4  | 606.8  | 786.9  |
| 6.0    | 5.0    | 2.7    | 13.3   | 2.1    | 10.8   | 12.8   | 0.8    | 14.1   |
| 2.3    | 11.0   | 5.1    | 15.3   | 1.7    | 181.6  | 130.5  | 5.4    | 10.0   |
| 84.3   | 50.6   | 70.4   | 50.1   | 19.8   | 125.5  | 124.8  | 73.2   | 90.3   |
| 146.5  | 136.9  | 198.3  | 165.7  | 41.7   | 257.7  | 173.4  | 71.5   | 102.4  |
| 3014.0 | 2905.5 | 2672.1 | 2220.1 | 1235.9 | 3830.7 | 3377.0 | 623.9  | 878.8  |
| 136.1  | 67.5   | 63.5   | 48.3   | 28.0   | 247.2  | 162.1  | 48.3   | 84.1   |
| 172.9  | 159.9  | 144.1  | 139.6  | 65.9   | 314.3  | 235.6  | 89.1   | 114.2  |
| 24.7   | 59.4   | 31.5   | 39.6   | 16.0   | 46.8   | 25.9   | 46.0   | 66.4   |
| 1113.0 | 1187.6 | 1135.3 | 966.4  | 335.4  | 1330.8 | 1096.2 | 430.4  | 642.9  |
| 428.3  | 394.3  | 386.4  | 279.3  | 96.6   | 947.1  | 677.1  | 117.0  | 207.7  |
| 91.2   | 92.1   | 51.0   | 66.5   | 44.9   | 943.9  | 814.2  | 542.4  | 672.2  |
| 123.0  | 97.3   | 94.3   | 42.8   | 33.8   | 275.3  | 161.5  | 46.1   | 64.9   |
| 1.9    | 13.7   | 1.4    | 2.5    | 3.0    | 158.8  | 46.6   | 9.7    | 3.6    |
| 1226.8 | 960.3  | 877.7  | 694.7  | 300.0  | 1338.3 | 1102.3 | 141.5  | 170.8  |
| 30.5   | 34.5   | 24.8   | 32.4   | 13.8   | 33.7   | 30.7   | 10.0   | 11.4   |
| 286.1  | 259.6  | 369.6  | 405.6  | 107.3  | 535.7  | 438.2  | 160.7  | 228.0  |
| 154.8  | 154.3  | 197.5  | 202.8  | 47.7   | 291.5  | 232.2  | 73.8   | 143.9  |
| 147.9  | 149.2  | 152.5  | 149.6  | 47.9   | 436.6  | 325.8  | 157.3  | 199.1  |
| 86.3   | 50.6   | 73.9   | 49.2   | 15.3   | 103.2  | 50.1   | 42.3   | 67.0   |
| 137.8  | 92.8   | 75.2   | 65.4   | 34.7   | 326.8  | 210.8  | 195.9  | 202.3  |
| 770.3  | 622.0  | 514.3  | 333.0  | 217.3  | 310.1  | 187.5  | 210.0  | 243.2  |
| 304.8  | 265.4  | 243.3  | 185.0  | 102.0  | 1212.6 | 1021.4 | 123.1  | 170.8  |
| 265.3  | 236.5  | 238.0  | 140.3  | 59.2   | 933.7  | 638.1  | 368.4  | 359.6  |
| 86.3   | 68.0   | 81.5   | 98.1   | 26.2   | 398.0  | 298.2  | 277.7  | 341.3  |
| 214.1  | 258.0  | 265.4  | 359.6  | 88.7   | 978.5  | 745.4  | 420.8  | 628.1  |
| 883.8  | 816.9  | 872.0  | 796.3  | 205.1  | 2264.1 | 1492.4 | 133.9  | 296.9  |
| 134.3  | 135.1  | 123.7  | 119.7  | 59.3   | 112.7  | 102.7  | 49.4   | 38.8   |
| 179.2  | 139.3  | 190.7  | 153.3  | 50.4   | 73.1   | 38.4   | 70.8   | 93.0   |
| 72.4   | 73.3   | 68.8   | 66.7   | 33.6   | 59.9   | 39.3   | 11.0   | 27.0   |
| 519.0  | 523.2  | 504.6  | 618.2  | 248.2  | 378.1  | 221.7  | 77.9   | 98.0   |
| 31.0   | 29.2   | 20.4   | 26.4   | 18.5   | 43.5   | 24.7   | 27.4   | 25.3   |
| 78.0   | 108.0  | 93.3   | 112.3  | 25.8   | 4973.4 | 4058.3 | 437.9  | 567.2  |
| 2576.3 | 2520.1 | 2231.3 | 1590.0 | 630.6  | 2983.0 | 1987.2 | 362.8  | 509.0  |
| 3380.1 | 2454.8 | 2943.8 | 2697.4 | 1154.1 | 570.1  | 459.0  | 1132.6 | 1285.7 |
| 621.1  | 645.9  | 398.7  | 100.7  | 151.4  | 2193.4 | 1484.3 | 18.1   | 24.3   |
| 125.1  | 160.9  | 94.1   | 40.4   | 32.4   | 297.7  | 220.7  | 8.0    | 10.5   |
| 204.3  | 118.3  | 183.0  | 255.7  | 69.2   | 371.0  | 294.1  | 95.8   | 116.2  |
| 196.5  | 210.5  | 282.5  | 400.0  | 78.1   | 436.5  | 301.4  | 74.3   | 112.6  |
| 189.0  | 72.2   | 108.7  | 120.2  | 31.9   | 512.3  | 272.0  | 106.2  | 125.6  |
| 384.1  | 373.4  | 340.4  | 182.1  | 117.5  | 315.4  | 209.9  | 94.2   | 103.6  |
| 621.4  | 850.8  | 528.3  | 404.2  | 313.3  | 84.0   | 59.4   | 126.2  | 125.1  |
| 903.9  | 1194.6 | 881.0  | 644.4  | 445.1  | 154.9  | 106.0  | 89.0   | 171.3  |

|        |        |        |        |        |        |        |       |       |
|--------|--------|--------|--------|--------|--------|--------|-------|-------|
| 15.8   | 12.9   | 19.7   | 25.3   | 10.2   | 433.1  | 405.5  | 4.5   | 28.8  |
| 412.5  | 371.1  | 459.9  | 403.0  | 183.4  | 467.7  | 256.9  | 105.6 | 109.7 |
| 2.0    | 10.2   | 4.9    | 1.6    | 0.9    | 1.6    | 0.8    | 14.3  | 11.3  |
| 328.3  | 347.4  | 289.8  | 191.5  | 101.7  | 361.4  | 344.7  | 367.0 | 475.8 |
| 267.2  | 219.4  | 227.3  | 196.1  | 100.1  | 683.3  | 454.3  | 145.9 | 191.4 |
| 205.1  | 202.9  | 266.8  | 172.3  | 65.3   | 273.5  | 194.8  | 107.9 | 154.0 |
| 366.5  | 299.3  | 370.0  | 397.9  | 58.5   | 179.7  | 74.9   | 110.2 | 134.6 |
| 1684.7 | 1502.4 | 1719.9 | 1925.4 | 596.5  | 1387.3 | 894.0  | 240.8 | 323.8 |
| 25.1   | 25.5   | 25.6   | 18.0   | 10.5   | 53.9   | 57.2   | 0.6   | 0.9   |
| 61.1   | 95.8   | 69.8   | 65.7   | 26.0   | 199.0  | 126.6  | 3.3   | 3.8   |
| 11.9   | 1.8    | 5.7    | 5.1    | 3.4    | 682.2  | 522.7  | 1.4   | 11.2  |
| 365.6  | 261.9  | 309.2  | 327.6  | 136.5  | 610.9  | 425.8  | 151.4 | 147.0 |
| 694.9  | 714.2  | 882.7  | 963.4  | 348.1  | 1439.7 | 1412.8 | 209.6 | 259.2 |
| 430.6  | 399.2  | 371.4  | 471.7  | 133.5  | 557.7  | 396.5  | 186.0 | 156.4 |
| 608.7  | 498.3  | 547.0  | 560.0  | 193.2  | 530.6  | 335.5  | 155.1 | 188.3 |
| 290.2  | 309.4  | 296.0  | 258.0  | 127.8  | 660.5  | 402.6  | 25.1  | 47.1  |
| 73.9   | 74.8   | 63.8   | 47.3   | 29.8   | 160.2  | 82.9   | 21.4  | 42.0  |
| 22.3   | 12.0   | 10.9   | 12.6   | 3.5    | 28.0   | 22.1   | 84.6  | 89.3  |
| 11.7   | 17.6   | 8.1    | 13.4   | 1.4    | 7.8    | 8.3    | 48.8  | 57.1  |
| 25.9   | 39.4   | 21.3   | 8.6    | 13.4   | 23.2   | 5.0    | 58.3  | 65.8  |
| 419.8  | 415.1  | 371.3  | 430.5  | 119.4  | 1331.4 | 742.3  | 269.5 | 369.6 |
| 207.7  | 200.9  | 192.7  | 315.6  | 99.7   | 686.2  | 524.2  | 122.6 | 159.2 |
| 522.3  | 544.4  | 615.0  | 569.6  | 162.5  | 1690.6 | 1044.3 | 177.1 | 220.3 |
| 289.2  | 296.9  | 325.5  | 291.9  | 96.5   | 1456.5 | 1097.6 | 80.6  | 126.8 |
| 575.0  | 439.5  | 287.1  | 195.1  | 94.2   | 713.0  | 401.0  | 338.8 | 379.0 |
| 301.7  | 234.0  | 145.1  | 85.4   | 62.5   | 321.2  | 193.7  | 107.6 | 133.8 |
| 665.7  | 767.9  | 669.4  | 407.0  | 313.6  | 1096.7 | 861.5  | 135.7 | 202.7 |
| 192.0  | 231.1  | 211.1  | 152.7  | 80.9   | 350.8  | 312.7  | 148.6 | 178.7 |
| 69.6   | 80.8   | 96.1   | 132.0  | 27.7   | 147.4  | 86.4   | 48.5  | 77.9  |
| 139.0  | 125.7  | 132.3  | 152.3  | 37.8   | 308.4  | 169.1  | 127.0 | 165.7 |
| 248.8  | 285.1  | 271.8  | 392.6  | 98.6   | 750.6  | 495.6  | 107.5 | 157.2 |
| 125.1  | 125.5  | 137.7  | 199.3  | 58.3   | 236.3  | 198.3  | 82.6  | 111.1 |
| 11.5   | 4.8    | 19.1   | 14.2   | 9.0    | 6.8    | 1.6    | 7.7   | 10.7  |
| 52.9   | 25.9   | 50.8   | 30.9   | 19.3   | 115.5  | 128.5  | 125.4 | 118.8 |
| 7.4    | 7.8    | 4.5    | 0.7    | 2.8    | 15.4   | 23.8   | 9.2   | 42.6  |
| 755.0  | 626.7  | 485.7  | 392.6  | 225.0  | 1922.3 | 1245.6 | 299.3 | 412.7 |
| 93.9   | 67.3   | 83.3   | 52.6   | 26.6   | 128.3  | 147.0  | 211.6 | 275.2 |
| 301.2  | 298.7  | 239.1  | 171.9  | 100.7  | 507.8  | 337.2  | 114.1 | 88.5  |
| 89.5   | 119.1  | 128.3  | 92.9   | 32.9   | 129.0  | 105.4  | 35.5  | 34.8  |
| 794.6  | 721.7  | 810.5  | 746.0  | 281.2  | 1497.8 | 1159.1 | 70.6  | 102.1 |
| 2914.4 | 2774.2 | 2982.7 | 1563.0 | 1072.5 | 5637.8 | 2927.0 | 285.8 | 332.5 |
| 3244.4 | 3183.4 | 2798.9 | 2211.9 | 1252.4 | 8698.4 | 7165.9 | 567.3 | 789.4 |
| 1820.6 | 1646.0 | 1630.3 | 1443.5 | 650.5  | 2251.7 | 1603.3 | 559.4 | 656.2 |
| 24.2   | 3.4    | 20.3   | 7.3    | 0.6    | 14.9   | 1.2    | 22.6  | 17.3  |
| 468.0  | 452.1  | 411.4  | 337.4  | 146.9  | 744.3  | 541.2  | 194.7 | 249.6 |
| 157.8  | 123.1  | 109.6  | 110.3  | 41.5   | 196.2  | 130.5  | 142.6 | 132.4 |
| 659.7  | 570.9  | 451.8  | 304.3  | 232.7  | 129.6  | 248.4  | 55.7  | 80.2  |
| 4609.0 | 3997.4 | 4264.5 | 3621.4 | 1593.6 | 2919.1 | 2587.9 | 543.4 | 654.1 |
| 1032.7 | 912.4  | 999.0  | 977.0  | 289.8  | 867.4  | 656.7  | 171.0 | 236.0 |
| 891.4  | 839.7  | 936.4  | 947.9  | 317.2  | 851.0  | 558.7  | 227.8 | 302.7 |
| 218.7  | 230.9  | 246.0  | 251.1  | 111.7  | 586.1  | 449.5  | 355.3 | 439.7 |
| 486.8  | 358.6  | 371.6  | 393.9  | 122.3  | 1639.6 | 1430.3 | 374.9 | 470.9 |
| 17.9   | 27.0   | 9.9    | 21.4   | 7.2    | 29.4   | 32.8   | 7.3   | 30.2  |

|        |        |        |        |        |        |        |       |       |
|--------|--------|--------|--------|--------|--------|--------|-------|-------|
| 825.5  | 655.5  | 665.9  | 565.1  | 229.4  | 1113.9 | 748.2  | 667.2 | 805.6 |
| 20.3   | 5.9    | 3.9    | 0.9    | 4.5    | 107.9  | 76.9   | 78.0  | 110.1 |
| 23.9   | 40.7   | 30.7   | 9.1    | 13.8   | 64.1   | 37.7   | 45.4  | 54.7  |
| 44.5   | 55.1   | 40.1   | 17.2   | 15.9   | 110.5  | 71.2   | 118.9 | 156.3 |
| 3.7    | 2.3    | 10.2   | 1.9    | 1.3    | 17.0   | 21.3   | 37.1  | 54.0  |
| 71.4   | 70.0   | 64.8   | 51.0   | 17.3   | 386.2  | 244.1  | 114.3 | 182.6 |
| 2.1    | 14.6   | 11.6   | 1.0    | 8.6    | 19.3   | 8.9    | 4.9   | 14.7  |
| 28.5   | 43.3   | 31.9   | 28.9   | 14.4   | 225.8  | 136.7  | 102.9 | 101.9 |
| 32.7   | 40.0   | 33.2   | 31.4   | 11.9   | 188.4  | 114.4  | 221.1 | 266.8 |
| 1140.0 | 860.1  | 960.7  | 847.4  | 273.4  | 1670.3 | 1173.1 | 338.5 | 413.7 |
| 433.5  | 391.4  | 418.4  | 401.2  | 192.8  | 575.0  | 437.2  | 60.5  | 96.6  |
| 135.3  | 120.7  | 109.3  | 157.9  | 40.4   | 560.9  | 285.1  | 77.1  | 86.8  |
| 51.9   | 42.9   | 48.7   | 27.9   | 15.1   | 98.3   | 62.8   | 27.5  | 25.4  |
| 321.8  | 302.4  | 318.3  | 367.3  | 138.1  | 1329.9 | 980.5  | 127.4 | 171.5 |
| 218.2  | 163.3  | 203.9  | 189.4  | 63.9   | 335.2  | 263.9  | 172.7 | 220.8 |
| 278.9  | 230.6  | 253.9  | 317.6  | 69.6   | 207.8  | 160.6  | 142.7 | 174.8 |
| 586.0  | 621.7  | 641.6  | 682.8  | 226.4  | 340.9  | 290.2  | 406.1 | 384.5 |
| 727.0  | 636.4  | 811.4  | 699.7  | 373.3  | 3565.3 | 2818.3 | 180.9 | 263.3 |
| 772.8  | 768.4  | 738.5  | 681.4  | 243.5  | 1087.7 | 845.5  | 55.5  | 65.2  |
| 2249.9 | 2133.4 | 2132.2 | 2079.2 | 818.8  | 4982.3 | 3692.7 | 397.6 | 459.6 |
| 1664.5 | 1557.1 | 1326.5 | 903.9  | 556.4  | 1742.3 | 1451.7 | 613.3 | 712.6 |
| 140.0  | 159.8  | 178.3  | 182.7  | 53.0   | 704.4  | 602.7  | 83.2  | 89.5  |
| 98.0   | 99.3   | 146.3  | 327.1  | 56.9   | 783.6  | 763.2  | 18.4  | 12.8  |
| 106.8  | 108.9  | 117.0  | 290.2  | 41.9   | 508.2  | 359.4  | 17.2  | 22.9  |
| 88.1   | 111.2  | 92.0   | 63.8   | 27.1   | 93.2   | 63.3   | 52.6  | 56.2  |
| 398.2  | 422.6  | 368.9  | 249.4  | 121.5  | 573.8  | 477.0  | 90.7  | 117.3 |
| 167.2  | 214.6  | 165.2  | 101.8  | 42.7   | 221.2  | 209.8  | 55.3  | 109.0 |
| 1679.5 | 1533.2 | 1364.1 | 651.8  | 467.9  | 1140.6 | 693.2  | 210.7 | 284.5 |
| 1070.4 | 941.3  | 915.9  | 735.4  | 283.5  | 2777.7 | 1952.2 | 747.0 | 895.7 |
| 84.5   | 86.3   | 94.4   | 123.6  | 36.8   | 278.9  | 211.7  | 146.3 | 170.4 |
| 300.3  | 229.3  | 273.0  | 236.7  | 80.2   | 713.7  | 517.8  | 256.0 | 215.6 |
| 713.1  | 574.7  | 679.8  | 436.9  | 197.1  | 971.4  | 667.8  | 137.5 | 277.8 |
| 144.7  | 143.4  | 116.9  | 119.9  | 38.6   | 427.7  | 350.7  | 43.2  | 47.0  |
| 104.8  | 110.4  | 114.2  | 117.4  | 50.8   | 205.5  | 122.6  | 7.6   | 10.0  |
| 301.6  | 268.2  | 254.7  | 199.9  | 88.6   | 443.9  | 334.3  | 164.8 | 173.0 |
| 2316.6 | 1940.9 | 1859.4 | 1100.2 | 836.0  | 3584.3 | 2430.7 | 664.9 | 816.6 |
| 502.1  | 485.0  | 651.3  | 1100.4 | 185.6  | 1725.6 | 1460.2 | 79.9  | 124.3 |
| 99.5   | 84.7   | 86.4   | 58.3   | 23.9   | 394.4  | 202.7  | 76.5  | 130.1 |
| 204.4  | 195.2  | 221.2  | 141.4  | 57.1   | 674.1  | 350.7  | 144.9 | 225.4 |
| 76.1   | 44.3   | 43.2   | 30.9   | 7.3    | 100.8  | 56.0   | 88.3  | 132.4 |
| 72.1   | 90.0   | 64.5   | 52.1   | 24.0   | 212.7  | 137.4  | 73.0  | 132.1 |
| 749.5  | 708.3  | 691.4  | 805.8  | 270.4  | 2197.2 | 1745.8 | 231.8 | 327.6 |
| 27.4   | 27.8   | 27.8   | 25.2   | 13.2   | 205.3  | 112.6  | 26.3  | 37.2  |
| 3614.7 | 3592.2 | 3546.8 | 3358.0 | 1349.7 | 3410.9 | 1984.9 | 663.3 | 786.0 |
| 4820.7 | 4341.3 | 4261.5 | 3938.1 | 2140.7 | 5944.7 | 4383.1 | 902.5 | 918.1 |
| 833.2  | 842.9  | 1052.2 | 1300.5 | 431.0  | 898.5  | 637.5  | 48.0  | 56.3  |
| 662.0  | 577.1  | 715.5  | 554.7  | 224.7  | 1592.9 | 1136.9 | 190.9 | 202.4 |
| 1703.1 | 1311.5 | 1159.5 | 831.3  | 422.7  | 1489.9 | 1083.4 | 412.6 | 559.3 |
| 54.5   | 49.5   | 31.4   | 23.7   | 9.2    | 1264.2 | 1421.7 | 120.0 | 184.8 |
| 171.3  | 165.1  | 137.5  | 86.2   | 49.9   | 2253.5 | 1883.7 | 356.9 | 490.7 |
| 883.8  | 775.5  | 870.8  | 650.7  | 330.8  | 1355.7 | 700.5  | 110.6 | 151.1 |
| 1207.8 | 979.3  | 1072.5 | 767.8  | 440.6  | 1833.4 | 1495.1 | 66.3  | 112.5 |
| 1124.1 | 1141.7 | 1122.8 | 1001.9 | 438.1  | 4204.3 | 3332.6 | 235.8 | 352.9 |

|        |        |        |        |        |        |        |       |        |
|--------|--------|--------|--------|--------|--------|--------|-------|--------|
| 320.6  | 322.9  | 300.4  | 404.3  | 172.2  | 503.9  | 390.9  | 164.3 | 199.0  |
| 39.8   | 31.8   | 21.2   | 18.4   | 3.4    | 28.2   | 21.8   | 13.7  | 16.3   |
| 2.1    | 1.6    | 1.4    | 2.5    | 0.7    | 1.3    | 2.6    | 2.1   | 0.8    |
| 115.2  | 85.8   | 115.5  | 79.7   | 44.4   | 209.2  | 199.2  | 15.3  | 51.9   |
| 153.9  | 148.6  | 122.0  | 118.0  | 55.1   | 487.0  | 358.8  | 35.2  | 66.5   |
| 52.0   | 66.5   | 69.1   | 78.8   | 15.6   | 62.1   | 13.3   | 24.7  | 18.4   |
| 78.2   | 78.9   | 61.6   | 79.7   | 14.6   | 47.3   | 38.9   | 48.6  | 54.3   |
| 126.3  | 150.6  | 153.2  | 116.1  | 43.2   | 283.6  | 180.8  | 186.0 | 291.8  |
| 134.5  | 122.2  | 172.4  | 191.1  | 45.8   | 131.1  | 67.3   | 80.5  | 143.6  |
| 56.0   | 69.4   | 78.6   | 114.3  | 23.2   | 115.8  | 65.3   | 68.2  | 88.5   |
| 3090.6 | 2714.5 | 2825.7 | 2110.7 | 911.8  | 953.3  | 739.0  | 589.6 | 916.2  |
| 185.1  | 186.6  | 166.3  | 218.2  | 69.8   | 222.4  | 149.9  | 28.8  | 43.6   |
| 321.5  | 312.7  | 274.2  | 169.2  | 143.4  | 721.3  | 567.9  | 64.8  | 93.6   |
| 90.0   | 82.4   | 69.7   | 46.3   | 24.8   | 135.8  | 96.0   | 36.8  | 63.4   |
| 1454.2 | 1433.3 | 1240.4 | 1000.3 | 470.1  | 1430.8 | 774.3  | 174.9 | 239.0  |
| 213.5  | 131.2  | 122.1  | 63.8   | 22.1   | 476.9  | 179.8  | 113.6 | 148.7  |
| 570.2  | 555.7  | 495.6  | 357.9  | 172.1  | 1246.9 | 776.7  | 211.6 | 372.7  |
| 2474.0 | 2507.1 | 2409.5 | 2538.8 | 1129.7 | 3682.5 | 2839.7 | 736.8 | 844.0  |
| 13.9   | 25.7   | 14.4   | 8.8    | 6.4    | 35.2   | 31.5   | 35.3  | 26.4   |
| 407.0  | 347.5  | 433.0  | 662.1  | 243.3  | 678.3  | 528.0  | 34.7  | 42.8   |
| 159.9  | 158.1  | 166.8  | 286.4  | 62.7   | 727.0  | 484.5  | 123.7 | 143.1  |
| 66.8   | 61.1   | 62.3   | 51.1   | 24.1   | 90.6   | 48.2   | 25.5  | 38.1   |
| 194.0  | 177.5  | 144.6  | 169.3  | 68.6   | 198.9  | 144.7  | 54.5  | 67.4   |
| 165.8  | 137.5  | 127.3  | 86.6   | 49.2   | 142.9  | 53.3   | 77.6  | 126.1  |
| 1058.5 | 839.0  | 849.1  | 638.7  | 352.0  | 499.3  | 314.5  | 72.9  | 61.1   |
| 13.0   | 9.1    | 9.7    | 16.0   | 8.0    | 34.0   | 21.4   | 7.1   | 0.8    |
| 7.1    | 16.8   | 20.4   | 12.6   | 7.9    | 14.2   | 1.7    | 6.5   | 3.7    |
| 451.7  | 130.3  | 171.5  | 120.8  | 79.9   | 2067.8 | 1498.4 | 36.4  | 45.7   |
| 137.8  | 109.5  | 132.8  | 135.5  | 39.6   | 623.3  | 429.9  | 20.2  | 43.4   |
| 151.3  | 130.9  | 157.6  | 141.0  | 37.2   | 289.4  | 168.2  | 139.4 | 206.6  |
| 253.2  | 146.9  | 192.0  | 155.7  | 49.5   | 487.8  | 296.1  | 69.0  | 116.5  |
| 460.4  | 400.8  | 436.0  | 373.4  | 148.9  | 808.2  | 487.2  | 104.8 | 141.5  |
| 162.9  | 153.9  | 158.9  | 140.6  | 48.1   | 145.0  | 97.0   | 85.8  | 103.2  |
| 337.6  | 321.0  | 322.3  | 298.3  | 137.7  | 363.1  | 327.1  | 105.1 | 167.6  |
| 149.1  | 137.6  | 143.0  | 118.3  | 62.2   | 142.6  | 102.1  | 45.3  | 73.7   |
| 1893.8 | 1503.2 | 1630.9 | 1431.2 | 825.1  | 2775.9 | 2655.9 | 402.3 | 471.8  |
| 198.7  | 146.3  | 160.3  | 158.9  | 51.1   | 148.6  | 128.6  | 127.4 | 193.6  |
| 788.3  | 781.4  | 804.1  | 1558.3 | 417.8  | 1992.3 | 1916.9 | 285.4 | 319.7  |
| 4990.9 | 4726.6 | 4412.7 | 4462.5 | 2009.0 | 3555.9 | 2476.1 | 904.4 | 988.3  |
| 269.7  | 204.6  | 185.9  | 197.4  | 88.0   | 806.5  | 675.4  | 61.4  | 74.6   |
| 88.3   | 22.0   | 29.2   | 27.8   | 10.9   | 59.5   | 39.5   | 16.1  | 22.4   |
| 331.0  | 327.1  | 338.2  | 378.2  | 113.3  | 533.1  | 353.7  | 58.0  | 79.6   |
| 50.1   | 43.2   | 41.1   | 15.9   | 5.1    | 121.3  | 118.7  | 78.9  | 76.0   |
| 854.2  | 816.5  | 892.5  | 717.1  | 304.1  | 2557.1 | 1981.1 | 499.4 | 623.4  |
| 215.6  | 189.7  | 171.2  | 158.1  | 65.1   | 392.1  | 268.5  | 173.8 | 181.4  |
| 1416.1 | 1361.7 | 1399.7 | 1140.2 | 545.2  | 3491.7 | 3000.9 | 440.6 | 521.7  |
| 71.6   | 37.2   | 27.4   | 39.0   | 14.5   | 18.3   | 4.0    | 15.3  | 33.1   |
| 348.8  | 388.4  | 352.0  | 252.9  | 151.4  | 390.9  | 291.3  | 86.9  | 96.1   |
| 1230.0 | 978.8  | 960.9  | 519.6  | 271.6  | 1200.4 | 774.4  | 741.0 | 1026.2 |
| 29.9   | 7.2    | 24.3   | 15.9   | 1.8    | 1256.8 | 1215.9 | 186.2 | 206.2  |
| 1161.6 | 1249.9 | 1218.9 | 1339.0 | 456.8  | 934.6  | 760.2  | 90.9  | 141.5  |
| 1.9    | 2.5    | 0.3    | 1.2    | 3.7    | 412.3  | 233.5  | 4.8   | 0.4    |
| 4.9    | 1.2    | 6.3    | 1.8    | 4.1    | 117.0  | 47.9   | 12.0  | 15.8   |

|        |        |        |        |        |        |        |        |        |
|--------|--------|--------|--------|--------|--------|--------|--------|--------|
| 125.2  | 94.6   | 119.6  | 73.1   | 58.9   | 240.7  | 163.6  | 52.7   | 40.8   |
| 336.1  | 321.1  | 346.2  | 418.5  | 101.1  | 494.4  | 306.7  | 123.7  | 251.0  |
| 617.0  | 651.3  | 744.7  | 888.8  | 252.1  | 1722.2 | 1206.2 | 181.6  | 323.1  |
| 122.0  | 128.0  | 102.3  | 71.4   | 31.0   | 588.6  | 366.7  | 98.2   | 116.0  |
| 106.1  | 112.6  | 104.9  | 91.6   | 38.4   | 313.3  | 194.1  | 36.0   | 46.2   |
| 67.6   | 71.4   | 115.4  | 694.5  | 49.8   | 702.7  | 431.3  | 34.4   | 19.8   |
| 2.2    | 3.6    | 3.9    | 5.4    | 1.9    | 9.8    | 1.1    | 2.8    | 1.3    |
| 930.1  | 966.5  | 768.2  | 590.3  | 262.2  | 1022.5 | 757.2  | 356.9  | 413.9  |
| 132.4  | 130.5  | 91.7   | 70.3   | 25.3   | 432.2  | 308.2  | 271.0  | 334.7  |
| 1.3    | 0.8    | 1.4    | 1.0    | 0.6    | 1.2    | 1.0    | 1.5    | 2.2    |
| 200.8  | 201.2  | 183.5  | 105.5  | 38.8   | 50.1   | 45.4   | 83.9   | 90.6   |
| 572.0  | 673.5  | 521.3  | 292.8  | 162.1  | 374.0  | 306.1  | 108.6  | 151.2  |
| 3576.5 | 3574.8 | 3763.7 | 5181.3 | 1754.8 | 3578.4 | 2138.1 | 823.4  | 1151.3 |
| 53.2   | 38.8   | 38.7   | 24.5   | 23.8   | 85.7   | 48.3   | 2.5    | 16.6   |
| 1087.0 | 1111.9 | 721.0  | 352.0  | 365.3  | 59.5   | 56.0   | 134.1  | 165.8  |
| 757.2  | 525.9  | 592.1  | 456.5  | 208.2  | 384.3  | 226.0  | 266.4  | 389.9  |
| 131.4  | 109.2  | 109.5  | 84.6   | 50.7   | 209.8  | 167.4  | 112.1  | 87.9   |
| 895.6  | 930.6  | 932.0  | 685.8  | 320.4  | 1277.4 | 847.9  | 105.5  | 135.0  |
| 161.9  | 154.6  | 172.5  | 126.9  | 38.9   | 521.0  | 368.3  | 120.3  | 148.0  |
| 162.7  | 93.5   | 112.0  | 83.2   | 49.3   | 462.8  | 375.8  | 91.1   | 156.7  |
| 7246.8 | 6588.2 | 5976.7 | 5471.9 | 3354.9 | 7616.6 | 5851.8 | 1878.4 | 2160.4 |
| 147.2  | 116.2  | 123.3  | 105.5  | 57.6   | 303.7  | 173.8  | 84.1   | 83.3   |
| 365.0  | 348.0  | 350.9  | 268.5  | 159.5  | 616.4  | 522.1  | 383.0  | 416.1  |
| 108.5  | 96.1   | 86.1   | 84.7   | 29.6   | 222.6  | 131.6  | 49.2   | 53.1   |
| 456.9  | 573.5  | 583.3  | 791.8  | 143.0  | 501.2  | 571.3  | 102.7  | 157.8  |
| 202.9  | 200.8  | 216.4  | 387.2  | 58.2   | 215.0  | 163.9  | 17.7   | 15.6   |
| 9.5    | 18.7   | 8.2    | 2.6    | 3.9    | 26.8   | 16.5   | 1.2    | 2.5    |
| 15.2   | 14.7   | 13.4   | 3.7    | 4.5    | 69.3   | 111.1  | 12.6   | 2.5    |
| 88.3   | 61.1   | 36.6   | 24.5   | 19.8   | 290.8  | 153.9  | 14.9   | 17.5   |
| 625.4  | 677.4  | 678.3  | 607.1  | 267.3  | 1347.2 | 935.9  | 114.9  | 168.0  |
| 40.2   | 54.6   | 35.1   | 27.8   | 10.8   | 117.0  | 89.9   | 68.1   | 80.7   |
| 191.5  | 131.7  | 130.8  | 115.1  | 50.0   | 388.2  | 263.0  | 31.6   | 56.9   |
| 563.3  | 490.1  | 485.1  | 432.9  | 247.5  | 690.9  | 453.3  | 446.2  | 527.2  |
| 685.5  | 643.8  | 672.9  | 513.6  | 244.1  | 1310.2 | 958.3  | 94.3   | 116.1  |
| 1042.1 | 880.3  | 815.8  | 714.6  | 260.9  | 1288.8 | 870.7  | 161.7  | 283.6  |
| 23.1   | 8.3    | 4.9    | 17.7   | 1.4    | 46.2   | 20.0   | 2.0    | 32.3   |
| 41.1   | 42.7   | 37.7   | 23.0   | 11.0   | 39.9   | 28.7   | 65.4   | 53.8   |
| 26.3   | 21.8   | 10.9   | 7.6    | 6.0    | 5.8    | 14.4   | 22.9   | 40.1   |
| 272.0  | 227.1  | 159.1  | 170.0  | 62.9   | 882.8  | 591.0  | 141.2  | 143.9  |
| 72.1   | 62.9   | 27.5   | 61.0   | 20.0   | 243.3  | 194.6  | 43.3   | 80.9   |
| 247.2  | 262.3  | 231.5  | 240.1  | 100.7  | 279.1  | 164.6  | 38.8   | 42.9   |
| 234.9  | 232.8  | 237.2  | 229.3  | 59.8   | 242.3  | 150.7  | 39.5   | 69.9   |
| 280.4  | 325.0  | 286.8  | 282.2  | 114.0  | 235.1  | 182.5  | 59.3   | 55.6   |
| 493.4  | 491.5  | 405.3  | 405.7  | 190.4  | 1033.2 | 922.1  | 60.2   | 75.9   |
| 432.9  | 545.2  | 718.7  | 361.8  | 200.3  | 449.0  | 395.3  | 156.4  | 210.8  |
| 260.2  | 262.9  | 258.8  | 148.4  | 120.7  | 361.1  | 273.6  | 104.7  | 111.7  |
| 237.7  | 239.5  | 235.7  | 231.8  | 93.7   | 318.5  | 279.7  | 84.8   | 125.4  |
| 206.4  | 179.6  | 172.9  | 161.0  | 57.7   | 215.6  | 178.6  | 35.3   | 61.0   |
| 48.5   | 44.4   | 36.1   | 39.9   | 18.7   | 77.0   | 68.7   | 11.5   | 17.3   |
| 267.4  | 217.1  | 250.7  | 228.3  | 79.6   | 261.6  | 154.7  | 100.2  | 156.7  |
| 271.2  | 222.7  | 258.0  | 229.4  | 94.8   | 667.7  | 671.2  | 254.2  | 370.0  |
| 729.8  | 714.8  | 725.5  | 743.7  | 207.4  | 1390.4 | 868.9  | 64.7   | 103.0  |
| 230.9  | 200.1  | 215.4  | 217.5  | 59.3   | 520.0  | 531.9  | 249.9  | 339.2  |

|        |        |        |        |        |        |        |       |       |
|--------|--------|--------|--------|--------|--------|--------|-------|-------|
| 35.4   | 23.0   | 31.0   | 15.4   | 7.3    | 89.6   | 57.6   | 61.0  | 95.3  |
| 17.9   | 12.5   | 16.1   | 8.3    | 0.7    | 12.1   | 5.8    | 10.1  | 11.3  |
| 70.8   | 38.8   | 58.4   | 34.6   | 19.4   | 40.3   | 50.3   | 64.3  | 118.6 |
| 193.7  | 170.5  | 149.7  | 165.2  | 39.2   | 142.8  | 54.9   | 62.6  | 83.7  |
| 759.8  | 684.0  | 809.5  | 730.7  | 249.0  | 1011.6 | 645.6  | 87.9  | 110.3 |
| 40.9   | 41.8   | 74.7   | 52.7   | 17.0   | 231.2  | 176.6  | 79.3  | 89.3  |
| 248.2  | 239.0  | 697.6  | 437.3  | 188.9  | 1458.7 | 1279.0 | 367.8 | 539.4 |
| 368.0  | 351.3  | 322.9  | 295.1  | 111.2  | 577.6  | 361.6  | 105.1 | 154.9 |
| 133.1  | 87.0   | 108.2  | 63.4   | 22.7   | 207.7  | 110.3  | 62.0  | 90.0  |
| 853.8  | 725.2  | 865.2  | 728.8  | 238.4  | 3763.9 | 2131.7 | 266.5 | 300.8 |
| 129.7  | 59.9   | 61.5   | 29.5   | 1.4    | 190.2  | 198.3  | 132.5 | 103.8 |
| 79.2   | 86.0   | 93.8   | 119.3  | 28.7   | 71.9   | 40.4   | 8.3   | 10.4  |
| 313.5  | 243.1  | 280.4  | 299.0  | 104.8  | 379.3  | 313.2  | 5.4   | 19.5  |
| 351.5  | 304.4  | 324.3  | 454.6  | 141.9  | 101.2  | 69.3   | 0.6   | 4.8   |
| 2119.9 | 1861.6 | 2162.1 | 1771.3 | 686.9  | 1409.7 | 906.8  | 192.9 | 210.7 |
| 3157.8 | 2830.2 | 2670.1 | 2052.1 | 1089.3 | 6863.4 | 5709.4 | 703.0 | 938.4 |
| 1105.4 | 1031.2 | 1045.3 | 852.3  | 394.0  | 1387.6 | 834.7  | 283.1 | 201.2 |
| 31.0   | 19.3   | 23.1   | 13.9   | 6.7    | 60.0   | 34.7   | 16.3  | 25.9  |
| 35.8   | 44.1   | 11.4   | 14.1   | 9.6    | 124.0  | 73.3   | 26.0  | 42.0  |
| 1520.9 | 1384.1 | 1767.1 | 1787.1 | 623.3  | 1534.2 | 1060.8 | 399.0 | 580.8 |
| 46.5   | 37.8   | 46.3   | 34.8   | 12.5   | 219.7  | 184.6  | 11.9  | 13.0  |
| 53.2   | 35.9   | 29.7   | 24.6   | 9.3    | 272.4  | 232.7  | 2.6   | 3.2   |
| 308.6  | 257.6  | 195.9  | 168.3  | 60.3   | 1070.5 | 898.9  | 40.1  | 44.1  |
| 26.3   | 25.2   | 21.4   | 12.9   | 10.3   | 811.3  | 717.2  | 117.0 | 188.5 |
| 11.8   | 13.1   | 2.5    | 17.9   | 8.1    | 235.8  | 173.5  | 2.0   | 12.8  |
| 504.7  | 386.4  | 706.6  | 941.2  | 172.4  | 976.8  | 790.5  | 84.4  | 102.0 |
| 997.0  | 975.4  | 1057.8 | 801.7  | 375.7  | 648.1  | 424.9  | 683.5 | 940.5 |
| 491.0  | 469.0  | 436.9  | 354.3  | 114.2  | 217.4  | 114.0  | 466.4 | 652.5 |
| 2233.7 | 2200.4 | 2001.1 | 1852.8 | 980.8  | 1535.4 | 1138.5 | 471.0 | 633.2 |
| 15.8   | 11.7   | 13.3   | 13.8   | 1.0    | 29.5   | 12.8   | 11.7  | 12.6  |
| 247.7  | 211.6  | 212.6  | 157.3  | 46.6   | 289.0  | 151.0  | 176.7 | 240.9 |
| 110.8  | 102.5  | 102.3  | 89.9   | 29.7   | 2009.9 | 1569.5 | 88.7  | 66.1  |
| 408.2  | 426.1  | 315.1  | 159.1  | 95.5   | 261.0  | 217.4  | 81.4  | 91.5  |
| 800.0  | 786.2  | 648.1  | 373.4  | 202.9  | 869.9  | 732.3  | 176.0 | 251.8 |
| 851.0  | 612.8  | 646.7  | 489.9  | 285.9  | 1362.0 | 1169.3 | 463.3 | 563.6 |
| 1132.0 | 1122.3 | 1071.1 | 970.1  | 282.6  | 554.1  | 358.3  | 130.3 | 153.4 |
| 123.8  | 107.3  | 125.4  | 101.3  | 45.0   | 251.2  | 128.9  | 79.2  | 99.9  |
| 4.7    | 10.6   | 5.0    | 5.7    | 3.8    | 56.8   | 30.8   | 28.5  | 92.9  |
| 369.0  | 343.8  | 430.6  | 436.7  | 121.3  | 1039.3 | 679.8  | 125.7 | 153.7 |
| 151.4  | 137.3  | 139.2  | 168.5  | 36.0   | 356.1  | 180.4  | 57.0  | 69.1  |
| 297.9  | 174.1  | 192.1  | 169.0  | 49.5   | 364.5  | 200.1  | 245.9 | 294.5 |
| 55.0   | 47.6   | 41.3   | 52.2   | 15.6   | 103.1  | 55.5   | 58.4  | 113.0 |
| 138.3  | 133.5  | 128.5  | 113.4  | 72.4   | 322.5  | 175.6  | 71.0  | 99.4  |
| 323.1  | 256.3  | 315.7  | 340.1  | 104.0  | 295.7  | 206.3  | 124.8 | 141.3 |
| 137.1  | 117.6  | 125.2  | 95.8   | 46.3   | 361.7  | 272.1  | 96.3  | 159.0 |
| 1465.9 | 1221.6 | 1078.0 | 601.4  | 405.9  | 2325.7 | 1137.6 | 492.1 | 575.0 |
| 385.1  | 302.6  | 311.0  | 239.3  | 124.4  | 1130.0 | 838.5  | 160.9 | 302.5 |
| 189.6  | 258.0  | 191.6  | 186.5  | 92.1   | 851.0  | 464.7  | 483.6 | 636.3 |
| 2365.8 | 2718.2 | 2345.3 | 1329.7 | 996.2  | 2436.8 | 2312.0 | 473.2 | 543.5 |
| 191.4  | 117.8  | 94.9   | 62.9   | 23.7   | 322.5  | 219.8  | 153.3 | 167.3 |
| 5.5    | 3.9    | 5.7    | 4.4    | 1.5    | 4.7    | 4.5    | 27.3  | 50.4  |
| 444.2  | 523.8  | 446.1  | 515.1  | 149.2  | 978.4  | 694.3  | 72.7  | 125.2 |
| 205.7  | 199.4  | 178.2  | 234.3  | 84.1   | 390.9  | 424.6  | 48.3  | 51.8  |

|        |        |        |        |       |        |        |       |       |
|--------|--------|--------|--------|-------|--------|--------|-------|-------|
| 392.5  | 305.9  | 329.7  | 207.6  | 83.7  | 378.0  | 243.1  | 63.7  | 76.7  |
| 214.3  | 171.8  | 173.5  | 207.5  | 82.5  | 522.4  | 324.5  | 242.6 | 353.6 |
| 574.1  | 500.6  | 490.6  | 340.2  | 198.0 | 1645.1 | 1063.7 | 388.1 | 527.0 |
| 68.1   | 52.7   | 52.8   | 51.9   | 18.3  | 383.0  | 260.3  | 186.0 | 302.2 |
| 176.1  | 136.7  | 137.1  | 111.0  | 48.5  | 1043.5 | 641.8  | 356.6 | 538.9 |
| 377.6  | 354.5  | 327.4  | 185.3  | 152.2 | 741.1  | 457.2  | 341.5 | 355.5 |
| 420.1  | 384.3  | 431.4  | 505.5  | 173.2 | 1057.4 | 751.9  | 441.5 | 454.3 |
| 175.7  | 157.1  | 146.6  | 147.6  | 75.3  | 367.6  | 326.0  | 141.4 | 185.7 |
| 113.9  | 90.4   | 115.4  | 104.5  | 42.5  | 211.2  | 118.0  | 339.2 | 509.9 |
| 210.9  | 69.3   | 68.0   | 57.0   | 21.9  | 169.0  | 165.0  | 70.8  | 60.4  |
| 301.0  | 324.5  | 311.3  | 221.3  | 124.8 | 362.0  | 208.8  | 111.7 | 116.6 |
| 561.7  | 539.0  | 395.0  | 255.5  | 147.3 | 368.1  | 242.1  | 64.1  | 114.0 |
| 167.5  | 214.7  | 192.6  | 148.9  | 67.7  | 106.8  | 86.2   | 21.6  | 31.1  |
| 210.0  | 174.6  | 190.4  | 147.2  | 60.3  | 237.7  | 195.2  | 103.3 | 152.5 |
| 178.2  | 205.3  | 235.1  | 315.2  | 59.8  | 303.1  | 219.1  | 58.4  | 152.5 |
| 468.1  | 490.8  | 546.6  | 808.1  | 173.7 | 999.1  | 681.1  | 189.9 | 207.0 |
| 131.1  | 217.8  | 218.9  | 335.8  | 76.5  | 391.4  | 377.0  | 21.7  | 51.8  |
| 99.9   | 92.2   | 119.6  | 84.0   | 30.2  | 248.8  | 144.6  | 18.3  | 16.9  |
| 406.6  | 456.6  | 587.8  | 424.5  | 226.0 | 1409.5 | 844.3  | 7.6   | 17.3  |
| 164.8  | 121.9  | 208.5  | 178.9  | 57.4  | 272.8  | 190.8  | 32.1  | 12.5  |
| 179.8  | 137.4  | 170.6  | 92.8   | 48.2  | 201.0  | 134.0  | 71.2  | 114.4 |
| 886.4  | 721.3  | 743.3  | 572.5  | 309.8 | 893.8  | 751.8  | 405.9 | 570.9 |
| 163.7  | 180.4  | 172.9  | 172.4  | 33.2  | 106.3  | 84.9   | 62.3  | 87.4  |
| 725.4  | 645.9  | 750.2  | 715.4  | 296.0 | 1528.1 | 1172.3 | 418.1 | 453.3 |
| 479.6  | 387.9  | 392.4  | 256.8  | 153.6 | 1061.8 | 529.4  | 116.7 | 133.5 |
| 159.8  | 151.4  | 156.1  | 238.4  | 106.7 | 269.9  | 146.7  | 67.2  | 69.5  |
| 1279.6 | 1139.7 | 1082.0 | 953.5  | 446.2 | 1499.9 | 872.9  | 168.0 | 248.5 |
| 688.8  | 730.4  | 735.1  | 687.8  | 287.8 | 662.5  | 429.3  | 80.9  | 171.6 |
| 822.1  | 777.2  | 824.7  | 728.8  | 275.0 | 818.8  | 554.1  | 154.9 | 149.6 |
| 1537.7 | 1484.3 | 1383.9 | 1213.2 | 649.4 | 2041.3 | 1587.3 | 196.5 | 235.9 |
| 285.6  | 240.9  | 193.3  | 93.5   | 55.3  | 1210.5 | 737.0  | 603.4 | 821.2 |
| 677.7  | 699.2  | 1267.5 | 1797.0 | 403.8 | 1428.2 | 1054.5 | 66.7  | 91.1  |
| 459.0  | 410.9  | 782.2  | 1145.1 | 264.5 | 778.4  | 627.3  | 44.1  | 59.9  |
| 594.6  | 519.8  | 583.4  | 567.4  | 266.5 | 318.6  | 179.9  | 346.1 | 377.7 |
| 11.0   | 3.8    | 4.2    | 8.0    | 2.6   | 171.5  | 149.8  | 28.9  | 31.2  |
| 17.5   | 14.1   | 20.4   | 7.3    | 10.4  | 108.1  | 30.0   | 30.5  | 39.1  |
| 147.2  | 152.0  | 121.5  | 57.1   | 60.0  | 166.0  | 110.6  | 87.4  | 144.1 |
| 105.4  | 101.2  | 136.9  | 87.9   | 40.4  | 367.5  | 372.1  | 105.3 | 95.0  |
| 382.4  | 278.3  | 321.4  | 241.6  | 138.7 | 629.4  | 356.4  | 152.4 | 151.7 |
| 1419.9 | 1433.3 | 1415.7 | 875.0  | 454.7 | 3389.7 | 2707.9 | 654.9 | 582.6 |
| 96.7   | 96.8   | 96.2   | 79.7   | 27.8  | 129.6  | 79.6   | 74.7  | 134.8 |
| 11.0   | 5.1    | 9.6    | 2.6    | 2.3   | 1.4    | 0.9    | 0.6   | 5.2   |
| 22.3   | 30.7   | 23.7   | 38.9   | 9.3   | 10.7   | 6.7    | 12.1  | 25.3  |
| 10.1   | 9.5    | 7.3    | 13.3   | 3.1   | 0.7    | 6.3    | 6.4   | 0.9   |
| 360.6  | 241.3  | 223.7  | 189.2  | 82.3  | 264.5  | 189.6  | 90.4  | 73.9  |
| 344.8  | 290.2  | 325.2  | 340.9  | 100.4 | 656.2  | 501.2  | 40.3  | 51.3  |
| 56.4   | 42.9   | 42.4   | 22.5   | 7.3   | 265.7  | 186.3  | 122.5 | 160.6 |
| 199.8  | 158.7  | 161.2  | 135.2  | 44.0  | 243.6  | 154.9  | 104.4 | 114.2 |
| 103.2  | 84.9   | 123.7  | 84.0   | 42.6  | 239.4  | 161.1  | 29.3  | 29.7  |
| 190.2  | 171.3  | 183.4  | 177.0  | 46.2  | 344.7  | 171.2  | 130.2 | 140.0 |
| 139.3  | 118.2  | 111.1  | 130.6  | 41.6  | 440.4  | 235.5  | 45.4  | 53.9  |
| 321.3  | 288.7  | 338.6  | 375.3  | 115.6 | 665.2  | 451.7  | 71.1  | 125.6 |
| 244.7  | 287.0  | 268.1  | 230.2  | 129.4 | 276.9  | 189.2  | 71.6  | 107.9 |



|        |        |        |        |       |        |        |       |       |
|--------|--------|--------|--------|-------|--------|--------|-------|-------|
| 1163.3 | 1238.3 | 1201.3 | 1145.1 | 504.2 | 765.8  | 475.7  | 122.4 | 137.8 |
| 953.4  | 957.5  | 960.5  | 857.2  | 250.7 | 1362.6 | 916.1  | 69.2  | 192.4 |
| 399.4  | 391.4  | 419.8  | 362.4  | 112.3 | 715.1  | 490.2  | 88.2  | 127.6 |
| 336.4  | 319.2  | 358.8  | 428.8  | 123.4 | 536.1  | 352.0  | 113.2 | 217.2 |
| 231.8  | 204.3  | 207.7  | 211.9  | 59.3  | 336.5  | 208.2  | 64.5  | 109.3 |
| 189.3  | 104.2  | 120.4  | 116.6  | 31.7  | 446.2  | 365.8  | 69.6  | 132.7 |
| 447.6  | 519.2  | 496.2  | 553.4  | 195.0 | 591.8  | 384.4  | 137.9 | 169.0 |
| 68.5   | 51.9   | 68.2   | 38.1   | 23.4  | 213.5  | 134.0  | 77.0  | 122.3 |
| 311.2  | 298.4  | 233.4  | 211.9  | 93.7  | 398.5  | 216.8  | 63.5  | 100.2 |
| 16.2   | 16.1   | 11.7   | 7.8    | 1.4   | 319.6  | 123.6  | 5.4   | 1.0   |
| 127.3  | 142.0  | 151.4  | 140.0  | 63.3  | 274.9  | 203.0  | 97.8  | 106.7 |
| 149.2  | 129.5  | 117.0  | 66.8   | 48.4  | 169.8  | 89.2   | 81.8  | 119.1 |
| 155.4  | 142.2  | 135.0  | 118.2  | 67.3  | 610.7  | 455.5  | 46.0  | 46.6  |
| 75.0   | 63.9   | 92.4   | 74.3   | 30.1  | 251.9  | 131.2  | 178.8 | 219.7 |
| 294.1  | 238.1  | 254.7  | 152.3  | 108.7 | 239.3  | 77.4   | 37.9  | 54.0  |
| 280.0  | 231.6  | 230.8  | 153.5  | 66.0  | 406.0  | 295.9  | 97.5  | 93.4  |
| 226.9  | 277.9  | 241.3  | 198.4  | 91.5  | 426.7  | 281.2  | 64.3  | 131.9 |
| 508.2  | 425.1  | 373.2  | 195.0  | 153.8 | 924.4  | 480.9  | 97.2  | 122.2 |
| 3.1    | 5.7    | 3.1    | 14.9   | 1.4   | 2.3    | 1.2    | 1.5   | 1.0   |
| 119.1  | 110.7  | 105.3  | 102.4  | 50.4  | 204.1  | 128.6  | 112.3 | 160.7 |
| 450.1  | 392.2  | 450.4  | 334.4  | 172.1 | 965.9  | 501.3  | 130.0 | 172.9 |
| 1611.2 | 1400.8 | 1655.9 | 1355.1 | 588.4 | 1935.1 | 1298.6 | 489.8 | 919.2 |
| 297.5  | 229.0  | 206.0  | 155.8  | 78.6  | 331.4  | 167.4  | 212.8 | 279.2 |
| 34.7   | 21.7   | 21.3   | 8.5    | 9.0   | 25.3   | 16.5   | 0.9   | 14.6  |
| 59.9   | 66.8   | 51.1   | 14.4   | 23.9  | 36.0   | 27.8   | 37.9  | 27.4  |
| 39.9   | 45.6   | 41.0   | 38.4   | 16.2  | 477.1  | 287.1  | 45.7  | 90.1  |
| 851.9  | 892.3  | 995.1  | 1085.9 | 250.1 | 1437.4 | 920.5  | 119.7 | 201.3 |
| 133.6  | 144.0  | 164.4  | 187.0  | 41.1  | 313.6  | 228.2  | 35.3  | 43.9  |
| 12.9   | 9.2    | 3.9    | 3.9    | 5.7   | 207.3  | 112.7  | 1.0   | 0.3   |
| 89.0   | 86.4   | 98.6   | 124.0  | 30.9  | 124.3  | 98.6   | 61.9  | 104.9 |
| 16.9   | 5.0    | 21.2   | 22.7   | 2.8   | 17.8   | 0.8    | 19.7  | 35.2  |
| 232.1  | 157.9  | 190.9  | 159.1  | 48.5  | 235.2  | 104.9  | 71.9  | 94.6  |
| 1242.4 | 1189.5 | 1158.8 | 1059.9 | 454.4 | 1975.1 | 1262.7 | 128.8 | 148.0 |
| 171.7  | 180.0  | 177.2  | 286.9  | 69.1  | 4206.9 | 3665.9 | 370.1 | 461.6 |
| 1.1    | 4.7    | 4.5    | 0.9    | 0.8   | 64.4   | 35.5   | 3.3   | 9.3   |
| 56.3   | 64.4   | 54.9   | 39.0   | 5.4   | 64.6   | 46.4   | 25.1  | 34.8  |
| 64.5   | 54.3   | 52.2   | 55.8   | 16.3  | 113.7  | 108.2  | 88.6  | 104.8 |
| 178.8  | 130.5  | 127.8  | 116.3  | 47.6  | 208.4  | 134.6  | 47.0  | 72.1  |
| 144.9  | 120.6  | 157.8  | 151.7  | 45.9  | 425.5  | 203.2  | 67.1  | 117.0 |
| 178.8  | 165.3  | 243.1  | 228.3  | 87.4  | 824.0  | 550.6  | 65.6  | 83.5  |
| 82.6   | 75.8   | 101.0  | 66.9   | 30.9  | 344.6  | 257.9  | 65.4  | 47.9  |
| 1390.2 | 1482.4 | 1296.6 | 790.1  | 493.2 | 2076.4 | 1507.0 | 383.9 | 430.6 |
| 41.0   | 32.1   | 28.5   | 8.7    | 7.8   | 35.8   | 40.1   | 18.9  | 39.8  |
| 197.3  | 233.4  | 219.2  | 309.3  | 102.7 | 1032.7 | 703.2  | 46.5  | 72.8  |
| 417.2  | 314.2  | 352.6  | 409.5  | 127.9 | 774.6  | 569.5  | 91.6  | 121.2 |
| 294.8  | 301.5  | 214.6  | 238.5  | 69.6  | 144.2  | 57.4   | 47.3  | 37.1  |
| 357.8  | 423.5  | 322.6  | 297.9  | 145.3 | 187.5  | 132.2  | 45.0  | 70.4  |
| 249.5  | 200.2  | 233.7  | 226.6  | 84.3  | 297.4  | 236.0  | 37.7  | 68.6  |
| 248.6  | 172.1  | 179.2  | 120.4  | 54.7  | 118.4  | 53.7   | 121.7 | 94.0  |
| 426.3  | 390.7  | 316.6  | 217.4  | 143.5 | 1252.2 | 1038.9 | 287.8 | 359.0 |
| 2.8    | 4.3    | 33.2   | 10.2   | 5.5   | 145.4  | 90.3   | 608.9 | 726.0 |
| 230.0  | 259.1  | 172.8  | 177.2  | 84.5  | 131.3  | 86.3   | 232.0 | 256.9 |
| 893.2  | 870.3  | 709.8  | 948.9  | 354.8 | 535.2  | 382.7  | 62.1  | 91.9  |

|        |        |        |        |        |        |        |       |       |
|--------|--------|--------|--------|--------|--------|--------|-------|-------|
| 89.3   | 87.5   | 104.8  | 118.9  | 37.3   | 88.8   | 137.3  | 18.7  | 34.0  |
| 9.5    | 5.2    | 8.5    | 3.4    | 3.0    | 3.0    | 14.9   | 8.4   | 9.6   |
| 179.3  | 63.1   | 60.4   | 45.9   | 17.1   | 309.1  | 229.1  | 61.2  | 67.1  |
| 418.4  | 393.7  | 425.6  | 493.3  | 188.5  | 747.1  | 561.9  | 102.3 | 162.0 |
| 637.3  | 562.5  | 628.1  | 688.1  | 197.0  | 640.5  | 428.8  | 130.9 | 184.6 |
| 499.2  | 379.2  | 465.4  | 590.8  | 109.9  | 711.4  | 516.4  | 193.5 | 272.8 |
| 459.2  | 468.1  | 420.7  | 458.4  | 189.6  | 346.8  | 372.0  | 96.6  | 108.4 |
| 974.3  | 1083.3 | 855.8  | 730.7  | 297.2  | 3828.6 | 2932.3 | 318.4 | 488.4 |
| 37.7   | 6.1    | 25.1   | 17.1   | 2.4    | 20.2   | 5.3    | 14.4  | 39.5  |
| 472.0  | 473.4  | 423.4  | 403.7  | 156.1  | 767.3  | 479.1  | 112.9 | 131.7 |
| 2936.5 | 2683.7 | 2745.2 | 2710.2 | 1081.2 | 4525.0 | 3604.3 | 147.2 | 152.3 |
| 1884.7 | 1791.5 | 1929.4 | 2064.4 | 747.2  | 3366.8 | 2676.6 | 191.2 | 193.9 |
| 4811.2 | 4206.0 | 3508.3 | 2542.1 | 1547.1 | 5307.4 | 4752.1 | 938.6 | 889.6 |
| 166.9  | 174.7  | 177.6  | 123.7  | 55.6   | 275.4  | 190.0  | 12.3  | 4.5   |
| 97.7   | 100.0  | 84.2   | 86.5   | 39.7   | 206.8  | 141.5  | 2.7   | 0.9   |
| 769.8  | 730.3  | 617.4  | 505.6  | 145.2  | 356.4  | 242.4  | 17.1  | 16.8  |
| 581.8  | 672.9  | 583.6  | 698.6  | 317.4  | 69.6   | 61.8   | 6.0   | 1.8   |
| 330.6  | 370.9  | 312.8  | 417.8  | 151.7  | 33.1   | 19.7   | 1.4   | 1.1   |
| 402.2  | 320.5  | 326.8  | 268.6  | 160.8  | 986.8  | 707.4  | 73.4  | 65.2  |
| 484.1  | 457.9  | 333.8  | 174.3  | 126.9  | 237.6  | 333.3  | 119.0 | 116.6 |
| 426.8  | 333.2  | 650.1  | 1224.6 | 188.6  | 1204.7 | 649.1  | 102.9 | 140.1 |
| 19.1   | 6.7    | 6.8    | 4.9    | 7.3    | 18.0   | 1.8    | 4.8   | 6.4   |
| 2984.4 | 2681.6 | 2366.3 | 2229.6 | 721.8  | 2099.9 | 828.0  | 355.7 | 544.2 |
| 3376.9 | 3245.5 | 3255.5 | 2972.9 | 1508.4 | 3209.1 | 1958.5 | 410.9 | 541.8 |
| 72.9   | 81.8   | 70.2   | 59.2   | 49.8   | 188.7  | 157.1  | 310.1 | 451.7 |
| 1669.7 | 1414.8 | 1261.8 | 1027.3 | 528.1  | 2918.8 | 1490.4 | 531.6 | 717.1 |
| 45.5   | 33.9   | 32.8   | 24.4   | 10.5   | 53.4   | 30.8   | 56.7  | 55.9  |
| 107.7  | 62.2   | 66.4   | 53.3   | 13.7   | 270.9  | 152.7  | 12.4  | 29.5  |
| 184.7  | 166.8  | 152.5  | 155.5  | 37.9   | 141.8  | 140.8  | 12.9  | 87.0  |
| 219.0  | 186.6  | 240.5  | 136.4  | 60.6   | 123.3  | 82.9   | 78.6  | 97.3  |
| 438.6  | 442.6  | 422.4  | 453.0  | 171.4  | 538.5  | 387.1  | 80.0  | 88.2  |
| 1041.5 | 1229.6 | 1005.7 | 1039.8 | 434.2  | 1563.9 | 1367.9 | 429.3 | 475.7 |
| 69.4   | 66.9   | 75.5   | 38.2   | 15.3   | 210.1  | 110.8  | 80.1  | 138.8 |
| 21.6   | 26.6   | 18.8   | 15.2   | 9.4    | 91.6   | 60.9   | 4.0   | 25.4  |
| 56.0   | 41.2   | 59.5   | 40.1   | 24.5   | 290.9  | 239.4  | 36.8  | 30.3  |
| 160.7  | 123.1  | 147.3  | 119.8  | 49.5   | 373.7  | 236.4  | 103.7 | 116.0 |
| 128.5  | 134.5  | 163.2  | 147.2  | 49.8   | 587.7  | 383.2  | 95.7  | 144.8 |
| 404.6  | 425.8  | 418.9  | 457.7  | 148.0  | 370.2  | 252.8  | 48.2  | 52.0  |
| 57.0   | 67.7   | 74.3   | 72.7   | 13.8   | 87.4   | 59.5   | 12.8  | 32.0  |
| 315.4  | 300.2  | 264.1  | 244.3  | 125.3  | 107.0  | 53.2   | 65.1  | 117.2 |
| 584.4  | 463.8  | 416.1  | 516.6  | 163.9  | 412.0  | 324.9  | 140.7 | 161.8 |
| 128.9  | 129.8  | 109.5  | 122.7  | 68.0   | 187.7  | 149.3  | 202.7 | 239.2 |
| 134.5  | 115.2  | 137.6  | 109.1  | 53.6   | 374.4  | 243.4  | 142.5 | 193.8 |
| 461.2  | 358.7  | 341.5  | 215.9  | 148.4  | 645.3  | 469.5  | 245.4 | 214.8 |
| 654.1  | 729.4  | 499.8  | 401.8  | 182.9  | 668.3  | 453.8  | 86.0  | 130.6 |
| 948.9  | 870.1  | 886.4  | 858.2  | 322.7  | 793.2  | 654.7  | 141.8 | 176.9 |
| 22.2   | 16.0   | 15.5   | 33.1   | 10.0   | 4686.0 | 2878.0 | 8.6   | 2.9   |
| 1594.2 | 1769.5 | 1678.8 | 1420.2 | 703.5  | 3346.6 | 2647.9 | 550.1 | 565.6 |
| 6.3    | 1.2    | 2.3    | 4.2    | 4.0    | 737.5  | 733.1  | 10.5  | 0.6   |
| 2.7    | 2.7    | 3.0    | 0.7    | 0.1    | 442.0  | 298.1  | 3.2   | 1.0   |
| 328.5  | 320.1  | 333.6  | 329.7  | 138.4  | 509.1  | 345.0  | 91.6  | 131.0 |
| 492.5  | 456.2  | 529.7  | 624.1  | 176.3  | 709.6  | 448.9  | 113.0 | 193.5 |
| 3.5    | 19.0   | 5.3    | 2.2    | 1.8    | 9.5    | 8.0    | 8.8   | 2.8   |

|        |        |        |        |       |        |        |       |       |
|--------|--------|--------|--------|-------|--------|--------|-------|-------|
| 29.1   | 22.9   | 44.1   | 19.6   | 7.2   | 37.8   | 33.8   | 9.6   | 26.9  |
| 211.2  | 161.1  | 180.8  | 122.1  | 70.7  | 1039.1 | 658.8  | 191.8 | 182.9 |
| 2251.8 | 2139.8 | 2123.5 | 1322.0 | 570.4 | 2857.8 | 2565.2 | 325.2 | 370.0 |
| 774.6  | 707.6  | 621.1  | 645.2  | 238.8 | 1008.3 | 706.1  | 160.7 | 201.7 |
| 209.7  | 185.1  | 197.1  | 187.9  | 48.0  | 167.8  | 89.5   | 74.5  | 74.1  |
| 599.0  | 639.1  | 528.2  | 295.4  | 232.9 | 966.0  | 814.7  | 167.8 | 227.9 |
| 0.5    | 6.7    | 7.4    | 0.4    | 0.9   | 13.8   | 2.7    | 1.6   | 1.0   |
| 124.6  | 118.2  | 103.7  | 105.3  | 54.3  | 289.7  | 192.2  | 104.2 | 134.8 |
| 1249.3 | 1168.4 | 1082.5 | 760.0  | 416.4 | 850.9  | 579.5  | 624.5 | 777.3 |
| 2.6    | 4.0    | 7.8    | 1.9    | 1.0   | 3.8    | 4.4    | 1.9   | 2.3   |
| 389.1  | 375.8  | 753.1  | 1035.9 | 297.2 | 1262.7 | 635.1  | 37.6  | 46.0  |
| 6.5    | 6.1    | 11.1   | 1.3    | 10.4  | 11.9   | 3.6    | 1.0   | 8.3   |
| 1.3    | 2.8    | 1.5    | 4.7    | 1.7   | 4406.6 | 4339.4 | 272.4 | 316.3 |
| 1.3    | 6.3    | 3.9    | 1.2    | 0.3   | 2.6    | 8.7    | 1.7   | 2.1   |
| 126.0  | 90.0   | 100.9  | 99.2   | 39.2  | 91.2   | 93.6   | 24.0  | 20.4  |
| 171.7  | 129.8  | 180.1  | 187.3  | 55.0  | 127.7  | 94.6   | 21.9  | 37.9  |
| 813.8  | 613.1  | 674.8  | 334.4  | 249.4 | 1007.4 | 415.7  | 395.7 | 385.8 |
| 1.2    | 1.2    | 0.7    | 1.4    | 0.5   | 86.7   | 62.0   | 536.3 | 597.3 |
| 284.1  | 225.0  | 267.2  | 175.6  | 100.5 | 360.4  | 229.1  | 228.2 | 280.0 |
| 221.0  | 230.9  | 252.7  | 240.3  | 83.6  | 306.2  | 219.8  | 44.6  | 53.8  |
| 272.6  | 198.9  | 227.5  | 148.0  | 55.4  | 315.9  | 157.9  | 81.8  | 92.6  |
| 107.4  | 167.2  | 99.3   | 60.3   | 45.3  | 357.2  | 240.0  | 155.0 | 137.5 |
| 969.9  | 798.2  | 794.0  | 627.5  | 277.0 | 1424.4 | 987.0  | 240.8 | 314.3 |
| 867.1  | 744.2  | 868.1  | 745.8  | 372.3 | 1912.3 | 1671.6 | 112.5 | 128.5 |
| 2362.2 | 2739.7 | 2275.1 | 1380.2 | 869.4 | 1468.8 | 1586.4 | 599.2 | 750.5 |
| 2891.2 | 2612.9 | 2317.2 | 1729.8 | 939.3 | 1903.7 | 1584.3 | 269.2 | 364.6 |
| 3613.3 | 3190.2 | 2607.4 | 1917.4 | 857.0 | 1719.5 | 1313.9 | 388.0 | 527.0 |
| 267.6  | 207.7  | 284.9  | 392.4  | 90.6  | 427.2  | 289.4  | 93.8  | 98.8  |
| 759.4  | 733.9  | 902.2  | 1199.2 | 312.0 | 1123.4 | 719.8  | 182.4 | 263.6 |
| 284.8  | 295.0  | 293.3  | 227.3  | 76.0  | 873.9  | 637.8  | 90.2  | 122.1 |
| 278.9  | 313.4  | 377.4  | 303.8  | 92.6  | 382.4  | 232.4  | 25.6  | 28.5  |
| 390.8  | 173.6  | 355.9  | 217.7  | 128.1 | 451.1  | 653.3  | 109.0 | 158.3 |
| 1094.0 | 1015.9 | 999.0  | 813.4  | 349.6 | 2199.4 | 1270.0 | 418.3 | 645.6 |
| 794.6  | 838.6  | 425.2  | 214.9  | 246.7 | 948.9  | 595.7  | 30.2  | 40.5  |
| 75.1   | 56.9   | 93.9   | 83.6   | 52.9  | 131.3  | 78.7   | 150.9 | 133.0 |
| 2012.8 | 2159.3 | 1728.0 | 1184.9 | 841.5 | 2137.3 | 1541.5 | 184.6 | 216.5 |
| 27.4   | 30.5   | 40.8   | 14.3   | 14.6  | 56.6   | 37.1   | 57.4  | 44.8  |
| 10.2   | 7.9    | 5.6    | 0.4    | 3.2   | 16.9   | 6.9    | 0.9   | 9.6   |
| 15.5   | 6.7    | 12.6   | 8.5    | 8.7   | 20.5   | 3.3    | 5.2   | 4.3   |
| 713.2  | 595.2  | 684.6  | 794.2  | 224.5 | 838.2  | 539.2  | 223.1 | 301.9 |
| 373.8  | 386.9  | 502.8  | 497.0  | 211.1 | 433.5  | 307.4  | 51.4  | 41.3  |
| 59.7   | 58.4   | 56.4   | 42.6   | 19.4  | 483.4  | 347.5  | 64.7  | 84.4  |
| 60.7   | 62.9   | 79.5   | 45.0   | 21.5  | 56.7   | 18.5   | 47.0  | 53.2  |
| 222.9  | 241.1  | 246.2  | 170.7  | 65.0  | 290.2  | 250.9  | 68.4  | 87.3  |
| 659.2  | 608.7  | 794.3  | 787.2  | 211.9 | 609.4  | 462.2  | 53.4  | 81.5  |
| 88.4   | 115.5  | 132.7  | 92.1   | 37.6  | 65.4   | 47.6   | 6.0   | 18.2  |
| 136.0  | 112.7  | 117.9  | 100.9  | 46.8  | 225.5  | 101.6  | 56.5  | 104.2 |
| 20.3   | 23.2   | 27.8   | 24.5   | 10.3  | 55.8   | 36.8   | 44.4  | 66.8  |
| 146.8  | 131.6  | 169.9  | 218.9  | 59.5  | 370.5  | 245.3  | 417.9 | 509.6 |
| 117.5  | 66.8   | 100.9  | 55.3   | 16.2  | 230.4  | 301.8  | 52.6  | 52.6  |
| 342.4  | 324.3  | 317.6  | 419.4  | 123.3 | 664.2  | 548.1  | 112.1 | 124.6 |
| 2206.5 | 2228.6 | 1876.6 | 1508.2 | 785.2 | 3871.6 | 3495.1 | 402.4 | 520.3 |
| 234.8  | 220.7  | 123.4  | 61.3   | 60.3  | 199.0  | 103.9  | 80.5  | 89.8  |

|        |        |        |        |        |        |        |       |        |
|--------|--------|--------|--------|--------|--------|--------|-------|--------|
| 27.7   | 12.9   | 25.4   | 9.4    | 3.7    | 17.3   | 4.6    | 2.8   | 20.7   |
| 36.8   | 40.8   | 51.9   | 30.6   | 16.1   | 88.9   | 54.8   | 29.4  | 18.5   |
| 261.1  | 216.5  | 191.3  | 123.7  | 60.2   | 552.2  | 441.2  | 116.1 | 181.3  |
| 628.3  | 638.3  | 543.7  | 365.7  | 225.0  | 1020.0 | 536.5  | 122.8 | 137.0  |
| 117.0  | 106.1  | 106.1  | 106.2  | 52.8   | 57.5   | 68.4   | 84.0  | 97.0   |
| 186.7  | 134.9  | 132.3  | 171.7  | 85.9   | 358.7  | 237.2  | 65.9  | 39.1   |
| 453.1  | 443.1  | 531.6  | 700.5  | 132.6  | 1083.3 | 688.7  | 121.6 | 173.2  |
| 140.0  | 134.5  | 142.3  | 173.9  | 30.5   | 236.4  | 121.5  | 29.2  | 36.7   |
| 8.3    | 5.7    | 11.3   | 8.4    | 5.1    | 19.8   | 14.4   | 0.7   | 7.3    |
| 369.3  | 492.9  | 352.4  | 276.9  | 148.5  | 814.0  | 516.2  | 21.4  | 8.3    |
| 523.7  | 353.3  | 401.0  | 302.5  | 145.5  | 350.4  | 264.1  | 252.2 | 343.2  |
| 509.0  | 482.9  | 399.5  | 193.5  | 158.4  | 689.3  | 358.0  | 105.8 | 126.7  |
| 24.6   | 18.6   | 34.5   | 26.3   | 11.4   | 43.3   | 27.3   | 32.0  | 30.7   |
| 131.6  | 142.0  | 165.4  | 57.2   | 42.4   | 42.9   | 23.7   | 46.4  | 45.1   |
| 12.5   | 17.8   | 5.4    | 1.1    | 0.5    | 31.3   | 34.8   | 9.9   | 10.5   |
| 28.3   | 19.0   | 18.8   | 7.6    | 6.0    | 105.4  | 81.2   | 12.0  | 13.9   |
| 3364.1 | 3081.7 | 2596.6 | 2282.9 | 1130.1 | 2316.0 | 1406.8 | 735.1 | 1065.7 |
| 101.4  | 74.9   | 94.8   | 99.7   | 48.4   | 333.3  | 234.0  | 97.2  | 103.1  |
| 727.1  | 664.7  | 769.6  | 552.6  | 166.4  | 3709.5 | 2143.3 | 8.4   | 10.8   |
| 266.1  | 250.4  | 289.0  | 267.8  | 100.7  | 516.6  | 345.0  | 71.3  | 139.7  |
| 731.2  | 598.6  | 702.1  | 678.9  | 231.5  | 1666.3 | 1300.5 | 192.7 | 264.2  |
| 279.1  | 288.1  | 227.8  | 214.8  | 76.6   | 482.1  | 280.6  | 145.6 | 172.7  |
| 183.7  | 185.1  | 174.8  | 130.9  | 65.4   | 269.0  | 216.6  | 165.0 | 198.1  |
| 15.3   | 16.6   | 6.4    | 8.4    | 5.4    | 65.8   | 65.7   | 11.5  | 18.0   |
| 1045.3 | 1139.9 | 1253.3 | 648.0  | 415.9  | 1721.9 | 1381.5 | 40.9  | 72.4   |
| 1535.1 | 1408.5 | 1652.6 | 1677.7 | 607.6  | 2759.4 | 2163.4 | 234.6 | 306.3  |
| 534.2  | 433.5  | 474.4  | 255.8  | 94.9   | 541.5  | 290.4  | 195.3 | 266.1  |
| 115.4  | 68.1   | 69.3   | 68.9   | 25.2   | 96.0   | 34.3   | 38.5  | 82.2   |
| 176.2  | 161.6  | 170.7  | 159.9  | 45.4   | 344.7  | 168.1  | 80.6  | 97.1   |
| 90.3   | 77.3   | 93.9   | 63.2   | 29.0   | 190.2  | 135.2  | 65.1  | 129.3  |
| 1.8    | 1.2    | 12.3   | 4.3    | 0.9    | 239.5  | 104.6  | 2.9   | 8.7    |
| 70.0   | 56.1   | 58.9   | 51.8   | 18.1   | 319.1  | 280.3  | 53.2  | 59.0   |
| 51.9   | 69.5   | 38.5   | 48.9   | 13.4   | 254.3  | 152.3  | 6.9   | 21.1   |
| 246.4  | 226.7  | 235.6  | 224.0  | 83.7   | 418.3  | 314.1  | 142.6 | 215.4  |
| 256.6  | 245.4  | 209.2  | 215.1  | 87.3   | 443.0  | 358.2  | 161.6 | 209.2  |
| 873.8  | 955.3  | 976.1  | 1086.4 | 328.2  | 872.8  | 741.0  | 66.1  | 125.6  |
| 195.4  | 192.6  | 172.6  | 93.3   | 93.4   | 69.9   | 44.0   | 9.3   | 14.0   |
| 257.6  | 195.1  | 228.3  | 230.1  | 90.8   | 101.9  | 74.9   | 37.2  | 73.1   |
| 313.7  | 318.1  | 245.8  | 247.0  | 72.9   | 517.1  | 330.3  | 96.9  | 149.7  |
| 7.1    | 22.4   | 58.7   | 28.2   | 8.5    | 34.4   | 27.8   | 6.3   | 29.3   |
| 45.2   | 49.7   | 45.4   | 54.5   | 24.0   | 268.2  | 131.5  | 76.5  | 100.1  |
| 64.1   | 45.3   | 48.0   | 28.8   | 14.4   | 365.2  | 193.8  | 23.5  | 50.1   |
| 258.2  | 229.6  | 194.0  | 130.4  | 40.3   | 787.9  | 522.7  | 97.9  | 144.3  |
| 854.2  | 639.0  | 693.6  | 504.7  | 185.1  | 2065.1 | 1240.3 | 302.2 | 345.0  |
| 1183.1 | 1288.0 | 1052.2 | 1243.6 | 462.8  | 538.4  | 450.4  | 119.1 | 197.3  |
| 129.5  | 129.6  | 169.0  | 186.6  | 60.8   | 339.2  | 211.0  | 43.4  | 43.0   |
| 262.5  | 300.4  | 317.6  | 348.5  | 117.5  | 421.2  | 280.3  | 83.2  | 114.9  |
| 116.9  | 124.8  | 122.9  | 127.4  | 25.3   | 168.8  | 113.1  | 34.7  | 64.7   |
| 34.2   | 31.7   | 30.5   | 46.7   | 18.0   | 238.0  | 174.7  | 9.4   | 19.7   |
| 16.9   | 1.0    | 13.3   | 16.5   | 9.1    | 7.6    | 2.0    | 2.6   | 19.3   |
| 324.6  | 327.6  | 278.0  | 293.0  | 95.9   | 814.0  | 773.5  | 143.2 | 240.8  |
| 286.3  | 155.5  | 151.3  | 134.3  | 56.8   | 798.4  | 733.0  | 169.1 | 231.2  |
| 185.3  | 80.7   | 97.6   | 65.6   | 47.0   | 471.7  | 297.1  | 21.0  | 34.7   |

|        |        |        |        |        |        |        |        |        |
|--------|--------|--------|--------|--------|--------|--------|--------|--------|
| 84.1   | 52.3   | 52.0   | 41.1   | 28.1   | 130.8  | 63.6   | 25.7   | 33.1   |
| 759.5  | 848.4  | 898.8  | 642.0  | 185.7  | 2131.5 | 1431.7 | 42.8   | 136.1  |
| 325.9  | 310.4  | 273.3  | 409.1  | 127.1  | 464.8  | 345.5  | 97.7   | 134.8  |
| 101.9  | 80.5   | 74.0   | 64.9   | 28.0   | 134.2  | 114.5  | 120.3  | 157.5  |
| 124.3  | 102.2  | 104.3  | 96.4   | 52.3   | 232.8  | 161.7  | 30.7   | 39.1   |
| 166.5  | 133.6  | 101.2  | 98.8   | 42.3   | 282.9  | 171.0  | 59.2   | 58.1   |
| 118.7  | 114.5  | 137.3  | 194.5  | 59.7   | 185.3  | 182.7  | 32.0   | 69.9   |
| 85.2   | 73.7   | 102.8  | 63.3   | 32.8   | 171.8  | 109.1  | 73.4   | 171.0  |
| 277.0  | 300.8  | 237.9  | 208.2  | 109.3  | 625.6  | 350.9  | 9.9    | 15.0   |
| 46.2   | 63.0   | 50.8   | 45.5   | 22.1   | 117.8  | 76.4   | 31.9   | 63.6   |
| 34.9   | 24.4   | 23.7   | 28.0   | 22.1   | 42.3   | 41.7   | 19.3   | 30.5   |
| 2702.6 | 2711.5 | 2165.3 | 2124.6 | 1055.9 | 1763.8 | 1734.8 | 680.4  | 930.8  |
| 50.3   | 54.3   | 64.0   | 96.4   | 18.0   | 279.2  | 170.1  | 32.1   | 43.4   |
| 849.8  | 858.2  | 989.8  | 1144.6 | 332.3  | 1480.8 | 931.5  | 36.0   | 50.3   |
| 52.0   | 35.2   | 38.8   | 19.2   | 16.3   | 185.5  | 102.5  | 65.8   | 113.1  |
| 800.7  | 723.2  | 662.3  | 434.6  | 203.8  | 1047.3 | 461.6  | 205.8  | 344.6  |
| 712.9  | 764.2  | 870.1  | 701.8  | 240.6  | 767.6  | 528.9  | 50.0   | 62.5   |
| 474.2  | 299.9  | 233.7  | 168.0  | 41.3   | 650.6  | 487.5  | 383.7  | 420.0  |
| 22.4   | 23.4   | 14.7   | 27.3   | 9.0    | 59.0   | 38.8   | 19.4   | 28.6   |
| 309.5  | 241.4  | 286.3  | 409.8  | 120.8  | 825.9  | 668.2  | 218.6  | 214.6  |
| 46.2   | 26.2   | 35.4   | 17.2   | 8.5    | 53.1   | 33.0   | 21.9   | 17.3   |
| 218.7  | 222.6  | 221.5  | 128.2  | 52.7   | 441.8  | 324.8  | 49.2   | 38.6   |
| 229.5  | 183.7  | 352.4  | 370.3  | 126.7  | 345.5  | 303.0  | 63.0   | 60.0   |
| 21.7   | 7.2    | 12.0   | 15.2   | 6.7    | 8.2    | 11.5   | 13.8   | 20.1   |
| 2.8    | 0.9    | 7.9    | 0.2    | 2.5    | 5.0    | 3.9    | 6.1    | 0.5    |
| 70.5   | 61.1   | 70.0   | 77.5   | 29.3   | 73.2   | 46.7   | 17.9   | 24.0   |
| 505.6  | 384.3  | 528.1  | 543.4  | 165.2  | 1085.2 | 777.8  | 104.3  | 120.3  |
| 239.4  | 181.1  | 205.0  | 133.2  | 68.2   | 183.8  | 74.3   | 49.6   | 59.0   |
| 589.8  | 476.2  | 508.1  | 430.8  | 245.2  | 615.4  | 393.2  | 149.1  | 162.0  |
| 298.8  | 295.7  | 277.4  | 372.0  | 141.2  | 1045.0 | 526.9  | 2.2    | 6.1    |
| 27.9   | 2.3    | 8.0    | 5.0    | 1.0    | 145.5  | 104.4  | 1.0    | 0.9    |
| 2.4    | 1.3    | 3.6    | 5.2    | 4.3    | 476.4  | 261.6  | 4.1    | 5.9    |
| 630.6  | 320.3  | 396.3  | 254.8  | 99.8   | 1835.1 | 1548.7 | 68.4   | 75.1   |
| 1337.4 | 1428.0 | 1524.5 | 1263.9 | 523.1  | 2045.8 | 1114.6 | 184.0  | 276.2  |
| 82.3   | 81.2   | 73.4   | 59.6   | 30.2   | 157.4  | 142.4  | 36.6   | 51.0   |
| 274.0  | 154.3  | 167.8  | 128.4  | 84.8   | 281.5  | 185.3  | 90.5   | 135.2  |
| 812.9  | 657.2  | 641.6  | 498.0  | 166.0  | 981.3  | 662.8  | 173.1  | 222.9  |
| 242.9  | 190.8  | 280.8  | 192.6  | 81.6   | 553.0  | 456.6  | 238.3  | 292.2  |
| 635.1  | 384.7  | 542.8  | 387.2  | 237.5  | 1179.7 | 601.7  | 329.9  | 371.1  |
| 224.9  | 184.3  | 206.2  | 265.7  | 79.1   | 193.5  | 171.3  | 60.1   | 74.4   |
| 299.3  | 456.1  | 577.8  | 320.8  | 152.6  | 1358.6 | 924.9  | 194.7  | 221.2  |
| 197.5  | 223.7  | 149.7  | 67.8   | 62.3   | 205.2  | 151.8  | 113.5  | 155.6  |
| 155.1  | 143.3  | 191.0  | 151.4  | 51.2   | 163.1  | 122.0  | 0.9    | 0.6    |
| 307.3  | 311.3  | 303.0  | 324.5  | 129.0  | 753.4  | 649.7  | 136.0  | 190.8  |
| 672.4  | 680.7  | 471.0  | 419.6  | 259.5  | 558.1  | 427.4  | 329.0  | 426.5  |
| 78.9   | 71.2   | 64.6   | 49.0   | 14.3   | 270.8  | 248.8  | 161.9  | 167.4  |
| 23.5   | 11.8   | 23.1   | 17.5   | 5.5    | 55.3   | 37.4   | 67.5   | 33.9   |
| 459.5  | 438.5  | 383.5  | 254.1  | 93.3   | 782.9  | 536.3  | 477.4  | 682.7  |
| 1851.3 | 1712.5 | 2007.3 | 1339.7 | 1067.9 | 3771.6 | 2874.4 | 1114.1 | 1606.7 |
| 94.2   | 127.0  | 92.0   | 55.7   | 41.1   | 675.9  | 319.9  | 234.6  | 316.1  |
| 52.9   | 52.8   | 58.1   | 25.2   | 20.9   | 541.5  | 350.4  | 17.0   | 21.7   |
| 1296.2 | 1222.5 | 1684.5 | 2103.4 | 399.4  | 923.9  | 595.7  | 108.4  | 87.6   |
| 283.6  | 269.2  | 337.4  | 355.6  | 92.6   | 357.2  | 245.1  | 68.8   | 79.2   |

|        |        |        |        |       |        |        |       |       |
|--------|--------|--------|--------|-------|--------|--------|-------|-------|
| 508.7  | 472.2  | 439.8  | 466.8  | 177.4 | 810.4  | 559.2  | 609.0 | 864.4 |
| 46.2   | 13.3   | 15.1   | 7.8    | 3.2   | 4.2    | 4.2    | 5.3   | 1.9   |
| 306.8  | 190.6  | 205.4  | 50.0   | 76.2  | 374.4  | 439.6  | 8.3   | 15.6  |
| 820.8  | 629.4  | 563.8  | 206.5  | 201.1 | 1162.3 | 1410.2 | 46.3  | 58.0  |
| 855.4  | 848.9  | 735.8  | 276.9  | 309.5 | 887.1  | 978.3  | 11.3  | 9.7   |
| 32.1   | 21.6   | 35.0   | 29.0   | 11.8  | 82.1   | 43.1   | 8.1   | 4.6   |
| 105.1  | 96.4   | 115.6  | 177.4  | 47.9  | 307.7  | 282.1  | 16.8  | 19.1  |
| 26.9   | 30.6   | 30.3   | 21.2   | 1.7   | 383.5  | 296.9  | 24.6  | 27.5  |
| 321.0  | 340.6  | 385.6  | 275.0  | 170.5 | 1190.2 | 607.3  | 76.7  | 102.7 |
| 1050.1 | 950.5  | 935.5  | 821.8  | 325.7 | 1731.0 | 1133.0 | 149.5 | 187.1 |
| 1178.4 | 1312.7 | 1016.3 | 645.3  | 397.2 | 873.8  | 729.0  | 126.6 | 239.1 |
| 314.1  | 281.2  | 250.4  | 178.4  | 62.0  | 216.6  | 74.4   | 42.6  | 71.1  |
| 48.3   | 43.9   | 35.2   | 41.9   | 18.2  | 51.2   | 33.3   | 9.6   | 9.3   |
| 187.9  | 199.0  | 164.3  | 115.0  | 57.3  | 1762.6 | 1215.3 | 46.6  | 50.7  |
| 95.4   | 121.1  | 134.1  | 104.3  | 60.4  | 364.9  | 222.6  | 207.1 | 266.8 |
| 26.2   | 14.0   | 16.5   | 18.6   | 10.5  | 17.0   | 9.7    | 48.1  | 63.0  |
| 130.5  | 104.5  | 96.5   | 67.0   | 44.6  | 580.4  | 425.8  | 200.4 | 138.7 |
| 35.7   | 47.0   | 45.4   | 42.5   | 24.1  | 19.3   | 13.3   | 17.2  | 28.3  |
| 316.2  | 412.2  | 425.6  | 486.8  | 126.2 | 780.0  | 618.0  | 48.1  | 90.3  |
| 40.5   | 43.5   | 35.1   | 22.8   | 13.6  | 42.5   | 15.3   | 127.4 | 99.8  |
| 247.9  | 240.7  | 286.2  | 312.8  | 74.6  | 403.1  | 275.7  | 91.4  | 154.2 |
| 15.4   | 11.5   | 10.1   | 15.4   | 4.1   | 94.7   | 111.5  | 226.2 | 324.0 |
| 34.6   | 16.7   | 44.8   | 40.0   | 7.7   | 65.3   | 31.3   | 30.3  | 46.5  |
| 3.5    | 5.1    | 8.8    | 10.2   | 2.3   | 14.3   | 5.3    | 72.3  | 95.0  |
| 108.1  | 121.3  | 105.9  | 72.1   | 30.3  | 702.7  | 420.5  | 155.1 | 370.7 |
| 194.1  | 218.8  | 197.3  | 62.3   | 78.9  | 1493.3 | 1228.0 | 128.0 | 180.6 |
| 119.4  | 99.9   | 93.7   | 63.3   | 23.8  | 219.4  | 116.5  | 149.4 | 221.1 |
| 186.5  | 144.5  | 157.3  | 131.1  | 61.0  | 220.0  | 118.2  | 42.4  | 43.5  |
| 612.2  | 558.9  | 588.8  | 660.8  | 263.8 | 795.3  | 582.5  | 122.3 | 143.5 |
| 970.3  | 1032.4 | 913.6  | 580.7  | 288.9 | 844.8  | 691.7  | 169.2 | 243.8 |
| 45.4   | 36.6   | 39.2   | 21.8   | 14.1  | 60.4   | 43.4   | 56.8  | 59.2  |
| 538.6  | 497.6  | 665.4  | 415.2  | 208.5 | 357.8  | 283.9  | 14.3  | 23.6  |
| 37.8   | 32.4   | 35.1   | 22.0   | 12.7  | 8.4    | 7.3    | 5.2   | 14.8  |
| 354.3  | 334.2  | 336.6  | 267.8  | 108.2 | 518.2  | 483.6  | 257.4 | 270.4 |
| 1132.6 | 1116.2 | 1067.2 | 1070.9 | 378.1 | 1684.6 | 1190.7 | 335.4 | 370.9 |
| 1473.7 | 1355.3 | 1473.5 | 967.8  | 670.4 | 1541.3 | 1173.6 | 67.4  | 101.7 |
| 753.9  | 681.9  | 696.5  | 417.3  | 214.7 | 1282.3 | 1003.1 | 160.9 | 237.4 |
| 64.6   | 51.9   | 72.3   | 37.2   | 26.0  | 46.0   | 45.0   | 31.4  | 48.1  |
| 493.7  | 523.5  | 451.7  | 319.4  | 188.1 | 351.0  | 181.4  | 197.5 | 263.9 |
| 57.5   | 49.5   | 67.9   | 46.1   | 14.6  | 115.1  | 68.2   | 40.9  | 45.4  |
| 7.4    | 3.8    | 4.1    | 4.3    | 2.7   | 20.6   | 19.9   | 7.6   | 10.7  |
| 247.0  | 189.7  | 165.1  | 194.1  | 65.8  | 390.0  | 207.5  | 105.3 | 88.2  |
| 1179.3 | 987.4  | 944.7  | 861.9  | 381.7 | 2877.2 | 2110.8 | 548.7 | 697.4 |
| 63.2   | 54.5   | 50.7   | 36.4   | 20.9  | 67.6   | 18.6   | 37.4  | 36.8  |
| 190.9  | 158.2  | 167.6  | 127.6  | 57.4  | 321.5  | 164.6  | 129.7 | 139.8 |
| 44.7   | 59.1   | 11.6   | 1.9    | 15.5  | 87.6   | 64.3   | 19.3  | 29.3  |
| 21.8   | 24.1   | 22.2   | 5.9    | 0.4   | 25.0   | 23.9   | 25.3  | 36.4  |
| 113.9  | 101.5  | 116.4  | 100.9  | 17.3  | 48.5   | 13.1   | 21.7  | 39.9  |
| 19.3   | 19.9   | 3.8    | 11.9   | 7.7   | 166.8  | 149.4  | 19.1  | 25.7  |
| 14.1   | 20.2   | 11.2   | 16.5   | 8.1   | 31.4   | 15.1   | 16.5  | 17.4  |
| 2632.5 | 2117.1 | 1981.4 | 1050.8 | 504.5 | 3840.1 | 2329.7 | 497.9 | 433.2 |
| 598.2  | 548.1  | 523.6  | 445.7  | 217.0 | 436.7  | 320.0  | 276.3 | 407.3 |
| 8.0    | 8.5    | 8.3    | 1.8    | 8.4   | 9.1    | 20.7   | 25.2  | 10.2  |

|        |        |        |        |       |        |        |        |        |
|--------|--------|--------|--------|-------|--------|--------|--------|--------|
| 296.8  | 242.4  | 259.0  | 195.7  | 87.7  | 634.2  | 433.2  | 279.6  | 379.9  |
| 2334.7 | 2397.2 | 2018.0 | 1413.0 | 712.2 | 3241.5 | 2682.3 | 1008.4 | 1033.4 |
| 78.1   | 56.9   | 63.6   | 37.5   | 26.6  | 58.8   | 60.9   | 124.4  | 154.7  |
| 4.1    | 3.3    | 5.3    | 5.7    | 1.9   | 331.4  | 153.4  | 716.1  | 971.8  |
| 9.8    | 11.2   | 14.7   | 11.0   | 2.0   | 28.0   | 12.4   | 7.7    | 4.0    |
| 309.9  | 371.6  | 353.4  | 364.9  | 123.3 | 589.4  | 342.1  | 95.9   | 108.0  |
| 118.2  | 100.3  | 91.3   | 52.9   | 32.9  | 86.1   | 71.1   | 74.5   | 72.9   |
| 0.7    | 0.9    | 0.7    | 0.5    | 0.3   | 0.7    | 0.9    | 0.6    | 0.6    |
| 210.7  | 207.3  | 226.2  | 255.1  | 99.1  | 433.2  | 279.2  | 64.7   | 66.8   |
| 335.8  | 318.6  | 246.8  | 285.3  | 107.7 | 547.3  | 375.1  | 96.5   | 110.0  |
| 97.5   | 74.2   | 81.6   | 51.3   | 29.6  | 209.4  | 118.1  | 72.3   | 101.5  |
| 857.5  | 736.1  | 649.5  | 662.1  | 212.8 | 26.1   | 25.9   | 1.5    | 2.8    |
| 349.7  | 354.9  | 332.2  | 323.0  | 114.0 | 17.0   | 10.3   | 2.7    | 1.2    |
| 708.7  | 758.8  | 676.7  | 904.3  | 469.1 | 30.4   | 17.1   | 1.0    | 0.9    |
| 102.4  | 80.3   | 95.9   | 88.7   | 32.4  | 132.6  | 89.1   | 27.0   | 67.0   |
| 122.2  | 114.7  | 110.6  | 77.4   | 28.3  | 89.6   | 70.2   | 35.7   | 37.4   |
| 811.3  | 944.7  | 861.4  | 607.7  | 322.6 | 1089.6 | 713.8  | 40.2   | 72.8   |
| 1826.8 | 1824.5 | 1402.6 | 303.9  | 488.0 | 3785.4 | 1976.3 | 396.8  | 501.2  |
| 4.6    | 12.3   | 9.9    | 16.1   | 10.5  | 72.7   | 60.1   | 27.8   | 25.0   |
| 1436.5 | 1267.4 | 1251.5 | 1142.2 | 514.0 | 3864.2 | 2557.1 | 296.7  | 349.2  |
| 481.5  | 464.2  | 461.1  | 340.0  | 129.7 | 994.5  | 832.3  | 32.6   | 30.4   |
| 87.5   | 72.4   | 58.2   | 57.1   | 38.8  | 18.0   | 18.8   | 20.3   | 25.5   |
| 86.9   | 113.0  | 85.6   | 120.8  | 39.0  | 3.0    | 3.4    | 3.7    | 1.6    |
| 9.8    | 4.8    | 4.7    | 3.8    | 1.5   | 22.1   | 26.7   | 5.4    | 3.3    |
| 65.6   | 36.1   | 55.4   | 47.0   | 17.2  | 394.2  | 311.7  | 44.1   | 40.7   |
| 498.8  | 457.7  | 497.6  | 677.2  | 230.2 | 1056.1 | 733.4  | 142.7  | 209.4  |
| 44.2   | 52.3   | 41.5   | 48.0   | 19.7  | 153.9  | 90.6   | 29.2   | 23.2   |
| 203.3  | 136.2  | 123.9  | 70.0   | 40.5  | 332.5  | 248.6  | 98.3   | 173.2  |
| 124.2  | 147.6  | 114.9  | 95.4   | 37.3  | 351.0  | 194.4  | 146.1  | 150.2  |
| 197.4  | 181.6  | 139.9  | 95.8   | 56.3  | 822.3  | 533.7  | 179.4  | 223.1  |
| 49.2   | 47.3   | 45.0   | 53.5   | 14.4  | 109.6  | 41.0   | 30.8   | 35.2   |
| 82.0   | 66.2   | 69.3   | 70.0   | 29.3  | 36.2   | 4.3    | 35.3   | 21.2   |
| 127.5  | 119.4  | 115.9  | 125.6  | 45.4  | 341.1  | 170.4  | 129.9  | 165.1  |
| 139.8  | 137.0  | 124.5  | 90.1   | 50.5  | 219.7  | 128.6  | 70.7   | 76.1   |
| 459.0  | 504.0  | 538.2  | 595.2  | 216.5 | 788.8  | 410.2  | 102.4  | 151.9  |
| 326.7  | 330.7  | 411.0  | 401.7  | 129.1 | 663.8  | 397.7  | 144.7  | 197.5  |
| 992.7  | 858.4  | 1049.4 | 1033.9 | 394.0 | 2053.5 | 1709.8 | 210.4  | 240.8  |
| 135.1  | 96.2   | 97.4   | 36.6   | 28.1  | 36.5   | 18.3   | 4.4    | 5.3    |
| 660.4  | 742.1  | 431.0  | 137.6  | 154.7 | 16.0   | 2.1    | 11.7   | 11.3   |
| 11.6   | 11.2   | 12.6   | 7.7    | 4.2   | 142.5  | 66.4   | 202.7  | 236.8  |
| 14.7   | 18.7   | 17.1   | 11.6   | 3.8   | 7.0    | 6.5    | 9.8    | 16.4   |
| 234.1  | 251.2  | 277.9  | 330.3  | 81.3  | 91.8   | 53.3   | 65.2   | 80.7   |
| 237.6  | 215.3  | 230.1  | 193.2  | 104.3 | 849.1  | 574.7  | 76.3   | 75.8   |
| 445.9  | 371.9  | 311.8  | 261.0  | 142.3 | 620.4  | 415.2  | 117.3  | 156.7  |
| 238.8  | 217.9  | 159.4  | 142.2  | 91.5  | 551.8  | 315.9  | 119.4  | 148.3  |
| 123.0  | 111.1  | 117.2  | 113.7  | 52.2  | 185.4  | 145.8  | 41.3   | 33.8   |
| 188.5  | 202.9  | 176.8  | 86.8   | 91.4  | 618.6  | 446.1  | 42.2   | 51.6   |
| 200.3  | 177.3  | 171.1  | 101.6  | 56.2  | 359.2  | 254.4  | 30.0   | 34.5   |
| 479.4  | 619.6  | 483.3  | 207.7  | 172.8 | 1580.2 | 793.6  | 115.3  | 140.0  |
| 891.7  | 743.7  | 734.0  | 538.3  | 295.4 | 704.0  | 488.9  | 262.5  | 281.1  |
| 569.0  | 543.1  | 711.2  | 996.3  | 259.9 | 934.0  | 825.3  | 115.9  | 139.8  |
| 258.2  | 220.3  | 314.5  | 393.2  | 103.9 | 1072.6 | 932.8  | 81.8   | 110.4  |
| 313.0  | 359.1  | 399.7  | 463.4  | 116.8 | 794.1  | 551.8  | 227.7  | 217.1  |

|        |        |        |        |        |        |        |        |        |
|--------|--------|--------|--------|--------|--------|--------|--------|--------|
| 215.2  | 185.5  | 370.9  | 362.6  | 91.5   | 282.7  | 245.0  | 99.0   | 124.6  |
| 149.0  | 129.2  | 285.9  | 226.5  | 71.5   | 255.8  | 224.7  | 61.1   | 92.2   |
| 301.2  | 282.5  | 295.7  | 197.1  | 82.9   | 765.5  | 500.3  | 66.9   | 81.4   |
| 881.5  | 797.5  | 895.7  | 926.4  | 270.4  | 1965.1 | 1442.2 | 194.0  | 253.9  |
| 791.2  | 716.1  | 836.8  | 883.7  | 226.2  | 680.2  | 573.1  | 83.1   | 158.5  |
| 964.5  | 955.5  | 954.7  | 832.8  | 289.6  | 1540.3 | 1020.2 | 116.2  | 225.4  |
| 38.2   | 25.6   | 36.7   | 43.1   | 14.0   | 97.5   | 45.1   | 56.3   | 71.1   |
| 276.2  | 230.7  | 222.0  | 152.3  | 93.9   | 1496.4 | 1234.1 | 302.8  | 333.1  |
| 85.4   | 69.2   | 94.1   | 99.4   | 19.6   | 106.9  | 51.1   | 30.5   | 50.9   |
| 312.6  | 257.5  | 270.5  | 303.8  | 112.3  | 488.0  | 263.2  | 89.9   | 112.4  |
| 15.0   | 10.2   | 11.0   | 1.0    | 0.7    | 19.2   | 2.5    | 12.3   | 20.7   |
| 419.0  | 456.2  | 454.0  | 455.6  | 160.9  | 1711.6 | 1305.8 | 1016.6 | 1164.9 |
| 484.2  | 401.5  | 343.7  | 150.8  | 83.1   | 412.2  | 308.0  | 6.1    | 14.3   |
| 473.5  | 479.7  | 425.6  | 143.2  | 129.6  | 272.7  | 237.7  | 5.3    | 5.8    |
| 461.6  | 418.5  | 540.0  | 721.3  | 181.6  | 514.3  | 423.1  | 93.0   | 108.4  |
| 465.4  | 523.1  | 397.8  | 326.2  | 191.9  | 268.9  | 246.5  | 192.5  | 265.1  |
| 21.0   | 15.8   | 23.0   | 10.1   | 8.9    | 261.6  | 211.8  | 1.3    | 5.2    |
| 210.6  | 119.8  | 169.1  | 110.7  | 57.2   | 132.4  | 87.1   | 117.1  | 161.6  |
| 426.0  | 412.0  | 639.1  | 564.5  | 162.8  | 932.1  | 610.9  | 17.0   | 29.9   |
| 460.3  | 448.7  | 531.8  | 534.9  | 130.6  | 630.5  | 464.7  | 16.5   | 20.8   |
| 972.0  | 801.8  | 899.2  | 950.2  | 286.7  | 761.4  | 513.9  | 149.7  | 168.4  |
| 823.5  | 725.2  | 716.2  | 763.8  | 267.3  | 553.4  | 399.5  | 145.6  | 212.6  |
| 150.0  | 158.6  | 146.5  | 119.7  | 41.6   | 107.4  | 91.1   | 15.0   | 31.5   |
| 325.7  | 237.4  | 251.0  | 172.9  | 113.0  | 421.6  | 337.1  | 148.9  | 231.8  |
| 16.2   | 9.2    | 20.6   | 9.6    | 0.4    | 16.0   | 4.6    | 10.4   | 3.5    |
| 353.3  | 293.6  | 265.4  | 169.0  | 84.1   | 479.0  | 293.0  | 248.3  | 281.6  |
| 278.5  | 288.8  | 350.1  | 397.2  | 123.1  | 431.2  | 365.2  | 30.2   | 47.3   |
| 108.5  | 106.6  | 125.0  | 116.9  | 19.0   | 139.1  | 88.1   | 28.5   | 35.3   |
| 1492.2 | 1502.0 | 1360.1 | 882.2  | 471.1  | 4663.6 | 3980.6 | 312.7  | 374.3  |
| 191.1  | 178.2  | 216.0  | 226.6  | 83.0   | 388.9  | 209.3  | 94.5   | 113.6  |
| 142.8  | 118.3  | 163.9  | 140.0  | 47.1   | 234.2  | 173.6  | 42.3   | 41.2   |
| 130.0  | 100.8  | 149.7  | 150.7  | 49.7   | 384.6  | 216.3  | 28.1   | 18.9   |
| 60.5   | 54.4   | 29.2   | 32.9   | 6.3    | 90.9   | 24.3   | 51.3   | 50.3   |
| 75.7   | 70.9   | 68.4   | 59.7   | 29.3   | 166.7  | 92.1   | 68.2   | 89.4   |
| 219.2  | 225.3  | 197.7  | 127.5  | 80.3   | 167.8  | 140.6  | 115.2  | 110.5  |
| 97.8   | 63.4   | 74.1   | 39.6   | 18.5   | 63.1   | 25.9   | 20.8   | 30.0   |
| 162.4  | 160.0  | 136.1  | 116.4  | 57.5   | 1043.0 | 793.2  | 78.1   | 117.7  |
| 203.6  | 210.7  | 247.1  | 266.2  | 89.5   | 445.4  | 228.5  | 129.9  | 199.9  |
| 173.5  | 196.9  | 205.9  | 163.8  | 64.9   | 714.6  | 528.4  | 54.4   | 65.8   |
| 143.8  | 152.5  | 148.3  | 146.8  | 50.0   | 478.4  | 208.4  | 84.4   | 101.5  |
| 1629.8 | 1515.4 | 1707.2 | 1814.0 | 636.3  | 503.1  | 353.7  | 95.1   | 142.7  |
| 630.1  | 609.0  | 446.7  | 268.5  | 162.3  | 1046.5 | 817.8  | 183.0  | 239.6  |
| 1604.3 | 1048.5 | 2129.7 | 1951.2 | 228.2  | 665.1  | 560.0  | 188.1  | 180.4  |
| 919.1  | 942.3  | 1084.8 | 815.2  | 358.4  | 942.5  | 751.6  | 136.8  | 259.7  |
| 218.4  | 206.1  | 232.4  | 194.3  | 60.6   | 336.3  | 189.6  | 210.2  | 267.5  |
| 92.2   | 81.1   | 91.1   | 93.4   | 34.3   | 55.8   | 37.5   | 52.0   | 69.1   |
| 49.9   | 51.5   | 44.7   | 52.8   | 15.1   | 54.9   | 27.6   | 28.6   | 23.3   |
| 55.6   | 47.3   | 36.8   | 23.9   | 11.7   | 178.0  | 152.9  | 2.7    | 14.2   |
| 190.1  | 189.1  | 194.4  | 164.0  | 66.4   | 270.8  | 185.7  | 276.8  | 329.8  |
| 4.5    | 4.1    | 3.4    | 9.8    | 1.9    | 7.7    | 2.6    | 6.8    | 12.0   |
| 5035.7 | 5500.8 | 4924.7 | 2301.3 | 2113.6 | 3489.4 | 2372.0 | 816.6  | 1009.0 |
| 65.7   | 46.4   | 40.6   | 20.9   | 12.2   | 51.9   | 33.8   | 84.3   | 106.9  |
| 3380.8 | 3229.2 | 3182.1 | 2916.3 | 1611.2 | 5137.7 | 4394.0 | 518.9  | 523.6  |



|        |        |        |       |       |        |        |       |       |
|--------|--------|--------|-------|-------|--------|--------|-------|-------|
| 309.4  | 292.8  | 246.1  | 147.7 | 100.1 | 328.2  | 218.8  | 109.0 | 176.0 |
| 225.2  | 207.4  | 179.1  | 123.6 | 83.4  | 625.9  | 339.8  | 252.9 | 308.1 |
| 194.5  | 186.1  | 161.7  | 141.5 | 72.1  | 416.1  | 200.2  | 88.2  | 170.1 |
| 328.8  | 288.4  | 260.0  | 253.5 | 127.2 | 445.4  | 320.6  | 96.8  | 128.8 |
| 1313.7 | 1170.6 | 1175.1 | 806.6 | 324.9 | 1615.5 | 1639.8 | 594.3 | 869.2 |
| 45.4   | 22.8   | 27.1   | 22.8  | 5.9   | 397.1  | 218.8  | 113.4 | 164.8 |
| 76.7   | 60.2   | 84.8   | 61.3  | 25.4  | 873.9  | 557.5  | 374.2 | 464.4 |
| 62.9   | 51.9   | 80.7   | 144.8 | 18.7  | 317.4  | 269.8  | 45.3  | 122.7 |
| 22.0   | 11.6   | 22.5   | 30.3  | 7.0   | 352.8  | 219.7  | 21.8  | 40.7  |
| 104.0  | 82.4   | 122.2  | 77.7  | 25.6  | 94.7   | 23.4   | 43.4  | 19.6  |
| 1007.8 | 850.2  | 1092.7 | 785.3 | 332.3 | 1080.3 | 778.2  | 71.0  | 86.0  |
| 428.6  | 480.4  | 396.0  | 270.4 | 168.1 | 1090.2 | 981.2  | 160.6 | 242.1 |
| 78.5   | 70.9   | 55.1   | 38.0  | 19.9  | 110.5  | 78.1   | 54.0  | 67.7  |
| 345.3  | 344.8  | 320.1  | 152.9 | 124.8 | 441.7  | 204.5  | 248.9 | 295.5 |
| 453.3  | 425.1  | 384.3  | 318.7 | 121.1 | 509.6  | 346.8  | 66.9  | 125.2 |
| 35.4   | 35.0   | 3.3    | 43.2  | 5.8   | 208.5  | 151.2  | 71.5  | 114.2 |
| 5.8    | 12.6   | 5.8    | 5.8   | 1.3   | 33.7   | 2.1    | 22.1  | 29.6  |
| 39.8   | 54.0   | 46.9   | 57.3  | 17.9  | 2723.8 | 1970.9 | 82.7  | 120.3 |
| 217.1  | 217.7  | 208.5  | 167.7 | 45.9  | 175.8  | 83.7   | 42.8  | 66.3  |
| 81.8   | 80.4   | 90.2   | 43.0  | 32.2  | 108.3  | 52.4   | 18.7  | 24.7  |
| 9.0    | 5.4    | 4.4    | 2.8   | 3.9   | 1.5    | 1.9    | 2.1   | 4.4   |
| 1329.3 | 1048.6 | 945.0  | 501.9 | 346.5 | 1702.0 | 1186.2 | 70.5  | 101.4 |
| 297.2  | 366.9  | 373.8  | 283.5 | 123.8 | 729.7  | 534.3  | 174.6 | 157.6 |
| 204.4  | 186.5  | 173.1  | 183.4 | 58.6  | 270.7  | 252.3  | 200.8 | 314.3 |
| 48.2   | 34.5   | 23.7   | 38.3  | 15.1  | 21.9   | 14.2   | 15.1  | 34.4  |
| 70.2   | 57.3   | 51.0   | 51.5  | 27.1  | 45.7   | 25.6   | 13.3  | 30.3  |
| 74.2   | 68.1   | 78.6   | 54.3  | 21.2  | 70.8   | 57.6   | 33.6  | 56.8  |
| 61.0   | 57.7   | 53.2   | 30.1  | 19.3  | 367.5  | 193.6  | 44.1  | 33.5  |
| 157.0  | 195.4  | 134.5  | 80.5  | 70.9  | 888.5  | 582.2  | 23.2  | 29.7  |
| 243.4  | 267.1  | 222.5  | 160.9 | 102.7 | 366.6  | 309.6  | 99.1  | 105.2 |
| 254.7  | 208.2  | 167.8  | 236.3 | 67.6  | 262.3  | 140.2  | 58.8  | 126.4 |
| 365.2  | 311.0  | 352.0  | 377.5 | 106.5 | 399.2  | 321.8  | 158.8 | 244.3 |
| 74.6   | 64.1   | 80.5   | 63.5  | 31.5  | 84.9   | 42.9   | 64.7  | 97.9  |
| 21.6   | 23.9   | 31.9   | 37.6  | 15.9  | 580.5  | 409.0  | 4.0   | 3.8   |
| 14.5   | 2.8    | 3.3    | 26.2  | 6.8   | 661.8  | 494.0  | 6.2   | 2.4   |
| 53.3   | 29.0   | 38.8   | 42.2  | 16.4  | 677.1  | 322.5  | 2.2   | 2.7   |
| 44.1   | 17.5   | 36.7   | 20.8  | 12.7  | 893.3  | 486.7  | 1.8   | 2.9   |
| 168.1  | 155.5  | 131.1  | 188.1 | 54.9  | 331.8  | 206.6  | 450.0 | 569.4 |
| 133.6  | 136.2  | 120.4  | 115.3 | 35.2  | 140.6  | 82.2   | 115.2 | 157.1 |
| 92.0   | 87.4   | 101.3  | 111.1 | 19.0  | 106.6  | 70.9   | 132.4 | 195.7 |
| 305.2  | 247.9  | 276.6  | 222.0 | 88.9  | 321.7  | 241.0  | 218.8 | 281.3 |
| 670.5  | 665.2  | 596.3  | 431.6 | 264.0 | 836.2  | 474.3  | 80.4  | 129.1 |
| 439.5  | 410.2  | 434.9  | 339.9 | 145.1 | 659.4  | 415.5  | 118.3 | 121.5 |
| 697.9  | 737.5  | 712.1  | 549.0 | 207.9 | 1805.9 | 1361.0 | 225.0 | 301.1 |
| 230.9  | 161.5  | 195.1  | 180.1 | 81.4  | 298.7  | 187.9  | 163.1 | 236.5 |
| 390.6  | 345.2  | 419.4  | 384.4 | 135.9 | 42.1   | 11.6   | 22.0  | 30.5  |
| 369.6  | 227.9  | 305.1  | 268.4 | 97.6  | 8.6    | 6.9    | 3.3   | 3.1   |
| 77.2   | 38.9   | 46.0   | 51.7  | 21.8  | 102.1  | 2.5    | 42.9  | 54.0  |
| 87.1   | 72.2   | 114.9  | 78.0  | 37.5  | 119.7  | 66.5   | 26.2  | 59.8  |
| 283.1  | 275.1  | 236.9  | 215.4 | 92.1  | 374.4  | 206.8  | 85.6  | 64.9  |
| 207.6  | 224.8  | 199.7  | 163.1 | 63.5  | 229.4  | 135.1  | 58.0  | 70.9  |
| 109.6  | 114.7  | 146.6  | 283.6 | 37.1  | 573.6  | 366.9  | 9.0   | 5.0   |
| 271.5  | 243.4  | 282.5  | 647.4 | 138.3 | 1180.4 | 799.8  | 17.3  | 14.4  |

|        |        |        |        |        |        |        |        |        |
|--------|--------|--------|--------|--------|--------|--------|--------|--------|
| 294.2  | 216.6  | 233.7  | 174.8  | 95.3   | 374.6  | 173.9  | 192.4  | 240.8  |
| 2059.9 | 1878.7 | 1867.4 | 1520.8 | 800.1  | 1663.3 | 1131.8 | 295.0  | 422.9  |
| 934.6  | 930.1  | 878.7  | 1015.8 | 318.8  | 472.3  | 404.4  | 56.8   | 94.8   |
| 11.2   | 5.9    | 17.5   | 16.6   | 6.7    | 64.8   | 27.7   | 16.8   | 20.9   |
| 7854.9 | 7573.7 | 7030.8 | 6680.2 | 3595.9 | 7948.4 | 6412.7 | 2595.2 | 2901.4 |
| 57.6   | 48.1   | 57.0   | 32.0   | 19.8   | 48.4   | 34.0   | 42.1   | 62.1   |
| 166.1  | 210.3  | 214.4  | 190.0  | 57.2   | 506.1  | 330.2  | 48.5   | 60.7   |
| 17.9   | 18.2   | 15.7   | 12.5   | 0.9    | 9.4    | 3.3    | 14.0   | 21.3   |
| 543.8  | 771.6  | 757.5  | 979.0  | 229.1  | 932.4  | 691.0  | 57.8   | 83.7   |
| 519.4  | 575.7  | 613.9  | 739.4  | 140.1  | 484.7  | 298.8  | 165.3  | 191.9  |
| 697.6  | 531.8  | 516.4  | 532.6  | 171.9  | 1152.0 | 1034.7 | 79.2   | 85.7   |
| 207.4  | 255.0  | 208.8  | 224.3  | 95.6   | 536.8  | 294.6  | 49.8   | 85.5   |
| 166.7  | 138.2  | 149.0  | 151.4  | 51.3   | 500.3  | 338.9  | 44.1   | 48.8   |
| 218.7  | 165.3  | 158.9  | 78.9   | 58.9   | 287.0  | 220.7  | 102.7  | 127.8  |
| 149.1  | 117.4  | 97.0   | 58.8   | 32.1   | 1035.8 | 572.4  | 54.2   | 49.9   |
| 84.8   | 117.3  | 98.7   | 90.3   | 37.5   | 14.2   | 28.1   | 14.1   | 8.9    |
| 23.1   | 29.8   | 32.3   | 24.7   | 9.0    | 1.5    | 6.1    | 1.6    | 8.1    |
| 86.8   | 83.6   | 68.2   | 77.6   | 28.2   | 18.1   | 26.5   | 25.6   | 20.9   |
| 14.3   | 16.5   | 21.9   | 21.3   | 5.5    | 39.6   | 26.9   | 0.9    | 0.8    |
| 36.6   | 34.8   | 38.4   | 31.1   | 14.9   | 98.0   | 55.6   | 4.7    | 2.1    |
| 29.3   | 26.2   | 22.1   | 13.6   | 10.1   | 51.5   | 45.7   | 24.9   | 4.7    |
| 825.7  | 785.8  | 780.2  | 633.8  | 294.2  | 1182.5 | 847.7  | 99.0   | 129.1  |
| 98.6   | 54.8   | 80.5   | 28.9   | 19.3   | 319.8  | 304.1  | 115.4  | 87.6   |
| 31.6   | 34.1   | 32.6   | 15.4   | 7.2    | 1354.2 | 866.4  | 98.6   | 118.0  |
| 11.0   | 3.2    | 4.1    | 0.8    | 6.3    | 550.2  | 387.6  | 66.3   | 56.9   |
| 213.1  | 176.5  | 191.5  | 169.7  | 65.8   | 1183.1 | 906.8  | 116.1  | 199.9  |
| 131.0  | 141.0  | 118.8  | 96.3   | 36.1   | 826.0  | 595.6  | 160.7  | 211.7  |
| 250.9  | 245.2  | 596.1  | 1544.2 | 203.0  | 237.6  | 166.4  | 15.1   | 24.9   |
| 2380.9 | 2123.6 | 2423.4 | 1981.8 | 878.0  | 3461.4 | 3005.6 | 427.7  | 541.9  |
| 7.1    | 8.8    | 4.9    | 11.7   | 5.2    | 14.1   | 8.1    | 2.8    | 1.8    |
| 1040.5 | 1038.3 | 1050.5 | 894.7  | 370.7  | 1067.8 | 860.6  | 135.0  | 195.5  |
| 99.3   | 101.4  | 113.0  | 100.3  | 30.5   | 168.9  | 109.4  | 133.7  | 217.3  |
| 386.1  | 337.5  | 405.1  | 363.1  | 141.5  | 1555.9 | 1380.2 | 62.5   | 99.8   |
| 1611.4 | 1453.0 | 1274.4 | 1118.9 | 453.3  | 1777.0 | 1286.9 | 288.2  | 324.9  |
| 316.2  | 278.3  | 417.0  | 341.5  | 128.4  | 412.5  | 313.3  | 61.7   | 74.7   |
| 347.9  | 296.1  | 344.8  | 333.7  | 118.2  | 662.7  | 539.1  | 80.4   | 105.4  |
| 163.6  | 155.8  | 163.2  | 142.2  | 64.1   | 240.9  | 172.5  | 55.5   | 69.4   |
| 132.0  | 110.3  | 134.8  | 102.0  | 44.9   | 314.0  | 223.4  | 32.2   | 25.7   |
| 427.0  | 399.1  | 509.2  | 595.9  | 162.6  | 338.9  | 222.7  | 109.7  | 137.1  |
| 102.8  | 82.7   | 101.4  | 210.3  | 50.5   | 131.9  | 120.1  | 7.6    | 20.2   |
| 6.6    | 20.5   | 21.9   | 21.7   | 7.2    | 131.4  | 74.7   | 2.0    | 5.5    |
| 178.5  | 181.2  | 181.5  | 156.6  | 87.0   | 698.4  | 322.9  | 3.2    | 2.7    |
| 7.8    | 0.8    | 1.6    | 1.6    | 1.0    | 22.5   | 12.8   | 38.0   | 35.4   |
| 0.9    | 0.6    | 3.3    | 7.9    | 3.4    | 30.6   | 26.2   | 39.9   | 70.1   |
| 119.2  | 82.8   | 73.2   | 59.0   | 27.8   | 112.4  | 84.3   | 85.3   | 97.6   |
| 1741.2 | 1659.5 | 1437.3 | 1009.4 | 570.9  | 3873.7 | 3380.3 | 318.3  | 326.6  |
| 239.3  | 191.2  | 179.5  | 135.4  | 46.6   | 590.8  | 296.4  | 171.1  | 197.3  |
| 156.0  | 125.4  | 150.4  | 98.9   | 43.4   | 183.8  | 93.1   | 74.7   | 75.5   |
| 224.0  | 214.6  | 293.3  | 317.4  | 109.3  | 751.2  | 607.9  | 25.0   | 46.4   |
| 4.1    | 0.7    | 4.3    | 7.2    | 4.2    | 21.5   | 17.3   | 3.0    | 8.5    |
| 48.4   | 36.4   | 45.7   | 49.0   | 22.8   | 122.5  | 87.8   | 25.1   | 31.0   |
| 357.2  | 289.3  | 300.2  | 298.4  | 113.4  | 421.6  | 294.7  | 86.6   | 104.3  |
| 409.3  | 392.2  | 367.7  | 319.8  | 130.5  | 1119.7 | 875.9  | 189.3  | 250.6  |

|        |        |        |        |        |        |        |        |        |
|--------|--------|--------|--------|--------|--------|--------|--------|--------|
| 3704.1 | 3297.1 | 3027.0 | 2534.1 | 1281.8 | 6249.2 | 4897.7 | 1522.1 | 1846.7 |
| 33.9   | 10.7   | 16.4   | 20.8   | 19.1   | 122.1  | 74.6   | 39.5   | 49.8   |
| 26.8   | 14.4   | 18.0   | 21.6   | 7.1    | 51.3   | 28.1   | 45.0   | 40.4   |
| 23.3   | 21.3   | 36.5   | 27.4   | 4.4    | 105.9  | 15.3   | 5.4    | 23.8   |
| 135.5  | 126.7  | 102.2  | 107.6  | 35.6   | 369.2  | 183.5  | 124.9  | 120.0  |
| 705.7  | 606.4  | 747.7  | 739.9  | 218.5  | 446.2  | 311.2  | 83.0   | 105.6  |
| 349.7  | 337.8  | 365.5  | 298.7  | 93.4   | 705.7  | 401.7  | 263.9  | 451.8  |
| 1134.4 | 1192.3 | 1043.4 | 813.2  | 475.4  | 880.7  | 1041.3 | 297.9  | 318.4  |
| 577.8  | 492.0  | 500.7  | 324.7  | 166.8  | 1243.4 | 869.5  | 99.9   | 198.1  |
| 18.4   | 17.9   | 17.0   | 14.0   | 7.0    | 29.5   | 16.5   | 15.3   | 11.9   |
| 108.6  | 78.4   | 134.0  | 279.3  | 44.9   | 51.2   | 54.5   | 50.4   | 64.1   |
| 31.5   | 27.0   | 20.0   | 15.0   | 6.6    | 26.2   | 10.1   | 76.4   | 136.3  |
| 599.1  | 575.1  | 580.4  | 590.3  | 199.0  | 226.7  | 206.2  | 65.3   | 70.2   |
| 32.6   | 34.5   | 32.5   | 18.7   | 4.5    | 14.2   | 8.6    | 16.2   | 3.4    |
| 128.1  | 104.0  | 114.4  | 124.3  | 55.6   | 218.2  | 157.9  | 173.6  | 230.3  |
| 382.0  | 337.0  | 317.3  | 236.8  | 118.5  | 463.0  | 305.2  | 243.3  | 338.4  |
| 24.0   | 21.5   | 21.2   | 18.6   | 1.1    | 47.1   | 24.1   | 24.3   | 25.9   |
| 498.3  | 484.2  | 442.9  | 400.1  | 219.6  | 436.6  | 197.8  | 66.3   | 100.8  |
| 143.5  | 92.6   | 132.8  | 91.3   | 55.8   | 200.3  | 161.6  | 99.9   | 93.9   |
| 353.5  | 359.4  | 404.7  | 401.9  | 135.1  | 673.7  | 412.4  | 68.4   | 122.5  |
| 565.7  | 425.4  | 438.0  | 69.3   | 130.6  | 196.2  | 102.7  | 261.2  | 404.7  |
| 96.9   | 87.0   | 101.2  | 129.0  | 24.8   | 259.8  | 161.2  | 97.0   | 127.2  |
| 543.8  | 408.3  | 558.2  | 721.3  | 149.8  | 1764.7 | 1277.6 | 133.7  | 198.0  |
| 308.9  | 249.2  | 277.6  | 532.8  | 99.3   | 568.5  | 481.2  | 162.0  | 236.6  |
| 391.6  | 324.2  | 345.3  | 679.3  | 141.1  | 997.1  | 905.7  | 168.6  | 247.0  |
| 3.0    | 3.2    | 10.2   | 1.3    | 0.7    | 32.0   | 19.5   | 7.9    | 1.9    |
| 10.6   | 16.0   | 14.7   | 15.6   | 7.5    | 117.2  | 103.2  | 9.6    | 7.5    |
| 305.5  | 282.8  | 299.6  | 351.5  | 84.8   | 365.0  | 206.8  | 132.1  | 139.8  |
| 145.8  | 127.7  | 137.7  | 74.1   | 53.8   | 207.9  | 143.3  | 91.9   | 117.0  |
| 437.9  | 461.2  | 473.2  | 339.5  | 149.7  | 646.6  | 406.9  | 93.1   | 62.4   |
| 2.4    | 2.3    | 2.2    | 1.6    | 0.5    | 6.4    | 10.6   | 18.4   | 23.8   |
| 25.7   | 21.9   | 21.4   | 18.0   | 5.2    | 113.4  | 81.1   | 52.1   | 56.4   |
| 25.0   | 21.0   | 20.7   | 20.6   | 18.9   | 6.0    | 22.7   | 42.0   | 45.1   |
| 37.2   | 23.9   | 35.4   | 51.7   | 9.8    | 19.3   | 15.1   | 142.5  | 140.9  |
| 352.7  | 324.4  | 313.5  | 256.1  | 142.3  | 191.7  | 139.9  | 134.7  | 196.2  |
| 186.0  | 194.3  | 166.6  | 101.6  | 70.0   | 1301.5 | 780.4  | 56.9   | 95.3   |
| 255.2  | 270.8  | 179.1  | 231.2  | 74.5   | 369.8  | 238.8  | 27.3   | 23.1   |
| 157.2  | 133.3  | 134.9  | 75.9   | 71.0   | 397.6  | 351.4  | 117.2  | 117.2  |
| 943.9  | 925.9  | 861.5  | 573.1  | 265.3  | 921.9  | 431.7  | 236.6  | 303.2  |
| 1154.7 | 1055.3 | 1034.5 | 595.6  | 319.2  | 1377.0 | 938.8  | 455.0  | 568.3  |
| 94.6   | 104.6  | 94.5   | 87.5   | 34.0   | 459.2  | 371.4  | 110.4  | 163.7  |
| 53.6   | 61.7   | 49.2   | 50.7   | 28.1   | 268.4  | 230.7  | 27.1   | 46.2   |
| 271.2  | 234.4  | 264.8  | 280.4  | 125.9  | 492.0  | 290.2  | 114.9  | 171.0  |
| 286.5  | 350.4  | 267.9  | 148.6  | 94.4   | 442.4  | 239.9  | 122.4  | 207.8  |
| 80.2   | 86.9   | 82.9   | 38.8   | 12.2   | 111.4  | 36.9   | 38.4   | 62.5   |
| 108.9  | 88.9   | 95.4   | 38.5   | 33.8   | 120.9  | 70.8   | 285.1  | 411.6  |
| 69.2   | 43.2   | 74.5   | 17.5   | 15.0   | 151.5  | 108.8  | 46.5   | 50.4   |
| 234.4  | 242.5  | 247.4  | 265.8  | 65.8   | 302.8  | 217.4  | 30.3   | 56.4   |
| 30.2   | 40.4   | 19.3   | 2.5    | 4.1    | 18.8   | 11.3   | 2.7    | 4.5    |
| 65.5   | 48.1   | 9.5    | 6.0    | 12.3   | 15.3   | 11.0   | 14.2   | 3.9    |
| 16.8   | 13.3   | 12.0   | 8.2    | 2.2    | 141.1  | 151.2  | 36.8   | 35.7   |
| 572.5  | 600.6  | 608.8  | 456.6  | 175.7  | 878.7  | 439.6  | 103.1  | 181.4  |
| 180.3  | 153.8  | 162.1  | 144.7  | 52.8   | 287.5  | 209.7  | 38.9   | 53.6   |

|        |        |        |        |       |        |        |        |        |
|--------|--------|--------|--------|-------|--------|--------|--------|--------|
| 22.1   | 11.9   | 19.3   | 17.9   | 8.1   | 31.2   | 12.7   | 3.4    | 10.9   |
| 7.8    | 12.6   | 25.4   | 12.9   | 2.8   | 5.8    | 3.0    | 115.0  | 194.1  |
| 1320.3 | 1063.6 | 1205.1 | 1075.8 | 454.4 | 2439.6 | 1952.0 | 340.1  | 509.8  |
| 609.8  | 680.4  | 521.6  | 431.0  | 211.4 | 489.0  | 349.5  | 75.7   | 74.9   |
| 6.9    | 15.7   | 11.1   | 6.5    | 1.4   | 45.1   | 39.8   | 14.0   | 9.2    |
| 105.4  | 105.9  | 88.2   | 23.6   | 30.5  | 371.7  | 196.9  | 44.1   | 57.2   |
| 225.7  | 175.0  | 195.9  | 136.2  | 80.8  | 335.6  | 252.8  | 225.3  | 248.6  |
| 317.9  | 214.9  | 249.5  | 151.8  | 114.0 | 255.5  | 142.3  | 100.3  | 72.3   |
| 358.4  | 323.9  | 291.9  | 494.3  | 88.5  | 802.2  | 615.8  | 13.4   | 22.3   |
| 146.5  | 105.4  | 87.2   | 168.3  | 35.5  | 472.9  | 456.5  | 8.1    | 10.3   |
| 117.8  | 112.8  | 108.7  | 43.4   | 27.2  | 138.2  | 55.0   | 36.1   | 71.7   |
| 390.8  | 368.6  | 366.7  | 256.6  | 117.4 | 274.1  | 158.6  | 32.8   | 46.7   |
| 137.4  | 117.4  | 140.5  | 161.3  | 40.3  | 696.7  | 347.3  | 82.4   | 72.6   |
| 36.7   | 31.9   | 9.9    | 18.8   | 11.8  | 94.4   | 67.3   | 11.8   | 28.6   |
| 2.8    | 2.7    | 3.2    | 0.6    | 2.2   | 9.6    | 2.4    | 1.2    | 2.5    |
| 13.1   | 29.2   | 6.6    | 6.5    | 7.7   | 59.2   | 25.3   | 8.0    | 2.3    |
| 153.4  | 91.6   | 120.1  | 78.4   | 65.5  | 540.1  | 292.7  | 100.9  | 100.3  |
| 2.5    | 11.8   | 12.9   | 14.9   | 3.3   | 5.2    | 2.5    | 1.3    | 1.8    |
| 99.5   | 132.8  | 135.3  | 211.9  | 58.3  | 248.2  | 335.3  | 320.4  | 351.2  |
| 54.6   | 50.8   | 85.6   | 136.4  | 36.7  | 159.6  | 194.1  | 309.0  | 602.8  |
| 273.9  | 193.3  | 162.1  | 180.3  | 71.0  | 739.9  | 322.4  | 92.4   | 127.8  |
| 104.3  | 104.5  | 148.3  | 241.8  | 49.7  | 364.2  | 299.2  | 184.0  | 177.5  |
| 124.8  | 100.4  | 95.5   | 71.5   | 24.3  | 72.5   | 20.2   | 41.5   | 35.8   |
| 221.6  | 171.8  | 178.3  | 186.1  | 77.4  | 342.3  | 196.4  | 62.9   | 63.7   |
| 112.3  | 106.2  | 108.2  | 113.6  | 42.9  | 110.2  | 85.4   | 66.6   | 86.2   |
| 1126.0 | 1099.6 | 1079.3 | 1127.0 | 422.5 | 1716.5 | 1431.0 | 119.7  | 164.8  |
| 215.9  | 185.1  | 241.1  | 252.0  | 59.1  | 332.4  | 198.9  | 78.1   | 105.4  |
| 274.2  | 318.7  | 329.3  | 361.6  | 112.6 | 285.4  | 241.7  | 54.7   | 98.3   |
| 2968.6 | 2671.9 | 2467.2 | 2089.5 | 933.9 | 1537.0 | 1274.9 | 1018.4 | 1111.6 |
| 363.6  | 316.9  | 325.1  | 159.1  | 114.6 | 781.8  | 410.1  | 169.2  | 199.8  |
| 96.1   | 68.7   | 85.5   | 66.4   | 29.9  | 66.1   | 43.3   | 79.8   | 107.7  |
| 83.2   | 73.9   | 75.4   | 78.3   | 35.0  | 107.6  | 41.6   | 47.2   | 90.4   |
| 1.7    | 4.4    | 6.3    | 0.7    | 2.2   | 136.0  | 107.4  | 19.1   | 24.3   |
| 8.2    | 5.4    | 1.7    | 8.8    | 0.3   | 79.3   | 34.2   | 40.6   | 56.8   |
| 242.0  | 251.0  | 215.5  | 147.0  | 81.2  | 318.9  | 228.5  | 119.2  | 88.1   |
| 238.3  | 226.1  | 256.0  | 209.0  | 74.6  | 694.5  | 352.6  | 35.2   | 29.9   |
| 87.0   | 81.1   | 69.4   | 58.1   | 35.0  | 304.5  | 155.5  | 43.1   | 38.8   |
| 146.8  | 140.2  | 127.4  | 90.2   | 49.3  | 993.7  | 599.1  | 80.4   | 129.9  |
| 160.2  | 223.4  | 142.8  | 38.5   | 39.0  | 223.7  | 108.0  | 27.1   | 35.8   |
| 2.5    | 0.8    | 4.8    | 2.3    | 5.8   | 1563.5 | 1442.9 | 360.6  | 669.4  |
| 33.9   | 46.3   | 42.9   | 40.7   | 11.5  | 130.8  | 78.3   | 71.7   | 63.5   |
| 24.7   | 32.9   | 30.7   | 27.4   | 3.9   | 59.4   | 55.4   | 10.0   | 20.3   |
| 82.8   | 99.2   | 107.3  | 61.7   | 43.2  | 90.2   | 29.6   | 66.1   | 53.4   |
| 79.3   | 83.7   | 85.8   | 152.9  | 45.2  | 917.2  | 589.8  | 26.3   | 26.2   |
| 134.5  | 118.2  | 148.0  | 106.8  | 50.4  | 679.6  | 356.9  | 85.1   | 124.8  |
| 33.9   | 50.5   | 27.1   | 29.8   | 18.2  | 52.0   | 33.5   | 25.7   | 8.1    |
| 424.7  | 446.0  | 499.1  | 407.3  | 204.0 | 542.3  | 440.3  | 54.9   | 55.6   |
| 344.8  | 396.7  | 401.0  | 382.0  | 179.4 | 664.7  | 465.7  | 44.2   | 98.4   |
| 426.5  | 341.1  | 356.9  | 305.4  | 130.5 | 344.9  | 228.5  | 208.3  | 221.3  |
| 71.2   | 64.9   | 52.4   | 25.0   | 16.9  | 207.0  | 115.4  | 24.5   | 29.7   |
| 46.3   | 23.8   | 20.7   | 27.9   | 5.4   | 178.3  | 195.7  | 3.7    | 7.0    |
| 111.0  | 81.5   | 79.4   | 69.8   | 29.0  | 174.2  | 86.4   | 78.5   | 117.8  |
| 167.6  | 147.5  | 131.7  | 115.8  | 49.8  | 216.6  | 153.4  | 146.4  | 148.1  |

|        |        |        |        |        |        |        |       |       |
|--------|--------|--------|--------|--------|--------|--------|-------|-------|
| 7.9    | 6.8    | 0.9    | 1.1    | 9.9    | 4.2    | 18.3   | 1.5   | 22.4  |
| 177.0  | 204.7  | 159.9  | 109.0  | 39.2   | 884.9  | 891.9  | 16.4  | 32.5  |
| 30.5   | 38.7   | 31.6   | 25.1   | 3.9    | 122.0  | 128.6  | 10.6  | 28.8  |
| 172.7  | 184.5  | 171.3  | 133.4  | 70.9   | 660.1  | 642.1  | 205.2 | 272.7 |
| 43.2   | 31.3   | 35.4   | 35.3   | 13.9   | 76.5   | 63.2   | 46.1  | 49.9  |
| 176.0  | 112.6  | 138.1  | 97.1   | 51.7   | 223.0  | 205.7  | 107.7 | 187.3 |
| 381.4  | 387.2  | 332.2  | 310.5  | 75.9   | 130.0  | 91.4   | 56.8  | 111.8 |
| 1331.7 | 1202.1 | 1070.4 | 898.7  | 472.6  | 1577.2 | 957.8  | 446.7 | 514.1 |
| 567.8  | 528.6  | 629.3  | 556.1  | 254.1  | 769.3  | 563.3  | 114.8 | 138.0 |
| 48.5   | 49.5   | 43.2   | 22.5   | 18.6   | 232.7  | 133.4  | 74.0  | 132.2 |
| 111.1  | 116.5  | 131.0  | 67.1   | 51.3   | 181.9  | 144.4  | 8.0   | 28.1  |
| 452.7  | 471.0  | 413.3  | 282.7  | 129.6  | 414.5  | 275.6  | 112.0 | 115.1 |
| 97.2   | 96.2   | 105.2  | 52.2   | 45.0   | 74.6   | 53.4   | 32.8  | 41.4  |
| 364.3  | 285.3  | 369.7  | 306.1  | 98.0   | 324.8  | 286.9  | 93.8  | 153.1 |
| 269.8  | 205.7  | 236.4  | 142.9  | 47.9   | 275.6  | 145.3  | 34.2  | 71.1  |
| 275.4  | 192.4  | 206.7  | 153.1  | 77.2   | 303.2  | 162.5  | 81.8  | 68.5  |
| 373.1  | 297.7  | 320.0  | 295.6  | 89.3   | 588.7  | 386.4  | 39.9  | 66.4  |
| 195.2  | 227.0  | 245.6  | 255.9  | 72.8   | 435.7  | 359.9  | 22.1  | 33.2  |
| 14.2   | 9.2    | 14.2   | 10.1   | 5.1    | 42.9   | 24.2   | 11.2  | 32.3  |
| 143.7  | 119.3  | 116.2  | 73.1   | 48.4   | 1003.7 | 818.0  | 44.8  | 75.0  |
| 130.8  | 167.1  | 166.4  | 137.4  | 40.9   | 647.9  | 393.9  | 8.4   | 25.4  |
| 1100.8 | 1098.1 | 1101.8 | 1019.9 | 435.8  | 4785.4 | 4163.6 | 287.6 | 314.6 |
| 148.2  | 126.5  | 130.5  | 75.1   | 41.0   | 336.4  | 209.2  | 277.0 | 452.8 |
| 6.1    | 4.1    | 4.3    | 6.7    | 5.3    | 905.7  | 641.4  | 244.9 | 239.2 |
| 4.3    | 2.9    | 2.9    | 1.9    | 1.1    | 133.0  | 58.5   | 3.3   | 4.5   |
| 2.7    | 1.6    | 2.3    | 1.9    | 1.1    | 84.1   | 85.1   | 2.7   | 2.9   |
| 799.8  | 796.7  | 810.1  | 722.5  | 289.5  | 518.1  | 303.7  | 139.7 | 196.8 |
| 86.9   | 62.3   | 59.7   | 39.8   | 20.0   | 304.4  | 154.3  | 26.6  | 69.3  |
| 5.3    | 15.5   | 6.8    | 17.0   | 1.1    | 93.9   | 64.0   | 20.6  | 38.3  |
| 167.1  | 169.4  | 180.9  | 158.3  | 63.2   | 164.8  | 154.2  | 43.9  | 58.0  |
| 0.6    | 1.1    | 1.2    | 12.2   | 2.4    | 106.8  | 52.6   | 4.8   | 24.2  |
| 8.0    | 10.8   | 20.2   | 15.9   | 7.1    | 25.0   | 17.9   | 10.7  | 13.9  |
| 14.5   | 24.9   | 10.4   | 19.8   | 4.1    | 45.1   | 18.2   | 49.2  | 40.8  |
| 2934.0 | 2570.3 | 2370.3 | 1722.6 | 1004.2 | 1077.9 | 825.9  | 445.4 | 490.3 |
| 33.4   | 28.6   | 22.4   | 21.4   | 4.6    | 52.6   | 36.1   | 28.4  | 34.0  |
| 139.6  | 132.4  | 135.9  | 60.8   | 51.8   | 562.1  | 330.3  | 107.6 | 123.6 |
| 233.3  | 231.7  | 192.2  | 144.3  | 74.5   | 456.8  | 293.2  | 131.3 | 151.9 |
| 241.4  | 102.8  | 131.4  | 57.6   | 38.7   | 262.5  | 196.8  | 116.5 | 94.1  |
| 209.5  | 161.7  | 153.5  | 145.1  | 72.7   | 247.7  | 147.0  | 91.2  | 95.2  |
| 181.0  | 181.3  | 264.9  | 933.6  | 134.6  | 672.4  | 489.5  | 55.2  | 99.1  |
| 47.8   | 43.0   | 88.8   | 327.2  | 30.2   | 222.4  | 162.5  | 4.6   | 5.6   |
| 196.6  | 96.4   | 100.5  | 75.9   | 38.6   | 456.1  | 381.3  | 79.4  | 61.7  |
| 322.5  | 368.4  | 361.7  | 281.1  | 125.2  | 616.0  | 580.5  | 165.9 | 225.6 |
| 166.8  | 209.1  | 149.6  | 151.4  | 60.6   | 239.0  | 177.2  | 145.2 | 200.6 |
| 164.4  | 167.8  | 388.9  | 437.8  | 170.1  | 212.2  | 142.4  | 189.8 | 230.7 |
| 54.3   | 62.9   | 46.4   | 57.3   | 27.4   | 99.2   | 83.0   | 41.0  | 42.9  |
| 51.8   | 115.1  | 32.4   | 12.3   | 38.5   | 129.5  | 129.0  | 63.1  | 77.1  |
| 417.3  | 439.9  | 396.8  | 284.3  | 130.5  | 977.4  | 706.2  | 128.3 | 154.9 |
| 37.0   | 24.2   | 7.1    | 13.0   | 2.5    | 43.6   | 7.4    | 3.0   | 6.2   |
| 341.2  | 284.9  | 310.4  | 397.8  | 139.6  | 692.8  | 466.5  | 153.9 | 120.2 |
| 479.3  | 489.4  | 490.5  | 445.7  | 153.7  | 1145.7 | 905.7  | 124.8 | 109.1 |
| 1458.6 | 1599.6 | 1547.1 | 1336.1 | 613.6  | 1707.1 | 1012.1 | 88.4  | 153.2 |
| 224.5  | 195.6  | 152.8  | 61.6   | 107.1  | 384.6  | 164.7  | 2.9   | 20.1  |

|        |        |        |        |        |        |        |       |       |
|--------|--------|--------|--------|--------|--------|--------|-------|-------|
| 348.2  | 348.1  | 269.3  | 114.0  | 197.3  | 1154.8 | 773.2  | 24.4  | 23.2  |
| 1641.9 | 1574.8 | 1306.9 | 820.6  | 609.8  | 2136.6 | 1556.7 | 314.5 | 430.4 |
| 1931.0 | 1624.0 | 1639.0 | 1319.7 | 613.5  | 4321.6 | 3156.6 | 451.7 | 560.2 |
| 104.9  | 139.1  | 447.8  | 2158.2 | 155.8  | 564.5  | 734.0  | 11.0  | 7.3   |
| 357.2  | 324.5  | 281.1  | 261.7  | 119.8  | 278.7  | 154.6  | 61.9  | 106.6 |
| 68.6   | 90.8   | 76.4   | 105.8  | 30.1   | 88.5   | 70.5   | 5.3   | 8.0   |
| 72.5   | 85.4   | 57.8   | 40.2   | 23.2   | 662.9  | 510.4  | 26.6  | 34.1  |
| 6.1    | 0.8    | 5.1    | 1.1    | 3.0    | 481.4  | 430.9  | 13.1  | 20.7  |
| 0.5    | 0.6    | 0.5    | 1.4    | 0.4    | 503.5  | 431.0  | 14.1  | 15.8  |
| 49.3   | 37.8   | 48.9   | 33.4   | 17.0   | 55.0   | 24.9   | 12.9  | 21.0  |
| 198.0  | 184.1  | 208.3  | 146.6  | 81.5   | 121.4  | 94.1   | 51.8  | 109.1 |
| 78.3   | 67.3   | 79.6   | 57.6   | 22.8   | 118.3  | 94.8   | 94.6  | 133.4 |
| 994.6  | 850.1  | 864.1  | 631.5  | 270.6  | 2229.6 | 1750.9 | 166.2 | 222.5 |
| 6.8    | 14.7   | 4.3    | 2.2    | 3.2    | 54.4   | 46.5   | 1.5   | 14.1  |
| 1559.3 | 1304.2 | 1051.4 | 874.4  | 483.3  | 1026.9 | 1160.1 | 340.7 | 449.5 |
| 132.3  | 115.6  | 88.2   | 109.4  | 50.3   | 170.5  | 133.2  | 152.7 | 133.9 |
| 259.8  | 230.6  | 296.5  | 348.4  | 79.4   | 374.7  | 256.7  | 40.4  | 70.1  |
| 94.9   | 72.9   | 92.6   | 76.0   | 20.5   | 42.7   | 14.3   | 46.3  | 66.4  |
| 586.4  | 449.9  | 494.8  | 640.8  | 110.7  | 547.7  | 291.1  | 120.4 | 179.2 |
| 53.7   | 49.2   | 47.6   | 27.8   | 19.1   | 85.5   | 64.4   | 34.4  | 38.0  |
| 117.9  | 40.2   | 74.1   | 29.6   | 28.0   | 200.6  | 73.3   | 76.0  | 113.4 |
| 7.7    | 7.6    | 3.0    | 2.5    | 0.7    | 4.4    | 2.1    | 10.5  | 8.3   |
| 8.7    | 5.0    | 6.2    | 6.8    | 2.7    | 3.0    | 3.9    | 12.7  | 17.0  |
| 21.9   | 13.5   | 24.9   | 22.0   | 1.4    | 2.6    | 6.5    | 8.2   | 26.3  |
| 145.5  | 117.2  | 131.3  | 93.5   | 45.2   | 142.3  | 124.2  | 24.3  | 24.2  |
| 20.0   | 7.5    | 20.2   | 8.4    | 9.3    | 22.9   | 14.1   | 6.5   | 1.7   |
| 2709.1 | 2597.7 | 2845.6 | 3288.5 | 1466.2 | 2452.7 | 2088.9 | 364.5 | 330.4 |
| 178.4  | 169.3  | 160.9  | 102.8  | 50.0   | 270.1  | 179.1  | 94.8  | 149.4 |
| 188.2  | 227.1  | 169.7  | 163.1  | 39.1   | 206.6  | 88.8   | 39.4  | 47.5  |
| 15.5   | 6.0    | 17.6   | 9.2    | 15.4   | 18.8   | 10.2   | 7.5   | 12.7  |
| 205.2  | 175.5  | 187.7  | 156.0  | 57.0   | 298.3  | 172.5  | 67.5  | 100.4 |
| 610.5  | 543.1  | 1339.4 | 1537.8 | 459.7  | 338.3  | 327.7  | 81.0  | 141.0 |
| 14.7   | 5.4    | 16.3   | 13.0   | 6.5    | 15.4   | 10.7   | 2.0   | 4.0   |
| 49.1   | 35.4   | 41.5   | 96.8   | 25.2   | 317.6  | 190.0  | 59.1  | 94.7  |
| 88.9   | 160.3  | 169.9  | 204.0  | 82.1   | 724.4  | 559.7  | 50.0  | 78.7  |
| 392.6  | 368.9  | 503.0  | 765.5  | 184.0  | 432.3  | 240.6  | 96.9  | 108.9 |
| 373.2  | 417.2  | 362.7  | 391.1  | 131.0  | 595.3  | 396.5  | 100.0 | 93.2  |
| 104.7  | 158.2  | 130.9  | 152.4  | 62.8   | 107.6  | 57.4   | 187.6 | 278.9 |
| 122.0  | 115.5  | 99.6   | 53.4   | 36.0   | 285.4  | 151.9  | 124.5 | 182.9 |
| 25.1   | 12.0   | 19.2   | 10.4   | 8.6    | 7.9    | 14.1   | 6.9   | 21.0  |
| 41.8   | 26.1   | 26.6   | 28.7   | 12.0   | 48.5   | 11.9   | 35.6  | 32.0  |
| 18.9   | 18.5   | 14.9   | 2.4    | 1.0    | 20.9   | 8.8    | 8.0   | 18.0  |
| 53.5   | 66.6   | 42.0   | 28.4   | 4.9    | 79.6   | 7.5    | 4.1   | 14.5  |
| 2902.7 | 2390.5 | 2228.9 | 1587.4 | 600.1  | 3130.7 | 2157.7 | 850.8 | 898.8 |
| 1170.5 | 1287.7 | 1359.9 | 1286.4 | 644.8  | 1421.9 | 960.8  | 98.4  | 102.8 |
| 3.1    | 8.9    | 7.0    | 3.5    | 0.1    | 52.0   | 43.6   | 3.5   | 4.1   |
| 20.6   | 2.8    | 13.7   | 1.7    | 3.3    | 131.5  | 109.8  | 12.4  | 14.8  |
| 72.6   | 82.7   | 75.6   | 36.4   | 20.4   | 170.0  | 133.9  | 30.7  | 37.5  |
| 159.1  | 152.4  | 146.1  | 103.8  | 43.4   | 360.5  | 238.9  | 17.5  | 56.9  |
| 250.8  | 187.1  | 223.5  | 164.4  | 69.8   | 261.1  | 240.4  | 86.2  | 124.5 |
| 390.1  | 333.0  | 411.0  | 357.1  | 170.8  | 443.1  | 358.4  | 75.3  | 96.7  |
| 591.3  | 421.3  | 464.3  | 335.8  | 131.9  | 1280.8 | 856.5  | 141.0 | 179.8 |
| 136.5  | 96.8   | 101.1  | 47.3   | 42.8   | 283.7  | 230.8  | 65.5  | 100.9 |

|        |        |        |        |       |        |        |        |        |
|--------|--------|--------|--------|-------|--------|--------|--------|--------|
| 158.5  | 136.8  | 137.5  | 101.2  | 83.3  | 193.8  | 124.7  | 44.1   | 55.4   |
| 154.6  | 132.3  | 158.8  | 94.6   | 51.8  | 159.5  | 99.3   | 13.7   | 1.7    |
| 1954.8 | 2286.7 | 1750.4 | 1184.2 | 736.5 | 1951.0 | 1263.8 | 141.3  | 227.6  |
| 1574.7 | 1524.1 | 1440.2 | 1199.1 | 470.1 | 814.4  | 611.3  | 14.8   | 21.0   |
| 116.4  | 104.5  | 91.9   | 62.2   | 37.1  | 132.6  | 71.6   | 45.9   | 76.3   |
| 65.7   | 72.7   | 72.6   | 43.1   | 22.2  | 52.8   | 24.1   | 19.2   | 36.2   |
| 142.8  | 125.0  | 113.8  | 108.6  | 31.4  | 381.2  | 224.1  | 84.3   | 105.9  |
| 124.9  | 94.1   | 98.3   | 78.8   | 37.7  | 474.6  | 340.5  | 21.8   | 51.0   |
| 14.6   | 7.3    | 10.9   | 4.1    | 6.6   | 100.0  | 52.6   | 7.4    | 24.5   |
| 1146.2 | 1046.3 | 1195.5 | 1064.6 | 378.4 | 2324.2 | 1935.4 | 162.0  | 217.9  |
| 312.9  | 310.0  | 321.6  | 277.7  | 141.2 | 930.2  | 574.3  | 293.4  | 300.2  |
| 33.8   | 33.2   | 42.3   | 84.6   | 16.6  | 46.6   | 15.0   | 3.3    | 6.1    |
| 13.0   | 4.0    | 9.6    | 14.0   | 8.9   | 7.6    | 1.1    | 11.2   | 13.6   |
| 125.8  | 107.9  | 133.0  | 136.7  | 36.6  | 431.2  | 431.1  | 49.2   | 72.0   |
| 259.8  | 240.2  | 344.8  | 344.9  | 79.0  | 836.9  | 763.0  | 101.1  | 145.6  |
| 55.3   | 24.8   | 28.7   | 29.7   | 6.6   | 72.1   | 44.9   | 48.8   | 56.3   |
| 190.6  | 161.5  | 145.2  | 157.6  | 61.0  | 400.1  | 180.5  | 44.4   | 67.9   |
| 145.7  | 146.5  | 190.6  | 172.6  | 84.1  | 217.5  | 137.6  | 78.2   | 55.7   |
| 200.1  | 182.5  | 176.8  | 110.5  | 50.2  | 295.7  | 182.7  | 28.6   | 43.4   |
| 12.3   | 17.4   | 19.1   | 2.0    | 6.0   | 34.6   | 26.2   | 21.9   | 27.5   |
| 373.4  | 328.0  | 328.1  | 205.7  | 111.8 | 562.6  | 330.2  | 119.9  | 109.7  |
| 377.9  | 391.4  | 382.3  | 281.8  | 128.0 | 849.3  | 656.0  | 95.3   | 155.9  |
| 196.2  | 132.0  | 155.6  | 135.3  | 44.6  | 255.6  | 183.8  | 3.3    | 14.3   |
| 623.1  | 666.0  | 654.2  | 666.8  | 185.8 | 863.3  | 672.0  | 163.0  | 276.7  |
| 1001.8 | 1019.5 | 1197.4 | 1090.1 | 409.7 | 1292.5 | 979.1  | 150.3  | 168.2  |
| 299.8  | 312.1  | 248.1  | 442.0  | 126.1 | 405.6  | 451.7  | 65.1   | 106.9  |
| 84.7   | 31.0   | 42.5   | 28.0   | 19.0  | 748.4  | 525.3  | 40.6   | 72.1   |
| 98.0   | 90.3   | 104.5  | 62.7   | 44.8  | 783.9  | 477.2  | 100.0  | 124.7  |
| 134.8  | 102.2  | 134.4  | 109.2  | 71.5  | 352.4  | 309.8  | 47.8   | 67.6   |
| 55.4   | 41.9   | 43.8   | 38.0   | 14.2  | 83.5   | 49.3   | 27.3   | 35.3   |
| 1058.8 | 852.4  | 850.4  | 666.7  | 340.1 | 1504.5 | 996.7  | 525.5  | 660.7  |
| 24.8   | 9.5    | 15.5   | 1.1    | 1.7   | 46.1   | 30.7   | 12.2   | 9.4    |
| 1154.6 | 984.3  | 1057.4 | 798.2  | 391.6 | 3125.3 | 2878.4 | 899.0  | 1098.4 |
| 244.0  | 287.8  | 221.2  | 165.6  | 90.7  | 450.5  | 317.3  | 238.1  | 259.4  |
| 119.6  | 110.7  | 89.3   | 70.8   | 37.3  | 165.3  | 56.3   | 73.6   | 84.7   |
| 76.8   | 56.3   | 35.0   | 22.6   | 20.4  | 101.7  | 67.0   | 63.1   | 62.2   |
| 95.6   | 70.3   | 71.7   | 52.4   | 22.3  | 226.1  | 133.6  | 94.4   | 62.7   |
| 135.4  | 128.3  | 157.6  | 155.2  | 50.3  | 262.0  | 221.8  | 78.9   | 94.7   |
| 20.5   | 9.0    | 11.6   | 3.8    | 4.4   | 11.7   | 3.8    | 3.7    | 11.8   |
| 56.3   | 50.9   | 78.1   | 76.2   | 18.3  | 136.0  | 86.6   | 53.4   | 48.4   |
| 2149.8 | 1923.1 | 2221.9 | 2187.8 | 916.7 | 1382.3 | 942.7  | 25.6   | 49.3   |
| 1295.9 | 1476.7 | 1426.3 | 910.2  | 471.5 | 991.1  | 775.7  | 63.9   | 74.8   |
| 392.2  | 399.2  | 420.2  | 364.2  | 180.5 | 671.6  | 495.0  | 93.2   | 132.0  |
| 2.6    | 0.5    | 10.4   | 4.0    | 1.0   | 15.3   | 2.0    | 1.0    | 2.2    |
| 8.9    | 7.1    | 15.3   | 6.2    | 1.3   | 5.3    | 11.6   | 3.0    | 4.1    |
| 3422.0 | 2664.1 | 2520.5 | 1796.3 | 862.3 | 1767.4 | 1174.5 | 639.0  | 773.1  |
| 95.5   | 65.0   | 67.5   | 56.8   | 12.6  | 150.5  | 87.3   | 117.1  | 142.5  |
| 134.7  | 136.8  | 149.2  | 151.1  | 49.0  | 522.5  | 408.4  | 139.9  | 166.6  |
| 8.0    | 5.1    | 8.3    | 10.0   | 5.1   | 887.2  | 677.4  | 18.5   | 24.1   |
| 74.5   | 59.6   | 71.9   | 68.1   | 17.4  | 269.9  | 171.2  | 48.2   | 91.9   |
| 64.5   | 90.0   | 83.6   | 81.4   | 30.4  | 89.8   | 45.3   | 40.6   | 70.2   |
| 208.3  | 201.1  | 229.6  | 285.4  | 92.5  | 286.8  | 213.8  | 96.0   | 196.0  |
| 3173.0 | 3438.3 | 2854.2 | 1508.4 | 914.2 | 3197.6 | 2704.1 | 1348.9 | 1537.2 |

|        |        |        |        |        |        |        |        |        |
|--------|--------|--------|--------|--------|--------|--------|--------|--------|
| 13.1   | 19.4   | 30.0   | 32.5   | 9.2    | 76.8   | 81.6   | 59.6   | 110.1  |
| 758.6  | 705.8  | 681.1  | 480.1  | 309.4  | 258.6  | 283.8  | 55.6   | 80.3   |
| 283.5  | 233.0  | 268.6  | 187.5  | 107.1  | 69.8   | 65.2   | 73.1   | 93.2   |
| 1.4    | 1.6    | 1.3    | 0.6    | 4.2    | 5.4    | 5.5    | 1.6    | 1.2    |
| 3.4    | 3.4    | 0.7    | 6.1    | 3.8    | 8.0    | 4.6    | 6.4    | 9.2    |
| 83.6   | 105.5  | 87.2   | 62.3   | 26.1   | 14.6   | 13.8   | 127.7  | 156.6  |
| 80.8   | 59.5   | 64.5   | 58.6   | 24.7   | 102.8  | 69.4   | 40.9   | 42.5   |
| 81.9   | 109.4  | 100.9  | 88.1   | 34.5   | 129.3  | 68.5   | 43.1   | 64.3   |
| 46.3   | 57.7   | 48.0   | 29.7   | 16.3   | 22.3   | 14.0   | 10.4   | 7.6    |
| 52.2   | 21.0   | 19.4   | 11.5   | 7.5    | 73.7   | 49.6   | 15.1   | 24.1   |
| 36.9   | 11.2   | 13.6   | 11.0   | 5.7    | 75.0   | 75.0   | 12.0   | 37.4   |
| 39.9   | 54.3   | 38.0   | 33.3   | 24.8   | 286.5  | 200.8  | 44.7   | 55.0   |
| 69.5   | 71.7   | 41.9   | 33.1   | 11.6   | 47.8   | 32.1   | 3.2    | 3.4    |
| 50.6   | 51.2   | 32.8   | 16.4   | 11.6   | 1554.3 | 1113.4 | 56.8   | 69.1   |
| 88.1   | 109.3  | 52.1   | 35.8   | 33.9   | 2550.0 | 2240.3 | 17.4   | 20.0   |
| 1.7    | 2.2    | 1.4    | 5.7    | 6.5    | 2.8    | 9.0    | 2.5    | 2.6    |
| 87.4   | 77.2   | 92.3   | 78.8   | 31.5   | 239.4  | 160.4  | 21.8   | 40.4   |
| 98.9   | 86.2   | 106.6  | 81.8   | 25.0   | 220.3  | 144.6  | 7.7    | 15.7   |
| 55.6   | 52.0   | 76.7   | 72.9   | 17.0   | 98.3   | 80.6   | 33.2   | 67.5   |
| 300.7  | 353.5  | 342.4  | 395.2  | 122.7  | 661.9  | 490.1  | 269.7  | 366.1  |
| 286.8  | 216.0  | 286.6  | 185.2  | 98.6   | 267.3  | 168.3  | 171.6  | 200.9  |
| 580.7  | 717.4  | 558.4  | 429.1  | 201.7  | 1517.5 | 814.2  | 145.6  | 229.9  |
| 45.5   | 45.7   | 32.1   | 24.5   | 9.6    | 186.0  | 113.2  | 18.6   | 37.4   |
| 364.2  | 311.7  | 300.1  | 283.6  | 114.2  | 841.4  | 554.1  | 228.3  | 294.4  |
| 13.6   | 12.5   | 12.1   | 7.1    | 1.7    | 72.5   | 36.0   | 15.4   | 7.8    |
| 7.4    | 4.3    | 1.6    | 1.2    | 2.1    | 14.4   | 5.4    | 6.2    | 7.2    |
| 1.0    | 0.4    | 0.4    | 0.7    | 0.3    | 0.4    | 0.6    | 1.0    | 1.3    |
| 0.8    | 0.1    | 5.2    | 0.5    | 2.0    | 0.7    | 0.2    | 0.8    | 1.2    |
| 951.3  | 983.1  | 978.7  | 967.3  | 377.8  | 668.7  | 409.2  | 8.0    | 17.5   |
| 53.7   | 28.3   | 59.9   | 47.2   | 27.3   | 91.2   | 57.4   | 206.8  | 463.1  |
| 17.2   | 3.4    | 1.3    | 10.3   | 1.6    | 2.2    | 1.3    | 2.0    | 2.6    |
| 111.8  | 112.1  | 55.6   | 45.7   | 41.7   | 104.0  | 78.8   | 243.2  | 271.3  |
| 26.2   | 20.7   | 3.2    | 2.0    | 1.9    | 118.2  | 112.4  | 6.6    | 3.3    |
| 26.9   | 23.8   | 17.1   | 10.9   | 5.0    | 138.4  | 35.5   | 17.8   | 18.8   |
| 281.4  | 193.4  | 201.2  | 193.9  | 89.4   | 352.0  | 248.0  | 137.2  | 146.8  |
| 69.7   | 65.7   | 48.5   | 19.5   | 24.0   | 30.4   | 1.5    | 1.0    | 1.8    |
| 762.6  | 680.1  | 493.2  | 226.6  | 246.2  | 1128.1 | 864.4  | 12.0   | 10.5   |
| 1.8    | 1.8    | 3.7    | 2.7    | 0.7    | 2.9    | 1.6    | 1.8    | 16.2   |
| 0.7    | 2.2    | 10.3   | 4.2    | 0.6    | 2.2    | 1.3    | 0.5    | 1.2    |
| 10.9   | 6.4    | 4.4    | 1.1    | 5.0    | 2.7    | 0.9    | 2.1    | 0.6    |
| 882.1  | 700.1  | 537.6  | 322.7  | 209.3  | 741.5  | 674.9  | 56.2   | 63.9   |
| 31.4   | 44.1   | 31.4   | 34.1   | 7.2    | 14.7   | 22.0   | 31.8   | 30.7   |
| 85.0   | 43.5   | 60.2   | 65.9   | 24.3   | 41.7   | 37.7   | 35.1   | 21.1   |
| 2.1    | 4.2    | 7.3    | 8.8    | 1.3    | 765.4  | 680.2  | 71.6   | 94.5   |
| 259.9  | 210.2  | 239.4  | 125.4  | 70.8   | 691.3  | 533.2  | 72.7   | 110.8  |
| 620.5  | 509.3  | 586.7  | 512.0  | 154.2  | 1148.6 | 610.9  | 259.4  | 418.7  |
| 1223.2 | 1283.4 | 1458.8 | 1358.0 | 514.8  | 1405.4 | 1230.6 | 142.9  | 227.7  |
| 17.0   | 2.6    | 2.7    | 5.9    | 3.5    | 4.0    | 8.0    | 67.3   | 112.4  |
| 15.6   | 25.1   | 4.0    | 12.9   | 5.8    | 70.0   | 54.7   | 13.1   | 10.9   |
| 381.7  | 373.7  | 463.4  | 470.3  | 138.3  | 597.2  | 391.2  | 55.4   | 68.0   |
| 8854.4 | 7933.8 | 7537.0 | 6886.3 | 4372.1 | 9757.3 | 8962.2 | 3251.3 | 4461.0 |
| 339.8  | 319.2  | 276.8  | 294.5  | 152.2  | 310.5  | 220.3  | 78.0   | 78.8   |
| 35.1   | 30.6   | 34.5   | 31.9   | 18.1   | 99.6   | 69.6   | 79.8   | 116.1  |



|        |        |        |        |        |         |        |        |        |
|--------|--------|--------|--------|--------|---------|--------|--------|--------|
| 166.6  | 152.8  | 148.8  | 80.9   | 36.5   | 100.0   | 77.0   | 71.1   | 73.6   |
| 308.8  | 296.1  | 278.1  | 132.9  | 73.4   | 220.4   | 109.3  | 72.5   | 107.8  |
| 230.4  | 255.7  | 265.3  | 130.0  | 65.7   | 163.9   | 58.0   | 88.0   | 83.7   |
| 143.5  | 165.8  | 157.5  | 85.5   | 58.1   | 128.2   | 42.6   | 29.4   | 27.0   |
| 68.8   | 76.4   | 80.9   | 55.0   | 32.2   | 69.6    | 34.2   | 25.7   | 33.3   |
| 114.7  | 100.8  | 89.8   | 81.3   | 33.2   | 157.3   | 88.6   | 34.5   | 43.3   |
| 34.6   | 4.5    | 18.7   | 25.4   | 10.9   | 2834.9  | 2065.1 | 68.4   | 79.8   |
| 702.4  | 640.8  | 578.9  | 521.2  | 305.8  | 1113.3  | 524.5  | 248.8  | 296.3  |
| 458.6  | 451.8  | 496.3  | 405.7  | 169.2  | 1005.8  | 755.2  | 52.8   | 57.5   |
| 532.4  | 540.5  | 528.0  | 341.9  | 162.9  | 1477.6  | 1269.5 | 83.8   | 124.5  |
| 645.7  | 604.5  | 636.5  | 571.1  | 250.8  | 485.7   | 342.4  | 79.3   | 75.7   |
| 438.4  | 334.1  | 344.8  | 356.0  | 125.3  | 80.1    | 52.6   | 86.6   | 99.9   |
| 2.5    | 7.2    | 12.2   | 1.8    | 5.4    | 24.0    | 12.9   | 56.9   | 71.6   |
| 382.2  | 310.5  | 227.9  | 139.2  | 99.1   | 2764.1  | 2262.5 | 98.7   | 143.8  |
| 41.1   | 47.7   | 24.4   | 50.2   | 22.9   | 40.4    | 26.3   | 84.4   | 81.7   |
| 2.2    | 1.9    | 0.8    | 0.6    | 1.9    | 1.3     | 0.8    | 37.4   | 48.6   |
| 53.6   | 47.4   | 51.1   | 30.7   | 23.6   | 196.6   | 96.7   | 85.3   | 97.1   |
| 209.1  | 185.4  | 201.8  | 119.4  | 55.1   | 326.7   | 194.6  | 27.6   | 36.9   |
| 518.8  | 510.1  | 467.9  | 252.4  | 146.0  | 1487.2  | 1236.9 | 791.4  | 937.7  |
| 9039.5 | 7648.8 | 7129.2 | 6940.6 | 4342.1 | 10951.9 | 9341.1 | 3061.3 | 3623.1 |
| 255.9  | 182.8  | 173.7  | 117.5  | 70.6   | 160.0   | 117.1  | 56.6   | 71.7   |
| 6.2    | 3.4    | 3.1    | 3.9    | 1.0    | 36.4    | 5.0    | 2.4    | 4.9    |
| 45.0   | 55.4   | 46.6   | 36.5   | 13.2   | 359.9   | 252.5  | 103.2  | 120.2  |
| 108.7  | 104.5  | 82.5   | 54.0   | 31.4   | 3217.6  | 2820.5 | 230.4  | 403.7  |
| 703.1  | 700.5  | 710.6  | 673.7  | 278.0  | 1045.3  | 745.8  | 134.0  | 156.8  |
| 344.8  | 221.3  | 322.8  | 189.5  | 111.6  | 641.8   | 531.5  | 149.5  | 167.9  |
| 248.3  | 239.6  | 224.1  | 233.2  | 86.9   | 419.8   | 249.9  | 132.4  | 154.4  |
| 136.3  | 157.1  | 133.3  | 154.6  | 70.5   | 303.2   | 257.5  | 34.7   | 57.6   |
| 127.7  | 93.9   | 89.1   | 47.3   | 39.3   | 212.7   | 106.1  | 135.3  | 162.8  |
| 269.2  | 250.3  | 277.0  | 179.1  | 89.7   | 865.7   | 490.5  | 93.4   | 74.3   |
| 69.5   | 59.0   | 59.0   | 38.0   | 23.8   | 96.9    | 65.8   | 141.3  | 164.4  |
| 510.1  | 471.0  | 465.9  | 331.0  | 163.3  | 702.7   | 379.5  | 132.2  | 170.2  |
| 54.5   | 56.1   | 51.2   | 50.3   | 19.3   | 161.8   | 92.7   | 3.5    | 1.8    |
| 121.5  | 140.6  | 123.8  | 145.8  | 34.9   | 190.2   | 154.6  | 33.4   | 41.5   |
| 205.9  | 328.3  | 294.0  | 332.0  | 83.0   | 464.1   | 233.7  | 10.9   | 21.4   |
| 191.8  | 184.9  | 139.1  | 155.3  | 71.7   | 242.2   | 184.9  | 39.9   | 40.9   |
| 19.7   | 34.5   | 32.5   | 22.1   | 21.1   | 96.2    | 45.8   | 60.5   | 62.6   |
| 15.6   | 6.5    | 10.5   | 10.6   | 5.4    | 20.4    | 15.5   | 43.8   | 11.9   |
| 1227.3 | 1286.3 | 1403.3 | 1680.5 | 634.5  | 1536.8  | 1114.9 | 175.2  | 181.7  |
| 81.6   | 51.6   | 89.4   | 67.9   | 29.3   | 125.8   | 71.1   | 83.9   | 78.2   |
| 88.0   | 53.0   | 59.3   | 39.8   | 24.7   | 122.2   | 77.5   | 21.7   | 51.0   |
| 37.8   | 26.6   | 46.3   | 40.6   | 3.0    | 22.9    | 13.3   | 21.1   | 46.1   |
| 178.3  | 189.5  | 188.5  | 220.1  | 51.9   | 237.5   | 169.8  | 60.7   | 102.4  |
| 532.0  | 610.5  | 500.8  | 293.3  | 193.8  | 475.6   | 381.6  | 15.4   | 13.6   |
| 160.0  | 149.5  | 120.3  | 84.6   | 38.8   | 92.3    | 68.7   | 2.6    | 22.2   |
| 1193.9 | 1437.8 | 1081.7 | 667.9  | 441.7  | 740.8   | 655.3  | 9.3    | 12.3   |
| 66.6   | 77.3   | 45.7   | 39.7   | 15.2   | 109.6   | 94.9   | 17.0   | 34.0   |
| 194.6  | 221.7  | 209.9  | 179.3  | 67.4   | 389.9   | 362.0  | 50.9   | 75.8   |
| 171.7  | 169.6  | 127.3  | 83.1   | 74.4   | 196.6   | 127.3  | 18.0   | 20.4   |
| 149.7  | 86.4   | 124.1  | 100.0  | 37.8   | 196.3   | 125.9  | 169.5  | 208.0  |
| 1885.2 | 1489.0 | 1181.1 | 431.1  | 409.1  | 953.3   | 752.9  | 1.9    | 8.1    |
| 146.6  | 145.8  | 153.8  | 126.6  | 56.8   | 252.5   | 181.7  | 36.8   | 53.9   |
| 370.8  | 389.4  | 385.6  | 383.1  | 144.5  | 1051.1  | 777.1  | 130.2  | 222.4  |

|        |        |        |        |        |        |        |        |        |
|--------|--------|--------|--------|--------|--------|--------|--------|--------|
| 136.8  | 125.9  | 132.7  | 238.7  | 49.6   | 713.9  | 428.3  | 19.0   | 39.0   |
| 55.4   | 49.1   | 18.7   | 20.1   | 22.3   | 66.8   | 29.0   | 1.3    | 2.9    |
| 14.0   | 2.6    | 20.6   | 8.8    | 1.5    | 3.3    | 6.6    | 2.5    | 1.4    |
| 6.4    | 2.6    | 4.1    | 17.3   | 8.2    | 9.2    | 2.7    | 9.2    | 1.9    |
| 50.9   | 40.8   | 53.0   | 36.4   | 17.8   | 202.5  | 136.7  | 13.3   | 24.8   |
| 154.4  | 143.9  | 174.3  | 144.8  | 67.7   | 298.7  | 178.0  | 88.8   | 141.6  |
| 41.8   | 25.8   | 43.7   | 22.1   | 18.6   | 293.7  | 168.9  | 17.9   | 30.3   |
| 435.2  | 402.8  | 429.8  | 379.2  | 151.4  | 196.3  | 135.9  | 123.5  | 238.9  |
| 530.0  | 480.6  | 476.6  | 487.2  | 156.7  | 204.6  | 142.5  | 221.4  | 322.3  |
| 313.6  | 280.9  | 302.6  | 291.5  | 98.6   | 96.3   | 60.2   | 44.4   | 48.0   |
| 65.0   | 71.8   | 94.2   | 52.5   | 22.4   | 46.7   | 36.4   | 12.9   | 13.8   |
| 257.5  | 217.9  | 233.5  | 148.3  | 48.3   | 225.9  | 125.1  | 81.4   | 106.9  |
| 65.7   | 65.7   | 65.8   | 46.5   | 30.8   | 75.5   | 60.0   | 22.2   | 38.0   |
| 67.7   | 41.9   | 31.5   | 22.3   | 12.1   | 194.8  | 109.4  | 83.1   | 117.5  |
| 571.5  | 499.7  | 507.6  | 449.0  | 159.1  | 1013.5 | 744.8  | 104.0  | 122.9  |
| 1.3    | 2.2    | 1.2    | 11.0   | 0.6    | 42.2   | 15.3   | 2.0    | 8.6    |
| 4.9    | 3.7    | 3.1    | 8.5    | 7.4    | 15.3   | 11.5   | 21.0   | 2.9    |
| 196.6  | 140.4  | 109.8  | 92.6   | 56.8   | 256.9  | 136.5  | 7.1    | 0.9    |
| 89.1   | 87.5   | 104.4  | 99.5   | 39.4   | 125.9  | 93.5   | 18.9   | 20.6   |
| 499.1  | 504.1  | 511.2  | 431.1  | 160.5  | 980.2  | 559.4  | 52.3   | 73.8   |
| 2.6    | 13.7   | 1.4    | 7.6    | 4.6    | 3.3    | 3.0    | 2.9    | 5.4    |
| 266.2  | 262.8  | 231.1  | 250.9  | 105.3  | 271.1  | 147.3  | 59.0   | 117.0  |
| 161.4  | 174.4  | 154.7  | 134.0  | 57.6   | 534.1  | 389.2  | 86.1   | 152.3  |
| 199.7  | 162.7  | 138.2  | 128.5  | 27.8   | 321.5  | 218.6  | 118.7  | 122.7  |
| 127.5  | 158.5  | 142.7  | 114.9  | 65.9   | 137.4  | 76.1   | 43.8   | 62.0   |
| 228.9  | 156.4  | 196.8  | 165.8  | 64.7   | 144.8  | 70.3   | 84.1   | 102.3  |
| 318.9  | 301.8  | 297.5  | 321.4  | 109.5  | 1117.2 | 750.8  | 125.0  | 174.2  |
| 876.1  | 861.3  | 996.9  | 1133.3 | 429.9  | 1172.7 | 968.7  | 92.3   | 113.5  |
| 26.5   | 15.9   | 24.7   | 25.1   | 10.8   | 28.9   | 15.2   | 18.1   | 49.7   |
| 171.5  | 151.0  | 170.6  | 172.4  | 54.9   | 328.6  | 207.7  | 31.9   | 61.9   |
| 334.4  | 348.0  | 387.0  | 436.5  | 129.3  | 205.0  | 115.1  | 88.3   | 115.5  |
| 113.7  | 110.3  | 134.7  | 153.2  | 30.4   | 140.2  | 77.7   | 68.4   | 75.7   |
| 260.1  | 364.9  | 374.9  | 433.2  | 109.5  | 210.0  | 68.5   | 55.8   | 69.4   |
| 24.6   | 16.3   | 11.9   | 17.1   | 3.8    | 42.7   | 13.7   | 2.8    | 8.2    |
| 692.4  | 679.9  | 683.4  | 534.0  | 152.1  | 778.7  | 729.5  | 51.8   | 51.1   |
| 652.7  | 474.3  | 450.7  | 355.8  | 104.9  | 2097.7 | 1122.4 | 697.3  | 755.1  |
| 10.0   | 23.1   | 16.3   | 5.0    | 8.0    | 17.0   | 15.8   | 15.2   | 11.3   |
| 546.3  | 544.4  | 590.5  | 626.2  | 249.6  | 846.9  | 605.6  | 114.0  | 141.3  |
| 23.1   | 29.9   | 20.5   | 22.0   | 6.8    | 55.2   | 31.0   | 4.8    | 10.4   |
| 9306.9 | 8276.3 | 7732.1 | 7340.0 | 5531.4 | 9823.5 | 8922.2 | 4440.8 | 5171.2 |
| 1319.0 | 1199.7 | 693.1  | 489.1  | 318.3  | 1484.1 | 1502.7 | 48.6   | 48.5   |
| 363.1  | 227.1  | 186.8  | 193.1  | 66.9   | 326.1  | 125.8  | 298.1  | 248.3  |
| 6.2    | 2.3    | 4.5    | 3.4    | 1.5    | 80.1   | 78.8   | 14.5   | 9.4    |
| 5.6    | 1.7    | 1.1    | 1.2    | 1.7    | 7.2    | 3.1    | 10.2   | 4.5    |
| 148.2  | 148.6  | 151.4  | 110.9  | 54.8   | 176.8  | 102.5  | 24.8   | 45.2   |
| 3176.4 | 2680.3 | 2707.8 | 2565.4 | 995.9  | 6614.0 | 5225.9 | 1394.9 | 1548.1 |
| 226.3  | 190.6  | 196.7  | 230.6  | 91.5   | 609.6  | 468.1  | 174.3  | 149.5  |
| 93.4   | 99.2   | 110.7  | 42.7   | 22.9   | 20.9   | 31.8   | 55.8   | 89.2   |
| 265.6  | 259.2  | 288.0  | 188.0  | 82.1   | 127.0  | 87.4   | 153.5  | 206.3  |
| 61.1   | 87.7   | 66.2   | 67.3   | 25.0   | 55.6   | 34.4   | 18.9   | 20.2   |
| 58.6   | 37.5   | 30.9   | 26.1   | 18.0   | 135.7  | 30.1   | 54.6   | 68.0   |
| 502.5  | 401.5  | 433.2  | 467.1  | 222.6  | 1042.8 | 789.4  | 201.6  | 232.0  |
| 223.7  | 171.9  | 206.5  | 367.6  | 78.4   | 452.1  | 256.9  | 26.5   | 40.0   |

|        |        |        |        |        |        |        |       |       |
|--------|--------|--------|--------|--------|--------|--------|-------|-------|
| 51.6   | 43.7   | 44.9   | 24.2   | 22.1   | 250.5  | 179.9  | 41.3  | 32.8  |
| 145.9  | 121.7  | 96.5   | 106.8  | 30.8   | 144.3  | 117.5  | 57.5  | 88.7  |
| 175.5  | 204.0  | 170.1  | 174.6  | 76.8   | 283.6  | 289.4  | 59.2  | 74.2  |
| 80.9   | 61.9   | 63.1   | 66.8   | 23.7   | 59.4   | 44.0   | 65.7  | 85.1  |
| 266.4  | 275.4  | 243.7  | 155.1  | 92.5   | 107.2  | 62.0   | 374.3 | 386.9 |
| 274.6  | 235.0  | 280.5  | 269.3  | 115.9  | 271.3  | 177.1  | 100.3 | 119.5 |
| 69.5   | 51.5   | 63.9   | 32.1   | 26.8   | 121.9  | 135.6  | 111.9 | 131.5 |
| 6.5    | 2.9    | 1.5    | 3.0    | 2.8    | 5.3    | 1.2    | 2.7   | 1.3   |
| 66.7   | 65.5   | 74.4   | 62.4   | 33.9   | 53.6   | 19.4   | 18.3  | 22.0  |
| 7.2    | 1.6    | 4.3    | 10.3   | 6.2    | 0.8    | 8.7    | 4.7   | 2.4   |
| 288.2  | 311.4  | 343.7  | 267.1  | 109.5  | 751.1  | 435.9  | 28.2  | 31.7  |
| 2131.5 | 2104.0 | 1868.7 | 2332.0 | 1008.7 | 4258.1 | 4009.4 | 245.9 | 365.9 |
| 66.6   | 23.1   | 39.9   | 33.1   | 19.6   | 194.9  | 159.0  | 21.0  | 37.5  |
| 159.4  | 157.7  | 171.4  | 159.7  | 44.4   | 432.5  | 298.6  | 50.7  | 66.8  |
| 533.8  | 441.9  | 391.9  | 269.1  | 135.3  | 614.9  | 357.9  | 412.8 | 510.2 |
| 415.9  | 389.4  | 473.1  | 561.7  | 130.3  | 1583.0 | 1349.5 | 60.1  | 97.2  |
| 1819.2 | 1827.6 | 1862.4 | 1476.5 | 706.6  | 2383.5 | 1252.9 | 169.3 | 162.5 |
| 30.5   | 22.6   | 24.8   | 30.7   | 10.6   | 295.5  | 137.4  | 21.9  | 28.6  |
| 21.3   | 41.3   | 31.5   | 38.8   | 18.6   | 92.7   | 61.3   | 32.8  | 39.5  |
| 70.1   | 72.8   | 78.0   | 62.1   | 33.4   | 85.5   | 28.4   | 32.8  | 26.1  |
| 255.7  | 287.8  | 266.6  | 224.7  | 80.2   | 328.8  | 184.2  | 110.0 | 211.2 |
| 4.9    | 9.9    | 18.4   | 11.8   | 11.8   | 89.2   | 86.5   | 74.3  | 83.7  |
| 6.8    | 3.1    | 11.6   | 0.8    | 6.1    | 72.1   | 21.9   | 35.2  | 65.9  |
| 712.4  | 656.2  | 528.3  | 330.0  | 247.3  | 557.2  | 379.5  | 182.1 | 178.4 |
| 50.3   | 53.1   | 50.5   | 44.2   | 15.7   | 41.5   | 16.4   | 20.8  | 31.0  |
| 53.7   | 41.0   | 52.6   | 16.3   | 13.9   | 73.7   | 45.1   | 32.7  | 33.2  |
| 159.7  | 189.5  | 164.5  | 75.9   | 58.6   | 344.4  | 209.3  | 30.2  | 43.5  |
| 76.8   | 86.4   | 70.4   | 49.9   | 33.2   | 190.8  | 153.1  | 131.0 | 166.0 |
| 522.9  | 480.1  | 428.8  | 486.5  | 223.3  | 381.0  | 319.7  | 205.0 | 228.4 |
| 56.8   | 28.6   | 47.6   | 22.6   | 20.4   | 21.8   | 26.3   | 20.8  | 26.4  |
| 429.7  | 433.6  | 384.2  | 373.1  | 215.5  | 1780.6 | 1529.2 | 112.1 | 151.7 |
| 30.3   | 58.2   | 7.0    | 168.6  | 23.3   | 173.3  | 179.7  | 0.6   | 0.9   |
| 142.2  | 128.6  | 120.8  | 97.5   | 59.6   | 920.8  | 744.0  | 159.6 | 246.0 |
| 146.9  | 134.4  | 130.5  | 152.1  | 46.7   | 133.2  | 89.2   | 42.1  | 55.5  |
| 232.1  | 230.3  | 221.4  | 254.1  | 91.7   | 466.1  | 231.1  | 62.2  | 88.1  |
| 83.0   | 65.0   | 76.1   | 81.2   | 24.0   | 131.0  | 65.9   | 55.5  | 65.8  |
| 55.1   | 50.5   | 62.2   | 46.8   | 16.5   | 65.2   | 41.2   | 37.0  | 29.3  |
| 190.2  | 111.1  | 201.8  | 211.7  | 58.0   | 324.6  | 128.0  | 101.1 | 109.7 |
| 212.9  | 155.5  | 148.5  | 121.0  | 40.5   | 348.4  | 177.6  | 39.0  | 47.9  |
| 0.9    | 0.5    | 0.7    | 1.0    | 1.3    | 3.1    | 2.3    | 1.1   | 0.8   |
| 276.7  | 237.9  | 318.7  | 193.8  | 152.4  | 356.9  | 312.2  | 58.0  | 76.9  |
| 79.5   | 37.2   | 54.6   | 29.2   | 16.2   | 66.4   | 42.0   | 21.6  | 36.3  |
| 220.3  | 219.2  | 210.0  | 304.1  | 83.3   | 443.2  | 323.9  | 42.3  | 41.6  |
| 70.1   | 80.7   | 88.1   | 147.7  | 40.5   | 210.9  | 176.0  | 10.7  | 19.9  |
| 324.2  | 358.5  | 311.9  | 288.4  | 106.9  | 1277.0 | 1176.4 | 74.0  | 122.9 |
| 45.6   | 41.9   | 17.4   | 10.8   | 13.2   | 263.6  | 179.6  | 2.2   | 3.0   |
| 16.6   | 19.8   | 11.5   | 4.7    | 1.7    | 40.3   | 28.9   | 6.7   | 22.5  |
| 142.4  | 141.3  | 127.7  | 163.6  | 36.7   | 168.0  | 113.1  | 28.1  | 30.4  |
| 10.7   | 8.7    | 11.1   | 5.3    | 2.9    | 20.1   | 9.3    | 10.5  | 12.6  |
| 136.5  | 107.7  | 117.2  | 138.7  | 48.4   | 273.8  | 162.7  | 76.7  | 74.6  |
| 124.1  | 95.4   | 91.7   | 80.8   | 29.2   | 107.9  | 59.8   | 32.7  | 54.1  |
| 122.5  | 113.8  | 123.5  | 138.6  | 49.2   | 250.9  | 155.2  | 16.4  | 17.0  |
| 72.3   | 80.7   | 115.1  | 89.3   | 33.2   | 192.8  | 115.5  | 56.3  | 112.0 |

|        |        |        |       |       |        |        |       |       |
|--------|--------|--------|-------|-------|--------|--------|-------|-------|
| 230.4  | 139.4  | 168.3  | 185.4 | 75.1  | 512.7  | 422.3  | 110.1 | 141.5 |
| 343.4  | 221.5  | 278.1  | 186.1 | 40.6  | 238.0  | 189.6  | 77.8  | 79.1  |
| 607.2  | 548.6  | 621.4  | 523.7 | 133.2 | 339.8  | 212.1  | 73.6  | 78.8  |
| 90.3   | 115.9  | 118.8  | 48.9  | 41.1  | 251.4  | 141.9  | 2.1   | 0.2   |
| 102.5  | 91.8   | 89.7   | 93.6  | 29.4  | 220.4  | 107.3  | 84.5  | 83.2  |
| 74.1   | 81.8   | 62.1   | 43.9  | 26.7  | 4229.4 | 3869.1 | 3.8   | 15.9  |
| 117.8  | 99.9   | 91.2   | 96.8  | 46.7  | 207.1  | 118.0  | 118.1 | 134.2 |
| 246.9  | 212.7  | 207.7  | 198.8 | 53.5  | 325.7  | 212.5  | 112.8 | 137.3 |
| 92.9   | 67.0   | 64.3   | 55.4  | 20.7  | 73.7   | 45.2   | 71.2  | 77.8  |
| 10.1   | 6.3    | 9.4    | 2.9   | 0.1   | 10.6   | 2.7    | 5.4   | 11.6  |
| 19.9   | 15.3   | 12.3   | 11.6  | 9.9   | 30.2   | 14.4   | 7.7   | 23.5  |
| 12.9   | 17.3   | 22.0   | 9.9   | 1.8   | 189.9  | 117.9  | 6.8   | 50.3  |
| 71.0   | 47.3   | 58.7   | 31.8  | 18.5  | 52.0   | 29.8   | 40.7  | 27.2  |
| 90.3   | 89.1   | 67.1   | 31.6  | 30.4  | 289.5  | 157.2  | 66.8  | 77.3  |
| 701.9  | 636.6  | 613.1  | 419.7 | 224.8 | 445.1  | 334.0  | 325.3 | 308.2 |
| 1779.9 | 1726.8 | 1326.4 | 968.5 | 615.5 | 1395.7 | 1147.3 | 768.9 | 803.0 |
| 1.4    | 1.6    | 1.3    | 1.6   | 1.3   | 4.4    | 2.0    | 2.8   | 1.1   |
| 95.0   | 89.0   | 94.9   | 44.5  | 32.2  | 205.2  | 190.6  | 41.4  | 58.5  |
| 37.8   | 38.4   | 28.7   | 22.2  | 18.1  | 122.1  | 75.9   | 72.7  | 80.7  |
| 266.1  | 305.1  | 287.0  | 300.1 | 85.5  | 296.0  | 167.7  | 48.0  | 57.5  |
| 206.3  | 210.7  | 237.5  | 204.4 | 64.1  | 399.3  | 251.7  | 43.7  | 58.1  |
| 209.0  | 203.0  | 162.3  | 186.9 | 89.2  | 173.5  | 100.7  | 15.4  | 17.6  |
| 270.4  | 239.2  | 267.4  | 222.9 | 77.6  | 428.2  | 336.2  | 39.6  | 61.0  |
| 51.5   | 39.4   | 50.4   | 37.2  | 14.1  | 69.4   | 33.1   | 70.8  | 75.1  |
| 121.7  | 161.4  | 168.0  | 147.2 | 50.3  | 240.2  | 107.3  | 25.5  | 31.7  |
| 441.1  | 464.4  | 492.9  | 490.2 | 171.3 | 882.4  | 701.9  | 48.9  | 76.2  |
| 125.1  | 105.7  | 106.4  | 171.7 | 50.7  | 578.2  | 367.4  | 113.6 | 143.2 |
| 397.3  | 373.8  | 442.6  | 443.5 | 132.0 | 454.3  | 268.0  | 38.9  | 90.1  |
| 467.5  | 370.3  | 445.8  | 465.1 | 161.6 | 708.9  | 540.0  | 19.6  | 14.1  |
| 95.5   | 77.9   | 109.3  | 99.9  | 34.0  | 61.0   | 34.6   | 52.2  | 68.2  |
| 105.2  | 64.1   | 122.0  | 97.4  | 33.0  | 113.8  | 69.7   | 43.5  | 57.5  |
| 62.8   | 36.4   | 55.7   | 39.4  | 14.3  | 102.4  | 57.3   | 68.5  | 64.5  |
| 332.3  | 321.1  | 370.9  | 389.7 | 112.2 | 352.2  | 297.5  | 292.6 | 350.2 |
| 536.3  | 587.5  | 559.3  | 670.6 | 209.6 | 539.0  | 404.3  | 169.4 | 213.3 |
| 562.0  | 626.0  | 498.2  | 265.4 | 174.0 | 652.8  | 338.2  | 94.4  | 90.2  |
| 307.5  | 338.5  | 265.4  | 176.7 | 62.4  | 331.2  | 82.6   | 52.0  | 86.7  |
| 301.9  | 338.8  | 436.7  | 444.1 | 134.5 | 985.8  | 700.6  | 28.1  | 35.8  |
| 98.6   | 101.2  | 111.2  | 84.7  | 40.6  | 311.9  | 262.8  | 14.4  | 29.3  |
| 1103.1 | 1366.6 | 1012.8 | 700.9 | 440.2 | 2312.9 | 1474.4 | 165.6 | 324.3 |
| 563.7  | 583.4  | 552.6  | 284.8 | 137.8 | 615.8  | 302.7  | 265.6 | 337.2 |
| 2.4    | 1.5    | 3.6    | 8.7   | 1.3   | 134.6  | 134.3  | 113.8 | 100.8 |
| 63.2   | 90.1   | 121.7  | 130.5 | 33.0  | 640.7  | 580.2  | 66.4  | 93.1  |
| 28.8   | 24.2   | 21.6   | 17.8  | 7.7   | 193.0  | 180.4  | 58.6  | 60.4  |
| 216.2  | 209.1  | 216.7  | 126.7 | 73.5  | 636.9  | 402.2  | 125.9 | 185.7 |
| 311.8  | 237.4  | 231.0  | 183.6 | 86.6  | 899.8  | 772.0  | 311.5 | 380.1 |
| 40.0   | 53.4   | 46.5   | 33.1  | 15.9  | 29.3   | 3.4    | 31.1  | 38.9  |
| 314.6  | 272.5  | 315.0  | 204.8 | 125.6 | 234.0  | 145.5  | 75.7  | 90.6  |
| 84.3   | 43.8   | 49.9   | 56.9  | 25.1  | 60.2   | 42.8   | 32.0  | 31.2  |
| 53.2   | 52.6   | 43.1   | 52.9  | 16.8  | 112.9  | 51.0   | 34.1  | 24.4  |
| 437.7  | 468.5  | 710.6  | 638.7 | 164.2 | 415.9  | 302.3  | 38.4  | 70.5  |
| 490.2  | 327.2  | 368.1  | 434.3 | 119.8 | 251.6  | 203.6  | 79.5  | 119.0 |
| 122.5  | 113.6  | 131.5  | 120.3 | 39.4  | 181.0  | 104.3  | 65.9  | 85.8  |
| 175.3  | 169.0  | 187.2  | 186.9 | 76.0  | 285.2  | 234.7  | 53.6  | 68.2  |

|       |       |       |        |       |        |        |       |       |
|-------|-------|-------|--------|-------|--------|--------|-------|-------|
| 205.1 | 211.5 | 171.2 | 93.7   | 57.2  | 331.6  | 145.9  | 304.9 | 321.6 |
| 306.6 | 298.7 | 332.1 | 339.2  | 99.8  | 291.7  | 132.1  | 50.7  | 116.4 |
| 199.9 | 144.1 | 188.1 | 180.8  | 69.4  | 548.7  | 398.2  | 99.0  | 66.7  |
| 30.4  | 18.6  | 13.9  | 17.3   | 10.9  | 72.3   | 85.1   | 26.1  | 31.3  |
| 145.2 | 127.3 | 129.5 | 223.6  | 58.4  | 82.8   | 90.4   | 44.3  | 48.5  |
| 108.9 | 64.4  | 95.3  | 61.9   | 33.0  | 568.3  | 395.0  | 6.3   | 36.4  |
| 398.0 | 245.6 | 492.1 | 1513.7 | 233.3 | 1686.6 | 1393.5 | 14.7  | 9.1   |
| 102.3 | 104.5 | 90.0  | 56.5   | 32.8  | 216.7  | 101.6  | 125.8 | 76.1  |
| 6.4   | 3.3   | 2.7   | 3.1    | 0.9   | 72.7   | 30.8   | 10.3  | 3.3   |
| 4.8   | 5.9   | 5.1   | 3.8    | 1.5   | 5.6    | 1.9    | 4.4   | 5.3   |
| 31.2  | 46.4  | 15.0  | 14.3   | 11.6  | 52.6   | 22.5   | 107.9 | 162.1 |
| 133.5 | 73.6  | 95.3  | 86.2   | 34.5  | 92.4   | 65.6   | 72.8  | 68.4  |
| 2.3   | 5.0   | 14.2  | 5.1    | 6.6   | 92.8   | 65.9   | 5.2   | 6.3   |
| 160.9 | 144.4 | 150.3 | 174.6  | 67.7  | 220.3  | 132.3  | 72.9  | 66.3  |
| 248.8 | 286.2 | 286.7 | 241.1  | 73.3  | 265.7  | 206.9  | 25.1  | 38.6  |
| 981.4 | 915.1 | 890.4 | 710.2  | 381.6 | 1084.1 | 1009.3 | 37.9  | 102.8 |
| 223.5 | 181.5 | 183.1 | 129.6  | 52.7  | 175.0  | 126.6  | 105.3 | 137.7 |
| 85.3  | 97.8  | 68.2  | 67.8   | 45.2  | 133.7  | 75.6   | 59.1  | 80.1  |
| 254.6 | 228.9 | 178.5 | 120.1  | 88.5  | 303.5  | 174.1  | 45.1  | 53.3  |
| 209.3 | 72.9  | 94.9  | 99.2   | 34.0  | 144.5  | 92.2   | 196.3 | 260.3 |
| 64.4  | 61.6  | 56.6  | 77.9   | 14.6  | 56.2   | 22.6   | 101.1 | 163.4 |
| 72.8  | 81.4  | 150.5 | 160.9  | 42.5  | 77.0   | 41.4   | 4.9   | 4.3   |
| 339.3 | 340.4 | 338.7 | 432.9  | 118.5 | 813.0  | 575.2  | 59.4  | 85.4  |
| 620.7 | 577.5 | 507.5 | 659.5  | 299.4 | 319.6  | 251.8  | 144.9 | 164.4 |
| 148.1 | 171.9 | 162.2 | 134.1  | 46.3  | 299.1  | 188.7  | 26.1  | 52.8  |
| 180.2 | 169.9 | 183.6 | 188.2  | 55.5  | 165.2  | 80.8   | 38.0  | 25.5  |
| 222.3 | 248.9 | 237.6 | 207.6  | 170.7 | 302.1  | 209.8  | 22.2  | 26.2  |
| 24.5  | 33.4  | 24.8  | 9.8    | 4.6   | 164.3  | 119.1  | 49.6  | 82.8  |
| 125.5 | 133.1 | 116.1 | 102.3  | 58.8  | 175.9  | 145.3  | 57.8  | 71.7  |
| 564.2 | 398.7 | 471.2 | 403.7  | 106.4 | 1677.9 | 1181.3 | 145.0 | 198.0 |
| 520.6 | 486.7 | 503.4 | 518.1  | 218.2 | 1918.1 | 1713.7 | 282.9 | 319.6 |
| 21.2  | 18.4  | 18.2  | 17.5   | 5.4   | 108.5  | 62.0   | 17.7  | 18.3  |
| 611.1 | 523.2 | 659.2 | 518.9  | 189.6 | 848.5  | 637.9  | 107.5 | 242.0 |
| 484.1 | 474.8 | 478.9 | 582.3  | 200.4 | 667.0  | 524.0  | 241.9 | 208.9 |
| 19.5  | 20.5  | 29.4  | 21.9   | 13.1  | 24.2   | 12.0   | 35.9  | 53.6  |
| 39.6  | 21.3  | 31.6  | 17.3   | 11.9  | 23.5   | 22.6   | 44.8  | 51.5  |
| 96.2  | 116.6 | 93.5  | 97.6   | 28.5  | 167.6  | 120.7  | 73.4  | 102.7 |
| 166.0 | 155.6 | 159.9 | 171.6  | 49.3  | 354.5  | 244.1  | 106.3 | 135.0 |
| 176.4 | 166.0 | 168.1 | 158.1  | 64.5  | 157.7  | 62.2   | 61.1  | 91.5  |
| 118.8 | 88.9  | 105.6 | 84.6   | 55.8  | 117.9  | 104.2  | 33.5  | 53.7  |
| 148.7 | 122.9 | 163.0 | 183.9  | 52.0  | 810.3  | 554.9  | 95.7  | 108.2 |
| 440.2 | 351.5 | 348.6 | 182.8  | 111.2 | 709.1  | 335.1  | 146.1 | 126.7 |
| 69.8  | 60.4  | 46.4  | 42.1   | 31.2  | 32.9   | 23.9   | 42.3  | 36.3  |
| 431.1 | 366.1 | 261.8 | 195.4  | 93.5  | 331.5  | 212.1  | 44.0  | 50.1  |
| 140.3 | 105.9 | 137.0 | 107.4  | 42.7  | 157.0  | 84.1   | 60.9  | 70.0  |
| 629.8 | 431.3 | 421.5 | 279.1  | 203.7 | 1027.9 | 740.3  | 201.8 | 251.1 |
| 26.5  | 19.7  | 18.9  | 13.2   | 6.1   | 132.6  | 89.1   | 36.7  | 75.8  |
| 190.1 | 78.0  | 65.8  | 16.1   | 11.8  | 686.7  | 343.2  | 81.7  | 139.0 |
| 517.8 | 425.2 | 528.0 | 624.2  | 209.9 | 571.5  | 388.3  | 83.1  | 85.5  |
| 54.7  | 77.1  | 53.2  | 46.1   | 12.8  | 71.0   | 41.7   | 30.6  | 42.7  |
| 103.7 | 74.7  | 96.6  | 78.7   | 25.4  | 297.5  | 210.5  | 27.6  | 48.9  |
| 24.8  | 23.8  | 31.1  | 10.6   | 4.5   | 53.7   | 8.6    | 46.5  | 37.8  |
| 2.6   | 6.0   | 12.0  | 3.9    | 7.1   | 65.8   | 30.0   | 4.9   | 3.1   |

|        |        |        |        |        |        |        |       |        |
|--------|--------|--------|--------|--------|--------|--------|-------|--------|
| 324.4  | 314.6  | 305.6  | 255.2  | 132.3  | 1510.4 | 1291.3 | 15.1  | 50.4   |
| 103.3  | 98.3   | 108.9  | 70.0   | 30.9   | 223.8  | 140.7  | 4.3   | 9.7    |
| 198.4  | 202.1  | 181.0  | 136.9  | 60.1   | 304.2  | 169.7  | 22.6  | 21.5   |
| 79.3   | 78.2   | 58.6   | 47.6   | 38.7   | 366.5  | 133.2  | 1.4   | 14.9   |
| 245.2  | 233.5  | 251.9  | 271.4  | 67.2   | 235.7  | 186.2  | 162.6 | 193.7  |
| 14.1   | 24.3   | 20.9   | 15.8   | 9.7    | 1039.4 | 658.5  | 124.1 | 140.6  |
| 45.8   | 71.4   | 70.4   | 103.9  | 18.9   | 103.7  | 66.2   | 26.2  | 47.0   |
| 20.7   | 16.7   | 29.9   | 16.5   | 10.8   | 75.1   | 29.3   | 31.5  | 56.9   |
| 2.5    | 3.6    | 2.6    | 4.5    | 1.3    | 2.5    | 1.6    | 7.5   | 2.1    |
| 203.5  | 196.5  | 260.5  | 395.6  | 106.2  | 269.4  | 221.3  | 52.7  | 73.0   |
| 98.6   | 77.2   | 92.3   | 78.9   | 44.8   | 135.2  | 92.1   | 58.3  | 79.8   |
| 163.8  | 226.8  | 147.6  | 181.1  | 44.7   | 91.7   | 69.3   | 51.8  | 65.0   |
| 130.5  | 164.8  | 100.1  | 88.9   | 37.0   | 43.3   | 20.4   | 60.5  | 87.2   |
| 9.4    | 7.0    | 8.8    | 2.6    | 7.6    | 4.1    | 16.1   | 8.6   | 1.1    |
| 5.9    | 3.1    | 1.2    | 0.7    | 4.7    | 8.4    | 1.2    | 6.4   | 4.1    |
| 143.0  | 159.9  | 129.7  | 109.7  | 57.4   | 283.1  | 221.1  | 104.3 | 133.1  |
| 90.5   | 77.5   | 65.7   | 69.4   | 27.2   | 133.8  | 93.7   | 93.5  | 131.6  |
| 29.0   | 23.8   | 40.9   | 22.1   | 12.3   | 64.8   | 76.4   | 1.0   | 1.0    |
| 70.6   | 52.0   | 59.6   | 39.9   | 13.6   | 224.5  | 212.2  | 30.9  | 31.1   |
| 255.1  | 269.6  | 364.6  | 447.8  | 118.8  | 255.0  | 147.7  | 19.6  | 25.2   |
| 286.3  | 323.6  | 342.9  | 294.9  | 97.3   | 688.8  | 319.6  | 25.2  | 37.7   |
| 280.5  | 310.7  | 337.3  | 355.3  | 96.9   | 792.4  | 516.5  | 29.4  | 44.3   |
| 224.5  | 201.0  | 116.8  | 60.0   | 61.5   | 75.2   | 26.6   | 720.0 | 1010.6 |
| 16.0   | 1.5    | 0.8    | 9.8    | 5.8    | 7.3    | 10.2   | 1.6   | 12.7   |
| 131.8  | 125.5  | 136.9  | 122.8  | 43.2   | 1252.8 | 975.8  | 135.2 | 212.8  |
| 82.4   | 72.0   | 86.6   | 64.2   | 34.4   | 107.4  | 82.2   | 68.8  | 26.6   |
| 12.0   | 29.0   | 25.0   | 19.3   | 7.0    | 75.6   | 20.6   | 68.5  | 71.2   |
| 22.1   | 21.8   | 19.1   | 14.9   | 9.9    | 41.4   | 24.4   | 26.7  | 36.2   |
| 792.3  | 800.5  | 1013.0 | 1066.8 | 279.9  | 331.3  | 234.1  | 26.8  | 45.8   |
| 121.6  | 50.8   | 93.4   | 88.6   | 13.5   | 169.0  | 74.3   | 98.1  | 140.6  |
| 230.0  | 222.9  | 223.7  | 214.8  | 56.4   | 577.6  | 425.1  | 224.1 | 471.7  |
| 763.1  | 695.5  | 871.7  | 1064.7 | 247.9  | 403.7  | 458.1  | 96.4  | 178.8  |
| 87.6   | 62.4   | 75.7   | 42.1   | 26.3   | 159.4  | 128.5  | 90.8  | 137.6  |
| 226.8  | 175.1  | 180.9  | 164.7  | 78.3   | 534.6  | 348.9  | 125.2 | 206.1  |
| 2683.2 | 2674.2 | 2335.7 | 1865.1 | 1046.0 | 4490.8 | 4450.9 | 854.5 | 990.0  |
| 22.6   | 19.3   | 16.9   | 17.3   | 12.3   | 130.2  | 102.3  | 55.6  | 56.8   |
| 233.6  | 145.7  | 131.3  | 125.3  | 46.4   | 634.7  | 429.4  | 199.0 | 203.5  |
| 227.5  | 130.5  | 128.4  | 114.7  | 40.1   | 516.3  | 337.4  | 107.0 | 136.7  |
| 161.1  | 149.2  | 204.2  | 101.2  | 64.8   | 718.9  | 482.3  | 20.2  | 17.6   |
| 210.7  | 135.2  | 143.3  | 157.1  | 38.6   | 199.3  | 171.6  | 87.8  | 113.1  |
| 127.0  | 136.1  | 132.2  | 181.9  | 56.5   | 90.7   | 83.0   | 72.3  | 150.0  |
| 752.4  | 648.6  | 531.4  | 195.8  | 199.5  | 850.7  | 644.3  | 6.1   | 2.0    |
| 1543.1 | 1442.5 | 1360.0 | 533.8  | 494.7  | 2017.1 | 2000.8 | 1.0   | 4.0    |
| 3.0    | 2.5    | 18.6   | 2.6    | 4.5    | 38.4   | 28.6   | 3.0   | 6.5    |
| 4.2    | 6.1    | 4.7    | 2.9    | 2.8    | 5.1    | 1.5    | 6.1   | 4.0    |
| 200.0  | 166.0  | 201.8  | 135.8  | 66.4   | 281.1  | 179.9  | 90.2  | 141.9  |
| 145.3  | 157.9  | 210.9  | 143.2  | 47.2   | 139.1  | 108.6  | 98.7  | 131.7  |
| 38.2   | 74.1   | 69.7   | 35.3   | 19.5   | 305.5  | 214.2  | 1.9   | 2.0    |
| 79.9   | 54.0   | 69.2   | 115.3  | 22.9   | 198.8  | 105.9  | 53.2  | 66.8   |
| 1.0    | 1.3    | 0.8    | 2.0    | 0.5    | 2.6    | 2.4    | 1.9   | 1.6    |
| 11.4   | 11.7   | 13.5   | 4.8    | 8.9    | 18.4   | 14.5   | 21.0  | 28.4   |
| 155.5  | 211.3  | 175.9  | 127.4  | 66.8   | 307.4  | 181.1  | 104.4 | 126.9  |
| 191.9  | 184.0  | 199.7  | 177.8  | 96.9   | 121.9  | 74.8   | 33.2  | 41.1   |

|        |        |        |        |       |        |        |       |       |
|--------|--------|--------|--------|-------|--------|--------|-------|-------|
| 372.6  | 426.3  | 381.2  | 378.4  | 139.8 | 325.4  | 177.3  | 63.4  | 100.0 |
| 602.7  | 680.1  | 689.4  | 386.1  | 234.4 | 1172.4 | 821.6  | 108.8 | 144.9 |
| 80.9   | 79.2   | 89.8   | 101.8  | 54.3  | 289.6  | 214.6  | 139.8 | 114.1 |
| 896.5  | 945.0  | 889.6  | 809.4  | 353.2 | 981.1  | 763.5  | 113.2 | 175.2 |
| 119.4  | 127.0  | 87.1   | 48.1   | 40.4  | 140.5  | 88.6   | 23.6  | 19.0  |
| 249.4  | 261.7  | 180.0  | 119.6  | 71.9  | 214.6  | 105.4  | 29.2  | 32.7  |
| 1091.0 | 1070.4 | 1085.8 | 1020.0 | 382.2 | 1528.9 | 1013.1 | 33.4  | 49.7  |
| 220.3  | 178.2  | 183.0  | 140.4  | 74.2  | 257.8  | 177.4  | 415.1 | 453.9 |
| 192.9  | 159.3  | 181.4  | 284.7  | 45.6  | 1308.8 | 1185.0 | 69.0  | 111.1 |
| 730.2  | 793.6  | 864.6  | 711.1  | 315.9 | 1798.1 | 860.9  | 181.0 | 255.9 |
| 507.1  | 361.8  | 369.2  | 262.5  | 141.6 | 844.9  | 782.2  | 71.8  | 119.8 |
| 221.5  | 184.7  | 188.2  | 161.1  | 60.6  | 336.1  | 284.8  | 50.8  | 79.3  |
| 163.9  | 192.5  | 177.3  | 156.9  | 52.5  | 175.0  | 135.0  | 5.1   | 19.6  |
| 81.1   | 39.9   | 42.9   | 51.0   | 22.8  | 147.6  | 187.0  | 11.6  | 28.7  |
| 128.1  | 103.5  | 106.1  | 141.7  | 25.0  | 191.6  | 161.0  | 34.9  | 52.4  |
| 218.9  | 213.8  | 271.6  | 264.6  | 72.5  | 740.9  | 472.7  | 125.7 | 172.6 |
| 463.3  | 486.5  | 499.9  | 631.1  | 238.1 | 865.9  | 636.6  | 99.5  | 146.0 |
| 85.5   | 91.1   | 101.0  | 87.0   | 34.7  | 47.6   | 42.2   | 23.6  | 26.5  |
| 349.0  | 334.5  | 373.4  | 418.2  | 134.4 | 275.2  | 193.8  | 86.5  | 113.6 |
| 2.3    | 9.1    | 2.4    | 1.9    | 6.6   | 41.6   | 40.8   | 9.9   | 2.4   |
| 15.5   | 23.2   | 19.1   | 15.0   | 7.4   | 79.8   | 60.8   | 14.1  | 12.4  |
| 238.3  | 244.9  | 273.0  | 271.8  | 64.5  | 246.4  | 130.2  | 73.4  | 88.6  |
| 136.1  | 183.6  | 159.2  | 189.2  | 44.9  | 160.5  | 63.3   | 113.4 | 218.7 |
| 427.6  | 444.0  | 540.1  | 406.6  | 183.7 | 453.0  | 199.8  | 98.5  | 86.8  |
| 479.5  | 442.2  | 439.2  | 228.9  | 117.0 | 640.5  | 393.9  | 98.5  | 122.5 |
| 474.9  | 460.9  | 402.9  | 179.4  | 135.0 | 613.5  | 435.2  | 37.1  | 80.0  |
| 73.1   | 99.3   | 79.5   | 38.8   | 23.9  | 125.6  | 77.1   | 48.7  | 36.8  |
| 2041.5 | 2145.4 | 1945.8 | 1376.2 | 610.1 | 2185.1 | 1655.1 | 48.5  | 106.8 |
| 159.5  | 122.6  | 183.5  | 173.5  | 53.9  | 181.7  | 114.7  | 107.6 | 124.3 |
| 149.1  | 114.8  | 138.1  | 132.5  | 56.7  | 226.1  | 128.9  | 79.3  | 89.7  |
| 8.8    | 3.0    | 3.2    | 2.6    | 0.8   | 30.9   | 17.0   | 74.6  | 55.2  |
| 104.9  | 119.6  | 129.6  | 126.6  | 46.7  | 360.5  | 270.0  | 54.3  | 30.5  |
| 391.2  | 323.5  | 410.1  | 356.1  | 143.7 | 929.8  | 738.9  | 663.3 | 719.0 |
| 14.8   | 27.2   | 17.7   | 20.8   | 10.0  | 69.7   | 47.4   | 20.5  | 19.9  |
| 2.1    | 15.9   | 42.3   | 21.4   | 4.8   | 78.7   | 22.8   | 3.7   | 3.9   |
| 91.6   | 72.2   | 77.6   | 62.2   | 16.7  | 535.5  | 396.9  | 40.2  | 41.8  |
| 1303.4 | 1155.3 | 900.3  | 517.1  | 310.6 | 1635.7 | 1129.4 | 207.3 | 288.0 |
| 316.2  | 278.1  | 286.0  | 291.4  | 99.6  | 68.0   | 38.1   | 32.7  | 45.3  |
| 568.2  | 563.9  | 583.4  | 569.0  | 258.4 | 150.9  | 115.2  | 29.9  | 35.9  |
| 91.8   | 94.0   | 85.7   | 96.3   | 38.5  | 279.4  | 171.5  | 35.7  | 40.9  |
| 71.2   | 79.7   | 69.7   | 61.1   | 27.8  | 268.2  | 184.0  | 26.3  | 39.0  |
| 355.3  | 306.6  | 328.1  | 274.3  | 101.2 | 662.1  | 455.0  | 76.9  | 136.0 |
| 93.6   | 84.3   | 101.6  | 103.0  | 23.3  | 126.6  | 79.3   | 20.4  | 29.3  |
| 75.7   | 84.3   | 73.2   | 116.9  | 20.6  | 90.9   | 72.8   | 22.8  | 20.2  |
| 83.5   | 81.9   | 50.4   | 52.8   | 31.1  | 254.4  | 152.7  | 99.6  | 105.6 |
| 445.7  | 608.6  | 469.1  | 384.0  | 199.4 | 738.2  | 562.5  | 218.8 | 279.7 |
| 85.8   | 73.6   | 86.2   | 72.1   | 35.3  | 50.0   | 22.9   | 9.6   | 1.3   |
| 67.6   | 44.6   | 44.8   | 48.7   | 22.5  | 37.7   | 17.2   | 1.0   | 1.4   |
| 56.0   | 50.3   | 67.0   | 49.0   | 32.5  | 94.1   | 50.5   | 109.3 | 172.5 |
| 44.8   | 34.6   | 41.6   | 35.2   | 17.4  | 45.5   | 29.9   | 52.7  | 90.9  |
| 75.4   | 44.3   | 81.0   | 41.5   | 27.8  | 160.6  | 84.0   | 11.8  | 38.0  |
| 176.4  | 107.1  | 96.7   | 103.0  | 24.6  | 309.9  | 273.0  | 123.7 | 53.0  |
| 160.3  | 138.0  | 105.9  | 64.7   | 26.9  | 163.7  | 104.3  | 48.3  | 73.1  |

|        |        |        |        |       |        |        |        |        |
|--------|--------|--------|--------|-------|--------|--------|--------|--------|
| 143.2  | 143.7  | 97.6   | 82.1   | 35.9  | 64.4   | 33.9   | 49.0   | 58.0   |
| 29.8   | 30.1   | 37.9   | 28.9   | 14.0  | 49.9   | 27.2   | 21.4   | 20.2   |
| 73.2   | 52.8   | 81.8   | 38.8   | 30.0  | 43.6   | 38.7   | 22.6   | 42.2   |
| 217.4  | 175.7  | 242.8  | 163.3  | 90.7  | 677.7  | 655.9  | 194.5  | 224.2  |
| 421.4  | 321.9  | 262.3  | 201.3  | 62.0  | 465.4  | 224.6  | 400.1  | 480.5  |
| 2.4    | 2.4    | 3.8    | 1.9    | 0.8   | 1.7    | 2.8    | 2.7    | 1.2    |
| 113.8  | 102.1  | 147.7  | 429.1  | 64.4  | 249.8  | 246.1  | 102.1  | 165.2  |
| 113.9  | 99.6   | 159.8  | 228.8  | 38.7  | 283.3  | 202.4  | 133.8  | 175.1  |
| 2016.1 | 2133.8 | 2142.6 | 1703.3 | 809.8 | 4591.4 | 4114.1 | 510.0  | 588.7  |
| 9.4    | 5.5    | 0.8    | 0.3    | 4.5   | 1899.8 | 1107.8 | 251.2  | 335.6  |
| 15.5   | 1.6    | 9.6    | 9.9    | 4.3   | 10.8   | 11.2   | 13.2   | 1.3    |
| 7.2    | 13.6   | 11.5   | 7.1    | 2.6   | 10.1   | 2.9    | 1.0    | 10.8   |
| 1.4    | 1.6    | 1.7    | 0.9    | 4.3   | 1.5    | 0.6    | 1.8    | 0.5    |
| 227.5  | 262.8  | 233.3  | 151.2  | 60.0  | 537.9  | 256.6  | 132.0  | 184.5  |
| 25.1   | 16.5   | 32.4   | 9.1    | 4.1   | 72.7   | 38.6   | 2.9    | 13.0   |
| 912.7  | 952.2  | 1180.7 | 1142.8 | 389.7 | 1581.1 | 1166.5 | 98.9   | 114.0  |
| 197.0  | 259.8  | 157.8  | 236.0  | 137.2 | 136.2  | 89.7   | 0.6    | 1.4    |
| 1028.2 | 1046.0 | 996.8  | 792.5  | 382.2 | 2759.4 | 1746.3 | 123.4  | 126.4  |
| 592.3  | 514.2  | 541.8  | 512.0  | 192.1 | 914.8  | 488.7  | 119.3  | 155.0  |
| 23.5   | 24.6   | 3.4    | 4.7    | 8.7   | 854.1  | 795.6  | 61.0   | 93.8   |
| 1.8    | 1.0    | 1.5    | 0.7    | 1.0   | 37.4   | 29.2   | 47.8   | 64.1   |
| 486.5  | 407.3  | 389.7  | 267.7  | 176.2 | 310.1  | 200.2  | 61.5   | 107.6  |
| 222.6  | 250.3  | 197.6  | 141.4  | 78.0  | 391.8  | 224.0  | 85.2   | 91.9   |
| 723.2  | 568.0  | 477.5  | 256.8  | 257.4 | 2527.5 | 1828.8 | 569.1  | 600.5  |
| 58.3   | 62.4   | 79.5   | 68.1   | 32.7  | 128.9  | 93.8   | 61.7   | 57.5   |
| 13.6   | 8.8    | 19.8   | 12.6   | 8.9   | 15.3   | 2.7    | 17.4   | 26.9   |
| 246.7  | 242.4  | 228.5  | 107.1  | 74.6  | 747.0  | 560.8  | 157.2  | 201.9  |
| 248.7  | 222.8  | 235.5  | 147.2  | 70.7  | 930.4  | 872.8  | 1334.8 | 1439.2 |
| 40.0   | 42.0   | 44.8   | 25.5   | 13.4  | 21.6   | 9.2    | 45.8   | 26.8   |
| 87.0   | 72.8   | 50.2   | 49.2   | 23.0  | 56.1   | 24.3   | 3.7    | 6.1    |
| 848.5  | 815.3  | 670.7  | 428.1  | 215.3 | 529.7  | 514.8  | 172.8  | 218.8  |
| 104.1  | 66.4   | 62.0   | 68.3   | 30.2  | 336.3  | 201.0  | 66.1   | 37.0   |
| 253.1  | 275.1  | 249.4  | 171.4  | 88.0  | 117.6  | 86.4   | 34.3   | 46.4   |
| 29.1   | 18.6   | 45.1   | 28.2   | 12.8  | 54.8   | 27.4   | 78.0   | 69.4   |
| 149.4  | 117.8  | 129.8  | 60.4   | 47.1  | 197.5  | 94.3   | 60.0   | 69.0   |
| 4.6    | 11.8   | 3.8    | 12.5   | 0.4   | 1378.8 | 926.3  | 53.0   | 58.7   |
| 2.1    | 2.4    | 2.2    | 1.7    | 1.0   | 6.1    | 0.9    | 126.8  | 119.9  |
| 26.3   | 20.3   | 19.8   | 6.2    | 8.7   | 16.7   | 18.4   | 145.1  | 135.7  |
| 3.5    | 4.2    | 12.3   | 3.2    | 5.5   | 10.3   | 9.8    | 102.4  | 107.4  |
| 56.3   | 64.0   | 84.5   | 107.2  | 25.9  | 400.5  | 269.4  | 40.9   | 97.8   |
| 141.3  | 118.1  | 204.9  | 210.2  | 50.2  | 649.3  | 542.4  | 167.0  | 164.3  |
| 181.8  | 168.3  | 246.3  | 233.4  | 47.9  | 754.5  | 535.4  | 50.0   | 74.3   |
| 188.8  | 196.9  | 202.5  | 180.6  | 75.0  | 1639.3 | 1431.6 | 333.7  | 454.0  |
| 19.0   | 8.8    | 14.0   | 17.4   | 6.1   | 81.9   | 56.9   | 65.1   | 82.5   |
| 1069.8 | 1012.2 | 1050.3 | 541.7  | 338.8 | 1473.1 | 886.4  | 299.9  | 351.8  |
| 127.1  | 107.5  | 125.2  | 129.7  | 55.9  | 797.4  | 480.6  | 126.6  | 112.0  |
| 218.7  | 263.0  | 210.4  | 224.5  | 74.8  | 48.4   | 24.1   | 4.2    | 1.8    |
| 150.3  | 219.7  | 159.1  | 108.4  | 78.9  | 63.0   | 10.0   | 3.6    | 4.4    |
| 451.2  | 397.1  | 386.2  | 397.6  | 180.4 | 762.9  | 409.0  | 99.4   | 149.5  |
| 377.1  | 263.3  | 262.8  | 187.0  | 91.6  | 483.1  | 357.6  | 99.9   | 151.7  |
| 68.7   | 52.5   | 68.8   | 47.7   | 34.3  | 2.9    | 7.8    | 41.4   | 43.1   |
| 44.9   | 37.2   | 94.2   | 69.3   | 28.7  | 37.9   | 27.0   | 34.1   | 52.0   |
| 61.5   | 71.0   | 73.6   | 31.2   | 17.7  | 565.6  | 374.3  | 12.3   | 11.7   |



|        |        |        |        |       |        |        |       |        |
|--------|--------|--------|--------|-------|--------|--------|-------|--------|
| 31.1   | 26.6   | 24.3   | 21.7   | 6.9   | 106.6  | 65.1   | 10.4  | 15.7   |
| 77.2   | 90.7   | 65.0   | 52.7   | 22.0  | 142.5  | 86.7   | 20.4  | 26.4   |
| 3.4    | 2.9    | 2.9    | 1.4    | 7.6   | 2.9    | 2.5    | 5.1   | 2.8    |
| 6.0    | 3.4    | 3.4    | 11.2   | 1.3   | 30.0   | 16.6   | 3.2   | 6.9    |
| 568.8  | 495.9  | 377.3  | 299.1  | 152.0 | 396.0  | 214.7  | 226.7 | 279.2  |
| 207.2  | 241.5  | 246.9  | 220.0  | 71.5  | 174.5  | 107.6  | 44.2  | 66.0   |
| 254.2  | 304.0  | 268.6  | 219.4  | 109.7 | 603.9  | 338.0  | 349.2 | 567.7  |
| 85.4   | 59.3   | 72.5   | 55.9   | 21.3  | 416.1  | 366.2  | 33.2  | 63.1   |
| 97.1   | 120.6  | 109.7  | 96.1   | 38.2  | 356.1  | 217.5  | 32.9  | 72.8   |
| 74.6   | 47.1   | 67.6   | 74.3   | 27.4  | 437.8  | 259.9  | 99.9  | 129.1  |
| 63.2   | 57.9   | 41.1   | 21.9   | 19.1  | 83.4   | 29.5   | 46.8  | 40.0   |
| 7.3    | 16.9   | 3.4    | 5.1    | 1.7   | 95.4   | 55.1   | 67.1  | 32.7   |
| 2.9    | 0.8    | 2.9    | 1.5    | 6.0   | 666.8  | 437.6  | 344.1 | 469.8  |
| 573.6  | 491.8  | 441.7  | 285.9  | 190.2 | 2424.6 | 1826.3 | 174.9 | 134.4  |
| 1549.7 | 1397.5 | 1955.3 | 2547.2 | 757.3 | 1088.6 | 849.5  | 119.7 | 222.8  |
| 109.8  | 101.4  | 123.0  | 96.9   | 52.4  | 59.5   | 5.3    | 36.9  | 59.0   |
| 28.5   | 3.9    | 22.1   | 35.7   | 15.0  | 42.1   | 27.7   | 43.3  | 50.1   |
| 553.3  | 438.0  | 424.6  | 289.9  | 131.0 | 341.9  | 188.8  | 88.0  | 125.4  |
| 132.7  | 145.3  | 131.9  | 142.2  | 72.8  | 135.6  | 94.4   | 96.2  | 109.9  |
| 312.3  | 280.0  | 355.8  | 458.7  | 133.7 | 444.3  | 307.6  | 126.5 | 178.9  |
| 9.4    | 3.0    | 3.3    | 8.3    | 5.5   | 12.2   | 9.8    | 9.1   | 9.9    |
| 1839.9 | 1517.8 | 1513.4 | 1233.9 | 647.8 | 2937.8 | 1579.8 | 744.5 | 1004.5 |
| 37.7   | 43.1   | 71.1   | 70.7   | 15.1  | 79.5   | 83.4   | 22.0  | 30.3   |
| 109.8  | 119.9  | 104.7  | 88.8   | 38.0  | 137.6  | 64.7   | 40.7  | 61.3   |
| 633.1  | 637.9  | 674.9  | 585.5  | 228.9 | 773.3  | 659.0  | 35.7  | 54.5   |
| 290.3  | 241.6  | 223.0  | 164.3  | 89.3  | 330.7  | 253.0  | 42.5  | 49.2   |
| 140.9  | 104.1  | 111.3  | 82.0   | 45.6  | 130.5  | 59.2   | 57.9  | 63.3   |
| 74.0   | 49.9   | 68.2   | 41.4   | 33.9  | 116.5  | 76.6   | 23.9  | 19.2   |
| 25.9   | 10.4   | 32.2   | 25.0   | 9.2   | 66.4   | 43.4   | 25.9  | 48.0   |
| 6.0    | 15.9   | 4.0    | 6.8    | 3.2   | 3.8    | 13.7   | 5.6   | 15.6   |
| 8.3    | 13.6   | 15.1   | 15.8   | 0.6   | 21.0   | 1.4    | 14.7  | 2.2    |
| 16.1   | 0.6    | 5.0    | 2.6    | 0.4   | 7.9    | 6.3    | 1.4   | 3.2    |
| 13.5   | 19.1   | 19.3   | 16.1   | 6.5   | 22.3   | 13.9   | 11.8  | 19.7   |
| 8.5    | 10.9   | 16.7   | 11.3   | 2.6   | 22.2   | 13.5   | 18.2  | 18.9   |
| 9.1    | 1.7    | 1.2    | 2.2    | 2.2   | 8.0    | 5.2    | 2.9   | 13.7   |
| 681.1  | 537.9  | 511.0  | 377.5  | 228.6 | 1579.6 | 1205.1 | 354.9 | 536.3  |
| 9.0    | 23.8   | 10.7   | 1.8    | 7.1   | 16.2   | 14.9   | 7.2   | 4.1    |
| 1100.5 | 1042.1 | 973.6  | 840.0  | 390.1 | 3103.5 | 2567.4 | 624.2 | 833.5  |
| 24.3   | 13.0   | 9.1    | 11.1   | 4.5   | 31.4   | 16.9   | 1.2   | 8.2    |
| 222.9  | 198.5  | 259.6  | 250.6  | 83.5  | 614.0  | 512.0  | 60.0  | 37.2   |
| 112.4  | 94.7   | 84.6   | 114.1  | 29.6  | 168.3  | 70.0   | 22.1  | 33.8   |
| 79.2   | 56.1   | 70.4   | 42.0   | 14.3  | 90.2   | 49.8   | 34.3  | 30.6   |
| 2.7    | 13.6   | 5.0    | 1.3    | 2.5   | 3.6    | 8.3    | 3.8   | 2.9    |
| 2045.0 | 2015.6 | 1828.0 | 1541.9 | 644.7 | 4175.1 | 3468.3 | 404.5 | 626.5  |
| 29.7   | 31.3   | 22.8   | 10.2   | 12.8  | 30.0   | 14.8   | 1.6   | 6.4    |
| 230.3  | 211.3  | 179.9  | 122.3  | 36.9  | 247.4  | 154.5  | 55.1  | 90.3   |
| 121.4  | 116.8  | 108.7  | 78.2   | 40.0  | 126.9  | 63.7   | 27.1  | 37.5   |
| 34.6   | 9.4    | 37.3   | 22.4   | 11.5  | 64.2   | 17.9   | 49.1  | 68.7   |
| 450.5  | 379.7  | 362.5  | 194.6  | 110.5 | 567.4  | 287.9  | 101.6 | 147.1  |
| 3.4    | 6.3    | 4.5    | 4.6    | 11.4  | 80.7   | 67.7   | 1.3   | 2.7    |
| 92.5   | 69.1   | 92.7   | 82.0   | 22.4  | 205.7  | 135.9  | 17.9  | 24.0   |
| 168.3  | 202.0  | 188.3  | 176.4  | 60.5  | 335.8  | 171.0  | 65.6  | 96.7   |
| 152.1  | 186.8  | 199.7  | 206.4  | 48.7  | 413.3  | 310.5  | 22.8  | 21.6   |

|        |        |        |       |       |        |        |       |       |
|--------|--------|--------|-------|-------|--------|--------|-------|-------|
| 145.8  | 176.5  | 160.9  | 151.7 | 91.2  | 451.2  | 360.2  | 76.3  | 93.4  |
| 8.5    | 15.9   | 9.7    | 13.5  | 8.1   | 87.8   | 42.7   | 33.6  | 20.1  |
| 98.1   | 24.5   | 11.2   | 13.7  | 5.0   | 59.9   | 57.0   | 253.9 | 293.1 |
| 759.3  | 374.6  | 448.7  | 340.7 | 135.8 | 989.2  | 959.2  | 401.9 | 702.5 |
| 3.6    | 7.8    | 5.0    | 3.2   | 1.1   | 6.3    | 2.7    | 3.7   | 5.9   |
| 652.0  | 439.8  | 581.7  | 428.8 | 156.1 | 795.8  | 469.9  | 17.2  | 21.1  |
| 81.5   | 68.2   | 76.5   | 53.5  | 27.7  | 121.1  | 105.6  | 92.9  | 69.4  |
| 3.1    | 10.6   | 12.6   | 9.6   | 1.2   | 58.8   | 45.5   | 1.7   | 2.9   |
| 153.1  | 135.2  | 154.6  | 173.1 | 54.9  | 119.7  | 110.8  | 23.1  | 24.3  |
| 152.5  | 84.7   | 91.4   | 95.1  | 31.2  | 171.5  | 130.3  | 35.1  | 79.5  |
| 13.3   | 21.7   | 39.3   | 93.9  | 25.5  | 44.7   | 28.1   | 7.1   | 15.6  |
| 11.6   | 17.8   | 29.3   | 100.0 | 24.1  | 84.1   | 57.8   | 5.3   | 7.6   |
| 69.2   | 65.1   | 61.6   | 77.6  | 27.0  | 38.9   | 25.5   | 26.8  | 48.7  |
| 2.3    | 7.5    | 2.4    | 15.8  | 8.0   | 24.3   | 29.6   | 4.5   | 8.4   |
| 3.9    | 14.3   | 4.3    | 4.8   | 2.1   | 133.6  | 113.9  | 2.4   | 3.2   |
| 66.7   | 57.8   | 45.1   | 17.9  | 21.7  | 464.8  | 294.1  | 54.3  | 73.7  |
| 962.1  | 1213.8 | 999.2  | 588.3 | 393.9 | 2592.9 | 2246.5 | 50.9  | 68.6  |
| 907.7  | 722.6  | 767.4  | 719.7 | 275.4 | 925.5  | 769.1  | 214.5 | 221.0 |
| 464.7  | 469.0  | 390.5  | 338.9 | 184.2 | 481.9  | 374.8  | 83.1  | 89.6  |
| 117.9  | 140.6  | 139.4  | 172.0 | 65.0  | 286.9  | 214.1  | 23.3  | 23.0  |
| 17.2   | 23.2   | 22.3   | 13.0  | 7.1   | 31.7   | 37.5   | 11.7  | 23.8  |
| 342.5  | 280.4  | 257.4  | 185.5 | 85.9  | 297.5  | 189.7  | 144.6 | 183.5 |
| 43.6   | 66.7   | 35.7   | 24.4  | 17.4  | 31.9   | 18.8   | 72.6  | 82.6  |
| 481.0  | 540.6  | 580.6  | 572.0 | 211.6 | 1109.7 | 965.1  | 148.7 | 176.2 |
| 32.7   | 32.6   | 46.8   | 37.8  | 13.1  | 38.2   | 21.0   | 12.3  | 10.7  |
| 273.2  | 243.1  | 257.2  | 280.4 | 66.9  | 176.5  | 146.4  | 40.7  | 59.0  |
| 88.3   | 66.1   | 44.7   | 44.8  | 17.8  | 146.4  | 49.1   | 25.3  | 51.7  |
| 120.3  | 119.9  | 75.3   | 54.9  | 25.6  | 279.9  | 139.3  | 22.6  | 44.5  |
| 120.7  | 99.5   | 106.7  | 108.3 | 28.8  | 268.7  | 179.3  | 20.3  | 44.2  |
| 7.3    | 1.2    | 2.9    | 1.0   | 0.7   | 3.3    | 1.1    | 1.7   | 1.5   |
| 117.9  | 121.3  | 107.1  | 78.4  | 43.9  | 239.1  | 189.3  | 212.5 | 221.3 |
| 72.7   | 93.6   | 134.1  | 120.8 | 32.7  | 164.9  | 93.3   | 9.2   | 7.9   |
| 50.0   | 38.5   | 49.2   | 42.7  | 14.2  | 49.2   | 28.0   | 16.2  | 20.9  |
| 18.0   | 22.5   | 19.0   | 2.7   | 7.3   | 6.0    | 2.3    | 1.6   | 2.1   |
| 38.4   | 40.2   | 28.9   | 25.8  | 13.5  | 137.4  | 72.6   | 12.3  | 21.0  |
| 653.9  | 613.5  | 545.8  | 450.3 | 203.9 | 1109.3 | 1020.7 | 354.1 | 495.7 |
| 296.7  | 196.5  | 225.9  | 257.5 | 102.6 | 291.5  | 197.1  | 92.8  | 107.9 |
| 380.9  | 383.6  | 410.8  | 508.9 | 140.6 | 914.5  | 547.9  | 109.5 | 155.1 |
| 69.6   | 37.0   | 49.6   | 28.6  | 8.5   | 78.3   | 59.0   | 28.2  | 30.8  |
| 70.5   | 86.3   | 84.3   | 96.2  | 27.1  | 220.0  | 105.7  | 18.2  | 13.0  |
| 695.5  | 507.0  | 648.9  | 506.8 | 173.5 | 880.2  | 686.6  | 169.0 | 287.2 |
| 17.1   | 4.8    | 16.9   | 4.0   | 6.1   | 1662.8 | 1257.5 | 3.3   | 7.7   |
| 1202.4 | 1188.3 | 1213.2 | 854.1 | 422.3 | 434.4  | 250.5  | 57.8  | 71.9  |
| 482.3  | 481.1  | 522.4  | 529.0 | 191.7 | 332.2  | 282.9  | 116.3 | 139.3 |
| 254.8  | 214.8  | 252.4  | 295.4 | 89.9  | 556.1  | 477.4  | 162.3 | 181.9 |
| 2.5    | 1.4    | 3.1    | 1.0   | 1.0   | 2.2    | 4.8    | 3.2   | 1.9   |
| 0.6    | 1.6    | 1.2    | 3.2   | 0.5   | 1.0    | 1.0    | 2.4   | 17.8  |
| 16.5   | 8.6    | 9.4    | 10.7  | 1.2   | 11.6   | 8.2    | 14.8  | 3.1   |
| 8.4    | 5.5    | 8.2    | 8.7   | 3.9   | 15.7   | 16.2   | 48.5  | 67.3  |
| 8.9    | 11.2   | 9.8    | 14.3  | 2.7   | 21.2   | 11.4   | 24.7  | 18.8  |
| 467.1  | 462.9  | 495.7  | 540.1 | 156.3 | 534.7  | 321.8  | 48.0  | 74.1  |
| 980.4  | 1049.4 | 857.6  | 606.6 | 326.6 | 1046.3 | 857.6  | 116.5 | 172.8 |
| 92.0   | 74.3   | 73.7   | 68.5  | 29.2  | 138.8  | 87.9   | 56.9  | 61.4  |

|        |        |        |        |       |        |        |       |        |
|--------|--------|--------|--------|-------|--------|--------|-------|--------|
| 9.7    | 3.0    | 6.6    | 3.6    | 1.1   | 9.6    | 5.4    | 2.3   | 13.9   |
| 18.9   | 27.0   | 16.4   | 13.8   | 3.8   | 75.5   | 21.7   | 2.1   | 0.5    |
| 29.6   | 42.9   | 26.7   | 22.6   | 11.9  | 99.5   | 58.2   | 14.5  | 13.3   |
| 483.8  | 472.0  | 316.3  | 266.5  | 215.0 | 441.9  | 308.8  | 97.2  | 134.7  |
| 48.5   | 42.5   | 39.4   | 23.9   | 24.1  | 64.9   | 49.4   | 89.8  | 113.3  |
| 253.3  | 324.4  | 364.1  | 386.0  | 92.9  | 488.7  | 413.7  | 15.5  | 16.5   |
| 247.2  | 216.4  | 270.5  | 341.3  | 65.4  | 373.5  | 246.4  | 22.7  | 46.7   |
| 2473.9 | 2675.8 | 1873.8 | 1183.0 | 894.8 | 2165.2 | 2420.6 | 738.5 | 1003.0 |
| 71.8   | 46.9   | 78.7   | 41.5   | 30.2  | 64.2   | 56.1   | 57.6  | 59.3   |
| 43.5   | 25.7   | 21.1   | 26.3   | 10.4  | 293.2  | 254.1  | 148.0 | 209.9  |
| 328.6  | 280.2  | 342.3  | 237.2  | 104.1 | 440.8  | 283.6  | 153.8 | 160.3  |
| 21.5   | 61.7   | 48.7   | 31.3   | 19.2  | 205.3  | 67.7   | 27.4  | 33.7   |
| 13.1   | 12.0   | 10.3   | 8.4    | 0.5   | 5.5    | 6.7    | 3.0   | 6.6    |
| 702.4  | 792.8  | 654.7  | 365.5  | 253.2 | 1280.2 | 703.6  | 82.1  | 104.5  |
| 5.6    | 0.5    | 7.3    | 0.5    | 0.3   | 8.1    | 8.5    | 5.5   | 6.0    |
| 119.9  | 97.3   | 117.9  | 118.8  | 56.8  | 82.2   | 37.7   | 2.0   | 12.5   |
| 13.5   | 17.5   | 15.2   | 12.1   | 7.3   | 46.2   | 35.6   | 4.9   | 6.3    |
| 530.0  | 478.9  | 421.6  | 290.8  | 183.3 | 641.7  | 317.9  | 262.7 | 362.4  |
| 294.4  | 234.6  | 288.6  | 366.3  | 91.0  | 302.2  | 235.7  | 86.6  | 64.3   |
| 126.3  | 166.4  | 162.0  | 164.3  | 57.0  | 448.5  | 290.0  | 20.9  | 30.2   |
| 3.0    | 4.7    | 1.8    | 5.4    | 1.2   | 82.5   | 61.6   | 22.6  | 57.8   |
| 6.8    | 19.7   | 5.5    | 8.3    | 9.6   | 97.5   | 70.1   | 20.7  | 20.4   |
| 200.8  | 202.2  | 224.4  | 241.3  | 90.5  | 359.8  | 258.8  | 153.8 | 158.4  |
| 87.6   | 90.1   | 54.5   | 41.4   | 21.4  | 105.9  | 62.8   | 9.9   | 10.2   |
| 1.5    | 1.8    | 5.1    | 0.7    | 1.1   | 87.0   | 35.8   | 376.4 | 488.0  |
| 422.6  | 358.7  | 319.9  | 258.1  | 130.4 | 317.7  | 217.1  | 158.8 | 218.5  |
| 142.7  | 98.4   | 113.1  | 93.1   | 49.0  | 192.9  | 98.1   | 94.0  | 124.8  |
| 184.3  | 165.1  | 286.9  | 888.6  | 147.1 | 197.6  | 98.9   | 67.3  | 114.0  |
| 102.5  | 81.8   | 121.5  | 172.8  | 58.9  | 527.0  | 287.6  | 90.4  | 116.0  |
| 311.4  | 294.8  | 285.8  | 201.2  | 110.8 | 181.1  | 80.7   | 189.2 | 224.6  |
| 176.5  | 128.2  | 137.9  | 127.2  | 70.6  | 234.3  | 148.0  | 41.6  | 39.9   |
| 77.4   | 72.5   | 68.5   | 47.7   | 25.7  | 154.1  | 130.2  | 25.8  | 32.9   |
| 83.5   | 85.9   | 70.2   | 53.8   | 18.6  | 219.7  | 137.0  | 48.6  | 62.7   |
| 209.9  | 212.3  | 218.3  | 98.7   | 68.6  | 431.3  | 313.2  | 46.4  | 60.9   |
| 204.7  | 235.2  | 224.4  | 165.2  | 76.8  | 422.1  | 343.6  | 44.3  | 48.9   |
| 202.9  | 211.3  | 179.0  | 143.0  | 59.6  | 389.4  | 249.6  | 54.8  | 89.5   |
| 803.9  | 789.0  | 753.1  | 560.6  | 290.9 | 586.8  | 464.1  | 166.4 | 201.2  |
| 385.3  | 444.8  | 484.6  | 563.5  | 180.8 | 1402.5 | 1194.4 | 91.9  | 104.4  |
| 145.3  | 126.7  | 105.3  | 72.8   | 36.4  | 416.3  | 202.6  | 113.0 | 167.3  |
| 64.3   | 64.6   | 47.8   | 36.7   | 21.6  | 94.6   | 70.0   | 26.6  | 35.6   |
| 15.8   | 9.1    | 2.7    | 1.0    | 0.7   | 1.4    | 7.0    | 0.9   | 4.0    |
| 187.3  | 165.7  | 145.2  | 204.4  | 78.4  | 184.3  | 141.2  | 69.3  | 105.2  |
| 55.7   | 43.1   | 48.5   | 62.1   | 18.5  | 53.6   | 30.5   | 23.6  | 23.8   |
| 380.3  | 151.3  | 196.2  | 129.7  | 94.1  | 849.6  | 777.1  | 113.0 | 147.0  |
| 3.2    | 5.7    | 1.9    | 1.3    | 2.0   | 14.8   | 15.6   | 3.8   | 2.5    |
| 80.1   | 72.0   | 67.3   | 60.9   | 31.4  | 65.3   | 23.8   | 19.7  | 32.3   |
| 538.3  | 518.5  | 578.3  | 610.0  | 197.5 | 1007.1 | 565.0  | 48.9  | 96.1   |
| 1033.3 | 955.9  | 1028.5 | 1338.2 | 402.1 | 1371.8 | 1191.8 | 67.9  | 84.5   |
| 59.0   | 56.8   | 55.2   | 27.6   | 16.4  | 116.6  | 74.7   | 1.7   | 1.2    |
| 13.7   | 19.3   | 21.2   | 4.9    | 5.4   | 31.4   | 22.9   | 1.0   | 1.5    |
| 93.9   | 102.9  | 127.3  | 167.0  | 47.2  | 264.8  | 224.3  | 16.5  | 18.5   |
| 162.7  | 165.3  | 160.3  | 201.9  | 59.3  | 268.1  | 212.4  | 8.4   | 11.7   |
| 116.2  | 102.4  | 119.5  | 161.9  | 42.4  | 110.6  | 70.0   | 42.3  | 53.9   |

|        |        |        |        |       |        |        |       |        |
|--------|--------|--------|--------|-------|--------|--------|-------|--------|
| 117.6  | 113.5  | 131.4  | 151.0  | 56.6  | 205.4  | 123.9  | 67.1  | 100.5  |
| 19.5   | 19.3   | 17.9   | 23.7   | 5.6   | 22.3   | 2.6    | 12.2  | 16.4   |
| 127.9  | 108.3  | 103.2  | 105.7  | 39.6  | 200.5  | 138.4  | 52.5  | 61.6   |
| 18.7   | 9.2    | 13.0   | 40.0   | 4.2   | 0.4    | 2.2    | 0.4   | 1.8    |
| 25.8   | 25.2   | 31.9   | 26.5   | 3.6   | 37.7   | 25.7   | 6.7   | 0.9    |
| 730.7  | 618.0  | 635.2  | 711.2  | 193.4 | 1015.3 | 704.0  | 415.4 | 448.3  |
| 604.1  | 564.5  | 555.2  | 328.6  | 181.4 | 3290.2 | 3319.3 | 983.2 | 1175.7 |
| 95.2   | 112.0  | 105.4  | 70.3   | 21.5  | 270.6  | 180.2  | 16.6  | 17.4   |
| 73.1   | 77.2   | 56.5   | 35.1   | 12.4  | 176.8  | 114.3  | 19.4  | 45.8   |
| 2.2    | 1.5    | 2.2    | 2.0    | 4.4   | 3.3    | 5.6    | 5.3   | 1.4    |
| 6.7    | 11.9   | 9.2    | 9.6    | 6.7   | 101.4  | 69.0   | 12.4  | 32.0   |
| 181.8  | 148.7  | 142.6  | 141.6  | 44.4  | 342.7  | 209.9  | 121.6 | 223.5  |
| 461.4  | 376.9  | 390.9  | 503.6  | 190.7 | 1463.6 | 812.3  | 83.2  | 111.2  |
| 490.7  | 493.1  | 473.0  | 337.4  | 149.8 | 1319.2 | 936.7  | 90.5  | 97.6   |
| 216.2  | 215.6  | 205.3  | 179.7  | 62.3  | 235.1  | 208.2  | 84.9  | 151.6  |
| 123.6  | 99.3   | 101.7  | 59.1   | 45.2  | 169.9  | 119.0  | 159.1 | 170.7  |
| 365.1  | 375.4  | 375.4  | 390.0  | 157.8 | 943.5  | 702.6  | 147.7 | 171.5  |
| 165.3  | 108.5  | 98.9   | 117.0  | 44.7  | 144.8  | 47.5   | 84.5  | 98.2   |
| 11.8   | 6.8    | 23.4   | 6.3    | 11.4  | 26.1   | 4.1    | 23.7  | 27.1   |
| 1.2    | 0.7    | 0.9    | 0.6    | 1.5   | 1.1    | 0.8    | 18.7  | 34.7   |
| 155.3  | 142.5  | 117.6  | 69.1   | 27.9  | 135.8  | 65.0   | 30.5  | 32.4   |
| 1114.1 | 1020.5 | 1021.8 | 972.1  | 425.1 | 2304.2 | 2000.9 | 463.8 | 507.4  |
| 2031.0 | 1809.5 | 1836.1 | 2168.2 | 663.9 | 1475.4 | 997.2  | 136.2 | 159.5  |
| 32.7   | 27.9   | 26.7   | 10.9   | 12.2  | 61.5   | 24.3   | 30.1  | 47.6   |
| 184.1  | 173.8  | 194.4  | 236.1  | 79.0  | 370.2  | 278.7  | 56.2  | 48.8   |
| 932.0  | 927.1  | 555.7  | 195.2  | 186.3 | 1437.6 | 635.7  | 49.1  | 97.6   |
| 98.7   | 77.0   | 51.5   | 14.9   | 4.9   | 45.3   | 3.9    | 13.6  | 30.7   |
| 192.0  | 168.5  | 175.2  | 144.1  | 69.7  | 202.6  | 111.2  | 35.5  | 33.4   |
| 293.8  | 81.0   | 62.0   | 63.0   | 35.1  | 99.1   | 80.8   | 61.7  | 56.2   |
| 125.3  | 155.3  | 124.5  | 208.2  | 66.5  | 153.6  | 101.4  | 26.0  | 40.5   |
| 250.5  | 267.5  | 250.5  | 448.2  | 122.2 | 286.7  | 200.4  | 126.4 | 171.9  |
| 13.8   | 11.4   | 14.8   | 8.7    | 8.7   | 20.5   | 4.6    | 6.7   | 15.1   |
| 15.3   | 29.2   | 15.0   | 14.1   | 3.8   | 77.5   | 39.6   | 3.4   | 19.1   |
| 274.5  | 380.6  | 332.8  | 332.4  | 120.5 | 363.1  | 353.5  | 337.2 | 496.5  |
| 32.7   | 28.6   | 29.9   | 29.2   | 7.9   | 23.9   | 19.1   | 24.8  | 36.9   |
| 217.7  | 202.2  | 167.5  | 236.3  | 82.1  | 173.4  | 123.0  | 38.3  | 44.8   |
| 140.7  | 150.6  | 75.8   | 84.4   | 47.1  | 199.2  | 142.4  | 28.4  | 31.9   |
| 177.6  | 225.4  | 136.2  | 101.8  | 95.5  | 234.9  | 233.7  | 23.1  | 33.8   |
| 36.3   | 25.9   | 20.9   | 13.4   | 2.9   | 6.9    | 2.6    | 0.8   | 1.1    |
| 4.3    | 3.3    | 2.6    | 1.9    | 5.3   | 1.5    | 1.2    | 7.7   | 1.1    |
| 549.2  | 621.2  | 449.6  | 204.3  | 181.2 | 473.5  | 591.8  | 29.4  | 43.9   |
| 26.1   | 4.2    | 12.8   | 8.3    | 6.5   | 70.5   | 40.5   | 36.7  | 50.3   |
| 39.9   | 37.7   | 31.4   | 19.8   | 12.0  | 229.2  | 191.4  | 21.1  | 15.0   |
| 130.7  | 145.1  | 130.1  | 85.4   | 51.7  | 82.2   | 71.1   | 46.0  | 50.5   |
| 49.9   | 57.5   | 58.5   | 64.2   | 13.7  | 114.0  | 100.0  | 38.6  | 31.4   |
| 7.2    | 2.2    | 7.8    | 1.1    | 4.8   | 2.8    | 2.2    | 8.7   | 1.1    |
| 82.3   | 103.3  | 142.1  | 85.8   | 27.6  | 783.3  | 460.4  | 32.9  | 49.4   |
| 301.4  | 288.4  | 328.0  | 250.7  | 115.4 | 1184.1 | 812.4  | 92.8  | 146.5  |
| 283.7  | 250.4  | 220.1  | 127.3  | 66.2  | 410.4  | 285.5  | 115.5 | 165.9  |
| 8.4    | 1.9    | 5.1    | 1.1    | 0.3   | 2.8    | 9.7    | 104.5 | 117.4  |
| 354.9  | 289.4  | 328.5  | 256.8  | 130.4 | 264.7  | 133.0  | 10.0  | 3.5    |
| 112.4  | 141.7  | 130.8  | 117.7  | 37.5  | 282.5  | 164.2  | 21.0  | 20.5   |
| 115.2  | 83.6   | 86.3   | 45.6   | 41.4  | 344.4  | 258.2  | 155.4 | 186.6  |

|        |        |        |        |       |        |        |       |       |
|--------|--------|--------|--------|-------|--------|--------|-------|-------|
| 124.9  | 94.9   | 137.7  | 75.3   | 26.9  | 178.7  | 196.9  | 25.0  | 21.9  |
| 405.6  | 445.0  | 414.6  | 408.8  | 158.1 | 575.4  | 448.9  | 112.8 | 59.1  |
| 47.8   | 37.0   | 45.6   | 36.3   | 25.2  | 176.2  | 108.6  | 39.3  | 31.0  |
| 93.7   | 101.1  | 100.7  | 115.4  | 48.4  | 332.8  | 248.8  | 50.8  | 55.0  |
| 18.2   | 40.1   | 36.7   | 23.0   | 16.5  | 26.4   | 18.2   | 27.5  | 25.7  |
| 189.8  | 165.1  | 137.7  | 92.4   | 42.9  | 129.5  | 82.0   | 36.4  | 49.5  |
| 150.5  | 147.6  | 147.9  | 159.9  | 65.5  | 301.7  | 181.0  | 42.2  | 52.2  |
| 99.8   | 95.9   | 101.8  | 93.5   | 19.1  | 194.2  | 95.7   | 48.7  | 73.0  |
| 31.0   | 10.2   | 16.1   | 13.1   | 6.4   | 19.6   | 17.1   | 11.5  | 16.0  |
| 1.6    | 1.7    | 8.4    | 0.8    | 0.6   | 9.5    | 2.6    | 1.1   | 1.3   |
| 2345.8 | 2222.5 | 2002.1 | 1672.2 | 979.9 | 4890.5 | 3547.9 | 634.7 | 833.5 |
| 274.3  | 201.5  | 239.4  | 200.6  | 69.6  | 678.6  | 388.4  | 86.6  | 97.8  |
| 344.1  | 144.7  | 2928.8 | 2755.6 | 229.6 | 64.0   | 47.0   | 13.0  | 24.3  |
| 23.8   | 16.1   | 13.7   | 13.9   | 4.4   | 58.9   | 17.2   | 30.8  | 33.5  |
| 2578.7 | 2509.6 | 2548.0 | 2449.7 | 762.6 | 5800.3 | 4242.7 | 364.2 | 456.2 |
| 49.3   | 17.9   | 26.4   | 24.4   | 6.0   | 82.1   | 40.9   | 44.3  | 50.4  |
| 83.2   | 70.1   | 76.7   | 43.2   | 19.3  | 147.9  | 67.7   | 31.6  | 28.5  |
| 16.8   | 3.2    | 1.2    | 5.5    | 5.0   | 3.3    | 1.1    | 25.2  | 17.0  |
| 52.5   | 39.4   | 48.6   | 30.9   | 21.0  | 70.5   | 33.9   | 26.4  | 44.3  |
| 254.4  | 206.7  | 195.6  | 156.0  | 79.1  | 178.8  | 70.3   | 102.4 | 166.9 |
| 27.2   | 23.6   | 25.7   | 17.1   | 6.5   | 27.0   | 2.8    | 3.4   | 13.9  |
| 113.5  | 107.3  | 99.8   | 88.2   | 28.0  | 147.7  | 76.1   | 58.8  | 106.9 |
| 211.5  | 175.6  | 171.0  | 206.9  | 93.1  | 735.4  | 705.2  | 54.1  | 91.6  |
| 68.6   | 87.9   | 55.4   | 66.4   | 22.9  | 59.8   | 17.6   | 119.8 | 146.2 |
| 282.6  | 214.3  | 171.1  | 118.3  | 78.4  | 304.4  | 175.3  | 140.6 | 138.4 |
| 68.4   | 69.6   | 76.6   | 54.6   | 27.5  | 184.6  | 103.6  | 43.4  | 49.9  |
| 70.3   | 76.2   | 61.7   | 62.5   | 27.5  | 281.6  | 162.2  | 97.1  | 95.9  |
| 57.4   | 79.2   | 56.2   | 28.0   | 17.5  | 21.6   | 22.5   | 24.2  | 30.9  |
| 0.9    | 0.8    | 3.0    | 1.5    | 0.3   | 10.2   | 0.9    | 2.7   | 1.3   |
| 38.6   | 41.3   | 30.7   | 11.9   | 5.7   | 232.4  | 144.7  | 35.3  | 58.5  |
| 22.2   | 20.3   | 17.6   | 10.6   | 6.5   | 78.8   | 53.6   | 99.3  | 89.1  |
| 4.2    | 0.9    | 2.7    | 13.6   | 1.6   | 1.4    | 3.6    | 9.7   | 2.4   |
| 20.4   | 22.6   | 16.0   | 16.3   | 7.5   | 5.4    | 10.8   | 29.1  | 43.9  |
| 83.0   | 66.1   | 68.0   | 37.9   | 27.3  | 521.4  | 375.1  | 106.9 | 132.3 |
| 4.3    | 2.4    | 9.3    | 1.7    | 1.0   | 4.1    | 3.6    | 24.8  | 38.0  |
| 137.3  | 133.3  | 135.1  | 71.6   | 36.7  | 329.0  | 146.7  | 19.5  | 21.6  |
| 340.1  | 318.3  | 325.1  | 388.5  | 126.6 | 310.4  | 203.8  | 65.5  | 52.3  |
| 321.9  | 375.4  | 379.9  | 244.8  | 120.5 | 629.7  | 462.7  | 18.7  | 39.4  |
| 6.8    | 8.8    | 12.9   | 5.0    | 2.9   | 1030.5 | 1299.9 | 9.5   | 1.2   |
| 99.8   | 101.0  | 115.7  | 94.0   | 24.9  | 104.6  | 72.9   | 42.1  | 42.7  |
| 296.1  | 255.0  | 355.6  | 358.7  | 103.2 | 357.1  | 269.1  | 50.5  | 32.2  |
| 612.3  | 531.3  | 513.8  | 493.0  | 191.1 | 513.8  | 326.1  | 164.7 | 165.5 |
| 77.3   | 88.2   | 78.7   | 99.4   | 36.7  | 690.2  | 460.4  | 12.8  | 9.8   |
| 646.8  | 632.0  | 501.0  | 343.6  | 151.5 | 914.1  | 430.7  | 103.1 | 95.9  |
| 5.9    | 0.4    | 0.9    | 6.6    | 5.0   | 15.2   | 6.1    | 6.1   | 4.0   |
| 1.1    | 1.2    | 1.2    | 2.0    | 1.0   | 1.8    | 1.0    | 3.1   | 2.7   |
| 11.1   | 12.2   | 9.2    | 8.1    | 1.2   | 2.8    | 9.1    | 0.7   | 4.8   |
| 16.7   | 11.2   | 6.2    | 19.6   | 6.4   | 16.5   | 13.6   | 2.7   | 11.1  |
| 212.3  | 194.0  | 270.4  | 279.9  | 95.8  | 194.0  | 145.9  | 27.4  | 38.1  |
| 127.1  | 90.9   | 113.5  | 79.2   | 24.7  | 158.4  | 106.6  | 2.3   | 7.0   |
| 24.2   | 23.4   | 21.1   | 14.8   | 10.9  | 41.7   | 23.6   | 18.6  | 18.2  |
| 289.6  | 404.7  | 349.2  | 533.5  | 150.4 | 327.0  | 267.8  | 95.7  | 128.2 |
| 52.7   | 49.6   | 40.6   | 38.8   | 9.4   | 170.6  | 110.5  | 11.7  | 11.1  |

|        |        |        |        |       |        |        |       |        |
|--------|--------|--------|--------|-------|--------|--------|-------|--------|
| 61.1   | 47.4   | 46.5   | 35.5   | 18.6  | 225.6  | 172.1  | 10.4  | 20.8   |
| 179.7  | 185.5  | 192.8  | 256.0  | 64.0  | 368.5  | 307.9  | 101.0 | 112.5  |
| 229.7  | 266.9  | 206.8  | 109.3  | 114.1 | 29.3   | 25.4   | 1.6   | 1.6    |
| 46.8   | 46.8   | 40.4   | 44.7   | 24.4  | 152.3  | 104.9  | 44.6  | 82.9   |
| 33.2   | 78.2   | 55.4   | 48.4   | 16.2  | 127.4  | 115.5  | 11.9  | 4.4    |
| 218.2  | 242.6  | 179.7  | 137.4  | 72.4  | 211.5  | 169.8  | 37.3  | 33.3   |
| 401.8  | 362.0  | 416.1  | 472.9  | 144.5 | 687.4  | 412.8  | 35.2  | 55.3   |
| 23.0   | 31.2   | 44.9   | 26.0   | 15.0  | 113.1  | 84.8   | 149.1 | 167.6  |
| 362.0  | 385.4  | 385.1  | 465.2  | 157.0 | 395.9  | 333.6  | 132.1 | 178.9  |
| 142.7  | 154.7  | 158.0  | 211.6  | 68.2  | 131.9  | 109.5  | 48.7  | 101.2  |
| 2.9    | 1.2    | 1.2    | 0.8    | 0.3   | 3.0    | 0.7    | 0.6   | 1.0    |
| 11.0   | 5.9    | 9.9    | 13.2   | 3.7   | 29.1   | 22.1   | 9.9   | 1.5    |
| 140.5  | 93.4   | 50.7   | 39.1   | 32.4  | 112.0  | 76.2   | 44.3  | 46.3   |
| 154.8  | 107.8  | 156.0  | 182.5  | 60.8  | 150.9  | 115.3  | 78.3  | 77.1   |
| 260.5  | 232.4  | 217.4  | 276.9  | 102.3 | 255.6  | 204.1  | 83.1  | 97.9   |
| 1312.0 | 1262.3 | 1217.9 | 1282.1 | 528.3 | 1724.3 | 1227.7 | 126.9 | 240.9  |
| 26.6   | 42.0   | 38.5   | 28.2   | 10.5  | 50.1   | 42.9   | 432.0 | 608.7  |
| 36.1   | 34.5   | 29.8   | 6.5    | 21.4  | 53.1   | 19.1   | 70.9  | 117.2  |
| 4.0    | 11.1   | 13.0   | 14.4   | 3.2   | 23.5   | 14.4   | 9.9   | 6.9    |
| 1693.7 | 1322.0 | 2471.4 | 4261.4 | 815.6 | 1392.4 | 854.5  | 37.9  | 98.5   |
| 11.2   | 0.7    | 1.9    | 6.8    | 0.6   | 3909.2 | 2180.2 | 1.4   | 3.8    |
| 160.9  | 155.6  | 238.6  | 168.0  | 51.3  | 360.0  | 259.2  | 113.5 | 141.3  |
| 90.7   | 96.2   | 68.7   | 54.5   | 21.0  | 188.7  | 154.1  | 52.6  | 79.3   |
| 266.0  | 241.0  | 217.4  | 219.9  | 80.8  | 327.7  | 245.2  | 2.2   | 9.6    |
| 98.1   | 109.1  | 109.1  | 98.3   | 39.5  | 108.6  | 88.9   | 25.5  | 33.5   |
| 53.7   | 38.1   | 31.9   | 33.8   | 26.7  | 43.3   | 30.3   | 23.5  | 16.2   |
| 262.3  | 261.2  | 330.1  | 414.8  | 133.1 | 540.6  | 386.0  | 67.6  | 84.7   |
| 126.0  | 108.2  | 100.7  | 77.7   | 41.9  | 369.2  | 271.5  | 45.5  | 83.5   |
| 364.3  | 304.8  | 285.2  | 229.2  | 98.9  | 427.3  | 200.8  | 73.6  | 98.0   |
| 246.1  | 246.4  | 252.6  | 171.4  | 97.6  | 272.2  | 179.6  | 22.9  | 25.9   |
| 44.7   | 69.2   | 53.8   | 55.2   | 18.1  | 73.6   | 64.4   | 10.0  | 9.4    |
| 218.2  | 195.6  | 198.3  | 242.9  | 93.6  | 300.7  | 183.1  | 79.8  | 55.9   |
| 559.0  | 565.4  | 578.8  | 546.4  | 181.0 | 579.5  | 407.5  | 117.3 | 152.3  |
| 822.7  | 599.0  | 634.4  | 434.2  | 116.8 | 329.6  | 278.3  | 132.2 | 197.2  |
| 818.9  | 658.9  | 640.0  | 532.3  | 242.0 | 1474.1 | 1283.4 | 415.4 | 615.7  |
| 9.0    | 20.2   | 15.6   | 24.7   | 6.6   | 366.1  | 294.7  | 3.8   | 5.8    |
| 60.4   | 66.0   | 61.9   | 52.7   | 14.0  | 127.9  | 127.7  | 24.1  | 27.9   |
| 433.5  | 500.2  | 521.8  | 554.0  | 189.8 | 1248.0 | 1060.2 | 96.4  | 132.9  |
| 507.8  | 321.6  | 256.4  | 115.1  | 71.3  | 292.1  | 192.1  | 180.1 | 285.9  |
| 147.1  | 140.9  | 146.0  | 141.1  | 45.1  | 196.5  | 91.6   | 94.7  | 133.6  |
| 505.3  | 429.5  | 446.5  | 388.1  | 111.2 | 789.4  | 453.6  | 249.0 | 271.9  |
| 12.8   | 8.2    | 3.9    | 5.2    | 5.9   | 5.9    | 3.5    | 19.1  | 25.0   |
| 423.8  | 336.7  | 350.7  | 300.1  | 135.5 | 1593.7 | 1154.8 | 103.6 | 168.7  |
| 51.7   | 41.8   | 43.2   | 33.4   | 9.8   | 63.6   | 62.9   | 60.9  | 61.8   |
| 11.0   | 11.5   | 22.1   | 22.6   | 2.9   | 37.6   | 43.3   | 28.6  | 29.6   |
| 26.3   | 11.1   | 31.0   | 23.2   | 5.7   | 11.7   | 1.3    | 46.9  | 55.4   |
| 918.9  | 870.8  | 1102.3 | 886.1  | 337.3 | 835.3  | 577.4  | 731.1 | 971.2  |
| 26.7   | 31.6   | 17.7   | 8.2    | 14.0  | 10.1   | 10.5   | 0.8   | 6.4    |
| 8.5    | 25.9   | 6.7    | 5.5    | 11.6  | 12.6   | 17.0   | 33.3  | 56.3   |
| 824.6  | 853.3  | 663.7  | 452.2  | 219.1 | 648.6  | 613.3  | 167.5 | 147.2  |
| 56.9   | 54.4   | 48.6   | 31.3   | 12.2  | 34.0   | 23.0   | 74.3  | 96.7   |
| 7.9    | 2.4    | 1.5    | 1.8    | 0.6   | 449.8  | 190.9  | 743.9 | 1394.1 |
| 11.3   | 16.0   | 28.0   | 15.4   | 4.8   | 108.6  | 67.7   | 60.0  | 75.6   |

|        |        |        |        |       |        |        |       |       |
|--------|--------|--------|--------|-------|--------|--------|-------|-------|
| 44.9   | 25.8   | 11.0   | 13.2   | 4.1   | 143.7  | 114.3  | 40.2  | 37.9  |
| 3.7    | 1.7    | 1.8    | 1.7    | 1.3   | 35.2   | 24.0   | 4.3   | 4.8   |
| 24.7   | 16.7   | 24.8   | 5.8    | 1.2   | 78.8   | 67.5   | 15.6  | 21.4  |
| 92.8   | 122.7  | 116.2  | 163.9  | 41.1  | 106.1  | 66.8   | 13.2  | 14.8  |
| 118.1  | 148.0  | 186.4  | 221.8  | 63.3  | 173.4  | 112.3  | 18.5  | 19.4  |
| 1158.3 | 1457.9 | 1048.3 | 866.8  | 425.9 | 415.9  | 406.6  | 78.8  | 138.7 |
| 70.6   | 86.9   | 89.2   | 64.9   | 34.5  | 222.3  | 128.1  | 23.6  | 35.2  |
| 2.8    | 1.6    | 2.7    | 1.5    | 1.2   | 1.9    | 1.1    | 1.9   | 3.4   |
| 17.9   | 15.1   | 12.9   | 16.0   | 1.3   | 220.5  | 206.0  | 34.3  | 106.8 |
| 1.8    | 7.8    | 10.4   | 4.9    | 2.4   | 80.1   | 84.1   | 67.3  | 87.0  |
| 14.7   | 6.9    | 7.9    | 1.7    | 4.4   | 111.5  | 67.7   | 47.5  | 66.9  |
| 1.1    | 0.7    | 1.0    | 0.5    | 1.3   | 14.2   | 22.9   | 34.0  | 55.5  |
| 51.6   | 60.4   | 62.5   | 46.4   | 17.4  | 174.1  | 133.5  | 81.3  | 84.3  |
| 1.5    | 3.8    | 6.9    | 10.1   | 6.0   | 1.8    | 15.5   | 1.2   | 1.1   |
| 157.5  | 186.2  | 167.3  | 229.3  | 70.3  | 714.4  | 718.7  | 387.3 | 508.1 |
| 130.7  | 119.1  | 105.4  | 105.3  | 34.5  | 449.1  | 288.6  | 26.3  | 37.4  |
| 451.3  | 491.1  | 440.3  | 440.9  | 205.4 | 678.2  | 542.2  | 46.4  | 97.6  |
| 198.6  | 152.9  | 192.3  | 200.6  | 89.7  | 333.1  | 271.8  | 98.4  | 143.8 |
| 135.6  | 119.5  | 133.3  | 92.0   | 45.3  | 120.1  | 57.3   | 180.5 | 175.2 |
| 35.7   | 38.2   | 5.6    | 43.1   | 12.5  | 127.1  | 93.5   | 38.3  | 53.5  |
| 0.8    | 0.7    | 0.9    | 2.2    | 0.9   | 69.6   | 65.3   | 2.0   | 3.5   |
| 3.9    | 8.3    | 6.8    | 3.5    | 0.7   | 354.5  | 360.4  | 13.1  | 9.1   |
| 1349.5 | 1461.6 | 892.6  | 1029.8 | 506.8 | 1888.4 | 1825.6 | 120.4 | 151.0 |
| 357.4  | 270.4  | 267.2  | 215.7  | 110.7 | 241.1  | 163.0  | 89.7  | 106.7 |
| 19.0   | 13.5   | 23.1   | 6.7    | 8.3   | 13.8   | 5.6    | 7.9   | 12.4  |
| 9.8    | 7.1    | 8.5    | 9.7    | 1.5   | 4.6    | 7.9    | 2.2   | 0.9   |
| 47.8   | 67.1   | 61.0   | 43.8   | 30.9  | 186.1  | 116.1  | 77.9  | 93.8  |
| 62.5   | 97.3   | 62.5   | 40.3   | 27.2  | 1312.5 | 764.3  | 449.1 | 786.0 |
| 17.9   | 23.9   | 17.5   | 10.4   | 10.1  | 57.1   | 25.4   | 24.4  | 29.4  |
| 172.0  | 186.2  | 264.9  | 151.0  | 31.2  | 45.4   | 25.9   | 56.2  | 94.5  |
| 1206.6 | 1230.7 | 1291.5 | 932.1  | 448.1 | 291.8  | 174.8  | 136.6 | 244.1 |
| 172.1  | 200.9  | 162.5  | 107.4  | 64.3  | 398.9  | 297.8  | 103.0 | 160.5 |
| 62.8   | 84.4   | 95.3   | 129.1  | 34.0  | 154.6  | 94.3   | 8.3   | 14.6  |
| 95.8   | 65.1   | 53.4   | 57.4   | 15.1  | 136.6  | 94.2   | 445.5 | 585.0 |
| 69.8   | 61.6   | 37.8   | 46.9   | 22.5  | 88.9   | 89.2   | 482.6 | 647.1 |
| 78.7   | 80.0   | 91.4   | 109.4  | 37.2  | 93.4   | 59.3   | 80.4  | 88.8  |
| 27.6   | 9.6    | 15.8   | 17.4   | 5.4   | 51.0   | 25.3   | 83.8  | 90.3  |
| 4.3    | 2.8    | 1.8    | 13.2   | 8.8   | 41.7   | 13.5   | 55.6  | 65.7  |
| 20.6   | 18.0   | 16.9   | 17.0   | 4.6   | 52.3   | 33.2   | 22.2  | 29.5  |
| 1.2    | 3.4    | 3.0    | 1.1    | 5.2   | 13.3   | 1.7    | 0.5   | 0.6   |
| 8.9    | 4.1    | 6.6    | 10.0   | 1.0   | 125.3  | 57.8   | 1.8   | 6.4   |
| 416.1  | 398.8  | 324.8  | 264.5  | 166.9 | 838.7  | 783.1  | 384.3 | 431.8 |
| 16.1   | 19.2   | 23.6   | 19.3   | 5.8   | 35.6   | 41.7   | 30.6  | 27.9  |
| 344.3  | 319.4  | 303.6  | 342.7  | 167.5 | 488.7  | 284.4  | 156.0 | 181.7 |
| 83.4   | 88.6   | 65.9   | 37.8   | 19.4  | 117.1  | 65.4   | 47.0  | 63.0  |
| 697.7  | 712.3  | 665.3  | 480.8  | 263.0 | 1351.6 | 907.7  | 114.9 | 249.8 |
| 74.8   | 76.1   | 91.3   | 43.4   | 27.3  | 189.2  | 88.0   | 32.1  | 44.0  |
| 57.4   | 86.6   | 50.6   | 45.9   | 25.0  | 197.7  | 76.4   | 10.0  | 26.7  |
| 0.7    | 0.7    | 0.8    | 0.5    | 0.5   | 0.9    | 4.1    | 0.9   | 0.6   |
| 4.4    | 5.5    | 2.8    | 8.4    | 0.3   | 23.7   | 7.8    | 4.7   | 14.6  |
| 40.8   | 17.7   | 26.2   | 12.2   | 8.1   | 62.4   | 25.2   | 61.6  | 69.7  |
| 129.6  | 134.0  | 202.8  | 153.6  | 33.0  | 168.7  | 121.7  | 4.8   | 7.5   |
| 103.2  | 48.5   | 128.2  | 101.6  | 22.6  | 64.9   | 37.0   | 10.8  | 7.6   |

|        |        |        |        |       |        |        |       |       |
|--------|--------|--------|--------|-------|--------|--------|-------|-------|
| 37.8   | 15.0   | 25.5   | 10.9   | 9.0   | 28.1   | 23.0   | 27.3  | 18.2  |
| 28.8   | 38.1   | 15.4   | 2.6    | 9.8   | 1.8    | 6.7    | 8.2   | 2.5   |
| 300.5  | 325.3  | 370.3  | 500.8  | 149.1 | 123.0  | 96.5   | 124.4 | 142.5 |
| 3.2    | 0.7    | 1.2    | 2.1    | 0.8   | 256.8  | 176.6  | 88.0  | 137.3 |
| 337.9  | 337.2  | 400.8  | 375.4  | 133.9 | 508.2  | 374.6  | 56.1  | 75.2  |
| 38.9   | 31.3   | 38.9   | 31.5   | 12.8  | 50.3   | 22.2   | 5.1   | 15.5  |
| 455.9  | 454.8  | 422.1  | 349.4  | 190.8 | 495.3  | 364.1  | 58.1  | 79.5  |
| 702.5  | 618.3  | 635.7  | 395.5  | 159.2 | 645.7  | 472.3  | 7.6   | 5.8   |
| 1080.3 | 1144.9 | 1078.2 | 759.7  | 347.6 | 849.0  | 635.3  | 7.8   | 1.6   |
| 81.2   | 76.5   | 156.3  | 99.7   | 43.1  | 1866.1 | 859.1  | 2.5   | 2.9   |
| 57.4   | 61.3   | 46.2   | 40.3   | 15.1  | 149.9  | 56.7   | 33.0  | 54.6  |
| 63.8   | 31.7   | 62.8   | 56.5   | 12.8  | 136.0  | 114.3  | 94.4  | 97.0  |
| 7.9    | 0.9    | 2.2    | 0.4    | 1.0   | 147.5  | 133.1  | 18.2  | 34.3  |
| 122.9  | 96.2   | 136.6  | 89.7   | 49.4  | 163.9  | 114.1  | 310.0 | 352.4 |
| 94.5   | 92.2   | 89.6   | 46.0   | 38.2  | 77.1   | 52.8   | 45.5  | 52.5  |
| 87.1   | 78.4   | 102.3  | 182.1  | 51.9  | 103.0  | 109.2  | 42.2  | 39.4  |
| 2.0    | 2.2    | 4.0    | 1.8    | 1.7   | 58.5   | 61.0   | 1.1   | 1.0   |
| 130.1  | 132.2  | 163.7  | 94.9   | 40.8  | 284.6  | 191.6  | 53.3  | 75.8  |
| 106.2  | 107.7  | 124.3  | 142.3  | 39.5  | 233.0  | 177.2  | 0.7   | 1.0   |
| 240.4  | 212.6  | 246.8  | 191.4  | 56.6  | 221.8  | 166.3  | 113.7 | 153.4 |
| 2674.2 | 2389.1 | 2048.2 | 1264.3 | 452.3 | 3696.2 | 2959.6 | 162.3 | 190.2 |
| 208.9  | 154.4  | 116.4  | 51.9   | 29.3  | 203.2  | 99.0   | 61.8  | 69.5  |
| 152.7  | 144.5  | 128.9  | 50.1   | 29.0  | 114.2  | 75.5   | 80.4  | 122.3 |
| 4.5    | 1.9    | 3.5    | 7.1    | 0.5   | 1.4    | 2.2    | 1.3   | 3.0   |
| 58.7   | 34.2   | 33.8   | 16.5   | 12.4  | 172.7  | 110.7  | 3.9   | 4.1   |
| 102.7  | 85.1   | 94.7   | 58.3   | 30.4  | 227.4  | 167.8  | 8.6   | 16.2  |
| 15.0   | 4.2    | 1.3    | 1.5    | 1.1   | 26.4   | 11.2   | 12.1  | 8.4   |
| 54.8   | 33.7   | 27.6   | 20.2   | 11.2  | 245.8  | 288.1  | 75.5  | 77.4  |
| 90.1   | 130.1  | 171.0  | 221.8  | 48.1  | 403.7  | 260.3  | 6.5   | 5.9   |
| 2.9    | 13.0   | 2.8    | 2.0    | 0.5   | 8.6    | 2.5    | 1.9   | 2.2   |
| 6.0    | 1.9    | 5.8    | 1.7    | 4.2   | 15.0   | 3.7    | 6.9   | 7.3   |
| 138.1  | 106.6  | 145.9  | 218.1  | 47.3  | 258.5  | 189.8  | 50.2  | 77.1  |
| 10.3   | 1.8    | 8.0    | 9.1    | 3.7   | 12.9   | 5.1    | 9.2   | 10.3  |
| 43.8   | 58.6   | 61.2   | 18.9   | 16.3  | 89.6   | 43.7   | 6.1   | 1.2   |
| 190.7  | 170.0  | 163.9  | 145.4  | 69.9  | 253.5  | 189.8  | 83.4  | 112.8 |
| 157.2  | 131.9  | 138.0  | 99.3   | 47.0  | 222.1  | 156.2  | 163.5 | 171.6 |
| 96.4   | 97.4   | 93.3   | 82.3   | 36.6  | 159.6  | 142.7  | 71.3  | 87.2  |
| 55.2   | 27.7   | 35.8   | 21.2   | 14.1  | 12.6   | 1.5    | 40.9  | 42.1  |
| 14.3   | 1.2    | 2.0    | 3.2    | 2.4   | 7.0    | 1.0    | 8.3   | 6.5   |
| 46.6   | 18.9   | 32.0   | 10.4   | 5.1   | 157.1  | 183.1  | 4.4   | 10.1  |
| 306.1  | 294.2  | 327.9  | 308.5  | 80.0  | 693.6  | 563.7  | 47.7  | 37.9  |
| 22.4   | 28.0   | 5.9    | 29.3   | 1.2   | 89.6   | 75.6   | 4.8   | 23.7  |
| 2.8    | 5.6    | 9.4    | 9.0    | 8.7   | 4.8    | 5.6    | 1.8   | 5.1   |
| 217.6  | 201.5  | 268.5  | 293.6  | 69.3  | 153.4  | 72.6   | 17.2  | 23.9  |
| 309.5  | 358.5  | 335.6  | 264.9  | 95.5  | 873.8  | 566.9  | 92.2  | 79.3  |
| 499.3  | 340.6  | 403.6  | 451.6  | 160.3 | 718.4  | 509.0  | 164.9 | 215.7 |
| 196.5  | 153.6  | 157.9  | 175.7  | 83.6  | 278.8  | 171.0  | 92.3  | 117.5 |
| 54.1   | 52.4   | 20.3   | 13.5   | 6.8   | 21.4   | 20.4   | 58.9  | 59.0  |
| 21.5   | 36.2   | 33.4   | 19.5   | 9.1   | 96.7   | 71.4   | 65.9  | 70.9  |
| 3.0    | 2.7    | 1.7    | 7.9    | 1.1   | 4.6    | 2.2    | 1.2   | 1.2   |
| 11.8   | 8.3    | 0.9    | 10.1   | 5.0   | 2.1    | 6.7    | 3.9   | 1.1   |
| 0.9    | 3.3    | 2.5    | 2.3    | 0.1   | 2.0    | 1.2    | 2.3   | 2.1   |
| 19.2   | 17.5   | 14.3   | 15.0   | 6.7   | 29.7   | 15.7   | 17.5  | 26.7  |



|        |        |        |        |       |        |        |       |       |
|--------|--------|--------|--------|-------|--------|--------|-------|-------|
| 39.0   | 39.1   | 36.4   | 22.0   | 15.4  | 39.1   | 23.8   | 15.1  | 1.7   |
| 49.4   | 44.2   | 42.3   | 35.5   | 21.6  | 73.1   | 51.6   | 36.6  | 39.1  |
| 229.0  | 175.8  | 218.9  | 232.4  | 75.2  | 421.9  | 255.9  | 123.4 | 122.1 |
| 10.0   | 6.2    | 18.9   | 4.1    | 3.6   | 8.5    | 5.6    | 16.6  | 12.1  |
| 225.3  | 252.3  | 209.0  | 154.5  | 57.5  | 321.8  | 244.4  | 42.0  | 56.8  |
| 379.5  | 357.2  | 372.6  | 253.4  | 111.8 | 242.9  | 155.0  | 22.1  | 32.3  |
| 311.4  | 235.0  | 222.4  | 181.3  | 57.0  | 441.6  | 304.2  | 97.8  | 156.9 |
| 18.8   | 19.9   | 10.7   | 9.6    | 8.3   | 17.8   | 9.0    | 7.5   | 9.4   |
| 10.2   | 9.2    | 17.5   | 9.4    | 4.0   | 7.7    | 5.1    | 7.1   | 13.5  |
| 154.5  | 230.1  | 175.0  | 155.6  | 81.4  | 193.3  | 124.3  | 8.4   | 3.8   |
| 126.3  | 195.7  | 112.3  | 120.2  | 69.5  | 227.7  | 129.8  | 6.5   | 5.9   |
| 2.6    | 2.6    | 3.1    | 1.3    | 0.6   | 1.7    | 1.6    | 2.4   | 7.1   |
| 3.0    | 4.3    | 3.1    | 2.4    | 1.1   | 14.3   | 15.5   | 2.3   | 1.3   |
| 21.7   | 28.1   | 15.8   | 24.3   | 12.6  | 36.6   | 14.0   | 9.2   | 16.6  |
| 84.3   | 58.8   | 111.7  | 73.4   | 31.0  | 164.1  | 101.3  | 2.7   | 7.7   |
| 1085.6 | 924.5  | 878.7  | 629.4  | 317.0 | 2093.7 | 1773.0 | 273.1 | 342.7 |
| 381.4  | 466.8  | 353.8  | 178.1  | 109.1 | 47.3   | 29.5   | 4.6   | 4.6   |
| 52.2   | 51.1   | 52.5   | 56.1   | 18.1  | 79.8   | 49.4   | 21.7  | 28.1  |
| 124.2  | 91.0   | 103.7  | 111.7  | 25.1  | 157.2  | 100.1  | 13.3  | 9.9   |
| 74.1   | 77.9   | 81.2   | 93.0   | 33.4  | 152.1  | 113.0  | 4.3   | 0.8   |
| 274.0  | 231.6  | 225.7  | 319.4  | 80.8  | 655.0  | 425.4  | 93.8  | 165.0 |
| 1.2    | 3.0    | 5.0    | 1.8    | 0.5   | 3.8    | 4.9    | 3.0   | 2.7   |
| 8.4    | 10.5   | 13.2   | 18.7   | 5.1   | 427.5  | 440.4  | 6.9   | 8.7   |
| 8.7    | 16.3   | 4.5    | 14.7   | 6.6   | 295.7  | 221.5  | 1.5   | 2.0   |
| 13.5   | 7.7    | 12.4   | 5.0    | 7.7   | 286.3  | 145.7  | 5.8   | 5.1   |
| 202.4  | 161.8  | 172.0  | 113.2  | 62.6  | 89.1   | 17.2   | 50.2  | 55.9  |
| 133.7  | 71.4   | 75.8   | 56.1   | 34.8  | 78.6   | 68.5   | 55.0  | 30.9  |
| 22.1   | 14.4   | 17.6   | 15.8   | 13.0  | 1215.4 | 551.0  | 21.8  | 25.2  |
| 718.9  | 723.0  | 860.8  | 1003.7 | 352.6 | 1654.9 | 1287.2 | 132.6 | 163.0 |
| 133.8  | 101.1  | 111.2  | 60.7   | 47.2  | 186.7  | 104.1  | 13.2  | 21.9  |
| 183.4  | 220.8  | 195.1  | 164.4  | 86.5  | 19.1   | 14.6   | 65.8  | 121.8 |
| 64.1   | 86.8   | 66.5   | 60.7   | 27.7  | 5.3    | 7.4    | 35.7  | 55.6  |
| 149.0  | 158.0  | 193.0  | 258.1  | 65.9  | 469.9  | 498.7  | 57.5  | 105.0 |
| 92.7   | 70.4   | 67.3   | 83.8   | 32.4  | 142.6  | 93.1   | 37.3  | 63.1  |
| 79.5   | 37.9   | 37.7   | 39.1   | 16.5  | 46.5   | 18.1   | 63.2  | 66.7  |
| 16.0   | 16.6   | 28.7   | 31.6   | 14.5  | 40.3   | 15.4   | 12.2  | 14.6  |
| 18.7   | 5.7    | 6.1    | 12.9   | 5.1   | 52.4   | 30.0   | 49.4  | 46.1  |
| 3.0    | 0.7    | 2.0    | 0.3    | 1.6   | 0.4    | 1.0    | 0.6   | 7.9   |
| 1.7    | 0.8    | 5.1    | 3.5    | 2.0   | 12.1   | 1.1    | 7.4   | 8.0   |
| 75.6   | 65.6   | 22.3   | 43.7   | 23.4  | 313.4  | 221.9  | 77.8  | 66.7  |
| 361.0  | 324.7  | 279.3  | 268.6  | 109.1 | 633.8  | 417.9  | 142.1 | 185.4 |
| 52.3   | 52.1   | 20.8   | 23.9   | 8.7   | 72.7   | 51.0   | 44.7  | 64.2  |
| 62.5   | 69.3   | 44.9   | 49.7   | 18.9  | 84.5   | 79.7   | 68.0  | 93.8  |
| 9.3    | 8.0    | 7.8    | 1.3    | 3.4   | 20.2   | 10.4   | 3.1   | 8.3   |
| 277.8  | 284.1  | 263.5  | 181.7  | 67.2  | 159.0  | 101.0  | 11.5  | 13.3  |
| 487.4  | 399.1  | 385.1  | 319.4  | 123.0 | 1514.7 | 1070.8 | 103.8 | 180.8 |
| 75.8   | 56.9   | 44.4   | 48.4   | 23.0  | 163.8  | 112.9  | 278.5 | 307.0 |
| 101.0  | 78.9   | 87.8   | 89.7   | 20.2  | 177.4  | 120.2  | 55.6  | 56.2  |
| 1.5    | 0.3    | 4.1    | 1.4    | 2.8   | 74.0   | 42.5   | 1.9   | 0.8   |
| 7.1    | 1.1    | 1.3    | 6.7    | 0.2   | 57.9   | 29.4   | 5.1   | 8.4   |
| 3.2    | 14.1   | 12.6   | 2.0    | 3.4   | 13.2   | 2.1    | 6.0   | 14.7  |
| 75.8   | 56.7   | 95.1   | 57.1   | 27.3  | 143.6  | 96.4   | 9.4   | 28.1  |
| 1653.0 | 1505.6 | 1329.3 | 1003.0 | 542.6 | 910.4  | 595.8  | 165.5 | 284.0 |

|       |       |        |        |       |        |        |       |       |
|-------|-------|--------|--------|-------|--------|--------|-------|-------|
| 8.1   | 16.9  | 12.8   | 2.3    | 7.3   | 143.5  | 92.5   | 18.9  | 36.7  |
| 105.9 | 121.3 | 98.1   | 108.8  | 53.6  | 72.9   | 57.4   | 25.8  | 45.7  |
| 19.5  | 19.3  | 22.8   | 21.3   | 8.7   | 116.7  | 70.9   | 19.3  | 32.2  |
| 44.2  | 46.4  | 56.8   | 21.5   | 8.3   | 349.1  | 287.9  | 11.5  | 13.3  |
| 15.6  | 4.5   | 21.4   | 6.4    | 2.2   | 4.0    | 7.8    | 16.6  | 13.1  |
| 3.1   | 7.9   | 7.1    | 4.8    | 2.2   | 7.3    | 8.6    | 6.2   | 8.6   |
| 0.9   | 2.4   | 7.8    | 0.8    | 3.4   | 6.8    | 8.5    | 11.5  | 3.0   |
| 896.3 | 571.0 | 1746.2 | 1672.6 | 300.4 | 1715.9 | 1471.9 | 39.4  | 75.0  |
| 150.1 | 135.3 | 144.1  | 83.1   | 63.4  | 209.5  | 148.0  | 117.6 | 84.6  |
| 138.2 | 117.4 | 126.3  | 102.2  | 56.0  | 171.5  | 131.0  | 24.5  | 36.5  |
| 37.1  | 20.4  | 38.5   | 38.6   | 18.9  | 12.9   | 21.3   | 25.8  | 40.1  |
| 32.1  | 24.0  | 24.7   | 24.4   | 11.2  | 25.2   | 2.3    | 21.9  | 33.1  |
| 9.6   | 3.0   | 13.0   | 8.0    | 6.0   | 16.5   | 1.6    | 1.1   | 12.9  |
| 373.1 | 332.7 | 325.2  | 252.0  | 125.6 | 786.1  | 548.5  | 196.0 | 175.2 |
| 47.0  | 34.1  | 33.8   | 23.1   | 14.8  | 69.2   | 65.0   | 45.7  | 34.5  |
| 38.6  | 43.9  | 63.8   | 36.1   | 11.9  | 150.7  | 64.2   | 87.4  | 102.1 |
| 12.2  | 4.1   | 5.9    | 9.5    | 4.8   | 7.5    | 1.1    | 6.0   | 10.1  |
| 170.6 | 159.4 | 200.1  | 195.9  | 61.8  | 444.3  | 309.7  | 21.9  | 31.0  |
| 125.2 | 65.4  | 94.2   | 82.7   | 54.2  | 112.3  | 101.9  | 13.8  | 24.7  |
| 27.3  | 22.2  | 30.4   | 32.2   | 6.7   | 52.8   | 28.6   | 12.0  | 24.5  |
| 77.1  | 78.3  | 73.2   | 69.1   | 32.4  | 88.2   | 103.4  | 19.3  | 21.6  |
| 341.7 | 217.9 | 437.3  | 270.3  | 149.8 | 4667.9 | 3189.6 | 2.4   | 8.8   |
| 39.6  | 26.1  | 14.1   | 0.9    | 9.1   | 15.4   | 11.9   | 10.1  | 12.3  |
| 144.4 | 151.7 | 126.4  | 102.5  | 51.7  | 173.5  | 100.3  | 72.5  | 91.3  |
| 5.1   | 19.9  | 14.6   | 17.9   | 1.1   | 55.1   | 23.3   | 117.9 | 109.3 |
| 218.2 | 205.9 | 207.0  | 189.6  | 76.3  | 396.9  | 385.3  | 52.4  | 72.6  |
| 161.9 | 150.0 | 170.7  | 176.9  | 47.2  | 258.1  | 157.6  | 49.6  | 65.3  |
| 46.5  | 40.6  | 27.8   | 25.0   | 15.3  | 104.4  | 65.3   | 20.0  | 37.8  |
| 16.9  | 29.9  | 30.3   | 36.6   | 12.2  | 175.1  | 135.7  | 32.7  | 45.1  |
| 409.4 | 258.8 | 327.2  | 338.1  | 84.8  | 637.3  | 361.8  | 199.1 | 169.3 |
| 2.5   | 1.3   | 2.5    | 0.6    | 0.5   | 17.9   | 1.2    | 1.6   | 1.0   |
| 10.9  | 16.6  | 10.3   | 15.8   | 1.1   | 18.7   | 11.2   | 8.1   | 3.5   |
| 32.9  | 42.3  | 39.7   | 37.1   | 15.8  | 34.1   | 25.9   | 3.7   | 15.7  |
| 5.0   | 2.2   | 0.8    | 2.4    | 3.7   | 5.7    | 9.9    | 0.8   | 1.4   |
| 197.4 | 218.5 | 122.5  | 437.6  | 112.2 | 223.9  | 220.1  | 66.3  | 73.1  |
| 16.1  | 19.1  | 10.4   | 19.0   | 1.3   | 69.6   | 35.3   | 141.4 | 145.5 |
| 23.4  | 23.4  | 13.8   | 15.0   | 11.8  | 84.2   | 58.5   | 53.4  | 75.6  |
| 71.7  | 58.6  | 52.2   | 51.1   | 25.4  | 155.9  | 97.5   | 60.4  | 76.5  |
| 356.6 | 340.5 | 410.4  | 403.5  | 140.2 | 814.8  | 575.0  | 141.9 | 120.7 |
| 372.8 | 339.7 | 361.8  | 433.1  | 142.3 | 360.5  | 211.6  | 48.7  | 53.4  |
| 19.9  | 23.2  | 22.9   | 24.7   | 5.7   | 15.4   | 22.9   | 14.7  | 21.3  |
| 152.1 | 146.5 | 163.1  | 177.1  | 72.3  | 155.7  | 99.0   | 24.3  | 48.9  |
| 402.0 | 468.4 | 384.3  | 165.7  | 164.0 | 873.4  | 829.5  | 34.9  | 29.4  |
| 127.5 | 121.6 | 134.9  | 48.0   | 47.7  | 18.4   | 17.1   | 150.0 | 183.5 |
| 167.0 | 181.5 | 151.9  | 66.5   | 44.2  | 41.8   | 25.2   | 202.2 | 248.8 |
| 20.5  | 19.5  | 16.2   | 8.2    | 9.6   | 27.4   | 17.1   | 94.9  | 124.2 |
| 184.3 | 234.0 | 268.3  | 272.8  | 84.0  | 1443.9 | 1152.2 | 57.0  | 65.9  |
| 31.1  | 4.9   | 23.4   | 7.2    | 8.5   | 44.9   | 53.2   | 47.6  | 24.1  |
| 441.8 | 502.9 | 507.4  | 565.8  | 161.9 | 397.4  | 269.3  | 179.6 | 257.1 |
| 418.6 | 437.8 | 407.1  | 334.7  | 146.3 | 754.4  | 236.5  | 56.4  | 65.8  |
| 490.4 | 474.9 | 415.3  | 334.8  | 133.7 | 926.3  | 357.0  | 50.6  | 66.4  |
| 10.5  | 14.9  | 16.0   | 11.7   | 9.0   | 25.8   | 17.6   | 1.8   | 8.0   |
| 147.2 | 194.6 | 165.2  | 121.2  | 52.1  | 422.6  | 247.8  | 16.6  | 30.7  |

|        |        |        |        |       |        |        |       |       |
|--------|--------|--------|--------|-------|--------|--------|-------|-------|
| 129.5  | 111.9  | 93.9   | 84.8   | 25.7  | 334.9  | 187.7  | 40.6  | 66.3  |
| 279.0  | 288.9  | 284.4  | 218.6  | 89.4  | 600.3  | 400.6  | 73.3  | 102.9 |
| 204.4  | 200.3  | 163.4  | 134.6  | 83.6  | 293.1  | 283.9  | 11.7  | 9.6   |
| 104.1  | 79.2   | 97.7   | 64.8   | 41.1  | 607.1  | 462.6  | 153.6 | 292.2 |
| 159.5  | 130.9  | 91.8   | 55.9   | 40.3  | 142.0  | 127.9  | 35.1  | 34.0  |
| 171.4  | 220.3  | 133.5  | 82.4   | 47.0  | 211.7  | 87.4   | 56.6  | 43.8  |
| 23.6   | 6.2    | 16.6   | 26.0   | 9.9   | 4.6    | 4.6    | 1.4   | 1.5   |
| 114.3  | 119.0  | 143.6  | 124.6  | 58.7  | 444.4  | 302.4  | 58.2  | 79.7  |
| 28.8   | 5.2    | 8.8    | 3.2    | 7.2   | 40.0   | 36.2   | 18.9  | 6.4   |
| 0.6    | 1.6    | 4.4    | 2.0    | 5.3   | 1.1    | 2.7    | 3.5   | 10.1  |
| 54.3   | 52.9   | 48.2   | 39.0   | 33.7  | 108.0  | 91.2   | 16.3  | 21.6  |
| 15.7   | 3.8    | 14.3   | 4.3    | 11.9  | 22.2   | 13.5   | 6.5   | 3.4   |
| 363.5  | 272.7  | 322.0  | 273.3  | 78.2  | 751.3  | 531.2  | 51.3  | 56.1  |
| 58.2   | 75.0   | 65.1   | 105.3  | 34.7  | 138.9  | 98.6   | 52.5  | 66.7  |
| 149.8  | 139.3  | 166.9  | 181.3  | 57.0  | 157.5  | 107.3  | 68.3  | 71.7  |
| 52.4   | 46.4   | 45.6   | 31.0   | 13.5  | 159.0  | 134.8  | 89.8  | 105.1 |
| 123.5  | 123.5  | 102.5  | 86.9   | 23.3  | 865.9  | 472.3  | 34.5  | 44.8  |
| 96.2   | 71.2   | 60.3   | 27.3   | 24.4  | 321.1  | 229.8  | 35.2  | 29.3  |
| 71.6   | 99.8   | 123.1  | 46.8   | 33.9  | 178.0  | 159.8  | 6.5   | 7.9   |
| 26.4   | 20.0   | 29.2   | 42.8   | 7.5   | 22.9   | 18.7   | 32.5  | 50.1  |
| 22.0   | 23.3   | 25.5   | 59.4   | 19.1  | 41.9   | 23.5   | 8.5   | 2.9   |
| 48.6   | 36.2   | 56.5   | 71.5   | 18.0  | 92.5   | 62.3   | 45.4  | 48.0  |
| 2.1    | 2.1    | 2.0    | 2.2    | 0.8   | 2.3    | 1.9    | 1.5   | 2.1   |
| 2.7    | 1.9    | 17.0   | 1.1    | 0.9   | 18.6   | 11.7   | 2.3   | 7.8   |
| 4.1    | 3.4    | 2.4    | 12.7   | 1.2   | 13.1   | 5.4    | 2.8   | 5.4   |
| 7.9    | 6.3    | 18.9   | 11.9   | 5.6   | 33.8   | 19.6   | 3.8   | 34.7  |
| 184.9  | 153.4  | 173.3  | 115.9  | 49.3  | 235.0  | 159.5  | 78.6  | 138.4 |
| 1.2    | 7.9    | 1.1    | 10.0   | 4.0   | 23.3   | 14.7   | 5.4   | 2.6   |
| 32.4   | 28.1   | 27.7   | 24.7   | 6.9   | 100.2  | 75.4   | 26.5  | 46.2  |
| 92.5   | 88.6   | 66.3   | 62.4   | 29.7  | 176.4  | 78.3   | 31.1  | 39.6  |
| 71.7   | 65.2   | 73.4   | 53.6   | 16.8  | 171.6  | 113.1  | 14.2  | 23.2  |
| 14.0   | 13.5   | 20.4   | 8.6    | 6.0   | 33.2   | 27.4   | 38.3  | 62.5  |
| 156.5  | 146.2  | 168.1  | 138.9  | 36.3  | 177.4  | 122.6  | 28.5  | 27.3  |
| 497.8  | 481.3  | 430.5  | 565.3  | 219.6 | 1018.3 | 980.5  | 213.9 | 286.0 |
| 285.4  | 292.9  | 311.5  | 552.0  | 116.7 | 607.9  | 527.8  | 40.8  | 71.3  |
| 0.8    | 0.7    | 1.3    | 0.7    | 0.3   | 1.7    | 1.8    | 1.3   | 5.2   |
| 14.7   | 3.8    | 9.1    | 1.8    | 4.0   | 12.3   | 2.6    | 14.0  | 19.2  |
| 35.8   | 32.0   | 42.8   | 49.2   | 13.5  | 70.4   | 35.9   | 12.0  | 26.8  |
| 1200.3 | 1370.0 | 1468.2 | 1405.5 | 473.7 | 2813.6 | 1839.5 | 105.3 | 172.2 |
| 3.3    | 10.7   | 7.9    | 7.6    | 8.7   | 29.1   | 25.7   | 4.7   | 4.9   |
| 217.7  | 231.7  | 204.4  | 206.3  | 78.6  | 519.0  | 246.9  | 0.7   | 5.4   |
| 107.2  | 114.3  | 149.7  | 104.1  | 45.2  | 312.7  | 150.2  | 53.0  | 75.7  |
| 1.9    | 2.8    | 1.3    | 8.3    | 1.7   | 8.8    | 7.9    | 2.7   | 3.0   |
| 115.1  | 83.5   | 124.7  | 63.2   | 66.2  | 1516.0 | 1298.0 | 329.2 | 495.2 |
| 185.5  | 100.9  | 144.1  | 139.9  | 87.4  | 864.1  | 829.3  | 342.1 | 338.0 |
| 90.6   | 99.5   | 108.5  | 92.5   | 41.6  | 141.1  | 126.5  | 38.0  | 42.7  |
| 326.4  | 370.6  | 254.0  | 159.9  | 97.5  | 516.0  | 288.3  | 108.6 | 152.7 |
| 7.0    | 14.7   | 21.1   | 7.4    | 4.3   | 8.8    | 5.1    | 16.8  | 31.4  |
| 70.2   | 74.5   | 94.2   | 159.4  | 32.2  | 640.1  | 279.5  | 232.0 | 535.2 |
| 171.6  | 166.2  | 194.5  | 169.3  | 65.1  | 813.5  | 558.9  | 77.6  | 111.8 |
| 43.1   | 28.8   | 31.3   | 17.1   | 14.6  | 131.3  | 89.2   | 33.6  | 37.2  |
| 70.3   | 79.4   | 79.8   | 55.7   | 27.7  | 232.7  | 204.9  | 89.0  | 98.9  |
| 516.2  | 565.5  | 535.8  | 405.7  | 232.4 | 1488.6 | 978.3  | 197.5 | 272.1 |

|        |        |        |        |        |        |        |       |        |
|--------|--------|--------|--------|--------|--------|--------|-------|--------|
| 74.2   | 74.8   | 93.1   | 55.5   | 23.5   | 137.6  | 103.1  | 13.8  | 21.7   |
| 90.1   | 139.0  | 156.2  | 179.9  | 70.9   | 517.5  | 389.8  | 33.7  | 22.6   |
| 1558.9 | 1356.5 | 991.3  | 351.4  | 325.1  | 1635.3 | 812.1  | 520.6 | 712.9  |
| 185.3  | 171.4  | 218.1  | 193.8  | 75.3   | 238.5  | 220.7  | 79.4  | 74.2   |
| 144.4  | 103.8  | 100.6  | 109.6  | 44.5   | 438.9  | 336.7  | 316.4 | 548.5  |
| 17.7   | 19.4   | 28.4   | 11.5   | 1.9    | 30.4   | 33.3   | 26.5  | 42.1   |
| 161.9  | 138.0  | 164.2  | 114.1  | 56.9   | 381.9  | 253.1  | 7.5   | 9.0    |
| 2531.8 | 1569.7 | 1636.3 | 1336.5 | 532.1  | 3525.1 | 2264.0 | 863.0 | 1335.0 |
| 118.0  | 105.4  | 141.9  | 134.8  | 54.3   | 492.1  | 463.6  | 39.0  | 34.6   |
| 462.1  | 435.8  | 366.4  | 181.9  | 127.9  | 1314.1 | 782.8  | 302.2 | 300.1  |
| 268.4  | 248.4  | 289.9  | 238.3  | 115.1  | 173.8  | 102.3  | 257.7 | 272.6  |
| 169.7  | 181.5  | 191.2  | 181.8  | 81.4   | 14.8   | 12.0   | 1.1   | 3.9    |
| 53.0   | 63.6   | 45.7   | 16.9   | 14.7   | 494.8  | 416.9  | 5.3   | 4.3    |
| 46.3   | 43.3   | 30.4   | 27.8   | 17.2   | 324.7  | 254.5  | 10.4  | 9.3    |
| 70.9   | 42.7   | 49.2   | 27.7   | 23.8   | 176.8  | 119.1  | 23.8  | 28.4   |
| 22.4   | 24.8   | 27.7   | 16.6   | 5.3    | 42.5   | 30.0   | 157.8 | 190.4  |
| 62.2   | 59.5   | 65.5   | 26.7   | 21.9   | 179.9  | 83.1   | 27.6  | 48.7   |
| 2.1    | 12.8   | 0.8    | 3.5    | 0.4    | 22.9   | 8.6    | 1.6   | 2.3    |
| 187.0  | 162.2  | 155.9  | 80.2   | 51.4   | 77.1   | 59.0   | 69.3  | 110.0  |
| 12.2   | 15.0   | 21.2   | 1.0    | 12.2   | 63.5   | 29.4   | 9.8   | 22.3   |
| 13.1   | 14.8   | 16.2   | 2.2    | 3.4    | 164.7  | 109.1  | 129.4 | 142.7  |
| 328.4  | 326.4  | 293.9  | 198.5  | 86.6   | 103.3  | 51.1   | 61.2  | 74.4   |
| 3.4    | 5.0    | 2.8    | 15.1   | 1.3    | 28.4   | 18.2   | 4.9   | 8.7    |
| 9.2    | 2.0    | 14.2   | 2.9    | 0.7    | 45.2   | 34.9   | 8.5   | 14.2   |
| 38.3   | 23.4   | 21.9   | 14.6   | 6.7    | 363.8  | 300.5  | 13.4  | 26.6   |
| 59.9   | 31.1   | 29.3   | 17.4   | 12.7   | 388.9  | 319.1  | 8.0   | 16.2   |
| 3154.8 | 3154.4 | 2914.0 | 3244.9 | 1617.3 | 1942.7 | 1542.5 | 397.8 | 453.1  |
| 16.4   | 9.0    | 9.1    | 6.6    | 5.2    | 12.8   | 4.0    | 12.3  | 18.1   |
| 0.5    | 5.8    | 0.7    | 7.9    | 0.5    | 5.5    | 9.0    | 7.1   | 1.3    |
| 362.9  | 369.4  | 296.1  | 220.5  | 113.9  | 314.1  | 257.4  | 80.4  | 113.2  |
| 39.3   | 38.7   | 25.1   | 20.0   | 12.2   | 41.5   | 38.1   | 41.8  | 64.2   |
| 10.4   | 16.5   | 14.4   | 9.3    | 2.9    | 12.5   | 13.3   | 1.3   | 0.8    |
| 53.3   | 18.3   | 27.3   | 22.8   | 14.1   | 43.5   | 28.4   | 73.7  | 97.7   |
| 32.3   | 34.9   | 16.9   | 19.7   | 9.9    | 63.9   | 46.0   | 3.6   | 22.0   |
| 42.3   | 51.8   | 95.6   | 125.2  | 23.1   | 1178.6 | 746.4  | 9.5   | 35.8   |
| 105.8  | 92.3   | 147.0  | 202.6  | 42.2   | 1754.1 | 1695.8 | 50.4  | 75.5   |
| 51.1   | 39.3   | 44.3   | 29.7   | 12.7   | 33.6   | 18.0   | 46.2  | 72.5   |
| 53.5   | 47.2   | 26.6   | 26.9   | 9.5    | 13.1   | 17.1   | 27.3  | 47.0   |
| 127.4  | 122.3  | 112.0  | 71.3   | 24.1   | 70.7   | 46.4   | 25.8  | 24.8   |
| 50.2   | 41.9   | 44.0   | 33.1   | 14.0   | 39.0   | 16.1   | 14.9  | 22.1   |
| 593.1  | 610.8  | 597.2  | 619.1  | 233.2  | 627.8  | 516.0  | 70.9  | 132.6  |
| 181.8  | 202.9  | 146.5  | 72.9   | 63.0   | 193.8  | 123.0  | 26.2  | 31.1   |
| 113.6  | 101.0  | 98.9   | 75.6   | 39.7   | 382.6  | 257.0  | 141.1 | 220.0  |
| 83.9   | 76.7   | 91.3   | 40.2   | 30.8   | 87.4   | 49.9   | 56.3  | 100.8  |
| 136.5  | 142.2  | 123.2  | 133.0  | 40.5   | 754.0  | 650.0  | 52.9  | 81.0   |
| 27.0   | 31.1   | 27.7   | 26.7   | 2.5    | 63.5   | 50.8   | 11.3  | 15.4   |
| 7.8    | 14.9   | 15.0   | 10.3   | 1.4    | 370.1  | 233.7  | 24.5  | 26.4   |
| 43.8   | 53.5   | 37.2   | 64.7   | 13.0   | 137.2  | 94.6   | 6.9   | 1.4    |
| 20.5   | 16.6   | 19.1   | 14.3   | 9.1    | 8.7    | 10.7   | 2.3   | 5.0    |
| 35.7   | 41.9   | 25.8   | 15.5   | 17.3   | 180.9  | 96.8   | 10.7  | 6.5    |
| 76.6   | 70.8   | 47.2   | 76.1   | 24.1   | 123.5  | 79.1   | 118.9 | 76.2   |
| 48.5   | 37.6   | 42.1   | 46.1   | 10.8   | 49.2   | 46.8   | 6.7   | 14.2   |
| 262.5  | 245.9  | 231.4  | 254.4  | 107.7  | 407.3  | 287.3  | 18.7  | 31.4   |

|        |        |        |        |        |        |        |       |        |
|--------|--------|--------|--------|--------|--------|--------|-------|--------|
| 23.4   | 17.0   | 21.3   | 3.3    | 7.0    | 26.5   | 27.9   | 19.1  | 25.3   |
| 49.1   | 61.9   | 39.6   | 19.0   | 29.1   | 218.3  | 101.3  | 3.3   | 2.2    |
| 108.6  | 111.1  | 108.0  | 59.1   | 28.7   | 124.6  | 67.2   | 15.1  | 20.9   |
| 235.2  | 202.3  | 200.2  | 115.8  | 102.7  | 315.1  | 156.0  | 20.7  | 25.8   |
| 38.5   | 35.5   | 24.8   | 8.2    | 18.2   | 59.5   | 14.6   | 21.7  | 4.0    |
| 67.7   | 55.5   | 31.5   | 26.1   | 18.2   | 235.1  | 151.8  | 176.0 | 229.3  |
| 4183.4 | 4222.6 | 3563.4 | 2942.5 | 1691.8 | 1342.8 | 1455.9 | 1.2   | 0.6    |
| 59.1   | 76.4   | 58.7   | 64.4   | 24.2   | 240.7  | 150.1  | 22.7  | 34.2   |
| 28.8   | 29.9   | 24.8   | 18.5   | 8.0    | 133.0  | 78.5   | 11.4  | 12.4   |
| 301.3  | 279.2  | 273.8  | 235.3  | 131.5  | 86.2   | 72.5   | 8.9   | 10.5   |
| 517.7  | 400.3  | 373.8  | 268.3  | 181.9  | 383.3  | 227.7  | 130.6 | 182.1  |
| 115.9  | 118.4  | 109.8  | 111.6  | 31.0   | 118.9  | 59.7   | 114.0 | 192.7  |
| 172.1  | 181.3  | 130.8  | 89.7   | 52.7   | 475.0  | 300.6  | 40.7  | 50.6   |
| 89.8   | 90.5   | 66.7   | 66.9   | 32.5   | 256.5  | 141.4  | 49.0  | 106.9  |
| 297.1  | 300.4  | 303.1  | 240.7  | 122.3  | 192.5  | 134.1  | 47.2  | 60.2   |
| 1563.2 | 1382.0 | 1504.8 | 1107.6 | 608.0  | 851.9  | 1414.4 | 573.3 | 790.0  |
| 633.2  | 702.3  | 652.8  | 810.0  | 262.7  | 988.5  | 814.5  | 81.2  | 100.6  |
| 269.1  | 248.2  | 323.1  | 552.4  | 113.5  | 710.4  | 342.7  | 25.7  | 54.3   |
| 39.4   | 25.2   | 16.1   | 35.4   | 18.5   | 31.2   | 17.2   | 12.8  | 7.6    |
| 26.8   | 12.7   | 26.8   | 33.1   | 11.5   | 45.9   | 39.3   | 2.2   | 11.5   |
| 167.8  | 141.2  | 155.4  | 176.9  | 47.0   | 185.0  | 110.1  | 43.7  | 41.8   |
| 137.2  | 116.3  | 144.1  | 115.9  | 34.1   | 166.0  | 101.7  | 26.1  | 35.8   |
| 108.9  | 86.4   | 73.5   | 54.6   | 32.1   | 19.4   | 5.7    | 17.6  | 17.1   |
| 1.3    | 2.1    | 1.1    | 1.0    | 0.6    | 5.0    | 1.0    | 1.5   | 2.2    |
| 54.2   | 54.5   | 63.5   | 49.1   | 13.7   | 29.0   | 17.5   | 1.4   | 1.5    |
| 5102.0 | 4407.6 | 4233.9 | 4295.7 | 2023.1 | 4979.8 | 3784.6 | 847.6 | 1136.7 |
| 3.3    | 1.3    | 2.6    | 1.8    | 1.3    | 4.3    | 1.6    | 3.6   | 1.3    |
| 111.3  | 88.7   | 87.5   | 80.0   | 44.9   | 60.8   | 33.5   | 21.6  | 52.9   |
| 2.1    | 2.8    | 3.1    | 3.5    | 3.5    | 36.4   | 37.5   | 117.4 | 159.2  |
| 128.5  | 124.3  | 166.7  | 184.2  | 107.9  | 146.4  | 91.9   | 25.3  | 48.5   |
| 59.6   | 51.1   | 58.0   | 48.2   | 12.6   | 104.4  | 31.5   | 34.6  | 48.2   |
| 128.4  | 101.8  | 121.8  | 128.1  | 29.9   | 190.4  | 136.0  | 71.1  | 111.4  |
| 89.8   | 92.1   | 82.1   | 81.1   | 18.5   | 156.1  | 87.3   | 39.5  | 63.5   |
| 1.5    | 7.5    | 8.9    | 1.7    | 3.8    | 13.2   | 8.1    | 5.0   | 8.2    |
| 6.9    | 1.1    | 5.0    | 0.2    | 1.9    | 9.6    | 1.1    | 2.3   | 4.6    |
| 2.6    | 5.5    | 0.6    | 0.6    | 0.8    | 93.2   | 129.2  | 40.8  | 71.2   |
| 85.1   | 48.4   | 63.6   | 34.3   | 19.8   | 82.1   | 43.8   | 25.1  | 58.8   |
| 9.6    | 5.4    | 6.9    | 9.8    | 3.5    | 15.6   | 17.4   | 11.5  | 5.6    |
| 1673.7 | 1439.7 | 1244.4 | 416.1  | 255.7  | 25.8   | 39.0   | 1.0   | 1.2    |
| 3.6    | 19.2   | 16.2   | 7.9    | 6.2    | 21.6   | 2.3    | 22.3  | 26.4   |
| 184.2  | 132.5  | 104.3  | 88.0   | 39.5   | 280.4  | 202.3  | 80.7  | 103.1  |
| 33.3   | 14.7   | 11.8   | 20.1   | 5.9    | 3.8    | 3.6    | 2.1   | 23.2   |
| 571.4  | 451.2  | 528.9  | 470.3  | 177.0  | 658.8  | 463.1  | 319.2 | 357.7  |
| 66.9   | 86.9   | 93.1   | 97.2   | 38.5   | 90.2   | 91.4   | 18.2  | 19.7   |
| 6.9    | 1.8    | 15.6   | 20.6   | 3.5    | 12.0   | 19.0   | 19.2  | 38.0   |
| 2.3    | 4.8    | 14.4   | 0.5    | 0.8    | 10.2   | 1.9    | 5.4   | 4.9    |
| 86.3   | 93.6   | 86.9   | 100.7  | 41.1   | 90.5   | 68.6   | 12.3  | 30.7   |
| 1.9    | 8.4    | 2.6    | 2.6    | 4.9    | 2.2    | 4.0    | 3.0   | 12.0   |
| 138.2  | 123.5  | 150.2  | 147.0  | 72.7   | 324.5  | 396.8  | 105.2 | 135.1  |
| 308.8  | 237.1  | 275.6  | 132.4  | 92.4   | 788.0  | 342.4  | 83.5  | 97.4   |
| 632.8  | 677.9  | 586.8  | 399.9  | 220.6  | 1482.5 | 765.2  | 205.6 | 214.8  |
| 340.6  | 434.7  | 353.3  | 231.4  | 91.4   | 721.5  | 218.6  | 82.6  | 125.3  |
| 75.8   | 68.0   | 54.5   | 40.1   | 24.8   | 42.8   | 28.1   | 8.6   | 36.5   |

|        |        |        |        |       |        |        |       |       |
|--------|--------|--------|--------|-------|--------|--------|-------|-------|
| 11.9   | 15.1   | 3.2    | 0.8    | 0.7   | 39.1   | 22.0   | 15.2  | 11.0  |
| 138.7  | 84.3   | 142.7  | 201.7  | 68.0  | 848.9  | 836.0  | 284.2 | 308.4 |
| 96.8   | 68.4   | 81.9   | 104.7  | 28.5  | 286.4  | 141.7  | 95.6  | 129.8 |
| 227.2  | 167.7  | 255.8  | 201.6  | 98.5  | 214.2  | 164.6  | 25.2  | 37.3  |
| 17.1   | 28.8   | 40.3   | 33.6   | 13.3  | 72.2   | 41.0   | 3.0   | 1.5   |
| 11.1   | 9.6    | 10.1   | 6.3    | 5.8   | 94.9   | 59.2   | 5.0   | 11.4  |
| 27.5   | 28.1   | 26.9   | 24.9   | 5.3   | 241.0  | 133.4  | 10.9  | 2.2   |
| 17.5   | 24.8   | 23.1   | 21.8   | 4.0   | 55.6   | 25.6   | 46.0  | 62.8  |
| 2.5    | 4.7    | 9.3    | 3.0    | 16.2  | 6.1    | 2.2    | 14.2  | 16.7  |
| 16.9   | 32.7   | 27.5   | 33.2   | 14.7  | 28.1   | 14.3   | 6.6   | 32.9  |
| 63.5   | 64.2   | 55.9   | 38.6   | 20.7  | 155.3  | 87.9   | 24.9  | 22.3  |
| 717.1  | 677.8  | 1119.3 | 1294.8 | 348.3 | 1528.6 | 1271.8 | 444.3 | 574.0 |
| 369.3  | 447.6  | 450.2  | 310.9  | 238.1 | 520.0  | 406.1  | 20.9  | 17.2  |
| 313.4  | 345.7  | 316.2  | 213.7  | 122.6 | 382.5  | 232.3  | 37.7  | 61.8  |
| 17.4   | 12.2   | 12.4   | 11.8   | 8.4   | 77.2   | 49.1   | 12.2  | 22.4  |
| 176.0  | 137.3  | 165.6  | 172.6  | 64.8  | 893.9  | 567.8  | 61.9  | 68.5  |
| 744.1  | 748.0  | 781.1  | 585.2  | 228.4 | 1031.0 | 618.0  | 25.5  | 62.8  |
| 86.1   | 100.7  | 73.5   | 6.9    | 24.0  | 342.3  | 180.0  | 76.0  | 72.5  |
| 136.0  | 123.5  | 124.8  | 136.0  | 58.1  | 214.2  | 161.2  | 19.5  | 30.6  |
| 94.8   | 89.7   | 80.3   | 48.9   | 25.4  | 30.3   | 12.4   | 29.1  | 37.4  |
| 20.4   | 10.3   | 19.8   | 13.2   | 5.4   | 15.0   | 4.0    | 2.3   | 5.8   |
| 16.8   | 14.9   | 11.5   | 59.5   | 6.3   | 2432.9 | 1951.5 | 9.7   | 27.6  |
| 2.4    | 1.1    | 3.0    | 2.3    | 1.1   | 13.9   | 1.4    | 3.0   | 2.1   |
| 20.1   | 4.6    | 11.9   | 5.7    | 3.1   | 11.9   | 6.2    | 13.5  | 9.1   |
| 24.6   | 12.9   | 16.3   | 10.2   | 1.1   | 18.6   | 8.4    | 1.4   | 6.1   |
| 87.7   | 71.2   | 65.8   | 63.7   | 23.4  | 57.2   | 24.5   | 13.4  | 20.2  |
| 61.4   | 78.8   | 64.0   | 64.1   | 17.5  | 76.0   | 25.8   | 4.5   | 1.2   |
| 87.2   | 89.4   | 82.3   | 80.9   | 36.4  | 88.4   | 58.8   | 8.6   | 14.2  |
| 60.2   | 44.0   | 39.2   | 36.7   | 28.8  | 314.8  | 269.0  | 50.5  | 48.9  |
| 97.7   | 94.9   | 39.1   | 16.9   | 24.6  | 172.3  | 112.4  | 43.9  | 44.2  |
| 57.0   | 74.2   | 61.8   | 42.9   | 17.5  | 253.8  | 120.5  | 21.8  | 31.6  |
| 31.2   | 28.5   | 31.0   | 26.3   | 5.8   | 139.2  | 90.6   | 1.7   | 7.9   |
| 594.8  | 666.6  | 623.9  | 490.5  | 305.4 | 812.6  | 946.1  | 78.8  | 116.0 |
| 2.3    | 2.5    | 3.9    | 1.7    | 2.4   | 1.3    | 2.5    | 2.4   | 1.8   |
| 50.3   | 47.9   | 42.5   | 47.3   | 21.5  | 114.9  | 67.7   | 3.8   | 5.0   |
| 178.3  | 193.6  | 178.7  | 106.0  | 46.9  | 235.6  | 90.8   | 9.8   | 11.3  |
| 104.0  | 68.7   | 96.0   | 67.7   | 38.1  | 140.1  | 103.9  | 45.0  | 54.5  |
| 43.7   | 42.8   | 24.9   | 22.4   | 6.7   | 30.3   | 18.4   | 19.7  | 30.6  |
| 4.0    | 14.4   | 20.1   | 1.1    | 7.2   | 745.8  | 574.9  | 80.3  | 98.7  |
| 136.5  | 133.7  | 134.0  | 91.5   | 40.3  | 122.3  | 97.6   | 153.7 | 147.4 |
| 2087.7 | 1999.0 | 1893.1 | 1400.4 | 565.0 | 767.8  | 1247.7 | 442.1 | 439.4 |
| 297.8  | 374.9  | 303.8  | 313.5  | 107.5 | 203.2  | 154.1  | 105.9 | 93.0  |
| 458.6  | 383.2  | 376.4  | 146.8  | 134.5 | 861.7  | 398.2  | 19.3  | 49.5  |
| 428.3  | 469.9  | 370.9  | 396.3  | 192.4 | 622.7  | 507.5  | 124.3 | 138.8 |
| 59.5   | 53.6   | 55.2   | 93.7   | 32.3  | 1196.2 | 954.1  | 4.3   | 17.8  |
| 864.5  | 697.4  | 696.3  | 827.9  | 280.3 | 737.1  | 522.2  | 73.4  | 79.1  |
| 87.5   | 61.6   | 75.6   | 68.2   | 16.4  | 125.7  | 77.8   | 12.2  | 18.0  |
| 86.4   | 49.9   | 72.8   | 45.1   | 16.4  | 196.4  | 111.6  | 59.3  | 78.5  |
| 278.8  | 202.5  | 225.4  | 100.7  | 44.7  | 322.2  | 187.7  | 123.1 | 199.1 |
| 31.2   | 32.4   | 45.5   | 22.4   | 15.5  | 137.9  | 93.7   | 420.2 | 433.4 |
| 47.0   | 26.6   | 20.9   | 29.8   | 10.8  | 59.8   | 49.6   | 37.7  | 40.4  |
| 66.6   | 44.5   | 47.7   | 51.5   | 19.7  | 113.9  | 60.4   | 92.3  | 96.6  |
| 44.3   | 21.3   | 23.7   | 52.4   | 12.0  | 63.4   | 75.5   | 37.5  | 38.2  |

|        |        |        |        |       |        |        |        |        |
|--------|--------|--------|--------|-------|--------|--------|--------|--------|
| 52.5   | 37.1   | 40.8   | 35.3   | 17.3  | 42.4   | 43.3   | 14.9   | 5.8    |
| 21.2   | 8.7    | 32.7   | 15.8   | 10.5  | 20.6   | 13.1   | 9.5    | 18.8   |
| 597.7  | 671.8  | 645.7  | 595.6  | 220.3 | 905.3  | 712.2  | 126.3  | 169.7  |
| 271.1  | 318.3  | 299.4  | 319.5  | 91.0  | 584.4  | 420.8  | 97.0   | 115.4  |
| 26.1   | 30.9   | 16.6   | 17.5   | 11.7  | 42.8   | 11.5   | 17.0   | 18.2   |
| 32.0   | 29.5   | 48.2   | 22.0   | 23.1  | 35.9   | 22.4   | 28.2   | 23.8   |
| 14.2   | 9.9    | 6.1    | 7.2    | 2.8   | 35.4   | 5.5    | 6.0    | 28.6   |
| 201.8  | 213.4  | 268.5  | 251.8  | 67.0  | 182.8  | 131.7  | 27.9   | 36.4   |
| 39.8   | 37.7   | 28.3   | 31.0   | 11.1  | 53.2   | 40.8   | 13.0   | 15.2   |
| 8.5    | 2.9    | 2.3    | 3.6    | 1.2   | 3.0    | 0.5    | 0.6    | 9.2    |
| 61.0   | 59.2   | 61.4   | 73.9   | 26.2  | 181.6  | 72.0   | 45.2   | 41.9   |
| 66.4   | 76.0   | 83.8   | 121.7  | 30.0  | 318.8  | 176.4  | 50.0   | 52.0   |
| 70.0   | 61.9   | 76.8   | 81.2   | 23.6  | 107.5  | 60.6   | 15.9   | 11.8   |
| 6.4    | 12.3   | 10.6   | 9.8    | 2.3   | 8.9    | 7.2    | 8.2    | 15.1   |
| 83.9   | 70.5   | 73.2   | 43.9   | 32.1  | 9.4    | 12.6   | 15.2   | 12.9   |
| 101.7  | 78.3   | 52.9   | 40.4   | 13.5  | 3.9    | 0.9    | 1.2    | 6.5    |
| 31.7   | 29.5   | 16.8   | 14.4   | 8.1   | 13.8   | 6.6    | 37.0   | 71.7   |
| 5.3    | 5.1    | 5.0    | 8.5    | 3.6   | 155.8  | 87.9   | 26.1   | 38.9   |
| 57.1   | 65.6   | 56.7   | 49.1   | 15.1  | 61.1   | 44.7   | 19.1   | 19.5   |
| 99.7   | 93.4   | 63.7   | 46.4   | 31.5  | 142.3  | 78.6   | 77.8   | 68.7   |
| 164.9  | 137.3  | 269.9  | 409.7  | 99.1  | 450.7  | 346.8  | 65.2   | 73.6   |
| 37.5   | 37.9   | 36.9   | 39.6   | 14.2  | 93.0   | 65.3   | 8.7    | 20.2   |
| 54.3   | 80.1   | 112.9  | 127.6  | 36.2  | 182.5  | 109.9  | 1.2    | 5.1    |
| 141.0  | 163.9  | 201.1  | 227.1  | 107.4 | 177.5  | 110.7  | 51.8   | 62.5   |
| 206.5  | 237.1  | 219.9  | 180.3  | 49.5  | 239.1  | 131.8  | 60.6   | 74.2   |
| 187.1  | 175.6  | 202.2  | 185.3  | 70.5  | 393.8  | 233.4  | 19.8   | 28.5   |
| 91.9   | 64.5   | 91.1   | 83.5   | 23.7  | 179.1  | 119.4  | 72.8   | 101.8  |
| 44.5   | 31.9   | 52.3   | 46.5   | 11.0  | 73.6   | 38.4   | 0.6    | 1.4    |
| 278.5  | 228.9  | 195.1  | 134.3  | 61.9  | 544.0  | 258.3  | 88.2   | 126.3  |
| 186.8  | 190.5  | 173.1  | 121.1  | 62.0  | 255.0  | 138.5  | 67.9   | 75.6   |
| 49.4   | 39.8   | 67.8   | 23.8   | 15.9  | 22.6   | 14.6   | 16.5   | 19.1   |
| 223.9  | 173.7  | 205.8  | 266.6  | 86.4  | 688.2  | 535.8  | 11.6   | 16.3   |
| 272.3  | 249.1  | 235.8  | 151.1  | 88.2  | 371.7  | 267.6  | 93.1   | 85.7   |
| 411.1  | 415.9  | 374.5  | 449.8  | 161.4 | 653.5  | 383.9  | 144.2  | 203.8  |
| 44.3   | 58.2   | 46.0   | 26.8   | 20.7  | 6.1    | 22.7   | 14.0   | 17.4   |
| 286.2  | 180.7  | 181.9  | 77.7   | 78.3  | 287.5  | 295.7  | 250.7  | 301.0  |
| 2169.6 | 1864.8 | 2088.6 | 1651.0 | 871.9 | 3015.5 | 2561.6 | 1090.6 | 1296.8 |
| 1.8    | 4.0    | 1.0    | 0.9    | 1.5   | 417.2  | 236.3  | 1.3    | 2.0    |
| 29.8   | 2.1    | 2.0    | 11.0   | 0.9   | 288.6  | 240.9  | 5.8    | 17.1   |
| 4.3    | 0.6    | 3.4    | 6.8    | 5.2   | 481.5  | 361.0  | 0.9    | 9.5    |
| 7.6    | 8.2    | 7.9    | 4.5    | 8.3   | 2.0    | 1.6    | 1.8    | 1.8    |
| 222.7  | 164.8  | 255.9  | 284.0  | 91.4  | 332.4  | 166.2  | 70.5   | 123.6  |
| 63.5   | 68.1   | 63.7   | 54.5   | 10.3  | 61.8   | 29.6   | 17.9   | 26.2   |
| 30.6   | 34.5   | 21.1   | 17.2   | 16.1  | 129.3  | 98.2   | 38.9   | 50.2   |
| 40.0   | 30.6   | 36.4   | 24.4   | 16.6  | 63.5   | 56.4   | 39.5   | 50.2   |
| 738.5  | 561.5  | 624.9  | 321.4  | 214.9 | 766.8  | 547.2  | 125.8  | 156.4  |
| 24.6   | 15.5   | 12.9   | 13.3   | 6.1   | 5.6    | 2.0    | 4.4    | 20.8   |
| 37.2   | 31.1   | 23.6   | 15.6   | 14.7  | 30.2   | 27.6   | 17.2   | 15.5   |
| 6.0    | 18.4   | 3.6    | 3.8    | 2.1   | 52.2   | 25.2   | 49.7   | 61.4   |
| 17.7   | 16.6   | 30.2   | 18.4   | 12.6  | 20.4   | 13.5   | 22.1   | 15.0   |
| 169.5  | 158.3  | 96.4   | 87.3   | 31.6  | 149.3  | 154.2  | 152.9  | 188.0  |
| 123.1  | 140.3  | 135.5  | 128.6  | 46.8  | 251.3  | 175.8  | 30.6   | 30.9   |
| 335.7  | 372.8  | 244.9  | 145.8  | 110.1 | 860.6  | 691.1  | 35.9   | 38.5   |

|        |        |        |       |       |        |        |       |       |
|--------|--------|--------|-------|-------|--------|--------|-------|-------|
| 4.8    | 0.7    | 0.2    | 4.5   | 1.3   | 113.9  | 142.1  | 0.5   | 0.6   |
| 330.8  | 327.5  | 259.7  | 163.0 | 86.0  | 1150.8 | 949.8  | 25.4  | 25.8  |
| 264.6  | 208.4  | 189.6  | 106.1 | 58.3  | 848.4  | 541.0  | 93.8  | 81.1  |
| 17.9   | 15.7   | 28.6   | 20.5  | 12.8  | 16.3   | 3.1    | 24.6  | 8.4   |
| 383.7  | 430.8  | 397.6  | 254.0 | 125.2 | 297.0  | 175.6  | 54.2  | 78.2  |
| 34.5   | 41.3   | 45.9   | 21.6  | 9.9   | 72.1   | 55.1   | 26.1  | 51.7  |
| 29.6   | 14.4   | 30.9   | 14.9  | 5.8   | 37.9   | 37.1   | 4.3   | 25.1  |
| 167.2  | 116.4  | 111.5  | 126.4 | 40.6  | 107.1  | 109.2  | 38.8  | 58.2  |
| 612.0  | 625.8  | 705.7  | 430.8 | 209.6 | 671.5  | 453.2  | 66.0  | 115.1 |
| 205.9  | 225.0  | 213.5  | 152.8 | 81.0  | 221.5  | 173.4  | 31.2  | 56.0  |
| 1555.6 | 1463.3 | 1269.6 | 885.0 | 491.5 | 948.4  | 670.7  | 699.7 | 941.1 |
| 391.2  | 311.5  | 241.7  | 150.0 | 96.7  | 151.3  | 59.4   | 149.3 | 174.3 |
| 88.9   | 51.8   | 69.8   | 45.9  | 13.2  | 77.2   | 53.6   | 84.9  | 62.8  |
| 3.8    | 14.6   | 22.0   | 12.5  | 5.1   | 30.9   | 26.7   | 18.7  | 16.5  |
| 41.4   | 28.4   | 35.9   | 26.8  | 11.5  | 42.6   | 16.1   | 11.8  | 16.6  |
| 60.3   | 58.7   | 54.2   | 63.2  | 13.3  | 57.4   | 41.6   | 14.6  | 32.7  |
| 474.7  | 528.6  | 475.4  | 271.2 | 97.6  | 540.1  | 224.1  | 103.3 | 154.6 |
| 23.3   | 6.5    | 16.3   | 17.3  | 1.7   | 68.4   | 30.9   | 93.7  | 74.5  |
| 52.2   | 34.7   | 43.9   | 21.2  | 21.0  | 436.0  | 296.8  | 122.4 | 123.0 |
| 36.6   | 28.0   | 25.9   | 14.5  | 17.6  | 220.5  | 170.8  | 105.7 | 114.6 |
| 57.5   | 61.9   | 39.7   | 31.0  | 16.0  | 829.5  | 712.6  | 31.8  | 48.8  |
| 92.4   | 55.7   | 82.4   | 74.5  | 41.8  | 115.0  | 84.7   | 30.2  | 36.4  |
| 246.2  | 230.9  | 233.2  | 269.7 | 54.4  | 563.0  | 323.0  | 24.9  | 45.3  |
| 13.2   | 12.8   | 16.6   | 7.2   | 8.5   | 183.6  | 128.5  | 16.2  | 9.6   |
| 85.9   | 72.0   | 90.3   | 46.7  | 29.7  | 5.8    | 12.4   | 8.6   | 11.6  |
| 22.4   | 24.0   | 22.8   | 14.6  | 11.4  | 42.0   | 18.0   | 23.5  | 29.1  |
| 60.0   | 51.4   | 50.7   | 32.5  | 21.2  | 144.4  | 120.7  | 39.3  | 27.9  |
| 48.6   | 48.6   | 53.2   | 33.8  | 16.1  | 86.7   | 59.2   | 63.0  | 133.8 |
| 78.1   | 86.7   | 77.2   | 75.5  | 24.0  | 251.1  | 162.5  | 22.4  | 25.4  |
| 31.9   | 12.5   | 11.5   | 21.9  | 3.0   | 232.5  | 145.4  | 17.0  | 19.7  |
| 198.6  | 151.8  | 109.8  | 110.9 | 30.3  | 181.8  | 172.5  | 258.1 | 275.3 |
| 224.8  | 134.9  | 134.2  | 78.0  | 50.4  | 643.3  | 289.3  | 105.8 | 149.2 |
| 91.8   | 70.7   | 76.4   | 143.5 | 38.0  | 616.9  | 271.0  | 1.5   | 3.1   |
| 20.9   | 34.0   | 26.2   | 8.5   | 4.5   | 29.6   | 40.6   | 19.4  | 36.4  |
| 23.2   | 33.8   | 22.3   | 27.9  | 21.3  | 80.8   | 57.0   | 11.6  | 6.9   |
| 11.8   | 11.9   | 8.4    | 7.9   | 5.1   | 7.3    | 14.8   | 9.0   | 8.1   |
| 12.5   | 10.8   | 6.8    | 5.5   | 4.1   | 26.1   | 5.0    | 8.1   | 5.6   |
| 2.1    | 0.6    | 0.2    | 0.2   | 0.2   | 0.1    | 0.3    | 0.4   | 0.5   |
| 349.8  | 399.3  | 358.3  | 373.2 | 138.7 | 895.5  | 766.9  | 110.4 | 233.4 |
| 61.6   | 51.6   | 37.4   | 76.2  | 25.1  | 262.6  | 145.9  | 28.5  | 30.5  |
| 56.2   | 35.3   | 36.6   | 25.1  | 22.8  | 100.7  | 108.7  | 42.4  | 37.5  |
| 5.0    | 13.1   | 30.8   | 4.4   | 10.2  | 52.8   | 56.9   | 10.4  | 9.8   |
| 89.9   | 94.4   | 91.3   | 83.6  | 26.6  | 322.7  | 270.4  | 58.6  | 63.0  |
| 903.6  | 942.1  | 624.8  | 152.2 | 143.5 | 1779.6 | 1430.5 | 4.7   | 13.4  |
| 43.4   | 23.1   | 1.5    | 15.5  | 6.7   | 43.2   | 29.7   | 36.6  | 26.4  |
| 585.9  | 463.8  | 409.5  | 285.5 | 171.7 | 752.9  | 527.9  | 93.9  | 130.9 |
| 99.9   | 93.7   | 77.5   | 84.7  | 34.8  | 107.8  | 70.7   | 69.3  | 63.9  |
| 165.5  | 153.0  | 165.9  | 103.4 | 56.4  | 154.7  | 106.7  | 57.8  | 76.9  |
| 37.3   | 25.0   | 23.5   | 22.3  | 18.0  | 78.3   | 40.5   | 60.1  | 62.3  |
| 239.9  | 193.6  | 309.9  | 503.8 | 76.0  | 427.4  | 358.3  | 69.0  | 95.6  |
| 131.6  | 128.5  | 310.5  | 557.4 | 66.5  | 326.7  | 230.1  | 11.4  | 16.8  |
| 40.7   | 30.0   | 33.1   | 16.1  | 14.5  | 21.2   | 3.7    | 58.0  | 79.3  |
| 1.1    | 4.2    | 4.7    | 1.2   | 3.6   | 68.4   | 66.0   | 31.7  | 17.3  |



|       |       |       |       |       |        |        |       |       |
|-------|-------|-------|-------|-------|--------|--------|-------|-------|
| 1.3   | 0.7   | 1.0   | 0.8   | 0.7   | 1.6    | 0.9    | 9.9   | 1.1   |
| 55.6  | 37.0  | 39.7  | 22.3  | 9.0   | 56.8   | 51.5   | 88.2  | 140.2 |
| 75.0  | 80.9  | 98.8  | 86.9  | 27.1  | 102.3  | 86.7   | 6.3   | 9.1   |
| 4.4   | 2.4   | 2.7   | 1.8   | 1.9   | 16.1   | 12.4   | 4.4   | 7.3   |
| 2.5   | 4.4   | 5.1   | 3.9   | 9.0   | 52.9   | 27.9   | 2.2   | 2.1   |
| 42.2  | 38.9  | 30.0  | 28.5  | 17.1  | 25.2   | 21.6   | 26.6  | 6.0   |
| 418.0 | 542.6 | 430.6 | 448.4 | 246.4 | 881.1  | 563.6  | 498.0 | 639.7 |
| 3.4   | 10.8  | 11.1  | 2.0   | 17.6  | 4.6    | 12.6   | 2.6   | 7.7   |
| 272.0 | 286.8 | 301.0 | 375.0 | 127.6 | 75.1   | 85.7   | 85.2  | 104.7 |
| 35.3  | 41.4  | 26.7  | 36.2  | 28.5  | 108.2  | 69.5   | 7.6   | 10.5  |
| 332.3 | 290.0 | 332.0 | 267.6 | 71.0  | 322.5  | 227.9  | 16.6  | 29.2  |
| 50.0  | 32.3  | 42.8  | 43.7  | 23.8  | 145.2  | 131.1  | 38.0  | 50.6  |
| 38.6  | 23.1  | 38.6  | 27.2  | 17.0  | 68.6   | 55.9   | 1.3   | 16.8  |
| 29.0  | 16.6  | 32.7  | 13.4  | 22.2  | 14.4   | 14.3   | 16.7  | 6.6   |
| 46.0  | 33.9  | 22.1  | 27.1  | 5.0   | 43.9   | 18.1   | 34.5  | 25.7  |
| 8.6   | 4.2   | 5.4   | 1.3   | 1.1   | 434.9  | 284.4  | 11.2  | 10.2  |
| 125.4 | 129.4 | 150.8 | 116.5 | 62.5  | 226.9  | 122.8  | 156.5 | 187.6 |
| 170.1 | 168.5 | 163.0 | 133.1 | 67.0  | 1172.5 | 702.6  | 115.6 | 163.1 |
| 27.1  | 33.6  | 12.3  | 17.8  | 13.9  | 18.9   | 28.9   | 1.8   | 2.4   |
| 60.0  | 37.3  | 47.3  | 35.4  | 17.1  | 83.6   | 58.9   | 40.3  | 57.8  |
| 1.3   | 3.0   | 4.7   | 2.5   | 3.0   | 55.4   | 42.4   | 4.8   | 5.4   |
| 3.9   | 1.7   | 2.9   | 2.1   | 0.6   | 14.8   | 10.4   | 3.3   | 2.2   |
| 6.8   | 7.5   | 12.7  | 4.1   | 0.8   | 6.0    | 5.3    | 17.7  | 25.8  |
| 197.2 | 122.4 | 174.0 | 194.6 | 47.2  | 206.3  | 99.9   | 63.1  | 74.1  |
| 238.2 | 160.4 | 223.1 | 285.2 | 55.2  | 280.8  | 234.9  | 51.2  | 81.9  |
| 182.8 | 98.4  | 156.4 | 142.5 | 28.5  | 294.5  | 239.8  | 21.9  | 32.3  |
| 101.9 | 91.5  | 73.0  | 41.2  | 28.1  | 123.1  | 84.7   | 37.1  | 31.4  |
| 39.7  | 27.3  | 36.1  | 46.1  | 14.3  | 70.5   | 37.2   | 8.2   | 13.9  |
| 78.5  | 90.3  | 65.4  | 41.3  | 24.1  | 86.2   | 48.8   | 20.1  | 24.8  |
| 194.0 | 146.5 | 129.5 | 74.5  | 58.4  | 258.3  | 370.0  | 42.7  | 54.7  |
| 210.5 | 182.9 | 214.1 | 191.8 | 110.7 | 852.3  | 813.7  | 39.8  | 65.8  |
| 5.6   | 4.1   | 1.2   | 6.8   | 0.7   | 14.8   | 5.0    | 8.5   | 4.0   |
| 84.0  | 65.7  | 40.2  | 38.4  | 17.6  | 14.3   | 5.1    | 73.6  | 110.7 |
| 1.3   | 1.3   | 1.4   | 1.1   | 1.1   | 3.2    | 2.9    | 0.9   | 0.9   |
| 24.1  | 22.0  | 24.4  | 13.5  | 8.7   | 21.4   | 29.8   | 20.9  | 27.8  |
| 8.0   | 1.3   | 1.4   | 3.8   | 2.3   | 17.9   | 16.7   | 9.4   | 11.2  |
| 22.1  | 14.4  | 10.4  | 9.1   | 4.8   | 21.7   | 11.7   | 17.8  | 21.5  |
| 937.4 | 751.2 | 627.2 | 254.2 | 190.7 | 2222.5 | 2011.3 | 170.5 | 207.2 |
| 126.1 | 106.1 | 112.2 | 147.7 | 35.8  | 143.6  | 76.2   | 20.3  | 27.8  |
| 37.7  | 25.7  | 23.9  | 25.4  | 23.3  | 297.2  | 256.0  | 78.4  | 76.6  |
| 49.8  | 40.5  | 39.5  | 56.2  | 24.1  | 61.3   | 50.3   | 8.3   | 3.9   |
| 58.4  | 50.7  | 54.1  | 47.4  | 16.5  | 199.8  | 121.5  | 12.6  | 24.0  |
| 999.5 | 824.5 | 791.7 | 537.6 | 268.7 | 5849.6 | 4327.2 | 338.9 | 391.5 |
| 66.0  | 64.4  | 66.4  | 48.3  | 21.4  | 288.6  | 177.1  | 213.9 | 412.8 |
| 18.8  | 26.3  | 23.7  | 22.5  | 11.7  | 94.4   | 51.5   | 88.8  | 145.1 |
| 65.2  | 51.2  | 70.7  | 49.2  | 25.3  | 133.3  | 65.3   | 36.9  | 48.9  |
| 217.3 | 139.2 | 146.2 | 148.0 | 47.8  | 80.2   | 40.3   | 49.2  | 40.5  |
| 411.7 | 343.7 | 367.2 | 324.2 | 288.7 | 465.9  | 271.2  | 53.2  | 67.0  |
| 15.0  | 14.3  | 9.8   | 0.5   | 6.4   | 8.3    | 8.3    | 5.9   | 8.7   |
| 1.0   | 1.5   | 0.6   | 0.4   | 0.6   | 2.6    | 1.4    | 0.5   | 0.5   |
| 4.7   | 6.8   | 2.8   | 2.7   | 3.0   | 2.5    | 6.3    | 1.9   | 2.8   |
| 37.1  | 41.3  | 42.7  | 43.6  | 24.6  | 43.8   | 39.3   | 36.1  | 35.3  |
| 71.9  | 59.4  | 123.4 | 122.2 | 22.9  | 915.2  | 749.2  | 111.1 | 145.9 |

|        |        |        |       |       |        |        |       |       |
|--------|--------|--------|-------|-------|--------|--------|-------|-------|
| 738.0  | 833.0  | 945.0  | 789.5 | 303.0 | 1478.4 | 991.0  | 157.3 | 129.5 |
| 16.2   | 18.5   | 23.6   | 16.8  | 6.6   | 48.7   | 46.0   | 11.7  | 21.2  |
| 155.1  | 146.6  | 147.9  | 105.6 | 53.2  | 105.3  | 57.4   | 85.4  | 92.2  |
| 2.6    | 10.0   | 2.5    | 1.7   | 1.3   | 128.6  | 100.7  | 2.7   | 2.3   |
| 72.9   | 66.8   | 49.5   | 86.9  | 22.7  | 86.4   | 89.3   | 8.9   | 51.2  |
| 146.5  | 165.1  | 131.8  | 87.3  | 49.0  | 140.9  | 57.9   | 33.2  | 47.9  |
| 513.1  | 357.5  | 240.8  | 173.0 | 90.2  | 214.6  | 206.6  | 98.0  | 119.3 |
| 135.9  | 190.5  | 144.1  | 210.4 | 70.3  | 170.1  | 160.1  | 18.0  | 13.7  |
| 226.0  | 192.4  | 196.1  | 205.8 | 65.8  | 266.2  | 203.6  | 63.4  | 53.4  |
| 2.1    | 11.1   | 7.6    | 11.2  | 0.9   | 1183.5 | 1019.2 | 299.0 | 372.3 |
| 44.4   | 37.8   | 38.2   | 40.4  | 14.3  | 190.7  | 128.9  | 40.5  | 49.4  |
| 236.2  | 240.4  | 257.7  | 260.9 | 73.8  | 168.7  | 99.8   | 34.8  | 69.7  |
| 199.4  | 280.1  | 230.6  | 299.3 | 91.7  | 233.6  | 197.2  | 48.4  | 79.9  |
| 292.2  | 340.5  | 327.9  | 264.0 | 141.1 | 301.7  | 215.1  | 113.9 | 130.7 |
| 1.7    | 1.6    | 1.5    | 0.9   | 1.7   | 1.9    | 1.0    | 1.3   | 2.3   |
| 23.0   | 18.3   | 22.4   | 1.4   | 1.1   | 68.5   | 63.0   | 2.1   | 5.4   |
| 50.6   | 22.0   | 30.9   | 27.2  | 9.1   | 39.3   | 7.3    | 16.3  | 10.6  |
| 174.6  | 123.7  | 131.6  | 205.8 | 63.7  | 1.8    | 6.6    | 3.3   | 4.9   |
| 26.2   | 29.5   | 21.3   | 31.0  | 9.1   | 112.5  | 76.0   | 56.5  | 44.6  |
| 47.3   | 54.5   | 51.8   | 69.6  | 14.0  | 152.4  | 104.9  | 11.9  | 5.8   |
| 149.6  | 168.4  | 182.3  | 238.0 | 94.6  | 585.9  | 375.5  | 37.2  | 25.5  |
| 2.3    | 2.5    | 11.2   | 21.5  | 6.3   | 3162.2 | 2013.2 | 0.8   | 2.2   |
| 32.7   | 32.8   | 35.7   | 13.1  | 14.3  | 17.4   | 5.3    | 103.6 | 188.0 |
| 23.3   | 16.1   | 19.9   | 10.5  | 7.5   | 19.8   | 11.2   | 137.1 | 155.9 |
| 773.1  | 681.2  | 730.4  | 539.0 | 341.5 | 624.1  | 401.3  | 322.7 | 359.6 |
| 249.9  | 170.4  | 166.4  | 155.6 | 49.3  | 248.9  | 172.1  | 25.3  | 24.8  |
| 32.6   | 35.8   | 14.2   | 18.4  | 14.4  | 683.4  | 366.9  | 15.4  | 12.7  |
| 88.0   | 71.7   | 85.4   | 114.6 | 23.8  | 193.8  | 130.0  | 36.4  | 54.7  |
| 394.9  | 325.7  | 342.4  | 329.2 | 131.9 | 500.9  | 353.1  | 99.6  | 119.7 |
| 34.5   | 23.3   | 28.2   | 18.5  | 10.6  | 55.2   | 18.4   | 27.4  | 47.2  |
| 710.4  | 596.5  | 550.4  | 369.9 | 210.2 | 1324.1 | 995.4  | 78.9  | 233.6 |
| 99.5   | 75.1   | 80.4   | 62.3  | 35.4  | 286.0  | 188.0  | 34.5  | 44.7  |
| 39.8   | 26.3   | 17.9   | 14.0  | 19.5  | 21.7   | 23.6   | 1.8   | 7.4   |
| 45.4   | 53.3   | 42.5   | 30.8  | 15.0  | 53.5   | 24.7   | 17.0  | 23.7  |
| 5.2    | 10.8   | 17.7   | 12.0  | 5.1   | 12.3   | 11.1   | 1.7   | 3.3   |
| 28.4   | 16.5   | 14.2   | 24.0  | 15.2  | 11.5   | 21.1   | 7.3   | 9.7   |
| 10.0   | 13.0   | 6.5    | 1.1   | 4.8   | 33.7   | 27.1   | 314.2 | 253.7 |
| 33.4   | 60.1   | 28.9   | 17.2  | 7.8   | 62.0   | 22.7   | 62.0  | 60.7  |
| 12.1   | 8.7    | 8.9    | 1.5   | 4.7   | 10.3   | 12.2   | 18.0  | 14.4  |
| 27.6   | 19.0   | 7.2    | 4.9   | 1.1   | 64.8   | 35.7   | 72.5  | 90.3  |
| 217.9  | 189.6  | 253.5  | 223.0 | 98.6  | 263.5  | 171.8  | 37.1  | 69.4  |
| 92.9   | 71.1   | 77.5   | 67.4  | 26.0  | 194.3  | 107.6  | 31.9  | 40.6  |
| 31.3   | 26.1   | 7.0    | 29.2  | 8.7   | 52.2   | 59.9   | 65.8  | 137.4 |
| 27.0   | 11.4   | 13.3   | 15.2  | 1.6   | 1218.8 | 1573.8 | 27.3  | 24.0  |
| 1193.6 | 1233.9 | 1126.1 | 970.1 | 518.8 | 2761.4 | 2206.7 | 436.9 | 618.9 |
| 126.3  | 126.2  | 145.5  | 84.4  | 67.7  | 203.1  | 241.9  | 51.0  | 32.1  |
| 17.4   | 9.6    | 10.5   | 12.5  | 5.5   | 221.1  | 199.2  | 1.0   | 1.6   |
| 17.3   | 9.3    | 16.5   | 10.1  | 4.2   | 193.1  | 117.4  | 1.4   | 5.4   |
| 1.8    | 0.6    | 1.0    | 1.0   | 0.6   | 1.7    | 1.0    | 1.9   | 1.0   |
| 161.4  | 177.8  | 147.3  | 89.8  | 55.9  | 226.5  | 167.0  | 55.1  | 85.2  |
| 19.9   | 3.3    | 25.2   | 2.8   | 0.6   | 24.4   | 3.3    | 3.2   | 18.1  |
| 5.4    | 10.4   | 0.9    | 5.7   | 2.0   | 14.9   | 8.7    | 7.4   | 15.8  |
| 43.5   | 22.1   | 29.8   | 13.7  | 2.8   | 41.5   | 19.8   | 26.7  | 20.8  |

|       |       |       |       |       |        |        |       |       |
|-------|-------|-------|-------|-------|--------|--------|-------|-------|
| 32.2  | 7.0   | 14.1  | 2.7   | 14.6  | 23.2   | 3.0    | 6.9   | 22.4  |
| 29.4  | 21.5  | 18.1  | 10.5  | 14.2  | 166.3  | 124.8  | 0.5   | 6.1   |
| 19.8  | 18.7  | 19.3  | 20.7  | 8.8   | 32.3   | 29.4   | 2.1   | 4.0   |
| 65.2  | 38.9  | 26.8  | 26.1  | 20.5  | 157.2  | 92.2   | 40.6  | 38.4  |
| 14.9  | 12.6  | 6.5   | 2.0   | 9.6   | 30.6   | 9.1    | 3.4   | 20.9  |
| 7.5   | 0.3   | 4.2   | 3.2   | 0.2   | 5.2    | 1.0    | 29.5  | 48.6  |
| 55.1  | 37.9  | 59.0  | 41.4  | 37.2  | 33.5   | 28.2   | 35.7  | 25.3  |
| 58.2  | 39.1  | 42.0  | 36.5  | 12.9  | 177.1  | 102.4  | 48.8  | 52.1  |
| 134.1 | 113.0 | 96.6  | 96.8  | 44.7  | 225.9  | 175.8  | 41.5  | 55.8  |
| 138.2 | 85.1  | 94.5  | 68.4  | 38.7  | 221.9  | 146.5  | 153.8 | 215.5 |
| 980.4 | 932.0 | 980.8 | 951.7 | 351.9 | 1461.9 | 1137.8 | 105.5 | 140.8 |
| 8.8   | 12.0  | 3.6   | 1.2   | 4.7   | 2.2    | 0.4    | 5.5   | 1.1   |
| 140.3 | 147.3 | 151.0 | 204.5 | 37.3  | 320.5  | 170.3  | 9.1   | 19.3  |
| 102.8 | 96.2  | 89.4  | 76.9  | 38.1  | 233.2  | 168.2  | 56.9  | 90.8  |
| 0.5   | 5.5   | 0.4   | 0.8   | 0.3   | 7.5    | 4.0    | 1.5   | 4.5   |
| 15.1  | 5.4   | 0.5   | 3.4   | 0.9   | 0.3    | 0.6    | 5.0   | 0.7   |
| 1.9   | 4.1   | 1.8   | 1.7   | 1.8   | 16.6   | 17.4   | 2.0   | 1.7   |
| 62.7  | 77.3  | 108.8 | 94.9  | 35.5  | 4.2    | 2.9    | 11.2  | 2.5   |
| 27.4  | 32.2  | 21.1  | 44.5  | 16.8  | 85.2   | 44.5   | 48.6  | 37.4  |
| 1.3   | 6.7   | 0.4   | 0.8   | 1.3   | 0.6    | 0.3    | 4.6   | 5.2   |
| 34.6  | 24.8  | 16.8  | 7.1   | 1.2   | 60.9   | 35.3   | 9.8   | 23.2  |
| 66.9  | 81.3  | 69.2  | 63.9  | 23.6  | 13.0   | 28.8   | 2.4   | 3.8   |
| 116.5 | 121.2 | 138.9 | 82.2  | 47.0  | 630.2  | 446.4  | 38.5  | 55.2  |
| 109.2 | 111.3 | 99.9  | 50.3  | 29.3  | 53.7   | 35.3   | 68.7  | 96.5  |
| 20.4  | 8.4   | 7.1   | 8.3   | 1.1   | 17.4   | 1.6    | 4.6   | 2.7   |
| 290.4 | 121.3 | 332.4 | 630.9 | 88.0  | 2106.2 | 1430.3 | 3.5   | 1.0   |
| 69.9  | 62.2  | 50.5  | 58.4  | 16.2  | 77.8   | 67.5   | 3.0   | 6.3   |
| 54.6  | 38.5  | 42.0  | 46.7  | 13.0  | 68.2   | 30.7   | 3.2   | 4.3   |
| 187.3 | 198.9 | 176.4 | 238.6 | 71.0  | 108.0  | 83.2   | 15.7  | 28.1  |
| 16.2  | 2.4   | 14.4  | 1.8   | 8.9   | 3.3    | 2.6    | 94.6  | 147.7 |
| 27.3  | 30.8  | 29.2  | 40.5  | 14.6  | 35.0   | 16.2   | 3.1   | 2.5   |
| 545.8 | 465.7 | 406.6 | 404.2 | 102.8 | 503.7  | 271.4  | 167.0 | 242.8 |
| 662.3 | 581.1 | 453.8 | 424.7 | 154.5 | 593.3  | 320.3  | 470.4 | 635.3 |
| 35.0  | 23.8  | 32.5  | 35.3  | 13.6  | 20.9   | 22.0   | 1.1   | 1.9   |
| 31.3  | 20.0  | 27.9  | 20.7  | 13.9  | 21.9   | 17.7   | 23.3  | 21.6  |
| 2.2   | 1.6   | 3.1   | 1.6   | 1.1   | 3.2    | 1.5    | 1.2   | 1.8   |
| 39.8  | 47.9  | 26.2  | 19.5  | 16.3  | 24.7   | 2.5    | 41.4  | 36.2  |
| 34.0  | 27.5  | 17.3  | 21.9  | 14.1  | 31.9   | 17.5   | 39.1  | 43.9  |
| 131.6 | 97.3  | 92.9  | 121.1 | 38.6  | 127.1  | 80.9   | 61.3  | 90.5  |
| 120.5 | 119.9 | 127.6 | 124.1 | 67.6  | 124.6  | 77.9   | 61.8  | 62.9  |
| 289.8 | 257.3 | 275.6 | 376.6 | 122.5 | 279.1  | 215.2  | 20.1  | 22.8  |
| 72.1  | 32.9  | 88.1  | 59.1  | 16.7  | 165.9  | 98.1   | 26.1  | 17.8  |
| 21.8  | 26.8  | 24.5  | 21.5  | 6.8   | 72.5   | 19.4   | 7.1   | 21.0  |
| 6.7   | 6.9   | 8.9   | 1.4   | 3.7   | 8.8    | 1.4    | 12.2  | 7.8   |
| 1.2   | 0.2   | 0.4   | 0.2   | 1.3   | 16.5   | 14.5   | 3.3   | 0.9   |
| 187.7 | 193.2 | 119.7 | 65.1  | 62.2  | 214.7  | 112.1  | 12.6  | 19.1  |
| 202.6 | 171.8 | 158.8 | 67.2  | 36.0  | 664.3  | 334.0  | 138.9 | 162.1 |
| 50.3  | 48.9  | 48.6  | 51.8  | 14.0  | 1045.4 | 615.5  | 6.2   | 5.3   |
| 7.9   | 2.7   | 3.9   | 14.6  | 9.2   | 1.8    | 0.9    | 8.4   | 12.2  |
| 360.9 | 433.9 | 321.7 | 187.7 | 122.2 | 336.4  | 295.5  | 61.9  | 70.6  |
| 7.0   | 21.5  | 10.8  | 12.4  | 11.2  | 34.1   | 3.6    | 11.1  | 1.9   |
| 0.6   | 4.1   | 7.5   | 4.0   | 3.3   | 101.7  | 79.3   | 5.1   | 2.6   |
| 27.5  | 32.1  | 32.1  | 25.2  | 20.2  | 21.2   | 20.5   | 5.0   | 17.5  |

|       |       |       |       |       |        |        |       |        |
|-------|-------|-------|-------|-------|--------|--------|-------|--------|
| 92.7  | 64.4  | 58.9  | 46.3  | 21.1  | 101.8  | 75.4   | 107.8 | 152.1  |
| 52.0  | 68.3  | 61.5  | 48.6  | 20.3  | 153.7  | 104.8  | 18.1  | 29.0   |
| 13.0  | 17.7  | 16.5  | 9.2   | 6.5   | 20.7   | 10.5   | 13.4  | 4.2    |
| 51.5  | 52.0  | 41.4  | 10.5  | 9.2   | 208.9  | 132.6  | 28.4  | 47.6   |
| 13.6  | 14.4  | 9.9   | 11.2  | 8.9   | 39.0   | 19.3   | 19.4  | 53.4   |
| 168.5 | 203.1 | 194.2 | 310.0 | 89.9  | 199.7  | 152.1  | 55.4  | 72.4   |
| 441.9 | 437.1 | 312.9 | 220.7 | 192.5 | 298.7  | 205.8  | 84.7  | 98.7   |
| 18.2  | 43.6  | 17.7  | 19.6  | 5.3   | 166.2  | 105.8  | 4.8   | 1.7    |
| 1.6   | 0.7   | 2.1   | 1.2   | 0.4   | 0.8    | 0.7    | 0.6   | 0.6    |
| 16.7  | 9.8   | 2.9   | 0.4   | 0.2   | 38.5   | 16.6   | 1.2   | 0.6    |
| 39.0  | 39.3  | 38.8  | 22.5  | 10.3  | 97.5   | 43.3   | 33.6  | 40.8   |
| 658.0 | 550.5 | 547.5 | 417.9 | 221.5 | 369.6  | 273.4  | 59.3  | 71.6   |
| 571.8 | 451.3 | 518.0 | 470.4 | 181.2 | 567.3  | 320.4  | 204.5 | 251.2  |
| 726.6 | 524.4 | 601.2 | 470.7 | 241.7 | 1039.9 | 754.1  | 94.2  | 130.3  |
| 226.9 | 160.3 | 164.4 | 104.9 | 83.2  | 19.6   | 7.0    | 49.8  | 43.1   |
| 0.2   | 0.5   | 0.6   | 0.1   | 1.7   | 11.9   | 3.9    | 3.2   | 0.3    |
| 1.6   | 1.0   | 9.2   | 6.6   | 2.2   | 38.9   | 18.0   | 5.2   | 6.2    |
| 615.3 | 434.5 | 560.9 | 386.9 | 196.0 | 3.8    | 11.4   | 12.2  | 28.1   |
| 145.5 | 120.9 | 120.3 | 60.2  | 36.3  | 188.8  | 148.7  | 12.5  | 13.9   |
| 26.7  | 32.7  | 29.7  | 18.0  | 11.8  | 34.6   | 41.6   | 5.4   | 7.3    |
| 0.8   | 0.6   | 4.6   | 5.0   | 0.2   | 12.9   | 0.4    | 0.4   | 0.4    |
| 5.3   | 0.3   | 0.8   | 6.6   | 2.5   | 7.3    | 6.5    | 1.2   | 9.0    |
| 231.7 | 249.1 | 299.4 | 818.2 | 135.7 | 163.8  | 222.7  | 11.9  | 5.7    |
| 0.8   | 5.8   | 1.1   | 0.3   | 6.9   | 12.3   | 0.8    | 3.7   | 7.3    |
| 56.6  | 43.2  | 78.0  | 521.3 | 26.2  | 296.4  | 251.7  | 7.5   | 6.7    |
| 64.5  | 42.7  | 42.9  | 46.3  | 12.7  | 161.9  | 116.8  | 45.0  | 74.9   |
| 129.0 | 145.4 | 112.8 | 97.7  | 34.2  | 137.7  | 72.8   | 11.8  | 19.6   |
| 59.5  | 32.0  | 119.8 | 869.3 | 60.9  | 2852.4 | 1592.3 | 3.7   | 1.0    |
| 13.7  | 4.4   | 2.8   | 2.1   | 1.3   | 29.8   | 35.5   | 20.3  | 26.1   |
| 57.6  | 40.9  | 50.6  | 42.4  | 25.3  | 28.4   | 21.2   | 23.0  | 27.2   |
| 205.6 | 206.6 | 246.2 | 165.1 | 77.9  | 225.6  | 191.1  | 129.5 | 172.4  |
| 70.7  | 64.1  | 60.6  | 28.2  | 15.1  | 175.4  | 91.3   | 72.3  | 98.0   |
| 233.9 | 180.8 | 166.5 | 143.5 | 70.4  | 405.4  | 204.7  | 407.2 | 445.8  |
| 104.7 | 70.8  | 82.6  | 95.9  | 49.4  | 136.7  | 97.7   | 21.5  | 40.0   |
| 11.7  | 10.8  | 27.6  | 5.2   | 12.3  | 22.2   | 9.5    | 2.9   | 1.3    |
| 146.3 | 128.4 | 151.9 | 140.0 | 111.1 | 60.6   | 35.3   | 1.4   | 5.2    |
| 126.8 | 145.9 | 137.5 | 63.4  | 59.3  | 182.2  | 144.1  | 41.8  | 53.7   |
| 285.0 | 383.3 | 357.1 | 335.9 | 99.3  | 518.9  | 299.2  | 979.8 | 1144.5 |
| 2.3   | 0.9   | 1.8   | 1.8   | 1.0   | 1.3    | 1.0    | 1.5   | 0.9    |
| 9.4   | 16.3  | 13.8  | 9.4   | 1.0   | 16.2   | 6.6    | 1.2   | 1.5    |
| 121.6 | 104.6 | 118.7 | 79.6  | 62.9  | 204.2  | 135.4  | 183.1 | 205.2  |
| 195.4 | 134.2 | 189.3 | 173.9 | 71.5  | 1235.6 | 809.7  | 31.0  | 34.4   |
| 133.0 | 63.8  | 115.8 | 183.3 | 52.2  | 1336.4 | 1140.0 | 14.2  | 11.6   |
| 102.6 | 116.0 | 70.7  | 62.5  | 33.2  | 96.8   | 93.5   | 2.8   | 20.1   |
| 51.2  | 40.1  | 53.4  | 39.1  | 14.4  | 71.3   | 74.6   | 5.3   | 8.4    |
| 39.6  | 38.6  | 50.0  | 40.2  | 14.6  | 833.1  | 623.3  | 42.6  | 74.7   |
| 66.7  | 37.1  | 42.3  | 27.6  | 16.0  | 133.1  | 68.6   | 54.9  | 55.5   |
| 94.5  | 79.0  | 42.1  | 36.5  | 27.4  | 290.7  | 200.2  | 52.3  | 54.4   |
| 260.6 | 262.7 | 292.6 | 324.0 | 66.4  | 602.5  | 445.6  | 32.1  | 37.7   |
| 35.7  | 70.2  | 32.0  | 17.4  | 19.6  | 50.8   | 28.8   | 18.6  | 24.2   |
| 4.9   | 16.2  | 3.1   | 2.8   | 0.6   | 14.4   | 13.2   | 16.0  | 28.1   |
| 6.5   | 7.7   | 14.5  | 3.6   | 0.5   | 1.3    | 3.0    | 1.1   | 4.7    |
| 128.4 | 157.0 | 129.0 | 204.4 | 63.7  | 148.7  | 125.6  | 10.6  | 18.9   |

|        |        |        |        |       |        |        |        |        |
|--------|--------|--------|--------|-------|--------|--------|--------|--------|
| 40.2   | 33.1   | 27.0   | 34.6   | 20.5  | 18.4   | 16.4   | 25.1   | 20.9   |
| 51.0   | 58.8   | 42.6   | 39.1   | 24.6  | 88.1   | 78.3   | 1.7    | 1.3    |
| 17.2   | 21.7   | 13.7   | 8.0    | 12.7  | 117.1  | 101.9  | 21.1   | 37.2   |
| 157.2  | 130.5  | 112.3  | 64.0   | 28.5  | 402.2  | 227.1  | 88.6   | 85.4   |
| 24.6   | 34.1   | 21.5   | 31.2   | 20.0  | 57.4   | 65.9   | 31.4   | 26.4   |
| 24.7   | 21.6   | 15.6   | 10.2   | 7.6   | 48.0   | 19.9   | 13.4   | 17.8   |
| 82.2   | 52.0   | 104.2  | 112.0  | 30.9  | 68.2   | 62.6   | 7.6    | 15.9   |
| 6.4    | 5.0    | 4.3    | 1.2    | 0.5   | 3.7    | 8.8    | 32.5   | 26.6   |
| 11.4   | 17.0   | 27.0   | 2.3    | 4.2   | 19.6   | 5.4    | 36.4   | 22.1   |
| 176.9  | 202.2  | 154.0  | 87.5   | 61.6  | 408.7  | 242.2  | 22.9   | 33.3   |
| 19.1   | 40.7   | 31.9   | 19.2   | 12.7  | 20.6   | 13.6   | 24.5   | 37.1   |
| 95.1   | 107.7  | 85.6   | 76.8   | 30.8  | 141.2  | 68.9   | 11.9   | 17.0   |
| 1.5    | 7.6    | 1.0    | 0.8    | 1.2   | 6.7    | 16.3   | 11.9   | 9.4    |
| 174.4  | 185.5  | 113.1  | 176.9  | 51.9  | 221.6  | 141.3  | 24.8   | 31.2   |
| 11.8   | 1.7    | 4.9    | 7.5    | 1.2   | 5.5    | 7.9    | 2.7    | 7.1    |
| 303.2  | 152.1  | 183.6  | 111.4  | 54.4  | 258.6  | 237.0  | 11.3   | 11.4   |
| 396.9  | 398.5  | 404.1  | 232.7  | 113.8 | 866.4  | 581.8  | 152.0  | 236.1  |
| 131.6  | 92.5   | 99.0   | 43.7   | 27.5  | 225.6  | 166.1  | 193.8  | 139.9  |
| 26.6   | 22.4   | 23.1   | 16.5   | 7.4   | 56.7   | 49.7   | 3.4    | 16.9   |
| 80.5   | 82.3   | 82.2   | 59.1   | 22.9  | 152.3  | 139.9  | 76.5   | 98.9   |
| 722.6  | 656.3  | 532.2  | 346.8  | 190.4 | 822.7  | 598.2  | 17.7   | 21.0   |
| 25.6   | 29.8   | 28.6   | 34.0   | 14.6  | 35.0   | 24.6   | 16.5   | 19.3   |
| 195.3  | 178.6  | 258.7  | 350.5  | 99.9  | 177.6  | 145.9  | 26.4   | 36.7   |
| 44.8   | 37.6   | 42.2   | 40.3   | 16.5  | 202.8  | 104.5  | 35.5   | 48.1   |
| 11.1   | 13.4   | 23.6   | 19.6   | 9.8   | 41.9   | 36.8   | 4.4    | 6.1    |
| 247.7  | 226.7  | 222.0  | 92.4   | 111.2 | 208.9  | 155.9  | 78.9   | 139.6  |
| 51.2   | 60.2   | 57.5   | 59.6   | 29.6  | 184.0  | 126.0  | 14.5   | 23.8   |
| 1647.6 | 1409.7 | 1591.6 | 1557.6 | 665.0 | 2024.1 | 1284.2 | 93.2   | 82.6   |
| 14.1   | 14.8   | 10.9   | 8.1    | 2.1   | 66.2   | 35.8   | 8.2    | 6.6    |
| 5.2    | 5.2    | 8.7    | 3.9    | 0.5   | 12.5   | 10.3   | 0.5    | 3.4    |
| 346.8  | 354.4  | 318.0  | 277.6  | 121.0 | 567.5  | 303.9  | 31.5   | 24.2   |
| 59.9   | 29.0   | 46.8   | 30.8   | 21.1  | 70.2   | 29.8   | 25.2   | 16.3   |
| 6.2    | 2.2    | 6.5    | 2.4    | 4.5   | 2.9    | 14.9   | 3.5    | 11.4   |
| 3.7    | 1.9    | 2.1    | 1.2    | 0.7   | 1.9    | 2.5    | 15.2   | 3.3    |
| 18.2   | 16.6   | 9.7    | 15.0   | 2.2   | 17.7   | 22.5   | 35.0   | 34.1   |
| 2.9    | 9.2    | 7.6    | 10.6   | 0.6   | 12.5   | 8.1    | 13.3   | 10.5   |
| 15.3   | 8.8    | 11.0   | 7.1    | 0.9   | 52.5   | 26.7   | 4.6    | 3.5    |
| 390.9  | 444.7  | 524.6  | 399.2  | 205.9 | 949.3  | 664.5  | 191.3  | 233.4  |
| 1.3    | 0.6    | 1.7    | 10.5   | 4.4   | 1.6    | 0.7    | 0.8    | 0.9    |
| 1533.9 | 1393.6 | 1340.9 | 1245.7 | 476.3 | 4146.8 | 2090.1 | 1030.2 | 1164.5 |
| 30.1   | 30.6   | 37.3   | 21.5   | 13.6  | 53.8   | 24.1   | 14.7   | 2.4    |
| 19.3   | 2.2    | 16.8   | 12.1   | 2.6   | 17.3   | 8.6    | 189.2  | 274.0  |
| 2.4    | 9.8    | 3.2    | 1.1    | 1.7   | 5.1    | 9.4    | 33.7   | 57.6   |
| 276.9  | 296.2  | 321.9  | 205.5  | 96.1  | 498.4  | 311.4  | 19.8   | 21.0   |
| 2.2    | 13.1   | 13.3   | 1.6    | 0.9   | 51.4   | 38.5   | 48.5   | 33.9   |
| 15.1   | 18.0   | 2.5    | 4.1    | 5.1   | 36.7   | 4.4    | 41.0   | 45.0   |
| 34.8   | 40.4   | 25.3   | 14.5   | 9.9   | 36.5   | 20.2   | 74.2   | 86.8   |
| 2.5    | 2.3    | 1.4    | 2.8    | 0.6   | 5.1    | 1.1    | 3.5    | 1.6    |
| 29.6   | 26.4   | 12.9   | 10.8   | 20.8  | 166.7  | 111.5  | 5.8    | 24.1   |
| 77.1   | 95.4   | 63.9   | 37.2   | 17.7  | 31.3   | 21.3   | 35.1   | 45.7   |
| 1.4    | 6.6    | 1.0    | 1.2    | 3.3   | 6.1    | 1.1    | 3.2    | 1.9    |
| 105.1  | 69.2   | 88.0   | 62.9   | 23.6  | 64.5   | 29.4   | 28.9   | 16.2   |
| 35.5   | 38.0   | 31.3   | 34.3   | 10.5  | 27.9   | 19.9   | 7.5    | 11.0   |

|        |        |        |        |       |        |       |       |       |
|--------|--------|--------|--------|-------|--------|-------|-------|-------|
| 67.6   | 59.0   | 64.3   | 54.8   | 34.8  | 247.8  | 143.9 | 31.6  | 42.6  |
| 16.5   | 14.6   | 15.0   | 11.6   | 6.3   | 3.8    | 9.1   | 14.8  | 32.4  |
| 93.2   | 124.1  | 83.6   | 78.7   | 38.2  | 35.0   | 24.6  | 17.2  | 16.4  |
| 45.3   | 69.8   | 46.8   | 34.3   | 11.0  | 34.3   | 15.2  | 0.2   | 0.3   |
| 202.9  | 175.9  | 163.9  | 111.3  | 47.1  | 220.2  | 93.0  | 4.0   | 6.0   |
| 1992.8 | 1897.8 | 1584.8 | 1050.0 | 626.2 | 936.7  | 767.0 | 223.2 | 249.8 |
| 2.2    | 25.2   | 1.4    | 4.5    | 0.4   | 11.8   | 0.9   | 0.8   | 1.9   |
| 3.2    | 2.0    | 3.6    | 1.7    | 0.9   | 3.3    | 3.3   | 2.6   | 1.5   |
| 13.4   | 9.6    | 3.0    | 14.8   | 4.7   | 17.3   | 16.8  | 10.2  | 11.6  |
| 16.5   | 6.5    | 6.8    | 7.2    | 3.9   | 135.1  | 126.9 | 6.7   | 6.6   |
| 52.9   | 65.0   | 60.5   | 57.8   | 20.6  | 76.6   | 55.4  | 26.2  | 51.2  |
| 526.2  | 596.9  | 550.9  | 566.6  | 229.4 | 327.1  | 382.8 | 173.1 | 223.8 |
| 192.0  | 189.5  | 191.0  | 192.2  | 68.8  | 206.5  | 110.0 | 136.8 | 193.9 |
| 27.5   | 13.8   | 25.4   | 33.4   | 17.8  | 334.5  | 347.1 | 31.3  | 46.6  |
| 248.8  | 241.3  | 247.3  | 336.1  | 98.8  | 152.2  | 100.2 | 40.1  | 58.3  |
| 20.5   | 26.3   | 32.7   | 13.6   | 10.4  | 29.4   | 19.1  | 11.5  | 10.4  |
| 2.0    | 2.1    | 1.3    | 5.9    | 0.6   | 7.6    | 3.7   | 1.7   | 5.4   |
| 1149.7 | 1063.9 | 800.3  | 666.3  | 322.3 | 938.5  | 858.2 | 213.2 | 205.0 |
| 49.9   | 63.6   | 41.7   | 16.8   | 14.4  | 24.7   | 20.0  | 23.2  | 36.9  |
| 109.5  | 158.8  | 109.8  | 68.7   | 18.5  | 114.3  | 40.2  | 40.7  | 84.5  |
| 2.8    | 2.2    | 3.5    | 1.7    | 7.0   | 4.9    | 16.5  | 2.0   | 15.7  |
| 3.7    | 6.7    | 0.7    | 0.5    | 2.2   | 8.7    | 0.9   | 0.4   | 1.0   |
| 117.9  | 132.2  | 114.7  | 138.2  | 48.3  | 237.2  | 190.2 | 47.7  | 52.1  |
| 20.3   | 7.6    | 17.2   | 15.1   | 5.7   | 41.8   | 26.5  | 11.5  | 11.8  |
| 24.2   | 18.1   | 2.6    | 25.0   | 7.4   | 31.2   | 34.7  | 23.4  | 26.3  |
| 44.2   | 42.4   | 33.1   | 27.1   | 18.1  | 43.4   | 33.9  | 79.7  | 110.3 |
| 6.4    | 9.7    | 9.8    | 1.4    | 6.6   | 7.5    | 6.4   | 10.7  | 6.9   |
| 3.3    | 2.3    | 8.5    | 1.9    | 1.2   | 30.9   | 14.5  | 9.1   | 2.5   |
| 6.5    | 1.6    | 18.0   | 1.6    | 1.0   | 8.7    | 13.6  | 8.1   | 1.7   |
| 3.0    | 2.5    | 1.8    | 3.5    | 1.0   | 2.6    | 7.1   | 10.1  | 5.4   |
| 243.5  | 235.4  | 219.6  | 131.7  | 104.7 | 32.0   | 18.3  | 2.4   | 1.6   |
| 29.8   | 24.3   | 7.1    | 4.7    | 1.3   | 3.0    | 1.3   | 3.2   | 1.6   |
| 5.6    | 1.9    | 5.6    | 4.3    | 3.8   | 10.6   | 2.1   | 2.8   | 2.6   |
| 295.4  | 203.9  | 267.6  | 179.9  | 103.0 | 102.6  | 81.9  | 46.3  | 50.1  |
| 4.9    | 11.3   | 22.7   | 13.2   | 9.7   | 157.5  | 138.9 | 12.8  | 4.0   |
| 69.7   | 78.0   | 59.7   | 14.7   | 16.2  | 352.5  | 321.4 | 12.5  | 9.6   |
| 70.5   | 70.0   | 62.5   | 76.0   | 29.5  | 72.3   | 32.2  | 6.7   | 24.8  |
| 5.6    | 0.6    | 0.5    | 0.1    | 2.3   | 1.3    | 0.9   | 0.4   | 4.3   |
| 17.4   | 5.9    | 13.0   | 4.2    | 2.1   | 11.2   | 7.0   | 14.5  | 17.5  |
| 228.7  | 224.8  | 238.3  | 245.3  | 92.1  | 380.2  | 240.0 | 34.2  | 60.4  |
| 163.7  | 160.9  | 157.9  | 151.0  | 59.7  | 258.5  | 160.3 | 74.0  | 94.9  |
| 127.1  | 62.0   | 99.0   | 98.6   | 54.3  | 58.6   | 29.9  | 12.2  | 17.4  |
| 50.5   | 40.5   | 39.7   | 54.3   | 22.9  | 14.4   | 2.8   | 10.4  | 2.6   |
| 81.0   | 87.6   | 97.0   | 151.6  | 41.8  | 49.1   | 27.1  | 5.4   | 2.6   |
| 21.8   | 38.6   | 29.1   | 20.3   | 5.3   | 41.0   | 20.3  | 30.5  | 49.7  |
| 108.8  | 77.4   | 69.9   | 68.4   | 36.8  | 778.3  | 626.7 | 109.6 | 100.3 |
| 27.9   | 6.9    | 10.5   | 3.1    | 1.7   | 97.2   | 44.7  | 129.5 | 134.4 |
| 31.5   | 39.6   | 93.1   | 88.4   | 25.3  | 341.6  | 202.4 | 21.9  | 40.2  |
| 2042.7 | 1988.7 | 1678.9 | 1683.3 | 804.8 | 1001.0 | 625.2 | 77.4  | 130.1 |
| 335.2  | 342.3  | 328.6  | 166.9  | 134.8 | 553.4  | 187.7 | 45.7  | 66.4  |
| 18.9   | 17.5   | 10.4   | 14.7   | 4.2   | 255.6  | 125.5 | 54.8  | 79.7  |
| 233.2  | 232.4  | 296.8  | 447.6  | 125.0 | 222.0  | 109.2 | 39.1  | 58.9  |
| 13.9   | 3.2    | 19.2   | 3.1    | 4.5   | 4.5    | 7.1   | 1.5   | 3.3   |

|       |       |       |        |       |        |        |        |        |
|-------|-------|-------|--------|-------|--------|--------|--------|--------|
| 1.8   | 1.4   | 1.0   | 2.0    | 3.7   | 4.8    | 2.5    | 137.6  | 201.6  |
| 162.7 | 122.6 | 124.3 | 130.7  | 45.5  | 494.8  | 202.5  | 65.9   | 86.0   |
| 0.9   | 1.7   | 2.0   | 1.9    | 0.6   | 0.7    | 0.9    | 2.5    | 1.0    |
| 150.0 | 142.1 | 107.7 | 48.3   | 36.5  | 148.0  | 122.9  | 115.4  | 96.6   |
| 49.1  | 61.2  | 65.6  | 40.5   | 13.1  | 115.7  | 68.6   | 40.1   | 17.9   |
| 41.7  | 57.3  | 43.8  | 36.9   | 14.4  | 587.2  | 440.8  | 76.9   | 138.1  |
| 74.9  | 67.8  | 64.8  | 83.2   | 27.4  | 77.5   | 56.0   | 20.2   | 16.8   |
| 66.4  | 65.6  | 129.4 | 1008.5 | 56.1  | 3111.7 | 2511.5 | 3.8    | 0.7    |
| 389.3 | 372.5 | 741.1 | 274.7  | 170.1 | 366.8  | 271.2  | 329.6  | 627.4  |
| 665.6 | 578.5 | 570.6 | 420.0  | 213.4 | 3179.7 | 2374.2 | 145.9  | 185.1  |
| 366.7 | 354.5 | 355.1 | 299.8  | 152.4 | 1067.1 | 509.5  | 87.2   | 87.1   |
| 118.4 | 90.0  | 112.2 | 112.2  | 16.6  | 163.5  | 94.8   | 73.9   | 183.4  |
| 3.9   | 0.3   | 5.0   | 6.1    | 4.4   | 0.7    | 9.4    | 2.5    | 0.9    |
| 11.5  | 23.0  | 18.4  | 15.7   | 8.4   | 27.9   | 32.0   | 1.0    | 7.0    |
| 409.3 | 335.3 | 299.6 | 163.9  | 138.8 | 24.1   | 16.9   | 9.0    | 13.1   |
| 637.5 | 790.3 | 768.6 | 320.6  | 270.4 | 21.6   | 10.4   | 4.7    | 5.9    |
| 16.2  | 10.2  | 6.7   | 2.8    | 1.3   | 105.9  | 55.9   | 2043.6 | 2074.6 |
| 26.2  | 23.1  | 22.5  | 3.2    | 6.2   | 20.5   | 21.2   | 71.0   | 132.0  |
| 7.4   | 5.7   | 7.8   | 1.5    | 0.8   | 0.9    | 3.5    | 3.1    | 1.7    |
| 3.3   | 15.4  | 5.4   | 17.9   | 4.7   | 4.1    | 4.5    | 16.4   | 12.7   |
| 1.0   | 15.1  | 8.1   | 7.9    | 4.1   | 11.6   | 0.8    | 1.3    | 1.6    |
| 23.9  | 14.0  | 17.3  | 12.9   | 10.4  | 19.7   | 12.5   | 23.1   | 18.5   |
| 53.9  | 46.8  | 48.2  | 53.1   | 19.5  | 181.8  | 99.0   | 53.4   | 62.4   |
| 596.7 | 293.2 | 391.5 | 328.2  | 151.3 | 1751.6 | 1556.5 | 185.4  | 191.6  |
| 14.9  | 16.8  | 16.2  | 10.2   | 7.4   | 9.2    | 12.5   | 11.2   | 6.7    |
| 100.4 | 76.5  | 58.7  | 33.7   | 25.3  | 250.3  | 145.6  | 72.0   | 156.7  |
| 36.5  | 32.4  | 39.2  | 31.3   | 12.7  | 104.7  | 62.6   | 102.6  | 118.6  |
| 218.2 | 228.1 | 247.1 | 196.4  | 82.9  | 337.6  | 195.8  | 15.7   | 25.2   |
| 32.2  | 30.8  | 21.7  | 13.0   | 10.0  | 51.8   | 35.1   | 44.3   | 48.7   |
| 1.3   | 1.0   | 1.4   | 1.2    | 0.5   | 3.9    | 1.4    | 1.6    | 2.9    |
| 3.7   | 9.5   | 2.3   | 4.6    | 2.8   | 7.8    | 9.1    | 1.4    | 2.8    |
| 3.5   | 10.6  | 12.2  | 12.5   | 2.5   | 49.5   | 36.2   | 3.6    | 3.4    |
| 673.3 | 889.9 | 610.1 | 325.4  | 268.2 | 300.5  | 271.9  | 6.8    | 26.3   |
| 281.2 | 209.8 | 261.6 | 215.0  | 90.2  | 586.2  | 452.0  | 300.5  | 434.0  |
| 526.4 | 521.6 | 451.2 | 303.2  | 113.4 | 282.8  | 326.0  | 77.3   | 106.6  |
| 16.7  | 14.4  | 8.8   | 1.1    | 6.4   | 56.9   | 46.5   | 7.3    | 0.3    |
| 123.0 | 116.6 | 183.1 | 140.8  | 29.2  | 94.3   | 115.0  | 24.7   | 21.6   |
| 16.6  | 3.0   | 26.1  | 20.4   | 4.3   | 14.5   | 5.7    | 13.0   | 13.5   |
| 118.5 | 90.1  | 149.8 | 192.1  | 38.2  | 253.0  | 146.2  | 16.4   | 32.7   |
| 14.8  | 20.5  | 25.3  | 4.1    | 4.6   | 82.2   | 71.5   | 4.7    | 4.3    |
| 73.1  | 55.7  | 76.6  | 58.1   | 28.5  | 69.6   | 44.7   | 60.2   | 84.0   |
| 4.5   | 3.1   | 5.7   | 8.9    | 1.7   | 4.6    | 14.3   | 25.8   | 5.2    |
| 324.2 | 276.4 | 208.1 | 188.7  | 91.6  | 153.4  | 134.7  | 89.6   | 118.9  |
| 31.4  | 25.0  | 36.1  | 24.0   | 17.4  | 28.7   | 35.2   | 22.9   | 35.4   |
| 87.4  | 66.1  | 76.6  | 56.9   | 19.9  | 103.3  | 104.4  | 28.4   | 23.9   |
| 57.7  | 66.3  | 75.9  | 40.9   | 12.9  | 79.1   | 51.1   | 29.6   | 30.3   |
| 596.9 | 664.9 | 419.3 | 237.9  | 210.0 | 329.9  | 295.8  | 277.5  | 435.4  |
| 140.3 | 81.7  | 68.1  | 33.0   | 19.8  | 47.9   | 25.3   | 74.1   | 90.5   |
| 231.3 | 115.6 | 270.4 | 1381.5 | 251.0 | 77.8   | 51.9   | 8.0    | 13.3   |
| 152.7 | 100.9 | 128.4 | 177.0  | 46.9  | 157.7  | 122.1  | 42.8   | 43.7   |
| 125.5 | 82.2  | 108.2 | 98.9   | 53.1  | 121.2  | 75.6   | 61.6   | 56.7   |
| 273.2 | 330.7 | 272.9 | 189.1  | 59.0  | 297.1  | 160.3  | 140.0  | 160.1  |
| 62.1  | 26.6  | 33.1  | 37.0   | 15.1  | 317.6  | 209.3  | 35.4   | 73.7   |

|       |       |       |       |       |        |       |       |       |
|-------|-------|-------|-------|-------|--------|-------|-------|-------|
| 6.7   | 3.1   | 6.2   | 4.4   | 3.8   | 10.0   | 17.0  | 3.4   | 3.9   |
| 2.0   | 2.0   | 1.2   | 2.4   | 0.6   | 1.6    | 2.0   | 2.3   | 2.7   |
| 220.4 | 239.9 | 198.9 | 125.6 | 40.5  | 435.4  | 233.5 | 8.6   | 15.8  |
| 54.7  | 47.3  | 79.7  | 28.4  | 18.2  | 271.0  | 175.2 | 3.9   | 2.5   |
| 1.0   | 0.6   | 0.9   | 0.7   | 0.4   | 2.2    | 0.8   | 0.7   | 0.8   |
| 13.6  | 10.3  | 17.3  | 11.0  | 8.3   | 18.0   | 9.7   | 12.9  | 7.3   |
| 90.6  | 79.4  | 87.4  | 58.8  | 10.4  | 20.9   | 13.7  | 8.6   | 13.7  |
| 17.5  | 11.7  | 15.7  | 6.0   | 3.5   | 87.6   | 55.5  | 209.2 | 262.6 |
| 28.9  | 26.3  | 25.9  | 28.5  | 9.2   | 74.3   | 19.8  | 26.5  | 41.9  |
| 2.3   | 9.8   | 4.2   | 3.3   | 8.5   | 56.0   | 59.0  | 5.3   | 19.5  |
| 41.4  | 29.4  | 23.9  | 22.8  | 11.9  | 73.2   | 43.2  | 19.7  | 31.0  |
| 14.1  | 22.3  | 21.6  | 22.8  | 16.0  | 152.2  | 105.0 | 7.4   | 5.5   |
| 11.4  | 14.6  | 10.1  | 7.1   | 3.4   | 34.9   | 23.6  | 7.3   | 11.1  |
| 23.1  | 17.4  | 10.9  | 15.0  | 6.6   | 26.5   | 10.3  | 22.7  | 12.5  |
| 1.6   | 3.6   | 2.0   | 2.2   | 2.2   | 5.9    | 1.4   | 3.0   | 16.5  |
| 233.0 | 229.8 | 197.7 | 90.9  | 78.7  | 454.6  | 312.4 | 57.4  | 97.0  |
| 120.9 | 100.3 | 118.2 | 136.4 | 42.6  | 315.7  | 242.9 | 68.1  | 86.4  |
| 2.2   | 1.1   | 1.5   | 0.4   | 1.3   | 101.0  | 85.9  | 8.1   | 1.3   |
| 4.0   | 2.1   | 6.8   | 1.7   | 1.8   | 221.3  | 181.0 | 117.0 | 107.5 |
| 15.4  | 11.6  | 16.3  | 27.4  | 8.6   | 1110.1 | 984.7 | 134.3 | 154.7 |
| 24.6  | 1.6   | 21.5  | 11.4  | 3.4   | 19.7   | 18.9  | 18.8  | 16.4  |
| 35.7  | 24.9  | 31.8  | 23.6  | 8.5   | 154.1  | 126.3 | 23.4  | 22.0  |
| 45.9  | 41.6  | 44.1  | 34.5  | 15.0  | 277.5  | 170.3 | 9.0   | 25.6  |
| 6.7   | 6.9   | 13.2  | 0.7   | 8.4   | 264.6  | 156.2 | 4.7   | 3.4   |
| 191.7 | 230.5 | 167.0 | 46.7  | 86.9  | 20.0   | 24.0  | 6.0   | 5.3   |
| 4.4   | 3.4   | 2.7   | 2.5   | 1.2   | 25.2   | 2.6   | 21.0  | 19.3  |
| 132.8 | 189.0 | 176.9 | 156.4 | 85.1  | 568.7  | 506.2 | 19.2  | 24.2  |
| 34.1  | 18.7  | 11.0  | 8.6   | 11.4  | 27.2   | 12.5  | 14.1  | 28.6  |
| 155.0 | 184.3 | 98.5  | 121.9 | 60.2  | 416.0  | 301.7 | 21.3  | 21.8  |
| 44.1  | 52.9  | 29.3  | 28.0  | 15.8  | 184.5  | 134.5 | 6.8   | 8.4   |
| 273.1 | 264.2 | 224.1 | 204.2 | 111.9 | 434.2  | 291.6 | 107.1 | 91.7  |
| 68.4  | 43.5  | 76.9  | 64.7  | 24.1  | 89.9   | 32.0  | 23.9  | 59.9  |
| 43.6  | 42.0  | 74.7  | 30.5  | 24.7  | 76.4   | 58.9  | 5.7   | 38.0  |
| 75.3  | 67.7  | 73.1  | 102.2 | 26.5  | 249.6  | 153.0 | 68.4  | 89.7  |
| 7.0   | 9.4   | 6.0   | 9.9   | 0.5   | 4.3    | 2.1   | 2.9   | 1.6   |
| 115.5 | 144.0 | 75.1  | 49.1  | 44.4  | 480.2  | 223.8 | 70.8  | 35.2  |
| 35.4  | 33.5  | 36.0  | 16.7  | 8.7   | 73.8   | 19.7  | 11.7  | 14.2  |
| 4.4   | 11.6  | 12.8  | 4.8   | 1.6   | 15.6   | 4.1   | 11.9  | 11.0  |
| 45.4  | 87.4  | 66.7  | 174.3 | 35.1  | 753.5  | 720.6 | 4.3   | 21.3  |
| 222.3 | 238.6 | 247.4 | 338.1 | 94.7  | 310.9  | 227.6 | 11.1  | 37.1  |
| 272.0 | 250.7 | 342.0 | 391.7 | 126.2 | 356.9  | 246.8 | 28.3  | 36.6  |
| 3.9   | 7.1   | 5.2   | 2.9   | 9.9   | 49.3   | 42.7  | 35.5  | 29.8  |
| 373.7 | 299.5 | 251.1 | 108.1 | 102.1 | 446.7  | 429.7 | 1.2   | 3.1   |
| 111.7 | 146.2 | 128.9 | 137.1 | 47.6  | 204.2  | 124.2 | 47.2  | 24.3  |
| 0.1   | 3.7   | 1.1   | 0.1   | 0.7   | 6.0    | 0.3   | 3.1   | 0.1   |
| 1.4   | 1.8   | 2.0   | 1.3   | 0.6   | 2.0    | 1.4   | 2.3   | 1.2   |
| 128.4 | 92.6  | 72.2  | 71.3  | 43.0  | 204.6  | 121.1 | 57.9  | 48.6  |
| 2.8   | 4.9   | 1.5   | 4.9   | 0.6   | 7.8    | 2.6   | 3.3   | 5.6   |
| 7.1   | 1.4   | 1.5   | 7.5   | 0.6   | 5.9    | 0.6   | 1.3   | 1.4   |
| 363.7 | 359.0 | 331.1 | 239.1 | 97.4  | 395.5  | 377.1 | 11.7  | 26.0  |
| 580.0 | 369.9 | 435.1 | 306.3 | 174.5 | 638.3  | 452.3 | 385.8 | 430.2 |
| 156.2 | 173.8 | 172.0 | 186.2 | 72.5  | 249.7  | 195.1 | 29.8  | 42.5  |
| 1.9   | 1.3   | 0.5   | 4.5   | 4.0   | 5.8    | 1.4   | 1.0   | 1.6   |



|        |        |        |        |       |        |        |       |       |
|--------|--------|--------|--------|-------|--------|--------|-------|-------|
| 1.0    | 0.7    | 10.2   | 12.0   | 10.3  | 24.0   | 18.4   | 4.5   | 5.2   |
| 8.5    | 8.8    | 7.6    | 6.1    | 5.6   | 53.6   | 42.8   | 15.3  | 6.8   |
| 92.7   | 73.5   | 101.2  | 92.2   | 27.6  | 358.4  | 288.9  | 33.0  | 49.1  |
| 127.0  | 106.1  | 109.6  | 104.2  | 35.8  | 84.6   | 47.0   | 37.1  | 106.3 |
| 36.0   | 36.6   | 37.1   | 22.0   | 14.4  | 93.2   | 43.4   | 84.0  | 100.4 |
| 20.8   | 25.2   | 21.3   | 11.8   | 13.7  | 287.4  | 173.7  | 36.1  | 39.6  |
| 1.0    | 5.0    | 5.4    | 1.8    | 1.7   | 7.1    | 2.1    | 4.6   | 0.2   |
| 125.2  | 95.8   | 170.0  | 121.5  | 33.8  | 223.6  | 143.0  | 5.2   | 11.4  |
| 10.5   | 1.0    | 8.0    | 3.2    | 9.2   | 9.7    | 2.2    | 1.0   | 5.2   |
| 0.9    | 1.3    | 1.5    | 1.3    | 6.2   | 23.1   | 7.5    | 1.2   | 0.8   |
| 13.6   | 9.3    | 5.4    | 18.8   | 6.1   | 2.1    | 3.1    | 2.2   | 2.8   |
| 2.4    | 4.9    | 4.2    | 1.6    | 2.6   | 24.4   | 8.0    | 2.8   | 2.9   |
| 218.3  | 190.9  | 219.5  | 191.3  | 49.7  | 299.7  | 199.9  | 45.2  | 91.5  |
| 1.3    | 3.4    | 1.1    | 0.4    | 5.1   | 37.3   | 59.6   | 0.6   | 1.3   |
| 80.7   | 93.3   | 76.2   | 44.5   | 12.1  | 45.5   | 15.7   | 3.7   | 7.0   |
| 132.9  | 140.8  | 122.6  | 72.2   | 33.0  | 126.5  | 58.0   | 32.1  | 13.3  |
| 64.2   | 44.0   | 79.7   | 91.4   | 28.9  | 182.4  | 139.8  | 6.1   | 38.9  |
| 61.6   | 69.7   | 31.7   | 16.5   | 24.7  | 16.4   | 9.2    | 16.6  | 20.0  |
| 17.0   | 15.2   | 11.4   | 8.1    | 8.7   | 42.0   | 25.9   | 12.0  | 4.6   |
| 55.9   | 37.6   | 39.2   | 59.2   | 5.7   | 103.1  | 46.8   | 10.3  | 14.0  |
| 17.4   | 25.6   | 6.1    | 8.9    | 0.7   | 16.6   | 8.9    | 26.9  | 21.4  |
| 1.9    | 2.6    | 2.2    | 3.8    | 4.5   | 39.6   | 34.5   | 70.2  | 114.7 |
| 99.5   | 114.2  | 69.9   | 23.0   | 37.1  | 20.5   | 18.8   | 9.4   | 8.9   |
| 3.3    | 5.9    | 0.5    | 1.4    | 3.5   | 2.6    | 1.2    | 1.6   | 5.0   |
| 0.9    | 0.5    | 0.9    | 0.5    | 0.3   | 1.6    | 0.7    | 1.4   | 0.9   |
| 11.3   | 83.9   | 89.6   | 66.8   | 25.6  | 67.7   | 57.9   | 24.9  | 34.3  |
| 35.1   | 42.7   | 41.6   | 44.2   | 20.8  | 81.9   | 64.1   | 19.9  | 13.0  |
| 66.5   | 70.1   | 62.8   | 69.2   | 28.2  | 158.6  | 110.1  | 14.2  | 16.5  |
| 10.2   | 7.7    | 8.7    | 4.2    | 9.7   | 50.5   | 18.4   | 2.4   | 7.3   |
| 28.2   | 36.0   | 35.3   | 14.1   | 10.8  | 66.4   | 26.9   | 18.4  | 16.8  |
| 12.1   | 13.3   | 8.7    | 2.5    | 2.2   | 80.6   | 39.9   | 23.3  | 22.5  |
| 2059.1 | 2140.9 | 1990.3 | 1875.0 | 965.2 | 1818.5 | 1394.2 | 452.8 | 583.3 |
| 912.4  | 682.4  | 552.8  | 209.1  | 179.8 | 5289.2 | 4028.4 | 113.5 | 166.3 |
| 59.1   | 29.4   | 38.2   | 29.3   | 5.2   | 55.1   | 47.8   | 34.4  | 35.3  |
| 23.7   | 20.0   | 18.5   | 31.9   | 8.6   | 168.5  | 155.8  | 9.4   | 16.9  |
| 20.3   | 22.4   | 40.0   | 168.1  | 16.2  | 315.0  | 271.1  | 3.5   | 6.0   |
| 23.9   | 30.1   | 16.2   | 12.8   | 2.8   | 6.9    | 1.3    | 6.3   | 0.9   |
| 7.1    | 2.2    | 1.2    | 7.7    | 0.5   | 2.9    | 6.2    | 15.1  | 16.4  |
| 8.3    | 12.7   | 11.8   | 22.0   | 5.3   | 38.5   | 20.0   | 33.3  | 72.2  |
| 609.0  | 628.1  | 609.8  | 508.2  | 210.1 | 853.1  | 442.1  | 223.9 | 256.4 |
| 4.2    | 5.5    | 5.0    | 9.1    | 0.8   | 24.9   | 8.6    | 2.2   | 20.0  |
| 15.0   | 8.7    | 8.8    | 1.5    | 4.1   | 4.5    | 6.7    | 2.3   | 11.9  |
| 13.9   | 4.3    | 0.8    | 2.2    | 0.3   | 1.8    | 12.2   | 1.8   | 17.4  |
| 51.6   | 36.1   | 50.6   | 46.8   | 18.3  | 49.9   | 42.1   | 27.8  | 29.4  |
| 29.9   | 37.5   | 27.6   | 14.6   | 4.1   | 50.9   | 57.8   | 42.7  | 65.6  |
| 1.0    | 9.5    | 2.0    | 0.9    | 0.4   | 1.6    | 2.1    | 1.4   | 1.9   |
| 78.0   | 82.4   | 80.1   | 49.0   | 13.8  | 91.3   | 54.6   | 3.7   | 0.3   |
| 6.9    | 15.3   | 5.9    | 34.9   | 9.3   | 29.8   | 22.6   | 2.0   | 3.0   |
| 134.0  | 147.6  | 165.5  | 146.4  | 43.0  | 93.3   | 83.9   | 10.9  | 22.6  |
| 28.3   | 23.3   | 23.9   | 10.6   | 8.2   | 16.2   | 9.0    | 13.1  | 13.5  |
| 9.9    | 22.2   | 20.2   | 4.8    | 6.6   | 6.1    | 3.1    | 2.1   | 7.8   |
| 156.3  | 143.6  | 157.4  | 83.1   | 44.3  | 66.0   | 10.3   | 31.3  | 78.3  |
| 85.7   | 79.1   | 59.3   | 90.5   | 19.0  | 298.5  | 190.3  | 68.4  | 126.8 |

|       |       |       |       |       |        |        |       |       |
|-------|-------|-------|-------|-------|--------|--------|-------|-------|
| 376.1 | 340.3 | 337.2 | 193.0 | 127.9 | 217.6  | 206.3  | 70.4  | 68.7  |
| 530.9 | 518.3 | 456.3 | 278.0 | 212.1 | 3156.6 | 1616.9 | 141.6 | 201.2 |
| 437.5 | 406.9 | 290.2 | 154.2 | 102.2 | 1422.7 | 619.1  | 144.8 | 278.0 |
| 215.9 | 142.5 | 134.8 | 73.2  | 42.4  | 471.1  | 268.6  | 29.9  | 24.8  |
| 69.0  | 41.7  | 53.5  | 19.5  | 9.7   | 135.7  | 33.9   | 14.8  | 13.2  |
| 169.9 | 170.4 | 146.0 | 154.0 | 84.6  | 280.7  | 183.2  | 81.8  | 105.2 |
| 118.8 | 115.1 | 113.0 | 121.8 | 55.8  | 178.4  | 93.4   | 59.2  | 92.7  |
| 43.3  | 51.2  | 29.7  | 17.7  | 15.9  | 18.0   | 18.2   | 18.0  | 17.9  |
| 8.8   | 1.7   | 8.6   | 0.4   | 0.7   | 25.5   | 17.1   | 9.2   | 4.8   |
| 134.1 | 136.2 | 127.7 | 56.4  | 49.1  | 339.6  | 164.3  | 45.5  | 41.3  |
| 12.1  | 4.4   | 10.5  | 16.2  | 11.6  | 50.9   | 38.8   | 16.8  | 12.8  |
| 12.0  | 12.2  | 12.1  | 21.4  | 10.9  | 22.2   | 9.5    | 14.7  | 12.1  |
| 47.8  | 49.9  | 34.4  | 41.2  | 18.7  | 668.3  | 387.6  | 132.2 | 130.4 |
| 150.2 | 129.9 | 103.3 | 103.7 | 49.2  | 1787.9 | 1478.3 | 445.4 | 666.7 |
| 171.3 | 191.5 | 167.5 | 113.7 | 54.5  | 73.0   | 41.1   | 7.1   | 4.4   |
| 104.0 | 106.7 | 95.2  | 57.1  | 27.8  | 57.8   | 34.6   | 13.9  | 6.9   |
| 11.8  | 10.0  | 8.1   | 1.3   | 9.0   | 20.0   | 24.0   | 1.1   | 5.9   |
| 142.3 | 165.5 | 136.8 | 135.3 | 46.2  | 155.1  | 93.6   | 29.7  | 43.1  |
| 411.0 | 418.5 | 378.1 | 356.9 | 124.8 | 557.7  | 410.2  | 117.3 | 125.1 |
| 204.6 | 173.5 | 166.5 | 137.4 | 72.9  | 108.6  | 83.8   | 20.5  | 30.5  |
| 63.3  | 19.3  | 10.9  | 12.5  | 7.2   | 54.6   | 43.6   | 15.8  | 2.2   |
| 3.8   | 3.0   | 14.0  | 4.2   | 2.8   | 6.3    | 10.8   | 10.9  | 21.2  |
| 95.0  | 102.9 | 80.1  | 90.8  | 41.3  | 100.4  | 75.1   | 59.8  | 78.7  |
| 55.6  | 55.8  | 45.3  | 21.8  | 27.2  | 76.2   | 59.5   | 3.3   | 12.8  |
| 38.2  | 48.5  | 49.4  | 29.0  | 21.8  | 76.0   | 33.8   | 35.3  | 50.0  |
| 283.0 | 306.9 | 258.7 | 276.2 | 114.2 | 147.6  | 84.1   | 28.7  | 25.3  |
| 16.7  | 10.5  | 14.4  | 17.3  | 0.8   | 48.6   | 37.1   | 34.4  | 25.2  |
| 24.7  | 11.2  | 15.9  | 17.8  | 4.3   | 9.1    | 9.9    | 7.9   | 8.0   |
| 153.2 | 152.5 | 263.2 | 766.5 | 123.4 | 41.4   | 24.3   | 1.6   | 4.1   |
| 103.0 | 88.9  | 71.3  | 65.4  | 26.6  | 41.1   | 22.3   | 20.4  | 15.9  |
| 28.0  | 17.6  | 19.1  | 9.7   | 5.4   | 0.6    | 1.0    | 1.0   | 10.5  |
| 76.1  | 53.5  | 61.1  | 35.5  | 20.8  | 13.6   | 1.1    | 19.1  | 24.6  |
| 11.9  | 15.4  | 16.2  | 18.5  | 3.9   | 33.7   | 16.2   | 79.6  | 166.1 |
| 64.1  | 70.8  | 72.7  | 69.4  | 21.2  | 131.3  | 90.6   | 23.0  | 26.3  |
| 30.8  | 23.8  | 27.1  | 24.5  | 10.7  | 64.0   | 35.8   | 38.0  | 46.4  |
| 9.7   | 3.3   | 14.2  | 18.3  | 4.9   | 35.1   | 21.5   | 32.9  | 9.0   |
| 1.5   | 15.0  | 2.7   | 7.6   | 0.5   | 99.7   | 47.2   | 1.7   | 1.1   |
| 13.7  | 14.0  | 1.4   | 20.7  | 7.0   | 209.5  | 60.9   | 2.7   | 0.7   |
| 54.7  | 50.4  | 43.4  | 36.1  | 15.1  | 177.5  | 118.4  | 33.6  | 28.0  |
| 422.7 | 426.3 | 366.6 | 460.1 | 133.0 | 314.3  | 361.6  | 414.0 | 432.5 |
| 589.9 | 474.3 | 468.4 | 396.6 | 182.4 | 2046.1 | 1192.5 | 118.0 | 85.6  |
| 91.7  | 84.7  | 110.7 | 95.2  | 33.5  | 253.1  | 200.8  | 9.5   | 14.4  |
| 557.4 | 431.0 | 452.5 | 405.6 | 220.8 | 1671.5 | 1478.6 | 154.9 | 154.2 |
| 299.3 | 277.8 | 355.0 | 369.6 | 98.0  | 402.9  | 294.9  | 39.7  | 55.7  |
| 1.9   | 0.7   | 0.9   | 0.9   | 0.8   | 3.3    | 1.6    | 1.0   | 1.7   |
| 11.9  | 3.4   | 9.2   | 10.6  | 3.9   | 19.8   | 7.1    | 20.4  | 35.3  |
| 225.8 | 261.9 | 244.8 | 187.7 | 98.6  | 511.9  | 470.5  | 84.0  | 113.0 |
| 4.5   | 31.4  | 35.7  | 27.6  | 13.2  | 38.1   | 17.6   | 55.9  | 96.9  |
| 3.6   | 0.6   | 0.7   | 0.7   | 0.5   | 0.7    | 1.0    | 7.1   | 4.4   |
| 49.4  | 34.9  | 58.2  | 24.1  | 16.2  | 3.7    | 1.8    | 29.4  | 23.4  |
| 1.9   | 13.9  | 14.5  | 10.1  | 9.9   | 20.5   | 13.7   | 10.5  | 7.6   |
| 429.2 | 402.9 | 332.6 | 183.5 | 126.5 | 278.1  | 173.1  | 79.2  | 102.2 |
| 1.6   | 0.9   | 0.4   | 0.4   | 0.5   | 34.6   | 30.1   | 0.9   | 6.3   |

|        |        |        |        |       |        |        |       |       |
|--------|--------|--------|--------|-------|--------|--------|-------|-------|
| 54.4   | 48.2   | 22.7   | 25.8   | 11.9  | 68.7   | 31.7   | 92.7  | 101.7 |
| 53.9   | 70.8   | 58.5   | 35.5   | 25.3  | 246.5  | 219.1  | 9.1   | 15.8  |
| 6.6    | 1.2    | 1.4    | 2.8    | 0.2   | 43.7   | 28.9   | 1.0   | 0.6   |
| 520.6  | 588.6  | 502.0  | 324.1  | 178.4 | 401.2  | 423.9  | 66.3  | 108.8 |
| 85.3   | 68.3   | 99.1   | 186.3  | 33.8  | 477.5  | 355.6  | 2.7   | 2.9   |
| 66.3   | 54.1   | 39.4   | 18.5   | 26.6  | 60.6   | 63.4   | 207.2 | 187.4 |
| 2367.6 | 2360.5 | 2314.8 | 2102.9 | 897.5 | 1816.4 | 1159.5 | 104.1 | 189.6 |
| 145.3  | 92.6   | 114.4  | 79.2   | 34.1  | 462.3  | 363.4  | 92.7  | 94.0  |
| 39.3   | 39.1   | 36.7   | 17.0   | 9.4   | 87.8   | 55.6   | 30.8  | 50.6  |
| 189.5  | 151.7  | 101.6  | 86.6   | 42.0  | 183.0  | 86.3   | 102.3 | 134.8 |
| 5.5    | 4.3    | 5.4    | 8.4    | 1.2   | 14.2   | 2.2    | 10.1  | 8.5   |
| 6.9    | 0.7    | 10.4   | 1.9    | 3.3   | 2.4    | 1.5    | 5.6   | 8.7   |
| 250.8  | 268.4  | 278.1  | 289.6  | 93.4  | 348.9  | 236.2  | 24.3  | 30.1  |
| 118.6  | 125.6  | 122.3  | 91.5   | 33.4  | 171.4  | 69.7   | 42.0  | 38.3  |
| 181.2  | 136.0  | 140.0  | 159.3  | 36.6  | 198.8  | 165.9  | 2.1   | 28.6  |
| 1.7    | 8.8    | 8.6    | 7.2    | 3.9   | 5.6    | 6.7    | 5.9   | 1.2   |
| 143.1  | 147.5  | 138.9  | 70.8   | 35.4  | 164.7  | 88.1   | 60.8  | 115.7 |
| 21.4   | 22.2   | 19.4   | 20.4   | 2.1   | 14.1   | 4.1    | 4.1   | 4.8   |
| 89.2   | 56.0   | 73.9   | 75.5   | 34.8  | 93.2   | 91.6   | 37.4  | 60.8  |
| 78.0   | 86.7   | 88.9   | 97.1   | 38.8  | 117.0  | 78.2   | 21.9  | 39.5  |
| 1362.9 | 1192.2 | 1074.9 | 556.9  | 402.2 | 1279.6 | 913.4  | 215.1 | 285.9 |
| 0.6    | 0.6    | 0.2    | 5.4    | 2.8   | 5.5    | 4.2    | 0.3   | 0.4   |
| 12.1   | 11.4   | 17.2   | 11.9   | 8.2   | 20.7   | 29.6   | 13.3  | 19.9  |
| 437.9  | 324.2  | 347.2  | 266.8  | 116.9 | 741.7  | 672.9  | 69.4  | 77.9  |
| 34.5   | 37.9   | 29.9   | 22.8   | 15.5  | 32.2   | 27.5   | 43.1  | 30.3  |
| 5.8    | 14.2   | 6.4    | 9.0    | 3.7   | 55.3   | 35.9   | 3.3   | 1.4   |
| 4.6    | 2.4    | 5.8    | 8.6    | 1.2   | 26.7   | 10.6   | 3.3   | 1.0   |
| 3.6    | 8.6    | 0.7    | 12.2   | 4.7   | 2.1    | 2.5    | 4.6   | 8.5   |
| 393.2  | 387.3  | 392.4  | 437.3  | 171.6 | 447.5  | 293.3  | 38.4  | 53.2  |
| 15.4   | 3.0    | 4.9    | 1.3    | 2.3   | 2.5    | 1.7    | 1.1   | 2.1   |
| 509.4  | 575.3  | 469.5  | 296.4  | 161.6 | 645.0  | 287.3  | 54.7  | 68.7  |
| 3.9    | 1.7    | 6.2    | 0.8    | 7.9   | 3.8    | 2.0    | 6.6   | 2.4   |
| 1.3    | 2.6    | 0.4    | 0.4    | 0.9   | 1.0    | 0.2    | 1.1   | 2.4   |
| 15.7   | 2.8    | 15.4   | 9.9    | 2.4   | 6.7    | 19.4   | 8.7   | 16.9  |
| 246.2  | 190.8  | 195.9  | 172.8  | 65.6  | 229.0  | 166.3  | 36.8  | 50.4  |
| 11.5   | 10.8   | 14.2   | 4.5    | 2.6   | 2.8    | 2.2    | 1.4   | 2.2   |
| 1.1    | 1.4    | 1.6    | 1.5    | 5.5   | 996.1  | 623.7  | 0.4   | 2.0   |
| 19.9   | 14.6   | 24.8   | 12.4   | 1.3   | 388.8  | 293.8  | 4.9   | 10.9  |
| 142.6  | 122.0  | 113.4  | 115.6  | 48.6  | 283.6  | 158.7  | 52.3  | 64.3  |
| 39.7   | 46.4   | 37.8   | 28.2   | 19.2  | 32.2   | 44.8   | 22.1  | 21.7  |
| 72.9   | 68.9   | 61.1   | 40.6   | 19.4  | 86.5   | 47.8   | 11.7  | 17.0  |
| 1.8    | 4.5    | 2.1    | 3.6    | 3.3   | 2.0    | 9.0    | 10.9  | 8.7   |
| 5.4    | 15.1   | 12.2   | 1.6    | 0.3   | 20.1   | 15.8   | 1.0   | 17.2  |
| 75.5   | 70.2   | 54.0   | 29.6   | 32.3  | 192.7  | 144.3  | 163.8 | 147.1 |
| 84.3   | 50.6   | 52.8   | 31.1   | 11.4  | 48.7   | 40.4   | 3.6   | 14.3  |
| 95.3   | 68.0   | 82.7   | 67.5   | 13.1  | 24.0   | 12.2   | 18.0  | 15.1  |
| 9.3    | 0.3    | 0.5    | 0.3    | 0.1   | 1.0    | 2.8    | 0.5   | 4.2   |
| 98.2   | 113.2  | 99.1   | 108.9  | 30.0  | 135.1  | 85.4   | 29.0  | 62.4  |
| 81.2   | 97.2   | 63.4   | 27.0   | 24.9  | 58.4   | 42.9   | 138.9 | 221.6 |
| 295.6  | 265.5  | 262.5  | 339.9  | 93.0  | 782.2  | 626.8  | 180.0 | 288.2 |
| 8.1    | 3.8    | 3.7    | 5.4    | 0.6   | 1.7    | 2.7    | 5.6   | 1.0   |
| 1.8    | 1.1    | 0.6    | 0.5    | 1.5   | 3.6    | 1.3    | 2.2   | 1.1   |
| 96.4   | 97.7   | 100.9  | 87.9   | 27.5  | 70.6   | 84.7   | 1.1   | 14.8  |

|        |        |        |        |        |        |        |        |        |
|--------|--------|--------|--------|--------|--------|--------|--------|--------|
| 43.2   | 42.6   | 38.1   | 23.3   | 14.2   | 23.8   | 13.3   | 1.2    | 3.4    |
| 77.5   | 68.8   | 85.5   | 59.9   | 27.1   | 64.7   | 45.7   | 11.6   | 16.6   |
| 4.5    | 13.3   | 3.7    | 3.2    | 1.5    | 4.2    | 1.5    | 1.6    | 0.9    |
| 95.3   | 108.1  | 90.6   | 63.0   | 36.9   | 179.8  | 141.8  | 147.1  | 173.1  |
| 18.0   | 19.2   | 12.9   | 5.2    | 8.0    | 25.1   | 24.0   | 19.3   | 35.3   |
| 31.2   | 10.7   | 23.6   | 5.6    | 3.6    | 59.1   | 33.1   | 35.5   | 38.8   |
| 16.4   | 17.7   | 24.4   | 4.8    | 1.9    | 46.2   | 22.1   | 33.3   | 29.2   |
| 0.8    | 1.9    | 2.3    | 1.5    | 1.1    | 1.9    | 1.1    | 1.5    | 0.7    |
| 96.0   | 95.8   | 64.5   | 68.0   | 22.0   | 0.8    | 4.7    | 54.2   | 62.0   |
| 381.3  | 122.1  | 184.1  | 159.0  | 68.2   | 803.7  | 847.7  | 110.6  | 142.4  |
| 1.5    | 0.9    | 2.3    | 1.9    | 0.5    | 5.1    | 3.2    | 1.0    | 1.2    |
| 165.3  | 126.9  | 140.0  | 126.1  | 49.5   | 202.4  | 184.8  | 49.0   | 74.0   |
| 24.5   | 18.1   | 24.7   | 27.2   | 4.7    | 14.5   | 9.5    | 0.6    | 7.1    |
| 2.0    | 10.0   | 2.5    | 2.7    | 2.9    | 17.4   | 2.1    | 1.9    | 1.9    |
| 91.8   | 63.7   | 65.2   | 41.3   | 26.2   | 97.0   | 62.8   | 3.4    | 10.9   |
| 126.2  | 187.0  | 110.7  | 76.3   | 33.7   | 183.1  | 129.2  | 55.1   | 46.9   |
| 7.8    | 8.5    | 6.5    | 7.8    | 1.3    | 23.5   | 7.7    | 7.6    | 13.2   |
| 10.8   | 10.4   | 22.7   | 15.1   | 4.6    | 30.5   | 15.8   | 12.3   | 24.6   |
| 4.9    | 2.4    | 1.8    | 0.9    | 1.3    | 277.0  | 158.3  | 2.2    | 2.0    |
| 2.3    | 6.7    | 12.7   | 6.0    | 1.5    | 980.2  | 663.6  | 3.7    | 2.4    |
| 9507.4 | 8522.0 | 8139.8 | 7657.2 | 5311.3 | 9433.0 | 7501.0 | 3545.6 | 5091.9 |
| 81.8   | 43.1   | 52.6   | 35.7   | 20.1   | 70.4   | 37.5   | 28.7   | 58.2   |
| 39.7   | 34.8   | 39.8   | 50.3   | 18.3   | 3.0    | 2.8    | 4.4    | 11.1   |
| 3.6    | 1.9    | 2.3    | 6.9    | 1.4    | 86.4   | 73.3   | 7.1    | 11.7   |
| 34.3   | 7.7    | 35.1   | 23.3   | 7.0    | 4.7    | 3.5    | 2.9    | 2.8    |
| 379.3  | 374.5  | 340.5  | 213.1  | 128.7  | 405.9  | 285.1  | 9.2    | 16.9   |
| 20.9   | 5.0    | 3.6    | 7.6    | 7.2    | 18.7   | 12.6   | 11.4   | 10.9   |
| 48.3   | 26.8   | 24.5   | 36.6   | 5.8    | 41.0   | 22.2   | 59.3   | 63.5   |
| 156.1  | 138.0  | 132.5  | 205.8  | 45.9   | 124.1  | 92.2   | 82.9   | 147.1  |
| 27.2   | 27.1   | 18.0   | 25.3   | 11.1   | 37.8   | 37.1   | 20.4   | 32.5   |
| 60.8   | 53.4   | 60.3   | 48.0   | 23.7   | 64.3   | 68.8   | 27.1   | 41.6   |
| 283.3  | 256.4  | 230.3  | 214.5  | 104.2  | 377.8  | 170.8  | 121.0  | 183.9  |
| 13.1   | 3.2    | 16.3   | 2.9    | 0.9    | 4.0    | 4.2    | 5.0    | 22.4   |
| 1248.6 | 1190.0 | 1114.1 | 1051.0 | 393.7  | 826.7  | 802.2  | 171.6  | 222.1  |
| 16.4   | 20.1   | 33.9   | 34.2   | 10.8   | 610.1  | 559.0  | 55.5   | 31.9   |
| 52.2   | 51.1   | 33.2   | 25.1   | 29.4   | 4.3    | 4.2    | 30.6   | 64.5   |
| 225.4  | 206.3  | 159.7  | 101.1  | 104.4  | 109.9  | 99.4   | 144.0  | 108.0  |
| 43.4   | 19.8   | 24.1   | 10.9   | 2.3    | 37.1   | 11.4   | 8.4    | 11.5   |
| 0.8    | 6.3    | 1.7    | 1.0    | 1.5    | 6.6    | 6.3    | 53.6   | 43.4   |
| 42.3   | 26.9   | 27.3   | 3.6    | 20.0   | 67.1   | 26.1   | 82.4   | 89.2   |
| 15.4   | 15.3   | 25.3   | 20.5   | 8.5    | 20.3   | 9.9    | 12.6   | 14.5   |
| 13.0   | 1.1    | 5.3    | 3.0    | 0.9    | 0.9    | 2.1    | 32.7   | 48.8   |
| 21.0   | 8.8    | 11.4   | 10.2   | 2.0    | 12.5   | 2.6    | 59.6   | 83.3   |
| 1.4    | 1.6    | 3.0    | 6.9    | 3.6    | 2.4    | 1.4    | 43.1   | 46.6   |
| 30.0   | 36.8   | 27.9   | 25.9   | 15.1   | 96.9   | 70.5   | 54.1   | 14.1   |
| 3.2    | 16.0   | 1.0    | 1.8    | 3.7    | 132.5  | 79.6   | 5.1    | 1.6    |
| 4.3    | 8.8    | 5.9    | 0.7    | 0.5    | 83.4   | 69.6   | 5.4    | 7.3    |
| 68.9   | 30.6   | 54.6   | 61.3   | 18.8   | 57.1   | 42.4   | 15.9   | 26.6   |
| 59.6   | 69.8   | 65.3   | 33.6   | 28.1   | 10.3   | 6.9    | 16.5   | 9.8    |
| 38.1   | 40.1   | 43.5   | 35.9   | 12.3   | 113.7  | 84.1   | 25.2   | 30.4   |
| 30.3   | 30.9   | 43.6   | 21.3   | 16.5   | 96.8   | 60.7   | 103.7  | 102.5  |
| 31.4   | 13.0   | 17.6   | 17.1   | 9.0    | 21.6   | 18.0   | 12.9   | 16.5   |
| 1.9    | 3.8    | 2.0    | 0.8    | 1.0    | 94.9   | 46.8   | 8.9    | 9.3    |

|       |       |       |       |       |        |        |        |        |
|-------|-------|-------|-------|-------|--------|--------|--------|--------|
| 129.4 | 103.4 | 122.4 | 115.2 | 48.6  | 145.2  | 56.7   | 16.0   | 28.6   |
| 7.8   | 9.1   | 2.2   | 5.0   | 7.4   | 130.9  | 157.3  | 2.0    | 6.8    |
| 50.9  | 67.2  | 38.8  | 29.5  | 25.5  | 311.8  | 169.8  | 38.1   | 64.3   |
| 242.9 | 181.3 | 210.4 | 127.5 | 79.1  | 165.1  | 89.5   | 40.7   | 47.3   |
| 2.8   | 11.9  | 3.5   | 9.4   | 0.8   | 109.3  | 77.5   | 20.0   | 14.9   |
| 73.8  | 52.1  | 68.7  | 76.5  | 32.8  | 110.7  | 65.5   | 20.0   | 21.4   |
| 3.1   | 3.2   | 1.4   | 0.6   | 0.3   | 1.3    | 1.8    | 0.6    | 2.7    |
| 121.9 | 129.0 | 136.1 | 178.4 | 49.3  | 322.1  | 251.7  | 9.0    | 3.5    |
| 151.0 | 169.8 | 118.1 | 156.9 | 35.3  | 241.9  | 182.7  | 9.2    | 0.4    |
| 30.7  | 27.0  | 22.1  | 18.5  | 8.9   | 33.5   | 19.0   | 10.2   | 7.5    |
| 58.7  | 77.9  | 93.3  | 74.6  | 23.7  | 92.1   | 72.5   | 0.6    | 3.7    |
| 12.8  | 19.9  | 28.2  | 13.7  | 4.0   | 59.4   | 12.0   | 30.2   | 19.7   |
| 316.2 | 291.0 | 357.1 | 503.4 | 146.4 | 290.3  | 181.9  | 60.6   | 65.8   |
| 0.8   | 0.9   | 1.1   | 0.9   | 0.7   | 9.6    | 0.2    | 6.9    | 3.0    |
| 7.7   | 5.5   | 1.3   | 0.5   | 0.4   | 0.6    | 0.6    | 5.1    | 3.8    |
| 4.9   | 0.1   | 0.6   | 1.5   | 2.1   | 7.3    | 0.4    | 0.4    | 5.0    |
| 2.7   | 1.1   | 1.8   | 9.3   | 0.3   | 1.2    | 1.1    | 404.7  | 724.2  |
| 9.6   | 1.3   | 11.0  | 10.2  | 1.0   | 12.3   | 6.1    | 1472.2 | 1812.7 |
| 9.5   | 6.6   | 3.9   | 13.3  | 7.4   | 14.0   | 13.7   | 9.9    | 12.5   |
| 13.1  | 12.2  | 11.7  | 13.2  | 2.1   | 14.2   | 0.5    | 9.3    | 15.2   |
| 22.8  | 14.4  | 18.8  | 16.9  | 8.0   | 9.3    | 10.7   | 26.6   | 20.4   |
| 94.6  | 78.1  | 85.8  | 55.6  | 24.4  | 75.5   | 43.5   | 32.1   | 50.3   |
| 117.2 | 92.4  | 87.7  | 15.4  | 29.6  | 273.5  | 180.6  | 27.6   | 28.7   |
| 30.8  | 9.9   | 19.5  | 23.7  | 6.2   | 1481.4 | 2001.6 | 18.5   | 3.4    |
| 185.7 | 154.2 | 137.5 | 76.7  | 40.7  | 218.6  | 163.5  | 249.6  | 178.7  |
| 36.6  | 27.1  | 28.4  | 38.9  | 13.3  | 30.7   | 25.1   | 24.3   | 17.3   |
| 2.9   | 2.0   | 3.8   | 1.4   | 8.9   | 24.7   | 12.1   | 44.2   | 36.0   |
| 10.3  | 13.9  | 2.3   | 3.6   | 5.1   | 54.6   | 26.9   | 130.0  | 233.6  |
| 2.1   | 3.3   | 4.5   | 1.7   | 0.6   | 0.7    | 0.7    | 2.0    | 14.1   |
| 1.8   | 2.1   | 2.7   | 14.2  | 1.0   | 44.3   | 13.5   | 26.6   | 5.3    |
| 89.2  | 113.4 | 92.5  | 51.0  | 35.7  | 107.1  | 64.0   | 9.2    | 12.0   |
| 22.5  | 21.9  | 20.5  | 17.8  | 6.7   | 6.1    | 0.8    | 7.0    | 5.8    |
| 365.1 | 367.8 | 411.6 | 461.0 | 177.3 | 477.6  | 272.1  | 163.6  | 169.3  |
| 34.7  | 32.9  | 51.2  | 40.9  | 28.1  | 114.9  | 66.4   | 5.7    | 5.1    |
| 1.1   | 8.4   | 7.5   | 4.3   | 2.7   | 3.2    | 1.1    | 5.4    | 0.3    |
| 1.6   | 6.7   | 8.6   | 2.0   | 2.8   | 3.4    | 2.6    | 1.8    | 1.0    |
| 1.4   | 2.4   | 9.2   | 2.5   | 2.0   | 5.6    | 4.2    | 3.0    | 1.6    |
| 822.0 | 822.3 | 798.8 | 560.1 | 340.4 | 346.4  | 697.6  | 127.1  | 175.8  |
| 23.4  | 28.1  | 24.4  | 13.3  | 8.9   | 163.1  | 161.0  | 6.5    | 15.4   |
| 22.8  | 9.7   | 24.5  | 4.7   | 2.3   | 73.9   | 87.7   | 18.2   | 31.6   |
| 7.5   | 1.0   | 5.6   | 0.5   | 0.1   | 0.9    | 1.1    | 1.4    | 0.9    |
| 19.8  | 32.5  | 25.6  | 13.8  | 11.7  | 52.3   | 13.2   | 28.0   | 10.9   |
| 5.1   | 15.0  | 19.7  | 8.3   | 4.4   | 239.1  | 175.7  | 76.8   | 105.8  |
| 36.3  | 25.8  | 50.7  | 23.3  | 20.7  | 181.8  | 89.3   | 50.3   | 83.5   |
| 43.8  | 49.2  | 34.9  | 27.8  | 9.9   | 135.0  | 53.3   | 8.1    | 1.4    |
| 99.3  | 96.9  | 145.4 | 128.8 | 39.3  | 200.4  | 175.3  | 34.2   | 43.8   |
| 2.0   | 2.1   | 2.7   | 11.7  | 7.7   | 205.3  | 135.1  | 19.3   | 10.4   |
| 12.5  | 13.4  | 15.8  | 8.4   | 2.9   | 32.4   | 23.4   | 9.9    | 17.5   |
| 4.2   | 5.0   | 2.2   | 8.6   | 8.9   | 5.4    | 4.0    | 15.8   | 21.0   |
| 25.7  | 8.8   | 8.7   | 2.9   | 11.0  | 4.5    | 3.9    | 12.5   | 10.3   |
| 138.8 | 125.1 | 103.6 | 47.6  | 33.8  | 380.8  | 243.5  | 273.9  | 343.6  |
| 287.8 | 226.0 | 249.3 | 171.4 | 61.5  | 320.7  | 222.0  | 50.7   | 65.5   |
| 396.2 | 379.3 | 381.6 | 422.9 | 138.6 | 817.4  | 725.7  | 77.8   | 88.9   |

|        |        |        |       |       |        |        |       |       |
|--------|--------|--------|-------|-------|--------|--------|-------|-------|
| 184.9  | 132.9  | 184.1  | 173.5 | 60.2  | 184.8  | 161.4  | 67.4  | 83.9  |
| 14.1   | 13.8   | 21.7   | 37.8  | 6.1   | 46.0   | 47.0   | 8.7   | 12.0  |
| 290.3  | 327.5  | 313.5  | 293.0 | 133.4 | 333.5  | 329.1  | 24.8  | 77.2  |
| 64.0   | 55.3   | 50.5   | 59.7  | 35.9  | 397.0  | 220.3  | 48.3  | 68.5  |
| 21.4   | 37.6   | 36.8   | 42.4  | 13.3  | 65.4   | 60.5   | 1.5   | 1.4   |
| 28.0   | 14.9   | 21.3   | 11.9  | 3.5   | 70.8   | 47.7   | 20.2  | 22.6  |
| 60.0   | 56.8   | 43.4   | 21.0  | 16.8  | 347.1  | 268.5  | 11.9  | 19.2  |
| 45.2   | 68.8   | 29.1   | 45.4  | 21.3  | 141.1  | 94.5   | 217.6 | 249.3 |
| 41.9   | 34.2   | 35.6   | 19.0  | 9.3   | 87.3   | 40.7   | 44.7  | 61.8  |
| 23.9   | 6.5    | 4.6    | 6.5   | 6.4   | 11.3   | 10.4   | 18.8  | 24.0  |
| 3.7    | 2.3    | 9.0    | 10.1  | 0.8   | 3.1    | 8.2    | 6.5   | 5.6   |
| 18.9   | 5.4    | 11.1   | 10.3  | 7.0   | 92.6   | 34.8   | 33.8  | 46.3  |
| 5.5    | 20.1   | 17.4   | 2.5   | 4.0   | 583.3  | 301.2  | 48.9  | 82.9  |
| 21.3   | 34.2   | 19.3   | 15.5  | 10.1  | 106.4  | 120.0  | 3.9   | 1.3   |
| 1457.3 | 1532.1 | 1311.4 | 850.8 | 497.8 | 3354.0 | 2346.0 | 442.9 | 615.8 |
| 56.7   | 46.5   | 41.3   | 31.2  | 23.2  | 2.7    | 4.8    | 16.9  | 17.2  |
| 14.3   | 15.4   | 15.6   | 8.0   | 6.2   | 334.2  | 280.8  | 64.3  | 94.6  |
| 24.0   | 31.6   | 27.0   | 17.7  | 11.3  | 116.3  | 83.9   | 9.4   | 7.9   |
| 4.9    | 3.1    | 0.9    | 12.3  | 1.4   | 1.1    | 3.4    | 1.5   | 3.7   |
| 3.7    | 1.3    | 2.0    | 1.0   | 0.6   | 1.4    | 2.1    | 1.0   | 0.8   |
| 88.1   | 89.5   | 72.4   | 57.1  | 31.3  | 155.3  | 144.1  | 119.0 | 110.0 |
| 33.8   | 5.2    | 20.2   | 17.2  | 7.0   | 57.8   | 44.7   | 45.0  | 53.3  |
| 1.8    | 8.3    | 1.2    | 0.7   | 4.4   | 6.5    | 8.0    | 1.6   | 0.7   |
| 1.5    | 0.7    | 1.8    | 1.7   | 6.8   | 8.7    | 0.7    | 1.1   | 1.2   |
| 44.4   | 24.6   | 28.4   | 21.7  | 10.7  | 58.0   | 49.5   | 24.2  | 27.6  |
| 31.3   | 23.4   | 46.2   | 48.8  | 18.1  | 213.0  | 169.4  | 8.3   | 11.0  |
| 162.4  | 164.3  | 151.5  | 143.9 | 65.1  | 120.5  | 70.0   | 23.2  | 38.4  |
| 93.8   | 110.4  | 87.8   | 82.9  | 33.3  | 144.2  | 82.5   | 17.7  | 18.5  |
| 98.3   | 119.9  | 72.0   | 69.3  | 31.0  | 102.5  | 72.2   | 10.2  | 10.2  |
| 42.3   | 40.0   | 27.5   | 27.3  | 13.3  | 30.0   | 32.8   | 9.0   | 4.3   |
| 101.3  | 89.1   | 113.6  | 100.4 | 56.0  | 141.8  | 117.9  | 3.7   | 32.0  |
| 7.0    | 13.3   | 13.1   | 4.3   | 4.4   | 1836.0 | 1028.5 | 807.4 | 940.2 |
| 233.1  | 155.2  | 156.9  | 166.2 | 49.4  | 268.3  | 185.8  | 38.4  | 56.7  |
| 82.3   | 72.9   | 84.5   | 61.3  | 38.4  | 45.7   | 24.8   | 16.9  | 19.5  |
| 93.4   | 96.1   | 114.8  | 93.3  | 61.6  | 273.5  | 263.2  | 99.8  | 96.5  |
| 44.5   | 46.1   | 60.3   | 62.5  | 34.3  | 111.9  | 74.5   | 19.5  | 20.3  |
| 23.4   | 9.0    | 15.8   | 8.3   | 6.5   | 126.6  | 89.3   | 5.7   | 8.8   |
| 1.6    | 1.9    | 0.7    | 1.4   | 0.9   | 87.2   | 36.4   | 1.1   | 1.2   |
| 20.0   | 23.3   | 37.2   | 18.7  | 8.0   | 1721.8 | 1211.3 | 13.9  | 21.2  |
| 82.5   | 60.1   | 54.8   | 34.0  | 6.4   | 28.9   | 18.4   | 44.7  | 68.0  |
| 149.8  | 108.2  | 91.1   | 31.7  | 10.9  | 54.1   | 21.0   | 34.5  | 80.2  |
| 9.4    | 4.8    | 5.6    | 21.1  | 2.0   | 632.1  | 554.1  | 75.9  | 83.8  |
| 317.4  | 268.9  | 300.7  | 286.8 | 136.5 | 439.3  | 296.5  | 70.3  | 84.5  |
| 44.7   | 21.3   | 24.9   | 11.6  | 2.6   | 20.5   | 16.6   | 24.4  | 47.7  |
| 40.5   | 27.8   | 29.3   | 20.5  | 7.7   | 90.5   | 71.4   | 93.3  | 103.8 |
| 11.3   | 7.3    | 8.8    | 5.2   | 5.4   | 45.8   | 28.0   | 0.5   | 9.3   |
| 244.2  | 260.1  | 232.6  | 149.1 | 82.8  | 614.0  | 355.8  | 89.7  | 124.6 |
| 79.2   | 68.5   | 94.3   | 43.7  | 24.2  | 49.7   | 47.2   | 18.2  | 22.8  |
| 32.7   | 30.6   | 12.8   | 34.4  | 10.8  | 48.0   | 28.4   | 23.1  | 17.7  |
| 82.1   | 113.9  | 124.6  | 87.7  | 39.9  | 15.7   | 10.4   | 3.0   | 4.8   |
| 2.9    | 1.0    | 3.4    | 8.8   | 1.0   | 1.0    | 2.0    | 6.0   | 1.2   |
| 5.4    | 6.2    | 1.6    | 5.0   | 4.3   | 1.4    | 0.4    | 1.3   | 0.5   |
| 9.2    | 5.0    | 13.5   | 3.5   | 5.3   | 2.2    | 6.9    | 2.5   | 12.2  |

|        |        |        |        |        |        |        |       |        |
|--------|--------|--------|--------|--------|--------|--------|-------|--------|
| 19.6   | 20.5   | 16.4   | 3.3    | 7.8    | 20.4   | 2.7    | 3.5   | 4.7    |
| 159.5  | 206.5  | 114.2  | 105.0  | 49.6   | 2527.9 | 1882.1 | 24.1  | 16.6   |
| 16.7   | 7.8    | 13.6   | 5.7    | 4.6    | 32.2   | 1.6    | 8.0   | 13.3   |
| 128.5  | 134.2  | 122.6  | 26.8   | 22.3   | 1023.9 | 251.9  | 56.7  | 87.8   |
| 85.1   | 71.1   | 51.6   | 65.4   | 21.6   | 24.5   | 8.0    | 46.3  | 65.4   |
| 299.2  | 232.7  | 260.1  | 161.0  | 66.2   | 1549.3 | 1025.6 | 57.0  | 92.9   |
| 159.9  | 159.5  | 149.4  | 126.3  | 76.9   | 298.3  | 235.3  | 88.5  | 148.2  |
| 0.7    | 10.8   | 6.9    | 0.3    | 3.7    | 2.4    | 1.9    | 7.3   | 5.1    |
| 44.5   | 22.4   | 34.5   | 19.2   | 1.7    | 35.8   | 19.1   | 21.2  | 28.9   |
| 3.4    | 1.2    | 5.4    | 0.9    | 3.7    | 1.5    | 1.0    | 7.7   | 0.7    |
| 4.9    | 4.7    | 3.0    | 0.6    | 1.5    | 1.4    | 5.5    | 4.6   | 3.3    |
| 332.3  | 374.2  | 446.5  | 454.6  | 162.7  | 228.2  | 245.9  | 27.0  | 26.0   |
| 2.1    | 3.0    | 2.2    | 1.0    | 0.9    | 35.8   | 9.0    | 2.8   | 2.2    |
| 0.8    | 1.3    | 1.7    | 1.6    | 0.2    | 0.9    | 1.1    | 1.6   | 1.4    |
| 48.7   | 51.1   | 55.7   | 57.2   | 8.1    | 52.5   | 20.4   | 23.6  | 24.3   |
| 255.1  | 309.0  | 252.0  | 174.8  | 80.1   | 133.7  | 235.0  | 40.5  | 61.3   |
| 1307.3 | 1158.9 | 2042.9 | 3100.1 | 1058.3 | 244.0  | 182.7  | 74.8  | 112.7  |
| 339.9  | 367.4  | 367.4  | 325.8  | 139.2  | 64.5   | 41.2   | 338.1 | 383.5  |
| 4.6    | 4.2    | 5.3    | 1.3    | 9.2    | 23.6   | 2.0    | 6.2   | 14.8   |
| 26.9   | 26.7   | 22.0   | 26.8   | 14.0   | 1.9    | 22.6   | 96.5  | 87.1   |
| 68.1   | 60.2   | 47.8   | 4.6    | 9.8    | 26.1   | 18.3   | 4.5   | 3.6    |
| 233.0  | 213.2  | 245.9  | 215.9  | 67.2   | 91.3   | 102.8  | 34.1  | 71.7   |
| 600.7  | 614.1  | 545.4  | 341.2  | 210.8  | 723.4  | 377.2  | 107.5 | 134.4  |
| 9.6    | 7.1    | 7.4    | 4.3    | 1.7    | 11.8   | 6.5    | 12.7  | 6.1    |
| 751.0  | 735.7  | 596.2  | 475.3  | 218.2  | 1304.0 | 1118.9 | 334.6 | 439.0  |
| 12.0   | 15.2   | 2.9    | 2.6    | 0.5    | 3.7    | 1.2    | 2.2   | 2.4    |
| 2.5    | 0.8    | 1.8    | 0.6    | 0.4    | 4.8    | 2.2    | 1.6   | 2.8    |
| 14.0   | 13.9   | 10.5   | 7.9    | 6.4    | 14.5   | 10.0   | 19.5  | 15.2   |
| 13.1   | 15.8   | 16.9   | 9.6    | 13.1   | 97.6   | 46.1   | 23.4  | 21.9   |
| 174.7  | 96.9   | 112.9  | 113.9  | 31.1   | 91.1   | 41.3   | 41.1  | 118.8  |
| 279.3  | 298.3  | 271.5  | 368.0  | 154.6  | 495.2  | 279.7  | 32.3  | 55.7   |
| 49.1   | 66.7   | 42.6   | 61.3   | 19.9   | 51.1   | 57.5   | 15.1  | 14.4   |
| 235.5  | 230.4  | 268.5  | 264.1  | 89.8   | 228.5  | 180.2  | 10.7  | 19.4   |
| 6.9    | 8.4    | 0.9    | 5.0    | 6.2    | 313.2  | 167.2  | 5.9   | 3.4    |
| 2.0    | 1.0    | 2.5    | 0.6    | 0.3    | 2.3    | 0.4    | 1.7   | 9.2    |
| 27.2   | 21.6   | 12.9   | 22.0   | 13.0   | 33.5   | 29.3   | 66.1  | 72.3   |
| 25.5   | 4.6    | 23.7   | 11.8   | 14.2   | 1601.8 | 1276.2 | 11.9  | 12.7   |
| 15.7   | 11.0   | 21.3   | 15.2   | 6.4    | 119.0  | 84.0   | 8.7   | 17.5   |
| 10.8   | 8.8    | 9.5    | 1.2    | 2.1    | 12.9   | 17.8   | 7.0   | 5.2    |
| 148.5  | 132.3  | 145.2  | 146.6  | 48.6   | 261.8  | 219.2  | 37.7  | 63.4   |
| 87.5   | 110.7  | 118.7  | 110.8  | 37.9   | 215.5  | 153.6  | 1.7   | 8.5    |
| 88.5   | 79.2   | 103.2  | 97.1   | 31.6   | 151.8  | 121.4  | 4.2   | 2.5    |
| 21.4   | 21.9   | 21.0   | 16.5   | 11.3   | 71.6   | 59.2   | 39.1  | 53.5   |
| 30.4   | 35.6   | 47.3   | 18.4   | 16.0   | 169.4  | 102.9  | 45.1  | 48.8   |
| 15.3   | 10.1   | 4.6    | 11.1   | 1.7    | 45.2   | 23.6   | 16.2  | 15.9   |
| 72.9   | 61.8   | 63.5   | 53.3   | 26.9   | 79.6   | 54.7   | 16.0  | 14.4   |
| 581.7  | 513.1  | 549.7  | 409.3  | 203.6  | 415.9  | 344.3  | 36.1  | 43.5   |
| 401.9  | 376.8  | 334.3  | 270.5  | 128.4  | 264.5  | 181.4  | 25.3  | 41.5   |
| 38.3   | 30.2   | 23.0   | 17.5   | 6.2    | 7.2    | 2.3    | 17.6  | 15.0   |
| 19.4   | 22.4   | 15.7   | 12.1   | 5.7    | 23.4   | 7.6    | 18.8  | 18.2   |
| 971.8  | 1044.7 | 810.4  | 377.4  | 283.2  | 297.9  | 269.1  | 959.9 | 1026.6 |
| 21.2   | 19.1   | 31.6   | 6.2    | 14.6   | 24.4   | 9.9    | 9.4   | 15.6   |
| 14.2   | 22.3   | 15.8   | 12.7   | 0.5    | 29.6   | 10.9   | 9.2   | 10.3   |

|        |        |        |        |        |        |        |       |       |
|--------|--------|--------|--------|--------|--------|--------|-------|-------|
| 241.8  | 208.3  | 262.3  | 256.6  | 102.8  | 293.0  | 196.5  | 24.0  | 32.6  |
| 223.7  | 258.8  | 219.3  | 79.8   | 56.7   | 213.0  | 71.5   | 15.2  | 13.6  |
| 94.5   | 81.0   | 85.7   | 52.8   | 28.3   | 137.9  | 96.2   | 27.2  | 50.3  |
| 120.5  | 119.7  | 134.9  | 104.6  | 38.8   | 258.1  | 193.1  | 10.7  | 15.0  |
| 31.5   | 29.2   | 24.5   | 29.5   | 14.3   | 93.1   | 60.8   | 13.6  | 13.6  |
| 154.0  | 141.7  | 198.1  | 190.7  | 75.7   | 283.4  | 168.1  | 33.7  | 44.7  |
| 66.6   | 63.5   | 51.6   | 45.3   | 19.4   | 171.3  | 96.9   | 21.8  | 25.6  |
| 675.0  | 647.0  | 689.2  | 657.6  | 215.0  | 525.6  | 486.3  | 15.0  | 15.4  |
| 20.6   | 25.2   | 23.9   | 18.1   | 12.0   | 13.2   | 13.5   | 1.2   | 10.0  |
| 3.5    | 3.2    | 2.1    | 1.0    | 1.0    | 58.4   | 24.3   | 5.0   | 8.7   |
| 68.9   | 73.6   | 101.5  | 66.3   | 22.6   | 165.6  | 99.4   | 26.8  | 55.0  |
| 77.0   | 53.0   | 65.3   | 54.4   | 16.7   | 44.8   | 15.3   | 46.4  | 75.6  |
| 29.4   | 18.3   | 35.3   | 29.2   | 4.1    | 35.7   | 34.9   | 29.4  | 26.6  |
| 180.5  | 73.3   | 76.2   | 47.3   | 32.1   | 542.5  | 523.3  | 8.1   | 12.4  |
| 1.2    | 8.1    | 13.1   | 10.6   | 4.5    | 17.4   | 7.2    | 8.7   | 13.4  |
| 8.4    | 7.5    | 8.6    | 1.2    | 5.8    | 6.3    | 1.8    | 11.0  | 3.3   |
| 27.2   | 22.6   | 17.4   | 18.4   | 8.1    | 764.3  | 561.8  | 19.1  | 19.7  |
| 8.3    | 5.3    | 1.9    | 4.7    | 5.1    | 5.0    | 2.3    | 1.6   | 6.5   |
| 4.4    | 28.4   | 6.9    | 4.1    | 1.4    | 61.3   | 39.7   | 29.4  | 55.9  |
| 83.9   | 107.5  | 96.2   | 58.5   | 30.6   | 51.3   | 26.8   | 21.5  | 28.7  |
| 10.3   | 5.1    | 4.6    | 4.8    | 1.2    | 11.9   | 25.1   | 28.5  | 37.6  |
| 127.0  | 96.0   | 90.9   | 90.3   | 36.3   | 577.3  | 444.3  | 45.9  | 66.5  |
| 30.3   | 20.7   | 30.9   | 19.1   | 8.3    | 23.6   | 9.9    | 6.2   | 2.1   |
| 95.4   | 69.3   | 55.3   | 41.0   | 24.7   | 120.1  | 63.9   | 76.3  | 99.4  |
| 14.6   | 8.2    | 17.5   | 5.4    | 4.0    | 8.4    | 4.5    | 7.3   | 12.7  |
| 14.0   | 14.3   | 13.0   | 11.3   | 10.2   | 76.8   | 54.0   | 11.6  | 24.5  |
| 15.1   | 20.8   | 12.3   | 6.3    | 0.3    | 138.2  | 71.6   | 84.8  | 110.3 |
| 18.5   | 39.1   | 17.6   | 16.7   | 16.0   | 78.2   | 38.9   | 9.0   | 2.2   |
| 14.5   | 27.3   | 23.9   | 6.4    | 12.2   | 49.8   | 24.6   | 4.9   | 1.1   |
| 7.1    | 0.5    | 0.5    | 7.1    | 1.9    | 1.4    | 1.6    | 2.0   | 2.8   |
| 20.7   | 16.7   | 17.6   | 69.1   | 11.8   | 9.9    | 21.5   | 5.8   | 9.5   |
| 206.7  | 185.9  | 219.4  | 274.6  | 92.1   | 234.4  | 138.4  | 48.2  | 59.0  |
| 13.0   | 43.4   | 16.8   | 22.7   | 11.9   | 41.5   | 24.5   | 6.4   | 5.5   |
| 3.1    | 2.5    | 6.7    | 5.1    | 1.1    | 1.8    | 1.4    | 2.5   | 2.8   |
| 0.4    | 1.2    | 16.2   | 5.0    | 1.9    | 0.9    | 7.3    | 2.2   | 0.9   |
| 4.0    | 7.8    | 4.3    | 13.1   | 1.2    | 25.6   | 1.3    | 20.4  | 4.0   |
| 670.7  | 606.8  | 584.5  | 499.9  | 188.8  | 267.5  | 180.7  | 1.8   | 9.1   |
| 75.7   | 90.1   | 83.0   | 51.4   | 14.9   | 7.6    | 2.0    | 6.4   | 0.3   |
| 86.6   | 91.1   | 160.7  | 183.4  | 24.4   | 142.0  | 90.6   | 5.2   | 4.1   |
| 55.4   | 40.3   | 56.5   | 78.6   | 11.8   | 43.8   | 25.3   | 1.1   | 4.1   |
| 3.3    | 4.4    | 2.7    | 1.4    | 0.8    | 1.5    | 1.1    | 1.5   | 1.2   |
| 43.3   | 65.1   | 47.4   | 31.8   | 17.2   | 17.1   | 7.5    | 14.0  | 30.2  |
| 384.0  | 438.9  | 418.7  | 639.0  | 200.4  | 688.9  | 520.4  | 82.7  | 108.5 |
| 1.3    | 1.7    | 1.2    | 4.1    | 1.0    | 7.6    | 5.4    | 3.0   | 8.0   |
| 27.3   | 1.8    | 10.8   | 3.2    | 8.3    | 65.7   | 35.7   | 10.6  | 33.5  |
| 309.0  | 176.9  | 204.1  | 66.9   | 53.2   | 241.2  | 144.5  | 96.4  | 102.2 |
| 82.8   | 47.4   | 51.6   | 35.3   | 16.4   | 301.0  | 166.1  | 14.1  | 29.0  |
| 118.2  | 89.5   | 83.5   | 32.0   | 22.3   | 2.5    | 4.0    | 20.6  | 5.7   |
| 54.8   | 6.3    | 6.6    | 31.8   | 16.6   | 50.4   | 21.0   | 30.0  | 33.1  |
| 3753.2 | 4007.2 | 3860.5 | 2651.0 | 1512.8 | 6399.1 | 5407.9 | 416.9 | 377.5 |
| 98.1   | 64.7   | 75.8   | 83.9   | 34.6   | 232.7  | 169.3  | 34.8  | 36.6  |
| 191.9  | 184.6  | 198.3  | 248.3  | 72.2   | 285.7  | 189.9  | 41.9  | 36.4  |
| 52.4   | 77.3   | 67.8   | 61.1   | 17.5   | 84.3   | 53.1   | 21.9  | 25.5  |



|       |       |       |       |       |       |       |       |       |
|-------|-------|-------|-------|-------|-------|-------|-------|-------|
| 4.6   | 2.6   | 13.2  | 4.8   | 2.7   | 5.4   | 14.6  | 2.5   | 12.4  |
| 6.0   | 1.5   | 3.0   | 11.6  | 0.7   | 3.7   | 0.8   | 6.9   | 2.3   |
| 25.2  | 21.2  | 21.9  | 28.4  | 7.6   | 20.0  | 19.6  | 34.5  | 50.2  |
| 129.7 | 139.7 | 141.0 | 115.9 | 52.6  | 118.0 | 80.8  | 37.2  | 33.0  |
| 29.7  | 42.5  | 37.2  | 42.3  | 20.0  | 2.9   | 17.0  | 18.9  | 6.2   |
| 44.9  | 61.3  | 55.0  | 32.2  | 12.7  | 132.7 | 107.0 | 50.4  | 36.8  |
| 9.5   | 10.8  | 1.6   | 6.0   | 3.1   | 10.0  | 10.3  | 18.1  | 24.8  |
| 24.6  | 29.4  | 32.3  | 13.3  | 3.9   | 15.0  | 23.3  | 10.1  | 19.3  |
| 26.2  | 11.2  | 21.2  | 11.2  | 0.8   | 51.6  | 35.3  | 28.6  | 18.1  |
| 41.8  | 46.0  | 27.1  | 48.4  | 9.8   | 43.2  | 30.5  | 19.1  | 13.6  |
| 8.2   | 7.7   | 9.8   | 10.9  | 1.2   | 6.9   | 12.8  | 11.0  | 15.5  |
| 1.3   | 16.6  | 3.5   | 2.6   | 1.4   | 68.9  | 51.8  | 3.1   | 2.9   |
| 5.2   | 1.9   | 3.9   | 2.4   | 1.7   | 44.8  | 26.3  | 2.4   | 8.4   |
| 8.7   | 10.5  | 10.0  | 0.6   | 0.7   | 8.4   | 15.5  | 96.8  | 128.1 |
| 13.2  | 10.2  | 1.6   | 1.7   | 0.5   | 1.4   | 15.3  | 71.0  | 123.3 |
| 5.8   | 2.3   | 6.0   | 0.8   | 0.2   | 2.7   | 5.1   | 9.3   | 8.5   |
| 135.0 | 104.2 | 177.2 | 138.8 | 43.7  | 558.2 | 291.4 | 2.3   | 2.3   |
| 1.4   | 15.2  | 3.5   | 24.0  | 6.9   | 19.3  | 2.1   | 2.0   | 6.0   |
| 8.9   | 16.0  | 14.5  | 4.3   | 5.0   | 65.8  | 40.0  | 54.4  | 30.5  |
| 35.6  | 34.3  | 5.6   | 8.2   | 4.8   | 27.0  | 4.2   | 44.0  | 29.9  |
| 1.9   | 2.7   | 18.4  | 13.7  | 1.0   | 367.5 | 343.2 | 13.4  | 4.7   |
| 49.8  | 75.7  | 54.7  | 50.1  | 15.6  | 2.3   | 16.7  | 10.7  | 18.2  |
| 0.4   | 1.8   | 0.4   | 4.2   | 5.4   | 0.6   | 0.4   | 21.4  | 12.8  |
| 26.0  | 20.5  | 24.5  | 20.6  | 13.2  | 72.0  | 44.1  | 37.4  | 48.8  |
| 13.0  | 1.2   | 3.1   | 6.9   | 5.8   | 34.1  | 22.7  | 11.5  | 5.7   |
| 73.0  | 57.9  | 57.3  | 54.0  | 21.9  | 127.6 | 95.4  | 34.1  | 54.9  |
| 3.3   | 17.0  | 2.8   | 20.7  | 1.5   | 27.3  | 16.3  | 2.9   | 7.9   |
| 2.0   | 24.9  | 12.9  | 11.1  | 4.2   | 116.3 | 81.9  | 169.6 | 130.8 |
| 27.2  | 14.9  | 26.6  | 22.2  | 4.5   | 13.0  | 6.3   | 10.8  | 20.2  |
| 15.0  | 23.7  | 13.1  | 16.9  | 17.3  | 16.8  | 10.1  | 6.1   | 11.1  |
| 123.2 | 146.9 | 112.5 | 147.5 | 50.5  | 90.4  | 128.0 | 53.6  | 80.1  |
| 9.6   | 3.7   | 25.8  | 5.0   | 3.4   | 19.4  | 5.3   | 3.1   | 1.7   |
| 33.5  | 34.2  | 31.1  | 16.8  | 6.2   | 57.9  | 31.9  | 12.9  | 10.2  |
| 7.8   | 17.1  | 2.2   | 10.7  | 1.8   | 26.2  | 3.0   | 25.3  | 35.1  |
| 54.6  | 58.8  | 43.8  | 32.3  | 12.3  | 69.7  | 45.7  | 21.9  | 29.0  |
| 146.3 | 120.0 | 116.8 | 63.6  | 26.2  | 534.5 | 304.0 | 108.8 | 116.5 |
| 838.3 | 771.2 | 736.8 | 580.4 | 286.6 | 706.0 | 485.6 | 34.7  | 47.4  |
| 129.0 | 127.4 | 159.5 | 275.2 | 73.8  | 186.0 | 98.7  | 6.9   | 1.3   |
| 1.8   | 1.1   | 1.5   | 1.3   | 0.5   | 2.0   | 1.4   | 1.9   | 1.6   |
| 463.9 | 550.6 | 548.0 | 343.5 | 210.2 | 485.6 | 277.2 | 58.3  | 74.5  |
| 1.5   | 1.1   | 1.1   | 1.1   | 0.8   | 1.9   | 0.8   | 1.0   | 1.7   |
| 145.0 | 101.8 | 112.7 | 87.5  | 46.5  | 425.8 | 323.6 | 37.3  | 58.6  |
| 10.5  | 9.0   | 12.1  | 3.9   | 5.6   | 51.7  | 10.3  | 2.7   | 0.6   |
| 27.4  | 37.9  | 43.8  | 22.8  | 10.9  | 525.1 | 381.4 | 4.7   | 4.9   |
| 51.8  | 49.1  | 44.6  | 63.3  | 19.7  | 50.8  | 37.1  | 27.1  | 40.7  |
| 4.0   | 3.7   | 4.4   | 2.8   | 1.2   | 31.3  | 29.6  | 9.5   | 10.1  |
| 2.1   | 1.7   | 0.7   | 3.6   | 1.1   | 3.5   | 6.1   | 2.3   | 1.4   |
| 66.7  | 64.2  | 78.0  | 41.0  | 25.8  | 40.6  | 16.5  | 39.0  | 37.5  |
| 10.8  | 1.6   | 12.7  | 4.6   | 2.1   | 17.1  | 10.1  | 15.7  | 14.6  |
| 1.5   | 1.7   | 1.5   | 0.7   | 0.8   | 91.7  | 78.9  | 2.5   | 1.6   |
| 103.5 | 60.3  | 73.7  | 57.6  | 17.0  | 56.4  | 49.4  | 18.1  | 12.5  |
| 63.1  | 56.2  | 67.0  | 61.7  | 20.2  | 68.6  | 28.0  | 30.0  | 43.0  |
| 95.9  | 82.0  | 71.7  | 68.2  | 27.5  | 87.6  | 66.3  | 58.5  | 60.7  |

|       |       |       |       |       |        |        |       |       |
|-------|-------|-------|-------|-------|--------|--------|-------|-------|
| 205.1 | 244.4 | 183.5 | 172.1 | 81.3  | 685.0  | 504.9  | 29.4  | 36.4  |
| 39.0  | 32.0  | 33.3  | 25.7  | 9.7   | 112.7  | 83.5   | 4.5   | 5.7   |
| 441.6 | 360.0 | 311.0 | 192.8 | 114.9 | 166.6  | 95.1   | 13.7  | 24.2  |
| 178.4 | 135.4 | 193.1 | 441.4 | 69.3  | 350.0  | 258.6  | 25.2  | 17.3  |
| 115.8 | 167.2 | 210.4 | 146.5 | 69.9  | 447.1  | 353.0  | 24.3  | 34.9  |
| 60.9  | 32.5  | 36.9  | 14.7  | 8.8   | 162.8  | 48.0   | 45.2  | 54.2  |
| 86.5  | 43.3  | 54.8  | 37.7  | 19.7  | 192.9  | 66.0   | 111.0 | 98.1  |
| 22.9  | 16.8  | 24.5  | 19.2  | 9.4   | 21.2   | 15.8   | 28.2  | 34.5  |
| 28.7  | 50.1  | 37.6  | 42.1  | 18.4  | 22.9   | 13.0   | 22.7  | 14.7  |
| 30.9  | 25.6  | 28.8  | 24.4  | 10.4  | 39.9   | 23.8   | 4.6   | 16.5  |
| 4.1   | 1.5   | 12.0  | 3.1   | 0.3   | 2.2    | 4.7    | 2.3   | 2.4   |
| 39.6  | 22.1  | 31.2  | 22.5  | 10.1  | 38.0   | 13.9   | 32.9  | 38.9  |
| 805.6 | 800.9 | 826.1 | 739.2 | 306.9 | 1884.8 | 1304.9 | 120.0 | 190.2 |
| 46.8  | 25.5  | 32.6  | 21.1  | 12.5  | 51.2   | 55.0   | 3.5   | 13.5  |
| 135.2 | 133.9 | 99.2  | 57.5  | 44.7  | 354.5  | 234.1  | 90.0  | 65.2  |
| 138.9 | 103.1 | 143.9 | 97.4  | 45.8  | 90.0   | 54.0   | 21.4  | 20.2  |
| 7.5   | 0.5   | 0.8   | 2.4   | 1.7   | 80.2   | 50.2   | 37.5  | 59.4  |
| 26.9  | 22.4  | 23.4  | 51.1  | 10.2  | 99.7   | 82.4   | 14.5  | 13.0  |
| 50.6  | 31.8  | 22.5  | 41.1  | 10.3  | 53.4   | 37.2   | 18.7  | 11.7  |
| 31.9  | 24.8  | 19.4  | 25.0  | 1.8   | 40.0   | 33.0   | 23.7  | 60.7  |
| 41.6  | 2.0   | 19.5  | 2.3   | 8.3   | 68.7   | 51.0   | 28.6  | 46.6  |
| 84.3  | 43.1  | 69.7  | 45.9  | 28.7  | 152.0  | 117.3  | 39.3  | 38.7  |
| 7.3   | 3.3   | 28.1  | 18.0  | 7.3   | 13.4   | 0.9    | 6.9   | 3.4   |
| 2.4   | 1.6   | 2.7   | 1.2   | 0.7   | 2.0    | 1.1    | 1.4   | 1.8   |
| 26.3  | 19.1  | 22.2  | 23.9  | 8.0   | 50.1   | 52.2   | 5.5   | 14.6  |
| 27.7  | 23.1  | 28.9  | 31.2  | 10.6  | 103.5  | 47.5   | 7.5   | 1.9   |
| 0.8   | 0.9   | 0.6   | 1.1   | 0.4   | 9.5    | 8.5    | 5.8   | 12.8  |
| 199.0 | 182.2 | 244.2 | 185.0 | 84.4  | 144.8  | 91.8   | 12.5  | 16.2  |
| 99.6  | 97.2  | 136.9 | 154.6 | 60.0  | 233.8  | 133.8  | 20.4  | 20.9  |
| 52.7  | 62.5  | 51.7  | 72.3  | 20.3  | 234.8  | 143.9  | 41.6  | 70.3  |
| 8.3   | 0.7   | 3.7   | 6.6   | 4.5   | 183.8  | 91.8   | 14.3  | 26.1  |
| 3.6   | 0.4   | 1.9   | 0.5   | 1.3   | 14.5   | 8.4    | 26.8  | 32.0  |
| 10.5  | 18.3  | 11.9  | 6.0   | 8.6   | 60.5   | 74.8   | 0.8   | 0.4   |
| 19.9  | 18.3  | 3.6   | 17.9  | 1.6   | 50.3   | 20.5   | 26.1  | 13.9  |
| 122.5 | 135.1 | 149.0 | 123.4 | 38.0  | 242.3  | 165.9  | 34.4  | 44.1  |
| 1.9   | 5.3   | 13.4  | 8.7   | 0.9   | 19.9   | 6.4    | 123.3 | 152.5 |
| 78.7  | 75.0  | 55.1  | 17.3  | 26.2  | 38.1   | 23.4   | 2.1   | 3.8   |
| 54.8  | 26.3  | 30.3  | 35.9  | 19.4  | 179.8  | 92.8   | 14.5  | 2.8   |
| 45.6  | 28.6  | 28.4  | 16.6  | 13.2  | 147.4  | 108.7  | 2.9   | 3.2   |
| 40.1  | 21.7  | 30.1  | 5.9   | 8.2   | 991.0  | 573.9  | 29.2  | 36.3  |
| 5.2   | 20.3  | 17.0  | 8.1   | 2.1   | 17.8   | 11.6   | 11.1  | 16.9  |
| 15.3  | 17.7  | 24.9  | 18.0  | 6.3   | 92.4   | 57.0   | 15.7  | 26.8  |
| 63.0  | 65.7  | 57.0  | 85.3  | 17.2  | 60.2   | 35.5   | 29.2  | 32.9  |
| 42.9  | 24.9  | 38.5  | 34.9  | 13.5  | 75.8   | 63.7   | 21.0  | 24.6  |
| 8.9   | 8.5   | 8.6   | 8.4   | 3.0   | 19.2   | 11.4   | 0.2   | 0.2   |
| 241.4 | 206.0 | 238.1 | 113.6 | 53.9  | 279.5  | 256.7  | 26.2  | 45.5  |
| 32.6  | 18.4  | 18.5  | 8.3   | 8.5   | 35.0   | 21.1   | 32.5  | 52.1  |
| 15.6  | 10.0  | 11.7  | 7.2   | 4.3   | 14.9   | 2.1    | 2.1   | 5.0   |
| 117.9 | 110.2 | 90.8  | 58.6  | 24.7  | 104.2  | 81.7   | 67.6  | 74.3  |
| 47.6  | 61.3  | 57.6  | 183.2 | 27.2  | 2111.5 | 1690.5 | 11.9  | 17.5  |
| 295.8 | 357.6 | 268.3 | 169.2 | 85.3  | 94.1   | 109.3  | 88.5  | 118.8 |
| 207.4 | 182.0 | 195.4 | 93.6  | 56.5  | 359.6  | 223.9  | 75.2  | 115.2 |
| 0.4   | 0.6   | 0.9   | 0.6   | 0.6   | 0.6    | 0.5    | 1.5   | 2.2   |

|        |        |        |        |       |        |        |       |       |
|--------|--------|--------|--------|-------|--------|--------|-------|-------|
| 2.3    | 2.9    | 4.2    | 2.7    | 4.3   | 40.4   | 2.4    | 15.5  | 3.8   |
| 2.0    | 1.9    | 2.0    | 2.4    | 1.0   | 2.4    | 19.6   | 2.0   | 2.2   |
| 19.6   | 42.2   | 61.9   | 21.4   | 19.9  | 61.0   | 16.7   | 44.7  | 62.7  |
| 86.0   | 91.9   | 93.7   | 77.1   | 24.6  | 198.1  | 148.0  | 29.5  | 47.8  |
| 25.8   | 11.7   | 18.2   | 15.9   | 10.6  | 53.8   | 27.1   | 11.3  | 20.7  |
| 20.5   | 19.8   | 18.1   | 28.7   | 6.8   | 52.5   | 41.8   | 54.1  | 90.5  |
| 6.2    | 7.9    | 15.5   | 15.6   | 8.4   | 31.1   | 24.2   | 9.4   | 1.1   |
| 68.7   | 91.8   | 96.1   | 107.8  | 26.2  | 113.7  | 81.2   | 6.0   | 6.8   |
| 120.5  | 82.9   | 125.2  | 44.1   | 33.2  | 407.4  | 207.1  | 30.5  | 74.4  |
| 54.6   | 42.6   | 39.0   | 41.4   | 21.8  | 79.3   | 73.5   | 22.5  | 34.4  |
| 12.3   | 8.1    | 5.4    | 4.9    | 0.5   | 13.1   | 0.9    | 207.5 | 328.1 |
| 7.5    | 4.0    | 7.6    | 11.4   | 4.3   | 21.8   | 22.2   | 1.4   | 4.8   |
| 63.2   | 83.7   | 63.1   | 47.9   | 24.5  | 180.1  | 112.0  | 31.6  | 34.7  |
| 57.6   | 52.5   | 57.8   | 58.1   | 20.6  | 81.2   | 62.0   | 30.7  | 33.1  |
| 17.7   | 13.0   | 19.0   | 11.2   | 3.0   | 19.1   | 5.5    | 10.6  | 15.3  |
| 13.8   | 2.7    | 11.9   | 17.7   | 7.9   | 326.6  | 271.0  | 168.1 | 190.8 |
| 1.5    | 1.1    | 4.4    | 1.1    | 0.5   | 36.3   | 23.1   | 1.2   | 13.7  |
| 209.8  | 225.0  | 173.1  | 135.8  | 56.3  | 291.8  | 216.7  | 2.2   | 15.6  |
| 11.2   | 32.3   | 25.4   | 16.7   | 7.8   | 20.1   | 29.0   | 15.6  | 13.3  |
| 3.9    | 20.6   | 5.2    | 1.9    | 1.0   | 6.0    | 9.7    | 3.0   | 7.1   |
| 422.4  | 308.0  | 411.6  | 386.9  | 93.8  | 1225.5 | 765.7  | 40.1  | 51.6  |
| 501.8  | 351.3  | 411.2  | 265.0  | 169.4 | 623.6  | 379.5  | 49.6  | 76.5  |
| 3.5    | 11.3   | 9.8    | 14.9   | 6.6   | 11.1   | 2.2    | 4.9   | 9.8   |
| 339.5  | 292.0  | 452.9  | 947.0  | 134.3 | 699.2  | 502.4  | 4.8   | 15.0  |
| 12.4   | 1.5    | 3.4    | 11.9   | 0.9   | 4.7    | 1.4    | 5.4   | 6.1   |
| 57.0   | 74.1   | 57.2   | 52.2   | 24.5  | 14.2   | 4.9    | 3.1   | 21.9  |
| 2.3    | 0.1    | 3.3    | 3.2    | 2.5   | 14.8   | 14.8   | 3.7   | 2.4   |
| 2.4    | 2.1    | 2.8    | 5.2    | 4.6   | 12.9   | 19.1   | 5.7   | 4.8   |
| 45.2   | 32.4   | 37.6   | 46.6   | 8.3   | 30.6   | 24.8   | 6.3   | 16.6  |
| 3.6    | 2.5    | 4.1    | 7.1    | 0.6   | 8.7    | 7.1    | 1.9   | 1.3   |
| 469.4  | 447.9  | 495.9  | 432.4  | 171.7 | 440.4  | 295.6  | 201.4 | 217.2 |
| 5.5    | 2.0    | 2.2    | 1.1    | 2.2   | 4.3    | 4.3    | 2.8   | 2.3   |
| 12.1   | 2.7    | 3.5    | 13.6   | 2.0   | 24.7   | 23.2   | 6.0   | 4.4   |
| 33.0   | 16.0   | 30.8   | 24.2   | 15.7  | 39.8   | 34.3   | 53.4  | 25.6  |
| 49.3   | 41.5   | 42.2   | 24.2   | 14.5  | 13.1   | 11.5   | 23.1  | 25.0  |
| 42.9   | 32.6   | 28.1   | 24.4   | 14.3  | 45.2   | 22.4   | 0.8   | 0.8   |
| 27.5   | 17.6   | 14.4   | 13.3   | 6.4   | 38.6   | 15.3   | 21.0  | 23.0  |
| 6.1    | 3.7    | 5.5    | 7.2    | 3.4   | 40.6   | 25.0   | 12.5  | 6.0   |
| 106.7  | 88.1   | 110.6  | 137.8  | 34.4  | 163.5  | 119.4  | 16.5  | 30.5  |
| 104.8  | 87.2   | 141.1  | 46.8   | 42.4  | 511.0  | 373.3  | 38.4  | 44.9  |
| 94.5   | 90.1   | 99.6   | 97.9   | 26.1  | 144.6  | 95.5   | 23.4  | 29.2  |
| 113.0  | 112.1  | 87.4   | 68.7   | 34.1  | 176.5  | 80.6   | 14.2  | 31.4  |
| 3.5    | 1.9    | 9.6    | 15.8   | 4.7   | 20.6   | 1.8    | 3.2   | 2.2   |
| 437.3  | 482.9  | 451.5  | 256.0  | 172.2 | 137.1  | 95.3   | 309.8 | 340.5 |
| 77.3   | 42.5   | 48.0   | 22.4   | 12.5  | 3.0    | 14.4   | 67.6  | 94.5  |
| 45.9   | 35.7   | 31.6   | 30.0   | 16.7  | 23.2   | 4.9    | 0.8   | 2.2   |
| 49.8   | 67.1   | 52.0   | 123.8  | 16.8  | 27.7   | 27.6   | 1.2   | 8.7   |
| 30.3   | 27.6   | 22.9   | 46.4   | 6.4   | 22.3   | 21.0   | 8.8   | 1.0   |
| 13.1   | 7.4    | 38.1   | 19.3   | 2.6   | 21.2   | 20.8   | 14.0  | 42.3  |
| 3829.4 | 3332.3 | 3147.7 | 2102.6 | 979.9 | 5393.7 | 5218.5 | 662.1 | 910.7 |
| 10.8   | 3.2    | 1.7    | 7.6    | 10.6  | 90.2   | 62.0   | 16.2  | 25.5  |
| 17.1   | 22.4   | 24.1   | 18.3   | 10.3  | 127.3  | 122.9  | 44.5  | 60.6  |
| 18.5   | 9.4    | 4.4    | 6.2    | 6.3   | 15.5   | 7.0    | 9.4   | 13.4  |

|       |       |       |       |       |        |        |       |       |
|-------|-------|-------|-------|-------|--------|--------|-------|-------|
| 130.1 | 155.0 | 162.0 | 95.7  | 51.4  | 171.8  | 119.2  | 5.8   | 0.5   |
| 13.3  | 1.4   | 23.1  | 13.2  | 8.0   | 18.1   | 24.7   | 28.3  | 2.3   |
| 69.3  | 63.4  | 44.7  | 63.5  | 32.7  | 84.1   | 61.4   | 25.3  | 26.4  |
| 15.5  | 16.9  | 16.7  | 11.7  | 4.2   | 12.5   | 13.0   | 5.2   | 12.4  |
| 98.5  | 101.1 | 92.4  | 79.0  | 42.5  | 211.8  | 176.3  | 47.0  | 53.4  |
| 41.4  | 45.9  | 30.8  | 45.0  | 14.5  | 73.2   | 40.4   | 28.7  | 23.5  |
| 10.2  | 5.8   | 1.0   | 3.9   | 1.2   | 42.1   | 91.5   | 0.9   | 3.2   |
| 4.7   | 0.9   | 0.8   | 1.6   | 0.6   | 10.7   | 5.1    | 3.6   | 2.8   |
| 1.0   | 1.7   | 0.6   | 6.6   | 6.5   | 0.9    | 6.0    | 1.9   | 2.0   |
| 13.6  | 13.8  | 33.8  | 12.9  | 6.3   | 7.3    | 31.0   | 18.1  | 20.0  |
| 17.3  | 15.2  | 14.9  | 16.7  | 8.1   | 12.0   | 13.3   | 107.7 | 162.9 |
| 11.9  | 4.0   | 1.8   | 10.9  | 3.1   | 6.9    | 7.5    | 48.8  | 22.0  |
| 37.8  | 18.1  | 30.3  | 35.9  | 6.9   | 221.2  | 204.3  | 69.1  | 63.9  |
| 8.6   | 24.2  | 17.4  | 1.3   | 1.7   | 54.7   | 26.6   | 30.0  | 17.1  |
| 138.9 | 89.9  | 90.8  | 70.6  | 33.2  | 88.1   | 40.0   | 38.9  | 55.5  |
| 2.4   | 12.5  | 3.1   | 7.4   | 2.1   | 14.5   | 4.7    | 9.8   | 1.6   |
| 4.0   | 2.4   | 1.4   | 1.9   | 3.1   | 3.8    | 1.6    | 2.1   | 3.3   |
| 27.7  | 7.3   | 26.6  | 11.9  | 11.6  | 117.8  | 83.3   | 37.9  | 12.7  |
| 0.8   | 1.4   | 0.8   | 0.5   | 0.3   | 0.9    | 0.7    | 0.6   | 0.7   |
| 114.4 | 57.1  | 60.4  | 39.6  | 24.0  | 282.8  | 182.3  | 43.6  | 86.6  |
| 19.5  | 13.8  | 11.3  | 14.9  | 9.4   | 103.7  | 54.5   | 1.1   | 15.9  |
| 8.7   | 23.8  | 20.5  | 10.8  | 8.7   | 51.1   | 20.7   | 6.9   | 11.5  |
| 43.1  | 8.6   | 23.0  | 17.5  | 6.1   | 16.6   | 14.7   | 14.5  | 15.6  |
| 9.5   | 0.7   | 3.2   | 0.7   | 4.9   | 98.2   | 60.6   | 30.7  | 32.3  |
| 13.5  | 21.7  | 20.4  | 16.7  | 8.2   | 33.2   | 21.4   | 18.4  | 7.0   |
| 25.7  | 2.6   | 13.2  | 19.3  | 3.4   | 90.0   | 48.2   | 89.6  | 121.4 |
| 86.9  | 64.9  | 102.8 | 121.2 | 49.0  | 99.0   | 66.9   | 38.7  | 32.5  |
| 118.8 | 84.5  | 80.9  | 81.8  | 36.2  | 157.8  | 109.3  | 38.1  | 57.9  |
| 327.5 | 341.8 | 335.8 | 306.0 | 112.5 | 766.3  | 649.3  | 141.6 | 186.1 |
| 4.3   | 2.3   | 1.8   | 2.4   | 1.1   | 13.9   | 3.0    | 6.3   | 12.8  |
| 6.6   | 23.6  | 24.4  | 11.5  | 2.2   | 25.2   | 16.0   | 10.8  | 14.2  |
| 60.8  | 41.6  | 50.2  | 34.5  | 27.6  | 113.4  | 80.5   | 63.7  | 74.2  |
| 56.4  | 102.9 | 55.7  | 34.8  | 28.3  | 630.5  | 636.1  | 24.5  | 15.7  |
| 168.3 | 177.2 | 182.1 | 155.3 | 39.8  | 247.1  | 194.5  | 91.2  | 99.8  |
| 2.2   | 3.7   | 7.4   | 11.4  | 6.2   | 39.5   | 30.0   | 2.2   | 7.9   |
| 21.0  | 16.4  | 12.4  | 2.4   | 7.6   | 7.1    | 2.8    | 8.1   | 3.6   |
| 9.7   | 7.5   | 4.7   | 5.9   | 5.4   | 27.9   | 26.1   | 6.1   | 2.8   |
| 78.4  | 27.6  | 42.1  | 42.3  | 17.5  | 98.8   | 50.7   | 55.3  | 93.8  |
| 13.7  | 9.5   | 8.7   | 16.2  | 2.0   | 25.0   | 3.1    | 5.6   | 10.0  |
| 594.1 | 556.8 | 459.7 | 561.6 | 194.5 | 2096.3 | 2076.7 | 193.1 | 274.6 |
| 9.5   | 7.1   | 1.7   | 4.6   | 0.5   | 2.7    | 6.3    | 24.1  | 39.8  |
| 4.7   | 2.7   | 2.3   | 0.5   | 0.5   | 8.7    | 0.7    | 1.0   | 5.4   |
| 21.2  | 18.2  | 11.9  | 17.8  | 5.0   | 5.0    | 1.4    | 18.4  | 14.3  |
| 676.8 | 542.0 | 733.0 | 425.7 | 220.6 | 739.3  | 495.7  | 35.4  | 40.9  |
| 166.9 | 183.3 | 172.4 | 121.2 | 58.2  | 373.3  | 219.1  | 39.8  | 50.8  |
| 46.4  | 25.2  | 34.9  | 28.3  | 18.4  | 26.0   | 23.8   | 6.0   | 21.8  |
| 4.6   | 4.4   | 1.8   | 1.6   | 3.1   | 66.1   | 48.0   | 1.1   | 9.2   |
| 1.1   | 4.1   | 5.9   | 7.3   | 1.2   | 18.3   | 8.2    | 5.6   | 3.4   |
| 10.0  | 3.3   | 3.0   | 1.2   | 1.2   | 4.1    | 1.6    | 2.7   | 3.1   |
| 283.8 | 215.5 | 180.3 | 103.1 | 95.6  | 752.4  | 457.6  | 75.8  | 89.1  |
| 28.2  | 14.8  | 16.9  | 10.7  | 3.6   | 23.0   | 10.8   | 6.7   | 6.1   |
| 86.6  | 105.6 | 59.3  | 16.3  | 22.5  | 17.9   | 7.8    | 37.6  | 38.6  |
| 16.3  | 7.7   | 16.2  | 16.4  | 0.8   | 56.7   | 39.7   | 15.5  | 13.8  |

|        |        |        |        |       |        |        |       |        |
|--------|--------|--------|--------|-------|--------|--------|-------|--------|
| 16.9   | 14.3   | 7.2    | 8.7    | 2.5   | 219.4  | 152.7  | 14.6  | 9.8    |
| 2.5    | 0.9    | 6.8    | 0.7    | 4.9   | 3.6    | 19.7   | 2.2   | 8.2    |
| 111.0  | 147.9  | 99.8   | 58.8   | 40.6  | 177.9  | 100.3  | 29.3  | 38.2   |
| 17.6   | 19.0   | 18.7   | 7.6    | 4.5   | 104.8  | 79.8   | 15.1  | 41.6   |
| 450.8  | 565.0  | 538.6  | 263.5  | 196.1 | 689.2  | 512.1  | 765.2 | 1028.2 |
| 73.0   | 78.9   | 54.9   | 26.1   | 18.5  | 61.2   | 43.3   | 79.5  | 99.2   |
| 24.5   | 12.1   | 25.8   | 13.7   | 0.7   | 49.2   | 30.5   | 13.7  | 12.2   |
| 193.5  | 121.5  | 115.6  | 65.0   | 58.3  | 598.9  | 418.3  | 154.4 | 126.2  |
| 4.6    | 8.2    | 11.6   | 27.6   | 4.5   | 23.7   | 9.3    | 18.1  | 15.9   |
| 0.4    | 0.5    | 0.5    | 0.3    | 0.2   | 0.4    | 0.5    | 0.3   | 0.5    |
| 12.7   | 13.2   | 14.8   | 6.3    | 7.8   | 12.7   | 8.7    | 12.8  | 8.9    |
| 19.5   | 7.5    | 3.8    | 12.1   | 2.5   | 4.6    | 13.5   | 23.3  | 25.7   |
| 1872.3 | 1900.4 | 1856.2 | 1956.1 | 677.5 | 2993.2 | 2529.7 | 500.4 | 701.0  |
| 118.4  | 116.3  | 132.1  | 149.6  | 45.4  | 134.1  | 114.7  | 67.2  | 47.6   |
| 1.8    | 1.0    | 1.0    | 1.2    | 3.3   | 2.0    | 0.6    | 9.2   | 1.4    |
| 17.4   | 10.3   | 28.9   | 8.7    | 13.5  | 48.5   | 28.8   | 10.7  | 16.3   |
| 7.0    | 7.0    | 4.8    | 0.5    | 6.5   | 27.6   | 6.1    | 3.0   | 13.0   |
| 11.6   | 29.2   | 22.8   | 17.3   | 7.0   | 493.4  | 539.6  | 34.1  | 20.2   |
| 75.5   | 58.9   | 53.7   | 50.2   | 37.4  | 74.6   | 48.1   | 62.4  | 58.6   |
| 1.8    | 2.9    | 1.7    | 0.6    | 2.9   | 2.5    | 7.0    | 3.2   | 1.6    |
| 37.1   | 44.4   | 44.3   | 55.1   | 7.1   | 67.0   | 44.9   | 53.1  | 78.4   |
| 237.1  | 215.3  | 237.8  | 242.1  | 125.8 | 701.1  | 613.1  | 73.5  | 84.6   |
| 28.1   | 27.4   | 30.6   | 30.0   | 8.6   | 53.6   | 37.0   | 13.5  | 23.0   |
| 23.0   | 8.5    | 15.1   | 12.0   | 6.1   | 20.8   | 28.2   | 3.9   | 5.5    |
| 1.5    | 2.4    | 3.2    | 3.8    | 2.3   | 1.5    | 1.6    | 4.0   | 2.6    |
| 10.9   | 5.5    | 6.8    | 9.0    | 3.7   | 15.1   | 5.8    | 21.5  | 28.5   |
| 40.3   | 21.1   | 33.6   | 13.1   | 9.2   | 211.8  | 115.8  | 20.8  | 16.0   |
| 2.0    | 7.8    | 1.3    | 9.7    | 4.3   | 502.5  | 464.0  | 78.2  | 101.7  |
| 14.5   | 4.5    | 6.1    | 2.2    | 4.9   | 2.1    | 1.2    | 2.7   | 2.9    |
| 1.1    | 0.4    | 0.7    | 0.4    | 0.3   | 0.9    | 0.6    | 1.1   | 1.0    |
| 49.1   | 42.2   | 97.6   | 44.9   | 21.9  | 201.5  | 196.8  | 128.1 | 124.3  |
| 10.4   | 0.8    | 2.8    | 6.8    | 0.5   | 8.6    | 1.8    | 0.4   | 0.4    |
| 7.0    | 6.6    | 2.2    | 8.3    | 6.0   | 1.4    | 4.3    | 12.3  | 4.2    |
| 207.9  | 230.7  | 167.2  | 139.6  | 83.6  | 88.4   | 57.7   | 6.8   | 2.2    |
| 31.5   | 30.6   | 25.4   | 28.6   | 8.9   | 309.8  | 208.6  | 25.9  | 22.3   |
| 12.8   | 5.5    | 6.8    | 11.5   | 10.0  | 5.7    | 3.5    | 2.7   | 6.8    |
| 5.1    | 5.3    | 4.6    | 2.0    | 3.0   | 11.7   | 6.5    | 2.1   | 2.0    |
| 12.1   | 11.9   | 13.2   | 10.4   | 2.8   | 10.0   | 10.8   | 4.0   | 6.5    |
| 8.1    | 18.9   | 19.9   | 12.0   | 11.6  | 145.0  | 64.8   | 4.6   | 1.2    |
| 2.0    | 7.6    | 10.3   | 2.4    | 5.6   | 17.1   | 2.4    | 3.2   | 2.8    |
| 2.0    | 8.3    | 15.4   | 1.1    | 2.4   | 12.1   | 3.8    | 2.6   | 12.7   |
| 1.8    | 1.6    | 3.0    | 1.7    | 1.1   | 2.9    | 10.0   | 2.5   | 3.2    |
| 2.2    | 14.2   | 1.6    | 2.5    | 1.3   | 1.3    | 2.4    | 0.9   | 1.9    |
| 3.2    | 4.0    | 3.1    | 1.1    | 11.7  | 5.2    | 7.2    | 3.6   | 2.6    |
| 324.9  | 319.9  | 345.0  | 240.7  | 102.6 | 506.8  | 330.6  | 16.9  | 28.0   |
| 346.0  | 344.9  | 301.3  | 214.3  | 107.9 | 587.5  | 318.8  | 38.7  | 46.0   |
| 156.2  | 209.0  | 137.9  | 170.2  | 65.6  | 297.0  | 208.7  | 20.9  | 37.7   |
| 78.7   | 64.2   | 62.4   | 35.8   | 11.3  | 43.9   | 37.5   | 17.0  | 23.4   |
| 141.0  | 117.3  | 86.7   | 84.0   | 36.3  | 115.2  | 75.1   | 5.1   | 18.2   |
| 231.4  | 208.1  | 209.7  | 121.0  | 75.7  | 360.4  | 269.1  | 18.7  | 34.9   |
| 198.8  | 155.2  | 193.5  | 112.4  | 39.5  | 106.7  | 50.3   | 57.2  | 74.1   |
| 1.7    | 1.2    | 8.7    | 0.7    | 3.3   | 9.9    | 5.7    | 1.4   | 9.7    |
| 295.5  | 239.4  | 237.4  | 250.2  | 72.1  | 420.7  | 295.1  | 27.8  | 39.5   |

|       |       |       |       |       |        |        |       |       |
|-------|-------|-------|-------|-------|--------|--------|-------|-------|
| 3.5   | 12.2  | 3.1   | 6.3   | 3.5   | 1105.6 | 540.0  | 6.9   | 11.4  |
| 4.8   | 4.5   | 11.2  | 4.1   | 1.0   | 197.0  | 110.0  | 1.6   | 1.7   |
| 7.6   | 14.2  | 9.3   | 9.2   | 0.8   | 50.8   | 50.4   | 7.3   | 8.3   |
| 5.8   | 1.7   | 4.8   | 3.0   | 1.0   | 6.3    | 13.1   | 16.9  | 34.0  |
| 38.0  | 46.1  | 30.7  | 31.1  | 16.1  | 182.8  | 180.2  | 23.8  | 27.1  |
| 84.4  | 99.7  | 67.6  | 46.8  | 17.4  | 9.0    | 0.2    | 4.8   | 2.9   |
| 97.7  | 132.8 | 138.2 | 118.8 | 30.6  | 44.8   | 25.7   | 43.4  | 55.9  |
| 72.5  | 52.3  | 57.1  | 37.3  | 21.6  | 38.2   | 33.6   | 42.1  | 28.8  |
| 10.3  | 18.7  | 19.8  | 2.3   | 1.3   | 9.3    | 7.1    | 12.6  | 25.5  |
| 65.6  | 28.1  | 39.7  | 42.2  | 14.0  | 37.5   | 26.9   | 23.5  | 29.1  |
| 694.9 | 648.6 | 559.5 | 430.2 | 159.6 | 1021.1 | 840.9  | 305.9 | 385.5 |
| 0.5   | 2.6   | 4.0   | 0.6   | 0.3   | 2.2    | 6.7    | 31.8  | 31.2  |
| 64.4  | 48.7  | 27.6  | 28.7  | 17.4  | 2.6    | 4.0    | 12.1  | 6.8   |
| 72.6  | 72.0  | 103.6 | 169.4 | 41.1  | 104.6  | 109.4  | 14.4  | 15.7  |
| 42.2  | 46.2  | 53.3  | 57.8  | 14.5  | 74.6   | 59.6   | 4.5   | 26.5  |
| 580.4 | 507.7 | 369.1 | 168.3 | 148.7 | 749.7  | 458.0  | 218.3 | 308.2 |
| 1.6   | 1.1   | 2.1   | 1.1   | 0.7   | 1.0    | 1.1    | 0.8   | 1.2   |
| 7.6   | 0.7   | 2.7   | 0.3   | 1.7   | 7.2    | 0.8    | 9.4   | 4.9   |
| 28.4  | 21.6  | 33.3  | 28.9  | 10.8  | 284.5  | 198.6  | 20.4  | 15.1  |
| 0.9   | 1.8   | 0.5   | 0.3   | 0.1   | 149.8  | 124.9  | 0.4   | 3.4   |
| 22.9  | 22.9  | 15.5  | 1.0   | 8.3   | 286.9  | 283.0  | 1.1   | 0.7   |
| 137.2 | 98.6  | 92.8  | 77.9  | 44.3  | 310.8  | 207.9  | 152.5 | 173.3 |
| 9.9   | 20.9  | 14.3  | 20.9  | 16.4  | 17.8   | 6.4    | 7.3   | 10.3  |
| 31.0  | 34.9  | 22.2  | 13.6  | 8.4   | 107.6  | 69.1   | 20.4  | 34.5  |
| 14.1  | 13.8  | 14.4  | 7.2   | 7.0   | 38.0   | 19.4   | 35.8  | 46.8  |
| 161.6 | 151.7 | 192.0 | 233.8 | 64.8  | 186.2  | 141.4  | 17.4  | 27.0  |
| 18.5  | 21.7  | 28.5  | 17.3  | 11.4  | 123.6  | 54.4   | 26.5  | 19.1  |
| 255.4 | 188.8 | 293.0 | 334.8 | 79.2  | 274.9  | 199.2  | 1.1   | 1.4   |
| 94.4  | 183.3 | 87.1  | 31.0  | 32.6  | 2.4    | 0.7    | 0.9   | 4.0   |
| 253.1 | 300.0 | 177.4 | 65.0  | 76.3  | 11.4   | 2.1    | 17.9  | 10.4  |
| 19.1  | 35.4  | 29.5  | 42.7  | 9.9   | 27.9   | 26.4   | 10.1  | 25.3  |
| 10.8  | 4.8   | 5.6   | 3.1   | 3.0   | 3.5    | 0.4    | 11.1  | 2.3   |
| 190.5 | 151.9 | 136.0 | 220.4 | 72.4  | 192.3  | 208.9  | 9.2   | 11.9  |
| 25.2  | 33.1  | 13.0  | 6.7   | 12.7  | 26.8   | 29.4   | 26.1  | 27.5  |
| 672.9 | 495.9 | 477.8 | 281.9 | 160.7 | 2353.3 | 2139.4 | 752.1 | 772.1 |
| 42.7  | 59.5  | 47.1  | 71.7  | 20.3  | 70.6   | 29.5   | 23.5  | 39.3  |
| 5.0   | 4.7   | 1.9   | 14.8  | 1.6   | 22.8   | 5.3    | 2.0   | 1.5   |
| 0.8   | 0.6   | 1.1   | 0.9   | 1.0   | 9.2    | 6.9    | 1.6   | 1.7   |
| 0.7   | 6.2   | 4.9   | 1.2   | 0.2   | 19.6   | 9.3    | 19.1  | 25.9  |
| 62.0  | 59.1  | 33.6  | 25.3  | 21.0  | 47.8   | 21.0   | 104.2 | 130.0 |
| 16.8  | 16.3  | 11.8  | 44.1  | 5.8   | 55.7   | 34.5   | 7.9   | 16.3  |
| 301.1 | 270.1 | 327.9 | 389.6 | 96.8  | 396.6  | 445.7  | 21.4  | 15.6  |
| 5.4   | 3.5   | 6.6   | 10.7  | 2.8   | 11.2   | 3.4    | 8.6   | 8.5   |
| 13.1  | 9.0   | 15.7  | 4.4   | 0.8   | 15.7   | 6.6    | 11.9  | 2.6   |
| 92.2  | 82.2  | 79.9  | 86.1  | 16.6  | 35.6   | 32.1   | 35.5  | 48.7  |
| 60.8  | 47.5  | 61.3  | 36.2  | 30.3  | 19.3   | 17.3   | 0.7   | 1.1   |
| 86.2  | 61.1  | 58.4  | 40.4  | 15.7  | 56.9   | 27.7   | 33.9  | 17.8  |
| 243.7 | 154.3 | 115.6 | 48.3  | 76.9  | 870.2  | 521.0  | 295.7 | 287.4 |
| 168.6 | 164.5 | 155.8 | 145.4 | 76.0  | 96.6   | 50.8   | 46.7  | 62.5  |
| 9.4   | 19.9  | 16.7  | 2.1   | 2.0   | 10.3   | 8.5    | 2.8   | 5.2   |
| 71.4  | 77.8  | 58.1  | 59.9  | 23.5  | 126.8  | 120.6  | 14.1  | 17.7  |
| 19.9  | 13.2  | 10.5  | 7.6   | 3.7   | 1729.1 | 1388.8 | 4.9   | 2.9   |
| 12.5  | 9.6   | 24.2  | 10.5  | 6.5   | 18.5   | 17.1   | 4.0   | 0.9   |

|        |        |        |        |        |        |        |       |       |
|--------|--------|--------|--------|--------|--------|--------|-------|-------|
| 28.9   | 20.3   | 18.2   | 22.6   | 10.8   | 223.8  | 130.0  | 30.5  | 25.4  |
| 8.1    | 7.1    | 18.9   | 11.2   | 0.6    | 22.2   | 1.1    | 4.1   | 31.1  |
| 35.2   | 25.3   | 34.3   | 29.2   | 12.9   | 64.9   | 46.8   | 51.1  | 88.5  |
| 33.9   | 47.3   | 51.2   | 26.3   | 23.3   | 62.1   | 31.8   | 20.5  | 22.0  |
| 16.8   | 25.5   | 30.6   | 18.7   | 6.5    | 98.4   | 29.1   | 4.7   | 14.8  |
| 43.5   | 14.8   | 26.5   | 15.7   | 1.5    | 101.5  | 40.9   | 0.8   | 2.0   |
| 77.0   | 40.4   | 68.6   | 41.6   | 14.3   | 107.7  | 27.4   | 46.0  | 45.7  |
| 93.4   | 92.3   | 69.7   | 73.8   | 42.4   | 539.1  | 273.4  | 89.4  | 132.2 |
| 34.9   | 19.1   | 24.7   | 19.8   | 6.3    | 123.7  | 66.6   | 39.8  | 65.8  |
| 1.2    | 1.6    | 6.7    | 2.7    | 1.4    | 4.2    | 2.6    | 2.2   | 6.2   |
| 1.0    | 2.6    | 1.4    | 2.3    | 0.8    | 173.4  | 96.9   | 2.8   | 3.9   |
| 0.7    | 7.2    | 1.5    | 6.5    | 1.1    | 2343.5 | 1892.5 | 0.7   | 1.5   |
| 5.0    | 2.1    | 5.2    | 3.2    | 4.3    | 34.2   | 22.5   | 2.7   | 9.0   |
| 6.1    | 3.7    | 4.6    | 11.3   | 1.7    | 4.8    | 4.5    | 2.9   | 1.6   |
| 56.0   | 43.4   | 59.0   | 66.2   | 21.2   | 74.1   | 32.7   | 35.0  | 35.2  |
| 2.4    | 7.4    | 10.5   | 5.9    | 5.1    | 1.3    | 0.9    | 15.6  | 13.7  |
| 5.0    | 5.4    | 9.6    | 6.5    | 6.9    | 15.8   | 9.6    | 14.3  | 14.5  |
| 8.6    | 0.4    | 1.1    | 0.3    | 1.0    | 3.9    | 12.8   | 0.9   | 1.2   |
| 12.5   | 6.6    | 8.3    | 11.5   | 6.7    | 9.0    | 10.2   | 20.7  | 24.7  |
| 510.1  | 498.8  | 610.8  | 627.5  | 170.5  | 328.3  | 251.1  | 55.5  | 47.8  |
| 15.1   | 15.8   | 2.0    | 9.2    | 3.2    | 5.4    | 7.3    | 13.8  | 13.2  |
| 5943.2 | 5175.0 | 5170.9 | 5026.2 | 2753.6 | 1377.3 | 1447.3 | 1.0   | 1.5   |
| 1.9    | 1.0    | 1.3    | 0.8    | 0.4    | 2.6    | 0.8    | 1.6   | 1.1   |
| 1.8    | 6.5    | 10.9   | 0.9    | 1.5    | 1.4    | 0.6    | 5.4   | 22.4  |
| 518.3  | 347.2  | 466.2  | 259.6  | 169.0  | 2822.8 | 2105.1 | 12.3  | 15.9  |
| 1259.4 | 1418.0 | 1105.9 | 904.5  | 555.3  | 1395.7 | 1106.6 | 335.3 | 432.1 |
| 47.7   | 41.0   | 33.4   | 8.6    | 8.6    | 24.3   | 15.1   | 16.5  | 20.9  |
| 134.5  | 129.9  | 132.6  | 147.6  | 70.6   | 162.7  | 105.1  | 103.3 | 142.5 |
| 497.1  | 619.0  | 397.5  | 530.9  | 239.4  | 2075.0 | 2284.4 | 10.1  | 13.2  |
| 6.3    | 6.2    | 10.4   | 3.0    | 0.8    | 1.8    | 5.1    | 6.1   | 13.4  |
| 65.8   | 54.3   | 62.4   | 79.6   | 13.8   | 8.1    | 4.2    | 1.5   | 6.6   |
| 35.5   | 28.9   | 13.6   | 25.0   | 14.3   | 23.2   | 12.6   | 43.4  | 38.4  |
| 9.3    | 1.6    | 1.8    | 1.4    | 0.5    | 44.6   | 31.4   | 2.7   | 1.7   |
| 1.8    | 5.0    | 10.7   | 3.8    | 4.4    | 6.6    | 15.4   | 11.7  | 8.6   |
| 13.2   | 12.7   | 12.7   | 8.0    | 3.3    | 7.8    | 11.4   | 91.3  | 140.8 |
| 28.7   | 8.6    | 27.1   | 8.9    | 12.3   | 861.2  | 539.3  | 9.8   | 4.0   |
| 2.9    | 2.6    | 11.9   | 0.9    | 8.4    | 2.7    | 1.6    | 5.2   | 13.7  |
| 28.1   | 17.4   | 3.5    | 5.4    | 3.4    | 6.7    | 5.5    | 2.9   | 3.4   |
| 9.5    | 15.2   | 25.4   | 12.6   | 5.8    | 17.2   | 11.4   | 1.8   | 2.3   |
| 3.9    | 0.8    | 1.4    | 15.7   | 6.9    | 2.2    | 7.9    | 5.8   | 26.2  |
| 11.9   | 12.9   | 3.6    | 6.5    | 1.9    | 15.7   | 7.9    | 3.9   | 7.3   |
| 1.4    | 3.5    | 0.7    | 0.9    | 0.4    | 0.4    | 0.6    | 0.4   | 0.8   |
| 82.9   | 80.3   | 54.2   | 75.5   | 31.2   | 8.6    | 4.0    | 57.7  | 98.4  |
| 38.2   | 45.8   | 35.4   | 15.1   | 18.4   | 2.9    | 0.5    | 62.4  | 101.8 |
| 2.2    | 2.6    | 8.2    | 4.6    | 2.4    | 99.7   | 56.4   | 2.6   | 1.7   |
| 16.5   | 16.1   | 12.8   | 1.4    | 1.0    | 3.4    | 14.5   | 17.7  | 21.2  |
| 37.4   | 32.5   | 24.4   | 21.0   | 9.6    | 7.6    | 9.5    | 3.5   | 7.1   |
| 19.2   | 2.8    | 16.8   | 1.9    | 4.9    | 3.7    | 2.2    | 5.5   | 21.9  |
| 43.2   | 32.1   | 25.7   | 25.0   | 7.3    | 72.8   | 51.1   | 8.3   | 14.5  |
| 2.4    | 2.9    | 2.5    | 1.9    | 3.7    | 3.8    | 1.1    | 5.1   | 12.0  |
| 28.4   | 27.6   | 27.6   | 13.6   | 9.8    | 61.8   | 38.4   | 42.6  | 67.0  |
| 1.4    | 1.8    | 1.6    | 1.0    | 1.0    | 5.1    | 3.1    | 3.1   | 1.1   |
| 30.9   | 28.7   | 20.0   | 20.8   | 14.3   | 33.4   | 14.8   | 18.5  | 17.9  |

|       |       |       |        |       |        |        |       |        |
|-------|-------|-------|--------|-------|--------|--------|-------|--------|
| 20.3  | 15.3  | 26.2  | 8.1    | 7.3   | 14.7   | 16.8   | 11.6  | 18.7   |
| 4.4   | 0.9   | 3.0   | 1.8    | 7.3   | 4.0    | 1.8    | 14.3  | 17.7   |
| 32.2  | 28.6  | 30.9  | 18.3   | 11.7  | 21.0   | 11.5   | 20.6  | 6.9    |
| 8.3   | 0.6   | 2.1   | 1.1    | 2.2   | 1.0    | 7.6    | 0.4   | 4.1    |
| 778.4 | 743.3 | 588.7 | 413.9  | 209.3 | 322.5  | 190.8  | 228.6 | 270.6  |
| 7.3   | 14.1  | 1.2   | 2.4    | 2.5   | 230.8  | 141.8  | 930.1 | 1507.3 |
| 27.3  | 22.6  | 22.8  | 24.2   | 9.4   | 18.2   | 10.4   | 19.7  | 28.4   |
| 9.4   | 11.9  | 1.2   | 3.8    | 3.0   | 30.4   | 5.5    | 2.8   | 11.6   |
| 141.1 | 121.0 | 150.2 | 107.6  | 35.7  | 363.1  | 292.3  | 362.1 | 534.0  |
| 35.7  | 34.4  | 32.7  | 23.7   | 13.1  | 277.8  | 154.0  | 27.3  | 35.8   |
| 6.4   | 3.3   | 1.1   | 1.0    | 3.5   | 2.7    | 1.0    | 16.9  | 25.0   |
| 67.6  | 53.3  | 46.1  | 17.3   | 15.9  | 85.5   | 19.5   | 28.3  | 37.7   |
| 37.6  | 42.3  | 34.5  | 42.0   | 24.0  | 15.5   | 4.9    | 24.9  | 18.2   |
| 58.5  | 70.5  | 56.8  | 56.7   | 18.4  | 101.3  | 28.8   | 2.3   | 9.3    |
| 10.4  | 21.0  | 20.4  | 11.7   | 4.1   | 13.4   | 12.5   | 5.6   | 3.4    |
| 3.7   | 0.6   | 3.0   | 0.3    | 2.0   | 5.1    | 0.8    | 1.0   | 1.1    |
| 2.3   | 8.7   | 9.0   | 2.2    | 1.9   | 3.0    | 1.3    | 2.8   | 2.6    |
| 27.1  | 20.4  | 7.7   | 4.1    | 8.7   | 18.4   | 24.7   | 5.9   | 7.8    |
| 410.4 | 496.8 | 469.6 | 647.9  | 182.4 | 347.4  | 272.3  | 71.3  | 92.2   |
| 293.4 | 346.3 | 322.0 | 265.4  | 158.9 | 584.1  | 293.9  | 28.0  | 26.6   |
| 0.8   | 0.2   | 5.1   | 0.7    | 0.1   | 4.5    | 2.9    | 6.2   | 0.4    |
| 5.2   | 5.8   | 0.7   | 2.5    | 0.4   | 0.7    | 1.2    | 2.2   | 5.2    |
| 53.5  | 38.2  | 49.6  | 35.0   | 14.2  | 50.9   | 34.5   | 17.1  | 20.1   |
| 2.7   | 4.6   | 4.4   | 4.2    | 4.8   | 2.2    | 3.1    | 5.0   | 33.0   |
| 9.3   | 5.5   | 5.5   | 3.7    | 5.3   | 194.3  | 164.2  | 6.9   | 8.1    |
| 1.4   | 0.5   | 1.5   | 0.8    | 3.1   | 21.4   | 25.0   | 1.5   | 0.7    |
| 209.3 | 264.2 | 147.6 | 29.1   | 52.7  | 133.9  | 103.9  | 1.0   | 3.3    |
| 88.8  | 111.9 | 72.1  | 10.2   | 27.1  | 67.2   | 48.7   | 1.8   | 0.7    |
| 25.6  | 24.5  | 31.9  | 23.8   | 2.0   | 45.8   | 24.5   | 48.5  | 47.3   |
| 1.0   | 0.8   | 6.3   | 3.4    | 2.3   | 3.7    | 0.8    | 27.3  | 17.1   |
| 19.6  | 18.7  | 3.4   | 12.7   | 8.0   | 59.6   | 62.4   | 21.1  | 15.7   |
| 20.7  | 17.9  | 7.6   | 18.4   | 1.1   | 6.8    | 10.1   | 0.9   | 6.8    |
| 10.5  | 12.6  | 14.1  | 6.2    | 8.1   | 8.5    | 8.2    | 15.0  | 21.1   |
| 153.9 | 181.5 | 161.9 | 133.0  | 58.0  | 129.0  | 89.6   | 1.3   | 1.9    |
| 161.5 | 209.8 | 184.5 | 245.3  | 86.4  | 1573.3 | 1747.6 | 1.3   | 4.3    |
| 80.6  | 68.6  | 75.9  | 55.5   | 17.9  | 293.6  | 173.9  | 10.0  | 6.2    |
| 1.9   | 2.3   | 0.6   | 0.7    | 0.4   | 51.0   | 61.5   | 13.6  | 2.9    |
| 931.9 | 884.2 | 768.1 | 828.5  | 288.8 | 1009.3 | 631.3  | 173.7 | 229.7  |
| 130.5 | 119.2 | 159.7 | 119.5  | 45.9  | 155.6  | 120.1  | 122.9 | 73.0   |
| 44.1  | 20.3  | 28.3  | 18.5   | 13.2  | 624.4  | 437.1  | 17.6  | 13.9   |
| 631.8 | 460.2 | 759.7 | 1066.6 | 278.5 | 1340.4 | 698.4  | 68.6  | 67.0   |
| 1.5   | 0.8   | 2.2   | 2.1    | 0.6   | 2.2    | 2.7    | 1.7   | 12.8   |
| 320.9 | 300.3 | 282.4 | 336.6  | 146.9 | 523.3  | 373.9  | 120.8 | 161.7  |
| 1.5   | 2.6   | 1.3   | 1.1    | 1.6   | 18.0   | 20.8   | 2.0   | 2.4    |
| 10.6  | 1.4   | 7.8   | 3.9    | 6.6   | 57.2   | 36.9   | 8.9   | 6.2    |
| 0.5   | 0.5   | 0.6   | 0.5    | 0.5   | 0.8    | 0.7    | 0.4   | 3.4    |
| 11.3  | 7.4   | 11.6  | 3.7    | 5.3   | 2.8    | 6.6    | 4.2   | 18.8   |
| 11.0  | 3.0   | 26.8  | 18.0   | 1.8   | 41.2   | 28.8   | 102.6 | 98.4   |
| 6.1   | 5.7   | 5.8   | 2.5    | 3.5   | 16.5   | 7.5    | 3.0   | 9.1    |
| 5.5   | 0.9   | 2.6   | 8.8    | 1.3   | 7.4    | 1.7    | 3.0   | 2.4    |
| 96.9  | 77.0  | 81.3  | 98.4   | 38.0  | 122.5  | 80.5   | 31.0  | 36.0   |
| 6.2   | 6.1   | 1.1   | 0.3    | 0.5   | 16.5   | 8.2    | 0.5   | 7.5    |
| 6.8   | 1.4   | 8.6   | 5.7    | 0.2   | 4.7    | 0.7    | 11.8  | 7.2    |



|       |       |       |       |       |        |        |       |       |
|-------|-------|-------|-------|-------|--------|--------|-------|-------|
| 3.1   | 15.4  | 16.7  | 1.7   | 5.6   | 41.6   | 39.0   | 4.7   | 12.1  |
| 395.9 | 371.1 | 460.4 | 534.9 | 192.8 | 271.8  | 230.8  | 118.1 | 116.1 |
| 2.3   | 3.6   | 4.6   | 3.1   | 1.3   | 136.5  | 70.7   | 1.3   | 2.8   |
| 7.6   | 2.0   | 2.6   | 9.6   | 6.1   | 9.0    | 10.8   | 6.9   | 12.5  |
| 120.1 | 126.0 | 124.8 | 87.2  | 36.7  | 150.2  | 105.1  | 33.0  | 25.5  |
| 38.9  | 35.7  | 20.7  | 37.6  | 9.7   | 277.6  | 217.1  | 14.6  | 36.8  |
| 14.6  | 10.9  | 14.4  | 20.9  | 1.6   | 19.2   | 5.4    | 15.2  | 22.3  |
| 2.4   | 1.5   | 9.2   | 2.6   | 1.1   | 1.6    | 11.8   | 2.6   | 3.0   |
| 16.3  | 21.5  | 25.4  | 61.9  | 9.1   | 159.9  | 145.9  | 4.9   | 5.2   |
| 14.2  | 11.0  | 14.3  | 20.3  | 3.3   | 67.7   | 63.1   | 10.5  | 13.1  |
| 202.5 | 230.9 | 265.1 | 312.1 | 125.7 | 77.6   | 80.6   | 16.9  | 26.0  |
| 1.8   | 1.6   | 1.4   | 3.9   | 0.6   | 16.3   | 21.1   | 1.3   | 0.2   |
| 219.0 | 224.9 | 215.9 | 129.8 | 77.5  | 841.5  | 503.2  | 48.9  | 72.8  |
| 22.4  | 10.6  | 8.2   | 10.8  | 8.7   | 177.5  | 89.2   | 19.5  | 11.9  |
| 68.1  | 59.1  | 59.7  | 37.2  | 26.4  | 20.8   | 32.1   | 20.3  | 22.4  |
| 4.6   | 0.9   | 4.4   | 4.5   | 0.6   | 825.5  | 412.5  | 1.4   | 10.0  |
| 1.9   | 4.9   | 3.0   | 2.3   | 2.2   | 7.8    | 0.9    | 8.5   | 15.4  |
| 19.9  | 19.4  | 22.3  | 8.2   | 4.3   | 14.2   | 3.1    | 2.2   | 1.7   |
| 39.2  | 28.8  | 48.8  | 50.8  | 20.3  | 174.9  | 83.5   | 5.9   | 9.9   |
| 22.8  | 9.7   | 1.5   | 12.5  | 3.0   | 49.0   | 47.1   | 9.3   | 8.3   |
| 37.7  | 38.5  | 40.5  | 54.4  | 22.0  | 7.7    | 2.5    | 3.0   | 2.1   |
| 2.5   | 2.1   | 4.8   | 1.6   | 0.7   | 2.2    | 1.3    | 1.2   | 5.4   |
| 62.7  | 89.2  | 104.2 | 114.9 | 46.9  | 75.4   | 55.3   | 12.8  | 5.3   |
| 37.9  | 73.5  | 67.1  | 89.6  | 21.8  | 48.9   | 26.8   | 3.1   | 5.8   |
| 24.1  | 10.7  | 19.3  | 17.0  | 7.6   | 72.1   | 65.5   | 18.9  | 18.8  |
| 105.7 | 65.8  | 82.7  | 47.4  | 26.2  | 32.0   | 28.2   | 27.6  | 28.5  |
| 2.6   | 1.1   | 1.9   | 0.5   | 0.6   | 14.6   | 0.7    | 2.2   | 1.7   |
| 220.1 | 179.0 | 143.9 | 149.3 | 53.4  | 336.7  | 251.0  | 42.3  | 16.5  |
| 3.3   | 7.6   | 1.9   | 7.3   | 2.1   | 26.7   | 10.7   | 2.3   | 4.9   |
| 16.8  | 13.2  | 17.8  | 9.9   | 3.8   | 23.9   | 14.9   | 9.6   | 1.4   |
| 148.0 | 126.3 | 137.1 | 83.1  | 42.0  | 3.4    | 0.5    | 34.8  | 41.1  |
| 3.8   | 5.6   | 4.6   | 2.9   | 1.0   | 19.4   | 8.5    | 4.5   | 5.8   |
| 10.6  | 10.9  | 3.4   | 2.5   | 1.0   | 1.4    | 2.8    | 9.3   | 9.5   |
| 115.0 | 85.3  | 85.5  | 59.0  | 39.5  | 336.0  | 279.2  | 72.9  | 168.7 |
| 3.2   | 16.8  | 10.0  | 2.0   | 0.8   | 17.5   | 13.4   | 5.9   | 7.1   |
| 964.9 | 707.7 | 874.7 | 781.7 | 354.0 | 1617.5 | 1387.7 | 45.2  | 48.9  |
| 11.9  | 6.4   | 1.6   | 2.5   | 3.8   | 24.7   | 11.7   | 5.4   | 21.3  |
| 63.8  | 61.5  | 43.7  | 38.6  | 21.1  | 41.5   | 18.8   | 6.6   | 14.9  |
| 47.1  | 25.0  | 80.1  | 102.1 | 25.0  | 26.8   | 26.8   | 2.3   | 13.7  |
| 38.1  | 28.1  | 28.5  | 19.9  | 16.4  | 111.1  | 142.7  | 8.6   | 31.4  |
| 37.4  | 29.5  | 23.8  | 17.3  | 13.6  | 130.8  | 118.8  | 20.7  | 17.5  |
| 4.4   | 6.3   | 22.9  | 12.0  | 0.8   | 13.6   | 25.9   | 11.3  | 14.9  |
| 58.9  | 65.6  | 61.6  | 61.6  | 31.7  | 86.3   | 59.4   | 10.3  | 9.0   |
| 50.6  | 32.1  | 41.0  | 29.7  | 14.0  | 10.3   | 10.0   | 18.1  | 22.9  |
| 2.7   | 2.6   | 2.0   | 5.5   | 2.6   | 9.2    | 5.4    | 1.8   | 1.4   |
| 40.4  | 26.0  | 16.9  | 7.4   | 3.3   | 65.2   | 35.3   | 6.1   | 26.7  |
| 31.4  | 27.6  | 15.0  | 36.4  | 8.1   | 72.5   | 43.5   | 101.4 | 126.0 |
| 20.0  | 17.6  | 12.9  | 16.9  | 7.5   | 25.7   | 21.6   | 25.2  | 28.4  |
| 3.4   | 11.9  | 7.1   | 11.6  | 4.9   | 13.0   | 5.8    | 3.3   | 6.5   |
| 13.3  | 8.3   | 17.7  | 3.4   | 0.5   | 22.4   | 3.8    | 2.1   | 13.3  |
| 4.8   | 1.8   | 4.8   | 4.2   | 2.1   | 11.5   | 1.2    | 1.6   | 2.5   |
| 0.4   | 0.2   | 2.9   | 2.7   | 1.6   | 3.0    | 2.2    | 6.2   | 4.6   |
| 13.3  | 21.4  | 17.0  | 13.1  | 15.7  | 29.5   | 24.9   | 55.1  | 68.1  |

|        |        |        |        |        |        |        |       |       |
|--------|--------|--------|--------|--------|--------|--------|-------|-------|
| 5.4    | 26.1   | 29.3   | 18.9   | 6.4    | 27.2   | 14.9   | 3.1   | 15.1  |
| 1.9    | 7.2    | 1.7    | 2.7    | 1.7    | 1.4    | 1.4    | 1.1   | 0.3   |
| 14.4   | 13.6   | 1.4    | 13.8   | 0.6    | 22.8   | 8.0    | 30.2  | 16.2  |
| 16.5   | 10.0   | 11.5   | 3.7    | 2.6    | 39.1   | 30.9   | 33.0  | 37.7  |
| 46.8   | 56.4   | 61.9   | 59.1   | 10.7   | 294.1  | 199.8  | 17.8  | 21.7  |
| 134.6  | 178.1  | 93.3   | 18.2   | 25.9   | 1.6    | 4.8    | 5.4   | 1.0   |
| 22.9   | 8.0    | 7.0    | 4.4    | 7.5    | 15.7   | 11.5   | 13.9  | 5.8   |
| 299.4  | 280.8  | 280.0  | 255.9  | 113.2  | 269.5  | 158.3  | 142.7 | 158.1 |
| 24.1   | 22.2   | 17.1   | 38.5   | 22.9   | 150.3  | 103.8  | 64.8  | 59.4  |
| 8.2    | 16.7   | 10.5   | 11.8   | 8.6    | 183.1  | 136.4  | 11.5  | 9.6   |
| 7.7    | 1.5    | 1.5    | 1.1    | 2.5    | 10.4   | 14.4   | 11.9  | 14.2  |
| 1.2    | 5.3    | 8.5    | 7.6    | 2.8    | 22.5   | 15.6   | 1.4   | 0.8   |
| 2.3    | 5.1    | 1.2    | 5.5    | 4.9    | 15.5   | 7.0    | 11.8  | 2.9   |
| 1.5    | 1.0    | 1.6    | 0.8    | 0.7    | 618.5  | 435.2  | 2.0   | 1.7   |
| 177.1  | 149.4  | 181.9  | 113.2  | 58.1   | 139.1  | 74.8   | 13.6  | 15.4  |
| 99.5   | 60.8   | 73.0   | 26.4   | 35.4   | 2.2    | 9.8    | 3.6   | 1.8   |
| 847.2  | 711.5  | 560.3  | 143.1  | 329.8  | 17.7   | 10.6   | 2.5   | 3.6   |
| 114.0  | 108.8  | 87.8   | 102.1  | 48.7   | 67.1   | 59.2   | 50.4  | 55.3  |
| 11.4   | 2.9    | 15.5   | 11.6   | 4.7    | 1.1    | 13.3   | 31.2  | 45.6  |
| 584.1  | 489.7  | 658.8  | 616.9  | 204.7  | 779.2  | 523.4  | 109.4 | 110.2 |
| 92.0   | 67.0   | 84.4   | 47.2   | 29.3   | 112.9  | 117.4  | 130.8 | 105.4 |
| 3.6    | 11.3   | 1.2    | 1.7    | 9.1    | 13.4   | 5.5    | 6.3   | 8.2   |
| 15.3   | 14.5   | 11.1   | 8.3    | 6.5    | 5.0    | 11.0   | 22.2  | 14.4  |
| 33.9   | 20.4   | 24.7   | 13.2   | 8.0    | 2.9    | 7.2    | 24.2  | 9.2   |
| 1.3    | 4.8    | 4.5    | 4.4    | 2.1    | 8.1    | 2.8    | 2.5   | 6.4   |
| 18.2   | 8.3    | 9.1    | 10.2   | 7.3    | 8.7    | 12.1   | 13.9  | 9.4   |
| 3.3    | 2.2    | 4.4    | 3.0    | 2.2    | 70.0   | 67.6   | 3.2   | 8.7   |
| 155.4  | 132.7  | 121.6  | 133.9  | 57.9   | 372.8  | 262.0  | 86.1  | 77.9  |
| 54.2   | 42.5   | 33.3   | 44.5   | 17.5   | 44.3   | 30.6   | 10.4  | 33.7  |
| 21.8   | 9.1    | 2.7    | 6.0    | 2.8    | 10.7   | 8.8    | 10.8  | 18.6  |
| 4427.1 | 4484.0 | 3853.0 | 2943.2 | 1836.6 | 5242.9 | 4833.1 | 452.7 | 642.6 |
| 7.9    | 3.6    | 2.8    | 10.5   | 0.7    | 19.4   | 31.0   | 8.8   | 14.4  |
| 112.5  | 107.3  | 107.3  | 128.4  | 55.2   | 153.3  | 128.2  | 2.1   | 1.4   |
| 82.6   | 74.9   | 84.5   | 102.0  | 27.3   | 37.2   | 16.4   | 16.3  | 13.3  |
| 144.5  | 169.1  | 121.5  | 19.5   | 61.1   | 17.4   | 2.5    | 3.8   | 2.6   |
| 8.9    | 0.8    | 1.5    | 0.5    | 3.3    | 1.3    | 0.9    | 0.8   | 0.5   |
| 21.4   | 10.1   | 17.8   | 9.8    | 2.8    | 15.3   | 3.6    | 2.9   | 1.5   |
| 2.8    | 2.3    | 3.8    | 1.1    | 4.9    | 8.1    | 2.2    | 2.1   | 6.6   |
| 28.3   | 44.0   | 39.0   | 29.8   | 17.3   | 15.2   | 23.9   | 29.4  | 46.6  |
| 25.0   | 18.4   | 9.9    | 5.3    | 5.8    | 29.0   | 3.7    | 12.8  | 17.3  |
| 3.6    | 4.9    | 8.9    | 5.8    | 4.7    | 27.3   | 16.0   | 2.7   | 3.0   |
| 9.7    | 0.6    | 0.4    | 9.7    | 1.5    | 11.3   | 1.2    | 1.4   | 0.3   |
| 20.8   | 20.0   | 17.7   | 7.8    | 7.6    | 44.4   | 30.8   | 16.2  | 27.2  |
| 21.0   | 18.6   | 12.9   | 13.5   | 9.2    | 22.0   | 21.8   | 1.1   | 2.2   |
| 68.4   | 82.8   | 71.5   | 79.4   | 20.7   | 111.1  | 72.3   | 22.7  | 48.3  |
| 36.5   | 29.6   | 27.6   | 61.0   | 17.3   | 375.9  | 280.4  | 2.6   | 7.0   |
| 16.0   | 17.9   | 16.6   | 34.9   | 9.3    | 132.5  | 135.4  | 15.9  | 26.6  |
| 395.8  | 318.6  | 312.4  | 297.8  | 130.8  | 289.2  | 112.4  | 119.6 | 132.4 |
| 41.0   | 47.2   | 37.3   | 34.0   | 31.1   | 126.3  | 100.2  | 11.6  | 17.4  |
| 34.0   | 33.4   | 21.3   | 18.9   | 8.3    | 12.6   | 16.7   | 18.1  | 15.2  |
| 285.2  | 301.3  | 372.1  | 465.6  | 115.4  | 255.0  | 219.1  | 19.0  | 29.7  |
| 16.9   | 25.1   | 41.2   | 23.6   | 12.9   | 32.3   | 23.7   | 37.3  | 36.3  |
| 8.2    | 9.1    | 13.9   | 1.3    | 9.2    | 1.9    | 3.5    | 5.4   | 12.1  |

|        |        |        |        |        |        |        |        |        |
|--------|--------|--------|--------|--------|--------|--------|--------|--------|
| 93.2   | 110.2  | 136.8  | 138.2  | 37.3   | 87.5   | 94.7   | 24.0   | 18.6   |
| 10.2   | 3.0    | 4.5    | 0.2    | 0.9    | 355.1  | 237.7  | 0.4    | 4.9    |
| 7.4    | 6.5    | 12.9   | 7.4    | 2.6    | 7.3    | 0.5    | 10.8   | 11.9   |
| 1.0    | 1.5    | 1.9    | 0.8    | 1.0    | 3.4    | 0.9    | 1.2    | 0.9    |
| 2.5    | 1.9    | 1.8    | 1.5    | 1.1    | 6.6    | 6.9    | 2.4    | 2.6    |
| 83.7   | 103.0  | 84.8   | 67.3   | 42.8   | 164.3  | 124.0  | 30.7   | 44.9   |
| 40.7   | 42.0   | 40.1   | 8.0    | 21.0   | 97.7   | 69.8   | 18.3   | 17.3   |
| 10.9   | 3.9    | 16.6   | 5.4    | 11.0   | 40.9   | 25.4   | 13.2   | 11.2   |
| 0.9    | 4.7    | 3.2    | 2.8    | 0.3    | 2.6    | 8.9    | 1.1    | 4.4    |
| 242.7  | 155.4  | 259.8  | 286.2  | 126.8  | 90.8   | 65.3   | 12.1   | 15.6   |
| 284.4  | 281.7  | 198.8  | 204.7  | 80.5   | 660.4  | 361.5  | 45.3   | 73.6   |
| 10.4   | 13.6   | 13.2   | 20.6   | 9.1    | 12.5   | 0.8    | 6.2    | 15.0   |
| 39.1   | 16.1   | 23.3   | 14.5   | 4.7    | 7.8    | 21.7   | 10.4   | 17.1   |
| 25.5   | 15.8   | 33.6   | 88.9   | 11.2   | 12.3   | 4.1    | 1.2    | 1.5    |
| 8.2    | 10.9   | 15.1   | 79.6   | 7.7    | 808.2  | 799.9  | 4.1    | 5.1    |
| 33.4   | 19.2   | 30.7   | 37.6   | 17.0   | 47.0   | 37.4   | 26.6   | 18.4   |
| 10.6   | 15.1   | 7.8    | 9.8    | 12.7   | 18.9   | 4.6    | 3.3    | 4.7    |
| 33.7   | 41.0   | 34.0   | 41.1   | 21.2   | 114.0  | 79.6   | 10.5   | 4.2    |
| 15.4   | 4.7    | 2.4    | 6.8    | 8.7    | 20.7   | 6.4    | 17.2   | 8.0    |
| 1.4    | 1.1    | 1.1    | 4.1    | 4.3    | 1.8    | 1.1    | 1.7    | 9.7    |
| 156.2  | 136.6  | 146.4  | 141.1  | 62.4   | 262.9  | 196.5  | 38.8   | 44.5   |
| 36.9   | 15.6   | 2.2    | 15.7   | 5.5    | 3.3    | 2.2    | 31.7   | 27.7   |
| 3.3    | 24.1   | 13.4   | 3.4    | 3.4    | 55.7   | 30.8   | 11.4   | 3.8    |
| 1222.9 | 1042.0 | 1087.2 | 1171.1 | 445.4  | 1288.9 | 852.2  | 279.9  | 352.0  |
| 77.4   | 68.8   | 86.1   | 116.8  | 63.0   | 93.3   | 43.5   | 2.3    | 2.6    |
| 12.2   | 2.5    | 1.8    | 22.4   | 4.6    | 1.0    | 1.7    | 12.5   | 10.2   |
| 12.8   | 7.0    | 10.3   | 11.6   | 0.5    | 20.8   | 2.4    | 18.4   | 16.8   |
| 7.2    | 8.5    | 5.1    | 7.4    | 2.3    | 35.5   | 20.0   | 6.2    | 3.5    |
| 3.5    | 3.7    | 21.7   | 3.4    | 3.5    | 13.8   | 23.5   | 16.7   | 14.1   |
| 10.6   | 7.7    | 6.6    | 3.8    | 4.0    | 8.0    | 7.9    | 6.7    | 8.1    |
| 2.4    | 1.3    | 2.2    | 2.0    | 2.1    | 3.4    | 4.7    | 158.2  | 201.4  |
| 27.4   | 22.5   | 20.1   | 16.3   | 5.9    | 29.3   | 6.3    | 26.6   | 22.5   |
| 9.0    | 7.6    | 2.8    | 11.8   | 0.6    | 6.0    | 2.2    | 7.1    | 4.3    |
| 45.2   | 49.1   | 38.9   | 24.5   | 12.8   | 32.6   | 14.2   | 6.1    | 1.4    |
| 37.4   | 25.0   | 35.1   | 29.5   | 13.3   | 50.6   | 21.3   | 45.3   | 45.4   |
| 72.7   | 84.4   | 68.0   | 49.4   | 29.2   | 115.4  | 74.5   | 18.1   | 18.6   |
| 1.1    | 4.4    | 1.2    | 1.3    | 0.6    | 10.1   | 9.3    | 1.4    | 2.3    |
| 159.0  | 130.1  | 177.8  | 258.2  | 60.0   | 123.5  | 68.4   | 41.8   | 99.0   |
| 32.2   | 24.9   | 35.9   | 27.7   | 0.8    | 10.5   | 8.4    | 8.7    | 23.5   |
| 33.2   | 44.1   | 37.3   | 23.3   | 14.3   | 40.0   | 22.8   | 8.5    | 4.0    |
| 75.0   | 31.9   | 49.4   | 24.5   | 9.1    | 131.9  | 69.5   | 25.8   | 63.4   |
| 143.4  | 113.4  | 125.3  | 97.0   | 46.1   | 45.6   | 19.6   | 107.7  | 115.3  |
| 17.5   | 11.5   | 16.3   | 6.4    | 1.3    | 1047.2 | 838.5  | 16.2   | 36.2   |
| 18.0   | 18.9   | 13.7   | 8.6    | 8.1    | 16.0   | 17.3   | 13.9   | 28.4   |
| 3093.2 | 3111.8 | 2748.8 | 2032.0 | 1290.0 | 2795.0 | 1822.3 | 1257.2 | 1387.1 |
| 22.9   | 15.8   | 17.6   | 13.3   | 0.8    | 4.1    | 17.0   | 8.9    | 7.6    |
| 2.4    | 2.9    | 2.3    | 2.3    | 3.8    | 1.8    | 1.4    | 14.5   | 0.9    |
| 42.3   | 7.5    | 37.0   | 3.6    | 18.3   | 4.0    | 7.2    | 7.4    | 6.7    |
| 9.4    | 0.6    | 1.5    | 0.5    | 4.2    | 47.6   | 35.7   | 8.6    | 0.3    |
| 97.9   | 94.9   | 98.2   | 63.1   | 30.1   | 91.2   | 42.3   | 39.1   | 57.3   |
| 59.7   | 31.2   | 50.6   | 25.2   | 0.8    | 163.5  | 122.3  | 55.5   | 95.1   |
| 1.5    | 2.9    | 6.4    | 2.9    | 5.0    | 14.9   | 6.1    | 20.6   | 2.2    |
| 4.3    | 7.2    | 3.8    | 2.2    | 0.3    | 12.4   | 1.3    | 4.1    | 4.9    |

|       |       |       |        |       |        |        |       |       |
|-------|-------|-------|--------|-------|--------|--------|-------|-------|
| 2.0   | 1.2   | 2.1   | 2.5    | 0.8   | 2.5    | 3.5    | 2.2   | 2.6   |
| 6.2   | 9.9   | 2.6   | 7.0    | 4.0   | 2.6    | 4.7    | 2.0   | 3.8   |
| 3.4   | 2.5   | 4.0   | 2.4    | 1.1   | 5.0    | 12.9   | 3.0   | 15.3  |
| 37.1  | 28.7  | 31.9  | 20.6   | 14.6  | 43.5   | 21.1   | 26.5  | 23.7  |
| 14.6  | 3.3   | 11.8  | 9.2    | 1.2   | 1.4    | 16.2   | 3.0   | 11.2  |
| 13.1  | 1.1   | 7.5   | 4.6    | 0.7   | 1.2    | 1.4    | 9.9   | 12.5  |
| 58.1  | 60.5  | 50.8  | 63.9   | 25.4  | 64.0   | 53.7   | 19.9  | 12.5  |
| 23.6  | 12.4  | 16.4  | 17.9   | 2.5   | 32.6   | 21.4   | 4.7   | 1.0   |
| 0.6   | 0.6   | 1.0   | 2.5    | 3.8   | 5.7    | 7.1    | 6.2   | 9.3   |
| 162.0 | 154.9 | 177.5 | 237.3  | 39.5  | 204.9  | 102.2  | 10.2  | 13.5  |
| 4.6   | 1.8   | 3.8   | 9.7    | 1.0   | 324.7  | 250.3  | 2.2   | 1.9   |
| 10.5  | 1.4   | 10.7  | 1.4    | 4.1   | 15.1   | 15.4   | 32.2  | 27.9  |
| 14.0  | 9.3   | 14.0  | 11.3   | 9.5   | 25.1   | 14.5   | 27.5  | 37.0  |
| 225.3 | 205.9 | 243.7 | 121.8  | 83.5  | 501.7  | 217.5  | 43.3  | 55.5  |
| 1.2   | 0.8   | 1.0   | 0.5    | 0.5   | 0.6    | 0.6    | 1.1   | 0.6   |
| 17.6  | 3.9   | 1.3   | 5.9    | 1.3   | 4.5    | 0.9    | 1.6   | 1.6   |
| 2.5   | 0.8   | 1.4   | 1.3    | 1.4   | 1.5    | 0.9    | 1.7   | 1.4   |
| 39.1  | 43.8  | 16.7  | 11.4   | 7.6   | 6.7    | 4.4    | 6.1   | 9.6   |
| 10.4  | 3.7   | 9.3   | 1.0    | 1.1   | 3.8    | 1.8    | 10.5  | 11.0  |
| 32.5  | 35.8  | 24.0  | 11.8   | 5.0   | 44.6   | 22.7   | 20.2  | 18.7  |
| 321.2 | 283.4 | 259.3 | 260.1  | 97.5  | 1457.4 | 988.6  | 127.0 | 184.7 |
| 11.4  | 12.5  | 11.4  | 7.6    | 13.2  | 81.3   | 40.0   | 36.7  | 56.3  |
| 51.6  | 46.5  | 49.6  | 38.5   | 21.0  | 25.5   | 29.8   | 3.2   | 12.4  |
| 141.3 | 123.0 | 120.9 | 59.0   | 45.7  | 38.8   | 18.5   | 19.3  | 25.2  |
| 19.3  | 17.1  | 17.9  | 6.1    | 0.9   | 15.8   | 8.5    | 1.2   | 9.5   |
| 259.7 | 212.5 | 266.7 | 396.7  | 89.7  | 394.6  | 333.5  | 27.1  | 36.3  |
| 73.5  | 56.3  | 65.4  | 65.1   | 10.6  | 38.5   | 42.5   | 22.0  | 19.0  |
| 29.0  | 20.4  | 6.5   | 2.9    | 9.8   | 17.7   | 7.9    | 7.1   | 3.7   |
| 322.9 | 257.4 | 292.3 | 231.5  | 131.7 | 342.9  | 155.7  | 67.5  | 99.3  |
| 10.1  | 2.5   | 10.9  | 1.3    | 0.6   | 58.2   | 44.0   | 23.5  | 24.4  |
| 62.1  | 50.1  | 68.7  | 47.9   | 17.5  | 51.2   | 43.7   | 42.3  | 41.0  |
| 6.7   | 1.0   | 4.8   | 0.6    | 4.4   | 11.0   | 4.4    | 5.7   | 3.2   |
| 25.5  | 34.2  | 25.9  | 17.0   | 16.1  | 52.0   | 21.4   | 28.6  | 21.7  |
| 2.3   | 0.6   | 1.1   | 1.1    | 0.6   | 1.3    | 0.6    | 2.0   | 5.4   |
| 2.6   | 1.0   | 8.0   | 2.3    | 0.8   | 3.2    | 2.8    | 2.1   | 5.2   |
| 1.0   | 8.5   | 6.5   | 1.9    | 0.7   | 0.9    | 1.1    | 3.1   | 8.6   |
| 102.3 | 126.8 | 117.1 | 82.3   | 46.1  | 58.6   | 49.8   | 8.4   | 18.3  |
| 31.7  | 22.1  | 14.6  | 9.5    | 9.8   | 23.1   | 24.5   | 23.6  | 27.6  |
| 50.0  | 35.6  | 36.2  | 49.4   | 15.1  | 19.4   | 16.1   | 6.6   | 21.7  |
| 35.3  | 38.2  | 17.6  | 26.2   | 10.6  | 58.8   | 49.3   | 98.3  | 112.2 |
| 120.6 | 130.6 | 109.7 | 88.9   | 38.8  | 47.6   | 26.6   | 12.2  | 26.5  |
| 142.7 | 137.5 | 193.0 | 325.9  | 80.2  | 289.1  | 219.0  | 64.5  | 85.7  |
| 46.6  | 68.6  | 70.9  | 135.9  | 33.0  | 95.5   | 66.6   | 15.6  | 6.1   |
| 534.3 | 400.1 | 439.1 | 361.3  | 127.1 | 683.9  | 409.0  | 95.7  | 144.9 |
| 4.4   | 5.3   | 6.0   | 0.8    | 1.6   | 3.3    | 1.1    | 5.5   | 0.7   |
| 1.2   | 1.4   | 5.2   | 5.2    | 1.7   | 33.5   | 40.8   | 2.1   | 1.6   |
| 6.5   | 2.5   | 3.8   | 3.0    | 1.1   | 2.8    | 4.9    | 22.6  | 30.7  |
| 259.0 | 290.5 | 483.9 | 1000.3 | 119.3 | 2658.3 | 2335.9 | 3.0   | 3.1   |
| 51.5  | 55.2  | 24.1  | 14.9   | 10.0  | 168.3  | 114.1  | 46.9  | 52.0  |
| 22.2  | 38.0  | 26.0  | 12.8   | 10.1  | 232.9  | 126.1  | 73.3  | 68.2  |
| 84.7  | 49.6  | 89.5  | 88.6   | 21.4  | 278.2  | 287.4  | 148.6 | 161.4 |
| 50.0  | 46.0  | 42.5  | 37.1   | 15.6  | 112.9  | 84.6   | 12.0  | 13.8  |
| 9.1   | 11.4  | 7.5   | 0.7    | 0.6   | 18.9   | 6.9    | 13.1  | 10.9  |

|        |        |        |       |       |        |        |       |       |
|--------|--------|--------|-------|-------|--------|--------|-------|-------|
| 12.8   | 16.2   | 9.9    | 14.8  | 5.9   | 4.3    | 4.4    | 0.6   | 1.1   |
| 197.2  | 180.5  | 197.2  | 119.2 | 87.3  | 235.7  | 174.8  | 12.2  | 9.7   |
| 193.6  | 190.2  | 177.7  | 157.2 | 78.4  | 6.1    | 3.0    | 15.0  | 31.1  |
| 17.4   | 4.4    | 8.5    | 0.7   | 2.4   | 25.8   | 5.4    | 22.5  | 13.6  |
| 46.8   | 42.8   | 42.5   | 27.4  | 18.8  | 47.6   | 17.6   | 9.3   | 26.1  |
| 4.3    | 1.3    | 1.0    | 3.6   | 3.4   | 15.8   | 8.5    | 9.1   | 11.1  |
| 17.2   | 3.1    | 4.5    | 2.2   | 0.9   | 21.9   | 11.2   | 1.2   | 2.3   |
| 26.9   | 22.9   | 16.1   | 24.8  | 6.5   | 371.4  | 283.3  | 196.7 | 277.1 |
| 8.7    | 8.1    | 10.0   | 10.0  | 1.0   | 46.1   | 36.2   | 44.5  | 57.4  |
| 6.2    | 0.5    | 2.6    | 5.0   | 0.3   | 1.9    | 1.7    | 5.6   | 6.8   |
| 16.1   | 13.1   | 16.6   | 14.8  | 6.2   | 4.6    | 3.2    | 9.6   | 17.5  |
| 3.4    | 5.7    | 3.7    | 2.9   | 1.4   | 14.1   | 14.3   | 16.0  | 47.5  |
| 16.9   | 14.5   | 15.4   | 5.1   | 8.1   | 16.6   | 2.1    | 18.7  | 24.0  |
| 56.4   | 49.6   | 39.5   | 35.3  | 25.1  | 15.1   | 10.7   | 15.3  | 5.2   |
| 92.0   | 61.4   | 66.6   | 62.2  | 6.6   | 71.5   | 34.5   | 196.9 | 289.1 |
| 708.9  | 676.9  | 697.2  | 799.1 | 252.9 | 1421.0 | 1066.6 | 442.1 | 588.6 |
| 0.7    | 7.9    | 6.1    | 5.4   | 2.4   | 0.6    | 10.0   | 1.5   | 2.1   |
| 20.5   | 17.3   | 21.9   | 2.3   | 1.3   | 85.5   | 73.9   | 14.1  | 20.5  |
| 39.3   | 30.9   | 56.4   | 53.4  | 14.2  | 17.7   | 21.8   | 3.1   | 6.0   |
| 17.8   | 7.2    | 8.9    | 4.5   | 6.6   | 5.1    | 2.2    | 2.4   | 2.4   |
| 28.4   | 12.2   | 12.1   | 19.2  | 8.1   | 146.5  | 51.7   | 50.6  | 58.3  |
| 70.1   | 60.6   | 55.8   | 31.5  | 13.3  | 20.2   | 8.0    | 19.0  | 20.9  |
| 1.2    | 0.6    | 0.9    | 0.7   | 0.3   | 3.6    | 2.3    | 0.9   | 1.0   |
| 49.3   | 45.4   | 70.1   | 74.6  | 21.8  | 61.8   | 35.2   | 1.4   | 6.8   |
| 41.3   | 18.9   | 27.7   | 33.3  | 21.5  | 44.1   | 22.8   | 3.1   | 9.9   |
| 37.2   | 19.5   | 10.4   | 17.7  | 14.5  | 246.4  | 194.7  | 9.0   | 10.9  |
| 45.1   | 44.7   | 42.4   | 58.0  | 38.7  | 31.7   | 30.2   | 8.5   | 3.9   |
| 0.7    | 0.4    | 0.7    | 0.7   | 0.4   | 1.6    | 0.9    | 1.0   | 1.8   |
| 2.7    | 1.4    | 1.4    | 1.4   | 1.0   | 49.4   | 58.3   | 1.0   | 1.6   |
| 64.0   | 105.5  | 86.6   | 103.3 | 24.0  | 45.2   | 24.7   | 0.6   | 0.5   |
| 67.7   | 80.4   | 65.0   | 72.3  | 22.0  | 54.4   | 20.9   | 5.4   | 3.9   |
| 1.1    | 2.1    | 6.8    | 1.0   | 3.2   | 3.1    | 2.5    | 1.8   | 1.2   |
| 18.3   | 26.0   | 28.0   | 13.9  | 10.3  | 113.3  | 62.4   | 0.7   | 1.5   |
| 32.9   | 4.1    | 13.5   | 7.9   | 13.2  | 19.6   | 7.7    | 13.2  | 7.9   |
| 345.5  | 300.7  | 347.8  | 285.2 | 118.0 | 832.7  | 777.7  | 84.8  | 134.6 |
| 16.6   | 15.7   | 6.6    | 8.3   | 0.9   | 107.6  | 39.4   | 44.6  | 45.0  |
| 106.1  | 28.6   | 42.1   | 29.9  | 7.4   | 45.1   | 60.5   | 39.6  | 26.7  |
| 38.1   | 9.3    | 32.5   | 21.1  | 3.7   | 6.4    | 3.1    | 39.5  | 50.2  |
| 251.0  | 191.4  | 190.1  | 152.9 | 62.8  | 154.0  | 136.4  | 31.4  | 36.9  |
| 1320.1 | 1071.9 | 1123.6 | 857.5 | 412.7 | 3848.8 | 2996.7 | 555.6 | 762.5 |
| 1.6    | 1.3    | 1.7    | 1.0   | 1.0   | 6.1    | 5.1    | 6.0   | 3.3   |
| 1.2    | 1.8    | 2.8    | 0.5   | 3.3   | 2.8    | 1.4    | 0.7   | 11.7  |
| 2.0    | 3.0    | 2.1    | 2.4   | 7.1   | 6.5    | 8.3    | 11.0  | 13.4  |
| 3.7    | 3.5    | 4.0    | 1.9   | 1.7   | 29.8   | 41.9   | 0.9   | 7.7   |
| 1.9    | 12.4   | 9.3    | 3.1   | 2.8   | 42.4   | 38.9   | 21.6  | 22.1  |
| 13.9   | 7.6    | 9.6    | 0.4   | 5.8   | 9.9    | 15.8   | 14.6  | 34.9  |
| 3.4    | 2.4    | 2.0    | 1.9   | 2.0   | 5.4    | 3.5    | 3.8   | 2.0   |
| 1.4    | 3.0    | 1.9    | 0.6   | 0.6   | 4.8    | 1.7    | 1.7   | 5.5   |
| 7.6    | 28.0   | 43.4   | 13.1  | 19.5  | 6.1    | 2.8    | 3.4   | 16.1  |
| 95.3   | 63.7   | 131.7  | 73.6  | 23.1  | 79.5   | 43.1   | 224.2 | 299.9 |
| 30.1   | 26.8   | 28.3   | 10.0  | 7.8   | 57.0   | 39.4   | 30.8  | 37.2  |
| 2.2    | 0.8    | 1.7    | 1.6   | 0.5   | 1.8    | 4.6    | 1.7   | 0.8   |
| 5.4    | 4.9    | 5.2    | 2.7   | 5.6   | 0.3    | 2.6    | 0.7   | 0.7   |

|        |        |        |        |       |        |        |       |       |
|--------|--------|--------|--------|-------|--------|--------|-------|-------|
| 1.9    | 3.7    | 11.9   | 12.9   | 8.0   | 7.7    | 9.4    | 2.0   | 3.4   |
| 2.2    | 1.8    | 1.4    | 0.7    | 0.3   | 45.2   | 23.0   | 1.1   | 1.6   |
| 2.1    | 14.0   | 9.5    | 92.6   | 9.0   | 8.1    | 10.1   | 10.7  | 13.9  |
| 78.2   | 74.7   | 72.1   | 63.0   | 33.0  | 20.2   | 1.7    | 3.4   | 2.3   |
| 18.1   | 13.5   | 19.2   | 58.2   | 13.4  | 75.4   | 26.9   | 2.2   | 5.9   |
| 18.5   | 7.7    | 19.0   | 11.5   | 1.1   | 25.2   | 10.3   | 12.7  | 4.6   |
| 32.4   | 27.4   | 24.4   | 9.9    | 8.3   | 27.8   | 18.6   | 16.0  | 33.5  |
| 4.0    | 3.2    | 26.8   | 10.3   | 2.8   | 4.2    | 2.1    | 1.5   | 2.1   |
| 5.0    | 10.0   | 16.7   | 2.3    | 0.5   | 14.1   | 6.5    | 10.4  | 14.8  |
| 18.9   | 23.6   | 26.4   | 14.7   | 2.2   | 25.9   | 25.4   | 13.4  | 14.9  |
| 26.3   | 39.0   | 39.8   | 35.5   | 10.0  | 68.4   | 44.5   | 15.1  | 19.5  |
| 1.0    | 0.7    | 4.0    | 0.9    | 0.3   | 1.2    | 0.7    | 3.9   | 0.2   |
| 10.4   | 4.1    | 2.0    | 0.6    | 1.1   | 9.7    | 1.4    | 1.7   | 1.6   |
| 1.4    | 7.1    | 5.9    | 2.1    | 4.0   | 2.4    | 4.4    | 13.7  | 2.7   |
| 1.4    | 3.0    | 2.5    | 1.1    | 1.4   | 2.8    | 2.4    | 5.0   | 5.2   |
| 8.1    | 1.4    | 2.1    | 3.2    | 0.5   | 27.5   | 15.1   | 0.4   | 1.0   |
| 21.0   | 9.2    | 23.4   | 14.2   | 5.4   | 66.2   | 51.7   | 3.2   | 6.1   |
| 10.7   | 3.3    | 19.2   | 24.7   | 2.4   | 12.2   | 21.2   | 286.5 | 360.1 |
| 3.8    | 0.5    | 7.5    | 6.8    | 0.3   | 27.0   | 48.1   | 0.4   | 3.7   |
| 2.6    | 7.8    | 7.3    | 4.0    | 1.1   | 2.3    | 1.1    | 1.4   | 3.6   |
| 8.4    | 1.4    | 9.2    | 14.9   | 5.3   | 27.9   | 21.5   | 0.8   | 0.7   |
| 36.0   | 33.4   | 34.3   | 20.2   | 12.8  | 312.0  | 378.9  | 40.1  | 45.2  |
| 5.7    | 3.9    | 0.2    | 3.4    | 2.5   | 35.0   | 1.8    | 0.6   | 0.4   |
| 1776.0 | 1896.5 | 1720.9 | 1487.6 | 682.0 | 5481.6 | 5217.0 | 943.6 | 999.0 |
| 1.2    | 0.3    | 10.6   | 0.4    | 0.6   | 7.8    | 3.2    | 14.8  | 20.8  |
| 111.5  | 78.6   | 101.8  | 98.6   | 44.0  | 134.1  | 104.6  | 41.6  | 42.6  |
| 11.2   | 1.3    | 0.8    | 5.7    | 0.5   | 19.5   | 8.4    | 3.1   | 0.6   |
| 2.1    | 1.6    | 1.9    | 3.6    | 0.9   | 8.5    | 1.4    | 11.0  | 19.6  |
| 452.3  | 276.0  | 319.6  | 273.7  | 133.6 | 876.3  | 569.8  | 63.9  | 69.1  |
| 19.8   | 19.1   | 21.1   | 23.2   | 1.5   | 43.0   | 29.5   | 26.6  | 20.7  |
| 1.7    | 0.7    | 0.6    | 1.0    | 2.1   | 1.2    | 1.4    | 0.4   | 0.8   |
| 1.6    | 0.6    | 1.1    | 2.7    | 0.8   | 15.0   | 27.3   | 0.6   | 1.6   |
| 1.2    | 6.6    | 3.2    | 9.2    | 0.8   | 2.0    | 0.9    | 8.1   | 0.7   |
| 26.6   | 31.9   | 16.4   | 16.9   | 6.5   | 36.3   | 3.8    | 19.6  | 7.7   |
| 1.4    | 1.0    | 2.8    | 1.3    | 1.2   | 23.0   | 6.9    | 10.8  | 13.7  |
| 18.6   | 5.6    | 19.8   | 8.5    | 5.5   | 1.2    | 9.4    | 4.8   | 16.0  |
| 1.5    | 6.7    | 4.3    | 5.1    | 2.2   | 6.2    | 7.1    | 32.5  | 29.2  |
| 7.1    | 3.5    | 6.5    | 6.7    | 6.3   | 29.6   | 23.7   | 3.3   | 13.6  |
| 18.3   | 9.7    | 16.8   | 9.4    | 9.9   | 24.1   | 10.5   | 12.4  | 10.6  |
| 38.5   | 28.7   | 29.3   | 26.0   | 12.3  | 68.3   | 60.8   | 13.0  | 19.7  |
| 3.2    | 13.5   | 2.9    | 7.1    | 5.0   | 11.7   | 7.6    | 1.8   | 2.0   |
| 53.5   | 45.6   | 42.9   | 22.1   | 10.9  | 39.6   | 9.6    | 21.6  | 4.0   |
| 72.1   | 43.0   | 48.9   | 31.7   | 6.4   | 28.7   | 29.4   | 40.3  | 39.8  |
| 2.2    | 2.0    | 0.9    | 0.8    | 0.4   | 220.3  | 62.3   | 1.3   | 5.3   |
| 2.0    | 1.5    | 1.5    | 1.9    | 1.7   | 96.8   | 88.8   | 51.2  | 44.6  |
| 12.6   | 8.2    | 7.3    | 2.3    | 2.6   | 3.0    | 7.0    | 6.1   | 4.8   |
| 19.0   | 27.9   | 37.0   | 80.8   | 14.1  | 6.0    | 2.7    | 2.3   | 1.1   |
| 68.7   | 64.8   | 69.0   | 39.9   | 28.2  | 108.1  | 57.1   | 26.2  | 43.0  |
| 1.5    | 4.7    | 1.6    | 0.8    | 1.4   | 38.8   | 20.7   | 2.4   | 1.2   |
| 2.3    | 2.4    | 1.6    | 1.3    | 5.5   | 30.1   | 16.7   | 26.8  | 17.9  |
| 39.0   | 39.6   | 49.2   | 48.8   | 11.1  | 30.3   | 17.6   | 10.7  | 4.1   |
| 2.3    | 27.7   | 27.0   | 32.3   | 16.0  | 85.4   | 52.5   | 35.6  | 34.7  |
| 19.2   | 15.7   | 11.6   | 3.2    | 8.5   | 12.1   | 1.7    | 20.7  | 3.3   |

|       |       |       |       |       |        |       |       |       |
|-------|-------|-------|-------|-------|--------|-------|-------|-------|
| 21.8  | 4.1   | 20.4  | 13.2  | 6.8   | 30.3   | 14.0  | 129.6 | 183.9 |
| 21.7  | 19.6  | 15.1  | 9.9   | 4.7   | 17.3   | 8.0   | 9.3   | 9.4   |
| 33.6  | 23.8  | 47.5  | 22.4  | 7.8   | 58.0   | 34.9  | 27.4  | 42.9  |
| 158.1 | 185.2 | 150.5 | 74.6  | 43.3  | 208.2  | 156.6 | 80.7  | 89.8  |
| 14.3  | 9.2   | 9.1   | 5.3   | 0.8   | 19.1   | 1.3   | 15.5  | 7.6   |
| 1.1   | 0.3   | 4.4   | 3.0   | 1.5   | 8.6    | 4.7   | 2.5   | 0.5   |
| 6.5   | 0.2   | 0.2   | 3.6   | 1.2   | 12.4   | 6.4   | 0.9   | 0.4   |
| 4.4   | 6.3   | 14.7  | 4.6   | 0.4   | 6.0    | 1.4   | 18.6  | 7.2   |
| 52.9  | 68.8  | 47.1  | 78.9  | 29.6  | 245.2  | 130.5 | 16.2  | 20.7  |
| 13.0  | 1.0   | 14.3  | 3.7   | 0.7   | 2.1    | 1.8   | 1.3   | 4.4   |
| 6.5   | 10.0  | 1.2   | 2.9   | 0.6   | 1.0    | 3.7   | 0.6   | 0.5   |
| 2.5   | 3.2   | 1.2   | 0.7   | 2.0   | 38.1   | 21.9  | 0.9   | 2.2   |
| 277.4 | 166.4 | 221.7 | 287.2 | 94.0  | 1454.8 | 906.6 | 9.0   | 14.2  |
| 0.8   | 0.9   | 1.0   | 0.9   | 0.4   | 0.7    | 0.3   | 1.0   | 0.8   |
| 11.0  | 12.8  | 12.2  | 8.3   | 2.1   | 7.1    | 1.1   | 2.8   | 1.5   |
| 2.9   | 10.4  | 4.3   | 0.9   | 3.6   | 16.9   | 8.0   | 13.0  | 24.4  |
| 851.1 | 736.7 | 716.9 | 607.1 | 233.3 | 495.8  | 332.4 | 90.0  | 139.7 |
| 21.6  | 21.0  | 37.5  | 33.0  | 20.5  | 83.0   | 55.2  | 12.5  | 14.9  |
| 21.9  | 9.3   | 2.4   | 3.6   | 1.9   | 6.5    | 24.6  | 23.4  | 21.1  |
| 0.5   | 0.9   | 3.6   | 3.8   | 0.5   | 0.4    | 0.9   | 4.6   | 1.5   |
| 37.6  | 34.2  | 48.7  | 92.5  | 23.1  | 16.4   | 11.5  | 0.5   | 0.8   |
| 2.9   | 1.1   | 5.4   | 5.5   | 6.6   | 17.4   | 2.3   | 14.9  | 9.1   |
| 1.7   | 1.6   | 2.7   | 8.2   | 0.7   | 1.1    | 2.5   | 10.4  | 3.1   |
| 4.0   | 3.1   | 1.7   | 1.5   | 0.6   | 158.0  | 163.8 | 0.8   | 0.9   |
| 25.1  | 7.5   | 20.0  | 2.9   | 1.0   | 139.7  | 93.1  | 0.7   | 0.5   |
| 184.7 | 141.2 | 222.3 | 207.5 | 118.0 | 492.2  | 269.9 | 14.3  | 17.9  |
| 225.4 | 206.4 | 236.3 | 182.4 | 61.0  | 461.4  | 271.8 | 21.3  | 25.1  |
| 56.3  | 57.1  | 52.2  | 25.9  | 24.3  | 19.2   | 3.4   | 13.2  | 10.8  |
| 0.6   | 7.1   | 5.9   | 0.3   | 0.6   | 0.5    | 1.2   | 2.3   | 4.8   |
| 0.5   | 3.1   | 6.9   | 0.5   | 0.4   | 1.9    | 2.5   | 0.2   | 3.1   |
| 589.3 | 585.1 | 539.6 | 251.7 | 168.5 | 433.9  | 235.1 | 78.2  | 91.2  |
| 3.5   | 2.0   | 2.1   | 1.1   | 0.6   | 1.4    | 0.8   | 2.3   | 5.3   |
| 19.8  | 24.1  | 13.7  | 20.6  | 17.8  | 17.5   | 20.2  | 21.9  | 17.1  |
| 1.3   | 4.9   | 1.3   | 1.2   | 1.0   | 3.9    | 1.6   | 2.4   | 5.9   |
| 2.5   | 2.7   | 2.2   | 1.8   | 1.0   | 1.8    | 1.5   | 1.9   | 6.2   |
| 1.4   | 1.1   | 1.3   | 1.4   | 1.3   | 1.8    | 0.8   | 1.5   | 1.4   |
| 26.2  | 9.4   | 26.1  | 2.7   | 1.3   | 28.9   | 14.3  | 3.9   | 3.2   |
| 1.1   | 1.4   | 1.1   | 0.4   | 0.7   | 1.3    | 0.9   | 2.4   | 1.0   |
| 88.7  | 45.6  | 41.8  | 28.0  | 16.5  | 100.2  | 91.6  | 23.1  | 41.0  |
| 1.8   | 9.8   | 1.9   | 1.5   | 0.6   | 1.7    | 1.2   | 0.9   | 1.0   |
| 3.6   | 4.9   | 3.1   | 17.5  | 1.2   | 37.9   | 22.9  | 10.9  | 2.8   |
| 3.5   | 2.7   | 3.1   | 3.2   | 1.1   | 18.3   | 34.3  | 1.2   | 3.0   |
| 2.1   | 0.5   | 19.2  | 2.7   | 0.7   | 16.4   | 9.0   | 1.3   | 10.1  |
| 0.7   | 1.5   | 0.9   | 0.4   | 0.7   | 12.1   | 14.6  | 1.0   | 0.5   |
| 12.3  | 10.1  | 4.0   | 1.0   | 0.4   | 50.3   | 47.3  | 24.6  | 18.7  |
| 5.3   | 16.0  | 7.6   | 13.9  | 9.8   | 92.3   | 73.4  | 6.6   | 1.8   |
| 21.0  | 30.4  | 19.0  | 15.7  | 12.3  | 54.9   | 30.0  | 5.3   | 8.8   |
| 88.1  | 53.0  | 66.9  | 41.5  | 15.4  | 86.6   | 93.8  | 3.4   | 16.2  |
| 27.5  | 9.1   | 20.1  | 13.8  | 3.4   | 68.5   | 52.0  | 10.0  | 23.9  |
| 112.2 | 93.4  | 81.0  | 58.0  | 28.1  | 14.6   | 15.8  | 105.0 | 162.2 |
| 2.0   | 5.3   | 2.9   | 2.5   | 0.9   | 12.0   | 11.9  | 10.4  | 15.2  |
| 298.5 | 265.9 | 248.6 | 257.5 | 85.2  | 367.8  | 295.6 | 70.4  | 111.0 |
| 23.8  | 11.4  | 25.7  | 14.5  | 8.1   | 58.2   | 48.7  | 6.4   | 5.0   |

|       |       |       |       |       |        |       |       |       |
|-------|-------|-------|-------|-------|--------|-------|-------|-------|
| 155.0 | 108.4 | 135.4 | 127.7 | 54.2  | 460.2  | 407.3 | 3.1   | 13.4  |
| 8.6   | 2.5   | 1.6   | 10.5  | 0.4   | 0.8    | 16.9  | 16.7  | 28.5  |
| 5.2   | 1.2   | 4.8   | 2.7   | 0.6   | 6.1    | 8.3   | 7.7   | 7.9   |
| 3.6   | 10.3  | 5.3   | 1.0   | 3.9   | 1.3    | 1.2   | 9.7   | 5.7   |
| 2.9   | 2.7   | 2.8   | 2.1   | 0.9   | 1.7    | 1.1   | 1.2   | 1.3   |
| 28.5  | 34.7  | 26.4  | 9.2   | 4.0   | 36.9   | 17.9  | 3.3   | 8.1   |
| 3.2   | 10.0  | 29.0  | 2.3   | 3.8   | 6.5    | 4.5   | 9.7   | 4.7   |
| 3.0   | 3.9   | 0.7   | 1.3   | 3.3   | 5.4    | 8.2   | 4.8   | 5.3   |
| 6.5   | 8.7   | 12.7  | 1.7   | 7.0   | 1.3    | 1.4   | 11.7  | 0.3   |
| 12.2  | 7.6   | 11.2  | 1.3   | 6.7   | 17.3   | 8.6   | 1.5   | 8.3   |
| 0.8   | 2.4   | 1.9   | 0.4   | 0.6   | 3.1    | 0.5   | 0.9   | 6.3   |
| 10.0  | 7.5   | 12.8  | 8.0   | 2.1   | 19.1   | 12.2  | 0.4   | 4.5   |
| 10.9  | 25.7  | 10.2  | 16.7  | 7.3   | 5.6    | 17.3  | 16.8  | 9.6   |
| 18.2  | 10.2  | 18.5  | 24.6  | 5.2   | 64.3   | 35.7  | 7.2   | 2.6   |
| 3.7   | 2.8   | 2.4   | 2.9   | 2.5   | 2.0    | 4.2   | 4.4   | 4.0   |
| 3.7   | 0.7   | 0.7   | 1.1   | 0.3   | 2.4    | 1.4   | 1.3   | 1.8   |
| 21.3  | 1.3   | 5.6   | 2.0   | 11.7  | 1.6    | 0.6   | 5.2   | 9.4   |
| 18.2  | 5.6   | 3.8   | 10.5  | 3.4   | 13.1   | 5.7   | 10.7  | 12.0  |
| 15.6  | 10.8  | 28.6  | 1.6   | 10.1  | 34.1   | 27.9  | 41.7  | 21.7  |
| 0.4   | 2.9   | 1.3   | 0.6   | 3.1   | 12.1   | 7.8   | 1.3   | 0.6   |
| 5.3   | 0.7   | 3.9   | 3.0   | 0.8   | 6.2    | 1.6   | 16.4  | 9.1   |
| 97.1  | 96.5  | 83.7  | 79.6  | 22.4  | 61.1   | 21.8  | 27.0  | 42.8  |
| 1.3   | 8.4   | 2.8   | 4.1   | 0.5   | 11.1   | 12.9  | 5.1   | 18.3  |
| 15.7  | 9.9   | 9.5   | 16.7  | 2.5   | 17.0   | 9.6   | 10.7  | 8.4   |
| 221.3 | 185.9 | 205.7 | 101.6 | 53.8  | 281.8  | 134.2 | 51.2  | 65.5  |
| 5.3   | 13.6  | 15.1  | 7.2   | 5.4   | 11.9   | 3.8   | 3.7   | 4.5   |
| 11.9  | 1.7   | 13.1  | 4.4   | 1.4   | 7.6    | 3.7   | 6.6   | 0.9   |
| 1.2   | 0.8   | 6.2   | 0.8   | 0.3   | 3.3    | 9.6   | 6.4   | 3.6   |
| 0.8   | 1.0   | 13.7  | 0.8   | 1.7   | 13.4   | 6.8   | 4.7   | 1.6   |
| 33.1  | 36.1  | 31.1  | 29.4  | 14.6  | 401.6  | 209.5 | 31.3  | 39.4  |
| 1.8   | 2.8   | 2.8   | 3.2   | 0.9   | 8.1    | 2.0   | 1.8   | 3.0   |
| 512.1 | 382.5 | 496.7 | 381.1 | 147.2 | 1046.5 | 510.3 | 291.3 | 356.6 |
| 45.2  | 64.3  | 52.5  | 77.6  | 27.8  | 95.4   | 60.5  | 12.2  | 10.8  |
| 10.2  | 15.2  | 10.1  | 8.1   | 1.1   | 311.4  | 337.9 | 155.0 | 179.7 |
| 78.9  | 38.9  | 49.2  | 49.3  | 13.5  | 40.8   | 23.8  | 2.1   | 7.6   |
| 438.9 | 219.1 | 287.2 | 173.6 | 123.9 | 311.6  | 373.5 | 272.1 | 315.8 |
| 30.3  | 32.4  | 30.3  | 21.6  | 8.9   | 283.2  | 180.7 | 19.1  | 38.8  |
| 2.2   | 1.7   | 1.4   | 7.7   | 0.4   | 212.6  | 157.3 | 2.3   | 13.2  |
| 18.4  | 28.3  | 26.1  | 16.3  | 7.7   | 59.0   | 30.7  | 24.4  | 22.2  |
| 9.8   | 1.6   | 10.7  | 2.9   | 6.5   | 5.3    | 2.8   | 4.2   | 2.7   |
| 9.6   | 9.6   | 2.5   | 10.0  | 1.7   | 3.9    | 3.2   | 3.3   | 9.4   |
| 18.1  | 20.3  | 16.6  | 19.1  | 15.7  | 14.5   | 14.7  | 8.0   | 18.7  |
| 1.3   | 1.9   | 1.6   | 0.9   | 1.1   | 4.6    | 0.2   | 2.8   | 5.4   |
| 37.8  | 15.7  | 42.8  | 24.2  | 11.2  | 59.0   | 66.8  | 11.7  | 16.7  |
| 7.2   | 15.4  | 12.9  | 16.0  | 6.0   | 21.0   | 10.7  | 8.2   | 0.9   |
| 28.9  | 15.1  | 8.9   | 2.8   | 4.5   | 174.4  | 90.0  | 58.6  | 69.9  |
| 0.7   | 2.8   | 4.3   | 2.4   | 1.0   | 20.1   | 16.2  | 5.2   | 4.0   |
| 1.1   | 1.0   | 1.9   | 3.1   | 0.1   | 0.5    | 0.3   | 7.0   | 17.6  |
| 89.9  | 76.5  | 58.3  | 67.4  | 25.5  | 183.2  | 117.1 | 164.0 | 182.3 |
| 107.7 | 124.0 | 98.8  | 105.9 | 36.4  | 559.0  | 332.6 | 66.7  | 116.3 |
| 1.9   | 1.3   | 1.6   | 1.0   | 0.7   | 2.2    | 1.3   | 1.3   | 1.5   |
| 4.9   | 10.2  | 3.2   | 1.7   | 0.8   | 2.9    | 1.7   | 4.7   | 3.7   |
| 0.9   | 5.4   | 0.9   | 2.6   | 0.3   | 0.7    | 0.7   | 15.7  | 1.1   |



|       |       |       |       |       |       |       |       |       |
|-------|-------|-------|-------|-------|-------|-------|-------|-------|
| 2.2   | 1.1   | 3.2   | 1.7   | 1.4   | 4.6   | 2.7   | 1.5   | 1.5   |
| 22.9  | 38.0  | 45.0  | 62.7  | 13.4  | 51.9  | 35.2  | 31.6  | 16.3  |
| 2.1   | 10.7  | 2.0   | 2.2   | 1.3   | 13.7  | 2.7   | 2.4   | 0.9   |
| 8.8   | 20.0  | 6.1   | 11.5  | 3.9   | 21.1  | 2.2   | 24.0  | 30.8  |
| 1.0   | 1.2   | 1.2   | 1.0   | 0.3   | 0.7   | 0.7   | 0.6   | 2.3   |
| 30.4  | 35.8  | 14.9  | 10.2  | 6.6   | 9.0   | 2.0   | 5.5   | 8.6   |
| 43.4  | 33.8  | 25.3  | 13.1  | 6.6   | 14.4  | 13.2  | 14.1  | 13.4  |
| 6.1   | 6.6   | 8.5   | 11.7  | 2.2   | 167.3 | 136.4 | 6.9   | 9.2   |
| 19.9  | 4.2   | 6.6   | 12.7  | 3.0   | 41.8  | 20.1  | 33.6  | 13.9  |
| 1.6   | 5.8   | 7.7   | 9.5   | 4.8   | 16.2  | 22.8  | 1.3   | 1.1   |
| 254.2 | 213.0 | 241.2 | 219.5 | 72.7  | 205.9 | 121.4 | 55.4  | 69.4  |
| 247.3 | 244.2 | 214.2 | 126.3 | 44.2  | 453.4 | 161.9 | 28.5  | 45.0  |
| 1.9   | 0.9   | 0.8   | 1.2   | 0.2   | 58.2  | 35.2  | 0.6   | 0.3   |
| 3.1   | 23.3  | 27.3  | 10.3  | 0.8   | 51.8  | 16.4  | 17.7  | 5.8   |
| 4.2   | 16.6  | 13.4  | 16.7  | 1.8   | 8.5   | 29.4  | 6.7   | 17.5  |
| 8.4   | 0.5   | 1.2   | 8.5   | 1.1   | 0.7   | 5.5   | 1.4   | 1.7   |
| 139.8 | 73.7  | 128.2 | 134.4 | 52.8  | 40.8  | 28.7  | 18.2  | 18.2  |
| 4.4   | 0.8   | 1.4   | 5.1   | 0.6   | 21.7  | 4.0   | 13.5  | 13.6  |
| 192.0 | 230.5 | 235.1 | 224.4 | 67.1  | 129.2 | 102.6 | 12.2  | 19.2  |
| 13.3  | 2.5   | 2.3   | 2.0   | 1.9   | 10.9  | 2.8   | 17.0  | 35.8  |
| 15.0  | 36.8  | 17.1  | 29.6  | 10.5  | 31.7  | 19.4  | 0.8   | 0.3   |
| 9.6   | 21.5  | 20.7  | 16.3  | 4.3   | 29.9  | 18.4  | 10.3  | 15.9  |
| 0.3   | 3.1   | 0.6   | 0.2   | 0.1   | 6.8   | 6.1   | 4.9   | 0.5   |
| 1.6   | 5.1   | 1.8   | 3.3   | 1.4   | 10.5  | 3.1   | 5.0   | 3.8   |
| 9.2   | 10.4  | 6.6   | 0.6   | 2.1   | 10.5  | 7.1   | 6.1   | 7.3   |
| 15.6  | 28.7  | 14.9  | 4.2   | 8.9   | 12.6  | 7.5   | 16.2  | 11.3  |
| 3.7   | 1.1   | 3.0   | 1.0   | 0.1   | 33.1  | 9.5   | 0.6   | 6.1   |
| 3.4   | 5.0   | 6.6   | 1.1   | 1.1   | 12.8  | 6.7   | 7.4   | 2.2   |
| 1.8   | 0.5   | 0.7   | 0.8   | 1.2   | 3.9   | 1.1   | 0.6   | 0.8   |
| 1.2   | 1.4   | 1.7   | 1.5   | 0.9   | 1.8   | 1.5   | 0.9   | 1.3   |
| 552.7 | 569.9 | 653.5 | 746.0 | 221.1 | 741.4 | 625.5 | 104.4 | 134.2 |
| 67.5  | 52.0  | 68.8  | 51.5  | 22.5  | 111.7 | 72.9  | 77.0  | 86.5  |
| 18.5  | 14.4  | 10.8  | 3.8   | 9.2   | 4.1   | 1.6   | 16.9  | 2.3   |
| 1.0   | 0.9   | 1.9   | 0.7   | 0.7   | 2.2   | 1.1   | 0.5   | 0.8   |
| 62.7  | 45.5  | 53.0  | 62.7  | 22.7  | 41.7  | 32.2  | 11.3  | 14.1  |
| 124.6 | 139.4 | 167.1 | 196.9 | 53.2  | 57.3  | 29.7  | 10.6  | 29.4  |
| 9.8   | 3.1   | 7.6   | 3.4   | 3.1   | 5.3   | 9.5   | 5.4   | 9.7   |
| 6.5   | 3.7   | 1.2   | 8.1   | 0.6   | 41.0  | 33.0  | 5.5   | 12.5  |
| 87.6  | 86.2  | 61.4  | 24.3  | 21.9  | 162.9 | 162.6 | 31.0  | 52.1  |
| 1.0   | 1.2   | 7.3   | 1.1   | 0.7   | 1.9   | 2.0   | 1.1   | 1.2   |
| 0.5   | 1.6   | 1.1   | 7.7   | 2.5   | 1.8   | 4.4   | 1.1   | 7.7   |
| 9.0   | 9.2   | 2.0   | 8.6   | 3.2   | 8.7   | 0.8   | 5.5   | 6.6   |
| 4.7   | 26.5  | 27.5  | 12.2  | 13.8  | 32.2  | 18.3  | 8.8   | 3.6   |
| 95.9  | 81.3  | 89.4  | 100.4 | 40.3  | 116.3 | 93.3  | 9.8   | 18.9  |
| 8.0   | 9.4   | 4.8   | 7.0   | 2.5   | 44.6  | 95.8  | 5.9   | 3.1   |
| 1.1   | 0.6   | 1.0   | 1.5   | 1.3   | 6.2   | 0.8   | 2.0   | 1.4   |
| 189.6 | 161.8 | 160.6 | 101.5 | 54.2  | 174.7 | 89.2  | 54.5  | 110.8 |
| 20.8  | 21.3  | 19.2  | 19.3  | 6.3   | 13.2  | 13.5  | 9.6   | 14.0  |
| 16.0  | 6.1   | 11.5  | 14.3  | 8.2   | 14.8  | 4.4   | 5.2   | 9.3   |
| 125.6 | 78.1  | 136.5 | 451.8 | 62.0  | 156.8 | 124.7 | 12.8  | 18.5  |
| 16.1  | 1.6   | 11.5  | 11.6  | 9.7   | 2.8   | 0.9   | 7.7   | 8.5   |
| 229.5 | 262.6 | 224.9 | 166.8 | 100.8 | 80.5  | 35.2  | 15.4  | 13.4  |
| 39.6  | 36.7  | 29.0  | 14.6  | 20.0  | 50.1  | 34.9  | 9.2   | 27.9  |

|        |        |        |        |       |        |        |       |       |
|--------|--------|--------|--------|-------|--------|--------|-------|-------|
| 44.1   | 28.5   | 37.1   | 33.5   | 13.3  | 39.0   | 22.2   | 13.1  | 15.8  |
| 13.9   | 4.8    | 2.6    | 9.0    | 4.2   | 16.8   | 0.7    | 6.5   | 8.7   |
| 1.2    | 1.0    | 1.0    | 0.7    | 0.5   | 2.7    | 1.0    | 1.4   | 0.7   |
| 200.2  | 217.6  | 226.3  | 174.3  | 84.9  | 446.6  | 234.3  | 106.3 | 169.5 |
| 5.9    | 2.8    | 5.4    | 6.5    | 1.4   | 445.6  | 277.4  | 85.0  | 151.6 |
| 48.2   | 31.6   | 39.5   | 26.0   | 21.1  | 75.1   | 62.1   | 17.4  | 36.6  |
| 1.0    | 0.9    | 1.9    | 0.4    | 0.5   | 2.6    | 1.0    | 2.3   | 1.6   |
| 48.3   | 57.3   | 61.6   | 42.0   | 12.7  | 82.8   | 58.0   | 19.4  | 17.9  |
| 41.2   | 28.2   | 29.2   | 20.1   | 12.6  | 21.5   | 20.9   | 4.6   | 15.5  |
| 9.2    | 10.4   | 6.4    | 5.2    | 0.3   | 8.4    | 25.1   | 1.7   | 4.7   |
| 20.3   | 14.2   | 14.1   | 10.6   | 2.8   | 107.6  | 83.1   | 28.2  | 35.9  |
| 557.0  | 469.2  | 483.4  | 485.4  | 126.4 | 1558.1 | 1040.0 | 208.4 | 323.9 |
| 13.3   | 7.6    | 12.7   | 9.9    | 1.1   | 3.4    | 2.6    | 6.4   | 2.3   |
| 1076.7 | 1015.6 | 907.0  | 606.8  | 318.3 | 2217.9 | 1273.0 | 184.5 | 258.6 |
| 30.8   | 27.5   | 58.1   | 30.8   | 11.4  | 29.8   | 15.0   | 28.5  | 42.5  |
| 0.6    | 2.9    | 0.8    | 0.7    | 1.2   | 1.0    | 0.4    | 1.9   | 2.0   |
| 1008.6 | 1082.4 | 1014.8 | 887.1  | 436.6 | 3774.1 | 2797.8 | 99.3  | 151.1 |
| 63.8   | 44.7   | 49.9   | 23.4   | 24.1  | 122.5  | 81.3   | 26.9  | 12.7  |
| 14.0   | 7.2    | 4.4    | 7.1    | 2.1   | 19.6   | 24.7   | 25.0  | 38.6  |
| 11.9   | 16.2   | 8.4    | 10.5   | 1.3   | 14.8   | 10.2   | 7.7   | 23.9  |
| 18.9   | 14.9   | 13.8   | 1.1    | 0.3   | 85.7   | 71.8   | 102.8 | 136.8 |
| 0.9    | 3.5    | 11.6   | 1.0    | 1.0   | 0.8    | 6.6    | 0.6   | 1.6   |
| 109.1  | 33.8   | 31.4   | 20.6   | 14.9  | 764.8  | 514.6  | 41.9  | 56.4  |
| 14.8   | 7.4    | 1.9    | 5.4    | 5.7   | 3.1    | 8.0    | 4.2   | 9.7   |
| 49.4   | 36.6   | 47.0   | 21.7   | 14.0  | 89.1   | 62.3   | 59.5  | 50.9  |
| 16.1   | 15.2   | 10.9   | 1.2    | 2.7   | 18.2   | 2.1    | 16.6  | 37.3  |
| 3.8    | 13.6   | 5.7    | 5.1    | 5.3   | 14.9   | 10.0   | 6.3   | 6.9   |
| 212.3  | 244.0  | 210.5  | 159.5  | 67.3  | 360.4  | 269.0  | 214.6 | 221.9 |
| 312.9  | 351.1  | 333.7  | 150.0  | 103.7 | 24.0   | 6.0    | 1.8   | 0.7   |
| 6.7    | 4.5    | 8.8    | 6.0    | 3.6   | 25.6   | 15.0   | 7.9   | 1.2   |
| 2.4    | 12.9   | 1.1    | 2.8    | 0.3   | 3.9    | 7.2    | 0.5   | 0.6   |
| 5.3    | 4.7    | 4.6    | 2.2    | 0.3   | 0.6    | 0.3    | 0.8   | 0.7   |
| 6.1    | 0.9    | 4.1    | 8.1    | 0.7   | 9.4    | 5.9    | 2.2   | 3.7   |
| 5.0    | 8.4    | 16.6   | 28.9   | 12.9  | 17.4   | 22.5   | 1.1   | 3.8   |
| 1.8    | 3.2    | 9.8    | 1.0    | 5.1   | 2.8    | 1.0    | 2.6   | 10.2  |
| 1204.4 | 783.2  | 951.7  | 1038.1 | 379.9 | 5001.4 | 3742.9 | 175.0 | 171.2 |
| 242.7  | 188.9  | 222.7  | 177.0  | 40.2  | 245.8  | 146.1  | 131.3 | 291.0 |
| 93.2   | 116.2  | 113.3  | 98.9   | 51.8  | 24.7   | 30.2   | 7.4   | 10.2  |
| 4.4    | 9.0    | 2.2    | 2.9    | 7.7   | 6.1    | 11.0   | 1.6   | 7.6   |
| 9.7    | 6.3    | 18.5   | 6.1    | 6.5   | 1.1    | 2.7    | 21.0  | 20.8  |
| 67.1   | 49.2   | 70.1   | 46.1   | 27.9  | 54.1   | 33.6   | 10.3  | 14.5  |
| 9.0    | 18.3   | 4.4    | 2.0    | 2.4   | 52.1   | 21.5   | 21.6  | 4.0   |
| 23.4   | 18.7   | 22.5   | 30.6   | 5.5   | 125.1  | 110.1  | 2.5   | 10.5  |
| 2.2    | 10.3   | 2.6    | 1.2    | 4.6   | 403.3  | 264.1  | 2.2   | 0.7   |
| 18.0   | 8.3    | 14.2   | 16.1   | 5.8   | 11.4   | 5.9    | 20.4  | 7.2   |
| 5.9    | 8.0    | 14.9   | 8.4    | 4.1   | 71.2   | 80.6   | 0.4   | 5.5   |
| 52.8   | 83.2   | 78.5   | 63.5   | 26.1  | 8.1    | 16.5   | 12.0  | 12.8  |
| 39.5   | 54.3   | 48.4   | 13.6   | 13.8  | 23.9   | 20.4   | 5.3   | 20.9  |
| 65.3   | 74.2   | 67.6   | 46.7   | 26.5  | 83.7   | 62.5   | 18.4  | 11.0  |
| 21.1   | 3.9    | 6.5    | 3.5    | 0.2   | 3.2    | 3.5    | 12.3  | 8.3   |
| 1.7    | 0.6    | 0.7    | 0.6    | 0.6   | 11.4   | 7.9    | 3.4   | 3.3   |
| 2.6    | 14.3   | 6.6    | 1.9    | 0.7   | 13.9   | 26.8   | 15.3  | 7.9   |
| 11.6   | 18.5   | 9.8    | 8.1    | 10.4  | 24.6   | 12.6   | 0.3   | 1.8   |

|        |       |       |       |       |        |       |       |       |
|--------|-------|-------|-------|-------|--------|-------|-------|-------|
| 55.6   | 41.6  | 35.2  | 39.4  | 18.9  | 68.1   | 34.9  | 29.4  | 28.5  |
| 26.1   | 9.7   | 13.8  | 24.0  | 4.3   | 34.8   | 10.0  | 9.2   | 9.0   |
| 28.4   | 18.7  | 27.8  | 10.5  | 5.3   | 35.9   | 15.4  | 36.6  | 24.0  |
| 763.8  | 914.3 | 844.6 | 573.3 | 319.4 | 1198.7 | 866.0 | 99.4  | 165.7 |
| 25.9   | 2.5   | 18.2  | 11.7  | 9.6   | 71.8   | 55.0  | 33.4  | 32.9  |
| 15.6   | 10.9  | 19.4  | 14.4  | 4.5   | 193.8  | 141.0 | 18.0  | 21.0  |
| 34.0   | 25.9  | 27.2  | 22.1  | 9.5   | 28.9   | 17.2  | 15.1  | 18.1  |
| 14.4   | 1.5   | 26.6  | 9.8   | 5.2   | 156.4  | 101.0 | 59.7  | 137.7 |
| 20.6   | 15.6  | 5.5   | 9.9   | 8.6   | 10.6   | 9.5   | 6.1   | 9.0   |
| 7.5    | 0.8   | 2.5   | 2.3   | 0.1   | 1.3    | 2.4   | 11.6  | 9.1   |
| 479.2  | 465.3 | 325.0 | 238.4 | 135.4 | 1212.6 | 941.1 | 163.0 | 221.1 |
| 53.1   | 39.7  | 28.6  | 8.5   | 16.7  | 94.3   | 26.3  | 101.3 | 84.4  |
| 56.1   | 58.2  | 54.1  | 28.1  | 18.3  | 137.6  | 83.9  | 10.3  | 6.8   |
| 9.5    | 14.1  | 17.5  | 12.9  | 5.7   | 19.1   | 10.1  | 11.4  | 35.9  |
| 75.9   | 45.8  | 62.4  | 48.4  | 21.4  | 158.6  | 108.5 | 26.9  | 26.1  |
| 13.6   | 1.5   | 2.2   | 4.1   | 4.8   | 0.8    | 0.9   | 3.5   | 1.0   |
| 29.1   | 19.6  | 14.1  | 8.2   | 4.3   | 119.4  | 100.4 | 106.5 | 118.6 |
| 14.3   | 16.6  | 21.1  | 16.8  | 2.0   | 150.4  | 130.5 | 48.5  | 34.1  |
| 29.6   | 30.1  | 36.0  | 53.3  | 13.4  | 0.8    | 4.7   | 1.9   | 21.5  |
| 16.8   | 18.7  | 22.2  | 12.7  | 8.9   | 14.1   | 17.7  | 13.1  | 8.3   |
| 16.9   | 19.1  | 15.0  | 16.3  | 9.5   | 4.0    | 8.2   | 0.9   | 4.0   |
| 184.0  | 139.7 | 173.5 | 210.7 | 50.8  | 233.0  | 108.4 | 89.1  | 121.8 |
| 1.8    | 1.2   | 2.3   | 1.0   | 4.6   | 46.3   | 24.6  | 4.2   | 6.9   |
| 21.3   | 14.6  | 19.1  | 15.3  | 1.4   | 10.7   | 10.1  | 4.6   | 3.8   |
| 1066.3 | 839.7 | 804.9 | 260.2 | 250.3 | 1622.7 | 944.9 | 254.6 | 253.2 |
| 66.4   | 46.8  | 40.2  | 14.9  | 19.9  | 95.3   | 72.3  | 23.8  | 18.7  |
| 9.5    | 15.5  | 14.2  | 8.5   | 10.8  | 42.8   | 23.3  | 18.1  | 12.3  |
| 13.7   | 3.1   | 16.2  | 6.4   | 1.1   | 3.6    | 6.7   | 1.7   | 9.5   |
| 1.6    | 1.7   | 6.1   | 0.8   | 0.7   | 2.0    | 3.1   | 1.1   | 2.7   |
| 10.7   | 9.0   | 7.5   | 6.8   | 6.9   | 0.8    | 12.3  | 5.0   | 16.9  |
| 2.2    | 2.1   | 15.4  | 1.2   | 1.0   | 108.0  | 63.4  | 47.1  | 65.2  |
| 4.3    | 7.5   | 5.9   | 6.6   | 2.0   | 3.2    | 2.0   | 2.9   | 11.4  |
| 31.0   | 30.7  | 27.2  | 3.1   | 14.5  | 33.4   | 15.3  | 3.4   | 5.5   |
| 34.2   | 4.6   | 17.8  | 11.9  | 14.4  | 23.2   | 3.5   | 15.5  | 18.6  |
| 7.0    | 7.6   | 3.0   | 4.5   | 0.8   | 6.5    | 0.7   | 3.4   | 3.1   |
| 70.7   | 62.0  | 71.0  | 71.0  | 26.4  | 56.8   | 42.0  | 0.5   | 8.7   |
| 94.6   | 66.9  | 62.4  | 48.3  | 19.5  | 31.9   | 1.5   | 46.5  | 22.0  |
| 11.9   | 14.6  | 22.9  | 14.2  | 4.4   | 32.0   | 15.7  | 7.8   | 21.0  |
| 2.5    | 1.0   | 1.4   | 1.0   | 2.0   | 4.9    | 3.7   | 4.7   | 8.2   |
| 7.0    | 14.3  | 4.5   | 14.5  | 5.6   | 17.4   | 0.8   | 20.1  | 21.8  |
| 29.0   | 4.6   | 15.2  | 2.5   | 9.9   | 35.6   | 31.4  | 25.0  | 38.0  |
| 14.5   | 10.5  | 5.8   | 7.0   | 1.4   | 34.3   | 29.7  | 11.0  | 4.9   |
| 3.6    | 4.8   | 5.4   | 7.7   | 0.9   | 2.5    | 2.6   | 6.8   | 5.6   |
| 0.9    | 0.2   | 3.7   | 0.9   | 0.2   | 0.4    | 0.8   | 0.2   | 0.7   |
| 4.0    | 4.3   | 7.3   | 11.3  | 0.9   | 21.7   | 2.6   | 1.5   | 1.2   |
| 50.7   | 27.1  | 44.5  | 28.7  | 1.3   | 55.0   | 50.5  | 10.0  | 32.8  |
| 461.5  | 392.0 | 354.2 | 341.9 | 154.9 | 588.5  | 317.4 | 122.7 | 161.2 |
| 108.7  | 80.8  | 97.7  | 79.1  | 30.6  | 155.6  | 97.1  | 34.9  | 66.1  |
| 169.6  | 170.5 | 98.7  | 52.2  | 43.5  | 18.8   | 12.3  | 11.6  | 7.4   |
| 86.2   | 74.5  | 57.8  | 34.8  | 19.2  | 76.4   | 40.8  | 76.5  | 87.4  |
| 1.1    | 4.8   | 7.0   | 9.2   | 7.1   | 1.4    | 0.3   | 1.0   | 1.2   |
| 7.5    | 0.4   | 4.0   | 0.4   | 0.7   | 0.6    | 0.4   | 3.1   | 2.0   |
| 14.0   | 9.6   | 17.5  | 10.4  | 6.5   | 1.9    | 8.7   | 7.7   | 5.7   |

|        |        |        |        |       |        |        |       |       |
|--------|--------|--------|--------|-------|--------|--------|-------|-------|
| 2.6    | 0.2    | 1.4    | 3.7    | 0.1   | 6.9    | 4.4    | 1.5   | 5.7   |
| 4.2    | 2.6    | 3.0    | 1.4    | 4.9   | 2.6    | 2.2    | 3.2   | 2.3   |
| 180.9  | 156.3  | 167.7  | 117.5  | 52.2  | 182.6  | 55.4   | 41.9  | 49.9  |
| 1.7    | 3.1    | 2.5    | 0.9    | 0.5   | 1.5    | 1.9    | 2.5   | 4.4   |
| 1.2    | 0.7    | 1.2    | 1.5    | 0.7   | 2.0    | 1.1    | 2.3   | 0.9   |
| 8.9    | 14.9   | 9.2    | 11.8   | 11.5  | 6.9    | 6.3    | 10.9  | 13.9  |
| 11.1   | 6.1    | 5.7    | 3.0    | 0.9   | 4.4    | 3.8    | 16.2  | 2.2   |
| 5.7    | 16.2   | 15.7   | 13.8   | 4.2   | 31.5   | 6.6    | 22.9  | 13.5  |
| 0.8    | 0.4    | 1.0    | 0.4    | 0.1   | 4.4    | 12.2   | 1.0   | 0.7   |
| 2.0    | 1.5    | 22.6   | 10.3   | 4.7   | 2.1    | 1.3    | 13.8  | 4.8   |
| 0.9    | 1.0    | 1.6    | 1.6    | 0.6   | 1.1    | 0.7    | 26.3  | 33.0  |
| 2.4    | 3.8    | 3.6    | 2.3    | 0.9   | 7.1    | 3.6    | 1.1   | 2.6   |
| 492.1  | 631.6  | 490.5  | 1233.2 | 313.2 | 748.3  | 587.6  | 6.8   | 5.0   |
| 2849.6 | 2469.1 | 2575.2 | 2763.9 | 826.1 | 3660.0 | 3485.9 | 795.0 | 798.8 |
| 12.4   | 1.9    | 2.3    | 6.8    | 6.0   | 3.1    | 8.0    | 1.6   | 7.9   |
| 33.3   | 22.9   | 10.8   | 9.9    | 7.2   | 37.1   | 15.2   | 16.6  | 14.8  |
| 14.8   | 15.0   | 10.8   | 10.5   | 6.0   | 2.2    | 8.0    | 3.5   | 14.0  |
| 11.1   | 6.1    | 11.0   | 6.4    | 5.0   | 4.4    | 7.1    | 1.4   | 1.2   |
| 7.2    | 3.9    | 1.0    | 4.0    | 4.6   | 2.8    | 0.6    | 6.4   | 1.4   |
| 1.3    | 1.2    | 2.1    | 3.2    | 4.4   | 0.9    | 9.4    | 27.5  | 21.2  |
| 5.6    | 2.3    | 0.3    | 2.1    | 0.9   | 4.3    | 5.0    | 33.7  | 76.6  |
| 10.8   | 2.2    | 6.9    | 5.0    | 2.0   | 8.7    | 6.5    | 30.8  | 43.9  |
| 13.0   | 7.5    | 8.1    | 1.6    | 0.2   | 11.7   | 4.8    | 5.5   | 6.3   |
| 7.8    | 1.4    | 10.6   | 3.4    | 4.7   | 4.6    | 3.2    | 10.1  | 11.1  |
| 18.5   | 25.7   | 29.9   | 21.1   | 12.5  | 60.7   | 60.5   | 2.6   | 11.0  |
| 17.6   | 22.0   | 20.4   | 12.1   | 6.5   | 488.3  | 456.2  | 2.2   | 16.9  |
| 4.0    | 16.2   | 12.7   | 4.1    | 5.7   | 1.8    | 13.3   | 16.5  | 27.5  |
| 19.5   | 12.3   | 10.1   | 32.4   | 1.6   | 14.1   | 7.7    | 0.7   | 2.3   |
| 83.2   | 87.7   | 133.2  | 124.1  | 29.0  | 153.7  | 147.3  | 29.0  | 48.8  |
| 417.5  | 326.8  | 369.5  | 327.8  | 103.9 | 456.2  | 380.1  | 285.7 | 417.9 |
| 33.0   | 41.0   | 64.0   | 64.0   | 18.7  | 15.9   | 32.6   | 3.1   | 7.5   |
| 86.7   | 50.7   | 73.0   | 114.8  | 19.2  | 55.2   | 39.3   | 22.3  | 3.4   |
| 11.8   | 2.2    | 1.4    | 1.3    | 0.2   | 7.1    | 2.1    | 10.3  | 6.5   |
| 24.4   | 19.2   | 25.2   | 13.4   | 8.7   | 16.0   | 14.4   | 1.2   | 17.3  |
| 10.6   | 3.8    | 3.4    | 8.2    | 1.3   | 19.1   | 4.2    | 68.4  | 37.7  |
| 61.0   | 71.9   | 73.9   | 65.6   | 23.1  | 149.9  | 107.6  | 87.6  | 109.9 |
| 9.8    | 17.6   | 14.2   | 8.6    | 6.1   | 17.6   | 10.3   | 12.5  | 6.9   |
| 107.6  | 70.8   | 82.0   | 63.1   | 18.2  | 89.8   | 38.2   | 32.2  | 54.0  |
| 7.8    | 8.9    | 5.3    | 9.2    | 5.0   | 26.7   | 17.6   | 22.1  | 7.6   |
| 67.0   | 43.1   | 38.4   | 38.3   | 7.0   | 49.4   | 13.7   | 43.1  | 56.4  |
| 2.5    | 1.1    | 1.4    | 1.9    | 1.6   | 1.4    | 1.1    | 3.2   | 1.7   |
| 18.4   | 29.7   | 28.7   | 21.3   | 14.8  | 61.7   | 24.0   | 20.7  | 24.7  |
| 8.9    | 14.9   | 15.6   | 3.2    | 2.6   | 6.1    | 8.3    | 4.5   | 11.5  |
| 52.0   | 49.3   | 60.6   | 47.0   | 19.8  | 109.6  | 80.4   | 5.8   | 10.8  |
| 2.6    | 7.9    | 2.6    | 0.8    | 2.8   | 5.5    | 3.8    | 2.1   | 7.2   |
| 1.5    | 1.2    | 0.5    | 1.0    | 0.2   | 0.7    | 0.4    | 0.6   | 1.1   |
| 1.8    | 9.3    | 2.9    | 2.4    | 3.5   | 143.0  | 94.4   | 13.5  | 11.2  |
| 8.1    | 2.1    | 13.7   | 2.8    | 2.5   | 4.8    | 1.9    | 2.8   | 1.7   |
| 1.0    | 1.4    | 1.0    | 4.1    | 3.0   | 10.0   | 1.1    | 1.6   | 1.0   |
| 23.3   | 27.8   | 42.7   | 17.9   | 11.6  | 30.6   | 15.7   | 65.5  | 59.1  |
| 3.8    | 1.1    | 1.6    | 1.9    | 1.7   | 2.4    | 1.9    | 2.5   | 4.5   |
| 3.9    | 7.0    | 5.8    | 1.3    | 1.6   | 25.3   | 9.0    | 15.3  | 9.0   |
| 29.2   | 32.2   | 34.9   | 26.7   | 17.2  | 38.2   | 19.3   | 10.1  | 11.9  |

|       |       |       |       |       |        |        |       |       |
|-------|-------|-------|-------|-------|--------|--------|-------|-------|
| 6.8   | 0.9   | 0.3   | 0.7   | 2.3   | 0.3    | 2.0    | 13.6  | 14.7  |
| 17.0  | 9.3   | 3.3   | 11.0  | 7.8   | 9.4    | 2.3    | 92.0  | 121.7 |
| 310.4 | 391.0 | 398.1 | 345.1 | 186.8 | 2141.1 | 1387.2 | 189.4 | 208.2 |
| 0.3   | 3.9   | 0.2   | 3.2   | 1.0   | 2.8    | 0.3    | 8.8   | 3.0   |
| 0.7   | 0.2   | 3.7   | 0.2   | 2.5   | 0.4    | 0.2    | 0.7   | 0.4   |
| 3.9   | 4.5   | 4.1   | 2.1   | 0.9   | 4.2    | 0.6    | 6.0   | 6.4   |
| 95.5  | 120.8 | 88.4  | 90.9  | 54.9  | 215.6  | 134.8  | 0.5   | 5.8   |
| 125.1 | 118.1 | 128.2 | 122.7 | 51.7  | 115.8  | 95.7   | 12.2  | 10.9  |
| 12.6  | 3.4   | 1.8   | 1.1   | 0.9   | 2.9    | 1.6    | 3.2   | 8.8   |
| 1.7   | 4.6   | 2.1   | 1.2   | 5.3   | 50.0   | 21.2   | 3.4   | 11.0  |
| 2.9   | 13.5  | 13.0  | 2.2   | 3.5   | 21.9   | 17.1   | 1.4   | 4.5   |
| 22.9  | 1.9   | 12.8  | 9.5   | 10.7  | 1.9    | 11.5   | 6.0   | 15.0  |
| 4.3   | 1.3   | 0.6   | 0.8   | 0.8   | 3.2    | 0.7    | 1.0   | 1.3   |
| 2.2   | 5.6   | 7.3   | 4.5   | 2.8   | 1.5    | 0.6    | 2.2   | 3.7   |
| 27.0  | 25.4  | 29.5  | 6.9   | 6.4   | 28.1   | 7.5    | 20.4  | 31.9  |
| 47.5  | 27.9  | 13.9  | 33.4  | 12.4  | 16.5   | 2.4    | 7.1   | 5.9   |
| 5.7   | 7.0   | 6.2   | 6.3   | 3.9   | 85.1   | 34.0   | 8.7   | 5.5   |
| 5.9   | 10.7  | 7.0   | 1.3   | 0.9   | 4.0    | 4.1    | 3.2   | 5.0   |
| 3.9   | 4.8   | 4.9   | 12.2  | 2.8   | 20.6   | 20.9   | 17.0  | 4.4   |
| 24.6  | 17.3  | 13.0  | 3.6   | 7.5   | 15.7   | 24.7   | 11.0  | 40.5  |
| 14.4  | 4.1   | 4.9   | 8.6   | 3.6   | 40.4   | 32.6   | 7.8   | 10.1  |
| 27.4  | 34.5  | 31.5  | 28.8  | 15.1  | 110.9  | 74.3   | 1.7   | 4.6   |
| 6.9   | 17.1  | 18.4  | 7.8   | 2.3   | 38.5   | 17.5   | 1.1   | 11.9  |
| 1.8   | 0.8   | 0.7   | 0.6   | 0.4   | 3.7    | 0.6    | 0.8   | 0.6   |
| 14.0  | 2.3   | 4.5   | 4.8   | 1.1   | 26.3   | 8.3    | 15.2  | 16.0  |
| 19.4  | 20.7  | 14.7  | 15.0  | 4.2   | 18.2   | 11.3   | 6.6   | 11.1  |
| 2.4   | 1.0   | 1.3   | 1.4   | 0.8   | 26.8   | 10.8   | 25.8  | 15.3  |
| 3.0   | 10.9  | 7.3   | 3.6   | 5.7   | 18.7   | 27.2   | 15.2  | 26.6  |
| 8.4   | 5.4   | 3.2   | 9.1   | 5.1   | 38.6   | 33.0   | 7.5   | 11.2  |
| 5.9   | 6.4   | 8.9   | 9.8   | 5.3   | 12.6   | 7.2    | 11.3  | 17.3  |
| 12.8  | 25.1  | 16.5  | 9.5   | 5.1   | 10.6   | 1.0    | 15.3  | 18.6  |
| 15.9  | 18.7  | 14.0  | 10.7  | 0.8   | 22.9   | 13.2   | 27.0  | 30.3  |
| 1.6   | 6.3   | 1.5   | 1.1   | 1.0   | 50.8   | 33.6   | 2.7   | 3.3   |
| 41.6  | 54.8  | 56.5  | 35.4  | 17.6  | 50.0   | 34.7   | 34.3  | 26.0  |
| 76.9  | 72.7  | 53.8  | 30.8  | 9.4   | 21.9   | 11.0   | 1.7   | 9.4   |
| 268.6 | 217.7 | 211.8 | 107.1 | 48.4  | 115.4  | 65.1   | 6.0   | 2.2   |
| 28.2  | 27.0  | 16.9  | 27.9  | 2.1   | 25.4   | 8.6    | 18.6  | 36.4  |
| 87.2  | 68.6  | 93.0  | 89.6  | 18.6  | 84.7   | 40.2   | 8.7   | 13.9  |
| 12.0  | 9.2   | 11.9  | 19.7  | 5.8   | 33.4   | 0.8    | 9.7   | 4.1   |
| 29.8  | 17.7  | 27.0  | 28.7  | 8.6   | 7.5    | 7.3    | 2.7   | 2.1   |
| 133.0 | 142.7 | 128.1 | 151.2 | 40.0  | 61.8   | 29.0   | 33.3  | 69.9  |
| 8.5   | 6.2   | 14.5  | 15.0  | 2.4   | 14.6   | 9.8    | 9.8   | 2.8   |
| 69.1  | 39.1  | 46.6  | 45.0  | 20.9  | 89.3   | 67.0   | 40.9  | 70.7  |
| 20.2  | 31.0  | 35.1  | 53.1  | 12.3  | 31.7   | 15.9   | 1.9   | 17.2  |
| 3.3   | 19.2  | 12.4  | 8.1   | 0.9   | 49.7   | 22.1   | 8.9   | 19.8  |
| 1.5   | 0.6   | 1.3   | 0.5   | 0.6   | 42.2   | 12.6   | 1.3   | 4.8   |
| 3.8   | 7.4   | 2.3   | 0.9   | 3.7   | 1.5    | 4.6    | 2.2   | 1.0   |
| 292.7 | 298.7 | 280.1 | 228.8 | 132.4 | 372.5  | 255.8  | 46.2  | 66.0  |
| 3.5   | 2.1   | 2.5   | 3.1   | 1.8   | 17.3   | 19.7   | 5.5   | 6.2   |
| 691.5 | 634.4 | 609.4 | 323.3 | 197.6 | 1562.1 | 1355.0 | 7.4   | 14.4  |
| 20.3  | 16.4  | 5.7   | 7.0   | 2.8   | 13.8   | 1.4    | 9.3   | 26.5  |
| 24.1  | 11.7  | 3.1   | 5.3   | 2.0   | 55.5   | 52.2   | 12.9  | 20.2  |
| 1.5   | 0.8   | 3.6   | 1.2   | 1.8   | 3.3    | 1.5    | 1.2   | 1.0   |

|       |       |       |       |       |        |       |       |       |
|-------|-------|-------|-------|-------|--------|-------|-------|-------|
| 4.3   | 1.4   | 7.9   | 2.0   | 1.4   | 2.3    | 4.8   | 7.6   | 3.4   |
| 10.4  | 2.1   | 4.9   | 3.3   | 7.0   | 2.3    | 1.9   | 10.9  | 1.0   |
| 8.4   | 0.6   | 6.7   | 2.4   | 0.6   | 20.8   | 16.0  | 5.7   | 8.2   |
| 1.9   | 2.6   | 3.2   | 7.4   | 3.5   | 44.3   | 26.8  | 15.8  | 9.7   |
| 2.9   | 7.1   | 2.3   | 1.3   | 0.7   | 1.8    | 1.4   | 1.2   | 2.6   |
| 23.3  | 5.2   | 18.0  | 16.7  | 9.5   | 15.1   | 17.5  | 18.9  | 16.4  |
| 89.7  | 61.0  | 73.4  | 58.5  | 20.6  | 52.4   | 33.5  | 57.4  | 79.8  |
| 3.1   | 1.5   | 1.0   | 0.5   | 2.0   | 3.4    | 0.6   | 1.4   | 0.7   |
| 2.0   | 3.7   | 13.1  | 1.5   | 0.5   | 14.1   | 14.9  | 2.4   | 1.7   |
| 7.9   | 3.3   | 5.5   | 4.6   | 6.0   | 12.4   | 13.7  | 5.5   | 7.1   |
| 32.1  | 27.6  | 42.6  | 49.7  | 16.9  | 51.8   | 31.5  | 7.5   | 7.2   |
| 1.1   | 4.5   | 3.0   | 3.9   | 1.1   | 0.4    | 2.0   | 1.0   | 5.9   |
| 41.8  | 20.3  | 18.4  | 23.3  | 9.4   | 25.6   | 19.6  | 37.3  | 54.5  |
| 18.6  | 17.4  | 11.5  | 13.3  | 4.1   | 17.6   | 6.5   | 15.5  | 14.2  |
| 7.2   | 1.6   | 5.9   | 1.3   | 0.7   | 2.0    | 3.8   | 0.4   | 0.9   |
| 0.8   | 0.8   | 1.0   | 0.6   | 0.3   | 0.9    | 0.8   | 0.8   | 1.0   |
| 98.3  | 54.4  | 66.5  | 52.1  | 21.5  | 6.2    | 1.0   | 7.5   | 26.0  |
| 1.0   | 13.0  | 7.2   | 5.8   | 6.5   | 16.8   | 5.5   | 12.2  | 17.2  |
| 4.5   | 1.5   | 13.0  | 9.6   | 3.2   | 8.3    | 3.6   | 1.6   | 3.3   |
| 3.0   | 7.3   | 3.3   | 3.2   | 8.0   | 2.9    | 1.6   | 1.1   | 2.1   |
| 1.2   | 0.6   | 5.2   | 3.5   | 4.9   | 29.3   | 34.5  | 0.9   | 5.1   |
| 68.7  | 77.8  | 62.4  | 61.9  | 26.8  | 129.6  | 80.5  | 11.6  | 26.6  |
| 39.3  | 23.3  | 43.9  | 46.5  | 19.8  | 66.7   | 30.0  | 3.0   | 3.1   |
| 22.0  | 21.0  | 16.5  | 31.6  | 8.7   | 17.5   | 15.5  | 2.9   | 14.6  |
| 21.6  | 15.7  | 22.9  | 3.5   | 5.8   | 39.5   | 17.9  | 17.0  | 11.5  |
| 3.3   | 3.4   | 1.8   | 3.3   | 0.6   | 37.5   | 34.9  | 9.4   | 1.6   |
| 5.1   | 18.5  | 2.9   | 4.6   | 5.0   | 100.2  | 77.2  | 94.3  | 134.7 |
| 12.3  | 1.3   | 1.6   | 3.2   | 1.2   | 29.5   | 19.3  | 5.5   | 4.6   |
| 8.8   | 15.7  | 13.7  | 4.4   | 1.9   | 16.9   | 5.8   | 1.9   | 3.7   |
| 4.3   | 10.3  | 11.8  | 10.8  | 3.6   | 4.9    | 2.7   | 5.7   | 11.2  |
| 4.3   | 1.2   | 2.8   | 3.0   | 0.8   | 1.9    | 0.7   | 3.8   | 13.1  |
| 1.2   | 2.4   | 2.0   | 1.1   | 1.7   | 6.9    | 4.0   | 7.1   | 1.1   |
| 1.9   | 4.3   | 8.9   | 4.6   | 6.8   | 9.3    | 5.4   | 10.6  | 7.1   |
| 202.2 | 132.6 | 128.5 | 89.3  | 40.8  | 1267.1 | 720.3 | 247.5 | 323.8 |
| 10.7  | 6.8   | 8.3   | 8.5   | 1.3   | 13.2   | 7.0   | 10.2  | 2.6   |
| 2.6   | 1.3   | 2.0   | 11.1  | 3.2   | 13.2   | 3.0   | 9.1   | 3.5   |
| 1.4   | 1.6   | 1.8   | 1.5   | 0.8   | 1.7    | 1.4   | 1.2   | 1.1   |
| 47.7  | 34.6  | 39.7  | 38.7  | 12.7  | 52.4   | 44.1  | 12.5  | 26.0  |
| 5.3   | 13.4  | 2.2   | 9.8   | 6.3   | 12.7   | 10.3  | 7.4   | 1.7   |
| 9.0   | 9.2   | 2.3   | 6.3   | 1.0   | 52.3   | 47.7  | 18.4  | 17.7  |
| 3.3   | 14.5  | 15.2  | 30.4  | 4.9   | 1.4    | 0.8   | 1.3   | 6.6   |
| 5.9   | 1.6   | 4.9   | 2.7   | 3.2   | 0.6    | 1.4   | 7.4   | 8.1   |
| 0.9   | 0.2   | 1.0   | 0.2   | 2.0   | 12.0   | 0.4   | 0.4   | 1.0   |
| 9.3   | 1.3   | 1.9   | 0.7   | 0.7   | 0.9    | 1.7   | 3.5   | 12.8  |
| 116.2 | 118.7 | 162.8 | 186.0 | 78.5  | 128.9  | 105.4 | 4.9   | 0.8   |
| 1.3   | 1.4   | 1.1   | 0.9   | 0.5   | 9.7    | 12.0  | 1.7   | 1.5   |
| 24.1  | 7.5   | 11.9  | 15.9  | 12.5  | 27.3   | 17.9  | 13.6  | 23.4  |
| 3.8   | 8.4   | 2.7   | 1.9   | 2.6   | 3.9    | 2.8   | 1.2   | 1.7   |
| 39.7  | 38.7  | 37.8  | 43.2  | 26.0  | 10.8   | 7.5   | 40.5  | 39.8  |
| 0.9   | 0.8   | 10.8  | 9.5   | 0.4   | 1052.1 | 864.7 | 5.1   | 4.9   |
| 4.4   | 11.8  | 2.6   | 0.8   | 1.6   | 7.5    | 1.9   | 0.7   | 1.1   |
| 266.1 | 244.2 | 293.7 | 276.9 | 108.0 | 405.5  | 330.4 | 109.3 | 225.8 |
| 144.8 | 94.5  | 82.1  | 55.3  | 29.1  | 139.2  | 147.1 | 164.2 | 199.9 |

|       |       |       |       |       |       |       |       |       |
|-------|-------|-------|-------|-------|-------|-------|-------|-------|
| 1.8   | 1.9   | 1.9   | 13.7  | 7.0   | 2.4   | 2.5   | 2.4   | 3.2   |
| 2.1   | 4.3   | 3.3   | 2.3   | 0.7   | 5.2   | 2.7   | 9.8   | 2.6   |
| 27.4  | 26.9  | 43.7  | 22.9  | 16.9  | 7.4   | 8.4   | 12.6  | 25.7  |
| 502.4 | 297.7 | 426.1 | 347.5 | 109.8 | 891.5 | 605.1 | 14.0  | 29.6  |
| 66.5  | 50.1  | 62.4  | 31.8  | 18.4  | 60.8  | 41.7  | 11.6  | 7.7   |
| 9.9   | 13.7  | 3.2   | 7.9   | 0.9   | 20.0  | 12.0  | 13.8  | 19.6  |
| 30.6  | 28.4  | 24.6  | 19.4  | 15.6  | 11.3  | 16.1  | 4.7   | 2.6   |
| 11.3  | 0.8   | 5.7   | 0.7   | 1.9   | 9.0   | 4.5   | 0.8   | 4.4   |
| 12.2  | 5.8   | 0.7   | 0.3   | 4.7   | 6.8   | 1.3   | 4.1   | 8.9   |
| 13.5  | 11.9  | 18.2  | 10.6  | 8.4   | 18.4  | 12.7  | 10.7  | 15.4  |
| 3.3   | 0.4   | 4.5   | 5.1   | 0.6   | 14.9  | 6.9   | 0.3   | 1.2   |
| 33.0  | 13.7  | 32.4  | 4.9   | 12.2  | 5.7   | 19.7  | 3.4   | 16.2  |
| 206.9 | 217.7 | 195.3 | 147.5 | 74.4  | 200.3 | 129.3 | 56.6  | 69.5  |
| 18.3  | 20.7  | 22.3  | 13.1  | 11.0  | 15.9  | 6.4   | 31.7  | 37.3  |
| 7.0   | 8.4   | 6.6   | 0.6   | 0.1   | 4.6   | 0.3   | 11.9  | 13.2  |
| 8.5   | 5.6   | 8.8   | 7.5   | 4.6   | 9.5   | 1.8   | 13.1  | 20.4  |
| 3.0   | 2.0   | 1.0   | 1.7   | 1.5   | 1.9   | 1.6   | 1.1   | 2.6   |
| 1.2   | 0.8   | 1.3   | 0.8   | 0.5   | 2.6   | 0.8   | 2.3   | 12.7  |
| 2.3   | 1.4   | 5.3   | 1.2   | 1.2   | 2.7   | 1.1   | 5.1   | 3.0   |
| 236.0 | 159.5 | 170.6 | 166.8 | 62.1  | 560.3 | 405.5 | 488.9 | 787.2 |
| 5.4   | 2.0   | 3.3   | 1.5   | 0.8   | 11.1  | 3.8   | 2.9   | 2.4   |
| 3.4   | 13.3  | 3.1   | 2.0   | 4.6   | 1.2   | 1.5   | 2.4   | 3.0   |
| 1.3   | 2.8   | 1.0   | 1.2   | 0.8   | 2.4   | 3.3   | 1.7   | 9.4   |
| 30.3  | 23.4  | 6.6   | 4.3   | 8.5   | 7.3   | 4.9   | 3.9   | 14.1  |
| 1.7   | 1.8   | 1.8   | 1.7   | 1.1   | 2.3   | 8.5   | 5.6   | 1.5   |
| 1.8   | 7.7   | 9.9   | 0.9   | 3.4   | 16.3  | 3.1   | 2.5   | 9.5   |
| 2.8   | 2.0   | 1.4   | 1.2   | 1.0   | 4.2   | 4.4   | 1.4   | 2.3   |
| 3.0   | 11.3  | 4.8   | 1.4   | 0.3   | 2.2   | 5.9   | 6.5   | 2.6   |
| 10.1  | 13.4  | 5.3   | 21.9  | 4.2   | 299.7 | 289.3 | 0.8   | 6.6   |
| 2.7   | 0.8   | 2.2   | 1.2   | 1.0   | 5.0   | 1.6   | 5.3   | 4.5   |
| 5.1   | 8.6   | 6.1   | 5.1   | 0.7   | 6.3   | 9.6   | 1.9   | 8.5   |
| 155.2 | 223.0 | 155.5 | 166.1 | 84.3  | 210.7 | 107.9 | 37.9  | 40.2  |
| 5.1   | 7.6   | 6.9   | 2.4   | 3.4   | 134.3 | 172.0 | 0.8   | 5.1   |
| 10.0  | 0.5   | 1.4   | 2.8   | 3.8   | 6.2   | 10.4  | 2.1   | 9.5   |
| 4.3   | 5.2   | 4.9   | 1.5   | 1.8   | 4.6   | 3.4   | 4.5   | 7.2   |
| 20.8  | 15.4  | 1.9   | 13.0  | 4.5   | 25.1  | 19.3  | 20.4  | 13.7  |
| 1.5   | 5.4   | 3.2   | 10.1  | 1.4   | 1.5   | 11.3  | 6.6   | 2.5   |
| 1.7   | 1.2   | 2.1   | 6.6   | 0.6   | 1.9   | 1.9   | 1.7   | 5.9   |
| 211.8 | 176.1 | 176.4 | 163.0 | 64.7  | 229.8 | 127.6 | 13.8  | 38.9  |
| 217.9 | 204.1 | 258.2 | 360.1 | 91.1  | 166.5 | 136.8 | 1.5   | 1.2   |
| 0.6   | 1.4   | 4.8   | 6.6   | 0.3   | 5.5   | 4.5   | 2.9   | 7.0   |
| 22.1  | 12.3  | 19.8  | 7.5   | 9.3   | 34.6  | 13.7  | 12.0  | 14.7  |
| 6.0   | 4.4   | 10.4  | 6.1   | 4.3   | 6.8   | 4.1   | 13.1  | 21.2  |
| 13.0  | 26.1  | 14.8  | 6.9   | 0.9   | 25.5  | 30.2  | 10.9  | 18.2  |
| 3.1   | 15.5  | 3.2   | 1.2   | 7.2   | 64.8  | 22.6  | 38.6  | 39.6  |
| 1.2   | 0.5   | 0.9   | 0.7   | 0.2   | 0.9   | 0.3   | 0.5   | 0.5   |
| 13.7  | 8.2   | 14.7  | 9.5   | 3.0   | 12.7  | 6.1   | 2.9   | 10.0  |
| 88.0  | 75.0  | 73.9  | 50.1  | 24.2  | 126.1 | 46.8  | 22.7  | 51.1  |
| 143.5 | 103.7 | 94.1  | 91.1  | 50.2  | 227.1 | 169.6 | 81.6  | 92.5  |
| 20.9  | 21.3  | 19.6  | 24.9  | 7.8   | 16.7  | 19.3  | 13.2  | 27.1  |
| 1.2   | 0.6   | 0.4   | 1.0   | 0.3   | 509.3 | 290.3 | 1.9   | 1.6   |
| 74.2  | 73.7  | 69.7  | 72.0  | 25.6  | 30.9  | 35.1  | 3.8   | 6.1   |
| 37.9  | 50.5  | 43.3  | 32.5  | 10.5  | 15.2  | 7.7   | 1.1   | 1.1   |

|       |       |       |       |       |       |       |       |       |
|-------|-------|-------|-------|-------|-------|-------|-------|-------|
| 27.2  | 24.4  | 20.2  | 24.7  | 9.9   | 36.0  | 31.9  | 20.3  | 17.5  |
| 15.4  | 7.0   | 6.4   | 4.1   | 1.4   | 6.8   | 2.4   | 7.8   | 2.3   |
| 15.5  | 9.1   | 19.4  | 8.1   | 0.9   | 49.6  | 34.2  | 6.2   | 1.6   |
| 40.8  | 34.3  | 26.5  | 18.5  | 9.1   | 42.0  | 30.0  | 19.3  | 19.3  |
| 14.2  | 23.9  | 15.3  | 10.5  | 8.4   | 38.0  | 15.3  | 2.8   | 5.9   |
| 4.9   | 2.3   | 4.5   | 3.0   | 2.1   | 6.4   | 5.1   | 2.7   | 2.3   |
| 3.0   | 2.4   | 2.0   | 1.2   | 0.3   | 1.9   | 0.9   | 1.8   | 1.6   |
| 278.4 | 352.0 | 303.9 | 231.9 | 132.0 | 271.3 | 455.1 | 44.0  | 53.0  |
| 1.5   | 5.9   | 6.0   | 1.0   | 4.6   | 1.5   | 4.3   | 3.8   | 7.4   |
| 1.2   | 1.0   | 1.3   | 0.9   | 2.2   | 0.9   | 12.8  | 2.0   | 2.0   |
| 2.1   | 1.2   | 3.5   | 13.6  | 0.8   | 6.2   | 16.4  | 1.6   | 2.2   |
| 6.0   | 4.7   | 1.1   | 5.4   | 1.7   | 6.1   | 3.3   | 13.8  | 9.1   |
| 0.8   | 1.1   | 2.0   | 0.5   | 0.6   | 19.8  | 0.8   | 1.3   | 1.8   |
| 3.6   | 2.3   | 3.9   | 0.5   | 0.7   | 3.7   | 0.2   | 0.4   | 0.7   |
| 11.6  | 14.1  | 10.3  | 8.0   | 15.3  | 16.2  | 20.8  | 3.6   | 5.4   |
| 6.7   | 12.3  | 9.4   | 17.2  | 1.5   | 3.7   | 8.4   | 18.5  | 1.9   |
| 40.4  | 33.4  | 42.8  | 45.2  | 13.2  | 35.2  | 29.3  | 0.4   | 1.2   |
| 28.2  | 20.8  | 17.5  | 47.8  | 8.1   | 53.2  | 17.6  | 21.1  | 25.7  |
| 15.9  | 22.3  | 13.4  | 0.9   | 6.5   | 3.4   | 2.0   | 1.6   | 2.3   |
| 34.2  | 46.2  | 51.6  | 108.8 | 17.3  | 159.0 | 74.7  | 0.7   | 0.8   |
| 165.7 | 102.3 | 103.1 | 100.4 | 36.4  | 211.3 | 132.1 | 12.1  | 7.0   |
| 5.5   | 2.3   | 0.2   | 4.9   | 3.8   | 7.1   | 0.1   | 267.8 | 447.5 |
| 15.9  | 8.1   | 3.8   | 6.4   | 3.8   | 14.7  | 12.7  | 2.3   | 18.2  |
| 1.3   | 0.8   | 1.1   | 0.3   | 0.4   | 47.3  | 4.4   | 1.6   | 0.5   |
| 15.9  | 2.8   | 1.1   | 13.4  | 0.8   | 1.0   | 1.5   | 6.8   | 7.0   |
| 35.2  | 12.1  | 18.7  | 21.1  | 8.3   | 85.1  | 49.0  | 2.1   | 10.4  |
| 119.2 | 85.7  | 89.6  | 72.2  | 22.0  | 154.5 | 118.7 | 169.9 | 208.3 |
| 1.5   | 0.9   | 1.7   | 1.0   | 1.2   | 2.7   | 2.0   | 2.3   | 1.0   |
| 3.2   | 7.4   | 10.8  | 5.1   | 4.1   | 222.0 | 179.9 | 167.5 | 243.2 |
| 3.1   | 9.3   | 9.0   | 12.9  | 4.7   | 19.6  | 9.7   | 11.7  | 5.1   |
| 4.9   | 1.2   | 3.7   | 2.7   | 0.7   | 3.6   | 1.7   | 3.5   | 1.3   |
| 1.6   | 9.6   | 9.6   | 9.7   | 16.4  | 3.5   | 3.1   | 23.4  | 16.9  |
| 7.4   | 2.2   | 1.7   | 0.8   | 3.6   | 3.5   | 1.7   | 0.7   | 1.9   |
| 7.3   | 3.3   | 2.8   | 4.6   | 1.1   | 13.0  | 13.0  | 3.4   | 2.6   |
| 1.7   | 8.7   | 1.0   | 2.3   | 1.1   | 23.8  | 6.9   | 1.8   | 6.4   |
| 0.7   | 0.5   | 0.6   | 0.4   | 0.3   | 43.7  | 15.0  | 19.8  | 21.3  |
| 1.6   | 1.1   | 1.7   | 0.9   | 0.4   | 1.9   | 1.3   | 1.3   | 0.9   |
| 2.5   | 3.5   | 3.9   | 0.8   | 1.5   | 10.7  | 0.6   | 9.4   | 0.8   |
| 2.0   | 1.9   | 5.4   | 2.7   | 5.8   | 49.6  | 31.6  | 2.1   | 5.9   |
| 9.6   | 5.0   | 8.4   | 6.0   | 6.4   | 4.0   | 2.3   | 10.1  | 4.8   |
| 29.5  | 19.1  | 25.0  | 1.9   | 6.9   | 55.8  | 23.6  | 16.1  | 35.3  |
| 5.2   | 9.4   | 14.6  | 2.4   | 3.4   | 6.9   | 10.1  | 8.3   | 19.3  |
| 4.9   | 2.7   | 4.8   | 1.5   | 3.8   | 4.4   | 2.1   | 12.4  | 2.5   |
| 4.1   | 2.1   | 2.3   | 0.9   | 0.4   | 2.9   | 2.3   | 1.5   | 1.2   |
| 20.5  | 12.4  | 30.9  | 20.5  | 8.4   | 8.8   | 8.0   | 18.7  | 19.2  |
| 4.8   | 3.6   | 3.0   | 3.4   | 1.0   | 1.9   | 2.0   | 14.0  | 2.1   |
| 4.4   | 10.8  | 19.3  | 15.7  | 5.4   | 13.2  | 12.5  | 3.2   | 10.9  |
| 1.8   | 17.2  | 10.2  | 11.1  | 1.8   | 3.5   | 3.8   | 1.9   | 5.6   |
| 68.5  | 65.0  | 60.6  | 53.5  | 26.0  | 59.3  | 45.0  | 49.3  | 83.0  |
| 1.2   | 3.0   | 2.1   | 1.3   | 0.6   | 1.2   | 1.4   | 1.8   | 2.1   |
| 4.0   | 1.2   | 20.1  | 2.7   | 6.8   | 2.7   | 1.0   | 8.7   | 2.5   |
| 6.4   | 0.8   | 7.6   | 0.3   | 0.1   | 11.9  | 11.7  | 7.3   | 2.0   |
| 4.4   | 4.5   | 4.4   | 5.8   | 1.9   | 29.2  | 18.9  | 16.6  | 9.3   |



|        |        |        |        |       |        |        |       |       |
|--------|--------|--------|--------|-------|--------|--------|-------|-------|
| 13.5   | 4.6    | 13.1   | 3.7    | 5.3   | 2.0    | 6.5    | 5.4   | 14.3  |
| 39.1   | 24.3   | 16.9   | 52.5   | 7.4   | 44.9   | 42.6   | 9.8   | 16.3  |
| 58.0   | 55.7   | 51.2   | 47.1   | 18.2  | 107.2  | 43.6   | 2.8   | 7.6   |
| 3.1    | 5.4    | 1.7    | 1.7    | 0.5   | 5.4    | 1.3    | 3.7   | 12.9  |
| 192.9  | 139.9  | 170.1  | 110.9  | 53.6  | 739.8  | 414.3  | 99.6  | 170.7 |
| 0.4    | 7.8    | 5.3    | 0.2    | 0.9   | 0.9    | 3.6    | 5.5   | 8.1   |
| 28.8   | 24.6   | 28.2   | 36.1   | 15.3  | 50.8   | 33.5   | 21.5  | 4.4   |
| 16.7   | 10.4   | 13.5   | 10.8   | 8.2   | 19.3   | 16.1   | 10.9  | 1.9   |
| 7.8    | 1.5    | 1.3    | 1.8    | 1.6   | 0.8    | 6.7    | 1.1   | 0.2   |
| 5.9    | 13.9   | 34.1   | 27.0   | 9.9   | 9.9    | 7.1    | 36.8  | 39.6  |
| 8.0    | 11.2   | 0.9    | 6.6    | 0.3   | 11.6   | 3.2    | 6.2   | 4.9   |
| 24.0   | 9.1    | 16.1   | 3.2    | 9.6   | 78.1   | 47.9   | 0.5   | 2.3   |
| 0.8    | 2.1    | 2.6    | 13.3   | 0.4   | 0.9    | 0.7    | 1.0   | 3.5   |
| 1.7    | 0.6    | 2.1    | 1.3    | 1.7   | 6.7    | 6.3    | 0.7   | 0.6   |
| 2.3    | 2.6    | 2.1    | 2.1    | 7.7   | 5.4    | 19.9   | 23.8  | 11.6  |
| 11.5   | 2.4    | 8.3    | 9.3    | 4.8   | 15.0   | 11.1   | 8.9   | 7.9   |
| 8.8    | 8.4    | 2.7    | 3.8    | 0.6   | 1.2    | 0.7    | 6.1   | 4.4   |
| 2.2    | 6.6    | 0.6    | 2.5    | 2.5   | 11.1   | 6.2    | 4.9   | 6.1   |
| 2.0    | 0.7    | 1.6    | 0.8    | 0.9   | 1.0    | 0.6    | 0.8   | 1.2   |
| 326.6  | 277.8  | 526.9  | 413.4  | 84.3  | 1374.1 | 688.3  | 7.8   | 11.4  |
| 2.3    | 2.2    | 2.5    | 5.0    | 1.0   | 4.1    | 5.3    | 2.4   | 6.3   |
| 107.7  | 92.9   | 96.6   | 65.4   | 43.0  | 209.8  | 140.6  | 135.2 | 147.6 |
| 29.9   | 34.2   | 14.9   | 9.8    | 2.1   | 19.2   | 15.0   | 0.6   | 9.2   |
| 1.7    | 5.3    | 3.7    | 0.9    | 1.2   | 2.2    | 1.0    | 3.3   | 1.0   |
| 0.4    | 2.2    | 4.2    | 0.1    | 0.3   | 1.6    | 8.0    | 2.4   | 2.5   |
| 87.8   | 90.9   | 98.5   | 56.6   | 38.6  | 44.4   | 37.0   | 7.2   | 16.5  |
| 16.8   | 2.8    | 14.0   | 33.0   | 1.7   | 21.2   | 13.4   | 27.4  | 12.4  |
| 17.8   | 4.0    | 4.9    | 15.5   | 5.3   | 7.0    | 19.3   | 14.1  | 15.4  |
| 91.5   | 80.1   | 76.1   | 51.8   | 34.1  | 159.4  | 78.2   | 50.1  | 107.5 |
| 5.4    | 5.2    | 0.2    | 6.0    | 0.7   | 2.8    | 0.8    | 4.9   | 0.7   |
| 10.3   | 1.0    | 0.8    | 5.0    | 0.9   | 9.5    | 1.4    | 52.4  | 45.5  |
| 543.1  | 427.4  | 475.7  | 393.6  | 173.6 | 733.2  | 483.1  | 106.6 | 174.3 |
| 0.3    | 0.2    | 0.4    | 1.7    | 0.4   | 9.5    | 4.8    | 1.1   | 1.6   |
| 1.0    | 1.0    | 0.8    | 1.8    | 1.0   | 1.0    | 1.5    | 1.2   | 1.1   |
| 1.9    | 2.1    | 9.2    | 1.8    | 0.9   | 4.5    | 1.3    | 5.1   | 4.3   |
| 2475.2 | 1810.2 | 2091.9 | 1714.4 | 631.8 | 2938.3 | 1920.5 | 660.4 | 873.4 |
| 1.9    | 11.4   | 8.0    | 0.9    | 0.4   | 10.0   | 6.7    | 3.7   | 0.8   |
| 1.9    | 5.8    | 3.8    | 1.3    | 1.3   | 3.9    | 2.9    | 3.1   | 1.5   |
| 10.2   | 14.8   | 9.9    | 13.4   | 10.6  | 30.5   | 17.1   | 10.3  | 6.3   |
| 7.3    | 1.8    | 3.9    | 10.2   | 4.3   | 8.2    | 12.3   | 8.7   | 9.6   |
| 7.0    | 1.6    | 1.1    | 0.9    | 0.5   | 1.7    | 1.2    | 1.5   | 1.0   |
| 51.6   | 46.7   | 41.3   | 40.5   | 23.1  | 248.5  | 175.4  | 17.4  | 26.2  |
| 119.0  | 90.1   | 99.2   | 54.5   | 46.0  | 188.2  | 93.8   | 670.2 | 698.5 |
| 24.8   | 25.4   | 8.8    | 4.3    | 14.2  | 10.4   | 5.8    | 34.4  | 88.2  |
| 5.5    | 1.5    | 3.0    | 0.8    | 0.3   | 2.1    | 3.5    | 2.2   | 1.3   |
| 33.6   | 18.4   | 28.0   | 8.8    | 16.7  | 31.3   | 24.5   | 32.3  | 22.2  |
| 1.5    | 5.4    | 0.6    | 0.7    | 3.3   | 1.0    | 0.6    | 6.5   | 2.9   |
| 10.7   | 1.3    | 9.9    | 7.9    | 5.4   | 6.5    | 4.3    | 8.9   | 2.1   |
| 13.6   | 19.8   | 17.3   | 5.9    | 9.4   | 14.9   | 4.5    | 2.0   | 1.0   |
| 31.3   | 19.6   | 16.3   | 13.6   | 6.3   | 21.4   | 10.4   | 13.2  | 7.0   |
| 29.8   | 15.1   | 25.2   | 10.7   | 9.1   | 1.9    | 4.4    | 2.1   | 6.1   |
| 1243.5 | 810.9  | 919.5  | 456.9  | 268.1 | 6911.6 | 5553.3 | 185.5 | 277.0 |
| 12.6   | 11.9   | 7.3    | 11.1   | 5.4   | 15.9   | 10.7   | 7.4   | 16.2  |

|       |       |       |       |       |        |       |        |        |
|-------|-------|-------|-------|-------|--------|-------|--------|--------|
| 54.8  | 25.5  | 29.7  | 71.7  | 13.1  | 13.6   | 20.9  | 1024.6 | 1449.6 |
| 1.9   | 0.8   | 1.7   | 0.8   | 1.1   | 1.7    | 1.5   | 1.2    | 2.0    |
| 1.5   | 2.1   | 2.9   | 1.5   | 2.3   | 3.3    | 3.2   | 12.0   | 1.4    |
| 2.6   | 1.6   | 1.5   | 8.0   | 5.5   | 9.2    | 7.7   | 5.8    | 4.5    |
| 60.2  | 31.8  | 51.6  | 33.6  | 8.6   | 489.9  | 438.6 | 4.2    | 23.1   |
| 144.2 | 129.8 | 116.0 | 90.4  | 34.8  | 232.5  | 149.3 | 109.5  | 147.8  |
| 104.0 | 77.9  | 88.2  | 63.0  | 46.5  | 164.2  | 126.3 | 36.9   | 39.3   |
| 1.2   | 1.1   | 1.5   | 0.7   | 0.3   | 5.0    | 2.6   | 1.0    | 0.5    |
| 1.7   | 3.0   | 3.0   | 0.6   | 3.6   | 8.8    | 8.4   | 4.2    | 5.2    |
| 41.4  | 35.9  | 44.1  | 26.1  | 14.1  | 106.5  | 107.6 | 44.3   | 53.5   |
| 52.6  | 59.1  | 65.9  | 29.1  | 10.2  | 50.6   | 9.0   | 79.8   | 114.6  |
| 76.0  | 36.1  | 88.6  | 102.4 | 17.4  | 32.5   | 27.0  | 11.8   | 20.3   |
| 2.5   | 1.8   | 2.3   | 0.5   | 0.4   | 1.5    | 2.1   | 2.1    | 1.5    |
| 3.0   | 1.1   | 0.7   | 0.7   | 0.3   | 14.5   | 4.4   | 2.9    | 1.1    |
| 29.4  | 31.7  | 39.8  | 15.6  | 15.1  | 20.0   | 20.7  | 4.2    | 5.7    |
| 1.6   | 6.2   | 12.7  | 6.0   | 7.0   | 15.7   | 8.7   | 17.7   | 16.0   |
| 5.4   | 8.0   | 4.0   | 1.9   | 0.3   | 11.1   | 7.3   | 5.9    | 2.6    |
| 3.3   | 13.7  | 3.4   | 7.2   | 3.3   | 8.3    | 5.4   | 1.7    | 2.5    |
| 1.6   | 0.6   | 3.7   | 0.6   | 0.3   | 37.5   | 26.3  | 3.1    | 1.6    |
| 12.2  | 17.1  | 20.5  | 19.5  | 1.2   | 169.3  | 202.0 | 57.0   | 39.1   |
| 50.9  | 41.3  | 27.3  | 25.1  | 14.8  | 22.6   | 29.9  | 15.4   | 1.6    |
| 15.8  | 3.0   | 13.6  | 11.9  | 2.2   | 3.4    | 4.2   | 11.1   | 3.0    |
| 23.0  | 28.8  | 10.8  | 16.6  | 3.8   | 23.6   | 25.2  | 6.9    | 22.1   |
| 11.1  | 9.9   | 10.4  | 17.6  | 5.9   | 5.0    | 0.6   | 3.6    | 0.6    |
| 2.2   | 1.6   | 1.0   | 1.1   | 0.9   | 86.5   | 73.4  | 7.5    | 4.5    |
| 1.6   | 1.0   | 5.1   | 4.9   | 4.6   | 1.5    | 0.8   | 1.7    | 1.4    |
| 91.9  | 102.9 | 83.6  | 47.3  | 29.8  | 6.3    | 6.1   | 1.6    | 14.9   |
| 102.5 | 98.7  | 64.2  | 66.0  | 53.7  | 4.1    | 8.9   | 10.7   | 9.3    |
| 392.8 | 346.8 | 350.6 | 280.7 | 105.8 | 367.4  | 180.0 | 204.8  | 316.6  |
| 11.9  | 6.7   | 6.5   | 4.2   | 5.6   | 31.4   | 8.3   | 15.8   | 13.4   |
| 32.1  | 20.6  | 24.8  | 19.7  | 7.0   | 1.6    | 9.8   | 21.6   | 23.8   |
| 8.6   | 9.6   | 2.8   | 0.4   | 3.2   | 0.6    | 7.0   | 1.4    | 0.4    |
| 103.8 | 85.2  | 93.1  | 104.8 | 31.1  | 118.7  | 72.6  | 40.7   | 39.2   |
| 0.6   | 0.9   | 1.0   | 0.3   | 0.2   | 3.9    | 2.8   | 1.9    | 2.6    |
| 18.2  | 9.2   | 19.2  | 15.6  | 9.6   | 69.5   | 41.7  | 7.6    | 1.4    |
| 9.6   | 25.4  | 16.7  | 12.4  | 8.7   | 22.4   | 10.6  | 6.9    | 19.1   |
| 494.3 | 364.5 | 370.5 | 185.9 | 103.3 | 1001.2 | 502.5 | 156.3  | 161.0  |
| 50.0  | 48.9  | 29.5  | 45.2  | 13.3  | 40.3   | 25.9  | 2.3    | 0.6    |
| 27.6  | 53.0  | 7.0   | 1.4   | 8.4   | 30.8   | 18.9  | 31.0   | 27.6   |
| 5.0   | 0.9   | 10.8  | 7.6   | 0.1   | 1.0    | 5.9   | 2.4    | 16.9   |
| 3.6   | 1.9   | 2.7   | 2.2   | 0.5   | 58.2   | 34.0  | 0.9    | 1.5    |
| 32.9  | 25.9  | 57.1  | 20.1  | 15.5  | 14.9   | 11.7  | 8.0    | 4.0    |
| 0.7   | 0.6   | 3.0   | 0.6   | 2.0   | 4.0    | 0.3   | 0.2    | 0.7    |
| 98.4  | 107.9 | 110.3 | 153.3 | 48.4  | 164.4  | 128.6 | 2.5    | 11.6   |
| 59.0  | 56.7  | 85.6  | 120.6 | 22.2  | 100.9  | 96.8  | 14.9   | 20.9   |
| 116.2 | 101.4 | 117.9 | 59.6  | 36.4  | 34.6   | 29.3  | 26.1   | 14.2   |
| 12.4  | 20.5  | 11.6  | 12.9  | 11.2  | 36.1   | 21.3  | 428.2  | 767.4  |
| 19.0  | 15.1  | 10.1  | 2.3   | 4.7   | 58.2   | 31.2  | 15.5   | 28.5   |
| 18.0  | 14.4  | 3.9   | 7.6   | 1.1   | 19.2   | 18.6  | 18.0   | 14.2   |
| 2.3   | 2.4   | 2.8   | 9.2   | 1.3   | 32.4   | 2.2   | 8.5    | 0.9    |
| 12.2  | 12.5  | 9.1   | 3.3   | 1.0   | 34.2   | 22.9  | 8.4    | 5.5    |
| 1.4   | 0.5   | 1.5   | 0.7   | 2.3   | 2.7    | 2.8   | 1.2    | 1.8    |
| 9.5   | 2.0   | 3.6   | 3.7   | 4.5   | 10.1   | 11.2  | 5.0    | 8.0    |

|         |        |        |        |        |        |        |        |        |
|---------|--------|--------|--------|--------|--------|--------|--------|--------|
| 24.1    | 3.0    | 1.3    | 3.2    | 3.2    | 33.7   | 21.5   | 2.1    | 1.3    |
| 6.7     | 0.6    | 7.5    | 1.8    | 0.9    | 1.0    | 0.6    | 0.9    | 7.2    |
| 7.2     | 0.7    | 7.3    | 0.5    | 6.3    | 2.4    | 2.3    | 8.6    | 0.2    |
| 1.3     | 2.7    | 2.2    | 2.3    | 2.3    | 6.1    | 5.0    | 2.0    | 0.5    |
| 22.5    | 24.5   | 25.9   | 16.9   | 2.7    | 29.7   | 18.4   | 13.4   | 15.6   |
| 26.5    | 16.9   | 25.2   | 15.1   | 0.5    | 26.5   | 7.2    | 20.5   | 10.5   |
| 2.1     | 0.8    | 1.0    | 9.9    | 5.0    | 2.6    | 9.4    | 0.8    | 1.3    |
| 6.8     | 16.9   | 9.7    | 10.9   | 1.0    | 16.7   | 13.5   | 5.8    | 3.0    |
| 17.5    | 14.9   | 25.7   | 19.2   | 14.6   | 17.4   | 5.2    | 2.3    | 6.5    |
| 4.4     | 2.0    | 8.3    | 0.8    | 4.5    | 8.8    | 0.3    | 5.9    | 3.8    |
| 7.0     | 12.9   | 10.1   | 0.8    | 1.4    | 2.3    | 1.6    | 1.4    | 1.9    |
| 19.5    | 10.4   | 14.6   | 9.6    | 9.1    | 42.6   | 40.0   | 38.6   | 40.1   |
| 1.6     | 4.6    | 1.4    | 6.1    | 2.0    | 5.5    | 1.2    | 1.1    | 6.7    |
| 10.6    | 12.5   | 6.9    | 7.0    | 3.5    | 6.7    | 5.0    | 6.4    | 4.1    |
| 24.7    | 27.0   | 22.6   | 17.0   | 5.8    | 12.4   | 16.6   | 14.2   | 15.8   |
| 4.7     | 7.7    | 8.2    | 12.9   | 2.7    | 6.0    | 6.3    | 5.9    | 4.8    |
| 12.9    | 6.4    | 6.5    | 10.9   | 5.8    | 6.8    | 0.4    | 10.0   | 2.2    |
| 92.2    | 73.7   | 64.9   | 26.0   | 18.8   | 209.9  | 103.1  | 17.8   | 20.1   |
| 3.2     | 13.4   | 16.8   | 2.4    | 0.4    | 4.3    | 4.5    | 7.6    | 17.7   |
| 0.4     | 0.8    | 0.3    | 0.6    | 0.3    | 1.3    | 0.9    | 0.4    | 1.6    |
| 31.6    | 23.3   | 32.2   | 40.4   | 11.8   | 23.5   | 21.9   | 8.5    | 11.9   |
| 36.1    | 13.9   | 32.2   | 20.7   | 1.1    | 8.4    | 7.6    | 4.8    | 19.0   |
| 14.6    | 13.8   | 15.3   | 18.8   | 5.5    | 1.2    | 2.4    | 2.1    | 0.8    |
| 8.5     | 4.6    | 4.9    | 2.6    | 6.2    | 6.9    | 3.0    | 5.6    | 8.4    |
| 18.1    | 24.9   | 29.6   | 11.2   | 13.1   | 52.1   | 41.6   | 25.9   | 15.4   |
| 2.6     | 3.4    | 7.4    | 3.3    | 9.3    | 10.4   | 1.1    | 10.3   | 23.7   |
| 1.4     | 13.6   | 5.7    | 3.8    | 3.3    | 171.5  | 83.9   | 14.7   | 22.7   |
| 8.3     | 6.0    | 4.2    | 4.1    | 2.2    | 29.3   | 34.2   | 4.4    | 2.8    |
| 5.3     | 3.0    | 2.4    | 0.7    | 0.5    | 42.4   | 33.0   | 9.9    | 25.9   |
| 8.3     | 6.1    | 3.3    | 9.2    | 2.8    | 7.5    | 0.3    | 6.7    | 1.0    |
| 17.4    | 18.1   | 13.2   | 7.1    | 6.5    | 15.0   | 8.5    | 11.3   | 19.7   |
| 11.2    | 4.6    | 2.6    | 1.6    | 3.9    | 3.2    | 2.0    | 8.8    | 2.1    |
| 0.8     | 0.7    | 1.7    | 2.3    | 1.5    | 2.8    | 20.6   | 1.4    | 2.3    |
| 27.4    | 8.5    | 10.4   | 3.0    | 6.6    | 44.3   | 39.2   | 6.4    | 4.6    |
| 591.8   | 582.5  | 584.2  | 513.5  | 172.1  | 405.7  | 290.0  | 59.7   | 76.7   |
| 47.6    | 51.5   | 58.9   | 67.3   | 31.2   | 85.0   | 84.7   | 16.3   | 11.8   |
| 4.0     | 0.5    | 0.2    | 18.7   | 0.1    | 0.4    | 4.5    | 1.2    | 0.6    |
| 3.1     | 1.1    | 7.5    | 2.0    | 5.1    | 20.8   | 1.0    | 3.2    | 5.1    |
| 47.7    | 69.9   | 62.7   | 39.0   | 13.9   | 58.7   | 38.9   | 37.8   | 27.3   |
| 169.4   | 161.6  | 128.9  | 139.7  | 63.8   | 835.3  | 763.0  | 35.6   | 55.1   |
| 2.2     | 2.9    | 4.9    | 7.9    | 0.9    | 7.0    | 1.2    | 1.8    | 8.0    |
| 3.4     | 7.0    | 5.7    | 2.4    | 3.0    | 36.9   | 13.4   | 9.7    | 16.7   |
| 18.7    | 10.5   | 19.3   | 10.6   | 1.2    | 194.0  | 133.9  | 38.6   | 50.3   |
| 10103.2 | 8811.1 | 8551.2 | 8286.0 | 5996.7 | 9779.3 | 8406.0 | 3321.6 | 4421.9 |
| 21.5    | 11.6   | 18.7   | 10.6   | 9.6    | 28.9   | 19.0   | 8.8    | 1.8    |
| 15.7    | 13.8   | 15.0   | 21.2   | 6.5    | 435.7  | 610.1  | 21.6   | 31.0   |
| 910.9   | 663.8  | 807.1  | 925.7  | 194.1  | 869.3  | 592.4  | 333.3  | 493.0  |
| 12.8    | 9.5    | 13.4   | 2.3    | 1.2    | 4.8    | 11.7   | 2.4    | 1.3    |
| 11.4    | 12.6   | 21.0   | 1.2    | 2.7    | 19.4   | 3.7    | 21.3   | 16.5   |
| 27.3    | 31.8   | 5.0    | 43.0   | 17.9   | 26.7   | 17.5   | 22.5   | 24.5   |
| 21.0    | 7.0    | 10.7   | 2.4    | 4.1    | 22.7   | 8.6    | 18.0   | 15.4   |
| 276.1   | 227.2  | 260.1  | 214.1  | 146.4  | 185.6  | 141.3  | 43.2   | 51.1   |
| 3.5     | 21.7   | 26.3   | 17.8   | 7.6    | 19.5   | 20.7   | 8.1    | 10.0   |

|        |        |        |        |       |        |        |       |        |
|--------|--------|--------|--------|-------|--------|--------|-------|--------|
| 2.6    | 4.5    | 12.3   | 4.5    | 5.2   | 12.4   | 11.6   | 10.5  | 8.4    |
| 7.2    | 1.9    | 1.7    | 3.8    | 1.0   | 13.3   | 0.7    | 4.0   | 3.2    |
| 131.7  | 107.7  | 118.6  | 119.3  | 39.4  | 568.9  | 507.1  | 38.3  | 34.1   |
| 23.6   | 17.4   | 33.1   | 17.3   | 7.8   | 15.9   | 7.6    | 52.0  | 65.2   |
| 18.0   | 9.7    | 18.3   | 13.9   | 5.5   | 7.3    | 9.0    | 15.8  | 17.1   |
| 24.1   | 23.2   | 20.1   | 22.3   | 2.6   | 43.7   | 28.4   | 30.1  | 52.2   |
| 2.5    | 3.0    | 2.0    | 6.0    | 0.4   | 1.9    | 2.2    | 1.9   | 1.9    |
| 25.1   | 8.6    | 12.8   | 8.9    | 9.1   | 20.5   | 11.9   | 10.2  | 25.3   |
| 5.0    | 3.8    | 0.8    | 1.3    | 0.7   | 14.2   | 4.2    | 0.5   | 3.7    |
| 50.8   | 49.0   | 38.7   | 30.1   | 20.8  | 167.0  | 79.1   | 3.0   | 10.7   |
| 22.5   | 16.0   | 12.6   | 15.6   | 4.2   | 0.5    | 4.8    | 13.0  | 10.3   |
| 44.3   | 53.8   | 33.1   | 29.2   | 16.2  | 47.6   | 37.6   | 7.7   | 3.2    |
| 20.2   | 12.7   | 18.1   | 24.2   | 7.8   | 6.9    | 0.9    | 0.7   | 11.3   |
| 2.2    | 2.4    | 2.7    | 3.8    | 12.3  | 132.8  | 34.8   | 135.5 | 147.6  |
| 70.2   | 53.2   | 73.1   | 118.2  | 30.7  | 93.1   | 68.1   | 14.1  | 6.5    |
| 6.1    | 4.6    | 1.0    | 1.1    | 0.1   | 125.1  | 133.4  | 4.3   | 12.7   |
| 14.0   | 1.6    | 2.7    | 8.7    | 0.5   | 6.7    | 16.6   | 3.5   | 2.3    |
| 38.8   | 16.2   | 31.4   | 27.3   | 16.7  | 27.9   | 24.4   | 21.4  | 32.4   |
| 35.4   | 33.4   | 23.7   | 30.2   | 13.8  | 44.3   | 37.5   | 57.1  | 87.6   |
| 7.1    | 5.5    | 0.5    | 7.5    | 2.1   | 1.8    | 2.3    | 13.7  | 10.9   |
| 1.4    | 2.7    | 2.5    | 4.0    | 4.2   | 40.4   | 4.9    | 1.0   | 3.5    |
| 39.8   | 23.2   | 13.6   | 19.4   | 14.3  | 40.5   | 29.0   | 13.0  | 17.3   |
| 1.2    | 7.2    | 8.1    | 3.9    | 2.4   | 11.5   | 4.4    | 5.1   | 5.7    |
| 714.2  | 749.3  | 684.8  | 699.6  | 326.0 | 1066.1 | 716.2  | 240.4 | 265.9  |
| 73.2   | 66.4   | 57.6   | 59.4   | 21.9  | 162.7  | 97.1   | 77.5  | 100.4  |
| 26.4   | 27.9   | 22.6   | 1.4    | 5.0   | 13.3   | 14.5   | 6.0   | 13.0   |
| 28.6   | 9.1    | 7.4    | 0.6    | 4.6   | 1942.9 | 1282.4 | 1.7   | 6.6    |
| 3.8    | 14.9   | 1.5    | 9.2    | 0.9   | 8.8    | 10.4   | 20.2  | 5.1    |
| 7.5    | 3.3    | 2.9    | 3.6    | 1.2   | 10.5   | 10.9   | 13.5  | 12.1   |
| 2.3    | 5.3    | 0.8    | 0.8    | 0.4   | 1.2    | 1.0    | 0.6   | 0.7    |
| 26.8   | 8.7    | 20.3   | 1.1    | 5.8   | 10.0   | 24.1   | 33.6  | 34.0   |
| 65.5   | 68.5   | 73.1   | 51.9   | 20.0  | 113.7  | 80.5   | 32.8  | 73.3   |
| 3.2    | 1.3    | 0.7    | 1.9    | 1.8   | 8.8    | 2.9    | 1.6   | 4.8    |
| 16.0   | 0.4    | 1.5    | 2.8    | 3.3   | 1.8    | 0.7    | 1.4   | 7.8    |
| 2.4    | 2.3    | 2.0    | 8.0    | 4.1   | 1.8    | 3.0    | 2.7   | 2.3    |
| 15.8   | 11.9   | 1.9    | 1.3    | 5.6   | 18.1   | 14.6   | 7.9   | 15.4   |
| 1.1    | 1.4    | 1.4    | 0.7    | 1.5   | 1.7    | 5.1    | 1.4   | 2.8    |
| 2.3    | 1.0    | 1.6    | 1.3    | 0.8   | 2.2    | 0.9    | 1.3   | 1.5    |
| 18.3   | 19.9   | 17.4   | 13.0   | 1.6   | 3.2    | 14.3   | 15.9  | 24.5   |
| 29.6   | 16.0   | 15.9   | 9.1    | 7.8   | 13.6   | 16.0   | 23.8  | 18.8   |
| 5.6    | 10.6   | 2.1    | 10.8   | 0.2   | 13.1   | 8.0    | 9.4   | 19.7   |
| 14.4   | 5.5    | 15.5   | 11.2   | 0.4   | 15.7   | 14.3   | 18.1  | 6.2    |
| 54.8   | 56.5   | 72.2   | 50.4   | 20.0  | 38.1   | 12.4   | 9.3   | 25.6   |
| 2.2    | 2.5    | 1.6    | 1.3    | 8.5   | 5.7    | 5.3    | 13.8  | 18.2   |
| 122.2  | 123.2  | 143.8  | 214.0  | 39.0  | 315.4  | 257.8  | 4.8   | 4.3    |
| 8.0    | 4.5    | 9.3    | 6.0    | 2.8   | 6.1    | 1.8    | 16.8  | 19.4   |
| 10.4   | 7.5    | 7.7    | 1.8    | 1.2   | 2.7    | 4.1    | 1.5   | 5.6    |
| 12.9   | 8.7    | 1.9    | 1.1    | 0.7   | 6.8    | 1.0    | 1.3   | 2.0    |
| 3.5    | 2.0    | 0.9    | 4.2    | 0.6   | 1.6    | 4.5    | 1.6   | 3.6    |
| 16.1   | 2.2    | 2.3    | 1.8    | 2.3   | 26.4   | 18.5   | 5.8   | 14.5   |
| 1.4    | 1.1    | 5.4    | 0.7    | 1.1   | 11.0   | 11.1   | 1.8   | 1.2    |
| 5.7    | 0.9    | 3.9    | 3.1    | 5.7   | 18.9   | 1.9    | 8.1   | 1.8    |
| 1828.2 | 1536.4 | 1475.6 | 1306.7 | 582.8 | 3831.8 | 3235.7 | 811.3 | 1007.0 |

|       |       |       |       |       |        |        |       |       |
|-------|-------|-------|-------|-------|--------|--------|-------|-------|
| 4.9   | 7.6   | 1.5   | 4.1   | 5.8   | 13.8   | 12.4   | 3.8   | 16.2  |
| 24.7  | 13.6  | 9.4   | 9.6   | 5.7   | 4.1    | 4.0    | 10.9  | 9.1   |
| 1.3   | 0.6   | 1.2   | 0.5   | 0.2   | 0.4    | 0.4    | 0.6   | 3.6   |
| 23.4  | 15.8  | 13.3  | 5.4   | 3.9   | 16.6   | 13.3   | 15.1  | 22.3  |
| 7.8   | 14.9  | 7.9   | 16.7  | 1.7   | 10.6   | 19.4   | 10.7  | 4.4   |
| 1.5   | 6.7   | 0.8   | 7.3   | 0.9   | 0.9    | 1.0    | 0.5   | 0.4   |
| 7.6   | 2.5   | 10.7  | 2.9   | 2.5   | 1.3    | 0.7    | 3.5   | 6.5   |
| 2.6   | 1.1   | 1.3   | 1.5   | 0.6   | 1.3    | 1.4    | 0.8   | 1.0   |
| 17.8  | 21.4  | 27.7  | 10.5  | 1.1   | 23.5   | 16.5   | 5.4   | 7.5   |
| 11.9  | 16.4  | 11.1  | 10.8  | 8.7   | 5.5    | 12.2   | 2.5   | 0.7   |
| 534.5 | 582.3 | 657.6 | 608.6 | 266.4 | 816.8  | 836.5  | 94.7  | 145.7 |
| 10.4  | 2.1   | 9.5   | 4.8   | 0.6   | 50.9   | 34.7   | 20.2  | 7.3   |
| 10.7  | 3.2   | 9.6   | 0.5   | 0.5   | 23.0   | 8.5    | 3.1   | 8.5   |
| 26.5  | 44.9  | 18.7  | 26.5  | 22.0  | 34.3   | 51.5   | 5.6   | 11.2  |
| 58.9  | 34.0  | 40.5  | 27.3  | 8.6   | 116.0  | 80.1   | 10.5  | 17.2  |
| 4.3   | 5.9   | 3.8   | 5.2   | 1.8   | 5.6    | 5.1    | 0.8   | 3.9   |
| 0.7   | 1.5   | 0.5   | 3.7   | 0.3   | 1.3    | 5.3    | 2.2   | 0.3   |
| 2.0   | 7.2   | 5.8   | 3.8   | 4.1   | 6.9    | 1.0    | 1.9   | 6.6   |
| 3.2   | 3.5   | 2.5   | 2.2   | 1.9   | 7.5    | 1.9    | 3.7   | 6.5   |
| 0.5   | 1.1   | 1.7   | 5.8   | 0.1   | 0.7    | 1.4    | 2.2   | 0.3   |
| 4.6   | 2.7   | 2.3   | 0.8   | 0.9   | 6.1    | 1.4    | 1.9   | 5.7   |
| 1.0   | 5.7   | 2.4   | 4.2   | 3.9   | 2.5    | 10.4   | 7.8   | 8.7   |
| 11.9  | 5.4   | 12.1  | 7.1   | 2.9   | 2.0    | 1.9    | 1.8   | 11.1  |
| 17.7  | 15.0  | 23.6  | 21.8  | 8.7   | 9.0    | 1.2    | 11.6  | 4.5   |
| 16.4  | 31.0  | 16.4  | 20.1  | 19.4  | 10.3   | 2.5    | 2.3   | 4.9   |
| 0.9   | 0.7   | 0.9   | 0.5   | 0.5   | 0.9    | 1.6    | 0.7   | 0.5   |
| 26.3  | 10.4  | 27.1  | 27.2  | 6.8   | 24.6   | 24.6   | 7.1   | 9.6   |
| 89.9  | 50.3  | 64.8  | 66.8  | 19.3  | 75.9   | 73.8   | 24.7  | 57.7  |
| 11.0  | 35.0  | 28.1  | 15.4  | 7.4   | 51.7   | 15.9   | 18.9  | 24.8  |
| 13.7  | 1.2   | 0.4   | 0.9   | 0.3   | 4.2    | 5.5    | 3.0   | 8.2   |
| 2.2   | 17.2  | 10.3  | 19.3  | 3.9   | 26.2   | 16.0   | 8.4   | 3.1   |
| 206.2 | 213.0 | 189.8 | 175.1 | 63.8  | 218.8  | 148.6  | 12.6  | 11.4  |
| 78.2  | 63.0  | 64.6  | 49.5  | 14.6  | 42.9   | 27.2   | 1.7   | 5.7   |
| 3.4   | 6.4   | 7.4   | 0.8   | 0.9   | 2.3    | 1.6    | 3.7   | 3.6   |
| 561.8 | 487.5 | 413.0 | 203.3 | 153.4 | 1143.1 | 771.7  | 638.8 | 697.3 |
| 3.8   | 3.0   | 2.7   | 7.2   | 1.0   | 3.1    | 2.0    | 1.4   | 3.3   |
| 2.4   | 8.0   | 1.9   | 8.9   | 4.5   | 29.5   | 6.9    | 3.6   | 0.9   |
| 53.9  | 50.8  | 48.3  | 33.7  | 21.6  | 76.6   | 57.8   | 9.2   | 11.0  |
| 11.0  | 2.2   | 14.4  | 2.4   | 6.8   | 18.5   | 2.8    | 4.9   | 5.4   |
| 33.0  | 28.4  | 22.5  | 18.3  | 8.2   | 13.1   | 14.8   | 1.0   | 10.6  |
| 53.4  | 84.8  | 33.2  | 31.2  | 15.3  | 4383.9 | 5144.5 | 15.3  | 14.0  |
| 2.2   | 7.6   | 11.4  | 7.1   | 3.6   | 10.1   | 13.3   | 2.7   | 13.9  |
| 0.3   | 0.4   | 0.7   | 2.5   | 4.8   | 0.2    | 0.4    | 2.6   | 3.5   |
| 22.1  | 25.0  | 19.3  | 23.6  | 5.2   | 200.8  | 66.3   | 56.6  | 74.1  |
| 4.9   | 9.2   | 3.1   | 2.5   | 1.3   | 11.6   | 8.9    | 3.2   | 4.0   |
| 34.3  | 25.9  | 40.9  | 31.4  | 11.5  | 40.3   | 19.2   | 39.3  | 44.8  |
| 51.5  | 48.0  | 42.1  | 35.7  | 19.1  | 61.9   | 35.5   | 51.6  | 87.6  |
| 89.2  | 63.3  | 57.3  | 48.5  | 31.8  | 80.3   | 63.7   | 1.5   | 4.7   |
| 61.3  | 42.3  | 48.9  | 41.0  | 14.8  | 87.3   | 51.9   | 2.3   | 6.3   |
| 13.4  | 13.7  | 3.3   | 0.9   | 1.5   | 20.4   | 4.2    | 8.4   | 13.8  |
| 19.8  | 25.1  | 3.6   | 13.6  | 3.3   | 7.7    | 18.2   | 38.1  | 38.7  |
| 27.2  | 26.9  | 15.8  | 16.3  | 9.9   | 55.7   | 22.0   | 2.7   | 5.0   |
| 4.2   | 17.7  | 9.0   | 1.8   | 1.0   | 3.9    | 1.4    | 15.6  | 8.9   |

|       |       |       |       |       |       |       |       |       |
|-------|-------|-------|-------|-------|-------|-------|-------|-------|
| 11.8  | 13.5  | 14.8  | 17.2  | 3.3   | 47.4  | 24.1  | 1.4   | 6.1   |
| 2.8   | 0.7   | 1.5   | 0.4   | 5.3   | 0.6   | 6.2   | 0.7   | 0.8   |
| 9.3   | 3.2   | 16.7  | 8.2   | 5.6   | 3.9   | 10.4  | 14.7  | 9.3   |
| 1.6   | 1.4   | 1.6   | 3.9   | 4.7   | 2.7   | 2.1   | 0.5   | 1.5   |
| 6.2   | 14.9  | 13.4  | 17.1  | 1.7   | 19.0  | 10.3  | 7.0   | 20.2  |
| 7.8   | 1.2   | 5.8   | 5.0   | 0.6   | 11.6  | 21.1  | 1.4   | 0.8   |
| 3.3   | 2.4   | 17.3  | 7.3   | 4.3   | 1.0   | 4.4   | 9.2   | 9.5   |
| 6.9   | 7.5   | 3.0   | 6.0   | 3.7   | 10.9  | 1.1   | 5.1   | 3.9   |
| 21.5  | 16.7  | 21.6  | 62.7  | 11.0  | 59.2  | 74.3  | 9.7   | 7.1   |
| 23.3  | 15.1  | 15.3  | 3.2   | 1.8   | 10.6  | 15.9  | 16.9  | 10.6  |
| 1.2   | 1.6   | 13.9  | 10.8  | 4.5   | 71.5  | 67.8  | 0.7   | 3.7   |
| 64.9  | 64.7  | 45.9  | 52.6  | 14.1  | 35.7  | 14.0  | 13.3  | 28.8  |
| 77.5  | 100.6 | 97.9  | 60.9  | 31.6  | 229.9 | 186.5 | 81.9  | 53.5  |
| 301.9 | 266.4 | 261.8 | 233.7 | 116.7 | 524.4 | 347.5 | 121.5 | 195.3 |
| 120.1 | 93.1  | 122.9 | 93.8  | 38.1  | 119.2 | 87.0  | 232.9 | 247.4 |
| 1.9   | 3.7   | 4.8   | 1.5   | 0.6   | 4.3   | 1.6   | 2.0   | 4.5   |
| 10.4  | 19.8  | 3.4   | 6.6   | 0.9   | 9.8   | 2.0   | 10.0  | 9.4   |
| 1.1   | 1.6   | 1.6   | 1.5   | 0.9   | 10.3  | 1.1   | 1.0   | 8.1   |
| 6.2   | 1.6   | 5.5   | 5.5   | 0.4   | 86.2  | 142.8 | 6.0   | 0.3   |
| 2.3   | 5.1   | 12.7  | 7.4   | 0.9   | 4.3   | 2.0   | 2.2   | 9.5   |
| 47.9  | 42.9  | 44.7  | 31.1  | 13.0  | 20.6  | 9.3   | 32.5  | 41.0  |
| 2.2   | 0.7   | 2.8   | 0.9   | 0.3   | 66.3  | 28.1  | 54.9  | 59.3  |
| 3.3   | 3.9   | 2.8   | 3.3   | 6.2   | 19.3  | 1.0   | 1.3   | 17.8  |
| 23.6  | 27.3  | 27.2  | 13.5  | 8.7   | 70.4  | 28.8  | 0.4   | 8.2   |
| 1.8   | 6.9   | 3.4   | 5.9   | 4.8   | 1.7   | 1.8   | 3.5   | 0.7   |
| 3.8   | 7.0   | 6.4   | 1.2   | 5.0   | 2.0   | 4.5   | 1.9   | 4.5   |
| 9.5   | 2.0   | 0.7   | 3.9   | 0.2   | 5.4   | 0.5   | 0.4   | 2.4   |
| 9.0   | 11.6  | 3.8   | 0.5   | 3.2   | 13.5  | 7.3   | 0.5   | 8.8   |
| 93.3  | 87.2  | 71.6  | 63.7  | 29.0  | 33.3  | 20.8  | 19.1  | 21.0  |
| 21.1  | 13.1  | 11.9  | 22.0  | 6.9   | 23.9  | 23.9  | 11.1  | 11.1  |
| 21.6  | 10.0  | 6.3   | 2.4   | 0.4   | 3.1   | 3.2   | 1.8   | 3.0   |
| 3.1   | 2.5   | 10.6  | 8.4   | 6.1   | 6.5   | 2.4   | 11.7  | 2.3   |
| 16.0  | 0.8   | 13.3  | 5.4   | 3.9   | 9.3   | 3.8   | 13.1  | 17.1  |
| 26.8  | 32.8  | 30.3  | 19.4  | 5.9   | 15.9  | 17.3  | 11.5  | 14.7  |
| 10.1  | 14.6  | 17.3  | 20.8  | 7.5   | 28.4  | 18.3  | 8.4   | 3.5   |
| 13.9  | 6.5   | 11.2  | 9.0   | 0.8   | 35.3  | 26.2  | 0.7   | 0.8   |
| 1.5   | 2.3   | 1.2   | 0.4   | 0.4   | 1.7   | 1.1   | 1.0   | 0.5   |
| 8.4   | 7.4   | 1.3   | 0.6   | 0.6   | 5.0   | 8.0   | 5.7   | 9.8   |
| 12.7  | 7.8   | 8.6   | 4.2   | 4.8   | 12.8  | 12.0  | 13.6  | 15.0  |
| 3.2   | 3.8   | 12.2  | 2.7   | 3.5   | 16.0  | 3.7   | 154.4 | 185.1 |
| 0.4   | 5.9   | 1.2   | 0.3   | 3.5   | 14.5  | 10.2  | 1.6   | 10.0  |
| 6.5   | 16.3  | 2.4   | 4.6   | 0.6   | 1.4   | 1.5   | 0.8   | 1.4   |
| 1.9   | 10.6  | 3.9   | 3.9   | 2.5   | 2.7   | 1.7   | 2.8   | 4.5   |
| 7.9   | 11.6  | 13.8  | 6.9   | 2.2   | 20.3  | 15.0  | 8.0   | 14.6  |
| 7.4   | 1.2   | 1.9   | 1.5   | 4.7   | 4.7   | 6.7   | 1.5   | 10.9  |
| 8.0   | 1.1   | 3.4   | 0.9   | 0.7   | 1.5   | 2.2   | 1.6   | 5.4   |
| 28.3  | 32.8  | 30.3  | 39.8  | 9.8   | 49.1  | 32.9  | 0.9   | 4.6   |
| 2.4   | 21.5  | 16.7  | 14.6  | 1.7   | 60.6  | 14.7  | 61.5  | 81.9  |
| 8.7   | 20.3  | 16.0  | 4.4   | 7.6   | 138.8 | 67.4  | 30.5  | 65.2  |
| 53.1  | 63.8  | 51.5  | 53.9  | 18.7  | 97.4  | 38.8  | 30.4  | 38.1  |
| 5.9   | 1.8   | 16.4  | 1.1   | 2.8   | 41.0  | 27.7  | 4.3   | 4.0   |
| 5.2   | 6.0   | 7.9   | 0.5   | 0.6   | 3.0   | 5.8   | 0.6   | 1.5   |
| 4.8   | 1.7   | 9.0   | 2.1   | 0.2   | 6.4   | 1.1   | 0.8   | 6.1   |

|       |       |       |       |      |       |       |      |       |
|-------|-------|-------|-------|------|-------|-------|------|-------|
| 3.3   | 1.5   | 7.1   | 2.3   | 0.8  | 5.4   | 1.5   | 19.8 | 25.3  |
| 14.9  | 14.0  | 16.6  | 10.6  | 5.1  | 30.7  | 11.9  | 20.2 | 17.1  |
| 0.9   | 9.2   | 3.6   | 1.8   | 4.1  | 1.2   | 1.4   | 0.8  | 0.6   |
| 6.1   | 8.5   | 5.7   | 4.1   | 0.8  | 2.8   | 12.8  | 2.8  | 13.0  |
| 1.6   | 1.9   | 0.8   | 1.1   | 0.8  | 9.6   | 1.2   | 2.1  | 8.0   |
| 11.7  | 12.6  | 7.5   | 17.3  | 10.2 | 2.4   | 1.9   | 2.1  | 1.3   |
| 54.9  | 55.0  | 66.3  | 55.8  | 20.1 | 217.0 | 92.5  | 4.5  | 5.6   |
| 7.1   | 4.7   | 5.8   | 2.0   | 1.4  | 7.4   | 19.3  | 1.7  | 4.3   |
| 7.1   | 1.8   | 1.6   | 7.9   | 3.0  | 1.1   | 6.9   | 5.0  | 8.1   |
| 2.2   | 1.1   | 1.4   | 2.3   | 1.9  | 1.7   | 9.3   | 1.4  | 1.1   |
| 16.5  | 8.3   | 12.9  | 6.6   | 11.6 | 19.9  | 24.1  | 12.5 | 10.5  |
| 13.7  | 19.1  | 13.8  | 12.0  | 2.9  | 4.2   | 3.9   | 16.5 | 6.5   |
| 6.9   | 5.9   | 13.0  | 1.0   | 1.0  | 9.2   | 1.4   | 9.9  | 2.2   |
| 9.9   | 2.6   | 3.2   | 1.7   | 0.6  | 4.7   | 2.1   | 4.3  | 5.1   |
| 6.0   | 8.3   | 2.5   | 1.0   | 5.2  | 0.6   | 4.9   | 2.2  | 2.3   |
| 2.3   | 0.5   | 1.4   | 2.6   | 0.6  | 16.5  | 15.0  | 0.7  | 1.6   |
| 14.1  | 21.3  | 20.5  | 30.0  | 8.6  | 31.4  | 17.1  | 11.0 | 8.2   |
| 26.9  | 31.7  | 27.0  | 14.1  | 8.2  | 28.7  | 17.0  | 53.0 | 116.3 |
| 5.1   | 2.5   | 9.0   | 14.7  | 2.9  | 54.6  | 38.6  | 1.4  | 14.3  |
| 44.9  | 23.3  | 32.8  | 26.0  | 2.7  | 8.4   | 19.0  | 22.5 | 32.4  |
| 181.6 | 167.4 | 200.6 | 399.3 | 39.7 | 172.5 | 61.8  | 59.8 | 67.0  |
| 7.8   | 1.6   | 0.7   | 1.9   | 1.1  | 1.8   | 1.2   | 0.5  | 3.0   |
| 28.6  | 14.6  | 13.0  | 8.9   | 7.8  | 22.7  | 12.7  | 22.8 | 19.8  |
| 3.9   | 0.4   | 2.2   | 1.9   | 0.6  | 0.4   | 9.2   | 1.6  | 0.5   |
| 30.5  | 29.8  | 33.1  | 13.4  | 13.7 | 68.0  | 46.5  | 23.3 | 9.2   |
| 6.1   | 2.4   | 15.4  | 8.7   | 1.8  | 3.5   | 4.2   | 1.3  | 2.1   |
| 0.7   | 5.8   | 4.2   | 0.6   | 6.3  | 18.6  | 0.7   | 19.5 | 26.5  |
| 1.9   | 9.4   | 2.3   | 1.2   | 0.9  | 10.6  | 1.8   | 1.9  | 2.6   |
| 21.6  | 17.6  | 11.5  | 13.1  | 6.9  | 126.9 | 80.4  | 0.6  | 1.1   |
| 7.2   | 7.6   | 6.3   | 1.0   | 2.8  | 0.7   | 0.4   | 3.3  | 7.4   |
| 4.8   | 6.8   | 1.2   | 1.1   | 0.9  | 6.1   | 16.1  | 2.9  | 9.2   |
| 2.2   | 2.6   | 3.1   | 7.4   | 3.5  | 3.5   | 1.6   | 2.7  | 1.4   |
| 0.7   | 0.8   | 2.2   | 0.7   | 0.7  | 1.3   | 1.6   | 1.1  | 0.8   |
| 3.9   | 8.3   | 5.7   | 7.7   | 3.4  | 4.0   | 3.8   | 1.2  | 2.7   |
| 1.0   | 1.1   | 1.4   | 1.8   | 0.3  | 9.8   | 0.9   | 1.3  | 1.4   |
| 26.1  | 4.5   | 16.2  | 13.9  | 12.9 | 17.0  | 9.8   | 14.3 | 14.8  |
| 47.3  | 55.4  | 28.3  | 41.6  | 13.6 | 25.4  | 13.7  | 56.6 | 81.4  |
| 1.3   | 2.3   | 1.6   | 5.9   | 0.9  | 7.6   | 8.8   | 12.0 | 10.2  |
| 29.4  | 11.6  | 14.2  | 9.5   | 6.6  | 9.6   | 18.0  | 21.5 | 21.7  |
| 51.3  | 34.2  | 32.2  | 25.2  | 20.3 | 28.2  | 29.3  | 1.6  | 17.9  |
| 10.8  | 2.4   | 12.6  | 4.6   | 0.6  | 10.5  | 3.4   | 2.3  | 2.7   |
| 4.3   | 5.6   | 15.2  | 24.0  | 4.2  | 8.4   | 9.8   | 26.0 | 20.4  |
| 154.0 | 126.9 | 132.2 | 95.8  | 39.0 | 208.5 | 167.9 | 73.2 | 86.5  |
| 1.9   | 1.1   | 3.6   | 2.2   | 0.9  | 2.4   | 4.0   | 1.8  | 1.0   |
| 8.1   | 1.7   | 1.9   | 4.9   | 0.2  | 10.3  | 6.1   | 15.2 | 33.7  |
| 7.3   | 4.0   | 11.4  | 5.1   | 4.0  | 10.5  | 9.1   | 5.8  | 14.7  |
| 3.6   | 1.3   | 1.3   | 5.4   | 3.9  | 7.5   | 2.1   | 20.1 | 1.2   |
| 7.6   | 9.8   | 11.8  | 2.7   | 7.4  | 9.1   | 1.0   | 9.6  | 1.5   |
| 17.1  | 13.9  | 16.2  | 10.3  | 7.6  | 21.3  | 16.0  | 8.7  | 14.3  |
| 104.5 | 110.5 | 86.2  | 88.9  | 38.6 | 100.5 | 73.1  | 49.3 | 62.6  |
| 5.5   | 7.9   | 7.3   | 2.7   | 1.5  | 2.9   | 2.6   | 3.9  | 17.4  |
| 6.7   | 0.8   | 1.3   | 6.5   | 2.3  | 8.9   | 12.7  | 1.8  | 3.7   |
| 4.2   | 2.2   | 13.7  | 2.8   | 6.1  | 21.7  | 3.7   | 22.4 | 27.3  |

|        |       |       |       |       |        |        |       |       |
|--------|-------|-------|-------|-------|--------|--------|-------|-------|
| 14.7   | 25.4  | 38.7  | 7.3   | 10.6  | 25.9   | 13.6   | 52.3  | 37.2  |
| 18.6   | 22.4  | 25.0  | 15.2  | 15.0  | 93.8   | 41.2   | 83.5  | 58.6  |
| 13.9   | 18.6  | 15.3  | 24.2  | 13.7  | 16.9   | 22.1   | 31.2  | 24.5  |
| 9.4    | 1.2   | 11.5  | 2.2   | 0.5   | 4.7    | 0.7    | 6.1   | 3.6   |
| 608.1  | 751.6 | 591.2 | 925.1 | 278.3 | 3.8    | 8.3    | 0.9   | 1.7   |
| 0.4    | 0.2   | 4.0   | 2.9   | 2.6   | 2.6    | 0.8    | 0.9   | 3.6   |
| 0.6    | 0.9   | 0.5   | 0.4   | 0.2   | 0.4    | 5.1    | 2.5   | 6.3   |
| 178.1  | 107.0 | 118.3 | 82.1  | 16.8  | 211.1  | 120.3  | 81.7  | 108.4 |
| 82.2   | 70.3  | 57.1  | 75.2  | 25.0  | 108.6  | 45.3   | 10.2  | 46.6  |
| 1089.2 | 985.9 | 863.0 | 582.8 | 311.0 | 2221.5 | 1520.3 | 444.8 | 575.8 |
| 45.9   | 40.3  | 39.8  | 22.0  | 12.1  | 53.9   | 24.6   | 23.1  | 45.2  |
| 234.4  | 182.1 | 225.5 | 184.6 | 113.9 | 456.2  | 465.0  | 52.7  | 65.1  |
| 7.5    | 4.6   | 20.5  | 11.6  | 11.2  | 5.6    | 10.7   | 147.0 | 248.8 |
| 11.7   | 9.7   | 1.9   | 2.9   | 3.7   | 14.4   | 6.4    | 2.2   | 4.5   |
| 1.6    | 3.3   | 2.1   | 0.5   | 4.5   | 16.5   | 2.2    | 10.3  | 1.5   |
| 5.5    | 11.3  | 4.3   | 2.0   | 4.8   | 4.6    | 1.1    | 7.0   | 3.0   |
| 1.6    | 2.4   | 1.8   | 2.5   | 0.8   | 1.4    | 1.1    | 4.3   | 5.6   |
| 3.0    | 2.6   | 5.0   | 3.5   | 5.4   | 12.2   | 8.8    | 5.7   | 3.2   |
| 1.4    | 1.3   | 0.6   | 1.3   | 2.3   | 3.1    | 1.0    | 140.1 | 224.8 |
| 28.0   | 28.6  | 5.2   | 19.2  | 12.0  | 30.8   | 2.6    | 4.7   | 8.7   |
| 15.1   | 17.8  | 15.6  | 12.4  | 1.6   | 28.6   | 7.8    | 1.2   | 7.1   |
| 4.2    | 1.8   | 1.7   | 3.0   | 6.0   | 2.5    | 2.1    | 5.5   | 11.6  |
| 6.5    | 3.0   | 5.7   | 0.9   | 0.6   | 5.5    | 2.5    | 1.1   | 2.0   |
| 9.3    | 1.9   | 4.2   | 3.0   | 1.0   | 12.0   | 9.4    | 2.8   | 2.1   |
| 61.6   | 58.8  | 32.9  | 15.5  | 18.3  | 262.1  | 194.4  | 7.4   | 7.3   |
| 0.8    | 1.0   | 3.1   | 0.5   | 5.1   | 5.8    | 15.8   | 9.6   | 9.1   |
| 20.1   | 18.7  | 24.7  | 3.6   | 6.3   | 28.2   | 41.8   | 6.0   | 16.8  |
| 20.8   | 9.3   | 9.8   | 11.0  | 5.5   | 6.1    | 15.6   | 8.7   | 2.2   |
| 321.7  | 269.0 | 224.1 | 219.2 | 80.6  | 500.6  | 277.3  | 72.9  | 133.3 |
| 5.6    | 4.2   | 1.7   | 3.2   | 6.1   | 12.3   | 1.9    | 8.2   | 1.0   |
| 10.5   | 1.4   | 1.9   | 14.2  | 0.8   | 1.6    | 11.7   | 3.0   | 5.9   |
| 1.6    | 1.3   | 2.2   | 1.4   | 1.2   | 3.5    | 1.7    | 3.7   | 6.0   |
| 2.8    | 5.3   | 6.1   | 12.0  | 9.6   | 41.0   | 28.9   | 4.2   | 17.9  |
| 31.1   | 22.5  | 12.2  | 51.1  | 11.4  | 36.3   | 4.1    | 2.3   | 14.7  |
| 1.2    | 1.3   | 2.8   | 0.8   | 1.1   | 1.7    | 0.5    | 1.5   | 2.9   |
| 11.7   | 9.4   | 22.3  | 9.4   | 7.6   | 27.1   | 13.4   | 16.8  | 15.2  |
| 6.8    | 1.8   | 5.4   | 7.3   | 0.8   | 5.2    | 4.4    | 7.2   | 5.2   |
| 43.0   | 34.4  | 43.3  | 37.3  | 16.2  | 27.9   | 13.1   | 47.7  | 52.8  |
| 13.5   | 14.6  | 9.0   | 5.1   | 0.7   | 9.1    | 8.3    | 8.4   | 10.3  |
| 2.8    | 3.2   | 1.6   | 3.3   | 1.2   | 3.4    | 1.9    | 2.4   | 3.3   |
| 22.4   | 18.1  | 30.2  | 10.3  | 3.5   | 16.1   | 15.7   | 8.7   | 17.0  |
| 44.4   | 33.5  | 26.3  | 26.1  | 10.6  | 15.1   | 16.3   | 1.8   | 2.1   |
| 31.3   | 11.2  | 2.9   | 3.4   | 1.6   | 6.7    | 3.3    | 4.1   | 2.0   |
| 21.8   | 12.8  | 7.7   | 2.1   | 0.6   | 9.6    | 3.2    | 3.8   | 0.7   |
| 34.3   | 28.9  | 34.6  | 21.3  | 11.0  | 99.9   | 76.0   | 15.7  | 15.9  |
| 2.5    | 3.8   | 1.2   | 7.1   | 0.2   | 2.5    | 5.7    | 9.9   | 5.3   |
| 3.0    | 2.2   | 2.3   | 1.5   | 6.1   | 5.4    | 2.9    | 74.2  | 39.1  |
| 12.4   | 6.5   | 0.5   | 0.5   | 0.6   | 1.6    | 4.0    | 0.7   | 1.0   |
| 91.5   | 74.3  | 68.4  | 58.9  | 30.1  | 181.5  | 119.2  | 19.1  | 34.1  |
| 5.0    | 2.0   | 0.1   | 2.1   | 2.5   | 6.1    | 0.5    | 5.2   | 6.3   |
| 0.9    | 1.0   | 1.9   | 5.3   | 0.9   | 14.8   | 14.0   | 71.5  | 68.1  |
| 3.4    | 1.2   | 2.1   | 3.2   | 1.1   | 9.0    | 2.3    | 19.6  | 35.9  |
| 120.6  | 96.1  | 140.1 | 85.9  | 26.5  | 304.8  | 230.4  | 47.2  | 44.0  |



|       |       |       |       |       |       |       |       |       |
|-------|-------|-------|-------|-------|-------|-------|-------|-------|
| 4.9   | 5.2   | 2.9   | 11.6  | 1.2   | 2.1   | 1.8   | 2.8   | 3.2   |
| 11.6  | 6.0   | 3.6   | 0.2   | 0.7   | 1.0   | 0.3   | 8.4   | 4.8   |
| 30.7  | 8.6   | 3.4   | 9.8   | 1.2   | 5.9   | 11.0  | 15.8  | 23.2  |
| 43.3  | 27.8  | 31.7  | 30.0  | 12.3  | 76.7  | 19.9  | 3.0   | 1.4   |
| 29.7  | 20.0  | 36.6  | 18.6  | 1.9   | 8.5   | 15.7  | 12.2  | 1.7   |
| 32.8  | 14.6  | 4.9   | 7.4   | 6.6   | 44.1  | 19.1  | 16.2  | 5.3   |
| 3.8   | 0.9   | 6.9   | 4.6   | 4.9   | 21.5  | 0.9   | 10.4  | 14.0  |
| 1.0   | 0.4   | 3.9   | 0.9   | 3.4   | 2.3   | 1.2   | 1.5   | 1.2   |
| 1.6   | 3.3   | 3.3   | 2.5   | 0.4   | 2.3   | 0.8   | 3.4   | 6.6   |
| 0.8   | 1.8   | 1.1   | 0.7   | 0.8   | 0.9   | 1.0   | 1.0   | 2.2   |
| 3.0   | 0.8   | 0.8   | 0.6   | 0.4   | 0.9   | 0.8   | 0.9   | 0.7   |
| 180.1 | 155.9 | 132.3 | 103.7 | 65.3  | 393.9 | 208.8 | 110.8 | 129.0 |
| 169.2 | 140.7 | 106.9 | 100.7 | 41.8  | 171.3 | 100.7 | 67.7  | 111.2 |
| 14.4  | 9.7   | 11.7  | 12.3  | 6.1   | 11.6  | 6.6   | 1.6   | 7.1   |
| 72.0  | 37.4  | 37.6  | 21.8  | 19.7  | 62.1  | 35.1  | 5.0   | 12.6  |
| 1.9   | 0.6   | 5.2   | 0.5   | 9.7   | 1.6   | 11.3  | 10.8  | 10.6  |
| 20.3  | 14.5  | 19.4  | 4.5   | 3.0   | 6.0   | 3.0   | 1.5   | 23.0  |
| 2.1   | 2.2   | 5.6   | 2.8   | 1.1   | 2.1   | 1.5   | 1.9   | 1.4   |
| 0.9   | 0.2   | 0.8   | 1.7   | 0.2   | 5.7   | 0.3   | 0.5   | 1.5   |
| 125.8 | 169.9 | 146.9 | 114.3 | 49.1  | 243.2 | 150.4 | 21.8  | 34.5  |
| 254.3 | 199.6 | 282.3 | 238.3 | 81.3  | 743.0 | 580.7 | 61.5  | 76.3  |
| 100.6 | 99.0  | 88.1  | 45.2  | 27.3  | 169.3 | 95.7  | 51.9  | 67.2  |
| 10.4  | 1.1   | 4.0   | 4.4   | 3.4   | 3.6   | 4.4   | 0.8   | 1.4   |
| 86.5  | 124.9 | 110.6 | 140.6 | 58.7  | 86.3  | 57.2  | 7.5   | 3.3   |
| 117.7 | 116.4 | 81.7  | 62.9  | 50.1  | 93.1  | 95.0  | 106.0 | 144.9 |
| 1.7   | 1.7   | 3.9   | 1.5   | 0.6   | 17.1  | 7.8   | 1.8   | 1.6   |
| 184.0 | 200.0 | 247.8 | 256.7 | 94.0  | 586.0 | 320.2 | 118.3 | 154.8 |
| 405.1 | 340.1 | 395.8 | 389.3 | 144.3 | 365.2 | 294.2 | 99.7  | 132.4 |
| 18.7  | 9.2   | 11.5  | 14.8  | 3.8   | 23.5  | 24.8  | 2.0   | 14.2  |
| 15.4  | 5.8   | 16.0  | 1.9   | 5.0   | 2.2   | 2.1   | 29.2  | 5.4   |
| 7.5   | 7.5   | 8.8   | 9.4   | 4.2   | 1.2   | 0.8   | 9.1   | 5.5   |
| 2.5   | 1.5   | 4.0   | 3.6   | 0.5   | 1.4   | 1.3   | 2.3   | 2.3   |
| 27.2  | 22.0  | 28.1  | 12.0  | 11.8  | 1.6   | 2.4   | 3.3   | 3.0   |
| 13.3  | 8.0   | 4.7   | 14.3  | 4.7   | 13.1  | 3.1   | 10.5  | 2.1   |
| 24.1  | 25.9  | 16.8  | 11.9  | 2.3   | 25.9  | 28.9  | 16.3  | 8.3   |
| 1.3   | 1.6   | 2.2   | 1.5   | 0.5   | 2.6   | 2.3   | 1.0   | 1.9   |
| 23.5  | 3.1   | 4.0   | 4.5   | 5.3   | 4.3   | 4.8   | 2.7   | 9.5   |
| 1.2   | 1.6   | 1.1   | 1.3   | 1.5   | 2.3   | 0.7   | 1.5   | 5.3   |
| 3.4   | 2.1   | 4.4   | 2.0   | 1.5   | 8.4   | 2.9   | 6.2   | 15.3  |
| 4.7   | 8.3   | 9.7   | 6.4   | 7.2   | 9.9   | 20.0  | 1.5   | 2.7   |
| 179.7 | 165.9 | 212.0 | 168.6 | 69.2  | 308.4 | 146.7 | 20.9  | 28.7  |
| 215.6 | 194.6 | 276.9 | 357.5 | 115.0 | 375.4 | 262.1 | 52.4  | 78.9  |
| 9.8   | 4.6   | 1.8   | 8.9   | 6.1   | 3.1   | 6.4   | 0.9   | 1.1   |
| 1.5   | 0.7   | 7.1   | 1.4   | 0.5   | 2.8   | 1.8   | 1.0   | 7.5   |
| 28.4  | 21.8  | 28.7  | 23.8  | 6.0   | 29.4  | 16.0  | 32.4  | 31.3  |
| 34.6  | 27.2  | 30.2  | 14.0  | 10.2  | 16.8  | 17.4  | 3.0   | 2.2   |
| 26.9  | 27.0  | 24.5  | 16.7  | 2.3   | 31.2  | 26.7  | 23.9  | 27.0  |
| 2.2   | 1.5   | 2.4   | 1.8   | 0.4   | 2.2   | 2.0   | 2.7   | 4.9   |
| 3.9   | 20.2  | 9.1   | 1.4   | 1.2   | 9.3   | 2.2   | 3.7   | 6.9   |
| 4.7   | 3.2   | 5.1   | 8.4   | 1.1   | 2.8   | 2.5   | 1.3   | 5.6   |
| 0.7   | 0.7   | 0.6   | 8.0   | 2.7   | 590.3 | 453.0 | 2.1   | 0.6   |
| 1.3   | 1.8   | 1.5   | 1.4   | 5.3   | 1.4   | 2.8   | 1.0   | 1.6   |
| 3.1   | 1.8   | 2.0   | 4.3   | 0.5   | 7.4   | 1.8   | 6.6   | 2.5   |

|       |       |       |       |       |       |       |       |       |
|-------|-------|-------|-------|-------|-------|-------|-------|-------|
| 20.5  | 14.4  | 17.4  | 19.7  | 13.9  | 6.9   | 15.2  | 4.1   | 11.6  |
| 32.5  | 20.8  | 20.4  | 20.3  | 1.9   | 20.9  | 17.0  | 26.3  | 25.7  |
| 4.8   | 1.4   | 7.1   | 2.2   | 2.3   | 2.5   | 9.3   | 2.2   | 1.9   |
| 24.6  | 8.1   | 17.9  | 3.2   | 6.6   | 9.5   | 22.9  | 9.7   | 2.1   |
| 14.6  | 2.3   | 18.9  | 10.1  | 4.2   | 22.8  | 13.3  | 3.2   | 16.1  |
| 2.7   | 2.3   | 1.8   | 2.1   | 0.6   | 4.7   | 1.4   | 2.4   | 1.6   |
| 37.2  | 40.4  | 21.5  | 13.0  | 13.9  | 5.8   | 4.1   | 2.8   | 0.6   |
| 22.0  | 5.9   | 11.4  | 2.8   | 8.1   | 14.8  | 24.2  | 15.3  | 14.8  |
| 2.7   | 0.3   | 1.0   | 1.9   | 3.3   | 0.6   | 0.2   | 1.3   | 4.9   |
| 13.8  | 21.7  | 29.1  | 13.8  | 9.0   | 26.4  | 7.5   | 21.5  | 11.4  |
| 11.8  | 0.7   | 18.6  | 11.6  | 10.5  | 9.4   | 5.7   | 1.7   | 3.3   |
| 5.6   | 4.7   | 14.5  | 22.4  | 4.0   | 0.6   | 3.6   | 9.9   | 0.5   |
| 0.7   | 0.9   | 0.7   | 0.5   | 0.4   | 0.6   | 0.6   | 0.5   | 0.6   |
| 29.7  | 43.0  | 28.4  | 14.8  | 9.7   | 23.9  | 8.7   | 15.9  | 42.8  |
| 18.4  | 5.1   | 5.2   | 8.4   | 1.3   | 8.2   | 4.0   | 4.1   | 11.8  |
| 26.0  | 23.9  | 29.3  | 17.0  | 5.9   | 22.7  | 8.8   | 1.6   | 0.7   |
| 4.4   | 9.8   | 4.6   | 3.9   | 0.6   | 1.6   | 2.1   | 2.4   | 1.0   |
| 26.5  | 28.6  | 18.0  | 14.9  | 0.9   | 2.5   | 16.1  | 7.7   | 16.6  |
| 16.0  | 18.0  | 1.2   | 7.8   | 1.1   | 2.6   | 3.8   | 3.3   | 4.2   |
| 27.0  | 24.3  | 12.3  | 14.2  | 9.6   | 17.8  | 11.5  | 11.9  | 19.9  |
| 43.9  | 29.6  | 38.5  | 12.9  | 9.2   | 17.1  | 11.7  | 11.8  | 8.5   |
| 26.3  | 4.4   | 20.0  | 13.2  | 3.1   | 56.8  | 25.5  | 8.8   | 20.7  |
| 1.3   | 4.5   | 2.1   | 2.4   | 0.3   | 1.6   | 0.5   | 1.8   | 2.1   |
| 11.0  | 11.7  | 3.2   | 1.4   | 8.1   | 14.0  | 7.6   | 7.9   | 9.7   |
| 53.4  | 25.0  | 33.9  | 27.0  | 12.2  | 57.5  | 37.7  | 43.9  | 54.1  |
| 263.7 | 279.0 | 323.5 | 142.0 | 91.1  | 8.5   | 9.5   | 1.4   | 0.3   |
| 7.1   | 2.6   | 3.0   | 1.6   | 1.2   | 3.1   | 16.3  | 15.7  | 2.7   |
| 0.8   | 3.4   | 6.6   | 6.9   | 0.4   | 7.7   | 7.5   | 0.7   | 0.3   |
| 8.5   | 3.6   | 0.6   | 5.0   | 1.3   | 2.3   | 0.7   | 1.4   | 1.5   |
| 23.2  | 16.1  | 7.7   | 9.6   | 7.8   | 37.0  | 19.9  | 24.4  | 5.7   |
| 94.0  | 68.0  | 98.2  | 102.7 | 24.3  | 30.4  | 21.4  | 185.2 | 267.7 |
| 835.0 | 686.3 | 704.3 | 732.5 | 230.3 | 852.8 | 588.9 | 87.4  | 118.8 |
| 19.5  | 12.1  | 19.6  | 16.7  | 7.6   | 1.7   | 5.2   | 1.0   | 5.1   |
| 93.2  | 64.3  | 65.6  | 83.9  | 13.8  | 73.0  | 29.2  | 152.5 | 199.6 |
| 19.0  | 20.9  | 24.8  | 17.3  | 10.7  | 5.5   | 13.2  | 2.2   | 10.8  |
| 33.2  | 4.3   | 25.5  | 21.8  | 1.8   | 29.1  | 32.1  | 9.4   | 22.6  |
| 11.6  | 2.8   | 15.2  | 20.3  | 4.7   | 47.0  | 24.3  | 3.2   | 0.8   |
| 3.0   | 4.1   | 19.4  | 17.0  | 1.4   | 402.5 | 147.7 | 3.7   | 6.1   |
| 12.3  | 2.6   | 5.1   | 8.4   | 0.9   | 24.5  | 15.5  | 0.4   | 3.6   |
| 8.1   | 9.0   | 7.2   | 6.6   | 1.8   | 38.9  | 23.6  | 6.3   | 6.0   |
| 9.9   | 11.8  | 2.4   | 4.8   | 6.0   | 16.0  | 7.8   | 12.3  | 37.1  |
| 23.8  | 14.2  | 12.7  | 15.5  | 4.4   | 60.0  | 38.4  | 81.2  | 73.7  |
| 71.3  | 40.7  | 29.6  | 24.4  | 16.9  | 63.3  | 27.2  | 43.7  | 40.8  |
| 15.8  | 9.9   | 12.8  | 10.0  | 9.8   | 16.6  | 7.8   | 9.8   | 12.4  |
| 25.5  | 24.2  | 21.3  | 18.1  | 8.6   | 51.9  | 25.9  | 7.8   | 3.4   |
| 16.8  | 6.6   | 16.0  | 15.6  | 11.0  | 12.2  | 9.3   | 6.7   | 9.3   |
| 2.8   | 4.3   | 5.4   | 4.1   | 0.7   | 2.6   | 3.7   | 3.8   | 18.1  |
| 2.2   | 1.8   | 0.8   | 8.5   | 0.7   | 11.0  | 0.6   | 6.0   | 1.8   |
| 17.3  | 13.2  | 17.3  | 13.5  | 6.7   | 1.5   | 6.4   | 1.5   | 1.5   |
| 88.3  | 37.2  | 55.6  | 44.5  | 22.1  | 175.6 | 86.7  | 30.5  | 38.9  |
| 9.0   | 2.7   | 8.0   | 2.9   | 6.3   | 1.3   | 1.5   | 2.6   | 10.3  |
| 9.3   | 10.4  | 4.0   | 10.5  | 1.8   | 6.8   | 10.3  | 3.2   | 5.6   |
| 9.0   | 6.9   | 5.1   | 4.9   | 0.9   | 2.6   | 9.8   | 10.1  | 10.2  |

|        |        |        |        |       |        |        |       |       |
|--------|--------|--------|--------|-------|--------|--------|-------|-------|
| 22.8   | 19.9   | 19.4   | 11.3   | 7.8   | 33.6   | 23.2   | 5.0   | 9.8   |
| 6.1    | 7.5    | 3.6    | 3.4    | 3.3   | 1.1    | 1.0    | 7.1   | 7.3   |
| 15.0   | 1.3    | 12.8   | 1.0    | 1.0   | 3.4    | 6.2    | 1.2   | 1.8   |
| 64.8   | 49.5   | 49.3   | 32.1   | 12.1  | 6.1    | 4.9    | 22.1  | 46.3  |
| 8.7    | 25.8   | 21.1   | 4.6    | 9.9   | 19.4   | 3.8    | 6.7   | 26.1  |
| 13.1   | 13.4   | 6.0    | 1.2    | 10.6  | 20.0   | 10.3   | 20.7  | 17.6  |
| 5.3    | 0.4    | 2.3    | 1.3    | 5.1   | 1.3    | 14.9   | 2.4   | 9.4   |
| 11.6   | 1.7    | 7.8    | 1.7    | 2.7   | 12.2   | 6.8    | 3.8   | 9.2   |
| 31.5   | 13.3   | 18.3   | 26.2   | 7.6   | 23.4   | 9.9    | 38.7  | 28.3  |
| 669.9  | 572.7  | 492.9  | 260.4  | 231.9 | 1022.6 | 409.0  | 351.4 | 433.4 |
| 2.1    | 5.2    | 0.7    | 8.2    | 6.8   | 2.4    | 1.1    | 5.4   | 1.3   |
| 10.4   | 17.6   | 17.4   | 17.8   | 7.0   | 3.2    | 13.0   | 6.3   | 14.8  |
| 1.4    | 5.3    | 1.0    | 0.8    | 0.1   | 0.3    | 3.1    | 0.2   | 0.4   |
| 86.2   | 117.4  | 112.8  | 56.0   | 32.3  | 118.1  | 55.0   | 4.6   | 12.5  |
| 43.0   | 45.9   | 51.6   | 50.6   | 22.1  | 2.1    | 15.1   | 20.4  | 1.5   |
| 5.4    | 16.0   | 9.7    | 1.8    | 1.7   | 19.9   | 4.2    | 6.0   | 4.2   |
| 38.6   | 33.9   | 42.9   | 18.8   | 19.2  | 88.8   | 62.6   | 72.3  | 43.6  |
| 1.9    | 2.0    | 1.5    | 0.8    | 1.8   | 7.9    | 12.5   | 5.7   | 7.1   |
| 216.8  | 203.5  | 214.0  | 200.4  | 65.8  | 286.3  | 146.6  | 87.9  | 127.8 |
| 41.4   | 63.9   | 43.8   | 51.2   | 16.2  | 72.7   | 39.9   | 48.5  | 59.6  |
| 4.8    | 7.6    | 1.1    | 3.7    | 3.9   | 9.5    | 6.6    | 1.1   | 1.3   |
| 93.0   | 85.2   | 83.4   | 73.4   | 21.7  | 161.5  | 60.1   | 55.6  | 48.0  |
| 6.6    | 7.2    | 3.1    | 9.4    | 8.0   | 7.8    | 11.7   | 13.2  | 3.9   |
| 5.8    | 3.2    | 2.6    | 1.9    | 1.0   | 2.8    | 1.0    | 1.6   | 6.4   |
| 1.6    | 0.9    | 1.1    | 1.6    | 2.9   | 2.7    | 1.9    | 0.5   | 1.3   |
| 10.1   | 7.4    | 4.2    | 1.1    | 2.6   | 5.5    | 1.3    | 6.6   | 0.5   |
| 39.6   | 30.9   | 31.0   | 16.1   | 17.3  | 22.9   | 19.9   | 17.0  | 19.1  |
| 58.2   | 25.9   | 10.4   | 17.8   | 6.2   | 59.7   | 34.0   | 27.4  | 33.0  |
| 68.2   | 61.8   | 66.5   | 45.3   | 18.6  | 72.1   | 35.2   | 54.4  | 80.3  |
| 0.7    | 0.4    | 0.6    | 2.6    | 0.2   | 4.4    | 1.9    | 1.0   | 1.7   |
| 2.0    | 6.6    | 2.2    | 11.0   | 11.6  | 1.6    | 1.6    | 4.7   | 9.3   |
| 11.9   | 16.7   | 13.6   | 14.4   | 9.2   | 23.8   | 13.4   | 22.5  | 17.5  |
| 19.7   | 13.3   | 2.1    | 10.2   | 0.8   | 2.9    | 10.3   | 2.1   | 12.5  |
| 2.3    | 3.1    | 2.1    | 1.1    | 0.6   | 10.3   | 4.5    | 1.3   | 9.1   |
| 4.5    | 4.3    | 23.7   | 8.4    | 8.5   | 17.3   | 8.0    | 14.0  | 4.5   |
| 2.6    | 1.9    | 1.9    | 3.0    | 1.7   | 3.6    | 1.3    | 2.4   | 1.7   |
| 1642.4 | 1476.4 | 1817.5 | 1811.8 | 586.4 | 3024.0 | 2086.0 | 264.6 | 464.6 |
| 6.4    | 7.5    | 1.0    | 4.8    | 0.2   | 9.8    | 0.3    | 1.7   | 2.6   |
| 5.0    | 0.9    | 1.2    | 3.6    | 0.6   | 9.6    | 8.3    | 8.8   | 8.5   |
| 8.9    | 7.3    | 11.2   | 24.0   | 4.3   | 16.6   | 10.8   | 9.9   | 23.4  |
| 1.2    | 1.5    | 2.5    | 1.0    | 0.9   | 1.9    | 1.4    | 1.1   | 1.8   |
| 4.6    | 1.8    | 2.4    | 2.6    | 4.8   | 21.2   | 1.5    | 3.2   | 4.8   |
| 0.9    | 1.0    | 0.7    | 10.7   | 0.6   | 1.0    | 0.6    | 0.8   | 0.6   |
| 0.9    | 8.0    | 0.9    | 9.6    | 1.9   | 9.4    | 10.6   | 1.3   | 4.4   |
| 0.6    | 1.5    | 1.0    | 0.8    | 1.0   | 2.4    | 0.4    | 6.1   | 0.7   |
| 11.3   | 2.1    | 12.6   | 17.3   | 2.5   | 3.9    | 1.8    | 28.4  | 3.1   |
| 9.9    | 12.3   | 13.3   | 7.6    | 7.1   | 20.6   | 8.9    | 23.5  | 8.3   |
| 2.4    | 11.8   | 2.4    | 3.6    | 3.8   | 1.5    | 2.2    | 0.9   | 1.2   |
| 23.6   | 12.6   | 7.4    | 12.9   | 5.0   | 2.9    | 9.5    | 5.1   | 11.0  |
| 404.6  | 333.1  | 386.8  | 500.6  | 166.3 | 484.1  | 356.7  | 84.9  | 156.5 |
| 19.4   | 1.7    | 6.3    | 3.8    | 11.3  | 15.3   | 11.9   | 18.9  | 13.7  |
| 4.4    | 10.1   | 9.0    | 1.5    | 19.6  | 4.4    | 2.0    | 3.0   | 2.9   |
| 224.5  | 193.4  | 222.4  | 161.0  | 80.5  | 320.1  | 200.8  | 64.4  | 109.9 |

|        |        |        |        |       |        |        |       |       |
|--------|--------|--------|--------|-------|--------|--------|-------|-------|
| 39.3   | 28.2   | 24.7   | 17.5   | 3.7   | 34.1   | 42.9   | 19.9  | 24.5  |
| 13.1   | 6.0    | 9.8    | 6.5    | 7.5   | 125.8  | 48.1   | 133.9 | 123.8 |
| 6.1    | 3.9    | 11.8   | 9.6    | 5.5   | 512.1  | 561.9  | 4.5   | 6.3   |
| 24.2   | 19.1   | 23.5   | 20.5   | 4.9   | 24.5   | 11.9   | 6.1   | 17.4  |
| 34.6   | 20.4   | 18.7   | 11.1   | 8.2   | 18.5   | 11.3   | 24.2  | 34.3  |
| 5.1    | 14.6   | 12.2   | 2.5    | 4.1   | 34.5   | 13.6   | 3.3   | 2.7   |
| 6.4    | 7.4    | 9.9    | 14.8   | 3.9   | 74.2   | 43.6   | 0.5   | 6.5   |
| 60.9   | 32.3   | 76.3   | 123.5  | 20.5  | 123.5  | 51.1   | 17.2  | 15.9  |
| 24.2   | 16.0   | 46.3   | 21.8   | 7.1   | 17.6   | 10.5   | 24.7  | 16.2  |
| 4.2    | 6.7    | 8.3    | 10.2   | 0.4   | 176.2  | 92.8   | 0.7   | 5.2   |
| 28.1   | 36.4   | 22.2   | 3.8    | 12.9  | 5.0    | 34.4   | 6.0   | 16.0  |
| 22.8   | 24.1   | 27.3   | 26.7   | 3.1   | 35.0   | 20.9   | 23.1  | 22.2  |
| 2.3    | 8.2    | 1.3    | 2.5    | 1.5   | 21.3   | 1.2    | 9.0   | 4.1   |
| 36.9   | 35.7   | 20.3   | 32.6   | 6.8   | 2.3    | 1.0    | 1.3   | 0.7   |
| 6.6    | 9.1    | 9.0    | 6.9    | 0.6   | 19.5   | 5.3    | 9.8   | 16.0  |
| 3.5    | 2.8    | 8.1    | 4.8    | 1.2   | 2.8    | 1.3    | 3.3   | 2.3   |
| 7.6    | 16.1   | 3.7    | 0.8    | 1.2   | 7.0    | 8.4    | 2.9   | 3.0   |
| 1.6    | 0.4    | 10.8   | 0.6    | 0.5   | 1.6    | 1.1    | 0.6   | 6.1   |
| 38.2   | 35.0   | 18.2   | 2.7    | 14.7  | 136.2  | 46.8   | 59.1  | 89.4  |
| 10.2   | 6.7    | 6.8    | 8.0    | 2.4   | 15.0   | 4.7    | 5.6   | 7.1   |
| 5.7    | 19.7   | 21.5   | 1.9    | 1.5   | 27.5   | 6.6    | 18.6  | 17.7  |
| 3.3    | 8.3    | 7.4    | 4.0    | 3.5   | 24.8   | 22.2   | 1.6   | 1.8   |
| 3.5    | 3.1    | 5.8    | 1.6    | 1.1   | 16.1   | 4.9    | 5.0   | 6.7   |
| 3.8    | 9.3    | 9.2    | 8.6    | 0.7   | 3.4    | 8.6    | 1.3   | 6.1   |
| 10.8   | 6.2    | 3.9    | 11.1   | 0.4   | 12.2   | 6.0    | 26.5  | 29.6  |
| 9.4    | 8.4    | 9.1    | 11.3   | 6.1   | 17.9   | 19.4   | 34.0  | 43.0  |
| 2.5    | 3.4    | 11.8   | 8.5    | 6.6   | 1.4    | 7.4    | 3.0   | 4.6   |
| 45.7   | 41.0   | 32.2   | 19.9   | 3.4   | 84.0   | 49.5   | 17.1  | 6.1   |
| 1.6    | 0.6    | 5.7    | 0.7    | 3.2   | 9.0    | 16.5   | 1.7   | 2.4   |
| 53.1   | 24.0   | 28.8   | 20.4   | 14.6  | 36.2   | 30.5   | 23.3  | 14.5  |
| 554.9  | 550.4  | 571.9  | 727.8  | 225.1 | 944.3  | 884.5  | 204.6 | 262.9 |
| 3.3    | 12.0   | 3.0    | 2.2    | 6.0   | 11.1   | 3.0    | 2.9   | 1.1   |
| 8.4    | 4.9    | 10.1   | 6.4    | 1.3   | 6.2    | 10.4   | 11.0  | 18.2  |
| 3.2    | 2.2    | 2.9    | 1.0    | 2.2   | 20.9   | 16.2   | 4.6   | 1.1   |
| 1.1    | 2.0    | 1.7    | 3.6    | 0.9   | 1.6    | 0.6    | 1.8   | 1.1   |
| 5.8    | 1.6    | 2.4    | 1.5    | 1.4   | 4.8    | 3.5    | 4.1   | 3.9   |
| 10.7   | 8.0    | 1.2    | 10.6   | 3.8   | 7.1    | 5.8    | 16.7  | 21.1  |
| 524.3  | 663.0  | 523.8  | 301.2  | 205.7 | 300.1  | 140.1  | 10.4  | 12.2  |
| 13.0   | 10.0   | 8.9    | 7.8    | 5.2   | 36.5   | 48.0   | 5.5   | 2.1   |
| 4.4    | 4.0    | 1.8    | 6.7    | 4.9   | 1.3    | 1.0    | 4.8   | 2.7   |
| 0.7    | 7.3    | 1.3    | 0.9    | 4.3   | 0.6    | 0.7    | 1.3   | 8.9   |
| 19.9   | 11.1   | 13.5   | 10.6   | 7.0   | 70.9   | 50.7   | 7.3   | 10.9  |
| 2.6    | 3.2    | 2.7    | 3.4    | 1.6   | 2.6    | 1.8    | 2.3   | 2.7   |
| 8.4    | 1.6    | 1.3    | 1.6    | 0.6   | 17.9   | 2.4    | 9.9   | 15.7  |
| 8.7    | 18.0   | 16.9   | 11.2   | 10.2  | 14.2   | 1.3    | 12.1  | 11.3  |
| 20.3   | 14.9   | 15.0   | 12.0   | 7.2   | 15.2   | 18.6   | 26.0  | 32.0  |
| 41.4   | 43.2   | 47.3   | 32.9   | 24.1  | 5.6    | 0.4    | 1.0   | 13.8  |
| 1164.9 | 1064.3 | 1029.5 | 1114.9 | 363.7 | 2610.5 | 1869.4 | 766.7 | 854.9 |
| 6.4    | 22.5   | 15.5   | 16.0   | 6.3   | 12.6   | 10.3   | 12.7  | 14.2  |
| 31.0   | 17.1   | 18.4   | 10.2   | 4.9   | 23.9   | 11.1   | 1.9   | 5.3   |
| 30.4   | 18.1   | 13.2   | 14.8   | 1.3   | 4.3    | 0.8    | 10.3  | 23.9  |
| 13.9   | 11.5   | 10.4   | 10.6   | 6.3   | 32.1   | 35.1   | 25.7  | 23.8  |
| 20.2   | 12.4   | 14.2   | 13.1   | 4.3   | 13.6   | 11.2   | 2.2   | 9.5   |

|       |       |       |       |       |       |       |       |       |
|-------|-------|-------|-------|-------|-------|-------|-------|-------|
| 28.4  | 22.9  | 34.0  | 83.1  | 13.7  | 26.6  | 5.0   | 8.5   | 1.5   |
| 11.4  | 6.6   | 5.0   | 4.0   | 1.4   | 11.7  | 6.6   | 0.9   | 4.7   |
| 18.0  | 34.9  | 23.2  | 11.4  | 1.3   | 32.9  | 20.5  | 24.4  | 24.1  |
| 5.3   | 5.6   | 11.7  | 0.7   | 1.2   | 0.9   | 0.6   | 0.8   | 0.6   |
| 23.5  | 28.4  | 32.1  | 10.3  | 6.2   | 16.7  | 1.3   | 3.4   | 5.3   |
| 20.8  | 20.0  | 16.2  | 12.4  | 11.5  | 2.6   | 17.0  | 2.9   | 14.7  |
| 23.5  | 10.2  | 7.0   | 5.9   | 0.5   | 9.6   | 12.2  | 2.0   | 11.4  |
| 2.8   | 2.0   | 1.6   | 0.3   | 0.3   | 8.4   | 0.5   | 1.5   | 0.9   |
| 5.9   | 2.9   | 1.2   | 2.9   | 1.8   | 0.4   | 0.7   | 0.2   | 0.8   |
| 1.0   | 2.9   | 3.1   | 2.2   | 0.9   | 1.8   | 4.3   | 0.9   | 1.4   |
| 24.0  | 15.8  | 20.6  | 9.3   | 8.1   | 8.7   | 8.1   | 4.1   | 2.9   |
| 34.9  | 14.9  | 8.3   | 4.7   | 4.6   | 134.4 | 72.9  | 0.5   | 0.6   |
| 12.6  | 4.7   | 1.8   | 3.0   | 7.1   | 9.4   | 7.5   | 9.0   | 8.6   |
| 30.8  | 27.8  | 24.3  | 23.4  | 10.4  | 28.2  | 18.0  | 36.4  | 48.0  |
| 24.2  | 26.2  | 32.1  | 12.9  | 11.5  | 7.7   | 8.0   | 6.6   | 8.8   |
| 34.2  | 13.8  | 27.2  | 24.8  | 14.2  | 39.0  | 21.8  | 16.0  | 23.4  |
| 0.5   | 0.5   | 0.6   | 1.4   | 3.3   | 1.3   | 0.6   | 1.7   | 0.6   |
| 1.0   | 0.5   | 1.1   | 1.2   | 0.6   | 0.5   | 1.0   | 0.6   | 0.6   |
| 48.4  | 47.2  | 43.0  | 60.2  | 19.4  | 19.0  | 9.2   | 10.6  | 11.2  |
| 15.9  | 16.2  | 11.5  | 7.5   | 6.4   | 1.5   | 7.9   | 6.5   | 9.5   |
| 1.5   | 1.6   | 2.4   | 1.3   | 0.6   | 0.9   | 1.3   | 1.7   | 1.1   |
| 2.4   | 10.5  | 9.4   | 5.7   | 9.6   | 16.9  | 8.4   | 8.2   | 14.4  |
| 27.8  | 27.5  | 30.7  | 22.7  | 7.3   | 10.9  | 6.1   | 2.8   | 7.8   |
| 46.7  | 56.1  | 29.7  | 4.6   | 20.6  | 52.7  | 53.2  | 18.4  | 10.2  |
| 21.2  | 6.0   | 12.5  | 1.8   | 0.9   | 2.3   | 1.5   | 2.6   | 0.6   |
| 68.5  | 79.0  | 80.3  | 62.2  | 27.1  | 477.9 | 279.4 | 31.6  | 48.5  |
| 13.4  | 9.9   | 6.8   | 9.8   | 1.2   | 3.5   | 6.1   | 1.5   | 5.4   |
| 13.3  | 2.4   | 5.4   | 2.1   | 1.2   | 3.4   | 0.7   | 1.4   | 0.9   |
| 2.3   | 2.4   | 10.1  | 0.6   | 0.4   | 12.0  | 2.8   | 6.6   | 2.4   |
| 2.1   | 1.0   | 2.6   | 6.4   | 0.4   | 112.6 | 81.1  | 2.8   | 2.7   |
| 82.8  | 109.5 | 96.3  | 112.2 | 36.8  | 912.1 | 775.2 | 47.3  | 69.4  |
| 9.7   | 9.2   | 2.5   | 7.9   | 5.1   | 3.5   | 10.1  | 10.3  | 14.0  |
| 13.6  | 20.9  | 9.5   | 18.0  | 11.8  | 12.5  | 18.4  | 0.7   | 0.1   |
| 533.4 | 458.3 | 498.8 | 534.0 | 152.2 | 554.9 | 354.0 | 59.3  | 88.6  |
| 2.4   | 0.9   | 2.4   | 0.9   | 5.9   | 1.5   | 0.7   | 0.6   | 0.8   |
| 95.7  | 73.9  | 88.3  | 73.5  | 28.2  | 331.8 | 171.1 | 93.7  | 146.4 |
| 2.8   | 1.4   | 1.1   | 1.1   | 2.1   | 15.6  | 2.8   | 1.7   | 4.0   |
| 3.1   | 4.7   | 3.7   | 17.0  | 0.9   | 1.7   | 0.8   | 20.9  | 23.5  |
| 4.9   | 2.4   | 2.4   | 1.2   | 0.9   | 3.3   | 15.0  | 4.6   | 6.4   |
| 3.6   | 2.8   | 4.6   | 9.3   | 1.9   | 2.5   | 1.8   | 2.0   | 2.6   |
| 4.0   | 15.6  | 4.9   | 10.1  | 2.2   | 2.8   | 2.1   | 18.4  | 21.2  |
| 3.2   | 1.8   | 8.0   | 1.1   | 6.8   | 1.7   | 6.0   | 1.2   | 3.1   |
| 265.5 | 214.5 | 229.3 | 136.6 | 92.2  | 548.4 | 199.0 | 270.3 | 384.8 |
| 9.8   | 7.9   | 18.0  | 1.9   | 1.2   | 20.8  | 3.9   | 1.4   | 9.9   |
| 79.7  | 59.2  | 59.3  | 43.4  | 17.2  | 95.2  | 63.4  | 18.0  | 25.9  |
| 0.7   | 1.2   | 7.4   | 1.8   | 0.5   | 3.5   | 1.5   | 1.9   | 1.2   |
| 1.3   | 4.0   | 0.7   | 0.7   | 0.8   | 7.9   | 1.2   | 0.5   | 1.1   |
| 12.6  | 16.6  | 6.1   | 14.8  | 8.5   | 26.2  | 13.5  | 15.6  | 19.4  |
| 8.0   | 43.0  | 6.5   | 4.7   | 3.3   | 7.6   | 6.8   | 5.0   | 5.4   |
| 2.6   | 9.7   | 9.8   | 9.6   | 2.8   | 18.1  | 16.8  | 9.0   | 11.4  |
| 26.3  | 23.3  | 19.3  | 13.9  | 11.5  | 113.9 | 116.9 | 25.1  | 22.2  |
| 0.4   | 0.2   | 1.4   | 0.6   | 5.3   | 5.5   | 3.3   | 3.6   | 6.9   |
| 375.6 | 387.9 | 377.1 | 381.6 | 122.2 | 470.1 | 371.9 | 59.4  | 81.1  |

|        |        |        |        |       |        |        |       |       |
|--------|--------|--------|--------|-------|--------|--------|-------|-------|
| 44.7   | 31.2   | 25.6   | 35.9   | 5.6   | 7.1    | 2.8    | 2.8   | 2.2   |
| 16.1   | 16.8   | 3.2    | 4.6    | 9.7   | 7.1    | 9.6    | 1.7   | 4.7   |
| 24.0   | 22.4   | 23.2   | 16.1   | 8.3   | 22.5   | 11.3   | 1.8   | 8.5   |
| 5.1    | 2.5    | 1.7    | 6.6    | 3.4   | 19.3   | 19.8   | 4.9   | 3.2   |
| 6.0    | 1.7    | 1.7    | 1.4    | 2.4   | 5.5    | 5.4    | 3.8   | 6.0   |
| 3.2    | 3.6    | 3.3    | 1.7    | 0.6   | 4.7    | 4.8    | 1.4   | 2.2   |
| 32.5   | 39.2   | 43.0   | 25.2   | 5.7   | 62.2   | 32.2   | 60.2  | 64.7  |
| 16.4   | 9.6    | 8.3    | 3.4    | 8.7   | 16.7   | 2.3    | 2.9   | 6.7   |
| 3.1    | 1.7    | 0.7    | 2.9    | 0.3   | 0.8    | 8.0    | 0.7   | 3.4   |
| 300.5  | 235.6  | 283.0  | 295.9  | 60.8  | 118.1  | 68.6   | 49.9  | 83.1  |
| 2.4    | 5.9    | 1.9    | 1.1    | 1.6   | 13.0   | 6.5    | 0.8   | 1.3   |
| 20.6   | 5.2    | 8.7    | 1.7    | 7.7   | 24.5   | 27.4   | 9.2   | 1.4   |
| 114.3  | 71.7   | 60.3   | 28.4   | 21.2  | 10.5   | 2.8    | 8.4   | 16.6  |
| 10.8   | 11.4   | 11.6   | 10.9   | 0.9   | 15.3   | 10.2   | 14.2  | 16.9  |
| 17.2   | 13.0   | 17.4   | 8.9    | 6.8   | 14.1   | 3.1    | 13.5  | 20.2  |
| 16.6   | 24.1   | 14.7   | 18.2   | 12.2  | 13.5   | 4.3    | 27.7  | 25.2  |
| 13.2   | 12.7   | 16.3   | 2.9    | 7.8   | 29.1   | 23.7   | 0.2   | 1.3   |
| 22.0   | 14.2   | 10.5   | 11.5   | 11.0  | 6.7    | 2.9    | 11.8  | 5.2   |
| 1.4    | 4.6    | 2.1    | 3.9    | 1.5   | 10.1   | 6.7    | 5.7   | 8.6   |
| 3.4    | 1.1    | 0.7    | 1.0    | 0.5   | 1.9    | 1.5    | 1.3   | 1.4   |
| 0.1    | 0.2    | 0.4    | 0.3    | 0.2   | 1.1    | 0.1    | 0.4   | 0.8   |
| 6.0    | 4.2    | 4.4    | 2.7    | 0.4   | 0.4    | 0.7    | 6.2   | 0.8   |
| 654.2  | 594.9  | 962.1  | 1184.0 | 237.0 | 2022.6 | 1542.8 | 212.6 | 340.8 |
| 90.2   | 101.1  | 97.3   | 54.1   | 33.8  | 167.2  | 69.4   | 121.8 | 104.6 |
| 18.9   | 23.9   | 23.8   | 22.1   | 4.9   | 3.4    | 17.3   | 19.9  | 13.7  |
| 97.0   | 97.5   | 71.9   | 46.1   | 26.8  | 206.3  | 84.7   | 8.2   | 22.6  |
| 20.0   | 15.4   | 15.5   | 17.3   | 3.4   | 12.0   | 6.4    | 1.1   | 4.4   |
| 28.7   | 14.9   | 23.5   | 20.4   | 8.9   | 40.1   | 18.4   | 22.9  | 30.4  |
| 450.3  | 523.8  | 387.6  | 373.5  | 103.6 | 1148.2 | 878.5  | 122.2 | 140.1 |
| 19.7   | 19.7   | 30.5   | 20.0   | 10.6  | 26.9   | 16.3   | 0.6   | 1.7   |
| 3.3    | 4.3    | 9.4    | 4.8    | 2.0   | 2.8    | 1.9    | 7.9   | 3.1   |
| 10.9   | 7.7    | 6.6    | 0.5    | 6.1   | 12.0   | 12.4   | 1.6   | 5.8   |
| 27.5   | 17.8   | 16.3   | 22.2   | 11.4  | 279.5  | 225.4  | 99.8  | 98.9  |
| 2085.7 | 1775.4 | 1607.3 | 1123.8 | 642.3 | 2104.5 | 1859.5 | 747.0 | 840.3 |
| 8.8    | 25.9   | 33.5   | 24.0   | 14.2  | 37.2   | 13.0   | 2.6   | 17.0  |
| 5.7    | 13.4   | 17.2   | 4.4    | 9.2   | 9.7    | 5.9    | 8.8   | 2.7   |
| 15.6   | 12.4   | 3.6    | 8.7    | 5.3   | 21.8   | 8.8    | 10.7  | 3.8   |
| 3.9    | 9.7    | 22.6   | 8.7    | 7.9   | 21.0   | 15.6   | 13.8  | 23.4  |
| 14.2   | 5.1    | 3.9    | 13.3   | 0.6   | 18.8   | 2.8    | 23.0  | 4.0   |
| 5.3    | 1.3    | 1.6    | 1.8    | 1.1   | 1.4    | 1.6    | 12.5  | 2.4   |
| 2.0    | 3.3    | 13.1   | 3.8    | 0.6   | 17.1   | 0.9    | 15.0  | 10.1  |
| 1.0    | 0.7    | 1.0    | 0.7    | 0.4   | 1.3    | 0.6    | 0.9   | 0.6   |
| 10.8   | 7.6    | 11.2   | 4.1    | 3.1   | 15.8   | 19.4   | 8.4   | 13.0  |
| 1.2    | 0.3    | 2.8    | 2.6    | 0.6   | 0.9    | 0.7    | 1.5   | 0.9   |
| 28.2   | 18.9   | 9.1    | 12.5   | 1.2   | 42.1   | 40.1   | 11.8  | 7.6   |
| 12.2   | 2.1    | 2.8    | 1.3    | 3.6   | 17.7   | 1.1    | 3.2   | 3.5   |
| 0.2    | 3.4    | 0.6    | 0.1    | 1.0   | 1.0    | 4.5    | 2.0   | 5.1   |
| 34.5   | 16.7   | 32.3   | 11.7   | 5.5   | 2.4    | 14.0   | 13.3  | 25.3  |
| 285.0  | 309.4  | 385.5  | 198.3  | 112.5 | 78.4   | 36.9   | 4.3   | 0.5   |
| 0.7    | 3.1    | 7.1    | 0.4    | 2.4   | 0.9    | 0.3    | 1.0   | 1.1   |
| 1.6    | 7.5    | 8.7    | 0.9    | 4.4   | 1.2    | 2.8    | 3.5   | 6.5   |
| 35.8   | 16.6   | 5.1    | 13.9   | 6.8   | 2.6    | 6.6    | 5.6   | 3.6   |
| 26.6   | 2.5    | 8.7    | 10.0   | 1.5   | 7.8    | 13.3   | 8.5   | 15.6  |

|        |        |        |        |        |        |        |       |        |
|--------|--------|--------|--------|--------|--------|--------|-------|--------|
| 14.3   | 15.6   | 21.7   | 6.0    | 3.9    | 22.8   | 19.0   | 11.4  | 24.1   |
| 363.5  | 397.5  | 418.9  | 347.0  | 129.7  | 345.0  | 186.6  | 30.3  | 55.0   |
| 22.8   | 14.0   | 3.4    | 6.2    | 0.7    | 21.4   | 2.6    | 18.0  | 2.8    |
| 2.7    | 11.3   | 14.3   | 2.1    | 6.6    | 2.2    | 1.3    | 5.0   | 1.5    |
| 13.7   | 27.2   | 41.6   | 38.0   | 24.4   | 14.3   | 34.1   | 3.6   | 4.2    |
| 2776.4 | 2790.0 | 2573.4 | 2476.0 | 1277.3 | 3219.2 | 2465.3 | 619.0 | 837.4  |
| 5.8    | 20.7   | 2.9    | 8.0    | 1.6    | 27.2   | 7.0    | 9.8   | 10.6   |
| 42.9   | 34.0   | 29.5   | 18.2   | 12.0   | 60.1   | 33.2   | 25.4  | 44.5   |
| 18.0   | 10.2   | 22.4   | 23.6   | 5.4    | 36.1   | 30.5   | 1.7   | 3.6    |
| 1.5    | 5.6    | 7.9    | 5.9    | 2.3    | 2.5    | 8.4    | 1.3   | 0.8    |
| 4.0    | 2.7    | 4.6    | 0.9    | 0.7    | 2.3    | 1.2    | 11.0  | 2.5    |
| 196.0  | 116.3  | 109.4  | 81.8   | 43.3   | 790.3  | 350.1  | 366.5 | 489.2  |
| 6.2    | 9.1    | 2.7    | 3.6    | 3.0    | 20.9   | 8.9    | 9.8   | 16.9   |
| 702.5  | 892.2  | 758.3  | 665.9  | 301.4  | 516.7  | 812.8  | 98.4  | 148.1  |
| 13.9   | 1.0    | 5.8    | 7.2    | 6.1    | 22.1   | 34.6   | 0.4   | 0.3    |
| 12.7   | 1.7    | 5.0    | 5.1    | 1.0    | 1.6    | 1.7    | 4.1   | 2.4    |
| 1524.7 | 1420.3 | 1230.9 | 906.9  | 476.1  | 3606.4 | 2598.6 | 824.4 | 1093.1 |
| 160.6  | 158.8  | 134.7  | 95.6   | 67.9   | 1029.1 | 637.2  | 359.1 | 510.9  |
| 231.8  | 196.9  | 218.2  | 271.9  | 74.9   | 210.3  | 140.9  | 59.2  | 68.9   |
| 113.7  | 98.7   | 107.8  | 56.0   | 22.3   | 3.5    | 16.4   | 2.4   | 1.1    |
| 383.5  | 446.1  | 359.4  | 127.0  | 94.3   | 18.3   | 11.9   | 7.8   | 11.0   |
| 0.6    | 0.6    | 0.3    | 0.7    | 0.3    | 0.7    | 1.1    | 9.2   | 2.2    |
| 11.9   | 9.2    | 7.0    | 4.1    | 3.1    | 8.3    | 9.3    | 9.3   | 2.2    |
| 32.3   | 21.7   | 20.6   | 23.4   | 11.0   | 17.3   | 18.9   | 21.4  | 25.3   |
| 1.0    | 0.4    | 0.3    | 0.8    | 0.2    | 8.3    | 0.6    | 0.8   | 0.3    |
| 7.3    | 7.2    | 0.7    | 0.7    | 3.9    | 25.3   | 21.7   | 1.3   | 0.4    |
| 3.7    | 2.8    | 4.2    | 1.4    | 1.0    | 4.8    | 3.1    | 4.0   | 3.0    |
| 142.2  | 126.9  | 229.5  | 230.3  | 63.6   | 756.2  | 691.2  | 34.6  | 26.7   |
| 125.0  | 76.4   | 107.4  | 64.2   | 32.0   | 298.8  | 178.5  | 18.9  | 29.6   |
| 0.6    | 0.3    | 0.9    | 0.9    | 0.2    | 0.7    | 5.3    | 4.6   | 3.0    |
| 38.5   | 93.1   | 51.8   | 59.3   | 27.4   | 186.0  | 75.8   | 23.2  | 26.9   |
| 40.0   | 22.4   | 33.7   | 15.8   | 3.1    | 30.7   | 17.4   | 34.4  | 25.9   |
| 10.5   | 15.9   | 19.0   | 10.0   | 1.3    | 7.4    | 21.5   | 8.9   | 12.2   |
| 145.3  | 78.2   | 79.6   | 55.5   | 28.4   | 298.4  | 325.6  | 54.2  | 125.4  |
| 38.9   | 15.2   | 31.0   | 22.8   | 12.4   | 39.4   | 2.7    | 20.8  | 54.0   |
| 4.6    | 5.9    | 22.6   | 4.4    | 2.7    | 2.9    | 3.0    | 12.6  | 20.0   |
| 12.1   | 8.4    | 3.0    | 11.8   | 13.8   | 24.6   | 7.0    | 19.0  | 21.7   |
| 3.3    | 3.5    | 3.0    | 1.8    | 1.1    | 2.0    | 1.0    | 1.6   | 0.7    |
| 8.3    | 7.2    | 1.7    | 7.1    | 0.5    | 10.1   | 3.9    | 2.4   | 21.1   |
| 7.6    | 4.1    | 25.0   | 3.1    | 1.1    | 6.7    | 14.4   | 2.6   | 14.6   |
| 1.7    | 2.9    | 7.5    | 1.7    | 4.3    | 1.4    | 4.3    | 1.9   | 4.5    |
| 8.2    | 8.3    | 13.9   | 11.1   | 7.3    | 0.6    | 5.5    | 0.4   | 1.8    |
| 6.8    | 0.4    | 0.9    | 4.0    | 1.1    | 6.2    | 0.6    | 1.6   | 3.0    |
| 240.2  | 176.7  | 210.6  | 266.3  | 128.4  | 1775.1 | 1419.0 | 84.6  | 68.2   |
| 10.5   | 1.3    | 13.6   | 1.1    | 4.4    | 2.4    | 0.9    | 1.0   | 3.9    |
| 195.9  | 113.8  | 126.1  | 129.4  | 42.0   | 506.6  | 357.9  | 64.6  | 78.2   |
| 17.9   | 28.8   | 31.2   | 26.8   | 12.8   | 26.1   | 27.8   | 24.3  | 12.3   |
| 1.4    | 0.7    | 1.8    | 7.2    | 0.2    | 1.8    | 2.3    | 5.9   | 1.5    |
| 5.8    | 2.6    | 10.3   | 17.1   | 1.1    | 9.6    | 11.7   | 1.7   | 10.0   |
| 3.6    | 6.1    | 2.7    | 5.1    | 0.6    | 2.5    | 2.8    | 2.0   | 13.6   |
| 3.7    | 14.7   | 9.7    | 8.0    | 7.2    | 3.7    | 8.6    | 2.0   | 4.1    |
| 0.7    | 0.9    | 1.0    | 1.1    | 0.3    | 4.7    | 0.6    | 1.7   | 0.9    |
| 37.8   | 18.3   | 20.0   | 19.4   | 10.2   | 31.2   | 8.2    | 18.2  | 23.8   |

|        |        |        |        |        |        |        |        |        |
|--------|--------|--------|--------|--------|--------|--------|--------|--------|
| 18.1   | 1.3    | 1.9    | 7.5    | 8.0    | 10.3   | 5.0    | 2.2    | 7.1    |
| 16.3   | 10.1   | 0.9    | 3.1    | 4.5    | 7.8    | 7.5    | 2.9    | 7.1    |
| 3.7    | 0.5    | 4.0    | 1.0    | 1.5    | 6.5    | 0.8    | 0.8    | 1.8    |
| 13.9   | 1.4    | 12.0   | 11.3   | 7.4    | 17.6   | 3.0    | 13.5   | 27.1   |
| 0.7    | 3.4    | 1.6    | 0.4    | 3.7    | 1.3    | 5.1    | 1.8    | 1.9    |
| 3.7    | 3.2    | 13.0   | 0.5    | 1.5    | 2.7    | 1.4    | 1.0    | 3.7    |
| 1.6    | 1.0    | 2.7    | 5.0    | 0.9    | 3.1    | 1.1    | 2.0    | 2.8    |
| 2.3    | 1.9    | 1.4    | 1.0    | 0.6    | 1.1    | 1.5    | 2.6    | 0.6    |
| 12.6   | 19.1   | 9.8    | 4.0    | 4.7    | 16.0   | 5.8    | 18.1   | 8.8    |
| 2.1    | 2.0    | 3.7    | 1.2    | 2.6    | 3.7    | 1.2    | 3.3    | 3.1    |
| 9.0    | 10.2   | 13.4   | 4.6    | 1.0    | 17.9   | 5.1    | 9.9    | 16.0   |
| 17.1   | 15.8   | 19.9   | 9.5    | 5.4    | 7.0    | 2.4    | 3.5    | 14.9   |
| 7.5    | 7.2    | 8.9    | 1.0    | 1.2    | 0.4    | 4.1    | 1.6    | 8.9    |
| 53.3   | 52.6   | 66.0   | 52.5   | 28.5   | 76.1   | 46.6   | 10.8   | 0.8    |
| 6.0    | 8.1    | 3.6    | 7.2    | 4.3    | 2.0    | 3.2    | 13.9   | 3.3    |
| 2.5    | 0.8    | 6.1    | 0.8    | 2.1    | 11.0   | 6.2    | 10.1   | 4.1    |
| 20.5   | 5.8    | 10.0   | 2.2    | 1.1    | 18.0   | 23.8   | 2.5    | 15.1   |
| 45.5   | 27.1   | 45.9   | 32.2   | 13.0   | 51.6   | 23.5   | 53.2   | 80.1   |
| 4.3    | 23.1   | 11.4   | 12.5   | 9.5    | 4.7    | 7.0    | 7.9    | 10.1   |
| 1.2    | 2.7    | 2.0    | 2.3    | 0.7    | 0.9    | 2.6    | 1.3    | 1.4    |
| 8.1    | 8.8    | 2.0    | 13.9   | 1.6    | 1.3    | 2.8    | 7.7    | 1.0    |
| 16.0   | 12.5   | 12.5   | 4.8    | 8.9    | 7.0    | 16.7   | 12.9   | 1.7    |
| 4.0    | 2.3    | 2.8    | 1.4    | 5.1    | 8.9    | 8.7    | 19.0   | 3.6    |
| 10.3   | 12.6   | 14.2   | 17.0   | 6.4    | 4.8    | 1.1    | 3.6    | 0.1    |
| 10.2   | 4.0    | 4.5    | 1.3    | 0.6    | 14.8   | 10.5   | 6.2    | 8.0    |
| 43.6   | 51.5   | 37.0   | 23.5   | 9.9    | 53.5   | 29.7   | 3.2    | 4.4    |
| 85.4   | 103.3  | 85.0   | 105.9  | 42.3   | 95.1   | 54.9   | 4.7    | 27.6   |
| 73.7   | 76.1   | 72.2   | 50.9   | 24.4   | 189.4  | 123.1  | 31.5   | 20.5   |
| 7.1    | 6.0    | 16.8   | 21.8   | 3.8    | 11.9   | 11.9   | 9.1    | 7.8    |
| 2.0    | 2.0    | 1.9    | 1.9    | 0.3    | 0.8    | 10.7   | 1.5    | 9.2    |
| 8.5    | 5.3    | 1.4    | 6.4    | 1.2    | 0.8    | 1.1    | 1.2    | 1.5    |
| 2.6    | 1.9    | 4.2    | 1.1    | 0.6    | 11.6   | 8.5    | 2.7    | 2.3    |
| 2.1    | 7.5    | 1.2    | 1.4    | 0.6    | 2.0    | 1.1    | 3.3    | 3.5    |
| 101.1  | 94.7   | 102.0  | 86.0   | 29.3   | 154.2  | 105.1  | 205.3  | 257.6  |
| 7.9    | 6.7    | 1.4    | 1.1    | 1.0    | 1.0    | 0.8    | 1.7    | 1.3    |
| 0.7    | 1.0    | 1.5    | 0.3    | 1.7    | 0.9    | 6.4    | 4.4    | 2.1    |
| 2.7    | 2.9    | 7.0    | 5.5    | 5.7    | 3.1    | 0.4    | 19.1   | 11.8   |
| 8065.0 | 7347.2 | 6934.3 | 5860.9 | 3900.8 | 8450.5 | 7240.7 | 2302.0 | 2677.8 |
| 17.7   | 5.7    | 22.4   | 15.4   | 4.2    | 37.1   | 24.7   | 6.9    | 2.0    |
| 0.7    | 0.4    | 0.3    | 0.2    | 0.4    | 2.5    | 0.2    | 0.2    | 0.7    |
| 7.7    | 7.5    | 1.0    | 5.5    | 2.6    | 9.5    | 7.8    | 5.5    | 6.9    |
| 14.3   | 10.7   | 21.1   | 24.9   | 4.0    | 32.6   | 12.7   | 1.5    | 7.6    |
| 0.8    | 2.5    | 7.1    | 2.2    | 0.7    | 5.3    | 1.9    | 3.1    | 11.7   |
| 1.1    | 0.9    | 1.3    | 1.8    | 0.5    | 1.2    | 0.9    | 2.7    | 3.1    |
| 8.2    | 1.5    | 5.1    | 6.8    | 0.8    | 6.7    | 1.5    | 4.6    | 11.3   |
| 7.9    | 2.6    | 9.8    | 2.7    | 9.0    | 1.5    | 1.8    | 3.0    | 2.5    |
| 15.3   | 16.3   | 17.2   | 14.7   | 9.3    | 20.3   | 12.1   | 24.4   | 8.3    |
| 119.1  | 113.9  | 130.3  | 81.1   | 26.1   | 389.2  | 314.6  | 53.2   | 63.5   |
| 0.8    | 9.7    | 3.0    | 4.8    | 5.1    | 79.9   | 57.5   | 7.8    | 4.6    |
| 10.2   | 13.8   | 8.3    | 12.4   | 1.4    | 7.6    | 9.0    | 1.3    | 8.8    |
| 0.3    | 2.1    | 1.8    | 0.2    | 1.9    | 0.7    | 0.5    | 4.6    | 0.3    |
| 2.2    | 0.7    | 11.5   | 7.8    | 0.7    | 2.0    | 2.0    | 4.0    | 0.7    |
| 3.2    | 1.9    | 2.0    | 1.1    | 1.2    | 2.5    | 1.2    | 2.3    | 2.6    |



|       |       |       |       |       |        |        |       |       |
|-------|-------|-------|-------|-------|--------|--------|-------|-------|
| 1.2   | 1.1   | 0.8   | 0.4   | 0.4   | 1.2    | 1.4    | 1.3   | 0.9   |
| 3.8   | 2.1   | 2.3   | 2.5   | 1.5   | 2.0    | 3.0    | 2.7   | 5.3   |
| 1.1   | 0.8   | 3.6   | 1.3   | 0.4   | 0.7    | 1.0    | 0.7   | 0.7   |
| 8.9   | 3.6   | 3.7   | 2.8   | 2.2   | 1.0    | 4.2    | 4.5   | 3.6   |
| 18.4  | 17.1  | 15.7  | 14.7  | 3.8   | 20.7   | 21.0   | 2.9   | 6.9   |
| 11.3  | 17.1  | 8.9   | 7.4   | 9.4   | 9.7    | 14.1   | 2.7   | 7.6   |
| 196.7 | 183.1 | 155.1 | 65.3  | 49.4  | 211.5  | 127.0  | 95.4  | 175.0 |
| 338.6 | 270.7 | 293.1 | 295.2 | 120.8 | 1521.7 | 1144.3 | 101.4 | 110.6 |
| 5.7   | 8.0   | 10.5  | 6.6   | 5.5   | 25.0   | 17.6   | 8.9   | 8.0   |
| 218.3 | 216.8 | 222.3 | 182.4 | 79.6  | 169.9  | 123.0  | 49.4  | 47.9  |
| 6.7   | 1.7   | 19.2  | 0.4   | 6.4   | 7.5    | 1.6    | 8.5   | 8.0   |
| 24.3  | 14.8  | 25.0  | 10.2  | 5.0   | 22.1   | 9.2    | 14.7  | 12.0  |
| 0.8   | 0.6   | 0.9   | 0.6   | 0.4   | 1.3    | 0.9    | 2.8   | 0.7   |
| 0.7   | 3.9   | 7.0   | 2.9   | 0.3   | 5.8    | 3.4    | 2.2   | 6.7   |
| 8.6   | 3.4   | 3.6   | 0.7   | 3.1   | 15.4   | 5.9    | 2.2   | 1.7   |
| 8.5   | 11.4  | 14.7  | 15.6  | 8.8   | 14.6   | 12.1   | 2.4   | 5.5   |
| 84.4  | 84.4  | 59.6  | 50.2  | 23.5  | 86.9   | 57.8   | 362.4 | 491.7 |
| 0.5   | 0.3   | 0.5   | 0.4   | 0.5   | 1.6    | 2.5    | 0.3   | 1.6   |
| 17.5  | 4.6   | 12.1  | 3.4   | 3.3   | 22.3   | 20.0   | 12.0  | 5.2   |
| 2.4   | 15.2  | 9.3   | 7.8   | 3.0   | 6.8    | 10.3   | 26.0  | 11.0  |
| 40.6  | 40.6  | 38.3  | 21.9  | 13.0  | 25.5   | 9.9    | 19.6  | 56.0  |
| 2.6   | 2.7   | 3.5   | 9.6   | 4.2   | 15.5   | 3.0    | 1.8   | 4.3   |
| 18.5  | 15.9  | 11.1  | 12.9  | 7.8   | 33.9   | 21.6   | 1.6   | 3.5   |
| 19.3  | 3.6   | 3.2   | 3.1   | 2.1   | 7.0    | 13.0   | 2.7   | 12.8  |
| 39.3  | 42.6  | 36.3  | 18.9  | 11.3  | 58.2   | 57.7   | 9.8   | 13.9  |
| 0.5   | 0.9   | 1.2   | 5.1   | 0.1   | 15.1   | 14.6   | 0.8   | 1.2   |
| 11.7  | 2.8   | 5.8   | 9.3   | 10.3  | 8.1    | 2.8    | 7.1   | 4.9   |
| 10.1  | 7.8   | 3.9   | 8.0   | 5.0   | 8.6    | 6.1    | 2.9   | 0.2   |
| 4.3   | 7.9   | 11.6  | 2.3   | 2.9   | 10.2   | 17.8   | 18.6  | 16.0  |
| 1.5   | 0.9   | 1.4   | 0.9   | 3.2   | 2.1    | 3.2    | 0.7   | 1.2   |
| 22.0  | 17.5  | 23.5  | 16.5  | 11.1  | 41.5   | 5.0    | 9.1   | 28.2  |
| 11.6  | 11.6  | 6.5   | 4.3   | 1.0   | 11.9   | 8.0    | 5.3   | 7.9   |
| 5.1   | 14.1  | 9.8   | 3.1   | 8.6   | 260.2  | 139.4  | 32.8  | 48.5  |
| 55.9  | 64.9  | 47.9  | 29.8  | 20.1  | 112.1  | 41.1   | 10.3  | 46.9  |
| 7.5   | 4.5   | 8.5   | 1.7   | 0.9   | 17.0   | 3.0    | 2.7   | 1.6   |
| 8.0   | 5.3   | 1.1   | 1.1   | 4.3   | 8.2    | 0.8    | 7.2   | 2.8   |
| 16.9  | 11.3  | 14.7  | 5.1   | 3.3   | 17.7   | 9.6    | 17.3  | 12.5  |
| 16.8  | 13.0  | 20.4  | 18.7  | 2.3   | 3.0    | 8.3    | 7.0   | 10.4  |
| 10.9  | 1.3   | 13.2  | 1.1   | 7.1   | 18.4   | 4.0    | 3.6   | 9.4   |
| 4.7   | 0.4   | 7.2   | 4.1   | 0.5   | 1.6    | 1.3    | 0.9   | 6.4   |
| 14.2  | 18.3  | 25.3  | 16.7  | 5.8   | 31.2   | 28.7   | 44.9  | 81.7  |
| 13.2  | 2.1   | 8.6   | 2.7   | 5.7   | 8.1    | 8.5    | 6.2   | 14.5  |
| 7.3   | 7.7   | 1.4   | 11.5  | 0.7   | 11.4   | 1.1    | 0.8   | 1.0   |
| 10.5  | 11.6  | 12.9  | 5.2   | 1.7   | 5.7    | 9.9    | 9.6   | 16.9  |
| 27.9  | 26.4  | 30.6  | 29.8  | 6.1   | 38.6   | 18.5   | 19.3  | 17.4  |
| 436.1 | 466.3 | 470.7 | 483.7 | 149.7 | 192.9  | 122.0  | 100.0 | 183.6 |
| 5.7   | 20.6  | 22.2  | 9.5   | 3.3   | 16.7   | 4.6    | 7.5   | 3.1   |
| 7.2   | 1.0   | 1.1   | 0.4   | 0.5   | 6.6    | 0.7    | 1.1   | 0.7   |
| 7.5   | 7.6   | 1.7   | 1.3   | 4.5   | 8.5    | 8.3    | 11.3  | 10.4  |
| 23.9  | 15.5  | 46.4  | 31.6  | 5.5   | 20.8   | 24.7   | 26.0  | 33.4  |
| 2.2   | 2.4   | 5.3   | 3.4   | 2.1   | 3.1    | 1.6    | 10.7  | 3.8   |
| 16.5  | 10.4  | 4.1   | 1.5   | 10.8  | 8.8    | 13.5   | 17.4  | 1.7   |
| 10.9  | 3.8   | 12.0  | 3.8   | 1.2   | 4.8    | 12.9   | 10.2  | 17.6  |

|        |        |        |        |       |        |        |        |        |
|--------|--------|--------|--------|-------|--------|--------|--------|--------|
| 16.4   | 5.0    | 8.3    | 8.8    | 0.7   | 6.9    | 16.0   | 6.1    | 16.0   |
| 12.5   | 8.6    | 2.1    | 0.7    | 8.6   | 10.0   | 5.3    | 3.2    | 1.8    |
| 11.0   | 4.9    | 7.0    | 8.6    | 5.9   | 15.2   | 0.4    | 10.6   | 5.6    |
| 6.0    | 8.2    | 9.1    | 2.2    | 1.2   | 3.3    | 3.8    | 1.4    | 8.5    |
| 2.7    | 1.1    | 1.0    | 1.6    | 0.7   | 1.5    | 6.0    | 9.7    | 3.2    |
| 230.3  | 134.9  | 184.9  | 164.6  | 56.6  | 264.2  | 143.4  | 142.3  | 126.1  |
| 62.3   | 37.6   | 49.2   | 41.9   | 10.7  | 46.7   | 20.2   | 35.4   | 53.6   |
| 2106.5 | 1829.8 | 1669.7 | 1118.4 | 640.8 | 2365.8 | 1503.5 | 829.9  | 1350.9 |
| 5.0    | 18.9   | 24.9   | 2.6    | 1.7   | 3.8    | 1.7    | 37.5   | 25.9   |
| 7.8    | 1.4    | 5.5    | 1.4    | 0.4   | 2.3    | 9.9    | 11.3   | 0.5    |
| 4.7    | 13.0   | 7.7    | 16.2   | 8.9   | 11.1   | 29.5   | 36.0   | 27.7   |
| 7.3    | 1.7    | 4.9    | 0.4    | 2.8   | 0.3    | 1.3    | 0.4    | 1.3    |
| 42.8   | 14.6   | 19.2   | 38.8   | 11.5  | 10.0   | 3.6    | 2.7    | 1.6    |
| 2.5    | 6.9    | 4.0    | 0.8    | 1.5   | 53.7   | 16.7   | 0.9    | 4.5    |
| 1.1    | 1.1    | 1.3    | 7.1    | 5.6   | 49.7   | 19.1   | 16.3   | 5.3    |
| 4.4    | 1.4    | 1.6    | 1.0    | 1.0   | 4.9    | 1.5    | 1.1    | 2.4    |
| 6.3    | 7.2    | 0.6    | 0.5    | 0.3   | 1.1    | 9.9    | 5.3    | 20.6   |
| 2.6    | 6.9    | 6.2    | 3.2    | 2.0   | 15.5   | 6.7    | 14.7   | 12.8   |
| 2.2    | 2.1    | 0.5    | 2.5    | 3.8   | 5.1    | 8.0    | 4.0    | 0.1    |
| 2552.0 | 2344.8 | 2125.3 | 1746.1 | 846.4 | 5338.5 | 4341.0 | 1014.5 | 1262.4 |
| 2.0    | 1.8    | 1.4    | 0.4    | 0.7   | 0.6    | 3.9    | 16.7   | 9.8    |
| 13.9   | 14.0   | 10.1   | 4.9    | 4.8   | 26.2   | 22.8   | 0.9    | 2.8    |
| 553.7  | 537.7  | 571.1  | 495.9  | 244.6 | 2235.4 | 1934.5 | 165.8  | 123.0  |
| 1.2    | 0.7    | 0.5    | 0.7    | 0.3   | 1.3    | 0.5    | 0.8    | 0.5    |
| 0.6    | 1.7    | 2.0    | 7.2    | 0.6   | 2.5    | 1.3    | 13.0   | 2.0    |
| 185.6  | 223.4  | 196.4  | 139.8  | 69.0  | 557.7  | 244.4  | 26.5   | 41.1   |
| 33.1   | 33.1   | 30.5   | 21.7   | 14.4  | 59.3   | 96.5   | 17.9   | 11.2   |
| 1.1    | 18.5   | 1.5    | 7.8    | 6.0   | 1.0    | 5.1    | 12.9   | 2.4    |
| 7.4    | 1.7    | 7.3    | 0.5    | 6.8   | 1.6    | 0.9    | 7.4    | 8.2    |
| 30.2   | 25.5   | 24.4   | 20.0   | 1.5   | 27.4   | 24.7   | 13.0   | 9.4    |
| 2.6    | 3.7    | 1.7    | 0.8    | 1.3   | 1.7    | 2.3    | 3.4    | 3.4    |
| 17.3   | 13.3   | 9.9    | 4.8    | 1.2   | 207.5  | 219.2  | 10.6   | 15.9   |
| 29.6   | 29.8   | 27.1   | 25.0   | 14.2  | 30.5   | 20.7   | 23.3   | 6.0    |
| 65.4   | 54.4   | 51.9   | 53.7   | 21.9  | 40.3   | 19.6   | 18.2   | 21.6   |
| 70.8   | 67.9   | 79.7   | 68.6   | 22.7  | 114.3  | 52.2   | 53.8   | 70.3   |
| 10.9   | 2.5    | 3.3    | 7.6    | 0.7   | 0.7    | 1.0    | 5.4    | 6.2    |
| 44.0   | 38.4   | 35.3   | 39.1   | 13.0  | 69.1   | 44.1   | 25.2   | 36.3   |
| 30.6   | 37.5   | 40.9   | 25.9   | 15.9  | 88.1   | 54.8   | 3.1    | 11.7   |
| 4.3    | 11.0   | 22.3   | 10.9   | 11.5  | 8.5    | 19.2   | 17.8   | 3.5    |
| 12.0   | 24.4   | 8.2    | 16.1   | 1.8   | 5.8    | 2.8    | 16.8   | 43.0   |
| 4.5    | 2.1    | 3.7    | 2.5    | 1.0   | 3.1    | 0.3    | 2.8    | 12.5   |
| 32.3   | 23.8   | 19.4   | 12.0   | 6.6   | 31.5   | 12.2   | 7.4    | 3.6    |
| 3.0    | 4.6    | 3.1    | 5.5    | 2.2   | 165.1  | 295.3  | 2.1    | 3.6    |
| 43.3   | 51.8   | 51.2   | 34.5   | 7.9   | 610.0  | 328.7  | 90.4   | 145.4  |
| 191.8  | 206.9  | 205.8  | 269.8  | 73.3  | 403.6  | 315.3  | 29.2   | 51.6   |
| 9.9    | 3.2    | 2.4    | 2.6    | 5.8   | 20.9   | 4.3    | 1.6    | 13.8   |
| 47.5   | 20.0   | 52.6   | 18.9   | 17.7  | 5.0    | 3.3    | 3.5    | 2.0    |
| 7.6    | 13.0   | 12.7   | 19.7   | 5.3   | 2.3    | 8.5    | 5.9    | 5.5    |
| 11.0   | 7.1    | 1.0    | 0.8    | 1.5   | 1.4    | 1.3    | 3.8    | 1.9    |
| 0.4    | 6.2    | 1.9    | 1.1    | 4.1   | 1.7    | 2.3    | 6.0    | 0.8    |
| 2.0    | 1.9    | 1.6    | 2.0    | 0.8   | 2.5    | 1.2    | 1.5    | 1.8    |
| 129.4  | 123.2  | 101.0  | 90.9   | 53.7  | 178.0  | 179.0  | 43.5   | 43.8   |
| 62.9   | 9.5    | 52.4   | 6.5    | 8.5   | 29.5   | 29.3   | 34.9   | 33.5   |

|       |       |       |       |       |       |       |       |       |
|-------|-------|-------|-------|-------|-------|-------|-------|-------|
| 5.0   | 8.3   | 9.0   | 5.3   | 9.0   | 8.6   | 11.9  | 3.3   | 10.7  |
| 19.7  | 1.0   | 5.5   | 4.0   | 0.7   | 18.8  | 21.5  | 1.2   | 1.0   |
| 16.6  | 10.7  | 9.7   | 7.5   | 4.7   | 17.4  | 4.1   | 11.6  | 15.4  |
| 1.1   | 0.9   | 1.0   | 11.3  | 6.9   | 23.2  | 13.9  | 24.4  | 14.5  |
| 3.3   | 0.8   | 0.4   | 1.0   | 0.3   | 7.5   | 4.9   | 0.7   | 0.8   |
| 1.6   | 1.3   | 2.6   | 1.2   | 0.6   | 6.3   | 1.0   | 1.6   | 1.6   |
| 12.7  | 9.8   | 10.6  | 4.9   | 4.9   | 1.8   | 2.3   | 0.7   | 0.8   |
| 7.4   | 4.2   | 0.9   | 5.6   | 1.4   | 12.3  | 6.1   | 3.1   | 0.5   |
| 31.3  | 21.7  | 38.0  | 37.3  | 4.2   | 263.5 | 186.0 | 2.7   | 2.5   |
| 4.3   | 9.9   | 3.8   | 2.5   | 0.3   | 3.0   | 2.1   | 7.5   | 13.5  |
| 2.9   | 1.1   | 0.8   | 1.2   | 0.3   | 1.3   | 1.2   | 1.0   | 1.0   |
| 0.7   | 1.0   | 1.0   | 0.5   | 0.2   | 1.2   | 0.6   | 1.1   | 1.1   |
| 19.1  | 7.1   | 13.8  | 8.0   | 1.3   | 17.7  | 2.8   | 3.2   | 2.1   |
| 3.6   | 10.3  | 2.3   | 2.3   | 2.3   | 15.4  | 1.3   | 2.6   | 11.8  |
| 25.1  | 29.5  | 37.7  | 48.4  | 10.8  | 47.3  | 22.8  | 1.5   | 0.8   |
| 11.2  | 10.5  | 14.5  | 1.6   | 4.6   | 11.3  | 12.7  | 1.5   | 17.8  |
| 2.0   | 2.6   | 2.9   | 8.8   | 1.6   | 1.0   | 1.6   | 1.7   | 1.8   |
| 8.5   | 1.0   | 4.5   | 1.0   | 4.4   | 10.3  | 3.0   | 10.8  | 1.7   |
| 0.8   | 0.8   | 1.6   | 1.3   | 0.9   | 3.2   | 2.5   | 2.0   | 0.7   |
| 2.1   | 7.8   | 1.2   | 1.4   | 6.4   | 22.0  | 10.7  | 3.9   | 6.6   |
| 14.0  | 11.4  | 13.9  | 15.2  | 5.2   | 43.2  | 23.6  | 12.9  | 18.0  |
| 53.0  | 25.8  | 32.4  | 28.8  | 22.3  | 55.3  | 26.0  | 32.3  | 60.1  |
| 43.5  | 31.0  | 28.9  | 26.8  | 11.9  | 31.0  | 24.6  | 28.8  | 35.4  |
| 72.0  | 43.3  | 60.8  | 40.5  | 26.5  | 251.6 | 110.8 | 48.1  | 70.7  |
| 431.6 | 250.0 | 334.5 | 179.2 | 79.8  | 634.3 | 245.8 | 121.9 | 101.7 |
| 2.1   | 1.5   | 5.5   | 0.7   | 0.6   | 11.8  | 17.0  | 11.2  | 14.6  |
| 1.1   | 8.0   | 0.8   | 2.4   | 1.6   | 8.8   | 1.0   | 2.0   | 8.9   |
| 11.3  | 13.6  | 2.7   | 12.1  | 5.2   | 2.5   | 4.2   | 9.0   | 14.8  |
| 1.2   | 0.9   | 1.8   | 3.2   | 0.7   | 1.4   | 2.1   | 10.9  | 3.1   |
| 177.3 | 140.9 | 153.4 | 106.5 | 51.8  | 710.2 | 445.5 | 151.7 | 200.9 |
| 0.4   | 0.5   | 0.3   | 0.3   | 0.3   | 1.1   | 0.5   | 7.1   | 0.6   |
| 3.9   | 3.9   | 3.9   | 7.3   | 1.6   | 3.5   | 6.7   | 1.2   | 6.3   |
| 18.7  | 2.8   | 3.1   | 3.0   | 1.2   | 4.9   | 5.3   | 9.5   | 8.1   |
| 13.5  | 9.7   | 8.9   | 11.2  | 9.4   | 11.9  | 6.9   | 11.8  | 8.9   |
| 4.3   | 2.5   | 5.4   | 1.0   | 6.2   | 10.6  | 5.9   | 5.0   | 4.0   |
| 23.3  | 20.3  | 17.9  | 21.7  | 6.8   | 40.1  | 15.4  | 6.7   | 2.0   |
| 28.3  | 14.3  | 20.0  | 18.0  | 6.6   | 26.8  | 21.2  | 24.1  | 19.0  |
| 12.7  | 10.0  | 8.0   | 2.3   | 1.2   | 3.7   | 2.7   | 11.8  | 3.1   |
| 265.1 | 268.0 | 337.2 | 274.2 | 115.3 | 399.7 | 369.9 | 7.4   | 13.3  |
| 9.8   | 3.1   | 2.3   | 4.0   | 0.4   | 2.5   | 1.0   | 0.3   | 2.9   |
| 13.8  | 8.0   | 10.2  | 4.9   | 1.1   | 7.4   | 0.9   | 1.8   | 9.2   |
| 17.3  | 34.7  | 28.4  | 25.3  | 7.2   | 40.0  | 22.7  | 52.4  | 32.9  |
| 0.8   | 3.9   | 6.8   | 3.2   | 0.7   | 0.9   | 0.4   | 0.5   | 1.6   |
| 0.4   | 1.2   | 0.9   | 0.5   | 0.5   | 0.9   | 0.8   | 0.4   | 1.4   |
| 2.4   | 1.8   | 1.6   | 0.8   | 0.8   | 1.8   | 0.8   | 0.9   | 1.0   |
| 23.9  | 11.7  | 14.5  | 14.6  | 8.4   | 26.0  | 13.4  | 8.1   | 7.9   |
| 25.8  | 18.1  | 13.7  | 14.4  | 3.5   | 144.2 | 64.3  | 0.8   | 8.1   |
| 8.1   | 1.3   | 1.4   | 3.2   | 0.1   | 3.6   | 5.1   | 3.9   | 4.8   |
| 29.0  | 43.2  | 54.6  | 27.6  | 16.5  | 92.9  | 105.6 | 48.5  | 50.0  |
| 46.5  | 37.3  | 39.8  | 53.6  | 21.2  | 1.8   | 6.6   | 5.8   | 16.3  |
| 1.0   | 1.9   | 1.3   | 1.0   | 0.5   | 31.9  | 13.2  | 2.2   | 4.1   |
| 0.9   | 1.3   | 1.5   | 1.3   | 0.3   | 446.9 | 200.7 | 1.2   | 1.3   |
| 1.5   | 5.2   | 11.9  | 9.6   | 2.4   | 8.2   | 0.6   | 6.8   | 2.8   |

|       |       |       |       |       |        |       |       |       |
|-------|-------|-------|-------|-------|--------|-------|-------|-------|
| 5.8   | 1.6   | 1.2   | 0.9   | 0.5   | 2.0    | 0.9   | 3.2   | 9.1   |
| 9.3   | 2.4   | 7.8   | 9.0   | 1.3   | 13.4   | 6.8   | 8.8   | 2.9   |
| 4.5   | 10.1  | 4.9   | 9.6   | 1.6   | 5.0    | 9.4   | 2.8   | 5.3   |
| 5.3   | 6.8   | 1.3   | 0.3   | 4.4   | 4.4    | 0.8   | 1.8   | 7.8   |
| 29.1  | 8.1   | 13.3  | 14.3  | 2.0   | 56.8   | 13.2  | 45.9  | 76.2  |
| 25.7  | 16.3  | 15.0  | 15.6  | 2.6   | 14.1   | 10.2  | 1.1   | 8.1   |
| 7.5   | 1.7   | 10.9  | 0.5   | 9.0   | 7.0    | 2.2   | 4.5   | 2.8   |
| 152.7 | 96.7  | 102.8 | 96.5  | 26.5  | 124.0  | 47.3  | 29.2  | 55.1  |
| 9.9   | 1.2   | 2.0   | 3.6   | 0.4   | 1.4    | 0.9   | 0.6   | 12.3  |
| 0.6   | 1.1   | 5.9   | 0.3   | 4.4   | 20.2   | 8.1   | 3.5   | 6.5   |
| 617.8 | 697.3 | 581.0 | 443.7 | 244.6 | 747.5  | 401.3 | 146.5 | 212.5 |
| 24.4  | 10.7  | 23.1  | 9.7   | 1.2   | 4.8    | 10.0  | 15.3  | 4.6   |
| 5.9   | 1.5   | 4.2   | 3.6   | 2.5   | 6.0    | 2.0   | 11.8  | 2.2   |
| 19.2  | 5.2   | 9.3   | 2.7   | 7.0   | 30.9   | 12.2  | 8.4   | 5.6   |
| 307.8 | 229.8 | 200.5 | 162.7 | 57.3  | 755.9  | 605.1 | 99.6  | 154.3 |
| 116.8 | 111.5 | 84.8  | 102.6 | 34.9  | 252.4  | 190.3 | 16.7  | 43.9  |
| 23.9  | 22.4  | 12.8  | 17.9  | 5.1   | 6.8    | 7.7   | 0.6   | 3.5   |
| 481.0 | 422.1 | 491.1 | 357.2 | 194.7 | 422.4  | 301.3 | 19.6  | 16.6  |
| 57.0  | 40.5  | 42.5  | 32.6  | 16.5  | 48.6   | 38.7  | 44.9  | 75.3  |
| 15.0  | 27.3  | 18.3  | 20.4  | 10.5  | 36.7   | 24.1  | 2.2   | 9.8   |
| 2.2   | 1.0   | 2.6   | 1.3   | 0.3   | 1.8    | 0.7   | 1.9   | 1.2   |
| 3.9   | 1.6   | 2.1   | 1.9   | 4.8   | 4.5    | 20.0  | 1.7   | 2.6   |
| 3.1   | 8.5   | 2.1   | 2.4   | 0.4   | 17.2   | 9.3   | 3.1   | 1.7   |
| 2.2   | 1.4   | 4.2   | 11.6  | 2.1   | 4.2    | 1.9   | 1.3   | 1.5   |
| 3.8   | 3.1   | 8.7   | 3.3   | 6.3   | 9.5    | 5.8   | 7.0   | 9.2   |
| 11.6  | 2.0   | 18.1  | 6.8   | 8.1   | 18.2   | 9.4   | 6.1   | 7.4   |
| 4.9   | 3.1   | 4.9   | 0.7   | 0.4   | 11.6   | 8.4   | 0.5   | 1.4   |
| 1.3   | 1.0   | 2.2   | 1.0   | 0.7   | 2.0    | 3.7   | 1.9   | 1.6   |
| 28.5  | 18.8  | 9.7   | 15.8  | 9.5   | 23.0   | 14.1  | 23.5  | 25.5  |
| 0.5   | 1.1   | 1.2   | 0.5   | 0.6   | 2.5    | 1.9   | 6.8   | 0.6   |
| 51.1  | 29.8  | 60.3  | 24.5  | 21.7  | 40.4   | 44.5  | 21.0  | 1.3   |
| 1.1   | 4.7   | 5.8   | 4.9   | 0.1   | 6.8    | 8.2   | 0.7   | 5.2   |
| 3.0   | 9.3   | 1.2   | 1.8   | 0.5   | 3.3    | 2.5   | 1.1   | 2.4   |
| 0.6   | 1.3   | 1.6   | 2.3   | 0.3   | 1.3    | 3.8   | 1.4   | 1.0   |
| 14.1  | 9.6   | 5.6   | 5.9   | 2.8   | 14.1   | 14.9  | 2.2   | 13.6  |
| 3.7   | 6.3   | 1.2   | 1.3   | 0.6   | 2.0    | 0.7   | 4.0   | 5.7   |
| 13.8  | 6.7   | 18.1  | 8.7   | 7.2   | 11.7   | 10.1  | 10.5  | 7.8   |
| 60.5  | 37.6  | 37.6  | 26.9  | 12.8  | 75.1   | 57.0  | 61.4  | 65.5  |
| 4.4   | 10.6  | 7.0   | 4.7   | 1.6   | 3.5    | 5.5   | 15.7  | 6.2   |
| 1.5   | 0.9   | 2.0   | 10.5  | 10.5  | 8.9    | 8.9   | 9.7   | 8.8   |
| 5.6   | 1.3   | 1.2   | 0.9   | 3.2   | 0.9    | 6.0   | 2.3   | 0.8   |
| 19.4  | 2.3   | 11.8  | 1.8   | 5.8   | 7.8    | 1.4   | 1.9   | 2.5   |
| 13.0  | 2.9   | 12.5  | 1.5   | 5.9   | 1072.2 | 599.1 | 19.6  | 10.5  |
| 15.8  | 10.4  | 13.4  | 10.1  | 2.4   | 8.8    | 3.0   | 7.2   | 7.0   |
| 2.2   | 0.4   | 0.9   | 0.6   | 0.3   | 2.0    | 3.5   | 4.6   | 0.2   |
| 23.1  | 7.7   | 17.5  | 13.0  | 6.1   | 24.3   | 13.2  | 13.5  | 11.8  |
| 515.4 | 456.3 | 459.3 | 547.9 | 164.5 | 1135.1 | 989.1 | 65.6  | 93.0  |
| 14.5  | 7.6   | 3.5   | 1.0   | 1.6   | 5.9    | 10.3  | 4.1   | 7.7   |
| 272.3 | 249.4 | 368.5 | 344.0 | 108.7 | 356.0  | 406.9 | 64.5  | 74.3  |
| 14.8  | 3.2   | 1.1   | 1.2   | 4.0   | 1.9    | 9.1   | 8.1   | 7.1   |
| 0.4   | 1.4   | 2.6   | 0.4   | 5.7   | 0.3    | 1.3   | 4.1   | 0.7   |
| 3.6   | 4.0   | 0.4   | 0.3   | 0.6   | 1.6    | 0.9   | 4.0   | 1.8   |
| 2.7   | 12.5  | 14.6  | 9.3   | 2.7   | 10.9   | 26.9  | 13.6  | 16.7  |

|        |        |        |        |       |        |        |       |        |
|--------|--------|--------|--------|-------|--------|--------|-------|--------|
| 0.8    | 3.0    | 6.2    | 2.3    | 3.2   | 3.2    | 5.5    | 7.5   | 0.4    |
| 2.9    | 14.7   | 14.4   | 2.5    | 1.0   | 19.2   | 5.4    | 7.6   | 2.6    |
| 6.9    | 1.7    | 4.7    | 11.9   | 1.3   | 12.5   | 2.2    | 6.0   | 7.4    |
| 5.0    | 9.7    | 0.4    | 5.3    | 3.0   | 8.8    | 0.6    | 0.8   | 8.1    |
| 1.4    | 0.4    | 5.0    | 1.4    | 4.2   | 3.9    | 8.0    | 1.3   | 7.6    |
| 11.5   | 0.2    | 2.2    | 6.7    | 0.9   | 1.0    | 6.9    | 6.1   | 2.0    |
| 116.3  | 140.5  | 121.1  | 64.6   | 39.4  | 196.3  | 109.8  | 5.8   | 24.3   |
| 1.6    | 1.6    | 2.2    | 1.8    | 0.8   | 8.7    | 1.1    | 0.6   | 0.4    |
| 3.8    | 18.7   | 17.7   | 7.7    | 10.6  | 4.9    | 15.4   | 31.9  | 16.7   |
| 893.4  | 860.3  | 945.3  | 696.4  | 288.4 | 923.2  | 654.3  | 78.0  | 141.6  |
| 53.7   | 29.8   | 25.3   | 7.8    | 2.5   | 24.3   | 6.9    | 6.9   | 8.5    |
| 16.7   | 2.6    | 3.1    | 1.4    | 1.3   | 26.9   | 10.5   | 3.0   | 5.5    |
| 16.5   | 9.9    | 6.5    | 19.1   | 7.6   | 8.0    | 12.9   | 18.7  | 25.0   |
| 6.2    | 0.4    | 1.3    | 4.8    | 1.9   | 13.4   | 10.2   | 5.1   | 4.2    |
| 2.3    | 1.7    | 2.2    | 1.2    | 0.5   | 2.0    | 2.1    | 1.8   | 2.7    |
| 0.5    | 3.0    | 2.6    | 3.8    | 0.5   | 4.2    | 3.0    | 4.1   | 0.7    |
| 40.6   | 39.5   | 30.5   | 35.5   | 15.9  | 73.3   | 79.0   | 41.3  | 30.0   |
| 4.4    | 4.3    | 7.1    | 3.1    | 1.8   | 9.9    | 25.8   | 4.3   | 20.8   |
| 1.1    | 4.8    | 11.8   | 2.9    | 1.1   | 14.0   | 30.2   | 1.0   | 10.7   |
| 7.6    | 10.4   | 2.5    | 1.6    | 3.3   | 4.5    | 9.2    | 5.4   | 2.1    |
| 6.6    | 12.1   | 13.6   | 8.4    | 4.7   | 35.0   | 15.3   | 4.6   | 14.2   |
| 23.0   | 29.8   | 24.2   | 21.8   | 11.0  | 46.3   | 35.6   | 21.6  | 10.4   |
| 3.8    | 3.9    | 1.1    | 0.7    | 3.8   | 0.4    | 4.9    | 7.4   | 12.3   |
| 13.9   | 2.6    | 8.2    | 1.5    | 0.7   | 10.0   | 1.4    | 12.7  | 14.6   |
| 23.3   | 25.0   | 14.1   | 26.9   | 14.7  | 2.2    | 11.4   | 22.3  | 19.4   |
| 85.7   | 69.8   | 78.8   | 68.9   | 34.7  | 124.7  | 7.8    | 32.0  | 64.0   |
| 2.6    | 0.8    | 2.3    | 8.9    | 3.0   | 6.6    | 12.5   | 1.6   | 0.4    |
| 19.2   | 13.7   | 15.3   | 11.8   | 0.5   | 128.9  | 43.3   | 10.7  | 22.6   |
| 2.1    | 1.4    | 2.4    | 0.4    | 0.3   | 3.2    | 1.9    | 1.7   | 3.0    |
| 10.4   | 8.5    | 11.9   | 8.1    | 8.8   | 5.6    | 12.3   | 14.6  | 11.9   |
| 26.8   | 18.1   | 17.5   | 19.0   | 3.5   | 9.9    | 7.2    | 8.4   | 10.9   |
| 11.5   | 9.8    | 10.4   | 14.9   | 8.9   | 9.4    | 15.3   | 8.8   | 13.8   |
| 3.1    | 9.4    | 11.4   | 12.2   | 7.4   | 44.0   | 8.9    | 10.0  | 16.8   |
| 2383.8 | 2429.4 | 2008.7 | 1387.7 | 814.8 | 4297.0 | 3559.2 | 899.6 | 1219.2 |
| 2545.4 | 2091.0 | 1936.3 | 1390.3 | 810.5 | 4158.1 | 3316.3 | 994.1 | 1235.3 |
| 20.6   | 16.3   | 7.2    | 9.9    | 6.7   | 80.4   | 61.6   | 2.5   | 12.2   |
| 21.2   | 4.2    | 20.1   | 14.9   | 5.3   | 27.4   | 36.7   | 13.1  | 27.5   |
| 62.1   | 67.8   | 66.4   | 98.7   | 27.5  | 122.9  | 69.1   | 53.4  | 78.5   |
| 116.6  | 97.5   | 127.3  | 129.2  | 40.2  | 173.0  | 133.1  | 20.8  | 30.1   |
| 1.6    | 0.8    | 1.8    | 1.3    | 0.5   | 1.5    | 0.7    | 1.6   | 1.4    |
| 853.3  | 615.5  | 733.2  | 544.6  | 202.3 | 1159.6 | 613.7  | 94.0  | 110.3  |
| 3.3    | 7.9    | 1.1    | 1.0    | 4.4   | 6.2    | 9.8    | 8.9   | 5.7    |
| 11.1   | 6.5    | 4.3    | 9.8    | 1.4   | 630.9  | 645.1  | 6.9   | 6.2    |
| 6.2    | 1.8    | 2.9    | 7.5    | 4.8   | 8.4    | 10.3   | 1.6   | 4.3    |
| 16.0   | 4.0    | 10.0   | 7.8    | 5.4   | 1.7    | 3.5    | 10.8  | 9.9    |
| 11.4   | 9.2    | 7.9    | 11.3   | 0.5   | 17.0   | 8.8    | 5.2   | 2.5    |
| 19.2   | 3.3    | 3.1    | 3.3    | 2.0   | 5.2    | 1.3    | 253.3 | 274.6  |
| 2.1    | 2.2    | 1.4    | 1.1    | 0.6   | 10.0   | 1.3    | 222.5 | 343.1  |
| 1.1    | 7.4    | 8.5    | 3.6    | 2.2   | 4.2    | 1.6    | 1.1   | 8.4    |
| 76.1   | 61.4   | 42.0   | 43.5   | 25.4  | 76.8   | 50.2   | 34.1  | 50.9   |
| 175.0  | 141.9  | 157.2  | 122.2  | 62.7  | 461.1  | 317.6  | 293.0 | 498.4  |
| 10.0   | 17.1   | 2.2    | 23.7   | 3.2   | 35.9   | 16.8   | 6.6   | 7.8    |
| 3.0    | 2.2    | 3.5    | 9.7    | 3.7   | 6.6    | 3.9    | 1.5   | 3.7    |

|        |        |        |        |        |        |        |       |        |
|--------|--------|--------|--------|--------|--------|--------|-------|--------|
| 22.8   | 11.3   | 41.1   | 27.8   | 6.6    | 329.0  | 302.4  | 8.7   | 15.8   |
| 2.1    | 1.4    | 13.3   | 3.3    | 5.8    | 2.2    | 0.5    | 13.1  | 12.4   |
| 2.6    | 4.1    | 8.7    | 7.3    | 1.4    | 1.3    | 1.2    | 1.4   | 0.9    |
| 3.6    | 13.2   | 15.3   | 3.8    | 1.1    | 16.2   | 2.6    | 3.1   | 4.8    |
| 4.9    | 10.1   | 15.8   | 12.3   | 9.5    | 16.7   | 15.2   | 12.9  | 3.3    |
| 1.4    | 1.7    | 2.1    | 0.9    | 0.6    | 2.9    | 0.8    | 0.8   | 0.9    |
| 0.9    | 5.9    | 0.8    | 0.8    | 0.4    | 2.0    | 2.1    | 8.9   | 5.0    |
| 371.6  | 275.0  | 357.4  | 330.7  | 123.5  | 90.6   | 41.6   | 23.9  | 21.9   |
| 13.1   | 1.9    | 2.9    | 5.8    | 3.4    | 25.9   | 19.9   | 12.1  | 7.6    |
| 15.7   | 15.5   | 16.9   | 1.4    | 11.3   | 21.0   | 3.6    | 13.1  | 9.0    |
| 5.6    | 4.1    | 0.4    | 5.0    | 4.7    | 1.3    | 0.3    | 5.0   | 2.6    |
| 0.7    | 0.4    | 0.8    | 0.6    | 2.0    | 1.8    | 1.2    | 1.1   | 1.5    |
| 2.8    | 1.5    | 1.2    | 1.2    | 0.6    | 80.0   | 38.0   | 16.1  | 19.9   |
| 467.7  | 493.6  | 560.1  | 483.6  | 234.0  | 590.1  | 373.8  | 82.3  | 70.9   |
| 25.0   | 18.0   | 17.6   | 10.3   | 0.8    | 8.3    | 2.6    | 10.6  | 13.1   |
| 272.4  | 307.6  | 272.1  | 201.9  | 80.2   | 181.5  | 130.2  | 60.7  | 101.3  |
| 0.9    | 4.8    | 9.0    | 3.5    | 0.2    | 0.6    | 1.0    | 4.0   | 2.0    |
| 73.3   | 61.4   | 96.9   | 133.6  | 20.9   | 185.2  | 100.6  | 9.9   | 9.3    |
| 2.5    | 1.6    | 4.2    | 1.7    | 1.1    | 2.4    | 17.1   | 9.4   | 2.9    |
| 13.2   | 14.5   | 11.7   | 9.8    | 6.4    | 11.7   | 12.8   | 13.1  | 14.4   |
| 1.0    | 0.5    | 0.6    | 1.6    | 6.9    | 1.4    | 0.4    | 3.1   | 2.1    |
| 205.5  | 199.2  | 173.1  | 131.1  | 50.9   | 437.3  | 200.5  | 260.7 | 298.2  |
| 1.0    | 9.1    | 7.5    | 6.0    | 5.7    | 16.8   | 18.0   | 1.2   | 2.3    |
| 89.1   | 90.3   | 87.0   | 63.1   | 31.3   | 88.8   | 49.6   | 104.0 | 124.4  |
| 14.3   | 9.6    | 6.5    | 2.8    | 0.3    | 2.5    | 1.6    | 1.2   | 17.5   |
| 15.2   | 17.0   | 7.4    | 0.8    | 7.3    | 16.2   | 1.5    | 3.3   | 20.0   |
| 44.9   | 27.4   | 40.8   | 30.4   | 15.1   | 31.6   | 25.2   | 26.3  | 18.5   |
| 10.4   | 15.0   | 11.5   | 8.4    | 0.9    | 8.5    | 10.5   | 34.0  | 21.4   |
| 94.7   | 73.4   | 77.3   | 51.2   | 25.2   | 402.7  | 234.3  | 261.7 | 340.4  |
| 3.7    | 1.0    | 7.4    | 0.6    | 0.9    | 1.9    | 1.6    | 2.2   | 7.5    |
| 49.8   | 40.7   | 51.1   | 28.5   | 14.3   | 13.5   | 4.5    | 3.8   | 2.9    |
| 179.9  | 186.1  | 99.4   | 59.8   | 56.2   | 144.0  | 80.3   | 72.7  | 92.9   |
| 21.2   | 4.4    | 19.6   | 8.3    | 8.6    | 22.6   | 8.3    | 28.3  | 19.4   |
| 19.8   | 8.8    | 15.8   | 14.6   | 6.9    | 6.2    | 9.9    | 18.0  | 24.5   |
| 3.5    | 2.7    | 2.0    | 1.0    | 0.9    | 1.9    | 2.9    | 0.9   | 1.0    |
| 149.8  | 106.7  | 132.3  | 152.7  | 33.8   | 69.8   | 28.7   | 36.6  | 71.2   |
| 105.3  | 98.5   | 88.9   | 114.8  | 26.5   | 46.1   | 29.5   | 39.4  | 52.3   |
| 9.1    | 4.1    | 0.6    | 6.3    | 3.9    | 25.5   | 19.6   | 7.6   | 3.4    |
| 1.3    | 2.4    | 1.5    | 0.9    | 0.4    | 6.3    | 1.5    | 2.8   | 4.4    |
| 13.5   | 2.8    | 2.1    | 15.0   | 0.4    | 2.8    | 7.7    | 2.5   | 2.4    |
| 18.3   | 19.7   | 20.9   | 14.2   | 9.3    | 21.4   | 17.6   | 15.4  | 21.6   |
| 6.6    | 3.4    | 3.3    | 6.1    | 2.6    | 1.7    | 7.8    | 9.7   | 9.6    |
| 2.2    | 2.1    | 1.5    | 2.0    | 0.9    | 0.9    | 0.9    | 1.4   | 0.9    |
| 21.6   | 18.2   | 13.0   | 9.0    | 8.1    | 63.4   | 31.8   | 12.2  | 8.1    |
| 4.7    | 8.5    | 6.7    | 10.0   | 2.2    | 5.5    | 11.8   | 2.0   | 3.2    |
| 3327.9 | 3123.3 | 2640.1 | 1637.7 | 1090.5 | 4831.6 | 3894.7 | 656.3 | 1065.3 |
| 535.0  | 374.5  | 406.3  | 718.8  | 158.6  | 370.0  | 223.7  | 118.0 | 67.2   |
| 7.3    | 8.6    | 7.8    | 9.8    | 0.4    | 12.4   | 7.9    | 7.6   | 7.9    |
| 4.7    | 17.8   | 13.6   | 13.3   | 4.8    | 12.7   | 13.4   | 3.5   | 1.5    |
| 5.3    | 8.0    | 1.5    | 1.6    | 2.0    | 2.1    | 2.1    | 7.4   | 6.2    |
| 48.1   | 37.8   | 43.3   | 37.0   | 4.0    | 64.5   | 37.0   | 28.8  | 23.3   |
| 13.9   | 1.9    | 1.3    | 2.3    | 2.8    | 1.6    | 3.0    | 5.6   | 1.5    |
| 3.7    | 0.2    | 0.4    | 0.3    | 4.7    | 0.4    | 0.6    | 2.5   | 2.1    |

|        |        |        |        |       |        |        |       |       |
|--------|--------|--------|--------|-------|--------|--------|-------|-------|
| 3.0    | 2.2    | 8.5    | 2.4    | 1.3   | 2.2    | 1.5    | 1.0   | 6.2   |
| 40.2   | 24.2   | 33.6   | 26.3   | 10.4  | 22.9   | 27.7   | 6.2   | 16.4  |
| 7.8    | 4.0    | 1.0    | 0.4    | 1.9   | 2.8    | 0.3    | 1.0   | 1.1   |
| 2.0    | 1.2    | 10.2   | 9.1    | 0.6   | 6.3    | 9.2    | 1.5   | 5.2   |
| 2079.6 | 2202.2 | 2044.9 | 2042.7 | 842.5 | 5555.4 | 4469.8 | 333.1 | 290.6 |
| 2.8    | 6.7    | 3.0    | 1.5    | 7.2   | 18.9   | 13.0   | 1.5   | 2.1   |
| 5.8    | 6.4    | 1.7    | 10.5   | 1.1   | 8.5    | 0.7    | 1.4   | 2.5   |
| 3.3    | 0.9    | 4.0    | 2.7    | 2.2   | 8.6    | 2.9    | 4.7   | 4.2   |
| 15.3   | 10.1   | 13.2   | 0.5    | 4.3   | 24.1   | 14.0   | 1.9   | 6.3   |
| 139.6  | 112.4  | 99.1   | 52.2   | 35.1  | 66.6   | 43.7   | 20.5  | 18.5  |
| 28.9   | 13.7   | 12.0   | 13.3   | 7.3   | 20.0   | 4.2    | 13.2  | 20.0  |
| 16.8   | 11.8   | 0.8    | 2.3    | 1.4   | 1.5    | 1.3    | 15.6  | 4.1   |
| 30.8   | 29.9   | 22.9   | 2.5    | 16.0  | 37.1   | 15.3   | 16.3  | 20.8  |
| 26.3   | 17.8   | 29.3   | 20.5   | 7.0   | 27.6   | 18.3   | 16.1  | 19.5  |
| 7.2    | 16.7   | 30.0   | 8.9    | 4.5   | 98.6   | 16.5   | 4.1   | 12.5  |
| 1.0    | 5.4    | 8.9    | 5.9    | 3.0   | 0.5    | 3.6    | 5.2   | 4.5   |
| 11.3   | 5.8    | 15.5   | 3.9    | 6.4   | 8.3    | 3.5    | 4.2   | 5.1   |
| 90.5   | 55.4   | 43.9   | 22.8   | 19.1  | 109.3  | 69.1   | 19.3  | 11.9  |
| 2.5    | 0.6    | 3.2    | 1.1    | 1.7   | 1.2    | 0.5    | 1.0   | 0.9   |
| 1.7    | 6.6    | 8.1    | 1.9    | 5.3   | 3.9    | 5.4    | 9.0   | 7.6   |
| 14.8   | 10.4   | 42.7   | 19.1   | 10.0  | 9.0    | 13.3   | 22.7  | 19.0  |
| 13.0   | 1.2    | 9.0    | 10.6   | 2.3   | 23.5   | 10.5   | 7.6   | 20.1  |
| 10.8   | 4.4    | 7.1    | 3.8    | 1.1   | 15.1   | 0.9    | 7.6   | 0.5   |
| 85.8   | 40.3   | 78.0   | 45.6   | 10.6  | 61.8   | 35.0   | 14.4  | 17.1  |
| 34.9   | 16.9   | 23.4   | 17.4   | 11.0  | 40.9   | 14.9   | 39.1  | 33.5  |
| 111.8  | 84.9   | 76.4   | 98.0   | 19.4  | 133.9  | 118.7  | 67.3  | 82.1  |
| 0.4    | 0.4    | 0.4    | 0.8    | 0.1   | 0.5    | 0.2    | 6.1   | 4.0   |
| 31.5   | 25.2   | 42.0   | 26.1   | 12.7  | 48.1   | 37.9   | 32.1  | 38.3  |
| 2.2    | 1.1    | 1.5    | 2.5    | 0.4   | 2.4    | 2.9    | 0.8   | 1.1   |
| 42.1   | 52.4   | 50.9   | 63.4   | 21.8  | 14.2   | 11.0   | 1.7   | 5.1   |
| 11.3   | 7.0    | 4.5    | 7.9    | 1.2   | 6.5    | 2.5    | 4.2   | 10.1  |
| 11.7   | 1.7    | 1.7    | 0.9    | 0.5   | 1.9    | 1.8    | 1.1   | 2.1   |
| 1.3    | 3.2    | 2.0    | 0.6    | 0.8   | 8.6    | 2.4    | 1.4   | 0.8   |
| 691.7  | 598.8  | 663.0  | 577.9  | 234.1 | 476.5  | 262.8  | 189.1 | 221.7 |
| 1.3    | 2.1    | 6.3    | 0.8    | 0.4   | 1.2    | 1.9    | 2.5   | 17.9  |
| 287.0  | 246.5  | 341.4  | 321.7  | 83.4  | 402.5  | 247.7  | 133.3 | 137.2 |
| 13.2   | 4.7    | 5.4    | 2.3    | 7.0   | 13.2   | 1.1    | 1.2   | 0.6   |
| 440.2  | 375.6  | 300.9  | 302.0  | 127.9 | 483.7  | 235.1  | 97.4  | 107.8 |
| 3.2    | 0.7    | 1.2    | 2.1    | 0.2   | 1.6    | 1.0    | 1.8   | 4.2   |
| 27.7   | 19.1   | 26.3   | 14.7   | 5.4   | 65.1   | 44.0   | 53.7  | 72.8  |
| 284.4  | 214.7  | 254.6  | 234.0  | 104.9 | 183.7  | 142.9  | 77.7  | 89.9  |
| 647.6  | 632.1  | 705.5  | 654.9  | 236.8 | 401.8  | 173.9  | 133.6 | 123.8 |
| 1.9    | 13.8   | 1.5    | 12.7   | 1.8   | 3.0    | 0.6    | 1.8   | 2.0   |
| 56.0   | 53.9   | 64.6   | 85.4   | 38.2  | 67.0   | 41.3   | 6.1   | 17.2  |
| 62.1   | 68.7   | 67.4   | 83.7   | 25.4  | 93.6   | 69.6   | 38.2  | 47.5  |
| 12.2   | 4.2    | 1.5    | 1.4    | 3.3   | 2.9    | 10.4   | 19.1  | 14.1  |
| 253.1  | 258.5  | 233.4  | 219.3  | 83.8  | 231.6  | 104.9  | 64.6  | 64.6  |
| 1219.7 | 1096.7 | 1106.7 | 922.2  | 353.1 | 1736.2 | 1219.2 | 433.9 | 576.7 |
| 82.7   | 57.9   | 77.8   | 94.7   | 26.2  | 163.7  | 69.4   | 31.8  | 41.8  |
| 252.0  | 327.7  | 412.2  | 446.9  | 105.8 | 126.8  | 58.9   | 29.5  | 57.6  |
| 2.9    | 6.1    | 5.0    | 11.5   | 7.3   | 13.5   | 8.7    | 2.2   | 2.4   |
| 1.3    | 5.5    | 1.7    | 0.4    | 2.8   | 18.7   | 8.5    | 0.8   | 1.1   |
| 16.7   | 11.1   | 12.2   | 4.6    | 5.2   | 4.9    | 18.5   | 4.2   | 0.4   |

|        |        |        |        |       |        |        |       |       |
|--------|--------|--------|--------|-------|--------|--------|-------|-------|
| 2.0    | 2.3    | 4.4    | 6.4    | 7.2   | 17.4   | 12.1   | 4.2   | 25.8  |
| 3.0    | 5.2    | 8.6    | 3.1    | 5.2   | 2.1    | 2.1    | 1.0   | 1.2   |
| 6.6    | 8.0    | 1.6    | 13.2   | 7.8   | 10.6   | 0.8    | 1.8   | 1.4   |
| 2.9    | 2.4    | 1.6    | 1.5    | 9.4   | 2.2    | 1.5    | 1.2   | 1.0   |
| 3.6    | 4.0    | 2.7    | 4.0    | 0.2   | 0.4    | 4.6    | 0.5   | 1.3   |
| 1.0    | 1.0    | 1.4    | 3.2    | 7.7   | 35.2   | 21.3   | 3.4   | 2.0   |
| 2.0    | 1.1    | 7.6    | 1.4    | 0.6   | 2.5    | 1.5    | 21.4  | 1.6   |
| 23.8   | 35.0   | 32.9   | 6.5    | 8.7   | 41.2   | 39.0   | 46.0  | 50.8  |
| 12.0   | 14.2   | 11.3   | 4.2    | 4.2   | 10.0   | 15.1   | 15.4  | 11.6  |
| 312.4  | 265.7  | 351.7  | 220.9  | 119.3 | 483.9  | 307.4  | 147.7 | 220.0 |
| 22.7   | 8.9    | 2.7    | 6.7    | 0.9   | 9.8    | 8.3    | 3.6   | 10.2  |
| 100.2  | 91.6   | 106.6  | 84.7   | 27.6  | 56.6   | 26.1   | 24.1  | 14.0  |
| 12.2   | 8.9    | 12.1   | 14.1   | 3.6   | 1.6    | 0.7    | 4.2   | 18.8  |
| 0.4    | 1.2    | 1.2    | 0.2    | 1.3   | 0.9    | 0.3    | 1.4   | 0.5   |
| 2.2    | 2.0    | 3.6    | 1.0    | 2.1   | 15.2   | 20.3   | 2.4   | 9.6   |
| 9.5    | 9.0    | 10.6   | 5.0    | 6.4   | 6.5    | 6.3    | 22.1  | 15.0  |
| 6.4    | 3.1    | 6.7    | 19.2   | 8.7   | 26.6   | 25.6   | 3.5   | 2.5   |
| 1.7    | 1.2    | 0.9    | 0.4    | 1.9   | 1.7    | 0.8    | 0.6   | 1.7   |
| 19.9   | 13.4   | 13.6   | 3.9    | 0.6   | 3.5    | 13.2   | 6.5   | 14.2  |
| 24.7   | 16.0   | 9.6    | 7.0    | 5.0   | 2.5    | 6.5    | 16.8  | 12.2  |
| 530.4  | 397.6  | 481.1  | 486.1  | 168.5 | 632.5  | 478.2  | 85.2  | 168.0 |
| 2.3    | 1.0    | 4.8    | 0.4    | 0.3   | 0.5    | 2.2    | 87.3  | 110.7 |
| 2.9    | 0.7    | 1.9    | 0.7    | 0.5   | 10.7   | 1.3    | 1.0   | 1.3   |
| 953.3  | 409.6  | 515.5  | 393.7  | 195.8 | 1780.5 | 1763.4 | 165.1 | 172.8 |
| 6.5    | 12.8   | 4.4    | 14.9   | 1.8   | 6.1    | 4.2    | 3.2   | 4.2   |
| 10.1   | 7.9    | 2.2    | 6.5    | 4.4   | 0.7    | 7.1    | 11.6  | 16.9  |
| 6.1    | 10.4   | 9.7    | 12.8   | 0.3   | 8.3    | 12.6   | 6.5   | 20.4  |
| 10.1   | 0.7    | 1.0    | 2.3    | 4.8   | 24.0   | 14.7   | 6.4   | 10.4  |
| 11.5   | 7.0    | 10.9   | 9.9    | 1.1   | 9.2    | 2.0    | 4.8   | 2.2   |
| 11.4   | 6.7    | 6.2    | 1.0    | 1.4   | 1.8    | 6.0    | 16.0  | 12.9  |
| 0.3    | 4.4    | 0.6    | 0.1    | 0.4   | 1.8    | 3.7    | 3.4   | 0.9   |
| 6.7    | 8.6    | 12.9   | 10.2   | 6.1   | 15.5   | 9.8    | 12.7  | 20.9  |
| 3.7    | 1.3    | 19.0   | 11.4   | 0.4   | 4.4    | 6.6    | 2.1   | 1.6   |
| 288.3  | 203.3  | 200.1  | 223.6  | 65.8  | 296.7  | 248.5  | 68.2  | 80.5  |
| 2344.6 | 2237.1 | 1983.9 | 1492.3 | 434.7 | 3648.8 | 3024.2 | 251.8 | 321.1 |
| 2.5    | 3.4    | 2.1    | 2.2    | 0.9   | 3.3    | 13.6   | 1.3   | 3.3   |
| 19.9   | 11.5   | 23.4   | 7.6    | 7.4   | 21.6   | 13.4   | 8.1   | 17.5  |
| 16.9   | 2.6    | 13.3   | 6.9    | 6.2   | 32.3   | 7.1    | 3.7   | 16.8  |
| 1.4    | 0.7    | 0.7    | 1.0    | 0.4   | 0.8    | 0.8    | 0.8   | 1.2   |
| 1.8    | 1.6    | 2.6    | 21.7   | 1.9   | 3.0    | 9.1    | 1.3   | 1.5   |
| 4.5    | 2.8    | 1.3    | 3.2    | 0.3   | 3.6    | 2.1    | 5.0   | 7.3   |
| 42.5   | 33.5   | 49.1   | 19.4   | 18.8  | 40.4   | 39.3   | 12.8  | 19.0  |
| 24.0   | 6.5    | 20.8   | 10.0   | 6.8   | 16.6   | 11.2   | 14.3  | 3.1   |
| 1.6    | 0.5    | 0.6    | 1.7    | 0.3   | 2.1    | 1.0    | 0.9   | 0.7   |
| 11.4   | 9.5    | 12.2   | 17.3   | 5.4   | 7.8    | 7.0    | 4.8   | 2.7   |
| 16.5   | 1.3    | 6.8    | 3.5    | 5.5   | 12.8   | 11.6   | 11.2  | 8.4   |
| 14.7   | 4.6    | 8.0    | 14.5   | 5.6   | 10.3   | 12.6   | 11.0  | 8.9   |
| 2.0    | 2.3    | 1.7    | 1.4    | 6.8   | 11.9   | 20.3   | 2.9   | 11.4  |
| 1.6    | 3.0    | 1.8    | 1.3    | 1.3   | 15.6   | 3.3    | 4.9   | 1.4   |
| 1.4    | 1.3    | 1.6    | 0.7    | 1.2   | 0.9    | 1.3    | 1.1   | 1.8   |
| 13.3   | 8.4    | 13.5   | 15.5   | 3.8   | 11.9   | 11.1   | 33.6  | 26.9  |
| 1.7    | 2.2    | 1.8    | 1.3    | 0.6   | 2.0    | 1.3    | 1.8   | 1.6   |
| 3.5    | 12.3   | 2.2    | 15.0   | 1.6   | 96.8   | 39.2   | 26.8  | 27.4  |



|        |        |        |        |       |        |        |        |        |
|--------|--------|--------|--------|-------|--------|--------|--------|--------|
| 22.4   | 21.7   | 15.8   | 12.1   | 10.3  | 18.2   | 13.4   | 9.6    | 27.0   |
| 120.3  | 147.9  | 147.9  | 147.1  | 101.4 | 239.0  | 183.7  | 20.7   | 26.8   |
| 16.1   | 20.7   | 19.1   | 5.7    | 7.0   | 19.5   | 11.4   | 16.2   | 18.5   |
| 4.3    | 2.5    | 16.6   | 8.6    | 1.4   | 29.6   | 20.5   | 7.4    | 17.3   |
| 2.1    | 7.6    | 7.5    | 0.6    | 2.5   | 1.5    | 7.0    | 5.8    | 14.2   |
| 14.0   | 15.3   | 28.7   | 16.6   | 7.2   | 19.9   | 18.9   | 6.4    | 6.5    |
| 1.5    | 0.9    | 1.9    | 1.6    | 0.6   | 2.0    | 2.2    | 1.2    | 2.3    |
| 11.8   | 8.4    | 1.6    | 3.6    | 5.2   | 18.6   | 11.2   | 6.0    | 1.0    |
| 11.7   | 7.5    | 9.6    | 2.2    | 8.1   | 13.1   | 21.7   | 10.5   | 4.5    |
| 1.5    | 0.1    | 3.1    | 0.2    | 1.0   | 0.5    | 6.2    | 0.3    | 0.4    |
| 3.6    | 1.4    | 2.9    | 1.5    | 0.8   | 3.6    | 1.3    | 5.0    | 2.3    |
| 8.7    | 4.0    | 3.2    | 2.0    | 2.7   | 7.5    | 16.4   | 2.3    | 11.1   |
| 53.6   | 42.4   | 44.3   | 19.8   | 14.5  | 53.7   | 31.6   | 39.8   | 25.1   |
| 147.4  | 88.6   | 89.8   | 98.1   | 24.9  | 224.2  | 180.0  | 273.4  | 506.1  |
| 10.4   | 12.2   | 18.2   | 21.0   | 2.2   | 18.2   | 6.0    | 8.4    | 38.1   |
| 0.9    | 1.4    | 0.8    | 0.8    | 0.9   | 1.4    | 0.7    | 0.7    | 0.7    |
| 6.6    | 0.5    | 7.7    | 0.8    | 6.4   | 6.2    | 4.0    | 14.2   | 9.1    |
| 22.2   | 22.6   | 15.1   | 6.1    | 5.0   | 4.3    | 5.1    | 3.7    | 8.1    |
| 59.3   | 42.8   | 46.7   | 29.1   | 21.0  | 82.2   | 62.3   | 22.1   | 22.7   |
| 6.6    | 0.2    | 2.7    | 0.7    | 0.3   | 2.0    | 5.1    | 5.8    | 3.3    |
| 694.6  | 726.8  | 568.6  | 614.1  | 340.4 | 969.6  | 901.3  | 349.0  | 522.5  |
| 34.0   | 30.5   | 29.4   | 42.2   | 4.6   | 105.1  | 49.7   | 7.8    | 13.3   |
| 9.0    | 18.4   | 16.9   | 13.8   | 7.6   | 28.2   | 21.6   | 10.3   | 3.5    |
| 2.7    | 1.3    | 3.9    | 9.1    | 0.8   | 6.3    | 7.5    | 6.8    | 15.2   |
| 18.8   | 17.2   | 14.0   | 1.9    | 4.8   | 21.6   | 16.7   | 0.8    | 9.7    |
| 4.7    | 5.1    | 4.8    | 5.8    | 0.1   | 1.9    | 7.3    | 3.3    | 10.9   |
| 43.8   | 39.7   | 37.7   | 42.2   | 21.2  | 130.1  | 96.1   | 30.6   | 40.2   |
| 632.9  | 471.8  | 449.0  | 279.4  | 100.1 | 643.8  | 559.2  | 126.8  | 276.5  |
| 9.9    | 10.1   | 7.0    | 4.4    | 0.5   | 6.8    | 5.2    | 3.1    | 4.4    |
| 21.6   | 15.1   | 27.0   | 7.6    | 5.5   | 35.2   | 11.7   | 14.1   | 18.9   |
| 49.7   | 51.4   | 49.2   | 37.3   | 15.2  | 319.7  | 192.0  | 14.2   | 14.3   |
| 21.7   | 15.9   | 17.7   | 13.5   | 8.4   | 23.4   | 13.0   | 7.5    | 27.8   |
| 324.9  | 319.1  | 368.5  | 317.8  | 85.3  | 751.3  | 563.3  | 27.6   | 40.8   |
| 3.1    | 1.9    | 1.7    | 11.9   | 1.9   | 2.9    | 0.8    | 8.9    | 15.3   |
| 2891.9 | 2919.5 | 2589.0 | 2135.4 | 981.4 | 4099.9 | 3094.3 | 1355.3 | 2210.8 |
| 124.5  | 85.7   | 72.1   | 49.1   | 22.4  | 96.3   | 73.7   | 125.1  | 164.6  |
| 287.2  | 294.8  | 318.5  | 459.3  | 131.9 | 2.2    | 0.6    | 1.5    | 8.4    |
| 102.3  | 97.6   | 85.8   | 74.0   | 25.5  | 28.6   | 22.0   | 7.8    | 26.2   |
| 1.5    | 3.4    | 9.4    | 3.7    | 1.1   | 5.8    | 5.1    | 16.7   | 7.0    |
| 1.0    | 1.1    | 2.0    | 0.8    | 0.3   | 1.6    | 2.5    | 1.1    | 1.3    |
| 234.1  | 305.4  | 330.8  | 258.2  | 189.8 | 522.5  | 333.4  | 50.7   | 78.5   |
| 1.5    | 7.6    | 0.7    | 3.4    | 1.0   | 9.5    | 7.4    | 13.2   | 7.4    |
| 5.8    | 5.9    | 1.1    | 7.4    | 0.4   | 2.1    | 1.4    | 1.9    | 1.7    |
| 139.9  | 119.7  | 113.3  | 120.2  | 62.8  | 241.6  | 293.0  | 16.1   | 23.2   |
| 1.3    | 12.4   | 1.5    | 4.9    | 0.4   | 11.2   | 1.0    | 0.5    | 2.4    |
| 20.1   | 30.4   | 19.3   | 5.3    | 11.7  | 52.6   | 52.4   | 51.6   | 60.0   |
| 19.3   | 1.3    | 12.3   | 1.6    | 8.4   | 20.7   | 11.4   | 12.0   | 7.9    |
| 10.7   | 12.8   | 14.1   | 14.9   | 9.0   | 22.2   | 20.4   | 15.6   | 15.3   |
| 23.5   | 27.3   | 17.0   | 29.7   | 9.3   | 12.4   | 10.2   | 8.9    | 14.9   |
| 1.4    | 0.5    | 0.5    | 1.3    | 0.3   | 0.7    | 0.6    | 0.8    | 0.9    |
| 1.8    | 1.3    | 8.7    | 1.0    | 0.7   | 0.8    | 5.2    | 4.6    | 3.8    |
| 1010.4 | 1130.3 | 1690.5 | 1567.2 | 617.6 | 2202.5 | 1578.6 | 102.5  | 165.9  |
| 7.4    | 1.6    | 14.7   | 3.0    | 0.4   | 1.4    | 0.6    | 4.7    | 4.3    |

|        |        |        |        |        |         |        |        |        |
|--------|--------|--------|--------|--------|---------|--------|--------|--------|
| 127.7  | 120.1  | 80.3   | 80.7   | 42.0   | 107.0   | 64.6   | 53.3   | 76.3   |
| 5.3    | 5.1    | 7.8    | 3.1    | 1.9    | 6.3     | 2.1    | 3.1    | 13.8   |
| 10.4   | 15.3   | 5.6    | 5.3    | 2.2    | 8.0     | 4.8    | 5.9    | 5.8    |
| 2.4    | 2.1    | 11.3   | 9.6    | 0.9    | 3.8     | 11.9   | 1.3    | 3.8    |
| 5.0    | 4.8    | 0.8    | 2.8    | 0.4    | 2.0     | 0.4    | 5.8    | 2.3    |
| 1.3    | 0.9    | 2.9    | 9.0    | 0.8    | 1.5     | 1.2    | 1.5    | 1.6    |
| 39.1   | 23.7   | 27.5   | 22.9   | 10.5   | 57.7    | 41.4   | 13.9   | 14.9   |
| 11.5   | 22.0   | 26.5   | 11.5   | 1.1    | 56.7    | 14.5   | 31.2   | 25.3   |
| 9.5    | 12.4   | 25.5   | 20.8   | 1.4    | 4.6     | 6.1    | 1.3    | 14.3   |
| 52.9   | 31.0   | 37.6   | 43.2   | 6.8    | 140.6   | 89.3   | 58.9   | 79.1   |
| 2.3    | 3.9    | 4.0    | 0.6    | 1.0    | 5.2     | 8.3    | 0.1    | 0.2    |
| 7.7    | 4.0    | 1.6    | 12.3   | 5.6    | 0.4     | 5.6    | 9.0    | 1.9    |
| 8.0    | 7.3    | 7.5    | 17.8   | 2.9    | 6.4     | 20.0   | 7.2    | 5.8    |
| 55.2   | 53.3   | 55.2   | 55.0   | 13.8   | 91.9    | 55.6   | 23.5   | 34.2   |
| 50.2   | 30.1   | 49.4   | 28.4   | 10.6   | 32.9    | 11.6   | 23.8   | 6.5    |
| 7.5    | 14.2   | 5.5    | 11.2   | 3.9    | 21.5    | 10.2   | 25.2   | 11.3   |
| 2.2    | 0.9    | 1.9    | 1.3    | 0.9    | 1.1     | 1.6    | 1.1    | 0.4    |
| 6.5    | 1.6    | 15.1   | 6.7    | 0.2    | 10.1    | 0.4    | 1.1    | 0.6    |
| 20.8   | 5.2    | 1.3    | 5.3    | 8.2    | 13.6    | 18.5   | 31.8   | 9.6    |
| 7.8    | 1.8    | 7.6    | 4.4    | 5.4    | 8.3     | 3.5    | 9.1    | 4.5    |
| 480.7  | 419.5  | 337.8  | 244.7  | 172.3  | 2138.4  | 1937.8 | 232.2  | 302.1  |
| 2.7    | 6.9    | 1.5    | 2.3    | 0.8    | 2.5     | 8.8    | 159.1  | 267.3  |
| 4.0    | 0.8    | 1.1    | 1.1    | 0.2    | 0.7     | 0.6    | 0.7    | 1.3    |
| 2.8    | 1.1    | 1.3    | 0.9    | 0.7    | 8.3     | 11.3   | 1.3    | 0.9    |
| 27.1   | 23.5   | 20.7   | 20.3   | 4.4    | 22.3    | 9.8    | 18.7   | 24.8   |
| 62.0   | 55.2   | 50.9   | 76.9   | 8.5    | 76.7    | 65.2   | 35.0   | 58.5   |
| 2.4    | 1.3    | 2.1    | 15.0   | 0.4    | 38.9    | 18.4   | 1.4    | 1.3    |
| 53.6   | 35.0   | 37.6   | 65.5   | 15.3   | 10.9    | 14.8   | 13.7   | 16.6   |
| 21.9   | 14.3   | 44.8   | 135.6  | 20.9   | 19.7    | 7.9    | 1.0    | 0.2    |
| 337.4  | 296.0  | 296.7  | 273.9  | 103.1  | 693.6   | 398.5  | 151.0  | 146.3  |
| 12.1   | 12.2   | 19.0   | 2.4    | 2.2    | 9.5     | 7.2    | 20.2   | 16.1   |
| 38.3   | 35.2   | 32.8   | 2.7    | 8.1    | 32.9    | 34.9   | 22.6   | 28.4   |
| 9.0    | 7.3    | 6.8    | 1.9    | 0.4    | 1.3     | 11.7   | 2.6    | 7.1    |
| 2.9    | 2.4    | 0.7    | 1.7    | 1.2    | 8.6     | 1.8    | 1.8    | 0.7    |
| 6.4    | 10.9   | 23.9   | 11.1   | 9.3    | 20.0    | 7.6    | 20.3   | 14.5   |
| 10.9   | 4.8    | 3.8    | 5.8    | 0.1    | 1.3     | 0.9    | 5.2    | 1.4    |
| 10.2   | 7.1    | 13.8   | 5.7    | 3.5    | 1.7     | 8.6    | 10.4   | 7.3    |
| 4.9    | 1.7    | 1.6    | 5.9    | 4.2    | 29.0    | 23.5   | 5.5    | 4.9    |
| 1.7    | 1.0    | 1.7    | 6.2    | 1.4    | 3.1     | 2.6    | 1.2    | 1.8    |
| 13.1   | 16.0   | 13.3   | 4.0    | 9.9    | 17.3    | 9.7    | 7.0    | 10.7   |
| 6.0    | 5.8    | 9.9    | 3.5    | 1.0    | 10.8    | 5.3    | 8.9    | 5.5    |
| 4.6    | 9.6    | 3.9    | 11.3   | 6.5    | 10.5    | 4.0    | 3.9    | 1.2    |
| 256.4  | 198.9  | 224.9  | 349.7  | 70.5   | 221.2   | 107.3  | 151.8  | 171.6  |
| 7832.3 | 7064.7 | 6562.4 | 6877.8 | 4716.6 | 10366.7 | 9165.4 | 3966.9 | 4511.5 |
| 4.8    | 0.9    | 3.1    | 2.9    | 1.1    | 1.6     | 4.3    | 4.0    | 3.8    |
| 402.3  | 341.6  | 342.7  | 287.3  | 119.7  | 607.8   | 356.6  | 41.2   | 53.8   |
| 31.8   | 23.9   | 23.6   | 22.0   | 10.0   | 19.9    | 27.2   | 15.6   | 9.0    |
| 4.5    | 3.6    | 2.2    | 2.9    | 0.4    | 5.2     | 1.3    | 1.5    | 1.4    |
| 61.5   | 49.1   | 36.9   | 20.2   | 12.2   | 55.0    | 29.5   | 42.9   | 47.3   |
| 7.0    | 9.0    | 8.7    | 8.9    | 4.6    | 15.7    | 1.9    | 13.6   | 11.6   |
| 8.6    | 7.2    | 2.2    | 5.6    | 4.1    | 19.9    | 12.3   | 16.1   | 10.7   |
| 1192.4 | 1130.8 | 1211.6 | 1293.4 | 349.4  | 1227.8  | 945.8  | 119.8  | 139.0  |
| 2.0    | 3.1    | 12.3   | 2.5    | 4.3    | 10.1    | 2.7    | 9.6    | 1.8    |

|        |        |        |        |        |        |        |       |       |
|--------|--------|--------|--------|--------|--------|--------|-------|-------|
| 6.4    | 5.0    | 5.5    | 1.6    | 1.7    | 8.4    | 2.5    | 3.5   | 3.0   |
| 7.2    | 7.5    | 7.6    | 0.5    | 0.9    | 0.9    | 9.8    | 8.4   | 13.9  |
| 11.2   | 2.0    | 9.2    | 9.7    | 0.5    | 1.0    | 1.7    | 5.9   | 3.0   |
| 17.8   | 23.4   | 15.1   | 19.4   | 5.3    | 18.5   | 4.5    | 12.2  | 19.7  |
| 1.7    | 0.5    | 1.1    | 5.3    | 2.1    | 8.7    | 2.1    | 0.9   | 2.3   |
| 45.0   | 25.7   | 37.3   | 23.8   | 5.8    | 30.9   | 12.1   | 15.8  | 9.0   |
| 2.8    | 3.1    | 8.5    | 0.8    | 1.2    | 3.4    | 2.7    | 3.9   | 3.0   |
| 10.1   | 1.9    | 8.3    | 1.4    | 1.3    | 1.9    | 6.4    | 2.1   | 1.0   |
| 457.4  | 360.1  | 348.0  | 389.0  | 117.3  | 470.1  | 318.0  | 190.3 | 245.1 |
| 0.8    | 0.6    | 0.4    | 0.4    | 0.3    | 0.9    | 0.5    | 0.8   | 4.1   |
| 3.3    | 1.2    | 1.3    | 1.3    | 0.6    | 1.6    | 2.3    | 2.0   | 2.2   |
| 6.8    | 1.3    | 3.1    | 2.1    | 6.5    | 9.0    | 3.1    | 11.9  | 1.7   |
| 598.1  | 558.1  | 601.3  | 614.3  | 273.1  | 910.9  | 738.8  | 281.4 | 402.9 |
| 46.0   | 60.8   | 43.9   | 18.2   | 22.6   | 14.6   | 13.9   | 0.7   | 8.7   |
| 406.4  | 341.5  | 331.9  | 204.4  | 91.1   | 429.7  | 244.8  | 406.6 | 635.2 |
| 6.8    | 1.0    | 5.7    | 0.4    | 1.2    | 5.4    | 2.1    | 6.3   | 3.1   |
| 8.8    | 7.0    | 1.9    | 4.7    | 0.3    | 2.7    | 1.3    | 1.7   | 0.8   |
| 993.6  | 934.3  | 895.7  | 1216.9 | 443.6  | 1395.2 | 1020.1 | 332.8 | 415.6 |
| 144.2  | 172.2  | 133.7  | 106.7  | 69.8   | 45.2   | 27.1   | 26.5  | 24.5  |
| 3.3    | 3.8    | 2.9    | 4.0    | 1.2    | 2.2    | 1.6    | 1.8   | 1.4   |
| 0.3    | 0.2    | 2.8    | 0.1    | 2.5    | 1.5    | 1.8    | 2.1   | 2.3   |
| 1.5    | 10.1   | 17.6   | 1.2    | 2.6    | 0.7    | 0.9    | 1.5   | 1.8   |
| 4.2    | 1.0    | 3.1    | 1.2    | 0.5    | 4.8    | 1.0    | 0.8   | 10.0  |
| 6.0    | 5.3    | 1.7    | 12.8   | 6.7    | 17.8   | 13.1   | 1.1   | 0.3   |
| 11.8   | 6.7    | 3.5    | 4.2    | 1.8    | 5.0    | 6.4    | 2.9   | 2.1   |
| 5.6    | 2.3    | 10.7   | 0.4    | 2.3    | 7.1    | 5.2    | 10.8  | 8.2   |
| 251.5  | 231.0  | 234.2  | 237.2  | 67.6   | 351.1  | 273.0  | 99.7  | 122.5 |
| 19.9   | 10.0   | 13.6   | 12.6   | 3.7    | 6.3    | 6.9    | 15.2  | 13.5  |
| 3.3    | 19.6   | 3.0    | 12.4   | 0.7    | 4.2    | 1.0    | 3.6   | 5.8   |
| 91.4   | 49.9   | 50.9   | 24.8   | 19.9   | 75.9   | 17.1   | 116.6 | 143.3 |
| 3.4    | 2.0    | 5.5    | 2.2    | 1.2    | 3.9    | 3.6    | 1.3   | 7.0   |
| 3122.3 | 2790.8 | 2731.1 | 1731.7 | 1297.2 | 645.6  | 223.8  | 20.9  | 32.2  |
| 92.7   | 84.1   | 73.9   | 48.8   | 21.8   | 149.5  | 102.9  | 9.8   | 9.9   |
| 558.6  | 572.5  | 520.0  | 417.1  | 211.7  | 328.1  | 470.2  | 196.0 | 235.7 |
| 94.0   | 82.8   | 74.8   | 107.6  | 38.6   | 86.1   | 64.8   | 34.7  | 40.7  |
| 560.7  | 501.7  | 511.3  | 496.6  | 166.4  | 863.6  | 608.8  | 132.5 | 163.6 |
| 228.0  | 220.0  | 207.9  | 224.2  | 95.6   | 315.7  | 223.9  | 116.5 | 154.2 |
| 1.2    | 1.1    | 1.4    | 1.2    | 0.8    | 10.0   | 26.0   | 2.6   | 0.8   |
| 23.0   | 9.2    | 25.2   | 14.4   | 8.1    | 47.4   | 2.2    | 3.1   | 8.6   |
| 3.1    | 2.4    | 17.5   | 1.9    | 0.8    | 20.3   | 12.3   | 18.1  | 9.4   |
| 34.3   | 24.7   | 21.7   | 3.2    | 0.8    | 23.0   | 15.9   | 11.1  | 16.8  |
| 1.2    | 7.7    | 6.0    | 14.5   | 6.0    | 11.6   | 19.5   | 32.3  | 29.8  |
| 5.1    | 0.4    | 0.7    | 0.7    | 2.1    | 1.8    | 1.2    | 5.2   | 5.2   |
| 2.5    | 4.1    | 1.4    | 1.4    | 1.8    | 2.7    | 1.0    | 13.9  | 7.2   |
| 50.2   | 27.8   | 38.4   | 27.0   | 18.7   | 37.1   | 23.6   | 14.3  | 28.5  |
| 9.1    | 5.4    | 15.1   | 1.2    | 3.8    | 11.0   | 8.3    | 7.5   | 10.6  |
| 5.8    | 14.6   | 1.8    | 3.5    | 4.1    | 1.5    | 10.1   | 2.1   | 10.3  |
| 402.9  | 344.8  | 406.1  | 370.3  | 136.2  | 665.9  | 386.5  | 143.0 | 171.5 |
| 669.5  | 662.8  | 559.5  | 361.8  | 193.4  | 342.2  | 269.9  | 179.3 | 287.4 |
| 29.7   | 23.3   | 19.8   | 12.0   | 14.7   | 26.2   | 19.3   | 14.0  | 12.0  |
| 118.5  | 116.8  | 171.5  | 187.6  | 47.3   | 578.8  | 557.4  | 19.1  | 22.1  |
| 0.6    | 0.6    | 0.1    | 2.0    | 1.9    | 0.5    | 4.7    | 4.3   | 0.1   |
| 88.0   | 83.4   | 53.4   | 37.8   | 14.4   | 37.4   | 26.3   | 216.7 | 279.4 |

|       |       |       |       |       |       |       |       |       |
|-------|-------|-------|-------|-------|-------|-------|-------|-------|
| 10.9  | 1.4   | 2.3   | 12.0  | 1.3   | 2.0   | 8.8   | 3.4   | 15.5  |
| 7.3   | 0.3   | 0.5   | 2.2   | 0.3   | 2.3   | 0.5   | 0.2   | 2.7   |
| 21.0  | 19.3  | 30.9  | 124.0 | 5.4   | 253.4 | 253.6 | 1.4   | 2.9   |
| 22.3  | 11.7  | 13.6  | 9.8   | 3.8   | 15.6  | 0.7   | 23.3  | 4.4   |
| 9.3   | 1.7   | 3.6   | 4.9   | 3.7   | 58.4  | 34.3  | 3.6   | 5.8   |
| 4.1   | 3.6   | 5.3   | 2.4   | 4.2   | 4.7   | 2.2   | 9.3   | 3.6   |
| 2.6   | 1.3   | 4.9   | 0.7   | 0.4   | 1.9   | 0.5   | 1.0   | 3.0   |
| 342.8 | 330.4 | 360.5 | 327.7 | 132.0 | 378.4 | 284.2 | 15.3  | 16.6  |
| 245.0 | 183.4 | 204.8 | 137.9 | 66.0  | 435.1 | 371.8 | 121.1 | 173.4 |
| 1.1   | 5.4   | 0.7   | 9.6   | 5.2   | 5.2   | 0.7   | 5.7   | 3.9   |
| 1.3   | 0.8   | 2.3   | 1.0   | 0.6   | 1.3   | 2.1   | 1.6   | 2.1   |
| 10.0  | 10.1  | 9.7   | 10.0  | 3.9   | 14.6  | 0.4   | 16.8  | 8.1   |
| 1.4   | 1.0   | 1.4   | 7.5   | 0.4   | 11.5  | 5.9   | 2.8   | 4.8   |
| 5.8   | 1.5   | 3.2   | 2.3   | 0.7   | 6.0   | 2.0   | 3.0   | 2.4   |
| 13.3  | 25.9  | 15.1  | 4.8   | 12.0  | 22.2  | 18.0  | 10.4  | 16.5  |
| 2.8   | 2.6   | 3.7   | 17.8  | 4.9   | 20.7  | 2.1   | 2.0   | 3.8   |
| 0.6   | 6.3   | 2.3   | 2.3   | 0.6   | 5.7   | 6.8   | 10.1  | 1.7   |
| 2.3   | 5.6   | 10.8  | 6.9   | 1.2   | 7.3   | 6.5   | 2.0   | 9.1   |
| 1.2   | 4.0   | 12.2  | 0.4   | 1.9   | 10.7  | 10.1  | 7.7   | 6.4   |
| 5.9   | 0.7   | 4.2   | 4.5   | 3.8   | 3.3   | 5.4   | 6.3   | 5.9   |
| 15.9  | 14.9  | 32.3  | 10.3  | 6.7   | 37.9  | 33.4  | 21.0  | 18.7  |
| 6.9   | 2.7   | 5.7   | 6.9   | 0.6   | 0.3   | 2.6   | 0.8   | 0.9   |
| 1.2   | 0.3   | 1.2   | 0.4   | 0.8   | 7.3   | 6.1   | 7.6   | 10.8  |
| 122.2 | 157.8 | 87.7  | 76.1  | 52.0  | 144.1 | 98.3  | 91.2  | 86.0  |
| 1.3   | 11.2  | 6.3   | 3.4   | 0.3   | 8.4   | 2.7   | 12.4  | 5.6   |
| 34.3  | 7.6   | 3.0   | 15.6  | 7.4   | 3.6   | 9.0   | 5.2   | 15.4  |
| 10.4  | 1.3   | 3.7   | 2.6   | 1.5   | 13.2  | 4.3   | 0.7   | 7.6   |
| 0.9   | 1.4   | 1.4   | 0.7   | 0.7   | 9.2   | 0.8   | 0.5   | 1.0   |
| 17.4  | 23.0  | 15.0  | 12.4  | 5.0   | 106.5 | 86.3  | 38.8  | 11.1  |
| 166.7 | 177.5 | 146.4 | 145.5 | 79.1  | 134.9 | 86.0  | 69.1  | 84.7  |
| 3.8   | 1.4   | 1.5   | 1.0   | 0.3   | 3.3   | 1.2   | 1.1   | 1.4   |
| 6.7   | 0.1   | 3.6   | 0.4   | 5.8   | 2.5   | 3.3   | 3.0   | 0.5   |
| 5.0   | 3.8   | 5.8   | 3.6   | 1.3   | 20.2  | 7.6   | 2.7   | 5.1   |
| 5.4   | 9.2   | 9.4   | 0.4   | 0.3   | 9.9   | 6.7   | 9.3   | 5.0   |
| 20.8  | 17.9  | 8.1   | 12.2  | 8.1   | 33.1  | 19.7  | 22.4  | 16.1  |
| 43.2  | 44.7  | 38.4  | 26.4  | 20.6  | 26.7  | 7.9   | 28.6  | 6.7   |
| 4.1   | 5.3   | 12.9  | 1.4   | 2.5   | 14.9  | 5.3   | 4.4   | 9.7   |
| 0.8   | 6.5   | 0.9   | 0.7   | 3.5   | 1.1   | 3.2   | 1.6   | 0.5   |
| 6.1   | 5.3   | 1.3   | 0.3   | 0.4   | 3.7   | 5.0   | 1.2   | 1.1   |
| 12.1  | 2.0   | 9.3   | 3.0   | 3.6   | 10.1  | 5.9   | 3.4   | 10.7  |
| 0.5   | 0.7   | 1.0   | 0.2   | 0.1   | 1.1   | 0.5   | 0.5   | 1.2   |
| 1.0   | 0.5   | 1.9   | 7.1   | 0.6   | 1.0   | 0.7   | 0.5   | 0.6   |
| 18.3  | 24.0  | 23.7  | 24.9  | 20.8  | 41.3  | 18.8  | 11.8  | 50.7  |
| 227.4 | 202.2 | 163.6 | 95.6  | 60.5  | 98.7  | 54.1  | 21.8  | 29.4  |
| 6.7   | 4.1   | 3.7   | 1.8   | 2.3   | 4.3   | 5.8   | 2.7   | 1.3   |
| 1.8   | 1.8   | 1.6   | 2.1   | 0.3   | 2.6   | 1.1   | 1.2   | 7.4   |
| 4.0   | 13.8  | 4.0   | 3.1   | 2.0   | 26.1  | 14.3  | 1.2   | 17.4  |
| 3.4   | 2.0   | 3.1   | 1.0   | 1.2   | 5.1   | 1.4   | 1.3   | 1.2   |
| 1.7   | 1.4   | 2.6   | 2.4   | 0.3   | 3.1   | 2.1   | 1.4   | 1.1   |
| 3.0   | 11.7  | 14.5  | 1.1   | 5.9   | 11.8  | 10.4  | 10.0  | 27.2  |
| 4.1   | 4.6   | 1.7   | 6.8   | 2.3   | 14.7  | 3.2   | 2.3   | 2.0   |
| 3.4   | 1.7   | 7.7   | 2.2   | 0.5   | 7.0   | 9.0   | 9.2   | 1.5   |
| 4.2   | 10.8  | 9.2   | 2.8   | 5.5   | 5.7   | 0.9   | 7.6   | 4.2   |

|        |        |        |        |       |        |        |       |       |
|--------|--------|--------|--------|-------|--------|--------|-------|-------|
| 15.6   | 2.8    | 2.7    | 2.6    | 1.7   | 4.8    | 3.1    | 2.2   | 2.4   |
| 26.7   | 14.7   | 18.3   | 12.2   | 2.3   | 59.5   | 40.1   | 3.8   | 7.6   |
| 0.9    | 1.4    | 1.4    | 1.3    | 6.6   | 1.2    | 1.3    | 0.6   | 1.7   |
| 0.9    | 2.1    | 1.4    | 0.7    | 3.4   | 1.1    | 0.6    | 0.7   | 1.8   |
| 5.8    | 12.4   | 2.8    | 1.2    | 7.5   | 4.8    | 16.0   | 22.2  | 20.8  |
| 1.3    | 1.3    | 0.6    | 6.0    | 0.5   | 2.1    | 0.5    | 10.8  | 2.9   |
| 0.5    | 0.6    | 12.0   | 5.8    | 0.6   | 0.9    | 0.6    | 1.4   | 1.8   |
| 15.7   | 9.0    | 34.8   | 10.8   | 4.1   | 22.5   | 6.1    | 13.3  | 25.7  |
| 7.2    | 0.5    | 0.8    | 0.2    | 0.2   | 0.6    | 0.1    | 1.0   | 1.0   |
| 2.9    | 3.3    | 12.7   | 8.7    | 0.8   | 0.7    | 0.9    | 1.7   | 4.7   |
| 4.6    | 3.4    | 3.7    | 4.4    | 1.4   | 10.5   | 7.1    | 4.9   | 5.3   |
| 4.6    | 7.4    | 8.0    | 2.8    | 0.7   | 2.2    | 7.2    | 12.3  | 11.5  |
| 11.6   | 3.4    | 2.7    | 5.1    | 3.7   | 10.8   | 7.0    | 14.9  | 14.7  |
| 40.5   | 40.9   | 34.3   | 32.6   | 16.9  | 45.2   | 31.2   | 11.0  | 9.1   |
| 1.9    | 1.6    | 2.4    | 1.1    | 0.3   | 1.3    | 0.4    | 0.4   | 0.7   |
| 20.6   | 15.7   | 16.2   | 10.1   | 10.4  | 46.6   | 15.0   | 14.7  | 18.5  |
| 33.5   | 55.0   | 69.6   | 50.9   | 25.3  | 81.3   | 50.6   | 24.7  | 31.9  |
| 5.3    | 37.7   | 15.6   | 28.4   | 10.4  | 12.7   | 14.7   | 5.3   | 10.0  |
| 667.8  | 578.0  | 667.1  | 521.0  | 243.2 | 1274.2 | 793.5  | 137.1 | 268.6 |
| 4.3    | 21.7   | 25.4   | 14.1   | 9.0   | 1.8    | 8.4    | 10.7  | 4.6   |
| 4.2    | 3.6    | 8.5    | 9.3    | 2.1   | 3.6    | 1.2    | 0.9   | 2.4   |
| 11.7   | 25.4   | 3.8    | 11.9   | 1.4   | 17.2   | 8.2    | 7.6   | 1.0   |
| 21.8   | 1.8    | 8.7    | 7.2    | 3.9   | 1.1    | 1.5    | 0.7   | 8.1   |
| 2.6    | 12.1   | 6.8    | 2.1    | 8.3   | 1.6    | 1.2    | 1.8   | 6.8   |
| 0.2    | 0.2    | 4.4    | 3.7    | 0.7   | 1.6    | 0.0    | 0.2   | 4.3   |
| 33.9   | 16.4   | 24.8   | 23.1   | 15.3  | 24.2   | 5.1    | 15.7  | 23.2  |
| 16.8   | 3.1    | 9.4    | 16.7   | 7.4   | 6.8    | 7.8    | 10.7  | 9.4   |
| 20.1   | 23.1   | 3.5    | 4.2    | 1.9   | 21.2   | 3.5    | 15.3  | 5.0   |
| 2.2    | 0.5    | 4.6    | 0.4    | 0.2   | 7.2    | 3.4    | 0.3   | 0.9   |
| 1.0    | 5.4    | 2.3    | 1.9    | 0.3   | 3.4    | 0.8    | 1.8   | 3.6   |
| 1.1    | 1.8    | 0.3    | 0.8    | 2.2   | 0.6    | 8.7    | 0.8   | 0.5   |
| 3.7    | 0.7    | 5.4    | 3.3    | 4.3   | 7.2    | 5.2    | 7.5   | 7.0   |
| 21.2   | 15.1   | 14.6   | 18.4   | 6.4   | 36.0   | 15.4   | 26.4  | 29.7  |
| 43.0   | 54.6   | 59.1   | 34.3   | 2.2   | 59.5   | 21.4   | 33.3  | 47.4  |
| 16.6   | 7.1    | 12.4   | 13.1   | 3.4   | 5.2    | 9.8    | 10.4  | 8.4   |
| 548.3  | 374.9  | 342.8  | 341.8  | 131.7 | 675.4  | 299.1  | 164.0 | 216.7 |
| 4.0    | 2.4    | 3.4    | 1.3    | 0.7   | 3.8    | 1.4    | 6.6   | 10.5  |
| 1069.5 | 1126.4 | 1243.9 | 1693.0 | 446.8 | 1324.5 | 1031.6 | 228.8 | 316.6 |
| 23.1   | 14.7   | 14.0   | 12.6   | 4.9   | 126.5  | 66.9   | 7.7   | 12.0  |
| 2.5    | 0.9    | 1.3    | 3.3    | 0.8   | 5.1    | 3.4    | 2.2   | 6.0   |
| 547.7  | 581.2  | 537.6  | 504.3  | 249.7 | 645.0  | 444.6  | 279.3 | 216.2 |
| 4.3    | 4.0    | 10.2   | 15.3   | 1.7   | 11.8   | 9.1    | 7.5   | 8.0   |
| 25.4   | 19.1   | 26.0   | 32.6   | 12.2  | 228.8  | 183.0  | 82.7  | 130.4 |
| 15.8   | 5.0    | 11.8   | 6.1    | 2.9   | 24.5   | 12.0   | 28.6  | 40.9  |
| 9.3    | 6.0    | 11.2   | 3.9    | 6.1   | 14.0   | 6.8    | 5.9   | 17.7  |
| 3.0    | 2.0    | 1.5    | 1.0    | 0.3   | 2.3    | 1.3    | 2.3   | 6.2   |
| 10.8   | 7.3    | 18.9   | 10.9   | 7.6   | 38.1   | 17.3   | 13.2  | 1.2   |
| 44.9   | 31.6   | 29.6   | 21.9   | 15.0  | 22.3   | 21.5   | 24.1  | 36.7  |
| 4.9    | 10.3   | 17.5   | 16.2   | 6.9   | 0.8    | 11.3   | 8.2   | 1.1   |
| 210.6  | 192.9  | 180.3  | 127.0  | 43.2  | 480.3  | 225.6  | 71.9  | 105.1 |
| 25.8   | 37.0   | 32.8   | 6.1    | 8.1   | 1.5    | 1.8    | 2.6   | 1.4   |
| 5.6    | 3.2    | 0.9    | 3.8    | 0.2   | 14.1   | 0.5    | 4.7   | 14.9  |
| 1.0    | 0.8    | 1.4    | 1.3    | 0.8   | 3.3    | 1.9    | 1.2   | 1.8   |

|        |        |        |        |       |        |        |       |       |
|--------|--------|--------|--------|-------|--------|--------|-------|-------|
| 29.5   | 17.2   | 30.7   | 13.8   | 16.1  | 29.1   | 0.9    | 23.0  | 28.8  |
| 3.0    | 1.8    | 6.3    | 2.1    | 1.0   | 3.0    | 1.5    | 17.4  | 3.3   |
| 2.1    | 1.5    | 8.4    | 2.3    | 2.5   | 4.3    | 1.1    | 5.7   | 7.5   |
| 5.5    | 7.0    | 6.8    | 5.5    | 0.6   | 10.3   | 6.3    | 19.5  | 10.6  |
| 15.0   | 8.0    | 10.3   | 3.3    | 2.4   | 2.2    | 0.5    | 8.9   | 4.2   |
| 2.5    | 1.4    | 10.2   | 0.7    | 0.5   | 3.9    | 5.9    | 1.0   | 0.6   |
| 183.6  | 145.2  | 136.0  | 93.0   | 61.4  | 513.4  | 435.7  | 93.5  | 136.5 |
| 17.2   | 17.7   | 1.5    | 8.4    | 5.0   | 12.6   | 3.8    | 2.1   | 4.7   |
| 4.1    | 9.2    | 2.8    | 4.6    | 4.1   | 25.8   | 1.4    | 0.7   | 1.6   |
| 22.6   | 19.4   | 23.1   | 9.9    | 10.4  | 26.2   | 17.8   | 14.5  | 14.8  |
| 64.7   | 51.3   | 44.2   | 40.4   | 12.3  | 34.6   | 34.3   | 20.7  | 17.1  |
| 1.2    | 8.4    | 2.9    | 7.7    | 0.4   | 15.0   | 9.1    | 10.2  | 9.8   |
| 10.7   | 17.9   | 13.2   | 12.6   | 7.2   | 9.8    | 15.2   | 17.1  | 15.7  |
| 1692.5 | 1527.4 | 1424.3 | 1216.0 | 447.5 | 2961.1 | 1743.2 | 480.6 | 875.5 |
| 10.4   | 9.2    | 24.4   | 19.8   | 0.9   | 13.6   | 10.0   | 39.3  | 23.7  |
| 9.3    | 1.3    | 7.2    | 9.0    | 5.5   | 14.7   | 7.3    | 2.1   | 1.2   |
| 162.0  | 166.4  | 142.7  | 73.3   | 26.8  | 11.0   | 8.8    | 12.7  | 5.4   |
| 15.7   | 2.8    | 15.0   | 9.1    | 2.3   | 9.1    | 8.2    | 5.6   | 11.6  |
| 164.7  | 193.3  | 158.2  | 183.5  | 37.6  | 110.1  | 65.2   | 27.7  | 43.5  |
| 2.9    | 2.3    | 2.2    | 0.7    | 2.0   | 8.4    | 8.4    | 9.6   | 18.1  |
| 6.0    | 0.9    | 3.5    | 0.9    | 3.3   | 9.4    | 2.2    | 18.9  | 3.3   |
| 502.1  | 306.0  | 320.6  | 342.4  | 128.3 | 544.4  | 409.3  | 157.3 | 128.8 |
| 66.0   | 60.8   | 55.4   | 18.9   | 31.9  | 31.6   | 18.9   | 13.9  | 22.6  |
| 1.3    | 2.6    | 4.7    | 1.9    | 1.8   | 3.5    | 2.7    | 3.7   | 5.8   |
| 66.2   | 52.1   | 47.8   | 67.8   | 23.4  | 839.3  | 598.4  | 118.9 | 144.5 |
| 6.2    | 6.2    | 6.4    | 7.2    | 0.4   | 1.9    | 3.6    | 3.1   | 3.3   |
| 1840.3 | 1684.4 | 1735.0 | 1543.3 | 841.2 | 3396.6 | 2646.2 | 278.4 | 291.0 |
| 3.0    | 12.1   | 1.9    | 7.0    | 0.4   | 7.9    | 5.6    | 4.2   | 1.2   |
| 20.8   | 20.3   | 14.5   | 12.3   | 7.8   | 20.4   | 8.4    | 14.2  | 17.7  |
| 17.1   | 12.5   | 18.3   | 3.8    | 2.1   | 9.0    | 12.5   | 29.3  | 16.4  |
| 28.7   | 21.7   | 20.6   | 40.9   | 11.9  | 446.7  | 332.4  | 30.1  | 33.6  |
| 97.4   | 30.1   | 43.4   | 31.1   | 10.6  | 64.5   | 44.6   | 26.5  | 39.4  |
| 0.6    | 2.1    | 0.4    | 0.3    | 0.9   | 0.7    | 0.3    | 0.9   | 0.5   |
| 14.6   | 10.1   | 12.7   | 10.5   | 8.4   | 18.5   | 8.5    | 17.1  | 14.0  |
| 0.7    | 2.3    | 0.1    | 0.6    | 2.9   | 9.4    | 6.9    | 2.7   | 5.9   |
| 5.5    | 14.9   | 18.1   | 2.6    | 6.6   | 3.4    | 4.8    | 28.5  | 19.0  |
| 23.9   | 2.5    | 17.6   | 5.7    | 4.0   | 11.3   | 5.6    | 14.0  | 5.7   |
| 18.0   | 2.7    | 14.5   | 5.0    | 0.3   | 16.6   | 3.7    | 17.0  | 22.3  |
| 876.9  | 744.3  | 695.9  | 650.5  | 233.8 | 1462.6 | 1069.6 | 136.8 | 165.0 |
| 32.1   | 13.4   | 25.7   | 12.2   | 7.3   | 36.7   | 31.1   | 11.0  | 7.7   |
| 13.7   | 1.6    | 9.5    | 11.9   | 6.3   | 16.0   | 14.5   | 16.1  | 16.8  |
| 3.3    | 9.3    | 11.7   | 7.3    | 6.0   | 3.3    | 7.1    | 10.6  | 12.7  |
| 4.3    | 5.2    | 10.3   | 2.4    | 1.1   | 13.9   | 20.5   | 10.2  | 5.7   |
| 3.0    | 2.4    | 5.1    | 1.7    | 0.9   | 3.0    | 4.4    | 14.1  | 2.6   |
| 19.5   | 2.6    | 1.3    | 8.4    | 4.9   | 22.8   | 1.4    | 4.1   | 5.9   |
| 61.4   | 46.8   | 57.5   | 34.7   | 19.0  | 138.9  | 99.9   | 83.2  | 96.6  |
| 2.6    | 0.5    | 0.5    | 1.0    | 3.1   | 1.0    | 3.7    | 0.6   | 0.5   |
| 5.9    | 0.7    | 6.9    | 1.6    | 0.1   | 9.3    | 2.6    | 0.9   | 0.1   |
| 66.8   | 63.0   | 55.0   | 34.6   | 21.2  | 475.6  | 369.8  | 42.1  | 78.2  |
| 10.7   | 11.9   | 14.3   | 14.7   | 4.2   | 28.2   | 10.4   | 14.2  | 15.3  |
| 22.9   | 11.7   | 11.4   | 14.6   | 10.5  | 7.4    | 2.4    | 17.0  | 24.5  |
| 0.9    | 4.9    | 4.5    | 4.9    | 1.0   | 10.8   | 5.3    | 1.6   | 7.0   |
| 16.4   | 7.9    | 10.9   | 13.1   | 2.9   | 12.2   | 0.9    | 9.5   | 6.8   |

|        |       |       |       |       |        |        |       |        |
|--------|-------|-------|-------|-------|--------|--------|-------|--------|
| 8.2    | 1.1   | 0.7   | 1.2   | 2.3   | 4.1    | 16.9   | 0.9   | 1.3    |
| 14.9   | 15.8  | 34.7  | 13.8  | 9.1   | 12.0   | 9.4    | 10.9  | 7.5    |
| 9.8    | 0.2   | 0.2   | 5.6   | 0.1   | 10.0   | 1.4    | 0.4   | 0.4    |
| 2.8    | 1.0   | 3.3   | 0.7   | 11.2  | 3.1    | 2.1    | 4.3   | 3.4    |
| 268.7  | 331.6 | 258.3 | 176.5 | 79.2  | 550.1  | 249.3  | 56.1  | 81.4   |
| 23.7   | 23.8  | 15.8  | 7.0   | 3.8   | 67.3   | 61.7   | 12.9  | 18.2   |
| 14.7   | 2.4   | 11.7  | 8.5   | 3.0   | 26.7   | 3.2    | 15.7  | 12.7   |
| 121.1  | 110.2 | 128.8 | 94.4  | 38.4  | 427.4  | 351.8  | 222.3 | 289.3  |
| 1196.5 | 968.5 | 958.0 | 547.4 | 392.3 | 5034.0 | 3134.2 | 3.3   | 18.3   |
| 21.4   | 11.3  | 11.4  | 13.4  | 0.6   | 5.9    | 4.8    | 6.8   | 0.5    |
| 2.3    | 2.2   | 5.2   | 4.3   | 1.8   | 4.0    | 1.3    | 1.8   | 6.9    |
| 14.8   | 0.6   | 1.6   | 6.9   | 0.9   | 0.8    | 4.7    | 2.7   | 2.2    |
| 1166.6 | 970.2 | 825.9 | 601.6 | 294.4 | 2708.4 | 1717.8 | 847.1 | 1166.4 |
| 232.9  | 219.5 | 249.5 | 281.4 | 98.3  | 662.8  | 408.8  | 66.6  | 45.7   |
| 14.1   | 36.4  | 35.8  | 28.3  | 12.6  | 40.0   | 6.4    | 21.9  | 5.6    |
| 2.8    | 0.7   | 1.4   | 12.0  | 2.1   | 4.6    | 0.8    | 1.5   | 5.5    |
| 16.3   | 19.5  | 10.6  | 19.5  | 4.1   | 118.9  | 89.5   | 37.9  | 47.8   |
| 4.0    | 2.2   | 3.4   | 5.9   | 0.5   | 12.0   | 2.7    | 9.8   | 12.2   |
| 12.4   | 9.5   | 11.6  | 9.6   | 4.1   | 12.7   | 20.3   | 21.1  | 26.2   |
| 2.8    | 2.0   | 4.4   | 1.0   | 4.5   | 14.5   | 10.4   | 4.7   | 3.1    |
| 9.1    | 15.5  | 22.0  | 17.9  | 4.0   | 14.2   | 21.9   | 19.3  | 22.9   |
| 8.4    | 2.0   | 1.4   | 10.0  | 1.8   | 1.0    | 12.5   | 1.3   | 1.5    |
| 22.1   | 21.5  | 7.3   | 11.0  | 9.4   | 32.5   | 24.3   | 22.3  | 14.4   |
| 33.7   | 18.3  | 9.6   | 6.1   | 5.7   | 19.0   | 35.5   | 6.8   | 7.5    |
| 15.5   | 4.4   | 15.9  | 2.7   | 5.8   | 2.3    | 10.3   | 2.4   | 13.2   |
| 66.3   | 53.9  | 74.1  | 55.1  | 21.2  | 88.6   | 37.4   | 22.5  | 22.0   |
| 1.1    | 0.6   | 1.2   | 6.6   | 0.8   | 0.9    | 0.5    | 5.7   | 1.6    |
| 40.3   | 22.3  | 34.5  | 17.4  | 3.9   | 77.0   | 58.8   | 39.5  | 24.5   |
| 7.9    | 0.5   | 6.9   | 2.7   | 0.5   | 8.0    | 2.6    | 8.9   | 0.9    |
| 7.0    | 2.1   | 3.1   | 4.7   | 1.0   | 2.8    | 9.6    | 3.0   | 1.4    |
| 53.6   | 41.7  | 49.6  | 25.7  | 10.9  | 148.4  | 43.9   | 1.6   | 1.0    |
| 15.3   | 9.6   | 14.2  | 4.4   | 0.8   | 0.6    | 2.7    | 5.9   | 9.7    |
| 15.5   | 7.2   | 12.5  | 1.9   | 0.6   | 0.9    | 9.0    | 1.4   | 1.2    |
| 39.9   | 13.0  | 9.2   | 10.5  | 3.1   | 37.6   | 23.5   | 36.6  | 48.9   |
| 427.4  | 374.9 | 459.3 | 330.6 | 169.3 | 354.5  | 229.7  | 237.2 | 369.4  |
| 39.9   | 31.5  | 22.2  | 21.8  | 16.5  | 52.4   | 34.0   | 28.5  | 49.3   |
| 2.5    | 6.0   | 0.5   | 0.6   | 0.8   | 1.6    | 1.6    | 1.5   | 1.1    |
| 8.9    | 0.8   | 9.1   | 7.1   | 3.4   | 1.4    | 0.9    | 2.0   | 0.6    |
| 179.3  | 179.9 | 197.0 | 222.3 | 37.1  | 79.1   | 44.7   | 17.5  | 23.6   |
| 22.5   | 4.7   | 26.2  | 11.9  | 4.2   | 9.5    | 14.6   | 57.2  | 68.9   |
| 5.4    | 6.7   | 5.6   | 9.0   | 1.0   | 16.2   | 12.0   | 1.4   | 7.3    |
| 4.0    | 2.3   | 4.6   | 1.6   | 1.8   | 3.4    | 2.7    | 3.5   | 10.1   |
| 2.0    | 1.6   | 3.0   | 1.8   | 7.0   | 7.6    | 1.4    | 1.5   | 7.9    |
| 14.6   | 14.3  | 2.0   | 4.0   | 2.7   | 2.0    | 4.3    | 1.4   | 1.5    |
| 10.0   | 8.4   | 3.8   | 2.8   | 3.7   | 15.0   | 2.5    | 11.9  | 5.8    |
| 14.7   | 2.3   | 4.0   | 1.0   | 1.1   | 1.0    | 1.6    | 0.3   | 1.3    |
| 14.4   | 15.9  | 5.3   | 1.8   | 2.1   | 4.7    | 12.8   | 10.7  | 11.8   |
| 7.7    | 1.9   | 3.8   | 2.2   | 4.2   | 6.7    | 12.2   | 12.2  | 3.2    |
| 1.3    | 4.9   | 4.2   | 1.1   | 0.3   | 0.3    | 6.3    | 0.4   | 2.3    |
| 428.5  | 370.0 | 472.7 | 534.6 | 159.0 | 806.2  | 570.0  | 109.5 | 122.3  |
| 17.6   | 3.4   | 4.9   | 27.9  | 2.6   | 4.9    | 6.2    | 15.0  | 41.5   |
| 2.0    | 6.8   | 10.0  | 3.7   | 6.9   | 3.0    | 9.5    | 11.7  | 4.3    |
| 2.0    | 0.8   | 1.2   | 0.6   | 0.9   | 1.1    | 3.9    | 2.3   | 1.8    |

|        |        |        |        |        |        |        |        |        |
|--------|--------|--------|--------|--------|--------|--------|--------|--------|
| 99.7   | 121.2  | 89.8   | 91.2   | 23.0   | 358.8  | 204.1  | 26.7   | 56.0   |
| 2.2    | 3.9    | 1.6    | 1.5    | 3.2    | 3.5    | 1.4    | 2.1    | 5.1    |
| 186.0  | 141.8  | 150.1  | 161.2  | 67.1   | 259.1  | 199.2  | 119.8  | 122.4  |
| 386.2  | 441.1  | 353.7  | 298.6  | 160.8  | 960.8  | 575.4  | 359.1  | 567.2  |
| 915.4  | 839.3  | 766.9  | 452.6  | 258.5  | 1645.1 | 948.1  | 467.3  | 644.4  |
| 6.0    | 6.1    | 7.7    | 10.8   | 5.3    | 1.2    | 0.6    | 9.7    | 3.5    |
| 15.7   | 22.1   | 20.5   | 16.1   | 7.3    | 13.7   | 14.4   | 11.6   | 14.1   |
| 12.4   | 7.7    | 4.1    | 1.2    | 3.7    | 10.2   | 10.1   | 1.1    | 6.8    |
| 588.7  | 500.3  | 563.0  | 327.3  | 119.0  | 298.6  | 201.3  | 16.5   | 14.5   |
| 2059.6 | 2250.9 | 1851.9 | 1353.0 | 999.9  | 1212.4 | 1896.7 | 1026.7 | 1497.8 |
| 28.2   | 25.2   | 26.2   | 11.2   | 10.1   | 28.0   | 35.0   | 16.6   | 32.2   |
| 2.6    | 8.2    | 0.4    | 10.5   | 5.9    | 4.3    | 4.9    | 1.9    | 4.5    |
| 153.0  | 118.3  | 134.7  | 113.0  | 72.8   | 213.0  | 236.3  | 34.7   | 44.2   |
| 0.9    | 1.0    | 1.2    | 3.3    | 0.7    | 36.1   | 19.2   | 20.1   | 32.8   |
| 2.4    | 2.4    | 1.1    | 1.8    | 3.1    | 34.1   | 2.1    | 19.2   | 24.1   |
| 1.8    | 2.8    | 1.4    | 5.5    | 1.0    | 1.1    | 0.8    | 1.4    | 1.4    |
| 50.1   | 42.3   | 29.7   | 18.5   | 20.0   | 12.3   | 9.7    | 8.6    | 9.7    |
| 10.0   | 2.0    | 5.0    | 1.3    | 1.5    | 3.9    | 1.6    | 2.1    | 2.3    |
| 0.9    | 0.6    | 0.2    | 1.2    | 0.2    | 1.0    | 0.8    | 0.4    | 0.3    |
| 61.8   | 50.5   | 63.3   | 64.7   | 20.4   | 79.5   | 59.5   | 27.0   | 22.8   |
| 18.2   | 3.1    | 12.5   | 25.2   | 8.8    | 18.9   | 14.8   | 4.3    | 2.3    |
| 483.9  | 375.6  | 353.2  | 246.3  | 121.7  | 1827.4 | 1455.4 | 386.6  | 358.2  |
| 9.0    | 13.9   | 1.4    | 11.9   | 3.8    | 47.0   | 20.9   | 15.2   | 10.4   |
| 367.9  | 282.4  | 457.7  | 475.5  | 119.0  | 546.2  | 321.3  | 76.2   | 107.8  |
| 63.6   | 38.4   | 71.0   | 92.4   | 29.5   | 87.9   | 39.2   | 40.5   | 59.8   |
| 2190.0 | 1815.5 | 1708.8 | 1656.5 | 647.1  | 1957.0 | 1681.5 | 315.2  | 394.9  |
| 5.4    | 9.9    | 0.4    | 3.5    | 1.0    | 4.1    | 2.6    | 7.4    | 4.5    |
| 448.2  | 402.7  | 389.2  | 247.3  | 94.2   | 523.3  | 263.8  | 103.3  | 147.4  |
| 2.2    | 1.5    | 9.4    | 0.6    | 3.8    | 0.6    | 10.2   | 2.4    | 10.1   |
| 18.9   | 20.8   | 19.9   | 10.3   | 8.6    | 20.6   | 11.6   | 12.0   | 16.5   |
| 33.9   | 3.0    | 4.8    | 4.0    | 1.8    | 4.1    | 2.5    | 4.9    | 13.2   |
| 218.0  | 165.4  | 196.0  | 159.7  | 70.0   | 175.2  | 107.7  | 366.4  | 366.0  |
| 21.3   | 3.4    | 4.9    | 3.3    | 2.4    | 3.8    | 10.5   | 4.4    | 12.0   |
| 1028.4 | 913.2  | 881.8  | 619.3  | 274.4  | 336.1  | 314.0  | 7.4    | 16.3   |
| 5.3    | 29.4   | 32.2   | 40.1   | 17.1   | 45.3   | 38.7   | 69.4   | 49.8   |
| 11.0   | 2.6    | 2.3    | 2.6    | 6.3    | 7.1    | 2.4    | 1.0    | 1.1    |
| 26.0   | 21.5   | 31.0   | 16.3   | 6.4    | 27.8   | 26.2   | 24.1   | 22.6   |
| 51.4   | 32.1   | 46.2   | 26.9   | 16.6   | 113.9  | 73.6   | 35.7   | 41.0   |
| 2.7    | 2.6    | 3.8    | 2.6    | 1.0    | 6.4    | 2.5    | 0.9    | 2.2    |
| 1.6    | 2.7    | 1.3    | 0.5    | 0.2    | 8.9    | 9.6    | 1.2    | 0.6    |
| 5.3    | 8.9    | 4.8    | 2.5    | 4.1    | 8.8    | 5.5    | 4.6    | 7.2    |
| 1.8    | 3.3    | 1.1    | 1.6    | 1.4    | 6.6    | 0.9    | 2.3    | 1.2    |
| 52.0   | 56.1   | 83.7   | 132.5  | 38.5   | 499.2  | 386.6  | 190.6  | 194.5  |
| 4482.4 | 4120.1 | 4092.6 | 3854.5 | 1926.7 | 7105.0 | 4885.7 | 640.0  | 975.9  |
| 901.0  | 696.2  | 643.0  | 619.9  | 284.6  | 1071.3 | 869.1  | 89.7   | 118.8  |
| 25.3   | 19.5   | 21.0   | 15.3   | 4.8    | 30.3   | 11.7   | 0.7    | 1.9    |
| 1.1    | 9.7    | 4.2    | 2.9    | 2.2    | 29.1   | 17.8   | 25.2   | 16.0   |
| 638.1  | 544.4  | 514.0  | 359.2  | 199.3  | 305.4  | 152.2  | 138.1  | 141.9  |
| 118.8  | 56.1   | 97.7   | 86.2   | 30.4   | 123.0  | 109.9  | 73.0   | 66.2   |
| 24.4   | 12.8   | 23.6   | 16.5   | 11.1   | 4.1    | 4.3    | 39.6   | 43.1   |
| 150.8  | 99.6   | 107.6  | 76.7   | 45.7   | 303.6  | 208.1  | 99.2   | 105.5  |
| 6.9    | 1.0    | 6.5    | 5.1    | 0.9    | 5.1    | 7.5    | 7.5    | 9.9    |
| 3.6    | 2.0    | 6.6    | 1.4    | 0.7    | 2.0    | 2.7    | 4.1    | 4.7    |



|        |        |        |        |       |        |        |       |       |
|--------|--------|--------|--------|-------|--------|--------|-------|-------|
| 1.4    | 0.5    | 1.7    | 0.5    | 2.4   | 9.1    | 0.5    | 9.5   | 4.4   |
| 43.7   | 37.7   | 59.8   | 26.2   | 15.2  | 53.4   | 15.5   | 11.5  | 32.7  |
| 7.7    | 3.1    | 9.7    | 6.5    | 1.4   | 1.3    | 6.0    | 7.7   | 6.5   |
| 235.9  | 238.5  | 248.1  | 276.3  | 93.1  | 178.7  | 110.9  | 12.7  | 10.9  |
| 3.9    | 5.6    | 9.9    | 0.9    | 0.7   | 2.6    | 2.3    | 18.5  | 21.8  |
| 26.1   | 24.3   | 18.2   | 24.1   | 8.1   | 58.0   | 51.0   | 21.4  | 12.9  |
| 9.4    | 6.2    | 9.3    | 6.4    | 0.9   | 36.6   | 22.2   | 9.2   | 4.2   |
| 27.2   | 14.7   | 21.4   | 17.3   | 11.4  | 2.8    | 7.2    | 9.6   | 14.2  |
| 209.5  | 174.6  | 150.3  | 174.1  | 57.0  | 394.8  | 205.4  | 165.4 | 158.9 |
| 10.0   | 10.9   | 7.1    | 1.6    | 0.8   | 13.3   | 1.5    | 1.3   | 0.7   |
| 9.1    | 8.0    | 9.9    | 1.1    | 3.5   | 6.6    | 1.4    | 18.6  | 7.4   |
| 3.1    | 8.6    | 2.7    | 0.9    | 1.1   | 2.5    | 2.6    | 2.0   | 4.0   |
| 12.4   | 4.7    | 9.1    | 0.6    | 3.6   | 24.7   | 1.4    | 5.2   | 7.4   |
| 94.2   | 94.1   | 88.5   | 85.4   | 47.2  | 223.2  | 224.4  | 39.8  | 25.3  |
| 33.5   | 14.4   | 23.0   | 10.3   | 9.6   | 8.8    | 9.4    | 9.2   | 26.5  |
| 12.9   | 1.8    | 17.1   | 1.3    | 7.8   | 0.7    | 2.6    | 3.6   | 14.2  |
| 34.0   | 18.5   | 30.8   | 26.5   | 9.1   | 41.9   | 20.2   | 24.8  | 20.7  |
| 119.8  | 82.1   | 103.6  | 92.0   | 53.4  | 165.6  | 164.7  | 91.5  | 88.6  |
| 9.5    | 2.6    | 1.1    | 4.7    | 0.3   | 8.2    | 1.8    | 0.9   | 1.0   |
| 5.2    | 0.6    | 0.4    | 4.2    | 2.6   | 2.8    | 5.0    | 0.7   | 3.3   |
| 18.3   | 10.0   | 2.1    | 9.7    | 4.6   | 15.8   | 16.8   | 10.3  | 7.3   |
| 1.5    | 1.4    | 2.7    | 8.0    | 1.0   | 15.6   | 0.9    | 2.7   | 2.8   |
| 94.9   | 107.6  | 92.4   | 62.5   | 38.4  | 284.7  | 198.6  | 4.5   | 6.7   |
| 1.8    | 7.8    | 0.6    | 5.4    | 2.2   | 0.9    | 1.4    | 2.1   | 0.7   |
| 2.9    | 2.4    | 1.3    | 1.1    | 2.7   | 13.0   | 1.1    | 1.2   | 3.3   |
| 326.9  | 292.4  | 238.3  | 152.1  | 67.4  | 800.6  | 427.2  | 87.0  | 60.3  |
| 112.0  | 53.3   | 32.0   | 31.9   | 6.1   | 278.0  | 223.0  | 178.6 | 260.5 |
| 1491.7 | 1572.8 | 1768.5 | 2129.1 | 725.9 | 1769.2 | 2032.7 | 295.6 | 371.3 |
| 17.1   | 12.4   | 16.1   | 13.1   | 0.7   | 5.7    | 7.3    | 3.6   | 7.8   |
| 6.2    | 0.5    | 9.1    | 10.5   | 3.0   | 19.2   | 11.6   | 5.5   | 2.9   |
| 10.0   | 1.4    | 2.9    | 6.9    | 5.0   | 3.6    | 11.6   | 11.0  | 21.3  |
| 34.2   | 28.3   | 33.8   | 15.8   | 5.1   | 89.2   | 62.2   | 34.0  | 39.7  |
| 0.9    | 2.7    | 1.3    | 16.1   | 0.4   | 45.3   | 50.5   | 3.7   | 0.8   |
| 167.6  | 146.7  | 129.5  | 95.4   | 54.6  | 158.5  | 98.1   | 25.4  | 43.6  |
| 266.4  | 307.4  | 265.6  | 164.1  | 75.1  | 581.1  | 408.6  | 59.8  | 74.9  |
| 1.6    | 2.0    | 3.2    | 0.9    | 0.8   | 2.5    | 1.7    | 1.7   | 1.0   |
| 91.4   | 64.1   | 134.9  | 101.4  | 42.7  | 396.9  | 434.8  | 291.1 | 421.1 |
| 1.1    | 1.3    | 9.3    | 6.5    | 0.3   | 2.7    | 2.8    | 1.5   | 3.1   |
| 2.9    | 8.4    | 3.4    | 1.9    | 1.3   | 11.6   | 2.1    | 3.3   | 15.1  |
| 4.1    | 8.6    | 1.5    | 3.8    | 2.3   | 2.0    | 2.6    | 1.4   | 2.0   |
| 53.4   | 34.3   | 23.2   | 41.0   | 22.5  | 42.5   | 27.9   | 2.1   | 9.4   |
| 5.9    | 1.0    | 1.3    | 5.4    | 0.2   | 0.9    | 4.5    | 5.9   | 3.7   |
| 0.8    | 2.3    | 13.7   | 4.8    | 0.6   | 2.4    | 4.3    | 9.0   | 5.6   |
| 2.9    | 0.8    | 1.8    | 1.8    | 1.2   | 1.9    | 0.9    | 1.4   | 4.2   |
| 3.2    | 1.9    | 0.5    | 1.1    | 2.0   | 2.8    | 0.4    | 15.0  | 0.9   |
| 8.9    | 3.7    | 0.8    | 1.7    | 0.2   | 14.6   | 1.5    | 1.4   | 1.6   |
| 3.2    | 10.1   | 17.5   | 3.5    | 0.7   | 6.1    | 4.4    | 16.1  | 8.0   |
| 0.7    | 0.7    | 1.3    | 1.2    | 0.6   | 1.0    | 1.5    | 1.7   | 2.1   |
| 76.3   | 60.7   | 61.6   | 74.0   | 32.8  | 204.2  | 140.9  | 36.8  | 62.3  |
| 1.0    | 0.5    | 0.2    | 0.9    | 0.3   | 1.7    | 0.5    | 6.4   | 0.4   |
| 2.4    | 9.4    | 3.9    | 14.0   | 0.8   | 13.6   | 8.8    | 2.3   | 2.6   |
| 11.1   | 1.3    | 13.3   | 2.5    | 2.6   | 12.0   | 7.5    | 9.6   | 4.4   |
| 134.9  | 78.1   | 78.2   | 90.3   | 21.3  | 133.2  | 66.5   | 69.6  | 128.7 |

|       |       |       |       |      |        |       |       |       |
|-------|-------|-------|-------|------|--------|-------|-------|-------|
| 22.3  | 2.7   | 9.5   | 1.5   | 11.1 | 18.9   | 15.1  | 11.3  | 4.5   |
| 31.5  | 18.6  | 32.9  | 94.2  | 7.4  | 22.4   | 16.5  | 20.9  | 28.9  |
| 0.3   | 5.2   | 6.8   | 12.3  | 1.2  | 4.0    | 5.6   | 6.5   | 7.2   |
| 6.7   | 1.1   | 13.8  | 10.3  | 8.8  | 2.8    | 1.8   | 11.3  | 12.9  |
| 11.0  | 3.9   | 2.3   | 0.8   | 1.8  | 0.6    | 1.3   | 5.1   | 4.3   |
| 51.0  | 52.0  | 47.1  | 48.6  | 15.6 | 95.7   | 56.4  | 35.7  | 44.3  |
| 42.8  | 28.3  | 29.6  | 28.5  | 6.8  | 50.2   | 36.7  | 23.2  | 8.8   |
| 15.3  | 26.4  | 21.3  | 19.1  | 6.3  | 15.2   | 5.9   | 6.0   | 3.6   |
| 3.1   | 1.7   | 2.7   | 3.9   | 3.4  | 8.2    | 0.9   | 3.7   | 12.2  |
| 12.5  | 21.3  | 35.8  | 10.0  | 11.2 | 34.4   | 3.1   | 19.3  | 12.0  |
| 3.4   | 4.3   | 4.1   | 2.3   | 3.3  | 2.4    | 1.6   | 3.9   | 7.4   |
| 213.0 | 115.4 | 150.3 | 110.3 | 41.3 | 1304.6 | 836.4 | 157.8 | 255.2 |
| 29.7  | 28.5  | 14.0  | 12.4  | 5.0  | 43.9   | 26.8  | 15.2  | 23.2  |
| 5.1   | 0.6   | 0.2   | 0.5   | 0.1  | 0.9    | 6.4   | 4.9   | 2.1   |
| 1.3   | 1.0   | 7.8   | 0.5   | 0.1  | 1.1    | 7.7   | 8.2   | 2.6   |
| 41.2  | 34.6  | 38.0  | 32.6  | 14.7 | 41.4   | 24.5  | 2.3   | 25.2  |
| 18.4  | 1.8   | 8.5   | 1.8   | 0.9  | 20.0   | 4.9   | 16.3  | 2.6   |
| 27.6  | 9.6   | 33.3  | 16.1  | 9.0  | 14.6   | 3.3   | 7.4   | 14.8  |
| 7.1   | 3.9   | 6.6   | 1.9   | 2.2  | 4.5    | 2.6   | 13.8  | 13.6  |
| 22.7  | 17.9  | 33.8  | 25.6  | 8.2  | 62.4   | 18.1  | 17.6  | 10.1  |
| 8.8   | 2.8   | 1.3   | 7.3   | 0.7  | 21.1   | 26.7  | 8.3   | 7.2   |
| 9.1   | 2.6   | 3.2   | 1.9   | 0.6  | 1.8    | 1.0   | 1.0   | 7.5   |
| 7.3   | 20.5  | 3.3   | 1.0   | 1.6  | 46.4   | 12.0  | 14.3  | 2.9   |
| 6.3   | 3.2   | 5.4   | 5.2   | 1.4  | 4.6    | 2.9   | 4.3   | 5.3   |
| 13.6  | 5.1   | 10.6  | 11.5  | 9.4  | 4.6    | 14.6  | 10.6  | 42.1  |
| 17.9  | 16.6  | 15.2  | 9.7   | 13.6 | 29.0   | 9.8   | 15.5  | 13.3  |
| 12.8  | 5.2   | 5.9   | 4.1   | 1.0  | 20.4   | 7.3   | 3.9   | 1.8   |
| 7.2   | 1.4   | 0.7   | 1.1   | 0.6  | 0.7    | 1.5   | 0.9   | 1.5   |
| 8.5   | 11.0  | 5.1   | 1.1   | 5.1  | 1.1    | 9.2   | 3.8   | 13.3  |
| 4.0   | 3.9   | 3.1   | 2.9   | 0.7  | 182.5  | 129.8 | 3.0   | 3.5   |
| 8.7   | 1.8   | 3.0   | 6.0   | 0.5  | 10.9   | 14.5  | 9.4   | 12.3  |
| 19.3  | 21.2  | 17.5  | 7.0   | 10.9 | 4.0    | 5.5   | 14.8  | 10.2  |
| 12.6  | 1.7   | 9.7   | 4.5   | 2.3  | 10.7   | 7.5   | 11.2  | 5.4   |
| 6.5   | 20.1  | 5.9   | 6.5   | 3.7  | 29.5   | 22.9  | 5.6   | 7.7   |
| 1.8   | 0.5   | 1.3   | 0.7   | 0.3  | 1.7    | 1.3   | 2.4   | 0.4   |
| 1.2   | 1.5   | 0.8   | 1.0   | 1.7  | 1.3    | 0.8   | 1.6   | 3.6   |
| 39.5  | 32.3  | 37.7  | 23.6  | 14.4 | 14.5   | 14.0  | 10.4  | 14.6  |
| 21.1  | 25.9  | 22.5  | 21.9  | 15.7 | 19.3   | 11.9  | 25.9  | 9.4   |
| 19.1  | 5.9   | 23.6  | 9.8   | 3.1  | 21.3   | 17.7  | 18.8  | 11.1  |
| 9.6   | 3.7   | 2.7   | 1.4   | 1.2  | 2.3    | 10.3  | 0.9   | 1.4   |
| 21.9  | 6.5   | 1.0   | 9.0   | 0.3  | 14.0   | 15.6  | 25.0  | 10.7  |
| 14.7  | 12.2  | 16.7  | 2.4   | 1.1  | 31.3   | 11.1  | 20.5  | 18.7  |
| 8.9   | 2.9   | 12.4  | 2.3   | 0.3  | 3.3    | 3.5   | 2.2   | 2.4   |
| 11.4  | 19.7  | 9.8   | 19.1  | 1.8  | 7.5    | 13.6  | 9.0   | 20.0  |
| 13.8  | 20.2  | 19.4  | 12.8  | 1.8  | 16.7   | 6.4   | 2.4   | 8.0   |
| 3.7   | 1.1   | 1.5   | 1.9   | 1.5  | 2.9    | 2.3   | 1.9   | 0.7   |
| 4.0   | 2.6   | 1.3   | 1.4   | 0.7  | 15.9   | 7.4   | 1.1   | 1.5   |
| 20.3  | 17.2  | 4.9   | 4.5   | 0.8  | 4.1    | 13.0  | 3.4   | 2.6   |
| 34.4  | 22.4  | 24.8  | 26.3  | 9.3  | 23.6   | 12.8  | 6.9   | 9.1   |
| 6.6   | 9.3   | 11.7  | 7.7   | 7.0  | 29.4   | 24.6  | 7.9   | 23.0  |
| 33.3  | 5.6   | 15.4  | 37.2  | 12.3 | 24.1   | 3.0   | 1.5   | 9.5   |
| 9.9   | 3.7   | 12.6  | 9.8   | 6.6  | 1.0    | 9.4   | 6.1   | 10.8  |
| 5.5   | 4.6   | 11.1  | 10.7  | 1.4  | 27.9   | 7.9   | 5.3   | 3.9   |

|       |       |       |       |       |        |        |       |        |
|-------|-------|-------|-------|-------|--------|--------|-------|--------|
| 1.6   | 4.8   | 6.8   | 0.4   | 7.0   | 13.1   | 0.8    | 7.5   | 6.3    |
| 3.0   | 2.0   | 2.0   | 3.5   | 0.7   | 3.4    | 2.7    | 1.8   | 1.7    |
| 6.0   | 2.2   | 4.5   | 6.7   | 1.1   | 5.2    | 4.1    | 6.0   | 15.2   |
| 7.7   | 18.9  | 10.6  | 13.6  | 1.4   | 4.2    | 3.7    | 12.0  | 20.9   |
| 135.0 | 95.4  | 92.2  | 103.7 | 69.9  | 142.3  | 136.8  | 23.9  | 40.8   |
| 7.6   | 0.6   | 1.2   | 0.6   | 0.9   | 1.6    | 1.7    | 1.3   | 1.3    |
| 13.6  | 14.3  | 9.6   | 10.8  | 4.1   | 4.4    | 11.0   | 8.9   | 5.9    |
| 10.2  | 8.5   | 7.8   | 6.6   | 3.7   | 24.8   | 15.4   | 17.6  | 17.1   |
| 2.6   | 1.7   | 2.0   | 2.1   | 1.6   | 1.9    | 2.0    | 2.8   | 1.3    |
| 1.5   | 1.2   | 1.7   | 1.5   | 0.4   | 1.0    | 0.7    | 0.9   | 2.2    |
| 2.0   | 4.8   | 14.3  | 2.1   | 1.2   | 6.4    | 3.4    | 8.1   | 2.5    |
| 0.2   | 0.9   | 0.9   | 0.4   | 2.7   | 8.3    | 0.4    | 1.5   | 4.1    |
| 144.4 | 100.8 | 61.1  | 105.0 | 58.0  | 306.5  | 293.4  | 27.0  | 28.9   |
| 3.4   | 10.0  | 13.2  | 11.4  | 6.0   | 15.6   | 7.7    | 12.8  | 8.2    |
| 712.1 | 530.6 | 464.2 | 295.7 | 78.9  | 1820.5 | 1127.3 | 869.7 | 1262.9 |
| 188.3 | 147.7 | 186.4 | 246.4 | 59.2  | 290.6  | 150.6  | 36.0  | 37.6   |
| 15.3  | 21.3  | 27.7  | 19.4  | 13.2  | 41.9   | 3.4    | 14.0  | 17.2   |
| 46.2  | 25.4  | 22.9  | 34.8  | 13.8  | 34.7   | 19.2   | 19.8  | 17.7   |
| 2.3   | 2.6   | 2.3   | 0.7   | 0.4   | 9.8    | 2.1    | 4.5   | 4.2    |
| 5.6   | 9.9   | 1.5   | 0.7   | 0.8   | 15.1   | 7.1    | 9.4   | 1.3    |
| 9.1   | 3.0   | 3.8   | 2.0   | 4.7   | 18.2   | 9.5    | 2.7   | 10.8   |
| 66.7  | 28.1  | 39.1  | 38.8  | 11.4  | 55.7   | 31.6   | 77.1  | 88.9   |
| 7.4   | 3.4   | 1.9   | 7.4   | 1.9   | 6.5    | 1.5    | 4.3   | 2.4    |
| 2.1   | 3.6   | 4.7   | 1.7   | 0.5   | 6.1    | 2.1    | 1.1   | 4.8    |
| 25.6  | 19.4  | 8.5   | 9.5   | 0.9   | 51.6   | 7.5    | 10.6  | 48.6   |
| 10.3  | 3.3   | 8.7   | 11.0  | 1.9   | 6.4    | 5.9    | 8.0   | 19.6   |
| 19.5  | 12.7  | 29.2  | 6.4   | 14.4  | 18.2   | 34.7   | 2.1   | 6.8    |
| 17.6  | 8.1   | 0.8   | 1.9   | 3.4   | 7.1    | 3.1    | 10.0  | 17.8   |
| 20.3  | 19.3  | 17.2  | 0.9   | 5.8   | 34.5   | 2.6    | 34.0  | 44.4   |
| 7.2   | 7.1   | 5.1   | 5.2   | 2.0   | 8.9    | 4.6    | 11.0  | 4.2    |
| 280.1 | 321.2 | 336.0 | 338.9 | 118.4 | 677.7  | 482.2  | 53.0  | 77.9   |
| 7.8   | 8.7   | 2.6   | 0.6   | 0.7   | 1.9    | 0.8    | 2.6   | 1.6    |
| 8.5   | 1.9   | 8.3   | 8.3   | 3.7   | 4.0    | 2.9    | 5.7   | 6.3    |
| 19.9  | 10.2  | 15.3  | 12.3  | 7.5   | 9.3    | 9.8    | 7.7   | 15.4   |
| 4.6   | 3.7   | 6.7   | 2.3   | 0.4   | 1.3    | 8.0    | 4.8   | 0.9    |
| 18.8  | 10.7  | 31.8  | 8.2   | 10.1  | 6.7    | 25.5   | 11.6  | 4.8    |
| 463.9 | 450.4 | 420.9 | 315.5 | 152.0 | 495.8  | 253.7  | 370.1 | 514.7  |
| 4.2   | 1.5   | 1.0   | 2.1   | 0.8   | 12.5   | 4.3    | 7.2   | 1.9    |
| 14.0  | 16.1  | 15.1  | 8.9   | 5.3   | 6.5    | 3.6    | 9.4   | 9.5    |
| 11.0  | 5.8   | 12.9  | 8.8   | 0.6   | 8.0    | 2.0    | 1.2   | 1.6    |
| 7.3   | 4.5   | 13.1  | 0.5   | 1.2   | 1.2    | 10.7   | 8.7   | 13.0   |
| 24.7  | 25.9  | 11.1  | 20.0  | 11.6  | 11.2   | 18.1   | 5.8   | 1.0    |
| 12.2  | 18.4  | 12.4  | 15.2  | 10.4  | 8.0    | 6.5    | 14.4  | 11.2   |
| 2.4   | 5.0   | 5.0   | 2.7   | 1.0   | 3.1    | 4.9    | 2.2   | 3.5    |
| 3.3   | 2.9   | 1.2   | 2.6   | 0.4   | 1.3    | 1.1    | 2.0   | 2.4    |
| 2.9   | 1.9   | 2.6   | 2.2   | 6.6   | 3.0    | 17.9   | 1.6   | 1.7    |
| 13.7  | 7.2   | 10.5  | 10.5  | 1.4   | 13.6   | 4.4    | 9.3   | 8.4    |
| 9.2   | 4.0   | 12.9  | 8.7   | 2.7   | 15.2   | 5.0    | 15.9  | 17.1   |
| 0.9   | 1.3   | 8.2   | 0.7   | 0.1   | 0.4    | 2.7    | 8.7   | 7.1    |
| 0.7   | 0.6   | 1.7   | 0.8   | 0.2   | 0.9    | 1.7    | 1.8   | 2.3    |
| 19.4  | 24.8  | 22.5  | 23.8  | 5.9   | 323.2  | 271.5  | 92.7  | 102.5  |
| 1.7   | 4.0   | 3.7   | 7.2   | 4.7   | 10.4   | 5.6    | 1.8   | 1.9    |
| 6.5   | 2.6   | 5.6   | 1.7   | 0.7   | 5.2    | 2.8    | 12.3  | 10.0   |

|       |       |       |        |       |        |        |        |       |
|-------|-------|-------|--------|-------|--------|--------|--------|-------|
| 13.4  | 2.3   | 7.5   | 5.1    | 1.6   | 13.4   | 21.2   | 1.5    | 14.9  |
| 6.4   | 0.7   | 2.0   | 5.9    | 4.5   | 2.5    | 1.0    | 1.5    | 1.1   |
| 551.6 | 522.4 | 544.3 | 286.5  | 136.9 | 1206.9 | 1061.3 | 57.6   | 89.8  |
| 650.3 | 558.4 | 805.6 | 1171.8 | 234.7 | 1491.5 | 1023.2 | 318.1  | 555.2 |
| 0.9   | 1.0   | 3.8   | 0.7    | 4.5   | 16.7   | 9.6    | 3.4    | 17.1  |
| 2.3   | 1.4   | 1.5   | 5.9    | 0.8   | 4.6    | 1.9    | 3.2    | 5.8   |
| 3.1   | 4.6   | 13.6  | 2.3    | 2.9   | 4.3    | 2.4    | 4.4    | 2.1   |
| 3.0   | 1.3   | 2.1   | 2.1    | 1.3   | 1.5    | 1.2    | 3.9    | 5.4   |
| 2.4   | 7.2   | 1.4   | 11.0   | 1.3   | 5.7    | 1.5    | 7.9    | 8.8   |
| 201.8 | 197.9 | 244.9 | 211.8  | 85.5  | 287.9  | 243.7  | 21.8   | 15.1  |
| 20.2  | 13.0  | 15.7  | 7.5    | 5.4   | 13.1   | 16.3   | 13.1   | 3.8   |
| 8.8   | 3.5   | 4.4   | 1.1    | 3.1   | 13.7   | 0.9    | 3.6    | 7.9   |
| 16.7  | 18.6  | 20.0  | 18.6   | 9.6   | 6.9    | 3.3    | 25.2   | 22.5  |
| 40.6  | 32.7  | 59.4  | 94.1   | 28.8  | 61.5   | 46.5   | 19.5   | 25.6  |
| 23.1  | 18.4  | 21.2  | 20.9   | 15.2  | 23.4   | 29.5   | 1.8    | 1.7   |
| 1.6   | 7.3   | 1.1   | 6.7    | 4.1   | 15.2   | 10.4   | 9.0    | 6.8   |
| 19.5  | 1.9   | 13.5  | 1.2    | 3.2   | 8.7    | 2.6    | 13.8   | 2.3   |
| 2.5   | 9.8   | 6.5   | 0.7    | 0.9   | 2.6    | 0.5    | 1.0    | 10.5  |
| 1.2   | 4.6   | 6.1   | 5.7    | 4.8   | 4.9    | 4.5    | 28.6   | 33.8  |
| 24.3  | 24.3  | 19.2  | 12.1   | 11.7  | 129.7  | 62.9   | 24.4   | 30.2  |
| 1.1   | 6.2   | 3.0   | 1.7    | 1.2   | 4.0    | 0.5    | 2.5    | 4.7   |
| 959.2 | 967.8 | 783.8 | 613.7  | 298.1 | 1507.0 | 1214.9 | 1013.0 | 995.8 |
| 228.1 | 192.0 | 180.2 | 113.3  | 65.3  | 59.4   | 39.6   | 40.9   | 69.9  |
| 674.3 | 815.8 | 842.4 | 767.6  | 272.5 | 853.9  | 499.0  | 182.1  | 255.8 |
| 1.3   | 0.9   | 2.1   | 39.3   | 1.3   | 0.9    | 1.8    | 1.2    | 2.6   |
| 4.3   | 2.9   | 2.7   | 2.3    | 2.1   | 8.3    | 2.1    | 2.1    | 5.2   |
| 427.6 | 308.5 | 353.7 | 352.8  | 108.2 | 1736.9 | 1083.2 | 650.1  | 879.0 |
| 11.6  | 9.2   | 5.7   | 7.8    | 2.5   | 11.3   | 13.6   | 12.4   | 15.0  |
| 60.7  | 39.7  | 54.3  | 48.4   | 14.6  | 72.0   | 81.1   | 21.7   | 23.9  |
| 147.6 | 118.0 | 105.8 | 99.1   | 47.8  | 75.1   | 34.7   | 72.1   | 71.7  |
| 1.5   | 1.5   | 1.2   | 1.0    | 0.4   | 3.4    | 0.9    | 0.6    | 0.9   |
| 2.7   | 20.8  | 2.8   | 3.0    | 4.4   | 41.3   | 6.9    | 1.0    | 1.0   |
| 925.6 | 766.8 | 938.3 | 562.0  | 234.0 | 1030.7 | 846.7  | 193.4  | 301.4 |
| 0.7   | 2.5   | 2.1   | 1.2    | 1.5   | 1.6    | 2.3    | 2.5    | 2.5   |
| 3.1   | 2.2   | 3.9   | 3.9    | 6.6   | 2.4    | 15.1   | 20.5   | 9.3   |
| 3.8   | 2.4   | 10.0  | 3.3    | 2.9   | 136.5  | 127.6  | 44.3   | 36.8  |
| 0.9   | 2.3   | 1.4   | 2.9    | 0.6   | 25.4   | 6.2    | 3.0    | 3.1   |
| 5.4   | 9.3   | 12.5  | 4.3    | 2.5   | 10.0   | 8.6    | 6.3    | 2.9   |
| 14.5  | 22.2  | 14.9  | 10.1   | 5.4   | 26.2   | 17.5   | 3.3    | 21.8  |
| 3.1   | 2.5   | 3.9   | 1.2    | 2.0   | 14.6   | 3.2    | 14.3   | 7.9   |
| 21.4  | 23.4  | 30.7  | 27.1   | 7.4   | 55.5   | 37.3   | 10.5   | 8.9   |
| 2.7   | 1.7   | 2.6   | 2.2    | 0.6   | 4.4    | 4.2    | 0.9    | 1.3   |
| 3.4   | 15.6  | 2.4   | 2.6    | 0.7   | 1.1    | 1.0    | 2.1    | 3.2   |
| 1.0   | 3.7   | 8.6   | 7.5    | 0.6   | 4.2    | 2.5    | 1.2    | 1.1   |
| 26.2  | 2.5   | 25.0  | 20.6   | 9.5   | 21.4   | 12.7   | 11.9   | 27.3  |
| 4.6   | 3.3   | 2.5   | 3.2    | 1.5   | 2.9    | 2.6    | 4.8    | 1.8   |
| 6.6   | 0.7   | 12.0  | 10.5   | 2.0   | 1.8    | 9.5    | 19.9   | 15.3  |
| 5.3   | 2.4   | 3.5   | 1.1    | 1.0   | 3.6    | 2.4    | 1.0    | 3.4   |
| 430.0 | 381.9 | 350.4 | 182.5  | 122.5 | 362.3  | 190.7  | 243.4  | 322.5 |
| 34.1  | 27.7  | 20.1  | 11.9   | 7.7   | 1.1    | 4.7    | 1.0    | 11.0  |
| 2.5   | 1.8   | 0.9   | 1.3    | 0.8   | 17.2   | 1.8    | 13.6   | 1.1   |
| 6.8   | 5.4   | 8.3   | 4.2    | 0.5   | 11.3   | 6.1    | 5.1    | 4.9   |
| 3.7   | 5.5   | 1.8   | 0.8    | 0.5   | 2.2    | 6.3    | 0.8    | 6.8   |

|        |        |        |        |       |        |        |       |       |
|--------|--------|--------|--------|-------|--------|--------|-------|-------|
| 2.9    | 1.1    | 0.9    | 0.7    | 0.4   | 1.0    | 0.8    | 1.0   | 2.1   |
| 2.0    | 1.9    | 1.5    | 1.5    | 0.4   | 2.8    | 2.4    | 1.8   | 0.6   |
| 33.2   | 19.0   | 19.4   | 13.7   | 13.0  | 0.4    | 1.8    | 0.8   | 0.3   |
| 22.0   | 22.9   | 22.8   | 7.9    | 1.0   | 6.1    | 9.4    | 12.8  | 5.8   |
| 12.0   | 4.4    | 3.4    | 4.3    | 3.6   | 3.9    | 5.7    | 14.4  | 21.9  |
| 0.9    | 1.0    | 1.5    | 0.8    | 0.4   | 1.2    | 10.6   | 1.6   | 2.3   |
| 28.5   | 30.6   | 46.3   | 24.8   | 2.2   | 34.7   | 12.7   | 5.3   | 23.5  |
| 0.5    | 2.1    | 0.5    | 5.5    | 1.1   | 1.0    | 6.0    | 0.7   | 0.8   |
| 15.3   | 13.1   | 21.6   | 12.0   | 8.5   | 9.1    | 3.5    | 2.5   | 18.4  |
| 2.3    | 1.0    | 1.0    | 0.7    | 1.1   | 1.0    | 0.8    | 1.9   | 1.2   |
| 158.2  | 153.2  | 159.2  | 146.5  | 27.9  | 166.1  | 87.7   | 106.2 | 131.3 |
| 19.8   | 5.6    | 1.9    | 1.3    | 4.3   | 2.9    | 9.9    | 0.8   | 1.0   |
| 24.2   | 18.9   | 13.8   | 6.2    | 1.4   | 16.8   | 16.7   | 2.9   | 5.8   |
| 3.2    | 0.8    | 1.2    | 0.8    | 0.5   | 3.9    | 1.2    | 2.7   | 1.1   |
| 0.9    | 0.9    | 1.2    | 1.0    | 0.4   | 2.1    | 0.9    | 1.8   | 0.7   |
| 1.0    | 0.7    | 2.5    | 0.8    | 0.8   | 5.2    | 0.8    | 0.8   | 0.7   |
| 67.8   | 60.9   | 36.8   | 13.8   | 18.3  | 67.6   | 22.3   | 2.0   | 1.1   |
| 1.0    | 1.0    | 10.2   | 7.7    | 0.6   | 9.5    | 9.7    | 2.3   | 10.2  |
| 39.7   | 18.7   | 33.0   | 12.0   | 6.9   | 25.1   | 15.2   | 25.8  | 21.9  |
| 100.5  | 66.6   | 126.5  | 117.9  | 35.1  | 117.3  | 46.0   | 19.9  | 44.3  |
| 46.7   | 35.3   | 42.9   | 30.0   | 10.2  | 35.1   | 22.1   | 7.3   | 12.9  |
| 20.3   | 9.3    | 8.7    | 2.7    | 7.1   | 19.9   | 8.4    | 10.2  | 9.2   |
| 8.9    | 10.6   | 1.6    | 4.7    | 5.9   | 14.6   | 0.9    | 14.0  | 11.9  |
| 1.7    | 2.1    | 1.5    | 8.6    | 2.1   | 10.4   | 6.6    | 2.3   | 7.2   |
| 1.8    | 1.5    | 0.8    | 1.3    | 0.3   | 1.7    | 1.6    | 1.9   | 1.9   |
| 54.1   | 48.0   | 67.0   | 45.1   | 18.1  | 118.7  | 71.2   | 0.3   | 4.6   |
| 49.5   | 36.9   | 63.6   | 44.8   | 36.2  | 118.4  | 62.4   | 74.2  | 86.1  |
| 639.0  | 580.8  | 674.1  | 1202.3 | 239.2 | 1366.9 | 1456.0 | 45.0  | 42.9  |
| 219.2  | 150.6  | 214.7  | 182.0  | 56.6  | 275.5  | 188.7  | 60.8  | 85.3  |
| 16.8   | 9.3    | 18.6   | 12.9   | 5.5   | 23.8   | 8.3    | 21.6  | 18.6  |
| 4.7    | 9.8    | 4.6    | 9.5    | 6.1   | 9.1    | 21.7   | 2.8   | 15.6  |
| 1984.5 | 1891.2 | 1691.4 | 1616.8 | 764.0 | 2698.2 | 1769.0 | 316.7 | 408.3 |
| 6.5    | 6.4    | 0.8    | 0.4    | 0.2   | 6.4    | 1.9    | 0.7   | 0.5   |
| 2.9    | 5.3    | 1.0    | 9.1    | 0.8   | 1.0    | 2.0    | 8.8   | 13.8  |
| 2.8    | 1.5    | 1.9    | 4.3    | 0.8   | 1.9    | 1.4    | 3.3   | 3.1   |
| 32.2   | 43.9   | 27.5   | 16.3   | 8.3   | 37.7   | 19.4   | 1.7   | 8.5   |
| 20.5   | 0.7    | 16.1   | 4.0    | 7.3   | 3.4    | 0.6    | 1.8   | 14.2  |
| 0.8    | 0.6    | 0.8    | 1.4    | 0.4   | 0.7    | 0.6    | 0.5   | 0.4   |
| 12.9   | 16.2   | 4.0    | 16.3   | 3.6   | 15.7   | 6.4    | 2.4   | 10.0  |
| 20.1   | 36.7   | 40.8   | 23.7   | 12.8  | 42.7   | 19.2   | 12.7  | 28.2  |
| 0.2    | 0.9    | 2.7    | 1.1    | 0.7   | 3.2    | 1.2    | 0.9   | 5.5   |
| 68.9   | 57.1   | 79.5   | 96.5   | 48.5  | 80.4   | 46.1   | 76.5  | 71.8  |
| 1.3    | 4.5    | 2.1    | 0.8    | 2.4   | 26.3   | 2.6    | 1.7   | 0.7   |
| 19.8   | 13.8   | 17.2   | 15.0   | 10.8  | 24.4   | 31.3   | 1.1   | 12.0  |
| 17.4   | 10.3   | 2.7    | 0.9    | 3.0   | 3.0    | 11.7   | 6.4   | 10.9  |
| 4.9    | 9.4    | 5.9    | 7.9    | 0.8   | 5.9    | 2.9    | 13.4  | 9.0   |
| 5.2    | 11.2   | 2.9    | 5.9    | 7.6   | 1.9    | 9.4    | 4.5   | 8.7   |
| 13.8   | 34.4   | 13.3   | 9.0    | 16.8  | 14.1   | 10.6   | 11.0  | 22.0  |
| 1.0    | 1.6    | 9.1    | 2.5    | 1.0   | 3.5    | 0.7    | 4.3   | 2.8   |
| 2.6    | 8.3    | 2.5    | 6.8    | 7.1   | 27.6   | 26.8   | 1.4   | 9.4   |
| 243.8  | 333.8  | 256.9  | 410.5  | 128.1 | 461.2  | 369.2  | 46.2  | 62.5  |
| 5.9    | 3.8    | 4.9    | 6.1    | 1.2   | 37.4   | 20.8   | 6.6   | 6.7   |
| 15.5   | 2.7    | 4.6    | 8.5    | 3.4   | 5.2    | 16.1   | 17.3  | 3.9   |

|        |        |        |        |       |        |        |       |       |
|--------|--------|--------|--------|-------|--------|--------|-------|-------|
| 1.8    | 1.3    | 0.9    | 2.7    | 2.8   | 1.9    | 2.7    | 8.3   | 4.7   |
| 3.2    | 1.9    | 3.6    | 1.4    | 2.3   | 5.0    | 5.7    | 2.1   | 5.5   |
| 308.4  | 295.9  | 332.2  | 349.7  | 90.5  | 686.1  | 463.9  | 42.8  | 54.2  |
| 1.3    | 1.1    | 1.5    | 0.4    | 0.2   | 7.9    | 5.8    | 6.0   | 10.0  |
| 16.7   | 7.3    | 11.7   | 1.4    | 7.1   | 3.5    | 11.9   | 13.6  | 5.6   |
| 11.9   | 8.4    | 7.6    | 2.1    | 1.1   | 3.5    | 5.7    | 5.7   | 6.8   |
| 1.7    | 9.5    | 1.2    | 12.2   | 7.1   | 5.3    | 1.0    | 3.2   | 9.2   |
| 98.8   | 76.2   | 60.4   | 59.0   | 19.9  | 35.1   | 30.1   | 57.2  | 55.1  |
| 21.6   | 3.7    | 9.1    | 20.1   | 3.8   | 4.9    | 22.7   | 3.0   | 18.2  |
| 1257.7 | 1332.1 | 1476.1 | 1286.7 | 465.0 | 3333.7 | 2355.7 | 788.0 | 994.4 |
| 2.0    | 2.2    | 3.4    | 1.2    | 0.7   | 1.6    | 1.3    | 2.4   | 3.8   |
| 123.4  | 138.9  | 102.8  | 133.7  | 62.4  | 690.6  | 510.8  | 89.6  | 146.4 |
| 5.1    | 21.7   | 20.7   | 10.3   | 1.0   | 17.4   | 14.3   | 9.7   | 10.3  |
| 4.7    | 5.2    | 2.3    | 1.2    | 3.6   | 3.5    | 3.3    | 2.3   | 1.8   |
| 11.0   | 10.6   | 18.7   | 7.7    | 9.8   | 16.8   | 6.6    | 19.6  | 12.2  |
| 1.0    | 0.9    | 6.8    | 0.7    | 0.7   | 11.1   | 2.2    | 0.4   | 1.4   |
| 13.4   | 3.1    | 9.5    | 11.4   | 1.8   | 17.8   | 22.3   | 3.6   | 1.4   |
| 2.4    | 2.1    | 0.9    | 1.5    | 0.9   | 0.9    | 1.3    | 1.5   | 1.8   |
| 3.7    | 1.8    | 3.9    | 15.6   | 5.1   | 36.9   | 7.2    | 13.9  | 1.6   |
| 139.3  | 137.9  | 168.7  | 116.7  | 46.4  | 207.3  | 164.2  | 92.0  | 164.8 |
| 33.9   | 26.4   | 6.3    | 19.2   | 11.4  | 21.7   | 13.0   | 6.0   | 16.6  |
| 37.3   | 19.0   | 38.0   | 25.1   | 14.2  | 24.9   | 5.8    | 5.7   | 4.2   |
| 194.1  | 225.0  | 186.1  | 234.4  | 68.4  | 315.3  | 155.6  | 87.4  | 138.0 |
| 11.2   | 1.6    | 12.6   | 4.4    | 5.1   | 3.3    | 15.6   | 9.7   | 9.7   |
| 1.3    | 3.1    | 1.2    | 0.5    | 2.6   | 1.3    | 4.0    | 5.9   | 6.2   |
| 9.8    | 9.1    | 8.7    | 10.8   | 3.9   | 11.5   | 9.7    | 7.7   | 3.7   |
| 265.2  | 269.0  | 246.2  | 232.8  | 92.6  | 652.7  | 394.0  | 81.9  | 108.9 |
| 11.2   | 18.9   | 28.3   | 32.3   | 1.2   | 22.0   | 5.6    | 6.2   | 13.8  |
| 15.1   | 9.6    | 12.5   | 3.0    | 5.8   | 1.4    | 2.6    | 13.4  | 10.5  |
| 1.9    | 5.5    | 6.0    | 1.1    | 0.2   | 1.5    | 2.4    | 8.3   | 1.0   |
| 2.8    | 3.5    | 6.8    | 0.5    | 0.8   | 11.7   | 5.1    | 0.4   | 7.9   |
| 18.2   | 15.5   | 4.1    | 17.2   | 5.2   | 13.9   | 12.5   | 9.4   | 13.5  |
| 2.5    | 2.1    | 10.8   | 2.5    | 4.3   | 12.1   | 1.3    | 20.7  | 33.3  |
| 14.0   | 11.9   | 9.2    | 9.3    | 7.0   | 12.3   | 9.1    | 15.5  | 17.1  |
| 3.2    | 1.3    | 1.9    | 1.8    | 0.9   | 1.7    | 1.9    | 4.4   | 1.2   |
| 74.1   | 59.1   | 64.0   | 26.5   | 28.5  | 190.1  | 189.1  | 87.0  | 61.3  |
| 1.0    | 1.4    | 1.9    | 0.9    | 0.7   | 3.5    | 1.1    | 0.6   | 0.8   |
| 3.5    | 1.3    | 3.5    | 1.8    | 1.4   | 4.8    | 2.3    | 1.3   | 2.3   |
| 48.0   | 46.1   | 79.4   | 69.9   | 27.8  | 259.4  | 129.1  | 29.4  | 37.9  |
| 13.0   | 7.0    | 8.9    | 2.4    | 5.5   | 6.4    | 4.0    | 14.8  | 3.6   |
| 12.9   | 4.6    | 3.5    | 2.4    | 1.6   | 12.2   | 1.9    | 9.5   | 3.6   |
| 16.5   | 11.7   | 16.8   | 11.8   | 10.9  | 21.7   | 6.4    | 19.2  | 36.2  |
| 1.7    | 1.3    | 1.9    | 0.9    | 0.5   | 3.0    | 2.5    | 1.3   | 2.3   |
| 4.4    | 14.7   | 15.9   | 9.3    | 4.6   | 17.3   | 5.7    | 8.5   | 13.1  |
| 51.2   | 56.1   | 77.9   | 72.9   | 22.2  | 133.6  | 83.6   | 11.2  | 15.8  |
| 18.4   | 33.7   | 20.8   | 9.8    | 6.3   | 60.1   | 36.6   | 1.7   | 7.4   |
| 213.3  | 183.8  | 166.2  | 135.4  | 55.9  | 315.0  | 191.6  | 166.7 | 185.8 |
| 10.9   | 13.0   | 11.7   | 15.3   | 8.7   | 21.0   | 3.2    | 13.3  | 22.7  |
| 79.1   | 66.1   | 80.5   | 261.2  | 31.1  | 318.3  | 117.7  | 87.5  | 101.1 |
| 0.3    | 4.4    | 5.9    | 6.0    | 4.8   | 8.7    | 1.4    | 6.9   | 9.1   |
| 1.1    | 2.3    | 1.1    | 1.7    | 0.4   | 1.6    | 0.8    | 0.5   | 0.8   |
| 2.2    | 2.4    | 7.2    | 1.3    | 3.2   | 6.3    | 5.2    | 6.2   | 3.5   |
| 3.3    | 18.0   | 15.7   | 21.2   | 0.9   | 20.2   | 20.3   | 3.4   | 22.0  |

|       |       |       |       |      |       |       |       |       |
|-------|-------|-------|-------|------|-------|-------|-------|-------|
| 38.3  | 37.4  | 41.1  | 20.7  | 14.2 | 33.3  | 29.1  | 43.3  | 48.5  |
| 217.2 | 201.9 | 175.0 | 133.7 | 67.4 | 466.4 | 274.3 | 37.9  | 77.7  |
| 17.3  | 4.3   | 1.8   | 3.0   | 1.4  | 72.3  | 34.7  | 9.9   | 1.6   |
| 2.7   | 9.3   | 1.2   | 2.7   | 3.8  | 12.8  | 10.8  | 19.0  | 18.4  |
| 197.4 | 142.8 | 170.0 | 211.7 | 56.8 | 618.6 | 483.1 | 34.3  | 48.4  |
| 29.6  | 14.7  | 23.2  | 5.0   | 8.5  | 2.4   | 1.8   | 6.9   | 9.5   |
| 2.1   | 2.7   | 5.5   | 0.7   | 0.5  | 3.6   | 2.1   | 1.6   | 2.4   |
| 234.5 | 165.9 | 161.6 | 110.2 | 37.5 | 76.1  | 34.7  | 115.0 | 178.1 |
| 108.9 | 55.0  | 68.5  | 64.4  | 7.9  | 58.7  | 50.3  | 7.3   | 6.5   |
| 0.9   | 0.8   | 0.6   | 0.6   | 0.8  | 2.0   | 1.7   | 2.4   | 0.5   |
| 7.2   | 7.0   | 10.3  | 5.6   | 1.1  | 6.8   | 3.9   | 9.5   | 16.7  |
| 16.7  | 10.3  | 17.0  | 4.5   | 4.5  | 17.5  | 9.9   | 10.9  | 8.6   |
| 2.4   | 1.9   | 10.3  | 11.6  | 0.3  | 3.6   | 5.9   | 0.9   | 8.0   |
| 2.4   | 5.2   | 1.5   | 1.4   | 7.5  | 1.3   | 11.0  | 2.1   | 2.2   |
| 23.8  | 18.8  | 18.2  | 10.9  | 4.5  | 22.5  | 2.0   | 50.6  | 86.7  |
| 1.7   | 10.7  | 3.0   | 4.7   | 1.0  | 2.9   | 11.0  | 6.2   | 1.7   |
| 21.7  | 1.6   | 1.7   | 1.3   | 1.4  | 3.8   | 7.4   | 15.5  | 3.9   |
| 19.1  | 30.2  | 16.7  | 24.3  | 19.7 | 23.3  | 18.3  | 3.8   | 2.6   |
| 2.7   | 1.3   | 2.4   | 1.5   | 2.6  | 2.2   | 0.8   | 2.0   | 2.8   |
| 14.4  | 15.1  | 2.0   | 1.1   | 3.5  | 10.6  | 1.3   | 4.5   | 5.2   |
| 16.0  | 20.4  | 22.8  | 12.9  | 10.6 | 34.3  | 26.6  | 35.4  | 16.5  |
| 6.1   | 19.7  | 2.2   | 3.0   | 0.4  | 10.3  | 1.7   | 12.9  | 5.3   |
| 4.4   | 2.1   | 14.4  | 3.6   | 3.9  | 5.1   | 3.2   | 13.8  | 19.8  |
| 6.8   | 0.9   | 2.8   | 7.4   | 0.6  | 11.1  | 11.2  | 1.3   | 0.6   |
| 1.8   | 0.9   | 1.5   | 1.4   | 1.1  | 18.9  | 2.2   | 13.0  | 15.5  |
| 2.7   | 1.8   | 1.4   | 8.0   | 0.8  | 2.3   | 8.7   | 1.7   | 15.3  |
| 119.3 | 49.7  | 51.3  | 37.4  | 22.1 | 194.7 | 79.2  | 39.0  | 33.2  |
| 9.5   | 11.7  | 12.9  | 4.2   | 1.2  | 8.2   | 5.5   | 12.5  | 13.7  |
| 8.5   | 2.5   | 1.5   | 0.6   | 0.6  | 2.9   | 6.4   | 2.1   | 1.2   |
| 3.8   | 8.6   | 7.2   | 0.5   | 2.0  | 1.0   | 3.5   | 3.7   | 7.9   |
| 1.8   | 1.8   | 7.9   | 0.7   | 0.3  | 9.6   | 1.0   | 0.9   | 0.8   |
| 1.1   | 1.0   | 1.2   | 0.7   | 0.6  | 2.2   | 1.5   | 0.8   | 0.8   |
| 1.2   | 2.6   | 4.1   | 1.0   | 0.4  | 1.4   | 1.5   | 1.3   | 1.9   |
| 42.1  | 24.7  | 33.4  | 18.5  | 10.1 | 107.1 | 66.7  | 42.8  | 51.1  |
| 26.2  | 24.2  | 27.7  | 18.8  | 8.8  | 7.7   | 4.1   | 28.6  | 21.1  |
| 1.2   | 0.8   | 1.6   | 0.8   | 0.5  | 3.6   | 1.4   | 16.2  | 12.5  |
| 3.9   | 16.4  | 19.8  | 6.5   | 5.4  | 4.6   | 3.3   | 8.6   | 18.2  |
| 19.6  | 10.6  | 4.5   | 2.0   | 1.9  | 9.7   | 2.8   | 4.1   | 2.5   |
| 199.3 | 121.2 | 153.1 | 265.7 | 57.9 | 38.2  | 45.4  | 42.4  | 64.8  |
| 2.7   | 1.2   | 1.6   | 2.1   | 1.0  | 2.9   | 1.7   | 2.1   | 1.1   |
| 20.5  | 10.8  | 2.6   | 1.5   | 0.7  | 3.3   | 5.0   | 3.9   | 8.6   |
| 7.9   | 3.8   | 12.7  | 12.2  | 2.9  | 1.5   | 1.5   | 1.5   | 1.7   |
| 1.4   | 1.2   | 1.9   | 1.3   | 0.6  | 1.5   | 1.1   | 1.5   | 1.6   |
| 6.1   | 3.9   | 14.8  | 2.1   | 2.6  | 3.7   | 2.6   | 0.4   | 11.8  |
| 55.4  | 9.8   | 53.1  | 60.2  | 19.6 | 8.6   | 1.1   | 2.2   | 11.2  |
| 16.7  | 11.2  | 9.2   | 5.5   | 9.0  | 0.8   | 7.9   | 0.4   | 8.9   |
| 9.6   | 3.7   | 4.0   | 7.1   | 0.2  | 3.1   | 0.6   | 3.9   | 5.9   |
| 22.3  | 6.7   | 1.4   | 19.0  | 2.5  | 109.0 | 107.2 | 8.8   | 14.7  |
| 1.5   | 1.7   | 3.1   | 0.9   | 1.2  | 3.0   | 1.2   | 1.0   | 0.4   |
| 1.8   | 0.9   | 10.3  | 5.5   | 1.4  | 2.5   | 0.8   | 0.6   | 7.2   |
| 1.1   | 9.0   | 1.3   | 1.2   | 0.7  | 77.5  | 50.2  | 82.8  | 125.1 |
| 114.0 | 82.1  | 89.8  | 110.2 | 30.3 | 252.1 | 194.2 | 78.8  | 96.6  |
| 1.4   | 0.9   | 2.8   | 1.4   | 0.4  | 1.7   | 1.5   | 1.6   | 2.2   |

|        |        |        |        |        |        |        |        |        |
|--------|--------|--------|--------|--------|--------|--------|--------|--------|
| 35.5   | 24.4   | 23.1   | 13.8   | 1.8    | 42.1   | 24.2   | 2.8    | 20.5   |
| 29.4   | 19.4   | 23.8   | 12.5   | 5.0    | 8.7    | 0.7    | 6.7    | 2.7    |
| 2.3    | 1.8    | 1.5    | 0.9    | 0.7    | 2.0    | 1.6    | 4.7    | 3.8    |
| 7.2    | 3.1    | 0.5    | 3.6    | 1.1    | 1.3    | 0.5    | 3.1    | 0.7    |
| 0.8    | 2.6    | 2.9    | 2.9    | 1.0    | 10.5   | 0.5    | 2.6    | 8.9    |
| 0.8    | 12.0   | 1.4    | 13.5   | 5.2    | 272.5  | 231.2  | 1.2    | 2.0    |
| 78.6   | 109.4  | 73.4   | 46.8   | 31.8   | 123.7  | 97.6   | 25.9   | 28.5   |
| 2.5    | 4.7    | 3.3    | 8.3    | 0.8    | 50.0   | 23.2   | 2.1    | 2.5    |
| 2.6    | 0.9    | 8.2    | 1.0    | 6.8    | 1.1    | 7.1    | 0.8    | 3.0    |
| 1.3    | 2.1    | 1.9    | 4.7    | 2.3    | 8.9    | 6.3    | 14.8   | 11.3   |
| 22.1   | 20.6   | 15.0   | 23.2   | 7.2    | 13.4   | 3.5    | 5.2    | 7.2    |
| 1.5    | 1.1    | 1.7    | 3.1    | 0.6    | 1.2    | 2.1    | 2.1    | 0.8    |
| 4799.8 | 4417.4 | 4139.0 | 3995.2 | 2079.4 | 7013.5 | 5800.1 | 1227.8 | 1714.8 |
| 10.8   | 5.0    | 1.4    | 0.7    | 2.2    | 5.5    | 1.6    | 14.5   | 15.9   |
| 5.6    | 3.8    | 19.8   | 9.1    | 5.2    | 35.5   | 7.7    | 15.7   | 12.4   |
| 12.0   | 10.1   | 11.4   | 8.0    | 9.3    | 19.0   | 10.8   | 20.6   | 36.8   |
| 2.5    | 12.5   | 17.5   | 0.9    | 1.5    | 9.4    | 1.1    | 5.0    | 16.4   |
| 3.0    | 2.3    | 4.6    | 1.4    | 6.9    | 1.7    | 6.6    | 1.0    | 1.4    |
| 85.5   | 46.5   | 67.3   | 119.0  | 27.6   | 14.4   | 24.5   | 44.8   | 45.1   |
| 25.6   | 16.7   | 22.1   | 12.7   | 7.0    | 4.9    | 8.8    | 9.0    | 6.4    |
| 3.4    | 1.9    | 0.5    | 0.5    | 3.2    | 7.4    | 4.1    | 9.0    | 1.0    |
| 3.6    | 2.0    | 2.8    | 11.8   | 7.3    | 20.2   | 12.5   | 2.9    | 6.9    |
| 245.2  | 146.6  | 201.4  | 224.8  | 73.6   | 92.6   | 72.2   | 47.6   | 72.9   |
| 4.1    | 2.0    | 2.9    | 1.9    | 0.8    | 1.4    | 4.6    | 1.9    | 2.5    |
| 5.5    | 1.0    | 2.1    | 4.8    | 2.8    | 1.2    | 6.3    | 1.0    | 0.2    |
| 2.8    | 3.3    | 2.3    | 1.9    | 3.7    | 1.6    | 1.3    | 11.5   | 3.8    |
| 5.9    | 2.0    | 6.7    | 0.9    | 5.6    | 5.6    | 1.4    | 4.8    | 12.5   |
| 11.3   | 11.9   | 10.3   | 5.1    | 1.9    | 14.5   | 5.0    | 7.4    | 12.3   |
| 0.8    | 0.6    | 1.0    | 1.1    | 0.5    | 2.8    | 1.7    | 0.5    | 0.7    |
| 1.0    | 4.8    | 2.6    | 4.5    | 0.7    | 16.7   | 1.2    | 11.7   | 13.9   |
| 9.4    | 5.3    | 4.7    | 2.8    | 4.2    | 28.3   | 36.1   | 3.2    | 5.4    |
| 1.5    | 1.0    | 4.2    | 0.3    | 0.4    | 6.6    | 2.2    | 1.3    | 6.2    |
| 1.3    | 1.0    | 1.7    | 0.6    | 0.4    | 1.1    | 1.8    | 1.0    | 2.7    |
| 14.2   | 2.0    | 2.0    | 12.6   | 1.1    | 7.5    | 0.9    | 1.1    | 1.6    |
| 12.3   | 4.7    | 25.7   | 14.1   | 10.1   | 206.6  | 188.7  | 7.4    | 8.0    |
| 4794.4 | 4195.2 | 4528.1 | 4404.4 | 2551.8 | 3128.7 | 3091.7 | 192.6  | 244.5  |
| 129.3  | 83.9   | 81.5   | 59.8   | 21.7   | 79.5   | 41.6   | 52.6   | 63.8   |
| 5.0    | 8.8    | 0.7    | 8.9    | 1.2    | 1.7    | 7.8    | 1.3    | 1.0    |
| 1.9    | 2.1    | 6.1    | 7.4    | 1.6    | 2.4    | 2.6    | 1.5    | 2.3    |
| 12.6   | 15.5   | 20.4   | 2.9    | 1.2    | 19.5   | 13.0   | 11.5   | 6.4    |
| 22.3   | 3.3    | 9.5    | 1.5    | 5.8    | 22.3   | 8.0    | 2.9    | 9.9    |
| 130.9  | 160.2  | 137.9  | 162.9  | 63.6   | 67.2   | 54.9   | 28.0   | 43.9   |
| 10.8   | 6.6    | 1.9    | 9.0    | 1.0    | 2.3    | 1.0    | 1.6    | 2.5    |
| 2.1    | 9.4    | 9.9    | 1.0    | 3.1    | 4.1    | 1.4    | 19.8   | 0.7    |
| 1202.8 | 1023.5 | 898.9  | 504.0  | 296.4  | 3559.8 | 2902.0 | 343.5  | 336.9  |
| 1.1    | 4.3    | 7.5    | 1.4    | 0.9    | 3.8    | 2.5    | 0.9    | 1.4    |
| 4.0    | 1.9    | 6.5    | 4.8    | 5.7    | 14.9   | 14.3   | 8.7    | 8.9    |
| 11.0   | 1.3    | 1.5    | 7.5    | 3.8    | 14.0   | 1.6    | 19.5   | 5.6    |
| 15.5   | 10.7   | 3.8    | 3.3    | 1.5    | 1.2    | 3.0    | 6.1    | 1.3    |
| 1.2    | 0.6    | 1.2    | 0.6    | 0.6    | 0.9    | 1.1    | 1.0    | 0.8    |
| 6.1    | 12.2   | 8.8    | 9.6    | 2.9    | 86.3   | 22.8   | 65.7   | 47.9   |
| 2.3    | 1.3    | 1.0    | 1.8    | 0.5    | 1.7    | 1.0    | 1.7    | 0.8    |
| 13.1   | 7.1    | 8.7    | 26.4   | 4.6    | 25.2   | 14.0   | 11.5   | 8.5    |



|        |        |        |        |       |        |        |       |       |
|--------|--------|--------|--------|-------|--------|--------|-------|-------|
| 7.9    | 2.5    | 2.6    | 1.7    | 2.0   | 8.4    | 1.4    | 17.6  | 12.0  |
| 4.2    | 1.1    | 0.9    | 1.3    | 0.4   | 2.6    | 1.3    | 2.5   | 1.8   |
| 1.3    | 2.9    | 5.1    | 1.2    | 0.9   | 17.6   | 2.8    | 9.8   | 1.3   |
| 1.1    | 1.9    | 0.5    | 3.1    | 4.1   | 26.9   | 23.0   | 0.8   | 2.8   |
| 1.4    | 5.1    | 10.2   | 0.8    | 0.7   | 28.9   | 1.7    | 1.0   | 9.3   |
| 12.6   | 7.2    | 1.2    | 1.4    | 0.8   | 2.8    | 0.9    | 1.9   | 0.7   |
| 0.8    | 6.1    | 11.1   | 0.7    | 1.3   | 26.7   | 8.0    | 0.9   | 0.7   |
| 21.5   | 11.3   | 14.7   | 9.0    | 6.9   | 2.9    | 11.6   | 21.2  | 6.7   |
| 3.5    | 0.7    | 0.5    | 2.2    | 0.6   | 4.4    | 2.6    | 4.6   | 0.5   |
| 12.7   | 8.9    | 1.6    | 3.6    | 4.7   | 14.7   | 15.9   | 7.5   | 2.0   |
| 26.1   | 21.4   | 17.0   | 20.3   | 6.6   | 28.4   | 20.2   | 14.1  | 25.7  |
| 20.8   | 15.9   | 19.8   | 15.4   | 7.3   | 25.3   | 9.2    | 18.9  | 8.4   |
| 11.3   | 1.8    | 11.8   | 7.1    | 1.4   | 11.1   | 6.7    | 5.4   | 1.1   |
| 13.7   | 1.0    | 2.9    | 0.4    | 0.5   | 2.8    | 9.9    | 0.5   | 8.3   |
| 1.6    | 6.5    | 14.3   | 8.0    | 8.2   | 17.9   | 1.7    | 1.1   | 0.8   |
| 28.0   | 12.6   | 16.5   | 7.8    | 7.7   | 17.8   | 2.7    | 7.2   | 9.4   |
| 1.2    | 0.6    | 1.7    | 1.1    | 4.8   | 1.8    | 0.3    | 3.8   | 1.0   |
| 15.1   | 8.3    | 9.1    | 6.9    | 2.2   | 1.4    | 12.0   | 1.2   | 4.3   |
| 28.9   | 12.3   | 17.8   | 19.9   | 5.6   | 11.3   | 12.5   | 2.4   | 0.5   |
| 10.7   | 0.5    | 3.9    | 2.1    | 5.2   | 5.3    | 14.5   | 0.6   | 1.6   |
| 26.7   | 20.5   | 11.0   | 2.0    | 9.9   | 33.1   | 21.2   | 18.6  | 19.1  |
| 729.1  | 471.7  | 607.4  | 792.3  | 210.3 | 183.1  | 182.9  | 226.9 | 274.8 |
| 49.6   | 42.3   | 44.7   | 34.2   | 15.8  | 31.4   | 40.0   | 18.6  | 7.6   |
| 2421.7 | 2073.2 | 2340.3 | 1206.3 | 840.0 | 9090.8 | 8393.6 | 291.3 | 412.8 |
| 0.7    | 1.8    | 0.8    | 0.4    | 0.5   | 1.1    | 0.9    | 1.9   | 0.4   |
| 66.9   | 55.1   | 78.6   | 66.9   | 23.3  | 12.4   | 12.2   | 25.6  | 35.1  |
| 9.1    | 17.2   | 11.0   | 9.8    | 1.6   | 6.0    | 1.7    | 2.1   | 2.1   |
| 14.3   | 13.0   | 9.7    | 11.2   | 1.1   | 9.7    | 10.8   | 12.4  | 7.8   |
| 1.5    | 3.4    | 1.2    | 0.6    | 0.4   | 1.4    | 2.5    | 9.9   | 5.2   |
| 19.6   | 17.1   | 22.2   | 3.9    | 6.5   | 35.6   | 8.8    | 19.3  | 23.6  |
| 11.8   | 10.3   | 8.6    | 17.3   | 7.6   | 19.2   | 18.2   | 17.1  | 6.7   |
| 0.6    | 0.8    | 0.5    | 1.8    | 0.9   | 0.9    | 0.5    | 0.8   | 0.6   |
| 1.5    | 1.2    | 2.0    | 1.0    | 0.8   | 4.1    | 2.4    | 9.5   | 1.4   |
| 15.1   | 15.6   | 23.8   | 13.3   | 5.8   | 20.9   | 15.2   | 19.1  | 31.5  |
| 4.1    | 9.6    | 9.1    | 2.2    | 4.0   | 15.6   | 1.2    | 2.9   | 8.9   |
| 4.7    | 4.5    | 16.9   | 11.9   | 1.6   | 3.4    | 4.3    | 3.5   | 12.3  |
| 20.7   | 11.3   | 2.4    | 8.3    | 2.6   | 11.2   | 4.7    | 11.2  | 16.5  |
| 93.4   | 104.1  | 76.9   | 91.0   | 28.5  | 55.1   | 35.0   | 32.5  | 52.5  |
| 6.8    | 14.1   | 5.2    | 14.2   | 8.5   | 11.5   | 4.3    | 16.5  | 14.3  |
| 4.9    | 2.2    | 8.2    | 5.9    | 6.1   | 11.9   | 0.9    | 12.4  | 12.7  |
| 388.2  | 350.5  | 358.5  | 355.5  | 124.5 | 703.7  | 442.2  | 235.5 | 345.4 |
| 4.3    | 5.3    | 4.2    | 12.9   | 1.5   | 12.0   | 3.2    | 13.7  | 12.1  |
| 29.4   | 35.1   | 31.4   | 29.8   | 10.8  | 44.9   | 18.3   | 28.0  | 27.7  |
| 23.5   | 8.1    | 12.3   | 12.2   | 7.0   | 12.3   | 1.0    | 8.7   | 0.8   |
| 2.8    | 2.2    | 2.9    | 2.1    | 0.5   | 1.9    | 3.7    | 3.9   | 2.3   |
| 2.9    | 4.5    | 3.9    | 2.0    | 8.3   | 6.7    | 1.6    | 9.5   | 50.5  |
| 7.4    | 17.5   | 14.5   | 15.7   | 0.8   | 53.3   | 19.7   | 4.3   | 4.2   |
| 8.3    | 7.3    | 2.9    | 3.4    | 7.8   | 2.8    | 9.0    | 1.8   | 1.8   |
| 1.7    | 0.6    | 1.3    | 0.6    | 1.5   | 1.3    | 1.0    | 0.8   | 0.6   |
| 4.9    | 10.0   | 10.5   | 2.2    | 0.7   | 859.7  | 751.9  | 16.2  | 1.8   |
| 1.0    | 0.6    | 1.5    | 1.4    | 0.9   | 5.2    | 1.9    | 0.8   | 7.6   |
| 2.8    | 14.8   | 8.9    | 5.4    | 5.8   | 11.6   | 22.2   | 9.0   | 1.5   |
| 234.6  | 75.1   | 72.5   | 67.4   | 33.7  | 567.3  | 825.0  | 57.3  | 82.6  |

|        |        |        |        |        |        |        |        |        |
|--------|--------|--------|--------|--------|--------|--------|--------|--------|
| 370.7  | 397.6  | 291.8  | 258.9  | 114.3  | 464.4  | 182.8  | 200.0  | 373.8  |
| 1006.5 | 912.8  | 786.9  | 643.4  | 226.4  | 4301.0 | 3331.4 | 335.6  | 418.8  |
| 88.1   | 76.3   | 70.8   | 62.8   | 31.5   | 1100.8 | 770.9  | 55.0   | 76.8   |
| 90.0   | 99.7   | 108.7  | 80.1   | 33.4   | 1606.1 | 1112.5 | 80.6   | 88.4   |
| 487.1  | 444.8  | 403.8  | 267.4  | 129.4  | 824.3  | 609.9  | 115.2  | 167.7  |
| 3552.3 | 3168.4 | 3203.0 | 2793.2 | 1521.4 | 5880.0 | 5363.5 | 473.3  | 631.7  |
| 1015.7 | 1424.7 | 1076.5 | 867.0  | 406.4  | 1866.8 | 1571.6 | 134.2  | 218.0  |
| 917.2  | 797.8  | 771.6  | 624.8  | 278.2  | 1815.2 | 1107.0 | 496.1  | 793.0  |
| 1674.6 | 1652.1 | 1492.9 | 1452.3 | 500.0  | 2046.1 | 1538.2 | 443.0  | 778.4  |
| 150.9  | 92.0   | 139.9  | 82.0   | 19.4   | 1265.5 | 299.2  | 122.0  | 175.0  |
| 246.7  | 162.6  | 172.4  | 149.3  | 37.6   | 3079.9 | 2051.7 | 212.3  | 312.8  |
| 485.8  | 392.7  | 417.0  | 372.3  | 111.4  | 4637.1 | 3557.3 | 162.0  | 231.1  |
| 62.9   | 98.6   | 92.4   | 66.7   | 21.9   | 257.6  | 94.9   | 130.4  | 159.9  |
| 327.0  | 313.1  | 295.8  | 291.5  | 87.1   | 2168.7 | 1435.2 | 364.2  | 353.8  |
| 391.5  | 374.0  | 340.0  | 379.9  | 130.1  | 396.7  | 264.9  | 80.2   | 95.2   |
| 5651.1 | 4767.6 | 4433.7 | 3829.7 | 1675.3 | 5060.9 | 3637.8 | 1805.1 | 1695.3 |
| 7275.6 | 6693.9 | 6178.9 | 5724.0 | 3020.3 | 7530.7 | 6544.2 | 1463.7 | 1572.1 |
| 281.7  | 313.1  | 350.0  | 259.4  | 102.8  | 334.5  | 233.2  | 222.5  | 302.5  |
| 406.0  | 390.8  | 352.6  | 331.9  | 121.2  | 381.5  | 279.7  | 92.4   | 119.4  |
| 628.1  | 433.4  | 489.8  | 385.7  | 174.0  | 659.1  | 347.5  | 200.9  | 311.1  |
| 99.9   | 89.8   | 104.6  | 102.9  | 29.5   | 256.9  | 249.0  | 28.6   | 47.7   |
| 133.7  | 110.5  | 117.6  | 135.1  | 38.2   | 207.2  | 133.6  | 79.1   | 130.7  |
| 351.7  | 383.7  | 333.8  | 444.4  | 171.1  | 841.2  | 773.2  | 104.1  | 127.4  |
| 6971.8 | 6460.6 | 6228.3 | 6055.7 | 3135.5 | 9095.1 | 8141.8 | 1960.5 | 2532.5 |
| 1847.2 | 1817.7 | 1752.6 | 1416.2 | 707.2  | 3748.2 | 2819.3 | 221.5  | 278.7  |
| 961.3  | 767.4  | 787.6  | 614.6  | 234.9  | 2497.0 | 1509.4 | 221.2  | 308.2  |
| 1813.3 | 1839.5 | 1535.7 | 1242.7 | 653.7  | 2607.9 | 2130.6 | 179.6  | 229.8  |
| 2400.9 | 1772.8 | 1693.1 | 1283.0 | 475.2  | 3576.2 | 3125.2 | 235.6  | 280.6  |
| 3902.5 | 2735.5 | 2964.7 | 2551.2 | 1492.1 | 4671.0 | 3428.0 | 1450.1 | 2146.0 |
| 3595.9 | 3152.8 | 3335.7 | 3319.2 | 1628.4 | 3684.6 | 3068.5 | 1214.4 | 1763.0 |
| 2726.7 | 2566.7 | 2690.8 | 2410.8 | 1175.9 | 3915.8 | 2741.7 | 401.1  | 571.3  |
| 1542.1 | 1253.9 | 1358.0 | 994.8  | 459.4  | 1393.7 | 785.7  | 665.3  | 895.1  |
| 787.9  | 638.9  | 668.6  | 376.1  | 158.9  | 846.1  | 534.0  | 503.6  | 598.4  |
| 8940.8 | 7255.7 | 7105.3 | 7039.5 | 4148.3 | 9402.3 | 8347.4 | 2697.8 | 3375.7 |
| 4000.9 | 3766.2 | 3566.0 | 3708.5 | 2028.9 | 5702.1 | 4786.7 | 352.8  | 468.5  |
| 664.6  | 644.1  | 929.0  | 483.2  | 341.1  | 1431.7 | 1264.0 | 373.5  | 581.6  |
| 884.3  | 785.1  | 901.6  | 741.7  | 237.9  | 445.1  | 335.9  | 449.5  | 693.4  |
| 1916.9 | 1712.7 | 1911.3 | 1673.7 | 703.8  | 1825.2 | 1452.3 | 1361.5 | 1589.3 |
| 5.0    | 12.7   | 6.2    | 6.5    | 4.8    | 995.7  | 771.6  | 732.1  | 886.6  |
| 26.7   | 13.0   | 6.7    | 14.0   | 7.7    | 827.3  | 513.3  | 625.9  | 821.6  |
| 1288.5 | 1149.7 | 1204.2 | 1271.0 | 367.8  | 2400.2 | 2002.5 | 414.7  | 677.7  |
| 350.3  | 350.2  | 335.5  | 365.6  | 105.4  | 801.6  | 714.0  | 223.9  | 371.4  |
| 559.3  | 507.7  | 473.8  | 455.6  | 137.9  | 1989.1 | 1401.7 | 554.8  | 700.5  |
| 773.0  | 626.9  | 648.8  | 577.7  | 159.3  | 2200.8 | 1713.8 | 1549.7 | 1571.4 |
| 857.8  | 659.1  | 587.6  | 544.1  | 292.1  | 2132.3 | 1555.5 | 2264.7 | 2755.6 |
| 67.3   | 57.6   | 46.4   | 35.2   | 13.7   | 449.9  | 333.8  | 122.4  | 138.9  |
| 150.5  | 131.8  | 130.1  | 119.4  | 48.1   | 469.8  | 415.7  | 99.0   | 158.5  |
| 4671.7 | 4019.6 | 4016.4 | 3028.8 | 1909.4 | 6161.5 | 4945.9 | 968.0  | 1127.4 |
| 1419.7 | 1237.7 | 1049.3 | 800.7  | 588.9  | 2064.6 | 1409.8 | 713.1  | 724.4  |
| 181.7  | 111.2  | 103.9  | 63.1   | 29.7   | 308.2  | 183.4  | 114.4  | 203.3  |
| 448.5  | 299.9  | 284.3  | 196.6  | 102.9  | 956.4  | 715.5  | 209.8  | 344.5  |
| 58.1   | 52.0   | 39.8   | 46.9   | 23.5   | 200.6  | 223.2  | 96.0   | 111.4  |
| 10.6   | 44.9   | 41.2   | 22.1   | 20.5   | 44.7   | 5.6    | 110.0  | 165.1  |

|        |        |        |        |        |         |        |        |        |
|--------|--------|--------|--------|--------|---------|--------|--------|--------|
| 237.6  | 248.4  | 218.1  | 233.7  | 73.9   | 904.0   | 493.5  | 79.5   | 117.8  |
| 587.2  | 644.0  | 628.3  | 594.9  | 244.1  | 2050.1  | 1349.4 | 274.5  | 339.4  |
| 4395.2 | 4015.0 | 3763.2 | 2927.5 | 1605.0 | 6790.8  | 5784.2 | 1764.7 | 2438.3 |
| 684.8  | 778.5  | 648.2  | 417.2  | 264.9  | 840.1   | 576.1  | 95.9   | 181.6  |
| 216.5  | 203.3  | 156.7  | 83.5   | 55.5   | 222.3   | 72.7   | 47.9   | 68.5   |
| 651.5  | 548.1  | 773.3  | 977.2  | 267.2  | 2338.1  | 1531.9 | 183.8  | 217.7  |
| 3302.9 | 2843.6 | 2564.3 | 2151.2 | 1116.5 | 4081.1  | 3025.1 | 795.3  | 956.5  |
| 540.3  | 529.0  | 513.2  | 480.8  | 189.5  | 1376.2  | 840.5  | 70.7   | 96.1   |
| 1304.2 | 1332.2 | 1182.4 | 791.8  | 411.3  | 2329.3  | 1540.1 | 108.6  | 146.7  |
| 2076.1 | 1849.1 | 1670.7 | 1106.8 | 527.1  | 2958.2  | 1820.0 | 604.6  | 781.8  |
| 1330.9 | 1143.2 | 1148.9 | 1153.9 | 369.4  | 2442.9  | 1627.5 | 323.9  | 512.5  |
| 1710.4 | 1260.7 | 1055.4 | 511.9  | 287.4  | 625.6   | 298.3  | 466.3  | 582.1  |
| 329.8  | 287.8  | 369.2  | 357.7  | 106.0  | 1519.5  | 1117.8 | 247.0  | 330.4  |
| 5548.6 | 4624.6 | 4196.3 | 3635.7 | 2162.8 | 7739.1  | 5514.5 | 528.0  | 754.2  |
| 6860.5 | 5454.7 | 5693.2 | 4199.1 | 2101.2 | 6772.4  | 5468.0 | 1537.5 | 1906.0 |
| 95.1   | 109.9  | 103.0  | 93.2   | 32.9   | 131.1   | 148.9  | 585.4  | 695.8  |
| 1636.1 | 1348.4 | 1703.5 | 1466.7 | 718.7  | 7505.1  | 6097.6 | 461.8  | 596.3  |
| 1175.8 | 1103.7 | 958.2  | 1059.2 | 352.9  | 1101.9  | 895.5  | 644.0  | 806.5  |
| 593.7  | 391.4  | 502.5  | 529.3  | 152.4  | 1040.9  | 796.1  | 312.5  | 401.0  |
| 352.8  | 312.2  | 341.0  | 476.1  | 78.8   | 480.4   | 221.0  | 198.3  | 238.8  |
| 8362.6 | 6950.3 | 7563.6 | 7018.2 | 3296.5 | 10090.6 | 7674.0 | 1786.8 | 2099.2 |
| 2237.6 | 1739.0 | 1689.7 | 1348.2 | 649.3  | 2762.4  | 1815.7 | 779.3  | 1107.9 |
| 2923.7 | 2829.8 | 2312.0 | 1489.1 | 891.6  | 3282.6  | 1854.0 | 315.1  | 453.8  |
| 359.0  | 370.8  | 313.1  | 233.0  | 159.0  | 1840.8  | 1225.9 | 147.2  | 237.6  |
| 3190.2 | 3160.4 | 2861.9 | 2577.9 | 1420.5 | 6184.4  | 5017.9 | 538.6  | 886.6  |
| 9110.2 | 7811.1 | 7381.4 | 6774.9 | 4738.1 | 9825.3  | 8465.3 | 2870.5 | 4051.4 |
| 1916.6 | 1480.1 | 2137.0 | 2758.8 | 1025.8 | 2406.7  | 2051.9 | 595.4  | 883.8  |
| 839.4  | 953.1  | 800.4  | 773.8  | 226.7  | 1571.1  | 895.4  | 31.0   | 62.9   |
| 9412.3 | 7713.6 | 7542.9 | 6801.4 | 4860.1 | 10106.4 | 8423.7 | 2226.7 | 3061.6 |
| 4572.2 | 3797.4 | 3888.5 | 3066.9 | 1629.0 | 4993.5  | 3756.2 | 1266.4 | 1565.6 |
| 2918.5 | 2819.6 | 2729.8 | 2904.7 | 1223.1 | 5804.0  | 4404.9 | 722.0  | 819.7  |
| 972.4  | 787.6  | 751.3  | 618.2  | 184.5  | 584.1   | 233.4  | 267.3  | 453.7  |
| 799.4  | 723.7  | 724.8  | 527.6  | 240.4  | 1054.4  | 729.0  | 298.8  | 475.9  |
| 1026.0 | 900.6  | 1074.1 | 719.6  | 372.6  | 1811.2  | 1457.4 | 246.5  | 510.3  |
| 40.4   | 14.6   | 21.8   | 15.8   | 8.5    | 84.6    | 63.8   | 31.9   | 42.0   |
| 652.4  | 523.2  | 532.0  | 446.6  | 202.8  | 1341.7  | 786.5  | 650.3  | 927.4  |
| 323.5  | 253.8  | 242.8  | 166.4  | 49.4   | 754.0   | 353.7  | 583.5  | 726.0  |
| 550.2  | 419.9  | 409.5  | 255.7  | 82.9   | 1563.9  | 853.3  | 813.4  | 1156.3 |
| 1474.0 | 1105.4 | 1514.2 | 1974.5 | 481.0  | 4743.9  | 3086.0 | 630.3  | 822.5  |
| 767.2  | 816.9  | 1022.2 | 1227.2 | 373.8  | 2291.3  | 1553.5 | 249.4  | 378.6  |
| 31.5   | 24.2   | 26.7   | 52.6   | 14.2   | 86.7    | 50.7   | 21.7   | 16.8   |
| 912.8  | 923.0  | 1191.1 | 1692.7 | 337.1  | 2579.9  | 1841.1 | 452.2  | 586.4  |
| 650.0  | 576.7  | 764.1  | 517.0  | 207.5  | 776.1   | 561.1  | 209.9  | 236.7  |
| 77.8   | 75.0   | 69.2   | 55.5   | 32.7   | 103.5   | 65.4   | 56.4   | 79.0   |
| 269.7  | 129.7  | 126.0  | 73.7   | 52.4   | 395.2   | 271.3  | 100.8  | 114.7  |
| 772.9  | 688.7  | 543.9  | 424.9  | 227.8  | 1716.6  | 1063.8 | 164.7  | 191.5  |
| 568.2  | 535.3  | 491.7  | 452.0  | 180.9  | 1489.5  | 960.1  | 178.3  | 220.8  |
| 2377.6 | 2035.3 | 2036.4 | 1536.1 | 622.7  | 1198.1  | 705.5  | 839.7  | 856.8  |
| 219.6  | 213.4  | 164.9  | 165.0  | 60.7   | 500.2   | 290.6  | 8.3    | 5.2    |
| 826.9  | 778.3  | 742.3  | 580.7  | 176.5  | 1516.3  | 920.1  | 1.3    | 1.1    |
| 980.8  | 832.0  | 848.4  | 703.4  | 327.6  | 631.3   | 390.0  | 615.5  | 750.3  |
| 1479.6 | 1692.0 | 1048.7 | 925.1  | 571.2  | 2526.7  | 2550.6 | 890.0  | 1093.0 |
| 31.4   | 10.8   | 3.0    | 2.8    | 2.9    | 159.5   | 81.1   | 106.2  | 137.2  |

|        |        |        |        |        |        |        |        |        |
|--------|--------|--------|--------|--------|--------|--------|--------|--------|
| 841.3  | 766.3  | 735.6  | 1115.9 | 256.6  | 1329.4 | 945.3  | 339.8  | 449.7  |
| 478.9  | 444.9  | 430.2  | 319.7  | 113.1  | 241.8  | 69.4   | 148.7  | 148.2  |
| 496.6  | 478.5  | 431.2  | 343.3  | 200.9  | 551.5  | 282.7  | 212.7  | 286.3  |
| 273.1  | 267.9  | 287.1  | 300.4  | 137.6  | 393.9  | 252.1  | 171.0  | 256.9  |
| 3417.6 | 3338.8 | 3092.6 | 3194.3 | 1222.9 | 5689.1 | 4339.1 | 479.3  | 806.8  |
| 49.2   | 45.6   | 57.2   | 40.5   | 27.6   | 155.6  | 68.8   | 1.6    | 5.3    |
| 3702.1 | 3350.6 | 3814.1 | 3693.3 | 1541.5 | 6517.1 | 4673.6 | 285.0  | 276.0  |
| 479.2  | 268.4  | 316.1  | 271.0  | 107.5  | 426.8  | 360.6  | 134.0  | 187.4  |
| 268.0  | 214.9  | 188.4  | 117.7  | 60.5   | 695.0  | 515.9  | 135.0  | 159.6  |
| 1352.5 | 1231.6 | 1168.6 | 1154.9 | 395.1  | 5704.3 | 3189.9 | 82.3   | 144.5  |
| 189.1  | 149.1  | 169.7  | 125.2  | 65.3   | 280.8  | 169.5  | 316.5  | 116.7  |
| 556.1  | 620.3  | 629.2  | 614.9  | 201.5  | 1511.9 | 1436.9 | 446.9  | 706.4  |
| 210.1  | 218.7  | 206.8  | 205.6  | 94.2   | 358.1  | 257.6  | 138.2  | 204.9  |
| 15.7   | 21.3   | 17.6   | 17.5   | 3.7    | 79.4   | 45.2   | 7.4    | 12.0   |
| 622.3  | 514.5  | 501.3  | 482.3  | 151.4  | 1468.0 | 1390.0 | 321.4  | 516.2  |
| 207.3  | 158.3  | 160.1  | 131.2  | 44.0   | 165.5  | 90.5   | 72.7   | 129.4  |
| 2173.1 | 2226.2 | 2123.1 | 1802.2 | 911.4  | 3158.0 | 2588.3 | 510.6  | 602.2  |
| 1252.3 | 948.7  | 1046.5 | 1319.2 | 387.7  | 1603.6 | 1100.8 | 845.4  | 998.1  |
| 2281.0 | 2367.7 | 2663.1 | 1575.2 | 931.0  | 3498.2 | 2091.0 | 251.8  | 303.8  |
| 2273.3 | 2020.0 | 1675.5 | 967.6  | 455.8  | 2677.0 | 1590.0 | 450.1  | 575.5  |
| 230.7  | 179.9  | 167.5  | 118.2  | 60.6   | 305.4  | 220.8  | 79.7   | 110.2  |
| 74.1   | 62.1   | 54.7   | 40.8   | 20.8   | 145.8  | 74.3   | 36.3   | 48.4   |
| 4199.8 | 4302.2 | 3201.6 | 2974.0 | 1388.6 | 4395.3 | 3328.1 | 561.6  | 670.2  |
| 1987.6 | 1640.3 | 1739.8 | 1967.8 | 853.2  | 3250.7 | 3399.5 | 719.1  | 842.4  |
| 619.0  | 663.1  | 837.3  | 905.8  | 171.8  | 867.4  | 448.4  | 292.2  | 281.6  |
| 244.1  | 308.3  | 253.0  | 159.8  | 106.4  | 635.1  | 385.6  | 74.0   | 75.0   |
| 4524.7 | 4436.1 | 3431.1 | 2062.6 | 1361.7 | 5968.6 | 4762.3 | 828.6  | 1152.0 |
| 12.5   | 23.9   | 24.1   | 21.6   | 14.3   | 1.8    | 1.5    | 7.1    | 5.4    |
| 130.1  | 105.2  | 113.4  | 117.6  | 42.7   | 177.8  | 51.9   | 34.3   | 29.2   |
| 895.2  | 803.3  | 765.0  | 831.9  | 361.9  | 1234.1 | 873.7  | 559.3  | 693.5  |
| 881.7  | 638.1  | 667.8  | 538.6  | 155.7  | 1097.3 | 409.9  | 627.9  | 693.4  |
| 160.3  | 152.8  | 137.0  | 148.5  | 63.9   | 150.6  | 82.9   | 88.6   | 111.4  |
| 3545.6 | 3473.7 | 3504.7 | 3292.8 | 1356.4 | 3410.6 | 2739.2 | 491.3  | 728.6  |
| 908.4  | 1111.0 | 912.5  | 786.3  | 386.6  | 773.9  | 386.4  | 89.2   | 100.7  |
| 1068.2 | 1235.0 | 1068.8 | 862.7  | 388.1  | 1006.7 | 550.9  | 93.9   | 83.6   |
| 4472.4 | 4154.4 | 3761.0 | 3092.8 | 2244.4 | 6889.9 | 6549.6 | 3542.6 | 4590.9 |
| 2690.2 | 2329.1 | 2226.2 | 2059.0 | 810.1  | 2194.5 | 1420.8 | 377.3  | 413.0  |
| 295.7  | 237.1  | 474.8  | 238.8  | 104.6  | 1144.7 | 818.0  | 160.1  | 417.1  |
| 1687.7 | 1471.5 | 1445.2 | 1924.6 | 777.0  | 3105.7 | 2224.1 | 484.0  | 462.6  |
| 415.9  | 422.8  | 482.2  | 409.7  | 184.6  | 388.6  | 190.5  | 99.8   | 152.0  |
| 44.0   | 70.5   | 54.2   | 49.5   | 31.8   | 219.1  | 142.0  | 64.4   | 47.8   |
| 1764.4 | 1619.2 | 1535.4 | 1325.4 | 507.0  | 1359.2 | 1100.9 | 279.8  | 309.9  |
| 101.0  | 112.6  | 111.4  | 109.2  | 31.9   | 79.2   | 62.1   | 4.4    | 9.4    |
| 86.1   | 63.9   | 297.2  | 112.0  | 26.8   | 108.9  | 76.0   | 328.2  | 290.6  |
| 1764.7 | 1599.2 | 1456.4 | 1216.6 | 596.8  | 1882.2 | 1708.4 | 855.8  | 1000.1 |
| 939.5  | 608.8  | 695.0  | 395.3  | 167.0  | 602.3  | 447.8  | 210.4  | 256.6  |
| 2230.0 | 1746.2 | 1842.0 | 1489.0 | 672.4  | 2353.0 | 1869.0 | 314.4  | 451.5  |
| 1105.9 | 965.8  | 929.3  | 580.4  | 307.6  | 2323.9 | 1384.4 | 772.7  | 1203.7 |
| 7781.2 | 7063.5 | 6300.5 | 5120.1 | 3356.5 | 7838.7 | 6765.6 | 1816.0 | 2771.2 |
| 28.5   | 33.2   | 23.4   | 12.1   | 11.1   | 33.3   | 12.9   | 38.1   | 62.4   |
| 167.9  | 153.9  | 137.2  | 53.5   | 32.8   | 281.4  | 152.0  | 96.1   | 145.8  |
| 1226.8 | 1192.1 | 1044.6 | 1009.3 | 468.3  | 817.6  | 784.6  | 177.6  | 172.4  |
| 124.4  | 76.3   | 121.6  | 144.5  | 51.6   | 475.6  | 311.2  | 89.1   | 79.8   |

|         |        |        |        |        |         |         |        |        |
|---------|--------|--------|--------|--------|---------|---------|--------|--------|
| 273.7   | 252.8  | 263.2  | 302.0  | 111.9  | 281.3   | 144.8   | 154.4  | 243.5  |
| 269.8   | 206.8  | 227.0  | 258.7  | 74.0   | 285.4   | 194.9   | 312.1  | 411.3  |
| 2489.2  | 2708.3 | 2813.7 | 2534.1 | 976.5  | 2560.6  | 1904.8  | 262.6  | 462.2  |
| 134.9   | 167.8  | 144.2  | 105.6  | 38.0   | 194.1   | 125.0   | 27.0   | 47.7   |
| 2020.1  | 1709.8 | 1936.3 | 1710.7 | 599.4  | 2315.5  | 2188.9  | 312.3  | 545.9  |
| 2533.8  | 2392.0 | 2486.4 | 2297.5 | 1054.8 | 7185.8  | 5970.3  | 467.1  | 713.2  |
| 268.1   | 170.8  | 160.6  | 116.7  | 86.6   | 946.9   | 658.9   | 465.3  | 691.9  |
| 3209.6  | 2906.5 | 3112.7 | 2829.2 | 1198.7 | 4247.0  | 3419.4  | 1096.2 | 1602.3 |
| 766.5   | 834.9  | 724.6  | 643.2  | 220.2  | 2718.0  | 1676.0  | 306.7  | 385.5  |
| 89.6    | 78.6   | 62.2   | 56.5   | 26.0   | 1977.5  | 1481.9  | 53.7   | 92.5   |
| 458.4   | 524.8  | 500.6  | 366.8  | 177.5  | 1733.5  | 1116.3  | 116.9  | 249.8  |
| 185.9   | 163.9  | 139.2  | 74.7   | 47.5   | 530.2   | 228.4   | 146.6  | 159.6  |
| 402.1   | 397.9  | 446.9  | 1148.3 | 190.0  | 746.1   | 692.7   | 162.5  | 233.4  |
| 462.0   | 419.2  | 642.6  | 1788.4 | 229.1  | 517.2   | 291.6   | 156.1  | 297.6  |
| 4309.9  | 3701.4 | 3519.2 | 3047.9 | 1767.4 | 5278.0  | 3950.7  | 608.7  | 929.1  |
| 2001.2  | 1982.3 | 2194.1 | 1565.0 | 816.3  | 2023.7  | 1107.8  | 521.3  | 702.3  |
| 1138.2  | 784.8  | 666.6  | 564.5  | 190.4  | 305.4   | 110.7   | 2.1    | 2.4    |
| 198.3   | 129.9  | 104.5  | 104.2  | 41.6   | 64.0    | 43.6    | 11.1   | 8.7    |
| 379.1   | 287.6  | 366.4  | 361.4  | 102.7  | 102.0   | 50.3    | 273.1  | 368.8  |
| 276.3   | 238.5  | 289.5  | 314.2  | 98.8   | 149.9   | 72.9    | 236.6  | 202.5  |
| 33.7    | 13.6   | 32.8   | 40.6   | 14.3   | 242.5   | 108.0   | 182.0  | 173.0  |
| 56.7    | 55.1   | 52.4   | 81.7   | 28.8   | 1543.3  | 1264.5  | 208.1  | 368.6  |
| 1382.9  | 1226.5 | 1345.2 | 792.9  | 620.9  | 1136.3  | 700.0   | 421.5  | 461.9  |
| 453.1   | 529.0  | 435.2  | 384.6  | 221.4  | 1103.9  | 857.4   | 227.8  | 290.0  |
| 24.8    | 24.4   | 36.9   | 22.1   | 8.1    | 5.8     | 5.2     | 14.4   | 19.7   |
| 284.0   | 387.8  | 290.9  | 342.2  | 136.7  | 313.7   | 210.1   | 17.3   | 40.8   |
| 2597.9  | 2005.7 | 2157.9 | 1305.1 | 672.7  | 2222.1  | 2035.6  | 1203.9 | 1343.3 |
| 1234.7  | 1425.4 | 1437.7 | 1394.2 | 437.4  | 1215.4  | 743.9   | 154.8  | 384.1  |
| 2746.9  | 2650.2 | 2556.0 | 2173.2 | 900.2  | 2117.2  | 1480.7  | 430.3  | 639.5  |
| 566.7   | 639.9  | 671.2  | 650.1  | 195.1  | 557.0   | 430.2   | 42.1   | 60.0   |
| 498.3   | 610.9  | 657.6  | 672.6  | 220.7  | 661.2   | 461.7   | 85.4   | 130.5  |
| 379.7   | 401.0  | 360.3  | 303.1  | 144.7  | 1484.1  | 740.7   | 192.7  | 227.8  |
| 5014.5  | 4847.9 | 4538.0 | 3826.6 | 2328.1 | 5625.1  | 4996.9  | 1256.9 | 1753.8 |
| 41.1    | 42.4   | 27.1   | 35.1   | 14.9   | 72.9    | 56.3    | 58.2   | 61.9   |
| 135.1   | 123.0  | 122.6  | 80.6   | 33.6   | 161.9   | 95.3    | 139.0  | 160.8  |
| 1426.4  | 1204.0 | 1262.7 | 1015.4 | 373.3  | 2188.8  | 2033.9  | 345.2  | 639.3  |
| 379.6   | 407.1  | 430.5  | 491.4  | 141.1  | 452.3   | 259.5   | 131.9  | 191.6  |
| 486.5   | 398.5  | 457.6  | 479.7  | 114.7  | 614.7   | 714.9   | 51.1   | 52.1   |
| 522.4   | 386.0  | 467.1  | 431.2  | 104.0  | 475.9   | 373.5   | 139.3  | 130.8  |
| 2513.4  | 2237.9 | 2007.7 | 2203.1 | 870.4  | 6629.8  | 4928.4  | 497.3  | 775.9  |
| 448.6   | 378.4  | 683.7  | 1514.9 | 270.8  | 462.1   | 377.8   | 259.5  | 240.1  |
| 67.3    | 35.2   | 44.1   | 13.6   | 7.5    | 145.1   | 63.3    | 66.2   | 54.3   |
| 1076.4  | 1039.6 | 1138.0 | 1308.7 | 587.4  | 2269.5  | 2011.9  | 191.2  | 155.3  |
| 1631.4  | 1282.1 | 1458.8 | 1632.1 | 629.1  | 6757.0  | 4992.6  | 120.2  | 76.8   |
| 254.3   | 204.7  | 181.5  | 129.5  | 83.5   | 1468.3  | 842.5   | 250.5  | 342.6  |
| 650.5   | 511.5  | 566.5  | 389.0  | 224.8  | 2559.0  | 1815.5  | 894.6  | 1071.0 |
| 424.6   | 339.5  | 237.5  | 233.3  | 80.8   | 601.0   | 333.0   | 157.5  | 221.7  |
| 504.7   | 527.8  | 593.9  | 672.7  | 212.4  | 1320.5  | 1171.8  | 250.0  | 220.3  |
| 1838.2  | 1440.5 | 1506.5 | 1116.0 | 550.8  | 1325.0  | 760.4   | 867.7  | 1153.5 |
| 2831.9  | 2730.5 | 3183.6 | 3031.2 | 1258.2 | 2211.1  | 1487.0  | 181.2  | 236.3  |
| 110.7   | 59.5   | 79.3   | 80.2   | 39.3   | 254.4   | 147.2   | 110.7  | 128.5  |
| 113.1   | 103.0  | 114.5  | 126.9  | 50.1   | 276.5   | 225.2   | 305.8  | 313.9  |
| 11326.1 | 9897.0 | 9629.8 | 8907.8 | 5904.9 | 12569.8 | 11207.7 | 4399.5 | 5786.4 |

|         |        |        |        |        |         |         |        |        |
|---------|--------|--------|--------|--------|---------|---------|--------|--------|
| 2615.6  | 2759.9 | 2400.7 | 1982.5 | 939.5  | 4238.8  | 2980.4  | 1181.2 | 1730.0 |
| 2072.1  | 1733.9 | 1774.2 | 1516.2 | 693.4  | 2796.2  | 2600.2  | 656.3  | 705.0  |
| 846.4   | 723.2  | 746.4  | 541.4  | 194.7  | 1167.1  | 569.6   | 168.8  | 180.1  |
| 615.3   | 432.4  | 380.1  | 162.2  | 83.6   | 1401.2  | 549.6   | 319.6  | 378.3  |
| 137.7   | 133.1  | 143.8  | 184.0  | 50.4   | 201.4   | 97.8    | 60.9   | 74.9   |
| 146.6   | 131.3  | 127.0  | 156.4  | 49.2   | 258.6   | 99.6    | 70.1   | 116.0  |
| 52.8    | 40.6   | 60.0   | 27.0   | 16.4   | 216.7   | 103.0   | 36.0   | 60.5   |
| 1286.2  | 1057.0 | 1124.8 | 946.3  | 440.7  | 3145.4  | 2307.5  | 382.1  | 625.3  |
| 11486.9 | 9984.9 | 9878.4 | 8800.6 | 5930.2 | 12622.3 | 11485.7 | 4504.0 | 5707.7 |
| 372.0   | 292.7  | 263.4  | 182.7  | 80.5   | 787.7   | 502.2   | 138.4  | 217.2  |
| 3930.0  | 4043.4 | 3455.7 | 3362.6 | 1484.8 | 3885.1  | 2644.5  | 364.0  | 431.9  |
| 229.9   | 208.3  | 206.2  | 157.5  | 84.4   | 1085.0  | 840.6   | 302.5  | 355.9  |
| 267.0   | 291.7  | 270.4  | 271.7  | 95.3   | 531.4   | 308.9   | 45.2   | 108.4  |
| 298.3   | 299.8  | 294.5  | 233.0  | 95.1   | 391.6   | 238.4   | 109.1  | 131.4  |
| 198.6   | 186.9  | 199.1  | 110.4  | 50.4   | 444.0   | 263.8   | 273.7  | 395.1  |
| 729.2   | 818.6  | 691.2  | 588.1  | 199.0  | 1890.6  | 1217.7  | 249.8  | 395.0  |
| 951.9   | 882.9  | 914.8  | 1069.5 | 344.9  | 1480.1  | 910.4   | 473.2  | 702.7  |
| 1080.2  | 1012.2 | 1002.4 | 1229.8 | 428.5  | 1380.3  | 1057.4  | 273.5  | 323.5  |
| 27.6    | 20.9   | 24.6   | 12.1   | 9.7    | 62.6    | 41.0    | 29.5   | 30.9   |
| 2479.0  | 2533.4 | 2279.3 | 1661.5 | 975.7  | 6042.9  | 5116.1  | 431.6  | 642.1  |
| 1061.6  | 1101.9 | 1057.8 | 869.2  | 382.3  | 3464.7  | 2602.6  | 129.4  | 222.4  |
| 752.1   | 778.1  | 675.4  | 487.8  | 278.0  | 2273.2  | 1834.3  | 276.4  | 290.3  |
| 361.0   | 378.8  | 375.4  | 216.9  | 103.8  | 721.6   | 444.6   | 91.8   | 161.1  |
| 8.6     | 6.9    | 11.5   | 12.6   | 6.7    | 20.4    | 6.4     | 1.8    | 5.4    |
| 11.8    | 4.3    | 20.9   | 12.2   | 5.3    | 19.7    | 16.6    | 17.6   | 19.9   |
| 14.8    | 26.0   | 20.8   | 24.4   | 8.8    | 38.6    | 41.1    | 5.7    | 2.9    |
| 920.0   | 782.7  | 736.5  | 729.9  | 220.5  | 1806.0  | 1296.6  | 539.7  | 684.0  |
| 410.5   | 288.6  | 336.7  | 447.7  | 103.6  | 603.5   | 444.4   | 227.3  | 619.6  |
| 252.3   | 193.1  | 189.1  | 213.4  | 75.7   | 1258.5  | 993.1   | 208.2  | 285.1  |
| 1119.7  | 988.4  | 934.3  | 885.5  | 373.4  | 3693.9  | 2829.6  | 355.0  | 483.5  |
| 8776.1  | 7904.4 | 7487.2 | 7125.1 | 5070.8 | 8895.4  | 7532.0  | 3216.3 | 4874.3 |
| 1062.0  | 1136.3 | 1027.8 | 968.2  | 428.9  | 1891.6  | 1508.0  | 139.3  | 174.5  |
| 239.6   | 237.6  | 143.0  | 180.4  | 77.7   | 459.1   | 303.0   | 129.8  | 173.4  |
| 49.9    | 24.7   | 25.6   | 22.3   | 11.6   | 32.0    | 40.6    | 13.0   | 24.6   |
| 151.2   | 151.9  | 123.7  | 130.9  | 42.0   | 87.7    | 61.1    | 50.0   | 56.2   |
| 259.6   | 269.5  | 250.9  | 218.2  | 100.2  | 190.5   | 114.5   | 75.3   | 115.5  |
| 153.8   | 155.3  | 132.2  | 92.6   | 26.9   | 718.5   | 394.1   | 180.9  | 428.0  |
| 684.8   | 693.8  | 650.4  | 520.6  | 169.1  | 1213.4  | 782.4   | 259.8  | 312.2  |
| 4976.9  | 4302.6 | 4556.9 | 4308.8 | 1710.1 | 7369.3  | 6688.6  | 563.7  | 593.4  |
| 668.5   | 718.2  | 777.9  | 978.8  | 274.3  | 2069.7  | 1172.6  | 380.2  | 544.8  |
| 60.6    | 57.5   | 64.0   | 62.4   | 28.2   | 353.2   | 317.1   | 22.1   | 53.8   |
| 197.5   | 136.8  | 135.6  | 90.9   | 27.3   | 233.1   | 109.1   | 115.8  | 143.2  |
| 642.5   | 576.0  | 629.9  | 874.8  | 192.8  | 55.0    | 53.5    | 25.7   | 21.5   |
| 633.0   | 639.9  | 692.5  | 964.6  | 219.8  | 82.3    | 92.7    | 33.2   | 25.8   |
| 3607.6  | 3649.4 | 3062.6 | 2460.2 | 1451.6 | 3383.6  | 2205.8  | 1311.2 | 1431.5 |
| 58.8    | 41.9   | 34.7   | 33.8   | 11.8   | 62.8    | 61.0    | 51.5   | 33.8   |
| 737.0   | 693.2  | 738.9  | 669.4  | 244.2  | 2587.4  | 2094.3  | 466.0  | 616.9  |
| 387.0   | 424.6  | 366.3  | 255.7  | 153.2  | 1217.1  | 836.6   | 263.3  | 372.4  |
| 228.4   | 156.4  | 139.1  | 79.8   | 50.9   | 197.5   | 166.6   | 666.1  | 669.5  |
| 206.8   | 167.5  | 187.2  | 157.7  | 71.3   | 293.1   | 208.3   | 131.7  | 210.3  |
| 97.3    | 67.8   | 73.9   | 60.8   | 24.9   | 187.0   | 149.8   | 35.8   | 41.5   |
| 384.8   | 326.4  | 335.0  | 231.9  | 95.6   | 536.4   | 343.5   | 65.8   | 105.1  |
| 296.4   | 247.8  | 251.0  | 242.1  | 96.1   | 489.0   | 353.9   | 50.8   | 98.9   |

|        |        |        |        |        |        |        |        |        |
|--------|--------|--------|--------|--------|--------|--------|--------|--------|
| 250.3  | 213.5  | 201.8  | 139.2  | 56.2   | 86.2   | 38.5   | 126.1  | 162.9  |
| 678.6  | 573.3  | 529.9  | 432.1  | 220.9  | 852.0  | 632.2  | 233.6  | 251.9  |
| 394.4  | 370.9  | 826.0  | 319.7  | 237.7  | 398.0  | 263.8  | 521.9  | 766.0  |
| 203.5  | 216.6  | 195.7  | 188.7  | 77.2   | 280.6  | 239.1  | 65.8   | 87.2   |
| 76.8   | 70.1   | 62.3   | 82.4   | 12.4   | 151.7  | 83.9   | 41.3   | 47.3   |
| 275.4  | 325.3  | 227.0  | 293.6  | 95.1   | 469.7  | 304.3  | 135.4  | 210.4  |
| 52.8   | 15.9   | 20.6   | 18.4   | 10.2   | 1957.7 | 1164.4 | 39.0   | 44.6   |
| 611.7  | 473.6  | 440.5  | 677.4  | 152.7  | 140.4  | 257.3  | 299.5  | 558.3  |
| 1358.1 | 1238.0 | 1153.2 | 1078.9 | 517.4  | 1740.3 | 1033.4 | 452.2  | 550.6  |
| 5.6    | 3.3    | 11.7   | 7.5    | 3.4    | 2.0    | 2.6    | 4.5    | 2.8    |
| 27.5   | 12.6   | 17.2   | 8.0    | 2.8    | 45.3   | 16.5   | 28.3   | 16.1   |
| 192.1  | 196.3  | 110.0  | 76.9   | 69.3   | 761.9  | 407.6  | 263.0  | 305.5  |
| 541.5  | 482.9  | 781.0  | 1554.5 | 280.2  | 2814.7 | 2292.6 | 50.8   | 142.9  |
| 324.9  | 333.8  | 478.4  | 856.5  | 163.6  | 1627.4 | 1165.8 | 74.0   | 79.4   |
| 176.3  | 133.9  | 207.4  | 368.0  | 64.3   | 474.1  | 386.6  | 10.6   | 29.0   |
| 7.0    | 5.8    | 2.6    | 1.6    | 0.5    | 291.3  | 130.4  | 2.3    | 2.2    |
| 1230.2 | 1052.0 | 1157.3 | 995.8  | 412.6  | 2831.1 | 3017.3 | 106.1  | 106.6  |
| 647.9  | 565.9  | 550.3  | 428.3  | 137.8  | 707.1  | 463.7  | 48.6   | 66.9   |
| 850.3  | 766.5  | 755.6  | 637.8  | 235.6  | 1102.2 | 695.6  | 219.0  | 266.0  |
| 1036.8 | 983.9  | 913.2  | 893.5  | 413.4  | 1623.1 | 1281.3 | 194.9  | 225.6  |
| 1052.6 | 929.7  | 1014.7 | 816.8  | 338.6  | 1898.8 | 1660.7 | 292.7  | 299.1  |
| 189.9  | 118.1  | 130.3  | 112.2  | 48.8   | 197.3  | 184.9  | 45.2   | 43.1   |
| 1577.6 | 1405.6 | 1403.3 | 1254.0 | 436.9  | 2069.7 | 1524.6 | 131.8  | 125.9  |
| 5.7    | 15.9   | 15.7   | 16.3   | 4.9    | 8.0    | 8.4    | 18.1   | 10.1   |
| 32.3   | 40.7   | 42.7   | 40.1   | 21.0   | 27.5   | 19.2   | 20.8   | 31.1   |
| 6200.8 | 5095.4 | 4913.4 | 4361.1 | 2495.8 | 5261.5 | 4750.6 | 2241.0 | 2350.8 |
| 5339.5 | 4938.6 | 5072.9 | 4951.7 | 2122.7 | 6690.7 | 5240.5 | 877.2  | 1425.6 |
| 75.9   | 93.6   | 98.7   | 79.6   | 55.4   | 247.9  | 136.6  | 188.0  | 268.7  |
| 630.5  | 526.5  | 524.6  | 451.9  | 205.2  | 843.0  | 669.2  | 185.3  | 234.7  |
| 307.5  | 267.4  | 321.3  | 396.0  | 137.6  | 756.5  | 641.8  | 68.4   | 73.2   |
| 2830.9 | 2649.3 | 2331.7 | 1900.8 | 887.4  | 4453.3 | 3530.1 | 1176.3 | 1383.6 |
| 3264.5 | 2561.5 | 2736.7 | 1846.7 | 664.6  | 3859.3 | 3174.0 | 309.0  | 446.3  |
| 592.6  | 466.1  | 512.8  | 323.4  | 203.5  | 492.1  | 375.2  | 161.7  | 151.1  |
| 234.7  | 233.1  | 154.4  | 105.6  | 85.6   | 383.0  | 174.9  | 94.8   | 112.6  |
| 78.5   | 107.5  | 73.8   | 55.3   | 42.4   | 423.3  | 349.8  | 38.3   | 40.6   |
| 44.1   | 49.7   | 24.2   | 15.7   | 10.7   | 118.1  | 43.2   | 51.0   | 57.1   |
| 106.5  | 108.8  | 78.2   | 60.2   | 35.8   | 177.1  | 124.9  | 106.0  | 114.7  |
| 300.2  | 297.3  | 269.1  | 278.3  | 111.8  | 641.2  | 323.8  | 151.4  | 209.3  |
| 43.7   | 39.5   | 41.1   | 43.8   | 15.8   | 45.0   | 19.9   | 48.8   | 71.8   |
| 380.8  | 345.1  | 441.8  | 378.5  | 124.1  | 563.1  | 376.5  | 94.1   | 98.1   |
| 273.2  | 250.8  | 274.3  | 208.0  | 99.8   | 475.7  | 277.4  | 119.2  | 159.1  |
| 86.2   | 102.2  | 105.3  | 80.6   | 38.0   | 134.9  | 66.4   | 14.1   | 26.8   |
| 1127.8 | 1160.1 | 1065.6 | 1016.9 | 422.3  | 1551.9 | 1417.1 | 263.2  | 311.1  |
| 418.6  | 377.6  | 423.6  | 517.6  | 161.3  | 564.8  | 227.3  | 124.5  | 162.4  |
| 901.2  | 896.1  | 913.9  | 856.1  | 328.9  | 1840.8 | 1112.5 | 1059.4 | 1318.0 |
| 859.6  | 973.4  | 959.3  | 787.4  | 346.6  | 1210.9 | 905.1  | 102.9  | 180.6  |
| 395.1  | 414.0  | 460.7  | 411.1  | 85.7   | 903.9  | 565.9  | 21.3   | 59.0   |
| 171.2  | 107.9  | 118.8  | 163.8  | 45.0   | 207.1  | 118.1  | 189.9  | 248.5  |
| 94.6   | 100.4  | 106.4  | 104.8  | 32.5   | 241.4  | 158.3  | 194.2  | 226.1  |
| 142.1  | 175.0  | 138.9  | 82.6   | 59.5   | 165.6  | 119.1  | 162.9  | 171.4  |
| 4788.2 | 4592.1 | 4559.7 | 4332.2 | 2057.1 | 8279.3 | 6711.5 | 1966.8 | 2396.9 |
| 135.9  | 97.3   | 116.2  | 70.7   | 19.7   | 137.8  | 80.3   | 87.9   | 96.3   |
| 322.0  | 192.6  | 214.1  | 136.5  | 48.1   | 247.2  | 151.2  | 93.3   | 286.4  |

|        |        |        |        |        |        |        |        |        |
|--------|--------|--------|--------|--------|--------|--------|--------|--------|
| 801.4  | 484.0  | 471.8  | 331.0  | 111.8  | 824.8  | 439.7  | 249.7  | 315.2  |
| 49.1   | 49.8   | 50.8   | 64.9   | 31.3   | 167.1  | 128.3  | 125.9  | 199.2  |
| 272.9  | 228.2  | 266.5  | 254.6  | 93.7   | 358.2  | 248.8  | 203.9  | 262.1  |
| 31.7   | 29.0   | 23.6   | 23.6   | 17.8   | 120.1  | 98.9   | 37.6   | 41.4   |
| 125.8  | 93.9   | 106.8  | 86.8   | 48.3   | 244.5  | 190.0  | 229.0  | 254.3  |
| 1322.3 | 1217.5 | 1280.8 | 442.6  | 280.9  | 2189.7 | 787.8  | 69.2   | 94.8   |
| 413.4  | 291.4  | 261.3  | 259.1  | 88.2   | 241.4  | 167.5  | 43.0   | 37.8   |
| 499.7  | 464.1  | 466.9  | 314.9  | 147.2  | 467.6  | 309.0  | 263.8  | 339.4  |
| 133.6  | 138.3  | 141.6  | 101.0  | 59.2   | 216.5  | 87.1   | 61.1   | 70.7   |
| 454.3  | 340.6  | 373.9  | 305.1  | 122.6  | 440.8  | 300.2  | 190.2  | 168.1  |
| 279.7  | 272.4  | 249.0  | 276.2  | 102.5  | 2505.6 | 1783.0 | 79.5   | 104.3  |
| 291.7  | 233.0  | 213.4  | 269.2  | 101.1  | 1269.5 | 876.1  | 261.3  | 433.7  |
| 172.2  | 166.2  | 111.5  | 76.1   | 38.1   | 720.5  | 611.1  | 58.5   | 53.3   |
| 285.1  | 256.0  | 254.2  | 250.7  | 68.6   | 307.2  | 237.4  | 81.9   | 156.0  |
| 550.5  | 541.6  | 542.8  | 518.2  | 196.0  | 686.1  | 597.5  | 114.8  | 179.1  |
| 53.3   | 45.1   | 59.8   | 28.6   | 17.5   | 49.2   | 29.9   | 34.4   | 48.6   |
| 1838.6 | 1723.1 | 1631.1 | 1356.9 | 694.4  | 2639.3 | 1949.7 | 589.8  | 1084.9 |
| 575.7  | 472.2  | 560.2  | 877.8  | 222.2  | 5455.1 | 6269.8 | 1016.7 | 938.8  |
| 211.9  | 233.0  | 196.2  | 158.7  | 90.7   | 666.4  | 506.9  | 104.2  | 129.2  |
| 195.9  | 233.9  | 159.5  | 92.9   | 56.5   | 530.7  | 369.0  | 157.8  | 167.0  |
| 234.0  | 221.0  | 233.1  | 269.5  | 79.0   | 409.4  | 221.9  | 150.0  | 239.1  |
| 219.7  | 212.4  | 251.8  | 235.8  | 70.6   | 372.5  | 265.4  | 97.9   | 132.4  |
| 189.0  | 180.1  | 171.6  | 174.7  | 62.9   | 298.3  | 259.2  | 136.1  | 164.2  |
| 212.9  | 176.2  | 178.9  | 69.5   | 63.5   | 298.6  | 146.4  | 66.3   | 94.8   |
| 1761.6 | 1583.9 | 1596.8 | 862.2  | 528.8  | 2471.1 | 1600.2 | 324.9  | 452.8  |
| 37.6   | 26.0   | 29.5   | 14.0   | 9.3    | 53.9   | 39.3   | 24.1   | 34.2   |
| 12.5   | 12.4   | 18.4   | 14.6   | 6.6    | 25.5   | 13.9   | 0.9    | 13.7   |
| 307.1  | 324.3  | 299.4  | 334.6  | 94.8   | 548.5  | 486.6  | 114.1  | 132.4  |
| 335.0  | 297.8  | 441.5  | 822.5  | 166.3  | 246.1  | 93.2   | 28.2   | 41.9   |
| 471.0  | 384.1  | 733.9  | 1210.2 | 220.7  | 438.4  | 279.9  | 44.4   | 54.6   |
| 90.9   | 92.1   | 130.8  | 125.2  | 63.3   | 465.5  | 474.6  | 87.7   | 102.6  |
| 67.9   | 74.4   | 135.4  | 112.3  | 52.0   | 640.4  | 626.4  | 118.1  | 121.6  |
| 151.8  | 152.1  | 162.4  | 148.5  | 84.4   | 525.1  | 271.3  | 130.4  | 181.7  |
| 7.3    | 0.7    | 1.9    | 5.2    | 0.9    | 64.1   | 43.8   | 2.1    | 0.5    |
| 9.9    | 12.8   | 8.9    | 17.0   | 5.4    | 264.4  | 250.0  | 1.6    | 9.6    |
| 1652.6 | 1455.8 | 1302.3 | 1051.5 | 454.4  | 1855.3 | 1261.0 | 238.5  | 311.3  |
| 742.7  | 598.3  | 618.6  | 491.2  | 230.3  | 1664.1 | 1155.2 | 306.1  | 498.5  |
| 1600.8 | 1245.2 | 1364.7 | 1053.1 | 494.4  | 1745.3 | 1224.0 | 396.6  | 489.1  |
| 668.4  | 689.0  | 692.0  | 573.5  | 296.0  | 1348.3 | 863.4  | 79.9   | 88.1   |
| 314.1  | 234.9  | 246.2  | 193.2  | 85.7   | 437.4  | 270.6  | 53.2   | 47.3   |
| 1105.6 | 857.0  | 813.9  | 342.3  | 317.2  | 1107.1 | 883.3  | 886.6  | 1106.9 |
| 319.7  | 259.2  | 289.3  | 196.9  | 69.0   | 276.2  | 128.5  | 45.1   | 61.4   |
| 1838.4 | 1737.6 | 1776.0 | 1520.9 | 633.6  | 3781.1 | 3843.6 | 441.6  | 640.2  |
| 960.7  | 878.9  | 988.8  | 681.8  | 251.8  | 1780.8 | 1815.2 | 110.1  | 160.2  |
| 3605.2 | 3170.9 | 2855.6 | 1993.4 | 1208.3 | 5053.7 | 3788.3 | 1418.8 | 1756.8 |
| 27.8   | 31.7   | 33.0   | 7.0    | 10.6   | 52.7   | 43.6   | 387.2  | 483.2  |
| 355.2  | 350.5  | 330.8  | 383.8  | 147.0  | 567.9  | 422.6  | 595.8  | 800.4  |
| 7174.1 | 6409.7 | 7293.6 | 7884.8 | 4146.4 | 7298.0 | 4575.6 | 2873.6 | 3286.7 |
| 1.3    | 3.6    | 3.6    | 1.8    | 3.6    | 1.8    | 2.6    | 3.0    | 1.8    |
| 4.5    | 1.7    | 14.0   | 3.7    | 1.8    | 24.1   | 10.3   | 17.2   | 14.5   |
| 1.4    | 1.2    | 1.1    | 1.2    | 0.4    | 1.2    | 5.2    | 1.7    | 1.7    |
| 152.3  | 139.3  | 135.2  | 175.2  | 63.5   | 339.3  | 280.8  | 79.9   | 149.7  |
| 1143.7 | 1145.3 | 1304.8 | 1366.1 | 481.9  | 2254.8 | 1656.8 | 181.6  | 274.2  |



|        |        |        |        |        |        |        |        |        |
|--------|--------|--------|--------|--------|--------|--------|--------|--------|
| 257.8  | 261.0  | 267.9  | 262.1  | 80.6   | 350.3  | 203.3  | 68.4   | 120.9  |
| 236.6  | 143.3  | 149.1  | 102.0  | 45.8   | 226.0  | 181.5  | 239.5  | 293.2  |
| 568.9  | 601.3  | 722.3  | 547.6  | 185.8  | 496.2  | 299.9  | 102.0  | 109.3  |
| 207.4  | 169.4  | 170.7  | 173.0  | 47.0   | 169.9  | 130.4  | 134.1  | 136.8  |
| 561.7  | 691.2  | 615.9  | 691.6  | 218.6  | 1315.0 | 808.8  | 231.6  | 281.2  |
| 1341.1 | 1349.0 | 1143.2 | 801.8  | 545.2  | 1098.9 | 905.1  | 137.8  | 269.0  |
| 726.1  | 816.5  | 646.6  | 562.4  | 274.1  | 499.8  | 237.5  | 105.5  | 127.7  |
| 467.3  | 275.5  | 309.9  | 295.1  | 128.2  | 601.6  | 339.9  | 72.1   | 54.0   |
| 330.5  | 209.9  | 250.0  | 216.3  | 89.3   | 615.2  | 476.2  | 54.2   | 62.3   |
| 213.8  | 192.6  | 205.0  | 222.6  | 70.3   | 273.1  | 203.5  | 19.9   | 23.0   |
| 555.3  | 494.4  | 546.2  | 399.0  | 169.4  | 956.2  | 626.5  | 247.4  | 369.6  |
| 88.7   | 88.5   | 109.3  | 58.1   | 29.1   | 46.0   | 24.1   | 1396.6 | 1725.4 |
| 155.6  | 113.4  | 140.8  | 105.8  | 89.5   | 62.5   | 59.4   | 2081.7 | 2670.4 |
| 111.2  | 120.8  | 68.0   | 28.1   | 21.1   | 499.9  | 268.2  | 128.4  | 133.9  |
| 34.4   | 34.1   | 30.1   | 22.3   | 8.1    | 138.7  | 68.4   | 31.5   | 28.4   |
| 1462.8 | 1343.9 | 1039.7 | 878.3  | 469.3  | 2803.1 | 1987.3 | 322.5  | 420.3  |
| 69.8   | 72.2   | 59.9   | 43.2   | 25.4   | 45.0   | 39.4   | 52.2   | 66.1   |
| 192.2  | 162.8  | 149.8  | 100.3  | 52.6   | 434.4  | 226.8  | 232.0  | 294.1  |
| 148.3  | 150.8  | 167.1  | 175.5  | 68.0   | 456.7  | 317.5  | 60.8   | 67.0   |
| 30.6   | 36.7   | 41.5   | 30.9   | 16.0   | 146.3  | 91.9   | 14.4   | 23.7   |
| 98.3   | 95.6   | 104.0  | 81.6   | 27.4   | 55.2   | 76.9   | 7.7    | 17.8   |
| 337.3  | 315.0  | 305.2  | 323.5  | 156.9  | 161.0  | 189.3  | 32.2   | 29.7   |
| 2251.2 | 1712.6 | 1575.8 | 631.2  | 442.4  | 4618.3 | 3588.6 | 1103.4 | 1254.8 |
| 993.0  | 1013.0 | 977.9  | 866.5  | 369.2  | 1808.3 | 1241.0 | 35.9   | 40.4   |
| 16.0   | 10.5   | 9.6    | 7.8    | 6.0    | 26.0   | 18.7   | 1.3    | 6.3    |
| 209.9  | 141.4  | 146.3  | 178.6  | 61.0   | 341.6  | 287.3  | 82.8   | 136.2  |
| 129.8  | 104.5  | 107.7  | 91.4   | 23.2   | 173.2  | 149.3  | 30.0   | 36.1   |
| 139.8  | 66.2   | 69.8   | 77.2   | 18.7   | 137.9  | 85.8   | 39.9   | 88.1   |
| 374.4  | 421.8  | 313.3  | 231.3  | 162.3  | 571.1  | 331.2  | 846.6  | 1045.3 |
| 382.7  | 282.9  | 440.6  | 522.1  | 118.1  | 758.5  | 593.2  | 75.7   | 101.6  |
| 45.2   | 34.7   | 42.7   | 41.2   | 18.7   | 7047.1 | 5880.2 | 780.7  | 1063.1 |
| 286.2  | 250.0  | 304.0  | 354.9  | 135.8  | 375.7  | 237.4  | 173.7  | 217.2  |
| 119.7  | 94.0   | 106.2  | 80.5   | 45.6   | 143.4  | 92.1   | 100.1  | 94.1   |
| 119.1  | 90.1   | 72.9   | 77.5   | 44.1   | 118.7  | 108.5  | 114.0  | 136.8  |
| 476.6  | 405.0  | 526.6  | 796.9  | 151.0  | 584.2  | 366.7  | 64.3   | 87.1   |
| 129.0  | 116.4  | 156.8  | 158.5  | 57.3   | 192.6  | 137.2  | 109.1  | 131.0  |
| 1066.3 | 1067.1 | 1071.1 | 1135.7 | 457.5  | 808.4  | 525.9  | 134.6  | 162.0  |
| 451.3  | 305.6  | 370.5  | 402.8  | 144.0  | 612.4  | 531.2  | 26.2   | 27.1   |
| 1155.8 | 726.5  | 899.9  | 733.2  | 239.0  | 2296.5 | 1898.4 | 350.9  | 360.2  |
| 900.0  | 746.8  | 852.8  | 737.4  | 271.8  | 1909.6 | 1471.0 | 269.5  | 280.0  |
| 6126.7 | 5336.2 | 4639.8 | 3250.5 | 2152.1 | 5612.4 | 3908.9 | 2723.0 | 3200.7 |
| 374.1  | 295.1  | 385.9  | 482.1  | 94.4   | 372.6  | 250.8  | 113.1  | 170.0  |
| 172.2  | 158.2  | 164.5  | 215.6  | 73.5   | 244.8  | 197.3  | 37.5   | 55.4   |
| 455.1  | 359.9  | 402.9  | 406.3  | 133.2  | 490.5  | 297.9  | 179.4  | 222.6  |
| 137.7  | 87.6   | 55.5   | 47.6   | 40.4   | 104.1  | 68.3   | 67.9   | 89.0   |
| 160.4  | 159.7  | 101.6  | 50.5   | 39.0   | 39.9   | 27.2   | 83.9   | 134.6  |
| 41.9   | 47.1   | 37.2   | 16.0   | 14.8   | 27.0   | 9.0    | 10.6   | 26.8   |
| 311.0  | 277.7  | 310.8  | 336.0  | 111.3  | 664.7  | 530.4  | 110.6  | 197.4  |
| 270.0  | 276.3  | 167.1  | 488.3  | 110.8  | 42.6   | 48.5   | 96.1   | 101.9  |
| 73.3   | 54.2   | 115.2  | 70.4   | 25.3   | 847.4  | 379.3  | 574.7  | 829.2  |
| 2122.3 | 1928.0 | 1716.5 | 1607.7 | 763.3  | 3684.1 | 2974.0 | 854.1  | 910.2  |
| 57.7   | 44.3   | 82.5   | 113.1  | 27.6   | 321.1  | 233.7  | 41.8   | 56.1   |
| 3.3    | 24.8   | 10.5   | 31.3   | 12.2   | 123.5  | 28.1   | 95.9   | 110.0  |

|        |        |        |        |        |        |        |       |       |
|--------|--------|--------|--------|--------|--------|--------|-------|-------|
| 144.6  | 113.5  | 130.4  | 189.2  | 76.1   | 595.0  | 375.1  | 241.3 | 245.8 |
| 273.1  | 237.6  | 182.6  | 56.4   | 52.2   | 2224.2 | 1845.5 | 1.0   | 1.5   |
| 102.0  | 71.7   | 72.2   | 42.9   | 24.6   | 110.2  | 69.5   | 14.4  | 18.3  |
| 284.8  | 230.8  | 255.5  | 241.9  | 92.2   | 636.4  | 483.2  | 22.3  | 47.2  |
| 432.7  | 348.8  | 307.0  | 245.3  | 114.6  | 1178.0 | 719.2  | 191.7 | 415.4 |
| 1209.4 | 831.4  | 817.9  | 753.3  | 311.0  | 1232.8 | 907.6  | 136.3 | 150.2 |
| 262.8  | 239.7  | 236.2  | 169.9  | 119.2  | 859.7  | 712.4  | 37.3  | 32.6  |
| 810.7  | 787.0  | 681.0  | 482.9  | 247.9  | 1866.2 | 1836.3 | 367.7 | 540.9 |
| 10.1   | 10.8   | 7.7    | 8.7    | 0.9    | 1.7    | 3.3    | 6.3   | 7.0   |
| 160.2  | 160.9  | 131.3  | 110.3  | 77.1   | 369.1  | 313.0  | 142.4 | 199.2 |
| 203.9  | 147.1  | 121.9  | 91.2   | 60.4   | 676.5  | 770.8  | 223.9 | 210.5 |
| 123.8  | 127.3  | 127.1  | 184.3  | 74.3   | 87.9   | 71.1   | 148.9 | 230.7 |
| 45.9   | 78.1   | 59.7   | 79.5   | 30.2   | 17.5   | 14.4   | 118.0 | 111.6 |
| 81.3   | 94.3   | 72.7   | 67.2   | 13.0   | 110.5  | 30.4   | 58.4  | 84.7  |
| 217.9  | 197.0  | 187.9  | 137.3  | 56.7   | 486.5  | 269.6  | 134.5 | 153.5 |
| 189.3  | 221.2  | 183.2  | 147.1  | 66.5   | 530.6  | 343.3  | 76.7  | 77.6  |
| 534.4  | 508.3  | 489.5  | 405.0  | 133.3  | 374.8  | 122.7  | 73.9  | 143.0 |
| 753.1  | 698.5  | 700.3  | 672.7  | 287.3  | 694.0  | 444.1  | 87.1  | 112.5 |
| 148.1  | 125.5  | 119.6  | 83.8   | 31.5   | 143.8  | 83.8   | 97.8  | 160.8 |
| 1169.5 | 1062.8 | 1171.1 | 1099.5 | 600.9  | 2513.6 | 1853.6 | 252.7 | 225.2 |
| 976.1  | 1059.2 | 1052.5 | 1070.8 | 476.8  | 2111.0 | 1446.8 | 214.0 | 287.3 |
| 94.0   | 57.3   | 71.9   | 82.3   | 21.6   | 90.3   | 55.2   | 260.3 | 530.0 |
| 162.3  | 129.6  | 150.8  | 156.4  | 56.4   | 221.9  | 227.6  | 273.1 | 386.4 |
| 100.5  | 80.6   | 83.1   | 106.4  | 32.0   | 86.0   | 60.8   | 363.5 | 476.3 |
| 735.9  | 763.3  | 763.1  | 717.6  | 294.0  | 932.4  | 765.9  | 285.7 | 411.1 |
| 563.9  | 545.4  | 549.0  | 471.0  | 249.1  | 473.7  | 338.4  | 378.9 | 520.5 |
| 73.1   | 63.5   | 69.4   | 57.3   | 26.5   | 159.2  | 87.7   | 44.0  | 57.6  |
| 1909.5 | 1994.9 | 1921.3 | 1381.2 | 680.4  | 5141.3 | 4868.1 | 614.3 | 827.9 |
| 802.0  | 918.0  | 708.9  | 1030.9 | 299.9  | 2670.3 | 2754.5 | 282.2 | 332.4 |
| 89.5   | 60.7   | 70.5   | 54.2   | 17.8   | 277.6  | 150.9  | 135.2 | 163.6 |
| 3804.1 | 3152.8 | 3509.7 | 3533.5 | 1259.3 | 6291.5 | 4961.1 | 773.9 | 993.5 |
| 19.4   | 23.3   | 16.0   | 36.0   | 3.5    | 11.1   | 14.5   | 7.4   | 3.8   |
| 17.2   | 16.0   | 23.3   | 29.9   | 10.7   | 31.1   | 23.9   | 1.8   | 13.8  |
| 19.7   | 6.1    | 16.6   | 2.9    | 5.3    | 39.0   | 6.7    | 14.6  | 6.3   |
| 171.2  | 147.3  | 183.8  | 272.0  | 45.9   | 321.9  | 160.0  | 62.7  | 57.7  |
| 0.9    | 2.3    | 1.2    | 2.2    | 5.0    | 9.6    | 0.8    | 2.5   | 1.3   |
| 1513.8 | 1940.2 | 1655.2 | 2041.9 | 713.8  | 1856.6 | 1913.3 | 195.9 | 182.5 |
| 978.0  | 834.0  | 866.0  | 774.5  | 298.1  | 1194.0 | 728.0  | 463.4 | 576.9 |
| 167.9  | 165.7  | 132.8  | 99.0   | 62.7   | 604.2  | 306.8  | 172.0 | 230.1 |
| 185.1  | 154.9  | 147.9  | 90.3   | 42.7   | 274.7  | 116.4  | 120.4 | 135.2 |
| 42.0   | 34.6   | 41.2   | 24.7   | 18.3   | 230.4  | 128.1  | 84.9  | 138.1 |
| 1411.1 | 1329.0 | 1258.1 | 1396.0 | 436.2  | 1880.3 | 1733.0 | 289.3 | 260.3 |
| 21.3   | 6.3    | 5.5    | 12.1   | 6.2    | 289.1  | 174.8  | 1.5   | 1.3   |
| 29.8   | 28.5   | 18.0   | 18.1   | 12.1   | 214.9  | 145.2  | 18.9  | 9.0   |
| 29.4   | 27.4   | 24.2   | 4.4    | 10.0   | 439.0  | 397.4  | 22.3  | 17.2  |
| 41.1   | 57.0   | 49.7   | 73.3   | 25.5   | 156.6  | 114.0  | 11.4  | 38.1  |
| 256.4  | 258.2  | 251.3  | 169.7  | 64.7   | 514.5  | 215.1  | 34.0  | 54.5  |
| 36.1   | 44.6   | 60.0   | 22.1   | 16.5   | 42.2   | 12.2   | 8.5   | 18.3  |
| 85.9   | 75.6   | 97.4   | 44.6   | 42.1   | 123.6  | 87.6   | 31.6  | 22.7  |
| 116.6  | 50.6   | 43.3   | 15.4   | 29.5   | 281.3  | 200.3  | 97.7  | 86.5  |
| 654.9  | 661.6  | 751.9  | 958.9  | 337.3  | 1314.0 | 1280.0 | 317.9 | 588.3 |
| 154.4  | 153.3  | 161.7  | 117.8  | 49.2   | 361.7  | 249.6  | 123.0 | 169.2 |
| 744.8  | 678.5  | 726.7  | 903.4  | 263.5  | 1395.6 | 945.5  | 198.4 | 286.2 |

|        |        |        |        |        |        |        |        |        |
|--------|--------|--------|--------|--------|--------|--------|--------|--------|
| 586.3  | 521.4  | 521.9  | 476.1  | 109.4  | 749.9  | 465.7  | 157.8  | 224.1  |
| 108.0  | 86.4   | 72.5   | 79.2   | 26.2   | 151.8  | 110.1  | 78.2   | 131.5  |
| 709.4  | 605.1  | 496.9  | 292.1  | 201.6  | 1677.2 | 1225.0 | 83.6   | 117.9  |
| 1645.3 | 1720.0 | 1550.4 | 1116.3 | 635.1  | 1589.7 | 1146.9 | 307.1  | 620.8  |
| 872.1  | 1031.5 | 1005.2 | 994.9  | 346.7  | 1884.0 | 1490.5 | 86.0   | 112.1  |
| 3.7    | 4.7    | 5.9    | 6.4    | 0.6    | 3.9    | 13.0   | 1.4    | 2.8    |
| 40.1   | 28.9   | 40.2   | 21.1   | 12.5   | 98.3   | 59.1   | 1.9    | 5.4    |
| 413.7  | 412.7  | 542.7  | 276.7  | 164.6  | 808.2  | 536.0  | 3.6    | 7.1    |
| 541.3  | 357.6  | 457.0  | 337.4  | 172.9  | 734.1  | 446.6  | 179.6  | 151.0  |
| 669.1  | 742.4  | 656.2  | 275.2  | 221.3  | 206.7  | 186.1  | 0.7    | 1.9    |
| 134.3  | 164.0  | 233.4  | 458.2  | 88.4   | 102.8  | 74.6   | 265.8  | 267.2  |
| 1309.9 | 1260.9 | 1308.3 | 1133.6 | 527.0  | 2829.2 | 1928.7 | 210.4  | 327.0  |
| 2911.4 | 2783.6 | 2291.3 | 1671.6 | 969.2  | 2586.5 | 1802.3 | 425.2  | 473.2  |
| 32.7   | 24.5   | 23.6   | 23.0   | 12.5   | 56.6   | 31.6   | 16.6   | 21.0   |
| 71.4   | 79.6   | 54.3   | 55.5   | 33.1   | 93.2   | 69.0   | 18.8   | 35.9   |
| 99.5   | 67.1   | 98.7   | 55.3   | 39.9   | 132.4  | 87.7   | 61.1   | 96.0   |
| 291.7  | 370.1  | 261.0  | 250.9  | 128.1  | 474.0  | 334.2  | 29.7   | 48.2   |
| 319.2  | 447.0  | 312.9  | 270.5  | 107.6  | 506.6  | 365.8  | 22.5   | 35.0   |
| 135.2  | 153.2  | 125.4  | 139.6  | 85.6   | 311.2  | 246.3  | 321.2  | 311.1  |
| 366.1  | 292.0  | 285.8  | 239.8  | 96.0   | 497.0  | 373.4  | 194.3  | 141.5  |
| 638.2  | 608.5  | 601.2  | 604.9  | 233.3  | 560.0  | 502.1  | 170.6  | 210.3  |
| 186.8  | 178.2  | 117.0  | 85.3   | 49.0   | 57.1   | 40.9   | 128.3  | 163.4  |
| 32.9   | 14.3   | 21.3   | 15.6   | 2.2    | 404.4  | 182.1  | 438.4  | 475.4  |
| 533.4  | 535.9  | 502.5  | 453.4  | 168.7  | 810.4  | 646.9  | 53.0   | 65.2   |
| 1.6    | 1.5    | 2.3    | 0.9    | 0.7    | 13.9   | 14.0   | 7.3    | 3.1    |
| 120.3  | 70.4   | 100.0  | 121.0  | 38.6   | 188.1  | 148.3  | 99.1   | 112.8  |
| 1619.4 | 1595.7 | 2239.4 | 2643.8 | 1147.4 | 59.8   | 39.1   | 30.9   | 63.4   |
| 27.8   | 27.1   | 8.0    | 9.1    | 3.8    | 96.1   | 63.7   | 17.6   | 13.9   |
| 366.0  | 380.5  | 248.1  | 141.2  | 95.2   | 1358.8 | 1090.3 | 70.1   | 106.3  |
| 206.2  | 157.4  | 102.3  | 61.4   | 59.0   | 781.6  | 500.3  | 109.7  | 162.7  |
| 170.1  | 164.9  | 147.9  | 337.2  | 129.8  | 485.4  | 401.7  | 48.9   | 71.6   |
| 325.9  | 273.7  | 220.3  | 160.2  | 65.1   | 1310.9 | 725.2  | 255.4  | 313.4  |
| 213.7  | 207.3  | 216.0  | 123.3  | 60.8   | 739.5  | 469.0  | 55.2   | 103.2  |
| 11.0   | 2.1    | 6.6    | 6.0    | 6.2    | 207.6  | 120.0  | 2.8    | 4.9    |
| 10.9   | 12.3   | 29.5   | 14.4   | 11.2   | 229.2  | 41.2   | 30.9   | 28.4   |
| 334.1  | 258.0  | 233.0  | 210.9  | 68.1   | 223.0  | 231.9  | 55.8   | 71.1   |
| 372.5  | 415.2  | 402.0  | 370.0  | 106.9  | 474.2  | 290.3  | 94.1   | 106.7  |
| 21.9   | 27.1   | 10.4   | 15.2   | 5.0    | 675.7  | 375.3  | 78.5   | 89.3   |
| 564.8  | 609.6  | 556.3  | 681.9  | 242.5  | 1637.1 | 1135.9 | 131.8  | 180.6  |
| 88.7   | 93.9   | 86.6   | 89.6   | 25.5   | 145.8  | 100.8  | 28.1   | 27.9   |
| 493.5  | 470.4  | 389.1  | 324.8  | 149.0  | 1066.7 | 657.1  | 104.9  | 118.2  |
| 37.7   | 31.0   | 34.4   | 19.0   | 6.9    | 50.0   | 31.9   | 22.8   | 22.4   |
| 4263.6 | 3876.2 | 3858.6 | 3856.3 | 1502.5 | 7986.2 | 7373.4 | 2253.6 | 2299.0 |
| 127.1  | 190.6  | 143.7  | 67.8   | 47.1   | 2601.0 | 2306.2 | 71.3   | 139.5  |
| 460.6  | 373.2  | 429.2  | 276.6  | 89.9   | 259.6  | 74.2   | 140.0  | 198.4  |
| 543.8  | 519.7  | 572.2  | 421.9  | 169.5  | 691.8  | 360.1  | 166.4  | 199.1  |
| 1.9    | 2.4    | 9.3    | 2.6    | 2.2    | 1.3    | 5.0    | 1.2    | 2.8    |
| 491.7  | 474.9  | 467.2  | 425.2  | 172.2  | 739.8  | 500.2  | 142.8  | 203.5  |
| 2222.0 | 1888.7 | 1706.9 | 1847.7 | 631.4  | 6755.3 | 5339.5 | 328.7  | 529.1  |
| 1004.3 | 1006.8 | 943.5  | 894.0  | 315.5  | 734.0  | 483.0  | 218.8  | 288.8  |
| 856.2  | 776.9  | 841.6  | 765.7  | 331.2  | 489.6  | 318.0  | 130.6  | 222.3  |
| 1632.0 | 1689.9 | 1532.7 | 1293.1 | 695.7  | 1900.2 | 1687.5 | 80.5   | 148.0  |
| 11.1   | 17.3   | 10.2   | 13.9   | 1.1    | 19.8   | 17.6   | 11.7   | 15.5   |

|        |        |        |        |       |        |        |       |        |
|--------|--------|--------|--------|-------|--------|--------|-------|--------|
| 15.5   | 13.8   | 23.6   | 14.1   | 10.5  | 25.4   | 8.3    | 13.7  | 16.1   |
| 148.8  | 145.7  | 277.8  | 151.8  | 71.1  | 826.5  | 616.3  | 188.6 | 221.2  |
| 105.1  | 105.8  | 122.0  | 105.1  | 39.3  | 133.2  | 82.9   | 46.9  | 76.7   |
| 133.4  | 111.3  | 128.3  | 156.2  | 57.6  | 167.7  | 130.7  | 61.6  | 92.7   |
| 219.7  | 179.9  | 192.0  | 136.6  | 47.9  | 306.2  | 179.7  | 138.5 | 193.4  |
| 398.0  | 336.1  | 318.8  | 272.0  | 137.2 | 629.6  | 340.5  | 263.0 | 278.1  |
| 31.4   | 38.4   | 19.3   | 13.9   | 4.2   | 12.1   | 1.4    | 32.8  | 62.6   |
| 87.2   | 87.3   | 69.1   | 58.7   | 27.2  | 57.8   | 45.2   | 45.7  | 49.3   |
| 411.8  | 580.9  | 433.0  | 297.1  | 234.0 | 169.4  | 124.9  | 87.7  | 111.2  |
| 1871.2 | 1644.8 | 1520.7 | 985.3  | 656.8 | 2562.7 | 1955.8 | 320.2 | 449.5  |
| 310.6  | 300.0  | 352.0  | 371.1  | 120.9 | 739.1  | 450.9  | 40.1  | 80.6   |
| 13.3   | 22.3   | 25.1   | 18.4   | 8.3   | 314.7  | 137.9  | 1.3   | 1.3    |
| 365.9  | 377.1  | 378.9  | 397.4  | 111.6 | 884.4  | 675.3  | 93.6  | 112.3  |
| 126.4  | 85.5   | 108.9  | 106.1  | 39.9  | 95.9   | 83.1   | 94.0  | 129.9  |
| 15.4   | 16.5   | 6.6    | 2.7    | 6.4   | 30.7   | 3.1    | 10.4  | 16.6   |
| 6.7    | 0.5    | 3.6    | 0.9    | 2.2   | 625.4  | 646.0  | 0.5   | 1.0    |
| 555.7  | 507.8  | 556.7  | 471.9  | 175.3 | 732.5  | 421.6  | 119.5 | 146.4  |
| 417.7  | 294.1  | 328.2  | 259.2  | 87.5  | 461.4  | 327.7  | 127.6 | 144.1  |
| 97.0   | 99.9   | 80.8   | 93.7   | 40.1  | 621.1  | 499.8  | 363.4 | 398.1  |
| 76.4   | 72.7   | 50.6   | 74.1   | 16.3  | 737.2  | 578.8  | 132.1 | 225.6  |
| 719.9  | 597.5  | 629.7  | 702.5  | 210.4 | 1374.8 | 872.3  | 215.8 | 268.8  |
| 54.7   | 47.0   | 21.9   | 21.0   | 17.0  | 114.9  | 64.0   | 90.9  | 133.9  |
| 1.4    | 6.4    | 6.1    | 1.6    | 0.8   | 28.5   | 11.4   | 2.4   | 6.4    |
| 20.2   | 6.6    | 13.4   | 6.1    | 3.9   | 24.6   | 23.9   | 16.8  | 13.9   |
| 1.4    | 1.4    | 2.1    | 8.7    | 1.6   | 13.5   | 5.6    | 13.5  | 0.6    |
| 1.7    | 8.5    | 10.3   | 1.6    | 6.4   | 30.8   | 12.4   | 0.4   | 2.7    |
| 529.6  | 407.7  | 438.8  | 395.2  | 169.6 | 602.4  | 376.6  | 264.6 | 370.9  |
| 98.9   | 105.1  | 84.6   | 77.4   | 24.4  | 81.0   | 99.3   | 28.1  | 33.5   |
| 1.6    | 5.6    | 1.0    | 0.7    | 0.5   | 4989.1 | 7000.0 | 894.1 | 1301.8 |
| 277.0  | 254.1  | 290.4  | 241.5  | 88.5  | 241.1  | 196.4  | 108.2 | 76.5   |
| 300.3  | 277.0  | 277.9  | 240.8  | 70.6  | 252.7  | 159.4  | 17.6  | 27.4   |
| 74.8   | 81.0   | 59.9   | 32.2   | 24.3  | 82.0   | 63.4   | 2.6   | 17.1   |
| 344.0  | 340.3  | 361.4  | 326.7  | 164.7 | 762.3  | 537.2  | 135.7 | 132.0  |
| 117.6  | 99.1   | 124.3  | 93.5   | 32.4  | 212.5  | 112.9  | 50.3  | 67.1   |
| 162.1  | 181.7  | 135.8  | 121.3  | 47.5  | 576.9  | 291.7  | 199.1 | 246.3  |
| 685.0  | 595.7  | 716.9  | 923.9  | 204.0 | 1370.1 | 1065.4 | 82.3  | 107.3  |
| 1272.4 | 1645.9 | 1544.2 | 2043.7 | 670.3 | 2697.2 | 2268.1 | 178.3 | 140.2  |
| 2.6    | 6.2    | 6.8    | 1.4    | 2.5   | 4.4    | 3.5    | 7.5   | 10.6   |
| 4.3    | 4.8    | 7.4    | 1.7    | 1.6   | 1.7    | 2.0    | 3.8   | 3.9    |
| 35.1   | 30.4   | 39.3   | 53.5   | 18.7  | 191.7  | 138.5  | 27.4  | 22.7   |
| 117.9  | 100.6  | 116.9  | 213.6  | 46.5  | 563.2  | 415.5  | 9.2   | 23.4   |
| 2377.3 | 1974.2 | 2025.2 | 1496.0 | 687.7 | 3205.2 | 2574.2 | 450.3 | 609.7  |
| 588.6  | 539.7  | 581.7  | 480.9  | 188.7 | 324.7  | 213.2  | 50.0  | 96.4   |
| 476.8  | 361.4  | 450.4  | 454.3  | 149.4 | 595.5  | 492.4  | 96.9  | 161.1  |
| 105.6  | 108.1  | 137.6  | 384.9  | 30.9  | 22.1   | 3.4    | 2.3   | 2.4    |
| 557.8  | 416.4  | 465.0  | 284.3  | 169.6 | 1883.5 | 1177.9 | 88.6  | 167.8  |
| 2147.6 | 1897.4 | 1832.9 | 1617.0 | 825.3 | 3971.3 | 2782.0 | 62.7  | 81.6   |
| 98.7   | 74.2   | 98.9   | 102.8  | 39.3  | 115.4  | 81.6   | 171.9 | 113.3  |
| 86.8   | 76.3   | 88.5   | 134.2  | 31.7  | 148.2  | 97.1   | 9.2   | 27.3   |
| 682.3  | 595.8  | 538.7  | 512.0  | 231.6 | 445.3  | 260.7  | 143.4 | 170.1  |
| 57.6   | 51.0   | 26.4   | 35.7   | 15.7  | 71.5   | 61.8   | 89.6  | 132.6  |
| 295.1  | 236.9  | 264.4  | 205.9  | 102.0 | 343.9  | 250.1  | 68.0  | 43.6   |
| 23.2   | 39.3   | 38.8   | 26.7   | 21.2  | 8.0    | 12.3   | 9.2   | 7.2    |

|        |        |        |        |       |        |        |       |        |
|--------|--------|--------|--------|-------|--------|--------|-------|--------|
| 28.2   | 51.6   | 26.8   | 27.6   | 18.3  | 6.5    | 5.5    | 14.7  | 14.3   |
| 30.2   | 39.7   | 26.7   | 12.5   | 11.9  | 90.0   | 68.9   | 0.9   | 0.8    |
| 18.3   | 24.2   | 1.5    | 4.0    | 1.6   | 57.8   | 50.3   | 0.6   | 1.9    |
| 56.3   | 72.1   | 33.0   | 8.7    | 11.7  | 24.2   | 1.1    | 50.7  | 70.9   |
| 40.2   | 27.7   | 28.7   | 20.0   | 1.7   | 87.0   | 61.8   | 31.8  | 45.7   |
| 85.4   | 72.5   | 62.3   | 53.4   | 15.6  | 106.0  | 42.7   | 13.6  | 41.3   |
| 18.8   | 9.0    | 10.5   | 10.7   | 9.3   | 34.3   | 27.2   | 44.8  | 48.6   |
| 102.2  | 61.9   | 96.0   | 84.0   | 31.0  | 172.2  | 118.3  | 399.2 | 608.5  |
| 222.0  | 188.9  | 215.8  | 193.4  | 72.3  | 399.8  | 264.1  | 31.2  | 42.4   |
| 116.1  | 75.5   | 69.1   | 65.4   | 31.1  | 217.3  | 112.9  | 70.7  | 94.4   |
| 453.9  | 295.7  | 315.3  | 227.6  | 87.9  | 678.9  | 278.4  | 216.2 | 228.9  |
| 319.0  | 266.1  | 273.1  | 188.2  | 63.1  | 254.5  | 137.4  | 14.0  | 16.4   |
| 751.0  | 749.1  | 646.9  | 435.7  | 176.4 | 686.5  | 367.5  | 23.5  | 49.7   |
| 34.0   | 40.0   | 32.8   | 46.1   | 9.8   | 604.8  | 377.4  | 12.1  | 15.9   |
| 44.0   | 14.4   | 12.3   | 13.6   | 3.2   | 349.8  | 188.1  | 67.6  | 84.2   |
| 350.8  | 284.1  | 339.2  | 221.5  | 73.9  | 680.8  | 370.3  | 2.5   | 3.5    |
| 825.0  | 655.0  | 745.3  | 685.4  | 222.1 | 1619.9 | 1153.3 | 223.3 | 310.7  |
| 74.3   | 68.8   | 68.9   | 53.6   | 28.4  | 297.5  | 181.6  | 86.6  | 40.5   |
| 199.5  | 113.0  | 220.5  | 506.2  | 126.9 | 121.8  | 97.5   | 62.7  | 128.8  |
| 106.8  | 98.0   | 135.6  | 272.1  | 62.8  | 101.2  | 59.9   | 84.6  | 102.4  |
| 218.4  | 197.9  | 270.0  | 165.0  | 76.7  | 1338.3 | 1057.5 | 363.3 | 629.6  |
| 1364.1 | 1227.0 | 1335.0 | 1594.7 | 557.5 | 2160.6 | 1537.7 | 190.7 | 248.4  |
| 16.6   | 16.8   | 25.2   | 8.0    | 9.6   | 23.7   | 1.5    | 13.1  | 9.1    |
| 102.1  | 84.5   | 96.1   | 99.9   | 25.5  | 152.8  | 154.4  | 56.0  | 49.3   |
| 222.9  | 186.1  | 205.8  | 220.1  | 110.2 | 522.6  | 545.0  | 99.7  | 95.3   |
| 26.0   | 7.3    | 19.4   | 8.6    | 11.5  | 40.8   | 25.0   | 12.8  | 14.5   |
| 619.7  | 644.0  | 532.0  | 265.8  | 189.4 | 878.5  | 642.5  | 384.0 | 443.5  |
| 649.6  | 393.5  | 550.7  | 462.1  | 193.3 | 904.3  | 792.8  | 117.5 | 140.3  |
| 844.3  | 352.3  | 464.2  | 345.5  | 183.3 | 1693.5 | 1645.9 | 104.0 | 137.7  |
| 78.4   | 71.5   | 62.8   | 42.9   | 23.2  | 131.3  | 64.2   | 5.4   | 9.1    |
| 298.9  | 276.1  | 253.6  | 222.5  | 82.2  | 1080.4 | 723.0  | 14.0  | 10.2   |
| 186.2  | 122.2  | 139.9  | 112.6  | 51.6  | 278.9  | 172.1  | 69.3  | 87.7   |
| 15.4   | 4.2    | 25.8   | 6.6    | 8.3   | 27.2   | 9.8    | 447.5 | 480.1  |
| 154.9  | 106.7  | 124.0  | 112.1  | 44.5  | 435.6  | 310.8  | 98.4  | 134.1  |
| 153.0  | 136.4  | 137.2  | 113.1  | 59.0  | 544.3  | 333.7  | 98.3  | 105.7  |
| 2728.5 | 2120.8 | 2240.0 | 1941.5 | 711.2 | 2768.0 | 2031.2 | 195.0 | 219.2  |
| 156.2  | 156.9  | 152.2  | 124.1  | 46.6  | 123.6  | 85.0   | 118.5 | 176.8  |
| 34.7   | 39.2   | 34.1   | 31.6   | 18.1  | 11.6   | 4.0    | 9.5   | 16.5   |
| 75.2   | 46.8   | 54.2   | 39.7   | 7.5   | 49.5   | 33.8   | 19.8  | 28.7   |
| 23.6   | 6.6    | 33.3   | 21.3   | 10.1  | 19.1   | 2.8    | 34.8  | 39.2   |
| 153.5  | 140.5  | 147.7  | 196.6  | 57.3  | 819.1  | 698.5  | 218.6 | 367.2  |
| 402.4  | 280.1  | 364.2  | 361.3  | 131.3 | 561.2  | 394.8  | 64.3  | 93.5   |
| 588.3  | 799.0  | 773.9  | 778.5  | 218.6 | 376.5  | 354.1  | 82.7  | 137.4  |
| 74.9   | 73.5   | 57.4   | 52.5   | 31.7  | 40.4   | 27.3   | 39.8  | 52.2   |
| 7.7    | 4.1    | 5.0    | 3.4    | 3.3   | 4.6    | 1.4    | 15.6  | 8.4    |
| 4.2    | 4.8    | 0.6    | 2.0    | 0.2   | 1.0    | 3.4    | 5.1   | 0.6    |
| 29.8   | 28.2   | 22.1   | 6.0    | 2.4   | 149.6  | 56.4   | 76.6  | 24.1   |
| 3.0    | 1.3    | 4.4    | 10.4   | 3.7   | 3.9    | 2.7    | 0.7   | 2.9    |
| 166.7  | 154.8  | 171.2  | 176.5  | 58.3  | 172.6  | 107.7  | 23.8  | 25.9   |
| 624.6  | 579.2  | 688.7  | 583.6  | 225.3 | 545.1  | 279.2  | 143.0 | 180.2  |
| 1182.8 | 1005.1 | 1271.8 | 1414.8 | 466.9 | 1697.5 | 1236.0 | 368.0 | 417.7  |
| 1675.4 | 1415.1 | 1567.5 | 1915.3 | 496.5 | 2028.5 | 1669.1 | 730.0 | 1064.8 |
| 517.2  | 592.5  | 594.7  | 560.1  | 387.8 | 1483.0 | 986.9  | 84.8  | 131.4  |

|        |        |        |        |        |        |        |        |        |
|--------|--------|--------|--------|--------|--------|--------|--------|--------|
| 6808.8 | 5780.3 | 5811.0 | 5026.5 | 3678.6 | 6793.9 | 6457.8 | 2811.2 | 4220.4 |
| 218.8  | 202.4  | 239.6  | 191.9  | 71.5   | 426.7  | 327.9  | 134.8  | 175.9  |
| 112.9  | 85.5   | 76.2   | 62.8   | 20.8   | 131.0  | 81.1   | 67.1   | 50.2   |
| 119.3  | 64.1   | 89.1   | 115.0  | 40.1   | 85.6   | 90.8   | 52.9   | 58.0   |
| 176.7  | 143.3  | 149.1  | 157.4  | 48.9   | 204.4  | 120.8  | 78.2   | 106.3  |
| 170.9  | 145.7  | 164.3  | 170.3  | 66.5   | 173.8  | 102.6  | 79.5   | 138.1  |
| 320.9  | 265.7  | 243.3  | 177.4  | 65.1   | 340.3  | 439.7  | 35.4   | 46.0   |
| 136.9  | 97.0   | 125.1  | 105.7  | 36.6   | 94.1   | 56.4   | 7.1    | 11.3   |
| 603.2  | 669.9  | 690.7  | 591.6  | 221.6  | 940.3  | 590.8  | 21.3   | 55.5   |
| 208.8  | 172.4  | 322.9  | 524.8  | 97.8   | 861.9  | 305.4  | 37.9   | 44.2   |
| 6.5    | 25.2   | 2.9    | 2.4    | 1.3    | 19.2   | 3.3    | 101.4  | 128.2  |
| 489.0  | 396.2  | 363.0  | 239.1  | 154.2  | 468.5  | 291.6  | 624.7  | 640.4  |
| 382.9  | 257.7  | 214.7  | 103.7  | 102.7  | 859.2  | 650.1  | 41.7   | 43.7   |
| 208.4  | 196.5  | 132.1  | 48.6   | 67.6   | 556.5  | 212.0  | 35.8   | 42.0   |
| 797.0  | 699.1  | 648.1  | 445.8  | 263.7  | 731.1  | 509.5  | 101.7  | 107.5  |
| 4.5    | 1.5    | 2.8    | 1.9    | 7.0    | 19.9   | 3.3    | 3.6    | 8.7    |
| 342.0  | 424.9  | 388.3  | 176.0  | 169.9  | 1151.9 | 807.4  | 13.6   | 24.3   |
| 327.5  | 442.9  | 355.9  | 330.5  | 132.9  | 262.3  | 163.7  | 46.4   | 82.8   |
| 1.0    | 1.1    | 0.7    | 1.3    | 0.6    | 33.5   | 14.3   | 2.9    | 12.4   |
| 7.4    | 3.5    | 1.1    | 1.5    | 1.3    | 3492.9 | 2274.2 | 3.4    | 11.5   |
| 112.9  | 105.0  | 77.5   | 85.1   | 21.4   | 208.3  | 119.9  | 64.7   | 66.9   |
| 349.6  | 356.8  | 284.1  | 131.0  | 102.8  | 260.3  | 101.2  | 17.4   | 15.1   |
| 316.1  | 338.6  | 506.0  | 341.3  | 92.4   | 382.0  | 247.4  | 58.6   | 102.3  |
| 566.6  | 583.5  | 599.0  | 477.8  | 232.0  | 417.1  | 272.2  | 53.9   | 82.7   |
| 110.0  | 83.2   | 52.2   | 73.5   | 25.6   | 141.3  | 85.1   | 197.7  | 292.7  |
| 61.1   | 65.3   | 49.8   | 21.4   | 10.2   | 2346.7 | 3045.5 | 10.3   | 9.8    |
| 3676.3 | 3669.8 | 3694.5 | 3195.4 | 1554.1 | 100.6  | 47.3   | 1.7    | 0.3    |
| 8051.7 | 7406.9 | 7053.9 | 6021.7 | 3388.7 | 134.7  | 82.8   | 0.8    | 0.8    |
| 260.4  | 201.8  | 204.8  | 159.5  | 72.1   | 169.1  | 109.4  | 75.1   | 73.5   |
| 38.4   | 24.1   | 22.8   | 3.4    | 14.2   | 13.5   | 22.6   | 38.0   | 28.3   |
| 224.4  | 131.1  | 191.5  | 275.1  | 43.7   | 268.9  | 151.7  | 25.1   | 37.4   |
| 55.7   | 61.3   | 49.9   | 45.7   | 23.8   | 210.4  | 135.9  | 58.3   | 63.7   |
| 23.2   | 14.4   | 2.8    | 13.3   | 2.1    | 18.9   | 20.3   | 14.1   | 5.2    |
| 294.9  | 232.8  | 296.5  | 220.1  | 86.6   | 198.5  | 137.3  | 41.8   | 62.0   |
| 87.8   | 94.1   | 86.2   | 66.2   | 24.7   | 140.3  | 120.6  | 23.7   | 10.6   |
| 36.0   | 75.6   | 82.6   | 90.5   | 28.2   | 819.6  | 728.6  | 3.3    | 25.7   |
| 40.8   | 37.7   | 45.1   | 67.1   | 13.5   | 270.9  | 154.5  | 15.5   | 19.7   |
| 105.0  | 87.6   | 108.3  | 138.9  | 34.5   | 780.9  | 532.2  | 11.2   | 20.7   |
| 209.6  | 209.6  | 161.7  | 72.5   | 62.6   | 339.7  | 269.7  | 50.5   | 54.5   |
| 137.9  | 133.0  | 95.8   | 54.6   | 42.0   | 279.3  | 248.3  | 36.9   | 61.8   |
| 58.8   | 48.6   | 58.2   | 45.0   | 14.4   | 1.1    | 3.9    | 9.0    | 6.1    |
| 13.2   | 13.9   | 13.0   | 10.4   | 6.2    | 0.1    | 0.2    | 4.2    | 4.4    |
| 26.6   | 34.6   | 32.8   | 40.1   | 16.1   | 21.5   | 12.8   | 15.6   | 14.4   |
| 144.9  | 95.3   | 162.4  | 177.5  | 30.3   | 169.0  | 95.9   | 22.2   | 17.7   |
| 659.2  | 672.5  | 853.5  | 1522.8 | 385.5  | 1562.1 | 1312.0 | 26.7   | 10.9   |
| 848.4  | 774.6  | 868.0  | 867.5  | 306.3  | 511.6  | 446.5  | 113.7  | 139.8  |
| 136.6  | 183.7  | 141.6  | 63.6   | 55.1   | 133.1  | 40.3   | 51.1   | 42.1   |
| 74.2   | 106.7  | 72.1   | 54.0   | 34.8   | 71.6   | 32.7   | 5.8    | 10.1   |
| 26.2   | 44.8   | 47.0   | 28.0   | 10.4   | 108.5  | 84.1   | 9.1    | 47.7   |
| 355.8  | 307.1  | 359.8  | 262.6  | 93.6   | 615.5  | 387.0  | 50.7   | 85.5   |
| 129.1  | 130.3  | 125.3  | 80.4   | 44.7   | 330.4  | 124.3  | 9.6    | 10.5   |
| 564.7  | 498.5  | 442.3  | 333.3  | 160.0  | 1197.3 | 736.4  | 395.3  | 478.7  |
| 445.5  | 405.8  | 422.1  | 427.7  | 163.5  | 1382.8 | 1073.3 | 177.4  | 190.5  |

|        |        |        |        |       |        |        |       |       |
|--------|--------|--------|--------|-------|--------|--------|-------|-------|
| 182.7  | 170.2  | 163.8  | 256.3  | 60.3  | 166.8  | 95.6   | 93.5  | 48.6  |
| 189.9  | 140.6  | 153.1  | 235.4  | 55.7  | 124.1  | 45.7   | 35.1  | 57.8  |
| 340.2  | 354.0  | 370.4  | 394.7  | 107.4 | 767.3  | 562.9  | 45.3  | 69.3  |
| 268.1  | 227.7  | 247.9  | 267.0  | 52.2  | 300.0  | 216.0  | 27.3  | 55.1  |
| 189.0  | 264.3  | 251.6  | 362.1  | 103.4 | 522.1  | 552.9  | 11.3  | 23.3  |
| 5.0    | 8.4    | 3.8    | 6.7    | 3.8   | 23.0   | 22.1   | 16.2  | 21.4  |
| 16.5   | 19.9   | 25.7   | 34.7   | 10.3  | 855.8  | 750.0  | 57.8  | 45.3  |
| 153.4  | 129.7  | 139.0  | 140.7  | 45.2  | 324.3  | 262.4  | 80.0  | 113.0 |
| 31.4   | 34.8   | 41.7   | 29.3   | 13.5  | 135.6  | 74.9   | 19.1  | 36.1  |
| 566.9  | 471.1  | 539.2  | 446.8  | 185.3 | 924.0  | 626.6  | 161.4 | 188.4 |
| 118.6  | 165.6  | 139.0  | 135.8  | 30.7  | 270.4  | 172.8  | 24.4  | 31.3  |
| 11.2   | 14.7   | 11.8   | 12.9   | 4.4   | 6.8    | 12.7   | 2.2   | 1.0   |
| 280.3  | 326.2  | 290.3  | 300.0  | 78.9  | 952.8  | 641.5  | 162.1 | 202.1 |
| 663.7  | 701.4  | 828.8  | 621.1  | 259.8 | 1062.2 | 639.2  | 65.4  | 101.5 |
| 15.4   | 11.6   | 15.7   | 21.9   | 0.9   | 309.5  | 165.9  | 9.9   | 0.8   |
| 91.2   | 100.9  | 61.1   | 39.2   | 33.2  | 188.6  | 108.2  | 34.4  | 38.9  |
| 141.5  | 133.4  | 88.1   | 54.2   | 33.6  | 365.6  | 228.3  | 5.1   | 10.1  |
| 19.3   | 9.4    | 5.7    | 9.0    | 18.0  | 77.8   | 26.8   | 40.0  | 25.9  |
| 1143.5 | 898.2  | 957.3  | 724.5  | 334.2 | 1391.9 | 684.0  | 443.8 | 687.0 |
| 19.9   | 23.2   | 29.2   | 26.8   | 4.9   | 17.7   | 14.8   | 2.8   | 21.6  |
| 31.8   | 29.9   | 32.3   | 31.6   | 11.3  | 5.3    | 2.5    | 15.5  | 11.3  |
| 225.8  | 186.5  | 191.3  | 189.3  | 71.2  | 475.3  | 480.9  | 172.2 | 196.4 |
| 2.5    | 1.5    | 1.1    | 1.9    | 3.0   | 5.8    | 26.2   | 2.1   | 5.1   |
| 42.7   | 34.4   | 47.5   | 32.4   | 10.7  | 26.9   | 11.6   | 15.3  | 10.8  |
| 843.9  | 714.0  | 663.0  | 472.2  | 236.5 | 656.6  | 402.8  | 429.9 | 591.6 |
| 1181.1 | 1036.5 | 1059.5 | 611.6  | 332.6 | 3057.1 | 2365.7 | 122.4 | 143.9 |
| 312.2  | 215.3  | 271.8  | 192.6  | 67.2  | 277.3  | 182.9  | 129.6 | 189.8 |
| 918.0  | 679.3  | 708.4  | 777.2  | 276.8 | 668.9  | 493.0  | 196.7 | 310.5 |
| 78.2   | 45.3   | 59.4   | 74.1   | 17.3  | 35.2   | 29.4   | 75.5  | 57.6  |
| 20.6   | 29.5   | 7.9    | 26.7   | 14.8  | 39.5   | 28.9   | 29.4  | 30.6  |
| 10.8   | 2.3    | 8.1    | 0.5    | 3.5   | 7.3    | 5.4    | 4.5   | 2.4   |
| 361.3  | 299.9  | 363.6  | 262.3  | 147.2 | 471.7  | 308.3  | 68.0  | 59.2  |
| 37.9   | 59.7   | 52.9   | 57.3   | 20.9  | 683.3  | 367.0  | 20.2  | 33.5  |
| 294.8  | 243.3  | 254.4  | 256.7  | 106.6 | 319.4  | 244.0  | 124.9 | 148.3 |
| 142.1  | 96.1   | 134.1  | 154.5  | 37.9  | 308.0  | 176.3  | 233.5 | 295.8 |
| 1184.0 | 856.1  | 1113.3 | 1850.7 | 353.5 | 913.5  | 702.0  | 232.0 | 273.6 |
| 114.5  | 121.2  | 107.8  | 125.3  | 47.0  | 231.6  | 206.7  | 31.4  | 62.5  |
| 34.8   | 25.1   | 24.2   | 44.4   | 14.4  | 67.5   | 44.6   | 17.2  | 26.5  |
| 43.7   | 63.0   | 52.5   | 18.2   | 30.2  | 3.0    | 15.5   | 658.1 | 946.7 |
| 481.1  | 360.1  | 383.5  | 240.8  | 122.8 | 692.9  | 469.3  | 104.0 | 189.3 |
| 150.3  | 107.3  | 125.7  | 118.0  | 41.7  | 189.4  | 117.1  | 42.6  | 65.3  |
| 29.5   | 32.0   | 34.6   | 21.2   | 5.8   | 13.3   | 7.2    | 12.5  | 6.8   |
| 6.8    | 1.2    | 1.7    | 0.4    | 0.3   | 11.2   | 7.3    | 2.8   | 2.1   |
| 1.2    | 6.2    | 8.6    | 0.9    | 0.4   | 11.3   | 7.7    | 1.1   | 4.9   |
| 73.3   | 42.4   | 44.3   | 35.8   | 13.8  | 72.5   | 54.9   | 26.1  | 34.7  |
| 717.8  | 460.2  | 537.5  | 458.0  | 216.6 | 831.1  | 539.4  | 143.8 | 166.8 |
| 1.0    | 10.3   | 6.5    | 2.4    | 0.3   | 2.2    | 1.9    | 9.4   | 0.5   |
| 49.2   | 34.6   | 51.5   | 66.4   | 19.6  | 67.5   | 55.8   | 22.6  | 24.4  |
| 1.0    | 11.4   | 4.1    | 1.4    | 1.2   | 1.7    | 1.2    | 4.9   | 2.2   |
| 18.3   | 18.8   | 22.5   | 15.7   | 11.9  | 76.0   | 67.8   | 13.7  | 15.8  |
| 41.8   | 17.6   | 22.3   | 12.0   | 10.6  | 92.1   | 63.7   | 15.0  | 13.4  |
| 24.6   | 19.7   | 11.7   | 15.7   | 14.0  | 42.3   | 21.7   | 2.1   | 5.3   |
| 334.0  | 405.3  | 259.9  | 430.8  | 135.9 | 197.5  | 120.6  | 28.8  | 25.3  |

|        |        |        |        |       |        |        |       |        |
|--------|--------|--------|--------|-------|--------|--------|-------|--------|
| 283.9  | 298.0  | 286.9  | 265.5  | 146.5 | 862.1  | 652.7  | 63.6  | 89.5   |
| 20.9   | 2.5    | 24.4   | 27.2   | 6.4   | 50.4   | 44.3   | 4.0   | 19.6   |
| 123.2  | 80.8   | 134.6  | 108.1  | 49.1  | 214.1  | 173.8  | 16.7  | 45.1   |
| 122.3  | 111.9  | 68.1   | 62.8   | 47.5  | 94.3   | 69.3   | 47.5  | 85.8   |
| 821.6  | 708.0  | 655.8  | 607.3  | 196.4 | 523.7  | 361.6  | 73.3  | 91.0   |
| 827.3  | 801.5  | 676.9  | 662.9  | 189.7 | 302.4  | 238.6  | 29.7  | 60.5   |
| 101.9  | 90.4   | 61.6   | 21.0   | 29.6  | 194.2  | 104.2  | 325.7 | 291.1  |
| 46.6   | 16.0   | 30.1   | 22.5   | 7.0   | 108.2  | 54.9   | 88.8  | 128.2  |
| 788.7  | 817.5  | 659.1  | 387.4  | 211.8 | 248.9  | 243.0  | 223.9 | 297.8  |
| 58.5   | 70.8   | 94.8   | 114.9  | 20.6  | 129.7  | 84.1   | 4.5   | 0.9    |
| 16.5   | 41.0   | 19.1   | 10.8   | 5.3   | 3.0    | 1.6    | 2.9   | 4.8    |
| 37.0   | 31.3   | 37.2   | 25.8   | 15.0  | 3438.8 | 2838.3 | 75.5  | 95.0   |
| 14.4   | 18.0   | 38.4   | 20.9   | 9.0   | 131.4  | 83.8   | 20.9  | 52.3   |
| 12.1   | 26.1   | 20.7   | 3.9    | 3.9   | 27.1   | 8.7    | 15.7  | 27.6   |
| 268.1  | 217.8  | 285.9  | 229.4  | 82.4  | 249.3  | 130.3  | 46.9  | 33.8   |
| 4.5    | 2.6    | 7.5    | 1.8    | 1.1   | 1862.1 | 1171.8 | 11.9  | 9.1    |
| 6.9    | 16.2   | 5.7    | 5.1    | 12.0  | 8.0    | 14.5   | 10.4  | 9.7    |
| 107.5  | 119.8  | 85.7   | 81.7   | 35.0  | 85.4   | 72.0   | 70.4  | 123.5  |
| 184.7  | 125.3  | 125.1  | 89.8   | 57.8  | 142.5  | 108.7  | 109.1 | 116.3  |
| 2380.0 | 2316.9 | 1585.2 | 800.8  | 649.4 | 3281.9 | 2375.3 | 396.2 | 727.7  |
| 64.6   | 43.5   | 46.8   | 76.1   | 14.6  | 110.6  | 53.8   | 48.8  | 64.4   |
| 48.6   | 36.6   | 70.4   | 60.8   | 25.9  | 142.1  | 110.7  | 25.7  | 42.3   |
| 151.1  | 144.5  | 164.5  | 92.9   | 47.1  | 185.0  | 88.0   | 99.9  | 138.3  |
| 131.6  | 65.2   | 65.8   | 48.9   | 29.3  | 118.2  | 96.2   | 45.5  | 53.8   |
| 303.6  | 254.6  | 312.8  | 480.3  | 135.2 | 461.6  | 321.6  | 64.9  | 74.4   |
| 179.2  | 162.1  | 644.3  | 2470.0 | 252.4 | 243.9  | 161.3  | 75.6  | 98.2   |
| 343.0  | 329.4  | 294.4  | 288.7  | 101.4 | 578.7  | 369.1  | 112.9 | 161.7  |
| 269.9  | 244.7  | 249.8  | 256.6  | 68.0  | 768.0  | 515.3  | 137.4 | 142.6  |
| 1727.3 | 1392.6 | 2243.5 | 4377.5 | 963.9 | 4266.2 | 4005.6 | 136.6 | 137.1  |
| 1077.8 | 621.9  | 1317.0 | 2187.8 | 384.6 | 2289.1 | 1926.4 | 45.0  | 51.2   |
| 226.9  | 202.0  | 236.8  | 247.9  | 71.3  | 672.5  | 650.8  | 66.2  | 78.4   |
| 935.4  | 828.3  | 1046.5 | 595.6  | 472.4 | 2068.4 | 1665.7 | 873.1 | 1143.0 |
| 93.2   | 86.2   | 109.7  | 109.4  | 35.8  | 92.0   | 56.2   | 68.6  | 83.4   |
| 202.1  | 158.6  | 190.6  | 140.4  | 74.0  | 253.9  | 116.4  | 144.0 | 157.6  |
| 5.5    | 1.3    | 7.0    | 3.5    | 4.1   | 3.9    | 0.6    | 7.6   | 0.7    |
| 614.7  | 449.9  | 498.5  | 373.3  | 161.0 | 1082.7 | 616.4  | 99.4  | 128.1  |
| 90.5   | 97.7   | 84.4   | 48.3   | 37.7  | 64.7   | 54.5   | 84.8  | 125.7  |
| 7.4    | 3.0    | 1.2    | 1.2    | 0.6   | 1.0    | 2.8    | 1.0   | 1.3    |
| 5.5    | 7.4    | 2.0    | 3.1    | 4.2   | 1.8    | 5.1    | 2.3   | 0.3    |
| 703.5  | 783.7  | 753.6  | 689.3  | 288.6 | 341.3  | 219.9  | 87.0  | 148.7  |
| 185.0  | 136.3  | 156.6  | 328.3  | 67.5  | 72.8   | 75.4   | 40.5  | 40.1   |
| 49.6   | 42.1   | 34.2   | 29.2   | 14.1  | 78.0   | 50.9   | 15.5  | 31.8   |
| 13.1   | 1.9    | 3.9    | 3.4    | 2.2   | 18.0   | 1.7    | 21.6  | 3.4    |
| 33.8   | 10.2   | 20.0   | 13.1   | 2.4   | 21.5   | 14.1   | 8.1   | 18.3   |
| 40.5   | 20.2   | 20.1   | 20.3   | 13.2  | 93.9   | 23.5   | 7.1   | 4.3    |
| 175.8  | 196.4  | 175.9  | 269.1  | 86.4  | 77.2   | 82.8   | 209.1 | 338.9  |
| 182.3  | 192.2  | 171.6  | 133.7  | 40.2  | 505.6  | 312.9  | 43.3  | 33.6   |
| 61.6   | 49.6   | 54.0   | 58.4   | 18.6  | 71.9   | 54.9   | 43.2  | 55.1   |
| 223.7  | 230.5  | 206.9  | 197.9  | 74.1  | 744.4  | 487.8  | 5.3   | 10.8   |
| 61.1   | 24.1   | 41.8   | 37.5   | 10.5  | 125.4  | 97.0   | 63.1  | 68.2   |
| 1255.4 | 1206.8 | 1155.4 | 1118.9 | 482.4 | 1043.5 | 793.4  | 169.5 | 220.1  |
| 79.1   | 73.7   | 83.7   | 99.9   | 36.1  | 334.0  | 220.6  | 191.2 | 272.0  |
| 79.8   | 69.2   | 54.1   | 78.6   | 29.6  | 185.6  | 157.4  | 89.2  | 90.0   |



|        |        |        |       |       |        |        |       |       |
|--------|--------|--------|-------|-------|--------|--------|-------|-------|
| 83.5   | 67.7   | 72.8   | 67.8  | 28.8  | 141.7  | 66.7   | 37.4  | 72.1  |
| 53.4   | 65.0   | 74.0   | 77.0  | 34.6  | 79.9   | 60.5   | 17.5  | 17.6  |
| 111.2  | 71.6   | 79.4   | 59.0  | 27.7  | 152.1  | 117.8  | 68.8  | 94.0  |
| 53.5   | 62.1   | 49.0   | 27.8  | 17.7  | 64.1   | 37.9   | 30.1  | 31.5  |
| 59.1   | 42.1   | 47.1   | 41.7  | 16.3  | 72.2   | 41.4   | 18.5  | 37.6  |
| 78.4   | 103.2  | 96.6   | 57.4  | 26.4  | 73.8   | 49.2   | 62.5  | 71.5  |
| 78.7   | 65.2   | 81.5   | 87.9  | 35.2  | 228.4  | 210.6  | 38.3  | 45.3  |
| 342.9  | 269.8  | 378.0  | 307.8 | 157.4 | 353.3  | 204.7  | 66.1  | 63.3  |
| 11.1   | 8.1    | 1.3    | 4.0   | 2.9   | 10.3   | 6.5    | 3.2   | 1.8   |
| 38.1   | 34.8   | 26.7   | 21.5  | 15.4  | 176.8  | 106.0  | 64.6  | 71.3  |
| 958.5  | 1062.7 | 975.1  | 542.7 | 268.3 | 937.2  | 466.9  | 74.6  | 82.7  |
| 1278.5 | 1321.9 | 1158.1 | 978.4 | 426.1 | 1236.2 | 799.3  | 78.6  | 121.3 |
| 53.2   | 66.0   | 49.4   | 47.9  | 21.3  | 36.5   | 25.4   | 31.7  | 26.0  |
| 47.2   | 39.2   | 40.8   | 30.2  | 15.7  | 75.6   | 38.7   | 73.7  | 101.8 |
| 21.7   | 11.9   | 18.8   | 4.0   | 3.6   | 25.3   | 15.0   | 31.7  | 44.5  |
| 34.8   | 40.8   | 56.8   | 23.9  | 11.9  | 78.1   | 36.9   | 106.3 | 109.5 |
| 59.1   | 35.8   | 49.1   | 25.9  | 20.5  | 246.6  | 122.1  | 26.9  | 51.4  |
| 105.5  | 92.7   | 101.8  | 109.5 | 35.5  | 216.2  | 91.9   | 127.8 | 202.7 |
| 378.1  | 354.6  | 328.0  | 320.3 | 127.5 | 647.8  | 415.2  | 187.7 | 191.5 |
| 184.1  | 182.3  | 214.6  | 240.9 | 68.3  | 184.0  | 135.4  | 35.6  | 31.4  |
| 49.2   | 56.8   | 37.3   | 36.7  | 15.2  | 94.4   | 134.5  | 96.5  | 163.8 |
| 555.7  | 384.5  | 429.6  | 482.5 | 158.8 | 405.2  | 239.2  | 74.2  | 94.8  |
| 404.5  | 282.4  | 290.9  | 202.7 | 91.2  | 953.5  | 648.0  | 76.3  | 74.2  |
| 505.4  | 429.3  | 401.7  | 401.6 | 118.9 | 362.7  | 171.7  | 28.5  | 31.8  |
| 408.5  | 320.5  | 473.6  | 618.9 | 187.1 | 1097.9 | 894.7  | 31.1  | 58.7  |
| 27.4   | 21.2   | 18.8   | 12.7  | 7.3   | 23.7   | 21.4   | 10.9  | 23.4  |
| 1.2    | 8.6    | 2.2    | 2.3   | 3.1   | 3.3    | 4.4    | 5.3   | 12.2  |
| 10.6   | 23.5   | 11.5   | 15.6  | 9.9   | 27.6   | 32.9   | 22.1  | 38.5  |
| 46.4   | 30.2   | 28.8   | 38.4  | 13.5  | 63.9   | 38.7   | 54.3  | 70.1  |
| 121.4  | 124.5  | 182.4  | 462.1 | 67.4  | 687.3  | 323.6  | 149.5 | 194.4 |
| 16.9   | 12.3   | 3.3    | 3.7   | 1.0   | 9.4    | 2.0    | 17.1  | 27.8  |
| 21.3   | 13.3   | 10.2   | 7.7   | 6.7   | 65.2   | 37.7   | 97.2  | 121.7 |
| 7.6    | 1.4    | 2.6    | 2.7   | 1.6   | 28.0   | 22.4   | 2.1   | 7.4   |
| 258.6  | 221.3  | 252.3  | 238.9 | 115.8 | 668.2  | 540.7  | 123.8 | 162.4 |
| 324.7  | 304.9  | 259.6  | 224.7 | 101.0 | 470.0  | 427.0  | 184.7 | 218.1 |
| 48.9   | 45.7   | 46.3   | 30.7  | 23.6  | 197.5  | 262.2  | 1.1   | 9.0   |
| 0.6    | 0.4    | 1.6    | 9.4   | 2.8   | 3.7    | 3.7    | 12.1  | 34.9  |
| 552.7  | 589.4  | 744.7  | 949.6 | 278.9 | 1959.8 | 2186.0 | 26.4  | 40.1  |
| 657.5  | 532.1  | 432.9  | 272.8 | 121.3 | 662.7  | 367.1  | 131.9 | 158.3 |
| 83.7   | 99.4   | 79.9   | 102.9 | 39.1  | 131.8  | 80.4   | 124.7 | 91.6  |
| 148.8  | 132.0  | 234.8  | 290.2 | 54.1  | 287.6  | 182.4  | 10.6  | 17.4  |
| 1376.7 | 1086.2 | 999.1  | 675.2 | 331.9 | 1697.1 | 1570.9 | 405.9 | 465.1 |
| 80.0   | 55.7   | 106.7  | 410.0 | 58.6  | 140.8  | 66.6   | 62.9  | 85.1  |
| 27.8   | 33.7   | 28.4   | 47.6  | 10.7  | 140.9  | 114.2  | 46.4  | 56.6  |
| 401.0  | 362.4  | 354.8  | 298.4 | 121.0 | 554.0  | 391.0  | 71.9  | 143.9 |
| 99.0   | 61.4   | 82.1   | 55.4  | 14.6  | 54.3   | 30.1   | 62.3  | 80.4  |
| 116.5  | 66.6   | 74.0   | 165.2 | 30.3  | 713.1  | 536.5  | 87.7  | 97.9  |
| 27.3   | 25.1   | 3.1    | 17.6  | 7.9   | 7.3    | 5.5    | 2.5   | 33.7  |
| 15.7   | 15.1   | 21.5   | 11.3  | 6.0   | 286.7  | 293.7  | 14.1  | 15.8  |
| 15.5   | 2.1    | 15.3   | 3.8   | 2.5   | 191.0  | 119.0  | 46.8  | 41.4  |
| 265.3  | 198.7  | 213.7  | 182.8 | 86.9  | 281.3  | 129.9  | 57.9  | 49.4  |
| 115.1  | 123.0  | 65.7   | 24.1  | 31.6  | 12.0   | 9.3    | 7.8   | 34.8  |
| 381.9  | 266.2  | 372.9  | 354.9 | 95.3  | 310.7  | 173.8  | 22.0  | 33.4  |

|        |        |        |        |       |        |        |       |       |
|--------|--------|--------|--------|-------|--------|--------|-------|-------|
| 781.1  | 762.9  | 688.6  | 553.3  | 269.6 | 842.0  | 418.4  | 112.6 | 115.0 |
| 1.9    | 0.5    | 1.3    | 2.4    | 1.8   | 27.6   | 13.9   | 4.2   | 0.4   |
| 35.9   | 38.7   | 22.9   | 16.7   | 8.3   | 53.1   | 30.6   | 33.1  | 29.7  |
| 99.0   | 83.8   | 93.9   | 91.0   | 37.6  | 360.0  | 179.5  | 88.6  | 119.1 |
| 39.4   | 33.3   | 13.8   | 16.5   | 12.2  | 234.5  | 151.4  | 70.8  | 79.9  |
| 5.3    | 4.9    | 0.2    | 0.5    | 0.2   | 30.6   | 32.3   | 0.7   | 3.2   |
| 7.6    | 5.7    | 6.7    | 0.7    | 2.0   | 45.5   | 15.8   | 2.7   | 3.3   |
| 605.9  | 454.2  | 476.4  | 615.2  | 171.4 | 1002.8 | 773.9  | 89.2  | 123.9 |
| 249.6  | 272.7  | 256.2  | 302.2  | 112.7 | 465.3  | 381.0  | 154.7 | 203.4 |
| 5.8    | 5.7    | 10.1   | 7.8    | 4.7   | 27.0   | 20.5   | 19.3  | 25.1  |
| 4.5    | 1.1    | 1.6    | 1.0    | 0.4   | 3.7    | 1.0    | 2.1   | 1.4   |
| 86.4   | 81.4   | 96.2   | 71.8   | 14.4  | 78.6   | 37.8   | 42.7  | 30.1  |
| 1589.4 | 1541.8 | 1480.5 | 1052.0 | 485.1 | 2248.5 | 1530.1 | 85.5  | 147.3 |
| 161.3  | 103.8  | 81.8   | 78.9   | 27.8  | 95.8   | 77.8   | 97.0  | 110.9 |
| 1342.9 | 993.1  | 912.7  | 356.0  | 246.8 | 1608.7 | 1063.1 | 613.7 | 914.8 |
| 166.9  | 133.6  | 153.0  | 237.9  | 47.5  | 165.4  | 136.3  | 37.2  | 41.8  |
| 1.2    | 4.5    | 10.5   | 1.0    | 0.1   | 13.6   | 4.0    | 1.2   | 2.6   |
| 164.7  | 151.9  | 144.5  | 149.9  | 47.6  | 242.9  | 150.2  | 104.8 | 154.8 |
| 716.8  | 680.4  | 629.1  | 764.2  | 314.1 | 1103.2 | 659.6  | 203.6 | 328.5 |
| 7.8    | 8.2    | 6.1    | 1.3    | 7.7   | 19.8   | 12.1   | 1.0   | 4.9   |
| 344.1  | 367.5  | 308.6  | 278.8  | 89.0  | 647.2  | 468.7  | 64.8  | 100.7 |
| 53.4   | 69.4   | 30.0   | 32.2   | 12.7  | 66.9   | 33.9   | 32.2  | 36.2  |
| 391.3  | 306.8  | 302.8  | 299.6  | 84.0  | 591.5  | 347.9  | 57.5  | 68.8  |
| 11.7   | 12.0   | 9.3    | 8.5    | 4.5   | 95.5   | 68.2   | 137.3 | 160.4 |
| 12.5   | 10.9   | 2.2    | 2.1    | 8.6   | 82.4   | 44.3   | 169.4 | 194.7 |
| 287.6  | 190.9  | 239.6  | 252.7  | 93.7  | 442.8  | 293.0  | 92.6  | 132.5 |
| 122.6  | 55.7   | 73.1   | 38.9   | 38.0  | 109.7  | 54.7   | 20.9  | 39.4  |
| 12.0   | 4.1    | 2.4    | 3.0    | 9.6   | 30.6   | 12.2   | 15.9  | 10.5  |
| 1730.8 | 1487.5 | 1454.2 | 1014.8 | 692.8 | 3650.0 | 3090.6 | 308.6 | 376.9 |
| 6.3    | 8.6    | 8.1    | 6.7    | 8.2   | 111.8  | 111.7  | 37.0  | 51.4  |
| 116.9  | 74.2   | 90.2   | 90.8   | 42.1  | 118.1  | 46.4   | 155.0 | 201.9 |
| 131.5  | 147.1  | 120.7  | 107.0  | 44.8  | 188.0  | 106.1  | 103.8 | 135.3 |
| 6.3    | 1.7    | 4.0    | 1.9    | 1.0   | 8.9    | 3.4    | 7.1   | 11.1  |
| 100.2  | 79.5   | 67.1   | 39.7   | 17.5  | 110.4  | 44.9   | 58.3  | 99.6  |
| 1.6    | 9.6    | 8.0    | 0.4    | 4.1   | 87.7   | 81.5   | 21.1  | 25.8  |
| 24.0   | 21.7   | 16.5   | 17.1   | 9.2   | 100.8  | 59.2   | 26.6  | 34.3  |
| 12.1   | 23.7   | 13.1   | 9.2    | 7.7   | 172.5  | 107.5  | 23.2  | 60.4  |
| 201.2  | 196.8  | 234.7  | 238.1  | 88.9  | 712.1  | 547.5  | 33.6  | 48.9  |
| 44.7   | 39.6   | 18.1   | 19.5   | 12.5  | 262.7  | 238.7  | 62.5  | 70.3  |
| 1844.8 | 1493.4 | 1734.5 | 1318.9 | 620.6 | 2103.5 | 1823.0 | 417.6 | 442.5 |
| 27.6   | 21.8   | 16.3   | 11.4   | 10.5  | 40.3   | 15.8   | 12.8  | 11.9  |
| 93.3   | 111.3  | 69.8   | 57.7   | 34.4  | 53.9   | 21.5   | 2.1   | 6.6   |
| 55.4   | 64.6   | 60.6   | 32.6   | 19.8  | 46.9   | 17.4   | 20.7  | 15.1  |
| 1482.3 | 1558.1 | 1503.7 | 926.0  | 447.7 | 2320.2 | 1998.2 | 262.7 | 299.2 |
| 43.1   | 27.0   | 36.9   | 15.9   | 17.9  | 119.1  | 70.5   | 27.1  | 34.5  |
| 324.6  | 326.7  | 251.4  | 296.9  | 135.6 | 428.5  | 331.2  | 130.4 | 157.7 |
| 223.8  | 165.9  | 165.1  | 153.9  | 71.8  | 431.1  | 325.8  | 104.9 | 199.6 |
| 566.7  | 770.2  | 490.2  | 318.1  | 161.4 | 1033.8 | 549.1  | 175.0 | 163.9 |
| 74.5   | 101.9  | 91.9   | 50.5   | 24.2  | 193.3  | 119.7  | 28.1  | 24.7  |
| 100.5  | 135.4  | 114.5  | 65.7   | 59.9  | 454.3  | 255.8  | 21.5  | 45.5  |
| 68.6   | 75.8   | 66.9   | 37.0   | 23.9  | 725.5  | 586.9  | 24.0  | 26.5  |
| 48.7   | 32.8   | 38.0   | 24.6   | 9.9   | 571.1  | 329.1  | 10.9  | 15.6  |
| 185.0  | 136.2  | 142.5  | 122.8  | 50.6  | 133.4  | 80.8   | 56.4  | 84.9  |

|        |        |        |        |       |        |        |        |        |
|--------|--------|--------|--------|-------|--------|--------|--------|--------|
| 302.8  | 254.9  | 243.8  | 160.3  | 82.5  | 489.7  | 215.0  | 133.8  | 156.0  |
| 153.1  | 118.2  | 121.4  | 84.5   | 39.0  | 84.9   | 57.9   | 56.9   | 69.0   |
| 35.0   | 34.3   | 21.5   | 16.1   | 7.0   | 38.6   | 14.0   | 6.0    | 4.4    |
| 284.2  | 264.9  | 260.9  | 237.9  | 90.5  | 370.6  | 238.5  | 81.0   | 106.5  |
| 11.5   | 3.6    | 9.1    | 4.2    | 5.2   | 18.5   | 6.1    | 17.8   | 10.0   |
| 91.2   | 102.4  | 90.6   | 67.3   | 30.3  | 42.1   | 45.4   | 544.4  | 682.9  |
| 451.0  | 468.2  | 520.9  | 549.0  | 178.1 | 726.6  | 519.8  | 57.0   | 91.0   |
| 201.2  | 200.0  | 179.9  | 178.8  | 49.5  | 1098.9 | 765.1  | 50.6   | 83.0   |
| 32.1   | 18.9   | 16.4   | 20.4   | 2.6   | 67.2   | 61.0   | 13.4   | 19.4   |
| 167.1  | 159.2  | 139.6  | 176.9  | 46.9  | 886.2  | 554.6  | 156.3  | 243.0  |
| 201.0  | 175.0  | 172.4  | 142.6  | 57.3  | 379.8  | 260.9  | 46.3   | 76.1   |
| 44.1   | 42.8   | 56.0   | 36.4   | 20.2  | 183.0  | 104.7  | 21.1   | 29.6   |
| 240.7  | 264.5  | 193.0  | 154.2  | 87.8  | 396.7  | 213.5  | 72.2   | 133.2  |
| 66.0   | 54.6   | 67.5   | 30.8   | 19.5  | 65.0   | 37.3   | 96.7   | 94.1   |
| 103.0  | 70.6   | 68.0   | 93.4   | 43.8  | 116.4  | 120.6  | 90.5   | 113.9  |
| 14.1   | 13.5   | 24.2   | 20.2   | 0.6   | 34.2   | 11.0   | 5.1    | 8.4    |
| 85.8   | 77.9   | 84.2   | 66.5   | 16.5  | 266.8  | 217.1  | 15.7   | 23.2   |
| 49.5   | 31.0   | 31.3   | 20.4   | 17.0  | 138.1  | 95.1   | 15.3   | 31.7   |
| 42.9   | 47.6   | 42.6   | 21.1   | 31.5  | 90.5   | 90.4   | 8.3    | 8.6    |
| 213.9  | 149.4  | 244.3  | 206.4  | 60.9  | 1298.7 | 1039.3 | 104.9  | 117.8  |
| 178.3  | 214.6  | 130.2  | 84.4   | 56.4  | 169.4  | 120.4  | 76.4   | 87.2   |
| 73.2   | 72.8   | 73.9   | 56.9   | 26.1  | 59.0   | 36.8   | 87.3   | 67.5   |
| 17.6   | 14.3   | 27.8   | 7.6    | 7.0   | 25.0   | 13.2   | 2.3    | 12.7   |
| 1.1    | 1.3    | 1.1    | 1.9    | 0.6   | 2.3    | 1.8    | 2.4    | 2.5    |
| 2.4    | 4.8    | 1.8    | 0.8    | 0.9   | 4.9    | 10.3   | 3.1    | 3.4    |
| 2.3    | 4.5    | 2.6    | 1.0    | 1.7   | 3.3    | 2.2    | 1.2    | 17.9   |
| 14.7   | 7.1    | 10.6   | 6.7    | 9.7   | 19.7   | 19.1   | 20.2   | 16.5   |
| 24.3   | 15.0   | 15.0   | 23.4   | 6.8   | 89.6   | 39.7   | 13.5   | 7.4    |
| 161.6  | 125.4  | 157.1  | 164.1  | 45.7  | 625.8  | 380.6  | 71.5   | 101.0  |
| 4.7    | 1.7    | 2.4    | 5.8    | 0.8   | 130.0  | 122.3  | 10.0   | 19.2   |
| 30.4   | 10.4   | 42.9   | 16.6   | 6.0   | 68.7   | 9.8    | 4.3    | 20.2   |
| 1409.6 | 1302.0 | 1265.4 | 1195.3 | 458.9 | 1631.0 | 1322.2 | 229.0  | 191.8  |
| 3.2    | 12.2   | 3.3    | 5.4    | 7.6   | 3.1    | 2.9    | 6.3    | 7.9    |
| 101.7  | 84.6   | 135.5  | 191.8  | 42.4  | 132.3  | 95.4   | 13.2   | 12.7   |
| 9.6    | 30.7   | 21.9   | 37.3   | 10.1  | 25.0   | 17.5   | 1.7    | 5.6    |
| 49.4   | 63.1   | 46.6   | 84.3   | 24.2  | 117.8  | 73.8   | 51.2   | 39.9   |
| 11.0   | 8.6    | 7.3    | 4.9    | 3.3   | 15.1   | 1.0    | 1.3    | 4.0    |
| 2.7    | 10.5   | 2.7    | 1.7    | 4.5   | 1.3    | 1.3    | 5.1    | 1.7    |
| 58.3   | 46.8   | 52.7   | 55.1   | 21.0  | 148.0  | 116.2  | 31.0   | 50.2   |
| 28.6   | 40.3   | 16.4   | 24.0   | 5.9   | 40.3   | 9.3    | 12.6   | 3.2    |
| 80.6   | 76.8   | 79.0   | 91.1   | 30.3  | 114.7  | 96.3   | 40.7   | 75.2   |
| 34.3   | 19.3   | 6.3    | 18.6   | 4.3   | 33.6   | 6.1    | 75.8   | 35.8   |
| 20.3   | 16.9   | 19.8   | 12.6   | 3.0   | 1.7    | 1.1    | 8.6    | 7.0    |
| 72.4   | 81.0   | 96.1   | 72.4   | 27.3  | 22.5   | 14.9   | 2.3    | 26.6   |
| 1592.9 | 1394.7 | 1258.7 | 962.4  | 454.2 | 3130.3 | 2305.8 | 1350.4 | 1620.6 |
| 212.0  | 166.6  | 191.2  | 184.2  | 95.4  | 201.7  | 149.3  | 70.0   | 78.1   |
| 103.1  | 71.4   | 114.8  | 70.7   | 37.7  | 393.0  | 253.4  | 66.8   | 92.3   |
| 715.1  | 566.8  | 510.7  | 356.5  | 124.9 | 1386.5 | 1233.8 | 132.2  | 167.9  |
| 30.7   | 27.3   | 27.6   | 22.1   | 12.8  | 46.5   | 47.7   | 22.9   | 17.4   |
| 18.4   | 11.2   | 16.7   | 5.8    | 8.5   | 11.8   | 4.1    | 7.2    | 20.2   |
| 2.9    | 0.9    | 12.3   | 1.0    | 4.1   | 11.4   | 2.7    | 2.2    | 1.9    |
| 50.3   | 39.1   | 42.1   | 75.2   | 25.9  | 85.9   | 82.3   | 35.3   | 23.2   |
| 514.7  | 487.4  | 534.7  | 363.8  | 153.3 | 1805.9 | 960.4  | 69.5   | 94.7   |

|        |        |        |        |       |        |        |       |        |
|--------|--------|--------|--------|-------|--------|--------|-------|--------|
| 1.7    | 1.9    | 1.3    | 4.1    | 3.0   | 18.1   | 21.7   | 10.2  | 9.3    |
| 1.8    | 10.8   | 2.8    | 12.1   | 5.6   | 27.4   | 23.0   | 7.8   | 7.5    |
| 86.7   | 92.9   | 111.9  | 130.8  | 50.3  | 311.9  | 291.2  | 30.6  | 29.1   |
| 198.8  | 229.7  | 185.6  | 134.3  | 64.0  | 137.1  | 58.7   | 8.6   | 3.0    |
| 39.0   | 34.8   | 23.9   | 27.2   | 9.0   | 141.9  | 115.8  | 186.6 | 177.1  |
| 112.4  | 105.1  | 106.5  | 78.7   | 48.1  | 188.1  | 133.1  | 117.8 | 95.8   |
| 546.9  | 422.4  | 420.5  | 281.9  | 168.3 | 1456.7 | 966.8  | 87.2  | 133.9  |
| 489.2  | 460.7  | 467.4  | 295.6  | 172.2 | 816.3  | 404.4  | 36.3  | 76.8   |
| 87.6   | 92.1   | 95.2   | 114.0  | 31.9  | 753.6  | 546.7  | 71.9  | 82.6   |
| 3.1    | 7.0    | 0.9    | 7.7    | 4.2   | 1.3    | 4.9    | 2.6   | 6.4    |
| 12.1   | 9.2    | 8.5    | 9.6    | 3.9   | 8.7    | 5.1    | 3.3   | 1.5    |
| 78.0   | 74.7   | 66.5   | 51.0   | 33.2  | 243.0  | 157.7  | 2.7   | 13.2   |
| 192.8  | 171.8  | 154.8  | 111.5  | 47.1  | 221.3  | 141.5  | 23.3  | 30.2   |
| 337.0  | 299.5  | 272.0  | 220.6  | 80.2  | 262.8  | 117.7  | 128.2 | 153.7  |
| 1.8    | 7.9    | 2.1    | 1.3    | 0.5   | 47.4   | 28.2   | 23.5  | 36.2   |
| 29.9   | 29.4   | 25.8   | 25.1   | 11.6  | 464.9  | 325.8  | 26.0  | 26.3   |
| 21.6   | 25.0   | 20.3   | 24.6   | 6.6   | 421.8  | 292.0  | 9.8   | 6.7    |
| 97.5   | 83.7   | 59.2   | 49.9   | 25.6  | 2.3    | 1.8    | 204.7 | 227.4  |
| 91.1   | 82.9   | 77.8   | 50.5   | 28.9  | 10.9   | 0.8    | 603.7 | 621.6  |
| 180.7  | 124.8  | 159.3  | 87.0   | 42.6  | 91.8   | 67.4   | 59.1  | 58.6   |
| 260.8  | 223.9  | 212.3  | 153.8  | 82.1  | 343.0  | 196.3  | 146.0 | 176.6  |
| 30.4   | 13.1   | 27.5   | 10.4   | 8.1   | 20.3   | 13.3   | 18.1  | 26.8   |
| 268.6  | 177.2  | 213.9  | 255.7  | 94.7  | 412.8  | 369.6  | 11.8  | 16.3   |
| 9.0    | 4.6    | 10.8   | 4.8    | 6.0   | 70.8   | 45.7   | 134.1 | 174.0  |
| 29.0   | 13.4   | 16.3   | 14.2   | 12.0  | 12.2   | 2.0    | 2.0   | 2.3    |
| 632.2  | 543.7  | 470.1  | 263.1  | 195.5 | 10.4   | 10.9   | 1.5   | 3.4    |
| 65.3   | 62.5   | 64.7   | 46.9   | 22.9  | 33.8   | 10.3   | 17.8  | 26.1   |
| 99.6   | 77.2   | 104.9  | 103.8  | 41.4  | 222.5  | 187.1  | 46.5  | 69.9   |
| 1.8    | 1.0    | 2.0    | 3.2    | 0.7   | 2.7    | 1.6    | 5.1   | 1.5    |
| 199.1  | 156.8  | 174.9  | 112.9  | 60.5  | 203.3  | 175.7  | 61.2  | 68.8   |
| 68.2   | 39.7   | 48.6   | 49.1   | 25.7  | 71.5   | 69.4   | 63.5  | 98.7   |
| 1221.7 | 1101.1 | 1012.6 | 697.1  | 465.1 | 1026.4 | 779.7  | 851.7 | 1142.7 |
| 68.2   | 101.7  | 63.9   | 38.6   | 35.5  | 497.9  | 418.1  | 183.8 | 216.9  |
| 0.8    | 4.5    | 4.1    | 5.8    | 3.5   | 0.7    | 3.2    | 1.2   | 4.3    |
| 139.4  | 141.7  | 108.9  | 74.0   | 56.4  | 197.8  | 121.8  | 127.0 | 139.7  |
| 274.4  | 280.8  | 308.6  | 159.7  | 82.4  | 746.8  | 664.8  | 138.0 | 203.2  |
| 1377.6 | 1305.7 | 1236.8 | 1214.4 | 663.2 | 1657.1 | 1396.2 | 116.2 | 164.7  |
| 51.5   | 41.3   | 115.1  | 35.4   | 31.6  | 275.8  | 100.3  | 281.2 | 343.3  |
| 30.0   | 8.2    | 31.0   | 3.3    | 4.8   | 45.4   | 18.8   | 66.2  | 94.9   |
| 2.8    | 5.0    | 5.6    | 3.1    | 4.0   | 8.2    | 1.1    | 8.9   | 9.5    |
| 0.7    | 6.1    | 0.2    | 0.1    | 0.0   | 2.5    | 2.6    | 3.6   | 5.1    |
| 1.9    | 1.5    | 2.2    | 1.2    | 0.9   | 2.1    | 2.9    | 3.6   | 2.0    |
| 29.5   | 24.7   | 18.8   | 37.4   | 4.3   | 38.0   | 28.6   | 1.4   | 13.2   |
| 9.3    | 1.9    | 10.9   | 2.5    | 0.8   | 4.3    | 0.7    | 2.4   | 6.9    |
| 5.9    | 8.9    | 8.2    | 8.1    | 5.6   | 6.5    | 7.4    | 76.0  | 95.6   |
| 9.2    | 1.0    | 2.2    | 5.1    | 0.2   | 1.2    | 2.4    | 25.6  | 36.7   |
| 5.6    | 4.0    | 13.9   | 1.2    | 2.4   | 1329.6 | 737.6  | 11.5  | 6.9    |
| 148.2  | 169.3  | 138.8  | 137.6  | 44.3  | 144.0  | 102.1  | 47.8  | 87.5   |
| 33.8   | 31.0   | 39.0   | 20.7   | 11.0  | 9.4    | 14.4   | 43.0  | 72.6   |
| 81.9   | 63.1   | 56.1   | 50.1   | 17.7  | 140.0  | 127.3  | 51.5  | 98.2   |
| 417.6  | 365.8  | 299.2  | 233.5  | 145.1 | 1287.7 | 939.7  | 652.5 | 841.1  |
| 62.3   | 80.7   | 59.0   | 57.2   | 22.7  | 191.0  | 165.5  | 235.0 | 266.8  |
| 190.4  | 159.8  | 210.9  | 187.4  | 55.9  | 161.5  | 94.5   | 24.4  | 25.1   |

|        |        |        |        |       |        |        |       |       |
|--------|--------|--------|--------|-------|--------|--------|-------|-------|
| 35.8   | 37.3   | 32.0   | 31.2   | 10.8  | 478.1  | 363.7  | 6.0   | 3.6   |
| 24.8   | 30.5   | 26.1   | 7.8    | 11.6  | 236.9  | 167.3  | 10.5  | 7.7   |
| 369.2  | 382.6  | 411.8  | 261.1  | 139.7 | 135.1  | 144.4  | 48.7  | 74.0  |
| 224.7  | 183.4  | 123.0  | 108.0  | 47.4  | 23.8   | 15.7   | 32.4  | 63.6  |
| 239.8  | 251.6  | 256.6  | 227.1  | 92.8  | 322.8  | 221.3  | 233.5 | 370.7 |
| 71.4   | 123.7  | 45.7   | 36.7   | 13.0  | 71.7   | 50.8   | 9.3   | 7.3   |
| 26.4   | 19.8   | 10.1   | 19.3   | 4.7   | 156.3  | 121.7  | 12.6  | 10.2  |
| 40.8   | 45.7   | 23.3   | 63.0   | 14.4  | 204.9  | 153.6  | 60.4  | 83.1  |
| 148.4  | 60.4   | 87.4   | 39.1   | 26.7  | 441.7  | 177.0  | 97.2  | 119.8 |
| 147.3  | 127.9  | 159.7  | 131.1  | 46.6  | 19.0   | 31.4   | 3.3   | 4.5   |
| 16.8   | 9.3    | 21.5   | 9.7    | 3.1   | 15.9   | 18.9   | 30.7  | 42.5  |
| 2.9    | 7.6    | 10.5   | 8.4    | 3.2   | 20.1   | 13.5   | 5.5   | 2.7   |
| 2.2    | 12.4   | 2.6    | 2.3    | 0.6   | 4.1    | 11.7   | 25.8  | 27.5  |
| 11.6   | 12.6   | 17.8   | 8.7    | 8.5   | 24.6   | 18.6   | 24.4  | 14.5  |
| 23.7   | 19.9   | 45.8   | 45.2   | 19.2  | 209.6  | 140.0  | 195.0 | 208.8 |
| 783.5  | 779.4  | 646.0  | 458.8  | 240.4 | 237.0  | 332.1  | 66.2  | 98.8  |
| 109.2  | 109.8  | 105.2  | 98.0   | 50.0  | 126.8  | 76.1   | 53.6  | 43.6  |
| 240.4  | 277.9  | 273.1  | 181.0  | 96.6  | 54.2   | 31.0   | 37.6  | 40.4  |
| 175.4  | 129.5  | 145.4  | 67.2   | 41.7  | 75.2   | 42.9   | 20.5  | 26.5  |
| 147.4  | 139.2  | 127.2  | 79.0   | 40.2  | 106.6  | 48.7   | 15.0  | 13.4  |
| 340.5  | 278.5  | 292.7  | 323.0  | 93.8  | 186.4  | 116.3  | 30.3  | 70.9  |
| 221.8  | 242.1  | 238.6  | 263.1  | 93.0  | 178.0  | 129.8  | 8.1   | 9.6   |
| 263.3  | 230.4  | 279.6  | 272.7  | 68.4  | 219.4  | 145.3  | 9.2   | 28.4  |
| 7.2    | 8.1    | 31.6   | 31.3   | 4.8   | 95.2   | 64.3   | 8.3   | 24.4  |
| 40.8   | 30.2   | 27.7   | 34.2   | 24.9  | 850.3  | 499.3  | 11.1  | 21.2  |
| 28.0   | 12.4   | 4.7    | 10.0   | 4.0   | 43.1   | 36.0   | 5.2   | 3.1   |
| 660.1  | 521.8  | 680.3  | 835.9  | 152.9 | 512.3  | 399.5  | 71.6  | 129.3 |
| 185.2  | 190.7  | 204.2  | 166.5  | 62.6  | 333.6  | 251.7  | 70.2  | 100.5 |
| 1.9    | 0.8    | 6.1    | 3.0    | 0.3   | 7.3    | 10.3   | 9.0   | 12.1  |
| 6.4    | 3.0    | 4.8    | 4.7    | 2.9   | 34.1   | 16.7   | 13.8  | 35.5  |
| 81.9   | 93.2   | 102.5  | 120.4  | 34.7  | 371.7  | 145.7  | 16.8  | 62.0  |
| 316.6  | 382.8  | 377.8  | 400.8  | 167.3 | 793.3  | 646.6  | 34.2  | 73.3  |
| 586.2  | 672.5  | 692.5  | 693.5  | 289.9 | 1288.1 | 920.0  | 95.4  | 137.3 |
| 27.6   | 12.9   | 8.1    | 11.5   | 6.0   | 2.6    | 6.2    | 1.2   | 2.4   |
| 50.1   | 40.9   | 64.5   | 37.0   | 21.1  | 97.1   | 67.1   | 25.1  | 33.9  |
| 478.2  | 491.8  | 510.8  | 454.4  | 152.9 | 1231.5 | 1082.1 | 27.3  | 44.6  |
| 2.7    | 6.7    | 3.7    | 9.7    | 7.2   | 2.2    | 2.3    | 0.8   | 3.1   |
| 3.9    | 22.6   | 14.5   | 11.2   | 6.4   | 12.7   | 3.0    | 2.6   | 1.3   |
| 122.8  | 110.8  | 106.7  | 68.3   | 45.0  | 171.1  | 113.6  | 70.7  | 87.9  |
| 163.0  | 176.0  | 201.1  | 160.3  | 54.7  | 334.5  | 194.7  | 30.8  | 29.7  |
| 97.5   | 98.0   | 86.7   | 97.8   | 40.3  | 282.7  | 204.3  | 89.6  | 121.2 |
| 79.6   | 76.0   | 85.2   | 65.5   | 27.5  | 264.2  | 199.7  | 119.5 | 155.6 |
| 1766.9 | 1571.3 | 1607.8 | 1495.3 | 399.5 | 3001.5 | 1730.9 | 167.6 | 178.2 |
| 20.2   | 11.3   | 18.0   | 4.2    | 10.0  | 28.1   | 22.9   | 25.6  | 6.3   |
| 11.3   | 3.2    | 3.2    | 3.3    | 0.8   | 16.7   | 16.1   | 3.0   | 10.4  |
| 34.5   | 26.3   | 26.5   | 26.7   | 5.3   | 45.9   | 17.0   | 5.9   | 14.9  |
| 919.6  | 904.3  | 1009.9 | 1081.0 | 370.7 | 743.9  | 617.0  | 31.4  | 35.2  |
| 166.7  | 89.4   | 121.2  | 111.5  | 41.4  | 373.0  | 156.1  | 136.9 | 187.5 |
| 87.6   | 83.9   | 82.5   | 92.5   | 26.2  | 72.1   | 97.1   | 2.5   | 6.6   |
| 13.3   | 24.2   | 15.1   | 16.0   | 6.6   | 36.4   | 23.2   | 6.8   | 17.8  |
| 448.8  | 306.4  | 330.8  | 271.0  | 107.2 | 1286.0 | 1086.4 | 322.3 | 361.0 |
| 119.3  | 88.6   | 81.8   | 125.5  | 59.1  | 1097.2 | 679.9  | 64.6  | 64.0  |
| 247.9  | 165.7  | 164.6  | 61.7   | 64.8  | 442.5  | 304.7  | 140.5 | 129.7 |

|        |        |       |       |       |        |        |       |       |
|--------|--------|-------|-------|-------|--------|--------|-------|-------|
| 70.2   | 51.3   | 96.5  | 66.4  | 17.3  | 274.2  | 214.1  | 65.7  | 117.3 |
| 40.9   | 38.2   | 40.9  | 55.9  | 13.6  | 102.0  | 125.0  | 18.0  | 23.8  |
| 2.4    | 0.5    | 1.4   | 0.9   | 4.7   | 10.1   | 0.6    | 1.1   | 0.9   |
| 8.4    | 1.3    | 6.2   | 7.8   | 0.3   | 247.3  | 224.3  | 29.3  | 35.2  |
| 63.5   | 68.8   | 66.2  | 41.3  | 35.6  | 16.9   | 12.5   | 16.7  | 10.1  |
| 1.5    | 0.6    | 1.2   | 1.5   | 0.5   | 1.3    | 1.8    | 1.2   | 0.8   |
| 1.6    | 0.7    | 0.8   | 0.8   | 0.6   | 2.0    | 1.4    | 1.8   | 14.3  |
| 122.0  | 102.9  | 114.9 | 125.7 | 38.0  | 280.6  | 149.6  | 16.1  | 33.2  |
| 82.9   | 84.4   | 76.7  | 91.3  | 24.2  | 164.3  | 101.0  | 5.8   | 0.8   |
| 4.2    | 17.1   | 13.5  | 3.0   | 9.6   | 26.2   | 24.2   | 5.3   | 9.8   |
| 4.1    | 21.4   | 7.5   | 16.0  | 5.4   | 125.8  | 76.5   | 31.0  | 30.9  |
| 18.2   | 7.7    | 3.8   | 1.1   | 0.8   | 2.6    | 2.9    | 2.0   | 4.4   |
| 45.9   | 37.0   | 27.9  | 19.9  | 18.5  | 27.7   | 14.8   | 25.5  | 13.8  |
| 688.6  | 586.6  | 712.5 | 551.2 | 204.4 | 1703.6 | 1181.3 | 96.1  | 172.5 |
| 35.4   | 34.6   | 35.3  | 44.0  | 17.3  | 51.9   | 55.3   | 42.8  | 55.1  |
| 16.8   | 7.6    | 27.2  | 17.3  | 6.2   | 20.0   | 26.3   | 375.1 | 716.7 |
| 13.5   | 1.1    | 10.1  | 1.1   | 7.7   | 16.9   | 6.2    | 12.8  | 6.6   |
| 86.8   | 87.9   | 58.9  | 64.3  | 47.4  | 454.3  | 240.2  | 51.7  | 29.8  |
| 2.3    | 3.7    | 2.8   | 36.5  | 0.6   | 2317.3 | 1873.5 | 3.4   | 14.1  |
| 3.1    | 7.0    | 7.3   | 19.0  | 2.7   | 7.2    | 4.6    | 3.8   | 6.0   |
| 6.5    | 5.0    | 16.0  | 9.3   | 6.5   | 28.2   | 25.0   | 20.2  | 15.7  |
| 250.3  | 247.0  | 220.2 | 159.0 | 71.4  | 616.1  | 438.0  | 53.7  | 145.0 |
| 22.3   | 17.1   | 24.4  | 8.9   | 6.1   | 19.6   | 14.8   | 43.6  | 46.1  |
| 138.0  | 149.1  | 156.1 | 170.2 | 41.8  | 128.0  | 76.3   | 12.1  | 23.2  |
| 157.9  | 158.0  | 144.7 | 115.8 | 46.4  | 97.2   | 78.7   | 53.1  | 70.9  |
| 64.2   | 46.7   | 70.4  | 78.1  | 20.8  | 255.7  | 155.2  | 29.8  | 27.7  |
| 155.9  | 174.1  | 171.7 | 123.0 | 67.1  | 272.2  | 209.1  | 29.9  | 47.6  |
| 13.4   | 1.7    | 4.6   | 0.8   | 2.9   | 67.0   | 26.5   | 10.4  | 14.8  |
| 370.8  | 451.5  | 440.2 | 405.2 | 158.4 | 367.9  | 488.1  | 125.5 | 152.8 |
| 66.8   | 109.6  | 97.6  | 53.0  | 30.2  | 75.0   | 50.1   | 139.4 | 140.3 |
| 112.2  | 48.8   | 49.4  | 39.5  | 16.7  | 302.5  | 177.0  | 39.0  | 46.9  |
| 49.0   | 37.1   | 28.0  | 23.2  | 13.4  | 76.5   | 32.0   | 19.4  | 42.1  |
| 36.6   | 11.4   | 31.1  | 11.4  | 8.7   | 50.8   | 37.0   | 1.6   | 6.7   |
| 1034.9 | 1240.8 | 915.8 | 706.1 | 380.2 | 729.8  | 781.6  | 321.2 | 342.8 |
| 129.5  | 121.9  | 132.8 | 110.2 | 53.3  | 423.8  | 419.5  | 17.8  | 39.5  |
| 46.5   | 34.8   | 54.8  | 51.7  | 21.9  | 76.9   | 61.9   | 9.0   | 2.5   |
| 133.7  | 151.6  | 150.1 | 181.5 | 55.4  | 232.1  | 145.5  | 8.8   | 10.1  |
| 44.1   | 37.4   | 49.5  | 26.6  | 21.6  | 52.1   | 33.2   | 32.1  | 26.0  |
| 2.0    | 11.1   | 7.5   | 2.8   | 11.4  | 2.3    | 6.9    | 14.9  | 13.2  |
| 3.1    | 1.1    | 0.2   | 0.3   | 0.1   | 0.9    | 0.9    | 0.4   | 6.1   |
| 4.6    | 5.4    | 3.4   | 8.2   | 0.7   | 42.3   | 22.0   | 3.8   | 14.3  |
| 23.1   | 8.1    | 6.1   | 5.9   | 4.4   | 17.4   | 11.1   | 1.1   | 2.3   |
| 67.2   | 51.9   | 40.5  | 35.8  | 13.1  | 433.0  | 327.3  | 6.9   | 17.0  |
| 83.2   | 82.2   | 73.4  | 62.9  | 27.2  | 88.4   | 74.1   | 32.8  | 36.7  |
| 183.3  | 175.0  | 131.4 | 107.7 | 22.6  | 127.5  | 74.4   | 27.1  | 39.5  |
| 43.9   | 47.9   | 53.1  | 36.0  | 18.2  | 11.8   | 10.0   | 20.3  | 17.6  |
| 34.0   | 36.1   | 23.8  | 12.0  | 13.7  | 39.3   | 3.3    | 4.1   | 18.5  |
| 1.1    | 0.9    | 1.1   | 0.9   | 0.3   | 2.6    | 12.3   | 0.8   | 1.3   |
| 127.1  | 82.6   | 70.3  | 46.6  | 54.1  | 238.6  | 184.5  | 94.6  | 79.6  |
| 17.7   | 1.7    | 16.9  | 20.3  | 2.2   | 18.1   | 2.9    | 20.1  | 35.3  |
| 141.7  | 138.2  | 115.6 | 51.2  | 40.6  | 241.4  | 174.8  | 56.4  | 40.5  |
| 37.6   | 42.0   | 34.6  | 50.2  | 19.3  | 21.6   | 37.9   | 10.4  | 9.2   |
| 36.9   | 11.0   | 40.4  | 20.0  | 11.5  | 49.4   | 28.9   | 16.7  | 18.6  |

|        |        |        |        |        |        |        |        |        |
|--------|--------|--------|--------|--------|--------|--------|--------|--------|
| 4.5    | 1.9    | 8.5    | 3.1    | 2.1    | 27.4   | 6.9    | 5.9    | 14.4   |
| 534.2  | 474.8  | 397.8  | 246.9  | 189.3  | 155.8  | 146.3  | 5.3    | 4.5    |
| 103.2  | 81.8   | 38.0   | 31.5   | 14.6   | 123.1  | 91.2   | 128.6  | 147.7  |
| 25.9   | 15.3   | 25.5   | 29.3   | 13.6   | 0.5    | 8.3    | 11.5   | 8.3    |
| 20.5   | 10.8   | 12.8   | 8.9    | 7.4    | 22.1   | 18.1   | 14.0   | 15.0   |
| 8.2    | 10.2   | 6.4    | 2.7    | 1.9    | 280.0  | 219.8  | 75.9   | 144.4  |
| 14.0   | 8.8    | 13.4   | 1.0    | 2.6    | 42.5   | 39.7   | 17.2   | 49.2   |
| 31.2   | 44.9   | 35.5   | 43.9   | 10.2   | 56.8   | 37.7   | 16.3   | 28.1   |
| 5.1    | 1.9    | 4.4    | 0.8    | 5.6    | 10.8   | 11.5   | 3.8    | 11.9   |
| 73.4   | 44.7   | 66.3   | 105.0  | 21.3   | 183.6  | 144.0  | 157.2  | 186.4  |
| 152.7  | 110.6  | 144.7  | 245.5  | 66.4   | 542.9  | 441.3  | 201.9  | 259.9  |
| 6.1    | 20.2   | 34.9   | 18.4   | 17.1   | 103.1  | 44.8   | 26.2   | 23.9   |
| 115.0  | 89.8   | 87.3   | 53.6   | 28.7   | 217.8  | 144.8  | 55.9   | 69.3   |
| 8.5    | 31.8   | 28.8   | 6.9    | 10.9   | 28.6   | 24.6   | 202.4  | 154.8  |
| 324.2  | 302.3  | 291.4  | 173.6  | 91.1   | 226.7  | 183.0  | 11.7   | 20.8   |
| 18.6   | 1.4    | 1.6    | 2.1    | 2.2    | 2.3    | 3.7    | 3.8    | 5.7    |
| 67.2   | 27.1   | 41.7   | 47.4   | 9.6    | 329.6  | 349.2  | 32.1   | 44.3   |
| 117.4  | 116.5  | 127.4  | 134.9  | 41.5   | 179.5  | 138.9  | 72.9   | 81.0   |
| 9.6    | 2.4    | 7.1    | 1.4    | 3.1    | 1.9    | 10.6   | 1.7    | 1.4    |
| 175.0  | 129.0  | 146.3  | 92.2   | 53.4   | 108.1  | 67.2   | 87.0   | 108.0  |
| 279.5  | 133.1  | 183.7  | 49.7   | 29.3   | 43.1   | 20.8   | 30.6   | 49.8   |
| 6.1    | 8.9    | 13.0   | 19.4   | 5.3    | 26.8   | 20.9   | 7.2    | 3.4    |
| 13.6   | 3.4    | 6.9    | 2.5    | 1.6    | 6.5    | 3.3    | 3.4    | 1.0    |
| 15.7   | 10.4   | 8.0    | 1.0    | 7.5    | 10.7   | 9.0    | 20.8   | 42.8   |
| 15.3   | 16.1   | 16.1   | 9.5    | 5.0    | 17.5   | 11.4   | 16.1   | 9.5    |
| 308.9  | 235.0  | 244.4  | 224.8  | 91.6   | 696.6  | 331.0  | 164.6  | 166.5  |
| 67.5   | 48.7   | 37.1   | 25.2   | 18.6   | 174.2  | 108.2  | 32.0   | 25.8   |
| 61.6   | 59.9   | 57.5   | 35.0   | 21.0   | 229.5  | 164.8  | 57.0   | 67.0   |
| 55.9   | 70.0   | 51.7   | 40.1   | 36.2   | 356.9  | 235.0  | 75.9   | 74.8   |
| 18.0   | 2.7    | 0.9    | 5.6    | 1.1    | 76.6   | 31.6   | 8.7    | 3.3    |
| 11.3   | 15.0   | 3.8    | 8.5    | 5.8    | 40.0   | 3.4    | 2.3    | 2.6    |
| 23.8   | 19.3   | 17.0   | 16.7   | 7.8    | 156.8  | 105.6  | 26.2   | 18.3   |
| 19.4   | 17.1   | 23.1   | 18.8   | 2.9    | 25.6   | 8.7    | 14.4   | 17.9   |
| 25.6   | 6.0    | 13.6   | 13.4   | 16.9   | 31.6   | 3.3    | 30.4   | 18.8   |
| 3.7    | 13.3   | 10.6   | 2.0    | 12.9   | 15.7   | 1.8    | 23.2   | 0.8    |
| 3.7    | 3.6    | 3.6    | 2.7    | 1.7    | 7.4    | 3.6    | 6.6    | 3.1    |
| 35.9   | 31.6   | 26.0   | 21.7   | 14.6   | 73.3   | 72.2   | 41.2   | 26.2   |
| 35.8   | 39.4   | 35.8   | 25.0   | 11.8   | 2500.8 | 1714.0 | 2239.5 | 3435.1 |
| 3.7    | 11.6   | 3.3    | 1.9    | 1.4    | 305.2  | 209.3  | 597.6  | 1055.5 |
| 4750.2 | 4490.1 | 4314.0 | 2292.8 | 1818.7 | 5015.3 | 2571.4 | 351.8  | 488.1  |
| 234.6  | 380.2  | 490.7  | 1941.9 | 250.0  | 292.3  | 205.4  | 1.4    | 10.7   |
| 4.0    | 1.6    | 9.0    | 5.5    | 4.8    | 2.6    | 2.5    | 4.0    | 1.0    |
| 27.2   | 23.3   | 16.1   | 15.7   | 6.1    | 33.6   | 15.9   | 34.7   | 36.4   |
| 38.0   | 46.2   | 44.6   | 17.9   | 21.4   | 138.6  | 80.8   | 36.3   | 63.0   |
| 43.5   | 40.4   | 42.9   | 60.5   | 20.2   | 134.4  | 86.2   | 29.5   | 48.7   |
| 23.8   | 1.4    | 11.4   | 7.0    | 8.0    | 17.9   | 9.3    | 8.2    | 9.1    |
| 463.4  | 477.2  | 434.5  | 286.1  | 125.4  | 393.8  | 196.0  | 69.8   | 79.7   |
| 73.7   | 71.8   | 59.6   | 87.0   | 28.5   | 19.8   | 17.4   | 61.9   | 75.6   |
| 36.4   | 40.1   | 26.1   | 25.7   | 10.1   | 27.4   | 14.9   | 40.9   | 46.0   |
| 26.9   | 13.9   | 15.6   | 15.8   | 5.8    | 18.7   | 8.3    | 3.6    | 7.8    |
| 90.3   | 100.8  | 62.7   | 35.3   | 41.6   | 56.3   | 27.1   | 85.9   | 109.2  |
| 29.0   | 22.0   | 19.9   | 25.6   | 8.7    | 51.5   | 26.3   | 29.2   | 29.0   |
| 788.1  | 786.7  | 783.1  | 864.8  | 307.0  | 282.0  | 195.9  | 25.9   | 61.3   |

|        |        |        |        |        |        |        |       |       |
|--------|--------|--------|--------|--------|--------|--------|-------|-------|
| 1133.7 | 1057.9 | 1176.0 | 1340.1 | 475.1  | 307.4  | 269.4  | 18.3  | 51.6  |
| 167.6  | 142.5  | 134.0  | 77.3   | 39.9   | 373.5  | 194.5  | 2.0   | 4.8   |
| 1.1    | 1.6    | 1.0    | 6.9    | 2.6    | 35.9   | 17.8   | 2.5   | 1.5   |
| 81.8   | 89.0   | 64.0   | 39.6   | 23.8   | 318.1  | 209.0  | 81.1  | 231.6 |
| 28.0   | 28.8   | 35.1   | 15.7   | 3.2    | 98.7   | 30.4   | 172.4 | 329.7 |
| 4.6    | 4.4    | 2.5    | 3.6    | 1.4    | 3.4    | 2.4    | 2.5   | 3.0   |
| 5.9    | 7.2    | 2.0    | 1.4    | 6.1    | 3.2    | 1.2    | 2.2   | 2.9   |
| 12.7   | 14.9   | 20.0   | 14.4   | 8.9    | 15.7   | 12.5   | 6.6   | 24.1  |
| 0.7    | 5.9    | 0.8    | 9.1    | 0.1    | 233.6  | 238.0  | 0.4   | 0.3   |
| 828.4  | 852.4  | 766.6  | 430.3  | 269.5  | 1316.9 | 929.0  | 110.8 | 178.9 |
| 276.2  | 228.3  | 186.1  | 122.3  | 97.5   | 237.3  | 254.6  | 46.2  | 72.8  |
| 147.2  | 132.8  | 135.7  | 90.5   | 48.0   | 347.7  | 207.9  | 18.7  | 24.5  |
| 301.2  | 253.8  | 286.1  | 283.5  | 73.5   | 205.7  | 130.0  | 19.3  | 24.8  |
| 11.4   | 1.3    | 6.6    | 1.0    | 1.9    | 9.8    | 10.4   | 6.8   | 2.9   |
| 20.1   | 9.5    | 20.9   | 4.9    | 9.3    | 13.3   | 17.0   | 14.4  | 16.8  |
| 2136.6 | 1836.4 | 2651.5 | 2577.4 | 1044.4 | 4173.9 | 2887.7 | 76.3  | 84.3  |
| 132.7  | 97.6   | 113.2  | 62.9   | 39.5   | 157.1  | 110.1  | 25.5  | 14.2  |
| 148.8  | 128.8  | 143.7  | 152.7  | 55.4   | 129.0  | 83.9   | 57.2  | 61.4  |
| 1791.4 | 1573.9 | 1740.5 | 2184.1 | 958.3  | 711.5  | 653.7  | 488.9 | 803.5 |
| 2.7    | 0.9    | 2.9    | 3.0    | 2.6    | 4.7    | 2.5    | 10.1  | 1.2   |
| 54.4   | 45.6   | 59.4   | 35.5   | 21.8   | 105.3  | 66.5   | 56.4  | 75.2  |
| 4.6    | 13.5   | 11.4   | 5.7    | 7.5    | 5.8    | 23.9   | 17.3  | 8.9   |
| 12.6   | 8.3    | 6.6    | 2.7    | 0.5    | 31.2   | 10.2   | 20.4  | 15.7  |
| 6.8    | 1.6    | 5.1    | 1.1    | 0.7    | 4.7    | 1.5    | 3.3   | 16.0  |
| 1.8    | 7.7    | 1.8    | 10.7   | 3.7    | 2.9    | 5.3    | 130.1 | 218.4 |
| 141.0  | 122.5  | 130.6  | 151.9  | 44.1   | 765.6  | 572.2  | 54.3  | 94.9  |
| 94.7   | 102.0  | 61.4   | 34.2   | 28.2   | 82.2   | 83.9   | 5.2   | 7.4   |
| 10.3   | 9.1    | 1.7    | 9.8    | 4.5    | 10.5   | 5.8    | 2.4   | 10.4  |
| 201.3  | 191.5  | 224.2  | 219.4  | 79.5   | 307.5  | 223.6  | 59.8  | 87.6  |
| 45.7   | 41.1   | 39.7   | 37.6   | 21.1   | 38.5   | 38.8   | 4.9   | 3.8   |
| 2.8    | 1.1    | 0.9    | 6.2    | 0.2    | 1.0    | 4.6    | 3.8   | 6.1   |
| 69.4   | 48.3   | 59.8   | 62.2   | 29.3   | 417.8  | 299.1  | 36.0  | 45.1  |
| 2.1    | 0.4    | 3.0    | 3.1    | 1.8    | 0.4    | 0.7    | 0.4   | 4.2   |
| 10.0   | 10.7   | 20.5   | 8.2    | 8.0    | 73.4   | 53.7   | 14.4  | 16.2  |
| 1.7    | 2.1    | 2.0    | 2.9    | 1.5    | 20.6   | 8.5    | 0.7   | 9.8   |
| 7.9    | 31.8   | 34.8   | 26.3   | 7.0    | 72.5   | 35.1   | 18.3  | 31.1  |
| 548.5  | 408.5  | 469.1  | 476.7  | 166.4  | 791.3  | 583.8  | 108.8 | 180.3 |
| 48.1   | 39.1   | 73.2   | 21.9   | 29.7   | 40.0   | 33.3   | 2.7   | 2.1   |
| 35.8   | 22.8   | 34.7   | 25.1   | 8.6    | 47.4   | 9.3    | 24.4  | 20.5  |
| 1.3    | 5.0    | 2.9    | 1.5    | 5.9    | 4.6    | 2.3    | 11.3  | 1.4   |
| 1.5    | 5.1    | 2.6    | 11.8   | 1.2    | 6.2    | 1.2    | 1.1   | 5.0   |
| 1.4    | 0.6    | 1.1    | 3.1    | 3.1    | 131.2  | 53.9   | 23.1  | 16.8  |
| 166.1  | 154.3  | 158.4  | 95.5   | 67.4   | 183.6  | 133.3  | 83.4  | 144.3 |
| 50.9   | 60.3   | 41.9   | 19.4   | 16.4   | 292.4  | 97.5   | 53.1  | 57.4  |
| 53.8   | 33.0   | 52.3   | 46.7   | 23.2   | 116.1  | 80.7   | 67.1  | 67.5  |
| 46.1   | 37.8   | 32.8   | 37.6   | 9.2    | 103.0  | 87.2   | 36.0  | 23.4  |
| 192.1  | 93.6   | 142.4  | 254.4  | 71.6   | 2182.0 | 1515.8 | 20.7  | 20.0  |
| 899.3  | 804.0  | 806.3  | 735.5  | 359.3  | 2436.2 | 2203.6 | 143.5 | 142.8 |
| 105.7  | 104.8  | 126.0  | 71.6   | 28.7   | 53.2   | 24.9   | 31.7  | 31.4  |
| 99.6   | 121.4  | 130.1  | 95.0   | 23.8   | 121.4  | 69.5   | 11.7  | 16.7  |
| 5.8    | 4.1    | 9.6    | 5.1    | 0.9    | 14.9   | 1.6    | 12.9  | 6.1   |
| 5.5    | 7.0    | 1.0    | 1.2    | 0.5    | 0.9    | 2.6    | 0.8   | 12.5  |
| 24.7   | 13.7   | 11.3   | 11.3   | 6.5    | 14.5   | 4.6    | 18.1  | 17.3  |



|        |        |        |        |       |        |        |       |       |
|--------|--------|--------|--------|-------|--------|--------|-------|-------|
| 18.5   | 12.3   | 15.2   | 4.4    | 1.5   | 3.7    | 5.9    | 4.1   | 3.1   |
| 5.2    | 3.8    | 4.1    | 3.2    | 1.3   | 6.6    | 3.1    | 4.2   | 5.1   |
| 21.2   | 5.0    | 24.7   | 3.1    | 6.3   | 17.6   | 15.4   | 92.1  | 120.1 |
| 244.0  | 227.7  | 209.6  | 179.0  | 85.3  | 140.6  | 167.3  | 105.4 | 148.2 |
| 19.0   | 23.7   | 16.4   | 11.2   | 4.1   | 103.8  | 87.6   | 8.0   | 1.5   |
| 11.9   | 8.5    | 2.2    | 0.6    | 1.6   | 17.7   | 11.4   | 10.8  | 1.9   |
| 3.2    | 4.8    | 9.3    | 2.2    | 0.4   | 2.3    | 2.5    | 25.5  | 16.8  |
| 233.7  | 284.6  | 237.2  | 234.8  | 130.1 | 752.2  | 597.8  | 296.0 | 375.4 |
| 19.5   | 28.8   | 54.9   | 58.0   | 25.3  | 226.0  | 202.3  | 52.2  | 91.9  |
| 1.6    | 3.5    | 16.1   | 2.4    | 7.3   | 15.5   | 12.9   | 8.4   | 17.6  |
| 1341.7 | 1043.7 | 1036.1 | 811.4  | 327.7 | 1797.9 | 1044.5 | 305.8 | 418.9 |
| 800.3  | 573.0  | 677.8  | 592.0  | 191.4 | 789.2  | 443.2  | 136.4 | 159.3 |
| 11.5   | 2.0    | 17.2   | 1.1    | 1.8   | 8.4    | 2.0    | 3.6   | 1.3   |
| 2.5    | 2.1    | 1.5    | 1.6    | 1.9   | 11.0   | 1.0    | 2.3   | 2.0   |
| 136.9  | 142.9  | 117.7  | 101.8  | 44.8  | 138.4  | 74.7   | 22.6  | 35.3  |
| 3.3    | 1.7    | 3.2    | 3.6    | 2.0   | 7.6    | 5.1    | 5.6   | 16.0  |
| 88.0   | 104.9  | 94.6   | 94.7   | 33.6  | 133.9  | 52.7   | 122.3 | 142.6 |
| 15.4   | 27.3   | 26.2   | 14.5   | 12.5  | 15.6   | 17.9   | 10.2  | 5.4   |
| 787.8  | 666.5  | 755.0  | 692.2  | 213.8 | 694.6  | 563.0  | 245.6 | 361.7 |
| 2274.6 | 2331.0 | 2711.4 | 2061.2 | 780.0 | 2060.7 | 1518.5 | 157.2 | 189.9 |
| 158.6  | 163.1  | 153.2  | 148.0  | 45.7  | 256.1  | 137.7  | 52.0  | 62.1  |
| 18.3   | 5.3    | 12.5   | 7.8    | 3.2   | 22.7   | 20.1   | 14.9  | 18.9  |
| 50.1   | 40.4   | 48.0   | 33.0   | 15.1  | 60.2   | 43.1   | 104.2 | 159.5 |
| 72.3   | 51.8   | 53.1   | 22.7   | 17.9  | 115.5  | 74.3   | 18.9  | 17.7  |
| 1.5    | 0.6    | 5.6    | 3.6    | 0.4   | 1.6    | 0.9    | 2.4   | 1.7   |
| 2.4    | 1.4    | 1.8    | 0.9    | 0.4   | 2.4    | 9.9    | 3.6   | 1.4   |
| 353.5  | 312.9  | 296.2  | 283.7  | 119.8 | 1426.4 | 1002.1 | 102.3 | 124.2 |
| 8.7    | 12.0   | 4.0    | 0.5    | 0.9   | 4.2    | 1.8    | 8.6   | 14.1  |
| 48.1   | 35.2   | 8.6    | 16.5   | 18.6  | 100.2  | 89.4   | 23.3  | 73.8  |
| 6.3    | 15.6   | 3.7    | 3.1    | 6.6   | 56.6   | 21.4   | 3.2   | 4.5   |
| 44.6   | 33.5   | 16.2   | 16.6   | 14.9  | 167.8  | 56.4   | 98.0  | 104.6 |
| 83.8   | 75.5   | 80.7   | 48.8   | 34.1  | 1149.9 | 808.1  | 235.9 | 275.8 |
| 46.2   | 43.8   | 33.4   | 27.2   | 30.7  | 30.5   | 18.5   | 31.2  | 38.0  |
| 18.4   | 7.6    | 16.7   | 43.1   | 8.4   | 157.9  | 93.7   | 6.7   | 3.3   |
| 124.4  | 104.0  | 88.6   | 66.6   | 11.2  | 57.8   | 52.4   | 2.2   | 3.4   |
| 1.8    | 10.5   | 10.2   | 4.0    | 1.1   | 77.1   | 42.3   | 2.6   | 7.8   |
| 93.2   | 70.8   | 84.7   | 94.2   | 34.4  | 105.7  | 39.9   | 120.5 | 145.5 |
| 2.9    | 4.8    | 23.9   | 6.2    | 2.0   | 28.5   | 37.6   | 3.8   | 5.9   |
| 5.0    | 8.5    | 5.4    | 2.6    | 1.2   | 9.2    | 3.3    | 5.8   | 11.9  |
| 4.9    | 3.7    | 13.5   | 4.1    | 2.7   | 253.3  | 158.0  | 5.1   | 2.9   |
| 188.0  | 172.6  | 191.2  | 283.8  | 81.7  | 472.4  | 453.5  | 19.8  | 28.8  |
| 10.3   | 21.2   | 18.3   | 13.6   | 7.6   | 16.3   | 10.1   | 13.5  | 13.9  |
| 378.7  | 323.3  | 510.2  | 338.5  | 102.1 | 99.5   | 44.1   | 7.4   | 13.7  |
| 64.7   | 47.2   | 42.6   | 24.1   | 17.4  | 348.6  | 253.2  | 144.7 | 140.0 |
| 5.5    | 10.0   | 12.2   | 7.6    | 8.1   | 21.0   | 7.8    | 6.1   | 6.4   |
| 3.5    | 0.9    | 7.1    | 0.7    | 8.8   | 2.1    | 1.8    | 2.4   | 1.6   |
| 3.5    | 1.7    | 3.2    | 5.4    | 1.2   | 5.5    | 18.3   | 2.2   | 3.8   |
| 2.9    | 3.7    | 3.4    | 2.6    | 1.7   | 3.1    | 2.8    | 4.2   | 4.5   |
| 37.8   | 25.5   | 20.8   | 16.0   | 7.1   | 136.3  | 71.8   | 27.6  | 34.7  |
| 461.9  | 481.4  | 465.3  | 281.1  | 189.8 | 702.0  | 440.3  | 31.7  | 35.9  |
| 40.4   | 40.5   | 41.7   | 30.6   | 14.7  | 212.8  | 139.4  | 4.1   | 1.3   |
| 20.5   | 22.8   | 38.7   | 19.3   | 8.3   | 214.6  | 143.2  | 1.2   | 1.3   |
| 24.8   | 33.4   | 38.7   | 22.1   | 5.9   | 136.5  | 106.3  | 6.6   | 3.1   |

|        |        |        |        |       |        |        |       |       |
|--------|--------|--------|--------|-------|--------|--------|-------|-------|
| 274.6  | 281.7  | 395.1  | 209.4  | 96.4  | 238.6  | 171.8  | 91.8  | 96.1  |
| 604.0  | 611.9  | 641.2  | 559.0  | 124.8 | 733.4  | 400.3  | 234.8 | 434.9 |
| 9.0    | 11.4   | 20.0   | 11.2   | 10.4  | 94.2   | 84.5   | 18.9  | 25.9  |
| 320.0  | 353.1  | 336.1  | 401.8  | 109.2 | 393.4  | 292.1  | 18.6  | 39.1  |
| 981.7  | 754.3  | 723.7  | 650.5  | 310.2 | 1721.4 | 1283.1 | 574.2 | 653.4 |
| 307.4  | 333.4  | 325.9  | 278.5  | 107.5 | 473.6  | 315.7  | 1.1   | 4.8   |
| 3.6    | 2.9    | 2.2    | 1.5    | 0.8   | 2.0    | 1.6    | 1.5   | 1.6   |
| 150.0  | 161.1  | 144.5  | 153.9  | 57.3  | 333.5  | 201.2  | 13.8  | 17.2  |
| 306.6  | 402.5  | 381.2  | 371.8  | 145.8 | 603.9  | 458.8  | 20.9  | 47.0  |
| 1.3    | 0.8    | 0.8    | 0.5    | 0.3   | 1.1    | 0.8    | 0.6   | 1.6   |
| 6.6    | 8.2    | 10.3   | 1.8    | 2.5   | 5.3    | 1.8    | 0.8   | 0.6   |
| 11.4   | 8.4    | 17.1   | 3.0    | 7.8   | 5.6    | 1.8    | 2.3   | 3.9   |
| 139.3  | 132.3  | 130.8  | 163.1  | 48.6  | 194.8  | 141.7  | 28.0  | 33.8  |
| 17.3   | 5.6    | 10.8   | 7.8    | 0.8   | 18.4   | 24.3   | 3.5   | 3.6   |
| 34.8   | 43.3   | 32.3   | 11.9   | 8.6   | 131.9  | 212.2  | 1.2   | 0.3   |
| 18.2   | 16.7   | 21.4   | 15.7   | 9.9   | 41.0   | 22.1   | 1.8   | 12.3  |
| 115.4  | 94.3   | 122.2  | 250.3  | 56.7  | 114.6  | 113.2  | 262.0 | 397.7 |
| 54.5   | 47.7   | 58.2   | 79.8   | 34.6  | 54.1   | 36.4   | 49.1  | 51.5  |
| 86.9   | 128.0  | 114.8  | 209.5  | 67.9  | 83.7   | 61.4   | 10.9  | 21.5  |
| 5.9    | 18.1   | 2.0    | 7.6    | 0.8   | 24.5   | 2.2    | 2.4   | 3.0   |
| 2.0    | 2.7    | 1.4    | 1.2    | 0.5   | 5.9    | 1.1    | 2.1   | 1.8   |
| 70.0   | 98.7   | 74.6   | 25.6   | 28.9  | 44.3   | 40.8   | 141.2 | 198.7 |
| 26.4   | 27.8   | 19.1   | 16.7   | 8.0   | 38.9   | 14.6   | 47.5  | 58.6  |
| 4.8    | 10.3   | 5.6    | 5.2    | 2.8   | 7.9    | 2.3    | 30.9  | 4.1   |
| 17.6   | 27.0   | 28.5   | 9.3    | 7.6   | 298.0  | 334.1  | 111.1 | 113.4 |
| 37.3   | 24.3   | 30.8   | 22.2   | 13.7  | 36.6   | 22.7   | 33.5  | 24.7  |
| 133.4  | 136.5  | 522.9  | 512.1  | 75.9  | 4130.6 | 3577.6 | 2.5   | 12.0  |
| 93.2   | 97.4   | 128.6  | 165.7  | 52.2  | 131.5  | 102.7  | 0.9   | 5.2   |
| 154.7  | 145.9  | 121.3  | 131.2  | 52.2  | 146.3  | 143.2  | 28.1  | 45.7  |
| 18.0   | 4.0    | 7.7    | 1.4    | 0.9   | 11.5   | 1.2    | 2.0   | 3.0   |
| 81.3   | 78.7   | 62.3   | 151.5  | 27.4  | 161.3  | 152.1  | 23.0  | 22.3  |
| 30.7   | 50.9   | 24.1   | 22.6   | 19.3  | 54.2   | 28.2   | 5.8   | 11.1  |
| 228.5  | 194.1  | 222.1  | 219.0  | 70.2  | 334.6  | 191.2  | 75.9  | 72.8  |
| 14.6   | 6.8    | 10.6   | 10.4   | 5.8   | 3.4    | 5.5    | 15.5  | 3.4   |
| 211.0  | 144.0  | 189.1  | 164.2  | 66.5  | 171.7  | 101.2  | 29.2  | 50.7  |
| 1.1    | 0.9    | 1.5    | 1.4    | 0.8   | 3.2    | 0.6    | 7.8   | 0.6   |
| 27.0   | 38.5   | 44.5   | 39.1   | 12.5  | 29.0   | 18.9   | 16.4  | 12.1  |
| 1551.8 | 1248.4 | 1324.8 | 625.4  | 333.8 | 2195.4 | 1613.6 | 260.9 | 309.2 |
| 16.3   | 7.6    | 14.4   | 13.7   | 0.7   | 2.0    | 9.5    | 5.5   | 8.1   |
| 225.2  | 185.6  | 234.6  | 169.8  | 85.1  | 266.0  | 205.3  | 14.0  | 12.5  |
| 231.2  | 243.9  | 281.0  | 192.9  | 91.3  | 336.6  | 228.0  | 16.0  | 13.0  |
| 23.0   | 11.2   | 8.2    | 5.5    | 4.3   | 3.9    | 0.7    | 6.3   | 6.6   |
| 3.0    | 1.5    | 8.5    | 1.4    | 1.7   | 9.8    | 2.4    | 3.5   | 3.1   |
| 40.3   | 45.9   | 36.2   | 38.8   | 19.0  | 75.5   | 74.5   | 42.1  | 63.8  |
| 179.8  | 151.4  | 154.7  | 118.1  | 48.5  | 1095.7 | 969.9  | 114.9 | 158.9 |
| 48.3   | 44.2   | 51.0   | 45.1   | 23.7  | 61.2   | 17.1   | 11.2  | 1.5   |
| 105.2  | 92.8   | 111.7  | 91.6   | 40.7  | 80.7   | 35.6   | 63.3  | 67.9  |
| 2331.7 | 1983.0 | 1985.0 | 1557.2 | 763.3 | 78.9   | 42.6   | 14.6  | 13.2  |
| 39.8   | 48.9   | 55.7   | 63.7   | 13.2  | 152.0  | 135.5  | 10.3  | 17.9  |
| 772.7  | 728.2  | 745.3  | 960.9  | 231.1 | 878.9  | 550.1  | 323.7 | 568.3 |
| 124.1  | 68.2   | 94.3   | 114.4  | 40.1  | 386.5  | 294.4  | 117.7 | 170.6 |
| 23.1   | 18.9   | 18.4   | 17.9   | 7.8   | 557.8  | 349.2  | 16.4  | 19.9  |
| 84.2   | 102.7  | 70.9   | 43.1   | 21.8  | 66.2   | 50.1   | 37.8  | 62.7  |

|        |        |        |        |       |        |        |       |       |
|--------|--------|--------|--------|-------|--------|--------|-------|-------|
| 17.1   | 17.6   | 11.0   | 20.5   | 3.4   | 19.7   | 12.2   | 26.6  | 21.0  |
| 5.2    | 7.1    | 3.3    | 1.6    | 0.7   | 695.0  | 532.5  | 2.0   | 9.9   |
| 32.5   | 20.8   | 38.5   | 46.1   | 4.9   | 52.0   | 43.6   | 4.0   | 4.1   |
| 14.5   | 13.3   | 12.8   | 13.6   | 7.1   | 14.9   | 8.4    | 16.0  | 10.8  |
| 28.2   | 10.8   | 17.9   | 8.3    | 8.0   | 23.0   | 0.9    | 13.7  | 2.8   |
| 925.0  | 707.0  | 778.4  | 632.6  | 255.3 | 873.0  | 452.5  | 150.3 | 182.9 |
| 272.7  | 199.9  | 183.0  | 135.7  | 69.2  | 131.6  | 77.1   | 119.7 | 134.5 |
| 3.9    | 14.7   | 2.4    | 2.2    | 8.5   | 0.8    | 0.9    | 1.3   | 2.6   |
| 1.2    | 7.6    | 5.0    | 4.6    | 2.1   | 7.2    | 5.1    | 13.3  | 17.5  |
| 30.6   | 19.1   | 32.2   | 20.2   | 12.6  | 30.6   | 26.9   | 62.1  | 30.3  |
| 49.5   | 73.6   | 50.5   | 65.3   | 29.3  | 36.0   | 19.9   | 4.2   | 2.7   |
| 216.8  | 177.6  | 192.4  | 106.0  | 77.6  | 4.1    | 2.5    | 3.8   | 1.7   |
| 14.9   | 13.6   | 15.0   | 15.2   | 8.0   | 0.4    | 4.7    | 7.5   | 4.3   |
| 10.7   | 9.1    | 16.5   | 21.4   | 7.0   | 20.3   | 12.6   | 5.1   | 14.6  |
| 75.5   | 80.9   | 77.3   | 75.5   | 22.6  | 30.5   | 10.6   | 31.0  | 38.0  |
| 61.0   | 37.4   | 45.8   | 47.9   | 19.5  | 13.9   | 20.8   | 16.0  | 27.1  |
| 71.8   | 60.2   | 62.5   | 62.2   | 34.6  | 66.8   | 47.0   | 14.2  | 13.2  |
| 59.4   | 46.9   | 54.3   | 40.3   | 16.7  | 94.5   | 57.2   | 56.8  | 36.5  |
| 13.8   | 1.1    | 5.5    | 9.3    | 2.4   | 22.5   | 9.1    | 16.7  | 11.5  |
| 223.0  | 285.5  | 355.8  | 355.6  | 112.3 | 87.0   | 40.0   | 14.6  | 21.6  |
| 1.7    | 1.4    | 1.2    | 1.0    | 0.5   | 7.7    | 0.9    | 2.8   | 4.6   |
| 153.1  | 121.4  | 106.1  | 102.4  | 35.6  | 48.1   | 35.8   | 11.5  | 18.3  |
| 26.3   | 22.3   | 23.4   | 19.2   | 12.8  | 264.5  | 186.4  | 16.1  | 8.0   |
| 825.4  | 733.7  | 900.3  | 832.2  | 383.0 | 1811.8 | 1352.6 | 482.4 | 587.8 |
| 28.1   | 29.1   | 31.3   | 20.1   | 8.8   | 82.2   | 59.4   | 36.1  | 29.4  |
| 24.8   | 19.6   | 29.9   | 30.1   | 9.9   | 33.8   | 12.3   | 22.5  | 8.7   |
| 1198.3 | 1235.2 | 1266.5 | 1091.3 | 507.8 | 1427.4 | 1261.3 | 115.3 | 182.2 |
| 45.7   | 50.4   | 59.1   | 54.8   | 16.9  | 26.4   | 22.7   | 8.8   | 5.7   |
| 28.2   | 23.9   | 12.7   | 27.7   | 11.0  | 6.8    | 9.2    | 15.9  | 1.1   |
| 13.9   | 2.2    | 3.9    | 1.3    | 0.5   | 5.6    | 2.0    | 1.0   | 0.7   |
| 2.1    | 1.6    | 1.9    | 1.5    | 0.7   | 1.9    | 1.0    | 2.2   | 1.6   |
| 2.0    | 3.1    | 2.2    | 2.3    | 0.8   | 3.5    | 1.8    | 3.0   | 1.5   |
| 170.6  | 200.5  | 119.0  | 47.3   | 30.5  | 176.7  | 37.8   | 24.6  | 67.9  |
| 1.6    | 1.7    | 5.1    | 3.0    | 1.7   | 7.5    | 7.4    | 4.0   | 2.5   |
| 11.1   | 9.3    | 17.7   | 4.1    | 6.4   | 3.6    | 3.2    | 4.7   | 0.9   |
| 15.2   | 7.1    | 1.7    | 2.3    | 1.6   | 2.5    | 2.1    | 1.0   | 2.2   |
| 22.4   | 39.0   | 28.4   | 22.1   | 9.1   | 38.4   | 4.2    | 11.4  | 27.0  |
| 3.7    | 8.5    | 2.6    | 7.6    | 2.6   | 6.1    | 0.7    | 12.1  | 3.7   |
| 13.1   | 3.0    | 1.0    | 1.7    | 1.3   | 2.7    | 2.9    | 1.5   | 1.2   |
| 1.1    | 0.8    | 1.1    | 1.6    | 1.7   | 3.0    | 1.1    | 1.0   | 1.4   |
| 0.7    | 0.3    | 0.4    | 0.7    | 0.4   | 5.2    | 5.5    | 4.6   | 5.2   |
| 95.0   | 93.3   | 113.4  | 112.4  | 43.0  | 93.8   | 104.6  | 5.3   | 13.7  |
| 7.3    | 17.0   | 1.9    | 4.1    | 6.6   | 28.0   | 15.0   | 6.2   | 10.0  |
| 9.5    | 22.6   | 6.5    | 18.9   | 7.9   | 16.5   | 6.9    | 15.3  | 20.0  |
| 18.8   | 15.4   | 24.7   | 17.8   | 5.3   | 26.4   | 10.9   | 17.5  | 15.0  |
| 3.7    | 8.7    | 6.7    | 5.1    | 3.6   | 9.6    | 6.2    | 7.0   | 9.6   |
| 4.6    | 10.8   | 4.0    | 1.1    | 0.5   | 8.2    | 0.5    | 2.5   | 3.4   |
| 6.0    | 4.4    | 5.2    | 11.2   | 1.9   | 3.4    | 4.0    | 3.6   | 19.4  |
| 23.4   | 3.4    | 7.3    | 2.8    | 1.5   | 2.7    | 1.5    | 3.5   | 3.0   |
| 88.9   | 63.3   | 68.3   | 47.7   | 21.6  | 32.0   | 15.7   | 36.8  | 53.7  |
| 245.4  | 176.7  | 173.4  | 128.0  | 88.0  | 245.7  | 198.7  | 292.5 | 462.5 |
| 3.4    | 3.5    | 10.7   | 2.8    | 10.5  | 2.0    | 1.1    | 1.7   | 3.6   |
| 1.3    | 0.5    | 0.7    | 0.5    | 2.4   | 6.1    | 0.9    | 4.8   | 0.5   |

|        |        |        |        |       |        |        |       |        |
|--------|--------|--------|--------|-------|--------|--------|-------|--------|
| 35.1   | 15.3   | 33.2   | 14.7   | 6.0   | 59.4   | 62.1   | 11.2  | 12.1   |
| 29.8   | 20.4   | 15.6   | 23.4   | 2.4   | 235.2  | 135.3  | 16.6  | 31.2   |
| 701.5  | 553.0  | 677.8  | 1627.7 | 263.6 | 11.6   | 0.3    | 5.3   | 1.9    |
| 244.6  | 193.4  | 255.5  | 196.5  | 76.9  | 261.7  | 195.5  | 14.5  | 12.1   |
| 105.8  | 98.8   | 81.6   | 44.4   | 37.9  | 97.7   | 68.1   | 29.7  | 26.7   |
| 52.0   | 53.9   | 43.6   | 36.8   | 26.1  | 59.0   | 46.0   | 14.1  | 29.0   |
| 98.3   | 85.8   | 86.7   | 49.2   | 34.9  | 1014.7 | 632.6  | 5.4   | 29.0   |
| 147.7  | 98.6   | 124.8  | 151.1  | 46.4  | 297.0  | 219.4  | 23.3  | 24.9   |
| 115.8  | 96.5   | 95.6   | 45.1   | 38.4  | 183.5  | 98.2   | 405.2 | 572.1  |
| 189.5  | 182.0  | 191.5  | 151.7  | 50.8  | 529.8  | 329.5  | 72.5  | 113.5  |
| 8.7    | 16.1   | 16.1   | 22.6   | 0.5   | 31.6   | 25.0   | 0.3   | 0.6    |
| 6.5    | 12.4   | 11.5   | 13.4   | 1.9   | 5.2    | 2.6    | 1.6   | 7.0    |
| 739.8  | 601.2  | 627.8  | 459.0  | 248.4 | 717.8  | 463.4  | 346.6 | 447.9  |
| 34.6   | 20.3   | 15.9   | 23.1   | 11.8  | 25.1   | 13.3   | 10.1  | 10.4   |
| 17.9   | 6.8    | 7.9    | 8.0    | 3.8   | 18.0   | 1.0    | 4.8   | 1.0    |
| 102.1  | 79.5   | 65.1   | 39.4   | 27.0  | 60.4   | 33.5   | 8.8   | 19.5   |
| 214.9  | 146.8  | 166.4  | 91.9   | 52.7  | 62.5   | 49.1   | 53.5  | 50.4   |
| 11.2   | 6.6    | 15.5   | 9.5    | 2.3   | 20.4   | 2.4    | 15.0  | 1.9    |
| 18.3   | 16.6   | 26.6   | 14.1   | 6.5   | 27.8   | 16.9   | 9.3   | 16.3   |
| 6.1    | 24.3   | 17.2   | 17.9   | 9.3   | 59.1   | 60.7   | 17.4  | 7.4    |
| 339.9  | 187.1  | 276.8  | 547.3  | 121.6 | 175.1  | 111.9  | 28.6  | 44.9   |
| 475.3  | 393.4  | 534.7  | 811.2  | 227.3 | 255.5  | 187.0  | 69.7  | 73.3   |
| 663.0  | 660.8  | 670.1  | 578.5  | 255.9 | 2819.6 | 2059.0 | 20.3  | 28.4   |
| 4.1    | 3.9    | 2.6    | 3.3    | 1.0   | 5.9    | 4.2    | 5.9   | 5.3    |
| 110.1  | 164.0  | 105.0  | 52.2   | 43.6  | 535.9  | 349.9  | 35.8  | 64.3   |
| 1672.9 | 1545.7 | 1466.8 | 1207.7 | 516.8 | 1505.1 | 839.3  | 933.9 | 1164.9 |
| 356.0  | 374.0  | 406.2  | 452.1  | 213.2 | 933.1  | 607.3  | 80.0  | 94.8   |
| 8.1    | 7.1    | 24.7   | 11.4   | 0.5   | 38.5   | 64.6   | 4.8   | 14.8   |
| 3.1    | 2.8    | 2.3    | 1.7    | 0.8   | 2.9    | 2.7    | 1.1   | 7.9    |
| 6.0    | 3.9    | 3.4    | 5.7    | 0.3   | 6.0    | 12.6   | 15.0  | 10.9   |
| 3.1    | 2.2    | 2.1    | 1.4    | 2.0   | 8.2    | 2.6    | 11.5  | 2.2    |
| 0.9    | 0.9    | 11.3   | 5.2    | 4.3   | 7.1    | 7.2    | 12.6  | 10.8   |
| 17.4   | 24.8   | 20.6   | 24.6   | 10.4  | 14.9   | 7.8    | 6.2   | 5.7    |
| 1.8    | 3.8    | 3.6    | 3.5    | 1.9   | 8.4    | 1.0    | 1.3   | 3.0    |
| 37.9   | 32.3   | 36.9   | 5.3    | 13.2  | 40.4   | 25.9   | 19.6  | 36.9   |
| 18.1   | 22.3   | 20.0   | 17.2   | 7.7   | 14.1   | 13.6   | 16.7  | 14.4   |
| 19.1   | 29.2   | 25.9   | 12.1   | 8.3   | 43.2   | 31.8   | 19.0  | 5.2    |
| 19.4   | 19.4   | 20.5   | 13.9   | 1.5   | 35.1   | 16.6   | 16.9  | 24.7   |
| 19.1   | 10.3   | 11.6   | 1.6    | 1.2   | 8.7    | 4.8    | 8.8   | 2.4    |
| 163.5  | 149.4  | 183.9  | 611.0  | 76.9  | 1043.1 | 794.4  | 49.2  | 63.2   |
| 42.2   | 29.1   | 41.3   | 22.6   | 9.7   | 131.2  | 103.3  | 13.7  | 15.6   |
| 20.5   | 25.1   | 24.0   | 8.7    | 13.0  | 16.8   | 20.6   | 27.2  | 19.8   |
| 18.4   | 4.7    | 15.7   | 14.6   | 6.5   | 8.4    | 9.8    | 9.6   | 2.0    |
| 10.4   | 22.5   | 20.3   | 5.8    | 2.6   | 81.9   | 52.8   | 107.4 | 129.3  |
| 182.7  | 183.4  | 151.6  | 76.8   | 61.5  | 877.2  | 523.6  | 759.6 | 1128.4 |
| 25.4   | 23.6   | 19.5   | 12.8   | 7.1   | 35.0   | 22.6   | 12.1  | 22.7   |
| 109.9  | 82.5   | 107.2  | 114.8  | 32.6  | 172.3  | 131.2  | 71.4  | 79.6   |
| 1.0    | 0.7    | 1.5    | 0.5    | 0.3   | 1.8    | 1.4    | 2.0   | 0.8    |
| 95.4   | 103.1  | 101.1  | 72.1   | 39.1  | 84.6   | 79.7   | 12.9  | 12.2   |
| 2.4    | 2.6    | 1.6    | 1.0    | 4.2   | 17.7   | 12.8   | 1.4   | 1.5    |
| 1544.1 | 1629.0 | 1245.1 | 1002.5 | 520.3 | 1404.7 | 1257.8 | 434.6 | 623.2  |
| 178.7  | 143.0  | 148.0  | 160.8  | 70.5  | 123.3  | 97.0   | 26.9  | 34.6   |
| 204.5  | 206.8  | 243.8  | 274.2  | 83.6  | 378.6  | 189.3  | 21.2  | 27.6   |

|        |        |        |        |        |        |        |       |       |
|--------|--------|--------|--------|--------|--------|--------|-------|-------|
| 0.6    | 1.2    | 1.1    | 0.9    | 0.3    | 0.7    | 0.6    | 1.0   | 2.3   |
| 8.1    | 10.5   | 21.2   | 3.7    | 1.2    | 43.3   | 39.4   | 8.3   | 13.8  |
| 26.6   | 11.1   | 22.2   | 21.5   | 4.3    | 67.9   | 43.7   | 5.3   | 9.4   |
| 24.3   | 22.2   | 23.7   | 23.1   | 13.1   | 1031.0 | 774.8  | 149.7 | 271.1 |
| 16.3   | 2.7    | 9.2    | 2.8    | 3.5    | 636.6  | 579.4  | 105.7 | 168.2 |
| 6.4    | 5.5    | 7.3    | 2.9    | 2.2    | 7.4    | 1.6    | 3.1   | 4.7   |
| 32.0   | 27.2   | 31.4   | 23.3   | 13.4   | 31.5   | 6.3    | 15.0  | 4.3   |
| 36.0   | 29.8   | 24.7   | 14.3   | 8.4    | 23.4   | 17.3   | 10.1  | 12.4  |
| 23.3   | 5.3    | 19.2   | 12.9   | 15.6   | 16.0   | 14.2   | 4.1   | 4.0   |
| 23.9   | 9.0    | 7.2    | 7.0    | 6.8    | 17.0   | 1.1    | 19.3  | 15.4  |
| 2.6    | 0.9    | 7.7    | 5.1    | 3.6    | 4.5    | 1.0    | 14.6  | 8.8   |
| 2.1    | 0.3    | 1.8    | 0.2    | 0.2    | 0.3    | 1.8    | 0.3   | 0.2   |
| 1.2    | 0.4    | 0.5    | 1.7    | 2.6    | 1.5    | 0.3    | 0.3   | 0.3   |
| 2.3    | 8.6    | 1.3    | 6.7    | 0.2    | 0.8    | 5.6    | 1.1   | 3.8   |
| 19.7   | 25.2   | 26.4   | 34.1   | 11.4   | 64.8   | 43.7   | 11.0  | 22.7  |
| 34.0   | 28.6   | 23.5   | 27.5   | 7.4    | 35.2   | 31.5   | 23.2  | 27.6  |
| 18.9   | 3.2    | 15.0   | 10.3   | 10.7   | 20.0   | 9.9    | 4.0   | 7.4   |
| 0.7    | 0.2    | 2.5    | 6.7    | 0.3    | 1.7    | 3.4    | 1.8   | 3.8   |
| 420.6  | 353.4  | 282.9  | 104.8  | 96.7   | 348.0  | 172.3  | 27.8  | 48.5  |
| 26.8   | 28.6   | 27.6   | 8.1    | 5.4    | 49.0   | 32.0   | 100.2 | 107.4 |
| 321.7  | 328.9  | 295.5  | 254.7  | 95.3   | 350.6  | 277.5  | 43.3  | 110.7 |
| 26.7   | 16.9   | 19.0   | 22.2   | 10.2   | 11.6   | 3.6    | 2.4   | 2.6   |
| 9.1    | 4.3    | 4.1    | 5.1    | 2.7    | 64.4   | 50.1   | 4.8   | 1.9   |
| 4.7    | 3.7    | 6.8    | 3.6    | 4.7    | 22.2   | 13.7   | 5.3   | 6.4   |
| 14.9   | 6.9    | 6.6    | 5.2    | 6.1    | 17.4   | 2.2    | 4.6   | 13.8  |
| 1.0    | 6.5    | 6.4    | 10.5   | 7.0    | 4.4    | 2.3    | 10.2  | 1.8   |
| 4.8    | 4.1    | 3.4    | 2.7    | 1.4    | 9.5    | 7.8    | 17.2  | 11.4  |
| 17.1   | 12.6   | 3.1    | 14.0   | 5.1    | 39.9   | 27.6   | 17.1  | 18.4  |
| 4.8    | 3.3    | 6.0    | 9.6    | 1.0    | 4.1    | 2.5    | 8.2   | 2.3   |
| 3.8    | 2.2    | 16.2   | 2.2    | 3.5    | 18.6   | 17.3   | 22.0  | 22.2  |
| 4.0    | 2.5    | 3.1    | 2.1    | 0.6    | 6.1    | 3.1    | 10.4  | 3.0   |
| 201.8  | 184.3  | 127.1  | 125.5  | 50.8   | 227.7  | 175.3  | 79.6  | 123.4 |
| 38.1   | 55.5   | 55.2   | 42.0   | 18.0   | 43.2   | 18.0   | 12.3  | 32.5  |
| 3.4    | 2.4    | 3.5    | 2.4    | 1.3    | 21.5   | 23.2   | 2.9   | 1.7   |
| 27.7   | 32.7   | 26.3   | 79.9   | 12.0   | 3.0    | 14.8   | 6.2   | 1.4   |
| 1.0    | 2.2    | 2.9    | 1.3    | 5.9    | 9.7    | 8.5    | 1.2   | 7.3   |
| 946.7  | 887.0  | 902.0  | 644.7  | 122.1  | 1345.3 | 1099.9 | 97.6  | 121.2 |
| 779.8  | 760.0  | 762.0  | 626.8  | 105.7  | 1190.8 | 964.5  | 40.0  | 48.6  |
| 119.5  | 107.2  | 117.6  | 158.4  | 72.3   | 271.6  | 151.5  | 63.2  | 90.8  |
| 70.1   | 69.3   | 55.0   | 67.4   | 25.8   | 458.5  | 682.7  | 10.6  | 20.3  |
| 0.7    | 0.5    | 0.7    | 0.3    | 0.4    | 1.6    | 2.2    | 9.0   | 15.9  |
| 2489.0 | 2182.1 | 2352.1 | 2813.4 | 1235.8 | 2219.3 | 1897.4 | 187.7 | 231.3 |
| 21.3   | 14.8   | 19.6   | 24.3   | 13.4   | 44.7   | 22.6   | 21.0  | 6.6   |
| 2.0    | 1.0    | 2.5    | 1.1    | 4.2    | 2.0    | 2.5    | 1.8   | 1.6   |
| 7.2    | 22.4   | 8.6    | 3.0    | 10.3   | 1.9    | 3.6    | 8.0   | 15.0  |
| 710.3  | 646.7  | 648.6  | 828.9  | 261.6  | 1252.7 | 870.8  | 222.3 | 321.9 |
| 166.6  | 199.7  | 143.7  | 106.9  | 66.6   | 22.9   | 44.9   | 7.6   | 7.4   |
| 3.1    | 2.0    | 2.4    | 1.9    | 1.4    | 209.3  | 199.0  | 1.9   | 2.2   |
| 484.5  | 341.9  | 391.4  | 413.2  | 137.3  | 534.0  | 363.6  | 67.8  | 90.5  |
| 76.9   | 82.4   | 97.3   | 122.6  | 39.0   | 471.8  | 437.1  | 6.5   | 16.8  |
| 8.1    | 6.3    | 4.5    | 2.5    | 5.5    | 9.6    | 10.7   | 1.9   | 3.7   |
| 20.8   | 10.7   | 2.8    | 2.7    | 1.2    | 11.7   | 8.7    | 12.8  | 13.8  |
| 10.7   | 4.2    | 2.5    | 0.5    | 4.4    | 1.8    | 0.5    | 10.0  | 17.3  |

|        |        |        |        |        |        |        |        |        |
|--------|--------|--------|--------|--------|--------|--------|--------|--------|
| 4.3    | 7.1    | 6.5    | 5.2    | 1.6    | 10.6   | 15.2   | 14.1   | 2.4    |
| 272.3  | 213.8  | 286.7  | 212.7  | 47.1   | 639.3  | 573.6  | 204.1  | 201.9  |
| 625.9  | 605.6  | 535.7  | 584.7  | 257.3  | 525.3  | 352.4  | 117.0  | 142.8  |
| 104.0  | 99.8   | 78.5   | 143.6  | 53.0   | 163.5  | 120.7  | 31.1   | 43.2   |
| 1.3    | 1.1    | 2.3    | 1.0    | 0.8    | 23.7   | 29.2   | 1.3    | 1.2    |
| 58.6   | 85.6   | 81.0   | 60.0   | 27.2   | 132.7  | 82.2   | 12.5   | 17.7   |
| 182.8  | 167.5  | 113.1  | 103.2  | 44.4   | 462.7  | 441.0  | 73.0   | 121.9  |
| 0.8    | 1.1    | 2.2    | 0.3    | 0.7    | 0.8    | 3.0    | 3.4    | 1.8    |
| 40.7   | 55.9   | 59.0   | 69.1   | 16.2   | 684.2  | 424.2  | 17.6   | 13.3   |
| 8.9    | 0.6    | 1.8    | 9.6    | 1.0    | 2918.5 | 2428.5 | 2.5    | 9.4    |
| 1.5    | 3.6    | 0.6    | 2.7    | 0.5    | 149.2  | 97.4   | 1.3    | 0.4    |
| 121.2  | 64.3   | 83.8   | 43.1   | 19.3   | 65.9   | 44.6   | 32.2   | 53.2   |
| 1.6    | 0.2    | 3.3    | 2.3    | 0.1    | 1.3    | 1.3    | 0.2    | 0.3    |
| 1.1    | 0.9    | 1.9    | 2.7    | 0.9    | 5.5    | 1.1    | 3.7    | 0.5    |
| 55.4   | 40.1   | 33.7   | 40.0   | 14.7   | 4.0    | 3.2    | 2.2    | 1.3    |
| 107.8  | 129.0  | 110.4  | 71.7   | 38.4   | 129.3  | 69.0   | 17.5   | 38.1   |
| 1501.8 | 1020.2 | 904.5  | 484.8  | 183.8  | 2095.4 | 1529.9 | 892.4  | 1214.3 |
| 2.2    | 2.0    | 2.0    | 8.6    | 0.9    | 2.5    | 10.0   | 3.3    | 5.0    |
| 30.9   | 17.6   | 35.7   | 19.0   | 2.9    | 7.5    | 0.9    | 8.8    | 16.3   |
| 34.4   | 46.4   | 38.6   | 45.5   | 18.7   | 50.7   | 47.2   | 5.9    | 8.6    |
| 12.7   | 19.7   | 8.8    | 14.4   | 9.5    | 1.7    | 2.4    | 2.3    | 4.6    |
| 33.6   | 26.5   | 24.3   | 26.6   | 11.9   | 88.2   | 39.1   | 402.3  | 545.3  |
| 1326.5 | 1083.0 | 1082.4 | 672.5  | 353.8  | 1330.8 | 930.7  | 819.5  | 995.3  |
| 128.9  | 67.3   | 90.1   | 54.8   | 25.5   | 5.5    | 10.2   | 62.9   | 66.4   |
| 15.8   | 17.6   | 15.0   | 3.3    | 0.8    | 29.6   | 1.0    | 3.8    | 0.7    |
| 4.3    | 15.4   | 14.7   | 3.4    | 1.3    | 19.6   | 9.3    | 9.0    | 3.7    |
| 45.7   | 63.0   | 57.6   | 31.7   | 19.3   | 65.7   | 40.1   | 0.2    | 5.6    |
| 32.4   | 18.5   | 22.7   | 26.8   | 10.9   | 157.4  | 174.7  | 35.8   | 38.5   |
| 241.1  | 183.7  | 240.9  | 207.2  | 72.4   | 1240.4 | 770.3  | 63.1   | 92.8   |
| 430.0  | 358.2  | 502.8  | 633.2  | 184.2  | 492.8  | 328.8  | 2.2    | 11.3   |
| 785.7  | 672.2  | 730.5  | 569.1  | 290.3  | 105.3  | 61.8   | 15.8   | 12.1   |
| 5.2    | 26.8   | 4.6    | 3.1    | 6.1    | 21.8   | 2.7    | 3.1    | 2.9    |
| 18.6   | 13.7   | 17.3   | 12.4   | 8.8    | 14.0   | 16.2   | 17.4   | 10.0   |
| 680.9  | 620.3  | 597.8  | 635.7  | 307.9  | 1080.9 | 795.3  | 583.2  | 836.3  |
| 14.0   | 0.9    | 1.9    | 1.4    | 4.8    | 107.1  | 76.2   | 10.1   | 1.7    |
| 21.8   | 30.1   | 22.1   | 10.2   | 10.6   | 71.9   | 57.8   | 19.4   | 29.8   |
| 11.4   | 8.1    | 4.0    | 9.9    | 2.0    | 61.5   | 62.2   | 2.5    | 2.0    |
| 2.0    | 6.0    | 0.3    | 1.0    | 0.8    | 5.9    | 0.6    | 4.2    | 0.7    |
| 4.7    | 1.0    | 4.9    | 0.5    | 4.9    | 8.9    | 7.0    | 13.3   | 10.9   |
| 35.7   | 28.8   | 31.6   | 34.0   | 7.6    | 27.9   | 16.3   | 12.3   | 23.6   |
| 3724.2 | 3620.4 | 3164.3 | 2690.2 | 1349.3 | 5498.8 | 4110.2 | 1137.1 | 1243.6 |
| 97.7   | 78.0   | 23.5   | 50.3   | 24.6   | 858.3  | 673.0  | 53.8   | 105.6  |
| 33.6   | 33.9   | 52.5   | 79.0   | 9.5    | 35.6   | 2.6    | 3.1    | 7.8    |
| 16.4   | 14.2   | 11.0   | 2.4    | 6.2    | 13.4   | 6.7    | 18.1   | 10.3   |
| 396.0  | 461.3  | 446.1  | 502.3  | 147.6  | 217.8  | 140.0  | 90.1   | 111.6  |
| 240.2  | 278.7  | 276.3  | 254.2  | 77.8   | 130.6  | 75.7   | 57.9   | 60.9   |
| 5.3    | 15.7   | 17.6   | 9.5    | 7.5    | 13.5   | 9.4    | 2.4    | 2.6    |
| 1619.7 | 1373.4 | 1517.7 | 1275.3 | 439.7  | 2428.7 | 2034.8 | 147.0  | 234.9  |
| 52.0   | 56.9   | 47.1   | 34.9   | 10.5   | 66.7   | 61.3   | 22.8   | 11.6   |
| 20.5   | 9.8    | 17.2   | 14.0   | 6.6    | 66.9   | 22.2   | 12.5   | 21.0   |
| 1.2    | 1.6    | 2.1    | 1.3    | 0.5    | 1.5    | 10.0   | 30.8   | 3.5    |
| 54.5   | 49.0   | 41.1   | 59.4   | 17.2   | 90.4   | 96.9   | 18.3   | 22.8   |
| 7.8    | 16.4   | 16.0   | 9.6    | 8.2    | 11.4   | 11.5   | 9.7    | 9.5    |

|        |        |        |        |        |        |        |        |        |
|--------|--------|--------|--------|--------|--------|--------|--------|--------|
| 84.0   | 66.7   | 73.8   | 51.6   | 30.2   | 54.6   | 41.5   | 22.7   | 30.7   |
| 4.4    | 0.1    | 0.6    | 6.9    | 3.8    | 28.2   | 19.0   | 0.1    | 3.7    |
| 1.2    | 14.9   | 8.3    | 3.4    | 8.2    | 11.1   | 6.1    | 4.1    | 3.6    |
| 1.2    | 0.9    | 1.2    | 1.0    | 0.5    | 3.5    | 1.5    | 1.2    | 1.4    |
| 6.5    | 12.3   | 23.8   | 2.7    | 0.9    | 22.8   | 26.2   | 14.1   | 16.4   |
| 0.6    | 1.8    | 0.9    | 10.6   | 0.3    | 2.2    | 1.1    | 27.0   | 16.7   |
| 6.9    | 4.6    | 15.4   | 3.0    | 1.1    | 21.4   | 6.7    | 16.4   | 4.0    |
| 15.0   | 20.5   | 19.1   | 15.1   | 9.8    | 32.7   | 11.3   | 16.9   | 18.6   |
| 15.6   | 15.7   | 19.3   | 10.1   | 10.1   | 15.7   | 10.3   | 5.5    | 7.1    |
| 8.0    | 1.9    | 5.6    | 13.7   | 0.3    | 18.5   | 0.5    | 0.8    | 6.9    |
| 27.6   | 7.2    | 9.3    | 8.0    | 1.5    | 16.3   | 11.2   | 10.3   | 16.5   |
| 2.8    | 2.3    | 2.0    | 2.1    | 0.7    | 1.4    | 1.3    | 1.7    | 7.4    |
| 61.0   | 60.4   | 47.7   | 20.1   | 21.8   | 7.9    | 10.7   | 4.4    | 8.3    |
| 204.6  | 190.3  | 202.9  | 161.0  | 59.0   | 100.4  | 127.7  | 9.5    | 12.6   |
| 6.2    | 9.7    | 14.6   | 6.8    | 3.2    | 10.9   | 15.5   | 5.8    | 5.1    |
| 5.6    | 1.4    | 3.3    | 1.4    | 1.0    | 76.7   | 43.6   | 3.8    | 3.6    |
| 663.6  | 590.2  | 676.0  | 472.4  | 167.3  | 555.4  | 372.7  | 102.8  | 174.8  |
| 1.6    | 0.7    | 0.7    | 1.0    | 0.3    | 1.8    | 1.1    | 0.8    | 1.2    |
| 136.6  | 98.1   | 95.0   | 85.7   | 23.4   | 313.9  | 176.8  | 45.0   | 56.3   |
| 10.2   | 2.2    | 1.8    | 1.6    | 0.9    | 3.0    | 0.5    | 10.0   | 4.8    |
| 28.2   | 21.8   | 35.1   | 16.6   | 9.4    | 42.2   | 37.8   | 22.1   | 8.3    |
| 1866.7 | 1765.9 | 1617.1 | 1287.6 | 654.7  | 2808.8 | 1913.0 | 917.3  | 1197.7 |
| 2.1    | 4.8    | 7.2    | 8.0    | 4.4    | 4.1    | 2.4    | 16.4   | 2.4    |
| 48.0   | 29.5   | 17.3   | 11.2   | 7.4    | 37.7   | 17.8   | 10.0   | 15.6   |
| 360.2  | 294.1  | 298.5  | 170.5  | 69.5   | 290.3  | 199.1  | 84.0   | 142.6  |
| 62.8   | 78.7   | 68.2   | 61.7   | 26.9   | 77.5   | 61.6   | 23.7   | 28.3   |
| 78.5   | 59.3   | 87.0   | 85.3   | 21.2   | 59.6   | 49.9   | 29.4   | 30.8   |
| 66.2   | 69.9   | 72.8   | 57.8   | 21.5   | 46.0   | 58.7   | 3.4    | 15.0   |
| 2.5    | 3.1    | 18.6   | 13.5   | 2.7    | 2.6    | 1.6    | 0.6    | 0.4    |
| 63.8   | 90.7   | 66.9   | 52.7   | 16.9   | 156.8  | 106.7  | 2.2    | 21.3   |
| 16.4   | 1.3    | 1.0    | 0.9    | 0.4    | 11.1   | 0.7    | 3.9    | 4.2    |
| 18.1   | 7.1    | 9.6    | 7.7    | 2.5    | 11.4   | 6.9    | 4.1    | 6.2    |
| 0.6    | 2.5    | 0.6    | 0.1    | 0.3    | 0.4    | 0.3    | 1.0    | 4.0    |
| 14.2   | 8.0    | 8.8    | 7.1    | 7.0    | 5.2    | 14.4   | 13.2   | 15.0   |
| 3.9    | 3.4    | 1.0    | 0.4    | 3.3    | 9.1    | 3.1    | 5.7    | 2.6    |
| 24.8   | 17.4   | 26.3   | 15.2   | 5.5    | 15.8   | 18.3   | 26.6   | 7.2    |
| 6.4    | 8.6    | 6.3    | 4.5    | 3.3    | 7.3    | 12.9   | 4.8    | 6.8    |
| 7.9    | 14.2   | 5.2    | 5.1    | 1.3    | 3.2    | 2.3    | 1.6    | 10.0   |
| 59.2   | 50.9   | 41.1   | 48.7   | 16.7   | 53.7   | 44.6   | 24.4   | 31.6   |
| 253.5  | 180.5  | 194.2  | 141.7  | 64.5   | 371.9  | 237.5  | 13.0   | 22.1   |
| 104.5  | 78.6   | 113.5  | 61.8   | 35.9   | 142.5  | 74.6   | 2.4    | 1.8    |
| 16.4   | 18.5   | 19.6   | 24.0   | 5.8    | 3.2    | 10.2   | 0.5    | 7.9    |
| 18.2   | 19.6   | 26.3   | 24.4   | 5.0    | 13.0   | 15.4   | 3.5    | 9.3    |
| 30.8   | 17.6   | 30.7   | 16.2   | 10.5   | 60.7   | 76.8   | 40.7   | 53.4   |
| 127.5  | 126.3  | 114.1  | 70.9   | 32.0   | 200.9  | 59.9   | 3.2    | 23.5   |
| 1361.5 | 1135.7 | 1141.1 | 1057.3 | 479.6  | 2140.4 | 1496.1 | 298.3  | 402.5  |
| 29.5   | 20.6   | 23.0   | 16.4   | 9.2    | 16.4   | 26.0   | 13.9   | 5.2    |
| 4288.8 | 4278.6 | 4402.4 | 3778.6 | 1698.6 | 7260.8 | 5903.1 | 1611.7 | 1654.8 |
| 150.5  | 206.9  | 147.0  | 121.7  | 70.7   | 103.0  | 82.4   | 52.1   | 66.1   |
| 2967.4 | 2285.9 | 2436.6 | 2164.0 | 903.3  | 5821.3 | 4004.8 | 1248.4 | 1732.4 |
| 45.5   | 34.3   | 22.5   | 23.0   | 12.6   | 38.1   | 19.1   | 35.1   | 42.0   |
| 110.9  | 74.1   | 73.0   | 54.0   | 25.3   | 25.8   | 31.9   | 0.7    | 4.2    |
| 776.6  | 627.9  | 741.3  | 611.5  | 238.9  | 869.5  | 519.2  | 180.8  | 273.2  |

|       |       |       |       |       |        |        |       |        |
|-------|-------|-------|-------|-------|--------|--------|-------|--------|
| 6.7   | 1.3   | 4.8   | 1.9   | 1.4   | 144.5  | 94.6   | 4.6   | 10.4   |
| 6.4   | 6.5   | 0.9   | 5.0   | 0.6   | 28.5   | 29.4   | 5.4   | 8.3    |
| 73.4  | 74.4  | 43.0  | 21.5  | 22.2  | 73.7   | 56.5   | 6.0   | 9.4    |
| 20.2  | 26.4  | 12.2  | 13.9  | 1.5   | 3.5    | 4.0    | 4.5   | 11.5   |
| 27.7  | 36.0  | 16.2  | 13.0  | 4.9   | 23.7   | 16.5   | 10.2  | 3.5    |
| 26.1  | 14.0  | 16.8  | 8.7   | 5.8   | 50.8   | 28.4   | 46.4  | 22.3   |
| 13.8  | 16.6  | 11.0  | 12.8  | 5.3   | 45.7   | 46.6   | 8.0   | 5.3    |
| 6.4   | 3.1   | 7.2   | 2.7   | 1.9   | 9.9    | 19.6   | 4.6   | 3.5    |
| 21.4  | 15.8  | 9.6   | 1.5   | 7.6   | 22.2   | 23.0   | 22.3  | 13.1   |
| 10.6  | 1.1   | 11.7  | 1.3   | 0.8   | 1.3    | 0.8    | 8.2   | 5.9    |
| 25.3  | 19.1  | 15.8  | 9.7   | 11.0  | 9.9    | 20.4   | 12.0  | 18.4   |
| 2.9   | 2.2   | 3.0   | 4.4   | 1.1   | 107.9  | 53.6   | 1.1   | 1.9    |
| 155.6 | 189.2 | 171.9 | 198.2 | 106.9 | 310.0  | 279.6  | 2.8   | 2.9    |
| 503.6 | 324.3 | 292.2 | 229.6 | 91.8  | 1080.0 | 664.8  | 988.4 | 1252.1 |
| 24.4  | 21.5  | 30.6  | 21.2  | 8.2   | 19.3   | 17.0   | 2.5   | 3.0    |
| 12.7  | 10.3  | 11.7  | 12.2  | 4.8   | 106.2  | 96.1   | 0.5   | 0.7    |
| 20.8  | 19.4  | 31.8  | 23.4  | 6.1   | 24.3   | 11.3   | 13.7  | 45.4   |
| 285.8 | 276.4 | 288.8 | 235.2 | 86.3  | 252.2  | 121.2  | 70.3  | 80.7   |
| 207.8 | 270.7 | 224.5 | 212.2 | 95.2  | 153.4  | 108.3  | 12.8  | 11.7   |
| 33.6  | 15.7  | 9.4   | 15.7  | 12.9  | 8.4    | 2.4    | 3.6   | 2.3    |
| 18.3  | 11.2  | 22.1  | 8.2   | 9.3   | 3.9    | 1.3    | 267.6 | 300.7  |
| 2.0   | 18.3  | 6.2   | 4.8   | 1.6   | 35.7   | 19.1   | 17.5  | 31.4   |
| 9.4   | 22.4  | 3.1   | 17.7  | 9.3   | 39.9   | 22.4   | 34.5  | 48.6   |
| 124.6 | 72.1  | 67.7  | 100.3 | 49.2  | 209.7  | 150.3  | 73.4  | 59.3   |
| 573.2 | 510.8 | 478.7 | 597.2 | 209.0 | 345.4  | 154.8  | 179.5 | 187.4  |
| 7.1   | 2.2   | 4.8   | 2.6   | 1.3   | 5.3    | 7.3    | 4.3   | 3.8    |
| 2.7   | 1.0   | 2.9   | 1.3   | 2.0   | 3.5    | 1.3    | 2.0   | 1.7    |
| 7.3   | 8.2   | 5.2   | 5.2   | 2.6   | 5.6    | 4.2    | 2.8   | 3.4    |
| 21.2  | 33.6  | 19.6  | 21.9  | 18.5  | 6.6    | 15.7   | 18.4  | 26.7   |
| 8.3   | 13.2  | 2.2   | 1.3   | 6.9   | 3.6    | 1.6    | 2.4   | 3.4    |
| 68.1  | 88.9  | 68.8  | 66.6  | 33.4  | 107.3  | 82.6   | 45.1  | 59.9   |
| 830.4 | 708.3 | 627.8 | 766.1 | 403.8 | 1717.9 | 1252.1 | 229.3 | 279.7  |
| 46.5  | 32.0  | 32.6  | 36.8  | 19.7  | 78.1   | 58.5   | 11.5  | 5.3    |
| 41.5  | 40.6  | 47.0  | 29.8  | 9.7   | 202.0  | 143.6  | 76.6  | 60.6   |
| 50.6  | 41.4  | 68.4  | 61.8  | 26.1  | 39.3   | 34.5   | 6.7   | 11.3   |
| 5.3   | 2.6   | 1.9   | 4.4   | 3.0   | 0.8    | 0.8    | 4.7   | 4.5    |
| 16.6  | 24.4  | 16.3  | 19.3  | 7.2   | 29.1   | 15.7   | 6.1   | 8.4    |
| 147.1 | 101.7 | 103.4 | 65.5  | 10.5  | 30.3   | 4.1    | 5.6   | 17.6   |
| 162.3 | 172.4 | 167.6 | 138.9 | 60.8  | 82.5   | 48.8   | 30.5  | 39.4   |
| 0.4   | 4.8   | 2.5   | 1.4   | 0.1   | 2.8    | 1.6    | 0.6   | 0.2    |
| 2.3   | 0.9   | 2.9   | 3.7   | 4.3   | 4.7    | 1.2    | 2.4   | 12.7   |
| 222.0 | 266.0 | 268.5 | 235.3 | 87.5  | 402.0  | 326.5  | 11.3  | 17.3   |
| 2.2   | 2.5   | 1.7   | 0.5   | 3.1   | 2.8    | 1.2    | 7.9   | 5.4    |
| 0.5   | 3.3   | 1.7   | 3.7   | 4.7   | 4.2    | 10.7   | 6.8   | 1.2    |
| 17.1  | 14.4  | 7.9   | 16.1  | 12.9  | 34.7   | 15.9   | 29.0  | 2.0    |
| 5.3   | 4.7   | 14.4  | 6.6   | 3.3   | 109.5  | 85.2   | 26.2  | 17.6   |
| 3.0   | 1.4   | 1.4   | 2.2   | 1.7   | 11.0   | 2.2    | 1.1   | 1.1    |
| 404.4 | 324.1 | 293.8 | 289.9 | 118.6 | 367.6  | 294.6  | 78.4  | 104.8  |
| 2.9   | 5.3   | 2.4   | 4.6   | 4.9   | 4.8    | 2.2    | 1.3   | 1.7    |
| 11.0  | 6.5   | 5.7   | 11.1  | 6.8   | 10.9   | 0.5    | 0.4   | 3.7    |
| 37.0  | 20.6  | 19.4  | 30.6  | 1.5   | 77.8   | 43.4   | 32.8  | 29.9   |
| 4.6   | 2.9   | 1.3   | 1.8   | 0.6   | 2.2    | 1.2    | 1.9   | 1.1    |
| 2.7   | 9.8   | 15.7  | 6.8   | 0.6   | 6.1    | 13.5   | 14.8  | 11.4   |



|        |        |        |        |       |        |        |       |       |
|--------|--------|--------|--------|-------|--------|--------|-------|-------|
| 10.1   | 1.3    | 4.2    | 15.6   | 1.1   | 3.5    | 1.4    | 25.8  | 31.2  |
| 40.0   | 26.4   | 35.0   | 14.3   | 14.8  | 42.5   | 55.8   | 13.7  | 14.5  |
| 1.9    | 3.8    | 1.2    | 3.3    | 4.1   | 9.7    | 0.9    | 6.3   | 7.9   |
| 759.7  | 752.7  | 892.2  | 938.1  | 249.5 | 1091.7 | 1012.2 | 240.9 | 353.6 |
| 150.7  | 137.1  | 179.1  | 108.1  | 83.5  | 981.7  | 626.4  | 161.8 | 199.7 |
| 62.5   | 60.1   | 64.4   | 103.0  | 37.4  | 159.4  | 151.1  | 22.2  | 32.0  |
| 71.8   | 65.7   | 67.0   | 85.7   | 25.7  | 136.4  | 127.5  | 38.4  | 43.5  |
| 4.4    | 5.8    | 4.1    | 0.8    | 1.1   | 6.1    | 3.8    | 3.0   | 1.0   |
| 25.0   | 3.4    | 10.8   | 5.0    | 2.4   | 5.2    | 7.3    | 14.0  | 1.1   |
| 50.6   | 51.1   | 33.8   | 30.3   | 1.1   | 16.4   | 11.9   | 13.4  | 23.9  |
| 15.5   | 0.6    | 4.9    | 7.7    | 0.6   | 1.0    | 4.1    | 3.2   | 0.5   |
| 591.2  | 449.3  | 644.6  | 646.2  | 169.0 | 817.2  | 671.0  | 207.9 | 315.0 |
| 424.4  | 355.4  | 311.7  | 436.8  | 98.1  | 341.5  | 179.6  | 157.1 | 160.7 |
| 187.0  | 184.9  | 149.4  | 185.9  | 65.2  | 518.7  | 339.1  | 88.9  | 96.1  |
| 59.2   | 53.9   | 73.1   | 61.3   | 18.9  | 10.0   | 10.7   | 3.9   | 4.9   |
| 3.2    | 5.5    | 1.1    | 2.5    | 0.4   | 2.1    | 1.1    | 6.8   | 1.4   |
| 39.7   | 35.8   | 45.9   | 26.6   | 13.6  | 31.8   | 18.5   | 10.6  | 24.5  |
| 2.5    | 5.7    | 2.1    | 3.4    | 3.5   | 7.9    | 1.1    | 13.3  | 1.1   |
| 24.9   | 21.5   | 24.4   | 9.9    | 11.8  | 40.5   | 46.5   | 6.4   | 9.0   |
| 24.0   | 23.7   | 19.3   | 21.9   | 6.6   | 42.9   | 30.6   | 4.8   | 13.5  |
| 11.1   | 5.0    | 4.4    | 0.7    | 1.0   | 11.6   | 11.9   | 5.0   | 10.1  |
| 481.0  | 528.2  | 661.7  | 601.1  | 268.9 | 1777.8 | 1316.8 | 94.2  | 109.4 |
| 6.6    | 3.1    | 15.2   | 2.3    | 1.8   | 35.0   | 19.6   | 2.8   | 11.4  |
| 1.9    | 2.0    | 2.7    | 1.1    | 0.7   | 1.6    | 1.2    | 1.9   | 1.3   |
| 159.8  | 143.8  | 138.8  | 93.2   | 46.3  | 717.7  | 506.5  | 223.2 | 270.5 |
| 1.1    | 5.9    | 5.5    | 0.9    | 0.4   | 15.1   | 5.2    | 6.3   | 2.6   |
| 1125.8 | 1037.1 | 1011.1 | 972.2  | 348.1 | 339.8  | 168.4  | 1.8   | 2.0   |
| 1767.2 | 1569.5 | 1481.3 | 1542.7 | 746.9 | 678.7  | 494.6  | 1.4   | 0.4   |
| 21.2   | 7.2    | 15.3   | 17.6   | 0.8   | 25.1   | 25.4   | 33.7  | 29.9  |
| 28.8   | 27.0   | 32.0   | 20.4   | 14.1  | 66.4   | 35.7   | 31.2  | 17.2  |
| 8.6    | 1.2    | 1.2    | 5.9    | 0.4   | 2.1    | 4.7    | 4.1   | 10.2  |
| 1.0    | 0.9    | 1.3    | 0.4    | 0.7   | 6.0    | 1.6    | 2.1   | 3.7   |
| 9.3    | 1.6    | 14.1   | 17.2   | 1.4   | 16.4   | 8.3    | 11.8  | 2.3   |
| 9.5    | 10.3   | 15.6   | 30.4   | 5.1   | 4.8    | 6.2    | 1.6   | 4.6   |
| 24.6   | 38.4   | 22.9   | 28.6   | 17.5  | 31.9   | 22.5   | 0.3   | 1.9   |
| 4.5    | 3.0    | 10.1   | 18.7   | 12.5  | 63.6   | 51.7   | 34.9  | 57.1  |
| 1.1    | 1.0    | 2.7    | 3.4    | 0.5   | 1.7    | 1.5    | 1.6   | 3.4   |
| 27.3   | 42.2   | 12.9   | 7.2    | 6.7   | 24.6   | 15.5   | 0.8   | 1.0   |
| 27.4   | 21.0   | 18.5   | 11.4   | 8.0   | 44.2   | 14.5   | 18.8  | 11.8  |
| 345.5  | 336.8  | 302.5  | 414.5  | 144.4 | 263.6  | 200.8  | 101.0 | 123.0 |
| 5.3    | 2.2    | 4.5    | 12.0   | 1.0   | 2.3    | 7.2    | 28.0  | 6.9   |
| 13.4   | 14.5   | 14.6   | 8.2    | 13.3  | 145.2  | 94.6   | 23.6  | 37.8  |
| 6.9    | 3.3    | 15.4   | 7.9    | 3.4   | 10.5   | 8.1    | 2.0   | 6.6   |
| 26.5   | 29.8   | 33.2   | 15.0   | 21.4  | 18.1   | 9.4    | 14.2  | 9.0   |
| 456.4  | 270.1  | 277.8  | 207.7  | 36.2  | 566.2  | 212.7  | 179.6 | 235.0 |
| 3.9    | 2.8    | 11.7   | 9.2    | 1.2   | 4.9    | 2.8    | 3.1   | 1.5   |
| 25.1   | 20.8   | 20.1   | 18.8   | 11.0  | 135.9  | 103.5  | 90.8  | 125.2 |
| 157.0  | 164.1  | 170.0  | 167.5  | 52.2  | 259.7  | 215.5  | 125.5 | 157.7 |
| 3.0    | 2.0    | 2.3    | 2.6    | 1.3   | 1.3    | 2.3    | 1.8   | 1.8   |
| 12.1   | 4.2    | 3.7    | 4.3    | 0.4   | 3.0    | 9.4    | 4.1   | 5.4   |
| 14.4   | 17.7   | 10.9   | 3.3    | 0.7   | 9.2    | 9.7    | 12.4  | 8.2   |
| 3.3    | 2.8    | 1.8    | 1.0    | 0.3   | 1.1    | 2.5    | 1.5   | 1.3   |
| 17.1   | 6.1    | 6.2    | 2.8    | 6.0   | 7.3    | 4.7    | 15.0  | 24.2  |

|        |        |        |        |        |        |        |        |        |
|--------|--------|--------|--------|--------|--------|--------|--------|--------|
| 13.5   | 2.7    | 21.2   | 2.6    | 1.4    | 3.0    | 0.8    | 2.3    | 2.6    |
| 22.7   | 12.7   | 2.9    | 0.8    | 2.4    | 11.0   | 4.4    | 5.3    | 1.0    |
| 1.9    | 3.5    | 0.9    | 2.4    | 3.4    | 7.0    | 12.6   | 9.2    | 13.6   |
| 16.4   | 11.5   | 6.6    | 8.7    | 7.1    | 28.4   | 2.6    | 5.4    | 5.9    |
| 1.0    | 0.7    | 6.6    | 4.7    | 3.7    | 1.8    | 0.7    | 3.2    | 3.7    |
| 8.5    | 15.4   | 2.4    | 13.3   | 5.7    | 1.7    | 15.2   | 15.6   | 14.7   |
| 12.2   | 20.6   | 15.3   | 6.6    | 1.1    | 22.5   | 1.1    | 24.2   | 14.4   |
| 3.3    | 0.6    | 3.0    | 9.4    | 6.4    | 9.5    | 1.2    | 2.3    | 4.7    |
| 207.6  | 160.4  | 122.1  | 85.0   | 40.2   | 98.1   | 103.4  | 92.7   | 70.1   |
| 7.5    | 1.6    | 2.2    | 4.0    | 5.3    | 13.3   | 11.6   | 3.0    | 4.7    |
| 31.9   | 27.6   | 26.2   | 41.4   | 16.9   | 50.7   | 27.5   | 12.6   | 41.0   |
| 489.4  | 406.1  | 457.0  | 296.6  | 100.0  | 334.1  | 138.8  | 323.3  | 396.8  |
| 7961.4 | 6329.3 | 6841.3 | 6049.8 | 2586.7 | 8828.7 | 3844.1 | 2658.5 | 3277.7 |
| 13.0   | 2.1    | 1.9    | 10.8   | 2.2    | 18.6   | 9.3    | 4.1    | 3.3    |
| 1.3    | 1.3    | 1.8    | 2.5    | 3.6    | 5.3    | 0.8    | 0.6    | 0.4    |
| 3.1    | 22.1   | 6.2    | 2.6    | 1.1    | 3.4    | 0.9    | 4.5    | 1.3    |
| 0.7    | 1.8    | 1.0    | 0.9    | 0.4    | 3.7    | 2.0    | 1.8    | 0.6    |
| 1.5    | 4.9    | 1.5    | 2.2    | 6.7    | 7.2    | 1.2    | 1.3    | 2.0    |
| 1.2    | 1.3    | 1.5    | 1.4    | 0.4    | 5.3    | 3.0    | 1.2    | 1.1    |
| 14.9   | 8.0    | 15.8   | 1.5    | 7.1    | 10.6   | 2.6    | 4.3    | 10.7   |
| 118.3  | 105.7  | 120.5  | 162.4  | 49.2   | 140.2  | 94.8   | 24.3   | 24.0   |
| 87.5   | 80.8   | 67.1   | 41.5   | 32.2   | 11.3   | 7.0    | 14.2   | 18.7   |
| 1.8    | 2.3    | 3.0    | 2.0    | 7.4    | 19.4   | 5.9    | 10.0   | 1.9    |
| 30.2   | 20.2   | 3.1    | 2.7    | 6.2    | 50.9   | 31.1   | 2.4    | 11.4   |
| 46.8   | 25.7   | 20.5   | 47.4   | 11.7   | 88.5   | 27.6   | 26.9   | 23.5   |
| 9.1    | 1.4    | 5.1    | 3.7    | 6.2    | 1.7    | 9.8    | 12.5   | 4.0    |
| 3.0    | 1.3    | 1.3    | 1.2    | 1.0    | 2.3    | 0.9    | 0.8    | 0.7    |
| 17.7   | 3.5    | 5.6    | 10.4   | 4.3    | 7.3    | 1.2    | 5.6    | 11.1   |
| 8.7    | 6.0    | 8.3    | 8.0    | 0.2    | 1108.8 | 751.8  | 6.2    | 5.9    |
| 2.1    | 10.5   | 2.8    | 9.0    | 1.5    | 14.8   | 8.3    | 11.6   | 17.0   |
| 30.4   | 26.9   | 48.4   | 67.4   | 22.1   | 160.0  | 154.4  | 41.1   | 35.8   |
| 73.9   | 55.6   | 41.9   | 25.4   | 21.1   | 43.9   | 37.2   | 78.5   | 90.0   |
| 3.4    | 8.6    | 2.9    | 4.6    | 1.6    | 20.8   | 1.9    | 6.3    | 15.5   |
| 14.8   | 7.1    | 14.4   | 9.5    | 4.2    | 19.7   | 11.0   | 11.9   | 20.8   |
| 37.9   | 24.9   | 28.9   | 15.0   | 9.1    | 75.4   | 35.2   | 21.5   | 17.6   |
| 8.3    | 13.3   | 3.2    | 14.8   | 3.0    | 49.2   | 6.5    | 9.4    | 4.3    |
| 0.9    | 0.9    | 1.1    | 0.7    | 0.5    | 1.8    | 1.8    | 0.9    | 0.9    |
| 2.9    | 17.3   | 9.5    | 10.6   | 2.9    | 20.8   | 11.6   | 6.8    | 11.8   |
| 10.1   | 8.4    | 16.7   | 17.7   | 5.6    | 40.4   | 24.5   | 8.5    | 14.3   |
| 5.3    | 0.7    | 10.9   | 7.6    | 3.5    | 8.8    | 9.3    | 3.8    | 3.7    |
| 88.4   | 82.2   | 106.0  | 68.8   | 51.9   | 163.7  | 252.2  | 109.5  | 103.0  |
| 0.5    | 0.8    | 3.7    | 2.2    | 0.7    | 0.6    | 12.1   | 1.1    | 0.9    |
| 8.2    | 12.6   | 19.4   | 17.6   | 7.3    | 14.4   | 8.9    | 14.2   | 10.6   |
| 1.0    | 1.3    | 2.1    | 2.0    | 1.1    | 3.8    | 2.1    | 2.1    | 2.0    |
| 535.0  | 529.8  | 434.5  | 248.7  | 99.2   | 782.3  | 456.8  | 109.2  | 175.5  |
| 16.9   | 39.8   | 24.8   | 22.5   | 12.7   | 444.5  | 254.5  | 195.3  | 203.5  |
| 5.1    | 5.8    | 2.7    | 10.9   | 9.3    | 7.2    | 1.9    | 3.4    | 3.3    |
| 15.0   | 10.0   | 12.4   | 13.5   | 12.5   | 14.4   | 6.9    | 14.5   | 19.4   |
| 4.4    | 1.0    | 5.9    | 5.3    | 0.3    | 0.5    | 6.8    | 0.7    | 5.6    |
| 53.7   | 56.4   | 43.4   | 55.7   | 22.5   | 41.4   | 35.3   | 34.9   | 73.6   |
| 1.8    | 5.4    | 5.6    | 6.1    | 5.8    | 10.7   | 6.9    | 9.7    | 10.5   |
| 170.2  | 128.8  | 156.8  | 104.4  | 67.6   | 181.2  | 117.7  | 182.5  | 236.4  |
| 34.4   | 22.8   | 18.4   | 16.4   | 11.0   | 34.0   | 24.8   | 11.2   | 9.2    |

|        |        |        |        |        |        |        |       |        |
|--------|--------|--------|--------|--------|--------|--------|-------|--------|
| 7.9    | 13.8   | 19.3   | 6.3    | 1.2    | 1.1    | 7.3    | 5.2   | 4.6    |
| 4.6    | 15.8   | 7.9    | 1.6    | 8.1    | 9.0    | 9.8    | 12.8  | 7.2    |
| 11.2   | 3.7    | 1.7    | 0.8    | 0.6    | 4.5    | 10.6   | 4.2   | 2.9    |
| 10.2   | 0.1    | 0.4    | 0.7    | 0.2    | 0.4    | 3.0    | 0.4   | 0.9    |
| 16.1   | 8.9    | 7.3    | 0.8    | 4.6    | 8.0    | 1.0    | 6.4   | 1.0    |
| 43.6   | 30.3   | 28.9   | 34.1   | 6.6    | 78.4   | 36.6   | 7.3   | 19.0   |
| 1347.0 | 1215.8 | 1301.8 | 1105.8 | 549.7  | 1034.1 | 667.8  | 362.7 | 338.3  |
| 126.7  | 127.2  | 170.4  | 415.0  | 91.4   | 13.3   | 23.8   | 13.9  | 15.5   |
| 2.0    | 1.8    | 2.5    | 1.8    | 0.5    | 2.1    | 1.9    | 3.7   | 2.3    |
| 206.5  | 192.4  | 186.3  | 141.7  | 84.7   | 165.5  | 171.0  | 188.6 | 268.3  |
| 0.9    | 1.9    | 0.4    | 3.1    | 0.1    | 1.2    | 4.5    | 10.1  | 8.0    |
| 2.9    | 1.4    | 3.7    | 2.4    | 2.2    | 1.1    | 2.3    | 1.2   | 1.8    |
| 20.0   | 16.5   | 22.7   | 26.1   | 6.6    | 34.9   | 15.0   | 13.9  | 6.7    |
| 7.5    | 1.0    | 1.2    | 7.6    | 0.6    | 0.9    | 1.3    | 0.9   | 1.1    |
| 11.3   | 3.0    | 8.2    | 4.0    | 0.2    | 23.1   | 14.8   | 20.4  | 11.3   |
| 35.5   | 47.1   | 32.2   | 24.1   | 20.5   | 57.9   | 22.0   | 12.1  | 32.2   |
| 1166.8 | 1139.2 | 1102.8 | 1180.6 | 429.0  | 1354.4 | 1262.9 | 93.5  | 110.7  |
| 19.3   | 11.1   | 7.0    | 4.8    | 1.1    | 19.2   | 11.9   | 9.0   | 9.1    |
| 0.6    | 2.4    | 2.3    | 2.3    | 0.4    | 27.9   | 7.9    | 0.5   | 1.2    |
| 7.2    | 22.3   | 9.0    | 4.6    | 14.9   | 73.1   | 81.9   | 4.4   | 24.2   |
| 3.0    | 2.3    | 2.6    | 1.6    | 0.4    | 3.2    | 1.2    | 0.6   | 0.9    |
| 10.5   | 18.1   | 15.6   | 17.8   | 8.5    | 10.9   | 13.5   | 4.8   | 20.7   |
| 11.0   | 0.9    | 1.5    | 7.9    | 3.9    | 10.3   | 1.3    | 2.3   | 2.9    |
| 2.7    | 7.0    | 1.6    | 0.5    | 3.5    | 2.8    | 0.8    | 1.4   | 0.9    |
| 16.7   | 2.5    | 2.4    | 10.7   | 0.4    | 2.9    | 1.1    | 8.9   | 25.8   |
| 122.6  | 101.2  | 142.7  | 195.1  | 40.3   | 167.5  | 101.3  | 9.3   | 25.1   |
| 1083.8 | 1095.1 | 1180.8 | 1470.4 | 477.2  | 1419.9 | 1136.8 | 742.3 | 929.7  |
| 26.9   | 22.8   | 17.4   | 25.1   | 12.9   | 42.0   | 40.4   | 10.6  | 14.3   |
| 8.2    | 1.5    | 1.2    | 1.7    | 0.5    | 1.5    | 2.2    | 2.0   | 5.3    |
| 9.6    | 4.9    | 1.3    | 1.0    | 1.9    | 29.4   | 29.4   | 1.4   | 4.0    |
| 53.1   | 44.4   | 54.6   | 85.9   | 33.7   | 73.4   | 57.0   | 8.3   | 2.0    |
| 7.6    | 9.5    | 2.5    | 6.9    | 1.8    | 2.8    | 13.3   | 1.2   | 4.8    |
| 14.5   | 13.6   | 12.8   | 4.7    | 3.2    | 1.5    | 10.1   | 10.7  | 15.6   |
| 7.2    | 12.3   | 13.7   | 3.7    | 2.6    | 14.9   | 11.3   | 3.7   | 9.1    |
| 25.8   | 15.4   | 17.6   | 6.7    | 7.5    | 17.1   | 11.1   | 16.6  | 18.8   |
| 83.0   | 81.1   | 71.1   | 70.3   | 27.5   | 49.1   | 45.4   | 44.6  | 47.2   |
| 173.9  | 184.8  | 154.3  | 105.0  | 52.4   | 79.9   | 75.3   | 55.5  | 59.0   |
| 217.9  | 181.3  | 245.6  | 169.3  | 91.7   | 253.9  | 129.0  | 95.4  | 123.3  |
| 852.6  | 765.1  | 664.5  | 432.5  | 275.0  | 592.3  | 376.5  | 394.6 | 559.6  |
| 5.6    | 20.0   | 26.3   | 9.9    | 9.4    | 23.9   | 11.6   | 27.4  | 4.0    |
| 1.6    | 1.3    | 16.0   | 6.4    | 6.5    | 16.8   | 17.7   | 18.9  | 2.6    |
| 11.2   | 4.5    | 18.0   | 11.5   | 0.8    | 19.6   | 20.6   | 2.3   | 5.2    |
| 9.6    | 6.8    | 66.0   | 37.3   | 6.1    | 77.4   | 27.8   | 25.2  | 24.3   |
| 9.7    | 13.5   | 28.6   | 14.3   | 10.5   | 24.8   | 14.8   | 5.5   | 24.7   |
| 79.2   | 69.1   | 60.7   | 54.0   | 18.0   | 33.7   | 20.1   | 10.8  | 13.6   |
| 240.9  | 257.5  | 199.5  | 232.0  | 73.4   | 125.8  | 66.9   | 27.5  | 56.7   |
| 12.8   | 5.7    | 1.6    | 4.3    | 3.4    | 7.9    | 6.8    | 4.5   | 16.3   |
| 5692.0 | 4943.3 | 4982.8 | 5059.4 | 2652.7 | 8430.3 | 7080.4 | 883.6 | 1104.6 |
| 531.1  | 380.7  | 414.9  | 310.2  | 186.3  | 910.1  | 619.2  | 317.3 | 317.7  |
| 7.7    | 0.8    | 12.2   | 3.7    | 0.4    | 5.2    | 5.7    | 0.7   | 5.1    |
| 12.8   | 7.3    | 5.5    | 4.4    | 1.5    | 4.0    | 4.4    | 3.8   | 4.6    |
| 13.1   | 25.8   | 6.7    | 7.4    | 14.6   | 20.9   | 18.2   | 1.7   | 3.9    |
| 0.4    | 0.2    | 0.6    | 0.6    | 2.5    | 0.5    | 1.1    | 7.6   | 3.5    |

|        |        |        |        |        |        |        |        |        |
|--------|--------|--------|--------|--------|--------|--------|--------|--------|
| 1.7    | 9.2    | 8.1    | 14.8   | 0.6    | 19.5   | 5.7    | 1.4    | 1.2    |
| 3905.2 | 3466.3 | 3145.8 | 2569.5 | 1652.8 | 3105.2 | 2381.4 | 1762.1 | 2145.3 |
| 0.8    | 8.0    | 10.2   | 5.4    | 4.7    | 9.8    | 7.7    | 2.8    | 0.8    |
| 13.1   | 11.9   | 11.1   | 10.7   | 4.1    | 13.7   | 0.3    | 7.4    | 14.4   |
| 7.9    | 12.0   | 15.4   | 3.3    | 5.5    | 3.4    | 8.2    | 16.0   | 15.2   |
| 455.1  | 246.7  | 313.5  | 267.4  | 111.0  | 1274.2 | 969.0  | 163.6  | 303.0  |
| 1.0    | 1.4    | 1.1    | 4.8    | 0.5    | 1.2    | 1.5    | 1.0    | 0.7    |
| 30.9   | 20.5   | 12.9   | 16.3   | 1.1    | 23.0   | 4.9    | 8.7    | 19.8   |
| 4.9    | 1.7    | 4.6    | 1.6    | 3.1    | 1.2    | 1.0    | 1.8    | 2.5    |
| 6.2    | 2.1    | 2.4    | 3.7    | 1.0    | 4.2    | 2.0    | 1.7    | 2.7    |
| 113.9  | 132.6  | 148.0  | 113.9  | 54.5   | 212.4  | 113.8  | 85.2   | 66.9   |
| 14.4   | 5.9    | 3.7    | 0.8    | 5.4    | 1.5    | 6.3    | 15.6   | 9.6    |
| 1.6    | 2.2    | 2.2    | 0.6    | 0.6    | 43.7   | 19.5   | 0.7    | 0.4    |
| 4.5    | 2.5    | 4.1    | 5.4    | 1.0    | 5.0    | 1.9    | 2.6    | 13.7   |
| 5.4    | 1.1    | 7.0    | 0.3    | 3.2    | 14.9   | 13.4   | 6.1    | 7.4    |
| 396.0  | 330.7  | 301.8  | 262.5  | 141.7  | 193.0  | 110.5  | 2.2    | 1.2    |
| 124.0  | 93.0   | 100.6  | 81.2   | 27.7   | 142.0  | 62.2   | 86.1   | 135.7  |
| 15.6   | 0.6    | 5.0    | 0.9    | 0.8    | 9.6    | 4.7    | 1.2    | 7.5    |
| 6.7    | 0.7    | 1.0    | 0.5    | 0.8    | 3.4    | 2.6    | 0.6    | 2.4    |
| 3.3    | 4.5    | 3.0    | 2.3    | 8.1    | 4.2    | 2.2    | 6.0    | 2.0    |
| 3986.9 | 3959.1 | 3323.4 | 2050.5 | 1349.8 | 5577.9 | 4652.6 | 906.3  | 1351.1 |
| 9.8    | 5.5    | 12.7   | 1.3    | 3.7    | 2.2    | 5.3    | 7.2    | 3.0    |
| 39.8   | 40.2   | 38.0   | 54.8   | 15.7   | 29.4   | 19.9   | 16.4   | 15.3   |
| 26.0   | 12.0   | 13.5   | 29.2   | 6.6    | 3.3    | 8.2    | 20.5   | 7.1    |
| 139.3  | 68.9   | 64.5   | 72.7   | 25.8   | 265.9  | 75.0   | 52.7   | 33.9   |
| 46.7   | 52.8   | 86.8   | 100.9  | 15.7   | 83.2   | 57.5   | 12.7   | 7.0    |
| 2.1    | 1.7    | 1.4    | 2.1    | 0.9    | 1.2    | 2.3    | 3.0    | 3.4    |
| 2646.4 | 2167.8 | 2050.0 | 1840.5 | 673.5  | 1845.6 | 1300.6 | 261.1  | 305.9  |
| 19.8   | 17.7   | 8.9    | 17.5   | 8.3    | 87.8   | 90.7   | 17.5   | 28.2   |
| 8.3    | 9.7    | 7.2    | 7.0    | 2.8    | 2.5    | 8.4    | 2.1    | 0.5    |
| 232.7  | 230.3  | 272.5  | 325.2  | 114.8  | 245.2  | 142.9  | 16.5   | 26.7   |
| 6.4    | 8.9    | 5.9    | 3.3    | 0.6    | 9.8    | 8.8    | 0.9    | 4.8    |
| 55.8   | 64.7   | 78.7   | 46.0   | 14.5   | 108.1  | 86.7   | 17.2   | 16.2   |
| 3288.2 | 2761.8 | 2808.4 | 2554.0 | 1035.1 | 4619.5 | 3886.3 | 262.0  | 436.0  |
| 152.9  | 122.2  | 166.7  | 113.9  | 35.6   | 32.5   | 16.7   | 6.6    | 9.5    |
| 5.2    | 8.2    | 13.3   | 6.3    | 6.7    | 20.7   | 15.4   | 8.1    | 7.6    |
| 1424.0 | 1079.4 | 1042.9 | 889.2  | 249.2  | 751.3  | 302.7  | 562.6  | 773.6  |
| 11.7   | 16.7   | 7.6    | 6.9    | 2.2    | 39.0   | 14.4   | 12.9   | 21.9   |
| 2.1    | 8.5    | 3.3    | 1.2    | 0.5    | 8.8    | 7.5    | 3.3    | 12.8   |
| 137.4  | 131.4  | 126.9  | 122.8  | 66.4   | 482.4  | 345.1  | 45.3   | 52.7   |
| 81.7   | 59.7   | 64.0   | 47.6   | 11.0   | 90.8   | 25.6   | 23.3   | 10.7   |
| 2.0    | 7.0    | 2.5    | 13.5   | 1.8    | 27.4   | 4.8    | 5.1    | 1.1    |
| 3.9    | 2.6    | 17.0   | 18.0   | 5.2    | 16.2   | 8.9    | 43.9   | 42.8   |
| 61.7   | 37.6   | 30.7   | 12.6   | 12.3   | 22.5   | 17.2   | 39.8   | 62.6   |
| 19.2   | 3.8    | 0.8    | 2.6    | 1.4    | 10.4   | 3.9    | 10.7   | 12.2   |
| 39.9   | 32.4   | 49.8   | 51.4   | 7.6    | 236.5  | 133.5  | 102.8  | 113.5  |
| 2.3    | 2.0    | 2.6    | 2.3    | 0.9    | 2.4    | 2.2    | 1.7    | 2.9    |
| 20.4   | 11.1   | 9.2    | 20.3   | 3.9    | 12.6   | 12.8   | 19.7   | 34.6   |
| 31.7   | 17.0   | 20.1   | 20.4   | 7.1    | 38.4   | 19.1   | 25.4   | 9.4    |
| 5.8    | 14.1   | 4.1    | 13.7   | 7.7    | 33.5   | 7.6    | 4.2    | 5.3    |
| 4.7    | 11.1   | 22.9   | 18.6   | 1.2    | 24.1   | 16.5   | 4.6    | 10.7   |
| 1.7    | 4.1    | 2.0    | 0.8    | 1.4    | 4.5    | 2.1    | 2.1    | 2.0    |
| 1.1    | 7.6    | 8.5    | 0.4    | 7.9    | 4.3    | 1.1    | 3.7    | 5.6    |

|        |        |        |        |        |        |        |       |        |
|--------|--------|--------|--------|--------|--------|--------|-------|--------|
| 4.2    | 7.0    | 4.7    | 11.1   | 0.8    | 12.9   | 6.3    | 0.9   | 1.7    |
| 12.6   | 10.8   | 13.0   | 10.4   | 5.7    | 14.2   | 16.1   | 1.6   | 7.0    |
| 33.8   | 29.2   | 30.0   | 12.6   | 9.7    | 2669.8 | 1275.4 | 1.0   | 8.2    |
| 1.4    | 8.6    | 6.9    | 0.7    | 0.2    | 0.6    | 6.7    | 4.7   | 2.6    |
| 4.0    | 2.4    | 3.2    | 2.2    | 1.7    | 22.5   | 22.5   | 3.6   | 2.7    |
| 5.9    | 3.4    | 4.9    | 7.7    | 4.2    | 10.8   | 0.1    | 1.0   | 4.9    |
| 35.9   | 27.3   | 18.1   | 18.3   | 15.7   | 40.5   | 17.9   | 26.3  | 19.3   |
| 6.7    | 6.0    | 4.4    | 5.0    | 1.8    | 0.5    | 1.6    | 1.2   | 6.7    |
| 1569.4 | 1495.8 | 1609.8 | 1271.3 | 647.5  | 2798.6 | 2055.1 | 616.4 | 766.0  |
| 431.3  | 410.6  | 526.8  | 532.9  | 182.5  | 695.3  | 416.5  | 151.8 | 176.6  |
| 1.0    | 3.1    | 0.8    | 1.6    | 1.0    | 7.2    | 4.9    | 7.4   | 1.1    |
| 18.8   | 11.3   | 4.7    | 10.2   | 7.6    | 7.1    | 6.6    | 9.8   | 15.1   |
| 17.8   | 5.0    | 26.1   | 7.3    | 3.1    | 16.7   | 12.1   | 0.7   | 11.0   |
| 1.9    | 0.6    | 1.7    | 0.7    | 2.3    | 1.2    | 0.6    | 1.8   | 1.7    |
| 2.4    | 2.9    | 2.0    | 1.8    | 2.4    | 4.5    | 4.5    | 6.0   | 2.6    |
| 146.7  | 131.9  | 81.2   | 37.6   | 21.1   | 1.0    | 2.2    | 9.4   | 1.4    |
| 1.5    | 2.7    | 1.5    | 1.5    | 0.6    | 241.9  | 174.1  | 3.9   | 2.7    |
| 1.9    | 8.8    | 3.6    | 30.1   | 0.4    | 1974.2 | 1869.7 | 1.1   | 0.7    |
| 423.2  | 472.2  | 715.2  | 587.9  | 238.3  | 1316.3 | 998.5  | 50.1  | 67.8   |
| 103.3  | 80.8   | 103.2  | 85.5   | 26.5   | 132.7  | 73.5   | 44.0  | 45.4   |
| 270.9  | 288.8  | 318.6  | 301.6  | 120.5  | 649.1  | 303.3  | 90.1  | 124.5  |
| 6.5    | 11.8   | 17.7   | 13.0   | 1.3    | 25.1   | 24.3   | 12.5  | 12.6   |
| 3.9    | 0.7    | 2.4    | 0.9    | 0.8    | 1.4    | 1.4    | 2.1   | 6.0    |
| 4642.5 | 4151.1 | 4001.8 | 4402.2 | 2078.6 | 4548.1 | 4093.7 | 0.8   | 7.5    |
| 10.1   | 10.8   | 11.2   | 8.3    | 4.2    | 3.1    | 1.1    | 5.5   | 5.9    |
| 2240.1 | 1979.9 | 2949.6 | 2954.7 | 830.4  | 4581.1 | 3706.2 | 630.0 | 903.5  |
| 0.9    | 0.6    | 1.0    | 0.8    | 0.7    | 1.8    | 1.4    | 2.8   | 0.5    |
| 1.3    | 3.4    | 0.7    | 0.5    | 0.3    | 0.5    | 1.8    | 0.5   | 2.4    |
| 3.6    | 5.5    | 8.6    | 2.0    | 0.6    | 3.5    | 4.8    | 1.9   | 1.9    |
| 194.6  | 136.2  | 142.3  | 51.2   | 51.5   | 4300.0 | 2012.4 | 112.0 | 170.3  |
| 11.8   | 7.3    | 1.9    | 9.5    | 6.1    | 11.4   | 6.5    | 6.4   | 3.1    |
| 211.2  | 169.6  | 201.4  | 116.8  | 66.9   | 222.2  | 133.1  | 138.9 | 107.1  |
| 1.2    | 1.6    | 4.7    | 2.5    | 0.5    | 0.8    | 5.5    | 1.0   | 0.8    |
| 120.5  | 121.4  | 112.6  | 81.4   | 28.1   | 86.4   | 29.5   | 107.3 | 169.8  |
| 53.8   | 74.8   | 58.7   | 47.4   | 26.2   | 40.5   | 35.4   | 4.6   | 2.3    |
| 48.2   | 29.5   | 35.8   | 18.3   | 4.3    | 18.5   | 15.9   | 2.4   | 4.0    |
| 2453.9 | 2426.1 | 2173.9 | 1375.7 | 828.0  | 4664.3 | 4668.9 | 800.3 | 1287.8 |
| 18.1   | 4.6    | 1.6    | 1.3    | 5.6    | 10.7   | 5.8    | 6.1   | 2.1    |
| 75.5   | 65.4   | 59.3   | 48.4   | 24.1   | 238.2  | 147.3  | 23.6  | 31.4   |
| 17.8   | 7.7    | 16.5   | 1.7    | 1.5    | 45.5   | 11.0   | 6.8   | 2.6    |
| 14.3   | 1.9    | 6.2    | 0.7    | 1.4    | 12.4   | 14.3   | 10.9  | 13.6   |
| 15.4   | 20.9   | 24.4   | 30.0   | 12.5   | 7.9    | 13.6   | 26.3  | 40.9   |
| 1175.8 | 1022.3 | 1192.7 | 1077.1 | 320.4  | 211.9  | 172.9  | 0.3   | 6.2    |
| 1.5    | 8.4    | 3.0    | 2.1    | 3.2    | 15.1   | 12.9   | 3.3   | 2.9    |
| 67.5   | 86.1   | 76.6   | 115.5  | 33.2   | 446.7  | 363.6  | 19.0  | 37.9   |
| 394.7  | 280.7  | 355.6  | 250.4  | 112.1  | 773.3  | 503.0  | 179.9 | 222.3  |
| 27.2   | 9.4    | 25.7   | 8.5    | 5.6    | 55.7   | 47.8   | 12.6  | 14.2   |
| 434.8  | 456.7  | 384.7  | 283.6  | 73.6   | 662.1  | 274.1  | 76.8  | 109.7  |
| 123.0  | 109.9  | 145.2  | 78.3   | 36.1   | 121.9  | 62.3   | 90.7  | 138.9  |
| 14.7   | 17.9   | 22.7   | 15.5   | 3.5    | 30.8   | 3.1    | 9.1   | 10.7   |
| 0.8    | 1.6    | 1.1    | 0.6    | 0.5    | 2.4    | 0.9    | 1.2   | 1.2    |
| 14.3   | 15.3   | 25.7   | 30.1   | 8.6    | 253.1  | 215.9  | 205.3 | 222.1  |
| 0.6    | 1.1    | 0.5    | 0.5    | 0.5    | 1.9    | 0.9    | 3.5   | 7.5    |

|        |        |        |        |        |        |        |       |       |
|--------|--------|--------|--------|--------|--------|--------|-------|-------|
| 3.9    | 1.2    | 1.5    | 4.8    | 11.4   | 14.6   | 16.0   | 6.7   | 5.7   |
| 0.8    | 3.8    | 2.7    | 1.6    | 0.6    | 8.7    | 15.5   | 2.1   | 3.2   |
| 1.0    | 1.4    | 1.6    | 1.5    | 0.8    | 0.9    | 2.3    | 10.3  | 1.8   |
| 18.7   | 16.1   | 12.0   | 11.6   | 6.9    | 15.3   | 21.8   | 32.6  | 27.3  |
| 5.1    | 4.3    | 3.1    | 3.8    | 1.8    | 146.0  | 73.4   | 1.8   | 3.4   |
| 823.9  | 685.6  | 603.4  | 680.2  | 369.3  | 2157.9 | 1964.0 | 213.6 | 407.7 |
| 79.6   | 73.5   | 82.8   | 70.0   | 24.5   | 188.7  | 86.0   | 47.1  | 86.2  |
| 6.4    | 5.7    | 11.2   | 6.1    | 3.6    | 18.5   | 18.1   | 10.0  | 0.7   |
| 5.2    | 3.2    | 2.9    | 3.3    | 3.3    | 5.2    | 3.9    | 4.4   | 12.1  |
| 3.5    | 7.4    | 2.6    | 0.8    | 3.1    | 19.9   | 6.3    | 11.6  | 3.0   |
| 774.0  | 858.3  | 757.7  | 424.6  | 194.9  | 906.4  | 441.3  | 254.8 | 342.4 |
| 29.6   | 38.1   | 29.0   | 26.4   | 11.0   | 1.7    | 1.0    | 1.1   | 0.8   |
| 817.8  | 675.5  | 720.6  | 715.4  | 287.0  | 384.3  | 346.7  | 69.4  | 130.0 |
| 1.0    | 2.7    | 0.4    | 0.8    | 0.2    | 0.7    | 1.3    | 1.2   | 0.8   |
| 159.7  | 111.6  | 127.1  | 75.2   | 32.1   | 765.8  | 706.2  | 130.8 | 121.9 |
| 51.0   | 32.9   | 34.9   | 29.1   | 17.2   | 160.1  | 98.1   | 32.0  | 55.9  |
| 11.9   | 6.3    | 4.4    | 4.6    | 0.5    | 20.1   | 18.3   | 10.8  | 1.5   |
| 217.0  | 203.4  | 146.3  | 59.7   | 32.1   | 181.3  | 82.9   | 19.0  | 24.2  |
| 599.1  | 566.7  | 625.2  | 682.0  | 174.9  | 468.0  | 319.5  | 36.9  | 25.2  |
| 1.1    | 4.4    | 4.6    | 1.1    | 2.1    | 1.2    | 2.0    | 1.0   | 1.2   |
| 124.6  | 130.1  | 88.4   | 66.2   | 28.8   | 301.0  | 156.4  | 146.1 | 176.4 |
| 4.7    | 5.8    | 0.5    | 1.2    | 0.5    | 11.4   | 1.9    | 9.6   | 18.9  |
| 0.8    | 0.5    | 2.0    | 0.3    | 0.2    | 1.5    | 0.8    | 0.9   | 0.5   |
| 287.5  | 239.9  | 281.8  | 384.9  | 99.9   | 310.4  | 141.4  | 72.2  | 73.1  |
| 1114.3 | 845.6  | 980.3  | 717.0  | 315.4  | 1888.0 | 1416.4 | 208.3 | 220.1 |
| 10.6   | 2.6    | 10.9   | 2.1    | 1.3    | 5.0    | 1.0    | 0.5   | 0.9   |
| 0.7    | 1.8    | 8.3    | 0.6    | 0.5    | 2.8    | 5.2    | 3.8   | 0.5   |
| 2.8    | 4.9    | 7.7    | 6.5    | 6.5    | 2.1    | 0.9    | 18.2  | 17.6  |
| 13.0   | 8.6    | 19.0   | 5.8    | 9.5    | 11.0   | 7.1    | 16.6  | 26.1  |
| 6.4    | 1.4    | 14.3   | 11.9   | 0.7    | 2.8    | 0.7    | 1.7   | 11.6  |
| 227.7  | 219.6  | 192.7  | 139.6  | 89.1   | 471.8  | 235.7  | 96.8  | 95.2  |
| 26.2   | 23.8   | 23.1   | 20.7   | 9.2    | 27.8   | 10.1   | 76.7  | 80.6  |
| 43.4   | 38.4   | 38.9   | 28.9   | 10.3   | 260.5  | 147.1  | 185.6 | 214.9 |
| 5.7    | 4.3    | 10.5   | 1.7    | 9.1    | 3.7    | 14.8   | 1.4   | 4.4   |
| 4.3    | 3.0    | 2.0    | 4.6    | 3.8    | 7.8    | 0.7    | 5.6   | 1.2   |
| 24.7   | 2.4    | 3.7    | 8.9    | 0.7    | 12.5   | 2.3    | 30.1  | 36.9  |
| 9.9    | 2.4    | 6.2    | 12.7   | 2.6    | 9.0    | 2.4    | 4.5   | 5.4   |
| 1.0    | 3.7    | 13.3   | 3.2    | 0.9    | 2.1    | 1.0    | 1.2   | 0.7   |
| 344.5  | 384.3  | 287.5  | 310.2  | 103.7  | 771.5  | 531.7  | 238.5 | 304.0 |
| 107.3  | 123.0  | 108.0  | 120.0  | 43.0   | 225.2  | 185.1  | 67.4  | 71.5  |
| 1525.8 | 1394.8 | 2135.7 | 4743.8 | 1024.3 | 1078.0 | 818.0  | 545.0 | 596.1 |
| 10.5   | 2.8    | 20.6   | 6.0    | 1.4    | 2.4    | 9.0    | 31.9  | 20.8  |
| 217.8  | 175.8  | 134.4  | 119.2  | 50.9   | 171.6  | 123.0  | 144.3 | 153.7 |
| 11.5   | 10.1   | 7.7    | 8.7    | 1.2    | 4.4    | 3.9    | 7.2   | 2.0   |
| 58.8   | 38.8   | 47.2   | 37.7   | 18.7   | 231.0  | 166.0  | 74.6  | 46.4  |
| 7.5    | 22.1   | 38.9   | 20.6   | 13.5   | 33.4   | 42.6   | 24.2  | 6.1   |
| 10.2   | 7.6    | 11.0   | 8.0    | 1.5    | 23.9   | 1.4    | 9.7   | 8.3   |
| 7.7    | 8.7    | 8.1    | 14.8   | 5.9    | 15.3   | 0.8    | 0.8   | 5.4   |
| 0.6    | 0.5    | 1.3    | 2.0    | 3.9    | 0.3    | 0.2    | 4.9   | 2.7   |
| 2.6    | 11.5   | 24.7   | 10.5   | 4.0    | 123.8  | 154.3  | 5.9   | 4.8   |
| 2.1    | 1.6    | 9.9    | 9.2    | 4.0    | 136.2  | 70.0   | 2.5   | 8.2   |
| 14.3   | 16.7   | 8.0    | 5.1    | 4.0    | 9.6    | 4.3    | 12.6  | 14.2  |
| 9.6    | 3.0    | 2.5    | 7.1    | 0.5    | 18.6   | 1.8    | 1.7   | 0.9   |

|        |        |        |        |        |         |        |        |        |
|--------|--------|--------|--------|--------|---------|--------|--------|--------|
| 28.4   | 17.6   | 31.8   | 21.8   | 8.4    | 177.5   | 59.8   | 3.4    | 6.2    |
| 1.4    | 6.8    | 3.5    | 19.4   | 4.7    | 3.9     | 4.3    | 2.4    | 1.5    |
| 1.6    | 2.5    | 4.4    | 1.2    | 7.1    | 11.2    | 5.7    | 0.6    | 0.3    |
| 15.9   | 12.8   | 14.9   | 6.7    | 3.0    | 78.8    | 69.2   | 19.6   | 22.0   |
| 125.9  | 119.5  | 124.3  | 110.8  | 56.0   | 708.9   | 607.7  | 29.8   | 32.8   |
| 4.7    | 3.5    | 25.6   | 12.9   | 7.4    | 3.0     | 16.2   | 11.9   | 11.6   |
| 5.2    | 6.3    | 3.9    | 4.3    | 2.6    | 5.5     | 7.6    | 8.7    | 13.8   |
| 79.0   | 73.9   | 82.8   | 52.9   | 26.3   | 452.8   | 254.9  | 8.9    | 14.8   |
| 46.5   | 51.5   | 44.1   | 27.6   | 22.2   | 51.9    | 37.3   | 60.0   | 62.6   |
| 1.7    | 6.2    | 8.6    | 0.6    | 0.4    | 7.6     | 0.7    | 8.7    | 16.8   |
| 2.3    | 1.8    | 2.9    | 1.3    | 2.7    | 2.2     | 1.4    | 3.2    | 2.0    |
| 335.4  | 255.9  | 292.7  | 259.3  | 102.8  | 418.7   | 333.6  | 233.1  | 308.2  |
| 6.4    | 16.6   | 5.3    | 4.8    | 7.8    | 8.5     | 15.8   | 24.7   | 44.0   |
| 2.8    | 1.9    | 10.4   | 2.6    | 1.2    | 11.0    | 4.2    | 2.5    | 17.1   |
| 3.2    | 1.8    | 1.9    | 2.0    | 0.9    | 7.7     | 1.1    | 1.6    | 1.2    |
| 181.7  | 156.1  | 171.2  | 110.2  | 50.5   | 73.1    | 24.5   | 106.3  | 86.6   |
| 238.1  | 192.1  | 202.6  | 214.6  | 68.4   | 948.6   | 686.8  | 41.5   | 52.8   |
| 56.8   | 54.3   | 48.9   | 38.9   | 19.2   | 84.2    | 35.2   | 47.0   | 57.6   |
| 2.9    | 12.0   | 10.5   | 1.9    | 12.3   | 24.9    | 13.2   | 2.1    | 10.0   |
| 159.9  | 161.5  | 118.5  | 78.7   | 57.1   | 147.8   | 103.0  | 173.0  | 191.1  |
| 155.2  | 115.5  | 102.8  | 51.1   | 40.2   | 189.7   | 88.1   | 104.7  | 96.1   |
| 4.9    | 6.2    | 18.2   | 14.5   | 11.2   | 25.1    | 21.8   | 4.4    | 15.2   |
| 195.7  | 157.4  | 111.6  | 99.8   | 65.2   | 280.4   | 214.3  | 37.5   | 42.5   |
| 25.9   | 23.3   | 43.9   | 46.0   | 11.4   | 140.6   | 86.8   | 12.3   | 15.4   |
| 29.3   | 15.5   | 17.3   | 16.0   | 9.5    | 3.7     | 6.1    | 5.3    | 3.1    |
| 47.5   | 26.0   | 33.3   | 37.1   | 15.6   | 35.6    | 19.5   | 0.9    | 7.7    |
| 13.3   | 14.0   | 17.9   | 14.2   | 5.5    | 6.4     | 22.8   | 6.2    | 7.2    |
| 0.9    | 1.6    | 1.9    | 0.8    | 0.7    | 1.3     | 1.5    | 2.1    | 0.5    |
| 897.7  | 918.2  | 897.8  | 933.0  | 311.4  | 1361.5  | 1193.6 | 215.7  | 458.9  |
| 14.1   | 1.3    | 0.8    | 1.1    | 4.0    | 10.4    | 1.5    | 11.8   | 1.8    |
| 53.6   | 45.7   | 58.5   | 39.4   | 7.9    | 75.9    | 35.7   | 25.8   | 47.6   |
| 3.6    | 6.4    | 3.3    | 9.2    | 1.7    | 20.4    | 16.0   | 3.5    | 6.9    |
| 4.8    | 2.6    | 5.5    | 6.2    | 1.3    | 5.0     | 3.6    | 3.7    | 3.3    |
| 697.2  | 538.3  | 477.5  | 342.5  | 157.4  | 622.6   | 402.5  | 357.0  | 459.7  |
| 256.8  | 193.5  | 283.4  | 309.3  | 89.1   | 410.1   | 240.8  | 80.5   | 106.8  |
| 1.3    | 2.5    | 10.7   | 7.9    | 9.5    | 2.3     | 8.7    | 4.0    | 26.0   |
| 9.0    | 7.0    | 5.8    | 17.6   | 5.2    | 21.2    | 10.0   | 14.0   | 9.8    |
| 4.6    | 0.9    | 3.1    | 3.0    | 1.3    | 1.6     | 1.9    | 4.3    | 4.3    |
| 0.8    | 0.8    | 0.8    | 1.0    | 0.5    | 199.3   | 161.9  | 1.3    | 6.9    |
| 27.1   | 30.0   | 19.8   | 14.1   | 9.5    | 21.8    | 13.6   | 24.5   | 25.6   |
| 316.3  | 372.5  | 291.8  | 307.8  | 144.3  | 764.3   | 546.9  | 160.8  | 283.6  |
| 9005.0 | 7923.3 | 7418.1 | 7383.9 | 4186.6 | 10117.4 | 8382.6 | 3773.2 | 4671.6 |
| 37.4   | 51.0   | 44.8   | 44.4   | 30.9   | 67.4    | 49.0   | 35.8   | 53.6   |
| 2191.5 | 2081.9 | 2038.5 | 1900.2 | 723.0  | 4023.8  | 2706.3 | 572.8  | 1013.6 |
| 430.5  | 286.6  | 255.0  | 247.0  | 68.8   | 356.9   | 263.1  | 57.1   | 111.8  |
| 10.9   | 7.1    | 8.5    | 8.1    | 5.4    | 4.2     | 2.4    | 7.1    | 9.2    |
| 70.7   | 32.7   | 44.3   | 47.0   | 24.1   | 208.9   | 141.8  | 19.8   | 33.9   |
| 16.4   | 13.2   | 6.9    | 1.6    | 0.5    | 92.5    | 70.4   | 253.8  | 200.9  |
| 56.5   | 54.2   | 54.7   | 30.3   | 16.2   | 137.8   | 97.0   | 63.2   | 78.8   |
| 87.6   | 88.0   | 79.7   | 73.1   | 32.7   | 85.7    | 19.6   | 0.8    | 4.0    |
| 26.1   | 3.1    | 13.3   | 38.8   | 10.4   | 165.2   | 45.5   | 112.4  | 194.9  |
| 5.0    | 5.9    | 2.9    | 6.4    | 5.4    | 5.5     | 1.1    | 1.7    | 0.8    |
| 8.2    | 2.6    | 1.8    | 7.5    | 7.5    | 11.3    | 7.5    | 10.4   | 7.1    |

|       |       |       |       |       |        |        |       |       |
|-------|-------|-------|-------|-------|--------|--------|-------|-------|
| 104.5 | 97.8  | 82.6  | 58.0  | 30.6  | 321.9  | 138.2  | 47.0  | 69.6  |
| 2.4   | 12.1  | 2.6   | 7.5   | 1.2   | 2.2    | 2.0    | 7.5   | 21.8  |
| 8.2   | 1.4   | 1.5   | 0.4   | 0.3   | 1.4    | 5.0    | 3.6   | 1.9   |
| 4.6   | 1.3   | 3.8   | 5.4   | 2.1   | 1.9    | 1.6    | 0.4   | 2.8   |
| 0.2   | 2.7   | 0.3   | 0.8   | 0.4   | 200.7  | 274.5  | 1.8   | 1.8   |
| 1.5   | 10.8  | 0.7   | 2.3   | 5.7   | 1938.9 | 2327.9 | 8.4   | 9.2   |
| 221.1 | 209.8 | 212.6 | 219.8 | 69.5  | 384.3  | 368.2  | 3.7   | 0.9   |
| 59.0  | 61.3  | 41.9  | 50.7  | 13.3  | 44.2   | 38.6   | 0.3   | 1.9   |
| 8.1   | 1.8   | 8.3   | 11.6  | 2.0   | 12.1   | 15.0   | 6.9   | 1.9   |
| 73.7  | 73.4  | 78.6  | 35.0  | 27.4  | 179.2  | 86.0   | 74.6  | 91.7  |
| 10.9  | 15.5  | 1.5   | 7.9   | 7.4   | 5.6    | 2.3    | 6.0   | 4.9   |
| 11.0  | 7.5   | 8.1   | 4.3   | 6.1   | 1.6    | 4.0    | 12.6  | 13.2  |
| 46.0  | 22.0  | 26.0  | 11.8  | 10.9  | 18.4   | 20.9   | 42.4  | 60.7  |
| 78.4  | 64.8  | 75.6  | 85.4  | 25.2  | 263.0  | 151.2  | 48.5  | 46.4  |
| 5.4   | 9.6   | 4.8   | 1.0   | 2.1   | 26.9   | 4.4    | 4.4   | 1.4   |
| 16.2  | 24.2  | 21.1  | 11.8  | 5.1   | 44.9   | 34.8   | 5.3   | 1.2   |
| 19.7  | 15.4  | 11.1  | 18.8  | 4.2   | 63.5   | 79.3   | 5.2   | 7.6   |
| 194.1 | 168.3 | 195.5 | 238.4 | 41.3  | 248.1  | 127.8  | 54.9  | 84.1  |
| 3.5   | 3.3   | 2.2   | 0.9   | 1.8   | 5.1    | 2.0    | 1.7   | 3.9   |
| 44.3  | 40.0  | 37.6  | 25.9  | 19.3  | 64.4   | 39.9   | 51.6  | 47.0  |
| 72.0  | 43.0  | 48.9  | 38.6  | 32.1  | 152.7  | 141.1  | 31.0  | 10.6  |
| 37.5  | 2.9   | 21.1  | 17.0  | 10.7  | 15.2   | 14.0   | 3.0   | 3.4   |
| 444.4 | 418.1 | 467.0 | 490.2 | 162.0 | 423.3  | 316.9  | 66.9  | 77.1  |
| 4.2   | 1.9   | 1.9   | 3.4   | 1.4   | 2.8    | 0.8    | 13.4  | 2.8   |
| 1.5   | 6.7   | 3.9   | 7.8   | 0.8   | 5.7    | 0.4    | 0.2   | 0.2   |
| 3.1   | 1.8   | 2.2   | 2.3   | 2.2   | 5.1    | 1.8    | 2.2   | 6.1   |
| 84.3  | 83.4  | 75.5  | 68.7  | 15.2  | 96.4   | 66.7   | 13.0  | 32.0  |
| 197.1 | 95.9  | 110.7 | 99.1  | 19.5  | 120.7  | 137.0  | 136.4 | 186.6 |
| 21.2  | 23.2  | 16.3  | 21.1  | 12.9  | 37.1   | 29.6   | 18.6  | 19.4  |
| 28.7  | 36.3  | 26.5  | 36.6  | 5.9   | 28.0   | 34.9   | 65.8  | 60.9  |
| 7.3   | 9.2   | 14.9  | 2.7   | 6.4   | 12.3   | 15.8   | 17.2  | 17.2  |
| 8.1   | 20.1  | 8.7   | 11.8  | 5.1   | 0.8    | 0.8    | 2.1   | 0.4   |
| 726.2 | 726.0 | 868.4 | 696.2 | 243.1 | 2724.6 | 2100.1 | 147.2 | 205.4 |
| 3.3   | 4.4   | 10.5  | 1.1   | 1.3   | 757.4  | 461.0  | 8.9   | 5.9   |
| 1.8   | 3.7   | 9.4   | 2.8   | 5.4   | 13.5   | 6.1    | 1.5   | 3.0   |
| 66.4  | 75.5  | 62.0  | 44.4  | 20.1  | 51.4   | 36.4   | 17.8  | 25.3  |
| 52.7  | 45.5  | 51.7  | 46.6  | 25.8  | 36.9   | 16.5   | 60.0  | 75.4  |
| 1.5   | 1.8   | 0.2   | 3.0   | 0.7   | 8.2    | 2.0    | 4.6   | 6.3   |
| 3.7   | 0.3   | 1.7   | 4.4   | 4.7   | 2.7    | 3.2    | 1.0   | 0.7   |
| 5.0   | 9.9   | 16.0  | 2.7   | 0.4   | 0.8    | 5.4    | 2.2   | 0.6   |
| 14.3  | 21.1  | 18.2  | 17.5  | 12.8  | 29.7   | 29.2   | 0.9   | 1.8   |
| 9.2   | 5.5   | 8.7   | 0.5   | 3.7   | 1.1    | 1.4    | 12.5  | 11.9  |
| 6.9   | 4.7   | 4.7   | 3.6   | 2.9   | 3.8    | 6.2    | 8.3   | 3.3   |
| 19.9  | 0.6   | 16.0  | 8.4   | 7.5   | 12.6   | 0.4    | 20.8  | 17.3  |
| 32.1  | 41.7  | 39.6  | 42.1  | 21.8  | 363.7  | 255.3  | 15.9  | 15.4  |
| 57.4  | 31.8  | 38.3  | 45.1  | 19.4  | 95.9   | 69.1   | 61.5  | 79.9  |
| 272.9 | 218.6 | 247.4 | 194.4 | 119.6 | 366.8  | 237.8  | 180.8 | 222.8 |
| 6.2   | 1.8   | 4.7   | 15.2  | 5.5   | 4.4    | 9.2    | 4.3   | 15.3  |
| 3.1   | 1.5   | 6.2   | 1.3   | 0.2   | 2.1    | 1.5    | 8.7   | 0.9   |
| 28.1  | 34.9  | 38.1  | 34.4  | 15.2  | 75.9   | 56.2   | 25.8  | 21.2  |
| 6.7   | 3.9   | 1.9   | 3.9   | 0.4   | 3.8    | 1.5    | 3.2   | 2.1   |
| 1.7   | 5.0   | 7.3   | 0.6   | 1.0   | 1.7    | 6.9    | 7.5   | 5.3   |
| 9.1   | 1.3   | 10.4  | 3.7   | 4.4   | 6.8    | 4.2    | 11.4  | 10.1  |



|        |        |        |        |        |        |        |        |        |
|--------|--------|--------|--------|--------|--------|--------|--------|--------|
| 14.4   | 7.2    | 5.5    | 6.5    | 5.5    | 16.4   | 8.0    | 14.2   | 2.0    |
| 246.6  | 156.6  | 149.6  | 88.8   | 36.6   | 4096.9 | 3250.0 | 1195.5 | 1285.4 |
| 184.3  | 194.6  | 259.8  | 348.8  | 53.1   | 201.3  | 129.0  | 24.3   | 63.2   |
| 4.7    | 6.2    | 7.8    | 3.7    | 0.4    | 14.2   | 7.1    | 1.3    | 1.4    |
| 16.2   | 7.0    | 1.8    | 9.5    | 4.9    | 17.1   | 6.5    | 30.8   | 7.0    |
| 366.8  | 354.5  | 273.8  | 176.5  | 141.9  | 129.6  | 89.9   | 286.6  | 378.6  |
| 68.4   | 62.1   | 76.5   | 38.2   | 18.0   | 152.8  | 82.5   | 46.8   | 46.3   |
| 1.4    | 0.4    | 0.5    | 2.4    | 1.1    | 1.1    | 0.4    | 4.6    | 5.2    |
| 2.4    | 1.0    | 2.4    | 0.4    | 2.9    | 1.2    | 2.2    | 1.6    | 1.5    |
| 18.3   | 17.1   | 15.1   | 14.5   | 6.3    | 18.6   | 16.5   | 16.2   | 21.0   |
| 5.3    | 13.4   | 1.9    | 1.9    | 0.4    | 3.8    | 0.9    | 2.2    | 1.7    |
| 4.0    | 10.3   | 8.9    | 8.7    | 8.4    | 2.2    | 15.3   | 13.8   | 5.6    |
| 22.7   | 1.4    | 14.1   | 9.0    | 0.5    | 14.4   | 1.7    | 1.5    | 1.8    |
| 1.5    | 1.2    | 1.7    | 1.2    | 0.9    | 2.6    | 1.3    | 2.8    | 1.5    |
| 1.7    | 0.4    | 0.2    | 0.2    | 3.5    | 0.4    | 2.0    | 0.2    | 0.7    |
| 7.6    | 10.9   | 13.4   | 1.9    | 6.6    | 1.0    | 8.8    | 8.1    | 22.2   |
| 26.4   | 13.6   | 23.4   | 23.1   | 7.9    | 25.8   | 23.0   | 24.4   | 35.9   |
| 169.8  | 154.0  | 194.5  | 203.7  | 68.9   | 69.3   | 55.6   | 76.4   | 149.2  |
| 69.8   | 42.1   | 56.1   | 34.3   | 24.9   | 390.0  | 478.0  | 34.6   | 38.6   |
| 209.4  | 97.8   | 104.8  | 101.9  | 29.2   | 84.8   | 44.0   | 67.1   | 100.3  |
| 16.5   | 20.4   | 6.8    | 14.6   | 7.5    | 21.7   | 0.8    | 42.0   | 75.3   |
| 5.2    | 14.5   | 20.4   | 15.3   | 9.8    | 51.8   | 38.7   | 3.6    | 40.8   |
| 10.4   | 11.8   | 16.2   | 11.1   | 2.6    | 20.7   | 3.7    | 3.7    | 4.7    |
| 1.0    | 3.0    | 2.1    | 4.5    | 0.2    | 5.3    | 0.2    | 0.5    | 0.2    |
| 22.5   | 9.2    | 15.2   | 7.3    | 10.2   | 22.3   | 5.6    | 34.0   | 34.2   |
| 147.1  | 121.3  | 131.6  | 107.3  | 76.7   | 416.9  | 336.1  | 346.3  | 384.1  |
| 1.3    | 5.8    | 1.3    | 1.3    | 2.5    | 4.4    | 3.9    | 4.2    | 4.7    |
| 5.2    | 6.6    | 0.5    | 2.0    | 6.2    | 2.1    | 2.1    | 0.6    | 1.4    |
| 14.1   | 15.6   | 16.6   | 10.4   | 5.2    | 8.8    | 3.0    | 3.5    | 0.5    |
| 2.0    | 2.2    | 1.8    | 2.2    | 0.8    | 3.3    | 2.2    | 3.6    | 1.9    |
| 11.3   | 1.0    | 12.2   | 1.0    | 0.8    | 2.8    | 0.8    | 2.3    | 15.7   |
| 3.4    | 5.1    | 5.9    | 3.7    | 0.9    | 3.6    | 1.2    | 1.6    | 2.3    |
| 0.6    | 3.4    | 0.7    | 1.3    | 0.6    | 10.4   | 0.8    | 1.7    | 2.6    |
| 2.7    | 6.3    | 6.8    | 9.1    | 6.7    | 25.2   | 18.1   | 1.9    | 3.9    |
| 184.0  | 201.3  | 186.6  | 143.1  | 74.2   | 923.7  | 635.9  | 344.4  | 500.4  |
| 33.3   | 7.7    | 34.6   | 3.6    | 14.7   | 7.0    | 1.4    | 2.9    | 2.9    |
| 3.6    | 7.2    | 4.3    | 1.8    | 0.9    | 3.3    | 3.2    | 10.1   | 2.8    |
| 32.5   | 32.4   | 30.3   | 21.5   | 18.4   | 51.8   | 44.4   | 12.2   | 6.4    |
| 5.4    | 6.9    | 7.7    | 2.5    | 1.6    | 8.2    | 1.7    | 6.8    | 15.4   |
| 47.6   | 24.4   | 36.9   | 35.3   | 16.4   | 837.5  | 559.0  | 0.6    | 7.5    |
| 17.1   | 8.9    | 8.5    | 0.6    | 3.0    | 4.7    | 0.5    | 1.9    | 11.2   |
| 310.2  | 311.0  | 201.8  | 144.5  | 51.6   | 203.8  | 74.0   | 111.9  | 153.7  |
| 175.0  | 127.4  | 96.0   | 46.9   | 36.7   | 66.0   | 49.9   | 1.6    | 19.7   |
| 36.5   | 18.8   | 27.6   | 11.1   | 9.5    | 50.0   | 42.6   | 5.6    | 16.2   |
| 1570.3 | 1409.9 | 1519.2 | 1183.9 | 418.4  | 3452.0 | 2579.4 | 866.3  | 1007.7 |
| 23.8   | 21.2   | 9.3    | 20.4   | 3.7    | 60.6   | 39.4   | 3.5    | 3.9    |
| 33.6   | 23.6   | 32.1   | 27.4   | 7.4    | 39.5   | 35.0   | 779.1  | 1102.6 |
| 138.2  | 91.1   | 64.6   | 40.7   | 28.2   | 169.0  | 161.8  | 1.8    | 11.4   |
| 2.6    | 2.1    | 2.0    | 1.1    | 0.7    | 2.0    | 1.0    | 5.3    | 10.5   |
| 1297.0 | 1237.3 | 1252.9 | 752.3  | 355.6  | 2241.2 | 1689.4 | 30.1   | 52.5   |
| 34.0   | 43.6   | 47.4   | 37.9   | 15.4   | 48.7   | 18.9   | 17.2   | 31.2   |
| 2345.6 | 2317.9 | 2172.2 | 1647.2 | 1055.3 | 2699.5 | 1672.4 | 586.5  | 710.0  |
| 13.8   | 12.8   | 6.6    | 8.9    | 4.8    | 39.7   | 24.6   | 12.2   | 2.0    |

|       |       |       |       |       |       |       |       |       |
|-------|-------|-------|-------|-------|-------|-------|-------|-------|
| 223.2 | 218.7 | 219.0 | 165.2 | 66.3  | 470.3 | 267.6 | 1.7   | 6.7   |
| 15.9  | 6.5   | 14.8  | 7.5   | 5.9   | 11.2  | 23.8  | 8.5   | 0.8   |
| 27.5  | 21.1  | 21.1  | 14.3  | 6.3   | 2.0   | 0.7   | 1.9   | 2.3   |
| 10.3  | 6.7   | 7.6   | 6.4   | 6.1   | 12.6  | 13.6  | 0.9   | 0.2   |
| 8.6   | 0.6   | 1.5   | 3.9   | 0.9   | 3.9   | 6.8   | 6.5   | 6.2   |
| 9.5   | 0.8   | 19.4  | 13.0  | 5.4   | 13.7  | 0.9   | 3.9   | 4.8   |
| 843.6 | 756.1 | 679.3 | 680.7 | 304.7 | 976.5 | 769.2 | 451.9 | 677.6 |
| 71.2  | 54.3  | 60.3  | 43.3  | 15.6  | 70.2  | 54.6  | 51.8  | 65.0  |
| 193.8 | 218.4 | 191.2 | 149.3 | 82.1  | 134.0 | 94.0  | 251.0 | 287.3 |
| 34.3  | 16.2  | 12.0  | 13.0  | 14.3  | 13.6  | 1.8   | 45.2  | 68.0  |
| 205.2 | 186.5 | 199.8 | 178.6 | 55.6  | 209.3 | 142.4 | 66.8  | 93.8  |
| 11.8  | 15.9  | 6.6   | 18.3  | 4.3   | 12.1  | 10.4  | 10.8  | 11.4  |
| 4.8   | 11.8  | 4.2   | 7.7   | 1.6   | 3.8   | 8.4   | 2.0   | 13.1  |
| 27.5  | 25.2  | 32.4  | 17.0  | 7.1   | 15.4  | 7.1   | 46.4  | 15.0  |
| 90.5  | 48.9  | 43.8  | 25.6  | 15.9  | 17.5  | 5.6   | 4.7   | 14.9  |
| 4.0   | 3.7   | 23.5  | 3.4   | 13.8  | 10.8  | 13.1  | 10.3  | 5.1   |
| 26.6  | 19.0  | 8.3   | 9.5   | 3.1   | 41.0  | 36.6  | 1.9   | 10.2  |
| 8.5   | 7.6   | 9.8   | 9.0   | 0.1   | 33.3  | 17.5  | 12.7  | 9.7   |
| 32.3  | 46.9  | 26.9  | 21.2  | 4.7   | 26.1  | 7.7   | 19.9  | 16.6  |
| 456.9 | 497.7 | 573.1 | 859.5 | 239.4 | 899.1 | 575.2 | 160.4 | 257.1 |
| 23.1  | 26.3  | 16.4  | 17.8  | 7.1   | 36.9  | 23.7  | 23.5  | 21.4  |
| 37.5  | 31.4  | 46.9  | 42.2  | 15.8  | 82.3  | 70.1  | 55.7  | 80.5  |
| 21.2  | 3.5   | 14.8  | 15.3  | 2.7   | 44.3  | 21.4  | 40.2  | 65.4  |
| 322.8 | 377.6 | 331.9 | 158.1 | 88.2  | 830.1 | 417.5 | 223.5 | 246.0 |
| 149.7 | 121.0 | 125.1 | 145.2 | 49.8  | 553.2 | 564.7 | 31.1  | 55.3  |
| 16.9  | 12.3  | 52.8  | 22.1  | 21.4  | 3.3   | 1.8   | 1.9   | 9.7   |
| 7.0   | 4.1   | 5.9   | 1.9   | 2.0   | 3.7   | 6.5   | 24.0  | 9.6   |
| 23.8  | 14.9  | 20.2  | 14.4  | 7.8   | 22.4  | 16.1  | 15.5  | 20.6  |
| 39.1  | 22.2  | 15.4  | 53.6  | 7.7   | 127.2 | 90.7  | 12.2  | 16.6  |
| 1.7   | 3.3   | 1.6   | 1.5   | 1.1   | 4.0   | 3.0   | 1.6   | 1.8   |
| 15.8  | 1.4   | 19.8  | 12.8  | 6.6   | 7.9   | 1.1   | 1.5   | 9.0   |
| 3.3   | 5.7   | 0.4   | 4.7   | 1.8   | 5.9   | 4.4   | 1.7   | 2.9   |
| 13.5  | 15.9  | 14.2  | 11.7  | 4.2   | 7.9   | 12.9  | 5.9   | 6.7   |
| 439.1 | 453.5 | 517.2 | 534.3 | 146.0 | 688.5 | 576.9 | 45.7  | 54.8  |
| 23.4  | 15.4  | 23.8  | 11.2  | 11.7  | 4.5   | 8.2   | 19.1  | 8.8   |
| 10.1  | 15.5  | 4.6   | 4.7   | 11.5  | 14.4  | 19.0  | 5.0   | 3.4   |
| 1.1   | 1.9   | 2.1   | 8.3   | 0.7   | 4.8   | 1.1   | 8.8   | 0.9   |
| 1.3   | 0.8   | 3.2   | 0.5   | 1.0   | 7.1   | 1.9   | 0.7   | 0.5   |
| 24.3  | 14.5  | 7.5   | 7.8   | 4.7   | 49.2  | 34.0  | 7.5   | 6.0   |
| 3.7   | 5.2   | 12.1  | 11.7  | 8.1   | 7.1   | 11.7  | 1.3   | 1.8   |
| 12.5  | 11.0  | 9.5   | 5.1   | 3.2   | 4.5   | 4.9   | 9.5   | 10.1  |
| 1.1   | 1.5   | 0.9   | 1.7   | 0.2   | 1.7   | 2.4   | 3.0   | 6.1   |
| 51.0  | 75.4  | 74.1  | 67.4  | 29.1  | 83.8  | 75.5  | 39.9  | 28.8  |
| 4.0   | 2.9   | 23.9  | 21.8  | 6.7   | 38.4  | 37.9  | 1.4   | 12.9  |
| 112.7 | 99.7  | 116.5 | 105.6 | 44.5  | 185.2 | 136.2 | 18.7  | 11.0  |
| 1.1   | 6.2   | 5.3   | 1.2   | 0.2   | 1.0   | 1.2   | 3.5   | 1.7   |
| 1.9   | 2.4   | 4.6   | 0.5   | 0.5   | 0.7   | 0.9   | 2.0   | 3.6   |
| 31.2  | 12.3  | 21.8  | 12.8  | 5.8   | 65.3  | 32.3  | 60.7  | 59.1  |
| 377.6 | 312.1 | 415.6 | 356.9 | 194.1 | 317.5 | 182.7 | 477.7 | 657.4 |
| 10.7  | 11.8  | 11.7  | 11.8  | 6.0   | 14.4  | 2.3   | 14.1  | 20.3  |
| 23.7  | 15.4  | 13.0  | 7.3   | 9.8   | 19.5  | 22.6  | 14.8  | 13.3  |
| 99.9  | 86.9  | 61.4  | 30.7  | 24.4  | 173.6 | 96.8  | 47.3  | 73.4  |
| 449.7 | 348.7 | 351.9 | 236.4 | 119.3 | 134.0 | 170.2 | 143.5 | 136.6 |

|       |       |       |        |       |        |        |       |        |
|-------|-------|-------|--------|-------|--------|--------|-------|--------|
| 57.4  | 16.2  | 39.2  | 47.2   | 20.8  | 46.1   | 25.2   | 1.6   | 2.1    |
| 10.0  | 15.8  | 9.6   | 2.9    | 1.2   | 2.1    | 8.7    | 7.4   | 3.4    |
| 2.8   | 3.0   | 8.7   | 8.7    | 0.9   | 17.6   | 2.2    | 2.3   | 9.6    |
| 991.9 | 999.0 | 859.4 | 519.5  | 351.8 | 1445.4 | 1174.6 | 922.9 | 1181.3 |
| 201.4 | 190.6 | 197.3 | 202.1  | 62.5  | 258.8  | 164.9  | 119.2 | 146.0  |
| 40.2  | 29.5  | 9.2   | 21.2   | 5.6   | 85.8   | 67.5   | 170.3 | 204.3  |
| 45.4  | 37.5  | 42.3  | 32.5   | 14.3  | 8.9    | 12.5   | 2.2   | 10.3   |
| 23.7  | 27.3  | 19.7  | 13.1   | 7.0   | 25.4   | 16.8   | 43.7  | 42.0   |
| 470.3 | 587.6 | 527.9 | 337.8  | 218.9 | 713.4  | 496.6  | 116.5 | 178.4  |
| 10.3  | 5.3   | 3.7   | 0.7    | 0.6   | 8.8    | 1.9    | 2.5   | 10.1   |
| 10.7  | 1.1   | 7.4   | 1.2    | 3.3   | 15.6   | 1.7    | 10.0  | 15.3   |
| 0.5   | 2.9   | 1.3   | 2.1    | 4.2   | 0.9    | 5.7    | 2.7   | 2.0    |
| 7.3   | 4.2   | 4.6   | 1.1    | 3.4   | 0.7    | 14.1   | 6.9   | 3.9    |
| 726.4 | 713.3 | 651.8 | 841.1  | 373.4 | 2218.2 | 2397.9 | 215.0 | 249.8  |
| 13.5  | 8.7   | 15.1  | 10.7   | 5.8   | 21.2   | 16.9   | 6.7   | 11.5   |
| 12.0  | 22.0  | 14.4  | 14.6   | 3.9   | 20.4   | 15.8   | 5.8   | 7.8    |
| 4.5   | 8.1   | 11.1  | 8.7    | 5.7   | 10.5   | 1.1    | 1.1   | 0.7    |
| 19.1  | 8.5   | 18.2  | 11.2   | 2.9   | 10.4   | 11.0   | 9.6   | 21.7   |
| 292.6 | 319.7 | 316.4 | 283.2  | 74.7  | 831.5  | 530.5  | 121.2 | 163.1  |
| 31.0  | 23.4  | 23.2  | 18.5   | 7.8   | 57.4   | 43.2   | 3.8   | 26.3   |
| 0.7   | 0.4   | 0.6   | 0.5    | 0.3   | 20.0   | 14.1   | 1.4   | 1.6    |
| 2.0   | 9.3   | 6.8   | 4.8    | 7.1   | 2.8    | 0.9    | 5.9   | 12.2   |
| 809.3 | 829.0 | 855.3 | 1153.9 | 344.7 | 2735.0 | 2135.9 | 661.2 | 924.3  |
| 410.0 | 331.1 | 382.3 | 164.9  | 150.9 | 1401.6 | 1057.3 | 35.5  | 30.2   |
| 36.3  | 40.1  | 52.9  | 20.0   | 14.8  | 69.7   | 38.5   | 15.2  | 7.4    |
| 15.3  | 4.6   | 13.1  | 1.9    | 1.0   | 40.0   | 33.8   | 1.3   | 2.4    |
| 8.8   | 8.1   | 1.6   | 9.9    | 2.4   | 14.1   | 7.1    | 7.5   | 5.8    |
| 271.5 | 227.7 | 252.5 | 250.6  | 84.3  | 314.4  | 194.3  | 120.9 | 237.2  |
| 20.0  | 3.5   | 8.2   | 6.9    | 2.9   | 3.6    | 1.0    | 1.3   | 17.4   |
| 9.5   | 2.3   | 4.0   | 6.5    | 1.0   | 21.7   | 17.0   | 2.1   | 3.3    |
| 0.7   | 3.0   | 3.2   | 0.5    | 1.1   | 0.3    | 1.0    | 0.7   | 8.5    |
| 204.6 | 175.8 | 152.9 | 176.2  | 65.9  | 155.6  | 92.6   | 158.6 | 208.3  |
| 2.2   | 9.8   | 11.6  | 8.2    | 8.7   | 6.6    | 2.2    | 1.3   | 9.9    |
| 128.7 | 157.4 | 133.3 | 127.1  | 69.3  | 247.8  | 205.6  | 30.2  | 34.0   |
| 112.7 | 93.0  | 97.9  | 78.9   | 35.2  | 135.5  | 70.3   | 298.9 | 346.0  |
| 0.5   | 0.8   | 2.2   | 0.8    | 0.5   | 4.2    | 5.7    | 0.8   | 1.7    |
| 2.3   | 4.3   | 2.9   | 1.0    | 1.0   | 1.8    | 0.9    | 6.0   | 10.5   |
| 34.2  | 48.6  | 35.1  | 24.7   | 13.8  | 41.8   | 32.8   | 2.7   | 16.3   |
| 17.6  | 7.0   | 13.8  | 3.1    | 10.9  | 14.9   | 9.1    | 9.8   | 10.8   |
| 53.8  | 42.1  | 52.5  | 74.4   | 8.2   | 31.4   | 9.1    | 31.9  | 30.7   |
| 12.4  | 6.8   | 15.0  | 9.9    | 2.6   | 4.7    | 8.8    | 9.7   | 7.2    |
| 33.2  | 31.8  | 20.1  | 17.7   | 10.5  | 362.4  | 244.3  | 18.8  | 22.1   |
| 60.1  | 68.6  | 88.2  | 45.5   | 24.8  | 75.1   | 42.4   | 1.6   | 10.7   |
| 13.5  | 9.0   | 12.3  | 4.0    | 4.0   | 44.0   | 19.8   | 9.1   | 11.8   |
| 85.5  | 89.5  | 101.7 | 53.7   | 25.0  | 99.0   | 33.2   | 35.2  | 43.3   |
| 19.9  | 12.8  | 21.5  | 13.8   | 1.1   | 5.0    | 1.7    | 11.1  | 16.0   |
| 26.2  | 17.5  | 21.1  | 20.9   | 7.9   | 25.4   | 20.3   | 10.1  | 11.5   |
| 10.7  | 2.4   | 3.3   | 9.9    | 0.8   | 3.8    | 7.5    | 2.4   | 5.8    |
| 73.1  | 96.7  | 119.7 | 175.4  | 13.6  | 8.0    | 7.4    | 5.3   | 3.6    |
| 32.3  | 33.6  | 33.7  | 42.9   | 10.9  | 90.6   | 80.2   | 2.8   | 19.9   |
| 171.6 | 133.9 | 133.7 | 104.8  | 30.7  | 144.3  | 82.3   | 99.6  | 145.1  |
| 127.5 | 129.1 | 99.4  | 121.1  | 46.0  | 282.1  | 192.6  | 63.0  | 54.0   |
| 4.1   | 7.9   | 2.6   | 2.6    | 2.7   | 2.8    | 2.0    | 27.9  | 48.5   |

|        |        |        |        |        |        |        |        |        |
|--------|--------|--------|--------|--------|--------|--------|--------|--------|
| 21.6   | 5.0    | 2.5    | 14.4   | 1.1    | 96.5   | 60.1   | 1.0    | 1.1    |
| 11.4   | 14.8   | 16.6   | 12.7   | 3.8    | 7.0    | 0.3    | 8.3    | 4.9    |
| 16.0   | 25.5   | 22.4   | 15.3   | 7.8    | 28.9   | 17.2   | 9.2    | 21.5   |
| 9.9    | 3.6    | 8.5    | 1.1    | 2.0    | 14.1   | 5.1    | 18.4   | 8.9    |
| 1.4    | 1.7    | 2.5    | 2.4    | 1.6    | 21.9   | 12.2   | 0.9    | 1.8    |
| 37.6   | 36.0   | 35.7   | 32.0   | 14.7   | 91.1   | 52.4   | 75.2   | 98.8   |
| 2.1    | 4.6    | 7.5    | 14.3   | 4.2    | 5.9    | 5.2    | 5.4    | 2.6    |
| 2.2    | 1.6    | 5.1    | 0.8    | 1.9    | 2.6    | 3.4    | 1.0    | 2.5    |
| 7.6    | 1.4    | 7.3    | 1.5    | 4.8    | 7.7    | 5.6    | 2.1    | 5.6    |
| 1.7    | 1.1    | 2.1    | 1.5    | 1.1    | 3.5    | 2.1    | 2.1    | 2.4    |
| 1026.5 | 906.8  | 777.2  | 434.3  | 333.7  | 1823.9 | 1482.2 | 290.4  | 491.6  |
| 104.3  | 104.5  | 90.7   | 56.7   | 20.8   | 76.6   | 40.2   | 96.9   | 95.3   |
| 0.4    | 1.1    | 4.8    | 0.5    | 1.0    | 0.4    | 2.2    | 1.0    | 0.3    |
| 27.3   | 14.1   | 14.2   | 15.6   | 8.2    | 23.9   | 19.1   | 27.0   | 38.8   |
| 0.6    | 0.4    | 0.6    | 0.6    | 2.2    | 0.4    | 0.8    | 4.9    | 9.6    |
| 171.9  | 149.8  | 105.2  | 62.9   | 27.4   | 3772.4 | 2038.0 | 263.4  | 395.9  |
| 194.5  | 170.1  | 149.3  | 115.3  | 46.6   | 139.5  | 89.1   | 50.1   | 98.4   |
| 2.5    | 4.1    | 2.5    | 1.9    | 0.8    | 7.9    | 2.7    | 3.9    | 5.8    |
| 6.1    | 5.9    | 2.9    | 4.9    | 0.2    | 0.3    | 4.7    | 2.4    | 0.6    |
| 819.3  | 913.5  | 909.8  | 1247.3 | 300.4  | 2823.0 | 1666.8 | 213.0  | 390.3  |
| 2172.1 | 1860.3 | 1681.6 | 968.9  | 587.4  | 2164.9 | 1945.9 | 395.1  | 591.8  |
| 3.0    | 1.2    | 2.4    | 4.7    | 0.5    | 3.4    | 4.4    | 1.0    | 7.0    |
| 141.7  | 118.7  | 116.2  | 129.4  | 53.2   | 135.0  | 109.6  | 25.9   | 35.4   |
| 10.0   | 5.7    | 5.8    | 4.9    | 1.2    | 0.5    | 5.1    | 2.1    | 1.8    |
| 34.0   | 62.2   | 42.9   | 21.6   | 25.9   | 31.9   | 13.3   | 50.6   | 36.8   |
| 0.9    | 0.8    | 1.7    | 0.4    | 0.3    | 2.7    | 5.3    | 0.6    | 1.6    |
| 10.5   | 1.5    | 1.2    | 1.1    | 2.4    | 0.3    | 1.3    | 5.0    | 7.4    |
| 19.4   | 11.7   | 14.2   | 2.7    | 4.6    | 213.7  | 128.0  | 7.2    | 4.0    |
| 114.2  | 59.5   | 86.7   | 109.0  | 38.6   | 548.9  | 340.5  | 1.9    | 0.5    |
| 4.3    | 10.1   | 0.9    | 3.8    | 1.1    | 1.3    | 7.5    | 6.1    | 11.4   |
| 15.2   | 7.7    | 18.1   | 6.1    | 6.3    | 7.1    | 9.7    | 15.8   | 11.9   |
| 1.0    | 0.8    | 0.3    | 0.4    | 0.2    | 0.4    | 4.9    | 0.2    | 0.6    |
| 3.2    | 2.9    | 2.2    | 2.3    | 4.0    | 10.1   | 2.5    | 8.3    | 9.3    |
| 1.6    | 0.9    | 2.1    | 1.2    | 0.2    | 0.8    | 1.9    | 1.0    | 1.5    |
| 1.4    | 1.0    | 1.8    | 1.6    | 0.9    | 4.8    | 1.7    | 5.6    | 0.7    |
| 22.1   | 8.9    | 18.4   | 18.9   | 10.4   | 16.9   | 13.3   | 26.7   | 23.3   |
| 32.9   | 10.2   | 16.0   | 2.5    | 10.0   | 8.1    | 11.6   | 5.8    | 9.2    |
| 25.7   | 10.0   | 5.2    | 15.6   | 6.9    | 8.4    | 7.1    | 20.9   | 4.6    |
| 184.0  | 105.0  | 197.2  | 137.0  | 64.8   | 311.4  | 218.2  | 33.9   | 56.5   |
| 3617.8 | 3355.3 | 3049.8 | 2471.1 | 1462.8 | 2991.5 | 2137.4 | 1534.3 | 2121.9 |
| 3.4    | 2.1    | 1.4    | 0.3    | 0.7    | 0.9    | 4.1    | 1.3    | 0.5    |
| 6.6    | 8.9    | 1.1    | 5.9    | 6.2    | 20.4   | 12.6   | 2.2    | 1.3    |
| 9.9    | 8.5    | 7.0    | 10.1   | 0.4    | 0.9    | 1.7    | 564.7  | 831.2  |
| 0.9    | 0.3    | 0.8    | 0.4    | 0.1    | 1.3    | 1.4    | 0.7    | 4.7    |
| 77.6   | 75.2   | 93.3   | 76.7   | 16.3   | 62.0   | 20.5   | 15.4   | 11.5   |
| 282.2  | 253.4  | 331.8  | 101.0  | 85.7   | 683.8  | 271.0  | 22.3   | 22.6   |
| 3.8    | 2.2    | 5.9    | 1.2    | 4.6    | 10.6   | 7.6    | 7.9    | 22.1   |
| 478.8  | 387.4  | 426.6  | 316.0  | 121.0  | 607.9  | 215.0  | 82.6   | 83.5   |
| 25.5   | 18.6   | 25.4   | 25.7   | 10.3   | 58.6   | 19.6   | 10.3   | 15.2   |
| 15.6   | 2.3    | 12.8   | 12.2   | 1.9    | 2.6    | 11.9   | 13.5   | 7.5    |
| 11.5   | 5.5    | 16.4   | 3.5    | 0.8    | 3.0    | 2.6    | 10.0   | 2.6    |
| 17.0   | 15.4   | 14.3   | 11.6   | 3.3    | 19.4   | 11.4   | 15.1   | 19.3   |
| 5.8    | 1.9    | 16.9   | 1.5    | 0.9    | 3.9    | 7.4    | 6.8    | 1.6    |

|        |        |        |        |        |        |        |        |        |
|--------|--------|--------|--------|--------|--------|--------|--------|--------|
| 12.9   | 11.9   | 8.3    | 7.1    | 5.3    | 10.4   | 10.5   | 1.7    | 0.4    |
| 22.0   | 24.5   | 10.6   | 11.5   | 6.6    | 114.3  | 59.5   | 1.4    | 1.2    |
| 38.6   | 20.4   | 22.1   | 14.2   | 10.2   | 46.8   | 31.4   | 26.7   | 22.8   |
| 16.4   | 8.4    | 8.7    | 2.4    | 7.6    | 14.6   | 11.8   | 13.9   | 18.5   |
| 7.2    | 14.5   | 2.0    | 6.8    | 1.6    | 49.0   | 18.4   | 4.1    | 2.3    |
| 113.5  | 104.9  | 157.2  | 138.9  | 69.8   | 145.8  | 96.1   | 26.8   | 23.1   |
| 92.7   | 101.4  | 111.1  | 93.1   | 27.4   | 281.6  | 156.1  | 53.2   | 52.0   |
| 11.5   | 6.4    | 4.8    | 0.7    | 0.3    | 19.1   | 9.8    | 0.8    | 4.6    |
| 4002.4 | 3598.3 | 3792.3 | 3829.3 | 1846.3 | 6836.4 | 3870.4 | 1023.2 | 1740.3 |
| 472.9  | 444.4  | 662.6  | 414.2  | 209.3  | 677.6  | 498.6  | 639.1  | 832.3  |
| 81.0   | 76.0   | 62.8   | 47.7   | 19.8   | 805.7  | 700.8  | 3.0    | 3.4    |
| 18.2   | 8.6    | 6.9    | 6.4    | 7.7    | 15.2   | 7.7    | 2.8    | 2.7    |
| 0.9    | 6.1    | 1.6    | 4.3    | 6.4    | 9.7    | 0.9    | 2.4    | 11.6   |
| 6.9    | 5.4    | 9.8    | 7.6    | 0.2    | 11.1   | 8.2    | 12.6   | 7.3    |
| 5.8    | 4.2    | 17.7   | 25.7   | 2.5    | 19.0   | 19.9   | 4.7    | 18.9   |
| 2.2    | 1.4    | 8.8    | 10.2   | 1.1    | 2.6    | 3.4    | 2.6    | 1.2    |
| 1.8    | 1.4    | 8.3    | 5.7    | 2.5    | 1.0    | 1.3    | 1.6    | 1.6    |
| 5.9    | 3.4    | 4.6    | 5.0    | 1.0    | 100.5  | 82.9   | 11.4   | 11.1   |
| 107.7  | 96.2   | 95.9   | 64.6   | 27.4   | 183.7  | 119.4  | 34.8   | 68.9   |
| 2.5    | 1.4    | 1.8    | 2.6    | 0.5    | 4.2    | 1.4    | 1.6    | 1.5    |
| 2.8    | 2.2    | 4.9    | 2.5    | 4.7    | 9.7    | 1.4    | 8.5    | 8.5    |
| 198.0  | 160.0  | 163.2  | 185.7  | 51.1   | 233.1  | 198.8  | 77.6   | 107.5  |
| 2.4    | 14.9   | 19.3   | 16.6   | 3.0    | 28.2   | 14.7   | 21.0   | 25.6   |
| 1.0    | 7.2    | 0.7    | 8.4    | 1.5    | 45.9   | 31.5   | 25.6   | 20.1   |
| 1.7    | 1.1    | 7.9    | 1.1    | 2.2    | 5.0    | 1.7    | 7.9    | 12.8   |
| 175.4  | 107.6  | 146.5  | 111.4  | 46.1   | 392.0  | 264.9  | 102.3  | 136.2  |
| 19.6   | 27.9   | 15.8   | 13.1   | 8.3    | 11.6   | 21.8   | 13.8   | 20.2   |
| 2535.8 | 2318.3 | 2704.8 | 3239.6 | 1160.5 | 7074.9 | 6163.0 | 339.2  | 509.3  |
| 10.9   | 3.3    | 8.6    | 9.1    | 1.2    | 7.9    | 5.5    | 6.0    | 5.0    |
| 258.8  | 325.7  | 380.4  | 600.6  | 156.7  | 1269.4 | 1235.2 | 55.4   | 48.7   |
| 20.4   | 23.2   | 31.4   | 26.9   | 7.9    | 26.7   | 10.3   | 9.2    | 20.5   |
| 2.2    | 5.1    | 2.8    | 8.8    | 1.9    | 2.6    | 9.8    | 3.6    | 14.3   |
| 47.6   | 62.5   | 47.4   | 23.9   | 16.5   | 75.0   | 4.6    | 67.9   | 109.7  |
| 45.2   | 46.6   | 39.9   | 42.4   | 13.1   | 28.5   | 2.1    | 42.7   | 74.0   |
| 113.1  | 106.9  | 101.1  | 59.6   | 39.6   | 264.3  | 108.0  | 189.2  | 247.4  |
| 397.1  | 462.6  | 366.0  | 339.0  | 133.4  | 288.5  | 169.2  | 106.1  | 135.9  |
| 8.4    | 8.5    | 9.9    | 1.7    | 3.4    | 5.8    | 6.9    | 4.5    | 3.3    |
| 4684.2 | 4153.1 | 4040.8 | 1998.7 | 1270.2 | 1565.2 | 692.7  | 386.2  | 383.0  |
| 9.9    | 2.6    | 2.2    | 1.3    | 0.9    | 16.3   | 2.1    | 1.7    | 2.7    |
| 164.2  | 238.1  | 188.6  | 126.2  | 67.0   | 926.6  | 497.9  | 63.6   | 128.6  |
| 127.1  | 70.4   | 101.5  | 64.7   | 42.7   | 207.2  | 140.6  | 96.0   | 115.8  |
| 1.4    | 0.9    | 1.1    | 0.7    | 0.7    | 185.4  | 127.2  | 1.8    | 1.8    |
| 1943.9 | 1715.5 | 1748.2 | 1026.1 | 619.7  | 1323.3 | 561.4  | 324.1  | 469.3  |
| 23.8   | 8.3    | 3.4    | 5.0    | 10.2   | 16.5   | 14.0   | 5.4    | 4.7    |
| 5.6    | 9.4    | 8.8    | 0.9    | 2.2    | 24.9   | 23.0   | 0.7    | 3.7    |
| 3428.3 | 2472.9 | 2170.9 | 789.3  | 929.9  | 4072.7 | 2941.3 | 240.9  | 363.9  |
| 1842.2 | 1588.4 | 1340.5 | 412.4  | 457.4  | 2479.0 | 1820.5 | 576.3  | 725.5  |
| 127.6  | 93.0   | 105.1  | 76.1   | 24.1   | 77.2   | 38.6   | 56.2   | 94.1   |
| 1.8    | 0.3    | 6.4    | 4.0    | 1.0    | 1.2    | 2.7    | 12.3   | 6.8    |
| 2.9    | 2.5    | 1.3    | 3.6    | 1.0    | 8.8    | 5.0    | 1.8    | 2.0    |
| 37.2   | 30.0   | 14.1   | 17.0   | 6.7    | 24.9   | 1.6    | 18.3   | 23.1   |
| 1.7    | 2.3    | 2.0    | 2.0    | 2.3    | 4.6    | 1.8    | 1.3    | 2.1    |
| 63.8   | 49.6   | 66.9   | 44.9   | 21.3   | 171.2  | 144.2  | 81.3   | 111.0  |

|        |        |        |        |        |        |        |       |        |
|--------|--------|--------|--------|--------|--------|--------|-------|--------|
| 28.9   | 28.7   | 17.9   | 37.6   | 1.4    | 29.2   | 13.4   | 15.7  | 18.6   |
| 37.0   | 30.6   | 42.9   | 35.9   | 7.2    | 44.2   | 18.7   | 5.1   | 31.7   |
| 705.9  | 752.9  | 631.9  | 659.3  | 211.7  | 2827.1 | 1980.5 | 331.2 | 618.6  |
| 5.8    | 6.9    | 7.8    | 0.5    | 1.9    | 0.6    | 0.8    | 1.6   | 3.0    |
| 11.3   | 2.1    | 0.9    | 3.8    | 0.5    | 2.0    | 8.1    | 1.7   | 2.1    |
| 66.1   | 53.4   | 75.6   | 157.1  | 58.4   | 333.4  | 256.7  | 138.3 | 167.9  |
| 85.0   | 54.7   | 61.7   | 35.1   | 18.0   | 51.1   | 33.4   | 18.2  | 10.3   |
| 9.3    | 14.5   | 18.7   | 6.1    | 9.2    | 18.3   | 12.4   | 13.6  | 17.0   |
| 2.7    | 1.0    | 2.8    | 1.7    | 1.6    | 13.3   | 4.6    | 3.9   | 20.5   |
| 84.5   | 72.2   | 55.1   | 28.0   | 33.0   | 450.8  | 243.3  | 1.2   | 1.0    |
| 67.7   | 37.7   | 41.8   | 40.8   | 10.2   | 67.1   | 59.2   | 31.6  | 44.2   |
| 14.9   | 3.8    | 3.7    | 10.1   | 6.6    | 235.1  | 179.7  | 2.3   | 7.2    |
| 77.1   | 41.1   | 35.9   | 20.9   | 10.2   | 25.8   | 14.7   | 18.7  | 11.2   |
| 20.9   | 4.3    | 12.8   | 10.7   | 6.2    | 4.0    | 6.9    | 1.7   | 11.4   |
| 68.0   | 79.5   | 84.3   | 78.0   | 20.9   | 40.5   | 37.2   | 36.2  | 30.7   |
| 4.7    | 2.5    | 2.5    | 2.0    | 8.0    | 3.7    | 4.8    | 2.8   | 3.6    |
| 2.3    | 5.2    | 1.5    | 1.5    | 6.0    | 4.2    | 1.1    | 7.4   | 1.7    |
| 15.7   | 2.9    | 6.3    | 37.0   | 2.5    | 164.9  | 138.5  | 27.2  | 6.9    |
| 2.9    | 2.9    | 2.3    | 4.5    | 2.2    | 80.8   | 67.2   | 1.4   | 0.9    |
| 56.2   | 46.6   | 46.4   | 29.8   | 16.4   | 71.9   | 57.7   | 30.2  | 31.5   |
| 955.0  | 985.2  | 1073.9 | 1204.8 | 466.2  | 2076.7 | 1797.8 | 78.2  | 123.2  |
| 540.3  | 440.2  | 531.3  | 555.2  | 160.1  | 502.6  | 186.2  | 94.0  | 111.5  |
| 20.6   | 14.8   | 26.3   | 10.8   | 4.9    | 61.3   | 41.5   | 2.9   | 8.8    |
| 17.9   | 13.2   | 11.8   | 9.8    | 0.6    | 42.4   | 17.3   | 28.5  | 9.2    |
| 10.7   | 7.0    | 13.5   | 1.8    | 7.4    | 1.9    | 17.0   | 49.7  | 59.8   |
| 10.8   | 1.9    | 0.7    | 5.4    | 0.3    | 33.6   | 14.8   | 8.0   | 6.7    |
| 1.2    | 1.6    | 3.6    | 0.9    | 0.9    | 8.5    | 1.0    | 2.6   | 1.1    |
| 19.0   | 7.8    | 10.0   | 6.1    | 3.5    | 3.6    | 10.7   | 5.7   | 2.2    |
| 1372.9 | 1267.1 | 1299.2 | 847.5  | 549.7  | 657.6  | 652.2  | 290.2 | 223.1  |
| 7.4    | 24.4   | 12.2   | 3.7    | 2.1    | 19.6   | 13.9   | 3.8   | 9.4    |
| 3009.1 | 2867.3 | 2397.7 | 2083.1 | 1012.0 | 1886.0 | 1186.3 | 671.5 | 932.5  |
| 33.7   | 23.3   | 39.5   | 25.2   | 8.9    | 1305.9 | 1107.1 | 383.7 | 721.6  |
| 37.0   | 37.8   | 46.6   | 21.3   | 6.2    | 24.6   | 4.3    | 17.0  | 27.3   |
| 34.1   | 40.7   | 20.7   | 12.3   | 15.8   | 33.5   | 36.8   | 67.6  | 54.9   |
| 1.3    | 4.5    | 1.4    | 5.1    | 4.5    | 1.6    | 3.0    | 1.5   | 1.3    |
| 1.2    | 1.0    | 3.4    | 1.6    | 1.5    | 23.0   | 29.3   | 1.3   | 0.7    |
| 23.7   | 18.9   | 10.1   | 28.4   | 9.9    | 104.0  | 101.0  | 10.1  | 9.9    |
| 4.8    | 0.8    | 4.9    | 0.4    | 0.3    | 23.0   | 10.5   | 0.5   | 2.2    |
| 103.4  | 80.5   | 107.3  | 77.5   | 33.9   | 362.4  | 219.1  | 54.8  | 84.5   |
| 62.8   | 69.9   | 70.8   | 75.7   | 22.8   | 88.8   | 63.6   | 49.3  | 87.4   |
| 1125.4 | 1145.1 | 1132.8 | 776.5  | 518.6  | 1339.6 | 830.6  | 442.9 | 586.6  |
| 53.4   | 33.6   | 43.5   | 23.2   | 11.0   | 62.7   | 57.1   | 7.1   | 6.5    |
| 259.5  | 355.2  | 277.9  | 256.6  | 105.8  | 176.2  | 103.6  | 22.1  | 25.8   |
| 5.8    | 9.6    | 7.1    | 1.9    | 0.9    | 11.8   | 8.4    | 12.1  | 2.3    |
| 247.9  | 186.3  | 175.9  | 137.5  | 89.8   | 420.3  | 449.0  | 95.1  | 117.4  |
| 518.9  | 534.6  | 393.8  | 189.2  | 197.7  | 701.1  | 394.2  | 71.3  | 85.3   |
| 253.5  | 124.6  | 183.7  | 162.0  | 57.7   | 1712.6 | 1004.0 | 279.4 | 316.3  |
| 6.6    | 2.6    | 11.8   | 1.8    | 0.9    | 15.8   | 11.5   | 9.6   | 10.8   |
| 5.7    | 0.9    | 10.3   | 0.5    | 0.8    | 1.9    | 1.3    | 2.1   | 1.2    |
| 7.3    | 1.1    | 0.4    | 1.8    | 2.8    | 1.6    | 8.6    | 0.8   | 0.3    |
| 1329.0 | 1247.8 | 1208.3 | 631.0  | 412.8  | 2363.7 | 1625.4 | 876.8 | 1068.3 |
| 362.9  | 323.9  | 329.7  | 197.6  | 81.4   | 467.3  | 521.9  | 142.4 | 152.1  |
| 3.4    | 8.7    | 17.8   | 1.3    | 7.2    | 8.3    | 6.3    | 2.9   | 1.3    |

|        |        |        |        |        |         |        |        |        |
|--------|--------|--------|--------|--------|---------|--------|--------|--------|
| 20.0   | 25.2   | 14.8   | 24.1   | 6.8    | 10.3    | 3.8    | 15.0   | 20.1   |
| 22.2   | 26.1   | 13.0   | 24.2   | 8.1    | 48.4    | 39.2   | 11.1   | 22.6   |
| 121.6  | 127.6  | 114.5  | 75.3   | 49.7   | 215.7   | 172.4  | 209.2  | 211.7  |
| 23.1   | 5.8    | 2.5    | 8.6    | 8.2    | 2.3     | 1.2    | 1.3    | 1.2    |
| 4.7    | 1.4    | 1.2    | 5.3    | 4.2    | 12.2    | 4.9    | 10.9   | 0.3    |
| 10.7   | 8.3    | 4.3    | 11.8   | 3.0    | 7.9     | 7.0    | 1.2    | 4.9    |
| 126.9  | 93.3   | 72.4   | 39.8   | 29.7   | 216.3   | 150.6  | 124.1  | 212.8  |
| 1.4    | 11.5   | 8.7    | 0.7    | 3.0    | 76.0    | 42.5   | 0.8    | 1.1    |
| 8168.9 | 7617.3 | 6649.3 | 6420.2 | 4384.9 | 8480.4  | 7442.3 | 3261.2 | 5097.8 |
| 29.4   | 32.0   | 43.2   | 46.8   | 25.3   | 84.6    | 65.3   | 120.5  | 88.6   |
| 133.6  | 116.9  | 124.6  | 65.2   | 50.8   | 763.3   | 417.2  | 214.9  | 282.9  |
| 215.9  | 185.6  | 196.4  | 190.1  | 60.0   | 415.2   | 328.4  | 52.0   | 68.5   |
| 7.3    | 2.5    | 2.0    | 1.5    | 2.4    | 3.1     | 2.0    | 3.1    | 4.4    |
| 337.0  | 326.7  | 362.7  | 352.6  | 107.8  | 440.0   | 320.3  | 35.7   | 76.3   |
| 9.6    | 4.8    | 7.5    | 6.0    | 2.3    | 4.2     | 2.6    | 0.7    | 4.1    |
| 165.4  | 163.2  | 164.8  | 132.0  | 49.3   | 206.9   | 127.1  | 155.1  | 157.1  |
| 41.7   | 56.8   | 46.6   | 20.4   | 10.4   | 263.2   | 210.5  | 88.5   | 126.5  |
| 48.1   | 30.4   | 45.7   | 11.8   | 7.2    | 5.6     | 2.6    | 9.1    | 14.3   |
| 262.3  | 287.7  | 249.5  | 382.1  | 118.2  | 139.4   | 121.3  | 112.3  | 165.6  |
| 2113.5 | 2029.9 | 2084.7 | 2101.4 | 989.9  | 2588.0  | 2390.9 | 191.4  | 245.8  |
| 1435.1 | 1322.2 | 1602.7 | 1043.8 | 867.6  | 3140.0  | 2551.4 | 905.8  | 1253.0 |
| 194.8  | 200.4  | 336.8  | 214.2  | 131.0  | 180.5   | 144.9  | 34.7   | 15.5   |
| 7751.2 | 6663.4 | 6303.2 | 5844.9 | 4071.3 | 7577.6  | 6576.4 | 3113.3 | 4798.0 |
| 6135.5 | 5513.5 | 5490.7 | 6207.0 | 2934.0 | 10140.2 | 8360.6 | 3185.0 | 3518.7 |
| 340.5  | 160.5  | 177.7  | 146.3  | 79.7   | 445.0   | 281.9  | 258.1  | 279.2  |
| 769.9  | 701.8  | 609.8  | 442.2  | 242.9  | 2392.8  | 2116.1 | 194.3  | 216.1  |
| 20.2   | 2.0    | 16.7   | 11.3   | 4.5    | 3.9     | 12.2   | 2.9    | 4.1    |
| 34.8   | 11.9   | 10.2   | 3.9    | 4.6    | 17.0    | 15.5   | 14.7   | 11.8   |
| 19.3   | 17.1   | 20.3   | 20.5   | 4.0    | 41.3    | 24.3   | 4.7    | 3.4    |
| 12.6   | 0.6    | 3.4    | 5.4    | 2.0    | 4.1     | 1.2    | 4.7    | 6.2    |
| 271.5  | 229.8  | 215.7  | 135.1  | 45.5   | 84.2    | 88.0   | 53.3   | 63.6   |
| 75.5   | 62.2   | 71.0   | 75.8   | 19.7   | 31.0    | 22.9   | 6.8    | 7.5    |
| 9.8    | 12.8   | 10.8   | 3.0    | 1.0    | 28.8    | 17.8   | 28.8   | 49.1   |
| 1.0    | 0.3    | 1.0    | 1.5    | 0.7    | 6.9     | 0.9    | 8.0    | 4.3    |
| 141.4  | 140.9  | 123.0  | 106.2  | 45.8   | 143.4   | 73.1   | 24.9   | 29.9   |
| 54.4   | 24.7   | 29.8   | 28.8   | 14.9   | 50.4    | 9.6    | 16.5   | 10.1   |
| 1.3    | 0.7    | 1.1    | 1.9    | 0.3    | 17.4    | 15.4   | 5.5    | 0.9    |
| 22.5   | 17.3   | 16.3   | 12.5   | 3.5    | 58.9    | 22.3   | 20.2   | 24.6   |
| 34.7   | 35.7   | 39.7   | 26.6   | 6.7    | 37.6    | 11.9   | 9.4    | 8.4    |
| 80.3   | 59.4   | 79.5   | 89.2   | 25.4   | 15.8    | 13.7   | 17.6   | 17.2   |
| 588.7  | 519.7  | 398.2  | 303.7  | 90.5   | 216.5   | 97.1   | 54.1   | 127.2  |
| 33.3   | 22.7   | 24.7   | 16.4   | 6.3    | 127.5   | 84.6   | 16.5   | 15.0   |
| 27.3   | 9.5    | 13.6   | 8.0    | 4.3    | 59.9    | 15.4   | 6.2    | 8.2    |
| 0.2    | 0.8    | 4.2    | 0.3    | 0.1    | 0.2     | 0.5    | 1.8    | 0.3    |
| 19.4   | 17.3   | 21.0   | 22.6   | 2.1    | 32.4    | 26.2   | 13.1   | 24.7   |
| 4.1    | 5.3    | 9.0    | 2.0    | 1.7    | 0.7     | 7.9    | 11.7   | 12.5   |
| 42.9   | 26.9   | 24.8   | 17.5   | 5.2    | 19.2    | 15.5   | 37.6   | 25.8   |
| 51.9   | 40.3   | 34.9   | 30.5   | 9.6    | 45.6    | 33.9   | 20.8   | 18.6   |
| 215.6  | 156.3  | 156.0  | 131.4  | 29.8   | 404.3   | 268.5  | 18.2   | 11.9   |
| 0.8    | 1.8    | 0.8    | 1.1    | 1.1    | 0.9     | 1.1    | 1.0    | 5.3    |
| 32.7   | 14.9   | 18.2   | 11.5   | 8.7    | 5.3     | 17.7   | 3.7    | 13.9   |
| 17.1   | 2.6    | 2.2    | 1.6    | 9.3    | 20.0    | 5.5    | 3.5    | 16.3   |
| 0.7    | 3.9    | 3.4    | 0.5    | 1.7    | 1.1     | 5.8    | 1.6    | 0.5    |

|       |       |       |       |      |       |       |       |       |
|-------|-------|-------|-------|------|-------|-------|-------|-------|
| 2.6   | 7.8   | 8.7   | 6.3   | 6.5  | 6.8   | 5.3   | 3.0   | 2.4   |
| 2.1   | 0.6   | 2.3   | 0.4   | 9.3  | 14.0  | 1.8   | 1.4   | 1.6   |
| 51.5  | 58.4  | 51.2  | 51.6  | 21.0 | 24.4  | 20.5  | 35.2  | 70.6  |
| 28.4  | 29.1  | 31.5  | 30.7  | 16.2 | 11.7  | 8.3   | 2.6   | 14.7  |
| 5.2   | 3.3   | 3.3   | 11.3  | 1.2  | 3.7   | 4.3   | 9.1   | 15.8  |
| 1.3   | 1.3   | 1.1   | 1.0   | 1.0  | 1.9   | 1.1   | 0.7   | 0.9   |
| 1.0   | 7.2   | 6.8   | 1.7   | 3.8  | 1.1   | 4.3   | 1.2   | 4.3   |
| 18.4  | 17.2  | 4.7   | 15.7  | 1.2  | 25.0  | 21.7  | 95.2  | 129.9 |
| 1.7   | 2.5   | 1.8   | 2.2   | 0.8  | 4.3   | 2.0   | 3.1   | 2.0   |
| 8.3   | 15.6  | 48.0  | 26.5  | 11.9 | 7.9   | 6.4   | 26.5  | 34.9  |
| 4.9   | 22.0  | 14.1  | 10.5  | 6.3  | 64.5  | 51.0  | 44.0  | 60.8  |
| 218.2 | 185.7 | 239.8 | 185.7 | 64.7 | 215.4 | 167.1 | 78.2  | 107.4 |
| 375.5 | 311.0 | 353.5 | 276.4 | 85.5 | 330.8 | 243.7 | 117.3 | 140.4 |
| 2.3   | 1.0   | 5.2   | 1.9   | 4.6  | 4.2   | 11.7  | 32.9  | 34.2  |
| 7.1   | 0.6   | 11.1  | 2.4   | 1.4  | 1.1   | 1.0   | 6.8   | 2.2   |
| 4.5   | 2.7   | 1.4   | 7.2   | 1.0  | 14.7  | 9.5   | 3.6   | 0.8   |
| 0.7   | 0.3   | 6.0   | 3.5   | 1.4  | 6.7   | 3.0   | 0.8   | 0.2   |
| 10.7  | 8.2   | 3.2   | 3.4   | 0.6  | 10.1  | 2.5   | 1.6   | 0.9   |
| 2.1   | 1.4   | 13.8  | 1.2   | 1.1  | 104.9 | 57.7  | 6.8   | 9.1   |
| 0.7   | 0.2   | 4.9   | 3.5   | 0.3  | 36.2  | 8.1   | 4.2   | 1.7   |
| 27.4  | 24.2  | 14.8  | 25.4  | 8.3  | 24.8  | 4.0   | 27.0  | 26.5  |
| 9.9   | 8.0   | 4.2   | 13.7  | 0.4  | 6.3   | 0.4   | 11.0  | 18.7  |
| 16.3  | 21.2  | 10.9  | 13.5  | 1.9  | 17.9  | 3.8   | 14.1  | 2.7   |
| 169.9 | 211.6 | 178.2 | 138.4 | 79.8 | 123.0 | 87.1  | 15.4  | 16.0  |
| 12.8  | 1.4   | 7.2   | 6.1   | 0.4  | 1.7   | 0.3   | 10.9  | 1.0   |
| 0.6   | 0.5   | 0.6   | 0.9   | 1.1  | 0.6   | 1.0   | 0.4   | 2.4   |
| 9.4   | 4.9   | 5.6   | 3.9   | 0.4  | 13.2  | 10.6  | 6.6   | 12.1  |
| 17.2  | 11.1  | 12.9  | 10.3  | 7.9  | 27.0  | 8.1   | 13.0  | 0.9   |
| 10.1  | 2.9   | 5.7   | 0.7   | 3.1  | 6.4   | 0.5   | 1.1   | 0.7   |
| 3.2   | 3.4   | 2.3   | 9.8   | 0.7  | 3.3   | 2.5   | 7.9   | 2.6   |
| 23.6  | 22.6  | 22.9  | 14.7  | 12.0 | 50.1  | 38.4  | 34.9  | 10.6  |
| 6.1   | 3.5   | 7.7   | 16.5  | 2.8  | 30.9  | 8.4   | 8.4   | 3.2   |
| 274.2 | 212.3 | 209.6 | 144.8 | 47.5 | 144.3 | 82.4  | 258.0 | 372.5 |
| 224.6 | 210.0 | 254.1 | 196.9 | 75.0 | 714.0 | 485.2 | 23.1  | 23.5  |
| 9.8   | 12.7  | 23.3  | 11.7  | 15.7 | 11.8  | 7.3   | 136.7 | 248.1 |
| 123.2 | 123.2 | 99.8  | 43.9  | 22.1 | 199.6 | 96.6  | 21.8  | 23.6  |
| 3.7   | 2.4   | 2.1   | 1.1   | 1.5  | 4.5   | 1.5   | 10.4  | 11.6  |
| 20.7  | 14.8  | 20.6  | 16.7  | 4.1  | 22.2  | 12.0  | 18.8  | 30.0  |
| 16.1  | 22.4  | 4.2   | 17.3  | 2.7  | 21.0  | 13.0  | 3.8   | 3.0   |
| 83.4  | 38.5  | 53.5  | 34.8  | 16.6 | 22.9  | 19.5  | 17.6  | 29.1  |
| 22.1  | 21.0  | 5.8   | 6.4   | 3.8  | 17.5  | 8.9   | 108.1 | 169.6 |
| 1.0   | 0.9   | 1.2   | 1.0   | 3.2  | 1.0   | 1.3   | 1.2   | 2.5   |
| 1.3   | 0.5   | 1.0   | 0.7   | 0.4  | 1.9   | 1.7   | 0.9   | 1.1   |
| 1.6   | 1.5   | 5.2   | 1.1   | 0.5  | 1.8   | 1.2   | 1.5   | 4.1   |
| 3.8   | 11.5  | 9.9   | 0.9   | 0.7  | 22.1  | 1.5   | 2.1   | 3.8   |
| 1.2   | 0.7   | 4.3   | 4.2   | 2.0  | 2.9   | 0.5   | 0.7   | 1.4   |
| 247.8 | 228.1 | 268.3 | 205.6 | 94.0 | 542.9 | 362.4 | 79.9  | 95.8  |
| 1.9   | 1.0   | 1.3   | 1.4   | 0.6  | 8.6   | 0.6   | 0.9   | 2.1   |
| 172.2 | 173.2 | 174.2 | 134.8 | 65.7 | 178.4 | 96.7  | 47.1  | 60.6  |
| 8.8   | 10.3  | 1.3   | 8.2   | 0.5  | 41.6  | 14.1  | 3.4   | 6.9   |
| 1.0   | 4.9   | 7.9   | 3.5   | 5.5  | 8.3   | 7.3   | 1.5   | 4.4   |
| 2.3   | 0.7   | 0.5   | 0.5   | 0.6  | 1.7   | 0.7   | 2.5   | 0.8   |
| 7.0   | 8.5   | 4.6   | 2.1   | 5.9  | 11.8  | 13.0  | 10.0  | 18.6  |



|        |        |        |        |       |        |        |       |       |
|--------|--------|--------|--------|-------|--------|--------|-------|-------|
| 3.4    | 4.1    | 11.2   | 11.6   | 3.4   | 4.9    | 13.7   | 24.2  | 19.1  |
| 159.8  | 182.4  | 156.1  | 118.8  | 46.4  | 204.5  | 98.0   | 68.7  | 95.7  |
| 338.4  | 261.2  | 330.0  | 220.8  | 100.9 | 2392.4 | 1289.5 | 91.0  | 129.4 |
| 0.6    | 9.9    | 2.4    | 7.3    | 1.9   | 3.1    | 5.0    | 2.7   | 0.3   |
| 35.4   | 14.0   | 133.0  | 69.7   | 64.7  | 9.4    | 5.6    | 139.3 | 220.0 |
| 2.3    | 9.9    | 3.9    | 2.0    | 2.2   | 33.9   | 25.9   | 1.3   | 0.8   |
| 6.3    | 2.6    | 5.2    | 0.3    | 0.4   | 0.7    | 0.4    | 7.6   | 4.3   |
| 11.7   | 4.0    | 1.8    | 2.3    | 1.0   | 264.4  | 176.5  | 1.4   | 1.9   |
| 29.7   | 29.2   | 27.9   | 31.8   | 21.8  | 18.2   | 13.3   | 10.3  | 24.3  |
| 3.1    | 2.3    | 3.6    | 2.0    | 5.0   | 4.6    | 1.0    | 1.1   | 6.4   |
| 141.4  | 137.6  | 131.2  | 101.1  | 50.9  | 221.1  | 134.1  | 67.1  | 126.3 |
| 0.5    | 3.9    | 0.5    | 0.2    | 0.2   | 0.2    | 6.9    | 0.6   | 0.2   |
| 10.1   | 9.3    | 8.4    | 3.1    | 2.6   | 13.2   | 3.0    | 0.8   | 5.0   |
| 27.3   | 16.7   | 18.1   | 12.1   | 6.1   | 13.5   | 11.7   | 2.1   | 20.1  |
| 30.4   | 13.5   | 20.9   | 20.8   | 10.4  | 25.3   | 33.0   | 36.9  | 23.8  |
| 6.1    | 8.7    | 2.8    | 2.5    | 2.8   | 12.2   | 3.2    | 4.0   | 4.4   |
| 29.6   | 1.8    | 2.4    | 9.3    | 14.3  | 6.0    | 20.5   | 4.9   | 2.8   |
| 8.1    | 2.1    | 1.1    | 1.0    | 0.5   | 2.9    | 2.1    | 1.7   | 1.6   |
| 4.9    | 19.4   | 3.5    | 6.6    | 1.7   | 1.9    | 2.5    | 5.1   | 8.8   |
| 136.5  | 114.2  | 107.4  | 57.8   | 52.4  | 289.1  | 142.3  | 78.9  | 87.1  |
| 13.1   | 9.8    | 18.6   | 2.1    | 1.6   | 9.0    | 3.0    | 9.7   | 12.6  |
| 3.9    | 0.2    | 0.9    | 1.1    | 0.5   | 7.4    | 1.0    | 3.0   | 0.3   |
| 8.9    | 18.6   | 21.5   | 23.4   | 10.9  | 66.1   | 43.3   | 8.7   | 13.7  |
| 23.1   | 3.1    | 18.0   | 11.6   | 0.8   | 24.3   | 8.5    | 12.2  | 17.2  |
| 9.6    | 6.1    | 19.8   | 7.5    | 6.7   | 12.9   | 1.1    | 7.8   | 3.5   |
| 17.8   | 5.8    | 2.6    | 9.5    | 7.8   | 13.5   | 12.9   | 8.9   | 10.0  |
| 2184.0 | 2234.4 | 2303.8 | 2057.4 | 782.9 | 2866.5 | 2154.4 | 254.4 | 325.1 |
| 2.4    | 1.7    | 1.8    | 1.0    | 0.8   | 1.7    | 1.0    | 0.9   | 0.8   |
| 0.7    | 0.5    | 0.5    | 3.1    | 1.9   | 10.4   | 3.8    | 0.2   | 0.2   |
| 8.9    | 9.4    | 0.9    | 7.9    | 0.2   | 2.1    | 17.2   | 5.3   | 2.8   |
| 1.4    | 1.8    | 18.0   | 12.7   | 6.6   | 26.1   | 11.6   | 11.7  | 15.9  |
| 3.8    | 0.9    | 2.2    | 8.4    | 1.0   | 5.6    | 2.1    | 1.4   | 13.4  |
| 0.7    | 0.6    | 0.6    | 0.8    | 0.5   | 2.7    | 0.4    | 1.4   | 1.2   |
| 0.5    | 0.7    | 1.0    | 1.0    | 0.5   | 2.4    | 0.6    | 5.7   | 12.0  |
| 11.0   | 9.1    | 12.3   | 7.9    | 4.6   | 10.8   | 10.7   | 8.6   | 15.3  |
| 5.4    | 14.5   | 0.6    | 0.9    | 0.5   | 10.4   | 9.9    | 1.2   | 19.6  |
| 18.4   | 2.9    | 12.9   | 0.9    | 3.8   | 2.0    | 1.5    | 11.1  | 8.9   |
| 9.8    | 6.0    | 4.4    | 6.8    | 0.8   | 18.7   | 4.0    | 0.8   | 1.6   |
| 37.2   | 27.7   | 36.0   | 12.7   | 13.8  | 6.1    | 6.2    | 19.8  | 14.9  |
| 4.1    | 1.6    | 5.7    | 4.5    | 2.1   | 3.9    | 2.4    | 3.7   | 3.6   |
| 4.6    | 1.2    | 10.4   | 3.1    | 7.0   | 11.0   | 0.7    | 8.0   | 2.1   |
| 33.7   | 39.6   | 41.3   | 20.1   | 16.2  | 50.3   | 45.8   | 18.3  | 14.6  |
| 0.8    | 0.7    | 0.9    | 1.3    | 0.8   | 2.1    | 0.7    | 2.2   | 1.8   |
| 125.8  | 128.6  | 133.0  | 200.1  | 56.4  | 187.3  | 160.2  | 189.8 | 359.7 |
| 4.7    | 3.0    | 2.7    | 5.9    | 7.9   | 4.7    | 5.3    | 4.4   | 38.7  |
| 8.7    | 4.9    | 3.0    | 4.5    | 6.5   | 30.4   | 3.3    | 1.7   | 2.6   |
| 125.5  | 61.1   | 93.4   | 63.3   | 18.4  | 93.8   | 18.3   | 53.8  | 69.2  |
| 4.5    | 4.3    | 0.6    | 1.6    | 0.2   | 6.4    | 5.9    | 4.8   | 4.8   |
| 137.9  | 150.9  | 145.5  | 118.6  | 36.2  | 266.8  | 181.3  | 148.7 | 198.2 |
| 2.8    | 3.2    | 12.5   | 12.9   | 0.7   | 2.0    | 2.2    | 1.7   | 2.9   |
| 7.4    | 3.0    | 4.3    | 3.6    | 2.8   | 24.4   | 13.2   | 2.6   | 17.7  |
| 6.1    | 2.2    | 25.3   | 7.4    | 0.9   | 4.8    | 1.4    | 3.5   | 4.2   |
| 180.2  | 177.0  | 211.4  | 275.8  | 77.4  | 201.9  | 95.3   | 34.5  | 42.0  |

|        |        |        |        |       |        |        |       |       |
|--------|--------|--------|--------|-------|--------|--------|-------|-------|
| 12.5   | 1.6    | 9.0    | 10.3   | 2.4   | 10.9   | 5.3    | 0.1   | 0.3   |
| 5.7    | 1.8    | 2.9    | 4.0    | 1.0   | 3.2    | 1.4    | 3.0   | 2.9   |
| 5.2    | 5.1    | 4.5    | 6.4    | 8.3   | 6.0    | 3.6    | 22.3  | 12.3  |
| 19.2   | 9.1    | 4.7    | 2.1    | 3.2   | 4.2    | 6.1    | 5.0   | 2.2   |
| 8.1    | 1.7    | 0.6    | 0.6    | 4.4   | 3.8    | 0.6    | 2.7   | 6.1   |
| 47.6   | 36.6   | 30.5   | 19.5   | 11.4  | 2.2    | 12.9   | 2.7   | 12.9  |
| 28.1   | 34.8   | 32.8   | 43.6   | 5.6   | 48.8   | 17.8   | 8.9   | 9.2   |
| 2.6    | 1.4    | 8.4    | 0.5    | 2.4   | 12.1   | 1.8    | 2.1   | 3.7   |
| 20.2   | 10.2   | 25.8   | 9.2    | 1.7   | 18.2   | 6.1    | 4.9   | 20.8  |
| 20.9   | 11.5   | 21.8   | 8.3    | 10.4  | 4.7    | 15.2   | 2.0   | 17.5  |
| 10.0   | 1.4    | 2.6    | 0.9    | 2.9   | 11.7   | 14.6   | 6.5   | 2.7   |
| 1.2    | 4.0    | 14.2   | 1.9    | 2.6   | 9.6    | 11.0   | 12.6  | 2.4   |
| 8.3    | 1.0    | 8.5    | 6.8    | 0.7   | 22.6   | 5.4    | 1.8   | 0.5   |
| 1.4    | 2.2    | 8.3    | 3.5    | 4.4   | 0.4    | 1.3    | 0.5   | 6.3   |
| 191.2  | 184.8  | 201.9  | 219.4  | 70.4  | 231.3  | 161.0  | 78.7  | 113.7 |
| 24.0   | 20.5   | 41.3   | 17.1   | 12.6  | 33.6   | 19.8   | 19.7  | 28.4  |
| 3.3    | 11.4   | 30.1   | 3.6    | 1.8   | 21.4   | 11.8   | 15.8  | 22.1  |
| 3.4    | 0.9    | 2.5    | 2.3    | 0.8   | 4.3    | 4.1    | 5.4   | 20.9  |
| 32.4   | 5.4    | 12.3   | 9.0    | 8.5   | 22.5   | 3.2    | 32.5  | 14.2  |
| 7.2    | 3.6    | 4.4    | 3.9    | 13.4  | 6.0    | 3.9    | 8.1   | 14.8  |
| 4.2    | 8.2    | 3.4    | 6.1    | 7.1   | 5.8    | 21.3   | 15.6  | 18.5  |
| 2.3    | 2.7    | 2.3    | 2.2    | 3.7   | 3.5    | 1.8    | 129.3 | 200.3 |
| 0.8    | 6.3    | 17.1   | 5.2    | 7.4   | 4.0    | 0.8    | 0.9   | 14.4  |
| 1.2    | 6.5    | 0.8    | 0.8    | 2.1   | 1.4    | 4.2    | 10.4  | 8.7   |
| 179.5  | 155.9  | 139.2  | 94.7   | 37.5  | 729.9  | 455.0  | 133.5 | 260.6 |
| 124.4  | 75.8   | 112.9  | 65.0   | 22.6  | 81.9   | 78.6   | 1.7   | 26.5  |
| 11.6   | 1.4    | 15.4   | 11.7   | 1.1   | 19.9   | 1.6    | 9.6   | 12.8  |
| 6.0    | 12.4   | 7.9    | 4.4    | 3.0   | 3.4    | 1.2    | 14.5  | 5.5   |
| 15.1   | 11.9   | 9.4    | 15.7   | 4.6   | 1.4    | 15.7   | 9.8   | 15.1  |
| 4.1    | 14.0   | 4.2    | 4.5    | 7.2   | 24.8   | 13.9   | 1.9   | 12.6  |
| 8.3    | 11.3   | 23.2   | 11.0   | 10.3  | 74.2   | 57.0   | 19.7  | 25.9  |
| 257.4  | 180.7  | 184.9  | 152.8  | 69.1  | 116.1  | 69.7   | 84.9  | 108.4 |
| 80.6   | 45.5   | 92.6   | 51.9   | 18.0  | 79.2   | 71.0   | 8.6   | 71.8  |
| 3.5    | 18.2   | 8.0    | 1.9    | 3.1   | 5.1    | 3.4    | 1.1   | 2.8   |
| 22.8   | 17.4   | 19.7   | 22.6   | 10.4  | 23.0   | 25.9   | 38.3  | 53.5  |
| 136.4  | 116.2  | 116.6  | 104.0  | 31.1  | 38.0   | 17.5   | 53.3  | 52.9  |
| 66.1   | 55.9   | 60.5   | 78.4   | 27.7  | 116.1  | 91.6   | 22.8  | 50.3  |
| 541.9  | 473.4  | 490.4  | 542.9  | 174.2 | 545.5  | 442.6  | 97.3  | 106.0 |
| 19.8   | 6.0    | 11.3   | 11.3   | 3.5   | 105.6  | 75.9   | 24.1  | 39.2  |
| 43.1   | 38.8   | 25.1   | 28.3   | 13.3  | 8.5    | 11.7   | 241.5 | 249.3 |
| 34.8   | 33.1   | 12.6   | 16.8   | 3.8   | 7.0    | 15.7   | 31.3  | 27.7  |
| 43.8   | 24.7   | 33.6   | 34.4   | 12.9  | 71.9   | 27.6   | 34.5  | 22.5  |
| 6.1    | 6.7    | 8.6    | 11.7   | 5.2   | 59.5   | 19.8   | 18.7  | 14.9  |
| 24.4   | 10.3   | 14.8   | 22.1   | 9.1   | 9.9    | 12.0   | 12.1  | 11.5  |
| 2.7    | 1.7    | 0.5    | 1.0    | 0.5   | 14.8   | 0.8    | 0.5   | 7.7   |
| 9.2    | 0.6    | 3.6    | 0.9    | 2.8   | 2.1    | 0.6    | 0.6   | 0.5   |
| 7.6    | 5.2    | 1.8    | 4.5    | 0.7   | 5.8    | 15.0   | 2.3   | 13.8  |
| 16.3   | 5.1    | 11.2   | 1.3    | 7.4   | 2.1    | 0.8    | 0.8   | 1.5   |
| 24.8   | 8.6    | 11.9   | 3.7    | 3.1   | 21.0   | 13.8   | 23.8  | 2.0   |
| 1767.9 | 1694.9 | 1726.9 | 1441.4 | 693.6 | 2071.6 | 1577.8 | 499.9 | 815.8 |
| 1527.6 | 1384.5 | 1475.3 | 1299.4 | 547.6 | 1550.6 | 1148.7 | 469.2 | 738.2 |
| 2.8    | 12.5   | 8.3    | 14.9   | 6.1   | 35.7   | 13.5   | 1.8   | 9.0   |
| 12.2   | 1.6    | 10.2   | 5.7    | 4.0   | 9.5    | 0.4    | 0.5   | 1.1   |

|        |        |        |        |        |        |        |        |        |
|--------|--------|--------|--------|--------|--------|--------|--------|--------|
| 7.0    | 1.4    | 3.3    | 7.2    | 4.7    | 8.5    | 8.7    | 2.5    | 5.7    |
| 777.6  | 804.3  | 796.8  | 774.1  | 336.1  | 2085.9 | 1597.8 | 228.3  | 329.8  |
| 20.0   | 5.1    | 8.3    | 0.9    | 0.7    | 20.2   | 6.9    | 11.4   | 4.5    |
| 110.2  | 57.1   | 57.6   | 21.6   | 33.0   | 121.1  | 81.7   | 126.2  | 102.7  |
| 15.6   | 14.2   | 20.6   | 16.7   | 6.6    | 21.0   | 22.1   | 2.1    | 2.7    |
| 38.1   | 36.0   | 21.1   | 17.3   | 8.7    | 23.3   | 25.7   | 12.1   | 6.8    |
| 28.6   | 25.4   | 16.9   | 20.8   | 8.9    | 101.7  | 49.6   | 2.8    | 17.5   |
| 290.7  | 252.1  | 239.2  | 99.9   | 102.2  | 249.0  | 104.1  | 69.7   | 135.0  |
| 491.1  | 490.2  | 543.4  | 577.3  | 212.9  | 1506.6 | 1591.5 | 209.8  | 262.4  |
| 6.3    | 0.9    | 2.9    | 1.7    | 3.8    | 4.7    | 7.3    | 5.3    | 2.7    |
| 12.9   | 10.6   | 7.3    | 1.5    | 11.3   | 21.9   | 16.8   | 9.8    | 5.6    |
| 112.3  | 68.9   | 96.0   | 46.0   | 31.9   | 127.0  | 82.1   | 57.8   | 34.8   |
| 32.8   | 20.5   | 33.4   | 27.4   | 8.4    | 63.2   | 28.6   | 26.2   | 27.0   |
| 9028.8 | 7980.4 | 8100.4 | 7923.6 | 6028.2 | 9255.2 | 7718.2 | 3834.7 | 4564.4 |
| 536.5  | 482.0  | 608.3  | 874.3  | 187.3  | 766.1  | 616.8  | 95.9   | 98.5   |
| 8.9    | 3.0    | 13.3   | 4.4    | 5.0    | 2.3    | 6.0    | 4.5    | 4.7    |
| 62.2   | 55.5   | 57.7   | 31.8   | 19.5   | 79.0   | 24.3   | 69.7   | 88.9   |
| 101.9  | 61.3   | 51.6   | 33.8   | 4.7    | 87.7   | 46.6   | 91.8   | 136.0  |
| 1.6    | 1.2    | 1.2    | 0.6    | 1.1    | 1.7    | 0.9    | 2.8    | 5.1    |
| 131.6  | 180.6  | 128.5  | 77.8   | 48.1   | 13.8   | 18.0   | 6.9    | 12.9   |
| 6.6    | 15.4   | 4.8    | 3.8    | 3.1    | 21.5   | 1.8    | 4.1    | 7.2    |
| 21.4   | 12.4   | 18.8   | 10.3   | 6.4    | 32.4   | 14.1   | 27.4   | 54.5   |
| 14.8   | 9.0    | 7.8    | 1.3    | 2.8    | 19.1   | 12.4   | 12.6   | 10.1   |
| 0.8    | 0.7    | 0.8    | 0.5    | 0.3    | 0.5    | 0.7    | 1.1    | 0.2    |
| 1.7    | 9.6    | 5.8    | 2.1    | 3.2    | 1.2    | 0.5    | 0.7    | 0.5    |
| 6.4    | 3.1    | 0.9    | 5.8    | 1.6    | 6.8    | 5.4    | 0.6    | 1.0    |
| 3.5    | 9.6    | 1.2    | 3.2    | 0.3    | 1.7    | 1.7    | 0.7    | 1.3    |
| 21.2   | 15.0   | 13.7   | 2.7    | 6.1    | 18.2   | 6.0    | 14.6   | 5.9    |
| 1.4    | 1.2    | 4.1    | 1.1    | 1.8    | 6.8    | 1.1    | 1.1    | 0.9    |
| 8.3    | 8.6    | 7.9    | 4.9    | 5.8    | 1.8    | 8.3    | 18.1   | 11.5   |
| 88.9   | 52.2   | 44.0   | 27.7   | 19.8   | 244.5  | 138.1  | 45.0   | 58.9   |
| 51.5   | 16.8   | 19.8   | 21.0   | 7.8    | 153.1  | 75.1   | 35.2   | 37.1   |
| 1003.6 | 916.5  | 1034.6 | 990.5  | 377.6  | 797.5  | 428.0  | 811.2  | 1276.8 |
| 6.0    | 6.9    | 13.0   | 7.7    | 2.1    | 2.6    | 5.5    | 3.0    | 17.5   |
| 24.5   | 30.3   | 31.4   | 21.9   | 11.4   | 75.4   | 52.5   | 9.6    | 20.3   |
| 2.8    | 2.8    | 3.3    | 4.7    | 1.4    | 4.8    | 19.2   | 4.3    | 3.8    |
| 20.6   | 22.5   | 12.6   | 28.4   | 11.2   | 81.1   | 46.2   | 6.5    | 7.2    |
| 0.8    | 0.9    | 7.0    | 1.6    | 0.6    | 7.0    | 0.2    | 0.8    | 0.9    |
| 159.1  | 163.1  | 165.6  | 154.5  | 70.2   | 222.8  | 123.9  | 76.3   | 112.9  |
| 37.2   | 51.3   | 66.4   | 14.0   | 9.3    | 31.3   | 25.3   | 22.2   | 5.9    |
| 39.4   | 65.4   | 57.6   | 21.2   | 14.8   | 42.0   | 24.7   | 12.7   | 8.6    |
| 59.0   | 36.6   | 28.1   | 29.0   | 15.8   | 41.0   | 33.8   | 15.1   | 27.2   |
| 49.1   | 37.7   | 41.7   | 25.2   | 21.2   | 42.1   | 22.6   | 12.9   | 6.5    |
| 34.8   | 24.3   | 32.2   | 15.0   | 14.0   | 49.3   | 47.0   | 6.4    | 4.5    |
| 26.4   | 17.0   | 2.0    | 1.2    | 1.1    | 22.6   | 6.8    | 1.4    | 10.5   |
| 45.6   | 33.8   | 45.2   | 26.3   | 15.7   | 34.7   | 49.0   | 8.9    | 26.6   |
| 2.6    | 6.7    | 7.1    | 3.4    | 4.3    | 20.4   | 7.2    | 2.4    | 16.7   |
| 10.9   | 7.4    | 11.2   | 6.0    | 3.7    | 11.4   | 5.4    | 2.4    | 9.7    |
| 7.2    | 2.1    | 2.1    | 3.7    | 7.7    | 7.3    | 17.2   | 1.9    | 12.6   |
| 235.5  | 231.5  | 220.3  | 154.0  | 82.6   | 282.7  | 181.6  | 64.8   | 83.3   |
| 1.3    | 0.6    | 6.1    | 1.1    | 0.1    | 1.0    | 5.2    | 3.9    | 3.9    |
| 10.2   | 7.4    | 8.7    | 14.1   | 3.4    | 13.6   | 4.4    | 8.4    | 10.0   |
| 118.3  | 109.0  | 141.5  | 84.0   | 63.2   | 158.7  | 92.2   | 11.8   | 17.6   |

|         |        |        |        |        |         |        |        |        |
|---------|--------|--------|--------|--------|---------|--------|--------|--------|
| 12.4    | 15.4   | 3.9    | 3.7    | 5.3    | 21.2    | 12.0   | 3.3    | 1.5    |
| 88.5    | 96.4   | 94.7   | 114.5  | 38.7   | 48.6    | 22.0   | 33.2   | 57.0   |
| 5.5     | 1.8    | 2.8    | 1.4    | 5.9    | 102.1   | 108.8  | 4.8    | 3.1    |
| 5731.9  | 4914.3 | 4701.0 | 4508.4 | 2707.2 | 6618.3  | 5369.3 | 2294.9 | 3382.4 |
| 12.5    | 18.0   | 12.4   | 2.7    | 7.2    | 4.3     | 12.7   | 5.9    | 11.5   |
| 16.9    | 6.1    | 4.8    | 1.3    | 1.3    | 4.9     | 4.7    | 7.1    | 5.9    |
| 21.7    | 1.3    | 7.3    | 11.8   | 7.2    | 29.8    | 13.6   | 6.3    | 11.1   |
| 3.5     | 1.9    | 1.0    | 4.8    | 2.3    | 7.6     | 14.6   | 2.4    | 15.3   |
| 3.9     | 1.0    | 1.5    | 0.2    | 0.3    | 0.6     | 0.3    | 7.0    | 2.5    |
| 62.3    | 38.0   | 33.3   | 51.0   | 14.8   | 75.8    | 69.5   | 242.0  | 487.2  |
| 2.5     | 0.5    | 1.1    | 0.5    | 0.3    | 6.5     | 0.5    | 0.5    | 0.7    |
| 16.0    | 8.2    | 14.5   | 17.3   | 2.4    | 21.9    | 15.3   | 7.8    | 17.4   |
| 11.0    | 13.1   | 24.4   | 18.2   | 7.4    | 30.0    | 23.6   | 14.8   | 27.3   |
| 27.0    | 31.2   | 15.1   | 18.1   | 10.1   | 36.0    | 27.3   | 13.4   | 12.2   |
| 0.9     | 0.8    | 0.6    | 0.8    | 2.7    | 15.4    | 3.8    | 1.3    | 1.6    |
| 73.0    | 79.8   | 67.3   | 49.2   | 22.2   | 182.5   | 128.5  | 154.4  | 218.4  |
| 16.1    | 8.0    | 2.3    | 4.5    | 4.3    | 13.8    | 17.8   | 6.0    | 11.7   |
| 5.3     | 2.4    | 2.9    | 3.2    | 1.2    | 3.6     | 2.0    | 4.5    | 13.5   |
| 0.2     | 1.8    | 0.3    | 0.2    | 2.1    | 0.1     | 3.0    | 8.3    | 1.6    |
| 12.8    | 7.4    | 3.4    | 16.9   | 2.6    | 27.4    | 10.7   | 9.7    | 13.3   |
| 39.4    | 33.2   | 33.9   | 16.7   | 12.2   | 1.3     | 1.0    | 3.1    | 1.4    |
| 17.9    | 13.2   | 17.9   | 9.0    | 9.2    | 21.1    | 14.2   | 31.3   | 30.8   |
| 1.1     | 0.7    | 2.7    | 0.5    | 0.3    | 2.1     | 2.1    | 0.5    | 1.0    |
| 26.9    | 26.7   | 33.9   | 21.4   | 7.6    | 299.2   | 161.0  | 2.1    | 18.9   |
| 0.5     | 1.8    | 1.6    | 1.3    | 2.4    | 88.6    | 51.0   | 2.0    | 0.4    |
| 1.1     | 0.7    | 1.2    | 4.4    | 0.5    | 172.7   | 139.2  | 1.2    | 2.5    |
| 7.2     | 4.4    | 0.7    | 4.1    | 1.1    | 1.7     | 1.6    | 10.8   | 0.6    |
| 54.3    | 37.7   | 37.7   | 46.9   | 17.8   | 80.9    | 64.5   | 60.4   | 69.0   |
| 7.8     | 7.2    | 9.2    | 1.7    | 0.4    | 8.1     | 1.3    | 4.4    | 1.7    |
| 6.0     | 2.3    | 0.8    | 1.0    | 2.0    | 94.6    | 48.8   | 0.9    | 1.0    |
| 79.0    | 82.8   | 49.6   | 52.2   | 33.9   | 143.4   | 118.3  | 65.7   | 77.8   |
| 4.5     | 10.0   | 20.6   | 13.5   | 4.3    | 17.9    | 15.0   | 9.1    | 18.2   |
| 584.6   | 641.9  | 601.1  | 538.6  | 138.2  | 1388.7  | 913.2  | 235.9  | 365.9  |
| 170.0   | 168.0  | 176.9  | 128.6  | 64.4   | 277.3   | 160.0  | 115.5  | 76.5   |
| 1.4     | 1.2    | 1.8    | 1.2    | 0.5    | 2.7     | 2.7    | 1.7    | 1.3    |
| 10147.3 | 8644.8 | 8394.9 | 7070.1 | 5221.6 | 10867.2 | 9249.9 | 4597.0 | 5854.4 |
| 44.9    | 43.0   | 32.3   | 20.2   | 9.0    | 361.9   | 250.8  | 15.1   | 35.2   |
| 2.6     | 0.6    | 5.9    | 0.9    | 0.7    | 2.5     | 2.2    | 5.9    | 4.6    |
| 1.8     | 1.1    | 1.5    | 0.8    | 0.4    | 1.2     | 0.8    | 3.4    | 1.9    |
| 99.8    | 52.5   | 98.6   | 87.6   | 33.6   | 103.7   | 92.1   | 46.4   | 55.9   |
| 119.1   | 139.1  | 114.8  | 104.1  | 52.2   | 291.5   | 165.8  | 49.4   | 92.3   |
| 9.6     | 0.9    | 1.5    | 1.2    | 4.2    | 2.8     | 12.2   | 2.9    | 1.6    |
| 81.6    | 92.2   | 79.0   | 49.2   | 30.2   | 144.2   | 86.5   | 75.1   | 78.8   |
| 4.1     | 2.0    | 6.0    | 5.1    | 5.4    | 10.0    | 10.0   | 1.8    | 3.2    |
| 30.7    | 52.4   | 39.2   | 30.7   | 14.0   | 33.8    | 18.7   | 25.3   | 24.3   |
| 10.6    | 8.5    | 9.6    | 14.1   | 0.9    | 33.5    | 19.7   | 9.8    | 9.0    |
| 2.6     | 2.0    | 3.1    | 1.9    | 1.4    | 2.0     | 1.2    | 1.7    | 7.1    |
| 0.7     | 0.6    | 1.0    | 1.1    | 0.5    | 0.3     | 0.4    | 1.4    | 1.3    |
| 50.7    | 40.3   | 17.9   | 20.4   | 8.2    | 30.7    | 18.3   | 96.7   | 108.6  |
| 62.7    | 42.6   | 49.2   | 46.3   | 13.4   | 57.8    | 24.0   | 221.8  | 321.0  |
| 26.1    | 8.5    | 13.1   | 1.4    | 7.7    | 10.0    | 13.5   | 11.2   | 17.7   |
| 18.3    | 2.8    | 16.1   | 11.7   | 3.1    | 7.3     | 11.5   | 3.1    | 16.6   |
| 1.0     | 3.4    | 3.3    | 12.1   | 1.1    | 9.8     | 19.0   | 1.3    | 1.9    |

|        |        |        |        |       |        |        |       |       |
|--------|--------|--------|--------|-------|--------|--------|-------|-------|
| 2.5    | 1.3    | 2.5    | 2.1    | 1.0   | 4.1    | 7.7    | 1.9   | 2.6   |
| 21.2   | 8.7    | 9.6    | 9.9    | 3.1   | 8.9    | 13.4   | 3.7   | 3.6   |
| 6.3    | 4.1    | 10.6   | 10.0   | 0.7   | 25.7   | 2.2    | 8.6   | 5.1   |
| 0.8    | 2.3    | 0.9    | 1.5    | 0.4   | 6.1    | 1.6    | 1.4   | 1.6   |
| 2.7    | 1.5    | 3.8    | 1.8    | 0.5   | 1.7    | 1.3    | 1.9   | 1.3   |
| 23.6   | 24.5   | 5.3    | 20.7   | 8.5   | 12.1   | 10.0   | 11.4  | 8.8   |
| 26.9   | 21.2   | 24.6   | 15.6   | 4.3   | 3.5    | 8.9    | 8.3   | 8.4   |
| 415.7  | 335.4  | 384.4  | 344.1  | 136.5 | 996.5  | 584.0  | 284.2 | 368.6 |
| 43.7   | 23.7   | 53.8   | 37.3   | 23.4  | 36.4   | 38.6   | 49.3  | 51.4  |
| 58.7   | 49.8   | 51.3   | 34.7   | 28.7  | 56.9   | 40.4   | 50.8  | 74.3  |
| 16.4   | 9.1    | 8.5    | 8.9    | 6.5   | 21.6   | 6.6    | 6.8   | 11.6  |
| 3.4    | 9.8    | 24.9   | 6.4    | 2.1   | 5.8    | 18.9   | 5.8   | 4.2   |
| 3.6    | 3.6    | 2.4    | 4.2    | 0.4   | 3.1    | 9.7    | 4.4   | 2.3   |
| 2.7    | 3.8    | 4.3    | 3.5    | 2.8   | 3.2    | 2.4    | 11.3  | 0.2   |
| 2.3    | 5.1    | 10.1   | 1.2    | 0.4   | 3.0    | 1.7    | 1.5   | 1.4   |
| 7.0    | 5.3    | 9.2    | 5.4    | 1.7   | 4.3    | 13.5   | 3.6   | 2.8   |
| 33.4   | 26.6   | 38.0   | 20.6   | 9.3   | 112.9  | 94.8   | 69.4  | 76.4  |
| 36.9   | 30.4   | 31.9   | 25.9   | 11.8  | 319.6  | 281.6  | 109.7 | 126.5 |
| 11.0   | 2.0    | 5.9    | 9.5    | 0.6   | 19.7   | 2.4    | 0.6   | 5.6   |
| 1.0    | 0.7    | 9.1    | 5.6    | 0.5   | 5.8    | 1.0    | 86.3  | 100.9 |
| 4.1    | 1.9    | 7.4    | 2.2    | 6.4   | 1.3    | 5.9    | 9.1   | 0.4   |
| 255.1  | 209.2  | 291.9  | 206.8  | 72.3  | 640.5  | 415.0  | 69.2  | 93.5  |
| 1.2    | 6.9    | 4.6    | 5.9    | 2.6   | 6.1    | 1.3    | 14.6  | 10.8  |
| 2.7    | 4.6    | 14.0   | 1.3    | 1.8   | 20.0   | 8.6    | 11.5  | 12.4  |
| 53.4   | 72.8   | 63.0   | 45.0   | 17.7  | 45.3   | 14.5   | 79.8  | 119.6 |
| 6.3    | 0.3    | 0.3    | 0.8    | 0.1   | 0.6    | 0.6    | 0.4   | 0.9   |
| 9.7    | 6.0    | 1.3    | 5.5    | 2.2   | 3.1    | 0.5    | 0.9   | 3.7   |
| 20.2   | 35.2   | 7.1    | 30.9   | 7.5   | 141.2  | 91.0   | 45.0  | 30.3  |
| 8.1    | 10.4   | 9.7    | 9.4    | 2.1   | 14.6   | 4.1    | 16.3  | 2.4   |
| 18.8   | 25.0   | 15.9   | 5.2    | 9.6   | 68.8   | 32.2   | 8.3   | 15.0  |
| 64.1   | 63.0   | 33.1   | 29.6   | 13.6  | 220.5  | 130.8  | 62.4  | 48.1  |
| 84.5   | 81.6   | 72.3   | 76.8   | 27.9  | 132.4  | 67.9   | 65.5  | 98.2  |
| 14.2   | 2.3    | 3.8    | 14.0   | 1.3   | 203.3  | 109.8  | 1.8   | 3.7   |
| 13.4   | 4.6    | 1.1    | 6.0    | 3.2   | 20.2   | 8.8    | 6.3   | 1.3   |
| 9.4    | 5.1    | 4.7    | 1.5    | 0.4   | 9.9    | 6.3    | 8.6   | 5.0   |
| 12.0   | 4.9    | 0.9    | 6.6    | 4.1   | 1.1    | 1.1    | 0.9   | 0.7   |
| 1.0    | 1.6    | 1.7    | 0.8    | 0.6   | 2.4    | 0.6    | 0.7   | 0.7   |
| 49.1   | 46.6   | 96.3   | 38.9   | 17.2  | 12.4   | 39.0   | 16.1  | 21.1  |
| 9.7    | 9.2    | 12.4   | 13.0   | 4.1   | 22.2   | 29.1   | 12.7  | 12.1  |
| 1.1    | 13.7   | 11.3   | 11.6   | 5.6   | 25.0   | 27.5   | 6.0   | 8.7   |
| 11.1   | 9.1    | 15.6   | 5.4    | 4.9   | 21.4   | 6.7    | 8.1   | 0.6   |
| 74.0   | 66.1   | 81.9   | 37.2   | 25.3  | 83.9   | 64.7   | 27.3  | 25.2  |
| 467.3  | 378.0  | 403.0  | 364.1  | 180.2 | 949.6  | 1190.3 | 104.8 | 98.3  |
| 15.2   | 10.5   | 13.8   | 2.9    | 1.6   | 8.0    | 2.2    | 12.1  | 21.1  |
| 13.8   | 21.5   | 8.2    | 4.7    | 0.8   | 2.1    | 5.4    | 0.7   | 4.9   |
| 1.3    | 1.7    | 1.1    | 1.0    | 0.4   | 1.3    | 0.9    | 1.6   | 2.3   |
| 9.3    | 1.6    | 7.4    | 7.1    | 1.4   | 1.3    | 7.4    | 7.7   | 12.0  |
| 980.4  | 1138.5 | 746.9  | 514.6  | 290.5 | 726.8  | 276.9  | 106.7 | 169.9 |
| 4.7    | 0.7    | 0.8    | 1.2    | 0.9   | 7.4    | 0.8    | 6.4   | 3.2   |
| 1255.1 | 1088.3 | 1286.9 | 1237.7 | 642.5 | 2386.5 | 2276.2 | 208.0 | 269.4 |
| 8.4    | 4.1    | 5.7    | 1.3    | 0.7   | 128.8  | 20.6   | 43.9  | 59.9  |
| 139.4  | 104.9  | 106.2  | 83.3   | 57.7  | 236.9  | 150.7  | 67.6  | 120.1 |
| 6.0    | 15.8   | 3.3    | 12.3   | 6.4   | 16.0   | 14.7   | 6.7   | 5.7   |

|        |        |        |        |        |        |        |        |        |
|--------|--------|--------|--------|--------|--------|--------|--------|--------|
| 3726.9 | 2383.7 | 2382.3 | 1155.9 | 877.1  | 9643.1 | 6993.7 | 243.8  | 300.7  |
| 28.4   | 2.3    | 6.3    | 10.1   | 0.6    | 2.0    | 2.1    | 1.7    | 8.1    |
| 1467.8 | 1412.5 | 1416.4 | 2103.8 | 795.0  | 119.7  | 221.6  | 19.8   | 59.3   |
| 0.6    | 0.5    | 7.0    | 7.8    | 2.2    | 2.0    | 0.5    | 0.3    | 6.1    |
| 3.9    | 19.0   | 16.2   | 13.1   | 0.9    | 7.8    | 8.7    | 11.6   | 17.1   |
| 1.7    | 2.3    | 9.9    | 2.1    | 0.6    | 1.9    | 1.1    | 5.8    | 2.2    |
| 4.2    | 0.6    | 4.0    | 1.1    | 2.7    | 3.3    | 1.9    | 1.7    | 11.4   |
| 2.0    | 2.5    | 3.6    | 5.0    | 3.3    | 15.0   | 0.4    | 6.5    | 9.2    |
| 46.5   | 43.7   | 55.3   | 41.0   | 25.9   | 208.3  | 142.8  | 26.5   | 47.3   |
| 83.6   | 65.5   | 154.4  | 49.5   | 24.0   | 220.1  | 180.8  | 35.3   | 39.8   |
| 4.3    | 0.8    | 0.4    | 1.0    | 4.8    | 3.0    | 0.5    | 3.1    | 1.9    |
| 28.7   | 37.0   | 21.7   | 4.9    | 15.5   | 40.6   | 17.1   | 17.2   | 32.6   |
| 13.8   | 9.4    | 15.0   | 13.1   | 0.8    | 52.1   | 28.3   | 0.8    | 1.3    |
| 2.3    | 4.2    | 4.2    | 7.3    | 5.1    | 3.9    | 3.4    | 2.3    | 0.6    |
| 1.3    | 6.2    | 7.4    | 0.9    | 2.9    | 80.1   | 61.8   | 8.1    | 0.3    |
| 43.6   | 44.6   | 46.1   | 27.3   | 15.9   | 117.4  | 71.5   | 13.8   | 27.1   |
| 5.8    | 0.7    | 2.0    | 3.6    | 11.4   | 5.8    | 1.1    | 2.4    | 12.4   |
| 20.0   | 21.3   | 25.9   | 8.7    | 9.7    | 15.0   | 10.6   | 5.2    | 2.8    |
| 355.5  | 404.4  | 382.3  | 320.2  | 171.8  | 612.9  | 379.9  | 193.8  | 183.1  |
| 155.7  | 122.9  | 140.0  | 114.6  | 41.6   | 199.9  | 109.8  | 176.9  | 238.0  |
| 1.0    | 3.9    | 0.7    | 0.7    | 4.4    | 0.5    | 3.2    | 2.8    | 1.3    |
| 0.6    | 0.7    | 0.9    | 0.5    | 0.9    | 15.8   | 4.0    | 6.6    | 2.1    |
| 1.0    | 0.2    | 0.5    | 3.1    | 4.7    | 8.8    | 1.3    | 6.2    | 5.0    |
| 9.9    | 0.4    | 0.6    | 1.0    | 0.2    | 3.7    | 4.2    | 0.9    | 0.4    |
| 16.5   | 3.4    | 2.0    | 1.3    | 0.5    | 2.1    | 10.7   | 9.0    | 7.7    |
| 10.8   | 2.5    | 9.2    | 1.9    | 3.6    | 4.1    | 4.1    | 17.1   | 20.3   |
| 4.3    | 3.7    | 3.8    | 3.5    | 4.7    | 9.1    | 17.8   | 2.6    | 3.2    |
| 2.7    | 4.7    | 5.8    | 14.3   | 0.7    | 2.2    | 0.8    | 6.2    | 1.3    |
| 6.2    | 1.4    | 1.6    | 2.0    | 0.6    | 2.2    | 3.0    | 1.5    | 1.6    |
| 6830.5 | 6446.9 | 5901.5 | 5683.7 | 3574.7 | 8697.0 | 7817.4 | 2896.4 | 3188.3 |
| 21.9   | 9.2    | 14.1   | 12.3   | 5.8    | 51.2   | 40.1   | 9.1    | 6.1    |
| 18.1   | 7.1    | 8.5    | 8.3    | 4.6    | 10.6   | 5.5    | 12.2   | 4.3    |
| 7.0    | 11.4   | 1.7    | 1.3    | 0.8    | 0.6    | 0.4    | 2.7    | 4.5    |
| 13.9   | 3.8    | 1.9    | 0.9    | 1.2    | 12.3   | 1.5    | 16.2   | 15.1   |
| 1.8    | 5.1    | 11.1   | 0.6    | 0.9    | 7.9    | 2.6    | 2.1    | 1.3    |
| 18.2   | 24.0   | 14.7   | 2.4    | 7.3    | 31.0   | 18.6   | 2.9    | 29.0   |
| 17.0   | 15.3   | 12.7   | 4.8    | 6.5    | 21.6   | 1.5    | 10.8   | 23.8   |
| 32.7   | 26.0   | 4.2    | 17.2   | 2.2    | 80.3   | 33.0   | 27.3   | 34.9   |
| 14.3   | 7.1    | 6.4    | 4.1    | 3.6    | 2.4    | 4.3    | 8.5    | 0.7    |
| 32.4   | 6.6    | 28.3   | 24.6   | 15.3   | 46.5   | 28.5   | 13.9   | 25.8   |
| 4.5    | 2.5    | 5.0    | 3.4    | 1.0    | 4.1    | 3.7    | 2.9    | 4.4    |
| 42.0   | 23.2   | 43.1   | 2.9    | 11.7   | 92.6   | 50.6   | 3.5    | 34.7   |
| 3.1    | 1.7    | 4.0    | 3.0    | 1.0    | 4.1    | 27.0   | 3.3    | 13.6   |
| 1094.2 | 1081.4 | 1076.0 | 758.7  | 421.2  | 1849.5 | 933.2  | 229.9  | 345.2  |
| 3.4    | 6.4    | 0.9    | 0.4    | 1.7    | 21.0   | 14.4   | 8.6    | 23.4   |
| 185.6  | 132.3  | 137.0  | 114.0  | 29.7   | 790.2  | 653.7  | 358.9  | 586.0  |
| 138.9  | 129.7  | 98.7   | 80.6   | 24.3   | 47.6   | 41.2   | 34.7   | 44.6   |
| 777.2  | 799.5  | 759.8  | 578.4  | 232.3  | 997.6  | 651.2  | 277.1  | 376.5  |
| 34.6   | 71.6   | 180.9  | 1353.3 | 54.7   | 120.6  | 125.5  | 1.0    | 0.9    |
| 4.3    | 13.4   | 6.3    | 30.4   | 2.5    | 3.3    | 2.1    | 23.4   | 31.4   |
| 2.3    | 5.3    | 0.5    | 2.0    | 3.7    | 6.5    | 4.3    | 0.9    | 6.0    |
| 3124.5 | 2466.5 | 2721.6 | 2762.2 | 1103.8 | 5969.4 | 4749.1 | 459.8  | 638.0  |
| 1.9    | 1.8    | 1.1    | 5.0    | 1.0    | 2.2    | 5.6    | 11.5   | 0.4    |

|         |         |        |        |        |         |         |        |        |
|---------|---------|--------|--------|--------|---------|---------|--------|--------|
| 85.1    | 60.3    | 43.6   | 48.7   | 37.8   | 82.1    | 48.2    | 30.8   | 55.6   |
| 91.3    | 55.7    | 63.6   | 45.6   | 47.3   | 34.4    | 7.9     | 25.8   | 30.6   |
| 10.7    | 9.9     | 13.8   | 10.1   | 0.7    | 10.4    | 11.4    | 16.2   | 5.0    |
| 26.7    | 26.5    | 24.1   | 24.6   | 11.8   | 41.8    | 18.6    | 27.1   | 27.1   |
| 8.8     | 11.1    | 2.1    | 2.0    | 2.5    | 12.4    | 4.6     | 5.7    | 10.8   |
| 1.1     | 1.9     | 0.4    | 4.7    | 2.2    | 4.2     | 0.9     | 3.2    | 0.4    |
| 2.4     | 19.1    | 2.3    | 1.7    | 0.6    | 6.7     | 19.6    | 2.9    | 1.6    |
| 677.7   | 677.4   | 661.4  | 594.1  | 264.1  | 399.8   | 242.3   | 122.6  | 151.0  |
| 6.2     | 0.5     | 0.6    | 3.3    | 0.3    | 0.8     | 2.6     | 4.3    | 0.6    |
| 11.2    | 10.0    | 2.2    | 3.0    | 6.0    | 18.1    | 10.9    | 5.5    | 3.7    |
| 0.4     | 0.5     | 0.5    | 0.1    | 0.8    | 8.2     | 0.4     | 0.9    | 0.5    |
| 2.4     | 7.7     | 0.6    | 1.5    | 2.9    | 2.9     | 10.7    | 1.4    | 5.9    |
| 3.3     | 0.5     | 6.3    | 11.3   | 3.4    | 11.5    | 1.4     | 7.5    | 1.3    |
| 0.7     | 1.1     | 4.4    | 0.8    | 5.0    | 0.7     | 4.3     | 1.1    | 1.0    |
| 4.8     | 6.1     | 10.0   | 2.4    | 2.9    | 1.1     | 0.3     | 0.8    | 2.5    |
| 89.9    | 40.0    | 79.9   | 47.3   | 25.4   | 123.4   | 76.2    | 25.7   | 34.2   |
| 1057.7  | 1003.4  | 977.3  | 948.9  | 404.8  | 4259.3  | 1669.4  | 137.5  | 182.9  |
| 1145.7  | 1034.9  | 1014.9 | 1170.4 | 424.0  | 2977.7  | 1600.0  | 53.7   | 81.4   |
| 409.8   | 346.1   | 362.0  | 250.0  | 89.1   | 1769.8  | 651.3   | 50.3   | 56.6   |
| 51.0    | 8.0     | 45.2   | 5.3    | 16.8   | 30.5    | 5.0     | 7.4    | 15.1   |
| 2.7     | 0.9     | 1.8    | 1.0    | 0.8    | 1.6     | 1.4     | 2.0    | 1.6    |
| 2.3     | 1.5     | 0.4    | 1.1    | 0.2    | 1.3     | 0.4     | 5.1    | 1.0    |
| 14.6    | 33.9    | 5.3    | 16.9   | 4.3    | 11.6    | 11.6    | 29.1   | 44.5   |
| 107.2   | 86.4    | 80.6   | 97.1   | 37.9   | 107.5   | 66.3    | 54.4   | 57.9   |
| 208.6   | 179.8   | 200.5  | 166.5  | 51.1   | 277.7   | 129.9   | 129.7  | 155.6  |
| 285.4   | 240.4   | 248.7  | 234.7  | 87.0   | 365.7   | 174.0   | 109.1  | 147.8  |
| 200.7   | 203.1   | 196.8  | 107.2  | 61.4   | 138.1   | 77.4    | 24.3   | 17.1   |
| 46.4    | 32.3    | 22.6   | 17.2   | 7.5    | 24.3    | 3.3     | 36.3   | 18.7   |
| 20.2    | 6.9     | 6.2    | 4.9    | 1.3    | 18.3    | 4.6     | 2.0    | 3.2    |
| 11530.3 | 10068.4 | 9427.6 | 8772.0 | 6276.3 | 12395.6 | 10569.5 | 3836.9 | 4870.0 |
| 99.1    | 84.1    | 70.4   | 47.6   | 36.5   | 165.6   | 90.2    | 64.2   | 47.4   |
| 2.8     | 11.4    | 13.2   | 7.5    | 1.3    | 5.4     | 16.1    | 10.3   | 19.8   |
| 3.5     | 1.7     | 2.4    | 1.6    | 5.5    | 2.2     | 8.6     | 2.0    | 1.1    |
| 64.8    | 87.1    | 57.4   | 49.2   | 17.6   | 120.4   | 82.6    | 23.0   | 22.0   |
| 159.2   | 142.9   | 169.5  | 101.2  | 18.2   | 112.2   | 56.6    | 63.2   | 118.8  |
| 7.4     | 11.4    | 4.5    | 4.2    | 7.9    | 64.2    | 43.6    | 0.3    | 1.4    |
| 2.4     | 6.8     | 2.6    | 1.3    | 11.0   | 24.4    | 22.5    | 4.9    | 0.6    |
| 2.1     | 1.2     | 3.0    | 1.7    | 1.0    | 3.5     | 2.0     | 1.3    | 1.7    |
| 31.6    | 23.1    | 37.3   | 30.9   | 15.2   | 40.5    | 34.1    | 30.5   | 31.7   |
| 33.4    | 34.4    | 26.2   | 26.2   | 11.1   | 29.4    | 7.0     | 299.9  | 321.2  |
| 16.3    | 11.1    | 10.4   | 10.3   | 3.5    | 13.3    | 1.1     | 13.8   | 11.3   |
| 52.0    | 35.7    | 25.2   | 21.6   | 8.0    | 30.6    | 12.6    | 5.5    | 20.1   |
| 23.4    | 17.7    | 27.8   | 20.0   | 5.2    | 21.6    | 4.9     | 16.2   | 7.5    |
| 6.8     | 4.3     | 1.1    | 1.1    | 0.7    | 7.9     | 0.8     | 0.6    | 0.4    |
| 4.2     | 3.9     | 22.0   | 3.3    | 5.3    | 3.5     | 24.2    | 9.7    | 10.0   |
| 253.8   | 225.0   | 196.3  | 169.8  | 95.7   | 230.5   | 173.2   | 125.2  | 137.3  |
| 58.1    | 42.4    | 42.9   | 78.1   | 18.7   | 81.4    | 78.6    | 570.4  | 824.7  |
| 1.5     | 1.4     | 1.9    | 1.3    | 1.8    | 1.6     | 1.3     | 0.9    | 0.9    |
| 137.0   | 110.5   | 104.9  | 90.6   | 23.5   | 149.9   | 67.3    | 86.0   | 130.9  |
| 6.4     | 11.2    | 2.4    | 5.9    | 1.0    | 1.0     | 8.4     | 1.4    | 2.0    |
| 264.2   | 264.7   | 220.3  | 277.1  | 74.7   | 394.1   | 229.0   | 55.2   | 77.2   |
| 13.9    | 14.3    | 14.0   | 8.5    | 0.4    | 150.0   | 72.7    | 0.9    | 16.1   |
| 1.2     | 9.1     | 2.5    | 6.7    | 1.1    | 0.5     | 1.2     | 9.7    | 8.5    |

|        |        |        |        |        |        |        |       |       |
|--------|--------|--------|--------|--------|--------|--------|-------|-------|
| 139.7  | 118.1  | 109.8  | 134.7  | 62.9   | 203.7  | 160.9  | 49.5  | 59.3  |
| 6.2    | 3.1    | 0.8    | 0.5    | 4.7    | 3.5    | 5.7    | 5.7   | 2.4   |
| 0.4    | 1.3    | 5.0    | 0.7    | 0.5    | 2.4    | 3.8    | 0.4   | 0.3   |
| 94.4   | 105.0  | 92.3   | 40.6   | 18.6   | 211.5  | 111.0  | 162.2 | 204.1 |
| 2.8    | 2.5    | 13.4   | 5.4    | 0.3    | 4.9    | 3.3    | 2.4   | 0.9   |
| 2.5    | 1.7    | 3.1    | 1.2    | 0.8    | 15.7   | 4.3    | 3.0   | 0.9   |
| 23.0   | 18.8   | 20.1   | 9.7    | 6.0    | 22.4   | 10.6   | 13.9  | 21.6  |
| 55.1   | 89.0   | 60.3   | 24.0   | 30.2   | 543.6  | 247.8  | 1.4   | 1.6   |
| 151.1  | 143.3  | 159.7  | 98.1   | 48.8   | 334.7  | 156.8  | 199.6 | 260.6 |
| 154.7  | 156.4  | 172.3  | 147.0  | 61.2   | 400.1  | 316.7  | 79.7  | 168.3 |
| 278.1  | 202.0  | 199.0  | 106.8  | 96.8   | 423.6  | 317.3  | 96.1  | 131.4 |
| 3.7    | 4.3    | 14.6   | 19.9   | 5.0    | 3.7    | 1.5    | 3.9   | 4.2   |
| 130.1  | 112.0  | 118.2  | 116.5  | 29.1   | 70.6   | 44.2   | 212.6 | 237.1 |
| 14.1   | 1.1    | 8.5    | 8.4    | 0.5    | 20.6   | 4.3    | 6.4   | 13.2  |
| 24.7   | 10.9   | 12.8   | 4.8    | 5.5    | 4.5    | 3.4    | 46.9  | 72.2  |
| 10.4   | 21.3   | 35.5   | 4.1    | 21.6   | 3.5    | 5.1    | 2.9   | 4.8   |
| 27.0   | 14.1   | 16.1   | 14.7   | 1.9    | 3.1    | 2.4    | 2.0   | 2.5   |
| 1.8    | 2.1    | 3.4    | 2.8    | 1.0    | 2.7    | 1.2    | 2.4   | 2.9   |
| 49.1   | 39.7   | 47.8   | 31.0   | 16.4   | 97.3   | 36.2   | 22.1  | 24.0  |
| 1.4    | 9.5    | 3.8    | 0.7    | 0.5    | 4.8    | 0.5    | 20.3  | 16.7  |
| 0.7    | 1.6    | 1.1    | 0.5    | 3.2    | 1.8    | 3.4    | 0.9   | 0.7   |
| 6.7    | 20.6   | 20.6   | 3.3    | 1.8    | 4.5    | 2.4    | 4.0   | 14.6  |
| 2.3    | 4.2    | 2.3    | 1.0    | 4.1    | 7.7    | 17.0   | 2.7   | 3.5   |
| 13.8   | 10.2   | 9.2    | 11.9   | 1.3    | 3.0    | 5.4    | 2.6   | 5.9   |
| 24.3   | 28.0   | 26.5   | 27.4   | 9.4    | 5.0    | 19.5   | 3.9   | 29.9  |
| 2.9    | 2.1    | 3.5    | 1.8    | 0.6    | 1.0    | 1.2    | 1.5   | 4.1   |
| 6.4    | 6.9    | 2.1    | 0.2    | 1.5    | 3.5    | 0.4    | 0.6   | 0.5   |
| 92.9   | 90.2   | 72.8   | 68.3   | 32.8   | 158.1  | 85.0   | 54.5  | 81.4  |
| 444.4  | 396.5  | 425.0  | 415.8  | 140.0  | 803.2  | 593.7  | 150.3 | 105.8 |
| 377.8  | 332.1  | 331.6  | 216.2  | 137.8  | 1274.5 | 766.6  | 181.4 | 222.4 |
| 49.9   | 35.6   | 48.1   | 36.0   | 7.0    | 136.6  | 102.1  | 141.2 | 127.2 |
| 2.5    | 6.3    | 3.0    | 2.7    | 2.2    | 86.6   | 68.3   | 38.2  | 69.6  |
| 28.4   | 16.8   | 33.4   | 15.9   | 11.9   | 2.9    | 16.0   | 18.9  | 21.2  |
| 298.3  | 283.6  | 176.5  | 91.4   | 36.3   | 224.0  | 62.0   | 73.5  | 127.0 |
| 6586.0 | 5208.5 | 4757.5 | 4642.7 | 2809.7 | 2839.7 | 1923.3 | 660.2 | 945.7 |
| 0.4    | 0.1    | 0.6    | 2.0    | 0.1    | 0.4    | 0.5    | 2.1   | 1.1   |
| 32.6   | 18.5   | 13.7   | 24.5   | 6.2    | 1.6    | 8.5    | 3.2   | 8.5   |
| 95.3   | 115.7  | 95.3   | 55.2   | 47.3   | 132.0  | 119.3  | 32.6  | 25.1  |
| 10.0   | 3.6    | 7.5    | 5.8    | 4.8    | 16.7   | 6.4    | 2.4   | 4.2   |
| 7.0    | 22.0   | 1.7    | 10.7   | 1.0    | 20.6   | 19.6   | 17.7  | 27.6  |
| 8.5    | 3.9    | 0.7    | 0.6    | 2.4    | 3.8    | 2.2    | 4.3   | 1.7   |
| 5.0    | 3.4    | 3.8    | 2.3    | 7.0    | 27.8   | 14.2   | 1.9   | 5.1   |
| 6.0    | 7.5    | 1.2    | 3.5    | 1.3    | 0.8    | 2.7    | 2.2   | 11.9  |
| 2914.6 | 2550.1 | 2487.6 | 2281.7 | 1032.4 | 1935.1 | 1524.1 | 308.7 | 386.6 |
| 22.9   | 19.4   | 33.4   | 30.7   | 9.1    | 28.4   | 13.3   | 10.4  | 14.7  |
| 1.2    | 0.9    | 0.9    | 3.2    | 0.7    | 10.4   | 1.2    | 3.0   | 5.6   |
| 148.9  | 165.3  | 154.9  | 135.4  | 50.6   | 159.6  | 113.0  | 35.1  | 53.4  |
| 35.3   | 24.7   | 34.8   | 9.8    | 0.4    | 22.0   | 3.4    | 11.6  | 19.0  |
| 0.9    | 0.7    | 2.0    | 0.6    | 0.6    | 1.2    | 1.2    | 1.3   | 2.8   |
| 1331.4 | 1391.5 | 1426.4 | 1360.9 | 660.8  | 1001.2 | 670.4  | 240.6 | 321.7 |
| 14.6   | 8.4    | 6.6    | 7.8    | 0.4    | 8.1    | 1.0    | 4.7   | 9.2   |
| 1.5    | 4.6    | 0.7    | 1.0    | 0.2    | 2.4    | 2.2    | 1.0   | 1.0   |
| 2.4    | 1.8    | 4.8    | 2.0    | 3.7    | 4.3    | 1.0    | 0.7   | 1.3   |



|        |        |        |        |        |        |        |        |        |
|--------|--------|--------|--------|--------|--------|--------|--------|--------|
| 11.3   | 6.2    | 16.8   | 3.3    | 1.7    | 10.2   | 15.2   | 8.8    | 2.3    |
| 16.8   | 13.4   | 10.9   | 8.5    | 10.5   | 26.3   | 35.9   | 18.1   | 6.3    |
| 10.6   | 9.6    | 11.8   | 8.7    | 3.0    | 24.3   | 12.8   | 13.7   | 32.5   |
| 430.3  | 263.8  | 278.4  | 194.5  | 81.8   | 174.7  | 145.0  | 108.3  | 172.9  |
| 3290.7 | 2903.2 | 2687.5 | 2041.1 | 823.3  | 8890.8 | 7554.4 | 544.6  | 836.4  |
| 18.1   | 2.2    | 5.9    | 9.1    | 1.2    | 3.5    | 19.9   | 9.6    | 7.2    |
| 0.7    | 0.7    | 2.2    | 1.2    | 0.3    | 1.0    | 1.6    | 0.6    | 0.6    |
| 41.2   | 35.9   | 12.0   | 15.0   | 9.3    | 1.9    | 3.8    | 1.6    | 5.3    |
| 0.8    | 0.8    | 9.3    | 4.4    | 0.6    | 0.9    | 13.0   | 9.0    | 0.6    |
| 4991.8 | 4031.8 | 5033.5 | 5844.1 | 2685.4 | 7642.5 | 6767.5 | 989.5  | 1391.2 |
| 1211.7 | 1095.0 | 969.7  | 1058.9 | 398.7  | 1226.9 | 636.6  | 758.8  | 1079.8 |
| 44.2   | 31.1   | 32.2   | 6.2    | 8.6    | 25.9   | 16.6   | 34.6   | 40.2   |
| 9.3    | 0.9    | 2.0    | 5.9    | 3.0    | 1.2    | 8.2    | 2.0    | 1.7    |
| 1.1    | 2.4    | 3.6    | 1.1    | 4.6    | 2.4    | 1.9    | 1.5    | 2.5    |
| 1.3    | 1.0    | 1.2    | 1.6    | 2.1    | 2.6    | 1.2    | 1.2    | 3.6    |
| 3.3    | 1.9    | 1.8    | 2.0    | 0.6    | 2.0    | 3.6    | 1.7    | 14.4   |
| 2.2    | 0.7    | 0.5    | 0.3    | 1.1    | 1.2    | 1.0    | 1.0    | 0.3    |
| 20.8   | 5.7    | 17.5   | 12.6   | 0.9    | 27.3   | 16.8   | 2.1    | 2.9    |
| 8.3    | 4.1    | 0.5    | 0.9    | 0.9    | 2.8    | 3.6    | 1.8    | 0.6    |
| 5.2    | 1.8    | 2.6    | 0.6    | 2.3    | 3.5    | 1.2    | 2.5    | 2.3    |
| 2.0    | 6.4    | 1.6    | 0.8    | 0.7    | 4.2    | 1.8    | 1.0    | 1.5    |
| 11.4   | 8.3    | 22.5   | 2.0    | 5.1    | 14.3   | 8.1    | 2.3    | 8.6    |
| 4.0    | 0.8    | 0.7    | 0.6    | 0.3    | 2.4    | 0.9    | 3.5    | 0.8    |
| 22.8   | 1.2    | 3.5    | 4.1    | 1.3    | 8.4    | 9.0    | 2.7    | 12.7   |
| 5.7    | 4.8    | 5.6    | 2.1    | 1.1    | 6.2    | 2.8    | 2.6    | 3.7    |
| 2.2    | 2.0    | 2.7    | 1.9    | 5.2    | 21.9   | 9.4    | 2.5    | 3.8    |
| 0.5    | 2.6    | 0.4    | 7.8    | 3.8    | 8.2    | 0.6    | 3.6    | 0.6    |
| 2.0    | 0.4    | 2.0    | 5.7    | 0.3    | 5.7    | 2.0    | 5.8    | 2.9    |
| 0.9    | 0.8    | 11.0   | 2.8    | 1.3    | 1.0    | 0.5    | 1.6    | 0.6    |
| 7.1    | 8.0    | 2.7    | 1.4    | 0.8    | 8.5    | 10.3   | 1.3    | 5.8    |
| 1.4    | 1.7    | 1.7    | 0.9    | 0.7    | 2.0    | 0.8    | 1.8    | 3.7    |
| 209.6  | 234.1  | 162.3  | 76.5   | 67.7   | 802.7  | 549.0  | 32.6   | 35.2   |
| 3.3    | 3.9    | 16.4   | 9.1    | 6.5    | 19.7   | 6.3    | 5.9    | 19.9   |
| 12.5   | 11.4   | 2.3    | 39.8   | 5.4    | 2176.5 | 1453.2 | 5.4    | 12.1   |
| 16.6   | 18.1   | 19.7   | 14.7   | 5.9    | 49.9   | 23.3   | 25.9   | 25.7   |
| 10.4   | 1.0    | 0.5    | 2.1    | 3.0    | 3.0    | 1.3    | 2.1    | 3.0    |
| 2.4    | 12.3   | 3.1    | 14.7   | 13.6   | 63.3   | 43.1   | 4.9    | 20.0   |
| 24.3   | 11.0   | 17.9   | 7.7    | 3.7    | 958.0  | 545.3  | 632.5  | 977.7  |
| 42.2   | 34.8   | 38.7   | 16.7   | 10.2   | 569.3  | 378.5  | 95.3   | 167.4  |
| 1.1    | 0.9    | 3.1    | 0.6    | 0.3    | 1.7    | 1.7    | 2.0    | 1.1    |
| 17.0   | 26.7   | 24.5   | 32.3   | 9.4    | 25.1   | 25.6   | 45.9   | 21.8   |
| 32.2   | 17.6   | 18.4   | 17.0   | 2.1    | 117.1  | 69.9   | 9.3    | 29.6   |
| 2316.0 | 2022.2 | 2110.0 | 2189.4 | 911.0  | 3865.8 | 3386.3 | 787.7  | 949.5  |
| 24.8   | 17.7   | 29.0   | 17.7   | 9.4    | 10.0   | 25.7   | 21.0   | 16.7   |
| 42.6   | 41.2   | 54.1   | 73.4   | 16.2   | 33.3   | 12.9   | 37.3   | 54.8   |
| 3926.1 | 3624.1 | 3721.8 | 4121.7 | 1667.7 | 6232.2 | 3954.0 | 1521.0 | 2339.7 |
| 7.8    | 5.0    | 5.3    | 8.6    | 6.0    | 0.6    | 0.4    | 7.2    | 7.8    |
| 388.4  | 286.7  | 413.0  | 199.4  | 99.3   | 1398.5 | 601.2  | 9.2    | 11.0   |
| 3.8    | 2.7    | 6.8    | 1.9    | 1.3    | 4.8    | 5.0    | 3.3    | 2.8    |
| 192.1  | 221.5  | 234.6  | 221.6  | 92.5   | 497.0  | 330.1  | 21.2   | 24.6   |
| 226.2  | 198.9  | 180.6  | 148.4  | 49.6   | 136.3  | 61.4   | 128.4  | 122.4  |
| 21.9   | 36.3   | 37.2   | 17.6   | 21.9   | 37.7   | 43.9   | 23.6   | 16.2   |
| 0.9    | 0.7    | 1.1    | 1.6    | 0.4    | 1.4    | 4.1    | 0.6    | 0.8    |

|        |        |        |        |        |        |        |        |        |
|--------|--------|--------|--------|--------|--------|--------|--------|--------|
| 171.5  | 245.3  | 244.3  | 197.4  | 71.9   | 213.7  | 147.0  | 18.5   | 32.7   |
| 178.4  | 179.5  | 183.1  | 123.7  | 52.4   | 171.4  | 69.4   | 44.0   | 38.3   |
| 23.3   | 12.1   | 7.9    | 8.5    | 3.1    | 29.5   | 4.1    | 9.6    | 4.4    |
| 722.3  | 744.8  | 742.2  | 874.8  | 300.3  | 1560.3 | 1058.0 | 284.8  | 295.0  |
| 2.2    | 12.0   | 24.2   | 5.8    | 1.9    | 36.7   | 20.9   | 6.9    | 14.8   |
| 0.5    | 2.2    | 0.3    | 0.4    | 2.1    | 2.0    | 5.3    | 1.5    | 0.7    |
| 193.6  | 173.3  | 183.2  | 149.8  | 50.4   | 96.7   | 57.8   | 30.9   | 49.5   |
| 9.6    | 2.4    | 5.3    | 7.8    | 0.3    | 4.9    | 2.7    | 14.6   | 3.1    |
| 1669.1 | 1614.3 | 1769.4 | 2319.6 | 724.4  | 1762.0 | 1418.3 | 314.8  | 448.8  |
| 7.8    | 1.9    | 14.8   | 5.7    | 4.6    | 57.9   | 36.3   | 43.0   | 51.0   |
| 464.5  | 435.8  | 546.6  | 484.3  | 187.4  | 544.6  | 352.9  | 68.6   | 82.9   |
| 1.8    | 2.7    | 3.1    | 0.7    | 5.0    | 7.3    | 3.1    | 1.6    | 12.4   |
| 4.9    | 8.9    | 2.2    | 2.3    | 0.6    | 2.0    | 1.1    | 2.3    | 2.2    |
| 2.6    | 1.2    | 0.8    | 1.6    | 0.2    | 64.2   | 19.8   | 16.1   | 52.5   |
| 3.0    | 5.5    | 3.5    | 2.5    | 1.4    | 6.0    | 2.1    | 1.5    | 2.1    |
| 19.7   | 18.1   | 6.2    | 20.3   | 3.9    | 21.8   | 14.3   | 4.7    | 33.9   |
| 54.9   | 43.2   | 45.8   | 31.0   | 15.6   | 70.4   | 47.1   | 105.2  | 130.1  |
| 42.1   | 34.0   | 35.6   | 23.6   | 11.5   | 73.1   | 32.0   | 43.4   | 30.0   |
| 3.9    | 0.4    | 0.6    | 0.9    | 1.3    | 0.7    | 0.5    | 0.9    | 1.9    |
| 31.7   | 22.7   | 26.2   | 11.7   | 7.8    | 13.6   | 16.1   | 43.4   | 72.5   |
| 16.1   | 11.5   | 12.1   | 15.5   | 9.8    | 14.3   | 9.5    | 13.3   | 19.6   |
| 516.9  | 531.3  | 426.8  | 534.1  | 243.7  | 567.4  | 295.5  | 131.0  | 238.1  |
| 355.3  | 477.1  | 468.9  | 243.9  | 202.8  | 691.2  | 553.4  | 30.4   | 30.6   |
| 4.4    | 9.2    | 3.5    | 12.0   | 1.7    | 4.0    | 4.1    | 18.9   | 1.9    |
| 7.3    | 30.4   | 7.9    | 11.7   | 10.3   | 1.4    | 4.2    | 1.5    | 0.9    |
| 29.5   | 24.0   | 27.8   | 29.6   | 23.5   | 9.6    | 1.3    | 8.3    | 1.2    |
| 77.7   | 110.2  | 101.6  | 134.3  | 37.1   | 94.9   | 85.5   | 60.6   | 78.1   |
| 259.2  | 249.2  | 239.4  | 250.6  | 83.0   | 375.4  | 298.5  | 40.2   | 65.2   |
| 73.6   | 86.6   | 50.7   | 42.1   | 23.4   | 97.8   | 75.7   | 21.3   | 24.2   |
| 2.7    | 6.1    | 17.6   | 7.7    | 1.4    | 4.9    | 5.2    | 2.6    | 5.3    |
| 2.2    | 0.9    | 4.6    | 1.4    | 0.6    | 1.4    | 1.8    | 4.7    | 14.6   |
| 195.5  | 187.8  | 174.3  | 224.7  | 76.2   | 195.8  | 93.1   | 53.5   | 60.1   |
| 28.0   | 19.5   | 137.7  | 110.0  | 63.2   | 13.4   | 5.3    | 166.9  | 280.0  |
| 336.7  | 309.4  | 251.7  | 121.7  | 103.3  | 6.6    | 8.2    | 7.0    | 32.5   |
| 6368.4 | 5929.3 | 5715.5 | 5664.6 | 2780.4 | 8646.6 | 7257.8 | 1961.3 | 2357.7 |
| 162.9  | 165.3  | 165.4  | 77.0   | 35.0   | 138.6  | 117.0  | 51.1   | 62.5   |
| 4.6    | 11.8   | 2.1    | 6.7    | 5.8    | 26.1   | 26.6   | 13.8   | 13.4   |
| 111.1  | 115.9  | 79.0   | 29.5   | 44.1   | 417.5  | 246.2  | 31.6   | 33.5   |
| 7162.2 | 6108.6 | 5572.4 | 3906.1 | 2370.7 | 7455.1 | 5472.1 | 2919.8 | 3770.7 |
| 45.2   | 46.3   | 36.8   | 23.5   | 17.0   | 309.7  | 207.9  | 342.7  | 314.7  |
| 397.2  | 249.9  | 273.3  | 232.5  | 119.5  | 774.2  | 576.7  | 835.4  | 1154.7 |
| 181.3  | 135.5  | 163.8  | 127.9  | 51.4   | 169.8  | 106.6  | 90.9   | 164.4  |
| 8.5    | 8.2    | 18.0   | 2.2    | 6.5    | 24.1   | 13.7   | 2.6    | 6.5    |
| 9.0    | 22.5   | 11.4   | 3.6    | 6.2    | 3022.0 | 1478.4 | 1.0    | 3.0    |
| 8768.4 | 7806.6 | 7447.8 | 7218.2 | 5122.1 | 9004.1 | 7770.9 | 3062.9 | 4977.1 |
| 63.9   | 66.1   | 58.9   | 51.7   | 19.6   | 160.0  | 122.6  | 4.8    | 6.8    |
| 12.8   | 9.2    | 10.6   | 10.9   | 6.2    | 17.6   | 9.7    | 11.7   | 4.3    |
| 209.6  | 220.2  | 241.1  | 275.8  | 99.5   | 568.9  | 390.5  | 97.2   | 138.0  |
| 134.3  | 113.6  | 153.9  | 126.1  | 44.6   | 1888.8 | 1739.0 | 106.7  | 110.8  |
| 9.4    | 17.6   | 12.3   | 11.8   | 1.6    | 10.4   | 11.8   | 14.8   | 12.6   |
| 1321.6 | 1246.8 | 1208.5 | 953.5  | 456.6  | 584.8  | 425.8  | 520.3  | 596.5  |
| 40.5   | 30.3   | 28.7   | 16.2   | 16.0   | 3.2    | 2.4    | 2.7    | 8.4    |
| 210.0  | 237.5  | 174.0  | 217.0  | 89.0   | 776.1  | 637.1  | 433.3  | 549.4  |

|         |        |        |        |        |         |        |        |        |
|---------|--------|--------|--------|--------|---------|--------|--------|--------|
| 3649.9  | 3374.3 | 2583.7 | 969.0  | 1030.7 | 5187.1  | 4366.3 | 738.5  | 487.8  |
| 8.3     | 8.9    | 2.1    | 7.6    | 1.0    | 15.4    | 10.2   | 16.4   | 11.2   |
| 3.4     | 1.1    | 1.1    | 1.7    | 0.6    | 65.3    | 57.4   | 25.9   | 46.4   |
| 437.4   | 542.1  | 464.5  | 305.2  | 126.8  | 1116.7  | 770.6  | 130.5  | 183.0  |
| 9.6     | 1.8    | 1.5    | 7.8    | 0.3    | 2.5     | 13.3   | 8.7    | 0.8    |
| 2.3     | 2.4    | 1.7    | 2.1    | 1.1    | 2.5     | 1.3    | 1.4    | 1.6    |
| 3.5     | 8.1    | 0.7    | 3.1    | 2.4    | 1.3     | 0.2    | 0.4    | 1.5    |
| 10.4    | 12.8   | 10.4   | 5.4    | 10.3   | 38.1    | 23.4   | 7.0    | 1.6    |
| 31.0    | 20.6   | 13.0   | 14.8   | 11.5   | 28.8    | 2.3    | 18.1   | 15.2   |
| 1.1     | 0.5    | 1.0    | 2.0    | 0.9    | 0.9     | 0.8    | 0.8    | 0.5    |
| 4.4     | 5.6    | 2.7    | 6.9    | 2.2    | 27.2    | 28.1   | 5.2    | 8.6    |
| 2.3     | 1.7    | 10.3   | 0.6    | 0.9    | 7.8     | 1.2    | 4.0    | 7.9    |
| 9.9     | 0.7    | 2.6    | 5.9    | 0.8    | 12.2    | 10.1   | 6.7    | 9.0    |
| 5.1     | 8.1    | 5.3    | 2.1    | 1.3    | 17.5    | 13.3   | 1.4    | 1.9    |
| 539.7   | 493.2  | 511.7  | 374.8  | 176.0  | 473.3   | 322.1  | 30.1   | 35.3   |
| 25.4    | 10.6   | 28.7   | 28.4   | 2.9    | 50.0    | 28.5   | 6.8    | 13.4   |
| 2140.5  | 2134.7 | 2587.0 | 2038.4 | 1025.6 | 5390.6  | 4348.2 | 736.6  | 1075.0 |
| 1431.5  | 1430.5 | 1409.0 | 1120.7 | 490.2  | 2675.8  | 2477.7 | 175.1  | 261.8  |
| 70.8    | 55.7   | 39.7   | 26.7   | 28.4   | 42.6    | 18.1   | 6.4    | 6.6    |
| 1282.1  | 1312.8 | 1276.3 | 1098.0 | 457.7  | 1552.2  | 922.0  | 225.1  | 445.1  |
| 7252.8  | 6125.0 | 5933.7 | 5341.5 | 3605.2 | 6736.1  | 6422.6 | 2872.8 | 3685.0 |
| 4.2     | 1.9    | 2.9    | 11.3   | 0.4    | 0.9     | 2.7    | 4.2    | 2.3    |
| 276.1   | 228.8  | 228.2  | 197.9  | 68.0   | 305.8   | 148.9  | 147.7  | 208.3  |
| 8.4     | 14.7   | 6.4    | 0.6    | 7.3    | 21.5    | 10.8   | 14.9   | 6.9    |
| 276.6   | 217.8  | 206.3  | 154.2  | 56.4   | 351.2   | 230.7  | 61.3   | 52.7   |
| 5868.5  | 5793.8 | 5333.1 | 4431.5 | 2595.9 | 5315.9  | 4439.1 | 841.9  | 1082.4 |
| 0.5     | 1.0    | 7.3    | 8.0    | 5.8    | 1618.8  | 1161.0 | 2.9    | 7.0    |
| 1353.0  | 1460.8 | 1670.1 | 1452.7 | 643.1  | 1621.9  | 1345.5 | 234.4  | 297.3  |
| 840.5   | 648.1  | 689.3  | 557.1  | 255.6  | 2653.1  | 2164.1 | 381.7  | 359.8  |
| 36.4    | 38.7   | 31.5   | 26.8   | 13.6   | 80.0    | 66.7   | 15.8   | 20.7   |
| 558.3   | 626.1  | 554.8  | 484.4  | 217.4  | 1294.8  | 875.5  | 534.6  | 669.4  |
| 3733.2  | 3908.2 | 3835.8 | 3330.4 | 1359.0 | 2816.0  | 2503.2 | 713.4  | 1009.6 |
| 137.2   | 177.1  | 202.3  | 216.1  | 60.2   | 310.1   | 172.8  | 64.6   | 105.7  |
| 208.3   | 188.8  | 291.1  | 299.6  | 80.3   | 71.6    | 75.7   | 24.0   | 32.5   |
| 10250.4 | 8703.5 | 8581.4 | 7313.3 | 5325.6 | 11223.2 | 9344.6 | 4209.8 | 5450.2 |
| 5.6     | 9.3    | 3.3    | 4.7    | 6.8    | 0.7     | 2.5    | 0.3    | 0.9    |
| 227.1   | 136.6  | 139.7  | 129.0  | 44.0   | 200.4   | 107.8  | 27.5   | 35.4   |
| 19.6    | 20.2   | 11.2   | 11.7   | 4.4    | 4.3     | 21.0   | 1.3    | 19.9   |
| 1339.7  | 642.4  | 710.0  | 566.5  | 205.4  | 1401.0  | 1188.7 | 1364.8 | 1377.1 |
| 4.5     | 9.7    | 5.7    | 3.4    | 0.5    | 7.6     | 17.6   | 2.7    | 5.0    |
| 2.2     | 3.3    | 2.1    | 1.3    | 0.6    | 5.3     | 13.8   | 8.7    | 1.6    |
| 63.2    | 35.5   | 67.8   | 49.9   | 13.9   | 76.7    | 48.9   | 30.1   | 30.8   |
| 103.0   | 86.1   | 64.7   | 45.9   | 28.6   | 81.2    | 62.8   | 1.6    | 19.5   |
| 8.5     | 2.7    | 8.4    | 3.8    | 5.2    | 23.2    | 8.3    | 4.2    | 8.1    |
| 16.1    | 8.7    | 15.9   | 18.9   | 7.6    | 24.3    | 26.7   | 4.2    | 7.2    |
| 29.1    | 19.4   | 15.5   | 12.9   | 6.7    | 124.1   | 96.7   | 121.6  | 155.7  |
| 247.2   | 228.1  | 239.2  | 229.8  | 80.1   | 695.6   | 412.4  | 177.0  | 252.9  |
| 335.7   | 360.7  | 323.9  | 324.3  | 106.3  | 363.5   | 249.2  | 70.1   | 89.8   |
| 8.9     | 19.0   | 19.1   | 24.8   | 8.2    | 53.4    | 28.4   | 1.2    | 5.4    |
| 19.7    | 8.0    | 15.0   | 14.7   | 4.9    | 22.0    | 9.5    | 0.5    | 6.9    |
| 215.8   | 175.0  | 160.5  | 149.0  | 59.4   | 427.9   | 348.8  | 205.9  | 203.6  |
| 2339.6  | 2457.2 | 2346.7 | 1960.5 | 921.4  | 4381.2  | 3625.1 | 284.7  | 348.2  |
| 1.2     | 0.9    | 6.3    | 1.2    | 5.8    | 20.2    | 0.9    | 3.4    | 7.5    |

|        |        |        |        |        |        |        |        |        |
|--------|--------|--------|--------|--------|--------|--------|--------|--------|
| 6815.7 | 5581.7 | 5596.0 | 5145.7 | 2707.5 | 7832.1 | 6895.7 | 1647.3 | 1679.3 |
| 1.9    | 0.9    | 1.2    | 0.8    | 0.4    | 1.0    | 0.6    | 0.7    | 0.6    |
| 1.0    | 1.1    | 6.5    | 12.4   | 2.7    | 5.4    | 0.5    | 1.6    | 17.3   |
| 2.9    | 2.1    | 8.4    | 8.6    | 2.4    | 6.1    | 1.2    | 1.6    | 11.7   |
| 4.2    | 1.5    | 2.8    | 1.2    | 3.3    | 19.8   | 10.9   | 1.7    | 1.3    |
| 56.2   | 26.3   | 26.1   | 24.6   | 4.9    | 58.4   | 23.1   | 63.3   | 39.6   |
| 304.3  | 279.1  | 295.6  | 250.8  | 95.6   | 268.7  | 182.8  | 27.3   | 46.2   |
| 7.8    | 7.6    | 2.6    | 2.9    | 1.2    | 1.9    | 1.5    | 1.5    | 5.3    |
| 4.1    | 7.5    | 9.3    | 5.7    | 2.6    | 16.3   | 9.0    | 11.3   | 1.7    |
| 7.2    | 8.3    | 1.4    | 0.9    | 4.8    | 459.9  | 301.8  | 0.7    | 0.8    |
| 206.4  | 149.4  | 152.1  | 132.1  | 46.1   | 88.4   | 43.0   | 30.3   | 52.9   |
| 28.5   | 19.1   | 9.4    | 17.2   | 6.1    | 34.5   | 4.3    | 7.9    | 7.7    |
| 639.5  | 548.9  | 478.2  | 382.4  | 208.8  | 1873.1 | 859.6  | 48.6   | 56.4   |
| 131.6  | 109.7  | 144.6  | 117.4  | 42.1   | 256.2  | 159.9  | 44.0   | 44.2   |
| 162.8  | 194.0  | 196.5  | 185.1  | 46.0   | 154.4  | 86.3   | 39.8   | 89.2   |
| 8.6    | 3.5    | 8.5    | 2.1    | 7.0    | 9.5    | 11.4   | 7.7    | 4.6    |
| 3.8    | 5.9    | 3.1    | 17.7   | 11.0   | 1.9    | 2.3    | 7.2    | 6.8    |
| 184.7  | 211.2  | 170.9  | 100.9  | 27.9   | 114.2  | 19.9   | 47.5   | 56.2   |
| 19.5   | 17.0   | 15.0   | 14.7   | 10.5   | 34.2   | 15.7   | 12.2   | 4.2    |
| 29.7   | 15.7   | 26.5   | 18.2   | 15.5   | 63.6   | 43.8   | 16.6   | 35.0   |
| 54.3   | 12.9   | 23.7   | 38.3   | 18.8   | 43.2   | 31.0   | 30.8   | 5.3    |
| 4.7    | 7.1    | 3.5    | 4.4    | 3.6    | 23.9   | 9.2    | 0.8    | 4.4    |
| 14.7   | 2.5    | 24.0   | 6.7    | 6.9    | 42.2   | 29.4   | 2.3    | 4.6    |
| 44.9   | 40.0   | 39.3   | 17.8   | 13.0   | 63.7   | 33.8   | 26.9   | 32.9   |
| 7.5    | 7.8    | 9.9    | 7.4    | 1.3    | 0.5    | 0.4    | 1.3    | 0.7    |
| 31.7   | 31.1   | 35.6   | 16.2   | 8.9    | 166.8  | 99.8   | 45.7   | 71.2   |
| 1.8    | 4.2    | 8.6    | 4.0    | 0.6    | 2.7    | 4.2    | 6.8    | 7.6    |
| 59.9   | 45.7   | 36.5   | 8.9    | 8.3    | 256.3  | 58.2   | 112.9  | 145.5  |
| 44.6   | 39.5   | 35.1   | 35.2   | 16.3   | 55.5   | 18.3   | 41.5   | 44.9   |
| 3.6    | 10.7   | 2.0    | 1.4    | 4.8    | 10.3   | 1.8    | 1.7    | 11.2   |
| 17.9   | 10.0   | 21.6   | 4.5    | 0.7    | 12.3   | 2.9    | 4.8    | 15.5   |
| 15.6   | 3.5    | 11.4   | 20.2   | 8.3    | 7.9    | 1.5    | 3.6    | 13.8   |
| 7.8    | 9.3    | 10.8   | 16.0   | 0.4    | 6.0    | 12.6   | 4.3    | 8.0    |
| 13.2   | 0.6    | 3.8    | 0.6    | 2.4    | 6.7    | 6.3    | 1.4    | 7.8    |
| 1.1    | 2.2    | 1.2    | 2.9    | 0.7    | 0.6    | 2.4    | 1.7    | 1.4    |
| 3.9    | 8.7    | 2.2    | 1.3    | 6.1    | 25.7   | 14.9   | 1.4    | 1.2    |
| 145.3  | 98.2   | 105.3  | 87.9   | 26.3   | 87.9   | 21.2   | 73.1   | 77.3   |
| 1.9    | 2.6    | 2.0    | 0.7    | 0.4    | 12.6   | 10.1   | 1.2    | 0.9    |
| 14.3   | 0.8    | 1.8    | 5.1    | 7.0    | 18.1   | 23.9   | 4.9    | 3.8    |
| 2.6    | 13.4   | 21.9   | 1.9    | 9.7    | 17.9   | 2.0    | 15.6   | 18.3   |
| 0.9    | 5.7    | 2.5    | 2.3    | 1.5    | 1.5    | 1.5    | 1.5    | 1.1    |
| 1.7    | 1.4    | 6.3    | 0.4    | 0.5    | 183.7  | 74.6   | 1.9    | 10.1   |
| 0.9    | 2.1    | 0.9    | 0.7    | 4.2    | 0.7    | 0.5    | 1.1    | 14.9   |
| 3.4    | 1.9    | 6.1    | 3.8    | 5.7    | 5.2    | 1.7    | 4.8    | 11.6   |
| 1.9    | 2.5    | 1.9    | 5.0    | 1.0    | 7.0    | 1.3    | 4.8    | 2.3    |
| 3.1    | 5.1    | 1.2    | 2.2    | 0.6    | 7.9    | 1.1    | 8.6    | 6.8    |
| 115.3  | 40.9   | 49.3   | 25.4   | 15.5   | 232.2  | 93.2   | 32.6   | 34.7   |
| 2.6    | 2.3    | 6.1    | 7.5    | 1.1    | 3.7    | 6.4    | 2.2    | 2.3    |
| 2.1    | 1.4    | 0.9    | 0.6    | 0.8    | 2.1    | 1.0    | 1.8    | 1.3    |
| 7.3    | 2.4    | 9.6    | 1.9    | 1.2    | 0.8    | 1.6    | 2.7    | 10.1   |
| 2.9    | 3.3    | 4.4    | 3.7    | 3.7    | 6.0    | 4.4    | 30.1   | 5.2    |
| 4.0    | 15.5   | 17.1   | 2.5    | 2.1    | 9.7    | 10.5   | 3.4    | 4.3    |
| 2.7    | 1.3    | 3.8    | 1.8    | 1.1    | 3.6    | 2.8    | 2.8    | 1.3    |

|        |        |        |        |        |        |        |        |        |
|--------|--------|--------|--------|--------|--------|--------|--------|--------|
| 1.9    | 16.1   | 7.1    | 8.0    | 2.5    | 8.1    | 7.8    | 1.1    | 0.7    |
| 8.4    | 10.9   | 4.6    | 2.7    | 3.5    | 25.0   | 21.9   | 2.6    | 1.9    |
| 2.0    | 9.4    | 2.9    | 4.6    | 3.0    | 22.8   | 9.4    | 17.1   | 1.6    |
| 2.2    | 1.8    | 1.9    | 0.4    | 0.7    | 17.7   | 31.3   | 2.2    | 2.5    |
| 1.2    | 0.4    | 1.0    | 2.9    | 0.5    | 3.9    | 13.4   | 1.5    | 0.7    |
| 1.1    | 1.1    | 0.9    | 0.8    | 0.4    | 1.3    | 1.9    | 1.7    | 0.9    |
| 14.3   | 3.8    | 11.8   | 14.2   | 3.7    | 29.5   | 26.8   | 23.4   | 22.4   |
| 3.1    | 1.0    | 6.2    | 1.4    | 0.8    | 2.3    | 1.3    | 13.6   | 22.2   |
| 66.6   | 78.5   | 72.0   | 59.5   | 16.1   | 65.8   | 29.7   | 20.8   | 38.6   |
| 122.7  | 135.6  | 137.0  | 85.1   | 57.9   | 155.0  | 69.5   | 19.1   | 30.4   |
| 34.5   | 38.5   | 35.2   | 12.3   | 11.3   | 39.6   | 20.8   | 70.7   | 92.2   |
| 207.0  | 149.7  | 159.9  | 110.2  | 43.3   | 39.2   | 5.2    | 45.7   | 17.6   |
| 3.6    | 13.1   | 8.2    | 2.5    | 0.7    | 20.2   | 1.3    | 1.4    | 1.9    |
| 3066.0 | 3011.1 | 2526.4 | 2159.0 | 1120.6 | 4266.9 | 2790.9 | 2267.9 | 4205.0 |
| 1.9    | 3.6    | 0.4    | 0.5    | 0.7    | 0.7    | 1.6    | 10.1   | 1.2    |
| 62.1   | 26.0   | 32.5   | 18.0   | 11.2   | 130.7  | 87.8   | 55.0   | 63.4   |
| 36.5   | 42.9   | 41.1   | 11.2   | 14.4   | 40.5   | 26.0   | 8.7    | 2.2    |
| 941.6  | 913.6  | 858.5  | 604.4  | 267.5  | 860.4  | 564.5  | 102.1  | 127.7  |
| 59.4   | 39.5   | 49.6   | 29.0   | 24.9   | 35.0   | 23.5   | 39.6   | 19.5   |
| 36.9   | 20.0   | 26.7   | 11.1   | 1.2    | 27.7   | 21.9   | 10.7   | 1.4    |
| 2.8    | 3.5    | 1.5    | 0.9    | 1.0    | 12.2   | 3.3    | 4.0    | 2.6    |
| 5.4    | 2.2    | 15.6   | 10.8   | 1.2    | 34.5   | 2.9    | 14.8   | 1.8    |
| 6.8    | 0.8    | 1.3    | 0.7    | 0.4    | 1.5    | 0.7    | 1.0    | 0.8    |
| 1.9    | 0.9    | 1.2    | 1.0    | 0.4    | 3.9    | 2.1    | 1.7    | 1.2    |
| 63.4   | 54.7   | 44.0   | 35.6   | 7.9    | 93.6   | 61.9   | 15.7   | 25.1   |
| 2.7    | 2.2    | 3.7    | 1.5    | 0.8    | 3.8    | 5.8    | 2.1    | 2.1    |
| 2.2    | 3.0    | 1.0    | 0.8    | 0.8    | 2.4    | 3.0    | 1.1    | 1.6    |
| 35.0   | 29.0   | 31.4   | 28.3   | 7.0    | 18.8   | 20.3   | 37.3   | 52.2   |
| 1.8    | 1.1    | 1.0    | 2.4    | 0.3    | 1.5    | 1.3    | 1.3    | 1.2    |
| 4.8    | 3.0    | 2.5    | 2.7    | 1.9    | 6.8    | 26.9   | 9.3    | 12.6   |
| 1.6    | 4.6    | 0.8    | 2.3    | 0.5    | 1.1    | 0.4    | 0.4    | 0.4    |
| 1.8    | 10.0   | 1.4    | 0.5    | 0.3    | 3.0    | 2.2    | 2.6    | 5.6    |
| 1.5    | 9.6    | 1.6    | 2.6    | 0.5    | 1.7    | 1.2    | 7.1    | 5.6    |
| 13.6   | 12.5   | 22.7   | 3.2    | 1.4    | 22.6   | 19.0   | 14.2   | 16.6   |
| 23.3   | 18.1   | 6.8    | 15.4   | 2.2    | 1.7    | 22.2   | 3.2    | 19.1   |
| 5.5    | 1.3    | 1.6    | 1.6    | 1.4    | 6.8    | 4.6    | 3.4    | 1.7    |
| 6.6    | 14.4   | 5.8    | 9.8    | 3.2    | 38.8   | 17.2   | 17.4   | 34.1   |
| 6.0    | 1.3    | 2.6    | 1.7    | 0.4    | 1.2    | 16.2   | 2.7    | 13.2   |
| 12.0   | 2.3    | 8.9    | 1.8    | 0.7    | 18.0   | 11.9   | 2.1    | 2.7    |
| 17.5   | 13.8   | 15.8   | 4.7    | 8.0    | 3.4    | 17.0   | 11.2   | 16.5   |
| 15.1   | 8.0    | 1.6    | 3.6    | 0.5    | 7.7    | 1.7    | 4.0    | 3.8    |
| 16.0   | 4.2    | 5.4    | 12.2   | 1.7    | 4.1    | 3.0    | 3.0    | 5.9    |
| 11.8   | 10.2   | 4.2    | 0.5    | 3.0    | 12.5   | 8.7    | 9.0    | 23.9   |
| 1.9    | 1.1    | 3.2    | 0.8    | 0.5    | 1.9    | 0.8    | 1.0    | 1.9    |
| 13.4   | 14.2   | 16.9   | 7.5    | 4.6    | 30.8   | 10.3   | 3.7    | 16.8   |
| 16.0   | 15.0   | 15.0   | 12.2   | 9.3    | 6.8    | 9.6    | 2.8    | 6.7    |
| 3.2    | 4.4    | 3.1    | 1.0    | 5.3    | 12.0   | 4.4    | 1.7    | 2.9    |
| 4.2    | 13.1   | 31.0   | 22.2   | 6.2    | 20.9   | 26.5   | 29.0   | 16.5   |
| 8.8    | 3.8    | 4.2    | 9.5    | 2.6    | 3.3    | 3.2    | 5.4    | 5.3    |
| 7.4    | 1.0    | 1.0    | 0.8    | 0.3    | 1.4    | 1.6    | 0.9    | 2.0    |
| 1.2    | 1.3    | 0.9    | 1.9    | 0.4    | 1.5    | 2.2    | 2.0    | 0.8    |
| 94.0   | 84.3   | 66.0   | 70.4   | 20.1   | 61.7   | 27.2   | 90.9   | 110.7  |
| 8.1    | 6.1    | 8.4    | 3.2    | 3.0    | 3.7    | 14.0   | 5.2    | 14.9   |

|        |        |        |        |        |        |        |        |        |
|--------|--------|--------|--------|--------|--------|--------|--------|--------|
| 1.6    | 9.2    | 3.0    | 2.7    | 0.7    | 10.3   | 2.1    | 3.1    | 1.5    |
| 4.4    | 6.5    | 10.9   | 5.4    | 5.2    | 4.6    | 10.3   | 10.2   | 13.4   |
| 2.5    | 1.6    | 8.7    | 9.9    | 0.9    | 15.0   | 1.3    | 13.3   | 11.3   |
| 5.2    | 23.1   | 31.0   | 17.3   | 14.3   | 2.8    | 3.0    | 7.5    | 11.4   |
| 16.4   | 9.2    | 20.1   | 7.8    | 7.6    | 26.0   | 16.9   | 16.5   | 20.8   |
| 1.9    | 3.9    | 0.6    | 2.8    | 1.0    | 1.4    | 0.5    | 0.3    | 0.8    |
| 23.9   | 1.2    | 18.1   | 0.9    | 0.8    | 2.2    | 0.5    | 8.0    | 6.3    |
| 10.2   | 6.6    | 3.4    | 2.8    | 0.6    | 3.5    | 1.3    | 2.9    | 1.3    |
| 20.1   | 6.4    | 12.8   | 17.0   | 0.9    | 2.5    | 9.2    | 9.9    | 2.0    |
| 2.2    | 1.2    | 2.5    | 1.5    | 0.9    | 1.5    | 2.2    | 2.0    | 3.8    |
| 2171.3 | 2019.0 | 1867.1 | 1832.6 | 664.4  | 6300.9 | 3510.4 | 101.4  | 157.4  |
| 19.4   | 20.2   | 5.7    | 8.4    | 1.1    | 17.5   | 10.0   | 11.5   | 1.9    |
| 39.5   | 49.2   | 52.9   | 46.6   | 16.0   | 61.0   | 30.4   | 10.9   | 18.9   |
| 9.7    | 1.8    | 2.5    | 5.7    | 1.8    | 25.0   | 1.8    | 5.1    | 25.4   |
| 1.2    | 0.8    | 1.3    | 1.9    | 7.6    | 7.7    | 1.0    | 6.8    | 0.9    |
| 11.6   | 13.4   | 20.6   | 16.2   | 7.1    | 22.8   | 13.2   | 15.5   | 21.8   |
| 17.4   | 0.9    | 7.2    | 8.0    | 2.5    | 15.4   | 1.3    | 19.2   | 20.9   |
| 61.4   | 51.8   | 34.2   | 40.4   | 4.0    | 55.8   | 44.9   | 38.7   | 38.7   |
| 76.7   | 86.2   | 64.9   | 33.4   | 20.0   | 43.1   | 7.0    | 52.2   | 87.5   |
| 4.2    | 2.5    | 3.1    | 3.2    | 2.4    | 3.8    | 2.8    | 19.4   | 2.6    |
| 4140.9 | 3114.9 | 2894.2 | 1898.8 | 1149.8 | 7973.7 | 7476.9 | 1488.8 | 1496.3 |
| 106.2  | 93.4   | 103.6  | 77.3   | 25.4   | 86.8   | 64.7   | 112.7  | 162.9  |
| 0.9    | 1.3    | 3.2    | 8.0    | 0.2    | 8.6    | 1.2    | 5.1    | 0.9    |
| 278.1  | 238.8  | 270.4  | 121.2  | 116.7  | 1232.6 | 819.1  | 16.5   | 5.4    |
| 4.2    | 9.6    | 3.5    | 6.6    | 2.4    | 5.1    | 10.6   | 9.4    | 1.4    |
| 570.3  | 416.6  | 510.7  | 384.0  | 132.0  | 1694.2 | 930.0  | 152.8  | 229.7  |
| 6414.6 | 5604.9 | 5151.7 | 5098.4 | 3078.2 | 7773.1 | 6108.5 | 2473.7 | 3268.9 |
| 334.6  | 342.8  | 437.2  | 648.6  | 189.9  | 1347.0 | 1073.2 | 128.1  | 157.3  |
| 757.1  | 897.3  | 734.2  | 663.0  | 325.9  | 1136.9 | 734.5  | 38.0   | 55.5   |
| 252.5  | 319.0  | 206.0  | 155.1  | 43.8   | 274.7  | 141.9  | 18.1   | 36.0   |
| 1733.6 | 1458.1 | 1374.8 | 1021.9 | 403.1  | 2073.1 | 1741.6 | 303.0  | 318.7  |
| 508.5  | 431.1  | 414.6  | 360.5  | 136.4  | 790.9  | 516.7  | 46.2   | 80.4   |
| 1339.5 | 1265.1 | 1216.0 | 846.1  | 340.4  | 1191.2 | 848.7  | 350.8  | 398.7  |
| 925.8  | 751.4  | 544.2  | 259.9  | 111.3  | 1875.1 | 783.2  | 273.3  | 452.5  |
| 1162.7 | 1108.5 | 1047.5 | 766.3  | 293.7  | 1285.3 | 1446.3 | 442.2  | 660.2  |
| 3266.3 | 3081.5 | 3261.5 | 4636.6 | 1951.9 | 4763.7 | 4502.4 | 354.6  | 597.9  |
| 1132.9 | 891.2  | 830.9  | 910.3  | 306.2  | 943.0  | 814.3  | 390.2  | 513.4  |
| 1249.3 | 1047.9 | 949.0  | 888.8  | 296.5  | 1402.6 | 846.0  | 374.6  | 452.7  |
| 4941.8 | 4374.1 | 4413.3 | 4198.5 | 2204.2 | 7560.6 | 5915.7 | 940.4  | 1317.9 |
| 3537.6 | 3492.8 | 3347.1 | 2352.2 | 1787.8 | 5874.5 | 6088.6 | 3405.2 | 4075.3 |
| 803.4  | 709.6  | 692.7  | 355.8  | 193.3  | 831.5  | 575.1  | 1289.8 | 1707.1 |
| 5467.7 | 4951.0 | 4253.8 | 4415.9 | 2072.2 | 5674.4 | 4944.5 | 1839.4 | 1812.7 |
| 5326.3 | 4904.9 | 4686.6 | 5263.0 | 2863.8 | 8190.9 | 7301.6 | 1672.4 | 2369.9 |
| 110.7  | 53.8   | 52.3   | 43.1   | 13.7   | 394.8  | 547.4  | 39.6   | 49.6   |
| 3186.8 | 3075.0 | 3340.8 | 2585.9 | 1018.7 | 5001.5 | 3855.7 | 389.4  | 562.5  |
| 1017.0 | 1105.6 | 1060.0 | 1221.2 | 351.5  | 2708.2 | 1989.8 | 97.0   | 163.8  |
| 30.7   | 14.2   | 9.6    | 11.4   | 0.8    | 48.3   | 28.5   | 17.3   | 28.0   |
| 204.3  | 150.5  | 140.2  | 161.4  | 75.8   | 673.6  | 538.2  | 95.1   | 130.7  |
| 300.1  | 257.0  | 279.1  | 225.7  | 88.5   | 210.7  | 86.6   | 75.9   | 76.6   |
| 468.1  | 481.6  | 467.4  | 616.2  | 218.1  | 1058.9 | 736.6  | 84.9   | 145.9  |
| 2093.5 | 1882.9 | 1979.4 | 1768.9 | 789.1  | 1922.3 | 1592.3 | 146.5  | 183.0  |
| 140.2  | 135.8  | 124.7  | 128.2  | 58.9   | 315.9  | 163.6  | 30.0   | 28.0   |
| 960.6  | 992.3  | 949.0  | 668.8  | 283.5  | 975.7  | 621.4  | 61.8   | 95.3   |

|         |        |        |        |        |         |        |        |        |
|---------|--------|--------|--------|--------|---------|--------|--------|--------|
| 1266.5  | 1225.4 | 1096.3 | 909.1  | 374.1  | 1643.1  | 868.9  | 154.9  | 186.2  |
| 932.2   | 850.4  | 891.5  | 614.6  | 285.5  | 1347.7  | 819.7  | 114.9  | 198.5  |
| 7445.0  | 6839.1 | 7132.9 | 7905.7 | 4113.0 | 9275.9  | 8129.0 | 1514.9 | 2489.6 |
| 2.3     | 10.1   | 16.9   | 3.5    | 3.7    | 13.7    | 2.1    | 202.8  | 258.0  |
| 0.9     | 3.5    | 0.8    | 0.8    | 0.6    | 21.0    | 8.2    | 1380.8 | 1526.5 |
| 778.8   | 702.7  | 733.7  | 1054.6 | 269.8  | 1216.0  | 990.7  | 118.0  | 169.0  |
| 666.3   | 722.7  | 699.4  | 891.0  | 325.0  | 1430.7  | 1017.2 | 264.0  | 391.0  |
| 329.8   | 341.8  | 397.5  | 334.4  | 98.5   | 1154.4  | 680.6  | 186.4  | 281.4  |
| 1152.4  | 1060.8 | 1076.9 | 798.0  | 330.4  | 1788.2  | 1047.8 | 204.5  | 344.1  |
| 49.7    | 49.9   | 25.6   | 13.4   | 15.9   | 43.2    | 37.3   | 10.9   | 21.2   |
| 17.5    | 12.3   | 14.5   | 11.1   | 9.9    | 109.4   | 87.4   | 53.5   | 105.5  |
| 21.3    | 13.9   | 11.5   | 2.6    | 8.6    | 7.1     | 10.0   | 11.1   | 8.5    |
| 1188.7  | 1434.0 | 1099.5 | 753.3  | 296.0  | 1351.0  | 891.6  | 260.0  | 375.1  |
| 3467.1  | 3502.5 | 3671.5 | 3081.4 | 1022.9 | 6592.5  | 4417.2 | 1919.1 | 2296.2 |
| 6935.4  | 5838.2 | 5807.5 | 5226.5 | 2809.5 | 10806.0 | 9031.0 | 1585.6 | 1907.6 |
| 6135.1  | 4820.6 | 4980.9 | 4063.6 | 2644.7 | 8480.0  | 7285.8 | 2618.1 | 4194.6 |
| 3782.1  | 3458.7 | 3573.7 | 3833.6 | 1552.4 | 2446.9  | 1703.5 | 368.8  | 445.7  |
| 8140.8  | 7257.7 | 7114.5 | 7007.9 | 4583.3 | 8050.9  | 6754.6 | 2820.0 | 3594.8 |
| 40.9    | 28.8   | 40.6   | 26.7   | 21.5   | 44.4    | 29.4   | 55.9   | 72.9   |
| 697.7   | 577.4  | 593.8  | 542.3  | 250.9  | 982.9   | 701.6  | 156.0  | 169.1  |
| 236.9   | 150.2  | 208.4  | 175.9  | 56.4   | 703.7   | 494.5  | 189.1  | 291.0  |
| 204.6   | 151.4  | 167.5  | 96.8   | 65.7   | 419.1   | 289.2  | 199.6  | 255.3  |
| 88.6    | 83.0   | 72.4   | 71.9   | 31.8   | 185.6   | 126.7  | 74.8   | 113.5  |
| 10563.0 | 9170.0 | 8811.5 | 7230.8 | 5575.8 | 11087.2 | 9629.2 | 4850.7 | 6386.8 |
| 72.8    | 76.1   | 92.2   | 73.0   | 30.2   | 144.0   | 136.8  | 199.9  | 299.1  |
| 48.2    | 46.1   | 33.2   | 14.7   | 12.4   | 31.8    | 23.8   | 5.0    | 9.3    |
| 4.9     | 3.4    | 2.3    | 1.0    | 4.8    | 4.1     | 2.4    | 1.3    | 1.4    |
| 606.6   | 544.3  | 484.8  | 517.1  | 234.5  | 892.2   | 601.5  | 168.6  | 203.1  |
| 7088.6  | 6188.1 | 6154.3 | 5153.1 | 3550.5 | 7933.4  | 7329.4 | 2670.2 | 4004.2 |
| 250.0   | 232.7  | 247.3  | 173.0  | 109.9  | 1261.9  | 964.0  | 1036.5 | 1147.9 |
| 175.6   | 198.9  | 199.7  | 131.0  | 51.8   | 890.9   | 680.4  | 415.5  | 849.2  |
| 295.8   | 240.8  | 234.7  | 264.5  | 63.7   | 1537.9  | 994.1  | 190.6  | 241.5  |
| 588.5   | 605.5  | 601.4  | 562.9  | 195.5  | 517.7   | 394.5  | 132.4  | 149.5  |
| 622.4   | 646.1  | 594.4  | 454.2  | 198.6  | 895.8   | 509.1  | 165.9  | 216.5  |
| 679.6   | 684.4  | 707.2  | 771.0  | 255.4  | 1470.0  | 1092.0 | 157.9  | 161.4  |
| 8.7     | 23.2   | 7.1    | 2.9    | 0.8    | 301.1   | 188.2  | 5.5    | 10.6   |
| 18.4    | 9.9    | 14.6   | 3.8    | 8.2    | 106.7   | 62.4   | 2.1    | 3.7    |
| 616.9   | 377.6  | 369.9  | 273.7  | 81.6   | 1171.2  | 946.1  | 107.2  | 125.2  |
| 32.1    | 14.7   | 17.9   | 15.8   | 7.8    | 29.6    | 41.6   | 7.0    | 30.7   |
| 741.1   | 673.6  | 749.1  | 619.5  | 210.7  | 760.5   | 445.5  | 67.2   | 107.4  |
| 6870.9  | 5766.8 | 5643.8 | 4516.5 | 2802.5 | 8480.9  | 7623.6 | 2865.4 | 4491.8 |
| 173.1   | 131.0  | 162.5  | 165.1  | 74.5   | 386.9   | 333.8  | 91.9   | 56.9   |
| 6516.5  | 5206.1 | 5266.0 | 5370.5 | 1840.9 | 8030.6  | 6433.8 | 1729.3 | 1966.9 |
| 127.1   | 141.7  | 127.3  | 80.1   | 47.1   | 416.0   | 270.4  | 35.2   | 41.7   |
| 3356.6  | 3099.0 | 3168.3 | 3063.5 | 1373.6 | 5755.7  | 4071.6 | 596.1  | 1145.7 |
| 38.2    | 38.4   | 40.7   | 23.0   | 20.6   | 50.2    | 27.0   | 2.0    | 9.3    |
| 138.4   | 102.4  | 92.5   | 78.4   | 50.0   | 105.2   | 70.1   | 80.2   | 56.7   |
| 208.9   | 156.4  | 117.1  | 70.4   | 30.3   | 163.4   | 91.3   | 145.5  | 178.5  |
| 334.6   | 185.1  | 201.9  | 145.9  | 45.5   | 337.5   | 175.0  | 59.1   | 79.2   |
| 394.1   | 292.7  | 295.4  | 251.8  | 93.6   | 494.9   | 304.5  | 84.7   | 143.1  |
| 341.4   | 239.9  | 222.0  | 172.7  | 64.3   | 314.0   | 142.5  | 70.0   | 98.8   |
| 337.6   | 345.6  | 370.1  | 340.9  | 117.6  | 565.2   | 405.5  | 200.8  | 229.6  |
| 230.2   | 159.7  | 190.3  | 184.2  | 55.0   | 272.9   | 259.6  | 177.9  | 211.6  |

|        |        |        |        |        |         |        |        |        |
|--------|--------|--------|--------|--------|---------|--------|--------|--------|
| 243.7  | 215.0  | 251.8  | 218.3  | 61.3   | 195.5   | 119.1  | 225.7  | 345.9  |
| 925.8  | 791.8  | 824.1  | 702.7  | 232.6  | 980.2   | 345.7  | 632.4  | 611.0  |
| 2145.2 | 2134.8 | 2188.5 | 2153.6 | 803.5  | 3620.3  | 2934.3 | 266.7  | 358.2  |
| 167.6  | 213.4  | 157.2  | 66.4   | 73.2   | 13.0    | 9.4    | 106.2  | 136.4  |
| 64.2   | 55.5   | 54.8   | 22.7   | 26.5   | 0.7     | 3.9    | 83.1   | 148.5  |
| 168.3  | 98.1   | 108.2  | 221.9  | 49.7   | 1778.3  | 1397.2 | 18.7   | 10.5   |
| 1487.2 | 1208.7 | 1369.3 | 1098.2 | 526.3  | 1506.6  | 800.0  | 419.9  | 655.1  |
| 517.8  | 423.5  | 554.9  | 383.5  | 132.4  | 237.3   | 151.3  | 314.1  | 334.4  |
| 541.5  | 447.7  | 422.5  | 477.0  | 128.1  | 772.5   | 590.4  | 206.5  | 304.2  |
| 1461.4 | 1485.5 | 1484.7 | 1678.4 | 628.4  | 2451.1  | 1737.9 | 124.1  | 148.5  |
| 17.9   | 18.0   | 12.1   | 31.0   | 9.6    | 82.8    | 48.4   | 45.8   | 49.1   |
| 178.7  | 160.9  | 129.7  | 84.2   | 54.2   | 132.7   | 139.3  | 34.8   | 61.9   |
| 336.5  | 382.7  | 303.4  | 228.3  | 112.0  | 446.0   | 286.4  | 72.7   | 94.5   |
| 287.1  | 269.4  | 265.7  | 209.8  | 120.5  | 538.1   | 437.9  | 51.8   | 56.7   |
| 179.3  | 199.0  | 167.6  | 86.5   | 65.0   | 120.6   | 84.7   | 25.6   | 29.0   |
| 599.9  | 538.3  | 574.2  | 462.6  | 239.5  | 1588.6  | 1111.4 | 165.6  | 151.8  |
| 326.2  | 262.4  | 253.2  | 238.4  | 89.0   | 822.3   | 394.4  | 121.7  | 137.2  |
| 49.5   | 46.9   | 77.4   | 60.1   | 13.9   | 79.7    | 52.4   | 8.8    | 23.1   |
| 264.3  | 153.6  | 191.8  | 210.5  | 82.9   | 1116.0  | 1167.0 | 67.2   | 29.3   |
| 385.8  | 221.5  | 272.9  | 207.8  | 76.3   | 681.4   | 492.2  | 80.3   | 93.9   |
| 5.9    | 0.9    | 9.1    | 1.6    | 3.0    | 2.8     | 1.3    | 1.2    | 1.5    |
| 152.2  | 135.6  | 143.6  | 134.4  | 41.4   | 183.0   | 124.6  | 32.0   | 47.0   |
| 469.2  | 378.8  | 427.2  | 393.5  | 99.8   | 582.5   | 407.9  | 58.4   | 123.9  |
| 104.3  | 97.3   | 96.0   | 67.6   | 42.4   | 303.0   | 190.2  | 273.6  | 303.9  |
| 561.6  | 431.7  | 528.6  | 380.6  | 108.9  | 426.0   | 267.4  | 73.4   | 135.2  |
| 361.4  | 313.2  | 285.9  | 266.6  | 146.0  | 447.9   | 291.8  | 110.8  | 111.0  |
| 104.5  | 98.1   | 102.5  | 79.4   | 25.6   | 102.1   | 46.1   | 42.0   | 77.0   |
| 1018.4 | 1047.3 | 851.3  | 628.7  | 295.8  | 1185.4  | 745.4  | 139.5  | 199.6  |
| 525.5  | 521.8  | 492.9  | 310.1  | 153.8  | 1394.5  | 713.5  | 167.6  | 216.8  |
| 1906.5 | 2123.9 | 2034.9 | 1826.7 | 877.3  | 4031.7  | 3159.0 | 298.7  | 635.3  |
| 6744.5 | 5381.6 | 6049.1 | 6663.5 | 2748.7 | 10413.2 | 8286.4 | 2591.6 | 3797.5 |
| 358.5  | 319.8  | 254.3  | 110.0  | 94.3   | 330.5   | 266.2  | 34.4   | 61.8   |
| 687.3  | 557.8  | 487.2  | 462.5  | 146.3  | 760.1   | 441.4  | 461.1  | 556.5  |
| 5290.8 | 4804.4 | 4838.7 | 4621.6 | 2448.5 | 9976.5  | 8969.0 | 1243.8 | 1697.9 |
| 1453.2 | 1492.9 | 1286.4 | 544.8  | 396.7  | 1481.6  | 847.1  | 107.1  | 154.3  |
| 78.7   | 83.0   | 66.9   | 41.4   | 28.0   | 204.5   | 145.5  | 36.4   | 57.2   |
| 46.7   | 57.0   | 50.0   | 44.8   | 23.9   | 239.8   | 246.0  | 33.3   | 52.5   |
| 70.5   | 70.6   | 46.8   | 39.6   | 24.7   | 179.1   | 89.7   | 167.5  | 197.0  |
| 428.0  | 334.7  | 401.0  | 204.0  | 123.0  | 425.7   | 156.3  | 69.8   | 153.2  |
| 1036.2 | 930.5  | 1169.8 | 1189.8 | 510.6  | 1139.3  | 768.4  | 232.3  | 264.8  |
| 146.5  | 128.2  | 160.8  | 182.9  | 66.2   | 185.9   | 181.2  | 84.2   | 73.9   |
| 279.2  | 268.3  | 263.8  | 403.4  | 124.4  | 417.5   | 352.9  | 81.0   | 137.8  |
| 233.7  | 212.2  | 249.9  | 312.1  | 101.2  | 403.6   | 331.3  | 128.6  | 187.4  |
| 165.0  | 179.1  | 161.1  | 104.2  | 68.1   | 356.5   | 262.4  | 240.9  | 347.3  |
| 190.8  | 179.8  | 202.5  | 98.3   | 64.0   | 994.4   | 691.7  | 272.6  | 325.5  |
| 122.9  | 103.3  | 96.4   | 79.0   | 32.9   | 219.5   | 124.9  | 157.2  | 197.7  |
| 546.4  | 564.4  | 464.1  | 274.0  | 209.9  | 248.7   | 185.2  | 265.7  | 452.1  |
| 229.6  | 217.4  | 199.1  | 183.7  | 75.0   | 176.2   | 145.8  | 127.3  | 240.8  |
| 345.9  | 241.7  | 187.8  | 160.7  | 75.7   | 305.0   | 218.9  | 402.9  | 603.0  |
| 1462.6 | 1409.0 | 1576.9 | 1825.1 | 515.6  | 1893.5  | 1237.3 | 188.0  | 229.5  |
| 161.2  | 140.7  | 150.2  | 152.5  | 64.6   | 326.5   | 140.0  | 304.5  | 427.9  |
| 394.5  | 424.8  | 463.5  | 440.1  | 117.6  | 753.1   | 450.8  | 40.1   | 41.4   |
| 327.0  | 321.0  | 380.2  | 271.1  | 131.0  | 317.6   | 231.4  | 42.4   | 38.2   |



|        |        |        |        |        |        |        |        |        |
|--------|--------|--------|--------|--------|--------|--------|--------|--------|
| 59.1   | 65.0   | 43.0   | 28.6   | 20.2   | 256.6  | 181.1  | 324.8  | 481.3  |
| 905.8  | 580.9  | 801.4  | 735.5  | 330.7  | 4089.6 | 2574.0 | 14.6   | 9.9    |
| 316.3  | 245.8  | 266.7  | 174.2  | 77.5   | 730.7  | 627.5  | 283.6  | 298.6  |
| 145.3  | 152.8  | 193.2  | 185.1  | 42.6   | 86.2   | 44.3   | 17.8   | 30.1   |
| 540.9  | 569.6  | 551.1  | 560.5  | 195.2  | 510.4  | 393.9  | 96.8   | 104.8  |
| 16.7   | 12.9   | 18.8   | 2.1    | 5.3    | 17.3   | 10.8   | 13.1   | 13.9   |
| 174.9  | 114.8  | 106.3  | 160.3  | 46.6   | 299.7  | 155.8  | 217.0  | 292.9  |
| 93.7   | 67.7   | 86.1   | 76.0   | 12.6   | 129.5  | 89.9   | 92.9   | 210.4  |
| 7.7    | 8.8    | 17.0   | 3.6    | 3.1    | 1221.9 | 1012.0 | 232.3  | 370.1  |
| 1018.2 | 1104.8 | 1025.5 | 675.3  | 215.9  | 2706.7 | 2126.1 | 192.5  | 416.8  |
| 645.8  | 523.1  | 596.4  | 598.9  | 210.6  | 872.8  | 535.9  | 227.2  | 301.1  |
| 196.7  | 101.5  | 104.1  | 62.7   | 25.3   | 152.7  | 90.3   | 90.1   | 112.5  |
| 1021.5 | 993.6  | 980.7  | 725.6  | 330.0  | 2311.5 | 2051.6 | 117.4  | 157.2  |
| 301.2  | 194.7  | 246.8  | 222.2  | 74.8   | 227.7  | 128.1  | 219.0  | 250.7  |
| 114.8  | 119.1  | 98.9   | 110.1  | 43.1   | 155.2  | 59.9   | 11.2   | 36.6   |
| 1784.1 | 1532.7 | 1553.2 | 822.4  | 436.2  | 1822.1 | 1469.7 | 7.5    | 0.8    |
| 72.9   | 78.0   | 47.6   | 37.2   | 36.9   | 103.5  | 57.9   | 11.1   | 23.2   |
| 23.1   | 29.9   | 17.1   | 13.3   | 8.2    | 33.8   | 18.3   | 4.2    | 12.0   |
| 229.1  | 270.6  | 226.3  | 211.4  | 106.2  | 305.6  | 229.9  | 26.7   | 35.3   |
| 258.2  | 201.4  | 218.9  | 221.0  | 96.5   | 471.7  | 241.5  | 144.1  | 235.2  |
| 5153.2 | 4145.2 | 3645.7 | 2623.5 | 1751.6 | 6117.1 | 5554.6 | 1476.4 | 1766.8 |
| 982.5  | 959.8  | 812.8  | 561.7  | 390.5  | 747.1  | 328.9  | 226.8  | 305.1  |
| 159.4  | 125.0  | 103.0  | 73.3   | 32.5   | 91.3   | 42.7   | 53.3   | 45.7   |
| 1296.1 | 1237.6 | 1413.8 | 1269.5 | 671.4  | 2919.4 | 2044.8 | 1084.7 | 1466.3 |
| 389.2  | 304.7  | 281.4  | 172.3  | 127.3  | 1623.1 | 1043.6 | 277.6  | 357.6  |
| 271.4  | 202.7  | 220.1  | 199.8  | 106.6  | 313.4  | 187.2  | 149.8  | 207.7  |
| 281.8  | 282.5  | 250.5  | 150.5  | 100.2  | 504.7  | 327.2  | 141.4  | 170.7  |
| 145.9  | 114.2  | 118.9  | 79.5   | 35.6   | 539.9  | 487.7  | 120.3  | 145.8  |
| 172.6  | 166.8  | 182.6  | 154.8  | 66.8   | 530.6  | 284.9  | 277.1  | 330.8  |
| 10.5   | 4.3    | 5.4    | 2.6    | 0.3    | 366.9  | 113.1  | 1.0    | 7.9    |
| 83.3   | 92.3   | 62.5   | 23.5   | 17.4   | 136.7  | 76.9   | 139.0  | 203.4  |
| 10.9   | 3.9    | 21.0   | 6.4    | 7.8    | 45.7   | 37.4   | 79.0   | 96.1   |
| 201.0  | 267.5  | 179.5  | 78.5   | 43.9   | 1041.0 | 903.6  | 132.5  | 154.7  |
| 6.9    | 8.2    | 13.8   | 12.1   | 5.5    | 21.0   | 24.0   | 32.9   | 37.1   |
| 23.4   | 20.7   | 10.9   | 14.4   | 2.4    | 125.2  | 157.1  | 103.1  | 142.1  |
| 3842.2 | 3335.5 | 2976.6 | 1204.3 | 1248.4 | 3284.7 | 2729.5 | 3.1    | 1.7    |
| 340.5  | 375.0  | 300.3  | 175.6  | 103.0  | 645.6  | 436.0  | 73.7   | 103.1  |
| 90.6   | 77.3   | 609.2  | 382.0  | 57.7   | 403.9  | 207.7  | 960.5  | 1188.8 |
| 190.7  | 176.5  | 186.8  | 184.5  | 62.2   | 488.8  | 382.4  | 176.1  | 310.2  |
| 370.7  | 281.0  | 278.9  | 210.5  | 105.4  | 404.8  | 527.2  | 128.1  | 174.8  |
| 82.0   | 90.1   | 92.7   | 71.1   | 27.0   | 82.2   | 62.4   | 24.0   | 30.0   |
| 134.3  | 122.6  | 109.3  | 127.9  | 58.2   | 258.9  | 201.9  | 121.0  | 141.8  |
| 279.0  | 124.9  | 123.6  | 122.6  | 46.3   | 667.6  | 413.1  | 48.8   | 63.8   |
| 181.4  | 169.7  | 186.3  | 118.8  | 34.9   | 110.6  | 32.5   | 61.0   | 87.5   |
| 66.8   | 54.7   | 51.4   | 51.9   | 16.2   | 114.2  | 110.7  | 27.7   | 55.4   |
| 373.1  | 399.7  | 387.6  | 256.2  | 74.2   | 240.7  | 66.8   | 171.7  | 188.0  |
| 484.9  | 473.3  | 545.4  | 693.0  | 237.4  | 1307.6 | 681.1  | 116.2  | 164.5  |
| 114.6  | 93.9   | 86.5   | 53.3   | 25.8   | 773.5  | 609.1  | 57.0   | 62.0   |
| 1593.4 | 1472.4 | 1792.6 | 1659.4 | 583.3  | 1453.0 | 1034.7 | 40.5   | 62.6   |
| 116.9  | 113.8  | 149.0  | 123.5  | 44.3   | 282.1  | 154.7  | 41.6   | 43.2   |
| 224.2  | 204.8  | 247.3  | 220.2  | 67.9   | 487.4  | 291.7  | 61.0   | 84.5   |
| 36.8   | 26.2   | 20.3   | 3.5    | 2.7    | 7.9    | 1.3    | 81.6   | 100.2  |
| 368.4  | 263.0  | 272.7  | 229.8  | 80.6   | 633.0  | 410.9  | 456.6  | 494.7  |

|        |        |        |        |        |        |        |       |        |
|--------|--------|--------|--------|--------|--------|--------|-------|--------|
| 674.2  | 661.0  | 458.2  | 411.8  | 159.2  | 2999.0 | 1939.3 | 699.4 | 1000.8 |
| 368.4  | 325.1  | 369.9  | 251.8  | 146.3  | 1102.9 | 733.4  | 197.9 | 252.1  |
| 247.0  | 192.6  | 226.0  | 270.8  | 128.3  | 269.2  | 231.3  | 49.1  | 75.9   |
| 194.2  | 171.2  | 157.5  | 98.5   | 62.5   | 520.0  | 403.7  | 70.8  | 91.2   |
| 324.8  | 251.2  | 282.2  | 274.9  | 97.8   | 348.1  | 329.9  | 85.9  | 124.6  |
| 374.9  | 440.5  | 515.1  | 545.5  | 194.4  | 272.8  | 201.1  | 55.2  | 109.5  |
| 337.1  | 373.1  | 332.2  | 191.9  | 125.3  | 327.8  | 200.5  | 154.6 | 181.7  |
| 63.4   | 57.9   | 74.5   | 83.0   | 29.7   | 46.1   | 30.8   | 8.6   | 8.3    |
| 156.4  | 140.2  | 128.4  | 93.1   | 52.1   | 217.4  | 177.8  | 74.8  | 104.5  |
| 53.3   | 32.5   | 50.9   | 21.0   | 13.0   | 310.6  | 284.2  | 114.5 | 244.2  |
| 351.6  | 311.0  | 283.7  | 154.4  | 67.3   | 298.0  | 174.1  | 197.9 | 279.0  |
| 127.5  | 143.1  | 119.3  | 74.9   | 36.5   | 481.5  | 236.4  | 178.6 | 269.3  |
| 200.4  | 149.0  | 152.2  | 115.8  | 39.0   | 195.4  | 194.5  | 181.8 | 122.7  |
| 89.0   | 103.6  | 74.1   | 48.9   | 26.5   | 70.4   | 57.4   | 79.3  | 75.2   |
| 722.6  | 650.1  | 682.9  | 489.3  | 225.1  | 1959.4 | 1263.7 | 459.0 | 584.6  |
| 3703.7 | 3692.5 | 4433.7 | 5342.6 | 1842.0 | 3449.4 | 2253.0 | 826.6 | 1260.2 |
| 575.5  | 469.9  | 441.9  | 315.3  | 170.1  | 1286.6 | 931.5  | 87.9  | 164.2  |
| 347.4  | 367.3  | 368.8  | 395.6  | 83.3   | 1314.1 | 1087.7 | 187.4 | 204.8  |
| 140.9  | 101.4  | 180.9  | 121.8  | 36.8   | 285.9  | 141.7  | 66.4  | 77.5   |
| 64.7   | 74.0   | 31.3   | 36.9   | 26.0   | 151.3  | 76.0   | 25.5  | 11.4   |
| 124.7  | 85.5   | 117.2  | 78.4   | 42.3   | 49.5   | 19.9   | 48.6  | 67.0   |
| 112.6  | 72.8   | 88.6   | 75.8   | 30.5   | 58.8   | 32.4   | 40.4  | 39.6   |
| 1030.4 | 914.1  | 987.3  | 743.2  | 295.1  | 3139.0 | 2987.8 | 297.2 | 406.8  |
| 425.2  | 482.2  | 462.7  | 436.5  | 117.3  | 711.5  | 496.5  | 180.4 | 269.6  |
| 472.8  | 500.3  | 444.3  | 322.6  | 148.7  | 546.1  | 377.4  | 117.7 | 100.7  |
| 371.8  | 382.5  | 369.0  | 268.9  | 82.6   | 399.8  | 262.5  | 89.4  | 159.0  |
| 828.2  | 696.0  | 630.1  | 237.2  | 213.3  | 900.6  | 506.3  | 130.4 | 107.7  |
| 298.4  | 266.7  | 234.6  | 99.6   | 67.0   | 168.2  | 38.8   | 84.7  | 75.3   |
| 43.8   | 39.8   | 30.3   | 30.0   | 11.9   | 172.9  | 176.6  | 15.1  | 13.7   |
| 43.1   | 33.3   | 17.0   | 14.5   | 9.4    | 133.3  | 114.7  | 51.2  | 83.2   |
| 407.6  | 406.3  | 351.3  | 310.4  | 108.4  | 490.4  | 373.6  | 128.2 | 115.3  |
| 95.6   | 87.6   | 86.8   | 116.5  | 40.3   | 157.3  | 70.8   | 43.0  | 55.9   |
| 126.4  | 124.7  | 106.5  | 77.1   | 35.8   | 135.0  | 95.3   | 59.9  | 80.6   |
| 31.8   | 55.0   | 24.4   | 8.2    | 13.4   | 16.0   | 9.6    | 644.0 | 933.5  |
| 1084.2 | 1084.1 | 1196.0 | 769.3  | 328.4  | 2097.9 | 1490.3 | 155.0 | 283.4  |
| 394.9  | 371.1  | 469.9  | 314.2  | 104.6  | 891.3  | 567.7  | 103.3 | 122.6  |
| 44.1   | 44.0   | 35.6   | 6.2    | 12.5   | 42.5   | 25.0   | 563.6 | 1043.4 |
| 502.9  | 391.9  | 349.9  | 329.4  | 119.8  | 489.9  | 388.9  | 191.7 | 233.5  |
| 265.7  | 228.0  | 219.3  | 189.1  | 72.7   | 151.1  | 94.0   | 46.3  | 56.9   |
| 9.1    | 14.0   | 5.7    | 1.8    | 2.6    | 246.8  | 149.5  | 40.9  | 39.5   |
| 207.8  | 153.7  | 167.0  | 116.2  | 59.8   | 369.9  | 287.2  | 256.2 | 373.8  |
| 58.1   | 68.3   | 66.5   | 45.4   | 13.8   | 118.9  | 63.0   | 52.7  | 77.2   |
| 3.3    | 18.9   | 8.8    | 3.1    | 1.2    | 112.9  | 54.2   | 14.0  | 22.0   |
| 10.0   | 2.3    | 14.1   | 4.6    | 0.7    | 271.4  | 184.7  | 12.6  | 18.8   |
| 239.6  | 240.3  | 250.9  | 226.7  | 97.1   | 721.0  | 445.3  | 175.5 | 263.8  |
| 1525.8 | 1403.3 | 1665.9 | 1747.8 | 612.0  | 1133.3 | 831.8  | 179.3 | 293.2  |
| 37.6   | 35.6   | 37.1   | 18.6   | 11.2   | 75.9   | 45.4   | 36.0  | 42.8   |
| 83.5   | 98.7   | 88.2   | 90.3   | 21.0   | 186.7  | 81.9   | 71.1  | 112.8  |
| 177.1  | 170.1  | 135.7  | 160.9  | 53.2   | 315.5  | 234.9  | 92.7  | 140.9  |
| 33.2   | 32.2   | 32.9   | 24.2   | 5.5    | 84.1   | 54.2   | 22.1  | 37.9   |
| 262.5  | 256.7  | 283.9  | 159.6  | 71.4   | 414.8  | 280.3  | 467.1 | 472.7  |
| 426.5  | 374.9  | 421.2  | 288.5  | 101.7  | 525.9  | 318.0  | 185.5 | 200.6  |
| 310.0  | 216.8  | 243.7  | 203.3  | 111.1  | 495.9  | 325.5  | 102.9 | 165.6  |

|        |        |        |        |        |         |         |        |        |
|--------|--------|--------|--------|--------|---------|---------|--------|--------|
| 510.2  | 619.4  | 444.2  | 406.8  | 177.4  | 845.2   | 628.3   | 170.9  | 237.8  |
| 224.4  | 278.0  | 217.0  | 144.2  | 86.4   | 447.4   | 277.5   | 212.5  | 272.1  |
| 88.4   | 124.3  | 112.3  | 71.5   | 57.2   | 155.2   | 95.5    | 29.3   | 37.7   |
| 170.3  | 152.0  | 179.9  | 158.3  | 45.6   | 484.0   | 297.1   | 62.4   | 83.5   |
| 21.1   | 19.6   | 2.1    | 13.4   | 9.9    | 23.8    | 23.9    | 12.4   | 9.5    |
| 188.7  | 238.3  | 162.3  | 168.8  | 90.7   | 149.1   | 114.0   | 7.8    | 15.3   |
| 385.5  | 390.8  | 309.7  | 184.0  | 79.4   | 836.2   | 373.3   | 45.4   | 47.6   |
| 1259.0 | 1133.5 | 1077.8 | 749.6  | 360.9  | 1412.0  | 764.6   | 161.0  | 206.1  |
| 127.6  | 146.9  | 132.9  | 143.8  | 49.0   | 207.1   | 225.0   | 24.3   | 26.7   |
| 81.6   | 72.4   | 51.5   | 43.1   | 22.0   | 110.2   | 120.0   | 14.9   | 13.3   |
| 170.6  | 188.1  | 203.7  | 156.2  | 50.4   | 300.3   | 122.5   | 266.3  | 317.5  |
| 148.6  | 168.1  | 156.9  | 149.5  | 54.2   | 143.4   | 103.1   | 12.3   | 22.0   |
| 335.4  | 352.2  | 314.3  | 357.7  | 129.4  | 1197.1  | 787.7   | 106.7  | 122.6  |
| 252.9  | 197.6  | 250.7  | 193.3  | 50.1   | 369.9   | 312.2   | 218.4  | 296.2  |
| 2.7    | 4.5    | 6.7    | 1.9    | 6.4    | 27.8    | 17.8    | 0.6    | 0.4    |
| 63.4   | 83.4   | 86.4   | 89.4   | 31.3   | 157.7   | 109.2   | 46.5   | 66.8   |
| 437.7  | 351.7  | 349.4  | 579.4  | 150.0  | 811.8   | 680.7   | 47.6   | 84.6   |
| 4883.4 | 3186.2 | 3077.4 | 1568.3 | 1041.9 | 10972.6 | 10072.3 | 958.0  | 1070.2 |
| 212.8  | 186.6  | 203.4  | 214.9  | 93.4   | 297.3   | 168.1   | 283.2  | 478.5  |
| 31.3   | 42.9   | 45.4   | 43.9   | 23.1   | 6.7     | 2.8     | 4.2    | 4.3    |
| 60.1   | 27.8   | 31.7   | 14.6   | 4.6    | 142.3   | 133.0   | 2.2    | 2.2    |
| 121.5  | 93.8   | 114.8  | 95.3   | 40.0   | 468.7   | 311.5   | 80.8   | 112.3  |
| 229.0  | 180.3  | 199.9  | 244.4  | 63.8   | 1256.1  | 676.0   | 32.6   | 30.5   |
| 4021.9 | 3914.8 | 3633.5 | 3800.3 | 1654.4 | 7962.9  | 6395.9  | 1857.0 | 2412.9 |
| 102.8  | 88.2   | 68.3   | 24.9   | 25.9   | 330.8   | 180.1   | 0.5    | 5.1    |
| 113.5  | 92.9   | 86.8   | 102.4  | 17.8   | 370.1   | 261.0   | 76.4   | 116.6  |
| 174.3  | 158.0  | 151.0  | 140.9  | 35.6   | 286.0   | 171.5   | 176.5  | 208.4  |
| 1536.9 | 1298.7 | 1408.7 | 1235.3 | 574.7  | 1979.3  | 1403.0  | 31.1   | 39.5   |
| 499.5  | 445.0  | 468.9  | 446.9  | 115.1  | 415.2   | 236.7   | 13.3   | 32.7   |
| 329.5  | 328.8  | 295.8  | 128.8  | 111.7  | 1282.4  | 977.8   | 141.5  | 207.3  |
| 165.7  | 112.3  | 122.8  | 115.6  | 45.3   | 202.0   | 123.2   | 152.3  | 256.7  |
| 411.1  | 375.6  | 345.4  | 312.0  | 97.0   | 1057.1  | 700.9   | 174.7  | 217.2  |
| 110.5  | 98.7   | 107.9  | 84.3   | 26.2   | 337.1   | 303.3   | 34.9   | 41.3   |
| 164.0  | 129.7  | 128.5  | 150.6  | 41.5   | 289.1   | 135.4   | 56.4   | 62.1   |
| 179.2  | 134.0  | 159.0  | 182.4  | 66.3   | 395.6   | 447.9   | 149.6  | 175.7  |
| 1087.6 | 1004.9 | 728.2  | 236.9  | 252.0  | 2505.0  | 2354.2  | 38.2   | 66.6   |
| 323.5  | 249.2  | 291.7  | 358.8  | 146.7  | 967.1   | 634.5   | 260.5  | 374.2  |
| 718.6  | 701.9  | 759.6  | 441.0  | 183.3  | 1280.9  | 595.6   | 286.3  | 397.6  |
| 265.2  | 229.7  | 243.7  | 134.7  | 71.2   | 442.3   | 212.9   | 216.5  | 218.5  |
| 54.4   | 43.7   | 49.3   | 47.5   | 10.6   | 43.5    | 25.6    | 34.6   | 31.5   |
| 83.0   | 55.8   | 66.6   | 45.6   | 14.0   | 92.9    | 61.9    | 41.5   | 64.4   |
| 196.1  | 140.9  | 137.7  | 95.6   | 49.3   | 106.4   | 99.8    | 37.6   | 56.8   |
| 11.3   | 10.1   | 3.5    | 20.1   | 0.6    | 15.8    | 1.3     | 34.0   | 37.6   |
| 155.3  | 167.7  | 159.6  | 167.3  | 43.6   | 215.1   | 142.2   | 83.7   | 97.2   |
| 103.3  | 66.5   | 65.5   | 63.3   | 36.5   | 315.1   | 171.5   | 69.7   | 128.7  |
| 262.3  | 272.4  | 271.9  | 215.5  | 77.3   | 606.4   | 473.0   | 90.8   | 155.3  |
| 177.0  | 119.4  | 167.5  | 108.5  | 50.1   | 220.3   | 105.9   | 117.9  | 130.9  |
| 740.0  | 869.1  | 930.7  | 1121.8 | 282.8  | 488.3   | 309.1   | 69.7   | 113.3  |
| 410.6  | 420.6  | 453.2  | 675.6  | 133.7  | 158.0   | 74.2    | 95.3   | 146.2  |
| 542.9  | 511.9  | 558.2  | 594.7  | 152.9  | 186.3   | 79.5    | 72.3   | 112.7  |
| 256.3  | 223.1  | 297.2  | 233.1  | 154.3  | 364.7   | 227.6   | 1019.8 | 1094.9 |
| 382.4  | 347.2  | 376.4  | 328.5  | 115.5  | 659.0   | 458.4   | 85.9   | 137.1  |
| 90.6   | 69.7   | 71.3   | 71.1   | 14.0   | 69.5    | 34.4    | 19.1   | 51.3   |

|        |        |        |        |        |        |        |        |        |
|--------|--------|--------|--------|--------|--------|--------|--------|--------|
| 324.5  | 361.3  | 330.2  | 273.7  | 102.8  | 1059.8 | 735.7  | 25.9   | 25.6   |
| 163.2  | 171.7  | 187.2  | 180.6  | 71.1   | 207.6  | 150.9  | 23.3   | 59.5   |
| 248.2  | 118.1  | 216.9  | 131.3  | 44.8   | 251.4  | 188.8  | 9.0    | 22.7   |
| 0.8    | 5.0    | 0.6    | 1.6    | 5.2    | 1.3    | 6.4    | 19.4   | 19.5   |
| 19.5   | 31.9   | 27.1   | 40.3   | 9.2    | 10.8   | 12.2   | 0.8    | 5.8    |
| 66.1   | 41.5   | 46.9   | 24.3   | 24.6   | 330.4  | 241.1  | 58.7   | 76.5   |
| 3925.9 | 3859.9 | 4138.6 | 5737.2 | 2009.9 | 3812.2 | 2375.3 | 798.0  | 1427.6 |
| 374.9  | 377.5  | 305.7  | 315.0  | 154.1  | 645.1  | 446.7  | 445.0  | 503.2  |
| 401.5  | 245.0  | 268.8  | 200.9  | 70.5   | 435.4  | 232.3  | 217.9  | 327.7  |
| 59.8   | 69.4   | 61.1   | 57.3   | 33.5   | 259.1  | 117.5  | 28.9   | 31.7   |
| 422.4  | 307.6  | 311.3  | 277.4  | 97.8   | 403.7  | 258.1  | 189.0  | 371.0  |
| 223.1  | 226.7  | 226.1  | 267.4  | 80.1   | 280.1  | 213.6  | 65.5   | 105.9  |
| 111.6  | 89.6   | 140.1  | 264.9  | 47.4   | 340.5  | 227.2  | 12.1   | 13.3   |
| 133.8  | 142.0  | 119.5  | 108.8  | 71.3   | 242.7  | 176.7  | 31.8   | 38.0   |
| 15.2   | 12.1   | 30.6   | 12.9   | 9.2    | 87.6   | 50.6   | 13.7   | 18.5   |
| 27.9   | 33.5   | 47.5   | 22.2   | 8.2    | 548.0  | 499.1  | 26.6   | 27.5   |
| 209.8  | 234.5  | 186.8  | 175.0  | 81.1   | 269.7  | 188.0  | 74.7   | 119.5  |
| 126.4  | 118.3  | 117.6  | 114.1  | 36.7   | 144.4  | 112.1  | 66.7   | 56.8   |
| 46.0   | 45.2   | 28.4   | 21.8   | 11.8   | 129.6  | 60.6   | 30.5   | 30.5   |
| 30.0   | 10.6   | 18.6   | 9.8    | 1.4    | 81.4   | 83.2   | 40.4   | 61.7   |
| 68.1   | 55.7   | 57.4   | 74.6   | 17.7   | 150.6  | 129.4  | 45.0   | 67.4   |
| 269.5  | 262.3  | 355.8  | 147.1  | 115.5  | 2861.1 | 2352.1 | 68.4   | 56.1   |
| 62.9   | 67.0   | 85.2   | 103.3  | 15.9   | 324.7  | 225.3  | 44.9   | 85.8   |
| 121.9  | 111.0  | 146.3  | 186.2  | 56.8   | 429.4  | 296.0  | 64.5   | 111.6  |
| 1017.9 | 1134.3 | 1086.3 | 1014.8 | 404.5  | 2838.5 | 2187.1 | 30.4   | 42.7   |
| 541.9  | 422.9  | 400.9  | 374.7  | 148.7  | 1200.1 | 854.6  | 33.7   | 38.4   |
| 965.3  | 947.0  | 925.5  | 813.1  | 305.3  | 615.9  | 354.5  | 148.4  | 225.3  |
| 265.7  | 239.9  | 276.8  | 256.1  | 110.7  | 946.7  | 701.2  | 92.2   | 136.0  |
| 18.9   | 6.9    | 9.7    | 7.4    | 4.2    | 20.8   | 10.5   | 9.7    | 29.6   |
| 419.6  | 440.3  | 467.0  | 479.4  | 198.3  | 2030.9 | 1610.4 | 203.8  | 267.7  |
| 327.1  | 247.0  | 240.0  | 236.3  | 122.4  | 1833.7 | 1489.8 | 328.9  | 388.6  |
| 100.0  | 84.8   | 88.3   | 67.0   | 25.1   | 202.1  | 113.1  | 80.3   | 99.8   |
| 14.9   | 35.0   | 20.6   | 36.1   | 2.9    | 130.2  | 92.3   | 4.5    | 22.8   |
| 199.8  | 211.8  | 178.9  | 171.5  | 52.7   | 547.5  | 433.6  | 39.5   | 43.8   |
| 249.9  | 292.9  | 410.3  | 252.1  | 117.9  | 576.7  | 374.2  | 40.9   | 77.0   |
| 67.8   | 65.0   | 56.8   | 28.8   | 27.5   | 983.3  | 826.0  | 140.0  | 170.0  |
| 11.4   | 11.9   | 13.9   | 9.9    | 3.7    | 19.8   | 15.8   | 21.6   | 28.4   |
| 7.8    | 8.5    | 3.5    | 14.0   | 6.1    | 14.4   | 3.9    | 3.2    | 3.3    |
| 44.4   | 37.4   | 18.1   | 25.4   | 9.7    | 3.1    | 3.8    | 30.6   | 44.9   |
| 117.0  | 97.5   | 108.9  | 80.3   | 30.9   | 148.4  | 88.2   | 66.0   | 95.4   |
| 187.6  | 152.2  | 149.0  | 141.7  | 51.2   | 216.0  | 156.5  | 129.7  | 144.9  |
| 135.5  | 116.7  | 98.5   | 96.4   | 41.6   | 526.4  | 513.5  | 15.3   | 25.5   |
| 341.1  | 200.6  | 261.3  | 183.3  | 89.1   | 1110.8 | 911.7  | 18.4   | 23.9   |
| 292.4  | 275.8  | 311.0  | 368.1  | 115.1  | 437.0  | 338.5  | 102.9  | 129.8  |
| 912.9  | 910.3  | 915.2  | 794.3  | 289.4  | 1375.3 | 804.7  | 26.7   | 58.5   |
| 745.6  | 813.9  | 656.0  | 462.1  | 217.7  | 999.4  | 708.0  | 271.1  | 433.1  |
| 271.0  | 288.6  | 315.1  | 337.1  | 113.7  | 292.4  | 201.2  | 36.0   | 87.2   |
| 0.9    | 13.4   | 8.7    | 12.2   | 0.8    | 267.4  | 235.1  | 24.0   | 37.2   |
| 196.5  | 138.3  | 163.9  | 118.1  | 54.5   | 362.7  | 295.7  | 59.7   | 88.5   |
| 6530.1 | 5706.6 | 5705.7 | 5284.4 | 2904.2 | 6140.7 | 4808.7 | 2348.7 | 3179.1 |
| 486.7  | 443.2  | 438.5  | 395.0  | 138.4  | 746.9  | 422.3  | 241.0  | 373.2  |
| 23.3   | 22.4   | 32.3   | 63.9   | 3.8    | 25.8   | 17.9   | 20.1   | 17.3   |
| 4985.3 | 4627.7 | 4185.6 | 3922.4 | 2118.8 | 6334.3 | 4497.7 | 3430.5 | 3964.9 |

|        |        |        |        |        |         |        |        |        |
|--------|--------|--------|--------|--------|---------|--------|--------|--------|
| 58.1   | 65.9   | 194.8  | 297.3  | 45.0   | 215.2   | 148.5  | 24.7   | 52.3   |
| 37.7   | 13.8   | 15.0   | 27.3   | 16.1   | 26.4    | 51.3   | 21.3   | 30.6   |
| 105.5  | 87.6   | 160.1  | 256.2  | 55.4   | 339.6   | 251.5  | 50.6   | 71.8   |
| 238.8  | 224.9  | 187.7  | 99.7   | 51.9   | 184.7   | 113.7  | 187.6  | 187.8  |
| 13.0   | 8.8    | 1.4    | 1.3    | 0.9    | 3.0     | 3.8    | 3.0    | 4.6    |
| 766.4  | 497.3  | 474.8  | 171.8  | 183.8  | 857.7   | 487.9  | 321.8  | 328.6  |
| 272.8  | 247.8  | 160.2  | 189.9  | 122.8  | 231.7   | 105.7  | 86.9   | 79.9   |
| 669.5  | 600.4  | 496.6  | 209.0  | 152.9  | 495.8   | 234.1  | 223.5  | 264.4  |
| 564.3  | 518.1  | 490.5  | 225.6  | 171.8  | 511.3   | 230.3  | 241.2  | 276.9  |
| 33.1   | 5.7    | 26.3   | 2.3    | 1.1    | 27.4    | 12.0   | 27.7   | 20.7   |
| 7874.0 | 7008.5 | 6892.5 | 7192.0 | 4647.2 | 10636.8 | 9518.1 | 3628.3 | 4147.3 |
| 195.7  | 188.5  | 121.3  | 119.9  | 46.6   | 888.6   | 558.7  | 228.0  | 219.0  |
| 101.7  | 106.4  | 110.4  | 134.0  | 24.5   | 90.8    | 76.0   | 50.9   | 78.9   |
| 1046.9 | 954.0  | 935.7  | 818.3  | 343.0  | 1669.1  | 809.7  | 230.1  | 216.6  |
| 131.0  | 140.6  | 65.5   | 93.0   | 40.4   | 255.4   | 225.7  | 64.8   | 105.1  |
| 83.8   | 75.2   | 72.9   | 90.4   | 23.6   | 108.8   | 71.6   | 15.2   | 29.8   |
| 88.3   | 40.6   | 87.5   | 84.3   | 27.3   | 388.5   | 474.4  | 65.6   | 53.9   |
| 116.8  | 22.5   | 26.9   | 24.2   | 12.1   | 57.9    | 46.9   | 32.5   | 44.4   |
| 34.2   | 28.0   | 24.7   | 16.0   | 10.0   | 76.9    | 51.4   | 15.5   | 17.3   |
| 351.2  | 349.2  | 410.2  | 375.3  | 102.3  | 397.5   | 156.4  | 84.3   | 109.7  |
| 713.1  | 722.9  | 702.6  | 702.0  | 229.5  | 860.9   | 620.9  | 61.1   | 98.3   |
| 888.2  | 795.9  | 1079.1 | 1054.2 | 307.1  | 2158.2  | 1734.8 | 158.2  | 211.3  |
| 2355.0 | 2134.9 | 2363.0 | 2445.0 | 950.9  | 3534.3  | 2601.0 | 832.0  | 904.1  |
| 396.4  | 534.5  | 582.3  | 380.5  | 129.2  | 1372.7  | 898.7  | 44.2   | 66.5   |
| 33.1   | 39.2   | 11.0   | 6.9    | 1.9    | 425.3   | 329.4  | 30.5   | 46.5   |
| 127.1  | 161.3  | 134.6  | 147.8  | 41.9   | 251.9   | 129.1  | 94.5   | 122.2  |
| 128.8  | 136.3  | 116.3  | 128.6  | 56.2   | 260.4   | 117.7  | 62.1   | 97.0   |
| 237.3  | 239.3  | 225.1  | 172.9  | 71.4   | 470.0   | 295.4  | 116.4  | 129.7  |
| 98.1   | 94.4   | 100.6  | 63.2   | 34.2   | 95.1    | 84.2   | 95.4   | 96.6   |
| 126.0  | 92.8   | 74.5   | 46.9   | 21.4   | 275.4   | 156.7  | 61.3   | 96.6   |
| 152.9  | 141.0  | 170.5  | 138.8  | 60.0   | 250.1   | 148.6  | 98.3   | 73.9   |
| 221.3  | 247.3  | 237.7  | 216.8  | 61.8   | 196.9   | 104.8  | 35.3   | 62.9   |
| 145.1  | 110.4  | 134.6  | 178.3  | 40.3   | 57.2    | 53.4   | 46.6   | 56.3   |
| 63.0   | 64.9   | 58.1   | 44.0   | 21.1   | 40.3    | 20.5   | 6.9    | 5.3    |
| 133.2  | 137.7  | 112.9  | 101.0  | 44.7   | 92.5    | 50.3   | 4.9    | 34.7   |
| 25.9   | 22.0   | 24.2   | 11.8   | 8.8    | 36.1    | 39.3   | 8.5    | 12.8   |
| 12.8   | 13.5   | 15.4   | 19.9   | 3.9    | 661.9   | 367.8  | 25.3   | 23.4   |
| 68.2   | 51.9   | 52.9   | 69.3   | 35.6   | 755.7   | 608.4  | 100.5  | 265.9  |
| 173.9  | 142.5  | 197.7  | 142.4  | 59.0   | 217.7   | 159.4  | 115.6  | 149.8  |
| 12.2   | 16.2   | 18.8   | 36.0   | 8.3    | 1811.7  | 1355.7 | 9.4    | 21.6   |
| 34.2   | 20.7   | 11.1   | 4.4    | 6.2    | 104.6   | 45.1   | 23.0   | 40.6   |
| 87.8   | 77.3   | 32.6   | 25.2   | 4.0    | 231.7   | 101.3  | 100.4  | 97.9   |
| 316.8  | 259.3  | 368.3  | 286.4  | 117.5  | 285.1   | 242.0  | 83.7   | 96.8   |
| 589.8  | 414.1  | 433.1  | 394.5  | 167.6  | 516.8   | 354.4  | 151.5  | 154.9  |
| 61.7   | 10.6   | 32.5   | 22.9   | 8.3    | 103.9   | 66.9   | 71.4   | 82.2   |
| 4062.4 | 3189.6 | 2828.9 | 1726.3 | 1288.9 | 4248.9  | 2928.2 | 613.1  | 860.9  |
| 120.0  | 95.8   | 110.2  | 97.3   | 37.7   | 168.7   | 104.0  | 127.5  | 174.2  |
| 241.2  | 248.4  | 224.0  | 240.6  | 69.2   | 386.3   | 293.6  | 141.5  | 159.6  |
| 105.7  | 78.2   | 83.4   | 69.7   | 34.9   | 92.9    | 81.4   | 60.4   | 67.8   |
| 51.9   | 46.0   | 52.5   | 54.7   | 18.7   | 57.2    | 45.6   | 27.6   | 43.3   |
| 11.0   | 8.0    | 9.7    | 7.1    | 6.4    | 270.9   | 177.9  | 34.2   | 45.8   |
| 38.8   | 19.9   | 27.5   | 19.8   | 12.4   | 60.2    | 28.8   | 3.8    | 7.8    |
| 19.7   | 16.6   | 6.7    | 5.0    | 6.1    | 451.5   | 367.2  | 33.3   | 66.3   |

|        |        |        |        |        |        |        |        |        |
|--------|--------|--------|--------|--------|--------|--------|--------|--------|
| 14.5   | 24.4   | 15.5   | 5.2    | 11.7   | 486.3  | 576.9  | 28.7   | 45.8   |
| 151.9  | 148.7  | 112.1  | 98.7   | 54.8   | 207.7  | 143.6  | 103.3  | 100.2  |
| 762.1  | 611.3  | 606.3  | 236.2  | 133.8  | 2239.5 | 1207.6 | 313.0  | 340.0  |
| 270.2  | 321.1  | 247.8  | 201.7  | 83.3   | 392.4  | 351.9  | 30.0   | 45.3   |
| 51.6   | 48.4   | 43.3   | 24.7   | 11.2   | 41.3   | 16.8   | 35.4   | 49.2   |
| 855.4  | 823.0  | 795.4  | 597.5  | 283.9  | 955.7  | 678.0  | 100.6  | 110.2  |
| 609.8  | 641.3  | 537.3  | 497.3  | 247.4  | 610.1  | 469.2  | 131.5  | 191.9  |
| 209.5  | 219.2  | 195.0  | 211.9  | 80.7   | 358.2  | 218.0  | 161.4  | 223.5  |
| 26.1   | 32.5   | 25.8   | 14.9   | 8.0    | 55.7   | 38.3   | 13.5   | 20.0   |
| 169.2  | 203.7  | 189.3  | 248.0  | 79.0   | 417.0  | 214.5  | 252.5  | 359.3  |
| 28.1   | 18.1   | 13.2   | 27.7   | 9.4    | 326.8  | 237.8  | 48.2   | 58.5   |
| 23.6   | 26.8   | 10.6   | 8.9    | 7.3    | 28.4   | 19.5   | 36.1   | 29.1   |
| 173.6  | 138.4  | 143.1  | 181.3  | 40.5   | 143.9  | 115.7  | 53.4   | 51.4   |
| 452.3  | 361.7  | 403.0  | 445.0  | 174.3  | 731.6  | 613.1  | 128.2  | 169.2  |
| 121.6  | 126.3  | 121.2  | 118.8  | 39.6   | 139.0  | 82.8   | 44.7   | 34.2   |
| 91.6   | 94.6   | 93.4   | 76.5   | 24.7   | 114.7  | 76.9   | 17.9   | 50.8   |
| 9.2    | 2.9    | 3.7    | 0.8    | 0.6    | 0.9    | 0.7    | 2.2    | 7.3    |
| 148.9  | 126.4  | 138.3  | 303.3  | 68.4   | 809.9  | 787.4  | 82.7   | 112.2  |
| 23.4   | 5.7    | 16.4   | 13.9   | 1.4    | 19.3   | 4.3    | 70.1   | 41.1   |
| 49.7   | 28.7   | 25.2   | 28.2   | 12.8   | 45.1   | 31.8   | 58.7   | 115.5  |
| 187.0  | 135.7  | 124.8  | 66.0   | 24.5   | 491.1  | 375.9  | 181.0  | 193.9  |
| 75.9   | 72.5   | 51.0   | 55.2   | 32.4   | 314.1  | 266.3  | 78.7   | 58.5   |
| 102.5  | 114.2  | 90.2   | 63.5   | 36.3   | 322.4  | 186.1  | 18.7   | 25.3   |
| 118.2  | 81.8   | 93.9   | 87.0   | 50.8   | 382.1  | 314.3  | 94.2   | 176.5  |
| 1413.7 | 1275.5 | 1084.5 | 1127.4 | 469.5  | 2527.1 | 1874.2 | 357.9  | 603.2  |
| 9.9    | 8.3    | 5.0    | 5.8    | 5.5    | 6.6    | 1.6    | 9.0    | 11.4   |
| 5.0    | 4.4    | 17.4   | 11.3   | 7.5    | 9.0    | 3.5    | 14.3   | 2.3    |
| 253.5  | 199.9  | 309.0  | 279.0  | 111.2  | 481.3  | 375.9  | 89.0   | 145.6  |
| 58.2   | 63.6   | 59.7   | 86.4   | 26.5   | 103.2  | 86.5   | 53.9   | 86.7   |
| 169.4  | 170.7  | 131.9  | 86.3   | 43.2   | 84.3   | 59.9   | 100.2  | 152.0  |
| 5.4    | 3.3    | 3.6    | 16.7   | 2.3    | 2.9    | 3.4    | 4.7    | 5.9    |
| 102.0  | 84.6   | 103.1  | 239.9  | 49.9   | 98.4   | 72.6   | 70.1   | 109.4  |
| 409.0  | 334.3  | 336.3  | 303.0  | 182.4  | 221.0  | 157.4  | 5.8    | 17.4   |
| 465.3  | 332.5  | 286.6  | 124.7  | 101.1  | 884.8  | 585.9  | 30.8   | 64.9   |
| 47.8   | 55.0   | 41.4   | 27.2   | 10.4   | 39.3   | 24.6   | 8.8    | 20.2   |
| 5503.6 | 4574.4 | 4641.9 | 3424.4 | 1975.3 | 7885.1 | 7110.7 | 2471.9 | 4634.9 |
| 160.1  | 174.8  | 176.2  | 115.3  | 43.1   | 1074.1 | 787.9  | 42.1   | 83.2   |
| 193.0  | 202.5  | 163.8  | 121.3  | 75.5   | 700.4  | 472.2  | 142.0  | 200.0  |
| 90.1   | 97.5   | 92.1   | 95.3   | 27.9   | 121.3  | 108.9  | 12.5   | 13.6   |
| 125.1  | 117.8  | 155.6  | 162.2  | 45.0   | 255.4  | 192.9  | 64.1   | 99.4   |
| 149.8  | 118.2  | 101.2  | 143.4  | 34.9   | 496.6  | 610.4  | 42.3   | 56.4   |
| 468.2  | 345.6  | 415.0  | 326.2  | 135.7  | 383.0  | 251.9  | 100.5  | 124.4  |
| 277.1  | 304.0  | 273.5  | 366.2  | 126.8  | 179.6  | 124.5  | 101.2  | 112.4  |
| 495.9  | 395.4  | 436.6  | 324.2  | 125.5  | 880.0  | 667.3  | 209.8  | 329.6  |
| 411.7  | 568.9  | 308.2  | 159.7  | 164.2  | 898.2  | 482.5  | 69.5   | 114.2  |
| 58.7   | 52.1   | 56.2   | 86.1   | 18.5   | 115.9  | 86.5   | 24.0   | 33.2   |
| 38.4   | 35.2   | 27.9   | 36.4   | 16.7   | 34.7   | 19.3   | 31.0   | 41.6   |
| 151.9  | 129.2  | 109.3  | 84.4   | 42.7   | 213.2  | 139.1  | 30.7   | 45.5   |
| 128.3  | 114.7  | 126.3  | 97.2   | 45.2   | 172.3  | 106.8  | 35.8   | 50.6   |
| 878.5  | 993.0  | 772.3  | 630.6  | 295.9  | 680.7  | 580.5  | 88.0   | 158.1  |
| 711.9  | 800.0  | 902.8  | 1128.6 | 367.3  | 1196.4 | 852.3  | 107.4  | 127.9  |
| 479.8  | 544.7  | 598.1  | 750.2  | 200.5  | 589.3  | 254.4  | 90.0   | 111.4  |
| 164.3  | 197.0  | 165.6  | 135.6  | 41.7   | 314.6  | 200.8  | 78.7   | 82.7   |

|        |        |        |        |        |         |        |        |        |
|--------|--------|--------|--------|--------|---------|--------|--------|--------|
| 159.3  | 125.1  | 174.9  | 204.4  | 64.8   | 196.7   | 116.9  | 30.9   | 31.9   |
| 9.7    | 14.9   | 8.9    | 5.9    | 6.2    | 4.6     | 4.8    | 7.2    | 11.2   |
| 234.5  | 152.5  | 149.4  | 174.6  | 63.1   | 133.3   | 86.0   | 82.4   | 125.0  |
| 20.4   | 27.7   | 38.4   | 34.3   | 12.1   | 13.0    | 3.3    | 2.8    | 1.3    |
| 16.5   | 1.1    | 7.5    | 16.0   | 4.8    | 1.6     | 1.9    | 1.6    | 6.5    |
| 32.2   | 49.9   | 24.1   | 17.4   | 8.4    | 17.3    | 12.5   | 3.6    | 6.6    |
| 17.4   | 23.6   | 3.5    | 6.6    | 5.3    | 2.7     | 3.5    | 2.5    | 3.0    |
| 201.2  | 223.8  | 243.8  | 246.9  | 87.2   | 170.4   | 102.4  | 9.9    | 23.4   |
| 2.9    | 3.0    | 2.8    | 1.5    | 1.5    | 3.2     | 2.2    | 11.2   | 10.4   |
| 6.0    | 4.4    | 4.7    | 15.6   | 0.8    | 93.4    | 61.4   | 9.6    | 17.4   |
| 8116.6 | 7531.9 | 6913.6 | 6860.6 | 4017.6 | 11953.0 | 9998.7 | 3136.4 | 4355.1 |
| 25.9   | 17.0   | 26.5   | 18.3   | 9.3    | 38.5    | 21.0   | 23.2   | 25.0   |
| 44.5   | 30.8   | 27.9   | 29.2   | 15.8   | 164.0   | 78.0   | 21.4   | 21.6   |
| 52.4   | 48.5   | 40.5   | 37.9   | 15.8   | 155.1   | 100.4  | 4.0    | 16.1   |
| 104.2  | 119.2  | 102.6  | 81.0   | 32.4   | 264.6   | 170.9  | 14.7   | 48.2   |
| 309.6  | 286.1  | 240.1  | 141.3  | 82.0   | 480.3   | 306.3  | 58.4   | 72.2   |
| 817.5  | 846.3  | 747.5  | 625.6  | 229.8  | 2136.2  | 1127.3 | 53.4   | 90.4   |
| 287.2  | 243.2  | 294.9  | 219.3  | 57.3   | 417.6   | 214.9  | 62.6   | 41.5   |
| 98.3   | 109.9  | 95.2   | 159.5  | 57.0   | 191.4   | 120.7  | 123.2  | 171.8  |
| 57.9   | 65.8   | 64.9   | 37.0   | 24.7   | 307.0   | 250.3  | 160.7  | 232.3  |
| 432.4  | 375.8  | 431.4  | 390.1  | 119.5  | 422.7   | 276.0  | 100.4  | 123.3  |
| 242.0  | 220.0  | 245.3  | 202.9  | 37.9   | 346.1   | 200.2  | 53.9   | 77.5   |
| 133.1  | 118.3  | 133.7  | 111.0  | 48.4   | 156.8   | 151.0  | 66.0   | 113.9  |
| 22.8   | 22.4   | 26.3   | 18.8   | 6.7    | 17.3    | 2.1    | 20.7   | 27.9   |
| 290.0  | 256.2  | 270.3  | 179.5  | 97.8   | 649.5   | 435.9  | 188.8  | 221.3  |
| 448.4  | 457.2  | 543.0  | 512.8  | 146.2  | 194.3   | 92.5   | 58.1   | 81.4   |
| 153.8  | 146.8  | 144.7  | 103.5  | 60.2   | 296.6   | 237.5  | 154.2  | 173.8  |
| 366.6  | 293.5  | 270.3  | 173.3  | 74.1   | 1157.1  | 685.1  | 75.9   | 114.3  |
| 133.3  | 105.0  | 112.7  | 79.7   | 23.1   | 233.3   | 116.3  | 57.3   | 54.7   |
| 584.5  | 576.4  | 618.8  | 576.7  | 206.8  | 1239.5  | 784.9  | 167.5  | 220.4  |
| 883.4  | 725.4  | 724.1  | 700.2  | 288.7  | 1099.3  | 743.6  | 217.9  | 206.4  |
| 1125.2 | 940.5  | 954.8  | 666.9  | 392.4  | 1797.6  | 1532.5 | 130.0  | 200.8  |
| 39.5   | 32.5   | 37.8   | 16.4   | 13.1   | 14.3    | 12.8   | 4.2    | 4.3    |
| 64.2   | 93.6   | 84.3   | 33.2   | 19.7   | 36.0    | 30.5   | 12.4   | 12.6   |
| 21.2   | 37.1   | 21.1   | 19.6   | 16.2   | 18.7    | 4.6    | 20.1   | 25.3   |
| 251.3  | 263.4  | 242.2  | 162.4  | 71.3   | 610.3   | 466.5  | 165.1  | 256.2  |
| 76.4   | 77.5   | 66.4   | 41.4   | 26.9   | 113.8   | 70.6   | 21.5   | 23.3   |
| 75.2   | 57.6   | 80.5   | 108.7  | 14.7   | 296.4   | 200.2  | 71.2   | 151.5  |
| 46.4   | 31.3   | 43.9   | 15.9   | 13.4   | 104.2   | 53.6   | 26.8   | 35.2   |
| 46.2   | 33.2   | 48.3   | 28.3   | 9.7    | 125.0   | 108.4  | 76.2   | 91.7   |
| 62.3   | 59.3   | 55.2   | 46.8   | 29.5   | 93.7    | 80.6   | 46.9   | 36.4   |
| 290.9  | 289.4  | 278.1  | 341.3  | 111.1  | 232.4   | 154.2  | 71.1   | 91.9   |
| 40.2   | 36.1   | 30.7   | 17.1   | 10.0   | 101.7   | 85.1   | 7.6    | 20.6   |
| 194.8  | 144.7  | 125.9  | 146.6  | 39.9   | 205.7   | 106.9  | 42.0   | 69.7   |
| 27.7   | 18.4   | 18.6   | 6.8    | 12.0   | 42.9    | 35.5   | 19.3   | 19.2   |
| 3249.3 | 3096.6 | 3435.1 | 2582.9 | 1516.2 | 4835.3  | 3626.0 | 473.0  | 936.0  |
| 9.4    | 17.3   | 11.6   | 17.6   | 10.4   | 26.2    | 9.3    | 14.0   | 15.8   |
| 136.1  | 140.1  | 145.0  | 154.4  | 49.5   | 630.9   | 469.9  | 56.9   | 92.0   |
| 676.5  | 636.8  | 625.0  | 495.4  | 301.0  | 514.2   | 371.1  | 240.9  | 278.2  |
| 116.9  | 113.1  | 102.4  | 97.3   | 48.2   | 167.9   | 99.7   | 204.8  | 238.9  |
| 114.1  | 73.5   | 79.5   | 80.6   | 18.9   | 112.7   | 56.8   | 56.0   | 60.7   |
| 827.4  | 689.8  | 646.4  | 553.7  | 214.3  | 1720.2  | 1310.8 | 146.8  | 156.7  |
| 8601.1 | 7717.8 | 7585.6 | 7187.5 | 4659.2 | 10305.9 | 8465.0 | 2830.6 | 3524.6 |

|        |        |        |        |       |        |        |       |       |
|--------|--------|--------|--------|-------|--------|--------|-------|-------|
| 562.0  | 481.6  | 496.8  | 439.1  | 211.7 | 1191.9 | 982.7  | 47.3  | 115.3 |
| 491.5  | 456.2  | 470.9  | 429.1  | 218.4 | 333.3  | 222.5  | 49.0  | 63.3  |
| 231.3  | 232.3  | 192.7  | 232.1  | 56.2  | 141.4  | 89.0   | 38.7  | 66.4  |
| 106.9  | 75.6   | 53.4   | 29.6   | 18.5  | 202.5  | 136.2  | 89.3  | 103.3 |
| 652.6  | 621.5  | 594.7  | 682.8  | 235.9 | 688.9  | 515.2  | 57.8  | 71.3  |
| 71.7   | 81.1   | 77.5   | 77.7   | 25.5  | 80.5   | 55.6   | 42.2  | 62.7  |
| 838.2  | 792.2  | 885.4  | 821.5  | 277.9 | 890.1  | 630.7  | 34.8  | 74.5  |
| 173.7  | 192.3  | 188.8  | 117.7  | 38.7  | 461.0  | 309.3  | 129.7 | 157.0 |
| 487.3  | 348.2  | 353.8  | 242.7  | 105.3 | 897.9  | 552.5  | 447.6 | 506.3 |
| 61.4   | 41.9   | 52.1   | 31.9   | 13.4  | 86.5   | 56.2   | 41.5  | 40.5  |
| 582.3  | 602.0  | 252.0  | 318.5  | 186.6 | 768.1  | 653.9  | 24.7  | 47.2  |
| 296.8  | 262.2  | 233.6  | 461.2  | 97.5  | 180.7  | 187.6  | 163.2 | 230.6 |
| 289.9  | 300.8  | 308.1  | 250.9  | 111.0 | 511.0  | 364.7  | 51.8  | 128.3 |
| 320.1  | 330.3  | 334.1  | 403.9  | 129.3 | 483.9  | 394.0  | 131.0 | 110.3 |
| 58.7   | 32.7   | 37.3   | 30.3   | 10.2  | 46.5   | 31.2   | 94.0  | 106.0 |
| 1798.0 | 1935.6 | 2132.3 | 1906.7 | 710.0 | 2947.3 | 2049.5 | 186.7 | 243.8 |
| 104.2  | 87.2   | 94.0   | 105.3  | 24.1  | 98.8   | 76.2   | 24.0  | 30.9  |
| 48.7   | 14.7   | 35.6   | 23.1   | 5.8   | 50.4   | 95.9   | 27.5  | 31.2  |
| 40.3   | 25.8   | 41.8   | 28.7   | 4.8   | 38.6   | 32.6   | 57.3  | 65.4  |
| 316.7  | 302.7  | 310.5  | 275.3  | 128.9 | 529.8  | 323.8  | 170.3 | 210.7 |
| 470.4  | 561.2  | 436.0  | 457.0  | 176.6 | 788.1  | 645.3  | 59.3  | 103.3 |
| 624.7  | 537.1  | 499.4  | 461.0  | 139.6 | 824.7  | 705.5  | 226.7 | 323.7 |
| 412.1  | 345.7  | 329.9  | 255.1  | 125.7 | 398.7  | 252.3  | 119.7 | 203.1 |
| 202.7  | 180.2  | 249.3  | 289.0  | 90.0  | 253.0  | 206.2  | 35.4  | 14.7  |
| 408.2  | 382.0  | 425.2  | 469.3  | 152.8 | 619.9  | 389.2  | 64.6  | 113.4 |
| 239.7  | 176.2  | 225.3  | 163.5  | 68.3  | 300.1  | 228.2  | 86.2  | 159.5 |
| 435.0  | 380.4  | 327.6  | 126.9  | 91.3  | 907.3  | 654.8  | 235.8 | 339.1 |
| 1141.7 | 1073.8 | 1051.3 | 852.7  | 351.3 | 1570.9 | 1266.2 | 430.7 | 553.2 |
| 111.0  | 78.3   | 89.4   | 91.8   | 29.5  | 79.5   | 34.5   | 46.1  | 46.4  |
| 112.2  | 115.0  | 141.1  | 130.4  | 55.2  | 589.2  | 333.1  | 24.2  | 43.9  |
| 17.8   | 38.9   | 25.7   | 15.0   | 7.5   | 2953.2 | 1236.4 | 2.5   | 1.2   |
| 227.8  | 170.5  | 207.1  | 147.4  | 73.0  | 808.2  | 473.6  | 125.7 | 178.4 |
| 39.8   | 17.0   | 32.4   | 29.5   | 4.3   | 24.3   | 17.7   | 20.8  | 26.9  |
| 287.0  | 292.6  | 305.2  | 344.3  | 114.9 | 442.4  | 280.3  | 57.6  | 61.0  |
| 58.7   | 23.4   | 33.1   | 35.5   | 13.8  | 73.9   | 46.7   | 24.0  | 14.3  |
| 188.8  | 173.6  | 166.8  | 241.0  | 33.6  | 99.9   | 51.3   | 31.1  | 73.5  |
| 613.5  | 601.0  | 831.3  | 1240.6 | 237.5 | 676.8  | 495.1  | 60.6  | 82.0  |
| 35.4   | 33.8   | 32.8   | 27.6   | 8.2   | 84.7   | 53.2   | 25.9  | 38.3  |
| 82.1   | 56.8   | 76.4   | 74.5   | 27.4  | 1805.7 | 1387.0 | 44.6  | 44.7  |
| 176.9  | 122.5  | 165.5  | 137.5  | 58.2  | 4622.7 | 3388.5 | 30.0  | 41.5  |
| 162.2  | 171.7  | 185.4  | 202.8  | 48.0  | 680.0  | 467.1  | 167.0 | 197.8 |
| 62.1   | 69.3   | 68.1   | 70.5   | 27.2  | 84.3   | 57.4   | 48.6  | 89.1  |
| 226.8  | 257.2  | 309.8  | 324.7  | 103.8 | 614.4  | 394.1  | 24.7  | 38.4  |
| 0.9    | 6.0    | 8.6    | 2.4    | 3.4   | 7.2    | 12.4   | 2.7   | 7.8   |
| 23.2   | 27.4   | 5.3    | 27.5   | 6.1   | 32.9   | 19.9   | 19.7  | 16.4  |
| 167.2  | 118.1  | 132.7  | 125.0  | 35.0  | 175.3  | 129.6  | 65.8  | 65.7  |
| 164.1  | 166.0  | 152.2  | 179.6  | 80.9  | 416.9  | 247.0  | 92.7  | 129.6 |
| 532.9  | 452.7  | 508.4  | 387.8  | 149.1 | 829.1  | 747.5  | 104.7 | 145.0 |
| 162.1  | 178.5  | 148.3  | 129.8  | 37.7  | 226.4  | 165.1  | 85.2  | 100.9 |
| 160.7  | 157.2  | 175.9  | 212.9  | 60.8  | 155.7  | 87.5   | 19.0  | 41.4  |
| 98.5   | 77.3   | 105.9  | 73.9   | 34.7  | 155.2  | 95.6   | 270.8 | 256.5 |
| 219.5  | 184.7  | 191.6  | 247.6  | 74.0  | 309.7  | 207.8  | 52.5  | 55.2  |
| 9.1    | 10.6   | 10.4   | 20.4   | 4.1   | 44.4   | 33.1   | 6.6   | 3.2   |



|        |        |        |        |        |         |        |        |        |
|--------|--------|--------|--------|--------|---------|--------|--------|--------|
| 55.5   | 26.1   | 40.6   | 47.4   | 16.5   | 130.8   | 53.9   | 9.2    | 29.1   |
| 19.9   | 14.1   | 3.5    | 5.3    | 13.3   | 53.7    | 3.9    | 0.8    | 7.3    |
| 2.2    | 2.0    | 2.8    | 1.4    | 1.2    | 21.6    | 10.2   | 0.7    | 0.8    |
| 49.1   | 59.1   | 44.2   | 64.0   | 25.6   | 83.4    | 56.8   | 17.1   | 19.0   |
| 408.6  | 397.8  | 398.8  | 421.0  | 155.1  | 571.5   | 289.6  | 92.1   | 110.7  |
| 52.8   | 51.9   | 54.1   | 45.9   | 28.1   | 78.7    | 70.2   | 75.9   | 88.6   |
| 240.4  | 240.1  | 224.0  | 206.8  | 77.3   | 211.0   | 117.7  | 37.7   | 68.1   |
| 27.9   | 34.2   | 20.7   | 15.7   | 10.3   | 41.2    | 22.6   | 43.5   | 32.4   |
| 34.5   | 53.9   | 33.5   | 31.6   | 19.0   | 45.8    | 33.1   | 52.2   | 74.1   |
| 97.0   | 127.8  | 90.2   | 100.4  | 64.4   | 116.1   | 94.7   | 97.1   | 126.5  |
| 115.9  | 95.3   | 101.8  | 103.3  | 23.5   | 48.7    | 15.2   | 14.3   | 15.5   |
| 330.5  | 336.8  | 322.6  | 238.9  | 110.9  | 451.9   | 217.6  | 163.7  | 320.9  |
| 434.4  | 459.9  | 492.3  | 526.7  | 91.7   | 473.5   | 427.9  | 33.2   | 29.7   |
| 141.9  | 154.3  | 175.1  | 143.3  | 57.1   | 285.4   | 169.9  | 20.2   | 48.6   |
| 2746.8 | 2111.2 | 4024.2 | 4590.9 | 1695.3 | 3027.6  | 1778.5 | 450.7  | 576.4  |
| 341.2  | 307.1  | 361.4  | 330.2  | 103.0  | 477.6   | 266.6  | 124.1  | 142.3  |
| 33.6   | 29.8   | 38.1   | 21.0   | 13.3   | 74.5    | 63.9   | 49.7   | 87.6   |
| 41.5   | 40.9   | 36.7   | 18.6   | 20.6   | 83.1    | 56.1   | 72.6   | 112.3  |
| 61.1   | 50.0   | 56.6   | 58.6   | 22.0   | 128.0   | 80.3   | 82.0   | 94.9   |
| 518.2  | 501.8  | 444.3  | 509.7  | 152.8  | 2321.6  | 2070.4 | 63.5   | 110.8  |
| 646.5  | 696.5  | 697.0  | 575.6  | 257.9  | 867.0   | 398.1  | 35.9   | 64.0   |
| 177.0  | 182.1  | 201.4  | 227.3  | 80.3   | 326.9   | 235.1  | 97.2   | 148.6  |
| 1516.0 | 1549.1 | 1435.8 | 1272.0 | 772.6  | 2530.0  | 1775.6 | 21.3   | 38.4   |
| 104.2  | 86.9   | 67.9   | 38.3   | 33.2   | 88.2    | 79.9   | 432.0  | 466.3  |
| 72.5   | 70.4   | 63.9   | 85.2   | 28.4   | 323.8   | 253.2  | 6.0    | 13.4   |
| 113.5  | 101.8  | 104.9  | 90.1   | 41.6   | 337.1   | 268.5  | 138.7  | 137.4  |
| 332.8  | 354.7  | 331.2  | 273.8  | 103.6  | 482.4   | 413.0  | 77.2   | 118.2  |
| 298.8  | 264.1  | 264.6  | 256.6  | 55.8   | 425.9   | 257.2  | 142.9  | 178.8  |
| 399.0  | 339.6  | 298.5  | 313.1  | 54.6   | 932.3   | 511.6  | 125.2  | 156.3  |
| 53.2   | 44.5   | 43.0   | 35.5   | 26.0   | 161.8   | 109.1  | 41.5   | 44.4   |
| 103.3  | 94.9   | 89.1   | 69.4   | 46.0   | 103.5   | 63.8   | 46.4   | 48.9   |
| 97.8   | 83.9   | 80.3   | 56.3   | 35.1   | 156.7   | 130.0  | 88.3   | 95.7   |
| 609.9  | 804.8  | 593.8  | 680.0  | 258.7  | 1580.0  | 1280.4 | 383.2  | 271.9  |
| 43.2   | 32.3   | 15.6   | 19.2   | 13.0   | 556.9   | 539.6  | 150.5  | 234.0  |
| 309.0  | 288.2  | 316.5  | 185.5  | 80.9   | 279.6   | 126.0  | 26.9   | 34.2   |
| 455.3  | 562.5  | 526.7  | 356.5  | 177.3  | 500.2   | 370.7  | 8.6    | 11.7   |
| 58.2   | 46.7   | 36.7   | 29.9   | 12.7   | 74.3    | 52.2   | 15.2   | 38.9   |
| 3.6    | 7.7    | 2.0    | 1.9    | 3.4    | 25.7    | 9.6    | 10.6   | 2.2    |
| 76.5   | 54.0   | 59.6   | 33.3   | 13.7   | 181.4   | 105.0  | 118.5  | 114.5  |
| 48.3   | 88.2   | 64.8   | 126.7  | 34.6   | 268.2   | 182.8  | 0.3    | 2.2    |
| 186.9  | 144.9  | 146.4  | 123.5  | 70.6   | 593.7   | 376.0  | 36.0   | 58.7   |
| 160.9  | 179.4  | 144.7  | 93.8   | 51.1   | 376.9   | 209.3  | 37.0   | 44.7   |
| 153.5  | 109.2  | 107.0  | 103.7  | 42.1   | 127.0   | 104.3  | 30.9   | 34.5   |
| 355.0  | 392.8  | 395.2  | 355.1  | 137.5  | 842.3   | 486.4  | 117.7  | 131.3  |
| 10.0   | 13.7   | 5.8    | 5.0    | 4.4    | 11397.2 | 9218.5 | 15.3   | 4.8    |
| 614.3  | 516.3  | 461.3  | 278.4  | 89.4   | 443.8   | 217.7  | 155.5  | 168.0  |
| 547.3  | 498.6  | 476.0  | 325.9  | 138.0  | 548.6   | 490.6  | 91.3   | 203.4  |
| 252.7  | 215.3  | 274.6  | 262.0  | 102.0  | 179.4   | 124.7  | 235.0  | 311.7  |
| 118.3  | 134.2  | 145.5  | 202.5  | 56.6   | 311.5   | 192.7  | 32.1   | 51.6   |
| 26.0   | 19.1   | 26.1   | 29.5   | 6.7    | 347.2   | 231.0  | 25.5   | 27.4   |
| 6697.5 | 6040.9 | 5853.4 | 5492.4 | 3002.5 | 6140.0  | 4885.4 | 2313.3 | 3014.3 |
| 55.5   | 52.4   | 75.9   | 40.4   | 21.7   | 936.2   | 972.3  | 29.5   | 29.8   |
| 800.7  | 748.9  | 754.2  | 672.1  | 259.2  | 804.9   | 513.3  | 123.7  | 160.2  |

|        |        |        |        |        |        |        |        |        |
|--------|--------|--------|--------|--------|--------|--------|--------|--------|
| 497.6  | 486.5  | 441.0  | 438.4  | 213.6  | 227.4  | 157.8  | 174.9  | 223.0  |
| 471.5  | 376.6  | 395.4  | 452.0  | 158.4  | 483.7  | 259.6  | 77.6   | 109.2  |
| 497.0  | 606.4  | 568.9  | 558.8  | 343.4  | 845.2  | 718.2  | 55.6   | 63.2   |
| 7.6    | 14.1   | 10.5   | 7.9    | 7.8    | 1070.5 | 897.9  | 225.1  | 262.4  |
| 544.2  | 465.2  | 543.7  | 460.3  | 154.6  | 996.6  | 636.4  | 420.4  | 652.8  |
| 20.9   | 13.6   | 3.7    | 3.9    | 7.9    | 6.1    | 4.1    | 4.0    | 2.6    |
| 195.3  | 195.9  | 206.0  | 197.0  | 61.7   | 292.7  | 213.9  | 18.1   | 25.5   |
| 97.2   | 101.8  | 112.3  | 88.0   | 38.8   | 150.2  | 111.8  | 185.1  | 225.7  |
| 228.3  | 193.4  | 198.5  | 189.8  | 70.0   | 318.3  | 152.6  | 45.6   | 57.5   |
| 105.2  | 81.6   | 91.2   | 65.8   | 19.8   | 138.6  | 91.8   | 37.9   | 54.8   |
| 26.3   | 29.6   | 27.8   | 39.7   | 11.8   | 56.5   | 36.0   | 17.0   | 28.6   |
| 204.6  | 175.8  | 124.7  | 76.6   | 33.7   | 137.4  | 97.3   | 147.8  | 179.0  |
| 203.9  | 193.6  | 197.4  | 151.0  | 111.4  | 2496.7 | 2217.9 | 265.2  | 406.3  |
| 159.7  | 130.0  | 131.7  | 103.9  | 24.6   | 395.1  | 297.7  | 102.0  | 123.5  |
| 187.6  | 234.7  | 164.3  | 118.5  | 71.9   | 301.9  | 172.1  | 58.9   | 76.1   |
| 38.3   | 9.0    | 21.1   | 35.5   | 21.1   | 115.5  | 52.2   | 36.8   | 23.6   |
| 303.1  | 322.6  | 276.7  | 176.4  | 107.9  | 981.9  | 479.5  | 76.7   | 63.2   |
| 193.2  | 203.3  | 206.3  | 213.8  | 83.4   | 133.8  | 93.3   | 38.5   | 53.9   |
| 95.6   | 100.5  | 68.1   | 62.7   | 33.7   | 67.0   | 51.7   | 33.7   | 53.8   |
| 46.9   | 34.3   | 44.9   | 32.6   | 23.0   | 131.4  | 104.9  | 49.0   | 64.6   |
| 48.5   | 64.8   | 33.6   | 4.7    | 19.2   | 457.3  | 298.4  | 21.8   | 28.2   |
| 205.1  | 183.5  | 253.5  | 232.3  | 51.2   | 179.2  | 104.4  | 91.2   | 113.9  |
| 4.7    | 13.8   | 5.2    | 19.6   | 0.7    | 26.4   | 14.4   | 3.9    | 3.6    |
| 385.1  | 303.7  | 273.4  | 227.8  | 120.1  | 875.8  | 554.0  | 99.3   | 95.5   |
| 47.7   | 51.2   | 60.7   | 55.2   | 28.5   | 94.2   | 34.5   | 44.4   | 64.9   |
| 78.3   | 83.9   | 66.0   | 81.7   | 36.5   | 112.2  | 72.1   | 12.4   | 12.9   |
| 377.8  | 393.7  | 351.5  | 391.3  | 140.9  | 313.5  | 321.0  | 90.4   | 92.6   |
| 82.0   | 47.1   | 93.8   | 61.7   | 33.3   | 100.2  | 60.5   | 31.3   | 71.3   |
| 397.5  | 365.6  | 366.1  | 275.4  | 109.4  | 824.6  | 546.4  | 79.9   | 105.6  |
| 381.5  | 441.3  | 364.5  | 331.8  | 105.8  | 362.8  | 258.4  | 14.4   | 29.1   |
| 45.3   | 38.9   | 24.4   | 16.9   | 15.5   | 123.7  | 77.6   | 29.3   | 43.3   |
| 184.8  | 211.0  | 192.6  | 213.9  | 91.9   | 333.1  | 341.9  | 152.3  | 222.1  |
| 364.5  | 392.3  | 521.7  | 546.4  | 157.1  | 452.2  | 256.2  | 61.7   | 84.4   |
| 99.2   | 83.5   | 80.2   | 29.5   | 18.1   | 417.2  | 270.2  | 65.6   | 89.0   |
| 115.9  | 59.4   | 91.6   | 29.6   | 25.9   | 61.2   | 22.4   | 70.9   | 110.9  |
| 31.1   | 3.1    | 4.6    | 0.8    | 1.5    | 1.7    | 1.3    | 26.1   | 24.3   |
| 95.8   | 70.6   | 80.5   | 49.7   | 24.5   | 364.2  | 228.3  | 115.1  | 160.6  |
| 462.0  | 523.5  | 444.3  | 405.6  | 102.1  | 356.2  | 187.3  | 71.3   | 87.6   |
| 6028.6 | 5705.3 | 5372.8 | 5196.8 | 3110.3 | 8573.2 | 7617.6 | 2178.2 | 3426.6 |
| 438.1  | 474.0  | 440.7  | 358.7  | 138.2  | 484.4  | 318.6  | 13.6   | 20.9   |
| 20.4   | 20.3   | 12.5   | 14.8   | 5.6    | 26.3   | 15.7   | 4.8    | 5.1    |
| 8211.6 | 7686.9 | 6934.0 | 6806.0 | 5404.4 | 8648.0 | 7581.3 | 3499.9 | 4843.6 |
| 312.1  | 235.6  | 250.8  | 296.9  | 83.8   | 775.7  | 524.3  | 100.2  | 178.8  |
| 20.0   | 27.8   | 31.5   | 13.8   | 12.8   | 72.7   | 54.7   | 9.0    | 16.8   |
| 367.4  | 348.4  | 351.8  | 319.9  | 126.9  | 465.9  | 278.7  | 105.3  | 122.1  |
| 233.1  | 268.9  | 301.2  | 425.3  | 100.3  | 559.9  | 312.5  | 40.9   | 80.6   |
| 611.4  | 530.2  | 489.4  | 368.3  | 148.1  | 1562.9 | 889.3  | 49.7   | 103.1  |
| 4.2    | 8.1    | 6.6    | 8.3    | 5.8    | 4.5    | 13.3   | 6.1    | 2.6    |
| 6.8    | 0.4    | 1.0    | 2.9    | 4.7    | 10.1   | 2.9    | 2.9    | 10.4   |
| 239.0  | 231.9  | 262.3  | 415.0  | 95.7   | 1021.1 | 757.5  | 56.0   | 80.4   |
| 353.7  | 277.6  | 333.2  | 391.8  | 103.6  | 1408.8 | 961.9  | 56.2   | 91.8   |
| 512.6  | 474.3  | 600.8  | 646.3  | 207.0  | 1231.7 | 844.8  | 153.2  | 235.4  |
| 4.7    | 2.9    | 0.8    | 0.5    | 1.8    | 0.3    | 0.9    | 1.7    | 2.5    |

|        |        |        |        |        |        |        |        |        |
|--------|--------|--------|--------|--------|--------|--------|--------|--------|
| 82.7   | 85.4   | 124.5  | 144.6  | 36.0   | 81.9   | 86.7   | 347.2  | 483.0  |
| 19.6   | 28.5   | 26.2   | 48.5   | 15.4   | 18.7   | 24.6   | 37.2   | 62.9   |
| 1327.1 | 1080.2 | 901.3  | 658.2  | 205.2  | 495.2  | 289.2  | 398.2  | 542.9  |
| 276.6  | 204.3  | 230.4  | 175.8  | 74.7   | 493.0  | 339.2  | 78.1   | 102.0  |
| 267.2  | 257.3  | 292.4  | 227.0  | 63.0   | 399.1  | 280.5  | 111.5  | 186.4  |
| 9.2    | 12.3   | 23.8   | 15.9   | 7.6    | 35.2   | 25.8   | 15.3   | 8.3    |
| 19.0   | 13.3   | 10.6   | 15.3   | 5.6    | 196.0  | 136.8  | 230.6  | 282.7  |
| 1554.9 | 1562.2 | 1440.8 | 1122.9 | 561.6  | 2996.9 | 2585.7 | 399.3  | 460.1  |
| 129.4  | 134.3  | 137.4  | 117.4  | 33.0   | 185.0  | 116.1  | 36.3   | 43.8   |
| 62.1   | 66.0   | 63.4   | 79.7   | 19.9   | 101.7  | 70.4   | 49.9   | 70.6   |
| 329.6  | 308.9  | 326.6  | 359.7  | 112.8  | 502.7  | 391.2  | 41.1   | 26.6   |
| 325.7  | 271.0  | 234.5  | 275.0  | 107.8  | 693.4  | 759.1  | 50.1   | 56.3   |
| 64.3   | 76.9   | 67.9   | 46.4   | 43.6   | 253.6  | 180.8  | 87.0   | 148.5  |
| 42.7   | 45.7   | 51.5   | 26.9   | 13.3   | 107.3  | 64.8   | 16.6   | 22.4   |
| 210.0  | 191.4  | 209.9  | 239.9  | 73.1   | 303.4  | 242.0  | 13.6   | 8.1    |
| 94.9   | 78.2   | 104.4  | 100.9  | 59.0   | 347.6  | 210.1  | 81.0   | 106.0  |
| 74.9   | 67.0   | 80.4   | 51.5   | 32.6   | 190.4  | 137.3  | 3.2    | 1.0    |
| 2125.7 | 2037.4 | 2068.5 | 1788.7 | 694.8  | 2469.6 | 1495.9 | 278.2  | 333.4  |
| 94.9   | 86.1   | 62.9   | 49.1   | 21.9   | 503.3  | 395.6  | 88.6   | 93.3   |
| 255.6  | 265.7  | 281.7  | 218.3  | 73.3   | 434.8  | 283.2  | 87.5   | 90.3   |
| 2.9    | 18.8   | 15.7   | 5.6    | 2.4    | 79.0   | 52.1   | 0.8    | 0.8    |
| 142.6  | 197.9  | 101.8  | 190.2  | 59.3   | 22.1   | 17.3   | 248.9  | 322.3  |
| 71.2   | 48.1   | 63.3   | 60.1   | 24.5   | 183.6  | 110.3  | 12.1   | 14.6   |
| 160.7  | 192.2  | 153.8  | 133.7  | 60.5   | 573.9  | 342.2  | 29.7   | 54.5   |
| 39.1   | 31.4   | 21.1   | 39.1   | 9.4    | 93.0   | 74.0   | 11.5   | 27.4   |
| 12.6   | 25.7   | 9.9    | 27.3   | 3.0    | 78.7   | 23.6   | 7.6    | 7.8    |
| 186.8  | 127.2  | 155.0  | 111.0  | 22.5   | 101.0  | 52.8   | 70.2   | 63.5   |
| 24.3   | 13.0   | 15.8   | 10.8   | 5.8    | 69.0   | 47.5   | 10.2   | 29.4   |
| 548.0  | 562.6  | 523.4  | 497.4  | 201.8  | 695.5  | 359.5  | 69.8   | 72.9   |
| 261.2  | 233.9  | 427.2  | 426.1  | 115.8  | 520.2  | 366.6  | 84.3   | 157.9  |
| 304.2  | 307.5  | 472.5  | 450.2  | 126.1  | 451.6  | 336.0  | 213.1  | 262.6  |
| 180.4  | 214.4  | 184.3  | 218.0  | 94.5   | 256.0  | 103.0  | 25.5   | 51.4   |
| 302.3  | 291.5  | 264.0  | 110.8  | 99.7   | 187.3  | 133.3  | 88.7   | 60.6   |
| 2987.5 | 2574.7 | 2440.9 | 2144.4 | 775.0  | 2932.4 | 2662.8 | 527.2  | 734.0  |
| 455.4  | 398.4  | 288.7  | 252.5  | 111.3  | 560.2  | 600.4  | 120.4  | 128.9  |
| 339.2  | 354.3  | 407.6  | 356.8  | 105.8  | 490.2  | 327.2  | 35.5   | 44.8   |
| 172.2  | 72.7   | 65.3   | 58.0   | 21.2   | 147.8  | 63.4   | 62.9   | 88.2   |
| 66.0   | 49.4   | 54.0   | 47.3   | 18.5   | 236.3  | 117.7  | 144.4  | 138.3  |
| 125.2  | 95.1   | 97.1   | 116.5  | 28.3   | 278.2  | 213.8  | 110.8  | 145.3  |
| 96.2   | 96.8   | 93.2   | 124.3  | 37.5   | 290.6  | 214.8  | 90.2   | 147.1  |
| 149.8  | 150.1  | 185.3  | 165.7  | 52.0   | 663.6  | 509.1  | 17.6   | 27.6   |
| 52.1   | 37.2   | 34.9   | 43.4   | 12.0   | 173.0  | 109.6  | 26.1   | 40.7   |
| 510.6  | 515.0  | 546.0  | 586.5  | 170.2  | 846.8  | 708.0  | 36.8   | 53.8   |
| 44.6   | 50.1   | 46.7   | 53.6   | 11.7   | 557.7  | 575.3  | 4.6    | 1.9    |
| 46.1   | 55.1   | 59.5   | 47.5   | 19.5   | 265.7  | 245.1  | 11.2   | 21.4   |
| 181.8  | 128.3  | 140.2  | 96.6   | 48.5   | 1581.1 | 1577.6 | 129.3  | 233.5  |
| 9814.4 | 8622.3 | 7732.0 | 7043.7 | 4228.5 | 9252.3 | 7783.3 | 3240.8 | 4078.9 |
| 504.4  | 466.4  | 420.5  | 265.2  | 125.1  | 1459.1 | 1164.4 | 100.4  | 183.9  |
| 58.6   | 56.0   | 55.5   | 89.8   | 21.6   | 193.6  | 127.4  | 11.6   | 10.9   |
| 103.9  | 77.9   | 105.7  | 136.5  | 40.1   | 252.1  | 195.5  | 20.5   | 40.4   |
| 2354.7 | 2261.0 | 2128.8 | 2365.0 | 904.0  | 2092.3 | 1418.4 | 255.7  | 401.5  |
| 534.4  | 514.3  | 528.9  | 601.3  | 216.3  | 536.9  | 284.3  | 47.9   | 69.8   |
| 149.4  | 120.7  | 134.0  | 169.8  | 57.3   | 281.0  | 187.4  | 66.0   | 75.1   |

|         |        |        |        |        |         |        |        |        |
|---------|--------|--------|--------|--------|---------|--------|--------|--------|
| 97.6    | 76.3   | 100.2  | 71.4   | 34.5   | 115.1   | 89.4   | 26.0   | 42.3   |
| 340.9   | 321.2  | 276.7  | 143.7  | 129.3  | 279.2   | 172.9  | 22.9   | 22.0   |
| 400.7   | 473.6  | 410.2  | 368.6  | 170.8  | 512.1   | 420.2  | 36.5   | 65.3   |
| 30.1    | 21.8   | 24.4   | 12.1   | 4.9    | 67.7    | 59.6   | 18.0   | 25.3   |
| 49.0    | 43.0   | 37.6   | 29.9   | 4.1    | 42.5    | 41.7   | 15.2   | 16.1   |
| 14.9    | 16.1   | 8.3    | 3.1    | 7.1    | 34.0    | 38.8   | 22.5   | 16.8   |
| 341.8   | 347.4  | 357.1  | 308.0  | 112.0  | 384.7   | 230.3  | 94.7   | 186.7  |
| 415.2   | 420.6  | 356.9  | 364.4  | 122.6  | 670.7   | 506.3  | 31.5   | 45.9   |
| 100.1   | 84.2   | 76.5   | 47.0   | 45.7   | 46.1    | 35.1   | 3.1    | 0.7    |
| 133.7   | 112.1  | 91.1   | 57.9   | 21.2   | 193.2   | 110.3  | 64.6   | 113.5  |
| 598.1   | 527.1  | 506.5  | 357.3  | 127.8  | 460.1   | 372.7  | 126.2  | 166.1  |
| 4.2     | 4.0    | 11.4   | 7.3    | 0.4    | 86.2    | 109.0  | 3.0    | 18.6   |
| 92.8    | 76.0   | 87.2   | 130.6  | 39.4   | 262.8   | 178.0  | 70.2   | 78.3   |
| 15.0    | 5.9    | 23.2   | 8.5    | 9.7    | 22.8    | 16.9   | 3.0    | 18.5   |
| 152.8   | 162.6  | 118.0  | 59.9   | 50.0   | 302.7   | 265.7  | 48.7   | 61.1   |
| 10648.0 | 9186.6 | 9169.1 | 7758.4 | 5690.5 | 11430.8 | 9749.8 | 4562.2 | 5479.1 |
| 83.6    | 75.4   | 104.2  | 87.9   | 44.9   | 596.3   | 515.4  | 10.1   | 12.8   |
| 287.5   | 197.2  | 228.4  | 216.8  | 91.0   | 251.3   | 130.1  | 55.7   | 105.8  |
| 36.3    | 27.6   | 34.9   | 9.5    | 10.7   | 11.5    | 11.6   | 7.8    | 11.4   |
| 974.7   | 1038.6 | 881.2  | 927.3  | 309.0  | 987.3   | 547.8  | 47.1   | 77.0   |
| 144.9   | 132.2  | 130.3  | 156.0  | 36.2   | 186.3   | 119.8  | 27.0   | 48.1   |
| 0.4     | 1.3    | 4.6    | 0.8    | 4.9    | 6.3     | 7.5    | 1.4    | 4.8    |
| 4.3     | 4.3    | 18.1   | 19.8   | 1.5    | 44.4    | 37.5   | 1.8    | 3.9    |
| 90.8    | 85.6   | 53.3   | 39.5   | 27.3   | 115.7   | 76.0   | 55.5   | 73.6   |
| 6.1     | 3.7    | 4.9    | 2.3    | 1.9    | 4.1     | 3.5    | 2.0    | 3.9    |
| 0.5     | 0.4    | 1.2    | 1.0    | 0.4    | 0.9     | 8.1    | 1.0    | 8.1    |
| 87.5    | 78.1   | 95.0   | 88.6   | 23.6   | 197.3   | 109.0  | 10.7   | 30.9   |
| 502.2   | 468.0  | 515.2  | 436.4  | 184.5  | 976.8   | 825.8  | 72.7   | 123.2  |
| 352.5   | 354.0  | 356.5  | 284.3  | 143.2  | 353.5   | 215.1  | 106.7  | 139.1  |
| 107.0   | 131.7  | 112.3  | 64.6   | 24.3   | 98.6    | 51.7   | 26.0   | 33.9   |
| 242.1   | 217.1  | 227.4  | 208.2  | 70.4   | 320.7   | 238.7  | 70.2   | 89.2   |
| 55.6    | 24.6   | 37.4   | 23.1   | 16.3   | 116.5   | 94.8   | 56.4   | 60.1   |
| 98.2    | 83.9   | 73.7   | 62.9   | 13.4   | 106.9   | 58.1   | 43.6   | 72.6   |
| 21.9    | 6.9    | 10.4   | 9.3    | 5.9    | 15.7    | 12.2   | 13.3   | 18.4   |
| 481.4   | 293.1  | 368.0  | 286.6  | 146.6  | 1281.5  | 1017.5 | 847.0  | 924.9  |
| 8.7     | 11.6   | 4.8    | 7.8    | 2.8    | 23.9    | 15.5   | 7.1    | 1.8    |
| 72.8    | 48.6   | 45.8   | 20.3   | 19.4   | 268.7   | 97.5   | 53.8   | 76.7   |
| 209.2   | 193.6  | 213.1  | 204.8  | 89.3   | 158.2   | 117.4  | 170.9  | 179.8  |
| 71.4    | 65.0   | 53.3   | 71.5   | 22.3   | 97.4    | 38.4   | 21.6   | 43.0   |
| 471.6   | 477.3  | 475.8  | 379.0  | 223.5  | 1092.2  | 1091.8 | 170.5  | 284.4  |
| 13.1    | 10.2   | 11.8   | 11.4   | 8.6    | 40.3    | 39.1   | 26.5   | 44.1   |
| 507.6   | 516.4  | 549.2  | 479.6  | 208.1  | 2390.1  | 1578.5 | 105.9  | 105.6  |
| 258.2   | 273.7  | 254.7  | 197.4  | 91.0   | 634.6   | 533.9  | 44.5   | 59.9   |
| 662.3   | 712.8  | 790.8  | 924.9  | 362.7  | 151.6   | 137.2  | 73.2   | 131.2  |
| 101.9   | 126.3  | 76.5   | 68.1   | 35.7   | 225.4   | 174.8  | 59.9   | 99.7   |
| 223.6   | 195.4  | 209.2  | 186.3  | 91.8   | 252.0   | 135.1  | 183.5  | 245.2  |
| 114.4   | 121.3  | 105.3  | 70.6   | 42.1   | 558.4   | 436.4  | 113.1  | 226.7  |
| 174.3   | 148.0  | 131.9  | 117.7  | 45.3   | 353.2   | 167.2  | 28.6   | 46.8   |
| 584.2   | 592.5  | 568.4  | 558.8  | 232.2  | 457.4   | 367.6  | 276.8  | 421.1  |
| 3.8     | 11.4   | 11.7   | 13.5   | 0.8    | 10.0    | 29.6   | 3.1    | 3.0    |
| 543.9   | 546.0  | 504.0  | 543.7  | 195.4  | 892.7   | 527.5  | 255.9  | 356.5  |
| 266.8   | 249.1  | 246.7  | 130.2  | 74.5   | 460.5   | 425.7  | 277.8  | 336.3  |
| 890.7   | 1035.4 | 1017.6 | 1003.0 | 335.1  | 1461.7  | 899.2  | 44.6   | 91.7   |

|        |        |        |        |        |        |        |        |        |
|--------|--------|--------|--------|--------|--------|--------|--------|--------|
| 29.9   | 23.8   | 24.5   | 27.5   | 14.1   | 42.8   | 18.6   | 36.9   | 54.8   |
| 52.3   | 53.5   | 74.1   | 77.9   | 27.8   | 92.7   | 59.6   | 11.1   | 17.2   |
| 16.9   | 1.8    | 4.2    | 5.4    | 2.8    | 2.3    | 5.1    | 2.7    | 5.8    |
| 104.9  | 102.1  | 113.1  | 77.6   | 36.1   | 207.7  | 146.9  | 26.7   | 74.3   |
| 6.1    | 4.9    | 4.4    | 2.8    | 4.3    | 17.8   | 10.0   | 4.1    | 44.8   |
| 144.8  | 143.6  | 127.0  | 133.7  | 50.4   | 144.5  | 67.9   | 29.8   | 51.7   |
| 35.8   | 24.2   | 34.2   | 25.6   | 11.8   | 81.1   | 55.0   | 46.7   | 97.5   |
| 16.5   | 42.8   | 31.8   | 24.9   | 12.0   | 22.6   | 21.5   | 4.9    | 8.8    |
| 2.4    | 10.1   | 3.9    | 6.2    | 1.7    | 14.8   | 42.9   | 3.9    | 23.0   |
| 305.4  | 263.4  | 293.7  | 247.6  | 106.0  | 642.1  | 480.2  | 143.3  | 172.7  |
| 309.4  | 396.1  | 404.1  | 356.3  | 129.4  | 510.2  | 319.9  | 11.4   | 17.1   |
| 120.1  | 114.4  | 155.5  | 165.8  | 41.4   | 175.1  | 112.6  | 36.1   | 61.4   |
| 79.5   | 106.4  | 108.7  | 129.8  | 32.0   | 213.6  | 137.7  | 41.1   | 69.1   |
| 89.0   | 69.7   | 100.1  | 102.4  | 25.5   | 174.8  | 101.3  | 54.8   | 76.2   |
| 2.7    | 0.9    | 1.7    | 1.0    | 0.5    | 1.4    | 1.1    | 1.5    | 2.8    |
| 750.6  | 671.9  | 751.1  | 699.5  | 197.0  | 639.8  | 328.0  | 153.8  | 252.7  |
| 40.5   | 50.6   | 35.4   | 50.6   | 18.7   | 115.0  | 92.1   | 14.7   | 15.4   |
| 1818.2 | 1660.5 | 1567.6 | 1349.9 | 722.3  | 3055.5 | 2414.5 | 570.1  | 811.7  |
| 109.1  | 93.3   | 118.3  | 116.4  | 42.0   | 234.0  | 143.0  | 49.1   | 60.1   |
| 1291.9 | 1360.2 | 1257.8 | 1130.6 | 452.1  | 2023.0 | 1282.6 | 304.7  | 528.5  |
| 48.0   | 39.0   | 24.9   | 41.3   | 10.7   | 74.2   | 40.0   | 41.3   | 49.6   |
| 334.9  | 453.7  | 363.9  | 342.6  | 69.6   | 331.1  | 127.5  | 58.3   | 132.6  |
| 300.5  | 343.8  | 318.1  | 374.5  | 100.9  | 846.4  | 493.2  | 62.9   | 100.1  |
| 218.2  | 185.1  | 219.2  | 248.3  | 107.3  | 262.7  | 174.9  | 50.6   | 34.5   |
| 495.1  | 434.4  | 507.2  | 546.0  | 197.4  | 743.0  | 528.3  | 59.3   | 61.5   |
| 574.2  | 516.3  | 528.7  | 1157.3 | 235.0  | 2441.7 | 1558.5 | 85.2   | 122.6  |
| 339.6  | 364.1  | 328.9  | 450.8  | 159.7  | 755.6  | 561.8  | 196.6  | 262.9  |
| 64.5   | 59.9   | 49.9   | 19.2   | 9.9    | 283.5  | 153.7  | 47.9   | 75.6   |
| 28.0   | 23.5   | 19.0   | 13.2   | 16.7   | 109.8  | 76.0   | 118.3  | 117.5  |
| 7.8    | 5.1    | 22.2   | 2.4    | 2.1    | 108.1  | 67.2   | 76.9   | 72.6   |
| 17.7   | 21.6   | 23.0   | 25.0   | 5.4    | 149.6  | 73.4   | 100.8  | 133.7  |
| 147.5  | 162.0  | 130.9  | 70.9   | 41.4   | 326.4  | 219.6  | 25.5   | 31.5   |
| 63.6   | 55.7   | 58.1   | 59.4   | 24.7   | 351.8  | 210.8  | 106.5  | 115.5  |
| 17.5   | 16.4   | 12.7   | 8.3    | 6.5    | 17.2   | 13.4   | 0.5    | 4.4    |
| 131.2  | 101.0  | 86.3   | 110.3  | 43.6   | 281.9  | 164.1  | 54.6   | 91.5   |
| 6191.6 | 5510.7 | 4977.9 | 4892.8 | 2654.7 | 8961.4 | 7687.2 | 2558.3 | 3740.4 |
| 36.9   | 37.5   | 32.7   | 34.4   | 12.7   | 51.0   | 35.2   | 37.0   | 45.1   |
| 110.1  | 74.9   | 121.7  | 81.3   | 31.8   | 18.8   | 8.4    | 4.0    | 27.7   |
| 323.8  | 302.9  | 263.8  | 135.9  | 110.5  | 570.5  | 343.9  | 66.4   | 94.0   |
| 173.5  | 125.3  | 191.2  | 154.2  | 52.9   | 124.2  | 95.7   | 6.3    | 32.0   |
| 200.7  | 185.4  | 164.8  | 82.3   | 61.2   | 480.3  | 346.6  | 275.7  | 367.1  |
| 391.4  | 352.1  | 344.6  | 297.5  | 138.2  | 454.1  | 253.4  | 70.9   | 80.1   |
| 34.2   | 23.3   | 22.0   | 15.8   | 8.8    | 656.2  | 358.0  | 2.3    | 3.0    |
| 289.0  | 150.4  | 188.0  | 231.2  | 56.3   | 402.0  | 300.5  | 66.2   | 92.1   |
| 25.8   | 28.4   | 23.9   | 22.5   | 8.5    | 40.8   | 24.3   | 43.2   | 96.5   |
| 103.4  | 97.6   | 126.2  | 130.7  | 37.0   | 85.1   | 41.0   | 36.4   | 28.3   |
| 60.7   | 53.5   | 72.1   | 89.9   | 29.5   | 66.8   | 39.3   | 9.3    | 17.3   |
| 153.1  | 97.2   | 119.4  | 90.5   | 26.1   | 312.8  | 208.3  | 18.0   | 37.7   |
| 165.7  | 235.7  | 173.8  | 182.9  | 72.9   | 348.3  | 337.1  | 46.8   | 61.0   |
| 96.4   | 46.1   | 75.6   | 59.0   | 25.8   | 151.5  | 100.5  | 34.4   | 56.2   |
| 344.4  | 294.1  | 334.5  | 384.5  | 90.6   | 938.3  | 782.3  | 297.2  | 389.5  |
| 23.2   | 28.9   | 6.9    | 10.7   | 17.9   | 5.3    | 4.2    | 1.4    | 1.4    |
| 286.0  | 286.8  | 283.7  | 247.5  | 84.2   | 629.5  | 353.0  | 60.4   | 92.7   |

|        |        |        |        |        |        |        |        |        |
|--------|--------|--------|--------|--------|--------|--------|--------|--------|
| 127.2  | 127.5  | 95.0   | 139.9  | 41.0   | 124.6  | 82.5   | 32.3   | 41.6   |
| 109.0  | 83.5   | 85.4   | 44.7   | 15.7   | 209.1  | 152.3  | 68.0   | 63.5   |
| 237.7  | 256.5  | 268.0  | 260.9  | 95.0   | 168.7  | 112.1  | 57.1   | 68.7   |
| 16.2   | 7.6    | 6.3    | 6.6    | 5.9    | 12.4   | 4.3    | 4.9    | 1.5    |
| 113.0  | 91.6   | 126.0  | 122.2  | 38.0   | 315.9  | 231.1  | 60.0   | 85.9   |
| 111.9  | 108.4  | 95.7   | 50.1   | 29.5   | 213.6  | 131.5  | 104.6  | 122.3  |
| 34.0   | 21.1   | 28.0   | 34.3   | 1.0    | 22.3   | 2.6    | 3.4    | 1.7    |
| 26.9   | 15.1   | 3.1    | 10.3   | 9.5    | 45.0   | 78.7   | 1.3    | 1.9    |
| 169.1  | 141.2  | 116.6  | 139.3  | 43.8   | 234.7  | 174.6  | 30.9   | 71.5   |
| 302.0  | 292.4  | 245.6  | 209.0  | 85.0   | 541.4  | 430.3  | 26.7   | 54.5   |
| 59.1   | 24.6   | 37.3   | 29.0   | 13.7   | 177.1  | 153.4  | 13.1   | 20.4   |
| 55.1   | 56.3   | 59.7   | 44.6   | 13.7   | 59.9   | 44.8   | 14.7   | 35.8   |
| 279.1  | 262.1  | 330.0  | 466.7  | 126.0  | 16.6   | 14.2   | 4.1    | 6.0    |
| 209.4  | 162.7  | 183.4  | 152.2  | 41.8   | 489.2  | 320.7  | 23.7   | 37.2   |
| 604.2  | 705.6  | 747.4  | 548.5  | 253.4  | 1126.7 | 597.0  | 69.6   | 104.0  |
| 119.2  | 97.3   | 127.0  | 108.2  | 41.2   | 192.0  | 128.2  | 30.5   | 22.1   |
| 5.0    | 0.9    | 0.2    | 0.2    | 0.1    | 23.0   | 5.0    | 0.7    | 1.2    |
| 67.6   | 38.1   | 51.8   | 28.7   | 17.4   | 128.0  | 96.7   | 37.9   | 38.7   |
| 39.4   | 58.5   | 54.4   | 40.3   | 13.3   | 177.5  | 107.0  | 150.8  | 252.4  |
| 224.4  | 159.6  | 169.4  | 105.7  | 80.6   | 286.3  | 156.7  | 9.9    | 10.8   |
| 54.8   | 36.4   | 34.7   | 16.2   | 8.5    | 54.5   | 22.8   | 22.9   | 30.5   |
| 797.3  | 634.6  | 692.8  | 748.0  | 278.1  | 1702.0 | 1323.9 | 399.2  | 435.0  |
| 121.0  | 126.1  | 96.5   | 86.6   | 36.4   | 478.3  | 397.0  | 96.8   | 130.1  |
| 32.0   | 33.4   | 38.9   | 36.3   | 23.6   | 165.8  | 102.2  | 79.1   | 113.2  |
| 30.4   | 11.9   | 12.6   | 17.0   | 9.6    | 78.3   | 38.3   | 85.6   | 140.0  |
| 115.2  | 73.5   | 88.5   | 73.8   | 17.6   | 74.6   | 30.8   | 22.0   | 40.5   |
| 47.0   | 49.7   | 59.0   | 44.1   | 21.7   | 161.2  | 82.8   | 55.4   | 83.0   |
| 108.5  | 97.8   | 140.7  | 90.6   | 28.1   | 113.2  | 96.5   | 12.7   | 9.9    |
| 155.6  | 144.1  | 138.0  | 140.0  | 41.2   | 204.7  | 144.0  | 27.3   | 42.1   |
| 246.0  | 229.3  | 254.3  | 306.1  | 102.9  | 564.3  | 367.1  | 55.0   | 29.0   |
| 1700.1 | 1663.7 | 1480.4 | 1306.0 | 598.4  | 1913.4 | 1312.9 | 567.8  | 642.3  |
| 217.3  | 232.7  | 183.9  | 201.7  | 94.5   | 486.8  | 313.4  | 78.5   | 106.3  |
| 44.9   | 36.1   | 42.7   | 44.9   | 21.7   | 110.6  | 40.0   | 32.2   | 48.3   |
| 307.0  | 209.1  | 287.5  | 234.2  | 90.4   | 538.7  | 327.9  | 108.2  | 121.1  |
| 47.1   | 63.3   | 32.0   | 49.6   | 20.9   | 72.5   | 58.8   | 15.4   | 20.0   |
| 266.4  | 256.2  | 284.9  | 210.9  | 72.8   | 765.4  | 546.2  | 65.4   | 99.4   |
| 5716.8 | 4985.7 | 5592.9 | 7313.9 | 3223.1 | 8720.1 | 7664.3 | 1874.4 | 2223.8 |
| 384.0  | 393.9  | 331.7  | 182.7  | 137.1  | 451.5  | 274.7  | 50.6   | 83.8   |
| 8575.0 | 7939.6 | 7005.9 | 7123.3 | 4160.5 | 9640.7 | 7565.9 | 3176.5 | 3612.2 |
| 135.9  | 141.3  | 141.2  | 117.6  | 54.8   | 289.5  | 181.5  | 42.3   | 48.9   |
| 189.4  | 232.4  | 217.4  | 112.3  | 53.6   | 555.8  | 378.0  | 33.2   | 43.6   |
| 6.2    | 19.8   | 17.4   | 12.9   | 4.2    | 11.0   | 7.4    | 9.2    | 17.6   |
| 274.4  | 206.1  | 245.3  | 244.9  | 104.8  | 524.6  | 542.3  | 47.9   | 81.5   |
| 385.7  | 433.4  | 511.4  | 751.9  | 152.8  | 502.2  | 285.9  | 44.4   | 74.4   |
| 132.7  | 120.5  | 100.8  | 55.9   | 27.7   | 356.2  | 167.0  | 65.5   | 88.1   |
| 18.3   | 13.1   | 16.0   | 6.6    | 3.2    | 16.3   | 9.2    | 21.8   | 29.3   |
| 132.0  | 152.3  | 118.0  | 103.5  | 51.6   | 689.4  | 485.2  | 74.6   | 137.4  |
| 172.5  | 168.8  | 161.7  | 148.2  | 82.5   | 314.6  | 243.7  | 66.0   | 82.8   |
| 51.4   | 53.2   | 50.7   | 34.8   | 9.7    | 64.5   | 42.4   | 36.8   | 30.8   |
| 166.5  | 153.1  | 138.7  | 73.9   | 31.8   | 213.3  | 137.9  | 119.1  | 155.1  |
| 243.9  | 237.8  | 226.3  | 211.8  | 71.4   | 302.3  | 206.5  | 146.4  | 174.0  |
| 116.9  | 101.9  | 100.3  | 89.2   | 46.6   | 89.8   | 36.9   | 18.9   | 33.0   |
| 191.3  | 172.4  | 192.8  | 202.8  | 56.1   | 147.4  | 103.0  | 45.0   | 112.3  |

|        |        |        |        |        |        |        |       |        |
|--------|--------|--------|--------|--------|--------|--------|-------|--------|
| 6.6    | 6.7    | 17.5   | 14.2   | 4.8    | 49.6   | 16.3   | 16.0  | 19.1   |
| 4.9    | 8.9    | 5.0    | 7.4    | 2.6    | 10.9   | 15.4   | 11.9  | 9.2    |
| 74.1   | 70.7   | 43.5   | 27.1   | 17.7   | 139.2  | 75.6   | 68.0  | 97.0   |
| 61.8   | 56.8   | 55.5   | 46.0   | 18.9   | 113.2  | 50.9   | 28.7  | 48.8   |
| 206.8  | 204.8  | 203.6  | 180.2  | 62.4   | 370.3  | 210.5  | 101.1 | 95.8   |
| 17.8   | 11.0   | 39.8   | 32.1   | 8.3    | 113.0  | 51.7   | 125.0 | 174.6  |
| 63.0   | 58.5   | 102.4  | 50.2   | 29.3   | 209.6  | 113.7  | 326.4 | 327.6  |
| 61.8   | 82.1   | 63.5   | 81.6   | 18.3   | 280.2  | 230.1  | 75.2  | 128.3  |
| 312.4  | 254.7  | 236.1  | 171.4  | 76.2   | 25.2   | 21.2   | 10.3  | 9.8    |
| 98.1   | 93.0   | 84.9   | 75.0   | 29.5   | 74.0   | 55.1   | 28.3  | 32.9   |
| 240.7  | 248.5  | 253.9  | 258.7  | 66.4   | 592.8  | 410.8  | 73.0  | 147.8  |
| 193.3  | 206.0  | 249.6  | 216.7  | 100.7  | 316.4  | 190.5  | 36.7  | 46.4   |
| 55.7   | 40.9   | 57.6   | 32.4   | 12.4   | 47.6   | 47.1   | 19.1  | 25.0   |
| 126.9  | 100.6  | 109.1  | 148.8  | 46.3   | 307.0  | 204.8  | 26.9  | 37.5   |
| 40.4   | 40.5   | 54.2   | 53.3   | 8.5    | 176.0  | 87.3   | 6.9   | 3.3    |
| 100.7  | 115.7  | 110.7  | 94.2   | 27.9   | 265.2  | 176.2  | 14.7  | 19.6   |
| 4.9    | 5.3    | 2.4    | 1.7    | 6.6    | 3.8    | 23.0   | 5.2   | 2.4    |
| 43.1   | 36.2   | 29.2   | 29.5   | 15.5   | 167.8  | 126.1  | 13.0  | 15.1   |
| 52.9   | 41.1   | 23.4   | 6.9    | 6.6    | 173.3  | 161.3  | 50.6  | 56.2   |
| 321.5  | 339.3  | 303.1  | 276.0  | 78.5   | 401.7  | 289.2  | 42.9  | 41.8   |
| 404.9  | 402.8  | 390.4  | 275.7  | 138.5  | 352.1  | 241.6  | 100.4 | 153.8  |
| 909.8  | 820.7  | 1074.8 | 1045.9 | 457.6  | 2817.1 | 2735.7 | 717.1 | 1084.6 |
| 38.5   | 9.0    | 29.1   | 17.5   | 5.0    | 13.7   | 4.8    | 17.7  | 40.7   |
| 131.5  | 119.0  | 149.0  | 83.3   | 44.3   | 612.3  | 375.7  | 57.7  | 78.0   |
| 127.6  | 135.1  | 104.6  | 80.8   | 41.3   | 284.0  | 188.1  | 66.5  | 90.6   |
| 29.4   | 29.6   | 13.3   | 9.6    | 4.7    | 165.8  | 123.0  | 209.5 | 367.4  |
| 7.2    | 6.5    | 9.1    | 2.3    | 0.9    | 8.4    | 13.3   | 25.4  | 43.2   |
| 434.5  | 423.6  | 384.6  | 362.3  | 127.6  | 500.6  | 397.5  | 137.2 | 192.5  |
| 211.1  | 230.8  | 213.2  | 245.8  | 101.2  | 781.1  | 570.2  | 70.1  | 115.4  |
| 123.3  | 105.7  | 108.6  | 90.4   | 40.5   | 193.5  | 149.7  | 133.7 | 76.9   |
| 124.6  | 100.2  | 105.0  | 121.5  | 33.0   | 118.1  | 62.1   | 25.5  | 28.6   |
| 397.9  | 355.7  | 357.3  | 200.2  | 114.7  | 524.9  | 297.2  | 116.8 | 146.0  |
| 179.1  | 150.2  | 173.6  | 131.0  | 47.3   | 218.2  | 139.7  | 48.7  | 52.4   |
| 303.8  | 257.5  | 290.2  | 185.6  | 116.8  | 529.4  | 466.9  | 72.1  | 93.0   |
| 17.0   | 15.4   | 10.4   | 24.0   | 5.2    | 20.6   | 21.7   | 12.1  | 20.1   |
| 95.3   | 72.4   | 71.7   | 85.3   | 20.0   | 281.6  | 189.6  | 30.3  | 52.6   |
| 20.3   | 28.0   | 22.3   | 23.1   | 11.8   | 27.0   | 31.6   | 141.9 | 163.2  |
| 334.6  | 318.2  | 381.0  | 440.8  | 120.0  | 395.3  | 281.4  | 76.6  | 85.5   |
| 8.5    | 12.6   | 0.8    | 8.2    | 4.7    | 24.0   | 9.2    | 1.6   | 8.2    |
| 103.5  | 81.8   | 83.8   | 62.3   | 25.8   | 100.4  | 49.7   | 49.9  | 23.5   |
| 476.3  | 408.5  | 354.9  | 428.7  | 127.8  | 227.8  | 172.0  | 10.4  | 7.2    |
| 948.2  | 1015.1 | 1014.4 | 696.2  | 241.1  | 1744.2 | 1127.4 | 85.3  | 135.6  |
| 155.2  | 153.8  | 140.7  | 89.7   | 40.8   | 256.6  | 165.0  | 19.9  | 21.9   |
| 28.8   | 4.4    | 11.1   | 3.1    | 3.1    | 167.0  | 191.8  | 44.3  | 50.2   |
| 14.7   | 28.0   | 31.3   | 32.6   | 14.8   | 98.1   | 62.9   | 62.9  | 75.5   |
| 25.0   | 38.9   | 38.4   | 15.5   | 14.3   | 20.1   | 4.8    | 1.1   | 6.4    |
| 245.1  | 230.0  | 231.0  | 188.3  | 66.5   | 113.6  | 55.3   | 37.7  | 45.9   |
| 590.6  | 326.2  | 393.5  | 381.4  | 153.9  | 1427.3 | 1302.6 | 166.6 | 224.9  |
| 199.3  | 146.4  | 182.2  | 165.8  | 45.0   | 67.1   | 35.1   | 24.6  | 22.3   |
| 1468.7 | 1450.1 | 1277.9 | 1491.7 | 529.4  | 871.4  | 667.8  | 374.8 | 633.6  |
| 592.7  | 619.4  | 642.5  | 528.5  | 265.9  | 254.8  | 109.7  | 15.0  | 26.5   |
| 66.6   | 62.4   | 54.8   | 55.1   | 19.3   | 188.7  | 133.3  | 69.4  | 99.0   |
| 2790.7 | 2643.9 | 2631.5 | 2183.3 | 1036.4 | 4201.3 | 3212.2 | 427.9 | 909.7  |

|        |        |        |        |        |         |        |        |        |
|--------|--------|--------|--------|--------|---------|--------|--------|--------|
| 93.9   | 85.5   | 77.7   | 41.2   | 27.4   | 169.8   | 146.8  | 71.9   | 90.8   |
| 3273.8 | 2621.6 | 2033.0 | 873.0  | 784.9  | 7112.3  | 6185.9 | 54.1   | 78.1   |
| 89.5   | 91.2   | 98.8   | 80.4   | 45.7   | 196.0   | 131.8  | 25.3   | 49.8   |
| 178.8  | 137.4  | 120.2  | 111.3  | 62.3   | 272.4   | 166.7  | 77.3   | 104.5  |
| 86.1   | 76.4   | 77.8   | 51.7   | 11.4   | 67.2    | 53.9   | 40.0   | 80.5   |
| 486.4  | 379.3  | 436.4  | 257.6  | 149.6  | 748.4   | 259.7  | 461.2  | 766.9  |
| 84.0   | 79.2   | 85.8   | 77.3   | 38.9   | 117.7   | 81.4   | 103.3  | 108.5  |
| 6.2    | 4.2    | 1.6    | 2.6    | 0.9    | 3.7     | 1.7    | 1.6    | 7.7    |
| 76.1   | 79.5   | 69.4   | 71.7   | 31.0   | 194.4   | 96.0   | 69.4   | 83.0   |
| 64.2   | 61.9   | 67.8   | 43.9   | 19.6   | 295.1   | 141.6  | 28.2   | 100.2  |
| 18.7   | 14.5   | 16.4   | 11.0   | 6.6    | 34.3    | 3.5    | 30.2   | 11.1   |
| 7886.3 | 7207.3 | 6851.9 | 7298.5 | 4801.7 | 10527.4 | 9702.6 | 4564.8 | 4656.9 |
| 178.7  | 175.0  | 259.3  | 485.7  | 98.6   | 168.0   | 89.5   | 39.7   | 57.1   |
| 182.4  | 148.3  | 170.4  | 170.2  | 49.6   | 333.8   | 202.5  | 144.4  | 146.4  |
| 295.9  | 256.0  | 254.1  | 197.5  | 87.2   | 1029.6  | 663.0  | 87.7   | 109.1  |
| 117.3  | 122.2  | 100.9  | 38.4   | 49.7   | 197.3   | 144.6  | 3.7    | 9.7    |
| 0.8    | 0.8    | 1.0    | 0.9    | 0.5    | 1.0     | 0.8    | 1.2    | 1.2    |
| 120.2  | 79.2   | 65.9   | 57.4   | 27.5   | 196.5   | 136.1  | 106.2  | 152.6  |
| 49.7   | 54.5   | 66.4   | 74.1   | 22.0   | 348.9   | 327.1  | 21.6   | 31.0   |
| 147.8  | 119.4  | 145.4  | 109.2  | 38.5   | 285.6   | 219.3  | 128.9  | 166.0  |
| 286.5  | 262.3  | 331.0  | 358.0  | 102.4  | 630.5   | 449.5  | 159.1  | 173.1  |
| 56.5   | 44.2   | 28.3   | 30.0   | 1.0    | 52.2    | 23.0   | 27.7   | 20.4   |
| 93.2   | 71.3   | 54.3   | 60.1   | 31.5   | 49.1    | 39.4   | 41.7   | 74.4   |
| 130.1  | 99.8   | 113.0  | 85.9   | 30.4   | 91.6    | 70.2   | 52.0   | 53.2   |
| 98.8   | 80.5   | 92.7   | 115.7  | 34.4   | 174.3   | 142.6  | 41.2   | 44.3   |
| 6.4    | 5.6    | 0.4    | 6.5    | 7.3    | 12.7    | 8.9    | 1.1    | 0.6    |
| 116.9  | 87.6   | 105.1  | 93.4   | 56.6   | 77.5    | 90.4   | 28.2   | 33.6   |
| 430.2  | 423.6  | 506.7  | 438.3  | 187.9  | 518.4   | 335.6  | 63.8   | 69.5   |
| 4.0    | 5.3    | 7.6    | 5.5    | 1.3    | 59.0    | 31.8   | 1.5    | 6.8    |
| 816.4  | 843.3  | 722.9  | 679.7  | 194.6  | 690.7   | 542.9  | 66.7   | 96.4   |
| 219.9  | 218.1  | 237.1  | 177.9  | 80.8   | 654.5   | 413.9  | 33.3   | 59.6   |
| 3.4    | 2.0    | 3.0    | 1.2    | 0.9    | 4.3     | 1.9    | 5.8    | 4.3    |
| 80.2   | 72.9   | 58.5   | 48.4   | 16.5   | 203.9   | 114.3  | 83.2   | 118.2  |
| 235.3  | 255.7  | 217.9  | 171.8  | 75.8   | 397.9   | 328.3  | 82.4   | 69.8   |
| 84.7   | 73.1   | 54.2   | 68.4   | 20.8   | 117.1   | 60.9   | 137.5  | 158.3  |
| 315.7  | 299.8  | 381.1  | 440.0  | 124.3  | 538.6   | 405.7  | 50.1   | 62.5   |
| 168.1  | 155.3  | 186.9  | 163.5  | 53.4   | 153.8   | 76.7   | 51.9   | 67.3   |
| 170.9  | 180.7  | 152.0  | 113.5  | 44.0   | 635.0   | 499.8  | 122.7  | 162.7  |
| 735.1  | 741.9  | 737.4  | 714.6  | 236.1  | 922.1   | 675.7  | 103.5  | 123.7  |
| 47.6   | 57.0   | 38.4   | 40.1   | 18.2   | 100.5   | 71.5   | 74.0   | 83.6   |
| 514.5  | 585.0  | 554.7  | 469.9  | 229.3  | 1155.7  | 802.1  | 23.4   | 73.3   |
| 67.5   | 64.3   | 69.4   | 114.4  | 23.5   | 110.5   | 88.3   | 98.9   | 144.2  |
| 176.9  | 173.0  | 192.3  | 176.6  | 63.1   | 332.6   | 250.4  | 64.0   | 56.0   |
| 61.8   | 31.6   | 40.9   | 15.7   | 15.4   | 50.7    | 27.4   | 65.9   | 50.1   |
| 68.8   | 58.6   | 59.6   | 85.3   | 34.7   | 115.8   | 103.3  | 45.1   | 76.9   |
| 1177.2 | 1082.6 | 961.7  | 797.7  | 408.8  | 1952.8  | 1402.5 | 246.5  | 324.2  |
| 106.6  | 119.7  | 88.6   | 50.6   | 29.5   | 61.6    | 34.4   | 42.7   | 45.6   |
| 799.6  | 789.1  | 737.0  | 570.6  | 331.4  | 175.4   | 140.8  | 18.3   | 7.6    |
| 343.0  | 321.6  | 381.9  | 236.9  | 88.3   | 719.9   | 498.9  | 42.5   | 54.7   |
| 105.0  | 69.0   | 82.2   | 72.9   | 29.8   | 306.2   | 232.9  | 23.2   | 50.5   |
| 2.0    | 1.1    | 2.2    | 1.6    | 6.2    | 112.9   | 82.4   | 4.7    | 14.9   |
| 230.3  | 241.3  | 199.9  | 135.9  | 110.5  | 460.3   | 301.4  | 115.6  | 101.8  |
| 68.3   | 52.7   | 63.1   | 61.9   | 22.1   | 110.3   | 88.2   | 13.6   | 23.7   |



|        |        |        |        |       |        |        |        |        |
|--------|--------|--------|--------|-------|--------|--------|--------|--------|
| 16.9   | 17.4   | 24.2   | 8.6    | 1.1   | 1242.9 | 1231.2 | 4.1    | 13.5   |
| 57.0   | 67.8   | 93.5   | 54.8   | 16.2  | 76.4   | 56.6   | 20.4   | 17.2   |
| 55.0   | 45.6   | 31.3   | 27.7   | 8.9   | 108.7  | 70.7   | 16.4   | 6.1    |
| 0.6    | 0.6    | 0.5    | 0.2    | 0.3   | 11.7   | 1.1    | 6.3    | 9.8    |
| 70.0   | 53.6   | 52.7   | 33.0   | 16.5  | 61.8   | 36.7   | 56.8   | 62.5   |
| 887.1  | 857.1  | 908.8  | 812.5  | 260.2 | 1245.9 | 861.9  | 20.0   | 19.0   |
| 1231.6 | 1252.2 | 1382.7 | 1291.4 | 529.1 | 1312.8 | 682.3  | 19.5   | 31.6   |
| 208.6  | 236.6  | 212.8  | 223.0  | 63.1  | 600.5  | 502.9  | 43.8   | 65.7   |
| 241.1  | 233.9  | 268.8  | 271.4  | 91.9  | 232.5  | 181.9  | 9.5    | 37.3   |
| 9.4    | 8.5    | 12.9   | 4.2    | 5.3   | 20.1   | 16.8   | 8.2    | 17.1   |
| 425.3  | 436.5  | 364.1  | 219.3  | 160.3 | 1108.7 | 760.9  | 183.1  | 302.4  |
| 172.0  | 128.0  | 206.8  | 236.8  | 71.5  | 209.3  | 158.8  | 5.0    | 13.4   |
| 5.3    | 1.5    | 7.5    | 2.6    | 4.6   | 46.0   | 31.1   | 2.9    | 9.1    |
| 41.9   | 41.7   | 31.3   | 40.4   | 8.4   | 532.7  | 344.7  | 169.5  | 268.5  |
| 75.9   | 48.9   | 51.6   | 38.3   | 9.1   | 141.4  | 94.9   | 15.4   | 29.1   |
| 103.7  | 101.6  | 121.9  | 81.4   | 39.6  | 156.2  | 95.2   | 11.2   | 13.4   |
| 114.5  | 96.0   | 101.3  | 52.0   | 23.6  | 356.5  | 247.6  | 46.5   | 66.8   |
| 133.3  | 169.6  | 152.1  | 200.2  | 67.1  | 78.2   | 70.1   | 44.4   | 41.8   |
| 119.6  | 115.4  | 169.3  | 210.9  | 58.8  | 220.8  | 95.8   | 7.9    | 10.6   |
| 150.2  | 72.4   | 123.2  | 91.6   | 28.3  | 418.0  | 279.1  | 51.6   | 77.5   |
| 114.4  | 61.6   | 49.5   | 31.8   | 17.2  | 177.4  | 87.0   | 60.4   | 52.3   |
| 2422.8 | 2287.4 | 2490.5 | 2446.3 | 905.4 | 6907.1 | 5427.4 | 1230.1 | 1439.4 |
| 97.9   | 150.4  | 150.9  | 97.5   | 56.5  | 227.1  | 131.4  | 35.7   | 52.8   |
| 2.4    | 3.1    | 2.2    | 1.7    | 0.6   | 18.7   | 11.4   | 171.9  | 248.6  |
| 253.7  | 210.6  | 219.9  | 172.6  | 64.8  | 171.9  | 114.7  | 34.5   | 35.1   |
| 1.7    | 2.3    | 14.5   | 1.6    | 0.7   | 42.3   | 2.7    | 1.2    | 3.1    |
| 30.9   | 18.2   | 4.5    | 3.3    | 9.3   | 41.0   | 10.5   | 10.9   | 10.6   |
| 1.2    | 3.3    | 1.8    | 1.0    | 0.5   | 16.6   | 1.3    | 1.0    | 3.6    |
| 2.4    | 1.9    | 1.7    | 1.7    | 6.2   | 17.2   | 3.7    | 16.8   | 17.9   |
| 0.6    | 3.9    | 9.0    | 2.3    | 0.5   | 6.3    | 6.2    | 4.1    | 14.1   |
| 827.7  | 796.9  | 805.0  | 578.2  | 170.9 | 843.9  | 533.0  | 22.6   | 70.7   |
| 129.3  | 148.0  | 113.1  | 68.5   | 36.1  | 316.4  | 158.3  | 13.0   | 39.3   |
| 85.5   | 74.4   | 69.6   | 112.5  | 30.0  | 283.0  | 172.9  | 21.5   | 24.9   |
| 67.1   | 80.2   | 72.2   | 53.6   | 31.1  | 166.6  | 140.4  | 57.6   | 77.2   |
| 48.0   | 35.0   | 39.1   | 78.0   | 16.3  | 163.0  | 130.2  | 36.0   | 31.1   |
| 72.5   | 57.6   | 40.9   | 91.4   | 16.9  | 94.5   | 53.9   | 45.4   | 53.5   |
| 1046.2 | 887.0  | 913.1  | 568.3  | 370.1 | 366.6  | 223.2  | 54.1   | 48.3   |
| 7.7    | 6.4    | 14.9   | 5.8    | 2.7   | 34.7   | 35.0   | 10.0   | 4.9    |
| 6.6    | 0.8    | 1.0    | 1.2    | 0.6   | 3.2    | 8.7    | 4.1    | 1.7    |
| 194.7  | 74.4   | 84.0   | 61.6   | 66.4  | 823.8  | 1925.5 | 97.7   | 81.5   |
| 570.6  | 613.6  | 423.9  | 336.6  | 157.7 | 678.3  | 269.7  | 264.6  | 445.4  |
| 178.9  | 160.8  | 166.2  | 233.4  | 68.8  | 26.6   | 8.9    | 39.7   | 46.8   |
| 615.8  | 643.4  | 654.5  | 497.0  | 310.3 | 3222.1 | 2296.2 | 231.3  | 305.8  |
| 70.4   | 82.0   | 73.9   | 87.9   | 30.7  | 56.5   | 49.1   | 62.6   | 93.3   |
| 14.1   | 14.6   | 6.5    | 5.6    | 5.8   | 33.4   | 21.8   | 14.5   | 26.4   |
| 270.2  | 295.9  | 198.9  | 168.1  | 87.1  | 546.0  | 369.8  | 34.6   | 65.2   |
| 251.8  | 271.3  | 272.5  | 206.0  | 95.8  | 325.9  | 200.2  | 30.8   | 36.2   |
| 36.7   | 16.7   | 29.4   | 23.0   | 15.9  | 23.9   | 20.0   | 30.7   | 28.1   |
| 511.4  | 404.7  | 457.3  | 420.3  | 190.9 | 324.8  | 193.5  | 159.3  | 201.4  |
| 49.1   | 34.5   | 18.8   | 11.3   | 14.8  | 23.0   | 1.5    | 1.9    | 7.3    |
| 17.7   | 9.3    | 15.7   | 7.5    | 10.6  | 34.9   | 17.1   | 4.6    | 24.5   |
| 117.9  | 131.4  | 116.1  | 146.4  | 47.9  | 241.6  | 176.6  | 19.2   | 17.9   |
| 22.6   | 8.2    | 25.9   | 24.1   | 10.3  | 63.1   | 22.2   | 3.5    | 9.4    |

|        |        |        |        |        |        |        |        |        |
|--------|--------|--------|--------|--------|--------|--------|--------|--------|
| 86.0   | 73.0   | 58.1   | 59.0   | 18.7   | 279.6  | 178.3  | 9.6    | 17.0   |
| 2860.6 | 2863.6 | 2731.9 | 2644.4 | 1196.8 | 3053.9 | 2496.6 | 630.2  | 709.1  |
| 52.4   | 49.7   | 54.7   | 45.5   | 28.0   | 112.2  | 54.1   | 78.2   | 117.2  |
| 62.1   | 47.8   | 48.8   | 51.8   | 35.5   | 151.7  | 58.6   | 25.3   | 25.6   |
| 101.7  | 76.4   | 66.5   | 58.2   | 35.8   | 140.0  | 90.7   | 36.1   | 42.3   |
| 1659.1 | 1431.9 | 2058.4 | 2187.9 | 1079.7 | 1909.9 | 1514.1 | 187.0  | 252.9  |
| 26.1   | 15.3   | 12.8   | 9.7    | 9.4    | 38.9   | 11.8   | 21.3   | 36.8   |
| 789.2  | 533.4  | 456.7  | 410.7  | 121.0  | 659.5  | 552.6  | 50.6   | 78.3   |
| 10.5   | 13.5   | 18.6   | 17.5   | 5.1    | 23.3   | 27.0   | 8.6    | 19.8   |
| 11.3   | 8.6    | 16.1   | 13.9   | 5.9    | 129.2  | 110.6  | 3.9    | 7.8    |
| 20.1   | 8.1    | 16.9   | 16.1   | 4.6    | 44.9   | 21.8   | 5.3    | 1.2    |
| 10.7   | 0.8    | 3.8    | 10.2   | 2.4    | 9.6    | 2.5    | 71.7   | 139.2  |
| 126.4  | 106.4  | 123.7  | 135.5  | 23.4   | 221.1  | 159.1  | 55.4   | 83.0   |
| 88.8   | 121.8  | 105.3  | 87.5   | 27.3   | 146.6  | 89.1   | 43.7   | 88.0   |
| 30.1   | 34.6   | 42.0   | 30.0   | 15.6   | 53.2   | 21.2   | 2.1    | 4.6    |
| 245.9  | 361.6  | 292.6  | 211.1  | 72.7   | 387.9  | 293.8  | 19.3   | 20.9   |
| 186.3  | 183.2  | 217.6  | 217.6  | 57.2   | 215.4  | 170.8  | 36.5   | 35.0   |
| 229.1  | 159.9  | 139.7  | 97.3   | 52.3   | 886.4  | 630.3  | 192.1  | 220.7  |
| 234.9  | 289.6  | 267.3  | 322.8  | 128.6  | 291.1  | 179.0  | 12.8   | 31.8   |
| 145.7  | 135.7  | 125.0  | 95.5   | 40.9   | 210.6  | 168.7  | 21.9   | 26.4   |
| 171.2  | 151.1  | 173.2  | 175.8  | 57.6   | 200.5  | 123.9  | 69.9   | 93.8   |
| 569.9  | 515.2  | 467.8  | 296.6  | 176.3  | 899.1  | 549.2  | 175.9  | 246.7  |
| 6232.7 | 5520.6 | 5378.5 | 4442.8 | 3063.1 | 7907.3 | 6809.7 | 2130.0 | 3561.8 |
| 90.7   | 99.3   | 128.3  | 122.5  | 31.6   | 149.3  | 85.5   | 15.2   | 24.2   |
| 80.8   | 83.9   | 88.9   | 69.9   | 29.4   | 173.0  | 74.3   | 6.8    | 11.5   |
| 28.7   | 44.1   | 23.2   | 15.7   | 11.7   | 19.0   | 14.5   | 10.5   | 14.9   |
| 158.4  | 157.7  | 148.4  | 125.2  | 83.4   | 366.1  | 256.7  | 2.2    | 1.2    |
| 125.3  | 115.1  | 82.1   | 64.9   | 24.5   | 355.4  | 170.5  | 31.2   | 48.4   |
| 119.5  | 136.5  | 126.0  | 131.3  | 44.5   | 113.4  | 85.5   | 47.4   | 69.1   |
| 931.5  | 904.3  | 809.1  | 695.1  | 377.3  | 2218.8 | 1653.9 | 394.9  | 563.3  |
| 59.8   | 66.5   | 63.7   | 58.4   | 25.6   | 66.9   | 85.0   | 14.9   | 15.7   |
| 185.1  | 167.1  | 177.8  | 275.3  | 52.0   | 309.2  | 229.2  | 44.2   | 55.1   |
| 6.4    | 14.8   | 6.3    | 6.5    | 0.5    | 24.8   | 1.8    | 1.9    | 7.3    |
| 3.3    | 4.8    | 2.2    | 5.7    | 1.0    | 9.7    | 8.4    | 0.3    | 0.9    |
| 211.9  | 165.6  | 211.1  | 288.7  | 60.6   | 261.2  | 157.8  | 16.8   | 17.2   |
| 32.7   | 12.0   | 18.2   | 17.3   | 0.8    | 22.0   | 9.1    | 15.2   | 21.4   |
| 54.0   | 37.7   | 45.4   | 56.5   | 15.4   | 145.8  | 157.0  | 53.0   | 78.9   |
| 15.5   | 7.3    | 12.5   | 6.5    | 0.9    | 11.0   | 12.7   | 1.3    | 7.9    |
| 15.9   | 13.2   | 16.9   | 3.7    | 6.5    | 26.2   | 10.9   | 12.0   | 8.4    |
| 58.0   | 50.6   | 44.3   | 41.6   | 18.0   | 167.0  | 103.3  | 9.3    | 22.6   |
| 3.7    | 2.6    | 5.2    | 0.2    | 3.0    | 3.6    | 6.8    | 1.8    | 4.3    |
| 414.2  | 329.3  | 465.2  | 217.7  | 104.4  | 1497.3 | 609.5  | 56.0   | 54.2   |
| 334.1  | 335.0  | 295.0  | 174.8  | 67.7   | 642.0  | 240.5  | 47.3   | 103.9  |
| 623.2  | 640.6  | 515.2  | 484.5  | 204.9  | 490.3  | 269.0  | 600.1  | 933.8  |
| 21.1   | 22.8   | 31.2   | 20.6   | 16.8   | 532.6  | 461.1  | 1.1    | 2.3    |
| 5124.1 | 4532.3 | 3908.3 | 3102.8 | 1998.0 | 5960.9 | 4580.6 | 944.3  | 1232.9 |
| 134.9  | 151.3  | 137.1  | 85.6   | 29.7   | 233.2  | 134.4  | 23.5   | 41.0   |
| 27.6   | 12.0   | 16.3   | 7.9    | 1.2    | 42.9   | 18.6   | 40.8   | 42.7   |
| 13.5   | 6.0    | 4.0    | 1.4    | 5.3    | 11.4   | 10.1   | 19.2   | 12.8   |
| 150.2  | 79.5   | 50.7   | 60.7   | 25.3   | 205.2  | 209.1  | 44.2   | 39.2   |
| 334.1  | 233.2  | 234.4  | 207.3  | 82.3   | 683.7  | 581.6  | 80.5   | 105.8  |
| 302.2  | 429.0  | 375.1  | 183.3  | 64.4   | 905.4  | 709.9  | 31.1   | 34.9   |
| 73.9   | 82.9   | 77.9   | 113.1  | 30.7   | 168.4  | 131.7  | 56.1   | 58.7   |

|        |        |        |        |        |        |        |        |        |
|--------|--------|--------|--------|--------|--------|--------|--------|--------|
| 85.8   | 91.7   | 78.5   | 43.4   | 28.9   | 394.3  | 257.4  | 6.5    | 20.7   |
| 161.7  | 170.0  | 189.8  | 144.6  | 47.9   | 198.4  | 111.3  | 33.6   | 80.9   |
| 235.6  | 199.5  | 209.1  | 274.7  | 80.6   | 525.6  | 377.0  | 150.3  | 232.1  |
| 46.3   | 33.8   | 44.6   | 17.1   | 11.8   | 55.0   | 29.4   | 45.5   | 32.4   |
| 18.5   | 17.3   | 23.8   | 9.2    | 3.0    | 12.0   | 18.6   | 20.8   | 20.4   |
| 87.5   | 71.4   | 87.2   | 102.6  | 30.6   | 114.9  | 77.8   | 8.5    | 17.0   |
| 153.4  | 154.9  | 152.4  | 156.3  | 54.6   | 418.3  | 290.1  | 26.0   | 39.5   |
| 201.3  | 164.0  | 169.5  | 297.7  | 69.1   | 611.6  | 415.6  | 42.0   | 58.1   |
| 177.4  | 156.6  | 158.8  | 205.7  | 49.5   | 508.7  | 351.4  | 29.8   | 63.0   |
| 98.9   | 86.0   | 84.8   | 76.7   | 31.7   | 216.4  | 115.9  | 83.8   | 84.1   |
| 81.4   | 122.0  | 66.4   | 34.0   | 33.4   | 182.6  | 128.8  | 37.1   | 44.0   |
| 5.9    | 5.3    | 1.2    | 2.8    | 1.7    | 90.6   | 66.4   | 1.8    | 5.5    |
| 297.6  | 241.8  | 296.5  | 242.4  | 95.2   | 851.2  | 490.6  | 103.4  | 85.7   |
| 24.0   | 29.2   | 21.2   | 9.5    | 1.0    | 44.9   | 24.0   | 15.1   | 13.8   |
| 2.2    | 3.7    | 3.4    | 0.6    | 0.6    | 14.1   | 2.2    | 1.5    | 6.0    |
| 144.5  | 178.6  | 166.8  | 148.3  | 50.0   | 166.4  | 89.9   | 23.8   | 30.0   |
| 277.5  | 218.5  | 224.6  | 151.1  | 106.1  | 94.5   | 75.8   | 24.4   | 32.3   |
| 2.9    | 1.3    | 2.1    | 2.1    | 1.3    | 23.7   | 16.3   | 473.8  | 548.3  |
| 1900.8 | 1809.2 | 1631.7 | 1254.3 | 657.5  | 2340.6 | 1664.0 | 835.9  | 1422.0 |
| 123.6  | 61.0   | 109.4  | 97.0   | 25.1   | 96.5   | 77.0   | 29.3   | 39.4   |
| 352.6  | 318.6  | 331.5  | 297.9  | 112.6  | 648.7  | 508.6  | 132.3  | 121.1  |
| 11.1   | 11.4   | 1.6    | 1.8    | 1.3    | 46.2   | 30.0   | 17.3   | 9.7    |
| 410.6  | 342.1  | 374.5  | 219.5  | 146.7  | 607.3  | 363.4  | 159.9  | 182.3  |
| 0.8    | 2.9    | 0.8    | 2.0    | 2.2    | 0.6    | 0.7    | 121.2  | 104.2  |
| 177.0  | 161.0  | 141.5  | 103.9  | 41.0   | 177.9  | 113.0  | 624.0  | 766.8  |
| 673.4  | 690.6  | 785.7  | 888.3  | 252.6  | 1284.8 | 899.1  | 173.1  | 283.3  |
| 40.3   | 56.4   | 29.8   | 24.3   | 26.2   | 28.0   | 2.2    | 8.9    | 3.2    |
| 86.0   | 68.7   | 80.9   | 58.3   | 13.8   | 69.8   | 45.6   | 46.4   | 78.9   |
| 1900.3 | 2127.7 | 1829.7 | 1805.8 | 738.2  | 3287.6 | 2491.4 | 1627.1 | 1907.2 |
| 5048.1 | 2994.5 | 3541.4 | 2642.5 | 2447.6 | 7014.5 | 4831.7 | 1398.8 | 1710.3 |
| 174.9  | 178.4  | 231.9  | 229.0  | 65.2   | 99.2   | 68.2   | 35.5   | 54.7   |
| 7.8    | 5.5    | 4.4    | 9.6    | 2.9    | 168.1  | 136.5  | 137.1  | 177.5  |
| 310.3  | 246.4  | 252.6  | 213.0  | 105.3  | 768.1  | 723.0  | 74.9   | 112.0  |
| 491.4  | 390.1  | 449.2  | 349.7  | 196.2  | 635.7  | 353.9  | 181.2  | 199.6  |
| 39.0   | 33.1   | 45.4   | 35.6   | 16.0   | 365.1  | 243.0  | 31.0   | 30.0   |
| 23.6   | 32.3   | 28.8   | 17.0   | 8.9    | 118.2  | 68.9   | 10.3   | 9.6    |
| 46.0   | 16.4   | 18.5   | 14.0   | 15.8   | 54.1   | 31.5   | 23.2   | 30.5   |
| 4.7    | 5.1    | 10.7   | 10.5   | 2.5    | 27.1   | 28.3   | 15.2   | 14.4   |
| 84.9   | 63.7   | 78.9   | 57.0   | 24.1   | 90.1   | 52.5   | 34.4   | 45.2   |
| 46.0   | 52.5   | 36.6   | 32.3   | 22.1   | 14.1   | 13.9   | 10.6   | 18.1   |
| 23.0   | 5.0    | 2.7    | 5.3    | 0.6    | 20.7   | 25.4   | 114.0  | 206.6  |
| 21.2   | 15.4   | 12.8   | 12.1   | 2.0    | 3.3    | 5.4    | 5.1    | 17.3   |
| 246.4  | 231.8  | 174.1  | 197.1  | 99.0   | 378.9  | 260.3  | 63.7   | 59.8   |
| 189.6  | 189.5  | 168.3  | 146.3  | 75.0   | 280.3  | 293.3  | 51.7   | 31.1   |
| 99.2   | 90.4   | 114.9  | 88.5   | 29.6   | 365.3  | 195.5  | 93.5   | 259.6  |
| 302.2  | 257.7  | 295.8  | 256.7  | 87.6   | 818.9  | 530.7  | 68.5   | 150.8  |
| 174.6  | 163.3  | 141.7  | 184.8  | 47.8   | 143.0  | 117.2  | 26.5   | 44.9   |
| 99.9   | 69.0   | 118.1  | 173.4  | 26.5   | 45.6   | 39.4   | 2.8    | 11.0   |
| 43.7   | 22.4   | 9.6    | 6.0    | 8.4    | 69.7   | 39.6   | 3.0    | 10.8   |
| 1.1    | 2.0    | 8.6    | 0.5    | 1.5    | 4.2    | 1.4    | 8.2    | 2.8    |
| 83.2   | 61.4   | 96.4   | 63.3   | 19.5   | 579.8  | 614.9  | 1.5    | 1.1    |
| 332.0  | 339.2  | 350.8  | 415.6  | 111.4  | 722.5  | 516.7  | 59.9   | 84.3   |
| 1.6    | 0.6    | 6.3    | 1.0    | 1.2    | 7.2    | 7.7    | 10.1   | 3.5    |

|         |        |        |        |        |         |         |        |        |
|---------|--------|--------|--------|--------|---------|---------|--------|--------|
| 41.8    | 11.2   | 21.4   | 24.9   | 12.4   | 53.2    | 29.1    | 53.4   | 59.4   |
| 88.2    | 97.3   | 86.3   | 107.3  | 40.5   | 87.4    | 61.6    | 28.3   | 39.6   |
| 614.2   | 590.8  | 604.5  | 492.2  | 172.1  | 727.4   | 570.7   | 97.8   | 168.6  |
| 14.2    | 40.1   | 8.1    | 15.2   | 7.0    | 39.5    | 12.8    | 11.8   | 11.1   |
| 40.6    | 30.8   | 46.6   | 48.1   | 10.4   | 781.4   | 624.4   | 77.5   | 94.3   |
| 91.7    | 135.6  | 118.9  | 136.2  | 43.6   | 286.8   | 220.7   | 16.9   | 22.2   |
| 38.8    | 37.5   | 27.8   | 20.4   | 12.0   | 66.2    | 46.8    | 15.6   | 19.0   |
| 124.7   | 98.8   | 108.4  | 95.7   | 36.5   | 197.7   | 126.1   | 113.1  | 154.5  |
| 6017.8  | 5507.6 | 5610.1 | 5333.1 | 3299.8 | 9393.0  | 7854.4  | 1127.0 | 1541.8 |
| 23.4    | 11.4   | 20.2   | 13.9   | 9.2    | 40.3    | 51.8    | 34.0   | 56.0   |
| 57.7    | 71.1   | 43.3   | 64.0   | 17.8   | 223.2   | 117.8   | 14.8   | 18.7   |
| 91.2    | 101.0  | 96.3   | 119.8  | 42.8   | 346.2   | 286.8   | 15.7   | 36.1   |
| 11140.3 | 9716.4 | 9466.2 | 8484.9 | 5721.3 | 12541.2 | 11013.7 | 4229.0 | 5110.8 |
| 159.0   | 121.5  | 116.2  | 85.4   | 37.6   | 399.2   | 345.8   | 122.7  | 190.8  |
| 954.9   | 853.9  | 1054.7 | 1284.7 | 399.3  | 1549.9  | 1195.3  | 469.1  | 547.0  |
| 11.4    | 28.6   | 23.6   | 21.3   | 10.0   | 72.5    | 47.4    | 18.0   | 19.7   |
| 866.8   | 792.8  | 733.4  | 470.8  | 269.9  | 2079.0  | 1034.6  | 274.6  | 364.5  |
| 34.2    | 31.9   | 39.1   | 26.4   | 10.0   | 39.3    | 37.5    | 2.5    | 9.8    |
| 411.5   | 324.7  | 382.4  | 276.4  | 104.2  | 516.8   | 300.5   | 50.8   | 75.8   |
| 22.7    | 8.6    | 3.4    | 3.6    | 11.8   | 5.1     | 4.5     | 7.2    | 5.5    |
| 269.7   | 201.4  | 206.6  | 151.5  | 70.7   | 765.8   | 392.9   | 44.5   | 48.5   |
| 171.0   | 149.0  | 173.9  | 213.5  | 82.8   | 229.2   | 214.0   | 13.9   | 17.3   |
| 492.1   | 578.9  | 403.9  | 128.6  | 111.9  | 395.6   | 304.7   | 20.6   | 35.9   |
| 2.7     | 1.4    | 2.7    | 1.1    | 1.2    | 2.8     | 2.8     | 1.9    | 3.9    |
| 33.0    | 16.0   | 18.0   | 8.2    | 1.8    | 24.2    | 2.9     | 2.1    | 4.5    |
| 957.6   | 943.0  | 1070.4 | 1189.4 | 488.0  | 1519.4  | 1207.6  | 100.7  | 123.5  |
| 110.1   | 60.9   | 91.2   | 74.7   | 27.4   | 173.9   | 92.8    | 1.4    | 20.4   |
| 104.2   | 97.9   | 95.7   | 59.4   | 31.8   | 148.0   | 108.9   | 81.9   | 94.0   |
| 3.9     | 17.4   | 29.0   | 20.0   | 12.2   | 3.7     | 15.9    | 14.9   | 20.7   |
| 3594.8  | 3153.0 | 3212.7 | 3154.0 | 1272.2 | 4609.1  | 3599.6  | 614.3  | 1179.4 |
| 1401.2  | 1344.2 | 1486.0 | 1508.2 | 489.4  | 2504.0  | 1910.3  | 109.2  | 168.7  |
| 59.3    | 56.8   | 36.7   | 39.5   | 12.8   | 142.7   | 51.5    | 25.8   | 42.9   |
| 122.5   | 77.9   | 93.1   | 61.4   | 41.1   | 318.6   | 258.5   | 56.0   | 53.9   |
| 153.6   | 121.7  | 133.9  | 80.0   | 50.4   | 640.3   | 539.8   | 83.9   | 69.2   |
| 7.0     | 15.0   | 4.6    | 10.1   | 2.3    | 11.6    | 9.1     | 6.1    | 8.0    |
| 11.1    | 15.8   | 17.5   | 7.3    | 9.3    | 387.6   | 227.5   | 22.8   | 27.9   |
| 3.5     | 3.1    | 2.5    | 10.5   | 1.0    | 4.0     | 1.4     | 1.2    | 4.9    |
| 26.5    | 8.9    | 10.9   | 7.5    | 5.5    | 109.5   | 66.7    | 16.6   | 17.2   |
| 106.7   | 156.6  | 101.5  | 79.1   | 45.6   | 212.6   | 146.6   | 6.0    | 8.9    |
| 201.8   | 186.4  | 214.4  | 216.2  | 53.4   | 103.6   | 86.4    | 31.8   | 38.7   |
| 58.8    | 45.2   | 92.6   | 177.8  | 38.0   | 252.4   | 204.0   | 30.5   | 8.3    |
| 5.6     | 2.1    | 3.6    | 4.5    | 4.0    | 1666.5  | 1359.6  | 7.1    | 18.7   |
| 3.4     | 16.5   | 6.7    | 2.6    | 4.5    | 17.8    | 42.2    | 8.4    | 31.0   |
| 103.5   | 109.1  | 119.3  | 84.8   | 36.1   | 113.7   | 62.6    | 45.0   | 77.5   |
| 108.0   | 99.3   | 115.4  | 130.3  | 44.3   | 26.3    | 11.7    | 15.3   | 16.7   |
| 60.4    | 86.7   | 73.0   | 75.9   | 18.5   | 7.7     | 9.4     | 10.3   | 8.4    |
| 181.5   | 145.1  | 170.1  | 224.9  | 58.3   | 111.7   | 90.3    | 15.8   | 6.3    |
| 55.0    | 29.3   | 48.5   | 53.7   | 12.3   | 109.5   | 56.7    | 4.6    | 30.4   |
| 18.3    | 8.0    | 14.3   | 8.6    | 6.6    | 11.2    | 15.3    | 6.6    | 3.2    |
| 2.2     | 7.5    | 14.4   | 2.1    | 3.9    | 1.8     | 3.2     | 2.9    | 1.7    |
| 37.3    | 29.8   | 26.7   | 18.5   | 10.7   | 3.1     | 2.3     | 7.9    | 7.7    |
| 192.9   | 176.3  | 142.9  | 122.5  | 48.5   | 443.0   | 248.4   | 64.3   | 91.5   |
| 144.4   | 120.7  | 150.3  | 170.1  | 57.0   | 1543.0  | 798.4   | 26.9   | 46.9   |

|        |        |        |        |        |        |        |        |        |
|--------|--------|--------|--------|--------|--------|--------|--------|--------|
| 25.7   | 11.4   | 10.2   | 3.0    | 3.4    | 6.8    | 18.9   | 3.7    | 3.7    |
| 178.3  | 148.7  | 159.5  | 174.5  | 53.5   | 171.5  | 74.1   | 13.5   | 15.3   |
| 177.8  | 176.0  | 195.3  | 172.9  | 69.9   | 224.0  | 155.1  | 51.2   | 61.4   |
| 209.8  | 222.5  | 221.3  | 237.9  | 72.3   | 507.4  | 296.6  | 31.1   | 50.6   |
| 1534.2 | 1574.6 | 1405.3 | 811.2  | 577.1  | 3354.5 | 2400.8 | 152.2  | 249.2  |
| 93.5   | 87.3   | 94.5   | 88.8   | 25.6   | 300.6  | 213.3  | 5.7    | 26.5   |
| 166.3  | 160.9  | 137.4  | 55.1   | 32.5   | 0.6    | 0.6    | 35.9   | 47.3   |
| 166.3  | 120.9  | 128.8  | 89.4   | 45.9   | 218.9  | 123.8  | 94.5   | 123.0  |
| 858.2  | 727.4  | 615.6  | 307.0  | 186.7  | 2146.6 | 1476.7 | 123.0  | 135.7  |
| 1201.8 | 1136.1 | 1359.5 | 1919.9 | 501.9  | 2284.8 | 1187.6 | 78.6   | 137.1  |
| 99.3   | 93.8   | 87.4   | 97.5   | 29.7   | 325.1  | 246.7  | 62.7   | 94.9   |
| 883.3  | 683.7  | 870.3  | 797.8  | 378.1  | 860.0  | 594.6  | 103.4  | 131.7  |
| 326.9  | 282.2  | 372.8  | 429.8  | 172.1  | 432.6  | 411.0  | 82.6   | 37.4   |
| 71.1   | 46.8   | 57.5   | 41.9   | 16.8   | 43.7   | 40.9   | 4.8    | 3.8    |
| 16.3   | 6.6    | 9.0    | 16.4   | 8.1    | 794.9  | 398.6  | 5.1    | 8.9    |
| 248.4  | 263.5  | 286.9  | 172.8  | 89.4   | 483.2  | 321.6  | 35.5   | 44.6   |
| 32.6   | 7.8    | 14.3   | 9.8    | 5.4    | 117.2  | 44.5   | 94.5   | 97.5   |
| 26.7   | 23.6   | 26.5   | 40.8   | 5.5    | 256.8  | 285.7  | 23.7   | 15.7   |
| 35.7   | 31.2   | 27.9   | 13.4   | 14.6   | 31.4   | 14.6   | 19.6   | 25.0   |
| 89.4   | 66.3   | 74.4   | 69.3   | 23.6   | 110.6  | 46.4   | 14.5   | 25.3   |
| 567.9  | 420.0  | 401.6  | 198.3  | 149.9  | 901.7  | 710.3  | 126.0  | 128.3  |
| 42.2   | 29.9   | 44.1   | 75.4   | 13.9   | 52.9   | 38.4   | 20.9   | 17.3   |
| 3.9    | 3.4    | 2.9    | 16.1   | 1.0    | 111.6  | 59.1   | 8.4    | 10.6   |
| 3.8    | 11.5   | 16.2   | 11.1   | 7.3    | 4.4    | 9.1    | 12.2   | 13.7   |
| 269.5  | 281.9  | 264.5  | 174.8  | 76.4   | 648.3  | 380.4  | 27.9   | 40.1   |
| 0.8    | 7.2    | 8.2    | 14.3   | 0.9    | 268.8  | 206.2  | 1.6    | 2.3    |
| 2195.7 | 2125.5 | 2190.2 | 2005.9 | 851.3  | 3649.4 | 2596.6 | 436.6  | 693.9  |
| 97.7   | 84.5   | 89.5   | 88.3   | 29.9   | 228.8  | 167.9  | 56.8   | 98.9   |
| 221.7  | 216.1  | 245.9  | 155.8  | 86.4   | 332.8  | 262.0  | 107.6  | 109.1  |
| 322.0  | 299.8  | 264.7  | 195.4  | 90.1   | 453.0  | 351.6  | 19.7   | 49.6   |
| 3.7    | 3.0    | 5.1    | 4.7    | 8.2    | 77.4   | 69.9   | 1.2    | 2.8    |
| 6.4    | 9.9    | 0.6    | 7.4    | 2.7    | 53.1   | 51.3   | 6.8    | 0.5    |
| 7.8    | 17.3   | 3.8    | 3.2    | 9.2    | 81.6   | 41.7   | 3.6    | 14.0   |
| 10.4   | 8.4    | 10.5   | 13.7   | 2.9    | 115.0  | 94.9   | 6.4    | 7.1    |
| 68.0   | 67.7   | 55.1   | 66.3   | 17.9   | 50.0   | 40.7   | 10.6   | 16.3   |
| 1.1    | 0.4    | 1.6    | 1.0    | 2.1    | 62.3   | 39.2   | 1.9    | 5.5    |
| 103.6  | 109.2  | 96.5   | 137.7  | 42.8   | 156.2  | 119.8  | 73.2   | 123.5  |
| 5.8    | 3.6    | 16.9   | 1.9    | 1.0    | 12.8   | 10.8   | 18.4   | 17.3   |
| 138.7  | 140.7  | 163.5  | 71.6   | 37.9   | 417.0  | 243.9  | 29.8   | 34.4   |
| 188.5  | 173.3  | 211.5  | 157.3  | 66.3   | 265.0  | 140.2  | 46.9   | 75.1   |
| 817.5  | 814.5  | 697.7  | 585.0  | 354.0  | 1991.8 | 1514.1 | 414.9  | 479.9  |
| 11.8   | 16.1   | 15.2   | 13.1   | 3.3    | 20.0   | 6.0    | 15.8   | 11.2   |
| 939.9  | 802.5  | 839.1  | 653.2  | 285.2  | 808.7  | 578.9  | 75.3   | 147.9  |
| 17.3   | 14.4   | 1.4    | 9.4    | 4.5    | 1.6    | 15.6   | 39.0   | 36.1   |
| 6.0    | 18.7   | 1.5    | 2.2    | 7.8    | 163.7  | 125.9  | 9.1    | 9.6    |
| 1.7    | 1.6    | 1.4    | 1.9    | 2.0    | 1.7    | 2.5    | 4.2    | 2.5    |
| 0.7    | 0.4    | 0.8    | 3.4    | 1.4    | 47.8   | 29.3   | 8.7    | 24.0   |
| 31.8   | 27.0   | 28.6   | 23.5   | 11.5   | 38.7   | 21.8   | 1.6    | 7.9    |
| 13.6   | 6.3    | 7.9    | 2.1    | 1.3    | 139.1  | 92.8   | 37.8   | 26.7   |
| 3481.4 | 2935.6 | 2908.0 | 2214.7 | 1042.1 | 2392.0 | 1379.6 | 1150.5 | 1717.6 |
| 37.8   | 29.3   | 35.7   | 29.4   | 12.3   | 102.2  | 47.4   | 3.1    | 2.3    |
| 3.0    | 25.3   | 20.6   | 5.8    | 14.3   | 16.2   | 31.5   | 4.9    | 3.1    |
| 67.0   | 31.5   | 44.5   | 56.1   | 19.0   | 128.3  | 115.3  | 25.7   | 13.6   |

|        |        |        |        |        |        |        |        |        |
|--------|--------|--------|--------|--------|--------|--------|--------|--------|
| 125.7  | 104.7  | 104.9  | 82.0   | 43.8   | 338.5  | 225.7  | 76.9   | 97.5   |
| 88.6   | 77.0   | 85.9   | 64.3   | 26.5   | 224.3  | 103.4  | 27.7   | 38.6   |
| 16.5   | 25.6   | 33.5   | 27.1   | 15.0   | 106.5  | 75.0   | 18.6   | 11.6   |
| 2.7    | 3.0    | 7.1    | 8.1    | 0.6    | 29.5   | 30.8   | 2.3    | 1.9    |
| 0.9    | 11.7   | 17.3   | 24.8   | 3.5    | 43.2   | 56.3   | 2.2    | 16.8   |
| 175.4  | 156.8  | 185.7  | 112.9  | 43.7   | 365.5  | 210.8  | 58.5   | 84.5   |
| 93.0   | 106.1  | 109.3  | 113.7  | 41.5   | 178.3  | 118.9  | 58.6   | 69.5   |
| 221.2  | 349.3  | 240.9  | 300.8  | 100.9  | 199.3  | 157.7  | 15.2   | 29.7   |
| 4321.9 | 3178.4 | 4406.9 | 5530.0 | 1706.8 | 6781.4 | 5184.9 | 793.7  | 924.6  |
| 460.4  | 490.6  | 555.7  | 508.4  | 182.6  | 1142.4 | 917.3  | 46.8   | 56.3   |
| 467.5  | 386.4  | 389.3  | 368.0  | 145.4  | 638.5  | 564.3  | 78.0   | 95.0   |
| 116.4  | 77.1   | 75.5   | 78.3   | 39.7   | 118.6  | 66.1   | 37.2   | 31.2   |
| 83.6   | 48.2   | 79.8   | 96.0   | 21.6   | 84.2   | 38.6   | 26.8   | 20.0   |
| 26.6   | 11.5   | 8.5    | 37.1   | 14.0   | 46.7   | 9.3    | 11.6   | 19.5   |
| 17.5   | 26.1   | 21.6   | 17.2   | 1.4    | 224.7  | 147.1  | 4.3    | 21.1   |
| 268.4  | 280.6  | 287.4  | 143.1  | 58.1   | 130.0  | 73.4   | 12.5   | 16.5   |
| 26.2   | 12.4   | 22.1   | 24.4   | 10.8   | 42.9   | 39.7   | 34.3   | 36.5   |
| 91.9   | 81.2   | 74.1   | 58.8   | 36.7   | 299.7  | 214.0  | 111.9  | 115.3  |
| 0.6    | 1.7    | 1.2    | 0.4    | 0.5    | 1.2    | 1.0    | 1.2    | 6.9    |
| 290.9  | 259.6  | 247.1  | 196.6  | 83.0   | 244.9  | 142.3  | 132.4  | 176.7  |
| 202.7  | 212.8  | 204.2  | 122.9  | 80.1   | 147.3  | 102.3  | 42.4   | 65.9   |
| 4.0    | 6.8    | 3.1    | 3.9    | 3.3    | 3.7    | 3.3    | 9.6    | 11.6   |
| 242.7  | 229.6  | 207.1  | 149.7  | 81.4   | 48.6   | 22.3   | 2.8    | 3.1    |
| 8.4    | 14.0   | 39.3   | 9.8    | 9.3    | 61.5   | 15.1   | 14.1   | 15.9   |
| 501.9  | 507.6  | 599.6  | 624.2  | 219.3  | 680.5  | 694.2  | 130.5  | 209.6  |
| 41.1   | 30.0   | 33.4   | 32.2   | 9.2    | 101.2  | 40.4   | 32.4   | 33.0   |
| 52.1   | 44.1   | 40.6   | 48.1   | 8.8    | 50.5   | 13.3   | 5.3    | 6.9    |
| 37.7   | 42.9   | 26.7   | 33.0   | 32.6   | 67.2   | 35.0   | 3.4    | 7.5    |
| 65.0   | 43.4   | 49.5   | 48.1   | 8.0    | 62.8   | 46.2   | 27.6   | 21.4   |
| 78.2   | 74.2   | 73.2   | 61.4   | 12.9   | 138.9  | 110.2  | 13.9   | 33.8   |
| 38.7   | 27.3   | 27.4   | 18.0   | 10.9   | 13.6   | 17.1   | 35.2   | 46.7   |
| 13.0   | 14.9   | 1.6    | 3.8    | 3.5    | 5.3    | 2.8    | 3.1    | 11.3   |
| 30.6   | 13.2   | 25.8   | 19.9   | 0.6    | 35.8   | 13.5   | 18.4   | 15.4   |
| 54.1   | 81.7   | 82.2   | 175.6  | 50.0   | 109.2  | 81.3   | 4.8    | 7.9    |
| 73.2   | 77.1   | 55.4   | 32.8   | 28.9   | 59.5   | 55.2   | 12.2   | 18.0   |
| 6837.5 | 6035.4 | 5811.7 | 4843.6 | 3200.5 | 7957.6 | 6997.5 | 2663.8 | 3576.4 |
| 49.4   | 37.3   | 43.0   | 46.7   | 20.3   | 133.2  | 86.7   | 46.6   | 68.1   |
| 88.4   | 69.7   | 69.2   | 59.7   | 21.6   | 74.4   | 33.2   | 19.5   | 22.2   |
| 7.1    | 15.2   | 14.2   | 11.7   | 5.2    | 13.2   | 16.3   | 7.9    | 22.4   |
| 41.2   | 44.7   | 42.0   | 74.9   | 16.9   | 53.6   | 49.0   | 5.0    | 15.8   |
| 2.3    | 2.7    | 3.1    | 10.9   | 0.5    | 1.6    | 4.4    | 8.6    | 12.9   |
| 381.8  | 358.9  | 428.4  | 448.0  | 171.3  | 309.2  | 266.5  | 9.9    | 3.5    |
| 92.9   | 66.1   | 62.4   | 46.9   | 19.3   | 100.6  | 88.3   | 20.4   | 9.9    |
| 66.9   | 76.7   | 66.0   | 58.5   | 29.5   | 30.3   | 29.7   | 30.7   | 44.1   |
| 96.1   | 81.3   | 78.5   | 51.4   | 28.3   | 149.4  | 81.7   | 54.0   | 79.2   |
| 105.0  | 81.4   | 145.7  | 110.0  | 38.8   | 64.8   | 49.9   | 26.8   | 47.4   |
| 309.1  | 296.5  | 350.2  | 449.6  | 89.6   | 269.0  | 235.4  | 11.1   | 17.8   |
| 652.4  | 632.3  | 674.4  | 459.6  | 217.7  | 890.1  | 812.7  | 106.5  | 160.6  |
| 91.9   | 80.9   | 77.2   | 45.8   | 33.8   | 182.6  | 116.5  | 24.0   | 32.9   |
| 11.4   | 10.2   | 13.0   | 2.0    | 8.7    | 84.6   | 52.2   | 17.4   | 11.5   |
| 270.0  | 85.5   | 109.3  | 68.4   | 40.1   | 1811.2 | 1463.6 | 23.2   | 41.7   |
| 70.3   | 89.8   | 68.2   | 47.6   | 32.2   | 110.8  | 41.2   | 131.8  | 144.9  |
| 51.9   | 30.9   | 28.2   | 14.6   | 15.8   | 17.5   | 30.8   | 21.1   | 17.9   |

|       |       |       |       |       |       |       |       |       |
|-------|-------|-------|-------|-------|-------|-------|-------|-------|
| 7.5   | 5.5   | 14.6  | 12.0  | 0.6   | 2.8   | 1.7   | 14.8  | 7.5   |
| 153.3 | 165.7 | 202.9 | 193.6 | 67.1  | 3.9   | 3.9   | 42.1  | 88.9  |
| 113.2 | 82.5  | 98.2  | 64.3  | 26.8  | 110.2 | 79.7  | 49.6  | 60.5  |
| 78.2  | 54.0  | 55.3  | 38.6  | 22.0  | 153.7 | 81.2  | 70.2  | 55.3  |
| 36.9  | 33.5  | 25.5  | 33.8  | 12.4  | 112.8 | 85.7  | 45.1  | 59.1  |
| 120.3 | 121.0 | 100.9 | 96.9  | 32.1  | 322.6 | 239.8 | 60.9  | 63.7  |
| 37.9  | 30.3  | 34.2  | 28.4  | 18.6  | 105.3 | 63.2  | 7.9   | 4.3   |
| 82.2  | 126.1 | 132.8 | 184.7 | 45.2  | 131.3 | 123.4 | 13.8  | 15.4  |
| 3.5   | 1.7   | 2.7   | 1.9   | 1.3   | 5.8   | 4.1   | 1.6   | 1.3   |
| 10.7  | 0.8   | 11.9  | 1.1   | 0.4   | 50.9  | 43.3  | 0.5   | 5.3   |
| 124.1 | 90.0  | 113.0 | 111.1 | 46.0  | 298.6 | 181.6 | 170.6 | 158.3 |
| 76.7  | 83.0  | 71.5  | 93.5  | 29.9  | 149.9 | 96.1  | 17.5  | 42.5  |
| 130.0 | 90.4  | 95.7  | 78.6  | 31.0  | 77.1  | 76.5  | 68.4  | 77.1  |
| 55.0  | 47.6  | 35.5  | 25.9  | 20.1  | 5.3   | 10.8  | 17.4  | 15.0  |
| 326.0 | 369.5 | 296.4 | 278.1 | 104.0 | 275.7 | 266.6 | 85.9  | 117.8 |
| 4.8   | 6.4   | 4.2   | 7.6   | 7.2   | 6.0   | 4.1   | 3.0   | 2.6   |
| 67.8  | 68.7  | 46.5  | 31.3  | 13.9  | 102.4 | 69.8  | 3.8   | 17.7  |
| 28.6  | 19.6  | 18.8  | 15.7  | 12.9  | 21.0  | 16.8  | 30.0  | 41.3  |
| 3.4   | 10.2  | 11.2  | 14.4  | 1.0   | 35.7  | 19.2  | 14.1  | 11.6  |
| 255.7 | 264.7 | 285.3 | 243.2 | 109.0 | 760.3 | 519.2 | 49.7  | 63.2  |
| 26.0  | 20.0  | 4.0   | 19.0  | 12.0  | 32.5  | 15.8  | 13.6  | 18.0  |
| 131.5 | 199.0 | 223.0 | 104.7 | 60.7  | 219.5 | 214.2 | 18.8  | 13.6  |
| 45.1  | 70.9  | 46.8  | 35.8  | 14.9  | 129.5 | 83.0  | 46.9  | 45.1  |
| 24.8  | 23.6  | 30.9  | 24.4  | 13.1  | 78.4  | 48.3  | 13.4  | 7.7   |
| 20.1  | 3.1   | 24.4  | 21.6  | 9.0   | 4.8   | 12.3  | 4.3   | 19.2  |
| 474.3 | 439.4 | 372.8 | 368.9 | 89.0  | 896.3 | 861.3 | 3.3   | 4.6   |
| 58.5  | 36.7  | 43.4  | 33.3  | 17.4  | 22.6  | 14.1  | 18.0  | 13.3  |
| 215.7 | 252.8 | 141.4 | 112.4 | 44.5  | 132.4 | 63.7  | 14.8  | 22.8  |
| 25.6  | 18.9  | 23.3  | 24.4  | 5.6   | 33.4  | 22.7  | 9.7   | 15.3  |
| 305.8 | 353.3 | 371.9 | 317.3 | 100.1 | 535.3 | 337.6 | 4.2   | 7.4   |
| 139.7 | 73.5  | 97.6  | 75.8  | 47.9  | 281.8 | 107.0 | 59.6  | 56.1  |
| 106.5 | 112.9 | 105.6 | 73.5  | 32.7  | 252.9 | 117.6 | 18.6  | 27.2  |
| 25.1  | 7.8   | 16.5  | 11.1  | 4.6   | 21.1  | 17.4  | 24.2  | 19.3  |
| 71.1  | 65.9  | 58.2  | 46.6  | 31.2  | 94.5  | 49.9  | 32.0  | 36.5  |
| 2.1   | 3.6   | 1.5   | 3.3   | 4.1   | 9.9   | 9.4   | 0.5   | 3.6   |
| 31.3  | 37.3  | 40.0  | 43.1  | 6.8   | 1.3   | 7.2   | 1.6   | 3.7   |
| 29.8  | 20.6  | 26.7  | 14.4  | 16.0  | 55.7  | 25.7  | 11.2  | 15.8  |
| 43.4  | 41.6  | 38.6  | 11.2  | 19.2  | 21.3  | 14.8  | 20.9  | 13.9  |
| 47.2  | 22.4  | 31.7  | 33.7  | 12.6  | 93.9  | 98.6  | 28.5  | 52.1  |
| 27.3  | 6.4   | 18.9  | 24.6  | 7.8   | 53.2  | 46.3  | 52.0  | 48.7  |
| 2.0   | 11.6  | 4.8   | 4.2   | 7.4   | 23.3  | 3.0   | 2.9   | 14.9  |
| 50.6  | 44.2  | 39.1  | 34.7  | 12.2  | 166.9 | 78.2  | 24.6  | 31.6  |
| 174.9 | 121.8 | 104.4 | 62.8  | 32.1  | 379.8 | 340.5 | 18.1  | 21.5  |
| 1.2   | 2.5   | 1.2   | 1.4   | 1.1   | 1.4   | 1.2   | 5.0   | 14.3  |
| 1.1   | 7.3   | 10.4  | 9.6   | 1.9   | 0.8   | 3.0   | 11.2  | 1.2   |
| 118.5 | 82.0  | 106.4 | 100.7 | 56.7  | 76.5  | 44.4  | 16.8  | 20.0  |
| 127.1 | 129.2 | 95.5  | 50.0  | 32.3  | 231.9 | 128.5 | 89.6  | 131.4 |
| 111.4 | 130.8 | 142.5 | 141.8 | 31.8  | 188.2 | 193.7 | 27.5  | 27.3  |
| 28.2  | 29.1  | 53.2  | 49.5  | 20.4  | 88.7  | 52.4  | 9.5   | 23.0  |
| 261.5 | 281.3 | 288.3 | 215.0 | 89.4  | 99.0  | 56.6  | 22.9  | 49.6  |
| 64.6  | 51.9  | 48.3  | 26.8  | 21.5  | 55.3  | 20.2  | 35.2  | 32.9  |
| 2.0   | 1.0   | 1.3   | 1.0   | 1.7   | 3.4   | 7.1   | 6.4   | 1.2   |
| 5.4   | 5.0   | 3.3   | 4.5   | 5.1   | 958.3 | 605.1 | 145.9 | 185.1 |

|        |       |        |        |       |        |        |       |       |
|--------|-------|--------|--------|-------|--------|--------|-------|-------|
| 139.8  | 106.1 | 89.2   | 137.5  | 14.6  | 56.7   | 16.4   | 17.4  | 40.3  |
| 697.2  | 735.9 | 756.5  | 972.3  | 367.1 | 1231.5 | 1033.5 | 135.8 | 188.8 |
| 50.4   | 60.7  | 57.4   | 29.8   | 22.7  | 218.9  | 114.0  | 133.1 | 181.6 |
| 128.7  | 118.4 | 136.7  | 97.4   | 22.5  | 56.0   | 34.2   | 48.6  | 70.1  |
| 30.8   | 26.4  | 24.0   | 14.5   | 9.8   | 123.6  | 58.4   | 25.9  | 16.2  |
| 296.7  | 219.4 | 250.3  | 232.7  | 74.4  | 762.5  | 473.8  | 115.3 | 271.2 |
| 125.8  | 119.6 | 150.8  | 153.4  | 47.5  | 212.0  | 160.6  | 93.2  | 127.0 |
| 1.6    | 5.0   | 9.6    | 5.9    | 5.6   | 22.6   | 15.4   | 2.4   | 9.1   |
| 248.9  | 303.3 | 248.9  | 187.7  | 102.1 | 643.9  | 404.9  | 49.7  | 90.4  |
| 65.3   | 72.4  | 74.8   | 62.5   | 27.3  | 69.4   | 51.0   | 15.9  | 29.5  |
| 77.7   | 75.3  | 63.1   | 47.8   | 31.3  | 144.5  | 117.6  | 34.1  | 46.2  |
| 66.2   | 40.1  | 42.7   | 20.8   | 11.8  | 49.4   | 41.3   | 20.9  | 34.8  |
| 29.1   | 11.0  | 11.7   | 10.9   | 9.7   | 25.4   | 16.4   | 15.0  | 31.0  |
| 0.9    | 0.8   | 5.2    | 6.4    | 3.6   | 12.7   | 1.3    | 19.7  | 9.9   |
| 77.6   | 105.0 | 92.5   | 76.0   | 34.1  | 160.5  | 135.0  | 112.5 | 175.4 |
| 161.3  | 189.6 | 172.8  | 145.6  | 55.7  | 205.2  | 171.1  | 52.0  | 85.3  |
| 439.2  | 530.1 | 463.6  | 376.9  | 178.6 | 478.9  | 350.8  | 24.9  | 33.8  |
| 10.1   | 16.5  | 14.3   | 9.9    | 6.0   | 14.7   | 28.4   | 10.0  | 8.4   |
| 153.3  | 160.7 | 157.8  | 212.8  | 51.6  | 209.7  | 83.6   | 10.0  | 16.4  |
| 241.4  | 245.9 | 229.1  | 182.4  | 101.3 | 441.7  | 391.6  | 94.8  | 100.2 |
| 53.1   | 73.5  | 51.7   | 48.0   | 16.6  | 2.1    | 1.1    | 1.4   | 2.8   |
| 17.8   | 23.3  | 16.6   | 14.7   | 4.7   | 17.8   | 21.3   | 32.6  | 59.4  |
| 82.1   | 91.3  | 74.5   | 67.2   | 26.3  | 88.5   | 64.8   | 65.8  | 141.1 |
| 2.2    | 2.1   | 1.3    | 3.9    | 1.2   | 108.7  | 86.2   | 2.9   | 2.0   |
| 206.4  | 200.1 | 200.9  | 281.1  | 67.6  | 304.5  | 235.5  | 59.9  | 69.5  |
| 121.6  | 84.3  | 86.9   | 74.8   | 43.5  | 473.8  | 256.3  | 92.9  | 105.4 |
| 101.8  | 75.9  | 73.4   | 79.6   | 27.4  | 117.0  | 88.5   | 21.5  | 32.2  |
| 148.8  | 139.5 | 114.9  | 199.8  | 49.3  | 347.3  | 252.4  | 312.6 | 523.6 |
| 34.1   | 30.3  | 29.6   | 31.5   | 9.4   | 36.7   | 19.9   | 18.4  | 22.0  |
| 699.6  | 544.8 | 621.8  | 615.2  | 238.1 | 336.6  | 215.9  | 166.6 | 225.0 |
| 32.3   | 27.6  | 25.6   | 6.3    | 12.0  | 187.0  | 151.1  | 0.3   | 2.6   |
| 3.6    | 0.2   | 0.7    | 2.9    | 1.7   | 46.8   | 20.2   | 1.4   | 3.3   |
| 1191.9 | 937.9 | 1097.6 | 1128.2 | 349.3 | 1854.4 | 1410.0 | 510.2 | 707.9 |
| 20.2   | 22.1  | 21.8   | 5.9    | 7.1   | 10.0   | 20.7   | 3.5   | 22.6  |
| 343.2  | 331.9 | 416.1  | 388.0  | 111.4 | 725.7  | 550.6  | 16.4  | 27.7  |
| 20.5   | 45.7  | 39.9   | 9.8    | 0.9   | 57.6   | 3.5    | 18.1  | 5.9   |
| 240.5  | 210.7 | 212.7  | 268.3  | 74.0  | 270.9  | 209.5  | 70.0  | 103.9 |
| 60.9   | 46.5  | 53.5   | 42.5   | 28.5  | 73.8   | 37.5   | 40.2  | 41.7  |
| 60.8   | 57.9  | 47.4   | 17.0   | 9.5   | 156.9  | 84.2   | 4.4   | 4.4   |
| 42.2   | 50.4  | 37.3   | 21.3   | 17.3  | 157.7  | 104.7  | 11.1  | 4.7   |
| 90.7   | 78.1  | 61.7   | 33.2   | 37.0  | 72.1   | 63.5   | 13.7  | 16.2  |
| 310.0  | 289.1 | 343.1  | 272.3  | 95.4  | 516.4  | 408.0  | 34.3  | 27.0  |
| 3.1    | 8.7   | 3.6    | 9.1    | 7.2   | 59.7   | 56.4   | 10.4  | 21.9  |
| 67.2   | 66.8  | 46.6   | 51.8   | 31.8  | 70.1   | 66.4   | 29.2  | 26.3  |
| 1042.5 | 817.5 | 835.9  | 702.2  | 249.5 | 2495.9 | 1309.4 | 486.9 | 566.0 |
| 27.1   | 38.1  | 29.7   | 35.5   | 8.4   | 154.1  | 94.9   | 14.2  | 26.9  |
| 20.9   | 11.0  | 21.6   | 18.6   | 0.7   | 61.1   | 47.4   | 13.9  | 29.4  |
| 100.8  | 97.3  | 66.6   | 54.7   | 13.8  | 144.0  | 97.8   | 86.9  | 96.2  |
| 314.8  | 297.3 | 253.4  | 147.0  | 115.0 | 163.6  | 103.2  | 56.8  | 50.1  |
| 0.8    | 2.9   | 1.8    | 0.3    | 0.5   | 9.5    | 1.3    | 2.0   | 0.8   |
| 4.0    | 1.8   | 1.9    | 1.6    | 2.3   | 47.9   | 23.7   | 10.5  | 18.6  |
| 28.3   | 22.8  | 21.2   | 14.7   | 16.2  | 37.8   | 19.5   | 25.4  | 22.3  |
| 200.5  | 107.2 | 145.4  | 196.6  | 58.1  | 274.5  | 199.9  | 15.6  | 24.5  |



|        |        |        |        |        |         |        |        |        |
|--------|--------|--------|--------|--------|---------|--------|--------|--------|
| 8.3    | 18.9   | 12.7   | 1.1    | 1.3    | 21.8    | 19.6   | 0.9    | 2.2    |
| 193.5  | 234.0  | 174.3  | 152.3  | 85.2   | 309.1   | 229.5  | 28.5   | 51.2   |
| 96.5   | 80.4   | 86.7   | 111.5  | 22.2   | 390.7   | 195.3  | 25.4   | 40.0   |
| 192.3  | 175.9  | 190.9  | 216.2  | 76.3   | 323.9   | 249.0  | 155.0  | 253.9  |
| 6.5    | 20.1   | 13.0   | 2.5    | 1.3    | 152.6   | 124.3  | 1.7    | 2.4    |
| 29.3   | 18.9   | 33.1   | 20.1   | 11.6   | 66.4    | 48.1   | 34.6   | 43.7   |
| 27.3   | 44.2   | 39.4   | 24.7   | 8.9    | 28.9    | 24.3   | 20.4   | 32.8   |
| 167.5  | 189.2  | 247.1  | 196.4  | 71.9   | 896.3   | 575.7  | 35.8   | 66.7   |
| 7946.5 | 6981.2 | 6443.0 | 6183.1 | 4295.1 | 7931.1  | 7203.0 | 1722.3 | 1877.8 |
| 21.7   | 16.8   | 20.7   | 31.3   | 3.8    | 129.5   | 97.1   | 22.4   | 27.2   |
| 55.6   | 51.0   | 72.3   | 65.2   | 12.8   | 189.4   | 129.8  | 45.3   | 50.7   |
| 10.8   | 33.1   | 22.6   | 41.0   | 56.7   | 168.7   | 813.8  | 52.7   | 71.6   |
| 43.4   | 38.2   | 49.2   | 26.6   | 19.4   | 190.1   | 140.0  | 14.7   | 39.0   |
| 41.8   | 38.0   | 39.5   | 34.6   | 9.9    | 81.1    | 62.6   | 15.1   | 29.8   |
| 52.7   | 48.5   | 57.7   | 73.9   | 26.2   | 54.8    | 67.9   | 10.0   | 12.4   |
| 1.1    | 0.7    | 2.1    | 0.7    | 0.6    | 10.3    | 0.6    | 1.9    | 3.3    |
| 11.2   | 15.2   | 14.6   | 6.6    | 1.5    | 151.8   | 69.6   | 0.3    | 0.7    |
| 4952.3 | 4741.3 | 4349.9 | 4068.9 | 2447.5 | 7803.3  | 6441.7 | 1596.1 | 2551.0 |
| 451.6  | 505.1  | 464.7  | 360.8  | 177.0  | 1800.1  | 1675.4 | 82.1   | 89.4   |
| 172.5  | 152.8  | 148.0  | 96.1   | 53.0   | 509.2   | 405.4  | 18.0   | 25.0   |
| 107.3  | 119.7  | 96.9   | 109.7  | 40.8   | 90.6    | 72.5   | 12.6   | 11.0   |
| 1031.3 | 1033.8 | 994.1  | 806.8  | 374.3  | 2049.5  | 1264.5 | 339.3  | 524.2  |
| 56.8   | 69.9   | 47.9   | 63.7   | 28.6   | 72.5    | 41.5   | 34.3   | 34.1   |
| 10.6   | 7.7    | 15.7   | 8.5    | 2.7    | 18.4    | 9.1    | 5.5    | 4.7    |
| 4.2    | 3.8    | 2.9    | 24.4   | 13.4   | 47.8    | 23.6   | 18.9   | 15.7   |
| 47.8   | 52.1   | 39.3   | 26.3   | 11.1   | 45.2    | 53.2   | 5.4    | 15.6   |
| 147.7  | 126.3  | 157.2  | 113.5  | 51.8   | 624.6   | 439.7  | 80.7   | 109.2  |
| 3939.2 | 3797.8 | 3296.9 | 2512.2 | 1641.5 | 3302.6  | 2201.1 | 1143.3 | 1550.2 |
| 41.0   | 41.6   | 27.5   | 39.7   | 26.2   | 48.3    | 16.0   | 18.3   | 20.7   |
| 62.7   | 37.2   | 34.1   | 17.0   | 14.8   | 45.4    | 36.6   | 52.5   | 51.8   |
| 3.0    | 1.0    | 2.7    | 2.7    | 3.3    | 1.8     | 2.1    | 3.0    | 2.1    |
| 98.8   | 100.4  | 86.7   | 124.9  | 36.0   | 190.0   | 129.4  | 25.5   | 26.9   |
| 8.8    | 8.0    | 0.9    | 1.1    | 2.5    | 10.5    | 0.8    | 3.5    | 6.7    |
| 258.0  | 322.2  | 322.8  | 266.2  | 58.2   | 683.6   | 550.5  | 7.4    | 9.8    |
| 55.6   | 67.0   | 84.8   | 65.3   | 24.6   | 636.1   | 450.8  | 43.3   | 69.4   |
| 341.4  | 381.5  | 327.4  | 183.9  | 116.9  | 356.1   | 236.8  | 41.3   | 46.9   |
| 6.6    | 12.5   | 10.5   | 11.9   | 7.1    | 36.5    | 16.4   | 4.8    | 10.5   |
| 409.2  | 360.1  | 397.6  | 282.2  | 95.8   | 258.1   | 131.2  | 64.0   | 119.3  |
| 7491.8 | 6572.5 | 6292.0 | 6116.7 | 3624.8 | 11189.7 | 9562.4 | 2400.9 | 2872.8 |
| 300.2  | 235.4  | 219.4  | 128.1  | 85.0   | 600.4   | 327.7  | 57.8   | 77.7   |
| 282.0  | 249.4  | 283.0  | 190.6  | 119.7  | 519.5   | 519.7  | 84.6   | 62.9   |
| 17.0   | 19.9   | 5.0    | 6.8    | 13.5   | 71.8    | 12.3   | 11.7   | 17.3   |
| 1.9    | 1.1    | 1.2    | 1.0    | 0.9    | 1.4     | 0.7    | 1.5    | 3.6    |
| 2.7    | 1.7    | 3.7    | 2.4    | 1.7    | 6.5     | 2.0    | 9.1    | 9.1    |
| 18.9   | 18.3   | 25.3   | 17.9   | 6.4    | 99.3    | 52.6   | 22.7   | 32.7   |
| 57.7   | 53.8   | 51.1   | 32.7   | 18.2   | 132.6   | 74.4   | 68.8   | 74.4   |
| 15.1   | 17.1   | 9.1    | 21.7   | 7.5    | 35.9    | 17.2   | 10.3   | 4.4    |
| 54.8   | 58.0   | 48.1   | 33.9   | 20.5   | 95.2    | 62.5   | 13.7   | 20.2   |
| 56.2   | 35.4   | 38.2   | 43.2   | 16.1   | 115.4   | 67.6   | 17.7   | 24.2   |
| 26.5   | 14.2   | 20.5   | 5.0    | 10.0   | 53.6    | 44.6   | 11.6   | 20.3   |
| 53.1   | 44.2   | 63.3   | 46.4   | 17.0   | 131.7   | 89.5   | 29.9   | 51.3   |
| 248.3  | 249.2  | 224.7  | 157.5  | 62.5   | 415.0   | 275.9  | 94.6   | 129.6  |
| 127.7  | 131.9  | 118.9  | 112.3  | 41.3   | 425.8   | 269.3  | 50.4   | 91.0   |

|        |        |        |        |        |         |        |        |        |
|--------|--------|--------|--------|--------|---------|--------|--------|--------|
| 81.6   | 79.6   | 87.3   | 74.8   | 29.9   | 234.5   | 158.5  | 27.2   | 60.6   |
| 48.0   | 40.3   | 48.2   | 41.1   | 15.1   | 56.4    | 42.7   | 20.0   | 25.9   |
| 57.7   | 63.5   | 94.4   | 111.8  | 32.6   | 81.4    | 68.7   | 3.4    | 9.8    |
| 3.0    | 2.1    | 1.8    | 5.9    | 0.2    | 7.2     | 0.7    | 1.8    | 3.1    |
| 164.6  | 131.6  | 174.5  | 173.7  | 46.7   | 138.0   | 119.7  | 28.6   | 46.0   |
| 75.5   | 97.7   | 69.5   | 78.0   | 43.1   | 19.0    | 22.0   | 15.4   | 22.7   |
| 179.5  | 176.0  | 220.0  | 160.6  | 70.2   | 383.9   | 255.5  | 151.7  | 187.5  |
| 3811.4 | 3557.6 | 2919.5 | 1813.7 | 1164.3 | 4795.9  | 3201.7 | 570.8  | 677.5  |
| 101.2  | 79.7   | 57.2   | 57.4   | 36.4   | 86.9    | 60.6   | 189.8  | 238.4  |
| 11.1   | 12.2   | 0.8    | 0.4    | 4.3    | 18.9    | 12.9   | 29.0   | 23.4   |
| 30.7   | 25.7   | 37.3   | 28.1   | 16.4   | 91.2    | 105.8  | 37.8   | 32.5   |
| 1.5    | 19.4   | 12.5   | 19.3   | 9.7    | 21.9    | 13.3   | 4.8    | 15.1   |
| 1504.5 | 1473.3 | 1764.7 | 1847.3 | 564.0  | 1793.0  | 1461.9 | 200.6  | 244.3  |
| 313.2  | 268.8  | 307.6  | 231.5  | 63.2   | 474.1   | 229.1  | 500.7  | 602.6  |
| 16.2   | 9.6    | 21.3   | 15.5   | 6.2    | 11.3    | 9.0    | 11.3   | 14.5   |
| 169.2  | 122.6  | 76.2   | 117.6  | 26.5   | 175.0   | 89.2   | 88.9   | 97.1   |
| 256.3  | 273.3  | 256.3  | 270.8  | 96.4   | 787.8   | 456.7  | 162.7  | 244.8  |
| 17.7   | 23.0   | 29.9   | 34.0   | 15.2   | 74.7    | 62.0   | 17.7   | 27.0   |
| 205.4  | 220.7  | 225.8  | 132.2  | 79.2   | 274.3   | 156.5  | 24.6   | 27.7   |
| 24.4   | 19.0   | 18.2   | 14.9   | 4.4    | 3.0     | 3.1    | 1.6    | 12.6   |
| 2.3    | 6.4    | 14.1   | 2.3    | 1.6    | 23.4    | 8.5    | 95.5   | 92.7   |
| 15.6   | 18.4   | 15.1   | 11.8   | 7.3    | 3.2     | 1.6    | 13.2   | 11.0   |
| 9227.3 | 8968.1 | 7904.9 | 8500.9 | 5024.9 | 10100.0 | 7062.0 | 3216.2 | 3291.5 |
| 5.1    | 3.0    | 0.9    | 4.4    | 2.8    | 6.3     | 3.7    | 0.5    | 0.4    |
| 5.8    | 6.8    | 1.7    | 5.3    | 0.9    | 31.7    | 15.7   | 0.9    | 5.7    |
| 3.4    | 2.9    | 17.3   | 1.9    | 1.0    | 6.3     | 3.2    | 18.8   | 28.0   |
| 31.3   | 16.7   | 70.8   | 208.5  | 17.7   | 49.4    | 51.3   | 7.4    | 2.6    |
| 57.7   | 44.8   | 43.9   | 36.5   | 20.7   | 116.1   | 66.2   | 14.1   | 12.1   |
| 197.6  | 232.0  | 166.4  | 149.7  | 51.8   | 75.1    | 58.0   | 5.5    | 22.7   |
| 13.9   | 10.8   | 12.1   | 8.3    | 6.1    | 1426.1  | 782.6  | 22.6   | 13.1   |
| 53.3   | 61.7   | 51.4   | 21.9   | 31.9   | 25.8    | 10.6   | 44.0   | 45.7   |
| 571.9  | 513.6  | 461.5  | 299.4  | 142.4  | 1734.7  | 1171.0 | 9.2    | 1.2    |
| 76.3   | 78.6   | 92.9   | 75.2   | 21.5   | 52.2    | 30.0   | 4.6    | 16.6   |
| 10.7   | 11.8   | 11.5   | 0.9    | 2.1    | 1.1     | 2.2    | 2.8    | 0.3    |
| 20.3   | 13.3   | 6.3    | 19.9   | 6.2    | 47.1    | 22.9   | 2.0    | 12.3   |
| 691.9  | 564.8  | 734.9  | 739.8  | 284.6  | 532.1   | 374.9  | 86.4   | 91.7   |
| 100.7  | 82.1   | 86.7   | 45.5   | 30.9   | 3800.2  | 2366.4 | 47.4   | 26.1   |
| 19.2   | 25.5   | 6.8    | 9.2    | 3.7    | 22.3    | 6.5    | 3.4    | 2.5    |
| 16.1   | 3.9    | 8.9    | 7.7    | 0.5    | 13.6    | 7.3    | 7.5    | 2.2    |
| 40.2   | 25.0   | 44.7   | 26.9   | 15.5   | 43.9    | 24.6   | 11.8   | 26.3   |
| 2.4    | 1.4    | 1.4    | 0.7    | 0.5    | 3.2     | 2.0    | 1.2    | 0.9    |
| 9.7    | 13.2   | 10.5   | 16.5   | 7.9    | 19.3    | 11.8   | 14.6   | 26.8   |
| 222.4  | 189.6  | 199.7  | 142.8  | 61.3   | 282.0   | 171.8  | 30.3   | 16.7   |
| 110.9  | 87.2   | 97.8   | 86.7   | 22.3   | 170.4   | 120.5  | 1.3    | 2.1    |
| 0.2    | 1.7    | 0.8    | 3.5    | 0.1    | 11.8    | 5.2    | 5.7    | 2.6    |
| 29.3   | 47.0   | 43.0   | 53.6   | 12.3   | 36.3    | 38.7   | 7.7    | 4.7    |
| 9.1    | 15.2   | 8.0    | 9.8    | 5.8    | 3.0     | 4.8    | 8.6    | 17.0   |
| 19.6   | 8.3    | 26.2   | 30.3   | 8.5    | 29.6    | 3.8    | 4.5    | 3.9    |
| 228.1  | 186.2  | 212.9  | 197.0  | 76.4   | 361.8   | 279.9  | 133.1  | 114.4  |
| 18.4   | 12.9   | 4.6    | 19.5   | 18.0   | 468.5   | 378.8  | 610.5  | 785.9  |
| 8.9    | 18.2   | 4.8    | 16.2   | 8.2    | 31.5    | 11.6   | 35.8   | 29.5   |
| 2.4    | 7.0    | 5.4    | 2.3    | 0.3    | 1.9     | 1.4    | 4.2    | 1.0    |
| 10.5   | 8.5    | 8.5    | 7.5    | 13.0   | 10.1    | 2.0    | 17.5   | 17.9   |

|        |        |        |        |        |        |        |        |        |
|--------|--------|--------|--------|--------|--------|--------|--------|--------|
| 68.5   | 66.4   | 50.2   | 60.5   | 32.5   | 133.7  | 74.2   | 42.6   | 69.1   |
| 81.5   | 80.5   | 94.7   | 67.8   | 6.9    | 76.4   | 27.7   | 80.0   | 100.7  |
| 91.9   | 86.1   | 112.6  | 85.7   | 21.5   | 152.8  | 113.3  | 64.6   | 86.3   |
| 131.4  | 128.5  | 108.8  | 99.5   | 64.6   | 55.3   | 60.1   | 32.0   | 33.0   |
| 36.1   | 56.1   | 57.8   | 54.2   | 24.8   | 230.3  | 109.3  | 31.4   | 39.2   |
| 65.1   | 26.3   | 36.3   | 16.3   | 10.8   | 25.0   | 5.1    | 2.9    | 22.3   |
| 21.2   | 19.5   | 8.7    | 26.8   | 13.4   | 30.6   | 8.4    | 4.0    | 11.8   |
| 135.8  | 146.8  | 156.7  | 133.0  | 51.4   | 33.5   | 22.7   | 12.0   | 8.5    |
| 8677.9 | 8122.2 | 7425.9 | 7249.9 | 5307.7 | 8938.3 | 7254.3 | 3110.5 | 4419.3 |
| 275.2  | 242.8  | 243.9  | 139.1  | 99.7   | 524.2  | 449.6  | 57.1   | 88.2   |
| 334.4  | 322.8  | 253.1  | 171.7  | 132.7  | 437.0  | 315.9  | 73.0   | 118.8  |
| 3.4    | 1.3    | 0.9    | 2.4    | 4.1    | 1.0    | 0.5    | 0.9    | 1.9    |
| 70.1   | 46.0   | 59.3   | 54.6   | 16.3   | 222.5  | 188.8  | 27.8   | 45.0   |
| 3.4    | 0.7    | 0.7    | 2.2    | 4.2    | 1.1    | 2.1    | 5.5    | 0.1    |
| 107.9  | 123.9  | 128.1  | 141.5  | 46.4   | 108.2  | 58.5   | 1.2    | 2.9    |
| 173.9  | 172.8  | 141.2  | 140.9  | 79.1   | 158.6  | 111.7  | 99.6   | 94.8   |
| 187.4  | 160.1  | 163.6  | 135.7  | 36.5   | 252.5  | 142.8  | 80.4   | 75.0   |
| 110.6  | 97.5   | 72.0   | 38.4   | 29.9   | 218.1  | 161.2  | 2.1    | 3.4    |
| 20.9   | 29.9   | 20.7   | 36.2   | 8.5    | 35.2   | 46.1   | 6.6    | 19.3   |
| 26.4   | 19.2   | 30.5   | 22.8   | 9.7    | 3.9    | 5.8    | 38.9   | 45.3   |
| 557.2  | 466.6  | 513.7  | 407.8  | 146.8  | 1279.5 | 615.6  | 136.0  | 185.5  |
| 6.0    | 4.3    | 2.5    | 1.3    | 1.3    | 8.5    | 2.3    | 6.9    | 4.3    |
| 22.9   | 30.5   | 16.7   | 4.1    | 2.6    | 5.2    | 1.9    | 13.6   | 2.2    |
| 10.1   | 30.0   | 5.8    | 8.2    | 2.8    | 83.0   | 54.4   | 32.6   | 73.3   |
| 61.2   | 65.6   | 58.6   | 62.5   | 14.5   | 45.6   | 9.9    | 5.2    | 9.9    |
| 86.9   | 67.6   | 51.6   | 43.8   | 14.9   | 154.7  | 121.6  | 40.2   | 53.1   |
| 50.5   | 43.5   | 27.8   | 27.1   | 24.3   | 57.4   | 42.5   | 21.3   | 18.4   |
| 12.4   | 6.1    | 5.9    | 5.9    | 1.0    | 3.5    | 7.2    | 0.5    | 0.3    |
| 79.7   | 75.1   | 54.5   | 87.4   | 20.7   | 83.6   | 41.8   | 45.7   | 47.5   |
| 44.0   | 27.5   | 25.8   | 43.6   | 12.9   | 55.4   | 19.3   | 11.4   | 32.5   |
| 14.1   | 23.0   | 20.6   | 2.3    | 9.3    | 13.9   | 12.3   | 7.6    | 12.0   |
| 2335.5 | 1962.6 | 2031.2 | 1489.7 | 702.0  | 3071.5 | 2102.9 | 803.1  | 884.2  |
| 9291.8 | 7913.0 | 7625.8 | 7178.5 | 5362.8 | 9063.2 | 8209.7 | 3104.1 | 3906.8 |
| 372.7  | 277.1  | 272.9  | 155.2  | 95.2   | 67.0   | 51.8   | 77.2   | 126.8  |
| 263.5  | 263.2  | 254.0  | 178.5  | 57.9   | 1.2    | 4.9    | 4.5    | 2.4    |
| 65.2   | 75.5   | 67.3   | 78.9   | 25.4   | 92.7   | 67.3   | 55.0   | 65.2   |
| 20.4   | 19.5   | 20.0   | 11.6   | 8.3    | 52.2   | 67.5   | 23.8   | 25.6   |
| 31.3   | 10.5   | 3.9    | 15.5   | 5.4    | 2.2    | 1.9    | 1.1    | 1.0    |
| 184.2  | 192.2  | 201.6  | 170.5  | 57.7   | 337.0  | 230.0  | 33.0   | 28.4   |
| 23.2   | 25.3   | 32.7   | 12.6   | 8.8    | 2.1    | 5.4    | 14.1   | 6.3    |
| 255.9  | 302.0  | 266.3  | 184.0  | 123.3  | 419.5  | 289.8  | 50.8   | 62.2   |
| 19.4   | 21.9   | 15.1   | 22.1   | 10.6   | 17.7   | 13.6   | 13.6   | 13.0   |
| 3.1    | 1.4    | 1.9    | 1.9    | 2.0    | 1.4    | 1.4    | 3.3    | 3.0    |
| 18.9   | 19.0   | 3.3    | 7.7    | 1.2    | 10.7   | 4.9    | 24.1   | 23.7   |
| 3.2    | 4.1    | 3.9    | 1.4    | 2.1    | 3.2    | 10.6   | 1.7    | 2.0    |
| 148.7  | 134.1  | 111.2  | 66.9   | 66.7   | 58.9   | 41.4   | 87.0   | 105.0  |
| 3688.5 | 3399.7 | 2637.3 | 1653.9 | 1025.3 | 5112.5 | 3160.2 | 670.0  | 782.3  |
| 11.8   | 11.2   | 6.0    | 6.4    | 4.2    | 11.1   | 2.2    | 11.3   | 5.7    |
| 1.6    | 2.0    | 2.3    | 1.0    | 0.8    | 6.0    | 0.7    | 11.8   | 2.0    |
| 55.9   | 30.2   | 20.6   | 32.6   | 13.2   | 75.9   | 39.6   | 39.7   | 60.9   |
| 9.1    | 1.7    | 16.2   | 7.0    | 0.5    | 24.4   | 11.1   | 2.3    | 12.4   |
| 6.2    | 4.4    | 8.9    | 1.4    | 4.8    | 2.1    | 0.1    | 3.8    | 12.8   |
| 98.4   | 77.5   | 154.6  | 105.2  | 44.1   | 278.1  | 202.0  | 41.1   | 51.4   |

|        |        |        |        |        |        |        |       |        |
|--------|--------|--------|--------|--------|--------|--------|-------|--------|
| 14.5   | 13.5   | 2.8    | 11.1   | 4.0    | 2.5    | 16.0   | 25.8  | 61.0   |
| 27.3   | 20.5   | 28.6   | 16.6   | 14.7   | 82.7   | 41.0   | 40.0  | 60.2   |
| 57.9   | 81.8   | 63.4   | 38.5   | 26.7   | 125.1  | 50.9   | 31.0  | 30.6   |
| 56.1   | 56.1   | 56.0   | 68.6   | 17.9   | 147.1  | 105.5  | 22.1  | 28.5   |
| 32.1   | 35.4   | 10.4   | 7.1    | 14.0   | 67.6   | 3.5    | 6.2   | 10.1   |
| 5490.8 | 4705.6 | 4802.3 | 5034.3 | 2570.4 | 8791.8 | 7198.4 | 799.9 | 958.2  |
| 362.5  | 343.9  | 366.6  | 217.2  | 92.7   | 383.4  | 290.5  | 136.3 | 172.4  |
| 209.6  | 177.0  | 138.8  | 101.6  | 63.8   | 189.4  | 120.3  | 54.5  | 36.1   |
| 931.3  | 821.6  | 1539.2 | 1270.7 | 644.7  | 4804.6 | 4071.4 | 10.2  | 7.3    |
| 2799.2 | 2367.5 | 2583.8 | 2248.8 | 956.9  | 4967.7 | 4800.1 | 869.2 | 1097.0 |
| 109.9  | 98.8   | 80.8   | 47.6   | 29.4   | 251.3  | 201.7  | 102.8 | 146.7  |
| 123.3  | 76.8   | 124.6  | 97.7   | 42.4   | 321.4  | 213.1  | 108.6 | 137.4  |
| 80.3   | 90.7   | 74.3   | 53.7   | 37.1   | 113.3  | 82.7   | 43.0  | 78.3   |
| 534.4  | 498.8  | 425.9  | 339.2  | 202.5  | 391.1  | 295.5  | 95.1  | 119.1  |
| 30.4   | 24.2   | 41.9   | 35.9   | 7.2    | 42.5   | 30.6   | 17.3  | 16.8   |
| 1933.3 | 1757.0 | 1831.3 | 1710.6 | 829.6  | 3281.4 | 2795.3 | 215.5 | 313.4  |
| 74.0   | 66.4   | 57.9   | 50.3   | 24.3   | 309.8  | 180.1  | 61.9  | 53.7   |
| 6.9    | 2.9    | 3.0    | 13.8   | 0.6    | 15.0   | 16.1   | 1.7   | 15.8   |
| 6.7    | 0.5    | 5.5    | 3.1    | 7.1    | 1.4    | 1.1    | 2.7   | 0.7    |
| 74.5   | 26.5   | 25.8   | 21.8   | 6.3    | 72.6   | 63.8   | 15.2  | 18.9   |
| 75.5   | 84.5   | 69.0   | 76.3   | 27.0   | 314.8  | 233.5  | 80.0  | 72.9   |
| 44.3   | 33.6   | 22.1   | 42.3   | 13.4   | 53.6   | 37.3   | 2.0   | 3.5    |
| 51.5   | 47.7   | 28.3   | 16.7   | 11.9   | 170.6  | 108.2  | 35.2  | 20.4   |
| 110.9  | 108.3  | 101.9  | 71.3   | 53.4   | 214.0  | 164.4  | 76.4  | 59.7   |
| 4.5    | 9.4    | 3.5    | 7.5    | 5.2    | 47.1   | 43.6   | 2.1   | 18.4   |
| 335.4  | 294.3  | 232.6  | 141.9  | 98.7   | 1277.9 | 454.0  | 22.3  | 27.9   |
| 27.3   | 20.5   | 24.7   | 56.2   | 18.4   | 728.0  | 406.5  | 8.7   | 8.0    |
| 16.7   | 23.6   | 8.0    | 6.7    | 1.6    | 16.1   | 5.7    | 33.6  | 17.1   |
| 93.9   | 95.6   | 127.5  | 239.0  | 74.3   | 411.4  | 272.3  | 23.0  | 19.1   |
| 59.8   | 37.6   | 42.1   | 24.8   | 17.9   | 75.1   | 68.1   | 54.1  | 46.6   |
| 75.8   | 101.5  | 69.8   | 111.2  | 30.1   | 124.5  | 104.8  | 71.1  | 116.7  |
| 34.4   | 6.8    | 21.7   | 21.6   | 5.0    | 35.1   | 26.8   | 33.1  | 40.7   |
| 116.1  | 96.3   | 94.4   | 105.1  | 22.2   | 260.7  | 261.7  | 38.7  | 53.6   |
| 486.9  | 404.3  | 493.9  | 477.2  | 164.4  | 982.6  | 836.6  | 130.0 | 206.7  |
| 319.4  | 307.2  | 364.3  | 548.3  | 149.0  | 621.1  | 611.9  | 78.9  | 86.8   |
| 2.8    | 7.0    | 1.2    | 1.6    | 1.8    | 10.0   | 7.5    | 2.4   | 5.8    |
| 63.2   | 73.7   | 69.5   | 16.7   | 22.9   | 131.2  | 41.5   | 9.4   | 27.4   |
| 1523.9 | 1337.1 | 1241.0 | 1017.1 | 504.9  | 3614.8 | 2520.2 | 614.7 | 813.5  |
| 1.6    | 5.0    | 9.2    | 3.3    | 2.9    | 49.0   | 33.6   | 6.8   | 10.8   |
| 1.1    | 0.5    | 0.7    | 3.0    | 0.2    | 24.9   | 14.0   | 3.8   | 3.3    |
| 180.3  | 151.3  | 174.4  | 155.2  | 60.9   | 235.4  | 159.3  | 29.1  | 45.1   |
| 6.8    | 4.0    | 31.0   | 1.3    | 1.1    | 25.8   | 20.8   | 4.9   | 2.0    |
| 96.4   | 115.1  | 99.9   | 133.9  | 28.6   | 305.1  | 180.4  | 124.8 | 154.3  |
| 29.5   | 31.9   | 10.8   | 11.5   | 12.0   | 2.7    | 4.5    | 9.7   | 9.0    |
| 11.3   | 41.2   | 61.0   | 57.4   | 7.4    | 156.7  | 132.3  | 79.9  | 76.8   |
| 7.0    | 8.7    | 0.4    | 5.9    | 1.1    | 11.6   | 7.0    | 3.5   | 0.6    |
| 5.3    | 3.8    | 3.3    | 4.3    | 1.0    | 15.7   | 18.1   | 13.8  | 10.4   |
| 567.5  | 591.5  | 572.9  | 511.1  | 183.0  | 1200.6 | 639.1  | 220.9 | 267.8  |
| 42.6   | 49.9   | 56.7   | 38.3   | 15.5   | 133.5  | 105.1  | 105.8 | 138.3  |
| 76.2   | 142.5  | 62.7   | 31.2   | 32.8   | 21.4   | 9.2    | 1.8   | 2.0    |
| 308.8  | 217.7  | 242.8  | 255.1  | 51.9   | 180.2  | 82.9   | 72.2  | 98.6   |
| 137.6  | 133.6  | 156.3  | 102.0  | 47.6   | 277.0  | 218.8  | 1.4   | 0.8    |
| 19.2   | 24.0   | 13.9   | 10.1   | 12.2   | 71.6   | 30.7   | 13.6  | 37.3   |

|        |        |        |        |        |        |        |        |        |
|--------|--------|--------|--------|--------|--------|--------|--------|--------|
| 99.1   | 108.9  | 81.2   | 75.4   | 39.2   | 183.6  | 138.5  | 364.6  | 511.0  |
| 41.6   | 36.4   | 24.2   | 22.7   | 2.8    | 160.4  | 88.6   | 10.5   | 15.0   |
| 51.4   | 61.1   | 52.1   | 41.8   | 27.0   | 41.1   | 31.7   | 10.9   | 2.5    |
| 428.4  | 261.4  | 332.8  | 402.7  | 96.1   | 634.8  | 503.1  | 156.3  | 165.4  |
| 43.2   | 39.3   | 57.4   | 102.2  | 24.0   | 94.3   | 71.9   | 47.9   | 80.2   |
| 8.9    | 1.8    | 18.6   | 14.7   | 5.2    | 19.6   | 12.2   | 10.4   | 3.1    |
| 44.2   | 42.0   | 38.2   | 29.2   | 22.7   | 21.2   | 35.6   | 178.5  | 263.0  |
| 25.7   | 33.5   | 31.3   | 39.1   | 14.4   | 26.9   | 9.0    | 8.2    | 28.8   |
| 2.4    | 2.2    | 10.8   | 4.3    | 0.9    | 1.1    | 0.8    | 5.9    | 2.0    |
| 18.7   | 22.8   | 10.3   | 29.1   | 4.8    | 8.2    | 17.1   | 4.0    | 5.5    |
| 22.9   | 10.6   | 21.7   | 17.0   | 9.2    | 53.5   | 44.9   | 44.7   | 34.8   |
| 72.6   | 75.3   | 103.1  | 81.2   | 25.0   | 198.1  | 102.6  | 67.8   | 100.2  |
| 12.5   | 3.8    | 20.3   | 13.5   | 3.6    | 21.1   | 13.3   | 9.6    | 15.7   |
| 6793.2 | 6447.3 | 5898.5 | 4604.4 | 3638.3 | 8982.4 | 7898.8 | 92.0   | 121.3  |
| 1.2    | 2.9    | 1.0    | 11.4   | 4.5    | 2.9    | 2.0    | 3.2    | 6.4    |
| 1.1    | 1.2    | 1.9    | 0.6    | 0.5    | 27.9   | 18.5   | 1.7    | 2.6    |
| 562.0  | 488.4  | 613.5  | 759.2  | 236.6  | 355.1  | 216.6  | 34.6   | 40.3   |
| 37.1   | 33.5   | 44.1   | 16.2   | 15.6   | 55.5   | 21.8   | 24.4   | 20.8   |
| 6.2    | 18.0   | 6.2    | 15.7   | 9.6    | 5.2    | 14.8   | 8.6    | 10.3   |
| 65.7   | 61.0   | 65.6   | 34.8   | 28.3   | 46.4   | 37.8   | 17.1   | 20.4   |
| 807.4  | 732.7  | 781.1  | 629.0  | 318.7  | 1508.9 | 1295.2 | 113.0  | 157.1  |
| 1.2    | 12.7   | 7.9    | 11.3   | 4.4    | 263.2  | 225.4  | 10.0   | 22.2   |
| 440.2  | 528.6  | 452.6  | 330.0  | 217.3  | 772.5  | 425.7  | 74.8   | 64.0   |
| 582.6  | 682.7  | 529.8  | 409.4  | 261.2  | 851.6  | 455.1  | 144.4  | 209.3  |
| 17.5   | 2.5    | 2.4    | 5.2    | 1.3    | 16.4   | 24.8   | 0.9    | 4.2    |
| 84.1   | 51.0   | 70.7   | 42.5   | 15.8   | 293.0  | 390.8  | 109.7  | 196.3  |
| 122.1  | 140.6  | 150.2  | 114.3  | 43.5   | 186.0  | 116.5  | 33.6   | 45.6   |
| 66.5   | 45.8   | 55.7   | 52.1   | 20.0   | 69.8   | 65.6   | 33.0   | 37.1   |
| 7.0    | 2.1    | 3.2    | 2.4    | 0.4    | 6.8    | 3.0    | 1.3    | 4.5    |
| 172.3  | 186.8  | 148.0  | 132.2  | 72.2   | 439.9  | 464.9  | 46.9   | 64.0   |
| 67.1   | 37.4   | 59.2   | 34.5   | 26.2   | 92.4   | 72.4   | 0.8    | 4.5    |
| 7706.6 | 6324.1 | 6132.2 | 5521.1 | 4002.8 | 7731.1 | 6579.5 | 2289.6 | 2762.8 |
| 17.8   | 28.0   | 25.8   | 23.0   | 8.2    | 37.6   | 18.1   | 29.7   | 33.0   |
| 2.4    | 2.3    | 6.2    | 2.5    | 9.5    | 19.4   | 19.4   | 4.9    | 24.2   |
| 5.2    | 3.8    | 7.8    | 1.9    | 3.1    | 2.3    | 3.2    | 4.2    | 1.3    |
| 243.5  | 206.4  | 142.0  | 95.0   | 76.4   | 310.6  | 234.6  | 519.8  | 629.3  |
| 3560.8 | 3737.4 | 3478.0 | 3442.3 | 2165.6 | 4783.9 | 4581.6 | 715.1  | 766.4  |
| 38.2   | 43.6   | 39.5   | 28.1   | 26.0   | 26.0   | 30.0   | 0.8    | 1.1    |
| 44.5   | 64.3   | 41.5   | 29.3   | 22.7   | 89.2   | 50.8   | 65.2   | 82.8   |
| 15.0   | 14.8   | 4.8    | 13.4   | 6.0    | 46.1   | 25.1   | 21.8   | 29.6   |
| 5.1    | 1.8    | 2.0    | 1.2    | 5.6    | 11.3   | 15.6   | 5.4    | 3.7    |
| 38.9   | 19.5   | 12.4   | 10.5   | 11.0   | 94.1   | 88.9   | 4.0    | 4.9    |
| 873.0  | 756.4  | 779.4  | 629.1  | 287.8  | 334.0  | 296.1  | 115.5  | 130.4  |
| 30.0   | 15.2   | 29.1   | 11.0   | 6.8    | 14.1   | 31.7   | 7.7    | 3.5    |
| 0.6    | 9.0    | 1.4    | 8.3    | 5.0    | 27.5   | 25.9   | 13.9   | 4.4    |
| 4.0    | 8.4    | 3.8    | 2.2    | 0.5    | 3.3    | 0.9    | 2.4    | 4.9    |
| 165.1  | 172.8  | 189.2  | 111.1  | 65.5   | 328.7  | 178.3  | 41.5   | 36.5   |
| 450.2  | 411.3  | 361.9  | 255.5  | 134.5  | 598.8  | 567.1  | 73.0   | 102.7  |
| 4.3    | 2.6    | 11.6   | 9.5    | 2.7    | 177.5  | 217.5  | 63.1   | 94.5   |
| 35.3   | 32.8   | 37.8   | 20.6   | 12.2   | 32.3   | 24.2   | 20.7   | 17.4   |
| 15.1   | 1.0    | 11.0   | 1.2    | 2.6    | 2.9    | 6.6    | 1.2    | 0.8    |
| 15.8   | 6.2    | 32.4   | 5.7    | 3.0    | 2582.9 | 1740.4 | 17.4   | 13.8   |
| 481.4  | 396.6  | 376.6  | 289.4  | 113.0  | 571.5  | 522.0  | 94.5   | 128.8  |

|         |        |        |        |        |         |        |        |        |
|---------|--------|--------|--------|--------|---------|--------|--------|--------|
| 24.8    | 31.1   | 31.6   | 23.1   | 7.9    | 27.9    | 30.5   | 16.6   | 20.8   |
| 111.5   | 59.9   | 74.0   | 46.8   | 14.4   | 107.9   | 40.6   | 109.3  | 152.2  |
| 73.1    | 59.0   | 89.9   | 70.2   | 28.7   | 100.8   | 44.5   | 49.7   | 71.3   |
| 203.1   | 175.7  | 232.6  | 165.1  | 61.2   | 445.8   | 324.8  | 79.0   | 73.8   |
| 12.2    | 13.6   | 9.2    | 1.4    | 0.8    | 2.2     | 2.8    | 2.1    | 1.7    |
| 134.4   | 226.8  | 168.3  | 88.8   | 36.8   | 592.9   | 300.1  | 10.5   | 11.7   |
| 3.6     | 5.0    | 6.5    | 3.9    | 0.7    | 4.5     | 2.2    | 1.7    | 2.2    |
| 1990.4  | 2044.2 | 1886.7 | 2036.0 | 661.2  | 1512.8  | 1042.5 | 276.9  | 425.7  |
| 4.6     | 1.3    | 4.7    | 2.1    | 0.5    | 34.5    | 9.0    | 30.0   | 20.7   |
| 10712.2 | 8859.8 | 8597.4 | 7910.0 | 6317.8 | 10848.3 | 7662.3 | 2875.7 | 3485.5 |
| 75.7    | 69.2   | 89.9   | 103.5  | 36.6   | 86.1    | 44.3   | 43.6   | 48.2   |
| 82.2    | 75.9   | 56.8   | 62.0   | 37.2   | 90.5    | 71.0   | 51.1   | 68.2   |
| 483.2   | 444.3  | 385.0  | 228.4  | 141.5  | 252.6   | 117.1  | 119.1  | 271.7  |
| 41.6    | 38.2   | 41.8   | 39.8   | 8.7    | 419.3   | 331.9  | 6.7    | 14.9   |
| 4890.3  | 4837.1 | 4668.7 | 4524.7 | 2961.6 | 6478.2  | 5234.7 | 579.4  | 961.9  |
| 10.3    | 8.8    | 8.0    | 14.8   | 1.2    | 563.3   | 366.0  | 1.9    | 1.6    |
| 20.5    | 5.8    | 27.2   | 7.7    | 5.3    | 52.5    | 22.5   | 16.2   | 15.4   |
| 24.9    | 22.3   | 17.7   | 9.0    | 14.5   | 39.3    | 27.2   | 90.3   | 83.4   |
| 55.2    | 36.3   | 43.0   | 45.5   | 20.8   | 104.2   | 84.4   | 3.2    | 10.3   |
| 22.2    | 18.6   | 14.7   | 21.0   | 5.1    | 110.9   | 74.9   | 41.2   | 45.2   |
| 47.8    | 38.7   | 43.8   | 26.0   | 11.6   | 91.3    | 71.8   | 32.9   | 27.8   |
| 28.2    | 44.0   | 34.6   | 21.3   | 7.5    | 171.3   | 105.9  | 23.4   | 34.9   |
| 111.8   | 83.8   | 46.6   | 57.8   | 35.2   | 123.3   | 98.9   | 335.5  | 767.2  |
| 355.1   | 304.4  | 292.6  | 207.7  | 128.7  | 242.6   | 152.6  | 42.4   | 38.4   |
| 329.1   | 251.7  | 207.9  | 81.8   | 79.5   | 4675.7  | 3302.6 | 148.9  | 178.4  |
| 2.5     | 0.8    | 5.1    | 1.8    | 1.8    | 4.0     | 3.7    | 4.9    | 2.3    |
| 31.1    | 33.8   | 39.4   | 18.6   | 8.7    | 29.2    | 36.5   | 16.4   | 12.5   |
| 102.7   | 99.0   | 82.3   | 62.6   | 31.1   | 188.5   | 141.5  | 35.6   | 28.7   |
| 25.3    | 25.4   | 25.7   | 4.7    | 12.5   | 59.7    | 54.8   | 3.9    | 27.5   |
| 78.7    | 47.5   | 70.2   | 51.3   | 24.5   | 188.0   | 81.4   | 39.0   | 47.3   |
| 17.1    | 14.9   | 23.5   | 15.5   | 6.6    | 43.4    | 27.9   | 8.4    | 10.1   |
| 15.5    | 4.3    | 17.7   | 16.0   | 0.9    | 3.4     | 4.0    | 4.9    | 16.8   |
| 152.8   | 121.6  | 112.5  | 106.3  | 38.3   | 206.1   | 139.7  | 132.0  | 156.0  |
| 2.1     | 7.9    | 1.8    | 1.7    | 1.0    | 1.2     | 2.5    | 1.0    | 0.9    |
| 38.8    | 24.6   | 20.8   | 10.1   | 13.4   | 61.0    | 57.7   | 31.6   | 40.8   |
| 2.3     | 1.5    | 6.6    | 1.1    | 3.1    | 2.9     | 6.0    | 2.9    | 2.3    |
| 6.3     | 3.5    | 10.8   | 20.4   | 5.1    | 4.7     | 8.5    | 2.3    | 18.0   |
| 161.7   | 86.7   | 68.5   | 54.2   | 47.7   | 53.0    | 98.0   | 37.5   | 46.3   |
| 9.9     | 10.8   | 4.2    | 12.6   | 9.8    | 3.5     | 2.1    | 1.5    | 0.8    |
| 61.2    | 70.7   | 53.8   | 61.1   | 26.2   | 27.0    | 17.1   | 3.9    | 8.3    |
| 66.3    | 67.2   | 68.5   | 64.2   | 19.8   | 269.9   | 160.1  | 49.1   | 74.3   |
| 8143.5  | 6586.3 | 6498.7 | 5980.3 | 3945.7 | 7865.6  | 6789.3 | 3303.8 | 4606.0 |
| 145.5   | 156.1  | 147.0  | 61.6   | 25.1   | 143.9   | 70.4   | 22.3   | 39.9   |
| 69.6    | 68.3   | 63.3   | 69.6   | 21.6   | 105.1   | 88.2   | 27.8   | 44.3   |
| 665.8   | 440.5  | 380.0  | 829.0  | 160.8  | 247.5   | 136.3  | 44.0   | 51.5   |
| 25.0    | 34.6   | 43.0   | 29.9   | 12.0   | 40.1    | 20.9   | 13.6   | 12.9   |
| 3.8     | 1.8    | 9.8    | 1.9    | 4.8    | 6.2     | 17.5   | 73.5   | 96.8   |
| 0.6     | 1.2    | 4.1    | 0.3    | 2.0    | 17.7    | 6.2    | 1.7    | 0.4    |
| 76.9    | 71.5   | 84.9   | 40.1   | 28.6   | 84.3    | 52.9   | 26.3   | 13.4   |
| 94.4    | 74.5   | 75.4   | 61.8   | 24.7   | 296.8   | 192.7  | 46.7   | 61.8   |
| 3844.5  | 2854.8 | 3084.6 | 2664.6 | 2703.6 | 3673.5  | 4180.7 | 818.4  | 1143.1 |
| 264.9   | 214.1  | 334.9  | 452.4  | 110.8  | 576.4   | 430.6  | 52.3   | 58.9   |
| 26.4    | 30.0   | 21.4   | 9.5    | 6.3    | 50.8    | 29.6   | 33.6   | 39.4   |

|        |        |        |        |        |        |        |        |        |
|--------|--------|--------|--------|--------|--------|--------|--------|--------|
| 18.8   | 15.9   | 9.7    | 6.9    | 2.7    | 37.7   | 22.1   | 18.4   | 35.8   |
| 37.1   | 17.6   | 33.7   | 25.9   | 13.8   | 30.7   | 29.7   | 5.7    | 16.4   |
| 15.2   | 5.4    | 6.6    | 19.8   | 2.6    | 22.4   | 1.7    | 23.4   | 18.2   |
| 4.0    | 14.7   | 12.0   | 1.2    | 4.0    | 16.8   | 1.4    | 2.1    | 1.8    |
| 2.1    | 1.0    | 1.7    | 0.8    | 3.4    | 7.6    | 4.8    | 1.7    | 2.6    |
| 0.5    | 0.1    | 0.7    | 0.7    | 0.2    | 0.7    | 0.4    | 2.9    | 1.4    |
| 40.9   | 52.2   | 30.4   | 13.5   | 13.1   | 34.3   | 24.2   | 32.2   | 24.3   |
| 3.7    | 8.1    | 1.2    | 5.6    | 0.2    | 5.8    | 6.2    | 8.6    | 0.7    |
| 23.3   | 26.1   | 17.0   | 13.9   | 5.6    | 16.6   | 6.7    | 12.8   | 20.9   |
| 22.8   | 22.4   | 12.6   | 29.9   | 10.2   | 214.4  | 142.7  | 40.1   | 52.4   |
| 23.8   | 3.9    | 10.4   | 4.9    | 1.6    | 35.2   | 22.1   | 25.8   | 45.5   |
| 117.8  | 74.0   | 105.3  | 66.4   | 42.3   | 85.9   | 77.3   | 3.6    | 10.0   |
| 119.0  | 157.0  | 113.6  | 107.4  | 59.7   | 115.1  | 94.9   | 66.7   | 58.9   |
| 1132.6 | 1019.2 | 1235.0 | 1517.3 | 693.9  | 1174.4 | 911.8  | 66.4   | 129.4  |
| 29.9   | 55.0   | 47.4   | 46.0   | 19.2   | 15.2   | 9.9    | 2.0    | 7.5    |
| 14.2   | 6.2    | 4.4    | 22.5   | 0.8    | 24.4   | 14.3   | 3.9    | 23.7   |
| 1.4    | 1.5    | 6.5    | 0.7    | 2.5    | 10.6   | 2.0    | 1.3    | 2.0    |
| 59.4   | 39.8   | 55.4   | 37.1   | 11.0   | 131.3  | 60.1   | 33.8   | 30.9   |
| 21.1   | 9.0    | 17.0   | 17.6   | 0.7    | 9.9    | 10.7   | 23.2   | 8.8    |
| 236.8  | 309.5  | 282.3  | 361.3  | 138.7  | 283.0  | 186.6  | 26.5   | 34.6   |
| 7.1    | 9.5    | 2.0    | 6.8    | 5.3    | 1.8    | 11.6   | 5.1    | 11.8   |
| 33.1   | 40.2   | 32.9   | 25.5   | 7.6    | 48.6   | 35.9   | 2.9    | 10.6   |
| 21.9   | 5.7    | 10.4   | 13.7   | 2.2    | 95.9   | 49.2   | 8.3    | 24.2   |
| 26.3   | 30.8   | 32.0   | 28.3   | 10.7   | 47.7   | 46.3   | 61.6   | 54.5   |
| 493.1  | 442.9  | 440.5  | 346.6  | 156.0  | 1251.4 | 795.6  | 150.8  | 149.8  |
| 13.6   | 0.5    | 3.8    | 3.6    | 1.6    | 2.7    | 8.0    | 1.6    | 13.2   |
| 8.8    | 14.7   | 20.1   | 9.7    | 3.7    | 27.5   | 23.7   | 0.6    | 0.4    |
| 34.8   | 30.2   | 35.2   | 60.2   | 34.7   | 46.0   | 58.0   | 35.0   | 30.9   |
| 47.6   | 43.4   | 28.8   | 19.2   | 10.9   | 34.7   | 24.9   | 15.0   | 20.2   |
| 3968.8 | 3547.7 | 3221.7 | 3110.5 | 1407.0 | 8251.8 | 7410.3 | 1413.9 | 1541.2 |
| 46.4   | 28.3   | 57.2   | 12.1   | 11.3   | 43.9   | 25.1   | 53.1   | 58.1   |
| 104.5  | 109.1  | 80.5   | 63.8   | 18.0   | 94.5   | 56.3   | 20.2   | 24.3   |
| 21.2   | 15.3   | 9.8    | 10.3   | 13.4   | 23.4   | 12.4   | 13.0   | 20.7   |
| 21.3   | 11.5   | 6.1    | 26.9   | 14.4   | 25.9   | 42.9   | 4.3    | 16.1   |
| 20.0   | 16.7   | 15.1   | 10.9   | 3.5    | 24.9   | 11.3   | 33.8   | 3.1    |
| 123.0  | 92.9   | 88.4   | 36.0   | 29.4   | 19.5   | 15.7   | 86.1   | 140.9  |
| 298.1  | 278.2  | 293.1  | 226.7  | 72.2   | 103.0  | 70.9   | 18.5   | 29.1   |
| 17.2   | 16.6   | 20.3   | 13.6   | 9.9    | 385.1  | 267.2  | 1.7    | 11.1   |
| 336.8  | 321.3  | 376.4  | 502.6  | 155.8  | 402.9  | 307.0  | 48.4   | 59.6   |
| 5.5    | 3.4    | 20.1   | 12.0   | 0.4    | 5.1    | 6.0    | 10.5   | 10.3   |
| 176.7  | 183.1  | 163.5  | 190.9  | 60.4   | 417.3  | 329.7  | 20.1   | 18.7   |
| 3984.8 | 3833.5 | 3529.7 | 3021.8 | 1985.8 | 5039.2 | 3888.0 | 1061.9 | 2106.5 |
| 56.4   | 62.5   | 55.4   | 33.5   | 14.6   | 108.6  | 96.5   | 24.0   | 24.2   |
| 272.4  | 330.5  | 313.9  | 219.6  | 107.4  | 546.5  | 275.7  | 22.3   | 31.9   |
| 446.7  | 390.9  | 307.3  | 234.9  | 131.6  | 1476.5 | 824.1  | 396.7  | 478.5  |
| 34.1   | 23.1   | 23.6   | 19.6   | 13.2   | 36.5   | 31.1   | 3.9    | 9.6    |
| 150.4  | 138.1  | 151.3  | 237.6  | 62.7   | 286.2  | 164.8  | 11.3   | 23.1   |
| 28.8   | 21.0   | 31.4   | 20.2   | 16.0   | 92.1   | 72.4   | 9.6    | 9.1    |
| 2.0    | 4.2    | 2.0    | 1.3    | 0.9    | 2.1    | 1.6    | 1.0    | 1.9    |
| 23.5   | 24.6   | 18.6   | 10.0   | 2.3    | 9.7    | 0.8    | 0.6    | 8.8    |
| 416.6  | 429.6  | 383.4  | 333.0  | 207.4  | 854.3  | 714.9  | 115.7  | 184.7  |
| 21.3   | 25.7   | 15.5   | 1.6    | 11.5   | 19.0   | 11.7   | 12.5   | 17.2   |
| 68.6   | 61.5   | 67.9   | 48.0   | 23.7   | 370.8  | 371.6  | 76.9   | 94.9   |

|        |        |        |        |        |        |        |        |        |
|--------|--------|--------|--------|--------|--------|--------|--------|--------|
| 3.9    | 2.7    | 4.7    | 6.5    | 4.3    | 4532.0 | 3833.1 | 6.9    | 8.7    |
| 48.6   | 38.3   | 32.4   | 14.6   | 11.0   | 21.1   | 10.8   | 7.3    | 2.0    |
| 152.2  | 155.2  | 87.1   | 70.7   | 43.7   | 176.6  | 77.6   | 3.1    | 22.5   |
| 0.9    | 5.4    | 1.5    | 0.9    | 0.7    | 2.5    | 0.9    | 2.9    | 1.3    |
| 3.6    | 1.7    | 3.0    | 4.8    | 9.0    | 1.7    | 1.5    | 4.6    | 10.0   |
| 24.8   | 28.2   | 30.3   | 3.3    | 18.2   | 20.3   | 42.9   | 65.2   | 123.7  |
| 2.8    | 3.6    | 4.6    | 3.8    | 1.8    | 3.6    | 3.1    | 3.4    | 5.2    |
| 14.3   | 15.7   | 13.4   | 15.8   | 1.3    | 25.4   | 21.9   | 2.7    | 30.6   |
| 3.5    | 2.4    | 15.9   | 0.9    | 0.4    | 11.0   | 5.1    | 2.5    | 9.9    |
| 24.2   | 32.8   | 33.9   | 41.8   | 7.3    | 567.4  | 399.3  | 501.1  | 632.3  |
| 21.4   | 14.8   | 8.7    | 8.9    | 4.7    | 22.2   | 3.9    | 4.2    | 17.6   |
| 1.6    | 1.0    | 1.3    | 11.3   | 12.2   | 1.4    | 16.1   | 1.9    | 3.4    |
| 7.0    | 3.2    | 3.7    | 8.4    | 1.1    | 5.0    | 8.3    | 3.0    | 2.2    |
| 88.7   | 89.7   | 71.9   | 42.1   | 25.4   | 27.0   | 9.6    | 97.4   | 120.4  |
| 2.7    | 11.6   | 4.4    | 6.1    | 4.1    | 1.2    | 1.6    | 10.0   | 11.8   |
| 4008.2 | 3572.7 | 3192.0 | 2027.9 | 1209.5 | 5423.6 | 3977.1 | 1184.8 | 1737.2 |
| 109.3  | 128.2  | 134.8  | 94.8   | 53.4   | 145.8  | 59.1   | 110.6  | 154.3  |
| 53.6   | 68.9   | 63.9   | 32.2   | 21.4   | 144.8  | 122.8  | 43.5   | 33.9   |
| 1265.0 | 713.7  | 772.0  | 861.9  | 374.7  | 1293.6 | 1113.6 | 347.0  | 651.1  |
| 180.9  | 183.7  | 220.0  | 123.2  | 73.4   | 179.5  | 108.0  | 213.4  | 266.8  |
| 7.5    | 7.5    | 7.6    | 3.4    | 1.2    | 3.9    | 13.4   | 3.9    | 3.2    |
| 14.3   | 15.7   | 3.1    | 5.0    | 2.1    | 14.6   | 15.3   | 12.8   | 10.3   |
| 4.1    | 17.4   | 33.5   | 14.8   | 12.6   | 9.6    | 10.0   | 13.7   | 12.1   |
| 277.8  | 109.4  | 106.0  | 44.6   | 60.9   | 1186.7 | 320.5  | 70.3   | 92.7   |
| 4139.6 | 3872.0 | 3442.7 | 3004.8 | 1507.2 | 2785.2 | 1914.6 | 799.7  | 883.2  |
| 31.5   | 18.1   | 32.0   | 4.3    | 11.1   | 57.2   | 26.2   | 24.7   | 18.8   |
| 149.2  | 180.3  | 198.6  | 222.6  | 79.4   | 118.9  | 82.9   | 15.0   | 22.4   |
| 4090.8 | 3655.1 | 3249.3 | 2729.2 | 1605.8 | 2862.3 | 2242.1 | 1627.0 | 2080.9 |
| 19.0   | 43.9   | 31.1   | 30.7   | 1.2    | 39.0   | 35.2   | 10.2   | 11.4   |
| 2.7    | 1.2    | 2.9    | 1.0    | 0.7    | 5.3    | 10.1   | 3.4    | 2.4    |
| 185.2  | 149.5  | 187.4  | 172.4  | 54.1   | 296.7  | 238.0  | 98.3   | 79.1   |
| 34.8   | 32.3   | 22.4   | 19.9   | 9.1    | 44.8   | 55.6   | 11.9   | 8.9    |
| 115.1  | 128.3  | 184.3  | 187.2  | 47.8   | 189.8  | 127.4  | 15.5   | 27.6   |
| 7.4    | 2.6    | 9.2    | 0.4    | 0.7    | 7.7    | 9.0    | 9.3    | 7.6    |
| 0.3    | 0.2    | 0.6    | 0.4    | 4.0    | 0.8    | 0.3    | 0.8    | 0.6    |
| 373.9  | 497.6  | 373.0  | 291.4  | 158.9  | 839.9  | 432.1  | 79.2   | 113.4  |
| 96.4   | 86.9   | 97.2   | 88.8   | 74.9   | 223.6  | 377.5  | 36.3   | 38.5   |
| 15.0   | 13.4   | 16.0   | 10.0   | 1.9    | 23.5   | 25.9   | 17.1   | 22.9   |
| 4.1    | 5.8    | 2.1    | 2.1    | 1.1    | 10.3   | 2.7    | 3.3    | 3.9    |
| 66.2   | 58.7   | 66.3   | 102.6  | 26.6   | 181.2  | 106.5  | 75.7   | 149.1  |
| 11.9   | 13.6   | 8.6    | 8.8    | 0.8    | 14.9   | 12.1   | 23.5   | 24.6   |
| 6.3    | 1.6    | 3.0    | 8.6    | 4.0    | 20.0   | 1.0    | 12.1   | 7.6    |
| 119.2  | 64.3   | 32.0   | 70.1   | 18.9   | 360.0  | 131.2  | 56.6   | 77.6   |
| 576.4  | 518.6  | 533.2  | 547.3  | 234.3  | 737.3  | 590.0  | 148.2  | 164.6  |
| 6.2    | 15.1   | 1.9    | 16.4   | 11.9   | 20.5   | 5.1    | 2.5    | 3.7    |
| 82.6   | 49.7   | 71.4   | 36.5   | 24.0   | 50.6   | 19.0   | 66.9   | 92.5   |
| 2547.7 | 1699.8 | 2656.9 | 2073.9 | 1723.6 | 2432.5 | 3979.6 | 405.4  | 363.2  |
| 34.5   | 45.3   | 30.1   | 13.3   | 5.0    | 75.8   | 46.9   | 4.2    | 3.2    |
| 1.4    | 1.6    | 2.2    | 1.9    | 1.2    | 1.0    | 1.2    | 2.3    | 1.3    |
| 85.0   | 57.1   | 77.6   | 42.6   | 20.6   | 177.3  | 106.5  | 41.5   | 36.4   |
| 111.1  | 129.6  | 126.8  | 85.1   | 39.7   | 145.4  | 57.0   | 11.1   | 13.6   |
| 1296.6 | 1338.7 | 1205.4 | 1166.1 | 512.5  | 1617.8 | 1078.1 | 431.3  | 612.5  |
| 17.3   | 14.4   | 26.4   | 19.6   | 5.4    | 47.2   | 15.3   | 35.0   | 66.9   |



|        |        |        |        |        |        |        |        |        |
|--------|--------|--------|--------|--------|--------|--------|--------|--------|
| 8.3    | 1.9    | 0.3    | 0.1    | 0.3    | 0.9    | 0.7    | 0.5    | 0.3    |
| 7.8    | 0.3    | 0.8    | 2.4    | 3.6    | 12.1   | 0.3    | 0.9    | 5.8    |
| 360.7  | 442.6  | 396.1  | 265.9  | 152.5  | 507.5  | 452.0  | 146.7  | 189.0  |
| 15.6   | 0.8    | 2.1    | 7.4    | 0.5    | 9.7    | 0.6    | 3.5    | 9.7    |
| 3.5    | 3.6    | 5.7    | 2.6    | 7.6    | 3.6    | 2.7    | 7.3    | 3.3    |
| 2.4    | 5.7    | 15.9   | 2.9    | 1.5    | 6.3    | 2.2    | 3.4    | 1.2    |
| 11.8   | 3.4    | 3.0    | 2.8    | 2.2    | 2.9    | 18.2   | 3.3    | 22.2   |
| 74.5   | 45.6   | 63.1   | 43.8   | 14.2   | 62.1   | 42.9   | 71.4   | 80.4   |
| 90.0   | 79.1   | 53.0   | 47.3   | 31.1   | 241.4  | 127.1  | 26.6   | 21.9   |
| 487.2  | 427.2  | 443.1  | 426.3  | 195.8  | 743.3  | 378.1  | 326.1  | 371.1  |
| 2.4    | 1.2    | 1.8    | 1.8    | 1.6    | 5.3    | 7.5    | 3.5    | 3.6    |
| 589.9  | 534.7  | 530.6  | 640.3  | 200.7  | 596.5  | 441.7  | 153.0  | 134.6  |
| 12.8   | 10.2   | 4.3    | 11.3   | 9.6    | 50.5   | 40.9   | 21.9   | 12.7   |
| 1.3    | 0.7    | 7.6    | 10.7   | 4.6    | 16.6   | 5.1    | 2.2    | 4.3    |
| 29.2   | 29.1   | 35.5   | 21.6   | 13.7   | 60.2   | 41.5   | 15.2   | 20.9   |
| 25.1   | 14.2   | 22.5   | 24.1   | 6.5    | 29.6   | 25.8   | 22.7   | 36.2   |
| 48.4   | 48.9   | 45.1   | 34.6   | 16.6   | 0.9    | 1.0    | 5.3    | 2.4    |
| 2.2    | 1.4    | 2.0    | 0.6    | 0.3    | 5.0    | 2.0    | 19.2   | 5.8    |
| 0.7    | 0.7    | 0.3    | 0.3    | 1.7    | 0.7    | 0.4    | 0.9    | 0.9    |
| 7.5    | 10.5   | 3.6    | 13.3   | 6.6    | 2.6    | 7.9    | 5.7    | 17.8   |
| 30.0   | 25.2   | 18.2   | 18.9   | 10.9   | 26.5   | 28.1   | 15.0   | 21.8   |
| 50.2   | 61.6   | 47.1   | 37.9   | 20.2   | 77.7   | 33.9   | 40.0   | 40.2   |
| 227.8  | 252.5  | 289.0  | 367.0  | 102.1  | 257.1  | 208.2  | 22.9   | 31.9   |
| 221.8  | 225.4  | 217.1  | 98.3   | 65.1   | 636.6  | 333.1  | 314.3  | 419.6  |
| 113.5  | 67.0   | 89.6   | 59.0   | 23.4   | 59.9   | 67.2   | 133.2  | 113.8  |
| 37.0   | 39.9   | 29.7   | 13.6   | 26.1   | 103.8  | 134.8  | 78.0   | 83.6   |
| 0.9    | 1.2    | 3.9    | 2.9    | 1.3    | 2.8    | 5.9    | 1.4    | 0.8    |
| 12.6   | 2.5    | 6.9    | 11.2   | 1.4    | 13.1   | 13.2   | 17.1   | 15.8   |
| 21.1   | 21.3   | 14.6   | 6.1    | 5.8    | 18.8   | 3.6    | 25.3   | 24.4   |
| 220.2  | 262.4  | 329.5  | 534.6  | 151.0  | 736.4  | 619.9  | 41.8   | 63.3   |
| 1214.3 | 905.2  | 1046.7 | 1130.1 | 338.9  | 823.1  | 520.8  | 220.4  | 245.0  |
| 122.4  | 99.1   | 90.0   | 65.0   | 40.5   | 121.0  | 70.9   | 51.4   | 100.4  |
| 0.8    | 0.9    | 0.5    | 0.5    | 0.5    | 0.8    | 1.1    | 0.5    | 0.6    |
| 7.0    | 1.4    | 1.5    | 10.8   | 1.6    | 54.4   | 31.8   | 8.2    | 6.4    |
| 2385.8 | 2286.6 | 2585.5 | 2401.3 | 972.7  | 2547.0 | 1698.8 | 534.4  | 785.3  |
| 46.3   | 49.8   | 53.2   | 27.4   | 13.2   | 36.7   | 12.9   | 45.7   | 78.0   |
| 6.5    | 5.0    | 0.9    | 0.9    | 1.1    | 53.9   | 25.2   | 3.1    | 1.1    |
| 7414.7 | 6873.1 | 6506.9 | 6182.3 | 4215.6 | 8076.3 | 6674.3 | 1721.9 | 2367.2 |
| 12.9   | 3.8    | 7.3    | 1.5    | 0.3    | 23.6   | 25.4   | 3.7    | 0.9    |
| 321.6  | 375.4  | 306.9  | 266.2  | 137.0  | 477.9  | 240.7  | 62.3   | 71.7   |
| 45.9   | 35.3   | 45.5   | 28.1   | 18.3   | 50.2   | 26.9   | 2.4    | 13.0   |
| 24.4   | 23.9   | 27.7   | 14.7   | 8.3    | 81.6   | 29.5   | 10.0   | 26.6   |
| 2.3    | 1.4    | 1.5    | 0.8    | 7.7    | 13.8   | 2.6    | 2.2    | 0.9    |
| 184.1  | 254.3  | 174.2  | 90.6   | 30.0   | 138.4  | 42.9   | 51.2   | 145.1  |
| 19.8   | 12.6   | 19.0   | 10.1   | 6.7    | 13.1   | 8.8    | 1.0    | 2.4    |
| 11.4   | 14.0   | 13.2   | 1.9    | 1.2    | 4.8    | 1.1    | 4.6    | 3.9    |
| 27.4   | 17.0   | 20.4   | 13.8   | 4.0    | 111.0  | 150.8  | 10.3   | 19.5   |
| 242.0  | 272.0  | 286.4  | 170.3  | 81.7   | 241.5  | 158.7  | 264.3  | 262.1  |
| 87.4   | 60.2   | 77.5   | 54.6   | 26.4   | 228.5  | 155.2  | 85.7   | 88.5   |
| 55.5   | 42.7   | 63.2   | 39.1   | 14.8   | 118.2  | 84.2   | 21.9   | 9.2    |
| 3.1    | 10.3   | 6.8    | 0.9    | 4.5    | 17.9   | 8.9    | 11.2   | 8.3    |
| 134.2  | 130.6  | 138.6  | 128.0  | 42.5   | 73.5   | 48.8   | 47.8   | 69.9   |
| 59.7   | 68.0   | 45.4   | 18.7   | 12.6   | 21.7   | 18.3   | 12.5   | 8.1    |

|        |        |        |        |        |         |        |        |        |
|--------|--------|--------|--------|--------|---------|--------|--------|--------|
| 4.4    | 0.2    | 1.3    | 0.4    | 0.1    | 65.5    | 42.2   | 0.3    | 1.9    |
| 5.5    | 6.3    | 10.7   | 6.9    | 3.1    | 11.2    | 10.2   | 24.5   | 15.3   |
| 24.7   | 30.1   | 23.0   | 24.4   | 8.7    | 34.2    | 32.4   | 19.6   | 8.6    |
| 16.2   | 17.6   | 23.7   | 7.0    | 1.1    | 34.8    | 18.4   | 17.0   | 24.2   |
| 1.2    | 2.2    | 1.8    | 8.0    | 7.1    | 24.4    | 3.3    | 2.7    | 7.9    |
| 87.4   | 74.8   | 84.2   | 45.4   | 29.3   | 158.7   | 90.1   | 28.9   | 40.4   |
| 69.6   | 40.0   | 47.4   | 46.7   | 23.5   | 3.5     | 2.4    | 20.0   | 18.2   |
| 3.5    | 4.4    | 7.7    | 8.0    | 0.7    | 2.8     | 1.2    | 1.0    | 10.3   |
| 37.3   | 20.7   | 27.8   | 37.3   | 12.2   | 8.3     | 3.8    | 1.3    | 5.2    |
| 59.2   | 65.0   | 62.2   | 46.4   | 16.2   | 162.1   | 41.9   | 25.7   | 52.6   |
| 30.2   | 28.1   | 24.5   | 12.6   | 13.1   | 48.7    | 41.3   | 33.0   | 5.8    |
| 4931.6 | 4520.7 | 4177.2 | 3257.7 | 2360.7 | 6906.9  | 6075.8 | 3606.2 | 4503.1 |
| 64.1   | 49.8   | 52.5   | 36.1   | 19.7   | 120.5   | 51.5   | 33.3   | 47.0   |
| 2.9    | 9.6    | 4.1    | 2.9    | 0.6    | 5.3     | 2.0    | 2.0    | 3.6    |
| 1.2    | 1.8    | 6.4    | 1.1    | 0.7    | 6.1     | 10.0   | 2.8    | 13.3   |
| 8.7    | 12.6   | 13.7   | 10.3   | 7.5    | 7.9     | 6.5    | 21.3   | 28.2   |
| 13.1   | 11.2   | 8.5    | 1.1    | 0.2    | 6.5     | 28.6   | 6.2    | 17.9   |
| 14.0   | 10.4   | 10.9   | 13.4   | 6.6    | 12.2    | 13.4   | 1.8    | 4.5    |
| 282.6  | 230.9  | 237.9  | 152.0  | 98.3   | 300.3   | 138.0  | 60.4   | 100.6  |
| 102.8  | 66.2   | 99.8   | 152.3  | 34.9   | 94.6    | 114.6  | 22.9   | 26.7   |
| 33.8   | 22.3   | 30.6   | 21.0   | 11.3   | 11.3    | 13.8   | 3.0    | 9.1    |
| 205.3  | 205.9  | 235.8  | 204.6  | 81.7   | 204.5   | 149.1  | 92.5   | 117.7  |
| 15.6   | 25.5   | 25.5   | 22.8   | 6.8    | 83.5    | 61.5   | 33.1   | 61.4   |
| 27.1   | 15.5   | 6.5    | 3.3    | 9.7    | 32.3    | 41.0   | 15.4   | 1.3    |
| 17.4   | 15.4   | 3.7    | 5.8    | 1.1    | 4.8     | 1.2    | 2.4    | 3.0    |
| 330.8  | 350.1  | 350.0  | 317.9  | 176.9  | 614.4   | 332.4  | 179.8  | 227.9  |
| 154.0  | 155.0  | 132.4  | 166.2  | 55.1   | 81.9    | 62.7   | 140.0  | 218.9  |
| 63.4   | 49.5   | 40.1   | 64.4   | 24.7   | 209.4   | 173.8  | 12.1   | 10.5   |
| 2.0    | 1.3    | 1.4    | 1.8    | 0.7    | 13.5    | 8.0    | 1.9    | 1.8    |
| 403.5  | 366.0  | 320.0  | 176.1  | 102.8  | 1072.0  | 845.1  | 74.1   | 91.4   |
| 41.6   | 31.4   | 52.0   | 47.0   | 16.6   | 7.4     | 5.5    | 1.8    | 27.1   |
| 208.1  | 136.1  | 132.1  | 78.1   | 43.7   | 277.9   | 161.6  | 34.4   | 28.5   |
| 8.4    | 10.6   | 7.2    | 6.9    | 8.6    | 9.4     | 12.5   | 9.3    | 9.8    |
| 247.6  | 162.4  | 173.7  | 145.8  | 56.1   | 205.4   | 179.6  | 135.7  | 175.4  |
| 93.7   | 66.3   | 82.4   | 54.7   | 26.5   | 100.3   | 66.8   | 26.8   | 19.5   |
| 255.6  | 223.2  | 222.8  | 132.8  | 84.5   | 467.8   | 281.3  | 103.5  | 140.2  |
| 201.1  | 190.4  | 189.2  | 237.2  | 86.6   | 310.0   | 219.7  | 29.0   | 37.8   |
| 20.0   | 5.2    | 16.9   | 10.3   | 2.3    | 5.5     | 1.3    | 7.0    | 15.4   |
| 13.9   | 18.1   | 15.7   | 6.9    | 5.9    | 22.6    | 1.2    | 12.5   | 12.8   |
| 4.7    | 3.3    | 0.6    | 0.2    | 2.4    | 9.5     | 8.8    | 0.3    | 0.8    |
| 729.0  | 701.0  | 688.1  | 563.4  | 329.0  | 2781.7  | 2313.5 | 85.3   | 96.9   |
| 67.7   | 48.6   | 63.2   | 49.3   | 25.0   | 53.6    | 32.6   | 28.8   | 42.5   |
| 107.0  | 104.2  | 129.8  | 113.9  | 38.4   | 572.3   | 245.8  | 22.6   | 32.6   |
| 1380.6 | 1587.2 | 1432.1 | 1949.6 | 645.4  | 2394.2  | 1774.9 | 410.2  | 696.3  |
| 101.6  | 86.2   | 73.1   | 78.3   | 28.4   | 195.5   | 120.9  | 50.0   | 59.8   |
| 6.7    | 1.0    | 2.3    | 7.1    | 3.7    | 14.6    | 15.2   | 2.0    | 0.6    |
| 4.7    | 7.5    | 10.3   | 4.8    | 1.5    | 6.9     | 1.2    | 0.7    | 7.5    |
| 2903.1 | 2730.5 | 2820.1 | 2568.0 | 1154.5 | 3207.0  | 2631.7 | 578.7  | 682.2  |
| 25.6   | 18.6   | 3.5    | 19.4   | 2.2    | 227.8   | 118.4  | 2.7    | 2.3    |
| 18.6   | 8.3    | 10.7   | 6.2    | 3.2    | 2.8     | 7.1    | 19.4   | 14.2   |
| 9448.1 | 8281.4 | 7841.5 | 6791.5 | 5101.0 | 11000.6 | 9916.4 | 3873.3 | 4840.9 |
| 0.8    | 2.4    | 1.8    | 6.5    | 0.3    | 11.1    | 10.7   | 1.0    | 2.5    |
| 14.1   | 12.4   | 4.1    | 6.6    | 1.6    | 42.7    | 34.6   | 2.1    | 9.3    |

|        |        |        |        |        |         |         |        |        |
|--------|--------|--------|--------|--------|---------|---------|--------|--------|
| 8.2    | 8.8    | 6.1    | 11.0   | 3.2    | 6.5     | 8.9     | 13.2   | 4.5    |
| 8.5    | 12.1   | 19.1   | 4.0    | 3.8    | 11.5    | 18.2    | 3.2    | 2.4    |
| 2348.7 | 1883.1 | 2243.1 | 1647.9 | 758.2  | 2059.7  | 2049.1  | 653.6  | 819.4  |
| 6.6    | 9.6    | 9.3    | 7.7    | 2.6    | 49.1    | 32.8    | 15.2   | 22.3   |
| 14.9   | 16.1   | 22.8   | 5.3    | 6.0    | 20.2    | 7.9     | 23.9   | 21.2   |
| 48.2   | 51.8   | 62.3   | 67.6   | 42.2   | 80.8    | 47.3    | 50.8   | 126.1  |
| 71.8   | 54.5   | 76.5   | 79.2   | 34.9   | 215.1   | 143.7   | 37.4   | 51.6   |
| 92.1   | 228.7  | 196.7  | 130.2  | 86.6   | 95.5    | 80.2    | 48.3   | 22.3   |
| 319.0  | 323.2  | 439.3  | 476.0  | 189.0  | 258.4   | 220.1   | 44.4   | 72.9   |
| 165.2  | 94.9   | 163.8  | 105.1  | 84.9   | 704.3   | 369.8   | 109.6  | 29.5   |
| 0.7    | 3.5    | 0.3    | 1.2    | 1.1    | 0.9     | 6.6     | 0.3    | 0.7    |
| 4597.8 | 4476.8 | 3926.1 | 2913.4 | 1756.2 | 5448.9  | 4178.1  | 934.7  | 1322.1 |
| 36.1   | 55.0   | 32.0   | 36.5   | 7.3    | 34.0    | 23.1    | 12.5   | 4.2    |
| 442.7  | 459.1  | 540.5  | 451.5  | 189.5  | 679.2   | 505.3   | 29.1   | 63.9   |
| 3.2    | 1.1    | 1.5    | 1.6    | 0.9    | 15.1    | 10.0    | 73.1   | 85.5   |
| 32.3   | 34.0   | 31.7   | 18.7   | 18.0   | 86.4    | 50.2    | 116.4  | 130.4  |
| 1304.9 | 1149.5 | 1052.3 | 643.6  | 368.5  | 906.5   | 377.8   | 289.5  | 309.4  |
| 1.2    | 0.8    | 0.6    | 3.3    | 1.4    | 7.3     | 5.6     | 4.7    | 8.5    |
| 82.6   | 95.1   | 78.8   | 75.5   | 25.0   | 52.3    | 39.2    | 19.8   | 29.1   |
| 7115.5 | 5976.5 | 5794.8 | 5395.0 | 3648.6 | 12090.0 | 10670.9 | 2260.9 | 2347.6 |
| 34.8   | 29.5   | 26.9   | 11.0   | 7.0    | 21.4    | 0.6     | 13.9   | 8.4    |
| 346.9  | 319.3  | 333.3  | 257.7  | 125.3  | 1020.3  | 995.5   | 209.7  | 311.9  |
| 209.4  | 225.7  | 243.1  | 179.6  | 84.6   | 269.6   | 171.7   | 243.7  | 317.7  |
| 5.8    | 2.0    | 1.5    | 2.5    | 2.1    | 16.8    | 24.0    | 9.1    | 2.6    |
| 4.2    | 8.2    | 3.8    | 1.2    | 0.9    | 221.7   | 142.3   | 12.8   | 7.5    |
| 50.8   | 44.9   | 49.8   | 61.9   | 24.6   | 56.8    | 33.5    | 3.3    | 19.8   |
| 544.7  | 493.1  | 441.1  | 293.1  | 190.9  | 1495.9  | 1210.4  | 178.5  | 167.3  |
| 12.8   | 13.1   | 16.2   | 8.3    | 4.6    | 25.2    | 11.6    | 9.4    | 15.6   |
| 123.2  | 140.0  | 123.7  | 95.1   | 30.2   | 296.7   | 156.5   | 13.8   | 15.9   |
| 30.8   | 18.8   | 27.3   | 11.1   | 8.1    | 20.0    | 27.3    | 32.3   | 23.9   |
| 245.6  | 133.2  | 153.9  | 151.6  | 36.8   | 395.5   | 199.1   | 64.5   | 91.6   |
| 103.5  | 137.1  | 119.8  | 87.8   | 47.1   | 135.5   | 95.3    | 62.4   | 54.0   |
| 6.3    | 16.1   | 6.7    | 1.0    | 2.4    | 34.2    | 30.1    | 1.0    | 1.7    |
| 8.2    | 3.7    | 2.7    | 7.0    | 2.4    | 2.1     | 0.9     | 8.4    | 1.7    |
| 20.3   | 16.3   | 33.3   | 30.7   | 21.9   | 2.0     | 13.5    | 20.2   | 8.5    |
| 1131.8 | 963.0  | 1052.9 | 398.7  | 303.3  | 256.0   | 90.6    | 10.7   | 18.7   |
| 40.3   | 27.2   | 36.7   | 26.0   | 17.0   | 57.7    | 34.7    | 31.7   | 22.3   |
| 28.9   | 20.8   | 49.8   | 20.0   | 9.4    | 33.5    | 15.6    | 2.7    | 2.0    |
| 12.6   | 15.3   | 20.0   | 5.0    | 3.1    | 7.9     | 10.2    | 9.6    | 11.2   |
| 3.1    | 0.7    | 2.8    | 0.5    | 0.6    | 5.3     | 0.7     | 0.4    | 1.7    |
| 4643.8 | 4214.6 | 3971.4 | 2828.2 | 2354.3 | 6509.5  | 5090.4  | 862.5  | 1257.4 |
| 18.2   | 16.2   | 15.6   | 9.2    | 0.6    | 50.8    | 50.6    | 77.5   | 120.1  |
| 12.0   | 10.8   | 18.2   | 15.1   | 1.5    | 84.0    | 64.7    | 37.1   | 60.2   |
| 11.2   | 9.9    | 3.0    | 8.2    | 0.6    | 11.7    | 6.4     | 2.4    | 1.5    |
| 1.0    | 1.3    | 1.7    | 0.6    | 0.6    | 1.5     | 0.4     | 0.9    | 0.8    |
| 86.6   | 83.6   | 66.5   | 46.1   | 25.3   | 41.7    | 55.7    | 38.4   | 51.8   |
| 30.4   | 12.4   | 16.9   | 5.4    | 1.5    | 46.2    | 22.1    | 16.3   | 19.1   |
| 910.2  | 798.9  | 875.2  | 853.5  | 185.0  | 351.5   | 273.1   | 72.3   | 99.5   |
| 26.1   | 13.6   | 26.1   | 16.0   | 13.0   | 15.1    | 25.2    | 29.9   | 36.1   |
| 7.6    | 17.9   | 0.9    | 5.7    | 3.6    | 5.2     | 0.4     | 4.7    | 2.3    |
| 1.0    | 20.1   | 16.5   | 9.7    | 1.7    | 4.7     | 2.5     | 0.9    | 2.5    |
| 15.9   | 10.8   | 9.7    | 2.6    | 4.2    | 10.7    | 11.5    | 1.6    | 7.5    |
| 404.9  | 327.9  | 429.9  | 351.3  | 106.7  | 1022.6  | 951.7   | 85.8   | 141.6  |

|        |        |        |        |        |        |        |        |        |
|--------|--------|--------|--------|--------|--------|--------|--------|--------|
| 121.0  | 145.0  | 103.6  | 99.1   | 56.0   | 52.2   | 56.5   | 2.8    | 6.1    |
| 9.2    | 15.3   | 28.4   | 4.2    | 7.6    | 15.8   | 15.3   | 2.5    | 13.6   |
| 269.8  | 224.2  | 225.6  | 257.3  | 65.9   | 125.0  | 41.2   | 24.2   | 48.7   |
| 60.5   | 60.5   | 40.3   | 21.7   | 18.2   | 154.2  | 141.2  | 22.5   | 25.6   |
| 23.9   | 26.6   | 12.6   | 24.1   | 9.5    | 42.5   | 31.5   | 17.3   | 18.9   |
| 4.6    | 7.3    | 8.0    | 10.1   | 1.9    | 198.9  | 250.7  | 14.6   | 21.5   |
| 42.7   | 34.2   | 53.8   | 78.7   | 19.0   | 74.1   | 47.2   | 12.8   | 15.2   |
| 18.8   | 30.0   | 23.5   | 53.2   | 22.5   | 23.8   | 9.5    | 1.3    | 1.3    |
| 3235.2 | 2883.2 | 2742.4 | 2329.4 | 1184.8 | 7070.1 | 5951.9 | 52.6   | 102.2  |
| 6.2    | 6.9    | 5.3    | 1.3    | 8.1    | 5.8    | 2.6    | 13.3   | 10.3   |
| 32.1   | 38.1   | 49.6   | 58.7   | 18.5   | 156.4  | 129.0  | 2.8    | 20.0   |
| 20.6   | 17.0   | 24.1   | 22.6   | 8.8    | 55.5   | 45.1   | 9.9    | 23.9   |
| 34.8   | 33.7   | 50.5   | 28.2   | 18.1   | 57.3   | 43.8   | 13.1   | 5.5    |
| 121.5  | 106.5  | 125.7  | 104.8  | 46.1   | 273.4  | 135.3  | 53.0   | 56.7   |
| 5.1    | 6.8    | 5.3    | 0.9    | 3.4    | 13.7   | 3.7    | 3.6    | 1.8    |
| 51.7   | 29.6   | 46.1   | 51.0   | 22.6   | 31.5   | 25.7   | 1.3    | 11.6   |
| 45.6   | 29.3   | 35.4   | 22.8   | 14.5   | 272.7  | 292.9  | 71.1   | 92.7   |
| 6764.1 | 6165.8 | 6109.9 | 6013.8 | 3648.1 | 7904.8 | 6651.4 | 1295.2 | 1671.6 |
| 8.4    | 11.7   | 19.7   | 5.4    | 1.0    | 18.4   | 16.2   | 1.2    | 8.8    |
| 170.5  | 195.2  | 119.6  | 73.7   | 40.2   | 4.2    | 1.1    | 40.8   | 24.2   |
| 204.8  | 195.1  | 186.8  | 121.3  | 68.2   | 260.5  | 178.5  | 167.5  | 234.3  |
| 21.3   | 20.9   | 19.2   | 7.0    | 3.6    | 26.1   | 50.0   | 9.6    | 23.9   |
| 29.9   | 14.6   | 22.1   | 11.4   | 0.8    | 3.9    | 8.9    | 11.7   | 0.7    |
| 67.2   | 72.3   | 23.6   | 16.6   | 22.3   | 262.2  | 139.7  | 54.5   | 132.6  |
| 9.6    | 5.1    | 14.6   | 9.9    | 3.3    | 15.9   | 7.0    | 10.5   | 2.9    |
| 3.9    | 17.2   | 4.4    | 16.0   | 3.0    | 3.0    | 2.8    | 3.6    | 8.4    |
| 2.8    | 0.3    | 1.4    | 3.7    | 0.4    | 16.6   | 15.7   | 1.0    | 12.0   |
| 189.7  | 168.6  | 203.4  | 161.6  | 91.7   | 334.2  | 184.2  | 31.9   | 9.5    |
| 10.6   | 5.6    | 11.4   | 1.0    | 1.4    | 7.7    | 14.9   | 3.8    | 6.8    |
| 4.8    | 10.4   | 4.8    | 6.0    | 1.6    | 2.3    | 20.0   | 2.0    | 1.7    |
| 24.8   | 14.6   | 12.6   | 12.6   | 3.1    | 151.8  | 123.7  | 8.5    | 4.0    |
| 11.8   | 4.4    | 2.1    | 3.3    | 3.2    | 1.9    | 1.5    | 6.0    | 10.3   |
| 26.3   | 10.5   | 17.8   | 7.7    | 6.9    | 121.3  | 92.7   | 19.0   | 15.4   |
| 28.3   | 15.5   | 21.7   | 12.8   | 0.2    | 41.4   | 38.5   | 20.7   | 29.6   |
| 12.8   | 16.2   | 10.0   | 3.0    | 2.2    | 37.0   | 6.4    | 18.8   | 34.5   |
| 34.2   | 42.5   | 39.3   | 35.7   | 20.2   | 121.9  | 73.9   | 7.0    | 8.2    |
| 12.2   | 3.1    | 1.6    | 5.1    | 0.1    | 2.1    | 8.0    | 9.9    | 16.0   |
| 1.9    | 3.1    | 2.1    | 4.7    | 1.1    | 4.8    | 1.2    | 2.2    | 3.0    |
| 11.4   | 3.1    | 9.7    | 1.1    | 8.6    | 10.6   | 18.6   | 12.4   | 2.3    |
| 12.8   | 7.7    | 1.0    | 1.7    | 1.0    | 23.7   | 9.6    | 14.3   | 22.7   |
| 5.9    | 7.9    | 7.1    | 9.1    | 4.2    | 13.6   | 10.0   | 0.3    | 0.7    |
| 20.2   | 13.2   | 18.9   | 12.4   | 5.7    | 16.6   | 9.9    | 20.7   | 10.1   |
| 8.2    | 4.4    | 2.6    | 0.8    | 3.8    | 16.0   | 16.3   | 0.6    | 6.5    |
| 9.0    | 1.0    | 1.2    | 1.0    | 1.8    | 4.7    | 1.1    | 1.8    | 14.3   |
| 11.4   | 2.3    | 6.4    | 1.6    | 1.5    | 3.8    | 1.6    | 9.7    | 4.6    |
| 5323.8 | 5019.0 | 4785.9 | 4486.4 | 2316.2 | 4844.9 | 3608.6 | 1311.0 | 1520.7 |
| 62.8   | 53.7   | 65.7   | 54.1   | 28.2   | 74.7   | 50.3   | 41.3   | 51.0   |
| 185.0  | 140.4  | 128.6  | 86.0   | 36.2   | 180.9  | 79.2   | 28.1   | 62.8   |
| 8.4    | 3.8    | 3.3    | 1.4    | 0.6    | 30.3   | 7.2    | 4.7    | 1.3    |
| 25.8   | 22.9   | 18.7   | 14.7   | 6.3    | 19.1   | 18.5   | 10.5   | 12.9   |
| 2.1    | 8.3    | 4.7    | 0.8    | 1.4    | 19.5   | 10.0   | 9.2    | 13.9   |
| 1.2    | 1.0    | 0.3    | 0.5    | 0.6    | 25.8   | 7.8    | 0.8    | 0.7    |
| 19.6   | 16.1   | 21.6   | 10.7   | 6.6    | 16.7   | 5.4    | 17.8   | 8.9    |

|         |        |        |        |        |         |         |        |        |
|---------|--------|--------|--------|--------|---------|---------|--------|--------|
| 111.2   | 84.4   | 86.4   | 73.2   | 34.0   | 255.7   | 180.2   | 291.7  | 362.7  |
| 2.6     | 1.5    | 7.1    | 1.7    | 3.6    | 7.1     | 0.8     | 1.0    | 0.7    |
| 74.6    | 45.6   | 50.1   | 23.5   | 27.6   | 907.8   | 1108.5  | 23.1   | 31.9   |
| 342.2   | 292.6  | 316.6  | 185.1  | 111.6  | 775.5   | 296.2   | 145.2  | 203.7  |
| 12.4    | 21.5   | 16.4   | 14.0   | 6.4    | 95.7    | 48.4    | 31.4   | 16.4   |
| 47.3    | 55.4   | 40.0   | 71.7   | 22.7   | 130.0   | 141.1   | 13.4   | 2.0    |
| 36.8    | 43.9   | 59.5   | 50.8   | 24.7   | 102.0   | 86.3    | 50.1   | 35.4   |
| 35.7    | 33.0   | 52.1   | 67.7   | 18.3   | 82.6    | 84.5    | 13.5   | 15.5   |
| 12.1    | 6.9    | 3.0    | 1.4    | 4.2    | 5.3     | 1.7     | 1.6    | 5.9    |
| 88.4    | 55.6   | 61.1   | 33.1   | 20.4   | 41.6    | 8.8     | 59.9   | 76.2   |
| 2.3     | 1.5    | 3.0    | 2.3    | 1.2    | 4.2     | 3.1     | 1.8    | 1.4    |
| 735.2   | 594.8  | 1005.9 | 3219.5 | 283.4  | 363.8   | 283.2   | 120.3  | 180.8  |
| 115.8   | 99.0   | 108.1  | 119.9  | 39.4   | 78.6    | 95.8    | 15.4   | 23.0   |
| 1.6     | 1.4    | 11.9   | 3.0    | 4.1    | 9.6     | 1.5     | 1.3    | 8.1    |
| 2.8     | 6.3    | 4.1    | 2.2    | 1.0    | 26.3    | 7.2     | 10.4   | 1.3    |
| 116.5   | 121.7  | 88.5   | 43.8   | 45.7   | 146.8   | 106.1   | 8.2    | 10.3   |
| 0.5     | 6.4    | 0.8    | 1.7    | 0.5    | 2.5     | 5.1     | 0.4    | 0.8    |
| 0.3     | 6.0    | 0.4    | 3.8    | 0.2    | 5.5     | 8.2     | 0.4    | 0.4    |
| 260.5   | 268.6  | 372.3  | 300.7  | 129.9  | 441.4   | 382.7   | 49.0   | 60.1   |
| 10.0    | 12.3   | 21.3   | 4.0    | 1.6    | 7.6     | 1.3     | 27.3   | 35.5   |
| 4.8     | 5.2    | 1.3    | 1.7    | 1.8    | 4.6     | 2.5     | 25.1   | 14.9   |
| 78.6    | 14.0   | 19.3   | 12.4   | 5.1    | 136.3   | 58.5    | 101.5  | 125.0  |
| 32.1    | 10.4   | 16.2   | 17.7   | 16.8   | 15.5    | 30.4    | 8.6    | 12.2   |
| 9.4     | 2.5    | 2.4    | 15.5   | 1.3    | 27.3    | 16.1    | 7.2    | 5.3    |
| 63.4    | 33.0   | 48.2   | 34.3   | 35.5   | 77.4    | 71.7    | 25.8   | 40.1   |
| 44.4    | 31.7   | 27.2   | 22.9   | 5.6    | 71.2    | 34.6    | 33.9   | 39.2   |
| 10098.9 | 8474.1 | 8353.9 | 7319.4 | 4792.8 | 11641.7 | 10292.9 | 1622.2 | 2440.7 |
| 137.6   | 44.8   | 42.4   | 43.2   | 29.7   | 203.8   | 143.7   | 117.8  | 118.4  |
| 258.9   | 286.6  | 212.1  | 147.2  | 116.2  | 226.3   | 205.4   | 62.3   | 65.5   |
| 122.4   | 130.2  | 106.0  | 67.1   | 33.3   | 130.7   | 81.7    | 86.9   | 86.4   |
| 940.5   | 950.2  | 971.1  | 838.9  | 234.7  | 259.8   | 118.3   | 163.9  | 236.8  |
| 16.3    | 35.2   | 26.9   | 18.2   | 5.9    | 19.8    | 8.4     | 9.1    | 19.2   |
| 9.2     | 15.6   | 12.4   | 12.3   | 5.0    | 25.0    | 15.2    | 23.3   | 25.5   |
| 6.2     | 3.8    | 4.4    | 3.0    | 1.2    | 3.7     | 4.3     | 3.0    | 2.5    |
| 497.4   | 444.1  | 496.5  | 419.2  | 176.0  | 1321.5  | 870.9   | 186.0  | 253.3  |
| 4.8     | 6.5    | 3.1    | 3.1    | 0.3    | 25.8    | 11.6    | 1.6    | 4.9    |
| 6.7     | 0.4    | 4.4    | 6.8    | 3.5    | 0.6     | 5.2     | 3.9    | 0.8    |
| 14.5    | 24.6   | 38.5   | 22.9   | 15.9   | 6.4     | 122.8   | 9.0    | 41.2   |
| 12.0    | 24.6   | 12.7   | 9.8    | 5.7    | 6.2     | 30.3    | 27.1   | 30.0   |
| 286.8   | 314.4  | 311.7  | 762.2  | 201.1  | 383.1   | 561.9   | 21.4   | 20.0   |
| 101.4   | 84.1   | 68.1   | 69.4   | 40.7   | 85.6    | 15.4    | 51.6   | 29.8   |
| 1.3     | 1.8    | 0.9    | 1.5    | 0.8    | 1.3     | 0.8     | 1.2    | 0.8    |
| 18.7    | 6.6    | 8.6    | 2.9    | 6.3    | 2.8     | 9.2     | 2.1    | 1.4    |
| 63.9    | 96.0   | 190.5  | 71.9   | 32.5   | 176.9   | 208.7   | 52.5   | 143.7  |
| 17.8    | 3.7    | 8.0    | 0.3    | 0.5    | 41.9    | 11.0    | 9.1    | 8.6    |
| 28.6    | 20.8   | 20.7   | 21.8   | 13.4   | 209.2   | 232.1   | 8.3    | 12.6   |
| 24.5    | 33.6   | 109.5  | 199.9  | 44.3   | 17.3    | 15.3    | 12.6   | 4.9    |
| 3.5     | 6.5    | 1.6    | 1.5    | 0.5    | 16.0    | 1.9     | 1.2    | 2.0    |
| 2.4     | 13.3   | 2.3    | 13.5   | 0.9    | 1.6     | 1.8     | 5.2    | 15.7   |
| 1.1     | 1.0    | 0.8    | 0.9    | 0.5    | 0.8     | 2.9     | 7.6    | 0.5    |
| 7.8     | 6.8    | 6.4    | 5.0    | 8.6    | 39.4    | 25.1    | 9.1    | 3.8    |
| 17.3    | 24.1   | 16.8   | 44.8   | 12.0   | 24.5    | 11.7    | 8.8    | 12.1   |
| 9.2     | 9.1    | 2.6    | 1.3    | 0.3    | 4.1     | 0.5     | 0.6    | 1.1    |

|        |        |        |        |        |        |        |        |        |
|--------|--------|--------|--------|--------|--------|--------|--------|--------|
| 148.2  | 126.9  | 120.0  | 110.1  | 33.9   | 223.5  | 160.7  | 16.8   | 28.0   |
| 1.1    | 1.1    | 1.1    | 7.2    | 0.3    | 51.8   | 29.4   | 1.1    | 9.2    |
| 2.9    | 1.5    | 22.3   | 2.8    | 2.4    | 4.4    | 2.6    | 2.1    | 8.5    |
| 38.6   | 35.3   | 33.9   | 19.3   | 22.4   | 16.2   | 23.8   | 12.9   | 16.0   |
| 0.7    | 1.1    | 4.4    | 1.2    | 3.2    | 7.3    | 4.8    | 4.9    | 1.6    |
| 352.1  | 405.2  | 374.9  | 381.5  | 138.3  | 800.4  | 428.9  | 138.1  | 198.2  |
| 58.5   | 55.5   | 65.0   | 16.8   | 20.9   | 143.8  | 141.3  | 25.8   | 44.0   |
| 14.9   | 26.0   | 8.2    | 22.7   | 14.5   | 51.2   | 37.5   | 17.5   | 23.9   |
| 5.8    | 9.8    | 1.7    | 1.4    | 1.0    | 10.1   | 3.7    | 8.9    | 13.0   |
| 2752.0 | 2662.1 | 2425.3 | 1589.7 | 1063.4 | 5557.2 | 3939.5 | 828.4  | 1401.8 |
| 6.2    | 16.0   | 1.9    | 3.7    | 0.9    | 15.2   | 2.9    | 66.3   | 61.1   |
| 172.0  | 72.3   | 110.1  | 89.5   | 88.7   | 220.9  | 170.0  | 24.5   | 52.6   |
| 1711.7 | 1594.2 | 1633.0 | 1197.4 | 535.0  | 2195.7 | 1868.0 | 429.1  | 401.4  |
| 29.1   | 31.0   | 20.0   | 10.6   | 7.9    | 31.8   | 13.3   | 1.2    | 8.8    |
| 1.8    | 5.4    | 1.7    | 0.6    | 0.5    | 16.8   | 11.0   | 3.2    | 1.1    |
| 98.4   | 91.7   | 80.2   | 155.6  | 26.8   | 88.2   | 58.7   | 18.5   | 28.3   |
| 3.4    | 7.4    | 3.3    | 0.5    | 2.3    | 184.9  | 68.8   | 15.8   | 29.3   |
| 439.7  | 431.7  | 460.0  | 301.5  | 141.8  | 835.3  | 466.4  | 54.2   | 76.8   |
| 70.3   | 67.6   | 66.4   | 51.8   | 22.6   | 64.9   | 24.7   | 2.5    | 6.4    |
| 30.6   | 6.2    | 9.9    | 11.4   | 8.4    | 18.6   | 14.4   | 3.8    | 2.4    |
| 16.2   | 2.4    | 31.5   | 9.3    | 8.0    | 21.1   | 1.3    | 4.5    | 15.2   |
| 42.6   | 53.1   | 37.9   | 27.3   | 13.5   | 19.1   | 18.0   | 3.5    | 6.2    |
| 20.8   | 12.7   | 16.0   | 10.9   | 13.6   | 55.4   | 39.8   | 15.9   | 18.9   |
| 5.2    | 7.4    | 1.3    | 2.5    | 2.0    | 1.7    | 3.2    | 14.8   | 28.0   |
| 29.7   | 3.7    | 11.7   | 1.6    | 1.4    | 3.4    | 6.9    | 13.2   | 11.4   |
| 209.3  | 148.0  | 141.0  | 158.1  | 70.9   | 738.3  | 627.6  | 56.4   | 65.6   |
| 57.3   | 48.7   | 73.6   | 114.5  | 40.7   | 138.8  | 101.1  | 32.7   | 30.9   |
| 40.6   | 23.4   | 49.4   | 55.1   | 27.7   | 76.1   | 72.6   | 30.4   | 28.8   |
| 19.2   | 13.5   | 19.9   | 12.6   | 6.9    | 4.9    | 14.2   | 44.6   | 59.5   |
| 11.5   | 9.2    | 8.1    | 4.4    | 5.6    | 12.0   | 18.7   | 12.9   | 2.6    |
| 34.5   | 27.5   | 38.0   | 35.9   | 10.0   | 26.5   | 17.5   | 3.8    | 4.6    |
| 58.1   | 75.0   | 71.3   | 59.1   | 20.0   | 191.2  | 137.9  | 14.8   | 27.7   |
| 65.3   | 51.4   | 69.6   | 55.9   | 36.0   | 594.3  | 318.5  | 21.8   | 8.8    |
| 3.5    | 1.5    | 1.8    | 1.0    | 0.7    | 1.7    | 5.2    | 9.3    | 1.8    |
| 12.1   | 2.7    | 4.6    | 1.6    | 10.3   | 14.6   | 5.5    | 14.0   | 20.5   |
| 1.1    | 4.5    | 0.9    | 2.2    | 4.9    | 12.0   | 1.4    | 1.3    | 2.0    |
| 15.4   | 9.4    | 16.2   | 16.6   | 11.0   | 26.4   | 17.4   | 20.9   | 15.6   |
| 2.3    | 1.2    | 2.5    | 2.0    | 0.8    | 3.2    | 3.0    | 2.5    | 1.7    |
| 15.9   | 12.5   | 9.6    | 8.4    | 5.5    | 26.7   | 8.9    | 10.7   | 15.5   |
| 0.9    | 7.4    | 4.5    | 3.4    | 0.5    | 16.1   | 6.3    | 14.1   | 4.5    |
| 29.5   | 27.8   | 32.1   | 12.6   | 11.3   | 14.0   | 8.7    | 21.5   | 37.7   |
| 92.9   | 76.8   | 71.8   | 50.5   | 17.4   | 46.3   | 59.2   | 0.3    | 0.3    |
| 41.4   | 9.9    | 10.2   | 7.6    | 6.7    | 39.2   | 27.7   | 13.2   | 27.8   |
| 172.6  | 145.0  | 159.0  | 182.7  | 61.0   | 152.9  | 145.5  | 40.8   | 42.9   |
| 249.5  | 130.8  | 110.6  | 103.0  | 37.2   | 157.6  | 118.7  | 40.7   | 56.5   |
| 82.6   | 95.5   | 67.6   | 63.1   | 34.9   | 199.1  | 174.5  | 32.3   | 51.2   |
| 33.8   | 21.1   | 10.0   | 7.3    | 6.1    | 66.1   | 49.1   | 27.9   | 50.2   |
| 113.1  | 91.6   | 79.9   | 35.1   | 14.4   | 302.1  | 226.3  | 11.0   | 15.4   |
| 0.6    | 4.0    | 0.4    | 1.3    | 3.1    | 8.9    | 11.5   | 2.2    | 2.1    |
| 87.4   | 78.2   | 61.0   | 194.5  | 41.5   | 61.9   | 83.6   | 1299.4 | 1631.6 |
| 573.7  | 464.0  | 468.3  | 148.8  | 134.7  | 587.6  | 422.7  | 210.6  | 298.5  |
| 24.2   | 12.8   | 10.8   | 9.3    | 7.8    | 10.5   | 8.0    | 10.3   | 15.9   |
| 2.0    | 5.2    | 2.3    | 4.4    | 3.2    | 3.7    | 2.7    | 20.8   | 31.4   |

|        |        |        |        |       |        |        |       |       |
|--------|--------|--------|--------|-------|--------|--------|-------|-------|
| 22.7   | 22.5   | 17.8   | 8.2    | 6.2   | 33.5   | 37.4   | 22.2  | 16.9  |
| 1.1    | 4.5    | 2.6    | 4.0    | 1.4   | 32.4   | 18.5   | 5.9   | 1.7   |
| 53.3   | 27.4   | 8.0    | 19.0   | 19.4  | 714.1  | 513.8  | 10.2  | 27.7  |
| 489.7  | 494.8  | 502.2  | 428.6  | 198.7 | 822.8  | 461.9  | 84.7  | 108.7 |
| 5.8    | 0.5    | 8.2    | 4.7    | 2.3   | 7.7    | 7.1    | 3.8   | 16.1  |
| 11.0   | 3.5    | 9.2    | 9.2    | 3.3   | 151.7  | 164.4  | 2.3   | 12.3  |
| 0.8    | 0.9    | 0.9    | 2.5    | 0.7   | 1.3    | 0.5    | 1.4   | 1.3   |
| 2.2    | 8.0    | 0.9    | 8.9    | 4.2   | 30.4   | 1.3    | 7.4   | 7.7   |
| 20.9   | 14.9   | 24.3   | 17.9   | 3.7   | 440.5  | 225.4  | 12.5  | 14.8  |
| 189.2  | 212.3  | 193.3  | 112.5  | 69.6  | 168.3  | 138.9  | 66.1  | 83.8  |
| 156.0  | 139.4  | 106.2  | 80.4   | 34.2  | 233.1  | 109.4  | 29.7  | 49.9  |
| 3.0    | 2.5    | 4.3    | 2.2    | 1.5   | 3.2    | 2.3    | 2.5   | 3.3   |
| 173.9  | 140.9  | 175.9  | 151.6  | 66.9  | 217.5  | 151.4  | 24.6  | 21.1  |
| 1071.5 | 998.8  | 1079.7 | 988.2  | 535.3 | 1402.6 | 1076.8 | 335.4 | 360.3 |
| 1382.7 | 1259.3 | 1405.8 | 1026.8 | 543.0 | 1348.5 | 1285.3 | 97.1  | 47.3  |
| 14.9   | 17.1   | 22.9   | 13.5   | 8.5   | 29.1   | 10.7   | 10.7  | 3.0   |
| 19.7   | 1.9    | 4.9    | 5.8    | 9.7   | 52.6   | 56.5   | 2.3   | 2.3   |
| 159.4  | 152.9  | 170.1  | 137.5  | 74.7  | 199.5  | 122.5  | 98.7  | 97.5  |
| 113.9  | 110.4  | 99.5   | 99.2   | 76.2  | 213.0  | 356.6  | 10.5  | 16.6  |
| 35.3   | 34.4   | 31.5   | 20.5   | 15.0  | 58.3   | 33.3   | 20.8  | 14.3  |
| 3.3    | 3.7    | 2.1    | 2.0    | 5.5   | 2.7    | 5.0    | 3.3   | 3.8   |
| 17.4   | 24.8   | 14.3   | 13.9   | 6.3   | 60.6   | 40.9   | 21.8  | 18.7  |
| 16.4   | 8.6    | 15.3   | 2.0    | 0.7   | 13.6   | 3.4    | 8.7   | 2.0   |
| 107.6  | 66.0   | 74.7   | 67.5   | 30.8  | 143.3  | 91.5   | 92.4  | 123.7 |
| 149.9  | 115.1  | 100.9  | 112.2  | 41.2  | 229.0  | 115.7  | 228.9 | 440.5 |
| 41.9   | 26.7   | 46.6   | 28.5   | 17.2  | 20.2   | 15.3   | 17.6  | 8.2   |
| 54.2   | 64.9   | 59.7   | 44.4   | 18.3  | 240.3  | 155.6  | 58.2  | 110.5 |
| 116.8  | 149.4  | 150.0  | 177.5  | 49.8  | 106.0  | 76.7   | 21.9  | 26.1  |
| 0.5    | 0.9    | 3.1    | 0.5    | 1.1   | 1.0    | 1.9    | 0.6   | 1.0   |
| 448.8  | 347.2  | 413.9  | 374.4  | 167.1 | 304.7  | 215.8  | 107.0 | 138.7 |
| 521.7  | 546.6  | 548.8  | 572.0  | 220.9 | 865.6  | 627.9  | 86.8  | 133.0 |
| 255.5  | 221.5  | 245.1  | 227.9  | 124.5 | 342.6  | 211.8  | 183.3 | 169.5 |
| 1.3    | 0.6    | 0.7    | 6.6    | 0.6   | 3.2    | 0.8    | 1.4   | 3.8   |
| 4.4    | 14.4   | 20.3   | 4.1    | 2.1   | 29.3   | 29.0   | 20.0  | 18.0  |
| 21.8   | 31.8   | 26.2   | 8.2    | 11.6  | 27.8   | 27.0   | 9.3   | 17.0  |
| 168.6  | 141.8  | 141.4  | 117.4  | 63.4  | 142.8  | 110.1  | 40.8  | 82.3  |
| 824.9  | 533.6  | 500.2  | 337.6  | 155.2 | 526.7  | 308.5  | 264.7 | 355.0 |
| 12.1   | 7.2    | 7.2    | 12.7   | 3.2   | 4.8    | 0.4    | 0.7   | 3.0   |
| 37.6   | 22.5   | 41.7   | 27.4   | 15.4  | 217.6  | 149.0  | 21.0  | 18.7  |
| 20.3   | 2.6    | 10.1   | 1.7    | 1.6   | 4.2    | 4.3    | 5.5   | 5.8   |
| 3.7    | 4.2    | 6.2    | 3.8    | 3.8   | 35.9   | 26.9   | 0.8   | 8.5   |
| 378.7  | 244.5  | 223.0  | 238.2  | 130.7 | 317.7  | 257.4  | 10.5  | 17.0  |
| 4.7    | 3.8    | 3.0    | 1.4    | 4.9   | 5.7    | 9.0    | 6.0   | 4.7   |
| 143.0  | 168.9  | 156.9  | 132.3  | 36.3  | 69.4   | 63.0   | 13.7  | 29.9  |
| 2.6    | 1.6    | 4.5    | 1.6    | 0.6   | 4.4    | 1.6    | 2.3   | 0.8   |
| 5.0    | 21.5   | 9.0    | 2.1    | 2.1   | 29.1   | 40.4   | 6.2   | 5.2   |
| 84.5   | 85.0   | 104.2  | 73.2   | 39.1  | 400.9  | 268.3  | 64.8  | 59.0  |
| 44.4   | 29.8   | 25.1   | 22.1   | 11.8  | 104.4  | 106.5  | 13.0  | 14.0  |
| 4.2    | 5.8    | 5.5    | 1.9    | 1.0   | 10.8   | 1.0    | 1.2   | 9.7   |
| 53.0   | 36.2   | 38.7   | 26.2   | 15.4  | 30.6   | 33.1   | 5.0   | 12.0  |
| 4.8    | 7.3    | 10.8   | 1.2    | 1.9   | 15.0   | 4.4    | 14.9  | 41.4  |
| 2.0    | 2.1    | 1.4    | 1.4    | 1.3   | 1.3    | 0.9    | 1.7   | 1.1   |
| 11.4   | 8.6    | 11.7   | 7.4    | 9.4   | 31.7   | 3.8    | 2.7   | 13.9  |

|        |        |        |        |        |         |        |        |        |
|--------|--------|--------|--------|--------|---------|--------|--------|--------|
| 68.5   | 71.6   | 65.5   | 56.0   | 29.1   | 20.6    | 11.6   | 8.7    | 5.1    |
| 5.1    | 13.7   | 20.9   | 14.9   | 7.2    | 15.5    | 14.3   | 12.0   | 11.8   |
| 28.6   | 27.2   | 40.7   | 33.7   | 15.2   | 23.6    | 23.3   | 16.3   | 19.8   |
| 10.7   | 1.3    | 10.3   | 3.5    | 4.1    | 9.9     | 8.3    | 16.8   | 16.2   |
| 31.0   | 26.4   | 38.0   | 42.2   | 13.3   | 96.1    | 41.8   | 14.3   | 19.5   |
| 3007.6 | 2991.7 | 2786.6 | 1889.4 | 922.0  | 3835.6  | 2644.0 | 563.2  | 645.7  |
| 14.7   | 2.5    | 10.4   | 8.7    | 0.5    | 8.8     | 14.0   | 4.5    | 3.4    |
| 7583.2 | 6850.7 | 6945.9 | 6156.3 | 3739.7 | 10807.5 | 9152.2 | 1625.3 | 1875.7 |
| 93.3   | 97.5   | 87.0   | 75.0   | 25.9   | 219.9   | 149.5  | 13.1   | 17.4   |
| 3.5    | 1.3    | 4.7    | 3.8    | 2.8    | 5.6     | 1.5    | 13.7   | 22.0   |
| 2.0    | 6.1    | 4.3    | 8.7    | 1.2    | 22.5    | 3.4    | 13.0   | 0.4    |
| 4.4    | 2.1    | 2.0    | 2.8    | 0.4    | 3.5     | 2.4    | 1.8    | 3.7    |
| 32.5   | 39.4   | 43.0   | 48.7   | 36.0   | 48.2    | 55.8   | 13.6   | 20.6   |
| 61.7   | 28.3   | 34.0   | 30.8   | 23.1   | 165.8   | 187.9  | 21.2   | 37.0   |
| 928.3  | 918.8  | 871.8  | 846.9  | 453.6  | 2794.6  | 2060.8 | 367.2  | 378.7  |
| 24.2   | 33.7   | 43.3   | 24.1   | 11.0   | 82.7    | 60.9   | 3.6    | 16.6   |
| 32.8   | 36.9   | 30.9   | 26.8   | 14.3   | 132.9   | 75.2   | 3.3    | 9.2    |
| 20.2   | 13.3   | 11.0   | 9.7    | 2.8    | 24.8    | 22.6   | 1.0    | 6.8    |
| 1.6    | 6.5    | 4.5    | 8.2    | 3.0    | 9.3     | 3.8    | 5.3    | 26.9   |
| 280.4  | 275.8  | 307.7  | 330.7  | 106.8  | 195.2   | 149.2  | 11.6   | 13.2   |
| 0.8    | 4.6    | 1.2    | 4.1    | 3.1    | 4.8     | 4.3    | 12.3   | 11.8   |
| 282.1  | 262.9  | 261.7  | 140.0  | 80.7   | 22.2    | 20.9   | 70.2   | 95.1   |
| 3.6    | 2.1    | 15.3   | 11.8   | 0.8    | 4.7     | 3.5    | 2.6    | 20.8   |
| 13.3   | 0.3    | 6.6    | 4.5    | 3.9    | 12.9    | 15.9   | 8.2    | 7.8    |
| 2.1    | 1.9    | 2.1    | 7.8    | 0.5    | 3.2     | 6.3    | 2.4    | 7.6    |
| 13.5   | 10.1   | 2.2    | 1.5    | 0.6    | 20.4    | 17.8   | 6.3    | 1.3    |
| 2.1    | 6.2    | 0.5    | 6.9    | 3.0    | 7.2     | 1.5    | 9.2    | 5.3    |
| 8.8    | 19.4   | 19.5   | 2.4    | 7.0    | 16.6    | 15.7   | 0.9    | 3.0    |
| 35.6   | 12.9   | 22.1   | 19.0   | 3.8    | 40.9    | 20.5   | 80.1   | 130.6  |
| 0.8    | 0.8    | 0.7    | 0.6    | 0.5    | 1.5     | 0.6    | 0.5    | 1.3    |
| 10.6   | 10.9   | 9.3    | 4.2    | 7.6    | 9.8     | 3.9    | 15.5   | 10.0   |
| 7294.1 | 6449.1 | 6038.0 | 5958.3 | 3759.3 | 6766.3  | 5490.5 | 1949.4 | 2071.8 |
| 114.0  | 90.7   | 101.7  | 141.7  | 35.6   | 224.6   | 160.4  | 47.6   | 104.8  |
| 31.2   | 33.1   | 28.4   | 37.8   | 11.1   | 52.3    | 86.2   | 15.9   | 16.2   |
| 530.9  | 456.3  | 524.3  | 302.8  | 206.2  | 1627.0  | 1414.4 | 371.6  | 691.1  |
| 6.4    | 14.5   | 7.2    | 2.2    | 1.7    | 21.5    | 4.4    | 10.5   | 13.4   |
| 182.5  | 173.3  | 156.1  | 142.7  | 56.9   | 246.1   | 192.6  | 89.3   | 77.8   |
| 834.3  | 757.0  | 772.6  | 706.4  | 261.9  | 1148.4  | 755.1  | 139.9  | 246.0  |
| 21.4   | 13.4   | 22.7   | 14.1   | 12.1   | 22.6    | 25.7   | 3.6    | 14.5   |
| 25.7   | 17.8   | 20.3   | 25.0   | 11.1   | 345.0   | 208.3  | 7.2    | 6.2    |
| 28.7   | 27.5   | 20.1   | 23.6   | 11.5   | 14.3    | 9.1    | 22.0   | 23.0   |
| 61.9   | 73.0   | 32.8   | 46.1   | 30.8   | 28.7    | 23.1   | 84.4   | 104.0  |
| 5.1    | 11.8   | 16.2   | 0.8    | 0.9    | 5.9     | 1.4    | 16.9   | 18.4   |
| 275.8  | 234.0  | 269.1  | 194.3  | 96.3   | 534.0   | 442.2  | 178.3  | 157.6  |
| 27.5   | 18.7   | 32.9   | 9.6    | 5.9    | 25.2    | 18.2   | 21.7   | 24.4   |
| 5.1    | 5.2    | 27.1   | 19.9   | 5.5    | 6.5     | 2.7    | 1.5    | 1.8    |
| 759.0  | 569.2  | 873.6  | 734.7  | 593.6  | 1212.3  | 836.8  | 88.7   | 86.0   |
| 10.9   | 3.3    | 6.4    | 4.0    | 1.0    | 2.3     | 3.2    | 0.5    | 1.3    |
| 12.2   | 15.1   | 13.3   | 3.6    | 2.6    | 2.2     | 8.8    | 8.5    | 1.1    |
| 49.6   | 25.7   | 38.8   | 46.0   | 14.7   | 40.0    | 20.6   | 8.8    | 15.9   |
| 9.0    | 21.2   | 30.3   | 18.9   | 7.0    | 60.7    | 65.5   | 2.5    | 2.8    |
| 3.2    | 1.5    | 4.1    | 1.1    | 0.8    | 3.6     | 1.4    | 15.2   | 28.9   |
| 33.7   | 26.8   | 36.0   | 29.7   | 29.4   | 41.5    | 38.0   | 1.1    | 1.0    |



|        |        |        |        |       |        |        |       |       |
|--------|--------|--------|--------|-------|--------|--------|-------|-------|
| 13.0   | 4.8    | 8.2    | 2.4    | 8.0   | 4.8    | 8.6    | 14.5  | 5.5   |
| 74.2   | 75.5   | 55.3   | 27.1   | 19.2  | 80.0   | 14.8   | 23.3  | 3.1   |
| 4.2    | 2.0    | 9.5    | 1.8    | 0.7   | 16.0   | 16.4   | 12.6  | 0.8   |
| 1.4    | 1.0    | 1.6    | 0.8    | 0.4   | 2.6    | 13.7   | 2.3   | 1.5   |
| 131.7  | 124.7  | 205.6  | 226.6  | 72.6  | 207.2  | 166.0  | 3.1   | 14.7  |
| 72.9   | 63.1   | 55.5   | 62.2   | 30.8  | 70.8   | 49.0   | 24.2  | 20.6  |
| 4.4    | 3.2    | 4.4    | 9.7    | 12.1  | 7.3    | 3.8    | 12.0  | 3.1   |
| 79.1   | 56.4   | 77.1   | 84.5   | 22.7  | 67.5   | 28.8   | 51.3  | 70.0  |
| 67.3   | 57.6   | 40.3   | 61.0   | 23.4  | 37.1   | 37.1   | 37.4  | 46.4  |
| 120.2  | 124.1  | 132.2  | 59.0   | 46.3  | 466.4  | 372.9  | 116.9 | 117.2 |
| 2.7    | 2.5    | 3.5    | 1.8    | 0.7   | 3.0    | 10.4   | 1.4   | 7.1   |
| 2.6    | 10.4   | 14.1   | 1.7    | 4.3   | 7.2    | 11.7   | 0.8   | 0.6   |
| 167.4  | 124.6  | 156.9  | 137.2  | 33.7  | 288.7  | 190.1  | 81.8  | 74.2  |
| 30.6   | 20.1   | 21.0   | 13.2   | 10.2  | 107.4  | 78.2   | 16.9  | 25.5  |
| 4.8    | 6.7    | 18.5   | 3.2    | 4.3   | 28.9   | 26.0   | 226.8 | 236.2 |
| 6.8    | 1.0    | 9.0    | 1.3    | 0.4   | 3.2    | 7.0    | 1.0   | 9.8   |
| 368.3  | 332.8  | 346.8  | 321.2  | 165.7 | 417.7  | 220.1  | 99.9  | 139.7 |
| 1.3    | 1.5    | 1.8    | 1.1    | 0.8   | 2.9    | 6.5    | 0.9   | 1.7   |
| 8.5    | 4.2    | 10.7   | 1.1    | 10.3  | 1.8    | 1.5    | 2.2   | 0.7   |
| 5.2    | 2.6    | 15.7   | 2.3    | 1.6   | 5.1    | 3.4    | 3.4   | 3.0   |
| 31.8   | 16.7   | 15.9   | 11.3   | 8.2   | 32.2   | 28.9   | 26.7  | 33.7  |
| 35.6   | 41.4   | 33.8   | 34.1   | 17.9  | 140.8  | 95.4   | 4.7   | 23.5  |
| 426.0  | 387.3  | 574.9  | 1121.5 | 220.9 | 1511.2 | 1144.0 | 452.2 | 618.6 |
| 111.2  | 64.6   | 81.4   | 46.4   | 9.0   | 102.4  | 84.2   | 11.2  | 19.7  |
| 130.3  | 88.0   | 104.2  | 82.7   | 38.2  | 133.8  | 50.8   | 154.2 | 122.7 |
| 3091.8 | 2605.1 | 2628.8 | 2072.4 | 814.9 | 3599.4 | 2903.5 | 211.8 | 217.1 |
| 2.7    | 1.8    | 1.8    | 0.9    | 0.2   | 1.8    | 1.4    | 5.1   | 2.3   |
| 52.8   | 25.0   | 21.8   | 27.1   | 6.5   | 20.9   | 5.0    | 36.1  | 43.6  |
| 9.4    | 6.7    | 2.2    | 2.7    | 4.4   | 18.6   | 15.9   | 1.1   | 1.3   |
| 8.5    | 3.1    | 1.5    | 5.8    | 2.2   | 244.0  | 150.1  | 2.9   | 8.2   |
| 2.2    | 1.8    | 1.5    | 1.2    | 0.6   | 3.8    | 2.4    | 3.5   | 2.1   |
| 93.5   | 102.2  | 85.4   | 119.0  | 45.5  | 105.5  | 68.7   | 13.5  | 6.5   |
| 106.5  | 114.1  | 95.8   | 104.1  | 41.7  | 90.3   | 45.7   | 12.2  | 12.1  |
| 16.9   | 17.0   | 8.7    | 4.3    | 6.8   | 9.3    | 17.8   | 24.4  | 4.8   |
| 12.9   | 21.9   | 21.9   | 21.3   | 1.5   | 11.9   | 11.5   | 31.7  | 2.2   |
| 809.4  | 975.9  | 761.1  | 569.1  | 381.9 | 744.4  | 800.1  | 149.2 | 190.0 |
| 29.8   | 26.7   | 15.7   | 14.2   | 5.8   | 15.6   | 1.6    | 10.9  | 10.5  |
| 37.9   | 32.6   | 28.4   | 4.5    | 13.7  | 28.1   | 13.5   | 6.4   | 5.7   |
| 3.9    | 2.2    | 1.8    | 3.0    | 0.9   | 3.5    | 0.8    | 0.6   | 5.1   |
| 4.8    | 6.6    | 4.1    | 2.1    | 0.9   | 32.0   | 2.7    | 3.6   | 2.0   |
| 3.4    | 9.3    | 1.2    | 7.7    | 1.2   | 1.6    | 6.5    | 9.4   | 1.9   |
| 28.2   | 9.9    | 24.7   | 11.3   | 5.2   | 15.0   | 13.0   | 9.7   | 7.2   |
| 39.5   | 36.6   | 36.3   | 19.5   | 8.6   | 84.5   | 52.0   | 13.4  | 22.9  |
| 147.0  | 136.2  | 136.8  | 112.9  | 55.3  | 101.9  | 68.8   | 20.6  | 30.1  |
| 15.4   | 19.0   | 3.1    | 9.1    | 4.6   | 23.7   | 4.5    | 25.4  | 16.9  |
| 8.2    | 5.1    | 7.8    | 5.1    | 0.6   | 123.5  | 102.8  | 2.1   | 0.4   |
| 1.1    | 0.8    | 5.5    | 6.5    | 1.1   | 98.0   | 103.5  | 1.3   | 1.9   |
| 23.6   | 13.0   | 8.6    | 15.4   | 7.2   | 4.6    | 9.2    | 3.4   | 16.8  |
| 39.6   | 35.8   | 40.7   | 40.1   | 9.4   | 33.4   | 23.7   | 15.4  | 26.3  |
| 14.4   | 18.3   | 12.8   | 15.6   | 9.0   | 4.4    | 12.0   | 2.3   | 7.7   |
| 202.1  | 206.3  | 157.8  | 135.6  | 80.7  | 368.7  | 228.5  | 513.4 | 832.9 |
| 487.0  | 370.1  | 379.8  | 236.1  | 106.0 | 1114.7 | 716.8  | 2.7   | 19.6  |
| 47.0   | 30.5   | 24.6   | 25.3   | 17.8  | 19.6   | 15.3   | 15.5  | 25.7  |

|        |        |        |        |        |        |        |        |        |
|--------|--------|--------|--------|--------|--------|--------|--------|--------|
| 3.3    | 1.5    | 5.9    | 2.0    | 2.8    | 2.2    | 4.6    | 1.5    | 2.3    |
| 27.6   | 27.1   | 10.9   | 19.7   | 9.1    | 3.2    | 2.7    | 3.8    | 9.0    |
| 20.2   | 10.0   | 9.1    | 10.0   | 9.3    | 84.9   | 57.0   | 11.3   | 14.7   |
| 24.1   | 10.9   | 13.9   | 19.0   | 4.9    | 18.7   | 10.2   | 14.2   | 14.8   |
| 255.4  | 254.0  | 196.3  | 151.0  | 103.5  | 318.7  | 338.3  | 184.7  | 188.9  |
| 29.5   | 47.3   | 36.7   | 10.9   | 14.8   | 763.2  | 466.8  | 0.9    | 5.8    |
| 2.3    | 1.9    | 1.8    | 1.0    | 0.4    | 4.6    | 2.1    | 2.6    | 1.4    |
| 1.9    | 3.3    | 6.1    | 1.4    | 0.4    | 2.3    | 1.1    | 1.2    | 1.5    |
| 12.5   | 2.9    | 6.2    | 4.8    | 2.1    | 7.7    | 2.2    | 0.8    | 0.7    |
| 54.8   | 62.4   | 69.2   | 53.6   | 16.1   | 55.3   | 5.4    | 57.1   | 62.8   |
| 52.9   | 42.3   | 33.9   | 45.1   | 21.2   | 114.9  | 61.6   | 6.4    | 13.5   |
| 2.9    | 5.7    | 3.3    | 2.3    | 2.1    | 4.3    | 4.9    | 9.4    | 2.1    |
| 1708.8 | 1254.5 | 1339.6 | 953.3  | 322.6  | 0.9    | 5.5    | 3.1    | 5.9    |
| 9.0    | 3.5    | 4.6    | 7.3    | 8.3    | 17.2   | 2.5    | 2.1    | 2.7    |
| 18.6   | 10.4   | 2.0    | 10.9   | 0.5    | 4.9    | 13.6   | 16.1   | 6.5    |
| 1432.5 | 1292.7 | 1541.4 | 1325.9 | 725.1  | 2194.6 | 1719.3 | 125.7  | 136.2  |
| 160.5  | 119.8  | 144.1  | 133.6  | 48.3   | 139.6  | 83.9   | 231.8  | 308.4  |
| 495.0  | 543.3  | 518.3  | 343.3  | 173.8  | 1305.4 | 715.5  | 111.4  | 161.9  |
| 29.4   | 47.2   | 47.4   | 42.3   | 13.9   | 73.4   | 40.2   | 9.4    | 11.9   |
| 1.4    | 3.4    | 3.9    | 1.0    | 1.0    | 24.6   | 1.7    | 3.7    | 14.7   |
| 2.4    | 1.5    | 8.9    | 2.0    | 2.1    | 22.0   | 20.5   | 1.0    | 2.1    |
| 646.0  | 557.1  | 587.6  | 496.5  | 236.5  | 1203.4 | 844.9  | 109.9  | 156.9  |
| 257.7  | 248.1  | 231.6  | 186.3  | 95.3   | 366.1  | 400.9  | 93.7   | 135.4  |
| 10.5   | 12.4   | 8.5    | 1.3    | 2.7    | 15.3   | 7.8    | 14.8   | 2.1    |
| 54.3   | 35.2   | 45.8   | 25.6   | 13.8   | 130.3  | 67.1   | 25.5   | 12.8   |
| 2.6    | 1.9    | 1.0    | 1.9    | 4.6    | 2.9    | 11.8   | 3.9    | 0.7    |
| 219.9  | 201.0  | 177.7  | 106.4  | 69.0   | 152.6  | 129.3  | 221.5  | 271.4  |
| 0.9    | 0.8    | 1.0    | 1.5    | 5.1    | 14.3   | 16.8   | 1.4    | 1.1    |
| 23.1   | 1.1    | 11.5   | 16.9   | 3.4    | 26.6   | 11.5   | 13.2   | 16.8   |
| 7103.0 | 6394.8 | 6131.4 | 6793.9 | 3680.1 | 7118.7 | 5974.1 | 1791.1 | 2895.3 |
| 13.4   | 2.1    | 10.5   | 17.7   | 3.5    | 11.5   | 14.2   | 11.4   | 18.1   |
| 41.0   | 38.7   | 42.1   | 36.5   | 24.0   | 127.8  | 85.0   | 48.5   | 52.6   |
| 166.3  | 202.0  | 177.5  | 126.0  | 102.8  | 562.8  | 520.2  | 46.4   | 39.7   |
| 3.5    | 0.5    | 4.3    | 1.4    | 1.1    | 1.9    | 5.2    | 13.9   | 16.9   |
| 17.2   | 21.4   | 29.5   | 19.9   | 10.7   | 39.7   | 11.7   | 14.6   | 13.0   |
| 44.0   | 52.8   | 31.8   | 19.6   | 11.3   | 30.6   | 28.9   | 6.6    | 13.6   |
| 4.5    | 1.6    | 4.3    | 1.9    | 0.8    | 7.5    | 3.6    | 13.1   | 10.2   |
| 21.3   | 17.0   | 12.0   | 5.1    | 4.6    | 17.0   | 7.6    | 27.1   | 41.9   |
| 1034.5 | 902.1  | 888.1  | 951.5  | 299.6  | 1100.0 | 592.8  | 197.0  | 231.0  |
| 248.0  | 256.5  | 298.6  | 328.7  | 80.6   | 765.9  | 690.8  | 268.5  | 298.1  |
| 2.9    | 0.1    | 11.4   | 3.9    | 0.2    | 6.3    | 0.1    | 3.5    | 1.3    |
| 104.0  | 77.6   | 130.0  | 60.1   | 23.2   | 77.4   | 37.4   | 39.6   | 64.2   |
| 4.5    | 3.5    | 0.7    | 7.7    | 6.7    | 15.5   | 0.9    | 4.8    | 3.1    |
| 19.0   | 4.4    | 1.1    | 3.7    | 2.8    | 11.7   | 7.0    | 2.3    | 12.7   |
| 1.0    | 1.9    | 3.2    | 1.0    | 4.4    | 3.9    | 5.3    | 2.4    | 1.8    |
| 11.4   | 15.4   | 9.6    | 1.0    | 0.6    | 16.3   | 12.5   | 5.1    | 12.0   |
| 2832.5 | 2547.3 | 2445.7 | 2064.0 | 1082.2 | 6794.3 | 5901.6 | 615.8  | 758.2  |
| 4.4    | 11.3   | 1.4    | 5.5    | 3.9    | 13.2   | 8.5    | 5.3    | 2.5    |
| 1066.1 | 696.7  | 942.3  | 2628.7 | 460.8  | 416.0  | 358.9  | 361.3  | 462.6  |
| 59.2   | 43.8   | 53.6   | 58.8   | 21.0   | 35.4   | 28.2   | 15.6   | 24.4   |
| 1.2    | 1.2    | 2.0    | 1.3    | 1.2    | 1.4    | 1.1    | 2.1    | 1.8    |
| 20.8   | 32.9   | 10.2   | 26.0   | 5.1    | 158.6  | 107.1  | 14.3   | 27.7   |
| 22.7   | 12.8   | 16.9   | 18.9   | 10.1   | 17.5   | 1.3    | 5.8    | 8.8    |

|        |        |        |        |        |        |        |        |        |
|--------|--------|--------|--------|--------|--------|--------|--------|--------|
| 2.0    | 6.6    | 2.4    | 1.1    | 1.7    | 7.2    | 13.2   | 2.6    | 7.4    |
| 1.5    | 1.0    | 1.5    | 5.5    | 2.3    | 9.9    | 11.7   | 13.2   | 13.1   |
| 9.5    | 1.8    | 1.1    | 3.5    | 1.0    | 0.4    | 0.9    | 8.5    | 3.8    |
| 14.7   | 20.1   | 19.0   | 14.0   | 9.8    | 8.0    | 17.4   | 11.4   | 18.6   |
| 46.1   | 40.8   | 40.7   | 28.4   | 17.6   | 78.6   | 30.4   | 30.2   | 31.3   |
| 54.4   | 35.2   | 24.5   | 34.0   | 14.3   | 20.1   | 9.6    | 18.1   | 25.5   |
| 4.5    | 2.6    | 4.2    | 11.8   | 3.4    | 19.6   | 3.7    | 7.2    | 3.8    |
| 1.8    | 3.3    | 3.7    | 2.1    | 0.8    | 3.9    | 1.2    | 0.9    | 1.4    |
| 5.0    | 3.7    | 2.4    | 1.4    | 1.7    | 37.5   | 16.0   | 2.5    | 1.8    |
| 0.7    | 1.2    | 0.8    | 0.4    | 0.3    | 1.2    | 0.9    | 4.2    | 0.4    |
| 605.2  | 494.8  | 494.3  | 375.7  | 107.8  | 390.3  | 221.0  | 161.6  | 217.0  |
| 92.5   | 82.7   | 71.8   | 66.7   | 27.0   | 154.8  | 96.1   | 36.4   | 53.2   |
| 1.0    | 1.0    | 2.1    | 2.0    | 1.3    | 3.4    | 2.4    | 12.7   | 14.9   |
| 9.9    | 13.7   | 4.6    | 6.4    | 2.5    | 10.6   | 11.4   | 77.3   | 42.3   |
| 11.3   | 8.0    | 9.3    | 1.6    | 2.5    | 17.7   | 2.1    | 2.3    | 5.4    |
| 60.1   | 64.3   | 59.6   | 54.7   | 23.6   | 92.2   | 36.5   | 36.3   | 52.6   |
| 6.5    | 2.2    | 10.7   | 8.8    | 4.0    | 8.8    | 3.8    | 3.9    | 4.3    |
| 2.3    | 3.8    | 11.2   | 3.6    | 2.6    | 17.3   | 20.9   | 16.3   | 0.9    |
| 34.4   | 16.8   | 16.8   | 6.3    | 7.6    | 47.3   | 34.0   | 1.0    | 9.0    |
| 178.9  | 158.6  | 169.4  | 204.2  | 86.5   | 457.4  | 489.6  | 10.7   | 6.9    |
| 625.1  | 671.9  | 492.2  | 351.2  | 184.9  | 656.8  | 168.9  | 165.5  | 483.0  |
| 62.5   | 58.0   | 47.9   | 27.7   | 28.3   | 207.5  | 337.8  | 102.0  | 26.0   |
| 2617.2 | 2382.8 | 2389.6 | 2736.1 | 678.4  | 6015.5 | 5228.9 | 485.7  | 565.4  |
| 13.6   | 12.3   | 7.9    | 5.6    | 3.2    | 14.1   | 1.1    | 7.4    | 8.2    |
| 9.5    | 11.1   | 6.9    | 7.0    | 5.4    | 15.3   | 5.9    | 9.0    | 1.2    |
| 16.0   | 3.2    | 25.9   | 9.5    | 0.9    | 7.7    | 34.0   | 4.8    | 11.2   |
| 52.4   | 45.2   | 55.0   | 45.8   | 20.1   | 20.3   | 8.5    | 4.9    | 9.3    |
| 11.5   | 4.2    | 8.8    | 8.2    | 9.4    | 38.4   | 19.6   | 8.1    | 14.5   |
| 419.8  | 412.2  | 359.5  | 405.1  | 137.4  | 597.8  | 368.7  | 189.3  | 228.4  |
| 1.4    | 5.2    | 4.8    | 1.4    | 6.8    | 1.9    | 8.3    | 5.5    | 2.3    |
| 3.8    | 0.8    | 1.4    | 1.6    | 0.6    | 4.5    | 2.2    | 1.3    | 1.6    |
| 35.6   | 16.1   | 32.5   | 22.1   | 12.6   | 17.0   | 0.9    | 41.3   | 63.4   |
| 4684.3 | 4272.1 | 4268.8 | 4370.6 | 2773.3 | 6643.1 | 5908.2 | 789.7  | 2655.1 |
| 6312.8 | 5794.4 | 5832.4 | 5256.6 | 2598.6 | 9456.6 | 7905.2 | 2414.9 | 2525.0 |
| 3.7    | 2.2    | 2.4    | 7.0    | 3.4    | 11.9   | 7.2    | 11.4   | 14.8   |
| 13.8   | 31.5   | 25.8   | 13.8   | 4.0    | 18.8   | 25.8   | 7.0    | 21.3   |
| 57.4   | 68.0   | 54.4   | 36.3   | 19.7   | 53.4   | 61.8   | 12.8   | 13.7   |
| 39.4   | 33.5   | 32.4   | 16.2   | 13.8   | 36.1   | 23.2   | 15.0   | 19.3   |
| 106.3  | 80.8   | 87.3   | 45.7   | 15.6   | 57.9   | 28.1   | 89.6   | 97.9   |
| 813.0  | 677.3  | 798.5  | 592.8  | 341.1  | 1526.4 | 775.0  | 228.9  | 539.5  |
| 32.2   | 24.9   | 24.8   | 23.5   | 8.8    | 22.0   | 17.9   | 16.2   | 26.1   |
| 286.2  | 288.0  | 290.9  | 369.2  | 80.6   | 76.8   | 36.4   | 269.8  | 349.9  |
| 8.7    | 14.0   | 18.8   | 18.6   | 6.7    | 27.9   | 32.6   | 3.6    | 5.0    |
| 28.0   | 15.2   | 14.6   | 21.9   | 2.3    | 39.6   | 40.8   | 29.3   | 29.9   |
| 23.8   | 18.7   | 28.6   | 10.7   | 6.3    | 33.4   | 20.6   | 12.4   | 11.5   |
| 16.0   | 3.0    | 12.3   | 2.5    | 1.0    | 23.7   | 11.3   | 2.6    | 2.0    |
| 3.6    | 10.8   | 16.5   | 8.8    | 0.8    | 2.6    | 2.3    | 9.0    | 1.7    |
| 20.5   | 6.2    | 3.0    | 11.1   | 2.1    | 19.3   | 15.5   | 5.8    | 3.0    |
| 17.5   | 13.5   | 11.3   | 5.3    | 5.3    | 13.9   | 15.7   | 1.2    | 7.6    |
| 1.6    | 0.6    | 1.2    | 1.2    | 0.3    | 4.2    | 2.0    | 27.3   | 3.9    |
| 22.1   | 23.4   | 16.5   | 4.8    | 7.0    | 21.3   | 15.3   | 14.4   | 18.3   |
| 0.5    | 0.4    | 0.6    | 0.6    | 0.4    | 0.3    | 0.4    | 1.0    | 1.8    |
| 4.5    | 1.4    | 5.8    | 5.5    | 1.9    | 3.0    | 2.7    | 1.5    | 1.4    |

|        |        |        |        |        |        |        |        |        |
|--------|--------|--------|--------|--------|--------|--------|--------|--------|
| 5.0    | 3.2    | 6.1    | 3.0    | 4.6    | 6.2    | 12.6   | 5.7    | 14.4   |
| 69.7   | 41.8   | 55.3   | 27.3   | 27.6   | 26.2   | 20.1   | 32.0   | 11.4   |
| 12.7   | 13.4   | 9.1    | 8.5    | 1.2    | 6.2    | 1.9    | 2.6    | 4.2    |
| 4443.3 | 4306.9 | 4008.2 | 4050.1 | 1425.5 | 8485.5 | 6570.0 | 1243.5 | 2004.6 |
| 925.7  | 477.1  | 628.7  | 432.1  | 212.6  | 2793.6 | 2305.2 | 192.8  | 216.9  |
| 26.6   | 28.4   | 24.2   | 28.3   | 11.0   | 39.6   | 31.4   | 1.3    | 2.1    |
| 5.0    | 21.7   | 9.2    | 4.7    | 10.8   | 46.7   | 36.7   | 4.5    | 38.5   |
| 107.5  | 139.5  | 125.5  | 129.0  | 52.4   | 187.9  | 85.4   | 73.2   | 88.3   |
| 182.6  | 186.6  | 221.0  | 234.4  | 75.3   | 722.2  | 577.2  | 56.0   | 46.8   |
| 23.0   | 9.5    | 16.6   | 1.2    | 12.9   | 37.2   | 27.2   | 7.6    | 2.1    |
| 47.3   | 30.0   | 43.6   | 40.0   | 19.1   | 46.9   | 37.5   | 62.6   | 54.2   |
| 5430.5 | 4815.7 | 5029.1 | 4579.8 | 1704.9 | 5718.2 | 3304.3 | 887.1  | 1065.2 |
| 4.8    | 7.3    | 2.5    | 4.4    | 1.8    | 7.7    | 1.2    | 1.2    | 1.3    |
| 2.4    | 4.7    | 7.4    | 13.3   | 1.5    | 3.2    | 3.4    | 19.2   | 20.1   |
| 2.5    | 1.1    | 2.4    | 2.8    | 0.7    | 5.0    | 2.2    | 4.7    | 4.4    |
| 2422.3 | 2190.3 | 2245.5 | 2023.3 | 766.4  | 2939.6 | 1999.4 | 469.3  | 976.9  |
| 64.5   | 61.6   | 63.1   | 53.5   | 25.1   | 63.6   | 47.6   | 15.0   | 20.0   |
| 21.4   | 17.3   | 28.4   | 15.9   | 3.9    | 14.1   | 15.1   | 7.3    | 3.0    |
| 2.4    | 0.7    | 8.7    | 12.0   | 0.3    | 22.1   | 17.5   | 2.4    | 8.1    |
| 5.9    | 8.8    | 3.8    | 2.8    | 6.4    | 21.3   | 4.3    | 32.8   | 10.7   |
| 15.3   | 12.2   | 2.8    | 7.8    | 1.5    | 14.2   | 4.2    | 7.7    | 7.6    |
| 20.8   | 27.6   | 24.2   | 17.0   | 9.8    | 25.2   | 7.8    | 9.4    | 7.1    |
| 1.1    | 0.9    | 0.7    | 0.3    | 0.4    | 0.5    | 1.0    | 0.5    | 1.4    |
| 9.5    | 6.8    | 5.0    | 6.8    | 0.4    | 1.6    | 2.9    | 7.6    | 0.6    |
| 31.4   | 9.3    | 16.7   | 15.4   | 12.8   | 70.8   | 103.2  | 2.0    | 7.5    |
| 41.9   | 38.5   | 32.3   | 15.3   | 7.8    | 48.0   | 44.7   | 18.7   | 26.7   |
| 18.3   | 2.5    | 12.2   | 18.8   | 8.1    | 38.8   | 36.7   | 9.5    | 1.1    |
| 15.7   | 4.9    | 7.0    | 3.8    | 0.4    | 34.2   | 14.4   | 3.9    | 0.3    |
| 18.8   | 10.6   | 3.6    | 4.3    | 3.4    | 8.7    | 4.3    | 8.9    | 9.8    |
| 45.7   | 35.0   | 41.2   | 17.0   | 15.3   | 26.8   | 20.4   | 10.7   | 10.2   |
| 21.3   | 13.1   | 12.7   | 16.9   | 8.3    | 25.6   | 26.4   | 0.9    | 3.5    |
| 6.7    | 10.9   | 4.0    | 6.3    | 6.1    | 10.4   | 5.7    | 20.9   | 6.5    |
| 1.2    | 1.3    | 1.4    | 1.2    | 1.2    | 1.6    | 1.2    | 1.7    | 1.7    |
| 21.6   | 16.0   | 19.9   | 2.2    | 6.0    | 12.3   | 2.2    | 21.9   | 2.7    |
| 2.8    | 2.2    | 1.6    | 2.3    | 0.4    | 0.7    | 1.3    | 7.7    | 0.7    |
| 435.2  | 349.9  | 287.2  | 180.0  | 94.7   | 703.8  | 264.9  | 321.2  | 308.8  |
| 12.6   | 14.3   | 6.7    | 9.0    | 0.8    | 6.3    | 16.2   | 9.0    | 8.6    |
| 1.1    | 1.2    | 1.9    | 0.9    | 0.6    | 65.2   | 36.6   | 1.0    | 1.8    |
| 2.8    | 1.9    | 3.4    | 2.6    | 1.6    | 4.6    | 3.0    | 6.4    | 5.9    |
| 3.0    | 2.9    | 3.0    | 1.4    | 1.7    | 1.9    | 1.5    | 1.8    | 2.2    |
| 13.1   | 4.7    | 6.7    | 3.5    | 6.6    | 17.7   | 0.6    | 3.0    | 1.9    |
| 4.1    | 4.1    | 1.1    | 0.4    | 1.5    | 5.3    | 1.1    | 1.9    | 0.5    |
| 50.1   | 43.6   | 48.4   | 66.2   | 18.6   | 425.2  | 388.6  | 2.2    | 2.2    |
| 4.0    | 2.9    | 6.7    | 3.3    | 2.0    | 6.4    | 6.3    | 2.1    | 4.6    |
| 1.9    | 0.8    | 1.1    | 2.0    | 0.5    | 0.8    | 1.9    | 2.2    | 1.5    |
| 7.9    | 12.4   | 6.7    | 3.1    | 3.4    | 20.3   | 4.1    | 5.2    | 0.8    |
| 4888.8 | 4516.4 | 4158.6 | 3516.2 | 1463.3 | 8553.4 | 7525.9 | 1268.6 | 1757.2 |
| 30.6   | 14.7   | 28.1   | 14.0   | 12.6   | 74.1   | 57.6   | 18.5   | 24.0   |
| 12.6   | 8.8    | 2.6    | 4.2    | 2.1    | 17.1   | 20.0   | 10.7   | 8.3    |
| 7.6    | 0.7    | 12.5   | 4.7    | 3.9    | 2.9    | 5.9    | 9.6    | 5.6    |
| 24.2   | 17.3   | 21.2   | 11.1   | 4.6    | 109.7  | 96.3   | 15.5   | 25.5   |
| 1.1    | 0.9    | 2.5    | 1.2    | 0.3    | 2.0    | 6.0    | 3.7    | 1.9    |
| 1.6    | 1.8    | 2.6    | 1.6    | 1.5    | 1.8    | 2.3    | 0.9    | 0.8    |

|        |        |        |        |       |        |        |       |       |
|--------|--------|--------|--------|-------|--------|--------|-------|-------|
| 18.5   | 20.6   | 23.1   | 4.8    | 1.1   | 4.2    | 1.9    | 10.1  | 17.2  |
| 27.4   | 22.0   | 27.6   | 21.7   | 10.5  | 38.0   | 20.8   | 3.5   | 2.1   |
| 62.2   | 20.6   | 44.3   | 19.7   | 18.9  | 40.0   | 62.4   | 56.4  | 13.1  |
| 41.6   | 4.9    | 13.8   | 5.8    | 6.2   | 449.1  | 411.8  | 304.1 | 312.5 |
| 1.2    | 0.3    | 0.3    | 0.7    | 0.5   | 0.3    | 2.8    | 2.3   | 0.6   |
| 1.4    | 1.7    | 2.1    | 1.5    | 1.0   | 4.3    | 2.9    | 1.2   | 2.0   |
| 3.1    | 1.4    | 10.7   | 2.6    | 1.1   | 3.1    | 2.0    | 11.0  | 26.6  |
| 16.7   | 1.5    | 13.1   | 14.3   | 3.2   | 0.8    | 0.9    | 10.0  | 9.8   |
| 6.6    | 5.5    | 9.3    | 17.4   | 7.0   | 0.4    | 1.8    | 3.2   | 3.3   |
| 8.9    | 0.2    | 8.1    | 7.4    | 3.0   | 7.2    | 17.2   | 5.0   | 0.7   |
| 14.9   | 19.3   | 13.4   | 13.8   | 7.1   | 38.9   | 8.7    | 26.5  | 21.0  |
| 3.0    | 0.9    | 4.9    | 1.2    | 1.9   | 32.6   | 24.5   | 10.3  | 1.8   |
| 1.6    | 1.6    | 3.5    | 4.0    | 0.4   | 9.0    | 3.7    | 5.5   | 10.1  |
| 13.4   | 13.1   | 8.8    | 1.7    | 6.5   | 5.2    | 4.9    | 1.9   | 5.4   |
| 3.4    | 0.4    | 1.5    | 0.8    | 0.3   | 1.3    | 5.6    | 1.9   | 1.0   |
| 0.5    | 1.1    | 4.8    | 2.8    | 4.1   | 1.0    | 3.8    | 1.1   | 1.3   |
| 6.6    | 9.8    | 6.5    | 4.6    | 4.5   | 12.0   | 4.7    | 16.2  | 8.6   |
| 52.1   | 45.4   | 33.0   | 33.5   | 14.0  | 3.7    | 1.6    | 3.8   | 1.9   |
| 24.6   | 3.9    | 10.5   | 1.0    | 6.8   | 13.1   | 4.6    | 19.0  | 22.9  |
| 2.6    | 2.3    | 1.8    | 5.5    | 3.1   | 2.8    | 1.4    | 7.6   | 1.5   |
| 5.7    | 18.8   | 15.4   | 11.4   | 3.8   | 8.6    | 10.4   | 22.6  | 17.8  |
| 3.1    | 3.1    | 5.5    | 3.4    | 5.2   | 8.1    | 4.1    | 2.5   | 4.1   |
| 35.3   | 26.9   | 36.3   | 12.0   | 10.3  | 36.6   | 30.1   | 30.9  | 13.9  |
| 8.4    | 2.6    | 2.0    | 2.6    | 0.6   | 12.0   | 1.3    | 11.6  | 8.0   |
| 2.9    | 14.3   | 10.4   | 3.6    | 6.2   | 8.2    | 2.6    | 16.2  | 12.4  |
| 329.7  | 417.4  | 239.7  | 182.8  | 116.6 | 334.6  | 149.7  | 72.7  | 88.7  |
| 1340.4 | 1338.8 | 1646.1 | 1541.3 | 682.0 | 1107.1 | 487.1  | 144.5 | 117.6 |
| 31.8   | 24.2   | 27.3   | 26.3   | 6.2   | 15.5   | 42.6   | 31.9  | 20.3  |
| 294.3  | 250.5  | 339.6  | 432.4  | 105.8 | 841.5  | 736.2  | 44.0  | 57.1  |
| 658.2  | 631.4  | 1170.6 | 1334.8 | 300.0 | 743.5  | 586.2  | 70.1  | 85.6  |
| 926.4  | 816.0  | 764.1  | 575.8  | 247.9 | 1661.8 | 1269.2 | 215.7 | 282.3 |
| 30.1   | 15.6   | 14.5   | 19.4   | 0.4   | 29.7   | 8.6    | 9.9   | 6.9   |
| 7.7    | 3.9    | 1.1    | 1.9    | 0.2   | 1.4    | 1.9    | 150.0 | 222.8 |
| 23.8   | 37.0   | 33.8   | 24.6   | 9.4   | 16.2   | 1.3    | 8.6   | 3.7   |
| 470.2  | 424.4  | 551.6  | 827.3  | 228.3 | 1788.6 | 1781.1 | 109.2 | 158.9 |
| 51.4   | 49.5   | 35.6   | 63.4   | 29.4  | 67.7   | 52.6   | 6.6   | 4.2   |
| 412.2  | 332.7  | 423.5  | 326.0  | 136.4 | 594.0  | 348.8  | 61.4  | 113.9 |
| 20.3   | 5.8    | 6.9    | 18.9   | 5.4   | 37.1   | 16.1   | 3.4   | 11.1  |
| 211.6  | 159.5  | 193.8  | 116.7  | 56.1  | 254.4  | 171.7  | 4.3   | 2.3   |
| 12.0   | 27.7   | 17.1   | 11.0   | 9.1   | 304.8  | 236.1  | 87.7  | 93.1  |
| 62.1   | 44.3   | 43.4   | 33.6   | 14.3  | 94.5   | 29.3   | 9.7   | 34.3  |
| 97.6   | 103.1  | 76.9   | 84.7   | 37.5  | 55.1   | 22.9   | 47.9  | 66.2  |
| 32.3   | 28.9   | 32.6   | 30.2   | 12.0  | 59.1   | 11.9   | 17.1  | 15.5  |
| 65.6   | 45.7   | 58.8   | 49.9   | 17.4  | 129.5  | 58.9   | 14.0  | 10.4  |
| 12.9   | 5.9    | 17.3   | 8.5    | 5.5   | 20.1   | 15.8   | 6.3   | 1.2   |
| 56.8   | 35.3   | 62.3   | 70.5   | 20.6  | 121.9  | 85.4   | 2.6   | 2.4   |
| 66.3   | 21.7   | 52.6   | 47.6   | 7.4   | 54.8   | 30.1   | 19.6  | 11.8  |
| 100.2  | 63.6   | 88.3   | 100.3  | 32.5  | 561.2  | 268.5  | 44.9  | 49.6  |
| 142.1  | 126.3  | 152.7  | 181.0  | 73.0  | 143.2  | 159.9  | 14.2  | 16.9  |
| 4.1    | 1.9    | 3.9    | 1.9    | 1.0   | 2.6    | 1.1    | 1.4   | 1.2   |
| 5.4    | 4.9    | 3.9    | 6.4    | 2.7   | 15.2   | 4.9    | 4.6   | 0.6   |
| 51.8   | 42.6   | 70.1   | 75.1   | 36.3  | 933.2  | 1112.8 | 2.7   | 3.1   |
| 10.7   | 3.2    | 0.5    | 4.8    | 0.3   | 382.8  | 406.7  | 7.3   | 6.9   |

|        |        |        |        |       |        |        |       |        |
|--------|--------|--------|--------|-------|--------|--------|-------|--------|
| 14.0   | 2.7    | 18.2   | 4.7    | 1.4   | 9.4    | 1.8    | 1.4   | 5.3    |
| 78.9   | 66.7   | 95.7   | 174.5  | 29.6  | 31.1   | 27.3   | 9.1   | 15.8   |
| 15.8   | 9.5    | 3.4    | 3.3    | 1.0   | 2546.1 | 2749.5 | 4.6   | 2.6    |
| 10.7   | 12.6   | 4.6    | 4.3    | 6.7   | 23.2   | 21.6   | 9.1   | 1.0    |
| 20.5   | 12.8   | 28.5   | 12.0   | 15.3  | 29.0   | 35.7   | 20.8  | 10.2   |
| 2216.2 | 1937.4 | 1803.5 | 1833.6 | 753.2 | 7618.4 | 5183.6 | 496.2 | 1006.3 |
| 0.9    | 0.6    | 1.0    | 0.7    | 0.3   | 1.2    | 1.5    | 1.1   | 0.9    |
| 1.1    | 0.5    | 1.5    | 0.5    | 1.9   | 3.0    | 1.4    | 0.9   | 0.8    |
| 113.1  | 100.8  | 115.7  | 104.2  | 24.0  | 24.4   | 21.4   | 18.1  | 49.1   |
| 49.6   | 46.6   | 55.3   | 51.5   | 19.8  | 51.6   | 32.5   | 25.0  | 24.7   |
| 32.5   | 9.4    | 15.3   | 16.4   | 4.5   | 33.3   | 51.0   | 17.3  | 34.9   |
| 1.1    | 0.9    | 1.1    | 0.8    | 0.4   | 1.4    | 0.8    | 2.3   | 2.5    |
| 2.5    | 3.7    | 1.2    | 1.4    | 1.8   | 2.1    | 3.4    | 4.2   | 2.0    |
| 3.4    | 2.6    | 1.8    | 4.5    | 2.3   | 26.4   | 10.0   | 0.8   | 4.1    |
| 2.9    | 1.7    | 1.7    | 1.5    | 0.7   | 15.7   | 1.4    | 0.9   | 0.3    |
| 17.8   | 12.0   | 28.2   | 43.2   | 8.8   | 4.0    | 6.8    | 13.0  | 20.6   |
| 3.7    | 8.8    | 11.6   | 1.0    | 1.7   | 1.4    | 0.6    | 2.4   | 4.7    |
| 10.2   | 6.1    | 17.7   | 8.0    | 6.9   | 58.6   | 14.0   | 40.5  | 21.9   |
| 14.2   | 18.8   | 25.3   | 75.5   | 17.0  | 0.7    | 5.2    | 1.5   | 6.8    |
| 242.2  | 207.5  | 229.1  | 186.4  | 74.8  | 236.3  | 161.8  | 196.2 | 236.7  |
| 44.0   | 24.8   | 30.2   | 42.3   | 9.0   | 27.3   | 11.4   | 13.1  | 24.3   |
| 0.5    | 0.7    | 0.6    | 0.6    | 0.4   | 0.9    | 0.3    | 0.4   | 0.9    |
| 3.2    | 3.8    | 1.3    | 0.8    | 2.0   | 397.5  | 134.3  | 1.9   | 7.5    |
| 3.7    | 1.3    | 0.5    | 2.0    | 0.8   | 1.0    | 1.6    | 2.3   | 0.9    |
| 4.8    | 4.0    | 2.4    | 1.2    | 0.6   | 12.7   | 4.8    | 4.4   | 7.9    |
| 4.3    | 3.6    | 2.1    | 1.5    | 1.1   | 1.8    | 1.3    | 3.1   | 4.5    |
| 2.5    | 2.6    | 1.6    | 0.6    | 0.5   | 1.0    | 1.7    | 1.0   | 1.2    |
| 14.6   | 21.7   | 25.7   | 42.0   | 15.2  | 17.2   | 21.8   | 18.1  | 7.1    |
| 57.8   | 71.3   | 79.8   | 91.6   | 23.4  | 22.3   | 11.9   | 11.8  | 17.4   |
| 62.2   | 44.0   | 52.7   | 34.7   | 13.1  | 103.6  | 55.9   | 54.4  | 107.9  |
| 602.3  | 530.6  | 446.1  | 414.0  | 194.1 | 612.0  | 284.1  | 5.1   | 27.1   |
| 16.1   | 5.7    | 10.6   | 8.7    | 5.2   | 7.0    | 15.6   | 4.7   | 9.4    |
| 44.4   | 26.8   | 14.4   | 13.9   | 3.2   | 98.3   | 81.2   | 24.0  | 38.9   |
| 51.2   | 23.2   | 33.6   | 20.5   | 4.0   | 65.8   | 39.6   | 18.4  | 20.9   |
| 1.4    | 1.0    | 3.0    | 1.3    | 0.4   | 5.9    | 1.0    | 0.3   | 0.7    |
| 10.7   | 3.7    | 2.7    | 1.7    | 0.7   | 3.5    | 1.7    | 14.9  | 6.7    |
| 5.2    | 9.6    | 2.0    | 13.5   | 3.9   | 5.3    | 2.8    | 3.6   | 1.7    |
| 5.0    | 1.4    | 3.3    | 1.2    | 7.6   | 1.8    | 1.7    | 3.5   | 5.8    |
| 18.0   | 8.3    | 2.4    | 1.5    | 1.2   | 7.9    | 1.6    | 2.6   | 16.9   |
| 3.1    | 7.9    | 24.4   | 6.9    | 11.9  | 45.5   | 26.4   | 5.4   | 4.3    |
| 301.4  | 279.4  | 209.5  | 177.1  | 109.4 | 493.6  | 313.7  | 64.8  | 85.8   |
| 2.6    | 2.6    | 14.0   | 2.0    | 0.9   | 3.2    | 2.4    | 2.5   | 3.3    |
| 26.4   | 33.3   | 26.8   | 21.7   | 7.5   | 40.8   | 16.2   | 42.2  | 49.5   |
| 2.7    | 1.1    | 2.7    | 1.2    | 1.3   | 4.4    | 2.4    | 0.4   | 1.0    |
| 2.5    | 6.6    | 3.5    | 3.4    | 3.4   | 11.4   | 7.7    | 0.7   | 6.8    |
| 183.5  | 172.2  | 180.5  | 119.2  | 36.2  | 239.2  | 136.5  | 39.6  | 60.3   |
| 82.2   | 106.9  | 79.3   | 45.8   | 22.6  | 474.0  | 231.7  | 58.5  | 109.2  |
| 414.6  | 378.7  | 325.0  | 215.8  | 124.2 | 1124.4 | 806.6  | 670.1 | 815.6  |
| 6.1    | 3.7    | 9.3    | 12.2   | 8.9   | 0.7    | 1.4    | 2.0   | 8.8    |
| 1.7    | 0.5    | 0.7    | 0.6    | 0.5   | 1.0    | 0.6    | 2.3   | 1.2    |
| 6.3    | 4.6    | 3.3    | 1.4    | 3.6   | 2.6    | 2.7    | 2.0   | 1.9    |
| 1373.7 | 1610.8 | 1530.4 | 1445.9 | 428.5 | 400.1  | 255.6  | 11.1  | 11.7   |
| 19.0   | 7.0    | 18.5   | 17.9   | 1.5   | 21.9   | 20.2   | 26.0  | 22.7   |

|        |        |        |        |        |        |        |        |        |
|--------|--------|--------|--------|--------|--------|--------|--------|--------|
| 241.5  | 201.7  | 218.0  | 164.0  | 48.0   | 287.2  | 174.6  | 91.3   | 124.3  |
| 186.9  | 184.6  | 217.9  | 259.9  | 64.4   | 111.2  | 41.4   | 44.9   | 64.3   |
| 6.8    | 3.8    | 13.5   | 6.1    | 4.3    | 3.5    | 2.4    | 1.4    | 9.8    |
| 4.3    | 1.2    | 4.5    | 10.2   | 2.3    | 7.4    | 10.1   | 0.7    | 3.4    |
| 4.8    | 9.2    | 11.5   | 9.1    | 1.2    | 3.2    | 1.9    | 2.6    | 1.8    |
| 1932.2 | 1916.3 | 1881.3 | 1244.5 | 584.5  | 4483.6 | 3405.4 | 471.1  | 618.6  |
| 107.8  | 71.5   | 102.6  | 118.5  | 24.7   | 131.2  | 72.2   | 15.9   | 39.4   |
| 6.9    | 1.4    | 0.8    | 1.2    | 0.7    | 0.8    | 5.9    | 1.5    | 1.5    |
| 13.9   | 9.6    | 8.1    | 7.7    | 7.1    | 6.8    | 2.8    | 12.6   | 12.4   |
| 19.7   | 8.8    | 5.7    | 12.2   | 2.2    | 11.9   | 12.0   | 1.6    | 11.7   |
| 9.2    | 3.8    | 1.9    | 6.8    | 1.3    | 4.8    | 11.7   | 9.4    | 3.5    |
| 17.9   | 7.2    | 5.7    | 12.5   | 3.4    | 3.4    | 13.9   | 9.2    | 11.6   |
| 13.3   | 7.9    | 11.6   | 5.3    | 1.8    | 32.7   | 33.5   | 10.3   | 9.3    |
| 15.1   | 1.6    | 5.3    | 2.5    | 6.2    | 7.0    | 2.0    | 5.1    | 2.2    |
| 17.0   | 15.0   | 1.6    | 10.8   | 7.2    | 30.5   | 28.4   | 1.9    | 6.6    |
| 18.7   | 37.1   | 36.7   | 65.7   | 29.0   | 1.9    | 15.6   | 1.8    | 3.8    |
| 18.9   | 17.7   | 1.8    | 15.2   | 11.1   | 20.5   | 12.6   | 19.8   | 20.8   |
| 13.6   | 1.5    | 15.2   | 5.4    | 5.1    | 7.4    | 0.8    | 15.4   | 6.1    |
| 41.7   | 59.7   | 95.0   | 62.6   | 22.8   | 105.8  | 47.0   | 21.8   | 35.4   |
| 271.8  | 264.8  | 249.0  | 205.7  | 80.8   | 231.2  | 152.2  | 206.5  | 256.6  |
| 590.5  | 480.5  | 467.4  | 379.5  | 169.9  | 878.3  | 539.6  | 179.9  | 181.3  |
| 13.6   | 11.9   | 2.6    | 12.9   | 1.2    | 13.0   | 0.7    | 1.4    | 0.3    |
| 12.7   | 13.2   | 17.0   | 13.9   | 9.3    | 8.2    | 6.2    | 20.3   | 17.4   |
| 3.1    | 1.5    | 0.9    | 0.5    | 0.8    | 1.7    | 0.7    | 0.7    | 0.9    |
| 118.2  | 135.6  | 161.0  | 113.9  | 54.3   | 259.1  | 187.4  | 46.4   | 39.5   |
| 34.6   | 31.7   | 9.3    | 1.6    | 16.1   | 4.2    | 10.9   | 12.8   | 32.5   |
| 12.3   | 3.0    | 8.9    | 1.1    | 9.0    | 4.1    | 1.5    | 1.9    | 3.8    |
| 20.4   | 3.1    | 2.0    | 3.0    | 5.1    | 3.2    | 12.4   | 1.6    | 3.3    |
| 5.3    | 1.9    | 1.6    | 13.7   | 7.2    | 2.8    | 3.4    | 11.2   | 13.3   |
| 3.4    | 1.9    | 4.6    | 6.6    | 1.2    | 27.5   | 16.9   | 6.0    | 6.9    |
| 6.2    | 5.5    | 19.6   | 18.8   | 7.9    | 8.6    | 6.3    | 4.9    | 6.5    |
| 3.5    | 3.1    | 4.5    | 2.2    | 2.1    | 5.3    | 3.9    | 2.5    | 3.7    |
| 15.2   | 18.4   | 7.0    | 2.5    | 9.2    | 6.7    | 14.6   | 2.3    | 23.7   |
| 12.0   | 1.4    | 12.2   | 11.2   | 5.2    | 1.9    | 1.6    | 0.6    | 0.8    |
| 1.9    | 0.8    | 0.7    | 12.6   | 6.3    | 8.8    | 24.0   | 0.8    | 0.9    |
| 35.5   | 26.2   | 30.4   | 46.2   | 14.5   | 25.7   | 28.3   | 26.9   | 9.9    |
| 124.0  | 74.5   | 69.0   | 75.7   | 13.1   | 228.1  | 136.5  | 27.8   | 28.3   |
| 165.5  | 153.2  | 151.3  | 151.5  | 34.4   | 267.9  | 124.1  | 66.2   | 89.8   |
| 99.4   | 71.6   | 91.3   | 73.2   | 32.3   | 149.7  | 64.6   | 35.3   | 28.1   |
| 16.9   | 2.5    | 5.9    | 1.0    | 3.6    | 5.4    | 1.1    | 1.4    | 6.3    |
| 9.8    | 2.7    | 2.9    | 6.0    | 0.3    | 2.6    | 3.7    | 4.9    | 1.8    |
| 4470.1 | 3979.2 | 3562.0 | 3170.1 | 1586.5 | 5292.0 | 4290.8 | 2375.6 | 3875.2 |
| 30.4   | 12.6   | 43.9   | 20.3   | 1.9    | 124.2  | 85.9   | 21.7   | 32.1   |
| 392.4  | 237.0  | 260.1  | 187.8  | 88.6   | 273.5  | 135.2  | 80.0   | 93.1   |
| 12.0   | 12.0   | 1.8    | 11.0   | 1.2    | 3.7    | 4.4    | 2.4    | 1.8    |
| 95.6   | 87.5   | 102.8  | 79.9   | 32.5   | 164.5  | 70.9   | 85.4   | 80.9   |
| 179.0  | 124.0  | 144.6  | 188.8  | 41.2   | 247.1  | 208.3  | 53.0   | 68.7   |
| 11.0   | 17.4   | 21.2   | 10.5   | 8.5    | 3.3    | 6.5    | 2.1    | 5.3    |
| 2.1    | 6.7    | 5.3    | 2.2    | 3.6    | 7.2    | 6.5    | 1.1    | 3.0    |
| 2.1    | 3.6    | 13.4   | 1.8    | 1.3    | 1.6    | 4.1    | 2.7    | 2.3    |
| 7.1    | 8.1    | 10.4   | 11.9   | 0.2    | 14.6   | 14.8   | 4.0    | 7.5    |
| 11.9   | 15.0   | 9.5    | 16.1   | 5.7    | 17.2   | 7.6    | 17.0   | 25.9   |
| 1.3    | 0.6    | 0.5    | 0.7    | 0.5    | 0.8    | 0.9    | 9.0    | 0.9    |

|        |        |        |        |       |       |       |       |       |
|--------|--------|--------|--------|-------|-------|-------|-------|-------|
| 19.5   | 10.3   | 10.1   | 4.1    | 0.7   | 12.9  | 4.8   | 6.2   | 11.0  |
| 10.3   | 8.0    | 4.3    | 1.6    | 0.4   | 6.6   | 10.0  | 1.4   | 10.0  |
| 1.9    | 5.4    | 1.4    | 2.2    | 3.5   | 5.7   | 1.0   | 2.5   | 0.9   |
| 5.2    | 6.4    | 12.1   | 5.4    | 4.4   | 4.1   | 6.3   | 0.6   | 7.9   |
| 22.9   | 18.4   | 4.5    | 5.5    | 1.2   | 22.6  | 11.5  | 22.2  | 22.5  |
| 17.7   | 0.9    | 1.4    | 0.7    | 0.4   | 3.2   | 6.5   | 1.9   | 3.2   |
| 1.7    | 12.1   | 9.7    | 5.7    | 1.0   | 7.1   | 4.6   | 11.7  | 1.7   |
| 0.8    | 0.6    | 0.7    | 1.0    | 0.2   | 1.1   | 5.9   | 0.9   | 2.0   |
| 3.8    | 2.1    | 3.0    | 3.0    | 0.8   | 3.9   | 1.3   | 3.9   | 13.5  |
| 6.3    | 3.3    | 4.1    | 2.6    | 0.3   | 8.4   | 8.3   | 0.4   | 5.7   |
| 3.3    | 11.8   | 3.7    | 13.3   | 4.0   | 18.7  | 14.4  | 1.9   | 12.3  |
| 1.0    | 1.1    | 1.4    | 0.8    | 0.7   | 0.9   | 1.7   | 0.9   | 0.6   |
| 25.1   | 15.5   | 12.5   | 5.3    | 9.6   | 14.7  | 10.4  | 3.1   | 5.6   |
| 50.5   | 42.1   | 30.5   | 25.2   | 8.7   | 4.7   | 3.3   | 1.9   | 3.6   |
| 1.9    | 12.8   | 2.4    | 3.4    | 2.9   | 2.4   | 5.0   | 1.1   | 1.6   |
| 0.7    | 1.8    | 0.4    | 0.7    | 1.9   | 0.7   | 0.9   | 0.4   | 0.4   |
| 14.1   | 8.9    | 16.0   | 13.7   | 8.9   | 72.8  | 29.7  | 9.1   | 2.1   |
| 162.6  | 162.8  | 181.9  | 201.5  | 59.4  | 214.9 | 153.7 | 104.3 | 51.1  |
| 21.0   | 2.7    | 2.6    | 5.1    | 9.8   | 31.8  | 67.8  | 6.7   | 6.4   |
| 1.9    | 1.5    | 2.8    | 3.0    | 0.5   | 118.4 | 56.4  | 2.0   | 2.3   |
| 101.5  | 106.8  | 138.9  | 72.7   | 67.4  | 953.3 | 838.7 | 3.7   | 8.4   |
| 30.3   | 34.1   | 37.4   | 22.9   | 8.2   | 22.1  | 13.6  | 16.2  | 15.8  |
| 128.2  | 92.7   | 118.3  | 99.2   | 20.1  | 137.8 | 86.1  | 12.3  | 19.4  |
| 4.5    | 16.3   | 20.4   | 2.1    | 2.8   | 29.0  | 12.1  | 1.3   | 2.0   |
| 431.6  | 394.1  | 440.7  | 360.9  | 239.5 | 786.4 | 618.1 | 181.4 | 209.5 |
| 8.3    | 10.2   | 5.8    | 0.3    | 2.0   | 4.9   | 7.0   | 4.7   | 0.9   |
| 0.5    | 2.6    | 9.9    | 3.3    | 3.3   | 7.4   | 15.3  | 1.1   | 0.4   |
| 23.5   | 23.4   | 23.0   | 31.6   | 10.4  | 26.8  | 25.0  | 13.6  | 15.3  |
| 10.5   | 9.5    | 8.6    | 5.7    | 0.6   | 20.6  | 8.1   | 3.6   | 9.3   |
| 59.8   | 47.2   | 71.5   | 123.4  | 20.4  | 21.0  | 21.5  | 14.4  | 11.3  |
| 12.9   | 7.7    | 17.0   | 9.4    | 5.4   | 33.5  | 6.3   | 3.3   | 12.9  |
| 14.0   | 2.9    | 3.9    | 10.3   | 4.2   | 21.6  | 20.8  | 8.9   | 3.5   |
| 9.6    | 10.0   | 3.3    | 6.3    | 2.0   | 1.4   | 0.4   | 1.5   | 1.7   |
| 97.9   | 70.3   | 97.0   | 95.3   | 59.9  | 226.8 | 213.9 | 25.7  | 36.0  |
| 117.2  | 130.0  | 103.3  | 88.3   | 40.4  | 87.3  | 53.1  | 48.7  | 23.9  |
| 11.1   | 16.8   | 8.8    | 10.3   | 2.8   | 38.8  | 34.5  | 5.5   | 2.3   |
| 2.0    | 4.7    | 4.7    | 5.9    | 6.4   | 15.2  | 1.2   | 1.6   | 2.0   |
| 0.6    | 0.8    | 0.8    | 2.5    | 0.2   | 1.3   | 1.2   | 20.3  | 23.2  |
| 22.2   | 3.3    | 13.6   | 7.5    | 3.6   | 98.9  | 29.7  | 3.3   | 24.4  |
| 53.3   | 38.9   | 35.9   | 38.2   | 12.6  | 34.0  | 35.1  | 5.9   | 9.1   |
| 0.6    | 5.9    | 0.8    | 0.7    | 3.3   | 9.7   | 5.7   | 5.3   | 0.5   |
| 1.2    | 0.9    | 0.8    | 0.2    | 0.2   | 2.7   | 1.2   | 1.0   | 1.8   |
| 9.1    | 14.6   | 11.1   | 1.1    | 1.7   | 25.9  | 10.2  | 2.1   | 0.6   |
| 44.2   | 19.6   | 27.1   | 31.5   | 16.0  | 13.3  | 0.8   | 1.9   | 3.5   |
| 2.4    | 7.8    | 7.1    | 6.1    | 4.2   | 45.6  | 42.2  | 6.7   | 4.5   |
| 3.4    | 4.1    | 6.9    | 5.3    | 4.5   | 36.2  | 31.5  | 6.0   | 1.7   |
| 28.0   | 9.7    | 3.3    | 16.7   | 1.5   | 21.5  | 6.7   | 4.5   | 16.2  |
| 2.5    | 2.1    | 2.1    | 0.8    | 0.8   | 17.8  | 37.3  | 1.1   | 1.4   |
| 13.0   | 4.3    | 8.5    | 4.2    | 5.2   | 20.1  | 2.4   | 8.4   | 12.2  |
| 13.8   | 0.4    | 1.5    | 2.6    | 0.3   | 2.2   | 7.7   | 15.2  | 9.2   |
| 11.3   | 8.8    | 8.0    | 8.2    | 1.2   | 11.0  | 5.3   | 5.0   | 4.5   |
| 1978.1 | 1750.9 | 1789.0 | 1409.1 | 632.5 | 58.4  | 33.7  | 8.0   | 10.1  |
| 20.0   | 27.4   | 20.9   | 7.5    | 3.1   | 20.9  | 4.1   | 3.1   | 2.2   |



|        |        |        |        |        |        |        |       |       |
|--------|--------|--------|--------|--------|--------|--------|-------|-------|
| 74.2   | 69.8   | 45.8   | 41.1   | 39.9   | 99.1   | 62.6   | 144.2 | 162.3 |
| 2.4    | 2.4    | 4.1    | 0.1    | 2.7    | 5.4    | 4.1    | 6.8   | 14.2  |
| 29.2   | 7.6    | 20.7   | 17.9   | 12.0   | 12.6   | 14.5   | 35.7  | 43.9  |
| 7.6    | 14.1   | 17.9   | 16.0   | 5.5    | 24.6   | 22.1   | 13.9  | 13.2  |
| 8.3    | 6.0    | 0.7    | 0.9    | 0.5    | 4.0    | 5.5    | 10.0  | 6.6   |
| 11.4   | 4.2    | 24.7   | 12.7   | 6.0    | 2.9    | 12.9   | 17.9  | 18.3  |
| 91.1   | 96.9   | 86.8   | 55.1   | 35.9   | 181.5  | 116.8  | 9.6   | 11.9  |
| 1.4    | 0.8    | 1.0    | 0.4    | 0.2    | 7.3    | 1.7    | 1.1   | 0.8   |
| 2.4    | 26.5   | 6.4    | 1.8    | 1.6    | 4.0    | 1.4    | 2.1   | 3.2   |
| 15.1   | 0.7    | 3.2    | 0.7    | 0.5    | 17.9   | 12.4   | 4.5   | 2.1   |
| 37.9   | 28.2   | 33.4   | 23.4   | 15.1   | 1.8    | 0.9    | 37.2  | 52.3  |
| 8.9    | 28.1   | 12.6   | 23.7   | 2.1    | 3.6    | 22.6   | 9.0   | 6.5   |
| 477.9  | 411.5  | 317.9  | 184.3  | 67.7   | 1031.9 | 574.4  | 104.3 | 170.2 |
| 30.4   | 10.4   | 7.8    | 9.7    | 8.5    | 3.9    | 16.6   | 4.9   | 10.5  |
| 9.6    | 14.4   | 2.9    | 2.7    | 8.2    | 2.0    | 12.4   | 2.8   | 5.0   |
| 3222.7 | 2835.2 | 3181.0 | 3127.4 | 1432.3 | 6498.3 | 5541.3 | 444.0 | 578.5 |
| 2.5    | 3.0    | 3.6    | 2.1    | 1.6    | 2.3    | 5.1    | 5.1   | 6.7   |
| 17.0   | 18.0   | 10.5   | 13.4   | 2.9    | 0.4    | 6.9    | 5.9   | 4.5   |
| 5.9    | 12.0   | 2.9    | 5.0    | 2.3    | 47.8   | 41.8   | 11.1  | 5.7   |
| 23.8   | 19.0   | 16.3   | 12.2   | 8.8    | 6.7    | 2.5    | 11.7  | 5.8   |
| 14.4   | 12.5   | 15.2   | 3.2    | 2.4    | 26.4   | 26.9   | 11.7  | 4.7   |
| 3.3    | 12.1   | 4.9    | 12.7   | 1.4    | 76.9   | 36.6   | 20.9  | 17.8  |
| 0.7    | 15.8   | 21.7   | 53.0   | 6.7    | 2.3    | 1.7    | 7.5   | 8.8   |
| 1.4    | 7.1    | 6.4    | 1.4    | 0.8    | 3.1    | 1.5    | 1.3   | 1.2   |
| 48.0   | 52.6   | 48.9   | 58.9   | 13.7   | 31.4   | 25.3   | 21.7  | 18.9  |
| 40.7   | 41.2   | 24.7   | 19.1   | 15.6   | 99.1   | 60.6   | 0.5   | 0.6   |
| 10.9   | 5.7    | 8.3    | 1.2    | 3.7    | 3.1    | 0.4    | 1.1   | 1.2   |
| 10.0   | 1.0    | 6.9    | 7.5    | 0.7    | 1.1    | 2.0    | 9.5   | 1.9   |
| 383.2  | 466.9  | 421.9  | 228.9  | 99.7   | 11.3   | 5.7    | 1.8   | 2.0   |
| 52.8   | 55.5   | 68.9   | 54.5   | 17.0   | 113.1  | 83.5   | 1.9   | 1.6   |
| 4.2    | 2.6    | 7.7    | 3.9    | 4.2    | 3.0    | 1.2    | 2.4   | 3.4   |
| 12.0   | 4.6    | 1.4    | 3.6    | 0.5    | 5.1    | 10.6   | 10.5  | 1.4   |
| 3.4    | 2.1    | 11.0   | 8.9    | 6.4    | 1.2    | 1.1    | 4.6   | 4.6   |
| 21.6   | 39.4   | 20.1   | 7.9    | 10.2   | 28.3   | 19.8   | 9.0   | 4.6   |
| 4.5    | 6.3    | 15.4   | 1.3    | 3.1    | 7.3    | 8.4    | 10.7  | 8.6   |
| 97.8   | 103.1  | 108.7  | 134.1  | 38.3   | 327.7  | 242.9  | 13.6  | 30.6  |
| 0.7    | 0.5    | 16.9   | 9.6    | 6.0    | 18.7   | 15.2   | 2.6   | 1.4   |
| 14.7   | 19.9   | 14.2   | 15.2   | 7.3    | 54.5   | 21.1   | 0.6   | 6.8   |
| 0.9    | 0.5    | 0.8    | 0.2    | 0.4    | 1.6    | 0.6    | 2.7   | 1.1   |
| 16.1   | 7.0    | 1.5    | 3.6    | 2.3    | 9.3    | 1.8    | 4.8   | 1.5   |
| 175.8  | 145.5  | 144.3  | 110.7  | 74.6   | 306.0  | 183.7  | 56.5  | 65.9  |
| 39.0   | 13.9   | 30.0   | 43.4   | 6.3    | 17.4   | 19.2   | 25.1  | 19.7  |
| 236.3  | 254.9  | 239.2  | 199.6  | 88.6   | 719.5  | 478.7  | 17.5  | 21.4  |
| 103.9  | 100.7  | 94.5   | 81.1   | 28.5   | 211.4  | 120.4  | 32.8  | 62.3  |
| 7.3    | 6.3    | 6.0    | 1.3    | 2.6    | 11.5   | 11.7   | 0.5   | 0.3   |
| 154.1  | 117.5  | 154.0  | 116.1  | 37.5   | 537.2  | 363.1  | 77.9  | 119.1 |
| 96.6   | 80.3   | 77.5   | 67.2   | 37.2   | 275.5  | 199.6  | 33.4  | 33.4  |
| 44.9   | 34.0   | 51.9   | 41.1   | 17.2   | 48.9   | 52.7   | 8.4   | 11.8  |
| 20.1   | 12.9   | 19.2   | 13.1   | 8.3    | 50.0   | 18.8   | 7.1   | 7.1   |
| 299.8  | 308.1  | 232.5  | 253.0  | 82.3   | 846.5  | 557.4  | 176.1 | 308.3 |
| 69.9   | 71.1   | 70.6   | 42.0   | 23.7   | 179.0  | 114.8  | 22.9  | 28.8  |
| 21.3   | 16.3   | 13.0   | 16.0   | 1.5    | 31.3   | 4.0    | 67.2  | 111.6 |
| 44.5   | 26.9   | 35.6   | 19.0   | 13.3   | 20.2   | 16.2   | 4.9   | 16.8  |

|        |        |        |        |        |        |        |        |        |
|--------|--------|--------|--------|--------|--------|--------|--------|--------|
| 11.5   | 11.4   | 8.8    | 6.6    | 0.7    | 16.3   | 2.4    | 9.0    | 5.0    |
| 184.7  | 215.3  | 229.8  | 259.2  | 118.9  | 280.9  | 227.2  | 61.2   | 102.5  |
| 49.5   | 32.4   | 13.9   | 29.2   | 14.6   | 117.3  | 78.9   | 42.6   | 42.1   |
| 143.0  | 118.6  | 111.8  | 96.4   | 56.8   | 192.0  | 122.3  | 69.3   | 89.9   |
| 24.2   | 25.9   | 13.0   | 4.2    | 0.4    | 4.0    | 5.4    | 19.1   | 37.5   |
| 31.9   | 13.8   | 18.5   | 14.5   | 7.2    | 40.0   | 32.9   | 30.2   | 33.6   |
| 2.4    | 9.2    | 1.5    | 8.9    | 7.5    | 16.8   | 9.1    | 2.8    | 2.7    |
| 19.7   | 21.1   | 13.9   | 9.1    | 12.4   | 13.0   | 12.6   | 5.9    | 9.6    |
| 1.3    | 1.6    | 1.4    | 1.7    | 0.6    | 3.4    | 4.5    | 2.3    | 1.0    |
| 87.8   | 77.4   | 110.9  | 77.3   | 17.3   | 125.4  | 96.3   | 7.8    | 9.2    |
| 199.1  | 216.3  | 176.3  | 150.0  | 56.3   | 250.6  | 188.8  | 134.9  | 131.4  |
| 1.4    | 2.4    | 2.0    | 1.5    | 1.9    | 1.5    | 0.5    | 4.7    | 2.3    |
| 23.1   | 19.9   | 16.8   | 11.5   | 6.2    | 38.7   | 21.2   | 10.4   | 16.1   |
| 19.8   | 3.6    | 4.4    | 1.6    | 4.0    | 39.5   | 31.2   | 2.4    | 2.4    |
| 168.3  | 159.7  | 214.0  | 335.8  | 55.5   | 180.4  | 170.7  | 11.2   | 26.1   |
| 145.5  | 133.9  | 166.8  | 144.9  | 45.4   | 310.1  | 255.3  | 5.9    | 6.7    |
| 6.1    | 0.9    | 1.5    | 8.5    | 0.4    | 3.5    | 1.3    | 1.4    | 1.2    |
| 165.4  | 188.6  | 168.2  | 173.7  | 73.3   | 151.2  | 91.0   | 61.8   | 99.0   |
| 4478.7 | 3944.6 | 3286.6 | 2977.1 | 1407.4 | 5243.9 | 4594.1 | 1969.3 | 2383.8 |
| 12.6   | 14.8   | 13.6   | 9.3    | 6.4    | 4.8    | 3.9    | 3.1    | 4.4    |
| 8.2    | 1.8    | 4.1    | 6.1    | 8.1    | 4.9    | 14.6   | 2.6    | 34.4   |
| 71.6   | 59.7   | 76.2   | 65.4   | 23.0   | 49.6   | 40.1   | 5.3    | 7.9    |
| 33.0   | 40.3   | 36.1   | 27.4   | 11.3   | 51.2   | 41.5   | 12.5   | 8.1    |
| 60.5   | 31.1   | 33.7   | 33.5   | 17.4   | 112.0  | 70.3   | 13.4   | 32.7   |
| 500.2  | 481.0  | 439.0  | 387.8  | 71.5   | 491.3  | 220.5  | 191.3  | 274.3  |
| 9.2    | 15.1   | 15.1   | 2.7    | 4.8    | 27.3   | 11.7   | 5.7    | 21.9   |
| 142.8  | 140.4  | 121.1  | 102.8  | 41.6   | 111.0  | 66.2   | 61.1   | 48.3   |
| 225.2  | 218.2  | 354.1  | 562.0  | 120.3  | 347.6  | 349.5  | 17.5   | 19.3   |
| 94.6   | 69.1   | 80.9   | 79.1   | 20.4   | 166.4  | 110.9  | 47.9   | 107.2  |
| 49.4   | 42.4   | 62.7   | 51.4   | 12.5   | 99.0   | 83.9   | 33.9   | 64.1   |
| 46.6   | 35.7   | 47.0   | 41.3   | 17.3   | 44.3   | 29.8   | 47.9   | 50.1   |
| 219.7  | 215.5  | 274.0  | 251.4  | 92.9   | 377.9  | 192.8  | 14.4   | 34.9   |
| 10.5   | 12.5   | 4.3    | 3.1    | 4.6    | 41.7   | 12.0   | 4.3    | 14.4   |
| 4.6    | 1.2    | 1.6    | 0.6    | 2.2    | 13.0   | 3.3    | 1.3    | 7.3    |
| 139.3  | 156.4  | 105.7  | 66.2   | 57.6   | 301.9  | 174.6  | 70.0   | 76.6   |
| 6.8    | 2.8    | 1.8    | 2.5    | 4.4    | 1.3    | 3.5    | 0.9    | 1.5    |
| 6.8    | 2.5    | 7.8    | 1.5    | 0.4    | 13.7   | 18.0   | 7.5    | 2.1    |
| 118.3  | 124.1  | 123.7  | 86.6   | 44.5   | 219.7  | 128.7  | 20.0   | 24.7   |
| 85.7   | 71.7   | 56.3   | 53.0   | 30.5   | 130.0  | 65.4   | 29.7   | 30.4   |
| 1.4    | 3.4    | 1.5    | 3.5    | 3.3    | 27.9   | 26.6   | 4.6    | 0.3    |
| 2941.8 | 2687.6 | 3043.4 | 2533.2 | 1157.5 | 2139.9 | 1658.6 | 118.2  | 176.4  |
| 1862.5 | 1956.7 | 1788.2 | 1559.2 | 724.6  | 1786.2 | 1871.1 | 249.1  | 304.1  |
| 197.7  | 129.4  | 124.0  | 107.2  | 39.4   | 240.2  | 120.3  | 22.6   | 43.3   |
| 0.1    | 4.6    | 2.7    | 0.3    | 2.7    | 6.6    | 11.9   | 0.2    | 5.7    |
| 42.3   | 40.4   | 24.9   | 14.0   | 14.5   | 57.6   | 23.2   | 15.0   | 24.5   |
| 125.5  | 130.9  | 107.9  | 219.1  | 65.3   | 131.5  | 97.9   | 46.4   | 64.5   |
| 196.4  | 146.8  | 216.1  | 162.0  | 85.0   | 471.4  | 307.5  | 65.9   | 19.6   |
| 7.9    | 3.8    | 14.6   | 9.2    | 2.9    | 21.7   | 6.5    | 7.4    | 4.7    |
| 20.8   | 34.2   | 26.5   | 17.5   | 10.5   | 92.4   | 39.8   | 7.3    | 15.8   |
| 139.1  | 86.6   | 111.7  | 153.5  | 51.1   | 303.3  | 259.8  | 19.0   | 27.7   |
| 33.1   | 14.9   | 31.7   | 21.5   | 15.4   | 40.2   | 31.7   | 1.8    | 0.6    |
| 234.6  | 235.7  | 290.9  | 229.0  | 67.9   | 326.2  | 149.1  | 31.2   | 44.3   |
| 51.8   | 57.8   | 29.9   | 20.9   | 18.9   | 95.0   | 64.4   | 74.3   | 63.8   |

|        |        |        |        |       |        |        |       |        |
|--------|--------|--------|--------|-------|--------|--------|-------|--------|
| 234.1  | 246.2  | 231.0  | 376.2  | 161.2 | 544.5  | 563.4  | 32.2  | 51.8   |
| 31.3   | 27.4   | 15.4   | 20.1   | 6.5   | 32.5   | 28.1   | 3.8   | 2.8    |
| 73.5   | 92.7   | 63.2   | 32.4   | 33.5  | 36.0   | 14.5   | 11.2  | 9.8    |
| 6.2    | 2.4    | 3.1    | 3.2    | 1.8   | 2.8    | 8.4    | 7.2   | 0.5    |
| 162.5  | 127.3  | 147.1  | 116.3  | 38.8  | 165.6  | 94.3   | 159.9 | 179.9  |
| 68.2   | 61.3   | 81.3   | 40.8   | 12.8  | 154.9  | 37.6   | 4.6   | 16.7   |
| 46.3   | 52.8   | 47.9   | 43.1   | 17.4  | 1244.7 | 966.3  | 430.8 | 539.2  |
| 27.4   | 35.6   | 30.7   | 24.6   | 10.2  | 66.3   | 35.0   | 12.3  | 14.0   |
| 258.5  | 171.2  | 179.8  | 133.1  | 63.7  | 895.3  | 576.1  | 131.8 | 201.6  |
| 33.3   | 33.5   | 17.9   | 19.9   | 2.6   | 30.8   | 20.8   | 12.5  | 10.0   |
| 24.8   | 31.8   | 27.3   | 17.5   | 8.0   | 37.5   | 22.5   | 38.1  | 49.4   |
| 135.2  | 124.8  | 131.9  | 119.5  | 46.5  | 134.1  | 82.2   | 134.3 | 147.7  |
| 16.4   | 9.4    | 17.7   | 10.2   | 4.8   | 247.4  | 356.6  | 55.2  | 95.0   |
| 1.6    | 5.2    | 5.0    | 8.0    | 6.2   | 2.9    | 1.5    | 1.5   | 9.4    |
| 233.5  | 191.6  | 231.5  | 211.7  | 85.1  | 786.7  | 457.8  | 170.3 | 197.6  |
| 3023.6 | 2656.0 | 2488.4 | 2192.3 | 752.2 | 3122.1 | 2715.2 | 790.2 | 1023.1 |
| 21.6   | 37.9   | 37.7   | 46.3   | 10.8  | 14.3   | 3.7    | 13.6  | 32.0   |
| 127.2  | 104.8  | 87.1   | 46.2   | 34.4  | 136.7  | 101.2  | 13.9  | 20.8   |
| 21.9   | 3.0    | 9.1    | 4.2    | 7.2   | 16.5   | 6.9    | 10.9  | 12.7   |
| 379.2  | 307.2  | 339.7  | 338.1  | 108.8 | 230.2  | 168.5  | 42.4  | 49.3   |
| 40.1   | 33.5   | 33.0   | 28.5   | 18.8  | 75.5   | 67.3   | 4.0   | 19.1   |
| 156.6  | 136.3  | 130.9  | 212.4  | 89.4  | 180.9  | 131.6  | 40.3  | 66.6   |
| 57.2   | 59.2   | 67.3   | 45.9   | 26.4  | 52.3   | 42.0   | 100.9 | 121.3  |
| 13.9   | 15.1   | 10.8   | 5.5    | 8.4   | 17.3   | 14.4   | 30.3  | 47.8   |
| 51.0   | 55.4   | 40.5   | 30.8   | 20.9  | 36.6   | 20.4   | 98.0  | 115.5  |
| 0.8    | 10.3   | 10.9   | 6.4    | 3.8   | 18.7   | 19.0   | 6.4   | 4.5    |
| 21.3   | 31.7   | 55.5   | 64.3   | 22.0  | 46.2   | 31.8   | 8.3   | 15.4   |
| 639.9  | 650.5  | 508.5  | 689.7  | 221.4 | 746.0  | 555.9  | 140.1 | 201.0  |
| 22.4   | 3.4    | 7.6    | 3.2    | 11.3  | 33.5   | 17.2   | 3.1   | 5.6    |
| 82.5   | 85.8   | 80.3   | 118.2  | 24.2  | 219.0  | 129.3  | 22.8  | 35.1   |
| 346.7  | 401.9  | 330.8  | 247.6  | 172.4 | 792.6  | 456.9  | 133.4 | 191.3  |
| 30.8   | 38.8   | 30.1   | 58.0   | 8.1   | 89.0   | 66.5   | 0.6   | 1.2    |
| 29.4   | 29.1   | 33.6   | 19.0   | 8.9   | 46.2   | 27.9   | 40.7  | 43.9   |
| 18.6   | 22.7   | 16.2   | 13.6   | 5.1   | 88.1   | 43.0   | 122.2 | 103.5  |
| 303.1  | 256.8  | 247.1  | 237.2  | 74.5  | 234.4  | 184.6  | 182.9 | 276.5  |
| 72.0   | 51.1   | 60.1   | 51.5   | 19.1  | 47.1   | 30.2   | 18.0  | 28.9   |
| 19.5   | 8.4    | 10.3   | 17.2   | 1.6   | 26.2   | 20.5   | 2.3   | 2.0    |
| 14.1   | 13.9   | 11.3   | 12.9   | 7.6   | 18.4   | 12.9   | 15.1  | 24.9   |
| 86.8   | 67.4   | 93.8   | 80.9   | 27.3  | 122.0  | 59.0   | 33.5  | 36.1   |
| 14.8   | 6.7    | 7.9    | 0.8    | 2.1   | 11.7   | 0.4    | 1.3   | 10.2   |
| 15.7   | 6.9    | 10.6   | 5.3    | 4.3   | 15.1   | 10.0   | 14.0  | 9.0    |
| 53.9   | 24.1   | 25.5   | 10.5   | 13.0  | 96.5   | 76.7   | 16.4  | 6.8    |
| 82.6   | 84.6   | 90.2   | 57.8   | 23.5  | 223.4  | 136.5  | 10.4  | 15.2   |
| 37.2   | 21.0   | 34.7   | 23.3   | 11.4  | 109.6  | 99.0   | 136.1 | 185.9  |
| 312.2  | 303.6  | 399.8  | 367.3  | 126.3 | 299.6  | 234.3  | 49.0  | 64.1   |
| 18.9   | 11.6   | 8.8    | 15.6   | 6.1   | 20.9   | 3.6    | 2.8   | 16.8   |
| 11.3   | 11.1   | 15.1   | 7.6    | 4.1   | 4.8    | 0.9    | 20.4  | 1.4    |
| 0.8    | 1.6    | 0.5    | 0.3    | 0.4   | 143.6  | 124.8  | 0.7   | 1.0    |
| 0.8    | 0.2    | 5.9    | 0.3    | 1.5   | 0.6    | 0.8    | 4.4   | 0.6    |
| 338.2  | 314.2  | 245.2  | 126.4  | 70.4  | 1221.9 | 897.9  | 167.1 | 207.2  |
| 16.1   | 15.3   | 11.7   | 14.0   | 1.2   | 179.8  | 144.6  | 11.5  | 5.9    |
| 142.1  | 144.5  | 75.7   | 116.9  | 47.8  | 169.9  | 115.2  | 82.4  | 115.0  |
| 3.1    | 0.8    | 0.7    | 0.4    | 0.1   | 127.7  | 81.6   | 172.6 | 274.9  |

|        |        |        |        |       |        |        |       |       |
|--------|--------|--------|--------|-------|--------|--------|-------|-------|
| 18.0   | 34.5   | 23.2   | 33.6   | 11.5  | 8.3    | 9.5    | 21.8  | 20.1  |
| 4.5    | 4.8    | 12.0   | 4.2    | 3.1   | 17.3   | 18.9   | 4.6   | 2.2   |
| 1.8    | 0.9    | 1.8    | 1.0    | 0.7   | 1.6    | 1.4    | 1.3   | 2.6   |
| 13.9   | 20.4   | 15.1   | 3.9    | 7.9   | 39.1   | 39.4   | 6.4   | 2.2   |
| 40.8   | 53.0   | 53.0   | 38.6   | 26.6  | 146.1  | 123.9  | 99.5  | 63.4  |
| 91.3   | 80.9   | 78.6   | 61.1   | 25.8  | 131.8  | 95.4   | 81.7  | 84.0  |
| 10.9   | 7.5    | 5.7    | 10.4   | 3.7   | 1.0    | 1.2    | 1.6   | 5.0   |
| 7.6    | 5.3    | 15.1   | 5.1    | 3.9   | 24.2   | 25.0   | 1.2   | 5.1   |
| 34.5   | 23.0   | 26.8   | 18.0   | 15.1  | 146.5  | 93.8   | 30.3  | 38.0  |
| 343.4  | 322.2  | 301.5  | 292.1  | 140.8 | 540.4  | 346.9  | 112.9 | 127.8 |
| 22.3   | 27.9   | 23.5   | 40.2   | 6.6   | 43.3   | 31.3   | 12.0  | 7.4   |
| 25.8   | 16.9   | 12.1   | 10.3   | 1.6   | 19.2   | 15.1   | 6.5   | 9.4   |
| 26.8   | 25.9   | 50.1   | 41.4   | 11.0  | 25.0   | 20.9   | 4.8   | 4.9   |
| 3.6    | 3.9    | 1.8    | 2.7    | 0.9   | 4.0    | 2.6    | 2.4   | 2.7   |
| 420.6  | 429.5  | 434.6  | 362.3  | 130.2 | 736.0  | 587.8  | 162.4 | 204.9 |
| 34.3   | 56.8   | 37.7   | 52.7   | 16.7  | 79.5   | 100.9  | 9.8   | 14.0  |
| 1.1    | 4.5    | 1.6    | 6.3    | 4.2   | 314.0  | 186.8  | 1.8   | 9.6   |
| 21.3   | 26.4   | 24.2   | 25.1   | 9.8   | 50.5   | 64.0   | 35.7  | 38.8  |
| 23.4   | 5.7    | 6.7    | 3.8    | 0.3   | 1.2    | 14.7   | 9.5   | 3.3   |
| 886.4  | 851.9  | 723.8  | 663.6  | 267.0 | 1172.0 | 580.0  | 73.1  | 127.2 |
| 14.1   | 2.8    | 12.9   | 16.9   | 5.8   | 3.2    | 27.1   | 33.4  | 62.2  |
| 1.3    | 1.6    | 5.5    | 1.7    | 7.3   | 5.3    | 1.3    | 5.6   | 6.0   |
| 36.3   | 11.9   | 20.4   | 13.2   | 2.1   | 60.5   | 70.7   | 1.6   | 9.0   |
| 18.0   | 16.8   | 9.1    | 5.0    | 4.8   | 137.4  | 110.8  | 61.8  | 29.8  |
| 3.7    | 4.7    | 7.5    | 2.5    | 1.2   | 10.6   | 0.7    | 7.7   | 2.8   |
| 1768.6 | 1949.1 | 1764.4 | 1692.0 | 906.2 | 2895.9 | 2354.7 | 139.4 | 282.9 |
| 230.5  | 315.8  | 269.2  | 246.0  | 53.5  | 702.7  | 526.7  | 29.0  | 19.0  |
| 29.3   | 23.3   | 7.0    | 19.0   | 8.2   | 40.8   | 22.1   | 9.1   | 2.2   |
| 2.3    | 1.3    | 3.0    | 3.8    | 0.8   | 66.9   | 60.0   | 1.6   | 7.1   |
| 148.9  | 156.0  | 142.7  | 67.0   | 40.0  | 103.7  | 78.1   | 16.6  | 18.8  |
| 194.0  | 153.4  | 177.6  | 125.2  | 72.2  | 192.6  | 172.2  | 22.9  | 31.3  |
| 20.2   | 31.5   | 40.1   | 14.9   | 11.0  | 42.7   | 47.3   | 1.6   | 11.1  |
| 6.0    | 4.4    | 4.6    | 0.5    | 0.2   | 6.0    | 10.0   | 9.1   | 11.3  |
| 23.0   | 22.0   | 5.1    | 23.0   | 7.8   | 71.3   | 82.2   | 15.2  | 27.6  |
| 13.2   | 5.5    | 20.7   | 4.6    | 9.6   | 9.6    | 8.2    | 11.8  | 12.5  |
| 2.7    | 1.4    | 1.2    | 1.5    | 0.7   | 2.1    | 1.2    | 4.1   | 2.1   |
| 857.7  | 813.8  | 727.8  | 500.1  | 211.7 | 857.2  | 458.9  | 129.4 | 194.5 |
| 41.6   | 39.2   | 32.8   | 29.6   | 10.2  | 27.1   | 21.4   | 16.7  | 29.3  |
| 9.3    | 8.6    | 7.5    | 6.1    | 3.3   | 18.5   | 22.6   | 2.7   | 5.7   |
| 9.0    | 5.8    | 13.7   | 8.1    | 1.2   | 22.5   | 19.6   | 0.3   | 1.0   |
| 71.7   | 39.8   | 59.3   | 45.0   | 23.5  | 126.7  | 83.9   | 25.1  | 15.3  |
| 16.9   | 3.0    | 1.1    | 2.6    | 0.5   | 4.1    | 2.4    | 1.4   | 2.7   |
| 3.0    | 2.7    | 2.5    | 5.5    | 1.1   | 6.2    | 5.9    | 2.9   | 2.9   |
| 30.7   | 20.1   | 19.2   | 17.8   | 8.0   | 39.6   | 30.0   | 5.4   | 2.0   |
| 28.5   | 32.6   | 27.3   | 53.1   | 10.8  | 40.3   | 34.2   | 8.1   | 10.6  |
| 11.2   | 1.4    | 2.0    | 1.9    | 5.4   | 10.6   | 11.4   | 15.4  | 11.9  |
| 2.3    | 1.8    | 2.1    | 1.4    | 0.6   | 6.2    | 8.0    | 24.4  | 24.5  |
| 12.1   | 19.7   | 15.9   | 13.1   | 7.8   | 32.6   | 16.1   | 1.8   | 4.2   |
| 2.6    | 0.9    | 1.7    | 1.2    | 1.3   | 1.9    | 1.2    | 1.4   | 2.2   |
| 4.2    | 0.6    | 10.0   | 4.8    | 2.9   | 24.4   | 16.8   | 3.1   | 1.8   |
| 27.0   | 20.0   | 12.8   | 18.6   | 8.6   | 13.5   | 12.2   | 5.5   | 10.6  |
| 7.7    | 5.4    | 9.3    | 16.8   | 3.7   | 0.8    | 5.5    | 2.0   | 1.0   |
| 56.6   | 64.8   | 33.4   | 33.3   | 7.5   | 144.4  | 69.0   | 33.9  | 43.6  |

|        |        |        |        |        |        |        |       |       |
|--------|--------|--------|--------|--------|--------|--------|-------|-------|
| 0.5    | 6.0    | 0.8    | 3.4    | 0.4    | 13.1   | 10.5   | 0.6   | 4.0   |
| 90.4   | 99.5   | 118.5  | 102.3  | 26.5   | 99.9   | 91.1   | 12.6  | 15.8  |
| 19.2   | 21.0   | 27.6   | 20.3   | 9.1    | 33.5   | 25.5   | 1.9   | 10.2  |
| 2.0    | 1.1    | 1.1    | 1.2    | 0.4    | 2.6    | 2.1    | 1.2   | 1.4   |
| 16.8   | 27.5   | 17.1   | 15.3   | 10.3   | 31.1   | 33.2   | 16.5  | 14.7  |
| 2.2    | 8.9    | 2.6    | 0.7    | 0.2    | 1.6    | 1.5    | 1.2   | 9.6   |
| 176.3  | 196.7  | 206.9  | 132.3  | 64.0   | 269.9  | 222.6  | 56.1  | 69.6  |
| 37.7   | 18.1   | 4.9    | 16.6   | 8.9    | 11.1   | 19.0   | 6.2   | 23.9  |
| 0.7    | 1.3    | 7.7    | 3.7    | 2.0    | 0.7    | 12.6   | 17.0  | 9.5   |
| 40.3   | 51.0   | 31.3   | 31.5   | 13.5   | 91.8   | 62.8   | 21.5  | 48.0  |
| 7.7    | 4.0    | 8.5    | 16.0   | 8.9    | 7.4    | 3.9    | 7.3   | 7.2   |
| 4.8    | 4.2    | 4.4    | 3.7    | 0.9    | 3.4    | 4.1    | 14.7  | 37.5  |
| 15.4   | 10.9   | 9.8    | 13.4   | 1.3    | 295.8  | 310.2  | 24.4  | 19.8  |
| 1.3    | 0.9    | 1.8    | 0.3    | 3.6    | 1.2    | 1.2    | 0.6   | 7.8   |
| 188.9  | 161.3  | 140.3  | 114.7  | 48.0   | 138.5  | 93.2   | 37.5  | 48.4  |
| 29.7   | 23.7   | 32.3   | 23.8   | 10.1   | 29.0   | 6.6    | 148.8 | 217.8 |
| 394.3  | 310.5  | 279.5  | 212.9  | 48.9   | 699.6  | 334.9  | 106.6 | 128.5 |
| 2.4    | 1.2    | 2.8    | 1.6    | 0.5    | 2.5    | 1.1    | 2.6   | 2.3   |
| 16.6   | 20.2   | 17.3   | 9.5    | 2.5    | 53.6   | 46.4   | 15.1  | 34.2  |
| 40.6   | 22.3   | 24.6   | 29.3   | 21.2   | 161.4  | 136.5  | 11.1  | 10.5  |
| 223.8  | 199.7  | 215.8  | 125.2  | 49.1   | 118.8  | 67.4   | 117.6 | 149.4 |
| 7.4    | 1.2    | 5.8    | 8.4    | 0.9    | 11.8   | 15.8   | 11.4  | 13.3  |
| 1.9    | 2.5    | 11.0   | 1.6    | 6.5    | 4.8    | 4.0    | 7.6   | 10.3  |
| 22.6   | 2.4    | 12.2   | 5.4    | 1.5    | 4.5    | 10.4   | 12.9  | 2.0   |
| 3811.9 | 3451.9 | 3270.0 | 3366.3 | 2223.7 | 3109.2 | 2531.7 | 211.2 | 297.4 |
| 1.8    | 0.5    | 1.1    | 1.2    | 1.3    | 2.0    | 0.8    | 2.9   | 2.2   |
| 105.5  | 113.4  | 127.7  | 125.1  | 43.4   | 83.7   | 41.5   | 42.8  | 73.2  |
| 1.4    | 1.3    | 0.8    | 0.8    | 0.3    | 18.8   | 16.9   | 1.1   | 0.6   |
| 23.1   | 21.6   | 22.8   | 18.7   | 9.4    | 21.4   | 22.3   | 30.9  | 26.0  |
| 8.4    | 6.1    | 1.8    | 1.6    | 0.8    | 7.9    | 15.9   | 58.1  | 85.4  |
| 4.6    | 3.6    | 2.9    | 2.9    | 0.9    | 5.4    | 14.3   | 3.3   | 1.9   |
| 15.3   | 4.7    | 1.6    | 4.1    | 5.3    | 24.5   | 12.3   | 3.4   | 8.5   |
| 11.5   | 2.0    | 5.3    | 1.5    | 1.1    | 3.7    | 9.5    | 17.6  | 1.4   |
| 3.0    | 2.0    | 1.9    | 3.1    | 2.0    | 1.0    | 0.3    | 1.1   | 11.1  |
| 2.3    | 1.4    | 1.5    | 0.9    | 1.2    | 6.2    | 3.6    | 5.4   | 1.8   |
| 1086.4 | 1115.4 | 949.1  | 735.1  | 457.2  | 798.4  | 464.1  | 197.1 | 177.3 |
| 1.8    | 1.5    | 1.8    | 0.9    | 0.9    | 2.0    | 1.6    | 0.8   | 3.1   |
| 84.0   | 79.2   | 66.5   | 21.9   | 29.7   | 267.9  | 205.9  | 16.3  | 2.7   |
| 24.9   | 25.7   | 17.8   | 13.6   | 7.0    | 13.3   | 17.9   | 3.5   | 21.9  |
| 12.1   | 1.4    | 3.1    | 1.4    | 0.6    | 16.8   | 11.4   | 7.0   | 0.6   |
| 131.4  | 121.6  | 107.5  | 121.0  | 37.9   | 96.4   | 59.9   | 99.5  | 149.7 |
| 466.1  | 466.3  | 545.5  | 466.2  | 219.4  | 1147.8 | 699.9  | 182.3 | 241.9 |
| 12.9   | 10.9   | 16.2   | 13.4   | 5.3    | 28.8   | 23.8   | 5.8   | 7.3   |
| 2.1    | 7.6    | 4.6    | 2.0    | 0.8    | 0.7    | 1.4    | 3.0   | 0.8   |
| 52.0   | 43.1   | 59.8   | 53.1   | 17.2   | 39.1   | 33.5   | 19.9  | 10.9  |
| 8.9    | 10.5   | 2.9    | 2.4    | 2.2    | 2.5    | 6.4    | 1.4   | 1.4   |
| 261.6  | 212.5  | 214.9  | 172.5  | 48.0   | 477.9  | 278.2  | 379.4 | 461.4 |
| 45.5   | 58.7   | 64.2   | 42.4   | 17.5   | 168.1  | 86.9   | 41.4  | 68.4  |
| 7.6    | 7.4    | 1.5    | 7.2    | 0.9    | 73.4   | 26.4   | 25.1  | 16.8  |
| 24.4   | 7.4    | 21.7   | 6.7    | 4.0    | 16.6   | 7.2    | 3.2   | 3.6   |
| 143.4  | 83.1   | 104.9  | 93.4   | 40.3   | 335.1  | 288.1  | 101.1 | 91.4  |
| 87.7   | 55.3   | 81.9   | 66.8   | 19.0   | 64.7   | 34.6   | 4.2   | 3.5   |
| 79.3   | 84.1   | 95.2   | 64.9   | 18.2   | 86.6   | 63.8   | 33.3  | 21.5  |

|        |        |        |        |       |        |        |       |       |
|--------|--------|--------|--------|-------|--------|--------|-------|-------|
| 1789.6 | 1948.2 | 1599.6 | 1163.7 | 705.2 | 3074.6 | 2053.9 | 472.1 | 661.9 |
| 12.0   | 8.2    | 3.9    | 10.1   | 1.1   | 13.1   | 12.1   | 12.4  | 3.7   |
| 2.3    | 10.9   | 3.9    | 6.5    | 0.6   | 5.2    | 1.0    | 6.5   | 2.2   |
| 32.5   | 25.1   | 26.5   | 25.7   | 13.2  | 39.0   | 23.8   | 20.3  | 29.3  |
| 3.5    | 12.9   | 1.0    | 2.9    | 2.3   | 11.8   | 1.7    | 3.2   | 0.9   |
| 0.3    | 0.2    | 0.4    | 2.3    | 0.1   | 1.9    | 1.3    | 0.7   | 0.6   |
| 12.8   | 14.8   | 15.5   | 15.0   | 9.8   | 13.9   | 18.9   | 13.0  | 15.3  |
| 15.9   | 7.4    | 15.4   | 12.0   | 2.9   | 54.2   | 51.6   | 1.1   | 1.1   |
| 2.1    | 4.4    | 0.9    | 1.0    | 1.3   | 55.4   | 16.1   | 5.1   | 1.0   |
| 20.0   | 9.8    | 17.6   | 3.2    | 8.2   | 14.6   | 4.4    | 14.5  | 2.9   |
| 145.6  | 133.1  | 119.9  | 93.7   | 48.9  | 100.0  | 62.2   | 7.2   | 70.5  |
| 45.8   | 24.9   | 27.1   | 21.9   | 11.0  | 46.4   | 10.7   | 25.9  | 3.0   |
| 182.7  | 165.5  | 199.0  | 198.0  | 68.5  | 277.0  | 215.5  | 60.1  | 75.5  |
| 96.4   | 82.9   | 62.3   | 29.9   | 10.5  | 129.9  | 73.1   | 27.5  | 54.3  |
| 22.9   | 16.5   | 20.5   | 21.5   | 4.0   | 12.7   | 12.4   | 3.4   | 10.2  |
| 7.0    | 4.8    | 1.7    | 0.8    | 4.4   | 10.4   | 14.1   | 5.5   | 1.1   |
| 21.0   | 35.5   | 38.0   | 14.9   | 14.2  | 15.2   | 13.2   | 4.7   | 2.0   |
| 4.7    | 6.3    | 3.7    | 2.8    | 3.0   | 22.8   | 8.2    | 0.4   | 1.1   |
| 34.4   | 20.1   | 27.7   | 21.1   | 5.7   | 28.0   | 12.6   | 65.6  | 86.5  |
| 43.6   | 68.9   | 85.8   | 58.2   | 28.7  | 78.4   | 63.3   | 36.7  | 53.6  |
| 97.7   | 71.0   | 66.1   | 70.0   | 53.6  | 153.6  | 114.9  | 14.3  | 9.1   |
| 7.7    | 2.9    | 26.5   | 10.2   | 10.8  | 6.6    | 1.6    | 6.9   | 24.6  |
| 12.3   | 1.9    | 5.5    | 6.4    | 6.4   | 12.9   | 16.8   | 8.4   | 7.3   |
| 7.9    | 2.0    | 1.7    | 9.1    | 8.6   | 17.3   | 9.2    | 9.5   | 2.2   |
| 18.1   | 26.5   | 29.6   | 23.6   | 5.7   | 25.9   | 9.5    | 12.4  | 24.8  |
| 4.5    | 12.5   | 15.1   | 3.0    | 4.4   | 0.9    | 1.1    | 5.9   | 4.2   |
| 67.5   | 105.6  | 64.7   | 60.7   | 21.8  | 72.1   | 17.1   | 52.2  | 83.4  |
| 121.7  | 121.9  | 124.6  | 130.0  | 71.3  | 209.5  | 146.4  | 202.6 | 204.1 |
| 29.6   | 12.9   | 19.0   | 0.8    | 2.4   | 16.9   | 7.0    | 16.6  | 20.2  |
| 592.4  | 440.7  | 535.9  | 619.0  | 157.1 | 1152.7 | 907.5  | 231.3 | 260.6 |
| 2.2    | 0.6    | 1.8    | 5.2    | 0.4   | 10.1   | 13.0   | 1.3   | 1.8   |
| 27.3   | 43.8   | 20.3   | 9.9    | 14.8  | 127.0  | 109.6  | 4.7   | 10.7  |
| 3.9    | 6.4    | 7.7    | 1.4    | 0.4   | 2.5    | 1.2    | 0.2   | 0.3   |
| 8.5    | 1.6    | 1.9    | 5.8    | 0.7   | 21.3   | 11.0   | 1.6   | 0.7   |
| 15.4   | 14.2   | 2.6    | 3.3    | 6.7   | 13.5   | 3.3    | 2.2   | 4.4   |
| 27.5   | 41.6   | 36.8   | 23.0   | 12.3  | 22.7   | 24.4   | 0.7   | 0.3   |
| 52.1   | 49.9   | 30.2   | 32.1   | 9.8   | 16.9   | 16.6   | 7.8   | 3.4   |
| 74.8   | 62.1   | 79.9   | 103.7  | 31.5  | 153.1  | 70.1   | 11.7  | 28.8  |
| 2.1    | 5.9    | 1.2    | 5.0    | 2.3   | 24.4   | 36.1   | 6.0   | 0.2   |
| 9.6    | 8.5    | 2.9    | 1.6    | 0.6   | 4.9    | 2.5    | 2.0   | 2.9   |
| 22.8   | 14.0   | 18.3   | 14.8   | 8.5   | 18.1   | 17.7   | 6.0   | 7.2   |
| 30.1   | 36.9   | 29.7   | 16.4   | 16.8  | 27.3   | 17.3   | 19.4  | 30.6  |
| 73.5   | 59.5   | 69.2   | 50.7   | 32.9  | 279.9  | 214.6  | 69.2  | 72.3  |
| 22.4   | 25.0   | 26.5   | 21.4   | 5.1   | 23.2   | 13.1   | 16.5  | 5.1   |
| 10.9   | 2.2    | 14.9   | 9.2    | 0.4   | 22.4   | 1.6    | 3.7   | 5.5   |
| 28.4   | 19.8   | 26.9   | 5.8    | 4.1   | 219.3  | 163.9  | 2.9   | 14.2  |
| 5.0    | 1.2    | 1.6    | 1.9    | 1.2   | 4.1    | 2.7    | 6.0   | 4.5   |
| 17.3   | 10.7   | 12.7   | 16.3   | 8.6   | 6.4    | 5.9    | 7.1   | 7.5   |
| 30.7   | 52.5   | 19.1   | 12.1   | 10.9  | 12.3   | 1.5    | 0.8   | 0.8   |
| 57.1   | 55.7   | 65.8   | 78.9   | 22.3  | 72.5   | 36.1   | 44.5  | 64.4  |
| 5.8    | 0.6    | 6.8    | 6.0    | 6.5   | 2.4    | 1.8    | 7.7   | 2.1   |
| 60.6   | 83.0   | 49.3   | 31.1   | 19.6  | 19.9   | 17.2   | 24.2  | 21.1  |
| 56.6   | 71.7   | 49.8   | 38.8   | 15.8  | 26.5   | 26.6   | 15.4  | 13.0  |

|        |        |        |        |        |        |        |        |        |
|--------|--------|--------|--------|--------|--------|--------|--------|--------|
| 3.1    | 2.6    | 5.9    | 7.0    | 5.9    | 5.6    | 11.0   | 17.2   | 3.7    |
| 8.0    | 6.6    | 1.6    | 11.1   | 5.1    | 9.0    | 10.8   | 7.7    | 7.1    |
| 356.3  | 389.6  | 468.5  | 399.6  | 219.9  | 412.1  | 305.1  | 61.6   | 102.4  |
| 5131.5 | 4222.1 | 4153.0 | 2764.7 | 1572.2 | 5773.2 | 5173.1 | 1228.7 | 3083.1 |
| 13.4   | 17.3   | 11.3   | 15.3   | 4.7    | 89.8   | 31.9   | 5.5    | 11.6   |
| 24.2   | 13.0   | 14.8   | 10.3   | 9.7    | 88.0   | 34.7   | 3.7    | 4.7    |
| 868.2  | 578.4  | 642.2  | 623.3  | 181.4  | 670.2  | 419.3  | 252.3  | 263.8  |
| 13.7   | 4.0    | 10.7   | 11.0   | 8.9    | 8.0    | 7.7    | 8.8    | 10.1   |
| 131.0  | 134.4  | 200.0  | 173.6  | 50.6   | 314.7  | 174.7  | 18.4   | 16.0   |
| 26.8   | 16.1   | 19.4   | 4.9    | 7.1    | 2.4    | 7.2    | 24.2   | 13.4   |
| 11.8   | 26.6   | 21.0   | 20.2   | 5.9    | 7.0    | 0.3    | 10.1   | 1.0    |
| 266.2  | 310.5  | 246.9  | 354.2  | 128.8  | 135.2  | 86.7   | 109.2  | 99.6   |
| 8.0    | 6.5    | 12.3   | 1.7    | 2.5    | 2.8    | 20.4   | 3.9    | 12.0   |
| 291.9  | 326.1  | 277.4  | 200.6  | 131.0  | 993.7  | 843.4  | 108.6  | 170.0  |
| 360.0  | 319.8  | 300.1  | 210.5  | 116.7  | 942.9  | 615.9  | 72.7   | 109.2  |
| 4.4    | 9.7    | 13.0   | 6.5    | 0.9    | 17.1   | 17.9   | 6.0    | 8.4    |
| 9.0    | 19.2   | 17.7   | 19.6   | 1.5    | 11.8   | 26.3   | 9.0    | 19.0   |
| 1.8    | 9.2    | 9.7    | 1.7    | 1.4    | 2.8    | 5.7    | 2.6    | 2.4    |
| 715.8  | 475.3  | 481.6  | 116.4  | 134.2  | 2066.0 | 1340.9 | 560.4  | 711.7  |
| 50.7   | 49.7   | 59.1   | 24.3   | 12.4   | 115.7  | 51.1   | 5.1    | 0.9    |
| 18.4   | 4.3    | 22.1   | 11.3   | 2.3    | 47.1   | 11.0   | 16.8   | 42.2   |
| 9.9    | 0.8    | 12.0   | 0.4    | 1.7    | 1.4    | 6.7    | 7.2    | 4.9    |
| 18.0   | 4.4    | 5.6    | 3.1    | 1.9    | 12.5   | 1.9    | 2.1    | 10.0   |
| 31.1   | 24.1   | 19.2   | 14.3   | 2.0    | 114.9  | 71.1   | 46.8   | 56.6   |
| 183.7  | 159.7  | 169.5  | 140.1  | 48.3   | 275.7  | 126.2  | 60.9   | 81.5   |
| 94.1   | 86.6   | 110.3  | 90.6   | 28.9   | 182.0  | 137.7  | 6.8    | 21.9   |
| 5.9    | 4.6    | 1.2    | 0.4    | 0.5    | 12.2   | 5.5    | 5.3    | 1.1    |
| 140.3  | 135.9  | 135.4  | 122.6  | 27.3   | 94.0   | 54.8   | 32.6   | 48.3   |
| 58.4   | 42.1   | 36.5   | 43.9   | 18.2   | 44.3   | 34.5   | 2.0    | 3.6    |
| 15.3   | 8.8    | 7.2    | 11.2   | 5.8    | 23.1   | 19.8   | 2.2    | 8.4    |
| 141.9  | 150.5  | 198.5  | 233.8  | 106.6  | 188.3  | 136.5  | 90.4   | 62.4   |
| 2.3    | 1.3    | 4.1    | 0.7    | 5.4    | 14.8   | 0.8    | 15.7   | 1.9    |
| 7.5    | 11.6   | 1.2    | 7.1    | 1.4    | 2.7    | 18.9   | 3.1    | 1.1    |
| 26.9   | 16.9   | 23.9   | 17.5   | 4.8    | 37.5   | 9.9    | 41.6   | 39.4   |
| 18.4   | 3.9    | 16.9   | 20.7   | 4.5    | 41.4   | 37.1   | 25.1   | 36.8   |
| 3.5    | 5.2    | 16.8   | 5.7    | 4.2    | 19.8   | 8.9    | 7.2    | 7.4    |
| 10.9   | 1.6    | 0.9    | 1.0    | 4.8    | 2.4    | 1.3    | 10.8   | 16.4   |
| 35.5   | 13.1   | 23.8   | 14.1   | 2.9    | 19.2   | 14.7   | 23.8   | 38.7   |
| 21.2   | 11.3   | 14.8   | 8.4    | 0.8    | 8.6    | 16.4   | 23.5   | 16.4   |
| 1.5    | 0.4    | 0.6    | 3.7    | 3.0    | 3266.4 | 3163.1 | 5.6    | 3.7    |
| 50.9   | 61.3   | 60.0   | 45.3   | 11.1   | 40.0   | 18.5   | 23.6   | 51.4   |
| 13.9   | 19.0   | 12.8   | 18.3   | 8.0    | 39.1   | 19.9   | 9.7    | 9.6    |
| 1.0    | 0.9    | 1.3    | 7.1    | 0.5    | 7.8    | 1.0    | 1.9    | 7.4    |
| 2.2    | 0.8    | 1.4    | 2.2    | 5.0    | 2.1    | 1.0    | 1.2    | 0.9    |
| 10.2   | 13.5   | 18.2   | 9.7    | 8.9    | 12.2   | 20.0   | 7.9    | 17.7   |
| 11.5   | 1.8    | 4.9    | 12.0   | 1.5    | 9.3    | 17.4   | 13.0   | 2.4    |
| 0.5    | 0.8    | 1.8    | 8.2    | 3.1    | 2.0    | 0.3    | 0.8    | 3.0    |
| 9.5    | 17.1   | 25.1   | 16.7   | 6.3    | 15.9   | 6.6    | 3.6    | 7.3    |
| 4.3    | 13.5   | 1.9    | 5.2    | 0.8    | 2.8    | 1.1    | 12.5   | 8.2    |
| 10.7   | 9.3    | 0.4    | 2.3    | 0.8    | 7.4    | 4.1    | 5.9    | 7.0    |
| 5.6    | 8.4    | 11.8   | 4.2    | 2.6    | 6.2    | 4.4    | 1.5    | 7.2    |
| 73.0   | 51.9   | 35.0   | 29.5   | 7.8    | 147.3  | 67.1   | 34.6   | 66.5   |
| 18.5   | 11.1   | 11.7   | 13.7   | 8.3    | 42.5   | 16.4   | 1.8    | 6.5    |

|        |       |        |        |       |        |        |       |       |
|--------|-------|--------|--------|-------|--------|--------|-------|-------|
| 890.0  | 878.5 | 949.3  | 827.2  | 326.6 | 1967.2 | 1547.5 | 131.4 | 175.0 |
| 148.7  | 100.8 | 118.5  | 125.2  | 35.3  | 208.9  | 258.1  | 36.6  | 59.0  |
| 3.5    | 14.6  | 4.5    | 11.5   | 5.8   | 2.6    | 3.0    | 22.5  | 5.4   |
| 67.9   | 41.1  | 55.4   | 37.8   | 13.6  | 53.4   | 29.0   | 99.8  | 139.6 |
| 63.2   | 61.2  | 56.6   | 42.7   | 24.2  | 62.2   | 18.4   | 78.4  | 55.6  |
| 22.0   | 39.8  | 33.8   | 4.2    | 8.4   | 82.4   | 91.9   | 0.8   | 2.8   |
| 10.3   | 5.4   | 16.5   | 15.9   | 2.6   | 76.2   | 32.0   | 20.1  | 13.2  |
| 33.2   | 23.1  | 30.4   | 30.6   | 19.8  | 64.8   | 41.9   | 5.9   | 2.4   |
| 6.5    | 6.2   | 11.3   | 3.6    | 0.4   | 19.4   | 11.1   | 8.9   | 8.4   |
| 12.5   | 13.7  | 16.8   | 8.4    | 4.9   | 12.9   | 12.4   | 1.0   | 7.3   |
| 9.3    | 13.0  | 2.8    | 1.0    | 6.5   | 1.8    | 1.0    | 11.3  | 19.6  |
| 45.8   | 26.9  | 19.6   | 19.7   | 13.8  | 40.0   | 21.5   | 3.1   | 5.9   |
| 704.5  | 734.3 | 743.0  | 700.8  | 295.8 | 942.1  | 863.6  | 210.3 | 299.1 |
| 530.9  | 501.2 | 494.3  | 478.7  | 197.8 | 930.4  | 744.0  | 79.4  | 104.6 |
| 0.9    | 1.7   | 0.7    | 0.2    | 3.6   | 0.6    | 0.3    | 0.3   | 0.6   |
| 9.8    | 3.1   | 16.2   | 5.3    | 2.3   | 20.9   | 1.2    | 19.8  | 3.5   |
| 79.9   | 65.9  | 64.3   | 65.9   | 22.9  | 139.2  | 67.3   | 40.1  | 36.2  |
| 4.7    | 5.2   | 3.0    | 1.9    | 1.3   | 2.6    | 3.5    | 3.8   | 2.6   |
| 23.5   | 25.7  | 11.1   | 12.6   | 8.2   | 47.2   | 43.9   | 11.4  | 4.9   |
| 4.2    | 4.9   | 1.6    | 0.9    | 0.5   | 0.7    | 1.1    | 2.2   | 1.3   |
| 368.6  | 429.1 | 587.1  | 847.5  | 172.8 | 418.5  | 228.7  | 40.4  | 55.9  |
| 11.5   | 2.8   | 11.0   | 15.9   | 1.0   | 5.6    | 7.4    | 3.9   | 1.6   |
| 59.4   | 45.3  | 49.2   | 47.5   | 22.8  | 25.1   | 30.5   | 11.1  | 15.9  |
| 22.4   | 29.6  | 20.0   | 32.0   | 19.2  | 44.2   | 29.0   | 12.2  | 14.0  |
| 13.8   | 22.8  | 7.7    | 11.0   | 8.4   | 20.1   | 19.9   | 0.9   | 8.1   |
| 5.2    | 1.2   | 2.4    | 3.7    | 0.1   | 0.3    | 0.8    | 0.3   | 4.4   |
| 31.0   | 25.0  | 30.7   | 24.9   | 3.3   | 25.8   | 1.3    | 45.6  | 54.6  |
| 225.5  | 224.5 | 210.5  | 184.5  | 65.6  | 645.0  | 487.0  | 27.1  | 41.0  |
| 177.7  | 202.4 | 160.5  | 245.9  | 56.9  | 330.0  | 263.2  | 48.5  | 96.1  |
| 1.2    | 0.5   | 3.9    | 0.6    | 2.9   | 2.7    | 5.5    | 0.9   | 3.7   |
| 17.7   | 17.9  | 27.0   | 26.8   | 11.3  | 32.1   | 9.5    | 18.8  | 5.4   |
| 2.1    | 2.3   | 1.3    | 1.2    | 2.2   | 14.6   | 1.1    | 0.7   | 1.8   |
| 1.1    | 1.9   | 2.4    | 0.4    | 2.3   | 14.4   | 3.9    | 2.9   | 3.2   |
| 48.8   | 54.0  | 28.0   | 40.2   | 25.0  | 65.5   | 54.6   | 38.1  | 38.2  |
| 81.8   | 77.1  | 68.5   | 68.7   | 18.3  | 68.9   | 35.0   | 34.0  | 45.6  |
| 18.5   | 22.2  | 9.7    | 13.1   | 8.1   | 28.5   | 9.2    | 10.9  | 12.0  |
| 4.5    | 0.8   | 3.1    | 1.6    | 1.4   | 2.6    | 1.1    | 2.6   | 1.4   |
| 2.2    | 3.1   | 11.7   | 2.0    | 1.9   | 9.6    | 6.8    | 8.0   | 35.1  |
| 24.5   | 6.1   | 12.2   | 2.2    | 1.1   | 12.8   | 4.4    | 6.0   | 9.0   |
| 7.1    | 0.6   | 0.3    | 0.6    | 2.7   | 0.3    | 2.2    | 0.5   | 0.9   |
| 44.0   | 37.5  | 24.6   | 13.4   | 8.8   | 45.2   | 38.3   | 1.1   | 7.3   |
| 39.8   | 36.0  | 25.0   | 19.1   | 10.5  | 173.4  | 96.8   | 10.3  | 30.4  |
| 153.4  | 136.3 | 159.0  | 107.1  | 68.4  | 208.6  | 110.8  | 63.8  | 62.4  |
| 14.9   | 19.7  | 17.8   | 13.7   | 8.4   | 35.3   | 40.8   | 14.2  | 10.8  |
| 15.1   | 9.3   | 23.2   | 26.0   | 8.2   | 14.9   | 14.7   | 4.0   | 1.1   |
| 1084.4 | 704.4 | 1299.9 | 3129.1 | 514.8 | 2339.2 | 2038.6 | 69.2  | 53.5  |
| 3.8    | 1.0   | 1.4    | 1.6    | 0.5   | 1.8    | 0.6    | 2.1   | 1.5   |
| 8.3    | 3.0   | 5.1    | 3.7    | 2.8   | 7.9    | 3.8    | 2.4   | 1.4   |
| 32.7   | 39.9  | 32.9   | 29.2   | 13.4  | 236.7  | 74.8   | 81.2  | 125.2 |
| 117.9  | 139.9 | 135.7  | 119.9  | 35.9  | 110.8  | 68.2   | 34.6  | 42.5  |
| 6.6    | 5.4   | 6.8    | 6.2    | 4.3   | 7.8    | 8.0    | 1.6   | 1.9   |
| 40.1   | 23.7  | 12.8   | 21.1   | 14.6  | 36.2   | 40.1   | 23.0  | 27.8  |
| 2.7    | 6.9   | 13.2   | 1.4    | 3.6   | 14.2   | 11.8   | 2.7   | 3.1   |



|        |        |        |        |       |        |        |       |       |
|--------|--------|--------|--------|-------|--------|--------|-------|-------|
| 23.8   | 3.4    | 6.9    | 1.8    | 1.0   | 19.2   | 9.8    | 1.9   | 0.9   |
| 19.6   | 14.2   | 3.6    | 16.2   | 5.4   | 34.2   | 25.9   | 9.6   | 14.4  |
| 132.6  | 94.3   | 129.4  | 144.8  | 51.7  | 93.9   | 73.2   | 40.5  | 48.5  |
| 2.7    | 1.9    | 1.8    | 2.1    | 2.9   | 11.3   | 5.2    | 2.4   | 14.3  |
| 11.7   | 7.9    | 12.0   | 15.6   | 2.9   | 17.8   | 18.5   | 5.8   | 11.3  |
| 80.2   | 32.0   | 31.3   | 35.3   | 22.1  | 0.4    | 0.4    | 0.3   | 5.8   |
| 5.4    | 1.8    | 15.6   | 14.1   | 0.9   | 16.9   | 2.1    | 2.2   | 2.2   |
| 11.5   | 2.4    | 2.8    | 2.1    | 1.0   | 4.0    | 1.3    | 1.0   | 10.4  |
| 33.0   | 18.9   | 25.6   | 23.9   | 15.3  | 80.8   | 31.4   | 23.8  | 42.7  |
| 3.4    | 2.1    | 5.0    | 1.5    | 0.8   | 4.5    | 1.3    | 2.9   | 2.4   |
| 0.8    | 1.5    | 1.9    | 1.8    | 0.5   | 3.1    | 0.8    | 8.9   | 1.2   |
| 5.0    | 8.0    | 12.8   | 8.8    | 3.7   | 16.5   | 2.6    | 9.6   | 14.3  |
| 87.3   | 77.5   | 90.2   | 75.4   | 45.9  | 28.8   | 36.7   | 6.4   | 24.0  |
| 15.9   | 12.0   | 7.1    | 5.0    | 5.4   | 34.2   | 24.5   | 3.5   | 7.6   |
| 8.7    | 13.7   | 16.9   | 9.8    | 0.8   | 13.2   | 7.4    | 15.9  | 31.1  |
| 6.7    | 12.2   | 13.9   | 3.7    | 1.3   | 7.7    | 4.5    | 17.0  | 15.8  |
| 112.4  | 110.2  | 85.3   | 59.6   | 41.3  | 6.3    | 5.4    | 2.2   | 3.7   |
| 1.3    | 1.7    | 2.2    | 0.9    | 3.4   | 2.7    | 0.8    | 2.5   | 0.6   |
| 2.0    | 1.3    | 3.9    | 7.7    | 10.2  | 4.9    | 10.5   | 6.3   | 8.8   |
| 4.8    | 9.4    | 3.3    | 19.3   | 0.8   | 3.1    | 1.4    | 2.1   | 1.0   |
| 2.9    | 5.6    | 7.8    | 12.6   | 0.8   | 14.2   | 2.7    | 2.8   | 5.5   |
| 25.3   | 43.9   | 55.0   | 33.0   | 29.7  | 55.7   | 30.2   | 13.5  | 29.9  |
| 3.4    | 6.5    | 10.6   | 8.1    | 6.4   | 29.8   | 1.0    | 11.9  | 11.7  |
| 11.7   | 7.9    | 6.2    | 5.1    | 2.8   | 4.9    | 5.3    | 8.8   | 3.3   |
| 26.1   | 13.4   | 14.0   | 13.5   | 6.2   | 39.4   | 39.4   | 3.5   | 7.3   |
| 17.5   | 29.0   | 20.6   | 28.1   | 15.3  | 57.9   | 83.1   | 4.0   | 2.9   |
| 76.6   | 47.2   | 42.1   | 21.2   | 23.3  | 299.5  | 265.9  | 69.7  | 89.3  |
| 15.0   | 9.5    | 9.6    | 11.7   | 5.1   | 24.0   | 25.6   | 11.6  | 16.1  |
| 7.8    | 8.6    | 2.8    | 4.5    | 3.3   | 8.0    | 13.7   | 7.4   | 8.5   |
| 203.4  | 216.3  | 313.2  | 827.1  | 152.4 | 57.5   | 59.1   | 52.9  | 89.4  |
| 12.2   | 8.1    | 23.5   | 9.5    | 4.6   | 41.2   | 11.2   | 2.6   | 1.3   |
| 108.7  | 168.5  | 84.3   | 57.0   | 32.2  | 531.5  | 427.4  | 14.6  | 23.1  |
| 5.4    | 3.0    | 2.5    | 0.3    | 3.3   | 19.9   | 9.4    | 1.8   | 5.2   |
| 182.6  | 127.8  | 167.9  | 147.6  | 67.5  | 257.3  | 193.0  | 97.9  | 112.5 |
| 11.1   | 19.9   | 4.0    | 1.4    | 1.5   | 5.9    | 1.0    | 11.7  | 11.1  |
| 10.4   | 1.8    | 2.6    | 7.5    | 0.8   | 20.7   | 3.3    | 2.8   | 1.7   |
| 5.4    | 5.6    | 3.5    | 49.5   | 2.0   | 5.7    | 3.2    | 1.1   | 0.5   |
| 52.7   | 24.8   | 30.9   | 27.1   | 8.8   | 21.1   | 21.2   | 22.8  | 19.9  |
| 0.8    | 2.6    | 0.7    | 0.8    | 0.2   | 1.0    | 0.6    | 1.5   | 13.1  |
| 7.1    | 10.3   | 12.3   | 4.6    | 2.0   | 3.3    | 1.0    | 0.8   | 6.7   |
| 37.1   | 29.3   | 28.0   | 43.7   | 15.8  | 52.0   | 26.3   | 18.1  | 17.0  |
| 1.5    | 5.5    | 7.3    | 4.3    | 8.1   | 11.4   | 11.1   | 1.2   | 1.7   |
| 210.1  | 220.9  | 218.3  | 279.8  | 78.3  | 673.1  | 366.2  | 18.6  | 51.5  |
| 6.8    | 4.0    | 1.6    | 1.5    | 2.5   | 5.9    | 5.5    | 3.4   | 17.6  |
| 0.5    | 2.9    | 0.6    | 0.2    | 0.1   | 3.3    | 5.8    | 3.4   | 0.3   |
| 10.3   | 5.9    | 18.3   | 5.3    | 2.7   | 25.4   | 24.1   | 4.1   | 14.3  |
| 1388.5 | 1303.5 | 1210.6 | 947.9  | 504.4 | 1472.6 | 1319.8 | 334.8 | 367.3 |
| 180.8  | 167.3  | 151.2  | 162.5  | 69.4  | 429.9  | 302.5  | 73.5  | 131.1 |
| 123.1  | 109.0  | 110.6  | 106.8  | 34.9  | 177.0  | 109.4  | 250.9 | 457.5 |
| 1863.7 | 1872.8 | 1602.4 | 1299.8 | 775.1 | 1882.5 | 1375.2 | 474.7 | 534.1 |
| 3.5    | 0.9    | 8.1    | 3.1    | 4.6   | 3.9    | 8.0    | 1.2   | 2.2   |
| 200.7  | 182.2  | 236.3  | 167.5  | 70.4  | 117.5  | 105.8  | 42.4  | 57.6  |
| 8.2    | 1.7    | 8.3    | 3.0    | 4.8   | 1.3    | 0.6    | 0.3   | 6.7   |

|       |       |       |       |       |        |        |       |       |
|-------|-------|-------|-------|-------|--------|--------|-------|-------|
| 10.6  | 8.5   | 12.1  | 13.3  | 6.8   | 24.3   | 22.0   | 0.7   | 0.6   |
| 728.0 | 859.6 | 993.7 | 963.9 | 395.3 | 2253.5 | 1622.7 | 1.9   | 3.5   |
| 1.6   | 1.3   | 1.5   | 1.3   | 1.0   | 3.7    | 6.1    | 11.2  | 1.6   |
| 18.6  | 9.3   | 7.4   | 9.1   | 9.6   | 3.7    | 1.8    | 14.8  | 13.2  |
| 52.4  | 44.3  | 39.7  | 59.6  | 12.9  | 35.1   | 13.0   | 26.0  | 44.1  |
| 25.8  | 3.9   | 20.7  | 16.9  | 11.8  | 95.1   | 55.4   | 17.3  | 25.6  |
| 0.5   | 0.3   | 0.3   | 0.3   | 0.2   | 901.0  | 621.4  | 0.8   | 1.4   |
| 2.2   | 1.4   | 0.7   | 1.3   | 0.7   | 0.8    | 6.6    | 1.0   | 1.8   |
| 0.6   | 0.7   | 1.7   | 1.4   | 0.8   | 8.8    | 1.6    | 2.8   | 0.8   |
| 5.8   | 16.4  | 9.1   | 2.1   | 5.0   | 5.2    | 0.5    | 3.1   | 7.7   |
| 4.1   | 1.8   | 1.8   | 1.5   | 2.5   | 4.3    | 1.2    | 1.4   | 7.3   |
| 3.0   | 1.0   | 1.6   | 1.1   | 4.1   | 11.7   | 6.3    | 1.5   | 1.8   |
| 1.4   | 0.4   | 1.1   | 0.6   | 1.0   | 10.6   | 0.4    | 0.6   | 0.3   |
| 3.4   | 5.6   | 2.0   | 7.2   | 0.5   | 57.0   | 57.6   | 127.0 | 208.8 |
| 14.2  | 24.2  | 17.3  | 6.8   | 2.1   | 18.7   | 14.4   | 23.5  | 18.8  |
| 1.3   | 2.6   | 2.2   | 2.7   | 8.2   | 8.9    | 3.2    | 2.0   | 2.6   |
| 403.5 | 370.1 | 636.8 | 813.4 | 254.9 | 3325.6 | 2015.0 | 265.6 | 420.8 |
| 0.4   | 2.1   | 3.3   | 2.5   | 4.0   | 1.2    | 0.0    | 0.2   | 0.3   |
| 182.5 | 139.1 | 125.6 | 106.6 | 23.4  | 189.8  | 78.3   | 93.5  | 120.2 |
| 15.9  | 20.0  | 14.0  | 18.5  | 13.0  | 33.4   | 17.5   | 1.3   | 7.9   |
| 18.3  | 12.8  | 6.4   | 14.7  | 1.9   | 1.9    | 7.7    | 16.8  | 18.8  |
| 37.7  | 33.0  | 10.7  | 18.2  | 13.7  | 61.9   | 39.8   | 16.5  | 25.7  |
| 0.1   | 0.2   | 2.0   | 0.3   | 0.2   | 4.0    | 2.6    | 0.6   | 1.2   |
| 2.4   | 9.5   | 5.3   | 9.6   | 5.4   | 14.3   | 4.5    | 6.3   | 9.5   |
| 2.5   | 1.5   | 1.6   | 0.8   | 1.0   | 2.3    | 3.2    | 1.0   | 1.7   |
| 16.9  | 12.3  | 5.1   | 7.6   | 1.5   | 13.1   | 6.2    | 1.8   | 0.8   |
| 6.3   | 5.9   | 5.7   | 7.6   | 1.6   | 17.7   | 2.6    | 8.1   | 4.4   |
| 8.0   | 2.1   | 2.2   | 5.8   | 4.4   | 14.8   | 13.2   | 2.3   | 2.8   |
| 26.8  | 14.5  | 13.3  | 20.4  | 11.5  | 126.3  | 172.6  | 9.4   | 3.5   |
| 17.7  | 16.0  | 20.6  | 11.2  | 6.1   | 9.2    | 1.1    | 8.7   | 3.3   |
| 11.0  | 6.5   | 3.8   | 1.5   | 4.4   | 20.7   | 12.6   | 16.8  | 15.8  |
| 17.1  | 6.4   | 11.5  | 5.7   | 5.3   | 0.6    | 11.4   | 13.4  | 18.8  |
| 779.0 | 747.5 | 795.9 | 714.8 | 272.6 | 2428.0 | 2038.4 | 27.7  | 34.5  |
| 44.7  | 25.9  | 36.3  | 25.6  | 11.0  | 73.3   | 59.5   | 22.1  | 36.5  |
| 2.5   | 0.6   | 15.6  | 8.6   | 0.9   | 7.3    | 3.0    | 3.5   | 1.3   |
| 43.4  | 40.6  | 43.7  | 25.6  | 14.7  | 66.3   | 58.5   | 16.7  | 23.9  |
| 25.9  | 28.6  | 30.6  | 15.9  | 7.4   | 35.6   | 19.1   | 25.5  | 25.2  |
| 6.2   | 4.5   | 9.3   | 9.5   | 3.7   | 21.2   | 20.0   | 6.6   | 3.9   |
| 5.1   | 8.4   | 8.1   | 12.1  | 5.8   | 1.6    | 6.4    | 8.8   | 0.3   |
| 42.1  | 37.2  | 44.0  | 24.2  | 10.3  | 42.7   | 16.3   | 7.2   | 13.5  |
| 19.9  | 12.1  | 18.9  | 14.8  | 10.3  | 13.8   | 22.7   | 8.1   | 17.2  |
| 613.4 | 656.4 | 741.9 | 692.7 | 257.6 | 1298.4 | 1071.5 | 95.8  | 77.4  |
| 8.2   | 15.1  | 15.8  | 2.9   | 2.7   | 15.7   | 13.2   | 11.0  | 4.0   |
| 6.4   | 21.0  | 5.6   | 11.2  | 9.9   | 11.1   | 2.9    | 6.8   | 8.9   |
| 14.6  | 13.6  | 10.7  | 13.1  | 5.1   | 29.8   | 30.7   | 2.6   | 8.4   |
| 4.6   | 2.5   | 1.9   | 1.7   | 0.9   | 5.8    | 2.3    | 1.9   | 2.0   |
| 8.0   | 4.6   | 2.3   | 3.1   | 6.8   | 11.9   | 7.2    | 5.5   | 16.2  |
| 2.3   | 0.7   | 4.4   | 1.1   | 1.2   | 2.6    | 2.9    | 0.6   | 0.5   |
| 93.1  | 88.7  | 71.5  | 32.8  | 28.4  | 25.9   | 9.0    | 7.3   | 4.7   |
| 1.9   | 2.3   | 3.1   | 1.4   | 0.4   | 2.0    | 0.7    | 1.2   | 0.6   |
| 3.5   | 1.7   | 1.8   | 0.8   | 0.4   | 8.9    | 3.4    | 51.3  | 49.6  |
| 43.0  | 45.0  | 34.8  | 36.8  | 14.3  | 0.4    | 3.0    | 3.4   | 8.7   |
| 23.4  | 12.3  | 14.4  | 2.6   | 7.6   | 20.2   | 11.0   | 3.7   | 8.8   |

|        |        |        |        |        |        |        |        |        |
|--------|--------|--------|--------|--------|--------|--------|--------|--------|
| 163.0  | 131.9  | 172.3  | 179.2  | 80.9   | 142.0  | 101.8  | 34.2   | 53.7   |
| 7.9    | 7.3    | 14.7   | 6.7    | 0.8    | 4.6    | 8.5    | 2.3    | 17.2   |
| 18.6   | 17.0   | 19.3   | 25.6   | 8.6    | 23.5   | 21.9   | 1.0    | 2.4    |
| 1.1    | 10.5   | 0.4    | 4.0    | 0.4    | 15.9   | 13.2   | 1.0    | 1.4    |
| 4.1    | 2.7    | 5.3    | 2.8    | 1.3    | 11.6   | 5.9    | 4.2    | 1.8    |
| 4.0    | 2.2    | 2.5    | 2.3    | 1.5    | 3.8    | 2.7    | 2.8    | 2.1    |
| 17.4   | 20.5   | 14.3   | 14.8   | 8.8    | 14.0   | 11.8   | 9.1    | 9.1    |
| 4.7    | 2.7    | 3.5    | 13.0   | 0.4    | 25.8   | 15.6   | 1.7    | 6.0    |
| 37.6   | 26.5   | 37.5   | 18.3   | 18.1   | 44.3   | 58.1   | 3.7    | 19.7   |
| 5390.1 | 5180.0 | 4722.0 | 4408.1 | 2108.1 | 7259.1 | 5259.5 | 2058.9 | 2799.9 |
| 442.6  | 459.7  | 510.2  | 695.4  | 234.1  | 317.0  | 190.0  | 119.1  | 173.9  |
| 37.3   | 15.7   | 33.7   | 31.6   | 9.5    | 39.0   | 9.4    | 43.8   | 27.3   |
| 247.3  | 224.2  | 215.1  | 225.4  | 75.6   | 421.5  | 268.7  | 20.7   | 21.4   |
| 4.4    | 1.4    | 2.0    | 1.7    | 0.7    | 3.1    | 4.1    | 0.8    | 2.4    |
| 19.9   | 13.2   | 11.6   | 8.3    | 2.9    | 20.2   | 11.5   | 1.8    | 7.3    |
| 4.1    | 0.4    | 1.9    | 0.3    | 2.6    | 18.3   | 23.3   | 3.4    | 1.8    |
| 7.0    | 0.3    | 0.3    | 0.6    | 2.4    | 1.1    | 0.6    | 8.2    | 2.6    |
| 670.3  | 684.9  | 652.1  | 457.7  | 221.4  | 1624.3 | 1162.6 | 148.2  | 233.2  |
| 1.8    | 0.6    | 1.0    | 1.2    | 0.5    | 2.3    | 1.3    | 2.0    | 1.7    |
| 21.1   | 10.0   | 20.9   | 10.6   | 6.1    | 25.7   | 17.8   | 5.7    | 13.2   |
| 1.8    | 3.9    | 5.0    | 4.8    | 1.0    | 4.6    | 4.4    | 3.4    | 2.4    |
| 10.5   | 0.7    | 6.9    | 2.4    | 2.8    | 18.7   | 5.1    | 9.1    | 5.0    |
| 24.5   | 22.2   | 24.0   | 27.8   | 9.7    | 52.8   | 43.2   | 5.6    | 0.8    |
| 1249.0 | 1127.4 | 1214.3 | 1280.1 | 566.6  | 2002.2 | 1632.8 | 187.4  | 263.1  |
| 0.1    | 4.7    | 0.2    | 3.8    | 2.8    | 50.4   | 28.1   | 2.0    | 1.5    |
| 1.5    | 0.7    | 2.3    | 2.4    | 0.9    | 3.2    | 1.4    | 2.3    | 8.7    |
| 15.5   | 1.3    | 10.1   | 6.6    | 2.8    | 4.9    | 1.3    | 7.6    | 12.6   |
| 17.8   | 8.0    | 10.8   | 8.9    | 2.2    | 14.2   | 24.2   | 5.8    | 6.2    |
| 1.9    | 3.6    | 1.2    | 0.6    | 0.5    | 8.0    | 0.6    | 2.6    | 3.4    |
| 158.7  | 154.5  | 131.6  | 75.0   | 36.1   | 631.8  | 315.8  | 23.6   | 53.6   |
| 32.6   | 22.0   | 28.6   | 11.3   | 13.2   | 37.3   | 28.1   | 31.7   | 56.3   |
| 234.9  | 149.0  | 181.1  | 126.3  | 93.3   | 347.2  | 356.3  | 31.1   | 56.8   |
| 10.9   | 13.7   | 6.3    | 5.9    | 0.9    | 3.3    | 4.8    | 17.1   | 13.0   |
| 10.3   | 4.0    | 3.7    | 2.1    | 1.0    | 4.7    | 1.6    | 2.9    | 14.6   |
| 48.7   | 32.2   | 43.0   | 25.8   | 17.2   | 61.3   | 30.7   | 32.7   | 38.5   |
| 9.3    | 1.7    | 13.5   | 9.8    | 4.7    | 8.1    | 4.4    | 16.9   | 7.0    |
| 2.4    | 8.5    | 12.4   | 1.9    | 1.5    | 2.1    | 4.0    | 10.2   | 11.8   |
| 24.4   | 28.5   | 10.9   | 21.9   | 1.4    | 6.0    | 6.3    | 9.4    | 18.1   |
| 17.9   | 1.8    | 11.2   | 5.7    | 4.3    | 19.2   | 12.9   | 2.9    | 3.5    |
| 1.9    | 2.4    | 4.2    | 7.2    | 3.6    | 9.4    | 0.5    | 1.2    | 5.0    |
| 1.5    | 0.6    | 0.4    | 1.0    | 0.5    | 5.3    | 8.4    | 0.6    | 1.8    |
| 28.1   | 19.4   | 15.4   | 24.4   | 10.5   | 184.8  | 100.0  | 23.3   | 29.2   |
| 18.4   | 17.2   | 18.8   | 23.0   | 8.8    | 21.0   | 19.7   | 8.6    | 12.6   |
| 25.0   | 27.4   | 23.7   | 20.3   | 11.8   | 7.9    | 20.2   | 6.6    | 3.4    |
| 2.9    | 7.4    | 0.9    | 0.4    | 0.5    | 1.7    | 2.8    | 0.7    | 0.9    |
| 34.3   | 33.5   | 28.4   | 17.5   | 13.9   | 109.9  | 44.8   | 17.0   | 20.8   |
| 1.5    | 3.6    | 4.6    | 1.1    | 0.8    | 4.8    | 14.5   | 2.4    | 30.7   |
| 41.9   | 32.9   | 28.6   | 56.9   | 20.9   | 166.4  | 129.3  | 1.2    | 14.1   |
| 8.6    | 0.9    | 8.8    | 7.1    | 3.4    | 20.4   | 1.3    | 5.8    | 6.2    |
| 8.7    | 5.5    | 1.3    | 5.2    | 0.3    | 6.5    | 3.5    | 1.2    | 0.3    |
| 23.7   | 20.8   | 17.5   | 12.0   | 11.4   | 18.4   | 13.0   | 3.8    | 8.2    |
| 6.7    | 11.9   | 2.2    | 9.9    | 2.5    | 8.8    | 9.7    | 10.2   | 4.8    |
| 1.7    | 2.0    | 4.1    | 4.2    | 5.4    | 17.8   | 49.6   | 2.5    | 0.8    |

|        |        |        |        |        |        |        |       |       |
|--------|--------|--------|--------|--------|--------|--------|-------|-------|
| 0.7    | 4.3    | 1.1    | 1.0    | 0.5    | 20.0   | 20.8   | 0.5   | 0.8   |
| 3.9    | 2.9    | 4.6    | 2.2    | 1.3    | 6.2    | 6.3    | 2.3   | 3.5   |
| 10.4   | 12.9   | 8.8    | 18.6   | 10.3   | 38.7   | 23.0   | 12.6  | 1.6   |
| 12.2   | 15.1   | 14.4   | 11.4   | 3.8    | 7.3    | 19.7   | 1.1   | 11.5  |
| 3.4    | 11.4   | 18.6   | 3.5    | 0.7    | 33.9   | 15.1   | 22.8  | 4.8   |
| 26.5   | 16.5   | 1.6    | 9.3    | 10.4   | 28.9   | 19.2   | 22.7  | 10.5  |
| 95.8   | 115.6  | 111.3  | 95.8   | 34.7   | 216.1  | 130.9  | 45.0  | 36.2  |
| 11.9   | 13.9   | 14.5   | 15.9   | 8.2    | 41.6   | 28.0   | 2.8   | 1.2   |
| 3.0    | 2.8    | 2.2    | 0.6    | 0.9    | 14.0   | 28.7   | 3.4   | 5.0   |
| 371.3  | 237.1  | 248.3  | 134.0  | 119.3  | 1301.5 | 803.6  | 206.5 | 271.0 |
| 2.0    | 1.1    | 0.5    | 4.4    | 0.7    | 3.9    | 1.2    | 1.3   | 1.5   |
| 0.5    | 1.9    | 8.7    | 3.5    | 0.7    | 3.7    | 8.0    | 3.6   | 3.3   |
| 4.2    | 0.6    | 0.7    | 0.7    | 1.1    | 6.7    | 1.2    | 15.3  | 6.4   |
| 5.6    | 14.7   | 14.9   | 4.8    | 1.7    | 27.9   | 2.2    | 11.2  | 3.7   |
| 36.7   | 44.7   | 48.1   | 32.1   | 11.3   | 95.7   | 44.8   | 39.3  | 31.8  |
| 3.5    | 5.6    | 2.0    | 1.9    | 0.2    | 2.5    | 1.4    | 2.9   | 1.8   |
| 13.9   | 1.9    | 9.5    | 9.5    | 4.3    | 15.9   | 2.9    | 14.3  | 19.7  |
| 37.3   | 65.2   | 44.0   | 27.2   | 24.3   | 129.9  | 55.9   | 35.4  | 56.8  |
| 13.9   | 5.5    | 12.1   | 5.3    | 2.6    | 11.4   | 0.7    | 4.9   | 8.4   |
| 43.6   | 80.4   | 72.0   | 80.9   | 12.4   | 35.4   | 8.0    | 5.8   | 7.1   |
| 15.3   | 17.0   | 29.3   | 10.8   | 5.9    | 16.0   | 36.0   | 15.6  | 38.3  |
| 199.1  | 137.3  | 194.3  | 205.7  | 40.4   | 330.3  | 226.2  | 59.7  | 136.3 |
| 238.9  | 140.9  | 186.1  | 376.9  | 99.4   | 522.2  | 705.4  | 31.5  | 32.8  |
| 40.0   | 19.6   | 27.4   | 19.1   | 14.3   | 33.8   | 45.0   | 14.2  | 25.8  |
| 2.2    | 1.7    | 0.7    | 1.0    | 1.0    | 1.9    | 1.0    | 1.4   | 5.2   |
| 12.7   | 1.9    | 9.6    | 2.5    | 2.9    | 3.2    | 1.2    | 10.9  | 4.9   |
| 895.8  | 739.8  | 808.8  | 763.4  | 246.2  | 1520.2 | 914.6  | 328.2 | 360.5 |
| 9.0    | 1.8    | 10.6   | 8.8    | 4.2    | 10.1   | 7.0    | 5.5   | 5.9   |
| 0.3    | 0.4    | 0.5    | 0.3    | 0.2    | 10.4   | 2.5    | 0.7   | 0.6   |
| 3154.2 | 3258.9 | 3441.1 | 3456.8 | 1633.5 | 5782.6 | 3826.0 | 600.2 | 960.8 |
| 4.7    | 0.4    | 6.4    | 3.7    | 0.2    | 1.3    | 7.0    | 0.3   | 1.0   |
| 19.4   | 17.9   | 11.8   | 13.5   | 13.7   | 21.8   | 21.3   | 36.9  | 38.7  |
| 4.1    | 17.2   | 20.8   | 14.0   | 7.0    | 33.9   | 19.8   | 6.5   | 2.8   |
| 1.0    | 0.8    | 1.4    | 0.8    | 0.4    | 1.9    | 1.8    | 1.3   | 3.6   |
| 299.4  | 266.7  | 215.7  | 175.5  | 91.9   | 420.2  | 257.0  | 92.0  | 162.4 |
| 197.1  | 191.0  | 171.5  | 197.8  | 44.7   | 474.3  | 234.5  | 63.1  | 107.8 |
| 15.9   | 7.2    | 6.8    | 13.6   | 3.2    | 38.6   | 37.2   | 3.7   | 2.4   |
| 4.8    | 12.1   | 9.6    | 1.3    | 6.3    | 30.9   | 31.7   | 7.3   | 1.4   |
| 30.0   | 29.8   | 33.9   | 22.4   | 17.5   | 52.0   | 48.5   | 11.3  | 23.4  |
| 4.1    | 0.6    | 6.2    | 5.3    | 3.1    | 1.3    | 3.2    | 4.2   | 3.0   |
| 3.1    | 6.5    | 0.5    | 2.1    | 0.2    | 28.1   | 28.5   | 9.0   | 4.5   |
| 2.6    | 3.1    | 1.5    | 9.0    | 3.4    | 35.4   | 24.5   | 9.2   | 0.7   |
| 27.5   | 31.2   | 16.0   | 13.7   | 14.2   | 732.0  | 527.0  | 19.2  | 30.7  |
| 3.3    | 2.0    | 1.4    | 0.9    | 1.2    | 12.4   | 6.7    | 19.2  | 3.0   |
| 541.5  | 610.9  | 578.8  | 568.2  | 199.5  | 520.1  | 259.2  | 30.8  | 48.6  |
| 3.5    | 11.3   | 12.6   | 4.1    | 2.6    | 20.9   | 9.3    | 20.6  | 8.4   |
| 18.7   | 2.4    | 12.7   | 3.1    | 2.4    | 24.4   | 6.9    | 6.5   | 14.6  |
| 7.2    | 11.3   | 0.9    | 5.2    | 2.3    | 13.3   | 14.8   | 8.3   | 6.2   |
| 9.3    | 4.7    | 12.2   | 0.3    | 0.6    | 5.8    | 6.9    | 1.0   | 7.9   |
| 2.4    | 7.8    | 2.8    | 6.0    | 3.6    | 1.6    | 11.5   | 6.8   | 5.0   |
| 2.3    | 0.8    | 8.5    | 1.1    | 1.0    | 8.7    | 2.4    | 5.6   | 10.1  |
| 35.3   | 32.3   | 40.6   | 23.8   | 13.9   | 53.0   | 60.8   | 3.3   | 3.8   |
| 254.8  | 193.1  | 238.0  | 370.3  | 62.8   | 192.9  | 140.3  | 17.0  | 36.8  |

|       |       |       |       |       |       |       |       |       |
|-------|-------|-------|-------|-------|-------|-------|-------|-------|
| 9.2   | 5.3   | 2.0   | 9.1   | 5.1   | 1.0   | 9.0   | 1.6   | 1.3   |
| 4.4   | 8.7   | 13.2  | 4.8   | 6.7   | 3.7   | 3.8   | 22.0  | 13.8  |
| 9.2   | 6.8   | 24.8  | 3.7   | 4.1   | 7.6   | 6.9   | 7.7   | 15.6  |
| 8.7   | 1.4   | 1.4   | 1.8   | 0.3   | 1.8   | 4.3   | 1.2   | 1.9   |
| 1.3   | 2.5   | 1.4   | 2.0   | 0.7   | 6.8   | 1.7   | 4.4   | 6.5   |
| 1.2   | 6.6   | 3.9   | 0.4   | 0.8   | 2.1   | 1.5   | 5.8   | 5.6   |
| 56.9  | 80.9  | 58.9  | 65.9  | 16.3  | 47.1  | 33.7  | 44.3  | 69.8  |
| 6.2   | 5.8   | 5.1   | 3.0   | 1.2   | 3.0   | 4.6   | 7.6   | 4.9   |
| 12.2  | 6.8   | 7.8   | 1.1   | 6.5   | 14.0  | 13.0  | 1.0   | 2.9   |
| 26.9  | 16.8  | 15.3  | 24.3  | 4.4   | 11.4  | 8.2   | 5.7   | 16.5  |
| 3.5   | 1.7   | 3.3   | 0.8   | 0.6   | 1.9   | 0.8   | 1.0   | 0.8   |
| 3.2   | 6.0   | 6.9   | 8.8   | 1.7   | 19.7  | 1.5   | 17.9  | 14.9  |
| 18.2  | 5.0   | 19.8  | 1.7   | 2.4   | 7.3   | 3.5   | 13.4  | 21.1  |
| 2.9   | 1.7   | 2.4   | 1.1   | 1.0   | 6.8   | 2.9   | 2.6   | 2.3   |
| 0.7   | 1.3   | 2.5   | 0.9   | 0.5   | 5.6   | 23.4  | 0.3   | 0.5   |
| 22.2  | 20.1  | 10.2  | 28.3  | 15.4  | 39.8  | 41.1  | 1.6   | 2.4   |
| 3.6   | 1.8   | 13.6  | 0.9   | 0.8   | 10.2  | 8.5   | 6.9   | 17.1  |
| 15.8  | 4.9   | 8.1   | 7.3   | 5.4   | 21.7  | 9.5   | 15.6  | 8.7   |
| 5.6   | 3.0   | 9.4   | 8.2   | 0.8   | 21.4  | 8.2   | 13.3  | 11.0  |
| 271.5 | 257.3 | 269.1 | 242.8 | 151.3 | 312.4 | 236.8 | 282.9 | 332.9 |
| 15.5  | 11.5  | 7.0   | 9.5   | 11.5  | 14.7  | 7.1   | 25.9  | 21.8  |
| 5.8   | 15.5  | 6.6   | 3.4   | 2.4   | 10.6  | 0.9   | 13.3  | 6.0   |
| 10.8  | 11.5  | 13.6  | 8.8   | 3.0   | 17.5  | 8.9   | 23.5  | 10.1  |
| 10.0  | 5.0   | 13.1  | 12.8  | 6.1   | 22.2  | 13.1  | 19.1  | 21.4  |
| 3.0   | 2.0   | 1.2   | 2.1   | 0.7   | 1.4   | 1.8   | 2.0   | 2.6   |
| 8.5   | 15.2  | 19.8  | 15.9  | 7.0   | 4.4   | 17.5  | 2.8   | 12.0  |
| 34.3  | 37.1  | 23.0  | 7.3   | 13.6  | 21.1  | 19.8  | 52.2  | 46.5  |
| 23.1  | 15.9  | 12.3  | 13.6  | 14.5  | 8.6   | 18.1  | 9.4   | 5.6   |
| 3.1   | 0.5   | 7.8   | 4.1   | 3.0   | 8.6   | 4.7   | 2.1   | 0.3   |
| 27.7  | 19.2  | 28.2  | 15.5  | 8.1   | 52.6  | 26.2  | 22.7  | 16.2  |
| 3.1   | 4.3   | 9.1   | 4.4   | 0.8   | 9.0   | 4.9   | 10.6  | 13.3  |
| 59.1  | 64.0  | 82.4  | 40.4  | 21.9  | 114.9 | 93.2  | 8.2   | 4.2   |
| 78.2  | 60.0  | 53.7  | 36.7  | 19.2  | 88.8  | 61.0  | 36.6  | 26.9  |
| 83.0  | 71.6  | 58.7  | 28.4  | 16.1  | 70.4  | 49.5  | 10.0  | 12.9  |
| 1.7   | 10.3  | 0.6   | 0.8   | 4.6   | 2.6   | 2.5   | 0.7   | 0.7   |
| 17.8  | 7.6   | 11.6  | 7.6   | 1.2   | 14.3  | 5.7   | 4.2   | 4.5   |
| 0.8   | 0.3   | 1.7   | 5.6   | 0.3   | 1.4   | 0.9   | 0.4   | 0.6   |
| 6.4   | 4.3   | 1.3   | 0.6   | 1.7   | 16.6  | 17.8  | 3.5   | 2.1   |
| 39.2  | 19.9  | 6.7   | 6.6   | 10.1  | 22.9  | 41.9  | 3.3   | 3.8   |
| 143.2 | 145.4 | 139.0 | 96.3  | 50.5  | 241.1 | 164.8 | 89.2  | 99.8  |
| 103.9 | 150.5 | 115.6 | 103.3 | 38.0  | 97.3  | 59.4  | 1.0   | 0.6   |
| 10.5  | 10.6  | 6.0   | 1.4   | 4.4   | 15.3  | 5.2   | 13.8  | 7.9   |
| 8.0   | 1.6   | 2.2   | 1.1   | 2.9   | 11.9  | 23.5  | 1.9   | 1.7   |
| 0.8   | 0.4   | 0.4   | 1.0   | 0.2   | 0.4   | 0.4   | 1.6   | 2.4   |
| 14.0  | 9.4   | 13.3  | 12.9  | 8.7   | 20.8  | 4.7   | 10.3  | 11.9  |
| 108.6 | 104.8 | 92.8  | 50.1  | 42.7  | 222.6 | 155.3 | 125.1 | 140.5 |
| 0.6   | 0.8   | 0.6   | 0.6   | 0.5   | 1.9   | 0.5   | 3.0   | 2.1   |
| 12.1  | 8.0   | 8.4   | 10.5  | 3.6   | 25.3  | 15.7  | 1.2   | 1.7   |
| 10.5  | 0.2   | 3.1   | 1.9   | 2.1   | 65.2  | 37.0  | 10.4  | 7.7   |
| 16.0  | 11.4  | 11.5  | 7.1   | 2.3   | 9.8   | 12.4  | 14.8  | 17.9  |
| 25.1  | 26.2  | 10.4  | 18.9  | 10.4  | 22.4  | 32.3  | 7.9   | 13.3  |
| 5.8   | 2.5   | 2.7   | 2.9   | 0.8   | 33.1  | 21.7  | 11.5  | 2.1   |
| 2.4   | 5.3   | 3.4   | 0.5   | 0.1   | 0.3   | 4.3   | 14.6  | 7.0   |

|        |        |        |        |       |        |        |      |       |
|--------|--------|--------|--------|-------|--------|--------|------|-------|
| 1.0    | 8.1    | 6.1    | 5.3    | 0.4   | 5.3    | 0.8    | 0.8  | 1.5   |
| 9.3    | 3.7    | 5.2    | 1.7    | 4.4   | 14.7   | 20.3   | 2.1  | 0.8   |
| 5.9    | 0.5    | 1.1    | 4.7    | 1.0   | 1.9    | 0.2    | 0.3  | 0.4   |
| 3.7    | 6.0    | 3.9    | 1.9    | 0.6   | 3.0    | 2.0    | 2.2  | 17.3  |
| 11.9   | 7.7    | 6.8    | 4.4    | 2.5   | 17.3   | 15.3   | 12.1 | 4.6   |
| 0.6    | 3.8    | 7.0    | 3.8    | 3.0   | 6.4    | 0.5    | 0.3  | 2.5   |
| 2540.9 | 1893.4 | 1935.7 | 1793.6 | 737.1 | 6375.8 | 4854.5 | 43.9 | 87.8  |
| 12.2   | 0.9    | 7.0    | 11.4   | 0.3   | 11.7   | 2.6    | 1.8  | 2.1   |
| 12.6   | 2.5    | 8.7    | 0.8    | 2.3   | 1.7    | 0.4    | 6.7  | 5.4   |
| 2.2    | 0.2    | 10.6   | 1.0    | 2.3   | 9.4    | 5.9    | 3.8  | 1.1   |
| 3.5    | 1.2    | 5.7    | 2.0    | 0.3   | 1.4    | 0.4    | 6.9  | 0.9   |
| 8.7    | 5.2    | 5.5    | 7.7    | 4.9   | 12.3   | 12.3   | 4.4  | 4.9   |
| 11.9   | 1.5    | 17.2   | 4.9    | 4.2   | 7.5    | 5.7    | 11.1 | 4.8   |
| 1.4    | 0.4    | 0.6    | 2.6    | 1.1   | 1.0    | 0.4    | 0.9  | 1.0   |
| 7.1    | 8.2    | 9.4    | 6.5    | 0.6   | 6.6    | 7.3    | 6.0  | 12.3  |
| 5.4    | 4.4    | 2.0    | 6.3    | 4.2   | 13.6   | 14.9   | 11.8 | 18.7  |
| 19.2   | 4.0    | 8.4    | 4.1    | 10.0  | 3.2    | 9.4    | 4.1  | 3.0   |
| 0.9    | 2.9    | 2.7    | 5.9    | 3.9   | 1.5    | 2.7    | 0.6  | 0.4   |
| 2.5    | 4.0    | 2.6    | 1.6    | 1.7   | 4.3    | 11.5   | 7.7  | 0.6   |
| 3.2    | 7.7    | 2.7    | 0.7    | 1.2   | 25.2   | 30.5   | 13.8 | 8.9   |
| 4.7    | 6.3    | 6.5    | 7.0    | 1.8   | 1.8    | 3.6    | 2.2  | 1.7   |
| 22.8   | 22.4   | 3.7    | 3.5    | 2.0   | 7.6    | 19.5   | 3.8  | 3.3   |
| 157.4  | 101.9  | 109.4  | 87.6   | 19.7  | 85.9   | 52.5   | 38.1 | 60.4  |
| 7.1    | 0.9    | 0.6    | 1.7    | 3.1   | 8.5    | 6.3    | 0.4  | 2.6   |
| 28.1   | 19.1   | 21.0   | 13.7   | 11.0  | 23.6   | 1.6    | 12.5 | 17.4  |
| 13.4   | 4.5    | 7.9    | 0.8    | 0.5   | 8.1    | 2.1    | 1.1  | 7.9   |
| 93.3   | 63.2   | 61.9   | 41.0   | 25.6  | 36.6   | 19.6   | 89.9 | 95.3  |
| 18.9   | 7.9    | 12.4   | 9.9    | 3.1   | 11.9   | 12.5   | 13.3 | 3.8   |
| 1.7    | 2.0    | 1.4    | 1.0    | 0.6   | 1.6    | 0.7    | 1.3  | 2.5   |
| 17.4   | 10.6   | 10.3   | 14.1   | 10.5  | 43.9   | 23.7   | 4.6  | 14.5  |
| 0.9    | 3.1    | 5.3    | 1.3    | 0.4   | 1.7    | 2.3    | 18.8 | 16.2  |
| 125.2  | 38.6   | 58.9   | 36.4   | 32.0  | 207.8  | 110.0  | 9.7  | 19.9  |
| 0.3    | 0.7    | 0.9    | 0.2    | 0.2   | 1.1    | 0.4    | 0.4  | 0.7   |
| 2.6    | 2.5    | 2.6    | 0.6    | 1.1   | 1.0    | 14.4   | 2.5  | 2.8   |
| 6.9    | 2.4    | 4.2    | 4.8    | 1.4   | 2.1    | 5.7    | 2.3  | 3.7   |
| 14.3   | 1.4    | 1.9    | 6.4    | 2.6   | 0.6    | 3.6    | 8.7  | 3.9   |
| 21.1   | 14.8   | 5.6    | 13.3   | 4.9   | 65.9   | 42.4   | 8.4  | 8.6   |
| 3.3    | 1.6    | 1.5    | 1.4    | 0.4   | 7.7    | 6.4    | 12.1 | 0.9   |
| 2.4    | 9.7    | 1.8    | 1.1    | 1.0   | 1.9    | 1.3    | 12.6 | 1.4   |
| 113.5  | 122.2  | 143.5  | 97.5   | 59.6  | 510.9  | 326.9  | 3.6  | 4.2   |
| 0.9    | 1.4    | 1.2    | 0.3    | 0.2   | 1.3    | 0.9    | 0.9  | 1.5   |
| 8.2    | 7.3    | 9.3    | 3.3    | 4.3   | 3.0    | 10.2   | 13.4 | 18.6  |
| 8.1    | 1.3    | 0.6    | 0.7    | 0.1   | 8.1    | 0.9    | 5.6  | 7.4   |
| 2.0    | 0.4    | 0.9    | 1.1    | 2.0   | 1.6    | 0.7    | 0.8  | 1.0   |
| 2.1    | 0.6    | 2.2    | 9.5    | 6.1   | 0.9    | 1.6    | 3.2  | 9.7   |
| 1.0    | 5.5    | 1.6    | 1.0    | 0.4   | 1.4    | 0.5    | 1.3  | 1.0   |
| 7.8    | 10.2   | 3.8    | 3.7    | 6.0   | 5.2    | 17.3   | 25.4 | 18.0  |
| 172.8  | 121.8  | 130.4  | 127.3  | 64.4  | 347.6  | 268.4  | 48.6 | 43.1  |
| 6.4    | 0.4    | 5.3    | 0.7    | 0.2   | 8.3    | 0.5    | 5.9  | 2.7   |
| 5.7    | 1.2    | 3.5    | 6.0    | 3.0   | 14.7   | 1.5    | 1.6  | 2.6   |
| 101.3  | 85.3   | 83.2   | 77.5   | 31.0  | 100.1  | 55.4   | 57.6 | 108.1 |
| 14.3   | 22.4   | 22.4   | 20.4   | 1.4   | 36.0   | 13.7   | 0.7  | 3.3   |
| 61.3   | 59.0   | 55.3   | 46.7   | 24.4  | 53.4   | 30.4   | 35.1 | 47.3  |

|        |        |        |       |       |        |        |       |        |
|--------|--------|--------|-------|-------|--------|--------|-------|--------|
| 0.6    | 0.6    | 0.9    | 9.8   | 2.3   | 3.4    | 1.6    | 0.8   | 1.7    |
| 2.1    | 1.2    | 0.5    | 0.3   | 0.3   | 2.4    | 1.4    | 0.8   | 2.3    |
| 2.2    | 9.0    | 1.5    | 0.8   | 1.1   | 2.3    | 0.9    | 1.2   | 1.7    |
| 2.6    | 0.8    | 2.6    | 1.7   | 8.2   | 45.7   | 13.1   | 9.8   | 22.4   |
| 27.1   | 23.3   | 31.2   | 53.7  | 14.6  | 46.7   | 32.9   | 24.5  | 36.0   |
| 2.5    | 1.2    | 2.9    | 1.6   | 0.9   | 2.1    | 6.8    | 1.9   | 4.4    |
| 21.6   | 21.4   | 23.7   | 20.9  | 10.4  | 19.5   | 24.2   | 27.6  | 29.8   |
| 6.2    | 9.0    | 2.0    | 3.5   | 1.8   | 10.3   | 2.0    | 4.4   | 4.0    |
| 3.4    | 9.6    | 2.5    | 3.0   | 4.4   | 15.5   | 8.0    | 6.5   | 9.4    |
| 5.6    | 0.7    | 1.8    | 1.6   | 1.2   | 2.7    | 0.9    | 0.7   | 0.8    |
| 27.3   | 9.1    | 11.8   | 5.2   | 7.9   | 15.9   | 19.2   | 16.0  | 11.9   |
| 10.6   | 6.7    | 3.8    | 10.9  | 7.9   | 5.9    | 21.3   | 5.4   | 30.1   |
| 2.3    | 2.1    | 2.8    | 2.0   | 20.3  | 59.6   | 1.9    | 21.6  | 43.0   |
| 62.6   | 52.3   | 66.2   | 30.8  | 36.2  | 105.1  | 99.8   | 19.8  | 19.8   |
| 1.6    | 3.9    | 6.0    | 11.1  | 4.5   | 17.4   | 10.6   | 2.5   | 6.7    |
| 4.9    | 9.2    | 7.1    | 8.1   | 3.0   | 27.1   | 14.8   | 14.3  | 17.0   |
| 15.6   | 16.4   | 15.6   | 4.0   | 1.3   | 24.2   | 21.1   | 5.5   | 15.4   |
| 13.0   | 5.1    | 5.9    | 2.4   | 2.4   | 4.4    | 9.4    | 0.9   | 1.7    |
| 6.0    | 1.5    | 3.6    | 4.5   | 4.0   | 15.5   | 12.7   | 0.5   | 0.9    |
| 2.9    | 3.2    | 1.7    | 2.2   | 0.8   | 1.9    | 6.5    | 1.8   | 2.2    |
| 1756.3 | 1691.4 | 1604.9 | 990.6 | 546.1 | 3487.5 | 2513.0 | 964.3 | 1619.2 |
| 1.2    | 2.5    | 0.9    | 2.5   | 7.6   | 1.8    | 12.0   | 1.7   | 1.6    |
| 3.2    | 5.7    | 3.0    | 3.1   | 0.7   | 4.5    | 1.8    | 2.1   | 2.8    |
| 109.6  | 92.8   | 107.1  | 77.9  | 43.1  | 192.0  | 152.8  | 38.7  | 46.8   |
| 28.6   | 2.5    | 10.5   | 7.2   | 1.4   | 8.8    | 5.5    | 16.5  | 0.7    |
| 6.0    | 6.0    | 4.6    | 3.5   | 4.3   | 40.4   | 30.0   | 1.2   | 0.7    |
| 0.9    | 1.0    | 1.5    | 0.5   | 0.6   | 0.8    | 1.3    | 4.3   | 1.5    |
| 19.7   | 13.3   | 15.6   | 14.1  | 9.2   | 48.8   | 53.1   | 21.4  | 2.9    |
| 4.8    | 3.7    | 1.0    | 4.6   | 4.8   | 35.3   | 18.1   | 4.1   | 0.3    |
| 2.6    | 15.8   | 2.5    | 12.5  | 4.0   | 17.9   | 17.5   | 26.8  | 3.5    |
| 8.1    | 7.3    | 9.9    | 10.9  | 5.9   | 12.8   | 13.5   | 5.3   | 8.4    |
| 0.4    | 0.7    | 0.4    | 3.9   | 0.4   | 3.7    | 2.9    | 7.9   | 5.0    |
| 10.7   | 2.9    | 3.9    | 0.5   | 2.3   | 11.5   | 22.1   | 0.3   | 2.6    |
| 16.4   | 10.5   | 1.0    | 10.6  | 7.7   | 17.3   | 0.5    | 3.3   | 11.3   |
| 19.4   | 2.4    | 22.3   | 12.6  | 0.9   | 40.4   | 12.1   | 11.6  | 24.1   |
| 20.5   | 12.2   | 2.0    | 4.6   | 0.6   | 525.0  | 296.2  | 26.9  | 22.7   |
| 1.9    | 3.4    | 9.5    | 2.5   | 0.4   | 1.8    | 5.3    | 0.7   | 2.2    |
| 13.3   | 19.8   | 3.5    | 2.6   | 6.7   | 28.1   | 33.9   | 32.7  | 12.6   |
| 16.8   | 2.2    | 2.3    | 1.6   | 0.8   | 23.4   | 28.3   | 5.3   | 5.7    |
| 346.0  | 271.9  | 247.2  | 214.2 | 63.9  | 596.3  | 386.6  | 264.5 | 136.6  |
| 2.1    | 7.6    | 4.0    | 9.1   | 4.7   | 2.2    | 0.9    | 8.9   | 3.7    |
| 9.7    | 1.4    | 1.1    | 3.9   | 0.9   | 33.6   | 43.2   | 0.8   | 0.9    |
| 2.9    | 1.0    | 1.1    | 1.4   | 1.9   | 1.7    | 7.6    | 1.9   | 3.5    |
| 2.1    | 9.8    | 6.0    | 2.7   | 5.6   | 2.7    | 2.0    | 13.7  | 1.7    |
| 37.5   | 42.5   | 27.9   | 22.0  | 21.2  | 38.4   | 72.5   | 7.5   | 11.9   |
| 4.2    | 1.0    | 9.1    | 6.3   | 2.0   | 9.1    | 1.1    | 6.1   | 9.1    |
| 8.8    | 2.6    | 6.1    | 3.9   | 3.6   | 2.5    | 0.4    | 9.7   | 1.9    |
| 31.7   | 37.7   | 17.4   | 19.7  | 11.7  | 15.2   | 19.1   | 18.3  | 22.9   |
| 1.1    | 0.6    | 0.6    | 1.0   | 0.2   | 1.8    | 0.7    | 2.5   | 2.9    |
| 8.4    | 2.0    | 2.5    | 8.1   | 7.8   | 9.3    | 2.2    | 10.2  | 2.6    |
| 2.8    | 5.6    | 9.1    | 1.9   | 4.7   | 4.6    | 7.6    | 20.4  | 7.1    |
| 24.7   | 54.1   | 20.2   | 26.7  | 11.7  | 327.9  | 199.1  | 105.7 | 127.1  |
| 55.1   | 34.4   | 64.4   | 56.3  | 22.1  | 66.2   | 68.8   | 67.9  | 65.1   |

|        |        |        |        |       |        |        |       |        |
|--------|--------|--------|--------|-------|--------|--------|-------|--------|
| 12.2   | 1.7    | 1.2    | 1.4    | 2.5   | 1.2    | 0.8    | 4.1   | 2.7    |
| 2.5    | 1.2    | 2.1    | 1.2    | 3.2   | 3.2    | 1.5    | 1.8   | 1.3    |
| 3.8    | 13.3   | 4.5    | 4.5    | 1.3   | 16.3   | 1.6    | 5.2   | 5.8    |
| 2287.8 | 2000.6 | 1915.5 | 1800.5 | 758.0 | 1320.5 | 857.7  | 928.5 | 1100.7 |
| 18.0   | 21.1   | 28.0   | 15.7   | 2.3   | 26.0   | 24.0   | 11.9  | 7.8    |
| 24.4   | 15.6   | 15.9   | 17.1   | 7.2   | 34.4   | 24.6   | 12.1  | 12.6   |
| 9.1    | 3.4    | 11.1   | 9.4    | 2.8   | 15.3   | 10.9   | 2.0   | 9.6    |
| 15.8   | 2.0    | 3.4    | 4.6    | 1.9   | 31.8   | 13.5   | 17.9  | 19.0   |
| 26.2   | 29.5   | 12.5   | 18.2   | 4.0   | 11.0   | 14.0   | 15.7  | 12.2   |
| 8.4    | 1.7    | 3.5    | 2.4    | 4.2   | 7.7    | 8.4    | 9.0   | 11.3   |
| 21.9   | 2.2    | 5.9    | 1.5    | 1.2   | 2.5    | 6.2    | 2.0   | 2.5    |
| 638.7  | 571.9  | 721.0  | 865.5  | 200.2 | 623.6  | 445.6  | 111.2 | 103.6  |
| 107.6  | 87.4   | 78.5   | 44.2   | 35.9  | 48.9   | 37.1   | 11.5  | 8.1    |
| 1.3    | 1.5    | 1.0    | 0.7    | 0.5   | 3.2    | 0.6    | 2.0   | 1.7    |
| 4.5    | 2.5    | 2.7    | 2.1    | 11.7  | 22.0   | 20.1   | 2.4   | 1.6    |
| 12.1   | 2.4    | 2.3    | 1.2    | 0.8   | 3.8    | 17.3   | 3.8   | 8.3    |
| 67.1   | 31.5   | 29.8   | 21.2   | 22.0  | 51.0   | 17.3   | 11.6  | 30.3   |
| 11.4   | 12.4   | 7.7    | 3.8    | 8.4   | 15.0   | 20.4   | 5.8   | 11.7   |
| 1.6    | 1.0    | 2.7    | 0.6    | 0.9   | 3.6    | 2.7    | 1.3   | 4.7    |
| 1.7    | 1.5    | 2.9    | 1.9    | 3.4   | 1.0    | 2.4    | 3.4   | 2.7    |
| 3.8    | 5.1    | 2.1    | 5.3    | 6.3   | 3.0    | 6.5    | 3.0   | 8.9    |
| 192.5  | 239.9  | 226.5  | 278.4  | 64.8  | 146.2  | 96.5   | 81.4  | 223.8  |
| 8.6    | 6.0    | 3.6    | 6.0    | 6.7   | 16.5   | 19.7   | 5.1   | 4.2    |
| 14.7   | 1.1    | 8.8    | 5.5    | 3.8   | 33.4   | 15.5   | 0.8   | 8.5    |
| 23.5   | 19.4   | 6.9    | 1.7    | 1.5   | 4.5    | 11.4   | 2.9   | 14.8   |
| 1406.3 | 1119.9 | 1126.4 | 969.8  | 431.6 | 2394.4 | 1653.8 | 319.8 | 330.7  |
| 11.2   | 5.7    | 6.0    | 7.6    | 0.9   | 12.6   | 12.1   | 2.1   | 1.9    |
| 11.8   | 10.5   | 16.3   | 79.3   | 8.1   | 413.3  | 343.1  | 4.6   | 5.2    |
| 7.7    | 0.2    | 6.2    | 6.7    | 2.7   | 0.3    | 0.1    | 1.1   | 4.5    |
| 9.1    | 0.3    | 0.8    | 2.0    | 4.4   | 1.1    | 1.0    | 1.1   | 0.8    |
| 0.4    | 1.2    | 5.8    | 1.3    | 3.4   | 1.2    | 1.7    | 0.5   | 0.5    |
| 8.4    | 3.5    | 11.9   | 6.2    | 5.0   | 6.6    | 1.4    | 1.6   | 11.6   |
| 9.1    | 9.9    | 16.9   | 16.1   | 1.3   | 16.6   | 16.2   | 14.4  | 12.4   |
| 24.3   | 51.7   | 25.1   | 23.1   | 11.3  | 132.3  | 106.2  | 0.7   | 6.0    |
| 13.6   | 10.0   | 7.7    | 0.7    | 5.8   | 7.7    | 6.9    | 0.8   | 2.1    |
| 2.0    | 1.8    | 2.3    | 8.4    | 2.0   | 2.0    | 0.3    | 7.6   | 8.0    |
| 3.6    | 2.1    | 4.0    | 1.1    | 1.7   | 2.6    | 10.3   | 1.9   | 3.6    |
| 94.0   | 90.0   | 95.2   | 85.2   | 58.6  | 239.8  | 163.4  | 26.6  | 79.1   |
| 2.2    | 3.4    | 2.3    | 2.7    | 7.2   | 9.1    | 9.2    | 26.9  | 10.3   |
| 528.0  | 477.3  | 395.4  | 269.0  | 118.5 | 531.7  | 390.1  | 83.4  | 139.3  |
| 8.7    | 3.1    | 2.1    | 2.7    | 2.7   | 9.8    | 8.3    | 4.9   | 9.3    |
| 16.3   | 17.5   | 21.7   | 15.6   | 0.4   | 24.9   | 14.3   | 1.2   | 0.7    |
| 1.6    | 9.0    | 2.2    | 5.5    | 3.8   | 2.7    | 5.8    | 17.1  | 8.0    |
| 4.7    | 3.9    | 0.2    | 4.7    | 3.1   | 6.4    | 5.3    | 1.1   | 4.1    |
| 20.7   | 45.9   | 33.5   | 41.8   | 14.5  | 74.2   | 44.3   | 30.7  | 31.4   |
| 4.8    | 6.9    | 2.4    | 4.4    | 0.4   | 11.2   | 5.7    | 6.2   | 13.5   |
| 72.9   | 70.0   | 74.5   | 60.7   | 31.5  | 134.0  | 125.7  | 38.9  | 65.8   |
| 16.7   | 4.7    | 9.8    | 4.7    | 0.7   | 3.5    | 7.0    | 18.6  | 19.1   |
| 18.1   | 17.3   | 13.8   | 16.7   | 3.6   | 29.0   | 3.2    | 14.3  | 29.2   |
| 5.2    | 10.0   | 10.6   | 0.8    | 4.8   | 7.4    | 12.1   | 9.3   | 5.9    |
| 482.4  | 341.0  | 348.1  | 167.5  | 106.7 | 795.5  | 233.6  | 210.9 | 258.6  |
| 8.7    | 4.0    | 6.6    | 14.8   | 3.3   | 38.0   | 18.2   | 12.9  | 22.2   |
| 2.2    | 1.3    | 3.3    | 0.8    | 4.6   | 2.7    | 0.9    | 3.2   | 12.3   |



|       |       |       |       |       |       |       |       |       |
|-------|-------|-------|-------|-------|-------|-------|-------|-------|
| 42.6  | 41.9  | 61.2  | 67.6  | 27.1  | 63.2  | 41.7  | 10.9  | 10.5  |
| 8.4   | 8.0   | 7.2   | 3.4   | 6.9   | 4.6   | 2.0   | 2.3   | 5.7   |
| 0.3   | 8.8   | 0.4   | 0.4   | 0.4   | 11.0  | 0.6   | 0.4   | 0.7   |
| 33.1  | 29.5  | 26.4  | 21.6  | 7.3   | 12.4  | 17.8  | 0.7   | 2.3   |
| 47.7  | 53.0  | 35.3  | 83.4  | 18.7  | 321.2 | 221.8 | 73.9  | 95.1  |
| 6.1   | 22.0  | 15.2  | 16.7  | 10.0  | 17.7  | 15.6  | 5.1   | 10.2  |
| 2.9   | 1.1   | 2.8   | 3.8   | 4.6   | 12.7  | 0.6   | 7.9   | 10.7  |
| 4.0   | 0.9   | 1.2   | 0.9   | 0.4   | 14.3  | 0.7   | 1.6   | 5.6   |
| 6.1   | 5.0   | 8.0   | 0.8   | 0.2   | 12.0  | 3.4   | 6.3   | 8.2   |
| 16.0  | 18.0  | 17.6  | 15.5  | 6.5   | 22.6  | 3.4   | 20.0  | 23.6  |
| 2.1   | 2.0   | 7.4   | 6.7   | 1.0   | 12.0  | 8.5   | 13.0  | 13.7  |
| 0.4   | 3.5   | 1.8   | 8.4   | 2.9   | 5.6   | 9.0   | 15.1  | 5.6   |
| 16.9  | 30.3  | 9.8   | 12.2  | 11.8  | 12.5  | 10.5  | 19.6  | 33.7  |
| 10.3  | 1.5   | 4.2   | 0.7   | 1.7   | 13.1  | 1.4   | 3.3   | 12.3  |
| 55.1  | 31.8  | 33.6  | 20.5  | 9.1   | 25.1  | 18.6  | 22.0  | 22.2  |
| 382.7 | 307.8 | 298.7 | 291.8 | 98.3  | 670.7 | 410.3 | 132.1 | 161.8 |
| 15.1  | 11.7  | 14.6  | 16.7  | 11.7  | 12.8  | 6.7   | 3.8   | 7.6   |
| 18.2  | 2.0   | 3.8   | 9.8   | 11.0  | 14.0  | 5.2   | 15.4  | 15.7  |
| 147.0 | 103.5 | 148.3 | 110.1 | 37.4  | 45.6  | 41.6  | 27.8  | 30.3  |
| 4.6   | 2.6   | 8.5   | 10.4  | 1.2   | 13.8  | 5.6   | 9.7   | 9.5   |
| 17.9  | 17.0  | 15.5  | 2.2   | 6.6   | 3.3   | 16.6  | 3.8   | 1.7   |
| 1.7   | 4.2   | 2.8   | 1.1   | 0.8   | 3.0   | 4.4   | 3.3   | 3.5   |
| 90.0  | 76.0  | 89.3  | 45.1  | 28.7  | 37.5  | 24.4  | 102.8 | 109.4 |
| 13.6  | 15.8  | 9.1   | 12.5  | 4.5   | 33.0  | 22.2  | 9.8   | 15.2  |
| 23.5  | 10.8  | 7.2   | 10.5  | 2.8   | 10.8  | 4.6   | 2.0   | 8.6   |
| 48.1  | 51.0  | 55.4  | 31.6  | 28.7  | 80.1  | 44.7  | 40.3  | 58.9  |
| 118.2 | 131.4 | 147.4 | 106.2 | 56.9  | 188.2 | 137.0 | 43.0  | 57.9  |
| 10.3  | 4.3   | 2.0   | 4.5   | 0.2   | 6.1   | 5.7   | 5.3   | 1.1   |
| 33.4  | 13.1  | 21.7  | 50.5  | 1.7   | 30.8  | 29.0  | 1.0   | 2.3   |
| 9.7   | 8.9   | 11.4  | 9.8   | 4.5   | 5.4   | 18.2  | 7.3   | 12.5  |
| 27.6  | 29.3  | 34.9  | 26.3  | 20.3  | 31.2  | 15.2  | 38.7  | 34.0  |
| 321.7 | 272.3 | 306.5 | 345.5 | 82.9  | 657.8 | 630.0 | 59.2  | 102.2 |
| 358.0 | 277.5 | 308.7 | 340.6 | 142.9 | 508.8 | 470.2 | 81.3  | 115.3 |
| 1.4   | 0.6   | 1.0   | 1.8   | 0.3   | 1.5   | 1.0   | 1.5   | 1.9   |
| 38.1  | 7.5   | 25.7  | 18.9  | 1.9   | 203.3 | 144.5 | 19.7  | 31.9  |
| 1.8   | 1.6   | 2.0   | 1.0   | 4.5   | 2.7   | 3.8   | 3.1   | 1.5   |
| 3.1   | 2.1   | 1.3   | 0.7   | 1.6   | 0.7   | 4.6   | 3.1   | 2.6   |
| 113.9 | 68.8  | 84.7  | 52.0  | 40.0  | 167.2 | 191.8 | 27.7  | 38.7  |
| 12.2  | 0.9   | 2.2   | 2.3   | 0.7   | 31.6  | 30.3  | 19.3  | 19.7  |
| 9.5   | 8.3   | 3.8   | 4.6   | 0.4   | 305.0 | 169.5 | 5.1   | 5.5   |
| 42.4  | 25.5  | 27.2  | 24.8  | 16.4  | 48.5  | 52.5  | 18.2  | 26.7  |
| 10.8  | 0.4   | 3.3   | 1.0   | 2.4   | 10.0  | 0.9   | 0.4   | 0.5   |
| 458.4 | 488.4 | 428.9 | 271.6 | 107.0 | 70.1  | 56.4  | 57.1  | 76.9  |
| 4.8   | 11.4  | 8.1   | 6.5   | 5.7   | 31.8  | 12.4  | 17.0  | 10.0  |
| 24.2  | 21.5  | 20.1  | 16.3  | 3.9   | 26.7  | 18.2  | 16.5  | 26.1  |
| 10.3  | 14.8  | 11.6  | 17.8  | 0.8   | 2.1   | 7.0   | 8.7   | 10.8  |
| 13.7  | 1.4   | 1.2   | 6.6   | 0.8   | 15.3  | 6.3   | 4.7   | 6.5   |
| 3.3   | 0.3   | 1.2   | 0.4   | 0.4   | 4.7   | 3.1   | 0.0   | 2.5   |
| 5.9   | 2.9   | 3.2   | 1.9   | 7.9   | 3.3   | 7.0   | 2.4   | 3.3   |
| 1.2   | 0.7   | 3.3   | 0.1   | 0.2   | 11.0  | 6.0   | 0.9   | 2.6   |
| 7.9   | 5.4   | 11.5  | 20.3  | 7.2   | 36.5  | 30.7  | 0.7   | 9.8   |
| 15.9  | 9.2   | 13.2  | 9.8   | 8.0   | 12.4  | 2.1   | 18.0  | 18.7  |
| 31.5  | 26.6  | 27.0  | 26.3  | 20.7  | 67.2  | 40.4  | 83.6  | 81.9  |

|       |       |       |       |       |        |       |       |       |
|-------|-------|-------|-------|-------|--------|-------|-------|-------|
| 8.1   | 1.1   | 3.4   | 8.6   | 5.3   | 10.5   | 6.4   | 1.4   | 0.9   |
| 13.9  | 8.4   | 1.9   | 5.0   | 5.7   | 18.7   | 19.7  | 13.0  | 11.5  |
| 0.8   | 6.0   | 0.7   | 0.4   | 0.1   | 0.4    | 3.7   | 0.5   | 4.5   |
| 26.3  | 32.9  | 45.0  | 59.2  | 17.5  | 13.0   | 7.8   | 17.0  | 7.5   |
| 0.4   | 0.5   | 0.9   | 0.4   | 0.9   | 0.5    | 1.1   | 1.1   | 1.1   |
| 18.9  | 1.5   | 12.7  | 1.6   | 3.3   | 2.3    | 2.5   | 13.0  | 2.1   |
| 5.7   | 0.8   | 6.4   | 8.0   | 3.7   | 4.0    | 1.3   | 2.3   | 2.0   |
| 21.0  | 3.1   | 6.3   | 7.0   | 1.2   | 8.1    | 4.6   | 12.1  | 10.8  |
| 10.1  | 15.2  | 6.6   | 9.3   | 5.0   | 33.5   | 39.9  | 17.2  | 15.6  |
| 65.3  | 55.4  | 81.8  | 60.7  | 42.2  | 142.8  | 143.5 | 10.6  | 13.1  |
| 31.8  | 28.2  | 34.6  | 17.1  | 19.6  | 61.5   | 37.9  | 32.8  | 21.2  |
| 9.4   | 1.8   | 2.2   | 0.6   | 2.4   | 1.5    | 0.7   | 1.2   | 8.3   |
| 4.4   | 5.7   | 3.7   | 4.1   | 3.7   | 7.3    | 1.7   | 3.8   | 0.5   |
| 81.9  | 75.3  | 76.8  | 56.5  | 22.4  | 77.8   | 21.2  | 34.4  | 43.1  |
| 18.8  | 2.2   | 10.8  | 10.3  | 0.7   | 18.2   | 12.2  | 1.1   | 2.2   |
| 321.9 | 284.2 | 174.1 | 142.4 | 58.4  | 390.1  | 212.1 | 152.7 | 161.5 |
| 16.0  | 14.3  | 17.9  | 18.0  | 9.2   | 23.2   | 8.9   | 6.3   | 4.6   |
| 159.6 | 115.3 | 140.2 | 119.5 | 58.4  | 195.2  | 164.6 | 257.4 | 323.7 |
| 21.2  | 7.7   | 13.6  | 10.8  | 4.7   | 4.4    | 13.5  | 10.9  | 13.3  |
| 6.3   | 5.9   | 0.8   | 0.5   | 2.2   | 1.2    | 1.4   | 3.1   | 1.2   |
| 14.1  | 2.5   | 4.5   | 6.0   | 3.8   | 4.6    | 2.4   | 6.1   | 6.2   |
| 102.1 | 78.3  | 105.2 | 46.9  | 44.6  | 143.3  | 102.0 | 49.8  | 51.5  |
| 4.6   | 4.8   | 5.3   | 7.1   | 6.0   | 1.3    | 0.9   | 0.5   | 3.2   |
| 3.3   | 4.6   | 6.5   | 2.4   | 1.5   | 5.1    | 1.9   | 77.8  | 112.4 |
| 38.6  | 53.5  | 48.5  | 27.2  | 20.2  | 84.6   | 40.3  | 51.8  | 77.8  |
| 25.6  | 15.5  | 20.9  | 15.2  | 7.2   | 21.1   | 29.6  | 16.4  | 18.2  |
| 0.9   | 0.9   | 2.1   | 0.5   | 0.2   | 8.9    | 0.7   | 1.5   | 0.7   |
| 1.6   | 2.2   | 3.0   | 1.4   | 0.7   | 14.1   | 7.8   | 4.4   | 11.2  |
| 573.3 | 558.5 | 541.2 | 695.4 | 193.0 | 1011.8 | 693.7 | 167.5 | 194.6 |
| 119.2 | 84.9  | 104.4 | 124.5 | 43.6  | 130.5  | 58.3  | 62.0  | 51.1  |
| 8.4   | 8.3   | 1.3   | 0.5   | 2.3   | 24.3   | 3.3   | 6.6   | 10.9  |
| 21.6  | 8.0   | 10.3  | 17.2  | 5.2   | 30.3   | 16.1  | 19.8  | 12.0  |
| 2.2   | 9.1   | 11.0  | 12.4  | 3.4   | 13.5   | 7.7   | 11.2  | 27.9  |
| 65.6  | 34.7  | 56.3  | 38.9  | 21.3  | 97.8   | 60.4  | 16.5  | 34.3  |
| 5.4   | 5.5   | 0.4   | 4.2   | 2.6   | 1.0    | 3.9   | 0.2   | 2.8   |
| 1.7   | 11.4  | 0.9   | 1.6   | 5.2   | 2.1    | 6.1   | 0.9   | 0.3   |
| 8.2   | 12.0  | 11.8  | 9.8   | 0.7   | 12.3   | 7.5   | 7.2   | 22.4  |
| 33.0  | 11.4  | 22.6  | 17.2  | 11.6  | 35.8   | 15.2  | 25.7  | 28.7  |
| 1.4   | 2.6   | 12.4  | 4.9   | 0.2   | 20.6   | 28.8  | 5.6   | 0.4   |
| 1.4   | 0.6   | 0.9   | 6.6   | 1.0   | 14.2   | 0.8   | 2.2   | 2.9   |
| 29.0  | 34.4  | 16.1  | 14.7  | 6.4   | 35.4   | 35.2  | 14.6  | 17.1  |
| 8.9   | 7.3   | 7.0   | 7.9   | 3.0   | 29.5   | 13.7  | 7.3   | 9.1   |
| 2.5   | 7.4   | 3.5   | 0.9   | 2.3   | 4.4    | 2.4   | 7.1   | 10.8  |
| 2.4   | 1.7   | 0.5   | 0.2   | 0.4   | 16.0   | 17.4  | 1.6   | 1.7   |
| 0.6   | 9.1   | 2.9   | 0.3   | 0.2   | 0.7    | 0.1   | 1.6   | 0.3   |
| 1.6   | 1.5   | 16.1  | 5.2   | 2.3   | 1.5    | 1.2   | 4.0   | 4.4   |
| 242.9 | 177.9 | 211.4 | 131.4 | 70.4  | 225.2  | 137.0 | 168.7 | 219.4 |
| 18.6  | 26.0  | 30.3  | 21.3  | 6.0   | 26.4   | 16.9  | 6.6   | 4.0   |
| 92.5  | 75.0  | 76.4  | 40.4  | 49.3  | 134.9  | 76.5  | 50.0  | 91.6  |
| 10.6  | 7.5   | 4.0   | 4.3   | 4.6   | 10.0   | 2.0   | 23.2  | 20.7  |
| 20.0  | 30.0  | 24.6  | 27.6  | 7.7   | 106.9  | 39.7  | 12.3  | 14.1  |
| 7.4   | 7.2   | 4.9   | 1.5   | 0.1   | 8.4    | 0.3   | 5.3   | 0.9   |
| 5.7   | 1.1   | 5.9   | 1.2   | 0.6   | 6.4    | 6.9   | 0.5   | 3.4   |

|       |       |       |       |       |       |       |      |      |
|-------|-------|-------|-------|-------|-------|-------|------|------|
| 4.9   | 9.2   | 1.7   | 1.0   | 0.4   | 1.8   | 1.4   | 4.8  | 2.4  |
| 10.0  | 4.5   | 4.8   | 2.3   | 9.3   | 11.5  | 1.3   | 3.4  | 1.2  |
| 0.5   | 4.1   | 0.6   | 0.2   | 0.4   | 10.5  | 6.3   | 1.0  | 2.4  |
| 11.6  | 7.2   | 8.4   | 7.4   | 5.7   | 14.7  | 7.2   | 17.5 | 5.2  |
| 14.5  | 12.2  | 13.0  | 15.7  | 10.3  | 18.5  | 17.5  | 11.5 | 6.3  |
| 5.2   | 8.2   | 7.3   | 3.3   | 4.9   | 14.6  | 14.4  | 4.5  | 6.9  |
| 3.8   | 6.9   | 2.8   | 3.2   | 1.1   | 6.1   | 5.7   | 3.6  | 3.0  |
| 13.0  | 2.6   | 1.3   | 5.1   | 1.1   | 7.9   | 4.6   | 2.3  | 1.7  |
| 33.3  | 52.9  | 48.9  | 30.8  | 10.0  | 24.1  | 10.9  | 24.6 | 47.1 |
| 106.0 | 67.3  | 92.3  | 59.8  | 38.9  | 107.5 | 60.9  | 35.5 | 35.4 |
| 24.8  | 3.7   | 26.3  | 15.2  | 6.9   | 31.8  | 21.1  | 19.9 | 17.5 |
| 29.8  | 31.1  | 35.5  | 20.7  | 4.1   | 21.1  | 18.1  | 26.6 | 51.8 |
| 9.1   | 10.0  | 6.4   | 13.2  | 6.4   | 17.8  | 8.1   | 1.0  | 0.8  |
| 2.9   | 3.9   | 6.8   | 3.8   | 1.3   | 17.0  | 6.6   | 0.7  | 0.8  |
| 13.2  | 20.2  | 6.3   | 5.5   | 5.8   | 30.2  | 33.3  | 4.1  | 11.0 |
| 117.8 | 82.8  | 62.7  | 58.0  | 38.3  | 105.2 | 127.3 | 29.6 | 47.0 |
| 6.1   | 5.2   | 2.7   | 3.1   | 0.3   | 4.1   | 5.0   | 2.9  | 1.6  |
| 15.1  | 1.2   | 11.2  | 2.2   | 6.9   | 1.2   | 7.6   | 7.9  | 6.5  |
| 4.9   | 4.1   | 4.2   | 5.2   | 6.0   | 12.3  | 20.4  | 2.2  | 0.2  |
| 1.4   | 1.1   | 2.5   | 0.9   | 2.1   | 5.1   | 1.6   | 2.8  | 2.2  |
| 3.8   | 1.3   | 1.0   | 1.5   | 0.7   | 2.4   | 11.5  | 1.1  | 1.4  |
| 248.1 | 292.2 | 250.3 | 187.1 | 105.3 | 3.6   | 12.9  | 12.9 | 9.1  |
| 8.3   | 18.9  | 5.7   | 16.4  | 17.2  | 71.2  | 27.6  | 3.4  | 8.5  |
| 393.1 | 426.5 | 392.3 | 384.9 | 111.0 | 470.0 | 310.7 | 65.7 | 78.0 |
| 0.3   | 2.0   | 9.6   | 7.4   | 4.0   | 15.9  | 2.5   | 0.7  | 7.4  |
| 16.4  | 9.1   | 17.7  | 8.1   | 6.6   | 15.9  | 10.2  | 8.7  | 9.4  |
| 11.0  | 24.4  | 12.6  | 12.4  | 5.3   | 56.5  | 63.9  | 0.7  | 3.6  |
| 128.7 | 85.5  | 128.3 | 112.2 | 65.3  | 289.6 | 291.5 | 29.0 | 26.3 |
| 7.5   | 1.7   | 0.9   | 1.3   | 1.4   | 0.8   | 1.0   | 0.6  | 3.8  |
| 11.8  | 7.6   | 6.7   | 0.6   | 9.2   | 6.3   | 1.6   | 9.0  | 10.7 |
| 12.3  | 25.4  | 26.8  | 22.2  | 0.5   | 237.6 | 186.1 | 68.6 | 60.3 |
| 52.8  | 51.0  | 70.6  | 38.7  | 18.7  | 112.2 | 123.8 | 4.3  | 9.2  |
| 13.1  | 17.5  | 13.9  | 14.7  | 0.3   | 30.6  | 24.7  | 26.6 | 9.2  |
| 203.4 | 154.0 | 118.3 | 137.9 | 65.8  | 19.0  | 4.8   | 31.5 | 63.0 |
| 11.4  | 18.5  | 20.0  | 4.5   | 6.7   | 20.7  | 21.3  | 1.9  | 13.2 |
| 19.5  | 28.2  | 22.8  | 18.1  | 5.6   | 79.7  | 20.8  | 16.8 | 31.9 |
| 20.6  | 23.8  | 9.9   | 2.4   | 1.9   | 12.2  | 14.2  | 1.9  | 9.1  |
| 13.9  | 8.4   | 11.9  | 12.5  | 9.2   | 23.5  | 11.9  | 1.1  | 9.3  |
| 2.1   | 6.0   | 1.8   | 4.7   | 0.7   | 0.9   | 8.1   | 6.0  | 4.2  |
| 2.5   | 0.3   | 5.6   | 0.5   | 1.2   | 5.6   | 5.8   | 11.7 | 13.5 |
| 2.5   | 7.7   | 4.6   | 0.7   | 7.7   | 3.4   | 1.4   | 12.9 | 3.7  |
| 7.7   | 2.0   | 1.4   | 3.1   | 0.4   | 2.8   | 1.1   | 1.7  | 1.4  |
| 1.3   | 6.0   | 0.7   | 2.5   | 4.7   | 15.1  | 8.8   | 2.0  | 3.9  |
| 3.6   | 5.8   | 15.6  | 6.8   | 1.3   | 29.1  | 24.7  | 30.6 | 43.7 |
| 0.5   | 3.5   | 10.0  | 5.7   | 1.7   | 113.9 | 55.4  | 5.8  | 5.7  |
| 4.9   | 3.2   | 11.5  | 2.4   | 6.7   | 2.2   | 3.7   | 11.0 | 8.9  |
| 0.7   | 0.4   | 0.5   | 0.5   | 0.4   | 0.9   | 2.4   | 0.4  | 2.4  |
| 13.1  | 2.4   | 5.7   | 4.1   | 9.1   | 15.6  | 15.5  | 12.9 | 4.2  |
| 3.7   | 1.3   | 3.2   | 1.2   | 7.6   | 3.8   | 2.1   | 2.2  | 3.3  |
| 35.9  | 26.2  | 30.8  | 17.7  | 13.0  | 19.5  | 12.7  | 12.8 | 29.5 |
| 78.0  | 60.9  | 58.4  | 84.8  | 9.0   | 38.7  | 38.1  | 6.4  | 7.7  |
| 13.5  | 10.2  | 7.2   | 4.8   | 4.4   | 10.6  | 16.9  | 3.2  | 9.0  |
| 2.4   | 1.7   | 3.1   | 8.9   | 3.1   | 21.4  | 0.7   | 10.6 | 7.1  |

|       |       |       |       |      |       |       |       |       |
|-------|-------|-------|-------|------|-------|-------|-------|-------|
| 4.5   | 6.0   | 8.5   | 8.1   | 3.5  | 17.0  | 31.1  | 2.6   | 1.4   |
| 2.8   | 5.1   | 0.4   | 3.6   | 0.2  | 2.9   | 1.2   | 0.7   | 0.9   |
| 76.7  | 70.7  | 66.8  | 58.1  | 31.5 | 113.4 | 84.5  | 33.1  | 25.8  |
| 96.7  | 109.4 | 103.8 | 73.6  | 29.3 | 150.6 | 119.4 | 4.4   | 7.2   |
| 10.9  | 0.6   | 11.8  | 12.6  | 0.4  | 9.5   | 4.3   | 9.1   | 6.3   |
| 238.4 | 173.7 | 179.4 | 180.4 | 65.8 | 489.4 | 248.8 | 161.2 | 222.2 |
| 0.5   | 1.2   | 0.8   | 1.0   | 0.3  | 9.4   | 1.1   | 1.6   | 0.5   |
| 17.6  | 18.5  | 22.6  | 9.3   | 10.1 | 3.9   | 1.3   | 1.7   | 2.9   |
| 3.0   | 0.9   | 0.4   | 0.8   | 0.2  | 0.8   | 4.5   | 4.6   | 6.4   |
| 4.8   | 5.6   | 3.4   | 1.5   | 0.6  | 9.9   | 3.4   | 2.0   | 0.7   |
| 13.2  | 1.0   | 0.9   | 5.1   | 3.1  | 5.3   | 10.8  | 1.5   | 6.4   |
| 19.1  | 14.5  | 13.0  | 2.6   | 0.8  | 2.1   | 5.0   | 8.4   | 8.7   |
| 14.4  | 14.1  | 20.9  | 14.0  | 9.3  | 16.4  | 9.1   | 12.6  | 17.4  |
| 2.6   | 11.1  | 3.0   | 1.8   | 1.2  | 9.8   | 1.6   | 11.4  | 2.9   |
| 38.8  | 25.1  | 31.7  | 17.8  | 11.2 | 49.2  | 29.9  | 17.8  | 17.9  |
| 0.9   | 5.4   | 6.6   | 0.9   | 0.6  | 14.4  | 14.5  | 4.0   | 1.4   |
| 1.1   | 1.0   | 1.2   | 0.7   | 1.2  | 2.7   | 2.6   | 3.4   | 1.0   |
| 13.0  | 10.4  | 4.7   | 1.5   | 5.3  | 7.9   | 4.9   | 4.8   | 1.4   |
| 4.2   | 3.4   | 3.3   | 2.6   | 7.1  | 15.2  | 3.1   | 11.1  | 11.7  |
| 21.3  | 18.9  | 22.1  | 21.1  | 6.4  | 39.2  | 29.3  | 5.6   | 7.3   |
| 0.8   | 0.6   | 1.1   | 3.9   | 0.8  | 12.1  | 0.9   | 2.0   | 0.8   |
| 0.7   | 0.7   | 1.8   | 0.8   | 0.1  | 6.6   | 5.6   | 0.3   | 2.2   |
| 8.7   | 17.1  | 9.0   | 8.6   | 0.3  | 29.3  | 10.8  | 2.6   | 5.9   |
| 23.0  | 28.6  | 45.0  | 17.4  | 16.3 | 42.9  | 13.8  | 40.6  | 45.0  |
| 3.2   | 7.9   | 2.7   | 1.2   | 1.4  | 10.6  | 8.1   | 1.4   | 1.2   |
| 9.8   | 19.3  | 13.7  | 1.9   | 1.3  | 9.0   | 2.7   | 13.8  | 4.5   |
| 6.6   | 2.6   | 5.4   | 8.4   | 0.6  | 1.7   | 1.1   | 1.4   | 2.1   |
| 5.9   | 0.3   | 0.3   | 0.1   | 0.3  | 3.8   | 0.5   | 1.7   | 5.2   |
| 13.3  | 5.6   | 8.3   | 3.7   | 3.1  | 5.1   | 2.4   | 6.1   | 3.8   |
| 3.2   | 0.5   | 0.3   | 0.8   | 0.1  | 6.6   | 1.2   | 1.3   | 1.3   |
| 1.4   | 2.6   | 0.6   | 0.9   | 0.3  | 2.0   | 3.3   | 0.5   | 8.3   |
| 4.4   | 4.8   | 1.9   | 3.1   | 0.3  | 1.7   | 3.1   | 9.0   | 0.7   |
| 3.2   | 2.2   | 14.0  | 5.7   | 2.0  | 13.7  | 1.3   | 17.4  | 5.4   |
| 9.6   | 1.8   | 4.8   | 7.3   | 0.7  | 8.4   | 5.5   | 2.4   | 14.0  |
| 60.2  | 49.3  | 37.1  | 37.6  | 15.0 | 40.6  | 8.6   | 53.9  | 47.6  |
| 2.8   | 5.3   | 11.0  | 1.4   | 6.1  | 16.9  | 5.9   | 3.2   | 1.8   |
| 23.2  | 13.2  | 29.7  | 9.4   | 3.6  | 26.9  | 5.2   | 54.4  | 22.9  |
| 5.3   | 4.1   | 5.6   | 2.3   | 0.2  | 4.7   | 6.5   | 2.7   | 0.6   |
| 12.0  | 0.5   | 0.7   | 1.2   | 2.7  | 0.4   | 3.8   | 4.7   | 7.3   |
| 1.9   | 1.4   | 6.1   | 0.3   | 0.5  | 1.3   | 1.6   | 5.7   | 5.1   |
| 1.0   | 0.8   | 6.2   | 0.9   | 0.2  | 1.5   | 5.3   | 0.4   | 0.4   |
| 286.4 | 221.2 | 248.3 | 233.4 | 81.2 | 244.1 | 155.1 | 132.0 | 245.7 |
| 26.1  | 3.0   | 5.2   | 9.3   | 1.5  | 5.7   | 11.9  | 25.7  | 32.2  |
| 15.6  | 8.2   | 5.1   | 10.7  | 5.0  | 18.0  | 1.8   | 3.2   | 3.8   |
| 11.4  | 30.7  | 31.1  | 31.5  | 16.3 | 24.3  | 29.0  | 2.3   | 3.1   |
| 8.5   | 12.5  | 3.5   | 3.4   | 3.7  | 0.2   | 0.3   | 3.0   | 0.4   |
| 44.6  | 30.7  | 33.6  | 28.7  | 5.3  | 29.3  | 16.0  | 32.6  | 37.1  |
| 1.0   | 0.1   | 1.4   | 0.9   | 0.3  | 7.3   | 0.2   | 1.1   | 0.7   |
| 8.1   | 3.3   | 5.2   | 0.9   | 3.8  | 3.0   | 6.1   | 3.0   | 0.5   |
| 1.4   | 5.7   | 3.1   | 1.0   | 5.3  | 13.1  | 1.0   | 9.4   | 1.3   |
| 3.7   | 4.5   | 6.3   | 15.0  | 10.7 | 7.1   | 6.3   | 4.4   | 2.1   |
| 2.5   | 1.7   | 9.3   | 11.8  | 6.5  | 1.5   | 1.4   | 7.6   | 10.0  |
| 3.9   | 5.4   | 4.7   | 2.7   | 1.6  | 2.1   | 2.9   | 1.7   | 1.5   |

|        |        |        |        |       |        |        |       |       |
|--------|--------|--------|--------|-------|--------|--------|-------|-------|
| 15.7   | 17.3   | 13.5   | 13.1   | 5.8   | 0.3    | 7.8    | 1.0   | 2.8   |
| 0.9    | 3.6    | 1.8    | 4.3    | 0.4   | 1.3    | 1.4    | 1.2   | 2.2   |
| 1.9    | 1.4    | 1.5    | 1.7    | 5.2   | 3.5    | 6.4    | 7.4   | 12.0  |
| 17.0   | 15.0   | 6.1    | 9.6    | 1.4   | 11.2   | 3.7    | 8.3   | 3.9   |
| 4.1    | 11.7   | 4.6    | 0.9    | 3.9   | 23.9   | 18.7   | 13.5  | 23.4  |
| 129.2  | 150.6  | 156.0  | 131.2  | 61.3  | 312.0  | 179.1  | 50.9  | 80.5  |
| 11.4   | 20.1   | 23.1   | 18.9   | 14.8  | 17.5   | 6.1    | 24.1  | 20.9  |
| 1.8    | 1.7    | 1.6    | 5.4    | 2.5   | 1.1    | 0.5    | 8.0   | 1.6   |
| 26.6   | 12.6   | 16.8   | 14.3   | 4.2   | 11.3   | 7.5    | 17.9  | 25.2  |
| 11.9   | 16.4   | 12.8   | 8.9    | 6.3   | 13.6   | 9.9    | 8.7   | 18.3  |
| 2.8    | 4.2    | 3.5    | 1.3    | 1.1   | 3.7    | 3.6    | 2.5   | 3.3   |
| 151.6  | 139.4  | 159.7  | 79.6   | 62.3  | 819.3  | 423.5  | 300.0 | 307.3 |
| 1227.8 | 1302.3 | 1148.5 | 586.5  | 464.9 | 2942.3 | 2775.3 | 106.6 | 190.7 |
| 0.7    | 2.6    | 1.0    | 6.0    | 0.3   | 15.5   | 10.1   | 16.1  | 10.4  |
| 1948.9 | 1745.4 | 1948.5 | 1950.0 | 799.0 | 1901.4 | 1480.4 | 413.5 | 513.5 |
| 8.9    | 13.2   | 21.8   | 8.1    | 8.1   | 10.8   | 13.7   | 5.9   | 6.2   |
| 4.9    | 4.6    | 2.2    | 7.5    | 2.4   | 34.3   | 34.7   | 6.2   | 10.9  |
| 437.2  | 441.5  | 420.4  | 335.9  | 191.0 | 491.9  | 313.1  | 318.8 | 478.7 |
| 4.5    | 2.1    | 4.5    | 4.0    | 0.5   | 3.8    | 1.4    | 2.2   | 5.1   |
| 56.2   | 41.3   | 36.8   | 33.8   | 10.6  | 105.7  | 88.2   | 13.0  | 16.6  |
| 26.5   | 35.5   | 46.0   | 34.2   | 18.8  | 43.7   | 32.2   | 5.1   | 22.6  |
| 4.9    | 8.3    | 3.1    | 1.6    | 6.2   | 4.6    | 2.2    | 3.3   | 2.5   |
| 7.4    | 27.8   | 20.7   | 12.9   | 8.0   | 16.0   | 27.4   | 14.0  | 17.6  |
| 3.1    | 0.5    | 5.0    | 1.0    | 3.3   | 9.9    | 3.4    | 1.3   | 0.8   |
| 0.4    | 2.7    | 6.1    | 5.4    | 4.8   | 6.9    | 7.5    | 0.7   | 0.8   |
| 3.0    | 3.5    | 4.1    | 8.5    | 2.1   | 4.3    | 4.7    | 5.0   | 7.3   |
| 45.3   | 13.3   | 24.1   | 28.2   | 9.3   | 36.8   | 15.6   | 17.8  | 4.5   |
| 980.9  | 723.3  | 688.7  | 496.9  | 247.3 | 550.6  | 330.2  | 135.7 | 162.1 |
| 263.2  | 252.8  | 352.2  | 367.4  | 126.5 | 306.4  | 165.3  | 40.3  | 45.4  |
| 152.2  | 135.2  | 134.0  | 83.1   | 24.1  | 69.0   | 25.7   | 13.5  | 15.7  |
| 7.7    | 20.8   | 6.9    | 2.0    | 0.6   | 17.1   | 2.7    | 6.6   | 8.9   |
| 1.6    | 5.8    | 2.3    | 1.0    | 6.9   | 12.9   | 17.7   | 6.0   | 1.6   |
| 117.1  | 101.5  | 106.9  | 56.8   | 23.0  | 153.6  | 111.1  | 153.4 | 156.1 |
| 35.5   | 24.4   | 25.2   | 22.1   | 10.3  | 14.8   | 13.1   | 10.8  | 23.6  |
| 0.5    | 0.5    | 0.2    | 0.1    | 4.7   | 0.5    | 0.2    | 2.3   | 0.2   |
| 4.4    | 9.6    | 19.3   | 38.8   | 1.1   | 928.9  | 605.8  | 290.1 | 334.0 |
| 5.4    | 4.5    | 5.6    | 1.6    | 4.6   | 3.6    | 12.3   | 5.6   | 2.2   |
| 493.3  | 448.6  | 599.4  | 892.8  | 185.5 | 695.8  | 381.2  | 5.2   | 13.5  |
| 1.8    | 6.5    | 1.5    | 0.4    | 0.3   | 3.8    | 0.4    | 1.8   | 2.8   |
| 64.5   | 59.0   | 66.9   | 67.4   | 21.8  | 145.7  | 84.7   | 22.2  | 9.3   |
| 110.3  | 88.8   | 90.3   | 62.0   | 27.3  | 29.2   | 19.6   | 4.4   | 5.6   |
| 28.3   | 20.6   | 26.4   | 44.8   | 8.6   | 66.5   | 25.2   | 35.7  | 24.8  |
| 1.3    | 1.5    | 1.5    | 0.5    | 2.9   | 2.0    | 4.6    | 9.3   | 7.6   |
| 301.6  | 329.7  | 305.1  | 291.6  | 117.2 | 1300.5 | 989.5  | 181.6 | 91.6  |
| 18.3   | 12.9   | 15.8   | 12.1   | 5.0   | 46.7   | 52.2   | 2.4   | 4.1   |
| 5.2    | 0.5    | 4.5    | 0.6    | 0.6   | 7.4    | 22.4   | 0.4   | 1.8   |
| 27.8   | 33.3   | 33.3   | 25.3   | 8.1   | 161.6  | 111.3  | 22.5  | 14.7  |
| 615.5  | 611.5  | 542.8  | 294.9  | 158.1 | 306.5  | 195.7  | 77.6  | 91.7  |
| 12.3   | 8.4    | 4.5    | 4.3    | 4.7   | 3.9    | 14.5   | 2.5   | 11.4  |
| 198.1  | 184.1  | 165.0  | 176.4  | 50.0  | 246.9  | 122.4  | 59.0  | 58.5  |
| 0.4    | 1.7    | 5.0    | 3.5    | 0.2   | 173.7  | 135.1  | 0.6   | 0.6   |
| 6.4    | 1.7    | 4.7    | 5.4    | 0.7   | 1.8    | 9.2    | 3.9   | 3.4   |
| 80.2   | 69.0   | 60.3   | 35.8   | 18.6  | 70.6   | 61.3   | 7.3   | 12.3  |

|       |       |       |       |       |       |       |       |       |
|-------|-------|-------|-------|-------|-------|-------|-------|-------|
| 12.2  | 19.8  | 30.1  | 22.7  | 11.2  | 75.6  | 42.3  | 14.5  | 24.7  |
| 1.3   | 1.5   | 3.2   | 2.1   | 1.1   | 2.6   | 1.3   | 1.7   | 1.3   |
| 17.0  | 11.4  | 2.4   | 18.2  | 7.6   | 18.6  | 12.2  | 17.4  | 1.3   |
| 97.7  | 81.9  | 63.4  | 77.7  | 33.9  | 256.4 | 151.2 | 41.2  | 86.2  |
| 3.3   | 4.5   | 8.5   | 12.2  | 2.1   | 1.3   | 1.2   | 11.7  | 10.3  |
| 103.0 | 91.3  | 98.9  | 74.5  | 38.6  | 243.6 | 214.2 | 104.8 | 113.6 |
| 21.4  | 15.2  | 14.1  | 8.3   | 3.7   | 20.3  | 4.0   | 16.8  | 18.9  |
| 62.2  | 55.6  | 67.2  | 38.5  | 11.6  | 137.4 | 75.9  | 28.1  | 19.3  |
| 2.6   | 2.8   | 5.5   | 2.9   | 2.0   | 2.1   | 1.0   | 9.5   | 4.3   |
| 19.8  | 35.5  | 4.2   | 21.4  | 2.2   | 15.8  | 21.5  | 7.0   | 6.7   |
| 1.7   | 0.7   | 1.2   | 5.3   | 0.4   | 2.3   | 7.8   | 3.9   | 1.6   |
| 15.6  | 12.0  | 10.1  | 10.9  | 2.6   | 22.6  | 17.1  | 6.7   | 7.7   |
| 37.4  | 20.1  | 37.4  | 22.1  | 9.3   | 78.7  | 43.0  | 20.4  | 16.8  |
| 1.7   | 2.4   | 2.9   | 1.6   | 0.7   | 2.2   | 3.1   | 14.6  | 10.9  |
| 1.6   | 10.0  | 5.8   | 1.6   | 3.2   | 1.7   | 6.2   | 5.0   | 8.6   |
| 143.5 | 86.0  | 117.2 | 62.7  | 32.9  | 197.1 | 111.6 | 54.4  | 71.3  |
| 3.4   | 4.8   | 1.9   | 2.4   | 0.8   | 11.6  | 2.1   | 1.8   | 3.5   |
| 80.2  | 79.5  | 72.2  | 55.1  | 31.0  | 178.5 | 98.1  | 97.1  | 105.2 |
| 12.4  | 7.7   | 7.7   | 1.1   | 0.4   | 7.9   | 10.5  | 0.6   | 4.9   |
| 2.4   | 1.6   | 3.1   | 0.7   | 1.1   | 1.0   | 1.4   | 3.1   | 0.2   |
| 9.9   | 1.9   | 0.4   | 0.5   | 0.3   | 0.8   | 1.0   | 0.7   | 0.6   |
| 8.2   | 11.4  | 5.5   | 1.1   | 0.7   | 6.0   | 3.2   | 1.8   | 2.2   |
| 17.6  | 9.8   | 10.6  | 4.6   | 3.8   | 12.8  | 12.9  | 14.6  | 19.4  |
| 9.3   | 10.6  | 0.8   | 8.9   | 10.6  | 18.9  | 9.5   | 9.7   | 10.1  |
| 29.8  | 19.3  | 24.5  | 17.5  | 9.5   | 14.5  | 5.3   | 14.9  | 15.2  |
| 1.1   | 5.0   | 8.6   | 1.5   | 4.2   | 11.8  | 14.3  | 1.3   | 2.9   |
| 43.6  | 42.5  | 66.3  | 30.1  | 14.3  | 46.8  | 32.5  | 83.9  | 124.4 |
| 0.7   | 1.0   | 4.1   | 4.8   | 2.6   | 1.4   | 2.8   | 2.6   | 8.7   |
| 41.2  | 34.7  | 38.4  | 22.4  | 18.3  | 53.5  | 19.8  | 59.7  | 56.7  |
| 26.0  | 6.1   | 9.8   | 11.1  | 6.3   | 25.5  | 25.3  | 7.1   | 17.5  |
| 2.3   | 1.6   | 3.3   | 2.5   | 1.5   | 3.6   | 0.6   | 3.7   | 2.6   |
| 3.1   | 2.7   | 8.2   | 4.3   | 2.4   | 3.7   | 2.6   | 0.6   | 0.5   |
| 84.9  | 96.5  | 67.8  | 89.4  | 35.9  | 113.6 | 121.7 | 75.0  | 63.4  |
| 32.8  | 23.5  | 33.1  | 20.2  | 10.7  | 58.2  | 38.0  | 11.1  | 11.7  |
| 45.8  | 25.3  | 30.2  | 17.6  | 9.4   | 29.0  | 23.2  | 23.4  | 25.5  |
| 12.2  | 0.9   | 10.3  | 12.4  | 4.0   | 14.1  | 23.3  | 3.1   | 11.0  |
| 0.8   | 0.9   | 3.3   | 6.6   | 1.8   | 5.2   | 6.9   | 1.5   | 2.1   |
| 12.0  | 5.5   | 0.5   | 5.9   | 4.9   | 6.0   | 11.1  | 8.7   | 7.5   |
| 11.1  | 5.1   | 7.7   | 7.6   | 5.7   | 2.6   | 2.6   | 0.6   | 5.8   |
| 21.8  | 23.0  | 26.4  | 22.9  | 12.7  | 37.2  | 19.9  | 61.7  | 97.2  |
| 236.9 | 220.4 | 237.6 | 155.9 | 68.7  | 269.7 | 209.2 | 90.7  | 178.0 |
| 587.4 | 564.2 | 594.1 | 518.9 | 189.1 | 751.8 | 458.8 | 226.6 | 297.7 |
| 0.7   | 1.4   | 0.6   | 1.7   | 0.6   | 3.0   | 0.6   | 3.9   | 7.9   |
| 20.0  | 14.0  | 7.7   | 2.8   | 3.2   | 21.1  | 12.4  | 20.7  | 24.2  |
| 16.3  | 2.2   | 1.3   | 6.9   | 5.3   | 2.4   | 2.0   | 1.1   | 3.6   |
| 5.5   | 20.6  | 4.6   | 1.2   | 9.3   | 13.5  | 19.5  | 2.6   | 7.2   |
| 47.5  | 31.8  | 56.6  | 23.1  | 16.0  | 53.0  | 55.4  | 171.4 | 59.2  |
| 56.1  | 77.9  | 112.0 | 262.5 | 43.2  | 12.9  | 6.8   | 5.4   | 14.5  |
| 481.9 | 125.7 | 140.2 | 60.3  | 17.5  | 719.7 | 500.5 | 314.4 | 484.9 |
| 35.8  | 36.4  | 33.7  | 29.3  | 19.7  | 34.5  | 2.6   | 21.0  | 14.7  |
| 16.6  | 2.3   | 1.1   | 0.7   | 1.2   | 6.7   | 2.5   | 7.1   | 1.8   |
| 16.9  | 11.5  | 14.7  | 9.4   | 3.8   | 29.4  | 12.7  | 12.4  | 12.6  |
| 1.8   | 3.4   | 0.5   | 0.3   | 0.5   | 5.4   | 0.9   | 1.6   | 6.2   |

|        |        |        |        |        |        |        |       |        |
|--------|--------|--------|--------|--------|--------|--------|-------|--------|
| 14.8   | 19.9   | 26.1   | 22.9   | 13.9   | 50.9   | 32.5   | 65.8  | 86.8   |
| 15.0   | 19.0   | 8.5    | 13.5   | 7.4    | 6.2    | 13.3   | 6.8   | 5.5    |
| 5.0    | 11.0   | 8.1    | 5.1    | 2.9    | 8.6    | 4.9    | 16.7  | 14.7   |
| 50.0   | 13.1   | 36.2   | 5.0    | 2.9    | 6.3    | 25.2   | 29.1  | 26.3   |
| 13.5   | 17.1   | 3.5    | 10.6   | 4.1    | 8.0    | 6.2    | 3.8   | 1.7    |
| 3.7    | 1.8    | 2.6    | 1.5    | 0.4    | 0.7    | 0.6    | 1.1   | 1.0    |
| 19.0   | 17.5   | 10.1   | 15.3   | 4.3    | 26.0   | 16.9   | 10.5  | 4.2    |
| 256.3  | 213.8  | 236.8  | 187.5  | 86.9   | 407.8  | 206.1  | 80.1  | 116.9  |
| 3.4    | 6.5    | 2.6    | 2.5    | 3.3    | 2.5    | 9.6    | 5.7   | 0.6    |
| 131.6  | 108.8  | 116.5  | 90.6   | 26.4   | 152.7  | 110.3  | 163.6 | 210.8  |
| 2.1    | 7.0    | 5.6    | 1.3    | 1.1    | 5.6    | 1.6    | 2.2   | 2.0    |
| 2.0    | 10.2   | 4.1    | 7.2    | 2.5    | 8.0    | 7.4    | 6.7   | 9.8    |
| 11.9   | 14.0   | 11.0   | 11.8   | 3.1    | 5.9    | 1.2    | 10.2  | 12.7   |
| 27.0   | 14.1   | 22.0   | 23.8   | 5.6    | 17.0   | 3.8    | 20.3  | 21.8   |
| 3.1    | 2.5    | 4.3    | 2.0    | 4.8    | 6.1    | 2.5    | 3.2   | 0.7    |
| 2.3    | 5.2    | 9.3    | 1.7    | 4.1    | 5.7    | 15.5   | 0.9   | 2.1    |
| 5.2    | 3.4    | 1.5    | 2.8    | 0.6    | 0.7    | 6.6    | 5.5   | 4.2    |
| 10.1   | 4.6    | 2.1    | 7.4    | 6.0    | 5.2    | 7.3    | 0.8   | 3.2    |
| 0.1    | 0.8    | 0.4    | 2.2    | 0.1    | 3.7    | 0.3    | 2.0   | 8.7    |
| 2.9    | 2.1    | 1.5    | 2.2    | 0.8    | 6.0    | 8.7    | 1.8   | 0.9    |
| 5.0    | 2.4    | 3.7    | 10.1   | 9.2    | 12.5   | 2.0    | 6.2   | 3.5    |
| 8.6    | 7.2    | 11.8   | 1.0    | 6.6    | 10.9   | 7.0    | 140.7 | 227.3  |
| 2.5    | 1.5    | 1.7    | 2.1    | 1.3    | 2.6    | 1.4    | 49.8  | 48.9   |
| 5.6    | 15.5   | 8.4    | 5.1    | 0.7    | 1.4    | 1.2    | 10.2  | 13.2   |
| 9.5    | 2.1    | 2.9    | 17.4   | 1.2    | 3.5    | 6.2    | 1.7   | 3.8    |
| 7.0    | 7.2    | 3.0    | 10.3   | 5.2    | 20.9   | 7.9    | 11.2  | 11.7   |
| 11.7   | 7.6    | 1.7    | 4.7    | 0.3    | 9.2    | 7.1    | 7.6   | 14.8   |
| 77.5   | 103.7  | 91.7   | 98.5   | 49.5   | 114.3  | 47.3   | 81.1  | 122.0  |
| 8.0    | 8.5    | 4.9    | 3.5    | 0.3    | 52.0   | 34.8   | 12.8  | 25.9   |
| 1.9    | 1.7    | 11.1   | 1.1    | 0.1    | 10.4   | 0.5    | 3.7   | 1.0    |
| 5.0    | 1.7    | 3.5    | 1.4    | 2.0    | 2.4    | 1.1    | 3.1   | 1.4    |
| 5.0    | 0.8    | 8.2    | 6.3    | 2.7    | 16.0   | 9.8    | 20.4  | 13.4   |
| 18.5   | 11.3   | 2.0    | 7.9    | 0.3    | 23.6   | 2.2    | 4.4   | 1.8    |
| 3.8    | 3.2    | 14.9   | 1.6    | 1.3    | 5.4    | 2.8    | 3.2   | 10.7   |
| 18.8   | 2.0    | 1.9    | 2.1    | 2.3    | 2.6    | 2.8    | 19.0  | 22.6   |
| 38.3   | 36.0   | 46.0   | 33.8   | 9.4    | 42.3   | 19.2   | 27.0  | 22.0   |
| 2.7    | 23.6   | 15.9   | 5.4    | 6.3    | 17.3   | 11.5   | 25.0  | 22.1   |
| 33.6   | 29.5   | 23.1   | 23.0   | 6.4    | 3.2    | 3.6    | 24.5  | 22.5   |
| 4294.5 | 3958.1 | 3979.4 | 3731.4 | 1753.7 | 6218.8 | 4303.8 | 684.7 | 1031.0 |
| 6.6    | 5.9    | 1.4    | 0.4    | 1.8    | 1.1    | 4.8    | 0.5   | 1.3    |
| 16.2   | 9.7    | 8.8    | 13.2   | 5.8    | 29.8   | 9.7    | 9.9   | 16.9   |
| 3.0    | 1.1    | 0.8    | 0.6    | 0.4    | 0.9    | 0.8    | 1.4   | 2.1    |
| 2.5    | 3.0    | 2.0    | 2.5    | 1.1    | 2.6    | 1.7    | 1.0   | 3.0    |
| 6.8    | 1.5    | 2.0    | 7.2    | 0.8    | 21.2   | 19.8   | 11.9  | 18.1   |
| 10.4   | 13.9   | 11.9   | 5.2    | 1.4    | 21.7   | 14.7   | 3.4   | 11.1   |
| 1.6    | 2.0    | 0.7    | 1.5    | 0.4    | 1.9    | 1.5    | 2.3   | 3.1    |
| 5.8    | 7.8    | 6.0    | 3.6    | 0.1    | 0.5    | 5.1    | 1.0   | 2.3    |
| 158.2  | 133.0  | 140.1  | 110.8  | 39.6   | 180.0  | 163.4  | 58.1  | 74.3   |
| 14.1   | 30.1   | 41.6   | 13.4   | 15.5   | 26.4   | 3.5    | 25.5  | 47.9   |
| 27.6   | 33.7   | 16.3   | 10.8   | 10.0   | 18.4   | 3.1    | 12.5  | 10.1   |
| 1.3    | 1.7    | 15.2   | 2.6    | 1.1    | 1.6    | 1.4    | 8.3   | 6.5    |
| 41.2   | 38.1   | 35.3   | 7.1    | 15.9   | 176.6  | 124.3  | 112.0 | 146.6  |
| 10.8   | 0.9    | 8.9    | 4.7    | 1.2    | 10.4   | 1.8    | 2.6   | 8.8    |

|       |       |       |       |       |       |       |      |       |
|-------|-------|-------|-------|-------|-------|-------|------|-------|
| 18.7  | 8.3   | 4.7   | 8.9   | 4.4   | 13.1  | 10.5  | 17.8 | 11.2  |
| 1.4   | 3.4   | 1.6   | 1.3   | 2.2   | 1.5   | 2.1   | 1.9  | 9.2   |
| 1.4   | 1.8   | 6.4   | 9.4   | 5.0   | 2.6   | 2.6   | 2.1  | 2.4   |
| 17.6  | 12.1  | 15.5  | 14.9  | 0.9   | 22.5  | 20.8  | 8.7  | 17.6  |
| 47.2  | 35.0  | 49.9  | 31.5  | 9.2   | 96.8  | 54.0  | 1.3  | 1.6   |
| 7.0   | 6.6   | 12.0  | 1.8   | 3.9   | 2.2   | 0.9   | 2.0  | 5.6   |
| 23.3  | 7.2   | 8.4   | 2.0   | 9.9   | 6.6   | 6.5   | 12.3 | 20.0  |
| 5.5   | 25.6  | 21.5  | 17.9  | 4.7   | 33.4  | 30.0  | 13.2 | 13.7  |
| 0.8   | 0.8   | 0.3   | 3.2   | 2.1   | 4.5   | 0.6   | 7.6  | 0.8   |
| 1.3   | 2.4   | 0.7   | 0.8   | 0.6   | 1.4   | 1.3   | 2.3  | 1.5   |
| 14.7  | 14.4  | 19.7  | 13.3  | 6.9   | 6.8   | 16.4  | 12.0 | 13.4  |
| 42.9  | 43.0  | 5.5   | 23.6  | 13.0  | 4.1   | 23.3  | 6.7  | 14.9  |
| 4.8   | 7.1   | 10.7  | 9.5   | 5.1   | 8.8   | 4.1   | 2.8  | 0.2   |
| 3.8   | 3.2   | 0.7   | 2.6   | 3.3   | 0.4   | 12.1  | 5.3  | 2.0   |
| 18.1  | 13.5  | 25.8  | 16.0  | 7.5   | 29.3  | 31.5  | 16.9 | 4.3   |
| 8.7   | 0.8   | 0.5   | 7.8   | 3.7   | 11.4  | 0.6   | 0.5  | 4.9   |
| 13.6  | 11.9  | 13.9  | 3.9   | 1.9   | 27.2  | 20.1  | 20.1 | 9.9   |
| 10.1  | 26.6  | 23.3  | 7.9   | 8.1   | 31.8  | 23.3  | 7.0  | 2.5   |
| 11.8  | 9.7   | 24.4  | 15.8  | 4.9   | 86.5  | 68.1  | 21.9 | 16.5  |
| 2.6   | 2.8   | 2.4   | 2.1   | 1.4   | 2.9   | 1.8   | 2.5  | 0.9   |
| 17.1  | 11.5  | 13.7  | 15.0  | 1.2   | 26.8  | 9.0   | 12.9 | 22.1  |
| 16.9  | 16.1  | 11.9  | 2.4   | 5.6   | 12.4  | 8.9   | 3.7  | 1.7   |
| 2.0   | 6.5   | 10.9  | 9.1   | 0.5   | 14.4  | 9.5   | 10.5 | 8.4   |
| 10.2  | 6.5   | 11.3  | 2.1   | 3.8   | 15.7  | 12.7  | 20.5 | 10.7  |
| 19.0  | 6.1   | 12.5  | 0.7   | 0.4   | 18.3  | 4.3   | 5.0  | 2.6   |
| 33.7  | 16.4  | 16.2  | 16.6  | 6.1   | 41.0  | 31.0  | 9.0  | 13.9  |
| 15.2  | 12.0  | 15.5  | 13.8  | 5.0   | 17.1  | 10.9  | 4.0  | 8.5   |
| 10.2  | 3.9   | 19.1  | 12.5  | 3.8   | 3.5   | 11.1  | 8.8  | 18.3  |
| 1.5   | 10.9  | 7.4   | 11.7  | 7.2   | 14.5  | 13.3  | 19.1 | 17.9  |
| 23.7  | 18.8  | 26.2  | 19.1  | 15.4  | 59.7  | 30.0  | 85.5 | 106.6 |
| 10.8  | 4.1   | 8.2   | 2.4   | 6.3   | 12.8  | 2.1   | 17.0 | 4.3   |
| 8.0   | 1.7   | 11.8  | 2.4   | 1.8   | 2.9   | 16.2  | 2.1  | 4.1   |
| 0.4   | 1.1   | 0.6   | 1.1   | 1.0   | 2.3   | 1.0   | 2.2  | 1.3   |
| 2.3   | 7.4   | 0.7   | 0.8   | 5.9   | 5.1   | 4.8   | 14.4 | 7.0   |
| 1.4   | 1.6   | 1.4   | 0.4   | 0.4   | 1.2   | 1.3   | 1.6  | 1.0   |
| 95.0  | 90.9  | 96.7  | 74.4  | 40.9  | 210.8 | 134.9 | 68.6 | 83.2  |
| 15.9  | 6.7   | 4.8   | 12.3  | 3.9   | 19.1  | 19.5  | 2.9  | 2.4   |
| 7.1   | 16.2  | 2.1   | 13.9  | 9.7   | 15.4  | 1.3   | 8.1  | 22.9  |
| 2.5   | 1.5   | 4.4   | 1.6   | 0.8   | 4.3   | 10.0  | 1.1  | 3.3   |
| 8.8   | 0.8   | 1.9   | 0.9   | 1.0   | 2.2   | 1.0   | 9.1  | 8.0   |
| 6.8   | 7.1   | 4.4   | 5.3   | 2.6   | 0.7   | 2.1   | 0.5  | 0.8   |
| 0.7   | 1.4   | 3.7   | 3.1   | 1.8   | 3.9   | 0.5   | 3.7  | 5.4   |
| 1.0   | 7.6   | 1.1   | 0.7   | 1.3   | 2.5   | 1.2   | 3.1  | 1.2   |
| 28.0  | 9.9   | 10.0  | 1.1   | 0.6   | 15.5  | 13.7  | 29.4 | 12.8  |
| 10.6  | 17.0  | 13.9  | 13.1  | 6.2   | 16.7  | 11.6  | 1.3  | 2.7   |
| 30.5  | 31.7  | 20.0  | 14.2  | 12.1  | 36.4  | 29.2  | 13.8 | 24.1  |
| 406.8 | 388.0 | 432.3 | 420.3 | 181.2 | 409.2 | 313.7 | 76.9 | 99.2  |
| 5.9   | 5.1   | 4.5   | 6.3   | 0.2   | 8.5   | 4.2   | 1.1  | 0.7   |
| 35.2  | 28.3  | 27.1  | 22.6  | 0.9   | 4.9   | 14.7  | 1.7  | 10.2  |
| 21.3  | 9.6   | 25.7  | 30.8  | 12.0  | 26.8  | 9.1   | 3.5  | 16.5  |
| 25.6  | 14.8  | 6.8   | 5.9   | 5.9   | 27.5  | 27.2  | 8.8  | 10.1  |
| 9.9   | 1.2   | 1.4   | 4.8   | 0.3   | 6.4   | 0.6   | 2.3  | 1.2   |
| 2.4   | 6.3   | 18.7  | 1.8   | 4.0   | 7.9   | 15.6  | 18.0 | 5.7   |



|       |       |       |       |      |       |       |      |       |
|-------|-------|-------|-------|------|-------|-------|------|-------|
| 63.2  | 54.9  | 31.8  | 16.5  | 9.3  | 46.0  | 22.2  | 19.3 | 19.7  |
| 3.8   | 6.2   | 1.0   | 0.7   | 1.9  | 15.4  | 2.3   | 0.8  | 8.1   |
| 11.3  | 7.3   | 5.3   | 14.0  | 4.9  | 1.5   | 2.3   | 1.0  | 1.4   |
| 3.3   | 8.5   | 8.9   | 6.1   | 4.2  | 10.3  | 0.6   | 1.9  | 0.3   |
| 5.3   | 10.0  | 5.3   | 9.9   | 8.1  | 14.1  | 10.9  | 2.4  | 21.2  |
| 3.9   | 3.3   | 9.4   | 3.0   | 2.6  | 2.0   | 12.3  | 3.1  | 5.8   |
| 15.2  | 16.4  | 19.4  | 12.2  | 3.7  | 10.9  | 3.1   | 3.3  | 10.9  |
| 4.8   | 0.2   | 3.5   | 4.1   | 2.1  | 7.3   | 8.6   | 6.7  | 9.4   |
| 25.2  | 25.9  | 30.6  | 18.9  | 10.3 | 28.5  | 14.5  | 24.4 | 18.0  |
| 7.8   | 1.2   | 4.5   | 2.7   | 0.2  | 1.3   | 4.0   | 1.6  | 3.7   |
| 5.9   | 10.4  | 4.3   | 6.2   | 4.0  | 11.9  | 0.5   | 3.4  | 0.9   |
| 13.4  | 8.0   | 4.7   | 0.6   | 4.4  | 1.6   | 7.9   | 5.5  | 12.1  |
| 126.1 | 128.7 | 120.0 | 94.1  | 58.7 | 188.8 | 105.7 | 75.8 | 84.4  |
| 1.8   | 9.5   | 0.5   | 0.4   | 4.7  | 20.1  | 5.6   | 4.7  | 7.7   |
| 311.3 | 193.1 | 183.9 | 147.6 | 38.6 | 239.3 | 103.7 | 67.3 | 104.8 |
| 1.8   | 1.6   | 7.3   | 9.7   | 1.4  | 16.4  | 2.3   | 5.5  | 4.1   |
| 19.2  | 2.0   | 22.5  | 3.1   | 1.2  | 5.3   | 58.1  | 1.3  | 1.0   |
| 6.9   | 14.1  | 4.9   | 11.6  | 5.3  | 17.5  | 10.9  | 5.8  | 1.5   |
| 81.9  | 96.1  | 70.8  | 34.2  | 35.2 | 77.4  | 48.4  | 22.0 | 56.7  |
| 47.9  | 43.1  | 56.3  | 35.8  | 15.9 | 30.4  | 16.6  | 10.7 | 23.2  |
| 8.2   | 4.2   | 3.0   | 14.5  | 0.7  | 10.7  | 1.1   | 0.8  | 7.0   |
| 2.1   | 1.1   | 1.6   | 11.3  | 0.2  | 1.8   | 1.8   | 9.3  | 0.6   |
| 152.9 | 152.8 | 93.9  | 48.2  | 22.0 | 290.1 | 220.2 | 17.4 | 28.7  |
| 21.6  | 2.3   | 13.8  | 1.8   | 0.6  | 2.7   | 14.0  | 10.0 | 3.2   |
| 4.9   | 1.1   | 2.0   | 0.9   | 3.5  | 1.1   | 7.6   | 12.5 | 14.3  |
| 11.5  | 10.0  | 13.4  | 1.4   | 6.6  | 17.2  | 15.0  | 18.9 | 18.2  |
| 2.2   | 4.9   | 5.4   | 6.0   | 0.3  | 8.1   | 0.4   | 0.5  | 7.0   |
| 14.0  | 23.9  | 24.7  | 21.0  | 3.4  | 302.5 | 280.9 | 3.9  | 8.0   |
| 29.5  | 21.0  | 25.4  | 26.0  | 22.7 | 59.8  | 50.3  | 6.3  | 4.5   |
| 21.2  | 13.1  | 23.8  | 22.3  | 7.8  | 52.8  | 9.7   | 13.6 | 15.5  |
| 22.8  | 33.9  | 34.4  | 24.3  | 10.0 | 57.3  | 22.7  | 1.3  | 9.9   |
| 1.1   | 6.5   | 0.9   | 2.1   | 5.7  | 10.6  | 0.4   | 4.6  | 9.3   |
| 14.9  | 10.8  | 16.3  | 15.0  | 9.7  | 58.5  | 23.3  | 47.3 | 29.1  |
| 2.9   | 0.7   | 2.1   | 0.5   | 2.6  | 4.9   | 1.0   | 1.9  | 0.3   |
| 1.1   | 1.8   | 2.0   | 8.9   | 0.4  | 5.2   | 13.8  | 1.9  | 3.9   |
| 112.8 | 98.3  | 108.6 | 98.7  | 41.4 | 131.9 | 63.2  | 41.9 | 19.5  |
| 4.8   | 15.4  | 13.0  | 5.9   | 0.5  | 8.8   | 21.2  | 15.2 | 17.1  |
| 5.8   | 4.4   | 6.9   | 6.9   | 4.8  | 22.4  | 8.2   | 4.4  | 0.3   |
| 0.5   | 2.7   | 8.0   | 5.5   | 0.3  | 1.5   | 6.0   | 1.2  | 0.7   |
| 53.4  | 51.4  | 83.7  | 97.8  | 35.5 | 67.1  | 35.0  | 16.4 | 22.5  |
| 76.2  | 56.4  | 69.2  | 80.5  | 18.5 | 63.6  | 54.5  | 62.0 | 125.9 |
| 14.7  | 7.3   | 0.8   | 2.6   | 3.5  | 2.9   | 16.7  | 11.8 | 6.7   |
| 25.2  | 21.7  | 30.8  | 25.8  | 9.0  | 144.1 | 124.1 | 4.3  | 6.7   |
| 3.1   | 0.9   | 1.9   | 1.2   | 0.6  | 5.5   | 1.3   | 1.5  | 1.8   |
| 3.8   | 3.2   | 7.2   | 0.3   | 4.2  | 4.4   | 0.9   | 8.1  | 6.9   |
| 195.7 | 165.0 | 188.7 | 250.8 | 66.3 | 305.5 | 288.2 | 30.6 | 36.1  |
| 0.4   | 0.3   | 0.5   | 0.2   | 0.2  | 0.6   | 0.5   | 1.8  | 0.4   |
| 28.1  | 22.5  | 16.8  | 24.2  | 15.6 | 28.9  | 17.9  | 9.2  | 21.2  |
| 4.9   | 9.0   | 1.2   | 1.0   | 0.7  | 6.2   | 5.5   | 3.5  | 5.9   |
| 0.8   | 0.5   | 1.4   | 2.9   | 0.5  | 0.9   | 0.7   | 6.7  | 1.0   |
| 5.5   | 6.5   | 1.4   | 1.6   | 1.0  | 4.2   | 2.9   | 8.8  | 12.8  |
| 114.3 | 110.2 | 75.3  | 43.2  | 29.7 | 197.1 | 178.7 | 58.8 | 53.9  |
| 0.8   | 3.4   | 2.2   | 2.7   | 0.6  | 1.3   | 0.5   | 3.1  | 3.6   |

|        |        |        |        |        |        |        |        |        |
|--------|--------|--------|--------|--------|--------|--------|--------|--------|
| 4.2    | 0.2    | 6.2    | 0.6    | 4.5    | 9.2    | 0.5    | 0.3    | 4.0    |
| 15.7   | 15.1   | 16.6   | 11.7   | 3.1    | 54.0   | 41.5   | 12.4   | 8.6    |
| 28.6   | 33.3   | 24.0   | 18.5   | 9.1    | 28.3   | 14.4   | 23.4   | 23.6   |
| 872.7  | 961.2  | 832.2  | 634.1  | 338.6  | 1283.8 | 880.8  | 66.0   | 158.0  |
| 51.0   | 83.9   | 84.4   | 88.8   | 27.8   | 133.8  | 76.2   | 17.4   | 12.3   |
| 6.6    | 3.9    | 5.9    | 4.2    | 9.4    | 10.4   | 5.3    | 17.4   | 4.1    |
| 15.7   | 12.1   | 15.8   | 8.6    | 4.2    | 22.9   | 17.4   | 2.4    | 22.1   |
| 5974.6 | 5368.4 | 5290.5 | 4531.2 | 2258.4 | 6370.6 | 4249.8 | 938.5  | 1084.5 |
| 12.1   | 0.6    | 7.3    | 2.3    | 0.8    | 1.0    | 2.4    | 1.9    | 5.7    |
| 135.7  | 125.3  | 165.0  | 124.0  | 57.5   | 78.1   | 39.4   | 24.5   | 49.7   |
| 7.4    | 8.2    | 1.1    | 1.2    | 0.3    | 14.1   | 1.4    | 0.9    | 0.8    |
| 2.0    | 13.9   | 15.3   | 15.9   | 0.6    | 3.3    | 7.6    | 2.1    | 1.1    |
| 8.3    | 3.6    | 6.9    | 5.5    | 2.7    | 3.0    | 5.4    | 3.8    | 3.0    |
| 2.2    | 12.3   | 6.2    | 2.3    | 1.7    | 5.1    | 2.1    | 1.0    | 1.9    |
| 15.3   | 20.0   | 2.5    | 15.3   | 6.4    | 21.6   | 9.4    | 13.6   | 28.8   |
| 0.9    | 2.3    | 6.3    | 5.5    | 0.3    | 17.4   | 0.7    | 1.6    | 9.0    |
| 2.5    | 0.8    | 1.9    | 0.9    | 0.3    | 1.0    | 1.7    | 1.1    | 1.6    |
| 2.8    | 1.0    | 2.5    | 0.2    | 0.2    | 3.5    | 6.9    | 5.0    | 2.7    |
| 5249.7 | 4802.5 | 4605.9 | 5090.6 | 2515.9 | 7889.6 | 6347.3 | 2661.0 | 3027.1 |
| 1.2    | 0.7    | 3.1    | 8.3    | 3.2    | 2.8    | 0.6    | 1.1    | 1.0    |
| 0.9    | 0.8    | 2.2    | 0.7    | 0.7    | 1.9    | 1.7    | 10.1   | 0.9    |
| 26.5   | 22.1   | 20.8   | 18.0   | 5.0    | 17.0   | 33.9   | 2.9    | 11.2   |
| 2.4    | 1.6    | 2.5    | 1.8    | 0.8    | 1.3    | 7.4    | 2.7    | 2.6    |
| 8.7    | 10.0   | 9.7    | 6.8    | 0.7    | 10.7   | 9.7    | 8.3    | 2.0    |
| 1.3    | 5.0    | 3.7    | 0.5    | 0.5    | 0.9    | 1.1    | 1.5    | 1.5    |
| 1.5    | 1.0    | 1.5    | 1.2    | 1.8    | 13.0   | 1.0    | 2.9    | 10.6   |
| 8.1    | 10.9   | 15.2   | 17.7   | 5.9    | 13.7   | 11.6   | 14.1   | 11.9   |
| 7.9    | 10.3   | 6.8    | 4.4    | 0.9    | 15.3   | 9.4    | 10.2   | 0.6    |
| 14.0   | 8.6    | 13.1   | 6.1    | 1.4    | 2.4    | 13.7   | 0.9    | 10.5   |
| 4.6    | 3.1    | 3.0    | 1.9    | 4.0    | 4.9    | 17.7   | 3.2    | 6.4    |
| 17.3   | 19.2   | 17.9   | 3.1    | 3.8    | 26.3   | 13.1   | 17.3   | 24.6   |
| 11.2   | 9.4    | 8.3    | 10.9   | 0.9    | 10.6   | 9.6    | 1.6    | 0.4    |
| 3.7    | 10.0   | 4.2    | 15.2   | 5.4    | 3.1    | 23.1   | 11.1   | 11.2   |
| 173.0  | 182.7  | 180.6  | 156.9  | 98.5   | 556.7  | 513.4  | 21.9   | 25.9   |
| 4.5    | 18.9   | 22.9   | 21.9   | 8.9    | 16.4   | 28.5   | 18.0   | 2.6    |
| 61.3   | 62.7   | 68.2   | 65.1   | 32.2   | 60.1   | 42.1   | 26.0   | 20.7   |
| 0.7    | 1.1    | 1.9    | 1.9    | 0.8    | 1.2    | 0.6    | 0.4    | 0.4    |
| 96.7   | 89.9   | 99.2   | 64.9   | 48.5   | 167.0  | 108.6  | 59.3   | 57.1   |
| 135.6  | 129.6  | 141.5  | 135.0  | 76.5   | 82.6   | 64.6   | 63.5   | 67.4   |
| 218.2  | 158.9  | 238.4  | 178.6  | 45.0   | 326.5  | 182.0  | 42.3   | 71.5   |
| 11.1   | 11.6   | 23.7   | 12.1   | 0.5    | 54.0   | 32.8   | 13.3   | 12.2   |
| 8.4    | 3.6    | 2.5    | 3.0    | 2.0    | 2.0    | 9.4    | 2.3    | 4.5    |
| 17.0   | 6.9    | 9.5    | 6.8    | 5.9    | 9.6    | 19.6   | 12.1   | 9.3    |
| 2.6    | 2.6    | 1.9    | 0.4    | 1.2    | 2.2    | 0.5    | 3.1    | 1.8    |
| 1.8    | 1.4    | 1.5    | 1.9    | 0.5    | 3.2    | 1.9    | 11.3   | 25.7   |
| 2.2    | 11.3   | 0.9    | 9.2    | 5.1    | 12.8   | 11.0   | 18.4   | 22.9   |
| 32.9   | 30.7   | 23.1   | 16.0   | 2.5    | 34.3   | 15.8   | 9.1    | 11.2   |
| 13.8   | 4.4    | 5.2    | 0.9    | 4.9    | 7.7    | 6.8    | 1.1    | 0.9    |
| 1.7    | 5.8    | 8.8    | 2.8    | 3.5    | 6.3    | 2.3    | 4.8    | 4.3    |
| 189.2  | 147.0  | 152.0  | 96.3   | 65.7   | 382.7  | 184.9  | 160.1  | 183.1  |
| 12.5   | 9.4    | 16.7   | 15.0   | 11.5   | 15.7   | 12.0   | 20.6   | 14.9   |
| 3.0    | 1.6    | 1.5    | 1.3    | 1.7    | 2.8    | 2.4    | 2.9    | 1.9    |
| 90.6   | 91.2   | 91.0   | 65.5   | 29.9   | 43.2   | 40.3   | 17.3   | 18.9   |

|        |        |        |        |       |        |        |       |       |
|--------|--------|--------|--------|-------|--------|--------|-------|-------|
| 2.9    | 2.8    | 1.1    | 1.7    | 1.0   | 0.9    | 3.2    | 1.7   | 7.2   |
| 4.9    | 1.9    | 5.3    | 8.0    | 5.1   | 16.9   | 10.2   | 16.9  | 11.3  |
| 1.2    | 3.0    | 0.7    | 0.9    | 1.6   | 0.6    | 0.5    | 1.3   | 1.7   |
| 26.3   | 12.1   | 9.2    | 3.9    | 7.5   | 12.3   | 1.6    | 2.5   | 15.3  |
| 6.6    | 9.9    | 1.3    | 1.8    | 2.1   | 4.4    | 4.0    | 1.8   | 2.2   |
| 6.5    | 2.6    | 2.2    | 1.6    | 0.3   | 1.0    | 0.6    | 12.3  | 1.7   |
| 13.9   | 8.4    | 6.7    | 12.5   | 0.3   | 14.1   | 6.8    | 3.8   | 6.7   |
| 7.4    | 5.9    | 4.8    | 2.4    | 6.5   | 21.2   | 13.4   | 2.1   | 6.2   |
| 12.4   | 7.2    | 11.0   | 11.6   | 4.8   | 12.4   | 8.3    | 1.6   | 0.3   |
| 4.0    | 4.4    | 1.3    | 6.1    | 1.5   | 3.3    | 1.7    | 0.7   | 3.6   |
| 85.6   | 83.5   | 102.9  | 93.6   | 46.1  | 94.4   | 55.8   | 21.8  | 34.6  |
| 13.6   | 1.9    | 3.2    | 10.6   | 6.8   | 22.5   | 15.3   | 2.0   | 6.7   |
| 13.2   | 16.0   | 16.5   | 11.9   | 11.8  | 40.4   | 17.2   | 3.9   | 14.1  |
| 1.3    | 10.8   | 7.4    | 1.7    | 0.9   | 0.6    | 1.1    | 1.7   | 8.7   |
| 13.0   | 10.3   | 3.4    | 7.8    | 5.2   | 13.2   | 9.3    | 13.6  | 15.7  |
| 13.3   | 10.9   | 18.8   | 19.4   | 3.4   | 2.2    | 7.7    | 12.3  | 14.3  |
| 4.4    | 2.8    | 3.4    | 3.6    | 1.1   | 3.3    | 1.1    | 2.9   | 6.8   |
| 1.7    | 0.6    | 1.0    | 0.6    | 0.7   | 24.6   | 14.6   | 1.3   | 1.2   |
| 8.3    | 7.0    | 1.1    | 0.4    | 0.2   | 3.5    | 1.4    | 0.7   | 1.4   |
| 65.7   | 45.1   | 75.2   | 41.9   | 23.2  | 14.6   | 1.1    | 5.9   | 20.3  |
| 10.6   | 16.6   | 14.8   | 10.6   | 1.5   | 2.7    | 14.8   | 18.6  | 2.2   |
| 23.1   | 6.4    | 5.4    | 3.2    | 11.2  | 6.7    | 5.1    | 22.0  | 3.1   |
| 7.8    | 9.3    | 0.3    | 7.2    | 0.8   | 10.3   | 11.7   | 1.0   | 5.5   |
| 3.7    | 13.4   | 13.4   | 9.7    | 0.5   | 6.4    | 7.7    | 4.5   | 0.9   |
| 1.8    | 4.0    | 14.3   | 5.3    | 2.2   | 20.6   | 12.9   | 5.1   | 1.7   |
| 9.5    | 4.4    | 3.2    | 0.8    | 0.6   | 18.7   | 2.3    | 4.1   | 3.6   |
| 1.1    | 2.8    | 1.2    | 0.8    | 3.2   | 8.7    | 6.5    | 1.1   | 3.7   |
| 24.1   | 16.2   | 17.7   | 7.9    | 2.1   | 28.5   | 13.8   | 27.7  | 26.0  |
| 176.0  | 151.2  | 189.5  | 74.1   | 81.8  | 209.9  | 144.9  | 83.9  | 77.9  |
| 0.8    | 4.5    | 3.2    | 0.7    | 2.3   | 0.7    | 5.7    | 3.3   | 0.7   |
| 103.9  | 83.0   | 127.5  | 81.3   | 46.4  | 138.5  | 117.3  | 79.1  | 42.5  |
| 8.3    | 22.5   | 7.3    | 6.2    | 9.2   | 21.1   | 29.8   | 16.1  | 7.1   |
| 0.9    | 4.7    | 9.0    | 0.5    | 1.9   | 5.8    | 1.0    | 1.3   | 4.0   |
| 81.2   | 34.6   | 51.9   | 26.1   | 16.9  | 91.7   | 67.7   | 29.0  | 35.9  |
| 1902.6 | 1600.1 | 1426.3 | 1260.3 | 678.7 | 2286.3 | 1368.9 | 147.4 | 188.2 |
| 14.5   | 22.6   | 23.3   | 40.9   | 8.0   | 190.0  | 176.9  | 1.3   | 2.0   |
| 13.9   | 21.8   | 31.3   | 13.8   | 3.7   | 35.4   | 15.3   | 15.3  | 14.3  |
| 141.3  | 133.0  | 142.5  | 96.4   | 41.7  | 283.3  | 203.0  | 15.4  | 37.2  |
| 46.3   | 33.3   | 38.8   | 27.2   | 9.6   | 32.0   | 11.0   | 43.2  | 53.5  |
| 157.6  | 121.3  | 130.5  | 88.1   | 33.6  | 205.0  | 187.7  | 29.5  | 45.5  |
| 194.0  | 225.8  | 288.0  | 481.7  | 137.3 | 239.7  | 221.9  | 95.2  | 68.4  |
| 5.1    | 0.9    | 3.5    | 5.9    | 0.1   | 4.0    | 6.4    | 1.3   | 5.1   |
| 21.0   | 13.8   | 9.9    | 10.0   | 4.1   | 25.6   | 6.4    | 7.9   | 8.0   |
| 428.5  | 367.7  | 378.6  | 160.3  | 138.0 | 419.7  | 207.4  | 133.6 | 192.5 |
| 36.0   | 33.7   | 7.3    | 11.0   | 10.6  | 9.7    | 16.3   | 5.8   | 39.8  |
| 23.3   | 1.9    | 21.3   | 16.9   | 1.3   | 29.8   | 21.9   | 17.2  | 17.4  |
| 102.3  | 121.6  | 82.8   | 70.1   | 39.1  | 73.3   | 62.4   | 21.0  | 12.5  |
| 2.2    | 0.3    | 0.9    | 0.3    | 0.7   | 2.7    | 1.3    | 0.7   | 0.5   |
| 4.1    | 9.1    | 13.3   | 4.1    | 1.2   | 3.3    | 2.1    | 14.9  | 21.1  |
| 20.3   | 36.8   | 10.0   | 30.1   | 8.9   | 20.8   | 2.4    | 15.7  | 7.5   |
| 9.5    | 21.8   | 21.2   | 13.2   | 3.3   | 318.3  | 199.5  | 14.0  | 26.0  |
| 7.7    | 8.5    | 6.0    | 4.6    | 2.0   | 30.1   | 28.0   | 14.3  | 11.7  |
| 0.1    | 0.9    | 0.3    | 0.8    | 2.4   | 4.1    | 0.7    | 0.3   | 5.1   |

|        |        |        |        |       |        |        |       |       |
|--------|--------|--------|--------|-------|--------|--------|-------|-------|
| 25.5   | 31.7   | 51.1   | 10.7   | 28.4  | 37.2   | 35.7   | 37.1  | 27.5  |
| 29.8   | 5.1    | 21.8   | 20.7   | 10.4  | 31.4   | 4.9    | 1.3   | 3.4   |
| 3.0    | 7.1    | 7.9    | 10.2   | 8.4   | 13.4   | 8.8    | 7.4   | 10.6  |
| 18.9   | 29.4   | 38.3   | 16.6   | 7.0   | 31.2   | 21.5   | 17.0  | 35.6  |
| 2.8    | 1.1    | 1.1    | 1.4    | 3.3   | 21.2   | 4.4    | 12.6  | 0.8   |
| 0.6    | 4.6    | 14.4   | 2.1    | 4.1   | 13.5   | 10.2   | 6.6   | 0.8   |
| 2.8    | 1.0    | 2.8    | 0.8    | 0.5   | 2.7    | 0.5    | 1.5   | 3.3   |
| 8.8    | 24.3   | 11.4   | 5.7    | 6.3   | 6.6    | 9.4    | 7.9   | 17.4  |
| 10.9   | 1.5    | 2.6    | 2.3    | 0.8   | 1.1    | 1.8    | 0.9   | 2.1   |
| 99.8   | 112.4  | 147.7  | 350.3  | 59.2  | 334.7  | 284.8  | 62.4  | 67.5  |
| 35.8   | 38.0   | 10.4   | 34.0   | 15.8  | 164.2  | 120.6  | 60.4  | 75.7  |
| 3.0    | 7.6    | 5.8    | 3.5    | 0.3   | 16.1   | 9.1    | 5.7   | 15.3  |
| 1.8    | 1.5    | 10.3   | 0.7    | 0.3   | 1.3    | 0.8    | 2.6   | 13.2  |
| 27.1   | 25.5   | 32.2   | 27.6   | 10.1  | 171.1  | 99.9   | 184.1 | 258.6 |
| 10.3   | 2.3    | 15.1   | 3.9    | 2.3   | 0.8    | 11.7   | 1.9   | 1.9   |
| 5.1    | 1.4    | 1.2    | 1.5    | 2.6   | 2.6    | 8.0    | 2.2   | 6.3   |
| 3.3    | 4.0    | 9.7    | 4.1    | 2.4   | 19.8   | 3.3    | 0.7   | 1.4   |
| 4.0    | 3.5    | 0.4    | 0.2    | 2.0   | 8.4    | 2.3    | 0.5   | 3.9   |
| 2.4    | 16.6   | 10.2   | 8.8    | 5.9   | 1.7    | 8.8    | 2.0   | 3.9   |
| 2.6    | 5.7    | 4.1    | 4.7    | 0.7   | 12.5   | 1.4    | 5.0   | 2.0   |
| 85.3   | 96.4   | 61.8   | 98.1   | 42.9  | 25.9   | 25.3   | 38.3  | 42.8  |
| 8.1    | 0.9    | 0.4    | 3.7    | 0.4   | 10.6   | 4.4    | 6.7   | 8.0   |
| 1.3    | 4.1    | 7.4    | 0.5    | 0.7   | 8.2    | 7.4    | 6.2   | 4.3   |
| 8.3    | 13.3   | 32.0   | 25.6   | 15.1  | 97.7   | 93.3   | 62.5  | 66.8  |
| 1.2    | 9.6    | 3.7    | 2.5    | 1.5   | 1.2    | 3.7    | 2.3   | 6.1   |
| 3.2    | 2.4    | 10.5   | 5.5    | 2.3   | 4.8    | 22.6   | 3.5   | 7.0   |
| 32.4   | 15.0   | 24.3   | 14.3   | 7.9   | 22.9   | 10.3   | 13.9  | 5.2   |
| 2.5    | 0.5    | 7.7    | 3.8    | 1.1   | 3.2    | 2.3    | 2.9   | 11.5  |
| 3.7    | 5.0    | 4.0    | 1.8    | 10.3  | 11.2   | 2.7    | 2.3   | 14.1  |
| 116.3  | 64.3   | 84.9   | 57.0   | 23.5  | 101.9  | 57.6   | 21.2  | 35.2  |
| 8.2    | 11.3   | 15.2   | 12.0   | 7.3   | 13.7   | 20.4   | 18.5  | 11.9  |
| 11.1   | 11.1   | 1.9    | 2.6    | 1.6   | 9.6    | 6.9    | 8.9   | 4.1   |
| 31.4   | 4.9    | 5.9    | 15.6   | 2.6   | 4.1    | 10.0   | 15.8  | 14.4  |
| 5.8    | 5.4    | 3.3    | 7.2    | 0.4   | 6.2    | 5.9    | 5.3   | 0.8   |
| 13.2   | 0.9    | 16.7   | 1.0    | 3.1   | 5.3    | 13.5   | 2.0   | 10.0  |
| 5.2    | 8.7    | 5.9    | 1.0    | 5.5   | 10.1   | 1.5    | 7.5   | 7.1   |
| 1.1    | 0.4    | 0.6    | 1.1    | 2.0   | 0.5    | 0.6    | 1.1   | 0.9   |
| 1694.7 | 1452.9 | 1632.1 | 1209.7 | 439.8 | 3137.1 | 2137.8 | 75.0  | 125.7 |
| 5.6    | 5.7    | 0.6    | 0.6    | 2.8   | 3.4    | 0.5    | 2.0   | 1.8   |
| 18.1   | 8.3    | 4.4    | 8.7    | 0.3   | 7.5    | 11.8   | 10.2  | 8.1   |
| 47.2   | 47.2   | 53.5   | 57.6   | 15.6  | 54.7   | 21.8   | 27.0  | 26.5  |
| 24.5   | 26.7   | 29.3   | 22.7   | 4.2   | 24.8   | 18.9   | 151.3 | 169.8 |
| 0.7    | 0.4    | 4.3    | 1.0    | 1.8   | 3.8    | 3.9    | 6.7   | 8.0   |
| 17.5   | 8.3    | 1.5    | 13.8   | 0.8   | 3.7    | 13.8   | 1.1   | 4.0   |
| 514.2  | 450.8  | 451.9  | 300.2  | 196.5 | 543.3  | 424.8  | 102.8 | 165.9 |
| 7.3    | 4.0    | 1.0    | 5.5    | 2.2   | 1.4    | 1.0    | 10.3  | 7.9   |
| 4.2    | 4.3    | 0.3    | 0.3    | 2.1   | 9.8    | 5.4    | 0.1   | 6.4   |
| 0.7    | 1.2    | 1.0    | 1.9    | 0.6   | 1.7    | 12.0   | 1.5   | 1.4   |
| 0.8    | 1.3    | 2.2    | 0.5    | 2.4   | 2.1    | 0.5    | 0.6   | 0.4   |
| 72.6   | 51.5   | 38.1   | 37.8   | 10.3  | 173.8  | 78.2   | 4.4   | 16.8  |
| 15.0   | 1.5    | 11.8   | 7.1    | 4.8   | 9.6    | 7.5    | 12.8  | 9.1   |
| 1.3    | 1.6    | 2.2    | 3.4    | 0.6   | 5.2    | 1.9    | 1.1   | 1.2   |
| 1.2    | 5.3    | 1.0    | 1.2    | 1.3   | 8.2    | 8.5    | 7.1   | 10.9  |

|       |       |       |       |      |       |       |       |       |
|-------|-------|-------|-------|------|-------|-------|-------|-------|
| 6.9   | 6.1   | 7.2   | 5.3   | 2.9  | 7.4   | 0.9   | 5.6   | 5.1   |
| 124.3 | 120.9 | 97.2  | 85.8  | 42.1 | 157.5 | 158.0 | 590.4 | 606.4 |
| 3.4   | 0.8   | 2.1   | 4.8   | 0.7  | 1.4   | 1.2   | 1.2   | 7.0   |
| 16.6  | 10.8  | 5.2   | 3.8   | 6.5  | 4.1   | 10.6  | 6.0   | 10.8  |
| 1.1   | 4.9   | 3.8   | 0.5   | 2.3  | 5.7   | 0.4   | 9.9   | 0.5   |
| 9.1   | 17.6  | 8.0   | 3.3   | 8.4  | 3.3   | 9.8   | 2.8   | 1.6   |
| 11.0  | 2.7   | 6.9   | 10.1  | 6.1  | 4.5   | 12.1  | 8.5   | 21.1  |
| 116.5 | 101.0 | 108.9 | 129.5 | 37.1 | 126.1 | 77.2  | 99.4  | 109.5 |
| 13.1  | 16.4  | 10.2  | 6.2   | 6.4  | 23.5  | 24.7  | 8.8   | 4.6   |
| 5.3   | 3.7   | 10.7  | 0.1   | 0.5  | 2.5   | 0.6   | 1.0   | 0.9   |
| 23.6  | 21.0  | 29.8  | 15.9  | 7.5  | 14.7  | 13.9  | 23.3  | 13.6  |
| 12.3  | 12.6  | 18.7  | 13.3  | 8.8  | 19.3  | 13.8  | 9.5   | 12.6  |
| 3.3   | 0.9   | 1.6   | 1.3   | 0.8  | 8.1   | 0.6   | 0.9   | 1.0   |
| 1.6   | 3.0   | 16.7  | 2.4   | 1.5  | 10.2  | 8.9   | 9.8   | 2.3   |
| 5.5   | 15.8  | 15.3  | 2.5   | 7.7  | 6.4   | 12.2  | 13.9  | 12.5  |
| 23.7  | 20.9  | 25.7  | 14.1  | 11.2 | 33.1  | 14.4  | 18.6  | 14.1  |
| 8.7   | 2.3   | 1.2   | 2.2   | 0.7  | 2.0   | 1.4   | 2.3   | 0.6   |
| 5.7   | 0.4   | 1.4   | 0.4   | 5.6  | 10.2  | 2.9   | 7.9   | 5.5   |
| 1.5   | 2.0   | 1.6   | 0.6   | 0.5  | 2.1   | 0.8   | 2.6   | 1.2   |
| 13.1  | 13.3  | 6.2   | 6.8   | 4.0  | 12.2  | 7.2   | 10.3  | 4.8   |
| 0.8   | 0.7   | 2.6   | 1.0   | 1.3  | 0.4   | 3.1   | 0.8   | 5.5   |
| 110.0 | 120.0 | 131.7 | 103.3 | 38.3 | 127.9 | 83.9  | 115.2 | 120.9 |
| 29.2  | 15.9  | 25.7  | 19.9  | 8.9  | 22.7  | 14.0  | 22.6  | 26.4  |
| 5.2   | 1.9   | 2.3   | 1.8   | 3.4  | 9.2   | 2.4   | 0.9   | 4.6   |
| 6.9   | 10.5  | 3.4   | 15.7  | 8.6  | 31.5  | 16.6  | 21.4  | 11.6  |
| 3.4   | 4.1   | 16.4  | 5.2   | 1.7  | 25.3  | 17.5  | 2.7   | 3.7   |
| 12.3  | 1.6   | 2.1   | 1.7   | 1.4  | 2.3   | 6.9   | 2.7   | 2.3   |
| 7.6   | 2.8   | 1.3   | 6.8   | 1.9  | 13.8  | 2.1   | 4.6   | 4.9   |
| 5.9   | 1.4   | 2.0   | 1.3   | 1.5  | 9.2   | 0.5   | 7.9   | 9.1   |
| 4.4   | 2.3   | 12.0  | 14.0  | 0.3  | 13.9  | 8.2   | 8.4   | 3.8   |
| 8.9   | 0.7   | 1.7   | 0.4   | 0.6  | 4.2   | 1.3   | 1.5   | 9.6   |
| 9.9   | 4.7   | 6.3   | 5.9   | 5.3  | 6.1   | 1.3   | 1.5   | 1.2   |
| 0.9   | 1.1   | 0.7   | 1.1   | 0.2  | 7.0   | 4.5   | 4.9   | 3.9   |
| 2.0   | 4.5   | 2.4   | 6.3   | 1.6  | 2.5   | 3.2   | 2.8   | 5.9   |
| 3.0   | 4.4   | 5.6   | 2.0   | 1.2  | 8.1   | 2.9   | 3.3   | 3.1   |
| 3.6   | 12.8  | 1.2   | 3.3   | 3.6  | 4.5   | 2.2   | 5.6   | 9.1   |
| 9.4   | 1.0   | 1.0   | 2.0   | 1.3  | 1.5   | 5.5   | 2.2   | 2.1   |
| 36.5  | 22.6  | 33.6  | 17.1  | 20.5 | 42.1  | 5.7   | 14.8  | 32.4  |
| 1.7   | 20.4  | 8.2   | 0.6   | 8.1  | 1.4   | 13.2  | 5.6   | 15.0  |
| 4.2   | 3.4   | 4.1   | 2.1   | 2.4  | 3.3   | 3.1   | 6.0   | 3.7   |
| 2.8   | 16.1  | 8.7   | 7.3   | 6.6  | 14.5  | 8.0   | 8.3   | 1.9   |
| 3.1   | 3.1   | 3.4   | 13.2  | 1.1  | 3.7   | 12.8  | 2.7   | 12.3  |
| 2.2   | 10.9  | 2.7   | 11.6  | 2.6  | 2.0   | 2.9   | 11.9  | 0.5   |
| 9.6   | 3.1   | 1.6   | 0.8   | 1.0  | 37.7  | 17.2  | 0.8   | 2.6   |
| 11.3  | 0.9   | 1.6   | 1.6   | 0.2  | 1.1   | 0.7   | 0.6   | 3.8   |
| 8.6   | 6.8   | 5.2   | 7.2   | 0.6  | 2.6   | 7.7   | 0.8   | 2.4   |
| 21.2  | 6.4   | 20.0  | 13.5  | 10.8 | 19.2  | 23.8  | 8.8   | 4.1   |
| 0.7   | 0.3   | 0.7   | 0.3   | 1.0  | 0.1   | 3.5   | 3.7   | 7.2   |
| 27.9  | 32.4  | 45.5  | 21.1  | 11.4 | 18.4  | 19.8  | 23.5  | 31.6  |
| 64.0  | 62.7  | 57.6  | 32.9  | 28.4 | 124.4 | 91.5  | 165.7 | 240.0 |
| 14.2  | 1.5   | 1.4   | 7.8   | 0.4  | 6.9   | 0.4   | 3.0   | 10.1  |
| 3.6   | 7.6   | 4.6   | 0.7   | 2.1  | 1.6   | 2.2   | 3.6   | 0.8   |
| 0.5   | 0.4   | 0.8   | 0.2   | 0.7  | 2.0   | 8.4   | 5.3   | 6.0   |

|        |       |       |       |       |        |        |       |       |
|--------|-------|-------|-------|-------|--------|--------|-------|-------|
| 18.1   | 6.7   | 3.9   | 3.9   | 4.0   | 12.7   | 0.7    | 1.5   | 10.5  |
| 1.1    | 0.4   | 5.3   | 2.8   | 0.5   | 0.5    | 5.0    | 5.7   | 2.9   |
| 20.8   | 9.4   | 16.7  | 6.4   | 9.8   | 24.2   | 10.0   | 13.4  | 20.7  |
| 8.8    | 2.8   | 1.6   | 6.5   | 0.7   | 11.5   | 7.0    | 14.3  | 2.3   |
| 17.8   | 15.7  | 7.0   | 8.5   | 7.4   | 12.5   | 2.3    | 1.1   | 1.4   |
| 3.3    | 11.2  | 1.6   | 7.9   | 0.7   | 3.7    | 11.8   | 2.1   | 0.6   |
| 22.7   | 17.1  | 17.8  | 8.2   | 1.0   | 4.2    | 3.4    | 2.7   | 4.8   |
| 11.1   | 6.1   | 19.7  | 1.8   | 8.5   | 22.3   | 10.5   | 26.8  | 32.5  |
| 8.8    | 2.0   | 2.8   | 1.3   | 3.7   | 15.5   | 11.1   | 3.0   | 4.8   |
| 2.7    | 2.6   | 7.9   | 6.7   | 4.1   | 12.2   | 12.5   | 12.4  | 14.1  |
| 0.4    | 2.6   | 2.0   | 0.4   | 0.2   | 1.0    | 1.0    | 1.8   | 4.0   |
| 20.8   | 6.8   | 1.2   | 0.3   | 5.0   | 8.6    | 2.8    | 6.6   | 3.7   |
| 1.4    | 10.8  | 12.8  | 6.9   | 8.2   | 6.1    | 1.7    | 0.6   | 0.5   |
| 4.1    | 6.3   | 6.2   | 5.7   | 4.0   | 13.8   | 13.1   | 8.6   | 2.2   |
| 0.3    | 0.7   | 1.2   | 0.6   | 0.1   | 0.3    | 0.6    | 2.2   | 0.7   |
| 3.9    | 11.2  | 4.7   | 2.9   | 4.3   | 4.5    | 9.4    | 3.2   | 12.7  |
| 0.7    | 2.3   | 3.4   | 1.8   | 1.0   | 22.6   | 6.0    | 6.7   | 2.0   |
| 25.4   | 16.8  | 16.5  | 13.1  | 0.7   | 29.7   | 30.3   | 1.3   | 14.1  |
| 30.1   | 21.9  | 23.6  | 17.5  | 8.3   | 55.1   | 28.3   | 9.5   | 13.3  |
| 16.8   | 6.7   | 9.2   | 8.2   | 5.9   | 23.8   | 36.4   | 14.4  | 22.3  |
| 87.0   | 93.6  | 91.6  | 58.6  | 31.7  | 90.0   | 43.0   | 16.4  | 14.8  |
| 14.2   | 3.2   | 9.3   | 9.3   | 10.5  | 37.2   | 12.1   | 2.2   | 5.4   |
| 10.8   | 12.9  | 6.7   | 6.6   | 1.2   | 26.2   | 17.2   | 10.6  | 4.2   |
| 115.8  | 57.3  | 91.7  | 55.8  | 19.0  | 472.7  | 434.5  | 53.6  | 9.6   |
| 3.6    | 2.1   | 3.3   | 2.6   | 1.2   | 10.5   | 7.7    | 1.8   | 4.0   |
| 6.4    | 1.6   | 4.1   | 3.3   | 2.1   | 2.3    | 10.0   | 2.0   | 2.5   |
| 6.6    | 3.7   | 2.6   | 1.7   | 1.1   | 39.1   | 26.3   | 5.6   | 4.9   |
| 1.1    | 1.8   | 3.6   | 4.3   | 1.0   | 2.1    | 1.7    | 2.6   | 16.7  |
| 13.9   | 0.6   | 3.3   | 0.8   | 1.6   | 1.4    | 0.4    | 0.5   | 1.8   |
| 21.3   | 5.1   | 5.4   | 14.5  | 5.6   | 5.7    | 4.6    | 5.2   | 3.8   |
| 216.7  | 184.3 | 192.1 | 188.3 | 114.1 | 374.9  | 392.6  | 37.3  | 45.0  |
| 2.8    | 6.5   | 6.0   | 1.0   | 0.9   | 7.2    | 2.9    | 11.0  | 3.3   |
| 4.2    | 0.9   | 4.4   | 0.5   | 0.4   | 1.6    | 6.8    | 10.1  | 4.4   |
| 5.8    | 7.5   | 5.8   | 5.2   | 0.4   | 10.2   | 0.3    | 0.2   | 6.1   |
| 8.9    | 1.2   | 7.1   | 6.8   | 4.7   | 2.3    | 11.2   | 6.4   | 0.8   |
| 0.8    | 0.9   | 8.4   | 0.4   | 0.9   | 6.2    | 14.2   | 7.3   | 2.1   |
| 4.3    | 1.6   | 17.4  | 9.5   | 8.5   | 21.4   | 1.4    | 1.2   | 9.4   |
| 1004.6 | 757.2 | 836.6 | 679.4 | 350.9 | 3021.3 | 2298.0 | 195.4 | 313.1 |
| 2.1    | 7.6   | 13.7  | 4.5   | 2.1   | 8.9    | 1.3    | 11.2  | 8.3   |
| 9.9    | 11.0  | 8.7   | 7.6   | 4.1   | 9.6    | 7.4    | 15.2  | 16.7  |
| 0.6    | 5.0   | 4.4   | 1.3   | 2.4   | 9.0    | 4.8    | 6.1   | 1.5   |
| 2.0    | 4.3   | 2.3   | 3.7   | 0.8   | 1.7    | 5.1    | 1.4   | 6.3   |
| 188.2  | 184.3 | 144.1 | 128.3 | 51.6  | 644.4  | 332.9  | 46.2  | 67.1  |
| 2.0    | 1.8   | 9.6   | 13.2  | 4.0   | 2.5    | 12.0   | 14.5  | 8.0   |
| 14.4   | 1.3   | 0.8   | 1.3   | 0.2   | 1.6    | 3.0    | 6.1   | 1.0   |
| 192.3  | 177.1 | 193.8 | 177.1 | 56.9  | 172.1  | 108.3  | 49.4  | 74.5  |
| 18.6   | 15.9  | 13.3  | 0.3   | 8.3   | 26.5   | 10.1   | 4.3   | 13.5  |
| 16.6   | 12.7  | 8.9   | 1.0   | 5.8   | 11.8   | 12.3   | 17.0  | 4.3   |
| 160.4  | 186.5 | 178.3 | 130.3 | 40.5  | 94.9   | 30.6   | 106.8 | 174.4 |
| 21.1   | 17.1  | 2.3   | 10.2  | 9.0   | 4.6    | 14.8   | 1.5   | 11.0  |
| 20.5   | 42.7  | 33.8  | 21.3  | 15.3  | 47.5   | 38.7   | 4.8   | 35.5  |
| 16.2   | 5.1   | 3.6   | 8.7   | 1.9   | 7.8    | 3.1    | 3.8   | 17.1  |
| 2.4    | 1.5   | 0.9   | 0.5   | 0.4   | 2.7    | 0.6    | 4.9   | 10.9  |

|        |        |        |        |       |        |        |       |       |
|--------|--------|--------|--------|-------|--------|--------|-------|-------|
| 158.9  | 152.5  | 177.6  | 135.1  | 73.7  | 1020.0 | 631.7  | 108.2 | 158.7 |
| 4.8    | 1.2    | 4.1    | 4.0    | 0.6   | 13.3   | 12.1   | 0.9   | 11.6  |
| 1106.6 | 905.7  | 1092.9 | 925.4  | 365.3 | 544.2  | 365.4  | 87.5  | 105.6 |
| 12.0   | 8.9    | 9.9    | 1.5    | 0.4   | 12.0   | 9.4    | 8.9   | 15.8  |
| 3.3    | 1.1    | 5.7    | 1.2    | 1.1   | 11.1   | 0.8    | 1.4   | 2.8   |
| 281.2  | 303.6  | 228.2  | 165.6  | 96.4  | 431.0  | 325.3  | 95.7  | 131.6 |
| 8.5    | 0.9    | 1.7    | 6.3    | 8.6   | 2.8    | 7.8    | 5.4   | 5.5   |
| 2.7    | 3.1    | 1.8    | 12.8   | 0.5   | 6.4    | 5.2    | 5.1   | 16.1  |
| 5.0    | 15.5   | 9.1    | 0.6    | 6.2   | 77.3   | 34.9   | 0.5   | 2.3   |
| 15.5   | 9.5    | 6.6    | 8.2    | 2.1   | 10.8   | 3.5    | 2.0   | 6.8   |
| 36.9   | 18.2   | 24.9   | 18.8   | 16.9  | 28.5   | 16.3   | 26.0  | 31.9  |
| 590.3  | 492.8  | 496.0  | 439.6  | 195.5 | 410.9  | 301.9  | 190.9 | 315.9 |
| 1.2    | 6.6    | 1.7    | 10.5   | 4.6   | 31.6   | 23.3   | 16.1  | 13.5  |
| 2.2    | 0.9    | 2.5    | 1.6    | 0.8   | 2.0    | 11.1   | 6.0   | 0.8   |
| 4.8    | 3.3    | 8.4    | 14.0   | 2.0   | 7.4    | 1.8    | 3.8   | 37.2  |
| 10.0   | 8.1    | 2.1    | 1.6    | 0.2   | 1.4    | 1.5    | 5.4   | 7.1   |
| 36.2   | 37.5   | 33.6   | 32.4   | 17.1  | 37.1   | 30.0   | 13.4  | 20.3  |
| 5.2    | 2.7    | 1.8    | 1.1    | 1.2   | 6.0    | 5.0    | 1.8   | 1.1   |
| 185.3  | 193.8  | 175.8  | 98.6   | 66.0  | 217.1  | 126.6  | 8.9   | 10.2  |
| 32.8   | 22.2   | 42.4   | 26.2   | 14.2  | 58.8   | 29.0   | 5.3   | 6.6   |
| 8.9    | 7.4    | 3.0    | 2.3    | 5.0   | 44.3   | 4.2    | 11.7  | 25.1  |
| 3156.0 | 3206.2 | 2637.2 | 2054.9 | 848.4 | 9881.7 | 7766.7 | 578.1 | 784.6 |
| 273.2  | 285.1  | 231.9  | 188.9  | 92.6  | 338.4  | 200.5  | 120.0 | 96.8  |
| 6.8    | 0.8    | 0.7    | 1.0    | 0.2   | 6.6    | 1.4    | 3.8   | 0.3   |
| 20.9   | 9.8    | 1.9    | 8.3    | 0.3   | 11.0   | 14.8   | 17.3  | 37.6  |
| 2.5    | 12.3   | 16.6   | 1.3    | 0.6   | 2.0    | 9.4    | 12.9  | 19.2  |
| 594.0  | 504.5  | 430.0  | 396.3  | 100.3 | 33.2   | 27.1   | 3.8   | 5.0   |
| 852.9  | 617.8  | 739.8  | 345.6  | 211.9 | 1095.3 | 542.2  | 162.1 | 140.8 |
| 2.5    | 0.6    | 0.6    | 5.0    | 0.3   | 9.6    | 3.4    | 1.6   | 8.1   |
| 6.9    | 5.4    | 7.2    | 1.0    | 0.7   | 7.0    | 9.9    | 1.6   | 8.4   |
| 2.6    | 10.1   | 13.2   | 10.2   | 2.9   | 18.7   | 5.6    | 1.7   | 7.5   |
| 1442.2 | 1620.1 | 1509.8 | 2190.9 | 638.7 | 2651.3 | 1796.4 | 727.4 | 726.6 |
| 162.6  | 234.8  | 132.7  | 125.9  | 36.2  | 148.9  | 94.0   | 132.4 | 209.0 |
| 6.6    | 10.0   | 2.9    | 1.9    | 2.5   | 9.2    | 25.7   | 26.5  | 22.1  |
| 1.9    | 0.9    | 1.5    | 0.6    | 0.3   | 13.4   | 0.3    | 6.5   | 6.9   |
| 5.1    | 1.7    | 2.7    | 1.5    | 0.6   | 4.8    | 6.6    | 3.3   | 2.3   |
| 81.5   | 76.0   | 54.0   | 51.4   | 34.6  | 146.3  | 127.9  | 20.1  | 34.4  |
| 13.0   | 6.5    | 9.6    | 16.4   | 7.4   | 15.3   | 12.5   | 21.9  | 30.6  |
| 639.7  | 816.7  | 769.2  | 421.7  | 255.8 | 16.8   | 10.3   | 6.5   | 9.2   |
| 13.4   | 24.1   | 10.5   | 9.3    | 7.3   | 25.4   | 11.8   | 11.6  | 17.7  |
| 16.8   | 17.7   | 20.8   | 34.4   | 8.8   | 1304.9 | 1037.7 | 35.9  | 52.5  |
| 210.5  | 147.1  | 133.0  | 83.4   | 55.6  | 624.2  | 451.7  | 216.0 | 227.2 |
| 85.8   | 68.8   | 70.9   | 42.8   | 18.8  | 24.4   | 15.9   | 1.3   | 7.6   |
| 36.5   | 24.4   | 33.9   | 24.1   | 10.6  | 58.2   | 55.5   | 35.9  | 27.6  |
| 1.8    | 7.7    | 1.2    | 9.5    | 3.8   | 2.5    | 6.5    | 1.4   | 4.8   |
| 0.5    | 0.3    | 0.8    | 1.1    | 0.4   | 1.9    | 1.1    | 0.2   | 0.5   |
| 34.5   | 18.7   | 4.7    | 5.3    | 12.2  | 3.8    | 11.7   | 14.9  | 8.1   |
| 0.7    | 1.3    | 1.0    | 1.8    | 3.9   | 1.4    | 4.8    | 1.6   | 1.4   |
| 0.8    | 2.3    | 1.3    | 1.2    | 0.6   | 0.9    | 1.2    | 1.3   | 5.4   |
| 0.7    | 0.7    | 8.1    | 10.6   | 2.9   | 14.1   | 5.1    | 11.5  | 0.2   |
| 14.9   | 4.1    | 1.7    | 9.1    | 1.9   | 15.6   | 22.8   | 9.5   | 8.3   |
| 17.1   | 13.2   | 22.8   | 7.9    | 8.2   | 9.7    | 10.5   | 17.3  | 5.6   |
| 133.7  | 146.3  | 93.6   | 46.7   | 32.1  | 140.2  | 72.2   | 59.4  | 62.8  |

|        |        |        |        |        |        |        |       |        |
|--------|--------|--------|--------|--------|--------|--------|-------|--------|
| 13.6   | 12.2   | 6.5    | 15.5   | 4.0    | 6.9    | 8.1    | 7.7   | 10.6   |
| 49.4   | 49.5   | 48.7   | 25.3   | 18.9   | 77.6   | 44.8   | 22.1  | 31.5   |
| 3.1    | 1.0    | 8.6    | 0.8    | 1.2    | 2.9    | 1.1    | 10.8  | 14.0   |
| 175.8  | 120.0  | 104.6  | 107.8  | 26.8   | 208.8  | 113.6  | 179.2 | 249.4  |
| 121.2  | 92.1   | 98.3   | 77.1   | 38.0   | 161.1  | 78.6   | 54.6  | 58.2   |
| 309.9  | 303.0  | 360.0  | 203.7  | 146.2  | 899.1  | 489.6  | 0.8   | 3.6    |
| 7.1    | 15.4   | 9.7    | 1.3    | 6.9    | 5.2    | 6.4    | 13.4  | 7.8    |
| 1.4    | 0.9    | 3.4    | 1.2    | 0.5    | 2.2    | 1.2    | 1.4   | 0.8    |
| 37.1   | 36.1   | 17.3   | 15.2   | 10.3   | 16.5   | 6.1    | 9.9   | 13.8   |
| 157.6  | 93.0   | 90.9   | 33.8   | 42.1   | 32.6   | 35.5   | 5.5   | 31.5   |
| 13.9   | 15.1   | 18.7   | 7.5    | 5.6    | 19.9   | 2.1    | 7.8   | 1.5    |
| 1073.0 | 927.3  | 890.9  | 731.4  | 301.5  | 3034.1 | 2228.2 | 389.2 | 551.1  |
| 21.3   | 11.9   | 24.7   | 8.4    | 8.3    | 11.2   | 14.2   | 12.3  | 18.6   |
| 1.1    | 0.5    | 1.1    | 1.9    | 0.5    | 4.7    | 4.5    | 2.6   | 0.6    |
| 17.5   | 9.5    | 10.9   | 7.4    | 1.0    | 15.6   | 4.3    | 2.8   | 7.2    |
| 6.8    | 4.3    | 0.3    | 3.3    | 1.2    | 6.5    | 7.1    | 6.6   | 0.4    |
| 17.7   | 7.6    | 19.0   | 15.1   | 3.6    | 7.5    | 10.1   | 0.3   | 7.5    |
| 7.2    | 3.2    | 6.7    | 10.8   | 3.0    | 10.7   | 12.0   | 14.4  | 15.5   |
| 0.9    | 1.6    | 0.9    | 4.4    | 1.0    | 11.5   | 6.7    | 0.7   | 1.8    |
| 101.0  | 55.7   | 55.5   | 73.6   | 31.1   | 88.9   | 103.8  | 69.9  | 41.2   |
| 40.1   | 27.6   | 45.5   | 48.7   | 10.6   | 55.9   | 13.1   | 12.7  | 3.1    |
| 3.1    | 7.8    | 2.1    | 4.9    | 0.2    | 4.4    | 2.1    | 3.2   | 8.6    |
| 4.6    | 3.4    | 3.2    | 7.5    | 1.4    | 5.8    | 1.4    | 15.3  | 11.7   |
| 15.5   | 14.5   | 7.8    | 1.1    | 4.3    | 5.1    | 1.4    | 5.9   | 1.0    |
| 4.8    | 5.1    | 7.9    | 1.5    | 1.1    | 8.8    | 3.5    | 10.5  | 14.7   |
| 8.5    | 6.8    | 2.0    | 6.4    | 4.7    | 14.8   | 10.7   | 14.6  | 5.5    |
| 15.6   | 2.6    | 3.8    | 3.6    | 1.9    | 2.4    | 7.4    | 1.6   | 4.3    |
| 6.1    | 8.6    | 7.0    | 4.3    | 8.5    | 8.6    | 19.2   | 1.4   | 0.4    |
| 8.4    | 3.3    | 0.9    | 1.3    | 0.4    | 4.3    | 6.1    | 2.0   | 5.5    |
| 20.1   | 21.8   | 12.3   | 21.6   | 1.6    | 27.3   | 24.4   | 30.1  | 26.4   |
| 16.0   | 18.2   | 8.5    | 4.5    | 3.8    | 42.1   | 6.6    | 48.4  | 55.9   |
| 41.8   | 31.5   | 35.3   | 22.5   | 12.6   | 33.5   | 12.2   | 21.0  | 32.8   |
| 4274.0 | 3419.2 | 3442.1 | 3231.2 | 2024.2 | 2219.9 | 1834.9 | 494.7 | 604.5  |
| 18.0   | 13.5   | 7.6    | 8.4    | 5.7    | 20.1   | 8.8    | 20.1  | 11.7   |
| 0.2    | 0.9    | 1.2    | 0.8    | 0.3    | 3.9    | 0.9    | 6.9   | 6.8    |
| 0.7    | 0.5    | 1.2    | 1.1    | 3.2    | 1.9    | 0.5    | 5.9   | 8.3    |
| 40.4   | 26.0   | 22.1   | 16.9   | 3.6    | 52.1   | 38.2   | 37.0  | 23.2   |
| 17.4   | 24.6   | 5.8    | 9.4    | 11.6   | 38.7   | 15.3   | 28.6  | 22.2   |
| 46.2   | 13.2   | 39.7   | 36.7   | 15.9   | 42.6   | 24.3   | 15.2  | 32.7   |
| 36.0   | 34.4   | 48.4   | 24.8   | 7.4    | 22.1   | 2.4    | 12.9  | 11.0   |
| 22.9   | 1.9    | 17.0   | 13.0   | 2.8    | 4.2    | 2.5    | 5.0   | 7.1    |
| 1265.1 | 1295.4 | 1215.1 | 1288.0 | 469.8  | 1482.0 | 1035.4 | 313.7 | 441.5  |
| 228.9  | 265.3  | 279.6  | 360.7  | 119.5  | 218.4  | 163.4  | 27.3  | 46.3   |
| 2731.7 | 2083.2 | 2003.6 | 1917.3 | 849.0  | 2641.4 | 1937.5 | 576.9 | 1019.5 |
| 4.8    | 0.5    | 0.5    | 1.0    | 0.3    | 0.6    | 0.8    | 11.1  | 1.7    |
| 1045.3 | 995.4  | 803.1  | 673.9  | 428.8  | 640.7  | 382.4  | 159.8 | 181.8  |
| 80.2   | 63.6   | 47.7   | 60.5   | 40.2   | 102.3  | 148.7  | 46.8  | 66.0   |
| 7.8    | 12.0   | 16.7   | 11.2   | 9.7    | 29.9   | 13.0   | 17.0  | 12.5   |
| 1.2    | 1.5    | 2.0    | 2.1    | 1.4    | 1.2    | 1.0    | 1.3   | 0.9    |
| 11.7   | 14.2   | 5.4    | 11.7   | 4.3    | 14.7   | 6.6    | 7.0   | 0.4    |
| 1.5    | 0.4    | 0.9    | 0.3    | 1.1    | 2.0    | 1.3    | 1.2   | 1.8    |
| 7.5    | 5.1    | 0.7    | 3.5    | 1.8    | 0.5    | 3.2    | 2.1   | 3.9    |
| 67.5   | 76.5   | 76.8   | 47.2   | 24.9   | 96.1   | 72.8   | 18.7  | 32.8   |



|        |        |        |        |        |        |        |       |       |
|--------|--------|--------|--------|--------|--------|--------|-------|-------|
| 16.0   | 19.6   | 20.9   | 11.3   | 7.0    | 20.0   | 11.8   | 21.2  | 13.0  |
| 10.6   | 12.2   | 2.5    | 18.1   | 2.3    | 27.0   | 2.7    | 1.7   | 21.9  |
| 17.9   | 6.1    | 24.9   | 6.3    | 5.1    | 13.4   | 9.3    | 18.1  | 6.3   |
| 1.2    | 0.7    | 0.8    | 0.2    | 5.3    | 16.6   | 7.9    | 0.3   | 1.2   |
| 28.0   | 10.9   | 23.3   | 16.6   | 7.8    | 62.2   | 17.2   | 8.6   | 18.3  |
| 164.4  | 175.9  | 192.9  | 172.0  | 74.9   | 368.6  | 232.2  | 12.9  | 19.7  |
| 10.6   | 8.9    | 8.4    | 8.4    | 1.2    | 14.9   | 11.6   | 4.0   | 7.3   |
| 244.0  | 181.3  | 225.0  | 128.6  | 54.0   | 184.4  | 78.2   | 49.5  | 36.3  |
| 2.2    | 1.0    | 2.3    | 2.8    | 2.4    | 1.7    | 0.8    | 2.2   | 0.8   |
| 14.2   | 13.7   | 18.5   | 10.1   | 0.6    | 138.0  | 45.2   | 21.2  | 16.1  |
| 227.7  | 295.7  | 237.3  | 202.2  | 82.6   | 413.5  | 282.6  | 97.1  | 136.4 |
| 15.0   | 9.7    | 4.0    | 2.6    | 6.3    | 7.6    | 11.9   | 5.8   | 6.6   |
| 5.4    | 6.9    | 2.7    | 1.8    | 5.6    | 2.4    | 3.8    | 1.6   | 0.5   |
| 5.1    | 7.5    | 3.8    | 4.7    | 3.1    | 14.2   | 8.2    | 1.8   | 11.5  |
| 4.3    | 2.4    | 10.1   | 1.7    | 2.6    | 2.4    | 27.1   | 15.1  | 21.1  |
| 2.4    | 8.4    | 15.5   | 15.2   | 7.8    | 30.0   | 8.4    | 3.7   | 1.9   |
| 3.8    | 3.9    | 5.7    | 0.9    | 0.9    | 2.6    | 1.1    | 2.1   | 2.7   |
| 19.9   | 7.0    | 10.0   | 17.7   | 3.7    | 12.8   | 23.5   | 3.9   | 8.7   |
| 1.4    | 1.7    | 1.4    | 0.6    | 0.4    | 1.1    | 0.6    | 2.0   | 0.6   |
| 2230.7 | 1772.8 | 1528.1 | 688.8  | 654.0  | 7041.8 | 6170.8 | 50.4  | 85.5  |
| 3.0    | 8.7    | 1.2    | 2.4    | 0.7    | 8.6    | 2.5    | 2.1   | 1.8   |
| 203.1  | 175.8  | 162.6  | 235.9  | 73.3   | 724.9  | 502.7  | 59.3  | 76.6  |
| 1.2    | 1.2    | 1.9    | 1.3    | 0.4    | 1.4    | 0.8    | 1.0   | 0.5   |
| 2.6    | 2.7    | 1.8    | 2.6    | 3.3    | 4.7    | 10.2   | 3.4   | 2.8   |
| 7.3    | 13.8   | 8.1    | 11.7   | 2.1    | 6.4    | 9.6    | 14.2  | 16.2  |
| 5054.2 | 4608.7 | 4212.3 | 3899.7 | 2139.1 | 4532.3 | 3815.0 | 585.4 | 740.0 |
| 11.9   | 1.1    | 1.1    | 0.6    | 0.5    | 2.1    | 3.4    | 1.6   | 9.8   |
| 18.4   | 1.6    | 7.7    | 1.8    | 0.6    | 4.6    | 2.5    | 10.3  | 14.2  |
| 3.2    | 2.3    | 2.9    | 8.3    | 1.6    | 2.2    | 0.9    | 9.5   | 15.3  |
| 0.5    | 1.8    | 1.8    | 4.3    | 1.7    | 0.9    | 0.4    | 0.4   | 0.4   |
| 37.8   | 35.3   | 50.6   | 31.2   | 15.2   | 77.1   | 54.7   | 46.4  | 45.7  |
| 401.4  | 404.5  | 458.3  | 333.8  | 153.4  | 833.4  | 741.1  | 55.7  | 63.7  |
| 33.0   | 38.3   | 55.9   | 37.3   | 17.2   | 66.7   | 36.8   | 20.4  | 21.0  |
| 46.7   | 28.8   | 60.4   | 42.3   | 13.8   | 42.4   | 26.6   | 7.8   | 11.8  |
| 6.2    | 4.4    | 0.6    | 2.3    | 0.7    | 0.4    | 1.8    | 10.2  | 9.1   |
| 3.7    | 5.1    | 8.5    | 2.9    | 0.4    | 7.6    | 0.5    | 8.0   | 17.1  |
| 3.4    | 1.4    | 0.9    | 0.3    | 0.7    | 10.3   | 5.0    | 4.0   | 0.7   |
| 47.0   | 30.5   | 34.2   | 36.0   | 15.4   | 57.4   | 28.9   | 3.3   | 30.3  |
| 7.5    | 4.6    | 12.3   | 4.4    | 5.5    | 23.8   | 12.9   | 7.8   | 10.7  |
| 21.8   | 11.9   | 8.0    | 20.2   | 3.3    | 2.9    | 2.1    | 5.8   | 6.9   |
| 2.8    | 2.3    | 2.2    | 3.6    | 10.5   | 1.7    | 11.6   | 5.2   | 6.9   |
| 17.2   | 7.5    | 22.2   | 16.5   | 3.6    | 35.9   | 15.2   | 17.0  | 6.1   |
| 5.5    | 4.2    | 1.3    | 2.0    | 0.7    | 0.5    | 1.2    | 7.0   | 7.5   |
| 77.9   | 64.8   | 94.6   | 84.6   | 19.8   | 35.7   | 2.1    | 22.8  | 34.7  |
| 13.9   | 3.5    | 4.4    | 9.5    | 0.1    | 17.1   | 0.9    | 14.0  | 26.8  |
| 4.7    | 2.6    | 7.8    | 1.8    | 1.2    | 6.4    | 2.9    | 1.4   | 5.9   |
| 24.4   | 11.4   | 26.1   | 9.7    | 1.3    | 7.7    | 4.4    | 9.7   | 15.0  |
| 1.3    | 2.4    | 3.4    | 1.0    | 5.5    | 2.3    | 1.2    | 1.3   | 0.6   |
| 2.9    | 2.4    | 1.4    | 1.6    | 2.2    | 4.6    | 1.0    | 6.6   | 1.2   |
| 42.9   | 29.3   | 37.9   | 28.9   | 14.9   | 50.1   | 14.2   | 36.4  | 49.5  |
| 0.6    | 2.1    | 3.6    | 1.5    | 0.2    | 1.9    | 0.6    | 4.2   | 0.7   |
| 7.8    | 7.6    | 12.4   | 4.5    | 7.7    | 8.2    | 1.8    | 7.7   | 8.0   |
| 2.1    | 4.7    | 1.6    | 4.9    | 7.9    | 2.5    | 2.6    | 10.9  | 6.7   |

|        |        |        |       |       |        |        |        |        |
|--------|--------|--------|-------|-------|--------|--------|--------|--------|
| 1.5    | 10.9   | 8.3    | 1.9   | 1.4   | 4.4    | 3.1    | 3.7    | 7.7    |
| 34.8   | 17.5   | 26.9   | 22.8  | 1.2   | 41.9   | 26.0   | 4.6    | 26.6   |
| 33.9   | 16.3   | 0.8    | 4.9   | 9.5   | 18.7   | 7.8    | 16.4   | 21.4   |
| 6.0    | 2.8    | 0.6    | 0.6   | 0.4   | 7.7    | 4.8    | 0.2    | 0.5    |
| 10.5   | 7.8    | 5.9    | 10.0  | 8.9   | 10.3   | 8.6    | 12.6   | 10.6   |
| 43.6   | 27.0   | 16.2   | 21.2  | 10.3  | 52.6   | 44.8   | 14.0   | 32.9   |
| 27.3   | 20.9   | 10.7   | 3.5   | 6.6   | 15.8   | 11.4   | 11.3   | 29.8   |
| 31.1   | 31.8   | 15.9   | 18.5  | 14.1  | 31.4   | 30.4   | 31.5   | 32.3   |
| 1.9    | 2.3    | 1.9    | 1.1   | 2.8   | 2.3    | 1.6    | 1.4    | 0.5    |
| 36.3   | 53.2   | 33.8   | 17.5  | 10.1  | 2402.3 | 1682.7 | 2358.1 | 3281.9 |
| 493.1  | 413.6  | 375.0  | 351.1 | 162.2 | 373.1  | 201.6  | 69.1   | 66.9   |
| 128.8  | 100.6  | 95.2   | 46.4  | 33.1  | 183.7  | 96.7   | 46.2   | 49.6   |
| 6.2    | 4.1    | 2.8    | 2.3   | 1.0   | 3.2    | 2.6    | 0.8    | 1.6    |
| 173.5  | 190.4  | 167.9  | 138.9 | 56.9  | 191.4  | 102.3  | 30.4   | 31.2   |
| 2295.9 | 1206.6 | 1252.3 | 639.3 | 302.6 | 5174.4 | 5201.4 | 437.7  | 487.3  |
| 9.6    | 4.9    | 9.7    | 7.3   | 6.9   | 10.1   | 3.4    | 5.2    | 4.4    |
| 1.9    | 1.7    | 0.9    | 1.6   | 3.0   | 3.6    | 0.9    | 4.8    | 0.9    |
| 277.4  | 239.0  | 344.5  | 113.8 | 97.6  | 374.4  | 241.5  | 114.6  | 85.3   |
| 6.4    | 29.9   | 27.6   | 17.2  | 5.8   | 39.6   | 3.2    | 3.0    | 4.2    |
| 71.0   | 74.9   | 73.0   | 62.2  | 20.6  | 73.9   | 19.8   | 147.3  | 187.1  |
| 2.2    | 3.9    | 1.8    | 9.6   | 5.6   | 4.2    | 1.3    | 1.9    | 3.2    |
| 19.7   | 6.4    | 14.8   | 2.1   | 0.9   | 18.1   | 2.7    | 2.7    | 10.0   |
| 188.5  | 184.4  | 164.5  | 136.3 | 40.1  | 186.7  | 124.4  | 46.0   | 69.1   |
| 10.6   | 6.1    | 2.6    | 5.0   | 7.8   | 7.4    | 1.1    | 8.8    | 9.6    |
| 3.4    | 1.3    | 2.2    | 1.7   | 2.3   | 2.7    | 2.1    | 1.9    | 1.4    |
| 16.5   | 1.5    | 11.6   | 2.3   | 6.0   | 13.6   | 5.1    | 3.9    | 12.2   |
| 449.7  | 469.3  | 431.2  | 277.9 | 174.3 | 685.6  | 481.5  | 161.6  | 235.2  |
| 162.7  | 153.3  | 152.9  | 102.2 | 62.8  | 193.3  | 85.8   | 91.3   | 75.6   |
| 12.2   | 16.0   | 13.0   | 23.5  | 8.4   | 18.6   | 2.4    | 25.0   | 17.8   |
| 25.0   | 30.0   | 33.8   | 25.5  | 13.4  | 44.0   | 22.5   | 13.6   | 9.5    |
| 1.8    | 8.2    | 21.6   | 1.9   | 1.1   | 11.7   | 7.5    | 4.0    | 5.4    |
| 3.6    | 9.4    | 1.4    | 2.1   | 0.8   | 3.2    | 1.9    | 1.8    | 1.3    |
| 41.9   | 46.7   | 34.3   | 17.7  | 16.1  | 4.2    | 8.1    | 11.8   | 6.6    |
| 3.2    | 3.9    | 10.8   | 0.8   | 0.6   | 8.1    | 1.5    | 1.8    | 12.2   |
| 9.1    | 6.0    | 8.5    | 10.5  | 4.8   | 2.8    | 1.2    | 14.1   | 17.0   |
| 12.0   | 13.6   | 12.6   | 4.7   | 3.0   | 1.3    | 9.6    | 2.3    | 1.2    |
| 7.9    | 3.1    | 1.5    | 5.4   | 0.3   | 11.0   | 0.3    | 0.4    | 0.3    |
| 28.4   | 23.1   | 21.8   | 30.2  | 15.2  | 39.4   | 28.5   | 20.5   | 25.7   |
| 8.2    | 0.2    | 0.4    | 5.2   | 0.4   | 3.4    | 0.8    | 7.2    | 7.4    |
| 21.5   | 25.0   | 15.1   | 14.2  | 6.8   | 7.9    | 11.8   | 8.2    | 24.5   |
| 4.4    | 1.2    | 1.0    | 0.9   | 0.3   | 15.4   | 10.4   | 1.5    | 1.2    |
| 10.7   | 9.8    | 22.2   | 15.1  | 4.9   | 20.5   | 19.9   | 10.6   | 15.9   |
| 13.3   | 2.5    | 12.6   | 3.7   | 1.5   | 2.9    | 6.3    | 27.7   | 9.1    |
| 14.9   | 0.8    | 3.5    | 0.5   | 1.1   | 1.2    | 0.6    | 11.4   | 4.1    |
| 2.8    | 8.4    | 3.3    | 3.6   | 1.9   | 0.4    | 1.5    | 1.5    | 0.8    |
| 1.3    | 7.0    | 7.6    | 0.4   | 4.9   | 7.1    | 1.7    | 7.5    | 2.2    |
| 13.3   | 16.6   | 11.5   | 0.9   | 0.7   | 12.1   | 9.4    | 12.0   | 13.8   |
| 29.1   | 32.6   | 16.8   | 26.6  | 6.6   | 57.9   | 27.8   | 7.4    | 13.0   |
| 2.3    | 1.7    | 17.9   | 2.0   | 2.0   | 4.1    | 22.8   | 3.9    | 4.5    |
| 4.2    | 1.6    | 1.9    | 1.9   | 8.6   | 3.3    | 11.0   | 8.3    | 8.9    |
| 10.7   | 3.2    | 6.8    | 8.0   | 0.5   | 11.7   | 0.9    | 6.7    | 4.7    |
| 57.1   | 52.3   | 59.8   | 45.2  | 16.8  | 101.2  | 89.8   | 5.8    | 13.2   |
| 37.4   | 51.9   | 26.6   | 29.1  | 13.8  | 63.5   | 28.2   | 14.4   | 14.5   |

|        |        |        |        |        |        |        |        |        |
|--------|--------|--------|--------|--------|--------|--------|--------|--------|
| 2.8    | 1.6    | 5.4    | 0.8    | 6.9    | 9.0    | 0.9    | 11.7   | 2.0    |
| 0.8    | 0.5    | 1.1    | 0.3    | 0.5    | 0.5    | 0.3    | 0.5    | 0.4    |
| 2.7    | 1.4    | 7.6    | 4.0    | 8.8    | 3.1    | 1.2    | 2.6    | 2.5    |
| 3.8    | 2.6    | 1.8    | 7.3    | 0.9    | 2.2    | 11.9   | 2.7    | 2.9    |
| 2.4    | 1.3    | 1.1    | 1.9    | 4.6    | 1.3    | 1.7    | 2.2    | 7.0    |
| 8.9    | 1.3    | 2.7    | 12.3   | 3.0    | 8.9    | 1.3    | 6.3    | 2.8    |
| 11.3   | 31.0   | 21.8   | 16.2   | 6.0    | 38.0   | 4.1    | 28.5   | 11.6   |
| 1.9    | 1.0    | 1.4    | 1.4    | 0.5    | 2.1    | 1.3    | 1.4    | 1.1    |
| 0.9    | 3.0    | 2.4    | 1.7    | 1.6    | 1.2    | 1.1    | 2.3    | 2.1    |
| 17.2   | 2.9    | 1.5    | 1.6    | 0.5    | 3.1    | 5.8    | 2.2    | 15.8   |
| 2.3    | 0.4    | 0.3    | 1.8    | 0.2    | 2.7    | 0.8    | 4.5    | 1.2    |
| 5.5    | 3.2    | 5.3    | 1.8    | 2.3    | 11.3   | 10.1   | 3.4    | 3.6    |
| 0.9    | 0.5    | 1.6    | 0.5    | 0.4    | 0.4    | 0.3    | 4.8    | 4.7    |
| 15.9   | 0.9    | 0.3    | 0.5    | 3.9    | 2.3    | 1.1    | 1.5    | 0.7    |
| 13.8   | 6.2    | 6.9    | 5.0    | 6.0    | 16.1   | 8.8    | 10.1   | 12.6   |
| 4284.8 | 4134.4 | 3931.4 | 2225.6 | 1745.7 | 8180.5 | 7114.1 | 1511.1 | 1696.6 |
| 15.4   | 4.0    | 2.3    | 4.7    | 3.1    | 1.8    | 8.3    | 2.5    | 2.6    |
| 6.0    | 7.4    | 10.3   | 3.9    | 0.1    | 8.0    | 3.2    | 11.7   | 12.7   |
| 2.3    | 1.7    | 0.4    | 2.5    | 0.1    | 1.1    | 0.4    | 0.7    | 0.3    |
| 23.2   | 26.8   | 23.3   | 10.9   | 9.7    | 2858.1 | 1258.8 | 1.1    | 5.5    |
| 5.3    | 1.6    | 2.3    | 6.1    | 3.9    | 1.1    | 7.0    | 4.7    | 5.5    |
| 8.5    | 4.3    | 3.8    | 1.8    | 0.2    | 4.0    | 5.4    | 1.0    | 2.3    |
| 7.1    | 7.2    | 1.1    | 0.5    | 0.4    | 0.9    | 1.7    | 4.0    | 1.9    |
| 8.5    | 8.2    | 8.9    | 14.4   | 1.4    | 4.7    | 1.9    | 14.4   | 19.5   |
| 6.9    | 0.5    | 1.2    | 0.7    | 0.2    | 0.7    | 0.9    | 3.6    | 2.8    |
| 3.6    | 8.6    | 13.0   | 8.1    | 6.8    | 12.9   | 7.8    | 9.1    | 20.3   |
| 980.1  | 1124.7 | 957.1  | 1230.2 | 303.9  | 1474.3 | 1144.2 | 15.1   | 29.3   |
| 75.6   | 71.5   | 76.8   | 89.2   | 13.2   | 124.4  | 73.3   | 16.6   | 30.7   |
| 17.3   | 11.1   | 9.7    | 2.8    | 0.8    | 13.4   | 2.8    | 5.2    | 2.7    |
| 17.0   | 9.0    | 2.4    | 4.2    | 2.3    | 15.1   | 8.2    | 15.3   | 13.3   |
| 27.4   | 3.7    | 15.6   | 3.2    | 11.1   | 19.0   | 5.1    | 16.8   | 15.9   |
| 1.0    | 0.6    | 13.9   | 0.6    | 0.9    | 3.4    | 1.4    | 0.5    | 1.9    |
| 31.5   | 23.0   | 28.8   | 12.4   | 11.6   | 37.5   | 11.2   | 30.0   | 15.4   |
| 0.6    | 1.6    | 0.6    | 1.1    | 0.5    | 14.2   | 1.0    | 1.6    | 0.8    |
| 819.9  | 749.8  | 681.8  | 681.0  | 351.8  | 1037.4 | 654.1  | 93.7   | 125.1  |
| 3.5    | 3.5    | 8.2    | 3.6    | 1.3    | 4.7    | 4.6    | 3.8    | 6.2    |
| 1.0    | 16.8   | 10.1   | 2.4    | 2.2    | 8.3    | 8.2    | 3.7    | 3.4    |
| 3.7    | 5.4    | 4.4    | 1.3    | 0.8    | 2.0    | 2.7    | 3.0    | 3.7    |
| 3.1    | 20.8   | 2.6    | 13.8   | 5.9    | 13.9   | 1.8    | 4.4    | 14.5   |
| 2.3    | 3.2    | 0.3    | 0.5    | 0.3    | 5.5    | 6.7    | 4.9    | 1.9    |
| 1.3    | 6.8    | 5.0    | 0.4    | 1.3    | 13.5   | 2.2    | 0.4    | 4.2    |
| 2.4    | 2.7    | 1.3    | 2.1    | 1.5    | 1.2    | 4.6    | 3.7    | 4.3    |
| 5.7    | 2.3    | 0.8    | 2.1    | 1.1    | 2.6    | 1.1    | 3.3    | 2.0    |
| 8.3    | 3.5    | 0.7    | 10.9   | 2.0    | 25.1   | 31.8   | 2.9    | 0.3    |
| 14.7   | 3.0    | 8.5    | 11.7   | 6.5    | 26.1   | 11.5   | 13.1   | 9.8    |
| 0.4    | 0.7    | 0.4    | 0.6    | 0.2    | 0.3    | 0.5    | 0.9    | 0.4    |
| 0.9    | 2.8    | 1.0    | 0.7    | 0.1    | 6.4    | 0.6    | 6.9    | 7.2    |
| 4.2    | 10.9   | 10.5   | 3.7    | 4.5    | 458.6  | 269.3  | 1.0    | 2.3    |
| 9.5    | 3.4    | 2.9    | 2.6    | 2.5    | 18.7   | 4.5    | 10.0   | 2.7    |
| 2.5    | 3.8    | 7.4    | 1.8    | 3.6    | 4.6    | 10.4   | 14.3   | 14.0   |
| 25.4   | 25.8   | 25.9   | 24.1   | 10.6   | 16.2   | 18.2   | 26.5   | 23.1   |
| 14.4   | 18.5   | 10.6   | 15.2   | 4.9    | 6.0    | 5.0    | 9.3    | 2.7    |
| 28.3   | 19.5   | 34.2   | 13.3   | 11.2   | 23.5   | 23.9   | 11.0   | 29.5   |

|        |        |        |        |        |        |        |        |        |
|--------|--------|--------|--------|--------|--------|--------|--------|--------|
| 20.7   | 16.2   | 8.6    | 2.2    | 2.7    | 39.4   | 27.1   | 18.1   | 18.3   |
| 3.5    | 3.4    | 6.4    | 0.4    | 0.4    | 6.7    | 0.7    | 7.9    | 0.9    |
| 10.5   | 0.7    | 3.9    | 3.0    | 1.9    | 2.1    | 0.5    | 0.6    | 0.2    |
| 17.0   | 20.3   | 31.9   | 18.2   | 7.9    | 17.7   | 13.0   | 19.5   | 10.4   |
| 10.6   | 7.1    | 6.3    | 0.2    | 3.6    | 18.4   | 6.4    | 10.2   | 13.6   |
| 2.6    | 14.6   | 11.6   | 7.1    | 14.8   | 4.4    | 6.2    | 4.9    | 14.9   |
| 14.9   | 6.1    | 10.7   | 12.8   | 1.6    | 6.8    | 5.7    | 2.0    | 15.7   |
| 926.4  | 779.9  | 774.9  | 879.3  | 304.6  | 1174.4 | 890.6  | 110.2  | 133.6  |
| 1106.9 | 1055.0 | 905.7  | 792.5  | 520.9  | 1133.5 | 731.0  | 358.9  | 546.3  |
| 3.4    | 1.1    | 1.2    | 0.8    | 0.6    | 1.4    | 1.3    | 4.2    | 10.3   |
| 62.4   | 55.3   | 61.6   | 73.8   | 21.8   | 63.3   | 38.1   | 30.5   | 54.7   |
| 1.8    | 0.7    | 1.6    | 0.3    | 0.4    | 1.0    | 7.7    | 0.8    | 1.4    |
| 110.7  | 111.4  | 98.0   | 76.6   | 30.9   | 106.8  | 37.5   | 2.7    | 11.9   |
| 6.1    | 1.2    | 1.5    | 0.8    | 6.2    | 23.2   | 8.2    | 16.6   | 8.6    |
| 29.8   | 30.2   | 44.3   | 33.1   | 22.6   | 49.4   | 18.7   | 20.7   | 13.2   |
| 2.3    | 2.2    | 0.9    | 5.2    | 1.0    | 3.9    | 1.6    | 0.8    | 0.7    |
| 31.8   | 23.1   | 19.7   | 14.2   | 16.7   | 24.6   | 18.8   | 4.1    | 15.9   |
| 152.0  | 128.0  | 118.0  | 52.5   | 25.0   | 43.7   | 28.0   | 4.9    | 0.5    |
| 10.6   | 0.7    | 8.8    | 5.4    | 4.4    | 3.0    | 9.3    | 0.6    | 0.9    |
| 39.1   | 15.0   | 31.9   | 13.4   | 15.9   | 12.4   | 7.7    | 21.5   | 21.9   |
| 2.0    | 1.4    | 1.2    | 2.4    | 0.5    | 1.9    | 1.4    | 1.7    | 0.9    |
| 43.9   | 42.3   | 20.0   | 35.1   | 16.1   | 60.0   | 56.6   | 5.9    | 15.0   |
| 9.9    | 7.2    | 1.2    | 7.4    | 0.7    | 0.7    | 0.8    | 13.6   | 7.2    |
| 16.9   | 22.5   | 16.6   | 14.2   | 10.1   | 14.2   | 8.3    | 20.4   | 19.8   |
| 7.7    | 5.6    | 14.1   | 9.4    | 7.6    | 4.6    | 1.5    | 1.7    | 12.6   |
| 2.0    | 5.7    | 1.2    | 0.3    | 0.3    | 1.3    | 1.7    | 0.8    | 1.7    |
| 14.3   | 12.5   | 0.5    | 10.6   | 0.3    | 0.8    | 6.3    | 4.5    | 14.4   |
| 114.5  | 66.1   | 80.3   | 42.5   | 24.0   | 46.4   | 39.7   | 13.0   | 19.0   |
| 12.1   | 15.9   | 12.2   | 9.2    | 3.9    | 43.7   | 28.8   | 0.9    | 9.9    |
| 1399.8 | 1349.2 | 1388.4 | 1142.4 | 587.7  | 1888.0 | 1606.3 | 196.6  | 228.4  |
| 72.4   | 60.3   | 63.1   | 38.0   | 12.8   | 37.5   | 45.1   | 21.7   | 44.7   |
| 7.0    | 5.0    | 7.0    | 2.9    | 1.3    | 15.2   | 1.8    | 14.3   | 2.5    |
| 2006.8 | 1202.1 | 1293.0 | 772.9  | 228.9  | 1787.6 | 1562.5 | 71.5   | 95.0   |
| 20.9   | 17.9   | 19.4   | 10.8   | 6.1    | 15.5   | 17.2   | 2.3    | 7.5    |
| 0.6    | 2.0    | 1.7    | 0.9    | 4.9    | 2.9    | 10.2   | 2.7    | 4.3    |
| 115.0  | 124.1  | 104.1  | 83.7   | 37.0   | 194.8  | 137.4  | 20.7   | 34.3   |
| 21.0   | 10.8   | 12.8   | 8.3    | 4.2    | 20.5   | 7.5    | 12.9   | 1.8    |
| 10.0   | 1.2    | 2.3    | 0.9    | 0.5    | 1.1    | 0.4    | 5.1    | 7.9    |
| 15.2   | 9.6    | 15.1   | 5.2    | 6.8    | 18.0   | 7.5    | 4.9    | 9.2    |
| 2586.5 | 2296.5 | 2184.3 | 1457.1 | 712.5  | 2980.8 | 2341.4 | 517.5  | 974.1  |
| 8.3    | 11.9   | 5.9    | 7.7    | 0.6    | 13.0   | 8.9    | 1.1    | 4.4    |
| 2.3    | 0.7    | 0.5    | 3.4    | 0.9    | 2.0    | 1.8    | 0.5    | 4.1    |
| 1.0    | 2.4    | 3.9    | 2.9    | 0.3    | 5.0    | 4.0    | 2.3    | 2.2    |
| 8.4    | 0.8    | 8.5    | 2.8    | 0.5    | 9.7    | 6.6    | 10.5   | 11.2   |
| 7772.3 | 6769.2 | 6261.3 | 6992.6 | 3239.3 | 9949.0 | 8325.3 | 2313.0 | 2880.3 |
| 139.6  | 114.3  | 83.4   | 71.3   | 34.7   | 112.7  | 54.9   | 66.8   | 70.1   |
| 13.2   | 10.4   | 17.5   | 17.6   | 5.3    | 26.3   | 4.7    | 13.1   | 8.4    |
| 45.5   | 66.9   | 98.6   | 42.7   | 22.8   | 72.8   | 55.9   | 33.9   | 29.5   |
| 326.9  | 312.1  | 280.0  | 308.3  | 97.0   | 247.8  | 159.7  | 165.8  | 242.7  |
| 1688.6 | 1671.8 | 1564.7 | 1759.7 | 660.9  | 7020.3 | 4750.4 | 906.3  | 1538.6 |
| 14.7   | 1.0    | 9.3    | 0.7    | 2.1    | 8.1    | 13.2   | 11.8   | 0.7    |
| 8.8    | 4.1    | 7.8    | 6.1    | 5.3    | 4.3    | 10.7   | 3.0    | 15.5   |
| 4.4    | 4.1    | 2.2    | 0.2    | 5.5    | 0.6    | 0.4    | 5.9    | 5.7    |

|        |        |        |        |       |        |       |       |       |
|--------|--------|--------|--------|-------|--------|-------|-------|-------|
| 1.6    | 7.1    | 6.6    | 11.0   | 3.0   | 2.8    | 11.3  | 16.8  | 17.0  |
| 22.7   | 23.9   | 34.5   | 21.4   | 9.9   | 26.5   | 19.3  | 32.0  | 32.3  |
| 263.5  | 185.8  | 445.6  | 403.2  | 50.6  | 352.3  | 404.9 | 18.8  | 45.6  |
| 5.4    | 6.2    | 0.5    | 0.7    | 3.3   | 4.6    | 6.6   | 1.1   | 0.2   |
| 0.8    | 0.5    | 0.8    | 0.5    | 0.3   | 1.0    | 1.4   | 1.1   | 7.4   |
| 13.4   | 1.9    | 5.1    | 1.9    | 1.6   | 13.8   | 7.1   | 19.5  | 11.9  |
| 1.3    | 1.7    | 0.9    | 2.0    | 0.3   | 16.4   | 1.4   | 3.3   | 1.3   |
| 13.6   | 11.9   | 7.6    | 14.5   | 4.7   | 18.4   | 8.3   | 10.8  | 10.3  |
| 23.6   | 11.9   | 7.6    | 7.6    | 3.4   | 24.3   | 25.3  | 21.6  | 21.8  |
| 9.7    | 8.2    | 5.9    | 2.1    | 3.0   | 1.0    | 2.5   | 9.5   | 7.8   |
| 9.6    | 7.0    | 3.6    | 8.7    | 3.3   | 8.2    | 10.3  | 12.7  | 6.9   |
| 19.6   | 1.4    | 1.6    | 10.3   | 4.2   | 2.0    | 1.9   | 11.5  | 5.8   |
| 42.7   | 26.0   | 11.2   | 2.9    | 11.5  | 29.7   | 13.0  | 42.1  | 37.0  |
| 1.4    | 0.5    | 0.6    | 0.9    | 0.6   | 1.9    | 1.3   | 7.8   | 1.6   |
| 14.3   | 2.6    | 1.8    | 8.0    | 1.1   | 13.6   | 8.3   | 3.5   | 0.6   |
| 22.6   | 18.8   | 38.8   | 15.2   | 11.0  | 44.0   | 28.8  | 22.7  | 23.5  |
| 4.2    | 8.1    | 5.3    | 6.2    | 0.8   | 3.6    | 5.0   | 11.5  | 11.1  |
| 260.8  | 201.9  | 229.8  | 157.4  | 78.7  | 209.1  | 138.2 | 53.9  | 37.7  |
| 99.1   | 61.2   | 60.8   | 36.8   | 15.6  | 118.5  | 133.0 | 40.6  | 27.4  |
| 8.4    | 12.9   | 11.0   | 16.5   | 1.1   | 4.5    | 1.2   | 7.7   | 6.9   |
| 35.3   | 18.4   | 25.7   | 14.3   | 8.7   | 82.8   | 164.5 | 12.6  | 14.7  |
| 70.1   | 64.9   | 53.1   | 31.6   | 27.7  | 81.9   | 38.3  | 59.6  | 49.9  |
| 3.1    | 2.1    | 2.9    | 1.7    | 0.7   | 2.9    | 2.9   | 1.9   | 2.0   |
| 18.9   | 14.0   | 14.4   | 5.4    | 9.2   | 28.5   | 6.1   | 2.8   | 4.7   |
| 128.0  | 69.5   | 110.1  | 65.7   | 28.5  | 149.8  | 97.2  | 37.0  | 56.9  |
| 9.3    | 8.2    | 13.3   | 6.5    | 6.8   | 16.2   | 12.7  | 14.7  | 17.3  |
| 32.1   | 31.3   | 40.9   | 35.6   | 8.6   | 73.9   | 33.5  | 2.7   | 9.5   |
| 17.8   | 15.1   | 2.3    | 1.5    | 7.5   | 13.5   | 1.8   | 16.9  | 29.8  |
| 3.5    | 6.1    | 0.7    | 1.0    | 1.4   | 3.1    | 2.2   | 5.5   | 5.9   |
| 506.2  | 451.5  | 410.2  | 289.0  | 101.1 | 700.3  | 409.3 | 72.1  | 111.7 |
| 1.9    | 1.1    | 1.7    | 1.6    | 0.6   | 1.3    | 1.0   | 1.1   | 1.3   |
| 7.8    | 1.7    | 3.0    | 8.0    | 6.9   | 23.9   | 6.7   | 13.7  | 12.6  |
| 20.9   | 28.0   | 14.0   | 7.0    | 15.3  | 41.9   | 2.6   | 2.9   | 9.0   |
| 13.6   | 5.0    | 13.5   | 6.2    | 1.6   | 43.5   | 72.0  | 9.1   | 18.2  |
| 3.1    | 1.1    | 1.8    | 7.5    | 3.9   | 3.6    | 2.0   | 2.5   | 1.3   |
| 55.8   | 71.0   | 64.1   | 46.8   | 31.5  | 276.5  | 217.1 | 16.6  | 18.8  |
| 1.8    | 7.1    | 7.7    | 0.7    | 0.2   | 0.9    | 1.3   | 1.7   | 2.8   |
| 1.3    | 0.9    | 0.9    | 0.8    | 0.5   | 1.1    | 0.9   | 0.9   | 1.1   |
| 40.2   | 28.9   | 28.2   | 7.4    | 8.9   | 127.6  | 89.6  | 17.9  | 26.1  |
| 11.2   | 4.1    | 2.7    | 0.9    | 1.9   | 2.3    | 13.8  | 13.0  | 2.6   |
| 1161.8 | 1347.3 | 1148.0 | 1334.7 | 557.4 | 1243.3 | 621.1 | 152.8 | 132.7 |
| 3.5    | 6.5    | 6.2    | 2.1    | 1.8   | 20.3   | 12.0  | 2.4   | 1.8   |
| 0.9    | 0.8    | 1.0    | 1.0    | 0.5   | 2.0    | 0.7   | 1.6   | 1.4   |
| 2.1    | 1.6    | 1.4    | 6.2    | 1.0   | 0.5    | 5.3   | 2.7   | 0.9   |
| 154.0  | 170.3  | 156.6  | 150.0  | 40.2  | 262.4  | 162.3 | 13.2  | 22.0  |
| 9.4    | 4.5    | 5.0    | 0.4    | 4.2   | 4.9    | 5.3   | 2.1   | 4.4   |
| 2.1    | 4.3    | 5.2    | 2.7    | 1.5   | 6.3    | 10.2  | 1.2   | 2.6   |
| 4.1    | 10.7   | 18.7   | 2.9    | 11.7  | 17.8   | 12.4  | 14.9  | 6.4   |
| 1.4    | 1.9    | 1.5    | 2.0    | 0.9   | 4.1    | 1.7   | 3.2   | 2.6   |
| 4.6    | 3.2    | 1.8    | 2.4    | 1.9   | 5.2    | 2.5   | 1.8   | 4.7   |
| 12.3   | 6.5    | 1.9    | 4.2    | 4.7   | 13.8   | 14.6  | 7.7   | 7.2   |
| 9.6    | 28.5   | 16.0   | 7.4    | 2.2   | 31.4   | 32.9  | 17.4  | 3.0   |
| 26.1   | 22.3   | 19.4   | 19.4   | 11.3  | 24.4   | 9.3   | 18.5  | 15.1  |

|        |        |        |       |       |        |        |       |       |
|--------|--------|--------|-------|-------|--------|--------|-------|-------|
| 232.7  | 180.9  | 181.9  | 154.0 | 61.4  | 193.4  | 95.4   | 43.4  | 42.6  |
| 5.0    | 2.9    | 1.5    | 5.3   | 1.2   | 2.5    | 1.2    | 11.0  | 7.7   |
| 9.3    | 8.7    | 7.2    | 9.8   | 0.7   | 2.2    | 2.0    | 0.7   | 5.4   |
| 3.4    | 15.1   | 11.0   | 9.6   | 6.3   | 13.0   | 16.4   | 7.8   | 20.0  |
| 2.2    | 2.2    | 1.9    | 0.7   | 0.3   | 5.8    | 1.1    | 0.8   | 0.8   |
| 3.8    | 3.0    | 0.3    | 5.4   | 1.1   | 5.1    | 3.7    | 3.6   | 1.4   |
| 12.6   | 29.4   | 23.6   | 24.8  | 20.3  | 33.5   | 28.2   | 13.5  | 21.3  |
| 7.9    | 4.1    | 3.7    | 2.5   | 0.3   | 0.3    | 0.9    | 7.8   | 6.6   |
| 1313.3 | 980.9  | 1062.0 | 520.9 | 237.2 | 798.6  | 342.4  | 270.2 | 403.3 |
| 6.4    | 11.7   | 5.5    | 3.1   | 1.2   | 9.9    | 1.6    | 1.3   | 5.1   |
| 135.7  | 116.0  | 147.0  | 110.5 | 33.0  | 153.6  | 110.6  | 79.0  | 119.9 |
| 20.2   | 16.0   | 18.1   | 34.5  | 2.0   | 2530.8 | 1892.0 | 15.3  | 26.4  |
| 5.5    | 8.2    | 3.1    | 3.8   | 4.3   | 22.0   | 8.9    | 3.7   | 7.1   |
| 12.3   | 2.9    | 12.9   | 6.6   | 3.0   | 1.4    | 1.2    | 3.1   | 8.5   |
| 6.5    | 11.3   | 5.2    | 1.6   | 0.8   | 4.4    | 2.2    | 1.8   | 1.6   |
| 2075.0 | 1496.2 | 1660.7 | 507.5 | 418.5 | 4.6    | 3.4    | 1.3   | 0.7   |
| 1.9    | 2.8    | 1.6    | 0.7   | 3.2   | 1.8    | 0.8    | 2.9   | 0.6   |
| 42.4   | 28.2   | 37.0   | 28.1  | 16.7  | 58.9   | 38.7   | 26.6  | 12.9  |
| 6.1    | 6.5    | 6.1    | 17.4  | 4.7   | 4.9    | 3.2    | 4.7   | 17.6  |
| 534.6  | 414.3  | 327.8  | 331.3 | 125.9 | 311.6  | 166.7  | 82.9  | 99.8  |
| 3.4    | 2.2    | 4.2    | 2.0   | 1.4   | 1.9    | 1.0    | 2.7   | 3.1   |
| 12.9   | 20.4   | 22.2   | 13.2  | 11.4  | 23.8   | 17.2   | 3.9   | 14.7  |
| 5.9    | 1.9    | 3.7    | 4.1   | 1.1   | 6.1    | 1.1    | 0.6   | 0.7   |
| 130.8  | 117.8  | 106.4  | 60.1  | 37.1  | 215.0  | 110.0  | 140.3 | 124.0 |
| 305.0  | 236.4  | 291.2  | 294.9 | 76.3  | 170.2  | 73.4   | 176.8 | 276.9 |
| 5.2    | 5.1    | 36.2   | 14.3  | 7.2   | 10.6   | 9.1    | 8.9   | 22.7  |
| 63.9   | 51.1   | 63.7   | 66.1  | 39.4  | 231.5  | 132.0  | 19.7  | 25.5  |
| 5.4    | 5.8    | 7.2    | 0.9   | 3.4   | 2.3    | 0.4    | 2.5   | 5.3   |
| 2.0    | 1.8    | 8.1    | 2.5   | 1.9   | 4.0    | 7.8    | 3.6   | 5.0   |
| 1.1    | 6.0    | 4.2    | 7.3   | 11.3  | 20.2   | 4.6    | 14.1  | 7.9   |
| 0.9    | 0.5    | 3.9    | 3.3   | 0.3   | 0.4    | 0.4    | 2.5   | 2.6   |
| 2.3    | 7.8    | 14.1   | 3.6   | 1.1   | 12.3   | 6.0    | 0.6   | 3.5   |
| 13.7   | 15.7   | 25.8   | 5.0   | 2.1   | 31.2   | 13.0   | 22.0  | 33.5  |
| 0.7    | 1.4    | 0.6    | 1.9   | 0.2   | 2.1    | 9.1    | 1.1   | 1.1   |
| 11.0   | 2.1    | 17.0   | 0.7   | 3.1   | 8.1    | 2.3    | 1.1   | 0.9   |
| 7.7    | 2.8    | 15.3   | 1.9   | 4.5   | 17.2   | 1.7    | 8.2   | 5.8   |
| 9.0    | 0.9    | 0.3    | 0.8   | 2.5   | 1.7    | 1.5    | 2.0   | 0.7   |
| 308.1  | 347.0  | 292.8  | 265.7 | 105.5 | 149.3  | 74.1   | 32.4  | 45.8  |
| 5.7    | 2.1    | 4.0    | 1.9   | 1.2   | 16.6   | 17.0   | 2.6   | 5.3   |
| 2.2    | 4.8    | 4.2    | 4.5   | 4.1   | 19.1   | 6.4    | 2.1   | 1.3   |
| 4.6    | 0.3    | 1.4    | 0.2   | 0.1   | 128.9  | 81.2   | 189.7 | 292.7 |
| 50.6   | 40.3   | 32.0   | 33.9  | 10.3  | 38.1   | 9.3    | 24.6  | 33.8  |
| 1.6    | 2.1    | 3.1    | 5.0   | 2.5   | 2.8    | 4.7    | 6.7   | 0.4   |
| 6.2    | 1.7    | 0.4    | 0.7   | 0.4   | 1.2    | 1.1    | 1.2   | 1.0   |
| 29.4   | 17.1   | 19.8   | 4.6   | 8.6   | 7.9    | 0.8    | 11.5  | 28.2  |
| 5.6    | 9.0    | 6.6    | 1.5   | 1.2   | 17.8   | 16.9   | 6.5   | 1.2   |
| 13.1   | 10.0   | 14.2   | 9.2   | 5.3   | 18.5   | 7.4    | 10.9  | 11.5  |
| 2.5    | 1.4    | 3.6    | 1.6   | 1.7   | 3.1    | 3.0    | 2.5   | 2.7   |
| 26.5   | 14.3   | 14.1   | 12.9  | 9.5   | 4.1    | 12.9   | 13.0  | 17.2  |
| 1.2    | 1.0    | 1.7    | 0.6   | 0.4   | 1.2    | 0.5    | 0.7   | 1.2   |
| 14.8   | 9.3    | 16.3   | 15.6  | 7.2   | 17.0   | 1.6    | 10.2  | 15.2  |
| 13.4   | 2.9    | 16.0   | 3.4   | 6.0   | 6.8    | 5.8    | 1.3   | 1.0   |
| 19.5   | 17.9   | 13.5   | 5.1   | 0.8   | 15.6   | 5.8    | 20.8  | 9.1   |

|        |        |        |        |       |        |        |       |       |
|--------|--------|--------|--------|-------|--------|--------|-------|-------|
| 9.3    | 8.1    | 6.2    | 0.5    | 0.2   | 2.3    | 5.4    | 6.0   | 8.4   |
| 3.3    | 7.8    | 2.1    | 2.8    | 2.7   | 2.5    | 3.5    | 1.1   | 3.1   |
| 4.7    | 6.4    | 3.5    | 0.6    | 6.1   | 6.9    | 0.7    | 10.6  | 19.3  |
| 0.9    | 4.3    | 3.3    | 2.7    | 1.0   | 1.0    | 9.4    | 8.1   | 4.1   |
| 1856.9 | 1752.0 | 1612.6 | 1185.1 | 479.6 | 3068.8 | 2267.8 | 213.6 | 274.3 |
| 20.4   | 9.7    | 19.3   | 17.6   | 17.4  | 446.1  | 238.6  | 76.3  | 99.5  |
| 7.6    | 6.0    | 13.5   | 1.5    | 4.6   | 2.4    | 3.2    | 2.5   | 7.9   |
| 1.9    | 5.9    | 4.7    | 0.3    | 0.3   | 8.2    | 8.1    | 7.7   | 3.4   |
| 2.7    | 8.6    | 3.0    | 1.6    | 0.2   | 18.0   | 10.6   | 7.8   | 3.9   |
| 9.1    | 4.4    | 4.5    | 15.5   | 8.8   | 10.4   | 7.6    | 9.0   | 7.2   |
| 13.8   | 2.2    | 2.8    | 1.6    | 1.6   | 4.9    | 0.9    | 1.4   | 1.2   |
| 58.9   | 14.9   | 40.6   | 26.3   | 24.9  | 32.9   | 22.8   | 55.0  | 35.0  |
| 8.3    | 2.7    | 3.6    | 5.8    | 2.3   | 1.5    | 16.0   | 2.0   | 2.2   |
| 5.5    | 0.5    | 0.6    | 0.6    | 0.3   | 0.9    | 0.4    | 1.1   | 2.0   |
| 30.6   | 57.4   | 57.9   | 30.7   | 27.2  | 49.8   | 20.1   | 1.0   | 0.8   |
| 6.8    | 2.0    | 2.4    | 1.7    | 2.5   | 0.9    | 4.5    | 5.4   | 5.7   |
| 330.3  | 305.1  | 355.8  | 291.3  | 114.9 | 462.4  | 366.6  | 75.2  | 82.4  |
| 10.8   | 0.7    | 3.8    | 3.2    | 4.0   | 0.7    | 0.3    | 14.5  | 3.7   |
| 6.2    | 4.1    | 5.7    | 11.8   | 0.8   | 8.6    | 10.0   | 2.4   | 25.8  |
| 4.0    | 3.1    | 1.7    | 1.1    | 1.2   | 21.2   | 3.0    | 16.3  | 5.4   |
| 3.6    | 0.9    | 1.6    | 0.9    | 1.0   | 2.2    | 1.4    | 1.4   | 2.8   |
| 11.1   | 0.5    | 4.3    | 3.5    | 0.4   | 10.8   | 2.1    | 5.6   | 4.7   |
| 31.0   | 25.5   | 22.5   | 21.4   | 6.3   | 36.5   | 26.4   | 21.1  | 23.0  |
| 6.7    | 0.2    | 1.2    | 9.1    | 2.9   | 7.2    | 4.0    | 1.2   | 0.9   |
| 1.8    | 0.9    | 0.4    | 3.6    | 0.5   | 3.4    | 0.5    | 0.7   | 0.5   |
| 3.2    | 12.0   | 19.2   | 12.0   | 6.7   | 25.0   | 3.7    | 34.5  | 28.5  |
| 19.5   | 11.2   | 12.2   | 9.1    | 5.2   | 0.9    | 12.1   | 12.6  | 11.2  |
| 7.0    | 2.5    | 8.5    | 2.1    | 1.2   | 9.2    | 6.0    | 10.1  | 3.1   |
| 1.8    | 12.0   | 6.8    | 1.2    | 1.5   | 3.5    | 11.9   | 2.0   | 3.4   |
| 0.5    | 1.2    | 1.0    | 0.3    | 2.0   | 6.1    | 4.2    | 7.7   | 1.7   |
| 5.8    | 9.8    | 5.2    | 12.2   | 3.4   | 2.4    | 0.6    | 9.5   | 1.1   |
| 4.2    | 1.2    | 2.6    | 1.0    | 2.3   | 1.4    | 12.9   | 1.8   | 3.8   |
| 29.4   | 31.5   | 27.4   | 10.1   | 12.5  | 22.9   | 34.2   | 7.8   | 13.5  |
| 2.9    | 3.8    | 2.4    | 5.6    | 2.8   | 1.6    | 0.3    | 6.5   | 1.5   |
| 1.5    | 1.3    | 2.8    | 1.8    | 2.0   | 2.0    | 5.4    | 2.6   | 2.1   |
| 4.2    | 38.2   | 4.5    | 2.8    | 15.5  | 32.2   | 9.7    | 3.6   | 4.6   |
| 1.5    | 4.9    | 2.7    | 0.3    | 3.7   | 1.0    | 0.4    | 0.8   | 2.2   |
| 9.3    | 13.4   | 7.3    | 5.7    | 4.5   | 8.2    | 12.5   | 11.7  | 14.5  |
| 0.7    | 1.2    | 1.0    | 0.5    | 0.4   | 2.7    | 0.7    | 1.7   | 1.5   |
| 7.3    | 9.1    | 12.5   | 4.2    | 5.0   | 7.8    | 4.3    | 4.6   | 2.0   |
| 2.4    | 1.8    | 1.2    | 2.0    | 0.6   | 1.6    | 2.4    | 1.3   | 4.0   |
| 13.8   | 13.7   | 10.9   | 4.0    | 4.8   | 3.5    | 5.8    | 7.3   | 14.4  |
| 43.7   | 45.5   | 42.2   | 28.0   | 19.3  | 40.5   | 41.2   | 31.5  | 53.2  |
| 13.3   | 2.6    | 13.8   | 1.6    | 1.3   | 2.5    | 13.1   | 5.4   | 2.4   |
| 53.1   | 55.2   | 49.8   | 25.8   | 18.4  | 75.6   | 51.5   | 47.5  | 61.6  |
| 4.7    | 1.1    | 3.6    | 0.6    | 2.0   | 13.6   | 5.0    | 9.0   | 5.1   |
| 12.4   | 5.0    | 2.1    | 1.4    | 3.6   | 22.4   | 20.0   | 10.8  | 1.3   |
| 9.3    | 0.5    | 7.5    | 3.8    | 2.1   | 6.1    | 5.5    | 4.0   | 6.0   |
| 176.0  | 120.0  | 137.1  | 133.7  | 44.8  | 87.2   | 76.3   | 47.4  | 65.5  |
| 50.9   | 46.9   | 52.6   | 36.5   | 9.6   | 8.4    | 0.7    | 4.8   | 7.4   |
| 0.6    | 1.1    | 7.4    | 5.0    | 0.6   | 1.0    | 6.5    | 0.7   | 0.6   |
| 5.9    | 2.2    | 0.7    | 1.4    | 1.0   | 0.9    | 6.9    | 1.5   | 11.3  |
| 9.1    | 9.0    | 6.3    | 1.3    | 2.5   | 4.6    | 14.1   | 10.6  | 19.1  |

|       |       |       |       |       |       |       |       |       |
|-------|-------|-------|-------|-------|-------|-------|-------|-------|
| 63.5  | 38.2  | 51.9  | 29.4  | 11.2  | 84.9  | 24.4  | 124.4 | 162.3 |
| 14.2  | 8.3   | 9.2   | 10.5  | 5.3   | 8.1   | 3.0   | 9.6   | 12.0  |
| 2.9   | 1.4   | 4.3   | 3.7   | 2.9   | 9.2   | 1.5   | 1.0   | 1.9   |
| 21.6  | 28.2  | 11.4  | 1.7   | 6.8   | 18.3  | 7.7   | 12.5  | 16.1  |
| 189.5 | 179.6 | 157.6 | 167.4 | 45.3  | 840.7 | 585.0 | 95.4  | 144.6 |
| 14.6  | 3.4   | 25.7  | 8.8   | 2.6   | 3.9   | 5.2   | 22.4  | 32.4  |
| 3.1   | 2.2   | 5.7   | 11.4  | 4.6   | 3.0   | 0.8   | 5.1   | 1.9   |
| 36.8  | 20.9  | 6.9   | 14.1  | 7.7   | 8.7   | 31.5  | 17.7  | 25.4  |
| 10.4  | 7.9   | 12.8  | 8.2   | 3.8   | 12.1  | 13.2  | 0.7   | 6.8   |
| 83.7  | 61.7  | 91.7  | 55.1  | 38.5  | 52.7  | 38.6  | 25.6  | 35.2  |
| 20.2  | 21.6  | 33.0  | 28.2  | 15.7  | 31.7  | 33.1  | 21.0  | 24.7  |
| 1.0   | 1.1   | 12.8  | 6.9   | 10.7  | 2.1   | 2.4   | 13.1  | 3.9   |
| 12.9  | 4.5   | 12.2  | 1.6   | 1.2   | 15.3  | 12.6  | 8.5   | 7.0   |
| 20.4  | 26.9  | 8.5   | 15.7  | 7.4   | 27.0  | 8.9   | 17.2  | 15.4  |
| 7.1   | 5.4   | 8.7   | 0.9   | 6.6   | 5.6   | 6.7   | 5.1   | 14.6  |
| 13.0  | 0.9   | 3.7   | 2.6   | 1.5   | 9.2   | 1.7   | 3.6   | 1.8   |
| 456.5 | 487.8 | 432.9 | 193.6 | 128.3 | 290.6 | 248.1 | 2.3   | 16.4  |
| 1.4   | 2.4   | 2.0   | 11.7  | 0.6   | 5.5   | 1.5   | 2.8   | 3.1   |
| 1.1   | 0.9   | 1.0   | 3.8   | 1.0   | 1.5   | 0.9   | 0.8   | 0.6   |
| 5.3   | 1.7   | 2.8   | 1.8   | 1.5   | 4.2   | 0.5   | 10.8  | 8.0   |
| 1.6   | 3.4   | 1.1   | 4.2   | 1.8   | 1.1   | 2.7   | 10.6  | 0.8   |
| 12.2  | 3.2   | 15.1  | 12.0  | 3.2   | 17.3  | 10.0  | 4.4   | 11.6  |
| 26.6  | 17.2  | 27.4  | 9.8   | 4.2   | 30.8  | 20.5  | 22.4  | 26.7  |
| 3.1   | 0.3   | 7.9   | 4.2   | 1.8   | 7.3   | 1.0   | 6.7   | 2.1   |
| 220.1 | 262.2 | 278.9 | 272.5 | 60.5  | 192.0 | 159.6 | 15.1  | 23.3  |
| 1.5   | 1.1   | 1.9   | 1.0   | 1.1   | 1.4   | 1.4   | 1.9   | 2.4   |
| 24.5  | 18.9  | 17.9  | 11.0  | 12.1  | 44.5  | 19.1  | 20.9  | 10.6  |
| 19.0  | 9.4   | 18.3  | 3.4   | 7.5   | 7.5   | 10.2  | 9.8   | 11.5  |
| 3.2   | 0.9   | 1.4   | 0.7   | 1.1   | 6.4   | 1.8   | 0.5   | 0.3   |
| 1.0   | 0.9   | 1.3   | 3.3   | 4.4   | 1.0   | 1.0   | 8.3   | 0.8   |
| 9.8   | 5.4   | 2.5   | 0.7   | 4.3   | 2.2   | 0.5   | 0.7   | 2.0   |
| 1.8   | 5.9   | 0.6   | 1.5   | 2.9   | 0.6   | 0.5   | 0.5   | 1.2   |
| 18.8  | 10.9  | 24.5  | 6.9   | 1.2   | 14.3  | 2.1   | 11.9  | 1.8   |
| 3.4   | 8.9   | 9.1   | 6.7   | 2.1   | 1.3   | 0.3   | 5.6   | 7.6   |
| 9.4   | 9.3   | 3.3   | 12.4  | 4.9   | 17.8  | 7.0   | 7.9   | 12.9  |
| 1.6   | 0.5   | 0.8   | 4.8   | 1.1   | 1.3   | 0.9   | 16.5  | 1.6   |
| 3.3   | 2.8   | 2.0   | 2.4   | 2.0   | 10.6  | 1.5   | 1.6   | 1.5   |
| 1.4   | 1.7   | 2.3   | 1.7   | 0.6   | 2.5   | 0.7   | 2.2   | 0.7   |
| 4.4   | 1.7   | 1.3   | 1.4   | 0.4   | 2.3   | 0.9   | 5.0   | 0.9   |
| 1.9   | 3.0   | 1.6   | 1.1   | 1.9   | 0.3   | 5.0   | 4.2   | 5.4   |
| 1.8   | 5.5   | 10.0  | 6.4   | 4.3   | 11.1  | 2.0   | 8.4   | 1.6   |
| 26.2  | 23.4  | 27.7  | 28.3  | 6.3   | 17.2  | 18.7  | 24.0  | 38.4  |
| 2.4   | 2.9   | 2.6   | 0.8   | 0.5   | 1.8   | 2.3   | 2.0   | 0.9   |
| 1.1   | 1.0   | 1.0   | 0.6   | 0.3   | 0.8   | 0.6   | 0.6   | 1.6   |
| 92.0  | 93.6  | 100.4 | 32.2  | 33.4  | 133.8 | 80.7  | 6.1   | 9.3   |
| 1.6   | 3.5   | 4.1   | 1.3   | 1.8   | 15.1  | 3.6   | 3.6   | 2.2   |
| 9.5   | 5.1   | 11.0  | 15.8  | 3.1   | 15.3  | 12.3  | 6.6   | 8.4   |
| 6.7   | 5.8   | 17.7  | 11.5  | 0.5   | 10.8  | 8.1   | 7.7   | 7.1   |
| 0.5   | 0.4   | 3.1   | 2.2   | 2.4   | 0.2   | 0.4   | 1.5   | 2.5   |
| 22.2  | 6.6   | 14.2  | 15.3  | 6.3   | 14.8  | 7.6   | 13.8  | 17.9  |
| 11.6  | 14.5  | 17.9  | 20.0  | 15.1  | 16.6  | 26.0  | 13.2  | 18.0  |
| 6.3   | 3.4   | 4.7   | 7.1   | 4.8   | 46.0  | 47.6  | 3.0   | 5.0   |
| 4.6   | 2.1   | 2.0   | 1.7   | 0.6   | 4.9   | 1.4   | 1.9   | 3.2   |



|      |      |      |      |      |      |      |      |      |
|------|------|------|------|------|------|------|------|------|
| 10.2 | 0.8  | 1.0  | 1.2  | 0.8  | 8.4  | 10.9 | 2.2  | 2.7  |
| 3.1  | 0.8  | 13.4 | 8.8  | 1.1  | 4.7  | 2.6  | 1.7  | 3.9  |
| 2.6  | 1.1  | 2.5  | 2.0  | 1.1  | 1.6  | 1.1  | 0.9  | 5.0  |
| 37.5 | 22.0 | 25.9 | 25.0 | 21.3 | 70.4 | 43.5 | 13.8 | 2.5  |
| 0.7  | 5.5  | 1.5  | 4.4  | 0.6  | 9.6  | 5.7  | 2.0  | 5.7  |
| 18.6 | 9.8  | 10.1 | 1.8  | 5.5  | 21.7 | 14.6 | 7.4  | 6.0  |
| 5.3  | 9.6  | 11.6 | 3.4  | 3.7  | 20.0 | 4.9  | 12.4 | 15.4 |
| 8.9  | 7.1  | 8.0  | 1.1  | 0.4  | 11.5 | 1.6  | 1.3  | 2.1  |
| 10.2 | 18.4 | 25.2 | 11.6 | 9.3  | 23.4 | 16.8 | 11.8 | 13.2 |
| 9.0  | 12.8 | 19.1 | 12.2 | 7.8  | 25.1 | 23.7 | 11.1 | 18.4 |
| 1.0  | 2.6  | 0.4  | 1.1  | 0.8  | 1.0  | 7.1  | 0.3  | 0.8  |
| 7.3  | 5.3  | 1.4  | 8.2  | 0.5  | 16.8 | 4.8  | 8.6  | 2.6  |
| 2.2  | 2.1  | 8.1  | 1.1  | 1.5  | 1.5  | 1.8  | 8.7  | 3.4  |
| 1.8  | 8.9  | 15.3 | 14.1 | 0.6  | 21.3 | 15.5 | 5.1  | 9.3  |
| 6.4  | 11.7 | 13.3 | 11.1 | 2.9  | 16.4 | 20.6 | 6.0  | 4.7  |
| 4.3  | 11.1 | 12.4 | 10.4 | 6.6  | 11.8 | 14.0 | 2.4  | 13.8 |
| 1.9  | 3.7  | 0.4  | 0.1  | 1.9  | 3.1  | 1.9  | 0.6  | 0.3  |
| 13.0 | 10.2 | 13.9 | 18.6 | 4.5  | 11.0 | 13.6 | 2.0  | 4.6  |
| 3.5  | 1.0  | 1.7  | 1.3  | 1.6  | 10.1 | 6.6  | 2.4  | 4.2  |
| 3.1  | 1.7  | 1.4  | 6.7  | 1.1  | 2.5  | 1.1  | 2.3  | 16.2 |
| 4.0  | 8.1  | 9.4  | 3.9  | 1.1  | 25.3 | 13.7 | 13.9 | 23.0 |
| 6.5  | 1.9  | 6.2  | 6.5  | 5.5  | 3.1  | 1.8  | 4.2  | 3.2  |
| 3.5  | 6.9  | 5.5  | 0.2  | 4.0  | 8.0  | 1.2  | 1.4  | 5.0  |
| 4.6  | 1.0  | 7.7  | 3.1  | 0.4  | 3.6  | 4.5  | 0.3  | 1.2  |
| 5.2  | 6.9  | 7.6  | 4.5  | 3.0  | 16.3 | 17.1 | 5.2  | 1.4  |
| 14.0 | 9.0  | 1.7  | 7.5  | 0.7  | 14.6 | 11.8 | 1.2  | 2.0  |
| 28.2 | 20.6 | 17.7 | 25.1 | 3.3  | 44.4 | 25.3 | 19.3 | 9.4  |
| 6.0  | 7.2  | 13.7 | 5.3  | 5.8  | 15.5 | 6.7  | 0.5  | 9.5  |
| 19.7 | 9.9  | 15.0 | 12.1 | 4.4  | 14.0 | 13.3 | 16.8 | 13.0 |
| 7.1  | 5.2  | 1.2  | 5.9  | 4.7  | 15.0 | 1.7  | 5.4  | 7.6  |
| 4.0  | 1.0  | 5.4  | 3.5  | 0.6  | 3.5  | 0.9  | 9.5  | 5.2  |
| 19.0 | 7.2  | 6.7  | 10.9 | 2.7  | 14.8 | 10.0 | 13.3 | 13.5 |
| 13.1 | 15.7 | 2.8  | 7.3  | 1.7  | 8.8  | 8.5  | 2.5  | 17.4 |
| 4.6  | 0.7  | 0.2  | 3.6  | 1.2  | 1.9  | 7.5  | 0.2  | 0.3  |
| 6.6  | 5.9  | 9.5  | 10.2 | 4.4  | 14.4 | 3.1  | 2.6  | 1.2  |
| 4.2  | 4.7  | 1.3  | 5.9  | 2.6  | 1.1  | 0.9  | 0.7  | 0.5  |
| 5.2  | 3.1  | 0.6  | 1.1  | 3.0  | 0.9  | 0.8  | 0.3  | 1.1  |
| 7.5  | 2.9  | 4.0  | 10.1 | 4.9  | 5.0  | 5.0  | 20.7 | 14.3 |
| 6.0  | 0.9  | 1.0  | 3.0  | 3.8  | 0.8  | 1.4  | 0.9  | 1.6  |
| 0.6  | 1.1  | 1.8  | 0.4  | 0.5  | 1.1  | 0.8  | 1.0  | 4.8  |
| 1.4  | 0.6  | 0.9  | 0.6  | 3.2  | 10.7 | 1.5  | 4.6  | 0.7  |
| 2.0  | 5.1  | 0.5  | 7.4  | 0.4  | 2.3  | 5.7  | 1.6  | 7.2  |
| 7.2  | 3.5  | 4.7  | 2.5  | 1.1  | 10.4 | 27.8 | 5.0  | 8.0  |
| 4.6  | 2.7  | 2.2  | 1.6  | 6.9  | 1.0  | 4.1  | 4.8  | 1.2  |
| 9.9  | 0.6  | 4.9  | 7.4  | 2.5  | 2.4  | 8.6  | 1.4  | 0.5  |
| 1.4  | 1.8  | 2.7  | 1.8  | 0.4  | 1.1  | 0.8  | 2.1  | 2.6  |
| 20.1 | 1.7  | 9.2  | 1.4  | 3.5  | 14.9 | 7.6  | 2.0  | 2.1  |
| 1.4  | 1.1  | 4.2  | 1.0  | 1.7  | 4.2  | 8.1  | 1.2  | 1.1  |
| 7.7  | 1.8  | 2.0  | 9.7  | 3.5  | 2.8  | 1.3  | 1.5  | 2.4  |
| 38.3 | 26.6 | 40.0 | 19.6 | 15.2 | 52.0 | 20.8 | 32.0 | 37.6 |
| 17.6 | 8.4  | 14.8 | 9.1  | 0.2  | 10.5 | 12.0 | 7.9  | 10.2 |
| 4.1  | 3.8  | 4.0  | 4.5  | 0.5  | 6.3  | 0.5  | 1.7  | 2.3  |
| 2.0  | 1.9  | 3.6  | 1.3  | 0.5  | 4.0  | 1.9  | 14.1 | 8.9  |

|       |       |       |       |       |       |       |        |        |
|-------|-------|-------|-------|-------|-------|-------|--------|--------|
| 0.4   | 0.4   | 0.5   | 6.1   | 3.5   | 7.2   | 2.3   | 0.7    | 1.1    |
| 1.3   | 0.3   | 0.5   | 1.9   | 0.4   | 1.3   | 0.5   | 1.6    | 0.5    |
| 1.2   | 0.4   | 0.5   | 4.4   | 0.2   | 11.0  | 1.2   | 0.5    | 0.7    |
| 7.7   | 0.4   | 3.9   | 7.2   | 2.0   | 1.6   | 9.3   | 1.9    | 8.3    |
| 8.0   | 2.5   | 9.9   | 4.8   | 3.1   | 13.1  | 8.1   | 19.0   | 1.5    |
| 2.5   | 1.8   | 5.9   | 7.2   | 2.3   | 24.5  | 10.9  | 2.6    | 2.3    |
| 24.0  | 3.5   | 4.1   | 18.0  | 5.0   | 21.3  | 14.1  | 6.4    | 4.9    |
| 1.8   | 0.5   | 1.0   | 1.9   | 3.8   | 8.5   | 0.6   | 1.2    | 7.3    |
| 3.2   | 6.1   | 7.2   | 4.3   | 5.5   | 7.4   | 11.5  | 1.5    | 1.8    |
| 370.4 | 401.3 | 379.6 | 341.6 | 124.0 | 443.5 | 344.4 | 45.9   | 82.9   |
| 1.2   | 5.0   | 4.0   | 1.3   | 5.2   | 14.6  | 23.0  | 1.1    | 4.8    |
| 89.5  | 101.5 | 107.7 | 115.5 | 50.5  | 53.5  | 81.0  | 15.3   | 30.8   |
| 27.1  | 19.2  | 18.9  | 9.7   | 7.6   | 6.2   | 7.5   | 12.0   | 23.4   |
| 19.6  | 9.5   | 4.4   | 2.5   | 2.8   | 17.4  | 22.4  | 2.2    | 1.4    |
| 17.7  | 0.5   | 10.6  | 2.6   | 7.4   | 6.8   | 17.4  | 17.8   | 16.7   |
| 18.3  | 6.7   | 3.7   | 9.4   | 3.6   | 6.0   | 0.8   | 5.6    | 4.3    |
| 3.5   | 6.2   | 7.9   | 1.6   | 4.0   | 1.9   | 4.2   | 6.9    | 4.2    |
| 2.1   | 1.5   | 1.1   | 2.0   | 0.8   | 2.3   | 2.6   | 2.4    | 2.3    |
| 8.8   | 6.7   | 1.6   | 4.7   | 0.6   | 1.4   | 8.7   | 4.5    | 1.2    |
| 18.2  | 3.2   | 1.8   | 14.1  | 5.4   | 8.4   | 5.0   | 0.9    | 4.4    |
| 0.9   | 0.5   | 1.9   | 1.8   | 0.3   | 7.5   | 1.7   | 0.8    | 2.7    |
| 11.6  | 10.8  | 11.1  | 2.5   | 5.2   | 4.7   | 11.0  | 13.4   | 15.3   |
| 15.6  | 3.4   | 25.3  | 1.7   | 1.9   | 12.6  | 2.9   | 2.4    | 4.2    |
| 7.6   | 0.9   | 2.1   | 0.8   | 1.0   | 1.1   | 1.9   | 1.0    | 0.4    |
| 1.2   | 7.3   | 0.7   | 0.2   | 0.6   | 0.7   | 3.6   | 4.2    | 0.7    |
| 0.9   | 1.4   | 1.4   | 2.9   | 1.2   | 3.7   | 1.3   | 0.9    | 5.5    |
| 14.9  | 12.7  | 15.5  | 15.8  | 3.4   | 22.7  | 20.3  | 6.1    | 3.2    |
| 51.4  | 54.0  | 50.2  | 44.1  | 23.9  | 53.3  | 73.8  | 6.8    | 14.9   |
| 67.6  | 41.1  | 48.0  | 36.1  | 22.5  | 91.4  | 12.4  | 26.7   | 26.2   |
| 1.0   | 0.8   | 0.9   | 2.6   | 3.1   | 19.1  | 3.0   | 3.1    | 11.3   |
| 7.5   | 1.8   | 1.7   | 1.7   | 3.7   | 2.6   | 0.4   | 0.8    | 2.0    |
| 1.7   | 1.2   | 1.8   | 0.8   | 0.6   | 1.7   | 1.9   | 2.6    | 1.6    |
| 1.9   | 2.9   | 1.2   | 2.1   | 0.7   | 7.3   | 1.6   | 1.4    | 1.8    |
| 6.1   | 0.8   | 6.4   | 5.6   | 1.1   | 2.2   | 1.3   | 7.9    | 6.3    |
| 1.0   | 0.9   | 4.4   | 0.8   | 0.6   | 1.5   | 1.5   | 0.7    | 0.7    |
| 3.1   | 8.4   | 1.5   | 4.3   | 0.5   | 13.6  | 1.0   | 18.2   | 3.8    |
| 1.0   | 0.9   | 0.8   | 0.6   | 1.1   | 0.8   | 0.7   | 2.5    | 0.5    |
| 22.3  | 10.0  | 9.0   | 5.1   | 8.5   | 19.9  | 0.8   | 22.5   | 36.0   |
| 4.2   | 8.4   | 7.5   | 6.4   | 0.7   | 4.8   | 14.8  | 2.7    | 27.3   |
| 0.4   | 0.2   | 0.5   | 0.2   | 0.4   | 0.8   | 0.2   | 0.3    | 1.2    |
| 37.6  | 31.8  | 29.0  | 37.0  | 11.5  | 80.6  | 92.7  | 46.0   | 19.9   |
| 50.5  | 44.2  | 36.2  | 25.9  | 16.0  | 104.8 | 65.3  | 2586.3 | 3412.3 |
| 12.9  | 3.6   | 6.8   | 2.8   | 1.0   | 11.9  | 4.2   | 13.8   | 27.0   |
| 19.0  | 12.9  | 2.8   | 1.2   | 1.0   | 24.8  | 14.9  | 17.5   | 26.5   |
| 0.2   | 7.9   | 0.8   | 0.2   | 0.7   | 0.6   | 1.6   | 0.9    | 1.4    |
| 32.3  | 28.7  | 31.7  | 27.2  | 10.7  | 29.7  | 36.8  | 1.2    | 2.0    |
| 90.3  | 79.8  | 91.6  | 135.6 | 29.2  | 325.7 | 388.3 | 9.1    | 11.5   |
| 4.1   | 6.8   | 13.1  | 2.6   | 4.7   | 15.8  | 5.8   | 15.4   | 10.8   |
| 285.6 | 235.8 | 261.1 | 218.1 | 81.7  | 237.0 | 179.8 | 196.0  | 277.3  |
| 2.1   | 1.2   | 2.9   | 0.7   | 0.7   | 0.9   | 1.0   | 0.9    | 0.7    |
| 6.3   | 3.3   | 5.0   | 1.6   | 3.0   | 2.3   | 1.9   | 2.2    | 2.7    |
| 4.0   | 3.4   | 3.0   | 1.3   | 1.1   | 3.8   | 4.4   | 2.7    | 2.2    |
| 8.0   | 18.0  | 12.8  | 7.8   | 2.7   | 18.5  | 19.2  | 4.1    | 9.3    |

|       |       |       |       |      |       |       |      |       |
|-------|-------|-------|-------|------|-------|-------|------|-------|
| 3.1   | 3.5   | 1.4   | 1.1   | 2.5  | 2.5   | 2.6   | 3.3  | 4.8   |
| 33.1  | 24.8  | 19.4  | 2.7   | 10.8 | 25.3  | 7.4   | 25.6 | 16.2  |
| 1.3   | 1.3   | 0.3   | 2.9   | 4.0  | 7.3   | 0.7   | 5.1  | 1.5   |
| 4.9   | 11.1  | 3.0   | 1.8   | 3.1  | 3.0   | 8.9   | 6.7  | 8.9   |
| 4.7   | 3.8   | 2.6   | 3.1   | 1.9  | 4.9   | 3.5   | 3.0  | 1.7   |
| 19.6  | 1.0   | 5.7   | 1.4   | 3.6  | 8.8   | 4.0   | 2.1  | 1.5   |
| 2.3   | 2.4   | 1.5   | 1.4   | 0.6  | 2.6   | 1.3   | 1.2  | 1.7   |
| 54.3  | 32.8  | 49.2  | 25.4  | 4.9  | 43.9  | 19.1  | 67.0 | 61.2  |
| 1.1   | 0.7   | 0.5   | 0.7   | 0.2  | 17.7  | 7.4   | 3.2  | 10.7  |
| 1.8   | 11.9  | 11.5  | 4.3   | 1.6  | 6.6   | 4.8   | 0.7  | 2.0   |
| 57.6  | 30.3  | 43.2  | 43.0  | 28.5 | 113.5 | 116.0 | 10.6 | 13.5  |
| 14.3  | 25.0  | 23.7  | 22.0  | 10.6 | 66.8  | 39.5  | 10.3 | 0.5   |
| 11.6  | 18.7  | 13.3  | 11.2  | 6.0  | 34.3  | 10.3  | 2.0  | 14.7  |
| 0.5   | 0.3   | 1.7   | 0.7   | 0.4  | 1.6   | 0.4   | 1.0  | 1.2   |
| 220.0 | 262.9 | 153.7 | 138.7 | 87.8 | 154.6 | 86.2  | 66.6 | 102.8 |
| 117.4 | 89.0  | 111.1 | 127.8 | 35.3 | 314.8 | 148.9 | 65.5 | 84.8  |
| 1.3   | 0.4   | 1.0   | 0.4   | 2.5  | 2.0   | 1.4   | 1.1  | 7.2   |
| 7.2   | 8.4   | 3.4   | 6.2   | 3.0  | 0.6   | 8.3   | 10.3 | 4.2   |
| 1.2   | 4.8   | 1.6   | 2.1   | 1.8  | 2.0   | 5.3   | 6.9  | 3.5   |
| 15.4  | 9.4   | 1.0   | 3.8   | 4.5  | 25.3  | 11.2  | 7.8  | 12.9  |
| 0.9   | 0.5   | 0.3   | 0.2   | 0.2  | 1.0   | 2.3   | 0.8  | 0.2   |
| 20.6  | 16.1  | 25.3  | 2.4   | 1.0  | 5.2   | 25.7  | 25.9 | 20.0  |
| 112.8 | 98.8  | 117.4 | 80.6  | 28.9 | 152.2 | 98.9  | 13.0 | 16.9  |
| 2.8   | 8.0   | 11.3  | 9.8   | 3.4  | 13.7  | 6.5   | 17.9 | 8.6   |
| 2.0   | 0.8   | 0.8   | 5.0   | 0.1  | 4.7   | 3.5   | 3.1  | 1.9   |
| 81.2  | 75.5  | 51.0  | 44.8  | 24.0 | 38.0  | 21.8  | 68.7 | 34.2  |
| 5.1   | 1.6   | 2.6   | 0.2   | 1.6  | 6.9   | 0.4   | 0.3  | 0.5   |
| 3.0   | 3.3   | 3.2   | 3.2   | 1.5  | 10.0  | 4.7   | 6.3  | 2.4   |
| 0.6   | 0.4   | 0.3   | 0.3   | 1.1  | 1.4   | 0.4   | 1.4  | 0.5   |
| 3.5   | 2.2   | 1.5   | 2.1   | 2.9  | 8.9   | 3.8   | 2.7  | 11.1  |
| 15.4  | 10.7  | 21.7  | 11.3  | 8.3  | 24.9  | 17.2  | 7.7  | 25.3  |
| 2.6   | 1.2   | 1.7   | 0.8   | 1.2  | 6.8   | 4.7   | 3.8  | 3.1   |
| 7.8   | 8.4   | 1.4   | 0.9   | 0.8  | 22.1  | 24.3  | 1.2  | 2.0   |
| 6.5   | 8.4   | 9.1   | 3.9   | 2.4  | 11.0  | 14.0  | 2.3  | 1.4   |
| 25.4  | 15.3  | 21.8  | 16.0  | 9.4  | 19.3  | 5.6   | 28.2 | 23.6  |
| 192.1 | 135.1 | 174.3 | 130.1 | 42.1 | 142.3 | 75.1  | 59.0 | 65.8  |
| 12.1  | 14.5  | 15.8  | 17.3  | 0.8  | 1.9   | 8.9   | 4.3  | 0.6   |
| 82.2  | 80.1  | 85.3  | 76.9  | 30.9 | 64.3  | 38.5  | 71.5 | 91.1  |
| 1.2   | 7.5   | 11.5  | 9.1   | 0.6  | 1.4   | 10.6  | 1.9  | 5.7   |
| 21.1  | 2.6   | 1.4   | 11.0  | 7.8  | 11.0  | 2.6   | 22.3 | 22.1  |
| 1.9   | 1.6   | 2.4   | 6.1   | 1.3  | 1.7   | 4.6   | 3.5  | 18.6  |
| 1.7   | 7.0   | 13.4  | 8.0   | 7.0  | 4.0   | 4.1   | 2.1  | 6.2   |
| 1.4   | 2.2   | 4.3   | 1.5   | 2.2  | 2.3   | 2.2   | 1.4  | 1.6   |
| 4.3   | 2.9   | 4.0   | 2.7   | 2.8  | 3.2   | 2.3   | 4.8  | 6.0   |
| 2.1   | 4.2   | 1.8   | 3.2   | 0.6  | 4.3   | 2.1   | 21.6 | 1.0   |
| 9.4   | 1.5   | 9.7   | 7.1   | 1.6  | 8.5   | 2.9   | 10.1 | 5.6   |
| 3.0   | 5.7   | 1.9   | 12.9  | 4.5  | 45.8  | 28.6  | 19.3 | 11.1  |
| 16.3  | 10.9  | 15.0  | 9.1   | 6.0  | 18.4  | 5.0   | 14.2 | 9.8   |
| 2.4   | 5.4   | 0.6   | 0.2   | 0.5  | 0.7   | 0.6   | 5.3  | 0.3   |
| 6.5   | 11.3  | 3.2   | 3.5   | 0.9  | 2.9   | 5.4   | 2.2  | 8.3   |
| 9.2   | 0.5   | 8.0   | 8.7   | 3.7  | 12.7  | 12.8  | 9.0  | 6.3   |
| 65.7  | 85.3  | 78.9  | 95.5  | 27.8 | 158.9 | 126.2 | 13.5 | 43.3  |
| 0.7   | 0.9   | 0.9   | 0.6   | 0.4  | 1.0   | 1.5   | 0.8  | 0.4   |

|       |       |       |       |       |       |       |       |       |
|-------|-------|-------|-------|-------|-------|-------|-------|-------|
| 1.0   | 0.3   | 4.7   | 1.9   | 2.3   | 1.5   | 0.3   | 10.0  | 1.6   |
| 90.3  | 103.5 | 130.8 | 121.0 | 25.8  | 105.9 | 38.3  | 53.4  | 53.9  |
| 178.8 | 157.4 | 173.3 | 185.6 | 47.4  | 205.0 | 110.7 | 122.5 | 188.2 |
| 1.2   | 4.6   | 9.8   | 1.1   | 7.8   | 2.5   | 2.2   | 6.6   | 1.3   |
| 1.4   | 0.7   | 2.7   | 1.3   | 0.8   | 886.6 | 610.5 | 36.2  | 58.9  |
| 5.0   | 9.1   | 2.1   | 2.4   | 0.3   | 3.6   | 1.9   | 0.6   | 1.8   |
| 6.1   | 8.1   | 15.9  | 2.3   | 7.5   | 27.5  | 10.7  | 11.0  | 13.0  |
| 106.8 | 124.7 | 77.7  | 147.9 | 19.6  | 103.1 | 67.0  | 50.1  | 59.9  |
| 17.9  | 15.7  | 17.8  | 9.7   | 5.3   | 16.1  | 15.2  | 15.3  | 13.6  |
| 18.4  | 15.9  | 11.4  | 11.0  | 10.3  | 14.0  | 5.6   | 2.0   | 1.4   |
| 1.4   | 1.2   | 1.1   | 0.8   | 0.7   | 1.6   | 0.7   | 1.1   | 0.8   |
| 6.5   | 2.9   | 3.0   | 4.9   | 0.3   | 11.4  | 2.2   | 2.2   | 1.6   |
| 164.0 | 100.8 | 179.6 | 226.3 | 63.5  | 233.2 | 163.4 | 8.3   | 18.2  |
| 3.3   | 1.5   | 2.9   | 0.7   | 8.5   | 3.4   | 7.2   | 5.9   | 13.2  |
| 264.5 | 257.6 | 264.5 | 272.2 | 70.3  | 78.0  | 55.5  | 27.0  | 35.3  |
| 1.2   | 1.6   | 1.6   | 1.1   | 0.5   | 1.3   | 2.0   | 1.4   | 1.8   |
| 1.0   | 0.2   | 4.8   | 5.1   | 0.5   | 0.5   | 3.4   | 1.3   | 5.7   |
| 14.0  | 7.2   | 12.2  | 6.8   | 5.3   | 34.3  | 22.1  | 4.3   | 4.0   |
| 3.6   | 9.8   | 20.0  | 6.7   | 6.1   | 24.9  | 15.2  | 22.2  | 18.7  |
| 2.4   | 9.6   | 10.7  | 14.6  | 0.3   | 3.1   | 4.6   | 192.9 | 258.1 |
| 1.5   | 7.8   | 4.2   | 1.8   | 0.2   | 2.2   | 3.8   | 4.3   | 1.1   |
| 2.0   | 1.3   | 2.4   | 0.7   | 0.6   | 11.4  | 1.2   | 15.9  | 5.2   |
| 9.6   | 6.5   | 12.1  | 5.7   | 0.3   | 9.9   | 22.8  | 12.5  | 12.8  |
| 13.9  | 10.6  | 2.0   | 3.2   | 0.8   | 13.3  | 2.3   | 7.5   | 3.6   |
| 3.8   | 7.3   | 2.8   | 14.2  | 4.4   | 2.4   | 2.5   | 14.8  | 13.9  |
| 2.0   | 3.1   | 3.8   | 5.9   | 2.2   | 6.6   | 0.7   | 4.4   | 10.9  |
| 4.9   | 5.1   | 8.9   | 7.8   | 1.1   | 1.4   | 7.3   | 18.2  | 16.2  |
| 2.4   | 3.4   | 1.1   | 2.6   | 1.7   | 2.2   | 1.5   | 1.4   | 1.9   |
| 7.6   | 6.5   | 24.7  | 3.4   | 17.9  | 30.2  | 15.8  | 5.0   | 10.7  |
| 13.7  | 5.8   | 5.1   | 4.4   | 5.8   | 13.4  | 9.5   | 5.4   | 14.3  |
| 9.8   | 9.8   | 5.4   | 1.5   | 2.0   | 16.2  | 1.1   | 9.2   | 5.4   |
| 4.5   | 5.4   | 5.0   | 26.5  | 5.8   | 39.8  | 3.7   | 16.1  | 6.1   |
| 6.2   | 12.4  | 3.8   | 3.6   | 0.4   | 11.1  | 8.7   | 2.5   | 2.7   |
| 9.2   | 14.1  | 9.6   | 9.2   | 3.5   | 19.6  | 15.8  | 3.9   | 14.8  |
| 1.0   | 5.8   | 3.1   | 1.3   | 1.4   | 2.4   | 1.6   | 4.5   | 8.7   |
| 2.1   | 4.1   | 7.0   | 13.7  | 6.8   | 6.8   | 3.9   | 15.7  | 16.4  |
| 17.8  | 1.6   | 14.1  | 8.9   | 0.2   | 9.4   | 11.4  | 8.6   | 9.6   |
| 26.3  | 25.8  | 22.3  | 29.7  | 9.8   | 24.0  | 29.2  | 9.8   | 17.2  |
| 14.6  | 3.5   | 4.8   | 3.9   | 0.3   | 16.5  | 2.6   | 1.4   | 10.6  |
| 23.9  | 31.5  | 6.7   | 31.8  | 9.2   | 7.3   | 22.5  | 16.6  | 4.4   |
| 164.1 | 151.7 | 176.4 | 178.9 | 49.5  | 156.8 | 103.6 | 25.7  | 34.7  |
| 496.7 | 505.2 | 524.7 | 390.9 | 162.1 | 417.4 | 322.3 | 10.5  | 20.0  |
| 5.9   | 0.6   | 4.3   | 4.7   | 0.4   | 30.4  | 1.6   | 1.7   | 6.9   |
| 11.1  | 57.5  | 46.9  | 52.9  | 16.4  | 92.2  | 78.4  | 1.1   | 2.0   |
| 39.7  | 74.3  | 44.0  | 16.7  | 13.2  | 125.4 | 34.5  | 18.1  | 16.7  |
| 13.1  | 16.4  | 8.5   | 9.9   | 7.8   | 9.7   | 5.7   | 8.5   | 12.6  |
| 14.6  | 1.1   | 0.4   | 8.6   | 2.4   | 5.7   | 3.7   | 4.6   | 0.4   |
| 0.4   | 2.2   | 16.2  | 0.4   | 2.8   | 2.4   | 2.4   | 0.2   | 0.4   |
| 2.8   | 5.0   | 2.5   | 2.5   | 1.6   | 2.8   | 1.9   | 2.3   | 14.4  |
| 13.4  | 10.6  | 10.6  | 6.1   | 1.2   | 5.8   | 4.4   | 6.1   | 17.4  |
| 1.6   | 1.6   | 0.8   | 6.6   | 3.0   | 2.0   | 0.3   | 0.8   | 1.2   |
| 572.6 | 413.7 | 304.6 | 159.7 | 96.1  | 456.4 | 220.7 | 103.6 | 108.1 |
| 75.3  | 66.7  | 53.7  | 23.6  | 14.4  | 0.7   | 1.2   | 0.7   | 0.5   |

|        |        |        |        |        |        |        |       |       |
|--------|--------|--------|--------|--------|--------|--------|-------|-------|
| 224.8  | 234.0  | 250.4  | 194.4  | 132.6  | 502.0  | 481.0  | 66.9  | 64.1  |
| 29.9   | 20.4   | 22.2   | 14.4   | 9.1    | 23.7   | 18.8   | 7.0   | 21.0  |
| 2.2    | 2.4    | 1.3    | 1.1    | 1.7    | 18.7   | 1.7    | 1.6   | 0.9   |
| 5.7    | 8.8    | 2.1    | 0.5    | 0.4    | 2.4    | 8.7    | 0.6   | 0.6   |
| 64.2   | 50.4   | 59.3   | 32.0   | 25.6   | 381.8  | 279.3  | 74.3  | 68.4  |
| 10.4   | 2.0    | 4.3    | 10.8   | 0.3    | 11.5   | 13.3   | 63.8  | 93.6  |
| 52.3   | 46.4   | 67.1   | 82.7   | 29.7   | 83.6   | 49.0   | 27.9  | 32.1  |
| 18.7   | 25.0   | 25.4   | 19.8   | 8.8    | 14.1   | 24.5   | 25.5  | 2.7   |
| 17.0   | 17.2   | 10.0   | 13.0   | 2.8    | 44.6   | 37.7   | 16.2  | 6.1   |
| 16.1   | 14.6   | 12.8   | 10.6   | 6.9    | 23.0   | 14.3   | 17.3  | 11.8  |
| 12.8   | 1.9    | 14.5   | 4.2    | 8.3    | 23.4   | 7.7    | 14.1  | 2.7   |
| 15.6   | 7.3    | 16.8   | 12.7   | 1.4    | 17.7   | 9.2    | 3.4   | 17.5  |
| 2.8    | 1.6    | 2.9    | 0.7    | 2.5    | 6.9    | 0.3    | 1.3   | 3.9   |
| 5.4    | 0.2    | 0.7    | 0.7    | 0.4    | 1.0    | 4.7    | 4.4   | 2.3   |
| 10.7   | 1.6    | 3.0    | 5.4    | 5.2    | 4.2    | 1.5    | 7.0   | 6.4   |
| 175.1  | 121.4  | 134.3  | 92.4   | 47.7   | 126.8  | 48.4   | 78.4  | 74.4  |
| 1.0    | 1.2    | 2.2    | 1.0    | 0.2    | 3.6    | 0.8    | 2.1   | 1.0   |
| 107.0  | 40.6   | 76.1   | 38.3   | 26.3   | 468.3  | 98.0   | 50.5  | 76.4  |
| 5.8    | 2.7    | 5.9    | 0.8    | 0.2    | 3.6    | 0.3    | 1.5   | 12.4  |
| 149.0  | 143.3  | 130.4  | 101.6  | 44.9   | 1637.2 | 1327.5 | 448.3 | 651.2 |
| 0.4    | 0.2    | 0.5    | 0.3    | 1.7    | 5.0    | 0.5    | 0.6   | 0.2   |
| 11.3   | 13.3   | 3.3    | 3.9    | 1.1    | 2.0    | 1.8    | 4.6   | 9.3   |
| 108.6  | 99.4   | 100.3  | 72.6   | 23.7   | 157.3  | 111.3  | 98.6  | 113.5 |
| 728.3  | 882.2  | 536.3  | 464.2  | 216.4  | 2409.7 | 1954.9 | 184.1 | 218.7 |
| 0.6    | 1.0    | 0.9    | 0.9    | 0.7    | 1.2    | 0.5    | 0.5   | 0.7   |
| 6.5    | 5.5    | 17.4   | 7.7    | 5.9    | 9.8    | 2.8    | 11.2  | 11.4  |
| 5.5    | 13.6   | 13.1   | 4.5    | 7.9    | 5.4    | 1.5    | 2.5   | 9.5   |
| 6.1    | 9.7    | 25.7   | 4.0    | 11.7   | 22.8   | 4.5    | 21.8  | 31.2  |
| 5.5    | 3.5    | 2.9    | 3.0    | 1.8    | 3.6    | 3.4    | 8.1   | 2.7   |
| 28.8   | 8.8    | 4.9    | 8.2    | 1.0    | 33.7   | 9.4    | 3.0   | 3.6   |
| 4.4    | 4.1    | 2.0    | 1.7    | 0.9    | 4.6    | 1.4    | 4.5   | 1.2   |
| 31.9   | 29.1   | 24.2   | 39.6   | 8.2    | 120.0  | 53.0   | 64.8  | 91.6  |
| 3.7    | 14.8   | 5.5    | 2.3    | 1.3    | 3.6    | 5.4    | 1.8   | 16.9  |
| 0.7    | 1.2    | 0.4    | 1.0    | 0.1    | 1.3    | 0.4    | 0.2   | 0.6   |
| 2494.3 | 2405.0 | 2300.6 | 2110.4 | 1048.1 | 3327.9 | 2886.2 | 416.9 | 539.2 |
| 1.4    | 0.9    | 10.3   | 11.7   | 3.8    | 10.9   | 12.2   | 7.5   | 13.2  |
| 10.5   | 9.6    | 3.0    | 1.2    | 4.7    | 6.3    | 5.7    | 0.6   | 0.7   |
| 2.5    | 1.7    | 3.9    | 1.0    | 8.0    | 1.3    | 5.9    | 11.3  | 6.1   |
| 5.2    | 9.1    | 12.0   | 4.5    | 3.7    | 2.1    | 9.2    | 0.4   | 1.0   |
| 58.9   | 55.7   | 61.8   | 34.6   | 14.3   | 82.1   | 47.6   | 50.0  | 63.2  |
| 0.4    | 11.6   | 1.2    | 7.0    | 1.1    | 11.3   | 10.2   | 9.0   | 19.2  |
| 2.4    | 1.4    | 5.4    | 1.1    | 2.1    | 2.0    | 2.5    | 6.6   | 5.2   |
| 413.5  | 446.3  | 430.0  | 383.8  | 181.0  | 748.0  | 602.0  | 74.4  | 100.1 |
| 11.2   | 8.5    | 4.6    | 7.5    | 4.6    | 0.7    | 8.8    | 0.2   | 0.4   |
| 13.0   | 11.9   | 19.1   | 10.0   | 1.0    | 6.6    | 9.9    | 6.9   | 2.9   |
| 1.0    | 0.2    | 1.8    | 7.4    | 2.2    | 5.8    | 3.2    | 3.1   | 2.0   |
| 1.5    | 21.6   | 2.2    | 5.0    | 1.2    | 11.7   | 0.8    | 14.9  | 6.6   |
| 17.5   | 3.1    | 20.6   | 4.4    | 9.2    | 12.1   | 6.7    | 15.4  | 27.5  |
| 2.2    | 0.9    | 0.8    | 0.8    | 0.2    | 1.2    | 0.7    | 1.5   | 2.0   |
| 10.4   | 9.5    | 6.6    | 5.1    | 3.1    | 16.3   | 2.9    | 6.5   | 18.1  |
| 1.2    | 10.7   | 8.3    | 8.8    | 2.0    | 30.9   | 8.6    | 22.2  | 1.9   |
| 20.6   | 2.2    | 9.5    | 4.3    | 1.4    | 8.8    | 3.3    | 3.5   | 2.8   |
| 8.9    | 6.0    | 4.3    | 19.0   | 1.4    | 3.8    | 2.1    | 33.8  | 29.4  |

|       |       |       |       |       |       |       |       |       |
|-------|-------|-------|-------|-------|-------|-------|-------|-------|
| 65.0  | 72.1  | 57.6  | 29.0  | 26.2  | 73.0  | 19.9  | 103.9 | 124.1 |
| 27.5  | 11.3  | 26.4  | 4.4   | 12.1  | 14.8  | 12.0  | 11.4  | 8.8   |
| 16.8  | 25.6  | 3.4   | 11.2  | 10.8  | 7.3   | 10.8  | 3.8   | 13.6  |
| 50.1  | 70.5  | 54.7  | 45.5  | 12.1  | 42.5  | 37.7  | 9.9   | 20.6  |
| 2.8   | 1.7   | 2.3   | 1.1   | 0.8   | 3.8   | 1.3   | 2.3   | 3.0   |
| 4.6   | 1.4   | 0.7   | 0.5   | 4.6   | 3.8   | 0.8   | 2.0   | 4.4   |
| 3.8   | 1.9   | 4.4   | 1.6   | 5.5   | 3.1   | 0.4   | 7.0   | 22.9  |
| 21.1  | 13.6  | 22.0  | 21.5  | 8.5   | 26.4  | 17.0  | 22.5  | 35.1  |
| 12.0  | 0.4   | 1.1   | 0.9   | 0.5   | 14.0  | 1.7   | 9.5   | 1.6   |
| 7.7   | 15.9  | 4.5   | 7.7   | 9.2   | 31.3  | 11.9  | 13.2  | 18.0  |
| 20.5  | 19.3  | 15.3  | 2.0   | 6.8   | 1.7   | 9.2   | 2.0   | 3.5   |
| 8.7   | 3.7   | 2.1   | 1.4   | 5.0   | 0.9   | 7.5   | 2.0   | 1.4   |
| 115.5 | 62.4  | 77.2  | 68.6  | 28.4  | 60.6  | 56.2  | 10.2  | 3.9   |
| 16.3  | 10.5  | 15.5  | 1.4   | 3.5   | 23.8  | 3.4   | 13.4  | 23.0  |
| 0.5   | 7.5   | 1.1   | 8.4   | 0.6   | 1.6   | 1.7   | 1.1   | 5.3   |
| 1.4   | 0.7   | 0.9   | 0.6   | 0.3   | 1.5   | 0.7   | 0.7   | 0.6   |
| 19.1  | 14.2  | 6.7   | 2.6   | 8.0   | 4.8   | 8.7   | 1.2   | 2.1   |
| 12.6  | 15.5  | 5.8   | 2.9   | 13.4  | 17.8  | 11.6  | 13.3  | 17.3  |
| 116.6 | 80.6  | 52.5  | 68.1  | 27.9  | 231.7 | 121.9 | 111.6 | 159.2 |
| 3.2   | 0.9   | 12.4  | 6.9   | 10.8  | 14.9  | 5.4   | 10.9  | 10.9  |
| 105.6 | 120.4 | 117.9 | 125.8 | 46.8  | 303.7 | 331.4 | 18.9  | 40.0  |
| 88.3  | 116.8 | 69.2  | 39.0  | 43.1  | 52.7  | 21.5  | 14.2  | 34.0  |
| 2.2   | 2.2   | 3.3   | 1.7   | 1.2   | 2.3   | 2.0   | 1.9   | 4.7   |
| 8.0   | 13.7  | 12.1  | 2.3   | 1.0   | 25.5  | 5.1   | 4.8   | 13.3  |
| 1.0   | 2.1   | 7.2   | 0.7   | 0.8   | 0.6   | 1.2   | 2.3   | 2.6   |
| 2.4   | 1.5   | 1.1   | 1.0   | 0.7   | 7.1   | 5.2   | 2.7   | 7.1   |
| 9.7   | 23.6  | 19.1  | 16.0  | 9.1   | 4.0   | 14.9  | 30.6  | 39.6  |
| 9.1   | 2.0   | 8.2   | 7.9   | 4.0   | 2.3   | 2.3   | 2.7   | 6.3   |
| 6.5   | 14.3  | 8.5   | 3.2   | 1.1   | 21.1  | 29.7  | 12.6  | 23.4  |
| 1.2   | 12.1  | 2.4   | 3.1   | 0.2   | 4.6   | 7.0   | 1.6   | 1.2   |
| 6.2   | 1.4   | 7.8   | 1.0   | 2.1   | 10.5  | 0.3   | 3.0   | 0.6   |
| 14.3  | 2.2   | 6.8   | 1.7   | 2.9   | 1.9   | 15.3  | 7.7   | 1.3   |
| 43.2  | 33.5  | 44.0  | 33.2  | 17.1  | 25.7  | 20.9  | 8.9   | 67.4  |
| 104.5 | 63.6  | 79.9  | 40.7  | 26.3  | 144.6 | 98.1  | 102.3 | 99.3  |
| 32.2  | 40.6  | 49.3  | 27.3  | 10.1  | 27.7  | 11.2  | 21.7  | 27.6  |
| 27.3  | 15.1  | 20.4  | 10.7  | 10.8  | 21.7  | 31.3  | 14.3  | 17.1  |
| 323.4 | 343.6 | 313.7 | 327.0 | 105.4 | 393.5 | 239.2 | 102.2 | 142.3 |
| 9.6   | 2.2   | 7.5   | 1.4   | 1.0   | 15.2  | 2.2   | 5.2   | 19.8  |
| 39.5  | 15.2  | 37.1  | 28.5  | 7.6   | 59.9  | 45.8  | 34.5  | 41.8  |
| 2.1   | 1.9   | 2.3   | 1.3   | 2.5   | 4.1   | 2.1   | 2.6   | 1.4   |
| 22.5  | 41.9  | 31.3  | 26.4  | 17.4  | 138.4 | 102.1 | 41.0  | 61.2  |
| 31.1  | 17.8  | 31.8  | 19.4  | 11.1  | 25.0  | 20.1  | 13.2  | 10.4  |
| 7.8   | 9.1   | 1.2   | 7.2   | 6.6   | 12.1  | 11.6  | 15.7  | 10.9  |
| 8.1   | 0.8   | 3.0   | 2.2   | 6.1   | 29.5  | 38.0  | 7.1   | 2.7   |
| 27.5  | 20.4  | 39.1  | 22.0  | 15.1  | 26.9  | 11.1  | 23.2  | 13.4  |
| 80.1  | 64.8  | 84.9  | 50.7  | 29.9  | 69.5  | 41.8  | 30.9  | 26.7  |
| 48.0  | 36.2  | 16.1  | 9.1   | 11.9  | 23.1  | 20.9  | 14.2  | 18.8  |
| 33.5  | 20.4  | 23.9  | 8.1   | 2.2   | 15.3  | 16.5  | 33.1  | 25.9  |
| 3.9   | 2.5   | 2.0   | 2.3   | 1.3   | 7.4   | 7.2   | 7.9   | 24.9  |
| 6.7   | 6.1   | 4.2   | 1.2   | 1.7   | 2.4   | 0.6   | 6.2   | 4.5   |
| 25.1  | 27.4  | 20.4  | 2.8   | 5.2   | 1.2   | 11.3  | 10.3  | 25.5  |
| 14.4  | 13.8  | 38.1  | 11.0  | 10.2  | 22.7  | 24.2  | 24.6  | 3.6   |
| 6.2   | 0.2   | 1.0   | 0.4   | 0.3   | 0.9   | 6.1   | 0.6   | 0.3   |

|       |       |       |       |       |        |        |       |       |
|-------|-------|-------|-------|-------|--------|--------|-------|-------|
| 6.5   | 1.6   | 3.2   | 8.7   | 5.3   | 3.2    | 8.6    | 1.9   | 11.0  |
| 51.9  | 36.4  | 26.4  | 13.2  | 9.1   | 11.0   | 22.5   | 7.3   | 9.8   |
| 1.7   | 3.5   | 1.3   | 1.8   | 0.6   | 1.8    | 0.8    | 3.9   | 3.1   |
| 10.7  | 11.2  | 13.2  | 6.1   | 6.5   | 2.8    | 7.7    | 11.4  | 9.9   |
| 2.3   | 9.4   | 2.3   | 0.9   | 8.0   | 9.2    | 3.0    | 5.8   | 9.1   |
| 6.1   | 6.4   | 5.7   | 2.1   | 4.1   | 5.1    | 15.3   | 15.0  | 27.9  |
| 1.9   | 5.2   | 4.0   | 6.0   | 4.1   | 1.7    | 8.0    | 1.8   | 2.5   |
| 1.6   | 5.9   | 1.1   | 3.2   | 5.1   | 4.8    | 1.2    | 0.9   | 0.6   |
| 2.2   | 2.9   | 2.7   | 0.8   | 0.6   | 9.5    | 8.8    | 3.9   | 6.4   |
| 19.6  | 12.5  | 5.0   | 0.9   | 0.7   | 24.0   | 13.3   | 5.8   | 2.1   |
| 4.9   | 4.5   | 2.1   | 1.7   | 3.2   | 9.3    | 1.3    | 4.1   | 1.4   |
| 5.9   | 1.7   | 3.2   | 0.8   | 6.5   | 12.0   | 2.6    | 2.9   | 2.1   |
| 11.0  | 9.6   | 5.8   | 7.7   | 9.0   | 19.2   | 19.0   | 25.0  | 1.9   |
| 2.1   | 4.1   | 2.5   | 1.7   | 0.7   | 22.4   | 21.0   | 10.1  | 3.2   |
| 4.6   | 3.3   | 1.2   | 0.9   | 2.0   | 5.0    | 11.1   | 0.7   | 1.3   |
| 0.6   | 1.1   | 0.4   | 0.8   | 0.9   | 0.3    | 3.1    | 2.5   | 3.1   |
| 3.5   | 19.2  | 1.7   | 8.1   | 4.8   | 18.3   | 20.8   | 4.1   | 8.8   |
| 0.7   | 1.0   | 0.5   | 0.4   | 0.2   | 0.5    | 0.5    | 0.4   | 0.4   |
| 2.0   | 1.8   | 5.7   | 1.5   | 4.2   | 3.3    | 1.6    | 7.1   | 2.7   |
| 34.5  | 29.2  | 26.9  | 33.0  | 10.3  | 123.6  | 68.3   | 72.5  | 77.5  |
| 11.4  | 7.4   | 12.5  | 9.2   | 5.5   | 10.4   | 10.3   | 10.2  | 5.9   |
| 2.2   | 1.1   | 2.2   | 6.9   | 1.2   | 3.2    | 1.3    | 9.4   | 2.0   |
| 1.1   | 0.4   | 1.3   | 0.4   | 0.4   | 1.2    | 3.0    | 0.5   | 1.0   |
| 1.8   | 1.2   | 0.4   | 0.8   | 0.3   | 1.9    | 0.7    | 1.1   | 1.2   |
| 2.3   | 3.4   | 0.3   | 2.6   | 0.2   | 1.5    | 0.2    | 0.6   | 8.0   |
| 2.5   | 2.7   | 0.6   | 0.4   | 5.7   | 0.6    | 0.3    | 0.4   | 1.6   |
| 1.5   | 1.6   | 2.1   | 1.7   | 4.2   | 3.5    | 2.6    | 2.1   | 2.5   |
| 2.4   | 7.3   | 9.1   | 3.4   | 1.9   | 16.9   | 3.0    | 1.8   | 3.5   |
| 17.5  | 6.6   | 7.9   | 3.4   | 1.6   | 1.8    | 9.5    | 1.4   | 8.8   |
| 7.1   | 2.6   | 1.2   | 0.8   | 1.0   | 3.1    | 6.5    | 0.6   | 0.3   |
| 633.0 | 624.5 | 647.7 | 546.9 | 301.2 | 2530.9 | 1560.4 | 178.9 | 233.7 |
| 0.5   | 0.7   | 3.2   | 3.7   | 0.4   | 0.6    | 0.9    | 3.1   | 1.2   |
| 117.8 | 96.9  | 116.4 | 181.7 | 51.1  | 453.8  | 472.8  | 149.4 | 184.5 |
| 16.7  | 1.8   | 4.9   | 3.7   | 0.6   | 4.5    | 6.8    | 8.9   | 4.4   |
| 4.5   | 1.5   | 2.1   | 1.6   | 1.0   | 6.2    | 0.6    | 0.7   | 0.8   |
| 74.8  | 73.2  | 75.9  | 34.9  | 16.9  | 31.9   | 18.0   | 64.4  | 86.5  |
| 5.6   | 1.4   | 5.2   | 12.5  | 1.9   | 13.1   | 0.8    | 0.4   | 0.4   |
| 291.9 | 281.8 | 227.3 | 163.0 | 103.6 | 340.6  | 137.4  | 68.4  | 99.9  |
| 75.7  | 61.1  | 52.4  | 65.1  | 23.0  | 220.0  | 131.1  | 55.6  | 60.6  |
| 2.8   | 1.7   | 2.4   | 1.0   | 1.2   | 5.8    | 8.1    | 0.8   | 3.6   |
| 24.7  | 14.9  | 38.5  | 27.7  | 5.9   | 10.5   | 2.5    | 11.9  | 16.0  |
| 0.9   | 1.1   | 1.8   | 0.5   | 0.2   | 0.8    | 2.0    | 0.9   | 3.1   |
| 22.7  | 22.9  | 11.4  | 15.7  | 7.9   | 28.8   | 19.7   | 8.2   | 11.0  |
| 0.4   | 0.3   | 1.2   | 0.9   | 1.9   | 0.9    | 3.3    | 6.1   | 0.2   |
| 881.9 | 861.7 | 932.4 | 776.1 | 280.4 | 1349.5 | 993.4  | 77.8  | 129.0 |
| 11.6  | 13.5  | 45.7  | 21.2  | 12.0  | 45.2   | 27.4   | 21.8  | 4.4   |
| 0.7   | 0.7   | 2.7   | 1.2   | 1.2   | 2.9    | 0.6    | 0.9   | 0.9   |
| 1.3   | 5.4   | 7.0   | 0.6   | 0.8   | 306.2  | 267.6  | 1.9   | 1.2   |
| 2.7   | 3.4   | 4.9   | 3.6   | 0.3   | 129.6  | 92.5   | 8.5   | 9.5   |
| 9.7   | 7.0   | 6.1   | 4.7   | 5.9   | 13.0   | 12.4   | 12.8  | 0.3   |
| 8.2   | 0.7   | 1.7   | 2.5   | 1.9   | 8.2    | 13.8   | 1.9   | 4.3   |
| 2.9   | 15.8  | 2.0   | 6.6   | 1.2   | 2.5    | 1.1    | 11.8  | 10.2  |
| 13.5  | 22.2  | 13.4  | 12.4  | 7.7   | 26.7   | 2.1    | 3.0   | 3.8   |

|        |        |        |        |       |        |        |       |       |
|--------|--------|--------|--------|-------|--------|--------|-------|-------|
| 7.1    | 1.0    | 4.6    | 2.0    | 0.4   | 2.0    | 1.6    | 1.0   | 5.1   |
| 51.6   | 57.3   | 53.4   | 41.9   | 21.8  | 24.6   | 31.4   | 31.4  | 51.3  |
| 112.4  | 109.9  | 101.9  | 85.9   | 37.2  | 323.3  | 264.6  | 126.5 | 147.4 |
| 3.9    | 1.5    | 17.9   | 1.6    | 9.0   | 10.9   | 8.0    | 9.1   | 1.1   |
| 20.2   | 15.8   | 13.0   | 26.3   | 7.3   | 20.6   | 10.2   | 11.6  | 26.8  |
| 8.7    | 9.5    | 11.4   | 14.5   | 2.8   | 16.8   | 16.0   | 7.6   | 8.3   |
| 305.1  | 292.4  | 294.9  | 261.1  | 132.1 | 479.4  | 319.7  | 188.5 | 288.9 |
| 3.2    | 1.0    | 5.5    | 5.8    | 0.6   | 0.8    | 5.8    | 1.0   | 2.6   |
| 14.5   | 24.1   | 25.7   | 17.9   | 7.3   | 56.9   | 38.6   | 18.9  | 18.1  |
| 109.2  | 83.6   | 117.6  | 90.1   | 39.1  | 83.5   | 69.5   | 8.2   | 11.1  |
| 1.8    | 0.3    | 2.0    | 5.2    | 0.5   | 1.2    | 3.5    | 1.5   | 0.5   |
| 123.1  | 169.1  | 209.5  | 200.1  | 67.9  | 39.0   | 46.6   | 12.5  | 8.7   |
| 11.6   | 2.9    | 21.0   | 1.2    | 6.0   | 7.4    | 22.8   | 14.7  | 22.1  |
| 13.6   | 26.6   | 19.1   | 1.9    | 5.0   | 5.1    | 22.2   | 14.6  | 13.1  |
| 8.0    | 5.5    | 8.0    | 1.7    | 5.3   | 22.8   | 8.7    | 15.6  | 11.5  |
| 15.5   | 3.7    | 9.6    | 8.2    | 5.9   | 14.9   | 7.8    | 9.6   | 5.3   |
| 0.3    | 0.2    | 3.7    | 0.4    | 2.6   | 2.5    | 1.9    | 3.2   | 7.5   |
| 11.9   | 10.0   | 10.7   | 10.0   | 8.1   | 14.7   | 8.3    | 7.6   | 5.8   |
| 1.3    | 1.9    | 8.5    | 6.7    | 7.7   | 3.2    | 12.3   | 2.0   | 1.3   |
| 19.5   | 25.8   | 27.7   | 12.5   | 10.8  | 65.7   | 38.7   | 3.8   | 18.9  |
| 7.3    | 9.8    | 12.9   | 12.5   | 6.1   | 15.2   | 10.6   | 4.7   | 5.2   |
| 6.5    | 1.8    | 21.7   | 22.5   | 1.4   | 7.4    | 4.1    | 5.0   | 2.9   |
| 1.3    | 1.2    | 1.1    | 2.3    | 1.4   | 3.5    | 2.8    | 4.5   | 0.8   |
| 16.3   | 31.5   | 22.7   | 19.4   | 6.9   | 23.3   | 15.2   | 13.5  | 18.6  |
| 968.3  | 1123.4 | 1048.5 | 794.3  | 325.3 | 1507.6 | 910.0  | 357.2 | 594.7 |
| 7.7    | 5.9    | 16.3   | 5.3    | 6.4   | 14.4   | 10.9   | 2.2   | 1.4   |
| 114.2  | 181.3  | 134.5  | 155.8  | 63.0  | 123.7  | 22.2   | 7.0   | 30.5  |
| 3.5    | 9.4    | 19.2   | 2.0    | 4.9   | 3.2    | 15.7   | 1.8   | 1.6   |
| 840.1  | 823.5  | 1046.8 | 786.4  | 426.0 | 803.4  | 636.1  | 118.2 | 102.5 |
| 17.0   | 12.4   | 6.8    | 6.0    | 5.4   | 21.2   | 14.1   | 5.5   | 1.4   |
| 1.5    | 1.4    | 0.7    | 0.7    | 0.7   | 4.4    | 0.8    | 0.7   | 3.2   |
| 1.1    | 6.1    | 0.4    | 0.7    | 0.4   | 0.5    | 0.5    | 4.2   | 4.5   |
| 36.0   | 22.2   | 39.1   | 21.3   | 10.3  | 36.7   | 22.9   | 6.8   | 5.1   |
| 60.6   | 42.3   | 48.1   | 19.7   | 19.5  | 203.1  | 99.5   | 93.2  | 72.6  |
| 37.8   | 29.6   | 41.3   | 11.2   | 10.3  | 295.2  | 216.1  | 22.3  | 27.4  |
| 0.5    | 3.1    | 1.3    | 0.7    | 0.6   | 5.7    | 0.5    | 1.3   | 0.8   |
| 3.6    | 10.7   | 14.6   | 9.2    | 4.2   | 17.7   | 2.8    | 10.1  | 3.2   |
| 17.7   | 3.9    | 12.1   | 12.9   | 6.1   | 16.4   | 16.8   | 2.1   | 13.9  |
| 1.8    | 8.8    | 0.9    | 1.1    | 0.6   | 5.3    | 1.5    | 1.5   | 2.4   |
| 1.4    | 1.1    | 1.1    | 0.7    | 0.4   | 9.2    | 8.3    | 0.8   | 1.1   |
| 32.0   | 32.1   | 28.3   | 28.0   | 7.2   | 22.4   | 18.2   | 18.9  | 18.5  |
| 14.5   | 9.1    | 7.0    | 4.4    | 4.7   | 8.2    | 8.0    | 2.1   | 5.4   |
| 2.8    | 5.0    | 1.8    | 1.1    | 1.3   | 2.3    | 1.8    | 1.4   | 4.6   |
| 4.4    | 2.3    | 3.6    | 4.0    | 1.1   | 2.7    | 3.3    | 3.9   | 4.6   |
| 4.3    | 2.1    | 3.4    | 2.5    | 0.6   | 3.7    | 7.9    | 3.0   | 1.8   |
| 16.3   | 19.6   | 23.3   | 13.7   | 4.5   | 33.2   | 15.1   | 12.6  | 6.5   |
| 6.1    | 3.0    | 2.0    | 9.8    | 0.5   | 16.0   | 5.0    | 3.8   | 1.2   |
| 1.1    | 0.4    | 0.9    | 0.4    | 0.4   | 10.9   | 0.5    | 2.2   | 2.0   |
| 17.4   | 21.6   | 11.2   | 13.4   | 7.9   | 15.9   | 20.5   | 2.8   | 5.9   |
| 1379.1 | 945.4  | 807.1  | 285.1  | 280.0 | 6239.5 | 5044.3 | 76.3  | 154.1 |
| 16.7   | 24.0   | 22.7   | 11.9   | 1.4   | 40.9   | 31.9   | 8.4   | 10.5  |
| 10.1   | 9.0    | 1.1    | 10.0   | 3.4   | 20.9   | 12.5   | 11.5  | 28.4  |
| 561.1  | 437.5  | 766.8  | 1382.0 | 349.9 | 947.4  | 929.1  | 422.9 | 498.0 |



|       |       |       |       |       |       |       |       |       |
|-------|-------|-------|-------|-------|-------|-------|-------|-------|
| 10.9  | 2.1   | 2.1   | 4.7   | 1.3   | 13.6  | 1.8   | 10.3  | 3.4   |
| 3.0   | 2.0   | 3.1   | 1.1   | 1.8   | 3.3   | 1.5   | 0.9   | 2.3   |
| 12.4  | 19.2  | 10.7  | 10.5  | 6.1   | 13.1  | 5.0   | 3.4   | 1.1   |
| 1.8   | 2.2   | 6.8   | 1.4   | 1.2   | 1.3   | 1.1   | 3.0   | 1.8   |
| 28.6  | 34.7  | 44.3  | 29.0  | 19.4  | 124.6 | 58.4  | 54.5  | 84.7  |
| 2.8   | 5.0   | 4.0   | 10.5  | 1.7   | 4.7   | 2.3   | 1.2   | 2.3   |
| 13.1  | 0.3   | 1.0   | 0.4   | 0.8   | 1.9   | 2.7   | 0.5   | 0.6   |
| 21.6  | 12.3  | 20.3  | 8.8   | 2.1   | 22.2  | 11.2  | 10.7  | 9.6   |
| 12.2  | 3.6   | 7.8   | 7.4   | 2.9   | 12.1  | 7.5   | 8.7   | 1.4   |
| 5.0   | 1.5   | 1.2   | 1.2   | 0.4   | 1.5   | 6.2   | 1.6   | 1.3   |
| 5.3   | 3.8   | 14.5  | 2.0   | 5.6   | 6.8   | 4.3   | 4.0   | 15.4  |
| 24.0  | 14.0  | 6.3   | 2.7   | 1.3   | 4.5   | 3.2   | 11.9  | 1.3   |
| 0.9   | 0.5   | 2.0   | 0.8   | 0.3   | 1.5   | 0.8   | 0.6   | 1.3   |
| 7.9   | 16.3  | 24.1  | 17.2  | 1.8   | 30.4  | 9.0   | 17.0  | 8.2   |
| 2.8   | 3.3   | 3.4   | 2.5   | 1.1   | 15.2  | 2.0   | 2.7   | 2.4   |
| 20.5  | 15.7  | 12.8  | 3.4   | 2.0   | 7.0   | 1.4   | 2.4   | 3.2   |
| 254.0 | 181.0 | 241.0 | 284.4 | 104.3 | 363.6 | 233.5 | 35.3  | 40.4  |
| 1.9   | 4.6   | 1.1   | 1.0   | 6.0   | 2.0   | 4.9   | 7.4   | 8.8   |
| 32.1  | 22.0  | 19.2  | 2.2   | 16.1  | 14.0  | 20.7  | 29.4  | 22.2  |
| 202.6 | 176.5 | 189.7 | 136.7 | 58.2  | 180.9 | 105.0 | 107.3 | 132.3 |
| 48.7  | 45.3  | 44.3  | 40.5  | 9.9   | 38.7  | 23.4  | 43.2  | 59.5  |
| 19.5  | 16.5  | 19.7  | 10.7  | 11.7  | 18.6  | 12.5  | 34.0  | 2.3   |
| 55.3  | 43.4  | 43.6  | 35.9  | 16.3  | 96.7  | 57.2  | 14.1  | 24.1  |
| 18.3  | 27.1  | 9.3   | 14.9  | 13.9  | 41.0  | 7.6   | 5.2   | 3.1   |
| 24.6  | 10.9  | 17.4  | 15.6  | 7.3   | 17.3  | 7.0   | 14.0  | 16.7  |
| 1.3   | 0.3   | 0.4   | 2.3   | 2.0   | 4.6   | 0.3   | 4.6   | 0.5   |
| 10.6  | 6.1   | 5.7   | 2.5   | 0.9   | 9.0   | 8.9   | 3.5   | 8.6   |
| 169.0 | 143.5 | 174.3 | 149.6 | 32.9  | 256.4 | 169.3 | 11.9  | 17.9  |
| 12.4  | 10.7  | 24.4  | 12.8  | 1.7   | 18.1  | 9.8   | 11.5  | 21.0  |
| 4.2   | 3.6   | 7.9   | 9.1   | 6.5   | 13.8  | 4.1   | 6.5   | 9.5   |
| 3.0   | 2.5   | 6.3   | 2.3   | 3.8   | 7.6   | 3.9   | 13.9  | 5.1   |
| 104.7 | 57.9  | 60.6  | 54.1  | 35.2  | 657.7 | 531.4 | 147.1 | 229.0 |
| 4.2   | 0.6   | 0.6   | 5.6   | 1.1   | 2.3   | 1.5   | 5.2   | 2.0   |
| 157.2 | 96.3  | 116.3 | 88.3  | 28.2  | 100.3 | 66.2  | 63.4  | 62.2  |
| 2.3   | 4.9   | 11.9  | 8.8   | 3.1   | 21.4  | 2.1   | 2.2   | 10.0  |
| 9.5   | 4.6   | 8.2   | 3.8   | 5.3   | 6.3   | 5.4   | 2.8   | 5.6   |
| 51.5  | 31.3  | 27.2  | 26.9  | 14.6  | 66.4  | 48.6  | 14.9  | 26.3  |
| 5.9   | 5.3   | 9.3   | 1.1   | 4.8   | 11.2  | 10.0  | 13.2  | 2.9   |
| 35.8  | 40.1  | 37.5  | 33.9  | 20.5  | 63.3  | 31.1  | 37.2  | 29.1  |
| 28.1  | 24.4  | 29.1  | 19.0  | 5.9   | 37.7  | 28.8  | 15.8  | 36.1  |
| 5.9   | 18.9  | 13.1  | 11.7  | 5.8   | 16.0  | 9.6   | 10.3  | 16.4  |
| 24.5  | 19.6  | 22.0  | 11.3  | 2.5   | 32.7  | 13.1  | 1.4   | 13.6  |
| 198.2 | 132.5 | 90.4  | 91.1  | 44.1  | 125.9 | 74.0  | 31.4  | 37.6  |
| 17.9  | 10.2  | 19.4  | 7.9   | 10.0  | 15.0  | 10.0  | 17.9  | 20.5  |
| 2.1   | 0.8   | 1.5   | 2.5   | 2.9   | 0.7   | 0.5   | 6.4   | 0.8   |
| 2.9   | 0.2   | 1.2   | 7.0   | 0.5   | 1.0   | 1.7   | 2.7   | 3.2   |
| 0.4   | 0.9   | 4.3   | 0.6   | 0.4   | 1.1   | 0.8   | 0.5   | 2.9   |
| 75.1  | 69.4  | 82.8  | 67.5  | 27.7  | 120.6 | 74.4  | 34.5  | 45.8  |
| 1.1   | 0.8   | 1.7   | 1.0   | 1.0   | 1.6   | 1.2   | 1.5   | 1.5   |
| 5.1   | 1.4   | 6.0   | 1.5   | 5.2   | 11.9  | 3.5   | 9.5   | 1.3   |
| 11.2  | 2.7   | 4.2   | 3.3   | 2.0   | 3.8   | 2.6   | 5.3   | 6.8   |
| 27.9  | 20.8  | 24.1  | 7.8   | 5.5   | 14.1  | 0.6   | 1.1   | 2.8   |
| 126.6 | 143.5 | 121.9 | 103.6 | 61.4  | 362.9 | 222.7 | 67.7  | 81.1  |

|        |        |        |        |       |        |        |       |       |
|--------|--------|--------|--------|-------|--------|--------|-------|-------|
| 1.7    | 0.7    | 4.4    | 3.1    | 0.8   | 2.0    | 1.3    | 1.5   | 1.2   |
| 25.8   | 23.2   | 7.4    | 9.1    | 4.6   | 275.0  | 149.0  | 53.8  | 47.9  |
| 1.8    | 12.7   | 20.1   | 3.9    | 2.3   | 20.5   | 3.5    | 15.0  | 3.7   |
| 778.0  | 749.6  | 516.3  | 343.4  | 208.5 | 2469.5 | 1398.5 | 256.8 | 445.0 |
| 39.7   | 53.2   | 39.3   | 15.3   | 22.6  | 265.0  | 164.3  | 25.1  | 14.6  |
| 20.3   | 11.6   | 2.8    | 8.6    | 5.8   | 1.8    | 1.0    | 8.7   | 3.9   |
| 13.8   | 3.1    | 1.8    | 1.1    | 1.7   | 15.4   | 9.4    | 10.0  | 2.8   |
| 0.7    | 0.3    | 0.2    | 0.3    | 0.2   | 0.3    | 0.7    | 0.6   | 0.6   |
| 6.5    | 9.8    | 1.7    | 1.7    | 1.8   | 75.4   | 74.4   | 6.3   | 5.5   |
| 2.7    | 1.1    | 2.8    | 1.2    | 1.4   | 2.8    | 0.8    | 0.9   | 0.9   |
| 28.7   | 19.8   | 15.8   | 17.5   | 0.6   | 33.6   | 28.5   | 20.3  | 24.0  |
| 5.0    | 14.9   | 3.4    | 7.8    | 0.3   | 20.1   | 9.0    | 6.6   | 1.7   |
| 196.8  | 171.1  | 186.6  | 121.8  | 28.2  | 1613.3 | 593.7  | 140.2 | 212.9 |
| 32.9   | 12.3   | 24.5   | 14.8   | 5.4   | 32.4   | 28.9   | 21.4  | 14.3  |
| 23.8   | 17.4   | 15.8   | 11.9   | 2.9   | 10.2   | 2.4    | 2.5   | 5.1   |
| 2.5    | 2.1    | 3.5    | 0.8    | 0.8   | 7.9    | 2.2    | 1.1   | 0.9   |
| 8.1    | 0.5    | 0.9    | 0.7    | 0.6   | 1.5    | 1.3    | 1.7   | 7.0   |
| 15.8   | 8.4    | 3.7    | 11.5   | 8.6   | 18.7   | 13.3   | 11.2  | 2.0   |
| 17.5   | 2.9    | 12.1   | 13.8   | 4.8   | 6.7    | 13.9   | 5.3   | 3.2   |
| 14.5   | 1.1    | 1.4    | 1.3    | 2.3   | 2.3    | 3.4    | 5.7   | 4.4   |
| 5.5    | 2.3    | 8.8    | 4.9    | 4.0   | 4.9    | 4.0    | 1.5   | 2.2   |
| 0.9    | 0.9    | 8.4    | 2.1    | 2.1   | 6.3    | 5.6    | 5.5   | 16.5  |
| 2.5    | 7.1    | 1.3    | 5.9    | 2.4   | 8.7    | 16.3   | 0.9   | 3.1   |
| 30.6   | 15.4   | 18.6   | 13.2   | 0.4   | 11.5   | 12.8   | 0.9   | 3.5   |
| 17.8   | 1.1    | 10.3   | 8.0    | 3.1   | 3.0    | 1.3    | 28.6  | 29.8  |
| 1226.1 | 1042.5 | 1015.2 | 556.9  | 317.8 | 1025.2 | 685.3  | 124.7 | 244.3 |
| 11.0   | 19.0   | 20.4   | 18.1   | 6.8   | 5.1    | 0.7    | 3.3   | 11.9  |
| 5.0    | 1.5    | 4.9    | 2.6    | 6.0   | 1.3    | 6.4    | 3.3   | 1.9   |
| 13.9   | 9.7    | 9.8    | 9.7    | 0.5   | 4.1    | 4.0    | 4.8   | 2.7   |
| 18.4   | 16.1   | 17.9   | 10.0   | 3.9   | 106.6  | 47.5   | 20.1  | 18.1  |
| 18.0   | 11.2   | 9.2    | 11.9   | 1.3   | 12.2   | 10.4   | 17.1  | 13.2  |
| 2.2    | 1.6    | 1.2    | 1.7    | 0.8   | 1.7    | 2.3    | 2.2   | 5.3   |
| 2042.2 | 2227.7 | 2125.5 | 1886.2 | 975.5 | 1955.4 | 2060.5 | 186.6 | 189.9 |
| 7.3    | 5.6    | 2.5    | 4.3    | 3.0   | 44.0   | 24.7   | 3.4   | 3.6   |
| 1.1    | 1.8    | 3.2    | 1.2    | 0.9   | 10.1   | 10.6   | 11.3  | 8.0   |
| 2.2    | 1.1    | 1.9    | 0.4    | 0.4   | 0.9    | 0.7    | 0.8   | 1.9   |
| 2.3    | 1.7    | 5.4    | 3.3    | 0.9   | 0.9    | 1.5    | 7.7   | 1.5   |
| 4.4    | 3.7    | 22.9   | 4.3    | 1.5   | 20.2   | 1.9    | 7.4   | 2.7   |
| 5.7    | 5.9    | 5.4    | 1.7    | 0.3   | 11.0   | 10.1   | 0.8   | 5.4   |
| 12.5   | 3.8    | 1.9    | 14.5   | 0.5   | 15.8   | 6.7    | 12.8  | 2.3   |
| 32.4   | 17.3   | 29.5   | 12.9   | 4.5   | 10.1   | 21.5   | 40.7  | 25.5  |
| 1.1    | 1.1    | 0.9    | 0.5    | 0.5   | 0.9    | 3.6    | 0.8   | 0.4   |
| 499.1  | 543.6  | 477.3  | 470.9  | 192.5 | 414.3  | 285.0  | 33.6  | 34.1  |
| 0.4    | 3.2    | 0.8    | 1.7    | 0.1   | 1.0    | 0.3    | 6.0   | 2.8   |
| 0.7    | 7.4    | 0.5    | 0.4    | 3.4   | 1.2    | 0.2    | 0.2   | 4.7   |
| 46.6   | 30.7   | 32.4   | 19.2   | 18.7  | 67.9   | 28.1   | 64.4  | 61.5  |
| 28.6   | 16.8   | 14.1   | 3.5    | 6.9   | 29.6   | 10.5   | 33.6  | 18.4  |
| 1.8    | 10.0   | 1.7    | 1.6    | 0.8   | 1.3    | 1.9    | 1.5   | 1.8   |
| 7.4    | 7.3    | 6.8    | 2.9    | 6.1   | 9.3    | 0.4    | 4.5   | 9.7   |
| 4.1    | 10.8   | 2.5    | 6.1    | 3.7   | 4.9    | 3.6    | 4.1   | 4.5   |
| 26.2   | 17.2   | 12.5   | 2.7    | 4.4   | 19.8   | 14.4   | 20.6  | 32.6  |
| 5.9    | 6.2    | 7.2    | 2.3    | 1.2   | 10.8   | 1.7    | 4.1   | 3.1   |
| 11.5   | 20.8   | 28.8   | 16.8   | 10.3  | 23.5   | 23.1   | 4.3   | 1.6   |

|        |        |        |        |        |        |        |       |       |
|--------|--------|--------|--------|--------|--------|--------|-------|-------|
| 8.7    | 1.8    | 4.3    | 6.3    | 5.8    | 6.2    | 2.7    | 1.0   | 1.5   |
| 1.0    | 0.8    | 0.8    | 0.7    | 0.8    | 0.7    | 0.5    | 0.9   | 1.5   |
| 3.9    | 10.8   | 2.0    | 1.4    | 1.3    | 61.6   | 8.3    | 3.0   | 2.6   |
| 16.4   | 3.4    | 14.3   | 6.0    | 2.6    | 12.6   | 3.1    | 14.1  | 2.3   |
| 1.7    | 1.1    | 1.6    | 2.2    | 0.4    | 2.9    | 3.4    | 2.4   | 0.8   |
| 1.5    | 9.4    | 4.3    | 1.0    | 0.2    | 2.3    | 0.9    | 0.5   | 0.6   |
| 0.8    | 0.9    | 1.9    | 0.8    | 1.6    | 1.6    | 2.1    | 3.1   | 1.3   |
| 31.6   | 28.5   | 29.8   | 21.9   | 7.1    | 40.1   | 34.5   | 11.7  | 11.9  |
| 5.3    | 4.4    | 2.5    | 4.0    | 0.7    | 3.2    | 3.5    | 2.4   | 2.6   |
| 644.3  | 696.3  | 580.1  | 235.6  | 215.9  | 985.4  | 792.3  | 41.5  | 49.4  |
| 4.1    | 8.2    | 11.7   | 1.2    | 5.0    | 0.8    | 3.4    | 6.2   | 4.1   |
| 12.4   | 1.7    | 5.5    | 6.8    | 2.7    | 1.6    | 8.0    | 8.9   | 11.6  |
| 39.1   | 31.6   | 36.6   | 14.5   | 6.3    | 111.8  | 57.9   | 57.5  | 121.2 |
| 1.6    | 2.1    | 2.0    | 0.8    | 0.5    | 4.2    | 6.0    | 0.8   | 1.0   |
| 39.0   | 19.9   | 13.2   | 14.9   | 1.7    | 19.8   | 8.2    | 8.2   | 17.2  |
| 4.4    | 10.4   | 14.6   | 3.7    | 0.8    | 9.1    | 0.7    | 5.5   | 0.5   |
| 17.7   | 18.6   | 14.2   | 10.6   | 9.8    | 25.9   | 18.7   | 15.8  | 22.3  |
| 5447.5 | 4561.8 | 4373.6 | 3603.1 | 1993.9 | 4371.8 | 2149.1 | 623.1 | 794.7 |
| 6.2    | 2.0    | 7.7    | 9.6    | 1.1    | 4.1    | 3.6    | 14.3  | 1.7   |
| 11.7   | 8.9    | 10.0   | 4.1    | 1.2    | 2.1    | 9.8    | 5.9   | 2.8   |
| 41.5   | 29.2   | 54.1   | 35.5   | 14.5   | 51.7   | 35.3   | 19.0  | 36.4  |
| 1.0    | 1.2    | 0.7    | 0.9    | 1.5    | 2.2    | 0.5    | 1.4   | 2.1   |
| 187.5  | 168.5  | 193.4  | 165.3  | 65.7   | 217.9  | 140.4  | 24.7  | 37.4  |
| 11.9   | 0.5    | 13.3   | 3.1    | 3.8    | 16.6   | 4.6    | 10.0  | 18.4  |
| 696.0  | 526.2  | 537.7  | 299.7  | 105.7  | 685.3  | 316.8  | 328.2 | 449.1 |
| 12.1   | 15.5   | 6.1    | 5.0    | 0.9    | 10.7   | 5.5    | 3.4   | 1.8   |
| 1.8    | 1.4    | 2.1    | 1.9    | 0.8    | 20.1   | 3.9    | 1.2   | 3.2   |
| 8.0    | 11.9   | 11.8   | 9.2    | 8.3    | 11.8   | 0.6    | 8.4   | 11.9  |
| 3.8    | 1.4    | 3.0    | 9.0    | 0.6    | 11.5   | 3.3    | 4.9   | 12.0  |
| 0.1    | 1.3    | 4.2    | 2.5    | 0.3    | 4.8    | 0.5    | 0.5   | 2.9   |
| 29.0   | 27.5   | 29.6   | 16.8   | 4.1    | 28.4   | 14.2   | 21.8  | 27.7  |
| 2.7    | 1.2    | 1.2    | 2.0    | 1.3    | 2.9    | 3.1    | 2.0   | 1.0   |
| 96.2   | 70.2   | 116.4  | 85.3   | 25.0   | 54.6   | 41.7   | 29.8  | 37.8  |
| 57.0   | 42.6   | 65.5   | 61.3   | 20.5   | 40.3   | 15.9   | 28.1  | 32.6  |
| 0.8    | 3.0    | 2.6    | 1.2    | 0.5    | 0.8    | 0.5    | 1.8   | 2.7   |
| 4.2    | 16.4   | 5.6    | 10.1   | 1.8    | 290.0  | 134.3  | 8.4   | 6.7   |
| 88.8   | 87.5   | 100.1  | 74.7   | 43.8   | 135.1  | 74.4   | 30.1  | 25.6  |
| 2.5    | 7.6    | 4.2    | 5.8    | 0.7    | 7.2    | 7.5    | 3.6   | 2.3   |
| 14.7   | 21.7   | 6.2    | 2.6    | 4.3    | 14.8   | 0.9    | 13.3  | 25.3  |
| 7.4    | 12.2   | 6.6    | 1.8    | 1.7    | 9.6    | 12.2   | 2.4   | 3.9   |
| 177.0  | 191.0  | 196.6  | 166.3  | 61.6   | 270.4  | 141.0  | 68.9  | 104.2 |
| 10.6   | 3.6    | 17.7   | 18.8   | 4.3    | 3.0    | 3.0    | 2.6   | 3.1   |
| 2.0    | 4.5    | 4.9    | 8.3    | 0.4    | 2.0    | 11.0   | 8.8   | 1.4   |
| 11.1   | 0.7    | 1.5    | 0.3    | 0.5    | 1.0    | 0.8    | 1.5   | 1.5   |
| 1.1    | 2.1    | 4.9    | 0.4    | 0.4    | 10.2   | 4.1    | 2.6   | 0.4   |
| 41.5   | 27.0   | 38.1   | 21.1   | 13.3   | 84.5   | 53.6   | 83.3  | 35.1  |
| 7.0    | 2.3    | 3.4    | 9.2    | 1.2    | 0.9    | 2.3    | 2.3   | 2.6   |
| 29.4   | 29.5   | 22.8   | 12.0   | 7.2    | 20.5   | 26.5   | 19.6  | 15.0  |
| 4.8    | 2.0    | 3.2    | 4.4    | 1.8    | 17.3   | 0.6    | 15.9  | 14.1  |
| 4.7    | 1.6    | 1.1    | 3.4    | 1.8    | 1.6    | 4.9    | 3.4   | 2.3   |
| 2.2    | 1.8    | 2.1    | 1.5    | 1.3    | 13.0   | 2.9    | 1.5   | 0.6   |
| 9.0    | 6.0    | 8.6    | 3.8    | 3.4    | 15.5   | 9.5    | 1.5   | 2.4   |
| 204.7  | 307.4  | 194.7  | 144.9  | 130.9  | 360.9  | 286.8  | 97.2  | 95.0  |

|        |        |        |        |        |        |        |       |        |
|--------|--------|--------|--------|--------|--------|--------|-------|--------|
| 2.9    | 2.6    | 2.1    | 8.4    | 0.3    | 10.8   | 13.3   | 9.7   | 2.5    |
| 20.7   | 22.2   | 23.5   | 6.6    | 5.0    | 20.3   | 6.5    | 18.8  | 14.6   |
| 12.4   | 3.6    | 12.4   | 1.7    | 9.3    | 6.7    | 1.1    | 10.2  | 2.3    |
| 4.0    | 0.9    | 4.3    | 1.2    | 3.8    | 26.5   | 2.8    | 1.9   | 0.6    |
| 1.9    | 1.5    | 1.6    | 1.0    | 0.5    | 3.6    | 0.8    | 2.7   | 1.0    |
| 7.7    | 0.5    | 10.2   | 5.2    | 0.9    | 2.2    | 0.7    | 13.3  | 11.2   |
| 99.2   | 99.2   | 157.1  | 123.1  | 66.1   | 166.2  | 145.7  | 29.8  | 36.7   |
| 21.5   | 31.0   | 28.1   | 21.5   | 9.7    | 23.1   | 13.2   | 2.0   | 6.5    |
| 17.3   | 5.6    | 1.1    | 6.5    | 6.3    | 14.2   | 12.5   | 10.4  | 7.0    |
| 1.1    | 3.2    | 2.1    | 3.4    | 1.6    | 1.1    | 3.0    | 3.1   | 3.1    |
| 17.0   | 16.1   | 20.1   | 16.8   | 6.5    | 10.8   | 22.9   | 11.4  | 8.9    |
| 11.6   | 3.3    | 1.7    | 1.1    | 1.4    | 4.6    | 2.6    | 3.7   | 18.1   |
| 6.6    | 3.2    | 11.4   | 4.5    | 0.9    | 9.4    | 11.1   | 6.5   | 14.9   |
| 2.4    | 4.8    | 6.0    | 3.1    | 1.9    | 3.0    | 1.0    | 1.8   | 1.5    |
| 13.3   | 21.5   | 34.5   | 23.9   | 7.8    | 30.2   | 12.2   | 9.5   | 10.9   |
| 1.6    | 1.5    | 1.0    | 5.9    | 0.6    | 15.9   | 3.2    | 5.2   | 7.3    |
| 102.6  | 119.9  | 88.2   | 48.1   | 39.8   | 110.7  | 97.7   | 29.4  | 45.4   |
| 116.7  | 84.0   | 108.1  | 76.5   | 55.2   | 136.7  | 111.6  | 18.1  | 28.1   |
| 26.6   | 26.9   | 15.5   | 12.0   | 5.5    | 34.1   | 16.8   | 23.5  | 29.0   |
| 44.1   | 38.3   | 23.2   | 20.9   | 8.2    | 35.1   | 31.3   | 26.9  | 26.3   |
| 3.7    | 1.3    | 2.3    | 5.8    | 0.8    | 17.9   | 9.5    | 19.4  | 8.4    |
| 5.6    | 18.7   | 27.4   | 12.5   | 7.8    | 45.8   | 26.5   | 9.1   | 17.5   |
| 25.6   | 52.4   | 39.6   | 25.0   | 6.0    | 77.2   | 32.5   | 0.8   | 1.8    |
| 43.3   | 34.5   | 22.7   | 26.3   | 14.8   | 57.7   | 25.4   | 6.4   | 12.9   |
| 44.8   | 38.3   | 32.9   | 41.6   | 20.5   | 47.3   | 13.8   | 18.7  | 24.5   |
| 16.1   | 14.8   | 5.0    | 12.3   | 6.0    | 17.6   | 8.3    | 14.5  | 8.3    |
| 3728.4 | 4312.5 | 3710.2 | 2787.4 | 1896.2 | 2145.7 | 1231.6 | 415.1 | 1023.8 |
| 2.9    | 3.9    | 1.0    | 1.6    | 0.5    | 1.2    | 3.1    | 1.0   | 0.6    |
| 17.0   | 8.7    | 7.8    | 3.3    | 2.5    | 18.2   | 15.9   | 3.1   | 12.6   |
| 7.5    | 6.3    | 9.0    | 6.1    | 1.0    | 2.2    | 2.1    | 15.4  | 17.3   |
| 4.7    | 8.0    | 1.8    | 3.8    | 4.1    | 9.8    | 0.9    | 2.2   | 1.7    |
| 14.2   | 6.4    | 1.6    | 7.1    | 1.2    | 3.2    | 2.0    | 5.6   | 1.0    |
| 31.9   | 20.4   | 17.5   | 3.8    | 7.0    | 33.4   | 28.3   | 3.9   | 26.4   |
| 105.0  | 91.7   | 25.9   | 49.1   | 16.3   | 31.3   | 46.8   | 25.7  | 37.0   |
| 68.4   | 90.9   | 99.8   | 118.4  | 27.8   | 158.4  | 75.6   | 17.5  | 17.7   |
| 11.6   | 15.1   | 33.3   | 19.6   | 8.1    | 29.1   | 23.2   | 10.9  | 23.7   |
| 1.0    | 0.5    | 0.6    | 1.0    | 0.5    | 4.0    | 1.2    | 0.8   | 0.9    |
| 45.4   | 40.3   | 37.9   | 24.1   | 12.7   | 46.2   | 42.5   | 2.7   | 1.8    |
| 28.2   | 27.0   | 42.3   | 26.0   | 17.5   | 49.9   | 25.5   | 28.0  | 22.2   |
| 11.9   | 16.9   | 25.2   | 8.9    | 2.6    | 21.5   | 14.2   | 7.6   | 15.5   |
| 416.4  | 233.1  | 259.0  | 291.8  | 73.9   | 627.5  | 174.2  | 175.2 | 188.1  |
| 5.9    | 2.1    | 3.5    | 6.6    | 3.4    | 81.0   | 43.3   | 4.2   | 4.5    |
| 4.8    | 1.3    | 0.9    | 0.5    | 0.1    | 1.1    | 0.4    | 1.2   | 8.3    |
| 3.9    | 10.3   | 15.4   | 11.7   | 1.2    | 4.8    | 6.0    | 3.9   | 2.8    |
| 2.1    | 1.4    | 2.7    | 1.1    | 2.8    | 1.9    | 2.3    | 0.9   | 2.6    |
| 9.1    | 6.9    | 1.3    | 9.3    | 2.5    | 1.6    | 5.6    | 9.6   | 2.5    |
| 14.7   | 2.5    | 13.0   | 5.3    | 8.4    | 5.8    | 7.1    | 6.7   | 14.0   |
| 26.0   | 22.0   | 23.6   | 28.5   | 6.5    | 24.8   | 1.1    | 22.0  | 33.9   |
| 1.8    | 1.2    | 1.2    | 1.2    | 0.6    | 1.9    | 1.2    | 1.6   | 4.0    |
| 1739.2 | 1243.0 | 1516.2 | 1429.1 | 692.9  | 1826.5 | 949.5  | 135.0 | 143.6  |
| 0.7    | 0.3    | 0.2    | 1.2    | 2.3    | 4.1    | 0.9    | 4.6   | 2.3    |
| 1.8    | 2.3    | 6.0    | 1.2    | 0.8    | 3.4    | 2.4    | 31.7  | 27.3   |
| 7.6    | 9.7    | 18.8   | 5.1    | 2.3    | 3.4    | 1.6    | 9.4   | 15.6   |

|        |        |        |        |        |        |        |        |        |
|--------|--------|--------|--------|--------|--------|--------|--------|--------|
| 25.9   | 20.8   | 21.5   | 23.7   | 9.8    | 43.7   | 17.5   | 17.9   | 18.9   |
| 1.7    | 4.5    | 3.5    | 3.2    | 4.3    | 9.6    | 1.1    | 1.3    | 4.3    |
| 7.1    | 2.1    | 2.3    | 1.2    | 3.2    | 10.2   | 0.9    | 2.3    | 2.6    |
| 9.3    | 6.1    | 11.2   | 10.5   | 0.6    | 20.5   | 9.0    | 14.2   | 4.1    |
| 0.9    | 1.1    | 0.8    | 1.3    | 0.2    | 0.9    | 2.9    | 0.8    | 0.3    |
| 1.5    | 2.0    | 3.4    | 6.8    | 2.0    | 2573.3 | 3544.0 | 12.4   | 6.6    |
| 9.0    | 16.1   | 2.9    | 2.6    | 1.1    | 7.2    | 11.0   | 2.6    | 2.9    |
| 29.9   | 29.7   | 20.4   | 21.6   | 20.8   | 36.9   | 38.3   | 34.1   | 15.5   |
| 36.6   | 36.0   | 7.9    | 2.6    | 1.4    | 5.4    | 3.6    | 1.1    | 2.9    |
| 6.1    | 0.5    | 2.8    | 1.4    | 0.5    | 0.5    | 0.2    | 0.5    | 0.3    |
| 312.6  | 125.3  | 274.5  | 159.6  | 102.8  | 415.9  | 336.3  | 88.0   | 94.5   |
| 6.6    | 0.6    | 11.9   | 1.1    | 0.3    | 1.3    | 5.9    | 5.1    | 10.8   |
| 2.6    | 8.4    | 4.0    | 3.9    | 0.6    | 24.3   | 2.3    | 5.9    | 6.7    |
| 7.6    | 1.7    | 2.2    | 8.1    | 1.0    | 5.8    | 1.4    | 3.7    | 2.1    |
| 15.4   | 14.2   | 17.4   | 10.8   | 7.1    | 29.7   | 12.7   | 21.1   | 24.4   |
| 8141.2 | 7725.4 | 6916.4 | 6809.2 | 5608.1 | 9019.5 | 7655.6 | 3289.2 | 4736.1 |
| 13.0   | 6.1    | 12.2   | 8.1    | 8.6    | 5.9    | 2.4    | 28.6   | 25.6   |
| 10.6   | 9.9    | 10.1   | 8.7    | 0.5    | 5.5    | 11.7   | 6.0    | 7.4    |
| 1.0    | 3.1    | 2.2    | 0.5    | 1.5    | 7.5    | 14.0   | 2.0    | 4.8    |
| 0.2    | 0.5    | 0.5    | 0.8    | 0.3    | 0.5    | 0.9    | 5.4    | 2.6    |
| 44.1   | 42.0   | 47.3   | 55.0   | 12.2   | 46.3   | 33.4   | 15.8   | 25.1   |
| 0.8    | 0.6    | 0.6    | 6.7    | 0.4    | 0.8    | 1.2    | 1.6    | 1.6    |
| 19.0   | 16.6   | 16.5   | 1.5    | 0.8    | 13.1   | 11.3   | 12.0   | 15.0   |
| 24.7   | 16.1   | 22.0   | 5.2    | 4.0    | 21.5   | 29.3   | 13.9   | 33.2   |
| 69.9   | 50.3   | 49.4   | 35.3   | 18.3   | 138.5  | 88.5   | 48.8   | 72.8   |
| 479.8  | 693.6  | 952.2  | 612.0  | 332.4  | 1655.8 | 1420.1 | 120.5  | 140.9  |
| 0.8    | 1.6    | 0.8    | 1.9    | 1.0    | 1.0    | 0.8    | 2.1    | 11.0   |
| 6.0    | 5.9    | 23.1   | 15.0   | 2.4    | 4.0    | 4.5    | 15.4   | 46.1   |
| 1.5    | 2.6    | 4.4    | 2.8    | 2.6    | 4.6    | 2.7    | 1.3    | 5.0    |
| 1.5    | 1.4    | 1.5    | 6.2    | 0.2    | 2.0    | 1.2    | 13.9   | 5.8    |
| 17.6   | 7.0    | 19.4   | 11.2   | 6.0    | 31.4   | 19.9   | 15.8   | 3.4    |
| 1.8    | 1.7    | 1.6    | 1.9    | 1.4    | 2.5    | 1.6    | 2.4    | 2.3    |
| 7.8    | 8.6    | 3.4    | 4.4    | 1.0    | 8.2    | 7.3    | 7.9    | 10.5   |
| 19.6   | 20.5   | 12.9   | 17.0   | 9.0    | 60.9   | 66.2   | 8.9    | 10.0   |
| 7.0    | 2.8    | 6.3    | 5.2    | 0.2    | 3.5    | 2.3    | 0.5    | 2.4    |
| 10.2   | 9.0    | 1.0    | 10.8   | 0.7    | 2.5    | 7.1    | 8.4    | 14.7   |
| 139.8  | 104.6  | 88.5   | 59.0   | 36.5   | 615.5  | 472.3  | 115.9  | 100.6  |
| 21.0   | 1.2    | 7.3    | 9.8    | 1.8    | 29.3   | 5.9    | 7.0    | 12.0   |
| 3.7    | 1.4    | 1.7    | 0.8    | 0.4    | 1.8    | 1.1    | 1.2    | 1.9    |
| 0.8    | 0.5    | 1.0    | 0.6    | 0.9    | 8.5    | 3.4    | 0.6    | 0.5    |
| 12.8   | 9.3    | 2.1    | 11.7   | 2.2    | 11.4   | 10.7   | 13.2   | 12.7   |
| 3.5    | 1.3    | 1.0    | 4.9    | 0.3    | 0.7    | 6.7    | 0.8    | 1.6    |
| 1.5    | 1.3    | 0.9    | 1.1    | 0.2    | 0.9    | 0.7    | 1.4    | 2.5    |
| 24.2   | 17.4   | 17.1   | 4.9    | 5.8    | 32.5   | 27.1   | 2.2    | 6.6    |
| 242.7  | 185.4  | 215.6  | 87.7   | 65.5   | 726.1  | 460.0  | 47.0   | 58.4   |
| 1.8    | 6.8    | 9.3    | 7.7    | 8.3    | 11.0   | 13.5   | 4.7    | 6.0    |
| 5.9    | 9.0    | 6.6    | 2.2    | 0.7    | 9.1    | 2.3    | 15.9   | 4.1    |
| 33.0   | 38.0   | 19.7   | 14.7   | 9.0    | 28.0   | 11.0   | 26.3   | 53.5   |
| 4.9    | 2.9    | 1.4    | 2.0    | 0.1    | 0.6    | 0.3    | 6.7    | 0.6    |
| 44.0   | 41.4   | 48.9   | 54.1   | 13.6   | 86.3   | 63.2   | 7.6    | 17.9   |
| 0.8    | 1.7    | 2.6    | 1.1    | 5.7    | 3.8    | 19.0   | 2.7    | 0.6    |
| 2.3    | 0.8    | 4.8    | 7.8    | 2.0    | 13.0   | 5.2    | 4.7    | 10.4   |
| 4.7    | 14.1   | 29.0   | 9.4    | 4.3    | 23.1   | 7.5    | 6.1    | 6.6    |

|        |        |        |        |       |        |        |       |       |
|--------|--------|--------|--------|-------|--------|--------|-------|-------|
| 508.8  | 394.9  | 422.0  | 362.2  | 178.5 | 1197.5 | 654.6  | 40.9  | 50.5  |
| 45.3   | 70.9   | 57.2   | 41.9   | 19.9  | 263.5  | 257.1  | 6.3   | 10.7  |
| 8.4    | 10.3   | 6.4    | 7.0    | 3.9   | 15.2   | 9.7    | 16.8  | 6.2   |
| 9.8    | 3.9    | 11.1   | 1.9    | 2.6   | 11.5   | 9.9    | 1.5   | 7.0   |
| 1.5    | 0.2    | 5.8    | 0.2    | 4.6   | 0.4    | 3.5    | 2.1   | 0.4   |
| 61.5   | 47.7   | 41.8   | 23.5   | 15.4  | 19.2   | 8.6    | 29.1  | 30.7  |
| 4.1    | 1.5    | 1.0    | 0.6    | 0.4   | 1.1    | 1.0    | 2.8   | 1.1   |
| 2.3    | 1.8    | 6.2    | 1.3    | 2.6   | 10.2   | 8.3    | 6.0   | 1.1   |
| 1.0    | 11.6   | 3.8    | 4.5    | 0.7   | 4.3    | 2.5    | 3.8   | 12.1  |
| 218.1  | 226.8  | 274.7  | 300.2  | 85.0  | 202.7  | 61.1   | 17.0  | 19.6  |
| 32.9   | 18.2   | 27.5   | 18.9   | 13.8  | 49.4   | 43.3   | 21.4  | 9.1   |
| 22.8   | 18.6   | 15.1   | 6.5    | 6.4   | 3.0    | 2.4    | 3.8   | 5.0   |
| 218.4  | 195.7  | 210.5  | 210.6  | 60.2  | 116.0  | 42.8   | 41.7  | 70.4  |
| 18.8   | 14.9   | 12.7   | 2.8    | 8.9   | 16.8   | 1.7    | 17.0  | 20.3  |
| 8.1    | 9.7    | 4.8    | 1.5    | 1.8   | 18.4   | 6.1    | 1.4   | 2.3   |
| 1.0    | 0.4    | 0.7    | 0.9    | 0.5   | 15.9   | 3.4    | 1.1   | 3.3   |
| 2.9    | 0.6    | 2.2    | 0.3    | 0.4   | 0.6    | 0.6    | 5.6   | 5.2   |
| 31.0   | 10.8   | 12.9   | 6.4    | 6.8   | 23.2   | 6.5    | 3.5   | 2.7   |
| 6.2    | 0.5    | 1.8    | 7.2    | 2.0   | 0.6    | 12.8   | 6.4   | 3.8   |
| 14.6   | 9.3    | 1.7    | 0.9    | 1.0   | 6.1    | 1.0    | 4.9   | 20.5  |
| 242.0  | 199.5  | 186.7  | 207.3  | 98.3  | 833.3  | 571.3  | 127.7 | 119.3 |
| 122.0  | 150.7  | 112.5  | 141.6  | 49.7  | 398.9  | 253.4  | 77.2  | 106.6 |
| 2.1    | 1.6    | 4.5    | 0.9    | 1.2   | 3.5    | 1.2    | 3.4   | 3.1   |
| 18.6   | 1.3    | 1.3    | 3.3    | 2.5   | 8.4    | 3.4    | 1.4   | 5.0   |
| 5.1    | 1.4    | 0.9    | 2.5    | 1.9   | 1.5    | 7.9    | 5.9   | 2.6   |
| 54.1   | 36.1   | 27.0   | 16.8   | 10.3  | 72.7   | 48.6   | 13.5  | 9.7   |
| 15.3   | 8.8    | 3.5    | 9.3    | 1.2   | 15.4   | 9.3    | 5.9   | 2.9   |
| 0.7    | 1.2    | 1.1    | 0.8    | 0.5   | 0.7    | 0.4    | 0.7   | 0.4   |
| 1.0    | 0.8    | 7.5    | 0.6    | 0.8   | 4.1    | 3.3    | 6.9   | 0.7   |
| 39.8   | 26.3   | 29.6   | 32.9   | 16.2  | 77.8   | 56.2   | 30.0  | 32.7  |
| 4414.0 | 3797.4 | 3608.3 | 3567.5 | 908.3 | 5579.8 | 4620.5 | 295.6 | 534.8 |
| 15.6   | 15.4   | 19.1   | 14.6   | 14.4  | 24.2   | 21.6   | 5.1   | 1.7   |
| 3.3    | 7.9    | 16.7   | 8.8    | 13.0  | 42.5   | 25.5   | 32.8  | 9.9   |
| 0.8    | 2.3    | 2.5    | 1.3    | 0.9   | 1.9    | 3.4    | 3.5   | 2.2   |
| 0.8    | 1.6    | 6.0    | 6.2    | 0.4   | 4.8    | 1.5    | 0.5   | 0.4   |
| 18.0   | 10.2   | 13.8   | 6.7    | 8.1   | 3.0    | 5.5    | 19.5  | 5.4   |
| 8.0    | 2.2    | 5.9    | 1.1    | 1.7   | 3.8    | 9.8    | 11.4  | 14.5  |
| 46.6   | 24.5   | 63.1   | 37.2   | 16.0  | 38.4   | 34.1   | 22.4  | 34.7  |
| 14.9   | 14.0   | 5.2    | 8.6    | 3.2   | 15.8   | 9.0    | 10.6  | 8.3   |
| 25.9   | 25.1   | 23.3   | 10.0   | 4.7   | 47.9   | 12.1   | 34.9  | 40.7  |
| 1.3    | 0.8    | 3.6    | 1.9    | 0.3   | 1.0    | 2.4    | 2.3   | 13.1  |
| 4.7    | 16.5   | 6.4    | 5.9    | 8.7   | 4.5    | 8.8    | 9.9   | 18.2  |
| 22.5   | 22.2   | 13.4   | 12.0   | 11.7  | 99.6   | 68.7   | 14.7  | 13.3  |
| 9.7    | 2.5    | 4.2    | 2.6    | 3.0   | 5.6    | 8.2    | 6.2   | 0.7   |
| 47.1   | 35.8   | 25.3   | 18.8   | 9.8   | 58.5   | 50.4   | 11.2  | 38.5  |
| 11.8   | 7.9    | 8.0    | 6.2    | 6.8   | 5.1    | 9.5    | 9.2   | 10.4  |
| 9.2    | 6.7    | 7.2    | 6.5    | 3.4   | 19.2   | 23.3   | 9.5   | 14.9  |
| 2.3    | 2.0    | 1.4    | 2.3    | 1.7   | 2.3    | 1.6    | 15.5  | 2.7   |
| 12.5   | 10.2   | 15.4   | 9.4    | 8.9   | 7.6    | 12.5   | 13.9  | 19.3  |
| 300.6  | 254.1  | 250.2  | 196.0  | 90.5  | 207.2  | 192.4  | 143.1 | 194.9 |
| 32.4   | 29.3   | 7.1    | 14.6   | 0.5   | 13.2   | 9.2    | 10.4  | 13.0  |
| 14.5   | 16.2   | 14.5   | 14.7   | 5.2   | 26.9   | 14.0   | 23.3  | 19.2  |
| 1.6    | 1.5    | 2.0    | 1.1    | 1.1   | 1.3    | 3.5    | 1.7   | 1.9   |

|        |        |        |        |        |        |        |       |       |
|--------|--------|--------|--------|--------|--------|--------|-------|-------|
| 9.4    | 1.9    | 3.6    | 1.2    | 2.4    | 3.0    | 1.4    | 0.4   | 0.8   |
| 15.0   | 2.3    | 1.7    | 17.6   | 7.8    | 10.0   | 12.0   | 8.7   | 2.2   |
| 3066.6 | 2999.3 | 2656.2 | 1776.2 | 1103.8 | 5468.0 | 4764.8 | 445.0 | 555.0 |
| 384.2  | 416.3  | 343.4  | 236.3  | 115.9  | 356.7  | 288.1  | 91.8  | 116.9 |
| 31.7   | 10.0   | 27.8   | 5.7    | 8.7    | 51.5   | 35.2   | 37.0  | 27.5  |
| 7.1    | 7.4    | 12.2   | 3.8    | 4.7    | 10.8   | 8.3    | 8.0   | 10.9  |
| 1.3    | 1.7    | 3.2    | 2.0    | 1.8    | 2.0    | 3.5    | 1.2   | 1.5   |
| 203.6  | 172.9  | 224.4  | 168.2  | 53.9   | 174.8  | 107.9  | 93.0  | 147.7 |
| 4.6    | 12.5   | 11.8   | 12.0   | 4.8    | 22.5   | 14.2   | 11.9  | 9.5   |
| 12.4   | 1.4    | 3.6    | 0.5    | 0.6    | 5.8    | 0.6    | 16.4  | 1.2   |
| 359.8  | 340.3  | 359.1  | 353.7  | 156.8  | 260.9  | 192.1  | 86.4  | 115.7 |
| 20.6   | 1.0    | 6.4    | 13.1   | 10.8   | 4.7    | 6.9    | 3.6   | 13.4  |
| 127.8  | 98.5   | 91.0   | 113.9  | 30.3   | 206.1  | 218.2  | 31.3  | 37.7  |
| 15.9   | 15.4   | 9.5    | 47.1   | 10.2   | 17.9   | 22.3   | 2.1   | 17.0  |
| 7.8    | 11.9   | 6.9    | 7.1    | 6.8    | 16.4   | 10.9   | 5.5   | 7.4   |
| 1.4    | 3.9    | 11.4   | 6.3    | 7.0    | 2.0    | 1.0    | 3.4   | 5.6   |
| 0.3    | 0.5    | 3.4    | 4.0    | 1.3    | 7.5    | 0.4    | 0.3   | 0.2   |
| 40.7   | 35.6   | 44.9   | 37.6   | 18.5   | 49.4   | 33.1   | 2.8   | 1.5   |
| 5.5    | 1.7    | 5.6    | 1.1    | 4.7    | 8.2    | 0.8    | 6.2   | 6.2   |
| 56.3   | 36.5   | 62.0   | 57.1   | 27.4   | 41.0   | 31.9   | 23.2  | 32.2  |
| 35.4   | 7.1    | 34.2   | 34.6   | 13.7   | 48.7   | 15.3   | 65.3  | 47.8  |
| 1.3    | 2.0    | 1.8    | 2.4    | 2.9    | 3.1    | 1.8    | 3.6   | 12.1  |
| 24.0   | 38.1   | 42.3   | 24.6   | 14.4   | 35.5   | 17.3   | 63.0  | 71.8  |
| 9.1    | 1.6    | 14.1   | 1.5    | 6.1    | 1.6    | 8.6    | 8.6   | 6.9   |
| 0.9    | 0.7    | 1.5    | 0.8    | 0.3    | 45.5   | 48.1   | 5.4   | 4.2   |
| 15.5   | 7.5    | 6.0    | 5.8    | 4.1    | 3.2    | 11.6   | 21.5  | 18.9  |
| 6.2    | 27.3   | 17.7   | 18.2   | 7.4    | 23.8   | 15.7   | 27.7  | 12.0  |
| 5.1    | 20.9   | 6.1    | 21.9   | 3.0    | 98.1   | 67.6   | 39.0  | 66.4  |
| 5.7    | 2.5    | 11.2   | 5.5    | 0.7    | 4.5    | 2.3    | 3.4   | 29.7  |
| 18.2   | 1.6    | 2.2    | 6.1    | 1.0    | 23.8   | 27.8   | 2.0   | 4.5   |
| 4.4    | 4.9    | 5.0    | 1.0    | 0.5    | 0.5    | 12.3   | 1.7   | 1.8   |
| 81.2   | 60.8   | 66.3   | 40.4   | 24.8   | 46.2   | 43.9   | 19.9  | 12.4  |
| 14.4   | 1.8    | 3.3    | 8.3    | 1.2    | 9.9    | 5.0    | 12.7  | 6.8   |
| 10.5   | 7.7    | 7.3    | 12.2   | 0.2    | 4.8    | 2.6    | 6.3   | 4.5   |
| 1.3    | 3.1    | 5.1    | 12.2   | 5.2    | 218.4  | 200.7  | 3.4   | 7.1   |
| 5.0    | 0.4    | 0.9    | 1.9    | 3.2    | 2.4    | 6.3    | 0.3   | 3.6   |
| 5.8    | 1.7    | 3.0    | 4.0    | 1.2    | 9.7    | 1.1    | 12.1  | 9.1   |
| 218.7  | 200.8  | 192.6  | 159.8  | 118.5  | 721.1  | 408.1  | 27.0  | 25.5  |
| 339.6  | 386.7  | 351.7  | 301.3  | 181.8  | 1050.6 | 754.7  | 53.9  | 54.7  |
| 7.1    | 0.7    | 1.5    | 5.1    | 0.8    | 7.9    | 4.2    | 21.8  | 35.3  |
| 14.2   | 11.4   | 21.8   | 14.3   | 7.7    | 41.1   | 38.9   | 2.4   | 14.9  |
| 7.1    | 1.7    | 9.8    | 7.7    | 10.0   | 11.5   | 3.7    | 2.6   | 2.6   |
| 5.0    | 3.3    | 1.9    | 1.4    | 0.5    | 1.2    | 4.8    | 5.2   | 6.3   |
| 1.6    | 1.8    | 0.8    | 0.5    | 0.6    | 5.3    | 2.5    | 1.8   | 1.2   |
| 8.0    | 4.1    | 16.6   | 9.6    | 1.9    | 2.2    | 2.8    | 12.1  | 14.0  |
| 29.7   | 3.8    | 12.0   | 8.1    | 5.4    | 9.1    | 23.2   | 2.7   | 1.6   |
| 2.0    | 3.2    | 6.1    | 4.0    | 1.9    | 5.9    | 1.0    | 4.3   | 1.8   |
| 3.9    | 0.2    | 1.5    | 1.7    | 0.7    | 2.5    | 13.5   | 0.1   | 0.4   |
| 6.4    | 0.9    | 1.0    | 7.2    | 0.3    | 3.2    | 6.9    | 4.8   | 2.6   |
| 8.6    | 10.2   | 11.4   | 2.7    | 4.2    | 26.6   | 18.8   | 4.0   | 3.4   |
| 10.0   | 9.7    | 13.2   | 10.3   | 2.8    | 13.6   | 8.4    | 7.5   | 8.5   |
| 23.9   | 46.6   | 33.5   | 21.8   | 7.3    | 38.5   | 16.6   | 0.7   | 5.9   |
| 34.4   | 24.7   | 31.9   | 33.5   | 14.3   | 32.9   | 12.4   | 34.7  | 40.2  |

|       |       |       |      |      |        |        |       |       |
|-------|-------|-------|------|------|--------|--------|-------|-------|
| 36.4  | 39.0  | 49.3  | 27.1 | 12.9 | 21.5   | 23.4   | 0.5   | 6.3   |
| 135.6 | 134.2 | 133.7 | 56.5 | 51.0 | 284.0  | 118.6  | 161.0 | 235.7 |
| 1.1   | 9.0   | 7.0   | 3.9  | 2.7  | 7.4    | 2.4    | 10.4  | 9.1   |
| 2.8   | 2.0   | 14.0  | 1.4  | 2.0  | 2.1    | 1.9    | 5.0   | 6.4   |
| 4.4   | 1.0   | 1.6   | 1.3  | 0.3  | 3783.0 | 2148.0 | 1.3   | 0.8   |
| 24.6  | 19.7  | 15.5  | 10.3 | 8.2  | 21.4   | 11.2   | 9.6   | 3.0   |
| 17.2  | 15.4  | 9.8   | 14.1 | 6.3  | 47.8   | 36.0   | 18.3  | 23.3  |
| 15.2  | 4.3   | 2.8   | 1.9  | 1.8  | 6.9    | 7.7    | 2.7   | 2.7   |
| 103.3 | 30.6  | 43.2  | 44.0 | 28.0 | 61.1   | 57.2   | 12.5  | 18.3  |
| 9.2   | 7.4   | 11.0  | 8.3  | 6.2  | 94.3   | 58.1   | 33.6  | 53.6  |
| 0.5   | 0.4   | 0.3   | 3.8  | 0.3  | 1.8    | 0.7    | 0.4   | 0.7   |
| 81.1  | 62.1  | 59.3  | 55.2 | 26.0 | 42.0   | 35.4   | 3.4   | 0.8   |
| 39.3  | 42.9  | 34.0  | 31.8 | 28.0 | 59.8   | 102.4  | 13.2  | 14.5  |
| 7.7   | 13.3  | 16.3  | 13.5 | 5.4  | 26.5   | 21.5   | 10.6  | 20.8  |
| 0.6   | 0.6   | 1.2   | 0.7  | 0.8  | 40.5   | 20.7   | 0.8   | 10.9  |
| 29.3  | 20.9  | 31.2  | 12.8 | 10.3 | 16.4   | 22.8   | 7.0   | 1.7   |
| 7.1   | 10.9  | 6.9   | 3.0  | 1.1  | 13.9   | 8.8    | 9.3   | 9.0   |
| 40.3  | 45.1  | 52.1  | 51.7 | 13.5 | 57.0   | 32.3   | 8.1   | 7.8   |
| 16.4  | 12.5  | 2.8   | 4.6  | 1.2  | 14.0   | 12.9   | 1.4   | 8.8   |
| 8.3   | 0.5   | 7.4   | 4.4  | 4.0  | 46.1   | 27.0   | 6.2   | 5.2   |
| 7.4   | 11.2  | 4.0   | 0.7  | 5.2  | 2.8    | 5.0    | 3.0   | 0.9   |
| 9.6   | 3.4   | 10.0  | 5.9  | 6.2  | 4.8    | 2.4    | 1.1   | 8.9   |
| 23.2  | 37.2  | 38.9  | 17.4 | 7.9  | 9.9    | 0.9    | 8.9   | 0.4   |
| 7.2   | 1.3   | 1.3   | 2.2  | 1.1  | 8.4    | 8.6    | 6.7   | 1.7   |
| 10.3  | 6.3   | 4.9   | 7.5  | 2.4  | 3.3    | 8.4    | 5.1   | 2.8   |
| 7.6   | 6.5   | 12.2  | 7.8  | 1.2  | 4.3    | 2.4    | 6.2   | 1.7   |
| 7.4   | 7.2   | 1.7   | 1.8  | 3.2  | 0.7    | 5.9    | 7.6   | 5.5   |
| 12.2  | 8.9   | 1.9   | 7.5  | 6.8  | 17.0   | 10.1   | 14.3  | 12.4  |
| 1.7   | 8.0   | 4.8   | 3.5  | 1.6  | 5.1    | 3.1    | 0.7   | 4.4   |
| 9.5   | 4.3   | 0.9   | 1.4  | 0.1  | 5.5    | 0.6    | 6.4   | 0.5   |
| 4.4   | 0.5   | 2.6   | 1.7  | 4.0  | 2.0    | 2.2    | 2.3   | 1.0   |
| 20.3  | 6.1   | 12.5  | 13.5 | 4.5  | 35.7   | 35.2   | 25.0  | 8.3   |
| 5.6   | 13.1  | 9.4   | 7.0  | 7.4  | 1.9    | 8.6    | 9.4   | 2.3   |
| 0.4   | 0.5   | 5.9   | 0.4  | 0.2  | 1.2    | 0.9    | 5.8   | 7.5   |
| 31.5  | 14.8  | 27.1  | 31.2 | 10.0 | 9.2    | 9.2    | 26.6  | 35.1  |
| 3.1   | 0.5   | 1.3   | 0.8  | 0.3  | 0.3    | 3.8    | 2.9   | 0.5   |
| 7.1   | 0.7   | 0.5   | 7.2  | 2.6  | 7.9    | 3.8    | 3.5   | 4.8   |
| 37.1  | 24.3  | 20.2  | 29.7 | 15.3 | 68.7   | 68.6   | 2.1   | 22.7  |
| 60.9  | 24.6  | 30.4  | 27.8 | 20.4 | 37.9   | 22.5   | 39.2  | 46.9  |
| 1.6   | 1.4   | 3.6   | 0.9  | 1.2  | 1.2    | 2.0    | 2.1   | 1.6   |
| 8.6   | 1.5   | 1.3   | 2.0  | 1.7  | 6.5    | 0.3    | 11.1  | 10.8  |
| 4.6   | 1.3   | 1.3   | 6.4  | 0.9  | 2.5    | 0.8    | 0.8   | 0.9   |
| 17.1  | 7.7   | 17.6  | 9.9  | 1.5  | 20.2   | 1.8    | 0.9   | 2.1   |
| 14.5  | 10.2  | 10.7  | 5.2  | 1.2  | 2.1    | 1.4    | 8.0   | 2.5   |
| 28.6  | 36.5  | 26.6  | 40.9 | 21.4 | 27.3   | 27.7   | 2.0   | 1.7   |
| 1.4   | 1.1   | 1.9   | 1.4  | 0.7  | 2.0    | 0.7    | 1.0   | 1.7   |
| 19.8  | 8.3   | 15.9  | 17.6 | 9.2  | 35.9   | 23.4   | 15.2  | 21.4  |
| 0.8   | 2.9   | 1.2   | 1.7  | 2.0  | 3.5    | 5.2    | 1.2   | 12.3  |
| 9.8   | 5.3   | 2.2   | 1.5  | 0.5  | 3.3    | 1.7    | 8.4   | 2.0   |
| 58.4  | 38.9  | 46.9  | 42.3 | 31.8 | 202.8  | 194.0  | 8.6   | 5.9   |
| 44.2  | 26.2  | 30.7  | 32.6 | 17.5 | 36.2   | 15.4   | 10.0  | 24.2  |
| 33.4  | 18.7  | 5.0   | 9.3  | 1.7  | 18.7   | 10.7   | 11.6  | 13.7  |
| 9.6   | 11.3  | 21.2  | 15.1 | 4.3  | 19.8   | 10.8   | 5.4   | 6.7   |



|       |       |       |       |      |       |       |      |      |
|-------|-------|-------|-------|------|-------|-------|------|------|
| 34.9  | 43.3  | 44.9  | 33.2  | 6.5  | 70.5  | 32.3  | 6.7  | 7.7  |
| 16.3  | 17.5  | 4.6   | 13.5  | 5.9  | 5.6   | 21.6  | 2.9  | 2.4  |
| 5.3   | 24.0  | 39.9  | 15.3  | 8.6  | 63.9  | 27.9  | 38.0 | 14.6 |
| 15.6  | 15.8  | 9.8   | 6.8   | 0.8  | 67.0  | 24.8  | 13.9 | 13.6 |
| 27.3  | 18.8  | 22.3  | 22.0  | 5.1  | 31.1  | 21.5  | 0.7  | 1.1  |
| 20.1  | 11.6  | 3.4   | 3.5   | 6.3  | 3.5   | 19.9  | 3.5  | 11.3 |
| 38.4  | 21.7  | 36.2  | 38.8  | 1.5  | 2.0   | 1.4   | 47.1 | 55.6 |
| 16.2  | 20.5  | 15.7  | 21.4  | 7.6  | 14.8  | 4.4   | 2.7  | 1.0  |
| 19.8  | 12.5  | 28.2  | 5.4   | 9.5  | 15.5  | 9.7   | 16.0 | 11.1 |
| 49.4  | 54.4  | 61.4  | 45.9  | 21.6 | 92.7  | 75.4  | 17.6 | 15.4 |
| 25.1  | 14.1  | 19.4  | 8.2   | 5.8  | 12.6  | 8.9   | 8.3  | 9.1  |
| 2.9   | 9.5   | 12.3  | 10.5  | 5.5  | 47.5  | 20.3  | 2.5  | 13.9 |
| 7.4   | 10.0  | 3.3   | 8.1   | 8.5  | 20.0  | 3.0   | 4.7  | 6.3  |
| 34.2  | 25.3  | 33.9  | 17.8  | 8.2  | 242.2 | 204.0 | 13.9 | 13.8 |
| 15.0  | 9.1   | 14.5  | 15.4  | 0.5  | 23.7  | 4.6   | 6.5  | 1.7  |
| 4.0   | 15.3  | 12.8  | 11.5  | 9.7  | 28.7  | 22.5  | 14.8 | 15.1 |
| 2.6   | 1.6   | 1.0   | 3.7   | 0.9  | 4.1   | 0.7   | 1.8  | 1.3  |
| 35.7  | 17.2  | 19.2  | 24.0  | 8.1  | 169.5 | 163.0 | 9.4  | 29.2 |
| 0.8   | 6.0   | 0.4   | 2.1   | 0.6  | 0.6   | 1.6   | 3.2  | 5.5  |
| 16.3  | 12.0  | 13.2  | 9.4   | 1.0  | 20.9  | 14.7  | 13.1 | 16.2 |
| 3.3   | 1.8   | 3.1   | 4.4   | 0.5  | 3.8   | 1.2   | 2.9  | 1.2  |
| 6.2   | 10.0  | 1.3   | 6.0   | 3.4  | 2.5   | 1.6   | 6.7  | 5.8  |
| 0.9   | 1.2   | 2.4   | 0.5   | 2.9  | 1.0   | 0.4   | 0.8  | 5.6  |
| 77.8  | 94.9  | 99.0  | 62.3  | 30.0 | 108.3 | 101.6 | 19.5 | 25.7 |
| 76.5  | 68.1  | 75.0  | 56.2  | 28.1 | 94.2  | 74.5  | 17.7 | 20.0 |
| 43.7  | 27.2  | 35.5  | 30.8  | 5.1  | 13.3  | 15.9  | 21.1 | 14.7 |
| 2.7   | 0.8   | 1.4   | 2.9   | 0.3  | 0.3   | 1.0   | 1.4  | 7.5  |
| 48.1  | 21.6  | 25.7  | 12.8  | 21.6 | 16.3  | 31.4  | 15.0 | 13.4 |
| 5.7   | 4.2   | 1.4   | 1.6   | 3.1  | 13.3  | 0.5   | 1.3  | 0.3  |
| 6.6   | 1.1   | 7.5   | 5.5   | 5.2  | 9.6   | 1.9   | 10.0 | 0.9  |
| 14.2  | 25.4  | 15.0  | 21.7  | 15.6 | 18.3  | 12.9  | 2.7  | 16.3 |
| 1.2   | 1.6   | 3.0   | 1.0   | 5.0  | 22.2  | 15.2  | 3.2  | 1.6  |
| 36.2  | 34.4  | 36.9  | 20.3  | 12.0 | 42.6  | 18.7  | 17.4 | 9.3  |
| 4.7   | 0.5   | 7.1   | 6.5   | 0.4  | 9.7   | 9.9   | 8.9  | 6.3  |
| 19.9  | 17.7  | 21.3  | 16.5  | 10.9 | 22.6  | 6.9   | 21.2 | 28.0 |
| 14.4  | 6.0   | 12.5  | 16.7  | 5.7  | 32.3  | 21.9  | 7.1  | 3.4  |
| 127.3 | 90.2  | 86.7  | 102.4 | 45.6 | 114.5 | 68.8  | 15.7 | 27.1 |
| 16.5  | 11.8  | 24.5  | 10.3  | 4.3  | 17.8  | 15.5  | 5.2  | 2.7  |
| 15.2  | 11.0  | 7.3   | 17.0  | 5.7  | 13.3  | 5.7   | 17.1 | 12.5 |
| 13.7  | 17.1  | 11.7  | 6.3   | 0.8  | 16.5  | 1.8   | 5.2  | 8.8  |
| 47.2  | 37.6  | 25.2  | 23.2  | 7.7  | 59.7  | 58.0  | 28.6 | 25.9 |
| 1.3   | 6.0   | 3.1   | 1.3   | 0.6  | 2.6   | 4.5   | 2.1  | 6.9  |
| 55.3  | 33.7  | 41.7  | 10.0  | 2.6  | 21.6  | 16.9  | 17.5 | 37.6 |
| 24.4  | 11.6  | 3.9   | 13.4  | 3.0  | 1.8   | 12.5  | 11.6 | 3.5  |
| 12.0  | 5.9   | 2.1   | 4.1   | 2.5  | 13.3  | 6.8   | 13.1 | 8.1  |
| 130.4 | 126.8 | 154.7 | 118.1 | 37.1 | 87.3  | 42.2  | 16.3 | 28.5 |
| 10.0  | 7.0   | 15.9  | 13.5  | 4.3  | 16.8  | 19.4  | 2.2  | 10.0 |
| 8.6   | 5.5   | 2.0   | 9.9   | 13.9 | 12.7  | 2.3   | 3.1  | 14.6 |
| 16.1  | 23.1  | 11.9  | 11.8  | 5.0  | 22.9  | 18.1  | 14.6 | 7.3  |
| 21.4  | 19.7  | 26.5  | 26.4  | 4.2  | 2.4   | 3.8   | 8.2  | 17.6 |
| 85.6  | 80.7  | 75.0  | 38.2  | 28.2 | 134.2 | 78.7  | 35.4 | 56.9 |
| 3.0   | 0.9   | 1.2   | 1.4   | 0.7  | 1.1   | 11.1  | 1.1  | 1.5  |
| 20.9  | 20.5  | 28.5  | 18.5  | 14.6 | 49.2  | 47.7  | 5.5  | 8.3  |

|       |       |       |       |       |        |        |       |       |
|-------|-------|-------|-------|-------|--------|--------|-------|-------|
| 1.1   | 1.2   | 2.4   | 2.2   | 1.0   | 1.0    | 0.6    | 1.0   | 0.9   |
| 6.4   | 5.3   | 7.4   | 2.3   | 5.6   | 9.0    | 8.8    | 5.3   | 7.0   |
| 58.3  | 43.6  | 60.4  | 23.4  | 18.6  | 92.1   | 93.2   | 12.4  | 1.4   |
| 30.8  | 45.0  | 20.1  | 26.4  | 7.3   | 24.3   | 6.2    | 9.6   | 1.9   |
| 2.5   | 6.2   | 6.3   | 0.5   | 4.3   | 2.4    | 0.6    | 1.5   | 8.0   |
| 58.6  | 42.2  | 43.8  | 42.0  | 36.0  | 51.4   | 62.6   | 7.9   | 8.5   |
| 3.9   | 10.9  | 11.0  | 5.7   | 1.3   | 9.6    | 5.2    | 9.0   | 14.6  |
| 8.9   | 10.9  | 3.1   | 6.4   | 0.4   | 43.6   | 33.4   | 6.2   | 5.5   |
| 17.8  | 24.6  | 22.9  | 12.4  | 1.7   | 37.1   | 24.9   | 12.9  | 7.5   |
| 21.0  | 12.9  | 20.4  | 12.5  | 6.1   | 35.1   | 18.6   | 0.9   | 8.4   |
| 17.2  | 2.1   | 18.4  | 20.8  | 1.5   | 9.4    | 7.3    | 11.2  | 8.5   |
| 3.0   | 5.0   | 1.0   | 5.8   | 0.3   | 7.3    | 16.0   | 4.6   | 1.2   |
| 3.4   | 4.1   | 9.3   | 16.1  | 7.2   | 9.7    | 9.0    | 1.7   | 1.0   |
| 1.2   | 2.2   | 2.6   | 9.0   | 1.6   | 3.1    | 0.7    | 2.2   | 0.7   |
| 37.9  | 17.9  | 21.9  | 28.7  | 18.5  | 58.3   | 67.3   | 5.5   | 6.6   |
| 8.7   | 5.3   | 15.5  | 10.2  | 0.4   | 9.5    | 6.7    | 6.2   | 3.4   |
| 1.7   | 15.4  | 2.1   | 1.9   | 1.6   | 5.4    | 9.8    | 1.6   | 1.9   |
| 38.5  | 39.4  | 46.0  | 29.4  | 15.2  | 56.9   | 53.9   | 10.8  | 16.2  |
| 14.5  | 5.6   | 16.1  | 12.5  | 6.0   | 29.8   | 3.8    | 8.7   | 10.7  |
| 1.0   | 9.3   | 11.9  | 0.4   | 5.3   | 7.0    | 9.0    | 2.9   | 0.4   |
| 2.8   | 3.1   | 2.0   | 2.3   | 1.1   | 5.6    | 8.2    | 2.8   | 2.5   |
| 0.9   | 1.9   | 0.7   | 0.5   | 0.3   | 0.9    | 1.1    | 0.9   | 1.2   |
| 12.0  | 6.2   | 10.2  | 2.1   | 3.8   | 20.1   | 9.2    | 0.8   | 6.3   |
| 16.6  | 0.8   | 8.4   | 0.7   | 6.2   | 8.3    | 11.0   | 21.9  | 10.6  |
| 107.5 | 116.9 | 199.9 | 167.4 | 64.2  | 138.3  | 81.0   | 32.4  | 25.6  |
| 769.1 | 896.8 | 828.2 | 792.2 | 318.1 | 1181.3 | 883.5  | 216.3 | 262.6 |
| 2.3   | 8.8   | 1.3   | 0.8   | 0.4   | 1.8    | 1.1    | 1.8   | 9.1   |
| 1.4   | 1.9   | 5.2   | 0.7   | 5.9   | 3.3    | 1.9    | 35.9  | 28.7  |
| 13.0  | 8.5   | 6.3   | 1.5   | 7.4   | 14.5   | 10.3   | 8.3   | 6.9   |
| 16.9  | 4.7   | 6.9   | 0.7   | 3.3   | 22.4   | 21.8   | 8.2   | 16.9  |
| 141.7 | 149.0 | 421.7 | 447.2 | 120.4 | 3607.5 | 3610.5 | 7.4   | 0.9   |
| 110.0 | 106.0 | 125.5 | 78.4  | 56.8  | 292.3  | 268.2  | 29.0  | 13.5  |
| 14.3  | 26.4  | 9.9   | 17.4  | 6.3   | 37.9   | 4.7    | 13.9  | 10.7  |
| 4.4   | 1.9   | 5.1   | 1.4   | 7.0   | 67.1   | 30.7   | 13.4  | 12.0  |
| 57.8  | 52.9  | 62.6  | 52.4  | 31.8  | 132.2  | 88.5   | 7.4   | 11.9  |
| 2.4   | 2.1   | 2.2   | 2.4   | 1.0   | 10.9   | 2.7    | 1.3   | 1.6   |
| 18.1  | 10.5  | 10.6  | 1.5   | 0.8   | 13.6   | 21.6   | 12.6  | 14.8  |
| 27.0  | 17.8  | 21.8  | 22.0  | 11.5  | 40.2   | 26.8   | 12.3  | 7.2   |
| 12.0  | 4.4   | 4.0   | 1.2   | 0.8   | 9.6    | 1.0    | 10.1  | 12.5  |
| 12.4  | 14.0  | 11.3  | 10.2  | 0.9   | 21.0   | 2.4    | 14.1  | 12.9  |
| 3.0   | 7.1   | 11.9  | 7.9   | 5.8   | 1.8    | 2.7    | 3.3   | 6.5   |
| 3.1   | 9.8   | 2.8   | 5.5   | 1.1   | 3.7    | 2.9    | 1.1   | 2.1   |
| 30.4  | 33.3  | 33.2  | 21.9  | 11.2  | 106.9  | 71.8   | 1.2   | 22.3  |
| 213.4 | 164.9 | 161.8 | 117.8 | 94.7  | 321.9  | 220.5  | 73.7  | 55.9  |
| 15.4  | 3.1   | 8.5   | 6.4   | 3.7   | 29.7   | 20.2   | 4.0   | 5.4   |
| 81.6  | 79.2  | 77.6  | 73.3  | 22.5  | 97.4   | 86.0   | 11.3  | 8.8   |
| 1.8   | 2.3   | 1.6   | 4.6   | 2.7   | 3.5    | 0.7    | 0.7   | 0.2   |
| 11.9  | 10.3  | 18.3  | 8.5   | 13.0  | 39.4   | 18.4   | 10.4  | 14.3  |
| 15.1  | 9.8   | 11.1  | 23.9  | 2.9   | 23.9   | 3.3    | 3.5   | 8.5   |
| 12.1  | 6.1   | 1.4   | 8.0   | 0.3   | 10.8   | 5.3    | 3.7   | 7.0   |
| 3.0   | 1.0   | 0.8   | 1.3   | 0.3   | 0.6    | 2.2    | 2.7   | 3.9   |
| 5.2   | 1.4   | 8.6   | 2.8   | 6.8   | 19.1   | 3.1    | 10.8  | 15.1  |
| 18.3  | 2.8   | 9.7   | 3.7   | 0.8   | 1.8    | 1.5    | 15.7  | 2.3   |

|         |         |        |        |        |        |        |        |        |
|---------|---------|--------|--------|--------|--------|--------|--------|--------|
| 4.2     | 9.0     | 1.7    | 4.0    | 5.0    | 14.2   | 3.1    | 3.4    | 0.5    |
| 12.6    | 1.2     | 0.9    | 5.3    | 1.3    | 2.0    | 12.8   | 9.3    | 11.0   |
| 67.1    | 103.4   | 78.6   | 81.9   | 45.7   | 175.0  | 134.3  | 9.3    | 36.6   |
| 27.3    | 18.0    | 12.2   | 8.3    | 3.0    | 50.5   | 21.3   | 1.1    | 15.5   |
| 9.7     | 9.8     | 8.1    | 0.7    | 0.2    | 6.9    | 3.0    | 0.7    | 5.2    |
| 24.6    | 13.5    | 12.1   | 14.8   | 5.7    | 9.6    | 13.1   | 20.9   | 1.3    |
| 9.7     | 13.1    | 2.0    | 7.1    | 6.8    | 132.8  | 82.3   | 16.4   | 18.0   |
| 8.6     | 11.0    | 13.1   | 2.9    | 9.4    | 35.9   | 2.8    | 37.2   | 30.0   |
| 4.7     | 0.4     | 0.3    | 0.8    | 3.8    | 0.5    | 0.2    | 3.3    | 1.9    |
| 2.4     | 1.9     | 1.7    | 2.5    | 4.0    | 8.7    | 3.2    | 8.5    | 29.4   |
| 22.1    | 17.2    | 24.9   | 9.1    | 4.4    | 6.8    | 12.0   | 4.5    | 7.1    |
| 6.7     | 3.5     | 1.2    | 8.0    | 0.5    | 1.4    | 6.2    | 0.7    | 9.2    |
| 46.1    | 41.8    | 39.7   | 34.2   | 23.9   | 78.7   | 74.1   | 18.6   | 23.5   |
| 160.4   | 157.9   | 155.5  | 110.5  | 72.8   | 170.3  | 106.2  | 116.0  | 85.3   |
| 50.6    | 34.3    | 47.3   | 32.1   | 17.5   | 53.1   | 38.8   | 21.5   | 19.7   |
| 874.8   | 727.7   | 665.9  | 714.8  | 280.8  | 1896.5 | 1004.9 | 226.4  | 201.4  |
| 1285.4  | 1000.7  | 907.2  | 865.5  | 422.4  | 2853.2 | 2168.5 | 1197.2 | 1760.8 |
| 4141.8  | 3892.2  | 3646.3 | 3079.3 | 1330.8 | 5528.1 | 4197.7 | 2124.8 | 2553.0 |
| 3801.3  | 3643.4  | 3396.8 | 3619.6 | 1801.4 | 4490.4 | 3822.4 | 714.9  | 867.1  |
| 5634.9  | 4910.3  | 4604.4 | 3905.7 | 1984.1 | 6702.0 | 5476.3 | 2640.7 | 3547.4 |
| 60.1    | 53.5    | 55.8   | 44.5   | 5.2    | 62.9   | 37.9   | 12.5   | 18.8   |
| 1204.9  | 1246.2  | 1256.9 | 1283.8 | 568.3  | 4309.5 | 3689.4 | 285.5  | 471.4  |
| 2.9     | 4.1     | 2.2    | 3.1    | 1.6    | 3.5    | 3.0    | 6.4    | 2.9    |
| 2265.6  | 2449.0  | 2381.9 | 1964.4 | 966.7  | 4074.4 | 2764.3 | 525.1  | 574.7  |
| 1913.2  | 1944.7  | 1884.5 | 1395.7 | 617.6  | 2470.2 | 1530.7 | 220.8  | 292.6  |
| 1321.4  | 1221.1  | 1192.7 | 1083.8 | 483.2  | 1371.1 | 976.7  | 267.8  | 331.4  |
| 812.1   | 682.1   | 764.1  | 912.3  | 330.0  | 2220.4 | 2277.0 | 638.1  | 881.0  |
| 4653.9  | 3197.5  | 3270.5 | 3895.2 | 1662.0 | 8469.3 | 6247.8 | 606.5  | 927.1  |
| 215.8   | 200.8   | 144.7  | 104.9  | 56.2   | 237.2  | 161.0  | 182.9  | 253.3  |
| 307.2   | 225.4   | 283.6  | 332.2  | 109.2  | 1056.2 | 1052.0 | 137.4  | 130.2  |
| 428.9   | 504.7   | 575.5  | 389.7  | 116.1  | 1845.2 | 1302.5 | 82.0   | 135.4  |
| 795.2   | 734.8   | 729.0  | 420.4  | 225.4  | 2176.9 | 1440.8 | 450.8  | 768.9  |
| 10905.1 | 10597.5 | 9237.5 | 8239.9 | 4638.6 | 9455.4 | 8040.3 | 1876.6 | 2294.0 |
| 120.1   | 115.0   | 86.3   | 69.0   | 33.7   | 380.6  | 240.0  | 40.2   | 102.2  |
| 125.4   | 158.7   | 109.4  | 125.1  | 58.9   | 95.5   | 67.3   | 34.3   | 37.1   |
| 1204.9  | 1282.4  | 981.7  | 726.3  | 553.2  | 1564.3 | 1023.1 | 953.8  | 1115.0 |
| 848.2   | 752.5   | 609.7  | 545.5  | 162.2  | 850.7  | 604.9  | 641.4  | 714.7  |
| 256.9   | 300.0   | 278.3  | 512.2  | 141.7  | 835.0  | 746.6  | 110.3  | 154.7  |
| 429.6   | 462.8   | 541.4  | 834.1  | 174.2  | 1448.0 | 1270.9 | 116.8  | 143.6  |
| 8187.1  | 7808.1  | 7487.0 | 6190.8 | 3854.7 | 9371.3 | 7425.8 | 3231.9 | 3746.0 |
| 624.9   | 574.7   | 731.5  | 975.2  | 203.8  | 881.3  | 776.5  | 158.0  | 317.0  |
| 452.7   | 486.7   | 564.4  | 661.3  | 188.2  | 590.9  | 457.1  | 380.7  | 601.8  |
| 722.0   | 650.4   | 638.7  | 523.4  | 234.7  | 1679.4 | 1171.2 | 86.4   | 161.9  |
| 288.9   | 244.5   | 300.5  | 254.0  | 90.5   | 1839.5 | 1230.0 | 257.1  | 261.3  |
| 2184.0  | 2140.7  | 2352.3 | 2479.4 | 891.9  | 5117.4 | 4220.6 | 159.7  | 215.8  |
| 1075.9  | 968.0   | 940.2  | 1191.7 | 387.9  | 1052.7 | 693.3  | 266.0  | 302.1  |
| 3815.5  | 3111.1  | 3086.3 | 2813.5 | 1299.6 | 5717.2 | 4591.5 | 1253.8 | 1383.9 |
| 297.9   | 213.0   | 196.6  | 178.5  | 65.4   | 612.8  | 426.4  | 172.6  | 240.3  |
| 115.4   | 109.9   | 103.7  | 91.5   | 19.8   | 146.4  | 105.6  | 97.8   | 107.7  |
| 520.3   | 392.5   | 491.6  | 532.3  | 148.8  | 885.3  | 702.1  | 1612.3 | 1773.4 |
| 336.6   | 356.3   | 306.5  | 201.8  | 144.1  | 445.3  | 223.1  | 152.6  | 238.8  |
| 574.2   | 487.6   | 616.6  | 552.0  | 213.2  | 586.2  | 447.5  | 154.0  | 214.2  |
| 6064.7  | 5585.7  | 5043.6 | 4326.7 | 2529.4 | 6239.8 | 4597.1 | 935.6  | 1076.5 |

|        |        |        |        |        |        |        |        |        |
|--------|--------|--------|--------|--------|--------|--------|--------|--------|
| 470.2  | 373.7  | 389.2  | 342.7  | 146.7  | 637.8  | 401.2  | 210.0  | 229.4  |
| 1469.0 | 1376.9 | 1194.0 | 821.7  | 507.8  | 1842.1 | 1465.8 | 397.7  | 325.0  |
| 2014.1 | 1907.1 | 1693.9 | 1236.3 | 685.0  | 2734.7 | 2010.9 | 908.0  | 1564.3 |
| 2.9    | 1.6    | 4.0    | 9.9    | 4.5    | 3.5    | 3.1    | 0.8    | 1.3    |
| 655.5  | 671.8  | 678.4  | 652.6  | 266.4  | 1068.6 | 815.6  | 173.8  | 282.3  |
| 359.6  | 397.4  | 393.7  | 502.2  | 191.6  | 1390.0 | 1347.8 | 146.2  | 202.2  |
| 145.1  | 153.0  | 173.1  | 164.9  | 78.6   | 598.4  | 380.2  | 97.0   | 61.7   |
| 476.4  | 398.1  | 418.1  | 260.8  | 149.7  | 1481.3 | 977.4  | 79.7   | 100.1  |
| 392.5  | 440.5  | 425.9  | 300.5  | 239.2  | 2159.0 | 2178.4 | 1.6    | 7.7    |
| 508.8  | 423.1  | 418.2  | 258.2  | 174.3  | 2696.4 | 2496.1 | 5.5    | 13.9   |
| 624.2  | 519.7  | 539.1  | 314.5  | 195.6  | 2039.4 | 1599.9 | 19.0   | 6.8    |
| 249.0  | 219.7  | 242.9  | 270.9  | 86.0   | 185.3  | 92.6   | 75.1   | 111.3  |
| 426.5  | 387.7  | 379.4  | 346.1  | 153.8  | 466.5  | 360.2  | 70.0   | 131.1  |
| 29.3   | 17.4   | 2.2    | 10.2   | 3.5    | 2114.2 | 1382.0 | 2.6    | 0.7    |
| 2437.9 | 2487.6 | 2287.1 | 2284.9 | 1043.3 | 4052.7 | 3082.0 | 786.0  | 977.0  |
| 3844.8 | 3615.4 | 3546.8 | 2910.2 | 1733.6 | 5478.5 | 4668.7 | 550.4  | 716.8  |
| 492.2  | 445.1  | 439.2  | 277.2  | 114.6  | 733.0  | 326.6  | 171.9  | 257.4  |
| 177.0  | 205.5  | 133.4  | 93.7   | 59.0   | 845.2  | 512.1  | 1.9    | 2.8    |
| 1219.0 | 1133.6 | 937.4  | 793.9  | 392.2  | 3185.8 | 1821.8 | 494.3  | 780.7  |
| 2386.7 | 2240.1 | 2307.0 | 1719.4 | 906.9  | 3724.8 | 2613.8 | 1055.1 | 1063.9 |
| 2279.8 | 1859.0 | 1825.6 | 1406.9 | 446.1  | 2328.3 | 1858.2 | 1628.4 | 1657.1 |
| 257.9  | 202.3  | 228.0  | 126.0  | 48.1   | 361.5  | 338.0  | 122.5  | 122.0  |
| 637.5  | 728.5  | 939.3  | 459.0  | 387.6  | 1117.6 | 1191.4 | 112.8  | 270.5  |
| 278.6  | 294.8  | 236.4  | 177.9  | 62.3   | 444.5  | 254.7  | 159.4  | 259.6  |
| 349.6  | 285.3  | 225.3  | 197.2  | 103.7  | 321.9  | 190.1  | 80.8   | 107.0  |
| 1127.0 | 991.2  | 1112.2 | 1100.4 | 330.5  | 688.8  | 649.8  | 278.3  | 268.2  |
| 697.2  | 601.1  | 598.2  | 481.2  | 249.3  | 770.6  | 485.6  | 746.5  | 793.9  |
| 221.2  | 186.1  | 191.0  | 172.9  | 66.8   | 590.2  | 441.1  | 99.5   | 114.9  |
| 324.9  | 235.5  | 235.4  | 185.9  | 108.7  | 307.8  | 128.6  | 353.2  | 306.6  |
| 218.2  | 222.5  | 270.8  | 787.9  | 166.7  | 289.1  | 208.7  | 145.3  | 203.7  |
| 233.8  | 202.3  | 209.2  | 224.3  | 59.0   | 792.5  | 440.7  | 246.9  | 332.5  |
| 219.4  | 135.3  | 160.4  | 172.1  | 40.2   | 217.9  | 149.3  | 103.2  | 137.1  |
| 1648.0 | 1357.1 | 1340.5 | 985.4  | 423.6  | 1473.1 | 886.3  | 312.3  | 402.4  |
| 96.2   | 73.4   | 91.0   | 48.8   | 39.6   | 269.9  | 153.1  | 39.0   | 30.2   |
| 289.0  | 299.4  | 174.6  | 147.1  | 91.2   | 1562.2 | 1264.2 | 53.5   | 99.3   |
| 423.9  | 351.1  | 366.4  | 463.9  | 110.8  | 458.0  | 327.6  | 113.7  | 104.7  |
| 110.8  | 97.2   | 56.8   | 64.4   | 24.8   | 297.1  | 197.9  | 18.8   | 31.0   |
| 343.4  | 375.8  | 298.0  | 230.8  | 115.2  | 310.0  | 127.6  | 281.6  | 322.5  |
| 291.3  | 272.0  | 266.5  | 225.9  | 81.0   | 762.0  | 395.8  | 196.2  | 246.7  |
| 76.7   | 13.0   | 62.8   | 25.6   | 16.0   | 39.4   | 62.2   | 37.5   | 51.3   |
| 1478.3 | 1139.7 | 1205.6 | 1248.3 | 458.9  | 1587.3 | 966.4  | 303.4  | 338.5  |
| 537.4  | 411.1  | 459.2  | 439.4  | 164.2  | 562.9  | 342.2  | 127.2  | 172.5  |
| 365.5  | 259.9  | 271.6  | 212.8  | 100.3  | 435.0  | 306.0  | 165.6  | 176.8  |
| 1529.4 | 1414.0 | 1481.1 | 1263.0 | 664.9  | 1414.7 | 1311.1 | 491.3  | 580.9  |
| 315.5  | 310.9  | 284.3  | 309.7  | 145.9  | 502.5  | 401.2  | 104.9  | 161.9  |
| 159.8  | 114.5  | 140.5  | 117.9  | 45.0   | 241.0  | 200.0  | 157.6  | 238.9  |
| 431.7  | 407.3  | 413.4  | 464.1  | 160.0  | 905.0  | 765.4  | 199.6  | 258.3  |
| 5719.8 | 5438.9 | 5282.5 | 4578.7 | 2568.9 | 6824.3 | 6439.4 | 399.3  | 686.7  |
| 582.1  | 439.1  | 460.2  | 399.5  | 196.0  | 2161.1 | 1258.7 | 449.9  | 675.1  |
| 695.7  | 459.6  | 716.6  | 692.0  | 202.7  | 1267.0 | 935.7  | 414.4  | 637.5  |
| 209.3  | 174.9  | 173.9  | 137.1  | 79.0   | 404.9  | 234.9  | 128.1  | 153.1  |
| 339.4  | 369.7  | 331.1  | 385.6  | 107.7  | 949.9  | 593.5  | 137.5  | 202.5  |
| 372.1  | 329.1  | 326.4  | 266.8  | 134.3  | 614.3  | 579.9  | 206.3  | 301.4  |

|        |        |        |        |        |        |        |       |        |
|--------|--------|--------|--------|--------|--------|--------|-------|--------|
| 1433.7 | 1199.3 | 1379.0 | 1603.0 | 665.9  | 1872.6 | 1652.8 | 930.6 | 1133.3 |
| 242.3  | 219.9  | 195.0  | 143.4  | 64.5   | 315.1  | 190.6  | 136.3 | 208.7  |
| 1432.7 | 1248.4 | 1273.6 | 985.3  | 366.2  | 3501.3 | 2822.4 | 673.6 | 894.0  |
| 194.8  | 203.4  | 182.7  | 178.1  | 103.3  | 545.9  | 384.6  | 42.1  | 62.5   |
| 955.8  | 840.9  | 638.3  | 496.4  | 154.2  | 2358.5 | 1412.7 | 579.2 | 598.9  |
| 768.6  | 785.7  | 757.8  | 838.6  | 338.5  | 1364.4 | 946.8  | 172.4 | 249.6  |
| 111.6  | 65.1   | 58.4   | 40.3   | 19.2   | 144.2  | 127.4  | 36.8  | 77.9   |
| 677.7  | 501.4  | 564.4  | 308.0  | 140.2  | 984.9  | 462.1  | 139.3 | 233.1  |
| 979.2  | 847.6  | 794.4  | 632.0  | 239.7  | 1357.7 | 658.2  | 393.0 | 511.2  |
| 1246.5 | 1395.8 | 1337.0 | 1492.7 | 529.0  | 1683.5 | 977.8  | 138.7 | 275.9  |
| 284.9  | 253.1  | 212.0  | 153.9  | 40.1   | 260.5  | 64.2   | 255.2 | 186.5  |
| 87.2   | 44.2   | 62.2   | 15.7   | 19.2   | 75.0   | 5.2    | 55.5  | 80.6   |
| 688.5  | 653.1  | 733.8  | 827.9  | 211.6  | 635.2  | 384.6  | 152.1 | 178.8  |
| 424.8  | 444.0  | 422.7  | 494.3  | 148.1  | 504.4  | 549.3  | 130.0 | 179.0  |
| 1062.9 | 835.1  | 785.3  | 645.0  | 219.5  | 814.4  | 374.6  | 158.0 | 252.1  |
| 1590.7 | 1405.8 | 1432.7 | 1328.3 | 511.9  | 1771.7 | 1239.2 | 120.8 | 175.4  |
| 210.8  | 254.4  | 202.7  | 251.1  | 76.1   | 584.1  | 462.0  | 85.4  | 76.2   |
| 50.7   | 29.4   | 60.0   | 62.0   | 22.3   | 149.5  | 88.6   | 21.5  | 20.9   |
| 119.8  | 99.2   | 113.6  | 77.1   | 31.9   | 245.9  | 154.0  | 57.4  | 106.2  |
| 203.4  | 170.8  | 161.2  | 169.6  | 41.6   | 466.3  | 280.8  | 59.9  | 154.2  |
| 532.5  | 420.5  | 453.2  | 430.3  | 115.2  | 757.9  | 565.4  | 571.8 | 701.4  |
| 376.8  | 390.5  | 349.7  | 349.3  | 137.9  | 645.4  | 464.0  | 64.0  | 76.3   |
| 362.0  | 312.5  | 310.3  | 213.9  | 90.2   | 367.9  | 229.7  | 100.5 | 112.6  |
| 140.7  | 111.5  | 124.2  | 90.8   | 44.4   | 144.9  | 74.2   | 115.9 | 148.3  |
| 332.6  | 214.7  | 284.2  | 258.8  | 77.0   | 243.0  | 166.9  | 78.4  | 91.3   |
| 881.8  | 772.4  | 836.2  | 608.2  | 222.4  | 1573.5 | 970.3  | 346.5 | 483.2  |
| 340.1  | 426.7  | 327.9  | 322.7  | 156.8  | 1403.9 | 1040.4 | 137.2 | 172.4  |
| 1262.1 | 1076.7 | 1143.2 | 1050.1 | 369.8  | 2235.4 | 1881.0 | 84.0  | 86.2   |
| 3806.3 | 3301.1 | 2869.4 | 2449.6 | 1377.4 | 7442.2 | 6271.0 | 387.9 | 537.1  |
| 649.8  | 759.4  | 821.8  | 1090.9 | 371.1  | 746.4  | 506.7  | 102.9 | 100.9  |
| 752.8  | 632.4  | 658.1  | 541.3  | 216.7  | 1167.4 | 792.2  | 357.6 | 523.3  |
| 22.0   | 36.7   | 24.1   | 6.8    | 2.1    | 27.5   | 39.4   | 150.9 | 205.7  |
| 1561.9 | 1558.6 | 1543.4 | 1808.5 | 732.5  | 2574.8 | 1883.1 | 264.8 | 333.3  |
| 458.2  | 367.3  | 377.3  | 295.9  | 136.1  | 532.0  | 286.9  | 242.0 | 295.6  |
| 531.7  | 446.3  | 353.4  | 405.1  | 177.3  | 350.6  | 185.2  | 161.5 | 207.3  |
| 184.3  | 252.0  | 236.7  | 318.6  | 89.7   | 382.1  | 269.1  | 31.2  | 42.8   |
| 172.8  | 201.9  | 190.3  | 184.0  | 64.4   | 336.6  | 244.5  | 23.9  | 34.7   |
| 223.2  | 213.7  | 159.7  | 80.4   | 75.4   | 334.7  | 300.1  | 181.8 | 167.6  |
| 1840.0 | 1863.2 | 1875.1 | 1485.1 | 876.8  | 2889.9 | 2040.9 | 305.4 | 535.0  |
| 884.1  | 925.9  | 864.3  | 692.9  | 424.2  | 1153.0 | 740.0  | 334.0 | 465.7  |
| 12.5   | 4.4    | 6.0    | 4.2    | 1.9    | 22.6   | 8.4    | 5.3   | 15.8   |
| 2452.9 | 2470.0 | 2357.1 | 1861.8 | 879.1  | 3439.0 | 2358.7 | 671.7 | 1314.5 |
| 65.5   | 63.1   | 68.7   | 50.9   | 17.4   | 218.6  | 206.7  | 115.3 | 199.2  |
| 1104.2 | 917.9  | 1047.9 | 1053.3 | 282.6  | 880.4  | 611.8  | 182.6 | 206.4  |
| 1154.1 | 1146.5 | 1202.5 | 954.2  | 303.2  | 606.7  | 554.7  | 30.9  | 38.6   |
| 800.2  | 767.5  | 761.4  | 984.6  | 275.5  | 890.0  | 671.0  | 254.9 | 351.7  |
| 310.2  | 344.8  | 188.7  | 40.4   | 83.9   | 1187.9 | 903.2  | 93.8  | 107.8  |
| 2278.9 | 1605.5 | 1628.2 | 1175.7 | 482.8  | 1453.0 | 781.7  | 323.5 | 354.7  |
| 562.1  | 490.9  | 544.1  | 517.0  | 246.8  | 819.5  | 543.5  | 212.2 | 312.0  |
| 76.3   | 41.8   | 46.3   | 44.6   | 24.9   | 94.8   | 28.4   | 39.1  | 59.2   |
| 121.3  | 102.9  | 79.9   | 93.8   | 38.3   | 229.2  | 162.3  | 60.5  | 82.5   |
| 172.8  | 209.1  | 162.2  | 357.1  | 67.9   | 265.9  | 198.5  | 6.0   | 16.8   |
| 60.3   | 44.8   | 46.5   | 33.7   | 9.5    | 79.2   | 35.4   | 74.5  | 55.1   |

|        |        |        |        |        |        |        |        |        |
|--------|--------|--------|--------|--------|--------|--------|--------|--------|
| 984.3  | 785.4  | 775.5  | 597.0  | 262.1  | 1382.1 | 676.4  | 357.4  | 424.0  |
| 269.8  | 211.2  | 255.0  | 279.2  | 92.4   | 468.5  | 292.6  | 160.2  | 202.9  |
| 40.3   | 37.7   | 35.3   | 45.5   | 8.9    | 112.1  | 89.5   | 36.0   | 51.9   |
| 58.5   | 47.2   | 61.2   | 61.4   | 24.6   | 90.6   | 60.5   | 6.8    | 22.4   |
| 256.4  | 159.3  | 142.2  | 127.9  | 50.7   | 135.8  | 96.4   | 32.1   | 44.5   |
| 226.9  | 208.9  | 185.5  | 122.0  | 63.4   | 213.2  | 103.0  | 246.4  | 266.8  |
| 338.0  | 255.2  | 256.8  | 204.0  | 85.7   | 635.6  | 399.0  | 185.8  | 292.6  |
| 71.8   | 66.0   | 46.9   | 27.3   | 21.1   | 598.4  | 406.6  | 55.2   | 61.2   |
| 716.8  | 684.6  | 788.9  | 542.9  | 232.2  | 1669.5 | 1295.1 | 149.6  | 209.5  |
| 442.6  | 462.1  | 485.3  | 421.6  | 173.5  | 2550.0 | 1929.3 | 306.8  | 462.3  |
| 777.5  | 670.0  | 683.8  | 519.0  | 253.0  | 1144.4 | 762.5  | 257.9  | 383.4  |
| 3689.2 | 3240.8 | 3075.4 | 2251.9 | 1012.3 | 4684.7 | 3242.4 | 1307.1 | 2047.4 |
| 655.1  | 639.0  | 594.1  | 569.6  | 272.0  | 725.5  | 424.5  | 255.2  | 290.7  |
| 414.2  | 361.8  | 454.6  | 445.4  | 140.0  | 1717.7 | 1428.0 | 167.3  | 203.9  |
| 1084.5 | 1015.0 | 972.9  | 884.3  | 506.2  | 1365.9 | 811.4  | 496.4  | 688.9  |
| 107.5  | 102.1  | 154.6  | 110.4  | 53.1   | 911.1  | 631.0  | 130.8  | 148.1  |
| 58.9   | 34.8   | 40.2   | 39.2   | 19.2   | 72.0   | 53.6   | 27.8   | 13.7   |
| 271.1  | 192.4  | 213.8  | 180.1  | 64.9   | 237.7  | 175.9  | 178.4  | 214.6  |
| 234.7  | 183.3  | 164.1  | 134.0  | 41.9   | 51.1   | 41.7   | 34.7   | 58.2   |
| 459.0  | 395.1  | 405.6  | 333.1  | 127.3  | 388.3  | 302.4  | 74.1   | 81.0   |
| 561.9  | 673.6  | 614.0  | 496.6  | 186.4  | 390.3  | 299.8  | 18.3   | 36.9   |
| 291.5  | 255.8  | 242.4  | 206.7  | 69.8   | 190.5  | 138.9  | 31.7   | 38.2   |
| 639.8  | 530.8  | 498.5  | 456.6  | 167.6  | 888.2  | 692.7  | 273.2  | 340.0  |
| 2242.4 | 2140.2 | 2122.7 | 2024.4 | 797.9  | 4186.1 | 3558.0 | 467.6  | 843.2  |
| 385.1  | 305.2  | 303.0  | 252.0  | 112.2  | 783.3  | 553.9  | 149.5  | 204.5  |
| 513.7  | 462.5  | 460.4  | 357.5  | 192.4  | 1016.9 | 567.8  | 140.1  | 207.3  |
| 90.3   | 115.9  | 124.2  | 94.8   | 43.2   | 201.0  | 160.2  | 17.9   | 26.8   |
| 239.6  | 254.6  | 291.0  | 248.6  | 80.8   | 552.8  | 395.4  | 60.7   | 90.4   |
| 208.9  | 129.9  | 138.7  | 145.9  | 56.7   | 309.6  | 333.9  | 142.1  | 141.6  |
| 1.8    | 22.8   | 1.7    | 17.8   | 5.1    | 21.6   | 15.1   | 1.4    | 0.6    |
| 158.0  | 87.6   | 79.2   | 61.1   | 23.7   | 491.3  | 386.1  | 43.0   | 66.9   |
| 55.6   | 43.8   | 69.7   | 81.6   | 32.2   | 254.9  | 155.8  | 138.4  | 186.1  |
| 1105.1 | 1094.5 | 765.7  | 582.5  | 271.8  | 1263.4 | 1137.1 | 246.5  | 326.7  |
| 528.2  | 572.1  | 529.9  | 580.4  | 201.8  | 1012.8 | 983.5  | 60.9   | 74.6   |
| 103.8  | 126.7  | 99.8   | 61.7   | 26.8   | 304.0  | 229.0  | 39.0   | 49.2   |
| 522.2  | 578.8  | 469.2  | 377.4  | 173.2  | 305.3  | 246.4  | 103.4  | 153.9  |
| 89.0   | 54.0   | 83.2   | 58.6   | 25.0   | 310.3  | 184.6  | 89.7   | 110.5  |
| 3.2    | 21.8   | 6.7    | 4.7    | 2.5    | 1.5    | 2.7    | 4.1    | 6.3    |
| 570.5  | 688.1  | 517.7  | 522.6  | 243.5  | 1909.3 | 1305.6 | 204.9  | 233.8  |
| 301.2  | 257.8  | 241.7  | 222.8  | 117.1  | 598.7  | 403.3  | 126.0  | 134.1  |
| 737.3  | 772.7  | 708.6  | 659.4  | 243.4  | 1609.4 | 1255.1 | 411.1  | 388.8  |
| 415.8  | 554.9  | 470.0  | 446.4  | 165.6  | 939.1  | 649.3  | 74.6   | 111.9  |
| 90.2   | 87.5   | 93.7   | 95.2   | 29.9   | 281.8  | 193.4  | 21.3   | 45.6   |
| 126.2  | 82.4   | 84.6   | 76.1   | 37.4   | 190.1  | 96.1   | 133.1  | 156.6  |
| 27.7   | 18.6   | 12.5   | 5.3    | 6.3    | 60.4   | 24.7   | 31.0   | 51.0   |
| 130.7  | 129.5  | 150.2  | 91.1   | 53.9   | 192.8  | 108.8  | 15.5   | 28.9   |
| 289.9  | 331.9  | 361.2  | 305.5  | 159.8  | 353.5  | 309.1  | 394.2  | 534.4  |
| 999.1  | 904.2  | 1021.5 | 857.1  | 355.9  | 4016.5 | 3236.4 | 193.8  | 264.5  |
| 187.7  | 212.9  | 209.5  | 143.2  | 60.4   | 313.6  | 282.7  | 98.8   | 158.9  |
| 389.7  | 355.1  | 363.4  | 274.7  | 98.0   | 532.0  | 294.9  | 85.7   | 85.3   |
| 270.0  | 249.4  | 222.8  | 236.1  | 111.7  | 531.1  | 416.6  | 135.1  | 139.8  |
| 715.6  | 628.0  | 1053.5 | 1014.1 | 325.4  | 1475.2 | 1079.9 | 37.2   | 60.8   |
| 297.4  | 233.8  | 239.1  | 147.6  | 102.4  | 418.9  | 301.4  | 224.8  | 336.3  |

|        |        |        |        |        |        |        |        |        |
|--------|--------|--------|--------|--------|--------|--------|--------|--------|
| 190.6  | 160.5  | 199.8  | 208.2  | 74.6   | 1338.2 | 709.1  | 185.7  | 231.1  |
| 120.2  | 80.4   | 104.7  | 61.3   | 45.3   | 402.3  | 403.4  | 93.7   | 80.4   |
| 1277.5 | 1119.2 | 1530.8 | 1536.2 | 425.7  | 1712.6 | 1399.2 | 130.1  | 226.4  |
| 336.2  | 298.5  | 422.8  | 374.5  | 171.3  | 1165.7 | 969.6  | 231.3  | 271.7  |
| 1300.6 | 1080.5 | 1083.7 | 996.9  | 495.4  | 2671.3 | 2059.9 | 1661.1 | 1946.5 |
| 1598.2 | 1459.9 | 1431.5 | 1221.8 | 552.9  | 3007.4 | 2262.9 | 2074.3 | 2858.5 |
| 1757.4 | 1691.9 | 1591.1 | 1252.3 | 486.9  | 1467.4 | 1251.7 | 238.8  | 338.5  |
| 78.8   | 131.0  | 85.1   | 72.2   | 31.5   | 148.0  | 78.9   | 26.7   | 36.4   |
| 130.2  | 120.0  | 129.9  | 81.8   | 29.3   | 146.7  | 90.3   | 14.7   | 19.8   |
| 405.2  | 388.2  | 360.4  | 264.8  | 122.7  | 509.1  | 335.1  | 102.1  | 144.0  |
| 347.5  | 253.6  | 268.2  | 231.5  | 76.8   | 586.9  | 400.5  | 223.5  | 251.4  |
| 74.8   | 48.8   | 79.9   | 75.6   | 16.0   | 129.2  | 85.1   | 77.1   | 124.8  |
| 58.7   | 58.3   | 45.3   | 63.5   | 25.6   | 219.8  | 189.5  | 110.7  | 104.4  |
| 1023.6 | 969.6  | 963.7  | 745.5  | 340.2  | 1372.3 | 949.8  | 508.1  | 597.9  |
| 2169.1 | 2135.6 | 1889.3 | 1638.2 | 752.8  | 2758.6 | 2122.5 | 516.6  | 649.3  |
| 295.7  | 208.4  | 214.6  | 173.0  | 60.6   | 311.1  | 203.1  | 185.1  | 192.6  |
| 9.0    | 54.2   | 40.2   | 61.0   | 17.7   | 64.6   | 54.8   | 46.7   | 44.2   |
| 86.8   | 68.7   | 92.2   | 67.3   | 23.7   | 146.6  | 87.5   | 47.1   | 54.4   |
| 131.3  | 124.4  | 116.8  | 59.6   | 45.1   | 449.8  | 304.0  | 49.0   | 51.2   |
| 605.9  | 508.4  | 555.6  | 491.4  | 205.2  | 988.6  | 643.9  | 260.0  | 276.5  |
| 871.4  | 865.9  | 820.4  | 630.9  | 248.2  | 1268.6 | 847.5  | 111.6  | 139.6  |
| 583.8  | 520.9  | 491.9  | 309.4  | 198.3  | 1844.0 | 1050.3 | 296.9  | 355.8  |
| 407.9  | 397.6  | 410.6  | 378.9  | 166.1  | 781.6  | 468.9  | 253.1  | 344.5  |
| 114.0  | 120.9  | 101.0  | 105.5  | 20.0   | 259.8  | 179.6  | 37.0   | 57.6   |
| 28.0   | 22.2   | 25.7   | 23.8   | 9.6    | 61.4   | 62.3   | 6.1    | 21.2   |
| 2893.1 | 2766.2 | 2964.3 | 3098.8 | 1366.2 | 2509.6 | 2233.5 | 379.6  | 511.8  |
| 454.1  | 449.2  | 524.4  | 761.0  | 210.6  | 409.4  | 278.3  | 222.6  | 259.1  |
| 200.2  | 150.2  | 189.1  | 197.9  | 65.7   | 683.3  | 389.8  | 342.3  | 348.6  |
| 420.4  | 400.3  | 435.1  | 396.8  | 119.3  | 808.9  | 621.6  | 41.2   | 61.6   |
| 1162.5 | 1011.2 | 1023.8 | 1108.3 | 420.3  | 3629.7 | 2438.6 | 676.7  | 736.1  |
| 312.8  | 224.9  | 255.2  | 225.8  | 110.8  | 1018.5 | 651.8  | 95.8   | 123.7  |
| 182.2  | 155.9  | 156.5  | 79.0   | 54.4   | 203.3  | 132.5  | 25.3   | 46.8   |
| 626.4  | 780.0  | 756.2  | 600.6  | 304.9  | 2307.3 | 1584.9 | 164.2  | 208.6  |
| 873.2  | 778.8  | 736.8  | 531.8  | 267.4  | 1115.5 | 749.4  | 438.5  | 561.2  |
| 1299.9 | 1085.0 | 1190.5 | 1048.7 | 522.7  | 2438.0 | 2260.4 | 86.3   | 124.0  |
| 158.1  | 128.7  | 128.7  | 155.9  | 57.0   | 63.1   | 59.5   | 20.0   | 40.9   |
| 567.3  | 528.0  | 378.1  | 162.6  | 151.8  | 848.0  | 462.7  | 196.7  | 286.1  |
| 382.9  | 313.9  | 309.4  | 238.8  | 102.3  | 955.0  | 796.9  | 149.2  | 155.8  |
| 29.1   | 20.5   | 19.8   | 16.9   | 7.0    | 28.5   | 18.8   | 22.4   | 16.5   |
| 200.5  | 212.9  | 215.0  | 231.9  | 109.7  | 457.9  | 368.7  | 92.7   | 59.5   |
| 8.6    | 8.7    | 7.7    | 6.7    | 2.1    | 13.6   | 6.6    | 2.0    | 0.7    |
| 322.2  | 297.9  | 326.5  | 352.6  | 113.7  | 630.4  | 487.3  | 29.7   | 60.3   |
| 153.1  | 122.7  | 143.1  | 160.4  | 46.1   | 483.4  | 346.6  | 95.9   | 133.3  |
| 747.4  | 822.9  | 857.8  | 800.3  | 294.5  | 3021.4 | 2130.5 | 204.8  | 280.1  |
| 747.6  | 743.7  | 643.5  | 550.3  | 258.8  | 2007.0 | 1421.9 | 158.5  | 236.4  |
| 886.9  | 793.6  | 749.7  | 610.8  | 286.4  | 1136.1 | 855.4  | 207.4  | 274.2  |
| 825.1  | 786.4  | 684.6  | 538.9  | 251.1  | 938.9  | 702.5  | 224.3  | 255.1  |
| 252.6  | 193.1  | 161.1  | 90.9   | 35.3   | 212.0  | 164.9  | 74.9   | 93.2   |
| 153.4  | 152.1  | 171.1  | 232.2  | 60.5   | 142.9  | 125.7  | 45.7   | 72.7   |
| 2591.2 | 2437.2 | 2361.3 | 2266.0 | 943.2  | 2549.0 | 1799.0 | 513.5  | 697.7  |
| 3568.2 | 3553.2 | 2913.5 | 1465.1 | 1362.5 | 3863.5 | 2942.2 | 623.6  | 1029.3 |
| 342.3  | 250.1  | 330.9  | 317.2  | 114.9  | 1510.6 | 1032.7 | 279.0  | 528.1  |
| 285.1  | 259.4  | 342.1  | 455.1  | 124.3  | 453.3  | 265.0  | 61.8   | 50.4   |

|        |        |        |        |       |        |        |        |        |
|--------|--------|--------|--------|-------|--------|--------|--------|--------|
| 37.2   | 19.0   | 38.9   | 112.1  | 21.4  | 91.2   | 89.6   | 19.9   | 20.5   |
| 117.1  | 101.9  | 165.2  | 627.5  | 93.2  | 232.8  | 152.3  | 34.0   | 33.9   |
| 201.2  | 182.3  | 184.3  | 208.8  | 70.9  | 317.9  | 229.7  | 81.3   | 136.6  |
| 311.0  | 272.5  | 281.2  | 221.8  | 95.2  | 625.0  | 361.2  | 574.0  | 697.0  |
| 198.5  | 154.1  | 152.5  | 140.2  | 49.9  | 484.1  | 395.7  | 71.7   | 145.8  |
| 347.4  | 331.0  | 385.4  | 520.4  | 124.3 | 915.1  | 653.3  | 60.1   | 120.1  |
| 928.3  | 851.8  | 866.4  | 805.3  | 290.2 | 1317.9 | 1059.5 | 175.8  | 263.4  |
| 303.1  | 304.8  | 251.7  | 200.2  | 87.7  | 469.9  | 280.1  | 1423.2 | 1819.4 |
| 114.8  | 79.6   | 55.8   | 35.3   | 22.3  | 185.0  | 123.6  | 13.0   | 24.7   |
| 788.3  | 1100.7 | 815.9  | 848.0  | 331.7 | 1086.5 | 724.0  | 1.6    | 0.7    |
| 236.3  | 248.2  | 303.2  | 391.0  | 96.3  | 315.2  | 223.7  | 14.7   | 18.3   |
| 225.1  | 189.7  | 172.5  | 118.2  | 79.4  | 692.4  | 510.0  | 163.4  | 251.1  |
| 1403.4 | 1298.7 | 1305.3 | 1130.1 | 520.9 | 851.6  | 639.1  | 288.3  | 362.9  |
| 157.7  | 209.4  | 133.9  | 121.1  | 55.5  | 4354.9 | 3689.4 | 1192.2 | 1757.4 |
| 627.0  | 503.2  | 516.2  | 305.9  | 186.9 | 1048.9 | 731.4  | 239.5  | 291.9  |
| 123.7  | 125.9  | 132.2  | 110.7  | 47.1  | 211.7  | 115.1  | 78.1   | 142.1  |
| 2314.1 | 2203.0 | 2222.0 | 1783.2 | 693.8 | 4692.3 | 3574.5 | 392.1  | 581.8  |
| 185.9  | 215.2  | 151.5  | 44.3   | 39.3  | 4605.2 | 2906.3 | 219.0  | 383.6  |
| 99.6   | 99.5   | 99.0   | 28.4   | 30.2  | 2717.2 | 1978.6 | 194.1  | 199.8  |
| 352.7  | 245.9  | 264.3  | 312.0  | 86.8  | 941.3  | 604.6  | 56.3   | 53.7   |
| 349.1  | 331.9  | 342.1  | 368.2  | 91.7  | 662.9  | 380.7  | 112.8  | 163.0  |
| 706.3  | 683.0  | 845.8  | 771.4  | 277.7 | 828.4  | 520.0  | 80.9   | 113.2  |
| 391.6  | 543.9  | 611.2  | 1101.9 | 232.1 | 688.3  | 406.7  | 256.5  | 334.5  |
| 498.7  | 543.6  | 391.4  | 262.9  | 155.0 | 488.6  | 486.3  | 10.2   | 8.9    |
| 351.6  | 327.1  | 287.6  | 250.2  | 112.1 | 331.3  | 219.7  | 151.9  | 215.8  |
| 60.0   | 38.5   | 39.2   | 14.2   | 12.6  | 102.5  | 71.7   | 74.6   | 75.0   |
| 284.2  | 152.0  | 166.7  | 114.3  | 53.3  | 1397.5 | 1103.9 | 81.2   | 78.3   |
| 847.4  | 716.3  | 657.0  | 632.0  | 201.2 | 1619.6 | 1410.3 | 183.9  | 314.3  |
| 232.1  | 249.4  | 255.1  | 240.4  | 100.1 | 407.7  | 167.9  | 86.4   | 121.7  |
| 306.0  | 223.5  | 407.5  | 403.8  | 156.8 | 1932.0 | 1525.6 | 251.2  | 339.0  |
| 1238.0 | 1381.1 | 1624.0 | 2243.9 | 561.3 | 2610.0 | 1999.1 | 12.8   | 11.4   |
| 382.5  | 371.8  | 502.0  | 952.7  | 236.7 | 795.8  | 531.1  | 5.9    | 7.9    |
| 140.5  | 112.9  | 108.4  | 119.2  | 21.5  | 198.6  | 157.7  | 2.4    | 24.3   |
| 168.4  | 150.4  | 151.8  | 198.4  | 43.3  | 375.0  | 250.9  | 8.5    | 6.2    |
| 383.7  | 253.8  | 332.8  | 543.1  | 59.5  | 520.6  | 303.6  | 1.6    | 1.6    |
| 348.8  | 296.4  | 296.6  | 267.6  | 125.7 | 471.2  | 347.7  | 165.3  | 245.8  |
| 0.8    | 1.6    | 1.1    | 0.5    | 0.5   | 1.4    | 2.5    | 81.6   | 64.9   |
| 954.3  | 1143.8 | 1094.9 | 1094.4 | 459.2 | 1654.2 | 1287.7 | 246.2  | 309.4  |
| 188.4  | 134.7  | 159.8  | 144.3  | 38.2  | 178.9  | 135.1  | 86.7   | 131.6  |
| 86.6   | 117.8  | 114.2  | 160.8  | 60.3  | 149.9  | 133.9  | 87.2   | 118.0  |
| 37.1   | 34.1   | 48.3   | 53.2   | 11.4  | 61.5   | 58.3   | 39.2   | 32.2   |
| 2480.7 | 2423.5 | 2029.5 | 1822.6 | 728.2 | 1355.9 | 1268.4 | 229.0  | 272.2  |
| 314.2  | 301.5  | 298.6  | 311.5  | 99.7  | 478.4  | 289.8  | 209.0  | 349.2  |
| 792.1  | 700.9  | 675.0  | 426.9  | 218.6 | 2036.8 | 1525.7 | 242.4  | 346.6  |
| 195.5  | 94.7   | 182.6  | 179.3  | 87.3  | 315.1  | 302.9  | 683.7  | 998.3  |
| 1204.5 | 1290.9 | 1115.5 | 893.2  | 438.3 | 1446.9 | 1001.7 | 279.9  | 338.5  |
| 119.7  | 101.3  | 138.9  | 88.3   | 47.9  | 178.4  | 115.2  | 29.9   | 66.1   |
| 139.1  | 138.6  | 144.3  | 104.5  | 34.4  | 104.1  | 80.6   | 89.7   | 113.7  |
| 849.8  | 779.7  | 740.9  | 476.0  | 298.2 | 808.7  | 495.3  | 112.8  | 144.8  |
| 14.1   | 5.8    | 3.7    | 10.2   | 2.6   | 13.5   | 5.0    | 6.0    | 18.2   |
| 390.3  | 349.7  | 372.1  | 371.0  | 156.8 | 855.3  | 647.0  | 122.3  | 153.4  |
| 34.1   | 25.8   | 49.9   | 19.4   | 15.5  | 258.3  | 123.7  | 31.8   | 74.2   |
| 72.7   | 71.3   | 103.5  | 64.6   | 28.9  | 521.1  | 435.0  | 43.0   | 57.3   |



|        |        |        |        |       |        |        |       |       |
|--------|--------|--------|--------|-------|--------|--------|-------|-------|
| 85.7   | 87.0   | 67.9   | 44.0   | 25.1  | 497.5  | 289.4  | 85.7  | 85.0  |
| 185.1  | 139.7  | 155.2  | 229.8  | 70.7  | 395.7  | 215.4  | 121.9 | 205.4 |
| 166.5  | 163.5  | 235.2  | 116.7  | 58.0  | 274.5  | 128.9  | 137.5 | 170.3 |
| 128.2  | 91.8   | 115.2  | 98.1   | 29.9  | 78.4   | 52.7   | 81.5  | 96.0  |
| 241.5  | 204.8  | 267.0  | 382.5  | 88.2  | 355.4  | 156.2  | 123.2 | 185.4 |
| 96.7   | 109.7  | 108.2  | 78.2   | 40.1  | 595.1  | 524.8  | 54.9  | 91.4  |
| 386.0  | 440.5  | 372.0  | 278.2  | 141.9 | 305.8  | 168.2  | 438.0 | 599.6 |
| 1006.8 | 1048.9 | 890.8  | 530.1  | 343.3 | 1610.8 | 1161.2 | 434.2 | 538.6 |
| 1104.6 | 931.5  | 1101.4 | 1003.9 | 373.5 | 3009.3 | 2426.1 | 402.4 | 395.6 |
| 397.8  | 282.2  | 293.7  | 239.7  | 111.6 | 805.7  | 428.8  | 154.8 | 159.9 |
| 37.5   | 45.6   | 15.8   | 20.8   | 21.4  | 511.4  | 296.7  | 15.7  | 59.2  |
| 61.3   | 66.9   | 53.5   | 39.7   | 30.1  | 76.1   | 53.4   | 112.9 | 122.3 |
| 22.4   | 41.0   | 25.9   | 11.5   | 2.1   | 28.4   | 20.5   | 104.5 | 121.2 |
| 89.2   | 81.2   | 68.5   | 58.7   | 31.3  | 492.9  | 427.8  | 138.9 | 176.1 |
| 2.5    | 7.1    | 7.3    | 8.7    | 4.6   | 75.2   | 43.3   | 16.5  | 33.6  |
| 672.2  | 546.1  | 558.3  | 455.4  | 184.2 | 971.4  | 691.3  | 536.2 | 582.9 |
| 35.2   | 28.7   | 20.7   | 26.7   | 8.4   | 607.2  | 421.2  | 554.2 | 555.8 |
| 532.3  | 542.5  | 567.0  | 559.1  | 129.2 | 552.4  | 309.2  | 91.5  | 147.1 |
| 202.9  | 147.5  | 133.5  | 116.3  | 60.4  | 190.8  | 136.2  | 165.8 | 178.5 |
| 183.1  | 149.1  | 168.3  | 141.8  | 61.7  | 173.5  | 114.3  | 78.8  | 117.1 |
| 1153.0 | 1342.5 | 1129.9 | 1013.2 | 490.5 | 1136.4 | 999.3  | 99.7  | 156.1 |
| 246.9  | 249.8  | 224.4  | 200.6  | 88.7  | 243.7  | 146.7  | 27.7  | 24.9  |
| 1285.2 | 1434.4 | 1873.0 | 1867.5 | 626.4 | 1872.3 | 1414.6 | 390.9 | 584.1 |
| 608.2  | 642.0  | 592.2  | 516.8  | 230.0 | 988.4  | 635.4  | 145.4 | 248.8 |
| 122.2  | 134.5  | 174.4  | 218.7  | 48.2  | 122.6  | 80.4   | 6.3   | 15.4  |
| 3.5    | 4.3    | 2.4    | 0.9    | 5.9   | 3.6    | 8.0    | 9.5   | 5.6   |
| 109.8  | 86.8   | 88.2   | 70.9   | 37.6  | 70.8   | 42.8   | 62.9  | 47.5  |
| 330.2  | 292.3  | 337.1  | 284.4  | 102.6 | 618.0  | 478.7  | 171.2 | 212.5 |
| 675.4  | 766.6  | 671.5  | 630.0  | 301.3 | 1350.9 | 1269.8 | 145.6 | 211.4 |
| 384.2  | 437.1  | 370.2  | 308.4  | 142.0 | 621.8  | 480.1  | 287.9 | 379.6 |
| 621.8  | 628.2  | 525.1  | 473.3  | 199.7 | 1686.8 | 1299.3 | 205.4 | 241.4 |
| 404.0  | 420.2  | 452.2  | 700.4  | 145.7 | 1196.2 | 911.6  | 43.8  | 57.2  |
| 251.7  | 230.6  | 199.3  | 82.8   | 76.0  | 749.7  | 471.2  | 207.2 | 232.4 |
| 223.3  | 240.9  | 142.1  | 115.7  | 67.1  | 246.4  | 117.7  | 56.4  | 80.7  |
| 1223.9 | 1150.8 | 1126.7 | 1131.6 | 478.1 | 2240.0 | 1930.2 | 202.8 | 254.9 |
| 18.9   | 18.1   | 19.7   | 14.0   | 6.6   | 3.7    | 16.9   | 13.1  | 15.1  |
| 96.0   | 115.0  | 130.8  | 171.3  | 54.5  | 149.7  | 124.3  | 23.2  | 37.6  |
| 260.2  | 246.8  | 253.8  | 287.4  | 85.4  | 1115.9 | 846.2  | 78.6  | 96.0  |
| 769.5  | 651.9  | 653.5  | 510.7  | 234.6 | 1521.0 | 1154.8 | 308.6 | 295.5 |
| 215.5  | 159.8  | 165.1  | 112.8  | 58.3  | 74.8   | 39.4   | 104.7 | 97.5  |
| 1006.1 | 956.1  | 951.6  | 760.0  | 388.0 | 1768.2 | 1213.7 | 583.4 | 784.9 |
| 96.6   | 93.8   | 87.0   | 43.6   | 38.1  | 330.9  | 237.8  | 50.8  | 124.2 |
| 1285.8 | 1203.0 | 1135.1 | 1081.4 | 601.3 | 3820.0 | 2816.7 | 442.5 | 547.0 |
| 47.8   | 57.1   | 46.2   | 40.5   | 15.9  | 89.4   | 72.8   | 153.5 | 159.0 |
| 2.2    | 1.9    | 1.7    | 1.4    | 0.5   | 1.9    | 3.2    | 3.7   | 11.1  |
| 147.5  | 118.6  | 112.2  | 134.7  | 45.5  | 128.2  | 82.4   | 55.2  | 76.7  |
| 345.2  | 333.2  | 331.7  | 173.3  | 110.2 | 1225.3 | 672.2  | 157.3 | 217.7 |
| 169.9  | 111.7  | 163.7  | 95.1   | 50.4  | 293.3  | 292.8  | 264.7 | 402.8 |
| 455.9  | 514.8  | 583.2  | 500.0  | 182.4 | 884.7  | 632.6  | 51.4  | 79.6  |
| 103.1  | 85.2   | 86.1   | 64.5   | 38.6  | 265.1  | 108.8  | 108.2 | 132.6 |
| 1185.7 | 988.3  | 864.1  | 487.2  | 316.2 | 1291.3 | 996.7  | 275.8 | 315.7 |
| 145.8  | 129.3  | 120.1  | 163.7  | 42.4  | 236.6  | 139.0  | 69.3  | 82.2  |
| 155.8  | 139.6  | 168.3  | 148.4  | 50.9  | 319.4  | 232.3  | 70.5  | 98.0  |

|        |        |        |        |       |        |        |       |       |
|--------|--------|--------|--------|-------|--------|--------|-------|-------|
| 199.7  | 169.3  | 170.6  | 151.9  | 62.5  | 232.1  | 175.2  | 77.6  | 129.6 |
| 445.6  | 427.0  | 423.9  | 338.5  | 141.9 | 426.6  | 224.7  | 35.8  | 56.8  |
| 1481.7 | 1319.7 | 1266.9 | 1144.9 | 515.6 | 2784.0 | 1820.2 | 412.7 | 419.0 |
| 158.3  | 103.9  | 107.4  | 69.6   | 49.6  | 165.0  | 99.4   | 49.3  | 64.2  |
| 270.9  | 210.8  | 215.4  | 158.2  | 65.0  | 319.0  | 275.3  | 56.5  | 85.1  |
| 80.5   | 80.8   | 74.6   | 48.9   | 25.8  | 141.4  | 83.4   | 78.7  | 69.2  |
| 140.9  | 174.6  | 72.8   | 103.6  | 53.2  | 204.1  | 146.9  | 83.6  | 144.9 |
| 326.7  | 390.3  | 383.8  | 408.0  | 146.2 | 684.3  | 594.2  | 432.3 | 507.1 |
| 413.1  | 373.7  | 345.0  | 360.5  | 146.1 | 772.2  | 478.6  | 97.4  | 125.6 |
| 107.6  | 72.6   | 61.5   | 35.3   | 29.5  | 109.2  | 67.7   | 82.2  | 58.2  |
| 375.7  | 355.9  | 358.4  | 240.6  | 122.9 | 489.1  | 415.7  | 114.7 | 125.5 |
| 148.1  | 144.4  | 122.0  | 81.1   | 39.7  | 195.4  | 151.0  | 297.0 | 363.8 |
| 441.1  | 309.2  | 369.8  | 267.4  | 131.7 | 4076.4 | 2845.6 | 27.3  | 37.9  |
| 535.7  | 547.3  | 702.4  | 655.0  | 188.1 | 748.9  | 665.1  | 75.8  | 73.1  |
| 84.5   | 68.1   | 80.0   | 47.1   | 37.1  | 183.2  | 98.9   | 232.4 | 259.5 |
| 7.1    | 5.4    | 8.0    | 7.0    | 2.2   | 26.1   | 26.0   | 3.8   | 1.4   |
| 247.2  | 185.5  | 288.4  | 585.6  | 123.2 | 614.5  | 477.9  | 143.7 | 211.7 |
| 445.1  | 391.0  | 362.7  | 365.9  | 151.1 | 520.6  | 317.8  | 110.5 | 130.8 |
| 186.1  | 207.1  | 209.6  | 211.6  | 62.5  | 232.2  | 158.3  | 13.9  | 21.0  |
| 329.3  | 334.7  | 326.9  | 365.9  | 131.7 | 396.8  | 391.7  | 86.3  | 116.8 |
| 731.1  | 733.4  | 786.6  | 949.4  | 265.7 | 659.1  | 509.5  | 116.6 | 163.2 |
| 76.6   | 85.0   | 78.3   | 78.5   | 24.2  | 152.9  | 69.1   | 75.8  | 116.1 |
| 336.4  | 263.6  | 224.2  | 277.7  | 124.4 | 1077.9 | 853.6  | 15.3  | 12.8  |
| 852.1  | 638.5  | 614.1  | 247.6  | 180.5 | 489.9  | 329.2  | 82.9  | 103.1 |
| 596.0  | 655.8  | 639.2  | 389.0  | 177.7 | 880.7  | 533.9  | 33.2  | 34.7  |
| 329.6  | 333.6  | 310.3  | 262.7  | 132.3 | 417.9  | 236.1  | 193.8 | 262.3 |
| 663.3  | 778.5  | 841.9  | 816.3  | 258.5 | 1318.8 | 928.2  | 177.4 | 414.9 |
| 229.6  | 207.6  | 206.6  | 130.8  | 64.0  | 249.4  | 183.0  | 123.7 | 132.3 |
| 378.1  | 446.3  | 448.9  | 496.5  | 189.7 | 706.2  | 544.8  | 1.2   | 0.6   |
| 3091.7 | 2453.9 | 2210.5 | 1541.4 | 776.4 | 3508.6 | 2438.0 | 596.1 | 751.0 |
| 591.3  | 596.6  | 521.5  | 360.9  | 188.0 | 2147.7 | 1448.9 | 99.7  | 128.3 |
| 644.2  | 573.4  | 599.2  | 486.7  | 198.1 | 895.8  | 546.1  | 109.5 | 125.7 |
| 284.4  | 276.7  | 272.6  | 360.2  | 95.2  | 476.1  | 296.6  | 63.7  | 97.5  |
| 436.6  | 328.7  | 340.5  | 279.6  | 110.5 | 398.4  | 218.1  | 268.5 | 264.8 |
| 353.1  | 330.0  | 389.6  | 472.6  | 119.1 | 1875.3 | 1417.8 | 72.5  | 95.5  |
| 838.4  | 831.3  | 763.5  | 812.9  | 249.7 | 1067.9 | 761.2  | 349.2 | 439.6 |
| 222.3  | 194.9  | 177.2  | 80.1   | 46.9  | 791.0  | 282.3  | 105.1 | 154.0 |
| 429.3  | 443.2  | 430.7  | 423.7  | 142.2 | 1181.7 | 815.0  | 95.4  | 138.5 |
| 40.6   | 30.0   | 31.8   | 24.0   | 14.9  | 49.6   | 33.2   | 48.6  | 40.1  |
| 339.5  | 336.7  | 422.9  | 302.7  | 104.3 | 1436.0 | 937.2  | 22.8  | 42.3  |
| 175.3  | 171.0  | 125.8  | 91.1   | 59.9  | 571.7  | 482.6  | 148.2 | 208.8 |
| 128.5  | 119.0  | 116.9  | 55.1   | 29.1  | 265.2  | 196.7  | 2.9   | 16.7  |
| 95.7   | 101.2  | 74.2   | 64.9   | 30.3  | 148.4  | 140.3  | 70.5  | 108.9 |
| 266.3  | 228.0  | 169.0  | 67.6   | 67.7  | 860.0  | 296.1  | 216.9 | 263.9 |
| 183.0  | 156.2  | 162.1  | 166.9  | 71.0  | 227.6  | 206.5  | 168.9 | 166.5 |
| 1402.3 | 1215.2 | 1094.5 | 536.7  | 322.8 | 3091.0 | 2692.6 | 367.6 | 517.2 |
| 542.0  | 421.4  | 456.7  | 420.3  | 149.9 | 481.5  | 392.9  | 103.8 | 131.7 |
| 483.5  | 377.5  | 346.3  | 296.1  | 109.7 | 314.9  | 221.4  | 158.8 | 157.3 |
| 245.2  | 212.7  | 237.0  | 196.8  | 78.0  | 1837.4 | 1149.0 | 120.2 | 153.8 |
| 20.4   | 24.0   | 34.3   | 29.6   | 5.8   | 153.3  | 103.0  | 36.3  | 47.1  |
| 78.4   | 65.8   | 69.1   | 43.7   | 24.5  | 205.3  | 99.5   | 70.9  | 87.8  |
| 665.6  | 558.6  | 541.9  | 473.3  | 207.5 | 1049.8 | 733.4  | 273.7 | 308.0 |
| 138.3  | 105.6  | 133.5  | 68.2   | 42.2  | 278.6  | 157.8  | 122.5 | 137.7 |

|        |        |        |        |       |        |        |       |       |
|--------|--------|--------|--------|-------|--------|--------|-------|-------|
| 106.7  | 114.0  | 123.9  | 68.8   | 35.1  | 117.0  | 83.4   | 30.8  | 28.8  |
| 177.6  | 139.1  | 149.3  | 107.8  | 66.6  | 555.9  | 328.4  | 124.2 | 114.8 |
| 261.4  | 244.1  | 238.7  | 146.5  | 67.3  | 365.4  | 194.5  | 81.5  | 73.1  |
| 167.1  | 178.2  | 174.7  | 146.1  | 50.1  | 283.1  | 188.7  | 21.9  | 11.1  |
| 263.1  | 274.5  | 269.3  | 199.1  | 65.6  | 367.2  | 249.5  | 36.1  | 42.9  |
| 114.6  | 137.7  | 132.4  | 95.8   | 62.2  | 202.1  | 134.2  | 72.7  | 104.4 |
| 242.2  | 141.1  | 139.6  | 124.1  | 50.5  | 676.4  | 523.1  | 76.6  | 112.1 |
| 928.7  | 752.7  | 708.3  | 401.0  | 309.1 | 753.1  | 529.9  | 348.3 | 474.1 |
| 431.5  | 403.3  | 421.9  | 285.7  | 164.9 | 686.8  | 462.5  | 194.9 | 218.0 |
| 403.6  | 339.1  | 412.2  | 408.5  | 90.6  | 782.5  | 462.9  | 58.1  | 80.4  |
| 612.3  | 512.2  | 503.0  | 454.9  | 174.4 | 1223.8 | 792.1  | 123.3 | 162.1 |
| 91.3   | 79.5   | 91.7   | 112.6  | 50.4  | 100.7  | 84.0   | 17.5  | 17.6  |
| 447.7  | 446.4  | 480.7  | 469.0  | 170.1 | 588.1  | 473.4  | 108.8 | 159.2 |
| 87.4   | 83.9   | 117.3  | 122.7  | 50.6  | 122.8  | 86.3   | 137.9 | 171.2 |
| 209.6  | 241.7  | 215.0  | 202.0  | 104.9 | 360.6  | 254.8  | 138.0 | 203.3 |
| 655.0  | 561.8  | 550.1  | 472.2  | 186.8 | 1132.3 | 586.2  | 222.8 | 306.4 |
| 52.2   | 42.4   | 60.2   | 43.2   | 20.4  | 103.3  | 85.4   | 21.1  | 30.6  |
| 44.2   | 48.6   | 38.5   | 42.2   | 20.5  | 148.1  | 111.0  | 98.1  | 174.7 |
| 259.9  | 174.8  | 181.3  | 179.7  | 68.0  | 309.0  | 193.3  | 211.6 | 222.7 |
| 39.2   | 51.9   | 60.3   | 34.8   | 18.2  | 178.8  | 123.0  | 115.6 | 139.1 |
| 100.0  | 78.0   | 283.4  | 792.2  | 138.6 | 410.6  | 291.0  | 617.3 | 830.1 |
| 501.5  | 504.7  | 473.9  | 267.2  | 189.3 | 316.5  | 244.3  | 54.9  | 75.0  |
| 303.8  | 329.2  | 313.0  | 188.8  | 146.7 | 215.9  | 141.0  | 14.4  | 26.7  |
| 45.5   | 36.8   | 37.5   | 10.2   | 1.0   | 57.4   | 29.4   | 31.1  | 39.4  |
| 110.7  | 115.1  | 58.6   | 47.8   | 44.4  | 274.1  | 267.5  | 57.1  | 87.8  |
| 802.2  | 638.8  | 606.2  | 399.1  | 226.0 | 1129.5 | 865.6  | 116.8 | 126.2 |
| 339.7  | 277.3  | 274.4  | 156.7  | 117.9 | 812.3  | 507.5  | 176.0 | 181.5 |
| 195.3  | 180.9  | 164.8  | 165.9  | 48.9  | 185.3  | 121.0  | 35.7  | 76.3  |
| 146.6  | 111.8  | 106.8  | 94.3   | 67.0  | 390.8  | 276.3  | 108.9 | 78.1  |
| 23.5   | 33.4   | 23.3   | 22.9   | 16.4  | 216.3  | 127.9  | 5.9   | 27.3  |
| 167.0  | 120.8  | 126.5  | 133.2  | 58.8  | 250.0  | 206.3  | 33.8  | 23.4  |
| 1106.2 | 832.3  | 935.4  | 958.8  | 294.9 | 999.9  | 536.1  | 66.4  | 66.1  |
| 133.5  | 121.7  | 107.8  | 88.7   | 54.4  | 280.5  | 147.6  | 94.4  | 181.0 |
| 122.8  | 144.1  | 134.9  | 84.3   | 46.7  | 146.1  | 92.9   | 27.8  | 37.3  |
| 134.4  | 98.3   | 136.5  | 127.9  | 55.3  | 339.9  | 230.3  | 160.4 | 176.6 |
| 593.7  | 664.3  | 556.0  | 445.9  | 242.2 | 993.2  | 646.2  | 546.5 | 615.4 |
| 64.3   | 33.5   | 40.2   | 25.5   | 11.4  | 161.4  | 77.8   | 30.5  | 27.9  |
| 57.2   | 42.9   | 29.5   | 17.2   | 21.9  | 11.4   | 7.8    | 1.9   | 2.7   |
| 1163.7 | 1335.3 | 1156.2 | 1064.9 | 459.1 | 1312.0 | 1137.5 | 212.9 | 219.6 |
| 107.3  | 127.9  | 136.1  | 87.6   | 62.8  | 296.7  | 172.2  | 459.7 | 585.4 |
| 530.5  | 411.0  | 405.5  | 353.0  | 77.5  | 444.8  | 296.3  | 204.6 | 146.0 |
| 132.0  | 108.1  | 144.3  | 192.5  | 38.0  | 159.8  | 96.5   | 6.2   | 11.6  |
| 1424.3 | 1321.0 | 1050.5 | 908.2  | 359.9 | 1442.2 | 1080.8 | 349.5 | 387.9 |
| 154.9  | 139.1  | 186.0  | 122.7  | 62.4  | 116.2  | 96.7   | 68.3  | 72.2  |
| 58.9   | 46.3   | 50.0   | 44.7   | 30.1  | 399.7  | 255.0  | 64.7  | 100.8 |
| 561.4  | 582.6  | 548.8  | 328.6  | 222.2 | 1680.5 | 1064.1 | 135.2 | 199.1 |
| 658.8  | 589.4  | 673.2  | 694.5  | 207.7 | 610.0  | 483.3  | 297.8 | 228.9 |
| 301.2  | 273.6  | 266.4  | 272.5  | 89.3  | 968.2  | 572.2  | 46.2  | 80.5  |
| 20.6   | 18.6   | 20.0   | 10.2   | 1.0   | 20.4   | 18.2   | 15.9  | 11.6  |
| 52.8   | 37.3   | 46.9   | 35.5   | 8.3   | 49.4   | 22.3   | 13.5  | 14.4  |
| 180.6  | 140.6  | 168.0  | 181.2  | 94.5  | 186.8  | 122.7  | 174.6 | 229.6 |
| 92.4   | 93.2   | 74.1   | 77.1   | 41.1  | 507.0  | 340.5  | 129.5 | 129.2 |
| 113.3  | 89.4   | 161.8  | 202.0  | 31.8  | 80.4   | 49.2   | 83.5  | 96.3  |

|        |        |        |        |       |        |        |        |        |
|--------|--------|--------|--------|-------|--------|--------|--------|--------|
| 753.5  | 570.3  | 856.1  | 1249.1 | 145.6 | 420.9  | 301.6  | 287.1  | 330.5  |
| 61.2   | 56.2   | 72.4   | 56.8   | 21.7  | 133.7  | 92.4   | 21.7   | 29.7   |
| 15.2   | 23.1   | 6.3    | 10.7   | 14.1  | 743.0  | 660.9  | 40.9   | 54.4   |
| 116.5  | 133.5  | 119.8  | 104.8  | 30.3  | 311.5  | 292.3  | 22.2   | 40.2   |
| 698.0  | 444.6  | 506.5  | 613.0  | 113.1 | 162.0  | 128.8  | 10.4   | 0.5    |
| 28.3   | 35.1   | 30.7   | 43.0   | 19.7  | 102.8  | 42.3   | 1.4    | 5.5    |
| 62.9   | 55.3   | 38.7   | 40.9   | 20.6  | 203.7  | 125.8  | 47.2   | 63.7   |
| 458.3  | 511.1  | 478.8  | 477.9  | 145.5 | 1017.7 | 624.9  | 113.1  | 191.7  |
| 12.9   | 0.6    | 12.3   | 3.0    | 0.7   | 1143.3 | 703.3  | 305.9  | 411.4  |
| 370.5  | 332.4  | 357.2  | 421.6  | 108.5 | 720.2  | 282.1  | 278.9  | 307.1  |
| 846.3  | 652.1  | 702.9  | 529.5  | 225.2 | 1128.3 | 722.5  | 344.5  | 395.6  |
| 441.3  | 462.3  | 430.4  | 382.5  | 162.4 | 867.4  | 725.9  | 266.3  | 283.9  |
| 2403.0 | 2148.8 | 1672.0 | 823.2  | 449.3 | 2752.3 | 2155.7 | 850.5  | 1199.7 |
| 251.8  | 261.6  | 223.8  | 238.3  | 81.6  | 495.2  | 318.6  | 135.0  | 236.6  |
| 207.9  | 170.2  | 132.7  | 173.6  | 46.1  | 115.2  | 118.2  | 45.3   | 66.4   |
| 1006.5 | 856.0  | 902.6  | 1128.5 | 318.6 | 1083.6 | 981.6  | 48.7   | 57.9   |
| 1260.6 | 1343.7 | 1216.6 | 1237.8 | 504.0 | 2545.2 | 2205.1 | 240.0  | 302.1  |
| 417.9  | 481.6  | 458.0  | 562.6  | 167.6 | 722.8  | 488.1  | 156.6  | 155.6  |
| 307.0  | 271.4  | 316.9  | 325.9  | 107.4 | 384.3  | 327.3  | 25.7   | 39.7   |
| 42.5   | 40.3   | 42.8   | 36.9   | 7.6   | 236.1  | 109.4  | 28.6   | 48.6   |
| 191.3  | 233.7  | 269.5  | 209.3  | 100.3 | 712.7  | 595.1  | 84.3   | 96.4   |
| 163.9  | 106.6  | 111.7  | 139.8  | 36.7  | 128.3  | 108.3  | 59.4   | 94.3   |
| 2860.6 | 2545.7 | 2195.9 | 1603.4 | 922.4 | 2325.4 | 1665.1 | 1329.2 | 1349.9 |
| 1143.8 | 1173.3 | 1071.7 | 637.1  | 405.5 | 1133.1 | 800.1  | 266.4  | 342.4  |
| 63.1   | 74.1   | 58.0   | 57.5   | 30.2  | 64.5   | 17.2   | 16.8   | 41.8   |
| 661.0  | 605.5  | 623.0  | 628.2  | 271.4 | 1781.7 | 1495.4 | 191.5  | 242.6  |
| 99.3   | 125.9  | 119.7  | 99.3   | 48.9  | 115.6  | 94.3   | 54.6   | 74.8   |
| 1374.2 | 1474.4 | 1593.5 | 1730.1 | 908.6 | 1503.0 | 892.0  | 288.4  | 355.5  |
| 362.1  | 228.9  | 248.4  | 241.1  | 115.1 | 422.2  | 289.3  | 161.9  | 204.3  |
| 11.2   | 5.6    | 6.9    | 0.5    | 7.1   | 5.5    | 5.3    | 34.3   | 31.6   |
| 78.4   | 121.5  | 104.7  | 63.6   | 43.6  | 64.8   | 43.6   | 66.0   | 108.9  |
| 357.4  | 372.4  | 381.6  | 404.8  | 122.2 | 84.9   | 47.5   | 123.6  | 195.0  |
| 282.6  | 209.0  | 204.5  | 111.3  | 68.3  | 645.7  | 387.5  | 146.1  | 212.5  |
| 43.8   | 45.6   | 41.8   | 36.0   | 17.4  | 2149.3 | 1533.9 | 505.1  | 687.7  |
| 150.9  | 144.5  | 163.4  | 110.4  | 45.3  | 615.2  | 532.3  | 31.1   | 36.1   |
| 1879.8 | 1854.6 | 1650.2 | 1382.6 | 667.7 | 3715.5 | 3580.2 | 891.9  | 1184.9 |
| 629.7  | 460.5  | 589.0  | 733.4  | 239.7 | 695.2  | 419.2  | 166.8  | 227.7  |
| 99.7   | 74.3   | 90.8   | 97.9   | 27.7  | 94.2   | 30.1   | 57.7   | 66.5   |
| 404.1  | 210.7  | 310.0  | 166.7  | 101.1 | 1171.2 | 887.7  | 170.7  | 218.4  |
| 91.6   | 92.3   | 97.0   | 81.6   | 23.6  | 106.3  | 56.2   | 19.7   | 17.8   |
| 122.8  | 106.3  | 112.1  | 97.3   | 36.9  | 134.6  | 67.2   | 44.4   | 54.3   |
| 429.9  | 249.8  | 360.0  | 228.3  | 138.3 | 542.1  | 490.9  | 262.7  | 279.2  |
| 442.9  | 318.6  | 347.5  | 353.6  | 151.4 | 478.3  | 340.2  | 91.3   | 104.9  |
| 182.6  | 208.0  | 188.6  | 164.6  | 53.1  | 122.0  | 77.5   | 16.9   | 14.9   |
| 91.6   | 82.7   | 72.6   | 107.8  | 20.8  | 42.1   | 4.6    | 12.0   | 23.9   |
| 4.4    | 2.1    | 1.2    | 1.2    | 1.1   | 21.3   | 16.0   | 22.2   | 0.9    |
| 672.0  | 564.6  | 665.4  | 504.9  | 234.8 | 1113.6 | 805.1  | 123.5  | 196.1  |
| 116.7  | 83.7   | 97.2   | 85.3   | 44.7  | 104.3  | 74.9   | 159.9  | 168.8  |
| 2993.5 | 2920.1 | 2402.8 | 1760.2 | 943.1 | 4934.2 | 3691.2 | 1303.0 | 1660.7 |
| 140.9  | 103.1  | 107.7  | 76.3   | 45.2  | 359.7  | 258.0  | 84.4   | 136.5  |
| 198.6  | 93.5   | 127.3  | 92.0   | 27.8  | 279.9  | 161.3  | 111.9  | 142.6  |
| 334.1  | 293.8  | 310.0  | 317.5  | 124.4 | 584.2  | 349.6  | 195.6  | 255.9  |
| 107.8  | 104.4  | 120.5  | 104.6  | 37.5  | 796.1  | 697.8  | 66.5   | 100.5  |

|        |        |        |        |        |        |        |       |       |
|--------|--------|--------|--------|--------|--------|--------|-------|-------|
| 414.5  | 293.4  | 316.0  | 313.7  | 95.6   | 977.4  | 499.1  | 106.8 | 179.4 |
| 1.9    | 2.5    | 3.2    | 2.3    | 0.6    | 12.2   | 1.8    | 1.0   | 10.2  |
| 3984.3 | 3469.8 | 3024.6 | 2156.7 | 1537.5 | 5048.8 | 4188.1 | 737.0 | 976.5 |
| 69.0   | 70.1   | 83.2   | 62.0   | 23.6   | 40.6   | 34.1   | 26.8  | 39.1  |
| 1004.4 | 856.0  | 960.8  | 926.6  | 364.9  | 1337.4 | 971.2  | 88.0  | 160.5 |
| 258.9  | 302.5  | 290.2  | 228.6  | 102.3  | 357.4  | 179.5  | 13.3  | 34.4  |
| 561.4  | 522.2  | 652.2  | 890.1  | 301.5  | 828.6  | 597.8  | 472.1 | 559.1 |
| 1323.8 | 1218.7 | 1271.4 | 1175.8 | 440.8  | 1150.8 | 942.4  | 147.4 | 160.7 |
| 1834.9 | 1700.2 | 1805.8 | 1871.3 | 744.9  | 1733.8 | 1340.8 | 71.1  | 105.5 |
| 119.2  | 104.0  | 90.0   | 107.0  | 40.2   | 335.5  | 196.9  | 72.8  | 86.1  |
| 244.7  | 264.3  | 298.4  | 370.9  | 77.9   | 559.2  | 389.8  | 145.6 | 251.8 |
| 269.7  | 173.8  | 218.2  | 249.6  | 85.6   | 239.7  | 151.5  | 273.3 | 340.4 |
| 202.3  | 161.2  | 176.0  | 129.3  | 59.2   | 283.2  | 196.0  | 73.8  | 85.0  |
| 368.0  | 337.2  | 391.7  | 431.7  | 146.5  | 413.3  | 267.7  | 36.5  | 54.7  |
| 98.1   | 88.9   | 60.0   | 53.1   | 41.4   | 181.8  | 121.3  | 279.5 | 239.7 |
| 97.9   | 104.1  | 91.3   | 73.0   | 34.7   | 194.4  | 123.8  | 43.2  | 70.0  |
| 307.0  | 291.1  | 408.3  | 587.8  | 150.6  | 260.5  | 187.2  | 46.9  | 55.6  |
| 243.8  | 225.9  | 148.9  | 66.1   | 59.9   | 1417.5 | 647.9  | 103.0 | 100.5 |
| 237.4  | 234.9  | 222.5  | 177.6  | 129.3  | 543.6  | 408.6  | 70.2  | 62.6  |
| 933.2  | 765.4  | 648.6  | 468.3  | 215.8  | 931.9  | 705.2  | 294.2 | 383.9 |
| 87.1   | 53.5   | 78.9   | 79.9   | 41.3   | 131.1  | 179.3  | 106.8 | 136.0 |
| 701.8  | 738.6  | 634.1  | 496.9  | 216.2  | 412.6  | 426.2  | 114.7 | 148.4 |
| 335.0  | 343.8  | 355.3  | 329.6  | 143.8  | 431.7  | 236.5  | 46.9  | 62.5  |
| 403.4  | 345.8  | 388.9  | 415.3  | 148.2  | 602.4  | 463.4  | 84.2  | 111.1 |
| 50.3   | 59.9   | 51.7   | 57.2   | 26.7   | 78.9   | 80.2   | 81.1  | 42.2  |
| 754.5  | 802.8  | 911.8  | 915.0  | 285.5  | 1468.2 | 908.1  | 99.7  | 150.0 |
| 87.2   | 72.0   | 95.9   | 73.4   | 32.0   | 179.4  | 104.4  | 36.7  | 25.3  |
| 772.2  | 897.3  | 828.0  | 1114.8 | 331.8  | 1570.6 | 1278.3 | 233.4 | 287.4 |
| 167.0  | 164.8  | 160.0  | 112.1  | 56.2   | 356.7  | 263.4  | 73.6  | 79.3  |
| 593.6  | 433.7  | 458.6  | 303.6  | 152.5  | 591.4  | 308.8  | 117.7 | 211.2 |
| 99.5   | 93.9   | 70.6   | 51.0   | 15.9   | 352.4  | 158.5  | 285.5 | 371.9 |
| 101.4  | 87.6   | 109.0  | 89.7   | 33.4   | 151.1  | 105.9  | 114.5 | 164.1 |
| 314.0  | 292.1  | 350.0  | 288.9  | 121.8  | 422.2  | 329.4  | 100.8 | 145.4 |
| 131.9  | 124.8  | 160.9  | 138.9  | 49.1   | 175.3  | 120.7  | 31.0  | 38.5  |
| 91.2   | 69.3   | 87.8   | 70.0   | 43.8   | 172.5  | 107.1  | 25.6  | 39.5  |
| 37.0   | 31.2   | 27.8   | 2.9    | 8.1    | 35.3   | 20.3   | 6.8   | 19.3  |
| 101.0  | 81.2   | 79.6   | 57.4   | 31.4   | 149.6  | 101.8  | 47.9  | 43.4  |
| 172.7  | 166.4  | 178.8  | 359.0  | 71.0   | 264.5  | 195.0  | 74.5  | 98.4  |
| 439.4  | 537.8  | 501.9  | 468.2  | 212.0  | 771.2  | 562.2  | 120.2 | 195.1 |
| 1021.5 | 927.5  | 996.3  | 880.6  | 391.8  | 773.1  | 524.4  | 139.2 | 225.7 |
| 432.7  | 355.5  | 346.4  | 330.5  | 156.3  | 1288.9 | 1010.7 | 241.4 | 400.0 |
| 18.4   | 23.6   | 6.4    | 7.0    | 16.1   | 102.3  | 44.1   | 24.7  | 33.9  |
| 42.1   | 22.8   | 19.8   | 24.9   | 16.9   | 229.6  | 156.7  | 44.9  | 48.4  |
| 60.5   | 80.7   | 87.0   | 51.9   | 34.9   | 106.8  | 82.3   | 15.9  | 23.0  |
| 54.1   | 47.8   | 35.8   | 30.1   | 11.4   | 152.8  | 81.3   | 132.3 | 165.4 |
| 117.7  | 125.4  | 185.0  | 163.1  | 50.5   | 321.4  | 234.3  | 31.7  | 41.1  |
| 466.4  | 484.7  | 468.1  | 538.8  | 199.3  | 273.2  | 248.7  | 291.5 | 409.8 |
| 156.9  | 195.6  | 164.6  | 186.2  | 55.1   | 336.5  | 353.9  | 47.2  | 42.3  |
| 15.8   | 16.6   | 17.1   | 6.1    | 9.0    | 26.0   | 11.2   | 9.5   | 16.0  |
| 311.6  | 243.8  | 362.6  | 1070.3 | 175.3  | 227.3  | 210.2  | 146.7 | 166.7 |
| 575.9  | 523.8  | 527.0  | 432.4  | 169.5  | 595.5  | 467.8  | 451.3 | 555.0 |
| 208.6  | 193.0  | 185.7  | 241.9  | 63.0   | 168.0  | 180.2  | 177.6 | 168.2 |
| 460.0  | 342.3  | 342.9  | 236.8  | 120.3  | 644.3  | 475.8  | 97.3  | 82.2  |

|        |        |        |        |       |        |        |       |       |
|--------|--------|--------|--------|-------|--------|--------|-------|-------|
| 454.8  | 391.4  | 353.8  | 259.2  | 135.5 | 438.3  | 382.0  | 30.6  | 40.5  |
| 57.4   | 111.5  | 49.2   | 44.2   | 24.6  | 92.1   | 22.9   | 85.0  | 90.4  |
| 499.3  | 456.7  | 443.1  | 483.2  | 181.3 | 797.6  | 711.4  | 136.2 | 135.8 |
| 134.0  | 125.7  | 145.2  | 100.3  | 52.1  | 274.9  | 207.6  | 92.5  | 118.3 |
| 303.2  | 324.5  | 412.8  | 451.4  | 146.2 | 1000.6 | 899.3  | 75.4  | 137.6 |
| 230.3  | 234.1  | 222.0  | 211.2  | 76.4  | 512.9  | 308.1  | 121.3 | 190.5 |
| 158.7  | 125.2  | 103.2  | 80.1   | 42.3  | 254.3  | 148.0  | 153.9 | 192.4 |
| 663.2  | 697.0  | 588.6  | 572.3  | 244.5 | 353.4  | 217.2  | 97.9  | 165.0 |
| 95.9   | 41.4   | 53.4   | 52.5   | 14.7  | 106.5  | 69.4   | 30.9  | 31.0  |
| 14.1   | 8.5    | 1.3    | 11.2   | 1.1   | 10.3   | 1.5    | 9.5   | 11.3  |
| 207.1  | 136.9  | 126.7  | 77.3   | 21.5  | 173.4  | 82.2   | 27.6  | 42.7  |
| 199.6  | 176.3  | 146.6  | 155.4  | 58.3  | 255.4  | 161.6  | 49.6  | 77.2  |
| 208.5  | 183.8  | 181.7  | 182.8  | 74.2  | 223.8  | 136.9  | 31.0  | 61.8  |
| 209.7  | 157.5  | 174.7  | 224.2  | 124.5 | 89.4   | 62.6   | 36.1  | 55.8  |
| 29.5   | 19.8   | 23.1   | 8.8    | 12.3  | 267.9  | 198.6  | 164.7 | 134.4 |
| 353.3  | 290.2  | 337.1  | 198.6  | 75.9  | 378.0  | 116.2  | 68.2  | 109.8 |
| 171.5  | 116.3  | 127.1  | 50.3   | 47.8  | 630.2  | 379.3  | 110.8 | 137.4 |
| 45.4   | 34.2   | 32.2   | 12.9   | 10.5  | 61.9   | 57.4   | 32.9  | 37.7  |
| 250.9  | 148.9  | 167.3  | 140.6  | 74.1  | 1056.6 | 759.4  | 118.2 | 141.6 |
| 139.3  | 132.2  | 168.1  | 286.9  | 54.4  | 1024.7 | 678.2  | 172.9 | 266.4 |
| 269.3  | 270.9  | 260.5  | 217.7  | 80.6  | 398.8  | 207.8  | 33.6  | 77.5  |
| 509.0  | 452.0  | 458.0  | 379.8  | 195.9 | 622.8  | 377.2  | 86.6  | 129.3 |
| 45.0   | 41.0   | 42.4   | 35.2   | 14.4  | 102.4  | 67.0   | 23.8  | 43.7  |
| 133.6  | 107.3  | 133.4  | 95.2   | 46.1  | 234.8  | 171.0  | 172.7 | 258.9 |
| 350.3  | 348.2  | 309.5  | 177.5  | 113.5 | 635.5  | 546.9  | 91.0  | 103.1 |
| 51.1   | 44.2   | 47.4   | 24.5   | 12.4  | 549.3  | 286.6  | 620.3 | 748.4 |
| 197.0  | 146.9  | 158.7  | 262.7  | 80.5  | 282.2  | 185.2  | 50.5  | 99.0  |
| 230.7  | 225.0  | 258.6  | 281.9  | 84.5  | 386.0  | 311.5  | 30.7  | 33.4  |
| 163.6  | 135.7  | 153.7  | 152.7  | 65.3  | 35.6   | 21.2   | 114.7 | 155.3 |
| 133.2  | 157.8  | 134.6  | 119.7  | 55.0  | 1206.6 | 834.8  | 135.9 | 285.5 |
| 78.2   | 83.9   | 79.9   | 91.1   | 28.0  | 136.1  | 58.6   | 36.6  | 51.6  |
| 331.4  | 319.6  | 263.9  | 256.7  | 114.5 | 823.6  | 509.6  | 103.6 | 100.4 |
| 504.7  | 492.3  | 506.9  | 651.3  | 210.3 | 587.9  | 390.8  | 101.5 | 130.1 |
| 243.2  | 144.8  | 186.8  | 170.7  | 52.1  | 378.1  | 196.7  | 138.2 | 161.7 |
| 47.3   | 41.1   | 39.7   | 35.6   | 15.8  | 94.3   | 75.9   | 21.0  | 39.2  |
| 42.1   | 32.7   | 39.5   | 57.2   | 13.5  | 132.6  | 88.2   | 5.3   | 11.0  |
| 795.7  | 729.1  | 578.8  | 518.4  | 275.1 | 825.7  | 677.8  | 686.3 | 552.9 |
| 279.0  | 254.9  | 214.2  | 267.1  | 131.4 | 680.8  | 444.3  | 154.6 | 177.2 |
| 14.5   | 11.2   | 14.1   | 14.1   | 5.5   | 591.9  | 399.1  | 17.8  | 8.8   |
| 247.3  | 281.7  | 244.9  | 211.7  | 107.4 | 299.0  | 230.5  | 95.5  | 173.5 |
| 100.7  | 143.9  | 100.7  | 124.2  | 47.1  | 99.9   | 70.5   | 36.3  | 56.3  |
| 191.7  | 195.6  | 182.6  | 125.3  | 58.7  | 353.5  | 188.7  | 83.3  | 90.4  |
| 34.4   | 46.8   | 22.3   | 15.6   | 12.3  | 339.9  | 298.8  | 12.2  | 13.4  |
| 188.7  | 162.4  | 181.6  | 210.7  | 82.8  | 811.9  | 469.5  | 107.7 | 105.4 |
| 64.7   | 60.1   | 76.2   | 76.2   | 17.9  | 164.0  | 97.6   | 104.7 | 137.1 |
| 259.1  | 232.2  | 276.8  | 228.9  | 94.5  | 226.8  | 175.5  | 115.0 | 111.4 |
| 40.5   | 30.8   | 14.5   | 20.0   | 11.8  | 403.8  | 448.3  | 10.5  | 11.7  |
| 745.3  | 924.2  | 1010.8 | 966.6  | 244.0 | 627.7  | 367.0  | 42.6  | 54.2  |
| 16.2   | 18.7   | 25.9   | 15.5   | 4.8   | 851.7  | 671.9  | 18.5  | 20.6  |
| 699.4  | 574.4  | 556.5  | 746.8  | 268.6 | 1143.8 | 1147.6 | 68.1  | 63.5  |
| 649.3  | 665.6  | 655.3  | 535.2  | 208.6 | 1512.9 | 1189.7 | 39.4  | 55.6  |
| 192.1  | 155.7  | 189.9  | 176.7  | 70.8  | 370.6  | 236.6  | 129.3 | 166.7 |
| 2713.0 | 2144.3 | 2595.1 | 3272.0 | 999.1 | 2193.1 | 1667.7 | 290.4 | 368.6 |

|        |        |        |       |       |        |        |       |       |
|--------|--------|--------|-------|-------|--------|--------|-------|-------|
| 111.2  | 110.3  | 128.5  | 61.8  | 32.1  | 155.8  | 103.4  | 54.2  | 57.6  |
| 172.2  | 171.0  | 157.9  | 134.4 | 45.0  | 44.6   | 46.5   | 24.2  | 55.3  |
| 541.9  | 575.2  | 528.8  | 436.0 | 172.6 | 1156.0 | 792.2  | 91.4  | 147.5 |
| 177.7  | 197.0  | 212.3  | 212.4 | 26.9  | 171.9  | 119.0  | 51.9  | 42.7  |
| 212.8  | 206.5  | 206.3  | 163.7 | 102.7 | 653.9  | 737.1  | 122.9 | 161.8 |
| 48.5   | 54.1   | 61.3   | 22.3  | 17.0  | 255.4  | 159.2  | 52.0  | 84.4  |
| 422.5  | 516.5  | 492.8  | 547.1 | 151.9 | 491.0  | 319.2  | 59.1  | 66.0  |
| 67.6   | 68.6   | 60.6   | 60.8  | 17.3  | 121.6  | 64.4   | 21.2  | 29.0  |
| 7.7    | 3.7    | 10.8   | 7.8   | 5.4   | 7.3    | 6.1    | 6.6   | 35.6  |
| 70.6   | 65.8   | 81.2   | 52.9  | 24.6  | 76.2   | 54.8   | 77.2  | 85.4  |
| 195.5  | 173.4  | 229.6  | 216.6 | 92.1  | 264.2  | 180.2  | 135.5 | 128.3 |
| 141.7  | 171.0  | 204.5  | 222.8 | 66.2  | 589.3  | 453.9  | 41.3  | 49.8  |
| 380.1  | 377.5  | 340.5  | 271.3 | 103.3 | 415.7  | 266.8  | 79.5  | 119.2 |
| 1450.6 | 1429.7 | 1175.6 | 642.7 | 488.7 | 1588.6 | 835.7  | 104.0 | 133.1 |
| 882.3  | 939.3  | 920.7  | 734.3 | 325.5 | 1006.6 | 653.4  | 30.7  | 96.1  |
| 69.7   | 87.6   | 77.0   | 83.3  | 24.4  | 166.1  | 103.5  | 17.8  | 28.9  |
| 4.3    | 5.4    | 16.7   | 14.9  | 3.5   | 14.3   | 8.5    | 6.2   | 7.4   |
| 472.6  | 436.8  | 413.7  | 347.1 | 140.8 | 1874.7 | 1441.3 | 174.8 | 213.2 |
| 879.8  | 851.3  | 726.0  | 470.1 | 230.2 | 503.1  | 343.8  | 96.8  | 140.5 |
| 751.6  | 654.9  | 663.4  | 462.4 | 277.5 | 1639.2 | 1205.6 | 126.9 | 186.2 |
| 994.8  | 901.8  | 744.5  | 470.9 | 273.3 | 2182.7 | 1889.6 | 432.9 | 390.9 |
| 382.4  | 313.2  | 289.4  | 189.3 | 79.3  | 1874.1 | 1494.9 | 168.3 | 254.5 |
| 51.0   | 35.0   | 55.8   | 31.2  | 15.6  | 57.5   | 56.4   | 76.0  | 95.0  |
| 397.4  | 334.9  | 419.6  | 619.0 | 162.1 | 747.1  | 590.4  | 753.3 | 890.4 |
| 193.9  | 163.0  | 145.4  | 228.4 | 74.4  | 248.0  | 239.9  | 6.6   | 17.6  |
| 23.6   | 27.5   | 30.3   | 20.4  | 16.6  | 51.3   | 37.4   | 7.6   | 10.5  |
| 99.0   | 98.3   | 88.1   | 102.0 | 35.5  | 122.4  | 81.4   | 71.0  | 92.1  |
| 102.7  | 78.8   | 115.9  | 135.1 | 45.5  | 178.4  | 129.4  | 51.0  | 50.8  |
| 136.1  | 110.6  | 106.0  | 125.9 | 35.0  | 209.3  | 117.7  | 163.7 | 150.8 |
| 746.0  | 639.7  | 619.0  | 481.3 | 276.4 | 424.4  | 310.7  | 169.2 | 237.7 |
| 328.2  | 266.0  | 290.9  | 229.9 | 99.4  | 107.9  | 48.3   | 175.3 | 239.6 |
| 761.8  | 459.8  | 760.7  | 773.9 | 221.2 | 3122.5 | 1886.6 | 257.7 | 208.6 |
| 0.7    | 1.1    | 1.1    | 3.8   | 1.1   | 6.4    | 0.7    | 0.6   | 0.3   |
| 149.1  | 186.9  | 145.5  | 124.9 | 59.8  | 119.3  | 72.2   | 22.4  | 41.8  |
| 135.5  | 136.0  | 146.5  | 131.5 | 49.9  | 263.3  | 192.7  | 28.8  | 52.0  |
| 51.3   | 45.4   | 47.3   | 40.2  | 20.5  | 99.1   | 71.6   | 50.8  | 54.9  |
| 201.8  | 212.3  | 226.1  | 161.2 | 43.6  | 359.1  | 286.3  | 95.4  | 191.5 |
| 321.4  | 312.9  | 335.6  | 371.7 | 93.9  | 296.7  | 210.8  | 48.0  | 53.8  |
| 162.8  | 147.2  | 138.1  | 162.4 | 52.8  | 659.4  | 491.7  | 75.1  | 122.1 |
| 11.7   | 29.7   | 39.0   | 32.1  | 15.0  | 99.8   | 57.0   | 8.2   | 9.1   |
| 50.2   | 82.3   | 87.9   | 92.2  | 39.1  | 176.3  | 136.1  | 57.1  | 61.6  |
| 134.5  | 109.0  | 186.8  | 100.2 | 37.0  | 234.2  | 93.9   | 78.0  | 84.1  |
| 440.8  | 382.1  | 371.3  | 582.6 | 106.2 | 648.9  | 460.7  | 60.4  | 59.7  |
| 34.0   | 25.7   | 22.8   | 14.1  | 21.0  | 24.0   | 21.4   | 22.2  | 14.4  |
| 783.4  | 607.7  | 686.9  | 555.3 | 194.1 | 1615.3 | 1157.6 | 97.3  | 195.9 |
| 132.4  | 41.3   | 36.3   | 19.2  | 12.5  | 136.5  | 23.1   | 71.4  | 77.4  |
| 156.3  | 150.4  | 152.6  | 133.4 | 66.8  | 522.6  | 304.4  | 79.8  | 107.4 |
| 425.5  | 396.3  | 283.3  | 121.7 | 104.2 | 1393.8 | 1322.6 | 80.9  | 96.5  |
| 265.7  | 232.9  | 288.1  | 232.2 | 98.5  | 987.5  | 770.6  | 128.1 | 133.4 |
| 512.3  | 417.5  | 484.7  | 403.7 | 145.3 | 881.4  | 641.2  | 156.7 | 150.4 |
| 143.9  | 152.8  | 160.7  | 168.2 | 67.2  | 240.1  | 200.1  | 117.7 | 135.1 |
| 148.7  | 139.9  | 155.8  | 185.2 | 72.8  | 250.7  | 203.5  | 145.6 | 127.1 |
| 521.1  | 259.3  | 264.2  | 150.8 | 60.1  | 470.9  | 322.2  | 185.7 | 258.9 |

|        |        |        |        |       |        |       |        |        |
|--------|--------|--------|--------|-------|--------|-------|--------|--------|
| 18.0   | 13.2   | 13.9   | 20.6   | 5.4   | 22.8   | 17.8  | 9.6    | 7.5    |
| 519.9  | 480.4  | 447.5  | 409.8  | 178.4 | 553.1  | 488.3 | 1347.4 | 1717.5 |
| 135.4  | 94.4   | 79.9   | 67.0   | 28.3  | 428.3  | 271.2 | 54.0   | 52.8   |
| 108.0  | 175.4  | 150.8  | 166.1  | 43.0  | 142.9  | 93.3  | 33.5   | 49.0   |
| 62.7   | 62.9   | 53.9   | 38.5   | 22.7  | 146.9  | 112.7 | 90.8   | 103.7  |
| 379.9  | 350.3  | 468.8  | 489.7  | 100.8 | 355.4  | 288.9 | 40.0   | 64.3   |
| 50.6   | 58.6   | 51.0   | 61.0   | 17.7  | 213.3  | 139.4 | 43.1   | 54.7   |
| 448.7  | 449.9  | 315.5  | 188.7  | 154.0 | 715.8  | 425.3 | 18.7   | 28.5   |
| 1656.8 | 1808.6 | 1978.0 | 2104.8 | 741.4 | 1100.5 | 845.8 | 148.5  | 191.3  |
| 341.4  | 304.3  | 318.6  | 189.7  | 106.8 | 1017.4 | 598.8 | 78.1   | 109.9  |
| 75.7   | 103.4  | 93.3   | 44.6   | 29.8  | 260.4  | 147.4 | 6.2    | 35.1   |
| 109.7  | 105.9  | 112.9  | 116.2  | 44.3  | 140.5  | 76.0  | 18.5   | 22.1   |
| 43.0   | 32.2   | 18.6   | 35.2   | 5.2   | 141.2  | 96.8  | 28.5   | 38.9   |
| 718.6  | 694.9  | 616.3  | 487.2  | 256.9 | 877.7  | 725.8 | 262.8  | 330.4  |
| 273.8  | 305.0  | 295.1  | 254.6  | 89.5  | 368.1  | 228.5 | 16.4   | 12.0   |
| 268.2  | 280.1  | 244.0  | 255.8  | 83.8  | 134.7  | 114.6 | 104.1  | 107.9  |
| 3.2    | 3.6    | 5.3    | 2.0    | 5.2   | 4.7    | 3.6   | 12.7   | 15.5   |
| 329.6  | 309.2  | 321.9  | 247.4  | 89.7  | 541.3  | 405.4 | 149.5  | 188.9  |
| 364.4  | 280.0  | 314.9  | 246.3  | 118.7 | 788.8  | 603.7 | 120.4  | 158.8  |
| 72.3   | 73.4   | 67.4   | 62.3   | 35.3  | 217.3  | 160.5 | 119.4  | 128.4  |
| 2.1    | 6.1    | 3.3    | 2.4    | 0.8   | 77.4   | 44.8  | 4.3    | 19.2   |
| 219.2  | 176.7  | 206.9  | 150.1  | 32.2  | 119.6  | 116.7 | 44.3   | 39.8   |
| 111.5  | 104.1  | 102.3  | 83.7   | 53.3  | 246.6  | 217.6 | 213.6  | 237.9  |
| 2.6    | 1.9    | 11.3   | 17.7   | 0.8   | 41.2   | 11.8  | 5.3    | 10.5   |
| 71.1   | 60.5   | 75.3   | 58.3   | 23.5  | 144.3  | 170.0 | 57.9   | 57.7   |
| 56.9   | 62.6   | 54.1   | 50.4   | 19.8  | 172.4  | 106.1 | 41.1   | 52.5   |
| 46.4   | 48.2   | 31.9   | 24.3   | 5.4   | 33.7   | 13.1  | 28.7   | 42.8   |
| 74.2   | 80.4   | 62.0   | 52.0   | 8.7   | 85.9   | 45.3  | 29.3   | 40.3   |
| 256.1  | 233.0  | 152.8  | 28.6   | 65.0  | 369.5  | 133.8 | 127.7  | 153.7  |
| 92.5   | 79.0   | 84.3   | 98.9   | 35.6  | 116.0  | 92.8  | 29.0   | 32.3   |
| 88.0   | 79.6   | 70.0   | 72.5   | 22.9  | 156.5  | 71.6  | 71.5   | 116.5  |
| 146.8  | 140.1  | 101.1  | 34.5   | 32.6  | 430.2  | 274.6 | 84.0   | 101.7  |
| 140.4  | 139.6  | 157.4  | 144.0  | 48.5  | 354.6  | 278.5 | 11.0   | 26.2   |
| 313.1  | 308.2  | 257.2  | 223.1  | 64.9  | 398.0  | 268.4 | 41.5   | 74.2   |
| 210.6  | 142.2  | 192.2  | 113.3  | 60.7  | 843.3  | 599.9 | 32.4   | 46.0   |
| 97.9   | 101.3  | 113.0  | 75.6   | 33.6  | 106.9  | 74.9  | 41.4   | 50.0   |
| 146.3  | 116.5  | 125.0  | 79.7   | 45.7  | 136.0  | 78.0  | 51.9   | 60.2   |
| 164.5  | 143.3  | 153.1  | 133.7  | 82.0  | 177.7  | 101.9 | 89.0   | 158.9  |
| 236.9  | 261.9  | 237.6  | 222.9  | 59.8  | 203.5  | 141.5 | 29.9   | 54.7   |
| 57.9   | 71.8   | 67.5   | 34.3   | 16.3  | 70.0   | 55.9  | 74.1   | 57.1   |
| 50.2   | 51.4   | 44.0   | 34.9   | 7.6   | 54.6   | 30.5  | 9.8    | 12.9   |
| 188.3  | 166.1  | 194.4  | 179.3  | 65.4  | 214.5  | 173.0 | 68.0   | 92.6   |
| 183.8  | 170.6  | 202.8  | 160.4  | 47.1  | 244.4  | 109.8 | 35.2   | 70.8   |
| 34.9   | 22.0   | 28.3   | 30.1   | 10.8  | 59.5   | 43.9  | 78.6   | 55.5   |
| 170.2  | 167.7  | 139.4  | 109.0  | 66.5  | 566.6  | 363.0 | 84.7   | 90.9   |
| 555.2  | 502.1  | 660.0  | 533.8  | 261.8 | 1064.5 | 844.2 | 243.4  | 356.8  |
| 21.4   | 29.3   | 24.2   | 30.9   | 17.5  | 214.0  | 194.0 | 24.3   | 24.3   |
| 153.3  | 136.2  | 161.0  | 179.2  | 52.1  | 73.9   | 62.0  | 14.2   | 26.4   |
| 226.4  | 200.9  | 252.2  | 245.6  | 87.3  | 379.2  | 431.6 | 38.5   | 49.1   |
| 288.6  | 187.4  | 266.2  | 133.1  | 76.6  | 237.6  | 193.0 | 126.5  | 161.4  |
| 66.8   | 78.0   | 81.0   | 52.7   | 29.9  | 382.6  | 325.8 | 195.7  | 208.0  |
| 114.7  | 73.7   | 68.4   | 66.8   | 37.0  | 186.0  | 148.3 | 20.1   | 49.7   |
| 238.8  | 193.6  | 276.2  | 241.2  | 106.6 | 280.7  | 238.9 | 38.1   | 45.0   |



|        |        |        |        |       |        |        |       |       |
|--------|--------|--------|--------|-------|--------|--------|-------|-------|
| 297.9  | 161.4  | 198.6  | 165.3  | 69.9  | 440.2  | 331.3  | 113.1 | 112.1 |
| 7.6    | 24.1   | 6.9    | 2.8    | 7.1   | 72.5   | 62.6   | 5.4   | 33.2  |
| 56.4   | 37.6   | 35.8   | 34.5   | 18.9  | 37.9   | 25.1   | 101.5 | 133.4 |
| 405.3  | 404.5  | 533.2  | 755.0  | 171.4 | 943.2  | 768.5  | 15.5  | 30.6  |
| 804.8  | 686.2  | 676.5  | 732.3  | 287.3 | 1888.3 | 1405.9 | 235.7 | 275.1 |
| 265.1  | 240.5  | 241.0  | 259.3  | 83.6  | 532.5  | 388.2  | 268.5 | 312.2 |
| 111.2  | 120.0  | 132.0  | 128.9  | 61.8  | 411.6  | 256.1  | 88.8  | 86.7  |
| 578.3  | 707.7  | 551.1  | 541.3  | 240.7 | 1242.7 | 882.9  | 283.1 | 367.3 |
| 91.0   | 79.0   | 118.9  | 230.3  | 65.1  | 1232.5 | 884.8  | 40.8  | 55.0  |
| 231.2  | 165.4  | 179.2  | 244.9  | 89.3  | 238.9  | 159.7  | 31.1  | 16.4  |
| 28.8   | 34.3   | 37.2   | 35.5   | 5.8   | 80.5   | 55.8   | 14.9  | 26.9  |
| 67.8   | 73.6   | 52.7   | 40.2   | 33.1  | 886.8  | 689.8  | 14.9  | 28.7  |
| 436.3  | 370.3  | 292.8  | 174.3  | 148.3 | 469.6  | 262.7  | 94.0  | 85.1  |
| 357.6  | 374.7  | 441.8  | 526.4  | 177.2 | 659.9  | 478.0  | 13.4  | 26.1  |
| 6.3    | 6.2    | 4.1    | 6.8    | 6.4   | 16.8   | 10.3   | 9.3   | 11.3  |
| 154.0  | 157.6  | 156.0  | 92.2   | 42.7  | 96.8   | 40.8   | 30.4  | 46.9  |
| 167.4  | 139.8  | 130.4  | 79.6   | 55.8  | 615.2  | 361.8  | 87.6  | 116.5 |
| 735.8  | 646.1  | 620.5  | 408.5  | 235.3 | 684.2  | 504.2  | 179.1 | 273.5 |
| 697.4  | 743.1  | 709.8  | 685.9  | 260.8 | 882.8  | 611.6  | 37.0  | 90.1  |
| 1378.1 | 1155.5 | 1364.6 | 1402.1 | 477.5 | 1741.2 | 1331.4 | 243.1 | 258.8 |
| 186.6  | 137.4  | 174.4  | 114.6  | 81.9  | 349.3  | 231.4  | 86.6  | 107.9 |
| 151.8  | 132.8  | 147.4  | 109.5  | 49.2  | 194.1  | 129.7  | 82.0  | 77.0  |
| 177.9  | 169.6  | 155.2  | 147.8  | 57.6  | 535.7  | 389.7  | 53.7  | 121.5 |
| 55.4   | 37.0   | 52.5   | 42.5   | 20.4  | 45.7   | 29.0   | 50.6  | 70.7  |
| 1754.7 | 1729.9 | 1860.3 | 1767.3 | 848.3 | 3085.8 | 2107.4 | 790.6 | 983.8 |
| 0.7    | 0.2    | 0.5    | 3.2    | 3.0   | 1723.3 | 1236.3 | 0.9   | 10.7  |
| 1.1    | 0.3    | 2.3    | 2.3    | 2.6   | 1729.7 | 1307.1 | 6.5   | 6.6   |
| 666.4  | 791.6  | 641.1  | 729.6  | 296.6 | 740.7  | 542.0  | 66.0  | 30.7  |
| 67.6   | 54.8   | 63.3   | 50.1   | 22.3  | 108.1  | 88.4   | 90.3  | 115.1 |
| 187.2  | 190.2  | 211.8  | 186.3  | 77.1  | 896.3  | 648.8  | 64.2  | 86.5  |
| 325.2  | 238.9  | 241.3  | 169.9  | 74.5  | 302.9  | 132.9  | 99.9  | 102.5 |
| 328.7  | 230.5  | 272.9  | 263.5  | 45.3  | 1555.1 | 1113.9 | 117.9 | 190.9 |
| 5.8    | 9.9    | 3.2    | 15.4   | 9.7   | 135.9  | 56.8   | 19.2  | 31.9  |
| 61.3   | 46.2   | 46.4   | 27.3   | 18.5  | 28.3   | 20.1   | 89.9  | 98.3  |
| 1131.6 | 1159.2 | 953.6  | 488.4  | 331.5 | 1100.5 | 752.4  | 196.9 | 305.1 |
| 407.0  | 406.0  | 524.8  | 460.7  | 142.3 | 379.9  | 231.8  | 62.9  | 87.5  |
| 97.7   | 96.2   | 101.9  | 110.2  | 33.4  | 125.8  | 77.9   | 12.5  | 32.4  |
| 105.9  | 141.5  | 126.8  | 74.9   | 31.6  | 81.3   | 58.2   | 25.5  | 26.5  |
| 337.4  | 289.4  | 286.4  | 280.7  | 131.9 | 410.7  | 190.9  | 68.7  | 88.3  |
| 1121.9 | 1120.0 | 1018.5 | 862.2  | 314.6 | 2739.0 | 2319.8 | 525.3 | 559.2 |
| 88.5   | 108.7  | 75.9   | 98.2   | 36.5  | 152.3  | 87.4   | 59.0  | 70.4  |
| 10.4   | 4.7    | 1.6    | 3.1    | 4.5   | 3.3    | 2.2    | 9.0   | 14.1  |
| 41.3   | 37.2   | 23.5   | 25.6   | 15.5  | 104.7  | 79.3   | 33.5  | 45.3  |
| 135.0  | 115.6  | 116.9  | 178.3  | 50.2  | 77.9   | 37.2   | 30.3  | 32.9  |
| 91.2   | 82.5   | 71.7   | 54.6   | 27.4  | 75.4   | 58.0   | 24.9  | 19.7  |
| 536.1  | 490.9  | 498.1  | 384.4  | 175.6 | 605.9  | 439.1  | 54.8  | 98.2  |
| 15.2   | 44.7   | 29.6   | 21.8   | 12.3  | 38.0   | 25.9   | 23.8  | 19.0  |
| 102.9  | 119.9  | 122.9  | 144.6  | 44.0  | 218.0  | 172.1  | 24.4  | 50.0  |
| 181.0  | 195.6  | 125.0  | 85.1   | 67.8  | 496.8  | 289.0  | 52.4  | 88.8  |
| 106.3  | 75.9   | 105.1  | 62.2   | 32.0  | 351.9  | 206.8  | 91.3  | 87.5  |
| 439.9  | 422.3  | 363.9  | 174.7  | 131.1 | 2812.2 | 1544.2 | 409.0 | 496.8 |
| 272.9  | 285.5  | 313.0  | 155.5  | 99.5  | 928.1  | 479.6  | 497.0 | 700.3 |
| 726.5  | 586.9  | 610.8  | 566.9  | 202.4 | 1102.3 | 818.8  | 376.5 | 414.7 |

|        |        |        |        |       |        |        |       |       |
|--------|--------|--------|--------|-------|--------|--------|-------|-------|
| 516.3  | 369.7  | 446.5  | 332.4  | 159.2 | 667.6  | 553.7  | 51.7  | 73.5  |
| 668.5  | 536.3  | 609.8  | 477.5  | 213.2 | 1357.8 | 1282.2 | 169.1 | 86.2  |
| 116.0  | 126.6  | 98.6   | 103.0  | 44.3  | 249.9  | 261.6  | 29.0  | 32.4  |
| 692.0  | 785.3  | 669.7  | 582.1  | 236.2 | 515.3  | 347.1  | 44.8  | 44.1  |
| 72.5   | 73.6   | 41.7   | 0.8    | 19.4  | 151.7  | 79.0   | 242.5 | 235.5 |
| 90.3   | 108.4  | 89.0   | 108.4  | 35.0  | 150.9  | 148.3  | 57.4  | 136.4 |
| 24.3   | 36.0   | 21.0   | 17.0   | 8.1   | 50.8   | 36.9   | 105.9 | 114.4 |
| 110.9  | 122.8  | 108.6  | 67.5   | 55.4  | 5.4    | 3.9    | 24.6  | 38.2  |
| 266.2  | 206.6  | 201.9  | 217.6  | 69.4  | 254.6  | 164.7  | 90.6  | 90.6  |
| 185.5  | 161.7  | 172.5  | 176.4  | 63.7  | 202.0  | 153.7  | 56.2  | 85.1  |
| 190.3  | 195.1  | 187.7  | 147.2  | 55.1  | 1034.0 | 818.3  | 125.6 | 112.6 |
| 307.6  | 300.6  | 305.4  | 233.1  | 131.2 | 158.1  | 123.6  | 610.2 | 625.2 |
| 158.6  | 147.8  | 141.4  | 233.9  | 57.1  | 183.4  | 136.2  | 27.1  | 49.0  |
| 45.7   | 28.4   | 15.4   | 25.9   | 10.8  | 40.8   | 26.4   | 99.8  | 122.0 |
| 23.2   | 2.4    | 18.1   | 1.6    | 6.6   | 23.1   | 10.7   | 17.0  | 12.1  |
| 184.2  | 151.3  | 163.5  | 138.8  | 61.2  | 429.9  | 301.3  | 80.3  | 87.3  |
| 1037.2 | 1018.2 | 1044.7 | 1062.8 | 338.2 | 1109.5 | 911.7  | 141.1 | 138.1 |
| 63.8   | 64.0   | 75.6   | 71.1   | 15.7  | 167.5  | 135.1  | 7.1   | 9.9   |
| 362.0  | 308.9  | 348.6  | 280.8  | 87.1  | 366.6  | 255.2  | 568.3 | 652.6 |
| 249.1  | 247.4  | 236.9  | 225.5  | 59.4  | 261.6  | 142.4  | 33.3  | 54.6  |
| 150.8  | 128.1  | 115.4  | 93.2   | 44.9  | 265.8  | 208.7  | 56.3  | 79.1  |
| 78.8   | 63.7   | 66.1   | 32.7   | 19.7  | 168.5  | 153.4  | 34.6  | 41.0  |
| 131.2  | 152.5  | 107.7  | 113.5  | 36.7  | 155.4  | 105.1  | 32.8  | 54.2  |
| 203.9  | 186.8  | 191.9  | 178.4  | 79.0  | 378.8  | 312.8  | 34.2  | 52.4  |
| 487.7  | 573.3  | 602.7  | 611.2  | 139.7 | 388.4  | 215.4  | 112.4 | 165.7 |
| 24.5   | 16.3   | 28.7   | 29.1   | 5.7   | 55.5   | 43.6   | 32.6  | 34.6  |
| 111.6  | 73.8   | 75.0   | 52.6   | 27.8  | 154.3  | 70.3   | 77.9  | 71.6  |
| 45.7   | 24.0   | 40.1   | 25.4   | 12.1  | 56.1   | 36.8   | 7.8   | 23.6  |
| 79.8   | 59.3   | 64.9   | 64.6   | 26.1  | 198.7  | 125.9  | 54.4  | 51.7  |
| 61.1   | 52.1   | 62.1   | 36.9   | 20.7  | 64.8   | 27.1   | 56.5  | 40.0  |
| 69.0   | 55.4   | 68.5   | 82.3   | 34.2  | 315.8  | 201.7  | 75.3  | 78.4  |
| 239.6  | 254.3  | 265.4  | 262.7  | 87.6  | 497.7  | 352.9  | 81.3  | 103.3 |
| 328.6  | 306.8  | 282.4  | 270.6  | 116.1 | 228.2  | 153.2  | 28.2  | 44.6  |
| 217.5  | 166.7  | 134.1  | 83.6   | 67.7  | 155.2  | 97.2   | 76.1  | 76.8  |
| 131.9  | 113.2  | 100.4  | 68.9   | 49.9  | 375.8  | 269.7  | 100.0 | 77.4  |
| 205.4  | 159.8  | 179.3  | 139.9  | 61.8  | 246.2  | 169.6  | 208.2 | 260.3 |
| 20.3   | 25.9   | 48.0   | 11.5   | 4.7   | 61.1   | 1.3    | 7.4   | 23.7  |
| 286.0  | 250.2  | 271.0  | 279.4  | 109.9 | 450.6  | 286.2  | 194.5 | 257.4 |
| 218.6  | 182.5  | 227.3  | 183.0  | 74.7  | 270.3  | 153.2  | 47.2  | 59.7  |
| 323.5  | 273.4  | 361.6  | 400.2  | 99.7  | 599.1  | 443.6  | 33.9  | 50.8  |
| 226.5  | 213.6  | 200.7  | 127.8  | 60.6  | 338.9  | 204.8  | 47.9  | 52.8  |
| 19.2   | 46.4   | 19.4   | 8.0    | 4.4   | 92.0   | 48.0   | 33.4  | 57.6  |
| 269.9  | 275.5  | 255.2  | 229.4  | 91.2  | 273.8  | 183.9  | 37.5  | 34.8  |
| 287.1  | 245.0  | 218.7  | 176.2  | 67.0  | 210.4  | 157.1  | 101.2 | 125.5 |
| 115.3  | 66.4   | 99.2   | 80.4   | 39.0  | 91.1   | 53.2   | 123.7 | 162.0 |
| 739.0  | 829.7  | 1247.4 | 1327.2 | 429.7 | 223.8  | 252.8  | 0.1   | 0.5   |
| 699.4  | 655.9  | 612.8  | 495.2  | 208.5 | 597.4  | 480.5  | 108.3 | 168.2 |
| 157.1  | 122.2  | 153.4  | 135.0  | 54.6  | 540.7  | 318.7  | 53.3  | 56.9  |
| 132.0  | 111.3  | 150.5  | 95.4   | 45.2  | 255.0  | 176.8  | 5.3   | 24.2  |
| 262.1  | 279.3  | 323.6  | 392.2  | 101.0 | 1032.0 | 748.0  | 23.5  | 38.4  |
| 61.7   | 51.7   | 43.2   | 28.1   | 15.8  | 72.5   | 33.0   | 68.7  | 137.7 |
| 145.4  | 123.2  | 166.7  | 140.7  | 42.6  | 388.0  | 223.9  | 58.7  | 85.9  |
| 120.0  | 75.6   | 83.1   | 72.2   | 39.6  | 133.4  | 80.6   | 37.7  | 51.8  |

|        |        |        |        |       |        |        |       |       |
|--------|--------|--------|--------|-------|--------|--------|-------|-------|
| 144.5  | 145.9  | 148.4  | 171.5  | 63.6  | 845.7  | 659.7  | 104.2 | 129.7 |
| 45.6   | 41.6   | 13.8   | 14.1   | 7.5   | 276.4  | 193.8  | 31.7  | 34.3  |
| 64.6   | 70.9   | 70.4   | 67.8   | 31.6  | 32.4   | 51.3   | 58.6  | 47.7  |
| 56.3   | 78.1   | 85.4   | 101.1  | 31.9  | 151.4  | 90.1   | 19.4  | 25.6  |
| 60.1   | 47.0   | 67.3   | 39.5   | 15.6  | 4.4    | 10.2   | 46.1  | 57.1  |
| 40.3   | 29.6   | 30.8   | 25.5   | 6.6   | 28.4   | 19.1   | 38.1  | 27.4  |
| 66.1   | 47.2   | 61.0   | 57.0   | 14.7  | 94.7   | 66.4   | 96.8  | 94.0  |
| 695.3  | 588.0  | 674.4  | 686.5  | 277.0 | 1898.1 | 1225.2 | 309.7 | 351.3 |
| 937.2  | 864.1  | 898.9  | 936.0  | 346.1 | 1628.2 | 1176.3 | 255.9 | 309.9 |
| 852.2  | 778.4  | 812.2  | 526.8  | 290.8 | 1684.5 | 1128.7 | 132.1 | 174.9 |
| 2.3    | 7.7    | 1.2    | 1.0    | 0.5   | 3.6    | 0.4    | 50.7  | 112.4 |
| 30.7   | 16.2   | 36.4   | 21.8   | 9.2   | 106.3  | 70.1   | 31.6  | 32.4  |
| 717.4  | 623.8  | 652.9  | 477.7  | 238.0 | 469.8  | 279.1  | 82.2  | 153.4 |
| 27.2   | 40.0   | 37.8   | 41.0   | 21.1  | 105.5  | 59.6   | 35.2  | 35.3  |
| 496.5  | 356.3  | 347.8  | 238.9  | 111.4 | 803.1  | 549.8  | 242.1 | 286.9 |
| 113.3  | 88.5   | 67.3   | 76.2   | 27.5  | 351.0  | 139.9  | 17.2  | 33.3  |
| 155.9  | 113.7  | 146.9  | 111.8  | 47.2  | 123.0  | 63.6   | 76.0  | 73.5  |
| 816.7  | 881.3  | 1026.4 | 1039.7 | 295.8 | 1668.9 | 1349.2 | 36.1  | 54.5  |
| 300.3  | 308.4  | 374.9  | 264.4  | 181.5 | 798.1  | 481.2  | 290.8 | 358.7 |
| 231.9  | 225.8  | 218.2  | 187.0  | 58.1  | 186.4  | 110.1  | 30.4  | 67.7  |
| 93.6   | 66.8   | 85.9   | 61.9   | 25.1  | 118.3  | 69.5   | 27.4  | 19.6  |
| 147.4  | 140.7  | 147.8  | 112.8  | 42.1  | 203.9  | 133.5  | 35.9  | 49.6  |
| 332.6  | 311.7  | 364.4  | 387.2  | 147.3 | 695.2  | 384.8  | 194.1 | 275.4 |
| 232.5  | 181.6  | 217.0  | 255.8  | 84.1  | 457.5  | 361.5  | 70.8  | 77.4  |
| 79.8   | 88.5   | 88.9   | 43.8   | 40.1  | 34.4   | 21.6   | 2.0   | 17.6  |
| 44.0   | 43.8   | 31.7   | 23.9   | 19.2  | 97.3   | 42.5   | 59.9  | 67.9  |
| 330.4  | 348.8  | 369.8  | 289.0  | 98.4  | 401.3  | 238.3  | 62.9  | 67.4  |
| 754.7  | 683.8  | 759.2  | 803.4  | 272.2 | 789.7  | 668.6  | 141.3 | 214.9 |
| 491.9  | 477.8  | 537.7  | 578.5  | 200.5 | 763.2  | 431.7  | 28.2  | 72.4  |
| 280.5  | 273.3  | 306.6  | 335.0  | 70.6  | 299.2  | 215.6  | 48.4  | 43.4  |
| 112.0  | 84.1   | 93.3   | 86.3   | 20.5  | 182.8  | 125.6  | 11.4  | 17.2  |
| 1382.0 | 1243.5 | 1180.7 | 969.5  | 545.5 | 2909.0 | 2176.5 | 420.5 | 536.7 |
| 83.8   | 73.4   | 104.8  | 111.8  | 32.7  | 207.9  | 131.3  | 63.9  | 63.0  |
| 250.3  | 218.0  | 226.8  | 248.9  | 83.4  | 225.1  | 192.1  | 210.0 | 289.8 |
| 106.3  | 94.7   | 98.4   | 86.1   | 33.1  | 436.0  | 308.7  | 112.6 | 204.6 |
| 61.1   | 55.7   | 53.6   | 44.7   | 34.9  | 166.0  | 67.4   | 34.0  | 56.7  |
| 463.6  | 528.4  | 400.0  | 277.9  | 209.5 | 1776.7 | 642.3  | 50.4  | 81.2  |
| 289.2  | 263.6  | 277.7  | 255.9  | 99.0  | 688.7  | 616.4  | 85.7  | 76.2  |
| 85.2   | 63.7   | 55.9   | 27.3   | 18.8  | 135.8  | 59.6   | 1.7   | 2.2   |
| 56.5   | 76.7   | 65.6   | 64.9   | 22.3  | 75.5   | 71.7   | 26.4  | 33.9  |
| 6.9    | 6.5    | 0.7    | 7.1    | 1.5   | 30.1   | 22.9   | 10.1  | 15.1  |
| 175.1  | 182.2  | 186.0  | 179.0  | 68.2  | 156.4  | 121.0  | 18.0  | 39.0  |
| 30.9   | 34.5   | 46.5   | 29.3   | 13.2  | 39.0   | 22.4   | 1.5   | 5.1   |
| 234.7  | 208.5  | 204.4  | 146.8  | 81.0  | 481.1  | 309.1  | 296.1 | 287.8 |
| 696.1  | 661.8  | 722.2  | 802.4  | 271.5 | 456.9  | 345.6  | 71.8  | 113.9 |
| 824.2  | 761.9  | 781.5  | 703.0  | 275.3 | 868.3  | 714.8  | 97.4  | 96.6  |
| 639.9  | 633.4  | 683.2  | 561.7  | 242.2 | 852.2  | 679.0  | 66.2  | 75.8  |
| 59.7   | 36.1   | 44.0   | 26.2   | 20.8  | 84.6   | 48.1   | 68.1  | 64.8  |
| 292.2  | 277.4  | 255.8  | 174.4  | 90.2  | 322.2  | 309.6  | 60.6  | 81.1  |
| 329.0  | 278.4  | 349.0  | 379.6  | 113.8 | 343.8  | 190.7  | 27.1  | 35.7  |
| 25.9   | 22.2   | 47.1   | 32.1   | 10.2  | 45.7   | 32.5   | 5.8   | 11.4  |
| 9.7    | 1.8    | 7.4    | 8.4    | 0.8   | 32.5   | 31.3   | 10.8  | 6.9   |
| 180.5  | 130.6  | 156.3  | 140.3  | 46.4  | 373.2  | 255.8  | 125.6 | 113.0 |

|        |        |        |        |       |        |        |       |       |
|--------|--------|--------|--------|-------|--------|--------|-------|-------|
| 57.8   | 50.2   | 66.4   | 52.2   | 11.7  | 134.2  | 91.3   | 4.3   | 0.3   |
| 71.8   | 56.1   | 76.5   | 91.2   | 26.7  | 255.4  | 170.8  | 39.4  | 47.8  |
| 254.4  | 243.5  | 307.3  | 185.4  | 56.8  | 690.4  | 308.4  | 85.5  | 177.1 |
| 1019.5 | 741.5  | 996.3  | 982.6  | 300.8 | 1028.4 | 775.0  | 197.0 | 378.8 |
| 281.2  | 253.0  | 317.1  | 176.7  | 102.1 | 1329.3 | 1014.3 | 196.1 | 282.0 |
| 298.3  | 293.8  | 307.9  | 279.2  | 70.6  | 373.9  | 223.6  | 263.8 | 332.6 |
| 127.0  | 107.3  | 76.6   | 49.8   | 30.4  | 201.4  | 95.1   | 32.2  | 29.9  |
| 55.2   | 41.2   | 48.5   | 51.6   | 25.7  | 99.2   | 86.7   | 33.8  | 29.3  |
| 14.3   | 14.0   | 13.7   | 8.6    | 6.1   | 18.0   | 19.9   | 3.4   | 7.0   |
| 446.1  | 442.3  | 569.5  | 514.9  | 208.5 | 1458.6 | 1009.5 | 40.1  | 33.1  |
| 83.4   | 58.0   | 77.2   | 81.0   | 27.1  | 177.8  | 129.9  | 44.0  | 49.0  |
| 23.7   | 15.5   | 19.3   | 13.9   | 8.6   | 121.6  | 70.5   | 17.0  | 22.2  |
| 181.1  | 211.3  | 176.8  | 131.7  | 50.5  | 122.4  | 88.9   | 30.6  | 29.7  |
| 124.8  | 92.9   | 108.5  | 130.1  | 51.6  | 313.0  | 275.2  | 36.0  | 56.9  |
| 243.7  | 221.0  | 323.4  | 368.6  | 122.3 | 332.5  | 224.5  | 85.4  | 99.4  |
| 340.7  | 285.5  | 303.0  | 289.4  | 112.7 | 351.1  | 287.2  | 59.5  | 65.3  |
| 322.8  | 102.9  | 122.3  | 77.9   | 33.3  | 1274.8 | 1343.7 | 37.6  | 37.2  |
| 89.1   | 81.7   | 61.3   | 45.7   | 35.8  | 164.0  | 108.8  | 78.3  | 104.8 |
| 27.1   | 29.7   | 31.8   | 45.6   | 7.9   | 50.1   | 25.4   | 12.1  | 8.6   |
| 3.6    | 17.6   | 16.4   | 10.1   | 2.7   | 12.1   | 5.1    | 3.0   | 4.2   |
| 1294.9 | 1260.9 | 1236.8 | 1096.4 | 500.5 | 1673.0 | 1319.6 | 88.6  | 137.3 |
| 10.3   | 3.7    | 3.5    | 1.3    | 0.9   | 3.5    | 4.7    | 1.3   | 4.0   |
| 130.8  | 77.0   | 88.9   | 85.9   | 34.5  | 81.7   | 58.9   | 40.3  | 43.7  |
| 65.9   | 60.6   | 38.3   | 11.7   | 23.2  | 26.9   | 15.5   | 8.9   | 15.7  |
| 144.5  | 120.6  | 129.2  | 68.2   | 39.7  | 215.5  | 106.4  | 95.1  | 121.6 |
| 192.9  | 110.4  | 151.6  | 157.3  | 60.2  | 259.1  | 194.3  | 28.8  | 34.2  |
| 278.8  | 292.9  | 282.8  | 310.4  | 102.3 | 496.9  | 480.2  | 41.6  | 70.6  |
| 44.8   | 33.7   | 44.4   | 25.8   | 11.9  | 53.1   | 35.2   | 66.0  | 84.4  |
| 67.1   | 46.6   | 54.3   | 48.4   | 24.5  | 38.7   | 32.6   | 73.8  | 52.1  |
| 210.7  | 247.8  | 149.2  | 92.4   | 92.7  | 206.9  | 130.3  | 37.6  | 56.2  |
| 129.5  | 118.4  | 118.8  | 119.6  | 58.1  | 183.3  | 150.4  | 56.4  | 56.1  |
| 296.4  | 267.1  | 237.7  | 154.4  | 85.0  | 496.6  | 293.4  | 174.9 | 203.3 |
| 81.9   | 43.9   | 68.9   | 47.7   | 21.6  | 140.9  | 65.2   | 63.8  | 72.5  |
| 116.2  | 107.8  | 90.2   | 56.5   | 47.7  | 193.1  | 95.3   | 84.2  | 86.0  |
| 45.4   | 65.5   | 60.4   | 50.7   | 24.8  | 101.2  | 111.0  | 17.6  | 20.3  |
| 28.2   | 14.2   | 23.2   | 15.4   | 5.7   | 26.0   | 30.6   | 25.3  | 25.2  |
| 55.5   | 42.3   | 53.7   | 44.5   | 15.3  | 213.1  | 127.4  | 50.6  | 59.0  |
| 84.4   | 61.9   | 71.4   | 91.3   | 18.4  | 380.2  | 197.1  | 228.8 | 264.6 |
| 74.0   | 86.9   | 99.4   | 69.8   | 32.9  | 144.2  | 120.3  | 80.5  | 92.6  |
| 93.3   | 91.0   | 79.3   | 35.2   | 22.1  | 399.6  | 308.0  | 38.0  | 57.2  |
| 276.2  | 256.6  | 267.9  | 269.2  | 99.9  | 70.7   | 84.3   | 25.4  | 27.5  |
| 74.4   | 71.0   | 120.7  | 59.5   | 41.0  | 2639.6 | 1665.8 | 25.8  | 37.5  |
| 169.0  | 198.6  | 241.6  | 336.5  | 101.7 | 227.4  | 151.2  | 24.9  | 38.2  |
| 398.9  | 393.6  | 421.2  | 235.4  | 125.9 | 898.0  | 544.2  | 111.6 | 148.6 |
| 553.1  | 479.2  | 606.4  | 819.0  | 203.4 | 823.7  | 924.8  | 40.5  | 54.1  |
| 161.1  | 142.9  | 143.3  | 191.8  | 66.0  | 483.7  | 284.5  | 135.1 | 182.2 |
| 288.0  | 336.9  | 326.2  | 350.0  | 130.2 | 362.4  | 269.8  | 50.2  | 54.9  |
| 74.1   | 68.0   | 89.3   | 58.9   | 28.6  | 175.4  | 143.0  | 40.8  | 71.9  |
| 67.2   | 54.4   | 56.9   | 125.6  | 38.3  | 201.3  | 123.2  | 13.1  | 26.6  |
| 196.9  | 208.6  | 214.1  | 194.1  | 75.0  | 554.3  | 325.6  | 95.4  | 126.4 |
| 219.3  | 176.6  | 172.7  | 122.0  | 42.6  | 396.5  | 300.9  | 59.6  | 87.6  |
| 645.8  | 700.7  | 674.1  | 615.5  | 269.5 | 1480.1 | 1398.3 | 295.4 | 387.8 |
| 173.5  | 137.2  | 161.0  | 157.4  | 54.4  | 111.5  | 71.7   | 239.0 | 324.5 |

|       |       |       |       |       |        |        |       |       |
|-------|-------|-------|-------|-------|--------|--------|-------|-------|
| 180.0 | 159.5 | 99.8  | 61.6  | 45.5  | 49.8   | 15.9   | 5.6   | 0.7   |
| 3.3   | 2.7   | 6.4   | 12.3  | 2.2   | 11.4   | 3.8    | 2.0   | 4.4   |
| 23.3  | 27.3  | 33.3  | 36.8  | 19.4  | 56.2   | 40.0   | 24.4  | 37.6  |
| 739.1 | 723.0 | 713.7 | 863.8 | 314.6 | 956.3  | 744.0  | 75.4  | 123.5 |
| 62.1  | 5.5   | 34.1  | 4.5   | 14.5  | 161.7  | 112.9  | 21.3  | 10.6  |
| 46.6  | 37.9  | 46.0  | 44.2  | 21.6  | 190.7  | 143.5  | 75.0  | 70.9  |
| 469.2 | 539.5 | 517.9 | 474.4 | 271.6 | 1000.1 | 644.1  | 74.9  | 54.6  |
| 545.6 | 599.8 | 540.1 | 446.1 | 232.2 | 920.6  | 524.5  | 47.5  | 71.5  |
| 222.3 | 249.7 | 212.7 | 143.5 | 81.0  | 200.6  | 146.2  | 77.8  | 44.8  |
| 44.4  | 28.0  | 24.7  | 13.6  | 3.6   | 46.2   | 30.9   | 67.4  | 79.9  |
| 37.9  | 34.1  | 53.1  | 26.5  | 19.3  | 83.2   | 54.6   | 26.3  | 55.4  |
| 346.1 | 291.8 | 289.0 | 330.8 | 98.5  | 215.9  | 133.1  | 73.4  | 109.8 |
| 355.5 | 387.8 | 430.5 | 419.2 | 100.2 | 316.8  | 262.7  | 22.5  | 19.6  |
| 450.8 | 433.3 | 447.9 | 440.2 | 126.7 | 264.8  | 153.5  | 51.4  | 54.3  |
| 345.2 | 264.0 | 298.8 | 243.7 | 95.1  | 303.8  | 233.5  | 59.4  | 61.5  |
| 521.8 | 471.2 | 387.1 | 242.8 | 172.9 | 1222.3 | 964.5  | 283.3 | 302.8 |
| 523.2 | 484.8 | 578.3 | 699.0 | 231.3 | 653.8  | 315.4  | 54.9  | 116.2 |
| 190.2 | 124.5 | 161.5 | 130.6 | 55.4  | 157.1  | 97.1   | 35.5  | 46.2  |
| 60.7  | 64.0  | 66.6  | 70.8  | 23.4  | 102.8  | 72.3   | 18.9  | 11.5  |
| 23.2  | 38.8  | 14.4  | 8.4   | 13.6  | 4.0    | 1.0    | 13.0  | 17.2  |
| 87.3  | 88.7  | 74.8  | 77.8  | 44.5  | 242.6  | 115.6  | 168.5 | 262.0 |
| 13.8  | 17.5  | 18.2  | 16.3  | 0.5   | 264.8  | 187.8  | 468.6 | 628.3 |
| 12.4  | 10.6  | 12.6  | 2.8   | 1.1   | 153.5  | 127.5  | 10.5  | 11.5  |
| 316.5 | 220.2 | 340.3 | 540.6 | 119.8 | 539.4  | 306.2  | 333.0 | 348.0 |
| 637.5 | 523.6 | 599.8 | 453.3 | 196.1 | 1219.1 | 1000.4 | 280.9 | 190.0 |
| 313.2 | 257.2 | 294.1 | 168.7 | 76.8  | 1047.0 | 838.7  | 62.7  | 64.9  |
| 304.1 | 270.0 | 329.2 | 310.6 | 128.6 | 446.0  | 340.6  | 59.3  | 81.2  |
| 45.5  | 48.2  | 43.1  | 45.8  | 7.3   | 113.0  | 123.7  | 10.3  | 16.9  |
| 267.5 | 245.4 | 254.3 | 133.7 | 74.8  | 462.6  | 354.2  | 138.2 | 170.5 |
| 162.1 | 153.1 | 156.6 | 140.3 | 70.0  | 156.2  | 110.6  | 37.9  | 50.0  |
| 49.7  | 51.7  | 39.1  | 26.5  | 23.5  | 372.4  | 216.0  | 71.0  | 112.3 |
| 3.0   | 7.2   | 12.2  | 2.5   | 4.7   | 137.7  | 143.7  | 2.5   | 10.0  |
| 36.2  | 37.3  | 33.7  | 27.2  | 13.3  | 89.5   | 49.4   | 66.5  | 71.7  |
| 18.4  | 21.3  | 30.8  | 17.4  | 2.7   | 143.6  | 109.2  | 83.7  | 112.4 |
| 32.8  | 14.9  | 19.4  | 20.5  | 4.6   | 25.7   | 17.0   | 5.9   | 6.7   |
| 1.6   | 1.5   | 1.4   | 2.9   | 3.9   | 38.3   | 22.9   | 0.7   | 1.4   |
| 58.8  | 72.7  | 65.0  | 47.6  | 21.2  | 66.8   | 36.7   | 103.1 | 176.0 |
| 34.9  | 18.1  | 27.8  | 10.3  | 5.4   | 109.5  | 75.4   | 125.6 | 57.9  |
| 83.8  | 58.1  | 65.9  | 119.3 | 19.2  | 192.5  | 204.0  | 0.9   | 3.6   |
| 302.5 | 241.1 | 204.4 | 138.8 | 69.6  | 504.9  | 281.3  | 146.5 | 100.8 |
| 274.4 | 242.3 | 291.4 | 461.8 | 112.1 | 233.5  | 168.9  | 33.3  | 43.6  |
| 168.0 | 149.4 | 113.5 | 124.0 | 66.1  | 170.7  | 103.4  | 36.6  | 68.9  |
| 242.6 | 179.4 | 226.9 | 171.9 | 62.6  | 971.4  | 696.2  | 137.7 | 199.4 |
| 87.6  | 104.2 | 76.0  | 101.7 | 31.6  | 254.2  | 125.7  | 48.7  | 49.6  |
| 56.9  | 59.4  | 37.9  | 58.2  | 24.4  | 136.2  | 122.7  | 22.5  | 25.3  |
| 75.7  | 58.7  | 62.6  | 50.7  | 16.0  | 670.7  | 426.4  | 25.1  | 50.4  |
| 86.3  | 59.3  | 74.2  | 42.4  | 16.7  | 796.9  | 544.8  | 47.8  | 65.6  |
| 106.0 | 119.7 | 110.3 | 98.5  | 29.7  | 310.6  | 161.2  | 44.8  | 30.7  |
| 24.1  | 13.4  | 15.0  | 2.4   | 9.7   | 45.0   | 32.3   | 83.9  | 136.8 |
| 79.8  | 93.2  | 91.1  | 136.1 | 36.5  | 291.7  | 216.5  | 21.8  | 30.8  |
| 18.0  | 19.8  | 13.8  | 10.9  | 9.6   | 414.7  | 311.9  | 26.0  | 43.4  |
| 32.7  | 22.6  | 32.3  | 14.4  | 3.1   | 56.2   | 34.1   | 34.3  | 18.6  |
| 379.4 | 345.5 | 315.9 | 280.8 | 111.7 | 697.3  | 332.2  | 163.2 | 202.0 |

|        |        |        |        |       |        |       |       |       |
|--------|--------|--------|--------|-------|--------|-------|-------|-------|
| 670.1  | 647.3  | 601.2  | 491.6  | 203.9 | 558.7  | 338.5 | 29.0  | 33.1  |
| 511.8  | 421.2  | 512.7  | 446.8  | 204.4 | 496.9  | 401.6 | 49.2  | 79.5  |
| 13.7   | 2.2    | 7.5    | 9.1    | 2.5   | 7.0    | 6.5   | 7.1   | 10.7  |
| 242.9  | 238.1  | 329.6  | 360.6  | 98.1  | 250.8  | 170.5 | 11.9  | 11.3  |
| 134.6  | 147.3  | 194.6  | 178.1  | 55.5  | 254.7  | 174.5 | 31.7  | 40.8  |
| 116.3  | 87.5   | 86.6   | 142.1  | 43.5  | 217.6  | 140.7 | 113.3 | 100.7 |
| 1059.8 | 1024.2 | 1115.7 | 1328.1 | 442.0 | 1157.4 | 767.4 | 123.0 | 171.6 |
| 514.7  | 501.6  | 558.6  | 535.6  | 215.9 | 439.2  | 293.0 | 112.9 | 138.4 |
| 299.5  | 177.5  | 210.4  | 88.0   | 66.6  | 58.6   | 29.0  | 1.9   | 2.7   |
| 423.3  | 444.7  | 411.4  | 325.6  | 149.5 | 638.7  | 407.6 | 33.7  | 38.6  |
| 135.0  | 120.1  | 115.5  | 79.7   | 47.1  | 270.0  | 115.2 | 33.2  | 40.6  |
| 51.8   | 49.5   | 46.8   | 38.6   | 16.9  | 105.9  | 52.5  | 19.3  | 23.7  |
| 124.2  | 107.7  | 149.6  | 203.9  | 68.3  | 563.1  | 427.6 | 28.6  | 43.7  |
| 427.5  | 353.9  | 399.1  | 318.9  | 190.2 | 484.2  | 353.7 | 87.4  | 125.0 |
| 11.8   | 16.3   | 10.5   | 12.6   | 10.4  | 337.4  | 251.2 | 6.1   | 0.8   |
| 20.6   | 31.5   | 24.4   | 14.4   | 11.4  | 69.5   | 49.0  | 20.8  | 27.0  |
| 116.3  | 68.3   | 88.9   | 45.7   | 32.4  | 310.2  | 165.1 | 64.2  | 65.8  |
| 797.3  | 725.1  | 555.4  | 435.1  | 208.6 | 516.6  | 504.5 | 54.3  | 122.0 |
| 64.5   | 35.1   | 58.3   | 66.2   | 21.0  | 87.9   | 65.2  | 33.4  | 19.9  |
| 472.6  | 472.9  | 515.5  | 445.7  | 164.0 | 960.1  | 791.8 | 142.7 | 168.2 |
| 2.4    | 1.9    | 1.1    | 1.6    | 0.5   | 105.0  | 58.3  | 90.2  | 119.8 |
| 1.1    | 2.4    | 6.4    | 0.6    | 0.3   | 0.3    | 0.5   | 0.5   | 0.4   |
| 15.9   | 6.2    | 4.1    | 3.4    | 1.9   | 115.0  | 67.0  | 55.3  | 40.9  |
| 527.2  | 570.4  | 551.9  | 605.9  | 252.6 | 661.2  | 514.5 | 304.5 | 373.4 |
| 138.5  | 89.7   | 125.6  | 125.1  | 30.9  | 154.0  | 127.9 | 28.3  | 43.3  |
| 77.7   | 60.5   | 46.7   | 39.2   | 11.7  | 209.1  | 162.0 | 186.4 | 248.8 |
| 226.0  | 231.2  | 230.6  | 193.0  | 86.0  | 374.2  | 316.2 | 95.9  | 90.1  |
| 12.3   | 43.3   | 25.3   | 12.7   | 14.9  | 11.1   | 13.4  | 2.4   | 18.6  |
| 160.1  | 161.0  | 164.5  | 175.1  | 46.4  | 129.1  | 89.7  | 29.4  | 27.1  |
| 848.5  | 1054.3 | 905.2  | 863.2  | 269.4 | 491.1  | 277.7 | 143.8 | 259.3 |
| 93.4   | 65.3   | 80.3   | 73.2   | 23.0  | 150.3  | 92.4  | 36.3  | 55.5  |
| 448.7  | 404.7  | 370.1  | 411.0  | 159.8 | 571.0  | 349.9 | 74.4  | 132.6 |
| 219.9  | 176.0  | 137.0  | 77.9   | 52.2  | 476.4  | 225.9 | 54.7  | 48.3  |
| 12.0   | 14.0   | 43.4   | 29.2   | 12.0  | 88.4   | 47.5  | 75.6  | 80.9  |
| 62.2   | 44.9   | 49.7   | 57.1   | 23.5  | 184.7  | 104.7 | 31.5  | 66.5  |
| 31.5   | 34.3   | 26.3   | 29.7   | 21.0  | 155.8  | 85.8  | 42.3  | 49.9  |
| 118.0  | 77.9   | 120.6  | 77.7   | 34.3  | 62.0   | 28.3  | 9.8   | 31.0  |
| 51.7   | 45.5   | 48.5   | 26.7   | 11.3  | 209.9  | 117.4 | 20.0  | 24.7  |
| 43.4   | 40.0   | 25.6   | 17.6   | 11.0  | 230.4  | 127.5 | 25.6  | 19.0  |
| 220.4  | 204.8  | 204.0  | 164.5  | 44.8  | 143.6  | 94.6  | 62.2  | 136.2 |
| 38.1   | 63.9   | 49.9   | 28.7   | 15.5  | 97.9   | 73.2  | 45.3  | 42.6  |
| 61.6   | 76.2   | 68.4   | 78.6   | 33.3  | 102.0  | 87.7  | 16.4  | 19.5  |
| 20.9   | 24.8   | 23.0   | 22.5   | 9.6   | 132.0  | 108.2 | 20.5  | 22.6  |
| 46.8   | 58.0   | 48.6   | 75.5   | 31.9  | 40.0   | 33.3  | 49.1  | 80.6  |
| 197.3  | 188.5  | 161.5  | 181.2  | 83.4  | 241.7  | 183.6 | 58.2  | 98.5  |
| 361.4  | 338.2  | 313.0  | 298.2  | 136.1 | 681.9  | 512.2 | 103.5 | 111.6 |
| 463.0  | 480.5  | 330.3  | 220.2  | 114.4 | 180.8  | 266.8 | 160.3 | 164.4 |
| 112.2  | 104.3  | 93.4   | 66.1   | 35.5  | 104.6  | 76.9  | 94.5  | 110.5 |
| 569.7  | 575.3  | 622.0  | 795.1  | 246.4 | 230.7  | 160.2 | 42.1  | 40.3  |
| 88.6   | 69.9   | 110.1  | 97.0   | 44.6  | 222.1  | 209.1 | 86.8  | 49.0  |
| 45.9   | 30.5   | 24.5   | 29.5   | 8.6   | 79.4   | 31.3  | 20.8  | 26.3  |
| 79.7   | 81.1   | 84.7   | 71.2   | 33.2  | 116.7  | 78.2  | 39.8  | 66.2  |
| 182.2  | 214.7  | 236.0  | 285.3  | 87.1  | 497.5  | 328.1 | 42.1  | 60.9  |

|        |        |        |        |       |        |       |       |       |
|--------|--------|--------|--------|-------|--------|-------|-------|-------|
| 59.8   | 77.4   | 83.3   | 55.0   | 35.2  | 103.5  | 65.7  | 13.8  | 57.8  |
| 204.8  | 162.4  | 190.2  | 184.3  | 63.9  | 478.4  | 346.7 | 67.8  | 79.7  |
| 13.1   | 20.2   | 11.5   | 13.3   | 11.7  | 448.1  | 357.3 | 103.8 | 149.7 |
| 66.7   | 55.8   | 70.0   | 35.0   | 26.2  | 50.5   | 11.4  | 25.4  | 65.8  |
| 210.8  | 164.5  | 206.1  | 210.1  | 68.1  | 77.7   | 81.5  | 35.8  | 32.2  |
| 127.1  | 102.1  | 112.2  | 90.7   | 23.2  | 327.2  | 226.6 | 58.7  | 95.7  |
| 1577.2 | 1525.7 | 1393.3 | 1200.2 | 503.2 | 1169.8 | 643.1 | 116.9 | 173.6 |
| 42.9   | 51.0   | 52.8   | 72.4   | 18.2  | 81.0   | 71.6  | 28.4  | 73.5  |
| 166.3  | 121.7  | 127.5  | 74.7   | 65.6  | 247.8  | 155.4 | 25.0  | 23.8  |
| 148.3  | 120.2  | 151.8  | 114.0  | 49.8  | 237.9  | 150.3 | 34.8  | 48.6  |
| 64.6   | 91.7   | 84.5   | 71.1   | 13.1  | 145.8  | 60.1  | 62.0  | 74.0  |
| 131.3  | 145.8  | 131.5  | 111.7  | 57.4  | 654.0  | 500.5 | 331.4 | 379.1 |
| 289.4  | 236.9  | 243.1  | 211.6  | 92.3  | 381.7  | 263.6 | 48.2  | 86.1  |
| 73.6   | 47.1   | 49.8   | 48.6   | 12.3  | 193.3  | 185.5 | 11.7  | 27.9  |
| 24.7   | 23.9   | 19.3   | 22.9   | 10.3  | 165.9  | 82.8  | 75.6  | 113.5 |
| 271.8  | 179.6  | 216.7  | 167.2  | 69.8  | 232.2  | 190.4 | 99.8  | 153.0 |
| 24.9   | 15.9   | 26.6   | 18.0   | 11.8  | 30.0   | 16.6  | 31.0  | 44.7  |
| 28.7   | 21.0   | 24.1   | 20.1   | 5.9   | 127.0  | 124.2 | 76.1  | 97.1  |
| 47.2   | 60.6   | 26.6   | 34.8   | 20.5  | 207.1  | 184.0 | 151.6 | 143.3 |
| 370.9  | 377.1  | 409.9  | 363.8  | 121.0 | 558.9  | 289.5 | 37.4  | 60.8  |
| 567.5  | 504.2  | 510.3  | 294.6  | 109.0 | 985.6  | 360.0 | 67.0  | 105.9 |
| 21.4   | 35.3   | 34.1   | 23.1   | 6.3   | 113.4  | 54.0  | 2.4   | 9.4   |
| 40.4   | 46.5   | 43.9   | 29.8   | 8.7   | 63.8   | 42.5  | 77.7  | 58.2  |
| 40.2   | 39.0   | 54.4   | 34.3   | 18.6  | 27.0   | 28.5  | 24.6  | 39.2  |
| 60.1   | 63.0   | 56.4   | 28.6   | 12.1  | 103.6  | 82.0  | 8.3   | 12.3  |
| 76.4   | 87.1   | 77.6   | 76.0   | 25.5  | 88.6   | 56.3  | 54.7  | 66.0  |
| 149.1  | 133.0  | 123.3  | 92.4   | 35.0  | 474.0  | 340.8 | 54.5  | 77.0  |
| 32.3   | 23.3   | 40.4   | 21.4   | 14.8  | 39.7   | 24.8  | 28.8  | 47.0  |
| 9.7    | 9.0    | 2.3    | 2.6    | 5.2   | 14.9   | 3.8   | 2.6   | 0.9   |
| 61.4   | 76.0   | 81.8   | 78.6   | 27.9  | 128.1  | 92.7  | 10.3  | 30.4  |
| 15.9   | 15.7   | 13.2   | 16.5   | 7.1   | 132.2  | 85.5  | 52.2  | 65.8  |
| 49.5   | 36.5   | 47.8   | 30.6   | 10.9  | 176.2  | 101.2 | 16.7  | 22.3  |
| 104.0  | 89.0   | 106.3  | 162.6  | 45.7  | 167.8  | 83.4  | 28.8  | 49.3  |
| 128.9  | 132.8  | 132.4  | 123.5  | 57.3  | 627.8  | 500.1 | 84.8  | 112.0 |
| 118.4  | 122.0  | 120.1  | 129.3  | 37.7  | 777.1  | 603.0 | 2.7   | 3.7   |
| 218.9  | 165.0  | 183.5  | 183.0  | 71.9  | 417.2  | 224.3 | 141.7 | 183.0 |
| 67.5   | 93.1   | 99.0   | 69.4   | 31.1  | 96.5   | 50.9  | 51.9  | 56.8  |
| 201.3  | 132.4  | 151.2  | 148.5  | 83.1  | 367.7  | 268.6 | 49.6  | 63.7  |
| 23.1   | 23.9   | 23.0   | 15.9   | 7.5   | 54.8   | 42.6  | 6.7   | 8.3   |
| 120.2  | 111.9  | 119.7  | 108.6  | 42.1  | 152.6  | 84.6  | 14.3  | 25.8  |
| 229.9  | 225.1  | 236.1  | 155.4  | 76.2  | 543.0  | 256.4 | 127.1 | 181.6 |
| 185.4  | 194.1  | 198.8  | 236.7  | 78.1  | 269.4  | 172.9 | 139.8 | 187.5 |
| 0.8    | 4.7    | 0.7    | 1.1    | 0.3   | 297.0  | 216.0 | 102.7 | 164.2 |
| 33.4   | 4.7    | 23.1   | 2.2    | 1.1   | 6.3    | 2.7   | 6.5   | 10.9  |
| 36.4   | 22.9   | 33.4   | 34.5   | 17.7  | 28.7   | 24.5  | 71.2  | 96.7  |
| 99.9   | 93.9   | 84.4   | 84.8   | 32.5  | 94.1   | 65.2  | 232.5 | 286.9 |
| 25.2   | 14.2   | 23.8   | 20.9   | 10.1  | 29.5   | 26.1  | 38.8  | 27.8  |
| 266.4  | 243.6  | 271.7  | 249.3  | 104.0 | 544.3  | 377.0 | 107.5 | 139.3 |
| 58.3   | 55.0   | 73.3   | 82.7   | 20.7  | 388.4  | 343.0 | 9.9   | 32.1  |
| 14.2   | 21.1   | 15.4   | 2.4    | 6.0   | 13.2   | 13.8  | 2.0   | 8.2   |
| 45.1   | 21.4   | 18.0   | 15.1   | 16.9  | 132.1  | 126.3 | 27.8  | 19.4  |
| 36.4   | 38.8   | 34.7   | 19.8   | 11.8  | 84.3   | 22.9  | 183.3 | 212.4 |
| 3.6    | 15.8   | 22.4   | 14.0   | 5.9   | 18.5   | 23.5  | 14.3  | 14.8  |

|        |        |        |       |       |        |        |       |       |
|--------|--------|--------|-------|-------|--------|--------|-------|-------|
| 47.5   | 49.2   | 54.4   | 55.8  | 14.7  | 269.8  | 252.1  | 31.3  | 53.9  |
| 71.4   | 78.7   | 79.9   | 65.1  | 26.5  | 239.0  | 167.4  | 76.6  | 107.6 |
| 55.7   | 46.8   | 40.5   | 29.6  | 11.4  | 346.1  | 304.2  | 17.6  | 16.6  |
| 22.8   | 8.8    | 31.9   | 27.3  | 14.8  | 139.5  | 56.1   | 13.0  | 6.1   |
| 161.5  | 157.9  | 144.3  | 189.5 | 55.2  | 424.5  | 256.8  | 36.2  | 27.0  |
| 13.0   | 19.3   | 17.3   | 21.7  | 8.3   | 5.9    | 13.3   | 116.9 | 281.0 |
| 33.5   | 39.7   | 39.3   | 21.9  | 19.2  | 33.9   | 38.0   | 72.8  | 95.8  |
| 39.0   | 40.8   | 36.1   | 24.8  | 3.8   | 4.6    | 13.3   | 65.2  | 76.8  |
| 203.8  | 249.3  | 296.6  | 280.4 | 90.5  | 360.8  | 281.7  | 20.1  | 31.7  |
| 219.5  | 244.5  | 208.1  | 113.3 | 103.3 | 1.7    | 6.8    | 6.3   | 5.2   |
| 87.5   | 70.2   | 102.5  | 47.4  | 39.9  | 62.8   | 44.2   | 50.4  | 53.8  |
| 279.0  | 291.1  | 288.8  | 327.6 | 99.4  | 552.2  | 416.7  | 53.9  | 75.1  |
| 130.0  | 204.0  | 167.7  | 144.5 | 51.7  | 148.4  | 70.5   | 24.6  | 36.8  |
| 177.6  | 128.4  | 104.7  | 147.5 | 83.9  | 563.4  | 519.4  | 14.7  | 72.4  |
| 100.5  | 69.9   | 94.7   | 77.4  | 21.2  | 321.8  | 242.7  | 45.2  | 58.6  |
| 1425.7 | 1184.3 | 1284.8 | 893.9 | 378.6 | 1468.4 | 1132.5 | 179.7 | 162.4 |
| 15.7   | 17.9   | 31.5   | 6.2   | 1.2   | 60.6   | 26.9   | 2.8   | 2.5   |
| 12.8   | 6.0    | 2.2    | 1.6   | 4.2   | 4.8    | 3.1    | 35.8  | 36.5  |
| 59.2   | 30.6   | 46.7   | 39.0  | 18.2  | 63.0   | 58.0   | 25.6  | 4.5   |
| 81.0   | 69.5   | 65.2   | 30.7  | 22.2  | 339.5  | 320.7  | 339.6 | 489.8 |
| 8.8    | 1.7    | 3.0    | 1.1   | 4.1   | 2.7    | 8.1    | 7.6   | 16.1  |
| 631.0  | 500.4  | 520.7  | 535.8 | 212.2 | 878.5  | 556.7  | 199.1 | 245.9 |
| 178.0  | 187.5  | 223.9  | 131.2 | 78.0  | 339.0  | 201.0  | 94.7  | 105.6 |
| 252.3  | 212.2  | 197.9  | 159.9 | 105.6 | 179.0  | 94.9   | 51.0  | 73.6  |
| 1.5    | 1.1    | 2.0    | 1.2   | 0.8   | 26.6   | 5.1    | 1.0   | 3.0   |
| 53.7   | 88.6   | 61.4   | 40.9  | 24.5  | 147.6  | 96.1   | 2.2   | 20.5  |
| 51.3   | 63.1   | 51.1   | 45.8  | 21.6  | 54.9   | 65.4   | 29.2  | 42.9  |
| 486.7  | 479.6  | 540.7  | 541.2 | 146.0 | 458.2  | 248.1  | 48.4  | 67.1  |
| 5.1    | 4.0    | 9.8    | 7.4   | 2.2   | 30.5   | 27.9   | 4.0   | 6.0   |
| 12.7   | 29.4   | 22.4   | 26.7  | 6.3   | 166.8  | 150.7  | 130.8 | 217.2 |
| 166.1  | 159.6  | 186.5  | 136.3 | 64.6  | 133.7  | 84.8   | 60.8  | 73.2  |
| 163.1  | 122.9  | 172.7  | 161.2 | 48.3  | 252.8  | 136.2  | 55.7  | 71.0  |
| 60.6   | 46.8   | 50.5   | 77.4  | 20.8  | 965.3  | 717.7  | 7.4   | 3.4   |
| 57.1   | 50.0   | 41.3   | 33.7  | 13.0  | 63.0   | 37.4   | 80.8  | 74.8  |
| 76.5   | 58.1   | 82.5   | 83.5  | 40.3  | 293.5  | 200.8  | 50.3  | 101.3 |
| 56.0   | 36.1   | 39.8   | 21.4  | 7.3   | 37.2   | 21.7   | 42.8  | 74.4  |
| 18.7   | 19.0   | 27.9   | 58.5  | 11.5  | 25.9   | 23.4   | 11.9  | 4.7   |
| 349.4  | 351.4  | 365.5  | 388.0 | 159.5 | 463.1  | 338.0  | 42.8  | 59.7  |
| 256.0  | 257.0  | 318.4  | 358.7 | 112.7 | 220.7  | 151.2  | 30.6  | 62.6  |
| 146.4  | 163.6  | 123.2  | 149.7 | 51.9  | 1140.5 | 871.3  | 10.9  | 8.3   |
| 70.7   | 55.6   | 68.1   | 71.8  | 25.9  | 233.6  | 188.1  | 53.2  | 68.9  |
| 256.0  | 260.0  | 337.8  | 122.0 | 147.5 | 2526.0 | 2265.4 | 29.1  | 22.3  |
| 153.3  | 190.1  | 156.7  | 87.1  | 68.0  | 125.2  | 88.9   | 8.9   | 16.3  |
| 12.3   | 10.0   | 13.4   | 9.2   | 3.6   | 17.3   | 9.4    | 119.6 | 131.7 |
| 220.4  | 149.4  | 209.0  | 177.7 | 47.2  | 354.5  | 339.3  | 52.8  | 52.7  |
| 152.7  | 149.0  | 142.2  | 121.5 | 50.1  | 254.8  | 147.4  | 49.4  | 58.0  |
| 98.1   | 86.2   | 72.5   | 95.9  | 21.9  | 113.1  | 57.7   | 4.6   | 18.5  |
| 82.1   | 109.0  | 84.0   | 30.7  | 13.0  | 69.9   | 73.3   | 41.5  | 56.7  |
| 2.7    | 2.0    | 2.0    | 1.6   | 5.4   | 7.1    | 0.7    | 5.5   | 1.8   |
| 2.0    | 1.7    | 0.8    | 2.0   | 3.5   | 1.8    | 1.9    | 1.2   | 1.5   |
| 3.1    | 8.0    | 8.8    | 5.2   | 1.2   | 214.6  | 162.2  | 51.7  | 16.0  |
| 383.0  | 342.0  | 337.8  | 192.0 | 91.4  | 1918.3 | 1187.5 | 241.6 | 215.3 |
| 101.5  | 90.8   | 74.9   | 55.7  | 20.6  | 113.0  | 85.1   | 95.6  | 90.4  |



|        |        |        |        |       |        |        |       |       |
|--------|--------|--------|--------|-------|--------|--------|-------|-------|
| 106.4  | 92.9   | 83.4   | 68.2   | 30.3  | 91.4   | 65.6   | 38.0  | 42.6  |
| 58.9   | 23.0   | 35.0   | 26.2   | 12.4  | 119.4  | 86.8   | 88.0  | 104.2 |
| 1.2    | 1.0    | 0.9    | 0.5    | 0.3   | 2.8    | 0.8    | 1.2   | 3.7   |
| 204.0  | 193.4  | 315.8  | 358.5  | 80.6  | 141.9  | 99.1   | 13.2  | 13.7  |
| 56.4   | 79.9   | 80.4   | 47.0   | 27.3  | 8.1    | 2.9    | 18.3  | 1.7   |
| 142.6  | 127.4  | 92.6   | 113.8  | 61.0  | 113.3  | 83.0   | 21.9  | 34.8  |
| 54.7   | 46.9   | 24.6   | 20.8   | 12.6  | 39.0   | 26.7   | 4.1   | 27.1  |
| 684.7  | 838.2  | 677.0  | 487.8  | 276.0 | 985.3  | 357.5  | 20.9  | 23.0  |
| 3.4    | 1.0    | 1.6    | 1.1    | 1.0   | 1.8    | 3.3    | 1.7   | 2.2   |
| 281.7  | 340.4  | 309.0  | 322.5  | 124.0 | 814.1  | 662.7  | 32.4  | 31.1  |
| 255.3  | 243.6  | 300.1  | 416.5  | 106.8 | 240.5  | 142.6  | 44.9  | 77.3  |
| 34.5   | 26.0   | 29.9   | 23.1   | 21.2  | 99.7   | 56.9   | 29.5  | 38.3  |
| 79.2   | 74.9   | 94.6   | 67.4   | 22.7  | 164.1  | 129.4  | 33.9  | 44.1  |
| 11.3   | 33.3   | 33.8   | 34.5   | 12.7  | 29.5   | 20.4   | 27.1  | 43.0  |
| 1472.5 | 1422.0 | 1505.6 | 1401.2 | 436.1 | 773.5  | 539.4  | 38.6  | 82.8  |
| 391.2  | 400.4  | 398.9  | 330.8  | 151.1 | 2599.2 | 1376.7 | 497.5 | 589.2 |
| 104.8  | 107.7  | 103.4  | 122.5  | 36.9  | 137.2  | 63.9   | 12.3  | 30.9  |
| 46.8   | 73.9   | 60.8   | 16.0   | 16.3  | 470.7  | 327.7  | 60.4  | 57.5  |
| 478.4  | 291.4  | 341.0  | 377.5  | 99.7  | 195.9  | 177.8  | 29.9  | 25.7  |
| 196.7  | 92.9   | 128.8  | 179.9  | 45.2  | 391.7  | 297.5  | 81.9  | 107.6 |
| 505.7  | 495.2  | 449.2  | 228.8  | 161.4 | 2600.8 | 1323.6 | 109.9 | 153.2 |
| 913.2  | 873.6  | 885.8  | 978.1  | 306.5 | 767.2  | 368.3  | 64.2  | 68.1  |
| 508.6  | 441.0  | 422.3  | 369.4  | 154.3 | 584.0  | 504.6  | 93.7  | 151.3 |
| 41.7   | 76.3   | 74.7   | 62.2   | 22.1  | 103.5  | 58.5   | 44.9  | 63.0  |
| 10.3   | 8.9    | 3.8    | 10.8   | 8.0   | 5.3    | 7.2    | 4.1   | 16.2  |
| 192.1  | 122.0  | 138.8  | 71.5   | 40.7  | 146.3  | 115.3  | 136.2 | 175.7 |
| 222.5  | 243.9  | 318.6  | 259.1  | 64.7  | 302.0  | 263.8  | 15.5  | 29.2  |
| 81.1   | 60.4   | 69.6   | 84.6   | 27.0  | 121.5  | 61.3   | 24.4  | 43.5  |
| 91.7   | 79.0   | 90.1   | 94.1   | 34.8  | 219.4  | 158.5  | 45.6  | 63.8  |
| 258.4  | 254.2  | 268.4  | 177.9  | 101.6 | 292.9  | 190.1  | 32.3  | 61.0  |
| 92.0   | 58.7   | 63.0   | 40.3   | 12.6  | 469.8  | 269.9  | 29.8  | 44.1  |
| 1.3    | 5.8    | 1.6    | 1.6    | 0.9   | 2.5    | 0.5    | 2.0   | 4.0   |
| 87.9   | 68.1   | 83.2   | 100.1  | 23.4  | 96.2   | 42.5   | 36.8  | 50.5  |
| 0.7    | 6.0    | 7.0    | 5.8    | 1.6   | 68.7   | 26.8   | 7.3   | 6.9   |
| 84.0   | 75.9   | 59.9   | 59.7   | 24.1  | 109.1  | 73.7   | 32.6  | 34.0  |
| 392.6  | 235.9  | 271.6  | 237.6  | 88.7  | 588.4  | 319.4  | 122.1 | 92.9  |
| 51.5   | 35.3   | 53.4   | 30.6   | 13.1  | 58.9   | 33.7   | 20.8  | 10.7  |
| 475.5  | 581.7  | 438.2  | 382.4  | 146.7 | 528.0  | 304.2  | 165.3 | 218.7 |
| 65.9   | 77.1   | 122.8  | 89.0   | 21.7  | 227.0  | 146.0  | 79.4  | 79.1  |
| 47.3   | 30.5   | 20.7   | 34.6   | 17.1  | 148.5  | 146.2  | 71.5  | 46.6  |
| 114.0  | 75.8   | 79.7   | 72.7   | 34.0  | 77.2   | 73.6   | 152.3 | 174.0 |
| 152.2  | 153.2  | 122.1  | 139.4  | 49.5  | 234.8  | 183.9  | 55.8  | 70.9  |
| 84.6   | 87.6   | 67.9   | 42.1   | 25.7  | 99.5   | 86.6   | 43.3  | 48.0  |
| 129.3  | 121.9  | 149.7  | 169.3  | 57.7  | 261.0  | 190.1  | 24.9  | 27.5  |
| 200.9  | 153.3  | 258.8  | 264.5  | 95.9  | 231.5  | 176.8  | 73.5  | 106.5 |
| 38.0   | 36.8   | 29.2   | 25.0   | 11.6  | 92.7   | 55.4   | 19.5  | 31.0  |
| 57.1   | 48.5   | 55.9   | 62.3   | 17.5  | 80.3   | 78.6   | 60.3  | 71.4  |
| 205.2  | 214.2  | 118.1  | 72.9   | 45.1  | 761.7  | 476.2  | 57.8  | 77.1  |
| 64.3   | 49.4   | 52.9   | 64.4   | 21.1  | 114.6  | 83.8   | 89.5  | 63.9  |
| 724.2  | 653.1  | 585.4  | 500.8  | 130.8 | 453.6  | 369.6  | 131.6 | 152.4 |
| 15.3   | 14.3   | 9.0    | 0.8    | 2.4   | 3.6    | 4.3    | 22.5  | 28.9  |
| 74.4   | 96.2   | 93.4   | 81.6   | 26.0  | 738.0  | 645.7  | 38.4  | 69.6  |
| 67.0   | 69.8   | 50.5   | 48.7   | 18.9  | 117.2  | 80.0   | 73.1  | 109.5 |

|       |       |       |        |       |       |       |       |       |
|-------|-------|-------|--------|-------|-------|-------|-------|-------|
| 37.5  | 40.7  | 22.6  | 32.8   | 7.2   | 172.5 | 137.8 | 49.4  | 50.9  |
| 2.5   | 0.9   | 2.7   | 10.4   | 0.5   | 4.8   | 0.8   | 33.5  | 52.3  |
| 53.3  | 67.2  | 72.4  | 76.8   | 25.5  | 84.1  | 58.6  | 10.3  | 15.0  |
| 77.8  | 77.6  | 77.9  | 85.9   | 21.2  | 193.1 | 139.5 | 10.0  | 31.2  |
| 7.3   | 3.3   | 1.1   | 0.7    | 4.2   | 3.8   | 1.2   | 8.9   | 4.7   |
| 57.5  | 52.9  | 57.6  | 81.2   | 17.2  | 174.6 | 138.6 | 60.4  | 99.5  |
| 125.1 | 119.8 | 111.8 | 76.9   | 49.8  | 262.7 | 110.5 | 35.3  | 26.8  |
| 15.8  | 1.5   | 14.8  | 17.8   | 0.4   | 317.9 | 211.9 | 67.7  | 53.5  |
| 49.9  | 44.0  | 61.2  | 59.3   | 13.6  | 226.6 | 116.0 | 80.7  | 107.3 |
| 186.2 | 166.9 | 179.4 | 155.6  | 51.6  | 596.3 | 466.1 | 81.8  | 123.4 |
| 3.3   | 4.3   | 11.9  | 21.8   | 3.4   | 109.9 | 110.3 | 107.0 | 116.1 |
| 476.2 | 399.1 | 481.8 | 591.0  | 155.8 | 844.2 | 583.1 | 30.5  | 30.2  |
| 178.7 | 149.1 | 192.9 | 137.1  | 57.9  | 134.1 | 74.8  | 26.5  | 20.7  |
| 16.1  | 20.9  | 8.0   | 16.2   | 6.3   | 14.8  | 7.2   | 2.0   | 4.5   |
| 130.1 | 107.6 | 105.0 | 83.2   | 49.6  | 95.0  | 82.2  | 6.9   | 7.3   |
| 670.3 | 692.2 | 981.8 | 1098.5 | 348.8 | 978.3 | 755.0 | 53.1  | 73.7  |
| 163.8 | 149.7 | 169.1 | 208.4  | 60.9  | 223.9 | 160.5 | 50.3  | 79.1  |
| 24.3  | 20.2  | 27.2  | 22.2   | 9.3   | 32.9  | 8.3   | 24.2  | 31.0  |
| 73.5  | 53.4  | 49.0  | 41.9   | 19.5  | 112.3 | 99.3  | 32.9  | 26.3  |
| 127.5 | 179.5 | 186.0 | 181.7  | 78.6  | 155.4 | 92.6  | 11.2  | 9.8   |
| 120.5 | 93.0  | 105.2 | 99.1   | 38.6  | 173.6 | 120.9 | 115.3 | 125.7 |
| 284.4 | 224.8 | 256.3 | 258.0  | 83.8  | 609.4 | 399.9 | 134.1 | 173.3 |
| 54.8  | 35.5  | 36.8  | 35.5   | 17.4  | 108.0 | 117.3 | 6.6   | 9.5   |
| 26.2  | 18.7  | 24.4  | 20.7   | 15.6  | 151.9 | 102.4 | 3.6   | 26.0  |
| 108.1 | 124.1 | 130.0 | 139.8  | 61.9  | 197.6 | 107.5 | 61.1  | 58.8  |
| 645.2 | 715.2 | 641.1 | 705.3  | 296.5 | 844.7 | 724.3 | 92.8  | 120.7 |
| 150.1 | 184.9 | 190.0 | 210.1  | 55.8  | 153.9 | 88.9  | 71.1  | 87.8  |
| 89.5  | 90.1  | 80.8  | 64.7   | 28.4  | 134.1 | 64.4  | 46.5  | 89.5  |
| 210.0 | 193.6 | 198.3 | 200.1  | 67.2  | 440.6 | 330.7 | 119.6 | 159.2 |
| 35.2  | 39.5  | 37.5  | 51.2   | 13.5  | 339.0 | 318.1 | 9.5   | 16.7  |
| 100.3 | 123.2 | 61.1  | 30.3   | 39.9  | 247.3 | 112.3 | 69.1  | 67.1  |
| 70.5  | 72.4  | 57.6  | 41.8   | 30.8  | 55.6  | 26.9  | 72.2  | 93.2  |
| 87.7  | 82.6  | 86.1  | 32.9   | 25.7  | 181.9 | 110.4 | 40.3  | 37.6  |
| 44.9  | 47.0  | 52.3  | 60.5   | 26.9  | 40.1  | 20.1  | 38.2  | 39.9  |
| 179.0 | 125.6 | 145.7 | 118.0  | 54.7  | 169.2 | 106.4 | 104.3 | 173.6 |
| 201.7 | 182.2 | 177.9 | 132.2  | 86.5  | 177.5 | 121.3 | 103.9 | 105.5 |
| 417.6 | 383.8 | 346.3 | 318.2  | 125.6 | 480.5 | 358.2 | 332.8 | 453.9 |
| 14.0  | 37.9  | 36.1  | 30.5   | 18.6  | 121.1 | 72.2  | 56.5  | 35.5  |
| 416.4 | 347.7 | 255.6 | 156.0  | 111.4 | 5.6   | 20.5  | 255.0 | 373.3 |
| 2.7   | 1.8   | 4.8   | 1.7    | 1.3   | 29.7  | 27.1  | 1.8   | 6.0   |
| 88.8  | 83.5  | 96.8  | 122.7  | 53.5  | 212.2 | 119.1 | 87.2  | 87.2  |
| 224.8 | 201.6 | 225.7 | 161.3  | 60.1  | 162.4 | 114.8 | 26.9  | 50.0  |
| 2.0   | 1.1   | 2.1   | 0.8    | 0.3   | 123.5 | 135.7 | 1.5   | 5.5   |
| 62.8  | 56.2  | 55.3  | 59.8   | 28.1  | 111.5 | 69.6  | 4.2   | 6.3   |
| 36.0  | 32.1  | 51.1  | 34.3   | 21.2  | 71.8  | 66.8  | 38.7  | 26.4  |
| 25.7  | 18.0  | 20.0  | 15.0   | 5.3   | 944.0 | 546.4 | 314.5 | 406.9 |
| 559.5 | 424.9 | 431.9 | 392.4  | 123.0 | 488.2 | 535.8 | 32.7  | 52.8  |
| 374.7 | 401.7 | 449.6 | 401.5  | 171.8 | 357.9 | 256.1 | 96.9  | 118.7 |
| 271.6 | 179.2 | 245.4 | 186.0  | 68.7  | 362.9 | 212.3 | 133.0 | 121.4 |
| 126.7 | 109.3 | 120.8 | 115.6  | 39.6  | 204.9 | 114.5 | 51.1  | 84.0  |
| 58.8  | 30.2  | 57.8  | 39.5   | 18.4  | 53.7  | 33.2  | 7.2   | 16.6  |
| 130.2 | 99.3  | 153.4 | 201.1  | 50.4  | 343.8 | 242.1 | 45.6  | 68.0  |
| 160.1 | 137.7 | 146.8 | 181.9  | 51.1  | 273.8 | 202.5 | 88.0  | 118.5 |

|        |        |       |       |       |        |        |       |       |
|--------|--------|-------|-------|-------|--------|--------|-------|-------|
| 30.7   | 29.1   | 27.2  | 12.2  | 8.3   | 78.2   | 62.9   | 7.9   | 11.5  |
| 2.3    | 2.1    | 1.4   | 1.0   | 0.8   | 2.6    | 2.6    | 1.5   | 2.7   |
| 3.4    | 4.8    | 3.9   | 8.6   | 2.4   | 12.3   | 8.7    | 25.3  | 39.9  |
| 152.7  | 132.4  | 167.8 | 111.4 | 58.2  | 242.9  | 189.6  | 36.8  | 42.8  |
| 26.5   | 22.4   | 25.7  | 25.6  | 11.0  | 6.3    | 2.4    | 1.2   | 9.9   |
| 322.6  | 284.5  | 316.6 | 172.4 | 78.8  | 513.2  | 236.3  | 81.8  | 96.2  |
| 36.9   | 31.0   | 34.8  | 17.3  | 23.3  | 63.2   | 54.4   | 4.2   | 3.8   |
| 188.0  | 228.3  | 194.6 | 161.0 | 74.1  | 73.2   | 60.9   | 0.4   | 3.5   |
| 1136.8 | 1072.8 | 991.6 | 832.8 | 336.2 | 1427.8 | 1290.6 | 245.4 | 268.2 |
| 85.1   | 90.7   | 75.2  | 85.0  | 30.7  | 203.2  | 134.4  | 9.0   | 14.5  |
| 572.9  | 559.2  | 562.1 | 536.3 | 233.3 | 642.8  | 529.0  | 138.2 | 248.9 |
| 113.0  | 88.9   | 97.1  | 35.1  | 30.6  | 58.9   | 33.2   | 40.3  | 66.9  |
| 16.3   | 17.8   | 17.4  | 16.5  | 9.9   | 159.2  | 199.2  | 3.2   | 8.7   |
| 151.8  | 178.8  | 113.0 | 158.4 | 64.9  | 134.0  | 118.6  | 59.1  | 80.3  |
| 123.5  | 142.2  | 121.8 | 112.0 | 51.9  | 219.5  | 206.3  | 25.9  | 40.8  |
| 250.2  | 245.5  | 261.3 | 232.7 | 83.7  | 490.1  | 330.5  | 35.5  | 60.1  |
| 7.3    | 4.6    | 3.0   | 10.2  | 0.8   | 61.1   | 42.9   | 2.1   | 25.7  |
| 98.0   | 117.9  | 103.3 | 134.8 | 57.3  | 69.1   | 25.2   | 40.4  | 98.2  |
| 118.5  | 142.5  | 104.3 | 102.6 | 32.3  | 555.0  | 496.2  | 40.3  | 76.2  |
| 280.3  | 239.7  | 300.3 | 303.0 | 101.2 | 559.9  | 358.5  | 112.3 | 122.4 |
| 8.1    | 13.4   | 18.8  | 14.5  | 2.0   | 16.4   | 9.3    | 21.0  | 26.6  |
| 27.1   | 29.0   | 21.1  | 15.7  | 9.9   | 221.8  | 282.8  | 6.2   | 8.6   |
| 70.1   | 63.6   | 43.8  | 53.2  | 19.6  | 401.6  | 293.8  | 147.8 | 156.2 |
| 836.2  | 641.8  | 652.6 | 596.1 | 228.1 | 395.0  | 178.7  | 13.3  | 31.8  |
| 234.9  | 241.7  | 302.7 | 350.6 | 86.7  | 217.8  | 152.5  | 38.0  | 40.1  |
| 6.8    | 16.6   | 2.8   | 12.5  | 0.8   | 27.1   | 21.8   | 14.9  | 10.5  |
| 312.8  | 318.7  | 240.6 | 132.6 | 112.0 | 780.7  | 340.4  | 53.2  | 48.9  |
| 156.8  | 138.7  | 159.4 | 169.0 | 89.1  | 130.1  | 79.3   | 22.7  | 37.0  |
| 637.2  | 693.0  | 616.0 | 565.2 | 267.2 | 459.0  | 347.4  | 48.8  | 48.5  |
| 53.0   | 64.4   | 52.1  | 23.3  | 10.2  | 123.8  | 58.9   | 5.7   | 6.4   |
| 198.1  | 125.3  | 117.8 | 100.1 | 29.4  | 337.8  | 304.1  | 89.7  | 97.9  |
| 2.2    | 2.2    | 3.1   | 3.9   | 3.8   | 2.9    | 1.0    | 5.3   | 4.6   |
| 635.3  | 620.0  | 958.7 | 692.3 | 211.1 | 1601.6 | 1100.5 | 65.8  | 67.5  |
| 685.7  | 707.9  | 608.8 | 532.2 | 251.4 | 1194.7 | 912.2  | 95.2  | 107.6 |
| 61.7   | 79.8   | 60.5  | 92.1  | 28.3  | 84.3   | 57.9   | 27.2  | 20.6  |
| 15.4   | 20.7   | 17.9  | 20.7  | 14.5  | 42.7   | 31.3   | 24.0  | 10.5  |
| 51.6   | 22.4   | 20.9  | 15.3  | 14.3  | 826.7  | 674.4  | 23.5  | 49.8  |
| 2.1    | 2.7    | 2.1   | 2.4   | 1.3   | 2.5    | 3.1    | 1.7   | 1.9   |
| 28.5   | 13.6   | 21.1  | 22.2  | 17.9  | 40.6   | 6.6    | 13.8  | 24.4  |
| 217.2  | 200.4  | 169.2 | 85.1  | 72.3  | 362.6  | 259.3  | 107.5 | 151.8 |
| 1384.5 | 1509.5 | 788.9 | 358.6 | 415.8 | 1357.4 | 1223.7 | 10.9  | 11.6  |
| 368.1  | 357.6  | 413.5 | 363.7 | 117.6 | 196.2  | 118.2  | 32.7  | 60.7  |
| 178.2  | 149.6  | 146.9 | 124.8 | 57.9  | 139.6  | 112.1  | 61.2  | 75.3  |
| 218.8  | 209.0  | 242.7 | 250.3 | 61.2  | 963.4  | 781.7  | 50.3  | 67.2  |
| 73.0   | 49.7   | 58.8  | 36.7  | 18.8  | 121.2  | 107.7  | 9.4   | 20.6  |
| 62.6   | 94.6   | 61.0  | 3.4   | 15.4  | 82.5   | 53.8   | 5.5   | 6.5   |
| 139.0  | 118.4  | 142.1 | 239.6 | 62.5  | 99.3   | 95.6   | 123.8 | 201.6 |
| 70.3   | 30.8   | 61.4  | 28.3  | 16.2  | 116.1  | 58.1   | 18.5  | 25.9  |
| 201.8  | 248.5  | 239.2 | 242.6 | 81.9  | 320.5  | 255.4  | 54.5  | 52.6  |
| 121.9  | 125.3  | 133.2 | 145.7 | 35.1  | 154.6  | 113.7  | 30.8  | 34.1  |
| 106.4  | 46.1   | 36.2  | 35.6  | 12.1  | 160.4  | 67.3   | 11.7  | 12.3  |
| 17.4   | 12.7   | 14.0  | 19.8  | 13.5  | 19.8   | 23.4   | 5.8   | 24.4  |
| 40.0   | 14.8   | 23.4  | 36.2  | 12.1  | 51.5   | 45.9   | 2.2   | 1.0   |

|        |        |        |        |       |        |        |       |       |
|--------|--------|--------|--------|-------|--------|--------|-------|-------|
| 29.5   | 35.1   | 37.6   | 33.4   | 9.1   | 25.1   | 28.4   | 18.0  | 51.8  |
| 15.3   | 6.4    | 15.4   | 7.0    | 7.4   | 54.6   | 42.2   | 37.9  | 20.6  |
| 410.1  | 380.2  | 471.3  | 473.7  | 134.7 | 192.6  | 161.2  | 34.1  | 33.7  |
| 1792.7 | 1849.3 | 1854.8 | 1552.2 | 699.3 | 1834.9 | 1328.8 | 140.6 | 158.4 |
| 526.4  | 464.0  | 494.8  | 432.0  | 142.5 | 2201.1 | 1721.3 | 38.1  | 26.1  |
| 138.9  | 81.5   | 119.3  | 83.0   | 24.6  | 510.1  | 427.1  | 200.3 | 230.8 |
| 16.6   | 22.5   | 34.7   | 32.9   | 11.9  | 94.7   | 79.5   | 25.0  | 33.0  |
| 62.4   | 42.2   | 40.2   | 36.2   | 19.5  | 95.1   | 51.5   | 26.7  | 37.4  |
| 572.1  | 524.0  | 531.6  | 447.2  | 169.0 | 872.4  | 546.9  | 207.6 | 261.8 |
| 139.6  | 192.7  | 142.5  | 104.4  | 61.2  | 90.1   | 93.6   | 40.9  | 48.9  |
| 460.4  | 408.4  | 490.8  | 469.8  | 158.3 | 1093.5 | 844.1  | 48.7  | 79.3  |
| 257.5  | 320.6  | 292.8  | 266.2  | 108.5 | 184.0  | 114.4  | 49.8  | 72.0  |
| 80.9   | 78.7   | 70.5   | 40.2   | 25.7  | 72.1   | 59.5   | 54.1  | 60.1  |
| 28.5   | 18.6   | 7.3    | 22.8   | 2.5   | 27.8   | 12.1   | 22.9  | 31.9  |
| 673.9  | 730.3  | 458.0  | 472.5  | 300.3 | 716.4  | 536.6  | 274.4 | 474.9 |
| 9.3    | 6.9    | 5.6    | 3.9    | 0.7   | 2.2    | 1.8    | 1.0   | 1.0   |
| 664.1  | 568.9  | 613.5  | 414.0  | 166.2 | 680.9  | 551.3  | 68.4  | 103.1 |
| 11.8   | 24.0   | 36.7   | 23.2   | 14.7  | 40.9   | 30.2   | 56.3  | 72.4  |
| 322.3  | 320.1  | 357.9  | 446.6  | 153.3 | 495.6  | 339.4  | 21.0  | 18.7  |
| 11.5   | 13.2   | 8.0    | 1.7    | 12.7  | 11.7   | 5.2    | 19.9  | 31.1  |
| 54.3   | 30.6   | 26.7   | 36.4   | 18.6  | 84.7   | 34.3   | 19.0  | 34.0  |
| 44.8   | 57.6   | 56.2   | 36.3   | 13.3  | 19.8   | 12.4   | 102.2 | 135.5 |
| 334.0  | 307.2  | 293.6  | 147.2  | 115.2 | 78.5   | 66.2   | 3.4   | 7.5   |
| 57.6   | 40.1   | 61.9   | 37.3   | 17.3  | 73.8   | 80.2   | 65.4  | 70.6  |
| 72.1   | 74.6   | 58.1   | 53.5   | 35.3  | 248.5  | 249.9  | 114.1 | 100.9 |
| 80.9   | 66.4   | 96.0   | 35.9   | 38.7  | 155.0  | 107.1  | 80.8  | 90.6  |
| 260.9  | 235.7  | 308.5  | 382.6  | 117.1 | 432.4  | 306.4  | 198.6 | 358.0 |
| 6.7    | 16.2   | 12.1   | 7.3    | 11.6  | 60.3   | 37.7   | 228.5 | 280.4 |
| 93.2   | 117.1  | 116.2  | 125.1  | 47.6  | 166.6  | 159.6  | 19.6  | 33.5  |
| 23.2   | 39.3   | 36.5   | 18.0   | 14.6  | 106.4  | 76.5   | 15.0  | 19.0  |
| 16.0   | 10.7   | 17.8   | 21.4   | 5.9   | 32.2   | 18.3   | 25.6  | 28.6  |
| 6.4    | 4.8    | 3.7    | 5.7    | 9.1   | 430.9  | 263.8  | 4.5   | 3.1   |
| 13.2   | 0.7    | 13.9   | 2.7    | 7.7   | 1.8    | 0.8    | 2.1   | 1.7   |
| 230.5  | 209.4  | 216.8  | 178.5  | 81.8  | 347.5  | 321.5  | 47.7  | 95.8  |
| 862.0  | 895.6  | 824.6  | 627.3  | 388.8 | 361.6  | 238.8  | 129.7 | 129.9 |
| 160.0  | 119.0  | 137.3  | 78.7   | 18.2  | 68.7   | 51.8   | 60.7  | 71.6  |
| 62.0   | 82.2   | 77.3   | 76.2   | 28.7  | 219.2  | 119.8  | 64.9  | 100.3 |
| 6.5    | 5.3    | 7.1    | 1.6    | 4.1   | 3.0    | 1.2    | 21.6  | 3.5   |
| 760.6  | 776.4  | 759.7  | 705.8  | 242.4 | 850.1  | 770.8  | 95.4  | 134.3 |
| 68.9   | 52.4   | 61.8   | 90.9   | 18.9  | 267.0  | 180.9  | 38.6  | 38.7  |
| 164.8  | 210.8  | 179.4  | 119.5  | 71.3  | 322.8  | 237.6  | 53.3  | 76.3  |
| 147.7  | 147.9  | 143.1  | 81.8   | 49.0  | 184.1  | 116.3  | 76.0  | 71.2  |
| 196.4  | 181.6  | 143.8  | 187.5  | 72.4  | 260.1  | 197.2  | 78.4  | 78.1  |
| 90.1   | 77.2   | 86.2   | 43.6   | 36.1  | 43.4   | 42.1   | 110.8 | 105.6 |
| 276.1  | 184.1  | 225.1  | 148.9  | 92.4  | 598.3  | 356.5  | 249.7 | 306.6 |
| 315.6  | 192.0  | 282.4  | 106.1  | 63.0  | 576.1  | 307.0  | 97.0  | 70.5  |
| 106.0  | 85.9   | 108.0  | 64.9   | 36.5  | 370.0  | 287.2  | 72.0  | 117.0 |
| 83.9   | 108.5  | 91.2   | 102.2  | 31.1  | 219.1  | 121.9  | 47.5  | 39.9  |
| 15.6   | 14.1   | 5.9    | 10.2   | 0.4   | 80.6   | 34.8   | 42.9  | 46.4  |
| 288.8  | 333.4  | 208.3  | 66.1   | 93.4  | 630.2  | 329.5  | 111.3 | 126.5 |
| 80.7   | 60.2   | 52.2   | 50.6   | 21.7  | 40.3   | 20.0   | 44.3  | 71.2  |
| 68.6   | 45.1   | 62.5   | 64.3   | 24.6  | 106.2  | 81.5   | 45.0  | 68.7  |
| 127.2  | 140.1  | 131.8  | 138.2  | 42.8  | 262.4  | 188.5  | 88.3  | 93.3  |

|        |        |        |        |       |        |        |       |       |
|--------|--------|--------|--------|-------|--------|--------|-------|-------|
| 32.9   | 28.7   | 32.4   | 30.1   | 7.1   | 188.6  | 130.3  | 87.2  | 120.9 |
| 129.0  | 105.7  | 177.3  | 130.5  | 39.0  | 363.4  | 280.6  | 59.0  | 85.2  |
| 1.9    | 1.1    | 6.3    | 15.2   | 1.3   | 77.0   | 70.1   | 20.7  | 15.1  |
| 354.0  | 336.2  | 330.3  | 265.1  | 95.9  | 257.3  | 145.1  | 50.3  | 60.7  |
| 54.6   | 43.4   | 25.8   | 29.2   | 12.5  | 95.2   | 64.9   | 9.2   | 27.0  |
| 14.9   | 6.5    | 9.6    | 9.8    | 1.3   | 13.5   | 11.8   | 8.2   | 12.4  |
| 20.4   | 22.4   | 39.9   | 31.9   | 11.2  | 49.0   | 41.4   | 20.0  | 34.7  |
| 3.2    | 1.6    | 0.5    | 4.8    | 0.5   | 0.7    | 0.5    | 6.2   | 0.9   |
| 48.9   | 42.0   | 41.5   | 37.9   | 11.6  | 98.3   | 57.1   | 27.7  | 25.0  |
| 82.5   | 92.8   | 86.5   | 67.0   | 28.5  | 102.0  | 47.4   | 43.8  | 39.9  |
| 1.3    | 2.0    | 3.3    | 0.5    | 1.2   | 15.9   | 0.7    | 128.3 | 172.6 |
| 6.7    | 5.5    | 11.6   | 9.2    | 4.9   | 18.1   | 26.4   | 18.0  | 16.2  |
| 59.1   | 54.3   | 56.9   | 42.0   | 23.9  | 123.9  | 117.9  | 51.2  | 53.3  |
| 22.9   | 6.2    | 10.6   | 5.1    | 4.1   | 532.5  | 389.6  | 6.4   | 1.0   |
| 33.6   | 58.6   | 48.0   | 76.8   | 17.1  | 117.4  | 95.0   | 9.7   | 6.7   |
| 3.5    | 10.4   | 26.9   | 12.9   | 3.2   | 27.4   | 14.3   | 3.8   | 2.7   |
| 56.5   | 73.2   | 50.3   | 27.3   | 31.4  | 157.9  | 111.1  | 66.9  | 61.5  |
| 284.9  | 236.1  | 255.7  | 191.4  | 86.5  | 431.2  | 341.6  | 211.0 | 266.8 |
| 289.2  | 296.8  | 271.5  | 193.7  | 70.5  | 400.9  | 352.7  | 48.1  | 42.7  |
| 1807.0 | 1568.1 | 1790.3 | 1525.1 | 683.0 | 746.4  | 577.9  | 59.9  | 51.3  |
| 55.8   | 47.2   | 60.3   | 47.0   | 18.9  | 204.7  | 141.7  | 58.4  | 60.4  |
| 6.6    | 17.9   | 33.2   | 8.9    | 18.9  | 6.5    | 22.9   | 1.5   | 3.0   |
| 4.0    | 2.8    | 6.2    | 2.9    | 1.8   | 9.6    | 16.6   | 5.3   | 2.9   |
| 3.9    | 22.4   | 6.0    | 3.7    | 5.1   | 35.0   | 30.0   | 16.7  | 13.1  |
| 64.4   | 60.6   | 69.2   | 54.0   | 16.5  | 283.6  | 210.2  | 46.2  | 56.0  |
| 390.8  | 345.1  | 338.2  | 253.1  | 127.9 | 1349.9 | 847.4  | 83.1  | 81.5  |
| 5.8    | 4.6    | 7.9    | 7.9    | 3.0   | 1.4    | 10.8   | 0.7   | 2.4   |
| 7.2    | 10.6   | 15.3   | 3.2    | 1.6   | 6.8    | 4.3    | 16.6  | 26.6  |
| 1366.7 | 1283.5 | 1474.9 | 1470.2 | 595.3 | 1424.0 | 1085.1 | 345.5 | 459.5 |
| 78.8   | 117.5  | 98.3   | 94.6   | 46.8  | 470.7  | 364.2  | 21.0  | 9.4   |
| 834.2  | 708.8  | 754.9  | 435.5  | 174.1 | 1291.9 | 1038.9 | 110.3 | 92.3  |
| 125.8  | 115.1  | 99.9   | 92.4   | 60.8  | 217.8  | 182.3  | 185.0 | 118.8 |
| 41.6   | 45.9   | 40.9   | 37.2   | 15.0  | 43.1   | 37.1   | 16.2  | 18.1  |
| 31.2   | 27.4   | 15.3   | 10.3   | 8.6   | 50.4   | 27.9   | 11.0  | 24.3  |
| 54.2   | 61.0   | 37.3   | 32.4   | 19.7  | 12.7   | 3.5    | 4.3   | 17.6  |
| 2.4    | 0.2    | 1.5    | 1.4    | 3.2   | 107.1  | 107.1  | 3.0   | 5.2   |
| 40.4   | 40.7   | 43.1   | 49.3   | 9.8   | 55.6   | 53.0   | 40.6  | 47.8  |
| 1013.0 | 1081.1 | 843.8  | 1004.8 | 407.0 | 1223.0 | 1104.9 | 42.2  | 31.1  |
| 301.7  | 259.9  | 248.7  | 234.6  | 110.1 | 409.5  | 370.7  | 17.1  | 13.4  |
| 828.5  | 930.1  | 815.4  | 787.7  | 270.1 | 1178.7 | 767.8  | 138.8 | 133.9 |
| 141.6  | 143.8  | 148.8  | 96.8   | 41.2  | 104.8  | 73.5   | 12.8  | 26.4  |
| 1.2    | 2.5    | 1.1    | 1.0    | 1.2   | 633.7  | 432.5  | 468.6 | 679.0 |
| 132.2  | 95.6   | 119.4  | 130.1  | 41.7  | 211.8  | 155.2  | 36.0  | 29.1  |
| 200.5  | 200.2  | 206.2  | 179.3  | 95.2  | 383.2  | 201.3  | 73.3  | 60.3  |
| 98.9   | 72.9   | 84.7   | 82.8   | 34.8  | 106.5  | 81.8   | 48.4  | 67.6  |
| 207.3  | 188.4  | 218.6  | 183.3  | 53.8  | 213.8  | 180.8  | 205.7 | 211.2 |
| 535.7  | 436.8  | 454.8  | 256.8  | 139.8 | 763.5  | 482.1  | 97.5  | 132.7 |
| 3.4    | 1.9    | 5.4    | 1.8    | 1.4   | 11.4   | 10.0   | 289.8 | 363.5 |
| 118.5  | 83.5   | 112.7  | 153.6  | 51.6  | 101.1  | 55.2   | 21.7  | 26.8  |
| 85.6   | 53.8   | 40.6   | 40.3   | 25.1  | 118.6  | 82.9   | 66.4  | 54.2  |
| 71.7   | 93.7   | 89.4   | 97.8   | 24.2  | 122.1  | 62.6   | 18.9  | 35.9  |
| 150.0  | 130.4  | 115.6  | 101.1  | 47.3  | 131.1  | 100.3  | 22.6  | 28.7  |
| 10.0   | 7.7    | 13.2   | 26.2   | 3.9   | 30.0   | 17.0   | 1.1   | 0.8   |

|       |       |        |       |       |        |       |       |       |
|-------|-------|--------|-------|-------|--------|-------|-------|-------|
| 199.5 | 180.3 | 204.9  | 196.4 | 89.3  | 188.6  | 149.2 | 130.3 | 153.1 |
| 1.3   | 4.5   | 0.9    | 0.5   | 2.1   | 0.4    | 0.7   | 4.2   | 0.8   |
| 12.7  | 7.7   | 5.3    | 2.0   | 1.0   | 14.7   | 3.3   | 19.9  | 30.3  |
| 20.9  | 21.5  | 33.0   | 18.8  | 7.8   | 3.8    | 4.6   | 27.4  | 14.0  |
| 389.6 | 351.5 | 414.3  | 310.4 | 144.4 | 425.8  | 272.9 | 70.2  | 75.9  |
| 29.2  | 3.9   | 16.8   | 13.9  | 13.4  | 38.0   | 35.4  | 1.5   | 3.3   |
| 17.7  | 16.4  | 12.1   | 5.6   | 0.8   | 17.2   | 12.0  | 3.9   | 10.1  |
| 2.9   | 2.9   | 2.2    | 1.6   | 0.7   | 45.9   | 19.7  | 2.0   | 1.3   |
| 89.8  | 69.1  | 64.7   | 56.1  | 17.6  | 213.4  | 168.4 | 67.3  | 65.6  |
| 33.0  | 27.9  | 18.4   | 14.6  | 6.2   | 81.3   | 30.6  | 38.9  | 46.5  |
| 142.6 | 132.8 | 121.1  | 82.2  | 54.2  | 263.9  | 141.6 | 75.4  | 53.0  |
| 10.9  | 20.3  | 12.5   | 2.5   | 4.8   | 4.4    | 12.4  | 5.1   | 3.7   |
| 78.3  | 73.8  | 60.2   | 31.0  | 20.4  | 49.4   | 32.4  | 35.8  | 65.7  |
| 284.6 | 294.4 | 266.0  | 238.4 | 113.5 | 285.3  | 204.7 | 81.8  | 65.4  |
| 26.1  | 37.1  | 37.5   | 36.1  | 13.1  | 83.5   | 81.7  | 35.2  | 43.1  |
| 915.6 | 989.1 | 815.1  | 401.6 | 253.1 | 726.9  | 483.1 | 151.9 | 197.9 |
| 161.5 | 128.2 | 150.7  | 107.9 | 38.5  | 282.7  | 133.8 | 29.4  | 41.9  |
| 23.7  | 24.1  | 27.5   | 21.5  | 4.7   | 139.1  | 118.9 | 44.0  | 66.7  |
| 72.3  | 55.9  | 68.2   | 77.6  | 27.7  | 187.6  | 134.4 | 6.7   | 12.2  |
| 13.3  | 16.4  | 14.0   | 10.3  | 1.5   | 31.8   | 24.7  | 30.6  | 28.0  |
| 6.0   | 4.4   | 3.2    | 0.9   | 1.3   | 25.2   | 13.0  | 11.2  | 18.6  |
| 34.8  | 30.7  | 15.7   | 10.1  | 9.4   | 35.1   | 4.5   | 18.5  | 29.3  |
| 165.4 | 123.3 | 146.7  | 110.6 | 56.6  | 98.1   | 51.2  | 104.2 | 155.4 |
| 229.5 | 117.8 | 124.8  | 99.5  | 55.3  | 426.0  | 348.9 | 41.9  | 41.0  |
| 71.3  | 73.3  | 70.9   | 74.7  | 22.3  | 399.7  | 211.7 | 15.7  | 30.6  |
| 168.3 | 75.8  | 97.7   | 80.1  | 26.7  | 834.3  | 628.9 | 82.3  | 90.2  |
| 3.1   | 2.2   | 3.5    | 1.5   | 1.4   | 3.2    | 2.5   | 1.0   | 2.7   |
| 14.6  | 13.1  | 11.4   | 19.1  | 2.1   | 8.9    | 10.7  | 3.4   | 8.0   |
| 483.4 | 566.9 | 442.0  | 288.9 | 174.9 | 1550.3 | 968.7 | 77.6  | 111.5 |
| 497.8 | 328.4 | 398.0  | 217.7 | 106.0 | 948.0  | 775.8 | 217.8 | 257.3 |
| 50.6  | 42.7  | 62.2   | 75.3  | 23.3  | 112.7  | 84.2  | 26.6  | 55.4  |
| 41.9  | 40.6  | 42.8   | 27.3  | 11.5  | 63.0   | 33.0  | 7.8   | 18.6  |
| 236.4 | 221.4 | 163.7  | 105.7 | 94.1  | 167.7  | 151.2 | 26.6  | 33.4  |
| 162.4 | 73.2  | 108.5  | 114.2 | 26.4  | 113.3  | 93.5  | 15.5  | 46.0  |
| 12.4  | 11.4  | 22.9   | 2.0   | 5.6   | 10.7   | 5.8   | 3.9   | 3.3   |
| 21.8  | 14.7  | 23.6   | 13.7  | 1.2   | 11.3   | 10.9  | 21.8  | 67.5  |
| 110.4 | 110.7 | 110.0  | 91.3  | 51.2  | 558.6  | 361.8 | 33.5  | 45.6  |
| 317.3 | 292.8 | 289.0  | 234.5 | 106.8 | 20.9   | 22.4  | 10.5  | 3.5   |
| 10.9  | 10.3  | 15.5   | 21.1  | 2.9   | 24.6   | 6.9   | 0.8   | 2.5   |
| 41.1  | 27.4  | 32.0   | 23.8  | 14.8  | 65.8   | 52.5  | 36.0  | 29.1  |
| 8.8   | 3.4   | 7.8    | 16.1  | 9.6   | 5.9    | 4.6   | 20.0  | 20.8  |
| 25.3  | 42.4  | 42.0   | 46.5  | 21.7  | 59.0   | 73.5  | 4.6   | 1.5   |
| 156.6 | 125.9 | 125.1  | 108.2 | 45.1  | 178.3  | 74.1  | 54.5  | 62.0  |
| 661.0 | 621.9 | 662.1  | 670.3 | 185.1 | 994.7  | 747.7 | 155.6 | 239.6 |
| 660.9 | 617.3 | 1060.7 | 722.0 | 271.4 | 584.6  | 319.2 | 33.2  | 41.0  |
| 267.3 | 226.8 | 256.9  | 215.8 | 71.3  | 514.7  | 343.4 | 29.8  | 45.1  |
| 10.8  | 2.1   | 16.3   | 23.0  | 4.3   | 12.1   | 1.6   | 2.6   | 9.1   |
| 69.3  | 58.0  | 45.6   | 26.9  | 11.0  | 228.0  | 121.4 | 78.8  | 70.4  |
| 22.8  | 31.0  | 26.6   | 25.0  | 13.2  | 306.2  | 205.8 | 13.4  | 5.1   |
| 83.4  | 70.1  | 89.7   | 66.2  | 28.7  | 65.3   | 42.8  | 13.9  | 15.2  |
| 33.6  | 30.9  | 29.8   | 19.4  | 13.7  | 72.4   | 53.8  | 25.1  | 20.9  |
| 106.7 | 75.7  | 95.1   | 76.0  | 34.1  | 120.8  | 46.7  | 29.5  | 24.3  |
| 65.2  | 83.4  | 70.4   | 96.3  | 28.1  | 122.3  | 134.1 | 42.4  | 32.9  |

|        |       |       |       |       |        |        |       |       |
|--------|-------|-------|-------|-------|--------|--------|-------|-------|
| 73.3   | 58.4  | 61.0  | 63.9  | 24.9  | 95.6   | 70.5   | 23.7  | 24.9  |
| 81.8   | 82.0  | 88.3  | 77.0  | 32.4  | 177.3  | 90.9   | 44.9  | 37.8  |
| 51.2   | 40.8  | 32.5  | 28.5  | 12.2  | 179.2  | 128.2  | 207.6 | 283.5 |
| 82.5   | 57.2  | 72.1  | 46.3  | 39.8  | 235.3  | 104.5  | 50.4  | 61.2  |
| 8.2    | 9.4   | 8.8   | 13.0  | 8.1   | 13.2   | 11.8   | 6.5   | 15.3  |
| 1.5    | 1.8   | 1.9   | 0.9   | 0.4   | 1.5    | 2.3    | 1.1   | 1.2   |
| 422.2  | 428.9 | 460.8 | 424.1 | 200.9 | 620.2  | 385.8  | 58.8  | 89.1  |
| 412.1  | 355.6 | 353.9 | 374.4 | 138.4 | 175.7  | 139.0  | 89.2  | 89.4  |
| 28.7   | 11.1  | 11.5  | 8.6   | 11.5  | 24.4   | 19.7   | 14.9  | 23.5  |
| 7.1    | 2.3   | 2.3   | 4.0   | 4.2   | 10.7   | 1.7    | 0.9   | 13.3  |
| 2.9    | 0.7   | 2.3   | 7.8   | 0.3   | 0.7    | 0.4    | 4.4   | 3.3   |
| 15.8   | 3.6   | 5.0   | 12.4  | 5.3   | 13.0   | 7.1    | 22.8  | 25.4  |
| 145.6  | 131.6 | 141.4 | 136.8 | 55.6  | 98.6   | 82.7   | 96.3  | 127.3 |
| 33.0   | 28.6  | 38.5  | 36.2  | 0.5   | 63.7   | 25.3   | 39.8  | 50.4  |
| 374.9  | 319.6 | 332.1 | 205.7 | 120.8 | 372.0  | 265.8  | 45.1  | 79.1  |
| 86.3   | 64.3  | 48.7  | 48.4  | 16.9  | 163.1  | 79.2   | 27.9  | 26.1  |
| 154.5  | 99.0  | 130.6 | 98.5  | 52.5  | 335.9  | 192.7  | 16.2  | 21.9  |
| 226.7  | 176.6 | 201.2 | 157.0 | 65.6  | 187.2  | 162.9  | 151.5 | 200.3 |
| 72.3   | 42.6  | 38.4  | 40.6  | 12.6  | 154.7  | 103.1  | 21.1  | 27.2  |
| 60.2   | 51.4  | 48.7  | 36.7  | 14.6  | 93.5   | 84.0   | 43.8  | 44.0  |
| 361.6  | 335.5 | 391.5 | 252.5 | 136.0 | 462.3  | 444.3  | 83.8  | 120.4 |
| 104.5  | 87.0  | 106.8 | 112.0 | 21.7  | 138.3  | 75.8   | 42.3  | 45.8  |
| 50.7   | 63.0  | 53.8  | 45.8  | 39.2  | 57.1   | 36.6   | 6.7   | 10.8  |
| 21.9   | 29.9  | 35.9  | 57.7  | 19.9  | 132.4  | 88.5   | 2.2   | 2.9   |
| 44.5   | 42.2  | 23.7  | 33.4  | 19.0  | 153.1  | 94.9   | 17.3  | 10.1  |
| 32.0   | 42.4  | 26.1  | 18.4  | 14.5  | 224.1  | 183.9  | 99.1  | 80.8  |
| 596.1  | 638.8 | 649.8 | 390.7 | 208.8 | 545.3  | 372.8  | 217.0 | 227.9 |
| 10.9   | 14.6  | 10.2  | 11.7  | 3.5   | 8.2    | 2.3    | 4.5   | 9.1   |
| 66.7   | 62.3  | 87.8  | 71.3  | 31.1  | 142.5  | 86.0   | 46.2  | 35.1  |
| 191.2  | 170.0 | 150.5 | 194.0 | 73.7  | 473.1  | 342.2  | 33.1  | 27.7  |
| 54.9   | 56.8  | 56.8  | 42.1  | 11.7  | 52.9   | 50.1   | 4.4   | 4.6   |
| 372.7  | 322.7 | 351.9 | 283.1 | 85.5  | 742.8  | 428.1  | 60.1  | 98.0  |
| 54.7   | 40.6  | 37.9  | 24.9  | 17.7  | 37.3   | 39.2   | 2.1   | 12.9  |
| 165.2  | 137.9 | 149.0 | 71.6  | 27.6  | 128.1  | 82.2   | 73.3  | 112.0 |
| 1166.5 | 930.0 | 964.9 | 819.5 | 442.0 | 1805.3 | 1348.5 | 154.9 | 240.5 |
| 87.3   | 47.6  | 49.3  | 23.0  | 6.5   | 357.1  | 255.5  | 51.4  | 69.1  |
| 153.6  | 156.3 | 154.6 | 207.1 | 80.2  | 166.9  | 149.0  | 13.5  | 14.9  |
| 22.6   | 24.6  | 17.7  | 13.7  | 0.8   | 45.4   | 26.3   | 119.8 | 205.0 |
| 101.3  | 67.3  | 69.3  | 84.7  | 48.1  | 254.2  | 148.3  | 51.5  | 65.8  |
| 2.2    | 6.8   | 1.9   | 2.0   | 0.6   | 469.1  | 241.5  | 2.9   | 21.3  |
| 229.5  | 160.6 | 171.8 | 137.4 | 59.4  | 315.5  | 208.1  | 92.5  | 119.5 |
| 1.0    | 6.2   | 6.5   | 6.0   | 1.3   | 61.9   | 39.6   | 18.9  | 25.5  |
| 107.6  | 51.3  | 56.7  | 44.4  | 26.3  | 150.1  | 76.4   | 36.6  | 57.5  |
| 16.7   | 14.9  | 30.6  | 15.0  | 8.0   | 220.9  | 227.5  | 4.0   | 17.3  |
| 4.7    | 5.4   | 8.3   | 5.3   | 0.6   | 12.1   | 0.4    | 9.2   | 6.7   |
| 158.8  | 192.8 | 251.7 | 238.9 | 76.0  | 369.3  | 224.6  | 32.4  | 40.4  |
| 15.6   | 6.7   | 10.1  | 0.4   | 1.6   | 34.3   | 41.8   | 35.0  | 57.4  |
| 28.2   | 27.4  | 21.2  | 42.6  | 19.6  | 87.3   | 68.0   | 38.3  | 46.0  |
| 17.7   | 16.8  | 13.9  | 17.2  | 4.8   | 12.3   | 8.8    | 10.5  | 19.6  |
| 83.8   | 72.0  | 50.9  | 50.4  | 31.8  | 87.3   | 70.5   | 26.1  | 49.8  |
| 29.1   | 44.1  | 44.0  | 56.1  | 23.3  | 3.5    | 13.8   | 17.4  | 36.5  |
| 67.5   | 50.1  | 65.4  | 67.7  | 19.3  | 278.1  | 231.0  | 11.7  | 21.1  |
| 132.9  | 119.4 | 115.4 | 83.8  | 50.4  | 206.8  | 116.0  | 63.7  | 60.8  |

|       |       |       |       |       |        |        |       |       |
|-------|-------|-------|-------|-------|--------|--------|-------|-------|
| 46.0  | 38.6  | 33.6  | 37.7  | 10.8  | 40.8   | 6.2    | 12.9  | 14.0  |
| 83.9  | 49.7  | 73.2  | 75.3  | 22.1  | 126.0  | 93.9   | 8.7   | 11.1  |
| 114.4 | 75.9  | 68.2  | 54.2  | 36.1  | 110.3  | 79.3   | 252.1 | 373.5 |
| 164.7 | 128.5 | 126.6 | 124.8 | 51.4  | 259.6  | 262.2  | 18.3  | 24.6  |
| 1.0   | 2.1   | 7.8   | 4.5   | 0.8   | 1.7    | 0.8    | 0.8   | 2.1   |
| 226.8 | 236.4 | 207.9 | 205.5 | 110.6 | 1054.5 | 804.1  | 58.1  | 81.8  |
| 115.6 | 73.3  | 74.2  | 71.2  | 29.1  | 133.1  | 102.1  | 58.4  | 38.3  |
| 54.8  | 35.1  | 35.5  | 33.6  | 17.7  | 50.0   | 46.4   | 17.8  | 18.9  |
| 20.4  | 24.6  | 4.6   | 9.4   | 3.2   | 98.7   | 97.7   | 16.0  | 5.5   |
| 134.7 | 169.4 | 148.5 | 179.4 | 63.8  | 292.3  | 171.2  | 31.8  | 53.6  |
| 99.5  | 53.2  | 57.4  | 22.7  | 20.4  | 195.4  | 68.4   | 1.9   | 1.7   |
| 11.8  | 11.7  | 1.1   | 15.0  | 8.9   | 36.3   | 17.7   | 15.1  | 11.4  |
| 64.0  | 65.7  | 81.2  | 59.4  | 16.7  | 61.2   | 38.8   | 16.7  | 8.0   |
| 21.9  | 20.9  | 25.4  | 23.7  | 10.0  | 24.8   | 15.2   | 15.4  | 21.1  |
| 209.2 | 201.5 | 228.5 | 287.6 | 92.0  | 556.4  | 418.5  | 24.4  | 45.2  |
| 27.8  | 15.6  | 27.7  | 6.4   | 1.1   | 63.6   | 57.2   | 41.7  | 41.5  |
| 42.4  | 35.9  | 9.7   | 3.7   | 12.8  | 152.9  | 43.0   | 59.0  | 40.8  |
| 10.4  | 1.7   | 9.9   | 5.1   | 10.3  | 41.3   | 15.5   | 18.0  | 22.8  |
| 167.0 | 109.5 | 138.1 | 136.3 | 43.1  | 137.0  | 67.0   | 31.4  | 29.3  |
| 416.8 | 407.7 | 394.4 | 265.8 | 177.2 | 1006.9 | 768.6  | 17.9  | 28.7  |
| 26.0  | 16.5  | 13.8  | 4.2   | 2.7   | 37.1   | 14.8   | 38.7  | 73.1  |
| 206.1 | 177.5 | 135.3 | 92.8  | 46.4  | 566.1  | 313.4  | 62.6  | 77.5  |
| 122.0 | 94.4  | 119.9 | 77.8  | 49.6  | 162.4  | 54.5   | 150.0 | 213.9 |
| 24.7  | 11.7  | 8.8   | 7.6   | 0.6   | 25.9   | 16.6   | 1.0   | 7.3   |
| 88.2  | 85.3  | 112.1 | 52.2  | 33.5  | 35.4   | 15.2   | 10.9  | 30.5  |
| 7.7   | 10.9  | 14.5  | 3.1   | 3.9   | 28.1   | 15.6   | 25.3  | 11.6  |
| 44.8  | 28.5  | 40.1  | 35.2  | 6.8   | 55.3   | 56.8   | 18.7  | 12.7  |
| 45.6  | 46.1  | 63.5  | 66.3  | 16.0  | 39.4   | 32.6   | 19.4  | 28.4  |
| 72.5  | 67.8  | 72.8  | 46.4  | 20.9  | 179.3  | 174.2  | 57.8  | 65.7  |
| 37.9  | 28.8  | 34.7  | 16.4  | 12.9  | 73.2   | 55.5   | 159.7 | 166.0 |
| 19.5  | 1.2   | 8.1   | 2.0   | 5.9   | 59.5   | 58.9   | 38.5  | 58.0  |
| 64.8  | 56.8  | 135.9 | 92.3  | 75.2  | 113.2  | 51.5   | 3.0   | 10.2  |
| 215.4 | 255.7 | 220.1 | 93.5  | 88.0  | 933.8  | 533.0  | 7.1   | 25.0  |
| 46.7  | 32.9  | 29.2  | 23.4  | 7.2   | 37.2   | 12.7   | 36.6  | 51.5  |
| 7.6   | 1.6   | 3.3   | 2.5   | 2.9   | 3.6    | 2.8    | 0.8   | 2.1   |
| 130.3 | 135.8 | 110.9 | 53.6  | 34.4  | 63.9   | 49.5   | 9.3   | 15.6  |
| 521.4 | 462.2 | 436.6 | 442.4 | 152.3 | 1676.4 | 1335.7 | 84.5  | 77.6  |
| 114.6 | 108.6 | 117.4 | 145.5 | 36.4  | 291.0  | 186.5  | 20.1  | 18.7  |
| 2.3   | 6.4   | 1.1   | 0.9   | 1.1   | 1.9    | 2.6    | 3.3   | 4.5   |
| 61.5  | 73.2  | 50.9  | 38.5  | 23.2  | 116.0  | 40.3   | 31.1  | 40.1  |
| 3.4   | 7.3   | 10.8  | 9.2   | 0.2   | 323.9  | 246.1  | 0.4   | 1.1   |
| 25.5  | 27.0  | 36.6  | 46.7  | 13.4  | 38.6   | 24.5   | 4.6   | 1.5   |
| 157.2 | 139.1 | 144.7 | 97.3  | 51.1  | 171.7  | 89.6   | 15.0  | 21.2  |
| 11.5  | 4.0   | 18.3  | 10.2  | 4.9   | 453.7  | 298.8  | 7.6   | 15.1  |
| 328.2 | 319.5 | 274.6 | 177.3 | 63.9  | 275.7  | 259.0  | 25.1  | 45.4  |
| 86.3  | 94.9  | 122.9 | 268.4 | 57.4  | 138.7  | 108.3  | 14.2  | 15.4  |
| 2.1   | 10.5  | 8.4   | 9.7   | 5.7   | 9.0    | 8.0    | 4.8   | 2.3   |
| 405.6 | 404.9 | 446.2 | 529.8 | 155.6 | 888.9  | 676.7  | 67.2  | 79.4  |
| 32.2  | 38.2  | 37.6  | 22.5  | 8.3   | 65.7   | 57.0   | 23.6  | 28.6  |
| 459.3 | 478.3 | 499.1 | 406.7 | 191.1 | 261.2  | 164.9  | 346.0 | 442.3 |
| 253.1 | 264.0 | 233.5 | 162.4 | 97.2  | 420.8  | 321.3  | 26.5  | 58.8  |
| 37.6  | 2.9   | 29.0  | 27.5  | 14.4  | 382.6  | 310.3  | 15.0  | 19.5  |
| 49.1  | 30.9  | 46.9  | 47.3  | 19.0  | 281.7  | 194.4  | 11.2  | 9.8   |



|        |        |        |        |        |        |        |       |       |
|--------|--------|--------|--------|--------|--------|--------|-------|-------|
| 107.9  | 107.8  | 166.1  | 184.3  | 51.3   | 140.3  | 121.7  | 15.8  | 25.0  |
| 2521.8 | 2317.6 | 2304.0 | 2126.3 | 1113.3 | 4134.7 | 3177.3 | 493.2 | 667.4 |
| 130.0  | 139.0  | 170.6  | 141.3  | 36.5   | 224.0  | 92.6   | 13.5  | 17.9  |
| 312.3  | 271.6  | 301.1  | 148.0  | 112.2  | 101.5  | 61.4   | 6.1   | 0.8   |
| 79.6   | 87.2   | 94.2   | 49.8   | 16.6   | 249.7  | 197.9  | 36.3  | 52.3  |
| 145.3  | 131.4  | 136.8  | 178.0  | 51.7   | 87.8   | 67.9   | 14.1  | 15.2  |
| 63.1   | 54.5   | 59.0   | 73.1   | 29.6   | 266.7  | 271.0  | 1.9   | 28.8  |
| 171.1  | 109.9  | 127.6  | 99.5   | 65.2   | 303.7  | 401.3  | 92.6  | 139.4 |
| 2.1    | 8.9    | 3.0    | 5.4    | 2.6    | 19.4   | 25.1   | 79.6  | 82.5  |
| 8.6    | 14.7   | 4.2    | 5.9    | 5.4    | 27.5   | 23.7   | 42.7  | 62.8  |
| 12.7   | 12.8   | 7.2    | 7.0    | 4.6    | 2.4    | 9.4    | 31.4  | 43.2  |
| 173.9  | 185.5  | 180.2  | 194.3  | 78.0   | 515.7  | 282.6  | 19.2  | 31.2  |
| 19.2   | 16.0   | 9.1    | 11.1   | 6.0    | 65.9   | 39.6   | 15.5  | 11.8  |
| 103.5  | 90.9   | 75.0   | 68.2   | 29.7   | 162.1  | 114.4  | 25.2  | 19.9  |
| 236.2  | 246.0  | 217.0  | 128.7  | 81.5   | 188.8  | 91.3   | 32.5  | 41.0  |
| 111.6  | 94.0   | 118.0  | 111.5  | 40.4   | 226.7  | 123.0  | 59.3  | 77.1  |
| 0.8    | 6.2    | 1.3    | 8.6    | 2.3    | 10.6   | 2.1    | 12.0  | 13.7  |
| 17.3   | 20.3   | 17.4   | 25.0   | 11.6   | 54.6   | 39.4   | 2.0   | 4.2   |
| 12.4   | 6.3    | 8.6    | 12.0   | 6.1    | 24.2   | 10.7   | 15.6  | 10.2  |
| 179.1  | 135.4  | 163.2  | 140.6  | 50.9   | 189.7  | 106.1  | 105.3 | 112.1 |
| 72.7   | 78.5   | 80.1   | 94.0   | 24.6   | 45.7   | 28.2   | 10.0  | 24.3  |
| 31.5   | 50.6   | 47.2   | 19.4   | 9.6    | 50.7   | 35.2   | 11.7  | 8.1   |
| 50.5   | 35.4   | 36.2   | 23.7   | 16.4   | 45.9   | 17.0   | 60.3  | 42.2  |
| 5.8    | 9.5    | 7.7    | 10.0   | 1.0    | 469.4  | 381.0  | 5.9   | 18.2  |
| 2.7    | 12.4   | 12.3   | 4.0    | 1.6    | 15.3   | 17.7   | 2.7   | 10.3  |
| 41.6   | 59.4   | 52.4   | 65.6   | 25.6   | 33.0   | 14.2   | 19.1  | 36.3  |
| 33.4   | 23.3   | 39.4   | 19.9   | 9.7    | 18.6   | 21.9   | 19.8  | 29.4  |
| 4.2    | 3.0    | 7.5    | 3.5    | 6.5    | 7.8    | 4.1    | 3.6   | 6.1   |
| 74.4   | 71.0   | 62.9   | 39.6   | 30.3   | 123.4  | 62.9   | 59.5  | 58.1  |
| 249.0  | 223.4  | 184.3  | 132.4  | 49.5   | 187.6  | 92.4   | 50.0  | 74.6  |
| 221.5  | 204.6  | 199.3  | 143.9  | 68.4   | 272.1  | 130.5  | 53.4  | 36.8  |
| 20.0   | 2.0    | 7.2    | 5.0    | 7.8    | 7.5    | 19.8   | 18.3  | 5.9   |
| 121.7  | 104.3  | 113.8  | 75.6   | 56.5   | 287.9  | 147.1  | 44.4  | 58.6  |
| 11.8   | 6.5    | 7.7    | 7.2    | 5.0    | 23.3   | 10.9   | 6.0   | 3.2   |
| 83.3   | 108.5  | 115.3  | 96.9   | 16.9   | 112.7  | 64.0   | 64.2  | 118.6 |
| 74.2   | 60.9   | 71.7   | 51.2   | 27.2   | 102.3  | 33.9   | 88.8  | 95.1  |
| 96.9   | 83.9   | 87.9   | 95.2   | 44.4   | 106.5  | 65.1   | 39.2  | 41.8  |
| 1033.7 | 922.1  | 791.3  | 513.6  | 255.0  | 1544.3 | 914.4  | 624.1 | 672.5 |
| 339.4  | 312.3  | 253.2  | 130.9  | 64.7   | 377.7  | 281.1  | 62.8  | 82.1  |
| 12.8   | 7.3    | 12.5   | 3.2    | 3.9    | 16.1   | 0.8    | 17.1  | 13.4  |
| 58.1   | 45.8   | 52.7   | 33.0   | 22.3   | 222.2  | 167.7  | 59.9  | 59.0  |
| 44.8   | 41.2   | 34.8   | 24.4   | 28.8   | 71.3   | 56.7   | 35.1  | 42.0  |
| 18.6   | 24.4   | 28.8   | 43.3   | 9.4    | 82.4   | 57.8   | 0.6   | 5.9   |
| 285.6  | 325.3  | 309.4  | 383.9  | 107.3  | 159.2  | 111.6  | 62.1  | 49.1  |
| 190.8  | 237.4  | 190.4  | 160.8  | 89.4   | 223.1  | 163.6  | 57.7  | 82.1  |
| 59.6   | 36.3   | 44.7   | 22.0   | 14.1   | 44.7   | 25.1   | 26.3  | 33.0  |
| 96.4   | 100.0  | 102.0  | 112.2  | 42.7   | 50.5   | 37.5   | 11.1  | 6.0   |
| 29.6   | 26.4   | 24.6   | 14.7   | 2.0    | 24.4   | 21.1   | 48.6  | 46.0  |
| 35.8   | 22.4   | 50.0   | 35.0   | 26.5   | 60.7   | 42.2   | 31.2  | 14.2  |
| 5.2    | 1.9    | 7.3    | 1.5    | 1.9    | 19.4   | 20.7   | 13.7  | 7.5   |
| 124.1  | 106.3  | 133.5  | 119.6  | 23.3   | 145.6  | 94.8   | 42.1  | 51.5  |
| 32.9   | 33.4   | 45.3   | 62.8   | 11.2   | 106.7  | 56.6   | 14.4  | 21.3  |
| 47.4   | 27.2   | 46.8   | 31.3   | 27.1   | 104.4  | 75.4   | 23.2  | 19.2  |

|       |       |       |        |       |        |        |       |       |
|-------|-------|-------|--------|-------|--------|--------|-------|-------|
| 68.4  | 62.4  | 72.4  | 60.3   | 20.5  | 63.8   | 43.7   | 16.2  | 25.5  |
| 27.5  | 17.9  | 13.7  | 7.3    | 8.2   | 100.4  | 52.0   | 18.7  | 26.5  |
| 281.5 | 246.2 | 299.9 | 184.3  | 86.3  | 742.0  | 632.2  | 40.4  | 55.3  |
| 43.6  | 27.4  | 46.8  | 53.1   | 6.1   | 106.3  | 77.5   | 50.9  | 56.0  |
| 123.5 | 134.5 | 135.1 | 118.9  | 48.5  | 75.2   | 79.5   | 49.7  | 44.2  |
| 686.3 | 593.2 | 692.7 | 655.8  | 218.1 | 1107.1 | 782.4  | 254.4 | 418.3 |
| 78.7  | 80.8  | 62.7  | 58.6   | 18.7  | 205.1  | 131.4  | 64.0  | 54.4  |
| 11.0  | 21.7  | 27.4  | 18.5   | 9.9   | 198.4  | 152.7  | 17.4  | 22.4  |
| 102.3 | 132.6 | 117.9 | 77.6   | 40.9  | 226.0  | 131.7  | 9.9   | 14.6  |
| 33.5  | 23.3  | 7.7   | 16.2   | 6.9   | 34.9   | 36.3   | 17.6  | 25.5  |
| 61.0  | 63.6  | 74.3  | 40.9   | 21.5  | 34.3   | 14.5   | 1.3   | 1.6   |
| 889.1 | 847.8 | 989.7 | 1031.8 | 293.5 | 1138.3 | 806.0  | 138.8 | 214.7 |
| 91.1  | 111.4 | 80.1  | 82.6   | 45.4  | 394.8  | 281.4  | 103.5 | 131.0 |
| 41.9  | 41.8  | 45.0  | 32.2   | 19.8  | 53.0   | 63.5   | 1.2   | 11.5  |
| 43.1  | 55.1  | 60.1  | 25.9   | 20.1  | 35.3   | 38.8   | 16.0  | 8.3   |
| 8.1   | 10.9  | 5.0   | 20.3   | 1.5   | 3.3    | 2.8    | 78.6  | 70.9  |
| 154.7 | 151.1 | 146.7 | 184.5  | 70.9  | 461.7  | 333.1  | 59.3  | 32.5  |
| 145.9 | 153.9 | 165.9 | 165.1  | 63.7  | 223.1  | 149.5  | 20.1  | 30.1  |
| 477.8 | 473.8 | 532.2 | 464.9  | 174.8 | 1130.5 | 673.3  | 80.1  | 113.5 |
| 1.6   | 1.4   | 1.6   | 1.1    | 0.8   | 1.8    | 2.3    | 2.5   | 8.3   |
| 27.4  | 25.0  | 22.1  | 13.9   | 16.1  | 16.5   | 19.9   | 20.1  | 24.9  |
| 103.0 | 77.6  | 102.7 | 97.2   | 38.5  | 582.3  | 402.4  | 41.2  | 64.0  |
| 3.4   | 3.7   | 9.5   | 6.9    | 1.2   | 26.6   | 29.5   | 11.9  | 3.3   |
| 43.8  | 42.9  | 79.5  | 42.8   | 8.3   | 23.9   | 9.4    | 15.1  | 25.9  |
| 31.4  | 36.8  | 30.5  | 34.1   | 14.6  | 153.9  | 84.2   | 11.5  | 25.3  |
| 18.3  | 10.5  | 14.1  | 16.1   | 7.3   | 36.4   | 19.0   | 14.5  | 14.0  |
| 101.7 | 83.9  | 229.3 | 145.2  | 47.3  | 92.4   | 36.3   | 66.1  | 83.5  |
| 160.5 | 165.3 | 131.3 | 108.6  | 45.4  | 107.0  | 39.4   | 11.9  | 12.4  |
| 249.1 | 226.5 | 225.8 | 154.3  | 82.9  | 109.2  | 81.5   | 62.9  | 77.3  |
| 100.2 | 92.5  | 88.6  | 70.1   | 40.4  | 274.1  | 200.2  | 34.6  | 49.5  |
| 147.2 | 117.2 | 107.5 | 96.8   | 38.6  | 157.5  | 89.3   | 29.2  | 36.9  |
| 87.9  | 84.2  | 95.8  | 90.8   | 37.6  | 79.3   | 52.5   | 29.1  | 61.2  |
| 50.3  | 37.6  | 49.2  | 27.5   | 13.6  | 21.9   | 20.6   | 45.8  | 65.8  |
| 123.1 | 158.8 | 133.3 | 125.2  | 41.5  | 248.1  | 183.2  | 29.5  | 48.8  |
| 12.5  | 30.2  | 19.4  | 33.4   | 19.1  | 42.1   | 8.8    | 103.4 | 75.3  |
| 54.2  | 21.6  | 17.8  | 17.2   | 14.8  | 96.3   | 87.1   | 11.9  | 7.7   |
| 18.6  | 28.2  | 23.0  | 21.9   | 10.3  | 24.3   | 18.3   | 1.5   | 0.9   |
| 122.9 | 59.9  | 82.2  | 66.8   | 24.3  | 174.8  | 95.4   | 52.3  | 78.8  |
| 8.3   | 20.9  | 8.8   | 8.5    | 6.6   | 86.7   | 26.6   | 0.8   | 6.0   |
| 72.7  | 83.9  | 76.8  | 74.8   | 34.4  | 224.4  | 192.9  | 32.2  | 61.0  |
| 5.4   | 16.1  | 6.1   | 16.9   | 1.1   | 10.2   | 15.6   | 8.9   | 11.1  |
| 1.1   | 0.8   | 1.6   | 0.7    | 0.4   | 16.7   | 0.9    | 1.1   | 0.6   |
| 37.7  | 26.3  | 25.5  | 24.5   | 5.4   | 8.4    | 9.3    | 4.4   | 0.6   |
| 13.9  | 8.9   | 7.8   | 11.5   | 6.4   | 526.2  | 511.4  | 65.4  | 73.2  |
| 3.3   | 3.9   | 5.3   | 2.2    | 2.5   | 10.1   | 4.0    | 4.5   | 16.4  |
| 142.3 | 98.2  | 94.5  | 100.7  | 36.7  | 382.3  | 251.0  | 35.9  | 42.1  |
| 3.9   | 8.2   | 2.3   | 2.3    | 2.2   | 2.0    | 0.3    | 0.9   | 1.0   |
| 462.7 | 356.8 | 318.9 | 215.4  | 124.7 | 825.7  | 1086.2 | 216.0 | 257.0 |
| 25.3  | 24.7  | 24.5  | 20.3   | 7.4   | 24.6   | 15.9   | 10.8  | 6.3   |
| 88.2  | 89.5  | 62.1  | 61.1   | 35.7  | 181.6  | 119.3  | 22.4  | 28.5  |
| 55.7  | 58.2  | 61.2  | 47.6   | 24.1  | 511.0  | 510.4  | 219.4 | 211.1 |
| 17.3  | 10.5  | 3.9   | 2.6    | 1.3   | 19.0   | 7.1    | 11.4  | 14.3  |
| 401.2 | 337.3 | 421.5 | 529.2  | 128.7 | 555.4  | 473.6  | 108.6 | 149.9 |

|       |       |       |       |       |        |        |       |       |
|-------|-------|-------|-------|-------|--------|--------|-------|-------|
| 39.9  | 31.6  | 27.7  | 27.8  | 11.9  | 46.6   | 33.1   | 24.9  | 27.8  |
| 114.4 | 98.4  | 117.4 | 109.4 | 33.6  | 304.5  | 231.6  | 34.2  | 68.9  |
| 56.0  | 71.3  | 68.6  | 64.2  | 25.4  | 14.5   | 5.1    | 22.0  | 30.2  |
| 33.5  | 46.8  | 24.8  | 9.0   | 9.6   | 88.7   | 68.7   | 59.2  | 74.7  |
| 367.5 | 370.2 | 359.3 | 312.0 | 79.2  | 991.6  | 635.9  | 192.0 | 380.5 |
| 36.6  | 50.4  | 30.1  | 16.0  | 12.1  | 144.6  | 115.9  | 2.1   | 8.4   |
| 14.6  | 2.3   | 2.4   | 3.3   | 9.1   | 51.3   | 61.4   | 5.6   | 7.0   |
| 80.2  | 55.3  | 68.8  | 71.1  | 20.5  | 231.1  | 146.9  | 48.9  | 58.5  |
| 56.4  | 62.0  | 63.9  | 74.4  | 26.6  | 151.0  | 109.1  | 30.2  | 17.9  |
| 55.0  | 65.5  | 50.8  | 32.7  | 18.1  | 13.1   | 12.5   | 9.1   | 0.6   |
| 78.5  | 74.4  | 57.2  | 39.3  | 9.3   | 161.6  | 86.9   | 42.3  | 60.4  |
| 94.3  | 78.1  | 109.0 | 104.6 | 24.9  | 99.3   | 84.8   | 32.3  | 40.3  |
| 164.6 | 213.0 | 132.3 | 109.4 | 64.3  | 436.4  | 431.2  | 14.5  | 14.6  |
| 30.1  | 14.9  | 35.4  | 26.8  | 6.2   | 155.6  | 135.3  | 46.9  | 87.6  |
| 4.3   | 1.7   | 0.8   | 3.6   | 1.3   | 398.8  | 306.5  | 2.1   | 12.4  |
| 44.2  | 49.0  | 35.2  | 36.0  | 11.5  | 34.5   | 40.9   | 23.2  | 49.9  |
| 11.3  | 0.8   | 1.5   | 1.3   | 0.9   | 2.4    | 0.7    | 33.0  | 37.1  |
| 1.1   | 1.3   | 2.2   | 0.6   | 0.6   | 1.2    | 2.2    | 2.1   | 2.1   |
| 20.3  | 32.9  | 11.7  | 7.2   | 1.7   | 20.7   | 10.2   | 37.7  | 35.0  |
| 2.8   | 2.7   | 2.2   | 19.7  | 3.2   | 6.4    | 5.5    | 22.5  | 21.6  |
| 129.2 | 105.4 | 117.2 | 109.1 | 30.6  | 134.6  | 71.6   | 29.4  | 38.4  |
| 147.3 | 139.3 | 134.2 | 100.2 | 50.0  | 119.5  | 93.8   | 79.2  | 72.4  |
| 251.4 | 190.3 | 246.7 | 205.2 | 59.6  | 275.1  | 207.7  | 26.3  | 62.4  |
| 199.9 | 229.1 | 244.5 | 369.4 | 61.4  | 44.5   | 29.8   | 10.3  | 21.7  |
| 1.7   | 4.5   | 1.8   | 1.2   | 3.7   | 9.7    | 2.8    | 1.3   | 3.8   |
| 18.0  | 15.9  | 14.7  | 12.0  | 6.2   | 84.6   | 55.6   | 3.3   | 2.3   |
| 54.0  | 53.9  | 45.6  | 13.4  | 18.2  | 1.5    | 7.6    | 10.3  | 1.5   |
| 37.5  | 38.4  | 37.3  | 34.3  | 9.0   | 30.2   | 22.5   | 4.9   | 18.3  |
| 152.5 | 98.5  | 117.4 | 144.0 | 30.2  | 157.7  | 98.3   | 8.0   | 14.1  |
| 26.9  | 35.3  | 32.4  | 12.5  | 7.7   | 22.8   | 10.7   | 9.2   | 7.3   |
| 108.5 | 127.0 | 112.1 | 56.9  | 30.6  | 192.6  | 125.9  | 30.2  | 44.4  |
| 4.5   | 8.2   | 0.3   | 6.0   | 0.4   | 121.5  | 126.7  | 88.6  | 112.1 |
| 26.5  | 38.5  | 18.3  | 7.2   | 5.7   | 32.0   | 13.3   | 46.0  | 50.7  |
| 24.7  | 22.2  | 27.1  | 28.1  | 7.1   | 137.8  | 95.5   | 46.2  | 72.3  |
| 23.8  | 33.1  | 19.2  | 25.4  | 0.5   | 1.1    | 1.1    | 1.9   | 3.3   |
| 86.2  | 112.9 | 94.8  | 69.8  | 23.5  | 119.8  | 81.3   | 15.9  | 21.2  |
| 6.6   | 10.7  | 4.7   | 1.6   | 2.0   | 8.2    | 8.5    | 8.2   | 13.1  |
| 113.4 | 104.3 | 131.6 | 112.4 | 51.9  | 49.5   | 15.8   | 14.5  | 30.8  |
| 2.0   | 1.6   | 12.1  | 1.0   | 0.3   | 1.0    | 1.8    | 5.6   | 0.9   |
| 57.2  | 25.4  | 43.3  | 39.0  | 14.9  | 225.3  | 204.9  | 32.2  | 33.9  |
| 23.1  | 22.9  | 27.4  | 7.1   | 5.6   | 26.3   | 3.4    | 18.8  | 21.9  |
| 179.5 | 216.0 | 190.1 | 178.8 | 62.7  | 453.8  | 347.7  | 27.7  | 20.5  |
| 0.8   | 4.0   | 0.7   | 3.2   | 3.0   | 1.7    | 8.8    | 25.3  | 37.9  |
| 12.2  | 12.6  | 13.4  | 15.9  | 1.0   | 73.3   | 41.4   | 2.9   | 14.5  |
| 25.6  | 20.7  | 29.2  | 11.5  | 13.3  | 39.3   | 24.1   | 33.6  | 48.0  |
| 69.2  | 74.8  | 76.8  | 92.9  | 27.5  | 130.9  | 98.3   | 16.9  | 24.8  |
| 86.6  | 82.1  | 67.9  | 77.2  | 33.1  | 124.3  | 68.2   | 22.2  | 30.8  |
| 51.3  | 44.6  | 59.8  | 50.0  | 20.5  | 37.6   | 34.7   | 46.8  | 57.0  |
| 154.7 | 139.6 | 131.3 | 103.9 | 34.6  | 109.5  | 45.9   | 22.7  | 26.5  |
| 121.8 | 92.3  | 120.3 | 99.2  | 43.8  | 148.3  | 93.0   | 59.4  | 93.4  |
| 7.4   | 10.6  | 11.7  | 17.6  | 3.0   | 39.0   | 43.8   | 11.0  | 13.5  |
| 452.5 | 386.8 | 443.5 | 332.6 | 157.8 | 2518.8 | 1563.7 | 346.6 | 419.0 |
| 21.7  | 20.8  | 11.9  | 13.0  | 8.9   | 291.9  | 239.5  | 31.4  | 32.6  |

|       |       |       |       |       |       |       |       |       |
|-------|-------|-------|-------|-------|-------|-------|-------|-------|
| 10.6  | 7.4   | 10.6  | 6.2   | 5.2   | 66.2  | 41.5  | 15.9  | 15.0  |
| 0.9   | 0.9   | 0.7   | 1.8   | 0.6   | 1.0   | 1.2   | 1.0   | 0.5   |
| 30.9  | 23.3  | 50.3  | 33.0  | 19.3  | 91.4  | 62.7  | 33.5  | 20.5  |
| 0.5   | 5.3   | 2.2   | 4.9   | 3.6   | 7.4   | 2.5   | 11.3  | 14.8  |
| 9.9   | 12.9  | 14.6  | 18.4  | 11.0  | 8.3   | 23.8  | 9.2   | 1.2   |
| 2.0   | 10.1  | 11.3  | 5.4   | 0.8   | 24.3  | 21.3  | 1.2   | 1.0   |
| 1.4   | 2.0   | 2.0   | 1.1   | 1.1   | 59.0  | 73.6  | 1.2   | 0.5   |
| 110.8 | 101.5 | 116.6 | 98.0  | 29.2  | 185.9 | 136.8 | 48.0  | 63.1  |
| 220.7 | 244.8 | 266.5 | 165.6 | 100.0 | 524.8 | 469.5 | 39.2  | 56.3  |
| 365.1 | 297.8 | 353.0 | 289.1 | 130.2 | 312.0 | 223.3 | 50.1  | 74.7  |
| 19.4  | 21.3  | 17.6  | 16.4  | 11.7  | 215.3 | 147.3 | 75.4  | 92.7  |
| 46.2  | 49.5  | 51.6  | 59.3  | 25.3  | 100.6 | 56.5  | 38.1  | 35.3  |
| 2.0   | 1.1   | 1.3   | 1.2   | 0.3   | 2.8   | 3.2   | 4.7   | 3.6   |
| 39.7  | 31.7  | 31.8  | 24.6  | 14.8  | 31.6  | 20.6  | 5.1   | 8.2   |
| 5.4   | 9.1   | 2.8   | 9.4   | 1.0   | 10.5  | 7.3   | 5.3   | 4.7   |
| 16.3  | 6.3   | 15.2  | 14.3  | 1.2   | 5.7   | 14.3  | 2.2   | 3.4   |
| 74.8  | 90.4  | 104.5 | 135.5 | 33.1  | 176.1 | 126.5 | 38.8  | 66.6  |
| 5.1   | 2.5   | 3.9   | 2.1   | 1.0   | 77.6  | 98.6  | 123.1 | 120.2 |
| 41.8  | 32.4  | 22.6  | 37.3  | 17.6  | 26.1  | 22.3  | 10.7  | 16.1  |
| 43.9  | 42.6  | 58.6  | 50.0  | 16.2  | 81.2  | 70.0  | 22.2  | 23.8  |
| 28.6  | 4.0   | 10.2  | 18.8  | 7.0   | 4.2   | 13.9  | 12.9  | 3.6   |
| 38.9  | 39.1  | 37.3  | 27.9  | 17.4  | 64.1  | 36.0  | 48.6  | 23.8  |
| 39.8  | 47.9  | 55.1  | 59.0  | 28.9  | 51.4  | 26.5  | 26.2  | 27.3  |
| 89.7  | 82.4  | 133.7 | 172.2 | 24.4  | 766.5 | 474.0 | 52.0  | 62.3  |
| 24.1  | 15.4  | 50.8  | 56.6  | 1.5   | 103.1 | 88.4  | 3.4   | 16.8  |
| 2.3   | 1.5   | 1.9   | 5.0   | 1.1   | 225.8 | 183.1 | 16.4  | 4.3   |
| 93.0  | 89.9  | 75.2  | 81.4  | 37.2  | 88.4  | 63.5  | 2.3   | 8.2   |
| 2.2   | 1.4   | 0.9   | 0.7   | 0.8   | 5.3   | 2.2   | 1.6   | 2.5   |
| 52.8  | 61.2  | 40.7  | 22.2  | 12.4  | 123.1 | 79.0  | 4.9   | 1.3   |
| 48.0  | 38.0  | 49.4  | 51.0  | 13.2  | 26.2  | 12.1  | 2.2   | 6.0   |
| 46.9  | 62.3  | 55.3  | 30.8  | 15.3  | 258.0 | 137.9 | 37.4  | 31.3  |
| 39.9  | 24.3  | 38.4  | 34.2  | 18.0  | 81.4  | 44.5  | 7.4   | 1.1   |
| 45.7  | 45.3  | 41.7  | 30.1  | 15.7  | 519.5 | 235.1 | 43.3  | 47.3  |
| 56.8  | 44.7  | 66.6  | 50.1  | 25.0  | 81.3  | 62.2  | 12.8  | 11.6  |
| 881.0 | 850.5 | 795.8 | 637.3 | 232.0 | 628.3 | 591.5 | 214.3 | 319.5 |
| 43.3  | 79.6  | 103.6 | 61.5  | 19.7  | 167.7 | 104.3 | 41.8  | 76.6  |
| 56.3  | 69.9  | 58.5  | 58.8  | 20.0  | 75.6  | 47.0  | 11.7  | 9.7   |
| 6.0   | 6.3   | 8.4   | 11.6  | 4.3   | 30.2  | 32.8  | 3.7   | 4.7   |
| 683.1 | 726.8 | 481.9 | 218.5 | 208.8 | 134.7 | 93.8  | 7.3   | 9.2   |
| 178.3 | 142.7 | 138.9 | 80.6  | 59.2  | 106.8 | 56.7  | 25.0  | 28.0  |
| 39.5  | 51.7  | 44.2  | 32.3  | 16.9  | 144.9 | 135.8 | 97.8  | 89.8  |
| 197.7 | 127.4 | 139.7 | 179.0 | 20.3  | 325.7 | 173.5 | 40.7  | 74.1  |
| 408.0 | 426.1 | 388.4 | 236.5 | 132.6 | 860.8 | 678.0 | 18.2  | 23.4  |
| 195.4 | 175.6 | 192.9 | 106.5 | 36.3  | 266.0 | 92.1  | 63.3  | 76.9  |
| 101.5 | 80.0  | 63.4  | 58.2  | 38.9  | 78.2  | 44.4  | 17.7  | 17.4  |
| 288.3 | 274.4 | 365.7 | 318.1 | 123.6 | 467.7 | 355.1 | 79.4  | 83.8  |
| 94.1  | 94.2  | 51.4  | 32.7  | 18.2  | 19.9  | 24.7  | 9.5   | 14.5  |
| 62.9  | 46.5  | 28.4  | 36.3  | 13.2  | 13.4  | 12.7  | 1.8   | 1.4   |
| 90.7  | 62.6  | 66.1  | 43.1  | 22.5  | 31.6  | 16.5  | 22.1  | 46.2  |
| 102.4 | 84.6  | 112.9 | 156.8 | 26.1  | 126.1 | 69.9  | 28.6  | 15.3  |
| 25.0  | 29.9  | 29.5  | 27.5  | 13.8  | 17.9  | 16.3  | 20.7  | 10.6  |
| 78.4  | 73.5  | 78.6  | 45.4  | 22.1  | 211.8 | 123.9 | 17.0  | 39.2  |
| 24.1  | 17.3  | 31.7  | 39.8  | 8.2   | 16.9  | 14.1  | 26.9  | 12.2  |

|       |       |       |       |       |        |        |       |       |
|-------|-------|-------|-------|-------|--------|--------|-------|-------|
| 34.9  | 18.9  | 18.3  | 15.8  | 8.6   | 39.6   | 30.8   | 21.7  | 20.9  |
| 2.3   | 1.5   | 1.5   | 2.3   | 1.8   | 3.8    | 2.4    | 12.2  | 22.5  |
| 3.0   | 3.6   | 7.7   | 16.1  | 0.9   | 40.4   | 36.2   | 6.1   | 15.5  |
| 94.1  | 63.9  | 81.9  | 98.8  | 33.3  | 186.7  | 150.7  | 37.1  | 30.2  |
| 30.7  | 6.7   | 10.3  | 1.6   | 6.3   | 44.3   | 30.8   | 12.8  | 3.6   |
| 26.2  | 3.3   | 10.4  | 7.8   | 2.7   | 5.5    | 16.9   | 15.2  | 28.5  |
| 163.5 | 185.9 | 170.9 | 133.1 | 44.2  | 371.1  | 180.6  | 35.8  | 50.7  |
| 2.2   | 3.3   | 3.4   | 3.1   | 4.4   | 21.4   | 16.8   | 3.1   | 2.8   |
| 181.6 | 207.0 | 174.8 | 115.9 | 58.6  | 426.9  | 229.9  | 13.1  | 9.2   |
| 24.6  | 18.4  | 17.4  | 14.5  | 5.8   | 186.7  | 184.7  | 12.7  | 15.3  |
| 5.4   | 8.4   | 2.9   | 1.8   | 3.1   | 3.6    | 9.7    | 2.4   | 8.8   |
| 81.4  | 61.3  | 72.1  | 64.1  | 20.9  | 142.8  | 122.4  | 39.0  | 49.5  |
| 7.5   | 11.5  | 3.9   | 1.5   | 8.6   | 25.4   | 2.1    | 11.3  | 13.1  |
| 35.0  | 47.6  | 33.8  | 32.9  | 18.6  | 62.8   | 70.2   | 26.4  | 58.3  |
| 23.8  | 17.5  | 9.2   | 11.3  | 7.5   | 37.6   | 33.8   | 49.9  | 59.7  |
| 1.9   | 1.9   | 0.8   | 0.7   | 1.4   | 1.8    | 1.4    | 0.6   | 1.8   |
| 14.4  | 27.2  | 29.3  | 21.2  | 10.6  | 106.0  | 106.5  | 199.2 | 212.7 |
| 22.7  | 2.9   | 3.5   | 8.6   | 4.8   | 2.2    | 1.7    | 14.1  | 8.6   |
| 102.7 | 145.2 | 117.6 | 72.8  | 22.4  | 408.8  | 286.7  | 6.5   | 17.2  |
| 49.4  | 37.1  | 16.1  | 16.4  | 1.8   | 109.7  | 74.9   | 1.6   | 13.9  |
| 1.3   | 0.7   | 5.5   | 1.9   | 5.3   | 7.8    | 2.4    | 2.5   | 14.7  |
| 67.3  | 55.9  | 68.2  | 34.6  | 29.8  | 6.1    | 2.1    | 1.2   | 3.5   |
| 493.5 | 457.9 | 492.3 | 323.7 | 159.2 | 594.7  | 415.3  | 135.8 | 209.3 |
| 2.2   | 17.8  | 8.2   | 4.3   | 4.7   | 122.8  | 49.4   | 41.3  | 61.3  |
| 14.3  | 16.7  | 11.9  | 5.5   | 7.4   | 2.4    | 6.3    | 5.2   | 8.7   |
| 11.4  | 13.9  | 5.5   | 5.4   | 5.9   | 10.5   | 0.8    | 8.3   | 10.7  |
| 110.0 | 97.9  | 104.0 | 97.7  | 36.5  | 435.7  | 304.6  | 30.2  | 36.6  |
| 22.7  | 19.7  | 13.4  | 10.3  | 15.9  | 56.9   | 46.3   | 27.4  | 42.5  |
| 30.6  | 49.9  | 52.4  | 51.2  | 14.7  | 164.2  | 64.3   | 0.8   | 1.3   |
| 0.7   | 0.6   | 0.5   | 0.8   | 0.8   | 1.0    | 0.6    | 0.5   | 1.2   |
| 14.5  | 2.9   | 3.8   | 7.0   | 5.0   | 39.0   | 34.9   | 1.4   | 4.0   |
| 16.7  | 7.1   | 15.0  | 4.6   | 4.7   | 5.3    | 2.8    | 20.7  | 13.9  |
| 93.1  | 57.0  | 60.3  | 81.9  | 27.9  | 115.0  | 73.3   | 17.5  | 9.8   |
| 79.4  | 54.8  | 78.1  | 64.2  | 19.5  | 2.8    | 13.5   | 3.7   | 12.4  |
| 89.1  | 101.3 | 98.7  | 91.2  | 42.1  | 78.6   | 62.8   | 32.3  | 50.2  |
| 709.2 | 588.0 | 530.9 | 339.0 | 221.1 | 686.1  | 402.0  | 80.2  | 77.4  |
| 113.6 | 118.7 | 119.3 | 158.3 | 30.3  | 365.3  | 216.2  | 18.1  | 15.2  |
| 50.8  | 58.1  | 33.1  | 53.2  | 19.0  | 45.3   | 34.3   | 13.6  | 13.8  |
| 48.7  | 30.9  | 56.4  | 45.4  | 19.4  | 81.0   | 51.4   | 22.4  | 31.3  |
| 19.0  | 28.1  | 33.8  | 32.5  | 9.4   | 70.3   | 59.5   | 20.1  | 36.7  |
| 312.8 | 281.2 | 285.9 | 214.2 | 114.5 | 365.3  | 429.7  | 69.1  | 78.3  |
| 130.1 | 120.0 | 114.2 | 75.4  | 43.8  | 111.7  | 59.6   | 3.6   | 1.5   |
| 30.5  | 26.9  | 45.1  | 45.7  | 18.8  | 129.3  | 50.6   | 0.7   | 7.7   |
| 202.3 | 207.2 | 184.1 | 161.8 | 53.3  | 312.9  | 173.0  | 60.5  | 103.6 |
| 65.8  | 71.1  | 68.8  | 63.5  | 31.7  | 103.5  | 62.4   | 56.9  | 58.5  |
| 280.1 | 200.4 | 155.4 | 99.0  | 37.7  | 368.4  | 216.7  | 389.6 | 452.2 |
| 42.7  | 72.4  | 84.6  | 141.2 | 53.1  | 72.3   | 60.3   | 2.1   | 1.1   |
| 102.5 | 124.9 | 121.5 | 133.6 | 49.2  | 154.0  | 94.6   | 47.6  | 77.1  |
| 2.5   | 0.6   | 1.1   | 0.2   | 4.2   | 0.8    | 1.1    | 2.0   | 7.8   |
| 204.2 | 192.7 | 206.8 | 210.9 | 93.7  | 1300.2 | 1036.3 | 22.2  | 27.9  |
| 6.6   | 5.7   | 23.9  | 149.3 | 14.4  | 43.8   | 37.4   | 1.2   | 0.8   |
| 819.9 | 786.6 | 758.0 | 602.5 | 276.1 | 1792.0 | 1565.4 | 91.5  | 119.9 |
| 88.6  | 73.2  | 91.1  | 34.6  | 28.1  | 163.2  | 83.3   | 9.6   | 14.0  |

|       |       |       |       |       |        |        |       |       |
|-------|-------|-------|-------|-------|--------|--------|-------|-------|
| 52.0  | 38.7  | 40.8  | 52.3  | 10.1  | 642.4  | 432.8  | 21.7  | 26.0  |
| 99.5  | 78.3  | 81.0  | 57.0  | 18.2  | 94.3   | 63.4   | 136.3 | 214.2 |
| 3.2   | 16.2  | 2.2   | 17.2  | 3.4   | 332.7  | 226.0  | 5.9   | 25.3  |
| 58.9  | 45.4  | 46.5  | 32.1  | 20.9  | 175.6  | 137.1  | 45.5  | 49.7  |
| 23.6  | 10.0  | 18.6  | 12.4  | 5.4   | 40.0   | 1.8    | 3.7   | 3.9   |
| 2.1   | 3.1   | 4.2   | 1.4   | 7.1   | 46.4   | 24.1   | 23.2  | 46.0  |
| 26.5  | 16.5  | 15.2  | 15.9  | 5.1   | 78.7   | 72.2   | 2.2   | 13.8  |
| 0.7   | 1.2   | 1.2   | 0.3   | 1.4   | 5.8    | 2.0    | 7.9   | 9.8   |
| 64.8  | 99.6  | 81.2  | 101.6 | 32.1  | 109.5  | 55.8   | 22.0  | 18.5  |
| 71.9  | 46.2  | 54.6  | 26.8  | 22.0  | 185.0  | 102.9  | 4.1   | 5.5   |
| 9.7   | 16.0  | 16.5  | 14.5  | 6.9   | 19.6   | 16.4   | 10.9  | 6.2   |
| 17.8  | 12.9  | 15.3  | 8.1   | 6.1   | 10.7   | 0.8    | 8.4   | 10.9  |
| 73.3  | 60.2  | 79.6  | 128.8 | 26.7  | 701.1  | 526.9  | 11.1  | 7.4   |
| 43.8  | 36.3  | 51.2  | 46.7  | 13.3  | 90.5   | 48.7   | 71.1  | 91.7  |
| 374.0 | 228.7 | 244.1 | 248.5 | 106.2 | 345.1  | 290.7  | 101.6 | 116.9 |
| 21.4  | 15.3  | 14.2  | 14.2  | 3.5   | 100.4  | 82.9   | 107.8 | 140.7 |
| 105.7 | 104.9 | 79.1  | 67.9  | 30.5  | 96.1   | 65.5   | 44.0  | 64.6  |
| 1.2   | 5.7   | 1.3   | 2.2   | 0.3   | 1.3    | 0.9    | 9.6   | 1.5   |
| 122.4 | 122.0 | 142.1 | 88.8  | 63.4  | 699.3  | 588.8  | 145.3 | 183.8 |
| 140.9 | 91.6  | 124.0 | 77.0  | 34.3  | 84.9   | 53.0   | 2.6   | 4.1   |
| 161.2 | 185.3 | 121.0 | 75.9  | 48.2  | 52.4   | 47.7   | 10.9  | 15.2  |
| 80.9  | 73.4  | 75.8  | 109.3 | 36.8  | 11.5   | 8.9    | 3.0   | 1.9   |
| 27.1  | 28.6  | 55.3  | 44.2  | 19.1  | 93.5   | 46.6   | 30.7  | 67.0  |
| 16.2  | 13.3  | 9.2   | 6.3   | 5.3   | 203.6  | 158.8  | 50.1  | 45.2  |
| 143.2 | 126.8 | 119.2 | 91.2  | 70.0  | 144.0  | 114.5  | 1.9   | 27.9  |
| 268.2 | 195.8 | 167.9 | 127.9 | 64.0  | 396.4  | 394.3  | 7.4   | 13.5  |
| 68.6  | 80.6  | 75.8  | 55.5  | 19.1  | 65.9   | 51.3   | 8.1   | 5.9   |
| 2.2   | 1.5   | 2.6   | 0.3   | 3.4   | 1.2    | 0.7    | 1.2   | 2.8   |
| 13.8  | 14.7  | 14.5  | 3.7   | 3.9   | 29.3   | 13.5   | 9.6   | 1.0   |
| 23.4  | 16.1  | 23.3  | 20.6  | 4.1   | 14.5   | 0.9    | 10.8  | 5.1   |
| 23.1  | 25.1  | 26.4  | 23.1  | 5.0   | 79.6   | 55.0   | 26.1  | 47.9  |
| 874.9 | 887.3 | 778.0 | 532.5 | 235.1 | 662.7  | 421.9  | 126.6 | 243.4 |
| 3.2   | 19.0  | 2.9   | 1.5   | 0.8   | 4.1    | 1.7    | 1.9   | 1.7   |
| 225.5 | 224.7 | 210.7 | 259.3 | 89.3  | 530.3  | 283.7  | 127.2 | 208.1 |
| 23.5  | 19.4  | 25.3  | 1.9   | 8.4   | 32.5   | 9.3    | 20.2  | 4.9   |
| 39.3  | 13.1  | 28.2  | 18.0  | 1.4   | 22.6   | 3.4    | 2.2   | 3.2   |
| 1.7   | 1.4   | 1.3   | 0.9   | 0.7   | 40.7   | 5.1    | 2.5   | 8.6   |
| 4.8   | 8.9   | 1.0   | 1.7   | 0.9   | 81.9   | 57.3   | 6.1   | 1.0   |
| 123.4 | 111.5 | 157.8 | 148.8 | 59.8  | 132.2  | 83.4   | 65.0  | 69.3  |
| 136.1 | 123.8 | 176.6 | 163.5 | 59.7  | 286.2  | 154.6  | 18.5  | 28.0  |
| 3.7   | 1.9   | 1.4   | 7.0   | 8.6   | 25.0   | 17.7   | 1.7   | 3.4   |
| 538.2 | 495.6 | 500.9 | 473.8 | 203.0 | 1925.2 | 1335.9 | 135.1 | 166.9 |
| 108.1 | 92.9  | 96.6  | 105.8 | 60.5  | 139.2  | 173.4  | 60.7  | 61.0  |
| 155.2 | 130.6 | 125.1 | 96.8  | 23.2  | 354.5  | 214.1  | 249.2 | 283.9 |
| 13.5  | 11.5  | 13.8  | 3.0   | 0.9   | 18.6   | 5.8    | 0.7   | 0.7   |
| 30.7  | 21.8  | 20.7  | 20.4  | 15.5  | 14.6   | 14.3   | 2.3   | 11.7  |
| 95.8  | 88.8  | 99.4  | 100.2 | 43.3  | 101.8  | 105.7  | 34.0  | 54.1  |
| 2.7   | 1.0   | 10.9  | 1.0   | 2.7   | 4.2    | 13.9   | 1.0   | 2.3   |
| 3.7   | 1.7   | 3.7   | 9.9   | 1.9   | 8.3    | 1.8    | 10.4  | 16.1  |
| 12.8  | 2.7   | 10.7  | 5.1   | 2.7   | 19.2   | 16.5   | 1.6   | 0.5   |
| 0.9   | 0.3   | 4.0   | 0.7   | 0.1   | 4.6    | 0.3    | 1.7   | 0.7   |
| 34.8  | 36.5  | 35.2  | 42.8  | 10.0  | 18.3   | 18.1   | 9.0   | 1.3   |
| 13.6  | 23.8  | 23.0  | 29.1  | 11.3  | 39.8   | 22.7   | 2.7   | 6.4   |

|       |       |       |       |       |       |       |       |       |
|-------|-------|-------|-------|-------|-------|-------|-------|-------|
| 7.2   | 3.2   | 2.7   | 4.8   | 3.6   | 84.8  | 56.1  | 4.4   | 10.7  |
| 190.4 | 158.6 | 158.5 | 106.6 | 40.6  | 148.5 | 49.3  | 71.2  | 70.2  |
| 1.9   | 6.6   | 2.0   | 1.6   | 0.6   | 10.4  | 5.4   | 5.7   | 9.2   |
| 150.5 | 91.5  | 112.0 | 106.8 | 26.5  | 67.0  | 24.7  | 46.2  | 46.8  |
| 5.8   | 4.5   | 1.4   | 5.6   | 1.9   | 0.5   | 1.3   | 1.8   | 0.5   |
| 69.6  | 67.4  | 93.7  | 62.2  | 35.4  | 138.1 | 94.4  | 2.8   | 10.2  |
| 17.9  | 9.7   | 15.2  | 12.4  | 6.7   | 10.5  | 3.8   | 22.0  | 17.7  |
| 44.4  | 35.5  | 36.8  | 24.1  | 11.6  | 59.9  | 28.0  | 9.6   | 13.6  |
| 35.4  | 33.0  | 31.6  | 36.4  | 12.0  | 28.7  | 21.6  | 48.4  | 36.8  |
| 1.5   | 0.1   | 0.7   | 5.9   | 0.6   | 1.1   | 1.9   | 5.6   | 1.4   |
| 35.4  | 33.5  | 19.5  | 31.4  | 12.5  | 218.2 | 141.3 | 19.5  | 20.3  |
| 11.1  | 13.3  | 23.1  | 10.5  | 8.7   | 43.7  | 18.7  | 2.1   | 8.4   |
| 33.2  | 34.8  | 17.9  | 13.0  | 8.8   | 487.7 | 289.5 | 100.4 | 139.9 |
| 331.9 | 282.3 | 257.1 | 204.5 | 123.3 | 154.4 | 97.0  | 14.8  | 32.0  |
| 36.6  | 22.1  | 45.5  | 33.6  | 12.1  | 38.0  | 27.6  | 10.5  | 5.9   |
| 85.6  | 41.4  | 60.0  | 63.8  | 27.8  | 265.5 | 246.3 | 51.4  | 78.7  |
| 143.5 | 120.9 | 136.7 | 93.8  | 42.2  | 113.9 | 67.0  | 21.3  | 22.4  |
| 65.9  | 67.3  | 77.3  | 47.5  | 22.4  | 36.8  | 25.7  | 38.2  | 36.3  |
| 153.5 | 133.8 | 128.1 | 140.5 | 48.4  | 276.0 | 177.7 | 18.2  | 13.7  |
| 40.9  | 28.5  | 24.9  | 17.7  | 11.3  | 46.5  | 35.4  | 17.2  | 27.5  |
| 18.6  | 3.0   | 11.3  | 1.5   | 1.4   | 8.8   | 11.5  | 2.4   | 8.3   |
| 70.6  | 62.0  | 82.5  | 53.8  | 19.4  | 468.9 | 307.4 | 0.6   | 10.9  |
| 22.3  | 24.0  | 30.1  | 15.5  | 9.9   | 53.6  | 34.4  | 16.7  | 10.0  |
| 237.0 | 165.7 | 210.1 | 153.6 | 73.8  | 336.1 | 160.1 | 81.8  | 108.9 |
| 44.4  | 33.4  | 36.4  | 42.1  | 12.1  | 230.7 | 182.2 | 17.7  | 15.7  |
| 43.8  | 27.0  | 30.7  | 24.4  | 14.1  | 47.1  | 27.3  | 49.0  | 53.5  |
| 36.3  | 35.8  | 39.6  | 33.6  | 16.0  | 41.4  | 40.5  | 7.1   | 14.4  |
| 88.3  | 72.3  | 89.4  | 53.3  | 34.4  | 144.5 | 65.5  | 17.2  | 24.3  |
| 13.8  | 3.0   | 10.2  | 6.5   | 0.7   | 29.1  | 32.0  | 8.2   | 16.4  |
| 163.7 | 167.2 | 155.2 | 212.1 | 60.0  | 243.2 | 148.5 | 105.9 | 142.3 |
| 56.6  | 59.8  | 47.9  | 63.6  | 18.4  | 55.9  | 55.5  | 17.2  | 40.7  |
| 72.0  | 63.2  | 67.1  | 62.1  | 16.9  | 170.3 | 122.6 | 40.4  | 46.3  |
| 9.6   | 0.2   | 9.7   | 1.3   | 0.3   | 0.9   | 0.3   | 1.7   | 2.3   |
| 8.0   | 3.1   | 2.3   | 3.8   | 2.1   | 0.5   | 2.9   | 0.5   | 0.4   |
| 125.6 | 146.6 | 153.6 | 110.6 | 38.9  | 66.1  | 41.4  | 9.5   | 20.9  |
| 9.6   | 6.8   | 13.7  | 0.5   | 0.3   | 11.1  | 3.4   | 5.6   | 11.0  |
| 164.9 | 171.7 | 149.9 | 94.9  | 49.8  | 455.1 | 458.3 | 68.0  | 110.3 |
| 2.6   | 10.5  | 0.5   | 8.0   | 3.0   | 10.0  | 11.1  | 5.0   | 1.7   |
| 292.8 | 246.2 | 353.8 | 471.4 | 135.2 | 430.6 | 298.8 | 123.5 | 156.8 |
| 333.3 | 311.5 | 342.7 | 195.4 | 86.5  | 530.1 | 288.8 | 69.4  | 106.0 |
| 375.3 | 436.4 | 407.5 | 205.4 | 105.6 | 165.5 | 83.8  | 14.0  | 26.0  |
| 1.5   | 2.7   | 0.7   | 0.4   | 4.8   | 5.3   | 0.7   | 0.9   | 4.6   |
| 1.4   | 1.0   | 1.3   | 1.3   | 0.6   | 1.2   | 1.9   | 2.7   | 3.7   |
| 80.7  | 52.2  | 42.6  | 15.4  | 3.5   | 138.0 | 45.1  | 29.0  | 17.6  |
| 456.8 | 441.6 | 397.9 | 249.7 | 166.9 | 276.8 | 225.5 | 13.7  | 17.4  |
| 21.1  | 24.8  | 14.0  | 6.8   | 3.4   | 42.1  | 8.5   | 10.4  | 2.1   |
| 32.3  | 8.5   | 6.5   | 19.4  | 8.1   | 21.0  | 16.4  | 2.3   | 5.0   |
| 43.6  | 39.5  | 39.8  | 45.6  | 11.5  | 56.0  | 17.7  | 39.7  | 72.9  |
| 19.3  | 3.9   | 3.4   | 2.7   | 11.2  | 51.6  | 56.8  | 2.0   | 2.8   |
| 7.8   | 0.7   | 1.9   | 4.4   | 0.5   | 33.8  | 16.6  | 26.2  | 25.1  |
| 11.4  | 2.1   | 1.3   | 1.6   | 5.6   | 24.3  | 9.3   | 11.2  | 31.2  |
| 58.8  | 60.2  | 73.7  | 50.2  | 32.1  | 16.6  | 4.6   | 22.7  | 32.5  |
| 238.0 | 182.6 | 236.7 | 277.9 | 93.4  | 223.7 | 198.4 | 31.3  | 31.1  |

|       |       |       |       |       |       |       |       |       |
|-------|-------|-------|-------|-------|-------|-------|-------|-------|
| 16.2  | 21.8  | 16.0  | 3.6   | 4.5   | 12.0  | 2.0   | 14.0  | 11.0  |
| 63.7  | 45.1  | 65.3  | 33.9  | 26.0  | 147.1 | 130.4 | 98.9  | 99.6  |
| 3.2   | 12.8  | 22.5  | 28.5  | 8.8   | 48.1  | 33.8  | 23.0  | 41.0  |
| 16.6  | 4.0   | 10.0  | 1.5   | 1.7   | 5.8   | 1.0   | 18.5  | 14.6  |
| 1.1   | 8.7   | 11.7  | 7.3   | 0.2   | 23.7  | 21.4  | 1.5   | 5.9   |
| 10.3  | 16.3  | 21.7  | 14.0  | 9.2   | 9.0   | 21.4  | 4.8   | 26.5  |
| 8.4   | 11.0  | 12.3  | 15.4  | 3.3   | 9.4   | 17.2  | 18.9  | 21.6  |
| 1.5   | 8.5   | 2.0   | 1.2   | 4.3   | 2.0   | 11.6  | 6.5   | 9.1   |
| 22.1  | 14.5  | 17.5  | 18.2  | 6.2   | 18.5  | 9.2   | 5.6   | 1.5   |
| 37.3  | 12.9  | 4.3   | 12.7  | 9.0   | 14.1  | 22.9  | 20.1  | 14.7  |
| 42.2  | 41.7  | 48.6  | 38.3  | 12.6  | 145.8 | 97.4  | 30.0  | 39.6  |
| 7.8   | 13.9  | 16.7  | 18.2  | 1.7   | 26.0  | 30.0  | 14.5  | 18.9  |
| 265.8 | 231.3 | 255.2 | 180.6 | 75.7  | 704.2 | 599.6 | 57.6  | 69.6  |
| 2.7   | 6.1   | 1.1   | 6.6   | 0.5   | 65.1  | 56.9  | 25.6  | 25.7  |
| 46.6  | 32.6  | 37.0  | 49.0  | 13.5  | 161.6 | 123.1 | 13.2  | 11.5  |
| 180.2 | 162.3 | 220.3 | 196.2 | 128.9 | 318.0 | 271.2 | 41.7  | 71.4  |
| 153.3 | 109.8 | 121.4 | 150.3 | 27.9  | 161.4 | 68.7  | 197.9 | 244.6 |
| 64.7  | 54.8  | 38.3  | 44.9  | 22.2  | 179.2 | 118.0 | 35.7  | 64.9  |
| 70.4  | 47.8  | 64.7  | 47.7  | 19.5  | 453.1 | 512.4 | 70.5  | 110.6 |
| 53.8  | 48.4  | 41.3  | 29.7  | 12.0  | 0.6   | 1.9   | 107.2 | 260.3 |
| 45.6  | 66.5  | 44.7  | 24.3  | 11.1  | 15.5  | 7.4   | 18.3  | 19.3  |
| 1.2   | 1.6   | 1.0   | 2.4   | 0.6   | 77.0  | 72.5  | 2.1   | 1.8   |
| 1.1   | 9.7   | 5.2   | 2.2   | 0.3   | 5.9   | 0.8   | 10.8  | 8.4   |
| 36.1  | 24.0  | 17.0  | 2.7   | 11.0  | 1.1   | 1.1   | 1.5   | 2.3   |
| 8.1   | 14.9  | 14.9  | 8.3   | 12.1  | 70.1  | 50.1  | 7.9   | 19.0  |
| 63.2  | 65.0  | 59.1  | 69.9  | 13.9  | 87.9  | 46.1  | 4.6   | 4.3   |
| 4.9   | 17.7  | 4.2   | 2.5   | 5.3   | 20.7  | 2.5   | 13.8  | 5.3   |
| 52.7  | 45.5  | 33.4  | 14.9  | 14.0  | 201.4 | 111.0 | 33.6  | 38.6  |
| 0.7   | 2.9   | 7.6   | 1.0   | 0.6   | 61.8  | 29.1  | 1.6   | 3.7   |
| 20.2  | 18.0  | 14.0  | 21.4  | 6.3   | 40.3  | 15.4  | 20.4  | 16.1  |
| 1.2   | 1.0   | 10.4  | 3.3   | 1.3   | 42.3  | 22.0  | 3.1   | 1.3   |
| 32.4  | 28.2  | 27.0  | 13.7  | 5.5   | 88.9  | 48.0  | 6.8   | 1.8   |
| 8.1   | 1.3   | 3.9   | 7.4   | 3.3   | 13.2  | 10.9  | 4.5   | 4.0   |
| 22.0  | 19.3  | 24.2  | 46.9  | 4.1   | 249.6 | 170.2 | 53.8  | 88.9  |
| 13.3  | 10.6  | 5.9   | 14.2  | 4.1   | 20.5  | 13.8  | 6.9   | 27.2  |
| 127.7 | 145.1 | 138.5 | 152.7 | 53.4  | 141.3 | 112.4 | 37.0  | 53.5  |
| 3.3   | 4.0   | 3.1   | 25.1  | 2.6   | 2.6   | 2.1   | 1.7   | 1.8   |
| 7.8   | 18.1  | 17.8  | 7.0   | 10.0  | 14.7  | 9.6   | 6.2   | 10.6  |
| 3.9   | 0.5   | 0.7   | 5.9   | 2.8   | 10.5  | 3.1   | 2.2   | 0.2   |
| 24.9  | 27.0  | 14.6  | 8.4   | 9.3   | 20.6  | 5.3   | 3.2   | 18.0  |
| 68.1  | 93.7  | 93.0  | 69.2  | 33.9  | 156.5 | 95.1  | 8.8   | 8.3   |
| 114.7 | 66.4  | 69.8  | 65.9  | 47.5  | 13.5  | 10.6  | 28.0  | 64.7  |
| 31.7  | 23.6  | 34.7  | 21.0  | 8.8   | 50.8  | 55.1  | 14.9  | 17.3  |
| 59.2  | 54.3  | 91.0  | 60.4  | 18.6  | 134.8 | 88.9  | 63.2  | 77.6  |
| 66.1  | 56.9  | 39.8  | 43.3  | 27.5  | 125.0 | 68.0  | 38.1  | 46.1  |
| 19.2  | 21.0  | 2.5   | 20.0  | 1.4   | 22.5  | 13.6  | 4.3   | 1.2   |
| 42.0  | 46.7  | 41.7  | 38.2  | 24.2  | 246.8 | 157.4 | 68.9  | 81.3  |
| 5.5   | 7.1   | 4.1   | 3.3   | 4.6   | 53.3  | 21.1  | 6.3   | 16.3  |
| 78.0  | 87.8  | 69.1  | 89.2  | 32.3  | 7.9   | 6.9   | 27.6  | 20.8  |
| 17.1  | 2.0   | 2.1   | 1.5   | 0.7   | 2.3   | 2.0   | 15.3  | 11.5  |
| 62.5  | 41.4  | 46.8  | 39.3  | 15.2  | 111.8 | 52.2  | 31.8  | 36.7  |
| 6.4   | 2.5   | 1.4   | 1.1   | 1.0   | 0.4   | 1.2   | 0.7   | 0.5   |
| 241.4 | 217.1 | 218.7 | 151.0 | 67.6  | 250.0 | 183.3 | 137.0 | 209.3 |



|        |        |        |        |        |        |        |       |       |
|--------|--------|--------|--------|--------|--------|--------|-------|-------|
| 14.7   | 14.8   | 5.3    | 3.1    | 1.3    | 90.5   | 71.8   | 7.9   | 13.7  |
| 45.5   | 23.2   | 13.5   | 16.0   | 8.3    | 47.4   | 33.2   | 22.4  | 28.0  |
| 39.7   | 30.2   | 47.5   | 39.0   | 2.1    | 93.0   | 47.8   | 36.6  | 47.7  |
| 2.1    | 3.0    | 1.5    | 3.1    | 6.6    | 11.6   | 1.0    | 1.6   | 2.0   |
| 53.1   | 30.2   | 42.1   | 31.2   | 9.5    | 34.7   | 23.1   | 20.4  | 17.1  |
| 1.2    | 1.6    | 1.1    | 2.7    | 2.6    | 1.3    | 0.8    | 1.8   | 5.7   |
| 24.9   | 24.3   | 42.1   | 21.6   | 9.5    | 127.1  | 75.4   | 22.4  | 42.0  |
| 22.8   | 9.1    | 13.8   | 3.3    | 8.9    | 42.5   | 30.2   | 24.7  | 54.5  |
| 8.1    | 8.9    | 7.6    | 8.7    | 3.5    | 15.6   | 17.0   | 1.9   | 9.0   |
| 9.8    | 10.3   | 2.5    | 1.9    | 2.9    | 4.5    | 1.2    | 2.8   | 1.1   |
| 12.4   | 12.8   | 3.2    | 10.9   | 10.2   | 4.9    | 8.5    | 6.7   | 9.5   |
| 5.3    | 4.5    | 9.6    | 10.0   | 1.2    | 10.4   | 1.7    | 0.9   | 3.5   |
| 2.1    | 0.3    | 0.4    | 0.6    | 0.5    | 0.6    | 4.3    | 6.6   | 0.6   |
| 76.0   | 69.9   | 52.9   | 57.4   | 35.0   | 3.5    | 25.8   | 18.7  | 4.5   |
| 17.3   | 8.5    | 17.2   | 4.2    | 3.2    | 10.1   | 8.6    | 1.1   | 1.6   |
| 148.4  | 87.9   | 137.7  | 82.2   | 35.0   | 119.9  | 70.6   | 74.8  | 77.8  |
| 15.1   | 14.6   | 11.3   | 8.8    | 9.3    | 7.2    | 0.3    | 15.1  | 18.1  |
| 44.1   | 36.0   | 14.4   | 6.3    | 14.1   | 39.9   | 31.3   | 1.4   | 8.4   |
| 6.8    | 3.9    | 1.5    | 12.9   | 3.5    | 76.3   | 51.4   | 51.5  | 82.8  |
| 29.0   | 4.0    | 3.2    | 4.7    | 4.2    | 32.0   | 16.7   | 21.3  | 20.9  |
| 16.3   | 19.4   | 29.9   | 31.1   | 7.0    | 102.4  | 48.5   | 17.7  | 21.8  |
| 40.2   | 23.1   | 27.2   | 28.6   | 12.8   | 30.5   | 10.1   | 1.4   | 0.8   |
| 10.6   | 0.9    | 5.1    | 3.8    | 5.9    | 0.3    | 0.7    | 4.1   | 11.7  |
| 2.0    | 1.2    | 2.5    | 2.4    | 1.7    | 18.9   | 2.9    | 2.2   | 2.4   |
| 8.5    | 13.0   | 4.9    | 0.3    | 0.7    | 1.2    | 3.5    | 5.5   | 7.0   |
| 49.6   | 32.2   | 40.0   | 29.7   | 17.7   | 82.6   | 60.1   | 45.5  | 70.8  |
| 72.0   | 61.4   | 34.7   | 44.0   | 24.5   | 55.8   | 54.2   | 24.3  | 21.2  |
| 16.1   | 20.4   | 22.7   | 14.0   | 5.2    | 8.3    | 6.8    | 16.8  | 19.1  |
| 1.5    | 6.5    | 0.6    | 0.8    | 0.5    | 2.2    | 0.5    | 11.2  | 7.8   |
| 14.8   | 22.7   | 12.0   | 5.8    | 0.9    | 61.2   | 31.4   | 5.2   | 16.1  |
| 22.2   | 15.3   | 15.0   | 17.6   | 4.4    | 16.4   | 8.1    | 14.7  | 33.3  |
| 11.4   | 11.8   | 6.7    | 10.1   | 9.3    | 23.0   | 10.3   | 18.2  | 16.1  |
| 2.7    | 2.1    | 5.2    | 1.4    | 0.8    | 10.2   | 2.9    | 4.4   | 8.2   |
| 63.9   | 73.8   | 68.1   | 37.7   | 23.1   | 383.9  | 260.1  | 43.9  | 56.6  |
| 2.7    | 6.7    | 0.2    | 6.7    | 2.0    | 0.7    | 5.5    | 7.4   | 5.4   |
| 129.0  | 80.7   | 92.4   | 65.2   | 50.0   | 185.9  | 174.8  | 17.4  | 25.2  |
| 24.2   | 26.3   | 18.9   | 13.2   | 2.3    | 23.9   | 26.1   | 6.8   | 3.1   |
| 37.8   | 24.3   | 26.0   | 17.1   | 13.0   | 29.2   | 16.4   | 10.5  | 10.4  |
| 59.3   | 46.6   | 45.4   | 55.3   | 24.6   | 111.6  | 102.2  | 5.6   | 12.0  |
| 21.4   | 36.3   | 25.1   | 11.0   | 11.1   | 34.2   | 32.0   | 7.8   | 22.7  |
| 1.4    | 2.9    | 4.1    | 1.0    | 3.9    | 33.3   | 36.7   | 17.7  | 43.5  |
| 77.0   | 51.1   | 48.7   | 48.5   | 22.2   | 113.2  | 69.7   | 31.7  | 34.5  |
| 123.8  | 100.6  | 134.4  | 133.0  | 35.8   | 81.7   | 65.5   | 15.1  | 16.6  |
| 0.6    | 0.4    | 0.9    | 0.3    | 0.4    | 324.5  | 319.3  | 4.6   | 0.4   |
| 21.6   | 31.4   | 20.4   | 19.8   | 1.6    | 30.4   | 11.6   | 4.4   | 13.2  |
| 24.7   | 19.1   | 23.5   | 9.6    | 4.5    | 12.4   | 1.7    | 8.7   | 11.2  |
| 3230.5 | 3023.2 | 3446.5 | 3288.1 | 1180.0 | 3847.7 | 3078.0 | 789.8 | 814.9 |
| 141.4  | 147.1  | 135.6  | 110.0  | 50.4   | 66.4   | 30.2   | 51.2  | 94.1  |
| 1.0    | 1.6    | 1.4    | 1.4    | 0.3    | 1.5    | 1.3    | 1.3   | 0.8   |
| 72.8   | 64.5   | 86.3   | 106.1  | 25.8   | 4.8    | 0.3    | 17.2  | 13.5  |
| 28.0   | 2.9    | 21.8   | 6.8    | 13.0   | 2.2    | 10.7   | 7.6   | 3.4   |
| 136.9  | 163.2  | 147.3  | 165.7  | 59.2   | 164.5  | 148.3  | 29.4  | 38.8  |
| 2.7    | 1.0    | 1.4    | 0.5    | 0.2    | 11.5   | 14.3   | 61.0  | 67.8  |

|       |       |       |       |       |        |        |       |       |
|-------|-------|-------|-------|-------|--------|--------|-------|-------|
| 65.0  | 47.5  | 31.0  | 26.5  | 13.8  | 38.7   | 18.0   | 14.6  | 36.3  |
| 99.3  | 97.9  | 78.6  | 92.7  | 27.9  | 161.4  | 137.3  | 47.5  | 68.2  |
| 39.1  | 45.2  | 54.6  | 35.6  | 15.3  | 22.4   | 14.8   | 17.3  | 21.1  |
| 1.8   | 1.0   | 4.8   | 0.4   | 0.5   | 0.9    | 9.1    | 8.8   | 1.5   |
| 12.4  | 3.6   | 12.8  | 0.2   | 0.6   | 3.8    | 14.9   | 9.5   | 7.6   |
| 86.6  | 65.6  | 59.9  | 63.9  | 31.8  | 144.1  | 89.9   | 22.0  | 29.3  |
| 10.6  | 1.0   | 7.2   | 3.9   | 2.5   | 10.9   | 3.7    | 4.8   | 3.2   |
| 10.9  | 1.4   | 2.6   | 11.2  | 0.9   | 7.2    | 6.7    | 2.6   | 3.4   |
| 6.0   | 3.9   | 0.7   | 3.8   | 2.0   | 4.4    | 0.7    | 0.5   | 2.1   |
| 4.8   | 3.3   | 11.9  | 4.0   | 0.1   | 25.6   | 17.3   | 2.5   | 9.3   |
| 19.4  | 7.8   | 15.8  | 8.2   | 6.9   | 19.3   | 11.7   | 5.0   | 23.6  |
| 0.9   | 1.5   | 1.3   | 0.6   | 1.6   | 3.2    | 12.6   | 5.6   | 5.5   |
| 14.1  | 26.5  | 26.1  | 35.4  | 8.4   | 25.8   | 9.7    | 7.2   | 37.9  |
| 0.4   | 1.5   | 0.4   | 0.5   | 0.3   | 5.5    | 3.9    | 1.1   | 0.4   |
| 77.5  | 72.9  | 66.7  | 45.3  | 31.5  | 105.5  | 71.7   | 19.0  | 12.5  |
| 58.1  | 53.7  | 19.9  | 29.8  | 19.9  | 58.3   | 40.0   | 16.8  | 6.2   |
| 31.6  | 18.2  | 28.3  | 19.6  | 11.7  | 102.7  | 82.6   | 4.8   | 11.7  |
| 20.8  | 22.3  | 6.1   | 8.0   | 4.6   | 8.9    | 2.6    | 26.4  | 44.7  |
| 458.2 | 414.4 | 375.8 | 259.9 | 119.1 | 1025.9 | 839.5  | 122.0 | 154.9 |
| 7.2   | 3.5   | 8.4   | 2.0   | 1.3   | 12.9   | 12.0   | 6.0   | 4.3   |
| 1.0   | 2.9   | 4.8   | 9.1   | 4.5   | 25.6   | 29.6   | 120.6 | 165.3 |
| 1.1   | 1.6   | 1.4   | 1.1   | 1.3   | 3.2    | 0.9    | 31.7  | 47.2  |
| 0.5   | 0.8   | 0.5   | 0.3   | 0.2   | 4.3    | 0.8    | 2.7   | 0.3   |
| 10.2  | 30.1  | 29.8  | 23.3  | 7.9   | 38.4   | 24.1   | 17.1  | 14.2  |
| 14.4  | 15.8  | 13.9  | 23.1  | 6.3   | 64.3   | 22.1   | 5.7   | 7.1   |
| 7.6   | 1.4   | 7.4   | 4.4   | 1.2   | 1.3    | 4.7    | 1.8   | 2.0   |
| 0.3   | 4.7   | 5.2   | 2.1   | 2.8   | 1.4    | 0.6    | 24.7  | 23.9  |
| 0.9   | 1.1   | 2.0   | 1.0   | 0.4   | 0.9    | 1.1    | 3.8   | 1.0   |
| 23.8  | 19.2  | 13.0  | 3.9   | 2.0   | 23.6   | 17.9   | 29.1  | 27.5  |
| 404.4 | 277.5 | 286.6 | 290.2 | 101.4 | 445.1  | 249.4  | 106.9 | 167.5 |
| 10.2  | 9.3   | 12.6  | 13.3  | 1.0   | 617.2  | 386.5  | 20.9  | 31.0  |
| 15.3  | 10.3  | 14.5  | 11.6  | 3.1   | 43.0   | 31.1   | 6.8   | 8.3   |
| 25.8  | 30.0  | 30.7  | 23.5  | 10.4  | 70.8   | 38.9   | 26.6  | 23.8  |
| 142.2 | 181.3 | 215.4 | 239.5 | 111.6 | 134.8  | 82.4   | 20.1  | 39.6  |
| 1.0   | 6.4   | 6.2   | 0.4   | 1.0   | 5.6    | 0.3    | 6.3   | 8.4   |
| 0.9   | 2.2   | 7.1   | 0.3   | 1.9   | 0.5    | 0.5    | 5.0   | 9.1   |
| 85.0  | 74.0  | 69.1  | 51.7  | 23.4  | 80.6   | 38.1   | 26.1  | 21.4  |
| 132.5 | 131.8 | 136.4 | 117.2 | 48.7  | 459.0  | 295.5  | 15.8  | 25.1  |
| 26.5  | 24.0  | 10.5  | 24.9  | 23.8  | 398.4  | 359.9  | 36.7  | 85.8  |
| 30.3  | 32.3  | 24.2  | 11.8  | 8.9   | 50.6   | 17.5   | 7.5   | 3.8   |
| 102.8 | 103.4 | 102.1 | 103.8 | 31.8  | 178.2  | 131.0  | 111.6 | 151.5 |
| 30.5  | 19.6  | 31.4  | 16.4  | 8.0   | 27.9   | 18.6   | 4.6   | 2.3   |
| 31.4  | 4.7   | 2.3   | 15.8  | 9.2   | 44.8   | 3.7    | 6.4   | 3.1   |
| 14.6  | 17.2  | 14.5  | 18.9  | 7.8   | 13.8   | 1.1    | 16.4  | 11.0  |
| 46.2  | 24.5  | 33.4  | 25.5  | 7.8   | 18.9   | 10.3   | 11.7  | 16.2  |
| 1.5   | 1.3   | 0.5   | 0.7   | 0.6   | 14.2   | 7.7    | 2.7   | 2.3   |
| 15.2  | 27.9  | 24.5  | 19.5  | 9.9   | 22.9   | 1.2    | 5.1   | 16.3  |
| 342.1 | 274.2 | 299.3 | 217.4 | 91.1  | 881.4  | 464.2  | 307.3 | 329.4 |
| 117.4 | 109.3 | 81.4  | 61.9  | 43.0  | 110.0  | 85.4   | 34.8  | 56.8  |
| 122.7 | 103.1 | 135.7 | 95.4  | 29.5  | 213.3  | 173.5  | 37.2  | 35.5  |
| 224.9 | 228.5 | 213.3 | 149.4 | 75.5  | 1272.3 | 1115.2 | 258.8 | 272.3 |
| 2.6   | 6.6   | 1.5   | 1.8   | 0.2   | 2.8    | 2.1    | 14.1  | 20.4  |
| 37.4  | 29.5  | 24.1  | 18.0  | 9.3   | 147.0  | 98.7   | 26.6  | 26.0  |

|       |       |       |       |       |       |       |       |       |
|-------|-------|-------|-------|-------|-------|-------|-------|-------|
| 39.4  | 53.1  | 36.6  | 65.5  | 19.0  | 68.5  | 52.8  | 21.1  | 10.4  |
| 12.4  | 3.3   | 0.9   | 12.2  | 4.1   | 1.5   | 1.0   | 6.1   | 2.2   |
| 13.7  | 10.8  | 12.0  | 2.8   | 2.2   | 3.3   | 3.1   | 4.1   | 15.4  |
| 58.8  | 67.0  | 67.4  | 32.7  | 26.8  | 25.7  | 2.7   | 1.3   | 2.5   |
| 50.0  | 46.7  | 54.6  | 49.7  | 16.2  | 97.2  | 88.6  | 26.4  | 29.4  |
| 30.9  | 14.4  | 27.4  | 15.9  | 8.2   | 30.1  | 10.2  | 12.3  | 4.7   |
| 85.7  | 41.5  | 54.3  | 31.6  | 15.5  | 61.1  | 47.0  | 28.9  | 28.1  |
| 1.1   | 7.8   | 1.6   | 2.6   | 6.3   | 1.2   | 5.9   | 0.5   | 2.3   |
| 6.3   | 2.0   | 16.3  | 4.3   | 5.8   | 21.5  | 7.7   | 2.2   | 5.2   |
| 11.2  | 10.3  | 27.4  | 47.7  | 1.5   | 29.2  | 52.7  | 16.1  | 19.7  |
| 69.1  | 77.0  | 20.5  | 26.0  | 26.5  | 1.7   | 1.1   | 25.4  | 30.7  |
| 120.3 | 159.2 | 145.4 | 138.2 | 57.4  | 174.3 | 112.9 | 3.3   | 6.0   |
| 0.4   | 7.9   | 8.8   | 11.2  | 2.9   | 8.3   | 10.8  | 1.6   | 4.4   |
| 1.2   | 1.1   | 1.1   | 0.9   | 0.5   | 2.0   | 1.0   | 1.4   | 0.8   |
| 3.3   | 5.8   | 11.8  | 2.5   | 1.1   | 707.3 | 538.4 | 1.5   | 0.9   |
| 1.9   | 3.0   | 5.2   | 1.0   | 0.8   | 4.0   | 1.8   | 2.0   | 1.1   |
| 54.3  | 43.3  | 56.2  | 40.2  | 19.5  | 103.0 | 54.4  | 14.7  | 22.3  |
| 2.2   | 3.2   | 2.0   | 3.8   | 0.3   | 12.6  | 3.5   | 1.2   | 1.2   |
| 14.7  | 7.8   | 10.0  | 1.6   | 3.9   | 2.2   | 2.2   | 2.8   | 1.1   |
| 1.4   | 6.8   | 1.3   | 5.3   | 0.4   | 1.1   | 2.5   | 1.4   | 1.4   |
| 5.8   | 5.5   | 2.2   | 6.6   | 2.9   | 12.0  | 11.8  | 5.3   | 2.7   |
| 84.4  | 70.8  | 73.8  | 46.7  | 26.2  | 137.5 | 83.2  | 33.8  | 46.0  |
| 24.8  | 22.5  | 26.1  | 16.2  | 9.0   | 13.2  | 4.2   | 14.1  | 13.7  |
| 57.7  | 42.2  | 53.4  | 29.0  | 15.5  | 4.4   | 4.3   | 18.6  | 2.3   |
| 28.7  | 40.7  | 32.6  | 48.7  | 15.2  | 9.7   | 17.1  | 5.8   | 12.3  |
| 4.5   | 4.2   | 3.0   | 3.2   | 4.1   | 6.1   | 25.2  | 6.1   | 19.5  |
| 70.8  | 45.8  | 50.1  | 60.1  | 20.4  | 61.3  | 36.5  | 11.0  | 25.1  |
| 4.6   | 8.8   | 24.1  | 11.5  | 1.6   | 6.0   | 1.9   | 4.3   | 2.2   |
| 0.3   | 0.4   | 2.6   | 0.4   | 2.7   | 111.3 | 79.0  | 51.8  | 113.9 |
| 11.8  | 10.2  | 12.9  | 17.5  | 6.9   | 3.0   | 0.8   | 3.0   | 9.6   |
| 4.4   | 2.2   | 3.2   | 3.8   | 1.0   | 17.2  | 7.7   | 5.8   | 5.3   |
| 6.2   | 0.9   | 2.8   | 7.4   | 1.7   | 45.7  | 25.6  | 1.7   | 13.8  |
| 54.5  | 77.4  | 92.1  | 80.2  | 32.8  | 59.4  | 46.1  | 21.0  | 34.1  |
| 72.7  | 60.0  | 72.4  | 50.5  | 31.8  | 3.1   | 2.2   | 2.5   | 3.1   |
| 5.5   | 3.2   | 1.0   | 0.7   | 1.3   | 180.2 | 78.4  | 3.4   | 20.1  |
| 7.6   | 1.3   | 0.8   | 1.5   | 0.3   | 2.9   | 8.2   | 6.5   | 1.0   |
| 14.6  | 10.2  | 8.8   | 26.5  | 4.6   | 68.7  | 23.0  | 14.6  | 14.6  |
| 1.6   | 4.8   | 6.1   | 3.1   | 3.7   | 13.8  | 1.3   | 9.4   | 3.4   |
| 24.2  | 15.4  | 18.8  | 15.4  | 11.6  | 56.4  | 41.0  | 34.1  | 56.5  |
| 41.7  | 25.7  | 28.4  | 15.3  | 14.2  | 22.9  | 32.9  | 36.5  | 31.6  |
| 287.6 | 280.4 | 242.8 | 156.0 | 105.5 | 195.3 | 152.5 | 159.5 | 182.9 |
| 106.5 | 131.6 | 101.9 | 153.8 | 51.9  | 241.3 | 167.9 | 8.8   | 13.0  |
| 5.1   | 10.5  | 10.0  | 7.0   | 1.8   | 5.7   | 2.5   | 7.3   | 10.0  |
| 42.3  | 41.2  | 26.5  | 32.0  | 8.0   | 30.4  | 19.2  | 19.0  | 47.5  |
| 2.8   | 10.0  | 15.6  | 7.0   | 5.8   | 40.4  | 41.2  | 2.6   | 10.4  |
| 10.8  | 2.9   | 15.0  | 1.4   | 3.3   | 11.9  | 6.8   | 2.9   | 8.9   |
| 119.2 | 124.9 | 117.1 | 42.8  | 32.2  | 126.3 | 54.0  | 37.4  | 111.9 |
| 173.2 | 173.0 | 151.4 | 81.0  | 60.6  | 418.2 | 270.2 | 24.9  | 32.5  |
| 21.4  | 30.7  | 25.1  | 39.7  | 14.9  | 51.2  | 46.8  | 16.4  | 4.0   |
| 0.8   | 0.9   | 0.3   | 8.3   | 0.3   | 11.8  | 3.0   | 1.0   | 1.0   |
| 0.9   | 5.2   | 5.4   | 5.7   | 4.1   | 11.0  | 5.9   | 5.8   | 17.4  |
| 12.4  | 3.7   | 9.5   | 33.9  | 2.4   | 13.9  | 10.5  | 0.9   | 3.3   |
| 3.0   | 1.0   | 8.7   | 3.9   | 3.3   | 240.5 | 242.3 | 36.6  | 37.9  |

|       |       |       |       |       |        |        |       |       |
|-------|-------|-------|-------|-------|--------|--------|-------|-------|
| 46.7  | 35.7  | 50.9  | 46.8  | 9.3   | 66.2   | 25.8   | 9.4   | 13.4  |
| 2.0   | 3.2   | 5.5   | 3.5   | 1.4   | 9.2    | 1.2    | 3.6   | 8.4   |
| 2.1   | 5.2   | 2.0   | 3.7   | 1.2   | 3.1    | 3.4    | 3.5   | 3.2   |
| 3.6   | 11.0  | 1.7   | 1.5   | 0.4   | 2.5    | 0.7    | 2.1   | 3.1   |
| 69.8  | 57.5  | 53.0  | 39.7  | 23.3  | 44.2   | 35.8   | 19.2  | 3.4   |
| 59.4  | 68.3  | 69.9  | 62.0  | 22.9  | 115.4  | 90.1   | 34.3  | 78.6  |
| 21.0  | 27.3  | 21.7  | 21.4  | 9.5   | 51.2   | 37.4   | 2.7   | 13.1  |
| 33.9  | 49.9  | 33.0  | 43.6  | 7.0   | 30.3   | 18.2   | 14.5  | 24.8  |
| 42.3  | 41.7  | 52.5  | 48.3  | 25.8  | 43.9   | 35.9   | 22.7  | 28.8  |
| 72.1  | 64.4  | 64.1  | 60.6  | 22.1  | 55.5   | 33.5   | 9.0   | 35.8  |
| 0.7   | 5.8   | 0.9   | 5.4   | 6.4   | 48.7   | 33.9   | 0.3   | 5.0   |
| 35.9  | 38.0  | 35.9  | 22.0  | 6.7   | 30.5   | 12.9   | 8.9   | 13.6  |
| 2.5   | 1.6   | 3.2   | 2.1   | 5.7   | 2.8    | 3.0    | 2.1   | 3.8   |
| 134.4 | 140.2 | 139.5 | 106.9 | 68.7  | 51.5   | 32.3   | 8.8   | 1.4   |
| 24.9  | 24.6  | 29.8  | 22.5  | 17.5  | 28.0   | 20.3   | 44.2  | 45.0  |
| 13.3  | 6.9   | 1.7   | 2.7   | 1.1   | 1.9    | 2.5    | 12.0  | 6.8   |
| 19.6  | 26.3  | 12.3  | 13.0  | 6.8   | 51.4   | 36.2   | 18.4  | 23.3  |
| 10.9  | 12.6  | 2.7   | 12.6  | 4.6   | 86.2   | 63.8   | 14.1  | 6.8   |
| 3.7   | 20.0  | 30.8  | 5.6   | 10.0  | 22.7   | 12.3   | 74.4  | 30.3  |
| 0.8   | 1.4   | 0.9   | 0.9   | 3.6   | 1.1    | 2.9    | 2.1   | 6.5   |
| 7.7   | 15.3  | 1.0   | 1.2   | 4.3   | 25.9   | 42.5   | 6.0   | 0.1   |
| 10.1  | 3.2   | 4.6   | 1.4   | 0.4   | 9.4    | 6.2    | 1.2   | 1.2   |
| 24.0  | 13.8  | 5.3   | 2.8   | 7.9   | 11.7   | 22.9   | 26.7  | 41.6  |
| 2.3   | 3.1   | 3.9   | 0.8   | 5.0   | 0.9    | 6.4    | 2.7   | 0.3   |
| 5.7   | 24.7  | 9.4   | 21.7  | 9.6   | 6.4    | 3.9    | 2.0   | 6.9   |
| 6.8   | 14.2  | 24.8  | 16.0  | 9.7   | 20.9   | 4.5    | 10.8  | 30.1  |
| 182.4 | 168.8 | 142.9 | 130.8 | 47.8  | 409.8  | 331.3  | 15.8  | 12.8  |
| 1.2   | 2.0   | 4.9   | 0.5   | 2.7   | 1.4    | 7.4    | 1.5   | 5.7   |
| 0.8   | 0.7   | 5.6   | 1.9   | 0.5   | 1.9    | 3.4    | 1.2   | 1.3   |
| 73.6  | 57.0  | 65.7  | 60.0  | 25.8  | 51.0   | 43.8   | 11.7  | 10.7  |
| 3.2   | 12.5  | 11.0  | 6.7   | 7.2   | 30.2   | 18.8   | 19.4  | 16.7  |
| 2.6   | 13.4  | 1.8   | 6.9   | 2.7   | 1.3    | 2.0    | 1.7   | 1.9   |
| 31.4  | 42.5  | 23.0  | 33.0  | 11.1  | 38.5   | 36.6   | 14.1  | 21.4  |
| 0.7   | 0.3   | 0.7   | 0.5   | 0.4   | 21.6   | 20.4   | 1.0   | 0.5   |
| 13.2  | 1.8   | 1.0   | 6.5   | 0.6   | 3.8    | 1.8    | 0.5   | 1.9   |
| 101.9 | 61.6  | 54.0  | 57.1  | 26.0  | 193.4  | 147.8  | 28.8  | 43.2  |
| 364.0 | 274.4 | 285.6 | 150.1 | 127.3 | 1874.3 | 1354.6 | 65.6  | 53.7  |
| 11.3  | 2.7   | 9.8   | 8.0   | 3.0   | 21.6   | 8.6    | 8.4   | 1.3   |
| 136.4 | 141.2 | 137.7 | 100.6 | 48.8  | 161.6  | 96.5   | 127.2 | 164.5 |
| 2.1   | 2.6   | 3.4   | 0.9   | 1.4   | 5.2    | 2.2    | 2.4   | 2.8   |
| 1.1   | 1.4   | 8.7   | 2.0   | 1.7   | 17.8   | 12.6   | 8.4   | 8.8   |
| 26.5  | 15.9  | 12.7  | 5.2   | 2.4   | 43.2   | 37.6   | 45.6  | 41.4  |
| 49.7  | 42.2  | 49.5  | 46.7  | 11.7  | 50.0   | 37.1   | 7.6   | 17.5  |
| 516.4 | 603.3 | 485.9 | 434.4 | 207.5 | 270.7  | 530.7  | 189.1 | 286.4 |
| 72.0  | 58.6  | 58.9  | 45.2  | 13.9  | 94.4   | 54.4   | 146.6 | 156.1 |
| 84.3  | 87.3  | 100.3 | 93.5  | 30.3  | 509.2  | 393.9  | 47.9  | 77.2  |
| 22.7  | 27.7  | 18.9  | 26.9  | 9.0   | 34.1   | 34.6   | 2.2   | 16.4  |
| 54.4  | 80.1  | 69.4  | 46.5  | 31.8  | 313.6  | 145.8  | 124.1 | 165.0 |
| 40.5  | 41.4  | 33.1  | 35.2  | 10.4  | 75.3   | 45.7   | 35.2  | 40.0  |
| 117.1 | 99.9  | 137.4 | 147.6 | 27.8  | 356.6  | 247.5  | 22.7  | 28.5  |
| 17.9  | 20.6  | 29.1  | 31.5  | 12.7  | 38.2   | 21.9   | 9.8   | 11.7  |
| 52.6  | 47.6  | 60.3  | 94.4  | 22.6  | 1236.7 | 1162.2 | 3.5   | 2.7   |
| 81.4  | 40.5  | 43.4  | 32.8  | 10.3  | 28.0   | 20.3   | 4.1   | 9.7   |

|        |        |        |        |       |        |       |       |       |
|--------|--------|--------|--------|-------|--------|-------|-------|-------|
| 104.8  | 175.1  | 130.7  | 87.2   | 46.8  | 59.4   | 81.9  | 12.9  | 17.2  |
| 56.4   | 48.5   | 54.4   | 32.1   | 17.8  | 354.1  | 184.5 | 61.9  | 109.4 |
| 6.9    | 2.5    | 10.2   | 7.5    | 1.4   | 0.8    | 7.0   | 2.9   | 12.9  |
| 55.6   | 70.6   | 77.4   | 95.5   | 19.7  | 126.9  | 66.0  | 41.4  | 53.9  |
| 1.0    | 3.6    | 1.2    | 3.6    | 0.6   | 4.4    | 0.5   | 2.9   | 0.8   |
| 449.5  | 325.0  | 417.3  | 429.1  | 189.7 | 1102.9 | 746.3 | 86.8  | 111.0 |
| 5.2    | 5.1    | 2.5    | 0.9    | 5.7   | 0.9    | 3.6   | 10.0  | 5.7   |
| 3.2    | 4.5    | 5.8    | 6.1    | 4.6   | 0.5    | 1.3   | 8.6   | 5.9   |
| 76.5   | 75.9   | 174.3  | 129.4  | 36.6  | 847.9  | 606.5 | 6.7   | 0.9   |
| 0.4    | 4.1    | 0.6    | 0.2    | 0.2   | 212.3  | 101.1 | 1.0   | 5.0   |
| 16.1   | 17.8   | 7.7    | 2.0    | 9.9   | 7.4    | 9.9   | 29.4  | 25.6  |
| 2785.0 | 2627.6 | 2451.4 | 2017.2 | 685.0 | 1324.5 | 719.7 | 474.2 | 689.1 |
| 318.9  | 270.1  | 325.9  | 424.5  | 104.6 | 520.4  | 353.9 | 151.3 | 186.0 |
| 15.5   | 3.0    | 1.8    | 8.3    | 4.0   | 11.0   | 13.8  | 3.8   | 8.8   |
| 2.2    | 1.5    | 3.2    | 1.2    | 1.1   | 2.7    | 4.6   | 2.3   | 2.5   |
| 9.7    | 1.3    | 2.6    | 1.0    | 8.3   | 4.7    | 2.2   | 1.8   | 3.0   |
| 17.0   | 13.1   | 15.4   | 39.7   | 8.3   | 103.3  | 83.0  | 3.2   | 8.0   |
| 9.9    | 10.7   | 11.8   | 7.9    | 2.2   | 6.7    | 9.6   | 3.6   | 8.6   |
| 13.8   | 14.7   | 27.3   | 6.2    | 3.0   | 304.8  | 241.7 | 53.9  | 90.8  |
| 6.2    | 23.9   | 16.0   | 23.2   | 7.0   | 11.2   | 7.9   | 3.3   | 0.8   |
| 0.2    | 0.4    | 0.1    | 2.4    | 0.1   | 0.6    | 2.2   | 0.2   | 0.4   |
| 3.6    | 0.4    | 0.6    | 0.8    | 1.9   | 0.2    | 0.6   | 0.6   | 3.3   |
| 13.5   | 4.9    | 12.0   | 0.8    | 4.0   | 6.3    | 24.0  | 17.8  | 16.9  |
| 29.8   | 29.4   | 33.5   | 41.0   | 10.9  | 32.5   | 13.9  | 9.7   | 1.8   |
| 97.1   | 75.9   | 90.1   | 96.7   | 44.3  | 114.1  | 58.0  | 36.9  | 34.6  |
| 171.6  | 138.2  | 145.8  | 126.1  | 45.1  | 541.8  | 411.9 | 87.4  | 76.4  |
| 10.5   | 7.0    | 8.6    | 1.1    | 0.8   | 5.1    | 5.5   | 11.2  | 6.7   |
| 8.9    | 1.2    | 2.5    | 9.4    | 7.4   | 29.3   | 12.8  | 21.6  | 11.6  |
| 65.0   | 58.5   | 57.6   | 26.6   | 20.0  | 894.0  | 684.2 | 161.2 | 151.0 |
| 30.3   | 24.6   | 20.3   | 14.9   | 9.4   | 24.6   | 34.2  | 2.1   | 5.4   |
| 48.9   | 47.1   | 25.6   | 23.2   | 9.5   | 12.8   | 14.3  | 25.5  | 22.3  |
| 30.3   | 26.1   | 28.5   | 34.7   | 20.2  | 183.7  | 98.5  | 36.8  | 45.6  |
| 334.1  | 388.2  | 340.2  | 363.3  | 122.6 | 863.5  | 554.1 | 52.5  | 123.4 |
| 50.3   | 70.2   | 62.4   | 54.1   | 37.4  | 62.9   | 32.5  | 19.0  | 13.1  |
| 8.4    | 2.5    | 9.1    | 3.4    | 2.1   | 9.3    | 9.6   | 8.7   | 3.0   |
| 19.7   | 24.0   | 17.1   | 11.2   | 2.0   | 44.5   | 23.6  | 24.9  | 16.5  |
| 7.2    | 19.0   | 20.2   | 9.9    | 7.2   | 2.8    | 2.6   | 3.8   | 16.7  |
| 8.6    | 4.7    | 5.5    | 4.8    | 2.4   | 20.6   | 7.3   | 2.9   | 4.7   |
| 277.4  | 228.3  | 329.7  | 375.4  | 104.5 | 557.1  | 288.6 | 75.8  | 89.2  |
| 33.4   | 38.2   | 35.8   | 17.8   | 14.9  | 51.1   | 49.9  | 33.0  | 40.3  |
| 37.7   | 39.7   | 31.9   | 23.1   | 9.3   | 52.3   | 6.3   | 25.6  | 18.4  |
| 49.3   | 47.0   | 57.1   | 55.5   | 13.9  | 50.6   | 30.5  | 21.8  | 35.5  |
| 0.8    | 0.5    | 0.7    | 0.3    | 2.2   | 115.2  | 57.9  | 3.9   | 0.5   |
| 6.7    | 1.3    | 3.2    | 0.9    | 0.6   | 1.4    | 4.6   | 0.6   | 1.4   |
| 206.6  | 214.9  | 265.0  | 245.6  | 99.7  | 269.1  | 237.9 | 3.0   | 8.6   |
| 40.3   | 49.1   | 25.6   | 25.4   | 8.1   | 210.5  | 150.6 | 6.5   | 15.8  |
| 216.7  | 235.2  | 224.9  | 231.6  | 71.5  | 698.2  | 538.7 | 4.9   | 1.0   |
| 8.6    | 3.7    | 4.6    | 11.6   | 10.0  | 9.3    | 0.6   | 8.8   | 1.2   |
| 11.9   | 11.2   | 8.4    | 13.2   | 7.8   | 69.1   | 62.1  | 25.5  | 27.2  |
| 15.2   | 12.8   | 16.9   | 7.4    | 1.0   | 13.0   | 10.4  | 25.4  | 17.4  |
| 425.5  | 351.0  | 281.2  | 250.4  | 73.4  | 188.8  | 125.0 | 50.4  | 68.1  |
| 219.6  | 234.4  | 242.9  | 196.9  | 84.4  | 579.2  | 373.5 | 22.2  | 20.7  |
| 14.0   | 18.2   | 12.3   | 14.8   | 3.8   | 70.4   | 44.7  | 5.9   | 7.2   |

|       |       |       |       |      |       |       |      |       |
|-------|-------|-------|-------|------|-------|-------|------|-------|
| 157.9 | 134.3 | 129.5 | 118.9 | 48.2 | 261.2 | 190.3 | 80.6 | 65.6  |
| 14.4  | 7.2   | 12.9  | 19.8  | 5.3  | 65.5  | 56.0  | 34.4 | 39.2  |
| 124.4 | 108.2 | 110.1 | 101.2 | 54.1 | 498.5 | 311.1 | 17.0 | 12.6  |
| 60.6  | 62.5  | 56.8  | 55.3  | 23.5 | 206.7 | 153.0 | 4.5  | 12.9  |
| 16.2  | 5.4   | 10.5  | 7.3   | 9.5  | 5.0   | 9.6   | 9.8  | 0.7   |
| 34.8  | 21.3  | 32.1  | 33.3  | 17.5 | 39.4  | 32.2  | 54.2 | 59.3  |
| 103.0 | 96.4  | 55.9  | 40.8  | 35.1 | 312.3 | 164.0 | 5.2  | 17.4  |
| 209.3 | 161.7 | 165.0 | 135.7 | 65.5 | 267.2 | 188.7 | 94.8 | 136.7 |
| 1.6   | 1.7   | 3.9   | 0.9   | 1.5  | 1.4   | 2.3   | 11.7 | 0.8   |
| 151.7 | 197.8 | 120.4 | 47.5  | 46.3 | 736.8 | 325.8 | 12.1 | 10.2  |
| 38.4  | 34.3  | 32.5  | 21.9  | 15.3 | 20.3  | 29.6  | 35.2 | 32.7  |
| 44.6  | 38.0  | 39.6  | 21.5  | 21.8 | 48.4  | 21.3  | 37.0 | 27.4  |
| 40.1  | 24.1  | 38.9  | 36.6  | 13.9 | 201.5 | 121.8 | 2.2  | 15.5  |
| 7.1   | 2.7   | 12.2  | 1.9   | 6.0  | 2.6   | 2.7   | 8.5  | 1.7   |
| 5.0   | 2.0   | 7.3   | 0.2   | 2.6  | 3.0   | 9.2   | 2.2  | 4.6   |
| 41.6  | 29.5  | 33.7  | 43.8  | 16.4 | 70.7  | 59.1  | 27.8 | 5.8   |
| 78.9  | 55.7  | 67.3  | 46.8  | 13.6 | 73.9  | 59.0  | 36.0 | 62.6  |
| 39.3  | 57.4  | 27.6  | 53.2  | 22.8 | 81.5  | 65.2  | 19.8 | 34.2  |
| 12.4  | 18.5  | 11.0  | 18.0  | 2.3  | 36.8  | 10.1  | 2.8  | 3.2   |
| 4.8   | 1.7   | 4.4   | 1.1   | 0.8  | 9.4   | 4.5   | 5.6  | 5.9   |
| 1.8   | 2.9   | 1.3   | 2.2   | 2.8  | 2.4   | 0.7   | 1.2  | 3.9   |
| 12.3  | 11.2  | 4.3   | 8.9   | 11.1 | 19.9  | 2.4   | 13.2 | 2.0   |
| 15.8  | 17.3  | 3.9   | 3.0   | 5.1  | 15.8  | 2.5   | 2.5  | 6.1   |
| 1.1   | 2.0   | 4.4   | 4.5   | 0.7  | 0.8   | 0.9   | 4.4  | 1.0   |
| 1.7   | 2.3   | 0.4   | 0.4   | 1.9  | 1.6   | 1.6   | 1.1  | 0.7   |
| 1.9   | 1.1   | 1.7   | 1.4   | 0.6  | 1.6   | 0.8   | 1.2  | 1.2   |
| 162.7 | 136.9 | 143.9 | 135.7 | 54.8 | 133.0 | 105.6 | 18.1 | 12.5  |
| 2.8   | 5.7   | 2.5   | 6.2   | 1.8  | 8.2   | 6.1   | 3.6  | 2.1   |
| 63.1  | 45.7  | 47.2  | 42.5  | 25.4 | 54.0  | 38.8  | 17.9 | 29.2  |
| 7.2   | 8.1   | 16.4  | 9.5   | 8.7  | 14.1  | 2.8   | 2.6  | 5.4   |
| 239.5 | 212.9 | 177.0 | 140.4 | 65.6 | 291.6 | 162.5 | 46.5 | 50.8  |
| 7.3   | 1.5   | 16.0  | 9.2   | 3.0  | 2.7   | 16.7  | 6.7  | 4.2   |
| 9.3   | 3.8   | 7.1   | 1.5   | 0.6  | 5.0   | 2.5   | 9.8  | 2.1   |
| 2.9   | 7.7   | 2.8   | 3.8   | 2.5  | 16.3  | 28.2  | 3.3  | 0.7   |
| 114.3 | 50.4  | 67.7  | 56.2  | 35.5 | 71.9  | 68.1  | 33.7 | 42.8  |
| 6.2   | 23.1  | 11.6  | 9.6   | 8.8  | 78.5  | 65.0  | 58.4 | 83.5  |
| 9.3   | 2.1   | 6.3   | 1.3   | 0.6  | 2.4   | 6.6   | 22.3 | 19.9  |
| 131.2 | 135.8 | 168.8 | 203.2 | 37.8 | 131.5 | 76.5  | 13.7 | 14.2  |
| 23.8  | 19.9  | 19.5  | 24.8  | 7.6  | 16.5  | 19.2  | 19.7 | 14.6  |
| 32.9  | 13.2  | 16.0  | 17.3  | 8.5  | 70.1  | 49.5  | 33.6 | 39.2  |
| 18.9  | 7.5   | 16.2  | 14.2  | 6.6  | 42.2  | 39.0  | 19.0 | 7.6   |
| 34.1  | 28.1  | 51.2  | 42.2  | 17.6 | 30.1  | 25.6  | 1.7  | 1.5   |
| 9.3   | 5.6   | 1.9   | 1.0   | 3.3  | 10.1  | 10.8  | 17.4 | 26.9  |
| 9.9   | 4.9   | 13.2  | 3.0   | 8.5  | 32.5  | 36.4  | 38.7 | 49.1  |
| 2.3   | 3.3   | 13.6  | 1.5   | 5.3  | 0.7   | 3.2   | 2.8  | 7.4   |
| 1.9   | 1.0   | 0.3   | 5.4   | 2.0  | 1.0   | 0.3   | 5.0  | 8.9   |
| 25.5  | 23.4  | 19.8  | 11.9  | 12.2 | 6.2   | 8.2   | 4.6  | 4.4   |
| 29.4  | 17.3  | 22.4  | 15.9  | 5.7  | 37.3  | 32.1  | 28.5 | 29.6  |
| 32.7  | 19.6  | 10.6  | 9.3   | 7.0  | 15.2  | 8.2   | 12.1 | 8.2   |
| 80.4  | 133.3 | 152.2 | 152.5 | 33.2 | 646.3 | 531.7 | 2.4  | 0.3   |
| 1.6   | 0.8   | 1.2   | 1.2   | 1.2  | 2.4   | 0.9   | 1.1  | 0.8   |
| 21.6  | 16.8  | 15.2  | 19.9  | 13.3 | 18.1  | 12.4  | 13.8 | 21.2  |
| 59.5  | 63.0  | 50.7  | 31.5  | 32.4 | 72.8  | 42.3  | 98.9 | 77.2  |

|        |        |        |        |        |        |        |       |       |
|--------|--------|--------|--------|--------|--------|--------|-------|-------|
| 7.2    | 2.3    | 13.4   | 1.5    | 4.0    | 58.9   | 55.7   | 2.2   | 2.3   |
| 34.7   | 23.0   | 12.6   | 5.3    | 5.1    | 101.5  | 80.2   | 31.5  | 28.2  |
| 46.1   | 26.6   | 41.8   | 25.6   | 11.7   | 82.9   | 72.8   | 31.8  | 34.3  |
| 0.4    | 1.4    | 0.6    | 1.1    | 1.0    | 2.2    | 1.2    | 0.8   | 0.8   |
| 77.0   | 72.2   | 61.1   | 45.5   | 29.1   | 244.4  | 176.7  | 18.8  | 21.9  |
| 0.3    | 9.3    | 0.7    | 4.1    | 0.5    | 9.4    | 6.6    | 8.0   | 5.5   |
| 4.1    | 2.6    | 5.0    | 9.6    | 3.6    | 5.5    | 2.4    | 4.2   | 7.1   |
| 48.0   | 30.7   | 47.7   | 28.1   | 17.6   | 45.9   | 31.9   | 3.0   | 11.9  |
| 14.4   | 29.2   | 28.4   | 21.9   | 13.1   | 84.3   | 41.9   | 4.4   | 5.6   |
| 5.5    | 2.5    | 15.5   | 13.0   | 4.5    | 59.8   | 21.3   | 2.4   | 3.0   |
| 586.2  | 617.5  | 598.2  | 418.2  | 184.0  | 1685.9 | 1229.1 | 163.9 | 266.8 |
| 3.8    | 5.8    | 11.9   | 1.3    | 0.9    | 11.5   | 4.1    | 4.1   | 4.9   |
| 411.1  | 460.1  | 423.5  | 652.7  | 144.8  | 329.4  | 191.0  | 82.3  | 92.4  |
| 25.6   | 21.9   | 18.7   | 22.5   | 4.3    | 0.6    | 0.6    | 4.2   | 12.0  |
| 32.1   | 36.5   | 36.0   | 21.0   | 11.9   | 22.0   | 23.5   | 26.1  | 35.6  |
| 1.6    | 0.4    | 0.6    | 0.7    | 0.8    | 39.2   | 15.3   | 0.5   | 1.5   |
| 56.8   | 52.8   | 49.6   | 38.6   | 19.0   | 36.8   | 26.8   | 33.4  | 13.3  |
| 10.3   | 13.2   | 2.1    | 6.0    | 3.1    | 121.9  | 80.4   | 2.0   | 10.0  |
| 100.0  | 66.8   | 147.6  | 138.6  | 45.6   | 199.8  | 106.4  | 166.4 | 214.0 |
| 11.9   | 18.2   | 21.0   | 9.4    | 8.5    | 10.7   | 5.4    | 13.6  | 12.3  |
| 24.8   | 25.0   | 40.4   | 49.8   | 16.5   | 185.9  | 117.6  | 2.1   | 2.8   |
| 13.8   | 18.4   | 9.5    | 18.0   | 0.8    | 1.8    | 0.4    | 9.4   | 7.2   |
| 22.2   | 22.0   | 16.0   | 22.8   | 11.5   | 109.5  | 56.1   | 22.8  | 14.6  |
| 3747.6 | 3626.3 | 3001.7 | 3409.2 | 1204.0 | 1.8    | 1.1    | 2.3   | 1.9   |
| 75.4   | 46.3   | 63.0   | 67.6   | 15.4   | 41.4   | 28.2   | 1.0   | 9.1   |
| 1.2    | 1.7    | 1.3    | 1.4    | 0.6    | 0.5    | 0.9    | 7.1   | 2.7   |
| 148.9  | 226.0  | 162.9  | 130.4  | 43.5   | 69.0   | 50.8   | 13.6  | 21.5  |
| 5.6    | 5.0    | 1.9    | 1.9    | 2.2    | 7.6    | 2.3    | 4.4   | 3.3   |
| 12.6   | 3.4    | 5.2    | 8.3    | 3.1    | 15.6   | 1.8    | 10.0  | 14.5  |
| 26.9   | 22.2   | 8.0    | 12.5   | 5.5    | 36.3   | 18.1   | 14.9  | 16.4  |
| 6.4    | 7.2    | 1.5    | 0.4    | 2.5    | 9.4    | 1.8    | 0.6   | 1.2   |
| 1.5    | 4.1    | 0.9    | 0.8    | 1.2    | 1.6    | 2.4    | 2.5   | 7.9   |
| 5.3    | 1.2    | 10.9   | 3.6    | 0.4    | 33.1   | 17.6   | 10.3  | 4.5   |
| 20.5   | 3.5    | 11.9   | 9.5    | 3.4    | 3.7    | 6.1    | 7.7   | 13.0  |
| 16.4   | 16.2   | 10.6   | 9.8    | 5.2    | 6.2    | 20.5   | 21.7  | 4.3   |
| 3.3    | 7.9    | 8.5    | 7.1    | 8.3    | 18.1   | 1.9    | 5.1   | 9.0   |
| 17.3   | 4.5    | 7.8    | 17.1   | 12.2   | 30.7   | 12.3   | 18.0  | 11.8  |
| 173.5  | 137.3  | 136.7  | 152.0  | 69.0   | 366.4  | 289.3  | 28.7  | 44.4  |
| 48.9   | 26.5   | 28.0   | 29.7   | 11.6   | 111.1  | 108.1  | 11.3  | 24.9  |
| 15.9   | 14.7   | 13.9   | 3.5    | 7.0    | 81.0   | 50.0   | 59.0  | 82.8  |
| 1.4    | 1.7    | 1.0    | 1.0    | 0.7    | 2.3    | 1.2    | 2.3   | 1.6   |
| 0.7    | 1.2    | 0.9    | 0.4    | 0.3    | 1.3    | 0.8    | 0.6   | 0.6   |
| 1.1    | 1.9    | 5.2    | 0.6    | 0.7    | 20.5   | 8.9    | 0.7   | 0.6   |
| 33.3   | 17.0   | 2.9    | 2.5    | 0.4    | 39.9   | 5.9    | 5.5   | 5.9   |
| 30.3   | 32.6   | 23.4   | 17.7   | 8.2    | 64.3   | 37.7   | 13.5  | 6.4   |
| 311.2  | 327.7  | 259.4  | 173.1  | 82.2   | 400.9  | 359.6  | 69.6  | 94.2  |
| 8.5    | 3.9    | 14.8   | 4.5    | 8.8    | 26.0   | 15.3   | 11.2  | 8.0   |
| 188.0  | 166.7  | 211.9  | 157.2  | 82.8   | 119.5  | 100.4  | 93.2  | 109.6 |
| 28.4   | 14.8   | 25.9   | 6.5    | 7.2    | 21.7   | 17.1   | 24.9  | 39.4  |
| 101.6  | 80.7   | 79.5   | 84.2   | 22.2   | 367.6  | 322.8  | 14.7  | 17.8  |
| 0.4    | 6.1    | 0.2    | 1.5    | 2.6    | 5.0    | 0.6    | 2.1   | 1.3   |
| 47.2   | 17.6   | 11.1   | 9.0    | 6.9    | 144.4  | 71.3   | 11.9  | 21.2  |
| 62.8   | 48.2   | 79.0   | 107.1  | 14.5   | 41.7   | 14.9   | 13.1  | 19.2  |

|       |       |       |       |       |       |       |       |       |
|-------|-------|-------|-------|-------|-------|-------|-------|-------|
| 11.8  | 5.8   | 5.2   | 5.7   | 6.6   | 2.1   | 1.1   | 11.4  | 6.1   |
| 5.0   | 7.1   | 7.5   | 0.7   | 4.6   | 3.4   | 2.8   | 0.5   | 4.9   |
| 51.3  | 70.0  | 57.7  | 34.2  | 20.6  | 85.6  | 100.6 | 12.3  | 8.4   |
| 2.9   | 1.4   | 13.7  | 1.1   | 0.6   | 2.0   | 0.9   | 1.8   | 4.5   |
| 79.8  | 45.7  | 71.7  | 40.0  | 22.5  | 64.1  | 52.2  | 3.1   | 2.1   |
| 59.1  | 76.7  | 46.5  | 29.2  | 22.6  | 26.4  | 2.1   | 3.7   | 1.0   |
| 16.8  | 16.5  | 19.8  | 1.0   | 8.4   | 30.1  | 20.8  | 1.3   | 0.9   |
| 723.7 | 565.6 | 561.8 | 528.7 | 266.8 | 878.4 | 718.9 | 147.8 | 203.0 |
| 7.2   | 11.1  | 14.0  | 3.1   | 1.1   | 8.9   | 8.0   | 5.1   | 0.8   |
| 22.4  | 21.8  | 16.2  | 13.8  | 10.4  | 6.1   | 12.9  | 22.2  | 22.9  |
| 77.7  | 80.0  | 58.4  | 23.5  | 25.3  | 97.1  | 76.4  | 6.5   | 25.0  |
| 9.8   | 2.5   | 2.5   | 3.2   | 0.8   | 7.1   | 0.9   | 5.9   | 0.7   |
| 528.0 | 466.5 | 472.0 | 561.0 | 151.9 | 840.3 | 552.6 | 222.1 | 338.6 |
| 2.5   | 1.1   | 2.3   | 1.0   | 0.9   | 2.2   | 5.4   | 1.7   | 2.3   |
| 17.5  | 3.2   | 15.9  | 11.5  | 3.6   | 16.6  | 9.1   | 9.2   | 16.8  |
| 28.0  | 31.8  | 49.6  | 47.4  | 9.0   | 75.0  | 67.0  | 4.5   | 7.8   |
| 9.9   | 14.8  | 14.6  | 12.6  | 7.6   | 16.3  | 9.6   | 8.1   | 8.0   |
| 11.0  | 19.3  | 18.0  | 13.5  | 7.9   | 50.2  | 29.7  | 2.1   | 15.6  |
| 14.6  | 1.9   | 2.3   | 1.0   | 0.7   | 2.0   | 1.3   | 2.0   | 0.6   |
| 17.6  | 4.6   | 15.0  | 3.5   | 8.8   | 16.6  | 11.6  | 2.3   | 12.6  |
| 29.3  | 33.8  | 38.5  | 28.4  | 13.5  | 47.2  | 19.1  | 1.7   | 6.9   |
| 5.5   | 5.4   | 8.5   | 11.1  | 0.6   | 2.0   | 17.1  | 14.8  | 15.9  |
| 0.8   | 0.3   | 5.3   | 0.4   | 4.6   | 0.8   | 0.7   | 0.4   | 0.6   |
| 1.7   | 0.8   | 1.0   | 7.6   | 1.1   | 2.3   | 1.2   | 1.8   | 1.5   |
| 11.8  | 5.7   | 2.4   | 0.3   | 6.2   | 7.7   | 1.0   | 12.3  | 11.8  |
| 31.5  | 33.1  | 18.2  | 21.6  | 13.5  | 12.2  | 14.8  | 7.2   | 12.1  |
| 78.2  | 73.8  | 72.6  | 52.5  | 30.6  | 96.9  | 92.9  | 23.2  | 20.2  |
| 4.8   | 7.6   | 12.1  | 4.1   | 4.1   | 5.6   | 2.9   | 8.0   | 15.1  |
| 45.2  | 76.0  | 43.3  | 25.0  | 42.2  | 16.7  | 14.4  | 11.9  | 7.3   |
| 18.0  | 16.4  | 2.0   | 2.7   | 1.6   | 5.8   | 0.8   | 3.5   | 8.3   |
| 7.5   | 5.9   | 5.3   | 2.0   | 1.7   | 3.3   | 2.3   | 1.9   | 0.8   |
| 1.9   | 1.9   | 1.4   | 0.9   | 1.2   | 2.6   | 2.1   | 2.6   | 0.9   |
| 17.7  | 22.4  | 20.1  | 20.7  | 5.9   | 12.6  | 6.5   | 12.7  | 17.5  |
| 1.8   | 1.5   | 0.7   | 0.8   | 5.2   | 1.4   | 1.3   | 1.1   | 6.4   |
| 27.6  | 26.7  | 26.0  | 46.1  | 9.6   | 33.8  | 24.9  | 11.5  | 1.1   |
| 63.9  | 38.9  | 49.5  | 133.8 | 29.9  | 64.1  | 52.7  | 5.6   | 1.1   |
| 11.0  | 12.8  | 9.6   | 13.3  | 3.0   | 12.9  | 11.6  | 4.9   | 0.8   |
| 19.2  | 17.3  | 25.9  | 15.3  | 4.3   | 25.6  | 22.7  | 9.8   | 15.7  |
| 2.4   | 2.2   | 1.3   | 0.9   | 2.7   | 2.2   | 8.1   | 7.2   | 1.0   |
| 7.7   | 12.7  | 16.5  | 1.0   | 1.5   | 18.4  | 2.1   | 5.1   | 8.9   |
| 240.2 | 195.8 | 222.3 | 274.8 | 83.5  | 385.2 | 257.3 | 92.4  | 122.0 |
| 8.3   | 12.1  | 6.3   | 13.1  | 2.6   | 24.7  | 9.2   | 47.6  | 61.2  |
| 8.6   | 10.4  | 9.5   | 6.4   | 0.8   | 326.9 | 279.6 | 2.7   | 7.9   |
| 3.0   | 2.7   | 4.4   | 0.8   | 0.8   | 7.1   | 1.2   | 12.7  | 3.0   |
| 3.7   | 1.8   | 3.9   | 2.3   | 1.4   | 26.5  | 11.1  | 1.7   | 11.1  |
| 6.0   | 6.0   | 6.4   | 4.2   | 1.1   | 15.2  | 9.4   | 7.1   | 3.1   |
| 1.8   | 6.7   | 6.3   | 9.2   | 0.2   | 9.9   | 4.6   | 12.6  | 11.2  |
| 72.1  | 51.3  | 60.2  | 54.0  | 25.7  | 65.2  | 53.5  | 38.3  | 18.7  |
| 31.1  | 18.1  | 18.8  | 13.5  | 9.7   | 14.1  | 13.4  | 18.6  | 18.9  |
| 1.4   | 1.2   | 1.2   | 0.6   | 1.1   | 1.3   | 0.7   | 1.3   | 1.3   |
| 59.8  | 61.2  | 48.0  | 27.9  | 16.1  | 112.6 | 69.4  | 22.8  | 39.0  |
| 12.5  | 20.0  | 20.3  | 4.4   | 1.0   | 21.8  | 12.8  | 21.6  | 22.3  |
| 4.1   | 10.5  | 3.3   | 6.4   | 1.5   | 4.3   | 3.0   | 4.0   | 3.7   |



|       |       |       |       |       |        |        |       |       |
|-------|-------|-------|-------|-------|--------|--------|-------|-------|
| 118.0 | 110.8 | 125.1 | 165.4 | 37.3  | 105.3  | 90.5   | 41.6  | 40.2  |
| 34.1  | 18.7  | 31.7  | 25.4  | 1.5   | 60.5   | 42.9   | 0.5   | 2.2   |
| 7.1   | 14.0  | 4.3   | 7.5   | 1.8   | 25.8   | 1.6    | 13.6  | 11.5  |
| 79.2  | 85.9  | 80.3  | 68.3  | 21.6  | 227.2  | 155.2  | 47.3  | 39.1  |
| 47.5  | 51.7  | 52.2  | 16.2  | 15.3  | 184.3  | 124.8  | 18.5  | 22.9  |
| 9.2   | 10.5  | 8.9   | 16.6  | 0.9   | 148.5  | 107.2  | 0.7   | 0.3   |
| 4.2   | 0.2   | 0.1   | 1.8   | 2.5   | 0.3    | 3.9    | 0.6   | 4.8   |
| 895.2 | 728.4 | 788.7 | 932.5 | 252.6 | 1789.8 | 1575.0 | 267.9 | 365.6 |
| 9.3   | 11.5  | 11.7  | 8.1   | 2.4   | 5.6    | 0.4    | 0.8   | 5.5   |
| 26.3  | 9.7   | 9.9   | 10.7  | 3.7   | 7.3    | 20.8   | 24.2  | 43.9  |
| 26.2  | 35.0  | 16.3  | 11.9  | 6.8   | 74.6   | 54.2   | 10.7  | 21.0  |
| 7.6   | 9.4   | 11.9  | 9.1   | 4.6   | 22.9   | 1.8    | 9.9   | 8.1   |
| 4.4   | 3.0   | 3.7   | 1.6   | 5.4   | 7.7    | 3.3    | 6.1   | 5.7   |
| 36.1  | 16.8  | 41.4  | 37.4  | 8.9   | 63.9   | 54.4   | 22.6  | 36.9  |
| 14.7  | 8.2   | 15.1  | 7.9   | 7.5   | 12.0   | 7.6    | 8.6   | 5.1   |
| 138.5 | 86.4  | 131.1 | 64.2  | 41.1  | 497.1  | 291.7  | 115.5 | 146.6 |
| 1.5   | 5.6   | 15.1  | 1.6   | 1.0   | 4.7    | 1.8    | 0.7   | 2.6   |
| 64.5  | 40.9  | 51.2  | 41.6  | 18.1  | 54.1   | 55.0   | 8.4   | 18.7  |
| 26.0  | 5.1   | 22.1  | 15.5  | 10.0  | 509.6  | 317.1  | 19.3  | 10.3  |
| 50.8  | 40.3  | 56.4  | 58.9  | 21.7  | 123.1  | 85.3   | 21.0  | 21.4  |
| 237.8 | 173.1 | 296.6 | 123.6 | 69.2  | 90.8   | 101.8  | 62.3  | 45.7  |
| 280.4 | 278.9 | 205.8 | 125.1 | 102.0 | 638.4  | 385.1  | 107.5 | 156.5 |
| 12.9  | 17.2  | 4.8   | 10.7  | 7.6   | 50.9   | 40.4   | 1.6   | 3.0   |
| 28.7  | 13.4  | 23.6  | 16.5  | 7.7   | 36.3   | 20.4   | 16.1  | 14.4  |
| 13.9  | 1.2   | 1.9   | 0.7   | 1.1   | 1.9    | 0.8    | 7.2   | 1.1   |
| 23.5  | 17.6  | 38.2  | 6.9   | 7.7   | 26.9   | 4.1    | 16.5  | 25.9  |
| 26.2  | 26.8  | 17.9  | 16.8  | 9.4   | 28.6   | 16.8   | 15.3  | 14.8  |
| 41.5  | 20.7  | 27.1  | 8.7   | 9.4   | 18.2   | 15.9   | 23.3  | 24.6  |
| 5.8   | 1.0   | 9.7   | 7.5   | 5.9   | 9.4    | 3.9    | 5.6   | 1.5   |
| 36.4  | 36.5  | 28.3  | 46.7  | 18.0  | 205.5  | 209.8  | 3.7   | 4.1   |
| 1.9   | 2.7   | 5.3   | 3.7   | 0.4   | 0.7    | 2.6    | 6.3   | 4.5   |
| 63.1  | 69.4  | 82.0  | 82.3  | 29.7  | 243.4  | 229.4  | 3.8   | 8.2   |
| 39.7  | 33.8  | 45.8  | 48.0  | 12.7  | 54.8   | 48.1   | 8.1   | 9.9   |
| 64.6  | 76.1  | 81.4  | 62.6  | 32.2  | 33.6   | 21.0   | 33.5  | 27.8  |
| 28.6  | 20.5  | 20.5  | 21.1  | 7.6   | 122.9  | 73.8   | 24.5  | 44.7  |
| 290.8 | 328.8 | 354.5 | 421.7 | 97.7  | 606.0  | 612.5  | 29.1  | 21.7  |
| 111.7 | 123.1 | 127.2 | 101.9 | 43.4  | 300.3  | 229.5  | 43.5  | 39.9  |
| 7.1   | 4.8   | 10.5  | 1.4   | 0.3   | 37.4   | 59.0   | 31.3  | 26.7  |
| 102.8 | 90.5  | 68.0  | 27.2  | 22.2  | 97.9   | 105.0  | 33.4  | 33.8  |
| 2.0   | 1.3   | 1.2   | 1.4   | 0.5   | 1.2    | 0.8    | 0.6   | 1.5   |
| 25.0  | 48.0  | 24.0  | 43.6  | 8.7   | 50.5   | 40.0   | 4.8   | 1.2   |
| 68.0  | 72.7  | 45.6  | 46.7  | 12.0  | 88.3   | 83.4   | 51.6  | 81.5  |
| 23.3  | 33.3  | 31.6  | 14.5  | 13.2  | 37.3   | 35.3   | 9.1   | 16.3  |
| 43.8  | 51.3  | 49.6  | 34.6  | 17.0  | 17.6   | 22.7   | 2.3   | 9.4   |
| 1.7   | 0.7   | 2.7   | 1.2   | 0.3   | 1.0    | 0.9    | 1.6   | 1.5   |
| 7.9   | 10.6  | 5.7   | 25.8  | 4.7   | 61.3   | 50.4   | 27.3  | 15.3  |
| 28.1  | 10.4  | 4.9   | 10.2  | 4.2   | 24.4   | 27.7   | 25.0  | 22.3  |
| 4.5   | 1.3   | 9.6   | 0.8   | 0.2   | 10.4   | 4.6    | 1.0   | 0.5   |
| 12.5  | 5.7   | 3.2   | 6.4   | 3.7   | 6.2    | 17.9   | 1.7   | 0.9   |
| 138.5 | 116.1 | 109.2 | 57.2  | 37.0  | 758.7  | 359.7  | 268.6 | 344.8 |
| 1.8   | 0.2   | 0.4   | 4.2   | 2.9   | 0.6    | 0.5    | 0.6   | 0.8   |
| 13.8  | 1.3   | 7.1   | 0.5   | 3.8   | 1.5    | 0.5    | 1.2   | 6.4   |
| 16.1  | 5.6   | 4.1   | 5.1   | 5.2   | 445.3  | 402.3  | 643.9 | 856.3 |

|       |       |       |       |       |       |       |       |       |
|-------|-------|-------|-------|-------|-------|-------|-------|-------|
| 9.7   | 11.0  | 30.7  | 9.9   | 4.3   | 8.6   | 31.1  | 23.8  | 14.4  |
| 11.1  | 1.5   | 1.8   | 1.1   | 0.2   | 14.6  | 9.5   | 12.4  | 16.4  |
| 67.5  | 61.2  | 54.0  | 59.1  | 17.4  | 86.6  | 57.0  | 26.6  | 34.9  |
| 1.0   | 10.7  | 0.7   | 1.2   | 1.0   | 3.5   | 2.6   | 0.7   | 1.5   |
| 1.3   | 0.9   | 5.6   | 2.4   | 3.9   | 10.1  | 5.2   | 255.5 | 249.0 |
| 21.7  | 15.0  | 19.6  | 13.5  | 6.4   | 211.1 | 110.0 | 1.4   | 1.3   |
| 597.0 | 526.9 | 643.3 | 615.4 | 161.0 | 527.2 | 318.2 | 27.1  | 76.6  |
| 66.1  | 51.5  | 60.8  | 62.9  | 24.9  | 102.5 | 72.0  | 49.7  | 58.4  |
| 17.7  | 39.1  | 30.7  | 24.1  | 10.6  | 128.2 | 64.4  | 33.8  | 42.6  |
| 214.9 | 121.8 | 104.7 | 83.6  | 37.2  | 327.6 | 225.8 | 127.6 | 183.0 |
| 4.1   | 7.7   | 4.4   | 2.7   | 0.8   | 5.7   | 2.5   | 6.4   | 2.0   |
| 3.4   | 1.7   | 3.3   | 1.8   | 1.1   | 4.2   | 2.8   | 0.8   | 4.2   |
| 10.8  | 0.5   | 2.0   | 1.6   | 1.6   | 0.9   | 2.1   | 6.1   | 3.6   |
| 130.5 | 136.2 | 147.7 | 186.4 | 55.3  | 168.2 | 134.6 | 14.4  | 17.1  |
| 35.7  | 18.4  | 19.0  | 10.5  | 2.3   | 102.8 | 82.4  | 30.8  | 31.7  |
| 8.6   | 18.6  | 20.0  | 18.6  | 0.9   | 42.1  | 27.1  | 17.2  | 21.3  |
| 3.7   | 3.9   | 3.6   | 7.5   | 2.8   | 5.9   | 4.3   | 4.4   | 3.9   |
| 19.5  | 13.5  | 7.3   | 11.1  | 13.8  | 20.6  | 10.8  | 6.9   | 8.0   |
| 9.8   | 1.5   | 0.7   | 0.7   | 0.8   | 3.4   | 0.5   | 2.0   | 0.8   |
| 131.7 | 133.8 | 150.9 | 110.3 | 54.0  | 103.6 | 86.3  | 24.9  | 31.8  |
| 4.2   | 3.8   | 11.1  | 4.4   | 1.1   | 28.8  | 1.2   | 7.0   | 22.3  |
| 47.0  | 61.9  | 63.6  | 52.8  | 23.5  | 182.8 | 106.4 | 1.6   | 1.9   |
| 34.9  | 20.7  | 28.9  | 29.2  | 8.2   | 46.8  | 37.3  | 24.4  | 20.3  |
| 12.4  | 13.3  | 11.8  | 6.3   | 8.0   | 27.1  | 7.6   | 5.0   | 22.7  |
| 6.1   | 12.4  | 10.0  | 16.3  | 6.9   | 630.9 | 582.9 | 16.0  | 16.2  |
| 6.4   | 9.0   | 6.1   | 6.3   | 6.7   | 1.0   | 1.2   | 11.3  | 6.7   |
| 22.8  | 24.5  | 37.8  | 31.5  | 14.0  | 41.3  | 34.0  | 20.0  | 20.6  |
| 14.7  | 8.9   | 11.9  | 1.3   | 5.4   | 1.8   | 4.2   | 8.6   | 18.4  |
| 12.9  | 1.6   | 5.2   | 2.0   | 1.1   | 2.8   | 16.3  | 0.4   | 6.2   |
| 2.3   | 0.9   | 1.5   | 1.6   | 0.3   | 1.6   | 1.5   | 0.4   | 0.5   |
| 52.9  | 42.6  | 43.9  | 25.5  | 18.0  | 60.3  | 36.6  | 15.3  | 26.2  |
| 4.6   | 1.6   | 6.9   | 2.6   | 0.2   | 1.7   | 3.7   | 5.8   | 10.4  |
| 14.5  | 4.9   | 14.8  | 6.2   | 1.7   | 30.1  | 17.4  | 215.5 | 252.2 |
| 7.5   | 3.1   | 9.3   | 4.4   | 2.1   | 17.4  | 15.9  | 15.0  | 8.2   |
| 38.4  | 22.0  | 25.4  | 14.6  | 11.3  | 5.8   | 9.6   | 7.7   | 18.0  |
| 0.9   | 1.5   | 1.7   | 4.8   | 1.2   | 11.2  | 0.8   | 1.1   | 2.4   |
| 10.0  | 12.4  | 14.2  | 0.7   | 1.5   | 4.8   | 0.6   | 1.5   | 1.3   |
| 108.2 | 118.0 | 98.2  | 89.2  | 47.7  | 368.5 | 236.5 | 11.3  | 11.1  |
| 11.2  | 2.6   | 2.0   | 4.5   | 5.0   | 4.0   | 4.3   | 13.2  | 12.9  |
| 12.0  | 12.2  | 13.3  | 10.2  | 5.2   | 32.9  | 19.6  | 81.4  | 102.6 |
| 30.8  | 36.2  | 16.7  | 22.2  | 11.2  | 504.6 | 314.3 | 1.2   | 1.3   |
| 57.0  | 42.0  | 44.4  | 19.4  | 19.3  | 88.6  | 93.5  | 35.5  | 39.5  |
| 214.2 | 196.8 | 250.8 | 380.9 | 58.9  | 233.8 | 153.8 | 45.4  | 69.4  |
| 30.8  | 23.9  | 28.1  | 19.1  | 2.9   | 6.2   | 8.1   | 25.3  | 23.2  |
| 43.4  | 34.5  | 34.1  | 37.9  | 13.3  | 21.6  | 13.0  | 7.7   | 9.6   |
| 176.6 | 169.3 | 159.3 | 182.2 | 55.3  | 214.9 | 160.4 | 8.9   | 18.9  |
| 218.5 | 210.0 | 218.6 | 215.2 | 85.8  | 391.5 | 309.1 | 26.8  | 33.8  |
| 74.5  | 82.1  | 62.9  | 60.0  | 16.9  | 200.7 | 117.2 | 74.6  | 93.9  |
| 19.7  | 19.0  | 31.4  | 20.7  | 3.5   | 74.6  | 60.1  | 8.7   | 7.7   |
| 26.5  | 35.5  | 37.3  | 31.3  | 8.7   | 38.4  | 23.1  | 7.6   | 21.0  |
| 12.3  | 1.0   | 12.9  | 2.3   | 4.4   | 2.9   | 5.5   | 1.9   | 1.9   |
| 13.6  | 9.6   | 14.0  | 6.4   | 3.5   | 19.8  | 12.4  | 20.4  | 16.6  |
| 2.7   | 16.1  | 19.7  | 19.7  | 0.8   | 4.4   | 10.6  | 9.3   | 12.8  |

|       |       |       |       |       |       |       |       |       |
|-------|-------|-------|-------|-------|-------|-------|-------|-------|
| 3.1   | 10.4  | 3.5   | 3.3   | 0.6   | 2.7   | 6.4   | 1.2   | 1.5   |
| 5.3   | 1.1   | 2.4   | 5.8   | 3.1   | 0.5   | 1.5   | 1.3   | 1.2   |
| 637.7 | 501.6 | 529.4 | 445.6 | 179.8 | 514.1 | 336.9 | 195.3 | 277.7 |
| 5.5   | 4.5   | 3.4   | 0.8   | 2.5   | 21.0  | 3.7   | 3.9   | 4.2   |
| 30.3  | 10.6  | 17.7  | 8.7   | 4.4   | 36.5  | 19.4  | 19.1  | 12.5  |
| 35.0  | 41.2  | 42.2  | 30.9  | 17.3  | 62.7  | 51.0  | 42.8  | 45.1  |
| 8.7   | 9.5   | 1.3   | 4.4   | 0.7   | 7.2   | 14.2  | 4.8   | 4.4   |
| 41.0  | 35.2  | 55.5  | 40.0  | 12.5  | 215.3 | 118.8 | 0.8   | 4.2   |
| 17.4  | 18.1  | 22.3  | 17.9  | 4.4   | 109.3 | 58.3  | 3.1   | 5.0   |
| 117.4 | 102.8 | 89.2  | 45.1  | 42.7  | 242.5 | 128.4 | 30.4  | 33.4  |
| 8.8   | 17.5  | 18.9  | 10.9  | 6.3   | 21.4  | 6.0   | 7.5   | 13.0  |
| 30.4  | 16.0  | 3.7   | 7.8   | 12.0  | 16.5  | 13.2  | 12.6  | 5.3   |
| 142.5 | 147.5 | 120.4 | 103.1 | 52.9  | 113.8 | 68.7  | 4.3   | 18.9  |
| 1.6   | 0.7   | 0.9   | 6.5   | 0.5   | 1.0   | 0.7   | 0.8   | 5.2   |
| 1.4   | 3.3   | 6.4   | 7.0   | 0.4   | 3.5   | 0.9   | 1.3   | 2.4   |
| 204.3 | 177.8 | 180.9 | 178.4 | 78.3  | 405.4 | 257.8 | 191.9 | 228.8 |
| 141.1 | 126.8 | 124.8 | 83.0  | 53.8  | 124.9 | 73.0  | 17.0  | 6.7   |
| 2.3   | 7.2   | 14.6  | 1.4   | 5.0   | 9.9   | 1.2   | 8.1   | 9.0   |
| 13.7  | 23.8  | 27.0  | 15.1  | 11.6  | 22.0  | 12.1  | 2.2   | 4.5   |
| 2.2   | 11.7  | 13.6  | 8.0   | 3.3   | 9.3   | 14.8  | 0.4   | 1.2   |
| 21.7  | 13.7  | 38.2  | 52.5  | 11.5  | 74.6  | 41.4  | 48.5  | 40.6  |
| 9.5   | 12.5  | 10.5  | 1.5   | 5.8   | 4.4   | 1.4   | 20.3  | 3.7   |
| 1.1   | 12.3  | 1.2   | 0.9   | 0.2   | 2.4   | 8.0   | 7.5   | 0.8   |
| 8.6   | 3.7   | 1.0   | 0.5   | 2.4   | 0.9   | 0.7   | 0.9   | 2.7   |
| 8.0   | 5.1   | 2.2   | 0.9   | 2.2   | 13.2  | 10.9  | 12.5  | 3.6   |
| 1.6   | 7.3   | 3.3   | 2.0   | 0.9   | 2.1   | 1.6   | 2.8   | 3.3   |
| 22.7  | 25.3  | 33.0  | 9.3   | 7.1   | 15.3  | 7.8   | 16.0  | 19.6  |
| 1.8   | 0.7   | 2.2   | 5.3   | 0.5   | 7.6   | 9.9   | 1.2   | 0.5   |
| 15.3  | 3.5   | 4.7   | 9.8   | 0.7   | 2.4   | 14.7  | 2.8   | 13.5  |
| 33.5  | 20.0  | 25.6  | 18.9  | 9.1   | 11.9  | 18.4  | 10.7  | 12.6  |
| 1.6   | 3.7   | 0.9   | 1.0   | 0.8   | 3.0   | 1.6   | 4.8   | 1.1   |
| 4.3   | 5.5   | 19.0  | 2.8   | 0.5   | 24.3  | 23.4  | 4.8   | 5.8   |
| 13.1  | 21.1  | 18.1  | 26.0  | 10.5  | 38.3  | 23.3  | 11.3  | 1.2   |
| 2.5   | 2.8   | 3.9   | 1.2   | 0.6   | 1.0   | 1.7   | 3.4   | 4.5   |
| 5.2   | 3.5   | 5.9   | 2.3   | 9.0   | 4.9   | 3.7   | 13.8  | 7.4   |
| 8.4   | 3.6   | 2.7   | 8.6   | 0.7   | 6.3   | 0.5   | 1.1   | 0.5   |
| 9.1   | 4.3   | 17.5  | 0.7   | 3.4   | 21.2  | 1.1   | 12.1  | 14.8  |
| 32.8  | 23.8  | 26.3  | 18.3  | 8.2   | 13.0  | 13.7  | 21.1  | 17.5  |
| 2.7   | 1.6   | 5.0   | 2.7   | 0.8   | 3.1   | 2.3   | 2.5   | 4.3   |
| 48.3  | 40.2  | 37.4  | 27.0  | 7.8   | 29.0  | 12.5  | 55.5  | 81.6  |
| 1.2   | 2.5   | 9.7   | 1.9   | 5.6   | 2.3   | 1.7   | 3.0   | 1.7   |
| 21.3  | 18.6  | 15.1  | 13.7  | 8.2   | 12.2  | 14.4  | 19.2  | 19.9  |
| 18.9  | 17.9  | 7.4   | 15.6  | 5.7   | 26.2  | 10.9  | 9.4   | 18.9  |
| 12.5  | 5.2   | 16.8  | 36.2  | 7.9   | 168.2 | 159.0 | 7.9   | 1.4   |
| 25.9  | 3.1   | 26.4  | 23.7  | 1.1   | 44.9  | 19.0  | 14.6  | 11.6  |
| 7.1   | 3.8   | 9.8   | 13.1  | 2.0   | 4.3   | 4.2   | 10.9  | 6.1   |
| 40.9  | 28.1  | 41.5  | 55.3  | 13.1  | 27.2  | 30.2  | 17.3  | 29.2  |
| 6.1   | 12.9  | 9.8   | 6.8   | 2.5   | 5.4   | 8.9   | 30.6  | 27.6  |
| 2.2   | 9.8   | 3.6   | 7.7   | 2.3   | 15.9  | 12.9  | 0.7   | 1.0   |
| 348.6 | 337.5 | 263.7 | 195.8 | 57.9  | 108.7 | 93.7  | 95.8  | 82.9  |
| 7.6   | 4.1   | 11.2  | 4.4   | 16.7  | 158.1 | 163.7 | 2.2   | 4.4   |
| 10.7  | 11.6  | 13.1  | 24.1  | 8.7   | 97.6  | 69.3  | 5.2   | 2.1   |
| 13.2  | 15.4  | 13.2  | 19.1  | 5.5   | 0.6   | 2.6   | 8.0   | 7.8   |

|       |       |       |       |       |       |       |       |       |
|-------|-------|-------|-------|-------|-------|-------|-------|-------|
| 21.7  | 31.3  | 28.3  | 24.7  | 13.7  | 7.4   | 5.7   | 7.3   | 13.8  |
| 6.9   | 14.7  | 14.6  | 0.6   | 0.5   | 12.7  | 18.1  | 8.7   | 14.7  |
| 10.4  | 0.5   | 2.1   | 0.8   | 0.4   | 2.3   | 0.7   | 0.3   | 0.3   |
| 18.4  | 21.2  | 8.5   | 10.1  | 5.7   | 6.1   | 1.5   | 1.7   | 2.0   |
| 2.6   | 1.4   | 3.7   | 1.3   | 6.5   | 2.1   | 1.7   | 3.4   | 2.0   |
| 22.4  | 13.8  | 4.2   | 4.6   | 5.8   | 8.0   | 12.2  | 28.1  | 8.1   |
| 70.7  | 97.6  | 103.9 | 112.9 | 44.2  | 129.2 | 74.9  | 34.8  | 65.6  |
| 9.3   | 1.2   | 1.4   | 0.6   | 4.3   | 20.4  | 16.4  | 23.6  | 51.5  |
| 10.9  | 3.8   | 3.1   | 7.0   | 7.2   | 0.9   | 1.0   | 2.4   | 2.8   |
| 33.0  | 31.9  | 26.8  | 21.6  | 6.7   | 69.3  | 52.0  | 9.8   | 2.9   |
| 0.9   | 1.4   | 1.1   | 0.8   | 0.5   | 3.3   | 8.3   | 2.7   | 2.2   |
| 4.2   | 8.6   | 15.2  | 8.0   | 6.0   | 15.7  | 12.6  | 16.6  | 14.5  |
| 33.3  | 42.2  | 52.3  | 61.2  | 21.9  | 191.3 | 138.4 | 25.8  | 23.7  |
| 1.2   | 0.7   | 1.0   | 0.6   | 0.3   | 1.6   | 2.1   | 24.3  | 61.9  |
| 1.8   | 3.3   | 11.0  | 3.5   | 1.7   | 5.5   | 4.3   | 5.1   | 4.5   |
| 11.1  | 10.6  | 4.7   | 7.6   | 7.5   | 1.6   | 7.1   | 1.0   | 10.7  |
| 36.1  | 28.0  | 63.0  | 61.1  | 13.3  | 8.7   | 1.7   | 0.6   | 7.4   |
| 2.9   | 1.9   | 8.7   | 0.7   | 7.8   | 7.6   | 1.7   | 17.6  | 8.9   |
| 1.0   | 4.8   | 4.6   | 0.2   | 3.6   | 15.5  | 7.4   | 2.1   | 8.2   |
| 2.8   | 1.3   | 1.0   | 7.9   | 3.6   | 81.7  | 74.2  | 194.9 | 205.9 |
| 19.6  | 31.1  | 34.0  | 40.1  | 11.8  | 58.0  | 44.2  | 68.9  | 133.9 |
| 17.7  | 15.4  | 3.1   | 4.4   | 9.3   | 10.9  | 4.1   | 1.0   | 4.6   |
| 34.4  | 37.4  | 34.4  | 25.7  | 9.6   | 16.1  | 11.7  | 10.3  | 9.9   |
| 7.4   | 15.0  | 14.2  | 2.0   | 1.1   | 18.0  | 10.2  | 5.3   | 5.0   |
| 15.7  | 5.8   | 3.1   | 3.5   | 6.4   | 14.4  | 21.4  | 5.6   | 41.5  |
| 10.4  | 0.4   | 7.0   | 7.9   | 3.1   | 19.7  | 25.9  | 4.5   | 1.4   |
| 8.8   | 8.8   | 1.4   | 8.4   | 7.6   | 7.7   | 1.9   | 2.0   | 13.4  |
| 12.1  | 8.2   | 23.3  | 6.7   | 6.4   | 25.9  | 12.2  | 7.3   | 30.8  |
| 8.7   | 6.2   | 2.8   | 6.5   | 0.6   | 40.4  | 33.5  | 4.5   | 0.1   |
| 9.6   | 0.2   | 0.5   | 5.6   | 0.2   | 4.8   | 0.6   | 5.5   | 1.2   |
| 263.8 | 256.2 | 279.1 | 337.4 | 118.2 | 331.7 | 241.7 | 58.7  | 68.3  |
| 8.3   | 6.9   | 4.2   | 14.6  | 1.3   | 53.7  | 58.3  | 3.9   | 2.7   |
| 2.7   | 2.4   | 3.0   | 3.6   | 1.0   | 1.0   | 1.4   | 4.2   | 18.2  |
| 15.6  | 15.6  | 35.3  | 14.4  | 1.5   | 3.1   | 5.4   | 3.5   | 2.0   |
| 2.6   | 2.4   | 2.0   | 8.0   | 0.9   | 6.7   | 10.2  | 2.3   | 2.0   |
| 43.9  | 54.5  | 60.3  | 54.2  | 23.5  | 214.6 | 152.2 | 7.8   | 15.9  |
| 45.8  | 50.5  | 48.5  | 48.8  | 34.4  | 54.1  | 49.0  | 3.8   | 22.2  |
| 2.7   | 4.4   | 15.6  | 8.4   | 7.5   | 5.7   | 14.9  | 5.0   | 13.3  |
| 2.1   | 5.5   | 9.5   | 10.2  | 0.5   | 17.5  | 6.3   | 2.7   | 2.9   |
| 7.2   | 1.2   | 7.7   | 1.4   | 0.4   | 14.9  | 15.8  | 3.7   | 0.7   |
| 6.0   | 5.0   | 4.6   | 7.2   | 1.4   | 7.5   | 3.6   | 2.5   | 5.1   |
| 13.5  | 24.2  | 16.9  | 1.3   | 10.6  | 32.9  | 15.8  | 2.7   | 19.2  |
| 3.3   | 35.2  | 20.5  | 2.9   | 2.4   | 46.6  | 45.2  | 3.9   | 2.4   |
| 42.6  | 36.2  | 47.7  | 28.7  | 10.7  | 176.4 | 93.1  | 18.0  | 29.4  |
| 9.5   | 8.8   | 12.4  | 6.9   | 5.5   | 2.6   | 12.6  | 14.3  | 8.8   |
| 8.0   | 6.0   | 7.1   | 8.5   | 1.5   | 14.1  | 5.8   | 2.3   | 7.4   |
| 10.2  | 4.3   | 3.3   | 4.4   | 0.4   | 4.4   | 0.6   | 0.7   | 3.3   |
| 57.0  | 47.8  | 51.4  | 43.9  | 19.9  | 152.7 | 128.1 | 7.9   | 14.8  |
| 8.0   | 6.6   | 17.4  | 8.8   | 2.9   | 23.4  | 1.0   | 2.3   | 19.9  |
| 14.0  | 8.1   | 5.0   | 5.6   | 6.4   | 12.4  | 11.2  | 6.1   | 3.5   |
| 58.4  | 49.3  | 49.0  | 46.7  | 24.2  | 72.4  | 54.7  | 13.8  | 12.2  |
| 23.8  | 15.8  | 39.6  | 60.6  | 6.4   | 7.7   | 9.5   | 2.4   | 2.9   |
| 3.5   | 2.4   | 10.0  | 2.2   | 5.8   | 2.9   | 6.2   | 3.1   | 2.4   |

|       |       |       |       |       |       |       |      |      |
|-------|-------|-------|-------|-------|-------|-------|------|------|
| 91.2  | 81.3  | 106.1 | 106.8 | 34.7  | 169.0 | 130.6 | 27.7 | 27.3 |
| 51.0  | 50.0  | 68.4  | 67.6  | 22.8  | 69.6  | 53.6  | 17.3 | 17.5 |
| 17.4  | 16.7  | 5.9   | 8.5   | 5.6   | 32.7  | 24.1  | 30.7 | 30.6 |
| 161.3 | 135.0 | 106.9 | 107.5 | 36.6  | 246.1 | 202.9 | 79.0 | 92.2 |
| 0.2   | 5.6   | 0.2   | 5.5   | 0.3   | 0.4   | 5.0   | 1.0  | 0.4  |
| 28.0  | 40.9  | 16.0  | 17.8  | 13.7  | 12.6  | 27.1  | 24.2 | 12.8 |
| 115.0 | 106.0 | 85.8  | 89.2  | 34.3  | 62.9  | 23.4  | 10.1 | 15.4 |
| 0.6   | 0.5   | 6.8   | 2.9   | 0.5   | 1.5   | 4.6   | 1.9  | 1.8  |
| 12.6  | 18.3  | 11.4  | 15.0  | 4.7   | 17.5  | 6.3   | 2.0  | 6.6  |
| 4.3   | 5.4   | 1.0   | 8.8   | 0.5   | 5.4   | 0.4   | 1.2  | 0.6  |
| 4.1   | 2.1   | 5.1   | 6.4   | 1.0   | 55.2  | 34.4  | 2.7  | 1.9  |
| 122.8 | 103.7 | 109.5 | 107.3 | 28.0  | 80.0  | 23.9  | 32.6 | 51.3 |
| 2.7   | 1.7   | 2.5   | 1.1   | 0.5   | 3.6   | 0.8   | 0.8  | 11.0 |
| 19.0  | 15.4  | 14.7  | 17.4  | 5.4   | 20.5  | 8.3   | 4.7  | 9.0  |
| 6.3   | 8.6   | 9.2   | 11.4  | 3.3   | 8.5   | 7.0   | 16.1 | 17.4 |
| 249.3 | 220.5 | 186.6 | 146.5 | 68.3  | 336.6 | 201.4 | 72.4 | 96.6 |
| 108.6 | 70.9  | 83.0  | 89.6  | 26.8  | 118.3 | 51.2  | 42.0 | 91.6 |
| 11.6  | 6.7   | 11.1  | 9.4   | 2.3   | 1.5   | 4.7   | 0.8  | 1.2  |
| 44.6  | 50.0  | 59.4  | 106.6 | 20.0  | 43.0  | 25.5  | 4.0  | 7.5  |
| 57.6  | 43.5  | 44.0  | 23.2  | 24.2  | 114.5 | 76.5  | 48.5 | 80.5 |
| 7.8   | 13.3  | 5.1   | 3.9   | 4.1   | 18.9  | 15.5  | 11.3 | 6.4  |
| 2.7   | 3.2   | 2.4   | 2.6   | 0.5   | 4.3   | 1.8   | 1.2  | 1.3  |
| 13.9  | 12.7  | 5.8   | 1.6   | 0.7   | 11.5  | 1.3   | 13.5 | 11.0 |
| 38.8  | 40.0  | 47.8  | 21.2  | 15.2  | 48.2  | 52.1  | 37.6 | 42.6 |
| 4.9   | 2.4   | 6.2   | 2.6   | 0.3   | 4.4   | 0.5   | 1.2  | 4.8  |
| 1.5   | 2.4   | 2.1   | 1.3   | 0.6   | 3.4   | 1.5   | 1.6  | 1.8  |
| 13.8  | 16.8  | 11.1  | 5.1   | 2.3   | 29.7  | 6.8   | 5.7  | 16.3 |
| 23.0  | 13.3  | 10.8  | 21.5  | 1.2   | 22.7  | 16.6  | 12.7 | 13.7 |
| 0.7   | 1.5   | 9.6   | 6.1   | 0.5   | 9.3   | 0.8   | 9.9  | 14.0 |
| 3.2   | 5.1   | 4.3   | 3.7   | 4.7   | 11.6  | 2.0   | 1.6  | 2.8  |
| 14.7  | 6.5   | 14.7  | 1.3   | 1.0   | 2.1   | 6.5   | 0.7  | 1.5  |
| 0.8   | 0.6   | 4.3   | 2.5   | 0.3   | 11.8  | 0.5   | 0.7  | 3.8  |
| 0.6   | 0.3   | 0.4   | 0.4   | 0.3   | 0.8   | 0.7   | 0.4  | 0.6  |
| 1.2   | 0.9   | 1.2   | 0.6   | 0.4   | 2.1   | 1.2   | 0.9  | 2.1  |
| 718.2 | 615.9 | 651.2 | 414.6 | 112.1 | 212.6 | 107.3 | 42.4 | 54.5 |
| 47.3  | 47.9  | 37.7  | 47.9  | 19.1  | 125.3 | 111.1 | 8.5  | 14.7 |
| 1.2   | 1.5   | 7.2   | 1.5   | 0.5   | 3.1   | 6.9   | 16.7 | 3.8  |
| 15.9  | 7.1   | 14.0  | 1.7   | 0.9   | 9.0   | 5.0   | 0.7  | 9.0  |
| 18.2  | 11.2  | 8.4   | 5.5   | 9.8   | 7.2   | 9.2   | 3.6  | 8.1  |
| 14.2  | 14.3  | 12.3  | 11.8  | 4.8   | 46.6  | 35.9  | 14.0 | 7.5  |
| 9.7   | 7.4   | 1.8   | 0.6   | 0.5   | 5.0   | 2.9   | 1.1  | 4.2  |
| 35.1  | 49.0  | 85.5  | 100.7 | 25.1  | 0.2   | 2.1   | 1.5  | 0.9  |
| 19.2  | 16.6  | 5.7   | 1.4   | 2.4   | 2.9   | 4.5   | 5.5  | 2.6  |
| 84.8  | 40.2  | 61.2  | 27.7  | 17.5  | 71.9  | 17.8  | 59.0 | 52.5 |
| 3.2   | 14.7  | 3.2   | 2.2   | 1.2   | 12.0  | 2.9   | 4.2  | 3.3  |
| 58.5  | 73.5  | 53.9  | 44.8  | 22.4  | 46.0  | 22.5  | 11.3 | 9.4  |
| 28.0  | 10.8  | 13.6  | 8.8   | 5.1   | 22.9  | 5.0   | 16.6 | 16.0 |
| 21.4  | 16.3  | 24.7  | 19.1  | 9.4   | 14.7  | 8.5   | 5.0  | 4.1  |
| 3.1   | 6.9   | 7.2   | 7.0   | 1.9   | 2.2   | 10.6  | 2.5  | 4.8  |
| 12.2  | 6.7   | 0.6   | 8.5   | 0.3   | 6.1   | 12.9  | 6.5  | 4.6  |
| 0.6   | 5.1   | 4.2   | 5.8   | 3.3   | 0.9   | 3.7   | 2.9  | 4.2  |
| 1.5   | 0.5   | 1.1   | 0.7   | 1.5   | 1.1   | 0.5   | 5.1  | 4.8  |
| 17.5  | 16.4  | 14.0  | 13.5  | 4.3   | 2.1   | 6.5   | 7.2  | 20.1 |

|       |       |       |       |      |       |       |       |       |
|-------|-------|-------|-------|------|-------|-------|-------|-------|
| 0.3   | 12.5  | 7.4   | 2.5   | 1.7  | 4.2   | 0.9   | 5.5   | 11.6  |
| 10.4  | 4.7   | 2.3   | 6.0   | 4.8  | 17.7  | 23.8  | 6.8   | 3.8   |
| 34.0  | 31.7  | 22.7  | 9.5   | 5.2  | 64.1  | 64.9  | 11.3  | 12.5  |
| 132.4 | 174.1 | 132.8 | 196.7 | 50.4 | 268.9 | 156.7 | 74.1  | 55.3  |
| 1.6   | 0.6   | 4.1   | 5.3   | 0.3  | 1.7   | 2.6   | 7.5   | 10.7  |
| 5.3   | 9.5   | 1.8   | 11.4  | 1.4  | 10.0  | 2.0   | 6.1   | 2.0   |
| 19.5  | 14.5  | 5.8   | 14.6  | 12.9 | 34.2  | 30.7  | 1.9   | 4.7   |
| 5.5   | 2.1   | 4.6   | 8.9   | 5.2  | 3.1   | 2.0   | 2.5   | 4.4   |
| 24.9  | 11.5  | 14.8  | 9.0   | 2.5  | 12.7  | 7.5   | 7.7   | 3.8   |
| 10.1  | 1.3   | 4.0   | 8.1   | 0.8  | 37.8  | 2.4   | 59.5  | 94.6  |
| 9.3   | 0.3   | 6.4   | 2.7   | 4.7  | 6.5   | 6.9   | 3.2   | 1.5   |
| 10.1  | 5.8   | 7.7   | 2.3   | 3.0  | 8.3   | 4.4   | 2.3   | 6.0   |
| 325.9 | 258.7 | 245.4 | 244.4 | 91.7 | 484.2 | 328.3 | 130.3 | 123.1 |
| 0.9   | 0.8   | 0.5   | 3.0   | 0.5  | 2.0   | 0.8   | 0.6   | 0.6   |
| 132.9 | 108.9 | 138.2 | 157.8 | 37.3 | 304.9 | 212.6 | 32.3  | 61.0  |
| 2.9   | 1.7   | 11.4  | 1.6   | 0.4  | 4.4   | 1.9   | 2.0   | 1.3   |
| 15.9  | 2.9   | 7.1   | 18.9  | 0.8  | 2.8   | 14.3  | 3.0   | 3.0   |
| 12.8  | 3.2   | 2.8   | 5.8   | 3.3  | 2.5   | 6.4   | 7.9   | 11.0  |
| 2.6   | 1.2   | 2.2   | 1.4   | 0.5  | 2.3   | 2.1   | 2.2   | 1.6   |
| 1.6   | 2.4   | 3.3   | 6.6   | 3.5  | 3.5   | 12.7  | 1.9   | 3.3   |
| 15.9  | 18.8  | 11.5  | 2.0   | 4.4  | 8.4   | 11.6  | 3.1   | 10.2  |
| 3.3   | 3.5   | 12.7  | 3.8   | 1.7  | 15.5  | 9.7   | 1.7   | 8.1   |
| 2.5   | 4.3   | 4.6   | 2.2   | 1.1  | 25.7  | 2.2   | 1.0   | 3.2   |
| 10.6  | 2.2   | 1.5   | 1.3   | 0.7  | 19.8  | 2.1   | 19.6  | 20.4  |
| 12.8  | 2.3   | 1.4   | 11.2  | 0.9  | 12.8  | 1.7   | 8.3   | 4.8   |
| 9.2   | 12.7  | 19.2  | 3.1   | 6.5  | 4.4   | 3.1   | 4.5   | 15.3  |
| 8.6   | 5.4   | 1.1   | 0.4   | 0.3  | 211.8 | 147.2 | 2.1   | 5.9   |
| 2.0   | 2.3   | 0.2   | 0.2   | 2.2  | 11.7  | 15.5  | 7.4   | 6.0   |
| 6.1   | 11.5  | 13.2  | 3.1   | 2.0  | 9.1   | 8.3   | 5.4   | 4.7   |
| 3.9   | 3.1   | 5.8   | 7.3   | 1.0  | 42.8  | 44.5  | 4.4   | 14.5  |
| 4.3   | 0.5   | 1.4   | 1.1   | 0.3  | 1.2   | 7.3   | 1.3   | 0.3   |
| 14.8  | 2.6   | 13.1  | 5.5   | 7.4  | 40.7  | 26.7  | 6.2   | 11.1  |
| 4.2   | 1.4   | 1.2   | 0.8   | 0.5  | 1.3   | 1.1   | 2.5   | 2.8   |
| 3.6   | 3.1   | 2.6   | 9.5   | 1.6  | 3.5   | 2.1   | 3.0   | 3.5   |
| 5.0   | 16.7  | 29.3  | 18.7  | 6.2  | 28.5  | 17.5  | 17.2  | 16.5  |
| 3.8   | 10.2  | 2.7   | 0.8   | 4.7  | 9.8   | 4.7   | 2.7   | 9.9   |
| 15.1  | 1.6   | 15.6  | 13.8  | 1.7  | 29.3  | 37.3  | 23.8  | 32.8  |
| 1.3   | 17.6  | 13.1  | 12.8  | 1.8  | 35.0  | 15.8  | 6.1   | 9.5   |
| 18.8  | 17.8  | 23.1  | 17.9  | 5.4  | 64.7  | 21.9  | 20.1  | 33.8  |
| 38.9  | 26.8  | 44.3  | 45.8  | 10.3 | 120.4 | 70.6  | 17.5  | 24.2  |
| 2.4   | 1.1   | 0.7   | 0.9   | 1.8  | 1.2   | 1.9   | 1.1   | 0.9   |
| 9.9   | 12.7  | 15.8  | 14.2  | 5.5  | 74.9  | 35.7  | 25.2  | 19.0  |
| 0.8   | 1.6   | 1.1   | 1.4   | 0.7  | 1.1   | 2.8   | 0.7   | 2.1   |
| 16.1  | 8.8   | 9.8   | 13.8  | 5.7  | 11.8  | 1.0   | 0.8   | 0.4   |
| 46.1  | 67.3  | 39.3  | 21.0  | 18.8 | 82.5  | 50.3  | 22.2  | 15.1  |
| 14.5  | 0.8   | 0.8   | 0.7   | 0.4  | 0.9   | 3.2   | 2.4   | 10.5  |
| 41.2  | 26.1  | 32.9  | 18.5  | 13.5 | 64.5  | 23.8  | 26.5  | 17.4  |
| 100.5 | 63.7  | 95.0  | 85.9  | 24.5 | 52.3  | 48.4  | 41.2  | 54.7  |
| 9.4   | 21.5  | 23.5  | 10.7  | 8.0  | 28.2  | 14.4  | 2.8   | 17.7  |
| 20.2  | 13.3  | 21.0  | 5.4   | 5.0  | 5.9   | 2.1   | 7.8   | 13.8  |
| 4.5   | 2.3   | 1.9   | 7.5   | 1.4  | 16.3  | 2.4   | 1.8   | 3.7   |
| 4.5   | 0.5   | 5.2   | 0.5   | 0.4  | 3.5   | 0.6   | 5.6   | 3.3   |
| 3.9   | 2.2   | 2.0   | 1.7   | 2.0  | 28.1  | 8.9   | 2.0   | 4.1   |

|       |       |        |        |       |       |       |       |       |
|-------|-------|--------|--------|-------|-------|-------|-------|-------|
| 17.0  | 7.8   | 25.1   | 9.3    | 7.5   | 9.8   | 12.4  | 8.9   | 2.1   |
| 30.7  | 18.4  | 19.0   | 25.0   | 9.7   | 77.4  | 49.7  | 12.0  | 9.5   |
| 10.9  | 3.0   | 11.8   | 4.4    | 5.7   | 5.2   | 1.7   | 5.4   | 10.4  |
| 1.8   | 2.5   | 9.1    | 1.0    | 0.4   | 2.7   | 1.0   | 0.4   | 2.9   |
| 2.6   | 1.2   | 2.2    | 2.6    | 0.9   | 10.6  | 6.0   | 9.3   | 2.9   |
| 20.6  | 22.6  | 12.0   | 1.7    | 8.4   | 1.2   | 16.7  | 8.2   | 15.3  |
| 7.9   | 4.4   | 1.0    | 14.3   | 1.4   | 27.5  | 15.2  | 19.0  | 36.0  |
| 47.8  | 62.0  | 47.3   | 39.8   | 26.0  | 83.2  | 70.0  | 70.8  | 59.9  |
| 58.3  | 29.3  | 29.2   | 18.0   | 19.9  | 137.4 | 49.4  | 1.9   | 12.3  |
| 19.4  | 18.1  | 18.3   | 18.7   | 6.8   | 32.2  | 23.4  | 12.3  | 11.8  |
| 545.8 | 627.8 | 1119.2 | 1542.4 | 373.5 | 232.1 | 269.3 | 0.3   | 4.4   |
| 1.2   | 2.6   | 4.8    | 1.5    | 1.0   | 2.5   | 4.5   | 2.6   | 0.7   |
| 16.6  | 9.7   | 20.5   | 13.8   | 7.7   | 51.5  | 31.2  | 23.9  | 20.4  |
| 13.6  | 11.5  | 2.3    | 11.2   | 1.9   | 2.6   | 8.5   | 2.2   | 7.3   |
| 12.9  | 2.9   | 6.5    | 16.3   | 6.5   | 21.3  | 6.1   | 1.5   | 2.4   |
| 23.4  | 26.7  | 16.0   | 42.2   | 8.1   | 55.6  | 47.9  | 8.1   | 7.4   |
| 33.0  | 19.2  | 32.8   | 15.8   | 7.6   | 17.1  | 11.3  | 2.3   | 11.6  |
| 13.7  | 19.4  | 16.3   | 12.6   | 2.3   | 22.3  | 18.5  | 19.4  | 21.6  |
| 18.5  | 20.9  | 22.6   | 7.7    | 0.7   | 21.8  | 4.6   | 5.4   | 3.5   |
| 464.2 | 501.7 | 445.8  | 375.2  | 118.7 | 308.6 | 152.1 | 181.3 | 271.2 |
| 3.2   | 1.5   | 1.2    | 1.6    | 0.7   | 2.5   | 1.0   | 2.2   | 1.7   |
| 1.9   | 1.4   | 1.2    | 1.7    | 0.7   | 2.2   | 1.0   | 1.5   | 2.3   |
| 4.2   | 0.8   | 1.8    | 0.8    | 0.2   | 3.3   | 1.0   | 1.2   | 2.2   |
| 4.4   | 3.6   | 0.8    | 2.4    | 5.2   | 4.6   | 3.0   | 2.9   | 1.6   |
| 21.7  | 20.9  | 16.8   | 3.0    | 13.7  | 32.6  | 30.6  | 1.7   | 11.5  |
| 9.7   | 1.0   | 3.3    | 9.1    | 0.5   | 19.5  | 4.6   | 63.0  | 68.1  |
| 23.8  | 27.2  | 26.8   | 27.5   | 3.9   | 160.1 | 69.0  | 0.8   | 2.2   |
| 3.8   | 0.8   | 2.2    | 4.3    | 0.2   | 6.0   | 3.4   | 2.8   | 11.4  |
| 147.1 | 124.4 | 131.4  | 137.7  | 58.6  | 260.7 | 176.1 | 194.3 | 217.6 |
| 0.8   | 0.5   | 0.9    | 1.8    | 0.2   | 0.5   | 0.6   | 0.8   | 0.7   |
| 40.8  | 27.9  | 34.0   | 22.1   | 10.5  | 22.7  | 15.0  | 75.5  | 112.7 |
| 7.5   | 13.6  | 8.0    | 4.1    | 7.4   | 4.9   | 25.0  | 10.9  | 14.8  |
| 18.1  | 4.4   | 2.9    | 3.3    | 2.8   | 26.6  | 9.2   | 17.0  | 9.5   |
| 21.8  | 14.8  | 33.5   | 19.6   | 11.8  | 26.5  | 14.7  | 44.9  | 21.8  |
| 1.2   | 1.0   | 4.0    | 1.0    | 2.1   | 1.9   | 1.0   | 0.9   | 1.2   |
| 10.5  | 3.7   | 3.1    | 7.8    | 1.0   | 3.2   | 0.6   | 1.8   | 0.6   |
| 243.8 | 216.0 | 249.4  | 179.3  | 69.0  | 529.8 | 423.5 | 96.2  | 116.7 |
| 251.5 | 181.5 | 373.3  | 226.3  | 67.6  | 531.2 | 689.6 | 45.3  | 55.7  |
| 4.6   | 4.1   | 16.2   | 1.3    | 1.0   | 5.2   | 16.1  | 7.0   | 14.5  |
| 5.9   | 6.8   | 3.2    | 8.3    | 0.9   | 20.0  | 8.8   | 2.7   | 0.5   |
| 2.1   | 1.5   | 2.0    | 1.8    | 0.7   | 2.7   | 3.2   | 1.2   | 2.8   |
| 2.8   | 1.4   | 5.3    | 0.8    | 1.1   | 3.3   | 8.2   | 2.7   | 3.0   |
| 68.4  | 51.1  | 62.7   | 36.4   | 12.7  | 63.0  | 33.1  | 18.0  | 22.2  |
| 4.2   | 2.2   | 2.2    | 6.6    | 3.0   | 2.8   | 3.8   | 2.0   | 1.1   |
| 0.1   | 1.8   | 0.3    | 0.7    | 0.4   | 7.5   | 0.2   | 3.7   | 2.5   |
| 4.9   | 1.3   | 0.1    | 2.2    | 0.4   | 6.1   | 0.5   | 0.6   | 2.9   |
| 2.8   | 0.2   | 4.5    | 2.6    | 0.3   | 5.1   | 0.3   | 1.8   | 0.4   |
| 1.3   | 3.5   | 0.9    | 1.6    | 3.3   | 1.6   | 4.1   | 2.0   | 1.1   |
| 1.7   | 1.2   | 3.2    | 0.8    | 7.5   | 2.8   | 3.0   | 2.2   | 1.6   |
| 8.1   | 10.5  | 11.7   | 2.4    | 8.1   | 1.2   | 13.2  | 2.2   | 1.0   |
| 1.1   | 12.8  | 9.6    | 4.3    | 3.0   | 3.5   | 2.2   | 2.2   | 5.4   |
| 6.1   | 3.4   | 6.3    | 3.0    | 3.8   | 7.9   | 0.8   | 1.6   | 9.5   |
| 2.3   | 2.2   | 3.3    | 1.4    | 0.8   | 3.2   | 2.8   | 5.2   | 15.5  |

|        |        |        |       |       |        |        |       |       |
|--------|--------|--------|-------|-------|--------|--------|-------|-------|
| 12.7   | 17.8   | 24.5   | 8.2   | 9.3   | 13.2   | 3.9    | 16.6  | 11.2  |
| 6.9    | 1.5    | 1.4    | 2.2   | 3.7   | 17.9   | 18.8   | 8.6   | 7.1   |
| 3.3    | 0.4    | 0.7    | 1.5   | 0.4   | 16.7   | 0.6    | 0.9   | 0.9   |
| 3.4    | 3.1    | 3.6    | 2.8   | 1.2   | 2.3    | 2.4    | 1.8   | 1.2   |
| 0.8    | 1.0    | 0.6    | 0.6   | 2.1   | 0.8    | 0.5    | 0.9   | 0.5   |
| 4.0    | 1.1    | 4.6    | 5.8   | 0.5   | 5.8    | 7.1    | 3.2   | 2.6   |
| 9.8    | 0.3    | 7.4    | 1.7   | 3.9   | 2.0    | 1.7    | 7.2   | 10.8  |
| 0.5    | 7.2    | 1.3    | 2.8   | 0.2   | 0.2    | 2.1    | 0.5   | 3.7   |
| 8.0    | 9.8    | 2.1    | 2.6   | 1.1   | 3.7    | 10.5   | 12.0  | 21.4  |
| 30.8   | 35.4   | 30.9   | 24.3  | 4.5   | 75.9   | 56.6   | 0.3   | 2.9   |
| 19.6   | 1.6    | 6.5    | 4.9   | 4.5   | 12.8   | 25.1   | 2.0   | 3.9   |
| 17.9   | 6.4    | 6.0    | 4.8   | 0.3   | 2.3    | 2.1    | 15.2  | 3.1   |
| 3.9    | 5.1    | 2.0    | 0.7   | 0.4   | 6.8    | 4.6    | 7.0   | 1.3   |
| 3.7    | 12.5   | 2.5    | 2.2   | 3.5   | 9.2    | 10.4   | 9.2   | 14.0  |
| 911.8  | 797.8  | 877.4  | 946.4 | 505.1 | 1019.4 | 832.3  | 120.5 | 141.1 |
| 1182.7 | 1061.3 | 1255.8 | 707.1 | 359.5 | 2186.3 | 1458.0 | 139.8 | 200.8 |
| 10.3   | 19.7   | 13.3   | 15.3  | 3.0   | 5.2    | 7.9    | 0.5   | 0.9   |
| 2.0    | 2.1    | 2.2    | 1.0   | 0.8   | 1.6    | 3.4    | 3.4   | 15.9  |
| 2.4    | 1.4    | 14.5   | 9.2   | 1.2   | 27.0   | 12.5   | 17.7  | 11.8  |
| 5.4    | 2.3    | 1.2    | 2.4   | 0.7   | 7.3    | 7.9    | 0.7   | 1.4   |
| 1.3    | 0.8    | 1.0    | 1.0   | 0.4   | 1.8    | 1.0    | 1.0   | 0.8   |
| 5.1    | 9.7    | 11.5   | 2.2   | 4.6   | 6.4    | 9.0    | 8.3   | 3.8   |
| 12.4   | 14.2   | 14.4   | 16.1  | 3.6   | 16.3   | 21.6   | 7.2   | 18.6  |
| 14.3   | 9.2    | 17.1   | 6.6   | 2.3   | 1.3    | 5.8    | 19.1  | 20.5  |
| 2.3    | 2.8    | 2.5    | 3.5   | 1.8   | 4.4    | 1.9    | 3.4   | 1.4   |
| 4.1    | 4.8    | 17.8   | 13.1  | 1.8   | 16.1   | 4.0    | 32.8  | 14.1  |
| 0.4    | 3.0    | 5.0    | 1.3   | 3.2   | 7.3    | 5.4    | 3.8   | 11.7  |
| 25.5   | 30.0   | 5.3    | 16.5  | 12.9  | 6.2    | 10.8   | 6.6   | 30.9  |
| 1.1    | 1.7    | 0.9    | 6.9   | 1.5   | 2.0    | 3.1    | 1.5   | 3.3   |
| 20.6   | 14.2   | 22.3   | 11.7  | 16.0  | 5.1    | 1.1    | 1.4   | 1.5   |
| 12.1   | 11.6   | 17.9   | 5.9   | 6.0   | 8.8    | 1.2    | 6.5   | 10.7  |
| 23.1   | 6.7    | 17.0   | 7.8   | 5.9   | 26.4   | 7.5    | 13.6  | 22.7  |
| 11.1   | 8.3    | 17.5   | 9.9   | 0.4   | 17.2   | 9.3    | 0.7   | 12.7  |
| 12.7   | 6.5    | 14.0   | 6.5   | 1.0   | 13.3   | 2.2    | 12.5  | 11.5  |
| 7.6    | 5.7    | 9.1    | 10.4  | 6.0   | 4.4    | 13.8   | 10.9  | 5.0   |
| 7.0    | 2.5    | 11.8   | 5.8   | 0.9   | 6.8    | 10.7   | 4.7   | 2.0   |
| 725.3  | 831.8  | 790.0  | 551.4 | 248.4 | 656.5  | 459.7  | 204.2 | 271.8 |
| 4.6    | 1.3    | 1.7    | 2.3   | 0.9   | 1.2    | 2.7    | 3.4   | 2.0   |
| 7.0    | 17.0   | 2.8    | 1.6   | 2.3   | 32.4   | 26.1   | 0.7   | 2.2   |
| 8.9    | 8.8    | 9.2    | 10.6  | 5.8   | 7.3    | 9.8    | 2.8   | 4.4   |
| 9.9    | 3.6    | 3.5    | 1.4   | 2.0   | 1.1    | 0.4    | 7.0   | 4.6   |
| 3.1    | 3.4    | 0.6    | 0.6   | 0.3   | 0.3    | 0.6    | 0.3   | 1.9   |
| 115.6  | 115.8  | 134.5  | 118.7 | 21.0  | 103.6  | 75.6   | 13.0  | 9.6   |
| 31.8   | 9.5    | 8.3    | 7.2   | 8.6   | 13.9   | 9.8    | 35.1  | 13.3  |
| 4.0    | 2.9    | 2.6    | 6.6   | 2.4   | 3.5    | 13.5   | 24.8  | 8.1   |
| 6.1    | 0.3    | 7.0    | 7.2   | 0.9   | 3.6    | 0.8    | 5.4   | 0.7   |
| 14.8   | 10.8   | 5.9    | 2.6   | 1.0   | 12.4   | 19.6   | 18.5  | 17.2  |
| 29.5   | 29.2   | 47.9   | 18.2  | 14.3  | 20.6   | 26.2   | 7.5   | 24.5  |
| 11.9   | 10.8   | 7.6    | 12.5  | 1.9   | 18.9   | 1.1    | 7.6   | 6.2   |
| 15.0   | 17.3   | 12.3   | 1.9   | 1.2   | 9.0    | 9.9    | 7.6   | 2.6   |
| 4.6    | 1.5    | 8.5    | 3.6   | 4.7   | 6.3    | 1.1    | 4.1   | 1.4   |
| 7.0    | 2.2    | 2.5    | 3.4   | 5.2   | 37.9   | 3.8    | 13.0  | 8.6   |
| 4.3    | 1.1    | 1.9    | 1.8   | 0.5   | 16.4   | 2.1    | 1.7   | 8.8   |



|        |        |        |        |       |        |       |       |       |
|--------|--------|--------|--------|-------|--------|-------|-------|-------|
| 10.0   | 0.8    | 8.1    | 3.8    | 2.9   | 13.4   | 13.0  | 5.6   | 9.3   |
| 41.6   | 37.4   | 52.6   | 51.9   | 21.7  | 12.0   | 0.8   | 12.7  | 8.7   |
| 43.1   | 32.8   | 30.5   | 13.8   | 19.2  | 45.1   | 20.5  | 23.3  | 37.3  |
| 8.0    | 3.3    | 1.7    | 1.1    | 6.2   | 2.6    | 1.7   | 5.8   | 2.5   |
| 1.0    | 1.7    | 0.7    | 0.6    | 0.5   | 3.8    | 4.8   | 1.2   | 0.9   |
| 2.0    | 1.6    | 3.3    | 1.0    | 1.9   | 2.1    | 12.7  | 2.2   | 2.5   |
| 9.5    | 3.4    | 1.0    | 6.4    | 0.9   | 2.3    | 6.6   | 8.1   | 1.4   |
| 12.6   | 17.8   | 25.0   | 3.8    | 10.6  | 28.5   | 4.3   | 10.0  | 16.6  |
| 15.6   | 8.9    | 9.4    | 5.0    | 2.0   | 12.8   | 25.7  | 3.8   | 1.6   |
| 2.2    | 2.0    | 1.8    | 2.3    | 1.7   | 3.4    | 2.9   | 2.0   | 1.5   |
| 14.0   | 2.6    | 10.5   | 8.8    | 0.5   | 14.4   | 1.1   | 16.5  | 12.6  |
| 11.9   | 7.5    | 3.7    | 5.6    | 2.7   | 1.3    | 9.4   | 5.2   | 1.1   |
| 18.7   | 12.7   | 12.0   | 5.6    | 5.1   | 11.4   | 10.2  | 4.5   | 2.1   |
| 3.9    | 11.2   | 16.3   | 4.9    | 4.0   | 30.6   | 12.5  | 18.9  | 3.8   |
| 8.7    | 14.3   | 4.1    | 12.9   | 4.5   | 4.4    | 2.5   | 17.3  | 17.4  |
| 1.0    | 0.9    | 0.8    | 0.7    | 0.5   | 6.8    | 0.8   | 0.6   | 1.2   |
| 17.5   | 17.7   | 13.1   | 8.8    | 3.2   | 13.4   | 7.3   | 17.6  | 18.1  |
| 2.0    | 0.6    | 4.7    | 1.4    | 0.8   | 22.9   | 2.7   | 22.8  | 29.5  |
| 1.6    | 0.5    | 1.3    | 0.6    | 0.3   | 0.9    | 0.6   | 0.6   | 0.5   |
| 1.7    | 19.7   | 10.4   | 11.3   | 10.2  | 22.8   | 12.6  | 4.6   | 4.2   |
| 1.6    | 1.9    | 2.6    | 0.8    | 0.8   | 2.9    | 1.9   | 5.9   | 4.0   |
| 1.3    | 1.1    | 2.1    | 5.8    | 1.3   | 54.8   | 24.4  | 0.7   | 0.8   |
| 1.2    | 3.3    | 2.0    | 0.7    | 1.4   | 0.7    | 2.7   | 3.0   | 3.2   |
| 83.6   | 57.1   | 81.9   | 71.9   | 29.7  | 287.4  | 164.0 | 122.4 | 141.2 |
| 74.7   | 51.2   | 55.2   | 65.4   | 14.3  | 48.0   | 35.9  | 29.0  | 55.7  |
| 58.3   | 44.6   | 49.3   | 48.5   | 20.4  | 48.4   | 24.8  | 14.4  | 11.2  |
| 52.5   | 44.9   | 50.5   | 37.7   | 28.2  | 46.7   | 29.5  | 2.3   | 1.0   |
| 6.9    | 5.7    | 3.9    | 5.3    | 7.8   | 6.5    | 7.0   | 13.0  | 16.6  |
| 23.0   | 22.6   | 13.6   | 8.1    | 9.4   | 15.3   | 10.1  | 12.9  | 17.2  |
| 17.6   | 20.2   | 4.1    | 6.1    | 8.1   | 53.4   | 28.4  | 3.4   | 4.3   |
| 17.9   | 1.8    | 5.4    | 10.5   | 4.4   | 5.1    | 1.9   | 6.9   | 4.6   |
| 8.5    | 3.6    | 4.3    | 3.5    | 3.6   | 7.8    | 3.0   | 5.6   | 0.5   |
| 26.7   | 13.2   | 23.9   | 4.1    | 6.5   | 15.0   | 17.6  | 23.8  | 26.0  |
| 149.6  | 138.2  | 142.3  | 94.8   | 62.4  | 441.2  | 307.6 | 185.6 | 148.5 |
| 1.4    | 1.0    | 1.1    | 0.9    | 0.6   | 1.7    | 4.2   | 2.1   | 2.1   |
| 7.7    | 6.9    | 11.1   | 8.9    | 4.2   | 17.1   | 6.9   | 11.2  | 5.3   |
| 12.2   | 13.4   | 4.3    | 5.0    | 9.3   | 18.8   | 18.8  | 20.0  | 1.5   |
| 2.1    | 2.4    | 0.9    | 5.6    | 0.8   | 3.2    | 0.9   | 1.0   | 1.5   |
| 45.4   | 34.0   | 33.7   | 57.6   | 15.8  | 55.6   | 23.1  | 56.2  | 44.6  |
| 13.1   | 13.1   | 5.9    | 6.7    | 4.9   | 85.2   | 65.4  | 11.6  | 8.6   |
| 35.2   | 42.6   | 38.2   | 33.0   | 15.0  | 6.2    | 3.3   | 3.7   | 3.3   |
| 91.3   | 81.0   | 71.5   | 56.2   | 28.8  | 415.1  | 198.1 | 70.1  | 81.9  |
| 87.5   | 91.5   | 123.8  | 201.2  | 46.7  | 76.6   | 47.6  | 28.9  | 42.9  |
| 1546.9 | 1523.7 | 1546.5 | 1579.9 | 643.4 | 1376.1 | 988.5 | 321.9 | 383.5 |
| 20.3   | 12.8   | 30.5   | 14.7   | 13.5  | 41.5   | 31.1  | 24.6  | 14.7  |
| 7.9    | 1.1    | 1.7    | 0.3    | 0.5   | 2.6    | 1.1   | 1.4   | 0.9   |
| 88.9   | 71.6   | 110.9  | 117.8  | 42.5  | 172.8  | 129.3 | 25.6  | 34.2  |
| 2.2    | 1.4    | 2.6    | 0.6    | 1.3   | 2.3    | 6.9   | 3.6   | 1.4   |
| 13.5   | 1.0    | 13.9   | 6.4    | 6.9   | 18.6   | 19.6  | 18.5  | 3.1   |
| 5.4    | 6.6    | 5.3    | 5.7    | 5.8   | 10.7   | 10.3  | 19.9  | 34.2  |
| 1.1    | 5.4    | 3.2    | 0.6    | 0.6   | 0.9    | 4.9   | 9.5   | 4.4   |
| 13.0   | 12.1   | 8.8    | 12.3   | 3.6   | 730.0  | 632.4 | 30.5  | 62.5  |
| 13.8   | 4.5    | 8.6    | 2.6    | 4.6   | 21.0   | 8.9   | 2.9   | 2.5   |

|       |       |       |       |       |        |        |       |       |
|-------|-------|-------|-------|-------|--------|--------|-------|-------|
| 31.9  | 22.4  | 4.5   | 25.5  | 1.2   | 29.9   | 32.3   | 16.5  | 34.3  |
| 12.8  | 17.5  | 27.0  | 20.4  | 13.8  | 21.1   | 25.7   | 5.8   | 6.7   |
| 7.9   | 0.8   | 1.6   | 5.5   | 0.8   | 9.6    | 0.5    | 0.5   | 10.1  |
| 8.4   | 2.9   | 9.3   | 5.9   | 1.1   | 8.8    | 2.8    | 3.8   | 4.7   |
| 3.5   | 8.0   | 1.7   | 6.4   | 0.8   | 3.0    | 1.4    | 1.6   | 1.2   |
| 1.4   | 0.8   | 0.4   | 0.8   | 1.4   | 1.8    | 0.9    | 8.2   | 2.0   |
| 10.6  | 11.3  | 5.3   | 9.8   | 3.1   | 23.3   | 17.9   | 5.2   | 13.3  |
| 1.4   | 0.7   | 1.2   | 0.6   | 0.3   | 1.5    | 2.3    | 25.2  | 33.6  |
| 1.4   | 3.7   | 0.8   | 3.7   | 2.3   | 42.7   | 18.3   | 63.4  | 76.3  |
| 3.1   | 4.6   | 1.9   | 1.4   | 3.0   | 12.8   | 13.7   | 2.5   | 9.7   |
| 16.3  | 13.1  | 3.1   | 3.9   | 6.8   | 4.3    | 16.2   | 10.7  | 20.8  |
| 1.8   | 3.1   | 1.5   | 1.1   | 2.3   | 2.0    | 1.0    | 3.5   | 13.7  |
| 3.7   | 2.3   | 2.1   | 5.5   | 1.1   | 2.5    | 2.0    | 15.7  | 3.8   |
| 14.5  | 13.5  | 2.5   | 10.5  | 0.5   | 14.3   | 2.9    | 1.4   | 6.1   |
| 165.7 | 129.8 | 112.1 | 74.4  | 33.6  | 67.8   | 36.3   | 32.3  | 42.0  |
| 62.7  | 26.7  | 43.4  | 42.3  | 15.8  | 46.8   | 39.6   | 17.4  | 21.3  |
| 154.0 | 144.9 | 112.5 | 99.2  | 20.2  | 38.5   | 36.9   | 90.8  | 95.3  |
| 1.2   | 3.2   | 2.1   | 1.1   | 1.2   | 5.0    | 2.4    | 2.3   | 2.3   |
| 6.1   | 5.4   | 7.4   | 3.7   | 1.5   | 6.3    | 31.0   | 3.8   | 8.6   |
| 3.2   | 10.3  | 1.5   | 5.8   | 1.0   | 7.4    | 7.9    | 1.7   | 1.2   |
| 1.9   | 1.2   | 1.5   | 2.1   | 0.3   | 3.0    | 1.0    | 1.0   | 0.7   |
| 1.2   | 0.8   | 1.7   | 0.9   | 0.8   | 59.0   | 59.5   | 1.1   | 0.9   |
| 1.6   | 4.8   | 8.9   | 2.9   | 2.1   | 11.7   | 3.7    | 10.6  | 2.7   |
| 19.1  | 7.5   | 18.4  | 9.4   | 5.8   | 6.9    | 12.0   | 20.1  | 16.5  |
| 4.6   | 19.5  | 26.6  | 4.7   | 1.1   | 12.5   | 3.6    | 4.3   | 16.0  |
| 320.5 | 310.2 | 272.3 | 234.3 | 77.2  | 477.7  | 372.7  | 98.0  | 165.4 |
| 263.0 | 228.8 | 297.4 | 311.8 | 106.6 | 821.5  | 634.4  | 70.6  | 66.4  |
| 1.5   | 2.2   | 3.1   | 6.8   | 2.0   | 3.3    | 2.9    | 3.4   | 3.5   |
| 1.5   | 2.1   | 1.6   | 1.1   | 1.0   | 1.5    | 0.5    | 0.9   | 1.1   |
| 12.7  | 18.2  | 10.0  | 4.2   | 2.0   | 34.5   | 31.5   | 4.5   | 6.0   |
| 629.2 | 664.2 | 614.3 | 479.6 | 237.6 | 700.4  | 516.5  | 280.2 | 245.5 |
| 16.8  | 3.1   | 1.1   | 7.2   | 3.7   | 2.7    | 12.4   | 2.9   | 4.8   |
| 0.3   | 4.0   | 1.8   | 0.3   | 0.2   | 4.1    | 3.9    | 0.3   | 0.5   |
| 23.1  | 7.2   | 13.0  | 19.0  | 13.4  | 52.0   | 31.8   | 3.9   | 5.1   |
| 591.1 | 658.9 | 529.2 | 272.3 | 201.7 | 468.8  | 188.8  | 45.2  | 79.1  |
| 3.4   | 5.6   | 1.7   | 2.3   | 4.5   | 4.8    | 6.9    | 4.8   | 8.8   |
| 4.5   | 9.2   | 18.0  | 17.5  | 8.3   | 2.5    | 16.1   | 25.7  | 33.5  |
| 1.2   | 1.0   | 1.5   | 0.8   | 0.9   | 0.9    | 1.9    | 3.0   | 8.0   |
| 17.7  | 7.1   | 1.8   | 12.1  | 0.6   | 87.1   | 143.4  | 4.3   | 3.4   |
| 0.5   | 5.3   | 1.2   | 4.3   | 0.2   | 1.1    | 2.6    | 0.3   | 3.5   |
| 2.5   | 3.2   | 6.7   | 10.2  | 0.9   | 9.9    | 1.5    | 3.1   | 3.4   |
| 230.1 | 180.0 | 192.1 | 200.2 | 72.6  | 1246.0 | 1080.0 | 1.2   | 8.8   |
| 42.6  | 39.2  | 56.6  | 23.5  | 15.2  | 42.9   | 31.5   | 45.7  | 33.2  |
| 2.4   | 4.2   | 2.4   | 0.8   | 1.0   | 1.1    | 1.4    | 5.4   | 3.5   |
| 114.7 | 82.3  | 110.8 | 79.2  | 37.3  | 106.3  | 85.5   | 43.8  | 69.6  |
| 2.4   | 10.4  | 8.4   | 5.9   | 23.5  | 8.4    | 2.3    | 1.7   | 2.2   |
| 8.7   | 7.3   | 3.4   | 9.0   | 4.0   | 79.1   | 62.3   | 6.0   | 3.2   |
| 11.5  | 0.7   | 8.8   | 1.0   | 1.3   | 57.2   | 34.9   | 2.9   | 9.1   |
| 10.4  | 11.1  | 1.6   | 5.7   | 1.7   | 4.6    | 2.6    | 12.9  | 5.8   |
| 3.8   | 4.3   | 0.8   | 6.5   | 1.1   | 3.3    | 4.2    | 1.2   | 4.2   |
| 7.3   | 7.4   | 8.4   | 0.7   | 0.4   | 9.5    | 4.9    | 6.1   | 2.1   |
| 83.9  | 96.6  | 84.2  | 58.9  | 33.7  | 212.8  | 164.7  | 77.7  | 66.0  |
| 5.9   | 8.0   | 0.5   | 4.8   | 3.0   | 17.0   | 13.7   | 6.8   | 1.9   |

|       |       |       |       |       |        |        |       |       |
|-------|-------|-------|-------|-------|--------|--------|-------|-------|
| 1.4   | 1.6   | 2.0   | 0.6   | 0.3   | 1.3    | 0.8    | 1.0   | 0.6   |
| 32.0  | 26.4  | 19.4  | 28.2  | 9.9   | 33.1   | 20.0   | 21.7  | 15.9  |
| 10.3  | 12.7  | 18.3  | 26.3  | 10.1  | 11.3   | 19.3   | 10.8  | 4.5   |
| 10.2  | 8.4   | 11.2  | 22.3  | 8.2   | 0.7    | 2.1    | 1.8   | 6.5   |
| 2.2   | 1.8   | 10.3  | 3.5   | 1.6   | 20.3   | 0.7    | 1.6   | 3.4   |
| 16.9  | 6.8   | 23.5  | 14.2  | 0.5   | 33.1   | 11.0   | 10.7  | 1.4   |
| 6.7   | 5.9   | 10.8  | 1.5   | 3.0   | 8.1    | 8.0    | 10.7  | 2.7   |
| 5.2   | 4.3   | 4.3   | 13.7  | 2.4   | 4.3    | 4.0    | 1.4   | 2.4   |
| 0.9   | 2.1   | 7.7   | 1.8   | 1.6   | 13.0   | 2.3    | 0.8   | 0.9   |
| 1.4   | 1.2   | 1.4   | 0.7   | 1.0   | 3.8    | 1.5    | 1.4   | 1.5   |
| 7.8   | 7.0   | 0.9   | 0.9   | 0.8   | 11.4   | 4.6    | 1.2   | 2.1   |
| 4.4   | 2.3   | 4.5   | 4.9   | 1.8   | 5.8    | 4.7    | 1.7   | 4.6   |
| 29.6  | 19.7  | 18.6  | 20.4  | 13.7  | 30.3   | 22.9   | 4.3   | 5.1   |
| 21.0  | 10.8  | 13.4  | 7.5   | 0.6   | 4.2    | 7.4    | 9.6   | 6.4   |
| 23.6  | 24.7  | 28.6  | 21.9  | 11.4  | 17.5   | 1.6    | 11.9  | 16.9  |
| 11.3  | 15.1  | 8.6   | 9.1   | 8.9   | 4.6    | 12.7   | 0.7   | 3.0   |
| 23.8  | 20.8  | 26.6  | 17.4  | 5.8   | 33.0   | 13.5   | 24.6  | 14.0  |
| 11.3  | 3.0   | 1.6   | 7.3   | 5.8   | 0.7    | 2.5    | 5.0   | 6.4   |
| 725.3 | 565.3 | 557.8 | 515.8 | 217.0 | 1311.5 | 1078.0 | 157.9 | 141.2 |
| 11.1  | 10.5  | 9.8   | 2.9   | 4.9   | 1.4    | 5.8    | 2.6   | 13.5  |
| 251.0 | 281.3 | 258.8 | 331.3 | 113.9 | 137.5  | 135.0  | 65.3  | 71.6  |
| 12.3  | 8.5   | 2.9   | 10.8  | 3.9   | 19.6   | 6.4    | 40.0  | 13.2  |
| 13.7  | 13.0  | 11.6  | 7.3   | 7.9   | 13.1   | 10.5   | 2.9   | 10.2  |
| 14.1  | 11.0  | 19.0  | 4.8   | 6.2   | 12.3   | 4.2    | 8.4   | 10.0  |
| 2.5   | 8.4   | 1.9   | 5.2   | 0.5   | 7.6    | 17.1   | 4.9   | 3.5   |
| 17.1  | 11.1  | 2.8   | 2.0   | 3.4   | 2.3    | 0.7    | 5.8   | 11.5  |
| 5.6   | 9.0   | 20.5  | 15.0  | 3.2   | 15.8   | 3.4    | 6.8   | 11.4  |
| 5.1   | 0.4   | 0.8   | 1.8   | 6.3   | 10.0   | 0.5    | 2.1   | 0.5   |
| 12.4  | 4.2   | 21.1  | 1.9   | 0.6   | 4.1    | 4.8    | 1.8   | 7.9   |
| 2.8   | 0.7   | 10.0  | 7.8   | 1.2   | 2.0    | 7.0    | 3.6   | 5.3   |
| 3.7   | 7.4   | 3.4   | 0.3   | 2.4   | 3.3    | 1.0    | 0.9   | 2.6   |
| 7.3   | 10.6  | 2.8   | 7.7   | 4.8   | 8.6    | 12.7   | 25.2  | 17.2  |
| 16.2  | 8.3   | 10.9  | 4.0   | 6.7   | 6.6    | 15.1   | 14.8  | 4.0   |
| 5.8   | 14.5  | 15.9  | 16.7  | 3.6   | 15.5   | 9.6    | 11.8  | 29.0  |
| 0.3   | 3.0   | 0.5   | 6.1   | 0.7   | 1.1    | 1.1    | 1.3   | 1.5   |
| 21.4  | 26.8  | 16.1  | 15.8  | 11.6  | 29.9   | 24.8   | 25.0  | 16.7  |
| 2.0   | 4.4   | 2.2   | 1.4   | 1.8   | 11.5   | 0.9    | 5.1   | 9.2   |
| 32.4  | 31.2  | 33.0  | 3.6   | 1.0   | 55.8   | 43.3   | 14.3  | 50.5  |
| 21.4  | 24.1  | 14.1  | 4.6   | 8.2   | 46.1   | 23.4   | 20.5  | 24.0  |
| 2.2   | 1.3   | 2.2   | 0.6   | 0.5   | 3.9    | 2.0    | 1.3   | 2.5   |
| 1.8   | 1.2   | 0.6   | 8.4   | 0.3   | 17.0   | 12.9   | 0.9   | 1.1   |
| 7.8   | 8.3   | 3.1   | 9.7   | 1.6   | 4.5    | 2.7    | 2.5   | 10.5  |
| 8.4   | 15.5  | 21.8  | 12.3  | 3.0   | 35.9   | 35.8   | 20.4  | 28.4  |
| 35.4  | 24.1  | 28.9  | 17.8  | 8.1   | 21.5   | 30.7   | 41.3  | 16.3  |
| 14.5  | 13.5  | 19.0  | 1.4   | 2.4   | 6.8    | 5.7    | 8.6   | 8.4   |
| 8.7   | 23.7  | 4.2   | 7.1   | 2.7   | 9.3    | 20.2   | 0.7   | 10.2  |
| 26.8  | 12.3  | 18.3  | 22.4  | 15.1  | 51.2   | 80.4   | 4.4   | 2.3   |
| 0.8   | 5.0   | 6.1   | 5.0   | 0.3   | 11.5   | 4.4    | 5.5   | 5.7   |
| 2.8   | 7.6   | 10.1  | 1.4   | 2.8   | 2.7    | 0.3    | 1.3   | 0.5   |
| 0.6   | 6.7   | 8.0   | 14.2  | 2.9   | 7.3    | 22.3   | 5.0   | 3.7   |
| 44.7  | 46.8  | 50.9  | 42.1  | 29.3  | 104.0  | 71.5   | 3.9   | 5.6   |
| 25.6  | 36.8  | 26.7  | 33.9  | 6.4   | 30.8   | 30.6   | 24.7  | 18.3  |
| 4.4   | 3.0   | 9.3   | 11.9  | 7.2   | 0.5    | 1.4    | 10.7  | 1.2   |

|       |       |       |        |       |        |        |       |       |
|-------|-------|-------|--------|-------|--------|--------|-------|-------|
| 3.2   | 0.8   | 1.2   | 4.8    | 2.0   | 2.4    | 4.2    | 1.3   | 1.2   |
| 0.3   | 3.5   | 0.5   | 0.3    | 2.9   | 3.9    | 3.6    | 0.4   | 0.2   |
| 89.4  | 73.4  | 89.3  | 59.1   | 27.9  | 147.1  | 67.6   | 98.5  | 141.5 |
| 4.3   | 5.4   | 6.1   | 0.2    | 0.4   | 6.3    | 4.7    | 3.0   | 2.8   |
| 12.4  | 12.3  | 10.1  | 0.7    | 4.3   | 8.9    | 4.8    | 14.0  | 10.1  |
| 11.5  | 7.9   | 2.4   | 6.2    | 4.2   | 18.0   | 11.5   | 0.3   | 0.6   |
| 16.7  | 13.3  | 10.3  | 19.9   | 8.5   | 19.4   | 25.2   | 5.3   | 2.7   |
| 24.2  | 33.3  | 45.6  | 38.4   | 7.8   | 44.1   | 31.3   | 17.9  | 19.5  |
| 237.0 | 255.3 | 191.4 | 202.5  | 75.2  | 320.5  | 219.0  | 82.5  | 94.3  |
| 5.0   | 2.0   | 9.4   | 5.7    | 6.8   | 8.7    | 8.0    | 15.9  | 3.8   |
| 1.2   | 1.8   | 2.7   | 1.0    | 0.9   | 1.5    | 3.8    | 1.0   | 2.4   |
| 74.5  | 52.1  | 66.5  | 45.5   | 29.8  | 229.2  | 90.2   | 100.0 | 81.5  |
| 18.6  | 20.4  | 17.2  | 18.8   | 2.7   | 10.7   | 9.8    | 6.7   | 7.6   |
| 52.0  | 62.9  | 45.7  | 19.9   | 13.6  | 1.6    | 3.3    | 16.9  | 16.1  |
| 10.6  | 2.6   | 19.9  | 8.4    | 5.3   | 7.3    | 4.9    | 3.2   | 15.7  |
| 23.9  | 25.8  | 23.4  | 26.2   | 8.8   | 2.8    | 5.6    | 3.2   | 10.1  |
| 140.9 | 77.4  | 80.8  | 31.0   | 30.5  | 97.3   | 53.8   | 35.4  | 74.3  |
| 17.1  | 17.7  | 19.2  | 8.6    | 7.1   | 43.3   | 30.5   | 10.2  | 17.6  |
| 402.1 | 395.8 | 392.5 | 277.0  | 175.7 | 1441.7 | 978.7  | 774.2 | 482.3 |
| 225.1 | 277.3 | 281.6 | 357.3  | 139.6 | 525.6  | 375.2  | 185.8 | 213.8 |
| 6.2   | 8.3   | 5.2   | 5.3    | 11.7  | 15.5   | 17.8   | 6.7   | 23.3  |
| 133.2 | 141.8 | 119.9 | 68.9   | 45.2  | 80.9   | 54.6   | 40.4  | 85.3  |
| 5.9   | 3.7   | 16.7  | 2.7    | 1.6   | 14.1   | 3.0    | 12.2  | 16.6  |
| 131.3 | 96.6  | 131.3 | 140.1  | 39.9  | 212.9  | 152.8  | 74.2  | 92.4  |
| 5.0   | 4.0   | 2.4   | 15.8   | 5.0   | 3.9    | 6.6    | 3.5   | 2.1   |
| 39.9  | 26.2  | 46.7  | 27.2   | 29.7  | 72.4   | 52.7   | 85.1  | 137.8 |
| 13.5  | 3.4   | 3.7   | 1.8    | 7.1   | 2.7    | 2.6    | 3.0   | 18.9  |
| 220.7 | 172.0 | 133.6 | 115.4  | 59.6  | 147.2  | 84.9   | 40.8  | 33.1  |
| 2.4   | 1.0   | 2.2   | 0.5    | 1.2   | 83.8   | 27.1   | 1.9   | 6.9   |
| 1.4   | 8.1   | 7.0   | 3.0    | 5.0   | 7.1    | 6.1    | 1.3   | 7.5   |
| 34.2  | 36.0  | 34.1  | 22.8   | 13.6  | 81.8   | 62.6   | 44.4  | 60.2  |
| 4.9   | 0.5   | 1.5   | 1.1    | 3.3   | 0.8    | 0.3    | 1.5   | 1.0   |
| 900.7 | 666.9 | 804.4 | 1910.4 | 408.7 | 3071.7 | 1901.7 | 456.4 | 524.9 |
| 2.1   | 10.9  | 3.8   | 3.0    | 0.4   | 3.4    | 5.2    | 3.3   | 1.4   |
| 111.9 | 105.5 | 78.0  | 114.1  | 31.9  | 68.7   | 56.6   | 64.1  | 56.9  |
| 18.1  | 18.5  | 38.7  | 3.0    | 12.4  | 21.9   | 25.5   | 32.6  | 26.2  |
| 2.3   | 0.9   | 0.6   | 0.7    | 0.6   | 3.7    | 2.7    | 0.5   | 2.0   |
| 192.9 | 136.8 | 176.5 | 115.9  | 66.5  | 146.5  | 125.3  | 56.6  | 53.0  |
| 60.0  | 67.7  | 74.1  | 106.5  | 37.3  | 456.8  | 506.0  | 59.4  | 73.4  |
| 51.3  | 51.3  | 42.4  | 39.2   | 19.1  | 71.9   | 55.0   | 19.3  | 17.7  |
| 1.8   | 1.1   | 1.2   | 1.1    | 0.5   | 2.7    | 2.0    | 1.2   | 0.9   |
| 27.2  | 10.2  | 18.1  | 15.6   | 0.9   | 13.1   | 9.1    | 1.5   | 1.2   |
| 51.7  | 36.8  | 31.4  | 21.0   | 13.6  | 26.8   | 14.8   | 31.6  | 18.0  |
| 3.3   | 6.0   | 2.2   | 12.9   | 1.1   | 25.8   | 13.7   | 0.7   | 2.2   |
| 14.9  | 1.7   | 10.6  | 6.3    | 0.2   | 13.1   | 6.2    | 12.7  | 6.7   |
| 233.2 | 196.9 | 243.4 | 338.5  | 63.6  | 311.8  | 237.2  | 35.9  | 55.3  |
| 17.5  | 13.0  | 14.1  | 15.7   | 4.6   | 14.8   | 9.2    | 9.5   | 14.2  |
| 36.4  | 50.3  | 37.5  | 33.4   | 17.2  | 66.8   | 48.5   | 13.7  | 16.1  |
| 20.4  | 18.7  | 27.7  | 29.7   | 9.9   | 9.5    | 2.8    | 1.6   | 0.8   |
| 1.0   | 0.3   | 3.3   | 0.2    | 0.1   | 6.1    | 1.4    | 0.5   | 0.2   |
| 98.8  | 107.2 | 91.1  | 66.4   | 29.2  | 80.6   | 64.6   | 35.7  | 48.7  |
| 3.8   | 4.0   | 4.8   | 8.7    | 4.5   | 7.6    | 13.5   | 0.7   | 2.0   |
| 136.0 | 134.6 | 161.3 | 160.1  | 23.3  | 252.0  | 191.4  | 32.9  | 70.8  |

|       |       |       |       |       |       |       |      |       |
|-------|-------|-------|-------|-------|-------|-------|------|-------|
| 15.2  | 29.4  | 18.6  | 9.5   | 7.9   | 24.5  | 11.9  | 15.4 | 16.2  |
| 18.3  | 11.0  | 7.0   | 6.0   | 4.4   | 0.5   | 4.7   | 1.1  | 9.5   |
| 34.1  | 17.0  | 3.3   | 11.9  | 8.0   | 18.6  | 7.3   | 19.2 | 16.9  |
| 4.7   | 4.1   | 4.4   | 3.1   | 1.9   | 21.1  | 14.9  | 13.1 | 3.1   |
| 2.4   | 3.3   | 2.0   | 2.5   | 1.3   | 8.8   | 13.7  | 2.4  | 2.9   |
| 6.3   | 3.4   | 1.0   | 2.2   | 3.3   | 2.8   | 1.6   | 2.4  | 0.8   |
| 17.5  | 12.0  | 32.2  | 11.0  | 3.2   | 34.0  | 26.6  | 10.5 | 15.8  |
| 9.1   | 11.3  | 7.6   | 6.7   | 4.6   | 8.9   | 9.0   | 13.2 | 7.3   |
| 26.0  | 29.9  | 28.2  | 31.3  | 12.2  | 0.8   | 0.9   | 5.0  | 3.2   |
| 16.7  | 19.6  | 22.8  | 11.1  | 10.0  | 9.2   | 0.7   | 4.4  | 3.9   |
| 9.5   | 1.3   | 0.4   | 3.2   | 1.7   | 0.4   | 4.4   | 1.9  | 3.2   |
| 0.4   | 0.3   | 1.3   | 0.4   | 0.4   | 0.2   | 0.4   | 5.1  | 0.3   |
| 79.9  | 75.0  | 70.6  | 62.3  | 31.7  | 102.4 | 51.1  | 39.3 | 39.1  |
| 394.3 | 279.0 | 277.8 | 225.8 | 106.5 | 432.8 | 289.2 | 89.3 | 162.9 |
| 4.0   | 1.0   | 7.8   | 0.9   | 0.9   | 1.9   | 0.7   | 1.2  | 1.0   |
| 4.9   | 10.2  | 10.9  | 4.7   | 5.3   | 6.8   | 7.0   | 4.5  | 9.2   |
| 15.2  | 32.5  | 23.6  | 20.9  | 2.3   | 25.1  | 21.6  | 28.0 | 16.6  |
| 2.2   | 1.1   | 0.5   | 0.6   | 0.6   | 1.0   | 0.9   | 2.0  | 1.6   |
| 3.1   | 5.1   | 2.4   | 0.5   | 0.7   | 1.7   | 1.0   | 2.2  | 3.6   |
| 44.1  | 40.2  | 59.9  | 47.3  | 28.3  | 9.7   | 13.8  | 17.3 | 2.3   |
| 168.6 | 210.5 | 190.6 | 167.4 | 87.1  | 393.5 | 428.2 | 13.6 | 55.5  |
| 72.9  | 39.8  | 41.6  | 57.0  | 13.5  | 30.3  | 18.2  | 12.3 | 13.6  |
| 23.3  | 21.0  | 27.0  | 13.2  | 9.8   | 14.8  | 2.5   | 28.4 | 3.9   |
| 6.8   | 5.7   | 5.9   | 6.3   | 1.0   | 0.5   | 8.3   | 4.3  | 0.9   |
| 51.7  | 29.7  | 37.3  | 51.0  | 11.9  | 172.7 | 113.8 | 7.2  | 18.7  |
| 7.9   | 4.5   | 3.7   | 2.2   | 4.6   | 8.1   | 1.5   | 22.2 | 23.1  |
| 8.1   | 13.2  | 14.0  | 3.5   | 2.6   | 17.7  | 3.6   | 6.4  | 15.4  |
| 5.0   | 3.0   | 6.2   | 1.2   | 0.2   | 2.0   | 0.5   | 1.2  | 1.6   |
| 2.3   | 1.8   | 0.8   | 1.6   | 0.5   | 2.1   | 0.9   | 0.4  | 1.3   |
| 5.9   | 3.0   | 5.1   | 4.2   | 5.6   | 9.5   | 1.4   | 8.2  | 9.3   |
| 2.2   | 1.0   | 2.5   | 1.2   | 0.9   | 0.7   | 3.1   | 1.9  | 6.8   |
| 4.1   | 6.3   | 8.2   | 5.1   | 3.2   | 4.0   | 1.1   | 0.8  | 0.8   |
| 1.7   | 3.0   | 10.0  | 4.4   | 2.0   | 3.6   | 3.4   | 4.0  | 12.2  |
| 4.8   | 0.6   | 1.9   | 9.5   | 2.5   | 17.5  | 4.4   | 9.4  | 5.4   |
| 5.1   | 2.3   | 0.1   | 1.2   | 1.7   | 0.4   | 0.6   | 4.1  | 1.4   |
| 13.7  | 9.1   | 9.8   | 1.4   | 0.5   | 11.6  | 8.5   | 5.3  | 20.2  |
| 2.2   | 3.9   | 10.0  | 1.3   | 4.6   | 11.6  | 1.2   | 6.6  | 4.0   |
| 1.8   | 7.0   | 14.7  | 12.1  | 6.0   | 11.8  | 2.8   | 9.6  | 3.7   |
| 1.1   | 0.7   | 9.0   | 8.3   | 0.2   | 1.7   | 0.5   | 1.0  | 9.9   |
| 5.6   | 1.2   | 4.1   | 2.7   | 1.2   | 3.6   | 6.4   | 1.3  | 14.7  |
| 38.9  | 31.2  | 27.8  | 14.8  | 8.8   | 23.4  | 17.8  | 2.7  | 12.6  |
| 8.3   | 15.2  | 7.3   | 5.4   | 3.9   | 7.4   | 2.4   | 0.2  | 6.8   |
| 12.4  | 6.5   | 9.1   | 4.3   | 5.5   | 2.9   | 10.8  | 2.2  | 1.7   |
| 2.3   | 3.6   | 4.1   | 2.9   | 1.1   | 7.9   | 4.1   | 3.1  | 4.7   |
| 7.5   | 5.6   | 8.0   | 9.5   | 0.4   | 3.7   | 13.6  | 14.0 | 6.3   |
| 0.2   | 2.3   | 0.9   | 1.2   | 0.7   | 1.1   | 4.4   | 1.2  | 1.5   |
| 8.3   | 4.9   | 17.6  | 1.6   | 0.4   | 6.1   | 5.2   | 4.2  | 4.3   |
| 6.4   | 10.9  | 10.2  | 3.5   | 2.9   | 25.3  | 17.7  | 4.0  | 13.0  |
| 12.3  | 8.5   | 1.7   | 1.9   | 9.1   | 1.5   | 3.1   | 18.3 | 10.3  |
| 13.3  | 16.5  | 12.2  | 0.8   | 3.9   | 11.7  | 11.0  | 2.6  | 2.3   |
| 25.2  | 24.8  | 20.3  | 8.7   | 11.7  | 18.2  | 14.0  | 12.2 | 18.7  |
| 3.1   | 2.8   | 7.1   | 2.6   | 5.0   | 1.2   | 0.7   | 2.6  | 3.4   |
| 0.3   | 4.9   | 0.3   | 0.7   | 2.8   | 1.8   | 1.3   | 6.8  | 0.6   |

|        |        |       |       |       |        |        |       |       |
|--------|--------|-------|-------|-------|--------|--------|-------|-------|
| 0.8    | 0.8    | 0.5   | 0.5   | 0.9   | 9.8    | 0.9    | 5.7   | 2.0   |
| 1.3    | 1.4    | 1.1   | 5.9   | 0.4   | 5.7    | 1.8    | 2.3   | 0.9   |
| 8.8    | 6.8    | 3.4   | 10.9  | 0.8   | 4.7    | 4.3    | 12.3  | 8.2   |
| 0.9    | 0.5    | 0.9   | 1.0   | 4.5   | 2.1    | 3.7    | 1.4   | 0.7   |
| 9.9    | 16.1   | 10.7  | 4.4   | 2.5   | 15.8   | 9.9    | 1.5   | 11.9  |
| 3.2    | 13.2   | 1.5   | 0.7   | 3.8   | 12.6   | 5.6    | 1.2   | 5.3   |
| 2.8    | 3.7    | 10.7  | 6.4   | 2.0   | 2.5    | 4.9    | 4.2   | 9.6   |
| 0.4    | 1.8    | 0.4   | 1.3   | 3.0   | 2.2    | 2.1    | 5.4   | 0.5   |
| 3.4    | 0.1    | 0.1   | 0.1   | 2.1   | 0.8    | 0.3    | 3.9   | 4.1   |
| 36.1   | 30.2   | 44.7  | 25.3  | 19.1  | 56.1   | 32.4   | 33.9  | 31.7  |
| 31.3   | 20.4   | 23.4  | 5.7   | 18.5  | 42.8   | 17.1   | 21.7  | 12.3  |
| 81.2   | 98.2   | 74.4  | 61.9  | 26.7  | 347.4  | 139.2  | 48.9  | 75.4  |
| 38.4   | 56.5   | 28.6  | 24.8  | 15.7  | 60.7   | 18.6   | 9.8   | 16.5  |
| 5.2    | 6.6    | 15.8  | 10.5  | 5.4   | 16.7   | 16.7   | 3.5   | 9.4   |
| 8.7    | 8.7    | 3.4   | 0.8   | 0.4   | 14.0   | 6.8    | 6.3   | 5.2   |
| 1.2    | 5.0    | 1.5   | 1.3   | 3.7   | 4.7    | 0.9    | 14.8  | 6.8   |
| 1.0    | 6.3    | 2.5   | 2.4   | 5.2   | 10.5   | 11.5   | 1.8   | 1.8   |
| 1.7    | 1.4    | 1.3   | 1.2   | 1.1   | 4.3    | 3.7    | 1.6   | 6.0   |
| 3.0    | 8.2    | 0.6   | 2.4   | 2.5   | 1.4    | 1.9    | 1.3   | 5.7   |
| 3.2    | 2.2    | 2.5   | 2.5   | 2.5   | 2.4    | 10.5   | 1.3   | 1.4   |
| 17.8   | 9.6    | 1.0   | 5.9   | 2.3   | 14.6   | 30.1   | 4.1   | 15.3  |
| 0.8    | 0.2    | 2.0   | 0.2   | 1.0   | 1.0    | 0.2    | 0.5   | 1.2   |
| 11.2   | 12.0   | 7.4   | 4.4   | 1.1   | 3.0    | 1.1    | 12.7  | 2.4   |
| 3.6    | 2.5    | 3.1   | 5.2   | 1.4   | 7.8    | 2.2    | 1.1   | 12.5  |
| 17.1   | 12.2   | 12.2  | 6.5   | 6.8   | 17.5   | 13.7   | 10.2  | 19.6  |
| 6.2    | 7.0    | 2.2   | 0.5   | 4.2   | 15.9   | 4.9    | 1.4   | 2.2   |
| 2.6    | 2.8    | 0.5   | 6.2   | 0.1   | 6.2    | 7.1    | 0.3   | 1.0   |
| 408.5  | 282.4  | 373.7 | 376.4 | 205.6 | 862.2  | 719.0  | 141.6 | 101.8 |
| 9.0    | 2.0    | 17.0  | 2.9   | 3.9   | 2.2    | 10.2   | 10.3  | 11.5  |
| 8.0    | 1.1    | 2.7   | 2.1   | 4.4   | 2.7    | 0.6    | 13.3  | 11.4  |
| 1.2    | 1.2    | 3.5   | 0.6   | 1.3   | 4.7    | 1.5    | 4.5   | 12.5  |
| 5.4    | 7.8    | 8.7   | 3.6   | 6.0   | 2.0    | 2.8    | 7.1   | 1.5   |
| 3.6    | 11.0   | 9.3   | 4.5   | 1.8   | 2.1    | 3.9    | 16.3  | 1.5   |
| 15.5   | 0.9    | 2.7   | 13.2  | 1.0   | 4.8    | 3.3    | 3.4   | 1.7   |
| 2.7    | 1.6    | 10.7  | 2.1   | 4.6   | 4.9    | 16.3   | 1.2   | 2.7   |
| 1164.6 | 1045.2 | 912.7 | 724.9 | 383.4 | 1715.0 | 1488.8 | 584.0 | 709.5 |
| 277.5  | 228.1  | 224.4 | 141.7 | 66.0  | 204.7  | 88.0   | 66.6  | 83.3  |
| 8.2    | 5.0    | 9.1   | 7.9   | 5.1   | 2.2    | 1.3    | 14.0  | 3.1   |
| 11.8   | 6.5    | 12.4  | 9.7   | 5.0   | 15.2   | 10.1   | 14.5  | 9.5   |
| 1.3    | 3.5    | 11.2  | 2.2   | 6.4   | 3.5    | 0.8    | 3.7   | 10.5  |
| 13.8   | 10.2   | 5.8   | 4.4   | 0.6   | 1.3    | 11.0   | 8.0   | 20.0  |
| 2.1    | 10.8   | 4.0   | 6.7   | 1.5   | 13.2   | 15.8   | 24.2  | 19.8  |
| 3.9    | 6.7    | 1.7   | 4.3   | 1.2   | 26.4   | 9.6    | 1.0   | 10.7  |
| 12.7   | 4.5    | 6.4   | 6.7   | 1.7   | 3.1    | 3.6    | 4.1   | 9.8   |
| 10.4   | 11.9   | 2.2   | 6.3   | 0.8   | 19.4   | 5.3    | 2.0   | 11.0  |
| 4.9    | 3.7    | 11.0  | 6.7   | 5.3   | 6.3    | 2.9    | 8.1   | 11.6  |
| 5.3    | 5.1    | 6.9   | 10.0  | 0.7   | 3.5    | 6.5    | 5.3   | 4.0   |
| 0.5    | 0.8    | 0.8   | 1.2   | 0.2   | 0.4    | 0.9    | 0.4   | 0.8   |
| 7.2    | 3.1    | 1.2   | 7.8   | 4.4   | 2.9    | 15.1   | 15.0  | 6.9   |
| 1.5    | 0.3    | 0.6   | 1.3   | 2.3   | 0.8    | 0.7    | 2.1   | 5.6   |
| 10.3   | 5.2    | 6.7   | 0.9   | 6.8   | 27.0   | 8.2    | 3.9   | 12.6  |
| 0.8    | 0.3    | 7.8   | 3.8   | 0.4   | 10.6   | 1.0    | 3.9   | 0.4   |
| 22.7   | 10.5   | 9.6   | 7.2   | 1.3   | 18.2   | 3.1    | 4.2   | 5.2   |

|        |        |        |        |       |        |        |       |       |
|--------|--------|--------|--------|-------|--------|--------|-------|-------|
| 2.2    | 1.7    | 3.0    | 10.1   | 0.9   | 2.7    | 4.0    | 1.8   | 2.7   |
| 1.0    | 1.1    | 1.5    | 1.7    | 0.5   | 0.6    | 5.9    | 2.1   | 5.9   |
| 4.0    | 1.9    | 0.1    | 0.1    | 0.1   | 0.3    | 0.3    | 1.2   | 0.3   |
| 65.6   | 74.3   | 57.1   | 53.3   | 18.9  | 73.1   | 35.8   | 14.2  | 20.3  |
| 18.7   | 12.7   | 15.9   | 5.9    | 1.0   | 7.8    | 10.4   | 10.6  | 19.9  |
| 16.8   | 11.2   | 2.0    | 1.5    | 1.3   | 2.4    | 1.4    | 24.5  | 20.3  |
| 0.9    | 0.6    | 0.7    | 1.6    | 1.0   | 7.1    | 1.2    | 1.3   | 5.5   |
| 1.8    | 0.6    | 1.7    | 0.5    | 5.2   | 3.0    | 0.4    | 3.7   | 7.3   |
| 3096.1 | 2783.6 | 2525.6 | 2262.5 | 982.0 | 3082.6 | 2515.8 | 249.8 | 395.6 |
| 7.5    | 9.9    | 4.1    | 5.5    | 5.2   | 7.6    | 5.1    | 9.4   | 1.4   |
| 514.4  | 443.2  | 748.3  | 647.3  | 245.9 | 269.9  | 120.5  | 194.4 | 240.6 |
| 0.7    | 4.3    | 11.4   | 1.0    | 4.2   | 14.1   | 6.9    | 8.9   | 3.2   |
| 3.8    | 1.3    | 5.5    | 1.5    | 5.4   | 17.9   | 26.6   | 1.8   | 1.0   |
| 3.7    | 0.5    | 2.6    | 4.7    | 0.8   | 2.3    | 0.9    | 8.5   | 12.1  |
| 4.8    | 17.5   | 6.3    | 24.4   | 5.2   | 39.1   | 27.9   | 2.7   | 3.9   |
| 7.4    | 5.3    | 10.7   | 3.4    | 0.4   | 6.1    | 0.7    | 2.5   | 9.3   |
| 8.4    | 11.5   | 2.7    | 4.4    | 7.3   | 3.1    | 7.9    | 5.1   | 7.9   |
| 2.4    | 7.7    | 7.8    | 1.3    | 0.8   | 13.7   | 6.8    | 1.6   | 1.4   |
| 0.6    | 2.9    | 0.2    | 0.2    | 1.2   | 3.2    | 0.4    | 1.4   | 0.5   |
| 16.7   | 10.8   | 11.6   | 5.4    | 7.1   | 18.1   | 16.8   | 10.5  | 11.5  |
| 2.6    | 2.1    | 3.4    | 1.8    | 0.6   | 2.3    | 4.6    | 9.1   | 2.1   |
| 1.2    | 4.2    | 2.4    | 1.7    | 0.5   | 4.6    | 1.3    | 5.1   | 13.1  |
| 3.2    | 2.6    | 11.1   | 2.9    | 1.3   | 10.2   | 1.3    | 15.7  | 1.1   |
| 11.5   | 20.1   | 22.0   | 8.3    | 8.3   | 64.3   | 27.7   | 16.1  | 3.7   |
| 8.8    | 3.8    | 7.4    | 6.4    | 4.3   | 8.0    | 2.5    | 16.3  | 10.5  |
| 1.8    | 2.7    | 11.6   | 2.2    | 0.8   | 28.1   | 44.0   | 5.7   | 8.4   |
| 20.3   | 15.3   | 11.1   | 9.1    | 6.7   | 9.5    | 6.9    | 15.0  | 23.5  |
| 14.4   | 1.9    | 15.8   | 16.6   | 6.1   | 1.2    | 0.7    | 7.3   | 8.7   |
| 17.9   | 13.2   | 13.9   | 11.3   | 1.5   | 5.8    | 23.1   | 25.4  | 11.9  |
| 1.9    | 1.7    | 3.4    | 4.1    | 0.4   | 37.2   | 21.1   | 1.7   | 0.8   |
| 9.5    | 17.0   | 6.1    | 1.1    | 0.3   | 20.5   | 11.3   | 13.0  | 12.3  |
| 1.1    | 5.4    | 1.8    | 0.7    | 3.3   | 7.5    | 0.5    | 1.5   | 1.0   |
| 1.4    | 15.0   | 15.6   | 0.8    | 4.0   | 12.8   | 12.0   | 4.3   | 1.2   |
| 31.4   | 21.1   | 2.3    | 9.0    | 11.0  | 13.8   | 9.1    | 5.1   | 14.9  |
| 3.4    | 7.4    | 4.1    | 4.8    | 2.7   | 6.3    | 3.0    | 1.4   | 7.9   |
| 88.4   | 100.2  | 85.1   | 108.5  | 31.5  | 46.5   | 50.5   | 2.2   | 4.4   |
| 2.8    | 7.2    | 6.4    | 1.8    | 0.9   | 35.6   | 21.0   | 1.2   | 2.3   |
| 1.5    | 0.6    | 6.1    | 0.7    | 0.3   | 1.4    | 0.7    | 0.5   | 0.3   |
| 1.5    | 2.0    | 0.9    | 0.3    | 4.1   | 3.3    | 1.6    | 8.8   | 10.5  |
| 3.1    | 4.3    | 1.5    | 3.6    | 2.4   | 361.8  | 326.5  | 9.0   | 0.6   |
| 4.1    | 10.7   | 2.9    | 15.9   | 5.1   | 1075.0 | 1002.3 | 0.7   | 3.0   |
| 6.4    | 4.8    | 4.4    | 11.0   | 2.3   | 16.3   | 13.3   | 4.8   | 15.2  |
| 1169.0 | 1225.6 | 1644.0 | 1686.9 | 554.2 | 1629.2 | 1257.3 | 351.6 | 561.1 |
| 301.2  | 251.0  | 289.9  | 306.3  | 113.7 | 399.4  | 221.3  | 76.4  | 83.0  |
| 52.4   | 59.0   | 68.7   | 37.9   | 10.0  | 218.4  | 101.0  | 6.6   | 9.7   |
| 1.1    | 0.6    | 2.1    | 1.9    | 0.5   | 1.2    | 1.7    | 1.5   | 0.7   |
| 0.9    | 1.9    | 1.5    | 11.7   | 0.3   | 10.5   | 2.2    | 11.0  | 9.3   |
| 22.8   | 16.3   | 9.1    | 12.8   | 5.2   | 9.6    | 16.7   | 4.2   | 9.7   |
| 0.4    | 2.1    | 1.2    | 1.6    | 0.2   | 2.6    | 2.6    | 6.8   | 7.1   |
| 12.2   | 7.1    | 8.4    | 9.5    | 3.4   | 5.2    | 10.7   | 8.3   | 4.8   |
| 0.8    | 1.4    | 0.9    | 0.5    | 0.4   | 0.8    | 1.4    | 0.6   | 0.5   |
| 59.7   | 79.8   | 94.6   | 121.4  | 35.4  | 165.6  | 116.2  | 29.3  | 40.1  |
| 108.2  | 80.0   | 71.1   | 54.6   | 36.3  | 295.4  | 230.8  | 49.4  | 73.1  |

|        |        |        |        |        |        |        |        |        |
|--------|--------|--------|--------|--------|--------|--------|--------|--------|
| 16.2   | 41.6   | 68.6   | 51.8   | 22.6   | 126.0  | 105.7  | 48.6   | 62.2   |
| 18.5   | 14.9   | 14.2   | 19.3   | 3.5    | 27.0   | 32.5   | 7.3    | 14.7   |
| 78.4   | 79.2   | 63.1   | 60.0   | 36.0   | 104.2  | 68.4   | 10.5   | 9.1    |
| 53.5   | 35.9   | 55.9   | 102.8  | 13.5   | 86.5   | 73.3   | 27.5   | 15.2   |
| 211.9  | 257.4  | 238.8  | 222.4  | 125.9  | 709.9  | 615.9  | 85.7   | 123.8  |
| 89.3   | 53.7   | 45.1   | 21.0   | 14.9   | 58.9   | 71.6   | 6.6    | 8.1    |
| 55.1   | 54.8   | 76.3   | 63.8   | 20.8   | 111.2  | 52.3   | 14.2   | 5.9    |
| 1747.3 | 2230.8 | 1805.8 | 1118.6 | 779.3  | 1632.9 | 1143.6 | 324.0  | 335.7  |
| 68.3   | 84.4   | 65.8   | 61.0   | 30.2   | 59.9   | 44.7   | 1.7    | 3.2    |
| 22.2   | 14.7   | 9.8    | 15.8   | 6.3    | 12.8   | 8.1    | 20.4   | 21.7   |
| 46.5   | 47.5   | 32.7   | 19.1   | 11.2   | 370.1  | 260.6  | 25.2   | 47.4   |
| 16.1   | 15.7   | 23.0   | 26.1   | 8.5    | 17.3   | 13.7   | 8.2    | 14.5   |
| 127.8  | 116.2  | 125.7  | 87.6   | 35.4   | 500.0  | 295.0  | 128.5  | 150.7  |
| 847.3  | 788.8  | 731.3  | 495.4  | 235.1  | 2031.2 | 1275.4 | 229.7  | 341.7  |
| 448.8  | 393.5  | 421.9  | 262.7  | 146.3  | 625.0  | 364.4  | 178.5  | 198.1  |
| 23.4   | 50.7   | 11.3   | 39.0   | 7.2    | 4.1    | 4.2    | 5.0    | 2.7    |
| 37.3   | 23.4   | 36.8   | 5.2    | 7.7    | 18.4   | 19.7   | 23.7   | 19.0   |
| 165.1  | 181.9  | 156.3  | 125.9  | 62.2   | 949.6  | 728.5  | 30.1   | 42.2   |
| 80.4   | 53.1   | 77.0   | 57.6   | 12.6   | 82.8   | 46.5   | 81.3   | 115.4  |
| 147.4  | 135.2  | 135.4  | 120.3  | 62.4   | 61.1   | 48.8   | 44.6   | 40.3   |
| 99.7   | 90.1   | 105.7  | 68.4   | 25.9   | 71.6   | 24.7   | 4.2    | 22.4   |
| 74.5   | 94.5   | 81.6   | 78.8   | 43.9   | 2668.3 | 2134.7 | 198.9  | 222.3  |
| 5.8    | 5.5    | 6.5    | 11.0   | 3.1    | 10.7   | 9.7    | 12.9   | 13.6   |
| 16.7   | 8.6    | 16.4   | 10.0   | 0.8    | 6.0    | 2.5    | 7.6    | 8.2    |
| 20.8   | 7.3    | 14.2   | 4.4    | 0.8    | 18.6   | 6.4    | 1.7    | 10.6   |
| 7726.6 | 7018.0 | 6290.3 | 5225.9 | 3582.6 | 8009.2 | 6442.1 | 1543.6 | 2140.5 |
| 17.5   | 24.5   | 15.0   | 18.0   | 3.2    | 26.4   | 13.0   | 12.3   | 19.0   |
| 46.6   | 27.8   | 35.9   | 28.8   | 19.4   | 52.7   | 51.1   | 31.6   | 38.9   |
| 9.4    | 30.9   | 16.2   | 25.3   | 11.6   | 72.7   | 19.3   | 9.3    | 32.2   |
| 201.5  | 132.6  | 150.9  | 103.0  | 71.2   | 695.4  | 498.3  | 584.1  | 739.9  |
| 24.8   | 17.1   | 18.4   | 12.8   | 7.3    | 8.7    | 9.2    | 12.3   | 17.2   |
| 739.0  | 714.0  | 599.8  | 545.6  | 285.8  | 2421.6 | 1503.5 | 712.6  | 955.7  |
| 35.7   | 31.3   | 63.9   | 71.4   | 25.8   | 91.5   | 80.0   | 30.6   | 22.3   |
| 108.7  | 101.3  | 101.2  | 47.4   | 27.5   | 107.9  | 75.1   | 103.8  | 79.4   |
| 15.6   | 25.7   | 17.2   | 10.2   | 9.8    | 69.1   | 48.5   | 0.8    | 7.5    |
| 0.8    | 0.5    | 2.8    | 0.9    | 0.3    | 0.5    | 1.4    | 1.6    | 1.4    |
| 7.7    | 2.4    | 8.0    | 2.2    | 2.2    | 13.7   | 1.8    | 1.7    | 1.9    |
| 0.5    | 0.5    | 0.4    | 9.1    | 2.0    | 0.5    | 0.2    | 0.2    | 1.0    |
| 69.0   | 59.3   | 59.8   | 62.2   | 18.1   | 154.9  | 165.5  | 93.8   | 79.7   |
| 47.1   | 37.4   | 39.6   | 20.7   | 20.0   | 240.2  | 135.4  | 10.1   | 8.7    |
| 172.5  | 141.0  | 132.7  | 124.9  | 54.6   | 77.9   | 54.4   | 19.7   | 17.8   |
| 18.1   | 5.3    | 16.0   | 9.5    | 0.9    | 10.0   | 1.7    | 4.0    | 16.7   |
| 13.5   | 26.0   | 21.2   | 12.1   | 5.9    | 3.6    | 14.6   | 12.6   | 16.2   |
| 0.9    | 0.8    | 4.2    | 4.1    | 0.7    | 0.5    | 9.1    | 1.6    | 10.7   |
| 7.1    | 1.5    | 7.6    | 0.6    | 2.2    | 75.7   | 62.1   | 6.2    | 11.5   |
| 258.3  | 194.1  | 230.8  | 117.9  | 66.9   | 777.1  | 506.8  | 103.0  | 140.8  |
| 3.8    | 2.3    | 20.7   | 2.3    | 6.4    | 19.3   | 8.6    | 3.5    | 2.2    |
| 1.2    | 0.9    | 1.0    | 0.7    | 5.3    | 7.2    | 4.9    | 1.3    | 2.0    |
| 1.5    | 0.6    | 1.2    | 3.2    | 0.4    | 1.8    | 3.2    | 2.6    | 2.2    |
| 19.2   | 8.1    | 2.1    | 8.6    | 7.0    | 3.3    | 2.3    | 4.0    | 11.7   |
| 43.8   | 35.0   | 48.2   | 44.3   | 15.6   | 70.1   | 70.3   | 7.5    | 11.1   |
| 7.0    | 9.0    | 5.9    | 8.9    | 4.0    | 5.1    | 7.8    | 2.0    | 5.0    |
| 382.5  | 324.2  | 333.3  | 250.6  | 139.2  | 129.5  | 111.5  | 30.4   | 49.1   |



|        |        |        |        |       |        |        |       |       |
|--------|--------|--------|--------|-------|--------|--------|-------|-------|
| 15.9   | 18.3   | 18.6   | 16.3   | 7.9   | 4.4    | 9.9    | 29.4  | 15.3  |
| 44.9   | 34.0   | 38.7   | 29.1   | 17.0  | 59.7   | 47.8   | 62.0  | 40.9  |
| 1381.3 | 1479.2 | 1414.8 | 1277.8 | 572.9 | 1638.5 | 1034.2 | 925.8 | 951.8 |
| 3.8    | 7.3    | 11.0   | 17.0   | 6.6   | 15.1   | 14.4   | 2.4   | 3.4   |
| 45.4   | 27.9   | 30.8   | 29.2   | 9.8   | 102.0  | 69.3   | 7.4   | 14.0  |
| 7.0    | 4.5    | 16.7   | 3.0    | 2.8   | 31.9   | 25.6   | 9.0   | 4.9   |
| 4.2    | 7.2    | 20.4   | 17.7   | 9.7   | 1.9    | 1.3    | 0.8   | 5.9   |
| 11.2   | 10.4   | 2.2    | 11.1   | 3.1   | 13.5   | 2.3    | 3.9   | 20.0  |
| 5.3    | 10.8   | 1.5    | 16.3   | 1.1   | 14.3   | 15.5   | 1.5   | 1.6   |
| 0.7    | 2.1    | 0.6    | 0.9    | 0.2   | 4.9    | 0.9    | 5.0   | 2.4   |
| 51.9   | 51.6   | 34.0   | 30.5   | 18.2  | 67.5   | 35.5   | 17.7  | 17.0  |
| 4.4    | 16.6   | 21.9   | 3.6    | 2.3   | 14.9   | 1.3    | 25.1  | 46.8  |
| 15.9   | 20.1   | 12.2   | 13.5   | 9.6   | 29.5   | 19.1   | 18.6  | 40.4  |
| 7.3    | 4.1    | 9.8    | 2.2    | 2.6   | 16.6   | 1.8    | 1.6   | 1.7   |
| 28.3   | 35.5   | 47.5   | 19.3   | 6.1   | 149.1  | 102.4  | 134.3 | 167.5 |
| 30.7   | 5.4    | 2.6    | 20.9   | 6.8   | 13.1   | 3.1    | 18.8  | 22.4  |
| 175.8  | 201.5  | 124.2  | 48.4   | 28.0  | 405.6  | 218.3  | 16.1  | 48.0  |
| 91.9   | 79.7   | 53.8   | 22.5   | 22.3  | 111.7  | 65.6   | 25.5  | 13.4  |
| 118.1  | 15.4   | 26.5   | 17.1   | 4.1   | 71.8   | 50.7   | 39.8  | 50.6  |
| 341.1  | 299.3  | 376.2  | 458.4  | 154.8 | 578.8  | 414.1  | 42.8  | 31.6  |
| 11.2   | 8.4    | 3.9    | 7.2    | 1.1   | 28.4   | 12.2   | 10.3  | 1.3   |
| 96.2   | 91.1   | 121.2  | 56.0   | 72.5  | 36.8   | 12.0   | 4.4   | 5.4   |
| 3.6    | 17.1   | 2.2    | 3.0    | 2.8   | 4.5    | 3.3    | 3.1   | 6.0   |
| 5.9    | 13.0   | 7.8    | 11.2   | 7.0   | 34.5   | 18.6   | 17.6  | 23.7  |
| 127.3  | 126.6  | 111.0  | 124.4  | 39.5  | 535.7  | 544.5  | 20.2  | 40.6  |
| 10.9   | 20.8   | 4.6    | 6.8    | 12.7  | 23.3   | 32.8   | 22.2  | 12.6  |
| 43.6   | 43.6   | 32.7   | 44.5   | 11.8  | 65.2   | 58.0   | 10.9  | 17.0  |
| 1.7    | 5.1    | 5.8    | 7.3    | 1.4   | 11.7   | 1.2    | 15.1  | 1.6   |
| 63.5   | 59.4   | 47.5   | 30.3   | 29.0  | 17.2   | 15.7   | 39.9  | 46.1  |
| 7.2    | 8.9    | 2.3    | 1.7    | 0.7   | 1.7    | 2.0    | 1.9   | 3.4   |
| 12.6   | 4.6    | 1.1    | 0.8    | 6.3   | 4.0    | 0.7    | 15.3  | 6.2   |
| 13.3   | 16.2   | 9.7    | 11.8   | 6.0   | 17.2   | 13.2   | 164.3 | 268.7 |
| 495.0  | 441.2  | 469.6  | 479.9  | 171.9 | 1585.2 | 1264.4 | 50.0  | 77.6  |
| 1058.3 | 741.3  | 806.6  | 776.8  | 334.2 | 690.4  | 508.1  | 79.0  | 72.8  |
| 1.5    | 2.7    | 2.4    | 3.5    | 2.1   | 1.2    | 1.4    | 1.3   | 2.5   |
| 19.6   | 7.9    | 13.8   | 5.7    | 6.9   | 5.2    | 13.4   | 4.8   | 8.2   |
| 6.1    | 14.7   | 3.9    | 2.6    | 3.5   | 421.0  | 280.3  | 288.9 | 449.4 |
| 88.9   | 89.2   | 49.6   | 50.3   | 34.3  | 51.9   | 49.0   | 24.8  | 28.8  |
| 1.1    | 1.0    | 1.6    | 0.4    | 0.5   | 1.0    | 3.3    | 1.1   | 1.4   |
| 184.9  | 192.3  | 246.4  | 145.7  | 52.7  | 385.3  | 397.3  | 24.1  | 26.0  |
| 20.3   | 28.7   | 12.7   | 23.8   | 6.7   | 87.7   | 71.1   | 38.8  | 40.7  |
| 1.2    | 1.0    | 0.7    | 1.7    | 0.6   | 2.3    | 0.7    | 1.1   | 3.5   |
| 11.7   | 11.2   | 8.8    | 8.4    | 0.4   | 1.4    | 18.1   | 9.8   | 14.4  |
| 59.3   | 66.6   | 64.7   | 40.1   | 27.7  | 122.7  | 137.1  | 26.0  | 39.3  |
| 3.6    | 4.0    | 14.0   | 2.1    | 3.0   | 15.4   | 6.0    | 16.4  | 19.1  |
| 6.7    | 4.4    | 0.4    | 2.8    | 0.3   | 12.1   | 2.7    | 13.8  | 9.7   |
| 3.9    | 5.0    | 22.8   | 9.0    | 1.6   | 2.4    | 14.5   | 14.2  | 17.5  |
| 21.8   | 20.2   | 21.0   | 40.9   | 12.1  | 9.3    | 1.0    | 1.5   | 2.3   |
| 41.5   | 35.1   | 52.5   | 34.5   | 13.1  | 60.9   | 45.0   | 29.0  | 28.7  |
| 4.3    | 3.4    | 2.4    | 1.6    | 0.1   | 0.6    | 0.1    | 1.8   | 0.1   |
| 33.6   | 14.8   | 27.1   | 19.5   | 10.8  | 60.6   | 34.2   | 4.8   | 10.1  |
| 227.7  | 203.4  | 204.1  | 189.7  | 102.0 | 447.7  | 263.8  | 52.0  | 58.3  |
| 2.3    | 0.4    | 3.1    | 2.0    | 4.3   | 19.8   | 9.6    | 1.2   | 1.9   |

|        |        |        |        |       |        |        |      |       |
|--------|--------|--------|--------|-------|--------|--------|------|-------|
| 106.2  | 68.6   | 81.7   | 59.0   | 40.2  | 143.5  | 133.9  | 97.1 | 115.3 |
| 17.4   | 19.7   | 16.3   | 14.1   | 7.7   | 200.8  | 142.0  | 45.4 | 46.3  |
| 1.7    | 8.5    | 6.2    | 7.9    | 5.8   | 4.5    | 6.6    | 5.1  | 9.0   |
| 1.4    | 3.4    | 8.7    | 9.6    | 5.9   | 101.7  | 76.8   | 53.3 | 113.8 |
| 66.7   | 52.2   | 56.0   | 50.5   | 10.0  | 73.5   | 57.7   | 22.5 | 37.7  |
| 291.6  | 200.8  | 215.7  | 183.1  | 91.0  | 509.7  | 439.0  | 55.9 | 73.0  |
| 32.6   | 34.0   | 34.0   | 45.5   | 20.5  | 99.2   | 55.6   | 11.3 | 29.2  |
| 31.8   | 43.3   | 61.8   | 29.6   | 12.2  | 68.8   | 34.7   | 2.6  | 11.8  |
| 7.2    | 9.0    | 10.5   | 19.8   | 4.8   | 12.2   | 4.3    | 9.2  | 17.2  |
| 136.4  | 152.3  | 141.8  | 213.0  | 58.5  | 418.0  | 242.3  | 47.3 | 72.0  |
| 11.5   | 3.3    | 3.3    | 1.9    | 2.7   | 13.3   | 4.8    | 2.0  | 10.4  |
| 19.2   | 18.0   | 22.1   | 10.8   | 7.2   | 10.5   | 11.9   | 12.3 | 17.7  |
| 17.2   | 12.4   | 15.1   | 16.2   | 9.4   | 16.4   | 11.5   | 6.6  | 6.0   |
| 2.0    | 0.9    | 6.6    | 0.5    | 0.8   | 1.0    | 0.8    | 1.4  | 1.4   |
| 50.5   | 35.8   | 37.3   | 30.5   | 13.3  | 78.9   | 80.1   | 15.1 | 26.4  |
| 1.4    | 0.3    | 0.6    | 1.1    | 1.5   | 6.3    | 5.3    | 2.3  | 0.1   |
| 256.8  | 263.9  | 226.2  | 132.4  | 74.4  | 1003.9 | 543.4  | 55.8 | 71.9  |
| 1930.1 | 1540.5 | 1694.4 | 1170.4 | 551.9 | 4135.3 | 2855.3 | 43.2 | 26.2  |
| 15.9   | 9.6    | 8.2    | 9.6    | 0.5   | 79.0   | 47.1   | 11.8 | 13.2  |
| 37.1   | 11.0   | 13.4   | 5.6    | 8.6   | 38.2   | 3.7    | 13.6 | 3.0   |
| 1.7    | 1.2    | 2.1    | 6.4    | 0.5   | 4.9    | 7.3    | 15.5 | 13.9  |
| 76.3   | 73.2   | 57.9   | 70.6   | 23.0  | 109.8  | 83.2   | 34.9 | 53.8  |
| 69.4   | 62.5   | 63.2   | 53.4   | 21.1  | 306.3  | 246.9  | 3.6  | 40.8  |
| 7.1    | 14.9   | 6.7    | 28.9   | 7.0   | 4.3    | 14.1   | 39.9 | 32.7  |
| 1.1    | 0.6    | 1.2    | 0.4    | 0.3   | 1.2    | 1.3    | 2.0  | 0.9   |
| 42.6   | 15.5   | 27.8   | 28.6   | 2.5   | 40.3   | 11.5   | 19.6 | 24.6  |
| 33.7   | 17.0   | 16.2   | 10.6   | 2.8   | 11.0   | 22.9   | 6.7  | 4.9   |
| 230.4  | 171.0  | 186.2  | 176.5  | 67.6  | 333.4  | 263.2  | 95.1 | 107.6 |
| 1.5    | 0.7    | 0.7    | 1.3    | 0.9   | 0.9    | 0.6    | 0.7  | 0.8   |
| 13.4   | 2.7    | 12.7   | 1.8    | 5.5   | 24.5   | 23.9   | 1.7  | 1.6   |
| 3.2    | 2.2    | 3.1    | 1.8    | 1.0   | 18.5   | 2.3    | 2.2  | 3.4   |
| 67.9   | 54.6   | 66.9   | 37.1   | 21.2  | 78.4   | 23.3   | 33.4 | 55.9  |
| 1.9    | 3.5    | 3.9    | 2.8    | 4.8   | 4.1    | 2.2    | 1.1  | 1.7   |
| 1.2    | 1.1    | 2.9    | 3.8    | 1.5   | 4.0    | 3.6    | 2.4  | 0.9   |
| 5.7    | 1.2    | 4.0    | 3.5    | 0.3   | 2.2    | 3.2    | 3.2  | 6.8   |
| 29.8   | 18.1   | 27.7   | 10.4   | 3.8   | 32.1   | 24.1   | 28.8 | 10.5  |
| 112.7  | 100.9  | 107.7  | 72.8   | 23.1  | 41.3   | 27.5   | 7.7  | 7.3   |
| 101.6  | 81.5   | 99.8   | 58.0   | 29.6  | 186.1  | 150.8  | 22.8 | 20.4  |
| 54.6   | 46.2   | 43.8   | 18.2   | 23.3  | 27.2   | 18.2   | 16.7 | 16.9  |
| 27.3   | 28.1   | 30.4   | 20.1   | 22.0  | 159.7  | 126.8  | 35.5 | 31.3  |
| 113.3  | 151.8  | 109.0  | 85.5   | 37.4  | 132.0  | 80.5   | 27.3 | 40.2  |
| 10.4   | 4.2    | 10.0   | 5.2    | 11.3  | 18.9   | 6.7    | 15.6 | 9.7   |
| 12.6   | 6.0    | 9.8    | 9.4    | 2.1   | 1.6    | 18.4   | 0.8  | 3.5   |
| 8.0    | 8.4    | 6.8    | 0.7    | 0.4   | 42.7   | 45.0   | 8.2  | 11.6  |
| 8.3    | 3.2    | 1.2    | 3.2    | 4.9   | 6.0    | 0.3    | 1.0  | 6.0   |
| 21.7   | 8.3    | 15.4   | 6.1    | 5.5   | 169.0  | 82.0   | 2.3  | 13.4  |
| 11.2   | 12.4   | 1.8    | 9.8    | 7.0   | 22.2   | 26.5   | 12.7 | 13.7  |
| 0.7    | 0.6    | 1.0    | 0.4    | 0.2   | 1.4    | 0.6    | 0.5  | 0.7   |
| 222.9  | 178.0  | 230.0  | 167.3  | 87.3  | 541.2  | 483.8  | 78.3 | 118.0 |
| 3.6    | 1.7    | 4.8    | 0.7    | 2.1   | 2.7    | 1.7    | 6.4  | 1.5   |
| 1.6    | 5.3    | 8.8    | 2.7    | 0.6   | 6.0    | 4.7    | 14.5 | 11.8  |
| 3.5    | 0.9    | 1.5    | 2.6    | 1.0   | 1.1    | 1.4    | 3.0  | 4.3   |
| 212.8  | 190.2  | 187.5  | 152.6  | 68.9  | 183.4  | 124.5  | 32.0 | 55.0  |

|      |      |      |      |      |       |      |      |      |
|------|------|------|------|------|-------|------|------|------|
| 3.8  | 2.3  | 3.4  | 12.1 | 0.9  | 3.0   | 1.1  | 1.4  | 2.2  |
| 81.8 | 72.8 | 76.7 | 41.5 | 32.7 | 147.2 | 88.5 | 15.0 | 24.5 |
| 19.7 | 7.8  | 15.2 | 16.6 | 6.9  | 4.3   | 1.0  | 27.3 | 5.2  |
| 49.7 | 43.5 | 58.4 | 42.1 | 24.4 | 16.9  | 13.2 | 6.0  | 0.2  |
| 21.9 | 16.1 | 3.1  | 12.8 | 10.1 | 20.7  | 30.3 | 4.9  | 4.4  |
| 10.6 | 5.6  | 6.6  | 20.5 | 2.3  | 92.1  | 5.3  | 5.9  | 3.9  |
| 2.4  | 0.8  | 1.3  | 0.6  | 0.4  | 2.4   | 1.2  | 1.9  | 2.9  |
| 3.7  | 7.5  | 3.0  | 7.2  | 1.3  | 22.3  | 8.6  | 8.3  | 2.3  |
| 15.0 | 14.2 | 16.3 | 16.5 | 4.5  | 0.8   | 1.4  | 8.3  | 8.0  |
| 9.7  | 8.5  | 5.3  | 8.3  | 2.6  | 4.9   | 6.1  | 7.1  | 11.6 |
| 1.2  | 0.8  | 0.8  | 1.1  | 0.7  | 2.1   | 0.5  | 5.4  | 5.1  |
| 15.8 | 10.4 | 14.5 | 2.3  | 1.2  | 18.3  | 1.3  | 23.2 | 11.7 |
| 7.8  | 10.6 | 5.4  | 9.6  | 1.0  | 34.7  | 11.3 | 8.8  | 8.4  |
| 5.3  | 1.9  | 6.5  | 1.4  | 1.3  | 24.8  | 2.3  | 8.0  | 1.6  |
| 1.9  | 2.3  | 2.1  | 1.2  | 1.4  | 1.8   | 3.0  | 1.6  | 5.4  |
| 20.2 | 15.5 | 26.0 | 6.5  | 5.9  | 11.5  | 9.9  | 18.6 | 7.7  |
| 0.9  | 0.4  | 5.1  | 2.0  | 0.4  | 0.6   | 4.1  | 0.5  | 6.8  |
| 18.2 | 8.6  | 20.4 | 22.7 | 7.7  | 4.6   | 10.3 | 10.2 | 24.6 |
| 33.6 | 29.4 | 22.0 | 22.9 | 1.5  | 7.6   | 26.3 | 2.9  | 10.0 |
| 10.7 | 2.1  | 10.0 | 4.5  | 2.0  | 27.6  | 1.0  | 3.8  | 3.5  |
| 32.0 | 28.6 | 32.3 | 32.5 | 18.8 | 15.0  | 24.1 | 26.0 | 9.5  |
| 3.5  | 1.6  | 3.6  | 3.2  | 1.8  | 22.6  | 1.2  | 16.5 | 4.3  |
| 1.1  | 0.6  | 1.6  | 0.7  | 0.6  | 2.4   | 0.6  | 1.0  | 0.5  |
| 7.0  | 2.3  | 6.4  | 9.0  | 2.0  | 2.3   | 1.4  | 4.9  | 0.2  |
| 2.9  | 1.9  | 7.6  | 4.6  | 0.9  | 6.7   | 2.1  | 24.7 | 18.0 |
| 9.9  | 6.1  | 12.2 | 12.8 | 10.4 | 12.9  | 25.7 | 1.5  | 1.1  |
| 3.1  | 1.6  | 8.7  | 7.0  | 3.5  | 1.8   | 1.9  | 1.7  | 2.7  |
| 6.2  | 3.5  | 15.9 | 8.9  | 2.1  | 38.3  | 4.9  | 36.9 | 48.6 |
| 65.9 | 38.9 | 23.7 | 25.9 | 23.5 | 129.9 | 99.0 | 45.7 | 70.9 |
| 2.8  | 1.4  | 3.1  | 5.8  | 1.0  | 2.8   | 1.0  | 8.0  | 2.1  |
| 20.9 | 17.6 | 10.9 | 5.6  | 5.3  | 55.8  | 26.6 | 12.2 | 2.9  |
| 3.9  | 3.6  | 3.7  | 6.4  | 1.1  | 7.3   | 3.1  | 4.7  | 5.2  |
| 9.9  | 0.7  | 3.9  | 7.4  | 0.5  | 52.9  | 23.2 | 2.0  | 0.6  |
| 11.5 | 10.8 | 3.6  | 12.1 | 3.3  | 26.6  | 3.7  | 14.0 | 24.5 |
| 14.8 | 4.8  | 2.7  | 1.6  | 0.7  | 2.1   | 12.8 | 1.1  | 7.8  |
| 2.3  | 1.4  | 2.3  | 1.2  | 0.4  | 2.6   | 1.7  | 10.0 | 2.0  |
| 13.3 | 2.8  | 5.1  | 13.0 | 6.3  | 15.3  | 11.6 | 18.0 | 25.3 |
| 1.0  | 1.2  | 1.6  | 1.2  | 0.8  | 1.1   | 0.7  | 1.4  | 1.0  |
| 5.4  | 1.8  | 2.0  | 1.7  | 1.5  | 2.9   | 1.0  | 0.7  | 1.7  |
| 1.4  | 5.1  | 1.2  | 1.5  | 4.0  | 23.8  | 7.6  | 1.1  | 2.0  |
| 75.3 | 63.4 | 60.2 | 50.1 | 19.5 | 121.9 | 53.7 | 11.8 | 31.4 |
| 12.2 | 10.8 | 26.2 | 15.2 | 2.0  | 24.7  | 2.3  | 18.4 | 8.9  |
| 12.8 | 2.4  | 9.8  | 4.8  | 4.3  | 5.4   | 1.0  | 5.9  | 12.2 |
| 10.9 | 2.9  | 0.6  | 1.1  | 0.7  | 6.0   | 0.4  | 3.1  | 4.2  |
| 42.0 | 40.7 | 45.7 | 36.4 | 15.7 | 24.7  | 25.5 | 8.1  | 15.5 |
| 3.6  | 0.8  | 1.8  | 1.0  | 0.7  | 2.2   | 0.9  | 2.1  | 2.1  |
| 40.1 | 33.9 | 25.8 | 24.3 | 11.9 | 48.8  | 30.9 | 67.2 | 31.3 |
| 63.0 | 75.4 | 42.3 | 28.1 | 15.1 | 61.6  | 48.1 | 12.3 | 11.5 |
| 0.8  | 0.4  | 8.4  | 9.7  | 3.6  | 16.1  | 10.1 | 1.0  | 7.0  |
| 7.1  | 7.2  | 0.4  | 2.9  | 0.9  | 4.7   | 0.3  | 1.4  | 6.2  |
| 8.8  | 2.0  | 2.3  | 0.7  | 0.4  | 3.4   | 0.5  | 8.5  | 0.7  |
| 6.4  | 3.6  | 11.5 | 1.3  | 1.7  | 2.3   | 5.9  | 0.8  | 3.2  |
| 35.1 | 29.3 | 31.8 | 11.0 | 14.1 | 28.8  | 17.3 | 24.8 | 37.1 |

|       |       |       |       |      |       |       |       |       |
|-------|-------|-------|-------|------|-------|-------|-------|-------|
| 7.2   | 19.5  | 14.3  | 13.1  | 1.1  | 29.8  | 1.7   | 20.7  | 3.6   |
| 6.8   | 1.2   | 1.1   | 1.5   | 2.2  | 4.2   | 1.3   | 8.2   | 8.5   |
| 3.7   | 3.0   | 2.0   | 2.9   | 0.9  | 3.2   | 2.6   | 2.4   | 3.3   |
| 3.9   | 1.6   | 2.2   | 0.4   | 0.5  | 1.8   | 1.5   | 1.7   | 8.1   |
| 12.6  | 0.4   | 5.4   | 4.3   | 0.2  | 5.8   | 3.8   | 8.6   | 3.0   |
| 0.4   | 7.4   | 1.2   | 11.4  | 2.5  | 11.3  | 6.3   | 10.0  | 0.8   |
| 4.2   | 3.8   | 6.0   | 0.6   | 2.5  | 4.1   | 5.0   | 7.7   | 4.4   |
| 22.3  | 18.6  | 19.3  | 9.1   | 7.9  | 29.5  | 35.1  | 11.7  | 21.0  |
| 32.3  | 30.7  | 30.0  | 21.4  | 11.9 | 72.0  | 63.2  | 4.8   | 3.5   |
| 4.8   | 7.5   | 6.6   | 3.5   | 4.6  | 9.8   | 3.3   | 9.4   | 9.5   |
| 146.8 | 161.7 | 181.0 | 127.8 | 46.3 | 252.0 | 149.8 | 26.6  | 30.7  |
| 2.4   | 5.8   | 11.2  | 1.0   | 1.9  | 21.4  | 9.6   | 10.9  | 13.7  |
| 0.9   | 0.7   | 0.8   | 0.7   | 0.4  | 1.0   | 1.6   | 1.3   | 3.6   |
| 2.9   | 1.3   | 3.0   | 3.4   | 2.1  | 13.1  | 10.5  | 4.7   | 10.0  |
| 13.7  | 7.3   | 8.7   | 6.1   | 12.0 | 7.3   | 6.8   | 8.0   | 16.2  |
| 3.6   | 6.8   | 12.4  | 3.2   | 2.3  | 5.2   | 13.0  | 26.9  | 6.8   |
| 26.9  | 33.3  | 21.5  | 22.6  | 13.8 | 24.9  | 14.3  | 11.3  | 24.5  |
| 17.5  | 6.8   | 15.6  | 18.8  | 6.1  | 19.6  | 16.2  | 13.2  | 13.5  |
| 1.5   | 0.6   | 0.7   | 1.2   | 0.5  | 2.1   | 1.1   | 1.5   | 2.0   |
| 1.5   | 19.6  | 4.2   | 3.0   | 0.7  | 8.3   | 1.7   | 3.3   | 2.1   |
| 102.5 | 98.8  | 122.1 | 62.4  | 31.9 | 222.6 | 146.5 | 4.0   | 5.1   |
| 3.7   | 7.1   | 8.8   | 3.8   | 1.7  | 1.6   | 2.1   | 4.2   | 11.4  |
| 1.4   | 1.8   | 2.7   | 0.7   | 5.7  | 1.0   | 0.2   | 8.5   | 7.1   |
| 1.4   | 15.4  | 12.5  | 12.5  | 2.2  | 9.9   | 6.6   | 8.7   | 1.5   |
| 2.2   | 1.5   | 1.9   | 2.3   | 0.8  | 1.0   | 2.7   | 2.0   | 3.5   |
| 2.1   | 8.7   | 13.6  | 4.4   | 0.7  | 5.7   | 3.5   | 3.4   | 8.6   |
| 1.3   | 1.0   | 1.2   | 1.1   | 5.2  | 12.9  | 0.3   | 1.5   | 0.5   |
| 4.6   | 1.8   | 2.5   | 0.5   | 4.8  | 7.4   | 3.2   | 10.0  | 7.8   |
| 13.6  | 28.1  | 39.9  | 14.5  | 14.0 | 49.9  | 9.2   | 16.4  | 19.1  |
| 8.8   | 7.7   | 2.3   | 2.0   | 0.2  | 4.1   | 4.4   | 7.9   | 10.3  |
| 0.6   | 0.5   | 1.5   | 4.5   | 0.4  | 17.2  | 16.5  | 4.7   | 1.1   |
| 5.4   | 2.2   | 2.6   | 1.0   | 0.9  | 10.1  | 1.7   | 1.6   | 5.4   |
| 3.3   | 3.5   | 5.3   | 5.9   | 1.4  | 7.0   | 4.9   | 2.4   | 3.6   |
| 1.5   | 4.4   | 2.0   | 2.7   | 1.8  | 2.0   | 3.2   | 3.3   | 4.4   |
| 1.5   | 0.2   | 1.0   | 1.0   | 0.4  | 0.6   | 3.4   | 1.2   | 2.9   |
| 1.9   | 1.7   | 3.3   | 0.8   | 7.1  | 1.4   | 1.7   | 1.6   | 0.8   |
| 15.5  | 2.0   | 2.3   | 3.4   | 1.3  | 2.1   | 13.0  | 14.5  | 7.7   |
| 43.8  | 38.1  | 30.3  | 46.5  | 16.7 | 64.1  | 28.7  | 24.8  | 39.9  |
| 3.6   | 2.8   | 2.0   | 0.5   | 1.3  | 1.9   | 3.1   | 3.7   | 11.6  |
| 47.2  | 69.0  | 65.9  | 41.3  | 19.7 | 51.4  | 22.2  | 22.1  | 19.4  |
| 14.2  | 9.1   | 2.9   | 3.4   | 2.4  | 30.5  | 27.7  | 12.9  | 26.0  |
| 162.5 | 180.2 | 156.8 | 135.2 | 65.2 | 103.5 | 76.3  | 109.8 | 157.9 |
| 125.0 | 145.3 | 129.8 | 182.1 | 70.8 | 188.7 | 106.1 | 69.6  | 88.8  |
| 16.7  | 24.5  | 17.8  | 7.7   | 8.7  | 5.7   | 31.7  | 24.7  | 26.0  |
| 35.4  | 24.6  | 33.8  | 21.6  | 19.9 | 76.3  | 40.1  | 28.1  | 29.3  |
| 117.9 | 126.7 | 151.0 | 141.4 | 54.2 | 235.2 | 152.8 | 25.5  | 34.8  |
| 104.4 | 125.3 | 128.9 | 131.7 | 33.7 | 40.0  | 22.1  | 81.9  | 95.6  |
| 13.7  | 18.9  | 19.0  | 13.8  | 8.5  | 13.2  | 10.4  | 20.8  | 15.7  |
| 196.3 | 217.7 | 202.4 | 177.2 | 88.8 | 698.6 | 488.8 | 44.7  | 54.5  |
| 6.0   | 11.5  | 1.4   | 3.6   | 1.4  | 4.8   | 9.6   | 1.0   | 13.2  |
| 1.7   | 1.3   | 1.1   | 0.7   | 0.4  | 1.6   | 1.3   | 1.9   | 0.7   |
| 2.4   | 1.6   | 2.6   | 1.8   | 1.1  | 3.8   | 1.4   | 1.7   | 2.0   |
| 26.9  | 1.7   | 30.0  | 19.3  | 1.2  | 1.8   | 9.5   | 1.4   | 1.2   |

|        |        |       |       |       |        |        |       |       |
|--------|--------|-------|-------|-------|--------|--------|-------|-------|
| 23.6   | 14.8   | 30.3  | 22.4  | 6.6   | 30.9   | 20.2   | 4.8   | 7.7   |
| 0.9    | 3.6    | 5.4   | 5.2   | 3.1   | 2.1    | 6.8    | 6.9   | 3.1   |
| 70.7   | 62.9   | 75.5  | 62.5  | 25.6  | 268.7  | 206.7  | 27.7  | 40.7  |
| 3.8    | 3.4    | 10.5  | 6.4   | 1.8   | 2.7    | 11.0   | 21.4  | 17.5  |
| 7.5    | 8.0    | 11.8  | 1.2   | 4.3   | 13.0   | 5.1    | 1.2   | 5.8   |
| 184.1  | 180.1  | 165.7 | 202.8 | 57.5  | 170.2  | 101.7  | 101.3 | 158.8 |
| 18.7   | 27.9   | 28.0  | 28.9  | 6.5   | 28.8   | 29.0   | 9.4   | 34.2  |
| 118.4  | 125.0  | 194.4 | 159.4 | 44.8  | 134.3  | 126.8  | 4.9   | 12.1  |
| 5.0    | 10.7   | 10.7  | 11.0  | 6.9   | 5.5    | 4.0    | 17.5  | 8.6   |
| 14.7   | 27.5   | 24.5  | 23.6  | 4.8   | 35.1   | 21.8   | 0.5   | 4.2   |
| 11.3   | 13.2   | 7.9   | 7.8   | 2.4   | 25.5   | 12.5   | 5.3   | 15.0  |
| 8.9    | 6.4    | 4.2   | 8.6   | 4.8   | 12.5   | 5.2    | 6.1   | 5.8   |
| 20.0   | 16.5   | 24.8  | 16.7  | 5.1   | 26.9   | 29.6   | 3.0   | 2.2   |
| 120.8  | 107.0  | 108.9 | 60.9  | 46.3  | 221.0  | 117.4  | 163.4 | 265.1 |
| 152.1  | 127.8  | 190.2 | 140.8 | 71.4  | 481.5  | 354.1  | 72.3  | 88.9  |
| 85.8   | 86.6   | 73.0  | 75.0  | 38.5  | 109.0  | 70.0   | 124.6 | 115.4 |
| 11.9   | 6.2    | 1.9   | 1.8   | 2.9   | 3.5    | 16.0   | 6.7   | 14.7  |
| 8.1    | 11.7   | 3.8   | 4.8   | 2.1   | 78.4   | 68.0   | 25.7  | 37.4  |
| 96.2   | 72.7   | 80.1  | 47.4  | 29.7  | 288.1  | 210.3  | 33.6  | 77.3  |
| 135.4  | 149.8  | 134.4 | 138.2 | 26.4  | 43.1   | 15.3   | 52.7  | 114.5 |
| 11.3   | 2.5    | 15.2  | 3.4   | 2.1   | 52.2   | 54.7   | 9.9   | 3.3   |
| 47.8   | 37.6   | 61.4  | 44.3  | 34.2  | 80.0   | 57.1   | 49.6  | 30.8  |
| 8.5    | 33.6   | 33.7  | 13.7  | 11.0  | 52.1   | 22.5   | 92.6  | 123.9 |
| 30.3   | 18.6   | 23.8  | 9.8   | 6.3   | 24.0   | 32.1   | 32.9  | 21.4  |
| 1.5    | 1.0    | 1.9   | 5.2   | 2.7   | 5.5    | 1.5    | 4.8   | 1.7   |
| 3.3    | 1.2    | 3.2   | 4.0   | 2.4   | 19.9   | 4.2    | 4.2   | 2.8   |
| 138.1  | 137.8  | 158.1 | 113.1 | 72.9  | 295.1  | 247.1  | 58.5  | 82.3  |
| 0.7    | 1.4    | 3.7   | 0.9   | 0.5   | 2.0    | 0.7    | 4.7   | 5.3   |
| 272.5  | 267.3  | 236.4 | 237.4 | 115.9 | 199.0  | 148.1  | 52.6  | 82.3  |
| 202.7  | 165.3  | 173.5 | 204.4 | 53.6  | 279.9  | 177.7  | 106.9 | 158.2 |
| 1.8    | 1.2    | 2.7   | 1.2   | 0.3   | 1.8    | 1.5    | 0.7   | 0.8   |
| 3.3    | 11.3   | 3.2   | 1.7   | 2.2   | 3.7    | 1.8    | 1.5   | 2.8   |
| 0.5    | 4.9    | 5.2   | 3.6   | 0.2   | 0.8    | 0.6    | 0.8   | 0.7   |
| 2.2    | 4.4    | 1.3   | 4.6   | 3.6   | 12.0   | 19.0   | 8.6   | 7.6   |
| 115.9  | 113.6  | 101.8 | 68.6  | 41.6  | 267.6  | 162.2  | 85.8  | 81.6  |
| 18.7   | 1.6    | 8.7   | 5.5   | 2.4   | 13.5   | 13.0   | 12.4  | 17.6  |
| 5.0    | 4.0    | 5.7   | 1.8   | 1.0   | 2.3    | 1.4    | 3.0   | 6.1   |
| 8.2    | 9.2    | 2.0   | 7.0   | 2.8   | 14.9   | 4.1    | 8.8   | 14.1  |
| 6.0    | 9.9    | 2.4   | 5.8   | 8.7   | 3.0    | 1.8    | 1.6   | 9.6   |
| 60.1   | 40.9   | 41.3  | 15.2  | 2.7   | 15.1   | 12.0   | 23.4  | 30.4  |
| 23.2   | 1.2    | 14.7  | 1.8   | 0.9   | 18.7   | 16.8   | 6.5   | 33.4  |
| 34.3   | 8.9    | 11.4  | 17.1  | 2.7   | 9.6    | 18.5   | 9.2   | 8.8   |
| 13.5   | 4.6    | 2.8   | 1.8   | 0.6   | 1.7    | 0.8    | 8.4   | 3.8   |
| 2.0    | 3.4    | 4.0   | 11.8  | 0.7   | 3.6    | 1.9    | 1.6   | 2.2   |
| 64.2   | 66.7   | 59.4  | 38.2  | 17.3  | 162.9  | 132.0  | 12.1  | 15.5  |
| 22.7   | 12.3   | 3.1   | 8.7   | 0.6   | 5.7    | 11.0   | 29.8  | 26.1  |
| 191.1  | 136.4  | 190.7 | 114.2 | 55.5  | 491.2  | 311.8  | 341.0 | 403.1 |
| 17.0   | 24.1   | 20.8  | 23.5  | 10.0  | 29.6   | 24.3   | 14.9  | 2.9   |
| 111.1  | 112.5  | 89.7  | 86.6  | 52.1  | 71.2   | 55.9   | 132.0 | 206.1 |
| 10.0   | 7.9    | 5.7   | 5.2   | 12.5  | 10.1   | 6.7    | 53.1  | 33.0  |
| 36.7   | 23.0   | 33.4  | 35.5  | 24.8  | 24.4   | 10.1   | 5.9   | 6.2   |
| 1.8    | 1.7    | 2.4   | 1.4   | 0.9   | 1.5    | 6.6    | 0.7   | 7.2   |
| 1376.7 | 1195.4 | 963.0 | 666.6 | 340.4 | 2149.5 | 1537.3 | 481.5 | 654.0 |

|        |        |       |       |       |        |        |       |       |
|--------|--------|-------|-------|-------|--------|--------|-------|-------|
| 0.8    | 0.7    | 0.8   | 0.7   | 0.3   | 1.0    | 0.6    | 0.7   | 0.9   |
| 722.3  | 624.1  | 625.6 | 528.0 | 238.3 | 1172.3 | 914.3  | 135.7 | 158.7 |
| 61.4   | 60.1   | 39.0  | 43.6  | 16.7  | 61.3   | 39.1   | 40.9  | 45.9  |
| 122.9  | 115.3  | 114.6 | 151.8 | 32.7  | 183.4  | 114.9  | 3.4   | 5.6   |
| 177.0  | 200.6  | 173.4 | 120.3 | 53.6  | 165.1  | 162.0  | 16.7  | 21.4  |
| 2.5    | 3.0    | 3.2   | 1.2   | 0.7   | 1.7    | 1.2    | 2.0   | 2.5   |
| 129.4  | 99.7   | 189.4 | 239.1 | 56.9  | 142.9  | 80.9   | 63.6  | 75.3  |
| 37.5   | 72.2   | 55.6  | 55.9  | 20.7  | 73.8   | 42.0   | 32.2  | 28.1  |
| 17.8   | 19.1   | 12.8  | 13.7  | 1.7   | 28.7   | 20.2   | 18.1  | 16.5  |
| 1061.6 | 1054.0 | 894.2 | 764.0 | 342.0 | 1744.9 | 1617.3 | 211.7 | 195.2 |
| 105.6  | 98.4   | 89.5  | 59.0  | 24.0  | 100.4  | 69.2   | 28.5  | 27.8  |
| 218.5  | 174.2  | 218.8 | 182.9 | 72.4  | 359.1  | 242.2  | 88.3  | 101.8 |
| 17.3   | 10.3   | 3.2   | 8.8   | 7.4   | 4.2    | 2.8    | 9.2   | 13.3  |
| 455.4  | 341.8  | 374.2 | 219.6 | 155.8 | 475.4  | 228.3  | 297.9 | 317.8 |
| 245.4  | 252.8  | 251.2 | 202.1 | 63.7  | 229.6  | 102.5  | 24.3  | 22.4  |
| 558.3  | 453.6  | 463.4 | 487.8 | 191.8 | 1770.1 | 1496.8 | 176.5 | 110.5 |
| 70.4   | 50.0   | 104.1 | 55.9  | 31.7  | 191.6  | 122.4  | 64.0  | 71.5  |
| 12.4   | 3.0    | 11.1  | 1.1   | 5.4   | 7.3    | 5.9    | 11.2  | 9.4   |
| 10.7   | 1.1    | 0.8   | 1.3   | 0.7   | 11.3   | 6.8    | 5.6   | 4.3   |
| 13.8   | 18.6   | 22.3  | 8.7   | 7.2   | 32.4   | 18.7   | 65.9  | 92.9  |
| 402.5  | 434.0  | 339.2 | 239.1 | 134.6 | 408.4  | 291.8  | 78.2  | 108.6 |
| 11.0   | 9.5    | 7.7   | 8.1   | 1.1   | 7.8    | 8.7    | 0.3   | 2.0   |
| 26.6   | 8.5    | 13.0  | 10.6  | 3.7   | 28.8   | 20.1   | 16.2  | 15.8  |
| 112.0  | 98.2   | 98.7  | 89.5  | 38.7  | 366.1  | 172.6  | 36.9  | 41.9  |
| 1.0    | 2.0    | 2.8   | 1.2   | 0.8   | 10.9   | 1.2    | 1.5   | 1.6   |
| 25.6   | 15.8   | 22.7  | 27.4  | 6.3   | 53.6   | 21.3   | 17.6  | 19.3  |
| 15.7   | 5.5    | 17.3  | 19.8  | 2.1   | 11.2   | 3.5    | 18.1  | 22.7  |
| 3.1    | 2.1    | 4.0   | 2.3   | 1.3   | 4.9    | 3.4    | 1.4   | 2.8   |
| 4.4    | 3.1    | 2.7   | 1.5   | 0.7   | 2.1    | 1.4    | 1.8   | 2.0   |
| 1.1    | 3.1    | 1.6   | 1.4   | 0.9   | 1.2    | 2.0    | 1.5   | 10.7  |
| 9.7    | 8.4    | 5.4   | 9.1   | 2.1   | 17.5   | 6.5    | 8.0   | 2.6   |
| 1.4    | 0.9    | 1.2   | 0.6   | 0.4   | 0.9    | 0.9    | 0.7   | 0.7   |
| 12.3   | 2.3    | 3.7   | 3.5   | 4.1   | 2.8    | 2.5    | 6.7   | 2.8   |
| 3.3    | 2.2    | 0.8   | 0.5   | 1.3   | 9.7    | 3.2    | 19.5  | 15.1  |
| 1.4    | 0.3    | 0.8   | 1.8   | 0.7   | 1.2    | 2.1    | 0.8   | 1.1   |
| 9.3    | 5.8    | 3.3   | 2.3   | 1.8   | 6.0    | 0.9    | 1.1   | 4.7   |
| 114.2  | 116.6  | 137.6 | 36.0  | 37.0  | 79.9   | 32.7   | 12.9  | 14.8  |
| 25.5   | 25.0   | 26.0  | 8.1   | 1.5   | 483.7  | 224.5  | 2.8   | 1.1   |
| 8.3    | 3.2    | 4.3   | 20.2  | 1.5   | 6.5    | 2.9    | 3.0   | 3.7   |
| 19.7   | 2.6    | 17.1  | 11.1  | 8.1   | 74.9   | 40.1   | 14.3  | 6.7   |
| 16.4   | 14.3   | 26.5  | 15.8  | 8.7   | 6.5    | 15.2   | 5.2   | 15.3  |
| 2.2    | 2.6    | 3.6   | 3.1   | 1.5   | 4.0    | 4.7    | 7.3   | 6.1   |
| 9.5    | 0.5    | 13.4  | 8.6   | 5.1   | 7.9    | 7.6    | 6.1   | 11.7  |
| 25.2   | 18.2   | 27.6  | 14.9  | 7.6   | 31.0   | 28.6   | 18.0  | 29.8  |
| 2.0    | 1.1    | 3.7   | 2.4   | 2.8   | 2.6    | 2.2    | 3.2   | 1.9   |
| 17.9   | 6.5    | 3.8   | 2.4   | 3.2   | 5.3    | 2.8    | 15.0  | 4.6   |
| 18.3   | 16.6   | 17.3  | 7.5   | 7.1   | 19.7   | 2.2    | 20.9  | 26.1  |
| 4.5    | 3.0    | 2.6   | 7.2   | 1.2   | 2.9    | 1.1    | 2.2   | 4.4   |
| 3.9    | 4.0    | 7.5   | 2.6   | 1.2   | 10.9   | 25.3   | 6.4   | 14.5  |
| 9.2    | 13.9   | 9.7   | 4.1   | 6.2   | 16.7   | 2.1    | 15.8  | 10.4  |
| 0.7    | 1.7    | 1.1   | 2.2   | 0.2   | 9.1    | 0.3    | 9.1   | 12.0  |
| 5.6    | 0.9    | 1.3   | 0.8   | 6.9   | 5.9    | 0.3    | 10.0  | 7.0   |
| 28.7   | 21.6   | 53.6  | 25.4  | 11.2  | 36.2   | 37.9   | 33.4  | 23.2  |

|       |       |       |       |      |       |       |      |      |
|-------|-------|-------|-------|------|-------|-------|------|------|
| 7.0   | 6.5   | 5.9   | 9.2   | 3.2  | 11.2  | 4.5   | 6.7  | 11.5 |
| 20.4  | 28.1  | 29.6  | 31.3  | 11.3 | 27.1  | 10.6  | 20.6 | 25.4 |
| 7.2   | 1.3   | 13.8  | 7.9   | 3.4  | 27.1  | 2.7   | 4.5  | 7.8  |
| 13.1  | 0.8   | 1.0   | 7.6   | 0.4  | 1.3   | 1.4   | 0.5  | 5.4  |
| 200.1 | 180.8 | 227.6 | 223.3 | 73.9 | 436.7 | 416.5 | 58.1 | 78.2 |
| 2.0   | 1.4   | 1.9   | 0.6   | 0.5  | 2.9   | 1.0   | 1.6  | 2.4  |
| 1.5   | 2.2   | 3.2   | 0.9   | 2.9  | 1.8   | 1.9   | 1.8  | 2.3  |
| 22.1  | 16.0  | 19.5  | 19.2  | 0.6  | 2.7   | 16.5  | 11.4 | 14.1 |
| 8.8   | 14.4  | 9.3   | 17.0  | 10.5 | 17.2  | 2.2   | 5.6  | 1.7  |
| 13.7  | 6.1   | 9.8   | 11.7  | 3.3  | 10.3  | 17.0  | 4.0  | 12.7 |
| 5.1   | 5.1   | 3.6   | 2.9   | 1.7  | 6.8   | 4.5   | 2.6  | 11.5 |
| 16.4  | 7.9   | 22.9  | 13.8  | 8.1  | 6.5   | 3.3   | 12.9 | 8.7  |
| 5.7   | 2.2   | 4.2   | 1.8   | 2.8  | 13.9  | 1.2   | 9.6  | 5.8  |
| 2.7   | 3.3   | 30.1  | 6.2   | 8.4  | 23.3  | 4.8   | 9.2  | 4.3  |
| 7.6   | 5.1   | 19.5  | 5.7   | 2.7  | 15.4  | 11.2  | 6.4  | 11.7 |
| 11.6  | 4.4   | 1.7   | 0.2   | 2.2  | 1.6   | 0.3   | 8.5  | 0.8  |
| 28.1  | 15.1  | 33.5  | 26.5  | 10.0 | 7.0   | 19.0  | 12.5 | 14.4 |
| 17.6  | 7.2   | 4.0   | 1.8   | 1.2  | 8.9   | 2.9   | 27.0 | 19.6 |
| 10.8  | 1.9   | 18.0  | 2.3   | 9.3  | 8.6   | 1.0   | 4.1  | 6.5  |
| 81.0  | 62.4  | 78.6  | 65.9  | 25.0 | 51.4  | 30.3  | 50.9 | 85.7 |
| 6.9   | 7.9   | 5.3   | 3.1   | 0.7  | 1.0   | 1.0   | 2.2  | 1.0  |
| 10.5  | 1.8   | 25.7  | 13.0  | 6.5  | 15.0  | 3.8   | 8.3  | 36.8 |
| 15.1  | 9.1   | 7.8   | 7.0   | 5.7  | 20.6  | 6.6   | 14.5 | 10.4 |
| 3.3   | 0.6   | 0.6   | 0.8   | 1.0  | 0.9   | 0.8   | 7.8  | 3.3  |
| 11.9  | 1.9   | 2.1   | 1.4   | 5.4  | 2.7   | 9.8   | 23.0 | 3.5  |
| 14.4  | 9.1   | 19.2  | 7.6   | 7.7  | 15.4  | 11.4  | 13.6 | 14.5 |
| 3.8   | 3.0   | 1.8   | 3.5   | 1.5  | 4.5   | 1.5   | 3.1  | 5.3  |
| 12.5  | 14.5  | 17.8  | 8.1   | 1.4  | 25.6  | 13.8  | 21.4 | 4.4  |
| 61.6  | 78.0  | 85.2  | 69.5  | 22.1 | 109.3 | 37.5  | 36.0 | 61.5 |
| 6.3   | 12.3  | 6.1   | 5.8   | 6.5  | 1.8   | 4.7   | 0.5  | 4.8  |
| 7.6   | 0.5   | 2.9   | 0.8   | 0.9  | 9.8   | 1.1   | 1.8  | 1.9  |
| 4.6   | 3.7   | 6.4   | 1.3   | 7.4  | 0.7   | 0.5   | 2.9  | 7.6  |
| 18.0  | 4.3   | 9.8   | 3.4   | 4.1  | 15.7  | 7.7   | 7.5  | 11.1 |
| 2.3   | 2.0   | 12.9  | 6.7   | 1.6  | 1.4   | 2.0   | 0.6  | 2.4  |
| 2.4   | 3.6   | 3.5   | 1.6   | 3.3  | 8.7   | 5.7   | 5.4  | 0.6  |
| 5.5   | 5.9   | 4.8   | 5.2   | 1.8  | 9.2   | 8.0   | 11.9 | 8.7  |
| 1.5   | 1.6   | 1.2   | 1.0   | 0.2  | 10.9  | 0.6   | 1.9  | 8.9  |
| 18.5  | 7.3   | 27.6  | 13.0  | 4.3  | 13.7  | 17.6  | 4.7  | 16.3 |
| 1.5   | 0.6   | 6.9   | 1.1   | 3.7  | 6.0   | 1.6   | 17.4 | 24.4 |
| 3.3   | 4.7   | 8.3   | 2.3   | 3.4  | 4.7   | 3.8   | 8.7  | 7.1  |
| 28.8  | 11.0  | 19.1  | 12.8  | 9.7  | 4.8   | 5.4   | 14.0 | 18.1 |
| 2.8   | 1.0   | 1.3   | 0.4   | 0.6  | 2.8   | 0.4   | 0.5  | 1.2  |
| 4.9   | 5.6   | 6.2   | 3.4   | 4.7  | 9.0   | 1.4   | 7.6  | 3.7  |
| 14.3  | 21.5  | 24.6  | 5.3   | 8.4  | 22.4  | 9.5   | 5.1  | 6.7  |
| 2.9   | 4.6   | 2.4   | 1.3   | 0.5  | 11.5  | 1.9   | 5.1  | 3.9  |
| 16.8  | 0.3   | 14.8  | 0.4   | 5.0  | 4.5   | 10.3  | 11.9 | 5.6  |
| 0.8   | 1.2   | 7.9   | 1.6   | 3.5  | 0.8   | 1.0   | 0.7  | 0.7  |
| 6.6   | 1.3   | 1.1   | 1.7   | 0.8  | 10.1  | 2.8   | 2.3  | 8.1  |
| 35.4  | 20.5  | 27.6  | 20.6  | 9.1  | 33.2  | 17.0  | 26.2 | 3.5  |
| 16.9  | 3.2   | 15.4  | 12.5  | 4.0  | 17.5  | 4.2   | 14.4 | 3.5  |
| 14.2  | 11.4  | 10.6  | 14.1  | 1.9  | 11.7  | 2.5   | 2.7  | 2.4  |
| 1.9   | 8.4   | 3.7   | 3.9   | 3.6  | 6.6   | 1.4   | 2.7  | 0.6  |
| 3.4   | 14.3  | 1.9   | 1.4   | 0.7  | 2.2   | 8.6   | 1.3  | 8.8  |

|       |       |       |       |       |        |        |      |       |
|-------|-------|-------|-------|-------|--------|--------|------|-------|
| 1.2   | 1.1   | 1.6   | 1.7   | 0.3   | 2.1    | 1.5    | 4.1  | 6.8   |
| 1.1   | 0.8   | 2.0   | 0.7   | 0.8   | 1.1    | 0.8    | 1.2  | 1.6   |
| 2.8   | 1.1   | 1.6   | 1.3   | 1.0   | 2.4    | 1.6    | 1.2  | 0.8   |
| 7.1   | 1.8   | 1.1   | 6.6   | 2.1   | 1.7    | 2.6    | 1.2  | 1.4   |
| 1.3   | 12.8  | 8.4   | 1.1   | 0.4   | 2.2    | 6.0    | 5.4  | 2.7   |
| 2.6   | 1.1   | 5.6   | 1.1   | 0.9   | 2.0    | 3.6    | 2.3  | 8.7   |
| 1.1   | 1.8   | 1.1   | 3.3   | 0.3   | 17.1   | 7.7    | 1.1  | 2.8   |
| 20.3  | 9.2   | 11.4  | 8.7   | 2.0   | 11.7   | 5.0    | 9.1  | 9.1   |
| 5.6   | 3.7   | 1.6   | 1.7   | 0.5   | 8.2    | 2.5    | 1.4  | 1.8   |
| 2.5   | 1.7   | 1.0   | 1.8   | 1.3   | 8.3    | 2.0    | 0.9  | 1.9   |
| 3.2   | 13.4  | 0.9   | 5.1   | 0.9   | 13.0   | 11.7   | 7.9  | 4.5   |
| 7.5   | 10.0  | 19.6  | 12.4  | 1.1   | 2.6    | 4.2    | 2.7  | 7.1   |
| 9.7   | 15.9  | 22.5  | 8.0   | 9.6   | 15.2   | 10.8   | 10.6 | 12.1  |
| 22.5  | 3.4   | 14.1  | 4.2   | 6.6   | 30.7   | 3.5    | 3.5  | 5.1   |
| 12.7  | 3.6   | 1.5   | 2.1   | 0.9   | 13.3   | 9.1    | 0.7  | 8.8   |
| 1.8   | 8.4   | 1.3   | 2.2   | 1.0   | 11.5   | 5.5    | 1.4  | 6.0   |
| 4.6   | 3.7   | 7.9   | 3.1   | 4.3   | 5.1    | 3.5    | 5.4  | 9.7   |
| 9.2   | 2.4   | 0.6   | 4.9   | 1.2   | 9.4    | 6.1    | 7.5  | 3.1   |
| 5.1   | 7.5   | 16.7  | 2.7   | 6.3   | 20.6   | 15.1   | 29.0 | 21.0  |
| 12.5  | 15.6  | 9.0   | 22.3  | 3.1   | 58.0   | 8.2    | 7.0  | 5.6   |
| 2.0   | 5.7   | 2.5   | 3.8   | 2.5   | 2.5    | 5.9    | 1.0  | 2.7   |
| 794.8 | 772.0 | 821.6 | 622.6 | 199.1 | 1515.5 | 1010.9 | 96.3 | 195.5 |
| 1.8   | 2.4   | 5.2   | 10.1  | 5.9   | 7.9    | 10.6   | 3.7  | 16.4  |
| 1.6   | 1.5   | 2.5   | 1.2   | 0.9   | 4.4    | 3.1    | 1.3  | 0.7   |
| 3.7   | 1.2   | 2.3   | 3.1   | 1.3   | 9.0    | 6.7    | 4.4  | 1.6   |
| 4.4   | 2.4   | 3.9   | 5.4   | 0.4   | 3.7    | 1.6    | 4.9  | 7.5   |
| 8.3   | 8.3   | 3.9   | 6.2   | 3.4   | 10.8   | 13.1   | 12.3 | 7.4   |
| 12.4  | 14.2  | 17.4  | 17.4  | 7.7   | 14.5   | 11.9   | 11.3 | 4.6   |
| 3.1   | 1.9   | 2.3   | 4.4   | 0.8   | 1.2    | 0.9    | 2.8  | 2.3   |
| 17.9  | 2.6   | 2.0   | 1.9   | 0.8   | 1.5    | 1.6    | 13.3 | 1.7   |
| 31.1  | 14.0  | 24.7  | 17.4  | 1.2   | 6.1    | 15.2   | 6.9  | 4.0   |
| 18.9  | 13.4  | 7.2   | 9.0   | 6.3   | 4.7    | 7.2    | 10.6 | 13.9  |
| 16.0  | 8.7   | 3.6   | 10.8  | 0.7   | 4.9    | 6.6    | 8.1  | 10.1  |
| 1.8   | 0.5   | 8.9   | 1.4   | 0.3   | 1.3    | 0.6    | 2.4  | 0.5   |
| 1.1   | 1.2   | 13.5  | 0.5   | 0.5   | 6.6    | 6.7    | 7.8  | 6.2   |
| 0.9   | 5.2   | 1.9   | 0.8   | 0.8   | 16.9   | 0.9    | 8.3  | 1.1   |
| 1.3   | 8.0   | 2.9   | 2.0   | 1.2   | 6.9    | 1.4    | 3.1  | 3.5   |
| 8.1   | 7.4   | 6.5   | 1.6   | 2.8   | 10.5   | 9.1    | 3.7  | 1.6   |
| 7.9   | 2.2   | 1.9   | 0.5   | 0.5   | 2.9    | 1.6    | 1.9  | 0.7   |
| 3.2   | 3.6   | 16.0  | 2.0   | 1.1   | 9.5    | 11.5   | 3.2  | 12.2  |
| 1.6   | 5.5   | 1.2   | 0.5   | 0.6   | 0.6    | 1.1    | 1.3  | 1.3   |
| 2.8   | 2.0   | 27.5  | 1.2   | 0.9   | 18.4   | 2.9    | 3.7  | 11.8  |
| 24.3  | 18.8  | 6.1   | 12.5  | 15.1  | 24.7   | 15.3   | 22.8 | 32.9  |
| 4.8   | 1.0   | 1.7   | 0.6   | 0.5   | 7.8    | 0.9    | 0.5  | 0.8   |
| 22.2  | 2.3   | 6.7   | 6.0   | 0.7   | 14.7   | 14.5   | 25.2 | 18.2  |
| 17.0  | 10.8  | 2.4   | 2.4   | 4.8   | 20.4   | 7.4    | 7.9  | 17.1  |
| 4.2   | 3.5   | 1.4   | 4.1   | 8.5   | 14.8   | 3.1    | 0.5  | 1.6   |
| 34.5  | 25.7  | 21.3  | 22.0  | 12.5  | 8.4    | 19.4   | 28.1 | 13.3  |
| 12.2  | 1.5   | 3.2   | 2.7   | 0.9   | 10.7   | 5.8    | 3.0  | 15.6  |
| 16.1  | 16.6  | 22.4  | 10.9  | 4.6   | 14.7   | 11.3   | 14.2 | 23.7  |
| 1.7   | 2.6   | 3.5   | 3.7   | 1.2   | 22.6   | 22.8   | 1.5  | 1.1   |
| 0.8   | 0.6   | 0.7   | 0.4   | 0.2   | 1.0    | 0.5    | 0.7  | 0.4   |
| 7.5   | 9.4   | 11.8  | 12.1  | 9.4   | 9.9    | 9.8    | 6.0  | 14.6  |



|        |        |        |        |       |        |        |       |       |
|--------|--------|--------|--------|-------|--------|--------|-------|-------|
| 7.8    | 7.8    | 19.7   | 0.9    | 3.1   | 3.9    | 9.4    | 5.4   | 1.0   |
| 1.1    | 9.1    | 1.1    | 1.6    | 0.7   | 8.4    | 0.8    | 2.1   | 14.0  |
| 23.8   | 13.3   | 16.7   | 11.2   | 12.3  | 27.5   | 12.0   | 3.9   | 8.3   |
| 6.4    | 2.1    | 2.4    | 0.6    | 2.7   | 13.5   | 4.8    | 9.8   | 3.4   |
| 1.1    | 0.8    | 0.9    | 0.6    | 1.3   | 1.0    | 0.5    | 0.4   | 0.5   |
| 37.3   | 29.9   | 25.9   | 45.8   | 18.1  | 38.6   | 15.0   | 38.0  | 30.8  |
| 302.0  | 172.0  | 174.9  | 244.3  | 112.0 | 445.2  | 316.7  | 131.3 | 175.3 |
| 0.2    | 0.8    | 0.6    | 0.2    | 0.2   | 8.8    | 4.2    | 0.8   | 5.4   |
| 34.7   | 16.9   | 20.7   | 11.4   | 4.7   | 28.0   | 20.2   | 8.0   | 19.7  |
| 18.9   | 14.9   | 13.4   | 6.4    | 1.4   | 5.6    | 11.6   | 2.1   | 14.0  |
| 207.9  | 177.3  | 171.1  | 204.2  | 60.2  | 379.8  | 253.2  | 78.7  | 97.5  |
| 1.1    | 1.2    | 2.4    | 3.2    | 0.3   | 2.6    | 1.3    | 2.4   | 2.1   |
| 249.5  | 273.7  | 323.6  | 297.1  | 107.4 | 278.4  | 176.6  | 21.9  | 18.0  |
| 12.3   | 18.6   | 26.3   | 18.9   | 1.7   | 35.3   | 20.0   | 26.4  | 24.1  |
| 143.5  | 118.9  | 141.9  | 106.4  | 27.9  | 149.1  | 55.1   | 12.3  | 46.1  |
| 125.7  | 125.6  | 111.1  | 75.4   | 33.3  | 269.6  | 149.5  | 57.2  | 97.1  |
| 5.3    | 2.9    | 16.7   | 1.8    | 0.9   | 17.3   | 7.4    | 1.1   | 3.9   |
| 66.5   | 53.4   | 68.0   | 80.5   | 22.6  | 193.9  | 125.0  | 63.3  | 85.3  |
| 2.3    | 0.8    | 1.8    | 0.4    | 2.0   | 2.0    | 0.8    | 2.3   | 6.1   |
| 126.0  | 99.0   | 98.3   | 75.7   | 32.0  | 136.7  | 74.0   | 54.2  | 66.3  |
| 2.9    | 7.4    | 13.0   | 2.0    | 3.6   | 3.9    | 2.8    | 20.5  | 2.2   |
| 2243.8 | 2054.2 | 1868.7 | 1555.1 | 783.3 | 5272.2 | 6112.8 | 524.1 | 726.0 |
| 91.8   | 61.0   | 73.0   | 48.8   | 26.3  | 232.8  | 173.3  | 52.8  | 48.2  |
| 705.1  | 638.8  | 456.6  | 281.5  | 221.8 | 258.2  | 257.4  | 78.0  | 151.2 |
| 763.5  | 626.6  | 680.6  | 670.9  | 281.9 | 1124.6 | 862.5  | 87.1  | 88.4  |
| 3.2    | 0.4    | 0.5    | 0.8    | 1.3   | 1.7    | 0.4    | 0.4   | 0.3   |
| 14.7   | 0.9    | 16.6   | 1.3    | 5.1   | 7.0    | 7.4    | 13.3  | 7.4   |
| 31.8   | 17.5   | 24.1   | 3.8    | 10.6  | 8.0    | 5.2    | 2.5   | 13.3  |
| 1.2    | 0.3    | 0.6    | 0.4    | 0.2   | 0.5    | 0.7    | 1.0   | 0.4   |
| 8.1    | 0.5    | 1.4    | 1.5    | 3.7   | 2.9    | 11.8   | 9.3   | 1.6   |
| 29.9   | 17.7   | 22.6   | 16.7   | 7.2   | 37.2   | 16.9   | 18.2  | 15.3  |
| 13.6   | 5.2    | 13.2   | 2.3    | 1.8   | 4.5    | 1.1    | 19.4  | 14.0  |
| 1.8    | 1.0    | 0.7    | 9.2    | 2.7   | 1.2    | 0.5    | 3.9   | 2.1   |
| 12.3   | 2.5    | 3.4    | 15.5   | 0.4   | 4.4    | 9.5    | 9.8   | 21.8  |
| 15.5   | 20.6   | 15.7   | 6.4    | 6.0   | 17.2   | 1.3    | 6.9   | 12.8  |
| 55.9   | 78.6   | 36.3   | 21.8   | 11.8  | 12.1   | 1.5    | 6.2   | 2.8   |
| 155.1  | 171.9  | 145.8  | 107.4  | 45.3  | 536.3  | 380.6  | 145.5 | 291.0 |
| 24.7   | 5.9    | 12.6   | 2.7    | 10.6  | 18.6   | 16.9   | 14.8  | 4.1   |
| 7.2    | 5.7    | 6.4    | 5.4    | 0.9   | 1.9    | 2.2    | 9.1   | 8.6   |
| 2945.9 | 2549.2 | 2564.1 | 1717.1 | 950.8 | 2004.5 | 1505.5 | 245.2 | 360.7 |
| 12.3   | 11.7   | 12.1   | 18.2   | 3.9   | 14.7   | 16.2   | 10.9  | 14.6  |
| 1.4    | 1.2    | 1.5    | 2.7    | 1.2   | 4.0    | 4.5    | 1.3   | 1.8   |
| 12.4   | 6.3    | 5.8    | 0.8    | 0.9   | 19.5   | 9.6    | 2.1   | 2.6   |
| 0.8    | 2.0    | 0.7    | 0.6    | 0.4   | 3.2    | 1.4    | 2.0   | 0.8   |
| 3.5    | 1.9    | 1.9    | 1.0    | 1.0   | 2.6    | 2.8    | 2.0   | 2.7   |
| 17.2   | 5.2    | 14.5   | 4.8    | 0.6   | 11.1   | 15.2   | 15.4  | 13.0  |
| 8.5    | 2.2    | 1.6    | 4.4    | 1.2   | 3.8    | 4.8    | 1.9   | 12.0  |
| 12.2   | 18.7   | 13.3   | 4.0    | 7.1   | 7.3    | 15.5   | 15.7  | 23.4  |
| 10.3   | 0.5    | 1.7    | 4.9    | 0.6   | 6.2    | 6.5    | 6.3   | 7.0   |
| 4.4    | 1.5    | 1.3    | 1.2    | 0.3   | 7.9    | 12.4   | 1.9   | 2.1   |
| 2.5    | 1.6    | 1.8    | 2.0    | 0.9   | 4.1    | 11.4   | 1.7   | 3.0   |
| 36.9   | 15.8   | 24.0   | 10.8   | 5.6   | 12.7   | 23.0   | 34.7  | 20.2  |
| 2.5    | 9.5    | 13.2   | 6.8    | 0.9   | 1.0    | 3.2    | 14.3  | 8.4   |

|        |        |        |        |        |        |        |        |        |
|--------|--------|--------|--------|--------|--------|--------|--------|--------|
| 22.6   | 8.3    | 15.7   | 10.4   | 6.9    | 11.3   | 2.4    | 8.8    | 24.8   |
| 11.5   | 13.8   | 15.3   | 1.7    | 1.2    | 10.2   | 3.3    | 8.0    | 25.0   |
| 7.1    | 4.1    | 1.6    | 2.1    | 4.0    | 5.7    | 1.1    | 8.9    | 10.3   |
| 1.2    | 2.6    | 17.7   | 2.2    | 1.0    | 2.7    | 3.5    | 10.1   | 10.1   |
| 1.2    | 0.6    | 1.3    | 0.3    | 1.8    | 47.2   | 23.8   | 0.6    | 0.9    |
| 1210.8 | 1126.7 | 1234.7 | 1265.9 | 408.0  | 1761.2 | 1123.8 | 347.7  | 514.2  |
| 514.9  | 420.0  | 401.3  | 321.8  | 97.5   | 986.3  | 756.4  | 405.2  | 484.0  |
| 1049.0 | 491.0  | 519.8  | 446.7  | 171.7  | 1242.6 | 1125.4 | 1215.5 | 1061.5 |
| 6304.5 | 5887.9 | 5490.1 | 5489.1 | 3347.2 | 5373.8 | 4974.5 | 708.9  | 754.0  |
| 5365.1 | 5100.7 | 4825.8 | 4765.2 | 2595.4 | 6264.0 | 5013.1 | 1396.4 | 1616.0 |
| 1637.1 | 1461.3 | 1495.8 | 1115.8 | 586.9  | 2412.3 | 1510.2 | 1250.7 | 1598.3 |
| 130.8  | 119.8  | 143.4  | 316.3  | 72.6   | 326.0  | 255.7  | 61.1   | 78.4   |
| 1119.5 | 1187.6 | 1318.9 | 1238.7 | 478.1  | 161.2  | 157.2  | 75.8   | 128.7  |
| 784.0  | 645.8  | 642.0  | 770.8  | 287.6  | 106.3  | 91.6   | 131.5  | 138.5  |
| 119.7  | 112.3  | 118.7  | 70.5   | 22.6   | 582.3  | 296.3  | 35.7   | 45.1   |
| 1662.1 | 1369.1 | 1392.6 | 786.2  | 438.7  | 3624.4 | 2731.9 | 430.6  | 627.3  |
| 333.4  | 317.9  | 344.0  | 393.4  | 86.6   | 732.1  | 483.9  | 47.3   | 57.3   |
| 700.7  | 514.2  | 591.9  | 382.4  | 115.9  | 1526.4 | 1229.1 | 387.6  | 460.2  |
| 274.0  | 257.8  | 251.5  | 293.0  | 82.6   | 1027.9 | 918.9  | 176.9  | 230.7  |
| 615.6  | 539.3  | 586.3  | 994.5  | 321.2  | 1434.2 | 1101.0 | 105.6  | 150.5  |
| 173.2  | 198.2  | 188.7  | 207.3  | 74.4   | 377.4  | 271.2  | 62.0   | 96.5   |
| 130.9  | 124.4  | 115.1  | 97.7   | 38.7   | 114.3  | 87.9   | 25.0   | 51.9   |
| 1139.5 | 1146.9 | 825.1  | 399.4  | 328.7  | 1326.4 | 736.9  | 378.3  | 424.6  |
| 214.3  | 159.2  | 166.4  | 148.5  | 52.1   | 310.6  | 176.2  | 43.0   | 60.0   |
| 114.7  | 110.0  | 127.3  | 189.7  | 44.8   | 160.2  | 158.8  | 111.4  | 139.6  |
| 11.4   | 8.6    | 3.4    | 3.8    | 0.2    | 8.2    | 8.9    | 9.6    | 7.8    |
| 1008.9 | 1022.6 | 891.9  | 1022.4 | 430.1  | 2562.3 | 1694.9 | 138.1  | 242.1  |
| 502.8  | 510.1  | 545.0  | 507.0  | 156.9  | 1756.5 | 1015.8 | 108.2  | 203.4  |
| 1750.6 | 1742.7 | 1653.2 | 1492.5 | 739.0  | 2925.0 | 2376.7 | 780.0  | 830.7  |
| 329.9  | 261.1  | 274.8  | 302.5  | 93.8   | 1038.9 | 600.1  | 253.1  | 354.0  |
| 88.2   | 29.5   | 50.2   | 30.0   | 19.7   | 265.7  | 186.2  | 36.5   | 40.3   |
| 220.3  | 219.8  | 213.3  | 190.7  | 71.7   | 117.7  | 85.4   | 15.4   | 14.0   |
| 234.8  | 267.9  | 207.8  | 194.2  | 78.5   | 323.6  | 264.8  | 50.6   | 63.4   |
| 258.1  | 262.1  | 268.8  | 254.2  | 91.7   | 385.2  | 294.2  | 280.4  | 381.8  |
| 338.0  | 348.7  | 418.0  | 475.3  | 138.1  | 585.9  | 467.2  | 529.0  | 703.4  |
| 540.5  | 608.6  | 643.9  | 594.9  | 249.8  | 1455.6 | 737.3  | 197.0  | 217.4  |
| 794.6  | 715.8  | 646.7  | 479.8  | 223.0  | 841.6  | 473.0  | 200.1  | 185.8  |
| 228.0  | 138.0  | 136.8  | 89.4   | 54.7   | 238.1  | 129.8  | 85.7   | 118.6  |
| 187.4  | 140.1  | 157.2  | 185.9  | 65.9   | 518.3  | 357.6  | 241.6  | 238.3  |
| 2146.1 | 2255.7 | 2168.8 | 1706.0 | 773.6  | 1413.0 | 1042.1 | 26.3   | 45.8   |
| 447.3  | 333.0  | 297.5  | 309.2  | 148.3  | 531.7  | 348.3  | 175.2  | 277.2  |
| 195.4  | 148.4  | 154.7  | 128.1  | 65.3   | 271.4  | 187.4  | 108.8  | 150.4  |
| 34.6   | 23.2   | 35.5   | 20.8   | 7.7    | 77.8   | 54.9   | 18.3   | 29.8   |
| 1413.6 | 1289.0 | 1313.4 | 1527.3 | 604.7  | 2356.9 | 1730.8 | 203.7  | 272.3  |
| 521.5  | 411.7  | 554.7  | 566.3  | 108.4  | 861.2  | 533.3  | 6.4    | 5.4    |
| 38.8   | 49.3   | 27.5   | 34.6   | 20.1   | 98.4   | 38.5   | 18.4   | 33.7   |
| 220.5  | 164.1  | 224.8  | 156.9  | 69.8   | 244.9  | 130.5  | 105.5  | 110.8  |
| 699.9  | 603.2  | 698.9  | 696.6  | 311.2  | 329.2  | 198.9  | 48.8   | 37.4   |
| 802.3  | 713.6  | 849.8  | 885.6  | 363.0  | 408.4  | 264.6  | 29.2   | 30.6   |
| 285.8  | 305.4  | 256.7  | 289.9  | 128.9  | 808.9  | 623.9  | 138.6  | 171.1  |
| 372.0  | 229.4  | 265.3  | 217.5  | 108.0  | 725.1  | 575.7  | 167.4  | 197.1  |
| 328.1  | 337.3  | 392.6  | 463.7  | 123.4  | 574.0  | 355.4  | 64.3   | 88.9   |
| 191.6  | 197.2  | 224.5  | 221.3  | 52.8   | 765.4  | 602.5  | 126.8  | 159.2  |

|        |        |        |        |       |        |        |       |       |
|--------|--------|--------|--------|-------|--------|--------|-------|-------|
| 67.4   | 41.4   | 80.2   | 51.4   | 21.3  | 162.1  | 148.9  | 80.6  | 81.7  |
| 625.8  | 552.1  | 496.7  | 338.2  | 179.6 | 424.3  | 451.9  | 141.0 | 235.9 |
| 498.2  | 493.5  | 387.2  | 153.0  | 179.6 | 1032.9 | 551.8  | 118.8 | 108.3 |
| 298.5  | 313.3  | 341.0  | 267.6  | 90.0  | 772.3  | 548.5  | 126.6 | 160.2 |
| 6.0    | 2.9    | 0.9    | 9.6    | 7.9   | 70.1   | 37.9   | 5.2   | 13.7  |
| 11.1   | 4.4    | 3.9    | 17.5   | 4.2   | 127.9  | 94.6   | 3.2   | 6.7   |
| 13.7   | 30.4   | 20.1   | 27.9   | 8.6   | 96.4   | 64.3   | 28.6  | 39.9  |
| 140.8  | 119.8  | 112.3  | 165.4  | 44.5  | 274.0  | 150.7  | 102.3 | 165.4 |
| 33.3   | 37.6   | 33.1   | 38.8   | 16.7  | 16.2   | 0.8    | 43.3  | 47.3  |
| 255.5  | 231.8  | 233.9  | 210.3  | 74.1  | 252.3  | 120.1  | 58.7  | 67.8  |
| 5.5    | 2.8    | 2.1    | 1.8    | 1.4   | 24.7   | 12.8   | 3.5   | 7.5   |
| 440.4  | 452.1  | 466.2  | 164.9  | 136.8 | 713.0  | 501.7  | 8.5   | 22.9  |
| 502.1  | 535.0  | 504.7  | 361.1  | 175.1 | 535.6  | 372.6  | 81.2  | 128.9 |
| 1194.0 | 1185.2 | 1056.4 | 822.0  | 400.1 | 1210.0 | 991.7  | 276.5 | 359.9 |
| 6.3    | 14.8   | 13.1   | 2.5    | 1.3   | 10.2   | 10.8   | 8.6   | 11.8  |
| 173.7  | 128.1  | 160.5  | 163.1  | 49.1  | 418.8  | 288.3  | 90.1  | 118.2 |
| 195.3  | 166.2  | 187.6  | 124.1  | 83.1  | 766.9  | 415.2  | 95.2  | 97.3  |
| 264.2  | 255.0  | 280.0  | 275.7  | 94.5  | 766.0  | 453.9  | 79.9  | 112.3 |
| 60.2   | 71.0   | 47.2   | 29.5   | 15.7  | 184.5  | 164.2  | 65.6  | 37.7  |
| 248.6  | 206.5  | 168.2  | 114.8  | 71.5  | 983.3  | 859.0  | 47.1  | 41.8  |
| 491.1  | 409.8  | 506.7  | 479.4  | 199.9 | 474.0  | 265.1  | 139.0 | 161.7 |
| 429.7  | 313.3  | 398.6  | 315.3  | 134.9 | 343.0  | 372.4  | 29.8  | 25.7  |
| 18.0   | 12.7   | 1.6    | 15.4   | 0.5   | 194.4  | 148.9  | 54.2  | 68.5  |
| 55.8   | 34.3   | 26.6   | 27.6   | 7.4   | 151.9  | 105.4  | 45.2  | 58.9  |
| 70.9   | 80.2   | 71.9   | 56.4   | 18.8  | 304.2  | 201.2  | 48.0  | 53.1  |
| 34.4   | 32.6   | 29.2   | 12.8   | 3.4   | 6.0    | 6.7    | 20.5  | 42.5  |
| 153.1  | 77.8   | 131.2  | 91.8   | 44.9  | 115.7  | 89.2   | 135.8 | 109.6 |
| 10.6   | 11.9   | 7.9    | 6.3    | 5.8   | 13.0   | 1.4    | 13.1  | 18.2  |
| 304.9  | 311.9  | 313.8  | 375.4  | 105.6 | 322.1  | 268.6  | 49.0  | 38.6  |
| 276.8  | 207.0  | 269.4  | 251.3  | 83.8  | 389.7  | 255.7  | 51.4  | 63.1  |
| 134.6  | 98.8   | 77.5   | 75.7   | 26.2  | 393.8  | 176.0  | 46.0  | 70.1  |
| 109.5  | 124.4  | 120.9  | 114.1  | 41.0  | 181.7  | 139.7  | 30.3  | 47.0  |
| 68.2   | 60.6   | 50.9   | 96.1   | 34.2  | 90.6   | 48.2   | 7.9   | 9.0   |
| 44.4   | 32.6   | 58.3   | 23.6   | 8.1   | 30.9   | 28.7   | 4.0   | 15.7  |
| 179.6  | 150.6  | 157.5  | 101.6  | 39.2  | 424.9  | 402.7  | 63.0  | 47.7  |
| 106.9  | 110.4  | 105.2  | 99.9   | 43.0  | 115.8  | 64.4   | 38.2  | 64.2  |
| 29.0   | 25.3   | 20.7   | 18.7   | 11.9  | 64.0   | 69.7   | 32.1  | 30.1  |
| 38.6   | 60.7   | 36.4   | 37.7   | 17.7  | 108.1  | 57.8   | 12.9  | 23.8  |
| 4.5    | 1.7    | 6.9    | 2.4    | 10.6  | 6.3    | 3.8    | 3.9   | 3.4   |
| 33.3   | 36.8   | 25.8   | 33.4   | 15.8  | 121.7  | 49.3   | 1.6   | 11.5  |
| 240.5  | 262.1  | 314.8  | 379.7  | 106.5 | 629.2  | 388.2  | 45.4  | 50.8  |
| 10.1   | 8.8    | 12.5   | 27.9   | 4.5   | 10.4   | 8.2    | 12.1  | 13.8  |
| 103.2  | 145.0  | 121.0  | 112.7  | 48.1  | 394.7  | 296.3  | 4.9   | 4.9   |
| 30.5   | 35.0   | 22.8   | 20.8   | 11.3  | 76.7   | 50.4   | 27.5  | 28.4  |
| 33.3   | 27.4   | 25.9   | 36.3   | 10.6  | 281.2  | 195.4  | 25.7  | 31.5  |
| 117.6  | 113.4  | 114.1  | 56.4   | 34.8  | 181.3  | 127.7  | 34.7  | 41.6  |
| 40.7   | 40.8   | 44.5   | 27.2   | 30.1  | 17.4   | 4.5    | 14.4  | 10.2  |
| 60.3   | 70.1   | 61.6   | 36.4   | 27.0  | 301.0  | 167.7  | 66.9  | 84.6  |
| 63.8   | 63.5   | 66.5   | 39.9   | 29.6  | 231.1  | 135.5  | 166.9 | 194.5 |
| 330.0  | 366.2  | 384.1  | 344.5  | 112.4 | 1511.8 | 1132.1 | 43.5  | 48.5  |
| 71.3   | 98.5   | 92.3   | 71.7   | 37.5  | 162.3  | 71.3   | 26.9  | 38.1  |
| 1418.1 | 1498.6 | 1402.6 | 1962.8 | 701.6 | 3590.1 | 2999.2 | 391.9 | 411.9 |
| 146.6  | 137.7  | 114.9  | 88.0   | 33.5  | 339.5  | 232.6  | 11.2  | 15.8  |

|        |        |        |        |        |        |        |        |        |
|--------|--------|--------|--------|--------|--------|--------|--------|--------|
| 52.2   | 52.3   | 37.5   | 16.6   | 15.2   | 46.4   | 25.2   | 28.2   | 32.5   |
| 97.6   | 84.1   | 114.7  | 107.4  | 46.4   | 147.1  | 115.7  | 27.6   | 42.9   |
| 111.8  | 107.8  | 86.3   | 71.1   | 37.1   | 134.6  | 93.2   | 27.2   | 37.1   |
| 0.6    | 0.9    | 1.0    | 0.8    | 0.4    | 1.2    | 0.6    | 0.9    | 1.2    |
| 62.2   | 72.6   | 143.1  | 215.1  | 64.3   | 101.9  | 153.6  | 14.7   | 13.3   |
| 6.5    | 8.4    | 2.1    | 17.7   | 1.5    | 2.3    | 3.9    | 2.2    | 1.5    |
| 309.6  | 215.7  | 175.5  | 188.8  | 50.7   | 453.4  | 230.9  | 125.6  | 163.6  |
| 711.5  | 668.7  | 680.6  | 973.2  | 294.6  | 1185.9 | 1066.3 | 53.0   | 65.6   |
| 13.6   | 18.3   | 27.9   | 20.8   | 17.0   | 175.2  | 120.0  | 4.5    | 4.6    |
| 90.8   | 92.7   | 148.9  | 229.6  | 74.7   | 106.5  | 123.5  | 84.5   | 77.6   |
| 36.7   | 36.4   | 36.3   | 49.1   | 7.6    | 13.5   | 7.7    | 19.9   | 26.1   |
| 243.3  | 265.8  | 307.2  | 197.6  | 98.1   | 28.3   | 12.0   | 102.0  | 85.1   |
| 3.9    | 1.9    | 1.7    | 1.0    | 0.7    | 1.1    | 1.2    | 44.6   | 41.9   |
| 25.6   | 27.3   | 40.7   | 50.0   | 21.6   | 150.2  | 104.7  | 32.9   | 28.7   |
| 347.5  | 227.2  | 289.3  | 199.5  | 102.9  | 305.7  | 193.5  | 54.8   | 49.0   |
| 40.9   | 17.6   | 26.2   | 31.4   | 13.1   | 85.3   | 70.1   | 83.8   | 95.8   |
| 29.5   | 50.3   | 38.5   | 39.3   | 15.3   | 74.4   | 77.4   | 79.2   | 79.5   |
| 11.2   | 9.4    | 6.1    | 8.9    | 1.8    | 21.2   | 17.6   | 11.3   | 17.5   |
| 692.1  | 641.6  | 547.7  | 321.2  | 223.0  | 319.4  | 320.0  | 129.9  | 173.4  |
| 12.3   | 2.9    | 4.1    | 1.3    | 1.6    | 1.9    | 2.9    | 1.4    | 12.0   |
| 197.3  | 241.4  | 212.0  | 216.4  | 97.0   | 268.8  | 235.4  | 48.8   | 48.7   |
| 19.2   | 2.4    | 19.3   | 12.4   | 1.0    | 15.2   | 16.5   | 11.5   | 11.6   |
| 44.0   | 34.0   | 36.1   | 49.8   | 13.6   | 34.0   | 21.6   | 19.7   | 12.2   |
| 150.9  | 141.4  | 157.3  | 167.5  | 44.1   | 112.3  | 99.1   | 15.3   | 21.3   |
| 435.6  | 332.1  | 349.2  | 330.0  | 127.7  | 966.4  | 641.2  | 111.7  | 170.5  |
| 157.1  | 149.3  | 158.0  | 137.2  | 40.4   | 166.2  | 185.2  | 55.2   | 50.3   |
| 86.3   | 110.5  | 80.9   | 72.8   | 34.0   | 141.2  | 143.1  | 63.4   | 55.1   |
| 86.3   | 95.3   | 71.3   | 69.0   | 31.0   | 107.4  | 79.3   | 56.3   | 51.4   |
| 6.9    | 21.1   | 15.5   | 13.1   | 3.3    | 53.4   | 45.1   | 7.4    | 3.9    |
| 5.0    | 3.3    | 3.7    | 2.5    | 1.1    | 3.3    | 6.2    | 1.6    | 3.0    |
| 29.7   | 22.2   | 22.5   | 13.5   | 10.0   | 23.8   | 26.9   | 3.7    | 13.6   |
| 58.4   | 64.7   | 64.8   | 57.5   | 22.3   | 152.8  | 62.7   | 45.8   | 65.8   |
| 16.1   | 16.5   | 20.0   | 24.6   | 9.3    | 24.8   | 22.1   | 20.6   | 19.0   |
| 10.1   | 18.8   | 20.0   | 15.3   | 2.1    | 10.4   | 8.6    | 14.1   | 19.0   |
| 7540.6 | 6682.5 | 6511.5 | 5566.3 | 3572.4 | 8869.5 | 7550.6 | 1949.3 | 3664.9 |
| 1.0    | 0.7    | 2.6    | 0.6    | 4.6    | 12.8   | 11.2   | 0.8    | 6.8    |
| 5.7    | 3.5    | 14.4   | 2.3    | 0.7    | 9.0    | 0.9    | 1.9    | 2.2    |
| 21.1   | 20.4   | 25.5   | 18.5   | 7.2    | 260.4  | 172.9  | 147.9  | 124.7  |
| 24.9   | 13.1   | 20.6   | 19.3   | 13.1   | 6.0    | 2.1    | 3.4    | 2.8    |
| 16.0   | 18.5   | 18.1   | 7.0    | 1.3    | 3.9    | 13.4   | 22.3   | 18.8   |
| 461.8  | 506.2  | 584.7  | 760.4  | 228.7  | 1355.7 | 1235.0 | 223.6  | 244.8  |
| 19.8   | 27.4   | 24.3   | 17.9   | 20.0   | 143.8  | 118.8  | 36.5   | 66.1   |
| 26.1   | 15.4   | 16.4   | 23.0   | 17.7   | 40.4   | 16.5   | 15.3   | 17.2   |
| 14.4   | 9.9    | 16.7   | 13.9   | 3.6    | 26.9   | 19.3   | 16.7   | 16.4   |
| 20.7   | 18.2   | 12.9   | 13.2   | 11.4   | 25.9   | 28.7   | 6.3    | 11.5   |
| 155.0  | 123.8  | 110.9  | 85.0   | 25.5   | 77.3   | 24.1   | 52.7   | 94.9   |
| 2349.5 | 2152.6 | 1918.3 | 1498.8 | 837.7  | 4134.6 | 2875.3 | 922.3  | 1456.9 |
| 422.4  | 428.3  | 369.3  | 318.1  | 197.7  | 428.2  | 317.4  | 195.8  | 292.8  |
| 42.9   | 25.8   | 33.7   | 36.4   | 16.0   | 24.7   | 28.3   | 16.8   | 20.4   |
| 395.6  | 434.2  | 343.4  | 404.3  | 150.8  | 1176.2 | 824.4  | 197.1  | 267.9  |
| 12.3   | 0.9    | 1.1    | 4.1    | 0.6    | 1.3    | 3.4    | 7.2    | 1.9    |
| 4.4    | 2.8    | 1.4    | 0.8    | 0.7    | 6.9    | 1.3    | 9.0    | 5.3    |
| 7.8    | 0.6    | 7.8    | 8.6    | 5.5    | 0.9    | 4.1    | 9.0    | 2.5    |

|        |        |        |        |       |        |        |       |       |
|--------|--------|--------|--------|-------|--------|--------|-------|-------|
| 1.9    | 14.2   | 14.9   | 15.1   | 9.1   | 16.7   | 6.6    | 14.6  | 19.7  |
| 33.9   | 10.2   | 28.1   | 15.2   | 9.2   | 40.7   | 17.9   | 19.6  | 26.6  |
| 50.1   | 33.9   | 33.4   | 17.7   | 6.5   | 53.4   | 12.9   | 50.6  | 101.0 |
| 96.9   | 63.2   | 118.7  | 49.4   | 37.0  | 220.5  | 167.1  | 169.3 | 205.1 |
| 1.4    | 1.1    | 0.6    | 0.4    | 2.0   | 0.7    | 1.2    | 2.5   | 0.6   |
| 35.4   | 25.1   | 29.2   | 21.0   | 11.8  | 16.4   | 17.4   | 3.8   | 12.0  |
| 55.6   | 39.0   | 21.0   | 14.3   | 11.3  | 58.2   | 46.1   | 11.5  | 25.0  |
| 29.6   | 11.4   | 8.8    | 16.3   | 1.1   | 2.1    | 12.0   | 16.6  | 23.4  |
| 190.6  | 221.6  | 164.5  | 174.9  | 91.4  | 287.7  | 198.1  | 2.9   | 8.0   |
| 28.4   | 27.1   | 20.1   | 10.4   | 6.1   | 154.4  | 93.0   | 74.4  | 95.8  |
| 493.1  | 542.0  | 455.4  | 447.9  | 172.5 | 1551.6 | 1026.8 | 149.1 | 141.6 |
| 113.4  | 88.8   | 100.4  | 108.5  | 13.9  | 45.8   | 31.9   | 117.5 | 128.2 |
| 17.8   | 17.4   | 18.7   | 2.4    | 1.7   | 3.4    | 21.1   | 3.7   | 10.9  |
| 27.6   | 14.7   | 22.4   | 16.8   | 2.0   | 95.9   | 44.2   | 1.4   | 11.8  |
| 575.4  | 407.3  | 469.0  | 500.7  | 175.8 | 550.0  | 561.1  | 48.9  | 148.2 |
| 37.3   | 34.1   | 23.8   | 12.4   | 8.4   | 21.2   | 6.9    | 6.5   | 17.5  |
| 34.6   | 38.9   | 21.8   | 27.1   | 12.1  | 38.4   | 2.1    | 46.5  | 82.3  |
| 4.8    | 1.9    | 1.2    | 1.1    | 1.6   | 3.4    | 1.3    | 8.4   | 5.1   |
| 48.5   | 58.1   | 59.4   | 58.8   | 23.0  | 66.7   | 68.4   | 15.4  | 14.9  |
| 71.5   | 77.2   | 77.7   | 72.7   | 33.3  | 37.9   | 43.0   | 30.3  | 53.5  |
| 481.1  | 376.8  | 354.5  | 267.7  | 162.1 | 1191.8 | 733.0  | 101.2 | 159.1 |
| 65.7   | 68.5   | 68.8   | 52.9   | 26.1  | 124.4  | 80.7   | 13.9  | 13.0  |
| 331.9  | 248.7  | 292.9  | 315.9  | 84.8  | 337.0  | 236.5  | 58.9  | 60.3  |
| 15.7   | 2.4    | 18.3   | 1.1    | 0.7   | 2.9    | 13.5   | 20.8  | 18.0  |
| 5.0    | 5.9    | 8.2    | 5.1    | 16.3  | 20.2   | 9.7    | 5.0   | 6.1   |
| 1576.0 | 1813.0 | 1605.1 | 1523.3 | 647.6 | 2252.4 | 1788.9 | 44.0  | 76.5  |
| 28.9   | 11.3   | 15.9   | 37.7   | 6.0   | 140.3  | 74.0   | 4.2   | 5.3   |
| 174.6  | 119.7  | 201.0  | 228.8  | 74.4  | 481.2  | 382.3  | 136.4 | 148.1 |
| 5.7    | 14.2   | 5.2    | 23.0   | 1.6   | 104.5  | 99.1   | 52.9  | 56.0  |
| 39.5   | 29.4   | 37.3   | 44.4   | 11.5  | 77.2   | 57.2   | 57.7  | 46.4  |
| 93.5   | 79.8   | 86.7   | 61.2   | 25.9  | 121.7  | 66.8   | 72.4  | 88.3  |
| 3.9    | 2.2    | 1.1    | 0.4    | 0.3   | 2.7    | 2.5    | 1.5   | 1.1   |
| 16.5   | 18.8   | 15.7   | 7.6    | 8.9   | 11.3   | 15.1   | 13.3  | 6.4   |
| 66.0   | 47.0   | 76.9   | 31.2   | 21.2  | 58.6   | 56.0   | 10.4  | 8.5   |
| 2.1    | 5.9    | 4.8    | 6.3    | 1.9   | 9.3    | 4.7    | 12.0  | 6.6   |
| 13.7   | 17.0   | 3.0    | 17.2   | 7.1   | 36.0   | 22.9   | 2.7   | 1.2   |
| 30.4   | 16.5   | 22.8   | 24.0   | 10.8  | 18.4   | 16.4   | 4.3   | 7.9   |
| 127.5  | 91.2   | 95.9   | 66.0   | 31.3  | 1004.8 | 797.8  | 236.4 | 277.9 |
| 5.6    | 7.9    | 14.9   | 2.5    | 9.4   | 68.1   | 69.5   | 41.5  | 70.0  |
| 143.6  | 127.1  | 121.2  | 46.6   | 47.0  | 308.6  | 226.6  | 61.9  | 61.4  |
| 16.9   | 21.7   | 25.8   | 51.2   | 8.7   | 334.1  | 204.4  | 18.9  | 12.5  |
| 2.8    | 3.7    | 1.8    | 14.2   | 1.1   | 3.6    | 17.1   | 1.1   | 3.7   |
| 111.3  | 126.2  | 84.1   | 54.3   | 32.2  | 346.9  | 188.4  | 44.0  | 90.6  |
| 26.9   | 19.9   | 21.5   | 12.9   | 16.4  | 27.0   | 12.0   | 16.3  | 22.3  |
| 9.2    | 5.6    | 8.3    | 19.5   | 5.1   | 27.8   | 24.8   | 5.3   | 6.1   |
| 1.9    | 4.6    | 3.4    | 11.4   | 4.2   | 14.5   | 3.3    | 7.4   | 27.0  |
| 23.2   | 15.2   | 32.9   | 26.9   | 12.0  | 47.8   | 16.2   | 16.3  | 14.2  |
| 12.6   | 2.0    | 9.8    | 2.1    | 1.2   | 7.7    | 2.7    | 9.5   | 7.3   |
| 706.5  | 665.6  | 653.7  | 442.2  | 254.7 | 645.4  | 518.2  | 64.3  | 127.6 |
| 843.7  | 749.8  | 786.5  | 869.2  | 248.8 | 1706.9 | 1179.8 | 157.4 | 152.1 |
| 291.7  | 315.3  | 334.8  | 186.8  | 113.6 | 1135.3 | 551.4  | 89.0  | 99.7  |
| 1.5    | 2.0    | 1.2    | 0.8    | 0.8   | 2.4    | 1.9    | 1.7   | 1.2   |
| 51.2   | 37.4   | 36.1   | 28.1   | 18.2  | 17.8   | 12.9   | 11.9  | 7.8   |

|        |        |        |        |        |        |        |        |        |
|--------|--------|--------|--------|--------|--------|--------|--------|--------|
| 43.1   | 21.8   | 34.7   | 21.5   | 12.3   | 33.0   | 27.8   | 21.4   | 19.2   |
| 8.8    | 18.8   | 4.3    | 7.9    | 5.8    | 19.5   | 14.3   | 30.9   | 7.6    |
| 6.5    | 2.4    | 0.9    | 3.3    | 4.6    | 0.8    | 1.4    | 7.6    | 7.1    |
| 11.8   | 7.2    | 11.8   | 7.9    | 6.3    | 27.1   | 15.0   | 2.4    | 1.0    |
| 2.8    | 0.7    | 13.2   | 9.7    | 0.4    | 29.8   | 1.0    | 23.2   | 10.2   |
| 499.5  | 508.2  | 501.7  | 374.2  | 151.3  | 1512.2 | 1071.0 | 51.9   | 63.0   |
| 37.2   | 28.6   | 42.4   | 16.9   | 3.1    | 49.7   | 40.4   | 4.7    | 28.5   |
| 12.8   | 16.6   | 10.3   | 14.6   | 7.1    | 14.6   | 5.6    | 46.7   | 107.9  |
| 442.1  | 324.1  | 268.7  | 156.3  | 80.8   | 652.6  | 334.9  | 171.4  | 256.9  |
| 256.9  | 232.1  | 270.4  | 268.3  | 125.4  | 1134.7 | 1159.0 | 173.9  | 214.6  |
| 343.9  | 363.6  | 298.1  | 247.9  | 144.0  | 11.6   | 1.5    | 148.7  | 202.5  |
| 5749.8 | 5147.1 | 5056.7 | 4904.3 | 2382.9 | 6696.0 | 4821.0 | 1157.8 | 1288.5 |
| 436.5  | 352.4  | 295.5  | 200.0  | 104.9  | 302.1  | 197.0  | 207.3  | 288.7  |
| 234.0  | 185.9  | 188.9  | 161.4  | 56.4   | 649.8  | 493.2  | 92.7   | 99.5   |
| 114.3  | 66.8   | 91.6   | 42.7   | 20.9   | 70.9   | 38.2   | 19.8   | 24.1   |
| 79.1   | 111.4  | 143.0  | 129.4  | 44.0   | 385.3  | 304.0  | 12.8   | 14.3   |
| 5.7    | 10.0   | 0.9    | 7.4    | 0.5    | 1.9    | 1.3    | 2.4    | 1.5    |
| 14.6   | 6.7    | 0.5    | 8.8    | 8.3    | 7.5    | 5.4    | 1.7    | 6.7    |
| 506.9  | 448.2  | 518.8  | 331.8  | 140.1  | 659.6  | 434.7  | 191.3  | 236.9  |
| 4838.1 | 4587.7 | 4035.1 | 3563.4 | 1920.0 | 4318.8 | 2759.7 | 934.6  | 1194.2 |
| 40.3   | 15.8   | 41.2   | 32.1   | 8.7    | 211.4  | 134.7  | 20.6   | 25.0   |
| 515.4  | 401.5  | 509.8  | 372.3  | 171.9  | 1020.8 | 678.1  | 109.3  | 143.8  |
| 62.8   | 87.4   | 49.9   | 20.6   | 8.9    | 98.7   | 39.1   | 13.0   | 26.8   |
| 124.7  | 99.2   | 134.3  | 322.6  | 57.9   | 911.3  | 556.0  | 231.5  | 283.6  |
| 83.1   | 46.9   | 61.0   | 32.3   | 11.6   | 45.7   | 19.3   | 12.8   | 11.0   |
| 52.1   | 49.6   | 58.6   | 62.2   | 17.4   | 111.4  | 68.5   | 43.3   | 49.1   |
| 4.1    | 16.9   | 15.5   | 10.4   | 0.8    | 1.8    | 11.8   | 6.6    | 21.7   |
| 81.6   | 111.4  | 118.6  | 53.0   | 32.7   | 317.8  | 238.2  | 77.6   | 90.7   |
| 59.5   | 25.7   | 46.4   | 38.9   | 9.1    | 67.9   | 54.6   | 15.9   | 17.5   |
| 65.2   | 62.2   | 61.3   | 52.0   | 25.5   | 74.3   | 62.2   | 41.1   | 16.4   |
| 338.6  | 319.0  | 333.5  | 250.8  | 118.2  | 448.0  | 286.5  | 309.8  | 487.3  |
| 259.2  | 189.8  | 207.4  | 256.8  | 77.5   | 712.2  | 413.1  | 93.7   | 118.7  |
| 43.4   | 39.0   | 24.6   | 30.1   | 15.1   | 117.4  | 53.9   | 51.9   | 59.7   |
| 1.5    | 1.2    | 1.8    | 0.8    | 0.4    | 10.5   | 5.1    | 2.4    | 2.1    |
| 5.2    | 18.9   | 34.2   | 17.3   | 1.9    | 3.6    | 2.3    | 15.2   | 13.1   |
| 3.1    | 16.0   | 16.6   | 5.6    | 1.0    | 16.3   | 18.0   | 3.2    | 12.8   |
| 18.5   | 15.2   | 23.7   | 11.8   | 5.9    | 15.6   | 29.1   | 13.8   | 15.4   |
| 98.1   | 77.9   | 57.6   | 84.5   | 30.3   | 242.0  | 307.9  | 16.4   | 30.6   |
| 6.8    | 4.4    | 14.5   | 1.9    | 4.6    | 3.1    | 13.8   | 5.2    | 3.1    |
| 1.2    | 1.2    | 1.6    | 1.7    | 4.7    | 1.2    | 1.0    | 1.1    | 0.6    |
| 0.6    | 0.6    | 0.7    | 0.4    | 0.3    | 0.9    | 0.5    | 0.6    | 0.6    |
| 1.2    | 1.0    | 0.9    | 0.6    | 0.4    | 1.3    | 1.0    | 0.8    | 0.6    |
| 22.0   | 12.6   | 34.6   | 3.6    | 9.5    | 19.6   | 22.7   | 10.4   | 13.6   |
| 1.9    | 6.8    | 2.0    | 3.0    | 1.0    | 1.0    | 2.4    | 1.2    | 2.2    |
| 430.2  | 323.3  | 277.6  | 341.1  | 111.7  | 738.4  | 530.9  | 195.0  | 252.7  |
| 1120.5 | 952.9  | 1002.6 | 897.2  | 353.8  | 1187.2 | 772.2  | 662.8  | 913.2  |
| 344.0  | 380.4  | 334.9  | 220.2  | 93.9   | 333.8  | 127.7  | 137.1  | 203.3  |
| 13.0   | 1.4    | 17.4   | 8.7    | 7.6    | 552.4  | 449.1  | 16.2   | 2.0    |
| 178.5  | 208.8  | 97.0   | 64.3   | 39.3   | 8.3    | 10.0   | 18.0   | 31.6   |
| 118.5  | 125.5  | 77.7   | 32.5   | 32.2   | 7.6    | 11.1   | 25.3   | 19.0   |
| 9.2    | 19.0   | 8.2    | 3.3    | 3.4    | 33.8   | 21.6   | 6.0    | 14.8   |
| 469.6  | 450.7  | 337.9  | 313.2  | 138.1  | 1302.0 | 755.8  | 464.8  | 641.2  |
| 18.0   | 2.7    | 2.0    | 6.5    | 3.6    | 4.7    | 11.4   | 17.8   | 17.6   |

|        |        |        |        |        |        |        |        |        |
|--------|--------|--------|--------|--------|--------|--------|--------|--------|
| 105.7  | 51.8   | 48.8   | 82.0   | 17.0   | 179.7  | 122.3  | 57.8   | 117.8  |
| 124.0  | 85.8   | 97.6   | 94.6   | 33.5   | 73.7   | 32.3   | 29.5   | 46.1   |
| 289.0  | 256.5  | 285.6  | 309.1  | 80.2   | 304.4  | 226.3  | 55.2   | 68.5   |
| 120.1  | 92.2   | 128.6  | 76.1   | 54.2   | 248.8  | 212.7  | 64.9   | 62.6   |
| 120.6  | 106.5  | 156.2  | 166.6  | 54.4   | 123.8  | 103.1  | 26.8   | 28.7   |
| 623.2  | 521.9  | 353.7  | 541.0  | 202.5  | 1416.7 | 1160.6 | 213.6  | 254.9  |
| 64.2   | 61.2   | 42.8   | 44.5   | 23.3   | 122.7  | 86.2   | 11.4   | 12.0   |
| 1129.8 | 1085.8 | 938.3  | 874.8  | 456.4  | 2426.1 | 1732.2 | 669.5  | 763.3  |
| 126.2  | 76.5   | 130.9  | 82.0   | 28.2   | 419.5  | 326.6  | 84.9   | 88.2   |
| 912.2  | 758.4  | 845.9  | 804.1  | 240.3  | 1868.8 | 1277.1 | 178.8  | 295.5  |
| 148.8  | 144.1  | 163.2  | 139.6  | 87.7   | 271.7  | 294.7  | 53.7   | 47.7   |
| 151.1  | 140.3  | 127.3  | 98.9   | 32.7   | 100.3  | 96.5   | 83.4   | 81.2   |
| 206.5  | 171.7  | 179.6  | 118.0  | 50.5   | 301.9  | 166.3  | 143.9  | 211.9  |
| 4.8    | 8.7    | 13.5   | 3.2    | 6.3    | 18.7   | 12.5   | 18.2   | 35.4   |
| 9.7    | 5.1    | 3.4    | 2.6    | 3.0    | 9.1    | 0.7    | 20.3   | 33.7   |
| 542.5  | 644.9  | 629.0  | 710.1  | 185.8  | 1308.0 | 875.4  | 83.2   | 79.8   |
| 124.5  | 111.9  | 255.7  | 206.0  | 54.7   | 194.0  | 136.2  | 112.6  | 157.2  |
| 310.4  | 305.6  | 423.0  | 393.6  | 138.6  | 697.3  | 460.0  | 125.3  | 232.7  |
| 165.1  | 121.4  | 121.8  | 102.0  | 47.9   | 251.6  | 213.9  | 44.4   | 36.9   |
| 151.1  | 65.0   | 79.2   | 45.6   | 32.8   | 421.2  | 378.3  | 37.5   | 46.5   |
| 77.8   | 78.0   | 80.5   | 67.3   | 31.8   | 113.4  | 74.8   | 203.5  | 212.1  |
| 24.2   | 12.7   | 10.9   | 2.0    | 4.1    | 114.6  | 61.1   | 1.0    | 0.8    |
| 19.4   | 25.0   | 28.5   | 23.9   | 16.5   | 41.4   | 25.2   | 43.5   | 45.8   |
| 38.0   | 28.5   | 19.6   | 38.4   | 2.0    | 44.7   | 16.1   | 31.3   | 53.5   |
| 86.4   | 65.5   | 72.7   | 46.6   | 37.7   | 100.5  | 57.0   | 62.4   | 49.3   |
| 284.2  | 229.4  | 214.3  | 193.6  | 87.3   | 298.6  | 190.6  | 78.0   | 119.7  |
| 10.6   | 8.7    | 9.6    | 4.6    | 0.5    | 103.6  | 72.3   | 16.9   | 37.9   |
| 258.1  | 180.5  | 209.8  | 134.0  | 58.3   | 636.9  | 488.0  | 178.4  | 271.3  |
| 82.5   | 61.1   | 69.3   | 40.4   | 25.8   | 160.8  | 105.8  | 57.4   | 74.9   |
| 111.3  | 142.3  | 216.1  | 495.7  | 73.2   | 179.8  | 121.1  | 18.2   | 19.3   |
| 219.1  | 167.0  | 199.1  | 171.2  | 63.8   | 447.8  | 188.7  | 110.1  | 139.1  |
| 98.0   | 64.8   | 66.0   | 86.8   | 23.0   | 50.7   | 40.8   | 18.0   | 19.8   |
| 160.4  | 235.7  | 102.3  | 91.8   | 99.2   | 433.3  | 347.6  | 13.6   | 51.0   |
| 713.2  | 734.9  | 658.6  | 772.5  | 313.0  | 1544.9 | 717.0  | 272.8  | 355.2  |
| 79.5   | 104.1  | 87.7   | 80.9   | 21.8   | 174.8  | 191.1  | 9.6    | 33.1   |
| 46.7   | 31.0   | 23.0   | 31.7   | 22.7   | 51.6   | 39.6   | 33.4   | 36.5   |
| 391.9  | 437.9  | 318.2  | 367.0  | 98.1   | 490.6  | 287.6  | 63.6   | 69.1   |
| 91.9   | 90.5   | 82.0   | 77.9   | 39.3   | 262.1  | 128.7  | 36.4   | 68.7   |
| 79.0   | 82.2   | 62.9   | 51.3   | 35.3   | 79.2   | 35.6   | 16.9   | 7.1    |
| 1164.1 | 1079.2 | 1288.1 | 1505.9 | 359.6  | 1448.9 | 1193.9 | 9.1    | 11.1   |
| 138.6  | 142.9  | 106.6  | 135.6  | 55.5   | 220.3  | 130.6  | 86.5   | 70.1   |
| 8062.1 | 7185.9 | 6489.9 | 5391.4 | 3445.4 | 8086.1 | 7192.0 | 1897.4 | 2579.4 |
| 306.4  | 261.7  | 285.1  | 236.8  | 120.2  | 1060.2 | 625.3  | 160.5  | 221.6  |
| 254.9  | 204.6  | 157.2  | 119.2  | 93.8   | 408.0  | 272.7  | 103.3  | 181.6  |
| 61.3   | 52.9   | 67.0   | 90.1   | 17.5   | 27.8   | 8.5    | 101.9  | 90.1   |
| 160.8  | 107.9  | 116.3  | 145.4  | 38.3   | 486.1  | 289.2  | 37.7   | 24.0   |
| 850.9  | 778.4  | 913.7  | 943.3  | 377.1  | 990.7  | 834.2  | 161.0  | 205.2  |
| 313.6  | 407.7  | 367.0  | 418.6  | 106.2  | 545.5  | 387.9  | 85.2   | 148.1  |
| 271.9  | 272.6  | 319.2  | 355.9  | 108.3  | 562.1  | 565.1  | 26.3   | 39.0   |
| 94.9   | 78.9   | 80.5   | 61.2   | 23.5   | 111.8  | 61.0   | 186.5  | 179.6  |
| 6.1    | 3.6    | 12.8   | 10.9   | 1.9    | 4.3    | 1.8    | 2.8    | 5.8    |
| 25.5   | 15.7   | 26.1   | 26.2   | 8.5    | 35.7   | 4.9    | 91.6   | 180.5  |
| 221.9  | 229.8  | 243.5  | 192.2  | 74.4   | 425.1  | 396.4  | 54.1   | 76.3   |

|         |        |        |        |        |         |        |        |        |
|---------|--------|--------|--------|--------|---------|--------|--------|--------|
| 54.8    | 71.4   | 86.6   | 60.5   | 27.0   | 127.1   | 91.5   | 34.1   | 38.2   |
| 44.3    | 39.5   | 58.8   | 140.9  | 35.0   | 215.0   | 116.6  | 45.1   | 58.1   |
| 35.7    | 64.8   | 51.3   | 48.6   | 22.5   | 251.0   | 143.3  | 64.9   | 115.8  |
| 90.3    | 76.5   | 82.7   | 41.2   | 27.7   | 201.5   | 90.8   | 73.2   | 84.2   |
| 4818.2  | 3808.8 | 3970.0 | 3127.5 | 1999.2 | 4679.3  | 4259.8 | 864.1  | 1026.6 |
| 83.8    | 81.2   | 51.9   | 40.0   | 32.6   | 44.7    | 26.9   | 13.3   | 29.2   |
| 1.7     | 2.3    | 3.5    | 1.9    | 0.9    | 2.6     | 0.9    | 1.6    | 1.7    |
| 61.2    | 62.5   | 47.8   | 69.5   | 25.4   | 81.8    | 63.1   | 53.6   | 66.3   |
| 14.8    | 9.2    | 14.7   | 5.2    | 3.2    | 1.8     | 2.3    | 11.7   | 4.3    |
| 12.4    | 0.7    | 0.9    | 1.7    | 0.2    | 1.8     | 6.3    | 0.3    | 0.5    |
| 57.4    | 81.2   | 104.7  | 92.5   | 53.9   | 104.2   | 86.9   | 45.2   | 39.3   |
| 10537.3 | 9311.8 | 8728.8 | 8407.3 | 6396.3 | 11022.3 | 9849.8 | 4591.3 | 5109.4 |
| 99.6    | 71.4   | 101.9  | 71.7   | 28.8   | 129.2   | 81.5   | 37.7   | 50.2   |
| 62.4    | 49.4   | 60.2   | 57.6   | 34.2   | 202.5   | 99.5   | 50.8   | 55.5   |
| 40.0    | 33.2   | 51.6   | 32.2   | 23.2   | 5.8     | 0.4    | 1.8    | 1.5    |
| 262.7   | 281.4  | 275.4  | 198.1  | 81.3   | 268.9   | 219.3  | 25.2   | 64.7   |
| 169.6   | 157.2  | 196.6  | 270.2  | 53.6   | 336.8   | 230.6  | 26.9   | 25.7   |
| 341.7   | 377.4  | 345.3  | 319.1  | 168.2  | 656.3   | 605.9  | 126.4  | 209.4  |
| 257.5   | 265.7  | 191.3  | 153.3  | 113.6  | 1.6     | 2.0    | 1.1    | 5.1    |
| 299.9   | 218.5  | 284.5  | 242.7  | 108.3  | 459.6   | 377.0  | 184.5  | 240.1  |
| 36.5    | 38.2   | 22.5   | 8.3    | 17.9   | 91.9    | 33.8   | 5.4    | 3.1    |
| 203.5   | 204.2  | 234.8  | 384.6  | 123.6  | 496.4   | 420.0  | 156.8  | 318.6  |
| 71.6    | 90.8   | 66.2   | 79.2   | 14.1   | 145.8   | 86.0   | 25.0   | 39.9   |
| 58.9    | 71.9   | 55.4   | 35.7   | 25.6   | 97.8    | 43.9   | 52.5   | 70.0   |
| 32.8    | 20.3   | 27.6   | 25.5   | 7.3    | 36.8    | 30.5   | 585.2  | 841.9  |
| 85.6    | 64.8   | 80.0   | 80.4   | 15.3   | 62.3    | 24.0   | 18.3   | 35.9   |
| 150.1   | 125.3  | 149.1  | 207.4  | 53.1   | 171.5   | 119.5  | 59.3   | 78.2   |
| 13.4    | 13.7   | 2.1    | 13.6   | 7.3    | 12.6    | 14.3   | 5.9    | 7.3    |
| 29.9    | 11.7   | 14.3   | 6.8    | 5.0    | 245.5   | 206.1  | 19.7   | 21.8   |
| 101.5   | 118.4  | 125.5  | 124.2  | 50.4   | 304.7   | 264.9  | 47.1   | 47.2   |
| 161.2   | 106.7  | 97.8   | 74.0   | 40.0   | 292.4   | 163.1  | 257.9  | 280.6  |
| 79.1    | 77.8   | 48.9   | 66.4   | 18.7   | 162.8   | 77.0   | 64.8   | 86.5   |
| 315.3   | 212.7  | 226.3  | 135.8  | 45.3   | 378.3   | 226.1  | 124.0  | 156.8  |
| 104.2   | 137.4  | 112.0  | 76.3   | 42.4   | 276.3   | 235.0  | 60.8   | 61.9   |
| 286.0   | 294.2  | 392.4  | 321.8  | 172.1  | 289.3   | 162.3  | 138.3  | 202.0  |
| 108.7   | 78.0   | 105.6  | 83.1   | 28.5   | 148.9   | 54.7   | 50.3   | 57.0   |
| 122.1   | 118.0  | 129.1  | 117.8  | 39.3   | 378.5   | 255.1  | 98.7   | 143.8  |
| 59.2    | 55.7   | 52.5   | 57.0   | 16.8   | 39.0    | 24.7   | 25.9   | 45.0   |
| 146.8   | 149.5  | 178.7  | 168.0  | 68.5   | 201.0   | 133.9  | 49.0   | 65.8   |
| 93.3    | 74.7   | 90.6   | 100.5  | 22.2   | 74.8    | 56.1   | 41.9   | 53.8   |
| 270.1   | 263.3  | 251.0  | 332.6  | 136.0  | 831.6   | 791.9  | 265.7  | 435.8  |
| 2.0     | 4.6    | 3.7    | 1.4    | 0.8    | 6.2     | 4.2    | 18.5   | 33.2   |
| 1738.2  | 735.4  | 959.1  | 713.6  | 358.2  | 3653.9  | 3590.1 | 168.9  | 201.7  |
| 192.8   | 93.2   | 88.3   | 38.6   | 35.1   | 531.6   | 411.2  | 110.1  | 141.3  |
| 126.8   | 92.1   | 112.8  | 125.4  | 56.6   | 232.0   | 148.4  | 5.9    | 4.7    |
| 73.5    | 113.3  | 92.3   | 85.4   | 35.3   | 209.5   | 136.9  | 26.9   | 24.4   |
| 2.7     | 1.8    | 2.6    | 1.7    | 0.6    | 30.4    | 39.5   | 15.6   | 26.6   |
| 29.8    | 20.7   | 24.0   | 16.1   | 4.7    | 54.6    | 41.1   | 24.1   | 47.7   |
| 22.4    | 11.9   | 4.7    | 20.0   | 3.8    | 30.8    | 9.4    | 23.3   | 25.6   |
| 40.5    | 23.6   | 42.5   | 8.3    | 8.0    | 55.5    | 28.0   | 68.9   | 67.9   |
| 2.3     | 2.4    | 3.3    | 1.5    | 0.4    | 46.8    | 10.7   | 19.3   | 33.8   |
| 24.9    | 22.9   | 13.1   | 20.0   | 4.6    | 143.5   | 65.7   | 39.1   | 49.2   |
| 416.1   | 301.9  | 318.8  | 189.6  | 120.1  | 565.9   | 495.0  | 76.7   | 89.6   |



|        |        |        |        |        |        |        |        |        |
|--------|--------|--------|--------|--------|--------|--------|--------|--------|
| 13.9   | 10.2   | 18.1   | 14.2   | 2.0    | 110.6  | 115.9  | 12.8   | 16.5   |
| 123.1  | 102.3  | 208.4  | 527.7  | 117.3  | 877.2  | 564.0  | 83.5   | 124.7  |
| 547.6  | 400.7  | 506.8  | 504.1  | 236.9  | 297.9  | 203.1  | 82.9   | 127.9  |
| 49.6   | 36.0   | 34.8   | 19.1   | 15.6   | 303.7  | 217.1  | 3.5    | 27.0   |
| 317.5  | 269.3  | 249.7  | 175.3  | 79.9   | 1833.1 | 1077.8 | 80.4   | 144.8  |
| 96.0   | 80.7   | 75.3   | 69.6   | 26.2   | 52.9   | 41.4   | 44.6   | 37.4   |
| 43.7   | 36.8   | 35.6   | 26.1   | 10.8   | 83.5   | 36.8   | 37.5   | 54.0   |
| 1382.1 | 1441.5 | 1535.3 | 1307.6 | 713.2  | 2013.6 | 1699.0 | 124.9  | 125.9  |
| 153.8  | 107.9  | 162.2  | 153.0  | 71.1   | 335.6  | 242.9  | 51.2   | 28.6   |
| 79.0   | 46.1   | 58.7   | 51.5   | 26.4   | 71.9   | 42.1   | 77.2   | 91.9   |
| 104.4  | 91.8   | 133.6  | 120.5  | 42.9   | 105.3  | 72.4   | 56.5   | 67.7   |
| 78.8   | 56.8   | 53.1   | 52.2   | 19.2   | 63.4   | 14.3   | 54.5   | 84.3   |
| 2.6    | 1.9    | 1.6    | 1.9    | 0.6    | 2.4    | 2.9    | 1.8    | 1.0    |
| 313.8  | 313.0  | 223.7  | 151.4  | 82.9   | 1205.4 | 635.4  | 116.7  | 180.0  |
| 1.7    | 1.0    | 1.2    | 2.0    | 0.5    | 8.7    | 1.2    | 25.3   | 12.0   |
| 150.2  | 115.9  | 134.9  | 116.3  | 54.4   | 571.6  | 321.2  | 67.6   | 122.4  |
| 20.1   | 18.3   | 30.7   | 20.5   | 11.1   | 53.3   | 25.6   | 36.0   | 48.8   |
| 45.6   | 16.1   | 22.9   | 27.2   | 15.5   | 74.3   | 41.3   | 38.5   | 40.3   |
| 66.8   | 63.6   | 55.9   | 69.6   | 13.0   | 45.0   | 50.9   | 31.9   | 42.4   |
| 19.0   | 7.0    | 20.3   | 14.2   | 7.3    | 26.4   | 18.9   | 9.7    | 5.1    |
| 44.2   | 20.1   | 28.2   | 26.8   | 14.9   | 315.3  | 290.8  | 18.4   | 19.5   |
| 127.3  | 96.8   | 81.6   | 29.6   | 17.8   | 15.8   | 6.4    | 173.0  | 183.9  |
| 19.0   | 13.2   | 13.6   | 7.1    | 1.0    | 25.1   | 9.6    | 8.4    | 10.5   |
| 6.0    | 9.5    | 10.2   | 3.9    | 1.1    | 25.3   | 25.4   | 4.2    | 1.6    |
| 67.9   | 53.6   | 57.9   | 26.9   | 35.7   | 173.3  | 166.2  | 54.4   | 54.5   |
| 31.2   | 29.1   | 35.1   | 39.0   | 13.6   | 75.7   | 43.9   | 39.9   | 46.8   |
| 8.0    | 10.9   | 6.8    | 4.8    | 6.8    | 34.9   | 24.4   | 17.0   | 5.3    |
| 23.1   | 20.4   | 18.9   | 6.9    | 7.9    | 93.8   | 48.8   | 13.0   | 33.6   |
| 22.6   | 19.2   | 11.1   | 16.1   | 2.0    | 15.3   | 6.1    | 5.4    | 33.1   |
| 93.3   | 62.6   | 69.6   | 34.5   | 13.9   | 195.7  | 115.3  | 55.0   | 58.1   |
| 7.1    | 6.0    | 7.8    | 7.9    | 1.6    | 4.6    | 7.7    | 3.0    | 2.1    |
| 85.1   | 60.3   | 56.4   | 71.0   | 38.7   | 143.6  | 158.5  | 15.5   | 30.0   |
| 0.5    | 1.0    | 10.6   | 1.3    | 3.4    | 52.6   | 25.7   | 13.9   | 22.6   |
| 115.3  | 129.4  | 123.2  | 164.3  | 38.4   | 170.2  | 91.4   | 35.0   | 78.6   |
| 4.1    | 9.4    | 5.9    | 4.0    | 2.4    | 6.8    | 7.8    | 41.2   | 89.8   |
| 576.5  | 489.0  | 468.9  | 447.3  | 192.6  | 3427.1 | 1938.4 | 140.4  | 99.8   |
| 55.7   | 50.1   | 62.2   | 40.1   | 27.1   | 76.6   | 49.0   | 29.0   | 33.8   |
| 57.9   | 52.2   | 62.7   | 60.3   | 15.1   | 151.9  | 69.0   | 94.5   | 136.7  |
| 9.9    | 40.2   | 31.0   | 15.9   | 13.4   | 21.3   | 15.6   | 2.1    | 11.0   |
| 59.0   | 81.3   | 53.5   | 47.4   | 23.1   | 162.1  | 122.3  | 14.4   | 4.6    |
| 5.0    | 1.7    | 13.2   | 15.0   | 0.7    | 197.3  | 110.4  | 166.4  | 124.4  |
| 108.7  | 93.9   | 130.5  | 123.9  | 37.6   | 88.1   | 91.6   | 47.5   | 84.2   |
| 28.2   | 17.0   | 21.9   | 20.1   | 17.9   | 477.5  | 222.0  | 75.8   | 116.4  |
| 45.7   | 40.1   | 58.1   | 48.8   | 17.6   | 124.8  | 86.1   | 15.5   | 19.0   |
| 18.9   | 31.7   | 23.1   | 15.0   | 8.1    | 102.0  | 135.2  | 1.5    | 1.4    |
| 11.2   | 12.8   | 1.7    | 12.8   | 6.6    | 66.5   | 35.8   | 1.2    | 1.6    |
| 0.7    | 0.6    | 1.7    | 6.2    | 0.4    | 2.3    | 1.7    | 6.8    | 8.2    |
| 23.7   | 32.3   | 38.7   | 39.8   | 13.3   | 6.3    | 4.6    | 3.6    | 29.7   |
| 49.1   | 39.8   | 44.3   | 50.7   | 28.1   | 61.5   | 24.7   | 46.2   | 63.7   |
| 63.9   | 35.6   | 40.4   | 27.9   | 12.0   | 81.9   | 45.1   | 32.3   | 39.4   |
| 166.8  | 154.5  | 132.2  | 148.1  | 32.0   | 64.6   | 53.3   | 34.3   | 36.2   |
| 8023.5 | 6162.2 | 6469.4 | 5945.9 | 3254.3 | 9394.0 | 7629.1 | 1224.5 | 1518.8 |
| 44.0   | 32.1   | 48.3   | 39.0   | 14.0   | 92.0   | 44.7   | 77.6   | 27.4   |

|        |        |        |        |        |        |        |       |        |
|--------|--------|--------|--------|--------|--------|--------|-------|--------|
| 156.1  | 138.1  | 120.7  | 92.3   | 41.0   | 266.1  | 187.6  | 71.4  | 131.8  |
| 94.4   | 82.6   | 79.7   | 60.4   | 28.3   | 138.1  | 72.2   | 27.2  | 38.4   |
| 59.6   | 44.7   | 39.6   | 34.4   | 15.7   | 74.5   | 25.0   | 59.7  | 72.9   |
| 1646.4 | 1366.4 | 1460.6 | 1148.5 | 480.9  | 1530.7 | 951.6  | 277.5 | 460.9  |
| 26.9   | 25.9   | 18.4   | 21.2   | 11.8   | 21.0   | 13.6   | 5.3   | 13.4   |
| 2.5    | 2.1    | 2.3    | 7.2    | 1.8    | 1.3    | 0.6    | 2.1   | 3.1    |
| 43.2   | 52.0   | 61.2   | 127.6  | 39.7   | 115.3  | 114.8  | 7.2   | 10.2   |
| 1.6    | 11.1   | 9.2    | 1.8    | 4.9    | 2.8    | 1.9    | 5.4   | 2.8    |
| 3.3    | 4.2    | 8.7    | 4.5    | 1.4    | 4.3    | 2.6    | 2.1   | 3.1    |
| 12.9   | 7.1    | 15.0   | 14.8   | 11.6   | 75.2   | 52.3   | 24.1  | 16.9   |
| 64.0   | 34.5   | 59.2   | 57.8   | 13.9   | 87.3   | 86.8   | 24.2  | 22.8   |
| 55.4   | 38.4   | 39.7   | 48.7   | 21.3   | 300.0  | 234.3  | 59.3  | 66.6   |
| 27.4   | 15.3   | 11.6   | 20.3   | 9.8    | 59.6   | 40.2   | 1.3   | 10.8   |
| 51.3   | 28.1   | 46.1   | 33.6   | 18.2   | 164.2  | 91.9   | 33.0  | 32.0   |
| 110.7  | 89.3   | 91.7   | 93.8   | 44.7   | 187.6  | 117.4  | 121.5 | 135.4  |
| 53.2   | 61.1   | 33.6   | 12.3   | 12.4   | 39.5   | 28.6   | 35.8  | 38.3   |
| 38.3   | 40.7   | 30.7   | 11.7   | 14.2   | 14.6   | 35.0   | 20.6  | 30.2   |
| 11.8   | 12.4   | 11.4   | 2.2    | 0.2    | 3.2    | 10.2   | 5.1   | 15.5   |
| 42.1   | 61.5   | 27.8   | 6.1    | 16.1   | 48.4   | 62.0   | 0.8   | 0.6    |
| 34.4   | 18.7   | 25.3   | 17.3   | 7.1    | 89.6   | 61.1   | 5.4   | 19.8   |
| 25.0   | 43.0   | 26.3   | 23.3   | 8.1    | 47.8   | 21.8   | 18.9  | 21.2   |
| 17.1   | 8.5    | 1.4    | 11.2   | 0.5    | 4.6    | 6.1    | 3.5   | 3.6    |
| 21.0   | 6.3    | 17.9   | 14.9   | 10.2   | 75.9   | 35.6   | 22.9  | 13.7   |
| 179.0  | 221.4  | 196.6  | 170.1  | 85.4   | 10.1   | 6.0    | 2.9   | 3.8    |
| 25.0   | 16.4   | 21.2   | 13.7   | 8.7    | 36.9   | 35.7   | 19.0  | 27.8   |
| 530.4  | 422.8  | 674.6  | 885.6  | 219.6  | 475.8  | 363.6  | 27.3  | 55.5   |
| 76.9   | 76.6   | 69.3   | 72.2   | 26.1   | 120.7  | 61.7   | 2.5   | 9.2    |
| 67.3   | 77.6   | 83.4   | 105.0  | 37.4   | 69.3   | 21.8   | 3.0   | 11.0   |
| 3.1    | 2.6    | 1.3    | 1.1    | 1.5    | 8.1    | 16.9   | 17.5  | 6.2    |
| 273.2  | 277.5  | 211.4  | 157.8  | 71.2   | 184.4  | 222.5  | 67.9  | 95.2   |
| 3631.1 | 2846.6 | 2831.1 | 2562.9 | 1304.9 | 4941.6 | 3955.2 | 753.1 | 1008.6 |
| 49.0   | 56.9   | 39.0   | 29.5   | 17.2   | 124.3  | 102.2  | 26.8  | 27.3   |
| 50.6   | 51.1   | 49.3   | 44.3   | 23.2   | 78.9   | 33.6   | 27.3  | 20.9   |
| 3.7    | 5.3    | 6.2    | 2.8    | 0.5    | 7.9    | 5.0    | 26.9  | 44.9   |
| 147.2  | 141.2  | 131.0  | 81.5   | 47.0   | 489.7  | 340.6  | 502.4 | 602.9  |
| 27.1   | 23.7   | 21.8   | 9.9    | 7.1    | 4.2    | 8.1    | 3.9   | 3.1    |
| 17.2   | 12.9   | 23.6   | 8.8    | 10.8   | 23.8   | 20.7   | 17.3  | 35.1   |
| 6.6    | 6.2    | 13.7   | 12.7   | 5.1    | 10.5   | 2.9    | 6.2   | 9.8    |
| 1714.8 | 1380.8 | 1434.2 | 1259.2 | 488.2  | 2451.4 | 1515.0 | 121.4 | 172.4  |
| 652.1  | 632.8  | 547.4  | 377.8  | 201.3  | 993.6  | 895.6  | 419.7 | 529.2  |
| 0.5    | 2.0    | 0.3    | 0.5    | 0.3    | 5.7    | 0.8    | 9.5   | 12.9   |
| 154.6  | 131.0  | 148.8  | 136.2  | 89.6   | 240.7  | 179.7  | 310.3 | 344.2  |
| 97.8   | 91.9   | 102.2  | 76.8   | 32.1   | 182.9  | 103.4  | 0.1   | 0.3    |
| 6.0    | 11.5   | 2.5    | 3.1    | 1.6    | 3.5    | 9.5    | 3.1   | 4.2    |
| 229.1  | 168.6  | 204.9  | 200.6  | 58.1   | 286.7  | 245.9  | 830.4 | 776.8  |
| 110.2  | 93.3   | 104.1  | 86.5   | 25.5   | 173.4  | 89.3   | 88.8  | 93.9   |
| 43.9   | 35.8   | 63.9   | 47.3   | 24.7   | 197.7  | 185.0  | 52.8  | 56.9   |
| 89.8   | 99.8   | 79.7   | 76.5   | 40.4   | 134.5  | 108.7  | 27.0  | 37.4   |
| 19.4   | 4.5    | 12.8   | 15.2   | 6.5    | 47.9   | 39.0   | 7.1   | 21.9   |
| 2.1    | 3.1    | 6.8    | 19.3   | 2.6    | 31.8   | 23.1   | 54.3  | 88.1   |
| 259.0  | 160.2  | 239.6  | 139.7  | 124.3  | 377.2  | 472.0  | 116.0 | 184.2  |
| 25.3   | 28.8   | 41.0   | 45.9   | 10.5   | 116.0  | 75.2   | 2.2   | 5.1    |
| 15.6   | 17.6   | 28.6   | 17.3   | 6.0    | 45.8   | 21.3   | 13.2  | 14.4   |

|        |        |        |        |       |        |        |        |        |
|--------|--------|--------|--------|-------|--------|--------|--------|--------|
| 23.8   | 23.5   | 3.5    | 3.2    | 6.6   | 3.6    | 9.6    | 1.8    | 2.7    |
| 25.7   | 19.1   | 17.1   | 11.7   | 6.7   | 7.6    | 5.3    | 29.0   | 14.7   |
| 2.0    | 1.8    | 8.9    | 1.4    | 0.5   | 1.4    | 1.5    | 3.7    | 4.9    |
| 37.0   | 51.2   | 25.7   | 25.6   | 15.6  | 63.1   | 43.3   | 34.4   | 24.4   |
| 2.2    | 4.1    | 7.1    | 4.2    | 0.3   | 7.3    | 0.4    | 3.8    | 0.3    |
| 87.8   | 65.2   | 72.4   | 43.5   | 19.0  | 105.6  | 73.6   | 55.1   | 46.3   |
| 3134.1 | 2790.5 | 2671.1 | 1881.9 | 858.0 | 5217.3 | 4202.2 | 1484.2 | 1913.8 |
| 66.5   | 54.0   | 60.4   | 37.0   | 19.1  | 178.0  | 163.3  | 97.1   | 62.4   |
| 145.4  | 155.9  | 197.9  | 307.1  | 50.6  | 112.7  | 74.5   | 32.0   | 52.7   |
| 1.4    | 0.9    | 1.7    | 1.4    | 1.0   | 1.0    | 1.0    | 0.7    | 0.7    |
| 18.2   | 11.1   | 17.8   | 9.1    | 2.5   | 65.3   | 36.6   | 14.3   | 37.9   |
| 36.6   | 48.7   | 23.4   | 14.4   | 13.8  | 53.1   | 37.2   | 78.2   | 161.3  |
| 192.9  | 155.5  | 108.5  | 52.5   | 32.5  | 356.9  | 217.7  | 67.7   | 68.2   |
| 59.5   | 38.7   | 51.9   | 36.5   | 29.8  | 43.3   | 19.6   | 47.8   | 63.5   |
| 20.4   | 18.6   | 32.5   | 22.4   | 14.5  | 124.4  | 142.7  | 22.5   | 45.6   |
| 23.5   | 6.8    | 7.6    | 14.7   | 10.9  | 48.4   | 45.1   | 12.0   | 9.2    |
| 235.9  | 188.4  | 240.2  | 244.1  | 79.6  | 347.6  | 265.2  | 139.3  | 146.6  |
| 153.6  | 119.4  | 88.5   | 75.8   | 33.2  | 219.6  | 167.8  | 20.3   | 22.5   |
| 205.9  | 156.4  | 194.9  | 201.4  | 61.8  | 358.6  | 167.6  | 40.1   | 42.1   |
| 135.3  | 137.5  | 115.0  | 67.5   | 39.4  | 122.1  | 76.3   | 20.2   | 47.2   |
| 21.5   | 14.3   | 14.5   | 8.2    | 9.6   | 20.2   | 40.5   | 26.4   | 110.1  |
| 24.9   | 27.3   | 22.9   | 26.6   | 16.6  | 32.1   | 28.2   | 14.2   | 28.8   |
| 1.8    | 1.2    | 3.3    | 1.3    | 0.5   | 3.2    | 2.1    | 1.3    | 1.5    |
| 20.0   | 24.4   | 11.0   | 11.9   | 9.4   | 17.7   | 6.7    | 5.5    | 10.6   |
| 1469.4 | 1445.6 | 1433.1 | 1096.6 | 515.8 | 1235.6 | 941.2  | 252.1  | 359.9  |
| 118.9  | 93.5   | 103.6  | 108.8  | 44.4  | 69.5   | 49.2   | 59.9   | 61.3   |
| 204.9  | 215.4  | 169.6  | 141.8  | 74.1  | 397.6  | 228.8  | 95.5   | 124.9  |
| 79.3   | 105.6  | 71.2   | 57.9   | 30.5  | 33.0   | 25.3   | 7.0    | 21.3   |
| 58.8   | 78.2   | 73.6   | 45.9   | 22.1  | 174.0  | 101.6  | 13.5   | 21.2   |
| 15.9   | 12.2   | 10.8   | 7.4    | 1.2   | 25.1   | 12.2   | 1.3    | 9.6    |
| 5.2    | 9.2    | 0.7    | 5.2    | 0.5   | 19.4   | 19.5   | 5.5    | 15.5   |
| 2.1    | 0.8    | 0.9    | 1.0    | 2.0   | 0.7    | 2.2    | 1.1    | 0.7    |
| 21.7   | 31.8   | 26.6   | 25.5   | 18.6  | 58.7   | 35.8   | 17.3   | 15.8   |
| 25.4   | 5.2    | 12.4   | 7.9    | 5.4   | 7.0    | 16.8   | 3.7    | 6.5    |
| 1.9    | 14.7   | 8.7    | 1.0    | 4.2   | 15.3   | 17.4   | 2.1    | 8.1    |
| 7.1    | 8.8    | 21.1   | 45.8   | 4.6   | 5.9    | 5.0    | 3.3    | 4.9    |
| 10.3   | 3.2    | 10.0   | 4.8    | 1.1   | 15.7   | 12.4   | 8.9    | 12.2   |
| 211.8  | 197.0  | 180.8  | 119.2  | 58.9  | 183.3  | 125.7  | 26.1   | 41.9   |
| 409.9  | 395.7  | 408.3  | 284.8  | 135.6 | 495.0  | 319.5  | 133.1  | 137.9  |
| 16.3   | 16.1   | 19.5   | 53.4   | 8.7   | 22.1   | 17.1   | 45.0   | 57.6   |
| 7.2    | 3.8    | 10.0   | 30.2   | 3.6   | 8.5    | 7.5    | 11.1   | 15.0   |
| 350.8  | 415.0  | 380.4  | 407.8  | 209.1 | 568.1  | 344.1  | 21.5   | 30.9   |
| 93.1   | 77.0   | 101.3  | 141.6  | 29.9  | 58.9   | 47.2   | 18.6   | 26.0   |
| 414.6  | 472.0  | 409.5  | 348.8  | 167.9 | 131.6  | 73.6   | 18.0   | 38.2   |
| 17.7   | 3.4    | 16.2   | 9.9    | 6.2   | 19.4   | 10.1   | 20.5   | 12.1   |
| 15.8   | 28.1   | 28.1   | 16.8   | 7.6   | 36.8   | 22.4   | 26.7   | 16.0   |
| 34.2   | 37.9   | 47.1   | 32.5   | 15.7  | 49.0   | 26.6   | 39.4   | 21.4   |
| 6.9    | 0.6    | 2.0    | 0.4    | 0.4   | 3.6    | 9.4    | 1.2    | 2.6    |
| 1.5    | 9.1    | 15.2   | 16.3   | 5.0   | 20.8   | 26.7   | 2.8    | 6.7    |
| 30.5   | 25.2   | 21.5   | 22.6   | 14.1  | 71.0   | 38.3   | 21.3   | 22.2   |
| 2.7    | 1.8    | 7.1    | 0.9    | 3.0   | 19.8   | 11.8   | 3.1    | 8.7    |
| 21.3   | 18.5   | 16.6   | 16.6   | 7.0   | 101.4  | 46.0   | 20.9   | 30.5   |
| 175.2  | 168.5  | 191.9  | 174.0  | 78.2  | 142.9  | 87.5   | 62.9   | 95.6   |

|        |        |        |       |       |        |        |       |       |
|--------|--------|--------|-------|-------|--------|--------|-------|-------|
| 153.2  | 119.3  | 170.1  | 153.7 | 44.9  | 105.3  | 71.9   | 49.7  | 45.1  |
| 438.2  | 380.4  | 441.0  | 364.2 | 117.9 | 679.5  | 422.8  | 43.2  | 60.5  |
| 269.8  | 233.0  | 182.6  | 184.8 | 88.4  | 298.4  | 187.6  | 39.4  | 58.7  |
| 5.4    | 1.2    | 3.2    | 1.1   | 4.4   | 1.4    | 2.7    | 1.5   | 1.5   |
| 21.0   | 33.8   | 24.8   | 28.2  | 13.8  | 41.3   | 25.0   | 53.2  | 44.1  |
| 3.1    | 4.0    | 2.3    | 1.6   | 4.5   | 3.2    | 1.3    | 1.5   | 1.5   |
| 23.1   | 16.6   | 17.5   | 17.5  | 7.2   | 27.0   | 8.0    | 29.8  | 24.9  |
| 109.7  | 118.1  | 122.8  | 86.4  | 29.6  | 318.2  | 129.2  | 64.2  | 112.6 |
| 2.0    | 1.0    | 1.6    | 0.9   | 0.5   | 1.8    | 1.3    | 1.5   | 1.0   |
| 1.4    | 1.7    | 1.7    | 1.1   | 0.8   | 2.3    | 2.0    | 1.2   | 1.3   |
| 2.2    | 1.4    | 6.2    | 11.0  | 0.5   | 4.3    | 3.6    | 4.5   | 1.1   |
| 243.3  | 243.8  | 264.8  | 249.0 | 115.6 | 481.8  | 301.3  | 74.2  | 106.1 |
| 232.5  | 250.2  | 266.5  | 282.4 | 117.0 | 619.9  | 379.1  | 41.1  | 70.3  |
| 1.8    | 1.6    | 3.2    | 1.3   | 0.7   | 4.0    | 1.6    | 2.5   | 4.1   |
| 69.0   | 133.3  | 161.0  | 119.2 | 45.7  | 106.4  | 45.8   | 3.6   | 4.1   |
| 424.3  | 460.5  | 509.7  | 467.2 | 182.3 | 407.8  | 274.2  | 40.1  | 40.7  |
| 29.0   | 12.5   | 20.5   | 6.1   | 2.1   | 96.8   | 76.1   | 4.7   | 7.5   |
| 10.0   | 8.3    | 10.3   | 10.5  | 1.9   | 34.9   | 22.8   | 14.8  | 28.5  |
| 4.8    | 6.5    | 6.5    | 3.8   | 0.7   | 35.2   | 17.5   | 6.3   | 17.2  |
| 41.7   | 65.1   | 57.1   | 69.9  | 28.8  | 37.6   | 29.6   | 1.6   | 1.2   |
| 58.4   | 42.6   | 51.3   | 17.1  | 16.2  | 34.3   | 33.4   | 11.0  | 24.6  |
| 2.4    | 1.6    | 6.2    | 6.2   | 0.5   | 3.3    | 6.8    | 0.6   | 1.5   |
| 340.0  | 365.2  | 317.0  | 230.0 | 133.9 | 1069.5 | 610.8  | 549.7 | 672.2 |
| 16.8   | 20.1   | 14.2   | 13.5  | 4.5   | 27.0   | 21.7   | 31.1  | 22.3  |
| 9.4    | 1.2    | 14.6   | 2.6   | 1.5   | 12.9   | 12.1   | 12.4  | 11.9  |
| 49.7   | 23.9   | 24.3   | 19.4  | 5.1   | 108.1  | 89.9   | 36.9  | 29.9  |
| 71.5   | 45.4   | 49.3   | 39.5  | 23.1  | 70.6   | 50.0   | 3.1   | 1.9   |
| 61.7   | 28.4   | 25.1   | 8.6   | 6.9   | 83.9   | 50.6   | 39.5  | 62.8  |
| 44.0   | 10.2   | 24.2   | 10.8  | 6.6   | 62.4   | 39.7   | 26.0  | 28.2  |
| 125.5  | 123.3  | 117.6  | 104.9 | 31.8  | 119.2  | 69.4   | 37.9  | 48.9  |
| 294.6  | 174.4  | 173.9  | 104.8 | 55.5  | 697.1  | 409.3  | 104.9 | 137.7 |
| 51.8   | 28.9   | 40.2   | 24.0  | 14.4  | 77.6   | 42.9   | 66.4  | 37.9  |
| 10.3   | 8.5    | 7.5    | 7.6   | 4.9   | 11.1   | 8.3    | 7.7   | 5.9   |
| 18.5   | 23.3   | 4.7    | 13.3  | 3.5   | 88.9   | 63.8   | 15.9  | 12.6  |
| 0.8    | 3.1    | 4.6    | 6.0   | 0.7   | 3.9    | 2.0    | 3.4   | 3.2   |
| 48.7   | 58.2   | 57.6   | 56.6  | 18.7  | 93.2   | 66.4   | 16.4  | 12.1  |
| 491.2  | 515.1  | 471.5  | 428.0 | 127.9 | 1182.4 | 1123.8 | 201.9 | 289.4 |
| 591.4  | 477.1  | 563.1  | 246.7 | 157.3 | 1335.2 | 734.9  | 134.8 | 161.6 |
| 272.0  | 184.1  | 215.9  | 53.3  | 48.5  | 517.2  | 241.0  | 105.0 | 92.4  |
| 15.2   | 13.9   | 17.5   | 8.1   | 5.4   | 20.3   | 9.2    | 10.7  | 14.5  |
| 373.8  | 534.6  | 417.3  | 288.8 | 127.4 | 413.9  | 405.2  | 63.8  | 97.3  |
| 84.4   | 106.5  | 94.5   | 64.7  | 34.6  | 73.9   | 48.5   | 10.1  | 7.2   |
| 53.9   | 52.8   | 42.4   | 33.6  | 21.1  | 50.8   | 57.2   | 31.5  | 25.2  |
| 9.2    | 8.8    | 10.4   | 11.5  | 8.1   | 20.1   | 19.8   | 4.8   | 16.3  |
| 18.3   | 18.3   | 12.3   | 18.7  | 9.5   | 9.8    | 12.7   | 6.5   | 6.5   |
| 202.1  | 144.7  | 157.4  | 92.8  | 54.4  | 46.8   | 84.8   | 25.6  | 29.9  |
| 114.4  | 84.5   | 84.2   | 68.9  | 29.6  | 56.7   | 29.5   | 52.3  | 36.4  |
| 26.8   | 39.0   | 26.7   | 16.8  | 7.0   | 18.7   | 11.4   | 22.9  | 16.4  |
| 1358.8 | 1339.0 | 1057.8 | 775.0 | 535.1 | 2076.9 | 1308.5 | 210.8 | 256.1 |
| 30.3   | 46.5   | 32.1   | 37.5  | 16.5  | 84.2   | 87.2   | 2.3   | 9.8   |
| 2.8    | 1.0    | 1.2    | 0.5   | 3.2   | 0.9    | 0.9    | 2.2   | 2.0   |
| 2.0    | 7.4    | 13.5   | 12.1  | 6.6   | 23.7   | 21.9   | 6.0   | 5.5   |
| 12.9   | 3.5    | 6.1    | 4.6   | 2.4   | 12.2   | 10.6   | 6.7   | 5.2   |

|        |        |        |        |       |        |        |       |       |
|--------|--------|--------|--------|-------|--------|--------|-------|-------|
| 78.8   | 72.9   | 65.1   | 92.0   | 51.5  | 1362.6 | 1281.1 | 43.6  | 34.2  |
| 7.3    | 1.2    | 0.9    | 1.5    | 7.6   | 3.4    | 7.4    | 4.0   | 2.2   |
| 12.6   | 19.8   | 3.9    | 8.6    | 0.6   | 10.4   | 0.8    | 2.4   | 2.8   |
| 1.4    | 4.2    | 4.1    | 2.6    | 0.3   | 3.6    | 2.1    | 1.0   | 0.8   |
| 304.2  | 349.3  | 335.8  | 303.9  | 135.7 | 351.8  | 329.2  | 28.1  | 31.8  |
| 23.2   | 25.5   | 14.2   | 2.6    | 18.6  | 3.9    | 21.2   | 3.0   | 4.0   |
| 13.4   | 13.8   | 12.8   | 10.0   | 6.9   | 12.2   | 17.9   | 15.2  | 13.6  |
| 7.4    | 1.2    | 7.8    | 2.9    | 5.0   | 2.9    | 1.8    | 2.0   | 2.5   |
| 66.4   | 65.4   | 70.5   | 71.0   | 16.8  | 101.7  | 73.5   | 21.9  | 32.8  |
| 18.7   | 13.2   | 16.8   | 25.3   | 7.2   | 8.4    | 7.0    | 0.8   | 1.5   |
| 93.5   | 54.5   | 61.6   | 29.8   | 23.2  | 121.3  | 69.1   | 0.9   | 0.3   |
| 7.7    | 1.3    | 4.0    | 1.3    | 0.8   | 16.3   | 2.9    | 2.7   | 3.8   |
| 169.2  | 171.6  | 178.9  | 140.9  | 67.3  | 386.1  | 272.6  | 52.0  | 32.4  |
| 468.8  | 607.5  | 645.8  | 662.2  | 250.0 | 2216.1 | 1202.6 | 159.3 | 154.1 |
| 14.3   | 18.8   | 15.1   | 12.7   | 3.4   | 27.2   | 14.9   | 4.3   | 3.0   |
| 173.5  | 126.9  | 153.8  | 254.8  | 55.1  | 84.8   | 60.8   | 76.2  | 95.5  |
| 1.9    | 2.4    | 1.7    | 5.0    | 0.6   | 4.0    | 2.8    | 1.5   | 2.0   |
| 2.6    | 2.5    | 3.1    | 2.1    | 3.8   | 3.1    | 18.1   | 7.6   | 0.6   |
| 77.4   | 60.0   | 73.2   | 51.2   | 35.0  | 116.3  | 94.7   | 48.1  | 72.8  |
| 3.6    | 0.4    | 9.0    | 6.9    | 0.3   | 3.1    | 3.7    | 2.5   | 0.4   |
| 2.4    | 1.8    | 4.1    | 2.0    | 0.6   | 2.0    | 2.2    | 4.9   | 12.8  |
| 3.8    | 5.3    | 4.1    | 8.7    | 3.3   | 16.0   | 8.3    | 4.7   | 5.3   |
| 24.1   | 19.2   | 13.2   | 10.8   | 7.1   | 14.5   | 17.6   | 4.0   | 0.7   |
| 23.9   | 5.1    | 18.3   | 22.0   | 13.6  | 27.5   | 36.2   | 11.7  | 6.2   |
| 1.7    | 1.0    | 0.8    | 1.0    | 0.9   | 2.3    | 1.8    | 1.4   | 1.5   |
| 1379.7 | 1476.5 | 1246.2 | 1090.7 | 500.1 | 539.4  | 492.9  | 164.4 | 263.6 |
| 3.1    | 2.4    | 4.4    | 6.8    | 7.4   | 2.5    | 11.4   | 13.6  | 4.6   |
| 8.7    | 5.7    | 10.3   | 6.1    | 7.0   | 6.2    | 0.7    | 11.6  | 12.5  |
| 4.0    | 1.5    | 18.6   | 1.5    | 5.0   | 9.6    | 7.0    | 9.0   | 11.4  |
| 3.0    | 5.4    | 2.4    | 9.1    | 1.1   | 3.4    | 2.4    | 10.5  | 16.1  |
| 2.2    | 7.1    | 4.9    | 4.7    | 8.0   | 11.9   | 2.3    | 16.3  | 15.1  |
| 1.2    | 0.8    | 1.8    | 0.6    | 0.7   | 10.2   | 0.9    | 1.4   | 1.0   |
| 9.2    | 1.7    | 1.9    | 3.0    | 6.2   | 9.5    | 12.9   | 0.7   | 2.3   |
| 7.3    | 2.2    | 1.7    | 0.9    | 1.0   | 24.3   | 3.5    | 1.6   | 1.9   |
| 2.1    | 1.6    | 4.1    | 1.5    | 0.4   | 1.8    | 0.9    | 1.0   | 0.9   |
| 8.5    | 13.6   | 3.0    | 9.6    | 0.8   | 9.5    | 2.4    | 6.6   | 7.5   |
| 521.8  | 546.1  | 499.2  | 495.1  | 181.4 | 9.7    | 9.9    | 5.3   | 3.6   |
| 3.4    | 0.8    | 1.3    | 4.9    | 7.3   | 15.9   | 0.7    | 7.8   | 0.9   |
| 35.5   | 23.2   | 36.6   | 16.2   | 11.2  | 51.7   | 34.4   | 2.9   | 6.0   |
| 2.1    | 2.8    | 2.3    | 1.8    | 1.1   | 3.7    | 3.3    | 4.0   | 8.0   |
| 2.2    | 5.3    | 0.9    | 1.6    | 4.0   | 4.0    | 1.9    | 3.7   | 7.4   |
| 106.0  | 83.5   | 106.7  | 144.4  | 40.6  | 80.5   | 25.8   | 29.2  | 17.8  |
| 8.2    | 17.7   | 17.6   | 14.5   | 8.2   | 37.4   | 4.5    | 5.0   | 18.0  |
| 1.0    | 1.6    | 1.1    | 0.5    | 0.9   | 1.8    | 8.5    | 2.2   | 1.7   |
| 48.8   | 37.1   | 46.1   | 32.4   | 10.3  | 39.2   | 28.1   | 19.0  | 25.1  |
| 14.8   | 6.7    | 3.9    | 2.8    | 3.7   | 2.2    | 2.1    | 9.8   | 2.1   |
| 2.0    | 1.1    | 2.3    | 5.9    | 0.3   | 13.7   | 1.5    | 1.4   | 2.0   |
| 150.1  | 122.8  | 132.7  | 92.4   | 56.9  | 182.0  | 111.2  | 123.3 | 127.9 |
| 11.5   | 3.8    | 1.6    | 1.0    | 1.0   | 8.2    | 5.1    | 11.3  | 5.1   |
| 28.8   | 19.1   | 8.0    | 14.2   | 5.9   | 38.5   | 29.9   | 9.1   | 10.3  |
| 3.6    | 2.3    | 1.2    | 1.4    | 0.5   | 0.8    | 2.0    | 0.9   | 2.2   |
| 437.3  | 451.3  | 540.9  | 655.8  | 187.6 | 627.4  | 427.6  | 30.6  | 53.1  |
| 174.8  | 178.1  | 216.1  | 199.4  | 94.6  | 572.2  | 667.3  | 14.6  | 20.1  |

|       |       |       |       |       |        |        |       |       |
|-------|-------|-------|-------|-------|--------|--------|-------|-------|
| 106.7 | 104.9 | 93.0  | 103.6 | 37.8  | 258.1  | 180.3  | 59.4  | 58.1  |
| 12.6  | 13.8  | 8.4   | 5.3   | 1.5   | 6.0    | 10.9   | 4.2   | 13.6  |
| 18.5  | 22.1  | 19.6  | 2.6   | 3.6   | 22.9   | 3.8    | 32.3  | 9.5   |
| 50.8  | 42.1  | 52.4  | 18.8  | 21.5  | 2413.0 | 1687.7 | 32.8  | 51.1  |
| 15.4  | 14.3  | 6.8   | 16.6  | 7.8   | 26.3   | 37.0   | 2.4   | 12.2  |
| 21.8  | 15.1  | 23.8  | 16.1  | 9.7   | 23.7   | 11.7   | 14.4  | 15.3  |
| 53.4  | 51.6  | 59.3  | 49.2  | 25.4  | 134.5  | 108.0  | 7.4   | 10.7  |
| 1.7   | 1.6   | 3.9   | 1.0   | 0.5   | 11.4   | 7.6    | 4.8   | 0.8   |
| 45.1  | 36.0  | 24.5  | 22.7  | 10.8  | 80.6   | 52.3   | 21.1  | 21.8  |
| 6.5   | 6.5   | 6.6   | 4.5   | 11.5  | 50.0   | 4.7    | 5.5   | 5.6   |
| 41.3  | 46.5  | 35.4  | 16.0  | 12.4  | 53.4   | 24.0   | 45.9  | 62.5  |
| 45.9  | 50.7  | 39.6  | 26.9  | 14.5  | 247.5  | 161.1  | 82.0  | 113.6 |
| 9.0   | 1.8   | 3.3   | 12.7  | 12.2  | 10.8   | 23.0   | 11.7  | 5.8   |
| 117.3 | 101.5 | 129.5 | 94.7  | 30.7  | 196.3  | 127.3  | 21.4  | 31.2  |
| 481.9 | 442.4 | 565.9 | 598.1 | 182.2 | 235.0  | 141.9  | 44.2  | 43.3  |
| 44.1  | 19.8  | 51.5  | 23.2  | 13.4  | 55.6   | 26.4   | 32.4  | 24.4  |
| 14.4  | 9.2   | 11.1  | 4.2   | 3.1   | 72.8   | 25.2   | 7.4   | 11.5  |
| 262.5 | 212.1 | 199.2 | 195.2 | 85.0  | 153.8  | 106.7  | 43.1  | 55.6  |
| 8.3   | 3.3   | 19.1  | 4.5   | 3.0   | 3.2    | 0.9    | 12.6  | 5.4   |
| 12.5  | 5.7   | 11.9  | 9.9   | 0.2   | 17.1   | 2.8    | 1.4   | 2.4   |
| 150.1 | 137.8 | 118.5 | 87.9  | 54.7  | 221.5  | 99.2   | 160.3 | 165.8 |
| 34.2  | 32.9  | 40.5  | 25.5  | 7.8   | 48.9   | 27.0   | 30.8  | 27.2  |
| 694.4 | 714.0 | 721.6 | 844.0 | 309.0 | 384.4  | 295.3  | 54.1  | 65.4  |
| 15.5  | 23.6  | 24.4  | 21.5  | 14.7  | 11.9   | 9.9    | 1.8   | 12.2  |
| 73.4  | 73.3  | 69.8  | 64.1  | 28.0  | 84.3   | 69.6   | 30.4  | 19.0  |
| 286.4 | 341.0 | 379.4 | 191.6 | 149.5 | 679.9  | 419.0  | 137.6 | 198.8 |
| 47.1  | 51.8  | 64.2  | 46.9  | 22.2  | 175.7  | 114.2  | 77.2  | 92.0  |
| 305.7 | 257.5 | 241.1 | 209.3 | 81.2  | 229.3  | 175.9  | 154.0 | 180.3 |
| 52.9  | 39.1  | 52.8  | 60.8  | 20.4  | 57.2   | 48.6   | 20.4  | 28.8  |
| 1.8   | 2.6   | 4.6   | 2.8   | 0.3   | 64.3   | 52.6   | 1.6   | 3.1   |
| 1.8   | 0.9   | 0.4   | 2.3   | 5.2   | 1.5    | 0.4    | 0.7   | 0.8   |
| 46.7  | 45.9  | 37.8  | 32.7  | 22.3  | 18.7   | 13.7   | 24.9  | 66.3  |
| 9.7   | 7.1   | 1.2   | 2.3   | 10.2  | 16.7   | 14.6   | 5.6   | 5.6   |
| 72.3  | 56.2  | 64.5  | 73.1  | 29.4  | 181.1  | 122.4  | 90.3  | 91.0  |
| 1.8   | 0.6   | 5.8   | 6.0   | 0.4   | 13.6   | 10.8   | 0.4   | 4.3   |
| 217.4 | 219.4 | 196.6 | 193.3 | 78.2  | 432.8  | 321.1  | 37.2  | 57.6  |
| 5.6   | 3.3   | 12.4  | 8.5   | 1.3   | 18.9   | 3.2    | 5.6   | 0.8   |
| 9.9   | 7.9   | 8.4   | 4.7   | 0.5   | 6.8    | 9.5    | 1.0   | 0.3   |
| 275.9 | 231.0 | 277.1 | 277.2 | 112.4 | 240.0  | 143.7  | 78.6  | 125.3 |
| 5.6   | 7.7   | 2.2   | 11.7  | 1.3   | 4.2    | 0.9    | 4.2   | 2.2   |
| 1.7   | 13.0  | 20.5  | 0.8   | 0.8   | 34.9   | 12.4   | 9.8   | 0.9   |
| 32.3  | 26.6  | 3.4   | 17.5  | 15.4  | 2.2    | 1.5    | 1.1   | 1.1   |
| 167.4 | 138.4 | 143.7 | 110.3 | 55.3  | 89.5   | 52.8   | 11.2  | 23.5  |
| 229.8 | 257.8 | 231.8 | 197.3 | 73.0  | 192.6  | 142.8  | 309.2 | 328.3 |
| 70.5  | 68.6  | 71.0  | 51.2  | 12.0  | 69.6   | 47.2   | 5.0   | 13.2  |
| 26.5  | 19.3  | 23.7  | 45.1  | 9.7   | 249.2  | 213.9  | 11.3  | 28.1  |
| 114.5 | 92.3  | 107.5 | 93.3  | 33.6  | 167.5  | 132.9  | 24.8  | 30.7  |
| 20.8  | 9.4   | 5.7   | 3.8   | 2.5   | 37.9   | 33.9   | 23.6  | 7.0   |
| 8.9   | 1.7   | 7.3   | 6.6   | 4.0   | 0.8    | 6.1    | 6.1   | 1.3   |
| 525.9 | 419.8 | 473.4 | 473.6 | 156.2 | 3961.5 | 2736.7 | 127.0 | 176.6 |
| 376.9 | 251.2 | 268.1 | 125.7 | 96.5  | 643.4  | 308.7  | 303.4 | 390.5 |
| 15.1  | 30.4  | 20.6  | 15.4  | 9.0   | 61.7   | 28.0   | 6.8   | 6.5   |
| 111.6 | 85.4  | 86.9  | 80.0  | 22.8  | 37.9   | 38.2   | 38.7  | 49.8  |

|       |       |       |       |       |       |       |       |       |
|-------|-------|-------|-------|-------|-------|-------|-------|-------|
| 212.8 | 110.3 | 129.6 | 87.6  | 40.6  | 420.5 | 353.6 | 62.2  | 81.3  |
| 27.0  | 21.5  | 33.6  | 17.3  | 1.4   | 40.6  | 25.7  | 23.4  | 16.2  |
| 14.3  | 18.1  | 24.9  | 15.4  | 3.6   | 32.5  | 5.5   | 13.0  | 18.5  |
| 10.7  | 8.5   | 6.6   | 3.4   | 4.7   | 10.8  | 7.3   | 3.4   | 1.4   |
| 7.9   | 14.1  | 2.3   | 9.1   | 6.4   | 463.1 | 301.5 | 8.9   | 9.0   |
| 578.5 | 486.8 | 629.0 | 355.4 | 169.2 | 481.9 | 242.5 | 39.5  | 47.3  |
| 45.7  | 39.1  | 34.7  | 37.5  | 12.3  | 73.7  | 39.7  | 24.2  | 16.9  |
| 104.9 | 78.3  | 70.8  | 68.1  | 27.2  | 118.3 | 130.0 | 105.3 | 158.0 |
| 8.7   | 1.5   | 6.5   | 6.6   | 1.6   | 1.4   | 9.8   | 7.1   | 4.4   |
| 9.4   | 2.1   | 10.0  | 5.8   | 3.2   | 29.1  | 24.2  | 21.0  | 16.6  |
| 5.0   | 8.6   | 1.5   | 1.6   | 0.4   | 74.1  | 107.4 | 1.1   | 1.6   |
| 42.8  | 26.5  | 30.0  | 14.5  | 10.0  | 40.0  | 47.0  | 5.1   | 13.9  |
| 9.2   | 1.5   | 1.2   | 2.9   | 0.8   | 26.6  | 23.4  | 6.9   | 8.4   |
| 1.7   | 1.6   | 1.2   | 0.9   | 0.6   | 23.6  | 1.6   | 2.7   | 0.8   |
| 1.6   | 9.6   | 7.5   | 1.1   | 0.4   | 10.7  | 3.1   | 6.0   | 0.3   |
| 20.8  | 4.2   | 6.7   | 11.0  | 2.7   | 77.0  | 57.8  | 9.5   | 15.5  |
| 2.0   | 0.8   | 1.9   | 7.5   | 3.1   | 9.7   | 0.4   | 14.0  | 4.9   |
| 97.1  | 90.4  | 90.0  | 87.1  | 38.8  | 466.0 | 225.1 | 152.4 | 122.3 |
| 1.1   | 2.9   | 2.2   | 2.9   | 3.8   | 1.1   | 0.9   | 1.9   | 1.1   |
| 15.0  | 13.1  | 25.2  | 24.5  | 9.5   | 16.7  | 5.4   | 0.6   | 5.5   |
| 1.4   | 0.5   | 1.2   | 3.7   | 0.4   | 4.2   | 2.3   | 10.7  | 1.4   |
| 25.5  | 9.7   | 4.4   | 9.5   | 0.4   | 10.0  | 11.0  | 6.1   | 13.9  |
| 7.1   | 0.9   | 17.1  | 5.6   | 6.3   | 10.1  | 15.2  | 9.0   | 3.6   |
| 12.8  | 3.1   | 4.7   | 10.5  | 2.6   | 12.7  | 12.3  | 11.4  | 11.7  |
| 441.9 | 565.8 | 548.8 | 652.8 | 268.8 | 702.8 | 804.5 | 50.3  | 77.5  |
| 57.8  | 92.6  | 56.5  | 47.2  | 27.4  | 74.2  | 54.2  | 5.0   | 12.5  |
| 14.2  | 9.3   | 14.8  | 9.1   | 6.3   | 13.4  | 4.4   | 14.6  | 1.8   |
| 20.1  | 12.7  | 7.1   | 5.2   | 3.0   | 6.5   | 4.3   | 9.6   | 18.3  |
| 8.3   | 3.9   | 1.6   | 3.2   | 9.6   | 27.2  | 28.5  | 4.6   | 7.4   |
| 50.8  | 41.0  | 55.1  | 23.9  | 20.6  | 44.8  | 21.9  | 21.9  | 12.5  |
| 2.0   | 1.1   | 1.3   | 0.4   | 4.3   | 4.7   | 1.4   | 0.9   | 5.4   |
| 1.5   | 0.6   | 1.4   | 0.8   | 4.4   | 1.8   | 0.7   | 0.9   | 15.3  |
| 73.0  | 40.6  | 54.6  | 58.4  | 35.8  | 121.8 | 84.5  | 113.8 | 108.8 |
| 39.4  | 54.6  | 54.1  | 36.4  | 22.0  | 119.2 | 76.9  | 45.7  | 42.1  |
| 50.6  | 67.3  | 55.8  | 72.9  | 29.8  | 131.5 | 91.4  | 27.6  | 42.5  |
| 50.1  | 41.1  | 43.7  | 51.7  | 16.4  | 78.4  | 55.1  | 19.9  | 27.5  |
| 1.9   | 1.5   | 1.4   | 2.1   | 1.0   | 2.8   | 12.9  | 1.6   | 1.2   |
| 57.1  | 46.6  | 67.8  | 48.2  | 10.5  | 46.6  | 55.0  | 14.5  | 30.6  |
| 12.6  | 20.6  | 10.6  | 7.8   | 1.4   | 6.5   | 0.3   | 0.4   | 1.5   |
| 10.9  | 6.0   | 4.3   | 1.1   | 1.7   | 6.6   | 5.4   | 24.5  | 12.9  |
| 2.3   | 3.5   | 3.7   | 1.6   | 1.3   | 4.8   | 2.2   | 1.7   | 0.9   |
| 183.8 | 158.4 | 161.3 | 131.6 | 66.5  | 236.5 | 137.0 | 50.4  | 62.3  |
| 113.1 | 97.2  | 123.8 | 111.9 | 31.7  | 170.0 | 113.3 | 76.9  | 67.6  |
| 159.7 | 196.1 | 180.0 | 145.3 | 45.1  | 334.8 | 135.1 | 35.9  | 52.3  |
| 1.0   | 2.6   | 9.9   | 0.3   | 0.2   | 0.8   | 3.2   | 1.6   | 1.0   |
| 279.5 | 269.5 | 280.0 | 264.7 | 109.8 | 721.5 | 631.2 | 59.0  | 91.3  |
| 349.7 | 346.5 | 366.6 | 411.8 | 148.8 | 621.0 | 424.5 | 44.3  | 69.4  |
| 7.5   | 9.7   | 18.9  | 6.4   | 2.9   | 6.5   | 5.4   | 17.2  | 13.1  |
| 72.0  | 60.5  | 78.3  | 40.0  | 24.8  | 141.2 | 101.0 | 64.9  | 66.3  |
| 98.3  | 80.9  | 76.5  | 78.3  | 59.8  | 157.9 | 142.1 | 82.3  | 44.2  |
| 23.3  | 26.7  | 18.2  | 15.1  | 8.1   | 31.0  | 20.8  | 8.9   | 15.8  |
| 109.5 | 134.7 | 161.8 | 200.4 | 72.9  | 218.2 | 203.8 | 52.6  | 85.6  |
| 7.5   | 4.2   | 6.8   | 3.2   | 0.8   | 21.6  | 8.4   | 9.3   | 1.1   |

|        |        |        |        |        |        |        |        |        |
|--------|--------|--------|--------|--------|--------|--------|--------|--------|
| 7.7    | 11.5   | 10.6   | 4.6    | 12.6   | 12.8   | 10.6   | 17.6   | 9.8    |
| 1231.0 | 1042.9 | 1056.2 | 842.5  | 314.1  | 1268.3 | 815.4  | 293.2  | 396.6  |
| 9.9    | 6.1    | 19.3   | 5.6    | 4.8    | 7.2    | 4.9    | 10.6   | 8.3    |
| 13.5   | 11.7   | 3.5    | 8.6    | 0.6    | 18.1   | 15.1   | 6.9    | 1.2    |
| 22.3   | 27.3   | 10.8   | 8.0    | 11.1   | 3.4    | 17.1   | 2.5    | 14.0   |
| 601.8  | 526.6  | 532.2  | 400.8  | 250.6  | 1575.7 | 1091.5 | 182.9  | 258.7  |
| 56.1   | 43.6   | 37.2   | 25.0   | 17.8   | 67.0   | 27.3   | 129.3  | 145.2  |
| 21.0   | 28.3   | 19.8   | 18.4   | 7.6    | 26.1   | 34.1   | 16.0   | 4.3    |
| 18.4   | 17.7   | 17.7   | 13.0   | 1.8    | 3.9    | 1.3    | 13.1   | 4.6    |
| 25.4   | 22.3   | 20.5   | 20.8   | 9.2    | 31.9   | 3.1    | 15.8   | 13.5   |
| 70.4   | 52.8   | 96.7   | 141.7  | 39.5   | 359.4  | 213.2  | 185.5  | 180.5  |
| 5.8    | 2.8    | 5.0    | 2.5    | 2.5    | 7.3    | 1.3    | 6.4    | 5.7    |
| 10.6   | 6.8    | 21.1   | 5.9    | 3.0    | 5.0    | 5.9    | 5.4    | 7.3    |
| 14.2   | 11.2   | 13.9   | 19.0   | 5.9    | 19.1   | 15.0   | 8.0    | 6.5    |
| 11.3   | 20.4   | 19.4   | 20.9   | 9.7    | 26.3   | 1.6    | 12.8   | 13.7   |
| 3.0    | 2.1    | 8.9    | 2.2    | 1.7    | 7.6    | 8.2    | 2.4    | 0.9    |
| 4.3    | 3.9    | 4.6    | 3.8    | 0.2    | 2.0    | 3.0    | 3.7    | 5.5    |
| 64.4   | 63.7   | 55.8   | 45.5   | 24.4   | 95.1   | 47.2   | 47.1   | 65.2   |
| 3680.2 | 3311.2 | 3308.5 | 3572.9 | 1733.2 | 5167.7 | 4486.1 | 217.4  | 305.4  |
| 1367.9 | 1301.6 | 1367.8 | 1460.5 | 526.9  | 1267.6 | 844.9  | 214.6  | 357.1  |
| 2322.3 | 2114.8 | 1927.9 | 1907.4 | 757.1  | 2614.4 | 1598.5 | 1793.2 | 2758.8 |
| 94.7   | 101.0  | 123.7  | 125.5  | 63.7   | 153.5  | 108.6  | 13.9   | 30.0   |
| 68.1   | 40.0   | 24.7   | 6.4    | 19.0   | 154.8  | 141.7  | 32.7   | 29.8   |
| 147.7  | 140.6  | 214.8  | 222.4  | 64.1   | 161.6  | 94.0   | 5.7    | 15.4   |
| 5.7    | 12.0   | 7.6    | 8.9    | 11.5   | 26.0   | 21.7   | 38.2   | 40.7   |
| 45.8   | 61.5   | 48.9   | 60.8   | 25.1   | 55.1   | 29.4   | 11.9   | 10.2   |
| 28.9   | 14.2   | 23.8   | 14.7   | 1.9    | 270.5  | 208.2  | 19.6   | 27.8   |
| 94.9   | 108.8  | 99.6   | 151.9  | 45.5   | 250.3  | 199.2  | 27.5   | 21.5   |
| 507.6  | 483.3  | 433.8  | 301.9  | 225.3  | 168.1  | 82.0   | 44.4   | 47.8   |
| 20.1   | 17.9   | 29.1   | 25.0   | 11.2   | 20.8   | 24.9   | 5.9    | 10.5   |
| 26.3   | 17.9   | 39.1   | 9.2    | 2.5    | 20.2   | 20.2   | 13.6   | 17.7   |
| 263.8  | 254.6  | 286.7  | 284.4  | 86.4   | 457.3  | 355.5  | 78.4   | 74.7   |
| 711.3  | 690.0  | 660.4  | 687.5  | 347.3  | 981.5  | 922.7  | 291.4  | 405.7  |
| 65.4   | 49.4   | 44.9   | 31.7   | 12.7   | 93.6   | 70.5   | 18.5   | 20.6   |
| 8.6    | 9.7    | 7.3    | 1.2    | 1.2    | 0.7    | 7.3    | 1.9    | 1.3    |
| 10.5   | 1.9    | 6.5    | 8.1    | 5.7    | 2.2    | 0.4    | 9.1    | 8.2    |
| 25.1   | 11.9   | 11.6   | 14.7   | 1.9    | 1.5    | 0.7    | 4.6    | 10.5   |
| 4.9    | 1.4    | 3.5    | 1.3    | 0.1    | 0.7    | 7.0    | 8.8    | 4.7    |
| 164.1  | 190.2  | 165.1  | 166.2  | 74.7   | 252.1  | 127.3  | 43.4   | 54.5   |
| 118.5  | 109.8  | 160.9  | 250.4  | 54.0   | 246.2  | 161.1  | 86.7   | 102.6  |
| 15.4   | 33.8   | 37.4   | 16.4   | 7.5    | 30.1   | 19.6   | 41.1   | 32.8   |
| 4.1    | 6.1    | 2.3    | 1.2    | 0.2    | 1.8    | 9.9    | 8.3    | 13.0   |
| 2.3    | 5.0    | 8.9    | 0.8    | 1.0    | 9.3    | 7.8    | 0.8    | 0.8    |
| 0.6    | 0.5    | 0.8    | 1.0    | 0.3    | 0.8    | 1.5    | 0.7    | 0.4    |
| 14.9   | 6.7    | 5.8    | 8.3    | 1.7    | 126.8  | 80.1   | 52.7   | 67.0   |
| 2.6    | 2.3    | 5.6    | 1.6    | 10.0   | 10.5   | 7.7    | 2.2    | 14.4   |
| 422.6  | 404.2  | 348.5  | 297.3  | 158.3  | 942.0  | 698.0  | 360.9  | 354.4  |
| 1.1    | 3.8    | 3.2    | 6.2    | 2.4    | 3.1    | 7.9    | 2.7    | 8.0    |
| 3.0    | 3.0    | 1.5    | 2.8    | 6.0    | 2.8    | 1.7    | 10.1   | 1.6    |
| 3.7    | 1.8    | 1.4    | 1.9    | 1.3    | 1.3    | 1.1    | 1.4    | 4.1    |
| 103.7  | 105.4  | 129.1  | 139.7  | 39.7   | 475.2  | 394.9  | 23.8   | 45.8   |
| 60.3   | 64.3   | 69.0   | 42.8   | 18.4   | 105.2  | 55.9   | 32.4   | 47.0   |
| 25.1   | 17.3   | 26.8   | 16.2   | 9.4    | 94.3   | 57.4   | 40.0   | 27.1   |



|       |       |       |       |       |       |       |      |      |
|-------|-------|-------|-------|-------|-------|-------|------|------|
| 18.4  | 12.5  | 26.5  | 5.0   | 9.3   | 98.3  | 61.0  | 19.4 | 5.0  |
| 194.7 | 212.6 | 202.2 | 197.9 | 106.2 | 440.3 | 425.3 | 20.4 | 13.8 |
| 30.7  | 22.4  | 25.7  | 33.6  | 1.5   | 6.8   | 2.7   | 2.5  | 20.4 |
| 2.5   | 2.0   | 4.8   | 1.3   | 0.2   | 2.0   | 1.6   | 1.9  | 0.9  |
| 61.6  | 49.2  | 54.9  | 83.7  | 18.9  | 85.1  | 57.2  | 2.9  | 13.6 |
| 72.2  | 70.5  | 74.9  | 91.4  | 19.9  | 26.7  | 30.3  | 4.6  | 10.7 |
| 3.9   | 3.7   | 10.5  | 8.5   | 11.6  | 3.0   | 1.2   | 3.1  | 8.7  |
| 9.3   | 1.6   | 2.1   | 2.0   | 10.9  | 26.2  | 36.1  | 1.2  | 2.1  |
| 74.2  | 87.5  | 90.7  | 63.2  | 35.1  | 70.0  | 57.2  | 9.4  | 12.3 |
| 2.5   | 7.8   | 5.0   | 3.2   | 1.2   | 14.6  | 11.0  | 4.2  | 23.0 |
| 156.4 | 160.3 | 144.3 | 98.4  | 61.2  | 157.6 | 102.3 | 70.0 | 62.7 |
| 36.6  | 43.8  | 46.9  | 26.6  | 6.8   | 33.9  | 24.3  | 17.3 | 20.1 |
| 35.3  | 28.3  | 20.0  | 20.3  | 10.5  | 10.1  | 21.5  | 30.8 | 16.2 |
| 21.5  | 14.5  | 3.6   | 1.6   | 4.7   | 4.9   | 3.2   | 9.0  | 9.0  |
| 144.4 | 114.2 | 125.9 | 73.7  | 51.7  | 124.0 | 146.0 | 24.5 | 34.1 |
| 107.0 | 99.5  | 125.0 | 79.0  | 40.7  | 255.4 | 327.5 | 45.7 | 62.8 |
| 19.9  | 11.6  | 2.8   | 5.5   | 5.2   | 60.4  | 37.2  | 3.4  | 6.4  |
| 18.3  | 13.9  | 13.3  | 7.0   | 1.1   | 45.2  | 22.6  | 2.1  | 10.1 |
| 14.4  | 23.1  | 21.0  | 4.9   | 9.4   | 15.1  | 15.0  | 25.1 | 26.2 |
| 3.2   | 2.8   | 5.1   | 5.4   | 1.1   | 53.4  | 44.6  | 3.1  | 7.0  |
| 1.0   | 0.9   | 1.1   | 0.7   | 2.2   | 8.0   | 2.3   | 1.8  | 1.2  |
| 18.2  | 12.9  | 7.7   | 5.2   | 2.3   | 20.3  | 25.2  | 10.0 | 8.6  |
| 0.3   | 0.4   | 0.2   | 0.1   | 0.1   | 0.2   | 0.3   | 0.2  | 4.4  |
| 2.0   | 1.1   | 5.5   | 0.3   | 0.7   | 21.2  | 19.0  | 0.5  | 0.6  |
| 3.0   | 15.6  | 10.0  | 7.8   | 1.4   | 5.8   | 2.9   | 3.3  | 3.4  |
| 33.4  | 22.8  | 20.6  | 37.4  | 16.1  | 22.7  | 22.7  | 1.4  | 7.6  |
| 5.3   | 5.2   | 12.2  | 6.7   | 0.4   | 18.1  | 19.0  | 6.8  | 6.6  |
| 25.5  | 14.7  | 17.4  | 19.8  | 7.0   | 22.1  | 7.8   | 3.4  | 2.0  |
| 11.9  | 2.0   | 2.0   | 1.3   | 1.0   | 7.8   | 0.8   | 1.2  | 8.5  |
| 16.6  | 22.0  | 29.4  | 23.3  | 3.3   | 272.8 | 169.1 | 3.4  | 5.8  |
| 5.6   | 9.4   | 1.1   | 5.8   | 1.4   | 13.5  | 1.5   | 11.8 | 2.2  |
| 1.4   | 2.5   | 1.3   | 1.3   | 4.5   | 2.0   | 1.4   | 15.9 | 5.3  |
| 193.3 | 218.9 | 249.6 | 194.0 | 112.1 | 299.0 | 184.7 | 66.7 | 51.6 |
| 6.8   | 1.2   | 5.9   | 1.1   | 2.8   | 5.9   | 0.8   | 7.6  | 3.0  |
| 5.3   | 0.3   | 0.4   | 0.1   | 3.2   | 0.5   | 0.8   | 2.6  | 2.1  |
| 5.4   | 2.8   | 14.3  | 5.2   | 0.5   | 2.7   | 1.0   | 5.9  | 12.2 |
| 28.4  | 31.2  | 37.7  | 20.2  | 18.7  | 34.7  | 15.8  | 14.7 | 18.5 |
| 56.8  | 46.1  | 18.9  | 23.2  | 15.2  | 72.8  | 54.3  | 51.5 | 34.0 |
| 5.7   | 4.1   | 2.9   | 4.3   | 2.6   | 54.6  | 38.2  | 1.1  | 1.3  |
| 37.2  | 36.5  | 6.4   | 28.0  | 9.5   | 18.8  | 25.9  | 17.9 | 30.0 |
| 61.6  | 56.8  | 36.1  | 34.2  | 21.7  | 103.0 | 103.9 | 12.1 | 4.4  |
| 7.2   | 4.7   | 10.4  | 0.6   | 1.8   | 9.6   | 10.2  | 6.5  | 13.9 |
| 4.0   | 13.9  | 1.9   | 8.4   | 2.6   | 2.2   | 4.0   | 4.0  | 3.1  |
| 7.7   | 7.1   | 2.2   | 3.6   | 0.2   | 8.9   | 5.6   | 0.5  | 0.7  |
| 62.7  | 50.0  | 94.1  | 58.1  | 10.0  | 95.2  | 90.2  | 4.8  | 6.5  |
| 14.1  | 19.5  | 21.5  | 13.8  | 8.6   | 41.4  | 28.5  | 3.8  | 3.2  |
| 31.1  | 22.2  | 28.0  | 20.5  | 12.0  | 26.0  | 21.9  | 26.2 | 28.7 |
| 59.1  | 61.4  | 46.0  | 40.7  | 14.0  | 76.7  | 39.1  | 6.5  | 18.5 |
| 10.9  | 0.4   | 8.4   | 3.7   | 0.4   | 1.6   | 1.8   | 0.5  | 4.8  |
| 10.5  | 10.3  | 2.6   | 2.0   | 2.9   | 2.2   | 1.9   | 2.1  | 2.4  |
| 9.5   | 16.5  | 2.1   | 7.3   | 6.8   | 0.9   | 5.2   | 1.8  | 2.8  |
| 10.3  | 12.1  | 12.9  | 12.5  | 5.3   | 22.2  | 29.7  | 8.6  | 16.8 |
| 22.7  | 19.0  | 14.0  | 8.6   | 1.6   | 12.5  | 9.4   | 5.8  | 4.5  |

|       |       |      |      |      |       |       |      |      |
|-------|-------|------|------|------|-------|-------|------|------|
| 32.3  | 23.7  | 34.1 | 21.1 | 11.0 | 46.3  | 12.9  | 25.3 | 24.4 |
| 33.4  | 14.6  | 9.8  | 4.7  | 2.3  | 22.0  | 23.9  | 12.6 | 4.3  |
| 4.5   | 3.8   | 0.4  | 0.8  | 3.6  | 5.9   | 11.4  | 1.0  | 1.9  |
| 11.4  | 14.3  | 8.7  | 0.5  | 0.9  | 1.1   | 4.7   | 23.1 | 16.2 |
| 3.1   | 0.8   | 1.0  | 0.6  | 0.1  | 0.3   | 0.3   | 2.4  | 0.8  |
| 14.7  | 15.1  | 9.5  | 3.7  | 0.8  | 9.9   | 10.1  | 16.2 | 11.9 |
| 9.5   | 9.0   | 2.9  | 4.0  | 4.8  | 18.4  | 9.5   | 2.8  | 13.9 |
| 0.3   | 0.7   | 1.1  | 0.5  | 1.2  | 1.1   | 3.8   | 1.2  | 0.6  |
| 12.9  | 11.1  | 11.0 | 6.4  | 7.5  | 3.6   | 7.7   | 12.8 | 3.8  |
| 62.4  | 62.5  | 68.8 | 65.5 | 21.3 | 53.8  | 28.8  | 21.1 | 35.4 |
| 15.5  | 9.7   | 11.4 | 13.3 | 4.4  | 10.6  | 5.7   | 15.5 | 7.3  |
| 30.5  | 7.8   | 27.8 | 22.1 | 13.9 | 20.1  | 15.3  | 21.1 | 65.4 |
| 2.8   | 0.2   | 0.1  | 0.1  | 1.5  | 5.5   | 1.3   | 2.9  | 0.3  |
| 1.7   | 1.8   | 2.5  | 1.2  | 1.2  | 2.3   | 1.4   | 4.0  | 1.6  |
| 4.4   | 0.4   | 6.8  | 0.2  | 0.5  | 0.3   | 0.5   | 3.8  | 0.8  |
| 94.7  | 65.9  | 80.0 | 21.2 | 36.1 | 101.9 | 81.3  | 50.7 | 44.5 |
| 21.6  | 30.5  | 5.1  | 12.9 | 3.5  | 19.0  | 14.8  | 25.1 | 11.4 |
| 23.2  | 19.1  | 40.5 | 19.0 | 8.3  | 84.8  | 45.8  | 4.8  | 3.3  |
| 2.4   | 0.9   | 3.4  | 1.8  | 3.4  | 2.4   | 4.6   | 6.1  | 8.3  |
| 1.5   | 4.5   | 2.0  | 1.1  | 0.8  | 3.5   | 1.8   | 1.0  | 0.7  |
| 121.9 | 134.9 | 97.4 | 84.2 | 46.0 | 135.9 | 76.3  | 56.5 | 46.1 |
| 4.1   | 11.5  | 3.7  | 12.6 | 8.6  | 22.5  | 45.0  | 17.3 | 2.6  |
| 2.4   | 0.9   | 10.0 | 6.5  | 0.8  | 11.9  | 11.5  | 9.0  | 7.6  |
| 12.0  | 7.7   | 9.7  | 0.4  | 5.6  | 22.5  | 16.0  | 4.1  | 3.8  |
| 1.3   | 0.3   | 0.2  | 3.9  | 0.5  | 5.1   | 6.0   | 0.5  | 1.1  |
| 15.3  | 6.9   | 15.2 | 19.8 | 8.1  | 31.1  | 27.1  | 19.4 | 31.6 |
| 4.1   | 3.5   | 3.4  | 0.5  | 1.2  | 0.5   | 2.3   | 4.6  | 1.7  |
| 3.1   | 15.4  | 3.0  | 1.8  | 4.1  | 14.0  | 1.3   | 1.7  | 1.8  |
| 17.0  | 2.3   | 16.8 | 13.4 | 1.4  | 17.9  | 7.6   | 6.7  | 8.5  |
| 15.3  | 21.6  | 3.2  | 9.9  | 12.4 | 1.3   | 1.7   | 3.3  | 5.6  |
| 1.2   | 0.8   | 1.2  | 0.4  | 0.2  | 1.0   | 12.1  | 2.5  | 0.7  |
| 78.7  | 61.0  | 50.3 | 63.2 | 16.3 | 61.8  | 43.2  | 17.1 | 12.6 |
| 9.8   | 8.5   | 9.2  | 8.0  | 4.5  | 7.9   | 0.5   | 5.1  | 5.4  |
| 25.8  | 19.2  | 36.9 | 18.5 | 7.8  | 3.7   | 13.0  | 6.6  | 1.8  |
| 19.2  | 20.9  | 11.4 | 28.2 | 8.6  | 44.6  | 28.1  | 21.7 | 24.2 |
| 1.5   | 0.4   | 9.1  | 0.8  | 1.0  | 1.1   | 1.6   | 4.7  | 6.2  |
| 17.9  | 20.6  | 16.5 | 12.5 | 0.9  | 90.1  | 51.9  | 9.3  | 25.7 |
| 6.0   | 2.5   | 15.3 | 12.6 | 0.8  | 6.8   | 1.1   | 1.7  | 4.1  |
| 14.3  | 11.0  | 15.5 | 21.5 | 9.4  | 27.9  | 15.1  | 22.3 | 14.2 |
| 6.2   | 2.9   | 0.7  | 3.7  | 0.6  | 1.1   | 1.5   | 1.3  | 2.0  |
| 10.1  | 16.1  | 16.9 | 12.4 | 15.2 | 28.7  | 34.0  | 0.2  | 6.0  |
| 0.8   | 7.5   | 9.5  | 1.2  | 8.5  | 1.2   | 7.8   | 0.5  | 2.8  |
| 16.8  | 16.5  | 18.1 | 20.5 | 10.3 | 69.9  | 55.6  | 7.9  | 11.5 |
| 26.9  | 36.1  | 22.8 | 45.9 | 14.7 | 9.3   | 0.9   | 20.4 | 61.6 |
| 6.7   | 6.6   | 6.7  | 8.8  | 6.0  | 20.0  | 22.3  | 9.0  | 12.9 |
| 3.5   | 18.1  | 12.6 | 3.0  | 6.2  | 1.4   | 3.3   | 1.5  | 10.7 |
| 2.7   | 1.5   | 2.5  | 1.6  | 1.2  | 51.5  | 43.8  | 2.0  | 4.5  |
| 1.4   | 9.1   | 2.2  | 12.2 | 0.9  | 22.9  | 2.9   | 3.6  | 2.5  |
| 36.6  | 10.7  | 15.2 | 8.2  | 8.4  | 34.3  | 44.8  | 11.7 | 16.8 |
| 10.2  | 9.8   | 5.7  | 6.7  | 6.2  | 24.5  | 2.1   | 0.9  | 5.7  |
| 20.7  | 27.3  | 27.1 | 3.6  | 6.9  | 17.5  | 11.7  | 26.0 | 27.1 |
| 62.7  | 71.5  | 70.4 | 39.1 | 12.3 | 493.8 | 276.9 | 50.3 | 66.0 |
| 19.8  | 6.7   | 18.0 | 6.4  | 8.2  | 10.1  | 18.1  | 12.8 | 8.5  |

|       |       |       |       |       |       |       |       |       |
|-------|-------|-------|-------|-------|-------|-------|-------|-------|
| 9.8   | 11.1  | 10.7  | 9.2   | 3.4   | 22.6  | 17.8  | 0.5   | 5.7   |
| 1.4   | 1.7   | 4.0   | 4.4   | 0.6   | 4.6   | 4.4   | 3.4   | 1.5   |
| 9.1   | 0.8   | 1.8   | 0.4   | 0.7   | 1.2   | 4.3   | 0.8   | 0.7   |
| 6.7   | 15.2  | 2.4   | 1.9   | 0.9   | 3.2   | 7.9   | 2.4   | 7.9   |
| 16.5  | 10.8  | 4.4   | 8.2   | 3.5   | 7.9   | 8.9   | 0.7   | 0.4   |
| 47.9  | 51.3  | 46.1  | 29.9  | 19.4  | 88.6  | 77.2  | 12.3  | 15.2  |
| 2.9   | 15.2  | 13.3  | 3.6   | 7.1   | 20.9  | 13.0  | 23.1  | 17.0  |
| 5.9   | 1.0   | 2.6   | 0.5   | 0.7   | 0.8   | 1.3   | 1.0   | 2.0   |
| 7.5   | 2.6   | 9.0   | 7.3   | 0.9   | 4.8   | 7.8   | 2.9   | 6.0   |
| 52.6  | 14.1  | 32.5  | 17.2  | 8.7   | 83.1  | 84.3  | 15.9  | 16.6  |
| 20.3  | 18.3  | 7.7   | 10.2  | 6.0   | 23.2  | 25.9  | 16.2  | 8.2   |
| 71.4  | 82.6  | 102.2 | 52.1  | 23.8  | 58.0  | 38.1  | 17.4  | 42.2  |
| 7.4   | 1.4   | 7.9   | 32.8  | 0.9   | 54.2  | 44.3  | 0.9   | 0.7   |
| 11.0  | 5.2   | 2.9   | 7.5   | 0.7   | 10.5  | 5.7   | 7.6   | 0.9   |
| 314.1 | 302.2 | 393.0 | 470.4 | 157.0 | 555.6 | 670.1 | 54.8  | 87.1  |
| 14.4  | 12.4  | 7.1   | 13.1  | 6.1   | 825.7 | 601.6 | 565.6 | 587.5 |
| 56.5  | 60.1  | 47.4  | 88.4  | 19.3  | 115.0 | 122.4 | 19.3  | 68.4  |
| 41.0  | 40.8  | 38.3  | 19.0  | 18.1  | 68.4  | 36.3  | 14.0  | 12.8  |
| 241.9 | 225.4 | 236.1 | 211.4 | 101.1 | 264.7 | 178.6 | 98.3  | 113.2 |
| 231.1 | 210.0 | 214.0 | 176.4 | 81.6  | 284.8 | 179.0 | 63.5  | 90.5  |
| 10.5  | 11.0  | 2.8   | 6.1   | 6.5   | 18.1  | 22.3  | 9.7   | 8.5   |
| 170.1 | 105.5 | 133.8 | 64.1  | 45.1  | 475.0 | 234.8 | 119.9 | 114.0 |
| 51.7  | 59.3  | 55.3  | 68.0  | 18.9  | 389.7 | 235.1 | 19.7  | 20.2  |
| 231.3 | 198.4 | 174.3 | 131.1 | 85.4  | 679.4 | 458.6 | 360.4 | 450.7 |
| 149.9 | 115.7 | 139.5 | 104.8 | 43.3  | 125.2 | 111.7 | 72.0  | 164.6 |
| 347.2 | 351.6 | 285.2 | 114.0 | 146.6 | 755.8 | 565.5 | 101.3 | 119.2 |
| 35.3  | 24.1  | 25.8  | 28.1  | 9.6   | 85.7  | 53.7  | 43.8  | 45.8  |
| 64.2  | 59.3  | 34.8  | 61.8  | 23.6  | 159.2 | 72.0  | 43.8  | 45.9  |
| 212.7 | 165.7 | 141.6 | 103.3 | 54.7  | 383.9 | 169.3 | 33.2  | 60.3  |
| 80.8  | 73.4  | 87.9  | 105.5 | 37.2  | 77.2  | 59.5  | 11.8  | 14.3  |
| 13.8  | 18.7  | 24.6  | 18.7  | 9.4   | 160.2 | 92.4  | 23.0  | 28.9  |
| 114.9 | 99.7  | 165.1 | 203.0 | 58.9  | 593.9 | 429.9 | 35.8  | 37.9  |
| 39.8  | 60.8  | 71.0  | 96.1  | 24.9  | 143.6 | 121.7 | 7.2   | 5.3   |
| 471.0 | 418.6 | 435.1 | 457.1 | 300.2 | 353.7 | 269.7 | 96.6  | 106.3 |
| 51.6  | 36.7  | 46.8  | 34.5  | 16.5  | 90.0  | 69.2  | 11.6  | 35.3  |
| 132.6 | 105.0 | 120.3 | 104.9 | 59.3  | 329.6 | 194.6 | 67.2  | 83.7  |
| 5.4   | 7.9   | 4.0   | 2.8   | 1.6   | 9.5   | 8.0   | 4.3   | 8.8   |
| 267.3 | 253.9 | 153.1 | 105.5 | 76.7  | 138.5 | 75.4  | 66.9  | 78.9  |
| 158.9 | 112.2 | 115.9 | 94.9  | 48.0  | 196.9 | 114.9 | 490.1 | 608.1 |
| 103.2 | 135.0 | 165.7 | 203.7 | 64.2  | 91.3  | 73.0  | 17.4  | 24.5  |
| 53.9  | 59.6  | 43.2  | 31.6  | 13.6  | 55.4  | 50.2  | 24.9  | 38.9  |
| 24.8  | 28.3  | 25.3  | 23.2  | 13.6  | 165.4 | 125.5 | 15.9  | 12.0  |
| 23.2  | 14.9  | 18.2  | 11.5  | 6.9   | 15.8  | 5.0   | 16.2  | 14.0  |
| 58.7  | 34.3  | 65.2  | 99.3  | 17.7  | 89.0  | 74.0  | 10.3  | 8.8   |
| 23.8  | 4.1   | 5.4   | 6.4   | 8.2   | 15.9  | 3.3   | 4.8   | 5.5   |
| 78.9  | 64.3  | 89.0  | 75.3  | 24.7  | 111.6 | 32.7  | 2.7   | 21.5  |
| 300.1 | 316.7 | 269.5 | 224.7 | 95.7  | 356.0 | 254.9 | 49.1  | 88.2  |
| 207.2 | 122.7 | 146.3 | 106.0 | 56.5  | 275.3 | 158.7 | 114.8 | 167.8 |
| 338.1 | 315.8 | 217.4 | 138.2 | 70.8  | 370.0 | 218.7 | 217.5 | 289.2 |
| 227.8 | 172.0 | 129.4 | 108.3 | 77.3  | 238.2 | 105.0 | 236.7 | 188.2 |
| 246.8 | 151.1 | 199.7 | 116.8 | 60.8  | 412.1 | 149.8 | 162.1 | 260.8 |
| 88.0  | 58.8  | 99.4  | 83.2  | 13.7  | 30.2  | 12.6  | 12.3  | 11.6  |
| 27.0  | 22.0  | 35.8  | 34.2  | 14.8  | 4.6   | 12.6  | 3.8   | 18.8  |

|        |        |        |        |       |        |        |       |       |
|--------|--------|--------|--------|-------|--------|--------|-------|-------|
| 119.6  | 107.4  | 127.8  | 177.5  | 66.6  | 634.5  | 651.2  | 36.4  | 42.0  |
| 138.1  | 132.1  | 129.0  | 97.3   | 55.4  | 364.3  | 292.5  | 45.8  | 40.7  |
| 1827.2 | 1576.4 | 2505.2 | 3199.8 | 907.6 | 5547.3 | 3358.7 | 531.7 | 500.6 |
| 1799.1 | 1579.5 | 2450.3 | 3316.5 | 961.9 | 5539.1 | 2690.6 | 194.5 | 228.0 |
| 57.2   | 43.7   | 53.5   | 41.7   | 18.3  | 58.3   | 40.0   | 12.7  | 17.1  |
| 27.3   | 27.7   | 37.0   | 24.0   | 9.0   | 17.3   | 21.0   | 18.4  | 5.4   |
| 81.6   | 65.5   | 68.2   | 41.2   | 24.0  | 50.5   | 25.0   | 6.4   | 23.6  |
| 66.5   | 43.8   | 42.7   | 25.5   | 11.9  | 48.1   | 18.4   | 17.8  | 18.4  |
| 28.7   | 21.1   | 29.9   | 20.5   | 14.2  | 162.3  | 137.7  | 19.1  | 33.2  |
| 235.7  | 220.8  | 273.3  | 297.1  | 113.8 | 433.6  | 377.4  | 35.8  | 45.1  |
| 97.4   | 138.7  | 105.5  | 104.4  | 68.8  | 4.9    | 4.3    | 6.2   | 4.3   |
| 98.7   | 63.1   | 77.3   | 70.3   | 42.2  | 91.2   | 82.8   | 69.6  | 87.1  |
| 105.6  | 104.6  | 99.6   | 97.9   | 38.5  | 287.6  | 217.2  | 60.1  | 78.5  |
| 184.8  | 142.5  | 132.1  | 105.9  | 54.6  | 1410.4 | 923.7  | 196.1 | 277.7 |
| 93.7   | 73.4   | 94.5   | 89.4   | 34.3  | 83.6   | 57.0   | 22.2  | 45.2  |
| 318.6  | 348.0  | 324.9  | 386.1  | 126.6 | 318.0  | 287.2  | 29.1  | 49.0  |
| 23.9   | 16.5   | 24.4   | 16.7   | 6.0   | 5.4    | 22.3   | 16.0  | 10.7  |
| 36.5   | 48.8   | 29.3   | 15.2   | 10.8  | 227.3  | 131.0  | 9.6   | 1.3   |
| 42.7   | 44.1   | 79.2   | 54.4   | 33.3  | 186.6  | 151.1  | 49.6  | 52.5  |
| 1.5    | 1.6    | 1.1    | 0.4    | 0.4   | 1.0    | 1.3    | 0.4   | 0.4   |
| 116.2  | 103.4  | 103.1  | 111.8  | 43.4  | 182.4  | 127.5  | 63.5  | 61.5  |
| 123.3  | 112.2  | 136.9  | 126.8  | 61.8  | 255.8  | 194.5  | 57.9  | 83.1  |
| 59.3   | 56.1   | 58.5   | 40.6   | 16.1  | 370.1  | 187.0  | 36.9  | 43.5  |
| 57.4   | 60.8   | 48.7   | 50.6   | 17.9  | 161.2  | 80.8   | 48.6  | 53.7  |
| 90.8   | 96.8   | 77.6   | 48.7   | 31.2  | 49.8   | 43.7   | 17.6  | 24.4  |
| 15.4   | 6.1    | 12.4   | 2.3    | 0.5   | 19.3   | 13.1   | 20.2  | 23.6  |
| 1.5    | 5.5    | 7.0    | 9.0    | 4.9   | 2.2    | 5.1    | 7.1   | 7.7   |
| 47.7   | 27.5   | 22.3   | 17.5   | 8.5   | 24.3   | 14.9   | 59.0  | 70.4  |
| 13.3   | 49.7   | 47.8   | 31.9   | 11.8  | 193.5  | 114.6  | 57.8  | 55.9  |
| 43.8   | 42.5   | 43.2   | 16.2   | 16.8  | 43.0   | 22.9   | 16.8  | 9.9   |
| 71.2   | 79.0   | 52.9   | 60.7   | 31.8  | 68.4   | 43.6   | 110.2 | 83.7  |
| 155.3  | 155.9  | 167.9  | 145.2  | 67.0  | 277.6  | 207.4  | 29.8  | 46.3  |
| 24.9   | 29.8   | 30.5   | 4.4    | 7.6   | 47.3   | 23.4   | 41.0  | 48.0  |
| 105.7  | 86.9   | 87.3   | 98.6   | 43.6  | 146.1  | 70.3   | 44.8  | 66.5  |
| 213.3  | 219.0  | 221.2  | 171.6  | 65.6  | 288.3  | 286.7  | 147.9 | 175.3 |
| 39.9   | 14.8   | 32.5   | 11.8   | 11.4  | 54.9   | 48.2   | 146.6 | 228.0 |
| 7.0    | 18.8   | 11.5   | 8.3    | 4.5   | 35.5   | 50.9   | 101.7 | 89.4  |
| 303.8  | 216.5  | 255.0  | 221.2  | 79.9  | 681.6  | 338.2  | 43.1  | 50.7  |
| 187.9  | 173.6  | 160.2  | 169.9  | 65.4  | 396.6  | 253.0  | 106.0 | 143.1 |
| 63.0   | 48.5   | 33.9   | 25.2   | 20.5  | 44.9   | 35.3   | 60.4  | 87.8  |
| 31.1   | 33.4   | 26.8   | 13.3   | 6.2   | 108.7  | 90.3   | 26.4  | 31.7  |
| 213.2  | 133.5  | 135.7  | 95.9   | 40.5  | 255.4  | 315.3  | 231.6 | 235.6 |
| 118.4  | 99.8   | 95.5   | 76.2   | 31.8  | 190.4  | 140.9  | 120.6 | 121.0 |
| 279.2  | 220.0  | 231.3  | 203.6  | 74.4  | 249.4  | 169.0  | 74.0  | 97.7  |
| 120.2  | 70.7   | 82.0   | 101.7  | 33.1  | 188.6  | 192.8  | 147.0 | 190.6 |
| 105.0  | 74.5   | 72.5   | 60.8   | 34.9  | 126.8  | 64.9   | 28.5  | 39.3  |
| 103.8  | 72.2   | 70.8   | 37.0   | 29.0  | 187.6  | 104.6  | 87.6  | 107.6 |
| 51.2   | 68.9   | 49.3   | 36.6   | 27.2  | 70.1   | 29.9   | 128.4 | 139.3 |
| 181.9  | 208.8  | 168.3  | 167.7  | 69.1  | 366.2  | 157.6  | 105.0 | 123.6 |
| 299.6  | 245.8  | 315.8  | 299.5  | 102.8 | 373.5  | 228.5  | 141.3 | 153.8 |
| 171.6  | 153.3  | 139.6  | 90.4   | 60.9  | 108.8  | 68.4   | 67.6  | 56.7  |
| 158.1  | 170.2  | 119.5  | 66.2   | 66.7  | 325.7  | 218.5  | 43.3  | 55.2  |
| 21.0   | 13.5   | 13.2   | 2.4    | 9.1   | 26.8   | 25.9   | 44.5  | 34.4  |

|        |        |        |        |       |        |        |       |       |
|--------|--------|--------|--------|-------|--------|--------|-------|-------|
| 8.6    | 0.8    | 1.7    | 3.8    | 2.0   | 5.8    | 7.1    | 4.5   | 1.0   |
| 132.4  | 88.6   | 101.8  | 66.1   | 34.3  | 159.0  | 104.2  | 97.1  | 121.8 |
| 102.5  | 100.6  | 107.2  | 93.0   | 41.4  | 255.0  | 162.4  | 100.6 | 142.4 |
| 29.6   | 18.3   | 16.5   | 9.8    | 6.8   | 50.3   | 21.6   | 14.9  | 18.7  |
| 129.2  | 100.5  | 117.1  | 93.4   | 39.1  | 369.4  | 198.3  | 75.3  | 107.2 |
| 185.6  | 217.5  | 196.2  | 95.3   | 78.1  | 527.3  | 314.2  | 128.4 | 143.5 |
| 83.0   | 68.4   | 62.8   | 45.6   | 25.0  | 124.6  | 97.1   | 94.4  | 158.2 |
| 32.9   | 31.9   | 18.8   | 12.3   | 8.8   | 49.2   | 37.9   | 18.2  | 23.0  |
| 46.2   | 49.7   | 41.0   | 26.3   | 15.8  | 91.2   | 36.0   | 27.8  | 12.4  |
| 168.6  | 199.8  | 214.6  | 128.1  | 74.4  | 182.2  | 114.3  | 33.8  | 45.9  |
| 196.0  | 232.4  | 226.2  | 153.6  | 121.5 | 172.9  | 141.0  | 54.1  | 62.5  |
| 96.7   | 81.0   | 69.7   | 49.7   | 30.3  | 60.9   | 35.4   | 88.2  | 116.7 |
| 125.2  | 53.6   | 89.6   | 89.5   | 25.3  | 82.2   | 42.3   | 27.7  | 44.7  |
| 137.7  | 124.7  | 127.9  | 134.3  | 62.9  | 162.9  | 66.9   | 28.8  | 36.0  |
| 96.6   | 104.3  | 77.9   | 67.8   | 24.3  | 60.3   | 30.6   | 18.1  | 21.3  |
| 666.8  | 785.3  | 1090.3 | 2505.2 | 390.6 | 1429.8 | 1094.2 | 9.7   | 14.3  |
| 19.9   | 11.3   | 12.0   | 5.7    | 3.7   | 77.0   | 56.5   | 10.1  | 16.4  |
| 125.6  | 98.3   | 101.9  | 129.2  | 69.7  | 115.9  | 78.8   | 45.4  | 56.0  |
| 90.5   | 86.2   | 92.3   | 68.1   | 33.7  | 164.5  | 132.1  | 121.6 | 145.2 |
| 81.1   | 82.4   | 83.7   | 46.0   | 30.6  | 113.6  | 80.1   | 85.8  | 36.7  |
| 94.4   | 73.9   | 102.1  | 47.0   | 20.1  | 229.3  | 139.1  | 81.8  | 87.8  |
| 114.0  | 100.9  | 148.2  | 81.0   | 28.4  | 142.5  | 104.6  | 137.1 | 200.7 |
| 65.5   | 49.5   | 78.3   | 79.5   | 22.4  | 38.8   | 31.6   | 1.2   | 4.5   |
| 483.5  | 418.8  | 394.0  | 338.2  | 169.7 | 1173.4 | 709.8  | 253.8 | 328.8 |
| 897.1  | 691.0  | 634.8  | 559.0  | 267.8 | 1800.5 | 1175.1 | 490.0 | 586.3 |
| 17.0   | 12.8   | 12.9   | 10.4   | 7.7   | 21.4   | 8.4    | 12.2  | 8.3   |
| 166.4  | 152.3  | 118.2  | 113.5  | 39.5  | 586.7  | 392.9  | 62.2  | 106.7 |
| 1493.2 | 1270.2 | 1236.6 | 783.3  | 365.6 | 2141.1 | 1725.8 | 266.5 | 372.9 |
| 2.3    | 1.0    | 0.7    | 0.8    | 0.4   | 1.8    | 0.9    | 1.1   | 0.8   |
| 29.2   | 23.1   | 40.4   | 20.9   | 5.8   | 22.3   | 38.1   | 30.4  | 24.5  |
| 101.3  | 66.5   | 127.3  | 743.9  | 60.8  | 713.5  | 472.5  | 51.6  | 46.2  |
| 76.0   | 70.7   | 48.5   | 51.0   | 19.6  | 103.4  | 70.0   | 20.0  | 22.7  |
| 92.9   | 96.9   | 111.5  | 139.0  | 37.9  | 289.6  | 192.6  | 122.4 | 183.5 |
| 1.5    | 2.1    | 3.2    | 2.6    | 6.2   | 1.0    | 0.6    | 2.1   | 1.5   |
| 218.9  | 202.7  | 221.0  | 148.8  | 85.4  | 634.2  | 460.5  | 14.8  | 45.6  |
| 20.9   | 15.5   | 15.7   | 12.1   | 5.7   | 31.1   | 22.9   | 8.3   | 9.0   |
| 1.7    | 1.9    | 10.1   | 0.5    | 8.0   | 10.0   | 4.8    | 13.7  | 14.6  |
| 63.6   | 71.4   | 56.2   | 91.5   | 27.9  | 78.2   | 56.3   | 23.9  | 32.5  |
| 51.5   | 60.8   | 55.8   | 40.3   | 20.0  | 35.5   | 31.9   | 37.9  | 30.6  |
| 49.7   | 47.9   | 55.3   | 81.9   | 17.4  | 79.0   | 65.9   | 20.1  | 34.1  |
| 61.4   | 64.3   | 77.8   | 62.0   | 29.5  | 58.2   | 48.2   | 22.8  | 30.7  |
| 198.6  | 170.6  | 139.8  | 78.7   | 49.4  | 170.1  | 115.8  | 8.7   | 35.1  |
| 201.4  | 158.7  | 180.4  | 59.4   | 78.7  | 22.2   | 34.2   | 20.8  | 36.3  |
| 95.1   | 101.2  | 71.6   | 64.9   | 40.8  | 380.8  | 220.5  | 33.7  | 27.0  |
| 65.7   | 63.3   | 53.6   | 49.8   | 27.7  | 305.7  | 148.8  | 30.9  | 28.0  |
| 33.8   | 50.1   | 33.2   | 28.7   | 12.1  | 12.2   | 6.5    | 11.7  | 11.3  |
| 213.4  | 108.4  | 134.8  | 115.2  | 69.3  | 228.3  | 185.4  | 96.4  | 133.9 |
| 23.9   | 25.6   | 36.7   | 20.2   | 12.6  | 32.0   | 15.0   | 5.6   | 2.6   |
| 9.3    | 6.4    | 7.2    | 0.8    | 4.1   | 2.7    | 3.4    | 0.4   | 0.8   |
| 55.9   | 40.8   | 45.0   | 52.7   | 31.2  | 42.1   | 28.4   | 12.1  | 8.6   |
| 15.9   | 6.7    | 14.1   | 17.9   | 5.8   | 9.3    | 5.9    | 11.7  | 3.4   |
| 123.0  | 107.6  | 128.1  | 115.3  | 38.2  | 81.3   | 62.2   | 7.8   | 7.6   |
| 62.2   | 48.6   | 66.0   | 46.5   | 23.9  | 80.2   | 40.4   | 12.5  | 18.7  |

|       |       |       |       |       |        |        |        |        |
|-------|-------|-------|-------|-------|--------|--------|--------|--------|
| 14.1  | 13.0  | 2.8   | 7.3   | 6.4   | 32.8   | 23.3   | 29.8   | 35.9   |
| 94.2  | 78.3  | 81.2  | 63.1  | 36.3  | 117.6  | 81.0   | 54.1   | 61.4   |
| 17.9  | 17.5  | 23.8  | 20.3  | 10.0  | 34.3   | 19.1   | 25.9   | 53.1   |
| 43.2  | 40.3  | 33.4  | 19.8  | 10.2  | 44.1   | 24.5   | 32.2   | 37.3   |
| 16.2  | 18.1  | 17.9  | 4.4   | 5.9   | 31.7   | 15.0   | 4.9    | 2.0    |
| 33.9  | 15.4  | 7.5   | 23.9  | 4.1   | 182.1  | 160.3  | 80.8   | 118.2  |
| 54.5  | 52.4  | 85.8  | 68.7  | 22.4  | 72.4   | 44.4   | 17.1   | 31.5   |
| 73.6  | 64.6  | 80.5  | 40.3  | 23.8  | 136.1  | 110.3  | 49.1   | 59.7   |
| 1.6   | 0.8   | 1.5   | 1.3   | 0.5   | 15.6   | 15.5   | 1.2    | 1.2    |
| 90.2  | 84.3  | 84.1  | 95.3  | 46.0  | 63.5   | 47.5   | 15.0   | 17.2   |
| 91.2  | 70.0  | 85.8  | 44.0  | 28.7  | 209.4  | 146.6  | 30.7   | 46.3   |
| 18.8  | 18.4  | 15.4  | 7.1   | 4.2   | 12.2   | 16.9   | 12.8   | 4.8    |
| 93.2  | 56.3  | 69.7  | 56.8  | 15.1  | 187.4  | 106.4  | 42.5   | 59.3   |
| 57.8  | 30.4  | 41.9  | 38.0  | 20.8  | 157.1  | 114.5  | 33.6   | 37.6   |
| 64.8  | 69.4  | 81.4  | 56.7  | 29.7  | 37.3   | 16.6   | 15.6   | 16.5   |
| 39.5  | 35.0  | 37.9  | 24.7  | 14.1  | 43.1   | 34.9   | 50.9   | 83.3   |
| 42.6  | 43.1  | 82.6  | 48.2  | 21.4  | 976.8  | 518.8  | 4.1    | 2.7    |
| 93.5  | 81.5  | 86.6  | 64.5  | 29.2  | 96.0   | 74.5   | 72.4   | 68.3   |
| 128.0 | 96.3  | 107.6 | 105.7 | 54.3  | 172.4  | 144.7  | 53.0   | 82.1   |
| 15.4  | 19.7  | 13.1  | 1.6   | 2.3   | 20.7   | 11.0   | 19.7   | 9.6    |
| 108.1 | 78.9  | 79.9  | 67.3  | 27.1  | 99.6   | 88.8   | 40.8   | 34.8   |
| 529.2 | 541.1 | 421.1 | 320.8 | 220.9 | 305.0  | 227.7  | 105.6  | 124.0  |
| 8.0   | 2.0   | 4.0   | 3.5   | 3.7   | 34.9   | 34.5   | 0.4    | 0.4    |
| 99.4  | 78.4  | 82.5  | 68.8  | 36.5  | 403.6  | 271.5  | 107.5  | 144.9  |
| 24.8  | 39.6  | 39.8  | 39.9  | 9.7   | 81.8   | 49.5   | 12.0   | 13.4   |
| 116.4 | 121.3 | 108.5 | 89.4  | 34.2  | 200.6  | 137.4  | 149.9  | 192.6  |
| 37.5  | 38.5  | 38.3  | 36.3  | 26.6  | 146.4  | 139.5  | 85.7   | 90.4   |
| 83.2  | 89.7  | 94.7  | 54.6  | 38.9  | 115.4  | 95.9   | 92.1   | 137.1  |
| 34.7  | 30.5  | 32.5  | 8.1   | 14.9  | 22.0   | 21.0   | 17.3   | 22.3   |
| 16.8  | 7.3   | 6.6   | 11.7  | 1.8   | 70.1   | 54.8   | 39.5   | 47.8   |
| 73.8  | 77.5  | 64.9  | 42.2  | 32.1  | 158.5  | 85.3   | 52.2   | 52.6   |
| 21.3  | 22.8  | 20.0  | 4.4   | 9.6   | 29.9   | 29.6   | 28.8   | 29.9   |
| 446.0 | 468.1 | 423.3 | 347.3 | 214.2 | 795.5  | 640.1  | 184.0  | 253.4  |
| 291.4 | 241.1 | 247.5 | 175.5 | 83.9  | 475.5  | 268.4  | 211.7  | 330.0  |
| 201.1 | 158.4 | 129.6 | 101.3 | 58.6  | 399.7  | 322.9  | 1541.8 | 1854.1 |
| 55.8  | 43.5  | 56.2  | 50.0  | 15.9  | 421.2  | 359.9  | 51.6   | 83.2   |
| 101.8 | 84.5  | 107.8 | 95.4  | 26.4  | 185.8  | 162.4  | 10.4   | 17.6   |
| 96.1  | 78.8  | 58.3  | 40.0  | 22.1  | 109.8  | 165.3  | 127.6  | 115.9  |
| 16.3  | 27.3  | 22.2  | 23.3  | 5.7   | 48.0   | 22.2   | 47.1   | 67.8   |
| 15.0  | 8.5   | 10.3  | 9.5   | 4.5   | 40.4   | 46.9   | 2.2    | 6.4    |
| 8.0   | 4.7   | 3.3   | 4.6   | 1.8   | 6.1    | 11.5   | 7.8    | 8.0    |
| 12.3  | 4.1   | 8.9   | 6.7   | 4.0   | 35.2   | 33.2   | 5.1    | 4.8    |
| 23.3  | 18.2  | 21.5  | 16.3  | 8.7   | 13.7   | 11.0   | 2.5    | 24.2   |
| 8.2   | 4.0   | 4.2   | 19.0  | 15.2  | 1474.8 | 1183.4 | 3.6    | 4.8    |
| 26.2  | 26.8  | 28.5  | 15.0  | 8.9   | 74.8   | 64.8   | 10.8   | 10.5   |
| 76.9  | 76.1  | 85.0  | 32.7  | 25.0  | 221.4  | 187.2  | 0.7    | 7.1    |
| 36.2  | 23.5  | 37.5  | 29.3  | 11.5  | 42.4   | 36.7   | 10.2   | 8.9    |
| 228.7 | 184.1 | 195.0 | 121.7 | 56.9  | 128.9  | 63.4   | 165.8  | 222.8  |
| 18.1  | 21.0  | 17.3  | 17.7  | 10.7  | 80.7   | 56.3   | 10.1   | 8.7    |
| 48.6  | 60.7  | 75.1  | 71.9  | 22.4  | 53.9   | 42.0   | 10.1   | 13.6   |
| 116.3 | 130.8 | 123.3 | 55.9  | 48.7  | 2329.2 | 1322.5 | 714.9  | 998.1  |
| 37.2  | 30.0  | 36.2  | 23.5  | 12.3  | 38.6   | 24.3   | 17.1   | 40.4   |
| 282.2 | 232.0 | 219.7 | 158.7 | 85.6  | 899.0  | 600.8  | 163.3  | 187.5  |

|        |        |        |        |       |        |        |       |        |
|--------|--------|--------|--------|-------|--------|--------|-------|--------|
| 107.6  | 120.8  | 58.6   | 85.0   | 17.0  | 311.0  | 195.9  | 62.6  | 84.6   |
| 290.7  | 342.7  | 271.9  | 179.8  | 151.3 | 482.6  | 349.3  | 277.6 | 286.1  |
| 33.1   | 36.4   | 23.3   | 47.1   | 14.8  | 210.0  | 189.4  | 20.6  | 32.6   |
| 82.2   | 135.3  | 66.7   | 20.3   | 18.4  | 72.7   | 33.9   | 11.4  | 10.7   |
| 8.1    | 3.5    | 2.8    | 9.2    | 3.4   | 188.8  | 147.2  | 5.8   | 16.8   |
| 115.5  | 96.3   | 86.4   | 94.9   | 35.1  | 36.3   | 20.2   | 29.7  | 38.2   |
| 22.2   | 17.3   | 15.9   | 1.6    | 1.1   | 39.8   | 20.3   | 245.2 | 300.1  |
| 54.2   | 49.5   | 41.6   | 28.8   | 8.8   | 93.2   | 76.9   | 15.1  | 22.9   |
| 40.9   | 35.9   | 36.8   | 20.8   | 16.9  | 138.9  | 102.0  | 19.3  | 35.6   |
| 1601.4 | 1750.1 | 1580.8 | 1501.3 | 657.8 | 2751.1 | 2420.6 | 841.8 | 962.1  |
| 262.0  | 274.6  | 308.5  | 271.0  | 134.3 | 875.9  | 639.6  | 129.3 | 247.6  |
| 85.4   | 72.1   | 91.7   | 67.2   | 38.4  | 228.3  | 190.8  | 87.4  | 56.9   |
| 80.3   | 61.6   | 63.3   | 46.8   | 25.1  | 140.3  | 96.4   | 26.0  | 34.1   |
| 0.9    | 0.7    | 1.1    | 4.4    | 1.1   | 315.2  | 357.9  | 1.1   | 1.3    |
| 144.1  | 117.7  | 123.0  | 57.2   | 38.9  | 517.9  | 337.3  | 89.6  | 141.9  |
| 90.5   | 85.4   | 84.0   | 76.4   | 32.4  | 231.5  | 178.3  | 20.5  | 17.4   |
| 313.3  | 266.6  | 297.5  | 190.6  | 98.4  | 420.8  | 332.9  | 103.9 | 132.0  |
| 397.9  | 355.8  | 299.3  | 223.0  | 141.4 | 290.1  | 183.8  | 56.3  | 59.1   |
| 67.0   | 77.0   | 49.3   | 26.5   | 26.3  | 125.6  | 64.8   | 7.4   | 4.9    |
| 99.1   | 61.0   | 69.4   | 46.3   | 21.9  | 143.7  | 77.3   | 48.0  | 93.0   |
| 15.3   | 9.0    | 15.0   | 17.5   | 6.0   | 37.4   | 12.0   | 1.1   | 1.6    |
| 10.3   | 9.7    | 14.7   | 3.2    | 1.4   | 19.6   | 17.4   | 33.7  | 26.8   |
| 178.8  | 99.5   | 122.2  | 87.0   | 39.1  | 215.7  | 123.4  | 68.0  | 76.0   |
| 46.1   | 40.7   | 63.0   | 54.9   | 33.0  | 82.8   | 48.4   | 35.2  | 54.3   |
| 21.1   | 19.2   | 25.5   | 23.6   | 8.8   | 71.5   | 42.8   | 10.2  | 4.6    |
| 19.7   | 30.5   | 31.1   | 7.6    | 14.1  | 34.1   | 33.2   | 20.5  | 26.5   |
| 0.3    | 4.7    | 0.2    | 2.2    | 0.2   | 4.8    | 1.6    | 1.1   | 2.0    |
| 2.4    | 3.5    | 0.9    | 0.9    | 0.5   | 3.1    | 8.6    | 10.6  | 3.6    |
| 71.9   | 81.7   | 65.9   | 58.6   | 27.8  | 78.1   | 89.9   | 91.7  | 118.2  |
| 84.8   | 108.2  | 62.3   | 49.4   | 34.6  | 12.2   | 13.1   | 59.0  | 78.3   |
| 40.0   | 34.1   | 7.7    | 18.8   | 13.6  | 32.4   | 40.5   | 45.7  | 55.0   |
| 712.9  | 633.7  | 569.9  | 421.9  | 209.7 | 823.8  | 697.3  | 63.4  | 65.1   |
| 227.8  | 200.8  | 199.9  | 155.7  | 70.0  | 486.3  | 264.5  | 453.7 | 571.4  |
| 24.6   | 14.2   | 17.9   | 14.4   | 4.6   | 38.5   | 31.3   | 26.3  | 28.8   |
| 157.1  | 140.5  | 139.4  | 109.6  | 47.5  | 306.6  | 226.6  | 120.3 | 163.7  |
| 1505.0 | 920.8  | 1031.1 | 536.5  | 395.0 | 3743.6 | 3037.4 | 846.5 | 1195.2 |
| 21.5   | 26.2   | 34.1   | 46.4   | 14.4  | 81.0   | 68.2   | 73.5  | 133.6  |
| 101.1  | 80.8   | 83.1   | 125.5  | 29.3  | 98.7   | 68.4   | 101.9 | 90.9   |
| 160.0  | 147.0  | 192.3  | 248.3  | 53.8  | 133.9  | 94.3   | 25.8  | 65.9   |
| 3.9    | 2.4    | 2.5    | 3.1    | 2.2   | 5.1    | 3.0    | 33.8  | 34.6   |
| 9.2    | 7.5    | 13.9   | 18.3   | 5.3   | 1202.7 | 1378.3 | 13.9  | 12.6   |
| 36.9   | 45.2   | 54.7   | 73.5   | 13.6  | 55.2   | 42.5   | 20.4  | 18.6   |
| 18.0   | 22.8   | 17.6   | 10.1   | 8.0   | 27.0   | 33.0   | 14.2  | 23.3   |
| 22.3   | 23.6   | 16.5   | 4.4    | 2.2   | 15.9   | 5.1    | 1.4   | 2.6    |
| 51.1   | 30.7   | 42.5   | 44.6   | 18.0  | 151.3  | 121.7  | 62.3  | 81.1   |
| 50.4   | 41.2   | 36.8   | 20.0   | 15.2  | 69.2   | 21.9   | 69.4  | 106.9  |
| 22.6   | 26.1   | 24.1   | 19.8   | 2.7   | 184.7  | 120.6  | 49.7  | 56.4   |
| 42.0   | 45.4   | 37.6   | 28.1   | 15.4  | 47.3   | 28.0   | 44.7  | 55.5   |
| 152.8  | 116.0  | 135.8  | 98.4   | 31.7  | 236.5  | 160.0  | 77.5  | 76.6   |
| 53.8   | 56.0   | 55.3   | 44.3   | 20.7  | 303.9  | 164.5  | 16.8  | 17.8   |
| 26.6   | 43.9   | 29.5   | 12.8   | 17.3  | 18.7   | 9.8    | 18.8  | 4.0    |
| 108.4  | 95.3   | 95.3   | 32.9   | 35.3  | 55.9   | 33.6   | 213.2 | 315.8  |
| 178.3  | 150.9  | 177.9  | 156.1  | 77.4  | 200.9  | 176.9  | 72.2  | 93.3   |

|       |       |       |       |       |        |       |       |       |
|-------|-------|-------|-------|-------|--------|-------|-------|-------|
| 82.4  | 42.6  | 54.0  | 30.8  | 19.7  | 57.0   | 39.2  | 97.3  | 156.8 |
| 231.8 | 243.4 | 242.7 | 172.2 | 100.7 | 206.2  | 118.4 | 82.4  | 111.0 |
| 124.1 | 92.7  | 86.0  | 94.0  | 39.8  | 144.8  | 102.3 | 32.1  | 32.2  |
| 118.4 | 108.0 | 87.5  | 65.0  | 55.4  | 233.5  | 158.7 | 48.8  | 70.1  |
| 127.2 | 151.5 | 154.0 | 112.3 | 53.9  | 302.3  | 216.2 | 34.7  | 53.3  |
| 169.0 | 197.4 | 149.2 | 120.8 | 70.1  | 305.5  | 226.8 | 62.1  | 93.4  |
| 190.6 | 178.0 | 256.2 | 327.9 | 98.4  | 348.4  | 272.3 | 166.4 | 213.8 |
| 461.1 | 398.5 | 344.8 | 264.8 | 155.6 | 268.2  | 174.5 | 64.1  | 75.7  |
| 126.1 | 109.6 | 104.7 | 72.7  | 37.2  | 170.5  | 98.1  | 94.7  | 128.9 |
| 629.9 | 500.1 | 608.4 | 495.9 | 358.9 | 773.7  | 603.7 | 222.6 | 256.3 |
| 78.6  | 90.7  | 82.2  | 68.6  | 29.9  | 561.1  | 359.5 | 56.1  | 51.5  |
| 14.9  | 15.9  | 23.9  | 10.4  | 9.2   | 21.0   | 15.0  | 10.1  | 25.6  |
| 95.3  | 94.8  | 67.9  | 56.3  | 42.6  | 159.4  | 56.8  | 77.7  | 112.3 |
| 338.5 | 265.2 | 217.8 | 111.9 | 100.3 | 89.8   | 64.9  | 47.2  | 47.5  |
| 20.9  | 22.4  | 24.0  | 15.9  | 6.5   | 63.4   | 40.3  | 16.2  | 23.5  |
| 5.5   | 5.0   | 6.5   | 19.5  | 1.7   | 5.4    | 0.2   | 3.4   | 4.7   |
| 104.9 | 81.3  | 73.1  | 123.5 | 34.0  | 102.1  | 83.7  | 22.5  | 20.3  |
| 42.7  | 41.4  | 41.8  | 34.4  | 16.3  | 39.0   | 29.6  | 16.9  | 15.8  |
| 42.0  | 31.2  | 52.4  | 33.6  | 18.7  | 66.3   | 29.4  | 8.2   | 17.8  |
| 412.6 | 360.9 | 447.7 | 385.3 | 158.5 | 868.4  | 566.6 | 284.9 | 351.5 |
| 343.3 | 319.7 | 311.4 | 300.5 | 107.2 | 859.6  | 690.3 | 336.1 | 517.5 |
| 131.8 | 148.4 | 122.3 | 84.6  | 46.8  | 287.8  | 141.2 | 19.4  | 19.7  |
| 69.6  | 52.4  | 55.9  | 55.8  | 21.6  | 95.8   | 82.4  | 31.9  | 36.5  |
| 217.2 | 148.2 | 171.3 | 189.5 | 71.0  | 324.3  | 150.0 | 113.7 | 112.4 |
| 107.3 | 103.6 | 77.7  | 65.2  | 44.2  | 178.6  | 117.8 | 87.9  | 100.8 |
| 236.2 | 206.3 | 190.3 | 154.9 | 96.5  | 1088.7 | 845.1 | 136.7 | 155.5 |
| 377.9 | 288.2 | 270.2 | 238.6 | 111.5 | 359.1  | 281.1 | 128.2 | 217.0 |
| 20.7  | 14.2  | 16.9  | 11.2  | 7.3   | 8.4    | 1.8   | 25.6  | 41.9  |
| 416.0 | 388.5 | 481.0 | 485.7 | 220.8 | 521.3  | 387.2 | 55.9  | 47.4  |
| 131.9 | 141.0 | 159.5 | 173.8 | 62.4  | 280.6  | 201.4 | 151.4 | 222.2 |
| 144.2 | 112.8 | 132.2 | 209.3 | 70.8  | 245.0  | 205.6 | 82.0  | 101.0 |
| 601.1 | 441.9 | 417.3 | 366.0 | 138.4 | 1288.9 | 821.4 | 296.6 | 426.3 |
| 658.0 | 455.0 | 585.3 | 308.2 | 220.5 | 492.5  | 468.1 | 119.4 | 114.3 |
| 49.1  | 20.0  | 21.2  | 13.5  | 9.4   | 63.8   | 37.3  | 20.9  | 29.3  |
| 44.7  | 24.4  | 36.6  | 21.7  | 19.9  | 82.7   | 55.7  | 129.4 | 158.6 |
| 211.8 | 168.1 | 224.4 | 167.9 | 65.8  | 224.7  | 158.2 | 111.4 | 160.2 |
| 72.6  | 61.5  | 71.3  | 54.5  | 27.3  | 158.5  | 111.7 | 15.2  | 22.9  |
| 67.9  | 48.0  | 100.6 | 57.0  | 28.9  | 106.1  | 98.7  | 29.1  | 32.6  |
| 1.3   | 9.5   | 3.3   | 5.2   | 1.0   | 11.1   | 1.7   | 2.0   | 1.7   |
| 27.5  | 26.4  | 21.3  | 33.2  | 9.1   | 2.4    | 2.5   | 22.1  | 20.7  |
| 115.4 | 127.0 | 102.3 | 53.0  | 39.4  | 63.4   | 41.5  | 36.2  | 126.2 |
| 82.2  | 76.3  | 87.8  | 72.9  | 23.6  | 32.1   | 25.9  | 24.8  | 47.7  |
| 354.6 | 281.3 | 311.3 | 339.2 | 108.0 | 814.4  | 381.8 | 47.3  | 61.4  |
| 79.8  | 70.7  | 86.3  | 112.5 | 35.0  | 84.4   | 43.9  | 18.1  | 26.4  |
| 115.8 | 74.0  | 103.6 | 66.6  | 44.5  | 202.1  | 153.9 | 146.2 | 295.9 |
| 12.3  | 6.3   | 8.9   | 3.3   | 5.2   | 125.9  | 74.2  | 12.1  | 10.1  |
| 79.8  | 114.8 | 74.1  | 66.3  | 21.8  | 104.2  | 61.8  | 69.1  | 100.7 |
| 101.4 | 73.5  | 59.1  | 57.2  | 26.8  | 114.6  | 65.0  | 52.3  | 56.9  |
| 223.3 | 136.9 | 226.3 | 225.6 | 84.5  | 539.0  | 380.1 | 84.4  | 97.9  |
| 354.0 | 320.3 | 301.6 | 209.9 | 118.6 | 239.8  | 144.6 | 214.8 | 242.4 |
| 180.2 | 131.9 | 165.8 | 106.3 | 61.9  | 326.4  | 163.6 | 115.2 | 171.4 |
| 224.1 | 180.3 | 193.4 | 167.7 | 83.0  | 179.5  | 108.9 | 77.5  | 121.8 |
| 253.2 | 204.3 | 172.3 | 83.6  | 65.5  | 1088.6 | 507.9 | 110.8 | 95.5  |



|       |       |       |       |       |        |       |       |       |
|-------|-------|-------|-------|-------|--------|-------|-------|-------|
| 78.9  | 53.7  | 57.4  | 71.8  | 35.9  | 56.1   | 41.1  | 11.9  | 37.2  |
| 23.5  | 9.8   | 21.1  | 20.2  | 3.1   | 24.4   | 3.9   | 29.6  | 37.0  |
| 10.0  | 1.2   | 8.7   | 0.8   | 5.5   | 10.3   | 6.3   | 10.7  | 23.4  |
| 517.8 | 404.4 | 434.8 | 352.2 | 175.6 | 347.0  | 218.6 | 254.5 | 286.1 |
| 68.7  | 78.0  | 54.8  | 38.3  | 23.9  | 30.9   | 23.9  | 110.1 | 160.3 |
| 8.3   | 1.3   | 1.7   | 1.1   | 1.4   | 15.0   | 9.9   | 9.4   | 9.6   |
| 88.9  | 88.7  | 105.8 | 63.3  | 33.2  | 84.7   | 65.2  | 53.2  | 90.2  |
| 50.5  | 41.8  | 45.9  | 26.8  | 18.2  | 249.9  | 151.2 | 81.4  | 84.6  |
| 48.5  | 53.6  | 40.2  | 18.4  | 19.7  | 12.8   | 6.4   | 16.5  | 14.6  |
| 134.4 | 108.5 | 138.5 | 153.5 | 58.1  | 119.8  | 96.5  | 46.4  | 53.3  |
| 67.3  | 72.5  | 85.1  | 66.4  | 21.3  | 164.2  | 139.9 | 104.7 | 92.0  |
| 303.4 | 217.1 | 297.2 | 264.4 | 121.1 | 499.4  | 405.6 | 105.3 | 116.2 |
| 29.7  | 17.6  | 23.0  | 19.7  | 13.9  | 34.1   | 22.2  | 15.3  | 3.8   |
| 353.9 | 326.1 | 361.7 | 276.7 | 120.2 | 924.8  | 670.8 | 348.9 | 472.9 |
| 166.9 | 146.8 | 101.9 | 64.0  | 40.4  | 146.1  | 77.4  | 145.2 | 161.0 |
| 172.2 | 168.8 | 186.9 | 167.3 | 85.6  | 259.7  | 166.8 | 101.1 | 124.4 |
| 95.4  | 91.4  | 90.5  | 73.4  | 30.0  | 131.3  | 115.7 | 90.9  | 94.7  |
| 22.0  | 14.4  | 16.5  | 14.8  | 7.0   | 54.0   | 31.2  | 14.4  | 20.1  |
| 14.0  | 18.2  | 13.9  | 2.3   | 8.1   | 48.8   | 37.5  | 34.6  | 48.4  |
| 100.0 | 104.5 | 98.9  | 67.5  | 42.1  | 146.7  | 119.2 | 22.2  | 14.0  |
| 10.0  | 11.3  | 12.2  | 6.4   | 5.7   | 323.7  | 251.4 | 154.6 | 175.6 |
| 406.3 | 332.5 | 342.0 | 268.5 | 138.3 | 481.6  | 321.9 | 290.9 | 330.4 |
| 113.3 | 118.1 | 107.2 | 87.7  | 54.4  | 99.9   | 106.8 | 165.6 | 199.9 |
| 137.7 | 107.0 | 135.1 | 95.5  | 38.8  | 282.5  | 283.2 | 101.8 | 115.9 |
| 4.1   | 8.1   | 6.9   | 3.8   | 0.8   | 4.1    | 7.8   | 11.2  | 13.3  |
| 68.5  | 47.6  | 54.1  | 32.7  | 14.1  | 87.7   | 66.7  | 11.3  | 15.4  |
| 177.5 | 143.0 | 144.3 | 96.4  | 50.8  | 260.8  | 179.4 | 94.8  | 188.2 |
| 150.4 | 123.3 | 138.3 | 108.2 | 52.8  | 204.0  | 110.2 | 127.9 | 156.2 |
| 396.8 | 271.6 | 274.6 | 190.7 | 116.0 | 269.7  | 229.3 | 97.1  | 132.8 |
| 56.7  | 65.8  | 69.7  | 95.7  | 26.4  | 114.8  | 104.9 | 26.3  | 28.6  |
| 662.4 | 643.4 | 664.9 | 450.1 | 235.2 | 647.3  | 412.5 | 77.1  | 114.5 |
| 219.2 | 153.0 | 200.8 | 136.8 | 57.0  | 153.9  | 117.5 | 105.4 | 126.8 |
| 21.1  | 10.2  | 17.6  | 2.4   | 1.0   | 2.2    | 1.1   | 24.0  | 6.2   |
| 235.7 | 231.3 | 243.1 | 157.0 | 59.5  | 245.6  | 170.7 | 30.4  | 52.8  |
| 22.8  | 14.1  | 17.6  | 10.8  | 7.0   | 14.4   | 11.5  | 10.9  | 19.2  |
| 74.2  | 68.4  | 62.4  | 56.7  | 20.6  | 158.8  | 131.4 | 10.2  | 24.6  |
| 63.0  | 39.6  | 66.1  | 48.3  | 18.3  | 101.5  | 83.6  | 46.4  | 60.4  |
| 17.2  | 9.8   | 20.2  | 13.0  | 4.8   | 14.3   | 1.9   | 9.8   | 10.3  |
| 108.6 | 113.9 | 76.8  | 85.7  | 30.9  | 498.5  | 355.2 | 129.7 | 117.0 |
| 35.4  | 15.0  | 33.0  | 25.4  | 17.1  | 92.5   | 55.9  | 80.1  | 80.6  |
| 199.2 | 203.0 | 192.7 | 109.1 | 60.6  | 292.4  | 221.9 | 67.2  | 106.4 |
| 58.8  | 69.9  | 69.0  | 78.8  | 42.9  | 170.3  | 169.7 | 43.2  | 51.2  |
| 43.6  | 49.0  | 63.9  | 57.0  | 25.1  | 79.0   | 96.9  | 7.8   | 9.5   |
| 47.7  | 63.0  | 55.8  | 33.2  | 30.0  | 98.0   | 79.6  | 24.2  | 30.9  |
| 132.6 | 226.9 | 108.9 | 118.4 | 55.0  | 112.7  | 192.1 | 41.2  | 57.7  |
| 126.6 | 124.2 | 114.5 | 96.7  | 50.1  | 295.0  | 181.8 | 75.9  | 71.5  |
| 85.1  | 80.1  | 75.3  | 78.9  | 30.2  | 126.0  | 86.5  | 35.6  | 63.4  |
| 20.0  | 10.5  | 11.7  | 3.4   | 6.1   | 110.1  | 69.6  | 1.6   | 2.8   |
| 32.1  | 23.8  | 30.2  | 22.7  | 9.1   | 113.0  | 94.6  | 10.8  | 12.2  |
| 26.9  | 23.7  | 30.3  | 30.4  | 3.0   | 74.5   | 36.6  | 2.7   | 9.7   |
| 183.7 | 223.9 | 247.3 | 260.1 | 103.3 | 135.4  | 123.1 | 29.0  | 47.6  |
| 372.2 | 354.7 | 355.8 | 228.9 | 117.3 | 1035.9 | 947.3 | 237.6 | 440.6 |
| 110.8 | 118.6 | 99.3  | 78.0  | 55.3  | 129.5  | 75.2  | 43.8  | 67.8  |

|       |       |       |       |       |        |        |       |       |
|-------|-------|-------|-------|-------|--------|--------|-------|-------|
| 134.8 | 141.4 | 198.7 | 203.9 | 87.5  | 593.3  | 421.2  | 11.1  | 23.1  |
| 146.4 | 123.5 | 116.1 | 59.5  | 43.0  | 119.8  | 92.2   | 45.2  | 69.5  |
| 48.4  | 44.9  | 50.7  | 75.7  | 33.7  | 87.5   | 62.0   | 63.7  | 67.0  |
| 78.9  | 74.5  | 73.9  | 51.8  | 27.9  | 115.0  | 67.3   | 651.7 | 911.9 |
| 59.7  | 37.5  | 46.5  | 43.4  | 17.3  | 56.2   | 33.0   | 21.5  | 23.3  |
| 301.8 | 290.1 | 308.9 | 296.0 | 89.7  | 336.9  | 194.1  | 24.5  | 51.2  |
| 543.1 | 439.1 | 443.5 | 372.3 | 132.1 | 632.0  | 402.3  | 454.9 | 530.9 |
| 259.8 | 339.8 | 197.8 | 140.9 | 91.8  | 812.1  | 561.7  | 171.1 | 205.1 |
| 338.7 | 326.8 | 380.4 | 274.1 | 145.3 | 1732.0 | 1200.6 | 191.3 | 238.0 |
| 159.5 | 171.1 | 188.1 | 88.3  | 68.0  | 220.5  | 157.2  | 144.8 | 217.0 |
| 269.0 | 158.5 | 158.2 | 93.0  | 49.7  | 261.6  | 170.8  | 92.6  | 109.6 |
| 13.7  | 7.4   | 7.0   | 1.1   | 3.4   | 2.8    | 6.1    | 2.9   | 5.1   |
| 55.0  | 53.7  | 55.8  | 64.5  | 26.8  | 118.1  | 59.6   | 31.5  | 40.2  |
| 65.2  | 65.6  | 60.6  | 67.9  | 24.0  | 94.0   | 60.8   | 130.7 | 197.0 |
| 98.4  | 84.1  | 109.1 | 114.0 | 46.9  | 77.3   | 84.2   | 34.8  | 16.3  |
| 157.7 | 130.3 | 107.7 | 46.9  | 48.7  | 368.8  | 237.0  | 111.3 | 156.3 |
| 379.1 | 361.6 | 342.9 | 279.5 | 141.8 | 1061.6 | 660.8  | 71.7  | 125.9 |
| 40.1  | 43.1  | 37.0  | 33.8  | 16.0  | 155.8  | 89.9   | 15.2  | 21.4  |
| 127.9 | 121.4 | 138.5 | 144.5 | 52.3  | 319.2  | 164.1  | 62.8  | 67.4  |
| 166.2 | 142.4 | 160.6 | 140.5 | 79.2  | 285.7  | 248.8  | 36.5  | 44.4  |
| 143.2 | 154.8 | 163.3 | 253.0 | 90.3  | 165.3  | 136.0  | 13.0  | 8.7   |
| 10.4  | 5.4   | 3.5   | 2.0   | 0.8   | 2.2    | 6.7    | 39.5  | 62.1  |
| 47.0  | 45.0  | 61.4  | 63.6  | 8.5   | 154.8  | 109.3  | 27.4  | 17.1  |
| 74.3  | 69.8  | 73.3  | 45.9  | 29.2  | 14.0   | 2.0    | 17.0  | 14.1  |
| 128.0 | 94.2  | 100.5 | 95.0  | 63.1  | 132.3  | 185.1  | 37.6  | 70.9  |
| 51.8  | 42.4  | 41.5  | 30.5  | 16.7  | 56.8   | 37.2   | 25.1  | 36.4  |
| 119.2 | 86.7  | 108.3 | 78.6  | 39.6  | 216.8  | 183.5  | 82.3  | 76.2  |
| 369.8 | 287.5 | 299.8 | 213.4 | 98.7  | 540.5  | 390.7  | 128.1 | 158.4 |
| 61.8  | 72.8  | 55.0  | 22.6  | 29.0  | 59.8   | 30.2   | 13.2  | 22.4  |
| 145.4 | 123.9 | 153.6 | 106.9 | 44.8  | 258.1  | 169.3  | 84.8  | 168.4 |
| 102.7 | 112.3 | 101.1 | 67.5  | 41.3  | 129.5  | 72.1   | 2.4   | 12.1  |
| 54.5  | 47.1  | 44.6  | 45.6  | 18.1  | 143.9  | 69.5   | 84.5  | 84.2  |
| 25.8  | 25.3  | 43.7  | 23.7  | 19.0  | 42.6   | 30.6   | 24.6  | 23.9  |
| 38.3  | 26.9  | 27.2  | 23.5  | 8.1   | 31.7   | 17.4   | 21.0  | 28.3  |
| 52.0  | 64.5  | 40.3  | 26.1  | 20.9  | 48.2   | 16.6   | 13.2  | 11.7  |
| 92.1  | 76.4  | 92.9  | 56.7  | 40.0  | 358.5  | 233.0  | 81.7  | 104.7 |
| 61.5  | 66.5  | 68.3  | 55.8  | 22.9  | 197.1  | 142.0  | 19.2  | 30.0  |
| 33.3  | 41.8  | 51.2  | 50.7  | 12.6  | 120.4  | 60.5   | 12.0  | 7.4   |
| 120.2 | 105.3 | 105.6 | 67.3  | 45.9  | 154.6  | 73.5   | 102.7 | 127.4 |
| 58.0  | 46.6  | 48.1  | 49.9  | 20.9  | 158.3  | 83.4   | 8.3   | 12.3  |
| 81.1  | 83.3  | 81.0  | 71.8  | 25.8  | 118.5  | 112.0  | 70.2  | 77.6  |
| 13.9  | 11.1  | 9.7   | 11.8  | 5.4   | 8.3    | 10.4   | 4.8   | 2.5   |
| 23.5  | 7.0   | 16.2  | 9.7   | 9.1   | 139.4  | 110.5  | 0.9   | 11.6  |
| 145.4 | 117.3 | 196.1 | 149.0 | 25.9  | 657.6  | 437.1  | 7.0   | 10.4  |
| 73.3  | 80.1  | 85.7  | 53.3  | 30.3  | 93.4   | 58.6   | 56.3  | 59.9  |
| 31.9  | 23.2  | 25.8  | 25.8  | 14.4  | 168.1  | 179.3  | 8.8   | 11.4  |
| 11.9  | 22.7  | 12.7  | 22.2  | 9.5   | 18.8   | 11.8   | 1.0   | 3.9   |
| 21.7  | 14.4  | 12.8  | 13.2  | 7.8   | 85.9   | 22.0   | 18.1  | 39.8  |
| 12.7  | 10.0  | 10.3  | 11.6  | 7.8   | 23.4   | 19.9   | 2.0   | 0.2   |
| 3.7   | 9.8   | 7.4   | 15.9  | 1.6   | 34.1   | 18.5   | 3.4   | 1.1   |
| 12.5  | 10.6  | 23.1  | 23.9  | 11.1  | 50.6   | 53.1   | 264.1 | 340.4 |
| 95.4  | 88.8  | 96.5  | 103.4 | 45.1  | 196.6  | 129.5  | 34.2  | 26.6  |
| 140.8 | 81.2  | 142.7 | 74.5  | 34.5  | 42.7   | 89.0   | 205.9 | 358.9 |

|       |       |       |        |       |       |       |       |       |
|-------|-------|-------|--------|-------|-------|-------|-------|-------|
| 246.5 | 210.3 | 255.5 | 186.9  | 71.1  | 161.5 | 91.7  | 30.9  | 38.7  |
| 136.1 | 94.5  | 145.3 | 79.7   | 39.0  | 179.3 | 86.6  | 138.9 | 118.2 |
| 18.1  | 14.4  | 14.5  | 18.7   | 4.2   | 20.4  | 16.0  | 21.6  | 22.2  |
| 30.4  | 37.7  | 25.2  | 39.5   | 13.2  | 73.2  | 37.1  | 27.6  | 35.4  |
| 69.6  | 63.7  | 65.6  | 39.9   | 18.2  | 628.8 | 594.0 | 24.0  | 34.7  |
| 27.9  | 24.3  | 34.5  | 21.4   | 9.4   | 22.7  | 25.5  | 22.2  | 16.9  |
| 61.2  | 56.6  | 49.9  | 24.2   | 18.8  | 36.9  | 18.8  | 19.8  | 17.3  |
| 42.5  | 42.1  | 45.0  | 29.1   | 18.8  | 89.3  | 105.7 | 7.8   | 4.8   |
| 149.2 | 128.5 | 169.9 | 145.2  | 60.8  | 307.7 | 192.9 | 266.8 | 389.3 |
| 72.8  | 85.8  | 81.6  | 137.3  | 32.5  | 137.4 | 129.3 | 20.0  | 16.1  |
| 55.9  | 37.3  | 49.1  | 30.9   | 18.4  | 228.9 | 160.4 | 56.1  | 57.3  |
| 77.1  | 62.1  | 84.0  | 50.8   | 34.6  | 111.3 | 67.4  | 81.7  | 105.7 |
| 130.4 | 104.3 | 134.6 | 82.8   | 41.3  | 279.5 | 215.9 | 27.2  | 63.4  |
| 409.6 | 311.8 | 327.9 | 324.2  | 135.7 | 498.4 | 392.0 | 678.9 | 861.3 |
| 44.0  | 44.5  | 58.2  | 43.0   | 14.6  | 110.0 | 56.1  | 57.0  | 95.7  |
| 51.8  | 48.8  | 67.2  | 67.1   | 13.9  | 75.2  | 51.6  | 33.2  | 52.8  |
| 58.2  | 53.5  | 42.2  | 30.3   | 10.3  | 66.1  | 12.0  | 129.5 | 189.6 |
| 62.1  | 67.3  | 72.5  | 62.3   | 21.8  | 57.7  | 46.8  | 3.1   | 2.6   |
| 97.3  | 80.2  | 84.7  | 52.8   | 27.0  | 102.6 | 71.0  | 39.9  | 49.3  |
| 44.4  | 39.6  | 43.9  | 33.6   | 16.9  | 202.4 | 105.4 | 77.9  | 102.3 |
| 77.2  | 46.6  | 74.9  | 103.6  | 31.6  | 56.8  | 40.5  | 22.0  | 17.4  |
| 24.7  | 18.1  | 23.5  | 14.1   | 8.3   | 107.9 | 100.3 | 13.4  | 11.9  |
| 12.3  | 20.1  | 17.6  | 14.4   | 6.6   | 20.7  | 15.9  | 3.4   | 7.3   |
| 65.5  | 76.8  | 93.1  | 87.6   | 33.1  | 32.4  | 45.3  | 42.4  | 77.1  |
| 50.5  | 32.9  | 29.6  | 19.7   | 3.9   | 170.1 | 142.2 | 154.3 | 252.6 |
| 135.5 | 101.8 | 129.4 | 102.1  | 50.1  | 204.5 | 122.1 | 60.2  | 120.1 |
| 300.1 | 223.6 | 301.1 | 238.5  | 92.3  | 305.6 | 233.5 | 38.7  | 48.3  |
| 762.3 | 617.4 | 721.2 | 1025.7 | 235.4 | 366.0 | 253.5 | 24.6  | 39.4  |
| 116.2 | 87.8  | 113.9 | 79.2   | 22.4  | 90.2  | 51.9  | 66.1  | 91.8  |
| 46.1  | 37.5  | 34.7  | 24.2   | 12.0  | 91.2  | 57.2  | 8.1   | 16.8  |
| 148.2 | 105.8 | 134.7 | 87.2   | 51.9  | 182.8 | 151.8 | 90.4  | 99.8  |
| 17.7  | 14.6  | 31.1  | 11.7   | 10.8  | 18.1  | 13.4  | 9.4   | 8.6   |
| 107.9 | 85.5  | 95.3  | 89.0   | 37.1  | 299.1 | 220.1 | 103.0 | 131.8 |
| 149.0 | 162.4 | 149.7 | 97.7   | 55.2  | 156.2 | 95.6  | 89.6  | 109.4 |
| 13.9  | 6.0   | 9.1   | 4.7    | 6.8   | 20.5  | 10.0  | 14.3  | 9.7   |
| 41.1  | 27.5  | 40.3  | 35.8   | 12.3  | 30.1  | 41.4  | 66.5  | 105.1 |
| 82.3  | 67.8  | 77.5  | 62.2   | 28.5  | 273.1 | 173.4 | 102.5 | 124.1 |
| 38.7  | 27.9  | 31.9  | 20.0   | 8.5   | 25.5  | 19.0  | 6.1   | 11.6  |
| 54.4  | 66.1  | 68.5  | 48.0   | 26.5  | 110.8 | 45.3  | 153.7 | 136.7 |
| 161.7 | 120.5 | 157.0 | 152.5  | 61.0  | 265.7 | 177.0 | 224.5 | 299.5 |
| 29.3  | 20.7  | 21.2  | 13.4   | 6.8   | 8.3   | 19.5  | 1.8   | 15.4  |
| 45.6  | 37.3  | 36.3  | 35.0   | 14.2  | 49.3  | 39.3  | 15.3  | 28.2  |
| 69.2  | 62.6  | 65.7  | 96.4   | 35.8  | 90.0  | 57.4  | 19.0  | 38.4  |
| 107.9 | 89.1  | 91.1  | 71.9   | 31.5  | 153.2 | 101.6 | 73.7  | 75.8  |
| 38.1  | 8.4   | 16.8  | 1.9    | 1.9   | 27.5  | 13.3  | 9.8   | 4.3   |
| 27.8  | 21.6  | 28.8  | 16.2   | 11.8  | 64.5  | 61.4  | 14.0  | 16.2  |
| 13.5  | 6.4   | 9.5   | 8.1    | 6.4   | 18.9  | 1.8   | 72.4  | 82.3  |
| 18.8  | 12.7  | 13.1  | 7.1    | 4.4   | 110.3 | 69.0  | 11.5  | 10.5  |
| 88.5  | 74.8  | 93.5  | 69.3   | 26.7  | 85.2  | 73.1  | 152.2 | 117.4 |
| 100.6 | 88.7  | 91.3  | 55.5   | 46.9  | 66.1  | 39.0  | 40.8  | 45.9  |
| 14.6  | 2.1   | 7.1   | 2.1    | 0.9   | 11.3  | 10.9  | 2.7   | 8.8   |
| 73.9  | 59.6  | 57.7  | 45.9   | 19.2  | 669.9 | 609.5 | 83.9  | 103.6 |
| 92.2  | 64.5  | 78.9  | 36.1   | 30.1  | 258.5 | 272.3 | 32.8  | 33.8  |

|       |       |       |       |      |       |       |       |       |
|-------|-------|-------|-------|------|-------|-------|-------|-------|
| 4.4   | 1.7   | 3.2   | 1.1   | 2.9  | 1.5   | 1.1   | 1.2   | 7.3   |
| 37.1  | 51.0  | 57.5  | 42.9  | 20.7 | 151.6 | 110.3 | 21.1  | 8.8   |
| 80.0  | 66.3  | 56.4  | 43.0  | 23.4 | 39.2  | 45.0  | 36.3  | 32.2  |
| 204.8 | 153.0 | 166.4 | 127.8 | 54.6 | 284.4 | 155.4 | 81.3  | 75.3  |
| 54.7  | 33.1  | 40.6  | 22.6  | 14.9 | 151.6 | 65.4  | 1.1   | 13.0  |
| 91.3  | 56.1  | 47.5  | 18.9  | 13.5 | 115.3 | 51.4  | 124.6 | 189.4 |
| 2.0   | 4.1   | 5.3   | 4.1   | 0.6  | 128.3 | 144.0 | 53.3  | 63.6  |
| 65.4  | 50.4  | 44.5  | 25.5  | 22.9 | 47.1  | 21.6  | 42.0  | 45.9  |
| 94.6  | 66.7  | 62.0  | 49.9  | 25.0 | 88.4  | 62.7  | 76.2  | 108.7 |

---

| Batch.5 G | Batch.5 V | Batch.4 R | Batch.4 R | Batch.5 G | Batch.5 V | Batch.8 V | Batch.8 P | Batch.8 E |
|-----------|-----------|-----------|-----------|-----------|-----------|-----------|-----------|-----------|
| 564.4     | 626.3     | 513.2     | 735.0     | 773.7     | 550.7     | 882.7     | 1001.1    | 1046.0    |
| 321.2     | 237.0     | 124.9     | 130.3     | 406.4     | 278.7     | 915.8     | 434.0     | 495.1     |
| 14.9      | 39.1      | 14.9      | 14.0      | 14.7      | 22.5      | 24.9      | 21.7      | 16.5      |
| 82.3      | 81.5      | 97.9      | 69.1      | 94.4      | 70.1      | 265.6     | 330.5     | 331.7     |
| 1.6       | 5.5       | 3.7       | 0.7       | 8.8       | 4.7       | 9.3       | 1.3       | 6.4       |
| 27.6      | 34.5      | 6.7       | 10.0      | 31.5      | 26.2      | 55.1      | 93.8      | 108.0     |
| 4.7       | 15.2      | 18.7      | 15.2      | 16.3      | 14.4      | 45.3      | 57.0      | 66.0      |
| 3.3       | 12.6      | 4.2       | 1.4       | 3.2       | 5.0       | 15.3      | 14.5      | 11.2      |
| 21.7      | 49.1      | 0.9       | 5.7       | 61.3      | 76.9      | 0.6       | 1.0       | 0.9       |
| 6.3       | 10.0      | 7.6       | 6.1       | 17.1      | 10.1      | 7.0       | 7.1       | 7.4       |
| 24.6      | 18.6      | 79.2      | 122.2     | 27.0      | 1.1       | 303.0     | 86.8      | 146.9     |
| 175.9     | 248.3     | 131.6     | 177.8     | 255.7     | 244.4     | 468.6     | 544.9     | 558.1     |
| 18.4      | 27.0      | 19.6      | 19.2      | 30.9      | 31.6      | 33.9      | 32.9      | 19.4      |
| 232.4     | 263.0     | 84.1      | 63.6      | 322.8     | 254.3     | 308.7     | 423.2     | 486.8     |
| 159.9     | 184.2     | 42.1      | 32.2      | 222.7     | 161.0     | 117.9     | 164.4     | 163.5     |
| 184.1     | 261.3     | 45.6      | 44.2      | 319.8     | 211.5     | 136.8     | 140.7     | 149.3     |
| 28.3      | 36.3      | 13.8      | 13.5      | 37.2      | 23.7      | 37.0      | 55.7      | 65.9      |
| 35.2      | 48.2      | 17.8      | 30.0      | 29.2      | 23.8      | 181.0     | 149.3     | 151.8     |
| 93.3      | 128.1     | 72.9      | 61.9      | 120.4     | 84.8      | 178.9     | 203.7     | 181.7     |
| 72.1      | 53.6      | 56.5      | 105.3     | 88.4      | 45.7      | 128.5     | 110.9     | 126.3     |
| 732.5     | 783.3     | 233.4     | 348.7     | 793.7     | 581.6     | 890.1     | 835.1     | 944.5     |
| 2618.2    | 3362.9    | 1099.2    | 1712.6    | 3390.8    | 2569.8    | 1576.5    | 1544.0    | 1638.7    |
| 4289.3    | 5595.9    | 2368.7    | 3452.6    | 5422.3    | 5608.7    | 8187.4    | 7614.7    | 8087.1    |
| 6391.1    | 8126.0    | 2289.8    | 3145.6    | 8090.7    | 7104.6    | 10568.0   | 10199.8   | 11232.6   |
| 3884.3    | 5143.0    | 748.9     | 1280.7    | 5562.5    | 4954.1    | 7463.7    | 6821.1    | 6659.8    |
| 2139.2    | 2732.4    | 720.3     | 1119.2    | 2941.0    | 2300.2    | 3493.9    | 2426.1    | 2900.7    |
| 3400.9    | 4564.4    | 789.3     | 1010.1    | 4394.1    | 4156.4    | 6705.8    | 6002.6    | 6017.3    |
| 2457.4    | 3277.8    | 910.5     | 1342.2    | 3668.5    | 2741.8    | 5676.5    | 5700.0    | 5955.4    |
| 415.9     | 506.1     | 431.8     | 634.8     | 607.1     | 380.8     | 2712.7    | 2027.6    | 2198.2    |
| 1924.7    | 2176.4    | 1008.4    | 1562.3    | 2480.0    | 2378.3    | 4459.3    | 3503.3    | 3763.6    |
| 5126.6    | 6348.3    | 1595.5    | 1713.2    | 6826.8    | 6339.9    | 8688.7    | 8667.7    | 8375.5    |
| 749.4     | 911.7     | 402.3     | 576.5     | 1209.0    | 1021.2    | 1922.1    | 1853.2    | 1963.7    |
| 5253.3    | 6364.9    | 1768.8    | 2371.6    | 6771.1    | 6393.9    | 8903.2    | 8485.0    | 8769.2    |
| 7354.9    | 8519.7    | 1444.2    | 1799.9    | 9593.7    | 7820.1    | 11348.9   | 10300.0   | 10218.3   |
| 1335.4    | 1932.4    | 679.0     | 964.4     | 2606.3    | 1875.0    | 3367.5    | 2587.2    | 2657.8    |
| 2343.2    | 2740.9    | 346.0     | 458.4     | 3028.9    | 2701.2    | 3957.3    | 3923.6    | 3948.2    |
| 5354.2    | 5901.6    | 2054.8    | 2235.1    | 5559.3    | 5708.3    | 10541.9   | 10387.3   | 10219.8   |
| 6721.8    | 8704.7    | 765.7     | 1786.4    | 9142.4    | 8100.6    | 11499.0   | 10947.0   | 10837.6   |
| 7143.2    | 8622.3    | 1886.3    | 3110.7    | 8128.9    | 7626.9    | 11376.2   | 11148.7   | 10931.6   |
| 5015.8    | 5524.9    | 3010.7    | 3840.5    | 6471.5    | 5283.6    | 7482.6    | 6508.3    | 6612.0    |
| 1328.1    | 1640.8    | 285.3     | 433.8     | 1749.3    | 1682.6    | 2424.6    | 1555.7    | 1721.0    |
| 6048.2    | 6103.9    | 3236.8    | 4253.4    | 6607.5    | 6240.3    | 8776.8    | 8753.4    | 8825.6    |
| 5621.4    | 6293.0    | 2186.2    | 2572.5    | 7613.0    | 5847.8    | 10459.1   | 9634.1    | 9441.5    |
| 2216.0    | 2933.3    | 755.5     | 995.5     | 3329.1    | 2951.9    | 4279.1    | 4370.8    | 4555.0    |
| 3418.3    | 3989.4    | 1727.1    | 2371.6    | 4353.2    | 2997.8    | 6559.2    | 6607.5    | 6806.4    |
| 4935.5    | 6710.1    | 1802.2    | 2568.6    | 6652.4    | 6374.4    | 10743.4   | 10915.7   | 10511.8   |
| 6091.6    | 7363.1    | 1714.0    | 2901.2    | 7407.1    | 6786.8    | 8366.5    | 8209.5    | 8641.4    |
| 615.2     | 712.1     | 816.9     | 999.3     | 1076.3    | 828.3     | 3369.1    | 2831.2    | 3058.9    |
| 1149.1    | 1353.2    | 509.1     | 511.7     | 1526.6    | 1449.7    | 2305.9    | 1488.5    | 1666.2    |
| 6028.2    | 6498.5    | 4556.2    | 6039.2    | 7312.1    | 6614.2    | 9504.6    | 8887.0    | 9278.2    |
| 2999.2    | 3545.6    | 1095.3    | 1472.9    | 3813.0    | 3574.5    | 6480.3    | 6295.1    | 6537.1    |
| 4400.6    | 5079.2    | 2346.6    | 3098.2    | 6185.8    | 2021.2    | 12222.2   | 11904.8   | 12009.9   |

|        |        |        |        |        |        |         |         |         |
|--------|--------|--------|--------|--------|--------|---------|---------|---------|
| 7070.9 | 8648.1 | 2543.2 | 3387.8 | 8086.7 | 7845.5 | 10432.1 | 10088.3 | 10083.8 |
| 1914.4 | 3024.1 | 369.0  | 607.2  | 2930.6 | 2801.3 | 5461.2  | 3994.5  | 4206.0  |
| 4556.4 | 6149.0 | 1363.3 | 1665.1 | 6053.4 | 4704.9 | 9167.8  | 8497.6  | 8613.1  |
| 331.0  | 292.4  | 179.1  | 236.7  | 391.8  | 379.4  | 377.7   | 377.2   | 413.4   |
| 4887.4 | 5516.9 | 1647.9 | 2229.0 | 4905.0 | 4659.6 | 5875.7  | 5245.8  | 5210.8  |
| 1879.9 | 2472.2 | 535.8  | 695.8  | 2620.2 | 2365.4 | 4925.2  | 2701.5  | 3105.5  |
| 4382.8 | 5642.3 | 1930.2 | 2566.5 | 5414.5 | 5299.7 | 10735.1 | 9387.3  | 9431.4  |
| 2115.5 | 2789.5 | 585.4  | 877.5  | 3286.5 | 2409.6 | 3668.2  | 2591.8  | 2679.1  |
| 1175.6 | 1719.3 | 575.7  | 711.1  | 1974.3 | 1573.7 | 3530.2  | 3183.1  | 3296.2  |
| 1761.0 | 2364.9 | 623.8  | 1013.7 | 2524.2 | 2244.2 | 3754.2  | 2673.9  | 2648.7  |
| 711.8  | 1004.5 | 254.8  | 446.7  | 1084.8 | 820.2  | 1035.2  | 771.5   | 825.8   |
| 2389.3 | 3074.7 | 659.9  | 988.2  | 3855.9 | 3003.2 | 5781.5  | 4687.7  | 4752.2  |
| 1160.6 | 1184.0 | 628.8  | 861.6  | 1508.2 | 1071.0 | 3434.3  | 2639.5  | 2726.5  |
| 345.3  | 439.4  | 290.2  | 355.5  | 483.8  | 441.2  | 733.8   | 552.9   | 574.2   |
| 1005.3 | 1508.5 | 591.0  | 819.6  | 1759.8 | 1840.6 | 4449.4  | 3652.8  | 3854.9  |
| 815.1  | 1293.5 | 264.0  | 339.2  | 1330.0 | 1195.2 | 3466.7  | 3146.4  | 3372.0  |
| 1639.6 | 2054.3 | 862.9  | 1314.0 | 2259.0 | 1889.4 | 5314.6  | 4447.2  | 4615.2  |
| 137.3  | 155.4  | 513.3  | 597.5  | 215.4  | 169.7  | 344.4   | 413.4   | 433.5   |
| 1396.8 | 2586.9 | 148.3  | 170.2  | 2157.6 | 1915.5 | 1341.4  | 917.5   | 1085.6  |
| 279.1  | 283.5  | 103.5  | 157.3  | 372.7  | 316.1  | 291.6   | 234.9   | 240.9   |
| 1123.7 | 1373.9 | 471.0  | 707.4  | 1547.0 | 1172.5 | 3114.0  | 1996.4  | 2038.7  |
| 449.1  | 415.3  | 231.2  | 304.0  | 486.8  | 506.2  | 371.3   | 411.8   | 404.8   |
| 371.2  | 410.0  | 41.4   | 75.5   | 603.2  | 413.4  | 261.3   | 163.5   | 204.2   |
| 1060.4 | 1280.9 | 938.3  | 1462.4 | 1306.6 | 1415.7 | 1553.7  | 1365.0  | 1425.2  |
| 281.4  | 461.7  | 31.3   | 48.9   | 509.5  | 488.8  | 1071.0  | 948.3   | 929.4   |
| 1597.8 | 1834.1 | 1013.3 | 1543.1 | 2184.7 | 1489.6 | 5649.9  | 5192.0  | 5218.8  |
| 819.8  | 1031.8 | 334.7  | 583.0  | 1137.7 | 971.0  | 1979.9  | 1911.9  | 2020.2  |
| 1810.9 | 2302.4 | 1081.8 | 1421.2 | 2690.4 | 1970.6 | 4421.5  | 4262.2  | 4508.1  |
| 1027.3 | 1404.0 | 307.8  | 536.8  | 1475.7 | 1249.0 | 2186.5  | 1288.9  | 1469.5  |
| 6083.8 | 6650.8 | 2380.0 | 3109.6 | 7225.8 | 6439.7 | 9511.9  | 9055.7  | 9963.5  |
| 7294.1 | 8677.0 | 3767.0 | 4746.7 | 8628.7 | 8380.7 | 10391.9 | 10460.7 | 10598.5 |
| 5348.4 | 6457.7 | 1511.8 | 2162.4 | 6519.9 | 6005.7 | 8891.3  | 8293.6  | 8316.9  |
| 4367.7 | 5733.1 | 2497.9 | 3595.5 | 5409.9 | 4806.3 | 4789.9  | 2422.9  | 2792.5  |
| 2189.8 | 3220.3 | 1562.1 | 2107.7 | 2616.6 | 1985.4 | 5975.7  | 5589.8  | 5488.2  |
| 441.3  | 596.3  | 168.8  | 227.7  | 649.6  | 528.4  | 957.5   | 946.0   | 967.0   |
| 1021.7 | 1355.1 | 371.4  | 457.2  | 1430.2 | 1090.1 | 1567.9  | 1310.5  | 1599.2  |
| 2131.8 | 3141.5 | 1485.4 | 2266.6 | 3474.2 | 2951.0 | 6942.0  | 6414.5  | 6539.7  |
| 138.3  | 187.7  | 26.7   | 27.5   | 160.8  | 203.7  | 352.6   | 268.7   | 302.6   |
| 174.4  | 179.5  | 96.5   | 135.0  | 197.7  | 170.9  | 534.2   | 575.0   | 696.1   |
| 526.5  | 714.4  | 47.2   | 72.3   | 948.7  | 626.2  | 1613.1  | 1137.1  | 1187.5  |
| 890.1  | 1207.2 | 324.4  | 644.7  | 1269.2 | 1011.9 | 3234.6  | 2535.4  | 2801.3  |
| 1718.8 | 2732.1 | 209.5  | 284.3  | 2236.2 | 2579.3 | 4055.6  | 2408.8  | 2547.5  |
| 3069.9 | 3862.3 | 698.7  | 985.5  | 3936.1 | 3841.1 | 4642.3  | 4083.4  | 4085.0  |
| 620.5  | 843.9  | 585.5  | 956.0  | 979.7  | 724.4  | 1059.3  | 887.3   | 1073.7  |
| 309.5  | 341.8  | 70.1   | 119.4  | 441.1  | 235.6  | 666.7   | 470.7   | 569.7   |
| 3883.6 | 5076.9 | 1416.4 | 1857.6 | 5084.0 | 4527.5 | 6870.9  | 6130.5  | 6412.1  |
| 539.7  | 721.7  | 225.3  | 365.0  | 739.5  | 478.6  | 2437.8  | 1781.2  | 2072.3  |
| 1901.4 | 2365.3 | 789.2  | 1111.4 | 2696.9 | 2157.8 | 3455.3  | 2511.0  | 2623.9  |
| 2546.3 | 3158.2 | 1610.4 | 2179.3 | 3553.8 | 3396.3 | 10012.1 | 10190.2 | 10174.7 |
| 4459.1 | 5080.3 | 1768.5 | 2149.6 | 6191.7 | 6065.3 | 10392.4 | 10225.0 | 10347.6 |
| 5121.6 | 6074.7 | 2229.3 | 2983.1 | 6141.4 | 5376.5 | 9689.1  | 9017.3  | 9342.8  |
| 405.0  | 683.4  | 235.6  | 271.6  | 768.8  | 572.4  | 1320.1  | 1310.7  | 1449.0  |
| 1424.5 | 1624.8 | 444.4  | 704.4  | 1982.9 | 1552.7 | 2426.6  | 2004.8  | 2083.6  |

|        |        |        |        |        |        |         |         |         |
|--------|--------|--------|--------|--------|--------|---------|---------|---------|
| 2226.6 | 2720.6 | 532.9  | 709.3  | 3086.2 | 2537.6 | 3761.7  | 3297.2  | 3839.6  |
| 2629.6 | 3536.0 | 851.5  | 1205.5 | 3852.3 | 3241.8 | 5626.9  | 5677.4  | 5825.6  |
| 1519.6 | 2334.4 | 1110.2 | 1290.5 | 2538.3 | 1891.9 | 6668.1  | 6577.0  | 6894.4  |
| 6635.6 | 7324.0 | 3482.9 | 4441.9 | 6954.2 | 6672.2 | 8944.6  | 8496.6  | 8558.1  |
| 4043.8 | 5593.2 | 995.3  | 1260.7 | 5221.8 | 5005.1 | 9763.3  | 8934.0  | 9010.8  |
| 1559.8 | 1545.6 | 144.6  | 181.2  | 1925.0 | 1657.0 | 1048.8  | 1038.1  | 1002.9  |
| 3743.4 | 5228.2 | 580.6  | 852.4  | 5509.8 | 4643.1 | 8062.0  | 8021.7  | 7832.6  |
| 7338.9 | 8314.6 | 1829.6 | 2414.5 | 8536.6 | 7648.2 | 11200.0 | 10753.1 | 10921.0 |
| 1670.9 | 1959.1 | 520.3  | 804.2  | 2458.4 | 1854.5 | 4510.9  | 4031.8  | 4214.6  |
| 2011.7 | 2746.6 | 1453.2 | 1858.0 | 2410.2 | 2201.2 | 4489.9  | 5429.1  | 5520.7  |
| 8033.1 | 9205.3 | 4507.6 | 5402.9 | 9542.6 | 8415.1 | 9416.4  | 8733.7  | 8709.8  |
| 1195.1 | 1770.1 | 441.6  | 519.0  | 2077.0 | 1466.8 | 2732.9  | 2788.3  | 2922.1  |
| 1302.4 | 1763.8 | 280.9  | 394.0  | 1526.0 | 1584.9 | 4002.0  | 3357.1  | 3550.1  |
| 740.2  | 792.0  | 304.0  | 502.3  | 1142.6 | 866.9  | 2661.5  | 1802.5  | 2034.3  |
| 6618.7 | 8520.4 | 2671.8 | 3397.4 | 8390.6 | 7245.4 | 11991.1 | 11883.8 | 11910.4 |
| 499.4  | 652.8  | 305.1  | 444.7  | 655.8  | 634.2  | 1912.0  | 1415.1  | 1606.5  |
| 1837.1 | 2554.8 | 998.1  | 1256.2 | 2403.4 | 2534.1 | 4416.8  | 3896.3  | 3936.0  |
| 682.0  | 959.3  | 80.4   | 76.6   | 1024.7 | 748.9  | 2936.4  | 2346.4  | 2581.5  |
| 802.5  | 949.2  | 94.1   | 123.4  | 826.4  | 1051.8 | 1026.5  | 831.4   | 850.1   |
| 136.2  | 152.8  | 25.8   | 27.1   | 151.1  | 156.3  | 256.4   | 194.1   | 211.7   |
| 761.6  | 1244.9 | 360.4  | 434.3  | 1293.5 | 877.4  | 3883.6  | 2572.8  | 2647.1  |
| 2055.0 | 3876.3 | 528.0  | 861.9  | 3622.5 | 2912.2 | 7934.6  | 6277.2  | 6395.9  |
| 1007.4 | 1450.6 | 1.6    | 2.3    | 1644.6 | 1305.4 | 3.9     | 7.2     | 4.8     |
| 1194.5 | 1508.3 | 430.9  | 521.4  | 1747.3 | 1328.5 | 2529.0  | 1171.4  | 1544.0  |
| 628.1  | 673.4  | 120.2  | 149.2  | 960.9  | 710.0  | 1836.8  | 1786.1  | 1897.4  |
| 989.9  | 1525.5 | 202.2  | 213.9  | 1957.5 | 1570.6 | 2369.6  | 2478.2  | 2695.7  |
| 321.2  | 329.4  | 342.3  | 477.0  | 504.0  | 385.7  | 744.5   | 647.6   | 705.2   |
| 870.2  | 1128.5 | 349.3  | 496.9  | 1194.9 | 1035.6 | 1571.3  | 1604.5  | 1632.7  |
| 205.4  | 320.4  | 441.9  | 581.3  | 370.9  | 313.9  | 1478.5  | 2785.5  | 3151.9  |
| 259.2  | 355.5  | 599.3  | 850.7  | 339.0  | 231.8  | 1368.9  | 1219.4  | 1172.2  |
| 823.1  | 1422.0 | 318.9  | 423.1  | 1346.8 | 1252.0 | 3701.8  | 3600.2  | 3681.5  |
| 2078.2 | 2728.1 | 329.7  | 692.4  | 2581.2 | 1908.9 | 3893.2  | 3484.2  | 3755.9  |
| 2609.1 | 4108.6 | 620.9  | 1000.5 | 4020.5 | 3969.4 | 3676.4  | 1618.9  | 1921.7  |
| 1777.4 | 2378.8 | 497.2  | 673.2  | 2205.0 | 1997.7 | 3351.6  | 3109.9  | 3276.8  |
| 395.7  | 447.1  | 361.2  | 396.0  | 583.6  | 421.9  | 862.3   | 1160.7  | 1443.0  |
| 1288.9 | 1803.8 | 453.3  | 631.3  | 2392.5 | 1337.0 | 3006.3  | 3092.7  | 3492.8  |
| 2687.0 | 3102.3 | 2586.0 | 3389.6 | 3363.9 | 2693.6 | 5515.7  | 6363.3  | 6501.0  |
| 428.1  | 646.9  | 375.1  | 458.9  | 726.1  | 533.4  | 586.0   | 775.3   | 765.7   |
| 422.1  | 618.9  | 155.6  | 154.2  | 814.9  | 764.0  | 1357.8  | 1153.8  | 1306.0  |
| 340.1  | 422.0  | 296.3  | 302.7  | 463.3  | 334.0  | 1913.1  | 1801.4  | 2030.3  |
| 2016.6 | 3086.6 | 1781.7 | 2236.1 | 2776.9 | 2575.2 | 4270.7  | 4859.7  | 5061.8  |
| 545.9  | 721.8  | 416.3  | 648.9  | 846.2  | 720.8  | 817.6   | 646.3   | 674.8   |
| 407.3  | 485.7  | 527.1  | 730.4  | 610.0  | 477.2  | 2141.4  | 2883.2  | 2909.2  |
| 751.3  | 1046.0 | 194.4  | 307.6  | 1218.7 | 904.8  | 1352.9  | 847.5   | 1123.1  |
| 187.4  | 229.2  | 199.3  | 258.4  | 268.8  | 226.1  | 808.6   | 942.1   | 1005.8  |
| 203.3  | 176.6  | 286.0  | 447.4  | 235.5  | 236.9  | 1092.1  | 1247.3  | 1253.8  |
| 841.4  | 929.9  | 402.1  | 523.7  | 1171.7 | 770.4  | 2837.8  | 2493.0  | 2604.4  |
| 1613.1 | 2139.6 | 527.0  | 883.5  | 2477.8 | 1686.4 | 2627.1  | 2397.5  | 2612.8  |
| 918.8  | 1258.9 | 252.7  | 387.7  | 1346.1 | 1050.6 | 3341.3  | 2799.6  | 3064.1  |
| 3666.9 | 4807.1 | 995.8  | 1423.9 | 4609.7 | 4412.6 | 8836.3  | 6267.3  | 6147.8  |
| 198.9  | 236.4  | 101.4  | 91.3   | 338.2  | 149.3  | 489.5   | 279.3   | 269.7   |
| 384.0  | 363.9  | 136.9  | 173.2  | 596.7  | 332.0  | 681.4   | 403.0   | 461.3   |
| 666.3  | 1026.4 | 978.5  | 966.6  | 797.0  | 491.2  | 2067.8  | 1990.2  | 1893.5  |

|        |        |        |        |        |        |         |         |         |
|--------|--------|--------|--------|--------|--------|---------|---------|---------|
| 1844.3 | 2135.4 | 1452.1 | 2652.7 | 2028.0 | 2530.3 | 3961.1  | 2499.5  | 2554.9  |
| 95.5   | 113.6  | 229.6  | 260.3  | 137.5  | 102.1  | 365.9   | 532.4   | 523.6   |
| 7508.0 | 8531.5 | 2831.8 | 3818.6 | 8611.4 | 7886.8 | 9798.5  | 9269.2  | 9395.0  |
| 2521.2 | 3001.6 | 1165.2 | 1519.3 | 3337.9 | 2456.8 | 6323.9  | 5051.2  | 5320.3  |
| 139.5  | 164.5  | 185.9  | 243.3  | 159.8  | 192.8  | 410.0   | 671.0   | 784.5   |
| 730.6  | 967.5  | 306.8  | 323.5  | 773.7  | 806.4  | 1350.9  | 1991.6  | 2377.8  |
| 118.3  | 136.5  | 198.9  | 260.1  | 106.6  | 99.1   | 321.9   | 512.4   | 606.3   |
| 2076.9 | 2997.5 | 783.8  | 1194.9 | 2971.0 | 2603.6 | 7826.4  | 7589.8  | 7263.8  |
| 3208.3 | 5561.9 | 676.7  | 1063.2 | 5724.4 | 4397.5 | 5864.9  | 5572.9  | 5884.3  |
| 3397.3 | 4410.8 | 1397.3 | 2080.2 | 4061.2 | 3234.7 | 6397.1  | 6402.1  | 6426.0  |
| 1074.4 | 1574.1 | 966.4  | 1335.0 | 1557.3 | 1189.7 | 5695.6  | 5398.8  | 5251.8  |
| 3903.7 | 4695.3 | 1077.5 | 1725.0 | 5445.6 | 4927.9 | 5758.8  | 5379.0  | 5616.9  |
| 384.1  | 525.1  | 340.5  | 443.9  | 550.4  | 313.4  | 562.2   | 644.9   | 670.7   |
| 527.1  | 524.0  | 557.0  | 789.5  | 1084.6 | 539.2  | 3626.0  | 2518.8  | 2644.1  |
| 1095.5 | 1348.3 | 1415.0 | 1755.1 | 1561.1 | 1290.3 | 3872.4  | 4846.9  | 4784.3  |
| 30.4   | 29.8   | 1.8    | 4.8    | 44.1   | 19.8   | 295.7   | 326.4   | 404.2   |
| 4749.3 | 4804.3 | 1244.1 | 1920.3 | 5768.2 | 3822.5 | 4117.3  | 3075.9  | 3446.8  |
| 72.4   | 78.5   | 52.2   | 58.3   | 109.3  | 55.9   | 23.8    | 53.8    | 54.8    |
| 50.5   | 59.2   | 7.5    | 6.1    | 75.0   | 63.4   | 514.5   | 569.8   | 675.1   |
| 5266.9 | 6145.4 | 1641.1 | 2253.5 | 6984.3 | 6086.0 | 9330.4  | 5804.1  | 6259.4  |
| 5639.5 | 6095.0 | 2177.8 | 2759.5 | 6811.9 | 5064.1 | 11017.2 | 10318.7 | 10250.7 |
| 1173.6 | 1580.7 | 417.8  | 544.0  | 1866.0 | 1435.0 | 3430.0  | 2794.6  | 3023.1  |
| 2082.1 | 3226.4 | 550.4  | 779.2  | 3057.3 | 2975.5 | 3482.5  | 3428.2  | 3409.6  |
| 2951.8 | 3429.0 | 1937.2 | 2385.5 | 4049.7 | 2838.2 | 7772.1  | 7735.9  | 8073.5  |
| 1215.2 | 1489.5 | 597.2  | 834.5  | 1968.7 | 1538.2 | 3885.4  | 3731.9  | 3955.9  |
| 1095.2 | 1439.7 | 716.9  | 1247.2 | 1614.4 | 924.7  | 4741.6  | 4355.1  | 5121.3  |
| 2466.9 | 2880.3 | 1930.8 | 2528.1 | 3252.3 | 2887.0 | 7997.8  | 7651.8  | 7561.6  |
| 1218.7 | 1373.6 | 1119.0 | 1781.0 | 1950.6 | 1204.0 | 3111.6  | 2077.9  | 2355.2  |
| 324.9  | 345.1  | 719.5  | 1114.3 | 428.9  | 381.9  | 849.0   | 566.5   | 700.2   |
| 3106.3 | 4052.3 | 424.7  | 564.0  | 3939.5 | 3982.7 | 8042.0  | 6447.3  | 6438.5  |
| 453.7  | 481.8  | 109.1  | 165.2  | 521.1  | 384.9  | 2106.9  | 3754.7  | 3998.3  |
| 1308.2 | 1992.9 | 727.4  | 720.4  | 1789.0 | 1615.3 | 4999.4  | 3902.1  | 4188.1  |
| 3533.9 | 4317.5 | 1324.0 | 2131.0 | 4327.8 | 4252.8 | 3527.6  | 3925.0  | 4138.9  |
| 262.9  | 368.3  | 333.1  | 465.6  | 467.3  | 260.2  | 1519.6  | 857.3   | 897.8   |
| 3.8    | 1.2    | 0.9    | 1.7    | 6.2    | 0.9    | 1.5     | 1.9     | 1.2     |
| 493.0  | 677.8  | 347.6  | 482.0  | 716.8  | 542.8  | 2740.8  | 1634.1  | 1705.0  |
| 858.1  | 1061.8 | 184.5  | 216.2  | 1202.1 | 1000.6 | 1680.9  | 1340.3  | 1352.0  |
| 1720.2 | 2515.5 | 498.4  | 672.8  | 2226.8 | 2125.4 | 4332.7  | 3715.9  | 3613.8  |
| 843.0  | 1179.8 | 382.9  | 485.3  | 1163.4 | 1049.2 | 2249.2  | 1833.4  | 1928.8  |
| 392.4  | 515.8  | 808.9  | 694.0  | 566.2  | 426.4  | 1597.5  | 1094.8  | 1121.4  |
| 47.7   | 90.6   | 24.8   | 37.1   | 72.4   | 64.6   | 292.4   | 359.9   | 384.3   |
| 50.0   | 49.6   | 51.1   | 61.9   | 82.8   | 61.0   | 605.5   | 747.4   | 796.4   |
| 891.1  | 1177.1 | 790.3  | 1084.4 | 1536.6 | 1166.4 | 2960.3  | 3627.5  | 3787.4  |
| 4857.3 | 5759.9 | 3075.5 | 3831.9 | 6139.6 | 5736.6 | 6995.9  | 6823.5  | 6940.2  |
| 1166.7 | 1532.3 | 559.1  | 779.9  | 1629.7 | 1522.3 | 737.5   | 562.8   | 715.0   |
| 98.9   | 144.2  | 27.1   | 46.0   | 154.5  | 108.4  | 287.6   | 200.8   | 258.8   |
| 1586.2 | 2152.4 | 509.7  | 752.9  | 2597.2 | 1891.4 | 2422.9  | 2366.3  | 2578.4  |
| 250.0  | 213.5  | 226.1  | 324.1  | 316.2  | 166.5  | 1086.0  | 1932.4  | 2224.9  |
| 1880.4 | 2416.3 | 680.2  | 1078.0 | 2694.2 | 2678.6 | 8515.5  | 6651.7  | 6469.5  |
| 5441.8 | 6059.5 | 2038.1 | 2620.0 | 5895.2 | 5836.8 | 10072.3 | 9692.3  | 9511.8  |
| 2345.0 | 2573.8 | 1841.1 | 2556.2 | 3252.8 | 2116.8 | 8868.7  | 7173.4  | 7479.3  |
| 2370.6 | 3140.2 | 449.1  | 665.8  | 3209.7 | 3067.0 | 3267.8  | 2426.1  | 2466.4  |
| 542.3  | 754.6  | 158.7  | 168.4  | 748.7  | 598.8  | 1094.8  | 875.9   | 962.2   |



|        |         |        |        |        |        |         |         |         |
|--------|---------|--------|--------|--------|--------|---------|---------|---------|
| 207.6  | 297.7   | 71.8   | 98.8   | 312.2  | 226.1  | 563.5   | 386.5   | 471.8   |
| 57.3   | 70.1    | 7.9    | 8.8    | 95.2   | 68.2   | 328.0   | 227.7   | 245.2   |
| 1347.0 | 2093.9  | 67.7   | 73.1   | 1606.2 | 1565.5 | 2517.9  | 2170.9  | 2259.1  |
| 378.2  | 548.8   | 148.3  | 285.9  | 639.1  | 614.1  | 1001.7  | 545.3   | 704.3   |
| 67.1   | 77.7    | 60.7   | 61.6   | 59.0   | 74.3   | 100.7   | 84.3    | 82.9    |
| 4924.0 | 5448.1  | 2624.2 | 3326.2 | 5684.3 | 4891.5 | 7274.8  | 7094.4  | 7191.1  |
| 169.4  | 221.1   | 69.6   | 71.0   | 233.5  | 248.0  | 563.0   | 292.6   | 342.5   |
| 822.3  | 809.2   | 735.0  | 979.0  | 1090.0 | 938.7  | 3462.0  | 2114.7  | 2332.2  |
| 699.8  | 905.6   | 418.5  | 490.1  | 962.0  | 926.3  | 2710.5  | 1598.1  | 1665.5  |
| 2178.1 | 2872.4  | 1500.6 | 2012.0 | 3454.8 | 2530.9 | 6898.4  | 5605.2  | 5898.4  |
| 605.2  | 605.2   | 256.4  | 357.4  | 973.6  | 585.3  | 806.6   | 462.8   | 498.0   |
| 113.8  | 157.0   | 357.9  | 528.1  | 195.0  | 199.2  | 472.6   | 427.2   | 496.2   |
| 227.3  | 284.6   | 533.9  | 715.9  | 233.4  | 199.7  | 942.0   | 1189.4  | 1335.6  |
| 509.8  | 508.9   | 719.7  | 1041.8 | 735.9  | 380.1  | 426.4   | 287.2   | 361.2   |
| 1158.6 | 1429.4  | 353.6  | 524.2  | 1646.4 | 1284.4 | 2865.5  | 2369.1  | 2358.5  |
| 1133.0 | 1396.8  | 243.9  | 495.3  | 1733.9 | 1345.1 | 1068.6  | 840.1   | 1141.9  |
| 1246.9 | 1413.8  | 1279.4 | 1470.0 | 1804.9 | 1273.8 | 2196.3  | 2161.5  | 2074.7  |
| 351.0  | 445.2   | 549.6  | 726.0  | 508.6  | 435.6  | 1437.3  | 2253.7  | 2531.6  |
| 106.0  | 125.7   | 43.2   | 85.1   | 156.1  | 183.0  | 234.3   | 112.0   | 144.0   |
| 3511.2 | 4426.6  | 326.2  | 569.6  | 5088.6 | 4826.7 | 6212.3  | 4621.3  | 4901.4  |
| 1261.3 | 1687.7  | 545.0  | 765.5  | 2346.9 | 1707.8 | 846.0   | 1132.0  | 1104.2  |
| 4971.7 | 5302.4  | 1131.6 | 1610.9 | 5562.8 | 5349.1 | 7107.7  | 6373.4  | 6749.0  |
| 411.1  | 589.4   | 382.4  | 435.3  | 899.2  | 468.1  | 495.4   | 620.9   | 643.1   |
| 206.6  | 191.7   | 625.9  | 863.0  | 298.5  | 284.8  | 770.5   | 729.3   | 840.4   |
| 1045.2 | 1172.5  | 814.1  | 1120.2 | 1424.8 | 1128.9 | 1992.3  | 1494.7  | 1702.4  |
| 959.6  | 1187.0  | 317.1  | 464.6  | 1640.2 | 1158.8 | 3880.9  | 3432.2  | 3379.9  |
| 868.4  | 920.9   | 564.3  | 762.3  | 1086.6 | 868.4  | 1762.7  | 1879.2  | 2006.0  |
| 399.2  | 379.2   | 320.7  | 473.2  | 593.2  | 407.7  | 2166.0  | 2073.7  | 2184.5  |
| 815.9  | 1062.9  | 158.2  | 227.5  | 1269.5 | 791.8  | 1900.8  | 1320.3  | 1429.8  |
| 2346.0 | 2850.3  | 694.3  | 1056.4 | 3081.0 | 2659.6 | 3351.1  | 2611.7  | 2817.9  |
| 361.1  | 377.0   | 615.5  | 883.3  | 497.8  | 370.4  | 1110.1  | 1372.3  | 1419.0  |
| 1132.0 | 1422.9  | 2070.8 | 2230.7 | 1261.9 | 1463.0 | 5203.6  | 6122.2  | 6747.1  |
| 6538.6 | 7378.1  | 3345.3 | 4014.9 | 7509.2 | 6641.9 | 10212.9 | 10065.0 | 9961.2  |
| 8830.9 | 10175.3 | 3321.7 | 4442.9 | 9992.0 | 8870.7 | 12652.4 | 12334.0 | 12111.1 |
| 3405.6 | 4057.3  | 1102.4 | 1517.9 | 4485.3 | 3423.4 | 8943.5  | 9011.3  | 9012.8  |
| 64.6   | 59.6    | 69.4   | 112.3  | 79.9   | 69.1   | 434.1   | 367.6   | 402.2   |
| 151.1  | 146.1   | 191.0  | 226.0  | 229.1  | 126.5  | 459.2   | 369.8   | 418.1   |
| 130.5  | 136.5   | 185.7  | 253.7  | 201.3  | 133.3  | 418.1   | 337.0   | 369.1   |
| 583.7  | 817.5   | 260.5  | 354.9  | 780.3  | 569.6  | 1571.5  | 1520.9  | 1484.4  |
| 1533.2 | 2054.2  | 674.3  | 966.7  | 1923.8 | 1533.3 | 4341.9  | 3975.7  | 4178.8  |
| 22.2   | 26.2    | 16.4   | 14.4   | 17.2   | 34.3   | 18.2    | 36.0    | 26.6    |
| 4041.9 | 4387.5  | 2477.8 | 3232.3 | 4632.0 | 4221.3 | 5998.5  | 5690.9  | 5966.6  |
| 1488.4 | 1890.6  | 530.4  | 635.2  | 2368.8 | 2098.6 | 5169.3  | 5165.1  | 5039.4  |
| 118.4  | 182.7   | 239.0  | 305.6  | 244.0  | 114.3  | 744.3   | 794.2   | 895.9   |
| 1257.6 | 1571.8  | 300.7  | 430.5  | 1769.1 | 1596.1 | 2949.1  | 3102.7  | 3366.9  |
| 702.3  | 1134.6  | 163.2  | 238.3  | 1382.1 | 969.1  | 3295.3  | 3526.8  | 3679.0  |
| 192.7  | 229.3   | 96.2   | 153.2  | 235.6  | 166.9  | 1557.6  | 1170.0  | 1172.1  |
| 206.6  | 288.1   | 74.1   | 103.0  | 256.2  | 256.3  | 945.6   | 832.9   | 771.8   |
| 379.9  | 490.8   | 117.1  | 161.4  | 368.3  | 476.4  | 1263.8  | 1193.6  | 1231.8  |
| 734.9  | 1152.9  | 49.3   | 57.4   | 891.2  | 1106.8 | 4626.5  | 3659.9  | 3829.0  |
| 411.4  | 540.0   | 402.0  | 471.1  | 565.5  | 624.4  | 985.2   | 832.7   | 907.6   |
| 5288.1 | 6941.0  | 2144.8 | 3105.3 | 6834.0 | 6798.5 | 8963.0  | 8179.4  | 8451.6  |
| 678.2  | 761.6   | 724.3  | 995.5  | 1078.6 | 692.4  | 2693.3  | 1887.1  | 2322.1  |

|        |        |        |        |        |        |         |         |         |
|--------|--------|--------|--------|--------|--------|---------|---------|---------|
| 419.6  | 546.3  | 273.3  | 434.7  | 596.0  | 523.1  | 2571.4  | 2033.4  | 2351.1  |
| 2207.4 | 2762.2 | 1053.0 | 1523.2 | 3199.3 | 2409.5 | 7317.4  | 7104.7  | 6978.9  |
| 399.2  | 491.6  | 201.2  | 311.6  | 603.1  | 454.3  | 452.8   | 354.9   | 411.0   |
| 1428.4 | 1820.3 | 517.9  | 666.7  | 2159.2 | 1865.4 | 1723.9  | 1184.4  | 1350.3  |
| 6655.4 | 8364.3 | 2535.2 | 3231.4 | 8349.8 | 7709.8 | 10878.4 | 10984.6 | 11133.6 |
| 108.0  | 130.6  | 209.4  | 288.8  | 169.2  | 73.9   | 426.0   | 604.6   | 740.3   |
| 211.1  | 303.2  | 96.2   | 114.4  | 334.8  | 240.8  | 852.2   | 1211.4  | 1294.4  |
| 698.6  | 946.4  | 421.2  | 500.1  | 962.4  | 696.8  | 1329.5  | 1020.7  | 1003.8  |
| 886.4  | 1187.3 | 613.3  | 733.6  | 1130.9 | 899.1  | 1944.7  | 1677.7  | 1824.1  |
| 1134.8 | 1542.9 | 618.3  | 722.0  | 1547.1 | 1501.4 | 1678.9  | 1383.3  | 1674.6  |
| 119.4  | 156.2  | 110.9  | 162.7  | 150.7  | 143.0  | 230.7   | 272.4   | 330.0   |
| 6160.8 | 7989.9 | 3042.9 | 3699.5 | 7777.0 | 6761.0 | 13509.2 | 13998.9 | 14016.4 |
| 868.9  | 1347.1 | 161.7  | 264.4  | 930.0  | 1221.0 | 2095.7  | 1114.9  | 1255.7  |
| 6116.8 | 7115.3 | 1021.6 | 1599.6 | 7003.4 | 6884.2 | 9135.2  | 5606.1  | 5920.6  |
| 951.6  | 1175.0 | 377.9  | 637.2  | 1393.3 | 899.9  | 3497.6  | 2558.7  | 2592.3  |
| 419.2  | 530.5  | 307.8  | 469.4  | 583.0  | 523.3  | 521.4   | 477.4   | 569.5   |
| 664.9  | 1058.0 | 131.8  | 178.8  | 793.9  | 857.6  | 2450.8  | 1242.9  | 1410.6  |
| 2086.2 | 2673.0 | 967.2  | 1537.1 | 2091.5 | 2522.1 | 4555.4  | 2940.7  | 3180.6  |
| 536.6  | 750.0  | 159.8  | 299.3  | 716.5  | 435.7  | 493.3   | 429.7   | 447.4   |
| 237.1  | 333.1  | 131.2  | 176.3  | 555.2  | 190.3  | 328.0   | 246.3   | 271.7   |
| 557.8  | 543.6  | 381.9  | 517.5  | 829.9  | 543.8  | 788.3   | 629.4   | 720.0   |
| 435.7  | 509.7  | 221.3  | 282.5  | 516.6  | 466.9  | 526.6   | 542.4   | 495.1   |
| 584.9  | 627.4  | 307.5  | 403.3  | 807.1  | 759.9  | 974.1   | 978.5   | 965.8   |
| 196.6  | 255.3  | 247.4  | 344.4  | 339.1  | 212.8  | 740.8   | 856.9   | 1025.2  |
| 419.8  | 451.0  | 356.5  | 477.6  | 516.3  | 479.0  | 1179.9  | 1623.0  | 1878.6  |
| 117.4  | 132.3  | 9.7    | 10.6   | 208.0  | 137.3  | 1359.0  | 422.1   | 668.3   |
| 7470.2 | 8128.8 | 2415.8 | 3163.6 | 8126.8 | 7586.6 | 11001.3 | 10817.0 | 10865.0 |
| 665.4  | 857.9  | 301.2  | 431.2  | 955.4  | 722.0  | 1800.3  | 1757.4  | 1837.0  |
| 1192.1 | 1428.5 | 663.3  | 873.2  | 1578.8 | 1347.1 | 2574.4  | 2647.0  | 2932.8  |
| 68.2   | 126.6  | 72.2   | 128.3  | 101.5  | 105.3  | 1138.2  | 1349.7  | 1652.8  |
| 47.9   | 60.1   | 53.4   | 90.2   | 103.7  | 77.8   | 242.6   | 216.1   | 253.7   |
| 753.0  | 1679.1 | 105.9  | 99.4   | 964.2  | 1259.2 | 1655.7  | 761.4   | 819.9   |
| 58.5   | 111.0  | 64.9   | 45.1   | 117.3  | 79.9   | 473.6   | 265.6   | 265.4   |
| 207.4  | 254.9  | 31.4   | 34.7   | 351.6  | 268.5  | 55.3    | 51.2    | 51.0    |
| 287.1  | 347.0  | 45.6   | 56.3   | 440.5  | 347.3  | 77.8    | 58.7    | 80.3    |
| 3804.0 | 4282.4 | 1853.8 | 2205.7 | 3754.9 | 5036.9 | 8607.0  | 6773.7  | 6506.0  |
| 2338.4 | 3002.6 | 1590.0 | 2143.7 | 2806.4 | 2880.9 | 7183.9  | 6698.7  | 6505.7  |
| 1329.9 | 1799.1 | 355.5  | 560.1  | 1774.2 | 1395.6 | 4947.7  | 4442.0  | 4609.5  |
| 2043.9 | 2552.6 | 1000.6 | 1306.1 | 2815.4 | 2649.1 | 5435.9  | 4713.5  | 4831.1  |
| 1396.9 | 1687.0 | 204.2  | 301.1  | 1767.9 | 1284.5 | 2903.1  | 1557.2  | 1803.4  |
| 1870.0 | 2575.9 | 245.5  | 394.8  | 2543.3 | 2395.9 | 2873.6  | 1884.2  | 2105.0  |
| 804.8  | 1016.7 | 428.6  | 681.0  | 1207.8 | 730.5  | 2052.0  | 2090.8  | 2214.2  |
| 1468.5 | 2019.8 | 1364.8 | 1435.4 | 1930.8 | 2052.1 | 4083.5  | 2630.9  | 2935.9  |
| 4363.9 | 4649.0 | 3441.6 | 4349.8 | 5339.6 | 3942.1 | 6553.3  | 6833.3  | 6969.4  |
| 7168.8 | 7836.2 | 2663.6 | 3367.4 | 7778.6 | 7296.4 | 8702.0  | 8619.9  | 8553.3  |
| 1085.4 | 1435.8 | 467.1  | 748.5  | 1613.2 | 1702.8 | 620.1   | 570.9   | 678.0   |
| 334.4  | 319.7  | 80.9   | 83.4   | 487.7  | 303.5  | 569.7   | 565.8   | 557.2   |
| 2.8    | 2.0    | 4.4    | 3.0    | 4.6    | 6.7    | 3.4     | 11.1    | 9.6     |
| 7.3    | 3.5    | 12.1   | 15.9   | 15.6   | 8.5    | 15.9    | 32.9    | 34.5    |
| 2158.2 | 2862.4 | 776.5  | 1168.6 | 3226.2 | 2706.2 | 4418.7  | 3645.7  | 3521.1  |
| 445.6  | 497.8  | 200.7  | 367.6  | 865.5  | 421.3  | 562.1   | 271.0   | 318.4   |
| 1380.0 | 1519.3 | 226.2  | 345.9  | 2625.7 | 1546.1 | 624.0   | 391.6   | 420.1   |
| 1243.4 | 1448.2 | 335.8  | 726.6  | 1568.0 | 1345.0 | 1765.3  | 2112.7  | 2234.6  |

|        |         |        |        |         |         |         |         |         |
|--------|---------|--------|--------|---------|---------|---------|---------|---------|
| 4504.7 | 4954.2  | 133.8  | 155.7  | 5348.7  | 4390.4  | 3976.3  | 1881.1  | 2147.6  |
| 1115.3 | 1651.5  | 209.4  | 277.3  | 1582.8  | 1294.8  | 1303.3  | 1697.8  | 1879.9  |
| 2215.1 | 3213.0  | 884.2  | 1320.7 | 2978.3  | 2562.5  | 3565.1  | 2940.9  | 3009.7  |
| 255.9  | 263.3   | 411.8  | 538.4  | 376.6   | 286.4   | 1474.1  | 1624.2  | 1739.4  |
| 713.0  | 853.2   | 677.3  | 951.2  | 872.8   | 992.3   | 3342.0  | 4098.6  | 4077.8  |
| 0.8    | 22.3    | 9.9    | 7.2    | 5.4     | 13.2    | 7.0     | 5.8     | 9.9     |
| 70.3   | 99.9    | 86.8   | 104.6  | 116.3   | 43.7    | 138.1   | 111.6   | 122.2   |
| 1081.4 | 1429.1  | 662.1  | 959.7  | 1495.8  | 1260.4  | 1502.4  | 1353.6  | 1434.1  |
| 654.5  | 991.3   | 203.7  | 345.1  | 813.4   | 849.2   | 1077.9  | 1057.0  | 1056.3  |
| 2203.7 | 4173.3  | 582.2  | 965.7  | 3508.3  | 3110.1  | 43.6    | 34.6    | 31.9    |
| 922.8  | 2442.6  | 232.4  | 394.4  | 1023.8  | 1430.4  | 437.5   | 330.2   | 360.5   |
| 9942.0 | 10978.7 | 4336.6 | 5542.8 | 10663.3 | 10083.7 | 11766.1 | 10360.6 | 10521.3 |
| 674.7  | 695.0   | 579.2  | 722.6  | 960.5   | 585.5   | 980.9   | 844.3   | 897.8   |
| 811.4  | 1096.1  | 1308.5 | 1617.8 | 1186.3  | 804.9   | 3233.4  | 3299.8  | 3185.4  |
| 726.6  | 1138.1  | 1451.2 | 2022.7 | 1046.8  | 693.9   | 3348.0  | 3508.6  | 3604.5  |
| 293.3  | 284.7   | 143.8  | 193.4  | 373.3   | 281.6   | 1105.0  | 995.7   | 1132.7  |
| 3616.4 | 4623.0  | 1389.3 | 1971.0 | 4784.7  | 3556.9  | 6672.2  | 3829.7  | 3860.6  |
| 6155.4 | 7790.0  | 1719.4 | 2239.5 | 7770.1  | 7295.6  | 10401.0 | 7635.4  | 7725.3  |
| 248.3  | 299.3   | 107.7  | 183.5  | 320.6   | 259.9   | 120.9   | 114.3   | 130.5   |
| 5632.6 | 6514.2  | 3359.7 | 4612.6 | 6440.9  | 5551.5  | 7635.7  | 7296.9  | 7310.2  |
| 477.6  | 633.9   | 412.6  | 499.5  | 401.6   | 517.6   | 506.8   | 519.1   | 518.4   |
| 150.9  | 182.1   | 353.0  | 384.9  | 231.3   | 127.0   | 287.2   | 280.6   | 269.0   |
| 1687.1 | 2003.4  | 507.1  | 808.2  | 2314.3  | 1846.4  | 2836.8  | 1630.9  | 1714.8  |
| 133.4  | 219.1   | 78.4   | 123.0  | 246.0   | 175.9   | 392.0   | 347.2   | 416.0   |
| 1112.0 | 1087.9  | 580.4  | 800.1  | 1153.2  | 917.7   | 1490.4  | 1757.8  | 1912.8  |
| 428.1  | 488.1   | 166.8  | 233.9  | 677.1   | 624.2   | 578.4   | 430.4   | 439.7   |
| 247.6  | 375.7   | 43.1   | 84.8   | 358.1   | 318.7   | 742.5   | 673.6   | 809.7   |
| 9892.1 | 10524.0 | 4155.0 | 4897.6 | 10264.5 | 9882.6  | 10254.9 | 9137.8  | 9076.5  |
| 2886.7 | 2968.0  | 618.8  | 898.7  | 3558.0  | 3412.7  | 5449.3  | 5337.6  | 5408.5  |
| 6961.1 | 7694.7  | 3729.9 | 4450.7 | 8315.8  | 7640.5  | 8938.3  | 8201.7  | 8219.0  |
| 1634.6 | 1811.5  | 535.2  | 782.5  | 2337.4  | 1510.8  | 1935.7  | 1426.5  | 1501.8  |
| 160.9  | 286.3   | 68.7   | 81.0   | 390.6   | 238.5   | 1537.1  | 1687.7  | 1733.9  |
| 3247.7 | 3477.3  | 1613.3 | 2046.3 | 4312.9  | 3631.4  | 4557.0  | 3963.1  | 4020.2  |
| 1825.9 | 2388.1  | 1311.6 | 1574.0 | 2739.0  | 1751.9  | 5552.0  | 5043.8  | 5377.4  |
| 1592.0 | 2133.4  | 25.1   | 11.3   | 2376.9  | 2218.6  | 4116.7  | 3792.9  | 3475.1  |
| 422.7  | 556.6   | 256.2  | 397.2  | 626.4   | 369.8   | 2123.1  | 1200.7  | 1184.1  |
| 3004.4 | 3294.5  | 1210.6 | 1763.9 | 3743.4  | 3794.5  | 6282.0  | 5130.6  | 5396.4  |
| 207.3  | 229.1   | 44.4   | 70.3   | 335.7   | 210.0   | 338.6   | 268.3   | 317.4   |
| 1111.5 | 1429.6  | 487.8  | 592.2  | 1918.0  | 1164.8  | 3783.1  | 2730.5  | 3151.9  |
| 949.0  | 1295.8  | 209.3  | 242.5  | 1311.3  | 1176.6  | 2880.3  | 2087.0  | 2190.6  |
| 2322.5 | 2604.6  | 579.9  | 782.3  | 3340.6  | 2455.3  | 2031.0  | 1287.4  | 1395.8  |
| 43.7   | 63.5    | 273.2  | 408.2  | 64.2    | 51.2    | 2673.2  | 2433.5  | 2659.3  |
| 159.2  | 274.6   | 687.1  | 1148.5 | 241.6   | 343.0   | 7375.0  | 7400.3  | 8058.1  |
| 1578.4 | 2079.1  | 261.8  | 354.7  | 2595.7  | 1921.8  | 2262.4  | 2081.8  | 2146.7  |
| 8096.4 | 8904.1  | 1806.7 | 2760.9 | 9333.9  | 8235.7  | 10390.1 | 10497.9 | 10647.3 |
| 2.4    | 2.3     | 7.4    | 6.2    | 1.3     | 1.1     | 5.0     | 6.5     | 22.6    |
| 94.3   | 116.6   | 39.4   | 77.3   | 83.5    | 106.2   | 83.2    | 62.5    | 78.6    |
| 434.0  | 567.3   | 432.1  | 915.5  | 559.4   | 422.4   | 2236.0  | 1850.8  | 1992.9  |
| 282.4  | 283.7   | 107.1  | 101.7  | 411.6   | 275.3   | 4428.4  | 4261.1  | 4502.7  |
| 419.3  | 487.6   | 214.0  | 295.9  | 597.5   | 407.2   | 4815.2  | 4822.9  | 5174.2  |
| 3476.4 | 4636.9  | 857.1  | 1141.7 | 4948.1  | 4444.7  | 6674.2  | 5144.0  | 5388.7  |
| 54.8   | 69.5    | 93.5   | 104.9  | 69.0    | 51.4    | 402.3   | 288.6   | 331.2   |
| 346.9  | 416.7   | 169.9  | 203.4  | 499.9   | 628.3   | 1432.1  | 1102.6  | 1167.6  |

|        |        |        |        |        |        |         |        |         |
|--------|--------|--------|--------|--------|--------|---------|--------|---------|
| 460.5  | 568.7  | 241.9  | 268.1  | 646.8  | 531.0  | 1047.1  | 860.8  | 914.8   |
| 1295.1 | 1529.4 | 1327.6 | 1883.5 | 1906.8 | 1328.1 | 2730.5  | 2389.6 | 2574.1  |
| 1143.2 | 1511.6 | 530.5  | 672.1  | 1765.6 | 1405.3 | 2977.0  | 2409.2 | 2665.4  |
| 687.5  | 894.7  | 770.6  | 1319.8 | 1203.6 | 750.2  | 2618.3  | 2168.2 | 2452.3  |
| 854.1  | 1135.4 | 221.5  | 259.5  | 1257.0 | 1008.0 | 2021.2  | 2198.2 | 2320.4  |
| 197.3  | 205.1  | 140.8  | 222.1  | 240.6  | 371.2  | 647.5   | 713.3  | 747.2   |
| 333.3  | 401.5  | 193.2  | 239.3  | 482.4  | 395.6  | 795.3   | 752.1  | 913.3   |
| 858.3  | 1227.9 | 436.5  | 552.5  | 1320.4 | 877.7  | 1290.0  | 1348.9 | 1466.9  |
| 938.7  | 1139.0 | 440.9  | 448.9  | 1292.0 | 1125.8 | 1203.0  | 1405.9 | 1517.2  |
| 345.5  | 351.0  | 729.0  | 879.3  | 432.0  | 279.6  | 1186.5  | 1031.7 | 1122.4  |
| 4843.0 | 5627.1 | 1456.1 | 1787.4 | 5679.8 | 5469.1 | 7804.8  | 5518.2 | 5661.7  |
| 75.7   | 122.2  | 49.0   | 75.8   | 105.0  | 95.5   | 529.3   | 636.2  | 654.9   |
| 24.7   | 22.8   | 21.7   | 9.0    | 34.6   | 32.0   | 186.7   | 190.5  | 201.4   |
| 23.3   | 30.3   | 23.1   | 15.7   | 41.3   | 32.7   | 209.3   | 224.3  | 232.9   |
| 86.7   | 123.1  | 57.7   | 59.4   | 148.7  | 113.6  | 364.6   | 427.1  | 529.4   |
| 3258.0 | 4286.5 | 1200.6 | 1774.3 | 4179.4 | 3771.9 | 7231.4  | 6719.1 | 7258.6  |
| 552.9  | 670.7  | 390.4  | 575.5  | 520.4  | 435.7  | 156.1   | 86.1   | 114.9   |
| 743.5  | 822.2  | 404.6  | 432.1  | 971.8  | 689.2  | 1093.1  | 1179.3 | 1291.3  |
| 204.1  | 219.2  | 86.3   | 82.8   | 246.9  | 178.7  | 349.5   | 385.2  | 434.6   |
| 315.6  | 305.9  | 681.7  | 1309.8 | 522.1  | 479.7  | 2289.2  | 1676.1 | 1978.8  |
| 1455.9 | 1731.1 | 1167.4 | 1579.2 | 2370.0 | 1874.1 | 4493.5  | 4442.1 | 4563.9  |
| 157.9  | 284.7  | 125.0  | 194.0  | 299.6  | 291.9  | 2057.0  | 1975.0 | 2061.5  |
| 3.0    | 4.1    | 0.4    | 1.5    | 0.3    | 0.6    | 3.3     | 1.0    | 3.9     |
| 258.0  | 266.9  | 587.6  | 740.1  | 365.2  | 194.9  | 3877.1  | 5324.1 | 5510.7  |
| 397.9  | 488.3  | 167.9  | 240.2  | 842.2  | 428.9  | 1309.0  | 1089.0 | 1210.5  |
| 730.3  | 714.9  | 458.8  | 596.9  | 1458.8 | 771.7  | 1056.5  | 1017.3 | 1029.4  |
| 5151.9 | 5693.9 | 1576.3 | 2092.2 | 6156.9 | 4352.4 | 10532.3 | 9961.2 | 10138.9 |
| 4252.8 | 4784.2 | 637.2  | 795.3  | 5169.8 | 4393.1 | 4148.2  | 2787.4 | 2800.0  |
| 736.5  | 821.5  | 1445.8 | 2015.3 | 1073.3 | 746.2  | 5795.0  | 7096.3 | 6808.6  |
| 5938.2 | 8001.2 | 378.4  | 634.1  | 8674.9 | 6252.5 | 6243.5  | 5174.2 | 5494.2  |
| 4221.9 | 4810.0 | 612.6  | 935.0  | 5013.8 | 4741.9 | 4613.0  | 2705.7 | 2892.4  |
| 121.5  | 133.7  | 50.6   | 59.7   | 122.8  | 104.1  | 430.4   | 136.4  | 179.0   |
| 1498.8 | 1709.6 | 146.8  | 194.8  | 1557.2 | 1926.7 | 2811.7  | 931.6  | 1043.5  |
| 3273.0 | 4070.4 | 576.5  | 754.8  | 4609.0 | 4149.0 | 3755.0  | 2689.2 | 2953.0  |
| 2569.3 | 3213.2 | 909.2  | 1327.1 | 3070.5 | 3065.0 | 4089.3  | 2306.0 | 2453.8  |
| 973.4  | 1126.2 | 58.0   | 84.7   | 1515.5 | 1097.5 | 260.0   | 351.1  | 347.9   |
| 20.7   | 22.3   | 13.3   | 20.3   | 32.4   | 17.7   | 25.8    | 33.8   | 32.3    |
| 629.9  | 950.8  | 139.5  | 210.3  | 950.7  | 867.5  | 1585.0  | 780.0  | 855.9   |
| 2499.4 | 3604.4 | 231.6  | 448.4  | 3619.7 | 3092.3 | 3363.2  | 1513.7 | 1746.7  |
| 1457.5 | 1683.9 | 342.2  | 412.1  | 2077.0 | 1738.4 | 2604.1  | 2123.2 | 2413.0  |
| 833.1  | 1330.6 | 300.5  | 429.3  | 1872.0 | 1162.1 | 2816.9  | 2677.1 | 2903.0  |
| 104.3  | 105.3  | 21.1   | 24.2   | 160.8  | 113.7  | 67.0    | 90.5   | 94.7    |
| 1272.3 | 1185.8 | 465.6  | 666.4  | 1598.5 | 1192.7 | 686.8   | 505.2  | 541.0   |
| 2329.4 | 3065.6 | 547.5  | 836.6  | 3080.4 | 2776.1 | 4394.4  | 2745.8 | 3118.2  |
| 698.9  | 769.1  | 237.6  | 318.8  | 1104.5 | 789.4  | 1053.8  | 1003.8 | 1111.8  |
| 3341.6 | 4978.9 | 3590.7 | 4533.1 | 4151.8 | 907.0  | 7698.0  | 7056.8 | 7124.8  |
| 380.3  | 646.2  | 105.7  | 163.3  | 789.1  | 709.1  | 993.5   | 681.2  | 736.0   |
| 142.4  | 233.3  | 62.0   | 115.9  | 258.5  | 227.4  | 670.5   | 456.1  | 403.2   |
| 2098.4 | 2694.9 | 235.1  | 281.5  | 2798.7 | 2714.1 | 2813.2  | 2276.5 | 2144.6  |
| 961.7  | 1357.8 | 342.7  | 400.6  | 1214.9 | 1140.2 | 3238.2  | 2094.0 | 2120.7  |
| 2146.6 | 2981.2 | 452.7  | 565.4  | 2543.0 | 2687.9 | 5843.0  | 3951.1 | 4019.5  |
| 494.1  | 626.2  | 258.4  | 403.3  | 668.1  | 553.5  | 781.4   | 260.1  | 308.9   |
| 1504.4 | 2062.1 | 675.4  | 985.5  | 1976.3 | 2286.1 | 1406.4  | 532.8  | 652.0   |

|        |         |        |        |         |         |         |         |         |
|--------|---------|--------|--------|---------|---------|---------|---------|---------|
| 1170.4 | 1725.7  | 1307.6 | 1393.8 | 1514.8  | 1543.7  | 3453.2  | 2935.9  | 2899.3  |
| 787.4  | 973.3   | 92.9   | 146.6  | 1189.1  | 747.3   | 318.1   | 424.3   | 450.8   |
| 44.6   | 90.0    | 251.2  | 262.1  | 126.0   | 94.2    | 317.3   | 352.2   | 308.5   |
| 117.9  | 157.8   | 122.2  | 142.6  | 251.8   | 150.9   | 592.4   | 723.9   | 864.8   |
| 265.5  | 316.8   | 189.4  | 284.5  | 357.6   | 256.0   | 657.0   | 565.8   | 647.3   |
| 596.0  | 738.2   | 271.4  | 320.8  | 764.9   | 623.0   | 960.8   | 789.2   | 934.8   |
| 1057.8 | 1464.5  | 167.6  | 155.8  | 1767.0  | 1335.4  | 3057.3  | 2616.8  | 2875.8  |
| 704.4  | 948.3   | 255.2  | 335.9  | 1036.3  | 908.4   | 2964.4  | 2297.1  | 2508.5  |
| 208.2  | 267.7   | 52.6   | 74.9   | 345.4   | 235.8   | 291.5   | 508.9   | 562.2   |
| 994.2  | 1298.9  | 231.6  | 200.7  | 1341.2  | 1231.9  | 1097.0  | 1657.0  | 1819.6  |
| 38.2   | 63.8    | 21.5   | 42.7   | 84.6    | 29.7    | 33.4    | 70.0    | 58.5    |
| 533.9  | 630.1   | 43.1   | 107.3  | 983.7   | 488.3   | 288.3   | 367.3   | 350.7   |
| 39.1   | 37.5    | 8.1    | 12.7   | 51.9    | 52.9    | 43.8    | 53.3    | 47.1    |
| 6902.3 | 7263.7  | 1839.7 | 2531.1 | 7522.3  | 6576.2  | 10373.9 | 9552.2  | 9742.3  |
| 2431.2 | 3111.5  | 977.5  | 1704.6 | 3275.6  | 3203.6  | 4752.7  | 2889.7  | 3231.7  |
| 990.0  | 953.6   | 97.2   | 101.3  | 1358.8  | 930.1   | 535.3   | 322.0   | 416.4   |
| 1590.4 | 2715.9  | 1048.5 | 1397.3 | 1860.2  | 2473.3  | 2761.2  | 2362.7  | 2386.1  |
| 322.6  | 253.0   | 104.6  | 182.1  | 335.8   | 224.8   | 615.2   | 277.6   | 338.0   |
| 591.2  | 872.0   | 35.3   | 39.7   | 889.8   | 1068.5  | 748.7   | 909.8   | 726.7   |
| 1058.2 | 1376.3  | 227.2  | 303.6  | 1628.4  | 1302.4  | 1800.7  | 1712.0  | 1888.5  |
| 1960.0 | 2151.3  | 684.0  | 864.2  | 2372.5  | 1925.2  | 4697.8  | 4317.8  | 4336.1  |
| 61.1   | 100.3   | 73.2   | 100.4  | 79.1    | 38.4    | 401.2   | 201.3   | 241.4   |
| 699.1  | 813.0   | 284.1  | 353.9  | 871.7   | 716.5   | 1329.6  | 1239.8  | 1244.3  |
| 529.6  | 725.6   | 160.8  | 207.1  | 732.6   | 591.0   | 1485.6  | 680.8   | 797.3   |
| 938.2  | 781.7   | 175.8  | 204.6  | 1016.7  | 669.6   | 1431.1  | 2816.8  | 2503.1  |
| 708.7  | 652.8   | 132.3  | 176.9  | 847.3   | 531.3   | 1757.4  | 3541.8  | 3033.4  |
| 88.1   | 107.9   | 296.3  | 371.8  | 150.9   | 76.3    | 735.3   | 738.9   | 810.0   |
| 773.1  | 1048.4  | 38.7   | 68.5   | 1279.2  | 775.3   | 4878.8  | 4874.9  | 5784.3  |
| 566.8  | 679.4   | 346.9  | 503.9  | 621.4   | 414.0   | 1470.1  | 1340.1  | 1591.7  |
| 2763.7 | 2852.3  | 2556.2 | 3152.0 | 3704.3  | 3039.1  | 9962.5  | 10494.0 | 10425.0 |
| 9743.0 | 12027.4 | 2457.0 | 3280.4 | 11865.7 | 10766.8 | 13121.9 | 12458.9 | 12085.2 |
| 197.2  | 260.0   | 444.5  | 695.3  | 325.2   | 248.6   | 1354.2  | 1174.2  | 1232.8  |
| 15.5   | 18.6    | 8.3    | 5.9    | 12.2    | 19.3    | 24.8    | 21.4    | 26.3    |
| 702.0  | 977.2   | 515.5  | 604.2  | 1379.8  | 876.1   | 2988.3  | 2421.5  | 2779.1  |
| 12.5   | 17.6    | 2.5    | 6.5    | 2.7     | 5.3     | 12.0    | 9.5     | 7.6     |
| 514.3  | 743.3   | 159.8  | 239.5  | 716.8   | 748.4   | 771.3   | 458.3   | 559.4   |
| 508.0  | 480.5   | 329.0  | 471.1  | 608.5   | 492.5   | 612.5   | 796.8   | 938.3   |
| 7209.5 | 7714.4  | 2603.2 | 3410.2 | 7957.4  | 7313.2  | 11363.5 | 11217.7 | 10957.0 |
| 975.8  | 1299.2  | 381.9  | 453.8  | 1475.1  | 1362.7  | 4124.4  | 2486.2  | 2683.8  |
| 30.1   | 44.9    | 241.0  | 272.8  | 61.1    | 65.0    | 669.7   | 524.8   | 601.0   |
| 8472.2 | 9363.0  | 3499.4 | 4637.2 | 10020.6 | 7968.8  | 10133.0 | 8858.7  | 9101.4  |
| 4438.9 | 6199.2  | 878.1  | 1324.8 | 5432.8  | 4887.0  | 6795.7  | 5714.3  | 5759.1  |
| 0.7    | 8.9     | 0.4    | 0.8    | 2.2     | 17.4    | 4.5     | 6.7     | 4.0     |
| 2.8    | 5.7     | 9.2    | 28.0   | 13.6    | 5.8     | 19.1    | 31.5    | 30.7    |
| 106.1  | 111.1   | 134.9  | 149.4  | 168.2   | 107.8   | 172.7   | 223.1   | 250.9   |
| 410.4  | 454.2   | 164.8  | 316.4  | 564.4   | 413.2   | 919.1   | 795.9   | 968.6   |
| 1647.1 | 2289.2  | 949.0  | 1324.6 | 2434.2  | 2154.3  | 2364.2  | 1977.1  | 2225.7  |
| 1039.5 | 1743.5  | 1631.1 | 2537.8 | 1621.6  | 1520.8  | 2366.7  | 2228.5  | 2701.9  |
| 3051.8 | 3310.4  | 1327.4 | 1735.1 | 4206.6  | 3518.6  | 4601.8  | 4028.8  | 4016.7  |
| 488.1  | 664.2   | 211.5  | 332.4  | 788.9   | 616.3   | 1233.2  | 1835.0  | 1994.1  |
| 163.4  | 196.8   | 406.9  | 494.6  | 209.7   | 187.6   | 489.6   | 295.8   | 370.1   |
| 74.1   | 127.6   | 216.3  | 295.0  | 124.3   | 130.0   | 563.2   | 397.2   | 457.1   |
| 877.2  | 1096.5  | 617.9  | 997.8  | 1185.9  | 774.5   | 1235.2  | 1110.6  | 1137.2  |

|        |        |        |        |        |        |         |         |         |
|--------|--------|--------|--------|--------|--------|---------|---------|---------|
| 5853.2 | 6833.7 | 1889.1 | 2767.8 | 7411.4 | 6405.0 | 7076.7  | 6947.7  | 6980.7  |
| 718.3  | 800.6  | 370.4  | 448.2  | 1340.6 | 744.7  | 1779.6  | 1379.9  | 1601.2  |
| 1.0    | 2.2    | 0.5    | 0.7    | 2.1    | 1.4    | 6.9     | 2.2     | 3.2     |
| 0.7    | 0.5    | 11.3   | 1.8    | 5.5    | 7.7    | 4.2     | 1.2     | 1.9     |
| 4.6    | 8.6    | 1.5    | 5.9    | 7.8    | 12.4   | 4.1     | 11.5    | 8.1     |
| 407.4  | 523.8  | 138.8  | 192.8  | 609.0  | 307.6  | 968.5   | 995.1   | 1013.7  |
| 619.5  | 670.1  | 263.7  | 392.1  | 790.5  | 600.5  | 1499.1  | 1135.4  | 1259.9  |
| 685.0  | 761.7  | 288.3  | 477.9  | 812.7  | 647.4  | 1281.1  | 706.7   | 821.3   |
| 1039.2 | 1210.1 | 297.2  | 463.0  | 1203.1 | 1232.7 | 1185.6  | 654.0   | 731.7   |
| 2041.3 | 2853.3 | 448.0  | 603.3  | 3310.3 | 2443.4 | 2874.7  | 3954.6  | 3923.6  |
| 1806.6 | 2315.4 | 135.3  | 175.6  | 1948.4 | 1444.7 | 1798.6  | 1329.5  | 1283.3  |
| 1864.8 | 2295.1 | 570.8  | 782.3  | 2673.4 | 2192.2 | 4921.8  | 4757.5  | 4546.7  |
| 569.8  | 688.7  | 400.7  | 382.1  | 797.9  | 694.7  | 1911.0  | 2331.4  | 2981.9  |
| 11.5   | 33.1   | 32.3   | 49.7   | 25.7   | 35.7   | 218.1   | 295.8   | 295.2   |
| 7872.3 | 8940.6 | 2905.5 | 3645.4 | 9383.9 | 8461.9 | 11750.4 | 10523.0 | 10923.9 |
| 851.6  | 992.9  | 910.1  | 1379.6 | 1369.2 | 761.7  | 2785.7  | 2491.9  | 2718.2  |
| 473.1  | 512.1  | 39.8   | 42.9   | 683.2  | 444.5  | 2808.4  | 2422.3  | 2658.0  |
| 3444.7 | 3782.6 | 2165.7 | 3229.0 | 4263.5 | 3335.7 | 7444.1  | 6724.5  | 7105.3  |
| 2227.5 | 3131.4 | 245.5  | 311.6  | 3623.7 | 3580.0 | 7625.6  | 6322.4  | 6140.9  |
| 1772.7 | 2115.5 | 297.1  | 414.3  | 2730.2 | 2926.0 | 5270.3  | 3175.1  | 3706.7  |
| 572.1  | 900.9  | 237.6  | 348.2  | 764.5  | 801.9  | 1931.5  | 1669.7  | 1705.4  |
| 551.8  | 924.1  | 366.0  | 390.3  | 831.4  | 701.3  | 1810.5  | 1698.6  | 1674.0  |
| 1602.2 | 2184.7 | 976.8  | 1323.6 | 2578.6 | 2416.1 | 4577.4  | 3595.9  | 3622.7  |
| 714.6  | 954.0  | 69.0   | 119.1  | 1152.0 | 889.6  | 3216.0  | 4405.1  | 4292.1  |
| 301.4  | 336.0  | 34.1   | 48.0   | 529.9  | 326.9  | 1734.2  | 2367.5  | 2401.5  |
| 21.2   | 27.1   | 10.9   | 16.0   | 35.5   | 36.6   | 40.2    | 42.5    | 28.5    |
| 1078.1 | 1425.8 | 406.8  | 488.4  | 1558.5 | 1229.7 | 2805.5  | 2314.6  | 2579.6  |
| 764.4  | 1145.8 | 682.6  | 904.1  | 1354.7 | 887.3  | 664.9   | 1032.5  | 1080.1  |
| 901.3  | 1228.6 | 465.5  | 731.2  | 1510.1 | 1108.0 | 1179.5  | 1657.8  | 1710.0  |
| 1299.2 | 1509.4 | 985.4  | 1225.0 | 1803.3 | 1391.0 | 3764.0  | 3995.9  | 4279.7  |
| 52.7   | 78.7   | 82.2   | 114.3  | 70.5   | 65.8   | 476.1   | 487.9   | 625.2   |
| 702.0  | 592.3  | 672.5  | 960.9  | 736.1  | 621.5  | 2666.9  | 2683.8  | 2741.0  |
| 3482.1 | 4426.0 | 3866.3 | 4968.5 | 5015.9 | 3445.9 | 6232.2  | 6508.2  | 6897.0  |
| 579.3  | 996.9  | 314.4  | 437.3  | 1089.4 | 756.9  | 133.6   | 107.8   | 130.3   |
| 2069.9 | 2398.4 | 250.2  | 338.7  | 2880.5 | 2165.6 | 339.5   | 593.5   | 571.0   |
| 1615.5 | 2096.5 | 196.5  | 272.2  | 2371.9 | 1946.9 | 375.2   | 594.8   | 580.1   |
| 1742.1 | 2021.8 | 202.9  | 322.5  | 2210.2 | 1684.3 | 382.1   | 533.3   | 591.8   |
| 8.8    | 9.5    | 1.3    | 8.0    | 2.7    | 6.9    | 1.5     | 2.0     | 6.2     |
| 576.7  | 594.3  | 161.4  | 349.5  | 849.8  | 484.1  | 1469.7  | 600.2   | 634.3   |
| 174.5  | 196.9  | 26.4   | 35.1   | 251.4  | 131.8  | 413.7   | 219.9   | 231.1   |
| 1846.5 | 2647.0 | 467.9  | 599.8  | 3055.7 | 2248.5 | 2875.5  | 2550.3  | 2617.7  |
| 890.9  | 1178.8 | 303.7  | 621.6  | 1228.7 | 1077.7 | 1706.3  | 1095.4  | 1229.8  |
| 311.6  | 365.0  | 141.6  | 207.3  | 399.8  | 265.7  | 659.0   | 481.3   | 594.4   |
| 1109.8 | 1638.7 | 454.7  | 517.6  | 1684.0 | 1210.7 | 1707.1  | 1000.1  | 1115.0  |
| 1007.2 | 1433.1 | 302.3  | 383.6  | 1335.7 | 966.9  | 1829.2  | 1025.6  | 1168.4  |
| 720.6  | 1086.7 | 175.9  | 226.1  | 1204.3 | 983.8  | 1475.8  | 806.7   | 939.8   |
| 248.4  | 364.3  | 40.3   | 55.6   | 476.6  | 477.2  | 403.2   | 169.3   | 207.4   |
| 1487.6 | 2176.8 | 309.2  | 423.6  | 2179.0 | 1929.4 | 3298.0  | 2825.9  | 2928.9  |
| 684.7  | 843.4  | 357.1  | 495.8  | 899.2  | 636.8  | 1009.4  | 882.5   | 982.2   |
| 1288.0 | 1620.4 | 196.8  | 228.7  | 1429.6 | 2486.4 | 1200.9  | 1103.5  | 1138.9  |
| 960.6  | 1723.2 | 297.9  | 419.0  | 1167.8 | 1290.6 | 859.3   | 753.1   | 731.4   |
| 699.6  | 739.4  | 1375.1 | 1562.6 | 882.6  | 705.0  | 1323.9  | 914.2   | 1041.4  |
| 1580.2 | 1884.6 | 280.0  | 411.7  | 2170.7 | 1667.4 | 1873.7  | 1576.0  | 1620.3  |

|        |        |        |        |        |        |        |         |         |
|--------|--------|--------|--------|--------|--------|--------|---------|---------|
| 1519.7 | 1786.3 | 333.4  | 539.2  | 2063.4 | 1484.2 | 2413.5 | 2059.0  | 2261.2  |
| 215.4  | 235.2  | 675.0  | 802.1  | 314.4  | 183.6  | 1226.5 | 1224.8  | 1428.2  |
| 607.4  | 740.9  | 605.2  | 1095.0 | 867.4  | 494.8  | 3691.0 | 3828.5  | 4040.9  |
| 721.4  | 918.6  | 1833.5 | 2511.5 | 1422.2 | 769.9  | 6430.1 | 5772.2  | 6272.7  |
| 3.9    | 13.9   | 10.9   | 11.8   | 36.3   | 40.0   | 74.0   | 58.8    | 40.7    |
| 532.1  | 693.1  | 710.2  | 921.9  | 945.2  | 808.6  | 2136.4 | 2655.1  | 2938.1  |
| 144.1  | 110.1  | 436.1  | 550.4  | 254.0  | 75.8   | 715.3  | 2577.3  | 2638.0  |
| 183.3  | 131.5  | 571.5  | 760.7  | 284.9  | 100.9  | 676.5  | 2152.5  | 2217.9  |
| 286.6  | 191.7  | 765.8  | 978.7  | 469.9  | 125.6  | 1084.5 | 3033.1  | 3019.2  |
| 317.6  | 460.4  | 214.8  | 265.2  | 502.5  | 340.1  | 3104.6 | 2339.8  | 2570.3  |
| 2576.5 | 3235.8 | 22.0   | 29.6   | 3883.4 | 3166.9 | 1362.9 | 1182.7  | 1301.2  |
| 1417.5 | 1931.8 | 438.8  | 642.6  | 2679.3 | 1950.8 | 3596.3 | 1828.4  | 2001.9  |
| 1571.9 | 2059.7 | 256.8  | 419.5  | 2397.2 | 1919.8 | 2626.6 | 1024.5  | 1129.0  |
| 604.6  | 848.4  | 503.0  | 769.2  | 933.9  | 630.3  | 1015.4 | 1785.8  | 2078.1  |
| 691.0  | 974.4  | 72.5   | 89.2   | 1016.8 | 976.1  | 1543.7 | 746.3   | 845.2   |
| 226.6  | 264.7  | 158.6  | 185.3  | 319.2  | 255.2  | 904.6  | 445.0   | 573.5   |
| 187.2  | 249.9  | 139.4  | 158.8  | 279.1  | 247.0  | 1228.1 | 629.3   | 747.3   |
| 1354.2 | 1807.4 | 207.8  | 280.2  | 2026.0 | 1991.0 | 2413.5 | 1351.0  | 1492.0  |
| 328.4  | 393.7  | 142.0  | 235.1  | 531.9  | 377.1  | 699.5  | 633.2   | 719.6   |
| 2256.7 | 3335.6 | 1026.2 | 1085.2 | 2879.2 | 2516.6 | 8597.4 | 9301.1  | 8629.4  |
| 2493.4 | 3419.8 | 1409.4 | 2214.3 | 3284.0 | 2790.5 | 8865.0 | 9001.4  | 9089.5  |
| 578.6  | 826.7  | 191.7  | 257.9  | 1102.3 | 875.5  | 1896.3 | 2028.4  | 2256.0  |
| 898.7  | 1096.7 | 56.5   | 54.2   | 1195.3 | 1532.9 | 706.8  | 410.8   | 505.0   |
| 138.0  | 199.7  | 33.1   | 29.7   | 226.5  | 191.9  | 228.8  | 136.7   | 136.4   |
| 69.9   | 71.5   | 28.3   | 26.1   | 114.2  | 67.5   | 83.3   | 64.0    | 89.1    |
| 376.8  | 449.7  | 60.0   | 115.5  | 592.5  | 446.6  | 393.8  | 220.2   | 259.5   |
| 472.6  | 553.9  | 681.9  | 892.6  | 653.3  | 478.7  | 1595.2 | 2389.4  | 2516.4  |
| 939.1  | 1249.8 | 1020.3 | 1293.9 | 1465.1 | 1064.3 | 2573.6 | 3675.0  | 3607.7  |
| 7715.8 | 8389.6 | 146.0  | 214.8  | 8384.2 | 7767.1 | 19.9   | 12.5    | 11.0    |
| 938.1  | 1278.9 | 144.9  | 177.4  | 1238.1 | 836.8  | 5132.6 | 4388.0  | 4135.8  |
| 1059.7 | 1261.5 | 75.0   | 90.5   | 1820.2 | 1295.2 | 698.0  | 848.9   | 874.5   |
| 7391.1 | 7611.0 | 4468.3 | 5754.9 | 7562.3 | 6897.4 | 9797.8 | 10319.0 | 10145.4 |
| 345.5  | 507.9  | 58.9   | 76.3   | 761.0  | 434.4  | 3628.0 | 4735.0  | 4699.7  |
| 93.8   | 107.5  | 254.7  | 358.7  | 181.7  | 71.6   | 574.5  | 493.3   | 613.1   |
| 207.6  | 206.8  | 302.5  | 329.4  | 268.3  | 144.1  | 1712.2 | 1549.7  | 1870.6  |
| 1255.0 | 1551.0 | 300.3  | 550.6  | 1435.0 | 1460.8 | 2337.5 | 1277.6  | 1422.9  |
| 152.7  | 235.1  | 38.1   | 67.9   | 175.6  | 220.3  | 965.6  | 691.5   | 724.3   |
| 174.2  | 184.7  | 150.2  | 323.4  | 172.5  | 177.6  | 726.9  | 416.5   | 464.6   |
| 91.7   | 85.3   | 71.6   | 114.5  | 142.1  | 73.3   | 132.0  | 123.8   | 155.0   |
| 347.6  | 229.6  | 275.3  | 496.8  | 667.0  | 145.5  | 82.8   | 85.0    | 115.0   |
| 692.8  | 998.8  | 1.7    | 1.6    | 1715.2 | 936.3  | 6.6    | 2.1     | 2.3     |
| 159.9  | 234.3  | 64.4   | 89.2   | 264.7  | 161.0  | 1001.0 | 600.2   | 625.5   |
| 15.1   | 3.1    | 2.6    | 28.2   | 35.2   | 3.6    | 5.3    | 3.9     | 7.0     |
| 3.2    | 1.4    | 12.6   | 31.6   | 2.4    | 2.6    | 60.6   | 35.6    | 47.8    |
| 467.1  | 685.6  | 377.1  | 449.1  | 572.5  | 667.5  | 878.1  | 522.5   | 519.8   |
| 621.6  | 879.3  | 938.6  | 1089.3 | 982.3  | 717.8  | 2684.6 | 2126.2  | 2270.5  |
| 27.2   | 37.3   | 151.6  | 228.8  | 42.3   | 26.1   | 397.7  | 278.3   | 326.9   |
| 8135.4 | 8944.3 | 3863.8 | 4795.4 | 8892.5 | 7938.3 | 9482.8 | 9505.0  | 9332.6  |
| 462.6  | 492.5  | 146.1  | 146.8  | 719.7  | 362.8  | 232.6  | 225.6   | 261.2   |
| 435.7  | 571.7  | 225.3  | 328.7  | 541.6  | 675.7  | 2800.5 | 2186.2  | 2184.9  |
| 251.9  | 324.6  | 121.5  | 206.9  | 393.8  | 261.4  | 1588.8 | 1092.3  | 1197.4  |
| 164.3  | 245.1  | 41.8   | 49.4   | 251.7  | 263.9  | 1615.9 | 1353.4  | 1446.1  |
| 697.0  | 1001.1 | 165.8  | 238.6  | 885.6  | 823.0  | 2608.6 | 1530.9  | 1663.6  |

|        |        |        |        |        |        |         |         |         |
|--------|--------|--------|--------|--------|--------|---------|---------|---------|
| 208.6  | 254.1  | 146.5  | 146.5  | 236.2  | 246.6  | 439.8   | 326.9   | 400.0   |
| 47.7   | 84.5   | 33.3   | 43.5   | 79.9   | 66.6   | 141.9   | 238.4   | 270.8   |
| 213.4  | 296.9  | 123.3  | 153.0  | 316.2  | 194.7  | 264.8   | 524.5   | 567.8   |
| 153.1  | 187.8  | 0.6    | 1.0    | 137.6  | 140.0  | 1.8     | 0.8     | 1.4     |
| 648.2  | 974.2  | 147.8  | 253.6  | 948.1  | 568.3  | 744.4   | 538.3   | 659.0   |
| 99.6   | 96.3   | 180.2  | 268.5  | 224.0  | 93.6   | 245.8   | 211.1   | 239.7   |
| 82.6   | 67.1   | 154.3  | 223.1  | 151.6  | 76.5   | 218.7   | 206.6   | 237.1   |
| 1.1    | 0.7    | 0.6    | 0.7    | 0.8    | 1.7    | 1.3     | 6.7     | 4.6     |
| 777.8  | 1180.4 | 83.9   | 107.9  | 1093.5 | 1260.3 | 1779.1  | 1150.0  | 1249.8  |
| 669.8  | 785.3  | 351.1  | 447.6  | 976.8  | 721.2  | 1058.3  | 644.0   | 691.2   |
| 345.7  | 461.6  | 214.0  | 217.2  | 552.8  | 470.2  | 1409.6  | 1538.1  | 1646.9  |
| 1394.2 | 1640.3 | 1076.4 | 1509.8 | 2177.4 | 1347.8 | 3816.6  | 2984.9  | 3739.4  |
| 166.5  | 209.7  | 113.3  | 287.2  | 169.3  | 190.0  | 509.5   | 406.0   | 447.7   |
| 1512.4 | 1990.8 | 407.3  | 625.8  | 1984.6 | 2010.6 | 2896.1  | 1985.5  | 2061.0  |
| 36.6   | 24.1   | 6.2    | 10.7   | 22.3   | 35.8   | 12.7    | 15.4    | 5.9     |
| 117.4  | 168.7  | 175.1  | 255.3  | 222.2  | 228.7  | 407.0   | 415.5   | 435.2   |
| 1052.0 | 1629.9 | 632.7  | 859.7  | 1832.9 | 1531.8 | 3070.3  | 2995.6  | 3060.4  |
| 25.0   | 14.1   | 56.2   | 73.9   | 37.7   | 30.6   | 144.4   | 122.5   | 156.6   |
| 47.4   | 64.2   | 142.1  | 195.8  | 83.2   | 42.4   | 222.7   | 203.5   | 189.8   |
| 217.5  | 286.2  | 198.4  | 260.1  | 394.6  | 334.5  | 685.1   | 531.0   | 654.6   |
| 124.4  | 149.4  | 150.2  | 232.9  | 166.5  | 136.2  | 427.1   | 289.2   | 337.4   |
| 511.9  | 597.1  | 177.9  | 303.5  | 760.8  | 542.4  | 401.0   | 226.0   | 257.7   |
| 2177.3 | 2599.5 | 653.7  | 910.9  | 3224.6 | 2480.4 | 2263.1  | 1330.5  | 1406.9  |
| 1039.9 | 1381.7 | 493.0  | 626.1  | 1546.2 | 1341.4 | 7193.2  | 8037.2  | 7758.3  |
| 414.6  | 546.4  | 453.7  | 620.6  | 520.6  | 447.4  | 2223.6  | 2284.5  | 2463.4  |
| 87.9   | 95.4   | 370.4  | 446.6  | 115.3  | 96.1   | 147.4   | 109.1   | 139.8   |
| 10.6   | 19.5   | 198.4  | 245.3  | 15.9   | 8.3    | 69.4    | 43.0    | 57.4    |
| 128.8  | 138.7  | 69.1   | 109.6  | 175.6  | 119.0  | 233.3   | 284.5   | 304.7   |
| 85.6   | 115.3  | 10.3   | 11.7   | 129.4  | 112.1  | 522.4   | 494.9   | 488.0   |
| 1437.1 | 1432.4 | 189.5  | 316.1  | 1817.8 | 1529.7 | 3434.0  | 3170.4  | 3142.1  |
| 54.3   | 56.5   | 24.1   | 47.9   | 49.3   | 56.2   | 266.9   | 230.1   | 224.4   |
| 569.8  | 872.2  | 145.0  | 217.6  | 819.2  | 864.2  | 1041.8  | 973.9   | 1039.2  |
| 490.6  | 474.6  | 75.7   | 174.8  | 547.7  | 346.1  | 293.6   | 253.4   | 367.7   |
| 1105.7 | 2281.8 | 301.9  | 290.6  | 2009.3 | 2103.4 | 4966.2  | 4119.5  | 4228.7  |
| 386.0  | 459.8  | 318.0  | 376.8  | 697.5  | 479.4  | 698.9   | 714.0   | 757.1   |
| 6076.6 | 6502.4 | 3599.5 | 4354.6 | 6764.6 | 6025.5 | 8812.9  | 7419.9  | 7108.6  |
| 1204.6 | 1844.6 | 155.4  | 212.4  | 1821.8 | 1938.0 | 3157.8  | 2002.0  | 2165.2  |
| 1240.9 | 1203.3 | 763.1  | 1079.3 | 1637.6 | 1244.5 | 4042.9  | 3516.3  | 3764.6  |
| 487.2  | 377.7  | 677.9  | 997.8  | 620.1  | 423.3  | 1615.7  | 1901.4  | 1971.2  |
| 5408.5 | 6703.9 | 2401.7 | 3271.1 | 6909.1 | 5837.6 | 10319.1 | 10462.9 | 10225.9 |
| 683.8  | 673.8  | 173.1  | 299.9  | 690.9  | 518.9  | 1179.2  | 1306.7  | 1211.3  |
| 973.3  | 1313.1 | 293.1  | 373.5  | 1548.8 | 1097.2 | 2093.8  | 1792.3  | 1768.6  |
| 2114.5 | 2809.9 | 288.2  | 380.1  | 3224.4 | 2390.1 | 2888.5  | 2616.5  | 2824.8  |
| 1241.2 | 1393.9 | 366.8  | 451.5  | 1828.5 | 1446.7 | 2486.3  | 2760.1  | 2844.9  |
| 132.9  | 193.3  | 52.5   | 61.3   | 208.9  | 155.2  | 277.9   | 389.5   | 448.5   |
| 236.4  | 402.0  | 98.5   | 123.3  | 414.0  | 298.3  | 503.7   | 743.4   | 758.8   |
| 111.7  | 140.0  | 102.8  | 189.4  | 143.3  | 91.8   | 635.4   | 615.4   | 571.9   |
| 100.5  | 104.1  | 202.7  | 235.5  | 121.7  | 105.9  | 282.2   | 221.3   | 244.0   |
| 760.2  | 870.9  | 282.3  | 299.6  | 1080.9 | 737.2  | 1070.4  | 1035.7  | 1122.5  |
| 240.2  | 314.1  | 213.0  | 235.8  | 402.9  | 269.7  | 356.6   | 353.2   | 372.7   |
| 2298.6 | 3267.0 | 3.3    | 3.1    | 2975.4 | 3278.4 | 1542.4  | 1059.5  | 1177.6  |
| 591.5  | 701.2  | 1125.0 | 1643.0 | 752.3  | 454.6  | 1902.1  | 2045.6  | 2163.4  |
| 32.2   | 46.8   | 1.0    | 1.6    | 36.3   | 28.0   | 5.1     | 1.6     | 1.4     |



|        |        |        |        |        |        |        |        |        |
|--------|--------|--------|--------|--------|--------|--------|--------|--------|
| 1278.6 | 1535.5 | 32.6   | 18.3   | 1333.7 | 1159.5 | 24.7   | 19.6   | 16.6   |
| 1351.9 | 1912.8 | 10.0   | 12.7   | 1283.5 | 1930.0 | 6.3    | 6.4    | 8.3    |
| 833.6  | 1416.1 | 3.4    | 5.7    | 1089.1 | 1248.9 | 8.9    | 11.2   | 10.3   |
| 769.6  | 858.1  | 368.8  | 570.9  | 1192.9 | 1044.3 | 1744.5 | 687.8  | 787.5  |
| 2824.8 | 3056.8 | 1060.4 | 1793.1 | 3653.2 | 2851.0 | 4808.0 | 2523.3 | 2737.7 |
| 1055.3 | 1262.2 | 752.4  | 1108.2 | 1406.8 | 1197.4 | 3156.7 | 2606.2 | 2706.6 |
| 4431.9 | 5107.7 | 862.0  | 1070.0 | 5275.9 | 3875.3 | 3218.3 | 2180.8 | 2302.7 |
| 421.5  | 389.9  | 231.2  | 399.0  | 478.4  | 236.3  | 872.7  | 487.3  | 545.0  |
| 94.0   | 80.7   | 80.6   | 116.4  | 161.6  | 54.0   | 2.2    | 1.7    | 2.6    |
| 64.6   | 62.0   | 18.9   | 28.5   | 125.0  | 49.3   | 5.3    | 3.6    | 0.4    |
| 636.1  | 1039.3 | 319.8  | 606.5  | 849.5  | 606.8  | 2087.6 | 2495.3 | 2729.5 |
| 1881.9 | 1989.8 | 2349.4 | 2787.8 | 2648.6 | 1823.0 | 4689.3 | 4591.8 | 4944.8 |
| 334.5  | 345.0  | 377.2  | 629.7  | 527.7  | 219.3  | 2463.3 | 2217.9 | 2453.5 |
| 857.1  | 1029.7 | 499.3  | 642.1  | 1369.3 | 886.7  | 3829.8 | 3787.8 | 3883.5 |
| 352.2  | 322.0  | 55.3   | 59.7   | 419.9  | 151.9  | 311.1  | 283.4  | 306.4  |
| 1125.9 | 1288.5 | 115.3  | 151.7  | 1720.6 | 466.9  | 961.0  | 778.0  | 917.8  |
| 46.7   | 46.5   | 38.0   | 46.8   | 42.7   | 38.5   | 56.3   | 53.6   | 60.3   |
| 381.1  | 462.1  | 251.6  | 408.8  | 501.9  | 416.9  | 376.9  | 249.5  | 308.1  |
| 198.8  | 255.0  | 93.9   | 98.1   | 260.1  | 215.4  | 407.4  | 307.3  | 406.3  |
| 92.3   | 100.4  | 138.2  | 225.1  | 140.4  | 82.1   | 519.7  | 307.9  | 387.4  |
| 574.3  | 681.8  | 704.7  | 871.9  | 999.6  | 790.3  | 2868.7 | 1875.5 | 2354.5 |
| 233.7  | 273.9  | 76.4   | 107.1  | 218.3  | 219.3  | 1162.1 | 613.3  | 659.1  |
| 62.3   | 50.7   | 187.3  | 300.9  | 105.4  | 26.2   | 467.1  | 622.0  | 714.5  |
| 2061.0 | 3193.0 | 957.3  | 1320.3 | 3820.0 | 2887.4 | 4112.5 | 5520.9 | 5710.4 |
| 80.0   | 122.5  | 29.8   | 41.1   | 140.5  | 100.9  | 2292.3 | 2294.9 | 2450.5 |
| 139.5  | 261.2  | 90.8   | 111.0  | 285.2  | 221.4  | 363.9  | 555.9  | 593.1  |
| 4576.4 | 5720.8 | 697.4  | 933.8  | 5142.2 | 4800.8 | 7505.0 | 7675.8 | 7678.8 |
| 795.8  | 842.1  | 324.7  | 573.8  | 1097.2 | 789.1  | 2759.6 | 2647.5 | 3050.8 |
| 1387.6 | 1475.7 | 637.1  | 980.4  | 1805.3 | 1376.6 | 1413.4 | 939.8  | 1113.7 |
| 260.6  | 260.7  | 6.2    | 14.9   | 403.2  | 238.8  | 11.1   | 3.2    | 4.1    |
| 884.0  | 1175.8 | 77.8   | 108.7  | 1191.4 | 1064.5 | 1610.9 | 998.5  | 946.9  |
| 551.1  | 858.9  | 56.0   | 75.5   | 884.6  | 778.8  | 1518.3 | 972.0  | 1035.4 |
| 223.7  | 237.4  | 395.0  | 651.8  | 386.9  | 260.6  | 522.8  | 581.5  | 662.5  |
| 2.2    | 1.1    | 239.6  | 314.9  | 6.1    | 10.5   | 5.7    | 11.7   | 10.6   |
| 304.3  | 344.5  | 109.4  | 149.5  | 398.9  | 256.4  | 726.5  | 389.7  | 436.3  |
| 341.3  | 418.3  | 62.2   | 81.0   | 357.8  | 393.9  | 524.2  | 367.0  | 374.3  |
| 1860.6 | 1985.7 | 288.8  | 401.0  | 2677.9 | 2017.3 | 2293.8 | 959.7  | 1109.7 |
| 659.6  | 752.0  | 643.4  | 925.0  | 974.9  | 622.2  | 1866.4 | 1577.8 | 1448.4 |
| 587.5  | 792.2  | 118.7  | 76.1   | 881.5  | 844.0  | 1782.0 | 1964.9 | 1826.0 |
| 45.5   | 86.1   | 0.9    | 0.6    | 71.8   | 83.0   | 2.5    | 3.1    | 1.7    |
| 5.9    | 26.5   | 6.7    | 4.2    | 34.9   | 3.9    | 19.0   | 24.3   | 27.4   |
| 31.0   | 55.9   | 9.6    | 6.9    | 60.9   | 37.8   | 20.6   | 17.1   | 20.5   |
| 50.3   | 68.5   | 8.2    | 1.9    | 76.6   | 39.7   | 1.3    | 1.2    | 0.6    |
| 96.2   | 181.4  | 23.7   | 21.3   | 155.9  | 138.8  | 508.0  | 341.4  | 369.4  |
| 295.5  | 487.0  | 171.9  | 157.1  | 503.4  | 470.4  | 1051.4 | 725.6  | 879.7  |
| 458.8  | 715.4  | 54.2   | 69.9   | 703.9  | 619.7  | 1097.8 | 844.9  | 945.3  |
| 5803.4 | 6806.1 | 2582.3 | 3198.3 | 6711.0 | 6352.3 | 8661.2 | 7506.0 | 7736.2 |
| 319.6  | 334.9  | 194.7  | 261.5  | 403.4  | 294.4  | 488.2  | 406.8  | 478.4  |
| 242.4  | 279.4  | 290.0  | 442.3  | 425.2  | 218.8  | 564.0  | 585.0  | 639.6  |
| 699.1  | 777.2  | 142.3  | 206.6  | 1005.9 | 784.4  | 1657.6 | 1027.2 | 1053.7 |
| 104.4  | 253.9  | 17.5   | 67.7   | 193.5  | 139.0  | 354.7  | 278.2  | 361.6  |
| 17.6   | 48.1   | 23.9   | 36.6   | 54.5   | 34.0   | 105.0  | 87.1   | 110.0  |
| 1658.5 | 2255.2 | 391.4  | 488.1  | 2966.8 | 2318.9 | 3130.7 | 1290.6 | 1511.3 |

|        |        |       |       |        |        |        |        |        |
|--------|--------|-------|-------|--------|--------|--------|--------|--------|
| 871.3  | 930.2  | 304.5 | 347.7 | 1354.8 | 1021.3 | 1259.3 | 454.3  | 495.1  |
| 232.4  | 155.1  | 1.2   | 0.9   | 374.4  | 139.6  | 4.6    | 2.0    | 2.5    |
| 291.0  | 252.0  | 1.6   | 0.2   | 522.9  | 211.3  | 1.1    | 0.5    | 0.9    |
| 307.0  | 536.3  | 121.8 | 151.4 | 610.9  | 373.5  | 681.3  | 780.3  | 866.4  |
| 182.1  | 251.2  | 145.2 | 189.2 | 328.5  | 291.2  | 811.7  | 905.9  | 981.0  |
| 534.7  | 879.0  | 150.5 | 174.4 | 999.4  | 705.4  | 1307.9 | 1485.9 | 1490.0 |
| 63.2   | 77.8   | 140.8 | 312.7 | 67.3   | 49.0   | 363.8  | 172.6  | 200.9  |
| 239.6  | 298.1  | 388.0 | 713.4 | 313.9  | 344.0  | 1123.2 | 617.2  | 612.6  |
| 21.3   | 33.8   | 4.8   | 2.6   | 27.3   | 18.8   | 225.3  | 187.5  | 214.6  |
| 159.2  | 181.8  | 12.2  | 24.7  | 178.1  | 152.2  | 917.0  | 892.5  | 1028.3 |
| 28.4   | 49.2   | 12.5  | 4.9   | 51.6   | 89.5   | 64.8   | 68.3   | 74.9   |
| 1038.0 | 1334.1 | 641.2 | 757.2 | 1742.2 | 1279.8 | 2404.5 | 2658.6 | 2543.3 |
| 1319.1 | 1357.6 | 266.8 | 452.2 | 1759.0 | 1394.8 | 2054.9 | 875.1  | 947.4  |
| 336.0  | 396.8  | 145.6 | 223.1 | 551.0  | 357.5  | 312.5  | 282.4  | 316.4  |
| 919.6  | 1163.0 | 270.5 | 482.1 | 1353.7 | 1135.7 | 3205.6 | 2362.2 | 2498.0 |
| 1127.2 | 1563.3 | 253.6 | 359.5 | 1608.2 | 1154.2 | 1076.4 | 1088.3 | 1130.8 |
| 1124.8 | 1646.7 | 101.7 | 140.8 | 1737.4 | 1465.7 | 3225.5 | 1578.9 | 1768.0 |
| 365.0  | 403.8  | 356.4 | 374.6 | 515.7  | 413.7  | 1094.8 | 1004.3 | 1180.9 |
| 359.1  | 396.8  | 133.1 | 163.5 | 580.7  | 320.3  | 587.6  | 357.8  | 400.5  |
| 1292.1 | 1477.2 | 302.6 | 444.7 | 1735.0 | 1471.3 | 1522.7 | 1171.4 | 1398.1 |
| 100.2  | 116.2  | 30.3  | 43.6  | 134.1  | 114.7  | 280.6  | 201.1  | 225.1  |
| 46.2   | 35.9   | 68.5  | 77.5  | 44.5   | 32.7   | 178.0  | 161.4  | 200.8  |
| 218.6  | 212.2  | 110.7 | 142.4 | 225.3  | 275.7  | 529.7  | 601.8  | 694.4  |
| 202.1  | 222.3  | 203.6 | 255.1 | 232.1  | 190.6  | 500.8  | 544.5  | 598.6  |
| 4.2    | 9.0    | 34.0  | 18.1  | 7.5    | 12.9   | 4.7    | 15.6   | 6.4    |
| 365.3  | 368.4  | 114.6 | 206.6 | 514.9  | 367.1  | 561.1  | 532.2  | 712.5  |
| 5.8    | 2.9    | 35.9  | 34.7  | 8.2    | 7.0    | 18.8   | 24.0   | 15.3   |
| 282.7  | 299.9  | 167.8 | 191.7 | 273.0  | 185.3  | 164.7  | 146.4  | 187.3  |
| 613.2  | 771.0  | 283.5 | 363.5 | 790.2  | 583.4  | 279.5  | 239.6  | 308.4  |
| 191.9  | 212.8  | 35.7  | 96.8  | 321.9  | 213.7  | 462.4  | 398.2  | 478.1  |
| 135.9  | 164.0  | 43.3  | 73.6  | 214.1  | 127.8  | 296.0  | 284.9  | 288.2  |
| 288.6  | 361.3  | 83.4  | 118.7 | 498.2  | 291.6  | 454.6  | 291.3  | 353.1  |
| 137.4  | 264.5  | 314.1 | 369.2 | 217.3  | 351.8  | 5157.9 | 6650.2 | 6637.2 |
| 389.6  | 289.4  | 486.5 | 676.4 | 486.7  | 213.0  | 673.9  | 506.7  | 540.4  |
| 1227.3 | 1743.4 | 680.0 | 767.2 | 1971.9 | 1359.8 | 4312.9 | 4103.1 | 4781.9 |
| 408.4  | 682.8  | 80.5  | 77.9  | 540.5  | 408.5  | 949.0  | 306.3  | 380.7  |
| 499.4  | 858.5  | 36.8  | 46.3  | 810.2  | 690.9  | 1826.8 | 618.3  | 697.2  |
| 828.8  | 1012.3 | 255.4 | 374.6 | 1235.7 | 889.3  | 1198.0 | 623.2  | 653.2  |
| 1210.8 | 1402.5 | 219.2 | 403.5 | 1594.5 | 1382.1 | 1329.1 | 729.5  | 786.5  |
| 385.8  | 467.9  | 205.4 | 248.0 | 587.9  | 551.9  | 3880.4 | 3584.4 | 3851.7 |
| 4387.6 | 5032.2 | 487.5 | 672.4 | 5071.9 | 4563.9 | 5538.1 | 5826.6 | 5700.5 |
| 818.8  | 882.8  | 545.2 | 841.8 | 982.3  | 892.0  | 6523.0 | 3876.5 | 4145.6 |
| 35.9   | 36.6   | 56.8  | 50.0  | 49.2   | 37.5   | 81.8   | 176.1  | 196.8  |
| 368.0  | 584.1  | 124.4 | 141.5 | 548.2  | 531.4  | 1023.7 | 1700.1 | 1764.9 |
| 16.9   | 19.9   | 20.4  | 18.2  | 38.1   | 25.9   | 28.3   | 36.3   | 38.4   |
| 105.9  | 123.9  | 60.2  | 84.7  | 148.7  | 123.7  | 290.2  | 523.8  | 568.7  |
| 147.6  | 167.4  | 166.1 | 203.2 | 271.7  | 163.0  | 238.9  | 290.9  | 334.7  |
| 51.9   | 74.3   | 47.4  | 47.7  | 84.9   | 60.4   | 104.7  | 115.7  | 122.7  |
| 1226.6 | 1376.8 | 146.0 | 227.2 | 2048.9 | 1548.6 | 4565.6 | 3812.7 | 3889.1 |
| 1578.9 | 1997.2 | 144.3 | 184.9 | 1724.6 | 1644.2 | 3589.3 | 2314.8 | 2557.5 |
| 61.4   | 58.0   | 50.4  | 60.0  | 73.1   | 55.0   | 357.5  | 240.2  | 266.8  |
| 175.5  | 205.4  | 59.3  | 65.6  | 320.5  | 133.2  | 974.8  | 901.8  | 963.5  |
| 27.8   | 27.7   | 14.1  | 41.4  | 57.0   | 36.2   | 139.8  | 122.6  | 156.2  |

|        |         |        |        |         |        |         |         |         |
|--------|---------|--------|--------|---------|--------|---------|---------|---------|
| 405.6  | 442.4   | 84.0   | 147.4  | 624.5   | 329.1  | 1008.6  | 881.9   | 1060.5  |
| 1285.9 | 1691.1  | 59.5   | 84.4   | 2011.4  | 1677.3 | 3362.6  | 4121.7  | 4344.9  |
| 801.4  | 850.0   | 781.7  | 1144.0 | 1063.3  | 828.3  | 1904.5  | 2040.5  | 2141.6  |
| 7549.2 | 8447.7  | 4064.0 | 4582.0 | 8084.8  | 7630.9 | 10325.9 | 10428.1 | 9921.5  |
| 539.6  | 960.9   | 53.7   | 113.8  | 889.4   | 1023.1 | 2408.0  | 1343.4  | 1615.4  |
| 107.8  | 165.1   | 37.7   | 38.3   | 156.9   | 158.1  | 469.3   | 269.8   | 307.1   |
| 1126.1 | 1782.1  | 283.6  | 317.8  | 1594.0  | 1888.2 | 2343.6  | 1376.0  | 1651.1  |
| 379.5  | 380.3   | 320.6  | 292.0  | 684.8   | 605.1  | 755.0   | 490.2   | 540.5   |
| 775.3  | 1143.0  | 501.8  | 809.0  | 1169.6  | 1095.7 | 3662.7  | 2596.0  | 2599.4  |
| 541.5  | 779.2   | 260.3  | 361.0  | 921.4   | 851.5  | 2169.3  | 1401.8  | 1577.5  |
| 63.3   | 81.3    | 49.1   | 71.2   | 70.6    | 54.4   | 390.0   | 230.3   | 301.1   |
| 577.4  | 612.6   | 165.8  | 298.1  | 744.2   | 748.9  | 1645.5  | 1177.2  | 1215.6  |
| 831.3  | 933.1   | 646.0  | 935.1  | 1247.0  | 887.6  | 1951.5  | 1915.2  | 2200.9  |
| 1149.7 | 1213.8  | 367.6  | 488.6  | 1637.0  | 1401.4 | 2454.9  | 2403.0  | 2609.0  |
| 28.7   | 44.9    | 15.3   | 23.6   | 39.6    | 38.1   | 82.8    | 66.4    | 59.6    |
| 96.9   | 172.0   | 27.5   | 40.3   | 136.6   | 152.4  | 254.7   | 123.7   | 152.8   |
| 54.1   | 93.0    | 34.7   | 41.6   | 71.6    | 83.3   | 308.8   | 170.9   | 232.1   |
| 3771.1 | 4604.1  | 1067.0 | 1440.3 | 4873.9  | 3727.5 | 9326.7  | 6450.3  | 7085.2  |
| 876.4  | 1171.0  | 96.8   | 167.8  | 1265.3  | 1106.5 | 999.1   | 613.6   | 673.6   |
| 317.0  | 367.0   | 52.6   | 54.5   | 427.7   | 305.3  | 548.9   | 320.5   | 336.0   |
| 462.2  | 541.3   | 201.8  | 261.5  | 496.0   | 434.3  | 670.0   | 713.6   | 700.2   |
| 10.1   | 6.6     | 40.1   | 31.9   | 2.1     | 1.3    | 14.6    | 40.7    | 33.9    |
| 10.7   | 16.7    | 92.6   | 79.7   | 13.2    | 3.0    | 59.3    | 113.8   | 102.4   |
| 81.2   | 130.2   | 62.7   | 98.5   | 117.0   | 86.4   | 1145.1  | 1011.6  | 1127.1  |
| 463.7  | 663.7   | 341.5  | 467.1  | 798.3   | 719.2  | 2714.7  | 2519.2  | 2744.2  |
| 1236.6 | 1529.9  | 898.0  | 1141.4 | 1807.5  | 1321.2 | 2276.0  | 1994.6  | 1918.7  |
| 1417.9 | 1835.2  | 1507.5 | 1880.6 | 2058.3  | 1545.1 | 3749.9  | 3475.0  | 3393.6  |
| 1262.2 | 1577.2  | 262.9  | 520.0  | 1862.6  | 1558.2 | 1806.1  | 1203.3  | 1385.7  |
| 1891.9 | 2782.9  | 619.5  | 849.1  | 2772.5  | 3002.5 | 4423.9  | 3421.4  | 3933.4  |
| 1923.4 | 2501.1  | 615.7  | 749.9  | 2930.7  | 2690.1 | 2053.0  | 1565.7  | 1750.2  |
| 216.8  | 249.7   | 173.5  | 257.7  | 270.8   | 226.6  | 350.4   | 273.1   | 323.5   |
| 237.5  | 277.9   | 419.9  | 705.3  | 358.6   | 231.1  | 700.3   | 615.0   | 654.5   |
| 81.8   | 75.8    | 324.1  | 502.2  | 78.9    | 70.1   | 237.6   | 167.5   | 195.4   |
| 59.2   | 65.4    | 135.3  | 134.9  | 92.2    | 55.8   | 444.9   | 425.2   | 592.1   |
| 21.9   | 30.5    | 144.9  | 124.2  | 34.8    | 17.1   | 239.5   | 277.1   | 321.5   |
| 26.8   | 25.0    | 10.1   | 4.9    | 24.0    | 17.0   | 33.3    | 12.7    | 5.2     |
| 341.3  | 477.0   | 92.3   | 91.2   | 454.2   | 535.1  | 438.7   | 182.1   | 177.2   |
| 3644.2 | 4392.7  | 1418.4 | 2371.7 | 4226.9  | 3578.5 | 6894.7  | 6038.8  | 6057.5  |
| 2097.5 | 2672.1  | 106.6  | 200.5  | 2911.2  | 2264.1 | 920.4   | 582.5   | 595.3   |
| 593.4  | 757.1   | 269.0  | 307.3  | 819.5   | 683.1  | 1356.4  | 1258.0  | 1425.4  |
| 6094.7 | 7124.8  | 2724.5 | 3475.2 | 7795.8  | 7377.8 | 12186.7 | 11761.3 | 11944.7 |
| 922.3  | 1056.5  | 495.6  | 593.2  | 1112.9  | 957.9  | 942.8   | 873.5   | 925.1   |
| 677.1  | 848.2   | 446.5  | 650.4  | 934.1   | 937.2  | 1342.7  | 1300.1  | 1389.2  |
| 9344.5 | 10036.2 | 4342.0 | 5491.4 | 10480.3 | 9585.0 | 12194.5 | 12114.7 | 11953.8 |
| 8182.2 | 9375.8  | 1395.6 | 1573.7 | 8924.9  | 8708.1 | 8309.0  | 7407.2  | 7752.7  |
| 527.9  | 700.5   | 618.0  | 901.7  | 756.6   | 575.2  | 2934.5  | 2029.2  | 2156.1  |
| 382.3  | 708.4   | 247.5  | 352.1  | 646.7   | 628.0  | 2558.4  | 1820.2  | 2140.7  |
| 15.7   | 18.0    | 20.3   | 7.6    | 19.1    | 26.6   | 4.6     | 1.7     | 9.4     |
| 2.0    | 1.0     | 1.9    | 2.2    | 6.0     | 1.5    | 10.9    | 4.3     | 1.7     |
| 911.4  | 1224.5  | 562.9  | 766.3  | 1489.2  | 1224.2 | 3102.0  | 2000.9  | 2116.8  |
| 226.7  | 406.9   | 425.7  | 594.4  | 616.9   | 331.8  | 1843.2  | 1823.7  | 1923.8  |
| 13.6   | 2.5     | 11.3   | 12.1   | 8.0     | 2.8    | 11.5    | 17.2    | 16.8    |
| 4145.2 | 5755.2  | 195.1  | 236.0  | 5020.0  | 4844.1 | 4720.9  | 2833.8  | 2966.8  |

|        |        |        |        |        |        |         |        |         |
|--------|--------|--------|--------|--------|--------|---------|--------|---------|
| 1100.5 | 1462.8 | 354.2  | 559.4  | 2024.8 | 1122.4 | 1552.1  | 959.2  | 1021.8  |
| 2900.8 | 3852.8 | 1563.9 | 2137.9 | 3526.9 | 3495.3 | 4950.4  | 4319.4 | 4595.1  |
| 2.3    | 6.4    | 15.9   | 15.8   | 14.0   | 1.7    | 20.4    | 14.9   | 12.0    |
| 152.2  | 214.7  | 217.4  | 291.1  | 228.8  | 190.0  | 277.5   | 241.1  | 286.2   |
| 363.9  | 309.3  | 91.5   | 152.9  | 456.2  | 412.7  | 971.0   | 794.6  | 923.8   |
| 1361.7 | 1445.7 | 19.1   | 13.8   | 2069.6 | 896.2  | 140.6   | 154.8  | 165.3   |
| 1789.1 | 2781.8 | 522.0  | 754.9  | 2605.8 | 2407.3 | 8334.0  | 8226.0 | 8103.8  |
| 1616.6 | 1808.7 | 230.1  | 295.7  | 2219.7 | 2004.1 | 1561.7  | 933.8  | 1027.7  |
| 699.1  | 944.0  | 267.9  | 371.9  | 1203.4 | 815.4  | 3520.7  | 2324.9 | 2373.3  |
| 51.2   | 51.3   | 91.3   | 151.3  | 107.0  | 54.8   | 479.2   | 698.9  | 763.9   |
| 2950.9 | 3281.0 | 711.4  | 1006.3 | 3325.3 | 3210.2 | 7543.1  | 4908.3 | 5200.2  |
| 38.0   | 35.5   | 4.1    | 10.2   | 59.4   | 32.0   | 464.6   | 975.8  | 1143.1  |
| 28.1   | 38.3   | 0.8    | 0.7    | 62.7   | 46.7   | 587.6   | 1370.9 | 1554.1  |
| 27.3   | 39.0   | 2.7    | 0.5    | 69.5   | 48.5   | 512.8   | 1161.6 | 1388.8  |
| 1418.4 | 1753.2 | 152.6  | 241.6  | 1663.0 | 1590.5 | 1096.3  | 565.6  | 622.0   |
| 167.9  | 210.7  | 195.4  | 322.7  | 331.2  | 154.0  | 428.8   | 438.1  | 554.2   |
| 18.6   | 14.3   | 24.4   | 21.5   | 25.5   | 4.2    | 36.7    | 44.6   | 57.6    |
| 261.9  | 295.1  | 172.0  | 236.0  | 314.8  | 248.2  | 862.5   | 547.7  | 715.1   |
| 239.2  | 303.2  | 397.3  | 440.3  | 364.9  | 296.5  | 895.9   | 1429.2 | 1455.1  |
| 562.0  | 715.2  | 162.4  | 333.9  | 574.4  | 552.1  | 2839.9  | 3307.8 | 3371.4  |
| 1158.8 | 1340.8 | 460.5  | 728.3  | 1380.5 | 1021.0 | 5680.3  | 5977.6 | 5869.3  |
| 4354.3 | 5669.3 | 187.1  | 343.4  | 6186.4 | 5009.2 | 38.3    | 48.0   | 48.0    |
| 1418.8 | 2296.4 | 41.4   | 69.4   | 2173.8 | 2109.2 | 9.9     | 3.4    | 6.1     |
| 2199.7 | 2729.7 | 326.2  | 494.6  | 3315.4 | 2721.1 | 3997.0  | 3637.5 | 3752.2  |
| 544.3  | 772.2  | 171.1  | 212.8  | 532.1  | 1436.6 | 2810.6  | 2646.2 | 2940.6  |
| 307.3  | 632.1  | 291.9  | 320.4  | 526.6  | 550.1  | 2586.3  | 2425.1 | 2583.8  |
| 8722.8 | 9415.9 | 5001.8 | 6576.6 | 9706.2 | 8897.5 | 10959.6 | 9874.7 | 10178.6 |
| 29.9   | 26.7   | 33.2   | 35.6   | 35.9   | 32.2   | 31.2    | 46.5   | 41.9    |
| 12.1   | 31.4   | 4.5    | 5.3    | 49.8   | 14.7   | 22.3    | 28.7   | 18.6    |
| 112.2  | 203.3  | 37.2   | 73.9   | 203.2  | 202.2  | 772.6   | 929.8  | 984.0   |
| 102.9  | 115.3  | 35.5   | 37.9   | 167.7  | 139.4  | 542.7   | 564.2  | 565.4   |
| 521.3  | 609.0  | 144.8  | 270.3  | 873.3  | 628.7  | 1262.3  | 1193.5 | 1172.6  |
| 61.9   | 71.2   | 28.2   | 29.7   | 69.4   | 66.7   | 480.8   | 557.2  | 578.8   |
| 922.4  | 1250.4 | 58.5   | 53.4   | 1916.5 | 1320.0 | 1725.7  | 718.7  | 825.7   |
| 565.9  | 765.4  | 264.7  | 363.4  | 809.3  | 664.3  | 4766.8  | 5374.5 | 5350.0  |
| 237.1  | 316.5  | 189.0  | 222.0  | 339.5  | 291.9  | 4615.2  | 5541.6 | 6037.2  |
| 1190.2 | 1123.9 | 537.8  | 701.9  | 1490.9 | 992.5  | 2128.4  | 1691.8 | 1770.6  |
| 414.5  | 595.7  | 90.6   | 101.4  | 653.4  | 587.5  | 1573.6  | 2028.6 | 2102.1  |
| 1004.8 | 1404.3 | 276.5  | 391.1  | 1044.0 | 1779.0 | 4118.5  | 2889.4 | 2902.5  |
| 1686.4 | 2025.1 | 1115.7 | 1515.9 | 1755.5 | 1996.4 | 5278.4  | 4059.3 | 4127.3  |
| 641.1  | 766.9  | 379.0  | 493.8  | 1109.2 | 752.0  | 1040.7  | 511.7  | 604.9   |
| 42.2   | 53.3   | 57.7   | 65.8   | 88.2   | 39.0   | 338.6   | 146.8  | 161.7   |
| 23.9   | 13.9   | 2.8    | 15.9   | 17.9   | 21.0   | 24.4    | 7.0    | 20.0    |
| 58.2   | 60.4   | 24.1   | 19.0   | 100.0  | 61.5   | 55.1    | 23.4   | 27.2    |
| 65.0   | 74.7   | 76.5   | 98.6   | 90.4   | 69.4   | 396.9   | 531.4  | 561.3   |
| 105.6  | 140.2  | 141.6  | 179.1  | 158.6  | 104.3  | 1328.1  | 1843.2 | 2025.1  |
| 68.7   | 49.2   | 32.2   | 57.2   | 63.0   | 41.6   | 260.1   | 152.0  | 172.4   |
| 110.9  | 165.8  | 74.0   | 98.3   | 185.9  | 139.6  | 147.4   | 135.7  | 149.6   |
| 608.9  | 843.2  | 37.3   | 54.9   | 1169.1 | 930.7  | 92.6    | 164.6  | 143.4   |
| 112.1  | 158.8  | 46.8   | 69.2   | 167.2  | 163.2  | 373.7   | 303.3  | 341.1   |
| 2985.3 | 3461.8 | 965.1  | 1155.3 | 4182.3 | 3595.1 | 3571.7  | 2824.0 | 2669.9  |
| 4411.2 | 5196.0 | 1321.5 | 1641.4 | 5479.4 | 5268.6 | 3708.7  | 2880.7 | 3122.2  |
| 585.7  | 931.4  | 160.8  | 167.6  | 876.8  | 700.4  | 740.3   | 396.8  | 474.0   |

|        |        |        |        |        |        |        |        |        |
|--------|--------|--------|--------|--------|--------|--------|--------|--------|
| 34.8   | 30.0   | 54.7   | 77.0   | 44.8   | 13.7   | 157.5  | 178.9  | 216.6  |
| 163.2  | 226.0  | 62.5   | 92.1   | 289.8  | 195.4  | 352.9  | 423.6  | 441.9  |
| 2507.7 | 3118.9 | 2137.9 | 2577.6 | 3216.6 | 2783.2 | 5930.8 | 5933.8 | 6492.8 |
| 905.6  | 1179.1 | 38.0   | 52.8   | 1431.1 | 1368.7 | 874.4  | 407.0  | 489.9  |
| 2394.4 | 3912.2 | 43.7   | 29.9   | 4313.8 | 3291.6 | 25.4   | 5.7    | 1.7    |
| 1122.6 | 1905.3 | 39.7   | 57.0   | 1937.9 | 1655.8 | 9.8    | 3.5    | 1.8    |
| 1235.5 | 1457.2 | 218.7  | 316.0  | 1696.5 | 1657.3 | 1401.0 | 708.0  | 818.4  |
| 2569.6 | 3221.0 | 285.9  | 502.8  | 3322.3 | 2866.4 | 3772.3 | 1796.7 | 1734.2 |
| 193.2  | 142.7  | 13.7   | 10.5   | 254.0  | 119.8  | 426.5  | 431.4  | 424.2  |
| 115.8  | 104.4  | 15.9   | 16.9   | 147.6  | 86.5   | 327.5  | 269.7  | 282.2  |
| 772.9  | 1769.0 | 166.9  | 205.2  | 1982.1 | 1667.2 | 2373.1 | 2197.6 | 2416.5 |
| 224.2  | 296.0  | 17.8   | 9.8    | 363.9  | 288.1  | 799.7  | 881.6  | 999.3  |
| 20.4   | 27.0   | 1.9    | 2.0    | 31.2   | 15.2   | 106.7  | 118.5  | 129.2  |
| 37.1   | 38.0   | 44.9   | 28.7   | 53.2   | 43.3   | 57.4   | 50.3   | 56.5   |
| 246.3  | 304.7  | 100.0  | 169.9  | 339.9  | 277.2  | 762.3  | 688.8  | 770.8  |
| 9.1    | 17.9   | 0.8    | 11.9   | 19.9   | 5.5    | 17.7   | 17.1   | 20.6   |
| 1346.5 | 1486.9 | 324.2  | 424.6  | 1890.8 | 1334.0 | 1037.2 | 990.3  | 1028.6 |
| 336.3  | 417.9  | 151.1  | 118.6  | 650.9  | 307.6  | 662.4  | 518.8  | 559.1  |
| 1181.7 | 1307.2 | 438.8  | 654.7  | 1440.6 | 1245.9 | 5125.3 | 3992.6 | 4175.0 |
| 435.8  | 545.0  | 262.1  | 335.3  | 641.0  | 466.3  | 2320.2 | 2615.2 | 2793.2 |
| 196.6  | 161.8  | 2.1    | 6.1    | 235.9  | 288.3  | 266.6  | 282.9  | 325.4  |
| 561.1  | 688.1  | 51.4   | 86.9   | 997.9  | 638.0  | 506.8  | 569.7  | 614.3  |
| 1029.8 | 1262.6 | 245.3  | 353.5  | 1480.9 | 1178.5 | 856.8  | 493.2  | 601.0  |
| 622.4  | 888.4  | 219.5  | 400.4  | 1047.2 | 861.7  | 1776.5 | 1332.5 | 1444.3 |
| 57.4   | 57.2   | 15.4   | 21.6   | 63.7   | 58.2   | 174.6  | 117.2  | 154.8  |
| 958.4  | 1204.5 | 417.1  | 512.1  | 1200.3 | 980.2  | 1862.5 | 1338.6 | 1486.8 |
| 424.5  | 495.9  | 241.9  | 390.9  | 652.5  | 435.5  | 628.5  | 702.4  | 728.8  |
| 348.8  | 342.8  | 166.5  | 208.4  | 498.4  | 325.6  | 638.7  | 522.5  | 638.5  |
| 498.3  | 414.2  | 14.7   | 4.3    | 776.9  | 378.4  | 353.3  | 490.7  | 497.3  |
| 82.7   | 106.2  | 364.2  | 527.0  | 107.7  | 61.7   | 1213.2 | 1276.6 | 1645.9 |
| 145.6  | 164.0  | 290.1  | 438.6  | 207.3  | 139.8  | 351.1  | 287.5  | 382.9  |
| 728.2  | 936.5  | 353.6  | 376.6  | 944.8  | 891.1  | 1762.6 | 1508.4 | 1615.5 |
| 655.4  | 876.1  | 163.4  | 190.8  | 902.3  | 814.7  | 1616.1 | 1491.7 | 1495.1 |
| 76.5   | 109.7  | 60.9   | 42.9   | 139.2  | 143.6  | 129.4  | 139.0  | 155.5  |
| 62.3   | 59.8   | 72.5   | 86.3   | 86.2   | 50.4   | 50.3   | 40.8   | 76.0   |
| 27.3   | 6.5    | 34.8   | 24.9   | 4.0    | 45.6   | 21.0   | 19.9   | 37.4   |
| 352.3  | 445.0  | 217.4  | 334.0  | 454.3  | 466.7  | 859.0  | 626.4  | 700.8  |
| 131.5  | 148.5  | 102.4  | 188.4  | 210.0  | 111.0  | 242.9  | 174.7  | 191.6  |
| 2114.2 | 2749.2 | 510.6  | 751.5  | 2936.9 | 2472.2 | 3536.5 | 3737.2 | 4093.2 |
| 1147.0 | 1582.8 | 448.0  | 517.4  | 1947.3 | 1265.0 | 1929.8 | 2513.5 | 2652.2 |
| 502.6  | 562.1  | 550.0  | 891.8  | 730.7  | 559.9  | 5543.1 | 4668.3 | 5335.4 |
| 419.1  | 428.9  | 387.4  | 635.6  | 544.0  | 394.5  | 381.8  | 169.2  | 216.5  |
| 92.0   | 101.1  | 33.4   | 11.3   | 82.2   | 109.6  | 170.7  | 137.6  | 131.2  |
| 51.6   | 80.0   | 22.4   | 24.0   | 63.4   | 61.6   | 169.1  | 107.1  | 130.3  |
| 183.9  | 157.6  | 109.5  | 143.4  | 351.4  | 195.9  | 649.3  | 587.8  | 578.1  |
| 181.3  | 180.4  | 112.4  | 142.3  | 270.7  | 198.7  | 469.1  | 434.3  | 530.4  |
| 357.0  | 500.6  | 142.0  | 146.9  | 579.1  | 432.4  | 1226.8 | 1338.2 | 1397.8 |
| 8.5    | 20.5   | 22.7   | 36.2   | 18.0   | 8.5    | 658.7  | 475.7  | 510.4  |
| 216.0  | 284.0  | 174.6  | 188.9  | 421.7  | 257.4  | 1928.7 | 1824.7 | 1877.3 |
| 50.5   | 56.7   | 24.0   | 34.6   | 63.8   | 63.6   | 277.1  | 224.1  | 251.7  |
| 45.9   | 67.1   | 32.1   | 23.4   | 64.1   | 68.9   | 245.4  | 180.1  | 190.0  |
| 958.8  | 1222.5 | 290.7  | 374.9  | 1257.3 | 1212.7 | 1909.6 | 1646.0 | 1663.2 |
| 7.4    | 9.7    | 0.7    | 1.9    | 1.4    | 10.6   | 17.1   | 11.1   | 8.7    |

|        |        |        |        |        |        |         |        |        |
|--------|--------|--------|--------|--------|--------|---------|--------|--------|
| 335.3  | 405.3  | 108.6  | 72.6   | 331.5  | 310.6  | 104.6   | 21.3   | 42.4   |
| 9.0    | 19.8   | 1.9    | 13.4   | 9.9    | 9.6    | 7.5     | 3.9    | 7.4    |
| 984.9  | 1461.1 | 371.8  | 487.2  | 1619.0 | 1437.5 | 1357.8  | 1065.8 | 1200.0 |
| 378.5  | 529.5  | 417.1  | 541.7  | 478.3  | 524.2  | 1939.8  | 1275.4 | 1439.1 |
| 450.0  | 509.3  | 163.0  | 284.3  | 743.5  | 571.0  | 834.7   | 578.4  | 655.4  |
| 383.3  | 410.5  | 521.1  | 713.7  | 460.5  | 286.8  | 741.8   | 561.8  | 624.7  |
| 765.3  | 1167.2 | 222.7  | 343.4  | 1059.4 | 969.0  | 896.8   | 509.3  | 611.0  |
| 31.6   | 52.3   | 25.3   | 24.6   | 72.3   | 43.9   | 144.5   | 118.1  | 164.0  |
| 1638.1 | 1934.9 | 442.4  | 667.2  | 2299.6 | 2163.0 | 3746.9  | 1761.3 | 1892.1 |
| 17.2   | 21.6   | 11.3   | 28.5   | 35.5   | 19.4   | 50.8    | 40.0   | 36.0   |
| 47.5   | 95.6   | 112.5  | 158.6  | 113.1  | 61.1   | 481.1   | 831.7  | 783.9  |
| 134.5  | 196.6  | 183.0  | 234.1  | 242.8  | 171.5  | 1212.9  | 2234.0 | 2137.3 |
| 2016.5 | 2420.9 | 552.5  | 814.1  | 2448.3 | 1686.4 | 5599.2  | 3209.8 | 3523.4 |
| 981.2  | 1434.8 | 532.1  | 743.6  | 1396.9 | 1193.3 | 2798.7  | 1506.1 | 1569.8 |
| 93.8   | 122.6  | 27.4   | 20.1   | 140.4  | 123.1  | 2.0     | 4.3    | 16.4   |
| 392.7  | 449.4  | 1531.6 | 2320.5 | 659.4  | 345.4  | 1471.0  | 725.4  | 778.8  |
| 87.6   | 66.5   | 10.3   | 7.3    | 125.3  | 41.9   | 68.1    | 51.3   | 67.2   |
| 1900.8 | 2287.3 | 914.9  | 1301.5 | 2827.7 | 1826.2 | 2037.6  | 1763.6 | 1912.5 |
| 893.3  | 1037.9 | 377.0  | 508.1  | 1295.8 | 941.1  | 1962.9  | 891.1  | 1035.0 |
| 126.0  | 107.1  | 29.4   | 47.8   | 173.0  | 85.1   | 292.9   | 419.3  | 463.2  |
| 477.3  | 533.2  | 43.4   | 83.4   | 762.1  | 520.4  | 598.7   | 854.3  | 1062.0 |
| 57.0   | 110.1  | 48.3   | 47.0   | 132.2  | 76.7   | 212.9   | 236.0  | 260.8  |
| 154.5  | 188.9  | 55.9   | 57.3   | 206.6  | 175.7  | 321.5   | 362.3  | 432.6  |
| 53.6   | 83.2   | 44.7   | 63.0   | 87.4   | 53.4   | 186.5   | 125.8  | 135.4  |
| 140.3  | 128.5  | 527.6  | 696.4  | 238.3  | 121.0  | 448.4   | 529.0  | 648.5  |
| 1010.4 | 1313.2 | 672.5  | 761.0  | 1518.2 | 1000.6 | 2459.8  | 2316.2 | 2531.8 |
| 426.6  | 568.0  | 586.5  | 697.8  | 747.7  | 478.1  | 1329.0  | 1211.4 | 1253.9 |
| 1346.5 | 1585.0 | 3162.8 | 4456.9 | 2180.3 | 1726.8 | 5880.9  | 4750.9 | 4956.7 |
| 78.0   | 71.1   | 112.0  | 136.7  | 69.9   | 33.8   | 352.4   | 117.8  | 101.1  |
| 4.7    | 23.0   | 1.7    | 1.6    | 3.6    | 12.2   | 13.7    | 8.8    | 21.1   |
| 527.8  | 567.8  | 679.7  | 890.8  | 813.2  | 606.0  | 4567.7  | 4372.3 | 4279.3 |
| 202.2  | 218.7  | 59.9   | 69.0   | 297.2  | 198.3  | 546.2   | 432.4  | 370.3  |
| 751.1  | 746.5  | 428.2  | 628.0  | 1082.7 | 722.0  | 1453.2  | 1113.6 | 1223.6 |
| 5580.9 | 6781.3 | 2274.8 | 2852.0 | 7854.5 | 7277.7 | 10183.1 | 9591.6 | 9580.9 |
| 303.8  | 555.6  | 24.2   | 55.0   | 465.3  | 382.3  | 1098.6  | 1021.6 | 1037.2 |
| 208.3  | 252.2  | 44.4   | 59.1   | 277.4  | 226.9  | 579.5   | 539.9  | 652.5  |
| 326.4  | 540.6  | 75.8   | 85.7   | 420.5  | 438.2  | 1325.6  | 1230.6 | 1316.8 |
| 509.9  | 890.0  | 240.7  | 264.9  | 974.8  | 679.3  | 1769.7  | 2128.5 | 2294.4 |
| 451.5  | 685.1  | 62.9   | 67.1   | 681.6  | 908.8  | 1427.7  | 1728.3 | 1889.0 |
| 794.8  | 1054.3 | 302.5  | 340.6  | 1148.1 | 924.0  | 1034.0  | 917.4  | 1041.5 |
| 399.5  | 504.4  | 123.2  | 167.0  | 561.8  | 615.9  | 1852.1  | 1839.2 | 2052.5 |
| 670.6  | 733.1  | 87.4   | 119.5  | 855.0  | 694.4  | 571.0   | 373.1  | 414.1  |
| 812.9  | 915.4  | 730.2  | 1414.5 | 1375.8 | 946.5  | 1372.6  | 1331.3 | 1409.2 |
| 71.2   | 57.7   | 144.5  | 243.5  | 55.9   | 84.1   | 227.3   | 177.4  | 248.1  |
| 214.7  | 222.9  | 325.0  | 385.8  | 268.9  | 167.8  | 1215.3  | 1093.7 | 1246.3 |
| 48.5   | 53.3   | 111.1  | 147.7  | 60.3   | 48.3   | 172.3   | 121.3  | 192.5  |
| 56.2   | 95.6   | 80.3   | 90.6   | 110.5  | 83.6   | 256.4   | 194.4  | 211.6  |
| 295.0  | 349.7  | 59.3   | 99.6   | 524.7  | 341.2  | 610.0   | 280.4  | 363.2  |
| 175.7  | 217.5  | 30.0   | 52.4   | 261.2  | 307.9  | 475.8   | 272.2  | 275.0  |
| 200.8  | 165.8  | 369.5  | 386.6  | 401.2  | 149.9  | 1406.4  | 2216.9 | 2473.1 |
| 248.9  | 308.7  | 183.6  | 249.7  | 370.3  | 279.5  | 332.0   | 190.8  | 266.8  |
| 208.5  | 353.8  | 25.9   | 36.2   | 324.1  | 387.8  | 666.4   | 452.6  | 512.4  |
| 300.1  | 249.7  | 1393.5 | 1746.1 | 413.9  | 301.7  | 2365.8  | 2818.5 | 3234.9 |

|        |         |        |        |         |        |         |         |         |
|--------|---------|--------|--------|---------|--------|---------|---------|---------|
| 948.9  | 971.4   | 29.8   | 51.8   | 995.3   | 1051.8 | 16.6    | 9.4     | 14.4    |
| 25.5   | 23.4    | 154.6  | 159.0  | 38.9    | 32.0   | 21.4    | 89.6    | 135.0   |
| 202.2  | 321.9   | 117.3  | 172.7  | 305.9   | 237.9  | 414.4   | 446.3   | 529.8   |
| 9556.8 | 10077.4 | 3745.5 | 4901.1 | 10412.9 | 9843.6 | 12175.7 | 12117.5 | 11593.6 |
| 40.3   | 47.6    | 2.4    | 2.0    | 75.7    | 43.2   | 2.0     | 3.6     | 5.2     |
| 89.9   | 79.0    | 12.9   | 1.3    | 137.8   | 80.7   | 5.4     | 2.7     | 3.5     |
| 205.3  | 259.1   | 337.6  | 530.0  | 258.3   | 225.4  | 1996.6  | 2737.9  | 3107.1  |
| 1971.7 | 1895.8  | 329.4  | 579.3  | 2396.4  | 2036.1 | 2096.6  | 1260.0  | 1447.0  |
| 388.5  | 474.9   | 52.0   | 113.7  | 595.1   | 493.5  | 496.3   | 376.6   | 404.3   |
| 383.6  | 651.6   | 217.8  | 280.5  | 712.1   | 494.9  | 2056.0  | 1294.7  | 1367.2  |
| 145.1  | 337.9   | 9.1    | 8.8    | 219.0   | 314.0  | 522.8   | 286.1   | 369.4   |
| 267.1  | 631.8   | 77.3   | 117.9  | 435.4   | 660.6  | 1639.0  | 1016.7  | 1126.1  |
| 15.6   | 25.3    | 10.7   | 3.1    | 26.7    | 20.2   | 2.0     | 10.3    | 6.1     |
| 70.7   | 77.3    | 43.1   | 77.3   | 81.7    | 57.3   | 163.2   | 170.8   | 198.0   |
| 178.8  | 180.8   | 51.4   | 121.8  | 232.6   | 239.8  | 650.6   | 515.5   | 562.2   |
| 3689.8 | 4364.7  | 1074.4 | 1462.0 | 4733.6  | 4115.3 | 4097.1  | 4155.7  | 4614.5  |
| 17.7   | 8.7     | 6.5    | 0.8    | 14.3    | 16.7   | 2.2     | 8.4     | 11.7    |
| 576.7  | 628.1   | 361.6  | 528.1  | 779.5   | 559.1  | 3599.5  | 3715.0  | 3861.8  |
| 178.8  | 217.9   | 294.3  | 551.4  | 270.9   | 237.6  | 1548.6  | 1391.2  | 1592.8  |
| 161.4  | 150.1   | 86.4   | 113.2  | 341.6   | 196.7  | 121.2   | 175.6   | 167.6   |
| 94.1   | 101.2   | 99.3   | 163.7  | 118.6   | 84.8   | 236.9   | 283.9   | 245.7   |
| 54.8   | 49.0    | 51.1   | 45.8   | 88.3    | 48.2   | 151.3   | 159.1   | 170.0   |
| 91.9   | 130.2   | 19.0   | 39.6   | 172.4   | 110.7  | 427.3   | 398.8   | 452.5   |
| 33.3   | 37.1    | 9.2    | 11.1   | 59.7    | 39.8   | 162.1   | 151.2   | 156.5   |
| 97.9   | 115.6   | 24.7   | 25.2   | 135.8   | 101.8  | 179.4   | 216.1   | 234.9   |
| 19.0   | 17.4    | 3.2    | 4.0    | 8.5     | 16.8   | 8.4     | 6.1     | 11.2    |
| 2.2    | 9.5     | 20.0   | 24.0   | 5.6     | 1.7    | 33.0    | 37.8    | 51.8    |
| 1566.2 | 2310.0  | 1142.5 | 1429.1 | 2386.3  | 2244.4 | 2678.1  | 2040.8  | 2012.0  |
| 292.0  | 387.6   | 66.0   | 104.4  | 405.7   | 487.7  | 485.9   | 610.6   | 667.5   |
| 164.0  | 241.0   | 97.5   | 135.0  | 301.1   | 237.7  | 526.6   | 729.3   | 760.1   |
| 170.1  | 235.8   | 132.9  | 154.8  | 223.6   | 257.2  | 1007.6  | 757.6   | 819.0   |
| 690.2  | 915.6   | 409.5  | 545.4  | 842.3   | 891.4  | 3500.5  | 2295.0  | 2677.7  |
| 481.7  | 645.8   | 180.2  | 308.2  | 573.0   | 739.6  | 1396.4  | 1088.8  | 1252.2  |
| 565.0  | 746.0   | 242.1  | 301.3  | 999.7   | 672.4  | 1918.0  | 1069.2  | 1220.1  |
| 214.6  | 255.9   | 98.2   | 126.1  | 340.6   | 249.3  | 285.6   | 261.4   | 305.7   |
| 48.8   | 78.2    | 16.1   | 45.2   | 106.2   | 39.3   | 151.8   | 122.7   | 152.4   |
| 1088.6 | 1435.6  | 505.7  | 760.9  | 1518.6  | 1840.4 | 137.1   | 154.6   | 169.3   |
| 3204.4 | 4824.4  | 429.1  | 652.2  | 4139.8  | 3797.8 | 5385.2  | 5004.2  | 4933.1  |
| 385.7  | 510.4   | 83.7   | 156.1  | 604.1   | 455.3  | 352.7   | 760.9   | 902.3   |
| 32.5   | 58.6    | 17.8   | 26.2   | 54.0    | 26.1   | 56.3    | 108.2   | 147.1   |
| 125.0  | 171.5   | 6.0    | 11.2   | 204.8   | 150.0  | 112.7   | 203.5   | 262.1   |
| 862.3  | 1103.4  | 239.0  | 342.5  | 1062.0  | 986.3  | 3675.7  | 3820.9  | 3980.1  |
| 1886.8 | 2403.7  | 346.8  | 689.2  | 1761.4  | 1966.8 | 6993.8  | 7962.6  | 8461.9  |
| 278.7  | 386.7   | 67.6   | 128.8  | 549.8   | 275.8  | 581.9   | 365.1   | 396.8   |
| 2443.5 | 3120.3  | 346.1  | 429.8  | 3625.5  | 3564.8 | 3449.8  | 2634.1  | 2969.7  |
| 795.3  | 1441.3  | 397.3  | 523.3  | 1128.3  | 1059.7 | 4224.9  | 4117.9  | 4318.5  |
| 792.6  | 934.1   | 311.4  | 397.5  | 1198.5  | 1038.9 | 3179.1  | 2157.7  | 2320.7  |
| 141.0  | 93.2    | 74.0   | 84.6   | 143.9   | 85.3   | 189.7   | 192.9   | 216.5   |
| 242.0  | 289.3   | 96.1   | 102.0  | 251.8   | 223.4  | 82.2    | 58.7    | 84.4    |
| 479.9  | 571.6   | 445.5  | 666.1  | 697.4   | 547.0  | 1166.4  | 522.1   | 514.4   |
| 639.5  | 543.2   | 219.2  | 289.6  | 880.0   | 420.7  | 1214.6  | 1036.0  | 1010.8  |
| 1802.9 | 1669.0  | 261.1  | 339.6  | 2395.6  | 1549.0 | 3632.3  | 2702.3  | 2966.8  |
| 664.5  | 805.5   | 168.6  | 412.8  | 846.4   | 831.3  | 1465.0  | 485.9   | 566.9   |

|        |        |        |        |        |        |         |         |         |
|--------|--------|--------|--------|--------|--------|---------|---------|---------|
| 871.6  | 1251.5 | 436.0  | 614.0  | 1202.4 | 1253.3 | 2459.3  | 935.3   | 1104.1  |
| 593.3  | 722.4  | 147.4  | 128.9  | 849.9  | 829.9  | 332.8   | 337.3   | 379.0   |
| 197.8  | 193.8  | 403.2  | 566.6  | 308.7  | 165.1  | 704.5   | 590.5   | 785.2   |
| 345.4  | 415.6  | 87.6   | 118.2  | 532.4  | 424.7  | 456.8   | 291.7   | 412.4   |
| 462.5  | 583.7  | 435.7  | 505.1  | 655.5  | 547.9  | 1104.2  | 1054.6  | 1155.8  |
| 151.3  | 152.2  | 282.5  | 414.4  | 254.9  | 131.6  | 487.0   | 422.4   | 491.0   |
| 504.9  | 683.8  | 220.8  | 256.7  | 780.0  | 562.3  | 1543.8  | 1065.2  | 1083.7  |
| 609.5  | 818.3  | 137.3  | 150.2  | 997.5  | 684.2  | 2866.5  | 2271.6  | 2339.4  |
| 732.3  | 753.2  | 41.2   | 59.6   | 973.8  | 854.6  | 2393.4  | 1988.9  | 2192.8  |
| 594.3  | 672.0  | 343.8  | 374.6  | 860.4  | 784.8  | 1517.0  | 1451.2  | 1539.8  |
| 1557.4 | 1628.0 | 218.2  | 326.8  | 2102.0 | 1583.3 | 2121.9  | 1114.1  | 1241.4  |
| 967.6  | 1123.1 | 121.5  | 184.8  | 1555.1 | 736.3  | 1594.1  | 702.4   | 838.0   |
| 1147.4 | 1466.7 | 358.9  | 558.8  | 1623.9 | 1474.6 | 1465.4  | 639.2   | 726.8   |
| 7550.1 | 8322.4 | 4376.1 | 5436.7 | 8342.3 | 8029.9 | 11439.1 | 11420.8 | 11486.7 |
| 228.0  | 360.9  | 179.7  | 201.0  | 355.7  | 317.7  | 1253.0  | 1066.8  | 1174.8  |
| 172.6  | 168.5  | 94.1   | 102.6  | 272.7  | 157.2  | 268.2   | 330.5   | 396.3   |
| 2.1    | 1.7    | 0.5    | 0.8    | 1.3    | 1.3    | 4.2     | 0.9     | 1.9     |
| 15.2   | 7.3    | 6.1    | 5.4    | 8.7    | 7.0    | 9.7     | 10.9    | 17.6    |
| 11.3   | 1.6    | 2.1    | 4.4    | 23.1   | 15.6   | 2.9     | 4.3     | 3.8     |
| 440.0  | 603.4  | 88.6   | 93.4   | 565.6  | 653.3  | 1130.7  | 774.9   | 928.4   |
| 793.4  | 865.1  | 229.7  | 266.2  | 956.2  | 1068.5 | 1014.4  | 749.7   | 887.5   |
| 994.2  | 1194.0 | 359.5  | 450.1  | 1277.6 | 1074.9 | 1331.8  | 1262.0  | 1275.4  |
| 479.0  | 619.4  | 82.4   | 118.7  | 702.9  | 601.7  | 878.9   | 781.9   | 938.8   |
| 575.5  | 901.2  | 400.4  | 595.0  | 793.2  | 1150.8 | 178.3   | 224.0   | 242.2   |
| 727.8  | 1122.4 | 108.6  | 190.0  | 1128.1 | 1126.6 | 2331.8  | 1481.1  | 1721.7  |
| 193.9  | 226.5  | 144.4  | 140.1  | 262.6  | 180.8  | 920.4   | 727.8   | 758.2   |
| 394.2  | 707.3  | 15.1   | 19.8   | 752.8  | 840.1  | 589.8   | 413.1   | 543.2   |
| 2733.7 | 2894.5 | 21.6   | 37.6   | 3747.5 | 2727.8 | 2379.3  | 954.7   | 1223.0  |
| 575.5  | 568.2  | 90.8   | 143.1  | 932.5  | 454.1  | 663.7   | 451.2   | 499.3   |
| 298.1  | 368.6  | 445.8  | 811.3  | 592.5  | 479.5  | 1396.4  | 624.6   | 758.8   |
| 135.4  | 160.8  | 106.2  | 201.3  | 226.7  | 159.6  | 750.8   | 568.8   | 679.1   |
| 19.6   | 30.6   | 50.3   | 72.3   | 30.2   | 19.5   | 425.0   | 994.4   | 874.7   |
| 280.4  | 251.4  | 171.1  | 287.9  | 313.6  | 182.9  | 751.2   | 593.8   | 716.6   |
| 428.7  | 548.4  | 93.7   | 104.2  | 604.7  | 483.0  | 972.8   | 774.9   | 815.5   |
| 80.7   | 101.5  | 33.8   | 29.5   | 117.1  | 128.6  | 383.4   | 346.4   | 350.7   |
| 149.9  | 202.3  | 52.6   | 73.0   | 244.6  | 196.0  | 640.2   | 423.2   | 482.6   |
| 673.7  | 901.3  | 339.1  | 448.8  | 1138.0 | 947.3  | 2118.1  | 1724.5  | 1880.8  |
| 541.8  | 587.9  | 159.5  | 259.9  | 723.2  | 533.6  | 591.3   | 150.7   | 187.4   |
| 523.1  | 724.4  | 74.2   | 123.2  | 629.1  | 629.5  | 1585.7  | 1079.5  | 1177.2  |
| 827.7  | 1014.6 | 367.7  | 460.0  | 1488.8 | 1125.4 | 1730.2  | 1293.6  | 1384.3  |
| 628.6  | 824.5  | 375.3  | 485.0  | 1102.3 | 906.5  | 2286.4  | 1894.5  | 2032.5  |
| 833.4  | 1078.8 | 401.1  | 605.6  | 1234.4 | 1154.0 | 1823.8  | 1613.6  | 1707.8  |
| 292.8  | 531.6  | 48.5   | 70.2   | 429.0  | 455.7  | 1015.0  | 549.0   | 574.0   |
| 509.2  | 644.9  | 383.8  | 521.6  | 700.9  | 557.4  | 27.9    | 44.8    | 34.3    |
| 700.5  | 769.7  | 151.9  | 234.5  | 954.9  | 658.8  | 1312.9  | 753.8   | 845.5   |
| 1434.9 | 1706.6 | 335.3  | 528.1  | 2110.6 | 1629.7 | 3398.6  | 2034.0  | 2178.9  |
| 10.0   | 16.7   | 1.9    | 7.7    | 6.4    | 11.6   | 39.2    | 73.9    | 89.6    |
| 202.1  | 211.2  | 374.8  | 546.7  | 234.9  | 170.7  | 508.9   | 576.0   | 632.1   |
| 696.8  | 750.9  | 887.5  | 959.2  | 1022.4 | 714.2  | 1283.8  | 1346.7  | 1461.5  |
| 766.6  | 830.5  | 266.7  | 386.5  | 1250.0 | 771.8  | 1987.4  | 1569.4  | 1684.0  |
| 518.7  | 439.1  | 309.0  | 438.1  | 732.3  | 314.1  | 1255.0  | 884.1   | 1004.0  |
| 5158.7 | 6394.2 | 2493.4 | 2393.3 | 5725.6 | 5621.4 | 7813.3  | 5649.8  | 5517.5  |
| 410.6  | 542.3  | 123.6  | 149.8  | 514.1  | 379.8  | 431.6   | 514.2   | 544.0   |



|        |        |        |        |        |        |         |        |        |
|--------|--------|--------|--------|--------|--------|---------|--------|--------|
| 2363.6 | 3107.5 | 284.9  | 391.1  | 3208.8 | 3066.5 | 4068.9  | 2672.6 | 2808.1 |
| 307.0  | 517.9  | 113.6  | 103.2  | 476.1  | 429.3  | 1596.7  | 1180.1 | 1369.4 |
| 125.6  | 168.2  | 127.6  | 130.8  | 340.1  | 158.6  | 1377.8  | 2688.9 | 2779.1 |
| 111.2  | 96.1   | 136.4  | 203.3  | 146.1  | 126.9  | 1096.1  | 1726.8 | 1801.6 |
| 310.9  | 343.9  | 65.3   | 52.0   | 383.0  | 247.4  | 284.1   | 295.8  | 374.5  |
| 170.9  | 156.9  | 21.2   | 26.2   | 222.8  | 175.4  | 106.8   | 129.5  | 157.7  |
| 48.5   | 42.5   | 18.2   | 28.8   | 46.1   | 30.8   | 77.7    | 71.7   | 83.4   |
| 112.6  | 181.6  | 1.6    | 12.5   | 276.1  | 110.5  | 19.8    | 19.6   | 10.4   |
| 1321.2 | 1745.6 | 15.6   | 12.2   | 2294.0 | 1556.9 | 11.8    | 12.9   | 9.5    |
| 191.0  | 259.3  | 45.2   | 75.8   | 274.0  | 212.3  | 1178.5  | 1121.5 | 1273.7 |
| 466.1  | 531.5  | 106.5  | 157.5  | 678.7  | 595.6  | 675.7   | 547.8  | 622.9  |
| 298.5  | 361.3  | 307.3  | 229.5  | 438.0  | 274.2  | 541.8   | 392.4  | 410.4  |
| 994.5  | 1701.7 | 543.3  | 818.9  | 1338.5 | 1699.7 | 1470.3  | 1120.4 | 1268.6 |
| 87.4   | 130.8  | 50.5   | 101.5  | 124.0  | 201.5  | 297.0   | 194.4  | 245.6  |
| 834.1  | 1011.4 | 198.4  | 251.1  | 1189.2 | 960.8  | 802.5   | 895.7  | 879.5  |
| 1.3    | 3.6    | 0.8    | 1.8    | 1.2    | 10.0   | 1.8     | 3.2    | 0.8    |
| 44.2   | 63.5   | 124.3  | 142.7  | 87.6   | 59.7   | 102.3   | 231.0  | 216.6  |
| 115.8  | 154.9  | 202.5  | 211.7  | 205.8  | 127.2  | 110.5   | 273.6  | 301.0  |
| 6245.9 | 7267.4 | 4652.6 | 5738.8 | 6553.6 | 6789.8 | 10214.8 | 9552.9 | 9318.6 |
| 71.5   | 54.8   | 274.8  | 347.6  | 70.0   | 29.9   | 440.9   | 502.9  | 636.2  |
| 624.5  | 527.1  | 312.4  | 437.2  | 886.4  | 536.0  | 1534.6  | 1727.5 | 2005.5 |
| 2491.4 | 2681.9 | 965.3  | 1621.5 | 2989.2 | 2561.8 | 3324.3  | 3338.9 | 3596.2 |
| 851.1  | 1044.1 | 312.3  | 556.4  | 1317.4 | 937.9  | 1034.5  | 901.1  | 1045.1 |
| 521.5  | 564.4  | 340.5  | 625.8  | 686.3  | 586.8  | 5234.7  | 1978.6 | 2208.6 |
| 15.9   | 23.5   | 49.0   | 56.4   | 30.0   | 39.1   | 52.1    | 77.8   | 76.9   |
| 21.1   | 41.2   | 59.8   | 78.8   | 46.3   | 44.2   | 79.3    | 85.4   | 90.8   |
| 789.6  | 820.1  | 881.9  | 1057.1 | 1073.8 | 799.7  | 2438.7  | 1628.4 | 1698.0 |
| 52.7   | 53.2   | 138.3  | 195.2  | 76.2   | 50.0   | 147.2   | 117.7  | 126.4  |
| 228.4  | 284.0  | 219.1  | 254.3  | 450.6  | 288.1  | 356.0   | 291.1  | 360.9  |
| 369.9  | 451.2  | 257.8  | 398.0  | 591.6  | 369.6  | 578.4   | 722.8  | 844.2  |
| 59.5   | 87.2   | 86.8   | 147.6  | 94.8   | 81.8   | 753.4   | 576.0  | 714.7  |
| 243.6  | 270.8  | 205.1  | 288.3  | 368.0  | 268.7  | 2691.8  | 2187.1 | 2411.7 |
| 339.1  | 488.8  | 5.8    | 27.7   | 466.1  | 373.1  | 235.7   | 85.7   | 125.5  |
| 210.0  | 169.9  | 394.1  | 486.1  | 207.2  | 196.0  | 715.5   | 578.0  | 659.2  |
| 42.0   | 27.4   | 42.2   | 34.0   | 47.3   | 46.8   | 172.0   | 118.1  | 186.9  |
| 234.4  | 305.7  | 70.6   | 81.3   | 390.8  | 292.9  | 384.5   | 413.6  | 443.0  |
| 1610.9 | 1913.3 | 521.1  | 872.9  | 2264.6 | 1836.3 | 6278.9  | 5603.4 | 5981.0 |
| 373.8  | 344.2  | 106.0  | 138.9  | 405.3  | 460.9  | 783.8   | 607.8  | 699.8  |
| 422.0  | 434.9  | 152.0  | 178.3  | 614.2  | 557.8  | 1061.1  | 924.8  | 1036.3 |
| 402.2  | 506.8  | 29.1   | 39.7   | 688.9  | 382.0  | 584.7   | 335.3  | 403.6  |
| 627.5  | 687.4  | 56.4   | 65.3   | 855.1  | 563.2  | 841.6   | 413.1  | 492.8  |
| 631.1  | 850.2  | 105.0  | 151.1  | 1061.3 | 887.9  | 1274.8  | 723.1  | 766.3  |
| 1125.3 | 1356.8 | 221.3  | 257.0  | 1570.0 | 1398.8 | 2594.1  | 1621.6 | 1675.2 |
| 774.7  | 1015.0 | 149.2  | 180.8  | 1129.0 | 999.6  | 1392.3  | 1160.2 | 1315.5 |
| 145.2  | 178.4  | 63.3   | 62.8   | 204.9  | 137.2  | 487.2   | 578.3  | 665.7  |
| 2124.2 | 2468.6 | 876.0  | 1473.7 | 3102.6 | 2887.5 | 4676.2  | 2336.0 | 2763.8 |
| 902.3  | 1299.8 | 50.8   | 63.4   | 1081.3 | 962.3  | 112.5   | 104.9  | 127.5  |
| 297.3  | 391.3  | 39.9   | 56.7   | 447.7  | 402.4  | 1382.0  | 1206.0 | 1298.2 |
| 52.2   | 54.7   | 29.9   | 37.7   | 86.1   | 63.1   | 297.1   | 317.7  | 370.5  |
| 81.4   | 90.7   | 15.2   | 17.9   | 123.6  | 96.0   | 514.5   | 438.9  | 518.8  |
| 107.7  | 135.8  | 82.6   | 82.7   | 185.8  | 149.8  | 431.5   | 373.6  | 381.4  |
| 545.8  | 651.2  | 366.0  | 457.1  | 854.8  | 539.5  | 1380.2  | 1142.5 | 1265.9 |
| 429.0  | 498.5  | 236.0  | 348.1  | 721.0  | 513.1  | 3927.7  | 2369.4 | 2531.2 |

|        |        |        |        |         |        |         |        |        |
|--------|--------|--------|--------|---------|--------|---------|--------|--------|
| 160.6  | 267.3  | 76.8   | 126.8  | 293.8   | 285.4  | 1684.4  | 1211.1 | 1058.3 |
| 1937.0 | 2619.3 | 151.0  | 415.0  | 2361.5  | 2384.5 | 3225.2  | 2443.3 | 2729.4 |
| 690.9  | 1023.5 | 233.9  | 357.8  | 1047.4  | 959.9  | 3011.5  | 1852.3 | 2037.1 |
| 662.4  | 764.7  | 664.4  | 796.5  | 895.3   | 899.7  | 2153.5  | 1524.7 | 1610.3 |
| 708.8  | 684.7  | 113.7  | 172.5  | 897.1   | 659.9  | 2793.9  | 1720.2 | 1967.6 |
| 6787.9 | 7455.1 | 1312.0 | 1499.1 | 7496.7  | 6584.4 | 8742.7  | 8741.2 | 8494.4 |
| 104.5  | 100.5  | 74.3   | 116.2  | 142.9   | 92.1   | 166.1   | 191.2  | 210.6  |
| 2840.5 | 3500.9 | 1038.4 | 1382.1 | 3845.3  | 3167.2 | 3763.5  | 3708.8 | 3847.5 |
| 1490.5 | 1933.5 | 317.0  | 344.4  | 1984.6  | 2263.6 | 2173.9  | 1503.0 | 1578.2 |
| 868.9  | 1246.2 | 165.2  | 210.5  | 1092.8  | 1174.6 | 394.2   | 277.3  | 274.4  |
| 733.2  | 1014.3 | 111.8  | 143.7  | 1171.1  | 1055.9 | 1695.5  | 1172.8 | 1286.1 |
| 8604.3 | 9998.0 | 2815.1 | 3694.5 | 10135.9 | 9308.3 | 11372.5 | 3652.6 | 4449.2 |
| 3048.6 | 3648.5 | 1107.9 | 1407.3 | 4137.1  | 3585.9 | 5186.3  | 5333.3 | 5255.9 |
| 111.9  | 105.8  | 262.0  | 341.3  | 146.8   | 67.8   | 97.9    | 127.0  | 116.0  |
| 1042.8 | 1502.4 | 37.4   | 44.0   | 1873.2  | 1561.6 | 1580.4  | 1140.4 | 1209.9 |
| 2973.4 | 3525.9 | 905.8  | 1302.1 | 3427.1  | 2855.4 | 4644.9  | 3327.3 | 3641.9 |
| 166.0  | 144.0  | 17.0   | 9.2    | 285.2   | 118.5  | 12.9    | 20.7   | 12.6   |
| 187.2  | 216.8  | 28.9   | 20.0   | 243.1   | 426.9  | 216.7   | 225.9  | 255.0  |
| 374.3  | 478.5  | 51.3   | 65.1   | 522.4   | 425.9  | 766.0   | 738.0  | 879.2  |
| 81.3   | 115.1  | 42.1   | 75.5   | 180.9   | 110.2  | 288.4   | 310.2  | 258.1  |
| 474.4  | 554.0  | 59.7   | 54.5   | 571.2   | 350.6  | 566.8   | 272.4  | 303.7  |
| 903.7  | 1423.4 | 145.9  | 159.5  | 1111.2  | 1692.2 | 870.5   | 648.1  | 740.6  |
| 160.7  | 230.8  | 32.1   | 39.1   | 204.6   | 215.1  | 195.5   | 140.1  | 163.5  |
| 514.2  | 771.9  | 155.7  | 190.5  | 684.3   | 799.0  | 511.2   | 329.3  | 388.8  |
| 999.4  | 953.5  | 64.3   | 134.0  | 1347.9  | 878.4  | 851.0   | 495.8  | 475.9  |
| 0.5    | 1.5    | 1.2    | 4.3    | 2.0     | 1.6    | 10.7    | 6.4    | 7.5    |
| 252.2  | 255.6  | 125.8  | 129.1  | 326.9   | 193.9  | 663.8   | 379.6  | 459.6  |
| 696.4  | 773.3  | 427.8  | 671.3  | 1058.1  | 840.4  | 1803.4  | 1615.3 | 1689.1 |
| 146.2  | 234.9  | 127.1  | 179.5  | 195.9   | 158.2  | 652.5   | 895.2  | 1075.8 |
| 470.6  | 623.0  | 45.7   | 117.2  | 855.0   | 496.0  | 1174.6  | 555.8  | 611.4  |
| 28.9   | 60.5   | 3.1    | 2.8    | 79.8    | 56.9   | 8.3     | 11.0   | 3.1    |
| 138.1  | 205.5  | 0.2    | 0.2    | 280.1   | 199.5  | 3.3     | 6.2    | 2.7    |
| 104.7  | 226.8  | 1.2    | 0.6    | 202.3   | 119.3  | 5.1     | 3.8    | 1.3    |
| 368.9  | 281.3  | 263.3  | 362.2  | 482.2   | 299.3  | 595.1   | 478.5  | 581.0  |
| 915.1  | 1111.1 | 504.7  | 699.0  | 1416.0  | 1220.9 | 2894.6  | 2901.2 | 3171.1 |
| 231.0  | 268.5  | 134.5  | 158.0  | 353.9   | 219.0  | 450.6   | 568.6  | 625.4  |
| 159.8  | 139.6  | 23.8   | 40.1   | 137.3   | 136.9  | 498.9   | 415.9  | 611.5  |
| 261.5  | 309.9  | 268.7  | 397.4  | 336.4   | 254.4  | 614.1   | 570.3  | 678.9  |
| 687.5  | 870.9  | 331.7  | 487.9  | 858.2   | 1358.6 | 1750.2  | 1195.4 | 1291.2 |
| 278.5  | 468.3  | 70.7   | 100.4  | 527.9   | 426.5  | 1479.4  | 1053.9 | 1074.6 |
| 13.2   | 29.3   | 145.9  | 169.5  | 27.3    | 21.5   | 725.7   | 917.6  | 955.3  |
| 34.3   | 47.0   | 177.2  | 156.8  | 34.3    | 90.8   | 1460.4  | 2179.1 | 2413.7 |
| 8.7    | 28.0   | 274.5  | 293.7  | 24.9    | 40.7   | 1511.0  | 1943.9 | 2078.7 |
| 261.1  | 367.0  | 94.9   | 125.5  | 405.9   | 348.9  | 1345.0  | 1070.4 | 1191.5 |
| 646.4  | 757.1  | 67.9   | 107.0  | 979.4   | 929.8  | 1585.2  | 1178.7 | 1186.2 |
| 408.0  | 551.2  | 177.9  | 221.9  | 537.7   | 423.3  | 2299.8  | 1802.6 | 2012.0 |
| 3447.6 | 3926.8 | 150.5  | 183.7  | 4457.0  | 3755.4 | 3338.9  | 551.4  | 584.1  |
| 599.8  | 646.8  | 127.2  | 121.9  | 815.8   | 594.6  | 1204.2  | 832.0  | 1011.6 |
| 204.1  | 243.5  | 82.1   | 70.6   | 365.4   | 214.1  | 1458.9  | 1904.5 | 1933.8 |
| 275.3  | 361.1  | 21.2   | 41.4   | 582.8   | 341.1  | 1553.1  | 1843.5 | 1832.5 |
| 398.2  | 576.9  | 200.0  | 265.0  | 604.2   | 560.3  | 696.0   | 636.4  | 706.6  |
| 246.0  | 440.4  | 77.1   | 97.7   | 482.4   | 481.7  | 254.3   | 191.6  | 212.3  |
| 967.2  | 1310.8 | 206.9  | 277.1  | 1448.8  | 1349.5 | 1050.1  | 1087.9 | 1150.0 |

|        |        |        |        |        |        |        |        |        |
|--------|--------|--------|--------|--------|--------|--------|--------|--------|
| 17.4   | 10.7   | 31.3   | 51.0   | 6.4    | 1.8    | 43.1   | 23.2   | 38.3   |
| 201.1  | 231.3  | 206.1  | 284.0  | 330.4  | 180.1  | 512.8  | 523.9  | 432.2  |
| 108.3  | 106.0  | 99.5   | 167.1  | 131.0  | 87.0   | 462.0  | 397.0  | 398.2  |
| 1.2    | 1.2    | 2.9    | 2.2    | 2.5    | 1.4    | 462.4  | 405.7  | 517.2  |
| 242.2  | 294.0  | 134.9  | 162.4  | 399.2  | 305.2  | 858.8  | 470.0  | 609.2  |
| 100.2  | 115.2  | 154.9  | 252.3  | 115.0  | 92.7   | 514.7  | 616.6  | 662.5  |
| 432.6  | 537.4  | 151.4  | 289.2  | 697.9  | 419.6  | 611.3  | 451.1  | 520.4  |
| 271.5  | 271.1  | 12.6   | 40.0   | 367.7  | 290.0  | 205.1  | 108.9  | 167.2  |
| 78.4   | 138.8  | 475.5  | 616.3  | 127.8  | 93.6   | 775.3  | 1222.5 | 1125.5 |
| 43.6   | 45.4   | 269.6  | 334.3  | 53.0   | 32.4   | 306.4  | 454.4  | 467.7  |
| 768.9  | 1029.4 | 145.2  | 192.8  | 1483.6 | 884.3  | 1181.9 | 1658.4 | 1756.7 |
| 424.5  | 537.4  | 20.4   | 6.7    | 652.6  | 485.4  | 330.9  | 387.6  | 419.2  |
| 2828.7 | 3694.7 | 1621.1 | 2362.9 | 3829.1 | 3608.3 | 6177.6 | 5090.0 | 5864.5 |
| 826.3  | 1323.9 | 343.1  | 463.5  | 1562.5 | 1053.1 | 2082.0 | 2585.7 | 2722.1 |
| 1145.1 | 1680.4 | 199.7  | 314.6  | 1937.1 | 1568.3 | 2181.3 | 1744.0 | 1806.2 |
| 1228.1 | 1539.8 | 252.2  | 290.8  | 1797.1 | 1411.2 | 3939.3 | 3219.5 | 3209.5 |
| 24.9   | 24.7   | 2.1    | 9.9    | 22.7   | 25.4   | 7.4    | 18.0   | 10.6   |
| 299.0  | 327.9  | 2.4    | 4.2    | 430.6  | 362.0  | 48.3   | 120.8  | 118.1  |
| 490.2  | 824.5  | 9.4    | 21.7   | 792.5  | 785.6  | 3808.1 | 3025.0 | 3309.3 |
| 96.5   | 154.2  | 23.8   | 32.6   | 167.9  | 129.5  | 361.1  | 375.7  | 404.4  |
| 198.6  | 246.1  | 77.5   | 57.7   | 222.6  | 241.5  | 376.4  | 380.0  | 434.0  |
| 445.0  | 728.8  | 108.5  | 143.8  | 789.0  | 770.7  | 859.1  | 855.4  | 909.9  |
| 135.8  | 177.0  | 145.3  | 221.9  | 204.2  | 195.5  | 855.3  | 744.7  | 865.7  |
| 169.9  | 208.7  | 88.1   | 136.1  | 263.0  | 204.5  | 782.2  | 579.3  | 704.4  |
| 361.2  | 465.0  | 257.0  | 380.3  | 693.7  | 634.9  | 1987.6 | 1881.5 | 2034.5 |
| 599.9  | 802.4  | 261.1  | 396.8  | 825.0  | 778.3  | 1127.2 | 713.5  | 713.5  |
| 702.8  | 1050.7 | 218.5  | 340.6  | 985.6  | 937.8  | 2203.5 | 1639.4 | 1663.6 |
| 7331.0 | 7915.9 | 3574.0 | 4099.5 | 7916.2 | 7108.3 | 8754.4 | 8368.6 | 8095.3 |
| 2341.8 | 1887.6 | 15.4   | 32.5   | 2788.6 | 1422.5 | 2284.1 | 1836.2 | 1917.9 |
| 959.4  | 1349.5 | 4.6    | 0.4    | 1779.3 | 1326.0 | 4.3    | 0.7    | 5.0    |
| 33.4   | 39.9   | 120.7  | 182.8  | 33.6   | 61.0   | 48.7   | 37.0   | 41.3   |
| 630.3  | 1045.2 | 253.8  | 287.8  | 1064.5 | 841.1  | 550.8  | 725.2  | 689.7  |
| 145.3  | 246.8  | 185.8  | 278.5  | 132.7  | 204.0  | 140.5  | 195.8  | 168.3  |
| 525.9  | 743.8  | 69.5   | 141.8  | 718.2  | 696.1  | 410.5  | 275.6  | 334.9  |
| 1964.7 | 2488.8 | 424.9  | 521.9  | 2401.4 | 2230.2 | 1171.8 | 920.0  | 806.7  |
| 126.0  | 116.4  | 127.0  | 174.0  | 183.8  | 80.6   | 188.8  | 219.6  | 240.1  |
| 215.3  | 326.2  | 189.1  | 273.9  | 342.9  | 361.7  | 1208.0 | 898.1  | 1061.5 |
| 221.5  | 234.4  | 172.4  | 307.5  | 332.4  | 264.8  | 1812.2 | 1475.8 | 1654.9 |
| 3373.7 | 4671.9 | 875.5  | 1172.4 | 4248.8 | 3635.0 | 2776.8 | 1897.5 | 1956.0 |
| 108.1  | 126.8  | 59.9   | 84.2   | 181.5  | 77.4   | 245.6  | 193.5  | 215.2  |
| 526.9  | 549.2  | 153.3  | 225.2  | 664.4  | 331.1  | 890.2  | 708.4  | 799.4  |
| 18.8   | 34.7   | 30.9   | 60.3   | 35.6   | 1.3    | 189.6  | 114.7  | 141.7  |
| 417.9  | 565.9  | 167.9  | 216.9  | 526.3  | 471.5  | 878.2  | 518.7  | 597.2  |
| 328.3  | 367.8  | 66.2   | 93.7   | 552.5  | 441.4  | 375.4  | 325.3  | 377.2  |
| 757.6  | 989.7  | 338.9  | 406.3  | 907.4  | 921.8  | 1725.0 | 1811.7 | 1902.7 |
| 88.9   | 110.2  | 111.7  | 168.4  | 130.2  | 96.5   | 269.0  | 270.6  | 292.5  |
| 233.0  | 289.7  | 227.0  | 307.0  | 370.5  | 233.6  | 522.9  | 495.4  | 536.6  |
| 55.3   | 79.6   | 80.9   | 99.8   | 73.4   | 118.8  | 249.7  | 321.0  | 359.8  |
| 129.5  | 142.4  | 97.0   | 122.6  | 223.2  | 129.5  | 235.7  | 180.1  | 180.2  |
| 466.8  | 678.6  | 98.3   | 118.4  | 699.8  | 640.6  | 1135.2 | 829.7  | 995.2  |
| 416.7  | 547.9  | 532.7  | 838.3  | 646.0  | 358.1  | 1171.3 | 1294.9 | 1286.6 |
| 502.1  | 930.6  | 239.8  | 347.6  | 890.1  | 771.7  | 1785.2 | 2271.2 | 2451.0 |
| 1145.5 | 1850.3 | 682.6  | 844.7  | 1876.9 | 1812.1 | 2873.4 | 3355.6 | 3319.3 |

|        |        |       |        |        |        |        |        |        |
|--------|--------|-------|--------|--------|--------|--------|--------|--------|
| 82.8   | 81.4   | 20.2  | 22.0   | 114.6  | 79.7   | 106.6  | 124.1  | 142.1  |
| 393.1  | 473.1  | 68.7  | 66.8   | 720.4  | 685.7  | 1154.0 | 439.5  | 533.9  |
| 45.4   | 57.8   | 7.3   | 14.7   | 30.0   | 13.9   | 22.5   | 15.7   | 16.1   |
| 199.6  | 269.5  | 21.0  | 24.8   | 229.1  | 137.9  | 112.4  | 42.4   | 19.7   |
| 933.8  | 898.2  | 228.3 | 302.4  | 1528.1 | 815.1  | 967.3  | 603.0  | 617.1  |
| 438.6  | 452.7  | 249.9 | 373.6  | 518.7  | 695.0  | 1152.1 | 793.7  | 945.8  |
| 465.6  | 419.2  | 210.2 | 404.2  | 703.4  | 421.2  | 1171.8 | 565.3  | 673.0  |
| 937.4  | 921.6  | 882.4 | 1243.4 | 1405.4 | 1045.4 | 2556.8 | 1791.3 | 2524.6 |
| 1001.2 | 1571.7 | 212.2 | 294.7  | 1695.7 | 1511.1 | 2509.8 | 1562.0 | 1704.4 |
| 1243.2 | 1117.5 | 81.8  | 181.3  | 1626.3 | 1060.7 | 3766.6 | 1862.0 | 2258.7 |
| 130.0  | 176.8  | 38.3  | 33.8   | 147.3  | 105.6  | 316.4  | 466.5  | 399.0  |
| 33.0   | 34.9   | 11.3  | 12.9   | 25.9   | 45.1   | 83.0   | 95.3   | 85.2   |
| 75.5   | 107.1  | 51.5  | 43.5   | 99.8   | 84.0   | 259.9  | 230.4  | 253.1  |
| 126.4  | 158.6  | 171.3 | 217.6  | 201.4  | 142.3  | 550.7  | 599.0  | 770.7  |
| 1067.8 | 1410.2 | 331.0 | 404.5  | 1411.9 | 1493.4 | 1827.2 | 1283.8 | 1316.4 |
| 112.5  | 152.0  | 129.5 | 206.5  | 226.0  | 154.3  | 564.6  | 506.7  | 544.7  |
| 101.6  | 138.7  | 65.3  | 74.4   | 160.9  | 133.2  | 321.8  | 248.2  | 271.3  |
| 105.6  | 136.7  | 211.3 | 267.0  | 160.9  | 93.0   | 293.9  | 301.8  | 364.6  |
| 299.8  | 374.6  | 416.1 | 672.8  | 362.7  | 408.5  | 728.7  | 807.7  | 931.8  |
| 788.4  | 341.6  | 134.2 | 235.5  | 1091.1 | 320.3  | 624.7  | 235.9  | 312.0  |
| 211.9  | 294.6  | 90.2  | 111.0  | 272.7  | 174.2  | 359.0  | 344.9  | 372.6  |
| 73.2   | 119.7  | 22.1  | 21.6   | 88.0   | 73.2   | 134.5  | 118.6  | 128.9  |
| 423.0  | 659.6  | 26.2  | 34.0   | 641.1  | 535.5  | 636.2  | 543.5  | 636.3  |
| 961.1  | 894.9  | 156.4 | 197.3  | 1342.5 | 955.2  | 1664.4 | 599.4  | 656.7  |
| 98.0   | 105.2  | 49.1  | 73.3   | 162.7  | 129.4  | 282.0  | 254.6  | 265.2  |
| 208.5  | 221.6  | 133.1 | 210.3  | 379.7  | 272.0  | 908.6  | 916.9  | 973.1  |
| 1383.9 | 1229.8 | 925.9 | 1337.7 | 1676.8 | 1284.8 | 1715.5 | 1282.3 | 1361.5 |
| 72.4   | 76.4   | 22.6  | 24.9   | 121.5  | 66.7   | 7.4    | 4.5    | 1.7    |
| 198.2  | 135.8  | 5.8   | 15.2   | 317.9  | 169.4  | 4.1    | 3.7    | 9.2    |
| 968.6  | 1248.6 | 4.7   | 3.1    | 1587.1 | 999.8  | 14.8   | 27.7   | 24.2   |
| 2540.6 | 2881.0 | 13.4  | 6.7    | 3299.2 | 2550.7 | 51.3   | 50.5   | 51.0   |
| 176.8  | 270.8  | 161.6 | 253.3  | 333.6  | 259.2  | 598.3  | 532.2  | 622.7  |
| 112.6  | 134.3  | 196.4 | 228.2  | 164.5  | 165.1  | 395.8  | 367.3  | 400.2  |
| 121.4  | 164.7  | 98.4  | 149.6  | 175.7  | 158.3  | 304.9  | 248.3  | 294.5  |
| 918.0  | 979.4  | 167.4 | 245.7  | 1266.8 | 868.0  | 1559.5 | 981.4  | 992.6  |
| 693.7  | 912.6  | 409.2 | 532.7  | 1145.8 | 668.3  | 2389.8 | 1497.3 | 1571.4 |
| 144.6  | 163.1  | 173.0 | 148.2  | 241.6  | 132.4  | 449.2  | 343.9  | 338.8  |
| 19.2   | 28.9   | 65.0  | 57.4   | 22.7   | 27.4   | 145.5  | 108.2  | 132.2  |
| 345.9  | 385.4  | 239.5 | 374.2  | 470.4  | 344.9  | 947.4  | 638.7  | 695.5  |
| 330.4  | 352.1  | 82.0  | 68.2   | 381.8  | 566.3  | 346.8  | 406.0  | 452.0  |
| 422.4  | 431.3  | 122.2 | 148.7  | 568.9  | 386.3  | 571.4  | 680.4  | 695.4  |
| 48.4   | 43.7   | 47.5  | 66.9   | 34.3   | 75.6   | 314.1  | 409.5  | 400.4  |
| 33.8   | 30.5   | 15.4  | 17.3   | 43.7   | 34.0   | 318.7  | 492.5  | 511.5  |
| 253.0  | 300.5  | 184.5 | 207.4  | 337.8  | 289.6  | 1084.1 | 1417.5 | 1505.0 |
| 169.6  | 225.7  | 206.6 | 213.6  | 277.0  | 252.9  | 976.8  | 1316.8 | 1320.7 |
| 320.4  | 375.0  | 435.1 | 574.3  | 463.7  | 325.5  | 664.5  | 636.5  | 702.9  |
| 210.8  | 266.5  | 71.5  | 85.5   | 301.9  | 241.3  | 755.5  | 762.1  | 795.6  |
| 414.1  | 434.4  | 87.6  | 105.9  | 667.3  | 379.4  | 754.2  | 808.7  | 803.9  |
| 300.7  | 335.3  | 9.2   | 13.5   | 548.2  | 320.2  | 115.0  | 149.4  | 146.9  |
| 906.5  | 967.0  | 602.5 | 855.9  | 1201.9 | 1004.7 | 1580.1 | 1332.4 | 1569.8 |
| 14.8   | 23.2   | 5.2   | 13.7   | 13.8   | 18.2   | 92.9   | 51.3   | 36.3   |
| 492.4  | 675.6  | 328.6 | 625.0  | 687.4  | 526.4  | 3038.7 | 1976.8 | 1972.6 |
| 1.4    | 1.5    | 0.5   | 0.4    | 0.7    | 2.1    | 26.5   | 3.8    | 9.2    |

|        |        |        |        |        |        |        |        |        |
|--------|--------|--------|--------|--------|--------|--------|--------|--------|
| 0.2    | 2.2    | 0.1    | 0.4    | 6.9    | 0.3    | 24.9   | 35.4   | 50.5   |
| 512.9  | 591.1  | 137.0  | 151.6  | 717.0  | 542.3  | 1722.3 | 1541.7 | 1581.3 |
| 195.7  | 280.9  | 211.9  | 391.2  | 256.8  | 247.5  | 557.4  | 688.5  | 691.5  |
| 23.4   | 28.1   | 28.5   | 55.1   | 43.6   | 11.2   | 173.0  | 123.0  | 123.0  |
| 132.6  | 152.2  | 65.9   | 115.9  | 152.6  | 126.6  | 322.1  | 213.7  | 279.2  |
| 138.9  | 94.1   | 55.0   | 79.0   | 121.1  | 140.2  | 162.1  | 68.6   | 120.6  |
| 12.1   | 25.2   | 12.6   | 33.1   | 40.8   | 19.9   | 78.2   | 52.7   | 52.8   |
| 456.6  | 513.0  | 99.9   | 125.1  | 548.2  | 362.5  | 306.5  | 246.7  | 282.1  |
| 177.1  | 221.4  | 62.6   | 85.0   | 305.9  | 203.4  | 1757.6 | 2613.8 | 2632.1 |
| 200.7  | 328.1  | 37.2   | 39.6   | 468.2  | 305.0  | 2611.0 | 3715.2 | 3625.6 |
| 3574.2 | 4020.0 | 1623.2 | 2075.0 | 4978.7 | 3646.7 | 7806.4 | 8377.8 | 8519.5 |
| 139.4  | 144.5  | 104.2  | 157.3  | 135.6  | 101.0  | 462.4  | 132.2  | 148.5  |
| 344.7  | 430.0  | 115.3  | 159.6  | 471.8  | 350.5  | 928.7  | 547.9  | 600.5  |
| 2254.9 | 2633.3 | 630.9  | 977.9  | 3050.4 | 3105.7 | 3252.5 | 3162.3 | 3700.0 |
| 649.3  | 801.2  | 290.6  | 346.4  | 931.2  | 764.0  | 1282.0 | 1434.2 | 1531.3 |
| 26.5   | 41.4   | 23.3   | 20.8   | 63.5   | 42.4   | 117.4  | 74.8   | 130.5  |
| 1076.6 | 1454.7 | 372.2  | 325.9  | 1602.5 | 1468.7 | 3478.4 | 2956.8 | 2980.2 |
| 1079.7 | 1226.4 | 902.3  | 1113.9 | 1501.2 | 1098.2 | 3109.6 | 3268.3 | 2781.4 |
| 2139.6 | 2807.6 | 820.3  | 847.5  | 2986.9 | 2751.5 | 2267.3 | 2051.4 | 2194.8 |
| 166.8  | 162.0  | 49.6   | 70.9   | 221.8  | 175.3  | 140.2  | 160.7  | 153.0  |
| 404.3  | 322.8  | 420.4  | 711.2  | 517.2  | 318.3  | 2251.3 | 1540.9 | 1591.0 |
| 358.3  | 355.3  | 244.9  | 383.0  | 477.1  | 292.3  | 1011.8 | 1243.8 | 1323.0 |
| 6.0    | 15.9   | 8.3    | 7.6    | 18.4   | 25.9   | 20.3   | 7.8    | 11.7   |
| 253.0  | 356.4  | 61.7   | 122.5  | 329.7  | 319.1  | 404.5  | 205.4  | 283.9  |
| 117.9  | 135.6  | 120.4  | 162.5  | 155.9  | 81.6   | 379.1  | 573.6  | 489.4  |
| 250.7  | 343.3  | 77.9   | 95.0   | 451.6  | 383.3  | 1019.4 | 1548.2 | 1496.9 |
| 905.3  | 1280.2 | 432.5  | 594.2  | 1386.0 | 946.1  | 1114.9 | 694.9  | 764.6  |
| 249.5  | 260.1  | 247.1  | 324.0  | 317.7  | 236.5  | 878.1  | 633.4  | 758.7  |
| 451.2  | 867.4  | 270.4  | 373.3  | 881.4  | 677.6  | 2011.6 | 1711.2 | 1641.7 |
| 376.4  | 564.2  | 182.9  | 170.7  | 545.7  | 477.2  | 1122.3 | 1223.3 | 1451.5 |
| 159.2  | 304.1  | 140.9  | 185.0  | 253.6  | 220.3  | 510.6  | 425.3  | 506.5  |
| 48.6   | 67.9   | 85.0   | 93.9   | 120.7  | 58.6   | 332.3  | 258.2  | 294.0  |
| 104.7  | 162.7  | 63.2   | 60.9   | 198.7  | 170.6  | 574.5  | 580.3  | 618.0  |
| 63.9   | 77.6   | 36.3   | 38.9   | 80.7   | 73.6   | 190.8  | 178.2  | 214.5  |
| 309.5  | 434.1  | 232.9  | 241.8  | 491.1  | 346.9  | 965.5  | 981.8  | 1113.5 |
| 380.9  | 472.9  | 260.4  | 333.8  | 485.9  | 377.5  | 981.6  | 1043.7 | 1143.4 |
| 249.4  | 369.8  | 80.4   | 113.4  | 383.6  | 348.4  | 874.9  | 857.9  | 921.3  |
| 80.7   | 123.1  | 166.5  | 212.1  | 127.6  | 102.4  | 308.5  | 298.4  | 317.5  |
| 146.1  | 181.6  | 256.9  | 310.7  | 189.6  | 175.8  | 512.7  | 474.1  | 490.3  |
| 551.6  | 558.3  | 230.5  | 328.6  | 776.9  | 637.0  | 387.1  | 359.3  | 465.0  |
| 1336.2 | 2168.0 | 350.6  | 543.7  | 2365.0 | 1754.5 | 2223.0 | 1948.1 | 2223.5 |
| 93.4   | 100.2  | 25.5   | 15.6   | 129.8  | 48.1   | 67.2   | 84.7   | 92.5   |
| 661.7  | 755.7  | 436.0  | 595.3  | 917.8  | 616.4  | 1551.2 | 1585.9 | 1669.4 |
| 41.5   | 31.3   | 68.1   | 92.1   | 57.0   | 29.1   | 3.6    | 4.0    | 2.6    |
| 414.9  | 508.4  | 135.0  | 127.4  | 541.7  | 464.8  | 480.8  | 432.0  | 440.0  |
| 0.5    | 1.0    | 1.1    | 6.3    | 6.9    | 3.5    | 0.5    | 4.3    | 2.9    |
| 86.0   | 123.1  | 137.3  | 210.7  | 159.6  | 107.0  | 662.4  | 552.0  | 697.7  |
| 116.8  | 141.9  | 204.3  | 285.2  | 163.1  | 167.2  | 617.7  | 447.4  | 619.5  |
| 32.6   | 25.9   | 10.1   | 2.4    | 47.9   | 32.7   | 3.5    | 4.6    | 3.7    |
| 13.7   | 11.1   | 18.3   | 3.3    | 28.2   | 19.5   | 56.1   | 61.3   | 58.3   |
| 135.0  | 204.7  | 89.7   | 114.5  | 237.7  | 164.3  | 491.1  | 417.5  | 488.3  |
| 739.7  | 1378.7 | 77.4   | 92.4   | 1311.5 | 1441.5 | 3376.6 | 2548.3 | 2487.6 |
| 25.7   | 31.7   | 60.7   | 94.7   | 47.2   | 16.1   | 143.1  | 64.7   | 81.7   |

|        |        |        |        |        |        |        |        |        |
|--------|--------|--------|--------|--------|--------|--------|--------|--------|
| 341.7  | 388.7  | 80.7   | 140.7  | 551.1  | 386.0  | 556.1  | 241.7  | 320.7  |
| 879.3  | 1296.1 | 143.4  | 196.0  | 1170.6 | 1012.7 | 198.6  | 102.1  | 109.5  |
| 104.0  | 150.9  | 161.1  | 178.4  | 147.4  | 121.5  | 477.3  | 439.4  | 531.2  |
| 176.5  | 231.9  | 268.0  | 322.7  | 233.3  | 169.2  | 722.4  | 808.2  | 895.5  |
| 107.9  | 97.9   | 296.0  | 411.5  | 136.5  | 61.9   | 538.5  | 547.6  | 615.9  |
| 82.4   | 65.2   | 227.9  | 279.2  | 112.9  | 89.8   | 268.7  | 243.8  | 271.5  |
| 845.9  | 1228.2 | 213.6  | 230.9  | 1406.3 | 1120.6 | 1721.7 | 1500.9 | 1523.3 |
| 1587.1 | 1684.1 | 290.5  | 488.6  | 1874.9 | 2004.3 | 605.4  | 482.0  | 575.9  |
| 142.6  | 146.8  | 281.1  | 400.3  | 139.8  | 127.6  | 669.1  | 623.5  | 664.8  |
| 52.7   | 33.7   | 45.3   | 42.9   | 66.0   | 29.9   | 59.7   | 49.3   | 54.6   |
| 602.4  | 748.7  | 474.5  | 728.6  | 941.2  | 661.2  | 2581.4 | 2300.4 | 2429.7 |
| 5.6    | 29.6   | 3.3    | 6.8    | 6.9    | 4.7    | 10.2   | 6.6    | 18.2   |
| 137.9  | 102.4  | 11.7   | 2.9    | 165.5  | 119.9  | 5.1    | 6.9    | 1.6    |
| 55.8   | 73.6   | 79.5   | 74.6   | 88.1   | 81.3   | 202.6  | 205.0  | 244.5  |
| 112.7  | 136.7  | 81.3   | 100.5  | 178.3  | 125.0  | 508.7  | 698.0  | 803.6  |
| 2129.5 | 2647.2 | 886.9  | 1238.4 | 2797.2 | 2923.8 | 2903.1 | 2678.3 | 2879.5 |
| 96.7   | 132.6  | 37.1   | 39.1   | 154.4  | 186.4  | 147.9  | 174.3  | 207.4  |
| 125.5  | 186.7  | 66.9   | 61.5   | 223.2  | 209.3  | 199.1  | 235.6  | 226.5  |
| 19.2   | 42.0   | 30.5   | 52.7   | 44.1   | 28.9   | 60.3   | 74.3   | 83.0   |
| 474.0  | 829.3  | 409.0  | 575.3  | 563.9  | 667.0  | 1886.2 | 1935.0 | 2186.2 |
| 373.1  | 506.6  | 105.4  | 101.7  | 600.5  | 565.5  | 683.7  | 518.8  | 597.5  |
| 364.9  | 522.7  | 420.6  | 586.0  | 517.8  | 736.9  | 3157.0 | 4339.9 | 4568.5 |
| 109.0  | 157.6  | 50.4   | 55.0   | 201.4  | 110.8  | 906.8  | 713.8  | 901.6  |
| 47.0   | 42.2   | 2.7    | 4.6    | 44.1   | 23.5   | 13.5   | 5.2    | 5.6    |
| 673.6  | 993.3  | 141.2  | 202.1  | 1045.1 | 922.3  | 2792.8 | 1809.8 | 1998.6 |
| 19.4   | 27.9   | 9.9    | 4.3    | 22.9   | 19.4   | 77.4   | 56.0   | 58.0   |
| 237.3  | 295.3  | 135.6  | 147.8  | 369.7  | 259.1  | 534.0  | 568.2  | 640.0  |
| 129.3  | 173.7  | 71.8   | 74.6   | 188.7  | 151.4  | 476.5  | 588.1  | 609.9  |
| 283.5  | 235.3  | 135.8  | 270.2  | 443.9  | 247.3  | 589.4  | 300.2  | 340.7  |
| 32.9   | 40.9   | 37.6   | 63.7   | 74.1   | 35.5   | 95.7   | 61.6   | 83.3   |
| 136.6  | 175.6  | 192.7  | 279.1  | 212.3  | 175.1  | 645.7  | 492.8  | 637.3  |
| 121.6  | 165.8  | 200.2  | 217.2  | 251.0  | 139.2  | 44.5   | 47.0   | 48.2   |
| 548.8  | 711.2  | 228.2  | 249.2  | 682.4  | 618.1  | 2942.7 | 2404.2 | 2980.3 |
| 356.8  | 560.0  | 602.7  | 916.3  | 592.2  | 481.0  | 3029.0 | 2600.4 | 2999.7 |
| 136.2  | 282.7  | 285.9  | 327.1  | 242.2  | 264.9  | 479.8  | 462.4  | 538.0  |
| 510.6  | 708.0  | 548.0  | 670.5  | 770.3  | 558.5  | 1040.1 | 1023.7 | 1129.9 |
| 1009.6 | 1342.6 | 205.6  | 232.4  | 1451.1 | 1324.0 | 1276.4 | 812.2  | 849.0  |
| 52.4   | 78.6   | 44.3   | 40.1   | 109.8  | 83.9   | 357.5  | 339.9  | 357.6  |
| 49.6   | 63.9   | 63.7   | 78.1   | 69.4   | 32.8   | 232.8  | 297.4  | 319.4  |
| 35.9   | 35.2   | 9.7    | 16.5   | 57.5   | 31.6   | 67.2   | 72.5   | 81.4   |
| 212.2  | 218.5  | 61.3   | 95.4   | 401.5  | 160.2  | 316.5  | 332.3  | 345.3  |
| 14.6   | 21.7   | 14.0   | 16.7   | 27.3   | 18.0   | 34.5   | 36.9   | 36.7   |
| 2577.8 | 3397.8 | 441.8  | 580.8  | 3574.4 | 3139.0 | 8666.0 | 8940.3 | 8583.8 |
| 1008.2 | 1765.9 | 415.2  | 768.0  | 2465.9 | 1664.7 | 2784.0 | 2267.7 | 2542.8 |
| 251.0  | 400.2  | 1453.2 | 2438.0 | 342.5  | 276.7  | 1961.5 | 4636.9 | 4349.9 |
| 1015.3 | 1308.9 | 15.8   | 25.3   | 1514.1 | 1188.6 | 11.1   | 2.5    | 8.1    |
| 135.9  | 152.7  | 9.9    | 3.8    | 192.2  | 165.3  | 6.0    | 4.0    | 2.1    |
| 178.9  | 267.6  | 97.4   | 163.3  | 260.7  | 180.6  | 159.5  | 175.8  | 171.0  |
| 181.4  | 257.3  | 84.2   | 101.0  | 338.9  | 220.2  | 450.0  | 383.8  | 424.9  |
| 230.9  | 281.8  | 119.5  | 162.3  | 315.0  | 215.9  | 295.4  | 286.5  | 286.8  |
| 140.4  | 215.7  | 82.1   | 116.7  | 263.0  | 178.2  | 1779.7 | 1852.1 | 1788.5 |
| 46.8   | 38.0   | 68.0   | 121.0  | 69.5   | 58.6   | 6.1    | 7.0    | 3.5    |
| 76.0   | 90.5   | 117.5  | 135.6  | 145.8  | 86.8   | 4.7    | 3.0    | 3.6    |

|        |        |       |        |        |        |         |         |         |
|--------|--------|-------|--------|--------|--------|---------|---------|---------|
| 238.9  | 333.4  | 21.0  | 28.1   | 489.9  | 315.6  | 576.6   | 627.9   | 754.9   |
| 194.4  | 243.8  | 104.4 | 169.2  | 264.5  | 204.2  | 215.0   | 223.7   | 208.1   |
| 0.4    | 0.9    | 14.2  | 7.9    | 7.0    | 2.0    | 8.2     | 5.8     | 4.8     |
| 130.9  | 217.0  | 459.4 | 683.3  | 223.9  | 253.3  | 1766.7  | 1467.1  | 1508.4  |
| 316.0  | 358.7  | 114.7 | 121.8  | 382.0  | 322.2  | 278.8   | 248.8   | 296.3   |
| 84.2   | 139.1  | 65.7  | 66.2   | 137.8  | 146.5  | 245.5   | 281.4   | 297.5   |
| 80.3   | 115.1  | 109.0 | 157.7  | 115.8  | 94.1   | 251.5   | 168.1   | 184.2   |
| 628.3  | 899.0  | 230.3 | 426.4  | 700.3  | 798.0  | 1491.2  | 1149.7  | 1110.8  |
| 38.6   | 57.0   | 1.1   | 1.7    | 79.6   | 47.3   | 1.2     | 0.7     | 1.0     |
| 63.4   | 120.7  | 5.6   | 2.0    | 146.0  | 146.4  | 4.1     | 9.1     | 5.1     |
| 389.8  | 442.2  | 11.8  | 6.1    | 785.8  | 453.0  | 5.4     | 3.3     | 4.6     |
| 300.6  | 407.2  | 109.0 | 128.0  | 426.9  | 382.5  | 424.6   | 369.6   | 418.2   |
| 649.0  | 1177.6 | 175.1 | 186.0  | 1092.6 | 878.6  | 1255.9  | 1293.5  | 1289.7  |
| 244.4  | 288.8  | 95.7  | 80.7   | 381.5  | 291.0  | 699.6   | 602.7   | 748.4   |
| 227.0  | 280.6  | 202.1 | 272.5  | 291.1  | 224.2  | 422.9   | 349.2   | 389.5   |
| 289.8  | 377.7  | 35.8  | 38.4   | 375.2  | 278.9  | 4.6     | 9.0     | 6.8     |
| 72.2   | 87.6   | 30.5  | 30.0   | 119.4  | 71.1   | 5.1     | 11.1    | 2.8     |
| 17.5   | 14.9   | 65.6  | 47.2   | 1.4    | 9.3    | 9.1     | 12.4    | 8.6     |
| 10.3   | 2.2    | 33.7  | 37.2   | 3.6    | 14.0   | 3.9     | 4.4     | 1.5     |
| 21.8   | 18.3   | 46.8  | 44.5   | 27.5   | 9.8    | 2.9     | 3.0     | 2.3     |
| 731.9  | 693.1  | 317.0 | 429.0  | 1010.5 | 639.2  | 898.7   | 440.7   | 470.7   |
| 295.3  | 356.5  | 176.5 | 248.5  | 432.3  | 354.9  | 547.6   | 553.0   | 611.9   |
| 799.3  | 1201.5 | 136.2 | 207.3  | 1354.4 | 1104.2 | 1774.5  | 584.9   | 639.9   |
| 624.9  | 811.7  | 71.0  | 84.4   | 801.1  | 904.7  | 1171.9  | 432.3   | 496.4   |
| 351.9  | 430.8  | 244.8 | 281.1  | 477.9  | 341.1  | 682.1   | 541.7   | 607.6   |
| 152.0  | 177.2  | 101.8 | 196.2  | 252.0  | 139.4  | 465.9   | 383.4   | 427.9   |
| 482.1  | 613.3  | 129.8 | 225.6  | 813.4  | 629.4  | 2080.8  | 1487.2  | 1596.6  |
| 135.6  | 243.1  | 85.9  | 97.5   | 208.5  | 249.1  | 540.2   | 718.3   | 793.8   |
| 67.5   | 78.6   | 63.4  | 75.8   | 103.1  | 97.0   | 239.5   | 203.2   | 210.1   |
| 136.3  | 164.2  | 138.8 | 159.3  | 207.9  | 172.1  | 378.5   | 408.8   | 428.5   |
| 296.5  | 403.5  | 142.2 | 159.4  | 437.5  | 351.0  | 697.1   | 624.7   | 753.2   |
| 130.0  | 166.6  | 98.3  | 111.0  | 199.5  | 166.2  | 330.6   | 326.9   | 318.0   |
| 2.9    | 6.3    | 24.9  | 14.5   | 19.4   | 3.5    | 20.8    | 14.1    | 14.2    |
| 55.8   | 75.4   | 107.0 | 110.7  | 75.4   | 112.8  | 132.2   | 152.8   | 149.4   |
| 22.8   | 9.6    | 89.1  | 85.4   | 13.4   | 12.9   | 47.2    | 40.7    | 38.2    |
| 1024.3 | 1124.8 | 394.1 | 512.4  | 1363.0 | 931.2  | 1233.2  | 961.3   | 1110.8  |
| 52.7   | 104.3  | 250.9 | 246.0  | 95.7   | 94.1   | 396.5   | 469.5   | 574.9   |
| 245.9  | 255.3  | 85.5  | 123.8  | 354.9  | 240.3  | 310.4   | 382.6   | 406.9   |
| 51.3   | 90.6   | 18.5  | 27.0   | 84.9   | 101.7  | 105.3   | 146.1   | 145.2   |
| 646.3  | 973.8  | 57.8  | 49.4   | 1085.2 | 842.1  | 948.7   | 701.6   | 749.4   |
| 3150.2 | 2494.3 | 324.4 | 615.9  | 3985.3 | 2735.2 | 4752.8  | 1950.8  | 2004.1  |
| 5839.8 | 6815.5 | 927.8 | 843.6  | 6811.7 | 6209.4 | 10498.2 | 11232.7 | 11110.6 |
| 1304.9 | 1412.5 | 880.9 | 1159.9 | 1487.8 | 1435.6 | 2333.1  | 1620.0  | 1847.2  |
| 7.7    | 1.6    | 6.2   | 14.0   | 3.7    | 6.1    | 24.3    | 16.8    | 24.6    |
| 395.3  | 439.9  | 198.8 | 216.9  | 556.9  | 402.4  | 860.0   | 670.0   | 704.7   |
| 98.3   | 150.7  | 176.5 | 140.3  | 176.3  | 82.2   | 596.3   | 475.4   | 537.4   |
| 56.1   | 199.2  | 120.5 | 103.2  | 87.5   | 245.9  | 340.9   | 259.1   | 280.7   |
| 2029.8 | 2615.3 | 929.9 | 1234.2 | 3259.1 | 2422.1 | 3770.0  | 2440.1  | 2507.2  |
| 357.8  | 497.1  | 160.3 | 292.9  | 696.7  | 560.0  | 1507.3  | 1164.4  | 1174.6  |
| 383.5  | 371.9  | 207.0 | 309.6  | 527.1  | 412.1  | 2420.0  | 2136.2  | 2059.3  |
| 284.8  | 338.5  | 560.3 | 550.8  | 282.1  | 307.8  | 1618.0  | 1885.4  | 2091.7  |
| 742.9  | 988.3  | 270.0 | 429.9  | 940.7  | 1283.1 | 1808.1  | 1465.2  | 1616.4  |
| 8.0    | 31.0   | 3.4   | 22.1   | 3.0    | 20.7   | 16.2    | 33.7    | 37.1    |

|        |        |       |        |        |        |        |        |        |
|--------|--------|-------|--------|--------|--------|--------|--------|--------|
| 573.9  | 578.3  | 802.4 | 1234.1 | 804.8  | 535.6  | 2450.2 | 2454.6 | 2687.1 |
| 78.1   | 93.2   | 94.5  | 102.7  | 115.3  | 70.0   | 133.7  | 113.5  | 140.4  |
| 36.2   | 47.4   | 38.3  | 45.2   | 91.0   | 42.6   | 75.5   | 53.0   | 63.2   |
| 57.2   | 54.6   | 120.2 | 158.4  | 118.0  | 76.4   | 300.3  | 267.5  | 311.4  |
| 23.9   | 25.0   | 24.2  | 61.8   | 16.3   | 10.2   | 56.5   | 55.7   | 57.2   |
| 200.8  | 172.8  | 124.8 | 157.6  | 259.8  | 158.8  | 258.6  | 260.6  | 265.6  |
| 26.3   | 5.7    | 17.3  | 6.3    | 1.8    | 2.1    | 22.2   | 15.8   | 20.3   |
| 128.3  | 145.6  | 48.9  | 83.5   | 173.7  | 121.6  | 527.8  | 453.9  | 608.4  |
| 119.2  | 123.5  | 212.7 | 273.4  | 204.6  | 83.0   | 520.2  | 400.9  | 479.1  |
| 796.4  | 1079.5 | 264.6 | 380.8  | 1314.7 | 863.6  | 1901.4 | 1254.1 | 1322.9 |
| 321.6  | 400.8  | 75.3  | 94.0   | 427.0  | 282.7  | 1388.0 | 980.8  | 1137.7 |
| 229.2  | 286.6  | 77.7  | 98.7   | 418.9  | 245.3  | 336.5  | 287.0  | 331.4  |
| 45.1   | 58.2   | 22.7  | 27.3   | 70.7   | 61.4   | 88.0   | 80.3   | 96.4   |
| 614.5  | 839.1  | 141.3 | 201.8  | 1058.1 | 787.0  | 745.5  | 660.4  | 769.4  |
| 155.1  | 201.0  | 185.6 | 213.9  | 207.0  | 267.7  | 404.1  | 423.7  | 449.8  |
| 82.7   | 126.0  | 171.0 | 186.1  | 127.1  | 121.9  | 402.1  | 344.4  | 379.5  |
| 194.2  | 256.8  | 300.2 | 385.4  | 258.5  | 267.1  | 595.2  | 621.8  | 591.4  |
| 1850.9 | 2194.9 | 126.5 | 195.5  | 2224.3 | 2162.9 | 1504.2 | 737.2  | 787.3  |
| 400.4  | 609.3  | 44.2  | 48.7   | 733.5  | 580.2  | 1204.3 | 1165.8 | 1273.9 |
| 2417.5 | 3182.1 | 364.5 | 527.0  | 3931.1 | 3523.1 | 3864.0 | 3235.9 | 3433.9 |
| 899.8  | 1181.9 | 645.9 | 911.3  | 1240.0 | 1197.0 | 4326.7 | 3799.3 | 4062.5 |
| 219.5  | 315.0  | 87.6  | 72.9   | 576.5  | 433.8  | 1258.8 | 1393.9 | 1637.3 |
| 362.8  | 514.8  | 37.6  | 35.9   | 802.1  | 507.3  | 2.8    | 3.3    | 2.2    |
| 262.6  | 320.4  | 51.9  | 51.6   | 459.5  | 262.2  | 1.9    | 5.4    | 2.9    |
| 44.1   | 73.7   | 47.1  | 62.7   | 81.2   | 71.9   | 143.0  | 139.0  | 173.8  |
| 266.5  | 372.7  | 77.2  | 88.9   | 379.8  | 430.4  | 296.1  | 306.7  | 344.8  |
| 94.4   | 156.2  | 48.0  | 74.7   | 150.3  | 199.0  | 167.8  | 169.1  | 194.5  |
| 423.3  | 618.1  | 192.6 | 364.0  | 391.5  | 658.7  | 3777.4 | 1199.1 | 1249.1 |
| 1285.4 | 1786.6 | 708.7 | 1028.8 | 2006.4 | 1634.3 | 4539.5 | 4358.4 | 4291.1 |
| 104.3  | 183.7  | 182.9 | 241.2  | 172.0  | 137.6  | 127.8  | 183.2  | 220.9  |
| 351.3  | 452.8  | 153.5 | 298.5  | 550.0  | 342.9  | 604.7  | 581.1  | 610.6  |
| 335.6  | 503.9  | 146.1 | 170.1  | 506.5  | 572.0  | 1352.0 | 1174.8 | 1308.1 |
| 192.3  | 209.9  | 46.0  | 50.4   | 318.8  | 344.0  | 199.4  | 114.5  | 155.4  |
| 38.5   | 122.8  | 8.4   | 7.7    | 128.4  | 95.6   | 142.3  | 98.9   | 113.5  |
| 206.1  | 258.7  | 168.6 | 147.5  | 264.3  | 216.6  | 418.2  | 300.2  | 306.6  |
| 1954.4 | 2293.0 | 512.7 | 786.2  | 2757.5 | 2138.0 | 2904.2 | 2009.6 | 2144.4 |
| 694.2  | 1378.2 | 21.6  | 31.6   | 871.0  | 1083.4 | 22.9   | 10.5   | 16.3   |
| 154.8  | 147.9  | 134.9 | 149.3  | 194.2  | 125.6  | 633.2  | 906.3  | 971.3  |
| 266.4  | 271.9  | 294.4 | 346.8  | 349.1  | 220.1  | 992.9  | 1530.4 | 1622.9 |
| 45.9   | 60.7   | 153.4 | 171.2  | 67.6   | 39.1   | 339.7  | 463.9  | 473.8  |
| 90.1   | 122.7  | 142.4 | 185.1  | 123.2  | 97.2   | 561.5  | 927.7  | 931.8  |
| 1117.7 | 1277.9 | 330.8 | 427.0  | 1684.1 | 1355.1 | 3360.0 | 3184.3 | 3442.0 |
| 99.5   | 113.8  | 20.2  | 34.6   | 102.5  | 80.7   | 108.2  | 81.0   | 101.1  |
| 2027.8 | 2339.5 | 570.5 | 894.0  | 2725.1 | 1981.8 | 3397.2 | 1366.1 | 1481.8 |
| 3426.0 | 4211.3 | 694.3 | 1026.3 | 4497.0 | 3842.8 | 5159.2 | 2753.0 | 2966.8 |
| 402.9  | 457.7  | 38.8  | 64.1   | 627.5  | 460.4  | 476.0  | 252.7  | 269.3  |
| 609.5  | 648.5  | 151.3 | 209.4  | 686.0  | 733.7  | 1520.8 | 1626.5 | 1706.0 |
| 800.3  | 1079.6 | 471.0 | 794.8  | 1219.3 | 858.2  | 1765.1 | 1709.9 | 1772.2 |
| 523.7  | 842.3  | 131.8 | 263.7  | 878.2  | 955.6  | 832.6  | 1444.6 | 1612.4 |
| 1314.1 | 1605.3 | 403.2 | 544.6  | 1861.4 | 1695.7 | 1334.3 | 2488.7 | 2338.7 |
| 660.6  | 851.8  | 136.4 | 193.2  | 1095.9 | 526.4  | 1909.0 | 1454.2 | 1775.2 |
| 899.7  | 1219.3 | 146.1 | 175.6  | 1217.2 | 1112.8 | 1557.2 | 1374.9 | 1495.5 |
| 2166.3 | 2987.3 | 162.1 | 232.9  | 3278.9 | 2617.7 | 1739.8 | 1222.1 | 1269.4 |



|        |        |       |        |        |        |        |        |        |
|--------|--------|-------|--------|--------|--------|--------|--------|--------|
| 341.8  | 341.7  | 109.8 | 158.0  | 413.6  | 324.6  | 791.4  | 750.1  | 833.6  |
| 12.7   | 31.6   | 15.8  | 19.8   | 38.9   | 22.3   | 110.5  | 171.9  | 175.1  |
| 2.4    | 1.4    | 0.7   | 1.1    | 1.0    | 0.9    | 1.9    | 3.3    | 1.7    |
| 146.3  | 170.6  | 14.8  | 24.8   | 168.3  | 152.2  | 289.8  | 292.3  | 333.3  |
| 222.1  | 214.6  | 27.0  | 21.4   | 386.5  | 274.9  | 684.8  | 615.0  | 774.4  |
| 25.3   | 28.0   | 53.3  | 107.9  | 44.2   | 19.6   | 81.2   | 103.3  | 84.6   |
| 25.4   | 42.1   | 53.7  | 74.2   | 57.7   | 21.6   | 155.0  | 161.9  | 147.1  |
| 108.8  | 153.2  | 180.3 | 189.4  | 192.9  | 123.7  | 1889.1 | 2958.1 | 3614.0 |
| 44.9   | 62.7   | 84.4  | 74.0   | 49.3   | 59.2   | 273.1  | 254.3  | 283.6  |
| 61.7   | 42.4   | 63.0  | 78.4   | 70.4   | 64.2   | 118.5  | 91.3   | 117.7  |
| 471.9  | 602.6  | 731.9 | 1000.1 | 595.0  | 531.2  | 2105.3 | 2292.9 | 2394.0 |
| 86.9   | 88.8   | 33.4  | 44.6   | 130.1  | 121.4  | 197.3  | 142.3  | 155.6  |
| 420.4  | 549.3  | 93.0  | 104.3  | 640.1  | 511.8  | 694.4  | 711.3  | 743.7  |
| 42.5   | 47.1   | 28.3  | 58.8   | 81.3   | 66.9   | 384.4  | 203.3  | 206.8  |
| 645.8  | 862.5  | 175.3 | 274.5  | 1011.3 | 834.1  | 1902.7 | 896.3  | 909.0  |
| 249.3  | 270.0  | 152.5 | 216.3  | 376.7  | 160.3  | 1005.6 | 968.9  | 1024.3 |
| 724.3  | 738.0  | 333.5 | 393.3  | 1098.9 | 746.9  | 1778.0 | 1881.0 | 2043.2 |
| 1302.9 | 2183.0 | 566.8 | 908.7  | 1902.0 | 2330.7 | 2968.9 | 2572.9 | 2707.1 |
| 20.8   | 18.2   | 8.2   | 19.1   | 8.6    | 20.7   | 30.3   | 23.7   | 29.1   |
| 287.7  | 372.4  | 44.1  | 42.6   | 456.7  | 346.6  | 308.1  | 275.6  | 293.2  |
| 370.1  | 380.9  | 152.0 | 170.5  | 501.8  | 357.4  | 1083.3 | 1142.0 | 1328.5 |
| 47.9   | 46.0   | 30.6  | 41.6   | 61.2   | 40.8   | 139.6  | 150.6  | 178.6  |
| 101.9  | 115.1  | 20.3  | 50.4   | 132.0  | 80.4   | 422.6  | 545.0  | 613.1  |
| 66.9   | 66.5   | 86.1  | 144.2  | 102.4  | 47.2   | 383.9  | 173.8  | 230.0  |
| 178.7  | 232.9  | 44.5  | 71.9   | 299.2  | 252.7  | 525.0  | 442.3  | 534.2  |
| 11.3   | 14.6   | 1.9   | 2.7    | 20.4   | 18.5   | 1.9    | 11.0   | 9.9    |
| 9.8    | 14.5   | 9.1   | 2.9    | 3.7    | 2.3    | 18.0   | 19.6   | 21.7   |
| 1179.2 | 1349.5 | 39.0  | 67.8   | 1303.2 | 1008.8 | 145.4  | 129.1  | 180.4  |
| 393.5  | 400.6  | 22.1  | 37.3   | 474.6  | 401.8  | 101.8  | 64.9   | 89.3   |
| 122.3  | 162.3  | 97.9  | 138.3  | 143.1  | 143.6  | 488.5  | 587.6  | 665.1  |
| 150.1  | 258.4  | 49.8  | 46.6   | 234.9  | 185.0  | 701.7  | 941.1  | 941.4  |
| 300.0  | 414.9  | 70.3  | 68.1   | 348.1  | 361.3  | 1376.5 | 1912.7 | 2001.0 |
| 80.1   | 89.0   | 73.3  | 87.6   | 159.4  | 66.9   | 314.6  | 238.6  | 281.3  |
| 252.7  | 244.0  | 126.8 | 148.2  | 411.5  | 318.1  | 610.2  | 636.6  | 621.8  |
| 48.3   | 82.3   | 25.8  | 36.6   | 117.0  | 62.9   | 385.2  | 457.6  | 506.2  |
| 1140.9 | 1716.4 | 294.6 | 298.9  | 1730.1 | 1908.8 | 1490.4 | 1316.7 | 1334.4 |
| 63.9   | 120.6  | 77.4  | 90.5   | 86.7   | 105.7  | 211.3  | 165.4  | 185.3  |
| 970.3  | 1386.3 | 310.2 | 464.8  | 1014.8 | 1324.3 | 1431.4 | 741.0  | 735.1  |
| 1712.2 | 2587.3 | 850.7 | 1232.4 | 2279.9 | 1960.5 | 6793.7 | 6049.9 | 6340.0 |
| 498.8  | 533.3  | 53.2  | 84.4   | 768.8  | 609.2  | 629.0  | 777.3  | 875.0  |
| 24.1   | 46.3   | 9.1   | 14.5   | 26.2   | 67.7   | 189.5  | 154.6  | 146.7  |
| 224.5  | 295.3  | 66.5  | 60.8   | 282.9  | 248.1  | 324.4  | 236.1  | 278.0  |
| 76.9   | 94.7   | 50.5  | 76.1   | 113.0  | 130.3  | 135.1  | 117.0  | 123.1  |
| 1191.6 | 1442.6 | 564.8 | 745.8  | 1975.5 | 1559.8 | 1725.0 | 1965.3 | 1860.0 |
| 208.0  | 235.7  | 71.4  | 127.3  | 276.4  | 252.0  | 344.8  | 300.2  | 330.3  |
| 1583.7 | 1999.4 | 392.6 | 509.4  | 2817.3 | 2333.5 | 2585.7 | 2331.9 | 2531.5 |
| 21.7   | 32.0   | 20.7  | 30.0   | 23.9   | 15.2   | 49.1   | 47.7   | 56.9   |
| 197.2  | 216.9  | 101.1 | 93.0   | 243.7  | 177.8  | 608.7  | 623.4  | 755.1  |
| 673.6  | 743.7  | 766.0 | 958.4  | 1086.5 | 707.7  | 1758.9 | 1784.0 | 1970.3 |
| 565.3  | 874.0  | 191.0 | 252.5  | 1150.7 | 754.6  | 886.4  | 941.9  | 1123.6 |
| 408.1  | 683.0  | 98.8  | 95.3   | 663.6  | 626.8  | 656.6  | 264.7  | 339.1  |
| 224.6  | 197.0  | 0.4   | 0.5    | 305.6  | 194.0  | 0.7    | 0.4    | 0.3    |
| 46.1   | 56.9   | 10.3  | 4.8    | 78.1   | 41.9   | 15.0   | 12.0   | 12.7   |

|        |        |        |        |        |        |        |        |        |
|--------|--------|--------|--------|--------|--------|--------|--------|--------|
| 112.1  | 167.1  | 29.0   | 60.4   | 177.6  | 176.3  | 160.9  | 148.5  | 178.9  |
| 205.3  | 239.6  | 159.2  | 207.4  | 319.7  | 242.1  | 495.9  | 388.2  | 403.3  |
| 801.7  | 1044.9 | 135.4  | 157.1  | 1441.0 | 919.5  | 1102.6 | 831.1  | 889.6  |
| 296.4  | 307.1  | 101.2  | 172.2  | 485.3  | 319.4  | 361.0  | 353.5  | 391.0  |
| 185.3  | 177.2  | 38.8   | 38.5   | 225.5  | 163.8  | 97.4   | 85.0   | 92.7   |
| 322.2  | 336.1  | 39.4   | 65.3   | 461.8  | 206.4  | 56.0   | 78.6   | 61.5   |
| 9.9    | 4.6    | 0.3    | 5.7    | 10.4   | 10.8   | 6.2    | 4.6    | 6.1    |
| 466.0  | 756.8  | 339.3  | 513.1  | 870.5  | 720.9  | 1294.6 | 693.3  | 837.5  |
| 178.9  | 202.1  | 304.6  | 491.7  | 240.2  | 136.4  | 2360.7 | 2231.8 | 2506.9 |
| 1.7    | 0.8    | 1.0    | 0.8    | 1.2    | 1.4    | 1.2    | 1.3    | 1.0    |
| 37.6   | 44.6   | 94.2   | 87.6   | 66.6   | 50.3   | 164.5  | 167.7  | 178.6  |
| 178.3  | 215.2  | 173.3  | 171.1  | 244.1  | 237.1  | 664.4  | 697.8  | 734.5  |
| 1873.1 | 1965.5 | 1323.9 | 1898.3 | 2361.8 | 1906.8 | 3829.7 | 2791.6 | 2788.3 |
| 53.9   | 55.8   | 3.4    | 3.2    | 62.3   | 40.2   | 498.3  | 424.5  | 494.4  |
| 40.0   | 46.8   | 164.5  | 286.6  | 68.2   | 42.7   | 128.5  | 357.8  | 355.6  |
| 212.5  | 236.9  | 271.0  | 420.7  | 249.2  | 170.8  | 755.5  | 641.3  | 622.0  |
| 121.5  | 133.1  | 80.2   | 117.4  | 163.8  | 128.3  | 249.1  | 212.0  | 274.8  |
| 601.2  | 785.6  | 119.7  | 139.6  | 981.5  | 645.0  | 3003.6 | 3345.1 | 3363.5 |
| 232.8  | 297.4  | 134.4  | 167.4  | 387.0  | 265.2  | 222.6  | 227.9  | 279.4  |
| 236.7  | 272.3  | 117.2  | 110.5  | 287.9  | 313.6  | 473.6  | 517.2  | 501.6  |
| 4990.3 | 5836.7 | 2214.2 | 2859.5 | 6091.4 | 5149.6 | 9298.9 | 8744.0 | 9140.6 |
| 183.4  | 160.0  | 100.8  | 104.2  | 230.1  | 126.0  | 211.5  | 197.1  | 181.9  |
| 317.4  | 340.0  | 325.9  | 427.7  | 513.4  | 439.3  | 386.6  | 357.8  | 390.0  |
| 111.2  | 118.4  | 46.6   | 65.3   | 176.4  | 112.3  | 208.7  | 154.5  | 168.9  |
| 213.4  | 467.4  | 73.5   | 90.9   | 422.7  | 414.3  | 624.6  | 855.6  | 837.1  |
| 100.3  | 129.0  | 14.1   | 13.7   | 126.5  | 137.1  | 449.7  | 478.0  | 570.7  |
| 14.5   | 16.8   | 2.4    | 5.4    | 4.8    | 11.9   | 3.1    | 1.1    | 4.7    |
| 56.8   | 46.9   | 4.1    | 2.0    | 32.3   | 95.4   | 1.7    | 11.5   | 2.3    |
| 132.9  | 111.5  | 14.3   | 10.3   | 140.4  | 120.2  | 15.5   | 12.4   | 12.6   |
| 604.3  | 691.0  | 85.8   | 114.6  | 1054.6 | 686.4  | 1224.9 | 1263.4 | 1418.5 |
| 74.4   | 71.0   | 87.3   | 111.3  | 96.5   | 63.7   | 297.8  | 380.0  | 467.1  |
| 171.8  | 191.1  | 39.3   | 38.5   | 222.0  | 218.5  | 195.9  | 281.7  | 303.3  |
| 316.0  | 345.7  | 428.6  | 676.3  | 456.5  | 354.5  | 1270.9 | 1220.7 | 1303.4 |
| 586.3  | 754.9  | 70.9   | 142.6  | 900.0  | 700.9  | 1051.7 | 665.2  | 726.7  |
| 560.9  | 750.4  | 213.9  | 345.2  | 771.8  | 689.2  | 2164.2 | 1588.2 | 1682.8 |
| 12.7   | 8.9    | 28.2   | 44.3   | 19.9   | 14.8   | 42.7   | 42.3   | 59.7   |
| 33.7   | 20.5   | 59.5   | 41.1   | 25.5   | 24.5   | 64.1   | 76.1   | 83.4   |
| 17.4   | 11.6   | 49.1   | 44.2   | 13.4   | 11.5   | 58.1   | 53.3   | 52.3   |
| 404.4  | 564.4  | 176.5  | 176.1  | 493.9  | 496.1  | 279.3  | 207.4  | 235.7  |
| 186.7  | 147.8  | 92.8   | 108.2  | 182.9  | 172.4  | 180.8  | 131.2  | 145.2  |
| 147.0  | 151.9  | 23.0   | 39.3   | 258.5  | 147.2  | 220.8  | 240.2  | 246.1  |
| 104.5  | 147.9  | 33.0   | 35.5   | 146.9  | 118.1  | 233.4  | 278.8  | 273.5  |
| 93.6   | 125.7  | 35.8   | 41.5   | 149.4  | 131.5  | 262.1  | 282.6  | 301.1  |
| 498.7  | 782.1  | 42.6   | 74.5   | 918.1  | 707.4  | 211.5  | 80.7   | 76.8   |
| 233.4  | 335.4  | 219.5  | 213.7  | 246.9  | 334.4  | 2048.3 | 1906.3 | 2258.4 |
| 135.9  | 165.3  | 66.6   | 96.6   | 120.3  | 179.0  | 1235.9 | 1193.8 | 1267.9 |
| 163.8  | 241.7  | 60.9   | 93.2   | 257.4  | 249.3  | 504.9  | 470.7  | 506.6  |
| 89.4   | 134.0  | 30.0   | 51.2   | 121.3  | 124.5  | 433.4  | 408.4  | 443.2  |
| 28.6   | 56.8   | 0.7    | 7.8    | 50.8   | 49.2   | 114.2  | 121.6  | 139.5  |
| 128.2  | 189.9  | 119.4  | 200.4  | 256.6  | 136.2  | 453.2  | 442.5  | 464.8  |
| 274.4  | 453.9  | 294.9  | 414.8  | 505.8  | 565.4  | 712.4  | 802.4  | 900.2  |
| 578.3  | 749.2  | 53.0   | 52.3   | 892.7  | 682.6  | 2052.8 | 1728.6 | 1956.0 |
| 271.9  | 364.3  | 348.5  | 349.2  | 402.9  | 331.4  | 892.2  | 701.9  | 731.9  |

|        |        |       |        |        |        |        |        |        |
|--------|--------|-------|--------|--------|--------|--------|--------|--------|
| 44.6   | 41.5   | 59.8  | 59.4   | 65.4   | 51.4   | 203.4  | 202.7  | 179.4  |
| 5.6    | 10.5   | 7.2   | 16.9   | 10.2   | 6.8    | 38.9   | 32.5   | 30.0   |
| 19.8   | 39.5   | 79.9  | 83.2   | 36.9   | 35.5   | 203.7  | 181.7  | 195.0  |
| 84.9   | 92.5   | 68.9  | 76.4   | 122.2  | 67.7   | 131.5  | 98.9   | 96.8   |
| 393.6  | 581.2  | 49.3  | 84.9   | 640.1  | 488.3  | 478.4  | 455.5  | 494.9  |
| 124.1  | 320.1  | 69.6  | 152.6  | 180.0  | 211.3  | 113.0  | 62.0   | 58.9   |
| 680.3  | 1311.6 | 377.7 | 438.0  | 1126.3 | 1382.4 | 985.2  | 493.2  | 603.9  |
| 349.0  | 362.3  | 100.2 | 139.4  | 488.8  | 389.1  | 1369.4 | 911.7  | 990.0  |
| 103.8  | 118.2  | 40.3  | 67.6   | 157.8  | 87.0   | 570.7  | 313.6  | 417.7  |
| 1796.8 | 2083.5 | 303.7 | 436.2  | 2547.7 | 1679.3 | 1291.5 | 1514.2 | 1695.4 |
| 103.7  | 127.3  | 102.8 | 163.3  | 99.2   | 181.9  | 609.4  | 619.8  | 672.9  |
| 32.0   | 40.2   | 10.2  | 7.6    | 58.4   | 30.8   | 94.8   | 189.3  | 228.9  |
| 185.0  | 285.9  | 41.1  | 23.8   | 337.1  | 231.8  | 171.8  | 336.1  | 359.6  |
| 51.6   | 54.1   | 1.8   | 1.1    | 97.1   | 52.5   | 5.0    | 10.3   | 3.8    |
| 802.0  | 889.7  | 180.4 | 349.1  | 1238.8 | 763.3  | 860.4  | 1116.5 | 1303.9 |
| 3229.0 | 4707.5 | 763.8 | 996.6  | 5379.1 | 4388.0 | 6009.7 | 4429.1 | 4749.8 |
| 743.9  | 558.5  | 124.7 | 241.7  | 972.0  | 758.2  | 1329.7 | 711.6  | 719.2  |
| 21.3   | 23.0   | 17.3  | 16.7   | 34.9   | 26.3   | 78.6   | 89.0   | 111.0  |
| 50.0   | 58.8   | 27.7  | 39.5   | 76.8   | 64.3   | 242.7  | 262.7  | 316.0  |
| 540.2  | 766.8  | 419.8 | 416.0  | 746.1  | 785.2  | 1530.2 | 1354.7 | 1482.8 |
| 136.5  | 126.9  | 13.8  | 16.7   | 151.6  | 168.2  | 85.1   | 112.2  | 93.6   |
| 148.0  | 167.0  | 1.3   | 0.8    | 281.1  | 156.2  | 44.1   | 67.6   | 72.3   |
| 584.4  | 675.7  | 34.8  | 57.1   | 944.7  | 688.7  | 248.1  | 432.6  | 455.6  |
| 370.0  | 619.6  | 129.9 | 153.5  | 607.1  | 537.0  | 1622.5 | 1747.0 | 1993.8 |
| 111.2  | 159.1  | 16.0  | 8.0    | 346.6  | 96.1   | 56.2   | 111.0  | 95.6   |
| 462.0  | 602.2  | 164.1 | 165.6  | 643.7  | 621.0  | 115.9  | 126.1  | 163.4  |
| 237.8  | 300.1  | 817.2 | 1157.0 | 358.5  | 391.1  | 1176.9 | 997.3  | 1151.9 |
| 105.6  | 128.0  | 456.7 | 767.1  | 136.3  | 92.8   | 652.0  | 471.0  | 495.7  |
| 787.2  | 931.5  | 469.5 | 568.2  | 1190.6 | 868.8  | 2025.5 | 2323.2 | 2603.8 |
| 16.0   | 8.0    | 9.1   | 7.5    | 14.0   | 24.2   | 14.1   | 8.6    | 11.8   |
| 131.4  | 194.4  | 142.2 | 176.3  | 210.2  | 157.6  | 285.3  | 246.4  | 265.8  |
| 876.6  | 986.8  | 75.9  | 100.1  | 1181.3 | 1215.5 | 205.7  | 165.4  | 213.1  |
| 151.8  | 244.6  | 75.9  | 115.8  | 196.7  | 200.9  | 366.5  | 296.5  | 288.8  |
| 437.3  | 601.6  | 199.8 | 266.4  | 653.6  | 587.2  | 1980.2 | 1507.3 | 1593.7 |
| 666.0  | 862.3  | 499.9 | 653.2  | 1084.7 | 967.2  | 2219.4 | 2063.8 | 2350.5 |
| 230.1  | 324.6  | 80.7  | 105.5  | 293.9  | 318.6  | 1008.1 | 586.8  | 669.2  |
| 118.5  | 144.3  | 45.3  | 42.0   | 162.2  | 135.4  | 205.0  | 346.3  | 374.8  |
| 5.4    | 22.5   | 42.7  | 62.1   | 4.2    | 6.8    | 99.5   | 70.0   | 63.0   |
| 502.3  | 570.5  | 124.8 | 160.2  | 782.2  | 563.9  | 963.0  | 1130.5 | 1183.6 |
| 107.9  | 182.8  | 47.0  | 58.3   | 281.9  | 104.2  | 459.3  | 468.7  | 553.0  |
| 138.0  | 198.3  | 230.1 | 355.3  | 217.6  | 207.2  | 399.5  | 373.2  | 407.8  |
| 47.8   | 55.4   | 58.0  | 85.5   | 73.0   | 35.9   | 139.2  | 93.3   | 106.4  |
| 126.6  | 214.9  | 47.9  | 79.2   | 253.5  | 141.3  | 282.4  | 262.8  | 343.9  |
| 147.8  | 173.5  | 124.3 | 187.1  | 180.5  | 151.0  | 797.7  | 1063.4 | 1125.6 |
| 139.2  | 185.0  | 89.2  | 91.1   | 177.2  | 174.3  | 195.3  | 230.4  | 238.5  |
| 1086.2 | 1087.2 | 644.9 | 967.4  | 1216.6 | 930.8  | 2998.1 | 1221.7 | 1333.5 |
| 543.1  | 692.8  | 185.2 | 282.9  | 755.6  | 730.9  | 571.6  | 654.9  | 732.8  |
| 347.8  | 414.6  | 405.5 | 500.0  | 475.7  | 356.3  | 499.9  | 554.3  | 480.3  |
| 1119.5 | 1496.7 | 421.9 | 801.9  | 1669.4 | 1866.5 | 7506.7 | 7830.2 | 7966.3 |
| 174.4  | 181.8  | 112.2 | 127.2  | 199.9  | 170.4  | 577.2  | 384.4  | 432.3  |
| 4.5    | 4.9    | 29.3  | 21.7   | 10.9   | 4.6    | 3.8    | 7.1    | 4.7    |
| 433.0  | 518.6  | 119.3 | 153.3  | 762.2  | 628.4  | 1876.8 | 1945.5 | 2137.7 |
| 239.4  | 317.2  | 52.7  | 49.1   | 280.5  | 324.7  | 916.7  | 916.2  | 1026.4 |

|        |        |       |        |        |        |        |        |        |
|--------|--------|-------|--------|--------|--------|--------|--------|--------|
| 212.4  | 207.3  | 62.8  | 94.0   | 257.1  | 218.3  | 276.5  | 180.8  | 216.1  |
| 244.0  | 291.9  | 326.0 | 390.2  | 418.0  | 243.1  | 241.4  | 262.5  | 287.3  |
| 1008.2 | 920.8  | 427.6 | 547.9  | 1218.7 | 834.7  | 744.8  | 773.4  | 857.5  |
| 142.4  | 178.1  | 162.0 | 270.9  | 257.6  | 307.6  | 556.2  | 538.8  | 669.4  |
| 512.5  | 556.9  | 404.5 | 537.7  | 753.1  | 572.1  | 744.5  | 669.9  | 898.1  |
| 502.2  | 390.1  | 405.8 | 422.2  | 579.8  | 408.9  | 908.6  | 713.0  | 772.9  |
| 505.2  | 611.7  | 500.4 | 701.0  | 594.1  | 559.9  | 1586.7 | 1785.4 | 1876.3 |
| 192.0  | 280.3  | 155.4 | 185.4  | 280.5  | 259.2  | 452.2  | 561.4  | 720.9  |
| 97.2   | 91.5   | 432.7 | 500.7  | 146.1  | 102.6  | 266.2  | 256.9  | 233.0  |
| 97.0   | 99.6   | 32.0  | 28.6   | 115.4  | 164.7  | 195.9  | 298.7  | 314.3  |
| 124.0  | 177.4  | 56.9  | 63.5   | 192.9  | 152.3  | 327.7  | 464.8  | 515.0  |
| 134.1  | 230.8  | 58.4  | 83.6   | 251.5  | 199.3  | 863.8  | 811.0  | 861.0  |
| 56.8   | 92.1   | 13.0  | 14.9   | 69.2   | 81.5   | 221.2  | 200.2  | 201.3  |
| 92.7   | 153.0  | 80.1  | 103.0  | 128.2  | 130.3  | 284.5  | 277.8  | 327.0  |
| 159.1  | 218.1  | 106.2 | 183.9  | 296.3  | 150.6  | 241.5  | 370.7  | 350.3  |
| 447.4  | 549.5  | 216.2 | 320.8  | 788.3  | 458.3  | 772.0  | 1112.4 | 1108.6 |
| 92.3   | 236.7  | 39.1  | 46.9   | 234.4  | 198.6  | 375.9  | 564.3  | 708.8  |
| 122.7  | 169.9  | 18.3  | 26.9   | 221.1  | 98.4   | 65.9   | 48.5   | 56.5   |
| 603.7  | 757.4  | 15.8  | 19.3   | 1017.5 | 609.5  | 269.3  | 188.7  | 198.9  |
| 195.4  | 217.3  | 25.8  | 52.3   | 257.7  | 238.9  | 115.2  | 55.6   | 43.6   |
| 94.2   | 116.9  | 102.1 | 112.3  | 112.0  | 102.3  | 416.7  | 427.3  | 500.4  |
| 488.4  | 575.2  | 310.7 | 401.5  | 541.7  | 660.3  | 758.9  | 585.3  | 585.6  |
| 50.5   | 45.3   | 38.4  | 46.4   | 70.7   | 64.3   | 139.6  | 101.0  | 113.0  |
| 850.5  | 1010.3 | 336.3 | 406.7  | 959.5  | 941.7  | 1228.7 | 607.1  | 666.2  |
| 562.4  | 495.3  | 142.9 | 228.2  | 872.8  | 426.3  | 1139.1 | 1117.0 | 1297.1 |
| 126.5  | 163.3  | 141.7 | 159.8  | 181.3  | 134.7  | 256.9  | 251.1  | 265.4  |
| 610.9  | 738.0  | 242.5 | 276.2  | 988.2  | 791.8  | 1207.3 | 947.7  | 1006.5 |
| 285.9  | 373.7  | 94.8  | 112.4  | 532.1  | 316.7  | 732.6  | 614.1  | 652.3  |
| 396.9  | 455.0  | 162.8 | 219.1  | 645.5  | 416.3  | 632.0  | 433.5  | 469.6  |
| 1141.2 | 1483.0 | 184.9 | 258.4  | 1103.2 | 1265.6 | 1330.9 | 784.1  | 862.0  |
| 749.9  | 778.2  | 639.4 | 1167.1 | 762.3  | 496.5  | 365.2  | 151.4  | 174.2  |
| 529.7  | 787.8  | 78.6  | 55.4   | 898.7  | 759.1  | 306.1  | 346.6  | 292.4  |
| 407.2  | 545.2  | 64.6  | 62.4   | 578.8  | 468.8  | 116.6  | 138.9  | 117.4  |
| 187.8  | 233.5  | 390.6 | 552.0  | 243.3  | 214.3  | 807.1  | 563.7  | 588.8  |
| 86.6   | 101.9  | 21.7  | 28.8   | 111.5  | 75.1   | 886.6  | 1238.5 | 1309.4 |
| 61.1   | 44.9   | 50.4  | 58.1   | 60.9   | 26.5   | 209.0  | 275.6  | 268.3  |
| 76.6   | 74.0   | 113.7 | 127.3  | 97.8   | 84.2   | 692.8  | 678.3  | 743.9  |
| 186.0  | 199.2  | 83.6  | 127.5  | 258.9  | 327.9  | 311.9  | 330.9  | 325.5  |
| 301.3  | 340.1  | 147.2 | 221.1  | 324.8  | 372.1  | 781.3  | 343.2  | 438.9  |
| 1607.4 | 2348.0 | 429.3 | 442.7  | 1737.4 | 1951.7 | 6736.2 | 3717.5 | 3445.9 |
| 83.8   | 80.8   | 85.9  | 105.7  | 115.2  | 83.6   | 153.1  | 189.2  | 209.4  |
| 0.7    | 11.4   | 3.7   | 0.8    | 0.5    | 4.7    | 4.9    | 4.1    | 1.0    |
| 11.5   | 7.7    | 13.0  | 11.1   | 0.9    | 17.4   | 13.5   | 9.7    | 6.8    |
| 0.6    | 4.4    | 3.8   | 1.1    | 1.4    | 11.4   | 3.7    | 2.3    | 0.9    |
| 114.9  | 165.0  | 70.6  | 99.1   | 187.5  | 129.9  | 530.5  | 210.5  | 275.7  |
| 272.6  | 365.3  | 23.8  | 25.9   | 381.5  | 319.8  | 387.2  | 434.7  | 519.6  |
| 159.6  | 177.8  | 171.0 | 227.2  | 198.2  | 154.8  | 118.7  | 119.5  | 109.1  |
| 125.1  | 122.0  | 151.5 | 264.5  | 165.4  | 108.8  | 486.4  | 552.1  | 531.3  |
| 107.2  | 101.4  | 49.7  | 66.9   | 153.9  | 100.4  | 383.3  | 454.6  | 467.0  |
| 153.9  | 167.1  | 218.6 | 276.2  | 280.7  | 136.9  | 612.2  | 761.3  | 771.8  |
| 176.4  | 239.2  | 27.9  | 39.4   | 229.3  | 182.6  | 838.5  | 788.0  | 946.9  |
| 342.1  | 418.2  | 99.9  | 88.2   | 575.7  | 336.1  | 2775.7 | 2636.4 | 2798.3 |
| 139.9  | 172.6  | 134.7 | 152.9  | 226.2  | 168.5  | 307.6  | 295.5  | 370.1  |

|        |        |       |        |        |        |        |        |        |
|--------|--------|-------|--------|--------|--------|--------|--------|--------|
| 371.4  | 447.3  | 125.5 | 194.0  | 616.5  | 356.3  | 2419.5 | 1692.6 | 1769.4 |
| 543.2  | 736.2  | 90.9  | 99.6   | 761.8  | 792.3  | 1154.9 | 802.7  | 892.1  |
| 320.2  | 446.3  | 95.9  | 134.9  | 499.7  | 474.7  | 480.0  | 303.8  | 339.3  |
| 230.4  | 348.5  | 218.2 | 207.0  | 277.8  | 320.9  | 856.4  | 925.0  | 977.5  |
| 139.3  | 216.0  | 80.2  | 67.5   | 135.8  | 191.4  | 587.3  | 654.2  | 665.2  |
| 198.8  | 227.6  | 109.4 | 119.8  | 248.5  | 278.0  | 802.1  | 859.7  | 931.3  |
| 294.3  | 337.2  | 99.6  | 102.5  | 386.0  | 299.0  | 416.5  | 564.0  | 556.6  |
| 103.8  | 107.4  | 99.9  | 122.5  | 152.8  | 66.8   | 97.7   | 81.7   | 86.1   |
| 122.4  | 199.5  | 65.6  | 76.2   | 206.2  | 156.9  | 187.3  | 128.1  | 166.9  |
| 112.8  | 99.3   | 5.6   | 10.5   | 178.3  | 96.6   | 157.4  | 228.3  | 302.4  |
| 126.7  | 149.8  | 119.2 | 124.9  | 199.2  | 126.9  | 381.9  | 471.7  | 552.8  |
| 64.7   | 94.3   | 79.3  | 150.3  | 129.6  | 81.4   | 321.3  | 181.2  | 218.7  |
| 302.9  | 349.0  | 82.0  | 112.6  | 431.7  | 328.4  | 985.1  | 1400.5 | 1655.3 |
| 120.2  | 129.2  | 149.2 | 171.3  | 196.9  | 81.9   | 244.7  | 444.3  | 469.9  |
| 79.0   | 95.7   | 40.0  | 48.9   | 184.0  | 96.5   | 248.6  | 136.3  | 166.1  |
| 203.3  | 245.8  | 106.1 | 130.8  | 246.3  | 236.4  | 423.3  | 252.3  | 261.8  |
| 167.1  | 233.0  | 93.3  | 103.5  | 244.2  | 232.3  | 553.0  | 446.8  | 525.5  |
| 496.5  | 484.0  | 97.3  | 135.7  | 617.9  | 428.7  | 348.6  | 286.7  | 315.1  |
| 1.2    | 0.8    | 0.9   | 8.1    | 3.5    | 3.1    | 13.0   | 18.3   | 20.4   |
| 114.0  | 153.0  | 126.8 | 143.1  | 126.8  | 100.4  | 544.3  | 587.5  | 643.5  |
| 524.2  | 487.6  | 189.9 | 249.3  | 751.9  | 522.6  | 564.2  | 267.4  | 288.8  |
| 1218.3 | 1456.1 | 670.3 | 1070.0 | 1645.5 | 1547.4 | 3011.1 | 2418.6 | 2325.1 |
| 150.5  | 178.2  | 239.9 | 243.4  | 168.9  | 137.4  | 386.6  | 303.7  | 351.2  |
| 6.2    | 14.0   | 9.7   | 10.3   | 1.2    | 3.2    | 13.5   | 14.0   | 26.8   |
| 6.7    | 30.5   | 32.7  | 24.6   | 27.3   | 22.3   | 27.0   | 46.1   | 54.0   |
| 176.8  | 154.7  | 36.2  | 61.2   | 227.2  | 199.4  | 1067.2 | 804.6  | 930.5  |
| 671.3  | 962.0  | 129.2 | 167.4  | 1181.5 | 739.6  | 1901.1 | 1478.5 | 1577.4 |
| 153.3  | 234.1  | 29.7  | 40.6   | 319.9  | 220.7  | 285.8  | 215.0  | 235.6  |
| 90.0   | 106.9  | 0.9   | 0.8    | 136.9  | 91.6   | 1.4    | 2.9    | 0.7    |
| 70.1   | 58.2   | 96.7  | 110.1  | 77.3   | 65.0   | 133.8  | 160.2  | 196.8  |
| 15.5   | 3.3    | 21.9  | 30.3   | 13.3   | 8.5    | 35.2   | 41.4   | 43.5   |
| 121.9  | 126.0  | 67.7  | 78.7   | 197.4  | 115.4  | 286.8  | 225.8  | 221.8  |
| 874.2  | 1175.3 | 89.6  | 141.9  | 1554.1 | 1153.4 | 1331.3 | 962.2  | 1048.6 |
| 2793.7 | 2935.3 | 538.1 | 688.0  | 4408.1 | 2903.7 | 666.5  | 1021.8 | 1102.2 |
| 37.4   | 41.9   | 11.5  | 10.1   | 86.1   | 33.7   | 6.4    | 4.1    | 0.9    |
| 27.5   | 37.5   | 35.3  | 29.5   | 46.5   | 50.5   | 131.0  | 158.2  | 164.2  |
| 81.5   | 95.6   | 98.7  | 115.8  | 119.6  | 81.9   | 96.6   | 146.5  | 157.5  |
| 96.2   | 112.5  | 50.4  | 57.1   | 124.8  | 114.2  | 365.6  | 331.0  | 368.5  |
| 170.2  | 208.3  | 77.4  | 112.3  | 232.9  | 160.5  | 2932.0 | 1072.4 | 1238.4 |
| 290.9  | 427.3  | 50.5  | 75.5   | 403.0  | 375.0  | 4800.5 | 1617.0 | 2072.1 |
| 96.3   | 164.8  | 45.5  | 91.5   | 176.9  | 162.7  | 1274.8 | 426.6  | 566.2  |
| 1087.8 | 1268.8 | 385.8 | 537.5  | 1892.5 | 1332.0 | 1799.0 | 1253.5 | 1333.1 |
| 42.6   | 33.2   | 19.1  | 15.9   | 38.2   | 5.3    | 48.3   | 45.7   | 44.8   |
| 350.4  | 579.5  | 88.1  | 110.9  | 700.3  | 444.7  | 655.8  | 922.5  | 973.7  |
| 337.6  | 433.0  | 78.0  | 123.2  | 525.1  | 370.1  | 651.5  | 239.0  | 328.8  |
| 35.7   | 64.7   | 48.9  | 53.9   | 55.8   | 53.5   | 530.8  | 561.1  | 690.4  |
| 71.9   | 135.6  | 59.3  | 66.1   | 154.7  | 104.3  | 354.3  | 501.1  | 559.8  |
| 117.4  | 176.5  | 41.5  | 61.1   | 149.8  | 185.7  | 280.9  | 303.4  | 340.8  |
| 60.5   | 63.0   | 67.7  | 92.0   | 78.9   | 50.4   | 247.1  | 227.0  | 240.0  |
| 604.1  | 690.6  | 145.7 | 284.1  | 881.3  | 805.0  | 538.4  | 518.6  | 661.8  |
| 60.5   | 56.6   | 308.0 | 742.9  | 91.6   | 86.0   | 7.3    | 10.1   | 3.1    |
| 56.2   | 62.6   | 204.7 | 246.0  | 61.3   | 71.0   | 31.9   | 50.1   | 74.1   |
| 226.5  | 401.0  | 51.1  | 75.9   | 515.1  | 352.9  | 677.5  | 558.0  | 591.2  |

|        |        |       |        |        |        |        |        |        |
|--------|--------|-------|--------|--------|--------|--------|--------|--------|
| 26.6   | 43.2   | 13.4  | 14.7   | 53.8   | 75.2   | 155.8  | 218.1  | 205.7  |
| 11.5   | 15.3   | 12.8  | 10.0   | 18.5   | 6.0    | 22.8   | 17.4   | 18.6   |
| 159.6  | 209.7  | 55.2  | 51.5   | 229.1  | 155.9  | 1095.7 | 944.3  | 1169.0 |
| 266.1  | 591.3  | 95.0  | 133.7  | 520.1  | 399.1  | 364.4  | 335.7  | 420.9  |
| 279.6  | 370.4  | 103.7 | 146.8  | 415.5  | 279.6  | 702.4  | 661.9  | 732.9  |
| 429.8  | 552.3  | 160.3 | 198.1  | 533.0  | 349.7  | 338.1  | 320.1  | 413.3  |
| 146.9  | 316.4  | 121.1 | 158.1  | 272.5  | 285.4  | 995.7  | 1026.8 | 1141.6 |
| 1682.8 | 2096.0 | 340.3 | 431.4  | 2699.0 | 2296.8 | 4518.1 | 5337.8 | 5244.7 |
| 3.8    | 10.8   | 26.0  | 17.4   | 10.6   | 17.1   | 44.8   | 25.8   | 28.2   |
| 368.2  | 415.6  | 80.0  | 93.2   | 536.0  | 447.0  | 972.9  | 643.8  | 732.5  |
| 2045.3 | 3135.1 | 144.9 | 195.1  | 3112.9 | 2753.2 | 4678.9 | 3433.7 | 3544.5 |
| 1486.9 | 2193.3 | 157.8 | 194.0  | 2191.4 | 2060.6 | 3696.8 | 2680.8 | 2732.5 |
| 3207.0 | 3904.6 | 810.1 | 1118.7 | 4571.4 | 4037.4 | 6107.1 | 5699.2 | 5843.6 |
| 134.3  | 134.1  | 11.1  | 3.9    | 201.5  | 132.2  | 37.8   | 19.1   | 21.8   |
| 71.1   | 94.9   | 1.4   | 4.9    | 181.6  | 117.3  | 21.7   | 14.9   | 9.8    |
| 233.3  | 235.8  | 10.1  | 4.5    | 372.4  | 233.4  | 139.1  | 64.8   | 83.6   |
| 36.6   | 43.7   | 0.5   | 3.6    | 108.4  | 39.5   | 1.5    | 6.3    | 7.7    |
| 18.7   | 7.8    | 2.7   | 1.6    | 58.1   | 20.1   | 2.6    | 3.8    | 6.3    |
| 484.1  | 645.2  | 68.5  | 61.0   | 1091.9 | 681.5  | 1666.2 | 2309.2 | 2654.9 |
| 108.8  | 423.8  | 127.9 | 173.2  | 211.6  | 328.9  | 649.1  | 387.5  | 465.1  |
| 514.3  | 490.5  | 77.7  | 114.8  | 770.7  | 442.0  | 568.6  | 392.8  | 526.1  |
| 12.4   | 5.7    | 9.6   | 6.6    | 2.3    | 1.3    | 22.5   | 32.1   | 33.5   |
| 1235.6 | 1470.1 | 403.2 | 631.7  | 1641.7 | 519.7  | 2657.7 | 2444.0 | 2534.8 |
| 1952.9 | 2228.5 | 428.4 | 628.6  | 2679.7 | 1498.3 | 3852.8 | 3488.4 | 3501.7 |
| 127.6  | 122.7  | 183.7 | 247.0  | 173.5  | 141.5  | 954.4  | 1269.4 | 1619.9 |
| 1270.3 | 1404.1 | 610.1 | 775.6  | 1921.3 | 1205.2 | 2167.3 | 1182.3 | 1352.4 |
| 23.3   | 42.7   | 49.4  | 59.3   | 40.7   | 23.2   | 60.0   | 48.2   | 42.6   |
| 118.9  | 138.5  | 25.2  | 9.7    | 159.9  | 139.0  | 140.1  | 84.5   | 84.8   |
| 67.1   | 100.0  | 77.9  | 72.0   | 112.2  | 108.1  | 187.6  | 219.9  | 209.9  |
| 45.1   | 59.1   | 91.5  | 83.0   | 74.2   | 52.2   | 209.9  | 207.1  | 231.6  |
| 193.1  | 295.5  | 41.0  | 84.6   | 297.7  | 258.9  | 466.8  | 309.7  | 331.1  |
| 949.8  | 1073.4 | 448.2 | 635.1  | 1455.1 | 1185.5 | 1243.1 | 1575.7 | 1698.8 |
| 108.8  | 123.9  | 133.4 | 216.6  | 164.7  | 95.9   | 357.2  | 372.8  | 456.8  |
| 32.4   | 27.2   | 14.8  | 15.0   | 40.9   | 44.1   | 60.7   | 88.0   | 87.6   |
| 130.1  | 220.3  | 22.4  | 42.1   | 249.5  | 209.1  | 111.0  | 163.7  | 176.9  |
| 161.9  | 199.5  | 73.3  | 113.6  | 230.1  | 188.1  | 176.6  | 137.7  | 166.4  |
| 317.8  | 335.0  | 141.1 | 163.2  | 377.3  | 237.6  | 161.8  | 177.2  | 173.8  |
| 186.3  | 228.9  | 74.2  | 73.9   | 320.1  | 273.0  | 1486.6 | 1228.6 | 1359.5 |
| 31.4   | 41.9   | 15.9  | 20.0   | 50.4   | 25.9   | 298.0  | 240.5  | 273.2  |
| 69.5   | 72.2   | 76.7  | 109.6  | 88.4   | 44.1   | 1088.5 | 488.9  | 635.2  |
| 235.3  | 335.7  | 159.1 | 189.6  | 338.8  | 270.1  | 424.6  | 374.4  | 416.9  |
| 103.0  | 114.9  | 315.5 | 310.2  | 113.4  | 95.5   | 102.7  | 65.1   | 91.6   |
| 198.6  | 209.9  | 149.5 | 197.1  | 283.2  | 194.2  | 412.4  | 454.2  | 463.1  |
| 317.1  | 347.7  | 163.7 | 248.2  | 418.2  | 345.6  | 718.8  | 255.9  | 319.3  |
| 298.4  | 379.5  | 57.0  | 61.8   | 344.5  | 353.6  | 540.3  | 481.6  | 521.8  |
| 347.6  | 584.1  | 114.4 | 129.1  | 521.0  | 444.9  | 1774.8 | 2015.2 | 2187.0 |
| 2511.4 | 2781.3 | 3.9   | 11.7   | 3364.0 | 2602.2 | 97.5   | 94.1   | 120.4  |
| 1847.8 | 2241.9 | 449.6 | 616.2  | 2529.4 | 2236.1 | 2487.0 | 1227.0 | 1396.0 |
| 347.3  | 466.5  | 2.6   | 1.6    | 517.3  | 426.7  | 44.8   | 64.8   | 64.2   |
| 145.9  | 177.3  | 0.4   | 7.4    | 263.4  | 165.4  | 36.6   | 35.2   | 38.0   |
| 218.9  | 330.6  | 41.6  | 28.3   | 313.5  | 273.7  | 520.6  | 495.3  | 534.2  |
| 380.1  | 419.7  | 56.7  | 60.2   | 628.2  | 492.1  | 735.3  | 539.9  | 556.0  |
| 0.9    | 2.2    | 9.5   | 3.3    | 4.1    | 11.1   | 7.1    | 15.2   | 22.8   |

|        |        |       |        |        |        |        |        |        |
|--------|--------|-------|--------|--------|--------|--------|--------|--------|
| 16.8   | 21.9   | 18.1  | 18.4   | 29.8   | 24.7   | 24.7   | 16.4   | 20.4   |
| 436.4  | 680.5  | 127.9 | 256.7  | 606.1  | 476.9  | 1611.7 | 1394.7 | 1558.5 |
| 1599.8 | 2134.1 | 318.7 | 603.6  | 2341.4 | 1615.0 | 2293.9 | 1528.1 | 1699.6 |
| 401.3  | 592.1  | 146.6 | 207.1  | 659.3  | 528.8  | 2356.5 | 2345.1 | 2466.7 |
| 68.0   | 76.3   | 48.3  | 51.5   | 101.5  | 75.0   | 373.7  | 363.5  | 332.1  |
| 435.6  | 613.6  | 153.8 | 230.4  | 850.5  | 590.6  | 1219.9 | 970.8  | 1121.8 |
| 8.5    | 1.3    | 1.3   | 1.5    | 2.5    | 1.5    | 1.6    | 0.7    | 1.3    |
| 137.9  | 171.6  | 96.4  | 135.5  | 186.9  | 143.1  | 294.8  | 303.2  | 376.7  |
| 462.6  | 525.5  | 500.4 | 794.4  | 692.7  | 558.0  | 1887.9 | 1506.5 | 1727.2 |
| 10.3   | 4.5    | 0.8   | 3.2    | 4.6    | 14.7   | 47.4   | 106.1  | 102.7  |
| 797.3  | 466.9  | 52.0  | 84.0   | 1191.0 | 396.0  | 138.7  | 309.6  | 282.6  |
| 2.5    | 13.6   | 7.9   | 5.7    | 9.6    | 3.4    | 8.9    | 13.7   | 9.8    |
| 2767.8 | 3565.1 | 293.7 | 388.5  | 4554.3 | 3489.3 | 2202.5 | 1888.6 | 1982.1 |
| 12.8   | 10.2   | 8.3   | 0.5    | 21.8   | 2.2    | 6.1    | 1.7    | 4.6    |
| 44.3   | 82.3   | 20.1  | 24.1   | 94.2   | 55.6   | 68.0   | 72.6   | 74.7   |
| 60.1   | 80.4   | 26.2  | 22.8   | 88.6   | 72.6   | 364.5  | 401.4  | 491.4  |
| 611.9  | 595.2  | 294.4 | 436.5  | 704.0  | 365.0  | 867.1  | 544.9  | 663.1  |
| 70.7   | 49.6   | 592.6 | 989.3  | 70.6   | 48.8   | 1.9    | 0.7    | 1.5    |
| 236.7  | 209.4  | 212.9 | 269.5  | 255.6  | 227.9  | 408.3  | 357.9  | 441.9  |
| 84.5   | 184.4  | 22.7  | 34.8   | 106.3  | 146.9  | 446.6  | 339.0  | 321.2  |
| 71.7   | 164.5  | 24.0  | 59.5   | 116.3  | 143.1  | 413.2  | 355.8  | 384.1  |
| 146.7  | 184.7  | 119.3 | 184.0  | 226.6  | 163.4  | 2851.3 | 3549.3 | 3769.0 |
| 756.1  | 819.6  | 226.5 | 370.0  | 1193.9 | 783.5  | 1703.7 | 1439.5 | 1539.4 |
| 893.0  | 1101.7 | 57.3  | 107.4  | 1577.9 | 1307.9 | 1395.0 | 1089.4 | 1216.6 |
| 754.4  | 974.0  | 788.8 | 1081.3 | 1045.6 | 1110.2 | 3599.7 | 4248.7 | 4844.4 |
| 965.8  | 1227.6 | 331.8 | 454.3  | 1363.7 | 1410.8 | 1433.3 | 1410.9 | 1657.7 |
| 856.4  | 1112.4 | 590.5 | 634.1  | 1478.1 | 942.1  | 1556.7 | 1495.9 | 1405.8 |
| 233.0  | 283.6  | 116.8 | 183.1  | 215.3  | 240.2  | 536.0  | 452.3  | 459.6  |
| 466.0  | 708.1  | 353.9 | 493.9  | 610.8  | 549.5  | 1399.3 | 1191.7 | 1221.7 |
| 393.9  | 517.4  | 57.3  | 85.1   | 577.4  | 529.8  | 774.7  | 628.5  | 681.4  |
| 138.6  | 200.7  | 19.0  | 17.3   | 205.2  | 141.6  | 1165.7 | 1795.2 | 1780.5 |
| 165.5  | 425.7  | 113.9 | 11.6   | 290.4  | 450.8  | 129.8  | 138.8  | 144.3  |
| 1251.2 | 1157.4 | 571.2 | 710.5  | 1624.2 | 1131.8 | 2130.1 | 1506.4 | 1682.3 |
| 453.5  | 571.9  | 28.4  | 38.1   | 708.8  | 479.5  | 296.9  | 410.2  | 453.7  |
| 72.8   | 66.1   | 99.6  | 141.6  | 59.9   | 48.4   | 937.8  | 1418.5 | 1602.9 |
| 1246.9 | 1502.1 | 209.4 | 286.5  | 1895.4 | 1386.4 | 2469.5 | 1250.3 | 1467.0 |
| 23.2   | 38.3   | 88.3  | 82.0   | 45.3   | 29.2   | 9.1    | 19.9   | 15.8   |
| 3.4    | 6.7    | 0.8   | 2.1    | 3.2    | 7.1    | 7.5    | 4.0    | 5.8    |
| 9.3    | 26.8   | 15.0  | 8.9    | 3.1    | 12.3   | 7.3    | 2.0    | 3.2    |
| 504.9  | 592.2  | 281.4 | 412.1  | 736.9  | 567.7  | 924.0  | 673.1  | 661.7  |
| 144.7  | 216.5  | 32.0  | 34.3   | 212.9  | 252.3  | 829.3  | 576.9  | 699.0  |
| 222.8  | 292.7  | 77.0  | 101.3  | 287.8  | 244.9  | 332.7  | 279.6  | 326.3  |
| 28.6   | 26.2   | 21.1  | 31.6   | 29.7   | 18.5   | 194.3  | 227.7  | 222.1  |
| 152.7  | 240.4  | 37.6  | 34.5   | 164.5  | 193.1  | 388.5  | 488.1  | 559.7  |
| 239.8  | 431.6  | 32.4  | 46.5   | 361.2  | 347.6  | 284.6  | 215.0  | 217.7  |
| 29.1   | 34.3   | 7.1   | 4.9    | 30.8   | 23.5   | 54.0   | 47.0   | 51.2   |
| 115.5  | 108.4  | 63.9  | 101.8  | 157.1  | 81.5   | 102.2  | 96.1   | 132.1  |
| 19.4   | 34.2   | 20.7  | 26.1   | 35.6   | 14.3   | 162.4  | 181.8  | 199.6  |
| 198.8  | 229.0  | 327.5 | 408.4  | 260.5  | 202.9  | 707.2  | 618.5  | 674.5  |
| 135.2  | 172.2  | 64.7  | 67.0   | 143.0  | 195.7  | 354.2  | 459.7  | 535.3  |
| 297.6  | 391.7  | 170.0 | 197.2  | 464.6  | 399.1  | 1039.5 | 1222.7 | 1299.3 |
| 2049.3 | 2699.2 | 324.0 | 488.8  | 2907.8 | 2788.4 | 5052.0 | 4974.6 | 5153.6 |
| 119.9  | 134.9  | 105.2 | 151.4  | 165.0  | 114.4  | 220.4  | 185.1  | 221.8  |

|        |        |       |        |        |        |        |        |        |
|--------|--------|-------|--------|--------|--------|--------|--------|--------|
| 23.1   | 12.0   | 17.6  | 1.3    | 7.5    | 5.9    | 8.1    | 2.2    | 6.9    |
| 39.0   | 22.3   | 25.3  | 28.6   | 51.7   | 53.1   | 39.2   | 48.8   | 51.1   |
| 275.0  | 335.2  | 139.0 | 128.5  | 350.6  | 348.2  | 1227.1 | 831.0  | 1102.8 |
| 437.4  | 351.8  | 87.4  | 141.5  | 610.4  | 438.3  | 2075.5 | 697.2  | 808.4  |
| 51.6   | 45.3   | 131.7 | 150.9  | 53.9   | 67.9   | 310.6  | 356.1  | 378.3  |
| 189.6  | 268.5  | 75.6  | 92.5   | 260.4  | 194.8  | 69.4   | 56.7   | 52.3   |
| 498.5  | 634.9  | 140.9 | 208.8  | 866.4  | 558.2  | 1263.9 | 1185.4 | 1145.1 |
| 99.0   | 119.1  | 27.4  | 33.2   | 138.3  | 99.0   | 432.0  | 404.8  | 400.2  |
| 11.1   | 13.4   | 3.1   | 7.2    | 19.4   | 11.5   | 30.7   | 19.5   | 31.5   |
| 381.7  | 458.2  | 10.0  | 22.7   | 650.5  | 398.5  | 1065.5 | 1358.7 | 1601.3 |
| 195.8  | 185.0  | 322.4 | 492.1  | 225.3  | 170.6  | 724.1  | 573.2  | 576.2  |
| 381.6  | 305.3  | 97.0  | 125.7  | 615.2  | 285.8  | 981.3  | 602.6  | 582.6  |
| 17.2   | 29.5   | 23.4  | 29.2   | 36.0   | 21.7   | 60.9   | 59.1   | 57.9   |
| 27.7   | 16.3   | 66.8  | 110.0  | 39.1   | 21.0   | 19.0   | 33.6   | 14.7   |
| 20.2   | 27.9   | 17.3  | 10.3   | 23.6   | 22.3   | 309.1  | 523.2  | 563.1  |
| 41.7   | 49.4   | 16.3  | 16.3   | 89.1   | 46.0   | 1724.0 | 2791.7 | 2699.4 |
| 1022.4 | 1303.8 | 946.3 | 1266.1 | 1477.1 | 1105.0 | 3642.4 | 4125.9 | 4306.4 |
| 130.7  | 180.1  | 98.3  | 162.0  | 253.0  | 140.9  | 332.8  | 251.7  | 315.9  |
| 1890.1 | 1711.7 | 13.1  | 14.9   | 2854.9 | 2149.4 | 3676.2 | 1290.9 | 1612.6 |
| 183.4  | 324.0  | 65.1  | 109.8  | 308.9  | 275.0  | 1006.7 | 813.4  | 866.1  |
| 936.1  | 1136.9 | 228.5 | 348.5  | 1578.7 | 1209.3 | 1131.4 | 943.1  | 977.3  |
| 207.7  | 228.9  | 103.8 | 140.7  | 306.1  | 225.9  | 533.4  | 302.6  | 352.5  |
| 218.8  | 239.9  | 130.7 | 183.8  | 274.0  | 209.4  | 282.9  | 214.2  | 257.7  |
| 23.5   | 35.1   | 7.5   | 10.6   | 70.3   | 43.6   | 30.1   | 54.2   | 49.7   |
| 815.0  | 864.4  | 38.7  | 43.7   | 1162.1 | 911.9  | 402.5  | 455.9  | 510.7  |
| 1334.7 | 1751.1 | 193.9 | 228.0  | 2051.3 | 1740.8 | 2141.1 | 1112.1 | 1231.9 |
| 163.7  | 271.0  | 94.8  | 165.7  | 281.0  | 218.2  | 802.4  | 471.3  | 536.9  |
| 45.8   | 71.6   | 47.8  | 77.9   | 40.1   | 47.1   | 282.6  | 257.6  | 266.5  |
| 164.6  | 190.7  | 97.5  | 154.4  | 220.4  | 160.0  | 542.6  | 518.5  | 660.0  |
| 84.5   | 84.7   | 83.3  | 51.7   | 96.7   | 80.0   | 424.6  | 427.6  | 424.2  |
| 97.9   | 71.1   | 2.0   | 3.0    | 87.9   | 46.2   | 21.4   | 55.7   | 53.7   |
| 204.3  | 263.5  | 21.5  | 26.5   | 328.3  | 229.2  | 209.6  | 217.2  | 229.8  |
| 105.8  | 136.8  | 6.8   | 12.9   | 160.7  | 118.0  | 154.2  | 151.4  | 188.3  |
| 169.1  | 241.2  | 123.2 | 136.4  | 263.1  | 254.0  | 474.4  | 485.9  | 551.6  |
| 172.2  | 261.6  | 178.3 | 271.9  | 338.9  | 237.4  | 654.2  | 622.5  | 785.5  |
| 365.7  | 533.2  | 104.8 | 109.5  | 753.4  | 497.2  | 1095.7 | 1266.1 | 1137.4 |
| 44.0   | 31.7   | 7.0   | 11.6   | 90.3   | 18.7   | 12.5   | 12.9   | 2.6    |
| 56.5   | 62.6   | 82.1  | 93.7   | 72.2   | 49.8   | 340.7  | 418.2  | 456.1  |
| 269.6  | 229.2  | 67.8  | 68.8   | 332.1  | 206.4  | 1003.4 | 1138.0 | 1046.2 |
| 8.2    | 39.2   | 7.2   | 20.3   | 25.1   | 19.9   | 126.8  | 216.7  | 267.3  |
| 75.1   | 92.8   | 70.5  | 100.4  | 124.7  | 107.0  | 192.4  | 264.3  | 298.6  |
| 184.4  | 260.1  | 22.3  | 19.3   | 228.1  | 144.1  | 117.9  | 113.9  | 115.1  |
| 366.2  | 452.8  | 39.7  | 51.7   | 532.6  | 412.4  | 869.7  | 785.5  | 873.0  |
| 1130.8 | 1219.3 | 382.7 | 537.5  | 1477.2 | 1124.2 | 1696.6 | 843.7  | 1033.0 |
| 165.1  | 358.4  | 125.3 | 173.4  | 404.3  | 311.7  | 1048.9 | 1072.8 | 1295.1 |
| 136.0  | 162.7  | 33.5  | 40.4   | 220.3  | 137.6  | 404.7  | 514.3  | 542.1  |
| 222.6  | 257.5  | 78.7  | 108.0  | 291.1  | 229.0  | 334.7  | 389.0  | 438.0  |
| 80.2   | 94.2   | 38.1  | 71.7   | 127.7  | 68.3   | 162.1  | 143.5  | 156.8  |
| 62.2   | 134.6  | 17.3  | 14.2   | 98.9   | 81.8   | 432.1  | 661.8  | 592.6  |
| 1.3    | 0.9    | 30.9  | 30.1   | 1.1    | 1.5    | 2.1    | 2.5    | 7.0    |
| 404.1  | 535.9  | 180.8 | 179.9  | 884.2  | 572.7  | 450.1  | 476.3  | 498.3  |
| 433.4  | 529.5  | 183.4 | 190.5  | 733.9  | 537.2  | 252.4  | 256.5  | 270.7  |
| 258.0  | 252.2  | 10.6  | 21.8   | 264.5  | 233.1  | 178.5  | 190.6  | 211.6  |



|        |        |        |        |        |        |        |        |        |
|--------|--------|--------|--------|--------|--------|--------|--------|--------|
| 63.0   | 45.1   | 14.7   | 19.5   | 61.6   | 80.0   | 78.6   | 78.0   | 92.1   |
| 886.6  | 1185.2 | 100.9  | 84.0   | 1367.2 | 1042.1 | 1272.8 | 1599.7 | 1759.5 |
| 240.3  | 301.9  | 97.4   | 121.1  | 328.9  | 268.6  | 1360.4 | 1289.5 | 1737.4 |
| 54.8   | 96.4   | 120.7  | 132.9  | 96.2   | 77.2   | 161.8  | 126.1  | 147.5  |
| 132.1  | 165.9  | 36.9   | 44.6   | 163.8  | 155.4  | 113.4  | 58.5   | 55.6   |
| 118.9  | 131.5  | 44.7   | 81.5   | 196.5  | 148.3  | 162.2  | 86.3   | 79.0   |
| 88.0   | 148.0  | 57.6   | 58.0   | 127.8  | 163.5  | 144.7  | 268.5  | 276.2  |
| 65.6   | 79.3   | 63.7   | 114.0  | 66.9   | 91.8   | 511.4  | 486.9  | 617.2  |
| 317.2  | 316.7  | 6.8    | 15.6   | 400.8  | 308.0  | 30.9   | 37.2   | 31.3   |
| 63.0   | 64.1   | 44.0   | 64.8   | 85.5   | 62.7   | 67.7   | 57.6   | 72.9   |
| 26.7   | 40.9   | 19.6   | 10.8   | 42.0   | 23.5   | 11.1   | 14.0   | 33.4   |
| 1065.3 | 1399.6 | 466.7  | 680.9  | 1851.0 | 1430.8 | 11.0   | 16.1   | 6.5    |
| 92.4   | 116.6  | 27.7   | 34.7   | 177.9  | 150.6  | 131.8  | 68.6   | 70.6   |
| 520.6  | 713.2  | 53.3   | 53.5   | 649.5  | 685.6  | 762.6  | 682.9  | 736.9  |
| 93.2   | 93.5   | 115.5  | 112.4  | 103.4  | 86.6   | 165.9  | 138.1  | 172.5  |
| 479.3  | 486.4  | 246.5  | 357.2  | 805.2  | 439.5  | 1489.2 | 1888.6 | 1879.7 |
| 330.7  | 492.0  | 51.6   | 69.5   | 438.0  | 474.2  | 1297.7 | 768.9  | 805.6  |
| 295.0  | 372.3  | 319.4  | 465.8  | 426.3  | 450.4  | 1931.7 | 1358.4 | 1398.9 |
| 36.0   | 47.0   | 11.6   | 30.0   | 50.3   | 17.5   | 86.8   | 77.6   | 93.8   |
| 491.7  | 575.4  | 235.2  | 262.4  | 669.1  | 528.7  | 845.2  | 706.9  | 719.4  |
| 37.4   | 43.5   | 26.3   | 10.3   | 45.7   | 16.8   | 28.1   | 30.5   | 28.5   |
| 114.0  | 200.6  | 29.7   | 31.1   | 225.9  | 247.0  | 67.5   | 68.9   | 85.6   |
| 199.1  | 221.0  | 70.3   | 70.1   | 289.5  | 187.8  | 367.8  | 240.0  | 252.1  |
| 8.8    | 22.6   | 14.8   | 14.8   | 11.6   | 20.2   | 8.4    | 14.5   | 19.8   |
| 2.7    | 0.5    | 7.4    | 0.5    | 5.7    | 5.8    | 1.5    | 4.7    | 4.0    |
| 23.8   | 43.5   | 9.6    | 15.6   | 45.9   | 38.1   | 115.7  | 80.4   | 86.2   |
| 542.0  | 672.0  | 99.0   | 124.0  | 858.4  | 649.2  | 1118.1 | 801.1  | 887.9  |
| 70.3   | 105.5  | 46.8   | 81.1   | 114.9  | 57.7   | 264.9  | 176.4  | 185.3  |
| 267.8  | 372.9  | 117.2  | 174.4  | 381.1  | 304.9  | 676.2  | 445.5  | 510.1  |
| 502.6  | 541.5  | 8.7    | 10.8   | 866.3  | 327.2  | 11.4   | 19.3   | 15.0   |
| 73.9   | 70.2   | 1.3    | 0.7    | 61.5   | 67.5   | 3.8    | 2.5    | 2.2    |
| 229.4  | 221.9  | 3.7    | 0.8    | 359.5  | 193.3  | 497.3  | 611.7  | 718.0  |
| 892.7  | 808.7  | 59.5   | 53.2   | 790.3  | 1291.9 | 1039.5 | 622.7  | 653.9  |
| 1154.9 | 964.7  | 174.4  | 255.5  | 1121.2 | 937.3  | 2070.3 | 1183.7 | 1244.2 |
| 126.1  | 82.3   | 49.2   | 60.4   | 137.5  | 91.0   | 693.2  | 859.3  | 949.9  |
| 138.1  | 187.0  | 88.2   | 109.8  | 133.6  | 156.7  | 418.0  | 175.9  | 213.1  |
| 487.2  | 654.8  | 100.4  | 215.0  | 650.9  | 650.9  | 740.1  | 569.8  | 598.9  |
| 271.8  | 312.4  | 159.4  | 263.1  | 381.8  | 333.5  | 647.8  | 494.6  | 564.0  |
| 578.9  | 620.3  | 302.2  | 433.4  | 691.3  | 440.2  | 989.6  | 880.2  | 1032.7 |
| 99.4   | 88.6   | 70.1   | 95.2   | 156.1  | 152.9  | 294.5  | 228.6  | 253.7  |
| 539.3  | 653.5  | 185.4  | 212.0  | 695.7  | 634.7  | 851.8  | 547.3  | 747.6  |
| 122.0  | 135.1  | 98.9   | 137.6  | 202.0  | 115.4  | 315.5  | 451.8  | 506.5  |
| 57.6   | 67.8   | 4.2    | 2.8    | 87.6   | 82.0   | 374.6  | 257.5  | 298.5  |
| 336.3  | 456.5  | 96.1   | 114.0  | 486.7  | 408.5  | 374.5  | 346.6  | 339.3  |
| 291.3  | 371.8  | 354.1  | 526.2  | 473.7  | 315.8  | 596.1  | 544.1  | 654.0  |
| 163.5  | 228.5  | 166.1  | 150.8  | 236.8  | 172.3  | 276.5  | 281.5  | 283.7  |
| 20.4   | 40.1   | 73.8   | 127.3  | 24.8   | 17.7   | 99.6   | 86.3   | 104.7  |
| 388.6  | 403.2  | 527.9  | 644.0  | 779.7  | 449.8  | 2564.4 | 3173.8 | 3217.5 |
| 1988.5 | 2238.6 | 1129.5 | 1587.7 | 2779.8 | 2245.3 | 7160.7 | 7158.2 | 7325.0 |
| 321.2  | 409.0  | 165.7  | 320.8  | 510.8  | 327.7  | 987.6  | 902.9  | 965.9  |
| 192.9  | 259.9  | 20.0   | 12.3   | 472.5  | 294.2  | 803.9  | 580.7  | 744.9  |
| 337.2  | 674.6  | 142.2  | 119.0  | 713.5  | 547.9  | 1516.8 | 629.1  | 701.7  |
| 127.7  | 230.1  | 48.1   | 84.7   | 180.2  | 229.5  | 252.8  | 249.4  | 303.1  |

|        |        |       |       |        |        |        |        |        |
|--------|--------|-------|-------|--------|--------|--------|--------|--------|
| 347.7  | 465.7  | 765.4 | 977.4 | 559.8  | 469.0  | 1188.4 | 671.2  | 759.0  |
| 5.1    | 9.2    | 3.0   | 2.3   | 1.7    | 1.6    | 1.2    | 0.8    | 2.7    |
| 126.8  | 267.2  | 18.3  | 14.4  | 114.2  | 178.2  | 13.9   | 10.2   | 13.1   |
| 356.5  | 686.8  | 48.7  | 37.5  | 409.7  | 434.0  | 17.7   | 14.3   | 13.0   |
| 246.5  | 528.0  | 15.4  | 10.4  | 307.0  | 292.4  | 8.0    | 6.7    | 12.5   |
| 25.2   | 50.8   | 6.6   | 6.2   | 33.1   | 39.2   | 34.9   | 39.8   | 46.1   |
| 141.5  | 211.2  | 14.6  | 10.3  | 231.9  | 200.0  | 73.2   | 94.9   | 105.9  |
| 190.9  | 209.2  | 9.7   | 44.1  | 325.0  | 201.3  | 114.2  | 159.7  | 233.4  |
| 446.7  | 491.3  | 118.6 | 161.2 | 717.3  | 514.7  | 967.0  | 851.6  | 781.3  |
| 774.3  | 900.5  | 161.6 | 217.7 | 1431.9 | 1009.8 | 2322.8 | 2459.0 | 2479.2 |
| 431.8  | 585.1  | 161.2 | 135.4 | 877.8  | 704.8  | 304.1  | 281.2  | 329.5  |
| 114.6  | 105.1  | 91.0  | 107.1 | 175.7  | 71.2   | 295.5  | 225.1  | 186.8  |
| 30.9   | 32.9   | 8.2   | 13.6  | 36.7   | 37.8   | 17.4   | 22.9   | 21.2   |
| 810.6  | 969.4  | 27.2  | 65.9  | 1562.5 | 1091.5 | 1442.5 | 1136.7 | 1144.7 |
| 223.6  | 167.5  | 193.3 | 272.8 | 358.2  | 187.1  | 1083.1 | 1391.6 | 1517.8 |
| 12.3   | 10.9   | 55.2  | 62.9  | 5.6    | 13.7   | 36.6   | 54.3   | 48.5   |
| 288.1  | 331.3  | 127.5 | 150.5 | 341.6  | 232.3  | 658.9  | 887.0  | 1153.9 |
| 3.3    | 18.2   | 19.9  | 15.3  | 26.3   | 18.9   | 24.5   | 45.2   | 39.9   |
| 362.3  | 491.9  | 33.0  | 40.8  | 465.4  | 470.8  | 696.5  | 628.8  | 853.1  |
| 23.7   | 28.7   | 84.7  | 86.8  | 22.7   | 26.3   | 50.4   | 71.0   | 96.2   |
| 168.8  | 254.8  | 59.7  | 84.2  | 300.3  | 205.0  | 347.8  | 318.7  | 357.9  |
| 53.2   | 59.1   | 281.3 | 402.1 | 102.2  | 65.1   | 670.2  | 1313.0 | 1424.0 |
| 16.9   | 8.3    | 88.2  | 94.1  | 14.7   | 13.9   | 34.8   | 72.3   | 82.6   |
| 5.3    | 6.6    | 70.7  | 79.4  | 6.5    | 5.6    | 18.7   | 51.8   | 56.4   |
| 324.9  | 366.6  | 147.0 | 224.6 | 488.6  | 416.0  | 741.6  | 677.7  | 692.6  |
| 747.7  | 1025.5 | 139.2 | 197.9 | 1133.5 | 831.2  | 1119.4 | 2551.7 | 2778.4 |
| 96.8   | 110.1  | 196.1 | 165.5 | 159.4  | 93.2   | 129.1  | 153.6  | 183.2  |
| 130.5  | 153.9  | 34.5  | 54.5  | 189.3  | 124.5  | 144.3  | 209.7  | 186.5  |
| 467.1  | 513.5  | 133.5 | 192.1 | 813.7  | 504.0  | 729.6  | 406.4  | 482.5  |
| 503.1  | 500.7  | 117.2 | 112.8 | 682.6  | 499.7  | 1637.3 | 1212.0 | 1238.8 |
| 65.9   | 37.8   | 9.3   | 47.8  | 42.2   | 54.9   | 99.8   | 59.2   | 61.6   |
| 151.6  | 184.2  | 12.6  | 10.7  | 241.1  | 197.9  | 144.8  | 110.4  | 106.5  |
| 5.2    | 4.4    | 7.0   | 12.5  | 4.6    | 3.3    | 5.0    | 14.7   | 6.8    |
| 260.3  | 321.3  | 153.0 | 163.4 | 406.5  | 393.8  | 414.5  | 287.5  | 299.9  |
| 850.5  | 1111.4 | 309.3 | 458.5 | 1370.1 | 1076.3 | 2080.2 | 1718.9 | 1892.7 |
| 861.4  | 942.7  | 103.1 | 119.3 | 1200.3 | 1095.8 | 725.5  | 423.3  | 382.5  |
| 659.2  | 838.9  | 131.3 | 174.3 | 980.8  | 899.3  | 1388.2 | 1015.7 | 1071.7 |
| 41.8   | 43.6   | 29.1  | 49.0  | 48.9   | 41.7   | 136.3  | 93.2   | 114.2  |
| 136.5  | 169.5  | 207.7 | 367.8 | 214.2  | 149.3  | 1070.1 | 964.2  | 1091.8 |
| 63.9   | 66.2   | 49.9  | 26.9  | 105.7  | 79.2   | 218.8  | 131.7  | 179.7  |
| 8.2    | 2.7    | 2.2   | 12.4  | 2.4    | 16.2   | 13.6   | 2.5    | 3.6    |
| 153.1  | 135.4  | 78.4  | 99.0  | 155.6  | 141.8  | 394.3  | 220.9  | 353.3  |
| 1650.9 | 1810.5 | 613.6 | 974.5 | 2000.7 | 1880.9 | 1002.5 | 695.7  | 792.1  |
| 35.8   | 35.1   | 28.2  | 43.4  | 33.5   | 22.6   | 110.3  | 93.3   | 96.1   |
| 174.6  | 146.2  | 121.1 | 125.7 | 221.6  | 122.5  | 441.4  | 314.3  | 427.3  |
| 27.2   | 37.3   | 12.9  | 11.5  | 45.2   | 50.2   | 235.9  | 166.1  | 205.9  |
| 6.4    | 8.7    | 16.1  | 16.9  | 24.6   | 19.1   | 96.2   | 72.8   | 81.2   |
| 19.9   | 32.0   | 47.2  | 63.9  | 22.9   | 15.1   | 194.8  | 177.5  | 170.0  |
| 100.4  | 122.6  | 6.2   | 17.8  | 134.3  | 134.4  | 269.8  | 836.8  | 702.8  |
| 19.0   | 25.8   | 27.0  | 21.7  | 10.5   | 17.2   | 78.1   | 43.1   | 45.5   |
| 2006.8 | 2168.6 | 411.1 | 684.4 | 3315.1 | 2024.4 | 4650.8 | 1875.1 | 2221.4 |
| 198.2  | 287.9  | 256.8 | 401.2 | 373.9  | 299.6  | 1424.2 | 1111.4 | 1168.7 |
| 16.5   | 17.1   | 24.7  | 13.9  | 12.0   | 11.8   | 25.8   | 14.9   | 22.7   |

|        |        |        |        |        |        |        |        |        |
|--------|--------|--------|--------|--------|--------|--------|--------|--------|
| 301.3  | 307.5  | 260.9  | 432.4  | 441.2  | 363.5  | 324.9  | 212.1  | 305.2  |
| 1839.8 | 2402.0 | 1122.6 | 1580.9 | 2851.5 | 2386.4 | 2187.9 | 2054.3 | 1979.5 |
| 65.9   | 47.7   | 87.5   | 72.2   | 64.6   | 69.0   | 153.1  | 251.9  | 231.6  |
| 132.7  | 150.0  | 610.3  | 1007.7 | 245.4  | 126.1  | 532.3  | 786.3  | 879.4  |
| 7.0    | 11.4   | 1.1    | 5.9    | 13.2   | 19.8   | 12.4   | 7.6    | 11.3   |
| 248.0  | 313.4  | 39.9   | 48.7   | 377.0  | 285.4  | 699.5  | 512.6  | 602.8  |
| 47.6   | 47.8   | 69.1   | 75.1   | 67.5   | 46.0   | 155.5  | 151.8  | 176.6  |
| 0.5    | 0.7    | 0.6    | 1.5    | 1.2    | 0.7    | 0.5    | 0.8    | 0.6    |
| 192.3  | 236.8  | 62.0   | 72.6   | 258.6  | 205.8  | 274.9  | 215.6  | 231.1  |
| 266.7  | 376.3  | 74.3   | 76.2   | 438.3  | 408.0  | 1729.4 | 1770.3 | 1657.7 |
| 84.8   | 97.5   | 56.4   | 78.4   | 137.3  | 74.5   | 188.4  | 161.7  | 180.6  |
| 26.7   | 22.2   | 2.2    | 1.4    | 45.0   | 17.6   | 5.9    | 5.4    | 2.0    |
| 5.5    | 14.2   | 0.7    | 0.3    | 12.6   | 1.0    | 1.5    | 8.5    | 4.9    |
| 7.5    | 10.9   | 1.0    | 3.5    | 25.1   | 10.3   | 5.4    | 3.5    | 0.8    |
| 53.1   | 93.6   | 46.8   | 51.6   | 60.6   | 52.1   | 112.1  | 177.6  | 205.0  |
| 42.7   | 66.7   | 33.8   | 33.8   | 90.6   | 64.8   | 538.3  | 645.6  | 675.9  |
| 508.6  | 631.0  | 33.4   | 37.9   | 774.9  | 642.9  | 1289.7 | 1563.4 | 1573.2 |
| 2249.4 | 1708.9 | 569.4  | 827.9  | 2527.8 | 1870.4 | 6358.5 | 5091.3 | 5107.2 |
| 48.7   | 50.7   | 44.1   | 48.2   | 84.8   | 34.7   | 99.6   | 96.3   | 101.5  |
| 1719.7 | 2392.8 | 273.3  | 351.3  | 2337.5 | 2042.6 | 3546.5 | 2710.6 | 2882.7 |
| 438.5  | 730.2  | 16.9   | 26.0   | 686.5  | 692.4  | 512.4  | 456.1  | 494.8  |
| 18.7   | 13.1   | 8.3    | 19.5   | 28.0   | 21.6   | 31.4   | 28.9   | 29.2   |
| 3.3    | 7.8    | 2.2    | 2.0    | 10.9   | 1.3    | 1.3    | 2.8    | 3.4    |
| 6.6    | 14.5   | 3.2    | 1.4    | 15.5   | 23.7   | 5.9    | 4.6    | 3.6    |
| 222.2  | 296.8  | 42.5   | 54.9   | 527.1  | 259.2  | 30.7   | 22.5   | 36.2   |
| 507.0  | 681.9  | 103.0  | 120.2  | 760.2  | 667.1  | 682.9  | 591.9  | 640.3  |
| 57.1   | 75.6   | 24.1   | 26.0   | 67.5   | 59.2   | 111.1  | 93.6   | 103.8  |
| 153.9  | 194.7  | 149.9  | 162.0  | 175.7  | 219.1  | 225.4  | 180.4  | 215.7  |
| 171.9  | 217.1  | 43.2   | 52.4   | 269.6  | 175.6  | 596.4  | 553.9  | 584.0  |
| 317.5  | 420.2  | 84.6   | 93.4   | 497.0  | 435.2  | 1154.9 | 1054.9 | 1174.2 |
| 39.5   | 79.3   | 21.9   | 15.9   | 71.6   | 47.8   | 371.1  | 317.3  | 330.9  |
| 3.1    | 18.4   | 8.9    | 11.0   | 21.1   | 17.3   | 24.9   | 12.6   | 18.6   |
| 149.9  | 139.4  | 79.5   | 129.2  | 186.3  | 171.6  | 256.1  | 200.8  | 198.2  |
| 123.0  | 93.0   | 51.4   | 45.7   | 166.9  | 92.5   | 385.5  | 608.6  | 692.0  |
| 353.2  | 412.4  | 122.0  | 151.1  | 537.8  | 384.3  | 820.1  | 561.1  | 619.3  |
| 233.6  | 355.4  | 162.2  | 188.0  | 282.5  | 343.4  | 695.9  | 585.4  | 638.8  |
| 1180.9 | 1287.9 | 157.5  | 231.6  | 1686.9 | 1575.7 | 1215.7 | 804.2  | 881.1  |
| 12.6   | 7.4    | 17.5   | 1.8    | 14.1   | 5.9    | 26.2   | 34.1   | 15.7   |
| 11.5   | 8.9    | 13.9   | 13.5   | 10.5   | 1.0    | 25.9   | 32.7   | 29.1   |
| 68.2   | 75.5   | 305.4  | 429.6  | 136.4  | 57.1   | 207.8  | 473.5  | 544.8  |
| 2.1    | 9.5    | 12.2   | 9.6    | 8.2    | 13.0   | 10.8   | 5.7    | 4.6    |
| 51.8   | 54.9   | 38.0   | 52.8   | 67.0   | 40.2   | 41.5   | 34.7   | 32.4   |
| 391.2  | 495.3  | 82.8   | 93.7   | 694.7  | 369.0  | 924.5  | 552.2  | 507.4  |
| 296.9  | 360.8  | 97.1   | 127.8  | 449.0  | 383.8  | 747.7  | 831.1  | 888.5  |
| 212.0  | 256.5  | 98.5   | 117.4  | 355.8  | 236.4  | 262.3  | 191.5  | 233.2  |
| 118.0  | 117.9  | 25.7   | 33.3   | 186.4  | 104.6  | 124.0  | 207.2  | 218.9  |
| 284.6  | 452.1  | 25.3   | 33.9   | 422.4  | 296.1  | 1400.1 | 880.6  | 889.9  |
| 198.5  | 223.9  | 21.0   | 47.2   | 337.6  | 271.7  | 774.6  | 425.3  | 439.1  |
| 648.9  | 690.7  | 83.7   | 129.1  | 1189.6 | 557.7  | 3861.2 | 2858.2 | 2965.6 |
| 267.7  | 476.1  | 138.4  | 120.1  | 396.7  | 396.7  | 558.7  | 414.3  | 469.4  |
| 382.2  | 566.4  | 68.0   | 130.3  | 704.8  | 648.5  | 764.2  | 633.5  | 667.0  |
| 442.5  | 630.4  | 71.5   | 109.2  | 679.1  | 604.9  | 857.2  | 797.4  | 842.9  |
| 405.2  | 481.8  | 114.6  | 236.2  | 575.1  | 499.3  | 917.3  | 861.2  | 913.2  |

|        |        |       |        |        |        |        |        |        |
|--------|--------|-------|--------|--------|--------|--------|--------|--------|
| 125.6  | 203.2  | 130.0 | 128.6  | 220.4  | 261.3  | 1696.9 | 1484.9 | 1634.7 |
| 105.7  | 180.0  | 53.5  | 71.5   | 188.8  | 225.2  | 984.1  | 957.0  | 1154.2 |
| 293.8  | 405.0  | 48.1  | 85.8   | 456.4  | 439.2  | 1192.0 | 795.6  | 819.5  |
| 1017.5 | 1245.1 | 232.1 | 324.7  | 1456.1 | 1323.7 | 1438.7 | 1058.4 | 1069.5 |
| 370.4  | 444.6  | 114.3 | 134.7  | 545.7  | 455.9  | 574.7  | 488.2  | 449.3  |
| 728.4  | 938.2  | 125.9 | 115.4  | 1015.4 | 807.0  | 1045.6 | 827.0  | 936.5  |
| 63.4   | 83.4   | 35.6  | 52.3   | 103.1  | 54.3   | 129.2  | 212.8  | 253.9  |
| 811.7  | 1011.3 | 361.7 | 588.3  | 1371.5 | 1015.8 | 1402.2 | 1589.2 | 1610.7 |
| 51.2   | 42.7   | 28.9  | 36.2   | 65.5   | 48.5   | 228.1  | 222.3  | 223.6  |
| 154.0  | 218.4  | 67.1  | 79.1   | 266.0  | 236.9  | 811.8  | 697.2  | 744.0  |
| 5.8    | 7.4    | 4.3   | 7.8    | 3.5    | 1.5    | 27.8   | 32.8   | 29.4   |
| 829.1  | 1076.6 | 607.1 | 966.6  | 1239.1 | 1013.6 | 1335.0 | 1005.5 | 1065.2 |
| 155.2  | 279.5  | 14.8  | 10.5   | 233.6  | 215.4  | 169.2  | 238.4  | 225.4  |
| 101.4  | 151.2  | 6.5   | 7.3    | 136.6  | 174.0  | 113.2  | 141.9  | 146.6  |
| 199.0  | 292.4  | 157.1 | 216.6  | 333.9  | 321.7  | 741.8  | 1111.4 | 1284.5 |
| 134.5  | 165.8  | 174.6 | 224.2  | 232.4  | 182.9  | 12.1   | 17.0   | 13.1   |
| 119.6  | 155.1  | 2.4   | 7.0    | 198.7  | 120.8  | 18.8   | 27.4   | 37.0   |
| 56.1   | 100.9  | 79.6  | 112.1  | 82.8   | 68.8   | 390.8  | 313.0  | 340.6  |
| 394.8  | 558.2  | 28.9  | 32.1   | 701.2  | 477.3  | 225.3  | 160.4  | 179.3  |
| 271.6  | 414.0  | 27.2  | 27.8   | 402.4  | 294.6  | 237.0  | 183.1  | 168.6  |
| 382.1  | 501.8  | 119.0 | 143.3  | 610.2  | 478.3  | 789.4  | 582.0  | 638.8  |
| 202.6  | 288.8  | 111.5 | 143.1  | 331.9  | 272.9  | 996.2  | 904.8  | 971.7  |
| 51.9   | 54.9   | 18.3  | 14.1   | 68.5   | 57.6   | 112.0  | 133.4  | 131.8  |
| 208.6  | 262.3  | 234.7 | 331.3  | 292.7  | 290.2  | 760.1  | 839.4  | 1023.2 |
| 9.6    | 0.8    | 5.1   | 7.1    | 3.4    | 11.2   | 11.3   | 10.1   | 14.1   |
| 209.5  | 286.3  | 263.7 | 385.8  | 300.8  | 273.9  | 297.1  | 188.3  | 231.5  |
| 218.3  | 345.9  | 46.7  | 57.4   | 343.2  | 328.7  | 131.8  | 72.1   | 79.0   |
| 50.9   | 111.9  | 28.2  | 38.0   | 89.5   | 58.0   | 58.0   | 25.8   | 30.2   |
| 2640.1 | 3005.6 | 335.4 | 449.9  | 3693.8 | 3175.0 | 3449.3 | 2400.7 | 2613.0 |
| 190.8  | 209.6  | 88.3  | 121.7  | 272.4  | 175.8  | 213.5  | 148.9  | 175.4  |
| 116.0  | 127.9  | 25.8  | 30.3   | 144.7  | 116.8  | 182.8  | 149.3  | 144.0  |
| 194.3  | 235.4  | 19.5  | 37.9   | 347.2  | 192.1  | 137.7  | 133.6  | 166.0  |
| 31.4   | 35.2   | 41.3  | 36.1   | 51.6   | 46.5   | 60.5   | 49.3   | 63.9   |
| 103.2  | 91.1   | 45.0  | 79.3   | 112.5  | 104.4  | 108.6  | 141.5  | 163.7  |
| 94.4   | 167.4  | 96.4  | 106.9  | 130.3  | 118.5  | 221.2  | 122.9  | 163.9  |
| 17.7   | 33.5   | 32.2  | 55.5   | 22.0   | 21.7   | 116.5  | 83.1   | 78.9   |
| 515.5  | 582.3  | 206.6 | 324.9  | 1522.6 | 518.4  | 49.5   | 28.1   | 26.9   |
| 303.2  | 267.0  | 203.1 | 229.5  | 299.6  | 234.1  | 358.5  | 259.9  | 293.0  |
| 282.9  | 350.6  | 38.8  | 39.6   | 386.2  | 360.0  | 476.5  | 246.5  | 288.8  |
| 260.6  | 217.1  | 42.8  | 67.6   | 330.5  | 150.0  | 300.3  | 160.3  | 193.7  |
| 290.3  | 362.6  | 198.6 | 213.9  | 426.4  | 333.6  | 1822.9 | 1788.8 | 1922.9 |
| 540.2  | 672.2  | 248.2 | 424.2  | 762.9  | 705.7  | 595.9  | 384.5  | 459.3  |
| 123.4  | 352.5  | 183.9 | 253.9  | 190.9  | 362.4  | 620.5  | 590.8  | 704.1  |
| 471.6  | 596.8  | 148.4 | 183.6  | 708.5  | 622.6  | 1401.9 | 1146.1 | 1212.7 |
| 147.1  | 173.3  | 208.7 | 261.9  | 237.6  | 132.0  | 495.3  | 398.0  | 408.1  |
| 42.1   | 50.8   | 43.5  | 37.6   | 60.3   | 33.7   | 191.9  | 158.9  | 141.8  |
| 20.1   | 21.8   | 21.4  | 29.7   | 38.4   | 14.7   | 86.1   | 61.0   | 66.0   |
| 78.9   | 99.2   | 7.6   | 2.2    | 93.4   | 98.9   | 99.6   | 47.2   | 62.6   |
| 168.2  | 119.4  | 199.3 | 325.2  | 329.1  | 169.3  | 1135.0 | 1130.2 | 1335.2 |
| 6.0    | 2.3    | 14.5  | 24.1   | 5.5    | 23.0   | 72.5   | 75.2   | 97.8   |
| 2114.6 | 2194.3 | 972.1 | 1454.6 | 3095.0 | 2350.6 | 2921.3 | 1285.8 | 1370.3 |
| 26.1   | 31.6   | 86.5  | 125.0  | 72.0   | 18.1   | 132.1  | 158.8  | 174.1  |
| 2967.2 | 3511.4 | 266.9 | 385.2  | 4014.4 | 3790.7 | 4648.7 | 2780.8 | 2895.4 |

|        |        |       |       |        |        |        |        |        |
|--------|--------|-------|-------|--------|--------|--------|--------|--------|
| 185.1  | 174.3  | 174.6 | 250.1 | 246.8  | 179.9  | 1038.1 | 1009.3 | 1084.8 |
| 275.4  | 367.4  | 228.7 | 314.1 | 528.3  | 316.8  | 900.6  | 888.8  | 938.7  |
| 175.0  | 160.4  | 101.9 | 154.5 | 264.9  | 167.1  | 539.9  | 384.0  | 438.3  |
| 212.0  | 238.8  | 85.1  | 118.9 | 357.6  | 249.6  | 772.6  | 504.5  | 581.2  |
| 814.9  | 901.2  | 531.6 | 861.2 | 1228.8 | 997.3  | 1719.7 | 1636.7 | 1891.0 |
| 184.1  | 196.5  | 202.1 | 245.1 | 259.1  | 186.2  | 292.5  | 539.0  | 609.3  |
| 426.1  | 441.2  | 280.8 | 468.1 | 640.6  | 443.3  | 570.2  | 612.3  | 600.5  |
| 191.9  | 299.0  | 45.4  | 58.6  | 567.7  | 315.6  | 856.9  | 1386.9 | 1406.3 |
| 248.4  | 329.4  | 16.1  | 21.9  | 454.7  | 332.9  | 908.6  | 1607.5 | 1731.7 |
| 47.2   | 34.5   | 22.7  | 22.9  | 43.1   | 25.5   | 172.5  | 142.1  | 127.9  |
| 312.0  | 543.4  | 50.8  | 63.0  | 514.7  | 521.7  | 1575.3 | 1280.9 | 1478.2 |
| 541.1  | 818.7  | 137.5 | 191.4 | 967.6  | 692.1  | 2305.8 | 3059.1 | 3163.0 |
| 52.9   | 105.2  | 52.5  | 72.8  | 137.7  | 65.3   | 358.7  | 494.3  | 460.5  |
| 191.1  | 221.8  | 314.2 | 489.4 | 281.5  | 181.4  | 1029.6 | 1004.8 | 1077.6 |
| 182.4  | 278.6  | 59.9  | 77.2  | 254.3  | 253.8  | 841.4  | 796.3  | 871.9  |
| 108.0  | 105.9  | 62.9  | 75.5  | 173.3  | 81.1   | 41.8   | 33.4   | 26.7   |
| 10.0   | 9.9    | 15.8  | 25.0  | 27.9   | 11.8   | 5.1    | 4.6    | 12.1   |
| 1335.9 | 1652.4 | 103.0 | 125.9 | 2423.9 | 1529.7 | 1844.7 | 2235.7 | 2369.9 |
| 71.6   | 67.6   | 51.6  | 61.9  | 130.9  | 65.2   | 383.3  | 320.8  | 373.9  |
| 44.7   | 42.2   | 14.5  | 15.6  | 49.1   | 39.1   | 173.9  | 163.4  | 179.4  |
| 5.7    | 3.4    | 1.3   | 1.1   | 3.3    | 2.7    | 4.0    | 1.7    | 3.6    |
| 944.5  | 1046.7 | 54.4  | 87.1  | 1340.0 | 996.6  | 921.1  | 176.0  | 205.4  |
| 313.5  | 402.7  | 120.6 | 137.2 | 446.7  | 442.8  | 791.8  | 747.0  | 922.6  |
| 181.3  | 152.8  | 142.1 | 203.3 | 176.0  | 150.4  | 271.8  | 358.4  | 346.3  |
| 15.7   | 17.0   | 18.0  | 13.6  | 18.6   | 11.2   | 55.4   | 43.2   | 74.6   |
| 8.7    | 19.2   | 16.2  | 21.3  | 25.2   | 21.4   | 72.1   | 73.5   | 98.1   |
| 11.2   | 31.0   | 41.1  | 53.3  | 44.8   | 50.8   | 136.4  | 137.7  | 126.2  |
| 140.1  | 177.8  | 37.8  | 49.3  | 224.2  | 152.4  | 321.9  | 235.3  | 253.8  |
| 363.6  | 500.3  | 32.3  | 41.4  | 629.2  | 395.5  | 601.2  | 452.8  | 491.1  |
| 224.6  | 254.0  | 88.6  | 130.0 | 299.5  | 227.0  | 509.1  | 372.5  | 369.6  |
| 116.0  | 156.0  | 79.6  | 130.8 | 205.8  | 130.8  | 188.3  | 184.3  | 196.9  |
| 184.8  | 194.2  | 161.6 | 191.8 | 273.7  | 226.3  | 578.5  | 663.2  | 692.7  |
| 46.7   | 53.8   | 74.0  | 67.8  | 63.9   | 37.9   | 95.0   | 98.2   | 118.4  |
| 264.6  | 359.0  | 8.3   | 4.0   | 396.2  | 320.7  | 317.6  | 309.1  | 322.9  |
| 352.6  | 420.5  | 5.8   | 2.0   | 446.6  | 461.3  | 303.6  | 254.9  | 278.4  |
| 380.4  | 297.8  | 2.3   | 2.2   | 652.8  | 209.1  | 32.1   | 16.7   | 20.6   |
| 410.7  | 365.2  | 2.8   | 2.0   | 772.6  | 247.9  | 4.0    | 2.7    | 2.6    |
| 137.5  | 152.4  | 364.1 | 451.7 | 263.6  | 155.7  | 364.1  | 478.8  | 504.0  |
| 37.4   | 54.8   | 107.8 | 114.8 | 45.3   | 33.3   | 197.3  | 285.8  | 331.8  |
| 56.7   | 65.4   | 101.2 | 125.5 | 88.7   | 72.9   | 171.2  | 203.9  | 198.8  |
| 157.7  | 187.9  | 174.2 | 249.2 | 216.8  | 166.3  | 426.2  | 317.9  | 351.7  |
| 416.8  | 364.4  | 92.4  | 94.1  | 530.6  | 411.6  | 1111.5 | 609.0  | 657.5  |
| 235.5  | 315.8  | 76.5  | 98.4  | 527.0  | 351.9  | 1040.1 | 640.4  | 615.7  |
| 897.2  | 1079.9 | 276.5 | 414.1 | 1329.5 | 1095.7 | 2354.3 | 1517.8 | 1608.8 |
| 140.4  | 140.5  | 109.0 | 121.6 | 185.1  | 125.1  | 313.3  | 412.8  | 435.6  |
| 3.2    | 25.8   | 18.4  | 14.1  | 48.8   | 17.6   | 28.7   | 15.2   | 24.1   |
| 11.1   | 11.6   | 9.2   | 5.8   | 24.7   | 19.0   | 20.2   | 20.8   | 30.8   |
| 35.2   | 39.1   | 34.5  | 61.5  | 60.5   | 2.2    | 222.0  | 140.2  | 138.7  |
| 60.4   | 48.6   | 21.7  | 37.4  | 83.1   | 67.6   | 130.8  | 85.9   | 102.3  |
| 184.7  | 184.7  | 81.1  | 104.4 | 324.6  | 148.9  | 570.7  | 588.1  | 636.3  |
| 102.4  | 118.6  | 44.2  | 58.6  | 126.9  | 105.1  | 186.0  | 175.4  | 226.3  |
| 261.2  | 370.2  | 4.3   | 1.9   | 352.4  | 294.7  | 38.6   | 69.1   | 77.3   |
| 616.0  | 783.7  | 19.3  | 14.9  | 763.5  | 655.3  | 72.9   | 122.9  | 128.9  |

|        |        |        |        |        |        |         |        |         |
|--------|--------|--------|--------|--------|--------|---------|--------|---------|
| 193.7  | 183.4  | 201.5  | 219.5  | 282.0  | 151.3  | 315.0   | 246.7  | 312.8   |
| 651.6  | 859.0  | 259.3  | 363.9  | 949.8  | 804.7  | 586.1   | 628.4  | 654.3   |
| 197.8  | 316.9  | 78.1   | 96.7   | 228.9  | 309.8  | 490.1   | 362.8  | 360.3   |
| 24.6   | 38.4   | 7.4    | 8.0    | 35.6   | 34.2   | 51.4    | 55.2   | 51.8    |
| 4657.2 | 5979.8 | 3265.4 | 3906.9 | 6242.1 | 5401.0 | 10046.2 | 9749.0 | 10149.3 |
| 31.8   | 40.1   | 46.1   | 56.5   | 35.9   | 33.1   | 97.2    | 170.9  | 167.9   |
| 239.4  | 239.2  | 49.0   | 53.5   | 276.5  | 225.3  | 653.3   | 503.9  | 559.4   |
| 4.6    | 13.9   | 13.2   | 22.5   | 10.6   | 3.6    | 3.5     | 5.7    | 17.0    |
| 361.9  | 430.5  | 60.4   | 52.0   | 716.6  | 496.3  | 842.4   | 819.9  | 815.7   |
| 218.8  | 306.6  | 129.4  | 143.5  | 384.2  | 264.7  | 572.0   | 536.6  | 520.8   |
| 678.5  | 868.0  | 156.2  | 202.0  | 1116.9 | 952.3  | 2032.1  | 714.2  | 775.2   |
| 246.5  | 280.7  | 92.2   | 110.9  | 345.8  | 226.6  | 239.9   | 319.8  | 343.1   |
| 229.0  | 240.0  | 52.4   | 87.3   | 310.5  | 324.4  | 304.6   | 405.3  | 452.9   |
| 122.9  | 132.6  | 104.5  | 109.2  | 153.1  | 112.0  | 534.5   | 530.2  | 596.6   |
| 442.8  | 453.9  | 53.7   | 48.6   | 488.7  | 375.7  | 599.7   | 960.9  | 1004.1  |
| 17.0   | 10.9   | 3.6    | 3.7    | 21.3   | 10.0   | 114.9   | 191.6  | 205.7   |
| 1.9    | 8.4    | 2.9    | 1.5    | 3.2    | 0.7    | 23.3    | 43.2   | 54.0    |
| 11.8   | 18.5   | 2.9    | 18.5   | 19.8   | 11.5   | 58.7    | 69.8   | 96.0    |
| 21.1   | 20.2   | 3.7    | 1.8    | 35.1   | 27.2   | 3.7     | 2.7    | 2.4     |
| 34.9   | 51.3   | 0.2    | 0.5    | 76.6   | 26.4   | 5.3     | 4.7    | 2.3     |
| 32.4   | 36.0   | 12.3   | 11.1   | 53.7   | 35.7   | 8.7     | 14.7   | 16.7    |
| 366.7  | 764.9  | 79.4   | 93.8   | 560.8  | 658.6  | 2076.5  | 1562.8 | 1619.1  |
| 136.8  | 176.4  | 86.8   | 106.2  | 196.1  | 216.6  | 177.7   | 218.9  | 206.7   |
| 694.2  | 745.4  | 70.5   | 58.8   | 870.5  | 648.9  | 3385.3  | 771.4  | 1060.7  |
| 309.0  | 290.4  | 26.0   | 32.2   | 293.8  | 370.8  | 1982.5  | 449.9  | 638.9   |
| 639.1  | 809.5  | 176.6  | 277.6  | 1256.4 | 802.6  | 1047.9  | 728.5  | 811.9   |
| 519.3  | 570.3  | 229.6  | 266.4  | 680.8  | 529.5  | 1423.1  | 1261.2 | 1379.4  |
| 128.3  | 99.9   | 69.3   | 90.0   | 164.4  | 83.7   | 34.8    | 152.7  | 67.6    |
| 1346.5 | 2245.9 | 417.3  | 551.0  | 2431.6 | 2084.8 | 4626.9  | 3183.7 | 3640.3  |
| 8.0    | 7.5    | 9.4    | 0.5    | 9.3    | 14.5   | 112.9   | 78.4   | 99.9    |
| 677.0  | 694.1  | 155.1  | 196.1  | 991.1  | 748.6  | 1240.6  | 1099.6 | 1252.5  |
| 93.7   | 85.1   | 122.1  | 242.5  | 92.0   | 92.0   | 165.2   | 145.1  | 202.1   |
| 977.0  | 1722.7 | 50.5   | 55.8   | 1849.0 | 1698.3 | 1740.6  | 1635.1 | 1665.5  |
| 987.2  | 1135.7 | 201.6  | 264.1  | 1461.1 | 1076.4 | 2241.4  | 1545.0 | 1540.0  |
| 256.2  | 281.4  | 84.8   | 136.1  | 449.3  | 251.1  | 138.1   | 170.2  | 169.8   |
| 321.1  | 462.1  | 86.3   | 128.1  | 489.0  | 498.1  | 456.3   | 336.5  | 413.8   |
| 139.8  | 172.9  | 84.8   | 75.2   | 190.8  | 146.8  | 177.6   | 126.0  | 157.1   |
| 127.4  | 166.1  | 28.0   | 35.9   | 153.2  | 155.0  | 274.4   | 228.0  | 260.6   |
| 128.3  | 176.0  | 99.4   | 120.3  | 154.9  | 177.3  | 200.6   | 158.7  | 180.7   |
| 65.4   | 90.2   | 16.8   | 14.3   | 124.1  | 83.0   | 48.1    | 37.9   | 38.0    |
| 48.4   | 68.3   | 4.8    | 1.5    | 71.8   | 58.9   | 4.9     | 3.6    | 5.3     |
| 317.5  | 312.7  | 10.5   | 9.1    | 388.1  | 252.1  | 6.2     | 5.5    | 2.3     |
| 5.6    | 8.4    | 20.1   | 17.5   | 11.0   | 12.1   | 75.2    | 195.1  | 181.1   |
| 14.5   | 15.9   | 34.7   | 37.0   | 49.9   | 18.7   | 146.1   | 374.4  | 386.9   |
| 66.4   | 81.0   | 62.1   | 82.2   | 65.6   | 86.0   | 250.5   | 233.0  | 227.7   |
| 1450.6 | 2715.5 | 265.0  | 451.3  | 2439.0 | 2673.0 | 2934.2  | 1437.8 | 1624.2  |
| 239.3  | 346.2  | 109.4  | 205.8  | 259.9  | 314.2  | 481.9   | 249.1  | 249.5   |
| 66.6   | 101.1  | 38.2   | 84.2   | 85.6   | 69.5   | 118.8   | 99.3   | 92.7    |
| 310.4  | 505.3  | 30.9   | 18.2   | 501.5  | 421.9  | 162.9   | 96.5   | 106.9   |
| 14.2   | 9.2    | 7.4    | 7.1    | 4.4    | 12.9   | 8.4     | 6.9    | 7.2     |
| 56.5   | 66.4   | 16.1   | 16.8   | 68.9   | 45.2   | 29.2    | 22.3   | 12.1    |
| 223.2  | 253.5  | 67.1   | 94.2   | 314.9  | 270.7  | 331.2   | 285.0  | 316.6   |
| 776.8  | 844.8  | 304.8  | 400.2  | 1304.7 | 870.8  | 1233.1  | 940.8  | 938.3   |

|        |        |        |        |        |        |        |        |        |
|--------|--------|--------|--------|--------|--------|--------|--------|--------|
| 4028.3 | 4687.1 | 1614.4 | 2119.1 | 5083.4 | 4012.9 | 6907.0 | 7183.0 | 7282.9 |
| 63.5   | 86.2   | 26.7   | 40.2   | 87.9   | 79.5   | 168.7  | 61.1   | 74.1   |
| 24.5   | 43.9   | 13.5   | 30.0   | 41.3   | 19.0   | 65.3   | 39.4   | 66.1   |
| 53.8   | 43.3   | 11.3   | 5.2    | 67.6   | 65.4   | 39.9   | 46.4   | 33.7   |
| 183.4  | 182.9  | 90.9   | 86.5   | 210.5  | 132.3  | 350.2  | 274.0  | 276.1  |
| 254.0  | 306.1  | 82.6   | 81.5   | 306.6  | 233.3  | 439.2  | 415.6  | 455.1  |
| 227.9  | 230.3  | 284.6  | 345.6  | 571.0  | 273.6  | 4485.3 | 4323.9 | 4271.7 |
| 439.5  | 902.9  | 349.6  | 487.5  | 665.3  | 975.6  | 2521.3 | 2407.2 | 2529.2 |
| 673.2  | 681.9  | 98.8   | 125.5  | 935.5  | 774.0  | 889.9  | 464.3  | 511.4  |
| 17.3   | 8.5    | 10.3   | 4.8    | 18.0   | 6.0    | 60.1   | 37.5   | 31.6   |
| 24.4   | 23.2   | 110.9  | 278.3  | 10.0   | 32.3   | 67.5   | 144.9  | 138.4  |
| 17.3   | 24.5   | 108.6  | 130.0  | 31.8   | 14.8   | 57.4   | 31.1   | 36.5   |
| 114.3  | 133.5  | 57.0   | 88.1   | 239.3  | 151.5  | 356.5  | 391.2  | 393.1  |
| 16.4   | 5.7    | 12.6   | 6.7    | 15.5   | 5.4    | 76.0   | 74.6   | 88.9   |
| 98.1   | 122.8  | 222.2  | 293.4  | 126.5  | 136.6  | 2102.8 | 2508.6 | 2906.8 |
| 210.9  | 297.3  | 262.1  | 316.9  | 399.1  | 282.8  | 455.1  | 326.1  | 364.1  |
| 11.4   | 30.7   | 17.9   | 26.1   | 29.9   | 31.2   | 53.7   | 53.1   | 47.9   |
| 185.4  | 237.2  | 107.6  | 147.0  | 288.1  | 190.6  | 273.5  | 123.1  | 144.3  |
| 106.0  | 121.6  | 81.4   | 93.9   | 143.7  | 151.5  | 126.0  | 132.4  | 142.1  |
| 274.6  | 408.9  | 72.9   | 79.8   | 415.3  | 310.6  | 405.5  | 308.5  | 355.9  |
| 91.9   | 85.0   | 325.1  | 547.9  | 134.5  | 76.2   | 1111.2 | 964.8  | 1048.9 |
| 128.5  | 149.9  | 95.7   | 158.0  | 247.7  | 159.5  | 259.7  | 186.8  | 223.8  |
| 886.7  | 1005.4 | 139.6  | 154.3  | 1289.1 | 981.7  | 1373.0 | 1130.6 | 1204.2 |
| 392.8  | 436.3  | 277.8  | 374.2  | 687.3  | 407.8  | 936.7  | 1243.5 | 1160.2 |
| 586.4  | 737.3  | 302.2  | 395.0  | 925.5  | 659.7  | 1751.5 | 2545.5 | 2396.6 |
| 31.7   | 7.4    | 3.3    | 12.0   | 18.7   | 5.0    | 2.4    | 2.4    | 3.5    |
| 64.1   | 77.5   | 1.0    | 5.2    | 104.3  | 78.3   | 44.8   | 50.5   | 48.0   |
| 125.2  | 134.6  | 175.6  | 245.9  | 211.5  | 179.2  | 247.7  | 283.4  | 227.4  |
| 135.1  | 85.8   | 112.4  | 194.4  | 162.0  | 82.4   | 402.0  | 282.6  | 319.7  |
| 292.6  | 374.0  | 49.0   | 49.9   | 518.2  | 402.0  | 3449.9 | 3530.4 | 3487.8 |
| 16.8   | 10.7   | 5.1    | 32.2   | 3.8    | 17.8   | 1.8    | 2.4    | 2.2    |
| 42.6   | 51.7   | 29.7   | 60.5   | 59.1   | 57.5   | 21.4   | 20.6   | 22.6   |
| 14.2   | 24.5   | 36.8   | 40.1   | 13.4   | 11.2   | 480.8  | 936.3  | 962.3  |
| 16.5   | 18.1   | 79.0   | 91.0   | 26.1   | 12.6   | 834.7  | 1703.4 | 1615.4 |
| 86.5   | 87.0   | 77.8   | 144.6  | 97.5   | 95.5   | 47.7   | 41.7   | 36.6   |
| 680.4  | 767.7  | 102.1  | 97.3   | 1025.6 | 614.4  | 424.1  | 565.1  | 699.4  |
| 154.4  | 232.3  | 27.7   | 20.5   | 223.9  | 189.2  | 195.5  | 178.2  | 199.7  |
| 217.4  | 237.2  | 80.0   | 193.1  | 297.4  | 222.8  | 908.3  | 556.0  | 707.0  |
| 465.2  | 513.0  | 385.6  | 450.4  | 747.4  | 384.6  | 2288.6 | 1507.3 | 1574.1 |
| 619.5  | 877.8  | 557.4  | 795.4  | 971.0  | 759.1  | 1933.6 | 1432.0 | 1518.9 |
| 203.1  | 330.1  | 97.9   | 126.7  | 331.0  | 311.4  | 409.4  | 545.7  | 612.7  |
| 107.3  | 164.0  | 28.3   | 34.5   | 135.0  | 156.7  | 179.4  | 232.2  | 214.6  |
| 255.1  | 258.1  | 105.7  | 201.3  | 358.9  | 202.9  | 702.3  | 455.6  | 553.6  |
| 237.7  | 222.0  | 117.1  | 160.2  | 314.3  | 194.4  | 9.4    | 1.9    | 7.0    |
| 58.1   | 40.0   | 38.6   | 43.5   | 100.6  | 35.5   | 5.6    | 7.5    | 3.8    |
| 60.8   | 53.3   | 120.8  | 101.3  | 92.4   | 67.8   | 194.6  | 867.8  | 776.0  |
| 41.8   | 95.9   | 33.4   | 27.9   | 75.5   | 64.7   | 60.7   | 55.3   | 68.5   |
| 96.5   | 171.7  | 27.4   | 28.1   | 204.0  | 157.3  | 699.2  | 802.2  | 898.2  |
| 10.8   | 1.9    | 6.0    | 7.7    | 20.4   | 14.4   | 4.1    | 6.1    | 0.4    |
| 27.2   | 5.2    | 5.6    | 6.3    | 17.2   | 7.8    | 3.3    | 9.7    | 2.3    |
| 98.6   | 97.2   | 64.5   | 72.8   | 56.5   | 64.2   | 88.4   | 183.4  | 120.5  |
| 328.7  | 478.1  | 148.1  | 135.2  | 449.8  | 372.7  | 871.4  | 795.9  | 862.6  |
| 133.8  | 144.8  | 43.8   | 44.1   | 184.4  | 140.4  | 176.3  | 140.6  | 187.0  |

|        |        |        |        |        |        |        |        |        |
|--------|--------|--------|--------|--------|--------|--------|--------|--------|
| 18.4   | 20.8   | 2.3    | 2.4    | 21.3   | 9.5    | 25.3   | 31.9   | 37.5   |
| 4.8    | 12.5   | 273.5  | 185.3  | 11.5   | 4.9    | 777.7  | 849.1  | 908.5  |
| 1284.8 | 1557.3 | 366.5  | 473.9  | 1812.2 | 1747.8 | 1326.6 | 751.9  | 814.5  |
| 263.9  | 304.4  | 46.3   | 65.8   | 406.4  | 339.5  | 754.7  | 546.8  | 593.8  |
| 25.5   | 22.8   | 12.2   | 15.1   | 34.0   | 25.4   | 6.1    | 7.5    | 6.6    |
| 193.6  | 160.9  | 24.7   | 32.6   | 188.6  | 154.6  | 88.5   | 42.4   | 67.5   |
| 165.5  | 174.9  | 216.4  | 288.2  | 216.1  | 195.7  | 646.1  | 451.3  | 573.1  |
| 159.8  | 132.4  | 57.0   | 66.0   | 232.6  | 158.5  | 352.1  | 263.2  | 321.2  |
| 353.3  | 528.9  | 6.5    | 8.7    | 701.4  | 485.3  | 299.0  | 304.0  | 388.4  |
| 220.2  | 284.0  | 7.8    | 5.1    | 447.0  | 433.3  | 233.5  | 246.1  | 295.1  |
| 43.2   | 55.1   | 57.8   | 77.6   | 66.3   | 39.3   | 251.0  | 524.0  | 594.2  |
| 115.3  | 136.2  | 26.3   | 21.4   | 169.0  | 136.7  | 587.6  | 432.6  | 529.3  |
| 258.5  | 333.3  | 49.4   | 61.5   | 388.3  | 268.9  | 649.3  | 495.9  | 632.4  |
| 63.4   | 64.4   | 24.6   | 25.9   | 95.8   | 53.1   | 63.8   | 65.5   | 71.7   |
| 15.3   | 2.5    | 0.9    | 0.7    | 9.0    | 2.9    | 3.2    | 4.6    | 4.9    |
| 30.2   | 20.0   | 1.1    | 3.7    | 52.9   | 17.1   | 39.7   | 28.6   | 36.6   |
| 284.4  | 299.6  | 83.2   | 102.2  | 233.6  | 200.2  | 236.6  | 313.7  | 304.7  |
| 2.7    | 2.3    | 2.7    | 2.1    | 14.4   | 3.0    | 3.6    | 4.0    | 2.4    |
| 131.1  | 237.0  | 418.9  | 709.8  | 221.3  | 172.3  | 142.9  | 420.5  | 446.6  |
| 94.1   | 163.4  | 755.5  | 662.3  | 198.8  | 108.8  | 96.6   | 233.1  | 250.5  |
| 460.5  | 392.6  | 79.8   | 132.1  | 620.0  | 308.2  | 528.3  | 360.4  | 454.5  |
| 179.4  | 205.7  | 222.9  | 261.8  | 291.2  | 204.8  | 482.9  | 744.7  | 816.3  |
| 21.5   | 42.6   | 32.5   | 44.4   | 41.0   | 38.5   | 74.9   | 62.3   | 57.9   |
| 152.7  | 188.5  | 59.7   | 80.9   | 191.1  | 148.0  | 186.8  | 150.9  | 165.2  |
| 67.5   | 65.7   | 70.3   | 72.0   | 77.4   | 79.2   | 131.1  | 108.8  | 100.9  |
| 838.5  | 1134.7 | 114.0  | 110.9  | 1049.2 | 1078.7 | 840.8  | 504.2  | 527.8  |
| 140.9  | 159.1  | 107.1  | 125.8  | 181.3  | 153.1  | 765.4  | 844.6  | 954.2  |
| 125.5  | 197.4  | 52.0   | 57.8   | 243.1  | 172.8  | 1151.3 | 1403.3 | 1547.2 |
| 712.2  | 1281.6 | 1462.3 | 1974.9 | 994.1  | 1110.1 | 2415.2 | 1327.2 | 1472.4 |
| 346.9  | 311.2  | 198.0  | 308.6  | 485.2  | 305.8  | 137.7  | 160.3  | 119.5  |
| 43.9   | 24.9   | 95.0   | 99.3   | 43.7   | 36.0   | 160.8  | 191.4  | 203.1  |
| 39.0   | 60.3   | 64.6   | 74.7   | 61.1   | 46.7   | 128.6  | 141.1  | 151.2  |
| 50.4   | 47.4   | 27.9   | 29.6   | 97.3   | 80.7   | 749.5  | 1068.8 | 1151.3 |
| 45.3   | 45.4   | 39.5   | 61.0   | 55.7   | 34.8   | 359.0  | 476.2  | 553.0  |
| 114.2  | 163.2  | 83.0   | 132.7  | 196.5  | 161.4  | 901.0  | 850.5  | 911.0  |
| 256.7  | 344.7  | 29.6   | 46.7   | 367.5  | 338.0  | 1903.6 | 2119.2 | 2288.2 |
| 178.3  | 215.4  | 38.9   | 40.9   | 226.6  | 189.0  | 146.0  | 100.6  | 144.8  |
| 474.9  | 497.8  | 102.5  | 95.2   | 766.3  | 576.2  | 317.9  | 236.8  | 289.3  |
| 78.4   | 87.1   | 26.7   | 54.4   | 151.0  | 86.5   | 121.3  | 86.8   | 95.4   |
| 1243.4 | 1187.7 | 444.6  | 832.8  | 1542.3 | 1454.9 | 2165.4 | 2124.3 | 2206.4 |
| 72.6   | 72.3   | 56.2   | 40.4   | 105.6  | 62.5   | 90.9   | 82.7   | 106.6  |
| 18.8   | 25.8   | 14.6   | 4.9    | 45.9   | 43.3   | 43.6   | 46.2   | 39.3   |
| 43.8   | 39.8   | 32.4   | 61.3   | 60.8   | 22.2   | 192.6  | 218.3  | 221.9  |
| 501.7  | 483.6  | 17.9   | 15.2   | 833.6  | 485.9  | 544.6  | 270.7  | 310.3  |
| 359.1  | 323.6  | 96.1   | 122.5  | 411.0  | 280.9  | 291.2  | 335.0  | 415.3  |
| 41.2   | 34.5   | 6.3    | 9.1    | 48.6   | 42.3   | 13.3   | 31.1   | 34.1   |
| 233.9  | 331.4  | 28.4   | 46.4   | 415.0  | 317.7  | 624.2  | 585.1  | 645.7  |
| 253.1  | 448.4  | 59.5   | 81.2   | 482.4  | 323.8  | 597.5  | 567.7  | 664.6  |
| 151.9  | 200.5  | 190.5  | 224.0  | 233.4  | 175.1  | 639.9  | 407.6  | 491.4  |
| 97.9   | 69.2   | 43.0   | 40.0   | 99.1   | 80.0   | 209.9  | 79.7   | 86.9   |
| 105.1  | 149.8  | 3.5    | 0.9    | 232.4  | 206.5  | 6.7    | 9.3    | 8.8    |
| 54.3   | 107.0  | 59.4   | 86.6   | 121.1  | 66.2   | 162.7  | 160.8  | 198.0  |
| 92.7   | 119.6  | 175.5  | 260.4  | 106.6  | 98.7   | 344.8  | 214.6  | 232.0  |



|        |        |       |       |        |        |        |        |        |
|--------|--------|-------|-------|--------|--------|--------|--------|--------|
| 13.2   | 1.0    | 9.2   | 4.9   | 18.2   | 19.1   | 4.4    | 1.5    | 6.7    |
| 447.1  | 539.7  | 52.6  | 38.5  | 755.2  | 624.8  | 581.7  | 285.1  | 344.2  |
| 86.2   | 86.2   | 19.4  | 27.9  | 117.8  | 89.1   | 223.3  | 99.9   | 114.7  |
| 270.1  | 439.6  | 182.7 | 230.9 | 429.3  | 541.8  | 60.9   | 41.8   | 79.6   |
| 52.4   | 28.8   | 52.0  | 53.1  | 64.3   | 39.1   | 125.9  | 215.5  | 259.2  |
| 107.1  | 127.1  | 142.1 | 111.2 | 151.6  | 141.3  | 293.4  | 349.2  | 387.7  |
| 79.0   | 67.4   | 59.4  | 60.8  | 109.8  | 98.6   | 372.4  | 367.2  | 415.1  |
| 1042.6 | 1001.7 | 347.6 | 513.6 | 1402.5 | 732.0  | 1525.6 | 1066.4 | 1214.5 |
| 413.5  | 438.5  | 90.0  | 123.1 | 650.8  | 435.7  | 727.0  | 895.9  | 889.6  |
| 109.9  | 110.1  | 122.7 | 178.4 | 144.4  | 94.7   | 43.6   | 76.7   | 79.1   |
| 105.8  | 101.5  | 23.7  | 3.3   | 142.7  | 118.0  | 189.9  | 146.4  | 172.4  |
| 159.2  | 225.8  | 52.3  | 101.2 | 277.0  | 183.1  | 418.1  | 427.4  | 439.5  |
| 11.9   | 30.0   | 20.6  | 18.4  | 36.0   | 10.4   | 39.4   | 52.7   | 56.8   |
| 149.1  | 240.9  | 77.0  | 123.4 | 219.9  | 248.3  | 389.2  | 318.3  | 325.9  |
| 105.6  | 147.5  | 29.8  | 65.8  | 164.3  | 116.2  | 429.6  | 379.7  | 343.7  |
| 142.0  | 189.3  | 59.2  | 62.5  | 257.6  | 181.8  | 196.3  | 135.9  | 139.4  |
| 331.2  | 392.1  | 37.0  | 61.7  | 538.7  | 370.6  | 204.1  | 148.2  | 144.2  |
| 231.1  | 342.6  | 18.1  | 20.6  | 390.1  | 301.4  | 157.5  | 124.9  | 113.7  |
| 22.2   | 24.0   | 27.0  | 21.3  | 35.1   | 29.1   | 52.9   | 78.7   | 77.0   |
| 392.2  | 587.2  | 53.9  | 69.6  | 477.4  | 457.3  | 251.0  | 369.7  | 427.3  |
| 228.7  | 327.5  | 26.1  | 19.7  | 440.7  | 282.5  | 499.0  | 337.8  | 349.3  |
| 2779.4 | 3559.6 | 326.9 | 367.7 | 3891.5 | 3523.4 | 3213.8 | 2016.9 | 1999.9 |
| 175.5  | 165.8  | 271.0 | 417.6 | 226.5  | 176.5  | 591.1  | 444.6  | 492.1  |
| 380.0  | 632.5  | 338.0 | 476.9 | 798.0  | 475.5  | 978.7  | 938.2  | 1123.6 |
| 63.5   | 82.7   | 3.4   | 4.2   | 104.8  | 33.9   | 56.0   | 85.4   | 70.0   |
| 65.3   | 70.0   | 2.3   | 2.7   | 102.3  | 72.6   | 42.2   | 58.4   | 51.6   |
| 201.2  | 265.0  | 124.5 | 172.1 | 363.2  | 241.5  | 1560.4 | 1614.1 | 1598.5 |
| 153.4  | 166.3  | 29.5  | 24.4  | 164.5  | 171.1  | 548.1  | 481.0  | 604.7  |
| 50.4   | 52.6   | 22.0  | 29.2  | 78.9   | 47.2   | 8501.7 | 7562.0 | 7292.5 |
| 81.1   | 121.8  | 28.4  | 39.3  | 138.3  | 109.3  | 322.9  | 661.9  | 679.2  |
| 28.8   | 40.7   | 19.9  | 22.9  | 74.8   | 55.4   | 0.5    | 6.7    | 2.5    |
| 14.3   | 17.5   | 12.9  | 13.1  | 27.2   | 16.4   | 261.7  | 230.2  | 318.1  |
| 3.4    | 3.8    | 32.0  | 36.4  | 3.7    | 30.0   | 73.8   | 48.0   | 56.7   |
| 634.5  | 703.3  | 363.4 | 578.2 | 797.1  | 724.4  | 1763.8 | 1043.5 | 1228.4 |
| 25.2   | 23.7   | 37.2  | 37.4  | 46.9   | 37.0   | 36.1   | 39.9   | 88.4   |
| 334.5  | 265.9  | 139.8 | 160.4 | 406.1  | 224.5  | 501.0  | 827.9  | 811.7  |
| 159.4  | 269.0  | 141.2 | 195.8 | 272.7  | 198.2  | 1072.5 | 1076.0 | 1292.2 |
| 121.8  | 139.0  | 81.2  | 112.8 | 179.1  | 165.3  | 155.6  | 135.6  | 161.2  |
| 145.4  | 168.8  | 98.6  | 121.2 | 160.1  | 146.8  | 201.4  | 171.6  | 187.5  |
| 276.1  | 325.5  | 165.3 | 166.4 | 492.3  | 296.2  | 516.2  | 388.7  | 373.1  |
| 75.5   | 119.2  | 5.5   | 14.8  | 170.2  | 92.4   | 121.0  | 104.4  | 78.7   |
| 260.8  | 320.5  | 52.3  | 95.6  | 375.4  | 312.9  | 243.8  | 248.7  | 263.5  |
| 367.2  | 432.2  | 187.5 | 231.6 | 664.0  | 433.9  | 440.8  | 401.7  | 510.6  |
| 96.7   | 142.1  | 118.2 | 152.9 | 150.8  | 158.0  | 865.6  | 751.3  | 919.2  |
| 152.0  | 98.7   | 601.4 | 615.7 | 188.3  | 125.0  | 221.0  | 295.1  | 272.7  |
| 51.6   | 66.8   | 60.5  | 65.4  | 68.7   | 47.4   | 148.0  | 138.7  | 132.7  |
| 47.5   | 65.6   | 52.8  | 71.5  | 85.0   | 36.5   | 187.0  | 162.5  | 156.6  |
| 480.8  | 547.8  | 117.2 | 135.8 | 913.7  | 535.5  | 2022.4 | 2681.6 | 2692.3 |
| 7.9    | 2.6    | 1.8   | 4.7   | 51.6   | 23.8   | 104.4  | 70.0   | 91.6   |
| 340.6  | 340.3  | 82.5  | 151.1 | 518.4  | 420.0  | 974.6  | 597.3  | 651.1  |
| 490.2  | 617.6  | 135.0 | 157.3 | 959.7  | 682.7  | 1037.9 | 848.7  | 942.1  |
| 870.1  | 785.7  | 196.7 | 209.8 | 1315.1 | 958.8  | 2381.7 | 1362.4 | 1470.4 |
| 169.2  | 230.7  | 28.5  | 34.8  | 210.4  | 146.4  | 686.8  | 228.8  | 310.1  |

|        |        |       |       |        |        |        |        |        |
|--------|--------|-------|-------|--------|--------|--------|--------|--------|
| 604.8  | 779.9  | 43.1  | 53.6  | 783.6  | 693.9  | 1589.9 | 558.2  | 686.3  |
| 1088.3 | 1213.4 | 273.4 | 282.5 | 1329.1 | 1277.8 | 1216.1 | 1133.5 | 1209.7 |
| 2546.6 | 2859.7 | 218.8 | 275.6 | 2916.7 | 2758.5 | 2254.1 | 1356.2 | 1393.4 |
| 487.0  | 690.4  | 6.9   | 4.5   | 973.4  | 567.5  | 13.3   | 4.5    | 1.4    |
| 112.1  | 156.2  | 106.1 | 95.9  | 124.0  | 152.4  | 276.8  | 216.6  | 182.6  |
| 33.8   | 10.8   | 45.0  | 84.5  | 26.3   | 48.6   | 29.7   | 36.1   | 36.8   |
| 332.5  | 442.7  | 32.4  | 42.8  | 548.4  | 403.8  | 488.7  | 345.6  | 374.2  |
| 221.9  | 314.6  | 36.2  | 43.6  | 374.2  | 295.0  | 233.6  | 233.7  | 254.9  |
| 251.6  | 299.0  | 22.3  | 44.9  | 448.6  | 332.5  | 229.2  | 264.9  | 293.7  |
| 21.2   | 27.7   | 1.5   | 12.4  | 20.9   | 26.7   | 122.0  | 103.4  | 104.8  |
| 62.5   | 75.0   | 47.7  | 56.5  | 82.0   | 77.3   | 309.0  | 272.0  | 265.2  |
| 50.8   | 77.5   | 88.9  | 104.9 | 82.1   | 83.9   | 340.9  | 332.5  | 423.5  |
| 1019.7 | 1249.0 | 118.1 | 144.0 | 1407.3 | 1261.2 | 1133.0 | 843.7  | 950.2  |
| 57.7   | 70.8   | 10.8  | 13.5  | 145.5  | 59.7   | 191.8  | 245.1  | 330.0  |
| 403.3  | 1060.6 | 601.3 | 783.9 | 598.8  | 1282.4 | 1667.5 | 1187.5 | 1317.3 |
| 66.1   | 142.3  | 170.6 | 221.9 | 136.2  | 120.6  | 329.1  | 268.9  | 320.7  |
| 143.6  | 211.9  | 58.2  | 53.6  | 274.2  | 180.0  | 617.0  | 721.9  | 670.3  |
| 32.5   | 32.5   | 24.3  | 24.4  | 32.4   | 11.0   | 160.3  | 158.1  | 150.8  |
| 312.1  | 351.6  | 167.1 | 160.7 | 530.1  | 264.3  | 1108.1 | 1160.8 | 1198.2 |
| 44.5   | 56.5   | 38.1  | 31.4  | 56.0   | 46.3   | 38.4   | 42.4   | 39.1   |
| 104.0  | 66.2   | 73.7  | 83.0  | 127.2  | 106.9  | 66.9   | 83.3   | 74.9   |
| 2.0    | 1.6    | 1.8   | 2.9   | 1.7    | 5.2    | 12.0   | 5.8    | 12.3   |
| 8.1    | 5.0    | 13.1  | 10.1  | 6.1    | 9.7    | 7.6    | 12.9   | 12.5   |
| 5.1    | 4.4    | 9.5   | 15.2  | 4.5    | 7.9    | 30.2   | 29.2   | 20.4   |
| 68.9   | 90.4   | 18.8  | 27.5  | 131.9  | 82.1   | 153.5  | 206.9  | 222.1  |
| 2.1    | 4.4    | 3.0   | 17.5  | 15.0   | 14.0   | 2.5    | 6.2    | 5.6    |
| 1034.0 | 1623.0 | 248.5 | 335.0 | 1528.3 | 1645.8 | 2436.0 | 1577.8 | 1638.3 |
| 176.6  | 203.5  | 57.8  | 66.4  | 213.2  | 147.5  | 533.2  | 364.9  | 381.6  |
| 133.8  | 157.4  | 26.5  | 25.5  | 170.9  | 102.6  | 450.3  | 230.3  | 297.5  |
| 10.6   | 9.5    | 12.6  | 7.8   | 4.6    | 3.0    | 13.8   | 18.5   | 6.9    |
| 140.2  | 172.3  | 56.4  | 61.9  | 211.4  | 147.1  | 431.1  | 315.3  | 319.8  |
| 170.9  | 168.5  | 262.5 | 325.6 | 198.6  | 181.3  | 386.6  | 1048.6 | 1005.9 |
| 11.3   | 11.8   | 0.9   | 8.1   | 8.9    | 7.2    | 0.9    | 2.8    | 8.6    |
| 143.8  | 208.1  | 70.5  | 102.9 | 232.4  | 160.0  | 1365.0 | 1558.2 | 1534.2 |
| 287.4  | 380.0  | 52.6  | 77.3  | 480.4  | 426.6  | 3301.1 | 3245.3 | 3628.6 |
| 240.5  | 229.4  | 128.5 | 127.3 | 334.2  | 224.4  | 500.0  | 573.8  | 613.5  |
| 253.5  | 321.0  | 67.4  | 88.0  | 378.2  | 295.4  | 900.9  | 614.1  | 684.1  |
| 63.3   | 80.1   | 171.2 | 211.1 | 66.9   | 58.7   | 263.9  | 272.2  | 269.3  |
| 112.8  | 144.7  | 164.1 | 161.9 | 126.0  | 113.4  | 373.0  | 435.6  | 483.9  |
| 13.1   | 20.3   | 4.4   | 11.3  | 7.7    | 22.7   | 22.8   | 21.5   | 18.7   |
| 22.6   | 5.5    | 12.9  | 24.6  | 27.7   | 23.3   | 16.1   | 15.2   | 12.4   |
| 4.6    | 4.4    | 5.4   | 8.3   | 3.6    | 3.6    | 2.4    | 3.0    | 1.5    |
| 46.5   | 36.6   | 16.5  | 3.4   | 40.1   | 37.2   | 85.2   | 102.8  | 112.2  |
| 1420.3 | 2098.2 | 441.7 | 864.2 | 1612.5 | 2124.0 | 4179.4 | 2578.6 | 2533.8 |
| 565.9  | 995.3  | 68.1  | 110.0 | 911.6  | 897.2  | 1411.0 | 831.8  | 882.9  |
| 17.9   | 29.3   | 0.2   | 4.0   | 14.2   | 18.0   | 201.2  | 478.4  | 477.3  |
| 41.9   | 76.2   | 11.4  | 8.2   | 67.1   | 75.9   | 523.9  | 1135.7 | 1102.6 |
| 92.7   | 100.4  | 18.2  | 32.1  | 99.7   | 130.3  | 240.4  | 129.5  | 143.1  |
| 139.4  | 232.4  | 16.9  | 27.7  | 224.6  | 253.4  | 497.3  | 295.5  | 308.4  |
| 147.9  | 182.7  | 61.4  | 102.8 | 206.6  | 245.1  | 501.6  | 455.4  | 518.3  |
| 278.0  | 317.9  | 60.2  | 62.9  | 367.3  | 331.8  | 687.1  | 533.1  | 667.1  |
| 560.8  | 738.5  | 103.6 | 168.1 | 670.2  | 769.2  | 1441.6 | 1251.0 | 1436.2 |
| 129.9  | 173.2  | 58.3  | 85.5  | 235.4  | 127.7  | 1206.4 | 365.2  | 624.1  |

|        |        |        |        |        |        |        |        |        |
|--------|--------|--------|--------|--------|--------|--------|--------|--------|
| 95.9   | 95.3   | 22.8   | 46.7   | 110.9  | 92.6   | 201.1  | 181.6  | 230.2  |
| 83.9   | 104.0  | 1.5    | 8.8    | 157.2  | 82.7   | 890.7  | 675.8  | 855.8  |
| 941.7  | 1003.4 | 151.2  | 158.1  | 982.2  | 976.6  | 1397.5 | 397.2  | 393.7  |
| 325.9  | 368.8  | 121.6  | 186.6  | 513.3  | 262.8  | 476.1  | 307.6  | 287.3  |
| 65.4   | 58.9   | 40.4   | 41.3   | 88.0   | 44.4   | 108.4  | 134.5  | 127.5  |
| 34.7   | 28.5   | 18.4   | 26.7   | 40.8   | 23.8   | 51.4   | 54.2   | 71.4   |
| 171.5  | 212.2  | 46.8   | 78.2   | 183.1  | 204.9  | 831.6  | 612.0  | 608.8  |
| 173.5  | 222.9  | 30.4   | 28.3   | 222.6  | 279.7  | 431.1  | 361.3  | 367.4  |
| 44.6   | 36.3   | 8.7    | 16.0   | 38.6   | 46.2   | 8.1    | 6.9    | 11.1   |
| 964.0  | 1494.5 | 129.4  | 194.4  | 1832.2 | 1524.4 | 1826.0 | 1318.7 | 1385.8 |
| 428.3  | 527.5  | 199.9  | 310.6  | 593.8  | 461.3  | 448.3  | 287.3  | 313.5  |
| 17.0   | 19.9   | 1.0    | 7.0    | 17.6   | 10.1   | 1.7    | 5.2    | 3.0    |
| 6.7    | 8.0    | 20.5   | 12.7   | 2.3    | 11.2   | 10.6   | 14.2   | 11.3   |
| 157.3  | 276.7  | 46.8   | 67.2   | 150.7  | 192.1  | 927.7  | 1056.1 | 1067.2 |
| 308.0  | 565.6  | 119.3  | 129.4  | 313.1  | 409.2  | 2250.1 | 2211.7 | 2289.0 |
| 41.2   | 39.4   | 49.0   | 33.5   | 60.4   | 31.2   | 121.1  | 99.7   | 102.7  |
| 188.1  | 181.9  | 48.8   | 40.4   | 231.7  | 159.8  | 272.9  | 225.7  | 267.8  |
| 94.0   | 101.2  | 69.0   | 89.7   | 134.8  | 88.7   | 130.5  | 183.9  | 202.2  |
| 112.0  | 156.4  | 42.2   | 92.6   | 218.8  | 146.0  | 542.5  | 465.5  | 515.7  |
| 18.3   | 13.2   | 42.3   | 53.6   | 37.0   | 19.0   | 36.9   | 18.9   | 22.7   |
| 274.7  | 312.1  | 119.0  | 198.3  | 484.1  | 275.0  | 779.8  | 665.8  | 782.6  |
| 333.6  | 501.2  | 87.4   | 149.9  | 619.6  | 482.2  | 4033.6 | 3612.9 | 3640.5 |
| 154.5  | 159.8  | 3.6    | 13.0   | 189.3  | 146.6  | 516.7  | 446.8  | 504.7  |
| 390.8  | 491.0  | 179.3  | 239.2  | 711.7  | 549.4  | 291.1  | 288.9  | 311.0  |
| 479.9  | 787.8  | 129.4  | 128.5  | 794.9  | 715.6  | 426.5  | 453.4  | 478.0  |
| 222.2  | 289.4  | 93.1   | 132.7  | 328.2  | 299.6  | 695.3  | 182.7  | 207.6  |
| 350.7  | 352.9  | 33.9   | 31.0   | 420.9  | 606.8  | 1830.3 | 1703.8 | 1789.2 |
| 352.0  | 446.7  | 52.3   | 58.2   | 741.9  | 540.8  | 2384.5 | 1991.5 | 2245.3 |
| 190.4  | 225.4  | 57.1   | 54.3   | 280.4  | 269.8  | 285.3  | 146.3  | 150.1  |
| 47.4   | 54.2   | 23.7   | 26.0   | 51.4   | 42.2   | 73.0   | 45.3   | 60.4   |
| 696.4  | 856.0  | 378.5  | 620.7  | 1014.3 | 920.1  | 2174.6 | 1664.4 | 1729.1 |
| 26.0   | 30.7   | 11.2   | 1.7    | 29.0   | 25.9   | 17.5   | 27.3   | 19.6   |
| 1496.0 | 2100.2 | 888.6  | 1160.9 | 2200.9 | 2255.5 | 1706.1 | 1202.8 | 1450.9 |
| 247.5  | 232.8  | 179.2  | 318.1  | 386.4  | 228.8  | 1481.1 | 1268.6 | 1371.4 |
| 93.1   | 89.6   | 76.7   | 94.0   | 117.3  | 65.5   | 221.0  | 226.5  | 257.2  |
| 40.5   | 21.6   | 57.6   | 81.2   | 65.5   | 45.6   | 139.3  | 146.6  | 173.1  |
| 87.1   | 108.0  | 106.9  | 155.7  | 134.5  | 118.3  | 184.5  | 112.3  | 126.3  |
| 103.6  | 167.3  | 60.0   | 85.0   | 140.0  | 145.3  | 739.2  | 443.8  | 531.0  |
| 4.6    | 5.5    | 4.6    | 2.5    | 3.5    | 48.4   | 28.4   | 15.0   | 5.0    |
| 61.1   | 73.8   | 39.2   | 26.2   | 166.8  | 59.5   | 64.0   | 91.4   | 115.5  |
| 876.1  | 1101.8 | 39.7   | 55.9   | 1413.9 | 817.2  | 1169.6 | 661.3  | 858.4  |
| 437.2  | 732.8  | 65.1   | 69.4   | 694.4  | 733.1  | 1632.6 | 2097.9 | 2596.5 |
| 360.5  | 403.2  | 91.4   | 96.0   | 501.1  | 401.9  | 364.1  | 552.3  | 602.2  |
| 8.1    | 10.3   | 0.9    | 6.0    | 10.7   | 2.0    | 4.7    | 6.3    | 1.2    |
| 10.2   | 20.2   | 1.8    | 6.7    | 6.7    | 1.2    | 15.5   | 18.7   | 14.5   |
| 745.9  | 1227.0 | 1103.9 | 1316.5 | 1256.7 | 1027.9 | 2401.5 | 1982.9 | 1993.3 |
| 85.3   | 93.0   | 123.4  | 125.6  | 86.2   | 70.9   | 223.0  | 273.8  | 287.8  |
| 213.0  | 284.7  | 129.9  | 126.6  | 305.3  | 273.0  | 520.9  | 587.0  | 612.3  |
| 489.9  | 546.1  | 10.8   | 13.8   | 721.6  | 453.5  | 2.7    | 8.6    | 6.7    |
| 132.4  | 129.3  | 51.9   | 69.4   | 179.5  | 121.6  | 166.1  | 156.2  | 185.9  |
| 31.3   | 31.3   | 47.5   | 80.3   | 56.4   | 28.5   | 136.0  | 181.5  | 227.2  |
| 129.9  | 167.3  | 130.5  | 189.9  | 200.7  | 123.0  | 351.5  | 532.5  | 588.6  |
| 1771.5 | 2432.7 | 1121.5 | 1671.1 | 2525.1 | 2497.1 | 4740.4 | 4304.5 | 4673.1 |

|        |        |        |        |        |        |         |        |        |
|--------|--------|--------|--------|--------|--------|---------|--------|--------|
| 76.5   | 74.5   | 70.2   | 85.7   | 83.4   | 56.7   | 160.6   | 159.9  | 192.6  |
| 135.9  | 197.3  | 46.9   | 41.9   | 302.2  | 222.5  | 753.4   | 901.0  | 966.2  |
| 34.2   | 55.5   | 59.8   | 54.2   | 89.3   | 48.0   | 197.8   | 273.0  | 327.3  |
| 5.9    | 0.8    | 0.9    | 1.4    | 2.8    | 1.6    | 35.7    | 41.7   | 69.6   |
| 2.5    | 0.5    | 4.2    | 2.1    | 8.7    | 4.8    | 30.9    | 52.4   | 57.7   |
| 14.8   | 6.5    | 149.0  | 164.6  | 9.9    | 24.5   | 176.2   | 232.1  | 259.7  |
| 31.4   | 54.4   | 56.8   | 49.3   | 54.2   | 60.7   | 224.2   | 202.8  | 222.7  |
| 44.8   | 50.5   | 27.6   | 27.4   | 46.9   | 58.6   | 258.5   | 211.8  | 265.3  |
| 15.3   | 16.5   | 3.5    | 7.8    | 23.4   | 19.6   | 145.9   | 176.0  | 167.7  |
| 29.4   | 31.7   | 17.4   | 12.4   | 44.0   | 20.1   | 268.3   | 273.5  | 323.2  |
| 53.9   | 42.5   | 19.1   | 21.9   | 41.7   | 64.7   | 17.9    | 24.7   | 17.7   |
| 99.1   | 146.8  | 30.6   | 21.0   | 170.9  | 130.7  | 18.7    | 24.3   | 31.7   |
| 31.3   | 29.0   | 4.2    | 4.7    | 47.9   | 29.4   | 671.3   | 966.5  | 1083.7 |
| 632.3  | 1002.9 | 46.7   | 37.7   | 687.8  | 1136.7 | 3478.9  | 3846.8 | 4091.1 |
| 1145.5 | 2683.2 | 12.7   | 27.8   | 1341.8 | 1438.8 | 2573.1  | 2808.0 | 2918.6 |
| 3.5    | 11.7   | 1.8    | 3.2    | 13.2   | 2.0    | 39.1    | 33.0   | 24.8   |
| 84.5   | 147.3  | 39.7   | 55.5   | 127.2  | 99.3   | 400.7   | 237.5  | 230.8  |
| 54.5   | 121.0  | 15.6   | 31.6   | 111.7  | 112.5  | 512.9   | 405.7  | 398.8  |
| 40.1   | 59.2   | 32.6   | 79.9   | 44.8   | 74.3   | 137.1   | 127.8  | 150.3  |
| 326.2  | 397.9  | 384.0  | 552.4  | 502.0  | 414.2  | 490.4   | 515.9  | 520.5  |
| 127.3  | 176.6  | 146.7  | 233.0  | 213.1  | 123.3  | 242.5   | 199.2  | 226.1  |
| 534.2  | 658.5  | 221.5  | 324.8  | 877.5  | 646.4  | 13.4    | 8.2    | 7.9    |
| 54.1   | 66.2   | 13.9   | 19.4   | 72.1   | 131.0  | 203.9   | 167.9  | 180.2  |
| 406.2  | 443.6  | 181.0  | 238.1  | 558.5  | 423.1  | 628.9   | 461.9  | 516.5  |
| 37.3   | 22.4   | 2.8    | 3.1    | 51.0   | 41.0   | 20.6    | 10.3   | 8.3    |
| 2.7    | 11.2   | 13.7   | 8.3    | 8.3    | 8.1    | 30.2    | 28.0   | 47.7   |
| 0.7    | 0.3    | 0.3    | 0.1    | 4.3    | 0.3    | 0.4     | 2.7    | 2.3    |
| 0.6    | 0.4    | 0.6    | 0.5    | 0.1    | 8.7    | 2.4     | 1.3    | 0.7    |
| 322.0  | 320.1  | 14.4   | 14.4   | 610.1  | 366.5  | 208.8   | 169.7  | 197.7  |
| 49.6   | 44.3   | 361.1  | 467.1  | 39.6   | 30.8   | 124.0   | 112.3  | 130.7  |
| 1.5    | 1.3    | 5.5    | 8.9    | 2.1    | 5.5    | 2.3     | 0.6    | 1.5    |
| 71.2   | 62.0   | 318.1  | 392.3  | 82.3   | 61.3   | 759.2   | 844.0  | 886.5  |
| 87.4   | 70.1   | 3.8    | 13.9   | 85.6   | 71.5   | 3.8     | 2.8    | 1.9    |
| 48.6   | 52.9   | 21.2   | 37.6   | 82.6   | 32.1   | 7.3     | 11.1   | 5.9    |
| 225.2  | 203.8  | 152.1  | 179.1  | 423.0  | 240.2  | 260.1   | 262.0  | 371.2  |
| 10.3   | 21.9   | 1.0    | 1.2    | 15.4   | 13.0   | 1.2     | 1.1    | 1.0    |
| 572.0  | 678.6  | 15.0   | 5.4    | 630.1  | 709.0  | 23.1    | 31.3   | 29.0   |
| 1.8    | 1.3    | 2.2    | 11.5   | 2.5    | 2.7    | 7.4     | 4.5    | 1.6    |
| 0.7    | 0.6    | 0.7    | 1.1    | 3.8    | 3.2    | 1.8     | 3.3    | 1.7    |
| 2.9    | 3.7    | 1.4    | 2.1    | 3.1    | 10.6   | 6.0     | 12.1   | 8.7    |
| 422.0  | 496.8  | 99.7   | 141.3  | 679.1  | 436.1  | 101.7   | 111.7  | 109.0  |
| 9.7    | 7.9    | 14.1   | 27.0   | 13.1   | 19.0   | 23.2    | 30.4   | 27.7   |
| 14.1   | 41.4   | 16.5   | 23.6   | 44.5   | 30.4   | 14.5    | 20.3   | 8.3    |
| 370.4  | 483.7  | 72.3   | 102.6  | 563.4  | 604.2  | 315.6   | 176.1  | 195.9  |
| 307.8  | 469.2  | 48.0   | 57.8   | 417.6  | 435.1  | 368.0   | 517.4  | 641.1  |
| 572.5  | 656.2  | 240.6  | 365.4  | 808.2  | 706.6  | 1709.2  | 1262.7 | 1432.9 |
| 706.5  | 974.7  | 83.6   | 139.4  | 1071.0 | 852.4  | 1509.2  | 1061.9 | 1298.6 |
| 14.4   | 2.5    | 87.2   | 140.2  | 4.1    | 17.6   | 2.7     | 20.3   | 4.6    |
| 30.0   | 38.9   | 3.9    | 24.8   | 29.4   | 35.7   | 88.5    | 99.8   | 121.2  |
| 257.9  | 368.6  | 63.5   | 81.4   | 390.5  | 402.9  | 804.9   | 882.7  | 932.2  |
| 7715.1 | 8546.7 | 4142.8 | 4280.3 | 9023.0 | 8164.4 | 10132.3 | 9660.7 | 9279.9 |
| 192.3  | 167.3  | 61.9   | 87.8   | 261.7  | 191.4  | 300.3   | 246.5  | 258.9  |
| 37.5   | 58.5   | 99.2   | 127.9  | 70.2   | 55.9   | 101.8   | 105.7  | 139.1  |

|        |        |        |        |        |        |         |         |         |
|--------|--------|--------|--------|--------|--------|---------|---------|---------|
| 72.6   | 64.1   | 61.1   | 90.1   | 112.6  | 62.5   | 76.8    | 41.0    | 45.6    |
| 83.8   | 91.6   | 94.4   | 112.6  | 126.7  | 122.6  | 145.5   | 108.6   | 106.5   |
| 62.6   | 92.7   | 63.7   | 84.7   | 92.7   | 60.6   | 74.9    | 51.0    | 46.2    |
| 51.2   | 48.9   | 34.8   | 42.3   | 54.5   | 47.0   | 40.9    | 38.9    | 37.6    |
| 28.0   | 24.7   | 19.0   | 19.9   | 45.9   | 25.0   | 27.3    | 25.4    | 25.2    |
| 60.7   | 82.2   | 43.7   | 41.2   | 104.6  | 85.3   | 413.4   | 623.0   | 629.5   |
| 1398.6 | 1508.1 | 87.7   | 117.0  | 2549.2 | 1515.5 | 1075.4  | 1093.9  | 1155.5  |
| 617.9  | 520.2  | 315.7  | 597.6  | 827.8  | 540.3  | 1907.6  | 897.5   | 846.6   |
| 397.2  | 678.6  | 26.1   | 26.1   | 605.6  | 684.3  | 1013.4  | 253.2   | 313.8   |
| 647.3  | 868.4  | 111.1  | 141.1  | 1129.0 | 890.1  | 981.1   | 1102.3  | 1155.9  |
| 196.7  | 256.9  | 47.4   | 93.6   | 325.4  | 280.8  | 618.9   | 346.0   | 373.4   |
| 43.4   | 75.0   | 104.6  | 98.3   | 60.4   | 48.1   | 285.4   | 308.4   | 273.7   |
| 15.4   | 17.4   | 44.3   | 42.7   | 24.0   | 6.6    | 111.1   | 77.3    | 113.0   |
| 1594.5 | 1808.1 | 104.7  | 141.5  | 2310.8 | 1630.3 | 2222.2  | 2402.7  | 2581.8  |
| 8.3    | 19.0   | 69.6   | 66.4   | 14.7   | 4.9    | 243.3   | 126.9   | 152.0   |
| 1.1    | 1.7    | 47.8   | 60.4   | 0.8    | 2.0    | 83.0    | 27.5    | 56.9    |
| 80.7   | 111.5  | 72.5   | 98.8   | 76.0   | 77.3   | 270.4   | 230.7   | 272.4   |
| 116.6  | 157.1  | 32.3   | 47.4   | 226.4  | 161.8  | 813.3   | 576.0   | 641.5   |
| 838.1  | 862.6  | 785.1  | 1166.6 | 1079.2 | 1042.6 | 2397.1  | 1768.5  | 1902.3  |
| 8245.8 | 9960.6 | 3396.0 | 4219.2 | 9494.8 | 8991.9 | 11786.1 | 11796.5 | 11706.2 |
| 71.3   | 80.5   | 45.2   | 60.4   | 121.9  | 96.2   | 170.7   | 158.3   | 173.4   |
| 2.2    | 12.5   | 4.0    | 3.6    | 29.2   | 1.8    | 11.9    | 28.8    | 52.2    |
| 149.9  | 210.9  | 104.9  | 123.2  | 173.6  | 248.6  | 726.1   | 959.8   | 1159.3  |
| 1477.1 | 2194.0 | 304.3  | 443.4  | 1915.1 | 2064.2 | 201.2   | 304.3   | 346.7   |
| 473.1  | 607.1  | 161.9  | 224.0  | 777.5  | 641.0  | 1284.3  | 1244.9  | 1325.3  |
| 349.9  | 463.8  | 113.7  | 176.2  | 478.3  | 423.8  | 610.6   | 316.9   | 372.3   |
| 228.1  | 226.8  | 158.0  | 239.2  | 328.9  | 194.3  | 541.0   | 858.8   | 848.9   |
| 132.1  | 170.6  | 50.4   | 64.3   | 243.1  | 195.1  | 350.9   | 634.1   | 685.0   |
| 94.1   | 85.4   | 95.7   | 140.2  | 108.0  | 93.3   | 203.4   | 230.4   | 276.7   |
| 421.8  | 397.7  | 49.8   | 71.1   | 423.2  | 337.6  | 458.5   | 189.2   | 199.0   |
| 67.2   | 38.5   | 125.9  | 212.1  | 65.0   | 15.3   | 109.1   | 111.2   | 127.2   |
| 413.3  | 317.8  | 172.2  | 256.7  | 490.5  | 322.1  | 853.3   | 555.7   | 607.9   |
| 65.0   | 107.2  | 3.5    | 2.3    | 165.1  | 82.8   | 170.4   | 109.3   | 160.9   |
| 111.2  | 138.6  | 32.2   | 44.9   | 140.4  | 126.8  | 595.8   | 586.2   | 702.2   |
| 138.0  | 206.9  | 10.1   | 13.2   | 236.5  | 212.9  | 1254.3  | 1288.5  | 1377.2  |
| 166.2  | 148.6  | 39.2   | 39.9   | 241.7  | 137.7  | 199.6   | 206.0   | 199.3   |
| 41.6   | 40.5   | 45.1   | 51.9   | 50.9   | 33.0   | 126.0   | 104.6   | 132.8   |
| 10.5   | 24.3   | 2.4    | 13.7   | 15.9   | 2.5    | 66.0    | 82.9    | 84.8    |
| 787.8  | 794.9  | 145.5  | 167.5  | 1132.9 | 834.1  | 897.8   | 716.3   | 807.1   |
| 40.5   | 85.8   | 36.1   | 69.0   | 122.0  | 51.0   | 226.9   | 204.4   | 286.3   |
| 53.8   | 69.0   | 39.6   | 40.5   | 73.1   | 75.5   | 106.6   | 103.9   | 126.4   |
| 8.1    | 18.2   | 12.7   | 16.8   | 19.5   | 14.9   | 64.7    | 60.8    | 72.2    |
| 116.3  | 131.0  | 37.7   | 48.1   | 149.3  | 94.3   | 245.3   | 308.0   | 303.1   |
| 284.7  | 277.3  | 8.3    | 12.1   | 451.5  | 331.4  | 15.1    | 9.1     | 20.4    |
| 46.4   | 69.2   | 16.6   | 13.9   | 112.4  | 64.5   | 14.6    | 26.1    | 16.2    |
| 473.9  | 489.9  | 7.9    | 1.9    | 969.5  | 586.4  | 32.9    | 20.9    | 30.5    |
| 47.8   | 78.3   | 25.5   | 80.9   | 79.0   | 86.1   | 93.1    | 57.8    | 70.4    |
| 134.6  | 238.4  | 74.7   | 94.4   | 214.5  | 362.2  | 252.6   | 202.4   | 212.2   |
| 58.7   | 122.6  | 8.1    | 13.0   | 147.8  | 112.6  | 53.7    | 29.2    | 32.9    |
| 167.4  | 155.3  | 228.3  | 311.6  | 139.8  | 116.3  | 364.1   | 260.0   | 238.4   |
| 453.2  | 781.8  | 5.8    | 1.7    | 610.9  | 705.5  | 52.0    | 44.6    | 50.4    |
| 127.6  | 173.0  | 27.0   | 36.6   | 187.9  | 141.3  | 683.8   | 233.1   | 290.4   |
| 514.8  | 625.2  | 212.8  | 288.5  | 790.4  | 627.6  | 1092.2  | 920.0   | 980.1   |

|        |        |        |        |        |        |         |         |        |
|--------|--------|--------|--------|--------|--------|---------|---------|--------|
| 352.9  | 364.9  | 39.6   | 48.3   | 528.9  | 371.8  | 218.7   | 152.0   | 174.6  |
| 40.4   | 13.2   | 1.3    | 2.1    | 31.4   | 11.9   | 2.3     | 2.0     | 8.3    |
| 3.1    | 2.7    | 0.7    | 2.5    | 5.4    | 2.9    | 5.0     | 2.9     | 8.7    |
| 2.0    | 9.8    | 5.5    | 4.7    | 32.1   | 1.2    | 6.6     | 1.8     | 3.7    |
| 100.7  | 130.8  | 19.5   | 20.6   | 182.0  | 80.6   | 244.5   | 360.8   | 367.7  |
| 122.1  | 154.9  | 118.9  | 83.7   | 186.8  | 145.3  | 569.9   | 455.9   | 563.5  |
| 124.7  | 171.3  | 21.6   | 9.2    | 173.8  | 84.5   | 29.4    | 28.7    | 15.6   |
| 63.7   | 94.6   | 119.2  | 189.5  | 102.3  | 125.6  | 540.3   | 539.0   | 540.5  |
| 109.4  | 117.6  | 237.1  | 285.1  | 124.0  | 137.6  | 496.3   | 464.7   | 466.9  |
| 35.2   | 51.7   | 32.6   | 51.4   | 58.6   | 54.6   | 294.2   | 246.9   | 299.1  |
| 13.1   | 42.5   | 7.6    | 3.3    | 41.4   | 31.7   | 76.3    | 57.4    | 91.3   |
| 86.3   | 111.7  | 49.7   | 53.8   | 124.2  | 89.4   | 264.3   | 170.9   | 227.8  |
| 27.8   | 45.3   | 25.0   | 28.2   | 74.4   | 40.4   | 114.2   | 256.6   | 251.9  |
| 88.4   | 118.7  | 63.6   | 94.3   | 131.7  | 69.6   | 353.8   | 110.6   | 172.2  |
| 453.0  | 509.3  | 85.6   | 102.0  | 640.8  | 649.5  | 388.5   | 206.8   | 250.8  |
| 18.6   | 19.4   | 2.3    | 5.9    | 24.4   | 3.0    | 11.4    | 7.6     | 4.5    |
| 14.0   | 7.3    | 3.4    | 14.0   | 15.7   | 15.7   | 12.3    | 7.3     | 14.2   |
| 136.7  | 168.1  | 1.3    | 8.3    | 185.5  | 79.6   | 16.6    | 10.0    | 1.4    |
| 76.9   | 80.3   | 20.4   | 29.4   | 98.2   | 105.0  | 202.8   | 149.1   | 151.2  |
| 389.2  | 532.9  | 51.0   | 68.5   | 634.4  | 525.1  | 710.7   | 462.2   | 500.2  |
| 4.1    | 2.8    | 4.5    | 10.4   | 2.9    | 12.8   | 3.4     | 3.5     | 5.6    |
| 125.2  | 128.3  | 116.6  | 102.4  | 217.3  | 99.3   | 266.3   | 211.1   | 243.1  |
| 225.1  | 243.6  | 104.2  | 125.7  | 351.7  | 283.4  | 482.1   | 502.1   | 486.8  |
| 158.3  | 202.1  | 75.6   | 140.3  | 200.5  | 177.3  | 471.2   | 345.2   | 368.4  |
| 76.5   | 76.4   | 59.2   | 65.3   | 93.3   | 79.5   | 251.1   | 134.2   | 179.6  |
| 88.9   | 89.3   | 86.0   | 104.9  | 108.9  | 70.4   | 326.0   | 199.1   | 241.0  |
| 553.2  | 599.4  | 145.5  | 188.3  | 955.3  | 503.2  | 311.2   | 326.9   | 371.1  |
| 604.6  | 781.9  | 101.5  | 95.4   | 722.2  | 812.3  | 1191.9  | 1017.5  | 1124.4 |
| 18.5   | 20.8   | 14.1   | 6.5    | 33.4   | 9.6    | 46.6    | 41.3    | 44.3   |
| 176.9  | 197.5  | 20.7   | 26.0   | 313.3  | 173.9  | 226.8   | 269.9   | 317.2  |
| 87.0   | 116.9  | 101.5  | 88.6   | 128.6  | 132.7  | 255.1   | 208.5   | 259.7  |
| 61.0   | 66.5   | 61.0   | 78.6   | 110.0  | 58.6   | 107.1   | 65.0    | 89.3   |
| 71.2   | 116.2  | 40.6   | 57.8   | 106.1  | 77.9   | 343.2   | 297.6   | 285.3  |
| 19.3   | 35.5   | 2.6    | 4.7    | 16.7   | 21.6   | 37.6    | 28.9    | 42.5   |
| 328.0  | 604.4  | 33.5   | 50.6   | 512.8  | 544.7  | 1150.1  | 1142.1  | 1187.2 |
| 926.2  | 1013.4 | 722.8  | 1027.0 | 1267.5 | 905.3  | 950.8   | 462.4   | 545.9  |
| 19.9   | 29.8   | 14.2   | 10.0   | 14.4   | 16.8   | 22.5    | 20.7    | 30.8   |
| 473.3  | 554.3  | 89.7   | 143.4  | 693.1  | 570.5  | 387.6   | 240.4   | 291.1  |
| 19.5   | 29.4   | 6.6    | 9.2    | 26.6   | 26.2   | 28.0    | 43.0    | 48.3   |
| 8244.9 | 8894.8 | 4249.2 | 5723.8 | 9494.9 | 8397.1 | 10303.6 | 10278.0 | 9876.9 |
| 1216.8 | 1422.5 | 12.5   | 29.5   | 2177.8 | 1306.2 | 983.2   | 883.7   | 892.0  |
| 109.0  | 207.1  | 328.5  | 414.4  | 196.7  | 106.8  | 1171.9  | 524.9   | 577.3  |
| 39.2   | 64.0   | 17.1   | 33.0   | 70.0   | 63.3   | 73.5    | 53.4    | 64.4   |
| 1.5    | 3.3    | 3.1    | 3.1    | 16.5   | 5.7    | 19.2    | 20.2    | 6.9    |
| 61.7   | 98.2   | 71.1   | 80.0   | 143.3  | 95.7   | 315.5   | 320.5   | 336.2  |
| 3601.8 | 4556.7 | 1825.6 | 2635.1 | 5167.0 | 5231.2 | 4395.7  | 3700.6  | 3980.7 |
| 402.5  | 369.7  | 89.3   | 138.3  | 526.9  | 379.5  | 284.3   | 121.9   | 160.2  |
| 11.7   | 29.9   | 44.2   | 64.8   | 23.1   | 7.7    | 116.1   | 93.7    | 114.6  |
| 63.0   | 76.9   | 270.0  | 273.5  | 87.1   | 67.6   | 191.0   | 160.8   | 213.6  |
| 24.3   | 50.9   | 32.6   | 34.7   | 44.4   | 23.2   | 110.5   | 110.4   | 114.2  |
| 67.1   | 56.4   | 34.3   | 50.6   | 113.7  | 30.2   | 174.0   | 174.1   | 174.7  |
| 500.2  | 634.5  | 90.4   | 150.8  | 722.8  | 635.8  | 490.1   | 115.8   | 135.3  |
| 251.6  | 284.9  | 28.7   | 34.7   | 418.1  | 221.6  | 300.9   | 271.1   | 315.2  |

|        |        |       |       |        |        |        |        |        |
|--------|--------|-------|-------|--------|--------|--------|--------|--------|
| 131.1  | 104.5  | 27.2  | 37.7  | 193.2  | 142.5  | 157.7  | 128.2  | 120.9  |
| 62.2   | 115.6  | 75.7  | 105.3 | 97.6   | 84.3   | 317.7  | 393.6  | 419.0  |
| 103.0  | 210.1  | 89.8  | 110.8 | 179.1  | 197.0  | 377.6  | 444.6  | 535.2  |
| 36.9   | 53.6   | 95.9  | 96.2  | 63.3   | 49.0   | 230.2  | 217.7  | 258.6  |
| 53.9   | 48.0   | 447.3 | 634.4 | 49.8   | 32.8   | 2032.7 | 2228.1 | 2563.4 |
| 175.1  | 167.6  | 129.7 | 172.4 | 257.9  | 149.3  | 256.6  | 190.1  | 221.1  |
| 54.6   | 82.0   | 124.1 | 124.7 | 62.9   | 74.9   | 165.1  | 182.2  | 208.9  |
| 12.9   | 2.2    | 2.2   | 0.8   | 2.4    | 1.2    | 3.3    | 2.8    | 3.0    |
| 33.0   | 23.2   | 12.4  | 15.5  | 47.7   | 28.9   | 13.4   | 10.9   | 15.1   |
| 1.9    | 7.1    | 0.7   | 1.0   | 2.3    | 0.4    | 5.3    | 1.4    | 2.6    |
| 323.6  | 341.5  | 24.0  | 20.8  | 457.0  | 350.5  | 2498.5 | 2126.1 | 2224.6 |
| 1999.9 | 3466.0 | 268.8 | 272.0 | 3141.8 | 3240.5 | 4689.8 | 3481.7 | 3609.8 |
| 77.1   | 142.1  | 36.7  | 32.9  | 97.2   | 167.1  | 133.8  | 78.1   | 111.4  |
| 232.6  | 255.9  | 39.4  | 33.7  | 313.6  | 294.5  | 177.0  | 120.2  | 113.4  |
| 251.3  | 307.5  | 549.8 | 579.8 | 410.2  | 281.1  | 519.5  | 607.5  | 648.5  |
| 730.4  | 1069.6 | 91.9  | 131.8 | 1262.7 | 1168.0 | 674.6  | 576.5  | 629.2  |
| 1264.8 | 1186.5 | 114.0 | 196.9 | 1746.0 | 1084.8 | 3134.5 | 1786.6 | 2001.8 |
| 159.6  | 165.7  | 20.4  | 10.4  | 217.8  | 132.9  | 61.6   | 148.0  | 138.3  |
| 56.6   | 58.1   | 66.1  | 66.1  | 93.0   | 43.5   | 100.9  | 147.1  | 190.9  |
| 41.4   | 39.3   | 24.1  | 19.3  | 86.1   | 22.1   | 196.7  | 212.5  | 268.8  |
| 201.2  | 168.5  | 156.2 | 195.1 | 288.3  | 148.4  | 804.7  | 974.9  | 994.1  |
| 61.5   | 52.8   | 57.6  | 68.9  | 94.6   | 63.3   | 63.4   | 47.7   | 71.2   |
| 40.8   | 34.8   | 31.7  | 34.5  | 24.6   | 42.2   | 39.2   | 30.7   | 29.6   |
| 306.8  | 371.2  | 201.4 | 258.9 | 380.6  | 330.5  | 688.1  | 497.5  | 564.6  |
| 21.1   | 22.5   | 30.1  | 25.2  | 30.7   | 3.0    | 22.3   | 17.7   | 7.7    |
| 36.0   | 26.7   | 32.5  | 28.0  | 44.7   | 49.5   | 102.7  | 81.0   | 101.2  |
| 163.7  | 232.5  | 31.7  | 36.1  | 321.0  | 220.1  | 306.0  | 237.8  | 294.9  |
| 98.9   | 120.4  | 156.7 | 188.1 | 149.9  | 139.1  | 149.9  | 121.6  | 116.7  |
| 224.9  | 263.3  | 99.9  | 198.7 | 379.3  | 282.6  | 593.4  | 463.1  | 485.0  |
| 23.4   | 17.1   | 16.3  | 7.1   | 22.0   | 4.0    | 29.0   | 25.1   | 28.8   |
| 1030.8 | 1102.1 | 98.5  | 128.8 | 1371.6 | 1267.1 | 962.5  | 679.0  | 793.7  |
| 111.7  | 190.0  | 1.0   | 11.6  | 221.0  | 222.2  | 22.7   | 68.2   | 99.2   |
| 414.7  | 535.4  | 207.9 | 312.0 | 697.1  | 613.1  | 351.4  | 365.4  | 456.8  |
| 77.7   | 85.1   | 49.2  | 51.6  | 79.2   | 55.1   | 171.7  | 206.5  | 230.8  |
| 240.9  | 229.4  | 64.0  | 75.9  | 280.1  | 198.9  | 1147.5 | 994.3  | 1030.8 |
| 59.3   | 54.2   | 41.3  | 54.7  | 61.9   | 40.5   | 107.6  | 48.9   | 62.2   |
| 37.1   | 42.1   | 15.6  | 45.4  | 59.7   | 44.2   | 80.6   | 43.7   | 42.2   |
| 121.3  | 168.0  | 74.9  | 102.5 | 149.3  | 135.9  | 210.2  | 131.8  | 130.7  |
| 159.1  | 144.5  | 55.3  | 79.7  | 205.2  | 156.0  | 166.6  | 117.5  | 154.9  |
| 1.8    | 0.9    | 1.0   | 2.3   | 2.2    | 2.1    | 2.6    | 1.8    | 2.4    |
| 153.8  | 242.8  | 69.9  | 101.3 | 244.1  | 201.8  | 288.7  | 200.9  | 245.7  |
| 41.3   | 43.0   | 28.5  | 32.4  | 66.4   | 49.7   | 108.3  | 74.8   | 88.5   |
| 205.0  | 297.0  | 21.8  | 21.9  | 370.7  | 261.8  | 506.8  | 454.4  | 539.3  |
| 98.6   | 125.1  | 14.7  | 7.1   | 165.4  | 145.9  | 347.1  | 350.9  | 390.7  |
| 587.0  | 783.3  | 136.5 | 165.0 | 1162.9 | 843.1  | 827.8  | 749.2  | 833.9  |
| 120.2  | 174.2  | 5.7   | 6.7   | 276.5  | 121.9  | 85.7   | 104.0  | 144.5  |
| 5.5    | 12.2   | 7.6   | 22.4  | 25.4   | 27.0   | 40.2   | 70.3   | 68.2   |
| 71.5   | 75.8   | 29.2  | 29.0  | 100.3  | 110.0  | 141.6  | 119.2  | 158.0  |
| 3.1    | 14.2   | 5.6   | 5.4   | 9.1    | 9.7    | 15.9   | 13.1   | 13.4   |
| 115.9  | 142.0  | 123.4 | 147.4 | 158.5  | 143.2  | 196.9  | 113.1  | 152.9  |
| 36.9   | 91.9   | 74.9  | 95.0  | 120.8  | 64.5   | 83.6   | 52.5   | 84.5   |
| 135.8  | 153.8  | 5.2   | 5.7   | 153.5  | 167.4  | 30.5   | 25.9   | 35.9   |
| 103.0  | 97.7   | 96.9  | 84.7  | 132.0  | 84.0   | 57.5   | 65.7   | 70.6   |

|        |        |       |        |        |        |        |        |        |
|--------|--------|-------|--------|--------|--------|--------|--------|--------|
| 242.5  | 317.5  | 127.4 | 160.4  | 369.7  | 348.5  | 400.4  | 385.5  | 414.1  |
| 105.0  | 119.7  | 57.8  | 63.9   | 118.7  | 185.8  | 508.1  | 224.9  | 263.4  |
| 113.3  | 181.1  | 60.5  | 79.4   | 202.6  | 187.5  | 734.3  | 337.0  | 383.7  |
| 77.9   | 125.2  | 0.9   | 1.9    | 132.1  | 90.3   | 22.8   | 41.1   | 32.4   |
| 93.2   | 96.3   | 76.3  | 105.0  | 122.8  | 111.4  | 199.5  | 192.5  | 214.8  |
| 2388.1 | 3385.2 | 2.5   | 9.3    | 2786.0 | 2546.4 | 6.2    | 4.9    | 0.9    |
| 75.8   | 89.0   | 99.8  | 113.7  | 173.9  | 101.0  | 89.9   | 90.1   | 98.3   |
| 139.9  | 165.3  | 113.9 | 113.8  | 257.1  | 189.5  | 276.0  | 334.7  | 369.4  |
| 31.7   | 36.9   | 45.7  | 66.4   | 51.5   | 26.8   | 84.5   | 71.6   | 88.4   |
| 11.1   | 4.4    | 6.6   | 6.4    | 8.4    | 18.0   | 4.2    | 6.7    | 12.1   |
| 12.0   | 14.8   | 13.5  | 9.3    | 14.9   | 12.3   | 15.4   | 8.5    | 17.8   |
| 44.9   | 84.0   | 27.8  | 23.4   | 87.8   | 43.4   | 7743.0 | 7190.1 | 7952.6 |
| 25.6   | 43.8   | 17.1  | 21.4   | 33.3   | 23.9   | 80.2   | 102.7  | 123.1  |
| 139.0  | 143.5  | 66.2  | 80.0   | 138.9  | 136.9  | 204.5  | 170.6  | 266.4  |
| 196.0  | 224.6  | 333.3 | 491.1  | 315.0  | 214.3  | 890.7  | 842.1  | 741.9  |
| 624.4  | 888.9  | 774.0 | 1211.6 | 932.5  | 839.4  | 1293.0 | 1004.5 | 1092.5 |
| 1.1    | 1.1    | 1.1   | 2.5    | 1.1    | 2.3    | 1.8    | 2.4    | 0.9    |
| 97.2   | 165.1  | 54.9  | 70.2   | 93.5   | 121.1  | 269.0  | 242.3  | 245.4  |
| 39.9   | 61.9   | 92.1  | 80.5   | 77.0   | 55.1   | 111.0  | 112.7  | 110.9  |
| 190.7  | 202.0  | 37.5  | 58.7   | 241.2  | 138.0  | 279.1  | 224.1  | 234.8  |
| 154.3  | 195.8  | 42.4  | 72.5   | 265.2  | 227.7  | 150.1  | 108.5  | 132.8  |
| 73.2   | 122.2  | 14.0  | 6.3    | 110.3  | 114.6  | 380.6  | 306.0  | 386.0  |
| 168.6  | 299.8  | 39.4  | 49.3   | 272.1  | 241.5  | 348.1  | 264.4  | 291.5  |
| 30.5   | 37.4   | 72.2  | 83.6   | 45.6   | 43.9   | 258.4  | 173.7  | 190.3  |
| 130.6  | 197.7  | 23.6  | 21.7   | 187.1  | 101.6  | 331.3  | 203.0  | 194.1  |
| 432.4  | 555.9  | 42.5  | 47.3   | 626.1  | 593.0  | 1075.2 | 589.0  | 618.3  |
| 219.6  | 364.6  | 71.2  | 93.2   | 364.2  | 285.8  | 382.8  | 246.4  | 317.4  |
| 206.2  | 217.8  | 59.6  | 62.3   | 293.0  | 276.6  | 648.7  | 452.7  | 454.1  |
| 293.0  | 400.4  | 20.8  | 27.0   | 447.9  | 376.2  | 1018.7 | 576.8  | 638.7  |
| 36.0   | 41.2   | 47.7  | 59.4   | 39.1   | 32.1   | 129.7  | 149.8  | 186.8  |
| 57.4   | 67.1   | 47.5  | 49.2   | 66.6   | 58.0   | 118.4  | 155.1  | 165.2  |
| 48.0   | 51.6   | 58.6  | 81.9   | 56.8   | 45.7   | 264.9  | 261.6  | 294.6  |
| 147.4  | 279.0  | 361.5 | 469.9  | 299.2  | 267.2  | 440.2  | 318.0  | 337.5  |
| 259.4  | 354.2  | 218.9 | 210.4  | 481.9  | 478.3  | 557.7  | 473.9  | 532.6  |
| 361.2  | 292.6  | 103.6 | 150.2  | 391.8  | 347.8  | 1248.1 | 517.2  | 572.0  |
| 155.7  | 125.0  | 110.0 | 129.2  | 197.4  | 130.1  | 671.4  | 294.3  | 334.4  |
| 458.9  | 664.8  | 30.3  | 30.5   | 517.5  | 531.7  | 1131.6 | 832.1  | 828.0  |
| 144.3  | 162.9  | 10.6  | 31.3   | 166.2  | 135.6  | 292.6  | 191.4  | 252.0  |
| 1264.9 | 1343.7 | 446.2 | 480.1  | 2041.4 | 1062.0 | 2817.3 | 2126.2 | 2451.8 |
| 362.5  | 352.7  | 643.7 | 707.5  | 621.8  | 269.5  | 1341.6 | 1015.1 | 1004.8 |
| 77.7   | 109.7  | 67.4  | 91.2   | 123.2  | 110.9  | 228.4  | 397.9  | 447.5  |
| 277.3  | 432.0  | 73.0  | 93.3   | 664.9  | 503.7  | 537.3  | 828.2  | 824.3  |
| 130.8  | 159.5  | 57.0  | 49.6   | 211.9  | 183.1  | 76.6   | 106.9  | 107.5  |
| 313.5  | 323.5  | 199.7 | 216.7  | 445.7  | 337.6  | 796.1  | 571.3  | 567.0  |
| 394.4  | 483.9  | 278.9 | 521.2  | 553.4  | 605.3  | 946.9  | 742.0  | 895.7  |
| 18.2   | 21.5   | 26.9  | 23.4   | 32.4   | 11.5   | 39.9   | 42.4   | 44.2   |
| 108.7  | 127.1  | 72.1  | 71.9   | 206.5  | 113.2  | 114.6  | 127.3  | 123.6  |
| 43.3   | 38.6   | 31.3  | 38.3   | 58.4   | 44.1   | 43.2   | 41.1   | 46.9   |
| 38.9   | 53.4   | 21.3  | 16.3   | 60.7   | 48.5   | 82.6   | 58.7   | 72.1   |
| 182.7  | 249.4  | 42.4  | 62.3   | 352.1  | 309.2  | 2571.4 | 3158.6 | 3044.3 |
| 122.2  | 149.8  | 86.8  | 133.4  | 195.6  | 253.4  | 2411.6 | 2499.0 | 2664.7 |
| 80.3   | 123.2  | 81.8  | 89.1   | 119.5  | 103.3  | 340.0  | 454.4  | 463.8  |
| 132.6  | 256.3  | 61.0  | 93.2   | 227.1  | 217.1  | 389.9  | 716.9  | 737.6  |



|        |        |       |       |        |        |        |       |        |
|--------|--------|-------|-------|--------|--------|--------|-------|--------|
| 201.1  | 150.9  | 291.7 | 438.2 | 252.4  | 186.4  | 562.5  | 418.0 | 492.0  |
| 84.3   | 160.1  | 169.2 | 140.4 | 113.3  | 119.5  | 400.9  | 322.1 | 295.7  |
| 166.7  | 257.7  | 67.9  | 76.9  | 170.3  | 374.6  | 225.5  | 189.0 | 209.6  |
| 34.0   | 54.2   | 20.1  | 21.2  | 52.1   | 33.2   | 132.5  | 151.6 | 212.9  |
| 29.5   | 79.0   | 28.0  | 24.9  | 48.6   | 47.1   | 303.4  | 417.6 | 471.9  |
| 314.0  | 360.1  | 13.1  | 3.5   | 407.7  | 364.0  | 205.1  | 214.2 | 215.8  |
| 904.2  | 1059.7 | 2.2   | 20.2  | 1104.0 | 944.6  | 92.9   | 54.6  | 28.0   |
| 119.4  | 105.8  | 45.6  | 107.6 | 152.6  | 123.0  | 265.4  | 127.0 | 143.3  |
| 27.5   | 54.7   | 2.4   | 5.7   | 54.2   | 38.6   | 234.2  | 164.3 | 185.7  |
| 8.8    | 5.7    | 3.0   | 2.1   | 2.8    | 3.2    | 20.5   | 12.3  | 11.5   |
| 17.4   | 18.7   | 154.6 | 140.3 | 27.1   | 18.6   | 59.1   | 104.1 | 117.3  |
| 55.2   | 66.3   | 47.3  | 56.2  | 57.8   | 61.9   | 247.8  | 208.9 | 240.6  |
| 4.6    | 66.8   | 1.5   | 4.4   | 40.7   | 35.3   | 3.9    | 5.7   | 4.8    |
| 94.8   | 93.3   | 47.5  | 81.8  | 140.3  | 94.5   | 270.3  | 273.2 | 291.8  |
| 137.2  | 192.1  | 22.9  | 31.9  | 251.2  | 174.3  | 233.6  | 242.5 | 272.0  |
| 448.0  | 751.4  | 41.4  | 90.8  | 638.4  | 587.4  | 734.0  | 839.4 | 951.6  |
| 108.5  | 101.3  | 111.4 | 132.3 | 127.8  | 126.6  | 287.7  | 396.8 | 444.1  |
| 55.4   | 52.1   | 26.5  | 46.0  | 73.2   | 54.4   | 94.3   | 121.7 | 129.5  |
| 145.4  | 116.1  | 47.2  | 80.1  | 192.0  | 145.2  | 352.4  | 274.3 | 298.8  |
| 55.5   | 78.0   | 183.7 | 290.2 | 93.4   | 73.3   | 238.6  | 222.3 | 253.5  |
| 25.8   | 29.8   | 77.1  | 133.0 | 38.9   | 23.3   | 152.1  | 147.5 | 147.0  |
| 28.7   | 7.6    | 8.0   | 18.0  | 24.7   | 27.7   | 56.5   | 98.9  | 80.8   |
| 428.5  | 442.3  | 51.9  | 65.7  | 643.9  | 463.1  | 629.9  | 571.7 | 670.3  |
| 144.0  | 181.5  | 154.6 | 218.6 | 206.7  | 194.8  | 940.5  | 615.8 | 730.6  |
| 98.0   | 165.0  | 17.2  | 16.3  | 193.8  | 135.2  | 791.5  | 695.7 | 875.0  |
| 55.9   | 93.0   | 25.7  | 30.4  | 103.5  | 53.8   | 128.4  | 150.5 | 155.4  |
| 160.1  | 170.3  | 22.0  | 20.0  | 145.8  | 167.6  | 200.0  | 105.9 | 123.4  |
| 123.8  | 111.4  | 77.4  | 93.8  | 240.0  | 111.3  | 33.5   | 38.0  | 52.9   |
| 107.9  | 142.9  | 51.1  | 59.9  | 113.7  | 124.5  | 479.3  | 597.5 | 662.8  |
| 997.8  | 1068.4 | 200.6 | 293.6 | 1308.5 | 863.6  | 376.2  | 217.5 | 242.7  |
| 1083.1 | 1168.8 | 259.0 | 372.3 | 1766.2 | 1432.1 | 1120.1 | 874.1 | 913.0  |
| 34.1   | 47.2   | 15.6  | 21.1  | 65.2   | 41.0   | 70.8   | 58.2  | 71.6   |
| 398.0  | 513.7  | 310.5 | 412.4 | 609.9  | 526.9  | 769.9  | 504.6 | 554.8  |
| 368.1  | 379.7  | 157.0 | 294.8 | 532.4  | 499.4  | 690.2  | 601.6 | 695.3  |
| 9.8    | 13.9   | 20.9  | 29.4  | 14.3   | 14.4   | 82.7   | 106.3 | 99.5   |
| 13.5   | 10.4   | 30.6  | 42.0  | 15.0   | 4.2    | 77.3   | 71.6  | 85.4   |
| 80.3   | 103.8  | 43.9  | 50.6  | 116.5  | 110.1  | 154.1  | 126.5 | 131.7  |
| 186.8  | 230.2  | 67.7  | 48.7  | 230.1  | 172.7  | 219.5  | 180.1 | 215.9  |
| 70.4   | 67.9   | 62.8  | 90.5  | 85.9   | 51.9   | 328.7  | 256.0 | 295.1  |
| 69.9   | 81.8   | 46.7  | 68.0  | 114.2  | 99.7   | 228.1  | 179.3 | 189.8  |
| 323.4  | 474.9  | 39.1  | 69.4  | 453.3  | 418.9  | 477.6  | 315.4 | 374.5  |
| 455.4  | 359.4  | 139.1 | 216.4 | 459.7  | 309.6  | 692.0  | 327.5 | 351.4  |
| 11.3   | 36.1   | 56.4  | 92.5  | 27.5   | 18.3   | 27.0   | 44.2  | 58.3   |
| 156.6  | 185.2  | 45.2  | 68.1  | 249.7  | 145.9  | 303.9  | 199.2 | 232.2  |
| 82.5   | 76.4   | 50.1  | 49.2  | 97.7   | 137.4  | 179.9  | 107.1 | 129.9  |
| 528.1  | 656.6  | 116.2 | 137.3 | 722.0  | 606.5  | 1127.2 | 830.4 | 921.4  |
| 34.8   | 64.9   | 56.5  | 63.9  | 91.1   | 69.4   | 256.6  | 269.0 | 302.6  |
| 276.2  | 366.4  | 154.6 | 133.8 | 278.6  | 367.2  | 1211.5 | 827.0 | 1149.1 |
| 373.4  | 366.1  | 62.0  | 94.5  | 437.3  | 296.2  | 310.4  | 243.9 | 251.8  |
| 12.4   | 47.2   | 56.8  | 68.0  | 59.8   | 20.7   | 68.0   | 91.1  | 115.3  |
| 95.7   | 202.4  | 42.6  | 34.5  | 211.2  | 148.7  | 130.3  | 104.1 | 118.8  |
| 33.1   | 16.2   | 30.5  | 37.4  | 19.0   | 4.5    | 76.8   | 66.7  | 59.6   |
| 38.3   | 34.0   | 1.8   | 3.3   | 36.3   | 27.1   | 56.9   | 72.1  | 138.3  |

|        |        |       |        |        |        |        |        |        |
|--------|--------|-------|--------|--------|--------|--------|--------|--------|
| 594.4  | 777.8  | 19.6  | 32.4   | 897.2  | 897.9  | 451.3  | 304.3  | 367.5  |
| 91.7   | 117.2  | 3.7   | 12.0   | 221.5  | 116.4  | 153.1  | 217.9  | 191.3  |
| 173.8  | 170.8  | 23.9  | 32.7   | 247.2  | 149.4  | 308.7  | 322.0  | 353.5  |
| 117.1  | 108.5  | 6.9   | 14.1   | 147.8  | 88.1   | 122.8  | 136.7  | 151.8  |
| 131.4  | 175.2  | 196.8 | 217.3  | 235.1  | 149.9  | 524.6  | 579.5  | 650.0  |
| 553.6  | 592.3  | 109.4 | 144.5  | 746.5  | 548.1  | 1796.7 | 1331.3 | 1488.9 |
| 67.3   | 64.9   | 35.7  | 34.6   | 91.1   | 37.8   | 88.3   | 95.3   | 100.3  |
| 52.8   | 55.7   | 22.4  | 46.5   | 72.0   | 37.7   | 60.1   | 60.2   | 55.6   |
| 2.2    | 2.4    | 0.7   | 2.2    | 1.5    | 1.7    | 3.2    | 3.0    | 2.7    |
| 157.0  | 162.8  | 28.5  | 33.0   | 190.7  | 148.5  | 194.7  | 210.3  | 177.1  |
| 63.0   | 83.3   | 78.1  | 73.5   | 68.7   | 72.2   | 124.0  | 166.9  | 178.4  |
| 46.6   | 56.6   | 99.5  | 81.4   | 83.1   | 72.4   | 183.3  | 142.2  | 160.9  |
| 19.7   | 29.5   | 115.9 | 140.7  | 35.5   | 20.6   | 166.9  | 127.4  | 125.1  |
| 9.2    | 10.5   | 1.8   | 6.9    | 3.2    | 12.5   | 4.2    | 9.2    | 10.2   |
| 3.7    | 1.9    | 8.0   | 4.8    | 2.1    | 5.4    | 3.6    | 1.9    | 4.0    |
| 126.3  | 167.5  | 94.0  | 88.4   | 223.2  | 146.6  | 109.4  | 138.7  | 128.8  |
| 78.6   | 93.4   | 76.3  | 87.6   | 104.7  | 72.5   | 86.1   | 96.3   | 105.0  |
| 44.4   | 45.6   | 1.4   | 12.9   | 51.6   | 55.5   | 12.1   | 12.4   | 11.3   |
| 126.2  | 147.6  | 26.1  | 23.8   | 168.7  | 259.1  | 61.7   | 45.5   | 40.2   |
| 149.0  | 182.9  | 22.6  | 18.5   | 185.6  | 135.9  | 184.6  | 129.0  | 175.3  |
| 367.3  | 303.3  | 46.7  | 63.8   | 445.6  | 330.8  | 1639.3 | 1346.7 | 1426.0 |
| 307.7  | 353.7  | 20.6  | 27.8   | 482.3  | 398.1  | 970.0  | 1115.3 | 1130.1 |
| 28.4   | 36.6   | 729.7 | 856.4  | 56.5   | 23.3   | 2107.8 | 3298.5 | 3186.7 |
| 1.1    | 8.8    | 2.2   | 7.2    | 10.2   | 1.9    | 10.2   | 15.5   | 12.5   |
| 578.5  | 868.8  | 132.6 | 206.6  | 877.8  | 903.7  | 518.3  | 489.0  | 522.9  |
| 76.5   | 81.4   | 41.3  | 31.3   | 123.9  | 70.6   | 87.0   | 70.3   | 69.8   |
| 23.7   | 22.6   | 25.9  | 46.6   | 40.8   | 3.5    | 82.7   | 112.1  | 141.4  |
| 10.4   | 12.5   | 21.6  | 14.5   | 22.9   | 20.4   | 54.7   | 75.7   | 80.2   |
| 119.4  | 177.9  | 19.9  | 28.2   | 204.8  | 148.6  | 561.3  | 688.0  | 694.4  |
| 67.7   | 105.0  | 157.3 | 343.9  | 96.7   | 62.5   | 869.8  | 621.3  | 725.5  |
| 246.8  | 384.7  | 446.4 | 525.9  | 371.2  | 351.2  | 1408.4 | 1223.4 | 1234.8 |
| 170.0  | 270.1  | 183.5 | 165.0  | 249.8  | 219.6  | 912.9  | 837.1  | 888.6  |
| 60.7   | 93.1   | 108.0 | 149.3  | 99.4   | 60.7   | 349.9  | 252.9  | 256.5  |
| 305.9  | 342.2  | 209.8 | 259.6  | 484.4  | 308.0  | 451.6  | 496.6  | 528.9  |
| 2713.7 | 3358.4 | 855.5 | 1243.2 | 3710.9 | 3625.5 | 6167.5 | 4287.3 | 4533.7 |
| 93.3   | 84.4   | 41.6  | 45.2   | 100.3  | 69.9   | 162.7  | 114.4  | 155.2  |
| 302.7  | 396.5  | 146.0 | 136.6  | 451.5  | 384.2  | 412.1  | 438.7  | 495.3  |
| 230.6  | 311.4  | 99.2  | 86.6   | 356.0  | 251.1  | 517.2  | 493.8  | 549.4  |
| 287.3  | 464.1  | 11.8  | 13.8   | 451.7  | 316.4  | 224.7  | 112.4  | 144.7  |
| 100.7  | 116.7  | 88.0  | 98.3   | 127.4  | 175.8  | 413.9  | 318.4  | 376.3  |
| 55.9   | 78.7   | 118.4 | 136.4  | 61.8   | 74.7   | 308.7  | 227.7  | 257.2  |
| 317.6  | 476.5  | 8.8   | 5.8    | 500.7  | 397.1  | 164.8  | 209.4  | 225.3  |
| 941.5  | 1597.0 | 6.4   | 4.2    | 1379.1 | 1568.1 | 284.6  | 375.5  | 379.9  |
| 18.7   | 13.6   | 0.7   | 1.9    | 23.5   | 4.3    | 11.7   | 19.5   | 20.2   |
| 2.3    | 4.9    | 3.9   | 20.5   | 6.7    | 2.4    | 2.9    | 5.5    | 14.3   |
| 89.4   | 132.5  | 96.4  | 175.6  | 203.6  | 145.0  | 542.4  | 354.8  | 404.3  |
| 103.3  | 108.7  | 83.7  | 150.3  | 167.9  | 94.9   | 381.4  | 261.3  | 254.2  |
| 110.2  | 179.3  | 4.9   | 1.7    | 180.5  | 170.6  | 19.5   | 14.7   | 18.7   |
| 88.1   | 91.3   | 59.0  | 80.4   | 158.2  | 70.7   | 208.9  | 222.8  | 227.0  |
| 0.6    | 1.4    | 2.1   | 3.9    | 1.3    | 0.6    | 83.4   | 57.5   | 82.3   |
| 1.1    | 10.3   | 15.6  | 21.9   | 28.3   | 0.9    | 228.0  | 216.1  | 273.7  |
| 158.8  | 143.8  | 105.9 | 153.2  | 363.9  | 126.6  | 430.6  | 450.4  | 422.7  |
| 66.9   | 83.9   | 37.5  | 46.6   | 83.6   | 52.5   | 169.9  | 191.6  | 208.3  |

|        |        |       |       |        |        |        |        |        |
|--------|--------|-------|-------|--------|--------|--------|--------|--------|
| 130.8  | 151.5  | 100.7 | 113.8 | 225.0  | 141.0  | 274.8  | 343.4  | 375.4  |
| 594.8  | 605.6  | 63.5  | 112.2 | 768.4  | 698.5  | 544.7  | 286.5  | 346.0  |
| 136.1  | 162.0  | 67.3  | 64.7  | 155.1  | 187.1  | 195.6  | 144.6  | 180.3  |
| 370.8  | 549.6  | 126.5 | 158.5 | 610.9  | 647.7  | 873.8  | 828.1  | 848.4  |
| 69.4   | 62.4   | 11.6  | 9.5   | 99.8   | 75.2   | 249.6  | 203.6  | 254.0  |
| 76.5   | 90.0   | 19.4  | 28.2  | 136.2  | 84.8   | 296.7  | 259.7  | 316.4  |
| 598.0  | 684.9  | 44.2  | 42.0  | 879.8  | 771.4  | 813.3  | 481.7  | 495.1  |
| 131.2  | 161.9  | 365.5 | 555.6 | 215.2  | 152.3  | 678.0  | 520.9  | 594.3  |
| 535.0  | 859.1  | 59.7  | 74.2  | 765.4  | 862.7  | 1453.5 | 1407.5 | 1403.9 |
| 940.6  | 775.1  | 188.7 | 238.8 | 1142.4 | 773.7  | 761.6  | 462.7  | 445.7  |
| 453.7  | 539.4  | 76.8  | 83.7  | 870.4  | 599.0  | 513.9  | 386.3  | 509.7  |
| 155.3  | 180.4  | 61.1  | 82.1  | 278.5  | 191.6  | 240.3  | 202.5  | 194.4  |
| 95.0   | 118.9  | 14.5  | 19.0  | 131.2  | 115.2  | 265.3  | 183.9  | 195.3  |
| 81.4   | 128.8  | 23.1  | 17.5  | 97.1   | 132.3  | 455.6  | 38.9   | 12.1   |
| 72.6   | 146.5  | 17.6  | 35.9  | 139.0  | 110.4  | 421.0  | 47.2   | 12.1   |
| 321.2  | 428.1  | 116.2 | 151.0 | 555.0  | 382.7  | 397.8  | 449.5  | 484.2  |
| 458.4  | 558.9  | 110.4 | 147.8 | 616.3  | 649.9  | 843.8  | 575.3  | 646.4  |
| 35.3   | 26.2   | 13.5  | 10.0  | 46.8   | 42.8   | 72.4   | 69.0   | 81.3   |
| 111.6  | 153.9  | 62.7  | 91.6  | 190.7  | 122.1  | 200.0  | 132.1  | 170.7  |
| 22.7   | 19.5   | 12.4  | 8.1   | 36.9   | 31.7   | 44.1   | 29.9   | 41.6   |
| 35.4   | 63.5   | 7.0   | 7.0   | 64.6   | 42.8   | 70.1   | 45.4   | 55.0   |
| 106.8  | 129.3  | 56.4  | 89.2  | 141.5  | 114.9  | 300.7  | 305.0  | 309.1  |
| 62.7   | 65.7   | 160.6 | 250.4 | 114.0  | 61.1   | 221.1  | 213.1  | 213.7  |
| 191.4  | 151.2  | 40.4  | 112.7 | 217.9  | 133.5  | 793.7  | 517.5  | 514.9  |
| 279.5  | 353.1  | 98.8  | 154.0 | 519.4  | 348.5  | 1063.3 | 821.0  | 852.8  |
| 282.7  | 327.6  | 45.0  | 113.3 | 532.0  | 363.9  | 998.9  | 666.1  | 663.2  |
| 49.5   | 65.4   | 33.3  | 38.8  | 104.8  | 56.4   | 206.7  | 146.8  | 147.1  |
| 1102.1 | 1341.3 | 138.6 | 152.9 | 1933.2 | 1480.1 | 3454.9 | 1697.2 | 1809.7 |
| 114.6  | 142.3  | 90.3  | 101.7 | 145.0  | 83.5   | 264.9  | 257.1  | 258.4  |
| 90.0   | 126.6  | 59.9  | 71.6  | 133.1  | 114.1  | 245.5  | 275.3  | 329.6  |
| 10.7   | 21.1   | 49.1  | 84.5  | 36.0   | 27.4   | 79.8   | 50.3   | 71.5   |
| 188.9  | 190.9  | 11.2  | 38.2  | 217.2  | 209.6  | 258.5  | 184.6  | 212.0  |
| 540.5  | 645.1  | 399.2 | 630.6 | 1007.6 | 632.0  | 248.8  | 182.4  | 211.1  |
| 17.9   | 35.8   | 24.0  | 26.9  | 38.6   | 24.7   | 97.1   | 70.0   | 70.0   |
| 26.4   | 46.1   | 9.6   | 18.2  | 37.0   | 23.9   | 51.2   | 39.0   | 32.3   |
| 174.6  | 213.9  | 31.6  | 44.3  | 228.0  | 261.4  | 105.1  | 64.2   | 97.6   |
| 791.9  | 1018.5 | 207.4 | 315.9 | 1175.3 | 1099.2 | 2005.4 | 1984.0 | 2078.9 |
| 26.2   | 34.7   | 18.4  | 16.3  | 24.4   | 35.5   | 2.7    | 3.1    | 2.1    |
| 51.9   | 79.9   | 17.5  | 15.9  | 66.4   | 93.6   | 12.6   | 12.6   | 9.0    |
| 157.1  | 182.3  | 42.6  | 57.4  | 185.7  | 137.5  | 833.2  | 631.3  | 612.0  |
| 105.8  | 147.3  | 19.3  | 29.9  | 194.0  | 160.1  | 1008.0 | 663.7  | 736.7  |
| 259.1  | 310.8  | 76.5  | 97.2  | 379.9  | 321.4  | 283.1  | 312.7  | 295.7  |
| 58.7   | 69.0   | 20.5  | 37.2  | 83.3   | 68.0   | 86.3   | 92.1   | 85.5   |
| 58.7   | 70.3   | 21.0  | 16.4  | 59.1   | 57.8   | 178.1  | 194.9  | 187.1  |
| 129.8  | 101.0  | 121.5 | 151.6 | 216.8  | 122.7  | 236.7  | 213.8  | 243.1  |
| 328.1  | 461.2  | 156.6 | 240.3 | 437.6  | 456.4  | 851.2  | 718.2  | 766.1  |
| 13.9   | 19.1   | 2.6   | 8.7   | 43.0   | 7.3    | 1.9    | 7.7    | 12.5   |
| 16.6   | 19.7   | 0.9   | 0.5   | 50.4   | 22.9   | 2.3    | 5.1    | 4.3    |
| 63.7   | 53.8   | 68.9  | 65.0  | 59.3   | 47.5   | 157.4  | 178.4  | 201.4  |
| 12.0   | 28.1   | 36.5  | 43.2  | 24.1   | 21.8   | 92.4   | 140.0  | 146.6  |
| 129.5  | 74.5   | 22.7  | 23.7  | 187.6  | 73.3   | 75.1   | 136.1  | 126.8  |
| 81.1   | 221.3  | 67.7  | 50.8  | 200.4  | 291.6  | 807.9  | 392.1  | 557.5  |
| 71.4   | 112.2  | 39.8  | 60.1  | 157.3  | 123.5  | 684.0  | 388.4  | 462.8  |

|        |        |       |        |        |        |        |        |        |
|--------|--------|-------|--------|--------|--------|--------|--------|--------|
| 33.8   | 29.7   | 64.4  | 84.0   | 31.6   | 27.8   | 121.5  | 108.9  | 103.2  |
| 22.2   | 14.4   | 31.5  | 24.6   | 27.7   | 25.5   | 99.7   | 88.9   | 90.4   |
| 38.8   | 35.7   | 29.8  | 22.9   | 56.3   | 34.4   | 301.4  | 258.8  | 271.1  |
| 317.9  | 477.1  | 179.7 | 246.9  | 550.5  | 492.5  | 393.2  | 318.8  | 401.5  |
| 171.9  | 224.9  | 279.9 | 432.5  | 265.2  | 224.0  | 2396.6 | 2150.1 | 2486.6 |
| 1.7    | 0.6    | 1.3   | 0.8    | 0.7    | 2.8    | 3.9    | 3.6    | 6.9    |
| 105.1  | 214.7  | 143.5 | 117.1  | 173.2  | 154.7  | 207.7  | 89.7   | 85.5   |
| 117.7  | 220.1  | 151.3 | 120.0  | 145.9  | 168.3  | 181.8  | 85.4   | 115.3  |
| 2279.0 | 3064.7 | 426.5 | 565.7  | 3702.9 | 3352.9 | 5365.1 | 4169.5 | 4389.1 |
| 719.2  | 1008.9 | 244.9 | 314.0  | 1239.1 | 916.8  | 2249.0 | 2488.2 | 2582.7 |
| 11.3   | 8.2    | 1.0   | 8.5    | 1.8    | 1.1    | 8.9    | 8.9    | 8.9    |
| 6.2    | 4.8    | 5.9   | 1.5    | 3.3    | 8.2    | 7.5    | 3.3    | 5.7    |
| 0.8    | 2.4    | 0.4   | 6.9    | 0.7    | 6.0    | 1.6    | 4.0    | 10.6   |
| 240.4  | 211.8  | 209.6 | 295.2  | 383.6  | 185.3  | 1693.8 | 1230.1 | 1438.3 |
| 21.5   | 52.7   | 5.2   | 3.7    | 39.9   | 48.5   | 425.7  | 190.9  | 235.0  |
| 618.8  | 974.2  | 70.5  | 92.7   | 914.1  | 831.4  | 4075.8 | 4010.5 | 4376.7 |
| 80.8   | 66.9   | 5.8   | 4.5    | 152.2  | 74.7   | 5.7    | 6.6    | 2.7    |
| 1533.0 | 1598.4 | 66.6  | 98.3   | 1975.5 | 1422.3 | 2440.3 | 839.1  | 967.1  |
| 384.2  | 414.4  | 101.5 | 114.7  | 569.6  | 393.4  | 1538.9 | 1257.6 | 1347.5 |
| 390.4  | 586.0  | 75.2  | 101.3  | 655.1  | 521.1  | 49.9   | 92.7   | 99.4   |
| 30.5   | 13.3   | 37.3  | 19.9   | 38.8   | 16.2   | 64.5   | 84.5   | 94.4   |
| 147.5  | 129.1  | 99.1  | 137.9  | 238.5  | 125.3  | 270.0  | 200.3  | 242.5  |
| 209.8  | 284.7  | 73.3  | 81.2   | 427.6  | 233.6  | 158.9  | 81.1   | 87.7   |
| 1277.7 | 1600.7 | 632.7 | 848.4  | 1510.5 | 1327.6 | 3481.2 | 1952.6 | 2404.2 |
| 71.2   | 72.7   | 52.8  | 72.3   | 85.8   | 25.2   | 108.6  | 101.3  | 122.4  |
| 15.2   | 5.3    | 8.1   | 1.5    | 6.1    | 10.6   | 16.3   | 17.6   | 4.4    |
| 387.0  | 455.3  | 136.2 | 181.4  | 515.2  | 452.7  | 337.2  | 118.6  | 128.7  |
| 550.9  | 659.6  | 686.1 | 1201.5 | 834.8  | 659.2  | 2068.9 | 2265.5 | 2287.1 |
| 31.4   | 8.7    | 18.8  | 14.0   | 17.5   | 24.6   | 35.9   | 28.0   | 26.1   |
| 29.0   | 9.6    | 1.7   | 1.8    | 58.9   | 33.1   | 16.6   | 24.7   | 36.4   |
| 287.8  | 507.4  | 249.7 | 344.5  | 365.6  | 559.2  | 1252.3 | 764.9  | 834.1  |
| 149.2  | 166.5  | 65.7  | 57.2   | 186.3  | 169.0  | 84.9   | 71.2   | 100.9  |
| 58.0   | 71.9   | 40.9  | 53.6   | 110.9  | 54.4   | 735.2  | 315.0  | 411.1  |
| 20.6   | 13.2   | 72.5  | 101.3  | 65.2   | 32.1   | 2.8    | 2.1    | 2.4    |
| 105.3  | 95.1   | 78.7  | 102.4  | 144.4  | 79.8   | 343.5  | 173.6  | 207.9  |
| 712.6  | 656.8  | 46.5  | 67.5   | 1151.0 | 700.6  | 17.2   | 16.0   | 9.9    |
| 1.0    | 1.2    | 98.7  | 60.1   | 0.9    | 0.8    | 9.7    | 3.9    | 2.7    |
| 17.8   | 11.1   | 139.2 | 219.8  | 2.4    | 17.6   | 18.3   | 6.8    | 13.4   |
| 3.2    | 1.3    | 88.1  | 110.6  | 26.7   | 2.0    | 10.6   | 5.2    | 5.1    |
| 136.5  | 239.3  | 21.6  | 39.7   | 170.6  | 168.4  | 404.6  | 231.1  | 251.8  |
| 317.6  | 477.1  | 74.7  | 83.2   | 358.6  | 438.1  | 427.0  | 234.9  | 245.0  |
| 283.4  | 437.1  | 27.9  | 36.7   | 527.4  | 417.8  | 893.3  | 813.2  | 899.9  |
| 801.3  | 1107.2 | 432.6 | 633.5  | 1140.2 | 1169.0 | 993.6  | 1093.9 | 1115.2 |
| 27.3   | 38.2   | 47.4  | 50.0   | 67.0   | 35.7   | 71.4   | 118.8  | 114.9  |
| 819.6  | 819.9  | 421.4 | 582.2  | 992.4  | 937.9  | 1851.5 | 1149.7 | 1202.1 |
| 372.9  | 430.6  | 67.7  | 72.4   | 522.1  | 374.8  | 381.4  | 258.6  | 287.7  |
| 32.8   | 38.3   | 0.9   | 5.8    | 54.4   | 29.1   | 11.3   | 8.7    | 6.7    |
| 28.4   | 11.1   | 4.0   | 2.6    | 19.0   | 31.6   | 7.0    | 4.6    | 6.5    |
| 406.4  | 386.5  | 114.6 | 187.9  | 539.6  | 384.1  | 662.8  | 424.7  | 507.8  |
| 266.4  | 291.4  | 116.0 | 151.8  | 413.5  | 293.0  | 485.1  | 296.6  | 333.4  |
| 1.9    | 2.0    | 53.6  | 54.5   | 2.4    | 1.0    | 1.3    | 2.0    | 1.6    |
| 16.5   | 30.2   | 42.7  | 45.6   | 37.5   | 23.4   | 17.9   | 16.6   | 14.2   |
| 196.5  | 325.6  | 6.1   | 8.1    | 353.2  | 310.9  | 1.6    | 3.3    | 0.8    |

|        |        |       |        |        |        |        |        |        |
|--------|--------|-------|--------|--------|--------|--------|--------|--------|
| 59.7   | 75.1   | 15.9  | 8.8    | 80.6   | 59.9   | 8.4    | 7.6    | 10.7   |
| 66.3   | 85.9   | 26.7  | 33.5   | 78.0   | 68.8   | 136.2  | 116.3  | 112.7  |
| 1.9    | 2.5    | 1.6   | 1.0    | 2.7    | 2.4    | 2.5    | 3.1    | 4.3    |
| 15.8   | 5.2    | 4.0   | 11.4   | 12.8   | 18.4   | 33.8   | 21.6   | 29.0   |
| 187.9  | 236.9  | 218.5 | 224.6  | 273.8  | 188.9  | 264.9  | 442.0  | 426.3  |
| 85.9   | 97.0   | 64.5  | 60.5   | 100.0  | 90.4   | 201.8  | 190.1  | 170.5  |
| 228.5  | 280.0  | 349.5 | 525.6  | 376.0  | 270.6  | 704.3  | 609.7  | 672.8  |
| 204.5  | 265.0  | 39.9  | 56.5   | 283.0  | 306.1  | 498.4  | 370.6  | 355.7  |
| 152.7  | 212.1  | 40.7  | 56.7   | 194.8  | 156.4  | 550.5  | 374.2  | 399.6  |
| 203.2  | 218.3  | 88.2  | 105.8  | 299.7  | 185.0  | 121.3  | 121.4  | 169.1  |
| 42.4   | 45.6   | 35.7  | 39.1   | 39.0   | 30.8   | 72.8   | 87.8   | 63.4   |
| 49.0   | 50.8   | 25.9  | 37.8   | 58.3   | 60.4   | 90.0   | 65.4   | 87.5   |
| 250.4  | 475.4  | 592.8 | 625.5  | 393.0  | 335.8  | 869.5  | 1211.1 | 1379.3 |
| 1112.0 | 1449.4 | 143.5 | 190.7  | 1927.9 | 1441.7 | 547.9  | 444.8  | 468.1  |
| 411.5  | 547.6  | 447.1 | 553.7  | 1164.3 | 476.0  | 3719.7 | 3511.8 | 3482.5 |
| 22.5   | 40.6   | 64.8  | 97.2   | 55.4   | 35.0   | 65.4   | 73.9   | 89.7   |
| 19.8   | 32.2   | 34.5  | 21.1   | 45.6   | 32.2   | 35.8   | 90.2   | 60.2   |
| 144.4  | 159.2  | 54.3  | 96.0   | 231.1  | 214.3  | 480.7  | 410.1  | 473.0  |
| 84.4   | 65.2   | 98.0  | 129.6  | 108.7  | 76.7   | 406.4  | 394.9  | 509.7  |
| 217.4  | 275.0  | 92.6  | 111.0  | 299.0  | 246.1  | 496.9  | 603.7  | 665.7  |
| 9.1    | 7.4    | 8.1   | 0.8    | 6.9    | 8.9    | 8.3    | 8.2    | 9.5    |
| 1303.4 | 1650.8 | 769.7 | 1076.7 | 2026.0 | 1347.7 | 1701.9 | 829.4  | 999.0  |
| 72.8   | 59.4   | 10.0  | 23.3   | 83.7   | 49.9   | 53.2   | 39.9   | 40.7   |
| 68.6   | 72.4   | 35.4  | 56.0   | 108.5  | 69.0   | 82.0   | 94.1   | 97.9   |
| 329.8  | 454.3  | 49.3  | 48.4   | 592.0  | 462.4  | 529.1  | 296.0  | 315.2  |
| 168.3  | 203.5  | 43.6  | 80.6   | 348.2  | 231.3  | 301.9  | 231.1  | 316.9  |
| 57.2   | 50.0   | 79.3  | 104.1  | 101.9  | 52.3   | 140.3  | 185.5  | 195.1  |
| 44.6   | 48.0   | 9.2   | 20.5   | 62.4   | 84.1   | 128.7  | 105.3  | 126.8  |
| 24.5   | 33.4   | 30.7  | 49.6   | 42.1   | 44.5   | 68.6   | 74.9   | 89.2   |
| 4.7    | 5.0    | 6.6   | 4.6    | 8.3    | 9.2    | 17.9   | 16.0   | 6.3    |
| 3.6    | 9.7    | 1.9   | 1.2    | 2.2    | 11.8   | 29.2   | 29.9   | 20.9   |
| 4.5    | 3.4    | 2.9   | 3.6    | 12.3   | 2.4    | 62.9   | 33.0   | 39.9   |
| 4.5    | 2.8    | 25.0  | 19.4   | 3.0    | 2.8    | 165.4  | 130.2  | 183.0  |
| 1.4    | 8.7    | 27.3  | 25.7   | 10.9   | 12.3   | 8.3    | 3.8    | 19.9   |
| 1.1    | 4.5    | 8.9   | 8.1    | 14.0   | 1.8    | 5.1    | 8.4    | 9.0    |
| 762.9  | 1167.0 | 325.9 | 435.5  | 1048.7 | 967.9  | 197.8  | 254.7  | 267.7  |
| 10.7   | 8.8    | 0.5   | 1.2    | 22.0   | 5.0    | 10.3   | 5.1    | 2.8    |
| 1700.9 | 1938.7 | 605.7 | 863.8  | 2054.0 | 2207.4 | 3294.6 | 2962.3 | 3152.4 |
| 19.4   | 10.9   | 9.2   | 2.0    | 10.6   | 18.8   | 36.8   | 30.4   | 27.7   |
| 179.7  | 376.0  | 48.4  | 43.9   | 332.9  | 381.3  | 407.5  | 413.4  | 390.1  |
| 67.5   | 83.6   | 17.0  | 25.2   | 90.1   | 79.9   | 174.2  | 145.9  | 174.8  |
| 33.1   | 30.0   | 26.3  | 34.2   | 53.9   | 41.0   | 177.5  | 149.2  | 195.1  |
| 2.3    | 4.3    | 2.1   | 2.5    | 4.6    | 4.7    | 5.1    | 3.2    | 2.4    |
| 1788.3 | 2975.5 | 409.6 | 653.0  | 3208.8 | 2862.8 | 2332.1 | 1724.5 | 1724.7 |
| 10.2   | 14.9   | 0.4   | 1.1    | 22.5   | 13.3   | 2.4    | 5.3    | 1.0    |
| 105.6  | 121.3  | 35.1  | 35.1   | 130.2  | 123.6  | 315.4  | 275.0  | 307.5  |
| 34.7   | 63.8   | 12.7  | 12.4   | 65.7   | 55.4   | 166.8  | 151.0  | 155.2  |
| 33.3   | 15.4   | 67.5  | 75.9   | 39.8   | 26.4   | 50.7   | 35.8   | 24.5   |
| 288.5  | 280.5  | 113.4 | 173.2  | 348.0  | 210.4  | 490.0  | 264.3  | 293.6  |
| 54.4   | 53.2   | 2.8   | 13.8   | 82.7   | 75.0   | 102.5  | 105.6  | 123.9  |
| 90.0   | 100.5  | 29.0  | 26.0   | 113.5  | 134.5  | 266.8  | 253.9  | 269.2  |
| 191.8  | 169.0  | 112.8 | 145.0  | 218.9  | 178.4  | 418.6  | 340.8  | 375.5  |
| 129.6  | 214.7  | 24.1  | 39.9   | 249.4  | 212.0  | 487.5  | 480.8  | 513.9  |

|        |        |       |       |        |        |        |        |        |
|--------|--------|-------|-------|--------|--------|--------|--------|--------|
| 249.9  | 250.4  | 122.6 | 134.8 | 321.7  | 248.2  | 520.2  | 612.6  | 655.1  |
| 26.8   | 48.4   | 14.9  | 31.5  | 47.0   | 48.6   | 53.0   | 31.8   | 46.6   |
| 47.4   | 41.7   | 148.6 | 173.1 | 18.0   | 63.6   | 118.0  | 87.2   | 119.7  |
| 346.3  | 565.6  | 419.5 | 517.7 | 637.3  | 665.3  | 855.7  | 642.9  | 699.1  |
| 8.9    | 9.9    | 6.1   | 0.9   | 13.1   | 14.7   | 7.6    | 10.7   | 5.4    |
| 418.4  | 574.3  | 20.8  | 19.2  | 675.5  | 491.3  | 124.3  | 24.1   | 9.1    |
| 94.6   | 76.3   | 91.0  | 119.9 | 93.6   | 63.4   | 134.5  | 117.3  | 124.5  |
| 25.1   | 16.3   | 11.7  | 2.2   | 37.5   | 33.5   | 15.6   | 10.5   | 5.7    |
| 44.7   | 68.3   | 14.1  | 13.9  | 94.9   | 80.6   | 157.6  | 182.1  | 188.0  |
| 79.5   | 110.1  | 71.3  | 96.5  | 122.5  | 165.0  | 243.1  | 223.4  | 212.3  |
| 26.3   | 25.6   | 5.1   | 7.8   | 41.6   | 28.8   | 18.4   | 55.7   | 47.8   |
| 34.7   | 32.1   | 6.8   | 3.8   | 52.3   | 23.0   | 14.5   | 81.4   | 67.5   |
| 21.5   | 19.6   | 32.3  | 34.5  | 26.2   | 22.7   | 52.4   | 87.5   | 85.8   |
| 6.2    | 13.7   | 5.3   | 2.5   | 32.7   | 14.3   | 173.1  | 334.1  | 319.6  |
| 68.9   | 79.0   | 10.6  | 2.6   | 155.6  | 93.6   | 422.1  | 188.1  | 216.3  |
| 214.5  | 259.1  | 59.0  | 53.4  | 214.3  | 161.0  | 398.3  | 488.9  | 564.6  |
| 1166.3 | 1745.7 | 28.9  | 41.2  | 1644.9 | 1841.7 | 899.4  | 815.5  | 1007.7 |
| 516.2  | 704.7  | 146.4 | 197.7 | 710.1  | 583.5  | 1016.0 | 802.9  | 892.4  |
| 247.0  | 285.5  | 42.0  | 68.8  | 374.1  | 385.3  | 551.1  | 448.9  | 465.6  |
| 105.0  | 145.3  | 12.9  | 14.3  | 168.2  | 138.7  | 662.8  | 1064.0 | 1221.8 |
| 16.4   | 18.0   | 4.3   | 13.3  | 5.5    | 16.7   | 60.6   | 56.3   | 46.3   |
| 121.0  | 142.1  | 126.3 | 163.2 | 148.3  | 151.1  | 985.6  | 750.0  | 866.2  |
| 26.8   | 18.3   | 60.4  | 83.0  | 24.5   | 12.6   | 38.5   | 53.9   | 38.6   |
| 512.7  | 694.8  | 141.6 | 218.4 | 757.2  | 720.8  | 891.3  | 748.0  | 823.7  |
| 17.3   | 23.8   | 1.1   | 3.1   | 31.6   | 21.3   | 20.4   | 55.9   | 61.9   |
| 54.5   | 81.2   | 40.3  | 32.5  | 126.5  | 89.7   | 254.9  | 269.3  | 300.8  |
| 78.0   | 59.1   | 9.6   | 18.6  | 86.5   | 45.4   | 136.7  | 143.8  | 128.8  |
| 185.2  | 176.2  | 23.3  | 22.6  | 293.8  | 102.5  | 198.8  | 197.3  | 220.3  |
| 114.4  | 142.7  | 44.9  | 58.6  | 202.5  | 138.7  | 180.4  | 168.6  | 219.2  |
| 1.7    | 3.6    | 1.9   | 6.7   | 1.2    | 1.9    | 1.2    | 1.2    | 1.3    |
| 147.5  | 160.7  | 239.9 | 276.6 | 179.3  | 156.3  | 1422.2 | 1064.0 | 1304.2 |
| 55.8   | 68.2   | 8.8   | 3.0   | 79.8   | 63.8   | 137.5  | 173.5  | 167.5  |
| 18.3   | 18.1   | 11.1  | 14.5  | 39.1   | 18.2   | 55.6   | 45.4   | 70.1   |
| 2.1    | 11.8   | 2.0   | 0.9   | 14.2   | 1.4    | 8.0    | 22.7   | 24.4   |
| 43.9   | 61.7   | 33.2  | 29.8  | 66.5   | 52.3   | 212.5  | 153.9  | 226.3  |
| 625.9  | 793.6  | 305.1 | 513.7 | 936.9  | 834.7  | 1779.2 | 1593.6 | 1649.4 |
| 162.5  | 156.7  | 56.3  | 88.0  | 264.0  | 154.9  | 265.9  | 288.4  | 297.4  |
| 340.1  | 473.4  | 84.5  | 89.1  | 632.1  | 406.7  | 692.7  | 604.7  | 735.4  |
| 45.4   | 53.9   | 19.8  | 36.8  | 55.4   | 38.8   | 107.5  | 93.9   | 108.1  |
| 65.8   | 85.6   | 6.0   | 10.0  | 130.8  | 111.8  | 189.9  | 183.1  | 199.2  |
| 410.1  | 513.3  | 151.7 | 194.2 | 653.9  | 478.8  | 658.2  | 585.1  | 549.5  |
| 690.4  | 935.4  | 5.8   | 1.3   | 1025.7 | 885.1  | 7.3    | 9.6    | 7.0    |
| 186.5  | 276.2  | 51.7  | 82.7  | 369.0  | 231.6  | 299.7  | 166.8  | 214.3  |
| 196.0  | 243.5  | 94.6  | 133.3 | 243.0  | 213.7  | 564.4  | 626.3  | 611.8  |
| 286.5  | 296.3  | 263.8 | 283.3 | 403.5  | 448.5  | 755.4  | 846.7  | 936.5  |
| 1.3    | 0.7    | 1.7   | 0.7   | 2.4    | 2.3    | 2.6    | 2.9    | 2.6    |
| 1.0    | 1.2    | 3.1   | 1.9   | 2.1    | 1.5    | 2.4    | 2.1    | 4.5    |
| 13.1   | 1.9    | 11.5  | 0.9   | 1.5    | 8.0    | 10.6   | 12.1   | 11.9   |
| 9.7    | 19.4   | 69.4  | 91.7  | 14.5   | 14.4   | 46.7   | 72.1   | 72.8   |
| 12.5   | 17.1   | 16.9  | 21.6  | 13.7   | 13.2   | 77.7   | 109.2  | 134.2  |
| 253.6  | 303.2  | 61.2  | 62.4  | 349.0  | 223.1  | 588.7  | 445.0  | 459.9  |
| 523.6  | 758.2  | 100.2 | 120.2 | 940.7  | 790.8  | 1046.4 | 686.7  | 686.3  |
| 66.7   | 55.3   | 47.3  | 36.2  | 122.2  | 72.4   | 142.4  | 126.3  | 139.0  |

|        |        |        |        |        |        |        |        |        |
|--------|--------|--------|--------|--------|--------|--------|--------|--------|
| 17.8   | 7.0    | 3.1    | 8.5    | 4.1    | 6.8    | 9.4    | 11.7   | 4.8    |
| 41.3   | 23.3   | 1.2    | 4.4    | 67.5   | 27.5   | 4.6    | 1.2    | 2.2    |
| 64.0   | 34.1   | 7.4    | 9.6    | 101.1  | 46.5   | 13.2   | 10.6   | 15.4   |
| 160.1  | 271.4  | 136.0  | 149.1  | 294.7  | 318.7  | 596.6  | 483.4  | 504.5  |
| 24.7   | 34.3   | 49.4   | 83.3   | 37.9   | 39.1   | 351.4  | 125.5  | 187.0  |
| 201.3  | 270.5  | 13.3   | 14.7   | 314.0  | 269.4  | 317.8  | 271.2  | 262.6  |
| 147.5  | 213.6  | 22.0   | 26.9   | 245.7  | 185.6  | 338.3  | 306.0  | 296.1  |
| 1294.0 | 2355.2 | 1585.4 | 1652.3 | 1830.6 | 2334.3 | 3422.6 | 2936.7 | 2873.3 |
| 60.3   | 43.1   | 38.5   | 42.5   | 32.0   | 31.5   | 233.3  | 205.1  | 193.3  |
| 135.1  | 152.3  | 134.9  | 216.9  | 159.5  | 177.4  | 351.8  | 404.8  | 461.8  |
| 192.4  | 262.2  | 163.0  | 232.9  | 324.7  | 226.6  | 1337.3 | 870.6  | 904.7  |
| 111.0  | 98.0   | 39.3   | 55.8   | 102.2  | 83.1   | 8.6    | 15.4   | 21.5   |
| 12.7   | 8.2    | 1.0    | 0.5    | 12.7   | 8.7    | 767.3  | 1285.0 | 1228.5 |
| 570.0  | 718.9  | 107.9  | 165.8  | 1023.6 | 571.8  | 2028.3 | 1653.9 | 1722.4 |
| 1.0    | 5.5    | 0.6    | 8.2    | 1.8    | 8.7    | 2.6    | 8.2    | 6.0    |
| 40.3   | 38.1   | 10.4   | 10.1   | 35.5   | 21.4   | 11.0   | 11.7   | 13.0   |
| 12.9   | 25.3   | 0.4    | 3.3    | 26.1   | 30.0   | 23.2   | 23.7   | 29.2   |
| 304.5  | 272.7  | 493.6  | 526.7  | 351.5  | 296.5  | 409.2  | 303.5  | 257.5  |
| 142.5  | 196.0  | 71.2   | 75.4   | 255.6  | 198.7  | 165.7  | 126.6  | 147.3  |
| 148.2  | 213.6  | 12.3   | 19.4   | 268.3  | 203.2  | 832.1  | 869.4  | 1025.1 |
| 53.5   | 51.3   | 30.8   | 40.4   | 81.6   | 47.3   | 207.0  | 333.2  | 299.7  |
| 34.4   | 51.3   | 17.3   | 23.0   | 76.2   | 56.4   | 205.0  | 358.0  | 330.5  |
| 194.6  | 216.0  | 115.2  | 113.3  | 328.7  | 240.3  | 419.5  | 463.1  | 507.7  |
| 40.4   | 51.9   | 2.0    | 2.2    | 48.5   | 49.5   | 59.6   | 44.6   | 59.6   |
| 62.5   | 19.4   | 523.4  | 703.3  | 52.7   | 25.5   | 7.6    | 1.9    | 1.7    |
| 186.9  | 218.1  | 225.5  | 253.4  | 209.3  | 178.2  | 388.9  | 328.8  | 387.5  |
| 96.4   | 119.4  | 104.2  | 119.7  | 162.5  | 87.8   | 179.0  | 148.0  | 206.9  |
| 121.5  | 104.2  | 136.7  | 184.0  | 152.9  | 79.2   | 398.1  | 551.1  | 570.7  |
| 258.2  | 289.6  | 152.1  | 157.2  | 443.8  | 275.8  | 221.8  | 249.8  | 270.2  |
| 106.3  | 105.5  | 173.6  | 219.4  | 146.7  | 65.9   | 638.7  | 829.1  | 917.6  |
| 133.3  | 110.2  | 46.9   | 51.6   | 155.9  | 107.4  | 132.4  | 127.1  | 117.2  |
| 74.2   | 109.1  | 23.9   | 20.2   | 154.4  | 99.7   | 62.3   | 45.5   | 50.4   |
| 100.7  | 106.4  | 27.4   | 34.4   | 143.2  | 114.1  | 121.4  | 79.1   | 91.8   |
| 160.9  | 218.3  | 55.1   | 57.3   | 213.7  | 227.2  | 268.1  | 176.2  | 218.7  |
| 184.8  | 172.2  | 33.0   | 32.3   | 289.8  | 233.9  | 1324.2 | 1229.1 | 1304.4 |
| 170.5  | 205.6  | 70.4   | 88.7   | 297.1  | 170.0  | 1155.1 | 1053.1 | 1130.5 |
| 217.4  | 390.5  | 90.0   | 87.6   | 352.0  | 350.9  | 736.9  | 687.3  | 737.1  |
| 589.9  | 942.7  | 112.8  | 117.6  | 891.1  | 904.5  | 1397.0 | 1199.8 | 1245.0 |
| 227.5  | 207.5  | 188.2  | 191.1  | 324.4  | 175.6  | 167.4  | 361.7  | 398.2  |
| 57.9   | 56.4   | 106.1  | 135.0  | 93.7   | 47.3   | 129.1  | 85.8   | 77.1   |
| 0.6    | 1.5    | 4.7    | 1.4    | 7.4    | 3.4    | 16.5   | 10.2   | 10.8   |
| 132.9  | 125.8  | 150.0  | 177.2  | 159.7  | 107.4  | 138.0  | 126.9  | 127.5  |
| 29.2   | 32.5   | 26.3   | 22.6   | 75.5   | 31.5   | 63.2   | 76.0   | 81.8   |
| 495.1  | 555.7  | 130.5  | 186.0  | 590.0  | 562.1  | 377.9  | 381.9  | 369.0  |
| 4.9    | 8.2    | 8.6    | 3.8    | 5.8    | 2.5    | 13.6   | 11.9   | 7.6    |
| 28.6   | 32.5   | 25.1   | 12.1   | 18.4   | 17.4   | 29.0   | 29.7   | 41.1   |
| 290.1  | 458.2  | 77.0   | 78.1   | 611.1  | 422.4  | 1396.3 | 1532.4 | 1450.7 |
| 642.5  | 975.0  | 70.9   | 98.6   | 949.7  | 993.7  | 859.6  | 661.7  | 715.1  |
| 75.2   | 75.2   | 4.6    | 3.2    | 57.6   | 70.8   | 239.4  | 254.6  | 225.8  |
| 10.7   | 22.4   | 3.0    | 2.6    | 12.8   | 18.6   | 67.9   | 84.8   | 79.9   |
| 114.3  | 149.6  | 16.1   | 16.6   | 180.5  | 177.9  | 301.9  | 263.5  | 258.2  |
| 98.8   | 177.0  | 12.6   | 8.2    | 166.7  | 167.5  | 522.4  | 415.0  | 448.9  |
| 48.2   | 60.3   | 25.1   | 38.8   | 69.0   | 43.5   | 336.1  | 311.0  | 344.3  |

|        |        |       |        |        |        |         |         |         |
|--------|--------|-------|--------|--------|--------|---------|---------|---------|
| 87.3   | 102.9  | 53.6  | 66.1   | 116.2  | 112.8  | 162.9   | 172.4   | 202.9   |
| 20.0   | 9.3    | 3.3   | 3.8    | 11.5   | 5.8    | 10.9    | 12.6    | 10.9    |
| 114.0  | 114.2  | 52.5  | 58.7   | 150.5  | 116.0  | 136.5   | 137.2   | 149.4   |
| 0.5    | 0.3    | 2.4   | 0.3    | 3.7    | 2.3    | 1.6     | 4.0     | 3.2     |
| 17.5   | 22.1   | 1.4   | 3.5    | 21.3   | 22.9   | 36.0    | 33.9    | 46.8    |
| 441.1  | 587.3  | 424.9 | 534.6  | 707.0  | 486.9  | 928.8   | 817.1   | 865.9   |
| 1687.1 | 2371.5 | 823.4 | 1181.4 | 2447.0 | 2534.0 | 4948.8  | 4411.2  | 4668.8  |
| 115.3  | 157.2  | 12.4  | 13.1   | 188.0  | 221.3  | 80.4    | 74.6    | 71.0    |
| 53.3   | 81.7   | 19.6  | 30.9   | 67.7   | 64.0   | 424.0   | 503.4   | 586.2   |
| 8.6    | 0.6    | 1.9   | 1.3    | 1.6    | 2.4    | 27.7    | 33.4    | 47.0    |
| 47.2   | 45.7   | 25.0  | 27.2   | 87.9   | 38.1   | 105.2   | 221.8   | 216.4   |
| 196.2  | 205.7  | 134.7 | 157.0  | 296.3  | 180.5  | 419.7   | 485.1   | 520.4   |
| 689.8  | 887.7  | 61.2  | 84.0   | 1138.0 | 703.3  | 2100.4  | 734.9   | 925.8   |
| 807.0  | 769.5  | 79.6  | 118.8  | 995.9  | 820.3  | 2648.4  | 1897.0  | 2493.0  |
| 121.9  | 164.2  | 69.3  | 66.2   | 174.7  | 140.3  | 945.3   | 1110.8  | 1203.9  |
| 91.2   | 90.7   | 135.8 | 148.3  | 151.3  | 112.0  | 719.6   | 717.0   | 904.5   |
| 514.0  | 571.6  | 132.3 | 212.3  | 971.3  | 601.8  | 421.7   | 404.9   | 373.1   |
| 74.9   | 42.5   | 82.3  | 129.0  | 57.3   | 81.3   | 332.2   | 238.3   | 299.4   |
| 2.9    | 24.9   | 30.3  | 26.9   | 25.3   | 6.7    | 39.7    | 25.0    | 33.0    |
| 1.8    | 8.7    | 11.0  | 15.6   | 3.9    | 3.0    | 85.5    | 25.8    | 26.3    |
| 58.2   | 80.1   | 25.8  | 33.5   | 69.9   | 50.0   | 75.4    | 68.9    | 80.7    |
| 1298.8 | 1482.4 | 515.9 | 565.6  | 2048.6 | 1626.3 | 3912.0  | 4458.6  | 4819.8  |
| 804.4  | 994.4  | 104.0 | 162.8  | 1086.8 | 967.3  | 873.2   | 270.9   | 278.7   |
| 19.7   | 31.2   | 35.8  | 37.7   | 34.9   | 12.3   | 30.1    | 36.5    | 40.9    |
| 168.8  | 215.5  | 72.5  | 87.1   | 282.4  | 219.1  | 400.0   | 391.7   | 401.1   |
| 712.9  | 707.8  | 65.8  | 89.1   | 747.7  | 625.7  | 1660.1  | 1097.4  | 1306.2  |
| 11.5   | 20.2   | 11.1  | 2.4    | 32.9   | 11.8   | 435.6   | 277.2   | 370.1   |
| 103.9  | 100.5  | 58.1  | 29.0   | 134.9  | 102.7  | 340.0   | 437.4   | 492.2   |
| 50.0   | 78.2   | 62.3  | 56.2   | 43.0   | 47.8   | 276.3   | 424.8   | 543.3   |
| 56.2   | 83.3   | 35.1  | 36.7   | 112.9  | 81.9   | 205.6   | 201.8   | 238.1   |
| 144.2  | 198.3  | 157.3 | 187.9  | 284.0  | 210.0  | 324.0   | 320.5   | 386.7   |
| 14.7   | 8.9    | 13.4  | 10.4   | 4.5    | 2.0    | 12.6    | 7.7     | 5.7     |
| 60.5   | 49.7   | 20.0  | 23.0   | 108.0  | 54.8   | 9.4     | 5.5     | 2.2     |
| 161.9  | 241.7  | 322.3 | 543.6  | 139.6  | 221.1  | 974.2   | 864.6   | 1016.2  |
| 14.0   | 14.9   | 30.7  | 33.8   | 13.5   | 20.2   | 139.3   | 106.4   | 125.7   |
| 78.2   | 92.8   | 30.5  | 23.3   | 113.2  | 91.5   | 406.8   | 404.2   | 449.1   |
| 88.8   | 98.1   | 27.2  | 39.8   | 147.1  | 87.2   | 255.4   | 256.4   | 319.7   |
| 113.4  | 157.2  | 14.8  | 13.7   | 172.6  | 149.7  | 266.5   | 323.6   | 362.6   |
| 13.1   | 1.1    | 0.9   | 0.6    | 9.8    | 3.2    | 1.6     | 1.7     | 0.9     |
| 1.8    | 1.1    | 0.6   | 0.7    | 1.0    | 0.6    | 1.0     | 1.2     | 1.1     |
| 262.7  | 468.1  | 52.6  | 42.9   | 466.4  | 392.5  | 1580.4  | 2146.8  | 2254.8  |
| 42.4   | 46.8   | 41.3  | 50.3   | 56.3   | 34.8   | 48.7    | 51.7    | 49.7    |
| 91.3   | 139.4  | 18.3  | 18.0   | 165.5  | 136.4  | 134.3   | 133.9   | 140.7   |
| 33.9   | 48.8   | 52.3  | 39.1   | 46.6   | 42.1   | 171.4   | 124.6   | 126.1   |
| 70.7   | 89.4   | 34.2  | 31.9   | 116.1  | 64.2   | 149.9   | 190.0   | 172.1   |
| 0.6    | 1.6    | 5.0   | 2.0    | 8.6    | 5.0    | 1.0     | 5.9     | 1.3     |
| 226.2  | 351.5  | 18.5  | 26.8   | 388.7  | 335.2  | 416.4   | 314.3   | 364.4   |
| 565.9  | 653.7  | 108.7 | 95.4   | 874.5  | 660.8  | 874.6   | 721.1   | 763.8   |
| 153.7  | 194.5  | 68.7  | 105.0  | 217.9  | 220.4  | 295.3   | 229.4   | 218.7   |
| 16.2   | 14.8   | 92.8  | 165.8  | 1.2    | 1.7    | 11119.3 | 12189.6 | 11918.0 |
| 118.1  | 133.9  | 3.6   | 1.0    | 337.1  | 176.4  | 532.2   | 467.0   | 509.7   |
| 105.0  | 119.4  | 13.8  | 13.6   | 153.6  | 118.2  | 138.6   | 155.8   | 183.5   |
| 158.6  | 202.5  | 107.8 | 158.7  | 280.9  | 185.0  | 306.7   | 392.6   | 450.4   |



|        |        |       |       |        |        |        |        |        |
|--------|--------|-------|-------|--------|--------|--------|--------|--------|
| 65.7   | 97.9   | 23.5  | 21.3  | 92.2   | 141.1  | 256.2  | 189.3  | 204.6  |
| 184.6  | 359.2  | 76.6  | 135.0 | 318.3  | 402.9  | 968.1  | 751.3  | 774.8  |
| 90.5   | 79.8   | 39.4  | 45.6  | 133.7  | 103.0  | 214.1  | 205.0  | 211.5  |
| 135.5  | 216.7  | 32.9  | 40.4  | 236.4  | 247.4  | 183.9  | 209.7  | 231.9  |
| 18.1   | 11.2   | 34.8  | 38.5  | 26.4   | 9.3    | 2.4    | 7.1    | 3.7    |
| 60.8   | 83.8   | 25.5  | 35.9  | 83.2   | 74.0   | 343.5  | 488.6  | 528.0  |
| 149.4  | 147.0  | 62.0  | 81.7  | 181.1  | 168.1  | 479.3  | 462.7  | 467.5  |
| 84.9   | 102.7  | 26.8  | 49.6  | 100.1  | 97.3   | 165.7  | 144.4  | 164.5  |
| 17.2   | 18.3   | 10.7  | 12.3  | 14.2   | 17.6   | 45.8   | 51.3   | 52.9   |
| 6.8    | 1.1    | 1.5   | 0.8   | 1.0    | 0.8    | 22.6   | 22.9   | 24.5   |
| 2162.5 | 2782.4 | 621.0 | 878.7 | 3147.0 | 2917.8 | 8591.4 | 8189.1 | 8392.5 |
| 358.3  | 261.0  | 75.5  | 103.7 | 514.8  | 328.5  | 676.5  | 342.7  | 361.4  |
| 39.3   | 29.3   | 25.1  | 22.6  | 64.2   | 29.0   | 247.6  | 459.0  | 452.2  |
| 9.6    | 16.0   | 26.5  | 10.6  | 15.7   | 23.2   | 22.0   | 24.4   | 21.5   |
| 3148.9 | 3919.2 | 425.0 | 494.6 | 4201.0 | 3617.5 | 4751.2 | 3355.0 | 3391.9 |
| 29.8   | 48.1   | 56.3  | 73.0  | 41.8   | 39.6   | 104.9  | 107.4  | 132.2  |
| 85.3   | 91.7   | 39.9  | 69.8  | 107.8  | 58.9   | 338.3  | 397.6  | 427.1  |
| 9.6    | 1.4    | 19.6  | 26.7  | 1.5    | 5.8    | 11.2   | 2.9    | 4.9    |
| 3.8    | 33.0   | 20.8  | 19.8  | 47.0   | 41.7   | 57.7   | 59.9   | 72.4   |
| 120.6  | 88.8   | 66.1  | 146.0 | 170.1  | 98.0   | 433.4  | 440.7  | 465.1  |
| 1.4    | 14.7   | 14.8  | 2.9   | 12.0   | 4.9    | 13.6   | 19.5   | 12.6   |
| 61.4   | 98.0   | 43.2  | 56.4  | 109.5  | 53.4   | 208.0  | 255.7  | 260.9  |
| 302.3  | 478.3  | 164.4 | 165.4 | 496.5  | 516.2  | 1341.6 | 1472.0 | 1544.2 |
| 18.8   | 38.2   | 107.7 | 157.6 | 46.6   | 34.6   | 158.3  | 222.2  | 244.9  |
| 134.4  | 180.0  | 95.4  | 127.5 | 144.8  | 153.4  | 342.0  | 237.1  | 264.0  |
| 67.3   | 69.5   | 28.4  | 27.7  | 105.1  | 81.1   | 234.0  | 165.5  | 190.4  |
| 174.1  | 154.7  | 150.6 | 152.2 | 157.2  | 138.4  | 223.1  | 170.1  | 190.5  |
| 10.2   | 10.3   | 23.9  | 28.3  | 17.3   | 12.2   | 1.6    | 0.5    | 3.6    |
| 0.8    | 0.8    | 1.4   | 0.5   | 4.0    | 5.3    | 1.3    | 1.5    | 5.4    |
| 109.4  | 119.7  | 36.0  | 43.0  | 147.6  | 116.0  | 304.3  | 278.3  | 338.5  |
| 34.0   | 52.4   | 85.9  | 131.7 | 63.5   | 57.8   | 119.4  | 91.7   | 120.3  |
| 2.2    | 11.3   | 0.9   | 0.8   | 14.0   | 1.0    | 4.6    | 3.2    | 2.1    |
| 9.6    | 10.2   | 15.5  | 21.7  | 3.4    | 1.3    | 9.2    | 4.2    | 8.5    |
| 264.0  | 310.3  | 94.2  | 144.0 | 369.8  | 262.0  | 357.7  | 292.2  | 351.3  |
| 3.6    | 2.9    | 52.1  | 68.3  | 4.0    | 19.2   | 4.3    | 3.3    | 5.6    |
| 114.4  | 123.0  | 8.9   | 11.7  | 152.0  | 127.3  | 61.4   | 45.3   | 47.2   |
| 156.4  | 195.6  | 40.3  | 87.3  | 186.3  | 137.8  | 497.3  | 493.3  | 468.2  |
| 280.8  | 343.5  | 19.9  | 14.5  | 478.1  | 438.6  | 1997.7 | 1260.0 | 1309.6 |
| 486.6  | 578.9  | 3.8   | 12.1  | 623.2  | 643.4  | 6.0    | 3.4    | 0.8    |
| 44.1   | 50.1   | 32.4  | 34.4  | 66.7   | 64.2   | 130.4  | 67.2   | 79.7   |
| 118.0  | 196.1  | 21.9  | 14.5  | 195.0  | 194.4  | 269.7  | 83.6   | 95.7   |
| 262.4  | 408.1  | 143.1 | 203.8 | 375.8  | 290.4  | 476.3  | 309.7  | 358.8  |
| 337.6  | 389.2  | 10.2  | 11.1  | 493.9  | 433.1  | 6.4    | 12.4   | 6.2    |
| 431.3  | 389.6  | 125.6 | 162.8 | 517.4  | 358.1  | 1351.3 | 642.8  | 733.1  |
| 1.8    | 5.3    | 0.4   | 2.8   | 8.2    | 9.0    | 10.5   | 1.6    | 4.2    |
| 0.7    | 21.0   | 1.0   | 0.6   | 1.7    | 2.3    | 7.3    | 6.4    | 2.5    |
| 0.7    | 1.5    | 0.5   | 2.2   | 11.8   | 8.0    | 18.0   | 14.5   | 13.1   |
| 15.4   | 12.6   | 8.0   | 6.9   | 17.4   | 18.7   | 19.5   | 18.3   | 10.5   |
| 117.6  | 123.6  | 32.5  | 31.2  | 156.6  | 134.4  | 176.6  | 79.0   | 91.6   |
| 68.0   | 110.1  | 5.5   | 14.3  | 109.7  | 98.6   | 174.8  | 141.3  | 148.7  |
| 18.9   | 10.9   | 15.6  | 12.4  | 11.6   | 18.1   | 47.0   | 49.9   | 46.6   |
| 124.2  | 238.9  | 107.7 | 122.1 | 168.7  | 186.3  | 745.1  | 652.5  | 889.9  |
| 74.8   | 104.7  | 11.0  | 12.9  | 129.0  | 79.8   | 101.1  | 57.6   | 65.3   |

|        |        |       |        |        |        |        |        |        |
|--------|--------|-------|--------|--------|--------|--------|--------|--------|
| 79.6   | 134.8  | 18.9  | 14.7   | 185.3  | 105.2  | 96.3   | 47.6   | 55.5   |
| 178.7  | 242.0  | 107.1 | 145.2  | 262.7  | 202.9  | 271.6  | 196.9  | 218.7  |
| 10.6   | 14.7   | 5.1   | 1.2    | 21.8   | 14.6   | 5.6    | 0.9    | 2.3    |
| 70.7   | 66.7   | 47.5  | 68.8   | 91.9   | 59.7   | 97.6   | 69.6   | 86.5   |
| 53.5   | 77.9   | 1.6   | 10.8   | 46.1   | 54.1   | 109.4  | 80.4   | 76.7   |
| 71.0   | 120.0  | 18.6  | 35.0   | 129.3  | 121.1  | 286.3  | 269.9  | 275.9  |
| 390.3  | 450.5  | 41.2  | 60.0   | 544.0  | 451.2  | 436.9  | 170.9  | 207.4  |
| 64.9   | 59.6   | 170.7 | 212.5  | 79.1   | 62.7   | 375.1  | 445.5  | 525.8  |
| 157.5  | 199.8  | 116.4 | 145.9  | 247.6  | 228.0  | 798.4  | 592.5  | 675.6  |
| 64.3   | 76.4   | 56.9  | 67.6   | 109.5  | 99.9   | 282.3  | 195.6  | 259.6  |
| 1.5    | 1.5    | 0.8   | 0.7    | 3.4    | 1.6    | 78.4   | 128.3  | 172.1  |
| 15.2   | 15.8   | 0.7   | 0.2    | 20.8   | 16.2   | 188.8  | 288.8  | 378.3  |
| 54.1   | 65.0   | 42.0  | 47.8   | 83.9   | 58.4   | 180.6  | 214.6  | 228.8  |
| 95.7   | 99.9   | 82.6  | 90.7   | 93.2   | 82.3   | 200.8  | 253.1  | 278.8  |
| 124.4  | 141.9  | 80.9  | 147.2  | 221.3  | 150.2  | 282.2  | 265.4  | 332.4  |
| 779.7  | 1071.5 | 102.2 | 174.1  | 1133.0 | 1074.1 | 1818.5 | 802.7  | 910.4  |
| 15.7   | 23.9   | 443.6 | 718.3  | 11.3   | 9.7    | 444.2  | 331.6  | 386.8  |
| 19.0   | 18.9   | 79.2  | 96.5   | 34.6   | 20.6   | 75.6   | 100.9  | 139.1  |
| 9.8    | 12.3   | 4.8   | 12.4   | 7.9    | 18.5   | 52.1   | 46.7   | 47.7   |
| 1005.8 | 838.0  | 175.2 | 184.4  | 1182.4 | 681.6  | 453.9  | 474.1  | 518.9  |
| 2381.2 | 2596.1 | 0.7   | 0.6    | 3883.6 | 1877.2 | 196.3  | 234.4  | 277.3  |
| 188.4  | 225.9  | 100.8 | 116.3  | 295.6  | 192.2  | 238.1  | 193.6  | 175.9  |
| 71.9   | 107.4  | 63.6  | 79.5   | 113.0  | 101.2  | 187.2  | 190.9  | 226.0  |
| 172.1  | 192.6  | 2.2   | 1.8    | 504.5  | 177.9  | 100.6  | 29.9   | 42.0   |
| 57.1   | 60.5   | 23.0  | 13.2   | 85.5   | 61.1   | 107.7  | 105.7  | 119.5  |
| 31.6   | 18.2   | 22.7  | 21.8   | 34.2   | 33.9   | 62.9   | 62.0   | 75.8   |
| 258.4  | 335.5  | 66.1  | 58.0   | 361.4  | 272.1  | 612.7  | 752.9  | 788.4  |
| 137.2  | 227.1  | 45.8  | 57.4   | 225.3  | 194.7  | 255.9  | 188.5  | 260.8  |
| 192.1  | 171.6  | 94.6  | 108.0  | 247.6  | 154.9  | 110.7  | 121.9  | 132.4  |
| 155.2  | 133.8  | 11.4  | 11.5   | 238.2  | 148.1  | 435.8  | 537.3  | 484.7  |
| 26.8   | 53.2   | 9.7   | 5.5    | 61.9   | 58.9   | 105.3  | 153.2  | 139.8  |
| 125.7  | 123.1  | 28.0  | 60.3   | 167.8  | 146.5  | 182.0  | 60.3   | 72.8   |
| 246.1  | 295.8  | 115.2 | 137.8  | 338.1  | 268.6  | 929.0  | 604.5  | 669.2  |
| 135.3  | 214.9  | 173.9 | 182.5  | 206.8  | 260.0  | 420.7  | 701.0  | 716.8  |
| 943.1  | 1088.2 | 252.1 | 344.3  | 1367.0 | 1135.2 | 910.6  | 416.1  | 495.2  |
| 170.3  | 228.0  | 7.5   | 0.5    | 191.8  | 202.0  | 37.7   | 37.1   | 34.6   |
| 70.4   | 80.1   | 10.5  | 12.8   | 101.9  | 110.8  | 89.2   | 62.2   | 99.9   |
| 521.8  | 643.8  | 63.7  | 103.6  | 713.4  | 761.2  | 1325.4 | 837.6  | 887.6  |
| 122.5  | 185.5  | 164.8 | 226.5  | 124.4  | 182.0  | 1279.6 | 634.7  | 684.7  |
| 81.0   | 81.0   | 55.5  | 67.5   | 133.2  | 65.9   | 355.7  | 309.4  | 374.9  |
| 404.6  | 488.0  | 198.2 | 239.0  | 640.4  | 432.1  | 856.8  | 516.7  | 593.3  |
| 13.1   | 18.8   | 4.7   | 12.2   | 22.1   | 4.8    | 48.3   | 66.7   | 34.2   |
| 1038.5 | 1256.4 | 102.5 | 142.9  | 1480.0 | 971.9  | 78.3   | 54.3   | 65.3   |
| 41.3   | 36.4   | 80.4  | 88.1   | 54.2   | 64.3   | 90.9   | 97.0   | 124.9  |
| 26.8   | 33.8   | 21.6  | 19.2   | 35.6   | 22.1   | 32.8   | 28.1   | 34.7   |
| 10.8   | 12.6   | 34.4  | 63.5   | 6.9    | 7.2    | 162.8  | 185.0  | 281.9  |
| 344.0  | 414.6  | 849.5 | 1174.3 | 514.8  | 469.3  | 2119.2 | 2818.3 | 3449.8 |
| 10.4   | 0.9    | 0.9   | 7.0    | 17.9   | 3.5    | 9.7    | 4.3    | 8.0    |
| 26.8   | 7.2    | 32.9  | 34.1   | 29.1   | 6.6    | 21.2   | 31.5   | 35.1   |
| 273.3  | 570.1  | 120.4 | 158.9  | 438.6  | 457.4  | 1693.8 | 1073.3 | 1145.8 |
| 5.7    | 25.1   | 67.6  | 75.9   | 34.5   | 18.6   | 4.3    | 4.3    | 3.9    |
| 242.4  | 177.9  | 863.3 | 1344.7 | 194.9  | 178.5  | 30.2   | 27.6   | 12.7   |
| 40.1   | 51.3   | 41.1  | 51.9   | 40.9   | 35.0   | 25.3   | 55.9   | 54.2   |

|        |        |       |        |        |        |        |        |        |
|--------|--------|-------|--------|--------|--------|--------|--------|--------|
| 57.9   | 70.1   | 46.2  | 40.7   | 109.5  | 89.1   | 45.1   | 24.7   | 34.0   |
| 33.6   | 25.5   | 3.0   | 2.1    | 58.7   | 37.6   | 2.9    | 3.7    | 2.2    |
| 70.9   | 76.2   | 1.9   | 6.5    | 140.8  | 63.7   | 9.7    | 6.7    | 9.9    |
| 42.6   | 63.2   | 20.0  | 17.7   | 64.6   | 60.2   | 180.7  | 207.8  | 220.0  |
| 67.1   | 94.1   | 8.7   | 22.1   | 102.8  | 81.2   | 244.7  | 282.5  | 317.0  |
| 168.1  | 441.8  | 133.9 | 135.8  | 288.5  | 427.3  | 981.2  | 818.7  | 887.9  |
| 87.4   | 109.4  | 33.3  | 29.2   | 137.6  | 112.7  | 421.1  | 436.1  | 495.7  |
| 2.0    | 0.8    | 1.4   | 1.5    | 0.9    | 1.3    | 3.5    | 2.8    | 5.4    |
| 100.0  | 175.0  | 36.1  | 73.9   | 204.3  | 148.6  | 1242.0 | 282.7  | 243.0  |
| 32.7   | 74.4   | 32.0  | 34.7   | 95.0   | 68.6   | 500.3  | 79.5   | 83.2   |
| 47.5   | 46.7   | 24.6  | 32.5   | 53.8   | 47.7   | 530.2  | 64.6   | 109.9  |
| 17.1   | 26.7   | 14.1  | 17.3   | 40.4   | 13.2   | 147.1  | 14.1   | 22.7   |
| 98.4   | 121.4  | 75.8  | 106.5  | 165.1  | 102.2  | 131.9  | 127.1  | 166.9  |
| 7.3    | 8.5    | 1.2   | 11.8   | 14.4   | 6.8    | 9.2    | 4.5    | 4.8    |
| 355.1  | 516.8  | 552.6 | 627.4  | 660.5  | 450.0  | 463.8  | 561.8  | 728.8  |
| 197.0  | 227.5  | 15.7  | 17.7   | 289.6  | 210.8  | 383.3  | 291.3  | 298.3  |
| 298.8  | 435.1  | 32.7  | 59.5   | 485.4  | 474.0  | 648.0  | 485.5  | 586.2  |
| 168.8  | 215.8  | 119.0 | 137.4  | 276.4  | 196.1  | 386.2  | 353.4  | 396.7  |
| 59.2   | 61.8   | 158.3 | 193.1  | 93.5   | 64.4   | 168.4  | 129.3  | 153.8  |
| 76.6   | 84.4   | 53.6  | 47.8   | 73.2   | 50.2   | 154.1  | 125.0  | 177.6  |
| 31.2   | 43.5   | 10.0  | 8.9    | 77.7   | 47.0   | 80.1   | 54.0   | 60.7   |
| 139.4  | 256.1  | 9.5   | 15.2   | 280.6  | 262.1  | 370.9  | 302.4  | 394.5  |
| 1257.4 | 1641.2 | 140.9 | 139.7  | 2018.2 | 1559.3 | 2025.2 | 2019.3 | 1765.7 |
| 107.5  | 188.8  | 107.0 | 134.3  | 190.6  | 152.8  | 255.0  | 157.1  | 171.5  |
| 3.2    | 14.0   | 12.3  | 11.8   | 13.7   | 9.9    | 28.0   | 22.9   | 16.8   |
| 11.6   | 7.0    | 1.0   | 1.4    | 11.0   | 2.7    | 36.6   | 18.6   | 27.4   |
| 88.2   | 99.6   | 27.8  | 41.3   | 100.2  | 111.9  | 165.3  | 86.6   | 92.8   |
| 619.3  | 626.8  | 881.5 | 1120.0 | 909.5  | 611.3  | 820.5  | 547.9  | 597.1  |
| 31.4   | 38.8   | 16.4  | 27.0   | 25.0   | 29.8   | 11.9   | 16.5   | 17.9   |
| 16.3   | 27.4   | 65.0  | 75.3   | 30.7   | 22.3   | 58.0   | 77.5   | 90.1   |
| 163.1  | 150.1  | 115.4 | 175.2  | 172.2  | 100.0  | 237.3  | 408.1  | 430.3  |
| 192.4  | 250.2  | 93.3  | 110.7  | 521.3  | 281.1  | 516.0  | 537.7  | 642.8  |
| 65.0   | 84.1   | 8.6   | 10.7   | 75.2   | 63.4   | 222.6  | 280.4  | 332.2  |
| 47.8   | 68.1   | 575.9 | 889.6  | 84.5   | 95.2   | 70.9   | 61.4   | 57.3   |
| 42.2   | 55.4   | 609.5 | 1002.1 | 48.2   | 52.1   | 119.9  | 96.9   | 103.0  |
| 33.7   | 54.6   | 54.4  | 48.0   | 50.0   | 62.2   | 749.6  | 724.2  | 850.4  |
| 17.4   | 24.7   | 88.7  | 72.2   | 24.5   | 13.5   | 81.8   | 58.0   | 52.5   |
| 20.1   | 20.3   | 44.3  | 45.0   | 9.4    | 17.9   | 95.5   | 54.5   | 75.4   |
| 19.4   | 19.5   | 12.1  | 12.2   | 33.5   | 15.0   | 737.5  | 416.4  | 547.7  |
| 8.2    | 0.7    | 1.1   | 3.2    | 17.6   | 6.5    | 391.1  | 192.7  | 278.3  |
| 36.4   | 47.9   | 7.1   | 0.8    | 71.9   | 56.8   | 134.3  | 139.4  | 175.4  |
| 550.3  | 666.6  | 412.4 | 514.7  | 890.0  | 851.7  | 1132.8 | 965.2  | 908.8  |
| 17.7   | 30.4   | 13.6  | 25.6   | 29.6   | 32.6   | 146.0  | 160.6  | 200.0  |
| 218.9  | 270.3  | 179.7 | 217.2  | 384.6  | 240.6  | 327.0  | 188.0  | 241.1  |
| 41.7   | 65.9   | 33.2  | 43.7   | 64.2   | 45.1   | 167.6  | 204.7  | 279.7  |
| 611.7  | 727.2  | 100.6 | 131.8  | 867.1  | 824.4  | 1476.3 | 1013.3 | 1063.5 |
| 127.8  | 97.6   | 33.8  | 63.0   | 172.1  | 96.6   | 233.5  | 164.0  | 165.1  |
| 96.1   | 95.3   | 18.0  | 21.7   | 117.6  | 117.6  | 66.9   | 46.6   | 50.4   |
| 0.9    | 0.9    | 0.7   | 0.3    | 0.7    | 0.7    | 1.4    | 1.1    | 0.6    |
| 6.7    | 32.9   | 5.1   | 9.0    | 15.8   | 22.9   | 17.6   | 17.8   | 12.2   |
| 51.0   | 49.1   | 49.0  | 62.2   | 56.6   | 23.6   | 62.9   | 65.0   | 98.2   |
| 64.0   | 82.4   | 7.6   | 12.7   | 101.1  | 56.3   | 77.8   | 102.5  | 93.1   |
| 26.7   | 47.2   | 3.2   | 12.1   | 52.9   | 21.9   | 60.0   | 63.4   | 57.5   |

|        |        |       |       |        |        |        |        |        |
|--------|--------|-------|-------|--------|--------|--------|--------|--------|
| 5.5    | 10.7   | 13.4  | 17.3  | 30.0   | 17.6   | 30.1   | 26.3   | 19.1   |
| 3.1    | 1.9    | 2.7   | 2.2   | 3.6    | 2.7    | 8.2    | 1.9    | 3.0    |
| 58.8   | 61.4   | 88.6  | 145.3 | 44.2   | 55.2   | 737.5  | 567.6  | 635.1  |
| 92.9   | 151.6  | 107.0 | 120.0 | 186.0  | 143.4  | 320.6  | 411.6  | 472.3  |
| 219.4  | 310.3  | 54.7  | 47.4  | 378.8  | 260.0  | 430.0  | 392.3  | 396.7  |
| 23.1   | 28.2   | 11.8  | 3.6   | 29.5   | 26.0   | 6.0    | 5.4    | 8.8    |
| 243.8  | 246.3  | 64.0  | 90.7  | 332.5  | 288.5  | 460.9  | 257.1  | 303.8  |
| 266.5  | 438.9  | 4.2   | 7.5   | 402.2  | 422.2  | 306.9  | 320.2  | 389.3  |
| 353.3  | 533.3  | 0.6   | 2.5   | 614.5  | 504.8  | 366.0  | 438.1  | 473.2  |
| 899.3  | 977.0  | 1.5   | 1.3   | 1500.4 | 685.5  | 38.0   | 32.7   | 15.6   |
| 52.4   | 61.4   | 42.3  | 40.8  | 68.6   | 70.9   | 246.0  | 204.9  | 252.8  |
| 63.6   | 104.3  | 137.7 | 156.1 | 111.8  | 68.6   | 155.7  | 200.0  | 225.6  |
| 62.1   | 98.0   | 22.4  | 16.6  | 116.2  | 118.9  | 7082.9 | 9268.6 | 8957.2 |
| 124.4  | 136.6  | 271.2 | 396.1 | 118.1  | 119.8  | 498.8  | 404.0  | 465.3  |
| 37.7   | 45.3   | 56.9  | 76.1  | 50.3   | 37.3   | 101.4  | 90.2   | 100.3  |
| 58.1   | 76.7   | 39.0  | 54.8  | 163.2  | 73.2   | 162.3  | 247.5  | 249.3  |
| 29.2   | 40.0   | 1.8   | 1.1   | 68.8   | 41.2   | 1.7    | 1.7    | 1.3    |
| 145.3  | 154.7  | 40.2  | 63.6  | 205.2  | 138.8  | 341.7  | 284.0  | 353.2  |
| 81.5   | 131.4  | 2.4   | 7.3   | 106.5  | 101.1  | 409.9  | 370.3  | 422.6  |
| 110.6  | 149.1  | 201.4 | 192.8 | 121.4  | 143.8  | 189.1  | 266.3  | 253.8  |
| 2052.5 | 2527.9 | 172.4 | 249.0 | 2769.4 | 2538.9 | 2431.1 | 1301.8 | 1313.8 |
| 77.6   | 93.7   | 60.0  | 58.3  | 117.6  | 67.1   | 280.1  | 305.5  | 369.4  |
| 73.0   | 65.7   | 87.4  | 87.2  | 84.5   | 68.5   | 236.2  | 234.1  | 257.7  |
| 5.1    | 0.9    | 0.7   | 1.9   | 1.0    | 1.6    | 5.1    | 14.4   | 9.0    |
| 99.6   | 102.1  | 2.9   | 2.5   | 111.3  | 185.0  | 513.5  | 235.9  | 355.9  |
| 92.3   | 142.7  | 9.5   | 6.0   | 120.0  | 162.6  | 609.4  | 337.4  | 481.5  |
| 2.4    | 11.6   | 0.9   | 12.7  | 2.3    | 20.3   | 191.2  | 100.8  | 103.9  |
| 170.1  | 193.8  | 68.7  | 66.3  | 242.2  | 213.8  | 602.2  | 392.6  | 455.7  |
| 103.3  | 159.4  | 0.9   | 1.2   | 363.0  | 186.5  | 358.6  | 365.0  | 333.5  |
| 10.4   | 6.0    | 5.7   | 3.0   | 19.1   | 0.8    | 43.0   | 23.5   | 28.4   |
| 4.5    | 7.5    | 9.4   | 8.2   | 6.1    | 12.8   | 14.8   | 3.2    | 7.4    |
| 123.1  | 182.4  | 36.7  | 40.4  | 233.0  | 169.7  | 590.6  | 501.2  | 568.7  |
| 2.1    | 4.9    | 7.9   | 3.8   | 3.7    | 0.6    | 8.6    | 3.2    | 6.4    |
| 17.6   | 35.0   | 5.7   | 9.4   | 92.3   | 23.7   | 33.5   | 38.2   | 44.0   |
| 140.8  | 135.2  | 64.7  | 66.6  | 182.5  | 157.8  | 434.2  | 344.7  | 431.5  |
| 117.6  | 138.4  | 115.3 | 155.0 | 163.2  | 145.3  | 260.6  | 213.9  | 227.5  |
| 62.2   | 102.8  | 56.3  | 79.7  | 96.3   | 122.9  | 236.8  | 215.9  | 244.5  |
| 5.9    | 3.7    | 38.2  | 23.0  | 19.3   | 0.8    | 6.7    | 7.2    | 15.0   |
| 3.0    | 0.2    | 6.7   | 8.9   | 6.7    | 3.4    | 6.1    | 0.3    | 5.1    |
| 112.9  | 154.8  | 2.4   | 3.2   | 238.4  | 147.6  | 66.1   | 47.8   | 45.9   |
| 271.1  | 406.5  | 29.4  | 40.4  | 393.6  | 442.2  | 418.0  | 252.8  | 240.3  |
| 48.9   | 36.7   | 26.9  | 37.6  | 60.1   | 52.4   | 57.2   | 77.2   | 91.3   |
| 11.6   | 4.0    | 5.9   | 5.5   | 3.9    | 12.1   | 6.3    | 8.0    | 10.7   |
| 96.5   | 78.9   | 19.6  | 15.4  | 88.2   | 104.2  | 91.7   | 95.4   | 104.6  |
| 437.3  | 483.9  | 68.2  | 109.1 | 580.2  | 510.8  | 1057.7 | 536.2  | 561.8  |
| 383.9  | 517.5  | 222.1 | 231.7 | 596.6  | 466.8  | 587.4  | 587.2  | 644.6  |
| 140.0  | 180.7  | 102.5 | 110.5 | 148.4  | 134.4  | 333.6  | 232.4  | 265.9  |
| 4.8    | 7.6    | 42.0  | 65.7  | 27.6   | 3.1    | 29.5   | 18.0   | 9.7    |
| 40.5   | 57.1   | 50.0  | 84.3  | 38.2   | 56.6   | 613.7  | 628.2  | 681.7  |
| 2.7    | 1.9    | 1.1   | 1.1   | 5.7    | 1.6    | 3.3    | 2.9    | 3.7    |
| 5.4    | 0.6    | 0.5   | 2.9   | 0.8    | 2.6    | 4.0    | 1.5    | 3.8    |
| 6.2    | 6.0    | 7.7   | 5.2   | 1.5    | 1.4    | 1.4    | 1.5    | 2.1    |
| 16.9   | 14.3   | 17.4  | 15.9  | 18.5   | 18.7   | 19.7   | 18.7   | 13.9   |

|        |        |       |       |        |        |        |        |        |
|--------|--------|-------|-------|--------|--------|--------|--------|--------|
| 11.8   | 24.5   | 1.7   | 8.3   | 23.5   | 1.4    | 30.4   | 27.1   | 58.2   |
| 37.0   | 39.3   | 28.8  | 47.9  | 50.6   | 46.9   | 60.5   | 33.3   | 34.3   |
| 190.3  | 250.3  | 96.9  | 122.8 | 274.5  | 235.0  | 191.9  | 76.4   | 99.6   |
| 6.7    | 4.7    | 6.2   | 7.4   | 6.2    | 6.2    | 7.1    | 8.4    | 8.6    |
| 150.1  | 188.2  | 25.8  | 32.6  | 192.8  | 163.1  | 183.7  | 148.6  | 152.3  |
| 98.1   | 127.2  | 21.4  | 26.0  | 160.3  | 173.5  | 113.4  | 102.1  | 124.0  |
| 155.8  | 233.3  | 135.8 | 147.0 | 277.7  | 219.3  | 348.3  | 214.9  | 220.7  |
| 6.6    | 5.5    | 14.8  | 4.6   | 14.9   | 22.9   | 14.3   | 5.4    | 7.1    |
| 5.5    | 5.4    | 3.8   | 7.8   | 9.9    | 10.8   | 12.8   | 8.2    | 9.4    |
| 111.6  | 128.2  | 9.6   | 7.9   | 207.6  | 109.8  | 28.7   | 29.3   | 33.0   |
| 76.5   | 88.9   | 6.7   | 0.7   | 173.0  | 115.5  | 34.2   | 55.1   | 34.9   |
| 9.0    | 2.4    | 13.2  | 4.3   | 6.4    | 1.3    | 1.2    | 1.2    | 1.1    |
| 3.2    | 2.0    | 2.3   | 2.0   | 3.4    | 4.5    | 4.5    | 6.2    | 3.6    |
| 25.1   | 21.3   | 20.1  | 17.1  | 20.9   | 14.6   | 10.2   | 16.8   | 26.1   |
| 113.1  | 102.2  | 10.5  | 12.9  | 105.3  | 73.5   | 2.9    | 13.5   | 11.7   |
| 1167.1 | 1468.3 | 313.7 | 481.1 | 1345.6 | 1562.2 | 1729.9 | 1178.6 | 1139.5 |
| 12.7   | 23.0   | 3.0   | 3.0   | 27.2   | 30.4   | 0.7    | 0.6    | 2.9    |
| 63.6   | 41.8   | 19.8  | 25.0  | 80.4   | 40.3   | 105.4  | 156.0  | 168.0  |
| 59.1   | 71.9   | 10.1  | 4.1   | 54.6   | 72.0   | 121.2  | 108.6  | 92.9   |
| 53.0   | 83.9   | 10.2  | 6.2   | 52.8   | 88.6   | 99.4   | 98.0   | 87.8   |
| 309.0  | 357.6  | 105.2 | 137.6 | 436.8  | 334.4  | 747.1  | 628.1  | 618.1  |
| 1.1    | 1.5    | 2.0   | 6.2   | 1.2    | 3.0    | 1.3    | 1.5    | 1.9    |
| 222.9  | 412.0  | 4.2   | 7.9   | 306.5  | 356.1  | 1.3    | 1.7    | 5.2    |
| 148.3  | 253.8  | 2.2   | 1.9   | 204.3  | 186.7  | 7.7    | 5.4    | 10.7   |
| 103.8  | 95.2   | 5.1   | 3.3   | 142.1  | 83.6   | 17.0   | 26.9   | 35.4   |
| 32.6   | 58.5   | 61.3  | 74.7  | 45.1   | 22.5   | 95.0   | 106.7  | 114.8  |
| 71.0   | 68.8   | 45.6  | 56.0  | 71.2   | 41.8   | 40.0   | 33.5   | 43.0   |
| 549.5  | 432.3  | 8.0   | 10.6  | 645.7  | 437.0  | 96.0   | 88.2   | 105.9  |
| 916.5  | 1102.6 | 86.0  | 156.9 | 1443.9 | 1250.2 | 1583.9 | 1036.5 | 1155.2 |
| 73.3   | 108.0  | 10.1  | 18.0  | 107.0  | 89.6   | 31.6   | 34.8   | 39.4   |
| 10.5   | 12.0   | 54.5  | 54.7  | 17.0   | 11.8   | 0.6    | 3.9    | 1.3    |
| 6.1    | 6.7    | 27.8  | 47.5  | 12.6   | 1.3    | 1.5    | 4.1    | 0.7    |
| 249.8  | 409.2  | 88.0  | 94.0  | 450.5  | 429.2  | 771.5  | 574.9  | 607.2  |
| 61.1   | 82.8   | 36.4  | 29.6  | 107.4  | 79.4   | 321.2  | 312.0  | 317.7  |
| 17.5   | 18.0   | 46.6  | 53.4  | 56.5   | 33.6   | 139.8  | 84.2   | 112.2  |
| 18.8   | 22.1   | 13.2  | 14.7  | 23.5   | 29.5   | 32.5   | 30.9   | 32.5   |
| 26.7   | 21.6   | 40.1  | 40.0  | 28.7   | 12.3   | 62.3   | 55.5   | 60.6   |
| 0.9    | 0.6    | 0.5   | 4.6   | 0.6    | 2.5    | 1.0    | 0.8    | 6.8    |
| 0.5    | 5.6    | 6.1   | 5.3   | 0.8    | 13.7   | 5.0    | 8.5    | 3.0    |
| 135.4  | 217.0  | 58.0  | 75.2  | 225.0  | 165.2  | 116.7  | 135.1  | 183.2  |
| 264.3  | 343.2  | 127.4 | 176.2 | 439.2  | 337.1  | 406.5  | 391.9  | 462.6  |
| 31.6   | 33.4   | 54.9  | 47.0  | 52.1   | 41.1   | 79.6   | 102.0  | 130.9  |
| 35.7   | 59.8   | 50.0  | 58.8  | 51.3   | 41.8   | 60.6   | 87.3   | 95.3   |
| 15.4   | 9.2    | 6.0   | 9.7   | 10.5   | 10.0   | 21.5   | 12.5   | 13.0   |
| 81.4   | 84.1   | 10.5  | 6.0   | 127.4  | 97.4   | 366.1  | 328.3  | 377.4  |
| 848.6  | 968.9  | 103.0 | 114.2 | 1389.4 | 950.6  | 9.5    | 8.5    | 5.7    |
| 96.6   | 99.3   | 221.5 | 244.6 | 138.0  | 77.7   | 158.9  | 107.0  | 119.5  |
| 88.9   | 100.4  | 35.1  | 30.7  | 129.5  | 100.5  | 173.4  | 190.5  | 246.4  |
| 32.8   | 40.7   | 0.2   | 7.6   | 84.1   | 29.7   | 179.1  | 298.1  | 376.6  |
| 40.8   | 44.1   | 8.6   | 3.5   | 58.8   | 26.2   | 138.8  | 285.9  | 380.3  |
| 7.5    | 11.7   | 4.5   | 2.2   | 1.7    | 2.5    | 13.9   | 7.3    | 12.8   |
| 64.5   | 67.2   | 28.8  | 24.7  | 87.4   | 58.0   | 103.1  | 92.0   | 108.8  |
| 460.3  | 635.2  | 241.2 | 328.2 | 693.2  | 515.8  | 34.6   | 30.3   | 29.6   |

|        |        |       |       |        |        |        |        |        |
|--------|--------|-------|-------|--------|--------|--------|--------|--------|
| 76.2   | 70.2   | 24.3  | 55.0  | 118.9  | 63.2   | 480.9  | 380.7  | 375.9  |
| 35.7   | 39.7   | 45.8  | 59.4  | 45.0   | 26.5   | 7.4    | 11.0   | 6.1    |
| 91.5   | 77.1   | 18.5  | 22.0  | 133.4  | 66.9   | 254.7  | 230.7  | 278.3  |
| 128.4  | 201.4  | 8.2   | 5.1   | 282.5  | 243.4  | 11.9   | 13.1   | 5.6    |
| 6.5    | 10.7   | 18.5  | 6.2   | 13.7   | 7.8    | 13.4   | 14.9   | 11.5   |
| 5.1    | 10.7   | 6.4   | 6.3   | 13.1   | 7.9    | 10.4   | 5.7    | 9.1    |
| 17.9   | 1.4    | 16.9  | 5.1   | 1.7    | 8.4    | 86.1   | 441.4  | 364.5  |
| 890.9  | 1125.1 | 53.4  | 61.6  | 826.5  | 871.7  | 979.8  | 682.5  | 731.9  |
| 59.5   | 76.9   | 42.4  | 59.0  | 117.7  | 116.8  | 192.7  | 155.0  | 212.7  |
| 100.0  | 115.5  | 23.2  | 25.7  | 154.2  | 118.8  | 54.5   | 69.9   | 70.4   |
| 6.2    | 11.0   | 46.6  | 49.8  | 21.8   | 11.3   | 23.6   | 17.3   | 17.6   |
| 2.8    | 3.1    | 35.7  | 34.3  | 12.9   | 5.5    | 13.3   | 3.1    | 10.5   |
| 0.7    | 1.0    | 7.9   | 9.1   | 5.1    | 9.0    | 4.4    | 6.2    | 1.4    |
| 393.9  | 451.9  | 129.8 | 185.2 | 432.8  | 450.9  | 1539.1 | 638.9  | 865.8  |
| 52.1   | 53.8   | 29.7  | 20.9  | 35.5   | 16.8   | 34.0   | 26.3   | 36.7   |
| 49.7   | 40.4   | 54.3  | 71.0  | 93.4   | 42.3   | 299.8  | 238.4  | 237.2  |
| 13.4   | 0.5    | 6.4   | 3.8   | 13.2   | 6.8    | 10.0   | 5.1    | 4.4    |
| 165.3  | 250.3  | 19.2  | 26.2  | 240.0  | 223.8  | 196.2  | 288.9  | 294.9  |
| 80.4   | 82.9   | 23.7  | 19.3  | 139.5  | 112.7  | 36.9   | 37.2   | 36.7   |
| 27.3   | 22.3   | 20.2  | 31.8  | 23.3   | 14.0   | 31.6   | 31.9   | 27.7   |
| 17.8   | 51.6   | 13.9  | 39.3  | 53.4   | 85.8   | 90.7   | 97.1   | 122.2  |
| 2274.9 | 2781.4 | 4.2   | 0.9   | 2657.7 | 2708.5 | 617.9  | 812.7  | 996.4  |
| 8.8    | 1.4    | 11.8  | 0.9   | 4.8    | 4.9    | 3.1    | 3.7    | 17.0   |
| 70.6   | 85.9   | 54.4  | 67.9  | 96.9   | 78.1   | 180.7  | 153.8  | 162.1  |
| 39.6   | 71.2   | 109.0 | 177.1 | 30.4   | 26.8   | 93.2   | 110.6  | 109.8  |
| 157.5  | 234.1  | 39.5  | 69.5  | 197.5  | 263.6  | 324.2  | 392.8  | 414.5  |
| 104.0  | 139.5  | 62.6  | 94.1  | 141.6  | 127.7  | 154.3  | 156.0  | 174.8  |
| 61.5   | 67.2   | 22.3  | 23.7  | 108.4  | 56.3   | 54.9   | 52.4   | 54.1   |
| 100.5  | 87.7   | 52.4  | 66.1  | 232.8  | 121.8  | 81.0   | 98.9   | 90.0   |
| 314.4  | 434.8  | 111.4 | 72.3  | 581.4  | 372.8  | 669.4  | 578.5  | 637.8  |
| 9.0    | 3.2    | 0.5   | 1.0   | 2.7    | 1.3    | 1.8    | 2.1    | 4.0    |
| 14.9   | 12.7   | 7.7   | 5.5   | 13.1   | 2.6    | 13.9   | 9.7    | 10.3   |
| 4.8    | 17.2   | 19.0  | 23.1  | 5.9    | 29.3   | 47.0   | 67.8   | 48.1   |
| 3.3    | 5.3    | 1.2   | 2.7   | 5.9    | 10.4   | 5.0    | 1.2    | 5.3    |
| 140.1  | 96.0   | 65.9  | 76.2  | 204.8  | 140.7  | 244.6  | 293.5  | 163.5  |
| 43.8   | 61.7   | 166.1 | 177.3 | 61.9   | 32.5   | 983.2  | 1557.9 | 1579.3 |
| 57.1   | 56.9   | 88.2  | 105.1 | 40.3   | 72.1   | 732.3  | 1097.6 | 1302.8 |
| 73.7   | 104.1  | 75.9  | 95.0  | 103.4  | 78.0   | 106.9  | 94.7   | 77.4   |
| 299.7  | 464.1  | 58.6  | 103.4 | 541.7  | 426.0  | 347.7  | 199.4  | 287.0  |
| 124.6  | 175.7  | 37.2  | 45.2  | 196.5  | 168.5  | 358.6  | 219.1  | 242.3  |
| 10.5   | 17.5   | 20.4  | 17.1  | 28.2   | 25.4   | 62.1   | 69.4   | 65.4   |
| 50.5   | 83.5   | 26.1  | 55.1  | 114.7  | 74.4   | 147.0  | 153.0  | 148.5  |
| 503.1  | 588.2  | 23.3  | 28.8  | 963.2  | 625.6  | 358.0  | 190.1  | 237.3  |
| 4.4    | 17.9   | 104.8 | 205.5 | 15.3   | 10.8   | 264.9  | 391.2  | 393.1  |
| 16.2   | 24.4   | 201.0 | 234.7 | 16.4   | 19.2   | 367.6  | 539.0  | 547.7  |
| 27.5   | 22.4   | 183.7 | 201.3 | 35.7   | 15.0   | 415.5  | 155.0  | 188.1  |
| 767.5  | 979.2  | 38.9  | 54.7  | 951.5  | 1020.2 | 1886.7 | 1673.7 | 1782.2 |
| 20.9   | 52.7   | 50.8  | 40.1  | 82.9   | 32.4   | 87.6   | 81.0   | 90.8   |
| 169.0  | 175.7  | 180.2 | 243.8 | 277.0  | 207.1  | 386.9  | 472.2  | 513.6  |
| 368.4  | 255.7  | 43.6  | 68.3  | 473.9  | 226.8  | 1087.6 | 252.6  | 209.5  |
| 378.3  | 341.8  | 42.0  | 76.2  | 552.0  | 314.4  | 883.1  | 254.6  | 237.4  |
| 11.5   | 15.7   | 4.8   | 0.8   | 11.3   | 15.9   | 33.1   | 25.9   | 20.7   |
| 169.4  | 214.1  | 20.9  | 25.0  | 279.6  | 179.2  | 374.8  | 294.6  | 328.4  |

|        |        |       |       |        |        |        |        |        |
|--------|--------|-------|-------|--------|--------|--------|--------|--------|
| 118.1  | 189.1  | 47.1  | 59.1  | 273.2  | 152.7  | 874.2  | 738.3  | 770.2  |
| 346.6  | 388.2  | 51.7  | 73.0  | 548.8  | 352.2  | 343.2  | 260.4  | 273.8  |
| 140.9  | 196.7  | 11.4  | 14.3  | 230.9  | 221.6  | 285.9  | 155.9  | 193.8  |
| 356.3  | 442.7  | 138.8 | 131.9 | 467.6  | 431.3  | 942.1  | 715.4  | 801.5  |
| 81.0   | 56.5   | 25.8  | 36.9  | 69.2   | 99.8   | 179.0  | 77.0   | 63.7   |
| 72.4   | 98.8   | 32.5  | 55.1  | 105.8  | 120.4  | 188.9  | 62.2   | 67.8   |
| 1.3    | 2.3    | 1.4   | 1.6   | 1.8    | 3.0    | 28.4   | 7.4    | 23.0   |
| 214.6  | 269.0  | 37.4  | 73.4  | 292.2  | 319.9  | 303.5  | 245.7  | 266.5  |
| 8.4    | 7.5    | 12.2  | 9.2   | 32.7   | 26.5   | 813.1  | 1279.7 | 1358.7 |
| 0.7    | 0.8    | 3.1   | 3.4   | 0.6    | 2.0    | 3.8    | 2.7    | 3.6    |
| 35.4   | 76.7   | 15.9  | 16.7  | 99.7   | 47.3   | 176.1  | 235.7  | 287.1  |
| 2.9    | 12.3   | 1.5   | 4.8   | 1.7    | 3.3    | 13.9   | 13.3   | 21.9   |
| 267.6  | 429.4  | 45.0  | 51.5  | 438.5  | 413.7  | 1019.9 | 873.9  | 1026.0 |
| 86.3   | 99.1   | 61.0  | 72.8  | 136.8  | 109.2  | 124.8  | 208.6  | 230.5  |
| 77.3   | 77.4   | 111.8 | 129.1 | 114.0  | 86.7   | 174.1  | 137.8  | 152.1  |
| 68.1   | 93.2   | 148.3 | 123.7 | 103.5  | 76.3   | 48.6   | 58.3   | 76.8   |
| 296.8  | 403.6  | 14.2  | 23.6  | 439.8  | 333.0  | 347.9  | 352.9  | 336.0  |
| 146.3  | 257.9  | 46.6  | 34.9  | 201.0  | 214.2  | 842.1  | 921.0  | 968.2  |
| 90.4   | 127.7  | 5.7   | 7.9   | 98.1   | 100.1  | 3.8    | 4.6    | 4.2    |
| 9.4    | 16.3   | 26.6  | 30.1  | 17.4   | 17.5   | 62.9   | 87.3   | 72.4   |
| 10.3   | 31.3   | 8.2   | 1.8   | 17.9   | 14.5   | 72.5   | 90.9   | 95.6   |
| 39.2   | 60.6   | 35.6  | 31.4  | 65.1   | 30.3   | 136.4  | 161.2  | 173.5  |
| 1.3    | 1.8    | 2.1   | 0.8   | 3.1    | 1.8    | 2.3    | 3.0    | 2.8    |
| 8.2    | 13.7   | 1.5   | 13.3  | 1.3    | 16.1   | 16.7   | 5.2    | 10.2   |
| 9.4    | 2.9    | 3.4   | 19.0  | 2.9    | 7.5    | 3.1    | 10.5   | 7.6    |
| 18.9   | 18.5   | 16.8  | 16.7  | 27.0   | 46.5   | 30.5   | 17.6   | 24.0   |
| 115.6  | 145.0  | 110.6 | 94.1  | 150.9  | 120.2  | 412.0  | 334.4  | 391.4  |
| 1.6    | 16.0   | 0.4   | 0.8   | 8.9    | 9.6    | 69.7   | 164.3  | 165.8  |
| 51.0   | 77.3   | 20.3  | 14.7  | 83.9   | 72.4   | 161.7  | 347.9  | 346.6  |
| 105.4  | 79.1   | 26.6  | 26.2  | 118.7  | 56.3   | 98.4   | 88.1   | 93.9   |
| 42.2   | 79.8   | 13.9  | 15.9  | 73.0   | 61.4   | 393.9  | 366.0  | 317.8  |
| 24.0   | 15.7   | 27.7  | 46.3  | 10.4   | 20.0   | 37.6   | 41.2   | 38.8   |
| 111.7  | 101.0  | 26.4  | 24.8  | 145.4  | 78.4   | 201.7  | 134.8  | 134.9  |
| 430.5  | 782.9  | 232.8 | 394.2 | 658.7  | 713.7  | 770.7  | 668.6  | 755.4  |
| 317.8  | 485.7  | 77.7  | 150.3 | 462.5  | 431.7  | 458.3  | 341.2  | 385.1  |
| 0.7    | 3.9    | 0.6   | 4.4   | 0.5    | 3.9    | 4.6    | 3.4    | 4.1    |
| 11.1   | 11.8   | 10.7  | 14.6  | 1.8    | 8.8    | 5.8    | 9.5    | 6.7    |
| 42.3   | 34.3   | 36.3  | 37.9  | 52.2   | 45.2   | 102.3  | 140.5  | 134.0  |
| 1283.0 | 1591.7 | 130.1 | 189.7 | 1902.1 | 1548.5 | 1116.2 | 1250.2 | 1302.4 |
| 11.2   | 15.6   | 2.8   | 3.1   | 37.1   | 18.3   | 23.6   | 24.5   | 31.0   |
| 179.2  | 249.0  | 0.3   | 3.3   | 239.3  | 202.2  | 729.3  | 255.5  | 342.0  |
| 150.5  | 128.5  | 29.5  | 16.4  | 202.2  | 132.5  | 718.8  | 349.9  | 443.9  |
| 7.2    | 2.1    | 1.5   | 5.0   | 0.4    | 7.4    | 1.8    | 1.5    | 1.7    |
| 695.9  | 1145.4 | 290.3 | 304.9 | 689.7  | 927.9  | 398.8  | 95.0   | 119.2  |
| 366.9  | 684.4  | 207.0 | 267.3 | 432.6  | 577.5  | 576.4  | 162.6  | 174.7  |
| 78.9   | 93.5   | 30.7  | 40.6  | 106.8  | 85.3   | 199.2  | 152.1  | 172.7  |
| 321.3  | 298.0  | 132.0 | 187.6 | 494.7  | 186.2  | 848.1  | 725.2  | 873.8  |
| 9.3    | 4.7    | 16.5  | 21.2  | 5.4    | 3.1    | 14.5   | 7.2    | 21.7   |
| 302.6  | 275.6  | 559.4 | 590.4 | 334.8  | 256.1  | 2294.2 | 2741.3 | 2829.4 |
| 321.0  | 500.4  | 46.0  | 53.5  | 493.5  | 391.8  | 586.3  | 526.6  | 565.7  |
| 50.6   | 84.1   | 15.3  | 38.6  | 64.5   | 62.5   | 137.6  | 127.7  | 156.2  |
| 78.4   | 116.1  | 51.3  | 76.1  | 98.2   | 123.6  | 294.2  | 280.1  | 359.1  |
| 778.3  | 786.6  | 262.7 | 347.8 | 927.9  | 838.6  | 1813.0 | 695.3  | 710.8  |

|        |        |        |        |        |        |        |        |        |
|--------|--------|--------|--------|--------|--------|--------|--------|--------|
| 67.2   | 107.7  | 18.3   | 21.1   | 87.5   | 62.8   | 105.5  | 76.5   | 103.8  |
| 176.9  | 294.1  | 14.0   | 11.2   | 371.9  | 316.6  | 248.3  | 195.8  | 215.1  |
| 923.9  | 929.3  | 477.1  | 841.3  | 1247.3 | 881.4  | 3709.4 | 2544.2 | 2469.3 |
| 88.8   | 115.8  | 44.9   | 52.9   | 143.9  | 123.2  | 168.4  | 67.3   | 68.1   |
| 216.9  | 286.3  | 365.3  | 508.2  | 295.8  | 274.3  | 582.6  | 734.8  | 823.9  |
| 14.7   | 19.7   | 36.7   | 35.5   | 22.3   | 18.9   | 44.5   | 63.0   | 63.3   |
| 183.5  | 200.5  | 9.0    | 5.8    | 282.3  | 183.4  | 46.5   | 32.7   | 31.9   |
| 1662.2 | 2185.9 | 1456.1 | 1917.7 | 2421.8 | 1973.0 | 3695.4 | 3537.8 | 3605.7 |
| 223.2  | 332.0  | 27.7   | 22.3   | 310.9  | 326.4  | 151.1  | 137.0  | 146.3  |
| 620.5  | 717.6  | 242.8  | 444.3  | 917.5  | 720.3  | 656.8  | 225.8  | 260.0  |
| 98.1   | 93.9   | 338.5  | 384.2  | 181.2  | 76.9   | 458.0  | 396.1  | 507.4  |
| 3.1    | 13.7   | 1.4    | 0.6    | 10.4   | 6.3    | 11.3   | 4.7    | 11.1   |
| 255.1  | 391.5  | 9.6    | 0.4    | 381.5  | 372.0  | 59.7   | 75.9   | 84.8   |
| 156.1  | 223.1  | 11.1   | 2.5    | 203.6  | 209.3  | 57.2   | 53.0   | 49.3   |
| 119.2  | 154.6  | 32.1   | 21.9   | 140.0  | 112.3  | 62.4   | 58.7   | 59.8   |
| 18.7   | 15.6   | 110.2  | 144.9  | 15.3   | 5.8    | 101.7  | 114.4  | 124.8  |
| 101.0  | 102.6  | 17.3   | 18.5   | 95.7   | 66.9   | 18.1   | 4.7    | 21.8   |
| 10.7   | 9.5    | 1.2    | 3.6    | 22.1   | 7.9    | 1.6    | 4.0    | 26.5   |
| 41.0   | 39.3   | 68.3   | 79.5   | 47.1   | 32.9   | 11.5   | 9.1    | 9.5    |
| 36.5   | 29.5   | 16.3   | 18.1   | 42.1   | 27.7   | 158.4  | 199.2  | 308.5  |
| 65.1   | 79.1   | 140.2  | 152.6  | 114.9  | 91.8   | 742.6  | 1325.8 | 1517.7 |
| 74.6   | 49.4   | 51.6   | 54.5   | 86.6   | 62.1   | 461.8  | 568.2  | 613.1  |
| 23.0   | 9.8    | 7.0    | 12.3   | 7.9    | 29.6   | 10.2   | 12.7   | 8.0    |
| 20.0   | 30.5   | 4.7    | 0.6    | 51.8   | 35.5   | 41.5   | 52.4   | 65.9   |
| 163.6  | 234.0  | 10.1   | 14.0   | 216.9  | 253.7  | 192.7  | 269.4  | 273.2  |
| 164.0  | 238.1  | 11.2   | 13.0   | 206.2  | 219.4  | 205.5  | 340.4  | 337.5  |
| 944.0  | 1221.2 | 340.1  | 522.2  | 1456.4 | 1194.4 | 2731.2 | 2297.1 | 2508.0 |
| 1.5    | 8.4    | 17.1   | 7.4    | 7.0    | 10.8   | 13.8   | 16.9   | 13.8   |
| 0.5    | 0.7    | 4.4    | 0.9    | 1.0    | 7.1    | 5.3    | 4.8    | 1.6    |
| 220.8  | 213.1  | 152.8  | 181.9  | 332.8  | 208.7  | 757.6  | 894.6  | 878.4  |
| 25.0   | 27.5   | 33.9   | 46.1   | 37.5   | 27.5   | 193.3  | 267.8  | 311.2  |
| 5.8    | 9.8    | 1.0    | 0.9    | 1.4    | 10.5   | 9.7    | 16.4   | 21.5   |
| 20.1   | 21.6   | 51.5   | 53.5   | 32.9   | 43.2   | 130.0  | 88.8   | 89.5   |
| 38.8   | 52.9   | 8.0    | 6.9    | 78.1   | 30.3   | 629.6  | 619.3  | 653.2  |
| 422.3  | 654.6  | 19.5   | 36.3   | 617.0  | 558.9  | 824.1  | 428.6  | 458.9  |
| 827.3  | 1285.1 | 37.5   | 71.8   | 1175.6 | 1261.2 | 1353.7 | 849.2  | 887.2  |
| 12.9   | 23.3   | 39.9   | 44.2   | 14.6   | 14.0   | 181.0  | 111.4  | 146.9  |
| 9.5    | 19.5   | 19.9   | 25.6   | 23.7   | 15.9   | 171.0  | 133.9  | 147.5  |
| 27.5   | 48.5   | 14.6   | 13.0   | 44.8   | 29.9   | 3.1    | 1.3    | 7.5    |
| 19.7   | 19.1   | 12.9   | 3.7    | 24.3   | 15.8   | 9.5    | 8.5    | 12.9   |
| 360.5  | 424.7  | 64.5   | 60.1   | 425.1  | 502.2  | 319.9  | 191.4  | 194.7  |
| 64.0   | 89.6   | 30.1   | 17.4   | 69.7   | 63.2   | 9.1    | 23.0   | 18.2   |
| 175.9  | 195.6  | 104.7  | 108.5  | 213.4  | 216.6  | 427.5  | 411.4  | 406.0  |
| 66.5   | 52.0   | 47.5   | 41.5   | 51.8   | 61.3   | 182.7  | 263.3  | 292.9  |
| 371.3  | 423.9  | 51.2   | 126.3  | 645.8  | 611.6  | 681.7  | 830.1  | 916.4  |
| 31.7   | 32.1   | 1.6    | 5.0    | 44.4   | 31.2   | 5.5    | 2.5    | 3.5    |
| 132.4  | 148.4  | 29.0   | 39.6   | 176.2  | 188.6  | 35.6   | 77.0   | 78.6   |
| 58.7   | 54.5   | 3.6    | 7.5    | 81.2   | 67.0   | 423.5  | 393.2  | 428.2  |
| 2.2    | 1.1    | 3.9    | 0.9    | 3.3    | 2.4    | 4.8    | 5.0    | 1.8    |
| 98.2   | 79.7   | 13.5   | 2.1    | 99.3   | 86.3   | 230.1  | 338.0  | 326.1  |
| 63.8   | 56.8   | 38.4   | 44.3   | 61.7   | 80.3   | 128.9  | 91.6   | 111.6  |
| 17.5   | 21.4   | 1.5    | 7.9    | 19.3   | 25.9   | 111.9  | 91.5   | 100.1  |
| 193.6  | 236.0  | 12.6   | 16.6   | 333.7  | 222.0  | 270.3  | 339.3  | 350.9  |



|        |        |        |        |        |        |        |        |        |
|--------|--------|--------|--------|--------|--------|--------|--------|--------|
| 17.8   | 16.3   | 11.9   | 6.1    | 29.2   | 27.0   | 51.5   | 60.3   | 63.8   |
| 102.2  | 115.5  | 1.5    | 3.0    | 103.3  | 123.3  | 64.8   | 49.7   | 67.7   |
| 53.8   | 64.6   | 10.7   | 19.0   | 99.7   | 74.1   | 109.2  | 99.2   | 107.2  |
| 164.9  | 137.0  | 5.6    | 20.0   | 167.5  | 143.3  | 187.3  | 88.3   | 110.1  |
| 42.2   | 19.2   | 3.0    | 24.2   | 31.0   | 25.6   | 21.8   | 14.5   | 16.7   |
| 123.7  | 128.8  | 193.4  | 279.0  | 146.4  | 129.9  | 434.7  | 265.2  | 317.9  |
| 845.0  | 793.9  | 1.0    | 1.2    | 1183.1 | 973.0  | 560.5  | 299.9  | 294.6  |
| 112.4  | 128.4  | 14.7   | 19.4   | 161.5  | 129.7  | 905.9  | 1029.5 | 1185.4 |
| 51.8   | 54.2   | 14.0   | 12.2   | 82.9   | 56.4   | 566.8  | 700.2  | 820.4  |
| 61.5   | 63.1   | 4.9    | 0.7    | 150.7  | 83.1   | 3.9    | 2.0    | 8.4    |
| 175.6  | 166.2  | 132.2  | 220.3  | 174.2  | 169.8  | 282.7  | 100.8  | 138.7  |
| 55.2   | 83.3   | 129.7  | 169.0  | 95.7   | 39.8   | 170.2  | 218.3  | 225.8  |
| 161.7  | 284.9  | 46.1   | 29.9   | 197.8  | 168.5  | 99.7   | 98.3   | 75.4   |
| 104.2  | 93.8   | 95.1   | 104.3  | 123.4  | 138.1  | 137.3  | 163.1  | 160.5  |
| 75.2   | 95.0   | 29.6   | 73.7   | 134.5  | 98.0   | 409.7  | 385.4  | 447.1  |
| 379.8  | 1282.5 | 595.7  | 790.7  | 587.5  | 1297.4 | 2318.8 | 2077.6 | 2113.2 |
| 477.6  | 575.1  | 112.4  | 142.0  | 563.6  | 602.3  | 1636.5 | 1070.7 | 1209.0 |
| 216.7  | 395.5  | 46.5   | 77.2   | 355.6  | 268.2  | 431.7  | 368.6  | 414.1  |
| 13.0   | 14.6   | 1.9    | 2.9    | 23.3   | 22.8   | 37.0   | 48.1   | 40.7   |
| 6.5    | 16.7   | 10.2   | 10.3   | 38.7   | 29.1   | 40.4   | 52.8   | 39.2   |
| 118.6  | 81.9   | 30.3   | 43.0   | 131.9  | 116.8  | 263.8  | 277.2  | 282.9  |
| 83.2   | 77.2   | 13.9   | 37.6   | 148.8  | 111.2  | 223.6  | 217.9  | 235.4  |
| 6.5    | 13.1   | 12.1   | 20.1   | 9.9    | 12.4   | 6.5    | 3.5    | 9.6    |
| 2.3    | 2.5    | 4.0    | 4.3    | 2.9    | 2.4    | 3.2    | 13.8   | 11.9   |
| 4.9    | 24.4   | 12.7   | 7.3    | 17.7   | 17.0   | 152.0  | 223.0  | 157.4  |
| 2664.4 | 3578.1 | 1121.0 | 1301.8 | 3120.2 | 3419.8 | 6868.2 | 7442.4 | 7468.3 |
| 6.0    | 0.9    | 3.1    | 2.1    | 11.2   | 6.5    | 1.5    | 1.8    | 1.7    |
| 31.2   | 35.7   | 40.2   | 48.9   | 41.6   | 28.7   | 53.2   | 40.6   | 40.3   |
| 37.0   | 41.4   | 90.7   | 137.8  | 62.8   | 28.8   | 156.0  | 533.4  | 699.3  |
| 50.8   | 57.9   | 36.2   | 38.5   | 101.2  | 36.2   | 84.8   | 79.7   | 68.2   |
| 29.4   | 63.0   | 54.7   | 50.0   | 56.9   | 43.1   | 423.9  | 327.5  | 326.2  |
| 75.1   | 98.8   | 66.6   | 108.2  | 132.1  | 96.3   | 824.8  | 653.3  | 647.7  |
| 67.6   | 90.6   | 60.4   | 62.5   | 97.3   | 76.0   | 378.9  | 261.4  | 261.0  |
| 0.4    | 8.2    | 5.6    | 2.8    | 4.2    | 8.6    | 15.3   | 13.1   | 11.0   |
| 1.9    | 9.2    | 2.5    | 2.7    | 3.3    | 1.1    | 21.2   | 15.4   | 17.1   |
| 50.8   | 86.0   | 25.2   | 45.3   | 170.5  | 138.9  | 674.4  | 542.7  | 665.1  |
| 44.7   | 58.6   | 40.2   | 89.9   | 99.3   | 58.7   | 160.6  | 104.2  | 117.8  |
| 15.7   | 12.0   | 3.3    | 6.3    | 8.5    | 20.0   | 1.2    | 3.3    | 6.9    |
| 17.9   | 34.5   | 0.5    | 2.1    | 50.2   | 44.2   | 7.8    | 1.9    | 0.6    |
| 2.3    | 17.1   | 11.9   | 12.4   | 8.6    | 1.6    | 13.6   | 19.0   | 18.1   |
| 142.7  | 190.8  | 48.5   | 83.5   | 171.7  | 150.3  | 230.6  | 147.3  | 206.5  |
| 7.2    | 16.7   | 16.0   | 13.5   | 12.4   | 25.9   | 17.3   | 17.2   | 14.5   |
| 405.7  | 462.0  | 369.1  | 493.6  | 587.7  | 477.1  | 979.2  | 730.8  | 863.5  |
| 47.8   | 70.5   | 17.0   | 13.6   | 77.0   | 56.2   | 236.9  | 196.6  | 232.4  |
| 1.4    | 5.5    | 24.7   | 32.4   | 11.8   | 14.1   | 50.3   | 147.1  | 160.6  |
| 4.0    | 8.1    | 8.3    | 5.1    | 2.9    | 0.8    | 8.1    | 18.5   | 18.3   |
| 63.7   | 78.0   | 39.3   | 77.3   | 50.4   | 75.9   | 116.7  | 138.2  | 115.2  |
| 1.1    | 14.3   | 3.2    | 3.9    | 0.4    | 2.2    | 11.0   | 6.2    | 6.3    |
| 176.2  | 245.5  | 100.6  | 74.2   | 244.3  | 265.9  | 929.6  | 741.2  | 877.3  |
| 463.4  | 298.5  | 70.6   | 140.7  | 461.0  | 292.9  | 423.1  | 111.2  | 105.3  |
| 788.8  | 690.2  | 236.6  | 338.2  | 812.9  | 668.3  | 2702.0 | 1099.3 | 1134.6 |
| 335.8  | 250.5  | 123.0  | 172.3  | 361.1  | 245.3  | 1622.8 | 562.6  | 578.3  |
| 18.7   | 27.7   | 22.6   | 14.9   | 41.2   | 29.0   | 102.0  | 91.0   | 91.8   |

|        |        |       |       |        |        |        |        |        |
|--------|--------|-------|-------|--------|--------|--------|--------|--------|
| 15.4   | 18.2   | 95.7  | 126.6 | 32.1   | 15.2   | 52.4   | 125.7  | 149.3  |
| 596.8  | 687.3  | 292.7 | 370.2 | 762.2  | 541.3  | 108.3  | 306.0  | 355.1  |
| 156.5  | 212.6  | 100.0 | 140.3 | 225.6  | 121.1  | 97.3   | 201.4  | 224.5  |
| 68.7   | 104.9  | 19.4  | 38.2  | 92.1   | 115.4  | 122.6  | 43.4   | 55.2   |
| 48.8   | 49.6   | 1.8   | 1.3   | 91.7   | 50.7   | 6.2    | 2.5    | 6.5    |
| 51.1   | 54.2   | 6.0   | 9.0   | 85.3   | 61.7   | 10.7   | 10.7   | 7.0    |
| 122.7  | 138.1  | 4.7   | 13.9  | 151.4  | 92.3   | 9.8    | 13.8   | 14.1   |
| 35.1   | 25.5   | 45.1  | 49.3  | 44.6   | 26.2   | 81.1   | 104.4  | 114.8  |
| 4.4    | 16.4   | 1.7   | 14.2  | 4.5    | 2.9    | 17.8   | 9.7    | 10.7   |
| 16.8   | 22.4   | 24.2  | 29.4  | 10.5   | 20.3   | 49.6   | 59.1   | 86.0   |
| 79.0   | 70.9   | 15.4  | 8.5   | 150.2  | 55.5   | 12.5   | 12.0   | 3.4    |
| 828.8  | 1046.7 | 324.3 | 253.8 | 1166.7 | 891.4  | 642.7  | 502.8  | 564.7  |
| 244.0  | 297.0  | 21.3  | 38.4  | 213.1  | 307.4  | 329.9  | 298.6  | 338.3  |
| 154.2  | 225.6  | 40.3  | 75.3  | 214.7  | 173.1  | 334.3  | 335.4  | 361.5  |
| 44.5   | 39.5   | 23.9  | 19.5  | 56.1   | 43.7   | 49.9   | 55.0   | 51.8   |
| 412.4  | 462.2  | 49.4  | 56.3  | 572.9  | 523.7  | 696.8  | 502.9  | 510.0  |
| 442.9  | 436.3  | 44.0  | 65.1  | 647.8  | 444.0  | 986.9  | 436.2  | 460.2  |
| 195.1  | 187.1  | 39.0  | 97.8  | 292.4  | 205.2  | 292.8  | 152.4  | 174.1  |
| 104.9  | 108.5  | 36.5  | 34.5  | 145.6  | 97.7   | 671.8  | 551.3  | 606.0  |
| 20.0   | 9.5    | 25.8  | 51.6  | 21.6   | 1.7    | 313.4  | 346.7  | 424.3  |
| 9.1    | 23.1   | 6.2   | 7.7   | 3.1    | 32.0   | 14.4   | 11.3   | 8.9    |
| 1103.9 | 1855.1 | 18.1  | 11.4  | 961.1  | 1083.5 | 8350.6 | 8648.5 | 8248.8 |
| 6.2    | 10.0   | 3.6   | 1.3   | 6.7    | 15.0   | 15.7   | 10.6   | 16.7   |
| 8.3    | 10.9   | 5.6   | 5.1   | 18.7   | 0.7    | 17.6   | 20.7   | 17.2   |
| 7.8    | 12.8   | 14.6  | 9.4   | 8.4    | 4.8    | 8.8    | 5.1    | 9.7    |
| 29.8   | 39.6   | 2.9   | 13.7  | 54.6   | 16.8   | 53.0   | 56.9   | 65.7   |
| 26.3   | 30.8   | 9.4   | 8.8   | 64.4   | 27.0   | 67.9   | 93.8   | 107.5  |
| 59.8   | 65.3   | 10.1  | 11.4  | 104.8  | 63.9   | 90.9   | 113.3  | 128.8  |
| 161.7  | 205.2  | 40.3  | 59.3  | 218.1  | 186.6  | 329.9  | 422.6  | 489.9  |
| 98.6   | 102.1  | 31.8  | 37.3  | 61.8   | 81.4   | 295.1  | 289.5  | 306.5  |
| 159.4  | 130.3  | 36.2  | 39.0  | 154.3  | 107.3  | 187.4  | 214.0  | 243.0  |
| 42.6   | 88.8   | 5.7   | 9.1   | 58.8   | 61.6   | 55.9   | 66.0   | 73.9   |
| 383.3  | 683.9  | 90.7  | 81.7  | 635.1  | 838.7  | 668.6  | 494.6  | 482.7  |
| 1.9    | 2.0    | 2.0   | 1.2   | 2.9    | 1.1    | 1.1    | 1.8    | 1.7    |
| 53.0   | 57.1   | 8.2   | 6.2   | 100.5  | 66.8   | 33.7   | 28.9   | 23.7   |
| 84.0   | 84.6   | 14.2  | 12.0  | 182.3  | 124.2  | 81.8   | 94.1   | 106.8  |
| 66.4   | 71.8   | 34.8  | 63.4  | 66.3   | 105.6  | 43.7   | 50.7   | 57.7   |
| 21.4   | 3.2    | 28.4  | 27.5  | 31.4   | 19.6   | 55.9   | 42.1   | 47.9   |
| 332.3  | 426.1  | 73.6  | 85.5  | 642.5  | 432.2  | 1711.7 | 1353.3 | 1506.4 |
| 71.8   | 87.9   | 152.8 | 189.5 | 81.4   | 96.0   | 129.1  | 51.2   | 63.8   |
| 381.5  | 886.5  | 595.0 | 799.2 | 736.4  | 1197.2 | 4957.4 | 3439.4 | 3778.9 |
| 68.4   | 114.7  | 55.9  | 66.4  | 112.4  | 180.8  | 204.9  | 210.2  | 189.2  |
| 373.8  | 384.1  | 25.2  | 31.9  | 579.6  | 374.5  | 1003.4 | 656.3  | 704.0  |
| 339.3  | 357.9  | 132.1 | 174.3 | 496.5  | 431.8  | 505.2  | 582.6  | 620.5  |
| 526.5  | 770.4  | 18.3  | 2.5   | 696.0  | 593.6  | 27.0   | 20.6   | 26.6   |
| 337.9  | 372.6  | 71.1  | 70.7  | 483.8  | 411.0  | 615.0  | 236.3  | 302.9  |
| 37.4   | 51.2   | 7.3   | 4.7   | 72.1   | 43.8   | 154.7  | 168.8  | 152.3  |
| 81.2   | 74.3   | 57.1  | 50.6  | 140.6  | 81.2   | 114.0  | 128.0  | 127.2  |
| 128.6  | 186.4  | 97.0  | 123.4 | 125.4  | 182.6  | 710.1  | 430.8  | 467.8  |
| 55.5   | 43.9   | 336.5 | 391.0 | 114.8  | 43.4   | 21.9   | 83.1   | 98.3   |
| 43.4   | 19.2   | 28.4  | 44.2  | 37.5   | 29.5   | 81.3   | 83.2   | 94.6   |
| 47.3   | 50.9   | 70.6  | 95.2  | 87.1   | 53.0   | 126.6  | 144.2  | 143.3  |
| 47.1   | 36.9   | 50.3  | 56.8  | 59.4   | 27.6   | 126.3  | 123.8  | 153.9  |

|        |        |        |        |        |        |        |        |        |
|--------|--------|--------|--------|--------|--------|--------|--------|--------|
| 35.1   | 35.4   | 13.9   | 4.9    | 25.6   | 33.6   | 64.5   | 52.6   | 71.6   |
| 11.3   | 20.9   | 9.5    | 12.7   | 9.0    | 7.3    | 26.6   | 15.9   | 19.5   |
| 445.1  | 603.7  | 84.9   | 112.5  | 806.9  | 617.1  | 1272.8 | 799.2  | 816.4  |
| 303.4  | 458.4  | 71.1   | 80.6   | 479.0  | 371.7  | 1002.6 | 594.5  | 662.3  |
| 11.6   | 25.9   | 12.8   | 6.2    | 38.3   | 18.4   | 12.0   | 12.8   | 22.7   |
| 30.4   | 26.3   | 33.2   | 38.1   | 15.3   | 21.4   | 86.8   | 106.9  | 107.2  |
| 18.7   | 35.6   | 6.8    | 23.2   | 17.2   | 17.4   | 40.1   | 71.3   | 95.1   |
| 77.3   | 139.4  | 30.0   | 29.9   | 98.7   | 91.8   | 476.8  | 379.4  | 359.9  |
| 11.0   | 30.3   | 1.9    | 8.9    | 28.3   | 27.6   | 50.3   | 56.2   | 56.7   |
| 0.6    | 5.1    | 2.4    | 0.4    | 4.1    | 12.6   | 2.8    | 0.8    | 1.5    |
| 91.3   | 93.1   | 44.4   | 60.1   | 92.4   | 77.8   | 102.8  | 131.1  | 123.7  |
| 142.2  | 193.3  | 73.3   | 64.3   | 227.5  | 135.8  | 209.7  | 225.8  | 268.6  |
| 51.9   | 70.2   | 7.6    | 14.7   | 65.3   | 83.3   | 99.2   | 59.6   | 71.7   |
| 3.3    | 1.3    | 11.8   | 7.8    | 4.0    | 4.6    | 49.9   | 34.8   | 41.1   |
| 11.6   | 5.6    | 12.5   | 9.1    | 13.8   | 15.5   | 55.4   | 56.9   | 47.0   |
| 4.3    | 11.6   | 0.7    | 0.5    | 2.1    | 9.7    | 44.1   | 38.9   | 41.2   |
| 6.9    | 6.0    | 52.8   | 42.6   | 1.5    | 7.8    | 101.7  | 170.8  | 179.7  |
| 55.4   | 87.0   | 11.9   | 23.7   | 94.6   | 65.3   | 13.4   | 19.1   | 14.3   |
| 26.5   | 27.1   | 13.3   | 15.9   | 36.2   | 23.8   | 8.5    | 4.9    | 3.4    |
| 56.0   | 80.7   | 35.1   | 45.1   | 84.8   | 71.6   | 178.4  | 198.5  | 218.9  |
| 272.3  | 270.9  | 86.4   | 90.4   | 303.6  | 277.5  | 247.9  | 166.1  | 166.1  |
| 35.3   | 52.1   | 10.5   | 16.7   | 68.7   | 46.1   | 240.3  | 214.4  | 225.2  |
| 101.3  | 90.6   | 8.8    | 0.6    | 247.5  | 94.3   | 15.3   | 12.8   | 18.6   |
| 100.1  | 121.0  | 55.4   | 57.2   | 137.1  | 87.0   | 171.7  | 198.5  | 234.9  |
| 125.9  | 150.9  | 51.1   | 65.7   | 119.4  | 140.4  | 225.5  | 172.3  | 177.6  |
| 177.8  | 222.6  | 19.5   | 21.7   | 235.9  | 214.1  | 191.2  | 123.7  | 155.9  |
| 78.1   | 103.5  | 57.8   | 58.2   | 124.8  | 119.4  | 162.2  | 156.5  | 163.1  |
| 37.3   | 53.0   | 4.1    | 4.3    | 51.9   | 29.1   | 113.4  | 102.1  | 96.7   |
| 305.7  | 255.6  | 56.3   | 111.2  | 414.1  | 168.0  | 582.4  | 506.0  | 567.4  |
| 138.9  | 162.0  | 69.6   | 62.4   | 168.1  | 129.6  | 407.6  | 345.9  | 380.7  |
| 30.9   | 38.8   | 27.3   | 5.2    | 5.6    | 28.6   | 39.9   | 51.9   | 48.1   |
| 293.5  | 409.8  | 47.1   | 50.3   | 446.1  | 391.4  | 19.8   | 31.0   | 27.2   |
| 158.6  | 215.5  | 85.3   | 101.3  | 310.0  | 207.2  | 639.2  | 485.8  | 510.0  |
| 410.8  | 442.1  | 142.1  | 161.0  | 514.2  | 356.3  | 428.8  | 310.6  | 310.3  |
| 8.5    | 24.3   | 5.1    | 15.4   | 31.9   | 17.1   | 27.8   | 35.8   | 36.6   |
| 86.3   | 165.3  | 182.2  | 282.7  | 225.1  | 238.7  | 336.9  | 387.2  | 322.1  |
| 1521.6 | 2314.7 | 1019.4 | 1452.4 | 2362.2 | 2114.8 | 1624.4 | 1188.3 | 1166.0 |
| 164.5  | 194.9  | 0.8    | 0.8    | 365.0  | 166.1  | 3.3    | 1.1    | 2.4    |
| 85.0   | 155.1  | 4.9    | 3.4    | 141.1  | 125.3  | 21.5   | 18.3   | 21.0   |
| 198.5  | 288.7  | 0.6    | 4.4    | 359.8  | 210.7  | 16.3   | 12.9   | 8.8    |
| 7.6    | 11.8   | 1.8    | 1.9    | 15.7   | 19.6   | 3.5    | 4.3    | 9.2    |
| 177.6  | 122.3  | 80.7   | 140.1  | 223.8  | 148.5  | 719.8  | 389.7  | 411.9  |
| 26.6   | 32.5   | 7.3    | 4.6    | 24.2   | 38.5   | 1161.8 | 426.4  | 485.2  |
| 84.3   | 88.0   | 41.5   | 48.4   | 104.5  | 82.1   | 98.1   | 77.1   | 89.9   |
| 42.9   | 51.7   | 27.4   | 46.1   | 47.5   | 45.2   | 65.7   | 51.3   | 64.5   |
| 381.5  | 344.3  | 185.0  | 243.4  | 576.4  | 543.5  | 791.5  | 591.2  | 641.8  |
| 2.2    | 3.0    | 5.0    | 3.6    | 2.6    | 2.6    | 26.7   | 12.8   | 21.7   |
| 16.7   | 28.3   | 15.5   | 2.8    | 5.5    | 4.4    | 25.8   | 33.0   | 29.0   |
| 35.2   | 25.2   | 38.5   | 63.5   | 35.6   | 27.4   | 162.0  | 173.8  | 174.4  |
| 17.7   | 11.2   | 19.0   | 8.7    | 21.8   | 10.6   | 20.2   | 24.1   | 23.4   |
| 72.4   | 119.2  | 55.1   | 118.2  | 142.5  | 101.4  | 385.5  | 368.6  | 440.1  |
| 113.6  | 176.4  | 18.9   | 13.5   | 226.6  | 140.2  | 233.4  | 189.8  | 200.2  |
| 358.8  | 809.1  | 31.6   | 41.3   | 412.2  | 482.1  | 268.8  | 179.5  | 145.3  |

|       |        |       |        |        |        |        |        |        |
|-------|--------|-------|--------|--------|--------|--------|--------|--------|
| 73.4  | 135.3  | 2.3   | 1.0    | 105.9  | 107.5  | 1.0    | 0.7    | 2.6    |
| 493.2 | 790.5  | 26.4  | 23.0   | 574.3  | 656.6  | 597.1  | 493.1  | 380.4  |
| 400.8 | 512.2  | 92.8  | 120.2  | 611.3  | 448.8  | 400.4  | 275.2  | 312.1  |
| 13.1  | 4.1    | 26.0  | 11.9   | 3.7    | 13.4   | 5.9    | 3.2    | 7.0    |
| 141.6 | 172.0  | 66.2  | 91.1   | 230.2  | 174.2  | 1122.6 | 740.8  | 782.1  |
| 33.7  | 30.3   | 25.8  | 34.3   | 55.6   | 47.5   | 94.7   | 109.9  | 132.5  |
| 24.2  | 21.3   | 5.2   | 29.4   | 33.9   | 28.3   | 65.5   | 50.2   | 83.3   |
| 63.6  | 83.8   | 18.1  | 30.8   | 110.7  | 89.4   | 118.0  | 122.5  | 137.6  |
| 216.8 | 397.8  | 89.2  | 82.3   | 358.9  | 401.5  | 918.7  | 514.5  | 565.4  |
| 110.1 | 130.7  | 32.5  | 31.2   | 127.6  | 138.9  | 203.0  | 166.1  | 192.2  |
| 492.7 | 573.9  | 918.6 | 1297.9 | 727.0  | 622.7  | 1095.7 | 1191.8 | 1254.6 |
| 66.9  | 70.6   | 115.2 | 148.4  | 103.3  | 48.4   | 335.2  | 256.2  | 255.2  |
| 67.5  | 56.3   | 54.9  | 60.1   | 61.4   | 28.6   | 176.2  | 151.3  | 131.5  |
| 41.4  | 27.7   | 27.5  | 21.8   | 35.3   | 23.5   | 23.1   | 54.9   | 44.8   |
| 12.4  | 26.0   | 13.1  | 8.4    | 26.3   | 12.2   | 25.2   | 15.8   | 24.1   |
| 23.1  | 29.6   | 27.6  | 21.4   | 25.0   | 41.3   | 47.6   | 32.8   | 45.6   |
| 268.9 | 202.3  | 161.8 | 242.1  | 406.9  | 187.7  | 907.3  | 476.6  | 519.2  |
| 23.0  | 28.6   | 27.8  | 54.0   | 54.2   | 30.6   | 29.4   | 11.6   | 12.7   |
| 237.7 | 263.6  | 52.1  | 61.2   | 330.2  | 253.9  | 217.0  | 161.9  | 206.1  |
| 81.9  | 171.7  | 39.0  | 63.8   | 161.8  | 90.0   | 78.2   | 72.8   | 86.8   |
| 396.2 | 583.8  | 27.4  | 20.9   | 734.8  | 660.2  | 1019.8 | 738.1  | 899.4  |
| 73.2  | 69.4   | 25.1  | 30.7   | 107.8  | 70.5   | 43.5   | 43.6   | 66.8   |
| 219.3 | 321.5  | 21.4  | 16.8   | 320.8  | 255.9  | 628.7  | 451.9  | 483.2  |
| 53.4  | 114.3  | 11.6  | 4.7    | 121.0  | 80.7   | 32.3   | 54.5   | 36.3   |
| 7.5   | 10.6   | 5.1   | 1.6    | 13.8   | 7.4    | 11.2   | 2.2    | 2.3    |
| 21.9  | 26.9   | 17.2  | 25.3   | 13.3   | 4.5    | 70.1   | 73.8   | 102.3  |
| 57.9  | 73.5   | 25.7  | 44.6   | 66.3   | 88.0   | 185.3  | 199.7  | 271.5  |
| 62.9  | 54.7   | 51.3  | 71.1   | 77.5   | 46.9   | 158.6  | 201.4  | 236.5  |
| 100.9 | 128.0  | 14.6  | 23.0   | 174.5  | 112.1  | 424.4  | 559.1  | 605.4  |
| 128.1 | 140.9  | 9.9   | 12.4   | 170.1  | 142.3  | 45.9   | 53.6   | 43.9   |
| 60.0  | 123.2  | 70.5  | 211.6  | 146.8  | 136.8  | 369.0  | 327.4  | 477.8  |
| 387.1 | 236.0  | 219.0 | 338.8  | 366.8  | 265.4  | 379.8  | 176.1  | 197.0  |
| 279.7 | 195.9  | 6.1   | 0.6    | 400.6  | 157.1  | 143.0  | 68.7   | 78.7   |
| 20.8  | 18.1   | 37.4  | 38.6   | 27.5   | 21.1   | 63.4   | 46.1   | 62.9   |
| 34.0  | 52.0   | 6.2   | 2.1    | 47.8   | 59.8   | 47.7   | 52.0   | 47.9   |
| 12.2  | 10.7   | 5.7   | 10.0   | 3.8    | 3.9    | 20.3   | 18.0   | 9.9    |
| 6.0   | 18.6   | 11.0  | 9.8    | 11.5   | 9.1    | 2476.8 | 3432.1 | 3681.7 |
| 0.3   | 1.9    | 3.1   | 1.8    | 0.8    | 0.7    | 0.3    | 0.5    | 0.7    |
| 404.5 | 647.2  | 110.0 | 108.4  | 529.7  | 599.0  | 1920.8 | 1693.6 | 1834.7 |
| 96.7  | 155.8  | 40.4  | 33.5   | 156.2  | 138.0  | 296.9  | 230.4  | 279.5  |
| 43.7  | 84.0   | 20.1  | 32.6   | 86.8   | 63.5   | 61.2   | 32.6   | 35.0   |
| 18.3  | 32.2   | 5.8   | 14.0   | 37.6   | 26.6   | 15.7   | 19.9   | 12.0   |
| 164.1 | 201.4  | 50.4  | 56.1   | 178.4  | 225.4  | 614.7  | 507.7  | 552.9  |
| 884.9 | 1182.4 | 11.1  | 12.1   | 1286.8 | 1204.9 | 415.8  | 589.9  | 669.0  |
| 5.1   | 5.6    | 17.5  | 24.2   | 34.0   | 22.4   | 102.7  | 61.6   | 74.7   |
| 391.1 | 420.5  | 133.1 | 156.7  | 526.2  | 535.5  | 462.6  | 250.7  | 291.8  |
| 59.1  | 83.4   | 57.8  | 58.2   | 72.5   | 58.4   | 146.7  | 112.3  | 139.9  |
| 72.0  | 97.4   | 51.5  | 50.4   | 94.9   | 87.1   | 407.6  | 270.0  | 335.9  |
| 43.9  | 32.7   | 23.9  | 28.1   | 87.7   | 45.8   | 3.3    | 10.4   | 5.8    |
| 243.8 | 322.7  | 210.0 | 295.3  | 371.0  | 367.9  | 737.3  | 699.6  | 717.8  |
| 164.8 | 184.0  | 24.6  | 28.5   | 351.5  | 193.7  | 328.5  | 318.4  | 353.5  |
| 21.4  | 16.6   | 68.0  | 75.2   | 5.7    | 7.5    | 16.6   | 12.6   | 4.2    |
| 35.2  | 75.2   | 8.4   | 12.7   | 102.2  | 52.1   | 106.1  | 170.2  | 203.7  |

|        |        |       |       |        |        |        |        |        |
|--------|--------|-------|-------|--------|--------|--------|--------|--------|
| 0.5    | 4.8    | 1.4   | 5.1   | 0.5    | 1.4    | 2.7    | 8.9    | 11.2   |
| 38.9   | 50.3   | 145.2 | 157.2 | 58.6   | 36.4   | 120.3  | 261.3  | 246.7  |
| 49.2   | 56.4   | 9.2   | 9.0   | 46.1   | 59.3   | 170.1  | 222.2  | 272.6  |
| 7.7    | 9.1    | 5.4   | 12.4  | 10.6   | 2.4    | 11.6   | 31.0   | 26.3   |
| 15.1   | 22.1   | 1.8   | 21.4  | 41.9   | 27.1   | 3.1    | 1.8    | 4.3    |
| 20.2   | 6.3    | 14.5  | 8.4   | 23.6   | 13.1   | 72.5   | 71.7   | 90.1   |
| 364.9  | 495.1  | 470.5 | 691.2 | 449.2  | 434.3  | 1611.6 | 1669.6 | 1709.1 |
| 11.6   | 13.0   | 12.1  | 1.6   | 12.2   | 9.8    | 6.6    | 16.2   | 11.9   |
| 28.6   | 74.6   | 46.4  | 71.2  | 53.2   | 40.1   | 196.9  | 246.8  | 285.9  |
| 67.7   | 65.1   | 5.6   | 6.2   | 120.9  | 62.6   | 1.4    | 9.6    | 3.7    |
| 95.5   | 187.8  | 20.2  | 21.8  | 141.8  | 162.2  | 720.4  | 394.7  | 412.0  |
| 93.9   | 102.6  | 45.0  | 73.6  | 114.5  | 100.8  | 256.9  | 224.0  | 282.8  |
| 17.7   | 35.8   | 10.6  | 5.3   | 35.7   | 36.2   | 177.0  | 247.6  | 310.5  |
| 10.3   | 5.0    | 10.8  | 32.6  | 13.2   | 23.2   | 30.9   | 39.6   | 26.1   |
| 32.0   | 17.2   | 21.2  | 15.9  | 28.3   | 18.5   | 58.3   | 49.8   | 61.2   |
| 181.0  | 201.2  | 8.4   | 5.3   | 335.4  | 179.7  | 156.1  | 178.2  | 186.8  |
| 133.4  | 141.7  | 146.1 | 201.3 | 140.0  | 108.6  | 825.6  | 647.3  | 850.3  |
| 644.0  | 601.9  | 89.3  | 238.7 | 804.8  | 570.8  | 291.1  | 294.4  | 368.8  |
| 3.3    | 10.6   | 1.6   | 2.4   | 11.1   | 10.5   | 20.0   | 11.1   | 26.9   |
| 61.7   | 74.1   | 26.6  | 34.5  | 64.9   | 45.7   | 32.3   | 53.6   | 56.1   |
| 25.9   | 30.4   | 2.9   | 5.0   | 60.9   | 28.0   | 18.2   | 5.7    | 9.7    |
| 7.6    | 3.3    | 1.1   | 7.8   | 20.5   | 19.3   | 26.0   | 23.5   | 31.2   |
| 4.3    | 8.4    | 28.7  | 13.4  | 3.4    | 3.9    | 5.5    | 17.9   | 3.7    |
| 105.1  | 136.0  | 57.7  | 56.5  | 151.7  | 102.7  | 182.9  | 188.7  | 209.0  |
| 136.8  | 232.2  | 42.5  | 51.2  | 272.4  | 218.7  | 438.9  | 537.6  | 532.1  |
| 130.8  | 233.9  | 20.0  | 12.2  | 183.7  | 210.1  | 283.2  | 350.5  | 376.3  |
| 67.2   | 79.9   | 26.5  | 36.9  | 86.7   | 79.5   | 125.7  | 95.0   | 102.6  |
| 47.6   | 40.7   | 16.5  | 9.2   | 48.1   | 36.3   | 15.1   | 21.7   | 12.6   |
| 41.9   | 76.8   | 4.0   | 26.3  | 82.8   | 56.2   | 94.4   | 62.0   | 80.3   |
| 149.0  | 280.2  | 41.8  | 63.7  | 238.4  | 302.1  | 311.4  | 223.0  | 264.3  |
| 541.4  | 641.7  | 75.0  | 97.7  | 1152.5 | 757.0  | 61.3   | 53.5   | 51.2   |
| 11.7   | 10.9   | 0.8   | 0.9   | 7.6    | 7.4    | 8.1    | 5.7    | 3.4    |
| 18.1   | 13.5   | 81.0  | 121.1 | 21.3   | 19.8   | 29.3   | 16.0   | 20.3   |
| 2.2    | 1.7    | 1.0   | 0.6   | 4.2    | 1.4    | 3.1    | 2.4    | 2.2    |
| 15.8   | 5.3    | 25.3  | 29.3  | 2.2    | 26.3   | 24.4   | 21.9   | 30.5   |
| 7.4    | 8.2    | 10.5  | 5.0   | 5.7    | 29.0   | 36.2   | 59.0   | 58.1   |
| 10.8   | 19.8   | 14.9  | 15.0  | 9.8    | 6.1    | 35.8   | 29.6   | 41.9   |
| 1032.6 | 1271.0 | 145.9 | 213.5 | 1219.6 | 1168.8 | 1320.6 | 778.3  | 1161.9 |
| 47.3   | 76.3   | 24.6  | 22.0  | 67.3   | 73.5   | 82.6   | 43.9   | 59.4   |
| 150.4  | 223.2  | 80.5  | 74.7  | 195.6  | 219.1  | 373.4  | 392.1  | 412.7  |
| 20.8   | 31.9   | 7.2   | 3.8   | 32.5   | 38.3   | 28.1   | 15.9   | 28.2   |
| 73.8   | 125.0  | 13.7  | 16.9  | 176.9  | 122.1  | 153.8  | 77.3   | 89.1   |
| 3807.8 | 4055.6 | 263.7 | 366.2 | 4820.0 | 3685.6 | 3397.1 | 1968.0 | 2309.2 |
| 143.1  | 153.5  | 331.6 | 520.8 | 200.9  | 148.0  | 763.7  | 884.0  | 1003.9 |
| 35.0   | 37.5   | 118.7 | 156.4 | 55.3   | 40.2   | 293.0  | 346.4  | 390.0  |
| 47.0   | 58.2   | 30.8  | 38.5  | 41.3   | 50.1   | 24.0   | 24.6   | 31.7   |
| 38.7   | 50.3   | 35.1  | 40.5  | 56.9   | 53.2   | 100.8  | 63.7   | 78.4   |
| 216.3  | 236.4  | 36.0  | 61.8  | 389.3  | 274.0  | 267.1  | 167.9  | 211.0  |
| 1.6    | 8.8    | 11.8  | 9.9   | 11.6   | 10.1   | 8.9    | 9.2    | 9.4    |
| 1.0    | 4.1    | 0.4   | 0.3   | 4.6    | 3.3    | 2.6    | 0.5    | 2.0    |
| 4.0    | 1.8    | 2.4   | 1.0   | 2.4    | 1.7    | 5.4    | 2.8    | 11.3   |
| 21.1   | 30.6   | 50.2  | 31.9  | 30.4   | 17.8   | 134.2  | 148.6  | 167.1  |
| 413.8  | 668.4  | 96.8  | 173.9 | 619.2  | 525.2  | 563.0  | 303.1  | 377.3  |

|        |        |       |       |        |        |        |        |        |
|--------|--------|-------|-------|--------|--------|--------|--------|--------|
| 495.2  | 809.0  | 90.2  | 97.1  | 1060.8 | 812.0  | 898.9  | 961.9  | 1134.7 |
| 18.2   | 22.9   | 17.2  | 23.5  | 25.9   | 23.8   | 8.1    | 7.2    | 8.6    |
| 49.9   | 63.3   | 65.9  | 84.8  | 67.4   | 49.2   | 144.6  | 166.9  | 169.9  |
| 60.3   | 104.0  | 2.5   | 1.7   | 133.7  | 79.6   | 2.7    | 1.8    | 3.4    |
| 45.7   | 43.3   | 20.3  | 30.5  | 90.7   | 78.2   | 98.3   | 76.2   | 83.0   |
| 64.2   | 54.6   | 28.3  | 39.7  | 78.5   | 65.4   | 16.1   | 0.8    | 1.9    |
| 165.5  | 139.2  | 93.2  | 88.0  | 214.0  | 157.6  | 60.6   | 7.7    | 12.4   |
| 54.1   | 116.1  | 9.7   | 12.9  | 100.6  | 93.5   | 290.3  | 274.5  | 298.0  |
| 136.0  | 150.1  | 48.2  | 62.8  | 198.2  | 141.1  | 328.4  | 314.8  | 303.5  |
| 488.4  | 776.1  | 514.3 | 846.2 | 787.4  | 489.2  | 3881.9 | 2864.0 | 2905.4 |
| 74.5   | 120.1  | 24.9  | 31.3  | 124.0  | 100.0  | 757.0  | 499.0  | 677.3  |
| 79.9   | 116.0  | 40.7  | 48.3  | 84.7   | 81.7   | 278.8  | 275.1  | 291.5  |
| 105.1  | 158.1  | 36.1  | 32.4  | 135.4  | 181.2  | 432.7  | 423.3  | 446.1  |
| 151.9  | 175.3  | 118.1 | 104.0 | 221.7  | 190.6  | 304.0  | 190.3  | 198.6  |
| 1.8    | 1.2    | 2.2   | 2.8   | 3.4    | 1.5    | 2.5    | 2.7    | 2.6    |
| 30.3   | 63.5   | 2.8   | 9.7   | 57.2   | 54.3   | 41.9   | 36.4   | 32.3   |
| 10.3   | 16.6   | 13.6  | 8.8   | 16.0   | 18.0   | 23.6   | 23.4   | 21.4   |
| 0.6    | 1.1    | 5.5   | 6.9   | 1.9    | 0.6    | 4.0    | 5.6    | 4.0    |
| 66.5   | 74.9   | 41.3  | 48.0  | 71.0   | 60.0   | 123.5  | 83.7   | 95.6   |
| 66.5   | 99.7   | 7.4   | 9.1   | 153.7  | 118.3  | 213.0  | 307.5  | 304.8  |
| 333.9  | 425.8  | 15.4  | 20.7  | 528.3  | 388.1  | 561.4  | 775.7  | 861.8  |
| 1065.5 | 2226.7 | 0.9   | 1.7   | 1483.1 | 1590.1 | 321.1  | 75.9   | 130.9  |
| 10.0   | 7.1    | 66.5  | 52.7  | 15.1   | 14.7   | 3.5    | 3.4    | 3.7    |
| 20.6   | 6.5    | 78.8  | 66.4  | 17.2   | 9.1    | 24.0   | 23.2   | 16.1   |
| 323.4  | 386.1  | 210.4 | 235.9 | 414.8  | 346.2  | 774.1  | 577.0  | 666.0  |
| 116.9  | 210.7  | 25.5  | 36.6  | 146.5  | 173.8  | 421.0  | 579.1  | 373.8  |
| 326.7  | 273.3  | 6.8   | 17.9  | 480.2  | 259.0  | 13.5   | 10.1   | 7.3    |
| 108.6  | 122.2  | 29.1  | 45.7  | 148.7  | 110.0  | 186.6  | 200.8  | 206.4  |
| 218.3  | 275.4  | 80.6  | 81.4  | 354.2  | 288.1  | 471.6  | 377.4  | 404.2  |
| 24.8   | 13.0   | 28.5  | 24.4  | 18.5   | 28.8   | 89.7   | 62.4   | 60.4   |
| 503.9  | 689.1  | 124.7 | 182.6 | 778.8  | 689.8  | 1141.1 | 792.4  | 943.9  |
| 108.8  | 144.6  | 18.1  | 15.1  | 156.4  | 135.9  | 324.5  | 370.7  | 451.3  |
| 10.6   | 13.9   | 1.8   | 10.8  | 40.8   | 9.3    | 80.9   | 78.5   | 97.7   |
| 40.9   | 44.7   | 36.2  | 27.7  | 41.7   | 26.2   | 24.6   | 27.4   | 34.9   |
| 7.1    | 10.0   | 11.5  | 0.8   | 0.3    | 4.2    | 8.0    | 9.1    | 8.9    |
| 2.1    | 9.2    | 12.2  | 6.9   | 19.3   | 15.1   | 15.4   | 9.4    | 7.3    |
| 10.0   | 19.5   | 165.8 | 225.6 | 27.2   | 27.5   | 151.0  | 579.1  | 759.7  |
| 30.7   | 28.3   | 24.9  | 63.5  | 51.9   | 10.9   | 199.7  | 172.2  | 227.7  |
| 10.5   | 6.1    | 16.1  | 13.5  | 6.6    | 4.8    | 20.4   | 24.1   | 23.6   |
| 52.7   | 33.7   | 77.3  | 85.3  | 61.4   | 22.8   | 7.4    | 12.2   | 5.3    |
| 103.5  | 154.9  | 32.9  | 38.2  | 167.8  | 120.0  | 226.9  | 189.8  | 210.2  |
| 84.6   | 98.9   | 30.7  | 41.9  | 141.6  | 74.1   | 106.6  | 100.1  | 113.8  |
| 30.9   | 25.4   | 158.0 | 156.2 | 25.6   | 46.5   | 104.8  | 157.3  | 176.0  |
| 452.6  | 798.2  | 23.6  | 19.2  | 597.5  | 856.6  | 133.6  | 113.8  | 124.6  |
| 1630.8 | 1886.9 | 468.8 | 627.9 | 2590.0 | 2184.4 | 6874.5 | 5466.0 | 5595.4 |
| 124.6  | 166.9  | 27.4  | 50.5  | 150.8  | 183.1  | 716.1  | 448.2  | 428.2  |
| 135.3  | 159.8  | 6.1   | 5.1   | 312.6  | 161.7  | 71.4   | 183.5  | 189.7  |
| 117.4  | 116.3  | 4.8   | 3.9   | 171.3  | 124.3  | 63.6   | 96.6   | 104.5  |
| 0.9    | 1.7    | 1.1   | 0.8   | 1.3    | 1.1    | 2.0    | 2.1    | 1.1    |
| 111.0  | 116.7  | 47.6  | 52.7  | 125.1  | 119.4  | 406.6  | 714.2  | 794.8  |
| 2.9    | 7.8    | 1.6   | 2.3   | 10.8   | 2.4    | 7.6    | 2.5    | 8.8    |
| 5.0    | 15.3   | 4.1   | 2.8   | 20.1   | 13.5   | 310.3  | 289.0  | 301.1  |
| 40.8   | 31.5   | 35.8  | 51.7  | 24.8   | 31.1   | 127.4  | 98.4   | 94.8   |

|        |        |       |       |        |        |        |        |        |
|--------|--------|-------|-------|--------|--------|--------|--------|--------|
| 30.4   | 13.7   | 19.9  | 14.7  | 41.8   | 6.4    | 21.2   | 24.0   | 33.3   |
| 67.0   | 93.7   | 4.2   | 0.4   | 127.7  | 83.1   | 87.6   | 94.2   | 125.5  |
| 20.0   | 20.8   | 4.9   | 5.8   | 27.2   | 20.7   | 49.1   | 35.4   | 27.0   |
| 66.7   | 70.9   | 54.6  | 70.4  | 109.0  | 76.3   | 188.2  | 211.4  | 281.3  |
| 3.8    | 17.2   | 12.0  | 27.9  | 22.3   | 27.7   | 60.4   | 57.1   | 82.6   |
| 3.3    | 2.5    | 36.7  | 36.0  | 0.8    | 1.1    | 4.1    | 1.9    | 5.7    |
| 31.0   | 20.4   | 28.3  | 37.2  | 44.9   | 29.3   | 64.9   | 82.3   | 79.7   |
| 65.1   | 86.9   | 39.5  | 50.9  | 88.1   | 87.8   | 98.0   | 63.8   | 99.1   |
| 101.8  | 112.6  | 37.0  | 43.0  | 116.8  | 123.6  | 189.7  | 190.4  | 188.6  |
| 134.7  | 197.7  | 113.6 | 193.8 | 220.4  | 179.3  | 1322.0 | 1980.3 | 1647.4 |
| 768.9  | 900.9  | 99.0  | 124.8 | 1002.3 | 1104.6 | 1198.5 | 531.0  | 554.0  |
| 5.8    | 2.7    | 3.8   | 0.8   | 2.5    | 1.6    | 6.6    | 8.4    | 8.9    |
| 128.0  | 180.1  | 12.6  | 8.2   | 279.2  | 177.7  | 225.7  | 131.0  | 140.6  |
| 127.3  | 174.4  | 85.6  | 136.5 | 142.3  | 131.8  | 235.9  | 168.3  | 170.1  |
| 0.8    | 4.9    | 1.9   | 0.3   | 3.2    | 6.7    | 1294.6 | 833.5  | 836.2  |
| 1.7    | 1.5    | 0.6   | 0.6   | 0.7    | 4.2    | 271.6  | 200.9  | 199.7  |
| 7.2    | 6.5    | 1.7   | 2.1   | 25.0   | 9.5    | 52.3   | 28.3   | 50.0   |
| 9.0    | 1.2    | 2.2   | 3.5   | 3.3    | 2.6    | 6.2    | 2.0    | 1.7    |
| 43.0   | 13.4   | 43.8  | 47.3  | 45.0   | 39.1   | 91.0   | 64.2   | 50.4   |
| 1.1    | 1.6    | 4.5   | 5.3   | 0.4    | 1.0    | 6.7    | 4.3    | 6.0    |
| 23.4   | 21.3   | 13.4  | 23.1  | 25.4   | 38.6   | 252.9  | 318.2  | 384.4  |
| 23.6   | 3.3    | 2.9   | 1.5   | 49.6   | 4.3    | 24.1   | 36.3   | 13.0   |
| 270.0  | 329.0  | 40.9  | 44.2  | 401.1  | 297.0  | 11.6   | 31.4   | 18.7   |
| 22.5   | 20.9   | 65.8  | 72.6  | 46.1   | 36.5   | 205.2  | 240.8  | 260.1  |
| 2.7    | 9.5    | 6.2   | 7.1   | 9.3    | 2.2    | 11.4   | 15.9   | 5.1    |
| 1129.5 | 1334.4 | 9.5   | 1.7   | 1206.4 | 1335.8 | 328.3  | 30.5   | 9.0    |
| 49.1   | 64.4   | 1.6   | 1.2   | 58.2   | 60.2   | 5.4    | 1.4    | 1.9    |
| 31.2   | 37.9   | 0.6   | 1.0   | 47.1   | 32.1   | 2.9    | 0.5    | 0.9    |
| 51.4   | 71.1   | 13.1  | 19.6  | 147.7  | 60.7   | 139.6  | 131.4  | 149.1  |
| 2.9    | 26.2   | 51.7  | 52.2  | 18.4   | 15.2   | 11.3   | 5.6    | 1.9    |
| 1.3    | 1.7    | 2.4   | 1.9   | 11.2   | 1.9    | 151.9  | 70.3   | 126.9  |
| 192.2  | 350.6  | 181.9 | 270.5 | 379.7  | 207.2  | 2702.0 | 2314.8 | 2316.0 |
| 274.1  | 381.4  | 407.4 | 477.6 | 457.1  | 256.9  | 2776.3 | 2315.8 | 2449.0 |
| 1.4    | 10.9   | 1.2   | 1.0   | 2.0    | 4.4    | 0.7    | 0.9    | 1.2    |
| 18.8   | 14.4   | 19.2  | 17.1  | 18.4   | 16.5   | 27.2   | 33.9   | 18.8   |
| 8.9    | 11.7   | 1.7   | 0.8   | 14.9   | 8.7    | 3.2    | 4.5    | 3.0    |
| 15.5   | 2.7    | 24.9  | 52.2  | 1.2    | 1.1    | 10.9   | 4.7    | 2.3    |
| 23.9   | 16.0   | 23.3  | 27.3  | 24.0   | 20.5   | 31.1   | 46.4   | 49.7   |
| 95.2   | 70.6   | 49.7  | 50.0  | 109.5  | 64.3   | 274.0  | 260.6  | 303.1  |
| 50.4   | 65.8   | 46.6  | 45.7  | 101.6  | 60.2   | 247.8  | 209.1  | 208.8  |
| 119.6  | 173.5  | 23.2  | 31.5  | 130.9  | 158.3  | 447.1  | 206.3  | 210.5  |
| 70.7   | 108.2  | 15.8  | 4.3   | 124.0  | 86.7   | 70.1   | 61.0   | 70.4   |
| 56.4   | 18.2   | 13.0  | 7.8   | 45.7   | 29.4   | 160.1  | 312.8  | 430.7  |
| 11.1   | 5.8    | 2.6   | 8.2   | 7.3    | 1.5    | 4.5    | 7.6    | 7.4    |
| 19.0   | 19.2   | 0.4   | 5.9   | 43.7   | 20.2   | 2.0    | 1.3    | 1.2    |
| 90.6   | 88.8   | 14.7  | 7.3   | 148.8  | 102.9  | 27.8   | 26.2   | 18.5   |
| 438.9  | 291.1  | 94.4  | 182.5 | 520.1  | 292.8  | 501.1  | 173.9  | 181.0  |
| 424.2  | 481.2  | 3.4   | 4.6   | 568.5  | 420.6  | 22.6   | 21.1   | 37.8   |
| 3.2    | 2.3    | 16.2  | 28.9  | 2.0    | 1.8    | 44.4   | 43.9   | 47.9   |
| 126.9  | 206.0  | 64.1  | 103.1 | 214.9  | 227.9  | 970.8  | 814.2  | 863.9  |
| 20.5   | 23.0   | 2.1   | 4.0   | 19.5   | 2.8    | 8.5    | 9.7    | 9.5    |
| 32.9   | 61.3   | 0.9   | 0.3   | 56.2   | 58.4   | 4.0    | 30.1   | 22.1   |
| 24.0   | 28.1   | 13.7  | 23.5  | 47.0   | 5.7    | 158.1  | 319.1  | 303.2  |

|        |        |        |        |        |        |        |        |        |
|--------|--------|--------|--------|--------|--------|--------|--------|--------|
| 42.1   | 58.7   | 132.8  | 187.5  | 60.3   | 60.4   | 238.1  | 238.3  | 273.0  |
| 34.0   | 66.9   | 30.9   | 26.7   | 75.0   | 65.5   | 234.5  | 221.4  | 286.9  |
| 2.8    | 6.6    | 3.4    | 9.2    | 16.6   | 8.3    | 10.2   | 14.9   | 2.1    |
| 94.4   | 83.6   | 24.9   | 22.5   | 69.1   | 101.0  | 97.8   | 64.3   | 59.4   |
| 19.8   | 25.1   | 24.7   | 27.6   | 23.7   | 12.5   | 21.6   | 16.3   | 14.7   |
| 118.1  | 116.2  | 43.6   | 66.5   | 159.9  | 145.7  | 123.6  | 186.0  | 205.4  |
| 139.1  | 201.1  | 62.7   | 90.1   | 222.5  | 147.3  | 9.8    | 3.3    | 3.2    |
| 66.5   | 93.1   | 6.2    | 8.2    | 88.2   | 103.1  | 29.6   | 27.5   | 22.4   |
| 0.9    | 0.7    | 1.8    | 0.6    | 0.7    | 0.5    | 1.3    | 1.6    | 1.3    |
| 2.8    | 14.8   | 0.6    | 0.6    | 1.0    | 8.2    | 5.7    | 4.3    | 4.5    |
| 49.0   | 25.5   | 20.4   | 30.4   | 61.9   | 43.4   | 66.5   | 66.8   | 78.6   |
| 234.8  | 259.3  | 44.7   | 62.3   | 302.9  | 244.7  | 456.2  | 299.5  | 293.2  |
| 327.5  | 265.6  | 197.4  | 231.7  | 363.9  | 279.5  | 583.3  | 295.8  | 319.4  |
| 361.5  | 547.4  | 83.5   | 105.8  | 529.9  | 568.9  | 1199.8 | 724.8  | 816.1  |
| 5.5    | 1.7    | 39.2   | 68.2   | 8.5    | 7.5    | 14.9   | 11.1   | 12.1   |
| 0.5    | 6.4    | 0.3    | 5.7    | 0.6    | 0.8    | 0.6    | 0.8    | 0.2    |
| 15.4   | 17.7   | 5.0    | 4.7    | 24.1   | 23.8   | 14.2   | 7.1    | 7.3    |
| 12.6   | 3.2    | 10.6   | 3.4    | 10.3   | 11.3   | 8.6    | 18.9   | 11.9   |
| 109.3  | 141.1  | 13.2   | 7.6    | 166.7  | 147.3  | 14.1   | 13.2   | 3.9    |
| 12.3   | 18.9   | 2.8    | 5.9    | 44.4   | 26.6   | 4.1    | 13.1   | 8.4    |
| 1.2    | 2.5    | 0.4    | 0.9    | 6.0    | 10.5   | 0.8    | 1.9    | 1.3    |
| 7.3    | 1.8    | 1.3    | 4.6    | 17.7   | 12.1   | 4.4    | 4.1    | 5.1    |
| 113.7  | 234.6  | 2.2    | 5.6    | 511.0  | 309.9  | 16.4   | 4.8    | 5.9    |
| 0.5    | 0.3    | 0.7    | 0.8    | 1.1    | 6.1    | 2.4    | 3.7    | 0.6    |
| 175.3  | 201.3  | 12.7   | 10.3   | 286.2  | 209.5  | 172.4  | 222.6  | 228.7  |
| 71.5   | 88.2   | 37.0   | 48.1   | 106.4  | 99.1   | 187.7  | 226.1  | 188.6  |
| 61.9   | 78.2   | 12.3   | 27.4   | 80.4   | 56.7   | 130.1  | 112.1  | 118.8  |
| 1833.2 | 1657.9 | 3.9    | 1.6    | 3622.8 | 1646.3 | 3.3    | 2.4    | 3.3    |
| 28.0   | 6.1    | 28.3   | 34.5   | 31.7   | 24.1   | 142.7  | 111.5  | 129.7  |
| 17.9   | 25.6   | 14.2   | 10.4   | 43.7   | 23.3   | 94.6   | 102.5  | 110.3  |
| 149.2  | 125.5  | 64.2   | 87.0   | 193.8  | 117.2  | 346.3  | 295.2  | 310.6  |
| 73.7   | 98.2   | 57.6   | 71.8   | 111.4  | 94.8   | 396.8  | 435.1  | 484.4  |
| 163.0  | 185.7  | 388.4  | 697.7  | 234.9  | 160.1  | 944.9  | 1046.4 | 1104.0 |
| 48.6   | 96.1   | 20.9   | 27.6   | 98.5   | 76.7   | 76.2   | 67.9   | 73.4   |
| 24.6   | 13.9   | 2.9    | 2.7    | 22.7   | 2.6    | 4.2    | 2.8    | 4.3    |
| 37.6   | 27.7   | 6.7    | 0.6    | 38.8   | 29.6   | 36.5   | 43.8   | 36.1   |
| 81.9   | 73.2   | 25.3   | 24.9   | 150.6  | 82.9   | 493.1  | 738.1  | 652.5  |
| 291.6  | 331.6  | 1154.4 | 1453.9 | 331.1  | 234.7  | 824.2  | 870.3  | 977.2  |
| 1.3    | 1.4    | 1.1    | 0.7    | 0.7    | 0.7    | 1.9    | 2.6    | 2.0    |
| 6.9    | 2.1    | 2.3    | 3.3    | 2.9    | 4.1    | 201.1  | 332.6  | 416.9  |
| 87.5   | 117.1  | 95.3   | 89.7   | 133.2  | 84.4   | 348.2  | 225.1  | 262.2  |
| 588.5  | 651.9  | 45.1   | 44.8   | 1133.7 | 667.4  | 438.5  | 265.2  | 318.2  |
| 643.2  | 823.6  | 22.1   | 20.8   | 1398.8 | 991.1  | 354.8  | 248.5  | 276.6  |
| 44.8   | 53.5   | 2.8    | 10.4   | 77.5   | 83.8   | 101.2  | 99.5   | 101.6  |
| 36.3   | 55.1   | 7.9    | 4.0    | 43.1   | 58.1   | 109.4  | 71.9   | 87.7   |
| 421.3  | 558.3  | 32.7   | 46.0   | 713.6  | 564.5  | 394.1  | 441.6  | 469.9  |
| 63.9   | 71.0   | 45.5   | 50.8   | 112.7  | 65.4   | 187.2  | 156.0  | 183.1  |
| 116.8  | 165.5  | 29.7   | 30.9   | 179.1  | 156.8  | 317.8  | 253.2  | 267.5  |
| 255.5  | 363.6  | 25.0   | 31.4   | 461.9  | 369.2  | 379.8  | 318.5  | 347.4  |
| 36.1   | 21.1   | 1.3    | 7.7    | 39.3   | 20.2   | 48.9   | 55.4   | 71.1   |
| 20.4   | 22.0   | 19.3   | 11.3   | 23.1   | 18.5   | 26.5   | 34.2   | 28.7   |
| 1.3    | 1.4    | 2.0    | 10.1   | 1.0    | 0.9    | 6.9    | 7.2    | 8.8    |
| 55.0   | 86.0   | 15.4   | 16.3   | 93.9   | 63.5   | 86.3   | 86.2   | 98.7   |



|        |        |        |        |        |        |        |        |        |
|--------|--------|--------|--------|--------|--------|--------|--------|--------|
| 12.5   | 16.2   | 18.4   | 7.9    | 37.5   | 27.4   | 12.0   | 9.8    | 6.4    |
| 77.7   | 55.2   | 3.2    | 1.9    | 113.6  | 75.0   | 96.6   | 39.8   | 56.6   |
| 68.7   | 70.9   | 23.3   | 28.7   | 102.5  | 91.3   | 245.9  | 97.4   | 128.6  |
| 207.6  | 228.6  | 96.4   | 132.0  | 288.1  | 126.8  | 299.9  | 217.6  | 264.5  |
| 38.0   | 45.6   | 14.3   | 18.2   | 48.9   | 48.7   | 176.0  | 146.4  | 123.2  |
| 17.2   | 18.4   | 13.7   | 18.8   | 26.1   | 22.9   | 59.3   | 68.4   | 55.6   |
| 34.5   | 39.8   | 14.2   | 10.9   | 35.5   | 62.2   | 109.1  | 77.5   | 87.7   |
| 7.0    | 8.6    | 32.8   | 48.6   | 6.1    | 8.0    | 129.0  | 48.4   | 50.6   |
| 15.0   | 5.2    | 21.7   | 17.1   | 6.8    | 7.2    | 12.4   | 9.3    | 16.2   |
| 191.7  | 205.3  | 17.4   | 22.5   | 309.8  | 218.4  | 344.7  | 182.0  | 195.3  |
| 13.2   | 16.6   | 21.5   | 24.3   | 9.3    | 3.5    | 79.7   | 114.2  | 123.8  |
| 60.1   | 84.1   | 8.0    | 12.8   | 91.7   | 61.4   | 79.9   | 88.0   | 102.3  |
| 1.9    | 9.3    | 5.8    | 8.9    | 6.3    | 8.9    | 7.7    | 1.5    | 7.0    |
| 116.8  | 119.7  | 37.1   | 41.1   | 132.5  | 153.0  | 189.2  | 80.6   | 107.2  |
| 5.6    | 11.4   | 1.1    | 8.6    | 12.4   | 4.8    | 27.4   | 11.8   | 8.2    |
| 116.1  | 144.4  | 7.0    | 3.9    | 168.8  | 146.5  | 207.9  | 264.0  | 269.7  |
| 448.3  | 533.8  | 154.2  | 255.0  | 618.6  | 502.1  | 2210.9 | 2921.1 | 3142.6 |
| 129.6  | 136.6  | 126.9  | 234.1  | 215.2  | 140.5  | 651.4  | 868.2  | 957.4  |
| 27.1   | 44.1   | 16.6   | 5.9    | 43.7   | 40.7   | 74.6   | 34.2   | 41.5   |
| 68.0   | 96.6   | 85.0   | 76.8   | 78.6   | 108.1  | 193.2  | 218.4  | 198.9  |
| 432.9  | 543.8  | 19.6   | 15.6   | 706.0  | 668.0  | 236.9  | 77.8   | 74.9   |
| 31.6   | 40.1   | 18.3   | 21.4   | 35.0   | 12.7   | 91.1   | 64.3   | 81.8   |
| 77.6   | 110.3  | 15.9   | 13.7   | 127.7  | 107.6  | 187.0  | 275.1  | 299.8  |
| 104.1  | 102.9  | 25.7   | 33.4   | 124.3  | 110.5  | 160.7  | 155.8  | 186.9  |
| 18.7   | 25.2   | 5.1    | 3.5    | 22.2   | 25.3   | 27.0   | 27.6   | 22.6   |
| 119.4  | 167.7  | 96.4   | 75.5   | 173.4  | 141.6  | 205.3  | 184.5  | 225.6  |
| 88.9   | 114.2  | 13.1   | 5.4    | 178.1  | 109.3  | 25.5   | 28.6   | 31.7   |
| 863.2  | 1136.3 | 74.2   | 115.3  | 1174.4 | 1078.2 | 1368.4 | 1307.7 | 1315.3 |
| 28.5   | 43.5   | 6.6    | 1.5    | 50.5   | 27.4   | 5.3    | 2.5    | 2.4    |
| 6.1    | 6.3    | 0.6    | 3.7    | 9.3    | 6.3    | 4.0    | 3.8    | 1.9    |
| 291.9  | 242.4  | 23.1   | 26.2   | 326.7  | 248.6  | 660.6  | 356.4  | 377.8  |
| 40.2   | 35.5   | 18.9   | 30.7   | 20.5   | 39.4   | 4436.4 | 4900.7 | 4934.8 |
| 2.7    | 4.0    | 5.4    | 9.2    | 11.1   | 17.2   | 11.9   | 2.3    | 11.1   |
| 1.4    | 1.9    | 10.0   | 6.8    | 4.3    | 1.3    | 5.0    | 1.2    | 0.9    |
| 15.3   | 13.2   | 18.9   | 17.1   | 7.1    | 18.5   | 20.4   | 5.9    | 17.4   |
| 1.5    | 1.1    | 8.0    | 11.3   | 7.3    | 1.6    | 10.5   | 13.3   | 2.5    |
| 18.7   | 20.9   | 8.3    | 3.8    | 28.3   | 18.2   | 46.3   | 35.8   | 37.3   |
| 479.0  | 512.7  | 125.7  | 187.5  | 597.4  | 523.8  | 345.4  | 382.1  | 341.9  |
| 1.0    | 0.7    | 2.3    | 1.2    | 3.8    | 0.5    | 2.0    | 3.4    | 4.0    |
| 2327.7 | 2353.3 | 1263.6 | 1868.0 | 2940.3 | 1380.5 | 33.6   | 25.3   | 28.0   |
| 43.1   | 15.3   | 6.5    | 2.1    | 44.4   | 7.3    | 47.9   | 36.5   | 52.9   |
| 25.2   | 11.5   | 173.9  | 313.9  | 23.2   | 16.7   | 15.1   | 40.0   | 25.9   |
| 4.3    | 2.5    | 19.3   | 33.4   | 4.4    | 1.1    | 34.0   | 28.1   | 30.0   |
| 178.6  | 247.5  | 23.2   | 13.9   | 395.9  | 277.3  | 263.4  | 237.7  | 256.3  |
| 35.5   | 38.7   | 37.1   | 64.1   | 94.8   | 41.3   | 5.7    | 4.5    | 1.8    |
| 11.1   | 3.4    | 50.8   | 38.8   | 52.8   | 3.3    | 16.8   | 40.0   | 40.0   |
| 18.1   | 17.1   | 51.0   | 59.5   | 22.3   | 22.3   | 482.3  | 1033.8 | 1069.8 |
| 2.8    | 3.5    | 1.6    | 1.1    | 1.3    | 1.4    | 1.9    | 1.9    | 1.2    |
| 85.9   | 132.2  | 29.3   | 10.4   | 155.1  | 102.6  | 133.6  | 146.1  | 184.0  |
| 11.1   | 14.4   | 22.1   | 43.8   | 14.3   | 18.6   | 200.5  | 203.5  | 244.9  |
| 2.2    | 1.3    | 1.9    | 3.5    | 5.1    | 2.3    | 2.0    | 4.5    | 1.4    |
| 24.4   | 29.0   | 19.1   | 19.8   | 52.6   | 27.9   | 50.2   | 42.2   | 55.6   |
| 21.0   | 34.8   | 5.0    | 19.8   | 36.4   | 21.0   | 35.3   | 26.0   | 28.9   |

|       |       |       |       |       |       |        |        |        |
|-------|-------|-------|-------|-------|-------|--------|--------|--------|
| 110.8 | 147.8 | 22.1  | 23.0  | 154.5 | 130.3 | 225.5  | 204.3  | 206.9  |
| 15.6  | 8.7   | 22.9  | 17.6  | 7.7   | 19.0  | 35.5   | 28.1   | 42.4   |
| 35.1  | 25.3  | 22.7  | 2.5   | 33.3  | 28.3  | 9.4    | 4.9    | 8.7    |
| 10.1  | 17.2  | 0.3   | 0.2   | 26.8  | 5.4   | 0.2    | 1.3    | 0.8    |
| 96.0  | 106.4 | 33.1  | 29.4  | 139.2 | 111.2 | 179.3  | 91.7   | 93.3   |
| 410.8 | 566.5 | 214.3 | 374.6 | 640.1 | 554.2 | 1362.1 | 902.8  | 993.0  |
| 15.8  | 1.0   | 0.5   | 0.4   | 11.7  | 1.1   | 113.2  | 51.4   | 56.1   |
| 3.5   | 2.3   | 2.4   | 1.4   | 3.6   | 5.4   | 2.5    | 4.0    | 3.1    |
| 15.7  | 10.5  | 11.7  | 11.1  | 9.8   | 9.6   | 20.4   | 33.8   | 32.6   |
| 57.6  | 103.3 | 5.3   | 1.3   | 55.7  | 92.4  | 14.9   | 11.2   | 8.1    |
| 49.9  | 55.4  | 33.6  | 41.5  | 84.1  | 39.4  | 87.2   | 73.9   | 82.6   |
| 141.6 | 286.8 | 156.0 | 228.3 | 216.6 | 268.7 | 703.9  | 746.4  | 810.6  |
| 78.5  | 95.7  | 95.0  | 118.7 | 122.5 | 78.9  | 520.5  | 471.7  | 498.9  |
| 126.1 | 184.0 | 46.6  | 50.7  | 204.7 | 109.8 | 110.6  | 144.7  | 131.2  |
| 72.7  | 97.7  | 32.8  | 59.6  | 115.7 | 81.8  | 102.8  | 137.4  | 167.1  |
| 4.3   | 20.5  | 9.4   | 5.4   | 0.9   | 15.1  | 1034.3 | 761.5  | 780.3  |
| 1.0   | 0.9   | 14.1  | 4.6   | 1.9   | 2.6   | 1.9    | 9.7    | 1.8    |
| 451.6 | 650.3 | 160.4 | 162.9 | 879.8 | 584.6 | 1300.8 | 1051.7 | 1048.9 |
| 1.4   | 21.0  | 16.4  | 17.7  | 17.4  | 12.1  | 95.4   | 90.0   | 108.2  |
| 44.7  | 37.1  | 14.0  | 14.5  | 38.9  | 32.4  | 36.1   | 52.8   | 43.6   |
| 18.1  | 1.7   | 25.5  | 1.9   | 7.4   | 5.4   | 35.4   | 20.1   | 24.5   |
| 1.8   | 0.7   | 9.4   | 7.3   | 9.1   | 0.7   | 2.3    | 3.0    | 6.5    |
| 121.9 | 160.9 | 36.3  | 53.3  | 128.8 | 192.2 | 80.5   | 83.0   | 89.1   |
| 15.8  | 33.1  | 12.3  | 9.6   | 23.7  | 19.6  | 51.7   | 40.0   | 41.4   |
| 30.7  | 27.5  | 15.8  | 16.6  | 31.6  | 35.8  | 155.1  | 152.1  | 194.4  |
| 31.0  | 25.2  | 51.0  | 76.2  | 33.4  | 31.4  | 688.5  | 345.1  | 389.1  |
| 1.0   | 2.5   | 8.2   | 12.6  | 11.7  | 6.0   | 7.9    | 1.6    | 10.1   |
| 10.1  | 24.1  | 1.4   | 5.5   | 23.4  | 5.1   | 5.8    | 3.2    | 2.7    |
| 2.8   | 4.2   | 1.6   | 8.8   | 3.1   | 2.6   | 17.4   | 11.6   | 8.0    |
| 3.2   | 4.7   | 8.5   | 5.3   | 14.5  | 1.9   | 13.8   | 12.7   | 2.5    |
| 9.1   | 13.9  | 8.1   | 9.6   | 13.4  | 6.4   | 5.1    | 1.4    | 6.3    |
| 3.2   | 1.3   | 1.0   | 1.1   | 2.1   | 1.9   | 6.1    | 3.5    | 2.3    |
| 2.5   | 1.1   | 3.3   | 5.0   | 0.9   | 9.9   | 4.1    | 2.5    | 1.3    |
| 83.2  | 44.6  | 14.6  | 33.4  | 87.2  | 50.0  | 289.1  | 221.2  | 219.1  |
| 65.7  | 114.3 | 13.2  | 9.4   | 192.5 | 77.1  | 452.5  | 660.2  | 817.5  |
| 198.1 | 254.7 | 8.1   | 4.6   | 343.5 | 267.6 | 35.7   | 35.3   | 26.9   |
| 33.5  | 46.4  | 17.5  | 30.2  | 52.8  | 24.3  | 179.9  | 154.4  | 203.5  |
| 0.6   | 1.4   | 5.4   | 2.8   | 0.9   | 3.3   | 0.9    | 7.4    | 4.6    |
| 8.7   | 7.8   | 2.0   | 10.3  | 9.0   | 6.8   | 7.9    | 8.7    | 8.6    |
| 150.5 | 227.7 | 26.0  | 46.3  | 230.8 | 199.8 | 330.2  | 213.4  | 237.1  |
| 126.1 | 173.2 | 48.0  | 58.5  | 185.4 | 164.2 | 309.2  | 208.2  | 248.5  |
| 50.2  | 29.0  | 11.9  | 12.0  | 113.8 | 39.8  | 12.1   | 20.5   | 15.6   |
| 2.7   | 4.4   | 2.4   | 12.5  | 17.8  | 2.3   | 9.9    | 15.2   | 12.9   |
| 39.7  | 21.3  | 0.6   | 1.6   | 83.7  | 20.3  | 6.2    | 5.3    | 5.9    |
| 14.7  | 21.6  | 31.8  | 32.4  | 20.1  | 26.8  | 79.7   | 73.1   | 87.1   |
| 437.6 | 500.8 | 85.3  | 119.9 | 447.5 | 488.1 | 345.6  | 281.2  | 306.3  |
| 24.4  | 37.8  | 90.0  | 100.9 | 51.2  | 20.1  | 400.3  | 105.1  | 194.3  |
| 214.9 | 309.8 | 30.6  | 32.4  | 366.2 | 198.8 | 53.4   | 63.7   | 78.7   |
| 379.7 | 537.5 | 43.1  | 46.5  | 380.5 | 541.1 | 10.8   | 16.0   | 13.6   |
| 256.1 | 159.6 | 69.5  | 79.8  | 260.6 | 130.8 | 447.9  | 111.9  | 113.1  |
| 101.9 | 91.7  | 37.2  | 63.3  | 156.5 | 146.8 | 21.1   | 42.6   | 53.4   |
| 88.8  | 114.7 | 36.1  | 29.2  | 102.8 | 82.4  | 156.6  | 112.4  | 138.1  |
| 18.9  | 2.0   | 2.9   | 3.9   | 7.1   | 3.2   | 6.9    | 2.5    | 17.6   |

|        |        |        |        |        |        |        |        |        |
|--------|--------|--------|--------|--------|--------|--------|--------|--------|
| 4.6    | 1.0    | 121.3  | 227.0  | 0.8    | 2.0    | 1719.6 | 3061.6 | 2992.2 |
| 281.6  | 214.9  | 79.9   | 90.0   | 416.6  | 183.3  | 540.1  | 637.4  | 780.1  |
| 1.2    | 2.2    | 4.7    | 2.5    | 0.4    | 1.4    | 1.4    | 0.7    | 3.1    |
| 99.8   | 103.2  | 98.4   | 147.0  | 89.7   | 111.6  | 384.3  | 172.4  | 208.0  |
| 32.0   | 51.3   | 25.0   | 29.8   | 56.3   | 23.6   | 27.6   | 35.7   | 39.9   |
| 206.6  | 301.8  | 46.0   | 76.3   | 261.0  | 469.6  | 71.2   | 41.0   | 50.6   |
| 63.6   | 54.6   | 24.4   | 24.3   | 99.1   | 55.9   | 103.1  | 151.7  | 176.0  |
| 1609.9 | 2042.4 | 1.1    | 3.6    | 2784.0 | 1928.0 | 9.1    | 3.8    | 3.2    |
| 231.4  | 246.9  | 351.7  | 509.8  | 347.1  | 287.3  | 2411.7 | 1885.8 | 2123.2 |
| 1747.7 | 2395.3 | 131.8  | 152.6  | 2632.0 | 2219.4 | 3543.4 | 2038.2 | 2150.8 |
| 603.5  | 449.4  | 79.5   | 92.3   | 685.3  | 424.6  | 307.9  | 126.9  | 172.8  |
| 64.6   | 101.9  | 57.2   | 71.3   | 89.5   | 114.7  | 328.1  | 209.5  | 254.5  |
| 0.5    | 7.7    | 2.0    | 2.0    | 8.8    | 10.3   | 4.3    | 5.1    | 3.4    |
| 29.8   | 21.8   | 7.9    | 5.0    | 35.2   | 19.4   | 14.2   | 9.4    | 17.9   |
| 6.8    | 15.6   | 9.7    | 11.2   | 17.7   | 11.0   | 26.9   | 26.4   | 32.2   |
| 4.8    | 2.6    | 7.6    | 8.7    | 13.8   | 2.9    | 31.3   | 29.7   | 30.3   |
| 40.4   | 35.0   | 1950.5 | 2749.0 | 63.6   | 35.8   | 2324.0 | 2017.6 | 2310.9 |
| 14.0   | 10.9   | 59.5   | 61.0   | 8.5    | 13.5   | 101.3  | 156.8  | 185.4  |
| 1.7    | 3.5    | 1.9    | 1.7    | 1.3    | 3.4    | 1.3    | 1.6    | 3.3    |
| 7.6    | 7.1    | 13.2   | 2.3    | 17.0   | 21.5   | 19.9   | 17.8   | 20.3   |
| 7.5    | 3.8    | 1.2    | 1.5    | 6.2    | 1.3    | 1.3    | 3.9    | 0.6    |
| 19.5   | 26.3   | 13.0   | 7.3    | 9.5    | 5.3    | 16.9   | 8.1    | 7.7    |
| 70.6   | 82.9   | 49.8   | 73.9   | 110.4  | 91.2   | 119.0  | 102.5  | 112.1  |
| 600.9  | 988.5  | 146.0  | 258.2  | 866.5  | 1054.9 | 1223.1 | 1354.7 | 1441.9 |
| 9.4    | 17.6   | 11.2   | 6.5    | 10.7   | 8.8    | 11.1   | 9.4    | 13.6   |
| 139.5  | 128.8  | 99.2   | 118.0  | 137.4  | 77.1   | 216.9  | 160.6  | 197.2  |
| 65.0   | 65.2   | 83.0   | 99.6   | 78.0   | 56.5   | 61.5   | 58.0   | 57.2   |
| 120.6  | 166.3  | 8.5    | 14.3   | 208.0  | 162.5  | 436.9  | 334.5  | 367.4  |
| 22.8   | 43.5   | 32.3   | 23.9   | 24.1   | 35.5   | 53.2   | 43.6   | 37.0   |
| 1.6    | 1.2    | 0.8    | 1.3    | 2.3    | 1.5    | 6.5    | 3.0    | 2.7    |
| 2.1    | 0.8    | 11.8   | 8.1    | 1.4    | 2.0    | 1.9    | 3.3    | 2.7    |
| 15.5   | 32.9   | 2.7    | 4.7    | 4.9    | 23.2   | 108.1  | 150.9  | 215.1  |
| 118.3  | 207.4  | 29.6   | 26.5   | 214.7  | 198.9  | 1370.2 | 1203.9 | 1190.5 |
| 339.7  | 421.9  | 229.1  | 331.8  | 404.3  | 372.6  | 505.2  | 568.0  | 619.1  |
| 102.0  | 239.6  | 141.8  | 157.1  | 201.8  | 257.8  | 2004.2 | 1739.8 | 1967.8 |
| 24.2   | 46.5   | 7.6    | 0.2    | 38.8   | 43.7   | 10.0   | 3.8    | 7.3    |
| 61.3   | 70.7   | 3.7    | 12.2   | 63.9   | 65.8   | 206.6  | 182.9  | 231.1  |
| 6.5    | 2.6    | 18.0   | 7.8    | 13.3   | 15.9   | 21.3   | 21.4   | 23.2   |
| 89.8   | 137.5  | 21.1   | 14.3   | 106.7  | 95.1   | 229.9  | 206.8  | 211.2  |
| 27.4   | 52.2   | 4.4    | 3.0    | 67.5   | 62.9   | 2.3    | 3.1    | 0.7    |
| 40.1   | 41.3   | 64.7   | 89.7   | 57.0   | 28.0   | 29.6   | 29.3   | 23.2   |
| 11.0   | 8.4    | 5.2    | 33.7   | 8.3    | 3.6    | 8.5    | 5.1    | 7.9    |
| 84.3   | 129.1  | 124.0  | 155.9  | 99.8   | 113.7  | 208.8  | 209.7  | 239.7  |
| 22.5   | 26.1   | 27.6   | 28.3   | 12.2   | 18.1   | 33.8   | 42.8   | 37.2   |
| 28.9   | 80.9   | 16.7   | 16.3   | 51.7   | 87.7   | 115.5  | 79.8   | 82.3   |
| 32.5   | 57.1   | 21.1   | 31.0   | 39.2   | 57.6   | 96.7   | 51.9   | 63.8   |
| 113.1  | 157.2  | 171.2  | 182.6  | 197.5  | 167.7  | 164.6  | 100.9  | 138.5  |
| 21.2   | 19.4   | 46.0   | 62.1   | 40.8   | 23.3   | 42.8   | 26.4   | 40.2   |
| 29.6   | 34.4   | 8.5    | 9.5    | 65.5   | 80.5   | 6.3    | 6.3    | 5.4    |
| 104.2  | 115.5  | 41.7   | 67.8   | 76.6   | 104.9  | 309.5  | 80.0   | 136.4  |
| 48.5   | 72.2   | 45.7   | 72.0   | 96.0   | 76.8   | 391.4  | 83.3   | 144.2  |
| 154.7  | 177.0  | 116.2  | 130.4  | 199.7  | 146.6  | 770.4  | 698.3  | 638.2  |
| 124.3  | 165.4  | 46.2   | 50.5   | 198.3  | 186.6  | 171.0  | 126.4  | 165.2  |

|       |       |       |       |       |       |        |        |        |
|-------|-------|-------|-------|-------|-------|--------|--------|--------|
| 4.8   | 13.0  | 2.6   | 4.0   | 5.0   | 5.7   | 16.0   | 25.7   | 30.8   |
| 2.9   | 2.4   | 2.3   | 2.2   | 2.4   | 2.1   | 6.1    | 5.2    | 9.8    |
| 200.6 | 180.9 | 9.8   | 12.4  | 204.9 | 172.6 | 161.1  | 158.4  | 155.3  |
| 93.1  | 147.3 | 13.3  | 1.1   | 151.0 | 116.7 | 208.1  | 237.2  | 277.4  |
| 0.9   | 0.9   | 0.8   | 0.6   | 0.9   | 0.9   | 0.8    | 0.8    | 0.7    |
| 9.3   | 14.8  | 12.8  | 10.7  | 12.7  | 13.6  | 11.5   | 11.2   | 11.7   |
| 20.6  | 13.2  | 10.7  | 8.2   | 21.8  | 17.9  | 46.4   | 50.3   | 50.3   |
| 36.0  | 37.8  | 101.1 | 97.9  | 56.8  | 48.5  | 51.1   | 53.8   | 60.1   |
| 41.8  | 36.8  | 26.3  | 30.3  | 56.6  | 15.1  | 85.5   | 48.5   | 52.6   |
| 31.0  | 33.2  | 1.6   | 15.5  | 60.9  | 30.1  | 82.4   | 60.8   | 71.6   |
| 47.3  | 29.8  | 26.5  | 31.9  | 34.1  | 33.3  | 406.2  | 342.6  | 437.6  |
| 74.4  | 89.9  | 1.4   | 3.2   | 115.2 | 96.1  | 0.5    | 1.5    | 7.6    |
| 16.9  | 23.6  | 7.4   | 5.9   | 25.8  | 22.0  | 7.0    | 4.7    | 5.9    |
| 10.6  | 27.4  | 3.2   | 6.6   | 10.6  | 15.2  | 21.6   | 21.3   | 13.3   |
| 2.4   | 1.4   | 4.2   | 2.0   | 2.9   | 3.8   | 3.8    | 4.4    | 2.0    |
| 195.0 | 220.8 | 82.8  | 98.6  | 294.2 | 238.2 | 1872.8 | 1455.0 | 1830.0 |
| 148.4 | 244.8 | 64.6  | 50.2  | 283.1 | 239.2 | 353.3  | 270.9  | 292.9  |
| 68.4  | 83.2  | 4.8   | 9.1   | 182.8 | 83.8  | 1.8    | 4.8    | 3.9    |
| 147.7 | 174.0 | 107.5 | 143.9 | 199.2 | 184.8 | 258.2  | 275.8  | 307.1  |
| 554.7 | 616.8 | 132.3 | 148.3 | 758.8 | 695.5 | 870.8  | 1046.1 | 1028.0 |
| 18.6  | 20.1  | 22.9  | 24.4  | 26.6  | 12.2  | 33.6   | 32.2   | 34.3   |
| 90.0  | 134.8 | 12.0  | 21.3  | 157.5 | 110.9 | 92.4   | 83.0   | 86.1   |
| 103.5 | 157.3 | 20.1  | 14.0  | 142.8 | 142.3 | 9.5    | 27.8   | 13.8   |
| 158.5 | 137.4 | 7.1   | 12.0  | 372.7 | 134.5 | 33.6   | 12.1   | 23.1   |
| 11.2  | 16.9  | 4.8   | 11.1  | 20.7  | 12.7  | 14.1   | 12.6   | 8.5    |
| 2.6   | 2.9   | 8.1   | 3.4   | 6.5   | 3.5   | 6.5    | 10.9   | 11.2   |
| 195.3 | 305.8 | 16.0  | 20.7  | 323.4 | 328.9 | 37.1   | 26.5   | 32.7   |
| 15.6  | 6.0   | 11.4  | 19.6  | 16.9  | 9.1   | 8.3    | 24.1   | 5.9    |
| 203.6 | 243.3 | 15.8  | 30.8  | 374.4 | 246.1 | 8.2    | 8.6    | 5.5    |
| 82.4  | 100.1 | 1.6   | 7.4   | 153.7 | 76.9  | 51.6   | 25.8   | 24.6   |
| 187.4 | 236.7 | 113.8 | 146.6 | 225.1 | 237.8 | 741.1  | 760.8  | 829.5  |
| 55.2  | 36.5  | 40.9  | 34.1  | 54.1  | 51.0  | 91.3   | 136.0  | 116.8  |
| 27.0  | 43.3  | 28.3  | 28.5  | 42.9  | 58.6  | 52.0   | 55.3   | 67.0   |
| 132.0 | 141.3 | 67.5  | 95.2  | 223.2 | 124.1 | 323.4  | 122.4  | 115.2  |
| 5.0   | 4.2   | 2.4   | 1.5   | 6.2   | 10.9  | 15.9   | 6.6    | 12.6   |
| 302.7 | 193.8 | 27.7  | 26.4  | 291.8 | 207.6 | 186.9  | 27.9   | 19.6   |
| 29.8  | 39.0  | 3.8   | 2.9   | 43.9  | 47.5  | 91.8   | 28.2   | 34.5   |
| 9.9   | 7.1   | 2.4   | 9.5   | 14.5  | 15.7  | 11.6   | 3.8    | 5.1    |
| 413.2 | 556.9 | 1.7   | 27.9  | 739.8 | 510.5 | 202.3  | 217.0  | 269.4  |
| 174.5 | 256.1 | 36.0  | 15.1  | 249.4 | 184.8 | 245.0  | 145.7  | 140.5  |
| 179.6 | 252.0 | 26.5  | 20.6  | 248.1 | 195.0 | 306.4  | 175.8  | 219.7  |
| 46.6  | 19.6  | 35.7  | 22.6  | 39.3  | 28.9  | 72.1   | 90.6   | 100.4  |
| 164.2 | 308.2 | 5.9   | 9.9   | 348.3 | 353.7 | 135.3  | 82.2   | 102.3  |
| 71.0  | 99.2  | 27.1  | 35.1  | 103.0 | 119.8 | 606.1  | 453.2  | 515.7  |
| 0.3   | 0.3   | 0.3   | 2.2   | 2.3   | 0.3   | 0.7    | 5.2    | 0.4    |
| 1.5   | 1.5   | 2.1   | 6.2   | 2.7   | 2.7   | 2.3    | 1.9    | 2.5    |
| 100.0 | 95.4  | 24.0  | 30.5  | 138.1 | 145.3 | 215.9  | 181.3  | 187.9  |
| 9.0   | 4.7   | 0.8   | 7.2   | 1.3   | 8.0   | 4.3    | 4.6    | 10.7   |
| 11.4  | 0.6   | 5.5   | 0.7   | 6.7   | 2.5   | 6.1    | 7.7    | 9.2    |
| 196.4 | 302.1 | 14.8  | 18.0  | 339.9 | 340.4 | 415.0  | 291.7  | 305.8  |
| 334.4 | 439.4 | 367.1 | 382.7 | 509.4 | 327.7 | 633.4  | 708.3  | 787.8  |
| 161.1 | 181.5 | 25.7  | 34.8  | 180.0 | 177.2 | 202.7  | 175.4  | 180.1  |
| 5.5   | 10.1  | 9.0   | 2.1   | 4.4   | 2.0   | 0.9    | 0.7    | 3.3    |

|        |        |       |       |        |        |        |        |        |
|--------|--------|-------|-------|--------|--------|--------|--------|--------|
| 5.3    | 23.8   | 5.5   | 3.1   | 0.8    | 27.8   | 49.7   | 106.3  | 141.0  |
| 26.8   | 31.6   | 2.0   | 1.2   | 26.3   | 50.6   | 81.3   | 182.8  | 216.7  |
| 153.8  | 240.9  | 22.2  | 21.9  | 228.9  | 206.8  | 121.4  | 79.0   | 101.2  |
| 33.1   | 43.3   | 79.2  | 99.2  | 47.4   | 53.5   | 375.6  | 705.2  | 634.5  |
| 22.6   | 52.7   | 50.4  | 114.8 | 43.7   | 49.5   | 190.4  | 101.4  | 176.9  |
| 113.0  | 127.0  | 38.6  | 44.8  | 121.9  | 98.1   | 567.1  | 129.3  | 157.0  |
| 6.9    | 0.3    | 5.7   | 6.0   | 0.3    | 0.4    | 4.0    | 4.1    | 4.3    |
| 84.4   | 107.3  | 6.0   | 7.0   | 152.1  | 107.1  | 40.0   | 25.1   | 22.6   |
| 1.0    | 15.2   | 1.6   | 3.0   | 6.1    | 1.8    | 5.7    | 3.9    | 1.1    |
| 5.7    | 1.5    | 0.8   | 0.4   | 1.9    | 3.3    | 1.8    | 1.7    | 1.4    |
| 5.7    | 7.1    | 1.4   | 5.3   | 1.4    | 1.6    | 0.8    | 1.9    | 8.6    |
| 10.4   | 24.6   | 1.2   | 0.5   | 34.9   | 24.0   | 16.3   | 6.3    | 17.9   |
| 154.7  | 181.7  | 111.0 | 146.7 | 254.9  | 167.5  | 284.1  | 280.3  | 289.8  |
| 3.7    | 30.8   | 0.7   | 2.5   | 18.4   | 11.9   | 20.0   | 8.0    | 11.7   |
| 15.7   | 14.3   | 5.5   | 5.3   | 34.5   | 10.8   | 85.1   | 39.0   | 39.8   |
| 53.9   | 46.3   | 19.9  | 33.5  | 113.5  | 64.7   | 195.5  | 87.7   | 83.9   |
| 74.7   | 112.6  | 27.6  | 31.9  | 88.9   | 92.7   | 91.5   | 68.3   | 65.7   |
| 11.8   | 6.1    | 35.0  | 17.2  | 17.3   | 2.9    | 164.8  | 174.8  | 232.8  |
| 24.5   | 22.5   | 5.3   | 7.2   | 25.8   | 20.6   | 220.6  | 99.3   | 115.3  |
| 26.6   | 34.9   | 11.7  | 16.4  | 40.8   | 34.5   | 65.4   | 71.5   | 86.5   |
| 4.0    | 0.6    | 17.8  | 14.4  | 4.6    | 14.3   | 1578.6 | 976.6  | 1054.0 |
| 20.2   | 13.9   | 40.8  | 83.9  | 39.8   | 24.5   | 35.9   | 42.9   | 39.2   |
| 29.3   | 24.3   | 3.2   | 8.1   | 30.9   | 20.8   | 88.9   | 97.3   | 136.5  |
| 1.1    | 1.2    | 7.2   | 1.1   | 0.7    | 1.7    | 3.3    | 1.3    | 1.0    |
| 0.6    | 0.9    | 0.5   | 0.8   | 1.4    | 0.3    | 3.6    | 0.4    | 1.0    |
| 46.9   | 74.9   | 23.2  | 23.2  | 19.1   | 47.0   | 96.9   | 106.1  | 92.8   |
| 36.4   | 31.4   | 19.5  | 16.7  | 47.6   | 43.0   | 108.7  | 133.4  | 133.7  |
| 79.1   | 106.5  | 13.7  | 7.7   | 136.3  | 90.7   | 123.8  | 163.1  | 166.3  |
| 14.9   | 7.9    | 3.9   | 4.5   | 32.5   | 20.0   | 39.1   | 29.1   | 39.5   |
| 25.7   | 24.9   | 1.9   | 16.8  | 14.1   | 22.2   | 193.7  | 147.6  | 160.7  |
| 79.2   | 43.6   | 25.6  | 22.7  | 107.6  | 63.3   | 12.7   | 19.7   | 17.9   |
| 853.7  | 1075.1 | 515.7 | 896.5 | 1365.1 | 1230.7 | 3257.7 | 1721.5 | 1902.5 |
| 1847.1 | 2424.0 | 138.5 | 140.5 | 1476.8 | 1851.5 | 635.2  | 524.2  | 722.6  |
| 26.6   | 35.7   | 24.4  | 33.0  | 22.2   | 50.2   | 32.2   | 29.0   | 39.7   |
| 95.0   | 167.8  | 19.0  | 6.4   | 188.0  | 269.9  | 83.6   | 136.8  | 164.6  |
| 159.3  | 194.8  | 4.2   | 0.5   | 201.9  | 116.1  | 1.3    | 6.2    | 3.8    |
| 5.0    | 7.2    | 7.0   | 0.5   | 1.2    | 0.8    | 4.8    | 0.6    | 2.4    |
| 2.0    | 0.7    | 7.3   | 12.8  | 0.6    | 0.8    | 96.4   | 98.0   | 112.8  |
| 14.5   | 22.6   | 44.2  | 39.6  | 24.3   | 15.2   | 116.4  | 145.4  | 142.7  |
| 471.9  | 422.5  | 248.3 | 333.6 | 605.9  | 441.5  | 823.4  | 406.6  | 451.6  |
| 5.9    | 2.3    | 9.1   | 20.9  | 1.1    | 5.6    | 12.2   | 1.8    | 8.6    |
| 0.8    | 1.1    | 21.8  | 10.0  | 1.2    | 0.7    | 7.4    | 6.4    | 2.9    |
| 2.4    | 13.5   | 12.5  | 13.2  | 0.8    | 5.6    | 7.3    | 7.4    | 6.1    |
| 36.0   | 35.9   | 18.4  | 30.1  | 55.1   | 35.3   | 74.1   | 94.1   | 93.3   |
| 55.1   | 43.7   | 43.4  | 36.9  | 60.0   | 49.6   | 82.5   | 22.6   | 35.4   |
| 1.2    | 0.6    | 1.4   | 4.3   | 10.5   | 1.3    | 3.6    | 1.0    | 1.1    |
| 38.7   | 41.9   | 0.3   | 5.6   | 63.9   | 46.8   | 117.2  | 103.9  | 149.1  |
| 2.2    | 16.6   | 2.5   | 2.6   | 23.0   | 13.6   | 38.8   | 21.8   | 21.9   |
| 35.4   | 56.6   | 5.3   | 9.8   | 61.7   | 53.4   | 109.0  | 113.0  | 128.9  |
| 10.1   | 33.4   | 19.0  | 10.9  | 8.6    | 10.9   | 27.0   | 21.0   | 16.3   |
| 3.6    | 1.8    | 4.1   | 2.6   | 5.1    | 1.8    | 3.5    | 6.4    | 2.0    |
| 14.1   | 32.8   | 32.8  | 45.5  | 24.8   | 3.2    | 171.7  | 143.5  | 119.8  |
| 147.4  | 141.4  | 78.2  | 115.5 | 182.2  | 177.9  | 299.9  | 328.8  | 357.4  |

|        |        |       |       |        |        |        |        |        |
|--------|--------|-------|-------|--------|--------|--------|--------|--------|
| 141.5  | 150.9  | 64.7  | 117.1 | 201.6  | 151.7  | 295.0  | 217.5  | 205.9  |
| 1632.1 | 1151.3 | 153.0 | 163.9 | 1916.6 | 1308.6 | 2336.3 | 850.2  | 911.3  |
| 715.8  | 624.9  | 174.0 | 243.0 | 838.9  | 534.9  | 1724.8 | 609.0  | 691.2  |
| 233.8  | 260.2  | 30.6  | 30.6  | 329.4  | 239.1  | 96.1   | 90.1   | 102.4  |
| 48.3   | 50.5   | 9.1   | 8.6   | 77.1   | 27.8   | 11.6   | 27.0   | 14.1   |
| 136.7  | 164.8  | 76.4  | 75.5  | 172.2  | 150.4  | 253.0  | 215.8  | 234.1  |
| 68.8   | 78.6   | 75.8  | 104.4 | 91.6   | 78.7   | 248.7  | 180.8  | 200.9  |
| 13.6   | 23.4   | 21.9  | 10.7  | 15.9   | 9.1    | 29.4   | 32.5   | 44.9   |
| 6.8    | 15.1   | 9.0   | 2.9   | 15.2   | 24.2   | 7.5    | 9.0    | 7.0    |
| 201.3  | 175.4  | 33.0  | 52.6  | 227.0  | 153.9  | 248.7  | 95.6   | 127.7  |
| 19.6   | 25.8   | 4.3   | 3.2   | 38.5   | 23.6   | 40.1   | 32.8   | 23.7   |
| 1.1    | 10.7   | 15.6  | 9.6   | 17.6   | 10.3   | 19.8   | 22.1   | 18.4   |
| 293.5  | 328.4  | 78.5  | 91.5  | 459.3  | 310.5  | 167.8  | 315.2  | 269.7  |
| 840.3  | 1154.7 | 319.8 | 447.3 | 1091.7 | 1449.2 | 944.8  | 1033.2 | 1151.4 |
| 51.9   | 53.2   | 11.6  | 0.8   | 90.5   | 40.6   | 48.3   | 25.9   | 29.1   |
| 38.2   | 22.8   | 10.8  | 6.3   | 56.7   | 19.5   | 34.8   | 27.0   | 22.6   |
| 15.1   | 13.0   | 5.3   | 2.0   | 18.2   | 15.4   | 4.4    | 3.7    | 9.2    |
| 82.8   | 80.1   | 50.1  | 38.0  | 91.5   | 42.9   | 102.1  | 106.3  | 94.1   |
| 290.0  | 328.4  | 145.7 | 154.7 | 304.7  | 281.0  | 213.1  | 191.0  | 205.7  |
| 65.9   | 68.1   | 15.6  | 37.1  | 87.1   | 82.9   | 228.0  | 247.9  | 242.8  |
| 17.3   | 24.4   | 9.0   | 4.7   | 26.7   | 35.5   | 41.7   | 69.5   | 78.6   |
| 2.2    | 8.1    | 16.9  | 5.7   | 10.8   | 3.3    | 2.3    | 1.8    | 2.1    |
| 31.4   | 57.0   | 96.4  | 100.0 | 52.7   | 50.0   | 133.2  | 119.1  | 155.8  |
| 49.8   | 68.1   | 4.5   | 2.6   | 81.7   | 67.4   | 2.0    | 7.7    | 4.1    |
| 47.7   | 32.7   | 27.3  | 25.6  | 45.2   | 28.2   | 61.2   | 82.3   | 83.0   |
| 79.4   | 99.9   | 16.5  | 13.9  | 99.7   | 87.2   | 187.0  | 149.8  | 180.3  |
| 16.0   | 31.8   | 22.3  | 31.5  | 27.4   | 17.4   | 39.6   | 49.1   | 52.6   |
| 0.3    | 6.0    | 0.4   | 4.4   | 0.3    | 7.0    | 10.6   | 10.8   | 10.3   |
| 24.3   | 24.3   | 3.1   | 1.7   | 20.8   | 29.3   | 46.2   | 24.8   | 18.5   |
| 16.5   | 27.5   | 19.0  | 16.6  | 18.8   | 33.3   | 69.7   | 36.0   | 39.7   |
| 0.4    | 7.2    | 4.8   | 3.9   | 5.7    | 0.3    | 0.7    | 3.2    | 2.3    |
| 5.4    | 1.6    | 14.8  | 8.2   | 10.4   | 2.4    | 11.6   | 1.1    | 7.8    |
| 17.8   | 0.9    | 55.0  | 72.4  | 20.8   | 12.3   | 4121.6 | 3098.0 | 3124.8 |
| 60.5   | 71.9   | 26.5  | 26.4  | 98.2   | 69.6   | 172.2  | 123.4  | 165.3  |
| 40.6   | 26.0   | 38.6  | 35.6  | 39.9   | 23.2   | 112.8  | 172.0  | 218.2  |
| 11.3   | 2.3    | 12.1  | 16.7  | 11.0   | 2.9    | 18.1   | 18.7   | 13.5   |
| 63.3   | 31.0   | 1.2   | 0.9   | 177.1  | 16.9   | 0.8    | 1.0    | 0.8    |
| 134.4  | 84.0   | 1.1   | 0.5   | 364.5  | 45.1   | 9.4    | 8.4    | 3.0    |
| 94.6   | 105.3  | 45.0  | 27.3  | 148.3  | 97.0   | 129.7  | 137.2  | 149.0  |
| 121.1  | 279.4  | 397.0 | 621.6 | 160.8  | 270.7  | 1102.1 | 1015.3 | 1048.7 |
| 1130.2 | 1165.0 | 100.2 | 101.3 | 1298.2 | 989.1  | 1565.0 | 1779.4 | 1939.4 |
| 110.1  | 141.3  | 5.9   | 9.9   | 142.6  | 133.4  | 178.1  | 93.9   | 103.5  |
| 896.3  | 737.9  | 73.7  | 113.0 | 1109.6 | 1534.2 | 785.2  | 411.9  | 501.6  |
| 185.6  | 229.2  | 59.7  | 61.2  | 271.0  | 214.7  | 697.1  | 646.1  | 720.5  |
| 1.0    | 1.8    | 2.6   | 1.6   | 2.3    | 1.7    | 3.8    | 5.6    | 3.2    |
| 8.6    | 10.2   | 23.8  | 24.3  | 4.2    | 4.5    | 28.0   | 11.2   | 22.0   |
| 304.2  | 323.8  | 96.5  | 98.7  | 296.0  | 402.0  | 356.7  | 248.9  | 253.7  |
| 17.0   | 20.9   | 37.2  | 59.2  | 21.0   | 38.3   | 43.3   | 25.4   | 24.7   |
| 0.3    | 0.5    | 6.6   | 1.0   | 11.0   | 1.1    | 5.3    | 0.9    | 2.6    |
| 4.2    | 26.5   | 2.2   | 14.5  | 2.8    | 1.1    | 69.0   | 39.8   | 45.5   |
| 13.9   | 0.5    | 1.7   | 0.9   | 16.3   | 12.2   | 6.8    | 2.7    | 4.9    |
| 163.1  | 180.2  | 145.7 | 101.8 | 206.6  | 169.4  | 352.7  | 329.6  | 361.7  |
| 10.1   | 31.8   | 5.9   | 3.2   | 70.9   | 17.6   | 192.5  | 91.9   | 129.8  |

|        |        |       |       |        |        |        |        |        |
|--------|--------|-------|-------|--------|--------|--------|--------|--------|
| 32.3   | 32.5   | 75.2  | 76.4  | 56.5   | 26.4   | 31.8   | 29.2   | 37.8   |
| 107.0  | 226.7  | 36.5  | 19.1  | 131.6  | 208.5  | 311.4  | 538.1  | 537.1  |
| 18.1   | 29.3   | 4.2   | 0.3   | 22.3   | 22.2   | 88.4   | 113.3  | 145.4  |
| 157.5  | 363.4  | 92.4  | 107.8 | 284.7  | 418.2  | 493.2  | 404.5  | 418.0  |
| 290.0  | 348.3  | 1.9   | 1.3   | 323.7  | 364.8  | 1.4    | 1.8    | 1.2    |
| 43.7   | 47.1   | 96.3  | 134.1 | 78.4   | 68.7   | 322.9  | 232.8  | 318.3  |
| 1049.1 | 1018.3 | 132.6 | 139.7 | 1646.4 | 1149.8 | 1876.2 | 981.9  | 1077.3 |
| 160.7  | 381.7  | 67.0  | 53.5  | 287.1  | 241.1  | 396.7  | 221.0  | 276.7  |
| 41.0   | 61.0   | 30.3  | 27.5  | 63.9   | 32.2   | 128.2  | 95.7   | 106.1  |
| 66.0   | 88.1   | 124.5 | 165.0 | 86.6   | 49.6   | 298.0  | 176.4  | 219.0  |
| 9.0    | 2.5    | 4.4   | 7.9   | 4.7    | 23.0   | 6.0    | 5.2    | 4.4    |
| 9.8    | 3.8    | 2.4   | 5.2   | 7.8    | 2.4    | 8.3    | 2.4    | 2.6    |
| 156.3  | 204.5  | 22.1  | 19.9  | 273.7  | 204.8  | 896.1  | 792.9  | 829.4  |
| 67.7   | 72.2   | 105.7 | 66.1  | 73.8   | 57.0   | 220.8  | 187.1  | 184.9  |
| 125.9  | 110.7  | 43.6  | 73.6  | 193.1  | 128.5  | 363.7  | 337.4  | 302.3  |
| 10.3   | 3.3    | 7.4   | 3.2   | 5.3    | 4.5    | 11.0   | 6.1    | 6.1    |
| 93.8   | 69.5   | 73.5  | 134.4 | 117.0  | 87.8   | 546.0  | 266.1  | 303.8  |
| 7.8    | 11.7   | 10.3  | 9.6   | 11.8   | 4.3    | 2.6    | 10.5   | 9.1    |
| 40.0   | 53.7   | 34.9  | 24.7  | 57.8   | 85.2   | 51.6   | 49.5   | 51.3   |
| 61.0   | 60.9   | 19.1  | 18.4  | 94.1   | 64.8   | 79.0   | 79.3   | 95.7   |
| 609.4  | 762.0  | 92.0  | 142.9 | 923.7  | 867.7  | 2265.5 | 1096.0 | 1343.5 |
| 2.3    | 5.0    | 1.8   | 0.4   | 1.0    | 8.1    | 10.8   | 12.6   | 9.2    |
| 13.7   | 27.0   | 19.2  | 14.3  | 34.5   | 19.9   | 19.8   | 27.4   | 22.6   |
| 323.3  | 398.8  | 46.3  | 66.5  | 476.2  | 520.4  | 980.1  | 771.1  | 841.4  |
| 20.6   | 28.4   | 20.1  | 27.0  | 22.5   | 22.0   | 57.6   | 40.7   | 61.2   |
| 18.4   | 41.5   | 3.9   | 0.4   | 35.7   | 35.5   | 88.5   | 131.2  | 146.3  |
| 19.4   | 7.4    | 0.8   | 0.5   | 28.6   | 18.6   | 46.7   | 73.9   | 72.1   |
| 2.1    | 6.2    | 1.9   | 9.0   | 13.1   | 2.5    | 4.4    | 3.0    | 3.2    |
| 150.5  | 247.4  | 35.2  | 36.2  | 246.9  | 199.4  | 404.2  | 404.6  | 458.8  |
| 1.9    | 5.9    | 1.4   | 1.4   | 1.6    | 1.5    | 2.7    | 4.1    | 3.6    |
| 296.8  | 263.4  | 42.3  | 45.7  | 334.9  | 226.5  | 595.9  | 568.2  | 626.7  |
| 4.3    | 0.4    | 8.7   | 5.6   | 3.6    | 6.9    | 6.5    | 2.2    | 5.2    |
| 0.6    | 0.8    | 0.4   | 5.7   | 1.6    | 0.3    | 2.0    | 2.3    | 0.5    |
| 16.3   | 3.1    | 8.3   | 16.1  | 8.0    | 14.7   | 8.8    | 15.7   | 5.7    |
| 115.0  | 130.4  | 42.9  | 47.0  | 138.4  | 179.6  | 348.4  | 261.7  | 288.0  |
| 2.4    | 4.4    | 4.4   | 1.5   | 6.0    | 2.4    | 3.3    | 4.0    | 5.0    |
| 425.7  | 536.6  | 0.8   | 0.7   | 662.1  | 400.1  | 1258.4 | 789.5  | 848.1  |
| 203.6  | 248.0  | 2.7   | 5.3   | 370.4  | 212.0  | 362.2  | 215.9  | 205.6  |
| 146.1  | 174.4  | 50.2  | 77.9  | 223.1  | 118.7  | 937.4  | 608.4  | 713.3  |
| 23.0   | 31.2   | 5.2   | 21.9  | 26.6   | 21.0   | 20.3   | 31.4   | 34.4   |
| 33.4   | 49.4   | 9.4   | 10.2  | 55.5   | 40.9   | 137.2  | 186.2  | 201.9  |
| 2.2    | 9.3    | 0.9   | 1.8   | 4.3    | 1.7    | 17.3   | 35.9   | 32.1   |
| 8.5    | 15.0   | 1.5   | 8.4   | 8.9    | 10.3   | 32.1   | 30.9   | 29.8   |
| 76.8   | 126.5  | 133.9 | 222.1 | 115.6  | 90.4   | 100.1  | 85.4   | 115.8  |
| 33.5   | 21.5   | 10.5  | 0.8   | 37.0   | 38.7   | 41.3   | 69.3   | 71.7   |
| 18.2   | 23.4   | 16.0  | 12.5  | 22.0   | 10.1   | 24.6   | 35.5   | 40.0   |
| 0.3    | 6.4    | 8.5   | 3.2   | 0.5    | 9.4    | 6.5    | 5.3    | 4.2    |
| 63.5   | 65.6   | 30.9  | 45.3  | 81.7   | 78.6   | 297.3  | 329.4  | 351.5  |
| 40.6   | 44.0   | 230.9 | 358.4 | 48.8   | 40.6   | 505.5  | 361.2  | 497.8  |
| 382.7  | 431.6  | 178.1 | 258.4 | 549.9  | 536.3  | 1071.8 | 563.1  | 656.1  |
| 8.3    | 8.3    | 9.4   | 1.0   | 1.4    | 8.9    | 3.9    | 6.9    | 4.4    |
| 1.1    | 0.5    | 0.7   | 2.9   | 2.4    | 1.6    | 1.7    | 1.7    | 2.0    |
| 54.4   | 61.8   | 1.3   | 10.3  | 50.9   | 62.0   | 48.0   | 52.1   | 46.0   |

|        |        |        |        |        |        |         |         |         |
|--------|--------|--------|--------|--------|--------|---------|---------|---------|
| 17.9   | 9.0    | 5.1    | 3.4    | 19.2   | 10.9   | 54.0    | 72.6    | 67.1    |
| 21.8   | 50.4   | 8.9    | 15.1   | 54.5   | 36.1   | 226.9   | 228.0   | 245.6   |
| 2.9    | 2.9    | 2.2    | 2.5    | 2.3    | 3.9    | 4.3     | 4.6     | 3.7     |
| 89.9   | 118.9  | 111.6  | 205.8  | 146.9  | 110.5  | 2730.1  | 2535.9  | 2654.6  |
| 19.6   | 25.9   | 40.7   | 18.6   | 15.9   | 12.8   | 35.9    | 21.7    | 41.7    |
| 37.4   | 34.9   | 13.8   | 23.7   | 44.7   | 17.4   | 47.0    | 49.5    | 36.5    |
| 24.2   | 13.1   | 16.7   | 13.6   | 43.7   | 29.2   | 23.4    | 46.5    | 41.0    |
| 1.0    | 1.5    | 1.0    | 1.1    | 1.8    | 0.8    | 2.2     | 1.1     | 1.6     |
| 1.0    | 4.3    | 45.9   | 54.9   | 5.5    | 1.8    | 270.1   | 252.7   | 318.2   |
| 361.0  | 560.5  | 105.0  | 117.6  | 636.7  | 775.1  | 591.8   | 448.4   | 546.9   |
| 14.6   | 1.0    | 0.7    | 1.6    | 8.3    | 1.9    | 2.2     | 2.1     | 1.5     |
| 115.7  | 143.2  | 34.4   | 66.7   | 169.5  | 192.2  | 261.0   | 173.1   | 180.3   |
| 9.9    | 14.3   | 6.6    | 0.6    | 20.0   | 7.2    | 44.7    | 29.9    | 34.9    |
| 2.6    | 1.4    | 1.1    | 0.6    | 2.1    | 3.5    | 146.8   | 234.6   | 285.0   |
| 47.7   | 61.4   | 8.1    | 10.7   | 65.7   | 84.1   | 252.8   | 138.5   | 126.7   |
| 103.7  | 153.0  | 33.4   | 57.6   | 150.4  | 151.4  | 356.1   | 208.4   | 220.6   |
| 14.2   | 6.1    | 11.2   | 6.7    | 4.1    | 2.3    | 9.2     | 7.3     | 14.3    |
| 11.9   | 8.8    | 18.1   | 13.5   | 20.1   | 17.1   | 28.9    | 28.0    | 25.8    |
| 153.4  | 202.4  | 1.2    | 0.5    | 334.3  | 130.8  | 2391.3  | 1203.7  | 1335.5  |
| 523.3  | 617.1  | 2.1    | 2.2    | 956.2  | 533.4  | 5058.1  | 2971.8  | 3041.5  |
| 7017.4 | 7982.4 | 4156.9 | 5462.6 | 7573.6 | 6791.7 | 10499.0 | 10750.3 | 10566.7 |
| 18.0   | 38.6   | 35.5   | 21.1   | 65.7   | 46.0   | 61.0    | 67.8    | 58.6    |
| 12.3   | 9.4    | 2.1    | 1.7    | 8.9    | 12.3   | 1.2     | 6.5     | 6.3     |
| 35.3   | 59.9   | 3.1    | 2.3    | 72.3   | 45.9   | 4.8     | 12.8    | 5.9     |
| 1.0    | 4.2    | 1.7    | 1.9    | 4.2    | 4.5    | 3.1     | 3.7     | 4.6     |
| 204.7  | 260.9  | 7.6    | 14.9   | 285.5  | 248.0  | 14.2    | 13.5    | 17.5    |
| 19.8   | 11.4   | 14.0   | 1.6    | 16.3   | 5.0    | 9.0     | 21.7    | 17.1    |
| 28.8   | 16.2   | 47.3   | 48.9   | 37.2   | 29.5   | 73.0    | 49.3    | 51.4    |
| 66.5   | 86.1   | 92.4   | 94.2   | 122.2  | 103.6  | 532.4   | 294.2   | 339.8   |
| 26.1   | 15.6   | 15.2   | 1.6    | 29.1   | 24.5   | 33.7    | 29.2    | 17.2    |
| 25.2   | 53.9   | 18.2   | 20.8   | 52.4   | 35.8   | 79.9    | 72.5    | 102.4   |
| 189.6  | 181.0  | 91.1   | 120.8  | 309.0  | 133.9  | 391.9   | 315.2   | 342.5   |
| 3.3    | 4.5    | 21.0   | 14.7   | 4.7    | 1.6    | 5.7     | 17.2    | 14.4    |
| 450.7  | 611.1  | 129.0  | 161.0  | 687.5  | 743.1  | 1234.1  | 368.6   | 404.3   |
| 277.7  | 402.6  | 45.6   | 39.2   | 264.7  | 321.5  | 44.3    | 72.8    | 67.7    |
| 3.5    | 6.3    | 25.2   | 33.0   | 3.5    | 9.6    | 28.5    | 24.3    | 29.5    |
| 56.2   | 66.1   | 65.2   | 84.7   | 121.6  | 67.8   | 53.3    | 53.4    | 52.8    |
| 8.7    | 17.5   | 10.2   | 8.4    | 19.1   | 20.9   | 23.4    | 28.7    | 30.5    |
| 6.7    | 1.2    | 19.0   | 37.1   | 13.2   | 1.2    | 14.7    | 12.6    | 20.1    |
| 27.3   | 33.5   | 43.3   | 84.8   | 34.3   | 4.5    | 87.8    | 100.0   | 79.6    |
| 12.0   | 16.0   | 12.7   | 8.9    | 13.2   | 12.3   | 24.9    | 20.7    | 18.6    |
| 0.3    | 1.0    | 9.9    | 16.8   | 1.9    | 4.9    | 4.7     | 6.1     | 1.3     |
| 1.7    | 8.0    | 14.3   | 26.2   | 1.8    | 10.8   | 1.4     | 1.1     | 0.5     |
| 5.1    | 5.8    | 20.0   | 22.1   | 0.6    | 3.3    | 7.5     | 3.4     | 4.3     |
| 43.7   | 52.5   | 20.4   | 26.0   | 65.8   | 50.5   | 40.2    | 23.2    | 55.8    |
| 71.6   | 95.2   | 2.8    | 9.3    | 93.2   | 65.1   | 34.8    | 49.0    | 62.8    |
| 29.5   | 65.8   | 4.5    | 0.3    | 37.3   | 62.8   | 37.5    | 54.1    | 59.7    |
| 26.6   | 42.2   | 10.7   | 13.9   | 27.4   | 32.3   | 84.1    | 54.0    | 72.8    |
| 9.2    | 5.3    | 5.0    | 13.0   | 10.3   | 11.6   | 13.3    | 14.4    | 5.8     |
| 72.6   | 95.6   | 8.4    | 15.8   | 93.1   | 64.9   | 102.7   | 71.2    | 96.6    |
| 38.8   | 52.1   | 59.5   | 99.9   | 54.8   | 45.3   | 82.6    | 60.8    | 88.2    |
| 15.3   | 21.7   | 25.0   | 10.7   | 29.0   | 26.1   | 24.0    | 25.3    | 23.3    |
| 68.7   | 45.3   | 8.8    | 2.5    | 78.4   | 36.9   | 17.2    | 3.3     | 8.7     |



|        |        |        |        |       |        |        |        |        |
|--------|--------|--------|--------|-------|--------|--------|--------|--------|
| 64.3   | 84.7   | 15.6   | 21.1   | 63.6  | 43.6   | 85.0   | 88.8   | 104.9  |
| 50.9   | 137.0  | 5.2    | 0.8    | 97.6  | 142.1  | 6.4    | 6.7    | 11.8   |
| 131.4  | 175.1  | 35.2   | 46.3   | 222.7 | 157.1  | 201.6  | 223.0  | 191.4  |
| 72.3   | 63.1   | 47.8   | 49.3   | 92.3  | 68.9   | 216.0  | 99.8   | 138.9  |
| 74.8   | 58.4   | 24.4   | 21.4   | 147.0 | 58.6   | 39.4   | 50.5   | 52.8   |
| 46.1   | 58.5   | 12.0   | 27.2   | 65.8  | 43.2   | 132.9  | 97.3   | 101.2  |
| 1.0    | 1.4    | 3.4    | 0.3    | 6.8   | 0.7    | 24.4   | 24.9   | 20.7   |
| 126.3  | 242.1  | 2.0    | 1.3    | 293.8 | 240.5  | 89.7   | 11.3   | 11.4   |
| 152.8  | 235.2  | 0.7    | 0.4    | 329.7 | 192.7  | 48.2   | 6.5    | 8.2    |
| 15.7   | 27.4   | 13.7   | 10.4   | 26.3  | 17.6   | 26.7   | 34.0   | 31.5   |
| 19.0   | 50.7   | 5.4    | 6.2    | 37.8  | 44.4   | 22.6   | 18.7   | 17.7   |
| 26.5   | 20.1   | 25.7   | 46.4   | 54.7  | 7.0    | 32.2   | 34.9   | 43.9   |
| 170.9  | 146.8  | 64.9   | 41.2   | 230.2 | 174.7  | 136.9  | 144.5  | 154.6  |
| 1.2    | 1.5    | 0.5    | 1.1    | 0.8   | 3.6    | 4.3    | 0.4    | 0.5    |
| 5.8    | 1.1    | 1.2    | 5.4    | 0.6   | 1.1    | 0.9    | 2.0    | 2.2    |
| 1.3    | 8.8    | 0.4    | 3.6    | 4.9   | 0.2    | 5.3    | 3.2    | 0.4    |
| 0.5    | 1.3    | 423.9  | 601.6  | 1.8   | 0.6    | 29.5   | 24.2   | 37.2   |
| 1.5    | 6.0    | 1075.7 | 1693.2 | 15.4  | 6.1    | 79.0   | 86.5   | 100.7  |
| 14.4   | 8.0    | 18.2   | 16.7   | 8.4   | 11.2   | 17.7   | 5.9    | 6.9    |
| 6.2    | 6.4    | 2.1    | 8.8    | 1.3   | 0.6    | 30.0   | 24.0   | 23.4   |
| 2.1    | 10.6   | 13.8   | 9.9    | 4.4   | 1.8    | 13.5   | 10.9   | 12.5   |
| 51.6   | 39.6   | 40.8   | 34.9   | 60.0  | 36.5   | 84.7   | 55.6   | 82.7   |
| 106.4  | 139.4  | 36.5   | 56.0   | 112.1 | 103.4  | 227.2  | 70.6   | 67.2   |
| 1007.4 | 2153.5 | 3.7    | 2.3    | 857.3 | 2522.5 | 34.7   | 23.7   | 37.8   |
| 100.9  | 106.6  | 98.0   | 215.5  | 200.5 | 112.9  | 118.8  | 63.0   | 72.5   |
| 25.1   | 20.3   | 17.3   | 18.7   | 31.4  | 35.5   | 41.6   | 63.3   | 55.3   |
| 9.3    | 12.7   | 28.5   | 36.2   | 11.9  | 8.0    | 111.8  | 81.5   | 84.1   |
| 30.6   | 8.6    | 152.8  | 111.8  | 56.2  | 3.8    | 85.3   | 71.6   | 95.3   |
| 0.8    | 5.5    | 6.4    | 0.9    | 0.8   | 0.8    | 2.0    | 1.1    | 0.9    |
| 8.1    | 16.2   | 4.8    | 3.9    | 27.5  | 33.7   | 3.4    | 7.0    | 6.1    |
| 65.3   | 48.5   | 9.8    | 14.7   | 110.5 | 47.1   | 4.9    | 5.3    | 3.3    |
| 4.5    | 5.3    | 3.8    | 5.9    | 1.0   | 3.4    | 201.2  | 99.3   | 94.5   |
| 222.3  | 279.8  | 83.2   | 108.5  | 288.4 | 243.1  | 407.2  | 230.2  | 281.1  |
| 64.1   | 49.7   | 3.1    | 2.8    | 64.6  | 55.6   | 31.4   | 15.6   | 17.5   |
| 1.3    | 6.5    | 3.6    | 0.2    | 5.2   | 1.4    | 3.3    | 3.1    | 4.5    |
| 1.7    | 9.6    | 1.5    | 0.9    | 5.1   | 3.7    | 5.5    | 5.2    | 5.4    |
| 2.3    | 5.1    | 1.0    | 0.5    | 42.5  | 1.7    | 1.9    | 1.0    | 2.8    |
| 237.6  | 544.8  | 185.3  | 185.8  | 361.0 | 641.4  | 999.4  | 782.3  | 742.4  |
| 51.3   | 94.2   | 4.9    | 16.0   | 88.4  | 108.5  | 8.1    | 9.9    | 11.0   |
| 22.0   | 44.3   | 8.7    | 10.9   | 37.7  | 58.7   | 1.9    | 8.6    | 2.1    |
| 1.6    | 3.0    | 0.3    | 0.9    | 0.8   | 0.3    | 4.6    | 0.9    | 0.6    |
| 30.3   | 6.7    | 4.3    | 2.1    | 39.4  | 21.5   | 7.9    | 10.1   | 3.1    |
| 133.1  | 183.7  | 66.2   | 79.9   | 225.5 | 205.9  | 15.4   | 22.6   | 6.5    |
| 76.0   | 77.0   | 41.4   | 52.3   | 70.2  | 73.3   | 62.7   | 65.6   | 60.6   |
| 64.1   | 58.2   | 5.9    | 8.3    | 107.6 | 54.3   | 4.2    | 1.1    | 6.0    |
| 105.2  | 184.9  | 27.2   | 42.8   | 135.0 | 80.2   | 162.1  | 92.8   | 105.4  |
| 89.5   | 67.6   | 16.3   | 15.4   | 164.4 | 92.2   | 5.0    | 5.7    | 6.8    |
| 22.9   | 6.9    | 3.9    | 4.5    | 52.3  | 27.5   | 15.3   | 16.8   | 18.5   |
| 8.2    | 3.9    | 21.6   | 2.7    | 22.7  | 15.9   | 466.2  | 559.7  | 676.7  |
| 4.2    | 3.8    | 24.1   | 33.2   | 26.8  | 10.8   | 45.6   | 29.6   | 29.3   |
| 196.7  | 181.8  | 320.2  | 473.1  | 291.0 | 172.7  | 1160.9 | 1099.7 | 1180.8 |
| 152.2  | 205.5  | 34.1   | 57.1   | 198.1 | 171.6  | 549.5  | 521.0  | 550.2  |
| 447.4  | 606.8  | 73.6   | 106.6  | 618.7 | 574.9  | 413.9  | 146.6  | 172.5  |

|        |        |        |        |        |        |        |        |        |
|--------|--------|--------|--------|--------|--------|--------|--------|--------|
| 89.2   | 108.9  | 73.8   | 119.8  | 126.4  | 130.2  | 227.2  | 174.7  | 195.6  |
| 44.3   | 41.4   | 43.0   | 55.0   | 44.2   | 27.5   | 33.3   | 48.8   | 51.7   |
| 119.2  | 299.8  | 34.7   | 48.3   | 149.4  | 260.0  | 189.4  | 167.3  | 188.1  |
| 167.5  | 224.8  | 84.2   | 81.3   | 202.6  | 145.7  | 807.8  | 1119.9 | 1338.5 |
| 39.3   | 34.4   | 1.5    | 5.1    | 69.3   | 44.2   | 39.8   | 43.8   | 54.2   |
| 38.7   | 45.1   | 22.0   | 32.2   | 49.8   | 49.0   | 134.1  | 117.9  | 100.3  |
| 123.6  | 161.1  | 23.8   | 12.1   | 187.1  | 199.1  | 254.8  | 200.6  | 222.4  |
| 81.4   | 71.4   | 220.7  | 254.1  | 66.6   | 55.7   | 240.8  | 266.4  | 321.9  |
| 51.0   | 35.7   | 27.6   | 34.9   | 52.2   | 53.6   | 88.8   | 83.1   | 73.9   |
| 9.7    | 2.4    | 17.2   | 10.2   | 11.6   | 2.4    | 42.4   | 17.6   | 21.7   |
| 3.0    | 17.2   | 7.5    | 4.4    | 1.2    | 3.0    | 7.6    | 3.5    | 4.4    |
| 60.6   | 57.3   | 45.2   | 66.4   | 83.6   | 31.7   | 531.8  | 410.0  | 414.6  |
| 300.5  | 335.0  | 71.0   | 107.7  | 407.3  | 249.8  | 1427.9 | 1253.1 | 1482.1 |
| 55.9   | 97.4   | 10.1   | 6.1    | 78.0   | 83.8   | 20.3   | 36.1   | 15.3   |
| 1922.4 | 2635.1 | 546.5  | 657.5  | 2682.9 | 2123.7 | 28.7   | 18.9   | 18.8   |
| 5.3    | 16.1   | 19.2   | 23.3   | 19.6   | 21.1   | 19.5   | 20.7   | 8.6    |
| 192.7  | 219.0  | 60.4   | 60.3   | 262.5  | 201.2  | 34.4   | 46.5   | 56.1   |
| 31.0   | 45.6   | 3.8    | 0.9    | 46.1   | 52.9   | 69.6   | 41.3   | 42.4   |
| 2.7    | 1.5    | 1.1    | 1.0    | 0.9    | 1.3    | 2.0    | 1.8    | 2.0    |
| 0.8    | 1.4    | 1.0    | 1.1    | 1.3    | 1.5    | 2.2    | 1.2    | 1.4    |
| 76.8   | 88.0   | 57.5   | 108.2  | 128.5  | 139.2  | 68.2   | 44.8   | 71.3   |
| 46.2   | 33.7   | 15.0   | 30.9   | 36.4   | 37.4   | 33.9   | 36.5   | 30.9   |
| 4.8    | 4.2    | 4.9    | 0.4    | 7.6    | 5.2    | 271.4  | 235.1  | 263.7  |
| 12.8   | 1.1    | 1.7    | 0.3    | 2.0    | 2.2    | 102.9  | 67.9   | 101.1  |
| 21.0   | 38.4   | 23.5   | 32.8   | 37.6   | 46.5   | 39.7   | 55.9   | 64.1   |
| 84.6   | 138.1  | 9.1    | 1.0    | 173.4  | 114.6  | 9.6    | 5.3    | 9.0    |
| 65.3   | 60.5   | 22.9   | 27.5   | 80.1   | 73.0   | 314.7  | 193.2  | 214.6  |
| 57.5   | 84.2   | 7.9    | 13.3   | 77.9   | 66.1   | 26.3   | 32.9   | 32.7   |
| 38.8   | 61.7   | 10.4   | 8.4    | 47.7   | 56.1   | 20.0   | 18.6   | 21.1   |
| 23.3   | 23.8   | 4.6    | 9.8    | 23.9   | 20.1   | 52.7   | 44.2   | 51.8   |
| 70.0   | 102.0  | 19.2   | 15.5   | 104.4  | 116.2  | 154.7  | 139.0  | 118.9  |
| 864.3  | 747.1  | 1197.7 | 1961.0 | 987.7  | 518.7  | 292.7  | 212.7  | 229.5  |
| 135.5  | 180.2  | 35.5   | 59.7   | 154.7  | 147.6  | 419.6  | 263.5  | 313.4  |
| 21.0   | 34.3   | 18.8   | 21.2   | 46.7   | 25.8   | 70.3   | 100.6  | 104.5  |
| 175.0  | 176.5  | 115.2  | 160.0  | 238.2  | 196.2  | 224.5  | 272.6  | 259.0  |
| 47.1   | 79.9   | 17.8   | 19.4   | 79.5   | 80.6   | 24.0   | 28.5   | 18.0   |
| 61.5   | 88.9   | 22.4   | 4.1    | 148.5  | 63.5   | 25.9   | 29.3   | 36.4   |
| 46.7   | 38.3   | 1.1    | 1.9    | 88.9   | 50.7   | 45.1   | 27.9   | 35.4   |
| 953.1  | 1001.7 | 25.5   | 26.8   | 1561.3 | 979.9  | 425.3  | 321.0  | 325.2  |
| 12.3   | 38.6   | 49.0   | 65.1   | 31.4   | 28.6   | 194.3  | 278.8  | 255.8  |
| 31.5   | 31.8   | 51.4   | 70.6   | 53.6   | 12.2   | 655.7  | 783.8  | 737.2  |
| 218.7  | 373.0  | 76.4   | 52.3   | 252.5  | 265.2  | 111.1  | 108.4  | 124.9  |
| 160.4  | 229.8  | 48.0   | 105.9  | 270.4  | 199.8  | 863.5  | 948.1  | 1024.3 |
| 21.8   | 5.2    | 40.0   | 43.9   | 18.4   | 6.5    | 64.9   | 76.4   | 74.1   |
| 36.8   | 42.7   | 133.7  | 124.6  | 54.1   | 51.3   | 112.6  | 128.7  | 155.6  |
| 15.1   | 17.9   | 9.8    | 3.3    | 27.4   | 19.4   | 66.1   | 34.1   | 26.6   |
| 246.8  | 266.4  | 93.2   | 135.3  | 280.1  | 301.1  | 733.2  | 334.0  | 353.2  |
| 32.1   | 52.0   | 13.3   | 23.6   | 41.2   | 41.5   | 71.5   | 92.3   | 102.6  |
| 22.6   | 27.0   | 16.4   | 24.4   | 28.2   | 20.9   | 55.5   | 41.3   | 45.7   |
| 8.7    | 15.6   | 2.8    | 0.4    | 15.1   | 10.9   | 167.2  | 91.9   | 110.8  |
| 9.6    | 1.7    | 2.2    | 3.5    | 1.2    | 5.5    | 3.3    | 0.8    | 2.9    |
| 0.3    | 3.7    | 0.9    | 0.3    | 6.4    | 11.2   | 3.0    | 0.8    | 2.5    |
| 11.6   | 6.0    | 12.1   | 1.6    | 3.4    | 1.2    | 14.8   | 13.6   | 15.1   |

|        |        |       |        |        |        |        |        |        |
|--------|--------|-------|--------|--------|--------|--------|--------|--------|
| 4.0    | 2.8    | 4.4   | 1.9    | 4.9    | 11.5   | 4.7    | 4.0    | 2.5    |
| 1385.4 | 2117.3 | 4.2   | 14.8   | 1728.0 | 1253.3 | 158.9  | 141.1  | 170.3  |
| 1.0    | 3.4    | 2.0   | 13.3   | 12.6   | 11.2   | 12.7   | 23.3   | 12.8   |
| 415.2  | 209.2  | 32.8  | 43.5   | 411.9  | 159.7  | 579.0  | 162.8  | 155.9  |
| 26.5   | 25.3   | 47.5  | 54.0   | 25.2   | 26.4   | 75.4   | 53.0   | 65.9   |
| 615.5  | 820.2  | 79.9  | 80.8   | 957.1  | 939.0  | 711.3  | 444.7  | 458.1  |
| 143.3  | 183.9  | 57.4  | 100.2  | 251.9  | 202.1  | 289.5  | 289.0  | 370.3  |
| 10.9   | 2.8    | 0.8   | 2.9    | 1.9    | 1.7    | 3.9    | 1.0    | 6.4    |
| 21.5   | 23.4   | 5.6   | 19.6   | 3.4    | 7.7    | 18.2   | 30.9   | 37.1   |
| 1.1    | 10.7   | 1.8   | 0.6    | 8.5    | 0.7    | 2.2    | 2.5    | 0.8    |
| 2.8    | 0.4    | 3.7   | 2.0    | 4.1    | 4.1    | 10.2   | 9.1    | 4.4    |
| 146.5  | 172.0  | 26.2  | 26.1   | 313.3  | 229.1  | 169.1  | 232.4  | 219.1  |
| 10.3   | 7.5    | 1.9   | 2.0    | 4.2    | 17.2   | 1.1    | 1.3    | 1.4    |
| 2.3    | 10.4   | 6.1   | 0.9    | 0.8    | 1.0    | 4.4    | 1.7    | 3.0    |
| 20.6   | 29.1   | 29.3  | 26.6   | 49.3   | 28.1   | 60.6   | 55.2   | 57.9   |
| 81.4   | 229.2  | 37.0  | 45.9   | 198.4  | 215.9  | 300.1  | 300.2  | 327.5  |
| 175.8  | 117.7  | 408.6 | 538.9  | 358.1  | 83.8   | 465.9  | 343.9  | 307.6  |
| 24.4   | 47.1   | 359.3 | 425.5  | 57.7   | 37.7   | 591.2  | 436.9  | 468.1  |
| 4.2    | 11.4   | 5.5   | 10.2   | 7.8    | 2.8    | 10.3   | 9.2    | 14.6   |
| 18.8   | 11.3   | 79.9  | 109.2  | 16.8   | 7.6    | 13.6   | 11.8   | 25.5   |
| 30.2   | 18.0   | 1.8   | 9.0    | 42.0   | 5.6    | 83.1   | 136.1  | 135.0  |
| 40.2   | 58.5   | 62.4  | 143.7  | 48.2   | 58.4   | 322.0  | 479.1  | 484.0  |
| 423.3  | 381.3  | 157.5 | 189.6  | 501.0  | 360.9  | 626.4  | 291.2  | 297.6  |
| 6.3    | 10.5   | 14.6  | 5.8    | 11.0   | 4.5    | 24.3   | 117.7  | 170.3  |
| 612.3  | 792.7  | 217.1 | 309.1  | 970.2  | 896.9  | 1867.7 | 1080.9 | 1267.9 |
| 2.6    | 1.9    | 2.5   | 8.2    | 1.8    | 1.9    | 4.2    | 2.5    | 2.2    |
| 1.2    | 2.1    | 1.0   | 0.8    | 2.2    | 2.0    | 6.1    | 3.9    | 4.5    |
| 15.0   | 13.2   | 6.3   | 10.3   | 28.8   | 2.3    | 12.0   | 19.4   | 12.4   |
| 27.3   | 37.0   | 20.4  | 32.3   | 53.4   | 34.0   | 88.3   | 92.6   | 103.5  |
| 32.5   | 37.7   | 28.4  | 14.3   | 59.5   | 42.9   | 208.9  | 219.3  | 172.8  |
| 219.4  | 194.6  | 39.0  | 36.0   | 210.7  | 202.9  | 704.2  | 312.9  | 343.8  |
| 29.1   | 32.8   | 16.6  | 9.6    | 40.0   | 43.1   | 81.4   | 125.7  | 145.6  |
| 94.6   | 137.4  | 17.8  | 17.2   | 152.4  | 148.6  | 244.8  | 158.6  | 167.2  |
| 196.4  | 141.5  | 5.5   | 11.1   | 770.2  | 133.3  | 103.1  | 114.7  | 109.4  |
| 0.3    | 0.5    | 0.8   | 5.2    | 0.8    | 1.7    | 4.3    | 5.5    | 3.0    |
| 35.3   | 22.2   | 76.8  | 78.7   | 39.6   | 31.4   | 18.9   | 41.2   | 47.3   |
| 1248.9 | 1492.2 | 13.7  | 13.1   | 3241.5 | 1426.6 | 19.3   | 34.1   | 33.3   |
| 59.3   | 86.1   | 14.0  | 15.5   | 108.9  | 82.9   | 423.0  | 472.0  | 486.3  |
| 2.4    | 10.0   | 1.5   | 6.2    | 18.0   | 12.0   | 39.9   | 52.9   | 51.8   |
| 124.4  | 168.6  | 14.2  | 26.5   | 138.9  | 204.3  | 263.2  | 263.6  | 264.0  |
| 89.3   | 130.8  | 3.6   | 0.9    | 199.0  | 104.5  | 289.1  | 207.6  | 199.0  |
| 64.5   | 106.2  | 3.4   | 0.3    | 115.3  | 105.3  | 259.3  | 211.1  | 199.2  |
| 26.2   | 51.3   | 19.6  | 48.7   | 100.9  | 30.0   | 49.8   | 60.9   | 79.0   |
| 103.2  | 112.7  | 42.6  | 30.5   | 142.4  | 86.3   | 147.8  | 194.3  | 210.9  |
| 12.1   | 32.2   | 13.0  | 13.8   | 16.8   | 29.8   | 23.9   | 63.3   | 75.8   |
| 51.3   | 56.2   | 24.3  | 18.0   | 78.3   | 38.0   | 348.4  | 774.3  | 699.6  |
| 169.5  | 254.8  | 23.8  | 58.2   | 261.0  | 239.4  | 551.2  | 600.9  | 632.5  |
| 114.4  | 150.7  | 25.3  | 46.7   | 170.4  | 137.0  | 532.2  | 478.0  | 527.9  |
| 0.6    | 0.9    | 9.2   | 25.1   | 1.5    | 3.9    | 6.3    | 10.9   | 11.7   |
| 9.7    | 8.3    | 13.4  | 12.8   | 17.8   | 10.6   | 15.3   | 16.9   | 21.4   |
| 126.4  | 171.0  | 720.6 | 1357.9 | 260.7  | 211.7  | 306.5  | 343.9  | 447.7  |
| 14.6   | 21.3   | 7.1   | 2.3    | 36.7   | 5.0    | 12.8   | 16.3   | 17.7   |
| 18.9   | 13.0   | 0.5   | 7.0    | 42.6   | 14.7   | 13.8   | 13.9   | 7.4    |

|        |        |       |       |        |        |        |        |        |
|--------|--------|-------|-------|--------|--------|--------|--------|--------|
| 140.5  | 161.1  | 28.0  | 22.4  | 260.8  | 165.3  | 282.2  | 244.9  | 273.3  |
| 90.1   | 63.4   | 33.1  | 33.9  | 115.4  | 86.8   | 343.8  | 134.5  | 151.2  |
| 85.2   | 93.4   | 31.8  | 51.4  | 126.1  | 88.5   | 232.6  | 128.5  | 180.7  |
| 84.8   | 139.4  | 14.3  | 13.6  | 193.6  | 105.4  | 167.6  | 222.5  | 200.7  |
| 38.5   | 58.9   | 7.0   | 9.2   | 44.6   | 47.8   | 6.9    | 6.8    | 7.3    |
| 150.2  | 177.4  | 29.3  | 36.7  | 193.5  | 165.2  | 118.8  | 116.8  | 130.9  |
| 84.8   | 71.4   | 17.5  | 14.8  | 104.4  | 68.8   | 125.9  | 124.9  | 169.0  |
| 312.2  | 373.6  | 13.3  | 9.5   | 462.2  | 377.7  | 501.5  | 324.7  | 375.9  |
| 8.7    | 8.4    | 0.3   | 0.8   | 6.1    | 8.9    | 14.2   | 17.6   | 15.4   |
| 25.9   | 5.0    | 2.6   | 14.5  | 28.8   | 22.2   | 133.2  | 153.7  | 185.0  |
| 63.4   | 68.7   | 41.7  | 31.5  | 86.5   | 83.6   | 217.7  | 244.7  | 265.9  |
| 12.7   | 14.7   | 24.9  | 46.4  | 16.9   | 13.1   | 139.7  | 250.4  | 243.8  |
| 14.3   | 21.8   | 17.1  | 26.4  | 16.7   | 24.3   | 29.6   | 42.1   | 44.4   |
| 254.6  | 369.9  | 6.1   | 6.0   | 313.8  | 288.4  | 90.6   | 97.0   | 109.7  |
| 12.1   | 12.7   | 10.1  | 4.9   | 11.4   | 7.3    | 497.2  | 434.2  | 500.5  |
| 2.0    | 2.0    | 1.0   | 3.6   | 15.7   | 4.8    | 187.5  | 216.5  | 276.1  |
| 420.2  | 571.0  | 10.3  | 11.0  | 744.0  | 433.7  | 19.6   | 13.3   | 18.3   |
| 1.0    | 1.1    | 2.7   | 3.2   | 17.2   | 10.5   | 6.5    | 5.1    | 3.7    |
| 36.3   | 49.9   | 18.9  | 18.3  | 86.0   | 35.9   | 245.7  | 301.7  | 302.7  |
| 24.4   | 21.7   | 5.1   | 21.9  | 18.1   | 40.1   | 27.3   | 19.4   | 24.7   |
| 5.1    | 21.1   | 3.7   | 14.2  | 4.3    | 10.0   | 2.3    | 6.5    | 13.0   |
| 233.6  | 328.7  | 55.1  | 84.1  | 365.0  | 437.8  | 374.7  | 678.6  | 835.6  |
| 7.7    | 18.2   | 1.2   | 0.9   | 22.1   | 13.9   | 25.7   | 16.9   | 24.1   |
| 35.5   | 67.7   | 81.1  | 118.3 | 66.5   | 60.5   | 174.1  | 184.3  | 219.9  |
| 2.2    | 1.9    | 8.0   | 4.3   | 8.3    | 2.6    | 12.1   | 13.1   | 10.7   |
| 38.4   | 49.2   | 21.4  | 18.7  | 45.9   | 43.6   | 11.2   | 8.7    | 15.6   |
| 45.8   | 67.4   | 133.1 | 103.9 | 85.1   | 71.3   | 11.1   | 2.7    | 6.5    |
| 24.2   | 31.2   | 5.0   | 0.3   | 46.0   | 22.7   | 20.9   | 23.2   | 16.9   |
| 28.9   | 22.1   | 0.7   | 2.0   | 33.9   | 13.2   | 9.1    | 21.5   | 20.2   |
| 0.6    | 8.7    | 6.9   | 1.2   | 1.5    | 10.2   | 9.5    | 2.8    | 10.0   |
| 14.8   | 16.5   | 7.4   | 0.6   | 22.0   | 17.3   | 12.1   | 5.4    | 4.7    |
| 122.7  | 139.0  | 21.8  | 61.2  | 201.6  | 114.8  | 139.9  | 80.3   | 95.5   |
| 34.3   | 22.7   | 3.7   | 9.4   | 35.4   | 25.7   | 11.8   | 11.7   | 9.7    |
| 2.6    | 7.1    | 2.0   | 1.7   | 4.9    | 2.2    | 9.2    | 4.1    | 6.8    |
| 1.7    | 7.2    | 6.8   | 10.0  | 1.2    | 0.9    | 1.3    | 4.8    | 5.3    |
| 8.6    | 20.5   | 6.2   | 9.0   | 3.5    | 3.1    | 22.0   | 7.1    | 10.6   |
| 156.6  | 134.5  | 8.4   | 9.1   | 223.2  | 157.4  | 159.4  | 141.1  | 164.5  |
| 15.4   | 6.3    | 5.5   | 0.5   | 5.7    | 11.2   | 25.2   | 22.8   | 26.5   |
| 47.6   | 60.6   | 2.1   | 3.2   | 60.9   | 63.9   | 108.8  | 64.7   | 79.8   |
| 26.3   | 27.2   | 3.0   | 5.1   | 40.4   | 28.3   | 39.3   | 20.9   | 26.3   |
| 3.3    | 3.4    | 1.0   | 3.7   | 4.9    | 1.8    | 4.4    | 4.5    | 6.9    |
| 26.9   | 9.4    | 26.0  | 27.3  | 36.5   | 14.0   | 55.6   | 70.9   | 107.7  |
| 392.2  | 449.2  | 55.4  | 91.2  | 410.3  | 478.3  | 351.0  | 284.9  | 279.5  |
| 6.8    | 11.0   | 3.4   | 6.5   | 11.6   | 2.0    | 3.9    | 2.3    | 2.2    |
| 34.3   | 37.3   | 27.8  | 23.3  | 101.8  | 29.8   | 18.2   | 11.9   | 20.3   |
| 114.2  | 138.1  | 77.0  | 107.4 | 145.3  | 122.4  | 274.2  | 139.3  | 149.4  |
| 138.1  | 179.9  | 4.1   | 13.2  | 247.6  | 174.5  | 24.6   | 36.9   | 48.1   |
| 1.5    | 9.1    | 16.8  | 19.5  | 8.3    | 3.1    | 628.3  | 450.7  | 497.1  |
| 24.1   | 32.0   | 31.8  | 23.8  | 39.2   | 12.7   | 35.9   | 24.6   | 34.9   |
| 3016.7 | 4740.7 | 328.5 | 476.7 | 3941.5 | 4326.7 | 5715.1 | 2350.8 | 2653.2 |
| 88.4   | 156.6  | 27.0  | 33.7  | 139.1  | 109.4  | 386.7  | 132.0  | 191.9  |
| 139.9  | 199.6  | 38.4  | 37.7  | 181.9  | 160.2  | 507.7  | 225.1  | 266.0  |
| 40.2   | 49.8   | 18.6  | 12.2  | 58.6   | 54.1   | 221.8  | 116.6  | 134.9  |

|       |       |       |       |       |       |        |       |       |
|-------|-------|-------|-------|-------|-------|--------|-------|-------|
| 1.6   | 5.0   | 2.1   | 2.3   | 7.8   | 4.5   | 562.2  | 789.1 | 911.5 |
| 0.7   | 0.9   | 1.2   | 1.2   | 8.2   | 7.5   | 1.0    | 1.1   | 1.2   |
| 13.6  | 20.0  | 26.0  | 26.1  | 27.7  | 25.3  | 13.4   | 9.0   | 8.9   |
| 41.7  | 62.1  | 18.7  | 22.3  | 67.7  | 59.4  | 241.9  | 231.7 | 261.1 |
| 2.1   | 13.2  | 18.7  | 16.6  | 2.5   | 16.9  | 43.6   | 160.8 | 164.8 |
| 59.9  | 77.6  | 23.5  | 30.7  | 66.4  | 73.0  | 171.8  | 112.4 | 145.8 |
| 3.1   | 6.1   | 9.7   | 9.0   | 10.1  | 5.1   | 4.4    | 8.5   | 10.4  |
| 3.5   | 13.6  | 22.2  | 14.4  | 9.8   | 16.0  | 29.3   | 9.2   | 9.4   |
| 30.6  | 16.3  | 18.2  | 23.7  | 18.4  | 28.8  | 57.6   | 62.7  | 50.9  |
| 22.1  | 23.2  | 13.6  | 33.9  | 35.4  | 24.5  | 35.8   | 25.9  | 30.4  |
| 11.8  | 6.1   | 11.1  | 11.1  | 6.5   | 11.8  | 20.4   | 42.5  | 43.6  |
| 26.4  | 47.8  | 2.2   | 2.3   | 39.9  | 38.7  | 50.9   | 42.9  | 53.9  |
| 21.1  | 13.7  | 3.3   | 3.1   | 44.6  | 27.3  | 36.4   | 48.6  | 43.9  |
| 8.1   | 12.8  | 109.1 | 163.4 | 0.7   | 2.3   | 4.4    | 6.5   | 5.3   |
| 1.0   | 13.9  | 60.5  | 85.0  | 2.0   | 3.0   | 2.7    | 2.8   | 1.5   |
| 7.2   | 5.7   | 0.6   | 0.6   | 1.4   | 1.0   | 3.9    | 7.9   | 0.9   |
| 313.9 | 312.9 | 1.5   | 2.8   | 684.4 | 257.5 | 8.8    | 3.4   | 3.2   |
| 3.9   | 11.5  | 2.5   | 2.2   | 20.5  | 7.5   | 11.3   | 4.0   | 2.8   |
| 19.9  | 28.3  | 31.2  | 32.9  | 55.9  | 29.9  | 32.3   | 37.2  | 50.6  |
| 13.3  | 12.6  | 39.4  | 8.7   | 5.5   | 2.7   | 46.2   | 9.7   | 13.8  |
| 134.1 | 193.9 | 3.6   | 6.9   | 152.7 | 140.2 | 1.7    | 3.6   | 2.2   |
| 3.3   | 14.4  | 57.6  | 82.1  | 9.6   | 5.8   | 166.0  | 418.0 | 435.7 |
| 2.6   | 0.6   | 6.3   | 7.1   | 2.5   | 1.3   | 7.7    | 4.5   | 10.0  |
| 13.3  | 38.7  | 20.5  | 22.2  | 33.8  | 46.1  | 189.0  | 288.1 | 321.9 |
| 16.6  | 22.3  | 1.4   | 2.8   | 3.1   | 23.0  | 97.9   | 115.8 | 118.0 |
| 64.5  | 89.6  | 22.4  | 18.8  | 135.0 | 104.4 | 104.2  | 126.4 | 125.7 |
| 23.8  | 15.2  | 4.2   | 3.0   | 28.8  | 7.7   | 3.6    | 6.6   | 10.5  |
| 65.3  | 53.9  | 177.0 | 230.3 | 92.4  | 55.5  | 58.6   | 33.3  | 46.1  |
| 4.5   | 1.6   | 6.8   | 7.4   | 7.0   | 2.2   | 6.6    | 29.0  | 23.9  |
| 29.6  | 16.8  | 14.1  | 12.5  | 18.1  | 18.7  | 222.6  | 276.7 | 257.5 |
| 68.9  | 106.7 | 75.5  | 65.8  | 89.6  | 106.4 | 334.0  | 322.4 | 343.4 |
| 2.2   | 7.0   | 2.2   | 2.6   | 11.4  | 9.4   | 4.1    | 3.0   | 5.4   |
| 33.0  | 29.8  | 14.2  | 7.5   | 33.5  | 44.9  | 425.3  | 345.6 | 366.8 |
| 6.0   | 13.1  | 23.1  | 20.7  | 24.8  | 3.9   | 53.3   | 79.2  | 71.2  |
| 43.9  | 60.6  | 30.6  | 28.2  | 76.1  | 51.0  | 206.9  | 152.4 | 169.4 |
| 242.3 | 318.7 | 92.7  | 230.1 | 344.8 | 261.3 | 324.7  | 252.8 | 243.1 |
| 379.8 | 421.6 | 26.9  | 15.4  | 609.4 | 462.0 | 923.0  | 827.9 | 896.6 |
| 86.5  | 74.8  | 0.4   | 0.8   | 121.3 | 53.1  | 514.2  | 658.6 | 705.6 |
| 1.5   | 2.1   | 1.4   | 0.7   | 1.3   | 2.2   | 1.9    | 1.3   | 1.0   |
| 268.7 | 256.6 | 61.5  | 88.3  | 386.9 | 268.5 | 1015.1 | 589.2 | 660.3 |
| 1.5   | 1.1   | 1.6   | 0.6   | 1.6   | 0.9   | 2.0    | 1.8   | 1.3   |
| 233.7 | 301.7 | 29.9  | 26.0  | 294.8 | 255.4 | 143.8  | 133.4 | 167.2 |
| 22.3  | 33.0  | 1.5   | 4.1   | 36.8  | 5.5   | 99.2   | 43.5  | 56.4  |
| 226.6 | 354.1 | 1.6   | 1.8   | 344.0 | 284.7 | 125.6  | 111.2 | 119.4 |
| 24.7  | 28.5  | 26.3  | 23.5  | 30.7  | 36.3  | 40.1   | 39.0  | 36.3  |
| 4.8   | 7.0   | 6.6   | 7.7   | 6.8   | 2.9   | 41.6   | 30.6  | 24.1  |
| 0.5   | 0.7   | 0.8   | 1.7   | 3.8   | 4.2   | 0.9    | 3.4   | 1.4   |
| 21.1  | 30.1  | 45.9  | 49.3  | 52.0  | 17.7  | 16.6   | 16.5  | 15.9  |
| 7.3   | 20.9  | 3.3   | 6.1   | 15.8  | 22.0  | 29.3   | 17.9  | 16.4  |
| 37.5  | 62.6  | 1.4   | 1.0   | 76.3  | 40.4  | 1.9    | 2.0   | 1.5   |
| 36.5  | 47.9  | 14.6  | 17.5  | 63.0  | 38.3  | 360.1  | 284.7 | 345.1 |
| 33.7  | 39.9  | 26.9  | 30.3  | 49.5  | 42.7  | 179.3  | 148.3 | 170.0 |
| 50.7  | 66.9  | 29.7  | 32.5  | 53.0  | 60.9  | 106.5  | 65.4  | 69.6  |

|        |        |       |       |        |        |        |        |        |
|--------|--------|-------|-------|--------|--------|--------|--------|--------|
| 306.2  | 446.8  | 33.3  | 54.5  | 537.9  | 508.6  | 2758.7 | 3646.3 | 3749.2 |
| 39.3   | 79.2   | 0.6   | 6.9   | 79.7   | 63.4   | 385.3  | 433.4  | 454.4  |
| 83.4   | 90.2   | 16.0  | 11.7  | 90.8   | 72.5   | 41.7   | 45.6   | 46.1   |
| 149.8  | 185.8  | 19.5  | 31.4  | 296.3  | 176.6  | 68.7   | 38.3   | 10.6   |
| 187.6  | 283.1  | 14.8  | 15.7  | 321.1  | 290.0  | 979.9  | 818.0  | 864.4  |
| 98.8   | 84.3   | 49.7  | 47.4  | 167.8  | 30.0   | 133.4  | 102.0  | 129.7  |
| 114.3  | 114.9  | 84.8  | 89.6  | 217.0  | 36.0   | 193.8  | 183.9  | 181.7  |
| 19.3   | 12.8   | 22.4  | 29.0  | 16.8   | 8.2    | 73.1   | 124.5  | 162.5  |
| 6.8    | 10.8   | 9.9   | 12.4  | 16.9   | 13.4   | 32.0   | 75.2   | 81.5   |
| 22.6   | 27.7   | 11.7  | 3.9   | 24.0   | 36.5   | 254.9  | 123.9  | 131.4  |
| 2.9    | 1.8    | 0.6   | 7.5   | 3.8    | 6.5    | 10.5   | 7.1    | 8.5    |
| 10.6   | 24.4   | 22.7  | 26.9  | 7.6    | 8.7    | 15.3   | 20.8   | 31.6   |
| 757.9  | 1022.1 | 135.5 | 217.0 | 1334.8 | 1005.6 | 1226.2 | 898.6  | 1051.5 |
| 35.5   | 46.7   | 20.7  | 19.0  | 64.7   | 61.6   | 51.6   | 71.3   | 84.0   |
| 197.0  | 226.2  | 61.9  | 67.2  | 361.3  | 171.3  | 470.6  | 422.7  | 406.7  |
| 43.6   | 47.9   | 3.2   | 10.5  | 81.9   | 48.6   | 27.8   | 30.7   | 26.6   |
| 21.4   | 56.9   | 26.0  | 48.9  | 47.1   | 25.0   | 5.5    | 10.4   | 8.5    |
| 79.8   | 65.1   | 0.5   | 9.9   | 68.4   | 50.0   | 9.1    | 7.4    | 5.5    |
| 26.5   | 33.9   | 13.9  | 19.4  | 33.7   | 19.0   | 28.0   | 38.7   | 34.6   |
| 18.5   | 9.5    | 53.4  | 58.1  | 9.8    | 7.9    | 142.7  | 188.8  | 210.4  |
| 43.1   | 47.5   | 34.3  | 24.7  | 47.6   | 43.9   | 121.9  | 106.9  | 123.3  |
| 93.4   | 108.1  | 39.7  | 43.4  | 92.2   | 122.9  | 65.5   | 85.3   | 74.2   |
| 9.1    | 4.4    | 8.2   | 9.2   | 16.6   | 10.9   | 16.2   | 10.7   | 21.4   |
| 1.3    | 2.5    | 0.6   | 0.5   | 1.5    | 1.5    | 2.9    | 2.1    | 1.2    |
| 27.7   | 40.8   | 29.8  | 15.6  | 48.5   | 44.2   | 76.4   | 70.2   | 87.2   |
| 34.7   | 32.4   | 1.1   | 4.7   | 25.6   | 36.6   | 36.3   | 45.3   | 35.3   |
| 1.7    | 11.9   | 6.1   | 2.9   | 12.9   | 1.9    | 107.9  | 83.5   | 96.6   |
| 80.1   | 77.5   | 7.1   | 3.6   | 140.5  | 75.8   | 218.9  | 96.3   | 114.2  |
| 71.8   | 149.3  | 10.7  | 17.3  | 123.8  | 121.9  | 294.7  | 173.2  | 150.7  |
| 96.1   | 155.3  | 44.3  | 73.2  | 162.2  | 143.9  | 686.6  | 539.8  | 683.8  |
| 175.8  | 89.6   | 6.1   | 23.3  | 261.7  | 78.9   | 11.2   | 7.2    | 8.3    |
| 2.0    | 6.4    | 14.7  | 23.5  | 1.4    | 1.4    | 896.5  | 1164.1 | 1283.5 |
| 25.2   | 52.3   | 0.7   | 1.6   | 63.4   | 49.2   | 376.4  | 648.6  | 810.1  |
| 23.8   | 25.1   | 10.7  | 12.7  | 24.0   | 22.8   | 98.1   | 72.1   | 93.1   |
| 98.6   | 122.3  | 7.7   | 63.1  | 139.3  | 138.4  | 270.5  | 138.5  | 154.3  |
| 15.0   | 5.0    | 70.6  | 82.8  | 34.8   | 12.7   | 7.3    | 3.7    | 3.4    |
| 19.5   | 14.3   | 25.4  | 23.2  | 37.0   | 23.4   | 1.1    | 0.6    | 1.2    |
| 66.3   | 75.2   | 9.6   | 1.8   | 98.4   | 74.8   | 40.1   | 57.3   | 50.2   |
| 95.4   | 151.0  | 2.1   | 1.5   | 189.1  | 100.2  | 10.3   | 11.4   | 12.4   |
| 664.1  | 640.8  | 33.5  | 36.0  | 991.9  | 545.5  | 5.0    | 7.2    | 2.8    |
| 15.5   | 25.0   | 11.1  | 2.0   | 13.9   | 17.1   | 23.8   | 23.1   | 25.3   |
| 27.6   | 41.1   | 13.4  | 9.0   | 48.1   | 34.0   | 59.7   | 28.0   | 39.2   |
| 34.9   | 54.9   | 31.8  | 36.1  | 31.0   | 26.6   | 175.6  | 204.8  | 182.7  |
| 35.0   | 58.9   | 18.3  | 22.2  | 53.3   | 36.5   | 88.1   | 100.2  | 90.4   |
| 5.8    | 6.4    | 0.5   | 2.1   | 12.2   | 5.2    | 114.0  | 373.1  | 366.3  |
| 100.7  | 210.3  | 25.1  | 41.9  | 225.7  | 203.2  | 535.8  | 328.6  | 372.7  |
| 29.1   | 25.8   | 29.9  | 51.9  | 21.2   | 22.2   | 25.0   | 18.1   | 17.5   |
| 14.5   | 20.4   | 1.6   | 5.1   | 5.6    | 9.6    | 6.2    | 7.2    | 10.8   |
| 46.0   | 70.1   | 34.9  | 39.3  | 84.1   | 70.8   | 351.4  | 332.0  | 369.5  |
| 1380.7 | 1769.7 | 30.1  | 29.7  | 2202.1 | 1531.7 | 1166.2 | 940.8  | 602.9  |
| 38.8   | 122.1  | 117.0 | 72.3  | 57.0   | 101.7  | 271.9  | 318.3  | 337.2  |
| 151.5  | 181.6  | 50.8  | 48.7  | 233.3  | 230.4  | 497.1  | 439.2  | 546.8  |
| 1.3    | 1.1    | 2.9   | 1.9   | 0.4    | 2.5    | 1.4    | 1.7    | 3.0    |

|        |        |       |       |        |        |        |        |        |
|--------|--------|-------|-------|--------|--------|--------|--------|--------|
| 2.2    | 10.9   | 4.8   | 11.1  | 2.8    | 3.3    | 8.5    | 20.6   | 5.2    |
| 2.9    | 4.0    | 1.9   | 1.2   | 2.0    | 1.9    | 4.7    | 2.2    | 1.8    |
| 28.7   | 27.4   | 40.0  | 78.2  | 19.7   | 20.6   | 76.3   | 47.8   | 73.0   |
| 89.6   | 116.4  | 54.8  | 72.0  | 182.2  | 123.3  | 246.5  | 314.4  | 303.5  |
| 35.2   | 13.6   | 9.5   | 18.1  | 41.2   | 29.1   | 30.4   | 27.6   | 19.4   |
| 31.7   | 43.0   | 55.9  | 72.9  | 32.8   | 23.1   | 188.7  | 268.0  | 322.1  |
| 2.9    | 16.8   | 8.1   | 7.3   | 30.7   | 3.2    | 4.0    | 2.2    | 8.5    |
| 50.0   | 81.0   | 7.0   | 7.7   | 76.2   | 72.7   | 63.9   | 70.4   | 70.7   |
| 122.9  | 201.5  | 34.5  | 39.5  | 197.7  | 185.0  | 255.6  | 456.0  | 453.7  |
| 42.1   | 49.2   | 23.6  | 20.0  | 46.1   | 47.7   | 74.3   | 86.6   | 96.4   |
| 9.9    | 3.9    | 203.4 | 287.3 | 1.4    | 3.3    | 3.8    | 8.5    | 14.2   |
| 15.7   | 7.8    | 6.2   | 6.4   | 31.0   | 21.4   | 1078.6 | 1194.6 | 1245.4 |
| 129.7  | 111.5  | 14.5  | 18.8  | 166.1  | 80.2   | 5427.7 | 6333.9 | 6489.3 |
| 28.2   | 45.8   | 19.4  | 23.1  | 46.0   | 43.4   | 49.7   | 42.0   | 61.3   |
| 10.4   | 12.2   | 18.1  | 16.1  | 14.9   | 10.3   | 11.0   | 12.7   | 7.2    |
| 140.7  | 225.2  | 129.4 | 202.8 | 258.3  | 223.6  | 337.3  | 1376.3 | 1290.8 |
| 19.8   | 11.5   | 6.1   | 4.5   | 40.5   | 10.4   | 11.3   | 17.0   | 18.1   |
| 138.3  | 147.3  | 26.5  | 35.2  | 351.7  | 184.5  | 782.7  | 433.9  | 452.2  |
| 9.0    | 3.1    | 15.3  | 9.8   | 16.6   | 27.9   | 164.3  | 186.7  | 251.1  |
| 9.8    | 2.1    | 2.5   | 3.2   | 2.2    | 1.6    | 71.4   | 54.4   | 77.3   |
| 584.4  | 749.5  | 54.5  | 51.1  | 933.5  | 675.8  | 453.7  | 681.3  | 649.7  |
| 215.7  | 328.7  | 45.5  | 48.3  | 287.4  | 300.8  | 402.9  | 94.4   | 99.5   |
| 14.4   | 3.6    | 9.3   | 4.0   | 17.7   | 6.2    | 5.3    | 7.2    | 4.5    |
| 248.3  | 490.8  | 6.0   | 14.8  | 372.2  | 386.3  | 122.9  | 30.5   | 31.0   |
| 8.5    | 1.5    | 7.8   | 7.2   | 3.6    | 7.5    | 18.2   | 28.2   | 24.7   |
| 6.4    | 18.3   | 10.3  | 7.9   | 21.6   | 16.1   | 5.1    | 6.5    | 3.6    |
| 11.4   | 20.7   | 0.4   | 5.0   | 18.7   | 11.8   | 1.7    | 1.8    | 1.1    |
| 15.3   | 15.2   | 0.4   | 1.8   | 15.0   | 16.2   | 2.1    | 2.6    | 4.1    |
| 17.0   | 12.6   | 17.1  | 19.9  | 16.7   | 17.8   | 37.9   | 53.6   | 63.4   |
| 2.9    | 2.5    | 1.7   | 1.5   | 4.2    | 6.2    | 2.0    | 1.7    | 1.4    |
| 238.9  | 264.0  | 163.9 | 255.2 | 344.5  | 245.1  | 932.6  | 813.8  | 889.1  |
| 12.9   | 2.8    | 0.6   | 2.6   | 2.7    | 3.3    | 2.3    | 3.7    | 6.0    |
| 19.9   | 15.5   | 2.9   | 13.5  | 15.5   | 27.0   | 8.3    | 8.9    | 11.3   |
| 18.8   | 32.6   | 33.3  | 26.2  | 28.1   | 17.0   | 5.6    | 3.1    | 8.4    |
| 10.9   | 9.8    | 30.3  | 18.1  | 18.0   | 16.6   | 27.3   | 34.8   | 37.1   |
| 12.1   | 17.3   | 0.3   | 5.9   | 27.0   | 22.3   | 84.8   | 48.6   | 65.8   |
| 37.3   | 27.0   | 20.1  | 23.5  | 38.2   | 12.7   | 5.7    | 13.3   | 7.9    |
| 20.5   | 19.6   | 4.5   | 11.3  | 31.2   | 16.8   | 2.2    | 0.4    | 0.3    |
| 64.3   | 84.6   | 35.5  | 35.7  | 109.5  | 80.9   | 676.0  | 500.7  | 467.2  |
| 231.8  | 361.4  | 21.8  | 33.2  | 220.1  | 311.9  | 421.1  | 75.6   | 75.8   |
| 47.5   | 51.7   | 6.9   | 14.6  | 93.2   | 66.8   | 184.4  | 181.3  | 225.9  |
| 122.5  | 102.7  | 14.3  | 18.0  | 114.4  | 79.7   | 198.1  | 75.8   | 82.9   |
| 1.6    | 1.7    | 22.0  | 8.4   | 9.7    | 9.6    | 9.5    | 17.0   | 4.0    |
| 68.2   | 59.2   | 204.4 | 308.0 | 98.7   | 55.6   | 299.1  | 360.6  | 364.4  |
| 5.8    | 8.6    | 40.6  | 66.1  | 2.4    | 2.3    | 35.8   | 47.3   | 45.1   |
| 9.4    | 8.9    | 0.6   | 0.2   | 20.0   | 8.6    | 18.4   | 18.1   | 14.9   |
| 29.7   | 26.2   | 0.2   | 5.7   | 45.0   | 22.8   | 1.4    | 6.1    | 6.0    |
| 19.5   | 20.9   | 3.0   | 1.2   | 31.7   | 7.9    | 3.9    | 6.7    | 1.9    |
| 20.5   | 12.6   | 56.8  | 26.1  | 29.3   | 31.1   | 40.8   | 26.5   | 23.8   |
| 2884.9 | 4420.7 | 613.5 | 973.7 | 4153.2 | 4508.0 | 8013.1 | 6488.7 | 6535.4 |
| 39.4   | 104.4  | 14.9  | 27.5  | 90.8   | 53.0   | 90.3   | 85.3   | 87.7   |
| 50.9   | 63.8   | 56.5  | 56.6  | 60.8   | 83.0   | 90.5   | 74.4   | 87.3   |
| 7.2    | 6.1    | 11.3  | 7.4   | 4.2    | 3.0    | 25.6   | 5.1    | 9.2    |

|        |        |       |       |        |        |        |        |        |
|--------|--------|-------|-------|--------|--------|--------|--------|--------|
| 42.7   | 65.8   | 6.1   | 6.7   | 73.9   | 79.4   | 248.3  | 116.5  | 115.7  |
| 11.5   | 3.7    | 4.3   | 2.4   | 21.0   | 21.7   | 3.1    | 2.4    | 4.6    |
| 50.8   | 48.0   | 31.3  | 30.4  | 42.9   | 58.1   | 83.6   | 107.1  | 105.4  |
| 1.5    | 6.0    | 5.7   | 2.4   | 19.9   | 16.3   | 19.3   | 17.1   | 27.4   |
| 113.9  | 145.0  | 39.9  | 37.0  | 168.0  | 157.0  | 252.8  | 188.5  | 210.8  |
| 54.2   | 30.8   | 13.5  | 32.2  | 53.9   | 26.8   | 81.5   | 60.4   | 84.7   |
| 20.7   | 54.9   | 5.1   | 12.6  | 31.6   | 32.6   | 23.5   | 56.1   | 9.0    |
| 9.9    | 14.3   | 2.6   | 1.3   | 7.5    | 1.1    | 10.5   | 14.6   | 3.6    |
| 1.1    | 1.3    | 1.1   | 4.8   | 15.3   | 4.4    | 4.9    | 0.7    | 2.5    |
| 10.9   | 9.2    | 17.1  | 12.0  | 17.8   | 5.3    | 13.2   | 11.4   | 19.5   |
| 11.0   | 7.9    | 51.6  | 95.5  | 12.3   | 4.9    | 6.7    | 7.4    | 1.9    |
| 1.0    | 4.4    | 19.0  | 17.4  | 14.5   | 3.0    | 7.4    | 6.2    | 4.6    |
| 96.8   | 132.5  | 40.4  | 41.4  | 127.0  | 143.3  | 27.4   | 27.2   | 31.1   |
| 10.7   | 29.3   | 5.9   | 16.2  | 33.4   | 11.1   | 38.6   | 32.2   | 54.7   |
| 29.3   | 53.5   | 37.5  | 47.2  | 59.8   | 40.1   | 171.3  | 128.4  | 163.4  |
| 2.4    | 1.3    | 5.6   | 1.8   | 22.2   | 3.2    | 930.2  | 972.4  | 1450.3 |
| 1.8    | 2.5    | 2.0   | 0.8   | 1.3    | 5.9    | 2.3    | 1.6    | 2.0    |
| 73.2   | 90.1   | 16.4  | 10.2  | 116.9  | 66.5   | 207.9  | 256.4  | 285.6  |
| 0.9    | 0.7    | 0.9   | 0.5   | 2.2    | 1.2    | 0.4    | 0.6    | 0.6    |
| 127.0  | 152.3  | 47.1  | 68.1  | 191.9  | 190.4  | 93.1   | 68.2   | 81.9   |
| 44.5   | 53.2   | 1.4   | 9.0   | 62.9   | 55.4   | 80.8   | 118.7  | 101.3  |
| 21.4   | 29.6   | 10.0  | 8.9   | 16.7   | 23.9   | 57.1   | 60.6   | 57.8   |
| 14.2   | 11.5   | 14.1  | 11.3  | 16.1   | 20.8   | 17.9   | 8.8    | 13.2   |
| 58.6   | 76.2   | 20.9  | 16.6  | 72.2   | 41.2   | 69.7   | 95.9   | 111.5  |
| 23.5   | 20.9   | 4.2   | 10.4  | 7.6    | 15.4   | 22.2   | 16.6   | 21.0   |
| 41.9   | 53.3   | 120.7 | 151.1 | 76.2   | 57.9   | 1048.3 | 1039.9 | 1067.3 |
| 73.5   | 62.1   | 30.3  | 20.8  | 83.7   | 56.7   | 84.0   | 49.8   | 60.2   |
| 62.2   | 93.8   | 30.6  | 46.6  | 89.6   | 71.8   | 101.8  | 92.5   | 102.3  |
| 394.5  | 565.1  | 112.4 | 126.4 | 418.3  | 361.6  | 912.2  | 454.9  | 496.5  |
| 1.1    | 2.6    | 14.4  | 2.4   | 16.6   | 1.3    | 1.3    | 1.7    | 6.9    |
| 14.8   | 9.6    | 17.1  | 12.2  | 17.7   | 7.3    | 10.7   | 22.1   | 11.1   |
| 49.6   | 74.4   | 31.1  | 42.4  | 62.6   | 68.1   | 70.4   | 82.0   | 83.3   |
| 254.0  | 432.9  | 17.7  | 13.4  | 453.6  | 382.5  | 15.2   | 7.6    | 12.0   |
| 107.1  | 141.3  | 80.1  | 125.8 | 140.6  | 140.2  | 352.8  | 318.9  | 350.4  |
| 20.9   | 26.3   | 3.7   | 0.8   | 24.5   | 10.8   | 2.0    | 3.9    | 4.5    |
| 2.6    | 4.7    | 6.5   | 4.5   | 4.3    | 1.8    | 4.0    | 3.5    | 5.8    |
| 5.6    | 5.0    | 4.0   | 7.8   | 7.6    | 3.2    | 4.7    | 6.1    | 9.0    |
| 45.2   | 46.2   | 89.8  | 106.9 | 64.6   | 75.5   | 82.7   | 105.9  | 112.7  |
| 2.6    | 14.8   | 16.1  | 18.9  | 6.2    | 7.5    | 4.3    | 5.2    | 5.5    |
| 1185.4 | 1661.4 | 137.7 | 217.9 | 1808.6 | 1821.2 | 1530.6 | 1005.4 | 1217.3 |
| 9.8    | 6.5    | 27.2  | 41.0  | 6.9    | 1.7    | 11.7   | 8.1    | 1.0    |
| 3.9    | 5.0    | 0.8   | 0.7   | 4.2    | 1.4    | 1.9    | 3.0    | 0.7    |
| 9.9    | 6.5    | 21.8  | 11.3  | 6.9    | 0.9    | 10.7   | 17.8   | 8.9    |
| 305.1  | 373.6  | 28.8  | 28.5  | 380.7  | 425.5  | 611.7  | 504.1  | 491.2  |
| 143.1  | 183.2  | 31.1  | 29.3  | 196.4  | 163.1  | 128.0  | 80.0   | 89.0   |
| 17.5   | 13.8   | 12.1  | 13.6  | 26.7   | 11.5   | 28.1   | 20.9   | 49.9   |
| 27.2   | 22.9   | 11.6  | 8.7   | 82.3   | 20.2   | 112.4  | 309.4  | 339.9  |
| 4.3    | 4.4    | 3.9   | 3.5   | 5.8    | 10.2   | 29.8   | 70.4   | 88.7   |
| 12.3   | 2.1    | 10.7  | 2.7   | 12.9   | 4.2    | 3.2    | 1.4    | 2.5    |
| 407.5  | 395.9  | 80.0  | 127.5 | 438.7  | 367.2  | 314.5  | 157.2  | 204.3  |
| 17.3   | 25.5   | 0.8   | 6.7   | 22.4   | 12.2   | 6.2    | 1.7    | 1.6    |
| 11.7   | 11.2   | 51.7  | 73.4  | 14.8   | 17.4   | 10.1   | 6.6    | 9.0    |
| 19.6   | 35.1   | 8.6   | 13.7  | 51.6   | 35.4   | 19.6   | 19.9   | 9.2    |



|        |        |       |        |        |        |        |        |        |
|--------|--------|-------|--------|--------|--------|--------|--------|--------|
| 111.4  | 127.4  | 3.4   | 9.1    | 175.4  | 132.7  | 163.1  | 132.0  | 139.2  |
| 5.9    | 22.2   | 1.4   | 1.4    | 6.5    | 13.0   | 9.4    | 8.3    | 6.4    |
| 101.0  | 89.3   | 26.5  | 34.4   | 150.9  | 78.9   | 155.8  | 171.8  | 176.6  |
| 48.1   | 59.9   | 16.9  | 18.0   | 52.7   | 65.2   | 39.6   | 43.8   | 53.0   |
| 373.6  | 383.7  | 678.9 | 1069.4 | 548.5  | 448.0  | 1456.3 | 1249.5 | 1441.1 |
| 59.6   | 43.1   | 81.2  | 105.3  | 77.2   | 42.5   | 14.0   | 5.3    | 2.9    |
| 14.3   | 17.7   | 20.5  | 20.8   | 16.9   | 21.8   | 92.1   | 96.4   | 122.1  |
| 364.5  | 453.1  | 121.6 | 154.1  | 394.5  | 417.3  | 327.2  | 204.6  | 236.7  |
| 31.1   | 8.3    | 9.9   | 6.0    | 46.3   | 13.8   | 5.4    | 6.5    | 3.7    |
| 0.3    | 0.7    | 0.8   | 0.4    | 0.6    | 0.9    | 0.5    | 1.0    | 0.5    |
| 7.3    | 9.4    | 11.6  | 8.8    | 10.6   | 12.5   | 16.7   | 13.3   | 18.7   |
| 2.6    | 11.1   | 23.3  | 21.7   | 15.3   | 1.8    | 13.1   | 12.9   | 8.7    |
| 1267.3 | 2054.2 | 701.4 | 845.7  | 1860.5 | 2249.6 | 2344.2 | 1258.5 | 1409.3 |
| 72.9   | 99.1   | 50.4  | 64.8   | 89.7   | 90.5   | 136.8  | 80.1   | 70.7   |
| 4.1    | 0.6    | 0.7   | 5.0    | 0.6    | 3.8    | 1.3    | 1.4    | 1.2    |
| 25.3   | 20.3   | 16.0  | 13.7   | 72.4   | 18.8   | 29.8   | 12.2   | 15.2   |
| 6.5    | 22.6   | 11.6  | 6.2    | 16.8   | 20.4   | 22.9   | 15.1   | 12.5   |
| 139.5  | 448.2  | 16.3  | 14.2   | 204.1  | 551.2  | 144.0  | 131.6  | 147.8  |
| 41.6   | 40.6   | 44.1  | 63.8   | 45.8   | 41.4   | 80.9   | 68.8   | 60.0   |
| 1.3    | 0.9    | 1.8   | 7.3    | 5.1    | 2.8    | 2.2    | 1.2    | 6.3    |
| 32.5   | 61.7   | 60.9  | 46.5   | 61.9   | 30.8   | 140.1  | 169.2  | 172.9  |
| 379.4  | 490.2  | 97.0  | 65.5   | 495.0  | 497.6  | 643.5  | 638.5  | 732.7  |
| 35.4   | 44.7   | 14.9  | 9.9    | 31.9   | 31.0   | 107.6  | 131.2  | 130.8  |
| 21.7   | 25.5   | 0.6   | 0.5    | 29.3   | 26.0   | 14.2   | 20.6   | 25.2   |
| 9.6    | 7.3    | 5.7   | 6.2    | 7.6    | 0.4    | 20.3   | 6.9    | 16.1   |
| 14.0   | 16.9   | 24.7  | 7.7    | 0.8    | 5.8    | 17.5   | 19.3   | 13.6   |
| 106.6  | 108.2  | 4.5   | 9.3    | 107.2  | 89.9   | 244.1  | 155.2  | 194.9  |
| 270.0  | 409.6  | 72.9  | 77.4   | 633.9  | 422.6  | 55.9   | 105.9  | 98.0   |
| 4.8    | 14.5   | 1.7   | 1.6    | 2.2    | 15.2   | 3.8    | 2.9    | 1.7    |
| 1.4    | 4.8    | 2.4   | 0.6    | 2.8    | 1.9    | 0.9    | 1.1    | 0.6    |
| 108.5  | 144.2  | 129.1 | 131.0  | 121.7  | 151.6  | 61.5   | 42.8   | 55.9   |
| 2.2    | 7.6    | 5.4   | 0.7    | 8.8    | 8.4    | 524.4  | 820.6  | 923.1  |
| 8.7    | 4.8    | 3.7   | 9.3    | 0.7    | 3.4    | 11.5   | 5.5    | 13.9   |
| 48.0   | 70.1   | 2.4   | 2.1    | 53.7   | 48.2   | 82.1   | 123.9  | 143.6  |
| 152.1  | 174.9  | 24.8  | 18.5   | 212.5  | 131.3  | 43.2   | 88.7   | 101.9  |
| 9.5    | 2.7    | 1.6   | 1.5    | 2.0    | 3.4    | 3.3    | 6.3    | 4.9    |
| 6.1    | 1.8    | 3.3   | 6.5    | 6.4    | 8.0    | 13.0   | 1.1    | 2.0    |
| 7.7    | 9.1    | 4.5   | 4.9    | 4.3    | 4.1    | 11.5   | 17.1   | 22.0   |
| 99.3   | 50.5   | 3.7   | 2.3    | 153.2  | 34.9   | 2.9    | 7.2    | 3.5    |
| 1.8    | 1.9    | 0.9   | 1.7    | 2.6    | 1.1    | 13.6   | 16.5   | 9.0    |
| 2.8    | 2.8    | 3.9   | 7.5    | 2.9    | 1.7    | 2.3    | 1.3    | 2.1    |
| 1.0    | 2.8    | 1.1   | 1.4    | 2.4    | 3.3    | 6.9    | 4.4    | 2.9    |
| 0.8    | 1.1    | 2.0   | 0.9    | 1.3    | 1.1    | 6.3    | 6.5    | 1.1    |
| 1.7    | 2.9    | 7.2   | 1.5    | 7.6    | 14.4   | 39.1   | 71.6   | 85.9   |
| 183.4  | 276.2  | 41.1  | 63.2   | 295.9  | 281.4  | 805.6  | 314.6  | 350.0  |
| 238.7  | 302.4  | 48.8  | 102.9  | 285.9  | 295.8  | 834.8  | 328.8  | 351.6  |
| 142.1  | 184.7  | 33.3  | 46.8   | 200.3  | 164.3  | 313.3  | 257.8  | 295.6  |
| 20.5   | 32.2   | 14.6  | 7.6    | 27.2   | 34.1   | 60.0   | 81.0   | 74.8   |
| 109.9  | 101.3  | 5.5   | 5.0    | 162.9  | 57.6   | 64.2   | 66.0   | 77.6   |
| 203.2  | 248.8  | 25.2  | 36.9   | 394.7  | 321.8  | 167.2  | 228.0  | 219.7  |
| 72.8   | 61.3   | 75.0  | 68.9   | 75.8   | 66.2   | 10.2   | 3.2    | 4.2    |
| 6.8    | 1.3    | 5.1   | 8.8    | 0.9    | 4.7    | 2.5    | 8.6    | 4.0    |
| 192.8  | 295.6  | 35.9  | 37.1   | 330.0  | 280.8  | 554.3  | 406.0  | 426.5  |

|       |        |       |       |       |        |        |        |        |
|-------|--------|-------|-------|-------|--------|--------|--------|--------|
| 512.6 | 456.3  | 8.6   | 12.8  | 609.4 | 345.4  | 3500.0 | 3007.9 | 2871.6 |
| 117.0 | 90.2   | 5.1   | 0.9   | 386.0 | 119.3  | 975.2  | 308.5  | 396.7  |
| 23.2  | 32.0   | 9.6   | 1.3   | 116.2 | 55.8   | 6.4    | 6.8    | 9.8    |
| 23.4  | 9.0    | 21.8  | 19.2  | 1.9   | 16.2   | 3.2    | 8.7    | 6.5    |
| 80.9  | 140.0  | 20.8  | 33.6  | 148.1 | 167.8  | 157.7  | 148.9  | 150.9  |
| 0.2   | 0.8    | 0.3   | 0.8   | 4.1   | 0.7    | 2.3    | 0.6    | 1.0    |
| 18.7  | 29.6   | 33.1  | 38.2  | 20.7  | 24.4   | 104.2  | 126.8  | 125.6  |
| 38.6  | 35.4   | 36.6  | 48.1  | 33.8  | 21.7   | 45.7   | 78.9   | 74.3   |
| 3.1   | 3.2    | 17.3  | 16.9  | 5.1   | 2.9    | 10.7   | 25.8   | 19.1   |
| 19.2  | 15.5   | 18.3  | 21.3  | 38.3  | 16.9   | 44.1   | 24.8   | 36.4   |
| 450.9 | 686.5  | 318.8 | 458.0 | 731.0 | 719.4  | 1239.7 | 1166.8 | 1375.3 |
| 2.4   | 4.1    | 17.8  | 24.9  | 8.0   | 8.3    | 1.2    | 1.0    | 0.9    |
| 4.6   | 1.4    | 0.8   | 9.8   | 8.8   | 1.3    | 15.8   | 9.8    | 14.2   |
| 52.4  | 90.9   | 15.5  | 14.8  | 85.6  | 92.0   | 158.0  | 167.6  | 182.1  |
| 23.3  | 29.4   | 36.2  | 37.3  | 60.1  | 50.5   | 106.6  | 124.4  | 135.9  |
| 400.2 | 392.6  | 266.7 | 356.2 | 424.6 | 373.0  | 755.1  | 510.1  | 626.1  |
| 1.4   | 1.7    | 1.3   | 1.5   | 1.8   | 1.1    | 1.2    | 1.2    | 0.8    |
| 1.4   | 11.4   | 0.2   | 0.3   | 0.9   | 7.0    | 4.8    | 9.0    | 3.6    |
| 94.4  | 164.9  | 24.9  | 14.5  | 172.6 | 129.4  | 726.0  | 629.0  | 688.7  |
| 23.7  | 59.6   | 0.2   | 0.6   | 30.7  | 56.1   | 46.3   | 29.9   | 48.1   |
| 161.5 | 182.8  | 0.9   | 0.5   | 212.1 | 201.0  | 0.9    | 1.9    | 0.6    |
| 172.2 | 166.6  | 137.0 | 183.1 | 229.5 | 139.9  | 368.8  | 327.0  | 307.1  |
| 3.0   | 11.2   | 16.4  | 6.4   | 3.8   | 8.5    | 10.7   | 20.3   | 10.2   |
| 66.3  | 52.3   | 42.8  | 50.1  | 72.9  | 75.7   | 36.5   | 12.9   | 12.1   |
| 16.9  | 20.1   | 32.8  | 42.5  | 25.6  | 19.7   | 21.5   | 11.9   | 15.2   |
| 93.8  | 143.7  | 21.4  | 6.4   | 93.4  | 100.0  | 128.6  | 117.1  | 146.2  |
| 65.7  | 55.2   | 21.3  | 15.6  | 64.0  | 47.7   | 45.8   | 28.2   | 28.7   |
| 156.4 | 151.1  | 0.7   | 0.3   | 292.4 | 203.9  | 72.8   | 22.9   | 27.4   |
| 0.8   | 2.3    | 5.8   | 0.3   | 0.3   | 0.7    | 2.5    | 5.5    | 1.2    |
| 9.3   | 10.5   | 10.8  | 9.7   | 6.4   | 11.8   | 20.5   | 21.1   | 12.1   |
| 13.2  | 17.5   | 30.3  | 11.7  | 20.1  | 13.1   | 94.7   | 126.4  | 143.9  |
| 0.8   | 6.6    | 4.7   | 5.5   | 3.2   | 4.6    | 9.2    | 1.2    | 6.7    |
| 158.7 | 128.7  | 5.8   | 14.0  | 215.7 | 187.4  | 89.3   | 151.5  | 93.5   |
| 17.7  | 20.7   | 12.8  | 22.5  | 22.8  | 21.5   | 35.7   | 30.4   | 32.9   |
| 798.0 | 1478.8 | 548.4 | 574.7 | 843.3 | 1948.5 | 2594.9 | 1450.8 | 1600.6 |
| 37.4  | 32.7   | 44.5  | 32.2  | 39.8  | 21.7   | 56.8   | 89.4   | 104.2  |
| 7.6   | 6.3    | 4.2   | 7.6   | 4.8   | 12.2   | 3.1    | 3.5    | 6.2    |
| 2.8   | 15.1   | 0.5   | 1.5   | 23.2  | 5.1    | 4.0    | 4.6    | 8.2    |
| 6.3   | 4.3    | 12.2  | 13.4  | 0.7   | 10.4   | 6.3    | 1.2    | 0.9    |
| 23.7  | 32.0   | 102.9 | 137.7 | 36.4  | 24.5   | 90.0   | 127.2  | 171.1  |
| 20.7  | 24.2   | 3.3   | 9.3   | 11.9  | 18.7   | 34.0   | 102.0  | 98.4   |
| 197.4 | 267.4  | 21.4  | 27.6  | 392.8 | 343.8  | 104.9  | 97.1   | 108.0  |
| 2.3   | 8.6    | 12.0  | 6.6   | 13.6  | 3.1    | 18.4   | 16.9   | 19.0   |
| 9.4   | 8.0    | 10.0  | 11.2  | 10.0  | 16.9   | 14.6   | 20.3   | 2.8    |
| 23.2  | 32.1   | 55.0  | 60.5  | 42.3  | 27.1   | 127.9  | 142.1  | 174.2  |
| 16.3  | 2.6    | 1.6   | 1.7   | 20.2  | 11.4   | 3.4    | 4.8    | 3.4    |
| 27.1  | 22.6   | 12.5  | 13.0  | 39.9  | 21.1   | 67.0   | 44.4   | 58.4   |
| 369.8 | 266.0  | 225.8 | 338.4 | 419.1 | 474.5  | 977.1  | 463.5  | 661.3  |
| 63.7  | 60.6   | 36.8  | 45.8  | 94.7  | 55.5   | 116.4  | 113.0  | 107.3  |
| 1.8   | 9.7    | 4.1   | 3.6   | 18.1  | 11.4   | 41.3   | 70.1   | 71.5   |
| 70.3  | 109.1  | 10.6  | 16.1  | 87.2  | 83.0   | 363.3  | 354.0  | 382.8  |
| 600.3 | 1418.4 | 3.7   | 8.5   | 865.9 | 1129.6 | 21.8   | 12.2   | 20.0   |
| 12.2  | 9.2    | 7.6   | 2.6   | 14.9  | 17.3   | 12.2   | 14.1   | 15.9   |

|        |        |       |       |        |        |        |        |        |
|--------|--------|-------|-------|--------|--------|--------|--------|--------|
| 96.9   | 163.2  | 19.2  | 19.0  | 155.2  | 136.2  | 162.5  | 93.1   | 117.4  |
| 4.3    | 17.0   | 29.3  | 21.6  | 14.0   | 10.6   | 20.3   | 22.5   | 9.8    |
| 36.6   | 34.4   | 86.3  | 107.7 | 75.1   | 28.9   | 79.3   | 77.7   | 72.7   |
| 29.0   | 35.4   | 11.4  | 22.5  | 26.7   | 31.0   | 22.0   | 25.1   | 27.7   |
| 43.9   | 57.4   | 8.2   | 7.2   | 56.9   | 21.8   | 94.0   | 107.9  | 94.1   |
| 41.1   | 50.6   | 1.3   | 0.5   | 55.0   | 28.9   | 67.9   | 49.5   | 57.5   |
| 56.4   | 56.1   | 2.6   | 24.6  | 73.5   | 28.0   | 160.2  | 117.8  | 115.3  |
| 242.2  | 382.1  | 93.8  | 188.1 | 388.8  | 173.2  | 482.0  | 340.1  | 401.8  |
| 53.1   | 60.2   | 57.9  | 59.5  | 45.8   | 64.6   | 47.0   | 81.7   | 79.9   |
| 3.4    | 4.7    | 16.0  | 16.7  | 4.2    | 9.1    | 8.9    | 3.1    | 5.0    |
| 74.2   | 96.3   | 1.6   | 1.0   | 47.7   | 69.6   | 8.8    | 3.0    | 3.6    |
| 725.9  | 1420.9 | 7.1   | 4.2   | 878.0  | 1379.4 | 28.9   | 22.2   | 26.1   |
| 12.3   | 15.5   | 3.2   | 2.1   | 36.6   | 23.5   | 40.1   | 60.8   | 74.4   |
| 3.2    | 3.2    | 1.5   | 3.2   | 4.1    | 4.0    | 2.6    | 3.5    | 7.7    |
| 40.8   | 36.6   | 25.5  | 26.1  | 54.0   | 20.0   | 23.1   | 36.0   | 43.9   |
| 3.1    | 2.7    | 13.0  | 8.8   | 1.7    | 1.3    | 9.5    | 11.9   | 12.6   |
| 3.3    | 5.4    | 5.0   | 9.4   | 11.1   | 7.2    | 6.0    | 8.0    | 7.5    |
| 0.7    | 7.5    | 0.4   | 0.6   | 1.3    | 1.3    | 1.0    | 1.7    | 1.0    |
| 10.2   | 2.0    | 30.2  | 29.3  | 10.4   | 1.4    | 1.3    | 12.4   | 3.7    |
| 135.8  | 188.9  | 92.3  | 86.2  | 220.2  | 209.4  | 550.5  | 477.4  | 486.3  |
| 10.9   | 2.7    | 14.5  | 12.9  | 3.6    | 4.2    | 14.9   | 17.5   | 21.0   |
| 1112.9 | 1404.7 | 1.3   | 0.7   | 2469.0 | 1580.8 | 1.9    | 1.1    | 1.6    |
| 12.6   | 0.8    | 1.2   | 2.8   | 0.9    | 1.1    | 5.8    | 7.7    | 4.9    |
| 0.8    | 0.8    | 25.5  | 24.4  | 2.0    | 0.7    | 1.3    | 1.0    | 1.0    |
| 1865.0 | 2131.1 | 9.9   | 13.7  | 2868.1 | 1822.8 | 56.5   | 81.4   | 109.7  |
| 796.8  | 921.5  | 359.6 | 475.7 | 1314.6 | 955.0  | 2748.2 | 2263.4 | 2540.2 |
| 1.7    | 16.0   | 16.8  | 19.8  | 12.0   | 14.3   | 11.9   | 12.1   | 6.4    |
| 102.2  | 101.6  | 114.9 | 139.1 | 105.2  | 81.7   | 197.3  | 183.1  | 216.7  |
| 1228.4 | 1992.1 | 8.9   | 1.4   | 2323.2 | 2017.5 | 388.4  | 417.7  | 506.8  |
| 7.7    | 14.1   | 14.3  | 6.8   | 3.7    | 4.9    | 11.4   | 1.1    | 3.1    |
| 8.6    | 14.4   | 1.8   | 1.0   | 11.5   | 4.0    | 2.6    | 9.2    | 2.8    |
| 7.6    | 14.5   | 51.9  | 42.3  | 11.5   | 11.8   | 110.6  | 203.1  | 196.8  |
| 31.7   | 30.7   | 3.6   | 0.8   | 60.0   | 34.1   | 2.0    | 1.4    | 2.1    |
| 3.8    | 1.4    | 0.4   | 9.5   | 17.3   | 19.9   | 14.0   | 4.5    | 2.0    |
| 5.1    | 1.4    | 93.4  | 104.6 | 21.5   | 6.1    | 37.9   | 59.3   | 60.6   |
| 457.3  | 539.5  | 3.0   | 16.0  | 648.5  | 497.9  | 442.2  | 360.1  | 420.1  |
| 1.9    | 2.5    | 7.9   | 7.0   | 10.7   | 0.8    | 16.9   | 10.6   | 12.9   |
| 9.9    | 14.6   | 2.5   | 2.1   | 12.4   | 11.2   | 13.2   | 7.2    | 3.1    |
| 11.5   | 9.7    | 0.8   | 0.3   | 29.0   | 7.5    | 14.3   | 9.2    | 17.5   |
| 1.2    | 1.1    | 8.0   | 40.7  | 3.2    | 7.8    | 18.6   | 18.5   | 34.3   |
| 2.7    | 7.9    | 13.6  | 4.2   | 8.1    | 4.6    | 9.8    | 3.7    | 7.1    |
| 0.3    | 0.3    | 1.0   | 0.2   | 0.4    | 4.7    | 1.3    | 1.3    | 0.4    |
| 14.5   | 10.9   | 20.9  | 27.3  | 11.7   | 5.3    | 77.5   | 58.1   | 83.0   |
| 2.5    | 1.0    | 50.3  | 47.2  | 5.5    | 1.0    | 2.0    | 2.8    | 3.7    |
| 51.3   | 54.6   | 1.7   | 1.1   | 105.0  | 57.0   | 33.4   | 12.7   | 11.4   |
| 8.6    | 6.8    | 13.4  | 17.0  | 0.8    | 6.3    | 70.5   | 97.1   | 87.3   |
| 11.2   | 6.7    | 3.7   | 3.7   | 10.4   | 6.5    | 4.3    | 4.0    | 4.7    |
| 3.4    | 3.3    | 20.6  | 18.2  | 2.8    | 8.8    | 18.5   | 30.4   | 37.5   |
| 46.3   | 49.6   | 16.9  | 16.6  | 69.5   | 41.4   | 39.7   | 29.8   | 33.6   |
| 2.2    | 2.6    | 3.3   | 8.5   | 2.0    | 1.3    | 5.7    | 3.1    | 2.1    |
| 27.6   | 32.0   | 42.4  | 74.6  | 44.1   | 31.9   | 85.7   | 95.0   | 94.2   |
| 5.9    | 1.9    | 8.1   | 4.8   | 1.8    | 2.8    | 1433.2 | 1228.3 | 1619.5 |
| 34.4   | 16.2   | 5.6   | 6.0   | 21.4   | 24.0   | 27.0   | 32.6   | 21.0   |

|       |        |        |        |       |        |       |       |        |
|-------|--------|--------|--------|-------|--------|-------|-------|--------|
| 8.0   | 16.3   | 14.6   | 13.0   | 20.3  | 19.1   | 22.0  | 18.9  | 18.3   |
| 4.0   | 11.6   | 14.3   | 1.0    | 14.4  | 0.7    | 11.8  | 8.8   | 6.9    |
| 9.0   | 18.9   | 9.3    | 12.2   | 20.0  | 32.8   | 44.1  | 44.5  | 52.9   |
| 0.7   | 0.4    | 3.9    | 6.5    | 0.1   | 3.1    | 11.5  | 11.7  | 13.5   |
| 135.3 | 192.5  | 210.9  | 346.5  | 234.4 | 157.1  | 935.7 | 868.5 | 1001.3 |
| 88.0  | 117.9  | 1323.0 | 1752.2 | 176.9 | 115.5  | 85.9  | 61.0  | 64.4   |
| 2.8   | 0.6    | 10.8   | 14.5   | 18.0  | 5.5    | 5.4   | 2.1   | 1.8    |
| 13.3  | 6.1    | 1.5    | 8.2    | 6.6   | 3.7    | 91.0  | 118.6 | 117.8  |
| 206.4 | 178.7  | 473.6  | 914.1  | 225.6 | 201.2  | 405.4 | 396.7 | 426.3  |
| 101.3 | 130.7  | 20.1   | 35.7   | 201.5 | 119.6  | 1.9   | 2.8   | 6.7    |
| 1.4   | 11.7   | 20.2   | 11.7   | 0.7   | 5.7    | 7.0   | 9.3   | 2.9    |
| 51.7  | 34.3   | 16.6   | 37.3   | 35.8  | 29.0   | 186.0 | 81.7  | 61.5   |
| 2.4   | 22.9   | 27.9   | 26.3   | 15.1  | 1.8    | 45.0  | 48.3  | 37.2   |
| 29.0  | 34.5   | 1.5    | 0.6    | 34.3  | 32.0   | 69.7  | 40.8  | 38.4   |
| 8.9   | 7.9    | 19.2   | 3.0    | 6.1   | 15.3   | 9.0   | 3.4   | 4.4    |
| 0.2   | 0.7    | 0.6    | 4.4    | 0.6   | 0.5    | 2.4   | 3.6   | 4.8    |
| 1.8   | 0.8    | 4.7    | 0.7    | 3.0   | 1.8    | 10.7  | 3.3   | 2.5    |
| 10.2  | 22.8   | 3.8    | 4.0    | 21.6  | 21.9   | 3.5   | 4.6   | 5.0    |
| 196.4 | 240.4  | 57.7   | 61.0   | 218.9 | 222.2  | 163.7 | 135.2 | 133.1  |
| 206.1 | 290.4  | 38.7   | 37.9   | 341.9 | 276.9  | 437.8 | 121.2 | 140.7  |
| 4.2   | 4.4    | 8.3    | 1.8    | 1.9   | 0.5    | 5.1   | 1.7   | 3.3    |
| 7.0   | 2.5    | 10.0   | 1.5    | 0.8   | 0.8    | 4.0   | 2.6   | 3.4    |
| 21.1  | 29.5   | 23.1   | 22.7   | 34.6  | 25.1   | 388.6 | 377.2 | 440.3  |
| 4.0   | 4.2    | 6.7    | 19.0   | 6.5   | 1.9    | 68.1  | 42.6  | 51.9   |
| 81.1  | 113.2  | 5.0    | 4.8    | 97.3  | 94.4   | 4.3   | 3.6   | 1.1    |
| 13.3  | 14.2   | 1.0    | 0.9    | 23.3  | 16.0   | 1.6   | 3.0   | 1.9    |
| 49.9  | 91.2   | 1.2    | 1.5    | 52.7  | 83.2   | 1.4   | 8.0   | 5.7    |
| 26.1  | 37.5   | 6.4    | 3.9    | 32.9  | 27.8   | 1.0   | 5.9   | 2.4    |
| 23.3  | 34.3   | 32.3   | 60.8   | 27.2  | 8.8    | 86.2  | 59.7  | 79.7   |
| 3.4   | 2.3    | 23.5   | 41.2   | 9.4   | 3.4    | 13.7  | 8.2   | 7.9    |
| 30.7  | 45.9   | 21.8   | 22.5   | 67.4  | 57.4   | 46.4  | 62.5  | 73.0   |
| 7.2   | 10.9   | 6.3    | 8.9    | 7.7   | 5.4    | 5.7   | 10.4  | 8.8    |
| 1.1   | 1.3    | 6.5    | 9.4    | 15.3  | 11.3   | 21.0  | 29.1  | 39.4   |
| 71.0  | 66.5   | 10.5   | 1.0    | 68.9  | 54.1   | 9.4   | 0.9   | 3.5    |
| 810.7 | 1536.1 | 11.7   | 10.6   | 996.0 | 1550.1 | 600.5 | 587.7 | 643.3  |
| 136.9 | 177.5  | 13.1   | 9.6    | 213.8 | 172.8  | 422.7 | 197.7 | 256.8  |
| 22.6  | 39.0   | 0.8    | 1.5    | 53.0  | 41.5   | 1.2   | 1.9   | 1.7    |
| 678.0 | 709.7  | 168.5  | 199.8  | 912.8 | 568.9  | 875.9 | 569.6 | 676.0  |
| 80.4  | 78.7   | 60.1   | 84.3   | 112.2 | 80.9   | 209.6 | 228.5 | 233.3  |
| 275.6 | 349.9  | 7.1    | 10.3   | 362.9 | 283.9  | 21.4  | 23.0  | 20.8   |
| 666.5 | 674.7  | 136.7  | 159.9  | 913.2 | 583.0  | 229.2 | 80.4  | 68.2   |
| 2.1   | 0.8    | 3.1    | 5.8    | 2.6   | 1.0    | 186.3 | 259.6 | 313.1  |
| 260.6 | 342.7  | 122.7  | 145.3  | 325.2 | 353.6  | 399.3 | 486.6 | 542.2  |
| 1.1   | 13.9   | 1.3    | 2.6    | 9.3   | 14.5   | 1.8   | 4.5   | 1.8    |
| 31.6  | 38.2   | 7.1    | 11.0   | 95.7  | 39.7   | 203.6 | 197.6 | 239.9  |
| 0.9   | 0.9    | 1.3    | 3.4    | 2.4   | 0.8    | 1.2   | 1.5   | 0.7    |
| 13.7  | 8.0    | 11.0   | 8.8    | 11.0  | 3.1    | 7.7   | 7.2   | 15.4   |
| 17.8  | 16.3   | 102.6  | 107.5  | 26.2  | 14.5   | 250.3 | 93.5  | 166.4  |
| 4.4   | 0.8    | 4.5    | 1.3    | 2.3   | 2.4    | 6.5   | 4.2   | 8.8    |
| 11.2  | 3.2    | 2.8    | 2.3    | 3.4   | 3.0    | 18.3  | 12.2  | 5.6    |
| 60.3  | 93.2   | 11.3   | 21.4   | 75.7  | 76.1   | 144.9 | 139.7 | 151.7  |
| 9.9   | 1.6    | 1.1    | 3.6    | 10.0  | 7.5    | 18.2  | 19.6  | 17.4   |
| 11.3  | 4.4    | 7.5    | 2.2    | 6.5   | 7.9    | 19.9  | 12.6  | 14.4   |

|       |        |      |      |        |        |        |       |       |
|-------|--------|------|------|--------|--------|--------|-------|-------|
| 13.3  | 20.3   | 4.6  | 7.8  | 33.9   | 16.0   | 33.0   | 12.2  | 25.3  |
| 127.9 | 151.5  | 34.3 | 61.5 | 232.5  | 171.2  | 296.6  | 245.7 | 243.8 |
| 53.3  | 74.7   | 2.0  | 1.4  | 128.2  | 55.9   | 11.1   | 6.6   | 3.6   |
| 8.4   | 15.6   | 7.0  | 9.8  | 8.4    | 15.2   | 1.1    | 9.0   | 6.5   |
| 55.1  | 91.2   | 20.6 | 29.6 | 92.6   | 86.1   | 192.5  | 62.2  | 91.2  |
| 165.9 | 211.3  | 27.2 | 27.7 | 275.0  | 153.1  | 1038.6 | 686.6 | 675.8 |
| 16.8  | 17.3   | 19.7 | 19.5 | 3.5    | 13.5   | 15.0   | 7.7   | 15.4  |
| 3.0   | 1.0    | 1.5  | 0.8  | 3.0    | 5.8    | 2.6    | 3.8   | 5.3   |
| 70.8  | 87.2   | 11.0 | 14.0 | 178.5  | 83.4   | 53.5   | 175.2 | 126.6 |
| 28.4  | 45.2   | 14.4 | 10.3 | 47.5   | 33.3   | 68.3   | 92.3  | 87.4  |
| 53.8  | 64.3   | 37.5 | 28.8 | 53.5   | 77.0   | 183.1  | 161.2 | 157.7 |
| 9.1   | 10.6   | 5.4  | 1.0  | 4.3    | 16.1   | 2.5    | 1.2   | 2.0   |
| 431.7 | 411.1  | 53.8 | 81.9 | 651.4  | 393.2  | 530.2  | 527.1 | 649.5 |
| 86.9  | 93.5   | 2.2  | 13.9 | 108.2  | 51.0   | 21.3   | 24.1  | 29.8  |
| 24.3  | 21.5   | 18.0 | 17.6 | 22.8   | 21.9   | 21.8   | 14.6  | 15.9  |
| 393.1 | 444.2  | 0.8  | 4.9  | 683.2  | 374.9  | 144.3  | 55.2  | 62.6  |
| 2.6   | 10.3   | 2.3  | 7.2  | 2.1    | 4.0    | 14.1   | 14.5  | 7.0   |
| 1.5   | 0.5    | 5.8  | 0.3  | 3.5    | 1.7    | 10.6   | 1.7   | 2.2   |
| 77.2  | 84.3   | 3.8  | 6.4  | 100.2  | 73.1   | 55.5   | 53.5  | 57.7  |
| 31.8  | 28.1   | 8.3  | 2.3  | 42.5   | 34.2   | 35.5   | 32.2  | 35.1  |
| 0.6   | 1.8    | 6.9  | 7.8  | 13.5   | 9.8    | 16.6   | 15.7  | 11.6  |
| 1.7   | 2.2    | 3.3  | 1.8  | 2.0    | 1.0    | 1.6    | 1.3   | 1.6   |
| 31.8  | 43.7   | 4.4  | 5.2  | 49.9   | 31.5   | 118.3  | 131.2 | 161.0 |
| 12.7  | 26.8   | 3.6  | 2.7  | 22.6   | 28.0   | 74.2   | 76.2  | 91.2  |
| 50.0  | 52.9   | 17.1 | 25.7 | 46.4   | 46.4   | 53.0   | 72.7  | 80.5  |
| 26.4  | 26.6   | 27.2 | 23.3 | 56.4   | 26.1   | 7.7    | 4.5   | 8.2   |
| 0.9   | 3.4    | 1.5  | 0.4  | 4.5    | 3.8    | 2.3    | 2.1   | 1.0   |
| 208.8 | 264.4  | 41.4 | 40.0 | 324.1  | 256.9  | 319.8  | 258.3 | 238.5 |
| 2.2   | 13.0   | 3.4  | 4.0  | 4.7    | 8.3    | 12.9   | 11.4  | 17.2  |
| 6.6   | 20.0   | 7.4  | 3.9  | 6.9    | 13.6   | 6.6    | 1.1   | 4.7   |
| 1.7   | 0.5    | 34.6 | 50.7 | 0.6    | 0.6    | 2.1    | 2.3   | 1.6   |
| 19.3  | 8.3    | 4.1  | 8.9  | 4.4    | 6.7    | 17.3   | 5.0   | 8.0   |
| 2.1   | 1.3    | 9.8  | 11.6 | 3.6    | 2.0    | 4.6    | 1.8   | 2.5   |
| 135.3 | 163.9  | 54.2 | 86.0 | 181.9  | 194.7  | 175.4  | 261.6 | 286.9 |
| 9.5   | 8.3    | 7.2  | 1.7  | 3.4    | 3.0    | 11.9   | 16.4  | 14.3  |
| 612.9 | 1222.8 | 25.1 | 28.4 | 1432.8 | 1243.3 | 631.2  | 309.1 | 336.5 |
| 12.5  | 17.2   | 10.6 | 10.3 | 13.4   | 11.1   | 293.7  | 683.2 | 710.1 |
| 24.0  | 25.7   | 14.6 | 19.1 | 34.9   | 23.3   | 61.5   | 36.7  | 40.7  |
| 15.3  | 23.5   | 8.4  | 8.1  | 55.5   | 11.8   | 19.4   | 24.0  | 20.2  |
| 45.6  | 129.8  | 23.5 | 15.4 | 75.1   | 132.4  | 83.9   | 93.2  | 103.1 |
| 53.0  | 132.4  | 22.6 | 9.0  | 71.2   | 109.5  | 58.9   | 77.4  | 79.1  |
| 23.0  | 22.9   | 10.0 | 9.4  | 3.1    | 5.2    | 11.5   | 11.8  | 11.0  |
| 53.9  | 63.9   | 9.6  | 7.4  | 63.8   | 53.8   | 183.6  | 155.0 | 163.7 |
| 14.6  | 1.6    | 14.1 | 17.9 | 3.1    | 7.1    | 14.2   | 11.4  | 12.0  |
| 7.0   | 2.0    | 2.6  | 1.4  | 5.2    | 15.1   | 5.1    | 1.6   | 2.1   |
| 44.0  | 10.6   | 22.6 | 19.1 | 25.9   | 9.2    | 138.1  | 118.5 | 162.9 |
| 39.6  | 33.4   | 62.4 | 91.5 | 41.9   | 50.6   | 187.9  | 211.6 | 222.7 |
| 10.7  | 13.5   | 13.2 | 5.9  | 13.9   | 29.0   | 18.4   | 14.3  | 12.8  |
| 7.0   | 4.1    | 2.7  | 2.8  | 5.9    | 3.1    | 5.0    | 5.2   | 5.0   |
| 9.9   | 13.6   | 6.9  | 8.2  | 8.0    | 7.2    | 5.7    | 7.0   | 7.7   |
| 3.8   | 3.7    | 1.5  | 1.2  | 6.6    | 13.1   | 5.8    | 9.2   | 13.5  |
| 4.5   | 5.1    | 3.4  | 3.5  | 1.2    | 6.4    | 4.5    | 2.4   | 3.0   |
| 3.8   | 23.8   | 35.7 | 42.9 | 43.4   | 3.4    | 5.8    | 4.4   | 6.1   |

|        |        |       |       |        |        |        |        |        |
|--------|--------|-------|-------|--------|--------|--------|--------|--------|
| 16.7   | 19.1   | 4.3   | 5.1   | 18.1   | 22.2   | 16.5   | 6.8    | 20.7   |
| 1.6    | 1.3    | 5.8   | 1.1   | 0.9    | 1.2    | 1.9    | 3.5    | 1.9    |
| 1.0    | 9.0    | 28.2  | 30.3  | 1.6    | 3.1    | 20.4   | 12.1   | 11.3   |
| 16.0   | 11.0   | 18.0  | 23.4  | 25.3   | 6.8    | 93.6   | 98.7   | 116.8  |
| 103.4  | 160.7  | 15.6  | 18.6  | 273.2  | 241.5  | 132.4  | 140.1  | 151.1  |
| 0.9    | 0.5    | 7.1   | 2.3   | 1.6    | 1.0    | 4.4    | 4.4    | 5.3    |
| 12.2   | 9.3    | 7.9   | 3.5   | 5.4    | 1.9    | 4.8    | 13.5   | 5.5    |
| 142.0  | 184.8  | 92.9  | 131.4 | 227.8  | 133.0  | 319.3  | 228.0  | 289.9  |
| 76.0   | 69.8   | 49.8  | 85.9  | 104.4  | 75.6   | 103.7  | 70.9   | 100.9  |
| 94.3   | 127.7  | 3.4   | 6.5   | 107.8  | 76.3   | 4615.3 | 3798.9 | 4060.8 |
| 4.6    | 3.0    | 4.6   | 0.5   | 1.8    | 3.2    | 7.2    | 12.1   | 1.3    |
| 11.3   | 11.9   | 2.7   | 3.5   | 34.2   | 12.9   | 164.5  | 172.7  | 155.4  |
| 11.1   | 0.9    | 7.5   | 4.7   | 17.7   | 5.4    | 167.7  | 191.5  | 181.9  |
| 334.8  | 401.8  | 1.1   | 1.0   | 654.8  | 277.3  | 281.1  | 539.0  | 661.5  |
| 56.7   | 65.1   | 14.9  | 21.9  | 75.9   | 62.5   | 474.1  | 367.1  | 404.4  |
| 6.6    | 9.6    | 2.1   | 2.1   | 3.7    | 8.8    | 2.3    | 2.2    | 3.1    |
| 13.0   | 1.3    | 1.4   | 5.0   | 1.4    | 1.0    | 4.0    | 8.5    | 6.7    |
| 36.1   | 40.2   | 54.2  | 54.5  | 50.3   | 40.8   | 98.7   | 96.1   | 91.7   |
| 10.1   | 8.0    | 29.7  | 45.5  | 1.5    | 7.1    | 782.8  | 1792.8 | 1709.6 |
| 397.7  | 453.0  | 125.6 | 156.8 | 626.4  | 391.4  | 712.3  | 735.1  | 789.3  |
| 66.9   | 76.7   | 103.0 | 157.6 | 88.4   | 85.2   | 142.2  | 125.7  | 143.0  |
| 1.5    | 1.1    | 8.8   | 8.3   | 0.4    | 4.5    | 14.1   | 5.6    | 7.6    |
| 2.4    | 14.8   | 23.4  | 2.6   | 15.0   | 19.9   | 9.3    | 15.8   | 7.6    |
| 7.9    | 13.3   | 11.9  | 1.9   | 4.7    | 12.3   | 9.6    | 15.1   | 28.3   |
| 0.7    | 0.3    | 7.0   | 5.7   | 0.5    | 4.6    | 4.1    | 3.4    | 1.3    |
| 6.4    | 3.4    | 9.8   | 9.7   | 18.8   | 13.7   | 8.9    | 3.0    | 24.7   |
| 42.9   | 58.9   | 16.5  | 2.3   | 42.6   | 52.0   | 33.8   | 84.3   | 147.2  |
| 230.8  | 312.1  | 62.2  | 73.7  | 296.9  | 229.4  | 108.6  | 148.8  | 137.8  |
| 3.3    | 10.8   | 16.3  | 10.1  | 27.4   | 27.8   | 98.4   | 111.1  | 136.4  |
| 14.3   | 6.8    | 7.5   | 4.5   | 14.6   | 17.1   | 14.8   | 13.8   | 7.0    |
| 3357.4 | 3958.1 | 438.6 | 638.6 | 4546.5 | 4586.4 | 5726.0 | 4223.4 | 4490.0 |
| 24.9   | 34.8   | 16.0  | 13.5  | 31.0   | 15.6   | 90.2   | 128.3  | 158.4  |
| 89.5   | 119.2  | 3.9   | 2.3   | 120.2  | 111.2  | 21.5   | 7.2    | 23.5   |
| 8.2    | 20.4   | 0.5   | 6.6   | 25.5   | 22.0   | 38.7   | 30.9   | 32.6   |
| 11.4   | 7.7    | 9.9   | 2.1   | 11.4   | 19.8   | 12.8   | 2.5    | 2.5    |
| 6.0    | 1.3    | 0.9   | 0.2   | 0.6    | 1.4    | 1.4    | 0.8    | 2.8    |
| 1.5    | 1.9    | 14.7  | 10.8  | 17.9   | 4.6    | 15.0   | 21.0   | 15.0   |
| 3.2    | 0.1    | 6.5   | 3.4   | 0.7    | 4.0    | 4.3    | 1.0    | 4.6    |
| 10.9   | 15.0   | 45.2  | 46.9  | 4.5    | 4.2    | 27.6   | 50.1   | 63.4   |
| 16.2   | 6.0    | 14.2  | 4.6   | 6.2    | 11.4   | 12.6   | 11.3   | 4.5    |
| 10.7   | 11.4   | 9.3   | 10.9  | 9.9    | 16.4   | 156.2  | 123.2  | 146.9  |
| 1.7    | 4.5    | 1.4   | 1.3   | 1.3    | 4.2    | 20.2   | 25.2   | 15.5   |
| 20.2   | 25.6   | 12.8  | 10.0  | 40.7   | 27.3   | 29.9   | 15.5   | 13.0   |
| 2.5    | 27.0   | 1.4   | 3.0   | 14.4   | 17.2   | 9.4    | 14.4   | 10.5   |
| 67.5   | 71.8   | 18.6  | 27.3  | 73.8   | 59.4   | 89.8   | 62.3   | 66.1   |
| 201.3  | 246.0  | 5.0   | 7.7   | 394.0  | 280.3  | 2.7    | 1.6    | 0.9    |
| 67.6   | 91.5   | 14.8  | 19.2  | 122.3  | 135.9  | 148.0  | 104.2  | 120.9  |
| 158.5  | 149.9  | 108.5 | 130.8 | 180.1  | 104.9  | 645.8  | 294.7  | 310.8  |
| 75.6   | 87.5   | 7.0   | 10.9  | 94.3   | 68.8   | 82.1   | 47.4   | 46.1   |
| 9.6    | 6.6    | 7.9   | 17.1  | 4.2    | 19.2   | 24.3   | 13.7   | 7.0    |
| 94.8   | 156.3  | 11.6  | 14.1  | 182.6  | 159.1  | 393.9  | 325.2  | 393.8  |
| 21.5   | 20.4   | 24.2  | 19.4  | 44.7   | 10.3   | 18.8   | 25.9   | 24.4   |
| 4.6    | 0.7    | 8.4   | 2.6   | 1.4    | 0.8    | 7.4    | 7.3    | 10.0   |

|        |        |        |        |        |        |        |        |        |
|--------|--------|--------|--------|--------|--------|--------|--------|--------|
| 52.1   | 71.2   | 16.6   | 14.1   | 70.9   | 87.1   | 84.9   | 77.0   | 72.1   |
| 150.2  | 171.4  | 3.0    | 0.6    | 245.1  | 157.3  | 574.1  | 854.3  | 1080.6 |
| 1.5    | 3.8    | 9.8    | 10.9   | 4.1    | 8.7    | 5.4    | 5.9    | 4.5    |
| 2.7    | 1.5    | 0.7    | 1.4    | 4.5    | 0.8    | 133.1  | 183.9  | 234.3  |
| 1.3    | 3.4    | 0.9    | 1.1    | 9.5    | 2.9    | 4.8    | 4.1    | 2.0    |
| 73.5   | 88.0   | 20.0   | 23.9   | 125.8  | 111.9  | 368.4  | 329.0  | 379.4  |
| 37.0   | 57.1   | 18.2   | 20.3   | 56.7   | 77.8   | 136.5  | 215.8  | 321.8  |
| 20.9   | 18.2   | 6.3    | 12.1   | 25.5   | 16.4   | 418.2  | 592.3  | 720.1  |
| 2.3    | 4.0    | 1.9    | 4.2    | 0.2    | 3.9    | 3.8    | 4.1    | 2.9    |
| 44.9   | 45.8   | 8.5    | 7.1    | 80.0   | 47.7   | 119.5  | 131.6  | 110.7  |
| 345.8  | 324.9  | 65.9   | 75.4   | 585.7  | 398.4  | 1115.9 | 540.8  | 565.8  |
| 1.6    | 2.5    | 10.4   | 13.8   | 1.3    | 1.9    | 9.1    | 6.5    | 1.2    |
| 26.9   | 14.5   | 3.7    | 12.9   | 2.4    | 13.9   | 23.2   | 12.9   | 18.7   |
| 10.1   | 6.9    | 0.7    | 3.4    | 23.1   | 12.9   | 3.0    | 0.9    | 8.6    |
| 453.1  | 476.8  | 0.8    | 6.9    | 1298.8 | 630.3  | 7.3    | 4.6    | 3.1    |
| 21.0   | 26.3   | 20.2   | 24.8   | 41.3   | 28.5   | 125.5  | 109.8  | 105.2  |
| 7.1    | 7.1    | 11.7   | 4.9    | 11.6   | 1.8    | 50.4   | 35.8   | 30.3   |
| 47.9   | 62.6   | 14.9   | 14.6   | 62.3   | 66.4   | 255.4  | 445.8  | 480.3  |
| 2.1    | 14.4   | 7.5    | 5.4    | 12.7   | 8.1    | 18.5   | 21.3   | 21.9   |
| 2.6    | 0.5    | 2.3    | 0.9    | 1.7    | 5.1    | 2.0    | 13.0   | 1.0    |
| 118.0  | 160.1  | 40.7   | 39.2   | 255.0  | 207.1  | 139.2  | 104.5  | 139.1  |
| 9.7    | 10.7   | 5.0    | 5.5    | 8.1    | 12.2   | 16.3   | 18.4   | 5.3    |
| 23.9   | 14.7   | 1.1    | 11.6   | 11.5   | 21.3   | 12.7   | 29.1   | 10.9   |
| 594.6  | 705.1  | 338.6  | 487.9  | 871.8  | 662.9  | 1381.8 | 1031.5 | 1146.7 |
| 37.2   | 42.0   | 1.5    | 1.9    | 78.0   | 37.0   | 11.9   | 28.2   | 32.7   |
| 0.9    | 8.8    | 5.7    | 6.4    | 1.5    | 4.4    | 7.3    | 5.9    | 1.4    |
| 9.9    | 19.9   | 12.6   | 5.9    | 3.8    | 26.6   | 15.3   | 4.5    | 11.8   |
| 14.1   | 20.4   | 10.4   | 4.9    | 18.6   | 36.9   | 9.0    | 4.6    | 5.4    |
| 5.3    | 27.2   | 14.9   | 15.1   | 10.0   | 11.0   | 10.5   | 21.8   | 22.7   |
| 9.0    | 12.6   | 8.4    | 11.1   | 4.0    | 3.7    | 7.9    | 7.0    | 0.6    |
| 1.1    | 1.3    | 107.2  | 174.2  | 1.5    | 14.0   | 9.2    | 9.2    | 10.9   |
| 11.1   | 23.4   | 18.7   | 15.5   | 27.7   | 17.3   | 406.6  | 413.8  | 745.0  |
| 3.8    | 4.8    | 8.2    | 7.4    | 0.8    | 5.1    | 30.0   | 31.7   | 48.6   |
| 21.7   | 2.7    | 2.8    | 1.7    | 28.8   | 13.2   | 11.1   | 6.2    | 2.3    |
| 26.5   | 25.6   | 23.8   | 29.4   | 47.1   | 25.6   | 47.1   | 52.7   | 59.8   |
| 59.3   | 77.4   | 11.9   | 8.0    | 105.0  | 63.5   | 89.6   | 71.9   | 71.4   |
| 5.0    | 2.2    | 1.7    | 3.5    | 1.2    | 5.1    | 2.6    | 9.5    | 1.6    |
| 75.6   | 72.6   | 39.8   | 41.5   | 88.1   | 68.0   | 200.5  | 149.1  | 151.1  |
| 6.5    | 1.6    | 14.8   | 1.7    | 18.7   | 10.2   | 17.2   | 16.3   | 19.1   |
| 14.3   | 24.7   | 0.7    | 7.5    | 27.4   | 15.3   | 22.1   | 15.6   | 22.7   |
| 55.3   | 29.5   | 50.2   | 43.3   | 63.1   | 67.6   | 132.8  | 143.9  | 134.4  |
| 20.3   | 11.9   | 43.0   | 70.0   | 31.9   | 22.7   | 171.4  | 72.6   | 95.6   |
| 331.3  | 539.0  | 34.7   | 35.4   | 586.8  | 478.3  | 195.6  | 154.7  | 190.5  |
| 18.5   | 13.5   | 21.4   | 20.3   | 11.9   | 12.4   | 13.5   | 12.5   | 12.7   |
| 1473.0 | 1739.8 | 1267.2 | 1624.1 | 2039.5 | 1630.1 | 5370.5 | 5078.7 | 5328.4 |
| 6.3    | 12.6   | 15.5   | 14.4   | 24.0   | 14.2   | 8.4    | 7.8    | 7.4    |
| 1.0    | 1.9    | 2.0    | 0.7    | 6.2    | 3.0    | 3.8    | 4.3    | 1.8    |
| 14.6   | 8.8    | 2.4    | 12.2   | 3.5    | 10.4   | 7.3    | 18.1   | 23.9   |
| 25.4   | 42.5   | 0.8    | 2.1    | 42.3   | 30.9   | 11.5   | 5.5    | 22.7   |
| 60.2   | 31.4   | 116.2  | 83.5   | 80.4   | 56.3   | 165.0  | 142.3  | 133.7  |
| 92.4   | 95.1   | 67.2   | 82.3   | 104.0  | 103.9  | 23.6   | 24.6   | 21.7   |
| 4.1    | 5.7    | 1.9    | 6.7    | 3.5    | 6.8    | 47.5   | 22.8   | 25.1   |
| 5.3    | 4.4    | 5.0    | 2.6    | 3.3    | 2.2    | 0.8    | 4.7    | 7.9    |

|        |        |       |       |        |        |        |       |       |
|--------|--------|-------|-------|--------|--------|--------|-------|-------|
| 1.6    | 1.5    | 1.2   | 2.9   | 1.8    | 9.9    | 1.7    | 2.4   | 6.0   |
| 1.2    | 7.0    | 3.1   | 7.4   | 1.8    | 3.4    | 5.5    | 7.3   | 2.7   |
| 2.5    | 1.5    | 5.6   | 1.6   | 6.2    | 4.6    | 2.3    | 1.6   | 1.0   |
| 31.0   | 21.8   | 13.0  | 23.4  | 20.2   | 27.6   | 22.3   | 22.5  | 25.7  |
| 14.0   | 9.3    | 9.3   | 2.4   | 9.3    | 2.4    | 44.0   | 60.0  | 60.1  |
| 1.9    | 1.6    | 3.1   | 1.0   | 1.4    | 4.1    | 12.5   | 3.1   | 4.8   |
| 36.7   | 31.4   | 11.8  | 14.3  | 29.6   | 39.6   | 243.9  | 278.5 | 329.9 |
| 12.7   | 2.6    | 1.6   | 0.8   | 14.6   | 7.2    | 37.0   | 46.3  | 61.6  |
| 0.8    | 2.3    | 0.3   | 3.8   | 0.7    | 6.9    | 0.6    | 3.1   | 2.9   |
| 96.5   | 112.0  | 4.3   | 13.2  | 167.8  | 74.1   | 8.0    | 9.5   | 8.6   |
| 176.7  | 206.6  | 7.4   | 3.6   | 242.2  | 206.2  | 28.9   | 18.3  | 16.6  |
| 5.3    | 5.2    | 17.9  | 10.5  | 11.8   | 6.8    | 35.9   | 61.7  | 56.1  |
| 14.6   | 10.9   | 14.6  | 12.4  | 16.6   | 14.5   | 59.5   | 84.8  | 100.9 |
| 223.5  | 199.2  | 36.5  | 40.5  | 234.9  | 172.9  | 485.8  | 201.1 | 199.7 |
| 0.9    | 2.2    | 0.5   | 0.6   | 0.8    | 2.8    | 1.2    | 0.9   | 1.0   |
| 1.2    | 1.4    | 1.5   | 1.3   | 1.0    | 1.3    | 1.1    | 2.2   | 2.6   |
| 0.8    | 1.1    | 0.5   | 1.0   | 1.1    | 1.6    | 3.3    | 2.8   | 2.6   |
| 7.3    | 3.3    | 5.0   | 0.8   | 1.3    | 8.2    | 8.2    | 9.4   | 21.8  |
| 0.8    | 1.0    | 12.5  | 10.2  | 3.4    | 9.3    | 15.7   | 9.0   | 6.4   |
| 14.6   | 17.5   | 3.4   | 3.9   | 33.3   | 23.1   | 140.4  | 100.3 | 123.3 |
| 838.2  | 914.1  | 101.3 | 221.7 | 1078.4 | 842.0  | 644.6  | 579.9 | 621.1 |
| 44.2   | 41.4   | 28.0  | 42.7  | 73.0   | 49.6   | 9.3    | 12.4  | 8.7   |
| 9.7    | 19.6   | 9.9   | 12.9  | 20.6   | 6.0    | 23.9   | 13.1  | 15.0  |
| 25.1   | 9.7    | 23.8  | 19.1  | 8.6    | 11.4   | 19.3   | 18.9  | 29.9  |
| 8.3    | 17.2   | 2.8   | 3.5   | 12.5   | 30.2   | 18.8   | 16.8  | 9.5   |
| 144.3  | 294.8  | 39.5  | 36.6  | 188.9  | 221.9  | 295.0  | 297.4 | 279.9 |
| 29.7   | 37.4   | 9.0   | 19.2  | 42.3   | 21.8   | 68.0   | 91.2  | 84.8  |
| 1.7    | 1.9    | 12.9  | 9.2   | 3.2    | 12.1   | 9.3    | 9.9   | 8.4   |
| 181.2  | 222.5  | 55.9  | 111.4 | 261.2  | 128.7  | 404.9  | 181.1 | 204.0 |
| 20.9   | 27.2   | 90.1  | 134.3 | 28.3   | 14.9   | 14.1   | 35.7  | 41.1  |
| 23.8   | 36.3   | 19.3  | 36.7  | 30.1   | 13.3   | 113.0  | 119.1 | 133.5 |
| 9.6    | 4.9    | 1.5   | 8.0   | 7.4    | 9.4    | 1.2    | 3.2   | 0.3   |
| 30.1   | 27.9   | 20.2  | 19.3  | 32.6   | 29.6   | 31.3   | 32.7  | 38.2  |
| 0.7    | 1.0    | 8.9   | 0.7   | 0.7    | 2.1    | 2.2    | 4.1   | 1.2   |
| 1.7    | 0.9    | 4.2   | 8.6   | 2.3    | 3.0    | 6.4    | 3.9   | 2.9   |
| 9.4    | 8.5    | 1.4   | 2.1   | 1.8    | 1.8    | 14.3   | 26.1  | 22.4  |
| 45.7   | 35.7   | 10.5  | 10.8  | 49.3   | 45.0   | 76.9   | 95.5  | 108.3 |
| 16.7   | 19.9   | 17.2  | 26.3  | 2.3    | 15.2   | 118.2  | 108.3 | 140.4 |
| 17.3   | 12.1   | 9.5   | 2.5   | 2.6    | 15.8   | 4.7    | 4.5   | 3.2   |
| 36.2   | 28.6   | 94.8  | 150.9 | 76.6   | 47.3   | 181.9  | 175.9 | 227.3 |
| 14.0   | 20.2   | 21.4  | 20.5  | 28.8   | 14.9   | 71.9   | 42.7  | 75.6  |
| 171.1  | 186.1  | 52.2  | 74.1  | 231.5  | 211.2  | 264.5  | 211.9 | 241.2 |
| 62.8   | 65.1   | 1.3   | 9.0   | 54.2   | 48.6   | 91.6   | 55.1  | 82.6  |
| 286.3  | 350.1  | 81.2  | 127.7 | 405.8  | 330.8  | 603.9  | 311.2 | 383.6 |
| 1.1    | 1.2    | 3.5   | 1.0   | 10.6   | 1.7    | 12.2   | 1.6   | 4.2   |
| 25.8   | 46.1   | 0.9   | 0.5   | 49.1   | 38.0   | 85.4   | 205.6 | 202.4 |
| 1.9    | 2.5    | 6.7   | 18.6  | 3.1    | 2.0    | 7.1    | 11.4  | 22.7  |
| 1145.5 | 2031.9 | 6.0   | 2.3   | 1358.6 | 1860.9 | 757.1  | 584.7 | 438.8 |
| 89.7   | 88.6   | 33.4  | 30.2  | 92.1   | 94.2   | 1401.4 | 849.0 | 822.1 |
| 102.3  | 95.8   | 30.8  | 49.8  | 118.2  | 124.9  | 1064.7 | 741.2 | 809.6 |
| 97.1   | 190.3  | 134.5 | 206.8 | 190.2  | 145.9  | 874.7  | 663.7 | 702.2 |
| 32.7   | 45.2   | 14.6  | 4.8   | 48.1   | 41.1   | 4.4    | 1.4   | 1.9   |
| 1.2    | 4.6    | 3.9   | 6.3   | 5.4    | 10.5   | 2.4    | 9.7   | 6.1   |



|        |        |       |        |        |        |        |        |        |
|--------|--------|-------|--------|--------|--------|--------|--------|--------|
| 6.2    | 6.6    | 1.1   | 0.8    | 7.2    | 2.4    | 35.0   | 85.7   | 69.0   |
| 146.3  | 126.7  | 12.0  | 17.4   | 114.8  | 146.3  | 489.1  | 209.0  | 282.3  |
| 3.2    | 11.7   | 30.0  | 39.1   | 3.2    | 4.8    | 14.0   | 7.0    | 5.7    |
| 9.7    | 8.8    | 15.7  | 14.9   | 1.1    | 17.3   | 183.2  | 393.4  | 410.4  |
| 11.5   | 8.0    | 20.5  | 11.0   | 22.0   | 33.7   | 6.4    | 7.8    | 2.9    |
| 7.5    | 10.9   | 7.4   | 2.4    | 1.9    | 11.0   | 24.3   | 20.8   | 16.2   |
| 13.0   | 2.4    | 6.0   | 2.1    | 6.8    | 14.7   | 2.8    | 2.3    | 1.7    |
| 338.0  | 309.5  | 148.9 | 140.5  | 448.2  | 278.7  | 794.9  | 837.3  | 907.2  |
| 14.8   | 23.7   | 38.3  | 41.8   | 16.3   | 29.4   | 50.3   | 62.4   | 58.6   |
| 0.2    | 2.9    | 5.7   | 4.6    | 1.2    | 2.9    | 1.9    | 3.4    | 4.4    |
| 4.3    | 4.4    | 5.3   | 7.7    | 9.0    | 15.8   | 20.1   | 12.1   | 13.1   |
| 35.2   | 34.8   | 24.7  | 22.6   | 19.2   | 12.0   | 7.0    | 4.5    | 9.3    |
| 1.5    | 24.8   | 15.0  | 14.7   | 15.9   | 5.8    | 20.4   | 17.8   | 22.7   |
| 9.4    | 4.2    | 10.3  | 1.2    | 24.9   | 10.2   | 13.8   | 8.1    | 7.6    |
| 34.9   | 45.6   | 156.0 | 194.6  | 54.3   | 32.1   | 174.0  | 189.5  | 181.4  |
| 666.4  | 980.9  | 407.2 | 425.2  | 1073.6 | 915.6  | 1028.7 | 1268.2 | 1208.9 |
| 1.0    | 8.5    | 4.3   | 0.6    | 5.5    | 0.8    | 1.3    | 2.8    | 1.8    |
| 51.0   | 32.9   | 20.7  | 1.9    | 51.4   | 48.6   | 234.4  | 169.8  | 200.1  |
| 18.2   | 3.7    | 14.8  | 18.2   | 14.8   | 6.9    | 47.1   | 70.4   | 72.6   |
| 1.5    | 4.3    | 2.4   | 2.7    | 1.4    | 2.3    | 11.2   | 5.9    | 7.7    |
| 55.0   | 45.7   | 22.9  | 33.2   | 51.4   | 25.2   | 70.9   | 96.6   | 110.8  |
| 14.7   | 10.5   | 12.2  | 6.9    | 16.4   | 14.6   | 5.4    | 7.1    | 12.0   |
| 2.5    | 8.5    | 1.2   | 0.8    | 13.6   | 1.6    | 1.8    | 0.7    | 3.6    |
| 40.9   | 31.2   | 7.5   | 0.6    | 42.7   | 28.3   | 50.6   | 58.7   | 54.7   |
| 18.5   | 5.9    | 2.5   | 3.0    | 5.8    | 23.4   | 40.8   | 32.3   | 36.2   |
| 117.9  | 132.1  | 2.2   | 2.8    | 240.1  | 236.5  | 17.7   | 4.9    | 11.4   |
| 13.6   | 16.1   | 8.2   | 4.2    | 22.1   | 26.8   | 30.3   | 52.4   | 54.9   |
| 1.1    | 1.2    | 0.3   | 1.4    | 0.9    | 1.3    | 0.7    | 0.7    | 0.8    |
| 19.6   | 49.1   | 0.5   | 2.1    | 63.4   | 33.3   | 3.4    | 32.1   | 27.0   |
| 28.8   | 19.3   | 4.1   | 0.7    | 45.0   | 20.7   | 5.4    | 5.0    | 1.8    |
| 16.2   | 21.1   | 2.8   | 5.4    | 55.9   | 10.9   | 6.0    | 8.1    | 6.6    |
| 2.6    | 2.1    | 0.8   | 0.7    | 1.8    | 1.7    | 5.7    | 12.5   | 15.0   |
| 42.9   | 60.7   | 1.2   | 0.3    | 54.1   | 70.9   | 5.0    | 6.8    | 4.7    |
| 15.5   | 2.8    | 12.8  | 3.1    | 19.7   | 15.8   | 18.8   | 16.8   | 22.5   |
| 512.5  | 503.3  | 165.5 | 261.0  | 1009.2 | 519.9  | 530.4  | 738.3  | 788.8  |
| 56.3   | 76.2   | 58.8  | 108.7  | 76.8   | 34.9   | 142.0  | 102.4  | 100.3  |
| 15.7   | 23.3   | 22.3  | 39.1   | 16.6   | 24.0   | 114.8  | 211.5  | 240.8  |
| 4.3    | 1.1    | 38.5  | 63.1   | 11.2   | 3.5    | 18.2   | 23.9   | 23.6   |
| 72.9   | 129.5  | 36.7  | 53.1   | 156.9  | 153.0  | 225.1  | 162.5  | 178.5  |
| 1999.9 | 2400.9 | 707.7 | 1059.2 | 2700.2 | 2358.0 | 4009.7 | 3730.4 | 4104.7 |
| 2.5    | 3.5    | 2.8   | 2.1    | 4.4    | 5.6    | 2.3    | 16.7   | 7.4    |
| 1.3    | 4.0    | 1.6   | 0.5    | 20.8   | 12.7   | 1.7    | 7.5    | 1.4    |
| 4.7    | 11.3   | 6.9   | 1.9    | 15.9   | 2.0    | 18.7   | 6.3    | 11.3   |
| 18.5   | 46.3   | 0.8   | 4.5    | 40.7   | 33.3   | 2.2    | 7.6    | 5.2    |
| 27.1   | 27.0   | 32.5  | 38.4   | 28.6   | 11.7   | 2.9    | 2.1    | 3.0    |
| 8.4    | 10.1   | 8.2   | 12.0   | 12.3   | 12.0   | 9.0    | 7.0    | 7.7    |
| 3.5    | 2.0    | 1.3   | 2.8    | 3.1    | 2.3    | 31.1   | 59.1   | 67.1   |
| 1.5    | 2.0    | 1.5   | 4.3    | 3.8    | 2.1    | 4.1    | 5.5    | 6.1    |
| 20.3   | 2.6    | 2.4   | 1.9    | 5.1    | 6.8    | 3.4    | 6.8    | 1.8    |
| 34.1   | 56.4   | 234.3 | 299.5  | 74.8   | 40.0   | 265.1  | 215.7  | 252.0  |
| 29.7   | 16.4   | 37.1  | 38.2   | 29.5   | 15.3   | 67.9   | 40.8   | 54.4   |
| 0.8    | 0.8    | 0.9   | 0.8    | 2.3    | 1.2    | 1.6    | 2.1    | 1.6    |
| 0.4    | 5.0    | 7.3   | 1.2    | 5.5    | 4.9    | 4.8    | 1.1    | 0.6    |

|        |        |       |        |        |        |        |        |        |
|--------|--------|-------|--------|--------|--------|--------|--------|--------|
| 1.8    | 8.6    | 2.8   | 2.7    | 15.8   | 4.8    | 83.4   | 106.1  | 84.6   |
| 9.6    | 12.9   | 5.3   | 12.7   | 3.0    | 8.2    | 33.3   | 18.7   | 11.1   |
| 4.1    | 10.3   | 11.7  | 2.4    | 36.7   | 11.9   | 5.7    | 10.1   | 15.8   |
| 8.9    | 12.4   | 1.2   | 5.9    | 2.1    | 2.5    | 97.5   | 60.0   | 70.6   |
| 9.3    | 36.0   | 9.8   | 3.8    | 43.2   | 16.7   | 4.6    | 4.1    | 3.8    |
| 13.8   | 15.2   | 12.7  | 10.7   | 5.0    | 23.8   | 17.0   | 19.4   | 16.4   |
| 12.0   | 21.9   | 20.8  | 10.1   | 73.0   | 11.4   | 33.2   | 35.2   | 18.3   |
| 4.2    | 13.4   | 2.6   | 2.9    | 1.1    | 4.2    | 3.0    | 8.6    | 3.5    |
| 7.3    | 10.4   | 12.4  | 11.3   | 10.5   | 7.2    | 17.7   | 10.3   | 9.2    |
| 17.6   | 18.9   | 9.7   | 13.7   | 27.1   | 15.1   | 51.1   | 59.3   | 48.5   |
| 38.7   | 48.2   | 11.2  | 14.7   | 56.8   | 38.3   | 118.6  | 111.2  | 113.6  |
| 7.8    | 0.4    | 0.2   | 6.3    | 0.9    | 1.3    | 2.2    | 1.0    | 6.0    |
| 1.0    | 1.4    | 2.6   | 0.8    | 7.6    | 2.5    | 5.8    | 3.3    | 4.3    |
| 1.2    | 1.6    | 29.9  | 41.1   | 1.5    | 1.7    | 24.6   | 26.8   | 24.5   |
| 7.9    | 2.3    | 0.9   | 5.8    | 5.4    | 2.1    | 12.7   | 9.8    | 6.5    |
| 12.6   | 21.2   | 0.4   | 1.0    | 26.5   | 19.8   | 20.0   | 34.8   | 42.8   |
| 24.6   | 19.3   | 1.5   | 7.8    | 40.3   | 34.6   | 52.0   | 63.0   | 65.2   |
| 4.7    | 8.7    | 266.0 | 381.0  | 8.9    | 7.9    | 47.6   | 113.0  | 78.0   |
| 18.8   | 33.7   | 0.6   | 1.5    | 93.9   | 44.8   | 5.7    | 0.9    | 6.9    |
| 1.1    | 1.0    | 3.6   | 3.4    | 2.5    | 1.4    | 4.8    | 3.7    | 4.0    |
| 8.2    | 26.6   | 3.9   | 0.8    | 16.7   | 21.3   | 17.9   | 22.0   | 21.8   |
| 169.5  | 197.8  | 37.8  | 63.0   | 611.6  | 236.0  | 90.2   | 118.6  | 103.0  |
| 12.9   | 14.1   | 6.3   | 5.5    | 14.0   | 12.1   | 636.1  | 1079.2 | 820.3  |
| 3445.1 | 4090.4 | 749.2 | 1163.6 | 4515.9 | 4342.6 | 7178.3 | 7495.5 | 7762.2 |
| 1.3    | 0.7    | 18.3  | 18.1   | 0.9    | 1.1    | 54.9   | 58.9   | 79.1   |
| 58.3   | 112.1  | 29.3  | 32.5   | 78.0   | 55.3   | 127.3  | 94.7   | 120.6  |
| 0.8    | 4.9    | 0.5   | 4.2    | 5.4    | 0.9    | 11.1   | 8.1    | 4.9    |
| 3.6    | 3.2    | 27.0  | 26.1   | 1.7    | 2.9    | 8.7    | 5.0    | 15.3   |
| 500.6  | 449.5  | 61.6  | 60.5   | 589.1  | 371.7  | 229.0  | 229.8  | 264.0  |
| 24.0   | 27.6   | 17.8  | 11.5   | 30.6   | 26.8   | 42.1   | 29.2   | 42.4   |
| 0.5    | 5.0    | 5.2   | 4.7    | 6.8    | 0.8    | 3.2    | 4.6    | 3.0    |
| 8.8    | 2.0    | 3.0   | 1.5    | 6.9    | 5.4    | 62.5   | 68.8   | 77.2   |
| 0.6    | 1.2    | 10.4  | 14.7   | 1.0    | 5.8    | 1.3    | 1.4    | 1.3    |
| 20.0   | 25.1   | 17.5  | 21.6   | 21.7   | 24.4   | 27.9   | 25.3   | 25.8   |
| 2.5    | 1.7    | 2.1   | 14.0   | 12.7   | 1.7    | 1.7    | 0.9    | 2.2    |
| 11.5   | 0.9    | 1.5   | 3.3    | 1.7    | 15.9   | 13.3   | 5.3    | 10.5   |
| 3.9    | 1.4    | 35.9  | 33.7   | 5.4    | 0.3    | 9.5    | 31.1   | 23.7   |
| 21.2   | 13.9   | 4.1   | 10.5   | 19.2   | 12.1   | 13.5   | 8.8    | 8.1    |
| 10.8   | 9.8    | 15.6  | 14.2   | 17.4   | 13.7   | 11.5   | 15.3   | 12.4   |
| 27.2   | 25.2   | 15.0  | 18.0   | 57.6   | 34.8   | 135.0  | 123.5  | 117.0  |
| 3.8    | 2.7    | 1.6   | 5.6    | 1.8    | 5.0    | 12.6   | 3.8    | 2.5    |
| 19.4   | 17.4   | 7.1   | 9.8    | 14.1   | 15.7   | 59.9   | 34.1   | 51.4   |
| 8.9    | 19.2   | 32.0  | 37.1   | 21.6   | 26.4   | 87.6   | 48.8   | 53.4   |
| 96.0   | 41.9   | 0.8   | 7.3    | 86.4   | 20.1   | 97.9   | 138.6  | 104.1  |
| 60.9   | 72.6   | 50.7  | 75.9   | 74.0   | 75.3   | 147.0  | 117.7  | 141.9  |
| 0.8    | 3.5    | 4.3   | 4.8    | 0.7    | 1.5    | 19.4   | 22.1   | 21.8   |
| 2.4    | 3.9    | 5.4   | 1.6    | 5.0    | 2.0    | 40.1   | 57.5   | 63.5   |
| 53.0   | 75.3   | 21.2  | 24.6   | 101.3  | 50.2   | 125.6  | 64.7   | 76.8   |
| 24.7   | 18.6   | 7.1   | 0.9    | 57.4   | 17.7   | 253.2  | 132.3  | 96.1   |
| 15.1   | 1.9    | 23.3  | 41.0   | 43.1   | 10.1   | 55.0   | 37.1   | 51.0   |
| 14.3   | 25.2   | 1.6   | 2.2    | 22.9   | 14.9   | 0.5    | 0.3    | 0.4    |
| 26.1   | 49.4   | 18.2  | 25.6   | 56.6   | 29.7   | 17.0   | 47.1   | 35.9   |
| 2.6    | 2.4    | 12.8  | 6.1    | 10.2   | 10.0   | 9.6    | 4.6    | 6.4    |

|       |       |       |       |        |       |        |        |        |
|-------|-------|-------|-------|--------|-------|--------|--------|--------|
| 16.1  | 8.0   | 129.5 | 218.7 | 9.7    | 25.9  | 40.4   | 18.2   | 22.9   |
| 8.5   | 13.7  | 9.1   | 10.2  | 16.9   | 10.5  | 6.9    | 5.7    | 2.6    |
| 34.2  | 35.0  | 25.0  | 24.1  | 29.9   | 36.4  | 44.8   | 38.2   | 36.8   |
| 121.9 | 214.8 | 64.6  | 75.2  | 228.3  | 150.4 | 2215.6 | 3182.8 | 3114.3 |
| 1.1   | 1.8   | 4.1   | 11.0  | 3.4    | 10.6  | 8.2    | 2.7    | 12.9   |
| 5.0   | 1.0   | 1.2   | 0.7   | 0.4    | 1.3   | 5.6    | 0.7    | 3.1    |
| 16.5  | 9.6   | 0.2   | 0.4   | 8.2    | 7.8   | 2.2    | 3.0    | 2.6    |
| 1.7   | 2.9   | 12.4  | 7.8   | 6.4    | 13.4  | 7.4    | 2.0    | 10.3   |
| 110.9 | 124.7 | 15.1  | 21.9  | 110.2  | 111.7 | 310.0  | 336.5  | 345.2  |
| 24.0  | 1.5   | 7.1   | 1.5   | 4.9    | 10.2  | 4.0    | 10.6   | 7.4    |
| 7.4   | 0.8   | 4.2   | 3.2   | 7.2    | 0.8   | 3.4    | 3.6    | 3.6    |
| 10.4  | 16.7  | 1.6   | 0.7   | 18.9   | 15.9  | 4.1    | 1.7    | 0.8    |
| 693.9 | 984.9 | 2.5   | 2.1   | 1118.7 | 714.8 | 512.6  | 256.8  | 296.8  |
| 2.1   | 1.1   | 1.6   | 1.2   | 1.6    | 0.5   | 331.7  | 254.9  | 233.4  |
| 4.8   | 5.0   | 3.5   | 2.6   | 9.0    | 6.6   | 2.5    | 0.6    | 1.9    |
| 5.7   | 11.4  | 18.8  | 5.8   | 4.7    | 2.1   | 270.3  | 409.2  | 453.0  |
| 301.0 | 357.0 | 117.7 | 146.7 | 456.2  | 327.1 | 972.0  | 318.0  | 377.9  |
| 56.0  | 60.0  | 10.6  | 5.5   | 68.1   | 35.8  | 12.1   | 8.7    | 2.8    |
| 15.3  | 3.1   | 19.2  | 20.7  | 3.6    | 4.4   | 5.6    | 24.3   | 26.0   |
| 0.6   | 5.2   | 3.0   | 4.6   | 0.3    | 0.9   | 3.4    | 6.3    | 3.3    |
| 9.2   | 1.0   | 7.5   | 3.1   | 11.1   | 8.9   | 9.9    | 1.1    | 9.4    |
| 8.3   | 1.1   | 15.6  | 11.8  | 14.6   | 22.4  | 14.2   | 14.2   | 13.9   |
| 11.0  | 2.2   | 9.0   | 1.9   | 1.9    | 2.1   | 5.2    | 6.9    | 8.5    |
| 80.9  | 119.9 | 0.9   | 0.6   | 141.5  | 85.2  | 1.0    | 1.0    | 0.8    |
| 61.5  | 111.9 | 0.9   | 1.0   | 112.1  | 52.8  | 1.0    | 0.5    | 1.0    |
| 226.8 | 230.9 | 22.5  | 31.3  | 298.3  | 222.0 | 143.6  | 74.5   | 90.4   |
| 242.3 | 248.4 | 24.1  | 21.1  | 317.2  | 181.7 | 152.6  | 87.5   | 92.2   |
| 2.8   | 1.3   | 9.5   | 0.7   | 12.8   | 1.0   | 4.2    | 3.9    | 2.9    |
| 7.2   | 5.0   | 8.0   | 1.5   | 1.2    | 0.3   | 5.0    | 4.2    | 4.0    |
| 0.4   | 5.7   | 1.2   | 0.3   | 2.0    | 6.6   | 5.3    | 5.9    | 6.3    |
| 285.4 | 241.1 | 51.2  | 88.4  | 306.6  | 242.9 | 734.7  | 246.5  | 284.4  |
| 2.3   | 0.9   | 2.0   | 1.8   | 3.1    | 1.4   | 63.2   | 156.3  | 176.4  |
| 11.5  | 15.6  | 18.6  | 17.9  | 18.9   | 16.6  | 19.3   | 18.8   | 19.9   |
| 1.0   | 11.9  | 1.4   | 7.2   | 14.8   | 0.6   | 1.3    | 3.7    | 1.8    |
| 2.8   | 1.2   | 3.2   | 2.2   | 2.0    | 1.7   | 4.8    | 5.9    | 3.9    |
| 1.2   | 0.8   | 1.5   | 0.8   | 1.4    | 1.4   | 1.6    | 3.8    | 2.2    |
| 1.3   | 3.2   | 2.9   | 11.5  | 12.0   | 1.7   | 20.3   | 10.2   | 9.7    |
| 0.9   | 2.1   | 5.0   | 1.0   | 0.8    | 1.1   | 1.9    | 1.4    | 1.5    |
| 40.6  | 47.7  | 22.3  | 21.9  | 55.5   | 64.2  | 130.4  | 192.9  | 214.8  |
| 1.3   | 1.2   | 1.7   | 0.8   | 1.5    | 0.9   | 1.2    | 1.2    | 1.3    |
| 20.8  | 32.1  | 1.7   | 2.0   | 27.1   | 24.0  | 5.8    | 8.7    | 16.9   |
| 13.5  | 21.6  | 1.0   | 0.9   | 12.8   | 2.4   | 118.7  | 72.1   | 91.4   |
| 0.9   | 11.5  | 4.2   | 0.7   | 1.7    | 5.3   | 49.5   | 47.4   | 31.9   |
| 5.5   | 2.0   | 0.5   | 1.9   | 13.3   | 4.3   | 2.3    | 1.3    | 1.3    |
| 27.0  | 31.2  | 17.1  | 9.2   | 44.9   | 31.1  | 2.1    | 9.0    | 4.0    |
| 57.3  | 63.2  | 1.5   | 1.6   | 118.3  | 63.7  | 1.8    | 4.1    | 4.8    |
| 36.1  | 32.0  | 1.9   | 7.2   | 85.3   | 47.1  | 20.5   | 1.0    | 9.9    |
| 41.1  | 45.3  | 11.8  | 15.5  | 81.9   | 83.7  | 100.8  | 74.5   | 95.0   |
| 31.8  | 39.6  | 9.5   | 11.7  | 79.1   | 36.3  | 29.9   | 18.9   | 27.5   |
| 10.1  | 6.5   | 80.5  | 63.0  | 14.5   | 2.6   | 266.9  | 180.1  | 212.1  |
| 15.2  | 11.5  | 14.0  | 0.8   | 12.2   | 2.8   | 739.7  | 469.0  | 463.7  |
| 176.1 | 211.7 | 61.3  | 78.7  | 287.5  | 241.5 | 355.6  | 282.0  | 300.1  |
| 23.1  | 32.8  | 6.8   | 10.6  | 48.2   | 41.7  | 7.0    | 6.9    | 5.6    |

|       |       |       |       |       |       |        |       |       |
|-------|-------|-------|-------|-------|-------|--------|-------|-------|
| 265.3 | 362.9 | 7.6   | 9.9   | 445.3 | 355.0 | 156.4  | 76.3  | 62.6  |
| 9.9   | 8.9   | 12.2  | 15.4  | 2.7   | 6.2   | 1.0    | 7.0   | 1.6   |
| 6.7   | 3.9   | 5.1   | 5.2   | 10.8  | 1.2   | 6.6    | 2.2   | 1.5   |
| 2.2   | 1.5   | 2.2   | 5.4   | 1.1   | 7.8   | 4.6    | 13.5  | 5.5   |
| 1.3   | 1.8   | 1.5   | 1.7   | 1.7   | 2.0   | 3.3    | 2.8   | 2.9   |
| 16.5  | 16.7  | 18.9  | 8.3   | 33.3  | 19.0  | 4.0    | 9.4   | 6.9   |
| 1.1   | 3.0   | 19.3  | 20.1  | 8.7   | 3.3   | 3.9    | 3.8   | 5.5   |
| 11.2  | 4.6   | 8.1   | 2.4   | 5.9   | 3.5   | 5.1    | 6.4   | 18.2  |
| 1.1   | 0.9   | 5.5   | 4.3   | 0.8   | 0.5   | 2.1    | 0.6   | 1.0   |
| 5.6   | 6.4   | 6.6   | 1.1   | 17.0  | 18.4  | 6.0    | 12.5  | 2.2   |
| 0.5   | 0.5   | 15.1  | 19.0  | 1.0   | 0.4   | 82.2   | 155.5 | 139.8 |
| 12.5  | 9.2   | 1.5   | 1.4   | 13.1  | 7.2   | 6.5    | 6.6   | 4.9   |
| 5.3   | 7.1   | 6.1   | 13.1  | 12.3  | 9.8   | 4.9    | 15.0  | 11.0  |
| 27.7  | 24.6  | 10.9  | 10.0  | 59.6  | 22.8  | 123.2  | 156.3 | 171.4 |
| 2.0   | 3.3   | 2.1   | 5.0   | 1.6   | 2.1   | 8.1    | 6.5   | 5.7   |
| 1.5   | 1.1   | 4.3   | 6.8   | 1.5   | 0.9   | 6.4    | 1.5   | 0.8   |
| 2.3   | 2.4   | 2.6   | 9.1   | 1.8   | 1.1   | 3.3    | 28.7  | 11.3  |
| 2.5   | 5.6   | 9.5   | 7.3   | 4.9   | 9.7   | 3.1    | 11.5  | 4.7   |
| 13.8  | 2.5   | 27.1  | 14.5  | 20.6  | 10.7  | 25.3   | 32.4  | 12.7  |
| 5.8   | 7.4   | 3.6   | 4.1   | 1.8   | 0.6   | 0.5    | 2.8   | 4.0   |
| 1.2   | 1.8   | 10.9  | 6.7   | 6.4   | 1.0   | 8.7    | 1.6   | 0.6   |
| 22.1  | 32.2  | 27.0  | 22.9  | 50.2  | 29.9  | 52.1   | 50.5  | 50.6  |
| 8.8   | 8.3   | 1.4   | 8.4   | 2.1   | 4.6   | 9.9    | 9.7   | 16.9  |
| 17.7  | 12.9  | 12.5  | 8.8   | 6.0   | 11.5  | 19.8   | 18.1  | 23.4  |
| 117.9 | 106.7 | 51.7  | 53.5  | 143.1 | 112.6 | 237.2  | 126.2 | 114.7 |
| 3.8   | 6.8   | 7.4   | 3.8   | 3.7   | 3.5   | 31.5   | 36.1  | 36.0  |
| 2.3   | 2.3   | 1.5   | 1.1   | 1.0   | 1.3   | 2.7    | 1.9   | 1.4   |
| 6.5   | 1.1   | 1.6   | 2.1   | 1.9   | 11.9  | 2.7    | 3.0   | 1.8   |
| 1.8   | 2.2   | 10.6  | 4.9   | 7.4   | 0.5   | 3.0    | 25.7  | 12.6  |
| 177.6 | 165.2 | 31.2  | 38.6  | 241.7 | 173.1 | 502.8  | 376.7 | 385.3 |
| 5.8   | 13.1  | 1.3   | 1.0   | 6.2   | 4.1   | 6.9    | 5.4   | 9.2   |
| 492.1 | 564.4 | 292.4 | 380.7 | 727.1 | 471.6 | 778.4  | 374.5 | 461.7 |
| 29.2  | 53.8  | 4.5   | 7.2   | 80.9  | 41.1  | 93.6   | 124.0 | 138.5 |
| 151.7 | 218.4 | 117.9 | 122.6 | 308.2 | 246.3 | 588.0  | 376.7 | 434.5 |
| 15.9  | 19.6  | 0.3   | 1.5   | 29.9  | 14.8  | 20.0   | 19.5  | 17.5  |
| 170.1 | 370.3 | 330.0 | 360.8 | 141.2 | 403.3 | 1028.8 | 603.2 | 616.1 |
| 172.8 | 161.1 | 27.0  | 45.2  | 188.0 | 152.4 | 573.8  | 574.9 | 606.0 |
| 161.3 | 179.4 | 3.6   | 2.4   | 306.0 | 110.0 | 1.7    | 5.1   | 2.8   |
| 22.2  | 34.0  | 26.2  | 18.7  | 50.1  | 4.4   | 34.1   | 30.0  | 32.8  |
| 1.2   | 1.7   | 7.0   | 8.9   | 2.8   | 11.4  | 4.0    | 5.0   | 0.8   |
| 3.6   | 9.6   | 11.1  | 6.4   | 3.7   | 5.5   | 13.1   | 2.8   | 10.8  |
| 3.3   | 18.6  | 7.3   | 9.9   | 41.9  | 13.8  | 17.1   | 17.5  | 15.1  |
| 0.5   | 0.2   | 0.4   | 2.9   | 0.9   | 0.3   | 3.0    | 4.2   | 3.3   |
| 38.7  | 21.5  | 6.2   | 1.2   | 24.5  | 39.9  | 24.3   | 16.8  | 15.8  |
| 3.7   | 13.3  | 5.7   | 0.8   | 10.3  | 8.4   | 16.5   | 13.4  | 6.3   |
| 80.3  | 95.6  | 51.4  | 50.7  | 116.9 | 86.2  | 109.6  | 102.0 | 119.2 |
| 15.0  | 11.7  | 2.9   | 0.1   | 17.4  | 13.5  | 0.6    | 5.7   | 3.2   |
| 0.7   | 0.9   | 12.7  | 17.4  | 0.8   | 0.8   | 5.5    | 2.3   | 1.2   |
| 89.2  | 95.3  | 145.0 | 165.1 | 164.7 | 128.8 | 153.8  | 114.6 | 107.8 |
| 299.0 | 260.1 | 76.5  | 77.8  | 328.0 | 297.9 | 285.6  | 182.0 | 208.8 |
| 1.3   | 1.5   | 1.1   | 1.1   | 1.3   | 1.4   | 2.4    | 2.1   | 1.6   |
| 1.6   | 2.7   | 13.8  | 15.1  | 2.6   | 2.4   | 282.4  | 251.3 | 400.1 |
| 0.9   | 0.8   | 3.1   | 9.0   | 10.1  | 6.7   | 5.5    | 7.6   | 6.2   |

|       |       |       |       |       |       |        |        |        |
|-------|-------|-------|-------|-------|-------|--------|--------|--------|
| 1.1   | 1.8   | 1.9   | 1.2   | 3.2   | 9.7   | 4.1    | 3.0    | 1.6    |
| 28.0  | 24.1  | 27.0  | 20.2  | 23.1  | 38.6  | 23.4   | 20.2   | 13.8   |
| 2.5   | 3.6   | 0.9   | 0.7   | 1.2   | 15.3  | 1.9    | 4.0    | 2.4    |
| 2.6   | 14.2  | 17.8  | 27.8  | 14.3  | 5.8   | 18.5   | 9.6    | 17.3   |
| 3.0   | 3.3   | 0.4   | 1.7   | 0.5   | 0.8   | 5.7    | 5.9    | 7.2    |
| 4.5   | 0.8   | 3.2   | 1.9   | 3.2   | 10.7  | 5.6    | 7.9    | 2.3    |
| 5.8   | 13.7  | 19.6  | 10.1  | 17.1  | 10.6  | 20.8   | 21.4   | 11.3   |
| 79.7  | 93.9  | 7.6   | 9.8   | 125.2 | 109.6 | 45.9   | 70.1   | 79.0   |
| 25.8  | 8.2   | 17.3  | 2.4   | 14.9  | 24.0  | 16.4   | 18.3   | 13.2   |
| 13.7  | 14.0  | 2.0   | 11.0  | 19.0  | 11.1  | 31.9   | 22.4   | 20.1   |
| 101.7 | 110.3 | 71.8  | 87.6  | 148.9 | 98.6  | 291.8  | 280.9  | 288.2  |
| 161.4 | 221.6 | 22.3  | 38.1  | 134.2 | 125.4 | 321.0  | 140.1  | 142.8  |
| 24.0  | 27.4  | 1.4   | 0.3   | 35.8  | 16.7  | 1.2    | 1.4    | 1.8    |
| 16.9  | 18.2  | 17.2  | 4.8   | 1.4   | 19.8  | 35.2   | 38.2   | 43.3   |
| 26.4  | 22.8  | 9.1   | 2.4   | 17.4  | 18.6  | 39.0   | 41.9   | 38.9   |
| 1.5   | 2.6   | 9.5   | 0.9   | 0.4   | 1.1   | 3.4    | 5.5    | 6.9    |
| 26.8  | 24.2  | 19.7  | 5.9   | 36.5  | 17.2  | 12.5   | 12.0   | 13.1   |
| 16.4  | 7.2   | 8.9   | 9.0   | 16.0  | 7.2   | 9.8    | 2.7    | 1.0    |
| 38.9  | 74.1  | 14.0  | 13.5  | 50.7  | 63.0  | 97.2   | 65.3   | 74.2   |
| 1.3   | 4.0   | 17.5  | 21.5  | 4.6   | 2.1   | 159.0  | 278.1  | 294.8  |
| 19.4  | 32.1  | 0.6   | 0.6   | 25.1  | 18.0  | 35.9   | 36.7   | 50.0   |
| 29.8  | 22.2  | 12.5  | 9.0   | 15.3  | 15.2  | 42.8   | 45.5   | 47.6   |
| 4.7   | 0.6   | 6.4   | 3.8   | 3.2   | 0.5   | 3.9    | 3.1    | 2.0    |
| 1.4   | 1.5   | 1.9   | 3.9   | 4.0   | 2.7   | 2.4    | 1.8    | 3.5    |
| 4.7   | 8.7   | 3.6   | 4.2   | 9.4   | 11.4  | 13.1   | 9.2    | 9.4    |
| 13.5  | 7.2   | 13.4  | 8.1   | 15.2  | 6.4   | 32.8   | 66.4   | 82.5   |
| 2.0   | 17.4  | 4.0   | 10.2  | 21.7  | 2.4   | 188.6  | 505.9  | 603.6  |
| 1.1   | 2.7   | 10.6  | 10.4  | 15.8  | 4.3   | 9.8    | 7.4    | 10.2   |
| 7.7   | 6.6   | 3.8   | 5.5   | 6.8   | 0.4   | 0.9    | 3.6    | 0.7    |
| 1.4   | 1.3   | 1.0   | 0.7   | 1.4   | 1.5   | 1.4    | 1.4    | 1.9    |
| 325.3 | 421.9 | 89.1  | 104.1 | 494.6 | 442.0 | 765.2  | 649.1  | 726.7  |
| 44.6  | 56.9  | 74.6  | 102.0 | 57.7  | 61.2  | 340.8  | 301.4  | 316.7  |
| 2.4   | 4.1   | 1.1   | 0.9   | 12.1  | 1.3   | 2.9    | 5.9    | 11.8   |
| 1.4   | 7.5   | 0.5   | 0.4   | 0.8   | 0.9   | 4.5    | 1.4    | 0.9    |
| 25.5  | 25.6  | 7.9   | 17.4  | 20.5  | 20.8  | 30.6   | 38.2   | 37.7   |
| 21.5  | 39.9  | 6.4   | 8.4   | 21.3  | 20.7  | 184.5  | 174.6  | 191.4  |
| 8.4   | 5.6   | 2.4   | 2.7   | 1.4   | 3.7   | 15.4   | 13.3   | 19.7   |
| 25.6  | 19.5  | 0.7   | 0.5   | 31.6  | 23.6  | 8.3    | 7.6    | 4.3    |
| 102.6 | 127.9 | 30.9  | 48.1  | 196.7 | 190.6 | 1745.6 | 1971.0 | 2041.9 |
| 0.7   | 6.4   | 1.4   | 1.9   | 7.6   | 1.7   | 2.8    | 5.8    | 1.6    |
| 8.5   | 5.9   | 6.5   | 0.4   | 1.5   | 3.1   | 12.5   | 7.1    | 2.9    |
| 8.3   | 4.0   | 7.1   | 5.8   | 0.6   | 0.2   | 6.3    | 3.4    | 6.1    |
| 11.7  | 11.9  | 4.3   | 4.7   | 49.3  | 16.6  | 41.8   | 35.1   | 43.1   |
| 73.4  | 69.1  | 9.7   | 7.7   | 144.6 | 80.8  | 10.0   | 34.0   | 30.8   |
| 35.5  | 46.1  | 1.0   | 0.5   | 51.4  | 80.8  | 9.1    | 8.0    | 9.2    |
| 1.6   | 0.7   | 0.5   | 0.9   | 4.1   | 0.5   | 6.1    | 8.1    | 8.3    |
| 95.2  | 82.7  | 100.7 | 105.3 | 129.3 | 64.9  | 209.2  | 123.3  | 139.4  |
| 4.4   | 7.7   | 12.3  | 8.6   | 8.4   | 0.8   | 13.0   | 6.9    | 9.7    |
| 3.8   | 11.2  | 7.7   | 2.5   | 1.6   | 13.9  | 7.1    | 9.3    | 6.2    |
| 76.0  | 88.4  | 9.8   | 12.5  | 129.3 | 97.0  | 59.1   | 47.1   | 41.6   |
| 9.5   | 1.7   | 9.7   | 9.3   | 9.3   | 4.7   | 13.7   | 28.8   | 15.8   |
| 40.4  | 45.3  | 6.4   | 14.2  | 58.9  | 26.5  | 114.2  | 214.4  | 188.7  |
| 27.4  | 36.5  | 18.4  | 18.5  | 51.3  | 51.6  | 147.2  | 97.2   | 114.1  |

|        |        |       |       |        |        |        |        |        |
|--------|--------|-------|-------|--------|--------|--------|--------|--------|
| 23.0   | 28.5   | 4.2   | 3.0   | 31.0   | 23.6   | 45.8   | 28.7   | 33.8   |
| 2.2    | 3.6    | 11.6  | 10.0  | 7.0    | 7.9    | 13.4   | 14.3   | 18.5   |
| 0.9    | 1.2    | 0.6   | 1.0   | 1.0    | 0.8    | 2.7    | 1.4    | 1.4    |
| 272.3  | 252.9  | 136.0 | 171.7 | 380.3  | 226.7  | 3.5    | 3.2    | 2.4    |
| 202.5  | 271.5  | 90.7  | 130.3 | 309.3  | 274.1  | 346.4  | 271.7  | 326.0  |
| 54.0   | 75.2   | 27.8  | 21.7  | 53.4   | 72.0   | 43.1   | 45.8   | 48.6   |
| 11.5   | 8.2    | 2.4   | 1.2   | 0.9    | 1.2    | 4.5    | 1.7    | 2.1    |
| 35.1   | 48.9   | 15.8  | 17.4  | 43.0   | 43.0   | 19.6   | 12.1   | 14.7   |
| 13.2   | 19.4   | 14.2  | 26.6  | 12.4   | 23.2   | 43.5   | 32.6   | 40.2   |
| 12.3   | 25.9   | 4.9   | 2.8   | 22.9   | 14.9   | 38.3   | 38.9   | 39.1   |
| 56.5   | 68.1   | 19.2  | 18.5  | 55.5   | 59.7   | 30.5   | 20.4   | 32.0   |
| 742.6  | 935.3  | 242.6 | 359.8 | 1062.4 | 794.3  | 803.2  | 531.8  | 651.4  |
| 1.8    | 0.9    | 2.8   | 6.4   | 5.4    | 1.4    | 7.0    | 7.6    | 1.6    |
| 999.5  | 1158.6 | 234.6 | 371.7 | 1336.9 | 1096.7 | 2096.8 | 1007.1 | 1121.9 |
| 10.4   | 19.9   | 29.4  | 18.9  | 29.0   | 14.3   | 56.4   | 77.4   | 69.5   |
| 0.5    | 2.0    | 1.7   | 0.6   | 0.5    | 1.0    | 1.7    | 2.9    | 3.9    |
| 1525.6 | 2352.4 | 131.9 | 153.6 | 2499.8 | 2317.0 | 4945.8 | 2539.4 | 2611.8 |
| 63.3   | 79.8   | 10.6  | 14.9  | 87.1   | 113.2  | 121.8  | 123.3  | 147.1  |
| 5.6    | 11.7   | 21.0  | 28.3  | 29.9   | 4.4    | 179.0  | 144.6  | 144.9  |
| 7.9    | 1.2    | 19.9  | 6.3   | 8.1    | 9.3    | 3.6    | 6.8    | 9.9    |
| 48.8   | 64.5   | 125.9 | 122.4 | 59.6   | 50.4   | 173.4  | 273.9  | 274.1  |
| 5.0    | 0.8    | 0.8   | 3.5   | 4.2    | 5.4    | 65.5   | 55.6   | 51.9   |
| 349.5  | 453.8  | 29.6  | 21.6  | 387.6  | 485.5  | 233.4  | 218.3  | 228.2  |
| 3.4    | 2.1    | 2.4   | 4.4   | 8.4    | 0.9    | 9.5    | 9.8    | 11.3   |
| 34.6   | 65.4   | 30.5  | 40.0  | 49.7   | 47.8   | 68.1   | 85.7   | 64.1   |
| 5.4    | 1.1    | 7.1   | 26.1  | 15.3   | 3.4    | 60.1   | 38.9   | 36.9   |
| 2.2    | 1.1    | 10.2  | 4.1   | 9.2    | 6.6    | 8.0    | 3.0    | 9.0    |
| 220.9  | 217.9  | 144.1 | 243.9 | 347.3  | 255.4  | 296.1  | 150.9  | 164.7  |
| 11.9   | 6.4    | 0.4   | 1.5   | 9.1    | 1.4    | 383.5  | 121.9  | 181.5  |
| 9.7    | 15.3   | 0.7   | 0.5   | 6.6    | 8.6    | 6.6    | 3.3    | 7.9    |
| 0.8    | 8.4    | 0.8   | 0.9   | 12.5   | 10.4   | 1.3    | 1.2    | 4.2    |
| 0.6    | 5.0    | 3.3   | 0.7   | 7.2    | 3.5    | 3.7    | 2.4    | 0.9    |
| 9.1    | 3.6    | 3.2   | 0.3   | 1.4    | 6.2    | 0.9    | 0.5    | 0.6    |
| 13.4   | 11.3   | 1.1   | 1.4   | 13.4   | 16.0   | 5.0    | 9.0    | 12.5   |
| 0.9    | 7.1    | 8.0   | 2.5   | 1.2    | 0.6    | 1.6    | 7.3    | 9.8    |
| 2424.0 | 3633.1 | 239.9 | 316.2 | 3823.7 | 3145.2 | 2067.8 | 1345.8 | 1375.1 |
| 137.4  | 190.6  | 215.3 | 328.3 | 227.4  | 186.4  | 625.9  | 520.1  | 542.5  |
| 17.9   | 15.2   | 20.6  | 13.4  | 20.4   | 17.8   | 52.1   | 54.8   | 57.6   |
| 3.1    | 1.9    | 8.5   | 13.9  | 9.6    | 2.0    | 10.9   | 23.0   | 2.9    |
| 12.4   | 15.4   | 2.1   | 1.0   | 7.6    | 17.2   | 83.8   | 89.9   | 90.0   |
| 34.4   | 28.2   | 3.5   | 17.8  | 60.6   | 32.9   | 72.3   | 47.6   | 49.9   |
| 2.2    | 31.0   | 3.4   | 21.4  | 28.9   | 24.9   | 7.8    | 20.0   | 16.9   |
| 51.2   | 61.1   | 7.7   | 5.2   | 73.0   | 74.6   | 90.2   | 176.0  | 176.2  |
| 175.4  | 222.8  | 1.8   | 1.5   | 310.2  | 219.7  | 284.3  | 342.3  | 402.5  |
| 15.1   | 8.3    | 3.3   | 3.3   | 2.4    | 5.4    | 5.2    | 2.7    | 2.1    |
| 37.1   | 45.9   | 1.0   | 0.6   | 77.7   | 70.3   | 4.5    | 3.3    | 2.4    |
| 13.4   | 13.7   | 19.2  | 17.2  | 17.5   | 16.7   | 12.2   | 12.9   | 16.1   |
| 27.5   | 42.7   | 8.4   | 7.3   | 30.1   | 27.2   | 72.4   | 80.6   | 93.4   |
| 35.1   | 53.9   | 9.9   | 11.8  | 43.6   | 59.0   | 290.7  | 372.3  | 388.6  |
| 6.8    | 11.0   | 7.9   | 10.9  | 4.5    | 9.6    | 16.9   | 16.7   | 19.4   |
| 2.0    | 1.6    | 2.2   | 5.5   | 0.7    | 1.7    | 4.6    | 1.8    | 2.4    |
| 20.7   | 22.3   | 1.9   | 8.2   | 17.0   | 24.6   | 19.2   | 20.3   | 25.2   |
| 12.2   | 9.6    | 0.1   | 0.3   | 11.4   | 15.5   | 0.5    | 2.6    | 1.2    |

|       |       |       |       |       |       |        |        |        |
|-------|-------|-------|-------|-------|-------|--------|--------|--------|
| 32.1  | 36.0  | 22.6  | 29.5  | 50.7  | 33.1  | 75.4   | 48.5   | 51.6   |
| 4.6   | 5.0   | 7.6   | 5.8   | 26.0  | 28.8  | 5.1    | 14.0   | 8.9    |
| 16.3  | 9.3   | 13.8  | 15.5  | 20.7  | 25.5  | 3851.0 | 3909.5 | 4490.5 |
| 521.1 | 757.7 | 65.0  | 107.4 | 656.5 | 928.6 | 1558.6 | 777.6  | 847.1  |
| 34.9  | 52.8  | 27.2  | 20.7  | 34.4  | 48.6  | 87.2   | 55.7   | 64.3   |
| 95.0  | 142.8 | 6.6   | 9.2   | 170.8 | 145.0 | 128.4  | 156.5  | 221.8  |
| 4.2   | 16.3  | 14.0  | 7.2   | 9.8   | 12.8  | 116.5  | 114.3  | 134.7  |
| 92.3  | 76.0  | 68.2  | 59.9  | 231.0 | 53.4  | 47.8   | 47.1   | 35.9   |
| 13.7  | 10.4  | 10.3  | 3.4   | 17.2  | 8.8   | 1.4    | 7.2    | 5.4    |
| 10.5  | 1.0   | 4.3   | 1.3   | 2.4   | 1.0   | 7.2    | 5.2    | 3.9    |
| 567.2 | 652.8 | 233.2 | 361.0 | 878.6 | 820.1 | 2554.6 | 1227.8 | 1504.0 |
| 16.4  | 24.5  | 94.2  | 146.8 | 34.7  | 29.9  | 29.6   | 9.0    | 11.6   |
| 54.9  | 70.8  | 6.5   | 7.2   | 68.5  | 72.1  | 45.8   | 38.7   | 50.2   |
| 7.6   | 19.0  | 18.7  | 16.4  | 7.7   | 2.6   | 14.6   | 13.1   | 25.2   |
| 74.3  | 78.6  | 25.8  | 29.9  | 102.7 | 72.6  | 17.0   | 20.3   | 19.2   |
| 0.7   | 4.0   | 8.2   | 2.2   | 0.7   | 0.9   | 12.3   | 4.7    | 6.8    |
| 57.5  | 55.7  | 49.6  | 89.7  | 47.8  | 87.9  | 371.9  | 361.2  | 351.1  |
| 62.5  | 81.1  | 37.8  | 33.4  | 75.0  | 69.4  | 37.9   | 38.2   | 36.2   |
| 6.6   | 5.4   | 20.2  | 32.4  | 10.4  | 7.8   | 40.3   | 106.9  | 109.5  |
| 11.0  | 9.7   | 8.0   | 8.6   | 18.8  | 9.9   | 18.2   | 13.8   | 6.0    |
| 4.7   | 0.8   | 1.1   | 0.7   | 1.0   | 0.4   | 1.0    | 0.8    | 1.2    |
| 90.3  | 151.6 | 102.5 | 163.8 | 191.8 | 107.4 | 275.4  | 290.7  | 318.3  |
| 29.0  | 14.0  | 3.9   | 5.1   | 21.1  | 23.5  | 68.6   | 46.3   | 34.8   |
| 7.8   | 10.1  | 11.8  | 2.6   | 11.2  | 6.0   | 17.3   | 9.4    | 10.7   |
| 579.7 | 740.0 | 158.9 | 306.3 | 745.3 | 627.8 | 773.7  | 512.7  | 625.2  |
| 32.7  | 58.0  | 14.6  | 18.4  | 60.0  | 59.0  | 46.2   | 51.1   | 40.3   |
| 19.0  | 23.4  | 13.9  | 10.2  | 74.2  | 16.8  | 21.9   | 15.8   | 12.3   |
| 5.6   | 11.4  | 10.7  | 0.9   | 0.5   | 4.8   | 9.4    | 18.3   | 11.0   |
| 1.3   | 1.3   | 2.1   | 1.5   | 1.9   | 1.5   | 2.3    | 1.3    | 2.4    |
| 0.7   | 0.7   | 9.6   | 3.6   | 0.6   | 1.3   | 8.6    | 4.9    | 5.9    |
| 29.9  | 34.2  | 66.9  | 83.2  | 67.4  | 23.9  | 13.4   | 3.5    | 8.6    |
| 14.9  | 8.6   | 10.9  | 4.5   | 10.4  | 3.7   | 30.0   | 11.6   | 8.6    |
| 19.5  | 19.4  | 1.1   | 0.7   | 23.1  | 11.0  | 23.2   | 12.3   | 19.8   |
| 4.3   | 6.4   | 12.0  | 9.9   | 4.9   | 16.6  | 339.1  | 354.0  | 351.4  |
| 3.0   | 5.8   | 1.8   | 1.9   | 7.4   | 0.8   | 4.2    | 3.4    | 3.8    |
| 53.7  | 48.7  | 16.3  | 10.3  | 65.2  | 53.1  | 24.0   | 25.9   | 15.9   |
| 17.7  | 14.6  | 27.5  | 29.4  | 3.0   | 17.8  | 13.8   | 14.0   | 16.6   |
| 20.1  | 21.3  | 9.4   | 13.4  | 16.2  | 16.2  | 21.3   | 11.9   | 15.7   |
| 5.2   | 3.7   | 3.5   | 1.7   | 4.4   | 3.2   | 8.5    | 6.5    | 6.4    |
| 7.2   | 8.2   | 8.7   | 1.3   | 3.3   | 12.8  | 18.7   | 20.9   | 20.4   |
| 24.7  | 42.9  | 17.7  | 16.6  | 34.7  | 13.7  | 37.0   | 45.3   | 30.9   |
| 33.0  | 32.6  | 1.5   | 8.5   | 68.3  | 16.9  | 53.8   | 52.0   | 54.8   |
| 5.2   | 2.8   | 11.1  | 1.0   | 6.8   | 0.7   | 4.9    | 8.0    | 5.3    |
| 0.7   | 3.6   | 0.7   | 0.3   | 0.5   | 0.7   | 4.1    | 1.3    | 0.6    |
| 2.7   | 6.2   | 1.4   | 3.8   | 1.6   | 2.5   | 108.0  | 186.9  | 166.3  |
| 34.9  | 34.9  | 10.4  | 2.6   | 82.8  | 31.5  | 26.5   | 27.5   | 22.6   |
| 227.7 | 278.7 | 107.6 | 151.6 | 356.7 | 237.9 | 606.9  | 608.8  | 729.7  |
| 63.7  | 92.8  | 49.3  | 37.0  | 103.4 | 77.5  | 91.1   | 119.5  | 90.2   |
| 2.7   | 1.3   | 1.5   | 1.4   | 5.9   | 0.6   | 7.5    | 1.2    | 1.5    |
| 47.9  | 42.9  | 52.5  | 46.7  | 55.9  | 46.9  | 158.6  | 144.9  | 156.0  |
| 1.0   | 3.4   | 0.8   | 3.5   | 1.3   | 0.5   | 0.9    | 0.4    | 0.4    |
| 4.4   | 1.5   | 3.9   | 0.7   | 0.4   | 6.6   | 0.6    | 5.1    | 0.6    |
| 1.3   | 0.3   | 9.9   | 4.3   | 15.4  | 4.5   | 15.0   | 11.5   | 7.1    |

|        |        |       |        |        |        |        |        |        |
|--------|--------|-------|--------|--------|--------|--------|--------|--------|
| 1.5    | 0.8    | 3.5   | 8.5    | 3.9    | 0.7    | 3.5    | 1.7    | 1.9    |
| 9.6    | 1.4    | 4.0   | 2.2    | 7.5    | 4.3    | 2.8    | 10.0   | 1.9    |
| 59.5   | 93.6   | 53.1  | 47.5   | 121.3  | 64.6   | 324.4  | 327.6  | 315.7  |
| 1.4    | 1.1    | 1.8   | 2.3    | 1.2    | 1.3    | 2.0    | 1.4    | 1.6    |
| 1.1    | 2.1    | 2.4   | 2.4    | 0.7    | 0.9    | 3.2    | 1.8    | 1.4    |
| 12.6   | 2.2    | 17.5  | 11.3   | 16.2   | 6.7    | 10.7   | 9.4    | 3.5    |
| 7.9    | 3.4    | 8.2   | 12.6   | 4.9    | 2.3    | 2.8    | 4.2    | 4.7    |
| 7.2    | 21.3   | 13.9  | 7.7    | 17.7   | 9.6    | 42.2   | 54.1   | 56.4   |
| 0.9    | 5.5    | 0.7   | 0.8    | 4.3    | 1.3    | 20.2   | 23.6   | 38.1   |
| 1.9    | 0.9    | 20.3  | 8.2    | 1.9    | 1.9    | 8.4    | 11.7   | 7.3    |
| 11.3   | 6.0    | 22.0  | 38.0   | 4.9    | 1.7    | 221.0  | 326.7  | 405.7  |
| 24.8   | 3.8    | 2.0   | 0.9    | 33.4   | 6.0    | 19.7   | 21.4   | 22.1   |
| 382.1  | 550.2  | 1.8   | 3.0    | 1218.1 | 867.7  | 2.1    | 8.2    | 3.7    |
| 1888.9 | 2717.1 | 641.3 | 1067.1 | 2705.3 | 2842.4 | 5377.7 | 3395.3 | 3483.5 |
| 3.1    | 1.5    | 1.2   | 1.8    | 1.9    | 1.8    | 8.7    | 7.2    | 5.1    |
| 32.6   | 18.9   | 9.5   | 9.8    | 22.8   | 14.0   | 27.6   | 26.9   | 25.1   |
| 12.7   | 12.4   | 13.9  | 7.3    | 18.3   | 11.8   | 14.2   | 15.2   | 13.7   |
| 1.6    | 13.1   | 3.5   | 3.1    | 1.5    | 2.6    | 2.5    | 1.7    | 1.7    |
| 6.4    | 12.2   | 5.6   | 4.6    | 1.3    | 6.8    | 7.1    | 4.6    | 5.1    |
| 7.1    | 10.2   | 9.3   | 19.0   | 5.6    | 8.6    | 2.2    | 0.9    | 2.8    |
| 0.2    | 8.0    | 35.6  | 57.5   | 15.1   | 4.8    | 5.6    | 0.5    | 5.7    |
| 0.5    | 4.6    | 31.2  | 30.2   | 7.0    | 3.0    | 4.6    | 7.5    | 1.4    |
| 7.8    | 4.4    | 8.5   | 1.1    | 12.8   | 13.8   | 5.5    | 7.6    | 4.1    |
| 7.6    | 1.8    | 12.8  | 2.8    | 12.6   | 6.1    | 17.4   | 10.5   | 5.1    |
| 33.1   | 76.9   | 1.2   | 7.7    | 44.9   | 47.1   | 35.6   | 32.7   | 41.0   |
| 286.7  | 490.5  | 17.3  | 2.2    | 700.8  | 573.9  | 8.1    | 7.5    | 10.2   |
| 12.9   | 9.1    | 17.9  | 4.7    | 8.3    | 18.5   | 18.4   | 12.4   | 13.8   |
| 6.9    | 2.3    | 0.5   | 0.5    | 23.1   | 3.9    | 3.4    | 1.7    | 1.7    |
| 69.5   | 92.6   | 40.8  | 42.7   | 77.2   | 109.1  | 175.5  | 86.5   | 94.6   |
| 211.7  | 287.6  | 284.4 | 448.6  | 342.8  | 275.9  | 1211.0 | 1030.6 | 1045.9 |
| 11.9   | 14.7   | 10.3  | 4.8    | 17.4   | 17.3   | 38.7   | 42.5   | 52.2   |
| 22.0   | 32.7   | 11.3  | 1.9    | 32.4   | 39.2   | 15.5   | 13.9   | 23.7   |
| 6.7    | 5.1    | 11.1  | 6.6    | 5.0    | 5.6    | 9.7    | 4.1    | 7.3    |
| 1.4    | 6.1    | 10.5  | 8.3    | 1.4    | 33.0   | 5.8    | 11.8   | 16.8   |
| 7.5    | 2.5    | 28.4  | 41.7   | 4.7    | 9.7    | 6.9    | 5.2    | 11.2   |
| 83.9   | 72.1   | 78.9  | 71.5   | 131.5  | 78.6   | 127.0  | 130.9  | 117.1  |
| 9.5    | 14.0   | 13.7  | 5.6    | 12.1   | 4.8    | 13.9   | 18.4   | 14.0   |
| 42.5   | 50.9   | 29.1  | 33.5   | 64.8   | 37.7   | 4.6    | 5.1    | 7.2    |
| 14.3   | 20.5   | 16.8  | 16.9   | 17.2   | 10.6   | 49.0   | 45.3   | 28.8   |
| 13.4   | 21.2   | 52.4  | 32.5   | 21.8   | 15.4   | 146.3  | 134.4  | 136.3  |
| 3.0    | 2.9    | 0.6   | 0.7    | 2.5    | 2.5    | 2.3    | 1.3    | 3.1    |
| 21.7   | 29.0   | 20.1  | 17.4   | 32.1   | 21.7   | 16.1   | 17.7   | 19.6   |
| 12.7   | 1.9    | 7.3   | 2.6    | 9.8    | 2.5    | 25.0   | 17.1   | 21.6   |
| 29.6   | 41.6   | 5.7   | 10.8   | 49.9   | 60.5   | 98.9   | 109.8  | 110.5  |
| 1.2    | 2.2    | 7.5   | 1.2    | 1.2    | 1.7    | 1.3    | 0.6    | 0.7    |
| 0.5    | 0.3    | 0.5   | 0.5    | 0.5    | 1.1    | 0.8    | 0.8    | 0.5    |
| 91.3   | 101.7  | 18.3  | 2.0    | 199.0  | 86.1   | 36.7   | 48.5   | 44.5   |
| 6.5    | 1.4    | 1.5   | 2.8    | 4.5    | 2.1    | 3.7    | 4.6    | 4.7    |
| 3.0    | 0.7    | 1.5   | 0.8    | 3.4    | 1.3    | 3.5    | 2.0    | 3.5    |
| 20.2   | 31.5   | 51.4  | 56.9   | 24.6   | 8.5    | 36.3   | 69.1   | 61.5   |
| 1.7    | 2.7    | 4.6   | 3.8    | 2.5    | 2.1    | 4.7    | 2.6    | 1.4    |
| 12.7   | 4.9    | 14.6  | 9.0    | 19.0   | 4.2    | 16.6   | 15.2   | 18.5   |
| 13.8   | 20.3   | 8.1   | 2.4    | 26.7   | 13.9   | 6.2    | 11.3   | 5.4    |



|        |        |       |       |        |        |        |        |        |
|--------|--------|-------|-------|--------|--------|--------|--------|--------|
| 2.8    | 0.3    | 1.6   | 4.6   | 1.3    | 2.2    | 2.2    | 4.4    | 1.3    |
| 4.7    | 10.1   | 35.7  | 58.6  | 8.7    | 16.4   | 16.2   | 6.6    | 16.7   |
| 1093.5 | 1360.5 | 169.4 | 277.6 | 1565.6 | 1229.3 | 2264.3 | 2321.0 | 2570.7 |
| 3.6    | 3.0    | 0.4   | 2.5   | 4.0    | 4.8    | 1.7    | 0.3    | 0.8    |
| 1.3    | 0.2    | 0.2   | 1.2   | 2.8    | 2.4    | 0.3    | 0.3    | 2.3    |
| 1.6    | 7.8    | 1.3   | 7.4   | 2.0    | 3.9    | 4.2    | 4.0    | 8.9    |
| 88.6   | 115.4  | 0.6   | 2.1   | 172.9  | 130.7  | 58.5   | 19.1   | 23.3   |
| 58.1   | 71.8   | 19.0  | 15.9  | 73.4   | 80.5   | 215.5  | 218.4  | 199.0  |
| 2.2    | 1.5    | 10.6  | 2.4   | 1.5    | 1.2    | 7.5    | 13.2   | 5.7    |
| 19.5   | 26.6   | 5.2   | 6.9   | 31.3   | 17.7   | 13.8   | 12.6   | 8.4    |
| 13.3   | 2.3    | 10.4  | 5.2   | 14.9   | 12.4   | 1.4    | 2.0    | 0.6    |
| 4.9    | 10.2   | 9.7   | 10.0  | 4.2    | 7.8    | 12.5   | 12.3   | 8.9    |
| 0.7    | 0.9    | 0.8   | 0.6   | 0.8    | 0.8    | 0.8    | 0.7    | 1.1    |
| 0.5    | 4.1    | 1.3   | 3.3   | 0.6    | 3.1    | 0.8    | 8.9    | 6.8    |
| 13.5   | 18.2   | 19.1  | 25.9  | 26.5   | 20.3   | 26.7   | 14.3   | 31.1   |
| 11.4   | 15.2   | 14.9  | 5.8   | 9.9    | 3.0    | 9.5    | 2.4    | 7.1    |
| 39.1   | 43.9   | 5.7   | 0.8   | 123.3  | 50.1   | 11.4   | 5.8    | 4.3    |
| 2.5    | 3.6    | 2.2   | 2.0   | 2.1    | 2.9    | 4.2    | 12.1   | 11.0   |
| 7.1    | 3.8    | 2.0   | 1.3   | 3.3    | 18.3   | 7.3    | 12.2   | 10.9   |
| 20.2   | 13.5   | 22.6  | 15.1  | 37.2   | 4.8    | 2.9    | 21.1   | 26.4   |
| 18.9   | 34.3   | 6.3   | 4.4   | 24.7   | 28.9   | 10.9   | 9.8    | 6.2    |
| 51.2   | 71.0   | 11.4  | 2.8   | 41.3   | 61.3   | 41.6   | 66.3   | 68.6   |
| 36.2   | 34.1   | 2.0   | 0.8   | 33.5   | 9.4    | 82.5   | 62.9   | 70.3   |
| 4.3    | 2.7    | 0.7   | 1.7   | 4.5    | 5.5    | 2.2    | 2.4    | 1.7    |
| 13.5   | 22.8   | 10.1  | 2.0   | 42.8   | 15.9   | 27.6   | 15.1   | 27.5   |
| 9.2    | 6.0    | 13.0  | 16.3  | 8.1    | 14.9   | 53.2   | 41.3   | 28.0   |
| 9.0    | 7.2    | 13.0  | 28.1  | 18.1   | 1.1    | 2.3    | 3.2    | 7.0    |
| 9.8    | 7.8    | 21.4  | 16.8  | 5.5    | 2.0    | 6.6    | 13.1   | 3.8    |
| 8.2    | 18.0   | 7.2   | 3.3   | 28.6   | 16.4   | 2.3    | 3.9    | 4.7    |
| 8.9    | 11.8   | 21.5  | 4.2   | 16.7   | 6.4    | 18.8   | 25.8   | 17.1   |
| 1.2    | 1.6    | 3.1   | 0.5   | 5.3    | 1.0    | 14.7   | 2.4    | 4.1    |
| 19.1   | 28.4   | 20.3  | 15.6  | 17.5   | 15.9   | 19.8   | 4.3    | 14.2   |
| 8.0    | 26.4   | 4.9   | 1.0   | 30.2   | 26.1   | 16.9   | 13.8   | 13.3   |
| 27.1   | 4.7    | 21.1  | 15.1  | 19.4   | 38.4   | 39.3   | 30.2   | 31.0   |
| 3.3    | 10.9   | 4.1   | 1.8   | 6.3    | 1.7    | 27.9   | 7.2    | 11.1   |
| 44.3   | 75.3   | 1.5   | 1.1   | 84.3   | 51.4   | 123.4  | 56.1   | 58.5   |
| 12.7   | 10.8   | 32.4  | 36.0  | 25.7   | 13.2   | 5.9    | 9.5    | 10.8   |
| 35.2   | 61.6   | 9.5   | 6.0   | 59.7   | 30.3   | 211.4  | 171.8  | 179.6  |
| 17.6   | 7.9    | 1.8   | 5.3   | 21.2   | 6.7    | 18.6   | 10.6   | 11.2   |
| 3.5    | 24.6   | 3.8   | 0.8   | 10.1   | 14.6   | 4.4    | 5.7    | 2.6    |
| 38.4   | 39.5   | 42.5  | 62.1  | 50.6   | 47.0   | 190.8  | 102.5  | 133.8  |
| 9.3    | 9.0    | 3.2   | 2.2   | 10.5   | 0.9    | 115.1  | 667.1  | 579.0  |
| 41.1   | 49.9   | 47.7  | 51.4  | 57.6   | 48.2   | 84.6   | 96.7   | 109.0  |
| 7.3    | 17.2   | 8.9   | 10.5  | 24.3   | 11.4   | 17.3   | 17.3   | 15.8   |
| 26.7   | 11.4   | 11.3  | 17.2  | 35.7   | 30.4   | 109.8  | 92.5   | 101.9  |
| 29.2   | 19.8   | 1.4   | 0.4   | 33.4   | 20.1   | 57.0   | 31.2   | 51.0   |
| 1.5    | 1.0    | 3.0   | 0.6   | 2.1    | 1.8    | 8.5    | 7.0    | 2.4    |
| 196.0  | 258.8  | 70.1  | 78.2  | 195.3  | 235.5  | 797.7  | 455.7  | 482.3  |
| 2.0    | 9.2    | 3.5   | 3.2   | 5.5    | 3.3    | 3.3    | 2.4    | 3.7    |
| 886.4  | 895.1  | 10.0  | 11.0  | 1292.9 | 1053.0 | 220.1  | 124.4  | 112.7  |
| 4.1    | 7.1    | 16.5  | 17.0  | 9.1    | 12.9   | 20.1   | 14.7   | 14.1   |
| 18.3   | 31.6   | 10.9  | 6.5   | 57.1   | 51.3   | 26.2   | 30.4   | 36.3   |
| 1.7    | 1.0    | 0.7   | 0.7   | 5.2    | 2.4    | 3.4    | 5.7    | 1.3    |

|       |       |       |       |       |       |        |       |        |
|-------|-------|-------|-------|-------|-------|--------|-------|--------|
| 1.1   | 0.6   | 3.5   | 5.8   | 1.2   | 0.4   | 7.2    | 7.9   | 3.1    |
| 1.9   | 1.6   | 0.7   | 1.7   | 8.1   | 2.1   | 5.9    | 7.9   | 6.4    |
| 4.0   | 4.9   | 8.5   | 1.9   | 10.8  | 0.6   | 9.5    | 6.6   | 7.9    |
| 23.7  | 14.3  | 15.2  | 10.1  | 45.3  | 16.4  | 7.5    | 23.4  | 20.9   |
| 2.4   | 1.4   | 0.7   | 0.4   | 1.0   | 1.6   | 3.3    | 11.1  | 9.6    |
| 8.2   | 14.7  | 16.4  | 14.0  | 18.8  | 8.8   | 17.7   | 12.8  | 22.8   |
| 29.4  | 30.3  | 79.8  | 74.0  | 38.7  | 38.0  | 77.3   | 72.2  | 71.9   |
| 1.0   | 10.4  | 3.9   | 0.5   | 2.8   | 0.6   | 2.7    | 2.0   | 2.4    |
| 2.2   | 4.5   | 1.0   | 0.8   | 8.4   | 1.9   | 13.7   | 57.9  | 76.8   |
| 2.2   | 13.8  | 6.9   | 1.6   | 2.8   | 10.1  | 17.7   | 6.0   | 14.6   |
| 35.3  | 38.0  | 2.8   | 6.9   | 41.9  | 27.7  | 122.5  | 33.0  | 43.4   |
| 9.2   | 1.8   | 0.4   | 3.0   | 5.5   | 1.4   | 11.2   | 2.7   | 2.9    |
| 13.3  | 6.4   | 39.7  | 17.7  | 28.0  | 26.2  | 54.2   | 46.2  | 56.9   |
| 3.4   | 10.6  | 8.7   | 2.0   | 4.3   | 15.6  | 13.6   | 6.5   | 5.2    |
| 1.3   | 4.3   | 0.8   | 0.8   | 2.2   | 1.3   | 10.0   | 2.7   | 2.5    |
| 2.0   | 1.1   | 1.5   | 0.8   | 1.0   | 2.3   | 2.1    | 1.0   | 1.2    |
| 9.4   | 6.8   | 6.5   | 22.9  | 23.1  | 5.9   | 2.9    | 2.8   | 5.0    |
| 6.2   | 12.5  | 16.3  | 7.1   | 1.0   | 5.6   | 7.0    | 9.3   | 6.3    |
| 0.8   | 1.0   | 2.2   | 8.5   | 1.1   | 6.6   | 4.2    | 3.4   | 3.9    |
| 6.0   | 2.1   | 0.7   | 1.1   | 3.2   | 2.3   | 2.1    | 1.6   | 2.6    |
| 20.8  | 20.2  | 1.9   | 4.0   | 15.1  | 18.6  | 29.4   | 107.1 | 93.1   |
| 47.9  | 48.3  | 15.7  | 12.8  | 68.3  | 41.1  | 233.4  | 233.0 | 259.9  |
| 19.2  | 14.3  | 2.5   | 13.4  | 45.8  | 42.0  | 2.9    | 5.9   | 2.0    |
| 11.4  | 12.8  | 10.6  | 12.0  | 13.5  | 15.9  | 30.5   | 30.9  | 35.7   |
| 24.1  | 20.1  | 10.9  | 1.6   | 23.9  | 5.8   | 25.7   | 26.8  | 27.4   |
| 8.0   | 20.5  | 0.9   | 5.5   | 21.1  | 9.3   | 64.7   | 90.3  | 136.3  |
| 65.5  | 64.6  | 58.5  | 97.2  | 104.1 | 65.0  | 7.5    | 8.7   | 15.1   |
| 14.4  | 26.7  | 9.1   | 7.2   | 38.6  | 10.9  | 44.9   | 54.3  | 46.2   |
| 5.8   | 5.8   | 7.4   | 6.2   | 8.9   | 8.8   | 21.7   | 23.6  | 14.4   |
| 1.7   | 2.3   | 4.0   | 4.3   | 3.2   | 10.1  | 5.4    | 2.3   | 9.2    |
| 1.9   | 0.8   | 7.0   | 10.6  | 0.5   | 1.4   | 8.5    | 12.3  | 11.8   |
| 1.5   | 1.5   | 8.1   | 1.2   | 0.4   | 1.3   | 2.7    | 2.4   | 0.3    |
| 3.7   | 0.9   | 3.4   | 4.4   | 9.3   | 0.6   | 17.2   | 8.7   | 8.4    |
| 677.0 | 526.0 | 218.6 | 380.6 | 939.0 | 618.7 | 592.3  | 436.4 | 516.0  |
| 3.2   | 11.7  | 1.2   | 3.6   | 17.6  | 8.9   | 4.2    | 9.7   | 3.4    |
| 27.1  | 1.5   | 2.1   | 6.5   | 14.1  | 2.6   | 1749.0 | 273.2 | 295.9  |
| 1.2   | 1.2   | 2.9   | 1.0   | 1.6   | 1.6   | 1.5    | 3.3   | 2.3    |
| 28.6  | 43.4  | 15.4  | 22.4  | 58.0  | 33.8  | 138.0  | 140.9 | 119.3  |
| 9.1   | 2.6   | 7.3   | 12.9  | 9.5   | 1.5   | 49.0   | 62.9  | 43.0   |
| 32.1  | 32.8  | 15.2  | 9.7   | 47.7  | 35.7  | 5.7    | 1.2   | 4.3    |
| 0.8   | 0.6   | 1.4   | 2.6   | 8.3   | 6.9   | 2.4    | 1.7   | 1.3    |
| 0.7   | 8.7   | 5.4   | 4.4   | 1.7   | 3.8   | 12.5   | 9.5   | 8.7    |
| 0.7   | 8.6   | 2.1   | 0.3   | 0.4   | 0.5   | 0.6    | 2.9   | 1.6    |
| 5.6   | 1.7   | 8.6   | 1.8   | 1.0   | 6.3   | 4.4    | 4.4   | 5.3    |
| 93.5  | 94.5  | 0.6   | 0.4   | 150.2 | 82.6  | 96.0   | 161.1 | 177.1  |
| 3.5   | 1.4   | 1.0   | 1.8   | 5.4   | 7.9   | 3.8    | 2.4   | 5.4    |
| 17.4  | 13.2  | 18.4  | 8.8   | 14.9  | 15.0  | 11.8   | 14.3  | 10.7   |
| 2.5   | 1.5   | 1.1   | 8.0   | 2.8   | 14.1  | 0.8    | 0.4   | 1.0    |
| 14.8  | 8.0   | 22.2  | 33.8  | 14.5  | 19.3  | 20.0   | 13.3  | 7.0    |
| 419.2 | 610.9 | 9.8   | 4.6   | 276.2 | 511.0 | 4.3    | 3.7   | 0.7    |
| 14.3  | 12.4  | 0.7   | 0.8   | 19.6  | 15.1  | 2.4    | 2.3   | 3.3    |
| 240.9 | 259.6 | 161.3 | 208.6 | 340.2 | 257.7 | 945.7  | 974.9 | 1074.3 |
| 92.5  | 83.2  | 123.6 | 211.7 | 106.1 | 139.7 | 264.2  | 247.6 | 250.0  |

|       |       |       |       |       |       |       |       |       |
|-------|-------|-------|-------|-------|-------|-------|-------|-------|
| 4.9   | 1.9   | 1.1   | 1.1   | 2.5   | 5.8   | 16.3  | 2.3   | 6.8   |
| 1.2   | 0.9   | 4.1   | 5.1   | 0.7   | 2.9   | 11.4  | 5.0   | 3.7   |
| 4.7   | 6.5   | 14.6  | 8.2   | 6.2   | 10.8  | 7.7   | 7.4   | 4.4   |
| 489.2 | 626.0 | 18.1  | 25.0  | 815.9 | 610.3 | 191.3 | 176.2 | 183.7 |
| 30.7  | 43.6  | 10.6  | 8.9   | 34.0  | 48.0  | 67.2  | 39.4  | 49.9  |
| 8.9   | 4.1   | 18.9  | 11.4  | 8.1   | 26.3  | 10.7  | 11.3  | 13.6  |
| 3.0   | 7.1   | 4.6   | 3.9   | 6.6   | 7.8   | 4.1   | 6.2   | 5.0   |
| 2.9   | 2.0   | 0.8   | 4.6   | 0.7   | 14.4  | 6.3   | 10.7  | 5.3   |
| 11.5  | 0.6   | 4.7   | 9.0   | 5.9   | 5.3   | 10.2  | 12.8  | 4.8   |
| 1.9   | 10.5  | 3.4   | 4.3   | 16.6  | 12.3  | 8.3   | 5.6   | 14.4  |
| 12.7  | 2.7   | 1.2   | 0.3   | 11.5  | 1.8   | 1.7   | 2.5   | 4.9   |
| 6.6   | 2.8   | 10.2  | 21.0  | 7.3   | 2.8   | 2.9   | 1.6   | 1.1   |
| 115.4 | 125.4 | 55.0  | 100.8 | 174.5 | 110.0 | 342.7 | 230.6 | 228.9 |
| 21.8  | 18.0  | 24.0  | 37.8  | 20.2  | 14.4  | 98.2  | 54.3  | 81.1  |
| 0.7   | 6.6   | 4.2   | 8.2   | 0.7   | 2.9   | 6.6   | 4.9   | 6.7   |
| 10.4  | 10.5  | 5.4   | 1.3   | 5.4   | 10.7  | 15.2  | 9.7   | 5.0   |
| 2.1   | 1.0   | 1.7   | 2.2   | 2.4   | 2.1   | 2.2   | 1.1   | 1.7   |
| 0.9   | 1.6   | 0.9   | 13.1  | 1.1   | 0.7   | 5.3   | 5.5   | 5.1   |
| 2.9   | 1.5   | 4.8   | 2.9   | 11.3  | 2.6   | 1.3   | 5.4   | 8.4   |
| 267.8 | 374.6 | 617.9 | 706.7 | 427.2 | 321.3 | 540.1 | 617.1 | 599.7 |
| 2.4   | 4.1   | 2.5   | 6.9   | 2.0   | 5.8   | 3.6   | 18.0  | 14.9  |
| 3.0   | 4.6   | 2.7   | 5.2   | 11.5  | 1.2   | 13.3  | 11.5  | 11.3  |
| 2.7   | 0.7   | 2.0   | 9.0   | 2.1   | 3.5   | 3.0   | 1.0   | 1.5   |
| 18.6  | 17.5  | 2.2   | 17.3  | 24.9  | 1.3   | 12.4  | 13.4  | 22.6  |
| 2.1   | 2.3   | 1.8   | 3.2   | 9.2   | 13.9  | 3.6   | 0.9   | 1.0   |
| 3.1   | 2.5   | 10.1  | 1.3   | 7.0   | 2.5   | 4.4   | 1.0   | 2.2   |
| 9.2   | 1.7   | 1.5   | 1.4   | 3.8   | 4.2   | 8.8   | 2.2   | 2.8   |
| 9.1   | 0.6   | 6.8   | 6.7   | 0.5   | 1.4   | 4.8   | 0.9   | 5.0   |
| 162.0 | 199.0 | 7.2   | 0.3   | 300.6 | 190.6 | 5.1   | 11.7  | 6.6   |
| 1.0   | 1.8   | 1.5   | 5.7   | 1.3   | 1.8   | 2.4   | 1.6   | 2.8   |
| 8.2   | 5.9   | 2.5   | 1.6   | 7.4   | 8.0   | 4.9   | 12.3  | 2.5   |
| 90.6  | 156.0 | 34.7  | 26.7  | 157.6 | 111.4 | 222.2 | 296.3 | 328.0 |
| 50.5  | 106.4 | 5.7   | 2.1   | 140.8 | 115.6 | 5.1   | 2.1   | 0.6   |
| 1.0   | 1.5   | 8.4   | 3.0   | 8.2   | 6.3   | 9.5   | 8.6   | 1.5   |
| 2.5   | 2.5   | 4.7   | 4.5   | 6.8   | 1.8   | 2.1   | 4.0   | 5.4   |
| 8.5   | 1.4   | 14.9  | 21.5  | 16.5  | 17.0  | 22.1  | 17.3  | 19.4  |
| 13.2  | 6.1   | 8.0   | 1.3   | 4.1   | 4.7   | 2.8   | 7.1   | 3.0   |
| 6.1   | 1.0   | 0.7   | 4.1   | 6.2   | 4.1   | 1.3   | 7.5   | 6.4   |
| 89.3  | 133.1 | 26.9  | 40.6  | 159.9 | 107.5 | 114.0 | 128.2 | 137.4 |
| 101.9 | 106.2 | 0.9   | 1.1   | 180.6 | 136.5 | 2.8   | 0.4   | 0.3   |
| 5.2   | 10.1  | 4.9   | 5.7   | 0.7   | 0.3   | 3.2   | 5.4   | 1.1   |
| 11.3  | 12.8  | 2.1   | 8.4   | 13.0  | 13.1  | 30.2  | 41.5  | 52.0  |
| 1.2   | 4.0   | 14.1  | 11.1  | 6.2   | 6.5   | 4.1   | 1.4   | 2.8   |
| 16.9  | 33.5  | 10.5  | 14.5  | 16.8  | 5.4   | 203.9 | 130.9 | 148.6 |
| 28.3  | 18.3  | 29.0  | 26.3  | 44.2  | 23.3  | 415.4 | 326.6 | 336.7 |
| 0.9   | 1.5   | 0.4   | 0.4   | 1.2   | 0.8   | 0.8   | 1.0   | 0.4   |
| 15.8  | 6.6   | 6.4   | 12.5  | 5.3   | 4.4   | 21.7  | 10.9  | 14.5  |
| 64.1  | 39.9  | 25.4  | 29.5  | 70.9  | 42.9  | 80.6  | 66.7  | 73.7  |
| 115.5 | 142.0 | 56.3  | 96.3  | 160.8 | 125.8 | 127.3 | 116.0 | 122.1 |
| 16.9  | 13.1  | 24.0  | 15.9  | 40.0  | 22.4  | 23.4  | 17.4  | 35.0  |
| 171.0 | 236.8 | 0.5   | 0.9   | 452.8 | 251.5 | 29.3  | 16.9  | 21.6  |
| 16.1  | 28.8  | 0.7   | 1.7   | 32.2  | 19.9  | 23.7  | 50.9  | 65.9  |
| 12.6  | 18.6  | 0.6   | 0.5   | 16.0  | 12.0  | 17.0  | 30.2  | 39.0  |

|       |       |       |       |       |       |       |       |       |
|-------|-------|-------|-------|-------|-------|-------|-------|-------|
| 19.3  | 20.8  | 3.4   | 13.0  | 35.0  | 31.5  | 63.8  | 49.6  | 64.6  |
| 6.3   | 1.5   | 2.7   | 1.3   | 2.6   | 2.3   | 9.8   | 9.8   | 4.7   |
| 22.3  | 37.6  | 1.2   | 0.6   | 43.9  | 44.0  | 1.7   | 1.3   | 1.3   |
| 28.4  | 24.7  | 20.5  | 9.0   | 21.1  | 23.0  | 33.3  | 22.8  | 25.2  |
| 14.1  | 24.5  | 9.9   | 2.6   | 11.5  | 13.5  | 12.5  | 11.1  | 20.5  |
| 6.1   | 6.5   | 1.8   | 1.9   | 10.6  | 11.7  | 12.1  | 7.7   | 19.4  |
| 0.9   | 1.4   | 2.3   | 0.9   | 1.5   | 1.1   | 2.7   | 83.8  | 83.0  |
| 121.6 | 399.6 | 26.0  | 53.2  | 256.6 | 334.2 | 785.2 | 558.8 | 568.0 |
| 1.0   | 1.4   | 0.7   | 2.6   | 1.0   | 11.9  | 3.8   | 5.4   | 7.5   |
| 11.0  | 7.9   | 2.7   | 1.9   | 5.6   | 9.1   | 1.3   | 3.5   | 3.3   |
| 14.9  | 1.1   | 2.3   | 1.2   | 2.8   | 3.6   | 7.5   | 11.1  | 4.3   |
| 4.9   | 3.0   | 1.4   | 1.7   | 8.7   | 1.8   | 1.3   | 7.4   | 7.2   |
| 0.9   | 0.5   | 0.8   | 0.4   | 1.1   | 1.4   | 1.5   | 1.8   | 2.3   |
| 4.0   | 5.8   | 0.5   | 0.6   | 6.3   | 2.2   | 2.1   | 0.4   | 4.1   |
| 6.1   | 15.2  | 13.6  | 2.4   | 20.5  | 17.6  | 29.5  | 17.9  | 13.8  |
| 1.4   | 9.0   | 2.5   | 1.7   | 1.2   | 17.8  | 11.8  | 9.3   | 3.9   |
| 13.5  | 18.4  | 1.0   | 0.4   | 18.7  | 1.6   | 1.7   | 2.1   | 1.5   |
| 12.3  | 25.3  | 34.6  | 34.7  | 36.7  | 32.1  | 22.9  | 45.7  | 76.2  |
| 2.4   | 1.3   | 2.1   | 2.4   | 2.9   | 7.9   | 7.2   | 6.4   | 2.3   |
| 87.8  | 88.7  | 0.5   | 0.5   | 87.5  | 91.9  | 1.3   | 0.9   | 0.9   |
| 92.2  | 121.5 | 17.2  | 5.8   | 127.6 | 104.3 | 9.6   | 1.6   | 3.9   |
| 7.2   | 0.7   | 235.3 | 327.8 | 5.1   | 3.5   | 5.5   | 7.3   | 1.7   |
| 8.1   | 24.8  | 14.1  | 2.1   | 11.9  | 9.7   | 34.1  | 17.8  | 37.8  |
| 12.6  | 3.2   | 0.7   | 0.7   | 8.7   | 18.7  | 1.2   | 1.2   | 0.5   |
| 1.7   | 2.0   | 2.8   | 3.3   | 3.0   | 2.0   | 4.8   | 3.1   | 8.5   |
| 13.8  | 50.1  | 2.8   | 2.1   | 46.6  | 58.3  | 8.8   | 7.2   | 2.5   |
| 86.9  | 86.5  | 125.2 | 155.5 | 102.8 | 111.4 | 302.7 | 217.0 | 239.9 |
| 0.9   | 2.3   | 1.3   | 0.5   | 1.3   | 1.0   | 1.7   | 1.7   | 1.5   |
| 117.5 | 127.0 | 140.5 | 147.6 | 207.0 | 156.0 | 185.7 | 313.2 | 369.6 |
| 6.9   | 12.0  | 10.7  | 1.2   | 4.3   | 1.2   | 9.5   | 9.6   | 5.5   |
| 4.2   | 1.9   | 1.7   | 2.9   | 2.4   | 1.6   | 2.3   | 27.2  | 23.2  |
| 5.8   | 16.8  | 17.9  | 13.3  | 7.6   | 10.7  | 12.9  | 5.7   | 9.6   |
| 1.5   | 9.5   | 1.2   | 4.1   | 6.4   | 1.3   | 4.5   | 1.0   | 0.7   |
| 3.8   | 25.8  | 3.8   | 1.6   | 20.3  | 16.1  | 10.5  | 8.4   | 10.7  |
| 1.3   | 11.3  | 3.2   | 6.4   | 21.8  | 2.6   | 56.3  | 79.6  | 73.4  |
| 12.0  | 6.4   | 11.5  | 18.6  | 15.6  | 10.6  | 197.9 | 235.3 | 228.5 |
| 2.0   | 0.9   | 0.9   | 0.9   | 2.1   | 1.3   | 1.8   | 1.8   | 1.3   |
| 1.5   | 0.7   | 0.6   | 0.4   | 0.7   | 13.6  | 2.2   | 2.7   | 3.9   |
| 22.4  | 24.5  | 1.1   | 11.5  | 23.5  | 19.5  | 41.8  | 8.4   | 6.1   |
| 2.7   | 4.9   | 4.0   | 7.6   | 1.6   | 2.1   | 10.4  | 12.2  | 12.5  |
| 12.2  | 4.7   | 40.9  | 46.8  | 20.4  | 3.1   | 4.9   | 3.5   | 11.6  |
| 1.6   | 2.5   | 12.4  | 6.0   | 5.3   | 10.9  | 8.7   | 16.8  | 10.5  |
| 3.2   | 2.8   | 1.7   | 1.2   | 2.2   | 1.7   | 2.8   | 3.7   | 2.3   |
| 1.1   | 3.2   | 2.4   | 9.4   | 1.3   | 0.5   | 39.4  | 56.2  | 56.5  |
| 14.6  | 6.9   | 60.1  | 44.1  | 3.8   | 5.0   | 16.7  | 12.2  | 12.7  |
| 1.7   | 1.5   | 2.2   | 1.9   | 3.3   | 1.5   | 3.3   | 1.8   | 2.5   |
| 1.8   | 8.9   | 17.7  | 8.0   | 9.8   | 5.7   | 5.1   | 9.5   | 5.8   |
| 6.9   | 1.5   | 2.8   | 11.4  | 1.7   | 1.6   | 645.9 | 679.6 | 880.7 |
| 34.2  | 38.5  | 46.6  | 33.6  | 34.7  | 44.9  | 128.2 | 137.4 | 138.4 |
| 2.3   | 1.2   | 1.0   | 1.2   | 1.0   | 1.5   | 2.2   | 2.1   | 2.3   |
| 13.0  | 7.7   | 8.2   | 2.0   | 1.1   | 2.2   | 3.2   | 12.0  | 2.4   |
| 0.4   | 10.3  | 1.5   | 4.6   | 0.7   | 2.9   | 2.8   | 11.7  | 5.6   |
| 12.8  | 2.0   | 7.7   | 9.5   | 8.9   | 22.3  | 85.8  | 56.5  | 68.6  |

|        |        |       |        |        |        |        |        |        |
|--------|--------|-------|--------|--------|--------|--------|--------|--------|
| 2.6    | 2.4    | 2.6   | 3.3    | 4.6    | 2.8    | 9.7    | 10.2   | 13.2   |
| 24.9   | 28.0   | 12.1  | 13.5   | 35.2   | 27.2   | 23.1   | 14.8   | 21.4   |
| 35.0   | 67.4   | 6.5   | 2.0    | 70.3   | 50.8   | 37.2   | 26.1   | 40.8   |
| 2.1    | 2.2    | 1.4   | 1.1    | 1.6    | 1.3    | 8.7    | 4.0    | 4.8    |
| 357.4  | 469.4  | 123.8 | 133.0  | 522.3  | 334.9  | 452.9  | 511.8  | 610.3  |
| 3.0    | 2.0    | 4.2   | 5.7    | 0.3    | 0.5    | 7.6    | 2.6    | 3.4    |
| 31.8   | 35.6   | 14.0  | 12.7   | 29.4   | 32.8   | 26.5   | 28.5   | 24.9   |
| 13.5   | 25.6   | 13.1  | 6.3    | 11.5   | 8.4    | 27.2   | 32.8   | 38.2   |
| 0.4    | 3.3    | 1.2   | 1.7    | 1.3    | 0.3    | 3.9    | 5.8    | 6.8    |
| 25.0   | 15.8   | 51.6  | 52.0   | 29.0   | 24.1   | 44.4   | 58.9   | 74.2   |
| 0.6    | 0.9    | 5.3   | 5.6    | 11.8   | 1.7    | 4.8    | 9.2    | 5.2    |
| 53.7   | 42.1   | 0.9   | 0.8    | 74.9   | 50.0   | 2.6    | 2.3    | 4.6    |
| 2.7    | 0.9    | 4.0   | 0.9    | 1.4    | 0.3    | 5.0    | 1.7    | 0.7    |
| 12.6   | 12.7   | 4.4   | 0.8    | 4.9    | 1.1    | 11.0   | 2.3    | 2.3    |
| 10.1   | 5.9    | 17.6  | 3.0    | 2.8    | 2.3    | 4.0    | 9.1    | 8.0    |
| 6.8    | 11.7   | 11.4  | 1.4    | 20.2   | 11.8   | 10.1   | 9.9    | 7.3    |
| 4.2    | 3.8    | 3.1   | 4.8    | 6.4    | 8.5    | 10.6   | 4.7    | 5.8    |
| 1.7    | 4.5    | 2.9   | 1.5    | 2.7    | 0.5    | 7.2    | 4.1    | 9.6    |
| 1.1    | 1.5    | 0.9   | 0.7    | 0.6    | 1.1    | 1.1    | 0.8    | 1.0    |
| 846.0  | 1003.0 | 5.8   | 11.3   | 1171.0 | 600.6  | 125.2  | 159.0  | 143.8  |
| 5.3    | 1.5    | 2.3   | 2.1    | 6.8    | 10.3   | 17.4   | 13.4   | 20.5   |
| 107.3  | 112.5  | 144.2 | 118.7  | 160.1  | 123.5  | 426.4  | 388.7  | 391.2  |
| 9.4    | 16.2   | 0.5   | 1.9    | 14.7   | 14.3   | 9.9    | 1.9    | 5.5    |
| 3.3    | 1.1    | 7.2   | 3.7    | 1.6    | 0.5    | 6.7    | 7.3    | 5.7    |
| 4.7    | 0.8    | 0.3   | 4.3    | 6.4    | 4.1    | 8.1    | 2.8    | 7.2    |
| 29.6   | 46.1   | 10.0  | 7.4    | 26.1   | 25.0   | 17.0   | 14.7   | 22.5   |
| 8.7    | 7.1    | 23.6  | 6.4    | 17.2   | 3.1    | 18.9   | 8.5    | 19.0   |
| 22.5   | 26.1   | 4.7   | 7.4    | 5.1    | 23.5   | 3.8    | 7.2    | 6.3    |
| 107.8  | 79.8   | 82.7  | 77.4   | 89.0   | 59.0   | 287.2  | 254.7  | 243.1  |
| 1.9    | 3.0    | 0.7   | 4.8    | 0.5    | 4.3    | 4.8    | 6.5    | 0.9    |
| 1.5    | 4.8    | 34.6  | 40.3   | 22.2   | 3.1    | 4.1    | 7.9    | 8.6    |
| 589.4  | 472.6  | 123.1 | 189.3  | 636.6  | 452.0  | 1718.3 | 1744.7 | 1615.7 |
| 10.4   | 7.5    | 1.0   | 3.6    | 9.0    | 1.1    | 1.0    | 2.1    | 0.9    |
| 0.9    | 10.2   | 0.3   | 1.2    | 1.7    | 0.8    | 4.3    | 1.7    | 1.3    |
| 2.0    | 2.4    | 3.0   | 2.3    | 3.4    | 2.8    | 4.2    | 2.7    | 2.6    |
| 1596.7 | 2083.8 | 606.5 | 1140.0 | 2135.0 | 1650.2 | 1474.0 | 754.7  | 874.5  |
| 0.6    | 3.5    | 4.1   | 5.4    | 7.8    | 5.7    | 11.8   | 11.7   | 6.8    |
| 3.8    | 1.9    | 1.7   | 1.3    | 5.9    | 6.7    | 5.6    | 6.0    | 4.8    |
| 16.6   | 24.0   | 8.7   | 3.8    | 38.2   | 27.1   | 2.3    | 14.6   | 7.1    |
| 14.6   | 9.7    | 5.3   | 2.9    | 17.8   | 1.3    | 3.8    | 5.6    | 9.6    |
| 1.0    | 2.6    | 1.0   | 1.3    | 1.1    | 8.1    | 2.2    | 4.0    | 4.2    |
| 87.0   | 163.7  | 9.4   | 8.6    | 148.3  | 120.8  | 369.6  | 217.0  | 241.6  |
| 88.0   | 89.4   | 510.3 | 710.4  | 131.6  | 68.1   | 290.8  | 277.0  | 334.2  |
| 15.9   | 7.9    | 70.2  | 80.8   | 13.6   | 3.4    | 385.0  | 619.5  | 645.5  |
| 2.2    | 2.6    | 1.9   | 7.3    | 3.5    | 1.9    | 3.6    | 3.2    | 12.5   |
| 19.6   | 21.5   | 17.9  | 13.0   | 11.5   | 35.3   | 38.2   | 25.0   | 22.5   |
| 0.7    | 5.2    | 0.8   | 0.5    | 1.3    | 8.3    | 3.0    | 4.1    | 0.6    |
| 7.2    | 8.4    | 6.0   | 4.6    | 7.6    | 12.2   | 9.1    | 36.0   | 48.1   |
| 16.7   | 2.1    | 8.3   | 6.3    | 6.1    | 2.5    | 6.4    | 6.7    | 4.4    |
| 10.2   | 24.9   | 1.5   | 4.4    | 11.3   | 7.2    | 13.4   | 16.9   | 13.9   |
| 9.4    | 7.4    | 7.2   | 2.1    | 1.1    | 1.1    | 5.7    | 10.1   | 7.8    |
| 3071.4 | 4576.3 | 237.8 | 340.0  | 3889.3 | 4732.9 | 549.4  | 430.6  | 801.6  |
| 9.4    | 1.8    | 7.8   | 3.6    | 9.6    | 1.5    | 7.9    | 11.4   | 7.6    |

|       |       |        |        |       |       |       |        |        |
|-------|-------|--------|--------|-------|-------|-------|--------|--------|
| 2.0   | 14.2  | 1670.3 | 2029.1 | 4.1   | 22.6  | 13.3  | 18.4   | 26.8   |
| 10.3  | 3.8   | 0.9    | 0.5    | 1.8   | 2.9   | 2.2   | 2.6    | 1.9    |
| 7.4   | 1.6   | 2.9    | 2.3    | 2.2   | 1.5   | 4.6   | 4.8    | 3.5    |
| 0.8   | 1.6   | 0.4    | 8.9    | 12.1  | 14.7  | 4.1   | 8.1    | 8.5    |
| 229.4 | 394.0 | 14.2   | 22.4   | 286.4 | 359.2 | 87.6  | 45.5   | 46.4   |
| 135.9 | 114.1 | 94.2   | 95.7   | 218.8 | 120.1 | 375.2 | 264.4  | 296.2  |
| 60.5  | 94.3  | 30.8   | 42.9   | 131.3 | 79.9  | 463.1 | 477.7  | 606.5  |
| 0.6   | 1.6   | 1.1    | 0.7    | 2.0   | 1.8   | 1.7   | 54.8   | 66.4   |
| 1.4   | 6.0   | 0.7    | 2.3    | 0.8   | 11.7  | 4.6   | 82.5   | 85.6   |
| 81.1  | 89.0  | 34.0   | 45.3   | 95.5  | 86.0  | 218.4 | 242.0  | 250.7  |
| 20.9  | 31.1  | 88.2   | 94.1   | 31.6  | 19.1  | 119.9 | 107.7  | 104.6  |
| 12.7  | 31.1  | 9.5    | 17.6   | 33.1  | 27.3  | 42.8  | 33.6   | 27.9   |
| 2.9   | 2.1   | 1.5    | 1.8    | 1.6   | 0.8   | 1.2   | 3.4    | 1.5    |
| 7.4   | 1.5   | 0.9    | 1.0    | 3.9   | 3.9   | 0.8   | 0.9    | 1.9    |
| 8.5   | 16.3  | 9.0    | 8.3    | 11.9  | 3.1   | 19.4  | 15.0   | 29.1   |
| 7.4   | 11.9  | 6.5    | 9.6    | 6.7   | 5.8   | 8.3   | 9.9    | 9.7    |
| 5.3   | 0.6   | 1.2    | 4.5    | 4.7   | 6.7   | 3.4   | 3.5    | 2.2    |
| 2.1   | 11.0  | 10.3   | 5.6    | 3.1   | 2.4   | 2.4   | 2.3    | 5.4    |
| 22.3  | 15.5  | 0.8    | 0.7    | 41.3  | 12.8  | 1.8   | 0.9    | 3.5    |
| 109.9 | 153.2 | 33.1   | 36.5   | 119.1 | 106.2 | 220.7 | 239.9  | 295.8  |
| 18.1  | 28.1  | 0.8    | 8.8    | 19.8  | 12.8  | 62.1  | 70.3   | 77.2   |
| 2.0   | 11.7  | 2.6    | 3.5    | 14.6  | 3.0   | 5.3   | 13.6   | 7.9    |
| 12.6  | 24.1  | 10.1   | 20.2   | 31.1  | 7.4   | 62.4  | 34.6   | 52.0   |
| 0.8   | 2.4   | 2.6    | 0.5    | 6.7   | 0.7   | 10.1  | 8.7    | 1.0    |
| 25.5  | 79.3  | 1.3    | 0.5    | 82.1  | 81.7  | 9.6   | 17.4   | 11.2   |
| 0.7   | 1.1   | 9.8    | 1.3    | 0.5   | 0.8   | 4.9   | 4.0    | 4.8    |
| 1.7   | 5.0   | 1.6    | 5.0    | 1.3   | 1.5   | 2.0   | 3.7    | 1.3    |
| 1.6   | 15.0  | 6.4    | 7.0    | 7.6   | 8.4   | 5.6   | 1.2    | 3.6    |
| 192.6 | 185.3 | 262.6  | 417.4  | 226.9 | 93.8  | 832.7 | 1042.8 | 1015.0 |
| 8.7   | 12.8  | 9.5    | 11.0   | 6.8   | 12.0  | 17.8  | 23.7   | 13.7   |
| 2.5   | 1.6   | 20.6   | 14.7   | 4.2   | 4.4   | 15.6  | 8.9    | 2.5    |
| 1.7   | 1.5   | 1.6    | 1.1    | 2.4   | 1.5   | 2.2   | 3.0    | 7.0    |
| 56.8  | 52.3  | 33.5   | 39.1   | 86.5  | 43.1  | 113.8 | 120.7  | 149.0  |
| 6.7   | 1.6   | 8.3    | 0.8    | 0.6   | 2.2   | 3.1   | 0.9    | 2.5    |
| 23.1  | 53.6  | 0.8    | 3.9    | 59.6  | 40.5  | 37.7  | 21.7   | 19.8   |
| 9.6   | 14.5  | 10.6   | 7.8    | 12.4  | 14.0  | 13.7  | 9.7    | 8.3    |
| 501.6 | 655.7 | 125.8  | 242.1  | 690.2 | 520.7 | 750.9 | 269.9  | 340.8  |
| 15.1  | 16.7  | 7.1    | 3.6    | 30.6  | 27.1  | 132.7 | 112.0  | 113.8  |
| 14.2  | 18.4  | 24.2   | 19.6   | 26.0  | 8.2   | 29.3  | 18.7   | 11.8   |
| 0.6   | 0.6   | 1.1    | 3.3    | 0.5   | 1.8   | 6.4   | 4.2    | 6.8    |
| 25.1  | 39.1  | 2.0    | 3.9    | 52.6  | 32.0  | 94.7  | 123.0  | 121.4  |
| 14.2  | 11.5  | 5.7    | 5.5    | 35.5  | 18.5  | 70.1  | 32.5   | 25.5   |
| 4.0   | 0.2   | 1.7    | 0.4    | 0.2   | 0.1   | 177.4 | 244.0  | 253.3  |
| 93.2  | 99.5  | 13.9   | 15.7   | 119.3 | 171.4 | 44.2  | 24.3   | 33.7   |
| 43.8  | 63.8  | 18.2   | 21.5   | 53.3  | 85.0  | 76.4  | 99.5   | 115.8  |
| 13.3  | 10.2  | 13.1   | 4.1    | 17.4  | 4.0   | 32.3  | 22.2   | 24.8   |
| 20.7  | 4.2   | 599.2  | 1074.9 | 18.0  | 7.9   | 19.9  | 32.2   | 31.4   |
| 35.8  | 16.1  | 8.4    | 13.9   | 42.6  | 31.9  | 14.3  | 19.8   | 18.4   |
| 10.5  | 11.4  | 17.9   | 15.8   | 15.2  | 3.4   | 7.0   | 8.0    | 7.4    |
| 7.2   | 16.6  | 1.6    | 12.3   | 13.4  | 11.5  | 2.4   | 2.5    | 7.1    |
| 21.4  | 12.7  | 8.7    | 12.0   | 31.1  | 28.2  | 8.6   | 8.2    | 4.6    |
| 2.6   | 4.2   | 2.7    | 1.1    | 13.8  | 14.0  | 111.9 | 200.4  | 222.8  |
| 6.7   | 3.4   | 7.2    | 6.8    | 7.0   | 0.9   | 327.7 | 885.2  | 983.2  |

|        |        |        |        |        |        |         |         |         |
|--------|--------|--------|--------|--------|--------|---------|---------|---------|
| 14.2   | 24.1   | 1.3    | 1.1    | 23.9   | 21.2   | 37.0    | 33.5    | 36.8    |
| 1.2    | 1.7    | 0.6    | 1.0    | 0.7    | 1.0    | 11.6    | 8.5     | 13.6    |
| 1.3    | 1.0    | 0.9    | 6.5    | 6.8    | 3.0    | 2.5     | 7.9     | 6.0     |
| 0.6    | 1.5    | 0.7    | 1.1    | 1.1    | 1.2    | 4.1     | 0.6     | 3.7     |
| 16.3   | 29.2   | 20.8   | 15.6   | 22.0   | 19.6   | 32.3    | 43.6    | 24.6    |
| 19.9   | 13.0   | 2.2    | 6.0    | 19.4   | 3.3    | 37.9    | 28.4    | 30.1    |
| 4.6    | 1.9    | 1.0    | 0.8    | 15.3   | 11.3   | 2.2     | 4.2     | 1.2     |
| 12.9   | 14.3   | 1.4    | 2.8    | 15.6   | 1.7    | 3.1     | 7.9     | 11.6    |
| 17.7   | 14.5   | 4.4    | 4.4    | 20.1   | 7.7    | 21.9    | 23.5    | 21.1    |
| 7.6    | 6.6    | 4.4    | 5.9    | 7.5    | 7.1    | 8.3     | 13.1    | 4.7     |
| 1.1    | 0.6    | 0.5    | 13.8   | 2.9    | 1.0    | 245.6   | 62.7    | 62.7    |
| 29.8   | 45.3   | 30.8   | 25.5   | 60.6   | 45.0   | 26.0    | 45.5    | 41.8    |
| 0.8    | 7.4    | 1.4    | 4.3    | 10.1   | 1.9    | 1.1     | 1.5     | 4.3     |
| 2.9    | 2.3    | 3.5    | 3.1    | 4.9    | 5.9    | 12.1    | 12.4    | 11.5    |
| 10.0   | 6.7    | 14.0   | 8.7    | 22.2   | 1.5    | 44.0    | 51.0    | 44.2    |
| 7.2    | 3.9    | 3.1    | 5.1    | 8.6    | 4.4    | 7.3     | 4.9     | 15.5    |
| 1.6    | 8.1    | 5.5    | 9.8    | 0.6    | 8.0    | 5.1     | 5.7     | 11.1    |
| 119.9  | 99.7   | 16.3   | 12.5   | 141.1  | 111.0  | 245.2   | 74.7    | 92.2    |
| 3.3    | 2.4    | 3.9    | 2.7    | 19.7   | 2.9    | 14.0    | 13.9    | 15.2    |
| 0.5    | 0.6    | 0.5    | 0.7    | 0.4    | 0.3    | 5.3     | 93.2    | 85.6    |
| 13.6   | 20.4   | 15.0   | 17.6   | 15.7   | 18.4   | 104.9   | 92.7    | 97.0    |
| 7.2    | 6.5    | 2.1    | 13.9   | 17.3   | 13.6   | 40.0    | 41.0    | 33.5    |
| 6.1    | 2.1    | 2.3    | 1.0    | 7.1    | 1.9    | 3.1     | 4.7     | 6.2     |
| 16.7   | 1.3    | 28.6   | 16.6   | 8.5    | 7.2    | 295.2   | 483.7   | 561.1   |
| 28.2   | 30.7   | 3.8    | 9.2    | 29.5   | 26.7   | 44.1    | 40.7    | 44.2    |
| 1.2    | 6.2    | 19.0   | 6.7    | 2.6    | 13.8   | 5.8     | 1.2     | 1.6     |
| 50.6   | 54.9   | 12.5   | 34.6   | 65.9   | 49.1   | 334.2   | 425.5   | 480.2   |
| 17.6   | 21.4   | 0.1    | 2.1    | 18.2   | 24.0   | 13.9    | 13.0    | 13.5    |
| 23.3   | 24.5   | 19.3   | 42.0   | 46.8   | 18.5   | 180.6   | 207.9   | 235.9   |
| 5.9    | 6.7    | 4.5    | 11.4   | 2.7    | 6.8    | 6.3     | 5.7     | 3.2     |
| 6.6    | 6.9    | 11.4   | 20.7   | 14.3   | 4.8    | 6.4     | 9.1     | 6.7     |
| 1.4    | 1.9    | 4.1    | 7.9    | 8.1    | 10.6   | 2.2     | 7.4     | 6.9     |
| 3.6    | 19.1   | 3.9    | 2.4    | 8.2    | 4.8    | 5.7     | 4.1     | 1.7     |
| 17.1   | 32.2   | 4.2    | 11.2   | 31.7   | 22.9   | 11.7    | 5.2     | 2.6     |
| 255.1  | 242.4  | 89.3   | 111.7  | 320.4  | 258.3  | 497.7   | 226.3   | 265.9   |
| 66.2   | 55.3   | 24.4   | 22.7   | 54.3   | 65.5   | 77.2    | 115.5   | 146.7   |
| 7.6    | 3.1    | 5.7    | 0.2    | 6.8    | 4.0    | 3.0     | 3.2     | 2.2     |
| 5.4    | 15.0   | 2.4    | 0.9    | 5.4    | 7.3    | 22.9    | 9.3     | 10.7    |
| 29.8   | 36.4   | 13.0   | 17.1   | 30.0   | 36.6   | 84.6    | 48.3    | 62.4    |
| 327.2  | 471.0  | 40.7   | 55.8   | 405.2  | 617.1  | 299.0   | 271.3   | 327.1   |
| 7.5    | 3.8    | 11.2   | 3.7    | 2.4    | 7.0    | 9.9     | 6.9     | 4.2     |
| 21.1   | 22.2   | 10.3   | 5.4    | 28.4   | 26.6   | 40.9    | 32.2    | 32.5    |
| 84.3   | 91.9   | 32.3   | 25.2   | 105.0  | 109.8  | 58.8    | 88.1    | 71.6    |
| 7835.5 | 8445.0 | 3979.5 | 5376.1 | 8239.9 | 7696.8 | 10914.2 | 11789.5 | 10538.4 |
| 14.9   | 26.8   | 9.1    | 7.3    | 21.5   | 25.2   | 23.5    | 18.8    | 16.4    |
| 185.5  | 346.0  | 15.2   | 17.4   | 212.4  | 219.6  | 4198.3  | 1360.2  | 1530.1  |
| 440.5  | 626.2  | 495.8  | 657.7  | 675.2  | 510.6  | 1004.9  | 995.4   | 987.7   |
| 1.0    | 2.0    | 5.7    | 0.9    | 3.6    | 5.2    | 10.1    | 18.1    | 20.8    |
| 2.3    | 1.9    | 22.4   | 14.9   | 4.5    | 11.7   | 16.6    | 19.4    | 20.6    |
| 9.0    | 18.9   | 9.5    | 18.2   | 15.9   | 12.7   | 110.5   | 93.4    | 104.0   |
| 23.5   | 12.3   | 27.3   | 35.6   | 7.5    | 12.1   | 125.1   | 57.5    | 57.3    |
| 110.5  | 138.4  | 41.6   | 52.5   | 143.6  | 124.8  | 94.2    | 95.5    | 104.1   |
| 17.9   | 16.2   | 4.6    | 4.8    | 28.6   | 27.9   | 20.7    | 10.1    | 15.1    |

|        |        |        |        |        |        |        |        |        |
|--------|--------|--------|--------|--------|--------|--------|--------|--------|
| 1.9    | 17.0   | 1.9    | 8.8    | 13.3   | 10.9   | 12.6   | 14.3   | 9.4    |
| 4.8    | 1.4    | 1.6    | 6.7    | 1.9    | 1.0    | 20.4   | 23.3   | 4.3    |
| 344.9  | 437.6  | 40.4   | 61.8   | 596.3  | 521.4  | 363.7  | 244.5  | 301.6  |
| 6.2    | 16.1   | 39.0   | 31.4   | 9.5    | 16.1   | 22.0   | 24.6   | 34.8   |
| 8.9    | 16.4   | 13.3   | 8.9    | 9.7    | 5.2    | 18.4   | 11.3   | 16.1   |
| 21.3   | 24.9   | 44.1   | 76.8   | 24.5   | 18.9   | 11.0   | 7.2    | 18.7   |
| 2.2    | 3.2    | 2.1    | 2.4    | 2.1    | 9.5    | 6.9    | 2.6    | 7.0    |
| 21.6   | 35.5   | 15.9   | 20.8   | 30.8   | 23.1   | 77.8   | 50.4   | 59.7   |
| 0.6    | 2.8    | 1.2    | 4.2    | 7.4    | 0.4    | 1.2    | 3.4    | 0.9    |
| 92.0   | 79.7   | 2.3    | 2.9    | 102.5  | 39.9   | 9.6    | 5.5    | 6.9    |
| 2.1    | 2.6    | 5.0    | 6.9    | 0.9    | 4.5    | 13.2   | 17.1   | 12.1   |
| 49.7   | 33.0   | 5.7    | 16.3   | 55.3   | 25.7   | 21.2   | 26.4   | 26.0   |
| 9.4    | 8.0    | 2.4    | 2.7    | 7.9    | 6.1    | 10.4   | 0.3    | 1.0    |
| 49.6   | 72.0   | 148.1  | 222.6  | 65.3   | 26.4   | 404.5  | 511.2  | 669.6  |
| 46.2   | 34.5   | 8.9    | 9.1    | 77.8   | 50.1   | 63.7   | 103.7  | 89.2   |
| 86.9   | 80.2   | 5.3    | 1.1    | 179.1  | 102.5  | 19.1   | 24.5   | 29.2   |
| 1.8    | 1.6    | 1.7    | 1.9    | 9.4    | 5.4    | 3.7    | 11.1   | 5.3    |
| 21.2   | 26.1   | 18.6   | 14.7   | 26.4   | 25.9   | 19.9   | 34.1   | 24.7   |
| 20.7   | 44.6   | 60.3   | 75.7   | 20.6   | 18.8   | 58.2   | 53.5   | 69.3   |
| 7.4    | 1.8    | 3.3    | 5.8    | 6.8    | 2.1    | 4.6    | 3.9    | 4.5    |
| 20.9   | 2.6    | 4.7    | 0.9    | 21.6   | 4.2    | 14.6   | 11.5   | 16.1   |
| 24.0   | 9.6    | 5.6    | 12.5   | 20.9   | 43.7   | 53.5   | 47.9   | 36.5   |
| 4.9    | 11.2   | 5.2    | 0.8    | 7.4    | 6.1    | 15.0   | 35.2   | 33.1   |
| 437.2  | 586.9  | 215.7  | 267.3  | 600.2  | 637.4  | 763.6  | 806.9  | 891.0  |
| 58.0   | 90.0   | 53.4   | 67.5   | 86.6   | 65.4   | 182.8  | 131.9  | 145.8  |
| 8.6    | 12.5   | 14.9   | 6.0    | 8.6    | 1.9    | 38.5   | 20.9   | 15.5   |
| 956.6  | 1019.2 | 5.7    | 4.6    | 1469.9 | 1024.4 | 20.2   | 20.2   | 18.1   |
| 11.0   | 1.6    | 3.5    | 3.5    | 13.8   | 1.0    | 13.8   | 13.7   | 16.8   |
| 9.0    | 4.4    | 2.5    | 5.4    | 3.2    | 2.4    | 11.4   | 15.8   | 10.8   |
| 2.0    | 0.9    | 0.6    | 0.5    | 1.1    | 0.9    | 1.6    | 1.1    | 5.5    |
| 14.8   | 20.2   | 43.2   | 22.1   | 20.2   | 8.2    | 69.7   | 73.8   | 85.0   |
| 62.5   | 80.3   | 59.8   | 58.5   | 122.1  | 75.5   | 96.8   | 100.6  | 111.9  |
| 14.1   | 11.7   | 2.0    | 2.4    | 15.9   | 6.8    | 1.9    | 12.2   | 5.5    |
| 0.8    | 4.6    | 1.5    | 1.4    | 1.8    | 1.4    | 4.0    | 2.7    | 3.4    |
| 1.6    | 1.3    | 3.5    | 1.3    | 6.0    | 1.0    | 2.9    | 2.9    | 1.2    |
| 1.0    | 7.5    | 13.2   | 19.0   | 17.3   | 2.7    | 70.4   | 73.7   | 77.3   |
| 0.6    | 2.2    | 0.6    | 3.3    | 2.7    | 1.4    | 4.2    | 5.0    | 5.2    |
| 1.6    | 0.9    | 2.2    | 2.7    | 2.1    | 1.7    | 130.4  | 312.1  | 175.4  |
| 2.9    | 2.7    | 20.2   | 6.9    | 6.3    | 11.6   | 26.8   | 21.4   | 15.0   |
| 13.6   | 10.0   | 19.0   | 11.4   | 15.6   | 22.3   | 15.6   | 20.6   | 15.5   |
| 17.2   | 0.5    | 9.6    | 3.5    | 13.1   | 3.9    | 8.9    | 4.4    | 5.2    |
| 18.8   | 11.2   | 16.1   | 16.2   | 2.8    | 15.2   | 17.1   | 16.3   | 15.0   |
| 11.3   | 7.1    | 1.5    | 14.1   | 11.9   | 12.4   | 39.8   | 35.0   | 35.7   |
| 1.3    | 21.9   | 30.0   | 26.6   | 2.8    | 7.0    | 14.4   | 3.7    | 9.2    |
| 147.5  | 271.7  | 6.8    | 7.6    | 342.9  | 249.1  | 175.2  | 84.9   | 87.0   |
| 14.0   | 19.9   | 6.2    | 9.4    | 2.9    | 3.8    | 10.4   | 7.2    | 9.3    |
| 2.5    | 7.2    | 3.3    | 0.7    | 2.2    | 4.6    | 17.2   | 14.0   | 15.3   |
| 9.3    | 1.2    | 1.4    | 1.1    | 2.0    | 3.8    | 8.8    | 3.1    | 1.9    |
| 2.0    | 4.1    | 2.7    | 1.9    | 1.3    | 1.1    | 1.2    | 29.1   | 39.6   |
| 4.2    | 7.9    | 5.2    | 3.4    | 19.6   | 7.9    | 33.7   | 24.0   | 29.2   |
| 9.3    | 10.6   | 0.7    | 2.6    | 2.4    | 6.1    | 1.8    | 1.4    | 3.2    |
| 1.0    | 10.0   | 8.0    | 1.9    | 2.5    | 8.1    | 3.6    | 13.1   | 12.3   |
| 1877.1 | 2779.7 | 1019.9 | 1143.6 | 2830.9 | 2696.5 | 2822.9 | 2168.6 | 2311.1 |



|        |        |       |       |        |        |        |        |        |
|--------|--------|-------|-------|--------|--------|--------|--------|--------|
| 6.1    | 10.1   | 4.4   | 4.2   | 5.6    | 19.0   | 17.7   | 11.3   | 16.0   |
| 1.9    | 2.2    | 10.0  | 9.2   | 1.9    | 13.3   | 8.4    | 9.2    | 13.1   |
| 0.6    | 0.6    | 0.5   | 0.6   | 1.1    | 1.8    | 1.2    | 0.7    | 2.7    |
| 9.7    | 9.4    | 17.3  | 16.0  | 15.6   | 11.2   | 13.7   | 16.6   | 5.2    |
| 7.6    | 10.7   | 7.2   | 4.3   | 12.7   | 2.7    | 19.9   | 11.4   | 11.0   |
| 9.5    | 8.2    | 0.2   | 0.6   | 3.2    | 6.6    | 5.7    | 2.0    | 5.7    |
| 6.6    | 1.2    | 9.8   | 8.5   | 10.0   | 10.1   | 45.6   | 22.4   | 26.7   |
| 1.0    | 0.9    | 1.1   | 1.1   | 1.9    | 0.9    | 1.4    | 1.2    | 1.4    |
| 2.0    | 13.3   | 1.7   | 2.9   | 7.7    | 11.3   | 11.6   | 19.2   | 18.5   |
| 17.1   | 2.6    | 2.1   | 3.2   | 14.8   | 6.0    | 0.7    | 0.8    | 1.5    |
| 474.2  | 610.4  | 195.0 | 252.0 | 1197.6 | 531.7  | 343.6  | 543.3  | 537.6  |
| 12.5   | 21.8   | 8.3   | 2.6   | 25.4   | 12.1   | 5.9    | 6.1    | 4.4    |
| 21.3   | 8.7    | 5.9   | 2.7   | 20.3   | 15.9   | 5.4    | 3.9    | 7.5    |
| 4.6    | 29.2   | 4.1   | 4.7   | 29.6   | 35.1   | 42.7   | 56.6   | 39.6   |
| 59.8   | 79.1   | 15.4  | 16.3  | 88.0   | 87.1   | 69.7   | 57.6   | 51.3   |
| 5.9    | 12.3   | 2.6   | 0.7   | 1.2    | 7.6    | 8.2    | 4.9    | 1.4    |
| 0.5    | 3.7    | 5.4   | 0.6   | 1.8    | 7.3    | 1.2    | 3.7    | 3.6    |
| 0.9    | 4.9    | 6.3   | 8.2   | 5.2    | 6.6    | 5.9    | 5.3    | 9.3    |
| 17.5   | 2.0    | 5.5   | 7.1   | 6.5    | 2.6    | 5.6    | 8.6    | 5.2    |
| 5.7    | 0.3    | 0.4   | 1.0   | 0.6    | 1.5    | 1.9    | 1.1    | 3.5    |
| 2.3    | 1.3    | 7.3   | 8.5   | 0.5    | 2.9    | 4.3    | 2.1    | 4.7    |
| 10.9   | 6.2    | 1.7   | 0.5   | 31.1   | 9.0    | 4.0    | 1.4    | 3.8    |
| 5.3    | 6.7    | 1.3   | 11.9  | 9.0    | 5.2    | 11.3   | 7.7    | 5.0    |
| 6.1    | 1.6    | 7.6   | 8.5   | 13.0   | 6.3    | 1.8    | 9.2    | 11.4   |
| 4.5    | 2.9    | 17.2  | 3.7   | 5.5    | 3.3    | 3.3    | 15.5   | 3.6    |
| 1.3    | 0.7    | 0.4   | 1.1   | 0.8    | 5.7    | 1.0    | 1.6    | 0.8    |
| 15.1   | 18.3   | 3.4   | 8.9   | 21.7   | 14.8   | 28.1   | 32.4   | 35.4   |
| 29.0   | 44.2   | 45.5  | 59.3  | 48.9   | 55.2   | 163.0  | 170.1  | 185.9  |
| 17.8   | 23.6   | 3.9   | 13.8  | 20.5   | 16.8   | 37.2   | 32.7   | 22.8   |
| 1.2    | 4.1    | 5.4   | 4.0   | 10.4   | 0.6    | 108.6  | 39.4   | 44.9   |
| 9.7    | 11.9   | 3.5   | 7.4   | 17.8   | 11.7   | 74.6   | 99.3   | 99.4   |
| 86.3   | 137.3  | 10.7  | 5.9   | 132.1  | 183.4  | 134.2  | 33.3   | 40.6   |
| 29.5   | 29.4   | 4.9   | 3.0   | 28.9   | 29.2   | 71.0   | 16.7   | 16.5   |
| 13.0   | 1.2    | 2.9   | 1.6   | 7.8    | 1.2    | 1.0    | 1.3    | 0.8    |
| 535.6  | 621.5  | 676.8 | 985.6 | 796.5  | 583.4  | 1168.8 | 1242.2 | 1588.3 |
| 2.9    | 2.3    | 2.2   | 2.8   | 1.4    | 3.5    | 3.5    | 3.9    | 5.6    |
| 3.8    | 7.2    | 3.0   | 2.2   | 11.7   | 1.9    | 18.8   | 38.0   | 45.1   |
| 27.1   | 56.3   | 5.2   | 4.9   | 36.2   | 41.1   | 15.8   | 18.1   | 18.1   |
| 5.0    | 2.7    | 8.7   | 11.6  | 1.5    | 12.2   | 8.3    | 4.1    | 5.9    |
| 8.2    | 0.7    | 6.0   | 9.2   | 4.2    | 17.1   | 30.3   | 22.9   | 26.9   |
| 2386.1 | 4160.5 | 17.7  | 19.8  | 4266.6 | 3545.9 | 2248.4 | 2015.9 | 2173.4 |
| 4.8    | 1.9    | 7.9   | 5.9   | 2.9    | 3.2    | 13.0   | 12.9   | 16.0   |
| 4.1    | 4.1    | 1.0   | 0.2   | 0.6    | 1.7    | 2.4    | 0.7    | 3.6    |
| 113.2  | 162.0  | 60.8  | 110.0 | 183.7  | 50.7   | 222.0  | 190.5  | 240.6  |
| 2.9    | 2.3    | 2.0   | 3.8   | 1.1    | 5.7    | 7.8    | 9.5    | 2.5    |
| 14.5   | 18.0   | 32.3  | 53.5  | 27.3   | 13.8   | 237.8  | 227.7  | 224.7  |
| 26.4   | 38.4   | 65.6  | 100.2 | 37.3   | 36.6   | 274.1  | 238.0  | 247.9  |
| 34.2   | 47.4   | 16.5  | 9.0   | 62.4   | 32.5   | 233.8  | 140.1  | 131.1  |
| 35.4   | 34.6   | 9.9   | 8.5   | 59.5   | 36.8   | 176.8  | 135.3  | 133.1  |
| 16.1   | 12.1   | 1.0   | 4.1   | 3.1    | 12.4   | 14.8   | 2.0    | 3.5    |
| 17.2   | 3.8    | 10.6  | 24.6  | 14.9   | 20.2   | 29.3   | 26.1   | 22.6   |
| 20.9   | 17.3   | 8.2   | 6.9   | 29.8   | 4.7    | 20.4   | 5.6    | 11.0   |
| 13.0   | 1.6    | 6.6   | 1.8   | 1.7    | 7.0    | 11.3   | 13.2   | 8.2    |

|       |       |       |       |       |       |       |       |       |
|-------|-------|-------|-------|-------|-------|-------|-------|-------|
| 34.3  | 34.7  | 3.3   | 6.2   | 39.6  | 24.5  | 36.3  | 37.3  | 32.1  |
| 0.7   | 0.7   | 1.1   | 0.4   | 0.2   | 0.7   | 5.2   | 0.7   | 3.2   |
| 11.2  | 4.6   | 7.8   | 2.1   | 9.3   | 7.1   | 5.9   | 17.7  | 5.5   |
| 1.1   | 1.1   | 2.2   | 3.4   | 1.3   | 4.4   | 1.9   | 5.2   | 3.2   |
| 11.3  | 7.7   | 2.8   | 5.6   | 25.8  | 12.1  | 15.8  | 8.4   | 15.4  |
| 22.5  | 7.6   | 3.1   | 2.3   | 1.0   | 18.2  | 2.9   | 3.6   | 3.9   |
| 5.4   | 5.9   | 5.4   | 4.0   | 12.0  | 4.3   | 17.2  | 13.9  | 8.1   |
| 4.9   | 10.4  | 10.8  | 2.6   | 2.2   | 6.2   | 11.6  | 2.1   | 8.8   |
| 24.8  | 44.6  | 8.9   | 5.8   | 29.5  | 75.5  | 320.6 | 273.5 | 295.9 |
| 6.1   | 12.4  | 19.4  | 8.6   | 23.0  | 1.7   | 19.2  | 23.2  | 20.4  |
| 46.0  | 57.9  | 0.6   | 1.8   | 63.0  | 52.1  | 9.3   | 3.5   | 4.8   |
| 9.3   | 17.4  | 9.3   | 25.0  | 13.8  | 12.4  | 94.6  | 28.3  | 44.9  |
| 112.7 | 152.0 | 77.9  | 86.9  | 225.7 | 137.2 | 247.0 | 335.1 | 372.3 |
| 222.7 | 270.2 | 107.5 | 125.3 | 293.5 | 285.6 | 409.6 | 255.3 | 273.9 |
| 55.9  | 69.9  | 205.6 | 209.5 | 83.5  | 76.9  | 217.7 | 252.3 | 254.9 |
| 2.1   | 3.0   | 1.9   | 5.6   | 1.9   | 4.0   | 6.0   | 12.6  | 4.9   |
| 10.0  | 3.4   | 9.8   | 6.6   | 0.9   | 2.6   | 11.9  | 2.1   | 4.9   |
| 1.1   | 4.9   | 1.1   | 1.8   | 0.6   | 3.2   | 3.1   | 6.5   | 5.6   |
| 42.6  | 71.1  | 0.2   | 1.4   | 51.5  | 93.9  | 8.9   | 9.8   | 5.5   |
| 7.4   | 3.5   | 1.0   | 7.2   | 3.4   | 2.8   | 4.2   | 8.2   | 2.8   |
| 20.5  | 16.3  | 32.6  | 31.0  | 22.1  | 22.9  | 29.0  | 28.2  | 21.7  |
| 18.1  | 45.3  | 35.7  | 69.5  | 48.2  | 29.4  | 1.5   | 2.0   | 2.0   |
| 3.8   | 11.5  | 6.2   | 1.2   | 13.6  | 4.8   | 7.2   | 5.4   | 6.1   |
| 33.9  | 29.9  | 10.3  | 6.5   | 33.3  | 25.0  | 16.9  | 19.1  | 25.2  |
| 5.5   | 3.4   | 1.4   | 3.0   | 9.1   | 1.2   | 6.4   | 2.1   | 5.4   |
| 7.7   | 2.3   | 1.3   | 0.7   | 2.2   | 1.2   | 287.9 | 382.7 | 387.6 |
| 1.0   | 1.1   | 9.2   | 0.3   | 0.5   | 4.2   | 1.2   | 1.5   | 3.8   |
| 9.9   | 17.4  | 1.8   | 1.0   | 7.8   | 1.4   | 10.2  | 6.6   | 6.1   |
| 17.6  | 20.7  | 19.8  | 17.7  | 49.9  | 16.0  | 28.7  | 34.9  | 60.4  |
| 18.3  | 22.5  | 10.3  | 9.0   | 38.6  | 22.9  | 48.2  | 60.8  | 63.1  |
| 2.0   | 3.7   | 7.0   | 2.8   | 7.3   | 11.2  | 5.6   | 2.2   | 2.9   |
| 3.0   | 4.0   | 1.5   | 3.2   | 3.4   | 1.7   | 6.6   | 4.2   | 9.2   |
| 9.1   | 2.3   | 11.6  | 7.4   | 15.6  | 10.1  | 17.0  | 9.8   | 11.6  |
| 9.1   | 19.4  | 18.9  | 15.3  | 16.0  | 15.1  | 23.6  | 25.3  | 28.6  |
| 26.9  | 25.5  | 2.7   | 1.1   | 12.1  | 12.5  | 15.2  | 31.7  | 26.9  |
| 15.5  | 18.7  | 1.3   | 0.5   | 28.6  | 6.6   | 0.7   | 1.7   | 1.2   |
| 1.4   | 0.8   | 0.5   | 0.4   | 10.9  | 1.7   | 2.3   | 1.9   | 0.8   |
| 3.7   | 5.3   | 2.3   | 9.0   | 7.2   | 1.6   | 37.2  | 45.2  | 36.0  |
| 15.8  | 15.2  | 12.4  | 9.9   | 18.8  | 19.0  | 15.5  | 8.1   | 12.4  |
| 13.6  | 17.1  | 139.4 | 172.3 | 3.6   | 10.9  | 4.2   | 9.0   | 10.3  |
| 13.1  | 6.4   | 2.3   | 0.6   | 4.2   | 16.4  | 1.8   | 5.7   | 5.8   |
| 1.4   | 1.0   | 1.3   | 1.0   | 2.5   | 1.2   | 4.4   | 3.5   | 1.7   |
| 4.9   | 3.6   | 3.9   | 2.3   | 9.2   | 2.1   | 1.9   | 1.2   | 0.9   |
| 10.5  | 4.7   | 7.0   | 11.2  | 14.9  | 23.4  | 10.0  | 14.4  | 13.8  |
| 12.3  | 0.8   | 2.1   | 5.8   | 5.2   | 1.0   | 27.1  | 31.6  | 29.7  |
| 2.0   | 0.9   | 0.8   | 2.2   | 1.5   | 1.4   | 12.2  | 13.2  | 16.8  |
| 15.3  | 27.5  | 5.8   | 1.1   | 28.6  | 29.0  | 13.3  | 5.5   | 2.0   |
| 41.5  | 22.9  | 31.2  | 81.0  | 43.3  | 33.5  | 148.4 | 89.7  | 104.5 |
| 90.8  | 57.2  | 36.1  | 59.6  | 75.5  | 57.8  | 170.6 | 112.5 | 124.9 |
| 33.3  | 47.9  | 67.8  | 93.9  | 47.1  | 38.6  | 267.1 | 334.5 | 319.9 |
| 8.7   | 18.0  | 4.2   | 4.5   | 6.9   | 15.7  | 5.0   | 3.4   | 7.5   |
| 7.7   | 1.5   | 0.3   | 9.2   | 5.3   | 0.6   | 1.9   | 2.4   | 2.2   |
| 3.8   | 0.4   | 1.0   | 0.5   | 9.0   | 3.1   | 2.9   | 5.0   | 2.1   |

|      |       |      |       |       |       |       |       |       |
|------|-------|------|-------|-------|-------|-------|-------|-------|
| 1.3  | 2.2   | 21.0 | 4.8   | 1.8   | 5.2   | 2.7   | 1.4   | 2.4   |
| 1.8  | 15.8  | 16.0 | 5.0   | 21.8  | 26.1  | 18.3  | 18.8  | 18.2  |
| 0.4  | 0.3   | 0.5  | 0.9   | 0.6   | 0.9   | 4.0   | 1.5   | 5.3   |
| 1.8  | 0.7   | 5.4  | 5.0   | 1.0   | 2.8   | 6.4   | 3.2   | 6.5   |
| 2.2  | 1.5   | 2.4  | 1.4   | 1.1   | 10.1  | 4.8   | 8.5   | 5.2   |
| 4.6  | 9.6   | 7.8  | 1.3   | 13.1  | 5.9   | 11.0  | 2.4   | 6.8   |
| 64.5 | 92.6  | 8.2  | 7.0   | 101.6 | 105.2 | 144.6 | 168.8 | 179.5 |
| 3.0  | 3.3   | 11.7 | 2.7   | 8.1   | 18.3  | 7.8   | 3.0   | 5.0   |
| 5.2  | 17.9  | 6.6  | 4.2   | 1.6   | 0.8   | 12.8  | 3.5   | 2.3   |
| 0.8  | 0.6   | 1.4  | 1.3   | 1.7   | 2.2   | 108.4 | 222.8 | 269.5 |
| 17.5 | 10.6  | 13.2 | 9.5   | 26.8  | 12.9  | 24.0  | 17.8  | 24.6  |
| 4.9  | 5.6   | 22.8 | 19.0  | 9.6   | 2.8   | 202.5 | 279.4 | 329.7 |
| 6.2  | 1.4   | 6.4  | 6.3   | 14.0  | 1.8   | 8.7   | 9.3   | 6.8   |
| 4.3  | 7.6   | 3.4  | 3.3   | 15.9  | 3.3   | 23.2  | 26.2  | 30.8  |
| 1.2  | 7.3   | 2.3  | 8.6   | 0.9   | 8.3   | 3.7   | 3.6   | 5.0   |
| 5.9  | 1.3   | 3.3  | 0.3   | 5.4   | 2.4   | 10.8  | 3.0   | 6.3   |
| 15.3 | 17.0  | 7.3  | 12.9  | 31.9  | 6.4   | 38.6  | 59.8  | 51.8  |
| 27.1 | 15.7  | 81.9 | 88.0  | 12.7  | 32.2  | 45.0  | 48.7  | 51.8  |
| 39.5 | 34.4  | 6.4  | 19.7  | 58.1  | 36.9  | 32.2  | 20.9  | 34.5  |
| 7.9  | 13.1  | 18.9 | 26.9  | 19.6  | 12.8  | 33.8  | 36.8  | 35.7  |
| 84.2 | 100.4 | 74.9 | 77.2  | 120.4 | 71.2  | 194.5 | 286.6 | 329.6 |
| 7.8  | 2.1   | 3.1  | 0.9   | 1.3   | 2.5   | 3.2   | 1.4   | 1.5   |
| 11.1 | 22.6  | 6.4  | 15.4  | 24.4  | 8.9   | 16.6  | 12.3  | 19.1  |
| 0.4  | 4.9   | 1.1  | 4.8   | 8.2   | 0.9   | 3.3   | 8.5   | 3.1   |
| 13.7 | 38.8  | 6.7  | 8.0   | 18.8  | 39.1  | 133.6 | 89.8  | 114.3 |
| 1.9  | 1.7   | 2.1  | 1.5   | 4.6   | 4.7   | 5.2   | 4.4   | 15.0  |
| 0.5  | 0.7   | 23.9 | 44.3  | 3.6   | 18.1  | 543.2 | 441.4 | 489.2 |
| 6.7  | 2.2   | 3.4  | 0.8   | 10.8  | 2.8   | 328.1 | 315.2 | 349.4 |
| 59.3 | 70.8  | 0.8  | 0.8   | 85.7  | 75.7  | 33.5  | 39.2  | 41.5  |
| 4.7  | 3.6   | 1.1  | 5.1   | 4.4   | 5.0   | 7.4   | 2.9   | 0.4   |
| 3.4  | 3.9   | 5.4  | 5.2   | 4.1   | 2.3   | 3.8   | 3.0   | 8.0   |
| 1.4  | 1.8   | 1.0  | 1.9   | 1.9   | 5.1   | 1.7   | 3.9   | 6.7   |
| 1.5  | 2.0   | 0.8  | 0.6   | 1.2   | 1.3   | 1.7   | 1.4   | 1.0   |
| 0.9  | 6.8   | 1.5  | 5.5   | 7.0   | 0.8   | 2.3   | 8.7   | 6.0   |
| 2.7  | 4.4   | 1.2  | 2.5   | 11.1  | 2.6   | 1.3   | 1.0   | 1.0   |
| 11.5 | 3.4   | 12.6 | 11.4  | 8.0   | 18.9  | 11.4  | 16.1  | 7.1   |
| 39.2 | 5.4   | 89.5 | 105.1 | 2.9   | 10.7  | 35.0  | 39.6  | 70.5  |
| 11.7 | 2.3   | 11.3 | 8.3   | 12.2  | 2.3   | 111.4 | 51.0  | 55.0  |
| 25.6 | 19.8  | 18.8 | 17.6  | 22.0  | 14.5  | 22.3  | 28.1  | 23.0  |
| 23.9 | 20.5  | 11.8 | 6.8   | 41.7  | 24.6  | 21.3  | 25.8  | 25.5  |
| 6.6  | 2.3   | 7.3  | 4.8   | 1.9   | 12.7  | 6.1   | 4.9   | 2.5   |
| 23.4 | 4.7   | 3.8  | 22.1  | 23.6  | 4.9   | 24.3  | 9.6   | 23.6  |
| 85.5 | 132.3 | 85.2 | 103.9 | 159.9 | 135.3 | 417.4 | 493.6 | 563.8 |
| 1.2  | 2.7   | 1.1  | 0.8   | 2.1   | 1.6   | 1.7   | 5.2   | 8.6   |
| 1.1  | 8.7   | 12.7 | 16.9  | 3.8   | 6.4   | 5.0   | 2.5   | 7.1   |
| 7.8  | 11.2  | 8.6  | 9.3   | 14.7  | 1.3   | 16.3  | 16.1  | 17.9  |
| 12.0 | 1.8   | 4.5  | 2.8   | 3.7   | 15.0  | 11.0  | 8.0   | 8.3   |
| 3.2  | 2.8   | 2.7  | 1.1   | 2.3   | 5.1   | 3.9   | 7.3   | 4.5   |
| 6.3  | 15.0  | 15.4 | 13.2  | 15.4  | 3.7   | 17.2  | 15.2  | 11.8  |
| 40.0 | 67.9  | 45.2 | 69.4  | 50.5  | 54.8  | 101.8 | 51.5  | 56.3  |
| 2.8  | 1.8   | 4.3  | 3.8   | 1.9   | 2.1   | 3.0   | 4.0   | 2.5   |
| 5.5  | 1.8   | 5.5  | 8.3   | 2.0   | 1.2   | 9.4   | 3.8   | 8.2   |
| 16.7 | 0.8   | 14.7 | 18.5  | 2.3   | 1.0   | 2.6   | 12.3  | 2.6   |

|        |        |       |       |        |        |        |        |        |
|--------|--------|-------|-------|--------|--------|--------|--------|--------|
| 12.9   | 17.3   | 33.2  | 18.3  | 20.7   | 21.9   | 28.2   | 18.2   | 18.1   |
| 40.1   | 42.3   | 70.9  | 92.3  | 59.3   | 44.4   | 74.4   | 112.9  | 133.4  |
| 19.7   | 23.7   | 19.8  | 9.7   | 23.9   | 10.7   | 17.3   | 24.8   | 14.0   |
| 7.3    | 4.4    | 10.3  | 2.4   | 4.1    | 1.9    | 6.3    | 5.0    | 3.7    |
| 0.2    | 5.1    | 3.1   | 4.1   | 8.9    | 7.5    | 4.1    | 2.3    | 0.8    |
| 3.9    | 0.9    | 0.9   | 2.4   | 0.3    | 0.6    | 1.1    | 1.3    | 2.6    |
| 0.7    | 3.9    | 0.6   | 6.6   | 1.1    | 0.4    | 1.6    | 3.8    | 8.0    |
| 120.0  | 133.2  | 78.1  | 129.6 | 168.9  | 99.2   | 589.0  | 290.1  | 279.1  |
| 46.2   | 89.3   | 39.3  | 48.7  | 50.2   | 52.8   | 131.7  | 94.7   | 96.2   |
| 1010.9 | 1069.0 | 419.5 | 663.9 | 1647.9 | 1244.3 | 4867.6 | 5150.1 | 5509.0 |
| 29.8   | 26.7   | 23.7  | 32.0  | 28.2   | 32.4   | 34.5   | 34.0   | 40.9   |
| 220.5  | 411.9  | 29.5  | 52.6  | 322.6  | 383.0  | 305.2  | 270.4  | 348.7  |
| 11.4   | 5.2    | 144.0 | 201.0 | 11.1   | 15.3   | 23.4   | 20.0   | 29.2   |
| 9.0    | 10.4   | 7.1   | 4.0   | 8.8    | 9.5    | 3.0    | 6.3    | 10.3   |
| 7.8    | 5.7    | 3.9   | 0.6   | 7.3    | 1.6    | 10.9   | 6.1    | 1.8    |
| 1.0    | 2.6    | 8.6   | 0.5   | 6.5    | 0.6    | 4.7    | 8.3    | 5.7    |
| 2.3    | 1.1    | 1.3   | 1.0   | 1.2    | 2.1    | 2.2    | 2.2    | 3.9    |
| 4.0    | 7.1    | 6.7   | 3.9   | 10.3   | 9.7    | 4.2    | 3.1    | 5.3    |
| 1.5    | 7.9    | 132.3 | 198.0 | 2.3    | 1.5    | 8.4    | 1.1    | 2.0    |
| 16.5   | 7.8    | 4.9   | 2.9   | 10.5   | 9.5    | 22.9   | 15.9   | 19.6   |
| 7.7    | 24.3   | 5.1   | 3.8   | 19.6   | 24.9   | 11.2   | 14.9   | 11.7   |
| 4.3    | 2.9    | 4.2   | 3.9   | 2.0    | 2.2    | 5.2    | 6.1    | 5.2    |
| 1.2    | 1.2    | 1.2   | 1.6   | 1.0    | 1.2    | 2.6    | 5.9    | 5.1    |
| 1.6    | 2.4    | 1.9   | 1.4   | 2.4    | 16.9   | 2.8    | 3.0    | 2.4    |
| 147.9  | 227.0  | 5.3   | 10.7  | 254.9  | 204.5  | 4.7    | 6.2    | 10.9   |
| 9.4    | 3.2    | 6.3   | 6.2   | 5.6    | 3.4    | 9.6    | 4.1    | 0.9    |
| 37.1   | 28.7   | 20.4  | 15.8  | 32.9   | 33.9   | 39.7   | 28.3   | 30.1   |
| 1.2    | 10.0   | 1.4   | 6.3   | 11.6   | 12.1   | 19.7   | 19.3   | 19.3   |
| 213.3  | 256.1  | 105.8 | 168.4 | 231.2  | 274.8  | 583.8  | 444.0  | 512.5  |
| 6.5    | 3.5    | 6.3   | 0.6   | 1.0    | 9.4    | 11.7   | 8.0    | 9.6    |
| 3.5    | 8.4    | 2.0   | 1.4   | 1.2    | 6.9    | 5.2    | 4.0    | 5.3    |
| 4.8    | 2.1    | 8.6   | 4.4   | 2.0    | 9.2    | 2.4    | 1.6    | 1.6    |
| 8.9    | 11.1   | 5.7   | 10.4  | 21.3   | 2.1    | 9.4    | 2.4    | 1.4    |
| 37.6   | 18.7   | 4.0   | 7.9   | 41.2   | 11.3   | 1.6    | 8.2    | 9.0    |
| 1.3    | 11.8   | 0.8   | 2.7   | 1.6    | 2.0    | 0.9    | 2.0    | 1.5    |
| 3.6    | 10.2   | 13.5  | 11.7  | 17.4   | 16.2   | 12.9   | 8.9    | 17.1   |
| 9.7    | 12.2   | 3.3   | 6.7   | 10.0   | 3.2    | 5.4    | 3.7    | 5.6    |
| 5.8    | 19.1   | 47.7  | 40.2  | 24.3   | 13.0   | 59.9   | 76.4   | 75.2   |
| 1.4    | 9.3    | 11.2  | 3.6   | 8.9    | 7.0    | 2.9    | 6.3    | 2.9    |
| 5.3    | 2.5    | 1.9   | 2.5   | 1.5    | 2.5    | 6.5    | 2.0    | 3.8    |
| 4.8    | 22.9   | 15.6  | 16.5  | 23.6   | 15.5   | 62.5   | 93.5   | 97.8   |
| 4.8    | 7.8    | 1.5   | 6.4   | 24.9   | 11.6   | 9.8    | 15.0   | 18.4   |
| 3.5    | 3.1    | 3.7   | 3.2   | 6.2    | 23.6   | 6.0    | 21.3   | 10.8   |
| 2.9    | 3.5    | 3.6   | 3.5   | 4.4    | 5.3    | 3.7    | 1.6    | 7.1    |
| 66.0   | 60.5   | 17.0  | 12.7  | 72.5   | 87.8   | 34.5   | 10.3   | 19.0   |
| 9.7    | 5.7    | 0.6   | 3.4   | 1.3    | 0.9    | 6.6    | 4.7    | 5.5    |
| 14.1   | 3.3    | 35.9  | 44.4  | 30.6   | 1.1    | 4.9    | 9.8    | 5.5    |
| 0.5    | 1.0    | 7.2   | 5.2   | 5.1    | 5.5    | 7.3    | 4.0    | 4.2    |
| 105.4  | 69.0   | 21.7  | 25.9  | 130.7  | 73.0   | 140.6  | 154.5  | 145.9  |
| 0.4    | 3.4    | 3.2   | 1.6   | 3.3    | 3.8    | 2.8    | 5.9    | 4.9    |
| 12.4   | 1.9    | 46.7  | 75.5  | 26.9   | 15.7   | 23.2   | 32.6   | 37.8   |
| 1.3    | 13.4   | 28.7  | 40.7  | 1.9    | 1.9    | 6.6    | 6.6    | 5.9    |
| 125.4  | 156.2  | 20.2  | 42.2  | 191.5  | 148.1  | 144.7  | 191.9  | 193.7  |

|       |       |       |       |        |       |       |        |        |
|-------|-------|-------|-------|--------|-------|-------|--------|--------|
| 2.9   | 3.1   | 4.3   | 8.3   | 2.7    | 3.2   | 9.7   | 6.7    | 2.2    |
| 5.2   | 0.3   | 7.6   | 0.8   | 0.6    | 9.0   | 7.3   | 4.9    | 6.2    |
| 10.5  | 13.3  | 15.0  | 21.1  | 10.0   | 15.2  | 35.6  | 39.1   | 40.5   |
| 38.3  | 19.6  | 3.0   | 4.8   | 38.0   | 22.1  | 1.8   | 1.6    | 2.6    |
| 19.4  | 26.8  | 18.4  | 13.2  | 12.3   | 4.2   | 38.3  | 49.6   | 47.3   |
| 15.6  | 20.8  | 8.3   | 4.9   | 8.9    | 19.2  | 10.8  | 9.0    | 27.7   |
| 1.0   | 3.6   | 9.2   | 4.3   | 1.8    | 1.2   | 7.6   | 11.0   | 11.2   |
| 4.6   | 2.1   | 1.0   | 3.5   | 0.5    | 2.2   | 1.0   | 2.3    | 1.5    |
| 0.9   | 2.2   | 3.2   | 4.0   | 7.5    | 1.4   | 3.2   | 3.0    | 8.4    |
| 1.1   | 0.8   | 2.4   | 0.5   | 0.7    | 1.8   | 0.8   | 1.0    | 0.8    |
| 0.8   | 2.0   | 1.4   | 1.7   | 2.7    | 0.9   | 2.5   | 1.1    | 1.2    |
| 186.4 | 201.8 | 72.3  | 133.4 | 249.5  | 139.1 | 353.5 | 298.1  | 340.0  |
| 73.4  | 77.6  | 101.2 | 122.0 | 99.9   | 94.5  | 269.0 | 354.5  | 320.7  |
| 2.1   | 16.6  | 0.9   | 1.3   | 7.5    | 18.5  | 59.1  | 56.2   | 48.7   |
| 32.8  | 33.8  | 17.5  | 18.4  | 30.6   | 42.3  | 69.1  | 74.2   | 80.4   |
| 0.8   | 8.3   | 13.8  | 8.2   | 10.6   | 5.0   | 8.5   | 3.5    | 7.5    |
| 12.0  | 7.6   | 7.2   | 12.8  | 2.4    | 10.7  | 23.5  | 34.2   | 33.8   |
| 1.6   | 1.4   | 2.1   | 2.6   | 1.7    | 3.2   | 3.7   | 2.8    | 3.6    |
| 1.9   | 1.0   | 0.8   | 0.3   | 1.0    | 1.3   | 3.2   | 2.6    | 0.9    |
| 134.2 | 147.6 | 35.5  | 37.9  | 195.6  | 137.9 | 133.8 | 106.9  | 121.9  |
| 334.5 | 424.7 | 51.0  | 44.4  | 647.4  | 443.9 | 235.3 | 224.4  | 259.1  |
| 76.0  | 86.5  | 35.0  | 53.8  | 87.9   | 70.6  | 192.5 | 112.7  | 119.5  |
| 8.6   | 4.1   | 1.3   | 0.9   | 12.3   | 1.2   | 5.1   | 2.3    | 2.2    |
| 28.5  | 45.9  | 1.7   | 3.0   | 66.3   | 53.6  | 14.5  | 30.4   | 32.2   |
| 37.6  | 38.8  | 59.7  | 84.8  | 47.2   | 76.1  | 956.2 | 1862.6 | 1762.7 |
| 1.0   | 1.7   | 1.3   | 1.3   | 16.9   | 4.5   | 3.3   | 3.6    | 8.9    |
| 301.0 | 338.9 | 84.2  | 131.7 | 403.5  | 311.5 | 192.9 | 114.5  | 131.8  |
| 245.9 | 251.7 | 123.8 | 139.9 | 311.0  | 252.8 | 310.3 | 270.7  | 228.2  |
| 10.9  | 15.7  | 2.0   | 7.2   | 14.4   | 17.1  | 32.9  | 35.2   | 28.8   |
| 9.4   | 2.0   | 6.2   | 2.9   | 2.8    | 1.1   | 11.3  | 13.6   | 5.8    |
| 5.9   | 0.5   | 6.9   | 7.6   | 5.6    | 0.5   | 10.4  | 4.0    | 1.2    |
| 2.2   | 1.6   | 4.4   | 2.1   | 1.2    | 4.3   | 2.2   | 1.3    | 3.6    |
| 1.0   | 4.0   | 3.5   | 2.4   | 2.1    | 0.9   | 2.4   | 0.9    | 2.9    |
| 16.2  | 10.4  | 10.3  | 1.0   | 14.5   | 3.3   | 9.3   | 4.1    | 11.5   |
| 11.3  | 3.1   | 10.2  | 1.5   | 38.3   | 4.4   | 25.6  | 23.8   | 21.7   |
| 6.9   | 1.3   | 1.4   | 0.6   | 1.6    | 1.3   | 5.3   | 2.2    | 2.4    |
| 1.8   | 0.5   | 5.1   | 5.3   | 9.4    | 2.1   | 47.6  | 67.6   | 62.4   |
| 7.8   | 1.0   | 1.1   | 6.1   | 8.6    | 11.1  | 4.7   | 2.4    | 2.1    |
| 3.2   | 2.6   | 10.2  | 10.7  | 3.6    | 3.7   | 23.4  | 5.7    | 3.9    |
| 2.7   | 13.6  | 2.3   | 2.0   | 8.3    | 4.3   | 6.2   | 13.1   | 10.0   |
| 97.1  | 117.2 | 22.6  | 20.5  | 111.0  | 107.0 | 457.8 | 394.8  | 442.5  |
| 202.2 | 222.3 | 65.8  | 75.2  | 262.9  | 194.6 | 623.4 | 623.5  | 611.6  |
| 9.8   | 1.1   | 4.6   | 4.7   | 4.9    | 2.4   | 13.8  | 6.2    | 5.0    |
| 2.1   | 7.4   | 1.7   | 6.9   | 1.3    | 8.4   | 67.3  | 74.4   | 68.3   |
| 15.1  | 17.3  | 22.0  | 25.2  | 6.7    | 12.3  | 27.1  | 24.5   | 23.5   |
| 7.5   | 7.7   | 0.9   | 7.1   | 9.5    | 16.6  | 8.7   | 13.4   | 10.1   |
| 18.8  | 32.7  | 6.8   | 10.5  | 28.0   | 28.0  | 10.3  | 38.0   | 24.8   |
| 1.1   | 1.6   | 2.5   | 2.6   | 1.4    | 1.3   | 3.5   | 2.4    | 2.5    |
| 1.8   | 4.1   | 2.7   | 3.9   | 2.4    | 2.4   | 4.1   | 3.0    | 4.3    |
| 7.7   | 1.6   | 2.9   | 4.2   | 6.5    | 17.8  | 32.2  | 24.1   | 30.0   |
| 319.1 | 424.8 | 1.1   | 3.2   | 1036.3 | 472.9 | 1.4   | 12.7   | 13.3   |
| 1.4   | 11.8  | 8.5   | 5.3   | 1.6    | 4.8   | 2.5   | 6.0    | 17.3   |
| 2.8   | 2.8   | 0.7   | 1.3   | 1.5    | 1.3   | 3.0   | 2.3    | 11.1   |

|       |       |       |       |       |       |       |        |        |
|-------|-------|-------|-------|-------|-------|-------|--------|--------|
| 13.1  | 19.5  | 9.8   | 8.4   | 36.1  | 26.7  | 25.1  | 21.0   | 16.8   |
| 21.3  | 24.7  | 28.1  | 38.0  | 22.7  | 14.5  | 45.2  | 35.8   | 30.7   |
| 6.2   | 7.9   | 4.0   | 2.7   | 2.4   | 1.3   | 5.4   | 10.0   | 4.5    |
| 8.0   | 6.8   | 2.7   | 7.0   | 10.7  | 25.3  | 19.3  | 21.4   | 18.9   |
| 4.4   | 19.2  | 8.4   | 8.9   | 9.7   | 16.2  | 19.2  | 14.7   | 14.8   |
| 1.8   | 1.8   | 1.6   | 1.0   | 1.5   | 5.9   | 2.2   | 4.0    | 3.9    |
| 3.4   | 3.4   | 3.5   | 6.4   | 0.4   | 3.0   | 3.3   | 1.4    | 2.2    |
| 26.6  | 12.1  | 3.5   | 5.1   | 16.7  | 9.9   | 5.0   | 13.1   | 11.3   |
| 0.4   | 0.5   | 0.4   | 0.8   | 1.9   | 0.2   | 0.5   | 1.9    | 1.7    |
| 9.7   | 11.7  | 9.6   | 17.9  | 5.1   | 4.7   | 7.5   | 6.6    | 9.8    |
| 9.2   | 21.2  | 2.2   | 3.8   | 9.4   | 10.3  | 11.5  | 10.5   | 11.4   |
| 1.0   | 0.2   | 6.7   | 4.4   | 4.4   | 5.2   | 5.1   | 2.7    | 5.8    |
| 0.7   | 0.7   | 0.6   | 0.4   | 1.3   | 0.7   | 0.7   | 0.7    | 1.0    |
| 7.7   | 3.5   | 31.8  | 18.2  | 7.7   | 9.0   | 56.8  | 78.4   | 77.4   |
| 9.7   | 4.0   | 10.2  | 9.9   | 19.0  | 3.9   | 112.9 | 41.7   | 43.8   |
| 15.9  | 22.1  | 2.3   | 0.9   | 4.9   | 13.1  | 30.1  | 31.8   | 26.4   |
| 2.2   | 2.6   | 13.0  | 3.2   | 2.5   | 2.2   | 2.0   | 1.3    | 15.7   |
| 7.7   | 21.7  | 5.5   | 10.7  | 15.3  | 12.1  | 25.8  | 16.4   | 2.5    |
| 13.9  | 4.2   | 4.2   | 1.2   | 0.9   | 5.4   | 16.0  | 2.7    | 8.7    |
| 9.2   | 13.6  | 8.1   | 3.2   | 5.9   | 10.6  | 8.2   | 9.2    | 7.8    |
| 10.4  | 7.0   | 14.3  | 9.9   | 18.3  | 2.8   | 103.9 | 111.5  | 129.5  |
| 26.9  | 28.0  | 2.8   | 7.4   | 31.5  | 40.1  | 15.4  | 20.6   | 23.4   |
| 5.8   | 1.3   | 2.0   | 0.8   | 2.7   | 0.7   | 4.4   | 3.7    | 4.2    |
| 4.1   | 13.7  | 3.6   | 8.1   | 18.8  | 15.5  | 18.1  | 11.1   | 6.4    |
| 49.6  | 34.9  | 27.3  | 30.7  | 47.2  | 43.0  | 73.8  | 71.4   | 90.3   |
| 7.6   | 3.4   | 6.6   | 0.8   | 11.4  | 2.3   | 1.5   | 2.1    | 1.9    |
| 11.0  | 2.1   | 1.3   | 1.3   | 6.9   | 4.2   | 634.5 | 1064.2 | 1067.6 |
| 1.0   | 3.5   | 5.9   | 0.4   | 1.2   | 4.4   | 1.6   | 0.6    | 2.3    |
| 1.5   | 0.7   | 4.1   | 0.9   | 0.4   | 0.3   | 1.1   | 2.2    | 4.2    |
| 11.6  | 16.1  | 7.1   | 19.4  | 19.5  | 14.1  | 22.7  | 17.8   | 28.1   |
| 23.4  | 28.4  | 208.3 | 295.3 | 27.0  | 21.2  | 134.2 | 119.1  | 123.5  |
| 485.3 | 642.8 | 124.2 | 181.7 | 672.9 | 490.1 | 427.9 | 504.8  | 517.4  |
| 1.0   | 4.5   | 6.0   | 3.2   | 5.5   | 16.8  | 55.3  | 20.3   | 22.6   |
| 44.7  | 37.7  | 126.8 | 191.6 | 51.7  | 38.9  | 411.3 | 389.7  | 426.0  |
| 12.3  | 14.2  | 9.2   | 9.7   | 7.5   | 8.8   | 60.3  | 66.9   | 68.3   |
| 15.4  | 5.8   | 7.5   | 15.6  | 13.7  | 16.2  | 25.8  | 8.0    | 22.2   |
| 22.2  | 43.1  | 1.8   | 0.6   | 21.9  | 16.4  | 88.1  | 75.0   | 74.4   |
| 238.1 | 162.1 | 0.5   | 6.1   | 441.6 | 94.4  | 8.6   | 3.6    | 4.3    |
| 10.8  | 14.3  | 4.0   | 5.1   | 19.5  | 15.7  | 4.7   | 6.0    | 2.9    |
| 38.7  | 10.6  | 6.0   | 5.1   | 51.8  | 7.6   | 5.7   | 14.2   | 15.6   |
| 4.3   | 8.1   | 9.7   | 19.2  | 6.2   | 2.0   | 7.1   | 6.6    | 8.7    |
| 20.7  | 38.6  | 29.2  | 25.6  | 19.7  | 29.0  | 201.6 | 193.2  | 196.0  |
| 21.3  | 33.6  | 44.4  | 47.9  | 51.0  | 29.8  | 43.0  | 27.3   | 22.9   |
| 1.6   | 2.3   | 22.7  | 11.6  | 0.6   | 7.2   | 6.1   | 12.8   | 12.7   |
| 22.7  | 32.9  | 2.7   | 0.9   | 25.7  | 18.0  | 5.0   | 4.5    | 8.5    |
| 3.1   | 10.0  | 9.1   | 0.5   | 8.2   | 11.6  | 4.4   | 2.5    | 7.5    |
| 2.5   | 2.3   | 5.3   | 3.6   | 1.9   | 5.6   | 3.8   | 6.1    | 1.9    |
| 0.9   | 2.2   | 3.0   | 2.2   | 1.8   | 1.9   | 7.6   | 1.5    | 1.7    |
| 0.8   | 3.0   | 1.3   | 1.2   | 4.6   | 6.9   | 1.9   | 4.0    | 3.5    |
| 100.2 | 126.5 | 38.0  | 24.7  | 151.1 | 68.9  | 181.9 | 174.0  | 181.1  |
| 9.0   | 8.0   | 7.2   | 4.5   | 4.3   | 12.1  | 6.0   | 5.1    | 7.1    |
| 6.9   | 1.5   | 17.7  | 1.4   | 3.1   | 8.9   | 14.5  | 5.1    | 12.6   |
| 2.1   | 8.4   | 8.8   | 6.8   | 0.9   | 0.8   | 7.2   | 4.8    | 5.8    |

|        |        |       |       |        |        |        |        |        |
|--------|--------|-------|-------|--------|--------|--------|--------|--------|
| 19.7   | 25.4   | 8.5   | 7.8   | 17.8   | 19.1   | 11.6   | 8.7    | 5.8    |
| 4.5    | 0.9    | 9.1   | 6.1   | 2.1    | 1.0    | 1.0    | 2.2    | 1.0    |
| 1.3    | 1.1    | 0.7   | 1.0   | 1.5    | 4.4    | 18.8   | 5.2    | 6.8    |
| 1.4    | 8.9    | 21.4  | 24.6  | 18.9   | 12.3   | 125.9  | 108.6  | 105.5  |
| 6.4    | 23.5   | 13.7  | 6.0   | 19.1   | 14.0   | 17.1   | 15.6   | 13.8   |
| 1.4    | 6.0    | 21.6  | 5.2   | 22.7   | 12.2   | 24.0   | 21.5   | 12.7   |
| 1.7    | 7.0    | 1.9   | 2.9   | 1.6    | 3.0    | 11.2   | 2.8    | 3.3    |
| 1.0    | 8.9    | 4.0   | 11.9  | 6.0    | 7.1    | 104.5  | 133.6  | 162.4  |
| 9.4    | 5.5    | 32.0  | 23.1  | 2.7    | 2.0    | 40.3   | 18.7   | 26.8   |
| 422.1  | 414.3  | 250.4 | 356.9 | 620.2  | 350.7  | 750.1  | 647.0  | 705.9  |
| 0.4    | 3.3    | 0.4   | 0.4   | 8.8    | 9.3    | 2.8    | 0.5    | 0.9    |
| 2.7    | 6.7    | 9.8   | 6.9   | 19.4   | 14.7   | 30.1   | 42.2   | 28.0   |
| 2.3    | 0.6    | 0.4   | 0.3   | 1.1    | 0.3    | 0.5    | 0.5    | 0.6    |
| 87.7   | 68.1   | 12.0  | 6.3   | 109.4  | 63.0   | 4.8    | 2.1    | 3.6    |
| 1.8    | 1.9    | 2.5   | 16.2  | 2.4    | 7.5    | 8.8    | 5.4    | 5.9    |
| 3.2    | 3.7    | 2.1   | 2.3   | 20.7   | 20.7   | 16.2   | 50.2   | 37.4   |
| 37.4   | 38.2   | 42.5  | 73.7  | 14.3   | 40.4   | 48.8   | 40.6   | 43.3   |
| 5.7    | 2.1    | 2.2   | 6.4   | 6.7    | 2.3    | 11.3   | 8.8    | 10.8   |
| 90.6   | 146.7  | 85.3  | 144.0 | 162.1  | 118.5  | 257.6  | 252.3  | 254.0  |
| 36.7   | 51.9   | 42.7  | 83.2  | 31.5   | 41.4   | 39.5   | 33.5   | 39.8   |
| 1.3    | 6.8    | 6.8   | 0.2   | 1.8    | 7.6    | 5.1    | 0.9    | 5.4    |
| 75.1   | 114.0  | 38.1  | 58.7  | 136.6  | 67.5   | 423.9  | 382.3  | 378.4  |
| 17.1   | 2.0    | 7.4   | 1.1   | 2.2    | 17.9   | 20.4   | 9.1    | 16.2   |
| 1.6    | 5.8    | 0.7   | 0.9   | 0.8    | 8.0    | 6.1    | 6.0    | 4.4    |
| 2.5    | 1.0    | 4.9   | 2.5   | 8.6    | 2.1    | 5.9    | 4.7    | 1.9    |
| 0.2    | 5.5    | 1.3   | 2.4   | 5.2    | 4.3    | 2.4    | 3.3    | 4.5    |
| 15.1   | 16.8   | 14.0  | 11.7  | 34.3   | 19.4   | 25.2   | 22.2   | 24.2   |
| 21.2   | 18.9   | 28.1  | 31.9  | 30.8   | 40.5   | 33.7   | 43.0   | 57.6   |
| 31.9   | 38.5   | 43.0  | 64.4  | 80.5   | 37.1   | 139.0  | 110.9  | 111.4  |
| 2.0    | 1.2    | 1.2   | 1.2   | 13.2   | 1.4    | 3.2    | 1.0    | 1.0    |
| 3.3    | 3.3    | 2.3   | 14.5  | 14.7   | 3.7    | 4.8    | 5.0    | 3.6    |
| 15.6   | 19.2   | 13.9  | 14.9  | 36.2   | 26.5   | 18.3   | 29.9   | 32.3   |
| 14.9   | 7.3    | 2.5   | 2.1   | 6.2    | 1.6    | 6.5    | 72.5   | 75.7   |
| 2.9    | 5.2    | 2.2   | 9.9   | 2.4    | 4.5    | 3.1    | 2.3    | 4.8    |
| 6.7    | 13.3   | 14.1  | 0.8   | 15.0   | 16.4   | 5.3    | 12.7   | 8.7    |
| 2.2    | 1.2    | 1.5   | 1.2   | 1.1    | 1.3    | 3.5    | 1.7    | 1.6    |
| 1659.9 | 2218.3 | 148.6 | 341.0 | 1912.9 | 1915.0 | 4587.7 | 1624.6 | 1904.7 |
| 1.3    | 7.0    | 0.5   | 1.1   | 0.6    | 4.2    | 2.9    | 4.7    | 5.1    |
| 5.3    | 0.3    | 11.7  | 6.3   | 1.3    | 8.4    | 7.8    | 15.9   | 8.7    |
| 6.7    | 10.5   | 9.5   | 10.1  | 14.9   | 12.7   | 10.3   | 25.9   | 14.5   |
| 1.3    | 1.2    | 0.7   | 0.9   | 2.8    | 3.1    | 2.6    | 5.3    | 3.4    |
| 3.2    | 4.0    | 3.9   | 3.8   | 4.0    | 3.3    | 5.8    | 8.5    | 12.4   |
| 0.8    | 1.0    | 2.8   | 0.5   | 1.3    | 1.7    | 3.0    | 7.3    | 1.6    |
| 3.5    | 1.4    | 5.5   | 1.7   | 0.7    | 8.4    | 229.4  | 34.4   | 62.3   |
| 0.8    | 5.7    | 10.0  | 12.4  | 1.7    | 4.9    | 1.7    | 6.3    | 3.4    |
| 2.3    | 1.9    | 9.2   | 10.2  | 13.4   | 16.6   | 5.2    | 23.9   | 12.0   |
| 14.4   | 13.1   | 8.0   | 6.9   | 19.9   | 11.2   | 9.5    | 4.4    | 12.1   |
| 1.1    | 3.1    | 1.2   | 1.2   | 0.8    | 1.5    | 13.1   | 18.7   | 13.9   |
| 7.2    | 8.8    | 2.7   | 2.8   | 1.3    | 1.2    | 8.0    | 8.8    | 6.8    |
| 195.1  | 270.3  | 85.7  | 99.0  | 226.5  | 306.1  | 1115.6 | 952.9  | 1178.4 |
| 10.1   | 25.0   | 13.1  | 11.8  | 13.1   | 4.7    | 9.2    | 9.5    | 2.2    |
| 0.9    | 2.3    | 1.0   | 3.3   | 1.0    | 3.3    | 23.0   | 8.0    | 6.8    |
| 140.6  | 205.6  | 77.2  | 77.5  | 223.3  | 158.3  | 269.0  | 237.9  | 228.0  |

|        |        |       |        |        |        |        |        |        |
|--------|--------|-------|--------|--------|--------|--------|--------|--------|
| 26.5   | 33.0   | 16.1  | 17.3   | 39.6   | 33.1   | 108.0  | 76.8   | 82.7   |
| 56.2   | 30.6   | 63.0  | 127.3  | 87.6   | 33.2   | 49.9   | 46.5   | 43.3   |
| 99.5   | 266.1  | 3.4   | 4.9    | 304.4  | 510.3  | 3.9    | 9.7    | 6.5    |
| 22.5   | 17.8   | 18.4  | 16.5   | 3.2    | 8.9    | 24.5   | 14.7   | 16.7   |
| 2.8    | 21.9   | 18.4  | 24.0   | 21.8   | 12.7   | 31.5   | 31.1   | 28.0   |
| 18.3   | 16.5   | 2.1   | 1.9    | 24.4   | 18.3   | 32.6   | 25.9   | 24.9   |
| 38.3   | 29.6   | 1.3   | 1.1    | 80.0   | 40.4   | 3.3    | 3.4    | 3.1    |
| 48.4   | 41.6   | 4.3   | 26.4   | 77.9   | 50.4   | 33.4   | 25.9   | 32.4   |
| 18.5   | 18.7   | 21.4  | 56.6   | 3.4    | 10.4   | 39.0   | 45.3   | 64.7   |
| 68.3   | 86.9   | 5.2   | 2.5    | 145.5  | 53.4   | 5.6    | 6.2    | 3.7    |
| 6.1    | 5.2    | 11.8  | 7.0    | 37.2   | 27.4   | 53.4   | 62.5   | 55.8   |
| 19.6   | 27.8   | 15.1  | 24.5   | 36.5   | 30.4   | 23.8   | 14.1   | 8.6    |
| 10.7   | 1.4    | 4.3   | 3.1    | 2.4    | 3.4    | 9.5    | 5.8    | 3.8    |
| 3.4    | 1.7    | 0.5   | 1.0    | 4.7    | 2.3    | 7.0    | 2.9    | 7.9    |
| 0.8    | 2.3    | 12.6  | 9.4    | 1.4    | 1.8    | 4.0    | 15.2   | 12.6   |
| 2.9    | 5.4    | 1.2   | 6.1    | 0.7    | 1.4    | 5.6    | 4.6    | 4.4    |
| 2.5    | 2.1    | 17.7  | 7.7    | 1.1    | 2.2    | 6.6    | 2.8    | 3.4    |
| 1.2    | 4.3    | 5.9   | 5.0    | 1.0    | 8.7    | 2.8    | 4.3    | 4.9    |
| 39.7   | 43.8   | 52.1  | 95.9   | 81.3   | 36.9   | 90.0   | 97.0   | 100.3  |
| 3.9    | 6.0    | 5.4   | 9.8    | 0.8    | 1.6    | 9.3    | 7.3    | 5.2    |
| 15.2   | 20.9   | 16.2  | 17.2   | 13.6   | 4.5    | 17.3   | 19.1   | 8.0    |
| 7.7    | 11.7   | 3.7   | 5.4    | 20.3   | 17.0   | 6.0    | 4.2    | 6.2    |
| 4.1    | 3.3    | 5.5   | 14.9   | 9.4    | 2.4    | 18.8   | 24.6   | 18.1   |
| 3.9    | 0.5    | 8.0   | 1.4    | 1.9    | 0.7    | 1.5    | 2.1    | 2.4    |
| 7.4    | 4.4    | 25.2  | 26.2   | 7.7    | 9.4    | 14.4   | 18.8   | 35.8   |
| 14.3   | 14.2   | 27.8  | 44.0   | 25.3   | 19.9   | 35.3   | 30.6   | 52.0   |
| 4.2    | 1.2    | 6.9   | 7.2    | 10.1   | 3.1    | 2.1    | 6.0    | 2.8    |
| 44.0   | 52.4   | 16.8  | 11.7   | 48.1   | 33.1   | 17.0   | 13.2   | 19.1   |
| 5.2    | 18.0   | 0.7   | 1.7    | 12.1   | 3.8    | 5.6    | 10.3   | 12.4   |
| 12.0   | 19.8   | 14.3  | 10.6   | 26.1   | 19.5   | 40.2   | 19.7   | 23.2   |
| 515.0  | 620.7  | 191.2 | 202.9  | 942.1  | 590.6  | 893.0  | 852.0  | 985.6  |
| 2.0    | 19.9   | 3.3   | 3.5    | 0.9    | 3.9    | 3.5    | 1.1    | 4.1    |
| 8.0    | 15.1   | 5.3   | 5.8    | 27.3   | 15.3   | 18.3   | 4.5    | 4.0    |
| 3.7    | 9.4    | 0.7   | 0.9    | 1.5    | 4.4    | 8.2    | 2.8    | 6.2    |
| 3.1    | 1.1    | 1.6   | 2.7    | 1.2    | 1.1    | 4.5    | 2.6    | 2.3    |
| 1.4    | 1.9    | 6.1   | 2.8    | 2.0    | 2.4    | 7.9    | 3.0    | 5.3    |
| 13.6   | 9.3    | 11.3  | 14.5   | 12.4   | 4.3    | 119.9  | 191.5  | 199.7  |
| 186.7  | 113.8  | 15.6  | 9.7    | 289.6  | 125.2  | 12.0   | 1.6    | 2.2    |
| 14.0   | 22.9   | 13.4  | 1.7    | 20.2   | 27.2   | 6.8    | 15.2   | 17.1   |
| 1.5    | 10.4   | 2.5   | 8.2    | 1.9    | 8.0    | 10.9   | 1.7    | 6.0    |
| 1.1    | 9.9    | 4.2   | 0.5    | 1.4    | 4.6    | 3.8    | 3.7    | 7.2    |
| 39.2   | 48.1   | 2.5   | 2.1    | 23.7   | 34.9   | 7.8    | 7.8    | 7.0    |
| 1.8    | 2.0    | 2.5   | 2.3    | 2.2    | 1.9    | 9.0    | 6.8    | 6.3    |
| 1.7    | 0.7    | 1.0   | 0.4    | 1.5    | 1.5    | 19.4   | 14.6   | 21.4   |
| 2.2    | 1.9    | 7.3   | 5.4    | 5.8    | 3.4    | 1.5    | 8.0    | 3.5    |
| 1.6    | 10.0   | 17.1  | 21.5   | 4.1    | 10.8   | 7.7    | 11.3   | 7.4    |
| 4.4    | 5.2    | 10.1  | 11.8   | 1.2    | 3.0    | 191.8  | 208.8  | 257.8  |
| 1348.9 | 1709.3 | 697.8 | 1055.3 | 1890.7 | 1540.9 | 3330.9 | 3407.1 | 3558.7 |
| 16.7   | 12.2   | 12.3  | 15.0   | 19.7   | 21.6   | 19.5   | 15.8   | 22.6   |
| 1.1    | 11.5   | 7.4   | 14.3   | 24.1   | 11.1   | 41.2   | 9.3    | 9.7    |
| 11.8   | 1.7    | 13.1  | 20.7   | 12.3   | 7.9    | 21.4   | 18.4   | 11.9   |
| 18.4   | 24.9   | 30.7  | 21.6   | 29.6   | 17.6   | 25.6   | 13.9   | 19.3   |
| 2.4    | 8.2    | 2.3   | 2.0    | 2.7    | 3.6    | 21.0   | 9.8    | 17.2   |



|       |       |       |       |       |       |        |        |        |
|-------|-------|-------|-------|-------|-------|--------|--------|--------|
| 11.0  | 3.0   | 6.0   | 6.1   | 18.3  | 12.4  | 25.2   | 54.9   | 40.9   |
| 9.1   | 10.0  | 4.8   | 0.7   | 12.8  | 3.1   | 6.1    | 4.1    | 3.0    |
| 15.4  | 4.4   | 31.4  | 37.8  | 15.7  | 2.4   | 13.8   | 14.0   | 2.4    |
| 1.1   | 0.9   | 0.9   | 0.6   | 0.5   | 0.5   | 1.2    | 3.1    | 0.9    |
| 11.2  | 13.0  | 3.5   | 8.6   | 10.7  | 18.1  | 7.6    | 8.2    | 7.3    |
| 15.1  | 10.4  | 10.9  | 0.8   | 1.7   | 25.0  | 15.1   | 15.6   | 11.5   |
| 0.9   | 0.9   | 6.9   | 1.0   | 2.3   | 1.2   | 5.9    | 11.1   | 6.5    |
| 2.0   | 0.7   | 0.7   | 1.3   | 4.6   | 0.9   | 0.9    | 2.7    | 1.3    |
| 0.3   | 0.6   | 0.2   | 2.1   | 0.3   | 1.2   | 1.7    | 0.5    | 0.3    |
| 3.3   | 7.6   | 1.0   | 0.9   | 1.0   | 3.1   | 4.0    | 10.5   | 11.4   |
| 8.9   | 17.9  | 0.4   | 0.3   | 2.4   | 10.2  | 10.7   | 7.9    | 1.0    |
| 64.6  | 42.5  | 0.3   | 4.0   | 38.6  | 88.2  | 1.2    | 0.5    | 0.4    |
| 3.5   | 6.8   | 0.9   | 6.5   | 1.9   | 3.1   | 4.2    | 5.0    | 1.1    |
| 15.2  | 21.7  | 50.6  | 51.3  | 16.8  | 9.0   | 36.8   | 29.2   | 31.4   |
| 8.4   | 5.8   | 0.9   | 4.4   | 5.1   | 9.8   | 9.5    | 8.0    | 10.1   |
| 13.7  | 20.2  | 18.9  | 16.5  | 28.7  | 22.9  | 51.7   | 29.8   | 28.6   |
| 4.0   | 1.7   | 1.0   | 1.0   | 1.3   | 0.7   | 8.6    | 2.9    | 4.9    |
| 0.7   | 1.9   | 0.7   | 0.3   | 1.0   | 1.0   | 1.4    | 1.4    | 0.6    |
| 5.4   | 4.5   | 7.9   | 11.4  | 10.5  | 12.0  | 16.5   | 13.9   | 16.4   |
| 6.1   | 9.7   | 3.3   | 10.8  | 2.7   | 12.8  | 15.2   | 18.5   | 17.0   |
| 0.9   | 0.9   | 0.8   | 3.5   | 1.0   | 2.9   | 2.1    | 2.0    | 2.4    |
| 14.1  | 1.3   | 9.1   | 3.4   | 13.9  | 15.5  | 8.6    | 15.8   | 3.6    |
| 3.9   | 4.4   | 6.3   | 4.2   | 7.3   | 1.7   | 1.1    | 2.6    | 1.3    |
| 36.3  | 46.7  | 8.1   | 2.2   | 74.0  | 45.8  | 213.4  | 181.0  | 195.1  |
| 1.6   | 8.9   | 6.2   | 3.0   | 10.7  | 6.5   | 7.5    | 6.8    | 11.6   |
| 219.3 | 244.7 | 37.5  | 46.4  | 351.3 | 251.0 | 432.8  | 436.9  | 508.0  |
| 5.7   | 6.2   | 1.9   | 3.4   | 8.8   | 18.9  | 9.5    | 7.0    | 5.8    |
| 1.1   | 1.4   | 2.0   | 2.3   | 7.3   | 2.7   | 6.4    | 4.0    | 4.3    |
| 1.7   | 0.9   | 1.7   | 1.6   | 3.2   | 1.6   | 2.3    | 6.3    | 7.8    |
| 73.6  | 54.4  | 2.7   | 2.3   | 166.6 | 64.0  | 10.7   | 5.4    | 5.1    |
| 305.3 | 485.2 | 137.6 | 177.2 | 410.4 | 427.5 | 1815.0 | 3079.0 | 3785.2 |
| 3.7   | 2.6   | 10.1  | 4.7   | 13.4  | 13.2  | 1.6    | 3.4    | 0.8    |
| 7.4   | 17.4  | 0.4   | 2.3   | 1.7   | 11.4  | 6.3    | 7.8    | 8.2    |
| 267.7 | 317.1 | 37.6  | 60.9  | 420.1 | 302.6 | 839.4  | 592.0  | 648.2  |
| 1.3   | 2.3   | 0.7   | 6.6   | 1.6   | 2.2   | 6.7    | 6.7    | 0.6    |
| 161.7 | 175.6 | 115.9 | 185.0 | 218.8 | 151.8 | 209.9  | 222.9  | 292.7  |
| 10.0  | 11.0  | 2.4   | 8.3   | 1.5   | 3.1   | 3.3    | 3.2    | 6.6    |
| 9.9   | 0.8   | 28.8  | 22.3  | 1.0   | 4.5   | 93.3   | 65.2   | 69.4   |
| 2.3   | 1.7   | 3.0   | 2.2   | 1.4   | 2.9   | 5.2    | 1.1    | 1.1    |
| 1.8   | 2.3   | 2.5   | 2.1   | 22.8  | 4.0   | 1.2    | 2.6    | 1.6    |
| 12.4  | 9.5   | 13.2  | 8.1   | 2.1   | 7.9   | 5.4    | 10.7   | 7.1    |
| 1.7   | 2.8   | 1.8   | 0.7   | 14.1  | 1.1   | 9.3    | 6.2    | 4.7    |
| 276.4 | 237.0 | 252.4 | 422.1 | 332.8 | 196.8 | 860.5  | 610.6  | 686.4  |
| 4.4   | 9.6   | 4.9   | 0.6   | 10.3  | 3.4   | 5.1    | 8.6    | 5.7    |
| 36.3  | 50.6  | 12.5  | 15.4  | 52.7  | 50.0  | 6.5    | 1.2    | 4.4    |
| 2.4   | 4.0   | 2.1   | 1.0   | 1.2   | 5.5   | 7.6    | 2.4    | 10.9   |
| 1.2   | 1.0   | 0.4   | 1.1   | 1.5   | 0.7   | 1.3    | 2.0    | 1.8    |
| 3.2   | 13.0  | 2.7   | 2.7   | 13.5  | 5.3   | 11.6   | 13.3   | 7.9    |
| 20.6  | 2.2   | 1.0   | 1.8   | 6.1   | 5.6   | 57.3   | 9.1    | 4.6    |
| 12.7  | 8.7   | 7.7   | 5.6   | 16.6  | 9.3   | 12.9   | 15.7   | 12.8   |
| 50.8  | 118.0 | 14.8  | 13.6  | 230.1 | 135.1 | 19.9   | 20.6   | 22.3   |
| 0.8   | 1.9   | 3.9   | 0.9   | 1.5   | 1.2   | 3.5    | 4.1    | 0.7    |
| 220.9 | 355.0 | 33.3  | 54.1  | 371.7 | 303.6 | 462.2  | 473.8  | 512.4  |

|        |        |       |        |        |        |        |        |        |
|--------|--------|-------|--------|--------|--------|--------|--------|--------|
| 19.8   | 2.1    | 1.7   | 14.2   | 7.2    | 2.4    | 58.5   | 71.4   | 67.5   |
| 1.6    | 5.6    | 3.7   | 2.5    | 1.8    | 10.6   | 3.2    | 9.0    | 2.0    |
| 12.5   | 14.5   | 8.9   | 6.2    | 14.0   | 3.4    | 15.2   | 16.6   | 12.1   |
| 13.5   | 14.2   | 6.7   | 0.3    | 16.6   | 14.7   | 4.2    | 3.8    | 5.2    |
| 3.3    | 0.3    | 1.1   | 3.1    | 3.2    | 3.2    | 4.3    | 0.8    | 5.4    |
| 1.8    | 1.5    | 2.3   | 1.5    | 1.5    | 1.2    | 2.5    | 2.1    | 1.8    |
| 33.6   | 37.1   | 54.0  | 61.3   | 29.9   | 3.6    | 86.4   | 90.7   | 81.5   |
| 7.2    | 14.0   | 8.0   | 0.8    | 3.9    | 26.8   | 15.1   | 15.0   | 17.8   |
| 2.0    | 4.9    | 3.8   | 0.4    | 0.6    | 2.5    | 4.0    | 1.6    | 1.0    |
| 55.4   | 76.4   | 59.3  | 51.6   | 65.0   | 56.9   | 231.0  | 320.2  | 325.7  |
| 3.1    | 4.7    | 1.5   | 3.7    | 5.1    | 11.1   | 4.7    | 8.9    | 5.7    |
| 13.5   | 15.7   | 1.5   | 1.3    | 19.9   | 14.0   | 10.3   | 5.2    | 2.1    |
| 2.6    | 3.7    | 2.6   | 7.7    | 7.2    | 4.5    | 19.6   | 11.0   | 9.2    |
| 8.0    | 11.6   | 11.0  | 19.3   | 15.0   | 10.0   | 17.6   | 24.6   | 21.5   |
| 8.4    | 11.7   | 13.7  | 6.4    | 14.4   | 22.2   | 4.5    | 11.1   | 11.0   |
| 7.9    | 10.7   | 13.8  | 15.9   | 21.6   | 15.6   | 23.8   | 19.8   | 16.8   |
| 8.9    | 28.5   | 4.7   | 9.3    | 17.5   | 20.9   | 30.7   | 14.2   | 18.6   |
| 3.7    | 4.4    | 10.3  | 8.5    | 3.1    | 4.6    | 8.2    | 9.5    | 10.8   |
| 4.0    | 3.7    | 1.1   | 5.3    | 7.8    | 4.2    | 7.1    | 12.1   | 2.4    |
| 1.0    | 0.7    | 1.4   | 0.8    | 3.2    | 1.0    | 1.8    | 1.5    | 2.1    |
| 0.3    | 1.4    | 0.4   | 1.1    | 0.5    | 0.4    | 2.1    | 7.0    | 10.7   |
| 2.6    | 0.6    | 1.8   | 0.3    | 0.9    | 1.2    | 1.9    | 2.4    | 1.7    |
| 1012.5 | 1341.3 | 288.6 | 430.0  | 1231.1 | 1312.3 | 1538.2 | 1466.4 | 1492.1 |
| 73.1   | 85.4   | 68.3  | 72.2   | 123.5  | 69.3   | 394.4  | 379.8  | 501.2  |
| 21.2   | 12.4   | 5.8   | 9.4    | 20.6   | 15.2   | 11.3   | 15.8   | 13.9   |
| 106.2  | 93.2   | 27.5  | 34.4   | 150.4  | 95.1   | 132.7  | 79.9   | 99.6   |
| 5.2    | 12.2   | 0.4   | 3.3    | 12.2   | 11.3   | 22.8   | 22.2   | 26.4   |
| 21.8   | 22.6   | 54.7  | 25.4   | 32.5   | 29.1   | 4459.7 | 4808.5 | 5000.1 |
| 435.2  | 578.9  | 98.0  | 152.7  | 778.2  | 893.9  | 794.0  | 540.9  | 503.4  |
| 16.5   | 15.6   | 1.3   | 6.9    | 14.4   | 17.5   | 22.6   | 39.5   | 31.3   |
| 4.6    | 3.2    | 19.1  | 18.7   | 2.7    | 13.3   | 11.0   | 7.7    | 8.7    |
| 1.3    | 16.0   | 8.9   | 2.2    | 7.8    | 20.1   | 28.7   | 28.6   | 29.0   |
| 155.7  | 182.9  | 79.3  | 111.0  | 218.0  | 196.0  | 178.3  | 214.5  | 248.9  |
| 1217.0 | 1247.2 | 887.0 | 1130.4 | 1657.5 | 1675.0 | 1981.1 | 1997.7 | 2105.3 |
| 52.0   | 44.3   | 2.9   | 1.1    | 43.4   | 23.8   | 58.1   | 47.0   | 58.6   |
| 2.5    | 7.1    | 3.3   | 1.8    | 13.8   | 2.1    | 44.5   | 28.9   | 35.7   |
| 13.3   | 10.9   | 12.7  | 2.3    | 5.8    | 20.9   | 18.9   | 13.7   | 10.7   |
| 30.9   | 6.2    | 10.7  | 2.6    | 24.6   | 25.3   | 23.2   | 24.4   | 16.2   |
| 2.4    | 8.3    | 8.4   | 8.6    | 6.4    | 2.8    | 19.9   | 3.4    | 7.1    |
| 1.3    | 1.3    | 2.1   | 0.9    | 0.9    | 1.7    | 6.0    | 13.2   | 5.4    |
| 4.3    | 1.6    | 2.6   | 3.6    | 9.0    | 7.6    | 8.4    | 6.4    | 5.3    |
| 0.7    | 0.7    | 0.6   | 0.5    | 0.9    | 0.7    | 1.3    | 1.2    | 0.9    |
| 12.2   | 13.7   | 3.0   | 0.7    | 11.6   | 9.3    | 12.1   | 14.3   | 17.0   |
| 0.7    | 0.4    | 5.9   | 0.4    | 1.0    | 1.9    | 3.5    | 10.7   | 7.3    |
| 17.3   | 33.0   | 1.8   | 0.9    | 27.4   | 30.2   | 57.6   | 65.7   | 64.2   |
| 2.3    | 1.5    | 2.2   | 11.1   | 0.8    | 1.1    | 3.4    | 1.9    | 3.9    |
| 0.3    | 3.5    | 3.7   | 1.1    | 1.0    | 4.6    | 1.9    | 4.0    | 0.2    |
| 7.6    | 13.1   | 1.8   | 9.4    | 20.2   | 9.8    | 8.6    | 13.7   | 7.0    |
| 24.1   | 20.2   | 1.4   | 0.7    | 68.2   | 44.1   | 2.3    | 7.0    | 12.7   |
| 1.5    | 0.4    | 0.4   | 0.3    | 0.3    | 0.9    | 6.7    | 4.4    | 1.3    |
| 0.8    | 0.4    | 2.1   | 0.2    | 6.4    | 1.1    | 0.6    | 4.1    | 4.4    |
| 2.5    | 3.2    | 5.4   | 8.6    | 2.3    | 3.1    | 10.5   | 10.5   | 11.4   |
| 12.2   | 8.2    | 10.2  | 8.5    | 4.0    | 16.3   | 6.3    | 8.5    | 9.6    |

|        |        |       |        |        |        |        |        |        |
|--------|--------|-------|--------|--------|--------|--------|--------|--------|
| 23.2   | 14.2   | 19.5  | 12.1   | 8.3    | 16.9   | 23.3   | 30.4   | 22.7   |
| 161.1  | 180.5  | 9.6   | 18.3   | 214.3  | 155.0  | 168.0  | 95.2   | 94.9   |
| 12.1   | 13.7   | 8.6   | 17.6   | 16.1   | 3.6    | 6.4    | 10.8   | 3.8    |
| 2.7    | 0.5    | 2.0   | 0.7    | 12.3   | 1.7    | 7.4    | 4.5    | 7.8    |
| 1.6    | 17.3   | 2.8   | 0.8    | 13.6   | 16.2   | 77.1   | 250.2  | 228.1  |
| 1606.7 | 2052.5 | 703.9 | 815.9  | 2737.2 | 2346.0 | 2898.6 | 2627.1 | 2619.1 |
| 14.7   | 1.1    | 12.8  | 2.7    | 3.0    | 2.2    | 555.3  | 975.7  | 1048.4 |
| 34.6   | 42.5   | 22.0  | 39.1   | 21.3   | 37.4   | 39.2   | 53.4   | 72.3   |
| 18.8   | 23.3   | 2.9   | 9.3    | 52.7   | 21.6   | 7.1    | 10.5   | 7.3    |
| 0.7    | 0.7    | 7.7   | 0.5    | 1.8    | 4.9    | 4.4    | 3.2    | 7.3    |
| 1.3    | 1.5    | 7.9   | 3.2    | 2.2    | 1.1    | 1.5    | 1.3    | 1.5    |
| 306.4  | 331.8  | 301.6 | 489.8  | 479.4  | 255.3  | 265.9  | 237.9  | 238.1  |
| 4.5    | 6.5    | 10.9  | 14.3   | 9.4    | 9.3    | 143.3  | 137.1  | 136.9  |
| 186.5  | 833.9  | 103.4 | 152.0  | 269.8  | 828.5  | 2155.2 | 1996.1 | 2148.1 |
| 14.1   | 17.2   | 0.4   | 2.9    | 6.3    | 16.3   | 1.4    | 0.8    | 0.4    |
| 10.9   | 13.8   | 6.8   | 2.8    | 7.4    | 1.6    | 9.7    | 3.0    | 4.5    |
| 2076.7 | 2519.2 | 784.7 | 1113.3 | 2830.6 | 2360.7 | 5857.6 | 5197.6 | 5431.9 |
| 590.6  | 649.0  | 525.5 | 676.3  | 893.1  | 614.3  | 894.8  | 1033.2 | 1079.1 |
| 132.0  | 125.5  | 77.8  | 112.3  | 180.3  | 130.8  | 376.8  | 609.9  | 644.4  |
| 20.5   | 11.6   | 1.6   | 1.6    | 13.5   | 2.8    | 17.0   | 18.1   | 17.1   |
| 7.6    | 10.8   | 9.0   | 6.1    | 10.1   | 5.7    | 4.0    | 1.5    | 4.6    |
| 1.4    | 2.1    | 3.7   | 0.4    | 0.9    | 0.3    | 2.3    | 2.3    | 4.1    |
| 3.5    | 5.5    | 4.7   | 7.1    | 7.0    | 6.8    | 9.3    | 9.3    | 10.5   |
| 17.3   | 19.6   | 18.3  | 20.3   | 10.9   | 21.1   | 25.3   | 14.7   | 14.3   |
| 3.7    | 8.1    | 0.9   | 0.6    | 2.2    | 1.6    | 1.3    | 1.2    | 0.8    |
| 18.0   | 26.9   | 0.6   | 5.2    | 39.3   | 17.4   | 81.2   | 81.2   | 88.7   |
| 5.3    | 3.2    | 1.7   | 1.9    | 2.5    | 3.3    | 29.4   | 18.5   | 42.8   |
| 355.0  | 556.7  | 31.4  | 30.6   | 585.8  | 482.9  | 1427.9 | 1460.0 | 1413.1 |
| 150.6  | 146.6  | 22.9  | 19.6   | 255.7  | 132.0  | 414.2  | 567.1  | 567.2  |
| 0.7    | 3.6    | 0.6   | 0.3    | 2.3    | 0.4    | 0.6    | 0.8    | 0.6    |
| 62.5   | 43.2   | 1.8   | 5.6    | 79.2   | 56.2   | 118.9  | 69.9   | 57.6   |
| 19.6   | 34.5   | 33.7  | 14.7   | 29.6   | 23.1   | 24.9   | 15.9   | 23.7   |
| 19.4   | 10.4   | 11.0  | 4.8    | 24.0   | 15.7   | 17.5   | 9.6    | 9.7    |
| 134.1  | 163.2  | 46.4  | 48.0   | 161.7  | 233.8  | 282.2  | 338.3  | 413.6  |
| 21.7   | 14.5   | 43.6  | 24.7   | 10.3   | 2.7    | 63.1   | 57.7   | 64.5   |
| 2.8    | 1.9    | 17.7  | 20.7   | 1.7    | 10.4   | 10.6   | 11.6   | 10.9   |
| 16.4   | 23.7   | 6.6   | 13.5   | 16.5   | 12.5   | 23.3   | 27.2   | 21.7   |
| 1.8    | 1.0    | 0.8   | 2.2    | 7.3    | 1.1    | 1.5    | 1.9    | 1.5    |
| 2.7    | 7.2    | 1.8   | 7.8    | 11.8   | 1.5    | 10.6   | 1.6    | 1.3    |
| 3.3    | 15.5   | 3.3   | 3.0    | 17.3   | 6.9    | 10.3   | 16.4   | 12.0   |
| 14.9   | 0.7    | 2.4   | 7.8    | 16.3   | 5.0    | 11.2   | 23.5   | 33.4   |
| 2.6    | 6.9    | 1.6   | 2.2    | 0.8    | 1.0    | 22.2   | 20.1   | 27.3   |
| 0.3    | 2.5    | 1.0   | 1.6    | 4.1    | 1.7    | 4.3    | 1.3    | 3.8    |
| 836.8  | 1411.1 | 61.4  | 69.2   | 1368.5 | 1262.0 | 309.9  | 410.6  | 443.5  |
| 11.5   | 0.9    | 0.5   | 0.6    | 1.5    | 10.3   | 7.3    | 9.0    | 1.8    |
| 245.6  | 330.7  | 81.8  | 98.8   | 342.2  | 289.7  | 551.5  | 441.8  | 571.2  |
| 18.4   | 27.6   | 5.4   | 3.6    | 28.5   | 24.0   | 2.3    | 4.5    | 7.1    |
| 1.0    | 1.2    | 1.2   | 3.3    | 1.0    | 2.3    | 1.2    | 1.6    | 0.9    |
| 2.5    | 5.0    | 1.5   | 11.8   | 21.5   | 1.5    | 5.2    | 7.0    | 6.9    |
| 5.4    | 7.2    | 5.2   | 1.5    | 2.0    | 6.0    | 11.8   | 3.1    | 5.9    |
| 12.6   | 5.9    | 2.6   | 2.1    | 8.9    | 4.7    | 7.6    | 6.6    | 9.0    |
| 0.7    | 0.7    | 0.9   | 0.5    | 0.8    | 0.5    | 1.3    | 3.8    | 0.8    |
| 16.8   | 20.4   | 17.7  | 19.1   | 12.2   | 19.0   | 23.4   | 39.1   | 29.1   |

|        |        |        |        |        |        |        |        |        |
|--------|--------|--------|--------|--------|--------|--------|--------|--------|
| 8.1    | 1.4    | 6.5    | 7.5    | 17.5   | 9.0    | 8.6    | 9.8    | 8.8    |
| 9.7    | 7.5    | 7.8    | 0.8    | 0.4    | 1.8    | 13.3   | 12.0   | 11.4   |
| 0.9    | 0.6    | 0.7    | 1.3    | 10.4   | 1.7    | 3.1    | 4.4    | 2.1    |
| 8.0    | 1.3    | 14.4   | 14.6   | 17.1   | 4.9    | 16.9   | 9.1    | 11.8   |
| 0.9    | 1.0    | 0.9    | 1.7    | 2.0    | 2.7    | 1.3    | 1.3    | 0.7    |
| 3.1    | 2.9    | 14.0   | 7.1    | 0.8    | 3.6    | 1.6    | 2.3    | 3.7    |
| 1.7    | 0.8    | 3.8    | 2.3    | 3.7    | 2.7    | 13.3   | 4.0    | 3.0    |
| 1.0    | 0.5    | 2.1    | 5.3    | 3.3    | 1.5    | 1.7    | 1.9    | 2.9    |
| 11.2   | 14.5   | 8.3    | 7.1    | 25.6   | 14.1   | 32.9   | 31.6   | 34.8   |
| 4.9    | 1.4    | 2.5    | 1.3    | 2.8    | 6.5    | 3.9    | 5.1    | 3.1    |
| 1.2    | 2.8    | 11.0   | 14.6   | 6.9    | 15.2   | 11.4   | 20.1   | 7.9    |
| 4.1    | 8.4    | 19.7   | 10.4   | 1.1    | 3.2    | 7.5    | 8.8    | 8.8    |
| 10.1   | 0.3    | 0.3    | 1.6    | 6.9    | 4.7    | 5.0    | 6.2    | 3.4    |
| 35.2   | 31.7   | 3.4    | 0.7    | 39.2   | 31.8   | 19.4   | 21.7   | 12.8   |
| 2.4    | 1.0    | 2.1    | 2.0    | 0.9    | 1.3    | 11.4   | 3.5    | 1.1    |
| 0.5    | 0.7    | 2.2    | 0.5    | 0.9    | 1.1    | 2.9    | 3.4    | 1.2    |
| 13.1   | 11.0   | 2.4    | 10.2   | 16.5   | 9.1    | 62.8   | 328.6  | 382.2  |
| 26.7   | 42.5   | 66.0   | 77.9   | 41.0   | 24.4   | 370.0  | 330.8  | 323.2  |
| 8.2    | 14.5   | 12.1   | 1.8    | 14.7   | 17.4   | 7.3    | 8.0    | 8.7    |
| 1.8    | 1.4    | 1.5    | 1.6    | 7.0    | 7.4    | 1.9    | 1.2    | 1.5    |
| 3.6    | 0.6    | 1.5    | 5.2    | 1.4    | 0.8    | 10.5   | 10.4   | 10.7   |
| 5.0    | 5.9    | 10.1   | 12.5   | 3.1    | 7.0    | 13.2   | 11.3   | 17.6   |
| 6.5    | 6.2    | 1.9    | 8.3    | 7.7    | 6.6    | 7.2    | 5.5    | 5.1    |
| 2.4    | 0.9    | 4.6    | 5.0    | 3.0    | 4.2    | 5.1    | 8.3    | 5.3    |
| 14.9   | 1.3    | 8.8    | 1.8    | 6.3    | 8.4    | 2.2    | 2.2    | 2.8    |
| 17.5   | 34.5   | 7.1    | 1.2    | 27.0   | 34.8   | 27.0   | 41.8   | 43.0   |
| 38.7   | 58.5   | 3.5    | 14.3   | 84.6   | 49.5   | 53.3   | 60.6   | 57.6   |
| 140.8  | 104.9  | 20.0   | 21.5   | 197.9  | 104.7  | 15.6   | 22.1   | 11.9   |
| 3.3    | 5.2    | 12.5   | 1.5    | 13.4   | 16.3   | 10.9   | 8.5    | 11.1   |
| 1.1    | 8.9    | 1.9    | 1.4    | 10.1   | 3.1    | 1.8    | 1.5    | 1.3    |
| 0.4    | 7.9    | 1.0    | 0.4    | 6.0    | 3.2    | 1.4    | 7.1    | 10.6   |
| 9.1    | 3.2    | 1.9    | 16.0   | 2.1    | 2.7    | 1.6    | 1.7    | 1.3    |
| 0.8    | 0.9    | 3.1    | 0.7    | 1.0    | 2.5    | 0.9    | 1.5    | 0.7    |
| 74.3   | 123.6  | 209.1  | 341.2  | 132.7  | 94.2   | 336.9  | 261.8  | 304.9  |
| 0.5    | 0.9    | 0.9    | 3.5    | 1.1    | 9.4    | 1.0    | 0.5    | 0.7    |
| 0.9    | 1.1    | 8.8    | 8.4    | 11.1   | 9.2    | 4.7    | 1.3    | 8.6    |
| 0.6    | 1.4    | 2.0    | 14.8   | 3.4    | 0.9    | 6.2    | 4.5    | 7.4    |
| 5381.9 | 6772.1 | 2325.5 | 3047.0 | 7852.9 | 6021.2 | 9016.5 | 8522.4 | 8954.9 |
| 13.4   | 18.6   | 3.0    | 8.9    | 35.7   | 13.2   | 3.9    | 9.7    | 9.3    |
| 0.5    | 3.7    | 0.2    | 0.4    | 0.5    | 0.3    | 0.5    | 8.5    | 9.3    |
| 7.2    | 2.1    | 6.7    | 4.6    | 4.6    | 8.9    | 8.0    | 5.4    | 8.5    |
| 7.3    | 21.4   | 5.8    | 3.4    | 20.8   | 18.6   | 33.6   | 28.6   | 29.6   |
| 11.9   | 1.2    | 12.8   | 10.8   | 1.9    | 0.6    | 8.5    | 5.7    | 2.5    |
| 0.8    | 0.7    | 1.9    | 8.5    | 2.5    | 0.6    | 4.1    | 27.0   | 10.2   |
| 1.6    | 6.7    | 8.6    | 1.3    | 2.0    | 3.7    | 3.3    | 3.0    | 5.2    |
| 4.2    | 1.2    | 8.6    | 2.6    | 4.8    | 7.8    | 10.7   | 7.3    | 9.8    |
| 25.7   | 12.7   | 6.3    | 4.5    | 3.8    | 3.6    | 13.0   | 3.6    | 16.7   |
| 138.4  | 182.3  | 53.9   | 62.6   | 223.1  | 243.0  | 244.1  | 212.4  | 267.1  |
| 21.4   | 38.2   | 9.8    | 0.2    | 45.1   | 33.1   | 1.0    | 1.0    | 9.6    |
| 11.8   | 3.7    | 5.5    | 10.5   | 0.7    | 1.4    | 18.1   | 16.4   | 12.6   |
| 2.9    | 1.6    | 5.8    | 4.1    | 1.4    | 4.8    | 9.8    | 0.8    | 1.9    |
| 12.0   | 7.7    | 9.2    | 1.5    | 1.2    | 1.7    | 3.3    | 1.4    | 2.0    |
| 1.5    | 1.5    | 1.3    | 2.9    | 1.8    | 1.6    | 2.5    | 3.2    | 2.6    |

|       |        |       |       |        |       |       |        |        |
|-------|--------|-------|-------|--------|-------|-------|--------|--------|
| 0.6   | 1.0    | 1.6   | 0.9   | 0.8    | 0.9   | 335.8 | 574.3  | 781.4  |
| 2.9   | 3.5    | 2.1   | 2.6   | 3.1    | 5.8   | 2.7   | 1.7    | 1.7    |
| 0.4   | 0.3    | 0.7   | 0.4   | 0.9    | 3.0   | 0.4   | 0.9    | 0.5    |
| 0.7   | 4.9    | 5.1   | 0.6   | 4.1    | 0.4   | 4.5   | 5.6    | 5.8    |
| 15.5  | 20.2   | 6.6   | 1.7   | 24.6   | 23.1  | 10.1  | 16.2   | 17.4   |
| 7.9   | 18.1   | 8.7   | 8.9   | 26.1   | 21.3  | 66.1  | 49.0   | 54.2   |
| 133.2 | 110.1  | 123.1 | 149.1 | 241.5  | 101.8 | 395.7 | 364.3  | 415.1  |
| 889.1 | 1159.2 | 95.5  | 151.0 | 1365.1 | 829.6 | 64.8  | 53.7   | 57.3   |
| 12.9  | 12.1   | 10.4  | 8.2   | 21.1   | 10.7  | 37.3  | 52.5   | 37.8   |
| 122.8 | 137.7  | 54.5  | 55.5  | 186.7  | 132.3 | 204.5 | 169.5  | 158.0  |
| 9.2   | 6.5    | 10.1  | 10.6  | 2.0    | 12.4  | 4.0   | 4.9    | 12.2   |
| 1.5   | 7.4    | 14.1  | 3.5   | 13.7   | 3.0   | 19.8  | 28.5   | 27.4   |
| 0.9   | 0.6    | 1.5   | 1.4   | 0.5    | 0.8   | 0.9   | 1.0    | 0.7    |
| 0.5   | 4.9    | 0.5   | 0.2   | 3.9    | 0.7   | 2.7   | 0.8    | 0.3    |
| 6.8   | 6.9    | 2.4   | 3.0   | 8.9    | 5.7   | 6.2   | 7.4    | 9.2    |
| 2.5   | 3.3    | 1.9   | 2.7   | 1.3    | 9.8   | 12.0  | 9.5    | 7.3    |
| 53.2  | 73.2   | 367.7 | 489.9 | 108.9  | 39.5  | 777.8 | 1621.5 | 1843.0 |
| 0.6   | 1.0    | 0.2   | 0.2   | 3.4    | 0.3   | 1.7   | 2.0    | 0.6    |
| 11.6  | 7.5    | 15.4  | 10.1  | 3.2    | 9.4   | 19.1  | 17.6   | 24.8   |
| 10.9  | 7.0    | 14.1  | 9.5   | 13.2   | 20.6  | 16.7  | 8.4    | 22.3   |
| 8.2   | 2.7    | 40.0  | 38.9  | 4.7    | 7.8   | 78.5  | 96.9   | 88.4   |
| 2.2   | 1.7    | 3.0   | 0.5   | 2.4    | 2.5   | 1.9   | 6.2    | 3.9    |
| 24.4  | 23.1   | 5.3   | 2.2   | 6.6    | 5.7   | 12.2  | 11.8   | 5.3    |
| 2.3   | 2.8    | 4.7   | 2.5   | 3.1    | 4.8   | 3.3   | 1.7    | 3.7    |
| 37.9  | 35.8   | 13.4  | 11.6  | 59.4   | 42.1  | 92.7  | 66.3   | 79.0   |
| 9.4   | 17.0   | 5.1   | 2.4   | 8.2    | 12.1  | 1.3   | 0.6    | 5.0    |
| 1.0   | 0.9    | 2.7   | 1.0   | 3.3    | 3.9   | 11.6  | 4.6    | 4.9    |
| 0.3   | 8.7    | 0.2   | 2.8   | 6.3    | 3.3   | 5.1   | 3.0    | 2.9    |
| 7.5   | 9.1    | 9.5   | 2.2   | 3.6    | 15.9  | 13.1  | 21.5   | 19.8   |
| 1.3   | 5.7    | 0.6   | 0.5   | 2.6    | 1.2   | 1.0   | 1.7    | 0.8    |
| 2.5   | 14.5   | 37.4  | 30.5  | 17.1   | 23.2  | 11.7  | 16.6   | 14.2   |
| 13.8  | 3.9    | 9.0   | 4.7   | 6.5    | 15.6  | 23.4  | 43.2   | 51.6   |
| 182.6 | 108.9  | 30.5  | 48.4  | 221.2  | 80.5  | 222.4 | 200.2  | 221.9  |
| 62.0  | 28.0   | 8.6   | 10.5  | 56.7   | 41.0  | 37.2  | 21.8   | 45.3   |
| 5.3   | 1.7    | 1.4   | 1.4   | 8.0    | 4.4   | 4.2   | 2.1    | 5.7    |
| 7.2   | 0.9    | 0.6   | 0.7   | 5.1    | 5.4   | 0.8   | 0.5    | 0.4    |
| 9.3   | 6.7    | 11.7  | 7.9   | 7.8    | 12.0  | 11.7  | 5.8    | 7.0    |
| 5.0   | 1.2    | 14.6  | 13.3  | 1.3    | 8.6   | 26.4  | 13.9   | 10.8   |
| 8.3   | 2.3    | 1.4   | 3.2   | 0.9    | 0.6   | 4.8   | 2.8    | 9.0    |
| 0.8   | 5.1    | 2.3   | 1.1   | 1.1    | 0.8   | 1.4   | 0.7    | 0.6    |
| 18.1  | 26.3   | 72.3  | 71.8  | 4.6    | 23.3  | 33.4  | 23.9   | 26.7   |
| 9.7   | 12.4   | 11.9  | 12.3  | 7.8    | 5.6   | 4.2   | 8.7    | 7.1    |
| 1.5   | 1.3    | 5.7   | 0.8   | 10.0   | 0.7   | 4.8   | 1.6    | 1.2    |
| 3.9   | 15.3   | 22.9  | 14.0  | 7.8    | 11.1  | 11.6  | 8.1    | 6.7    |
| 19.3  | 15.4   | 12.8  | 14.8  | 15.5   | 18.4  | 25.6  | 37.0   | 47.3   |
| 67.6  | 78.9   | 115.3 | 137.6 | 89.0   | 101.1 | 557.5 | 590.4  | 637.2  |
| 1.8   | 2.5    | 5.3   | 9.9   | 3.8    | 2.1   | 2.9   | 6.9    | 8.2    |
| 6.4   | 4.0    | 0.2   | 0.8   | 1.0    | 1.2   | 1.2   | 5.5    | 6.6    |
| 5.2   | 1.9    | 7.0   | 4.7   | 3.0    | 13.4  | 4.8   | 4.1    | 7.0    |
| 10.8  | 18.8   | 21.4  | 12.0  | 21.8   | 20.8  | 20.8  | 23.5   | 35.8   |
| 12.0  | 1.8    | 3.4   | 3.1   | 4.0    | 2.3   | 2.6   | 3.1    | 3.6    |
| 12.4  | 3.7    | 2.0   | 1.6   | 21.3   | 3.0   | 3.1   | 3.4    | 2.8    |
| 2.6   | 1.6    | 9.8   | 7.3   | 16.4   | 3.1   | 7.4   | 13.1   | 5.3    |

|        |        |        |        |        |        |        |        |        |
|--------|--------|--------|--------|--------|--------|--------|--------|--------|
| 7.6    | 3.7    | 8.2    | 10.0   | 12.4   | 10.6   | 29.2   | 12.1   | 13.6   |
| 10.8   | 2.5    | 1.0    | 1.1    | 1.1    | 3.6    | 8.9    | 6.9    | 4.1    |
| 2.3    | 0.9    | 6.9    | 2.0    | 11.8   | 6.3    | 2.2    | 2.8    | 6.4    |
| 5.0    | 2.1    | 4.5    | 1.6    | 8.4    | 1.1    | 2.7    | 6.8    | 4.6    |
| 1.5    | 1.1    | 3.5    | 1.8    | 6.9    | 2.9    | 4.4    | 13.8   | 11.0   |
| 133.2  | 130.6  | 64.8   | 40.2   | 137.5  | 121.0  | 258.2  | 271.7  | 300.6  |
| 28.5   | 33.1   | 28.4   | 25.3   | 41.5   | 11.4   | 86.8   | 81.0   | 91.5   |
| 1353.4 | 1564.8 | 1239.6 | 1681.3 | 1892.2 | 1398.9 | 1846.6 | 1826.3 | 1894.4 |
| 3.2    | 8.9    | 17.3   | 16.6   | 12.1   | 3.3    | 106.1  | 103.3  | 117.4  |
| 7.0    | 7.9    | 1.5    | 0.9    | 3.5    | 4.2    | 7.2    | 6.3    | 1.9    |
| 8.1    | 13.7   | 20.3   | 16.6   | 2.9    | 16.8   | 25.6   | 21.4   | 30.8   |
| 1.5    | 6.7    | 8.9    | 0.7    | 1.9    | 0.7    | 1.2    | 0.8    | 1.1    |
| 4.1    | 1.3    | 5.3    | 0.9    | 11.5   | 3.0    | 4.2    | 2.0    | 2.0    |
| 16.0   | 27.1   | 0.4    | 5.2    | 39.0   | 17.7   | 29.7   | 33.8   | 26.0   |
| 32.2   | 36.9   | 5.5    | 3.8    | 30.1   | 24.5   | 3.5    | 1.9    | 3.2    |
| 0.8    | 1.5    | 9.0    | 1.4    | 2.2    | 11.9   | 15.0   | 27.0   | 22.2   |
| 1.7    | 2.5    | 3.4    | 12.9   | 3.2    | 2.9    | 6.4    | 5.6    | 4.7    |
| 7.1    | 2.0    | 11.4   | 7.9    | 13.4   | 6.1    | 9.7    | 7.8    | 14.5   |
| 4.6    | 7.9    | 1.5    | 7.4    | 13.9   | 14.3   | 14.7   | 18.8   | 21.3   |
| 3346.9 | 3954.6 | 746.6  | 1120.0 | 4109.4 | 3818.3 | 7580.0 | 6603.0 | 7144.6 |
| 7.0    | 0.6    | 2.2    | 3.6    | 0.5    | 0.4    | 6.1    | 2.7    | 0.9    |
| 3.9    | 16.3   | 0.8    | 3.5    | 25.2   | 23.5   | 43.4   | 30.0   | 21.2   |
| 956.5  | 1345.3 | 111.0  | 133.5  | 1063.6 | 1229.2 | 2883.5 | 2535.8 | 2629.1 |
| 3.3    | 0.5    | 0.5    | 0.4    | 6.3    | 1.2    | 1.2    | 0.7    | 1.3    |
| 2.2    | 1.4    | 4.0    | 10.1   | 7.7    | 1.2    | 5.1    | 4.5    | 1.9    |
| 281.4  | 206.8  | 24.8   | 14.2   | 302.8  | 231.2  | 486.5  | 306.9  | 351.6  |
| 25.4   | 60.4   | 11.7   | 2.8    | 73.1   | 86.6   | 5.0    | 4.3    | 2.2    |
| 5.6    | 1.1    | 4.9    | 6.6    | 11.1   | 0.6    | 8.7    | 1.2    | 7.0    |
| 4.9    | 3.4    | 1.4    | 1.1    | 1.9    | 0.8    | 1.0    | 6.6    | 7.8    |
| 3.2    | 23.7   | 9.3    | 10.9   | 20.9   | 23.5   | 39.8   | 29.3   | 21.3   |
| 4.2    | 0.8    | 3.6    | 2.2    | 0.9    | 1.0    | 12.5   | 5.5    | 5.1    |
| 142.1  | 296.9  | 11.2   | 1.8    | 96.9   | 301.8  | 7.1    | 16.9   | 7.1    |
| 13.9   | 4.2    | 0.9    | 1.9    | 8.7    | 36.1   | 6.2    | 6.8    | 8.2    |
| 19.1   | 26.2   | 18.1   | 17.1   | 29.1   | 22.4   | 47.6   | 35.1   | 48.5   |
| 37.9   | 60.4   | 68.5   | 89.3   | 41.0   | 43.8   | 119.8  | 75.9   | 86.3   |
| 5.5    | 7.4    | 4.6    | 8.8    | 8.0    | 12.5   | 3.7    | 3.7    | 9.0    |
| 37.4   | 46.8   | 35.8   | 57.5   | 73.6   | 39.3   | 124.1  | 131.5  | 104.4  |
| 53.6   | 62.0   | 5.9    | 2.8    | 90.8   | 83.3   | 69.4   | 50.5   | 49.4   |
| 4.7    | 17.0   | 26.7   | 6.9    | 6.7    | 16.1   | 16.8   | 15.5   | 3.7    |
| 4.2    | 2.0    | 20.5   | 29.4   | 4.7    | 2.8    | 8.2    | 6.0    | 5.5    |
| 6.6    | 0.9    | 2.9    | 6.5    | 4.6    | 1.1    | 3.6    | 3.2    | 3.6    |
| 22.5   | 4.3    | 1.2    | 10.1   | 10.6   | 6.7    | 15.8   | 10.6   | 3.0    |
| 93.0   | 141.1  | 2.6    | 2.4    | 202.6  | 148.6  | 2.5    | 6.1    | 3.4    |
| 315.6  | 371.7  | 80.1   | 127.1  | 305.4  | 311.3  | 50.1   | 25.3   | 30.6   |
| 236.3  | 331.9  | 27.6   | 39.8   | 406.1  | 347.1  | 410.8  | 333.0  | 314.6  |
| 4.1    | 8.4    | 12.3   | 0.8    | 7.2    | 0.6    | 10.8   | 2.6    | 1.8    |
| 2.7    | 8.0    | 4.9    | 2.0    | 18.4   | 17.2   | 40.5   | 23.4   | 30.9   |
| 6.0    | 2.1    | 19.6   | 13.3   | 1.6    | 5.8    | 28.7   | 39.0   | 36.4   |
| 0.6    | 8.3    | 8.2    | 0.8    | 8.0    | 7.7    | 1.2    | 2.9    | 5.4    |
| 1.2    | 5.1    | 5.4    | 3.7    | 8.8    | 1.0    | 2.8    | 1.7    | 1.5    |
| 1.6    | 0.8    | 9.6    | 0.5    | 2.4    | 2.9    | 2.5    | 1.8    | 1.7    |
| 117.7  | 179.5  | 36.1   | 36.5   | 132.2  | 160.0  | 189.7  | 164.2  | 164.7  |
| 37.6   | 3.8    | 32.7   | 15.2   | 46.2   | 4.5    | 20.9   | 12.3   | 13.7   |

|       |       |       |       |       |       |        |       |       |
|-------|-------|-------|-------|-------|-------|--------|-------|-------|
| 7.5   | 3.7   | 3.2   | 3.7   | 3.0   | 6.5   | 14.5   | 15.5  | 6.5   |
| 31.8  | 13.0  | 0.9   | 0.5   | 10.9  | 19.3  | 13.7   | 27.0  | 28.1  |
| 1.6   | 13.1  | 11.4  | 10.1  | 11.8  | 7.7   | 10.7   | 6.6   | 7.4   |
| 14.9  | 19.3  | 4.6   | 15.3  | 6.6   | 6.3   | 13.0   | 12.3  | 12.1  |
| 2.9   | 0.6   | 0.8   | 0.2   | 1.0   | 3.6   | 3.0    | 5.0   | 0.4   |
| 1.5   | 1.8   | 2.7   | 4.7   | 17.1  | 1.0   | 2.3    | 7.8   | 1.4   |
| 2.1   | 6.5   | 0.6   | 0.5   | 1.3   | 0.5   | 0.8    | 0.9   | 0.5   |
| 3.7   | 1.1   | 12.2  | 4.8   | 4.9   | 11.3  | 18.0   | 7.8   | 9.8   |
| 150.7 | 171.2 | 3.6   | 6.4   | 211.5 | 212.7 | 92.8   | 89.4  | 46.2  |
| 4.0   | 1.2   | 3.2   | 2.9   | 2.3   | 4.9   | 4.9    | 7.4   | 4.0   |
| 1.0   | 0.9   | 0.6   | 1.0   | 0.7   | 0.9   | 1.4    | 1.5   | 0.8   |
| 0.6   | 0.7   | 0.9   | 0.4   | 0.6   | 0.6   | 1.5    | 0.7   | 0.8   |
| 7.9   | 13.2  | 2.8   | 2.9   | 10.3  | 9.2   | 8.9    | 4.6   | 8.3   |
| 7.0   | 8.0   | 7.8   | 1.1   | 13.3  | 11.7  | 10.6   | 3.8   | 16.9  |
| 31.6  | 11.0  | 1.8   | 1.0   | 47.0  | 15.7  | 14.9   | 30.5  | 37.4  |
| 3.5   | 1.8   | 11.0  | 1.7   | 10.1  | 12.2  | 4.9    | 10.7  | 12.0  |
| 0.5   | 2.0   | 2.1   | 1.9   | 1.8   | 1.4   | 2.8    | 15.8  | 22.3  |
| 2.4   | 14.3  | 4.3   | 1.5   | 1.2   | 2.4   | 2.1    | 5.0   | 1.9   |
| 0.6   | 6.8   | 1.9   | 0.6   | 1.0   | 0.6   | 3.3    | 1.1   | 3.4   |
| 12.8  | 13.3  | 5.9   | 2.5   | 13.5  | 13.8  | 1.7    | 2.5   | 4.1   |
| 25.6  | 22.5  | 15.6  | 14.4  | 24.9  | 16.6  | 131.0  | 149.8 | 130.5 |
| 11.5  | 26.1  | 54.5  | 71.9  | 37.8  | 27.1  | 33.5   | 54.4  | 51.7  |
| 19.1  | 24.2  | 20.0  | 24.1  | 31.6  | 36.1  | 42.8   | 37.3  | 33.8  |
| 127.2 | 146.1 | 69.5  | 72.4  | 276.0 | 99.5  | 123.0  | 100.5 | 113.0 |
| 284.0 | 260.1 | 105.3 | 116.5 | 672.8 | 264.8 | 261.1  | 170.3 | 149.3 |
| 16.0  | 9.3   | 1.8   | 7.6   | 10.9  | 7.1   | 21.7   | 64.3  | 49.3  |
| 1.3   | 1.6   | 12.3  | 1.2   | 6.9   | 1.0   | 6.2    | 6.7   | 8.6   |
| 4.3   | 8.7   | 5.5   | 5.4   | 1.8   | 5.6   | 10.2   | 11.2  | 13.9  |
| 0.6   | 1.1   | 8.6   | 8.4   | 2.2   | 2.6   | 10.3   | 8.3   | 2.9   |
| 341.0 | 451.7 | 153.2 | 225.7 | 471.4 | 353.7 | 1185.9 | 635.4 | 796.6 |
| 0.7   | 0.4   | 0.9   | 0.1   | 2.4   | 0.5   | 0.9    | 0.5   | 2.4   |
| 1.0   | 1.5   | 10.6  | 9.7   | 1.5   | 1.2   | 6.5    | 5.6   | 9.6   |
| 3.2   | 2.3   | 2.0   | 2.4   | 6.9   | 4.9   | 6.5    | 4.3   | 10.6  |
| 2.1   | 13.9  | 4.7   | 4.1   | 14.4  | 3.7   | 6.8    | 7.4   | 11.9  |
| 5.0   | 1.7   | 7.4   | 9.3   | 9.5   | 4.9   | 195.4  | 236.0 | 242.2 |
| 10.4  | 9.7   | 0.8   | 2.7   | 10.2  | 14.8  | 4.0    | 3.6   | 4.5   |
| 24.7  | 32.6  | 16.5  | 4.1   | 28.0  | 23.4  | 8.7    | 10.6  | 16.5  |
| 12.4  | 0.5   | 8.9   | 2.5   | 7.5   | 8.3   | 8.7    | 10.2  | 11.3  |
| 108.7 | 244.3 | 14.6  | 19.0  | 200.4 | 265.9 | 628.8  | 703.4 | 711.1 |
| 0.6   | 6.2   | 1.9   | 0.6   | 0.3   | 0.2   | 4.9    | 0.3   | 1.8   |
| 1.6   | 4.0   | 8.9   | 5.4   | 10.0  | 8.4   | 12.1   | 15.4  | 9.6   |
| 27.7  | 20.7  | 16.4  | 29.7  | 34.8  | 19.6  | 58.9   | 48.3  | 54.0  |
| 1.8   | 0.4   | 0.7   | 3.6   | 1.5   | 1.4   | 1.9    | 2.6   | 3.0   |
| 0.7   | 0.6   | 0.2   | 0.2   | 0.5   | 1.2   | 1.0    | 0.8   | 1.0   |
| 1.2   | 1.1   | 1.0   | 3.1   | 5.2   | 1.1   | 10.0   | 43.4  | 59.8  |
| 15.3  | 22.8  | 7.2   | 0.5   | 12.7  | 6.3   | 5.4    | 11.3  | 12.1  |
| 80.4  | 56.1  | 1.6   | 1.3   | 94.8  | 62.5  | 198.2  | 112.3 | 143.4 |
| 0.9   | 2.1   | 0.7   | 7.4   | 9.0   | 1.8   | 9.2    | 10.4  | 10.3  |
| 84.0  | 30.8  | 46.6  | 50.2  | 79.1  | 53.1  | 95.2   | 120.2 | 106.8 |
| 0.8   | 3.7   | 6.4   | 7.6   | 0.6   | 4.8   | 31.1   | 42.3  | 38.6  |
| 13.0  | 6.9   | 0.8   | 1.3   | 24.7  | 1.8   | 3.8    | 1.1   | 1.2   |
| 246.2 | 321.7 | 0.6   | 1.6   | 397.4 | 170.9 | 233.7  | 147.9 | 181.0 |
| 9.3   | 5.1   | 1.9   | 1.0   | 7.0   | 15.3  | 12.3   | 9.2   | 13.1  |

|       |       |       |       |       |       |        |        |        |
|-------|-------|-------|-------|-------|-------|--------|--------|--------|
| 0.7   | 3.5   | 8.5   | 2.7   | 2.1   | 0.8   | 3.7    | 2.3    | 1.7    |
| 15.3  | 6.6   | 8.1   | 1.7   | 10.9  | 7.4   | 8.2    | 7.3    | 3.0    |
| 14.0  | 11.1  | 12.9  | 14.2  | 2.7   | 23.5  | 10.8   | 5.1    | 5.4    |
| 5.5   | 1.1   | 0.8   | 1.1   | 5.7   | 10.7  | 4.0    | 1.3    | 3.2    |
| 27.6  | 41.0  | 64.3  | 90.1  | 37.9  | 14.2  | 93.7   | 71.7   | 95.5   |
| 15.3  | 7.4   | 6.5   | 7.0   | 11.7  | 13.3  | 161.2  | 49.7   | 76.8   |
| 1.5   | 2.1   | 6.4   | 7.8   | 9.6   | 8.4   | 9.3    | 13.7   | 6.4    |
| 57.1  | 79.7  | 30.6  | 38.5  | 73.5  | 52.4  | 247.7  | 201.2  | 221.7  |
| 2.4   | 2.3   | 9.2   | 2.4   | 0.9   | 0.8   | 2.7    | 2.3    | 3.7    |
| 0.3   | 7.6   | 3.5   | 0.8   | 9.7   | 5.7   | 3.5    | 7.3    | 2.8    |
| 350.0 | 356.0 | 63.7  | 50.6  | 515.0 | 296.4 | 530.8  | 133.1  | 177.8  |
| 2.6   | 15.1  | 16.6  | 2.7   | 16.3  | 10.0  | 9.5    | 13.2   | 15.5   |
| 1.2   | 1.6   | 3.6   | 8.3   | 1.8   | 6.9   | 31.0   | 5.8    | 5.8    |
| 10.6  | 5.3   | 6.6   | 6.3   | 14.3  | 7.7   | 203.0  | 357.0  | 346.2  |
| 364.6 | 506.8 | 107.1 | 230.6 | 505.3 | 504.1 | 220.5  | 199.5  | 229.5  |
| 97.9  | 140.9 | 37.8  | 39.0  | 138.4 | 183.1 | 186.3  | 207.9  | 193.6  |
| 4.9   | 11.8  | 1.4   | 1.8   | 0.9   | 3.4   | 0.7    | 1.6    | 3.9    |
| 251.5 | 269.6 | 15.7  | 28.2  | 332.2 | 274.2 | 562.4  | 596.7  | 666.3  |
| 27.8  | 22.5  | 44.7  | 72.2  | 24.6  | 30.4  | 241.1  | 264.7  | 265.5  |
| 24.1  | 26.4  | 12.7  | 6.9   | 25.0  | 23.9  | 12.5   | 21.6   | 22.2   |
| 2.1   | 2.0   | 1.9   | 0.9   | 1.4   | 1.7   | 2.3    | 2.5    | 2.0    |
| 1.9   | 2.2   | 1.4   | 1.1   | 61.7  | 11.9  | 2.7    | 2.7    | 2.0    |
| 8.2   | 2.2   | 2.8   | 0.6   | 3.8   | 6.5   | 4.4    | 0.8    | 4.7    |
| 1.0   | 4.9   | 2.1   | 1.3   | 1.7   | 2.4   | 1.4    | 1.5    | 1.7    |
| 7.8   | 8.5   | 9.4   | 5.5   | 5.4   | 12.0  | 14.1   | 10.0   | 8.5    |
| 0.8   | 9.9   | 2.2   | 8.8   | 5.7   | 10.7  | 5.9    | 15.6   | 13.5   |
| 5.3   | 6.9   | 7.2   | 4.1   | 11.5  | 2.8   | 2.2    | 4.0    | 2.6    |
| 1.1   | 1.8   | 1.4   | 1.7   | 1.0   | 5.7   | 1.9    | 1.8    | 4.2    |
| 13.5  | 22.7  | 22.3  | 20.7  | 13.1  | 10.4  | 21.9   | 17.5   | 16.3   |
| 1.0   | 1.1   | 2.0   | 0.5   | 1.3   | 5.3   | 2.9    | 2.1    | 0.5    |
| 24.8  | 15.7  | 4.9   | 0.6   | 36.1  | 19.6  | 9.1    | 3.5    | 3.4    |
| 11.7  | 2.9   | 0.7   | 2.8   | 10.4  | 2.1   | 7.7    | 6.3    | 0.7    |
| 1.5   | 0.8   | 1.1   | 6.5   | 1.1   | 2.0   | 1.6    | 1.1    | 1.0    |
| 0.7   | 0.9   | 0.8   | 0.6   | 1.9   | 1.1   | 2.4    | 1.5    | 4.4    |
| 15.5  | 15.5  | 7.9   | 6.8   | 15.7  | 2.9   | 8.3    | 14.3   | 11.3   |
| 2.3   | 7.1   | 1.5   | 2.3   | 6.2   | 1.2   | 25.2   | 32.2   | 29.5   |
| 1.2   | 7.6   | 15.4  | 4.7   | 9.4   | 10.0  | 5.9    | 5.1    | 8.8    |
| 41.2  | 62.7  | 50.2  | 40.8  | 74.8  | 38.7  | 34.9   | 35.7   | 38.7   |
| 1.6   | 1.1   | 13.9  | 16.2  | 3.4   | 6.4   | 4.0    | 17.9   | 23.8   |
| 3.3   | 1.2   | 2.1   | 2.9   | 3.9   | 1.6   | 2.9    | 1.4    | 2.8    |
| 0.3   | 5.7   | 0.3   | 0.1   | 1.3   | 3.7   | 1.1    | 4.1    | 2.1    |
| 12.1  | 5.5   | 5.3   | 0.7   | 9.5   | 3.4   | 11.3   | 13.1   | 9.8    |
| 530.6 | 599.3 | 6.8   | 12.5  | 745.9 | 525.4 | 1746.2 | 1450.4 | 1577.8 |
| 9.7   | 0.6   | 7.1   | 6.0   | 4.8   | 6.1   | 10.8   | 11.5   | 7.7    |
| 0.9   | 0.3   | 0.3   | 5.9   | 3.4   | 1.4   | 0.7    | 1.2    | 1.3    |
| 18.3  | 23.4  | 1.1   | 11.2  | 13.3  | 14.8  | 16.8   | 11.0   | 9.2    |
| 539.9 | 694.6 | 83.4  | 94.7  | 992.9 | 822.4 | 1186.5 | 1407.5 | 1637.7 |
| 3.8   | 3.0   | 2.4   | 3.0   | 4.2   | 4.1   | 4.8    | 3.0    | 1.8    |
| 184.4 | 313.3 | 41.9  | 78.1  | 235.9 | 333.7 | 750.4  | 682.6  | 698.7  |
| 1.0   | 1.8   | 4.9   | 0.5   | 3.4   | 4.2   | 2.2    | 10.6   | 3.1    |
| 2.7   | 3.0   | 6.6   | 0.4   | 1.4   | 5.4   | 1.7    | 4.8    | 5.4    |
| 2.2   | 4.1   | 1.6   | 5.7   | 0.6   | 0.8   | 1.3    | 4.3    | 5.4    |
| 1.6   | 12.1  | 9.0   | 17.1  | 20.4  | 20.7  | 21.3   | 18.7   | 16.6   |



|        |        |       |        |        |        |        |        |        |
|--------|--------|-------|--------|--------|--------|--------|--------|--------|
| 8.1    | 4.8    | 4.3   | 0.8    | 4.0    | 1.2    | 4.7    | 6.3    | 6.1    |
| 5.4    | 9.2    | 21.1  | 10.1   | 20.6   | 8.5    | 7.5    | 5.9    | 5.5    |
| 6.6    | 12.0   | 1.7   | 9.9    | 4.7    | 2.1    | 3.4    | 5.2    | 2.2    |
| 7.7    | 3.9    | 4.5   | 0.5    | 9.5    | 8.9    | 1.6    | 7.3    | 2.3    |
| 3.9    | 1.1    | 8.0   | 1.2    | 0.4    | 3.8    | 6.5    | 6.7    | 1.9    |
| 3.0    | 4.5    | 0.6   | 0.7    | 5.2    | 5.7    | 0.2    | 6.4    | 4.7    |
| 78.4   | 104.9  | 5.5   | 8.6    | 101.1  | 103.0  | 1232.6 | 1366.3 | 1478.8 |
| 2.0    | 0.8    | 4.4   | 0.6    | 6.3    | 0.7    | 2.9    | 5.9    | 1.2    |
| 12.5   | 2.3    | 22.4  | 2.2    | 2.6    | 8.5    | 14.9   | 17.2   | 15.6   |
| 459.9  | 554.8  | 83.7  | 108.7  | 684.0  | 520.3  | 825.3  | 671.9  | 741.2  |
| 22.6   | 5.2    | 19.4  | 26.4   | 6.6    | 5.6    | 19.3   | 35.7   | 34.3   |
| 21.6   | 33.2   | 13.2  | 7.2    | 13.9   | 1.8    | 38.2   | 43.3   | 50.5   |
| 16.7   | 14.4   | 23.4  | 10.7   | 22.7   | 11.0   | 50.9   | 70.2   | 65.3   |
| 6.1    | 12.3   | 9.9   | 0.6    | 8.6    | 11.7   | 5.2    | 5.0    | 7.0    |
| 1.2    | 2.1    | 2.1   | 3.3    | 1.5    | 2.3    | 1.6    | 3.2    | 2.9    |
| 5.4    | 4.2    | 6.1   | 7.1    | 0.4    | 0.3    | 0.6    | 3.5    | 6.1    |
| 21.4   | 35.1   | 15.0  | 25.1   | 52.6   | 54.6   | 40.3   | 24.4   | 18.2   |
| 2.9    | 3.3    | 8.4   | 9.5    | 1.6    | 9.2    | 6.5    | 11.5   | 18.7   |
| 11.1   | 19.2   | 9.1   | 6.7    | 5.7    | 15.7   | 21.8   | 20.6   | 17.7   |
| 7.7    | 2.7    | 1.4   | 4.8    | 2.0    | 2.2    | 1.4    | 2.4    | 2.4    |
| 8.3    | 14.2   | 3.6   | 26.3   | 9.9    | 4.0    | 20.4   | 22.2   | 32.8   |
| 18.6   | 46.4   | 7.9   | 8.5    | 35.6   | 37.0   | 58.6   | 51.1   | 43.6   |
| 4.5    | 6.8    | 5.3   | 3.7    | 0.2    | 9.7    | 3.6    | 4.3    | 2.6    |
| 11.7   | 8.2    | 8.7   | 7.2    | 10.4   | 1.7    | 18.5   | 4.7    | 9.1    |
| 3.3    | 4.4    | 15.5  | 11.0   | 4.4    | 2.5    | 16.7   | 8.2    | 8.5    |
| 30.9   | 28.0   | 46.3  | 51.0   | 75.6   | 36.5   | 147.2  | 178.0  | 200.8  |
| 14.1   | 8.2    | 1.6   | 5.2    | 11.6   | 16.6   | 17.1   | 26.6   | 29.9   |
| 50.4   | 46.7   | 9.2   | 14.8   | 71.3   | 53.4   | 15.8   | 9.7    | 6.4    |
| 2.5    | 1.9    | 2.8   | 0.8    | 0.8    | 0.6    | 3.0    | 4.3    | 1.5    |
| 16.1   | 12.4   | 2.1   | 7.0    | 4.6    | 1.5    | 17.6   | 16.3   | 14.3   |
| 4.8    | 2.3    | 3.4   | 17.4   | 3.3    | 8.9    | 4.2    | 14.1   | 5.0    |
| 4.3    | 16.5   | 11.0  | 17.1   | 26.9   | 14.7   | 56.7   | 52.8   | 58.4   |
| 10.7   | 16.6   | 8.1   | 3.2    | 10.7   | 10.6   | 11.1   | 22.6   | 7.5    |
| 2616.0 | 2950.6 | 801.1 | 1073.2 | 3319.0 | 2998.3 | 6114.8 | 5506.4 | 5678.9 |
| 2236.2 | 2707.0 | 956.3 | 1283.4 | 2935.9 | 2815.0 | 5636.4 | 5554.4 | 6032.7 |
| 53.8   | 30.9   | 15.6  | 2.8    | 51.3   | 56.1   | 19.9   | 18.6   | 14.1   |
| 16.4   | 35.1   | 21.1  | 15.3   | 27.8   | 32.5   | 59.1   | 35.5   | 49.4   |
| 34.5   | 59.3   | 49.5  | 91.8   | 53.0   | 30.5   | 233.6  | 214.6  | 239.4  |
| 61.0   | 86.6   | 10.0  | 16.2   | 134.8  | 106.5  | 315.6  | 456.1  | 497.3  |
| 2.8    | 1.0    | 2.1   | 2.7    | 1.4    | 0.9    | 0.9    | 0.8    | 1.0    |
| 475.4  | 576.9  | 59.1  | 64.5   | 773.3  | 519.1  | 299.8  | 179.4  | 211.6  |
| 3.5    | 9.6    | 2.9   | 6.4    | 2.6    | 9.2    | 12.7   | 10.3   | 12.5   |
| 311.2  | 450.5  | 4.1   | 0.8    | 386.8  | 542.7  | 18.6   | 18.2   | 16.9   |
| 14.9   | 10.8   | 1.2   | 0.7    | 15.9   | 6.6    | 28.8   | 13.2   | 9.9    |
| 5.9    | 1.1    | 8.0   | 2.6    | 3.8    | 0.7    | 7.2    | 14.0   | 22.3   |
| 7.0    | 3.4    | 3.1   | 4.8    | 10.5   | 8.3    | 15.9   | 13.8   | 15.0   |
| 1.9    | 3.1    | 179.7 | 289.0  | 9.0    | 1.2    | 62.1   | 129.7  | 157.9  |
| 4.4    | 4.0    | 248.3 | 336.6  | 7.4    | 2.2    | 242.9  | 595.9  | 629.5  |
| 1.3    | 0.5    | 4.8   | 0.6    | 1.4    | 0.5    | 1.9    | 3.3    | 4.9    |
| 38.4   | 41.1   | 40.9  | 43.4   | 52.5   | 39.8   | 47.1   | 48.3   | 50.2   |
| 218.8  | 258.4  | 403.4 | 646.7  | 279.4  | 271.7  | 590.6  | 538.8  | 635.0  |
| 14.4   | 10.8   | 10.6  | 7.4    | 45.4   | 9.7    | 2.3    | 4.3    | 3.4    |
| 1.9    | 11.5   | 5.6   | 8.2    | 5.8    | 12.9   | 11.3   | 15.7   | 12.7   |

|        |        |       |        |        |        |        |        |        |
|--------|--------|-------|--------|--------|--------|--------|--------|--------|
| 194.6  | 257.9  | 0.9   | 7.6    | 204.4  | 250.8  | 30.8   | 21.1   | 27.3   |
| 7.6    | 4.3    | 11.6  | 10.2   | 10.1   | 8.6    | 14.9   | 17.8   | 6.9    |
| 1.4    | 0.7    | 2.5   | 1.2    | 1.7    | 1.9    | 4.7    | 12.4   | 1.8    |
| 7.7    | 11.8   | 4.6   | 1.6    | 3.3    | 3.1    | 12.9   | 2.7    | 5.5    |
| 2.1    | 4.1    | 14.8  | 10.6   | 30.2   | 12.7   | 12.9   | 9.6    | 5.6    |
| 1.1    | 1.4    | 0.9   | 0.8    | 1.9    | 1.8    | 1.5    | 2.9    | 1.5    |
| 1.0    | 1.3    | 7.1   | 1.2    | 9.1    | 1.2    | 4.6    | 8.1    | 2.3    |
| 46.1   | 52.5   | 27.0  | 44.2   | 61.2   | 42.4   | 38.5   | 35.7   | 32.5   |
| 29.2   | 8.6    | 9.7   | 11.2   | 46.9   | 22.6   | 10.1   | 2.4    | 9.7    |
| 25.5   | 2.0    | 1.8   | 13.2   | 13.9   | 14.4   | 18.7   | 18.0   | 17.2   |
| 0.6    | 4.8    | 1.5   | 0.6    | 10.1   | 2.0    | 0.9    | 2.6    | 0.7    |
| 3.2    | 0.5    | 9.3   | 1.2    | 1.2    | 1.4    | 3.5    | 9.8    | 3.5    |
| 37.7   | 60.3   | 3.9   | 18.0   | 39.6   | 35.0   | 545.1  | 569.7  | 739.0  |
| 258.9  | 334.1  | 71.5  | 114.2  | 358.5  | 320.9  | 431.7  | 277.1  | 387.2  |
| 2.7    | 24.3   | 12.8  | 9.9    | 18.8   | 2.7    | 167.2  | 243.1  | 237.9  |
| 86.1   | 103.7  | 85.7  | 103.2  | 154.3  | 88.1   | 442.2  | 266.0  | 277.9  |
| 4.8    | 6.2    | 0.8   | 0.7    | 0.8    | 1.7    | 7.7    | 13.6   | 13.3   |
| 65.1   | 102.7  | 7.8   | 10.5   | 123.8  | 82.7   | 321.0  | 414.0  | 419.5  |
| 3.1    | 1.6    | 5.1   | 7.0    | 1.2    | 3.4    | 6.0    | 5.4    | 10.3   |
| 5.8    | 2.4    | 15.4  | 6.6    | 4.2    | 9.7    | 21.2   | 5.2    | 3.1    |
| 3.2    | 0.6    | 1.8   | 1.8    | 2.9    | 3.9    | 0.9    | 1.0    | 2.0    |
| 221.9  | 289.2  | 192.8 | 234.1  | 331.9  | 190.3  | 1932.4 | 902.5  | 1015.4 |
| 9.0    | 6.6    | 2.1   | 0.2    | 3.1    | 11.0   | 5.3    | 3.3    | 10.3   |
| 53.5   | 80.9   | 81.2  | 91.6   | 81.8   | 57.9   | 175.4  | 160.8  | 165.0  |
| 1.8    | 1.4    | 1.9   | 13.0   | 6.5    | 1.4    | 7.5    | 1.4    | 1.6    |
| 19.7   | 10.0   | 1.8   | 6.3    | 13.4   | 9.8    | 7.0    | 15.4   | 7.7    |
| 13.5   | 32.4   | 7.7   | 21.5   | 22.1   | 22.3   | 32.8   | 31.7   | 32.7   |
| 5.7    | 13.1   | 11.4  | 15.8   | 40.6   | 14.8   | 15.0   | 4.7    | 33.1   |
| 213.9  | 177.4  | 229.1 | 235.3  | 326.5  | 197.7  | 596.5  | 423.5  | 517.3  |
| 2.3    | 15.6   | 2.6   | 0.6    | 15.6   | 22.4   | 1.4    | 5.1    | 3.4    |
| 9.5    | 10.1   | 6.2   | 6.1    | 6.6    | 6.0    | 278.8  | 348.1  | 327.6  |
| 80.9   | 76.0   | 67.1  | 86.1   | 110.5  | 97.0   | 157.2  | 213.2  | 193.1  |
| 12.0   | 11.2   | 9.8   | 9.4    | 32.4   | 13.4   | 3.9    | 4.8    | 16.6   |
| 19.0   | 7.0    | 8.8   | 21.4   | 7.1    | 14.2   | 10.9   | 11.7   | 13.0   |
| 2.4    | 3.1    | 3.5   | 3.7    | 3.4    | 3.2    | 26.8   | 25.6   | 52.3   |
| 27.7   | 34.0   | 32.6  | 56.8   | 37.0   | 49.6   | 186.9  | 189.9  | 180.3  |
| 19.8   | 33.5   | 28.0  | 39.1   | 35.0   | 29.8   | 292.3  | 281.2  | 284.5  |
| 17.7   | 7.8    | 3.9   | 7.6    | 42.1   | 11.4   | 97.2   | 132.7  | 154.7  |
| 9.7    | 2.2    | 1.3   | 1.4    | 14.2   | 1.9    | 33.0   | 61.4   | 51.8   |
| 10.2   | 5.5    | 7.0   | 2.3    | 1.2    | 10.9   | 1.6    | 2.2    | 3.8    |
| 15.0   | 10.9   | 19.6  | 14.4   | 10.2   | 20.0   | 20.1   | 19.2   | 17.8   |
| 4.5    | 2.1    | 6.6   | 3.0    | 1.2    | 10.9   | 9.6    | 7.2    | 4.0    |
| 0.8    | 0.7    | 1.0   | 1.6    | 4.8    | 2.1    | 6.7    | 3.2    | 1.4    |
| 37.2   | 34.0   | 1.7   | 6.7    | 70.7   | 42.6   | 20.4   | 14.6   | 16.4   |
| 0.8    | 0.6    | 9.2   | 8.3    | 1.7    | 8.7    | 11.6   | 9.3    | 13.7   |
| 2660.8 | 3281.9 | 820.5 | 1237.8 | 3747.3 | 3219.3 | 5323.4 | 4929.3 | 5164.3 |
| 140.4  | 184.7  | 102.4 | 111.6  | 217.8  | 126.1  | 60.7   | 52.3   | 67.9   |
| 6.7    | 8.1    | 6.2   | 6.1    | 8.7    | 1.3    | 10.1   | 11.5   | 9.1    |
| 3.5    | 1.4    | 2.0   | 1.1    | 6.7    | 3.1    | 11.5   | 8.2    | 5.9    |
| 2.9    | 5.7    | 6.2   | 1.6    | 5.9    | 13.6   | 2.7    | 9.7    | 2.2    |
| 39.7   | 32.9   | 21.4  | 26.9   | 16.8   | 39.7   | 50.5   | 76.3   | 40.1   |
| 2.8    | 11.9   | 1.4   | 1.3    | 1.2    | 1.9    | 1.5    | 1.1    | 5.7    |
| 0.7    | 2.8    | 2.0   | 0.9    | 3.1    | 2.2    | 0.7    | 2.3    | 3.1    |

|        |        |       |       |        |        |        |        |        |
|--------|--------|-------|-------|--------|--------|--------|--------|--------|
| 2.5    | 6.5    | 1.5   | 1.9   | 0.9    | 3.6    | 3.6    | 1.3    | 1.2    |
| 19.8   | 21.2   | 0.6   | 9.7   | 33.8   | 26.0   | 22.5   | 31.9   | 33.9   |
| 0.3    | 0.7    | 10.2  | 4.9   | 7.3    | 0.8    | 2.1    | 2.9    | 2.7    |
| 6.4    | 7.1    | 9.3   | 0.8   | 1.6    | 0.5    | 2.3    | 1.9    | 3.5    |
| 2772.2 | 3827.3 | 329.6 | 425.0 | 4172.3 | 4095.0 | 4930.9 | 3633.1 | 3703.5 |
| 0.7    | 8.2    | 10.8  | 2.1   | 1.9    | 9.7    | 8.8    | 6.3    | 11.1   |
| 0.8    | 1.9    | 2.8   | 1.2   | 1.9    | 8.8    | 1.9    | 1.6    | 1.7    |
| 0.3    | 0.3    | 0.2   | 6.8   | 0.7    | 7.8    | 3.0    | 4.8    | 3.6    |
| 16.7   | 19.5   | 7.3   | 2.8   | 24.2   | 5.7    | 9.8    | 5.4    | 5.0    |
| 29.0   | 35.2   | 3.4   | 18.7  | 42.6   | 37.2   | 152.5  | 94.1   | 109.8  |
| 11.5   | 35.4   | 4.3   | 14.7  | 15.2   | 5.0    | 20.2   | 13.7   | 8.4    |
| 1.7    | 14.4   | 1.6   | 7.3   | 7.9    | 14.7   | 5.0    | 5.3    | 4.2    |
| 12.7   | 17.9   | 20.0  | 10.1  | 19.2   | 10.1   | 20.2   | 18.2   | 19.2   |
| 13.8   | 15.0   | 12.8  | 11.5  | 24.5   | 7.6    | 32.2   | 38.8   | 43.9   |
| 33.7   | 25.2   | 2.3   | 17.8  | 59.7   | 53.4   | 35.4   | 36.0   | 36.2   |
| 6.8    | 5.7    | 5.9   | 2.2   | 6.8    | 6.8    | 11.0   | 6.4    | 3.5    |
| 12.6   | 0.5    | 0.9   | 4.7   | 9.0    | 15.2   | 11.1   | 11.3   | 14.6   |
| 62.9   | 67.2   | 13.4  | 10.7  | 63.7   | 93.3   | 109.0  | 57.8   | 61.7   |
| 1.2    | 0.4    | 1.1   | 0.3   | 0.7    | 0.8    | 4.4    | 1.5    | 0.8    |
| 6.8    | 6.4    | 2.9   | 2.0   | 11.5   | 7.3    | 23.6   | 6.7    | 10.3   |
| 2.5    | 15.2   | 9.1   | 5.1   | 20.6   | 11.4   | 29.2   | 28.3   | 25.1   |
| 13.0   | 18.5   | 24.6  | 15.3  | 8.0    | 9.1    | 20.2   | 24.0   | 17.8   |
| 9.1    | 6.0    | 4.1   | 4.8   | 1.6    | 0.7    | 0.6    | 1.2    | 1.3    |
| 36.8   | 22.3   | 28.1  | 27.7  | 18.4   | 33.3   | 41.0   | 19.0   | 15.7   |
| 23.6   | 23.5   | 16.4  | 24.8  | 35.6   | 18.8   | 44.7   | 52.4   | 37.9   |
| 68.4   | 81.6   | 60.8  | 41.6  | 97.6   | 97.3   | 428.8  | 334.0  | 389.0  |
| 0.8    | 0.3    | 6.0   | 3.6   | 0.3    | 0.4    | 36.6   | 28.2   | 43.8   |
| 17.0   | 19.7   | 23.3  | 21.3  | 38.3   | 1.9    | 59.6   | 55.1   | 56.3   |
| 4.9    | 1.2    | 5.3   | 1.8   | 1.8    | 1.2    | 2.6    | 3.9    | 11.2   |
| 0.5    | 5.9    | 1.9   | 1.6   | 8.4    | 7.8    | 5.7    | 6.2    | 2.9    |
| 1.4    | 4.0    | 8.0   | 1.0   | 1.4    | 10.2   | 6.8    | 3.3    | 1.4    |
| 4.7    | 1.6    | 1.6   | 5.3   | 2.1    | 0.6    | 2.5    | 3.6    | 3.8    |
| 3.7    | 3.7    | 1.4   | 8.1   | 2.5    | 2.2    | 1.3    | 0.9    | 1.2    |
| 244.6  | 318.9  | 93.0  | 142.5 | 344.6  | 259.7  | 427.1  | 259.6  | 280.8  |
| 1.3    | 1.4    | 10.6  | 1.5   | 1.5    | 1.3    | 6.5    | 2.2    | 0.8    |
| 256.1  | 259.4  | 115.4 | 141.0 | 311.8  | 274.0  | 495.5  | 467.2  | 539.8  |
| 1.3    | 5.9    | 0.7   | 1.5   | 10.1   | 3.7    | 3.3    | 4.8    | 2.9    |
| 216.1  | 315.7  | 72.0  | 82.6  | 327.8  | 258.3  | 494.5  | 289.8  | 344.9  |
| 4.6    | 0.4    | 0.9   | 2.8   | 0.9    | 3.0    | 1.8    | 1.4    | 1.8    |
| 30.0   | 36.7   | 46.6  | 84.5  | 44.1   | 29.4   | 301.8  | 341.5  | 368.7  |
| 95.5   | 105.4  | 91.2  | 137.0 | 83.8   | 102.3  | 264.6  | 150.8  | 200.9  |
| 215.5  | 266.8  | 77.6  | 135.8 | 355.4  | 134.5  | 547.9  | 199.2  | 219.1  |
| 1.4    | 10.9   | 0.5   | 9.6   | 11.3   | 3.2    | 2.8    | 4.1    | 9.5    |
| 22.7   | 15.1   | 11.8  | 7.2   | 35.3   | 29.0   | 93.4   | 66.9   | 70.7   |
| 56.1   | 53.6   | 23.2  | 17.7  | 76.6   | 36.1   | 130.8  | 163.5  | 194.2  |
| 0.6    | 1.6    | 26.9  | 28.6  | 16.5   | 14.0   | 5.9    | 3.6    | 5.0    |
| 97.8   | 125.3  | 50.1  | 52.9  | 170.9  | 143.7  | 232.9  | 240.3  | 255.0  |
| 820.1  | 1075.4 | 428.9 | 654.4 | 1363.8 | 1058.7 | 1777.9 | 1138.1 | 1276.9 |
| 81.1   | 103.5  | 29.3  | 25.4  | 152.9  | 81.6   | 171.8  | 162.1  | 170.9  |
| 57.0   | 50.5   | 27.5  | 34.8  | 95.4   | 53.1   | 114.8  | 116.7  | 100.7  |
| 3.8    | 9.1    | 12.3  | 4.8   | 3.4    | 5.4    | 14.4   | 23.6   | 24.4   |
| 0.8    | 0.8    | 5.8   | 7.0   | 8.1    | 6.3    | 3.5    | 1.4    | 2.1    |
| 7.0    | 11.0   | 5.3   | 3.9   | 6.1    | 6.6    | 4.5    | 5.6    | 10.3   |

|        |        |       |       |        |        |        |        |        |
|--------|--------|-------|-------|--------|--------|--------|--------|--------|
| 6.7    | 4.0    | 3.2   | 12.2  | 3.4    | 2.1    | 19.6   | 10.1   | 10.8   |
| 2.0    | 2.3    | 7.4   | 0.3   | 10.7   | 0.6    | 5.8    | 1.6    | 5.3    |
| 8.9    | 1.6    | 7.0   | 4.3   | 13.7   | 4.3    | 14.6   | 4.1    | 4.3    |
| 1.6    | 0.8    | 1.9   | 1.2   | 2.5    | 1.0    | 2.0    | 2.9    | 2.1    |
| 8.3    | 4.5    | 2.0   | 3.6   | 3.6    | 2.2    | 4.6    | 3.7    | 3.5    |
| 4.8    | 8.3    | 3.2   | 1.0   | 6.0    | 10.6   | 1.9    | 3.4    | 1.3    |
| 0.9    | 6.3    | 10.6  | 2.9   | 1.8    | 1.7    | 4.1    | 6.4    | 1.5    |
| 22.5   | 17.9   | 38.2  | 43.4  | 21.3   | 24.6   | 27.7   | 22.0   | 28.5   |
| 10.0   | 8.4    | 7.4   | 10.2  | 9.8    | 12.6   | 8.9    | 14.2   | 26.9   |
| 232.9  | 281.7  | 153.3 | 190.3 | 281.3  | 215.8  | 488.9  | 276.7  | 286.0  |
| 2.1    | 1.5    | 2.2   | 9.0   | 7.0    | 7.2    | 6.1    | 9.7    | 15.4   |
| 41.3   | 24.5   | 11.0  | 28.6  | 48.1   | 23.8   | 69.9   | 66.8   | 61.9   |
| 7.5    | 1.0    | 6.0   | 10.6  | 11.7   | 1.4    | 10.2   | 7.8    | 12.1   |
| 0.7    | 7.2    | 4.6   | 1.8   | 1.0    | 1.3    | 1.1    | 2.6    | 1.1    |
| 4.9    | 3.0    | 8.1   | 1.7   | 11.1   | 15.1   | 6.8    | 14.3   | 13.8   |
| 2.0    | 17.7   | 12.5  | 13.7  | 5.7    | 1.4    | 20.3   | 22.5   | 13.1   |
| 38.4   | 22.4   | 2.7   | 1.0   | 41.4   | 24.7   | 3.5    | 5.2    | 8.1    |
| 0.9    | 0.8    | 0.8   | 0.6   | 5.7    | 3.3    | 1.5    | 1.0    | 0.7    |
| 3.3    | 4.3    | 8.4   | 3.0   | 4.7    | 16.8   | 8.7    | 15.5   | 6.6    |
| 0.6    | 2.2    | 10.3  | 16.0  | 3.0    | 9.1    | 11.3   | 15.8   | 16.1   |
| 264.9  | 387.7  | 161.1 | 181.1 | 477.1  | 342.9  | 442.5  | 335.8  | 337.9  |
| 0.3    | 1.5    | 55.4  | 66.0  | 0.3    | 3.0    | 3.0    | 23.8   | 25.2   |
| 1.5    | 2.0    | 1.7   | 1.1   | 11.1   | 0.6    | 4.5    | 1.3    | 2.6    |
| 1033.4 | 1163.0 | 156.4 | 186.1 | 1245.9 | 1591.6 | 1202.2 | 919.4  | 961.7  |
| 17.2   | 11.8   | 8.9   | 1.3   | 13.7   | 14.7   | 5.3    | 10.0   | 4.5    |
| 3.5    | 4.5    | 13.0  | 6.2   | 11.1   | 4.9    | 9.7    | 2.1    | 4.8    |
| 6.6    | 7.0    | 19.1  | 8.0   | 11.2   | 4.1    | 9.0    | 10.3   | 7.8    |
| 6.3    | 8.7    | 4.9   | 11.5  | 5.9    | 16.3   | 48.4   | 37.4   | 41.1   |
| 10.8   | 10.7   | 7.3   | 4.5   | 13.5   | 11.7   | 7.2    | 11.9   | 11.8   |
| 5.8    | 4.0    | 7.6   | 9.2   | 3.8    | 2.4    | 7.7    | 3.8    | 1.7    |
| 6.5    | 0.8    | 0.5   | 3.7   | 4.6    | 0.9    | 4.4    | 0.4    | 1.8    |
| 6.9    | 7.8    | 9.3   | 8.7   | 11.8   | 18.6   | 16.9   | 16.4   | 13.2   |
| 1.0    | 6.8    | 1.9   | 0.9   | 7.6    | 13.8   | 7.3    | 5.3    | 1.4    |
| 136.5  | 252.7  | 46.4  | 58.8  | 253.8  | 225.4  | 222.0  | 148.0  | 164.7  |
| 2132.4 | 2829.3 | 495.7 | 467.9 | 3070.5 | 2437.1 | 5080.2 | 3476.7 | 3606.6 |
| 2.0    | 3.9    | 19.9  | 19.2  | 9.5    | 1.0    | 3.1    | 2.5    | 2.6    |
| 19.4   | 8.5    | 5.1   | 19.3  | 11.2   | 19.8   | 5.9    | 19.7   | 12.2   |
| 5.3    | 12.6   | 5.9   | 8.6   | 20.0   | 8.8    | 18.4   | 14.1   | 5.3    |
| 1.4    | 1.7    | 0.6   | 1.1   | 1.1    | 1.1    | 3.8    | 5.2    | 1.1    |
| 3.1    | 4.8    | 1.7   | 2.5   | 3.1    | 2.9    | 3.0    | 7.1    | 10.4   |
| 6.1    | 2.9    | 2.7   | 0.8   | 8.2    | 3.7    | 3.9    | 5.0    | 0.7    |
| 27.7   | 25.3   | 1.8   | 10.4  | 38.3   | 27.7   | 67.6   | 41.8   | 57.8   |
| 12.1   | 21.2   | 10.1  | 6.9   | 10.6   | 10.8   | 5.6    | 4.8    | 6.4    |
| 1.1    | 1.4    | 0.4   | 0.5   | 0.8    | 1.9    | 2.1    | 16.8   | 21.0   |
| 4.6    | 10.8   | 0.5   | 4.2   | 14.7   | 12.2   | 90.1   | 71.4   | 68.9   |
| 6.2    | 5.2    | 3.7   | 9.1   | 7.3    | 15.1   | 7.8    | 8.0    | 2.5    |
| 4.2    | 0.7    | 2.6   | 5.4   | 2.6    | 7.9    | 15.1   | 9.8    | 14.9   |
| 3.0    | 14.9   | 3.0   | 2.4   | 18.4   | 5.3    | 384.6  | 315.2  | 372.1  |
| 2.4    | 5.7    | 1.5   | 2.6   | 3.1    | 1.9    | 3.4    | 5.8    | 2.2    |
| 0.8    | 0.9    | 4.4   | 0.8   | 1.2    | 0.6    | 1.8    | 1.8    | 1.6    |
| 12.9   | 12.7   | 10.8  | 15.6  | 10.8   | 6.3    | 26.4   | 20.0   | 29.7   |
| 1.6    | 1.6    | 1.5   | 0.9   | 1.5    | 1.8    | 1.9    | 1.8    | 1.3    |
| 62.1   | 45.2   | 33.1  | 30.5  | 94.0   | 40.9   | 232.8  | 187.4  | 196.6  |

|        |        |        |        |        |        |        |        |        |
|--------|--------|--------|--------|--------|--------|--------|--------|--------|
| 9.2    | 10.8   | 13.6   | 8.9    | 17.1   | 14.1   | 22.1   | 24.5   | 23.2   |
| 132.4  | 164.4  | 20.2   | 21.7   | 176.5  | 186.0  | 233.5  | 201.0  | 226.2  |
| 7.9    | 8.3    | 20.0   | 16.4   | 12.2   | 17.8   | 14.1   | 10.6   | 12.2   |
| 4.1    | 10.0   | 4.8    | 2.0    | 16.2   | 1.8    | 6.2    | 3.7    | 14.2   |
| 1.4    | 9.1    | 4.1    | 12.2   | 1.1    | 6.9    | 7.7    | 9.7    | 12.1   |
| 22.3   | 28.2   | 2.9    | 7.4    | 15.9   | 16.4   | 17.3   | 17.4   | 17.8   |
| 1.4    | 1.4    | 1.0    | 1.6    | 1.5    | 1.9    | 5.4    | 8.1    | 1.5    |
| 6.8    | 8.6    | 1.7    | 5.2    | 4.6    | 13.1   | 15.3   | 6.3    | 10.2   |
| 6.5    | 20.9   | 6.8    | 8.8    | 13.8   | 23.3   | 4.8    | 15.7   | 7.6    |
| 4.4    | 0.4    | 0.6    | 0.2    | 0.6    | 2.2    | 1.3    | 1.2    | 2.4    |
| 1.7    | 1.1    | 2.5    | 2.3    | 1.4    | 1.7    | 9.8    | 5.2    | 10.5   |
| 10.5   | 2.6    | 2.1    | 2.8    | 8.0    | 0.7    | 9.3    | 16.3   | 8.5    |
| 22.9   | 31.3   | 15.5   | 20.8   | 31.1   | 25.5   | 26.8   | 27.5   | 19.9   |
| 78.6   | 95.4   | 280.8  | 301.4  | 116.7  | 127.8  | 328.1  | 638.0  | 615.9  |
| 17.0   | 13.8   | 13.2   | 13.4   | 14.5   | 9.3    | 26.2   | 26.0   | 18.0   |
| 0.7    | 0.7    | 0.3    | 0.4    | 0.8    | 0.9    | 1.2    | 1.5    | 5.8    |
| 0.5    | 1.3    | 13.5   | 6.8    | 4.0    | 0.4    | 3.0    | 7.1    | 3.8    |
| 8.0    | 6.5    | 4.0    | 12.3   | 7.6    | 5.7    | 13.8   | 12.4   | 10.1   |
| 52.2   | 55.9   | 12.0   | 10.7   | 77.0   | 60.7   | 40.2   | 30.3   | 21.4   |
| 0.6    | 7.4    | 1.6    | 4.5    | 0.3    | 0.2    | 2.8    | 0.4    | 2.1    |
| 513.7  | 656.2  | 436.4  | 566.5  | 698.2  | 688.6  | 961.1  | 865.2  | 842.6  |
| 51.5   | 42.8   | 9.5    | 4.1    | 70.6   | 43.6   | 27.1   | 34.6   | 27.2   |
| 18.2   | 16.4   | 5.7    | 6.6    | 15.4   | 16.1   | 7.1    | 2.0    | 5.2    |
| 11.6   | 9.3    | 3.7    | 1.6    | 6.6    | 14.0   | 12.1   | 5.6    | 4.1    |
| 12.5   | 18.6   | 6.3    | 3.3    | 8.3    | 12.8   | 3.8    | 3.5    | 6.6    |
| 1.6    | 3.4    | 0.6    | 7.1    | 0.6    | 2.3    | 6.2    | 2.0    | 8.8    |
| 79.0   | 80.9   | 53.8   | 61.8   | 116.4  | 65.3   | 422.6  | 431.3  | 523.0  |
| 312.9  | 393.2  | 148.9  | 324.2  | 593.9  | 364.2  | 164.0  | 103.9  | 115.1  |
| 14.8   | 2.1    | 8.7    | 1.5    | 7.0    | 16.8   | 8.1    | 8.3    | 6.2    |
| 17.5   | 20.2   | 22.1   | 10.3   | 24.5   | 19.6   | 12.4   | 19.9   | 15.4   |
| 126.7  | 186.3  | 10.5   | 12.3   | 296.8  | 167.9  | 446.9  | 448.7  | 516.3  |
| 14.2   | 21.2   | 22.0   | 7.1    | 20.0   | 20.6   | 8.5    | 13.9   | 22.9   |
| 237.2  | 480.4  | 35.1   | 33.7   | 327.3  | 548.7  | 162.7  | 149.6  | 165.1  |
| 2.6    | 3.7    | 9.5    | 3.7    | 1.7    | 1.9    | 3.3    | 2.0    | 3.2    |
| 2608.5 | 2723.5 | 2148.2 | 2940.0 | 3282.3 | 2627.9 | 5121.4 | 4225.6 | 4274.0 |
| 35.5   | 44.7   | 124.4  | 184.3  | 54.3   | 74.0   | 57.9   | 56.2   | 83.9   |
| 0.5    | 0.6    | 2.7    | 0.6    | 11.1   | 0.9    | 10.2   | 2.1    | 5.4    |
| 14.2   | 27.2   | 15.9   | 12.9   | 17.4   | 21.1   | 185.9  | 199.6  | 193.4  |
| 8.2    | 4.8    | 7.4    | 3.6    | 2.3    | 3.8    | 8.9    | 5.0    | 8.8    |
| 2.5    | 1.9    | 1.8    | 0.5    | 1.9    | 7.2    | 8.7    | 2.6    | 2.2    |
| 259.0  | 233.3  | 74.7   | 84.6   | 338.8  | 220.5  | 189.2  | 159.1  | 156.8  |
| 5.6    | 5.8    | 6.2    | 8.0    | 4.0    | 7.7    | 7.8    | 15.7   | 15.0   |
| 1.2    | 1.1    | 1.2    | 1.5    | 3.6    | 5.7    | 3.6    | 4.6    | 4.7    |
| 141.3  | 257.3  | 18.7   | 17.4   | 207.8  | 226.4  | 166.0  | 192.3  | 209.7  |
| 7.6    | 1.1    | 5.6    | 5.2    | 8.4    | 12.4   | 6.3    | 6.6    | 5.6    |
| 36.5   | 49.3   | 38.3   | 73.0   | 41.9   | 34.9   | 211.8  | 122.1  | 136.3  |
| 21.5   | 4.3    | 15.4   | 9.7    | 6.8    | 17.0   | 13.6   | 5.8    | 7.2    |
| 10.9   | 20.9   | 8.6    | 12.1   | 11.7   | 12.7   | 26.5   | 20.0   | 21.2   |
| 10.4   | 10.7   | 10.9   | 18.3   | 3.0    | 5.7    | 18.5   | 9.7    | 13.7   |
| 0.6    | 1.0    | 0.5    | 0.7    | 1.1    | 1.3    | 1.8    | 2.0    | 1.6    |
| 1.1    | 1.2    | 6.2    | 7.3    | 6.5    | 9.7    | 3.2    | 1.3    | 4.3    |
| 926.1  | 980.9  | 128.0  | 99.9   | 1088.8 | 858.0  | 2214.4 | 1674.1 | 1793.6 |
| 9.4    | 5.2    | 1.2    | 5.3    | 3.2    | 0.9    | 8.9    | 2.4    | 4.3    |

|        |        |        |        |        |        |         |         |         |
|--------|--------|--------|--------|--------|--------|---------|---------|---------|
| 58.3   | 65.1   | 64.7   | 99.0   | 70.3   | 45.4   | 266.6   | 140.1   | 144.8   |
| 22.8   | 6.0    | 6.5    | 1.6    | 9.8    | 2.0    | 37.3    | 35.1    | 43.5    |
| 4.5    | 4.1    | 9.6    | 7.3    | 2.6    | 2.0    | 4.9     | 11.0    | 18.1    |
| 7.3    | 2.7    | 1.9    | 1.6    | 9.1    | 3.6    | 5.1     | 4.4     | 5.4     |
| 0.8    | 5.0    | 5.2    | 0.5    | 4.8    | 6.7    | 6.5     | 5.8     | 1.1     |
| 6.0    | 4.2    | 1.6    | 9.1    | 1.2    | 9.9    | 1.8     | 4.8     | 2.3     |
| 27.9   | 30.5   | 15.3   | 10.5   | 38.2   | 32.7   | 18.4    | 26.1    | 12.3    |
| 36.7   | 16.7   | 27.3   | 31.0   | 16.6   | 16.3   | 74.5    | 78.4    | 97.9    |
| 8.6    | 10.6   | 0.9    | 8.7    | 2.2    | 22.9   | 26.2    | 22.8    | 2.2     |
| 91.9   | 94.5   | 49.8   | 47.2   | 243.9  | 111.5  | 18.4    | 24.2    | 21.5    |
| 2.2    | 4.1    | 0.2    | 0.6    | 3.0    | 4.2    | 2.1     | 1.5     | 3.2     |
| 3.7    | 5.4    | 13.4   | 9.1    | 1.2    | 1.4    | 13.3    | 12.0    | 7.8     |
| 4.2    | 13.5   | 6.6    | 4.1    | 13.3   | 18.4   | 8.3     | 12.0    | 6.2     |
| 40.0   | 43.5   | 29.0   | 23.6   | 32.1   | 39.7   | 1.0     | 2.6     | 4.1     |
| 10.1   | 16.6   | 1.7    | 2.6    | 31.7   | 13.5   | 10.9    | 6.4     | 9.2     |
| 11.8   | 5.1    | 5.5    | 4.3    | 10.2   | 16.9   | 14.9    | 13.1    | 7.1     |
| 1.6    | 1.2    | 0.7    | 6.0    | 1.7    | 1.9    | 6.1     | 0.8     | 1.0     |
| 0.3    | 6.0    | 3.2    | 6.8    | 4.7    | 1.2    | 5.8     | 1.1     | 3.9     |
| 2.9    | 10.3   | 6.6    | 5.8    | 9.3    | 17.6   | 1.5     | 3.8     | 4.5     |
| 11.5   | 1.4    | 7.8    | 2.8    | 1.6    | 1.6    | 7.9     | 6.0     | 1.7     |
| 1057.7 | 1251.3 | 237.2  | 290.5  | 1437.7 | 1548.9 | 888.2   | 792.8   | 1030.2  |
| 0.9    | 13.1   | 391.2  | 494.2  | 4.9    | 1.3    | 1562.7  | 2736.4  | 3095.1  |
| 2.5    | 5.7    | 0.6    | 0.3    | 1.2    | 4.0    | 1.8     | 1.1     | 2.2     |
| 6.8    | 3.6    | 0.7    | 0.6    | 1.2    | 13.5   | 163.8   | 128.4   | 155.7   |
| 4.1    | 12.7   | 5.8    | 12.7   | 14.7   | 11.9   | 44.0    | 41.3    | 32.3    |
| 56.6   | 43.3   | 60.5   | 70.9   | 89.8   | 44.6   | 61.9    | 84.5    | 78.7    |
| 2.5    | 15.9   | 0.7    | 0.7    | 20.2   | 7.0    | 2.0     | 1.6     | 0.8     |
| 23.5   | 9.3    | 15.0   | 14.5   | 10.0   | 23.8   | 38.9    | 41.4    | 34.7    |
| 6.3    | 1.8    | 1.1    | 1.0    | 5.7    | 8.0    | 9.0     | 7.3     | 5.0     |
| 368.5  | 402.5  | 95.8   | 159.9  | 550.0  | 368.3  | 626.1   | 466.4   | 511.9   |
| 15.8   | 1.4    | 19.6   | 11.1   | 9.0    | 3.6    | 24.3    | 23.5    | 21.7    |
| 21.5   | 14.1   | 17.6   | 3.0    | 20.2   | 9.8    | 34.7    | 13.9    | 17.5    |
| 10.8   | 10.1   | 7.3    | 5.0    | 13.8   | 4.5    | 5.7     | 5.8     | 11.8    |
| 6.4    | 1.1    | 3.7    | 8.2    | 7.4    | 0.5    | 6.9     | 8.7     | 11.6    |
| 15.1   | 11.9   | 4.2    | 15.4   | 4.4    | 7.2    | 17.5    | 14.7    | 23.4    |
| 1.0    | 4.7    | 10.2   | 4.5    | 0.5    | 1.3    | 5.6     | 2.1     | 1.2     |
| 7.2    | 17.3   | 2.7    | 10.6   | 12.6   | 12.6   | 10.2    | 7.7     | 8.7     |
| 17.4   | 23.9   | 1.2    | 3.1    | 26.7   | 19.7   | 11.0    | 14.9    | 13.4    |
| 6.8    | 1.3    | 2.3    | 0.9    | 1.5    | 1.2    | 5.7     | 2.5     | 6.1     |
| 10.2   | 23.4   | 0.7    | 8.7    | 7.4    | 13.5   | 8.7     | 7.7     | 8.4     |
| 10.5   | 8.3    | 11.3   | 5.5    | 2.8    | 7.2    | 7.1     | 6.2     | 8.5     |
| 0.4    | 0.7    | 0.5    | 4.5    | 3.3    | 0.2    | 7.4     | 4.7     | 6.4     |
| 119.1  | 126.8  | 109.8  | 134.5  | 145.8  | 78.1   | 311.7   | 343.1   | 363.6   |
| 7893.1 | 8855.2 | 4097.5 | 5525.8 | 8434.1 | 8523.1 | 11095.9 | 11233.8 | 11346.7 |
| 1.7    | 3.4    | 3.8    | 3.2    | 6.6    | 2.8    | 2.6     | 2.6     | 2.8     |
| 244.0  | 346.9  | 52.7   | 58.7   | 399.8  | 255.7  | 954.7   | 857.6   | 931.8   |
| 14.8   | 21.1   | 8.4    | 7.1    | 24.0   | 30.6   | 57.7    | 55.8    | 58.7    |
| 1.2    | 2.5    | 2.5    | 1.3    | 2.2    | 0.9    | 3.7     | 5.6     | 10.1    |
| 28.5   | 37.0   | 44.7   | 51.3   | 40.5   | 23.9   | 36.5    | 22.9    | 40.9    |
| 6.0    | 10.3   | 6.0    | 9.3    | 12.8   | 10.3   | 14.3    | 8.1     | 10.3    |
| 10.6   | 14.4   | 5.1    | 11.2   | 16.9   | 10.0   | 18.5    | 30.8    | 18.6    |
| 656.9  | 916.2  | 62.9   | 86.6   | 1018.4 | 762.2  | 1647.0  | 1460.4  | 1511.6  |
| 3.3    | 2.9    | 7.8    | 4.5    | 7.7    | 10.3   | 3.5     | 5.4     | 2.5     |

|       |       |       |       |       |       |        |        |        |
|-------|-------|-------|-------|-------|-------|--------|--------|--------|
| 2.0   | 6.1   | 2.5   | 5.2   | 8.3   | 6.5   | 51.3   | 57.9   | 70.3   |
| 3.0   | 6.8   | 1.0   | 10.1  | 4.4   | 3.1   | 6.7    | 8.2    | 3.2    |
| 1.5   | 1.9   | 4.6   | 13.3  | 2.0   | 9.5   | 9.4    | 5.7    | 8.5    |
| 2.0   | 0.8   | 6.9   | 12.4  | 8.6   | 9.4   | 13.3   | 11.7   | 9.2    |
| 0.9   | 1.0   | 7.2   | 0.3   | 1.0   | 7.9   | 3.1    | 0.9    | 3.0    |
| 17.4  | 28.9  | 16.1  | 20.3  | 20.0  | 10.7  | 49.2   | 40.7   | 41.9   |
| 2.3   | 7.9   | 3.0   | 0.6   | 2.0   | 3.4   | 6.6    | 7.0    | 5.2    |
| 5.1   | 10.1  | 3.5   | 0.9   | 21.8  | 1.8   | 4.7    | 6.0    | 5.2    |
| 206.8 | 290.0 | 243.5 | 382.7 | 405.4 | 252.9 | 856.7  | 1194.1 | 1203.7 |
| 13.3  | 2.1   | 0.6   | 2.3   | 0.9   | 0.6   | 2.4    | 2.6    | 0.7    |
| 1.2   | 0.4   | 1.1   | 10.1  | 1.7   | 4.2   | 2.1    | 4.6    | 2.4    |
| 7.7   | 8.2   | 6.6   | 0.7   | 1.2   | 1.7   | 4.5    | 6.7    | 2.4    |
| 535.8 | 591.2 | 381.4 | 547.1 | 654.0 | 582.8 | 891.1  | 667.5  | 792.1  |
| 9.7   | 8.1   | 4.8   | 0.7   | 10.8  | 6.5   | 1418.6 | 1481.2 | 2226.6 |
| 196.8 | 200.4 | 612.1 | 908.0 | 289.7 | 174.5 | 1331.5 | 1470.1 | 1617.7 |
| 7.3   | 4.3   | 5.3   | 0.4   | 2.3   | 0.3   | 4.9    | 3.9    | 0.6    |
| 1.3   | 2.8   | 1.0   | 1.4   | 5.1   | 8.5   | 1.0    | 2.2    | 2.6    |
| 694.8 | 865.4 | 301.2 | 354.9 | 939.4 | 809.8 | 1776.9 | 1530.3 | 1547.6 |
| 29.5  | 35.0  | 24.6  | 27.4  | 44.9  | 25.8  | 169.9  | 162.6  | 216.7  |
| 3.0   | 2.7   | 2.2   | 1.8   | 2.5   | 3.4   | 3.1    | 3.4    | 4.1    |
| 0.2   | 5.4   | 2.8   | 2.9   | 7.8   | 0.4   | 1.5    | 2.9    | 3.2    |
| 1.8   | 2.8   | 3.9   | 1.5   | 8.4   | 1.3   | 1.3    | 4.1    | 2.0    |
| 2.0   | 1.0   | 2.7   | 10.9  | 1.9   | 2.0   | 8.8    | 3.7    | 3.5    |
| 8.3   | 12.2  | 1.5   | 0.2   | 5.9   | 8.5   | 7.0    | 1.5    | 4.4    |
| 14.9  | 4.3   | 3.6   | 2.5   | 3.1   | 1.2   | 1.7    | 4.3    | 1.0    |
| 7.1   | 0.4   | 4.3   | 8.6   | 6.8   | 2.9   | 5.8    | 9.4    | 8.4    |
| 214.3 | 298.2 | 95.0  | 99.7  | 314.6 | 229.8 | 452.0  | 506.5  | 572.5  |
| 3.4   | 10.9  | 5.6   | 12.5  | 8.3   | 14.8  | 11.9   | 12.7   | 9.4    |
| 15.0  | 5.9   | 2.9   | 2.5   | 3.3   | 8.5   | 7.1    | 3.9    | 3.6    |
| 33.4  | 36.9  | 76.5  | 120.7 | 29.1  | 17.4  | 186.3  | 133.0  | 133.7  |
| 1.3   | 0.7   | 1.6   | 0.9   | 5.5   | 5.6   | 16.0   | 3.7    | 2.8    |
| 238.9 | 300.6 | 14.5  | 22.0  | 323.8 | 190.4 | 34.6   | 24.2   | 28.2   |
| 90.9  | 88.6  | 22.9  | 12.9  | 105.2 | 84.0  | 14.6   | 9.9    | 16.7   |
| 206.0 | 469.7 | 180.6 | 248.4 | 346.5 | 442.7 | 732.2  | 841.1  | 895.8  |
| 40.4  | 57.0  | 42.4  | 59.7  | 83.9  | 49.5  | 112.9  | 95.4   | 124.6  |
| 373.7 | 432.3 | 142.0 | 196.7 | 588.4 | 534.2 | 895.9  | 609.2  | 673.0  |
| 140.1 | 173.5 | 201.2 | 387.2 | 160.3 | 152.2 | 688.7  | 397.5  | 495.4  |
| 7.2   | 14.7  | 2.6   | 2.0   | 11.8  | 6.6   | 1.7    | 5.9    | 5.2    |
| 29.4  | 18.7  | 5.7   | 16.8  | 13.9  | 13.2  | 48.4   | 31.8   | 34.0   |
| 13.5  | 4.4   | 3.2   | 15.0  | 26.1  | 2.8   | 6.4    | 5.4    | 6.9    |
| 16.9  | 4.5   | 21.1  | 15.7  | 19.6  | 15.3  | 11.8   | 23.5   | 28.5   |
| 12.8  | 16.1  | 23.9  | 35.4  | 15.3  | 18.3  | 112.5  | 85.0   | 94.0   |
| 2.0   | 3.7   | 1.1   | 0.6   | 1.3   | 1.5   | 11.1   | 3.0    | 2.5    |
| 1.6   | 1.7   | 19.0  | 33.8  | 1.6   | 3.6   | 38.4   | 106.1  | 150.6  |
| 10.7  | 12.7  | 37.1  | 31.7  | 20.9  | 3.6   | 55.1   | 63.5   | 57.1   |
| 13.3  | 7.3   | 0.5   | 1.0   | 8.2   | 11.4  | 9.1    | 10.7   | 16.3   |
| 11.0  | 6.2   | 10.4  | 5.8   | 2.2   | 6.6   | 7.4    | 7.2    | 9.1    |
| 291.9 | 313.4 | 152.2 | 201.4 | 326.0 | 293.9 | 798.4  | 783.8  | 779.2  |
| 160.7 | 177.4 | 235.1 | 357.3 | 168.8 | 162.3 | 1412.7 | 1016.5 | 1133.1 |
| 10.6  | 6.3   | 10.9  | 9.9   | 18.0  | 15.4  | 10.9   | 18.9   | 29.5   |
| 259.9 | 353.8 | 19.2  | 34.3  | 367.7 | 418.8 | 420.3  | 231.3  | 246.8  |
| 0.4   | 8.8   | 3.0   | 2.4   | 0.5   | 3.4   | 3.3    | 4.0    | 3.0    |
| 33.3  | 22.2  | 186.7 | 291.5 | 30.6  | 46.7  | 362.1  | 715.5  | 669.6  |

|       |       |       |       |       |       |       |       |       |
|-------|-------|-------|-------|-------|-------|-------|-------|-------|
| 1.2   | 6.3   | 2.7   | 2.2   | 3.5   | 1.9   | 2.2   | 6.0   | 8.0   |
| 0.2   | 2.3   | 0.5   | 0.2   | 0.2   | 1.2   | 3.1   | 7.8   | 1.0   |
| 159.4 | 274.4 | 3.3   | 0.6   | 386.6 | 373.4 | 14.4  | 13.2  | 14.6  |
| 0.6   | 8.5   | 10.7  | 9.3   | 6.3   | 9.2   | 25.5  | 18.0  | 21.6  |
| 5.0   | 39.2  | 1.6   | 2.7   | 44.6  | 30.2  | 3.4   | 3.9   | 2.6   |
| 1.4   | 3.2   | 2.5   | 2.3   | 3.7   | 2.9   | 3.8   | 11.0  | 4.2   |
| 4.2   | 1.0   | 2.9   | 0.9   | 0.5   | 0.4   | 3.8   | 3.3   | 0.9   |
| 139.8 | 195.3 | 19.3  | 15.1  | 225.7 | 236.3 | 31.4  | 19.5  | 15.0  |
| 186.6 | 236.3 | 156.7 | 261.5 | 320.7 | 282.6 | 423.9 | 222.1 | 255.9 |
| 3.5   | 0.6   | 1.0   | 4.1   | 4.9   | 1.2   | 9.6   | 5.9   | 5.5   |
| 2.4   | 0.9   | 1.3   | 1.0   | 1.0   | 15.8  | 3.4   | 12.0  | 9.4   |
| 2.0   | 14.4  | 19.6  | 7.2   | 5.8   | 14.0  | 10.2  | 8.0   | 8.6   |
| 4.4   | 1.9   | 5.2   | 2.2   | 0.8   | 1.0   | 4.2   | 3.1   | 1.8   |
| 2.4   | 1.8   | 3.2   | 2.0   | 4.4   | 1.8   | 3.8   | 2.9   | 3.0   |
| 15.5  | 15.5  | 4.8   | 1.4   | 29.4  | 15.2  | 4.4   | 6.2   | 12.6  |
| 9.9   | 7.8   | 2.6   | 8.1   | 13.0  | 11.5  | 10.3  | 10.6  | 3.3   |
| 2.1   | 0.6   | 0.7   | 1.4   | 0.8   | 0.4   | 4.0   | 2.8   | 2.5   |
| 1.5   | 1.1   | 8.5   | 6.3   | 5.1   | 4.2   | 14.8  | 8.8   | 11.6  |
| 1.6   | 0.9   | 0.5   | 8.1   | 14.6  | 7.1   | 10.4  | 1.5   | 5.5   |
| 2.4   | 4.2   | 1.0   | 4.7   | 8.8   | 4.9   | 11.5  | 5.7   | 8.2   |
| 30.7  | 30.8  | 27.1  | 20.7  | 18.3  | 14.1  | 38.6  | 44.4  | 29.6  |
| 0.2   | 0.6   | 0.8   | 2.9   | 5.1   | 2.2   | 1.5   | 4.5   | 2.1   |
| 7.1   | 10.5  | 4.7   | 5.9   | 0.7   | 3.8   | 0.8   | 0.9   | 0.9   |
| 82.9  | 93.6  | 33.5  | 50.5  | 102.0 | 66.2  | 296.4 | 226.0 | 269.3 |
| 9.8   | 1.3   | 8.0   | 5.6   | 1.3   | 2.6   | 7.2   | 8.8   | 5.0   |
| 2.3   | 1.5   | 4.4   | 0.9   | 5.5   | 3.1   | 4.3   | 8.3   | 2.9   |
| 10.1  | 10.1  | 7.9   | 7.4   | 6.8   | 8.6   | 3.8   | 2.3   | 9.2   |
| 0.8   | 1.8   | 0.8   | 0.5   | 0.4   | 0.3   | 0.6   | 0.5   | 3.8   |
| 57.7  | 54.4  | 11.4  | 5.7   | 179.7 | 58.4  | 51.0  | 40.8  | 37.7  |
| 106.1 | 106.0 | 35.0  | 49.7  | 132.3 | 72.0  | 130.1 | 107.3 | 97.6  |
| 0.9   | 0.9   | 1.2   | 0.7   | 2.7   | 0.9   | 4.7   | 3.7   | 1.7   |
| 3.8   | 1.8   | 0.3   | 0.2   | 1.7   | 0.7   | 2.9   | 1.7   | 1.9   |
| 5.0   | 4.8   | 4.3   | 3.6   | 2.0   | 2.4   | 2.9   | 4.5   | 2.1   |
| 5.9   | 0.4   | 0.9   | 4.0   | 5.1   | 1.3   | 9.1   | 7.2   | 6.8   |
| 9.5   | 18.1  | 12.1  | 11.3  | 15.4  | 15.2  | 21.3  | 26.2  | 18.8  |
| 13.5  | 3.7   | 8.9   | 7.9   | 23.1  | 15.3  | 34.0  | 31.8  | 42.0  |
| 19.0  | 11.3  | 3.5   | 1.7   | 6.2   | 6.6   | 24.9  | 12.1  | 21.0  |
| 2.5   | 0.7   | 5.1   | 0.5   | 1.6   | 0.8   | 7.3   | 6.8   | 3.2   |
| 7.8   | 15.3  | 0.6   | 1.1   | 5.1   | 10.3  | 0.8   | 2.2   | 0.8   |
| 9.5   | 3.5   | 13.7  | 5.7   | 3.0   | 6.3   | 5.5   | 8.1   | 1.8   |
| 0.4   | 0.4   | 0.7   | 2.2   | 0.7   | 0.4   | 5.3   | 1.0   | 1.0   |
| 1.7   | 1.1   | 0.5   | 1.1   | 8.3   | 1.8   | 1.9   | 4.4   | 3.9   |
| 25.7  | 10.8  | 26.9  | 30.5  | 22.4  | 47.9  | 14.0  | 25.3  | 38.9  |
| 47.1  | 65.9  | 15.3  | 27.7  | 58.1  | 43.0  | 202.4 | 67.9  | 81.8  |
| 6.3   | 2.9   | 1.7   | 1.8   | 3.5   | 3.3   | 2.1   | 1.0   | 1.5   |
| 1.0   | 0.9   | 0.5   | 3.2   | 0.9   | 0.5   | 1.5   | 1.6   | 1.1   |
| 4.3   | 2.1   | 11.3  | 9.3   | 3.1   | 23.1  | 9.7   | 16.8  | 13.3  |
| 15.4  | 1.5   | 1.0   | 0.7   | 1.6   | 0.9   | 4.7   | 1.8   | 4.3   |
| 1.9   | 0.9   | 3.7   | 1.4   | 1.3   | 1.1   | 1.3   | 1.2   | 1.2   |
| 19.7  | 5.4   | 10.6  | 15.9  | 6.6   | 14.8  | 2.3   | 9.4   | 12.2  |
| 16.9  | 4.6   | 1.7   | 1.3   | 2.8   | 8.7   | 4.4   | 4.8   | 4.5   |
| 2.7   | 14.5  | 1.9   | 7.1   | 2.6   | 9.5   | 11.1  | 10.2  | 3.0   |
| 5.6   | 6.1   | 0.3   | 4.1   | 8.5   | 3.9   | 8.7   | 2.2   | 1.6   |



|       |       |       |       |       |       |        |        |        |
|-------|-------|-------|-------|-------|-------|--------|--------|--------|
| 9.2   | 14.5  | 3.3   | 4.9   | 2.7   | 18.1  | 9.9    | 5.1    | 11.9   |
| 22.0  | 30.6  | 10.8  | 10.6  | 61.1  | 52.0  | 69.8   | 58.3   | 64.9   |
| 4.6   | 0.5   | 0.8   | 0.6   | 0.5   | 1.3   | 1.0    | 0.8    | 0.6    |
| 0.9   | 1.3   | 0.6   | 5.8   | 0.8   | 0.9   | 1.4    | 0.8    | 2.0    |
| 11.2  | 5.9   | 20.1  | 11.2  | 1.4   | 5.4   | 15.0   | 14.6   | 3.2    |
| 5.0   | 0.2   | 5.4   | 3.8   | 0.7   | 0.2   | 0.6    | 1.0    | 1.4    |
| 3.3   | 5.7   | 6.0   | 7.5   | 0.5   | 1.0   | 6.2    | 9.8    | 7.1    |
| 5.5   | 21.6  | 6.9   | 13.7  | 6.9   | 6.2   | 167.3  | 142.5  | 142.8  |
| 4.4   | 0.7   | 1.3   | 0.4   | 0.3   | 0.4   | 2.4    | 0.5    | 1.9    |
| 0.8   | 10.5  | 2.2   | 2.7   | 1.7   | 3.8   | 1.9    | 5.2    | 2.2    |
| 4.6   | 5.5   | 4.9   | 3.0   | 6.6   | 3.1   | 6.9    | 6.2    | 7.3    |
| 1.8   | 3.8   | 12.4  | 1.8   | 5.5   | 15.4  | 3.7    | 18.5   | 6.3    |
| 3.1   | 5.9   | 4.2   | 6.0   | 3.8   | 6.5   | 7.7    | 12.4   | 12.8   |
| 23.4  | 29.7  | 4.7   | 8.7   | 22.9  | 33.0  | 31.5   | 31.8   | 22.7   |
| 0.9   | 0.6   | 0.3   | 0.5   | 0.8   | 7.1   | 1.7    | 1.1    | 0.8    |
| 12.9  | 20.0  | 15.7  | 10.2  | 19.5  | 28.0  | 22.6   | 20.4   | 16.9   |
| 79.8  | 73.2  | 8.4   | 19.1  | 51.3  | 40.3  | 65.5   | 51.9   | 60.2   |
| 13.4  | 9.6   | 2.7   | 4.6   | 12.9  | 12.5  | 33.2   | 49.5   | 40.9   |
| 614.8 | 764.2 | 198.9 | 133.3 | 898.0 | 647.3 | 1254.4 | 1172.2 | 1444.1 |
| 1.3   | 7.5   | 4.6   | 4.7   | 15.0  | 1.8   | 30.0   | 28.5   | 32.1   |
| 2.5   | 3.5   | 3.1   | 0.7   | 0.6   | 2.7   | 19.3   | 19.5   | 21.6   |
| 2.6   | 1.7   | 2.7   | 17.0  | 3.1   | 28.7  | 9.2    | 16.0   | 12.6   |
| 9.7   | 10.8  | 6.9   | 0.7   | 2.9   | 2.0   | 5.4    | 6.3    | 6.4    |
| 5.9   | 8.6   | 10.6  | 2.5   | 12.2  | 0.8   | 1.1    | 1.1    | 1.4    |
| 2.5   | 4.0   | 2.6   | 3.0   | 0.3   | 1.1   | 2.8    | 1.5    | 2.4    |
| 17.7  | 7.5   | 24.3  | 13.1  | 15.5  | 6.6   | 32.8   | 35.2   | 30.2   |
| 6.5   | 0.9   | 5.9   | 6.6   | 6.1   | 6.1   | 19.3   | 12.3   | 18.4   |
| 3.7   | 28.3  | 28.9  | 10.9  | 3.0   | 3.4   | 44.5   | 39.6   | 39.1   |
| 0.4   | 2.2   | 0.3   | 2.6   | 3.8   | 4.1   | 4.3    | 2.3    | 2.0    |
| 2.6   | 2.4   | 0.6   | 0.5   | 4.1   | 1.7   | 8.4    | 2.0    | 5.8    |
| 1.2   | 0.9   | 2.7   | 0.8   | 0.8   | 0.5   | 0.8    | 0.6    | 0.5    |
| 8.3   | 6.5   | 5.8   | 1.7   | 15.9  | 7.9   | 1.2    | 7.9    | 1.0    |
| 21.3  | 18.1  | 24.1  | 13.7  | 14.6  | 13.6  | 28.2   | 29.8   | 32.1   |
| 30.7  | 36.9  | 23.8  | 54.1  | 25.1  | 25.0  | 28.5   | 13.7   | 25.1   |
| 10.3  | 11.0  | 14.5  | 5.4   | 13.4  | 12.5  | 28.2   | 11.0   | 21.9   |
| 168.8 | 219.0 | 204.5 | 172.7 | 204.1 | 195.7 | 527.5  | 454.1  | 601.3  |
| 3.7   | 2.2   | 2.7   | 2.0   | 1.0   | 10.9  | 6.7    | 1.9    | 6.4    |
| 535.7 | 894.5 | 217.9 | 284.6 | 765.0 | 716.8 | 2565.0 | 2269.7 | 2287.8 |
| 68.8  | 80.0  | 7.8   | 0.8   | 93.6  | 70.1  | 11.2   | 11.6   | 8.5    |
| 7.2   | 4.2   | 1.5   | 1.2   | 5.0   | 2.5   | 7.6    | 5.4    | 2.6    |
| 335.6 | 431.0 | 206.2 | 256.5 | 634.5 | 311.1 | 835.5  | 821.0  | 973.3  |
| 20.6  | 11.3  | 2.6   | 9.3   | 1.5   | 2.6   | 11.8   | 12.4   | 11.8   |
| 85.7  | 145.8 | 101.1 | 119.0 | 124.7 | 153.0 | 155.4  | 139.2  | 150.8  |
| 12.7  | 9.0   | 40.7  | 30.7  | 18.6  | 16.1  | 26.9   | 31.9   | 23.2   |
| 10.1  | 4.6   | 12.5  | 13.1  | 15.3  | 11.9  | 6.9    | 5.2    | 8.7    |
| 0.6   | 2.0   | 8.6   | 1.4   | 1.2   | 6.2   | 1.9    | 1.4    | 1.8    |
| 13.3  | 17.2  | 2.3   | 1.6   | 17.9  | 13.9  | 12.4   | 13.8   | 13.6   |
| 12.2  | 16.4  | 24.6  | 20.5  | 14.1  | 15.3  | 33.6   | 30.6   | 39.7   |
| 10.3  | 4.9   | 10.1  | 2.3   | 4.9   | 2.3   | 0.9    | 5.7    | 3.3    |
| 195.5 | 215.3 | 80.3  | 89.8  | 214.9 | 192.9 | 743.2  | 622.3  | 702.3  |
| 0.7   | 3.0   | 0.5   | 3.1   | 1.1   | 1.1   | 3.5    | 0.9    | 2.1    |
| 7.9   | 6.6   | 7.0   | 5.6   | 8.0   | 6.1   | 7.8    | 6.6    | 4.3    |
| 1.6   | 1.5   | 0.7   | 0.7   | 4.3   | 2.7   | 19.1   | 7.2    | 10.6   |

|        |        |       |        |        |        |        |        |        |
|--------|--------|-------|--------|--------|--------|--------|--------|--------|
| 22.1   | 17.3   | 16.2  | 14.4   | 16.8   | 19.5   | 20.7   | 24.6   | 24.8   |
| 3.2    | 1.7    | 4.9   | 15.7   | 4.0    | 2.3    | 2.7    | 3.5    | 3.0    |
| 1.5    | 4.2    | 8.9   | 1.1    | 0.8    | 1.3    | 10.9   | 5.0    | 2.7    |
| 2.5    | 1.3    | 1.8   | 7.3    | 10.0   | 3.6    | 6.4    | 2.4    | 11.6   |
| 15.3   | 13.6   | 10.8  | 7.7    | 1.6    | 0.7    | 1.4    | 1.6    | 1.4    |
| 3.6    | 17.1   | 1.4   | 1.1    | 3.7    | 5.7    | 6.5    | 8.3    | 3.8    |
| 326.8  | 335.2  | 115.8 | 125.0  | 408.2  | 406.3  | 228.1  | 264.8  | 277.3  |
| 5.2    | 20.9   | 2.1   | 3.3    | 2.2    | 11.2   | 8.9    | 19.2   | 13.9   |
| 8.3    | 18.8   | 6.3   | 7.3    | 3.0    | 1.9    | 8.1    | 7.4    | 4.7    |
| 19.3   | 25.2   | 19.0  | 10.8   | 18.4   | 18.9   | 28.3   | 24.2   | 14.3   |
| 31.1   | 29.5   | 21.6  | 26.6   | 39.9   | 25.6   | 34.9   | 44.1   | 48.3   |
| 0.6    | 4.2    | 2.9   | 4.7    | 7.0    | 12.8   | 5.2    | 5.7    | 9.0    |
| 12.6   | 1.1    | 16.8  | 8.3    | 13.9   | 12.0   | 11.8   | 11.8   | 8.1    |
| 1341.2 | 1943.4 | 737.0 | 1091.8 | 2430.5 | 1348.3 | 5015.7 | 5144.2 | 5006.4 |
| 13.9   | 16.4   | 4.2   | 16.4   | 1.8    | 2.0    | 21.8   | 14.2   | 18.0   |
| 2.7    | 2.4    | 0.6   | 2.1    | 9.4    | 5.3    | 6.4    | 3.5    | 1.5    |
| 1.4    | 1.3    | 7.4   | 5.1    | 2.0    | 0.4    | 3.7    | 3.3    | 0.8    |
| 2.5    | 10.2   | 3.2   | 7.1    | 5.9    | 3.0    | 5.3    | 5.2    | 2.3    |
| 61.6   | 60.8   | 19.3  | 33.7   | 108.1  | 46.1   | 58.1   | 69.2   | 78.0   |
| 6.2    | 11.8   | 20.8  | 20.9   | 11.4   | 7.8    | 6.2    | 3.6    | 3.5    |
| 4.7    | 3.2    | 1.6   | 6.5    | 4.5    | 2.8    | 2.4    | 6.4    | 2.2    |
| 288.0  | 289.1  | 140.4 | 142.3  | 373.8  | 367.3  | 700.2  | 669.5  | 744.9  |
| 26.0   | 7.0    | 18.2  | 10.7   | 17.9   | 26.2   | 65.0   | 51.4   | 57.9   |
| 2.7    | 4.5    | 1.9   | 1.3    | 3.8    | 2.7    | 6.4    | 4.7    | 7.6    |
| 258.0  | 605.3  | 88.4  | 105.4  | 445.6  | 539.0  | 708.2  | 566.2  | 702.0  |
| 1.6    | 2.1    | 0.6   | 3.3    | 2.7    | 8.3    | 4.7    | 7.4    | 9.0    |
| 1572.7 | 2555.6 | 168.8 | 367.9  | 2294.5 | 1998.6 | 2402.8 | 1866.3 | 2028.0 |
| 3.7    | 7.6    | 4.1   | 1.8    | 1.0    | 3.1    | 2.8    | 6.2    | 8.6    |
| 11.3   | 4.3    | 18.4  | 11.4   | 11.8   | 9.4    | 8.7    | 15.6   | 14.3   |
| 14.3   | 13.4   | 13.8  | 8.1    | 13.4   | 2.0    | 13.6   | 10.4   | 7.4    |
| 251.0  | 309.7  | 26.6  | 18.1   | 475.2  | 264.0  | 195.6  | 200.2  | 216.2  |
| 33.6   | 31.9   | 33.4  | 36.7   | 34.1   | 28.2   | 404.1  | 454.7  | 475.6  |
| 0.4    | 0.8    | 1.0   | 0.6    | 1.5    | 7.6    | 1.0    | 1.2    | 1.2    |
| 12.3   | 8.8    | 20.4  | 11.0   | 19.3   | 6.8    | 12.3   | 9.3    | 12.5   |
| 3.7    | 2.5    | 4.6   | 1.6    | 2.4    | 0.5    | 18.8   | 59.0   | 72.5   |
| 5.5    | 1.2    | 3.9   | 16.7   | 1.3    | 12.4   | 23.7   | 36.3   | 39.9   |
| 22.3   | 21.0   | 15.7  | 13.8   | 21.3   | 13.4   | 20.9   | 33.3   | 23.0   |
| 6.2    | 1.9    | 22.2  | 13.5   | 6.2    | 0.9    | 6.4    | 8.1    | 7.6    |
| 867.5  | 1070.0 | 118.9 | 231.2  | 1202.8 | 966.9  | 1756.9 | 1134.5 | 1409.5 |
| 16.8   | 17.6   | 11.1  | 13.7   | 17.5   | 34.2   | 41.0   | 95.3   | 103.6  |
| 3.1    | 8.0    | 9.0   | 9.3    | 14.2   | 6.3    | 14.3   | 17.5   | 13.2   |
| 10.6   | 1.5    | 9.5   | 1.8    | 11.7   | 2.0    | 18.6   | 14.7   | 6.6    |
| 9.9    | 2.4    | 5.3   | 0.7    | 2.5    | 3.7    | 9.1    | 8.9    | 6.4    |
| 2.4    | 2.8    | 8.6   | 8.2    | 9.4    | 4.3    | 8.7    | 3.4    | 8.2    |
| 1.1    | 1.0    | 9.7   | 6.3    | 11.9   | 16.5   | 6.2    | 7.5    | 15.6   |
| 107.0  | 108.6  | 97.6  | 82.1   | 148.7  | 100.1  | 167.0  | 174.0  | 200.0  |
| 3.5    | 5.8    | 1.2   | 2.8    | 5.2    | 0.4    | 26.0   | 16.0   | 18.7   |
| 0.4    | 1.3    | 0.6   | 0.6    | 5.0    | 8.3    | 1.2    | 0.5    | 4.3    |
| 266.2  | 287.2  | 53.9  | 62.7   | 444.4  | 289.9  | 243.7  | 237.3  | 257.1  |
| 4.5    | 6.9    | 10.8  | 3.8    | 15.9   | 1.6    | 10.6   | 13.1   | 1.4    |
| 3.0    | 17.1   | 23.9  | 29.1   | 12.3   | 20.1   | 24.4   | 26.3   | 20.4   |
| 11.8   | 8.1    | 1.8   | 0.5    | 8.0    | 1.4    | 3.1    | 1.1    | 7.4    |
| 14.8   | 11.3   | 9.2   | 8.4    | 23.7   | 2.6    | 6.0    | 5.9    | 3.2    |

|        |        |       |        |        |        |       |        |        |
|--------|--------|-------|--------|--------|--------|-------|--------|--------|
| 6.8    | 2.0    | 1.4   | 2.3    | 0.4    | 3.7    | 1.0   | 2.0    | 1.3    |
| 18.4   | 13.6   | 9.4   | 7.6    | 17.3   | 8.7    | 10.4  | 8.0    | 15.1   |
| 0.8    | 0.4    | 0.4   | 0.4    | 0.6    | 6.8    | 5.6   | 0.6    | 5.4    |
| 1.9    | 1.8    | 2.2   | 7.7    | 0.9    | 1.2    | 17.3  | 13.0   | 14.8   |
| 287.2  | 248.9  | 62.4  | 104.1  | 391.0  | 214.3  | 352.8 | 254.3  | 343.0  |
| 35.9   | 30.8   | 0.6   | 7.5    | 44.1   | 40.1   | 198.4 | 369.2  | 388.2  |
| 9.8    | 1.1    | 6.2   | 2.2    | 10.5   | 16.0   | 13.8  | 12.5   | 12.4   |
| 249.5  | 222.6  | 207.5 | 340.9  | 299.3  | 207.9  | 710.1 | 1245.2 | 1342.5 |
| 2195.0 | 3038.6 | 16.2  | 7.4    | 2052.2 | 2538.6 | 144.2 | 51.3   | 58.8   |
| 6.0    | 0.5    | 5.2   | 0.4    | 1.9    | 8.9    | 6.5   | 4.1    | 7.5    |
| 0.8    | 7.7    | 1.5   | 10.3   | 0.8    | 8.9    | 4.6   | 8.3    | 6.0    |
| 1.5    | 1.2    | 0.9   | 1.4    | 2.7    | 2.6    | 2.8   | 9.9    | 7.1    |
| 1528.7 | 1763.2 | 980.2 | 1378.2 | 1927.9 | 1443.8 | 309.7 | 354.3  | 392.8  |
| 266.5  | 367.1  | 45.2  | 44.8   | 404.8  | 296.8  | 484.9 | 579.9  | 654.6  |
| 5.3    | 24.8   | 3.1   | 13.1   | 19.0   | 12.5   | 34.1  | 21.5   | 24.8   |
| 1.2    | 1.4    | 4.5   | 0.5    | 2.5    | 6.3    | 6.4   | 7.0    | 6.9    |
| 35.2   | 59.5   | 24.6  | 30.3   | 60.7   | 22.7   | 31.2  | 35.4   | 43.6   |
| 3.6    | 18.4   | 9.0   | 8.3    | 3.7    | 3.0    | 6.8   | 5.7    | 2.9    |
| 12.7   | 15.5   | 21.2  | 9.2    | 13.0   | 15.4   | 9.5   | 10.8   | 8.0    |
| 4.8    | 4.4    | 1.7   | 2.3    | 8.3    | 0.7    | 10.8  | 5.9    | 3.0    |
| 11.6   | 14.4   | 23.7  | 14.4   | 23.6   | 15.8   | 37.8  | 39.4   | 34.5   |
| 1.1    | 2.1    | 7.9   | 1.2    | 7.6    | 1.4    | 17.1  | 7.1    | 14.1   |
| 25.7   | 40.2   | 7.1   | 17.1   | 33.4   | 26.5   | 28.5  | 19.4   | 15.8   |
| 18.0   | 9.0    | 11.4  | 5.1    | 5.5    | 19.3   | 37.4  | 41.4   | 30.0   |
| 9.3    | 11.4   | 9.5   | 3.0    | 4.3    | 20.3   | 12.8  | 5.2    | 7.4    |
| 20.4   | 29.3   | 10.4  | 20.1   | 30.0   | 45.0   | 405.8 | 425.5  | 460.4  |
| 1.0    | 1.2    | 4.6   | 4.2    | 5.9    | 1.3    | 1.2   | 1.0    | 1.3    |
| 74.2   | 65.5   | 32.8  | 22.8   | 43.2   | 37.1   | 40.3  | 32.0   | 44.5   |
| 6.5    | 0.3    | 2.2   | 0.7    | 13.6   | 12.2   | 3.4   | 8.1    | 1.3    |
| 6.9    | 5.5    | 0.6   | 4.5    | 4.9    | 1.0    | 7.7   | 5.0    | 9.4    |
| 39.8   | 50.8   | 2.5   | 0.7    | 97.7   | 38.6   | 147.7 | 63.1   | 63.9   |
| 7.6    | 6.7    | 1.8   | 4.2    | 0.7    | 7.2    | 5.9   | 6.5    | 3.1    |
| 2.0    | 1.0    | 3.8   | 0.9    | 0.9    | 2.0    | 2.2   | 6.2    | 3.3    |
| 17.7   | 20.7   | 33.7  | 53.8   | 35.6   | 27.3   | 94.9  | 86.8   | 89.7   |
| 113.9  | 139.5  | 243.9 | 343.5  | 156.8  | 160.6  | 698.4 | 578.5  | 678.8  |
| 34.2   | 36.2   | 27.8  | 27.7   | 40.8   | 38.1   | 50.1  | 43.3   | 46.1   |
| 1.7    | 1.0    | 2.3   | 1.4    | 1.4    | 1.3    | 0.8   | 2.0    | 1.5    |
| 0.4    | 0.9    | 3.0   | 6.6    | 4.9    | 0.5    | 3.7   | 2.2    | 3.1    |
| 39.2   | 38.8   | 16.5  | 26.7   | 56.6   | 59.8   | 112.5 | 100.1  | 117.0  |
| 1.8    | 6.5    | 34.4  | 36.8   | 2.8    | 18.9   | 8.4   | 8.5    | 9.8    |
| 13.4   | 0.4    | 11.9  | 7.4    | 12.6   | 1.2    | 8.9   | 8.7    | 6.2    |
| 3.5    | 2.0    | 6.1   | 10.9   | 2.8    | 3.5    | 19.0  | 3.2    | 15.4   |
| 0.8    | 5.8    | 7.6   | 6.8    | 19.1   | 2.1    | 10.4  | 2.8    | 7.8    |
| 6.8    | 2.8    | 2.8   | 2.4    | 2.7    | 7.1    | 11.0  | 8.2    | 2.6    |
| 11.7   | 9.6    | 6.9   | 1.5    | 2.2    | 9.5    | 1.2   | 5.3    | 3.2    |
| 0.6    | 0.8    | 0.7   | 0.3    | 0.9    | 1.1    | 5.0   | 9.9    | 2.2    |
| 5.0    | 10.2   | 1.2   | 3.8    | 2.0    | 4.1    | 35.1  | 48.9   | 61.8   |
| 1.4    | 4.4    | 2.1   | 3.7    | 10.8   | 1.3    | 11.7  | 11.0   | 7.2    |
| 0.9    | 4.2    | 0.4   | 0.3    | 6.5    | 1.0    | 5.7   | 2.4    | 2.9    |
| 456.3  | 566.2  | 136.9 | 156.2  | 725.5  | 501.5  | 434.1 | 491.0  | 461.5  |
| 14.0   | 7.5    | 23.7  | 22.4   | 4.1    | 6.0    | 88.2  | 91.1   | 110.6  |
| 1.6    | 10.2   | 1.9   | 11.4   | 1.7    | 6.2    | 13.2  | 21.6   | 9.6    |
| 1.0    | 1.0    | 1.7   | 1.3    | 2.0    | 2.4    | 2.3   | 1.8    | 5.0    |

|        |        |        |        |        |        |        |        |        |
|--------|--------|--------|--------|--------|--------|--------|--------|--------|
| 149.3  | 182.9  | 19.1   | 16.9   | 133.3  | 153.4  | 171.1  | 163.5  | 198.5  |
| 2.7    | 1.8    | 2.9    | 2.6    | 2.2    | 5.0    | 2.2    | 4.4    | 3.2    |
| 141.8  | 188.8  | 84.9   | 90.9   | 219.6  | 179.5  | 121.2  | 101.8  | 123.1  |
| 414.4  | 519.4  | 362.1  | 289.5  | 688.9  | 359.3  | 1969.1 | 2262.0 | 2554.1 |
| 769.6  | 821.7  | 458.4  | 702.8  | 1376.3 | 774.7  | 2898.1 | 2320.1 | 2334.3 |
| 1.7    | 4.1    | 5.1    | 2.6    | 3.5    | 5.6    | 3.3    | 4.3    | 6.3    |
| 6.9    | 4.4    | 18.1   | 16.6   | 5.1    | 10.9   | 19.1   | 23.1   | 21.4   |
| 12.3   | 8.4    | 5.0    | 7.4    | 11.4   | 7.2    | 4.4    | 8.1    | 3.8    |
| 89.0   | 134.3  | 9.1    | 14.2   | 173.2  | 136.4  | 233.9  | 209.7  | 266.3  |
| 559.1  | 1649.3 | 988.9  | 1464.3 | 829.3  | 1642.4 | 2941.4 | 2133.3 | 2360.0 |
| 18.0   | 18.6   | 23.5   | 28.2   | 19.2   | 40.4   | 34.8   | 34.4   | 37.2   |
| 6.4    | 0.4    | 10.4   | 8.6    | 5.6    | 7.1    | 17.1   | 20.9   | 23.4   |
| 90.2   | 178.4  | 43.6   | 37.9   | 133.7  | 156.9  | 273.1  | 270.4  | 270.4  |
| 16.8   | 31.7   | 6.7    | 13.1   | 26.9   | 14.3   | 62.6   | 74.8   | 90.7   |
| 12.9   | 16.4   | 10.5   | 16.9   | 16.6   | 3.4    | 40.4   | 57.9   | 61.1   |
| 0.8    | 1.7    | 0.8    | 0.4    | 1.4    | 1.2    | 2.3    | 7.1    | 1.1    |
| 12.7   | 14.1   | 9.3    | 8.0    | 14.6   | 13.2   | 1.1    | 3.5    | 1.8    |
| 1.3    | 1.7    | 1.5    | 2.2    | 3.7    | 1.8    | 3.9    | 1.7    | 1.7    |
| 0.7    | 0.7    | 0.5    | 0.4    | 1.3    | 0.4    | 0.5    | 1.9    | 0.4    |
| 39.6   | 55.0   | 14.3   | 24.5   | 19.4   | 33.4   | 469.2  | 355.9  | 355.6  |
| 9.6    | 21.9   | 8.2    | 4.6    | 19.4   | 3.7    | 13.4   | 10.1   | 9.2    |
| 867.5  | 1167.9 | 368.5  | 476.4  | 1324.4 | 1135.1 | 1772.5 | 1085.0 | 1297.4 |
| 22.9   | 30.0   | 11.4   | 9.3    | 32.1   | 26.4   | 32.6   | 103.7  | 107.0  |
| 228.8  | 284.9  | 103.7  | 136.5  | 342.4  | 236.0  | 204.2  | 202.8  | 264.8  |
| 40.6   | 30.7   | 57.1   | 70.8   | 45.9   | 37.8   | 95.1   | 101.7  | 104.4  |
| 894.7  | 1538.4 | 289.2  | 383.6  | 1325.8 | 1229.4 | 1241.9 | 822.1  | 847.7  |
| 0.3    | 0.2    | 3.2    | 0.7    | 5.6    | 13.6   | 3.2    | 2.9    | 2.6    |
| 315.1  | 296.9  | 73.9   | 125.4  | 474.4  | 277.6  | 1574.4 | 922.5  | 1000.0 |
| 1.1    | 1.1    | 2.0    | 1.5    | 7.6    | 1.6    | 1.7    | 1.2    | 8.3    |
| 19.4   | 16.4   | 11.9   | 2.7    | 24.6   | 18.8   | 19.8   | 19.1   | 19.8   |
| 3.5    | 12.3   | 1.2    | 11.2   | 13.6   | 6.7    | 3.9    | 2.2    | 4.0    |
| 91.1   | 94.9   | 259.0  | 342.1  | 132.1  | 68.9   | 571.7  | 475.0  | 482.4  |
| 5.7    | 14.1   | 13.3   | 2.6    | 3.0    | 11.9   | 4.6    | 6.1    | 6.5    |
| 178.2  | 265.4  | 20.4   | 22.6   | 286.2  | 293.2  | 847.7  | 726.5  | 656.5  |
| 30.4   | 29.6   | 60.9   | 88.0   | 39.7   | 2.4    | 41.0   | 68.9   | 42.4   |
| 3.8    | 10.8   | 11.3   | 7.0    | 16.3   | 5.4    | 6.6    | 10.7   | 2.7    |
| 24.6   | 21.4   | 28.3   | 14.6   | 26.9   | 18.0   | 36.1   | 23.4   | 13.0   |
| 66.8   | 71.2   | 62.0   | 78.2   | 83.4   | 68.9   | 188.6  | 161.1  | 152.9  |
| 1.4    | 2.0    | 2.3    | 0.8    | 7.8    | 4.0    | 3.7    | 3.2    | 3.1    |
| 2.6    | 6.3    | 3.7    | 3.8    | 9.4    | 2.6    | 5.7    | 2.6    | 4.9    |
| 5.2    | 6.1    | 6.8    | 10.1   | 4.4    | 2.1    | 7.7    | 19.6   | 10.9   |
| 2.5    | 6.5    | 2.1    | 2.4    | 1.2    | 0.8    | 11.1   | 3.9    | 4.1    |
| 247.7  | 303.0  | 111.9  | 128.7  | 395.3  | 270.5  | 92.8   | 90.7   | 81.8   |
| 3984.9 | 4625.7 | 1107.0 | 1462.9 | 5436.1 | 4126.4 | 5960.3 | 6293.0 | 6703.5 |
| 560.9  | 627.3  | 80.2   | 61.4   | 765.2  | 800.7  | 647.1  | 414.3  | 455.5  |
| 16.5   | 12.7   | 3.2    | 9.9    | 10.2   | 16.1   | 20.3   | 15.3   | 14.5   |
| 23.8   | 12.1   | 15.4   | 25.4   | 23.4   | 8.2    | 409.2  | 499.7  | 571.7  |
| 169.1  | 183.5  | 111.2  | 169.9  | 215.2  | 182.4  | 505.1  | 244.6  | 287.5  |
| 61.0   | 71.0   | 37.5   | 64.7   | 83.4   | 52.0   | 92.9   | 108.0  | 121.7  |
| 16.4   | 11.5   | 24.8   | 23.2   | 10.0   | 10.1   | 72.1   | 71.8   | 67.1   |
| 158.2  | 166.9  | 98.0   | 85.8   | 179.4  | 206.0  | 219.2  | 282.7  | 294.2  |
| 0.8    | 6.5    | 5.6    | 13.5   | 0.7    | 1.2    | 2.3    | 2.9    | 4.5    |
| 1.3    | 1.2    | 2.0    | 2.4    | 1.0    | 1.5    | 3.3    | 2.5    | 1.7    |

|       |        |       |       |        |        |        |       |       |
|-------|--------|-------|-------|--------|--------|--------|-------|-------|
| 5.0   | 11.9   | 0.6   | 1.1   | 10.0   | 8.1    | 9.6    | 4.1   | 3.5   |
| 30.4  | 34.6   | 17.9  | 19.6  | 30.5   | 21.0   | 43.8   | 45.1  | 42.6  |
| 6.6   | 4.5    | 6.2   | 10.7  | 5.8    | 2.1    | 53.1   | 58.9  | 61.1  |
| 61.5  | 77.2   | 6.1   | 2.2   | 101.0  | 105.1  | 124.7  | 142.1 | 163.0 |
| 2.1   | 2.6    | 8.2   | 13.9  | 1.7    | 2.1    | 34.4   | 12.0  | 9.2   |
| 24.4  | 27.5   | 19.6  | 14.3  | 52.2   | 33.8   | 78.0   | 53.9  | 59.6  |
| 4.6   | 21.6   | 7.8   | 2.0   | 14.8   | 11.7   | 43.9   | 25.3  | 24.5  |
| 0.6   | 1.1    | 6.4   | 9.6   | 2.4    | 5.8    | 18.4   | 11.9  | 3.5   |
| 178.1 | 219.4  | 140.9 | 168.4 | 228.8  | 159.0  | 254.5  | 201.5 | 208.9 |
| 15.9  | 1.6    | 5.8   | 0.4   | 1.0    | 11.2   | 9.8    | 12.6  | 4.5   |
| 8.5   | 9.7    | 13.5  | 1.2   | 1.7    | 2.0    | 3.1    | 2.5   | 4.8   |
| 1.5   | 4.4    | 3.8   | 1.8   | 1.1    | 1.4    | 3.9    | 8.1   | 13.3  |
| 4.3   | 14.6   | 9.8   | 2.2   | 5.3    | 2.3    | 10.0   | 7.0   | 7.3   |
| 121.1 | 160.9  | 13.3  | 21.3  | 159.6  | 159.3  | 161.7  | 202.0 | 180.4 |
| 18.7  | 12.2   | 17.7  | 20.1  | 5.7    | 3.2    | 19.5   | 28.8  | 17.9  |
| 1.5   | 1.6    | 10.5  | 0.8   | 1.2    | 9.9    | 7.3    | 8.8   | 4.7   |
| 24.2  | 36.6   | 14.6  | 1.8   | 20.6   | 34.1   | 40.4   | 38.8  | 41.7  |
| 88.7  | 89.8   | 67.9  | 83.1  | 112.0  | 91.2   | 143.7  | 60.2  | 89.3  |
| 3.0   | 7.7    | 1.4   | 0.4   | 7.2    | 0.5    | 1.5    | 6.5   | 1.1   |
| 6.3   | 3.6    | 0.2   | 5.0   | 1.1    | 0.5    | 2.3    | 2.8   | 0.9   |
| 7.5   | 14.4   | 6.3   | 8.1   | 2.0    | 2.6    | 15.0   | 27.6  | 17.5  |
| 1.6   | 0.7    | 1.2   | 1.8   | 1.5    | 8.3    | 12.7   | 13.4  | 9.4   |
| 120.2 | 162.3  | 1.9   | 10.7  | 201.5  | 158.6  | 141.8  | 157.4 | 200.0 |
| 1.0   | 1.7    | 0.7   | 0.7   | 5.5    | 0.4    | 2.0    | 0.8   | 0.6   |
| 4.9   | 0.7    | 0.7   | 0.7   | 10.3   | 2.3    | 7.2    | 1.8   | 9.7   |
| 420.0 | 465.6  | 61.2  | 99.1  | 604.5  | 376.9  | 258.6  | 207.2 | 198.5 |
| 105.1 | 165.1  | 144.9 | 166.8 | 146.9  | 291.1  | 102.9  | 124.0 | 134.9 |
| 835.8 | 1162.6 | 355.9 | 411.2 | 1252.0 | 1989.1 | 1096.8 | 398.4 | 480.5 |
| 7.5   | 11.4   | 4.4   | 2.1   | 2.1    | 11.7   | 19.2   | 8.4   | 12.5  |
| 0.9   | 17.1   | 0.5   | 0.9   | 12.8   | 14.6   | 6.4    | 6.1   | 11.1  |
| 2.0   | 6.9    | 14.9  | 17.3  | 2.1    | 5.8    | 3.3    | 2.2   | 12.1  |
| 47.6  | 56.3   | 39.6  | 37.0  | 74.5   | 69.9   | 35.5   | 19.9  | 37.9  |
| 22.4  | 44.1   | 0.5   | 0.8   | 13.1   | 38.0   | 2.5    | 4.2   | 6.3   |
| 87.6  | 96.0   | 31.1  | 49.8  | 113.9  | 83.8   | 100.4  | 106.3 | 129.9 |
| 393.4 | 373.9  | 60.5  | 105.6 | 426.5  | 416.1  | 258.4  | 145.2 | 156.8 |
| 1.7   | 1.4    | 2.1   | 1.0   | 1.8    | 1.6    | 3.0    | 2.0   | 2.3   |
| 165.5 | 342.2  | 322.5 | 349.3 | 226.5  | 318.8  | 833.4  | 707.5 | 886.7 |
| 5.3   | 5.9    | 0.9   | 1.3   | 2.2    | 1.6    | 1.2    | 3.9   | 2.1   |
| 9.6   | 1.5    | 6.0   | 17.5  | 8.1    | 1.2    | 38.4   | 45.5  | 38.7  |
| 2.7   | 5.6    | 1.5   | 4.7   | 2.2    | 0.9    | 2.7    | 9.1   | 15.5  |
| 10.8  | 20.6   | 2.2   | 1.4   | 34.5   | 20.5   | 100.3  | 118.1 | 153.1 |
| 3.0   | 10.6   | 3.3   | 2.9   | 4.7    | 0.5    | 4.5    | 3.3   | 2.3   |
| 2.1   | 7.0    | 8.9   | 1.9   | 9.8    | 1.6    | 9.2    | 6.4   | 7.7   |
| 2.4   | 1.3    | 1.5   | 1.2   | 0.7    | 1.9    | 3.1    | 2.2   | 1.6   |
| 2.6   | 0.9    | 11.6  | 1.4   | 0.4    | 2.0    | 5.3    | 6.1   | 1.6   |
| 0.5   | 4.8    | 7.5   | 2.5   | 4.1    | 5.3    | 68.6   | 174.5 | 148.5 |
| 7.8   | 16.1   | 7.6   | 1.5   | 19.2   | 4.6    | 16.5   | 10.5  | 13.0  |
| 0.7   | 0.4    | 1.2   | 0.8   | 1.2    | 4.4    | 1.7    | 0.7   | 0.7   |
| 88.4  | 122.1  | 34.2  | 48.1  | 127.8  | 118.5  | 100.3  | 100.6 | 106.2 |
| 0.4   | 1.4    | 1.3   | 0.2   | 1.1    | 0.5    | 0.5    | 4.4   | 0.6   |
| 19.2  | 29.1   | 3.1   | 4.3   | 12.7   | 19.3   | 7.6    | 12.1  | 3.7   |
| 17.3  | 10.4   | 17.7  | 6.3   | 6.6    | 12.7   | 11.7   | 8.4   | 4.7   |
| 71.2  | 113.1  | 51.2  | 76.5  | 68.6   | 79.8   | 162.5  | 188.2 | 216.5 |

|       |       |       |       |       |       |        |        |        |
|-------|-------|-------|-------|-------|-------|--------|--------|--------|
| 6.4   | 13.5  | 9.3   | 10.5  | 3.0   | 2.3   | 9.5    | 24.3   | 14.8   |
| 4.1   | 7.2   | 10.8  | 11.3  | 4.1   | 10.9  | 25.4   | 54.0   | 62.9   |
| 0.8   | 0.7   | 3.7   | 0.4   | 0.6   | 7.0   | 9.0    | 8.3    | 6.7    |
| 5.0   | 6.2   | 12.8  | 12.1  | 1.5   | 6.2   | 17.3   | 8.0    | 9.3    |
| 0.6   | 5.2   | 0.9   | 9.1   | 7.3   | 1.8   | 7.0    | 1.6    | 1.3    |
| 32.8  | 61.4  | 19.7  | 39.3  | 60.3  | 44.3  | 99.0   | 86.8   | 99.9   |
| 22.5  | 40.2  | 7.4   | 13.0  | 42.7  | 24.9  | 81.0   | 63.8   | 75.2   |
| 14.7  | 15.3  | 3.0   | 3.5   | 15.5  | 6.3   | 92.4   | 63.0   | 41.0   |
| 3.1   | 2.0   | 12.2  | 12.0  | 5.9   | 10.5  | 6.3    | 12.8   | 13.2   |
| 15.6  | 16.2  | 8.0   | 10.5  | 6.4   | 11.9  | 9.1    | 19.9   | 8.4    |
| 2.1   | 2.0   | 10.5  | 12.4  | 4.7   | 1.6   | 3.1    | 1.6    | 1.7    |
| 681.5 | 637.6 | 164.1 | 257.3 | 982.0 | 668.5 | 1082.1 | 1059.1 | 1042.4 |
| 23.7  | 23.7  | 21.3  | 20.7  | 30.6  | 26.0  | 13.9   | 10.7   | 16.1   |
| 7.5   | 0.5   | 0.2   | 0.5   | 0.4   | 8.4   | 0.6    | 3.4    | 2.6    |
| 6.2   | 1.3   | 4.3   | 7.7   | 0.4   | 0.4   | 9.3    | 2.5    | 5.8    |
| 16.9  | 29.0  | 5.2   | 10.9  | 28.9  | 25.9  | 54.6   | 65.3   | 51.6   |
| 11.3  | 12.5  | 1.3   | 4.0   | 5.0   | 7.6   | 11.3   | 11.1   | 8.9    |
| 10.9  | 2.7   | 13.0  | 1.8   | 2.7   | 2.1   | 3.9    | 7.6    | 4.7    |
| 3.3   | 3.4   | 17.2  | 4.1   | 3.2   | 2.9   | 4.1    | 3.3    | 4.5    |
| 15.9  | 26.5  | 8.9   | 3.2   | 20.5  | 20.5  | 48.9   | 42.6   | 38.7   |
| 13.3  | 21.5  | 7.9   | 9.7   | 20.0  | 24.3  | 14.8   | 18.9   | 9.2    |
| 1.6   | 3.9   | 1.3   | 1.4   | 2.7   | 1.7   | 1.4    | 4.3    | 1.4    |
| 22.8  | 20.9  | 25.8  | 14.0  | 30.9  | 17.7  | 47.6   | 31.3   | 43.7   |
| 2.5   | 2.7   | 4.6   | 3.8   | 6.2   | 2.5   | 6.0    | 5.8    | 8.1    |
| 3.3   | 4.4   | 19.1  | 3.4   | 4.2   | 4.4   | 14.9   | 8.0    | 35.0   |
| 11.4  | 7.1   | 4.0   | 7.6   | 13.3  | 19.7  | 19.3   | 14.9   | 16.1   |
| 5.3   | 2.4   | 1.8   | 4.5   | 2.8   | 1.8   | 16.2   | 10.4   | 12.2   |
| 1.3   | 1.5   | 1.4   | 5.3   | 0.8   | 1.1   | 3.3    | 2.3    | 2.8    |
| 6.6   | 10.4  | 5.6   | 1.0   | 12.8  | 12.8  | 7.2    | 6.8    | 12.2   |
| 71.8  | 97.3  | 1.6   | 1.4   | 198.9 | 101.9 | 147.5  | 165.3  | 180.3  |
| 13.9  | 2.9   | 17.0  | 2.8   | 1.0   | 14.3  | 12.4   | 31.8   | 19.7   |
| 13.7  | 3.6   | 13.9  | 7.6   | 8.0   | 19.9  | 18.0   | 14.4   | 11.7   |
| 6.8   | 8.1   | 3.1   | 2.8   | 15.9  | 11.7  | 7.7    | 14.4   | 11.0   |
| 8.4   | 11.7  | 9.5   | 8.6   | 22.9  | 10.4  | 20.0   | 6.1    | 6.0    |
| 0.7   | 0.6   | 4.6   | 0.8   | 1.7   | 0.5   | 2.7    | 0.8    | 1.1    |
| 0.9   | 1.1   | 0.9   | 1.0   | 1.0   | 7.4   | 6.3    | 1.0    | 1.8    |
| 3.7   | 19.3  | 6.5   | 9.4   | 10.9  | 14.9  | 32.6   | 48.3   | 42.3   |
| 2.8   | 22.4  | 20.6  | 11.7  | 16.2  | 15.8  | 20.3   | 17.4   | 4.7    |
| 16.7  | 6.6   | 20.8  | 14.2  | 14.7  | 16.2  | 40.8   | 36.4   | 35.5   |
| 7.6   | 10.7  | 10.4  | 19.4  | 3.9   | 1.2   | 11.8   | 5.9    | 11.2   |
| 1.2   | 5.1   | 16.4  | 14.4  | 4.4   | 0.5   | 14.7   | 6.4    | 4.1    |
| 2.5   | 15.8  | 8.8   | 2.2   | 21.5  | 4.9   | 15.8   | 10.3   | 12.0   |
| 17.4  | 12.5  | 1.7   | 0.9   | 0.9   | 14.6  | 16.7   | 7.0    | 14.2   |
| 0.8   | 9.4   | 31.5  | 24.8  | 12.8  | 7.0   | 28.7   | 42.9   | 41.2   |
| 14.5  | 21.0  | 4.7   | 8.6   | 16.6  | 18.7  | 12.6   | 17.9   | 13.5   |
| 1.3   | 8.6   | 1.7   | 1.2   | 1.0   | 2.4   | 1.7    | 1.0    | 0.6    |
| 1.4   | 1.5   | 1.6   | 4.3   | 4.7   | 1.5   | 15.0   | 11.3   | 9.6    |
| 13.2  | 1.5   | 7.4   | 12.9  | 3.9   | 12.2  | 28.5   | 23.1   | 42.0   |
| 11.0  | 10.1  | 6.9   | 7.0   | 15.2  | 6.8   | 9.9    | 12.2   | 15.6   |
| 16.7  | 29.5  | 21.0  | 10.5  | 20.4  | 28.9  | 49.7   | 48.6   | 58.6   |
| 12.5  | 11.7  | 1.6   | 1.9   | 15.5  | 7.6   | 16.6   | 2.8    | 2.5    |
| 4.7   | 2.9   | 5.4   | 6.5   | 7.4   | 2.6   | 8.2    | 10.6   | 5.7    |
| 14.8  | 10.5  | 4.6   | 3.9   | 10.0  | 4.3   | 12.7   | 14.9   | 8.3    |

|       |       |        |        |        |       |        |        |        |
|-------|-------|--------|--------|--------|-------|--------|--------|--------|
| 8.2   | 3.6   | 2.0    | 5.5    | 11.0   | 7.1   | 1.7    | 1.6    | 2.4    |
| 1.8   | 2.8   | 0.9    | 0.8    | 2.8    | 2.3   | 4.1    | 5.6    | 5.3    |
| 1.6   | 7.3   | 8.6    | 5.9    | 3.9    | 1.3   | 4.8    | 2.3    | 4.2    |
| 1.1   | 3.3   | 20.0   | 23.0   | 22.0   | 0.9   | 27.5   | 18.9   | 23.6   |
| 97.3  | 146.1 | 20.0   | 33.0   | 124.2  | 122.0 | 150.3  | 165.6  | 153.9  |
| 1.8   | 0.7   | 1.1    | 1.6    | 1.5    | 1.1   | 1.2    | 0.9    | 1.1    |
| 4.9   | 5.3   | 11.0   | 10.0   | 1.7    | 20.0  | 3.4    | 7.0    | 11.9   |
| 17.5  | 7.3   | 13.2   | 8.1    | 0.9    | 11.1  | 21.1   | 12.0   | 11.2   |
| 6.9   | 1.5   | 1.6    | 5.2    | 1.6    | 1.7   | 3.8    | 3.3    | 13.1   |
| 0.9   | 0.9   | 1.4    | 1.5    | 1.6    | 1.6   | 2.2    | 0.8    | 0.8    |
| 8.3   | 3.3   | 14.4   | 8.0    | 2.4    | 8.2   | 1.3    | 1.3    | 5.5    |
| 0.2   | 1.1   | 5.3    | 1.5    | 8.4    | 0.5   | 2.6    | 0.3    | 4.3    |
| 171.6 | 270.4 | 20.0   | 11.3   | 191.2  | 242.6 | 223.8  | 220.0  | 244.2  |
| 2.9   | 13.7  | 13.5   | 0.6    | 1.2    | 11.1  | 6.6    | 13.4   | 4.7    |
| 808.9 | 878.4 | 1150.2 | 1547.1 | 1168.3 | 865.2 | 3437.1 | 3081.1 | 3396.5 |
| 95.6  | 182.2 | 30.7   | 36.4   | 167.5  | 128.1 | 699.5  | 567.6  | 611.7  |
| 12.0  | 25.0  | 23.6   | 17.2   | 13.3   | 14.4  | 40.8   | 24.6   | 27.0   |
| 18.3  | 19.6  | 1.8    | 10.9   | 7.8    | 16.9  | 15.9   | 7.4    | 13.0   |
| 4.1   | 3.4   | 1.1    | 1.4    | 1.0    | 1.2   | 8.8    | 1.7    | 4.7    |
| 4.7   | 1.9   | 11.3   | 4.1    | 1.7    | 3.3   | 4.6    | 2.6    | 3.5    |
| 7.0   | 13.6  | 6.3    | 2.6    | 12.3   | 2.7   | 3.2    | 7.4    | 7.9    |
| 15.8  | 22.1  | 65.4   | 102.8  | 30.5   | 27.5  | 115.7  | 102.7  | 132.3  |
| 3.5   | 6.8   | 1.0    | 1.9    | 1.9    | 1.6   | 5.1    | 11.7   | 11.2   |
| 3.9   | 1.7   | 1.9    | 4.4    | 2.5    | 4.8   | 3.3    | 2.1    | 1.5    |
| 12.5  | 11.5  | 15.8   | 28.1   | 17.9   | 14.0  | 14.2   | 7.7    | 33.1   |
| 7.4   | 0.6   | 15.7   | 7.2    | 9.4    | 8.4   | 1.2    | 4.9    | 6.1    |
| 12.2  | 12.8  | 4.4    | 5.8    | 6.6    | 7.7   | 44.0   | 53.0   | 19.8   |
| 11.2  | 10.2  | 11.5   | 5.8    | 7.0    | 1.7   | 14.5   | 4.7    | 10.0   |
| 11.2  | 23.1  | 37.2   | 33.5   | 20.6   | 2.0   | 37.9   | 14.4   | 24.5   |
| 0.4   | 5.9   | 8.3    | 3.7    | 4.6    | 6.2   | 3.9    | 3.9    | 7.3    |
| 306.9 | 414.3 | 50.9   | 60.5   | 499.6  | 378.4 | 540.4  | 242.3  | 267.6  |
| 5.6   | 17.0  | 1.2    | 1.9    | 2.5    | 1.7   | 7.6    | 10.1   | 1.4    |
| 7.2   | 7.1   | 5.8    | 10.7   | 9.6    | 7.6   | 7.6    | 3.9    | 9.2    |
| 8.9   | 7.6   | 17.7   | 2.8    | 26.4   | 5.8   | 20.1   | 10.6   | 12.6   |
| 1.7   | 1.5   | 1.5    | 3.8    | 8.9    | 2.6   | 6.8    | 4.5    | 3.9    |
| 28.9  | 25.6  | 16.8   | 1.9    | 6.9    | 16.3  | 6.1    | 4.1    | 6.0    |
| 276.1 | 266.6 | 434.9  | 678.5  | 365.7  | 216.2 | 1485.9 | 1694.7 | 1836.9 |
| 0.8   | 1.8   | 0.8    | 0.8    | 1.5    | 1.3   | 5.8    | 4.0    | 1.6    |
| 8.4   | 6.7   | 6.0    | 6.8    | 10.6   | 4.9   | 14.1   | 11.7   | 14.1   |
| 8.7   | 4.5   | 4.8    | 7.0    | 1.8    | 0.4   | 18.3   | 13.1   | 8.2    |
| 10.5  | 12.3  | 21.6   | 13.7   | 13.8   | 4.7   | 18.1   | 12.3   | 11.3   |
| 3.6   | 7.3   | 2.3    | 2.7    | 12.5   | 7.4   | 14.3   | 7.2    | 12.6   |
| 17.4  | 10.0  | 7.3    | 5.8    | 17.0   | 26.1  | 17.2   | 19.6   | 13.3   |
| 2.3   | 2.1   | 2.1    | 2.7    | 4.1    | 4.6   | 6.0    | 4.5    | 4.7    |
| 2.1   | 2.2   | 2.4    | 2.9    | 1.9    | 2.9   | 4.0    | 2.8    | 1.9    |
| 2.5   | 9.1   | 1.7    | 5.1    | 7.7    | 3.1   | 2.6    | 2.8    | 3.0    |
| 4.9   | 4.1   | 9.2    | 9.8    | 6.0    | 9.6   | 11.0   | 8.9    | 6.6    |
| 2.9   | 4.5   | 6.8    | 5.9    | 14.4   | 9.6   | 18.2   | 19.9   | 15.8   |
| 7.9   | 0.9   | 0.7    | 3.3    | 2.9    | 6.3   | 4.1    | 8.1    | 1.3    |
| 0.9   | 1.4   | 3.5    | 3.2    | 0.9    | 2.0   | 1.1    | 1.5    | 0.6    |
| 147.9 | 188.4 | 86.0   | 108.2  | 225.1  | 220.5 | 195.0  | 217.4  | 231.2  |
| 2.9   | 2.9   | 1.4    | 5.0    | 1.2    | 3.4   | 6.2    | 2.7    | 1.2    |
| 2.1   | 4.8   | 9.4    | 14.0   | 5.4    | 9.0   | 25.4   | 16.8   | 16.2   |

|       |        |        |        |        |        |        |        |        |
|-------|--------|--------|--------|--------|--------|--------|--------|--------|
| 3.3   | 4.0    | 9.8    | 1.5    | 18.5   | 19.9   | 10.9   | 3.8    | 14.6   |
| 0.8   | 1.8    | 9.4    | 8.3    | 1.1    | 1.6    | 2.1    | 1.1    | 4.0    |
| 466.5 | 709.3  | 58.9   | 70.5   | 796.0  | 821.7  | 643.4  | 445.2  | 458.4  |
| 700.1 | 1092.5 | 215.8  | 216.7  | 823.7  | 941.6  | 772.2  | 542.2  | 580.3  |
| 5.2   | 1.8    | 0.8    | 9.5    | 18.1   | 1.6    | 2.8    | 2.3    | 4.2    |
| 8.4   | 13.0   | 8.4    | 13.6   | 7.8    | 5.4    | 11.3   | 10.3   | 9.9    |
| 7.1   | 1.3    | 5.0    | 5.2    | 8.6    | 10.5   | 3.1    | 9.8    | 10.2   |
| 1.4   | 0.9    | 1.3    | 1.0    | 1.6    | 0.9    | 9.3    | 3.2    | 1.7    |
| 1.5   | 0.6    | 0.5    | 8.2    | 2.3    | 3.6    | 12.3   | 7.5    | 10.5   |
| 159.6 | 181.6  | 16.9   | 20.0   | 219.4  | 167.4  | 411.6  | 384.7  | 471.1  |
| 11.0  | 10.4   | 4.5    | 0.6    | 11.1   | 11.8   | 20.7   | 13.0   | 26.8   |
| 7.1   | 0.9    | 1.3    | 1.4    | 5.8    | 1.7    | 1.2    | 1.2    | 1.6    |
| 5.9   | 6.5    | 19.8   | 25.2   | 3.6    | 13.6   | 24.4   | 11.1   | 14.4   |
| 31.3  | 40.0   | 17.0   | 8.8    | 51.3   | 33.2   | 51.5   | 184.6  | 175.3  |
| 17.6  | 23.5   | 4.4    | 6.6    | 11.4   | 29.0   | 20.7   | 22.2   | 33.8   |
| 1.1   | 12.8   | 10.5   | 6.7    | 0.7    | 6.9    | 8.5    | 5.1    | 9.6    |
| 8.1   | 2.6    | 2.9    | 1.1    | 1.9    | 9.5    | 3.0    | 8.0    | 7.7    |
| 2.8   | 1.2    | 1.0    | 3.9    | 2.2    | 2.8    | 11.2   | 15.0   | 13.1   |
| 7.0   | 0.8    | 29.3   | 40.3   | 0.7    | 1.5    | 1.0    | 3.2    | 1.1    |
| 73.1  | 48.8   | 21.8   | 20.6   | 76.0   | 42.8   | 688.8  | 558.1  | 610.9  |
| 2.0   | 2.6    | 4.6    | 5.4    | 1.3    | 1.5    | 1.3    | 1.9    | 1.8    |
| 993.3 | 1092.1 | 1101.7 | 1728.1 | 1336.9 | 1007.4 | 3276.6 | 2807.7 | 3309.7 |
| 41.2  | 51.4   | 21.5   | 41.5   | 73.2   | 46.7   | 195.0  | 88.3   | 95.6   |
| 409.9 | 540.5  | 163.5  | 223.1  | 540.6  | 454.9  | 998.4  | 792.5  | 786.6  |
| 1.2   | 1.4    | 2.9    | 12.8   | 1.7    | 7.2    | 5.4    | 5.8    | 2.8    |
| 2.0   | 2.3    | 2.1    | 2.8    | 2.6    | 1.5    | 6.2    | 5.4    | 3.0    |
| 737.8 | 1065.8 | 545.6  | 794.0  | 1021.2 | 888.6  | 1156.9 | 688.4  | 773.1  |
| 6.0   | 10.0   | 7.9    | 9.4    | 8.1    | 14.5   | 8.3    | 11.1   | 6.2    |
| 42.3  | 55.3   | 7.2    | 16.5   | 86.2   | 80.0   | 39.3   | 52.1   | 42.3   |
| 50.6  | 42.0   | 99.0   | 121.9  | 62.9   | 36.0   | 130.1  | 133.0  | 141.4  |
| 7.8   | 3.7    | 4.6    | 0.5    | 9.0    | 0.9    | 1.9    | 1.9    | 3.1    |
| 18.6  | 31.1   | 2.4    | 0.9    | 6.7    | 4.5    | 19.2   | 2.8    | 17.3   |
| 301.5 | 559.3  | 164.6  | 247.5  | 448.2  | 367.2  | 2435.8 | 2101.0 | 2217.9 |
| 3.2   | 1.0    | 1.5    | 1.9    | 4.3    | 2.6    | 2.3    | 1.5    | 1.0    |
| 1.6   | 2.0    | 6.6    | 10.8   | 3.1    | 9.0    | 1.0    | 1.8    | 2.7    |
| 77.6  | 84.4   | 28.8   | 25.2   | 114.9  | 74.9   | 15.2   | 6.5    | 6.2    |
| 0.9   | 9.5    | 12.0   | 11.8   | 2.9    | 9.2    | 64.8   | 205.3  | 266.6  |
| 1.7   | 6.2    | 4.8    | 1.4    | 7.1    | 12.2   | 15.8   | 15.8   | 9.7    |
| 19.6  | 39.6   | 8.9    | 7.0    | 29.2   | 20.0   | 41.0   | 59.1   | 64.4   |
| 1.7   | 2.7    | 2.6    | 10.8   | 2.0    | 16.7   | 5.8    | 5.8    | 11.0   |
| 27.7  | 41.1   | 0.3    | 1.7    | 33.4   | 26.0   | 56.7   | 73.7   | 62.3   |
| 5.0   | 1.0    | 1.3    | 1.4    | 5.5    | 3.9    | 1.6    | 8.3    | 1.3    |
| 2.2   | 5.3    | 11.7   | 4.1    | 9.3    | 8.4    | 13.7   | 19.5   | 1.6    |
| 0.6   | 3.0    | 1.5    | 0.8    | 9.7    | 1.7    | 4.0    | 3.4    | 6.0    |
| 23.1  | 18.8   | 18.5   | 11.2   | 10.7   | 19.0   | 29.6   | 39.5   | 39.5   |
| 2.1   | 1.8    | 3.3    | 2.4    | 2.3    | 1.8    | 10.5   | 7.1    | 3.1    |
| 0.6   | 9.7    | 6.8    | 12.6   | 2.2    | 1.7    | 14.3   | 9.3    | 3.4    |
| 9.8   | 1.1    | 2.0    | 1.4    | 1.2    | 0.7    | 3.7    | 4.1    | 2.1    |
| 180.9 | 141.5  | 277.9  | 386.8  | 289.0  | 155.0  | 2852.9 | 2886.8 | 3093.7 |
| 5.0   | 4.8    | 1.1    | 1.3    | 6.4    | 4.9    | 1.4    | 6.1    | 1.9    |
| 2.1   | 0.9    | 5.6    | 1.4    | 0.8    | 1.6    | 1.8    | 2.2    | 0.9    |
| 8.6   | 0.5    | 1.4    | 1.1    | 4.0    | 3.5    | 6.9    | 6.3    | 3.3    |
| 4.2   | 0.7    | 1.5    | 0.8    | 7.7    | 3.8    | 1.3    | 3.5    | 0.8    |



|        |        |       |       |        |        |        |        |        |
|--------|--------|-------|-------|--------|--------|--------|--------|--------|
| 4.8    | 0.7    | 2.3   | 0.6   | 2.9    | 0.6    | 1.8    | 1.5    | 3.6    |
| 1.0    | 1.1    | 0.8   | 1.1   | 1.7    | 1.8    | 2.3    | 3.2    | 2.8    |
| 0.2    | 2.1    | 5.3   | 0.6   | 1.1    | 4.5    | 1.9    | 0.4    | 3.5    |
| 16.3   | 20.4   | 4.4   | 6.4   | 8.8    | 19.4   | 13.2   | 7.3    | 12.1   |
| 6.5    | 4.3    | 0.5   | 10.0  | 9.0    | 5.4    | 3.8    | 6.0    | 8.7    |
| 4.3    | 1.0    | 1.0   | 0.8   | 4.2    | 2.2    | 1.6    | 3.9    | 0.9    |
| 26.9   | 39.3   | 6.1   | 7.8   | 15.8   | 6.1    | 39.4   | 43.9   | 34.0   |
| 7.1    | 0.9    | 2.9   | 4.6   | 3.3    | 1.1    | 2.2    | 4.4    | 2.0    |
| 7.0    | 10.0   | 4.1   | 6.0   | 10.4   | 8.5    | 16.4   | 9.5    | 11.7   |
| 6.9    | 5.6    | 1.8   | 1.1   | 2.4    | 2.3    | 1.1    | 0.7    | 4.1    |
| 80.1   | 104.2  | 103.6 | 145.9 | 144.2  | 72.8   | 210.5  | 181.7  | 189.5  |
| 2.6    | 2.2    | 1.1   | 2.1   | 7.5    | 1.7    | 9.1    | 17.0   | 5.0    |
| 1.2    | 6.8    | 10.7  | 2.0   | 22.3   | 13.3   | 17.6   | 10.6   | 15.5   |
| 2.0    | 1.0    | 1.9   | 0.9   | 0.7    | 2.2    | 1.8    | 1.6    | 1.4    |
| 0.9    | 1.3    | 1.1   | 0.7   | 2.0    | 1.2    | 2.1    | 1.0    | 1.3    |
| 0.8    | 1.8    | 1.8   | 0.5   | 0.9    | 2.8    | 3.5    | 1.6    | 1.6    |
| 24.9   | 29.9   | 1.5   | 1.2   | 30.4   | 31.2   | 716.2  | 566.5  | 667.8  |
| 10.0   | 1.9    | 2.2   | 11.0  | 1.3    | 4.5    | 5.6    | 3.3    | 5.0    |
| 23.2   | 12.6   | 13.9  | 9.4   | 23.6   | 28.2   | 18.0   | 19.0   | 20.4   |
| 51.3   | 59.1   | 26.3  | 47.5  | 90.9   | 55.6   | 71.8   | 55.2   | 62.0   |
| 21.0   | 34.1   | 11.6  | 22.1  | 45.2   | 30.5   | 41.5   | 21.0   | 31.6   |
| 5.2    | 16.5   | 4.3   | 2.0   | 6.5    | 0.8    | 12.2   | 12.5   | 14.1   |
| 6.7    | 7.3    | 6.1   | 4.7   | 9.4    | 1.8    | 8.2    | 8.4    | 7.5    |
| 8.3    | 6.9    | 7.5   | 4.8   | 8.6    | 4.3    | 7.9    | 6.0    | 9.0    |
| 10.5   | 1.5    | 2.4   | 1.4   | 13.0   | 0.7    | 1.9    | 4.8    | 4.9    |
| 47.6   | 59.4   | 0.4   | 4.3   | 138.7  | 75.1   | 378.7  | 256.8  | 260.1  |
| 46.9   | 60.8   | 84.6  | 132.3 | 56.1   | 51.8   | 108.1  | 91.2   | 102.3  |
| 768.0  | 1150.6 | 29.4  | 46.6  | 1906.6 | 1213.7 | 569.3  | 622.7  | 666.1  |
| 137.4  | 131.1  | 68.2  | 50.8  | 119.4  | 117.2  | 177.4  | 148.6  | 163.6  |
| 12.2   | 12.0   | 9.7   | 16.6  | 11.5   | 11.2   | 16.6   | 16.9   | 16.4   |
| 36.4   | 19.5   | 11.6  | 13.9  | 36.2   | 22.3   | 11.3   | 13.6   | 13.9   |
| 1337.9 | 1927.6 | 298.7 | 430.9 | 2014.6 | 1427.2 | 3302.2 | 2975.8 | 3102.5 |
| 0.4    | 0.4    | 0.5   | 3.3   | 5.8    | 0.4    | 9.0    | 6.4    | 1.7    |
| 7.7    | 1.5    | 2.6   | 2.1   | 9.5    | 0.7    | 5.0    | 9.8    | 1.8    |
| 2.3    | 1.6    | 3.5   | 2.7   | 1.5    | 3.4    | 3.4    | 1.9    | 2.5    |
| 8.1    | 16.6   | 2.6   | 2.0   | 33.4   | 25.0   | 1.7    | 3.3    | 1.9    |
| 0.6    | 1.6    | 8.8   | 0.7   | 1.7    | 14.1   | 6.3    | 5.6    | 9.6    |
| 1.0    | 0.6    | 0.6   | 0.3   | 0.8    | 0.7    | 0.9    | 2.1    | 2.1    |
| 0.9    | 10.8   | 5.5   | 13.9  | 0.7    | 9.1    | 17.5   | 17.4   | 24.7   |
| 21.9   | 16.3   | 17.0  | 22.0  | 25.8   | 22.4   | 5.1    | 5.7    | 3.7    |
| 5.1    | 7.8    | 4.7   | 1.4   | 8.9    | 1.5    | 782.8  | 670.0  | 671.6  |
| 52.0   | 55.0   | 83.3  | 79.8  | 67.1   | 56.3   | 30.8   | 35.4   | 34.2   |
| 3.7    | 3.2    | 3.3   | 3.4   | 2.4    | 2.2    | 3.0    | 2.5    | 1.9    |
| 18.8   | 22.6   | 5.4   | 5.0   | 24.5   | 30.1   | 10.2   | 13.3   | 12.3   |
| 2.2    | 9.4    | 2.6   | 5.7   | 5.5    | 6.2    | 8.3    | 10.5   | 7.7    |
| 2.1    | 1.0    | 6.5   | 4.3   | 5.5    | 1.0    | 9.7    | 6.6    | 9.2    |
| 10.8   | 4.3    | 13.6  | 14.4  | 14.8   | 10.8   | 17.0   | 13.0   | 14.4   |
| 21.3   | 24.4   | 25.6  | 20.6  | 24.5   | 21.2   | 31.9   | 14.1   | 15.9   |
| 2.4    | 2.9    | 2.0   | 2.7   | 1.8    | 5.3    | 1.6    | 1.5    | 1.0    |
| 31.1   | 29.4   | 2.9   | 9.4   | 63.2   | 27.7   | 26.8   | 35.5   | 24.8   |
| 272.4  | 321.9  | 42.1  | 43.4  | 471.4  | 308.0  | 491.9  | 391.6  | 458.5  |
| 25.3   | 33.1   | 3.7   | 0.9   | 23.8   | 15.7   | 9.5    | 2.3    | 7.1    |
| 2.6    | 7.6    | 4.0   | 4.3   | 15.2   | 4.6    | 24.7   | 18.5   | 17.7   |

|        |        |        |        |        |        |        |        |        |
|--------|--------|--------|--------|--------|--------|--------|--------|--------|
| 1.1    | 4.5    | 0.7    | 3.4    | 1.3    | 1.4    | 1.0    | 1.6    | 4.1    |
| 2.5    | 4.0    | 8.1    | 4.0    | 3.7    | 5.0    | 4.0    | 3.4    | 2.8    |
| 319.1  | 407.8  | 61.2   | 57.7   | 657.8  | 396.9  | 2832.1 | 2452.6 | 2507.2 |
| 4.4    | 1.8    | 3.3    | 5.8    | 10.2   | 2.4    | 1.7    | 8.6    | 15.3   |
| 11.0   | 7.5    | 8.3    | 4.0    | 10.0   | 5.7    | 8.6    | 4.8    | 4.4    |
| 12.2   | 7.4    | 7.6    | 12.7   | 7.0    | 2.3    | 9.3    | 11.0   | 12.6   |
| 6.8    | 1.3    | 5.1    | 1.3    | 0.9    | 13.3   | 4.8    | 4.3    | 1.8    |
| 38.4   | 36.4   | 32.9   | 32.7   | 62.1   | 31.7   | 120.3  | 118.9  | 105.4  |
| 18.5   | 13.5   | 4.0    | 3.7    | 36.7   | 7.9    | 23.1   | 10.9   | 14.9   |
| 1458.1 | 2062.9 | 1053.5 | 1277.8 | 2211.1 | 1775.6 | 3508.1 | 5336.2 | 5427.3 |
| 1.3    | 2.6    | 1.8    | 1.1    | 5.2    | 1.9    | 1.6    | 1.4    | 1.1    |
| 237.1  | 418.0  | 181.4  | 242.7  | 432.8  | 369.9  | 394.8  | 504.4  | 543.9  |
| 15.8   | 2.3    | 3.2    | 5.9    | 5.0    | 6.9    | 16.3   | 3.1    | 4.6    |
| 2.7    | 3.5    | 2.0    | 1.8    | 12.5   | 3.2    | 4.7    | 5.2    | 12.7   |
| 8.2    | 14.3   | 11.2   | 5.8    | 3.6    | 1.0    | 11.6   | 13.5   | 8.2    |
| 1.0    | 1.3    | 7.5    | 0.3    | 1.8    | 1.3    | 3.9    | 1.9    | 3.0    |
| 1.1    | 12.2   | 0.9    | 1.4    | 9.2    | 1.8    | 10.6   | 1.6    | 4.7    |
| 0.7    | 0.7    | 4.1    | 0.5    | 0.7    | 1.6    | 1.1    | 0.9    | 0.8    |
| 5.1    | 17.8   | 14.2   | 3.3    | 17.2   | 18.1   | 21.8   | 24.0   | 27.0   |
| 133.3  | 156.6  | 161.5  | 202.4  | 156.7  | 126.8  | 453.7  | 354.5  | 404.7  |
| 26.8   | 4.7    | 18.5   | 8.9    | 46.9   | 11.7   | 16.9   | 13.4   | 12.3   |
| 9.5    | 14.0   | 14.8   | 13.1   | 15.7   | 4.3    | 33.3   | 23.4   | 9.9    |
| 155.1  | 136.9  | 94.0   | 133.1  | 171.0  | 93.3   | 268.9  | 241.4  | 272.3  |
| 6.8    | 15.9   | 5.4    | 2.5    | 18.7   | 7.4    | 8.8    | 12.0   | 6.1    |
| 1.7    | 1.1    | 6.0    | 11.5   | 1.4    | 3.3    | 5.5    | 3.9    | 5.7    |
| 9.7    | 2.1    | 7.0    | 9.5    | 2.0    | 5.9    | 12.7   | 10.7   | 13.0   |
| 236.4  | 343.0  | 69.0   | 93.9   | 442.5  | 261.4  | 331.0  | 229.7  | 267.8  |
| 7.2    | 18.3   | 7.2    | 1.6    | 10.3   | 9.0    | 9.2    | 5.0    | 19.9   |
| 8.3    | 11.9   | 2.1    | 0.7    | 9.3    | 6.0    | 11.1   | 6.3    | 3.3    |
| 6.8    | 7.8    | 5.7    | 13.8   | 13.3   | 5.1    | 4.8    | 8.0    | 7.5    |
| 7.6    | 8.0    | 5.7    | 4.5    | 0.5    | 0.9    | 0.7    | 4.8    | 7.1    |
| 4.7    | 14.3   | 13.0   | 12.4   | 14.5   | 6.8    | 78.2   | 76.2   | 70.1   |
| 10.3   | 19.0   | 20.7   | 24.6   | 7.7    | 12.7   | 6.1    | 8.3    | 11.5   |
| 10.6   | 7.0    | 10.2   | 1.7    | 9.4    | 15.5   | 11.6   | 18.7   | 4.6    |
| 1.0    | 2.3    | 3.3    | 1.2    | 3.4    | 3.0    | 1.1    | 2.6    | 1.9    |
| 91.2   | 140.8  | 35.2   | 73.5   | 91.3   | 112.3  | 346.3  | 68.8   | 91.5   |
| 0.9    | 1.5    | 1.2    | 0.6    | 1.7    | 1.3    | 1.5    | 1.2    | 4.2    |
| 2.3    | 2.0    | 1.1    | 0.9    | 1.7    | 1.8    | 1.9    | 1.7    | 2.0    |
| 122.4  | 114.3  | 24.9   | 37.8   | 143.1  | 129.7  | 169.2  | 198.4  | 224.1  |
| 10.4   | 4.1    | 8.9    | 2.5    | 10.5   | 6.2    | 14.2   | 11.7   | 15.3   |
| 3.0    | 2.3    | 3.7    | 8.4    | 4.1    | 1.3    | 15.4   | 12.8   | 12.8   |
| 19.8   | 3.5    | 14.4   | 20.8   | 16.4   | 2.9    | 7.5    | 7.2    | 14.8   |
| 1.4    | 1.5    | 1.8    | 1.6    | 2.5    | 1.7    | 1.7    | 1.9    | 2.4    |
| 5.4    | 11.0   | 12.7   | 11.2   | 1.2    | 11.3   | 6.6    | 13.1   | 17.9   |
| 57.3   | 96.4   | 11.1   | 13.8   | 89.1   | 66.8   | 74.3   | 77.3   | 88.0   |
| 24.7   | 24.7   | 1.3    | 8.4    | 46.4   | 27.9   | 10.9   | 8.0    | 9.7    |
| 119.9  | 160.0  | 97.0   | 168.7  | 163.9  | 135.6  | 380.6  | 242.0  | 299.3  |
| 11.9   | 7.0    | 9.8    | 8.1    | 7.6    | 15.6   | 19.3   | 17.4   | 15.7   |
| 161.2  | 129.6  | 88.9   | 151.9  | 239.4  | 132.6  | 534.6  | 188.4  | 211.2  |
| 2.2    | 4.8    | 8.3    | 8.2    | 7.9    | 5.1    | 12.7   | 7.9    | 6.3    |
| 0.5    | 1.6    | 0.4    | 0.3    | 1.7    | 0.9    | 1.8    | 0.8    | 1.8    |
| 3.5    | 2.1    | 4.2    | 3.7    | 6.9    | 1.2    | 11.8   | 6.0    | 3.7    |
| 17.1   | 2.5    | 11.9   | 9.8    | 1.5    | 4.5    | 16.5   | 11.4   | 36.1   |

|       |       |       |       |       |       |        |       |       |
|-------|-------|-------|-------|-------|-------|--------|-------|-------|
| 7.5   | 32.3  | 26.6  | 34.7  | 27.4  | 10.9  | 40.9   | 39.9  | 45.4  |
| 235.5 | 285.1 | 43.2  | 79.2  | 370.6 | 240.2 | 715.3  | 730.8 | 753.1 |
| 25.4  | 14.0  | 1.3   | 12.9  | 24.7  | 27.0  | 10.5   | 5.9   | 6.2   |
| 3.7   | 2.3   | 9.5   | 2.4   | 2.3   | 8.0   | 6.8    | 11.0  | 9.8   |
| 287.3 | 373.8 | 39.8  | 52.7  | 548.7 | 394.4 | 113.4  | 80.5  | 68.7  |
| 2.2   | 1.0   | 1.7   | 10.0  | 2.4   | 1.2   | 1.4    | 2.2   | 1.8   |
| 9.4   | 6.3   | 8.3   | 1.9   | 15.7  | 1.7   | 6.8    | 9.9   | 2.6   |
| 47.7  | 81.5  | 136.9 | 194.9 | 70.1  | 45.4  | 192.4  | 148.1 | 172.4 |
| 46.3  | 27.5  | 6.5   | 4.9   | 35.0  | 52.4  | 8.0    | 4.4   | 3.1   |
| 8.2   | 0.8   | 1.4   | 1.7   | 0.9   | 0.9   | 1.4    | 0.5   | 0.5   |
| 6.9   | 4.8   | 11.2  | 7.0   | 3.9   | 1.3   | 6.7    | 7.8   | 6.7   |
| 19.0  | 14.8  | 16.3  | 5.7   | 15.9  | 9.0   | 11.9   | 19.1  | 11.1  |
| 7.6   | 3.8   | 8.9   | 5.2   | 1.1   | 2.2   | 10.0   | 7.6   | 7.5   |
| 2.0   | 12.1  | 1.6   | 4.6   | 5.6   | 1.0   | 11.3   | 2.2   | 3.3   |
| 7.7   | 18.9  | 43.0  | 66.4  | 14.5  | 2.7   | 54.0   | 61.5  | 78.5  |
| 12.7  | 7.7   | 1.4   | 3.6   | 7.4   | 4.4   | 2.2    | 8.7   | 7.1   |
| 21.0  | 1.7   | 4.8   | 1.6   | 9.9   | 5.2   | 3.2    | 1.9   | 5.9   |
| 15.3  | 9.6   | 2.3   | 7.0   | 16.4  | 13.8  | 7.7    | 20.2  | 10.4  |
| 1.8   | 1.7   | 2.0   | 1.4   | 2.6   | 1.5   | 11.7   | 2.9   | 6.8   |
| 1.7   | 3.8   | 1.0   | 3.1   | 1.6   | 9.8   | 8.1    | 1.3   | 3.7   |
| 14.5  | 24.5  | 19.1  | 11.2  | 25.4  | 22.2  | 25.9   | 19.0  | 15.8  |
| 9.2   | 7.4   | 7.9   | 1.9   | 13.5  | 8.5   | 7.7    | 8.3   | 5.2   |
| 13.7  | 2.9   | 14.1  | 6.9   | 8.1   | 2.7   | 24.0   | 18.5  | 21.9  |
| 1.2   | 2.0   | 0.7   | 1.1   | 6.8   | 14.7  | 1.9    | 4.0   | 5.4   |
| 2.5   | 6.7   | 8.4   | 15.1  | 9.6   | 6.4   | 12.2   | 16.9  | 18.4  |
| 7.4   | 7.2   | 6.7   | 5.0   | 9.4   | 12.0  | 4.1    | 2.2   | 6.0   |
| 94.5  | 94.9  | 16.9  | 20.9  | 146.0 | 80.8  | 168.6  | 153.4 | 166.7 |
| 0.9   | 0.9   | 1.1   | 5.5   | 10.3  | 7.0   | 8.8    | 7.5   | 12.0  |
| 1.4   | 1.1   | 0.8   | 1.0   | 2.8   | 0.9   | 3.3    | 6.6   | 3.1   |
| 5.3   | 5.5   | 4.1   | 6.2   | 5.4   | 4.8   | 324.9  | 91.1  | 104.7 |
| 3.8   | 12.1  | 4.4   | 9.3   | 2.2   | 0.8   | 21.0   | 31.0  | 22.6  |
| 0.8   | 1.2   | 0.5   | 0.6   | 2.2   | 1.3   | 1.7    | 1.3   | 1.2   |
| 4.7   | 2.3   | 0.6   | 0.5   | 1.3   | 2.0   | 1.5    | 1.0   | 1.4   |
| 52.5  | 85.9  | 29.2  | 32.2  | 73.4  | 85.7  | 43.6   | 122.2 | 154.8 |
| 15.7  | 19.1  | 23.6  | 22.3  | 9.3   | 25.0  | 18.3   | 16.5  | 14.1  |
| 5.0   | 3.1   | 20.2  | 30.5  | 10.5  | 1.1   | 2.3    | 3.6   | 9.4   |
| 23.6  | 19.4  | 17.1  | 16.8  | 15.4  | 18.2  | 8.0    | 14.6  | 17.2  |
| 8.7   | 2.5   | 3.4   | 1.0   | 3.6   | 2.9   | 3.0    | 4.1   | 11.3  |
| 22.3  | 63.0  | 39.5  | 68.5  | 38.4  | 31.3  | 267.5  | 295.3 | 298.4 |
| 3.1   | 1.7   | 4.2   | 2.4   | 1.3   | 2.0   | 2.0    | 2.5   | 3.1   |
| 5.6   | 2.7   | 0.3   | 6.3   | 23.0  | 17.4  | 80.4   | 45.3  | 61.2  |
| 1.3   | 1.7   | 0.5   | 1.2   | 7.4   | 0.6   | 41.0   | 39.8  | 33.9  |
| 1.5   | 1.4   | 1.4   | 1.2   | 1.3   | 1.3   | 1.8    | 1.6   | 2.0   |
| 6.1   | 2.3   | 1.1   | 1.5   | 2.1   | 14.8  | 7.1    | 4.7   | 1.5   |
| 1.1   | 3.4   | 7.6   | 30.0  | 16.5  | 29.3  | 107.9  | 120.7 | 128.4 |
| 16.6  | 7.7   | 1.8   | 1.7   | 2.2   | 6.9   | 3.4    | 8.1   | 9.4   |
| 5.4   | 4.7   | 8.2   | 6.9   | 5.1   | 0.2   | 16.0   | 37.7  | 34.1  |
| 54.5  | 79.8  | 19.8  | 18.6  | 139.7 | 86.8  | 1032.1 | 801.4 | 869.5 |
| 0.5   | 1.0   | 2.4   | 1.4   | 0.5   | 0.4   | 2.2    | 0.6   | 1.3   |
| 1.4   | 6.8   | 3.0   | 5.5   | 3.9   | 0.7   | 6.7    | 7.4   | 8.7   |
| 52.3  | 47.5  | 80.2  | 121.8 | 63.7  | 41.2  | 322.8  | 275.0 | 345.8 |
| 95.3  | 116.4 | 25.6  | 46.8  | 114.8 | 160.9 | 353.0  | 287.7 | 345.9 |
| 1.1   | 2.2   | 1.7   | 2.2   | 3.4   | 2.0   | 3.6    | 3.8   | 3.8   |

|        |        |        |        |        |        |        |        |        |
|--------|--------|--------|--------|--------|--------|--------|--------|--------|
| 23.0   | 33.2   | 3.5    | 3.1    | 47.9   | 30.3   | 51.9   | 74.8   | 84.6   |
| 8.3    | 1.3    | 8.5    | 8.0    | 7.7    | 5.5    | 31.1   | 16.7   | 19.1   |
| 1.4    | 0.9    | 3.1    | 1.4    | 1.4    | 1.1    | 2.4    | 3.3    | 3.0    |
| 0.9    | 1.5    | 0.2    | 0.8    | 5.7    | 3.9    | 5.2    | 1.4    | 1.6    |
| 9.7    | 2.8    | 10.6   | 11.2   | 8.8    | 1.7    | 16.3   | 10.7   | 6.0    |
| 139.9  | 181.7  | 7.1    | 2.8    | 232.9  | 167.5  | 552.1  | 281.1  | 270.9  |
| 51.6   | 111.3  | 30.0   | 33.5   | 79.7   | 117.0  | 169.6  | 116.6  | 118.4  |
| 8.7    | 5.5    | 2.4    | 10.7   | 25.7   | 23.0   | 2.0    | 6.9    | 1.9    |
| 3.4    | 1.0    | 7.0    | 0.3    | 8.7    | 0.9    | 3.5    | 3.7    | 2.5    |
| 2.5    | 2.0    | 7.0    | 2.1    | 2.4    | 12.6   | 9.6    | 5.8    | 6.9    |
| 1.4    | 4.1    | 7.7    | 7.7    | 3.0    | 6.1    | 20.0   | 15.5   | 14.2   |
| 1.0    | 0.9    | 1.6    | 1.3    | 1.5    | 8.7    | 2.3    | 1.7    | 3.3    |
| 4722.2 | 5473.4 | 1784.0 | 2143.4 | 5556.7 | 4686.4 | 7701.5 | 6652.5 | 6627.3 |
| 2.4    | 2.2    | 13.6   | 5.6    | 4.3    | 1.3    | 11.2   | 16.4   | 17.0   |
| 25.2   | 15.4   | 5.0    | 17.1   | 24.3   | 8.5    | 15.3   | 11.3   | 5.1    |
| 2.5    | 10.2   | 22.0   | 20.4   | 3.4    | 13.1   | 4.6    | 4.1    | 9.8    |
| 5.8    | 3.2    | 11.3   | 3.4    | 10.1   | 5.7    | 6.8    | 17.3   | 3.2    |
| 12.4   | 1.8    | 0.7    | 1.2    | 1.2    | 1.3    | 6.8    | 4.8    | 3.6    |
| 16.0   | 10.6   | 31.9   | 59.1   | 11.2   | 28.8   | 101.1  | 119.8  | 114.2  |
| 14.5   | 2.8    | 15.7   | 9.4    | 3.6    | 14.9   | 16.5   | 27.6   | 18.8   |
| 7.4    | 7.8    | 1.0    | 4.8    | 0.6    | 0.8    | 7.6    | 2.5    | 3.1    |
| 7.0    | 1.8    | 2.9    | 10.1   | 13.9   | 18.7   | 22.7   | 32.3   | 22.9   |
| 31.1   | 66.0   | 38.5   | 67.5   | 44.5   | 64.6   | 312.1  | 354.8  | 372.1  |
| 1.6    | 1.0    | 0.9    | 2.1    | 1.8    | 10.9   | 2.5    | 2.2    | 2.0    |
| 3.9    | 0.5    | 0.8    | 0.6    | 7.7    | 7.9    | 4.1    | 3.5    | 3.7    |
| 2.9    | 1.5    | 3.3    | 5.6    | 3.3    | 13.9   | 7.9    | 4.3    | 5.6    |
| 1.1    | 2.2    | 8.7    | 0.4    | 3.8    | 5.6    | 2.2    | 0.8    | 1.8    |
| 3.1    | 4.9    | 9.6    | 6.5    | 3.4    | 2.4    | 6.3    | 5.8    | 3.3    |
| 2.1    | 1.4    | 0.6    | 0.3    | 1.9    | 0.9    | 1.5    | 1.6    | 1.9    |
| 10.0   | 12.8   | 14.8   | 20.4   | 1.1    | 5.7    | 8.7    | 26.4   | 31.0   |
| 19.0   | 14.9   | 2.6    | 2.7    | 18.5   | 20.6   | 18.1   | 20.6   | 21.7   |
| 7.8    | 3.6    | 4.9    | 7.1    | 3.2    | 5.0    | 47.1   | 69.5   | 72.9   |
| 0.8    | 1.1    | 4.9    | 0.7    | 0.9    | 0.8    | 1.7    | 2.1    | 2.4    |
| 8.3    | 9.7    | 0.9    | 2.5    | 3.4    | 2.8    | 2.1    | 1.3    | 2.3    |
| 150.4  | 126.0  | 3.9    | 1.4    | 477.5  | 159.3  | 12.1   | 10.6   | 11.2   |
| 1089.1 | 2662.7 | 187.1  | 190.3  | 2102.1 | 1739.4 | 5599.8 | 4334.0 | 5177.7 |
| 39.9   | 53.5   | 34.5   | 63.6   | 41.6   | 47.1   | 168.0  | 112.1  | 121.1  |
| 3.6    | 3.2    | 1.3    | 0.8    | 1.2    | 8.1    | 1.9    | 7.6    | 8.2    |
| 1.5    | 1.9    | 5.5    | 0.6    | 8.0    | 1.4    | 2.4    | 1.6    | 0.5    |
| 14.2   | 9.9    | 8.6    | 2.5    | 3.6    | 15.2   | 9.7    | 7.8    | 2.5    |
| 11.7   | 3.2    | 4.7    | 2.2    | 15.7   | 5.3    | 18.8   | 4.7    | 10.7   |
| 6.1    | 41.3   | 22.4   | 45.7   | 25.9   | 19.7   | 207.0  | 324.8  | 338.4  |
| 3.7    | 1.0    | 0.9    | 3.2    | 1.0    | 1.6    | 12.3   | 21.8   | 21.6   |
| 1.7    | 2.0    | 6.6    | 0.8    | 10.8   | 2.0    | 2.8    | 3.5    | 4.0    |
| 1770.8 | 1909.1 | 431.7  | 437.6  | 1720.2 | 2582.4 | 5326.4 | 4080.3 | 4092.3 |
| 4.0    | 2.8    | 1.4    | 1.3    | 2.3    | 0.9    | 1.4    | 1.3    | 2.0    |
| 1.0    | 7.0    | 0.5    | 4.5    | 3.6    | 12.9   | 13.1   | 8.7    | 8.2    |
| 1.1    | 1.9    | 0.7    | 10.3   | 0.6    | 5.4    | 6.9    | 2.8    | 4.9    |
| 2.2    | 12.8   | 6.0    | 8.1    | 3.3    | 3.7    | 15.2   | 16.7   | 12.7   |
| 1.0    | 1.3    | 0.6    | 1.0    | 0.9    | 11.9   | 0.7    | 0.8    | 0.7    |
| 24.0   | 19.2   | 19.4   | 56.2   | 41.1   | 15.5   | 17.4   | 15.3   | 12.1   |
| 1.3    | 0.8    | 1.1    | 0.9    | 1.2    | 7.2    | 1.0    | 1.7    | 2.1    |
| 10.2   | 24.9   | 8.6    | 8.6    | 9.4    | 23.4   | 21.1   | 19.3   | 14.5   |

|        |        |       |       |        |        |        |        |        |
|--------|--------|-------|-------|--------|--------|--------|--------|--------|
| 2.5    | 2.5    | 16.4  | 1.1   | 3.5    | 19.3   | 16.7   | 11.2   | 11.3   |
| 2.9    | 2.2    | 1.0   | 1.3   | 1.5    | 2.7    | 1.4    | 1.3    | 1.8    |
| 9.0    | 7.4    | 1.9   | 1.3   | 7.3    | 3.1    | 6.8    | 9.9    | 2.2    |
| 18.4   | 25.0   | 0.7   | 4.2   | 35.6   | 26.7   | 3.0    | 1.7    | 3.7    |
| 22.1   | 13.6   | 0.9   | 1.0   | 23.2   | 13.3   | 13.3   | 7.7    | 7.0    |
| 1.0    | 1.0    | 1.8   | 1.4   | 8.3    | 1.7    | 4.2    | 1.8    | 1.4    |
| 4.3    | 4.7    | 5.2   | 2.6   | 18.3   | 5.0    | 2.0    | 2.0    | 8.5    |
| 7.2    | 2.2    | 6.7   | 5.9   | 14.8   | 10.1   | 3.5    | 3.0    | 1.5    |
| 1.1    | 0.7    | 2.0   | 0.2   | 0.3    | 4.7    | 0.3    | 0.6    | 5.0    |
| 4.6    | 8.8    | 0.8   | 0.6   | 11.6   | 5.7    | 0.7    | 2.4    | 1.3    |
| 8.5    | 17.2   | 14.5  | 16.4  | 4.4    | 6.5    | 17.1   | 20.6   | 8.5    |
| 6.4    | 15.2   | 8.0   | 2.5   | 20.1   | 10.0   | 14.8   | 5.1    | 8.5    |
| 6.1    | 1.7    | 1.3   | 1.0   | 2.1    | 2.6    | 9.1    | 2.0    | 4.8    |
| 2.3    | 1.3    | 1.7   | 4.3   | 2.9    | 4.6    | 3.7    | 5.5    | 4.3    |
| 1.6    | 12.8   | 2.2   | 0.8   | 3.8    | 2.2    | 18.0   | 11.3   | 1.6    |
| 27.0   | 13.0   | 8.9   | 13.0  | 5.3    | 23.2   | 15.6   | 12.4   | 16.5   |
| 1.6    | 1.3    | 0.6   | 8.6   | 1.9    | 6.2    | 1.6    | 0.8    | 1.2    |
| 0.3    | 0.4    | 1.6   | 0.7   | 5.8    | 0.3    | 9.9    | 10.0   | 10.4   |
| 4.8    | 16.1   | 0.8   | 0.4   | 1.0    | 7.3    | 20.0   | 18.3   | 26.1   |
| 9.2    | 6.7    | 2.8   | 2.5   | 10.0   | 2.8    | 24.7   | 19.3   | 36.7   |
| 28.1   | 15.3   | 14.2  | 13.9  | 18.8   | 21.7   | 20.9   | 18.6   | 16.6   |
| 76.6   | 133.2  | 126.7 | 320.8 | 79.4   | 75.8   | 960.1  | 1001.6 | 1082.2 |
| 13.2   | 23.1   | 4.4   | 22.7  | 24.8   | 13.3   | 149.4  | 110.2  | 131.9  |
| 5866.7 | 7289.5 | 381.5 | 551.3 | 6831.7 | 6629.3 | 1221.8 | 791.5  | 1119.1 |
| 6.1    | 0.6    | 0.6   | 0.5   | 4.1    | 0.9    | 2.4    | 2.9    | 0.7    |
| 8.7    | 40.9   | 16.3  | 39.6  | 10.8   | 30.6   | 85.1   | 111.9  | 121.1  |
| 1.6    | 7.9    | 1.0   | 3.4   | 1.3    | 1.8    | 3.6    | 2.8    | 5.9    |
| 5.3    | 3.7    | 16.5  | 4.1   | 20.7   | 18.6   | 11.3   | 24.1   | 14.6   |
| 4.1    | 1.1    | 1.6   | 5.1   | 0.7    | 0.7    | 2.8    | 3.0    | 3.4    |
| 9.2    | 25.6   | 23.3  | 13.3  | 20.0   | 21.5   | 26.9   | 20.3   | 23.7   |
| 12.6   | 6.7    | 14.9  | 5.3   | 8.5    | 7.0    | 31.0   | 21.5   | 27.3   |
| 0.7    | 0.5    | 0.5   | 0.5   | 0.5    | 0.5    | 0.6    | 0.6    | 0.5    |
| 1.2    | 1.0    | 1.3   | 0.8   | 4.7    | 3.0    | 2.7    | 2.9    | 2.8    |
| 18.0   | 18.7   | 23.9  | 17.5  | 25.4   | 12.7   | 71.5   | 82.3   | 60.9   |
| 15.9   | 8.4    | 4.1   | 8.6   | 3.3    | 14.1   | 6.7    | 7.5    | 12.2   |
| 4.9    | 4.5    | 10.0  | 10.7  | 4.2    | 2.2    | 13.1   | 13.9   | 13.1   |
| 0.9    | 4.2    | 11.9  | 7.0   | 1.7    | 2.3    | 10.4   | 2.2    | 9.0    |
| 37.8   | 44.1   | 47.3  | 66.0  | 32.5   | 29.8   | 79.7   | 61.3   | 61.5   |
| 10.0   | 11.6   | 9.1   | 7.6   | 18.3   | 4.4    | 5577.2 | 5474.7 | 5333.8 |
| 2.2    | 11.1   | 13.7  | 4.9   | 7.9    | 0.6    | 14.3   | 5.0    | 10.9   |
| 317.9  | 408.8  | 273.3 | 346.2 | 493.3  | 330.6  | 463.8  | 565.6  | 694.5  |
| 15.8   | 10.1   | 9.3   | 13.5  | 6.2    | 11.5   | 2.9    | 3.1    | 11.7   |
| 13.3   | 47.3   | 12.7  | 16.0  | 19.1   | 14.2   | 75.0   | 87.1   | 92.4   |
| 17.8   | 7.9    | 5.5   | 2.4   | 7.8    | 18.5   | 3.8    | 7.2    | 9.0    |
| 1.7    | 2.4    | 1.1   | 2.6   | 4.6    | 2.0    | 1.9    | 2.0    | 2.6    |
| 4.9    | 1.9    | 7.1   | 41.1  | 3.4    | 4.8    | 3.4    | 3.5    | 4.2    |
| 2.7    | 14.5   | 1.9   | 4.9   | 4.5    | 3.1    | 26.0   | 33.6   | 38.1   |
| 3.0    | 2.4    | 0.7   | 0.7   | 5.9    | 1.7    | 4.4    | 4.1    | 1.1    |
| 1.1    | 0.9    | 0.9   | 5.9   | 1.2    | 1.5    | 2.9    | 2.0    | 2.4    |
| 343.2  | 412.7  | 10.4  | 2.5   | 594.1  | 525.9  | 1.3    | 2.6    | 1.3    |
| 4.7    | 2.3    | 0.6   | 1.3   | 5.2    | 2.0    | 447.0  | 289.0  | 295.4  |
| 2.5    | 13.9   | 2.2   | 1.8   | 14.2   | 14.0   | 19.2   | 7.8    | 12.1   |
| 376.7  | 345.9  | 71.0  | 78.5  | 291.5  | 721.0  | 193.6  | 207.1  | 213.7  |

|        |        |        |        |        |        |         |         |         |
|--------|--------|--------|--------|--------|--------|---------|---------|---------|
| 206.0  | 261.9  | 229.5  | 495.3  | 367.4  | 169.1  | 474.7   | 741.2   | 865.5   |
| 2125.3 | 3050.7 | 476.8  | 687.6  | 3311.5 | 2799.3 | 8049.0  | 6883.7  | 7263.2  |
| 449.6  | 824.4  | 58.3   | 82.9   | 671.0  | 608.2  | 86.2    | 86.8    | 115.3   |
| 672.1  | 952.6  | 58.7   | 97.8   | 848.1  | 698.1  | 135.4   | 150.2   | 185.2   |
| 282.7  | 443.3  | 64.8   | 90.4   | 330.2  | 506.1  | 1531.7  | 1148.0  | 1391.4  |
| 2753.0 | 4356.7 | 352.5  | 458.8  | 3631.6 | 3959.5 | 4460.3  | 3403.5  | 3768.9  |
| 547.8  | 1005.3 | 144.1  | 133.8  | 941.9  | 1089.1 | 2334.6  | 1542.9  | 1852.1  |
| 919.2  | 1062.9 | 695.4  | 801.4  | 1262.9 | 1041.4 | 1416.4  | 1259.5  | 1391.5  |
| 908.8  | 1236.9 | 619.3  | 803.0  | 1366.6 | 1217.3 | 2968.8  | 2252.9  | 2382.5  |
| 657.3  | 880.3  | 150.2  | 226.6  | 901.1  | 318.4  | 531.6   | 331.0   | 365.6   |
| 1475.5 | 2112.4 | 227.4  | 362.4  | 2011.1 | 1807.9 | 766.8   | 484.7   | 552.3   |
| 2193.0 | 3229.2 | 178.2  | 270.2  | 2846.5 | 2587.0 | 1567.5  | 1234.1  | 1314.2  |
| 115.3  | 141.0  | 120.0  | 187.7  | 142.7  | 122.8  | 517.4   | 278.4   | 305.7   |
| 1087.7 | 1235.8 | 248.7  | 442.6  | 1211.9 | 1237.0 | 1335.5  | 746.7   | 851.1   |
| 192.4  | 181.4  | 78.8   | 96.3   | 242.7  | 182.0  | 700.9   | 870.3   | 927.8   |
| 3122.3 | 3833.6 | 1660.7 | 2542.1 | 4223.2 | 3147.5 | 6154.9  | 5633.6  | 5777.8  |
| 4632.5 | 5885.2 | 1668.6 | 2149.2 | 6118.0 | 5309.9 | 8088.0  | 7748.7  | 7794.6  |
| 150.4  | 183.0  | 176.9  | 224.9  | 281.1  | 214.6  | 1069.9  | 1220.1  | 1296.4  |
| 155.4  | 592.1  | 100.2  | 124.2  | 377.9  | 316.7  | 659.2   | 770.8   | 1030.3  |
| 314.3  | 462.8  | 256.7  | 434.2  | 425.7  | 365.3  | 1455.3  | 1796.0  | 1853.8  |
| 114.7  | 163.0  | 27.9   | 37.4   | 172.2  | 167.8  | 194.7   | 256.4   | 277.5   |
| 90.1   | 160.2  | 68.2   | 84.0   | 209.7  | 110.0  | 182.1   | 130.7   | 140.5   |
| 521.1  | 677.8  | 101.1  | 118.3  | 953.8  | 786.3  | 658.7   | 447.6   | 526.0   |
| 5844.7 | 7247.6 | 2522.0 | 3159.7 | 7097.3 | 7040.2 | 9505.3  | 8600.8  | 8610.1  |
| 1529.7 | 2127.3 | 298.3  | 323.6  | 2434.4 | 2008.7 | 3897.1  | 3328.8  | 3577.0  |
| 1154.7 | 1666.3 | 249.5  | 371.0  | 1601.6 | 1014.5 | 1208.4  | 856.9   | 1020.1  |
| 1407.9 | 1933.9 | 232.0  | 249.1  | 2018.2 | 1711.6 | 3981.3  | 2583.9  | 2762.2  |
| 1989.6 | 2745.9 | 360.3  | 473.0  | 2814.1 | 2651.3 | 4841.0  | 3267.6  | 3346.3  |
| 2522.7 | 3085.0 | 1676.3 | 2378.4 | 2944.0 | 2660.9 | 3525.8  | 3143.8  | 3370.0  |
| 2101.6 | 3081.7 | 1608.5 | 2088.0 | 2778.0 | 2226.3 | 1925.4  | 1657.8  | 1812.0  |
| 2085.2 | 2126.1 | 456.8  | 741.7  | 2824.1 | 2522.8 | 4031.0  | 2767.3  | 2641.0  |
| 649.1  | 798.2  | 805.3  | 1077.1 | 921.1  | 737.4  | 2553.2  | 1886.8  | 1959.3  |
| 351.4  | 471.9  | 471.7  | 560.4  | 574.5  | 355.0  | 1226.7  | 901.9   | 968.2   |
| 6898.4 | 7860.0 | 3140.3 | 4118.4 | 8364.3 | 8077.7 | 10552.9 | 10444.1 | 10291.3 |
| 3128.8 | 3459.9 | 689.8  | 754.8  | 4293.1 | 4074.6 | 4540.6  | 3722.5  | 4490.5  |
| 624.9  | 1060.9 | 436.3  | 550.3  | 1349.6 | 1270.1 | 4891.7  | 5197.9  | 5399.3  |
| 148.6  | 235.8  | 360.5  | 464.3  | 254.2  | 266.4  | 586.8   | 340.8   | 373.3   |
| 846.9  | 1244.0 | 1079.1 | 1408.9 | 1117.8 | 1097.2 | 1736.7  | 1116.6  | 1265.8  |
| 539.4  | 610.6  | 590.7  | 855.1  | 1211.9 | 647.7  | 6050.5  | 7960.7  | 7516.5  |
| 441.7  | 458.5  | 678.2  | 682.2  | 751.3  | 394.8  | 3975.7  | 6280.1  | 5610.0  |
| 1093.9 | 1456.1 | 534.6  | 818.1  | 1491.6 | 1513.8 | 3578.2  | 2830.8  | 2856.9  |
| 492.8  | 617.0  | 361.1  | 303.0  | 649.8  | 614.4  | 2077.6  | 2791.5  | 2512.5  |
| 914.5  | 1213.0 | 687.0  | 996.1  | 1353.8 | 1161.4 | 2787.4  | 4233.4  | 4230.8  |
| 931.8  | 1354.6 | 1367.1 | 1484.0 | 1317.8 | 1306.5 | 2191.0  | 2768.0  | 2802.7  |
| 1159.0 | 1960.0 | 2390.5 | 2879.6 | 1553.9 | 941.4  | 1616.9  | 1913.8  | 1955.6  |
| 297.9  | 349.2  | 131.2  | 245.1  | 322.3  | 335.6  | 322.0   | 225.3   | 292.1   |
| 273.0  | 328.8  | 130.6  | 165.6  | 311.5  | 288.5  | 1373.5  | 840.3   | 955.7   |
| 3787.8 | 4973.9 | 1230.1 | 1636.3 | 4804.2 | 4051.8 | 5409.8  | 3221.6  | 3748.7  |
| 1007.4 | 1291.8 | 734.4  | 1027.4 | 1498.4 | 1292.4 | 3241.1  | 2929.7  | 3223.5  |
| 126.6  | 160.7  | 116.9  | 100.7  | 202.9  | 152.4  | 1085.7  | 1450.2  | 1714.3  |
| 408.0  | 545.3  | 210.1  | 180.6  | 618.3  | 573.8  | 1828.2  | 2332.4  | 2620.6  |
| 89.2   | 90.1   | 72.8   | 70.1   | 122.7  | 207.3  | 531.0   | 732.6   | 821.7   |
| 21.1   | 12.9   | 87.4   | 82.0   | 32.1   | 4.9    | 188.5   | 239.2   | 229.1   |

|        |        |        |        |        |        |         |         |         |
|--------|--------|--------|--------|--------|--------|---------|---------|---------|
| 345.2  | 451.0  | 82.6   | 106.6  | 557.4  | 329.6  | 781.4   | 869.6   | 890.6   |
| 824.2  | 1075.5 | 241.6  | 319.4  | 1338.1 | 978.3  | 1793.2  | 1855.9  | 2025.7  |
| 4543.5 | 5367.4 | 1876.6 | 2708.1 | 5667.6 | 5069.8 | 8140.4  | 8012.9  | 8041.6  |
| 317.6  | 533.7  | 83.1   | 357.5  | 641.9  | 407.8  | 852.1   | 730.9   | 741.7   |
| 94.4   | 143.7  | 35.8   | 73.9   | 179.1  | 61.1   | 189.4   | 173.2   | 201.2   |
| 886.7  | 1193.5 | 250.2  | 323.1  | 1453.2 | 959.9  | 939.2   | 1233.6  | 1218.3  |
| 1724.4 | 2596.6 | 568.5  | 1005.1 | 2130.6 | 2593.1 | 5329.5  | 3691.5  | 3723.0  |
| 489.4  | 570.0  | 39.3   | 68.5   | 505.4  | 655.6  | 1259.1  | 807.6   | 857.1   |
| 756.7  | 1232.4 | 132.0  | 136.8  | 1367.8 | 1148.0 | 2692.3  | 2809.8  | 2867.7  |
| 1429.4 | 1758.3 | 976.1  | 1155.3 | 2094.0 | 1461.4 | 3909.8  | 4137.0  | 4320.9  |
| 1305.3 | 1318.5 | 401.4  | 439.8  | 1546.8 | 1306.5 | 1570.1  | 607.8   | 698.5   |
| 352.5  | 399.5  | 457.9  | 699.3  | 492.8  | 262.2  | 1557.2  | 1406.4  | 1523.0  |
| 837.5  | 947.6  | 291.3  | 487.2  | 1270.5 | 810.5  | 1073.7  | 1045.9  | 1073.3  |
| 3548.7 | 5542.1 | 534.2  | 707.3  | 5489.6 | 4603.5 | 5764.5  | 4629.2  | 4905.3  |
| 3984.1 | 5196.5 | 1506.6 | 2184.8 | 5314.7 | 4536.3 | 7901.2  | 7793.7  | 7702.8  |
| 74.8   | 109.8  | 855.8  | 1089.9 | 113.8  | 77.7   | 316.8   | 586.1   | 601.4   |
| 4388.1 | 6065.5 | 449.4  | 657.1  | 4857.0 | 5053.7 | 3536.1  | 2477.5  | 3058.0  |
| 617.4  | 910.4  | 681.3  | 970.4  | 875.3  | 651.2  | 1126.3  | 1567.5  | 1707.5  |
| 439.1  | 606.6  | 247.9  | 303.6  | 469.9  | 591.7  | 549.4   | 451.6   | 524.9   |
| 140.8  | 217.9  | 124.9  | 174.4  | 204.9  | 149.8  | 281.7   | 231.1   | 248.6   |
| 6651.8 | 8196.6 | 1321.6 | 2474.1 | 7612.4 | 6387.8 | 11827.0 | 5674.8  | 6520.2  |
| 1431.0 | 1991.6 | 806.5  | 1018.0 | 1882.9 | 1524.8 | 1920.2  | 942.2   | 1091.9  |
| 1865.6 | 2543.0 | 390.5  | 525.9  | 2505.2 | 1623.5 | 4686.9  | 4485.5  | 4818.9  |
| 939.4  | 1071.1 | 253.9  | 417.4  | 1360.0 | 956.2  | 492.7   | 810.6   | 830.6   |
| 3024.9 | 4351.6 | 491.8  | 586.3  | 4836.5 | 4110.0 | 10547.6 | 9217.4  | 9699.9  |
| 7635.5 | 8518.4 | 2903.7 | 4136.0 | 8304.3 | 8015.4 | 10139.6 | 9764.8  | 9706.1  |
| 1436.6 | 1672.4 | 1376.6 | 1415.7 | 2070.0 | 1580.9 | 2020.9  | 1149.0  | 1242.6  |
| 638.6  | 749.0  | 50.6   | 59.9   | 943.4  | 500.8  | 671.8   | 531.1   | 585.7   |
| 5884.3 | 7677.3 | 2688.3 | 3661.4 | 7788.4 | 7070.2 | 13494.2 | 13579.7 | 12857.5 |
| 3419.4 | 4142.7 | 1475.3 | 2067.4 | 4066.3 | 3445.1 | 4299.8  | 2208.4  | 2402.8  |
| 3189.8 | 4634.2 | 806.0  | 988.8  | 4240.1 | 4140.6 | 5726.7  | 4801.2  | 5099.9  |
| 248.6  | 312.1  | 415.5  | 623.4  | 391.2  | 200.7  | 2426.0  | 2100.7  | 2154.0  |
| 490.1  | 642.9  | 486.8  | 754.3  | 641.3  | 569.4  | 2776.0  | 3071.1  | 3151.0  |
| 793.6  | 1170.2 | 398.8  | 590.8  | 1115.8 | 1074.9 | 5152.9  | 5413.8  | 5482.0  |
| 39.8   | 52.5   | 43.2   | 36.4   | 60.8   | 76.2   | 78.4    | 71.7    | 78.1    |
| 677.4  | 734.1  | 900.2  | 1273.1 | 1078.6 | 646.2  | 2215.2  | 2056.5  | 2171.5  |
| 297.6  | 323.8  | 673.3  | 963.0  | 482.7  | 241.1  | 2088.8  | 1965.5  | 2048.6  |
| 791.7  | 647.2  | 1290.1 | 1748.5 | 1114.5 | 697.9  | 3506.4  | 3110.3  | 3427.0  |
| 2281.3 | 3125.7 | 323.3  | 313.0  | 2518.7 | 2791.1 | 1654.0  | 1309.7  | 1465.0  |
| 965.3  | 1231.5 | 134.3  | 140.9  | 1062.2 | 1262.1 | 1095.1  | 808.1   | 950.6   |
| 28.3   | 51.0   | 19.5   | 7.8    | 21.9   | 34.4   | 62.9    | 55.0    | 53.7    |
| 1251.9 | 1937.3 | 260.9  | 283.7  | 1529.8 | 1799.9 | 1118.0  | 836.6   | 917.7   |
| 353.9  | 396.0  | 184.6  | 250.2  | 532.3  | 398.4  | 942.9   | 766.3   | 821.6   |
| 58.6   | 46.2   | 45.4   | 70.5   | 56.1   | 51.5   | 120.7   | 135.1   | 130.6   |
| 153.6  | 187.6  | 62.5   | 53.0   | 142.1  | 213.1  | 183.6   | 33.1    | 42.9    |
| 706.9  | 936.8  | 63.6   | 117.7  | 699.4  | 757.0  | 284.8   | 35.8    | 41.3    |
| 529.7  | 790.5  | 187.0  | 269.4  | 749.6  | 747.5  | 1240.2  | 1334.1  | 1115.6  |
| 639.1  | 612.6  | 1037.2 | 1557.4 | 845.5  | 593.3  | 2369.8  | 2171.8  | 2383.9  |
| 173.7  | 185.8  | 4.7    | 4.8    | 267.8  | 197.0  | 846.9   | 730.2   | 811.4   |
| 626.8  | 935.3  | 2.1    | 1.6    | 970.5  | 703.6  | 3991.5  | 3621.1  | 3717.3  |
| 348.0  | 423.5  | 681.4  | 939.0  | 581.3  | 354.5  | 1060.7  | 1064.7  | 1199.6  |
| 980.3  | 2015.6 | 725.0  | 937.2  | 1611.7 | 2124.4 | 2809.9  | 2997.1  | 3437.2  |
| 47.3   | 79.5   | 98.1   | 83.6   | 63.3   | 83.2   | 63.4    | 78.9    | 85.5    |

|        |        |        |        |        |        |         |         |         |
|--------|--------|--------|--------|--------|--------|---------|---------|---------|
| 575.2  | 858.1  | 367.5  | 513.3  | 712.9  | 726.8  | 1589.3  | 1387.7  | 1451.4  |
| 124.4  | 132.6  | 119.8  | 209.9  | 167.2  | 85.4   | 693.3   | 404.8   | 478.4   |
| 250.7  | 290.6  | 194.1  | 289.1  | 390.9  | 220.3  | 910.8   | 583.1   | 706.9   |
| 259.0  | 252.3  | 171.8  | 279.6  | 395.3  | 201.6  | 246.8   | 241.8   | 262.1   |
| 2620.0 | 3896.1 | 494.7  | 671.7  | 4318.9 | 3499.6 | 7020.8  | 6603.2  | 6630.2  |
| 78.0   | 58.3   | 3.4    | 14.0   | 83.8   | 62.7   | 156.8   | 75.7    | 95.5    |
| 4221.4 | 5029.5 | 260.0  | 312.8  | 5661.2 | 4262.6 | 5774.3  | 3452.2  | 3369.3  |
| 229.2  | 314.0  | 122.8  | 203.0  | 390.2  | 324.3  | 2100.3  | 2905.2  | 3024.8  |
| 341.6  | 499.4  | 160.2  | 173.7  | 400.7  | 354.5  | 513.8   | 474.5   | 620.7   |
| 3459.6 | 4009.4 | 138.3  | 181.2  | 4352.9 | 2436.3 | 1850.7  | 2262.2  | 2400.6  |
| 197.8  | 177.0  | 135.8  | 194.0  | 187.9  | 154.6  | 95.8    | 70.9    | 88.9    |
| 813.6  | 1048.5 | 458.2  | 666.8  | 1090.1 | 1073.2 | 1160.6  | 1152.5  | 1134.8  |
| 137.7  | 217.3  | 129.4  | 142.9  | 174.9  | 193.0  | 286.0   | 289.9   | 323.0   |
| 30.2   | 30.5   | 4.0    | 7.7    | 19.5   | 27.4   | 43.4    | 48.5    | 71.7    |
| 788.3  | 1045.6 | 402.6  | 618.3  | 1160.8 | 1149.3 | 1164.1  | 1071.4  | 1177.4  |
| 62.6   | 86.1   | 95.9   | 92.8   | 83.2   | 66.8   | 70.5    | 88.3    | 90.9    |
| 1838.5 | 2234.7 | 430.5  | 594.8  | 2252.0 | 2141.0 | 3784.3  | 3744.3  | 3734.0  |
| 726.6  | 944.9  | 908.8  | 1306.6 | 1123.2 | 849.9  | 2729.6  | 2778.5  | 2945.1  |
| 1278.1 | 1676.2 | 269.2  | 314.6  | 1804.6 | 1425.3 | 3915.2  | 3603.7  | 3388.8  |
| 1121.7 | 1402.5 | 590.8  | 832.8  | 1699.0 | 1272.9 | 3983.3  | 3213.0  | 3381.6  |
| 154.2  | 161.2  | 56.7   | 106.4  | 185.4  | 180.9  | 1479.8  | 1622.5  | 1856.3  |
| 45.2   | 61.3   | 30.0   | 34.6   | 61.1   | 60.1   | 358.5   | 418.3   | 498.5   |
| 2442.4 | 2810.2 | 780.6  | 1134.6 | 3394.6 | 2677.8 | 8598.5  | 8061.0  | 8090.0  |
| 1621.3 | 2335.7 | 659.2  | 969.4  | 2617.1 | 2455.2 | 3553.7  | 2650.8  | 3055.0  |
| 478.9  | 537.2  | 166.0  | 291.4  | 559.0  | 444.2  | 2025.6  | 663.0   | 854.3   |
| 224.1  | 242.6  | 69.6   | 112.3  | 297.9  | 196.8  | 903.4   | 697.5   | 969.3   |
| 3469.6 | 4464.4 | 1004.0 | 1591.6 | 4590.9 | 3917.6 | 6853.5  | 6251.7  | 6382.3  |
| 1.1    | 2.7    | 5.6    | 1.4    | 0.9    | 0.9    | 1.3     | 1.9     | 1.6     |
| 32.3   | 84.6   | 65.0   | 85.2   | 37.3   | 30.5   | 94.9    | 111.6   | 122.8   |
| 590.2  | 720.0  | 757.1  | 1065.3 | 680.1  | 873.5  | 942.8   | 822.3   | 965.1   |
| 526.9  | 718.9  | 727.8  | 959.3  | 820.8  | 364.9  | 2971.0  | 2621.1  | 2711.6  |
| 71.1   | 72.1   | 101.4  | 147.4  | 112.4  | 50.7   | 479.8   | 534.5   | 584.3   |
| 1772.9 | 2175.1 | 622.3  | 895.7  | 2569.2 | 2287.3 | 3838.2  | 3759.9  | 3772.0  |
| 330.4  | 438.8  | 67.2   | 114.2  | 514.4  | 361.8  | 890.9   | 892.9   | 923.7   |
| 437.1  | 479.4  | 55.2   | 91.7   | 686.8  | 426.1  | 1672.6  | 1620.2  | 1661.6  |
| 4399.2 | 5381.6 | 4198.7 | 4852.3 | 5442.6 | 5549.2 | 10567.4 | 10669.2 | 10566.5 |
| 1361.1 | 1386.1 | 332.7  | 456.5  | 1801.9 | 1233.2 | 3082.8  | 2360.9  | 2536.0  |
| 603.9  | 635.0  | 219.5  | 262.6  | 710.9  | 629.7  | 1049.2  | 946.1   | 1173.8  |
| 1729.3 | 2064.7 | 510.3  | 696.5  | 2345.2 | 2113.1 | 2689.6  | 1217.6  | 1403.9  |
| 197.2  | 166.6  | 154.4  | 192.4  | 327.3  | 180.4  | 374.5   | 395.8   | 457.7   |
| 72.5   | 87.2   | 31.7   | 39.1   | 95.9   | 84.9   | 162.8   | 164.1   | 190.6   |
| 681.2  | 998.8  | 312.9  | 397.6  | 1153.0 | 893.3  | 2057.2  | 1758.5  | 1917.3  |
| 18.8   | 45.9   | 12.5   | 8.0    | 29.7   | 31.3   | 228.0   | 154.2   | 167.5   |
| 51.3   | 59.0   | 413.1  | 551.0  | 101.7  | 72.1   | 209.7   | 476.2   | 515.7   |
| 898.3  | 1335.1 | 913.7  | 1295.8 | 1262.7 | 1344.4 | 3154.7  | 3326.0  | 3411.3  |
| 276.7  | 426.6  | 183.3  | 256.6  | 327.4  | 468.0  | 983.3   | 581.7   | 589.0   |
| 953.5  | 1654.3 | 310.7  | 390.4  | 1355.8 | 1629.3 | 5228.0  | 3807.7  | 3742.6  |
| 1224.2 | 1461.0 | 972.4  | 1559.2 | 1657.7 | 1145.8 | 458.2   | 485.7   | 565.8   |
| 5604.2 | 6847.2 | 2318.7 | 2508.8 | 6069.2 | 6069.7 | 7608.7  | 7420.2  | 7128.4  |
| 11.1   | 11.3   | 21.0   | 28.3   | 1.3    | 1.7    | 118.1   | 122.8   | 129.2   |
| 116.4  | 116.6  | 70.7   | 106.2  | 154.8  | 126.4  | 587.3   | 565.6   | 657.1   |
| 487.7  | 619.1  | 219.2  | 247.6  | 855.9  | 591.5  | 939.0   | 1014.9  | 1171.6  |
| 205.5  | 286.0  | 85.7   | 81.4   | 299.1  | 205.8  | 234.7   | 287.6   | 323.5   |



|         |         |        |        |         |         |         |         |         |
|---------|---------|--------|--------|---------|---------|---------|---------|---------|
| 119.3   | 127.0   | 211.0  | 185.3  | 194.9   | 109.8   | 692.1   | 900.8   | 984.8   |
| 122.0   | 149.2   | 290.6  | 412.7  | 173.0   | 128.2   | 477.5   | 606.5   | 663.7   |
| 1252.7  | 1896.0  | 262.7  | 314.1  | 1642.5  | 1781.7  | 4116.9  | 2801.2  | 3132.4  |
| 58.8    | 74.8    | 24.1   | 39.0   | 69.4    | 104.9   | 162.0   | 95.7    | 106.5   |
| 1489.0  | 1721.4  | 291.7  | 482.4  | 2112.2  | 1696.6  | 2671.4  | 1763.5  | 1691.1  |
| 3857.6  | 5076.2  | 458.1  | 647.3  | 5194.6  | 4920.5  | 2664.6  | 1171.7  | 1250.8  |
| 482.5   | 601.3   | 597.6  | 689.8  | 820.2   | 592.1   | 828.9   | 931.0   | 1037.5  |
| 2632.3  | 3259.5  | 1320.2 | 1592.3 | 3538.1  | 3089.3  | 3038.2  | 2696.8  | 2567.5  |
| 1206.5  | 1656.2  | 319.7  | 653.6  | 1957.7  | 1583.2  | 1269.5  | 1432.3  | 1536.4  |
| 974.6   | 1460.2  | 86.7   | 98.9   | 1457.5  | 1082.6  | 1.4     | 9.7     | 15.5    |
| 700.5   | 982.8   | 119.1  | 166.1  | 1108.7  | 852.2   | 5444.3  | 2882.4  | 3307.0  |
| 207.7   | 188.9   | 141.5  | 200.6  | 298.5   | 182.3   | 297.3   | 229.3   | 285.4   |
| 383.9   | 453.5   | 281.8  | 349.3  | 806.2   | 469.5   | 944.3   | 1212.1  | 1219.3  |
| 324.8   | 276.2   | 449.5  | 382.8  | 515.5   | 209.1   | 926.1   | 1230.0  | 1132.7  |
| 3058.7  | 3819.6  | 685.6  | 919.9  | 3808.7  | 3456.2  | 6174.3  | 3629.5  | 3805.8  |
| 976.8   | 1014.7  | 608.0  | 732.7  | 1408.5  | 988.3   | 2568.0  | 1483.6  | 1807.2  |
| 151.3   | 140.8   | 2.4    | 3.6    | 285.5   | 117.5   | 10.8    | 7.6     | 11.5    |
| 43.0    | 22.7    | 0.4    | 0.8    | 52.8    | 24.4    | 11.9    | 1.4     | 1.2     |
| 52.9    | 46.5    | 266.8  | 423.8  | 75.0    | 34.5    | 219.0   | 222.4   | 227.8   |
| 65.0    | 73.2    | 147.4  | 264.4  | 103.8   | 49.4    | 188.5   | 170.5   | 247.9   |
| 115.7   | 127.6   | 150.6  | 301.5  | 180.7   | 142.2   | 211.6   | 167.8   | 183.3   |
| 813.5   | 848.3   | 304.9  | 529.1  | 1100.4  | 994.7   | 1313.2  | 1036.2  | 1214.6  |
| 647.0   | 568.5   | 454.4  | 820.5  | 611.1   | 594.9   | 1211.2  | 456.1   | 522.6   |
| 563.4   | 727.7   | 309.4  | 381.1  | 846.3   | 712.7   | 2354.9  | 2316.2  | 2610.1  |
| 1.5     | 14.5    | 11.9   | 9.9    | 13.0    | 1.7     | 4.0     | 6.7     | 11.1    |
| 157.6   | 214.7   | 28.7   | 34.0   | 327.6   | 193.5   | 36.9    | 69.4    | 80.3    |
| 1188.5  | 1508.8  | 1034.2 | 1513.3 | 2046.9  | 1670.0  | 1645.1  | 932.2   | 995.6   |
| 444.3   | 741.3   | 193.6  | 251.0  | 755.5   | 573.4   | 1002.4  | 601.8   | 591.9   |
| 988.9   | 1388.3  | 456.4  | 571.5  | 1444.0  | 1241.0  | 2005.2  | 1300.2  | 1383.6  |
| 195.6   | 325.0   | 37.5   | 49.4   | 393.3   | 328.3   | 508.2   | 344.8   | 377.7   |
| 299.0   | 355.2   | 111.8  | 184.6  | 422.0   | 397.0   | 462.1   | 272.9   | 309.5   |
| 549.0   | 607.0   | 98.2   | 190.5  | 454.1   | 447.9   | 1601.5  | 981.0   | 1007.1  |
| 3929.7  | 4507.2  | 1302.6 | 1721.4 | 4826.5  | 4110.5  | 4062.7  | 3238.4  | 3426.7  |
| 35.6    | 40.7    | 47.4   | 89.1   | 66.3    | 43.3    | 56.8    | 107.7   | 124.8   |
| 110.8   | 95.2    | 132.8  | 136.2  | 102.9   | 105.7   | 270.8   | 351.6   | 353.0   |
| 1146.5  | 1697.7  | 929.6  | 1208.6 | 1165.5  | 1891.5  | 6418.1  | 5855.3  | 5859.0  |
| 118.1   | 262.8   | 68.6   | 85.1   | 261.7   | 204.3   | 1726.0  | 1710.9  | 1668.8  |
| 224.1   | 548.2   | 48.7   | 63.3   | 477.7   | 514.9   | 597.6   | 384.6   | 373.2   |
| 248.8   | 379.0   | 132.4  | 177.5  | 421.3   | 390.8   | 505.1   | 366.0   | 392.8   |
| 4505.0  | 5026.4  | 693.5  | 1083.1 | 5140.7  | 4458.1  | 3915.2  | 5157.5  | 5432.6  |
| 352.3   | 345.2   | 274.4  | 356.0  | 554.5   | 324.2   | 970.5   | 846.3   | 953.3   |
| 36.2    | 17.8    | 34.0   | 46.5   | 37.0    | 46.6    | 272.0   | 160.3   | 208.9   |
| 1251.1  | 1486.3  | 115.9  | 152.7  | 1822.1  | 1806.5  | 1406.7  | 760.4   | 840.8   |
| 3166.2  | 4735.0  | 133.0  | 136.7  | 5143.1  | 3228.2  | 2951.0  | 3589.1  | 3438.9  |
| 633.9   | 755.6   | 154.3  | 325.2  | 1044.7  | 746.5   | 642.8   | 483.4   | 562.5   |
| 1306.4  | 1464.3  | 587.0  | 982.4  | 1782.7  | 1551.7  | 1243.7  | 945.6   | 1219.0  |
| 307.9   | 345.0   | 142.2  | 169.5  | 411.5   | 295.0   | 1446.2  | 1100.6  | 1134.7  |
| 623.2   | 861.4   | 226.2  | 244.3  | 996.3   | 942.3   | 886.1   | 1100.7  | 1153.4  |
| 582.6   | 685.0   | 900.6  | 1453.2 | 619.5   | 605.2   | 4911.6  | 3425.8  | 3599.6  |
| 1040.9  | 1319.9  | 254.8  | 303.5  | 1607.4  | 1266.3  | 2420.0  | 1425.0  | 1688.4  |
| 108.1   | 113.7   | 85.1   | 84.2   | 143.1   | 108.1   | 231.9   | 182.5   | 196.9   |
| 133.9   | 190.0   | 390.1  | 499.5  | 251.7   | 206.0   | 517.1   | 425.2   | 441.5   |
| 10361.1 | 10808.5 | 5063.7 | 6007.6 | 11766.4 | 10052.2 | 13276.1 | 12772.0 | 12515.7 |

|         |         |        |        |         |         |         |         |         |
|---------|---------|--------|--------|---------|---------|---------|---------|---------|
| 2291.7  | 2875.9  | 1639.3 | 3072.4 | 3586.4  | 2709.4  | 4959.2  | 4433.0  | 4448.6  |
| 1723.3  | 2057.6  | 482.1  | 840.7  | 2230.0  | 2164.0  | 2069.8  | 1610.4  | 1797.7  |
| 483.6   | 501.9   | 136.8  | 211.9  | 522.6   | 407.3   | 2362.6  | 1077.7  | 1263.0  |
| 635.6   | 796.4   | 267.2  | 416.5  | 755.9   | 411.8   | 381.9   | 752.1   | 845.1   |
| 87.7    | 70.1    | 72.3   | 84.5   | 130.2   | 60.3    | 171.4   | 151.7   | 159.1   |
| 108.9   | 93.7    | 60.8   | 119.0  | 139.1   | 76.5    | 206.5   | 197.8   | 217.7   |
| 82.4    | 97.8    | 46.1   | 40.5   | 116.1   | 100.4   | 141.7   | 96.9    | 104.3   |
| 1595.5  | 2231.9  | 436.7  | 684.7  | 2496.9  | 1986.7  | 1798.2  | 1475.3  | 1330.5  |
| 10484.3 | 10872.4 | 5094.2 | 6412.1 | 11524.6 | 10706.4 | 13132.4 | 12882.3 | 12716.7 |
| 327.6   | 420.8   | 88.0   | 156.1  | 556.2   | 451.9   | 835.6   | 644.4   | 593.7   |
| 2111.9  | 2234.4  | 330.4  | 440.1  | 3061.6  | 2271.7  | 3545.2  | 2433.0  | 2868.6  |
| 476.1   | 631.0   | 348.4  | 533.4  | 560.4   | 656.5   | 1477.8  | 1243.2  | 1414.5  |
| 182.1   | 238.9   | 67.8   | 99.2   | 208.2   | 279.8   | 648.0   | 501.0   | 594.5   |
| 162.2   | 216.4   | 62.0   | 114.2  | 204.8   | 184.7   | 662.0   | 554.4   | 615.8   |
| 218.4   | 239.1   | 187.8  | 278.9  | 262.8   | 205.1   | 1026.3  | 722.4   | 710.7   |
| 779.8   | 1068.7  | 243.7  | 256.2  | 1142.6  | 866.3   | 1967.8  | 1484.6  | 1519.0  |
| 688.7   | 867.1   | 510.9  | 668.0  | 962.4   | 791.4   | 1665.1  | 1390.1  | 1344.4  |
| 643.9   | 840.5   | 272.3  | 289.0  | 962.8   | 789.2   | 1910.6  | 1814.7  | 1771.9  |
| 42.6    | 34.2    | 19.6   | 17.1   | 47.3    | 44.2    | 35.2    | 24.8    | 38.3    |
| 3756.3  | 4331.2  | 214.9  | 347.6  | 4819.0  | 4329.3  | 3041.1  | 2353.2  | 2656.3  |
| 1867.9  | 2117.1  | 81.3   | 166.0  | 3057.0  | 2074.6  | 1348.7  | 955.2   | 1089.7  |
| 1552.6  | 1649.3  | 298.7  | 355.8  | 1956.9  | 1710.8  | 1249.3  | 1018.8  | 1159.8  |
| 329.7   | 371.9   | 132.5  | 166.7  | 418.1   | 289.4   | 523.9   | 455.1   | 486.6   |
| 17.0    | 9.8     | 4.5    | 8.2    | 6.4     | 16.4    | 9.7     | 11.2    | 8.0     |
| 10.6    | 11.2    | 10.4   | 6.2    | 32.2    | 23.9    | 22.1    | 16.9    | 22.7    |
| 26.0    | 23.0    | 6.1    | 1.8    | 83.5    | 25.5    | 26.2    | 24.0    | 22.8    |
| 835.0   | 1271.5  | 706.6  | 896.2  | 1451.0  | 1056.2  | 5504.2  | 5009.5  | 4977.3  |
| 371.1   | 426.4   | 461.0  | 771.7  | 522.0   | 362.7   | 3257.6  | 3075.5  | 3083.3  |
| 614.7   | 716.0   | 278.8  | 416.2  | 1000.6  | 769.0   | 3444.2  | 3528.0  | 3717.8  |
| 1930.3  | 2640.4  | 488.5  | 629.7  | 2845.8  | 2246.3  | 6755.0  | 7180.2  | 7007.5  |
| 7776.2  | 7378.5  | 4303.7 | 5743.9 | 7805.4  | 7128.7  | 10043.7 | 10000.3 | 9874.1  |
| 979.9   | 1299.0  | 113.9  | 146.2  | 1630.2  | 1237.7  | 836.5   | 627.5   | 673.5   |
| 220.2   | 204.1   | 184.5  | 211.9  | 329.9   | 276.2   | 224.5   | 220.1   | 267.2   |
| 12.9    | 18.0    | 16.9   | 10.6   | 23.6    | 32.8    | 115.6   | 123.1   | 135.7   |
| 58.6    | 53.4    | 25.2   | 34.3   | 60.1    | 38.3    | 168.5   | 188.6   | 234.0   |
| 77.1    | 97.4    | 57.0   | 61.6   | 112.2   | 94.4    | 233.2   | 285.9   | 320.1   |
| 303.2   | 473.0   | 365.3  | 332.5  | 466.6   | 367.6   | 799.8   | 964.5   | 1057.6  |
| 479.5   | 709.1   | 128.6  | 248.5  | 561.9   | 563.9   | 1761.0  | 957.9   | 1102.1  |
| 3759.8  | 5481.1  | 463.5  | 595.0  | 5398.1  | 5239.8  | 10259.4 | 9194.6  | 9385.7  |
| 1014.1  | 1358.8  | 423.3  | 587.9  | 1294.7  | 1076.5  | 1575.9  | 1705.4  | 1810.9  |
| 160.8   | 207.0   | 22.4   | 36.7   | 200.9   | 174.4   | 235.3   | 220.4   | 232.7   |
| 127.3   | 118.3   | 131.4  | 148.2  | 160.6   | 135.2   | 447.2   | 491.8   | 493.5   |
| 25.0    | 40.1    | 34.4   | 45.3   | 71.4    | 23.9    | 42.9    | 79.0    | 78.2    |
| 52.4    | 59.6    | 27.6   | 30.6   | 76.8    | 55.4    | 51.9    | 108.0   | 106.5   |
| 1994.4  | 2090.6  | 1370.2 | 1851.5 | 2475.3  | 2079.7  | 5748.1  | 5449.2  | 5925.9  |
| 42.6    | 55.3    | 34.7   | 62.9   | 39.0    | 40.3    | 67.8    | 56.3    | 55.7    |
| 1276.4  | 1682.3  | 506.7  | 767.0  | 2091.4  | 1788.9  | 1939.9  | 1645.6  | 1755.3  |
| 439.2   | 596.2   | 251.3  | 389.6  | 407.0   | 538.1   | 1206.3  | 1179.4  | 1301.9  |
| 112.1   | 127.8   | 500.2  | 836.5  | 157.9   | 128.3   | 518.8   | 480.6   | 654.9   |
| 115.8   | 173.5   | 141.6  | 219.7  | 237.9   | 192.7   | 1008.1  | 999.2   | 1030.6  |
| 74.3    | 120.1   | 39.3   | 77.8   | 144.7   | 122.7   | 356.4   | 360.1   | 367.9   |
| 198.4   | 262.7   | 91.4   | 104.9  | 278.3   | 304.9   | 817.4   | 733.6   | 817.3   |
| 218.6   | 312.5   | 88.0   | 92.8   | 373.5   | 267.3   | 492.4   | 548.2   | 556.6   |

|        |        |        |        |        |        |        |        |        |
|--------|--------|--------|--------|--------|--------|--------|--------|--------|
| 56.8   | 61.7   | 151.2  | 166.2  | 63.7   | 32.1   | 314.6  | 230.3  | 264.2  |
| 401.4  | 439.4  | 209.7  | 322.5  | 497.0  | 470.5  | 855.9  | 606.1  | 709.3  |
| 287.8  | 344.5  | 447.6  | 613.7  | 370.1  | 314.9  | 2404.7 | 1723.1 | 2097.4 |
| 159.2  | 168.8  | 50.5   | 53.9   | 206.0  | 188.6  | 186.2  | 214.7  | 235.4  |
| 62.2   | 60.2   | 29.0   | 31.0   | 88.1   | 52.6   | 98.0   | 100.9  | 106.0  |
| 272.2  | 310.8  | 198.7  | 263.8  | 380.3  | 289.3  | 401.7  | 477.0  | 426.8  |
| 951.6  | 1222.5 | 34.6   | 39.1   | 1392.7 | 915.2  | 29.4   | 33.8   | 34.9   |
| 50.7   | 171.3  | 695.9  | 958.9  | 72.8   | 203.8  | 2456.9 | 3100.7 | 2730.8 |
| 890.8  | 1023.0 | 449.0  | 659.0  | 1083.3 | 861.8  | 1456.6 | 1007.3 | 1163.6 |
| 2.5    | 1.2    | 2.5    | 3.0    | 3.8    | 2.0    | 7.7    | 5.4    | 3.4    |
| 16.5   | 28.0   | 25.2   | 5.1    | 9.1    | 6.6    | 22.5   | 17.7   | 10.2   |
| 382.7  | 532.0  | 238.6  | 381.5  | 380.9  | 343.0  | 389.3  | 581.4  | 580.1  |
| 1240.9 | 2157.0 | 38.7   | 42.7   | 1639.7 | 1576.3 | 1334.6 | 102.0  | 63.8   |
| 568.7  | 1036.0 | 23.0   | 21.9   | 826.7  | 772.0  | 1034.1 | 82.0   | 62.7   |
| 256.9  | 333.6  | 5.0    | 4.7    | 284.5  | 253.2  | 463.8  | 5.5    | 5.3    |
| 129.0  | 119.9  | 7.1    | 2.2    | 149.9  | 84.1   | 3.2    | 6.9    | 9.9    |
| 1495.5 | 1847.1 | 79.3   | 125.9  | 1813.7 | 2464.7 | 1246.4 | 635.8  | 759.9  |
| 256.1  | 386.0  | 45.7   | 52.5   | 389.7  | 376.5  | 805.5  | 406.4  | 492.7  |
| 480.0  | 686.8  | 190.2  | 257.8  | 842.6  | 592.1  | 975.0  | 494.5  | 558.7  |
| 875.8  | 953.9  | 182.0  | 264.9  | 1479.2 | 955.4  | 1351.9 | 1357.6 | 1421.8 |
| 1067.7 | 1178.8 | 241.0  | 244.8  | 1650.0 | 1237.6 | 1509.9 | 1511.5 | 1461.4 |
| 127.0  | 91.4   | 28.8   | 26.1   | 148.4  | 192.6  | 454.1  | 351.6  | 366.4  |
| 1273.3 | 1380.6 | 63.4   | 135.4  | 1877.7 | 1490.8 | 1813.5 | 1343.7 | 1440.7 |
| 8.4    | 16.7   | 9.3    | 5.8    | 17.4   | 8.7    | 28.8   | 33.3   | 26.6   |
| 7.1    | 28.8   | 29.1   | 19.4   | 13.3   | 12.6   | 72.6   | 73.8   | 81.3   |
| 3215.6 | 4117.1 | 2357.5 | 3401.1 | 4292.5 | 3910.5 | 6779.5 | 6734.4 | 6776.1 |
| 3838.8 | 4492.9 | 880.8  | 1309.1 | 6016.2 | 4386.8 | 8811.1 | 7026.7 | 7485.6 |
| 98.1   | 131.3  | 196.8  | 393.2  | 175.7  | 96.0   | 300.6  | 243.3  | 262.2  |
| 442.9  | 689.3  | 198.5  | 275.0  | 646.9  | 588.1  | 792.9  | 585.3  | 717.4  |
| 497.6  | 543.5  | 82.7   | 108.6  | 809.9  | 560.9  | 698.2  | 795.8  | 922.7  |
| 2250.1 | 3212.4 | 1060.3 | 1427.8 | 3108.3 | 2966.4 | 5448.2 | 5137.6 | 5232.0 |
| 1805.3 | 2390.1 | 321.0  | 573.3  | 2474.4 | 2617.0 | 4721.7 | 2275.5 | 2438.3 |
| 213.8  | 326.7  | 116.9  | 154.2  | 357.7  | 313.5  | 468.8  | 412.7  | 452.0  |
| 229.9  | 166.0  | 92.7   | 105.0  | 372.1  | 154.5  | 441.0  | 401.8  | 516.7  |
| 157.4  | 203.6  | 28.8   | 25.4   | 214.4  | 226.5  | 214.2  | 223.3  | 267.5  |
| 40.2   | 37.4   | 36.0   | 26.7   | 79.6   | 33.9   | 178.8  | 163.6  | 196.8  |
| 81.6   | 100.2  | 59.2   | 78.8   | 181.4  | 98.8   | 197.1  | 152.4  | 149.8  |
| 246.6  | 298.0  | 178.0  | 251.9  | 364.3  | 301.7  | 3090.7 | 1777.4 | 1672.7 |
| 20.1   | 22.1   | 41.3   | 59.3   | 58.9   | 5.6    | 100.2  | 79.5   | 91.5   |
| 229.0  | 308.3  | 122.7  | 140.3  | 401.6  | 235.3  | 1097.0 | 842.6  | 874.6  |
| 255.9  | 290.6  | 104.1  | 154.6  | 282.1  | 242.7  | 705.8  | 550.9  | 730.2  |
| 59.8   | 59.7   | 8.4    | 22.6   | 54.5   | 39.4   | 124.3  | 123.3  | 118.9  |
| 878.4  | 1157.5 | 261.7  | 383.0  | 1263.5 | 1217.2 | 1535.9 | 2056.2 | 2094.0 |
| 250.3  | 287.7  | 116.7  | 190.3  | 367.2  | 217.2  | 324.7  | 275.0  | 275.0  |
| 874.9  | 964.1  | 1139.9 | 1541.7 | 1320.0 | 956.3  | 1344.9 | 1369.1 | 1530.2 |
| 489.0  | 660.6  | 113.8  | 140.7  | 866.3  | 642.5  | 892.1  | 931.2  | 1014.6 |
| 372.9  | 538.5  | 63.4   | 68.7   | 821.8  | 458.1  | 553.5  | 395.4  | 401.6  |
| 103.3  | 126.0  | 243.0  | 335.7  | 199.2  | 75.3   | 706.8  | 1442.5 | 1645.1 |
| 74.4   | 85.0   | 135.3  | 148.5  | 122.9  | 142.9  | 518.1  | 572.6  | 568.4  |
| 80.9   | 98.3   | 163.6  | 249.5  | 176.4  | 81.8   | 392.7  | 955.2  | 1010.9 |
| 5349.1 | 6396.4 | 2455.6 | 3529.5 | 6577.8 | 5801.2 | 8224.3 | 7864.0 | 8216.4 |
| 57.8   | 53.1   | 113.9  | 178.6  | 51.5   | 95.1   | 393.2  | 230.2  | 241.6  |
| 93.6   | 133.3  | 123.5  | 187.7  | 118.8  | 134.4  | 580.1  | 333.5  | 365.3  |

|        |        |        |        |        |        |        |        |        |
|--------|--------|--------|--------|--------|--------|--------|--------|--------|
| 371.0  | 413.0  | 269.4  | 354.6  | 534.0  | 311.5  | 861.2  | 697.2  | 819.0  |
| 65.2   | 85.3   | 81.9   | 137.6  | 131.8  | 83.5   | 386.8  | 408.3  | 467.6  |
| 215.5  | 207.0  | 236.0  | 277.8  | 434.5  | 233.0  | 546.9  | 414.8  | 471.7  |
| 47.9   | 77.7   | 23.4   | 31.0   | 76.9   | 72.7   | 197.7  | 170.0  | 170.8  |
| 147.8  | 151.5  | 154.4  | 235.2  | 301.4  | 130.3  | 385.3  | 341.8  | 365.4  |
| 956.4  | 964.7  | 53.1   | 56.1   | 1034.5 | 755.9  | 367.4  | 231.5  | 153.6  |
| 98.7   | 125.9  | 18.4   | 31.8   | 163.7  | 111.7  | 439.6  | 308.1  | 346.5  |
| 206.2  | 240.0  | 219.7  | 318.3  | 261.4  | 271.7  | 422.6  | 258.8  | 316.1  |
| 90.0   | 93.8   | 40.6   | 73.0   | 94.4   | 100.7  | 144.1  | 107.2  | 129.9  |
| 201.6  | 295.5  | 136.3  | 181.0  | 264.4  | 260.7  | 396.1  | 251.0  | 281.1  |
| 900.7  | 1977.2 | 74.7   | 109.7  | 1413.2 | 1677.7 | 1012.9 | 1074.2 | 975.0  |
| 534.2  | 895.5  | 313.4  | 282.6  | 885.6  | 663.4  | 1352.5 | 1110.0 | 1250.3 |
| 397.4  | 541.9  | 24.1   | 22.1   | 558.0  | 610.6  | 523.7  | 330.8  | 359.0  |
| 168.2  | 197.6  | 111.2  | 142.8  | 238.0  | 166.8  | 660.0  | 798.1  | 857.0  |
| 355.1  | 488.8  | 129.3  | 144.4  | 501.6  | 477.9  | 972.0  | 1228.8 | 1301.5 |
| 36.1   | 41.4   | 27.2   | 66.1   | 69.9   | 37.0   | 192.9  | 179.3  | 184.1  |
| 1374.4 | 1660.4 | 846.5  | 1272.4 | 2129.7 | 1552.5 | 2357.6 | 2353.2 | 2632.6 |
| 2890.0 | 3135.5 | 1056.0 | 1154.5 | 3358.8 | 4053.4 | 4340.7 | 4462.9 | 4937.2 |
| 303.0  | 411.7  | 116.0  | 161.0  | 513.1  | 397.4  | 805.4  | 789.3  | 909.0  |
| 231.9  | 275.3  | 158.8  | 184.0  | 433.5  | 290.1  | 560.6  | 491.2  | 603.2  |
| 201.5  | 251.8  | 145.3  | 149.6  | 320.2  | 189.8  | 380.0  | 323.6  | 368.4  |
| 139.7  | 206.1  | 71.8   | 77.6   | 218.2  | 213.2  | 547.0  | 428.6  | 494.8  |
| 124.1  | 166.1  | 75.2   | 109.8  | 182.7  | 177.9  | 194.7  | 195.9  | 254.9  |
| 159.2  | 117.9  | 99.1   | 175.1  | 185.4  | 151.7  | 779.4  | 524.9  | 515.8  |
| 1004.1 | 1342.2 | 524.2  | 707.0  | 1174.5 | 1379.3 | 5682.9 | 3812.2 | 4007.2 |
| 22.5   | 44.7   | 28.0   | 29.3   | 40.7   | 35.6   | 119.3  | 86.1   | 118.5  |
| 11.1   | 12.0   | 1.7    | 6.9    | 6.3    | 5.6    | 43.3   | 32.0   | 41.6   |
| 295.6  | 390.2  | 168.0  | 229.6  | 456.0  | 380.3  | 1926.5 | 1805.5 | 1908.2 |
| 127.4  | 177.3  | 36.7   | 44.6   | 176.7  | 71.3   | 35.3   | 56.2   | 57.0   |
| 209.2  | 288.8  | 38.8   | 90.7   | 210.4  | 163.9  | 90.7   | 114.1  | 123.9  |
| 235.3  | 379.3  | 43.5   | 92.0   | 409.2  | 357.6  | 3.6    | 3.4    | 5.3    |
| 363.8  | 383.4  | 46.6   | 97.9   | 543.7  | 624.8  | 8.5    | 2.4    | 8.1    |
| 260.4  | 242.5  | 111.1  | 128.9  | 445.3  | 289.1  | 31.1   | 27.5   | 31.7   |
| 28.4   | 46.9   | 0.9    | 3.9    | 99.4   | 40.8   | 2.2    | 2.1    | 1.6    |
| 175.3  | 169.4  | 0.3    | 0.3    | 271.1  | 205.1  | 5.1    | 13.6   | 5.4    |
| 1211.8 | 1278.6 | 361.1  | 521.2  | 1995.0 | 1281.7 | 2245.1 | 1185.0 | 1223.8 |
| 880.1  | 943.1  | 346.0  | 470.3  | 1325.2 | 917.2  | 841.6  | 508.6  | 626.1  |
| 886.3  | 1108.1 | 409.0  | 605.0  | 1220.1 | 988.9  | 1971.2 | 1558.5 | 1846.0 |
| 656.8  | 704.2  | 57.1   | 72.1   | 988.9  | 642.8  | 794.3  | 680.2  | 762.8  |
| 225.1  | 196.8  | 39.3   | 37.2   | 348.5  | 214.0  | 379.3  | 253.2  | 304.2  |
| 609.8  | 700.4  | 950.5  | 1089.1 | 958.3  | 701.7  | 2424.3 | 1752.3 | 2015.5 |
| 125.3  | 147.5  | 44.4   | 83.1   | 135.1  | 85.4   | 287.2  | 191.8  | 228.6  |
| 2111.8 | 2726.1 | 357.8  | 653.2  | 2643.5 | 3775.4 | 3583.0 | 2078.1 | 2154.5 |
| 933.5  | 1269.5 | 78.3   | 146.8  | 1153.7 | 1399.1 | 1156.4 | 720.2  | 752.6  |
| 3241.7 | 3424.1 | 1338.3 | 1261.9 | 3483.0 | 3352.6 | 7832.9 | 5430.8 | 5807.7 |
| 36.2   | 43.2   | 297.3  | 522.6  | 16.9   | 16.3   | 9.8    | 13.3   | 3.1    |
| 245.4  | 312.3  | 456.5  | 749.8  | 320.6  | 297.0  | 483.1  | 564.0  | 625.2  |
| 4862.5 | 5694.8 | 2938.0 | 3769.8 | 5929.4 | 4325.8 | 8912.9 | 8785.0 | 8761.6 |
| 4.7    | 8.8    | 3.2    | 2.7    | 17.1   | 2.6    | 12.9   | 4.5    | 7.5    |
| 18.9   | 15.9   | 10.7   | 10.7   | 22.0   | 13.6   | 13.9   | 10.2   | 14.9   |
| 2.0    | 4.0    | 1.7    | 1.2    | 0.6    | 0.9    | 2.9    | 1.2    | 1.4    |
| 193.4  | 224.5  | 124.6  | 178.8  | 211.4  | 241.9  | 562.1  | 436.1  | 516.1  |
| 1180.3 | 1591.9 | 143.9  | 181.9  | 1788.7 | 1453.0 | 2321.5 | 1087.4 | 1175.3 |

|        |        |        |        |        |        |        |        |        |
|--------|--------|--------|--------|--------|--------|--------|--------|--------|
| 135.2  | 184.9  | 73.5   | 128.8  | 247.5  | 176.5  | 839.7  | 899.0  | 941.0  |
| 151.8  | 99.5   | 181.6  | 204.7  | 122.8  | 174.9  | 133.1  | 149.6  | 163.4  |
| 145.6  | 257.4  | 72.6   | 91.4   | 288.6  | 224.3  | 434.6  | 477.2  | 535.3  |
| 72.6   | 111.9  | 83.9   | 96.6   | 146.5  | 82.9   | 70.9   | 77.5   | 78.6   |
| 491.7  | 768.2  | 200.9  | 286.3  | 591.5  | 636.8  | 2185.6 | 1528.0 | 1550.9 |
| 570.9  | 747.7  | 188.0  | 241.2  | 915.6  | 666.0  | 654.0  | 646.2  | 782.0  |
| 272.3  | 252.8  | 109.9  | 175.2  | 367.1  | 200.7  | 260.7  | 286.1  | 352.2  |
| 261.6  | 265.0  | 69.7   | 70.5   | 320.1  | 284.5  | 834.4  | 560.2  | 604.1  |
| 272.0  | 290.7  | 67.0   | 54.0   | 341.1  | 367.2  | 437.0  | 345.3  | 338.6  |
| 125.8  | 138.0  | 15.4   | 9.3    | 169.3  | 160.8  | 222.0  | 188.9  | 227.3  |
| 492.3  | 655.5  | 277.7  | 394.2  | 616.6  | 504.9  | 673.2  | 577.2  | 574.9  |
| 41.3   | 6.8    | 1269.0 | 2101.9 | 31.5   | 13.4   | 567.8  | 695.9  | 786.6  |
| 54.6   | 31.2   | 2551.6 | 2824.5 | 51.3   | 45.3   | 1551.5 | 2066.8 | 2001.7 |
| 238.3  | 202.7  | 115.5  | 172.4  | 327.2  | 171.1  | 684.4  | 763.1  | 861.2  |
| 93.3   | 76.8   | 26.1   | 45.7   | 106.4  | 62.1   | 305.1  | 241.6  | 281.6  |
| 1422.1 | 1731.6 | 326.3  | 417.0  | 2580.8 | 1800.5 | 2107.5 | 1637.0 | 1597.4 |
| 27.5   | 28.1   | 62.3   | 53.6   | 31.0   | 25.0   | 117.2  | 226.0  | 203.9  |
| 193.8  | 203.5  | 212.7  | 341.3  | 264.8  | 199.2  | 651.2  | 440.1  | 504.0  |
| 194.7  | 284.2  | 57.3   | 63.2   | 229.2  | 228.6  | 486.2  | 524.9  | 619.9  |
| 45.9   | 75.6   | 10.8   | 19.3   | 57.0   | 42.2   | 83.1   | 80.8   | 93.5   |
| 24.7   | 51.4   | 12.1   | 11.8   | 91.2   | 76.7   | 191.5  | 417.2  | 355.5  |
| 74.2   | 163.4  | 30.4   | 35.0   | 185.3  | 116.1  | 572.7  | 888.6  | 809.7  |
| 2679.1 | 2969.6 | 1332.6 | 2151.1 | 3025.5 | 2926.6 | 7914.6 | 3525.8 | 4122.5 |
| 928.2  | 965.0  | 44.5   | 27.4   | 1255.8 | 1031.2 | 5383.6 | 4237.9 | 4788.8 |
| 12.6   | 18.7   | 11.9   | 12.2   | 20.2   | 15.9   | 17.6   | 8.3    | 10.3   |
| 188.6  | 272.1  | 87.1   | 50.7   | 232.8  | 195.3  | 185.4  | 231.0  | 237.0  |
| 81.6   | 130.6  | 19.4   | 8.3    | 120.2  | 95.6   | 143.6  | 158.5  | 168.1  |
| 43.7   | 72.5   | 42.9   | 59.1   | 54.7   | 19.3   | 139.6  | 170.8  | 178.8  |
| 225.4  | 278.9  | 951.0  | 1265.3 | 350.6  | 267.5  | 504.7  | 1094.3 | 1241.4 |
| 330.1  | 468.2  | 14.7   | 23.5   | 570.4  | 419.5  | 288.4  | 280.5  | 315.8  |
| 3650.0 | 4666.6 | 683.7  | 1361.9 | 4250.5 | 4265.3 | 84.7   | 61.1   | 66.7   |
| 142.2  | 188.4  | 245.6  | 385.7  | 203.3  | 184.4  | 524.1  | 291.4  | 310.3  |
| 76.7   | 71.1   | 71.2   | 124.2  | 118.1  | 79.4   | 292.6  | 635.2  | 603.9  |
| 93.7   | 82.8   | 76.7   | 117.8  | 145.7  | 80.6   | 336.4  | 791.9  | 774.9  |
| 346.7  | 384.6  | 113.5  | 195.7  | 577.1  | 309.5  | 420.0  | 444.5  | 409.7  |
| 76.1   | 116.6  | 94.1   | 108.3  | 119.9  | 96.7   | 210.2  | 229.2  | 233.6  |
| 381.1  | 412.1  | 131.0  | 145.1  | 581.2  | 452.3  | 1679.1 | 1721.6 | 1980.0 |
| 251.7  | 336.1  | 41.1   | 42.7   | 363.8  | 388.3  | 996.2  | 1178.6 | 1169.9 |
| 1053.2 | 1521.5 | 209.3  | 229.6  | 1364.3 | 1958.9 | 1470.8 | 658.9  | 739.3  |
| 724.6  | 1249.2 | 163.4  | 211.0  | 933.1  | 1158.2 | 799.8  | 404.3  | 424.8  |
| 4109.5 | 4221.6 | 3009.5 | 3451.7 | 4929.1 | 3779.8 | 6974.3 | 3764.9 | 4072.2 |
| 167.4  | 227.4  | 159.8  | 235.8  | 314.3  | 199.9  | 683.0  | 748.1  | 730.8  |
| 91.4   | 140.1  | 55.1   | 71.5   | 134.5  | 143.0  | 377.1  | 449.7  | 455.1  |
| 235.7  | 305.9  | 186.5  | 294.9  | 332.9  | 250.5  | 529.4  | 374.0  | 389.0  |
| 49.6   | 58.5   | 46.3   | 76.7   | 71.7   | 66.1   | 17.7   | 22.4   | 25.2   |
| 15.7   | 21.3   | 42.3   | 88.4   | 29.7   | 31.3   | 9.5    | 15.4   | 15.1   |
| 5.1    | 8.1    | 7.3    | 17.2   | 18.8   | 18.1   | 6.6    | 8.1    | 6.3    |
| 285.1  | 438.0  | 112.5  | 211.6  | 327.9  | 377.2  | 1123.8 | 1132.4 | 1278.0 |
| 23.4   | 30.1   | 106.9  | 100.0  | 35.6   | 44.9   | 62.0   | 310.6  | 258.5  |
| 367.7  | 351.0  | 622.5  | 963.3  | 583.2  | 261.5  | 831.7  | 941.1  | 948.7  |
| 1707.0 | 2440.9 | 1010.9 | 1371.7 | 2527.4 | 2226.3 | 6018.5 | 5723.0 | 5788.4 |
| 166.6  | 180.2  | 30.8   | 30.8   | 266.0  | 150.3  | 173.8  | 122.3  | 132.7  |
| 51.0   | 49.1   | 62.0   | 83.2   | 100.5  | 45.6   | 35.7   | 15.0   | 51.3   |

|        |        |        |        |        |        |        |        |        |
|--------|--------|--------|--------|--------|--------|--------|--------|--------|
| 291.8  | 350.2  | 170.3  | 152.3  | 477.2  | 410.0  | 185.4  | 141.2  | 181.8  |
| 1177.6 | 1575.2 | 0.9    | 0.7    | 1762.8 | 1537.4 | 862.4  | 890.8  | 1000.8 |
| 52.6   | 47.1   | 9.7    | 12.0   | 71.9   | 57.7   | 191.8  | 131.7  | 147.5  |
| 273.5  | 409.5  | 29.9   | 36.9   | 416.1  | 390.1  | 201.2  | 130.3  | 178.3  |
| 507.6  | 517.5  | 334.6  | 380.4  | 813.4  | 600.3  | 874.2  | 943.9  | 1141.3 |
| 604.4  | 631.9  | 92.5   | 117.0  | 823.2  | 674.1  | 1109.1 | 673.4  | 773.5  |
| 390.5  | 537.5  | 67.1   | 43.0   | 641.6  | 550.9  | 1247.9 | 1138.4 | 1316.8 |
| 1218.9 | 1359.3 | 379.3  | 553.0  | 1543.0 | 1402.3 | 1665.5 | 1899.1 | 2084.4 |
| 6.6    | 2.4    | 3.0    | 14.7   | 17.0   | 1.7    | 340.4  | 560.5  | 642.7  |
| 216.4  | 300.4  | 136.3  | 163.9  | 355.4  | 243.9  | 479.0  | 568.9  | 576.6  |
| 353.2  | 389.0  | 150.7  | 172.3  | 546.1  | 704.8  | 1296.3 | 1650.2 | 1560.3 |
| 50.9   | 43.7   | 206.5  | 233.4  | 101.5  | 63.3   | 509.4  | 788.6  | 843.6  |
| 12.5   | 15.8   | 89.2   | 109.7  | 32.2   | 2.8    | 207.1  | 322.6  | 345.8  |
| 49.0   | 51.1   | 52.3   | 81.4   | 94.4   | 22.5   | 235.8  | 192.3  | 193.9  |
| 239.5  | 252.1  | 117.9  | 193.8  | 335.7  | 220.8  | 585.3  | 439.7  | 461.6  |
| 237.2  | 315.7  | 80.5   | 76.4   | 302.0  | 312.0  | 491.7  | 334.3  | 409.0  |
| 162.6  | 162.4  | 102.2  | 138.2  | 283.4  | 116.7  | 311.6  | 270.0  | 282.7  |
| 378.1  | 336.8  | 85.0   | 120.5  | 534.0  | 384.9  | 505.8  | 514.5  | 567.5  |
| 56.3   | 66.8   | 107.3  | 122.4  | 95.2   | 52.8   | 285.1  | 226.4  | 226.0  |
| 1193.3 | 1453.0 | 190.4  | 312.9  | 1505.7 | 1332.6 | 1743.8 | 1492.7 | 1831.3 |
| 1105.5 | 1155.6 | 205.4  | 298.1  | 1298.0 | 1163.0 | 2244.2 | 1822.3 | 1884.8 |
| 38.2   | 67.0   | 238.6  | 264.9  | 44.0   | 60.1   | 197.1  | 462.8  | 447.7  |
| 97.2   | 133.7  | 292.4  | 269.2  | 176.8  | 138.3  | 273.8  | 474.6  | 508.1  |
| 26.5   | 57.6   | 230.4  | 238.6  | 63.3   | 48.4   | 117.9  | 200.7  | 177.0  |
| 403.6  | 556.5  | 329.4  | 406.0  | 522.5  | 562.1  | 1121.6 | 935.8  | 935.0  |
| 158.7  | 224.8  | 329.3  | 456.8  | 206.7  | 221.6  | 933.3  | 724.9  | 819.2  |
| 56.3   | 101.1  | 38.8   | 68.5   | 112.8  | 103.4  | 504.4  | 561.3  | 618.7  |
| 2695.1 | 3977.4 | 718.6  | 892.3  | 3969.1 | 3923.7 | 5956.6 | 6569.7 | 6875.3 |
| 1235.5 | 1448.8 | 300.1  | 463.0  | 1121.7 | 1766.9 | 1731.7 | 849.0  | 802.7  |
| 69.2   | 86.1   | 127.9  | 219.9  | 71.7   | 99.9   | 484.3  | 271.2  | 320.1  |
| 3222.4 | 4476.8 | 1401.3 | 2112.9 | 3965.2 | 4214.8 | 6814.1 | 6217.3 | 6161.6 |
| 1.1    | 10.7   | 3.4    | 3.0    | 1.8    | 15.2   | 19.7   | 44.9   | 38.1   |
| 13.4   | 28.2   | 7.8    | 4.9    | 18.2   | 15.6   | 63.4   | 72.1   | 71.3   |
| 8.7    | 7.7    | 12.2   | 7.6    | 13.6   | 18.7   | 18.5   | 14.6   | 13.0   |
| 121.6  | 128.2  | 47.6   | 50.1   | 175.8  | 142.5  | 430.5  | 631.4  | 619.8  |
| 1.2    | 2.1    | 1.6    | 1.8    | 1.9    | 2.1    | 1.5    | 1.9    | 2.1    |
| 833.6  | 1235.7 | 200.0  | 228.4  | 1329.6 | 1031.0 | 2855.9 | 2208.9 | 2438.0 |
| 490.5  | 680.1  | 348.4  | 464.7  | 718.7  | 598.9  | 1451.1 | 1279.6 | 1402.9 |
| 211.0  | 327.9  | 228.9  | 270.8  | 302.2  | 181.4  | 528.8  | 517.9  | 554.3  |
| 161.7  | 166.5  | 121.4  | 167.2  | 225.2  | 127.0  | 533.5  | 506.4  | 589.5  |
| 82.8   | 113.9  | 73.9   | 110.7  | 118.5  | 125.7  | 25.2   | 13.3   | 21.1   |
| 952.6  | 1186.6 | 183.7  | 245.6  | 1477.4 | 1552.7 | 2326.8 | 1230.1 | 1445.8 |
| 128.1  | 140.2  | 12.3   | 16.8   | 152.9  | 100.1  | 3.3    | 10.4   | 5.4    |
| 118.1  | 120.8  | 16.5   | 8.8    | 114.3  | 122.2  | 14.2   | 8.7    | 12.8   |
| 299.7  | 349.6  | 4.2    | 24.7   | 573.6  | 362.7  | 40.1   | 16.4   | 7.2    |
| 48.7   | 74.7   | 18.7   | 8.3    | 101.2  | 91.8   | 119.7  | 92.5   | 94.8   |
| 249.5  | 205.5  | 76.1   | 109.5  | 376.3  | 204.0  | 488.8  | 342.1  | 398.5  |
| 19.2   | 37.6   | 8.4    | 12.9   | 42.4   | 29.2   | 26.7   | 27.8   | 26.7   |
| 81.3   | 73.4   | 31.5   | 25.1   | 226.6  | 60.5   | 9.3    | 7.5    | 10.7   |
| 117.6  | 169.1  | 50.7   | 38.3   | 146.6  | 237.4  | 292.1  | 275.8  | 343.1  |
| 888.7  | 1004.6 | 483.2  | 626.1  | 1259.5 | 1034.0 | 862.5  | 980.7  | 1008.1 |
| 127.9  | 190.3  | 130.5  | 161.4  | 191.1  | 167.4  | 237.0  | 286.0  | 339.5  |
| 699.2  | 935.2  | 273.9  | 359.6  | 1184.7 | 839.1  | 486.7  | 677.3  | 641.2  |

|        |        |        |        |        |        |         |         |         |
|--------|--------|--------|--------|--------|--------|---------|---------|---------|
| 334.8  | 391.5  | 194.8  | 241.8  | 504.0  | 368.8  | 1135.8  | 881.7   | 1010.7  |
| 77.2   | 97.1   | 108.0  | 121.2  | 126.8  | 59.2   | 291.5   | 314.7   | 385.9   |
| 880.5  | 1031.9 | 109.6  | 187.9  | 1372.3 | 993.6  | 2178.9  | 2617.0  | 2846.8  |
| 841.9  | 1025.5 | 428.3  | 615.7  | 1045.7 | 933.4  | 3358.9  | 3312.5  | 3431.2  |
| 743.6  | 1177.3 | 74.7   | 132.4  | 1230.6 | 1234.2 | 1866.7  | 1135.4  | 1277.8  |
| 7.9    | 1.2    | 3.7    | 9.0    | 7.0    | 2.1    | 11.0    | 8.3     | 5.7     |
| 38.2   | 49.3   | 6.4    | 1.5    | 63.7   | 47.6   | 117.2   | 55.3    | 47.4    |
| 667.1  | 536.4  | 7.7    | 0.9    | 600.7  | 485.4  | 859.1   | 301.4   | 322.0   |
| 460.3  | 406.7  | 142.6  | 138.6  | 511.8  | 415.3  | 633.7   | 203.0   | 210.3   |
| 103.1  | 149.8  | 1.1    | 11.0   | 145.3  | 118.9  | 10.8    | 4.7     | 4.1     |
| 38.6   | 68.8   | 244.4  | 280.3  | 55.8   | 53.0   | 166.4   | 410.6   | 431.7   |
| 1553.8 | 1573.8 | 145.1  | 220.7  | 2277.4 | 1590.7 | 1787.2  | 1283.9  | 1391.2  |
| 1500.3 | 1615.6 | 443.4  | 601.7  | 1993.2 | 1869.8 | 3927.5  | 2497.4  | 2536.0  |
| 29.5   | 18.2   | 12.4   | 11.3   | 25.8   | 19.0   | 39.6    | 51.3    | 54.9    |
| 33.5   | 31.8   | 15.2   | 13.6   | 56.9   | 36.5   | 39.4    | 57.7    | 67.6    |
| 96.1   | 98.7   | 51.7   | 56.8   | 93.0   | 74.8   | 85.7    | 102.8   | 103.2   |
| 250.7  | 281.0  | 51.7   | 46.5   | 368.3  | 261.4  | 778.2   | 574.6   | 639.1   |
| 264.2  | 284.4  | 21.8   | 38.4   | 361.0  | 311.0  | 1196.4  | 924.5   | 970.1   |
| 180.8  | 153.5  | 369.2  | 370.7  | 245.1  | 225.0  | 240.0   | 282.1   | 296.9   |
| 203.8  | 336.4  | 182.7  | 227.9  | 335.3  | 188.1  | 770.9   | 1196.5  | 1112.8  |
| 203.8  | 344.9  | 239.2  | 278.4  | 414.4  | 318.9  | 1130.8  | 1454.0  | 1529.3  |
| 26.5   | 50.5   | 136.1  | 197.5  | 31.1   | 23.9   | 104.9   | 104.1   | 103.7   |
| 232.0  | 229.1  | 483.3  | 665.8  | 470.7  | 192.8  | 105.3   | 842.2   | 690.3   |
| 345.9  | 536.4  | 32.0   | 41.7   | 566.7  | 545.3  | 845.3   | 764.9   | 806.4   |
| 6.0    | 19.1   | 1.1    | 2.1    | 8.6    | 26.7   | 2.8     | 1.6     | 2.4     |
| 82.8   | 95.0   | 111.8  | 177.5  | 128.6  | 117.5  | 518.5   | 644.0   | 647.2   |
| 30.5   | 41.6   | 32.3   | 47.3   | 51.3   | 32.6   | 11.6    | 6.1     | 6.0     |
| 27.8   | 37.9   | 4.4    | 11.8   | 39.9   | 74.0   | 30.6    | 21.4    | 29.9    |
| 406.1  | 980.5  | 33.2   | 35.8   | 910.7  | 873.2  | 780.2   | 742.1   | 850.2   |
| 439.5  | 576.4  | 51.5   | 98.4   | 569.7  | 501.6  | 291.5   | 275.6   | 318.2   |
| 301.9  | 314.2  | 68.8   | 86.5   | 407.9  | 363.4  | 3237.2  | 1464.4  | 1670.4  |
| 650.2  | 711.7  | 230.4  | 360.2  | 939.6  | 638.5  | 856.7   | 599.6   | 796.5   |
| 378.3  | 393.9  | 56.7   | 60.7   | 596.2  | 342.7  | 666.9   | 637.9   | 693.2   |
| 228.5  | 70.8   | 11.6   | 4.5    | 1052.4 | 96.7   | 29.7    | 29.9    | 30.0    |
| 145.1  | 110.0  | 7.2    | 24.5   | 232.2  | 53.4   | 207.4   | 185.6   | 230.6   |
| 128.1  | 162.7  | 89.4   | 109.6  | 100.1  | 195.0  | 394.7   | 280.6   | 296.3   |
| 200.4  | 322.5  | 118.4  | 125.4  | 279.0  | 264.3  | 677.5   | 492.2   | 484.5   |
| 314.5  | 384.8  | 81.2   | 94.1   | 409.8  | 246.8  | 360.3   | 257.4   | 315.2   |
| 700.7  | 1037.5 | 106.0  | 86.1   | 1464.9 | 895.6  | 1480.5  | 1973.1  | 2116.9  |
| 67.2   | 86.4   | 14.0   | 19.7   | 201.2  | 80.3   | 256.7   | 344.4   | 305.6   |
| 627.1  | 529.0  | 142.5  | 247.8  | 977.4  | 596.1  | 1564.2  | 1399.7  | 1492.5  |
| 11.4   | 24.6   | 15.4   | 19.8   | 33.6   | 12.2   | 33.7    | 25.1    | 26.1    |
| 5236.5 | 5791.8 | 2046.1 | 2613.3 | 6364.5 | 6406.1 | 10704.4 | 10421.9 | 10364.4 |
| 952.9  | 1550.1 | 123.0  | 152.0  | 1518.7 | 1585.2 | 1680.2  | 794.5   | 771.9   |
| 136.9  | 177.1  | 154.4  | 169.7  | 220.8  | 89.3   | 334.6   | 240.9   | 237.5   |
| 377.8  | 435.3  | 165.0  | 148.5  | 597.0  | 377.3  | 634.6   | 367.6   | 427.0   |
| 5.7    | 3.3    | 3.3    | 0.9    | 5.1    | 2.1    | 26.4    | 15.3    | 16.4    |
| 353.5  | 427.4  | 174.7  | 263.6  | 577.8  | 391.6  | 534.7   | 341.5   | 354.8   |
| 4784.2 | 5332.2 | 454.4  | 652.9  | 5750.3 | 4477.2 | 4366.4  | 4746.4  | 5121.1  |
| 364.3  | 522.6  | 261.3  | 284.7  | 564.1  | 476.3  | 916.5   | 813.3   | 800.6   |
| 238.3  | 312.5  | 175.8  | 202.0  | 423.8  | 321.3  | 1021.7  | 753.5   | 796.1   |
| 878.4  | 1197.9 | 153.1  | 162.6  | 1400.9 | 1333.1 | 1742.8  | 1246.6  | 1362.3  |
| 14.1   | 5.7    | 3.8    | 16.4   | 23.3   | 5.1    | 42.1    | 52.5    | 71.1    |

|        |        |       |        |        |        |        |        |        |
|--------|--------|-------|--------|--------|--------|--------|--------|--------|
| 10.2   | 11.5   | 9.1   | 12.6   | 6.6    | 6.8    | 42.7   | 62.1   | 58.1   |
| 365.8  | 592.5  | 272.3 | 351.5  | 628.4  | 677.4  | 1787.6 | 1674.9 | 2024.8 |
| 46.4   | 52.2   | 50.3  | 47.2   | 64.4   | 61.0   | 56.5   | 59.4   | 60.9   |
| 124.1  | 97.6   | 55.4  | 82.5   | 85.9   | 138.0  | 149.5  | 146.3  | 159.6  |
| 215.5  | 201.8  | 133.8 | 197.4  | 210.4  | 157.7  | 438.4  | 379.3  | 409.8  |
| 328.2  | 304.7  | 271.1 | 356.0  | 366.6  | 254.7  | 640.2  | 710.1  | 917.4  |
| 6.2    | 15.3   | 45.5  | 69.0   | 14.5   | 4.0    | 44.2   | 30.6   | 27.7   |
| 43.2   | 38.2   | 87.9  | 86.6   | 49.3   | 17.2   | 73.6   | 46.5   | 55.0   |
| 93.9   | 121.7  | 84.2  | 155.5  | 89.1   | 128.2  | 314.3  | 197.9  | 225.2  |
| 1255.2 | 1632.5 | 254.3 | 429.0  | 1660.5 | 1366.1 | 1103.9 | 1249.5 | 1287.0 |
| 262.0  | 292.0  | 27.6  | 65.6   | 542.5  | 324.5  | 991.4  | 1119.5 | 1182.4 |
| 152.9  | 158.6  | 8.6   | 14.2   | 209.4  | 110.9  | 1.8    | 3.4    | 1.8    |
| 424.9  | 601.9  | 80.0  | 116.9  | 661.7  | 586.0  | 1052.6 | 830.7  | 883.8  |
| 91.0   | 71.2   | 102.1 | 154.0  | 105.7  | 72.2   | 180.9  | 202.5  | 209.4  |
| 9.0    | 22.2   | 32.6  | 34.0   | 53.1   | 5.2    | 9.1    | 12.5   | 20.2   |
| 271.8  | 525.0  | 2.1   | 1.0    | 390.6  | 345.0  | 8227.7 | 8795.2 | 8739.4 |
| 280.8  | 366.2  | 113.4 | 184.2  | 503.9  | 337.0  | 799.9  | 421.6  | 466.1  |
| 208.4  | 241.7  | 105.0 | 177.3  | 261.0  | 285.8  | 976.9  | 548.7  | 656.5  |
| 308.1  | 401.5  | 280.4 | 402.1  | 401.7  | 385.2  | 680.5  | 469.7  | 542.7  |
| 280.1  | 372.9  | 155.3 | 193.0  | 376.8  | 399.7  | 560.5  | 404.9  | 529.1  |
| 614.6  | 739.1  | 211.4 | 308.0  | 884.4  | 691.2  | 1355.7 | 807.8  | 863.6  |
| 37.7   | 48.5   | 142.6 | 183.7  | 60.4   | 46.6   | 279.7  | 280.2  | 381.8  |
| 13.4   | 11.4   | 0.5   | 8.2    | 17.8   | 20.3   | 1.4    | 3.5    | 1.1    |
| 6.6    | 20.3   | 11.2  | 10.7   | 22.7   | 4.9    | 8.9    | 6.5    | 13.2   |
| 0.7    | 4.8    | 11.9  | 8.1    | 16.2   | 11.5   | 5.0    | 5.1    | 6.5    |
| 7.2    | 10.3   | 0.9   | 1.9    | 10.7   | 18.0   | 5.2    | 5.6    | 4.3    |
| 290.6  | 349.2  | 188.9 | 274.5  | 408.0  | 336.1  | 1044.9 | 786.5  | 857.7  |
| 44.8   | 50.1   | 33.2  | 22.7   | 59.4   | 58.6   | 148.1  | 143.8  | 147.7  |
| 2890.0 | 6041.4 | 760.5 | 1336.7 | 4656.1 | 5540.4 | 4085.8 | 2834.4 | 3193.2 |
| 138.7  | 165.7  | 74.5  | 61.9   | 158.9  | 151.9  | 243.2  | 214.7  | 195.1  |
| 96.0   | 128.3  | 16.4  | 11.9   | 156.3  | 147.8  | 490.0  | 449.4  | 497.1  |
| 26.2   | 43.0   | 3.8   | 1.3    | 38.2   | 30.4   | 82.1   | 96.3   | 85.9   |
| 378.0  | 435.4  | 116.0 | 169.3  | 524.2  | 430.3  | 671.0  | 477.3  | 482.5  |
| 106.3  | 133.8  | 42.7  | 66.6   | 161.1  | 91.1   | 132.3  | 89.3   | 96.6   |
| 207.0  | 232.5  | 207.9 | 254.9  | 272.2  | 293.2  | 416.1  | 439.8  | 421.7  |
| 764.8  | 848.0  | 147.9 | 228.4  | 897.3  | 997.1  | 622.9  | 288.3  | 350.6  |
| 1364.4 | 2350.8 | 166.0 | 197.5  | 1774.1 | 2130.0 | 1727.4 | 963.9  | 1093.8 |
| 2.4    | 2.1    | 8.9   | 9.5    | 5.6    | 4.8    | 16.4   | 18.1   | 16.2   |
| 1.2    | 1.1    | 18.2  | 34.8   | 2.2    | 1.0    | 4.1    | 4.7    | 5.8    |
| 98.2   | 127.0  | 27.5  | 23.8   | 111.6  | 108.0  | 221.9  | 217.0  | 245.5  |
| 270.1  | 298.6  | 18.3  | 22.0   | 333.1  | 318.0  | 1405.1 | 1143.4 | 1289.4 |
| 1840.4 | 2328.9 | 481.7 | 686.9  | 2855.5 | 2240.7 | 3554.8 | 2367.8 | 2430.3 |
| 157.6  | 210.9  | 69.0  | 102.1  | 321.1  | 187.5  | 670.6  | 540.5  | 541.2  |
| 307.2  | 402.9  | 147.1 | 175.9  | 498.6  | 360.0  | 436.4  | 334.1  | 325.0  |
| 4.7    | 12.8   | 2.8   | 2.5    | 21.2   | 3.2    | 71.1   | 20.6   | 1.6    |
| 958.2  | 894.4  | 120.5 | 156.8  | 1224.6 | 954.8  | 1515.9 | 1133.3 | 1283.3 |
| 2659.4 | 2591.5 | 42.4  | 41.7   | 3904.7 | 2472.2 | 9.2    | 2.9    | 2.7    |
| 56.7   | 66.8   | 98.9  | 164.9  | 41.5   | 74.6   | 222.4  | 239.8  | 261.9  |
| 83.8   | 110.3  | 45.4  | 58.4   | 107.3  | 117.0  | 81.2   | 59.8   | 73.1   |
| 208.2  | 255.7  | 126.8 | 197.2  | 283.6  | 190.5  | 1046.7 | 954.5  | 1037.6 |
| 59.0   | 46.8   | 83.6  | 98.7   | 109.2  | 37.5   | 135.6  | 168.8  | 169.6  |
| 169.1  | 216.0  | 39.9  | 64.2   | 223.6  | 213.6  | 122.4  | 54.9   | 60.9   |
| 9.8    | 1.3    | 8.0   | 5.2    | 13.2   | 9.9    | 7.4    | 9.8    | 5.7    |



|        |        |       |       |        |        |        |        |        |
|--------|--------|-------|-------|--------|--------|--------|--------|--------|
| 6.9    | 6.0    | 9.3   | 8.0   | 11.3   | 6.3    | 8.1    | 5.7    | 6.4    |
| 64.8   | 57.3   | 8.8   | 1.0   | 98.6   | 61.9   | 9.0    | 6.7    | 4.2    |
| 36.1   | 39.9   | 1.4   | 2.2   | 39.6   | 43.5   | 1.4    | 0.8    | 0.8    |
| 10.4   | 1.6    | 46.0  | 55.3  | 2.8    | 3.0    | 154.1  | 157.6  | 154.0  |
| 14.5   | 42.4   | 30.5  | 42.9  | 47.8   | 37.2   | 49.7   | 46.1   | 52.2   |
| 23.8   | 47.6   | 26.7  | 30.2  | 56.9   | 58.7   | 107.5  | 73.5   | 93.1   |
| 10.2   | 23.5   | 22.1  | 22.4  | 19.3   | 32.0   | 18.5   | 13.6   | 13.4   |
| 76.2   | 133.6  | 319.5 | 390.9 | 124.2  | 111.4  | 86.9   | 55.7   | 57.4   |
| 160.6  | 198.6  | 19.8  | 40.2  | 301.9  | 179.8  | 262.5  | 336.9  | 372.4  |
| 102.9  | 133.6  | 43.1  | 63.1  | 177.6  | 115.0  | 206.3  | 312.7  | 335.5  |
| 344.2  | 372.4  | 154.8 | 246.1 | 504.7  | 258.0  | 1019.3 | 808.3  | 902.8  |
| 94.9   | 132.2  | 15.8  | 23.0  | 131.2  | 124.7  | 0.6    | 1.4    | 0.9    |
| 236.3  | 304.6  | 31.6  | 53.1  | 316.4  | 272.9  | 4.7    | 3.4    | 3.3    |
| 209.3  | 341.0  | 7.9   | 16.5  | 243.8  | 235.3  | 1553.4 | 2581.5 | 2221.9 |
| 196.7  | 168.2  | 116.2 | 100.0 | 184.8  | 180.7  | 770.5  | 1277.2 | 1388.4 |
| 399.0  | 517.6  | 2.8   | 6.8   | 603.0  | 311.3  | 573.7  | 316.4  | 377.3  |
| 631.7  | 898.0  | 176.3 | 287.0 | 888.5  | 863.3  | 1870.2 | 1482.8 | 1597.7 |
| 103.9  | 137.0  | 66.6  | 128.6 | 149.4  | 128.9  | 293.1  | 239.9  | 303.4  |
| 61.8   | 64.8   | 88.9  | 134.9 | 105.1  | 64.7   | 286.9  | 330.1  | 362.2  |
| 53.4   | 48.0   | 124.1 | 129.3 | 80.7   | 46.4   | 159.7  | 194.0  | 186.2  |
| 619.8  | 1071.3 | 427.0 | 502.9 | 1018.8 | 1132.0 | 1804.7 | 1115.7 | 1401.6 |
| 1250.7 | 1389.7 | 256.9 | 366.4 | 1473.2 | 1265.9 | 1065.1 | 704.8  | 788.5  |
| 11.2   | 16.7   | 11.6  | 10.4  | 19.1   | 2.3    | 37.1   | 38.3   | 38.4   |
| 86.8   | 112.3  | 34.4  | 46.0  | 99.1   | 95.7   | 167.0  | 177.1  | 191.0  |
| 315.5  | 488.4  | 74.3  | 100.0 | 676.0  | 324.2  | 576.4  | 657.6  | 698.1  |
| 1.3    | 11.8   | 8.4   | 2.4   | 14.0   | 31.8   | 35.4   | 32.1   | 42.8   |
| 404.0  | 510.9  | 372.0 | 510.4 | 565.8  | 512.8  | 2602.5 | 2628.3 | 2899.0 |
| 514.6  | 589.5  | 94.5  | 136.9 | 726.1  | 713.7  | 1019.3 | 828.3  | 870.2  |
| 921.7  | 1078.7 | 202.6 | 156.7 | 1193.5 | 1419.6 | 1191.7 | 872.3  | 971.5  |
| 48.8   | 55.8   | 2.2   | 0.5   | 72.3   | 46.9   | 5.3    | 2.4    | 3.6    |
| 605.8  | 694.9  | 14.4  | 9.9   | 810.4  | 564.6  | 5.3    | 10.0   | 5.3    |
| 126.3  | 163.8  | 48.2  | 73.7  | 164.9  | 142.4  | 787.1  | 506.1  | 568.9  |
| 21.6   | 21.0   | 714.4 | 974.2 | 13.6   | 20.9   | 9.1    | 30.8   | 9.5    |
| 266.9  | 290.1  | 71.0  | 85.0  | 367.3  | 257.0  | 342.4  | 231.4  | 234.6  |
| 252.0  | 260.4  | 73.6  | 104.2 | 405.8  | 252.8  | 435.2  | 328.9  | 343.1  |
| 1499.6 | 1920.7 | 195.1 | 283.3 | 1934.3 | 1881.1 | 996.9  | 336.5  | 369.4  |
| 70.7   | 43.9   | 146.1 | 163.1 | 76.7   | 44.5   | 194.7  | 209.4  | 247.0  |
| 24.5   | 17.1   | 12.5  | 15.0  | 63.6   | 27.7   | 74.3   | 70.8   | 87.2   |
| 30.9   | 45.8   | 5.5   | 3.0   | 40.3   | 28.2   | 162.4  | 137.5  | 142.7  |
| 16.9   | 14.6   | 24.0  | 29.1  | 32.0   | 17.5   | 20.9   | 7.4    | 19.7   |
| 382.0  | 555.2  | 207.7 | 264.3 | 723.5  | 546.0  | 853.0  | 959.9  | 1055.3 |
| 314.2  | 400.2  | 59.9  | 54.8  | 344.7  | 371.1  | 255.2  | 217.9  | 252.8  |
| 187.2  | 359.0  | 66.1  | 131.7 | 297.8  | 219.4  | 704.9  | 699.8  | 765.9  |
| 30.9   | 24.5   | 42.3  | 55.5  | 21.4   | 29.9   | 81.7   | 62.3   | 66.5   |
| 4.0    | 1.1    | 12.9  | 11.6  | 3.8    | 8.7    | 7.4    | 6.8    | 7.2    |
| 0.8    | 1.6    | 0.7   | 3.0   | 0.7    | 0.5    | 3.7    | 2.1    | 3.7    |
| 85.7   | 101.5  | 32.7  | 45.5  | 111.9  | 64.8   | 82.0   | 111.1  | 104.9  |
| 1.7    | 3.7    | 5.0   | 4.1   | 1.3    | 1.6    | 2.5    | 8.7    | 2.5    |
| 95.3   | 85.2   | 3.7   | 14.5  | 105.6  | 91.2   | 99.8   | 40.8   | 56.9   |
| 282.2  | 296.7  | 120.1 | 188.4 | 411.7  | 222.8  | 508.4  | 213.0  | 234.6  |
| 783.1  | 1044.9 | 493.4 | 748.7 | 1157.5 | 882.0  | 4322.0 | 4500.6 | 4874.7 |
| 1045.2 | 1329.7 | 734.8 | 972.6 | 1508.9 | 1208.1 | 4913.0 | 4982.1 | 5280.0 |
| 695.4  | 750.6  | 37.6  | 30.4  | 1003.6 | 817.3  | 628.8  | 192.5  | 256.1  |

|        |        |        |        |        |        |        |        |        |
|--------|--------|--------|--------|--------|--------|--------|--------|--------|
| 5732.7 | 6302.9 | 2870.9 | 3288.9 | 5909.7 | 6143.2 | 8228.8 | 6754.6 | 6483.0 |
| 208.6  | 279.2  | 120.0  | 166.0  | 243.5  | 280.5  | 507.7  | 510.2  | 546.5  |
| 67.8   | 95.4   | 56.0   | 66.4   | 103.1  | 91.2   | 78.0   | 64.8   | 58.4   |
| 40.6   | 57.5   | 32.4   | 39.7   | 53.0   | 84.5   | 191.8  | 186.1  | 223.8  |
| 69.8   | 103.1  | 95.4   | 114.5  | 118.9  | 52.8   | 165.1  | 171.9  | 214.9  |
| 88.5   | 94.0   | 105.1  | 137.5  | 97.9   | 96.5   | 148.8  | 194.4  | 170.1  |
| 162.4  | 180.2  | 51.4   | 52.3   | 153.0  | 407.9  | 776.6  | 534.4  | 618.1  |
| 38.1   | 47.5   | 22.1   | 21.4   | 57.0   | 55.0   | 423.9  | 278.6  | 259.8  |
| 227.0  | 379.9  | 54.8   | 57.1   | 467.7  | 535.4  | 1193.5 | 908.4  | 989.8  |
| 439.8  | 352.7  | 53.3   | 54.4   | 608.3  | 255.5  | 557.6  | 222.3  | 286.3  |
| 9.9    | 4.2    | 109.8  | 139.8  | 9.2    | 2.9    | 79.6   | 81.7   | 81.1   |
| 261.6  | 267.5  | 501.5  | 746.0  | 416.1  | 256.1  | 338.9  | 304.2  | 379.0  |
| 442.8  | 510.2  | 31.5   | 51.5   | 605.1  | 518.1  | 28.5   | 18.9   | 26.2   |
| 231.5  | 295.2  | 25.3   | 44.3   | 373.6  | 205.8  | 10.2   | 12.4   | 12.5   |
| 385.0  | 506.8  | 66.1   | 90.5   | 654.2  | 602.0  | 616.3  | 381.1  | 441.6  |
| 2.3    | 10.4   | 2.6    | 1.4    | 2.2    | 11.7   | 2.5    | 1.8    | 4.5    |
| 546.1  | 679.5  | 13.4   | 15.0   | 1186.7 | 680.6  | 714.4  | 126.1  | 130.3  |
| 121.0  | 139.2  | 64.8   | 89.6   | 201.1  | 101.7  | 442.8  | 534.2  | 582.6  |
| 14.0   | 21.2   | 1.2    | 3.4    | 27.5   | 7.4    | 154.8  | 160.8  | 211.3  |
| 2441.4 | 2017.4 | 13.8   | 8.7    | 3093.3 | 1747.9 | 275.8  | 513.4  | 486.4  |
| 83.7   | 103.7  | 45.7   | 29.7   | 139.1  | 142.4  | 334.8  | 426.8  | 509.4  |
| 122.8  | 113.5  | 18.4   | 21.3   | 224.3  | 103.7  | 297.8  | 145.9  | 162.9  |
| 119.5  | 161.3  | 46.8   | 59.0   | 209.7  | 151.5  | 514.3  | 357.8  | 466.4  |
| 173.8  | 168.8  | 43.2   | 72.0   | 210.8  | 192.8  | 730.5  | 580.8  | 719.5  |
| 58.4   | 72.5   | 163.1  | 278.3  | 94.7   | 60.0   | 287.2  | 368.7  | 423.2  |
| 1120.6 | 2250.4 | 9.4    | 14.6   | 2578.0 | 1875.4 | 872.0  | 678.1  | 793.4  |
| 32.8   | 36.6   | 4.6    | 5.8    | 105.4  | 33.2   | 0.9    | 2.1    | 2.1    |
| 103.7  | 74.8   | 0.5    | 0.9    | 300.4  | 87.7   | 0.8    | 2.1    | 1.0    |
| 95.4   | 113.8  | 56.8   | 60.4   | 125.0  | 82.3   | 381.0  | 258.4  | 306.1  |
| 11.8   | 21.0   | 33.0   | 31.9   | 22.4   | 11.4   | 3.1    | 3.6    | 5.2    |
| 172.8  | 143.1  | 14.9   | 16.5   | 173.6  | 178.7  | 194.5  | 100.2  | 146.3  |
| 96.7   | 114.2  | 81.8   | 100.3  | 141.5  | 98.9   | 223.3  | 239.2  | 212.8  |
| 1.5    | 4.5    | 3.9    | 5.0    | 4.7    | 13.7   | 37.7   | 35.3   | 26.2   |
| 82.9   | 140.9  | 25.5   | 26.0   | 164.5  | 161.8  | 566.8  | 464.5  | 529.6  |
| 69.7   | 95.0   | 18.8   | 8.4    | 91.2   | 138.7  | 99.4   | 73.6   | 85.9   |
| 384.8  | 543.9  | 3.1    | 1.8    | 521.7  | 426.3  | 92.2   | 120.7  | 138.2  |
| 117.6  | 142.7  | 22.0   | 29.2   | 182.8  | 124.7  | 94.7   | 109.0  | 125.4  |
| 285.4  | 440.4  | 20.8   | 22.1   | 469.1  | 431.6  | 332.4  | 381.9  | 427.4  |
| 145.1  | 226.8  | 15.4   | 19.6   | 194.4  | 232.3  | 51.0   | 26.7   | 28.8   |
| 131.0  | 186.8  | 16.2   | 25.6   | 179.8  | 231.7  | 42.2   | 25.9   | 23.3   |
| 3.7    | 5.2    | 6.5    | 8.0    | 5.1    | 0.2    | 5.7    | 5.8    | 2.9    |
| 4.1    | 5.5    | 5.2    | 9.7    | 0.8    | 1.2    | 2.7    | 6.0    | 1.6    |
| 16.1   | 10.1   | 14.3   | 19.5   | 21.8   | 18.1   | 12.7   | 8.0    | 17.3   |
| 124.9  | 122.7  | 41.8   | 40.4   | 150.0  | 144.3  | 133.4  | 72.5   | 91.0   |
| 717.3  | 1100.8 | 27.4   | 34.1   | 1342.3 | 1132.2 | 809.6  | 532.9  | 756.5  |
| 254.6  | 351.7  | 64.3   | 90.5   | 432.7  | 390.1  | 771.5  | 993.9  | 1029.5 |
| 41.3   | 71.9   | 10.8   | 23.8   | 36.4   | 20.3   | 128.0  | 123.6  | 142.8  |
| 31.1   | 48.2   | 11.7   | 6.4    | 45.8   | 36.9   | 75.3   | 116.1  | 114.4  |
| 69.1   | 70.3   | 8.1    | 32.7   | 81.1   | 53.7   | 85.7   | 60.2   | 101.3  |
| 254.9  | 345.8  | 52.2   | 81.3   | 394.6  | 311.2  | 342.2  | 327.4  | 354.2  |
| 265.0  | 153.5  | 12.5   | 9.0    | 425.3  | 150.4  | 10.6   | 5.5    | 5.8    |
| 630.8  | 686.2  | 549.0  | 736.3  | 848.0  | 776.0  | 1488.3 | 744.9  | 767.8  |
| 672.4  | 889.5  | 168.9  | 183.7  | 861.0  | 858.8  | 1488.2 | 1354.5 | 1457.0 |

|        |        |        |        |        |        |        |        |        |
|--------|--------|--------|--------|--------|--------|--------|--------|--------|
| 86.7   | 94.9   | 100.1  | 62.3   | 125.9  | 70.8   | 44.4   | 48.6   | 46.0   |
| 57.5   | 81.5   | 63.9   | 72.4   | 77.4   | 28.9   | 38.0   | 31.9   | 48.4   |
| 368.8  | 416.3  | 48.0   | 63.8   | 654.9  | 402.6  | 319.1  | 321.2  | 358.6  |
| 141.8  | 135.2  | 28.1   | 35.3   | 252.2  | 138.9  | 156.5  | 168.6  | 193.8  |
| 210.6  | 372.2  | 27.3   | 25.0   | 391.5  | 329.7  | 238.2  | 205.8  | 193.6  |
| 13.0   | 22.1   | 1.2    | 18.1   | 33.9   | 23.1   | 1064.1 | 1105.6 | 1172.8 |
| 403.7  | 593.4  | 35.0   | 20.7   | 775.3  | 510.1  | 381.6  | 574.3  | 650.7  |
| 185.9  | 219.6  | 88.5   | 126.0  | 247.1  | 213.0  | 218.8  | 184.6  | 170.5  |
| 73.2   | 63.0   | 21.4   | 24.3   | 88.4   | 38.4   | 588.4  | 543.9  | 554.3  |
| 493.9  | 539.7  | 129.2  | 199.2  | 665.7  | 527.2  | 726.1  | 578.7  | 668.6  |
| 124.4  | 165.1  | 13.2   | 11.3   | 161.0  | 118.2  | 2096.3 | 1833.6 | 1921.7 |
| 9.6    | 22.8   | 1.8    | 3.2    | 7.8    | 2.3    | 34.2   | 43.6   | 30.4   |
| 455.5  | 567.3  | 144.4  | 182.0  | 681.6  | 519.8  | 4482.5 | 3795.7 | 3847.6 |
| 401.4  | 632.6  | 66.9   | 52.9   | 725.3  | 528.7  | 254.3  | 134.6  | 150.5  |
| 168.7  | 141.2  | 0.9    | 3.4    | 330.9  | 121.5  | 13.9   | 9.4    | 10.7   |
| 106.8  | 64.0   | 29.0   | 40.4   | 128.2  | 103.7  | 13.2   | 20.7   | 13.4   |
| 211.5  | 191.2  | 12.6   | 12.8   | 279.5  | 220.8  | 30.1   | 16.2   | 13.8   |
| 30.6   | 47.1   | 19.2   | 17.9   | 64.1   | 16.5   | 45.0   | 36.1   | 48.7   |
| 671.2  | 696.3  | 423.6  | 450.6  | 601.7  | 589.4  | 707.0  | 538.6  | 632.3  |
| 1.7    | 21.1   | 5.2    | 6.0    | 18.5   | 17.5   | 13.1   | 6.7    | 5.7    |
| 11.1   | 10.2   | 8.2    | 27.0   | 19.4   | 11.6   | 25.6   | 24.7   | 18.9   |
| 209.0  | 273.7  | 166.2  | 210.8  | 269.8  | 313.3  | 909.9  | 955.3  | 1160.4 |
| 13.8   | 8.8    | 2.4    | 8.9    | 12.9   | 28.3   | 21.4   | 13.7   | 6.6    |
| 18.2   | 18.3   | 16.0   | 18.2   | 21.0   | 17.1   | 137.7  | 136.0  | 138.4  |
| 315.0  | 384.6  | 521.4  | 774.5  | 550.7  | 350.0  | 2446.0 | 2792.5 | 2889.2 |
| 1105.4 | 1652.1 | 114.3  | 142.4  | 1510.9 | 1871.3 | 3332.2 | 1819.0 | 2065.8 |
| 149.7  | 161.2  | 104.8  | 129.6  | 234.8  | 159.6  | 494.8  | 494.4  | 458.2  |
| 396.9  | 432.4  | 141.3  | 182.9  | 684.2  | 382.5  | 1262.2 | 1427.6 | 1545.8 |
| 17.7   | 25.1   | 68.3   | 107.8  | 52.2   | 22.9   | 52.2   | 64.8   | 65.9   |
| 1.1    | 8.1    | 21.0   | 19.0   | 17.7   | 10.2   | 41.6   | 26.1   | 32.1   |
| 7.1    | 5.0    | 2.3    | 0.8    | 1.3    | 1.0    | 5.4    | 9.7    | 7.7    |
| 253.0  | 282.0  | 33.0   | 75.3   | 323.8  | 278.1  | 156.1  | 96.2   | 107.4  |
| 417.2  | 316.1  | 35.6   | 44.7   | 451.2  | 256.2  | 785.2  | 566.8  | 647.8  |
| 114.3  | 248.9  | 75.9   | 63.6   | 219.4  | 184.5  | 228.2  | 282.5  | 282.0  |
| 112.6  | 162.9  | 250.7  | 300.7  | 165.8  | 141.1  | 511.8  | 942.9  | 1052.6 |
| 499.2  | 550.8  | 280.0  | 328.9  | 839.9  | 567.0  | 854.3  | 757.7  | 848.9  |
| 94.7   | 191.4  | 10.3   | 17.0   | 160.6  | 162.3  | 122.7  | 135.5  | 152.5  |
| 24.8   | 33.5   | 2.9    | 13.7   | 25.0   | 26.3   | 37.6   | 43.3   | 43.8   |
| 12.4   | 8.1    | 1086.8 | 1489.3 | 5.5    | 8.3    | 4.6    | 2.0    | 11.2   |
| 283.1  | 422.3  | 134.2  | 310.3  | 315.1  | 327.6  | 334.8  | 233.3  | 258.7  |
| 111.5  | 100.5  | 40.1   | 43.2   | 164.0  | 88.6   | 351.4  | 281.5  | 324.8  |
| 18.9   | 22.4   | 5.1    | 11.1   | 19.7   | 3.7    | 59.9   | 62.8   | 58.8   |
| 1.3    | 10.8   | 2.1    | 5.0    | 1.8    | 1.1    | 1.3    | 14.6   | 6.9    |
| 7.7    | 6.9    | 6.4    | 5.8    | 1.4    | 1.4    | 24.2   | 205.6  | 198.5  |
| 41.9   | 53.4   | 15.8   | 20.7   | 68.5   | 47.8   | 37.8   | 39.5   | 40.1   |
| 382.7  | 468.4  | 82.0   | 174.4  | 573.8  | 431.4  | 816.4  | 717.6  | 760.9  |
| 0.8    | 1.8    | 1.1    | 1.2    | 2.3    | 1.0    | 6.9    | 1.1    | 1.0    |
| 38.1   | 28.3   | 22.7   | 28.5   | 53.8   | 32.2   | 36.3   | 46.8   | 41.4   |
| 1.7    | 1.7    | 1.1    | 5.9    | 0.9    | 2.2    | 2.9    | 2.3    | 3.1    |
| 34.8   | 41.1   | 1.8    | 7.3    | 36.1   | 25.7   | 55.3   | 71.1   | 90.0   |
| 42.4   | 84.6   | 17.3   | 9.9    | 67.4   | 39.5   | 200.2  | 391.5  | 501.2  |
| 24.8   | 19.8   | 4.9    | 6.9    | 41.9   | 24.1   | 12.3   | 2.7    | 6.4    |
| 122.4  | 117.5  | 17.4   | 16.4   | 211.1  | 134.1  | 52.4   | 77.0   | 76.0   |

|        |        |       |        |        |        |        |        |        |
|--------|--------|-------|--------|--------|--------|--------|--------|--------|
| 342.4  | 474.4  | 40.1  | 70.2   | 560.9  | 411.4  | 580.4  | 431.3  | 499.7  |
| 34.7   | 29.6   | 18.8  | 22.2   | 43.6   | 33.8   | 55.3   | 36.2   | 47.3   |
| 119.1  | 164.6  | 25.9  | 26.4   | 138.5  | 129.6  | 509.4  | 453.6  | 579.1  |
| 65.8   | 53.2   | 76.2  | 76.9   | 87.1   | 45.9   | 76.6   | 68.6   | 79.2   |
| 248.6  | 311.3  | 74.9  | 98.7   | 428.9  | 282.4  | 608.0  | 530.9  | 565.1  |
| 180.3  | 220.1  | 38.9  | 56.1   | 283.9  | 207.2  | 329.3  | 275.8  | 289.2  |
| 103.9  | 91.9   | 156.3 | 264.9  | 170.4  | 69.0   | 206.3  | 155.0  | 183.1  |
| 58.5   | 45.2   | 77.2  | 94.1   | 117.3  | 48.2   | 949.5  | 986.0  | 1189.5 |
| 130.5  | 152.9  | 311.4 | 403.4  | 196.2  | 206.7  | 1661.8 | 1165.3 | 1235.4 |
| 66.7   | 78.6   | 3.6   | 1.7    | 85.8   | 80.0   | 319.7  | 356.5  | 423.7  |
| 1.4    | 1.4    | 1.2   | 1.9    | 0.8    | 0.9    | 156.5  | 347.2  | 368.0  |
| 1654.0 | 2327.0 | 75.0  | 110.9  | 2625.1 | 2201.2 | 1421.7 | 1235.2 | 1338.1 |
| 93.1   | 79.1   | 31.5  | 45.7   | 75.3   | 110.9  | 108.0  | 69.8   | 111.0  |
| 11.3   | 20.5   | 15.0  | 15.6   | 20.3   | 30.4   | 56.2   | 60.0   | 62.9   |
| 111.5  | 115.6  | 48.1  | 34.5   | 199.4  | 132.9  | 414.1  | 241.5  | 273.3  |
| 856.8  | 1085.4 | 2.4   | 2.3    | 1000.5 | 956.3  | 1077.8 | 1188.0 | 1405.9 |
| 3.9    | 9.5    | 6.9   | 16.9   | 5.6    | 7.4    | 16.6   | 4.6    | 19.5   |
| 35.3   | 42.1   | 83.0  | 83.0   | 48.7   | 51.2   | 113.5  | 88.9   | 119.9  |
| 72.5   | 83.0   | 96.3  | 97.2   | 75.8   | 114.2  | 315.3  | 298.7  | 371.3  |
| 1532.3 | 2013.4 | 334.3 | 717.9  | 2353.6 | 2234.6 | 2.7    | 4.3    | 5.3    |
| 61.3   | 52.4   | 49.0  | 35.7   | 87.9   | 85.8   | 39.1   | 63.3   | 57.9   |
| 78.7   | 64.5   | 20.3  | 24.4   | 84.2   | 66.6   | 113.7  | 125.7  | 145.5  |
| 120.4  | 78.5   | 117.7 | 132.6  | 152.0  | 68.6   | 160.8  | 157.0  | 171.3  |
| 56.3   | 86.9   | 62.6  | 97.5   | 67.1   | 101.0  | 114.2  | 104.3  | 118.5  |
| 216.1  | 241.3  | 39.7  | 39.7   | 292.4  | 245.9  | 302.3  | 241.9  | 276.7  |
| 149.4  | 111.0  | 303.8 | 306.5  | 203.6  | 131.4  | 181.3  | 208.8  | 159.9  |
| 301.5  | 306.7  | 125.2 | 156.9  | 388.1  | 339.3  | 648.0  | 529.8  | 625.0  |
| 363.5  | 549.6  | 101.8 | 202.5  | 512.5  | 397.3  | 499.6  | 504.5  | 512.4  |
| 2569.4 | 3531.8 | 213.4 | 307.9  | 3600.5 | 3354.0 | 3234.0 | 2240.2 | 2152.6 |
| 1060.2 | 1724.0 | 65.4  | 110.1  | 1788.5 | 1484.9 | 1479.1 | 1065.6 | 1037.8 |
| 213.7  | 393.6  | 111.1 | 98.2   | 294.4  | 454.0  | 767.9  | 683.5  | 724.0  |
| 1016.8 | 1091.2 | 699.7 | 1138.3 | 1442.4 | 1215.1 | 4718.8 | 4582.7 | 5109.0 |
| 39.0   | 46.2   | 62.2  | 62.8   | 45.2   | 38.6   | 237.0  | 300.0  | 346.9  |
| 113.8  | 125.3  | 113.5 | 195.9  | 141.8  | 109.3  | 579.9  | 323.2  | 327.5  |
| 4.3    | 5.6    | 10.3  | 2.3    | 3.8    | 3.1    | 4.4    | 4.0    | 2.7    |
| 427.0  | 431.9  | 91.4  | 124.6  | 634.2  | 478.5  | 753.3  | 525.4  | 536.7  |
| 39.4   | 33.8   | 140.0 | 201.3  | 34.0   | 31.5   | 54.2   | 42.1   | 40.2   |
| 2.5    | 2.5    | 1.4   | 0.5    | 1.1    | 1.6    | 26.8   | 36.7   | 53.6   |
| 1.3    | 0.4    | 2.4   | 1.5    | 2.7    | 1.4    | 16.1   | 14.5   | 34.1   |
| 151.1  | 187.7  | 122.0 | 179.0  | 236.8  | 205.1  | 556.5  | 428.3  | 450.7  |
| 33.0   | 52.2   | 27.4  | 72.6   | 41.6   | 54.3   | 218.7  | 280.4  | 278.7  |
| 38.0   | 48.7   | 20.1  | 13.3   | 41.7   | 33.1   | 98.4   | 73.8   | 80.5   |
| 14.3   | 9.9    | 12.4  | 12.4   | 6.0    | 11.2   | 4.9    | 3.7    | 8.5    |
| 19.3   | 9.3    | 18.7  | 12.4   | 29.8   | 19.9   | 5.2    | 2.1    | 1.1    |
| 40.5   | 27.9   | 13.7  | 8.7    | 65.6   | 15.9   | 11.4   | 6.1    | 18.4   |
| 31.5   | 60.3   | 180.0 | 262.3  | 66.6   | 121.6  | 72.2   | 140.1  | 129.6  |
| 242.2  | 373.6  | 35.5  | 41.0   | 366.5  | 249.8  | 1369.6 | 1122.4 | 1037.5 |
| 50.5   | 36.7   | 54.5  | 67.8   | 70.3   | 53.0   | 98.5   | 71.0   | 127.4  |
| 303.5  | 463.6  | 3.2   | 11.3   | 426.1  | 401.7  | 1506.0 | 470.8  | 520.4  |
| 70.4   | 95.8   | 51.4  | 71.8   | 69.3   | 63.4   | 128.3  | 107.1  | 120.9  |
| 603.2  | 793.1  | 374.8 | 377.5  | 844.3  | 639.6  | 1134.7 | 810.0  | 875.9  |
| 138.1  | 171.0  | 164.6 | 172.6  | 198.6  | 182.1  | 103.4  | 58.2   | 49.2   |
| 112.3  | 120.2  | 109.3 | 122.4  | 145.3  | 112.1  | 87.3   | 46.4   | 51.8   |

|        |        |       |       |        |        |        |        |        |
|--------|--------|-------|-------|--------|--------|--------|--------|--------|
| 47.8   | 79.5   | 57.5  | 56.0  | 90.1   | 55.9   | 208.2  | 199.3  | 248.3  |
| 43.2   | 47.9   | 11.7  | 16.8  | 67.3   | 52.5   | 145.1  | 149.2  | 168.7  |
| 65.4   | 117.0  | 77.7  | 83.5  | 119.7  | 98.2   | 88.4   | 87.5   | 83.8   |
| 21.1   | 29.1   | 7.2   | 23.5  | 24.6   | 28.0   | 36.0   | 33.4   | 39.1   |
| 25.8   | 34.9   | 28.1  | 27.6  | 44.0   | 41.1   | 55.0   | 56.5   | 67.3   |
| 56.0   | 54.7   | 70.8  | 70.6  | 59.0   | 48.5   | 147.1  | 163.6  | 139.3  |
| 126.3  | 130.5  | 37.3  | 35.1  | 221.4  | 140.1  | 372.3  | 333.4  | 396.1  |
| 185.7  | 217.2  | 51.9  | 73.6  | 259.2  | 190.6  | 240.8  | 161.4  | 199.3  |
| 11.1   | 10.4   | 4.1   | 3.1   | 7.7    | 5.9    | 10.8   | 7.6    | 8.1    |
| 81.3   | 76.7   | 59.3  | 65.2  | 147.3  | 78.6   | 61.8   | 109.8  | 106.6  |
| 402.6  | 496.4  | 64.7  | 72.8  | 640.1  | 370.4  | 1059.6 | 466.6  | 515.7  |
| 524.9  | 726.2  | 86.4  | 83.8  | 777.1  | 695.9  | 499.9  | 511.0  | 569.2  |
| 23.9   | 17.5   | 24.5  | 32.8  | 31.4   | 23.4   | 39.0   | 28.9   | 35.0   |
| 49.1   | 39.7   | 61.3  | 101.0 | 61.0   | 38.2   | 576.2  | 2896.7 | 2943.0 |
| 10.6   | 13.2   | 40.5  | 47.3  | 16.3   | 9.5    | 437.2  | 2344.1 | 2558.8 |
| 42.4   | 36.4   | 102.0 | 117.1 | 41.9   | 35.5   | 518.0  | 2732.0 | 2814.5 |
| 121.3  | 129.9  | 42.9  | 56.7  | 221.6  | 111.5  | 126.4  | 111.8  | 134.9  |
| 112.3  | 123.8  | 178.1 | 197.3 | 153.6  | 94.0   | 213.8  | 195.3  | 199.8  |
| 282.6  | 350.6  | 132.4 | 190.8 | 390.3  | 361.3  | 435.8  | 318.4  | 378.0  |
| 76.6   | 108.9  | 11.7  | 18.3  | 138.8  | 127.2  | 240.0  | 210.1  | 227.0  |
| 65.0   | 82.5   | 89.8  | 150.1 | 63.9   | 111.8  | 193.6  | 119.3  | 168.2  |
| 256.5  | 213.5  | 81.1  | 96.2  | 356.7  | 180.3  | 377.2  | 423.6  | 440.5  |
| 390.9  | 513.9  | 80.6  | 114.7 | 648.4  | 642.7  | 391.9  | 133.2  | 134.5  |
| 117.6  | 172.7  | 51.4  | 48.7  | 282.9  | 157.6  | 322.7  | 86.8   | 93.4   |
| 529.7  | 497.3  | 56.8  | 49.4  | 680.8  | 611.8  | 530.2  | 581.1  | 512.2  |
| 12.0   | 21.3   | 9.6   | 19.5  | 24.6   | 20.5   | 20.8   | 24.5   | 19.0   |
| 7.4    | 2.5    | 2.3   | 1.3   | 1.4    | 11.1   | 15.0   | 4.2    | 5.1    |
| 21.2   | 24.1   | 16.4  | 20.5  | 28.0   | 23.1   | 63.0   | 55.2   | 57.4   |
| 39.0   | 47.7   | 59.8  | 82.6  | 42.1   | 39.8   | 197.7  | 207.1  | 186.7  |
| 322.4  | 341.9  | 211.4 | 345.0 | 438.4  | 309.2  | 863.3  | 416.1  | 432.3  |
| 4.6    | 3.8    | 4.3   | 10.3  | 2.6    | 8.9    | 21.2   | 7.9    | 30.6   |
| 35.5   | 33.4   | 83.5  | 95.6  | 43.6   | 41.0   | 30.6   | 63.4   | 69.7   |
| 16.0   | 23.8   | 7.9   | 2.6   | 21.9   | 27.6   | 2.9    | 1.3    | 6.5    |
| 362.3  | 432.8  | 135.0 | 207.4 | 570.2  | 424.3  | 454.4  | 422.1  | 456.4  |
| 299.8  | 378.5  | 175.0 | 236.7 | 452.0  | 455.7  | 423.3  | 238.1  | 259.6  |
| 63.2   | 239.3  | 2.2   | 15.4  | 106.8  | 170.2  | 52.9   | 30.4   | 51.2   |
| 1.9    | 6.0    | 13.5  | 5.9   | 4.1    | 6.1    | 1.0    | 1.3    | 0.8    |
| 938.7  | 1749.5 | 31.5  | 25.5  | 1492.5 | 1474.8 | 3303.4 | 3273.3 | 3230.1 |
| 352.1  | 350.7  | 160.6 | 225.6 | 427.0  | 341.5  | 782.8  | 442.9  | 527.2  |
| 54.5   | 63.2   | 77.0  | 159.8 | 93.4   | 64.2   | 250.0  | 189.7  | 197.7  |
| 96.5   | 173.7  | 8.9   | 10.4  | 271.4  | 143.1  | 644.8  | 578.7  | 628.8  |
| 1134.0 | 1315.8 | 391.1 | 577.7 | 1338.3 | 1444.2 | 1071.0 | 957.5  | 1039.5 |
| 78.0   | 51.1   | 54.9  | 102.0 | 132.6  | 33.7   | 213.0  | 365.4  | 269.7  |
| 62.4   | 94.7   | 50.6  | 47.7  | 119.0  | 63.2   | 56.1   | 57.8   | 67.9   |
| 232.4  | 342.1  | 76.6  | 88.9  | 440.3  | 315.8  | 405.7  | 363.0  | 403.3  |
| 35.4   | 37.4   | 51.9  | 65.2  | 75.2   | 26.2   | 120.3  | 79.8   | 102.8  |
| 352.1  | 465.8  | 59.4  | 67.9  | 677.9  | 392.7  | 46.4   | 19.1   | 17.6   |
| 22.8   | 14.9   | 15.4  | 8.0   | 18.7   | 3.4    | 34.7   | 24.0   | 27.1   |
| 140.5  | 188.5  | 10.8  | 16.8  | 471.1  | 166.9  | 106.6  | 253.9  | 337.7  |
| 77.4   | 120.1  | 27.8  | 27.7  | 245.4  | 136.2  | 48.3   | 91.6   | 122.6  |
| 148.9  | 144.5  | 42.0  | 62.9  | 186.1  | 130.7  | 297.6  | 191.9  | 232.5  |
| 27.3   | 2.2    | 32.8  | 56.8  | 29.8   | 2.5    | 2.2    | 2.2    | 2.4    |
| 168.5  | 158.2  | 36.6  | 47.4  | 252.9  | 169.5  | 274.5  | 251.8  | 253.2  |

|        |        |       |       |        |        |        |        |        |
|--------|--------|-------|-------|--------|--------|--------|--------|--------|
| 305.6  | 419.9  | 190.7 | 240.3 | 540.5  | 412.8  | 841.5  | 447.1  | 502.8  |
| 6.2    | 5.3    | 7.2   | 1.0   | 4.5    | 11.6   | 2.6    | 4.3    | 1.7    |
| 19.0   | 37.4   | 17.1  | 14.7  | 47.7   | 21.9   | 32.0   | 41.2   | 28.5   |
| 150.4  | 147.6  | 69.2  | 75.4  | 207.8  | 136.8  | 381.7  | 331.4  | 325.2  |
| 109.1  | 124.9  | 82.2  | 130.5 | 154.0  | 101.7  | 265.9  | 120.7  | 203.4  |
| 12.8   | 16.7   | 3.0   | 0.5   | 30.1   | 11.8   | 2.0    | 0.8    | 1.0    |
| 3.7    | 9.8    | 4.8   | 4.9   | 9.5    | 29.4   | 4.0    | 3.2    | 4.6    |
| 535.8  | 667.6  | 88.1  | 108.6 | 865.5  | 636.2  | 443.2  | 396.6  | 435.1  |
| 162.2  | 241.2  | 190.9 | 209.9 | 251.4  | 234.9  | 368.8  | 356.7  | 383.8  |
| 16.3   | 10.2   | 12.6  | 9.2   | 24.2   | 9.6    | 22.4   | 20.3   | 17.3   |
| 0.8    | 0.4    | 9.0   | 1.5   | 1.8    | 6.4    | 1.8    | 4.0    | 7.2    |
| 58.0   | 40.5   | 31.9  | 38.5  | 38.4   | 38.4   | 122.2  | 107.8  | 110.3  |
| 1096.0 | 1206.3 | 61.1  | 76.5  | 1697.2 | 1269.6 | 4016.0 | 2990.5 | 3217.2 |
| 36.8   | 54.8   | 146.6 | 114.5 | 62.5   | 44.3   | 260.9  | 221.7  | 272.0  |
| 1101.9 | 965.7  | 430.7 | 764.5 | 1400.6 | 908.7  | 1611.3 | 993.8  | 1089.2 |
| 91.3   | 120.5  | 91.8  | 111.4 | 134.5  | 84.2   | 285.8  | 572.0  | 673.0  |
| 1.6    | 0.4    | 0.3   | 1.5   | 0.7    | 1.5    | 109.4  | 133.3  | 137.8  |
| 128.7  | 157.2  | 94.3  | 111.9 | 175.7  | 112.8  | 229.7  | 217.4  | 219.8  |
| 567.9  | 574.4  | 262.4 | 303.6 | 724.2  | 553.9  | 1046.8 | 455.0  | 495.0  |
| 1.0    | 9.7    | 3.1   | 6.2   | 9.8    | 6.9    | 32.6   | 24.6   | 29.8   |
| 264.3  | 357.7  | 68.7  | 57.0  | 482.9  | 492.2  | 1404.2 | 1103.4 | 1185.2 |
| 22.2   | 25.3   | 26.8  | 38.6  | 29.7   | 39.0   | 59.0   | 87.1   | 97.2   |
| 272.9  | 284.7  | 30.1  | 68.6  | 373.5  | 285.4  | 433.4  | 291.2  | 317.1  |
| 47.2   | 39.3   | 85.0  | 116.7 | 104.3  | 51.2   | 323.3  | 218.6  | 246.0  |
| 48.4   | 47.0   | 149.9 | 145.3 | 113.6  | 41.2   | 252.4  | 197.9  | 218.4  |
| 174.7  | 332.1  | 132.9 | 126.8 | 247.7  | 253.7  | 234.6  | 218.5  | 252.1  |
| 59.2   | 64.8   | 41.1  | 43.7  | 88.1   | 41.8   | 61.5   | 70.6   | 87.0   |
| 20.7   | 21.8   | 9.4   | 11.4  | 28.1   | 3.8    | 16.4   | 25.8   | 28.6   |
| 1616.0 | 2459.5 | 350.9 | 454.9 | 2497.6 | 2584.1 | 4057.9 | 3566.0 | 3547.1 |
| 78.6   | 97.7   | 23.2  | 20.0  | 128.9  | 69.7   | 5.0    | 0.8    | 2.8    |
| 63.0   | 59.2   | 75.2  | 112.7 | 68.6   | 51.9   | 290.5  | 215.6  | 284.7  |
| 77.8   | 99.4   | 97.6  | 139.6 | 78.4   | 91.1   | 122.6  | 122.7  | 130.9  |
| 2.3    | 2.4    | 14.1  | 5.8   | 6.8    | 4.3    | 38.7   | 146.7  | 198.7  |
| 40.7   | 47.4   | 21.1  | 51.8  | 70.9   | 51.2   | 171.8  | 165.6  | 173.8  |
| 52.2   | 49.0   | 25.2  | 40.0  | 139.2  | 81.7   | 223.1  | 145.7  | 177.0  |
| 52.8   | 46.7   | 31.5  | 28.1  | 78.3   | 36.0   | 92.2   | 145.3  | 157.4  |
| 65.7   | 102.2  | 33.4  | 28.4  | 126.9  | 64.9   | 96.6   | 137.3  | 172.4  |
| 281.4  | 445.2  | 36.9  | 47.1  | 510.2  | 529.1  | 302.8  | 230.0  | 243.2  |
| 100.8  | 145.6  | 33.0  | 68.0  | 227.7  | 146.4  | 187.5  | 208.6  | 277.0  |
| 1424.6 | 1481.2 | 386.3 | 519.0 | 1523.3 | 1576.1 | 2741.2 | 1739.7 | 1941.2 |
| 6.9    | 10.0   | 10.5  | 8.3   | 16.0   | 8.7    | 304.8  | 277.2  | 323.8  |
| 18.6   | 16.9   | 0.4   | 0.2   | 35.1   | 27.6   | 147.3  | 131.0  | 150.7  |
| 25.9   | 22.9   | 12.3  | 16.4  | 30.8   | 20.1   | 58.7   | 61.4   | 79.1   |
| 1207.7 | 1512.0 | 361.2 | 449.9 | 1603.0 | 1491.3 | 3149.8 | 2523.6 | 2477.2 |
| 55.2   | 76.0   | 22.4  | 24.2  | 81.8   | 84.7   | 52.4   | 104.8  | 118.8  |
| 229.9  | 310.5  | 129.0 | 167.3 | 337.9  | 307.2  | 489.3  | 330.2  | 358.3  |
| 198.9  | 282.4  | 136.5 | 209.5 | 200.7  | 258.7  | 565.5  | 568.7  | 622.6  |
| 415.7  | 444.3  | 108.7 | 128.7 | 722.6  | 389.9  | 823.4  | 386.2  | 415.4  |
| 112.0  | 98.0   | 17.0  | 17.1  | 158.6  | 110.0  | 851.1  | 836.6  | 926.5  |
| 212.9  | 206.3  | 33.6  | 45.7  | 309.6  | 200.7  | 1220.3 | 1242.5 | 1462.8 |
| 521.1  | 432.4  | 23.0  | 20.1  | 835.0  | 501.4  | 595.0  | 457.2  | 502.8  |
| 289.5  | 279.6  | 10.4  | 1.0   | 328.1  | 210.1  | 425.3  | 403.8  | 454.5  |
| 53.0   | 72.7   | 39.0  | 60.1  | 74.6   | 50.0   | 115.1  | 28.8   | 43.6   |

|        |        |        |        |        |        |        |        |        |
|--------|--------|--------|--------|--------|--------|--------|--------|--------|
| 235.3  | 231.8  | 145.5  | 183.4  | 328.3  | 179.5  | 393.5  | 362.3  | 359.1  |
| 49.6   | 67.6   | 45.0   | 59.0   | 35.7   | 40.9   | 177.5  | 139.5  | 191.8  |
| 4.1    | 11.5   | 0.5    | 8.2    | 24.5   | 7.9    | 166.5  | 116.9  | 132.1  |
| 184.4  | 191.4  | 56.0   | 84.4   | 276.9  | 195.8  | 1222.2 | 796.7  | 856.3  |
| 5.5    | 0.6    | 11.8   | 5.2    | 8.5    | 12.1   | 14.4   | 11.6   | 18.6   |
| 27.6   | 29.2   | 503.5  | 701.7  | 38.3   | 19.0   | 170.0  | 282.8  | 450.0  |
| 328.6  | 416.2  | 56.2   | 62.0   | 555.4  | 390.0  | 725.8  | 635.2  | 694.8  |
| 522.6  | 615.3  | 65.7   | 112.6  | 745.7  | 663.7  | 1.4    | 1.0    | 3.6    |
| 30.1   | 54.1   | 7.1    | 8.5    | 62.1   | 41.4   | 9.8    | 7.8    | 3.6    |
| 452.6  | 476.3  | 217.2  | 278.3  | 641.5  | 508.4  | 12.3   | 8.5    | 10.1   |
| 142.7  | 214.7  | 35.9   | 52.7   | 225.9  | 217.3  | 398.6  | 163.8  | 176.3  |
| 84.4   | 82.3   | 28.6   | 31.5   | 136.0  | 93.0   | 99.5   | 61.9   | 73.0   |
| 169.1  | 210.9  | 122.9  | 156.8  | 238.0  | 180.7  | 869.8  | 610.1  | 632.7  |
| 48.3   | 28.2   | 77.0   | 117.3  | 48.6   | 39.8   | 69.7   | 43.6   | 56.9   |
| 75.6   | 81.8   | 88.7   | 115.2  | 94.1   | 58.7   | 288.7  | 319.6  | 340.5  |
| 6.0    | 10.3   | 9.4    | 5.6    | 22.1   | 6.0    | 39.9   | 22.4   | 32.7   |
| 115.7  | 152.9  | 6.6    | 20.1   | 204.2  | 148.3  | 597.8  | 405.5  | 455.5  |
| 76.3   | 85.3   | 30.9   | 28.8   | 95.2   | 85.9   | 44.6   | 87.1   | 94.5   |
| 46.1   | 50.0   | 10.2   | 9.3    | 53.6   | 75.7   | 47.0   | 44.7   | 38.9   |
| 622.5  | 809.9  | 67.4   | 127.4  | 1083.1 | 880.1  | 880.4  | 742.3  | 793.8  |
| 84.3   | 115.2  | 56.3   | 42.9   | 159.1  | 90.7   | 222.6  | 177.4  | 214.9  |
| 37.6   | 31.9   | 40.2   | 32.2   | 45.2   | 36.0   | 195.2  | 139.3  | 210.9  |
| 22.6   | 15.1   | 10.5   | 6.5    | 14.7   | 16.5   | 18.1   | 11.7   | 21.8   |
| 11.5   | 13.6   | 1.8    | 0.7    | 1.5    | 0.9    | 4.9    | 7.6    | 5.5    |
| 5.8    | 3.2    | 7.0    | 3.4    | 0.2    | 1.1    | 1.9    | 2.2    | 1.2    |
| 2.4    | 3.3    | 2.8    | 1.5    | 3.8    | 6.5    | 27.4   | 22.7   | 15.2   |
| 16.0   | 15.5   | 11.2   | 10.1   | 19.5   | 5.4    | 19.8   | 25.3   | 16.3   |
| 28.5   | 34.6   | 3.8    | 8.4    | 47.7   | 33.3   | 120.2  | 149.8  | 119.9  |
| 379.5  | 345.8  | 99.1   | 135.1  | 583.1  | 317.6  | 527.0  | 551.7  | 570.4  |
| 73.4   | 58.6   | 5.0    | 2.8    | 95.7   | 67.8   | 55.6   | 82.3   | 139.8  |
| 45.3   | 4.3    | 4.9    | 9.5    | 6.4    | 7.3    | 29.8   | 10.1   | 6.7    |
| 724.2  | 1010.4 | 222.6  | 217.2  | 1051.5 | 1048.9 | 1191.2 | 1096.7 | 1243.7 |
| 1.8    | 7.8    | 8.1    | 2.1    | 2.7    | 2.0    | 3.1    | 11.9   | 6.8    |
| 48.9   | 86.3   | 11.8   | 14.0   | 95.5   | 73.3   | 191.2  | 169.3  | 170.5  |
| 13.2   | 21.5   | 12.4   | 4.6    | 20.0   | 3.6    | 49.5   | 71.3   | 90.2   |
| 66.8   | 70.4   | 56.0   | 44.8   | 73.0   | 74.5   | 184.7  | 248.8  | 279.8  |
| 1.8    | 9.2    | 4.3    | 1.2    | 3.2    | 3.4    | 2.1    | 1.1    | 1.2    |
| 2.2    | 0.7    | 8.6    | 0.4    | 0.3    | 2.8    | 10.3   | 1.8    | 3.3    |
| 73.3   | 74.6   | 46.2   | 27.9   | 98.3   | 105.5  | 116.2  | 75.6   | 74.4   |
| 3.4    | 29.7   | 1.1    | 8.6    | 5.4    | 4.7    | 12.7   | 7.6    | 7.0    |
| 77.1   | 73.3   | 69.3   | 66.6   | 102.2  | 79.1   | 315.1  | 415.0  | 478.1  |
| 16.8   | 44.7   | 35.0   | 69.9   | 22.0   | 6.2    | 56.4   | 47.1   | 48.6   |
| 5.8    | 5.7    | 10.7   | 10.3   | 6.1    | 8.4    | 17.3   | 10.9   | 9.7    |
| 15.9   | 18.4   | 21.1   | 13.7   | 9.0    | 20.8   | 45.2   | 57.5   | 70.4   |
| 1733.3 | 2050.9 | 1210.6 | 1644.6 | 2311.8 | 1996.3 | 4042.4 | 4134.9 | 4230.9 |
| 85.6   | 126.6  | 120.3  | 141.5  | 166.4  | 107.3  | 417.4  | 429.3  | 488.0  |
| 161.7  | 234.8  | 60.3   | 90.9   | 283.4  | 213.5  | 243.0  | 211.5  | 244.3  |
| 417.3  | 873.6  | 102.1  | 99.2   | 693.9  | 1123.5 | 408.0  | 181.4  | 227.4  |
| 31.8   | 27.6   | 12.7   | 14.0   | 50.2   | 30.1   | 65.8   | 77.6   | 74.5   |
| 8.7    | 8.7    | 16.6   | 13.5   | 9.0    | 1.6    | 6.8    | 3.9    | 10.4   |
| 4.9    | 8.2    | 0.7    | 1.2    | 0.8    | 4.2    | 6.1    | 11.8   | 5.2    |
| 38.6   | 42.2   | 29.2   | 36.6   | 63.8   | 41.6   | 81.2   | 100.4  | 108.5  |
| 886.3  | 838.7  | 48.7   | 59.6   | 1307.4 | 942.4  | 1553.8 | 947.6  | 976.5  |

|       |        |       |       |        |        |        |        |        |
|-------|--------|-------|-------|--------|--------|--------|--------|--------|
| 10.8  | 11.1   | 9.2   | 2.4   | 7.1    | 15.9   | 25.7   | 17.7   | 12.4   |
| 6.4   | 14.6   | 8.5   | 7.4   | 14.2   | 6.3    | 36.0   | 33.7   | 47.3   |
| 124.0 | 196.1  | 14.5  | 22.6  | 269.4  | 218.5  | 637.8  | 815.7  | 894.6  |
| 52.0  | 48.4   | 6.6   | 7.9   | 85.1   | 55.2   | 8.4    | 4.0    | 1.1    |
| 87.5  | 78.4   | 101.0 | 172.0 | 92.1   | 89.8   | 348.5  | 245.9  | 282.1  |
| 93.1  | 112.7  | 97.2  | 84.8  | 147.1  | 93.5   | 65.6   | 66.5   | 68.5   |
| 818.9 | 718.8  | 69.4  | 112.6 | 1028.0 | 773.2  | 965.4  | 902.2  | 911.7  |
| 362.4 | 329.6  | 42.9  | 40.6  | 479.1  | 265.4  | 791.8  | 721.0  | 778.5  |
| 340.4 | 454.4  | 91.3  | 114.8 | 532.8  | 414.4  | 189.3  | 154.9  | 167.8  |
| 0.6   | 5.3    | 7.1   | 4.8   | 3.9    | 1.2    | 12.1   | 6.2    | 6.1    |
| 2.8   | 11.3   | 3.1   | 1.5   | 7.1    | 4.9    | 4.7    | 2.1    | 3.8    |
| 116.4 | 140.5  | 23.2  | 6.3   | 307.9  | 140.7  | 360.2  | 361.5  | 380.6  |
| 104.3 | 123.1  | 12.8  | 11.8  | 159.6  | 100.1  | 383.9  | 374.1  | 421.1  |
| 119.4 | 152.1  | 176.8 | 210.9 | 166.0  | 139.8  | 768.9  | 974.8  | 898.3  |
| 14.8  | 18.3   | 22.3  | 36.6  | 21.8   | 11.8   | 189.9  | 155.6  | 183.2  |
| 182.8 | 257.1  | 26.4  | 15.9  | 220.8  | 219.0  | 982.8  | 775.6  | 972.0  |
| 169.5 | 307.7  | 10.7  | 10.3  | 225.7  | 192.8  | 1498.0 | 1013.1 | 1296.3 |
| 2.5   | 5.3    | 183.5 | 280.6 | 11.2   | 2.3    | 565.6  | 380.0  | 501.8  |
| 9.1   | 0.5    | 494.4 | 817.2 | 0.3    | 9.0    | 838.3  | 601.0  | 742.5  |
| 47.3  | 72.0   | 97.2  | 69.9  | 65.2   | 66.4   | 277.2  | 286.6  | 332.7  |
| 194.4 | 184.6  | 89.5  | 124.2 | 274.8  | 160.1  | 327.7  | 280.9  | 311.5  |
| 9.6   | 16.3   | 17.1  | 9.6   | 11.8   | 22.4   | 16.5   | 12.7   | 9.9    |
| 144.5 | 259.8  | 13.7  | 15.3  | 264.0  | 237.1  | 701.3  | 418.2  | 495.4  |
| 33.5  | 39.0   | 87.6  | 147.0 | 34.5   | 33.3   | 5.0    | 2.2    | 5.4    |
| 9.2   | 8.4    | 6.9   | 8.1   | 2.3    | 12.9   | 11.3   | 5.2    | 8.3    |
| 7.9   | 14.1   | 3.5   | 1.0   | 17.4   | 11.2   | 11.9   | 4.1    | 8.1    |
| 18.1  | 27.0   | 22.3  | 18.8  | 22.5   | 4.0    | 140.8  | 162.2  | 136.7  |
| 118.0 | 127.1  | 55.5  | 68.0  | 198.8  | 131.9  | 400.0  | 547.6  | 606.7  |
| 1.2   | 2.1    | 2.0   | 2.4   | 1.3    | 1.3    | 1.5    | 5.5    | 4.5    |
| 43.0  | 122.8  | 31.9  | 31.0  | 137.7  | 104.4  | 25.4   | 17.7   | 20.4   |
| 29.7  | 41.7   | 58.8  | 51.5  | 64.1   | 56.9   | 24.6   | 14.2   | 11.7   |
| 475.8 | 755.6  | 637.9 | 704.0 | 806.6  | 711.2  | 276.6  | 159.7  | 171.3  |
| 258.9 | 308.9  | 154.4 | 186.8 | 493.9  | 244.3  | 3743.5 | 3227.9 | 3509.8 |
| 1.7   | 7.4    | 4.7   | 1.9   | 1.7    | 6.4    | 3.0    | 2.6    | 4.3    |
| 104.0 | 131.0  | 96.7  | 106.9 | 209.2  | 118.3  | 701.9  | 567.4  | 839.3  |
| 507.7 | 493.8  | 105.3 | 169.8 | 772.2  | 542.2  | 942.5  | 508.5  | 618.2  |
| 948.4 | 1112.3 | 130.6 | 191.9 | 1153.6 | 1177.2 | 1902.8 | 1166.5 | 1372.8 |
| 125.3 | 79.2   | 265.6 | 398.6 | 119.3  | 58.1   | 1424.5 | 1090.0 | 1311.1 |
| 32.8  | 12.7   | 65.9  | 114.0 | 24.5   | 11.3   | 288.2  | 210.1  | 267.4  |
| 1.1   | 1.5    | 0.8   | 1.2   | 1.1    | 1.0    | 7.6    | 4.9    | 4.2    |
| 0.6   | 6.8    | 1.8   | 2.0   | 1.0    | 4.4    | 4.1    | 1.4    | 1.4    |
| 1.7   | 8.6    | 1.4   | 1.3   | 0.8    | 2.6    | 3.2    | 1.1    | 4.6    |
| 31.0  | 26.4   | 13.4  | 15.1  | 48.7   | 23.6   | 190.0  | 220.2  | 215.3  |
| 2.2   | 1.9    | 2.5   | 3.1   | 2.0    | 3.5    | 300.3  | 433.2  | 548.7  |
| 7.5   | 7.4    | 38.4  | 67.0  | 9.3    | 9.6    | 6.1    | 6.6    | 9.1    |
| 1.7   | 0.8    | 2.0   | 9.6   | 1.0    | 0.9    | 4.9    | 3.1    | 1.9    |
| 594.0 | 573.3  | 7.2   | 6.7   | 746.7  | 468.8  | 12.8   | 23.5   | 20.7   |
| 57.0  | 91.9   | 88.2  | 91.0  | 87.1   | 100.3  | 433.2  | 456.3  | 493.7  |
| 10.2  | 7.8    | 87.7  | 136.2 | 9.3    | 3.2    | 12.8   | 19.6   | 10.5   |
| 91.0  | 107.8  | 65.4  | 79.2  | 97.4   | 112.3  | 228.1  | 263.0  | 257.3  |
| 542.5 | 823.6  | 632.6 | 891.9 | 857.6  | 800.4  | 1740.3 | 1536.4 | 1820.2 |
| 79.0  | 174.4  | 230.3 | 293.2 | 176.4  | 151.8  | 517.5  | 450.7  | 429.7  |
| 89.1  | 69.3   | 25.4  | 19.3  | 68.6   | 59.7   | 224.7  | 185.6  | 191.8  |



|        |        |       |       |        |        |        |        |        |
|--------|--------|-------|-------|--------|--------|--------|--------|--------|
| 202.4  | 373.9  | 2.2   | 1.1   | 461.4  | 349.5  | 257.1  | 137.1  | 139.8  |
| 96.8   | 147.1  | 12.1  | 1.7   | 130.0  | 133.1  | 351.4  | 215.7  | 290.4  |
| 55.4   | 82.0   | 55.1  | 97.1  | 92.2   | 89.2   | 947.7  | 854.9  | 865.7  |
| 15.4   | 30.5   | 36.7  | 77.0  | 23.0   | 22.5   | 297.8  | 261.7  | 214.9  |
| 125.9  | 155.9  | 202.7 | 228.7 | 150.7  | 145.1  | 826.0  | 855.6  | 992.8  |
| 25.7   | 23.3   | 7.7   | 0.9   | 31.8   | 27.0   | 3.0    | 3.1    | 3.0    |
| 76.1   | 114.5  | 12.3  | 4.2   | 170.2  | 132.5  | 8.2    | 14.2   | 15.4   |
| 112.1  | 114.5  | 30.2  | 39.6  | 240.5  | 169.8  | 8.8    | 21.2   | 31.7   |
| 144.3  | 204.5  | 178.5 | 169.2 | 253.2  | 95.8   | 183.5  | 197.7  | 198.8  |
| 30.6   | 38.7   | 1.7   | 13.7  | 52.0   | 40.2   | 11.1   | 15.2   | 15.4   |
| 20.9   | 11.3   | 23.7  | 19.3  | 14.2   | 16.4   | 54.3   | 53.7   | 38.5   |
| 4.7    | 12.6   | 16.8  | 1.4   | 1.3    | 11.8   | 10.8   | 3.6    | 13.1   |
| 1.3    | 2.4    | 16.5  | 15.5  | 13.5   | 4.3    | 6.0    | 25.2   | 23.8   |
| 22.2   | 14.7   | 15.0  | 14.2  | 54.6   | 28.5   | 59.9   | 95.2   | 101.1  |
| 92.3   | 148.2  | 192.3 | 208.6 | 98.8   | 96.3   | 330.2  | 251.4  | 348.6  |
| 114.7  | 303.1  | 131.1 | 155.8 | 259.9  | 325.1  | 948.8  | 698.2  | 717.5  |
| 65.7   | 83.0   | 30.3  | 44.1  | 79.1   | 50.5   | 59.8   | 84.6   | 88.2   |
| 24.0   | 18.2   | 37.8  | 26.3  | 26.0   | 27.2   | 832.4  | 855.8  | 954.6  |
| 40.1   | 40.3   | 16.3  | 16.0  | 68.6   | 30.2   | 256.5  | 218.4  | 276.7  |
| 30.5   | 56.5   | 17.7  | 12.6  | 53.8   | 41.0   | 314.9  | 239.2  | 302.2  |
| 85.3   | 117.6  | 27.9  | 28.9  | 128.0  | 101.4  | 143.0  | 151.9  | 158.5  |
| 60.8   | 102.5  | 4.5   | 6.2   | 107.1  | 80.8   | 106.3  | 106.7  | 110.2  |
| 49.6   | 130.2  | 12.7  | 23.0  | 121.1  | 109.3  | 355.9  | 482.1  | 462.4  |
| 63.4   | 64.2   | 9.3   | 26.4  | 84.2   | 82.0   | 83.8   | 99.8   | 117.9  |
| 438.6  | 417.7  | 15.7  | 12.9  | 343.9  | 333.4  | 18.8   | 25.4   | 16.5   |
| 31.4   | 26.3   | 5.2   | 1.9   | 31.7   | 22.3   | 11.0   | 18.2   | 17.1   |
| 225.7  | 387.5  | 90.3  | 127.4 | 463.6  | 329.3  | 320.0  | 204.1  | 205.7  |
| 169.6  | 232.7  | 54.2  | 46.2  | 192.1  | 195.0  | 345.0  | 287.8  | 351.9  |
| 5.3    | 4.5    | 4.4   | 7.8   | 3.6    | 7.9    | 1.0    | 1.9    | 4.6    |
| 20.9   | 7.4    | 8.8   | 19.1  | 31.3   | 18.3   | 1.7    | 3.3    | 4.6    |
| 113.8  | 122.5  | 46.9  | 67.0  | 179.0  | 123.8  | 131.4  | 100.0  | 118.1  |
| 341.8  | 629.5  | 44.2  | 33.3  | 535.2  | 440.5  | 258.1  | 249.8  | 283.5  |
| 481.3  | 725.0  | 89.4  | 124.7 | 730.2  | 682.3  | 449.0  | 394.6  | 428.0  |
| 11.7   | 7.9    | 9.9   | 3.6   | 9.3    | 16.3   | 29.9   | 21.0   | 29.0   |
| 42.7   | 29.8   | 21.3  | 25.8  | 61.1   | 55.7   | 43.4   | 17.8   | 36.0   |
| 581.0  | 848.0  | 44.8  | 29.0  | 972.4  | 955.4  | 1718.6 | 1166.3 | 1263.0 |
| 1.9    | 2.0    | 2.0   | 0.5   | 3.6    | 2.1    | 12.1   | 18.4   | 20.6   |
| 1.0    | 1.8    | 2.3   | 5.1   | 0.8    | 0.7    | 1.8    | 3.2    | 3.5    |
| 79.0   | 91.7   | 49.1  | 57.8  | 141.9  | 78.5   | 349.1  | 287.7  | 262.1  |
| 176.5  | 159.5  | 25.9  | 32.0  | 247.0  | 162.4  | 390.4  | 273.7  | 271.2  |
| 126.7  | 150.2  | 65.2  | 65.1  | 210.3  | 134.4  | 134.7  | 164.4  | 184.1  |
| 155.9  | 133.8  | 75.5  | 82.6  | 190.9  | 111.1  | 142.7  | 145.4  | 164.6  |
| 1556.7 | 2012.4 | 177.3 | 211.6 | 2299.1 | 1643.9 | 3553.6 | 1715.0 | 1958.9 |
| 3.7    | 12.3   | 13.8  | 15.5  | 21.5   | 6.1    | 31.4   | 14.6   | 22.9   |
| 13.4   | 2.8    | 4.4   | 10.8  | 3.4    | 11.8   | 7.4    | 8.2    | 5.8    |
| 7.7    | 16.2   | 4.4   | 5.7   | 22.0   | 18.4   | 8.3    | 6.6    | 7.7    |
| 372.4  | 465.7  | 20.1  | 24.2  | 492.3  | 432.7  | 499.0  | 423.1  | 434.5  |
| 130.0  | 166.2  | 161.5 | 230.0 | 196.5  | 143.0  | 478.4  | 411.6  | 445.8  |
| 38.7   | 70.3   | 4.2   | 5.7   | 59.9   | 48.0   | 87.4   | 145.9  | 148.5  |
| 11.7   | 14.6   | 18.7  | 13.3  | 21.7   | 25.2   | 95.0   | 100.2  | 97.8   |
| 714.3  | 760.3  | 301.5 | 299.4 | 1207.6 | 901.7  | 1382.1 | 1468.7 | 1649.3 |
| 386.7  | 619.8  | 42.5  | 60.4  | 699.9  | 603.3  | 1307.1 | 1374.1 | 1403.4 |
| 246.8  | 347.6  | 189.4 | 170.7 | 354.6  | 287.8  | 144.3  | 113.9  | 153.1  |

|       |        |       |       |        |        |        |        |        |
|-------|--------|-------|-------|--------|--------|--------|--------|--------|
| 91.8  | 159.9  | 113.2 | 116.3 | 197.2  | 145.0  | 297.2  | 304.1  | 339.7  |
| 51.0  | 74.8   | 19.0  | 17.1  | 79.6   | 54.8   | 64.2   | 123.3  | 153.6  |
| 3.3   | 4.8    | 1.6   | 0.6   | 1.7    | 1.6    | 12.7   | 96.3   | 89.6   |
| 90.2  | 204.5  | 14.1  | 22.4  | 295.0  | 202.3  | 351.8  | 524.0  | 605.1  |
| 0.7   | 6.8    | 16.2  | 8.0   | 9.6    | 14.7   | 13.2   | 10.6   | 10.7   |
| 1.6   | 0.8    | 1.4   | 0.6   | 2.0    | 2.0    | 1.9    | 1.2    | 1.1    |
| 1.4   | 0.4    | 1.0   | 11.7  | 1.5    | 0.4    | 10.1   | 4.0    | 0.9    |
| 138.2 | 123.2  | 21.0  | 21.8  | 188.5  | 121.0  | 211.5  | 190.0  | 194.6  |
| 81.7  | 56.7   | 1.5   | 1.8   | 73.4   | 77.0   | 123.9  | 117.0  | 125.6  |
| 25.2  | 25.2   | 2.8   | 2.2   | 59.9   | 36.3   | 71.5   | 54.6   | 60.8   |
| 84.5  | 53.6   | 21.8  | 26.5  | 112.2  | 66.7   | 163.4  | 161.4  | 195.0  |
| 2.4   | 2.1    | 2.4   | 1.8   | 0.6    | 5.2    | 5.5    | 11.2   | 1.8    |
| 14.6  | 21.7   | 14.9  | 41.6  | 24.3   | 6.0    | 74.2   | 59.7   | 74.5   |
| 915.4 | 857.9  | 112.2 | 212.4 | 1132.4 | 1000.3 | 939.4  | 610.3  | 752.9  |
| 29.6  | 47.9   | 39.3  | 62.2  | 40.4   | 39.2   | 21.0   | 13.9   | 19.9   |
| 8.0   | 18.3   | 412.4 | 606.0 | 37.5   | 12.6   | 183.7  | 133.4  | 181.1  |
| 5.0   | 15.6   | 6.0   | 2.0   | 18.0   | 13.0   | 3.0    | 7.6    | 5.2    |
| 278.5 | 204.0  | 47.4  | 74.4  | 321.7  | 239.8  | 169.0  | 180.8  | 222.4  |
| 941.2 | 1859.6 | 11.5  | 15.6  | 851.5  | 1001.2 | 6694.6 | 7154.5 | 6944.6 |
| 5.3   | 2.5    | 4.0   | 7.1   | 3.2    | 4.9    | 4.6    | 6.9    | 13.2   |
| 18.7  | 15.6   | 19.4  | 11.4  | 15.9   | 20.5   | 32.5   | 29.0   | 25.2   |
| 316.8 | 376.1  | 115.4 | 110.1 | 464.1  | 373.5  | 351.3  | 338.9  | 366.2  |
| 32.8  | 11.4   | 35.3  | 42.8  | 45.9   | 21.6   | 248.6  | 466.0  | 504.4  |
| 45.8  | 68.8   | 12.8  | 22.7  | 94.2   | 53.7   | 137.9  | 105.6  | 108.7  |
| 50.7  | 70.2   | 64.6  | 58.9  | 72.9   | 58.6   | 137.6  | 102.0  | 101.8  |
| 121.8 | 116.6  | 4.3   | 15.4  | 205.0  | 155.5  | 18.9   | 14.1   | 17.0   |
| 135.8 | 156.7  | 31.6  | 46.0  | 231.5  | 193.0  | 223.8  | 201.4  | 213.4  |
| 25.5  | 23.0   | 16.2  | 9.2   | 47.1   | 30.0   | 12.0   | 12.7   | 10.7   |
| 110.9 | 504.2  | 147.8 | 155.1 | 197.4  | 534.6  | 998.2  | 956.2  | 980.0  |
| 35.7  | 26.0   | 94.2  | 128.4 | 64.4   | 42.1   | 78.9   | 63.9   | 65.8   |
| 131.9 | 119.4  | 11.7  | 16.5  | 170.1  | 119.3  | 238.0  | 241.0  | 283.7  |
| 36.4  | 35.5   | 12.3  | 17.9  | 71.1   | 30.4   | 106.6  | 103.3  | 125.8  |
| 36.8  | 25.8   | 1.8   | 6.0   | 48.2   | 24.2   | 38.2   | 34.5   | 39.3   |
| 350.7 | 737.6  | 317.7 | 476.1 | 461.1  | 764.2  | 1566.7 | 1089.4 | 1143.4 |
| 204.9 | 282.2  | 15.6  | 24.3  | 393.2  | 344.2  | 126.3  | 111.1  | 105.6  |
| 49.2  | 61.9   | 7.0   | 3.7   | 77.3   | 72.4   | 19.5   | 24.1   | 16.7   |
| 89.3  | 107.4  | 9.0   | 9.0   | 97.4   | 84.2   | 72.1   | 68.2   | 76.8   |
| 13.4  | 42.8   | 32.3  | 33.0  | 40.5   | 7.2    | 61.6   | 33.7   | 50.9   |
| 6.6   | 8.0    | 12.0  | 2.0   | 16.8   | 13.0   | 24.8   | 18.8   | 13.9   |
| 0.3   | 0.3    | 2.8   | 5.9   | 4.4    | 0.3    | 1.6    | 1.5    | 0.5    |
| 24.7  | 26.2   | 2.8   | 10.1  | 47.3   | 13.7   | 17.1   | 29.9   | 13.5   |
| 2.8   | 3.1    | 4.6   | 4.8   | 11.1   | 5.5    | 27.7   | 17.9   | 22.2   |
| 197.9 | 277.5  | 11.2  | 8.2   | 412.0  | 246.8  | 46.1   | 42.2   | 50.9   |
| 46.1  | 63.4   | 15.5  | 25.0  | 48.4   | 60.5   | 84.0   | 66.7   | 86.3   |
| 70.8  | 81.8   | 23.9  | 26.0  | 61.5   | 65.3   | 112.9  | 58.8   | 72.4   |
| 7.7   | 12.7   | 20.2  | 25.6  | 2.8    | 11.7   | 36.6   | 37.0   | 33.9   |
| 4.7   | 32.4   | 25.4  | 34.8  | 33.8   | 1.4    | 60.8   | 75.0   | 97.8   |
| 2.7   | 10.1   | 0.7   | 0.7   | 18.6   | 1.6    | 1.7    | 1.2    | 2.1    |
| 129.5 | 144.0  | 68.3  | 104.1 | 162.6  | 116.7  | 56.1   | 76.5   | 70.8   |
| 2.2   | 6.1    | 28.5  | 36.4  | 7.2    | 3.0    | 8.5    | 4.3    | 10.9   |
| 136.5 | 158.8  | 40.0  | 40.5  | 182.1  | 167.2  | 197.8  | 133.3  | 193.5  |
| 22.2  | 27.7   | 3.7   | 2.0   | 28.2   | 25.5   | 1.7    | 4.4    | 5.0    |
| 20.4  | 22.5   | 12.6  | 14.1  | 33.5   | 25.6   | 19.5   | 12.8   | 9.7    |

|        |        |        |        |        |        |        |        |        |
|--------|--------|--------|--------|--------|--------|--------|--------|--------|
| 2.2    | 4.3    | 3.5    | 2.5    | 4.5    | 2.0    | 7.7    | 9.0    | 8.2    |
| 108.2  | 124.9  | 10.6   | 9.8    | 159.7  | 120.4  | 131.4  | 72.8   | 96.0   |
| 56.8   | 63.8   | 99.6   | 111.8  | 74.5   | 98.6   | 120.1  | 110.7  | 120.7  |
| 3.3    | 7.0    | 4.7    | 4.8    | 5.6    | 5.1    | 21.0   | 11.1   | 9.3    |
| 13.2   | 7.3    | 16.8   | 16.0   | 19.3   | 3.7    | 10.2   | 17.4   | 15.1   |
| 127.2  | 177.6  | 81.9   | 115.1  | 213.4  | 162.4  | 321.3  | 272.5  | 351.6  |
| 28.2   | 26.8   | 22.7   | 29.1   | 27.7   | 23.7   | 74.7   | 90.1   | 89.9   |
| 38.8   | 40.7   | 15.4   | 25.0   | 51.3   | 36.4   | 137.3  | 189.5  | 194.0  |
| 1.5    | 5.2    | 3.4    | 1.0    | 7.1    | 4.5    | 2.0    | 1.8    | 2.6    |
| 151.3  | 149.5  | 137.5  | 197.1  | 265.8  | 142.7  | 98.3   | 102.9  | 113.7  |
| 342.9  | 444.1  | 223.7  | 262.8  | 646.2  | 509.9  | 149.4  | 194.0  | 164.7  |
| 35.6   | 41.1   | 17.6   | 21.5   | 40.6   | 34.8   | 141.4  | 133.5  | 130.7  |
| 105.8  | 78.2   | 55.4   | 69.3   | 118.8  | 140.1  | 299.6  | 243.9  | 266.3  |
| 17.5   | 9.3    | 136.2  | 206.7  | 32.4   | 18.9   | 28.9   | 37.8   | 36.3   |
| 81.6   | 118.7  | 4.3    | 10.1   | 103.2  | 104.5  | 267.6  | 268.5  | 229.3  |
| 7.2    | 5.0    | 2.3    | 7.0    | 9.1    | 4.0    | 19.3   | 16.4   | 38.6   |
| 85.9   | 136.8  | 41.7   | 46.8   | 109.4  | 215.2  | 322.6  | 389.3  | 394.0  |
| 112.9  | 128.9  | 69.1   | 60.9   | 146.4  | 108.9  | 407.1  | 400.5  | 388.9  |
| 15.1   | 3.4    | 4.5    | 0.6    | 16.0   | 11.2   | 12.0   | 8.1    | 11.1   |
| 63.3   | 67.5   | 69.3   | 84.3   | 71.4   | 75.3   | 674.7  | 387.9  | 393.7  |
| 28.4   | 38.9   | 42.6   | 44.3   | 41.6   | 20.0   | 1286.3 | 705.5  | 846.7  |
| 5.3    | 2.2    | 1.8    | 6.0    | 33.9   | 1.0    | 3.3    | 0.9    | 3.2    |
| 12.4   | 1.7    | 4.0    | 1.6    | 1.3    | 2.7    | 7.1    | 21.8   | 17.8   |
| 5.9    | 6.5    | 48.2   | 33.3   | 11.2   | 6.9    | 547.3  | 601.3  | 642.0  |
| 12.8   | 6.9    | 10.1   | 13.7   | 45.5   | 2.5    | 19.0   | 10.8   | 10.1   |
| 328.2  | 376.5  | 218.0  | 309.1  | 511.1  | 304.3  | 367.7  | 405.2  | 561.8  |
| 65.6   | 113.4  | 24.0   | 17.3   | 124.7  | 70.3   | 67.8   | 77.8   | 68.9   |
| 129.8  | 130.5  | 35.3   | 58.3   | 224.8  | 124.8  | 153.9  | 144.9  | 157.1  |
| 193.9  | 195.8  | 51.3   | 66.4   | 314.7  | 226.0  | 205.0  | 186.8  | 191.6  |
| 39.6   | 44.5   | 7.6    | 1.5    | 59.4   | 24.4   | 4.1    | 5.8    | 8.3    |
| 15.8   | 16.6   | 0.9    | 3.0    | 17.4   | 21.6   | 115.5  | 103.1  | 122.1  |
| 85.4   | 78.3   | 7.5    | 7.9    | 107.0  | 69.2   | 257.2  | 122.2  | 119.0  |
| 5.6    | 13.3   | 17.7   | 10.6   | 20.5   | 13.0   | 19.9   | 16.3   | 26.0   |
| 12.7   | 14.5   | 12.3   | 8.6    | 18.0   | 13.0   | 11.0   | 6.5    | 6.9    |
| 2.9    | 1.2    | 9.8    | 4.5    | 2.2    | 2.4    | 6.5    | 3.2    | 9.4    |
| 6.5    | 3.2    | 4.7    | 3.6    | 2.3    | 1.9    | 3.1    | 6.8    | 5.4    |
| 37.5   | 63.3   | 33.7   | 27.6   | 43.9   | 89.6   | 106.9  | 130.2  | 194.8  |
| 1744.7 | 1516.5 | 2703.0 | 3433.7 | 3271.9 | 1598.8 | 7663.8 | 9862.0 | 9747.0 |
| 258.3  | 263.2  | 847.6  | 1193.6 | 536.3  | 176.1  | 2093.1 | 3493.1 | 3282.6 |
| 3812.0 | 2278.4 | 886.1  | 1268.0 | 4419.0 | 2587.9 | 5372.4 | 2370.5 | 2265.8 |
| 143.5  | 191.5  | 3.2    | 11.1   | 257.5  | 219.4  | 26.5   | 39.6   | 18.4   |
| 3.3    | 1.1    | 0.5    | 11.1   | 7.2    | 0.7    | 21.5   | 11.1   | 10.3   |
| 13.7   | 14.7   | 20.2   | 33.1   | 26.5   | 19.8   | 86.9   | 28.0   | 32.6   |
| 43.7   | 50.8   | 30.4   | 45.5   | 97.1   | 88.4   | 133.4  | 66.0   | 71.1   |
| 72.0   | 89.3   | 15.8   | 18.3   | 105.9  | 70.8   | 63.9   | 91.3   | 81.3   |
| 13.6   | 15.7   | 8.9    | 9.9    | 22.9   | 5.9    | 19.9   | 10.8   | 11.5   |
| 193.6  | 186.3  | 35.2   | 59.3   | 264.2  | 176.1  | 564.4  | 331.3  | 360.9  |
| 8.4    | 18.2   | 50.2   | 90.7   | 6.7    | 26.7   | 431.1  | 343.2  | 442.7  |
| 13.3   | 15.6   | 128.4  | 149.6  | 14.3   | 12.7   | 107.4  | 172.2  | 206.4  |
| 14.3   | 14.0   | 12.9   | 4.4    | 15.0   | 11.7   | 21.8   | 25.2   | 29.7   |
| 46.1   | 29.7   | 103.0  | 122.4  | 70.2   | 52.1   | 43.4   | 44.1   | 43.9   |
| 33.1   | 19.4   | 19.1   | 27.5   | 47.1   | 34.9   | 5.4    | 14.8   | 16.6   |
| 111.6  | 142.1  | 75.6   | 97.1   | 192.8  | 189.8  | 971.7  | 1029.6 | 1115.8 |

|        |        |       |       |        |        |        |        |        |
|--------|--------|-------|-------|--------|--------|--------|--------|--------|
| 156.7  | 192.0  | 88.9  | 76.6  | 254.7  | 229.5  | 1413.3 | 1523.2 | 1507.1 |
| 145.7  | 205.2  | 1.0   | 0.4   | 197.8  | 159.9  | 1094.8 | 986.1  | 1094.8 |
| 14.2   | 16.7   | 2.3   | 0.6   | 16.9   | 13.0   | 6.1    | 2.2    | 7.7    |
| 136.4  | 177.2  | 120.8 | 175.9 | 203.2  | 140.5  | 801.2  | 761.4  | 841.8  |
| 34.8   | 24.3   | 197.4 | 312.5 | 30.0   | 22.7   | 16.4   | 27.7   | 10.8   |
| 2.9    | 1.6    | 3.6   | 2.1   | 1.4    | 0.9    | 72.3   | 60.3   | 45.6   |
| 1.6    | 7.8    | 2.2   | 7.2   | 2.8    | 1.1    | 3.1    | 2.7    | 2.2    |
| 10.2   | 17.4   | 9.7   | 18.9  | 20.5   | 11.2   | 34.2   | 32.9   | 35.1   |
| 91.8   | 233.2  | 1.5   | 4.6   | 280.6  | 229.6  | 0.3    | 1.6    | 3.0    |
| 510.1  | 712.1  | 89.8  | 120.9 | 833.2  | 738.1  | 951.0  | 790.9  | 826.0  |
| 101.2  | 176.3  | 35.9  | 72.4  | 178.4  | 179.1  | 498.5  | 268.8  | 321.9  |
| 148.8  | 146.3  | 20.1  | 18.1  | 167.6  | 176.7  | 217.6  | 175.5  | 194.1  |
| 122.3  | 128.8  | 25.0  | 42.7  | 174.1  | 121.9  | 197.2  | 184.6  | 186.7  |
| 22.1   | 12.4   | 0.9   | 4.8   | 14.2   | 0.9    | 4.9    | 6.0    | 6.7    |
| 15.4   | 11.8   | 6.2   | 13.3  | 11.9   | 14.8   | 4.2    | 10.5   | 10.2   |
| 2144.3 | 3077.4 | 27.8  | 72.9  | 3127.4 | 2483.2 | 1661.6 | 457.9  | 505.4  |
| 69.7   | 102.7  | 22.5  | 20.9  | 92.2   | 88.9   | 190.4  | 120.0  | 135.7  |
| 50.2   | 81.8   | 62.0  | 54.8  | 116.0  | 76.1   | 80.4   | 76.1   | 73.2   |
| 263.5  | 463.7  | 405.6 | 609.3 | 240.9  | 476.0  | 2416.3 | 2819.6 | 2794.5 |
| 9.2    | 1.9    | 1.7   | 3.2   | 1.1    | 1.7    | 29.6   | 18.2   | 19.4   |
| 50.1   | 59.8   | 75.7  | 86.3  | 87.7   | 68.9   | 213.3  | 135.3  | 160.1  |
| 18.5   | 2.2    | 13.6  | 4.9   | 20.1   | 15.7   | 2.6    | 1.7    | 2.3    |
| 12.6   | 7.7    | 14.0  | 15.7  | 12.8   | 6.2    | 82.9   | 84.9   | 81.1   |
| 2.2    | 2.6    | 3.2   | 10.8  | 1.7    | 1.1    | 37.5   | 13.0   | 35.3   |
| 1.2    | 3.8    | 58.7  | 129.6 | 0.7    | 6.2    | 2.4    | 9.5    | 6.6    |
| 303.6  | 434.0  | 135.3 | 163.9 | 531.0  | 412.8  | 876.3  | 672.8  | 769.6  |
| 25.7   | 51.0   | 9.9   | 3.6   | 49.0   | 50.4   | 207.4  | 77.5   | 114.2  |
| 7.0    | 7.5    | 0.9   | 4.6   | 6.4    | 7.8    | 19.9   | 7.0    | 11.5   |
| 124.8  | 207.2  | 66.3  | 106.6 | 174.6  | 244.6  | 391.6  | 297.8  | 332.7  |
| 9.6    | 8.9    | 8.2   | 18.1  | 40.1   | 36.0   | 42.3   | 71.7   | 57.4   |
| 0.8    | 1.6    | 5.0   | 0.6   | 3.0    | 1.1    | 12.1   | 8.5    | 10.0   |
| 195.6  | 276.8  | 40.0  | 76.9  | 272.2  | 236.3  | 200.1  | 99.9   | 104.2  |
| 0.5    | 1.9    | 2.1   | 4.0   | 0.3    | 0.5    | 4.8    | 5.3    | 0.5    |
| 33.6   | 37.6   | 26.5  | 23.8  | 32.9   | 32.6   | 77.5   | 69.0   | 81.8   |
| 16.1   | 1.3    | 11.5  | 12.7  | 6.6    | 3.0    | 52.0   | 40.4   | 56.7   |
| 51.8   | 39.8   | 27.9  | 26.4  | 100.7  | 31.8   | 189.2  | 218.1  | 233.0  |
| 438.5  | 522.2  | 286.4 | 381.6 | 652.5  | 547.8  | 1605.0 | 399.0  | 488.8  |
| 21.2   | 35.6   | 2.4   | 6.1   | 45.6   | 28.6   | 29.0   | 39.1   | 24.3   |
| 11.9   | 22.5   | 13.3  | 14.5  | 17.0   | 18.4   | 29.8   | 24.5   | 27.0   |
| 10.5   | 2.8    | 5.1   | 9.4   | 7.3    | 6.8    | 1.3    | 2.0    | 2.3    |
| 0.7    | 6.0    | 1.3   | 4.4   | 3.7    | 1.2    | 0.6    | 4.0    | 3.3    |
| 31.2   | 56.2   | 12.7  | 10.8  | 58.8   | 28.1   | 2.0    | 3.7    | 0.8    |
| 92.9   | 100.6  | 114.7 | 145.5 | 126.8  | 128.5  | 444.1  | 673.8  | 675.3  |
| 127.3  | 89.9   | 153.1 | 180.0 | 137.1  | 102.4  | 290.1  | 137.3  | 135.8  |
| 47.5   | 58.6   | 47.9  | 59.4  | 77.2   | 64.4   | 177.4  | 187.8  | 213.8  |
| 60.7   | 43.2   | 40.1  | 60.0  | 68.1   | 53.7   | 4.6    | 2.7    | 9.5    |
| 1099.2 | 1235.5 | 23.4  | 25.2  | 2173.3 | 1502.0 | 479.2  | 308.2  | 351.9  |
| 1738.5 | 1795.3 | 125.5 | 165.6 | 1954.2 | 2140.1 | 1368.3 | 617.4  | 722.0  |
| 22.5   | 28.0   | 27.0  | 40.1  | 33.7   | 16.1   | 112.3  | 107.0  | 144.6  |
| 42.0   | 47.3   | 35.4  | 38.2  | 67.8   | 61.6   | 159.0  | 112.7  | 127.8  |
| 8.8    | 1.8    | 7.6   | 5.8   | 7.2    | 0.4    | 6.5    | 11.5   | 8.5    |
| 0.8    | 0.9    | 1.6   | 1.5   | 0.8    | 1.0    | 2.6    | 1.6    | 3.6    |
| 14.9   | 9.3    | 23.1  | 21.6  | 4.8    | 8.0    | 4.1    | 18.8   | 13.0   |

|       |        |       |       |        |        |        |        |        |
|-------|--------|-------|-------|--------|--------|--------|--------|--------|
| 7.8   | 2.5    | 2.0   | 2.4   | 12.2   | 3.8    | 8.9    | 19.5   | 4.4    |
| 2.6   | 2.7    | 4.0   | 3.8   | 11.9   | 4.4    | 2.7    | 5.3    | 5.8    |
| 13.5  | 3.3    | 41.4  | 85.9  | 17.6   | 2.5    | 36.6   | 78.4   | 84.2   |
| 52.8  | 107.9  | 326.2 | 596.5 | 99.2   | 117.7  | 306.7  | 400.5  | 406.7  |
| 31.1  | 92.7   | 14.4  | 8.8   | 61.6   | 68.7   | 108.7  | 135.0  | 151.7  |
| 8.0   | 2.0    | 0.9   | 3.1   | 7.9    | 1.1    | 800.8  | 1687.3 | 1964.9 |
| 2.0   | 9.4    | 15.3  | 19.3  | 3.4    | 1.3    | 32.2   | 23.0   | 34.3   |
| 427.7 | 537.0  | 227.6 | 405.5 | 797.5  | 575.3  | 496.5  | 244.6  | 258.5  |
| 118.6 | 166.2  | 29.2  | 38.3  | 156.4  | 174.0  | 22.4   | 33.4   | 9.7    |
| 12.0  | 10.5   | 13.0  | 8.7   | 14.1   | 3.3    | 9.7    | 20.2   | 13.8   |
| 889.0 | 929.2  | 217.5 | 352.6 | 1341.7 | 816.8  | 2069.0 | 1003.5 | 1160.6 |
| 451.8 | 480.4  | 100.5 | 169.4 | 703.0  | 409.6  | 1178.7 | 513.7  | 530.9  |
| 2.0   | 0.9    | 2.5   | 2.0   | 0.7    | 5.6    | 2.8    | 1.3    | 1.9    |
| 2.4   | 1.2    | 1.2   | 1.8   | 1.5    | 2.5    | 2.9    | 2.4    | 2.6    |
| 63.0  | 68.4   | 34.6  | 32.0  | 101.2  | 77.4   | 130.8  | 111.6  | 102.5  |
| 9.5   | 5.9    | 2.8   | 4.4   | 3.0    | 8.5    | 80.9   | 65.7   | 69.1   |
| 71.0  | 44.4   | 165.5 | 207.6 | 85.9   | 29.7   | 97.0   | 160.1  | 155.5  |
| 7.4   | 7.8    | 5.5   | 5.9   | 6.1    | 8.9    | 13.0   | 8.1    | 6.1    |
| 388.7 | 508.1  | 309.0 | 374.7 | 547.9  | 448.9  | 1569.7 | 1470.4 | 1572.3 |
| 847.4 | 1208.2 | 144.3 | 171.8 | 1369.8 | 1028.0 | 1552.5 | 1097.8 | 1196.2 |
| 151.3 | 144.0  | 72.1  | 90.0  | 191.3  | 132.2  | 293.0  | 265.2  | 270.9  |
| 15.2  | 14.9   | 12.6  | 20.8  | 12.3   | 13.6   | 11.4   | 14.4   | 12.4   |
| 33.2  | 40.4   | 101.2 | 116.2 | 33.3   | 50.8   | 639.5  | 833.2  | 944.2  |
| 34.9  | 67.9   | 25.6  | 28.6  | 48.0   | 60.5   | 169.5  | 185.6  | 200.0  |
| 0.3   | 0.5    | 2.7   | 8.3   | 0.9    | 1.2    | 7.2    | 9.0    | 4.5    |
| 0.9   | 0.7    | 1.5   | 1.1   | 10.0   | 1.3    | 2.8    | 9.0    | 1.9    |
| 867.3 | 1108.5 | 98.9  | 135.2 | 1303.0 | 776.5  | 94.6   | 76.2   | 84.6   |
| 6.2   | 1.6    | 17.0  | 6.1   | 13.6   | 3.6    | 27.2   | 38.9   | 67.8   |
| 70.7  | 35.4   | 21.0  | 35.3  | 88.4   | 92.7   | 5.3    | 4.7    | 5.8    |
| 22.4  | 24.4   | 8.4   | 2.1   | 25.2   | 21.6   | 1.8    | 2.6    | 1.4    |
| 86.1  | 83.3   | 72.5  | 88.7  | 106.9  | 43.7   | 149.2  | 132.8  | 174.7  |
| 452.9 | 639.9  | 173.2 | 243.1 | 606.5  | 699.8  | 495.6  | 420.5  | 480.1  |
| 22.5  | 19.4   | 35.9  | 34.3  | 11.3   | 24.8   | 74.3   | 99.7   | 97.6   |
| 74.8  | 91.0   | 1.0   | 5.2   | 72.4   | 72.0   | 5.4    | 9.8    | 13.0   |
| 18.1  | 55.4   | 1.7   | 1.1   | 66.4   | 35.7   | 32.0   | 71.8   | 62.1   |
| 41.1  | 47.8   | 2.8   | 2.9   | 42.3   | 23.3   | 6.3    | 2.3    | 2.4    |
| 71.8  | 52.9   | 82.3  | 130.7 | 78.7   | 20.3   | 222.0  | 206.7  | 219.3  |
| 17.5  | 21.1   | 5.7   | 4.5   | 46.1   | 23.4   | 132.8  | 186.5  | 229.8  |
| 4.5   | 1.9    | 11.6  | 4.2   | 19.7   | 3.7    | 37.9   | 32.6   | 40.0   |
| 117.5 | 146.9  | 3.2   | 3.4   | 166.8  | 140.9  | 123.5  | 18.6   | 33.9   |
| 265.2 | 335.7  | 26.8  | 36.0  | 389.9  | 295.1  | 252.8  | 305.6  | 309.5  |
| 16.0  | 20.1   | 15.7  | 8.1   | 17.2   | 18.3   | 172.7  | 31.1   | 12.0   |
| 36.7  | 41.3   | 6.5   | 6.1   | 61.5   | 36.6   | 153.1  | 57.5   | 63.9   |
| 175.0 | 171.3  | 130.2 | 150.4 | 369.3  | 102.5  | 73.7   | 55.7   | 60.6   |
| 3.5   | 12.9   | 11.8  | 7.1   | 12.0   | 7.8    | 24.2   | 21.9   | 21.4   |
| 5.1   | 15.6   | 1.3   | 8.8   | 1.0    | 9.9    | 10.7   | 8.6    | 7.8    |
| 2.9   | 2.6    | 2.5   | 6.9   | 8.6    | 20.4   | 18.7   | 2.1    | 5.6    |
| 2.5   | 2.0    | 4.3   | 3.8   | 2.1    | 4.8    | 4.9    | 2.8    | 3.6    |
| 92.6  | 74.4   | 29.2  | 25.4  | 98.7   | 89.7   | 470.0  | 477.8  | 571.5  |
| 361.5 | 345.1  | 30.9  | 26.2  | 462.4  | 337.9  | 671.2  | 338.1  | 377.6  |
| 77.3  | 124.5  | 5.4   | 0.6   | 107.5  | 101.9  | 344.0  | 189.1  | 190.8  |
| 100.6 | 163.4  | 4.2   | 5.6   | 136.5  | 128.3  | 125.4  | 54.6   | 76.1   |
| 46.1  | 93.7   | 0.7   | 3.6   | 76.7   | 73.0   | 223.6  | 284.3  | 287.6  |

|        |        |       |       |        |        |        |        |        |
|--------|--------|-------|-------|--------|--------|--------|--------|--------|
| 193.7  | 191.7  | 84.3  | 74.2  | 189.9  | 145.9  | 369.9  | 279.8  | 296.4  |
| 434.2  | 459.5  | 258.2 | 388.7 | 573.8  | 340.0  | 851.3  | 579.8  | 605.6  |
| 56.8   | 85.7   | 10.6  | 12.8  | 111.9  | 95.5   | 9.1    | 13.4   | 8.2    |
| 260.0  | 250.3  | 18.1  | 14.6  | 327.3  | 242.4  | 294.7  | 337.1  | 350.6  |
| 788.0  | 1066.6 | 583.2 | 807.4 | 1006.5 | 1067.9 | 1418.2 | 899.5  | 1071.0 |
| 237.8  | 195.4  | 0.4   | 1.2   | 410.4  | 256.6  | 55.0   | 27.1   | 38.0   |
| 2.4    | 1.7    | 2.0   | 2.4   | 1.8    | 1.7    | 2.2    | 2.1    | 2.2    |
| 126.7  | 149.5  | 3.8   | 9.7   | 199.2  | 164.0  | 240.2  | 186.6  | 233.8  |
| 226.4  | 314.1  | 12.3  | 21.1  | 389.0  | 325.5  | 520.5  | 419.3  | 473.0  |
| 1.7    | 0.8    | 0.4   | 0.5   | 4.5    | 1.4    | 0.6    | 1.0    | 0.5    |
| 2.8    | 4.6    | 0.5   | 0.7   | 12.1   | 9.6    | 718.4  | 649.9  | 653.4  |
| 3.6    | 5.6    | 9.7   | 2.8   | 2.4    | 1.5    | 13.4   | 11.4   | 16.6   |
| 127.1  | 131.8  | 31.8  | 27.9  | 191.5  | 124.9  | 102.2  | 130.5  | 151.7  |
| 20.1   | 13.4   | 1.5   | 0.4   | 10.4   | 22.5   | 2.5    | 2.2    | 1.0    |
| 57.6   | 135.1  | 2.3   | 3.2   | 97.1   | 124.8  | 3.8    | 1.9    | 3.2    |
| 22.1   | 26.4   | 10.1  | 17.2  | 27.9   | 39.1   | 27.8   | 28.5   | 28.7   |
| 35.7   | 89.3   | 131.8 | 261.9 | 23.0   | 54.4   | 276.1  | 842.3  | 813.4  |
| 30.1   | 29.5   | 21.5  | 38.4  | 38.5   | 37.6   | 54.8   | 68.3   | 81.5   |
| 26.5   | 48.3   | 25.6  | 28.8  | 47.0   | 53.1   | 45.6   | 48.1   | 59.7   |
| 4.9    | 2.0    | 2.5   | 6.4   | 10.8   | 7.1    | 13.5   | 3.8    | 1.8    |
| 2.5    | 2.8    | 1.2   | 1.2   | 6.5    | 7.5    | 2.9    | 4.0    | 3.5    |
| 22.2   | 21.4   | 155.7 | 251.1 | 57.6   | 23.8   | 34.4   | 79.0   | 69.9   |
| 11.8   | 19.0   | 46.8  | 61.2  | 22.3   | 18.4   | 33.0   | 37.5   | 54.5   |
| 4.5    | 2.4    | 16.7  | 10.9  | 9.2    | 6.5    | 4.1    | 2.2    | 2.6    |
| 154.3  | 236.8  | 89.4  | 103.3 | 217.1  | 235.2  | 208.5  | 234.2  | 243.7  |
| 18.4   | 27.1   | 14.8  | 5.7   | 35.0   | 19.2   | 44.3   | 56.0   | 65.5   |
| 2072.9 | 3017.5 | 19.3  | 18.8  | 1314.7 | 1829.0 | 84.1   | 99.8   | 62.9   |
| 63.6   | 64.7   | 2.9   | 5.5   | 94.9   | 68.0   | 95.3   | 85.1   | 80.2   |
| 95.4   | 88.7   | 46.6  | 56.2  | 132.6  | 80.6   | 103.6  | 116.5  | 103.3  |
| 2.8    | 3.1    | 2.3   | 1.6   | 12.8   | 8.4    | 7.1    | 8.1    | 6.5    |
| 89.5   | 148.3  | 35.5  | 34.9  | 209.7  | 129.3  | 231.3  | 342.1  | 312.7  |
| 16.0   | 21.0   | 8.7   | 24.7  | 42.5   | 41.2   | 47.8   | 34.0   | 31.0   |
| 186.3  | 170.7  | 79.1  | 88.7  | 236.0  | 131.5  | 338.9  | 199.4  | 237.9  |
| 6.1    | 7.6    | 6.4   | 4.9   | 11.7   | 14.6   | 1.6    | 8.6    | 4.3    |
| 96.8   | 105.1  | 51.7  | 35.9  | 108.5  | 138.1  | 209.1  | 196.1  | 207.4  |
| 1.3    | 1.3    | 4.1   | 4.1   | 1.4    | 2.9    | 76.5   | 57.8   | 60.8   |
| 20.8   | 25.3   | 10.4  | 13.0  | 24.9   | 10.9   | 18.9   | 14.9   | 21.3   |
| 1051.2 | 1040.4 | 413.0 | 497.3 | 1154.5 | 1596.0 | 5534.8 | 3111.0 | 3307.4 |
| 3.8    | 7.0    | 3.0   | 8.1   | 13.4   | 1.4    | 3.2    | 9.9    | 10.3   |
| 113.9  | 132.2  | 16.6  | 22.3  | 152.8  | 130.1  | 65.9   | 83.8   | 88.1   |
| 111.6  | 145.9  | 12.2  | 2.9   | 187.0  | 143.8  | 97.3   | 102.6  | 103.6  |
| 3.3    | 0.4    | 7.9   | 9.7   | 1.0    | 1.7    | 11.5   | 10.2   | 13.7   |
| 3.1    | 2.7    | 2.2   | 2.3   | 12.1   | 12.2   | 19.1   | 28.1   | 34.8   |
| 33.5   | 38.3   | 43.2  | 66.8  | 46.0   | 52.3   | 79.4   | 54.4   | 75.5   |
| 629.8  | 852.0  | 166.8 | 203.8 | 1122.0 | 1004.5 | 720.7  | 602.6  | 624.7  |
| 29.8   | 33.6   | 8.3   | 6.6   | 55.9   | 24.1   | 33.7   | 42.3   | 42.4   |
| 37.2   | 44.5   | 29.4  | 49.3  | 41.6   | 38.5   | 111.6  | 130.3  | 162.4  |
| 32.4   | 33.2   | 7.0   | 9.8   | 38.0   | 23.1   | 7.2    | 5.6    | 3.0    |
| 80.1   | 85.4   | 9.6   | 9.5   | 97.6   | 91.0   | 83.1   | 74.4   | 98.2   |
| 539.0  | 555.2  | 333.2 | 442.2 | 636.0  | 512.9  | 1165.7 | 826.4  | 934.7  |
| 236.1  | 246.4  | 168.1 | 198.5 | 326.7  | 229.6  | 285.5  | 312.6  | 336.9  |
| 242.1  | 329.3  | 14.9  | 10.4  | 288.8  | 294.3  | 17.2   | 11.1   | 14.4   |
| 18.1   | 22.2   | 57.7  | 56.9  | 28.6   | 49.8   | 75.1   | 104.2  | 82.5   |

|       |        |       |       |        |        |        |        |        |
|-------|--------|-------|-------|--------|--------|--------|--------|--------|
| 15.1  | 3.1    | 11.7  | 10.9  | 9.7    | 16.1   | 26.8   | 22.4   | 15.9   |
| 400.2 | 402.6  | 0.7   | 2.8   | 789.9  | 366.7  | 7.9    | 49.4   | 34.4   |
| 28.6  | 19.9   | 2.2   | 2.1   | 47.2   | 11.6   | 126.6  | 178.8  | 168.4  |
| 11.6  | 11.6   | 11.1  | 13.7  | 11.2   | 17.3   | 24.4   | 24.9   | 26.9   |
| 3.2   | 2.8    | 2.5   | 2.4   | 15.3   | 10.6   | 25.3   | 8.5    | 18.3   |
| 454.9 | 443.9  | 149.0 | 233.3 | 677.8  | 353.5  | 781.8  | 595.6  | 622.1  |
| 72.6  | 106.4  | 76.6  | 114.6 | 125.3  | 92.1   | 118.5  | 110.1  | 112.1  |
| 7.5   | 1.1    | 1.8   | 1.2   | 1.8    | 5.2    | 9.8    | 12.6   | 12.2   |
| 0.6   | 2.3    | 14.6  | 24.1  | 3.2    | 1.1    | 4.0    | 3.4    | 2.0    |
| 12.6  | 19.9   | 24.3  | 27.1  | 42.8   | 15.4   | 14.9   | 11.1   | 15.9   |
| 5.4   | 17.9   | 2.7   | 3.2   | 8.5    | 4.6    | 52.6   | 103.9  | 124.8  |
| 2.3   | 0.8    | 4.1   | 3.3   | 11.0   | 1.5    | 3.2    | 1.2    | 3.0    |
| 3.5   | 0.8    | 4.4   | 2.1   | 0.2    | 0.4    | 0.3    | 3.9    | 1.0    |
| 9.8   | 3.7    | 5.9   | 15.3  | 5.9    | 9.4    | 21.5   | 14.5   | 24.9   |
| 4.2   | 18.1   | 54.8  | 62.0  | 31.2   | 3.8    | 24.2   | 21.1   | 30.1   |
| 15.8  | 7.4    | 34.3  | 36.1  | 19.2   | 4.3    | 32.5   | 29.9   | 25.3   |
| 25.8  | 31.9   | 11.0  | 7.3   | 35.3   | 44.1   | 46.7   | 46.6   | 44.3   |
| 57.7  | 37.4   | 28.5  | 40.5  | 64.9   | 40.8   | 115.6  | 65.5   | 74.8   |
| 4.0   | 8.8    | 16.7  | 16.0  | 14.4   | 9.9    | 7.2    | 1.8    | 0.6    |
| 53.7  | 24.4   | 10.4  | 11.5  | 54.7   | 25.5   | 49.4   | 65.4   | 41.5   |
| 1.3   | 1.2    | 0.8   | 1.1   | 1.5    | 1.1    | 3.3    | 2.7    | 3.5    |
| 19.5  | 36.9   | 33.5  | 43.8  | 41.2   | 36.5   | 85.8   | 76.0   | 92.5   |
| 119.5 | 148.1  | 12.1  | 9.7   | 240.9  | 109.6  | 1273.8 | 2163.6 | 2069.2 |
| 894.5 | 1214.2 | 418.0 | 444.0 | 1243.4 | 1126.2 | 1406.6 | 720.2  | 813.3  |
| 41.3  | 55.5   | 25.0  | 22.9  | 51.5   | 64.1   | 61.5   | 50.4   | 56.0   |
| 37.9  | 25.2   | 41.2  | 48.9  | 33.7   | 29.6   | 74.7   | 59.4   | 83.7   |
| 601.9 | 872.6  | 137.0 | 205.7 | 989.1  | 956.8  | 3109.3 | 2202.3 | 2451.0 |
| 22.6  | 13.2   | 7.1   | 9.0   | 22.1   | 29.1   | 15.6   | 16.8   | 8.3    |
| 1.9   | 6.2    | 0.7   | 4.4   | 6.3    | 0.9    | 6.3    | 4.0    | 3.8    |
| 5.4   | 5.0    | 0.8   | 0.8   | 1.7    | 0.7    | 5.1    | 2.3    | 7.4    |
| 5.7   | 14.7   | 3.5   | 3.6   | 1.0    | 1.1    | 1.3    | 2.3    | 1.9    |
| 3.9   | 1.8    | 2.8   | 4.0   | 1.6    | 1.5    | 1.5    | 1.0    | 2.3    |
| 62.6  | 72.1   | 39.8  | 64.6  | 92.2   | 36.8   | 189.6  | 133.2  | 157.1  |
| 2.6   | 2.3    | 1.2   | 3.0   | 11.5   | 3.6    | 11.8   | 9.1    | 18.7   |
| 1.6   | 2.1    | 1.3   | 5.3   | 5.6    | 5.6    | 7.6    | 3.5    | 2.4    |
| 0.9   | 2.0    | 0.9   | 0.8   | 7.9    | 1.2    | 1.0    | 0.9    | 1.3    |
| 18.6  | 30.6   | 21.0  | 13.8  | 28.9   | 13.1   | 177.7  | 193.4  | 193.0  |
| 0.6   | 2.6    | 5.6   | 0.5   | 1.3    | 3.9    | 5.7    | 2.2    | 5.7    |
| 3.5   | 2.6    | 7.6   | 10.0  | 1.4    | 14.9   | 2.6    | 2.7    | 2.7    |
| 6.3   | 0.9    | 3.6   | 0.3   | 2.0    | 1.1    | 2.9    | 1.4    | 1.5    |
| 1.5   | 1.9    | 5.9   | 1.0   | 8.1    | 5.4    | 8.0    | 5.0    | 1.7    |
| 49.3  | 61.8   | 7.2   | 3.4   | 69.7   | 70.3   | 77.8   | 109.0  | 110.6  |
| 16.0  | 12.2   | 3.6   | 6.2   | 31.3   | 14.4   | 11.5   | 8.0    | 2.1    |
| 11.9  | 20.8   | 18.3  | 11.0  | 21.5   | 17.0   | 4.6    | 9.8    | 12.6   |
| 17.6  | 25.4   | 15.1  | 17.3  | 21.3   | 18.6   | 90.3   | 135.0  | 127.0  |
| 1.1   | 0.4    | 1.2   | 6.0   | 1.4    | 1.3    | 4.9    | 11.5   | 7.5    |
| 9.1   | 3.0    | 0.8   | 2.4   | 0.6    | 1.1    | 1.9    | 2.0    | 1.6    |
| 5.7   | 3.1    | 16.7  | 14.2  | 1.5    | 2.3    | 12.1   | 4.3    | 5.1    |
| 4.3   | 4.8    | 6.7   | 14.6  | 1.3    | 1.4    | 18.5   | 21.8   | 8.1    |
| 34.8  | 27.6   | 70.5  | 66.8  | 40.5   | 25.1   | 50.5   | 59.1   | 59.1   |
| 109.9 | 116.5  | 334.8 | 444.9 | 127.3  | 141.9  | 470.0  | 435.3  | 467.1  |
| 2.5   | 1.3    | 0.7   | 2.3   | 6.3    | 4.6    | 7.5    | 14.8   | 16.1   |
| 1.2   | 0.4    | 2.2   | 0.6   | 1.5    | 0.4    | 0.8    | 8.6    | 4.7    |

|        |        |        |        |        |        |        |        |        |
|--------|--------|--------|--------|--------|--------|--------|--------|--------|
| 26.2   | 33.5   | 6.8    | 16.4   | 75.6   | 33.2   | 44.6   | 81.1   | 83.8   |
| 98.1   | 124.5  | 12.5   | 17.0   | 138.3  | 96.3   | 625.0  | 909.9  | 866.5  |
| 11.7   | 7.2    | 4.2    | 8.9    | 14.2   | 7.4    | 12.0   | 3.6    | 7.5    |
| 105.0  | 137.4  | 10.6   | 5.2    | 140.5  | 148.3  | 205.0  | 78.2   | 81.1   |
| 57.4   | 36.1   | 22.6   | 38.2   | 57.3   | 35.8   | 148.9  | 133.5  | 175.0  |
| 32.5   | 38.0   | 25.5   | 33.2   | 53.5   | 52.6   | 104.0  | 75.6   | 89.1   |
| 518.9  | 538.0  | 12.1   | 12.3   | 1036.8 | 600.2  | 379.3  | 139.9  | 199.7  |
| 165.6  | 172.8  | 15.7   | 27.4   | 228.2  | 166.4  | 144.8  | 99.7   | 101.4  |
| 109.5  | 106.6  | 527.4  | 636.5  | 159.0  | 80.0   | 613.1  | 551.1  | 665.8  |
| 236.9  | 312.5  | 76.6   | 154.3  | 317.4  | 236.8  | 499.4  | 415.7  | 408.1  |
| 11.5   | 21.4   | 0.8    | 3.1    | 8.9    | 29.4   | 23.6   | 20.4   | 21.4   |
| 2.6    | 4.7    | 13.5   | 11.4   | 3.1    | 3.3    | 8.7    | 9.1    | 17.6   |
| 370.9  | 405.5  | 372.7  | 531.4  | 515.6  | 400.4  | 1786.5 | 1533.1 | 1648.8 |
| 16.8   | 17.2   | 5.3    | 7.4    | 6.6    | 4.4    | 2.5    | 3.6    | 4.6    |
| 9.3    | 8.4    | 2.9    | 4.2    | 15.5   | 6.5    | 5.9    | 8.0    | 0.7    |
| 17.7   | 34.7   | 6.1    | 6.7    | 38.3   | 33.1   | 152.0  | 66.4   | 85.1   |
| 30.8   | 40.1   | 24.7   | 32.8   | 67.1   | 53.6   | 171.9  | 93.6   | 93.8   |
| 6.7    | 5.3    | 3.3    | 5.3    | 7.4    | 6.3    | 12.4   | 9.7    | 6.7    |
| 21.1   | 9.2    | 11.7   | 9.8    | 15.4   | 15.1   | 245.0  | 387.3  | 574.9  |
| 47.7   | 24.3   | 17.0   | 16.3   | 46.6   | 60.6   | 194.7  | 138.4  | 163.0  |
| 96.5   | 91.2   | 65.8   | 112.3  | 111.5  | 86.3   | 187.9  | 203.6  | 176.6  |
| 116.5  | 178.7  | 112.9  | 171.4  | 190.4  | 153.7  | 210.9  | 153.1  | 197.7  |
| 1276.0 | 1751.0 | 19.4   | 32.2   | 1707.5 | 1883.2 | 1382.3 | 1116.7 | 1282.1 |
| 2.8    | 3.6    | 3.9    | 13.2   | 4.2    | 1.6    | 5.3    | 4.8    | 5.8    |
| 256.8  | 316.0  | 66.9   | 62.1   | 455.6  | 260.4  | 539.9  | 452.5  | 543.0  |
| 734.1  | 965.4  | 1058.8 | 1289.1 | 1047.3 | 764.2  | 1727.9 | 1052.4 | 1301.3 |
| 574.0  | 558.7  | 85.5   | 95.4   | 758.4  | 473.1  | 289.2  | 180.6  | 207.7  |
| 19.6   | 34.4   | 7.1    | 13.9   | 17.0   | 31.1   | 18.1   | 14.1   | 22.1   |
| 2.0    | 2.7    | 7.0    | 6.5    | 0.7    | 2.1    | 4.2    | 4.4    | 12.2   |
| 7.5    | 13.8   | 8.9    | 1.6    | 11.5   | 2.5    | 8.6    | 7.3    | 6.8    |
| 2.5    | 4.0    | 11.8   | 13.3   | 3.3    | 1.2    | 3.5    | 3.8    | 4.3    |
| 9.1    | 1.3    | 5.2    | 7.4    | 9.5    | 9.1    | 0.8    | 5.3    | 7.5    |
| 2.2    | 13.2   | 4.2    | 9.0    | 8.1    | 7.7    | 10.4   | 6.1    | 9.5    |
| 0.9    | 7.7    | 0.6    | 0.3    | 3.5    | 7.8    | 6.8    | 5.9    | 9.6    |
| 23.3   | 19.4   | 32.6   | 29.0   | 29.8   | 19.9   | 260.9  | 258.7  | 264.0  |
| 13.8   | 9.9    | 13.0   | 7.0    | 14.3   | 8.7    | 40.8   | 78.4   | 69.2   |
| 17.7   | 23.7   | 7.5    | 2.1    | 13.2   | 24.8   | 95.9   | 93.4   | 99.1   |
| 22.5   | 16.7   | 20.1   | 15.5   | 27.1   | 14.9   | 74.2   | 77.9   | 74.8   |
| 3.7    | 2.1    | 7.3    | 5.8    | 7.9    | 18.3   | 10.5   | 7.7    | 8.5    |
| 494.5  | 676.8  | 46.5   | 57.4   | 848.8  | 578.9  | 192.3  | 188.0  | 189.1  |
| 54.1   | 71.8   | 14.3   | 30.4   | 81.3   | 87.9   | 96.5   | 91.6   | 127.6  |
| 3.2    | 17.2   | 15.1   | 22.5   | 3.7    | 2.0    | 32.6   | 10.2   | 27.1   |
| 16.3   | 8.4    | 1.7    | 10.2   | 19.5   | 14.5   | 12.3   | 5.0    | 9.9    |
| 41.7   | 37.7   | 95.8   | 144.0  | 61.8   | 23.1   | 169.1  | 206.3  | 228.8  |
| 537.4  | 442.8  | 1374.2 | 1845.8 | 792.2  | 386.7  | 3278.5 | 3573.1 | 4008.6 |
| 11.5   | 10.6   | 9.4    | 14.4   | 22.2   | 31.3   | 73.6   | 79.6   | 88.2   |
| 98.8   | 127.3  | 73.9   | 88.9   | 174.1  | 127.4  | 177.8  | 155.3  | 174.4  |
| 1.1    | 1.6    | 1.1    | 0.7    | 0.8    | 2.5    | 1.7    | 1.8    | 1.3    |
| 32.5   | 48.1   | 9.8    | 13.0   | 53.2   | 36.5   | 89.7   | 67.5   | 77.3   |
| 6.3    | 28.3   | 0.9    | 2.6    | 10.7   | 4.4    | 5.0    | 2.3    | 3.3    |
| 878.2  | 1508.0 | 739.3  | 946.1  | 1373.6 | 1246.8 | 1850.3 | 1621.1 | 1667.3 |
| 45.7   | 76.4   | 29.8   | 34.6   | 64.8   | 99.6   | 264.2  | 160.2  | 176.6  |
| 162.0  | 185.6  | 33.6   | 24.5   | 242.5  | 164.9  | 303.1  | 192.4  | 205.6  |



|       |        |       |       |        |        |        |        |        |
|-------|--------|-------|-------|--------|--------|--------|--------|--------|
| 1.2   | 0.7    | 3.6   | 1.0   | 0.6    | 1.5    | 1.9    | 3.3    | 6.9    |
| 44.7  | 3.5    | 9.7   | 21.0  | 67.7   | 34.1   | 21.8   | 25.6   | 52.9   |
| 22.2  | 26.3   | 5.4   | 6.0   | 21.1   | 40.2   | 74.3   | 102.6  | 91.3   |
| 611.8 | 660.5  | 186.4 | 298.1 | 695.2  | 603.4  | 432.8  | 334.7  | 365.6  |
| 322.1 | 387.6  | 94.8  | 135.3 | 367.1  | 425.8  | 270.6  | 219.0  | 223.4  |
| 4.1   | 6.2    | 3.4   | 5.0   | 8.1    | 4.8    | 5.9    | 7.8    | 4.8    |
| 16.2  | 14.3   | 14.9  | 7.2   | 18.9   | 8.9    | 31.0   | 31.0   | 34.8   |
| 9.1   | 11.8   | 5.1   | 7.2   | 11.4   | 4.8    | 33.1   | 41.7   | 43.6   |
| 25.9  | 16.7   | 3.2   | 8.8   | 21.3   | 10.6   | 8.1    | 14.8   | 15.4   |
| 4.2   | 2.1    | 4.1   | 9.7   | 1.4    | 14.0   | 17.8   | 9.9    | 12.6   |
| 1.8   | 2.9    | 5.8   | 1.2   | 1.9    | 8.0    | 7.8    | 6.2    | 5.9    |
| 3.5   | 5.5    | 0.1   | 0.5   | 2.3    | 0.3    | 0.4    | 0.5    | 0.2    |
| 1.2   | 0.8    | 0.3   | 0.5   | 0.4    | 2.2    | 1.0    | 1.0    | 0.4    |
| 5.2   | 2.7    | 0.8   | 0.8   | 0.7    | 5.3    | 6.8    | 7.6    | 6.1    |
| 21.4  | 38.8   | 15.0  | 18.3  | 32.0   | 32.0   | 56.7   | 79.4   | 86.6   |
| 22.6  | 41.7   | 13.7  | 28.9  | 28.8   | 23.8   | 47.2   | 67.9   | 69.1   |
| 7.8   | 11.5   | 2.0   | 2.4   | 5.8    | 4.1    | 22.5   | 14.7   | 18.8   |
| 0.9   | 0.4    | 1.5   | 0.7   | 0.9    | 0.3    | 0.6    | 0.6    | 1.0    |
| 165.3 | 170.9  | 63.2  | 85.4  | 310.1  | 140.2  | 328.1  | 340.8  | 440.3  |
| 10.1  | 20.0   | 64.5  | 90.6  | 28.5   | 23.4   | 59.8   | 77.2   | 97.9   |
| 156.1 | 239.1  | 69.9  | 98.2  | 239.3  | 234.2  | 514.0  | 293.2  | 290.3  |
| 9.7   | 6.2    | 7.9   | 7.6   | 10.3   | 8.8    | 18.6   | 20.5   | 22.3   |
| 28.7  | 53.2   | 4.2   | 0.2   | 32.6   | 31.6   | 45.8   | 40.6   | 38.0   |
| 2.7   | 4.8    | 3.8   | 7.3   | 3.3    | 12.9   | 15.2   | 22.1   | 14.5   |
| 3.0   | 10.9   | 8.7   | 1.6   | 16.0   | 6.6    | 11.8   | 6.8    | 7.4    |
| 10.9  | 15.1   | 9.4   | 15.3  | 2.7    | 1.0    | 17.9   | 9.8    | 6.9    |
| 15.0  | 10.1   | 7.9   | 3.7   | 31.3   | 10.1   | 9.8    | 2.0    | 3.4    |
| 14.1  | 18.6   | 18.1  | 14.0  | 17.2   | 30.8   | 4.4    | 21.3   | 9.5    |
| 2.7   | 1.3    | 2.4   | 1.3   | 12.3   | 3.0    | 21.3   | 23.7   | 34.8   |
| 18.6  | 28.7   | 9.9   | 23.3  | 19.6   | 10.2   | 121.7  | 210.8  | 264.0  |
| 1.9   | 4.7    | 2.1   | 2.2   | 2.0    | 3.6    | 12.2   | 7.2    | 10.7   |
| 104.3 | 175.7  | 77.7  | 115.8 | 184.6  | 177.4  | 379.0  | 324.3  | 313.9  |
| 31.6  | 37.5   | 25.7  | 26.1  | 25.6   | 23.6   | 58.8   | 55.5   | 63.1   |
| 29.2  | 8.5    | 1.2   | 10.4  | 54.2   | 5.1    | 2.0    | 1.1    | 2.1    |
| 2.0   | 1.2    | 1.3   | 0.7   | 3.8    | 0.8    | 1.5    | 1.5    | 2.3    |
| 1.3   | 6.2    | 9.5   | 6.7   | 0.8    | 2.3    | 0.9    | 0.9    | 0.8    |
| 534.1 | 782.7  | 90.7  | 83.5  | 873.0  | 770.0  | 1020.7 | 618.5  | 651.7  |
| 563.8 | 659.0  | 31.4  | 36.8  | 801.9  | 703.8  | 1006.2 | 716.9  | 697.7  |
| 143.2 | 95.5   | 122.4 | 128.0 | 184.2  | 155.5  | 117.3  | 83.7   | 96.1   |
| 168.2 | 360.1  | 12.0  | 18.4  | 270.4  | 337.7  | 265.2  | 71.2   | 63.0   |
| 3.9   | 0.4    | 12.5  | 13.9  | 1.0    | 4.5    | 3.9    | 0.8    | 7.1    |
| 974.0 | 1440.4 | 185.4 | 246.0 | 1393.9 | 1494.9 | 2253.2 | 1349.2 | 1425.3 |
| 23.7  | 27.4   | 12.9  | 13.2  | 24.3   | 22.4   | 61.3   | 44.1   | 56.2   |
| 1.1   | 2.2    | 0.7   | 2.1   | 2.8    | 0.8    | 2.0    | 1.2    | 2.0    |
| 2.5   | 6.4    | 14.8  | 11.3  | 5.4    | 5.3    | 21.8   | 27.0   | 24.7   |
| 680.1 | 838.7  | 276.2 | 352.2 | 1161.1 | 782.1  | 403.8  | 474.1  | 517.1  |
| 17.0  | 29.2   | 5.2   | 0.9   | 48.1   | 27.8   | 105.0  | 168.4  | 159.3  |
| 77.1  | 176.4  | 1.5   | 1.2   | 119.5  | 155.7  | 321.8  | 242.3  | 261.0  |
| 294.8 | 272.1  | 33.4  | 55.9  | 404.3  | 280.0  | 704.9  | 549.1  | 587.9  |
| 317.9 | 278.9  | 20.7  | 11.7  | 549.2  | 396.2  | 528.5  | 387.9  | 399.9  |
| 10.8  | 7.0    | 2.9   | 4.6   | 5.8    | 5.8    | 12.1   | 13.4   | 19.3   |
| 7.8   | 12.7   | 14.8  | 11.4  | 3.6    | 2.6    | 1.6    | 9.3    | 3.1    |
| 0.7   | 1.0    | 0.5   | 9.5   | 5.8    | 0.3    | 39.4   | 60.8   | 69.8   |

|        |        |        |        |        |        |        |        |        |
|--------|--------|--------|--------|--------|--------|--------|--------|--------|
| 12.1   | 37.9   | 2.4    | 1.2    | 20.7   | 10.2   | 5.7    | 15.5   | 6.6    |
| 330.3  | 588.9  | 132.9  | 185.1  | 371.4  | 496.3  | 707.1  | 281.5  | 313.2  |
| 197.5  | 302.5  | 134.5  | 152.9  | 320.3  | 260.9  | 538.4  | 608.2  | 673.5  |
| 63.7   | 73.6   | 42.7   | 49.5   | 144.8  | 102.9  | 127.4  | 129.2  | 118.2  |
| 18.9   | 13.8   | 1.1    | 1.9    | 42.6   | 16.6   | 1.6    | 1.1    | 1.2    |
| 56.1   | 54.5   | 13.5   | 13.2   | 72.1   | 61.9   | 133.3  | 105.8  | 125.8  |
| 277.4  | 321.4  | 109.8  | 178.7  | 474.4  | 406.9  | 299.5  | 128.6  | 150.4  |
| 0.6    | 1.2    | 2.1    | 0.9    | 0.9    | 3.0    | 7.7    | 2.6    | 1.7    |
| 291.0  | 315.0  | 9.4    | 15.8   | 439.6  | 311.1  | 118.2  | 40.6   | 39.9   |
| 2261.0 | 2709.4 | 17.5   | 8.6    | 3831.5 | 2438.8 | 5.3    | 3.1    | 2.2    |
| 64.8   | 63.3   | 4.6    | 1.3    | 96.0   | 62.2   | 3.3    | 3.5    | 0.7    |
| 56.0   | 34.5   | 47.5   | 34.2   | 54.1   | 45.6   | 78.9   | 71.2   | 84.7   |
| 0.2    | 0.1    | 0.4    | 0.1    | 0.3    | 0.7    | 2.4    | 2.0    | 0.4    |
| 1.8    | 3.8    | 0.6    | 0.5    | 1.2    | 1.8    | 1.5    | 1.2    | 1.0    |
| 3.0    | 2.6    | 3.1    | 5.7    | 2.5    | 1.3    | 2.9    | 2.7    | 4.0    |
| 90.0   | 74.8   | 33.2   | 28.9   | 87.3   | 85.5   | 82.9   | 87.7   | 90.7   |
| 1053.1 | 1415.6 | 1389.2 | 2144.9 | 1375.8 | 1176.7 | 2211.1 | 1600.4 | 1786.7 |
| 1.6    | 2.2    | 2.7    | 8.2    | 13.1   | 3.3    | 2.1    | 3.8    | 2.0    |
| 14.1   | 14.1   | 15.8   | 17.6   | 16.5   | 8.7    | 4.9    | 11.4   | 15.9   |
| 15.7   | 25.1   | 12.1   | 9.1    | 47.9   | 22.4   | 9.5    | 23.7   | 22.3   |
| 2.9    | 3.4    | 4.6    | 3.9    | 6.8    | 4.0    | 9.8    | 38.3   | 19.9   |
| 46.1   | 25.7   | 335.4  | 419.6  | 52.9   | 30.2   | 87.9   | 80.1   | 84.3   |
| 718.4  | 802.5  | 756.1  | 1142.7 | 1156.5 | 745.1  | 1673.7 | 1845.1 | 1991.7 |
| 2.4    | 5.7    | 118.0  | 132.7  | 4.2    | 10.7   | 119.4  | 137.5  | 115.7  |
| 7.1    | 2.1    | 3.2    | 1.9    | 11.2   | 6.9    | 7.6    | 6.8    | 5.2    |
| 11.7   | 18.6   | 2.3    | 1.5    | 16.0   | 22.9   | 19.0   | 6.6    | 16.0   |
| 47.9   | 24.5   | 1.4    | 0.5    | 61.1   | 34.8   | 4.0    | 1.3    | 2.2    |
| 62.8   | 92.2   | 23.0   | 21.1   | 86.3   | 173.1  | 403.0  | 334.5  | 446.8  |
| 598.8  | 755.7  | 66.2   | 75.0   | 981.6  | 603.0  | 967.7  | 528.8  | 574.9  |
| 246.1  | 324.9  | 1.4    | 0.6    | 324.0  | 263.8  | 4.8    | 2.2    | 10.3   |
| 55.2   | 59.7   | 4.9    | 14.3   | 73.3   | 45.2   | 9.8    | 11.6   | 9.4    |
| 5.9    | 3.9    | 7.9    | 1.9    | 8.4    | 3.5    | 218.2  | 182.4  | 219.2  |
| 13.0   | 11.0   | 9.4    | 6.6    | 12.4   | 16.6   | 14.0   | 14.2   | 16.9   |
| 658.5  | 669.9  | 786.5  | 1035.0 | 630.4  | 899.6  | 809.3  | 729.5  | 799.1  |
| 54.1   | 74.0   | 9.8    | 0.6    | 77.7   | 85.1   | 5.7    | 7.0    | 5.9    |
| 41.3   | 62.3   | 4.2    | 20.6   | 30.7   | 30.5   | 76.6   | 69.9   | 75.4   |
| 27.0   | 46.3   | 3.5    | 3.7    | 59.1   | 31.3   | 4.0    | 1.7    | 1.5    |
| 0.5    | 3.7    | 0.9    | 2.3    | 7.1    | 0.5    | 1.4    | 1.2    | 0.5    |
| 10.3   | 2.3    | 8.6    | 5.6    | 5.3    | 3.6    | 10.5   | 3.8    | 8.8    |
| 20.6   | 25.5   | 10.5   | 8.5    | 29.6   | 13.3   | 112.2  | 87.8   | 99.7   |
| 3188.0 | 3677.9 | 895.8  | 1222.9 | 4540.8 | 3481.5 | 6939.6 | 7078.3 | 7691.3 |
| 341.3  | 423.0  | 55.7   | 59.2   | 493.8  | 502.9  | 22.4   | 30.1   | 35.0   |
| 3.3    | 7.7    | 9.9    | 2.1    | 30.2   | 9.3    | 31.1   | 21.7   | 34.6   |
| 12.5   | 13.0   | 10.0   | 4.0    | 12.4   | 3.7    | 16.2   | 13.9   | 11.6   |
| 122.3  | 146.6  | 80.7   | 133.9  | 175.1  | 138.0  | 473.8  | 321.9  | 339.6  |
| 69.3   | 75.9   | 56.4   | 95.5   | 94.0   | 82.7   | 300.9  | 215.4  | 244.1  |
| 6.2    | 10.9   | 12.7   | 5.0    | 35.8   | 8.4    | 21.1   | 14.4   | 23.4   |
| 1519.2 | 1780.7 | 186.4  | 236.9  | 2348.8 | 1692.1 | 1072.6 | 702.0  | 734.0  |
| 38.3   | 42.1   | 11.0   | 20.5   | 56.5   | 26.4   | 86.3   | 63.5   | 86.7   |
| 44.2   | 39.7   | 9.4    | 4.9    | 19.8   | 27.1   | 29.1   | 38.2   | 36.1   |
| 0.6    | 5.1    | 4.5    | 2.2    | 2.5    | 2.8    | 37.8   | 135.5  | 118.7  |
| 47.9   | 71.7   | 18.5   | 28.1   | 71.5   | 82.5   | 70.9   | 42.0   | 43.7   |
| 6.9    | 4.7    | 3.2    | 3.6    | 4.4    | 3.1    | 7.4    | 3.4    | 3.0    |

|        |        |        |        |        |        |        |        |        |
|--------|--------|--------|--------|--------|--------|--------|--------|--------|
| 36.5   | 59.3   | 27.1   | 33.2   | 44.5   | 35.9   | 24.3   | 11.3   | 38.2   |
| 20.2   | 18.4   | 3.9    | 0.3    | 32.9   | 17.8   | 2.5    | 3.3    | 3.0    |
| 1.5    | 4.5    | 14.1   | 0.5    | 9.3    | 7.2    | 9.2    | 10.0   | 7.7    |
| 1.6    | 1.0    | 1.2    | 1.1    | 10.3   | 2.3    | 1.4    | 1.9    | 2.3    |
| 11.4   | 13.7   | 18.5   | 13.4   | 23.4   | 7.3    | 40.7   | 49.4   | 47.1   |
| 0.7    | 2.5    | 5.1    | 15.4   | 0.8    | 1.6    | 21.4   | 19.6   | 17.9   |
| 3.5    | 9.7    | 2.1    | 7.7    | 6.4    | 6.6    | 10.1   | 18.3   | 15.3   |
| 16.8   | 5.4    | 15.2   | 10.0   | 13.0   | 17.9   | 31.8   | 27.8   | 18.9   |
| 22.4   | 4.6    | 10.8   | 6.1    | 24.1   | 4.4    | 5.9    | 6.5    | 0.6    |
| 0.4    | 0.7    | 3.8    | 4.2    | 1.7    | 1.0    | 2.2    | 2.2    | 1.2    |
| 2.1    | 10.5   | 1.2    | 8.0    | 7.7    | 19.2   | 19.8   | 30.4   | 24.4   |
| 10.5   | 1.5    | 1.4    | 2.3    | 20.6   | 0.4    | 42.0   | 43.7   | 48.6   |
| 11.0   | 3.8    | 6.9    | 5.1    | 9.9    | 5.9    | 10.9   | 5.9    | 8.4    |
| 70.6   | 94.3   | 28.0   | 36.7   | 90.3   | 86.1   | 163.3  | 58.0   | 87.9   |
| 4.5    | 11.6   | 7.5    | 4.1    | 12.2   | 5.8    | 5.6    | 9.3    | 6.6    |
| 40.5   | 40.7   | 3.3    | 2.9    | 86.3   | 23.3   | 94.6   | 94.2   | 68.0   |
| 334.2  | 394.7  | 83.5   | 162.0  | 421.0  | 348.9  | 813.8  | 409.8  | 435.1  |
| 1.9    | 1.4    | 1.0    | 1.5    | 2.6    | 2.1    | 4.5    | 2.1    | 5.2    |
| 190.4  | 208.3  | 45.9   | 52.9   | 163.8  | 144.9  | 311.7  | 163.4  | 177.7  |
| 2.4    | 6.0    | 1.3    | 1.9    | 2.1    | 0.4    | 8.3    | 3.5    | 5.0    |
| 1.7    | 32.9   | 15.3   | 16.4   | 12.6   | 21.1   | 20.1   | 22.3   | 22.2   |
| 1411.8 | 1786.6 | 1173.1 | 1753.0 | 2163.3 | 1497.3 | 4171.2 | 4580.2 | 5184.4 |
| 5.7    | 6.4    | 3.7    | 1.4    | 2.8    | 2.7    | 5.4    | 6.1    | 4.7    |
| 24.7   | 38.4   | 14.8   | 11.2   | 30.5   | 12.3   | 37.2   | 31.7   | 22.6   |
| 126.3  | 165.2  | 102.1  | 115.5  | 308.6  | 224.1  | 2049.6 | 1462.6 | 1547.5 |
| 37.3   | 55.9   | 16.8   | 28.6   | 63.4   | 48.6   | 143.6  | 101.3  | 112.6  |
| 41.5   | 74.3   | 22.1   | 32.1   | 51.5   | 59.4   | 109.8  | 99.2   | 97.7   |
| 31.2   | 45.1   | 16.3   | 6.4    | 56.7   | 24.8   | 19.2   | 17.3   | 20.6   |
| 0.8    | 1.3    | 0.6    | 0.5    | 5.3    | 0.9    | 1.3    | 1.1    | 1.2    |
| 91.9   | 101.2  | 15.9   | 9.0    | 159.9  | 78.9   | 120.2  | 90.4   | 106.5  |
| 2.7    | 0.6    | 9.8    | 11.3   | 0.7    | 4.7    | 7.0    | 10.8   | 13.1   |
| 16.7   | 3.8    | 7.7    | 5.4    | 4.5    | 1.0    | 8.6    | 9.2    | 4.3    |
| 0.2    | 5.3    | 1.3    | 2.0    | 0.2    | 6.5    | 1.0    | 6.6    | 11.6   |
| 16.4   | 11.9   | 11.9   | 10.9   | 12.7   | 18.4   | 16.9   | 15.2   | 10.5   |
| 0.9    | 0.4    | 1.1    | 0.6    | 9.0    | 4.1    | 4.1    | 4.1    | 4.4    |
| 19.8   | 29.4   | 18.4   | 18.1   | 19.3   | 14.6   | 22.4   | 21.9   | 20.2   |
| 13.3   | 1.6    | 0.9    | 3.2    | 4.4    | 4.1    | 6.2    | 3.2    | 3.7    |
| 3.9    | 4.4    | 8.9    | 9.4    | 12.0   | 10.4   | 11.9   | 16.4   | 13.6   |
| 22.1   | 32.1   | 57.2   | 45.0   | 31.5   | 16.6   | 35.4   | 54.5   | 61.6   |
| 194.7  | 241.4  | 12.4   | 17.8   | 275.6  | 188.8  | 693.5  | 616.3  | 678.3  |
| 82.4   | 77.5   | 1.0    | 1.4    | 98.7   | 61.1   | 481.0  | 356.2  | 477.0  |
| 3.1    | 1.5    | 0.8    | 0.5    | 9.2    | 1.1    | 5.1    | 17.3   | 11.0   |
| 15.8   | 6.1    | 13.3   | 13.2   | 9.0    | 2.2    | 16.3   | 11.9   | 18.4   |
| 27.5   | 26.1   | 50.0   | 64.2   | 43.7   | 51.6   | 83.3   | 95.4   | 110.0  |
| 104.6  | 105.3  | 28.7   | 37.3   | 156.3  | 51.6   | 136.3  | 63.8   | 68.3   |
| 1207.5 | 1310.4 | 473.2  | 599.1  | 1520.9 | 1219.9 | 1370.4 | 1163.9 | 1292.6 |
| 12.0   | 20.3   | 21.4   | 21.0   | 19.0   | 11.3   | 17.1   | 20.7   | 18.6   |
| 4888.7 | 5935.9 | 1297.8 | 2026.0 | 5226.2 | 5137.5 | 8540.4 | 6553.8 | 6941.5 |
| 61.4   | 67.3   | 68.9   | 115.1  | 139.0  | 70.7   | 171.6  | 134.0  | 159.6  |
| 3033.3 | 3593.6 | 1256.9 | 1872.0 | 3670.4 | 3211.0 | 2598.1 | 1712.4 | 1848.7 |
| 22.1   | 18.9   | 11.0   | 22.6   | 23.9   | 18.7   | 50.8   | 58.8   | 57.7   |
| 18.6   | 16.5   | 8.1    | 2.2    | 23.7   | 19.1   | 72.2   | 65.0   | 75.0   |
| 402.1  | 413.0  | 214.8  | 281.5  | 495.1  | 459.9  | 857.6  | 524.3  | 555.7  |

|        |        |        |        |        |        |        |        |        |
|--------|--------|--------|--------|--------|--------|--------|--------|--------|
| 75.9   | 87.4   | 0.6    | 10.9   | 152.3  | 75.6   | 68.7   | 86.7   | 105.7  |
| 13.7   | 21.3   | 9.9    | 7.1    | 35.7   | 26.2   | 18.4   | 16.2   | 16.7   |
| 31.6   | 79.6   | 15.4   | 5.8    | 94.9   | 44.3   | 45.5   | 73.6   | 95.9   |
| 1.6    | 14.1   | 13.1   | 7.9    | 12.2   | 4.6    | 13.7   | 11.3   | 7.0    |
| 16.0   | 10.9   | 7.0    | 7.5    | 24.4   | 13.6   | 1.2    | 3.4    | 2.0    |
| 28.5   | 30.9   | 25.2   | 18.4   | 71.4   | 25.5   | 133.4  | 208.5  | 201.7  |
| 37.2   | 32.0   | 20.1   | 7.8    | 67.6   | 32.3   | 69.5   | 128.6  | 124.7  |
| 4.0    | 6.8    | 3.3    | 2.4    | 6.6    | 9.1    | 5.8    | 3.5    | 3.9    |
| 19.4   | 6.7    | 20.2   | 14.1   | 18.0   | 17.0   | 45.1   | 37.0   | 22.4   |
| 3.9    | 1.5    | 5.6    | 7.6    | 1.9    | 0.9    | 5.1    | 11.7   | 6.7    |
| 16.5   | 26.1   | 7.9    | 9.2    | 23.4   | 10.2   | 14.9   | 15.8   | 10.9   |
| 65.8   | 71.7   | 1.3    | 6.4    | 226.0  | 72.0   | 29.5   | 3.7    | 3.6    |
| 149.6  | 270.4  | 1.1    | 7.1    | 218.3  | 184.9  | 31.7   | 36.1   | 31.4   |
| 569.0  | 793.5  | 1039.1 | 1229.5 | 735.9  | 568.2  | 2100.3 | 1638.0 | 1700.4 |
| 4.0    | 1.1    | 19.2   | 7.2    | 18.2   | 2.5    | 31.1   | 27.9   | 20.4   |
| 39.6   | 60.2   | 11.4   | 6.4    | 65.1   | 53.2   | 57.4   | 25.1   | 24.9   |
| 16.2   | 19.5   | 22.3   | 28.4   | 14.3   | 19.3   | 22.4   | 23.2   | 17.9   |
| 129.6  | 174.1  | 63.3   | 83.8   | 205.3  | 101.1  | 116.5  | 99.2   | 115.4  |
| 55.0   | 73.5   | 21.0   | 16.0   | 131.9  | 86.5   | 43.9   | 21.5   | 32.5   |
| 2.6    | 3.5    | 1.2    | 1.7    | 12.6   | 11.5   | 4.7    | 6.8    | 9.7    |
| 0.9    | 2.7    | 176.4  | 186.0  | 4.6    | 4.0    | 5.3    | 2.8    | 6.4    |
| 16.0   | 17.3   | 88.2   | 124.1  | 25.6   | 3.7    | 66.3   | 33.3   | 31.0   |
| 22.2   | 29.3   | 31.1   | 39.3   | 42.2   | 24.0   | 61.8   | 51.7   | 63.3   |
| 108.4  | 132.2  | 61.1   | 72.4   | 156.3  | 110.6  | 76.4   | 57.3   | 63.6   |
| 147.6  | 187.2  | 230.6  | 281.1  | 265.9  | 180.1  | 363.7  | 323.4  | 375.6  |
| 5.4    | 2.9    | 3.2    | 3.3    | 5.4    | 3.4    | 2.5    | 4.4    | 6.3    |
| 2.1    | 2.4    | 1.1    | 1.0    | 2.0    | 2.0    | 2.6    | 1.0    | 1.4    |
| 1.5    | 4.8    | 2.7    | 3.3    | 3.1    | 1.5    | 15.4   | 7.5    | 15.0   |
| 18.0   | 12.9   | 23.7   | 20.4   | 19.1   | 17.1   | 23.9   | 14.4   | 21.7   |
| 2.8    | 6.0    | 2.3    | 8.0    | 12.2   | 1.9    | 8.4    | 18.3   | 15.6   |
| 44.1   | 80.2   | 27.7   | 37.9   | 83.0   | 54.1   | 66.7   | 83.7   | 89.8   |
| 1082.8 | 1154.6 | 154.3  | 257.3  | 1104.5 | 1000.6 | 904.7  | 621.4  | 679.3  |
| 31.2   | 35.5   | 5.3    | 5.7    | 35.1   | 52.0   | 82.4   | 81.9   | 89.2   |
| 91.4   | 86.7   | 57.0   | 72.1   | 132.1  | 87.9   | 143.3  | 144.1  | 177.3  |
| 10.5   | 35.6   | 10.4   | 5.3    | 21.0   | 30.6   | 170.3  | 173.4  | 169.7  |
| 0.6    | 6.2    | 0.9    | 4.0    | 1.0    | 3.2    | 1.6    | 5.6    | 6.3    |
| 21.2   | 18.1   | 2.7    | 9.1    | 34.5   | 17.4   | 56.7   | 43.4   | 38.1   |
| 27.4   | 10.0   | 23.9   | 3.8    | 39.9   | 3.3    | 61.8   | 69.3   | 66.7   |
| 34.3   | 39.2   | 45.1   | 46.5   | 64.1   | 39.6   | 261.4  | 327.6  | 346.3  |
| 4.0    | 0.2    | 2.8    | 1.3    | 3.1    | 0.2    | 1.5    | 1.0    | 0.4    |
| 8.1    | 5.8    | 11.3   | 5.9    | 9.1    | 11.4   | 17.2   | 20.1   | 15.9   |
| 158.0  | 238.1  | 13.6   | 12.0   | 268.7  | 223.4  | 505.4  | 422.3  | 449.4  |
| 0.6    | 1.1    | 1.5    | 0.7    | 1.1    | 1.2    | 1.5    | 10.4   | 6.9    |
| 5.4    | 2.3    | 3.9    | 6.0    | 1.5    | 4.0    | 4.8    | 3.2    | 2.2    |
| 20.8   | 17.2   | 1.6    | 11.0   | 22.0   | 23.4   | 8.0    | 2.3    | 3.0    |
| 58.0   | 44.8   | 12.5   | 15.9   | 116.5  | 56.9   | 238.3  | 201.9  | 239.9  |
| 14.4   | 2.8    | 2.4    | 0.7    | 2.6    | 1.2    | 13.3   | 12.3   | 3.6    |
| 178.9  | 233.4  | 69.0   | 101.4  | 250.5  | 197.8  | 119.6  | 118.3  | 121.0  |
| 13.5   | 1.3    | 1.3    | 1.2    | 2.1    | 1.2    | 9.5    | 3.1    | 1.5    |
| 6.1    | 11.9   | 6.2    | 0.5    | 17.1   | 8.6    | 10.9   | 11.1   | 14.8   |
| 40.1   | 43.7   | 22.1   | 35.9   | 63.2   | 28.2   | 86.2   | 60.9   | 84.5   |
| 8.5    | 2.5    | 1.2    | 2.2    | 4.5    | 2.2    | 3.0    | 2.8    | 1.8    |
| 9.8    | 4.6    | 12.5   | 13.6   | 6.3    | 9.0    | 13.5   | 10.8   | 9.6    |

|       |       |       |       |        |       |        |        |        |
|-------|-------|-------|-------|--------|-------|--------|--------|--------|
| 10.0  | 1.1   | 38.0  | 24.6  | 13.4   | 3.1   | 18.3   | 19.4   | 11.2   |
| 29.3  | 50.1  | 10.2  | 1.7   | 38.4   | 31.0  | 15.5   | 20.3   | 12.5   |
| 9.9   | 0.7   | 0.8   | 4.8   | 6.6    | 1.3   | 1.7    | 5.0    | 1.6    |
| 566.4 | 853.9 | 217.4 | 229.2 | 920.7  | 729.3 | 1348.7 | 1200.9 | 1284.3 |
| 510.9 | 501.6 | 172.1 | 230.4 | 669.6  | 525.5 | 510.0  | 588.0  | 593.6  |
| 60.6  | 93.9  | 20.7  | 32.9  | 105.2  | 95.8  | 57.8   | 38.5   | 53.2   |
| 69.8  | 89.3  | 20.3  | 28.0  | 87.1   | 94.4  | 41.0   | 28.7   | 20.2   |
| 0.8   | 1.1   | 2.8   | 0.7   | 1.0    | 4.7   | 6.9    | 7.0    | 2.8    |
| 6.9   | 20.0  | 7.9   | 3.2   | 14.7   | 11.9  | 17.5   | 19.0   | 15.4   |
| 10.7  | 11.5  | 16.3  | 20.2  | 18.2   | 7.7   | 153.4  | 170.5  | 163.7  |
| 6.5   | 6.1   | 1.1   | 3.7   | 3.8    | 1.4   | 21.3   | 37.6   | 35.1   |
| 311.1 | 445.1 | 227.8 | 278.6 | 468.3  | 461.1 | 1009.6 | 783.5  | 776.3  |
| 175.3 | 220.5 | 102.2 | 188.3 | 287.9  | 196.2 | 206.6  | 224.3  | 258.7  |
| 247.3 | 330.4 | 69.4  | 138.4 | 429.6  | 295.3 | 227.7  | 185.7  | 200.9  |
| 8.0   | 12.1  | 14.5  | 8.7   | 12.0   | 17.0  | 25.4   | 12.5   | 8.9    |
| 2.8   | 1.7   | 0.9   | 0.7   | 11.1   | 1.5   | 3.4    | 4.8    | 5.2    |
| 17.4  | 6.5   | 14.0  | 22.1  | 18.0   | 17.9  | 33.9   | 29.9   | 39.9   |
| 4.4   | 1.7   | 9.1   | 8.4   | 1.1    | 1.3   | 3.4    | 5.6    | 1.7    |
| 23.6  | 28.8  | 5.2   | 1.1   | 42.2   | 30.9  | 37.2   | 24.6   | 30.5   |
| 19.3  | 21.5  | 4.4   | 7.5   | 22.4   | 19.3  | 72.0   | 44.1   | 51.1   |
| 6.7   | 4.0   | 3.2   | 5.4   | 1.4    | 12.1  | 1.7    | 4.5    | 2.3    |
| 541.2 | 846.1 | 79.2  | 89.3  | 1130.8 | 853.2 | 1995.1 | 1603.8 | 1669.4 |
| 19.4  | 28.5  | 7.6   | 3.5   | 11.1   | 11.9  | 8.5    | 15.3   | 17.9   |
| 2.0   | 0.7   | 1.4   | 1.3   | 1.3    | 1.5   | 2.1    | 1.5    | 2.0    |
| 323.2 | 459.1 | 190.6 | 250.1 | 415.1  | 443.7 | 664.3  | 701.4  | 703.5  |
| 14.8  | 6.4   | 4.4   | 1.8   | 9.3    | 5.5   | 5.6    | 6.0    | 4.0    |
| 162.3 | 222.6 | 7.8   | 2.7   | 342.1  | 152.5 | 8.0    | 2.4    | 3.7    |
| 390.3 | 505.8 | 0.3   | 0.9   | 643.6  | 364.8 | 4.5    | 7.7    | 12.2   |
| 22.8  | 7.0   | 24.0  | 22.6  | 18.0   | 16.0  | 19.7   | 17.3   | 15.6   |
| 36.1  | 42.2  | 30.1  | 20.6  | 70.9   | 34.2  | 25.9   | 26.8   | 25.2   |
| 0.5   | 0.8   | 0.9   | 9.0   | 1.0    | 0.9   | 8.9    | 13.4   | 10.9   |
| 0.7   | 0.4   | 1.9   | 3.1   | 1.3    | 4.9   | 4.1    | 0.8    | 2.0    |
| 8.1   | 9.1   | 3.4   | 1.9   | 13.5   | 5.4   | 11.3   | 10.2   | 3.4    |
| 5.5   | 12.1  | 2.9   | 3.0   | 17.2   | 7.4   | 13.7   | 28.3   | 24.0   |
| 9.9   | 32.1  | 0.9   | 4.5   | 24.6   | 17.8  | 12.4   | 22.8   | 18.0   |
| 48.9  | 24.8  | 45.2  | 8.9   | 53.4   | 4.1   | 87.1   | 80.6   | 102.7  |
| 1.2   | 1.5   | 1.5   | 1.2   | 2.1    | 1.1   | 7.8    | 4.1    | 2.6    |
| 3.5   | 15.8  | 1.4   | 0.5   | 21.5   | 17.4  | 2.4    | 2.7    | 5.7    |
| 34.1  | 18.9  | 9.6   | 6.5   | 25.5   | 23.6  | 17.8   | 17.8   | 11.2   |
| 157.7 | 161.7 | 41.0  | 84.9  | 230.9  | 178.4 | 566.8  | 742.7  | 768.8  |
| 1.7   | 13.5  | 10.1  | 6.0   | 1.2    | 8.6   | 3.9    | 6.4    | 1.5    |
| 63.4  | 90.1  | 18.9  | 30.7  | 135.4  | 70.1  | 79.9   | 160.7  | 151.9  |
| 6.3   | 11.6  | 1.7   | 1.2   | 9.1    | 4.3   | 8.0    | 7.8    | 13.0   |
| 10.6  | 12.9  | 0.8   | 5.0   | 10.0   | 2.4   | 6.9    | 3.5    | 7.1    |
| 193.1 | 280.9 | 207.0 | 339.3 | 350.2  | 185.0 | 2699.4 | 1824.9 | 1921.4 |
| 6.7   | 2.5   | 11.7  | 6.8   | 2.7    | 1.9   | 3.3    | 3.8    | 2.6    |
| 57.9  | 61.2  | 52.4  | 64.0  | 66.2   | 43.4  | 590.2  | 361.1  | 469.8  |
| 117.6 | 149.2 | 89.3  | 117.9 | 293.3  | 169.4 | 269.1  | 193.4  | 211.4  |
| 1.9   | 0.8   | 2.2   | 1.3   | 3.9    | 2.8   | 2.3    | 7.2    | 6.7    |
| 16.4  | 8.8   | 1.7   | 8.0   | 6.9    | 2.4   | 33.5   | 44.6   | 43.3   |
| 1.0   | 7.8   | 1.3   | 3.7   | 0.9    | 7.5   | 7.3    | 10.8   | 12.7   |
| 1.6   | 10.6  | 2.5   | 1.0   | 0.8    | 2.6   | 2.5    | 0.7    | 1.8    |
| 13.5  | 13.8  | 14.2  | 12.1  | 13.2   | 3.7   | 9.3    | 12.5   | 8.1    |

|        |        |        |        |        |        |         |        |        |
|--------|--------|--------|--------|--------|--------|---------|--------|--------|
| 2.0    | 3.0    | 3.1    | 5.1    | 2.3    | 10.0   | 6.9     | 4.8    | 2.7    |
| 3.6    | 2.5    | 0.5    | 1.7    | 0.9    | 10.9   | 1.7     | 6.6    | 3.2    |
| 3.5    | 9.9    | 18.5   | 24.0   | 7.6    | 6.3    | 1.2     | 2.1    | 1.6    |
| 19.4   | 4.2    | 4.6    | 1.0    | 16.7   | 1.8    | 14.6    | 19.0   | 9.2    |
| 0.4    | 0.9    | 7.8    | 6.8    | 0.7    | 1.6    | 4.8     | 3.7    | 7.4    |
| 4.2    | 11.6   | 12.2   | 12.0   | 12.5   | 5.6    | 9.6     | 13.7   | 15.2   |
| 20.5   | 6.3    | 8.0    | 15.8   | 1.6    | 1.6    | 12.6    | 4.1    | 3.6    |
| 6.9    | 1.4    | 1.4    | 5.8    | 2.0    | 5.1    | 2.8     | 3.1    | 7.1    |
| 57.5   | 83.9   | 78.1   | 82.3   | 86.3   | 68.1   | 696.0   | 492.7  | 524.8  |
| 8.3    | 5.9    | 3.0    | 0.1    | 5.2    | 9.5    | 31.5    | 31.4   | 39.9   |
| 12.5   | 31.7   | 22.3   | 36.5   | 5.0    | 31.3   | 93.1    | 91.4   | 89.7   |
| 139.3  | 166.6  | 298.1  | 447.2  | 289.1  | 133.7  | 1226.7  | 675.1  | 774.7  |
| 5193.5 | 6937.0 | 2040.9 | 3121.8 | 6758.9 | 3017.1 | 10517.6 | 6448.8 | 6725.5 |
| 5.8    | 1.4    | 3.1    | 1.6    | 2.3    | 3.6    | 3.6     | 13.3   | 2.3    |
| 0.8    | 1.2    | 0.9    | 1.3    | 12.9   | 2.4    | 1.0     | 1.3    | 0.9    |
| 8.6    | 1.1    | 2.8    | 1.5    | 0.5    | 1.4    | 64.2    | 89.5   | 91.7   |
| 0.8    | 1.9    | 7.1    | 0.5    | 1.1    | 0.8    | 7.2     | 2.6    | 2.5    |
| 0.9    | 1.4    | 0.8    | 1.2    | 3.1    | 4.0    | 11.7    | 2.2    | 1.8    |
| 1.5    | 2.3    | 0.6    | 0.9    | 1.5    | 4.5    | 13.6    | 27.1   | 16.2   |
| 4.9    | 2.3    | 4.9    | 7.3    | 1.1    | 5.7    | 33.8    | 19.7   | 22.8   |
| 39.4   | 89.0   | 34.0   | 39.6   | 82.1   | 73.0   | 216.7   | 256.9  | 273.0  |
| 9.4    | 19.2   | 21.2   | 11.4   | 9.1    | 15.2   | 59.1    | 53.8   | 65.1   |
| 11.9   | 6.1    | 6.4    | 1.1    | 6.4    | 2.9    | 7.6     | 10.2   | 3.8    |
| 17.5   | 33.5   | 9.3    | 3.3    | 34.3   | 29.5   | 18.6    | 14.0   | 2.5    |
| 22.6   | 40.8   | 23.6   | 32.7   | 32.7   | 41.4   | 203.3   | 97.7   | 114.5  |
| 6.0    | 7.8    | 9.2    | 2.4    | 1.6    | 2.5    | 1.8     | 10.2   | 5.2    |
| 1.9    | 0.7    | 1.8    | 1.6    | 0.6    | 2.5    | 8.9     | 2.2    | 2.4    |
| 5.1    | 1.4    | 5.2    | 10.9   | 11.1   | 4.5    | 17.5    | 11.3   | 7.5    |
| 413.9  | 527.3  | 3.1    | 4.0    | 233.9  | 431.3  | 8.6     | 2.5    | 1.2    |
| 0.8    | 2.0    | 16.7   | 5.5    | 0.3    | 9.2    | 3.6     | 9.3    | 8.5    |
| 86.2   | 81.9   | 26.8   | 45.3   | 134.9  | 83.1   | 328.1   | 266.1  | 299.0  |
| 31.0   | 22.1   | 114.0  | 101.6  | 42.3   | 26.5   | 38.8    | 47.5   | 28.1   |
| 1.5    | 2.4    | 8.6    | 5.9    | 3.0    | 1.5    | 32.1    | 39.3   | 36.9   |
| 14.9   | 10.8   | 23.5   | 17.6   | 8.7    | 11.1   | 37.3    | 54.5   | 64.9   |
| 35.7   | 45.7   | 22.3   | 16.9   | 61.2   | 45.4   | 185.8   | 190.7  | 188.4  |
| 22.5   | 25.4   | 26.0   | 21.6   | 20.9   | 15.2   | 89.8    | 106.9  | 121.6  |
| 1.0    | 0.8    | 0.6    | 1.6    | 1.6    | 1.0    | 1.1     | 1.9    | 2.1    |
| 1.0    | 19.5   | 5.3    | 7.6    | 15.3   | 14.8   | 5.5     | 3.5    | 1.9    |
| 15.3   | 12.7   | 8.5    | 3.8    | 47.9   | 19.6   | 35.5    | 21.0   | 21.5   |
| 7.2    | 6.1    | 5.4    | 10.2   | 9.9    | 16.3   | 3.9     | 11.6   | 8.3    |
| 93.4   | 141.8  | 86.9   | 98.9   | 330.8  | 141.5  | 32.9    | 74.6   | 85.5   |
| 0.9    | 4.0    | 2.0    | 0.4    | 7.9    | 9.9    | 8.8     | 4.1    | 1.7    |
| 13.6   | 4.1    | 34.0   | 52.7   | 24.8   | 6.6    | 17.4    | 5.1    | 16.7   |
| 13.1   | 0.7    | 1.9    | 1.5    | 2.6    | 2.6    | 6.0     | 6.9    | 5.9    |
| 344.5  | 406.9  | 184.5  | 234.9  | 503.4  | 404.9  | 2472.2  | 1801.0 | 1957.9 |
| 208.1  | 236.7  | 263.7  | 379.7  | 368.5  | 255.4  | 296.1   | 188.1  | 205.1  |
| 1.9    | 9.2    | 2.0    | 2.7    | 7.9    | 3.6    | 7.5     | 14.2   | 13.1   |
| 7.8    | 11.4   | 24.2   | 11.6   | 5.1    | 7.6    | 18.6    | 17.6   | 18.7   |
| 1.6    | 3.9    | 4.0    | 4.5    | 11.0   | 5.5    | 4.7     | 1.0    | 3.8    |
| 25.8   | 27.1   | 53.3   | 64.4   | 34.9   | 24.6   | 162.9   | 131.4  | 171.0  |
| 4.8    | 9.8    | 14.3   | 11.5   | 0.9    | 13.1   | 99.4    | 241.0  | 220.5  |
| 67.4   | 111.9  | 163.6  | 206.6  | 100.7  | 103.1  | 508.3   | 268.9  | 412.8  |
| 13.8   | 21.7   | 7.6    | 11.6   | 29.5   | 21.4   | 206.7   | 201.7  | 216.0  |

|        |        |        |        |        |        |        |        |        |
|--------|--------|--------|--------|--------|--------|--------|--------|--------|
| 2.1    | 0.8    | 4.6    | 6.6    | 2.1    | 14.0   | 7.7    | 2.1    | 13.9   |
| 11.9   | 8.3    | 12.4   | 8.0    | 15.2   | 5.8    | 15.1   | 21.1   | 20.1   |
| 9.5    | 2.8    | 3.0    | 2.0    | 1.0    | 5.6    | 16.1   | 5.7    | 7.4    |
| 0.9    | 0.1    | 3.8    | 0.3    | 5.2    | 5.1    | 6.2    | 2.1    | 2.4    |
| 6.7    | 6.6    | 0.3    | 4.1    | 3.6    | 3.5    | 18.3   | 9.5    | 7.7    |
| 35.0   | 56.9   | 9.5    | 12.2   | 56.4   | 59.8   | 602.8  | 572.1  | 661.6  |
| 511.4  | 567.5  | 326.8  | 409.3  | 839.4  | 499.2  | 1326.4 | 969.7  | 1138.3 |
| 1.9    | 11.1   | 15.0   | 33.4   | 1.9    | 10.7   | 121.5  | 183.7  | 186.1  |
| 1.4    | 2.5    | 0.8    | 2.5    | 0.9    | 2.9    | 2.6    | 2.7    | 3.7    |
| 53.8   | 116.5  | 167.4  | 140.8  | 135.1  | 144.2  | 359.4  | 309.8  | 311.7  |
| 0.6    | 6.9    | 5.3    | 5.4    | 1.3    | 1.4    | 513.5  | 882.5  | 1041.0 |
| 1.0    | 2.0    | 1.6    | 1.6    | 1.2    | 4.4    | 2.9    | 1.7    | 2.2    |
| 18.7   | 4.2    | 4.4    | 6.9    | 27.1   | 17.6   | 29.8   | 24.8   | 16.1   |
| 3.1    | 1.0    | 1.4    | 1.2    | 0.4    | 1.2    | 49.4   | 12.0   | 19.3   |
| 3.6    | 11.4   | 11.2   | 9.9    | 7.4    | 10.0   | 18.3   | 15.4   | 16.0   |
| 29.0   | 38.0   | 29.3   | 18.9   | 40.4   | 46.0   | 48.3   | 61.8   | 49.7   |
| 662.8  | 875.3  | 73.2   | 126.5  | 914.2  | 944.8  | 987.9  | 708.1  | 765.5  |
| 4.7    | 16.0   | 0.8    | 4.4    | 8.0    | 6.1    | 3.4    | 1.2    | 2.7    |
| 10.2   | 5.2    | 1.0    | 1.0    | 24.2   | 15.6   | 157.1  | 217.1  | 215.6  |
| 36.3   | 51.9   | 20.7   | 16.0   | 64.4   | 45.3   | 256.3  | 360.3  | 333.9  |
| 1.8    | 1.0    | 1.1    | 0.8    | 1.1    | 2.4    | 1.7    | 1.3    | 1.2    |
| 6.7    | 8.0    | 10.6   | 16.5   | 16.0   | 2.2    | 30.8   | 14.3   | 20.2   |
| 4.5    | 4.7    | 1.1    | 0.8    | 0.8    | 9.9    | 6.0    | 10.8   | 7.7    |
| 1.0    | 0.4    | 5.4    | 0.3    | 4.1    | 0.5    | 4.3    | 2.7    | 0.8    |
| 3.4    | 12.2   | 20.0   | 31.5   | 2.5    | 2.4    | 20.9   | 14.4   | 18.1   |
| 94.8   | 94.7   | 27.0   | 32.6   | 148.2  | 99.0   | 139.5  | 100.0  | 102.7  |
| 617.0  | 936.8  | 725.1  | 986.1  | 1175.1 | 794.8  | 3270.0 | 2733.8 | 2739.4 |
| 14.6   | 17.1   | 21.7   | 26.3   | 19.8   | 42.3   | 31.2   | 32.3   | 30.9   |
| 2.5    | 1.4    | 1.2    | 3.7    | 1.6    | 0.9    | 3.3    | 1.2    | 10.4   |
| 15.0   | 25.7   | 1.4    | 0.4    | 27.8   | 24.0   | 1.9    | 12.4   | 6.4    |
| 43.4   | 64.0   | 16.4   | 15.3   | 40.1   | 37.4   | 92.9   | 55.0   | 79.5   |
| 8.3    | 3.5    | 1.8    | 1.5    | 7.0    | 1.5    | 5.2    | 5.7    | 13.1   |
| 11.9   | 6.8    | 6.6    | 3.6    | 8.1    | 9.3    | 13.7   | 13.2   | 15.8   |
| 16.3   | 10.5   | 16.2   | 2.1    | 8.8    | 11.4   | 6.4    | 15.8   | 12.4   |
| 4.9    | 3.7    | 15.6   | 7.0    | 6.6    | 6.0    | 18.0   | 13.7   | 14.9   |
| 36.3   | 30.4   | 59.9   | 76.9   | 43.9   | 37.0   | 59.2   | 58.7   | 55.3   |
| 43.2   | 55.3   | 75.9   | 88.4   | 84.4   | 63.2   | 218.4  | 129.7  | 147.2  |
| 147.2  | 117.0  | 103.9  | 93.1   | 203.2  | 111.7  | 252.4  | 282.8  | 273.7  |
| 324.4  | 353.5  | 371.4  | 624.4  | 460.5  | 316.5  | 1577.8 | 1324.0 | 1472.2 |
| 2.2    | 4.7    | 12.8   | 13.5   | 14.4   | 4.9    | 33.6   | 32.4   | 39.0   |
| 1.9    | 5.2    | 8.4    | 8.4    | 3.8    | 8.9    | 14.0   | 8.0    | 13.9   |
| 23.7   | 22.3   | 1.3    | 1.2    | 10.6   | 13.1   | 27.2   | 33.3   | 37.9   |
| 39.3   | 18.6   | 28.6   | 17.6   | 10.8   | 3.4    | 56.9   | 114.0  | 42.8   |
| 12.2   | 10.9   | 12.2   | 21.7   | 19.1   | 17.9   | 42.6   | 35.8   | 49.8   |
| 4.2    | 16.6   | 8.6    | 13.2   | 42.5   | 38.2   | 13.5   | 7.9    | 19.2   |
| 44.7   | 72.0   | 24.2   | 51.2   | 102.1  | 43.4   | 81.9   | 81.0   | 95.8   |
| 1.5    | 4.7    | 16.1   | 17.2   | 17.5   | 2.1    | 22.8   | 21.5   | 25.7   |
| 6688.2 | 7453.0 | 1233.6 | 1680.7 | 7212.6 | 6743.3 | 8551.4 | 8546.5 | 8446.1 |
| 440.0  | 531.8  | 263.0  | 419.0  | 637.5  | 539.8  | 754.0  | 578.3  | 658.5  |
| 0.8    | 4.9    | 6.0    | 0.9    | 4.7    | 2.4    | 3.4    | 4.0    | 1.1    |
| 11.0   | 11.4   | 3.9    | 2.1    | 5.6    | 4.9    | 17.1   | 10.1   | 7.5    |
| 6.8    | 15.6   | 1.6    | 1.7    | 13.5   | 11.6   | 4.1    | 7.0    | 4.3    |
| 1.0    | 0.6    | 0.4    | 0.5    | 0.7    | 0.7    | 3.5    | 1.2    | 1.4    |

|        |        |        |        |        |        |        |        |        |
|--------|--------|--------|--------|--------|--------|--------|--------|--------|
| 0.6    | 7.6    | 1.4    | 2.6    | 16.2   | 15.0   | 10.8   | 10.8   | 4.7    |
| 1902.9 | 2154.0 | 1575.7 | 2292.5 | 2298.7 | 2226.5 | 5139.3 | 4334.0 | 4581.2 |
| 5.0    | 5.2    | 4.2    | 0.3    | 0.3    | 2.2    | 5.8    | 13.2   | 10.8   |
| 0.3    | 12.9   | 12.3   | 7.7    | 7.6    | 7.7    | 14.0   | 9.9    | 14.4   |
| 4.7    | 8.7    | 16.7   | 13.2   | 25.4   | 6.4    | 7.4    | 9.4    | 1.7    |
| 649.3  | 636.6  | 193.2  | 252.1  | 902.6  | 702.4  | 687.7  | 557.5  | 676.2  |
| 2.7    | 0.7    | 0.4    | 0.7    | 1.3    | 0.9    | 1.0    | 0.6    | 1.1    |
| 14.0   | 16.4   | 14.4   | 6.6    | 7.6    | 15.3   | 8.6    | 8.6    | 14.9   |
| 2.8    | 0.7    | 1.4    | 1.9    | 2.0    | 2.1    | 2.3    | 10.7   | 4.5    |
| 15.6   | 1.5    | 3.4    | 3.9    | 5.0    | 3.1    | 6.1    | 7.7    | 16.3   |
| 95.8   | 107.2  | 73.4   | 71.5   | 133.2  | 94.2   | 176.8  | 137.6  | 160.2  |
| 0.9    | 8.5    | 12.9   | 12.0   | 6.6    | 1.2    | 21.7   | 20.7   | 13.3   |
| 32.4   | 1.3    | 0.6    | 0.4    | 10.0   | 3.6    | 190.8  | 162.3  | 243.4  |
| 11.6   | 3.3    | 4.0    | 2.4    | 2.8    | 3.9    | 16.5   | 14.8   | 11.1   |
| 5.2    | 4.3    | 6.1    | 3.6    | 8.1    | 4.2    | 5.8    | 7.1    | 3.7    |
| 90.8   | 125.9  | 1.9    | 0.9    | 195.5  | 100.6  | 13.0   | 7.6    | 4.4    |
| 66.5   | 77.1   | 102.9  | 101.6  | 122.7  | 46.7   | 211.2  | 171.1  | 202.4  |
| 1.6    | 1.2    | 0.8    | 0.4    | 0.8    | 7.1    | 7.2    | 0.7    | 3.7    |
| 0.7    | 1.0    | 3.7    | 1.1    | 2.4    | 1.7    | 7.3    | 4.5    | 7.4    |
| 2.9    | 2.6    | 2.0    | 1.2    | 1.3    | 2.7    | 105.7  | 250.2  | 228.7  |
| 3315.8 | 4000.8 | 1138.1 | 1581.3 | 4458.7 | 3779.1 | 6649.7 | 6137.6 | 6389.1 |
| 3.1    | 1.3    | 2.2    | 6.9    | 4.6    | 1.3    | 6.0    | 5.9    | 4.3    |
| 28.1   | 16.1   | 5.4    | 8.0    | 12.2   | 1.1    | 72.0   | 78.9   | 71.0   |
| 4.6    | 3.1    | 3.6    | 8.8    | 2.5    | 10.0   | 9.6    | 5.6    | 2.4    |
| 157.4  | 184.7  | 34.2   | 66.2   | 220.9  | 81.6   | 157.8  | 99.1   | 103.6  |
| 32.6   | 61.7   | 9.4    | 9.9    | 74.6   | 50.5   | 154.9  | 142.0  | 149.9  |
| 1.9    | 2.5    | 3.8    | 2.1    | 2.6    | 3.9    | 1.2    | 3.5    | 2.5    |
| 1051.7 | 1192.8 | 271.4  | 329.1  | 1577.1 | 1115.6 | 1913.6 | 1617.0 | 1753.3 |
| 39.8   | 35.6   | 12.2   | 13.2   | 38.8   | 72.5   | 304.7  | 263.9  | 311.2  |
| 0.5    | 1.0    | 6.1    | 17.8   | 6.8    | 4.2    | 6.9    | 6.7    | 8.6    |
| 127.1  | 123.6  | 33.3   | 61.9   | 195.8  | 137.3  | 170.4  | 48.4   | 77.9   |
| 4.6    | 0.8    | 0.1    | 4.0    | 1.5    | 4.0    | 3.2    | 1.0    | 1.5    |
| 59.0   | 107.4  | 26.8   | 20.6   | 104.2  | 89.4   | 299.7  | 209.2  | 229.1  |
| 2272.6 | 3494.6 | 348.5  | 310.7  | 3356.5 | 3407.6 | 4579.0 | 2762.9 | 3178.6 |
| 13.0   | 18.0   | 9.9    | 2.2    | 17.5   | 18.1   | 5.3    | 8.9    | 7.5    |
| 9.9    | 3.7    | 3.9    | 8.8    | 16.3   | 7.2    | 10.8   | 14.0   | 13.7   |
| 388.9  | 398.7  | 753.1  | 1159.1 | 530.2  | 271.8  | 2985.3 | 2388.5 | 2517.1 |
| 16.8   | 14.8   | 7.9    | 2.8    | 22.1   | 12.2   | 19.8   | 14.6   | 20.9   |
| 3.6    | 5.9    | 4.4    | 7.6    | 0.6    | 3.5    | 1.8    | 3.3    | 13.4   |
| 279.7  | 331.2  | 17.5   | 18.5   | 376.0  | 315.6  | 126.1  | 59.1   | 62.7   |
| 37.1   | 39.2   | 12.2   | 23.4   | 60.7   | 42.3   | 92.0   | 67.3   | 82.8   |
| 2.0    | 4.3    | 3.5    | 2.3    | 5.6    | 3.8    | 6.2    | 1.7    | 1.3    |
| 4.0    | 19.7   | 39.0   | 43.1   | 3.2    | 2.8    | 11.5   | 15.5   | 4.0    |
| 16.3   | 25.0   | 56.4   | 44.6   | 19.9   | 14.5   | 32.0   | 24.8   | 15.7   |
| 5.9    | 15.4   | 21.3   | 13.1   | 13.9   | 11.3   | 21.1   | 20.2   | 19.1   |
| 103.5  | 178.5  | 89.0   | 148.2  | 265.2  | 141.0  | 141.4  | 195.9  | 219.0  |
| 8.5    | 1.8    | 1.2    | 2.5    | 9.3    | 2.2    | 3.6    | 3.3    | 1.3    |
| 22.3   | 5.2    | 33.3   | 32.9   | 7.2    | 16.2   | 102.9  | 106.0  | 139.3  |
| 14.3   | 6.0    | 17.1   | 29.4   | 5.9    | 13.7   | 13.1   | 17.9   | 12.7   |
| 21.7   | 15.1   | 4.4    | 19.9   | 32.3   | 1.1    | 19.6   | 24.4   | 27.8   |
| 19.5   | 24.3   | 9.2    | 4.2    | 16.4   | 26.3   | 28.5   | 15.8   | 24.1   |
| 1.5    | 2.6    | 1.6    | 2.0    | 1.3    | 1.0    | 2.4    | 3.0    | 2.3    |
| 3.7    | 3.9    | 0.3    | 2.2    | 5.3    | 3.7    | 8.9    | 10.0   | 14.6   |



|        |        |       |        |        |        |        |        |        |
|--------|--------|-------|--------|--------|--------|--------|--------|--------|
| 3.0    | 9.5    | 3.5   | 0.6    | 9.7    | 18.5   | 15.7   | 10.5   | 8.7    |
| 10.0   | 13.3   | 5.4   | 3.1    | 10.6   | 3.3    | 27.9   | 20.6   | 19.7   |
| 1513.7 | 1059.0 | 2.6   | 1.7    | 2274.6 | 866.9  | 20.2   | 9.3    | 8.7    |
| 6.1    | 3.2    | 3.3   | 2.0    | 0.4    | 1.5    | 3.6    | 3.7    | 4.6    |
| 2.0    | 15.8   | 2.2   | 1.6    | 7.6    | 8.4    | 5.4    | 10.7   | 16.8   |
| 3.8    | 6.9    | 6.4   | 5.8    | 3.3    | 3.8    | 7.6    | 6.4    | 9.5    |
| 12.4   | 18.1   | 17.5  | 24.7   | 24.7   | 25.9   | 20.9   | 27.2   | 24.1   |
| 13.9   | 4.7    | 4.6   | 6.3    | 11.3   | 1.6    | 6.7    | 6.3    | 6.3    |
| 1704.9 | 1863.2 | 655.9 | 897.5  | 2272.4 | 1954.4 | 2854.0 | 2476.5 | 2788.0 |
| 344.5  | 392.0  | 184.2 | 234.2  | 525.3  | 368.4  | 515.7  | 358.8  | 418.3  |
| 2.7    | 1.1    | 5.4   | 1.0    | 0.4    | 5.9    | 2.9    | 0.8    | 0.9    |
| 8.5    | 1.7    | 5.7   | 4.7    | 2.1    | 7.3    | 9.8    | 9.1    | 7.0    |
| 15.5   | 16.2   | 2.5   | 2.5    | 24.1   | 8.9    | 15.7   | 8.6    | 13.1   |
| 1.0    | 0.9    | 0.7   | 0.8    | 3.8    | 1.1    | 3.4    | 1.0    | 1.9    |
| 1.1    | 7.3    | 2.8   | 1.4    | 2.3    | 3.0    | 1.3    | 6.2    | 8.1    |
| 3.5    | 7.5    | 1.8   | 12.1   | 3.0    | 3.4    | 7.6    | 19.8   | 11.8   |
| 136.9  | 137.0  | 7.2   | 25.7   | 192.8  | 152.8  | 15.8   | 15.1   | 9.8    |
| 1198.5 | 2155.8 | 2.0   | 5.6    | 1515.6 | 1470.5 | 1.2    | 0.7    | 1.3    |
| 595.3  | 750.9  | 109.6 | 137.2  | 854.2  | 666.4  | 427.3  | 464.0  | 382.7  |
| 57.7   | 68.3   | 84.6  | 96.3   | 79.3   | 54.6   | 130.2  | 107.2  | 99.1   |
| 244.8  | 397.1  | 109.2 | 127.8  | 455.4  | 264.8  | 694.3  | 643.1  | 859.7  |
| 17.6   | 15.8   | 16.0  | 24.1   | 13.3   | 25.2   | 180.3  | 132.2  | 156.6  |
| 7.5    | 2.6    | 2.7   | 9.3    | 6.2    | 7.5    | 5.6    | 6.1    | 5.1    |
| 2609.7 | 3601.4 | 1.4   | 5.8    | 3459.0 | 3057.5 | 5.2    | 7.0    | 8.0    |
| 9.4    | 12.7   | 4.2   | 7.4    | 1.6    | 13.2   | 23.8   | 20.8   | 8.1    |
| 2405.3 | 3350.2 | 701.3 | 1096.2 | 2937.2 | 2723.1 | 7686.4 | 7667.4 | 7622.2 |
| 1.8    | 1.6    | 0.7   | 0.6    | 1.5    | 2.3    | 1.3    | 3.1    | 1.9    |
| 0.6    | 0.9    | 1.1   | 0.4    | 1.3    | 0.5    | 2.4    | 1.0    | 0.8    |
| 1.6    | 19.1   | 4.3   | 1.2    | 4.0    | 11.4   | 6.8    | 2.7    | 2.2    |
| 1640.9 | 1109.5 | 115.7 | 154.3  | 613.1  | 705.0  | 211.8  | 168.0  | 225.7  |
| 6.4    | 3.1    | 13.7  | 8.9    | 3.3    | 1.3    | 44.7   | 45.8   | 49.9   |
| 180.5  | 113.5  | 72.2  | 81.4   | 176.3  | 153.4  | 279.0  | 225.2  | 208.0  |
| 0.4    | 7.3    | 1.7   | 1.1    | 7.5    | 7.2    | 2.2    | 14.2   | 13.0   |
| 35.1   | 47.0   | 130.0 | 163.5  | 68.8   | 37.4   | 178.0  | 132.1  | 147.9  |
| 21.4   | 13.1   | 1.2   | 3.7    | 32.8   | 28.5   | 56.6   | 44.4   | 28.7   |
| 19.5   | 13.4   | 8.3   | 5.6    | 24.0   | 24.6   | 48.2   | 34.7   | 32.1   |
| 2852.6 | 3267.1 | 870.6 | 1193.6 | 3914.2 | 3685.3 | 4076.3 | 3811.2 | 4018.2 |
| 5.0    | 2.9    | 11.7  | 12.6   | 0.9    | 2.0    | 4.2    | 4.8    | 9.7    |
| 130.0  | 137.9  | 41.8  | 50.3   | 181.9  | 151.1  | 155.7  | 88.9   | 108.9  |
| 9.5    | 9.6    | 9.2   | 9.2    | 21.2   | 4.1    | 21.5   | 9.4    | 14.1   |
| 7.0    | 6.2    | 4.2   | 10.5   | 0.7    | 6.9    | 7.7    | 3.5    | 6.0    |
| 15.1   | 24.3   | 19.8  | 31.3   | 23.7   | 6.2    | 26.2   | 32.2   | 34.3   |
| 137.3  | 277.2  | 5.2   | 9.7    | 402.8  | 281.6  | 69.4   | 74.8   | 58.8   |
| 11.9   | 17.3   | 1.6   | 2.5    | 16.5   | 3.8    | 11.0   | 7.3    | 4.9    |
| 188.1  | 246.4  | 54.7  | 68.7   | 356.7  | 229.0  | 541.1  | 599.6  | 727.1  |
| 349.8  | 488.2  | 96.3  | 123.6  | 518.6  | 380.6  | 540.8  | 344.2  | 348.8  |
| 21.4   | 47.1   | 2.3   | 11.5   | 34.4   | 27.8   | 21.4   | 12.0   | 14.9   |
| 265.9  | 308.3  | 70.7  | 128.0  | 396.7  | 207.1  | 294.4  | 208.7  | 232.3  |
| 78.5   | 89.1   | 74.4  | 96.4   | 71.6   | 54.1   | 642.4  | 656.9  | 689.2  |
| 6.3    | 16.3   | 11.7  | 6.8    | 13.7   | 3.0    | 18.0   | 11.4   | 3.5    |
| 1.6    | 1.4    | 0.6   | 0.8    | 5.2    | 1.9    | 1.2    | 1.7    | 1.2    |
| 147.8  | 184.5  | 180.1 | 247.6  | 161.2  | 171.7  | 127.9  | 119.0  | 148.1  |
| 7.1    | 0.9    | 1.3   | 0.3    | 1.3    | 2.6    | 3.8    | 3.0    | 3.2    |

|        |        |        |        |        |        |        |        |        |
|--------|--------|--------|--------|--------|--------|--------|--------|--------|
| 0.5    | 12.6   | 3.6    | 5.5    | 3.0    | 0.6    | 6.5    | 9.4    | 7.2    |
| 1.6    | 4.0    | 3.1    | 2.8    | 11.3   | 3.0    | 43.4   | 10.5   | 6.5    |
| 1.8    | 10.0   | 1.8    | 1.1    | 1.8    | 0.5    | 1.9    | 1.5    | 3.5    |
| 11.5   | 10.2   | 16.4   | 26.6   | 11.8   | 15.3   | 74.8   | 77.9   | 87.7   |
| 56.7   | 54.7   | 3.1    | 1.2    | 105.8  | 78.4   | 5.1    | 6.7    | 15.5   |
| 1009.3 | 1962.0 | 252.0  | 264.6  | 1431.7 | 1630.2 | 2328.3 | 1632.2 | 1690.7 |
| 82.3   | 88.6   | 48.0   | 44.6   | 122.6  | 57.5   | 124.1  | 92.8   | 112.1  |
| 16.7   | 13.0   | 5.5    | 7.0    | 21.0   | 11.4   | 12.0   | 16.8   | 15.0   |
| 4.5    | 5.3    | 11.6   | 3.7    | 4.4    | 1.8    | 5.2    | 6.0    | 3.1    |
| 7.0    | 9.2    | 1.0    | 5.1    | 1.5    | 3.9    | 142.0  | 221.1  | 216.9  |
| 511.8  | 537.0  | 515.5  | 711.7  | 939.4  | 471.9  | 1945.5 | 1388.6 | 1404.9 |
| 10.8   | 9.4    | 0.8    | 0.7    | 25.0   | 7.8    | 1.0    | 0.7    | 1.4    |
| 167.7  | 261.8  | 75.2   | 65.5   | 355.1  | 276.8  | 578.2  | 600.7  | 634.0  |
| 1.5    | 4.5    | 0.5    | 3.2    | 1.5    | 1.0    | 3.3    | 2.0    | 0.5    |
| 434.1  | 659.7  | 112.5  | 136.1  | 838.4  | 695.1  | 554.1  | 474.9  | 496.4  |
| 71.6   | 92.0   | 21.9   | 27.4   | 140.2  | 60.5   | 84.7   | 132.3  | 126.6  |
| 5.5    | 20.5   | 1.3    | 3.9    | 2.1    | 12.6   | 5.7    | 7.9    | 2.2    |
| 70.7   | 77.8   | 29.7   | 36.3   | 66.6   | 56.6   | 884.9  | 434.3  | 504.6  |
| 214.1  | 238.5  | 27.3   | 34.8   | 356.7  | 245.2  | 388.9  | 309.8  | 313.4  |
| 8.1    | 2.6    | 0.8    | 0.4    | 0.9    | 2.5    | 1.4    | 2.7    | 2.2    |
| 200.8  | 144.0  | 129.0  | 254.0  | 195.2  | 110.3  | 366.4  | 233.6  | 232.0  |
| 1.0    | 3.2    | 8.3    | 7.4    | 0.6    | 1.7    | 6.1    | 4.1    | 1.0    |
| 0.8    | 3.7    | 1.7    | 0.6    | 0.6    | 1.2    | 1.1    | 1.3    | 0.9    |
| 153.2  | 148.0  | 49.5   | 60.9   | 219.5  | 137.0  | 234.8  | 183.3  | 222.8  |
| 1197.4 | 1136.3 | 210.3  | 309.7  | 1477.7 | 1202.2 | 1898.5 | 760.4  | 832.3  |
| 0.6    | 2.0    | 1.0    | 0.4    | 0.6    | 7.0    | 1.6    | 4.4    | 1.2    |
| 7.7    | 2.9    | 0.3    | 3.4    | 1.1    | 0.4    | 13.3   | 14.7   | 18.4   |
| 11.1   | 8.9    | 2.5    | 7.9    | 5.4    | 4.2    | 3.6    | 3.3    | 3.2    |
| 3.9    | 3.3    | 9.7    | 7.0    | 8.5    | 19.2   | 12.7   | 8.3    | 6.5    |
| 2.7    | 5.2    | 9.3    | 11.2   | 17.2   | 7.8    | 9.9    | 21.8   | 11.0   |
| 207.1  | 247.8  | 73.4   | 85.6   | 462.3  | 224.9  | 663.3  | 563.4  | 828.7  |
| 15.1   | 21.7   | 47.7   | 63.0   | 26.6   | 18.0   | 72.1   | 61.5   | 66.5   |
| 136.9  | 114.9  | 123.8  | 171.2  | 161.7  | 104.4  | 461.4  | 388.0  | 418.1  |
| 13.4   | 8.2    | 1.7    | 1.0    | 2.9    | 2.2    | 6.9    | 4.2    | 9.0    |
| 1.7    | 1.1    | 0.9    | 6.9    | 0.8    | 6.1    | 3.5    | 7.5    | 3.3    |
| 2.0    | 19.9   | 21.4   | 39.3   | 3.7    | 10.0   | 37.4   | 24.6   | 10.8   |
| 1.6    | 1.0    | 5.6    | 4.0    | 10.0   | 5.9    | 4.6    | 15.0   | 8.9    |
| 4.4    | 0.6    | 9.4    | 4.6    | 7.6    | 1.4    | 13.6   | 14.4   | 15.9   |
| 434.2  | 534.2  | 197.9  | 295.8  | 482.8  | 512.5  | 972.0  | 563.1  | 586.4  |
| 117.9  | 127.7  | 44.2   | 71.4   | 165.7  | 143.4  | 344.0  | 402.7  | 494.9  |
| 498.7  | 606.7  | 1353.4 | 2117.9 | 1250.3 | 529.5  | 3104.0 | 3003.5 | 2895.3 |
| 10.9   | 1.6    | 15.2   | 11.3   | 2.1    | 2.9    | 6.6    | 2.5    | 6.2    |
| 82.0   | 143.0  | 121.3  | 141.7  | 192.8  | 113.7  | 323.1  | 231.8  | 260.3  |
| 2.0    | 0.8    | 1.1    | 2.0    | 1.0    | 3.1    | 13.0   | 10.1   | 5.6    |
| 138.5  | 149.5  | 46.5   | 68.5   | 200.9  | 143.8  | 215.8  | 213.7  | 229.1  |
| 30.4   | 24.6   | 6.1    | 4.4    | 33.4   | 24.3   | 8.3    | 12.8   | 14.5   |
| 8.2    | 15.7   | 5.9    | 7.6    | 7.3    | 18.0   | 17.2   | 11.9   | 15.0   |
| 2.7    | 1.2    | 6.4    | 1.6    | 2.1    | 2.7    | 7.9    | 5.6    | 8.0    |
| 0.5    | 0.2    | 0.8    | 0.5    | 0.9    | 4.5    | 1.3    | 1.3    | 1.4    |
| 88.9   | 81.7   | 6.7    | 3.4    | 82.2   | 102.5  | 21.1   | 15.8   | 9.4    |
| 39.3   | 74.5   | 12.0   | 8.7    | 62.3   | 53.5   | 3.0    | 17.2   | 6.5    |
| 3.7    | 9.4    | 13.4   | 14.4   | 6.5    | 4.5    | 14.7   | 9.9    | 11.2   |
| 1.8    | 6.0    | 1.5    | 0.7    | 2.8    | 9.0    | 2.4    | 2.1    | 2.1    |

|        |        |        |        |        |        |         |         |         |
|--------|--------|--------|--------|--------|--------|---------|---------|---------|
| 87.1   | 49.1   | 3.9    | 7.9    | 114.0  | 48.9   | 35.8    | 27.9    | 38.1    |
| 9.2    | 7.3    | 1.6    | 2.0    | 13.0   | 1.9    | 8.6     | 8.3     | 2.5     |
| 13.9   | 12.4   | 1.3    | 2.4    | 23.5   | 6.4    | 1.9     | 1.0     | 1.6     |
| 40.3   | 85.0   | 16.7   | 11.2   | 80.7   | 72.7   | 129.6   | 228.8   | 209.8   |
| 355.4  | 523.9  | 17.3   | 28.3   | 441.9  | 356.2  | 225.5   | 321.8   | 365.4   |
| 14.4   | 6.5    | 15.4   | 4.2    | 16.2   | 3.5    | 27.8    | 21.0    | 19.2    |
| 1.5    | 7.3    | 2.6    | 13.4   | 4.7    | 5.1    | 3.5     | 3.5     | 4.2     |
| 210.4  | 226.9  | 11.5   | 11.3   | 222.3  | 213.0  | 258.7   | 336.1   | 439.5   |
| 35.5   | 36.7   | 68.4   | 101.3  | 91.8   | 38.7   | 2.3     | 3.4     | 3.7     |
| 3.8    | 7.7    | 7.7    | 8.2    | 1.1    | 0.7    | 4.2     | 6.3     | 2.5     |
| 0.9    | 2.9    | 6.9    | 7.5    | 5.2    | 2.7    | 6.5     | 4.9     | 7.1     |
| 239.8  | 279.1  | 200.3  | 336.0  | 329.9  | 230.2  | 492.3   | 701.7   | 771.4   |
| 13.3   | 21.2   | 21.3   | 23.8   | 22.8   | 17.0   | 39.9    | 48.6    | 41.9    |
| 4.5    | 8.2    | 19.0   | 14.1   | 3.2    | 6.7    | 4.0     | 5.3     | 3.9     |
| 0.9    | 4.7    | 1.0    | 1.3    | 1.9    | 5.4    | 100.0   | 102.8   | 121.3   |
| 39.0   | 43.0   | 70.2   | 52.0   | 42.7   | 29.0   | 160.2   | 99.1    | 109.5   |
| 507.1  | 879.3  | 33.4   | 22.1   | 1150.6 | 826.7  | 1070.4  | 965.8   | 927.5   |
| 57.1   | 49.2   | 43.2   | 62.7   | 64.1   | 35.7   | 242.0   | 193.8   | 201.3   |
| 5.7    | 13.6   | 8.2    | 7.2    | 2.7    | 2.9    | 14.3    | 9.4     | 5.4     |
| 88.9   | 96.4   | 262.1  | 332.4  | 84.9   | 86.8   | 837.1   | 763.3   | 888.6   |
| 95.6   | 137.1  | 96.4   | 142.2  | 131.3  | 85.0   | 484.1   | 299.8   | 418.0   |
| 3.4    | 13.4   | 2.0    | 16.1   | 1.9    | 4.6    | 23.7    | 22.9    | 29.5    |
| 131.3  | 196.9  | 38.5   | 45.6   | 214.1  | 179.6  | 289.4   | 233.9   | 315.4   |
| 74.6   | 77.4   | 11.4   | 17.0   | 112.8  | 73.9   | 30.0    | 25.0    | 29.5    |
| 1.1    | 15.2   | 6.4    | 2.4    | 4.2    | 3.9    | 9.3     | 4.5     | 7.6     |
| 6.8    | 12.0   | 1.0    | 0.5    | 24.2   | 16.0   | 36.7    | 43.7    | 33.3    |
| 5.0    | 9.0    | 5.2    | 9.7    | 7.2    | 6.5    | 9.6     | 18.0    | 14.6    |
| 1.0    | 1.0    | 0.5    | 0.5    | 2.1    | 0.6    | 1.4     | 1.6     | 0.7     |
| 694.0  | 888.6  | 324.0  | 356.1  | 1079.4 | 902.8  | 1342.6  | 1271.5  | 1563.3  |
| 1.0    | 8.1    | 31.4   | 24.8   | 1.6    | 1.3    | 3.2     | 11.9    | 9.4     |
| 35.7   | 47.6   | 44.7   | 46.7   | 67.8   | 37.5   | 62.2    | 73.3    | 77.2    |
| 11.0   | 13.9   | 7.5    | 5.6    | 16.8   | 13.2   | 12.7    | 8.8     | 11.8    |
| 3.5    | 1.9    | 3.1    | 3.0    | 13.1   | 1.9    | 11.6    | 6.7     | 2.2     |
| 344.4  | 307.8  | 124.0  | 146.8  | 505.4  | 326.5  | 2030.4  | 1745.8  | 1896.3  |
| 181.7  | 269.9  | 54.0   | 79.7   | 332.6  | 221.2  | 325.6   | 300.3   | 315.9   |
| 3.8    | 7.4    | 2.4    | 2.2    | 7.7    | 1.9    | 117.5   | 185.2   | 245.6   |
| 4.1    | 13.7   | 9.2    | 9.5    | 8.1    | 12.8   | 21.2    | 31.3    | 31.7    |
| 0.9    | 1.0    | 3.2    | 1.8    | 3.6    | 5.6    | 2.0     | 3.5     | 1.5     |
| 104.6  | 107.3  | 6.7    | 4.4    | 150.4  | 116.9  | 3.8     | 2.1     | 5.8     |
| 15.3   | 11.7   | 18.8   | 16.2   | 13.2   | 18.8   | 25.3    | 20.1    | 21.5    |
| 412.1  | 464.8  | 140.2  | 163.3  | 572.2  | 349.4  | 1906.6  | 2333.7  | 2580.2  |
| 6934.0 | 8312.9 | 4807.3 | 5781.6 | 8187.2 | 7589.9 | 11722.6 | 11664.9 | 11830.0 |
| 42.3   | 58.9   | 45.4   | 55.3   | 44.9   | 38.3   | 58.9    | 114.3   | 114.3   |
| 2280.2 | 2718.3 | 872.7  | 1152.3 | 3083.7 | 2480.7 | 2408.9  | 2352.1  | 2685.3  |
| 143.3  | 250.8  | 62.9   | 83.7   | 279.7  | 193.3  | 408.4   | 361.2   | 381.4   |
| 0.4    | 7.5    | 4.7    | 4.2    | 1.3    | 7.9    | 5.5     | 1.6     | 6.3     |
| 100.3  | 126.7  | 15.5   | 25.5   | 133.5  | 115.9  | 814.1   | 660.7   | 795.9   |
| 43.0   | 71.9   | 215.0  | 274.9  | 83.8   | 43.1   | 272.8   | 646.5   | 631.3   |
| 71.6   | 72.7   | 60.5   | 75.4   | 87.6   | 67.5   | 86.6    | 88.0    | 90.8    |
| 59.4   | 46.1   | 2.6    | 1.4    | 73.3   | 22.0   | 75.8    | 36.6    | 27.6    |
| 70.8   | 103.1  | 117.2  | 273.3  | 87.6   | 42.3   | 28.8    | 81.2    | 132.4   |
| 3.8    | 4.3    | 3.5    | 4.8    | 10.9   | 1.1    | 5.9     | 10.8    | 5.0     |
| 1.2    | 0.5    | 5.4    | 0.8    | 1.8    | 5.8    | 16.3    | 27.2    | 47.6    |

|        |        |       |       |        |        |        |        |        |
|--------|--------|-------|-------|--------|--------|--------|--------|--------|
| 153.4  | 167.5  | 39.1  | 53.3  | 222.0  | 141.9  | 212.5  | 183.2  | 221.3  |
| 14.0   | 0.8    | 21.0  | 6.4   | 5.3    | 2.9    | 4.0    | 10.2   | 6.9    |
| 1.0    | 10.5   | 6.4   | 0.8   | 10.6   | 0.6    | 7.2    | 2.1    | 3.1    |
| 0.4    | 3.5    | 4.9   | 0.6   | 13.2   | 3.4    | 3.6    | 4.8    | 1.7    |
| 67.8   | 153.2  | 0.3   | 0.2   | 68.2   | 86.3   | 8.1    | 9.6    | 6.5    |
| 798.2  | 1638.3 | 2.5   | 10.7  | 963.2  | 1333.1 | 215.7  | 209.2  | 215.2  |
| 158.3  | 287.2  | 5.6   | 7.2   | 271.5  | 266.8  | 155.6  | 197.4  | 196.9  |
| 8.8    | 21.4   | 3.0   | 3.1   | 28.4   | 20.1   | 19.8   | 28.5   | 21.6   |
| 2.4    | 2.3    | 2.0   | 2.1   | 8.3    | 18.6   | 4.0    | 5.7    | 14.4   |
| 84.7   | 96.1   | 48.5  | 88.0  | 154.4  | 65.8   | 217.6  | 176.9  | 209.6  |
| 1.7    | 0.9    | 9.8   | 1.2   | 2.9    | 7.3    | 18.2   | 9.4    | 12.4   |
| 7.4    | 2.8    | 8.2   | 1.2   | 8.8    | 5.5    | 13.4   | 4.9    | 7.4    |
| 12.9   | 16.4   | 60.7  | 61.2  | 10.0   | 17.2   | 22.8   | 33.5   | 19.5   |
| 129.7  | 175.4  | 40.6  | 31.6  | 172.2  | 137.9  | 150.6  | 98.6   | 99.5   |
| 17.4   | 13.0   | 4.9   | 2.2   | 10.3   | 8.4    | 10.6   | 6.6    | 4.1    |
| 23.8   | 13.8   | 6.6   | 0.5   | 30.0   | 31.3   | 14.5   | 28.6   | 31.5   |
| 52.7   | 71.4   | 6.9   | 5.9   | 87.3   | 53.1   | 1.8    | 5.7    | 8.2    |
| 121.4  | 155.0  | 63.8  | 68.5  | 173.4  | 113.5  | 187.6  | 240.4  | 248.0  |
| 5.7    | 1.1    | 2.0   | 1.1   | 1.9    | 2.8    | 2.5    | 6.8    | 3.1    |
| 53.0   | 24.4   | 28.2  | 52.4  | 58.0   | 29.7   | 336.6  | 234.6  | 289.4  |
| 86.8   | 115.1  | 21.6  | 10.5  | 95.7   | 90.9   | 69.5   | 79.6   | 94.3   |
| 2.5    | 12.1   | 10.3  | 6.0   | 2.9    | 8.1    | 24.1   | 12.9   | 14.5   |
| 205.3  | 315.3  | 63.4  | 47.5  | 373.3  | 284.5  | 367.7  | 314.1  | 297.1  |
| 1.3    | 6.2    | 2.6   | 0.8   | 1.8    | 1.6    | 11.2   | 3.4    | 3.0    |
| 1.6    | 5.9    | 0.4   | 0.3   | 4.5    | 1.0    | 1.7    | 0.7    | 0.9    |
| 1.8    | 4.5    | 3.9   | 3.5   | 2.4    | 3.1    | 6.9    | 3.1    | 2.6    |
| 33.6   | 50.3   | 12.8  | 15.8  | 67.3   | 45.1   | 253.1  | 294.1  | 367.4  |
| 28.8   | 148.4  | 113.9 | 157.9 | 215.3  | 140.1  | 175.3  | 240.0  | 258.9  |
| 16.7   | 10.6   | 11.9  | 12.7  | 11.7   | 20.1   | 35.2   | 32.2   | 33.8   |
| 8.9    | 37.2   | 57.1  | 83.8  | 27.0   | 28.9   | 144.2  | 120.2  | 138.3  |
| 11.3   | 4.5    | 2.6   | 2.8   | 16.1   | 10.5   | 5.3    | 11.4   | 15.5   |
| 0.4    | 0.2    | 0.2   | 0.4   | 3.6    | 0.7    | 2.2    | 1.6    | 2.6    |
| 1285.2 | 1639.9 | 149.2 | 199.8 | 1828.3 | 1597.5 | 2931.3 | 1261.3 | 1402.6 |
| 433.6  | 526.3  | 7.3   | 7.4   | 722.3  | 408.8  | 13.3   | 8.8    | 6.4    |
| 1.3    | 2.6    | 0.4   | 8.5   | 7.1    | 3.6    | 41.6   | 63.0   | 68.8   |
| 19.4   | 33.5   | 21.5  | 11.2  | 31.4   | 22.8   | 44.4   | 53.3   | 49.7   |
| 33.6   | 23.1   | 59.4  | 61.8  | 30.3   | 18.9   | 256.8  | 310.1  | 332.6  |
| 1.0    | 7.7    | 0.4   | 0.9   | 1.7    | 0.6    | 1.5    | 0.5    | 1.2    |
| 1.8    | 1.7    | 1.2   | 1.7   | 1.8    | 1.5    | 7.9    | 3.4    | 5.9    |
| 7.1    | 1.0    | 5.7   | 3.0   | 1.2    | 5.5    | 7.5    | 3.3    | 6.4    |
| 20.8   | 23.6   | 11.2  | 10.5  | 20.7   | 40.9   | 23.3   | 14.9   | 22.5   |
| 10.8   | 1.0    | 1.5   | 4.5   | 3.7    | 2.1    | 8.1    | 1.9    | 5.6    |
| 0.5    | 1.2    | 6.9   | 1.5   | 2.7    | 0.9    | 7.2    | 5.0    | 4.4    |
| 2.3    | 5.5    | 8.7   | 6.3   | 17.8   | 9.4    | 9.7    | 5.9    | 9.7    |
| 137.6  | 223.4  | 7.9   | 12.8  | 262.1  | 206.2  | 187.2  | 128.6  | 150.1  |
| 58.5   | 52.5   | 48.1  | 66.7  | 77.0   | 54.7   | 132.1  | 101.6  | 100.0  |
| 173.6  | 130.2  | 201.1 | 305.8 | 259.3  | 169.2  | 258.4  | 249.2  | 269.7  |
| 25.3   | 15.5   | 11.5  | 1.4   | 11.6   | 1.3    | 37.2   | 36.1   | 40.1   |
| 1.8    | 2.0    | 7.9   | 4.3   | 6.1    | 9.6    | 5.5    | 9.1    | 1.9    |
| 30.5   | 34.6   | 20.6  | 20.0  | 48.8   | 75.5   | 60.5   | 57.3   | 48.7   |
| 1.6    | 5.3    | 2.3   | 0.5   | 6.7    | 1.4    | 7.1    | 7.8    | 12.3   |
| 7.1    | 3.1    | 6.6   | 6.1   | 6.4    | 0.4    | 5.5    | 10.3   | 4.3    |
| 4.4    | 2.1    | 7.2   | 1.4   | 1.6    | 2.4    | 14.4   | 13.8   | 7.2    |

|        |        |        |        |        |        |        |        |        |
|--------|--------|--------|--------|--------|--------|--------|--------|--------|
| 4.9    | 14.6   | 10.6   | 8.8    | 7.6    | 7.2    | 8.8    | 9.2    | 7.8    |
| 2094.3 | 2750.0 | 1176.2 | 1611.2 | 2603.5 | 2504.1 | 2757.0 | 2670.8 | 3110.6 |
| 97.5   | 130.9  | 40.5   | 51.9   | 144.9  | 104.6  | 183.4  | 163.5  | 160.3  |
| 16.5   | 5.9    | 3.7    | 6.2    | 13.6   | 8.1    | 10.3   | 13.5   | 17.5   |
| 4.1    | 7.4    | 16.8   | 13.9   | 13.4   | 1.7    | 15.6   | 12.2   | 5.1    |
| 72.7   | 80.4   | 333.3  | 498.0  | 105.8  | 72.1   | 184.4  | 197.6  | 211.9  |
| 74.3   | 66.3   | 31.4   | 40.6   | 137.9  | 67.5   | 234.4  | 254.8  | 290.4  |
| 3.8    | 0.8    | 0.2    | 3.9    | 6.7    | 0.8    | 0.4    | 0.7    | 4.0    |
| 2.3    | 2.9    | 1.5    | 8.3    | 0.6    | 0.6    | 8.0    | 2.5    | 1.6    |
| 14.8   | 17.9   | 6.6    | 12.9   | 15.3   | 15.5   | 15.8   | 23.3   | 22.8   |
| 10.4   | 10.9   | 0.8    | 0.3    | 0.8    | 12.1   | 10.8   | 4.6    | 8.3    |
| 1.6    | 2.6    | 7.2    | 1.2    | 6.0    | 2.9    | 12.6   | 3.0    | 9.4    |
| 5.7    | 1.2    | 7.1    | 9.5    | 1.8    | 1.4    | 7.6    | 12.9   | 9.5    |
| 1.2    | 2.1    | 0.4    | 0.7    | 1.4    | 3.4    | 2.9    | 0.9    | 2.0    |
| 3.4    | 0.2    | 0.4    | 0.6    | 4.4    | 4.4    | 0.5    | 3.7    | 3.3    |
| 11.7   | 2.5    | 10.8   | 10.8   | 8.4    | 6.9    | 14.2   | 9.4    | 11.3   |
| 22.4   | 15.9   | 12.7   | 24.9   | 30.1   | 32.1   | 63.4   | 57.4   | 70.5   |
| 43.0   | 70.5   | 83.9   | 120.5  | 81.0   | 68.9   | 331.0  | 233.6  | 223.1  |
| 141.3  | 263.4  | 33.2   | 52.2   | 228.1  | 449.5  | 198.6  | 182.7  | 188.8  |
| 48.5   | 62.8   | 40.9   | 64.1   | 83.0   | 37.1   | 268.9  | 270.3  | 306.4  |
| 23.8   | 20.2   | 93.9   | 122.7  | 22.3   | 7.0    | 226.9  | 88.9   | 111.4  |
| 15.5   | 34.8   | 25.9   | 30.3   | 22.8   | 21.2   | 30.8   | 41.3   | 29.5   |
| 10.7   | 6.7    | 1.2    | 7.2    | 8.2    | 3.7    | 32.6   | 22.1   | 35.6   |
| 4.0    | 0.2    | 7.3    | 1.4    | 0.8    | 0.1    | 5.4    | 4.5    | 0.8    |
| 14.8   | 3.4    | 23.8   | 25.7   | 17.5   | 15.4   | 13.3   | 12.8   | 15.4   |
| 228.1  | 267.4  | 323.8  | 474.9  | 314.3  | 280.2  | 360.3  | 293.4  | 339.9  |
| 1.3    | 5.4    | 4.8    | 5.7    | 5.2    | 8.2    | 4.1    | 6.3    | 8.5    |
| 4.8    | 4.8    | 3.0    | 6.9    | 6.1    | 8.5    | 6.4    | 6.3    | 4.4    |
| 4.1    | 10.3   | 4.9    | 0.5    | 0.4    | 6.6    | 7.8    | 12.0   | 7.9    |
| 3.1    | 2.8    | 2.0    | 0.7    | 2.0    | 4.2    | 2.0    | 3.0    | 2.4    |
| 11.1   | 5.9    | 1.8    | 3.7    | 9.1    | 8.0    | 15.9   | 4.9    | 6.8    |
| 1.9    | 2.8    | 1.5    | 1.2    | 2.4    | 3.6    | 3.5    | 4.4    | 4.5    |
| 0.8    | 1.4    | 0.8    | 0.3    | 4.3    | 6.6    | 1.4    | 3.9    | 1.4    |
| 8.4    | 14.8   | 18.3   | 12.3   | 7.2    | 20.6   | 13.0   | 10.9   | 11.3   |
| 574.2  | 584.6  | 467.3  | 501.3  | 840.5  | 571.4  | 879.6  | 969.5  | 981.4  |
| 0.9    | 6.2    | 12.3   | 9.3    | 3.4    | 1.9    | 6.2    | 2.7    | 7.8    |
| 12.5   | 1.9    | 4.7    | 6.9    | 11.3   | 2.0    | 5.2    | 4.5    | 6.0    |
| 28.3   | 36.0   | 22.3   | 17.3   | 39.9   | 37.8   | 61.2   | 52.0   | 68.3   |
| 5.6    | 3.0    | 12.0   | 7.5    | 4.2    | 2.6    | 26.8   | 22.3   | 15.3   |
| 363.8  | 482.6  | 8.2    | 11.6   | 535.6  | 475.9  | 421.7  | 388.3  | 414.8  |
| 5.1    | 1.4    | 6.4    | 4.9    | 8.1    | 2.9    | 6.9    | 2.9    | 2.5    |
| 83.3   | 101.3  | 100.5  | 104.4  | 141.2  | 55.8   | 100.2  | 74.3   | 111.7  |
| 38.6   | 46.5   | 14.2   | 1.8    | 77.9   | 49.1   | 618.7  | 1177.0 | 1438.4 |
| 35.1   | 35.9   | 10.3   | 14.3   | 45.5   | 48.8   | 95.9   | 71.3   | 73.9   |
| 2130.9 | 2692.1 | 841.2  | 1043.9 | 2933.6 | 2251.5 | 2483.5 | 1702.7 | 1700.2 |
| 24.7   | 18.7   | 7.1    | 12.8   | 30.1   | 31.3   | 35.1   | 25.3   | 20.0   |
| 30.5   | 23.9   | 1342.7 | 1946.0 | 47.0   | 33.4   | 172.0  | 224.6  | 200.8  |
| 99.8   | 110.5  | 1.0    | 11.7   | 146.6  | 125.1  | 18.1   | 5.4    | 16.9   |
| 2.0    | 3.3    | 8.7    | 5.4    | 1.6    | 2.2    | 2.6    | 3.1    | 2.1    |
| 935.0  | 1280.3 | 49.5   | 91.1   | 1681.0 | 1147.2 | 7.5    | 2.7    | 1.9    |
| 20.3   | 27.6   | 16.2   | 22.0   | 28.2   | 23.4   | 42.2   | 21.0   | 19.8   |
| 1428.5 | 1620.9 | 574.5  | 891.0  | 2220.9 | 1538.6 | 2213.2 | 992.5  | 1121.9 |
| 15.6   | 21.9   | 3.2    | 3.1    | 35.3   | 27.2   | 17.1   | 17.9   | 14.1   |

|       |       |       |       |       |       |        |        |        |
|-------|-------|-------|-------|-------|-------|--------|--------|--------|
| 150.5 | 231.1 | 1.0   | 5.8   | 303.4 | 196.4 | 1374.3 | 1322.2 | 1406.4 |
| 17.0  | 3.6   | 1.1   | 1.2   | 3.4   | 26.7  | 27.0   | 13.3   | 11.5   |
| 1.0   | 3.2   | 5.5   | 3.0   | 2.9   | 2.2   | 1.5    | 1.9    | 4.2    |
| 10.1  | 6.8   | 0.2   | 2.1   | 13.7  | 11.1  | 22.5   | 18.3   | 15.0   |
| 1.5   | 5.7   | 2.3   | 4.2   | 14.9  | 0.9   | 12.4   | 5.5    | 5.1    |
| 2.4   | 2.4   | 3.0   | 0.9   | 13.2  | 8.4   | 17.3   | 12.8   | 11.3   |
| 501.0 | 584.0 | 598.2 | 701.7 | 772.0 | 640.1 | 2727.8 | 3276.8 | 3329.9 |
| 73.3  | 57.2  | 60.2  | 51.4  | 100.4 | 73.0  | 120.4  | 181.4  | 189.3  |
| 77.3  | 74.1  | 288.1 | 449.5 | 152.5 | 110.3 | 173.6  | 105.8  | 117.3  |
| 2.2   | 10.2  | 46.8  | 37.0  | 9.9   | 8.3   | 35.8   | 46.6   | 73.8   |
| 111.4 | 127.0 | 95.9  | 120.3 | 129.7 | 144.3 | 147.8  | 115.5  | 112.7  |
| 1.5   | 8.7   | 10.4  | 3.7   | 11.2  | 13.8  | 12.3   | 9.3    | 9.2    |
| 2.9   | 3.7   | 2.0   | 2.1   | 3.5   | 1.7   | 6.8    | 11.1   | 6.3    |
| 10.8  | 7.9   | 3.9   | 15.0  | 6.3   | 6.7   | 27.4   | 23.4   | 13.4   |
| 1.4   | 7.6   | 21.6  | 35.7  | 20.2  | 3.6   | 447.2  | 280.1  | 368.9  |
| 6.1   | 13.0  | 2.8   | 5.3   | 9.1   | 3.4   | 8.6    | 3.9    | 3.9    |
| 45.4  | 28.3  | 6.0   | 1.7   | 60.6  | 18.8  | 17.8   | 18.1   | 14.5   |
| 22.3  | 34.1  | 6.7   | 2.6   | 22.0  | 20.2  | 8.5    | 3.4    | 3.2    |
| 12.3  | 24.8  | 16.7  | 28.7  | 25.9  | 13.2  | 87.7   | 54.6   | 49.3   |
| 503.1 | 576.6 | 294.3 | 335.0 | 647.7 | 523.6 | 486.1  | 629.1  | 649.1  |
| 17.4  | 16.9  | 21.3  | 3.6   | 22.2  | 35.2  | 25.6   | 13.4   | 19.5   |
| 41.8  | 48.0  | 55.2  | 65.7  | 85.5  | 72.7  | 39.0   | 34.1   | 20.4   |
| 20.9  | 26.5  | 43.7  | 52.6  | 28.8  | 14.5  | 49.2   | 74.2   | 76.4   |
| 391.8 | 300.3 | 204.6 | 297.6 | 455.0 | 310.8 | 418.6  | 216.9  | 238.6  |
| 212.8 | 385.1 | 22.7  | 37.3  | 374.8 | 439.9 | 552.8  | 380.2  | 440.2  |
| 3.4   | 1.8   | 0.9   | 1.8   | 5.0   | 1.3   | 3.7    | 3.8    | 7.3    |
| 2.6   | 2.8   | 18.5  | 2.6   | 3.2   | 2.4   | 8.7    | 12.5   | 5.8    |
| 10.8  | 14.0  | 14.1  | 8.3   | 18.5  | 11.4  | 37.5   | 27.9   | 25.5   |
| 80.7  | 89.4  | 22.2  | 17.8  | 115.6 | 105.9 | 153.4  | 111.1  | 157.5  |
| 1.2   | 2.3   | 1.3   | 2.0   | 4.8   | 2.5   | 2.5    | 1.9    | 2.6    |
| 25.6  | 16.8  | 2.4   | 1.0   | 3.9   | 11.4  | 11.1   | 12.6   | 14.4   |
| 0.3   | 4.4   | 1.2   | 3.3   | 0.5   | 4.2   | 3.7    | 6.3    | 5.4    |
| 10.5  | 8.1   | 2.5   | 1.6   | 10.9  | 12.2  | 20.2   | 12.5   | 7.4    |
| 294.0 | 376.6 | 33.8  | 54.2  | 545.1 | 548.7 | 673.8  | 219.7  | 268.3  |
| 17.4  | 19.6  | 8.0   | 9.0   | 24.6  | 18.5  | 17.6   | 11.4   | 11.0   |
| 1.2   | 1.2   | 2.3   | 8.0   | 13.4  | 25.6  | 6.3    | 19.8   | 11.9   |
| 15.2  | 4.8   | 1.3   | 1.1   | 12.8  | 2.6   | 20.8   | 12.9   | 15.6   |
| 5.8   | 7.8   | 0.6   | 1.1   | 7.3   | 7.1   | 4.6    | 5.1    | 2.0    |
| 13.5  | 26.3  | 8.8   | 4.2   | 14.8  | 31.4  | 1.9    | 11.6   | 6.8    |
| 4.5   | 26.6  | 4.2   | 4.9   | 7.2   | 5.8   | 12.2   | 4.0    | 7.8    |
| 3.7   | 0.2   | 13.1  | 3.4   | 3.8   | 4.0   | 8.6    | 5.9    | 6.4    |
| 2.3   | 1.5   | 3.7   | 1.1   | 1.0   | 13.1  | 2.5    | 1.9    | 3.8    |
| 47.2  | 57.5  | 23.8  | 30.4  | 60.8  | 56.9  | 182.7  | 122.6  | 138.6  |
| 7.2   | 24.2  | 0.5   | 3.9   | 50.6  | 39.0  | 31.5   | 38.4   | 28.2   |
| 83.7  | 134.9 | 23.1  | 11.6  | 137.2 | 117.9 | 242.1  | 232.4  | 211.0  |
| 4.3   | 0.9   | 0.5   | 0.7   | 0.4   | 2.4   | 4.2    | 4.5    | 1.4    |
| 0.9   | 4.5   | 1.3   | 1.4   | 6.1   | 1.3   | 7.2    | 1.8    | 7.4    |
| 39.7  | 32.7  | 37.3  | 54.3  | 38.4  | 34.8  | 79.8   | 64.7   | 71.1   |
| 166.4 | 158.5 | 685.7 | 760.3 | 283.1 | 147.2 | 693.3  | 915.9  | 987.3  |
| 19.7  | 18.1  | 20.9  | 19.5  | 19.4  | 9.8   | 25.9   | 28.9   | 30.4   |
| 12.8  | 14.7  | 7.9   | 9.2   | 8.1   | 13.5  | 7.8    | 23.5   | 33.2   |
| 77.6  | 64.9  | 53.5  | 54.7  | 96.3  | 113.7 | 278.7  | 241.6  | 264.1  |
| 76.4  | 173.9 | 157.4 | 110.7 | 92.7  | 188.5 | 309.0  | 267.4  | 319.5  |

|        |        |        |        |        |        |        |        |        |
|--------|--------|--------|--------|--------|--------|--------|--------|--------|
| 16.7   | 21.4   | 1.2    | 7.8    | 9.8    | 31.9   | 103.9  | 185.4  | 184.1  |
| 7.7    | 2.1    | 9.4    | 13.2   | 1.5    | 1.5    | 10.3   | 8.1    | 2.8    |
| 1.8    | 8.4    | 0.6    | 9.7    | 2.4    | 5.7    | 15.4   | 5.6    | 3.3    |
| 692.2  | 787.6  | 1081.7 | 1382.4 | 929.5  | 947.5  | 2742.6 | 2662.7 | 3047.9 |
| 124.3  | 162.9  | 116.1  | 119.9  | 175.2  | 174.6  | 360.3  | 377.1  | 413.4  |
| 66.9   | 67.3   | 241.9  | 232.9  | 117.7  | 43.8   | 1123.8 | 2807.0 | 2364.7 |
| 11.1   | 10.7   | 2.0    | 10.8   | 11.1   | 6.3    | 40.8   | 46.4   | 59.9   |
| 14.4   | 26.2   | 35.9   | 57.1   | 22.9   | 11.8   | 8.6    | 20.5   | 4.8    |
| 336.0  | 384.4  | 148.8  | 219.6  | 481.6  | 342.9  | 1829.5 | 1271.0 | 1471.2 |
| 2.6    | 7.7    | 10.2   | 16.1   | 6.3    | 1.9    | 11.1   | 7.9    | 8.8    |
| 6.2    | 0.8    | 17.9   | 11.4   | 1.5    | 1.4    | 4.7    | 14.9   | 9.6    |
| 1.4    | 9.1    | 7.7    | 7.3    | 2.8    | 5.4    | 0.9    | 0.9    | 3.8    |
| 7.0    | 4.8    | 9.2    | 0.9    | 4.8    | 5.0    | 1.2    | 7.7    | 5.9    |
| 1037.7 | 1928.4 | 168.7  | 254.3  | 1640.6 | 1933.0 | 1849.9 | 963.5  | 1105.8 |
| 6.2    | 14.0   | 8.3    | 8.8    | 5.8    | 15.1   | 18.5   | 17.3   | 18.5   |
| 9.2    | 15.8   | 8.5    | 3.1    | 12.5   | 12.7   | 14.6   | 16.4   | 17.0   |
| 9.9    | 12.7   | 10.1   | 11.8   | 1.7    | 1.2    | 4.0    | 7.0    | 3.8    |
| 6.8    | 3.2    | 7.7    | 5.5    | 7.3    | 8.4    | 20.0   | 11.9   | 1.7    |
| 360.3  | 487.9  | 161.0  | 208.1  | 606.1  | 396.3  | 857.4  | 1082.0 | 1098.2 |
| 39.8   | 38.7   | 2.4    | 3.2    | 29.1   | 32.4   | 36.6   | 30.8   | 27.2   |
| 7.8    | 9.5    | 0.4    | 0.4    | 15.1   | 0.8    | 9.1    | 0.4    | 0.6    |
| 1.8    | 5.6    | 1.0    | 9.1    | 15.8   | 4.4    | 6.2    | 14.8   | 8.6    |
| 1448.2 | 1778.8 | 934.9  | 1188.7 | 2096.8 | 1664.8 | 2910.5 | 2804.0 | 3046.0 |
| 732.3  | 951.1  | 28.9   | 54.8   | 1102.3 | 866.0  | 82.1   | 68.0   | 69.3   |
| 38.0   | 20.0   | 7.3    | 9.9    | 55.9   | 43.9   | 53.3   | 46.0   | 45.2   |
| 42.1   | 21.2   | 0.9    | 1.2    | 36.4   | 12.3   | 38.5   | 46.5   | 58.7   |
| 2.6    | 5.8    | 7.4    | 0.8    | 6.4    | 3.6    | 14.1   | 15.7   | 8.7    |
| 126.8  | 163.1  | 125.4  | 153.8  | 177.9  | 169.0  | 243.1  | 272.8  | 299.7  |
| 3.3    | 0.9    | 7.3    | 3.3    | 1.9    | 1.1    | 21.1   | 20.8   | 14.6   |
| 10.1   | 5.4    | 0.7    | 1.1    | 18.2   | 16.3   | 3.2    | 8.4    | 8.8    |
| 2.2    | 0.2    | 0.3    | 2.5    | 8.5    | 8.4    | 8.6    | 4.5    | 5.3    |
| 76.5   | 89.7   | 167.9  | 235.2  | 110.3  | 52.8   | 77.6   | 130.5  | 158.0  |
| 10.3   | 14.5   | 12.9   | 5.0    | 5.8    | 1.8    | 9.8    | 6.8    | 4.7    |
| 118.1  | 198.8  | 24.5   | 24.8   | 157.8  | 121.8  | 140.4  | 155.7  | 167.6  |
| 49.7   | 60.2   | 239.1  | 398.9  | 79.9   | 54.9   | 324.1  | 416.0  | 551.9  |
| 2.8    | 9.6    | 5.1    | 0.3    | 4.3    | 7.2    | 1.2    | 1.2    | 4.6    |
| 2.1    | 7.4    | 13.8   | 12.7   | 1.8    | 0.9    | 5.6    | 1.4    | 2.7    |
| 48.9   | 37.1   | 9.6    | 17.9   | 21.7   | 32.5   | 63.0   | 62.0   | 72.9   |
| 11.0   | 14.0   | 8.8    | 2.9    | 11.2   | 16.2   | 33.3   | 22.2   | 25.7   |
| 16.1   | 14.0   | 13.8   | 16.8   | 14.7   | 2.5    | 49.0   | 54.2   | 48.8   |
| 9.8    | 6.2    | 3.2    | 0.9    | 13.0   | 17.1   | 8.2    | 12.0   | 9.7    |
| 154.1  | 239.4  | 11.0   | 16.6   | 267.3  | 230.2  | 583.3  | 366.1  | 417.1  |
| 51.9   | 24.4   | 11.4   | 12.0   | 125.7  | 44.5   | 1.6    | 6.9    | 4.1    |
| 15.4   | 28.4   | 10.1   | 11.0   | 12.7   | 17.7   | 28.5   | 16.1   | 23.1   |
| 39.1   | 35.0   | 26.9   | 35.9   | 43.0   | 22.4   | 40.9   | 28.1   | 34.1   |
| 8.1    | 1.7    | 16.5   | 2.3    | 2.0    | 5.8    | 15.0   | 3.2    | 18.3   |
| 12.3   | 15.4   | 10.1   | 0.7    | 23.4   | 24.9   | 16.8   | 21.1   | 12.4   |
| 1.8    | 4.3    | 7.6    | 5.8    | 2.8    | 2.7    | 10.4   | 13.0   | 27.3   |
| 3.2    | 2.1    | 3.2    | 0.1    | 5.6    | 9.0    | 5.2    | 4.9    | 4.4    |
| 29.6   | 43.2   | 15.9   | 28.9   | 57.7   | 51.6   | 90.2   | 79.1   | 90.9   |
| 58.2   | 69.3   | 164.9  | 167.5  | 92.9   | 60.6   | 517.4  | 676.5  | 709.7  |
| 121.0  | 148.7  | 52.1   | 66.7   | 214.0  | 124.4  | 91.4   | 130.1  | 123.8  |
| 4.9    | 7.8    | 27.2   | 52.3   | 2.9    | 10.0   | 3.9    | 4.2    | 6.4    |

|        |        |        |        |        |        |        |        |        |
|--------|--------|--------|--------|--------|--------|--------|--------|--------|
| 43.4   | 42.3   | 0.8    | 0.5    | 61.4   | 47.8   | 3.3    | 3.9    | 2.3    |
| 3.0    | 7.5    | 7.3    | 10.2   | 1.1    | 7.1    | 6.8    | 6.4    | 10.4   |
| 12.9   | 21.8   | 8.6    | 7.9    | 15.8   | 13.9   | 25.0   | 28.3   | 21.4   |
| 13.8   | 11.7   | 1.2    | 8.3    | 7.6    | 5.0    | 3.8    | 14.8   | 3.4    |
| 23.0   | 8.6    | 0.5    | 0.6    | 37.4   | 5.0    | 32.1   | 26.3   | 43.5   |
| 45.5   | 46.6   | 100.8  | 91.7   | 49.3   | 48.4   | 74.8   | 95.8   | 113.5  |
| 1.3    | 1.8    | 4.9    | 3.6    | 3.5    | 6.1    | 1.9    | 4.5    | 6.0    |
| 3.1    | 1.8    | 2.0    | 1.1    | 2.2    | 2.9    | 11.8   | 6.5    | 7.8    |
| 0.6    | 0.9    | 2.1    | 1.4    | 1.0    | 1.7    | 2.1    | 4.6    | 4.8    |
| 1.1    | 6.3    | 2.0    | 1.2    | 1.5    | 1.6    | 5.3    | 2.5    | 3.2    |
| 700.3  | 1090.7 | 229.3  | 377.6  | 1219.1 | 1145.6 | 2554.9 | 2692.3 | 2735.9 |
| 37.2   | 66.0   | 31.3   | 76.0   | 48.4   | 26.1   | 359.6  | 403.0  | 373.7  |
| 1.3    | 0.2    | 1.2    | 0.8    | 0.7    | 0.3    | 2.9    | 1.8    | 3.4    |
| 5.2    | 4.5    | 27.9   | 23.8   | 2.0    | 7.2    | 29.6   | 18.8   | 9.9    |
| 2.2    | 5.8    | 7.1    | 4.4    | 0.9    | 0.7    | 4.3    | 28.2   | 13.4   |
| 1685.2 | 2694.5 | 352.0  | 571.9  | 2401.2 | 1930.1 | 808.4  | 327.9  | 374.5  |
| 61.8   | 87.4   | 75.2   | 80.4   | 122.4  | 83.2   | 189.1  | 233.0  | 228.4  |
| 14.1   | 1.8    | 3.1    | 5.0    | 8.6    | 1.0    | 3.6    | 2.4    | 10.1   |
| 0.3    | 0.7    | 0.3    | 3.0    | 2.7    | 0.2    | 2.0    | 1.3    | 9.3    |
| 1528.5 | 1713.9 | 278.9  | 357.2  | 1730.2 | 1346.8 | 2845.2 | 2479.1 | 2434.2 |
| 1109.5 | 1324.0 | 547.6  | 809.0  | 1591.7 | 1743.2 | 1938.3 | 1914.1 | 1920.8 |
| 5.5    | 0.8    | 3.6    | 0.5    | 1.4    | 15.1   | 3.8    | 1.8    | 1.4    |
| 69.6   | 90.6   | 30.8   | 47.1   | 94.4   | 82.3   | 575.8  | 453.0  | 523.5  |
| 1.7    | 2.5    | 9.6    | 1.8    | 10.2   | 7.3    | 1.7    | 1.8    | 1.4    |
| 21.3   | 22.0   | 38.7   | 34.8   | 17.5   | 13.6   | 113.7  | 134.5  | 180.1  |
| 1.6    | 0.5    | 1.4    | 0.8    | 1.6    | 1.0    | 1.7    | 1.7    | 1.6    |
| 1.2    | 0.8    | 3.3    | 0.6    | 11.3   | 7.3    | 3.6    | 4.9    | 5.0    |
| 88.7   | 144.7  | 1.2    | 4.1    | 118.6  | 89.4   | 26.0   | 20.4   | 13.2   |
| 302.1  | 377.3  | 7.1    | 2.3    | 600.5  | 316.3  | 214.7  | 118.7  | 155.9  |
| 2.9    | 0.4    | 7.0    | 4.8    | 9.2    | 1.7    | 3.8    | 3.5    | 4.7    |
| 8.3    | 3.4    | 1.6    | 6.6    | 8.1    | 3.6    | 12.1   | 11.7   | 7.3    |
| 2.4    | 0.9    | 0.7    | 1.1    | 2.1    | 0.4    | 0.6    | 0.4    | 0.6    |
| 5.6    | 6.4    | 1.6    | 1.1    | 2.3    | 1.6    | 14.6   | 11.1   | 8.8    |
| 2.6    | 1.0    | 0.9    | 0.6    | 2.3    | 2.5    | 2.1    | 1.2    | 0.5    |
| 0.9    | 11.5   | 1.3    | 1.2    | 5.7    | 1.0    | 2.8    | 5.1    | 6.3    |
| 17.0   | 15.0   | 18.6   | 19.5   | 21.2   | 18.3   | 23.6   | 11.9   | 18.8   |
| 5.6    | 3.9    | 8.4    | 3.7    | 4.5    | 11.9   | 25.6   | 4.2    | 11.6   |
| 2.4    | 9.8    | 21.3   | 8.7    | 19.4   | 14.6   | 13.5   | 6.5    | 14.1   |
| 153.6  | 216.8  | 59.4   | 32.1   | 301.0  | 189.3  | 225.1  | 184.4  | 175.3  |
| 1754.3 | 1892.1 | 1215.2 | 1658.5 | 1994.2 | 1877.8 | 4892.3 | 4126.0 | 4308.5 |
| 1.1    | 0.4    | 1.7    | 3.8    | 0.8    | 0.6    | 2.2    | 3.8    | 4.7    |
| 17.9   | 14.2   | 4.4    | 8.4    | 19.4   | 4.7    | 5.3    | 4.2    | 2.9    |
| 4.7    | 0.7    | 612.5  | 681.9  | 0.7    | 1.0    | 85.4   | 97.4   | 116.3  |
| 0.4    | 6.2    | 4.2    | 3.7    | 0.4    | 2.7    | 34.6   | 44.8   | 29.2   |
| 33.0   | 43.4   | 15.0   | 16.8   | 59.8   | 13.8   | 348.0  | 298.7  | 311.5  |
| 158.4  | 371.7  | 38.6   | 33.4   | 377.0  | 128.6  | 504.9  | 192.9  | 274.7  |
| 9.1    | 2.5    | 15.7   | 10.7   | 11.4   | 1.3    | 12.0   | 8.5    | 13.6   |
| 238.1  | 405.7  | 101.0  | 133.3  | 400.1  | 162.5  | 1168.5 | 1072.8 | 1221.8 |
| 22.8   | 8.8    | 9.4    | 3.3    | 29.7   | 25.0   | 70.4   | 62.4   | 50.6   |
| 2.2    | 1.5    | 0.9    | 5.2    | 10.8   | 1.9    | 13.3   | 14.9   | 18.5   |
| 3.2    | 5.8    | 3.7    | 12.9   | 3.7    | 1.5    | 21.6   | 7.8    | 8.1    |
| 6.5    | 19.0   | 9.0    | 4.1    | 10.4   | 20.1   | 10.4   | 17.7   | 12.1   |
| 1.9    | 1.6    | 1.5    | 3.2    | 3.6    | 3.1    | 1.7    | 1.2    | 4.9    |



|        |        |        |        |        |        |        |        |        |
|--------|--------|--------|--------|--------|--------|--------|--------|--------|
| 6.4    | 6.9    | 0.4    | 4.5    | 11.7   | 7.4    | 2.0    | 3.2    | 3.7    |
| 55.2   | 56.2   | 5.1    | 1.9    | 94.7   | 47.6   | 2.3    | 1.6    | 1.0    |
| 24.5   | 23.7   | 27.0   | 13.8   | 29.8   | 24.6   | 38.5   | 33.5   | 41.4   |
| 7.6    | 10.2   | 3.2    | 9.0    | 6.4    | 11.6   | 25.0   | 42.4   | 45.8   |
| 21.6   | 13.9   | 1.7    | 1.3    | 26.5   | 16.7   | 11.4   | 9.2    | 5.5    |
| 65.8   | 55.3   | 30.5   | 31.6   | 73.6   | 49.1   | 81.8   | 96.1   | 110.7  |
| 87.4   | 168.7  | 46.5   | 50.9   | 174.2  | 105.5  | 379.6  | 341.1  | 323.9  |
| 0.4    | 1.9    | 0.6    | 5.0    | 5.2    | 5.0    | 30.8   | 13.0   | 9.1    |
| 4420.3 | 4802.0 | 1608.1 | 2137.4 | 5714.1 | 3729.4 | 5097.3 | 3563.6 | 4114.6 |
| 345.0  | 512.4  | 725.9  | 922.6  | 709.7  | 579.6  | 3175.4 | 3100.8 | 3341.5 |
| 570.7  | 567.8  | 18.0   | 6.4    | 919.3  | 612.3  | 650.0  | 489.1  | 541.7  |
| 17.7   | 4.1    | 4.2    | 1.8    | 3.5    | 20.7   | 3.1    | 3.5    | 5.2    |
| 7.3    | 12.6   | 6.8    | 8.6    | 15.0   | 9.2    | 11.8   | 1.2    | 1.6    |
| 0.8    | 11.5   | 6.7    | 13.9   | 7.1    | 5.8    | 11.2   | 15.1   | 9.9    |
| 16.1   | 3.1    | 2.2    | 13.5   | 2.9    | 20.1   | 18.4   | 30.7   | 34.6   |
| 2.1    | 1.8    | 4.6    | 12.1   | 2.7    | 2.5    | 14.0   | 17.9   | 9.1    |
| 1.2    | 1.2    | 4.8    | 0.6    | 0.5    | 0.7    | 2.0    | 0.9    | 2.7    |
| 84.5   | 51.7   | 11.9   | 6.9    | 93.4   | 49.4   | 33.0   | 78.6   | 62.9   |
| 87.6   | 119.2  | 43.1   | 65.7   | 154.1  | 81.3   | 723.4  | 535.4  | 589.2  |
| 1.7    | 3.4    | 6.2    | 0.7    | 1.2    | 1.7    | 2.8    | 1.4    | 3.2    |
| 5.7    | 0.9    | 4.2    | 2.1    | 2.7    | 2.5    | 4.2    | 8.5    | 10.5   |
| 116.7  | 168.3  | 70.4   | 70.4   | 170.4  | 134.2  | 203.8  | 316.7  | 350.9  |
| 12.8   | 15.9   | 17.9   | 17.7   | 18.6   | 18.5   | 60.2   | 71.3   | 86.0   |
| 28.3   | 26.2   | 24.1   | 3.6    | 32.6   | 31.9   | 93.9   | 105.2  | 127.5  |
| 5.6    | 8.4    | 7.0    | 5.6    | 4.1    | 2.0    | 4.9    | 6.3    | 8.2    |
| 177.4  | 335.7  | 102.3  | 137.1  | 206.3  | 223.6  | 469.1  | 349.6  | 403.3  |
| 13.6   | 30.4   | 4.7    | 15.6   | 22.9   | 25.2   | 35.5   | 21.2   | 12.1   |
| 3224.0 | 4920.1 | 428.7  | 448.2  | 5476.5 | 4871.9 | 4148.6 | 4018.6 | 4389.3 |
| 3.5    | 5.6    | 5.7    | 3.7    | 7.2    | 9.5    | 6.8    | 7.0    | 12.4   |
| 485.0  | 805.7  | 36.9   | 34.4   | 821.6  | 753.8  | 423.3  | 512.3  | 554.1  |
| 30.8   | 24.8   | 7.3    | 8.5    | 57.4   | 19.7   | 166.4  | 192.6  | 211.9  |
| 2.3    | 3.7    | 8.2    | 15.7   | 1.4    | 1.9    | 20.6   | 12.4   | 11.8   |
| 33.2   | 28.1   | 41.0   | 81.5   | 32.9   | 12.4   | 27.3   | 10.8   | 15.7   |
| 19.7   | 18.7   | 36.2   | 54.8   | 7.0    | 6.7    | 95.0   | 90.7   | 83.9   |
| 105.4  | 132.7  | 149.2  | 244.9  | 169.8  | 143.0  | 204.9  | 152.1  | 242.0  |
| 161.7  | 176.8  | 145.4  | 165.0  | 232.1  | 185.1  | 596.4  | 424.3  | 535.1  |
| 4.6    | 2.2    | 6.4    | 5.9    | 6.0    | 5.2    | 10.9   | 6.1    | 8.1    |
| 839.9  | 929.5  | 364.0  | 632.0  | 1082.7 | 511.5  | 2695.9 | 2270.0 | 2382.4 |
| 7.6    | 1.0    | 8.2    | 0.7    | 1.9    | 1.1    | 0.9    | 2.3    | 2.0    |
| 356.3  | 455.1  | 88.6   | 103.8  | 427.2  | 333.8  | 1035.2 | 1359.8 | 1577.4 |
| 116.1  | 127.6  | 90.2   | 99.7   | 164.4  | 108.3  | 275.7  | 232.9  | 271.5  |
| 114.4  | 102.4  | 1.0    | 1.4    | 139.1  | 75.2   | 1.5    | 1.0    | 1.1    |
| 687.5  | 582.8  | 492.8  | 839.4  | 714.7  | 501.9  | 2047.4 | 654.8  | 710.3  |
| 11.3   | 37.0   | 3.7    | 4.0    | 30.3   | 1.9    | 13.9   | 13.7   | 4.1    |
| 18.2   | 20.5   | 7.8    | 2.0    | 31.0   | 24.4   | 13.4   | 21.3   | 27.7   |
| 1795.0 | 2230.6 | 205.4  | 301.5  | 1825.9 | 1919.0 | 1922.4 | 1393.3 | 1624.8 |
| 1042.9 | 1366.0 | 408.3  | 708.6  | 1121.4 | 1125.1 | 1364.7 | 1063.8 | 1137.4 |
| 29.8   | 45.0   | 92.1   | 105.2  | 59.6   | 29.0   | 355.0  | 423.1  | 420.1  |
| 7.7    | 0.6    | 0.9    | 0.2    | 7.5    | 0.4    | 6.3    | 4.0    | 0.8    |
| 7.7    | 3.2    | 1.5    | 1.2    | 17.8   | 3.5    | 8.3    | 8.2    | 8.3    |
| 16.7   | 3.8    | 20.6   | 12.4   | 7.5    | 9.2    | 36.4   | 22.3   | 28.9   |
| 2.4    | 2.8    | 0.8    | 0.9    | 4.2    | 2.8    | 25.3   | 4.3    | 4.9    |
| 97.7   | 168.9  | 70.3   | 71.1   | 110.6  | 98.2   | 169.6  | 163.6  | 198.8  |

|        |        |        |        |        |        |        |        |        |
|--------|--------|--------|--------|--------|--------|--------|--------|--------|
| 21.5   | 14.9   | 22.3   | 38.5   | 27.0   | 20.5   | 27.0   | 40.6   | 49.7   |
| 18.9   | 23.5   | 18.0   | 30.0   | 14.6   | 24.8   | 39.4   | 53.9   | 48.4   |
| 1202.0 | 1879.8 | 417.6  | 541.8  | 1814.6 | 1123.7 | 4730.7 | 3573.8 | 3640.0 |
| 1.0    | 6.8    | 0.4    | 0.4    | 0.3    | 0.7    | 0.7    | 0.4    | 2.5    |
| 1.4    | 1.3    | 0.9    | 0.5    | 3.3    | 1.7    | 2.5    | 9.4    | 5.6    |
| 161.5  | 197.6  | 253.5  | 228.5  | 267.2  | 201.0  | 76.0   | 43.7   | 23.2   |
| 19.8   | 23.0   | 10.5   | 11.3   | 23.2   | 43.2   | 45.1   | 60.3   | 67.1   |
| 12.4   | 2.2    | 9.9    | 8.9    | 11.4   | 10.7   | 11.5   | 14.2   | 18.8   |
| 22.1   | 4.8    | 24.0   | 35.0   | 32.6   | 24.7   | 28.9   | 32.1   | 41.7   |
| 211.6  | 260.4  | 1.5    | 1.3    | 315.4  | 210.9  | 3.1    | 1.2    | 2.1    |
| 20.4   | 40.4   | 40.7   | 35.7   | 63.9   | 57.7   | 36.3   | 43.1   | 57.7   |
| 127.7  | 154.8  | 1.8    | 14.4   | 162.7  | 146.1  | 242.2  | 46.6   | 58.0   |
| 4.7    | 8.8    | 5.7    | 0.6    | 18.2   | 3.6    | 11.7   | 17.9   | 8.6    |
| 3.4    | 2.0    | 6.2    | 3.5    | 18.8   | 3.2    | 17.2   | 9.1    | 8.4    |
| 34.4   | 26.9   | 22.4   | 16.9   | 34.2   | 22.2   | 122.7  | 106.2  | 115.5  |
| 4.8    | 9.0    | 2.8    | 2.0    | 2.5    | 10.1   | 2.6    | 1.9    | 2.5    |
| 6.6    | 1.9    | 2.2    | 3.4    | 1.2    | 1.1    | 15.4   | 6.3    | 6.3    |
| 93.4   | 104.8  | 45.5   | 45.8   | 205.0  | 88.5   | 100.7  | 106.3  | 102.6  |
| 65.3   | 52.4   | 1.5    | 2.7    | 86.1   | 59.5   | 142.2  | 180.4  | 188.6  |
| 56.9   | 48.9   | 22.2   | 30.6   | 84.2   | 54.7   | 60.0   | 87.7   | 72.5   |
| 981.2  | 1472.7 | 76.2   | 94.1   | 1451.8 | 1394.8 | 2170.7 | 1099.5 | 1240.6 |
| 232.1  | 324.5  | 82.8   | 96.4   | 457.8  | 220.6  | 752.1  | 394.7  | 414.9  |
| 20.2   | 38.0   | 17.5   | 10.3   | 52.3   | 34.0   | 52.4   | 30.9   | 32.4   |
| 8.2    | 13.7   | 11.2   | 9.4    | 12.0   | 14.9   | 21.8   | 12.4   | 25.3   |
| 11.5   | 8.5    | 49.8   | 55.6   | 10.2   | 3.1    | 108.4  | 109.7  | 144.0  |
| 14.2   | 13.4   | 1.5    | 7.4    | 26.3   | 14.5   | 39.7   | 29.3   | 47.4   |
| 3.1    | 2.9    | 0.7    | 0.6    | 16.6   | 1.0    | 37.1   | 16.9   | 23.4   |
| 7.8    | 2.9    | 10.4   | 5.6    | 1.0    | 13.7   | 32.7   | 44.4   | 42.8   |
| 385.3  | 424.7  | 200.2  | 315.5  | 468.0  | 554.8  | 1347.0 | 1195.3 | 1251.1 |
| 2.7    | 1.7    | 1.6    | 1.2    | 20.9   | 13.2   | 3.9    | 6.5    | 2.5    |
| 895.1  | 1098.6 | 756.1  | 966.8  | 1267.0 | 957.7  | 2953.7 | 3249.7 | 3796.4 |
| 730.5  | 992.9  | 559.6  | 833.6  | 1231.4 | 789.5  | 247.7  | 194.9  | 261.6  |
| 17.5   | 35.2   | 5.3    | 16.9   | 30.4   | 13.2   | 42.8   | 46.1   | 44.9   |
| 27.9   | 28.2   | 30.9   | 42.4   | 36.7   | 36.3   | 12.2   | 6.9    | 33.8   |
| 1.7    | 0.9    | 1.9    | 1.2    | 2.2    | 1.0    | 15.9   | 9.0    | 9.0    |
| 21.5   | 35.1   | 1.2    | 0.6    | 38.1   | 25.8   | 3.5    | 1.8    | 2.3    |
| 53.6   | 67.4   | 5.2    | 14.4   | 95.2   | 67.7   | 218.4  | 331.2  | 373.8  |
| 3.3    | 11.8   | 0.4    | 1.3    | 7.0    | 9.9    | 3.6    | 4.8    | 3.3    |
| 138.9  | 166.5  | 95.4   | 133.9  | 252.1  | 189.8  | 947.1  | 768.7  | 927.3  |
| 43.1   | 68.4   | 53.6   | 57.6   | 89.5   | 49.3   | 77.4   | 93.7   | 91.0   |
| 682.3  | 778.5  | 372.6  | 594.6  | 919.4  | 719.9  | 1809.6 | 1214.2 | 1409.5 |
| 20.4   | 48.0   | 14.2   | 9.7    | 29.7   | 41.6   | 31.9   | 35.9   | 27.9   |
| 59.1   | 93.2   | 16.9   | 24.4   | 111.1  | 85.9   | 178.1  | 174.8  | 213.5  |
| 2.1    | 1.9    | 10.4   | 1.1    | 1.5    | 4.0    | 4.0    | 2.8    | 8.7    |
| 205.1  | 393.4  | 97.9   | 112.9  | 314.9  | 345.4  | 263.2  | 244.3  | 256.1  |
| 406.5  | 328.0  | 77.2   | 77.7   | 481.4  | 290.2  | 1048.8 | 619.6  | 853.9  |
| 820.6  | 737.1  | 269.0  | 495.3  | 1232.9 | 770.3  | 751.6  | 496.9  | 584.5  |
| 9.3    | 8.0    | 6.4    | 3.0    | 1.9    | 3.7    | 10.1   | 7.8    | 8.4    |
| 0.9    | 0.8    | 1.1    | 0.8    | 2.6    | 0.8    | 5.8    | 2.9    | 2.7    |
| 0.9    | 11.0   | 0.8    | 0.8    | 1.0    | 9.4    | 2.4    | 5.1    | 1.6    |
| 1373.4 | 1344.2 | 1157.0 | 1548.9 | 2335.7 | 1341.4 | 3125.4 | 2363.3 | 2513.0 |
| 259.3  | 355.3  | 236.0  | 264.2  | 428.8  | 371.9  | 2691.1 | 1484.2 | 1565.1 |
| 6.3    | 11.1   | 1.1    | 1.3    | 6.6    | 11.7   | 11.5   | 15.5   | 10.8   |

|        |        |        |        |        |        |         |        |        |
|--------|--------|--------|--------|--------|--------|---------|--------|--------|
| 8.7    | 3.8    | 14.8   | 9.6    | 16.1   | 4.8    | 132.5   | 100.2  | 121.9  |
| 29.6   | 31.1   | 15.2   | 19.6   | 33.4   | 18.6   | 59.2    | 36.3   | 35.9   |
| 100.6  | 129.3  | 138.6  | 232.0  | 158.0  | 122.7  | 402.5   | 386.5  | 574.9  |
| 2.0    | 2.3    | 2.3    | 4.6    | 3.3    | 2.8    | 8.1     | 1.4    | 1.6    |
| 6.0    | 1.6    | 5.0    | 0.4    | 4.8    | 7.1    | 3.4     | 1.3    | 4.1    |
| 1.1    | 1.6    | 4.3    | 0.6    | 5.7    | 9.4    | 10.9    | 7.5    | 5.7    |
| 116.8  | 77.7   | 193.8  | 242.6  | 154.3  | 136.6  | 530.2   | 464.5  | 591.1  |
| 17.1   | 42.4   | 0.7    | 1.4    | 59.1   | 36.7   | 5.6     | 1.0    | 2.2    |
| 6749.4 | 7378.6 | 3780.3 | 4453.9 | 7414.0 | 7178.1 | 10679.2 | 9244.3 | 8930.9 |
| 11.0   | 67.6   | 119.1  | 118.1  | 42.3   | 82.5   | 123.9   | 172.7  | 182.5  |
| 514.5  | 337.8  | 290.8  | 352.5  | 562.1  | 379.9  | 602.1   | 543.5  | 603.1  |
| 153.6  | 251.6  | 62.6   | 59.7   | 269.2  | 202.1  | 552.2   | 491.8  | 492.6  |
| 3.5    | 2.2    | 1.8    | 2.9    | 2.7    | 2.8    | 5.2     | 1.7    | 2.7    |
| 182.7  | 277.3  | 77.0   | 85.6   | 375.2  | 245.4  | 490.5   | 517.7  | 534.8  |
| 5.3    | 3.3    | 3.3    | 4.4    | 5.0    | 9.9    | 4.3     | 11.3   | 3.0    |
| 108.2  | 123.0  | 175.9  | 257.6  | 150.7  | 100.4  | 254.0   | 267.0  | 227.4  |
| 108.8  | 147.4  | 73.5   | 82.9   | 153.0  | 141.2  | 29.3    | 28.1   | 34.8   |
| 1.5    | 4.9    | 17.0   | 18.0   | 3.0    | 3.6    | 18.3    | 12.0   | 24.5   |
| 59.9   | 98.8   | 79.7   | 109.5  | 113.0  | 69.9   | 351.2   | 597.4  | 672.1  |
| 1296.0 | 1735.2 | 279.4  | 307.4  | 2018.9 | 1915.6 | 2922.0  | 2548.8 | 2750.0 |
| 1581.8 | 1799.1 | 853.7  | 1127.9 | 2225.7 | 1876.7 | 5770.3  | 5931.1 | 5875.3 |
| 91.3   | 103.0  | 19.4   | 18.5   | 199.7  | 105.0  | 494.7   | 411.9  | 380.0  |
| 6090.3 | 6800.0 | 3900.1 | 4782.3 | 6777.2 | 6426.0 | 9662.8  | 8059.4 | 7942.0 |
| 6539.2 | 7168.7 | 4062.9 | 5045.8 | 7098.7 | 7498.3 | 9096.0  | 8967.5 | 8904.1 |
| 176.3  | 237.1  | 228.6  | 255.8  | 246.4  | 265.2  | 1208.4  | 1196.8 | 1288.7 |
| 1347.7 | 1707.0 | 169.0  | 207.2  | 2566.7 | 2145.8 | 1336.6  | 1063.9 | 1291.5 |
| 15.1   | 9.3    | 7.8    | 7.4    | 9.2    | 19.6   | 16.1    | 17.6   | 11.1   |
| 1.9    | 9.1    | 6.2    | 4.5    | 21.6   | 10.7   | 168.9   | 131.3  | 149.9  |
| 15.4   | 28.6   | 2.8    | 1.7    | 29.1   | 21.1   | 61.2    | 78.7   | 83.2   |
| 1.4    | 10.2   | 6.0    | 2.0    | 2.2    | 0.8    | 15.6    | 15.1   | 22.6   |
| 33.2   | 92.6   | 62.5   | 98.3   | 78.8   | 86.6   | 984.3   | 752.6  | 816.5  |
| 25.3   | 22.3   | 7.7    | 8.8    | 42.5   | 19.0   | 105.2   | 66.8   | 81.6   |
| 8.0    | 12.4   | 33.2   | 44.1   | 14.4   | 2.0    | 38.5    | 39.9   | 44.6   |
| 0.7    | 1.6    | 0.4    | 1.9    | 4.4    | 0.6    | 1.3     | 1.4    | 7.5    |
| 86.4   | 84.9   | 30.0   | 32.3   | 107.3  | 62.6   | 233.2   | 201.4  | 188.4  |
| 27.4   | 29.7   | 20.3   | 14.4   | 31.5   | 16.7   | 73.3    | 64.8   | 70.5   |
| 1.8    | 9.8    | 0.2    | 0.3    | 1.9    | 2.1    | 22.6    | 30.4   | 35.4   |
| 12.4   | 17.5   | 23.8   | 26.2   | 33.0   | 2.6    | 74.9    | 50.6   | 49.3   |
| 17.6   | 21.9   | 9.4    | 10.9   | 24.8   | 12.9   | 94.2    | 55.9   | 52.2   |
| 11.5   | 4.1    | 19.5   | 19.9   | 12.1   | 8.3    | 221.8   | 143.2  | 171.3  |
| 86.9   | 143.4  | 38.4   | 73.9   | 174.1  | 86.8   | 757.7   | 606.7  | 666.6  |
| 37.0   | 54.1   | 10.0   | 9.8    | 76.2   | 46.6   | 35.2    | 28.3   | 32.7   |
| 35.3   | 32.3   | 9.5    | 10.1   | 38.5   | 19.1   | 33.6    | 18.6   | 27.0   |
| 0.6    | 0.1    | 0.6    | 0.4    | 0.4    | 0.2    | 3.6     | 1.1    | 2.0    |
| 11.8   | 17.3   | 39.5   | 42.2   | 2.4    | 20.1   | 63.2    | 59.4   | 59.2   |
| 11.0   | 4.3    | 11.7   | 21.5   | 1.2    | 7.5    | 14.2    | 7.4    | 10.6   |
| 13.6   | 14.8   | 20.6   | 18.3   | 22.6   | 13.6   | 22.6    | 27.4   | 17.9   |
| 26.7   | 36.0   | 19.1   | 15.0   | 31.0   | 18.3   | 33.1    | 27.2   | 33.5   |
| 203.6  | 217.4  | 2.5    | 7.1    | 263.1  | 210.7  | 1374.1  | 1234.7 | 1407.7 |
| 0.6    | 0.7    | 3.2    | 2.5    | 1.0    | 1.1    | 0.9     | 1.3    | 4.2    |
| 10.8   | 16.1   | 3.2    | 3.1    | 16.7   | 16.2   | 23.8    | 18.9   | 17.8   |
| 16.7   | 3.3    | 7.9    | 1.1    | 11.4   | 12.9   | 6.0     | 6.5    | 9.9    |
| 0.6    | 0.5    | 1.5    | 0.8    | 0.7    | 2.9    | 1.6     | 0.9    | 1.3    |

|       |       |       |       |       |       |       |       |       |
|-------|-------|-------|-------|-------|-------|-------|-------|-------|
| 1.7   | 4.9   | 0.6   | 1.1   | 10.2  | 2.2   | 7.7   | 1.1   | 1.7   |
| 1.4   | 3.5   | 1.7   | 3.7   | 1.3   | 1.2   | 1.1   | 1.3   | 2.2   |
| 29.2  | 16.6  | 32.2  | 65.1  | 20.3  | 8.4   | 29.2  | 33.0  | 26.1  |
| 13.2  | 3.2   | 8.3   | 6.8   | 9.0   | 15.2  | 13.3  | 9.0   | 11.9  |
| 4.8   | 1.8   | 2.3   | 8.9   | 2.8   | 4.2   | 5.5   | 3.0   | 3.8   |
| 0.6   | 1.6   | 0.7   | 0.7   | 1.3   | 1.8   | 1.7   | 1.1   | 1.1   |
| 3.5   | 7.4   | 1.1   | 4.3   | 2.4   | 1.5   | 1.5   | 5.7   | 4.8   |
| 9.7   | 21.3  | 53.6  | 60.1  | 12.6  | 11.8  | 6.8   | 17.7  | 11.1  |
| 1.3   | 2.1   | 2.2   | 2.8   | 3.3   | 1.6   | 2.8   | 1.3   | 2.8   |
| 4.1   | 5.9   | 26.7  | 11.4  | 5.4   | 7.2   | 11.5  | 9.7   | 11.0  |
| 31.9  | 37.8  | 63.9  | 62.2  | 49.2  | 16.2  | 48.4  | 67.7  | 75.6  |
| 120.2 | 131.9 | 104.2 | 131.7 | 164.0 | 127.5 | 160.4 | 111.6 | 126.0 |
| 176.8 | 210.3 | 167.8 | 195.4 | 214.4 | 252.1 | 292.3 | 205.2 | 221.7 |
| 15.5  | 23.9  | 20.9  | 18.9  | 22.1  | 17.9  | 40.5  | 49.7  | 54.1  |
| 11.4  | 14.9  | 6.5   | 9.7   | 3.3   | 0.6   | 24.7  | 13.8  | 3.4   |
| 5.6   | 10.2  | 1.8   | 1.5   | 3.7   | 0.6   | 10.1  | 15.4  | 12.1  |
| 0.4   | 2.8   | 0.5   | 0.5   | 9.7   | 0.2   | 4.3   | 0.6   | 4.0   |
| 2.7   | 5.0   | 2.3   | 1.8   | 6.7   | 2.1   | 8.6   | 16.1  | 7.6   |
| 53.8  | 71.1  | 9.2   | 1.7   | 57.0  | 61.5  | 51.8  | 45.3  | 69.4  |
| 17.3  | 28.0  | 0.2   | 0.3   | 35.2  | 32.8  | 3.6   | 2.8   | 2.9   |
| 32.3  | 17.8  | 18.2  | 28.8  | 12.9  | 30.9  | 41.6  | 37.7  | 60.0  |
| 8.9   | 1.1   | 8.4   | 9.2   | 11.0  | 0.4   | 105.8 | 166.4 | 166.2 |
| 1.7   | 12.1  | 2.2   | 10.6  | 1.3   | 3.0   | 10.3  | 5.3   | 20.0  |
| 78.0  | 53.9  | 10.8  | 17.3  | 103.5 | 72.6  | 12.7  | 11.4  | 12.0  |
| 2.9   | 0.4   | 0.4   | 5.5   | 3.6   | 3.4   | 5.4   | 2.9   | 6.6   |
| 0.8   | 1.0   | 0.8   | 1.1   | 9.1   | 0.7   | 1.7   | 1.2   | 1.5   |
| 1.8   | 1.3   | 5.1   | 0.8   | 13.7  | 2.2   | 16.4  | 5.7   | 5.5   |
| 12.7  | 11.4  | 1.6   | 6.2   | 24.4  | 6.3   | 13.7  | 19.5  | 17.7  |
| 3.9   | 9.1   | 3.3   | 8.6   | 0.7   | 0.9   | 4.3   | 1.6   | 3.9   |
| 1.4   | 2.1   | 0.7   | 1.6   | 6.6   | 9.0   | 2.2   | 2.2   | 4.4   |
| 16.1  | 13.9  | 7.3   | 11.2  | 27.1  | 42.2  | 9.1   | 5.9   | 6.1   |
| 4.7   | 5.0   | 4.8   | 6.7   | 5.2   | 6.7   | 3.3   | 3.4   | 3.8   |
| 120.8 | 125.6 | 231.7 | 395.6 | 177.2 | 83.0  | 982.4 | 887.4 | 930.7 |
| 237.9 | 379.7 | 19.6  | 42.0  | 419.2 | 340.8 | 159.2 | 160.9 | 161.7 |
| 2.4   | 9.5   | 62.3  | 84.7  | 11.8  | 2.8   | 10.3  | 10.0  | 6.7   |
| 139.1 | 126.6 | 19.8  | 21.6  | 181.0 | 102.9 | 134.5 | 73.7  | 72.8  |
| 1.1   | 3.5   | 3.0   | 20.5  | 1.6   | 1.6   | 28.3  | 10.5  | 10.0  |
| 5.0   | 11.7  | 7.9   | 30.5  | 3.6   | 2.9   | 47.8  | 36.6  | 37.6  |
| 13.5  | 28.8  | 3.7   | 1.7   | 5.0   | 32.9  | 11.2  | 3.0   | 2.6   |
| 26.6  | 16.8  | 21.6  | 20.7  | 14.1  | 23.0  | 13.8  | 17.0  | 9.1   |
| 8.8   | 8.6   | 70.7  | 88.4  | 7.6   | 3.7   | 10.9  | 13.7  | 10.5  |
| 0.7   | 1.2   | 5.3   | 0.5   | 0.7   | 0.9   | 1.4   | 1.6   | 0.8   |
| 0.7   | 0.5   | 1.2   | 0.8   | 1.1   | 0.8   | 1.0   | 1.0   | 1.2   |
| 1.8   | 1.1   | 1.2   | 1.2   | 1.4   | 1.8   | 2.4   | 2.6   | 5.9   |
| 1.1   | 7.7   | 1.0   | 3.7   | 5.7   | 3.4   | 1.0   | 3.7   | 4.8   |
| 2.8   | 0.3   | 3.0   | 7.5   | 0.4   | 0.5   | 33.9  | 41.4  | 47.9  |
| 253.8 | 349.1 | 57.8  | 96.1  | 373.6 | 310.6 | 722.7 | 526.9 | 553.6 |
| 2.9   | 6.2   | 4.8   | 2.7   | 7.5   | 10.0  | 10.7  | 3.1   | 4.5   |
| 92.0  | 105.1 | 58.4  | 80.7  | 129.7 | 121.3 | 217.1 | 168.8 | 216.3 |
| 5.0   | 21.9  | 6.2   | 3.7   | 33.3  | 20.5  | 1.4   | 2.4   | 2.0   |
| 3.1   | 2.2   | 6.5   | 6.5   | 9.0   | 4.0   | 6.7   | 13.0  | 1.5   |
| 5.4   | 0.8   | 9.4   | 0.3   | 2.1   | 0.5   | 2.0   | 3.5   | 1.3   |
| 9.5   | 2.1   | 8.9   | 10.9  | 4.9   | 6.0   | 1.7   | 3.4   | 3.7   |

|        |        |       |       |        |        |        |        |        |
|--------|--------|-------|-------|--------|--------|--------|--------|--------|
| 8.4    | 6.3    | 10.4  | 3.5   | 7.8    | 4.7    | 14.5   | 6.1    | 9.6    |
| 107.1  | 119.6  | 73.0  | 104.6 | 124.7  | 74.2   | 273.3  | 265.1  | 238.9  |
| 1076.5 | 1430.8 | 129.9 | 141.8 | 1486.5 | 837.2  | 687.9  | 426.8  | 635.8  |
| 0.4    | 4.2    | 0.3   | 3.4   | 0.3    | 2.7    | 4.0    | 1.9    | 0.1    |
| 2.1    | 4.3    | 111.3 | 164.9 | 7.7    | 4.3    | 930.7  | 838.5  | 995.7  |
| 27.9   | 20.6   | 3.5   | 1.1   | 60.8   | 18.2   | 13.2   | 17.8   | 22.2   |
| 0.1    | 0.6    | 0.2   | 5.5   | 2.2    | 7.2    | 4.0    | 8.0    | 4.2    |
| 76.6   | 119.0  | 1.2   | 0.9   | 117.3  | 147.4  | 1086.6 | 906.9  | 1048.4 |
| 24.1   | 3.8    | 21.8  | 4.9   | 20.9   | 14.2   | 13.3   | 9.3    | 14.1   |
| 1.8    | 1.5    | 1.9   | 1.0   | 2.5    | 1.1    | 4.5    | 6.1    | 3.0    |
| 93.9   | 138.5  | 107.6 | 183.4 | 134.0  | 87.7   | 302.0  | 243.5  | 276.0  |
| 4.5    | 5.3    | 0.2   | 1.8   | 1.0    | 0.9    | 1.5    | 2.2    | 0.2    |
| 8.0    | 5.8    | 3.6   | 2.0   | 12.4   | 7.2    | 12.3   | 8.1    | 4.0    |
| 15.8   | 12.0   | 6.0   | 10.9  | 16.9   | 7.2    | 17.6   | 16.1   | 7.1    |
| 28.0   | 17.3   | 33.2  | 13.9  | 25.3   | 17.1   | 31.3   | 34.4   | 22.1   |
| 1.3    | 3.6    | 2.6   | 2.2   | 2.4    | 3.3    | 3.6    | 7.2    | 2.8    |
| 11.1   | 11.3   | 2.6   | 4.4   | 14.0   | 4.1    | 19.6   | 10.8   | 7.7    |
| 0.9    | 1.6    | 2.3   | 2.8   | 8.3    | 2.0    | 3.0    | 4.6    | 8.6    |
| 3.5    | 1.2    | 4.3   | 3.7   | 1.1    | 1.6    | 10.8   | 16.9   | 16.7   |
| 102.9  | 135.9  | 98.1  | 117.6 | 116.6  | 95.4   | 172.7  | 149.7  | 169.6  |
| 15.6   | 13.5   | 8.0   | 3.5   | 11.4   | 13.1   | 15.9   | 9.9    | 2.1    |
| 0.4    | 3.4    | 0.9   | 0.8   | 1.0    | 0.3    | 5.9    | 3.0    | 0.7    |
| 42.3   | 20.1   | 9.6   | 23.1  | 55.7   | 35.8   | 66.3   | 31.4   | 58.9   |
| 3.4    | 11.9   | 12.6  | 2.7   | 2.3    | 11.7   | 30.0   | 24.4   | 37.9   |
| 15.4   | 3.5    | 13.7  | 4.1   | 22.8   | 0.9    | 33.9   | 22.3   | 36.3   |
| 6.7    | 5.3    | 12.6  | 10.3  | 3.5    | 0.8    | 450.9  | 691.6  | 805.5  |
| 924.3  | 1537.8 | 258.2 | 281.5 | 1772.2 | 1501.9 | 3294.8 | 3245.9 | 3241.6 |
| 1.3    | 1.2    | 1.5   | 0.8   | 1.3    | 1.0    | 1.8    | 1.8    | 2.0    |
| 1.1    | 1.9    | 0.1   | 0.1   | 0.9    | 0.3    | 3.4    | 2.0    | 3.0    |
| 6.0    | 6.7    | 2.2   | 0.7   | 3.2    | 11.1   | 8.9    | 12.3   | 5.4    |
| 13.3   | 17.8   | 16.7  | 7.6   | 12.8   | 14.4   | 1.6    | 18.3   | 10.1   |
| 3.9    | 4.8    | 10.2  | 7.8   | 2.3    | 17.8   | 7.9    | 8.1    | 2.5    |
| 0.5    | 0.9    | 0.6   | 0.9   | 0.6    | 0.5    | 1.2    | 0.7    | 0.7    |
| 1.4    | 3.5    | 3.2   | 5.2   | 0.4    | 0.6    | 1.6    | 0.6    | 0.9    |
| 2.0    | 2.1    | 9.8   | 5.6   | 1.6    | 4.8    | 13.8   | 11.8   | 5.5    |
| 1.1    | 1.6    | 14.0  | 5.1   | 1.5    | 6.0    | 2.8    | 7.6    | 2.4    |
| 15.6   | 1.9    | 3.9   | 2.0   | 1.5    | 2.1    | 11.2   | 10.5   | 1.9    |
| 1.5    | 1.1    | 0.7   | 4.3   | 0.7    | 4.1    | 3.2    | 6.4    | 3.7    |
| 10.0   | 19.7   | 2.6   | 19.0  | 2.3    | 1.4    | 24.1   | 17.8   | 16.8   |
| 2.5    | 1.3    | 3.0   | 6.7   | 2.2    | 7.5    | 3.8    | 4.2    | 3.0    |
| 10.1   | 3.3    | 1.3   | 4.1   | 4.3    | 0.6    | 5.1    | 0.8    | 1.6    |
| 27.3   | 38.4   | 7.0   | 6.7   | 37.2   | 30.8   | 42.0   | 30.1   | 27.5   |
| 2.4    | 1.1    | 2.4   | 1.0   | 1.7    | 1.6    | 1.9    | 6.0    | 1.9    |
| 131.0  | 137.5  | 291.4 | 271.7 | 219.1  | 100.4  | 127.3  | 284.6  | 295.1  |
| 5.4    | 2.4    | 27.7  | 19.7  | 9.9    | 12.1   | 7.3    | 8.7    | 17.2   |
| 2.7    | 2.5    | 2.3   | 1.1   | 5.0    | 32.1   | 21.3   | 16.4   | 13.9   |
| 34.3   | 38.3   | 57.3  | 51.2  | 55.3   | 17.7   | 72.4   | 85.2   | 77.9   |
| 1.1    | 5.3    | 3.4   | 10.2  | 8.4    | 10.2   | 0.7    | 3.5    | 1.6    |
| 162.0  | 161.7  | 177.8 | 174.5 | 198.2  | 160.3  | 1278.9 | 1379.7 | 1441.4 |
| 1.0    | 1.6    | 4.2   | 1.0   | 2.7    | 1.4    | 9.9    | 4.7    | 8.9    |
| 4.0    | 17.1   | 9.5   | 3.1   | 14.1   | 7.4    | 17.3   | 9.7    | 2.9    |
| 1.2    | 16.9   | 1.8   | 9.2   | 1.3    | 26.0   | 15.0   | 17.5   | 9.7    |
| 89.8   | 117.2  | 26.9  | 22.5  | 121.8  | 88.2   | 237.9  | 147.4  | 162.5  |

|        |        |       |        |        |        |        |        |        |
|--------|--------|-------|--------|--------|--------|--------|--------|--------|
| 3.3    | 7.5    | 0.3   | 1.0    | 10.6   | 10.2   | 6.4    | 4.2    | 6.1    |
| 2.8    | 15.1   | 10.5  | 1.5    | 4.4    | 1.7    | 5.9    | 14.5   | 13.3   |
| 1.7    | 4.1    | 18.8  | 3.3    | 2.2    | 2.5    | 6.3    | 12.2   | 7.3    |
| 5.8    | 3.6    | 3.4   | 3.4    | 20.5   | 7.0    | 71.9   | 78.3   | 93.2   |
| 12.5   | 9.7    | 0.7   | 0.3    | 3.2    | 3.6    | 5.0    | 2.2    | 6.6    |
| 1.0    | 2.1    | 1.2   | 0.7    | 10.2   | 0.9    | 1.8    | 1.2    | 2.0    |
| 13.7   | 18.7   | 11.7  | 11.0   | 31.4   | 16.7   | 39.3   | 41.2   | 30.6   |
| 2.0    | 2.7    | 1.4   | 1.2    | 2.4    | 1.9    | 4.3    | 2.2    | 5.2    |
| 6.9    | 16.3   | 15.6  | 9.9    | 15.1   | 1.1    | 15.4   | 20.3   | 19.7   |
| 23.9   | 16.5   | 7.9   | 4.8    | 13.2   | 9.4    | 4.6    | 1.6    | 4.2    |
| 1.9    | 2.8    | 6.3   | 0.6    | 2.6    | 2.5    | 7.3    | 9.2    | 11.0   |
| 12.4   | 24.8   | 3.9   | 12.5   | 3.4    | 4.1    | 9.9    | 9.5    | 11.0   |
| 10.9   | 13.9   | 0.5   | 5.1    | 31.8   | 2.3    | 6.8    | 1.9    | 2.9    |
| 4.0    | 0.4    | 4.3   | 1.6    | 2.9    | 3.4    | 3.6    | 2.6    | 3.5    |
| 127.7  | 169.6  | 117.9 | 87.0   | 149.8  | 147.0  | 320.6  | 322.0  | 374.1  |
| 26.6   | 29.5   | 32.0  | 12.5   | 26.7   | 7.7    | 19.3   | 10.7   | 20.3   |
| 5.1    | 2.8    | 16.7  | 12.3   | 14.1   | 5.7    | 17.9   | 4.1    | 2.4    |
| 4.5    | 10.3   | 11.9  | 3.6    | 2.9    | 1.4    | 3.0    | 4.1    | 3.3    |
| 4.2    | 22.0   | 6.0   | 25.0   | 26.1   | 13.5   | 14.1   | 9.0    | 3.1    |
| 3.5    | 16.9   | 17.6  | 6.1    | 10.3   | 5.8    | 8.6    | 4.1    | 2.1    |
| 26.8   | 5.1    | 4.9   | 28.5   | 4.8    | 3.8    | 4.9    | 9.7    | 3.9    |
| 1.8    | 1.8    | 96.1  | 151.2  | 1.7    | 0.9    | 213.9  | 110.6  | 169.0  |
| 1.3    | 1.8    | 6.8   | 1.1    | 2.3    | 2.6    | 7.8    | 4.8    | 6.1    |
| 5.8    | 0.3    | 1.1   | 1.2    | 0.8    | 1.3    | 1.1    | 0.7    | 3.7    |
| 333.9  | 437.9  | 238.9 | 309.5  | 518.2  | 332.8  | 611.7  | 799.6  | 903.6  |
| 43.4   | 85.1   | 18.7  | 8.2    | 124.4  | 85.2   | 116.7  | 93.4   | 87.1   |
| 2.3    | 11.9   | 9.0   | 7.1    | 4.6    | 6.7    | 13.9   | 7.7    | 10.7   |
| 10.3   | 8.4    | 2.3   | 7.1    | 5.0    | 2.7    | 3.8    | 6.6    | 5.0    |
| 22.6   | 7.6    | 15.0  | 13.9   | 6.1    | 12.7   | 10.1   | 9.0    | 12.0   |
| 7.7    | 9.6    | 6.9   | 6.5    | 5.6    | 21.9   | 18.5   | 17.4   | 14.3   |
| 50.2   | 42.2   | 24.4  | 24.9   | 58.0   | 45.9   | 51.1   | 41.8   | 59.7   |
| 54.9   | 69.3   | 70.2  | 108.1  | 82.3   | 61.3   | 253.1  | 225.6  | 242.0  |
| 54.4   | 42.3   | 60.4  | 41.0   | 89.8   | 65.0   | 83.5   | 94.2   | 69.9   |
| 7.3    | 6.0    | 1.2   | 2.0    | 2.5    | 5.1    | 3.9    | 2.4    | 2.4    |
| 13.4   | 11.1   | 31.8  | 19.7   | 3.5    | 18.4   | 36.2   | 35.9   | 32.3   |
| 21.6   | 21.5   | 52.7  | 63.2   | 35.3   | 17.4   | 235.3  | 193.0  | 192.0  |
| 61.9   | 69.7   | 28.4  | 33.3   | 84.0   | 73.4   | 89.2   | 85.0   | 102.1  |
| 245.7  | 343.9  | 65.0  | 79.7   | 382.7  | 396.7  | 748.7  | 836.6  | 892.6  |
| 88.5   | 98.7   | 8.9   | 22.7   | 132.3  | 47.1   | 82.2   | 48.3   | 63.5   |
| 1.4    | 12.0   | 161.5 | 327.1  | 23.7   | 9.3    | 348.8  | 228.4  | 315.5  |
| 4.6    | 26.5   | 31.5  | 39.3   | 9.4    | 9.8    | 34.0   | 31.5   | 40.5   |
| 22.7   | 23.4   | 12.8  | 13.8   | 35.2   | 51.1   | 35.1   | 54.2   | 44.8   |
| 21.3   | 22.3   | 13.1  | 4.4    | 31.5   | 20.2   | 12.9   | 11.4   | 11.4   |
| 12.1   | 3.5    | 8.6   | 10.3   | 10.8   | 2.7    | 11.5   | 10.5   | 11.3   |
| 5.8    | 1.0    | 1.5   | 5.7    | 0.5    | 8.5    | 4.3    | 6.1    | 0.4    |
| 0.8    | 8.8    | 0.7   | 0.7    | 4.9    | 2.7    | 3.8    | 2.9    | 0.5    |
| 3.0    | 14.3   | 10.9  | 14.6   | 4.5    | 3.0    | 10.2   | 10.7   | 7.4    |
| 0.9    | 0.9    | 0.8   | 0.4    | 6.5    | 9.7    | 13.8   | 17.8   | 21.9   |
| 7.8    | 16.9   | 14.4  | 7.9    | 7.6    | 16.8   | 3.2    | 13.9   | 8.7    |
| 1349.9 | 1516.1 | 650.9 | 1201.5 | 1682.0 | 1303.0 | 2883.6 | 2204.0 | 2413.0 |
| 894.0  | 1016.4 | 549.7 | 952.2  | 1141.3 | 975.7  | 2983.2 | 2116.3 | 2263.4 |
| 20.2   | 22.7   | 0.6   | 2.9    | 42.0   | 12.6   | 40.3   | 44.8   | 63.1   |
| 4.2    | 4.7    | 2.1   | 0.9    | 0.5    | 1.3    | 0.8    | 1.1    | 0.6    |

|        |        |        |        |        |        |        |        |        |
|--------|--------|--------|--------|--------|--------|--------|--------|--------|
| 6.5    | 2.7    | 2.1    | 1.7    | 2.1    | 6.6    | 17.1   | 7.0    | 5.3    |
| 1114.9 | 1202.0 | 232.7  | 429.4  | 1705.2 | 1340.5 | 1475.4 | 1264.7 | 1388.8 |
| 11.4   | 9.5    | 9.7    | 4.4    | 22.6   | 1.8    | 12.2   | 7.8    | 5.4    |
| 80.4   | 101.9  | 136.0  | 152.0  | 114.6  | 60.1   | 79.2   | 72.0   | 99.2   |
| 2.2    | 16.0   | 12.6   | 13.3   | 6.7    | 14.9   | 26.7   | 24.6   | 14.5   |
| 10.0   | 26.8   | 2.0    | 12.5   | 33.0   | 32.5   | 40.2   | 30.2   | 18.7   |
| 36.2   | 46.4   | 3.0    | 2.7    | 62.8   | 54.1   | 49.6   | 74.0   | 80.4   |
| 136.9  | 100.3  | 118.5  | 153.1  | 145.9  | 70.8   | 647.9  | 1157.1 | 1374.1 |
| 813.8  | 1189.0 | 152.8  | 185.1  | 978.0  | 1048.9 | 1080.1 | 885.2  | 979.6  |
| 5.6    | 1.6    | 2.5    | 1.5    | 9.0    | 10.9   | 5.2    | 2.7    | 6.2    |
| 17.1   | 1.9    | 11.7   | 2.4    | 8.5    | 13.1   | 16.8   | 15.6   | 13.8   |
| 46.5   | 71.4   | 35.9   | 32.0   | 77.9   | 69.8   | 162.7  | 151.7  | 173.6  |
| 37.2   | 31.4   | 29.3   | 16.8   | 38.2   | 30.8   | 21.2   | 22.7   | 20.7   |
| 7340.4 | 8020.9 | 4515.3 | 4953.5 | 8231.1 | 6778.8 | 9757.2 | 9937.8 | 9918.5 |
| 489.4  | 542.6  | 157.7  | 211.0  | 723.0  | 532.5  | 771.0  | 599.2  | 616.4  |
| 0.7    | 0.3    | 3.1    | 4.5    | 4.2    | 6.2    | 5.7    | 6.1    | 4.9    |
| 49.1   | 31.6   | 59.8   | 127.2  | 59.3   | 30.0   | 175.4  | 130.9  | 169.2  |
| 32.6   | 50.1   | 110.5  | 163.9  | 50.8   | 20.2   | 329.5  | 315.9  | 337.3  |
| 3.2    | 1.0    | 1.7    | 2.2    | 1.4    | 2.4    | 7.5    | 16.4   | 11.9   |
| 10.0   | 9.9    | 8.0    | 7.4    | 9.5    | 3.5    | 14.3   | 10.8   | 6.6    |
| 8.8    | 2.3    | 0.6    | 8.9    | 2.1    | 12.6   | 5.5    | 8.0    | 1.9    |
| 29.3   | 21.3   | 58.1   | 15.4   | 16.3   | 16.4   | 25.8   | 6.2    | 30.6   |
| 14.4   | 10.2   | 22.0   | 11.3   | 10.3   | 15.9   | 23.7   | 19.6   | 16.3   |
| 0.7    | 0.4    | 0.6    | 0.6    | 0.9    | 0.9    | 0.7    | 3.7    | 1.0    |
| 4.0    | 1.1    | 2.6    | 0.3    | 4.1    | 1.8    | 1.6    | 3.9    | 0.7    |
| 4.3    | 0.9    | 0.9    | 0.4    | 6.8    | 2.6    | 3.2    | 2.3    | 0.7    |
| 5.8    | 0.7    | 1.6    | 1.4    | 1.1    | 2.8    | 6.6    | 2.3    | 2.9    |
| 21.3   | 8.7    | 3.2    | 8.9    | 10.4   | 24.0   | 10.7   | 5.0    | 1.3    |
| 1.3    | 1.9    | 1.0    | 0.6    | 1.2    | 1.2    | 1.6    | 1.0    | 1.0    |
| 10.3   | 0.7    | 1.4    | 4.9    | 1.8    | 4.5    | 1.5    | 1.9    | 1.9    |
| 134.9  | 136.8  | 35.4   | 33.3   | 142.3  | 130.1  | 93.6   | 183.1  | 206.1  |
| 88.9   | 117.9  | 19.1   | 21.6   | 111.5  | 62.5   | 100.1  | 155.6  | 169.5  |
| 416.3  | 381.7  | 712.3  | 1049.1 | 626.2  | 402.4  | 1604.2 | 1097.9 | 1120.2 |
| 7.2    | 1.5    | 3.5    | 7.9    | 7.8    | 1.3    | 3.9    | 3.8    | 6.1    |
| 38.9   | 44.2   | 21.9   | 19.8   | 31.3   | 41.6   | 29.7   | 29.1   | 30.1   |
| 2.0    | 11.2   | 0.8    | 2.1    | 7.0    | 2.5    | 2.4    | 6.6    | 2.7    |
| 20.9   | 54.4   | 7.9    | 2.9    | 29.3   | 28.9   | 58.1   | 42.2   | 48.4   |
| 0.3    | 7.0    | 1.7    | 0.4    | 3.5    | 0.8    | 3.4    | 0.8    | 2.5    |
| 106.4  | 97.6   | 80.1   | 118.5  | 186.0  | 88.6   | 307.5  | 439.6  | 369.5  |
| 19.7   | 15.5   | 4.4    | 8.3    | 15.3   | 25.2   | 46.4   | 54.9   | 57.0   |
| 24.9   | 29.1   | 9.3    | 7.5    | 21.8   | 20.8   | 73.9   | 99.7   | 110.5  |
| 17.1   | 16.9   | 16.5   | 9.7    | 32.1   | 28.0   | 83.5   | 82.9   | 86.8   |
| 28.4   | 38.2   | 10.2   | 0.9    | 44.0   | 28.7   | 105.2  | 141.3  | 130.9  |
| 32.4   | 32.0   | 5.6    | 5.2    | 21.4   | 32.4   | 116.7  | 168.3  | 191.5  |
| 12.0   | 11.6   | 3.2    | 2.2    | 2.4    | 1.9    | 23.3   | 43.1   | 38.0   |
| 33.9   | 20.0   | 3.3    | 17.9   | 25.0   | 18.9   | 61.6   | 84.8   | 87.1   |
| 8.3    | 12.4   | 5.9    | 18.4   | 0.8    | 2.3    | 25.8   | 16.0   | 16.6   |
| 6.6    | 8.2    | 9.8    | 5.5    | 2.2    | 12.1   | 7.6    | 1.0    | 6.1    |
| 9.0    | 6.1    | 1.6    | 6.4    | 6.4    | 4.9    | 5.1    | 12.2   | 3.6    |
| 137.1  | 192.9  | 95.7   | 103.3  | 241.1  | 151.8  | 529.9  | 261.3  | 285.6  |
| 0.2    | 4.6    | 0.4    | 3.7    | 0.7    | 3.9    | 0.4    | 0.6    | 2.7    |
| 0.9    | 13.4   | 12.6   | 8.2    | 11.4   | 10.1   | 4.0    | 12.5   | 10.9   |
| 115.2  | 78.8   | 6.6    | 12.1   | 263.9  | 87.1   | 8.1    | 10.4   | 7.9    |

|        |        |        |        |        |        |         |        |         |
|--------|--------|--------|--------|--------|--------|---------|--------|---------|
| 17.5   | 11.1   | 1.2    | 0.3    | 10.2   | 9.8    | 3.6     | 6.3    | 2.0     |
| 42.6   | 29.4   | 47.2   | 40.3   | 35.0   | 24.1   | 83.8    | 93.4   | 108.3   |
| 43.1   | 76.4   | 0.4    | 2.7    | 98.2   | 102.4  | 2.1     | 1.4    | 1.6     |
| 4785.0 | 5381.8 | 3000.3 | 3914.2 | 5542.2 | 4960.1 | 7243.8  | 7142.6 | 7132.3  |
| 1.3    | 2.9    | 3.7    | 7.7    | 5.1    | 3.1    | 17.4    | 25.8   | 28.7    |
| 1.7    | 6.3    | 3.5    | 0.9    | 1.5    | 3.8    | 11.7    | 25.6   | 33.6    |
| 13.0   | 16.0   | 8.3    | 7.7    | 1.0    | 1.9    | 9.1     | 10.3   | 6.4     |
| 1.2    | 1.7    | 12.1   | 5.8    | 3.4    | 1.9    | 3.8     | 6.9    | 4.4     |
| 0.5    | 1.1    | 0.5    | 0.5    | 5.6    | 1.3    | 2.1     | 1.0    | 0.7     |
| 30.2   | 42.1   | 238.7  | 244.7  | 40.7   | 47.1   | 159.5   | 294.0  | 268.1   |
| 1.9    | 1.1    | 0.5    | 1.8    | 8.8    | 1.0    | 1.3     | 3.6    | 0.9     |
| 13.9   | 21.2   | 4.4    | 2.9    | 20.4   | 15.9   | 76.9    | 93.5   | 94.7    |
| 20.7   | 33.7   | 22.4   | 8.7    | 23.6   | 29.6   | 98.7    | 93.2   | 104.5   |
| 20.7   | 39.7   | 16.3   | 15.0   | 26.9   | 36.6   | 111.3   | 116.3  | 121.4   |
| 1.0    | 1.3    | 11.0   | 1.5    | 2.8    | 1.8    | 3.9     | 9.1    | 8.9     |
| 75.2   | 127.1  | 182.9  | 312.4  | 140.2  | 116.0  | 460.2   | 407.3  | 465.0   |
| 8.3    | 4.5    | 16.6   | 7.8    | 1.3    | 9.4    | 19.0    | 14.7   | 16.5    |
| 4.1    | 1.3    | 2.1    | 2.4    | 2.8    | 1.1    | 25.5    | 26.9   | 24.1    |
| 3.1    | 1.2    | 3.4    | 2.6    | 0.3    | 0.7    | 3.9     | 3.2    | 4.1     |
| 5.1    | 2.1    | 5.8    | 7.8    | 6.9    | 12.1   | 12.1    | 8.4    | 12.1    |
| 7.5    | 0.6    | 2.0    | 10.1   | 1.1    | 3.1    | 169.1   | 77.9   | 92.8    |
| 14.5   | 14.2   | 18.1   | 16.3   | 15.2   | 8.3    | 26.9    | 28.3   | 29.0    |
| 1.4    | 0.9    | 0.4    | 0.7    | 3.9    | 1.5    | 0.8     | 1.1    | 0.6     |
| 139.9  | 181.9  | 23.5   | 13.2   | 261.3  | 115.9  | 924.7   | 1482.7 | 1637.1  |
| 40.2   | 46.3   | 4.2    | 0.4    | 109.4  | 41.3   | 542.0   | 902.4  | 1058.6  |
| 80.6   | 106.7  | 1.7    | 1.5    | 156.1  | 83.8   | 699.0   | 1164.4 | 1389.6  |
| 3.8    | 6.6    | 3.7    | 6.0    | 3.7    | 0.4    | 8.5     | 6.0    | 2.6     |
| 31.3   | 41.6   | 49.1   | 66.6   | 65.0   | 33.3   | 171.5   | 185.8  | 221.7   |
| 0.9    | 10.1   | 5.2    | 1.8    | 1.5    | 1.1    | 12.1    | 4.1    | 5.3     |
| 47.7   | 32.7   | 0.8    | 0.7    | 208.5  | 60.9   | 594.6   | 195.4  | 241.3   |
| 67.5   | 87.6   | 54.1   | 73.4   | 97.5   | 81.7   | 178.7   | 200.8  | 275.7   |
| 15.1   | 14.0   | 7.2    | 8.2    | 23.0   | 16.0   | 22.7    | 20.0   | 24.3    |
| 621.2  | 898.9  | 378.1  | 516.4  | 914.0  | 764.5  | 1156.0  | 828.0  | 931.5   |
| 114.1  | 180.2  | 55.6   | 56.9   | 167.1  | 154.6  | 728.9   | 388.1  | 486.6   |
| 0.9    | 1.5    | 1.3    | 0.8    | 1.4    | 1.0    | 2.7     | 2.4    | 4.3     |
| 8632.7 | 9384.3 | 5003.6 | 6108.9 | 9547.1 | 8570.9 | 10630.1 | 9893.6 | 10140.3 |
| 140.1  | 225.3  | 19.7   | 22.7   | 238.1  | 192.4  | 4.0     | 0.7    | 1.8     |
| 2.7    | 15.3   | 0.9    | 0.7    | 7.7    | 1.9    | 4.4     | 8.5    | 7.9     |
| 5.3    | 2.9    | 2.7    | 3.8    | 0.6    | 1.5    | 1.5     | 2.1    | 1.8     |
| 43.2   | 62.9   | 36.7   | 38.1   | 78.2   | 54.0   | 219.9   | 254.6  | 309.6   |
| 116.3  | 122.1  | 50.9   | 40.6   | 157.9  | 112.2  | 211.4   | 293.6  | 302.4   |
| 1.6    | 1.2    | 1.4    | 1.8    | 5.9    | 5.4    | 3.8     | 1.3    | 1.5     |
| 61.2   | 71.3   | 55.5   | 65.9   | 120.4  | 64.1   | 435.3   | 404.1  | 546.2   |
| 1.0    | 1.2    | 6.4    | 6.6    | 19.7   | 11.4   | 6.3     | 8.7    | 7.4     |
| 19.1   | 50.4   | 11.6   | 18.3   | 29.6   | 23.9   | 33.5    | 38.4   | 33.0    |
| 13.2   | 15.6   | 9.7    | 18.6   | 12.6   | 21.8   | 15.2    | 8.0    | 10.2    |
| 0.8    | 0.7    | 2.8    | 2.1    | 1.1    | 0.6    | 2.3     | 3.4    | 1.9     |
| 0.5    | 1.3    | 2.3    | 0.9    | 6.7    | 0.4    | 0.4     | 1.2    | 0.5     |
| 19.2   | 25.1   | 63.4   | 90.6   | 24.6   | 31.7   | 70.1    | 69.6   | 70.8    |
| 37.6   | 25.0   | 101.8  | 206.3  | 45.5   | 25.9   | 168.4   | 135.3  | 165.7   |
| 16.1   | 10.2   | 16.5   | 4.2    | 12.3   | 16.1   | 19.9    | 24.7   | 19.8    |
| 10.7   | 12.7   | 12.5   | 9.3    | 5.1    | 13.9   | 21.9    | 16.0   | 16.8    |
| 7.9    | 1.6    | 2.6    | 2.1    | 6.8    | 10.7   | 3.7     | 5.7    | 12.9    |



|        |        |       |       |        |        |        |        |        |
|--------|--------|-------|-------|--------|--------|--------|--------|--------|
| 1.3    | 1.4    | 2.1   | 2.6   | 2.0    | 1.2    | 4.0    | 2.5    | 2.3    |
| 10.8   | 20.5   | 3.6   | 10.0  | 16.9   | 2.5    | 8.5    | 3.9    | 18.7   |
| 3.1    | 17.4   | 1.7   | 2.3   | 23.4   | 13.2   | 2.1    | 2.9    | 2.0    |
| 1.3    | 1.8    | 3.5   | 10.0  | 2.8    | 3.2    | 1.9    | 1.4    | 2.1    |
| 0.9    | 1.3    | 1.2   | 0.3   | 1.8    | 1.3    | 1.8    | 1.6    | 2.6    |
| 7.4    | 30.3   | 1.3   | 7.7   | 22.2   | 26.9   | 24.8   | 20.6   | 11.9   |
| 6.6    | 20.4   | 3.2   | 8.1   | 1.3    | 3.7    | 8.3    | 13.3   | 18.3   |
| 496.7  | 532.0  | 342.8 | 522.1 | 762.3  | 501.1  | 1684.9 | 1565.5 | 1836.0 |
| 12.9   | 0.7    | 51.0  | 28.3  | 32.9   | 21.6   | 28.8   | 28.6   | 3.3    |
| 34.0   | 40.3   | 61.2  | 78.0  | 37.9   | 54.3   | 70.1   | 55.8   | 56.7   |
| 6.5    | 15.5   | 6.1   | 9.7   | 14.6   | 17.4   | 21.1   | 26.0   | 24.8   |
| 4.7    | 2.7    | 5.8   | 3.5   | 18.7   | 3.5    | 13.4   | 7.0    | 6.8    |
| 0.9    | 1.1    | 2.3   | 2.9   | 6.5    | 2.0    | 1.4    | 11.6   | 1.8    |
| 0.7    | 7.8    | 1.0   | 1.4   | 0.7    | 0.5    | 1.1    | 2.6    | 0.4    |
| 1.5    | 1.7    | 0.8   | 0.4   | 3.2    | 1.8    | 2.4    | 6.2    | 2.1    |
| 3.3    | 25.7   | 3.9   | 2.6   | 7.8    | 9.2    | 7.4    | 3.7    | 7.8    |
| 60.8   | 66.2   | 52.8  | 64.3  | 83.4   | 70.7   | 93.5   | 87.3   | 109.1  |
| 176.8  | 202.4  | 111.1 | 127.5 | 281.2  | 255.4  | 227.4  | 235.6  | 255.7  |
| 1.6    | 3.9    | 7.2   | 1.1   | 3.6    | 1.4    | 61.3   | 50.4   | 46.7   |
| 8.2    | 1.1    | 26.1  | 45.9  | 5.7    | 0.7    | 5.4    | 3.2    | 5.8    |
| 4.8    | 0.8    | 7.5   | 3.4   | 4.7    | 9.3    | 8.9    | 5.6    | 7.1    |
| 307.1  | 328.9  | 48.9  | 73.3  | 474.7  | 366.4  | 993.2  | 1372.2 | 1354.4 |
| 0.6    | 10.7   | 16.4  | 20.1  | 2.1    | 0.4    | 9.9    | 15.1   | 8.7    |
| 9.8    | 6.1    | 5.8   | 4.2   | 10.9   | 15.3   | 19.6   | 16.3   | 16.5   |
| 29.7   | 44.0   | 61.1  | 96.5  | 53.1   | 31.5   | 108.4  | 117.7  | 108.2  |
| 0.2    | 0.4    | 0.4   | 0.2   | 0.2    | 4.0    | 2.5    | 1.4    | 2.2    |
| 0.5    | 6.7    | 2.3   | 2.6   | 1.8    | 1.4    | 14.2   | 8.9    | 6.0    |
| 69.3   | 61.5   | 33.9  | 61.8  | 140.6  | 69.9   | 13.6   | 11.3   | 13.8   |
| 8.7    | 10.7   | 1.6   | 2.4   | 13.2   | 1.9    | 9.1    | 15.2   | 4.6    |
| 33.5   | 32.7   | 9.0   | 26.3  | 56.0   | 18.4   | 31.4   | 18.8   | 27.3   |
| 129.8  | 118.6  | 40.2  | 67.5  | 184.0  | 115.5  | 113.2  | 49.1   | 42.3   |
| 60.0   | 70.9   | 107.4 | 106.3 | 111.2  | 62.0   | 85.9   | 95.7   | 118.1  |
| 123.5  | 99.7   | 2.0   | 5.5   | 157.6  | 82.5   | 22.1   | 47.8   | 39.8   |
| 1.5    | 10.4   | 1.0   | 6.8   | 0.9    | 1.6    | 13.1   | 12.7   | 22.3   |
| 8.8    | 1.2    | 1.0   | 3.6   | 14.7   | 1.2    | 0.9    | 5.7    | 5.2    |
| 0.2    | 0.5    | 1.4   | 0.7   | 1.8    | 4.2    | 0.7    | 1.0    | 0.5    |
| 1.0    | 0.7    | 1.4   | 1.1   | 0.7    | 0.8    | 2.6    | 1.2    | 1.5    |
| 41.1   | 37.8   | 13.4  | 7.8   | 17.7   | 50.5   | 74.2   | 33.7   | 35.5   |
| 10.8   | 26.2   | 11.8  | 13.0  | 44.6   | 23.9   | 37.6   | 43.0   | 36.6   |
| 18.7   | 15.3   | 7.6   | 11.1  | 19.3   | 13.7   | 16.7   | 33.5   | 18.9   |
| 16.9   | 4.9    | 0.8   | 2.8   | 27.9   | 8.2    | 30.0   | 26.6   | 24.7   |
| 34.3   | 37.7   | 20.1  | 14.9  | 43.3   | 46.7   | 113.5  | 80.4   | 109.3  |
| 461.3  | 912.6  | 89.5  | 72.8  | 661.4  | 755.9  | 660.2  | 723.4  | 794.6  |
| 2.2    | 13.0   | 16.1  | 1.6   | 7.1    | 24.3   | 5.7    | 15.6   | 3.5    |
| 0.8    | 7.8    | 0.5   | 3.7   | 3.0    | 1.3    | 22.4   | 21.2   | 23.3   |
| 0.8    | 1.7    | 5.2   | 1.8   | 0.9    | 2.7    | 1.7    | 1.9    | 1.2    |
| 11.8   | 2.6    | 0.8   | 4.7   | 5.3    | 6.4    | 9.0    | 6.1    | 4.3    |
| 335.9  | 320.6  | 106.3 | 126.1 | 375.2  | 233.7  | 683.4  | 183.8  | 197.1  |
| 1.8    | 3.6    | 2.2   | 0.4   | 3.4    | 0.5    | 12.3   | 10.5   | 3.9    |
| 1191.1 | 1775.9 | 192.7 | 223.5 | 1501.6 | 1991.5 | 1371.2 | 1263.8 | 1388.8 |
| 56.8   | 60.6   | 36.0  | 40.6  | 91.9   | 7.3    | 91.0   | 92.7   | 109.9  |
| 141.1  | 150.6  | 93.1  | 64.7  | 141.4  | 151.5  | 175.0  | 196.4  | 195.5  |
| 1.5    | 3.1    | 5.6   | 4.1   | 3.0    | 18.3   | 19.9   | 2.2    | 21.4   |

|        |        |        |        |        |        |        |        |        |
|--------|--------|--------|--------|--------|--------|--------|--------|--------|
| 5369.5 | 6757.9 | 256.7  | 291.7  | 4872.1 | 6143.6 | 1206.9 | 805.1  | 1260.5 |
| 1.4    | 2.7    | 3.8    | 7.9    | 6.4    | 10.5   | 8.8    | 7.5    | 15.5   |
| 73.3   | 137.4  | 110.9  | 146.1  | 218.2  | 89.3   | 82.3   | 188.0  | 199.5  |
| 1.1    | 0.4    | 2.7    | 2.8    | 1.1    | 1.7    | 4.2    | 3.2    | 2.6    |
| 20.9   | 4.6    | 11.2   | 7.8    | 13.5   | 9.8    | 16.8   | 16.2   | 13.2   |
| 2.8    | 1.7    | 2.9    | 0.9    | 1.6    | 3.1    | 2.1    | 3.0    | 3.4    |
| 13.0   | 2.2    | 1.7    | 5.9    | 1.8    | 1.9    | 1.5    | 8.8    | 5.5    |
| 9.3    | 5.0    | 6.6    | 6.9    | 5.4    | 7.3    | 9.7    | 9.3    | 6.9    |
| 83.5   | 93.8   | 31.2   | 36.5   | 116.6  | 124.1  | 678.2  | 679.6  | 759.0  |
| 99.7   | 193.7  | 44.2   | 29.8   | 168.3  | 201.8  | 367.6  | 457.8  | 498.0  |
| 3.0    | 0.3    | 4.7    | 6.9    | 7.5    | 0.6    | 2.7    | 0.8    | 0.9    |
| 11.5   | 14.9   | 18.2   | 39.7   | 17.4   | 4.3    | 4.1    | 8.9    | 11.0   |
| 22.2   | 16.1   | 2.1    | 1.1    | 25.5   | 10.1   | 55.2   | 52.9   | 40.5   |
| 7.9    | 15.4   | 2.7    | 4.8    | 3.9    | 10.2   | 4.4    | 15.0   | 4.6    |
| 33.4   | 59.6   | 2.4    | 0.7    | 68.2   | 28.2   | 147.0  | 342.1  | 417.2  |
| 44.4   | 56.7   | 29.7   | 31.4   | 98.8   | 67.8   | 22.6   | 25.4   | 26.3   |
| 1.3    | 3.6    | 1.8    | 19.3   | 11.5   | 4.0    | 2.1    | 1.9    | 1.3    |
| 17.6   | 21.5   | 1.0    | 0.6    | 7.0    | 7.6    | 6.8    | 4.7    | 2.2    |
| 397.4  | 364.6  | 216.9  | 253.1  | 677.7  | 318.3  | 916.7  | 669.0  | 792.8  |
| 100.4  | 97.5   | 146.4  | 219.1  | 114.3  | 83.0   | 540.9  | 562.1  | 614.2  |
| 2.0    | 4.8    | 1.2    | 0.6    | 0.4    | 2.0    | 1.8    | 2.3    | 3.0    |
| 0.9    | 0.8    | 4.4    | 0.8    | 16.2   | 10.1   | 110.4  | 172.8  | 186.0  |
| 0.7    | 1.3    | 4.8    | 5.1    | 4.1    | 7.1    | 1.3    | 4.0    | 4.3    |
| 0.3    | 5.0    | 9.1    | 0.7    | 0.8    | 2.2    | 3.8    | 1.8    | 1.1    |
| 0.3    | 11.0   | 13.3   | 2.7    | 7.5    | 2.6    | 7.9    | 13.1   | 13.6   |
| 2.7    | 4.5    | 19.8   | 26.6   | 13.9   | 2.7    | 17.6   | 18.0   | 13.7   |
| 5.7    | 2.9    | 7.1    | 2.3    | 17.6   | 4.1    | 14.0   | 6.0    | 7.5    |
| 2.1    | 2.4    | 3.8    | 1.8    | 7.3    | 1.0    | 13.9   | 27.3   | 15.8   |
| 1.7    | 1.1    | 1.1    | 1.6    | 1.6    | 1.6    | 2.1    | 1.9    | 2.2    |
| 7517.2 | 7976.7 | 2954.5 | 4607.6 | 7999.2 | 7325.5 | 8632.3 | 8347.8 | 8052.0 |
| 23.7   | 31.4   | 6.2    | 2.0    | 27.6   | 28.3   | 23.7   | 10.2   | 12.0   |
| 1.9    | 11.9   | 6.8    | 5.7    | 4.3    | 2.2    | 6.0    | 11.0   | 10.3   |
| 6.8    | 1.9    | 1.5    | 0.7    | 2.8    | 1.5    | 2.0    | 1.4    | 1.8    |
| 1.9    | 1.9    | 0.6    | 1.6    | 1.9    | 16.1   | 5.6    | 5.3    | 5.8    |
| 5.8    | 11.7   | 2.8    | 3.7    | 3.5    | 2.5    | 1.4    | 3.0    | 2.5    |
| 23.4   | 28.9   | 6.4    | 9.2    | 12.1   | 25.7   | 35.8   | 27.4   | 23.2   |
| 7.6    | 1.4    | 17.7   | 14.5   | 12.6   | 1.8    | 7.4    | 4.7    | 3.5    |
| 54.5   | 45.1   | 19.9   | 27.0   | 54.6   | 41.0   | 65.7   | 118.4  | 95.6   |
| 6.2    | 2.2    | 5.0    | 2.9    | 7.4    | 4.5    | 4.8    | 2.8    | 0.9    |
| 10.7   | 24.3   | 12.3   | 3.2    | 33.0   | 26.8   | 43.4   | 39.0   | 30.1   |
| 2.7    | 2.8    | 4.0    | 3.6    | 2.8    | 4.5    | 3.0    | 2.6    | 3.0    |
| 33.1   | 23.0   | 44.7   | 39.7   | 68.0   | 26.4   | 4.7    | 15.0   | 18.3   |
| 2.6    | 2.8    | 5.2    | 11.1   | 4.4    | 4.0    | 4.9    | 4.4    | 5.3    |
| 792.6  | 1057.2 | 273.2  | 401.4  | 1427.0 | 638.3  | 1048.8 | 482.8  | 569.5  |
| 7.9    | 9.3    | 11.8   | 16.1   | 15.5   | 19.3   | 6.1    | 9.3    | 11.8   |
| 329.5  | 383.1  | 581.2  | 652.5  | 428.4  | 624.7  | 1447.1 | 1341.4 | 1360.4 |
| 29.9   | 31.6   | 28.8   | 23.2   | 46.3   | 42.8   | 232.2  | 144.2  | 184.5  |
| 427.5  | 585.5  | 289.0  | 411.9  | 820.8  | 458.1  | 1493.2 | 1562.6 | 1596.5 |
| 116.1  | 205.7  | 3.8    | 5.7    | 330.1  | 53.8   | 2.2    | 3.5    | 0.9    |
| 3.3    | 16.4   | 25.7   | 27.5   | 3.7    | 1.8    | 32.7   | 23.8   | 38.7   |
| 1.1    | 0.8    | 1.1    | 0.5    | 8.0    | 1.4    | 1.8    | 3.5    | 1.3    |
| 3165.4 | 4138.7 | 538.8  | 603.2  | 4427.0 | 3629.2 | 5464.7 | 5322.1 | 5721.8 |
| 2.4    | 0.3    | 0.9    | 1.0    | 11.9   | 0.5    | 3.2    | 6.5    | 9.8    |

|         |         |        |        |         |         |         |        |        |
|---------|---------|--------|--------|---------|---------|---------|--------|--------|
| 35.0    | 57.8    | 38.1   | 32.9   | 70.0    | 39.1    | 70.6    | 65.2   | 63.1   |
| 13.7    | 12.5    | 29.2   | 32.2   | 42.2    | 1.6     | 36.1    | 30.8   | 34.2   |
| 11.5    | 9.0     | 3.3    | 5.9    | 8.8     | 7.3     | 24.8    | 30.0   | 39.6   |
| 25.8    | 17.6    | 18.0   | 24.3   | 18.4    | 15.4    | 60.7    | 61.2   | 75.5   |
| 9.4     | 4.1     | 9.7    | 4.4    | 9.5     | 9.8     | 6.6     | 5.4    | 0.8    |
| 1.4     | 1.3     | 0.9    | 0.4    | 1.4     | 5.5     | 0.4     | 6.2    | 2.2    |
| 2.1     | 19.8    | 3.2    | 16.8   | 16.7    | 4.2     | 502.1   | 211.6  | 272.2  |
| 234.1   | 311.3   | 272.5  | 323.9  | 366.0   | 197.9   | 556.9   | 415.1  | 452.2  |
| 1.0     | 2.0     | 1.1    | 0.5    | 1.2     | 8.5     | 0.6     | 4.0    | 3.7    |
| 11.6    | 14.0    | 24.1   | 10.6   | 1.1     | 19.6    | 23.3    | 8.7    | 7.7    |
| 7.0     | 0.2     | 0.4    | 0.4    | 3.7     | 0.9     | 0.3     | 2.1    | 0.2    |
| 6.2     | 3.5     | 0.5    | 7.9    | 1.7     | 5.8     | 3.6     | 4.7    | 4.8    |
| 5.7     | 3.3     | 6.5    | 8.6    | 7.9     | 7.2     | 8.0     | 6.9    | 0.8    |
| 6.1     | 1.0     | 3.7    | 2.6    | 0.9     | 7.5     | 0.7     | 2.5    | 2.4    |
| 0.6     | 8.4     | 0.6    | 4.8    | 7.5     | 0.9     | 7.3     | 5.7    | 2.0    |
| 58.5    | 65.9    | 56.1   | 74.2   | 73.2    | 52.6    | 79.6    | 72.4   | 75.4   |
| 1963.4  | 2289.1  | 181.3  | 285.7  | 3471.2  | 1064.4  | 3098.6  | 3688.0 | 4218.1 |
| 1315.8  | 1434.0  | 77.2   | 91.0   | 1801.8  | 1400.0  | 2709.2  | 3104.0 | 3022.1 |
| 648.9   | 960.9   | 16.1   | 74.5   | 939.8   | 580.3   | 1332.2  | 1131.8 | 1482.9 |
| 21.2    | 26.6    | 7.1    | 13.2   | 28.1    | 9.0     | 16.3    | 30.6   | 12.5   |
| 1.4     | 1.0     | 1.3    | 1.5    | 2.2     | 1.0     | 2.1     | 3.4    | 1.8    |
| 0.3     | 1.0     | 0.8    | 0.5    | 2.1     | 1.3     | 1.0     | 6.6    | 2.5    |
| 17.9    | 2.9     | 47.7   | 32.2   | 11.5    | 1.9     | 80.6    | 32.9   | 51.1   |
| 54.7    | 73.5    | 43.4   | 45.5   | 98.3    | 50.9    | 3.1     | 6.4    | 3.0    |
| 157.9   | 172.4   | 96.7   | 110.5  | 277.7   | 129.2   | 189.7   | 151.2  | 150.9  |
| 225.2   | 227.9   | 99.2   | 123.0  | 358.7   | 183.6   | 220.6   | 167.9  | 180.7  |
| 38.3    | 59.2    | 14.0   | 14.6   | 74.0    | 56.5    | 151.5   | 92.7   | 89.8   |
| 12.3    | 23.8    | 17.2   | 25.7   | 21.2    | 1.6     | 328.5   | 242.3  | 229.3  |
| 8.6     | 9.0     | 2.8    | 3.7    | 4.8     | 15.6    | 54.6    | 36.3   | 18.2   |
| 10089.3 | 10721.2 | 5007.8 | 5932.9 | 10558.4 | 10151.5 | 10378.6 | 9397.4 | 9341.7 |
| 70.4    | 92.3    | 63.5   | 88.0   | 98.2    | 75.4    | 220.6   | 181.1  | 192.5  |
| 1.5     | 9.8     | 14.5   | 6.9    | 16.6    | 15.0    | 11.6    | 11.0   | 12.7   |
| 1.1     | 2.1     | 1.8    | 2.6    | 8.0     | 1.5     | 4.1     | 3.5    | 3.0    |
| 72.0    | 96.1    | 10.6   | 14.2   | 101.0   | 64.6    | 13.6    | 26.1   | 20.7   |
| 41.1    | 52.7    | 43.3   | 54.0   | 80.7    | 43.5    | 324.9   | 276.5  | 280.7  |
| 34.8    | 29.4    | 0.6    | 7.6    | 39.0    | 20.6    | 132.8   | 269.2  | 331.3  |
| 19.8    | 4.7     | 4.2    | 1.1    | 18.5    | 14.7    | 44.9    | 64.9   | 82.2   |
| 3.2     | 3.1     | 2.0    | 1.1    | 1.4     | 2.0     | 3.2     | 3.6    | 4.2    |
| 20.4    | 22.5    | 11.4   | 5.6    | 29.8    | 26.4    | 24.7    | 22.1   | 27.7   |
| 18.7    | 17.8    | 286.7  | 435.4  | 14.9    | 12.6    | 310.2   | 215.5  | 284.4  |
| 0.6     | 0.5     | 2.0    | 7.1    | 0.8     | 0.7     | 9.1     | 18.7   | 19.8   |
| 27.6    | 23.4    | 20.7   | 31.4   | 15.3    | 32.1    | 60.1    | 84.3   | 72.4   |
| 14.6    | 12.8    | 1.2    | 4.9    | 14.0    | 13.3    | 7.6     | 10.0   | 6.0    |
| 1.4     | 0.6     | 3.7    | 4.1    | 8.9     | 4.6     | 0.8     | 0.6    | 2.9    |
| 2.8     | 11.0    | 11.3   | 3.6    | 13.4    | 14.1    | 75.0    | 57.6   | 73.2   |
| 95.8    | 139.9   | 177.7  | 269.8  | 135.1   | 145.9   | 507.7   | 349.7  | 418.8  |
| 51.1    | 78.6    | 1063.6 | 1318.0 | 87.3    | 41.5    | 59.1    | 129.9  | 146.8  |
| 2.7     | 1.0     | 0.7    | 0.6    | 1.9     | 0.8     | 2.1     | 1.7    | 1.6    |
| 71.6    | 79.7    | 138.7  | 125.8  | 127.6   | 52.2    | 234.7   | 173.5  | 232.6  |
| 3.8     | 4.0     | 1.3    | 5.5    | 7.7     | 5.8     | 9.9     | 4.5    | 5.2    |
| 166.0   | 212.3   | 41.6   | 42.1   | 297.0   | 194.5   | 521.5   | 360.4  | 357.1  |
| 92.1    | 47.1    | 19.8   | 37.7   | 141.3   | 51.3    | 4.5     | 1.0    | 1.1    |
| 1.7     | 5.0     | 8.6    | 10.5   | 6.2     | 3.5     | 2.7     | 2.4    | 2.2    |

|        |        |        |        |        |        |        |        |        |
|--------|--------|--------|--------|--------|--------|--------|--------|--------|
| 105.1  | 139.7  | 63.4   | 81.9   | 135.5  | 200.6  | 171.4  | 225.7  | 242.0  |
| 0.9    | 0.5    | 3.1    | 5.4    | 0.9    | 7.5    | 4.6    | 3.6    | 4.2    |
| 0.8    | 7.7    | 0.7    | 6.5    | 0.4    | 3.2    | 3.0    | 0.7    | 0.6    |
| 91.6   | 105.3  | 229.4  | 411.8  | 160.6  | 78.0   | 1212.6 | 1255.0 | 1287.8 |
| 1.3    | 4.0    | 1.1    | 1.7    | 0.6    | 8.5    | 4.1    | 12.7   | 8.8    |
| 1.3    | 1.8    | 1.9    | 0.7    | 7.5    | 1.4    | 3.7    | 1.0    | 0.9    |
| 11.5   | 15.0   | 18.7   | 13.1   | 26.0   | 6.0    | 44.0   | 36.6   | 38.8   |
| 251.4  | 269.7  | 1.6    | 1.1    | 260.7  | 209.0  | 4.8    | 5.4    | 1.5    |
| 169.4  | 215.8  | 145.6  | 168.5  | 270.6  | 136.6  | 1589.5 | 686.2  | 788.6  |
| 207.3  | 251.8  | 79.4   | 83.5   | 281.2  | 291.9  | 502.0  | 389.4  | 388.4  |
| 256.6  | 293.4  | 52.6   | 101.5  | 250.6  | 278.2  | 326.5  | 86.4   | 142.0  |
| 2.2    | 2.8    | 2.4    | 6.8    | 8.1    | 1.9    | 11.5   | 20.2   | 8.1    |
| 39.5   | 42.9   | 117.1  | 156.6  | 71.4   | 37.9   | 102.4  | 88.5   | 84.5   |
| 1.4    | 1.5    | 7.3    | 1.4    | 13.6   | 1.1    | 9.3    | 5.8    | 3.1    |
| 12.0   | 10.0   | 29.8   | 24.3   | 13.5   | 5.0    | 46.7   | 139.0  | 105.4  |
| 3.6    | 3.4    | 2.6    | 2.3    | 11.8   | 3.4    | 3.0    | 1.5    | 9.6    |
| 3.9    | 3.0    | 2.4    | 1.6    | 3.4    | 4.3    | 3.7    | 1.5    | 2.1    |
| 2.6    | 1.0    | 5.0    | 1.3    | 3.1    | 2.6    | 4.6    | 2.3    | 1.5    |
| 45.0   | 30.3   | 15.9   | 11.1   | 33.6   | 26.5   | 145.2  | 108.4  | 95.7   |
| 2.1    | 5.9    | 11.6   | 11.9   | 1.0    | 1.3    | 5.1    | 5.4    | 6.1    |
| 0.6    | 3.9    | 1.2    | 0.7    | 2.1    | 1.3    | 0.8    | 1.5    | 1.0    |
| 3.4    | 3.0    | 21.7   | 14.5   | 5.4    | 6.0    | 10.1   | 28.1   | 10.6   |
| 10.3   | 8.4    | 7.0    | 1.1    | 22.9   | 11.5   | 34.9   | 64.8   | 67.9   |
| 5.8    | 5.8    | 1.7    | 5.2    | 10.3   | 9.9    | 5.6    | 3.3    | 2.9    |
| 20.2   | 20.8   | 18.1   | 25.3   | 18.6   | 25.1   | 27.0   | 46.0   | 42.4   |
| 1.7    | 1.4    | 7.2    | 2.0    | 8.1    | 1.5    | 5.0    | 4.6    | 4.2    |
| 3.0    | 1.0    | 0.3    | 2.0    | 1.6    | 0.5    | 19.8   | 37.3   | 33.4   |
| 91.0   | 57.9   | 55.0   | 63.6   | 139.7  | 77.1   | 204.3  | 178.6  | 202.5  |
| 382.0  | 425.3  | 89.0   | 149.2  | 552.8  | 484.2  | 1156.6 | 568.0  | 719.0  |
| 711.5  | 713.2  | 116.2  | 169.9  | 924.2  | 612.1  | 876.5  | 727.6  | 846.7  |
| 55.8   | 94.4   | 112.3  | 114.2  | 87.1   | 91.5   | 284.1  | 269.9  | 296.2  |
| 51.6   | 58.6   | 45.2   | 60.6   | 79.3   | 106.2  | 7.4    | 1.4    | 1.4    |
| 1.1    | 9.8    | 19.1   | 19.6   | 1.6    | 4.7    | 2.8    | 1.2    | 8.2    |
| 109.1  | 135.4  | 93.8   | 96.2   | 192.9  | 117.5  | 275.5  | 264.5  | 284.0  |
| 1878.6 | 2501.3 | 1038.7 | 1118.7 | 2839.4 | 2192.6 | 1359.6 | 1847.7 | 1554.8 |
| 0.8    | 0.2    | 0.3    | 0.5    | 0.3    | 0.4    | 2.4    | 1.0    | 0.9    |
| 8.4    | 2.1    | 4.5    | 2.8    | 7.2    | 1.5    | 4.1    | 0.8    | 3.7    |
| 60.5   | 87.5   | 4.1    | 33.9   | 117.4  | 81.9   | 222.1  | 2.5    | 5.7    |
| 9.5    | 3.0    | 2.4    | 2.0    | 3.2    | 11.5   | 10.1   | 2.6    | 9.2    |
| 10.6   | 24.9   | 17.6   | 37.9   | 6.2    | 3.6    | 23.6   | 34.7   | 15.4   |
| 6.4    | 1.3    | 1.4    | 5.3    | 0.4    | 8.9    | 7.9    | 9.7    | 5.8    |
| 18.8   | 25.1   | 2.5    | 2.5    | 16.3   | 1.8    | 17.0   | 10.1   | 14.9   |
| 3.4    | 1.1    | 3.3    | 3.8    | 3.5    | 0.9    | 12.0   | 2.5    | 8.1    |
| 1308.2 | 1478.9 | 326.2  | 481.3  | 1790.4 | 1389.6 | 2312.1 | 1882.6 | 2072.3 |
| 2.0    | 7.2    | 3.8    | 8.0    | 12.1   | 1.5    | 21.6   | 25.5   | 16.6   |
| 8.2    | 7.8    | 7.7    | 11.2   | 3.0    | 0.8    | 29.5   | 36.5   | 32.0   |
| 89.3   | 116.6  | 41.1   | 66.7   | 134.3  | 115.1  | 138.7  | 200.3  | 211.0  |
| 25.3   | 2.8    | 15.5   | 18.9   | 14.8   | 5.6    | 31.9   | 26.0   | 29.4   |
| 0.8    | 0.7    | 1.7    | 0.7    | 0.6    | 1.8    | 3.0    | 1.2    | 10.0   |
| 477.2  | 640.3  | 269.9  | 407.5  | 673.4  | 583.6  | 888.4  | 621.5  | 710.0  |
| 6.0    | 7.0    | 2.2    | 4.2    | 9.6    | 1.5    | 11.1   | 9.6    | 3.6    |
| 1.4    | 1.9    | 0.7    | 3.2    | 6.3    | 1.7    | 8.0    | 10.2   | 3.6    |
| 7.5    | 1.8    | 0.4    | 0.8    | 10.3   | 0.6    | 1.1    | 1.1    | 2.0    |

|        |        |        |        |        |        |         |         |         |
|--------|--------|--------|--------|--------|--------|---------|---------|---------|
| 14.4   | 25.9   | 0.7    | 1.8    | 18.0   | 3.8    | 4.4     | 4.3     | 1.1     |
| 23.3   | 18.0   | 1.0    | 2.6    | 30.1   | 12.9   | 31.9    | 21.0    | 31.0    |
| 0.4    | 20.8   | 14.9   | 11.4   | 11.5   | 10.1   | 5.7     | 8.8     | 5.1     |
| 94.1   | 131.6  | 128.5  | 187.9  | 160.3  | 98.1   | 349.2   | 290.3   | 300.9   |
| 6808.8 | 7794.8 | 866.2  | 1202.0 | 7707.4 | 7064.9 | 2861.2  | 1533.9  | 1684.2  |
| 22.0   | 10.5   | 7.0    | 10.0   | 17.7   | 18.3   | 3.4     | 4.0     | 4.0     |
| 0.9    | 0.5    | 1.1    | 0.3    | 0.9    | 0.6    | 1.0     | 2.8     | 1.2     |
| 0.7    | 1.7    | 15.7   | 2.0    | 0.9    | 7.2    | 1.0     | 2.4     | 1.4     |
| 0.6    | 9.2    | 7.4    | 6.7    | 1.2    | 1.1    | 2.5     | 1.1     | 6.6     |
| 4058.6 | 6093.8 | 1398.5 | 1863.8 | 6163.0 | 5387.9 | 10124.0 | 10537.3 | 10620.8 |
| 629.0  | 647.2  | 784.7  | 1469.7 | 936.0  | 525.8  | 1219.2  | 1152.7  | 1226.4  |
| 19.7   | 20.0   | 30.2   | 40.0   | 23.3   | 3.7    | 43.4    | 44.6    | 49.0    |
| 0.8    | 1.9    | 6.3    | 3.3    | 1.7    | 0.8    | 2.8     | 5.3     | 3.2     |
| 1.1    | 2.6    | 1.3    | 1.2    | 2.0    | 11.0   | 4.3     | 1.6     | 2.6     |
| 1.5    | 8.7    | 0.7    | 0.9    | 3.1    | 1.5    | 4.2     | 2.1     | 2.7     |
| 4.9    | 3.7    | 3.7    | 6.8    | 1.5    | 6.0    | 5.1     | 4.1     | 2.9     |
| 0.8    | 0.8    | 0.2    | 0.4    | 7.7    | 6.0    | 6.0     | 2.8     | 1.7     |
| 13.0   | 22.3   | 1.3    | 1.8    | 18.8   | 7.3    | 15.8    | 14.2    | 17.9    |
| 3.8    | 1.2    | 0.9    | 0.7    | 1.8    | 1.0    | 3.1     | 3.2     | 2.9     |
| 7.8    | 0.9    | 1.4    | 1.0    | 1.6    | 11.3   | 3.0     | 2.5     | 1.6     |
| 1.4    | 1.1    | 2.4    | 1.2    | 1.1    | 1.0    | 1.5     | 3.2     | 1.2     |
| 13.3   | 6.6    | 6.2    | 1.9    | 4.9    | 22.1   | 12.2    | 13.8    | 19.3    |
| 0.8    | 0.8    | 0.9    | 0.5    | 0.5    | 3.0    | 0.8     | 0.8     | 0.7     |
| 21.2   | 5.5    | 9.8    | 6.4    | 4.0    | 15.7   | 10.0    | 12.5    | 5.8     |
| 3.8    | 2.1    | 1.6    | 3.5    | 4.4    | 1.5    | 3.3     | 2.9     | 3.1     |
| 6.5    | 2.3    | 2.2    | 4.5    | 1.4    | 2.8    | 5.4     | 22.4    | 5.2     |
| 3.1    | 2.3    | 2.3    | 0.6    | 9.4    | 0.8    | 2.3     | 1.0     | 4.6     |
| 1.3    | 1.3    | 1.6    | 1.6    | 0.7    | 1.7    | 7.9     | 9.5     | 7.2     |
| 3.1    | 0.4    | 9.5    | 1.0    | 0.6    | 3.4    | 5.1     | 5.3     | 1.7     |
| 2.4    | 1.7    | 2.4    | 1.8    | 2.6    | 2.2    | 7.3     | 6.7     | 13.0    |
| 1.5    | 2.0    | 2.8    | 2.4    | 1.4    | 2.0    | 1.7     | 1.3     | 1.5     |
| 339.3  | 532.4  | 24.6   | 34.6   | 538.3  | 506.4  | 367.6   | 281.5   | 360.2   |
| 17.0   | 4.7    | 6.8    | 6.5    | 13.0   | 4.3    | 2.7     | 12.5    | 9.7     |
| 806.8  | 1518.6 | 11.6   | 5.2    | 608.1  | 794.2  | 6145.5  | 6289.4  | 6246.6  |
| 24.2   | 29.0   | 23.9   | 26.6   | 22.5   | 17.6   | 233.5   | 346.6   | 336.2   |
| 4.2    | 1.1    | 1.5    | 1.7    | 5.9    | 6.9    | 4.1     | 1.7     | 2.1     |
| 34.0   | 30.1   | 4.3    | 17.1   | 49.4   | 7.3    | 122.7   | 166.3   | 135.5   |
| 314.0  | 411.9  | 724.3  | 1114.5 | 401.2  | 354.5  | 86.8    | 31.5    | 45.7    |
| 255.6  | 224.9  | 133.4  | 133.7  | 464.2  | 227.5  | 1366.0  | 742.9   | 843.4   |
| 1.0    | 0.8    | 1.5    | 0.9    | 0.9    | 1.2    | 0.9     | 1.0     | 1.1     |
| 16.7   | 37.8   | 35.1   | 25.6   | 18.5   | 32.9   | 31.1    | 25.3    | 30.6    |
| 62.0   | 64.3   | 18.3   | 5.1    | 132.8  | 68.5   | 109.5   | 131.5   | 173.8   |
| 2208.2 | 2675.0 | 1124.8 | 1304.2 | 3366.8 | 2991.0 | 4223.7  | 3070.6  | 3481.4  |
| 11.7   | 4.2    | 15.4   | 11.0   | 6.1    | 16.0   | 21.8    | 27.5    | 27.7    |
| 22.0   | 17.0   | 34.9   | 30.1   | 38.4   | 12.9   | 42.0    | 64.8    | 79.8    |
| 3637.4 | 4128.5 | 2405.2 | 3031.8 | 4282.6 | 3671.0 | 6447.6  | 6170.3  | 6452.1  |
| 7.9    | 6.0    | 11.0   | 12.4   | 0.5    | 10.2   | 13.7    | 6.7     | 5.2     |
| 775.1  | 966.0  | 9.9    | 7.4    | 1360.9 | 434.1  | 44.8    | 47.4    | 69.6    |
| 2.2    | 4.5    | 3.0    | 4.9    | 4.0    | 1.7    | 4.0     | 1.8     | 10.8    |
| 237.9  | 288.1  | 16.7   | 23.0   | 286.8  | 210.6  | 4.9     | 2.0     | 7.1     |
| 68.6   | 75.5   | 78.2   | 129.0  | 76.0   | 43.9   | 488.0   | 447.4   | 469.4   |
| 36.8   | 24.9   | 19.2   | 22.4   | 44.4   | 36.3   | 16.9    | 16.0    | 15.9    |
| 0.6    | 0.8    | 2.2    | 0.8    | 7.2    | 2.4    | 2.0     | 1.0     | 2.6     |

|        |        |        |        |        |        |         |         |         |
|--------|--------|--------|--------|--------|--------|---------|---------|---------|
| 137.5  | 154.9  | 12.0   | 9.8    | 150.9  | 118.4  | 0.8     | 2.6     | 4.1     |
| 81.1   | 92.0   | 46.0   | 50.4   | 137.5  | 67.2   | 1714.4  | 1826.6  | 1831.1  |
| 12.4   | 29.9   | 6.6    | 10.4   | 29.0   | 12.2   | 10.3    | 8.0     | 9.4     |
| 659.9  | 858.7  | 150.9  | 262.6  | 1441.8 | 826.5  | 1884.7  | 1697.3  | 1778.3  |
| 20.6   | 14.5   | 24.6   | 8.2    | 26.4   | 24.0   | 8.0     | 4.6     | 7.6     |
| 4.2    | 0.5    | 0.9    | 0.2    | 0.3    | 8.5    | 2.4     | 2.3     | 1.1     |
| 68.2   | 89.2   | 45.0   | 70.7   | 118.7  | 63.7   | 122.2   | 129.2   | 127.0   |
| 0.9    | 1.2    | 1.3    | 1.8    | 2.1    | 1.2    | 38.2    | 63.2    | 59.7    |
| 948.5  | 1234.7 | 349.5  | 564.4  | 1556.7 | 1158.8 | 1912.1  | 2088.7  | 2361.1  |
| 18.4   | 29.4   | 38.2   | 28.6   | 30.9   | 19.9   | 81.6    | 100.1   | 123.9   |
| 234.6  | 280.9  | 43.8   | 79.2   | 355.3  | 305.0  | 280.9   | 137.9   | 160.8   |
| 4.2    | 2.5    | 3.7    | 1.8    | 21.0   | 19.0   | 13.1    | 5.5     | 7.3     |
| 8.4    | 1.1    | 1.5    | 3.1    | 3.6    | 9.4    | 1.9     | 1.9     | 1.2     |
| 28.2   | 25.4   | 31.0   | 34.9   | 56.5   | 20.6   | 440.4   | 595.9   | 692.9   |
| 6.3    | 4.1    | 2.0    | 1.2    | 5.2    | 1.4    | 6.3     | 10.6    | 8.0     |
| 8.6    | 9.8    | 9.9    | 3.8    | 17.1   | 20.5   | 46.6    | 33.5    | 40.8    |
| 50.5   | 43.0   | 162.5  | 193.4  | 63.8   | 50.1   | 57.6    | 88.7    | 92.2    |
| 30.1   | 32.0   | 22.6   | 25.1   | 46.0   | 35.5   | 20.6    | 12.4    | 18.8    |
| 6.3    | 4.3    | 0.3    | 0.6    | 0.4    | 2.7    | 2.8     | 0.5     | 1.8     |
| 13.8   | 2.6    | 63.4   | 54.1   | 21.9   | 8.0    | 106.7   | 172.2   | 174.5   |
| 14.0   | 22.3   | 19.8   | 13.9   | 12.0   | 16.1   | 26.4    | 23.4    | 27.8    |
| 285.0  | 381.8  | 118.8  | 166.9  | 430.8  | 220.1  | 639.8   | 316.9   | 316.9   |
| 221.5  | 357.3  | 19.8   | 20.0   | 477.1  | 429.4  | 709.9   | 575.2   | 615.1   |
| 5.1    | 6.6    | 13.1   | 14.2   | 2.6    | 14.6   | 46.8    | 20.0    | 33.6    |
| 1.1    | 1.1    | 0.8    | 0.7    | 1.9    | 2.3    | 5.2     | 12.3    | 8.4     |
| 0.8    | 1.5    | 1.3    | 0.9    | 8.7    | 4.2    | 1.6     | 8.6     | 1.1     |
| 79.9   | 67.3   | 61.7   | 49.3   | 99.5   | 75.4   | 185.5   | 187.8   | 219.4   |
| 155.6  | 202.6  | 59.2   | 61.4   | 237.2  | 226.2  | 698.7   | 617.7   | 628.5   |
| 33.8   | 61.8   | 26.8   | 24.1   | 79.0   | 42.6   | 175.5   | 139.2   | 143.4   |
| 1.0    | 1.8    | 2.5    | 1.7    | 4.2    | 3.0    | 5.6     | 3.7     | 2.0     |
| 2.0    | 1.9    | 12.3   | 12.1   | 2.1    | 3.7    | 3.4     | 3.3     | 3.7     |
| 96.0   | 115.3  | 62.7   | 71.4   | 134.9  | 101.8  | 288.5   | 244.4   | 262.2   |
| 3.4    | 1.5    | 198.6  | 221.0  | 7.5    | 2.3    | 1422.4  | 1183.4  | 1404.9  |
| 1.9    | 1.4    | 20.7   | 23.4   | 2.3    | 7.4    | 1367.8  | 1007.9  | 1083.4  |
| 6410.3 | 7211.3 | 2539.9 | 3072.4 | 6898.6 | 6888.7 | 8458.5  | 7294.8  | 7599.0  |
| 55.6   | 88.0   | 38.4   | 44.3   | 106.1  | 91.6   | 309.6   | 492.5   | 539.2   |
| 23.9   | 13.0   | 22.3   | 11.6   | 22.1   | 11.9   | 133.0   | 184.9   | 270.4   |
| 186.5  | 158.7  | 35.2   | 29.7   | 169.3  | 177.9  | 565.5   | 250.9   | 269.2   |
| 5004.1 | 5293.4 | 3322.4 | 3655.7 | 5608.3 | 5311.6 | 9294.1  | 5126.6  | 5381.6  |
| 201.4  | 192.9  | 303.7  | 471.5  | 355.0  | 173.3  | 697.4   | 622.0   | 715.4   |
| 282.8  | 379.5  | 755.7  | 1165.7 | 288.1  | 443.0  | 900.2   | 640.5   | 748.3   |
| 79.9   | 126.6  | 98.1   | 136.3  | 102.9  | 121.0  | 218.7   | 153.3   | 170.2   |
| 7.5    | 1.5    | 1.4    | 2.4    | 23.7   | 13.0   | 7.8     | 4.9     | 13.7    |
| 1438.6 | 1164.6 | 2.2    | 1.3    | 2356.4 | 980.1  | 9.7     | 1.4     | 7.7     |
| 7093.6 | 7706.0 | 4243.4 | 5356.2 | 8107.9 | 7148.5 | 10038.4 | 10111.8 | 10162.7 |
| 68.8   | 69.3   | 12.5   | 10.1   | 90.1   | 73.1   | 164.7   | 124.6   | 145.9   |
| 6.9    | 7.3    | 12.6   | 12.0   | 10.2   | 5.3    | 6.9     | 8.9     | 7.3     |
| 305.3  | 337.8  | 92.5   | 114.2  | 370.1  | 288.1  | 155.9   | 122.1   | 121.2   |
| 954.0  | 1377.4 | 78.9   | 112.7  | 1723.7 | 1413.7 | 852.9   | 816.9   | 918.5   |
| 4.4    | 10.0   | 8.3    | 8.4    | 5.2    | 6.1    | 13.2    | 21.4    | 16.0    |
| 289.7  | 388.6  | 369.6  | 613.4  | 372.9  | 394.2  | 3172.2  | 1065.6  | 1306.8  |
| 1.8    | 10.3   | 8.1    | 2.5    | 20.7   | 2.5    | 30.4    | 25.9    | 29.3    |
| 441.1  | 488.2  | 572.7  | 542.4  | 667.7  | 486.9  | 521.5   | 554.5   | 617.9   |

|        |        |        |        |        |        |         |         |         |
|--------|--------|--------|--------|--------|--------|---------|---------|---------|
| 2879.4 | 3569.5 | 352.8  | 670.7  | 4183.4 | 3846.4 | 3389.2  | 2770.8  | 3096.3  |
| 13.5   | 1.9    | 6.6    | 7.4    | 5.7    | 14.1   | 23.8    | 12.0    | 12.4    |
| 31.3   | 21.5   | 48.3   | 87.8   | 49.5   | 32.8   | 40.7    | 29.5    | 35.1    |
| 471.1  | 681.6  | 141.7  | 158.5  | 741.6  | 517.0  | 3090.5  | 3502.7  | 3705.4  |
| 4.6    | 6.5    | 2.6    | 1.5    | 0.5    | 6.7    | 10.0    | 3.9     | 11.9    |
| 1.7    | 1.5    | 1.1    | 0.7    | 1.2    | 1.8    | 2.1     | 3.0     | 2.2     |
| 0.7    | 0.9    | 0.5    | 3.2    | 2.6    | 2.5    | 10.0    | 5.1     | 6.1     |
| 6.7    | 14.8   | 10.9   | 0.5    | 29.3   | 21.3   | 9.0     | 15.2    | 7.1     |
| 3.5    | 16.1   | 10.5   | 12.3   | 25.9   | 17.1   | 46.7    | 28.2    | 22.0    |
| 0.8    | 0.6    | 0.8    | 0.5    | 0.6    | 0.7    | 1.1     | 0.7     | 1.5     |
| 17.3   | 18.8   | 5.3    | 3.7    | 10.2   | 20.0   | 44.1    | 42.5    | 41.6    |
| 0.5    | 2.2    | 9.3    | 1.1    | 6.3    | 6.6    | 2.5     | 6.2     | 6.9     |
| 11.3   | 10.1   | 4.1    | 0.5    | 15.5   | 28.9   | 4.1     | 6.9     | 0.9     |
| 3.9    | 17.4   | 1.1    | 2.4    | 14.8   | 13.7   | 15.5    | 5.0     | 8.3     |
| 235.0  | 308.8  | 11.1   | 24.2   | 405.7  | 282.8  | 514.6   | 439.2   | 459.3   |
| 3.5    | 17.8   | 14.2   | 13.3   | 26.9   | 22.1   | 54.7    | 33.9    | 48.1    |
| 3675.6 | 4700.5 | 801.0  | 1234.7 | 4084.5 | 3933.6 | 3257.9  | 2345.3  | 2356.7  |
| 1286.4 | 1905.8 | 193.7  | 231.4  | 1918.3 | 2091.1 | 3532.9  | 2217.8  | 2224.1  |
| 21.3   | 11.2   | 5.0    | 3.2    | 25.5   | 21.8   | 28.1    | 20.9    | 10.9    |
| 940.7  | 948.5  | 304.9  | 387.1  | 1296.8 | 780.7  | 1017.9  | 978.7   | 1016.2  |
| 5496.5 | 6147.5 | 2734.3 | 3646.9 | 6194.3 | 6124.6 | 8164.9  | 6732.1  | 6155.0  |
| 3.0    | 1.8    | 2.9    | 1.0    | 4.5    | 6.6    | 12.2    | 6.6     | 4.5     |
| 124.8  | 142.0  | 205.5  | 278.7  | 141.2  | 143.4  | 853.3   | 841.5   | 974.6   |
| 12.4   | 17.2   | 3.1    | 8.5    | 7.8    | 13.6   | 26.6    | 22.6    | 31.0    |
| 171.5  | 193.0  | 58.3   | 52.5   | 226.9  | 164.1  | 347.8   | 216.4   | 222.6   |
| 3217.9 | 4193.9 | 789.5  | 1087.8 | 4201.3 | 3754.3 | 6016.0  | 5999.4  | 6118.8  |
| 606.5  | 997.9  | 0.6    | 4.6    | 362.0  | 780.3  | 1.0     | 2.2     | 4.5     |
| 835.1  | 1083.1 | 136.4  | 173.6  | 1187.6 | 1078.1 | 1669.0  | 1150.2  | 1346.1  |
| 1767.7 | 1556.9 | 275.1  | 524.0  | 1871.9 | 2114.8 | 609.5   | 470.8   | 514.4   |
| 33.4   | 52.1   | 30.5   | 34.4   | 80.1   | 53.1   | 158.8   | 196.2   | 185.9   |
| 669.0  | 671.0  | 436.3  | 666.3  | 863.9  | 734.9  | 2107.5  | 1103.4  | 1187.6  |
| 1655.4 | 3023.9 | 959.5  | 998.1  | 2479.8 | 2672.8 | 5778.4  | 3418.7  | 3746.9  |
| 129.4  | 158.1  | 65.8   | 89.5   | 177.5  | 133.4  | 578.8   | 580.8   | 608.8   |
| 34.9   | 66.7   | 20.5   | 24.3   | 53.9   | 58.6   | 369.5   | 317.1   | 310.4   |
| 8563.4 | 9488.6 | 4334.3 | 5569.3 | 9548.5 | 8918.9 | 10734.2 | 10315.8 | 10326.7 |
| 3.2    | 1.9    | 0.9    | 3.8    | 2.1    | 4.9    | 0.9     | 5.7     | 1.4     |
| 100.6  | 87.7   | 11.0   | 16.5   | 150.0  | 95.8   | 251.3   | 119.1   | 135.5   |
| 26.9   | 12.9   | 11.8   | 7.8    | 17.1   | 17.4   | 26.2    | 26.4    | 18.0    |
| 750.3  | 1017.2 | 1107.4 | 1382.1 | 1035.6 | 984.9  | 1283.4  | 1473.6  | 1605.7  |
| 8.5    | 26.1   | 4.4    | 1.9    | 19.7   | 15.1   | 2.5     | 2.8     | 2.9     |
| 1.6    | 2.5    | 1.5    | 1.3    | 6.6    | 2.7    | 3.2     | 4.9     | 5.3     |
| 40.3   | 31.7   | 22.8   | 17.4   | 48.1   | 38.7   | 53.7    | 76.6    | 64.5    |
| 73.5   | 55.9   | 2.3    | 19.3   | 72.7   | 70.9   | 87.0    | 64.0    | 83.6    |
| 4.2    | 5.9    | 4.1    | 7.1    | 3.0    | 7.6    | 5.9     | 4.9     | 7.7     |
| 13.7   | 13.0   | 4.8    | 5.5    | 28.9   | 15.6   | 5.7     | 3.9     | 7.1     |
| 70.5   | 71.2   | 146.4  | 143.5  | 132.4  | 73.9   | 384.6   | 358.1   | 392.4   |
| 303.4  | 375.1  | 194.6  | 223.5  | 486.3  | 351.9  | 460.4   | 563.4   | 631.1   |
| 165.3  | 171.7  | 96.5   | 94.7   | 231.6  | 160.5  | 290.1   | 324.8   | 352.3   |
| 22.1   | 37.7   | 1.8    | 4.2    | 36.6   | 17.3   | 8.1     | 13.2    | 14.3    |
| 6.6    | 12.0   | 1.5    | 0.3    | 11.2   | 7.3    | 9.2     | 12.6    | 12.1    |
| 178.7  | 360.9  | 140.0  | 200.8  | 262.4  | 357.6  | 281.3   | 199.3   | 212.8   |
| 2029.4 | 3030.8 | 134.3  | 288.0  | 2318.7 | 2913.9 | 4763.2  | 3102.9  | 3226.4  |
| 1.3    | 1.2    | 3.7    | 4.1    | 11.2   | 2.1    | 4.6     | 3.9     | 5.9     |

|        |        |        |        |        |        |        |        |        |
|--------|--------|--------|--------|--------|--------|--------|--------|--------|
| 5571.4 | 6927.9 | 1531.4 | 2411.6 | 6406.7 | 6381.3 | 7661.6 | 5220.5 | 5005.9 |
| 1.2    | 0.6    | 0.6    | 0.7    | 0.9    | 1.7    | 1.4    | 0.9    | 0.8    |
| 1.1    | 1.2    | 11.3   | 5.4    | 1.3    | 0.5    | 41.0   | 43.0   | 47.0   |
| 1.7    | 1.9    | 2.3    | 7.7    | 3.5    | 7.6    | 7.5    | 9.4    | 7.1    |
| 7.7    | 8.0    | 1.2    | 0.9    | 5.6    | 6.8    | 92.7   | 50.9   | 63.2   |
| 24.3   | 27.0   | 39.0   | 64.9   | 28.1   | 17.8   | 96.7   | 111.1  | 104.9  |
| 143.8  | 186.9  | 38.6   | 64.1   | 270.9  | 173.4  | 252.5  | 199.0  | 188.8  |
| 6.0    | 2.3    | 5.9    | 1.4    | 2.9    | 2.2    | 2.6    | 1.7    | 6.3    |
| 5.3    | 6.3    | 8.0    | 2.2    | 10.9   | 6.4    | 7.2    | 15.6   | 10.3   |
| 225.4  | 291.1  | 0.8    | 0.5    | 228.4  | 210.3  | 6.4    | 8.6    | 5.7    |
| 42.1   | 46.6   | 33.6   | 39.4   | 55.5   | 45.6   | 233.1  | 198.7  | 252.2  |
| 9.7    | 12.1   | 12.5   | 20.5   | 22.3   | 3.3    | 16.5   | 10.7   | 13.4   |
| 1045.6 | 1121.2 | 63.5   | 103.1  | 1262.6 | 764.7  | 992.9  | 1187.3 | 1247.4 |
| 135.0  | 172.7  | 28.1   | 42.9   | 173.9  | 159.7  | 246.3  | 180.0  | 211.4  |
| 76.3   | 82.9   | 47.4   | 54.3   | 109.1  | 90.7   | 190.7  | 171.2  | 186.4  |
| 6.4    | 4.7    | 8.0    | 1.8    | 7.1    | 9.8    | 15.4   | 14.7   | 12.1   |
| 7.6    | 2.0    | 7.6    | 11.6   | 7.7    | 3.8    | 14.1   | 2.2    | 2.1    |
| 43.7   | 43.3   | 74.5   | 104.9  | 112.2  | 21.3   | 375.0  | 170.1  | 162.8  |
| 11.4   | 10.0   | 3.6    | 2.5    | 4.4    | 18.0   | 6.6    | 12.6   | 9.7    |
| 29.8   | 45.5   | 2.9    | 12.5   | 64.7   | 37.1   | 31.1   | 22.6   | 31.9   |
| 29.7   | 6.3    | 20.8   | 20.5   | 50.8   | 26.4   | 45.7   | 31.6   | 34.6   |
| 7.6    | 2.7    | 2.6    | 2.9    | 9.7    | 5.1    | 18.5   | 11.1   | 24.2   |
| 15.1   | 26.2   | 2.1    | 9.2    | 21.9   | 28.0   | 15.3   | 31.0   | 16.5   |
| 31.8   | 48.9   | 25.3   | 24.8   | 59.5   | 32.3   | 17.0   | 16.7   | 20.8   |
| 7.1    | 4.6    | 1.0    | 5.6    | 0.5    | 8.6    | 10.1   | 4.6    | 8.9    |
| 95.7   | 135.5  | 50.8   | 71.0   | 113.5  | 82.5   | 1.9    | 2.1    | 3.2    |
| 2.7    | 1.9    | 6.7    | 9.2    | 6.1    | 3.7    | 21.1   | 2.8    | 8.0    |
| 156.0  | 62.3   | 54.5   | 95.0   | 132.6  | 48.4   | 203.7  | 52.4   | 49.9   |
| 30.0   | 15.1   | 34.0   | 22.5   | 28.9   | 24.1   | 61.2   | 62.0   | 59.2   |
| 8.8    | 3.3    | 1.8    | 5.1    | 2.1    | 2.4    | 6.6    | 4.1    | 21.4   |
| 8.5    | 14.4   | 1.7    | 6.2    | 2.3    | 18.7   | 6.6    | 5.2    | 18.2   |
| 19.2   | 3.5    | 13.3   | 17.4   | 2.0    | 10.8   | 21.7   | 10.4   | 19.7   |
| 1.9    | 12.7   | 1.0    | 4.5    | 15.4   | 12.2   | 160.5  | 216.1  | 196.9  |
| 5.7    | 0.9    | 1.3    | 5.2    | 1.5    | 1.4    | 2.4    | 1.5    | 4.2    |
| 0.7    | 0.8    | 1.5    | 1.2    | 0.5    | 5.4    | 6.2    | 1.3    | 2.8    |
| 15.8   | 11.2   | 1.5    | 0.6    | 29.1   | 6.5    | 3.6    | 6.5    | 2.9    |
| 30.1   | 63.7   | 49.9   | 61.6   | 55.9   | 14.7   | 168.9  | 124.0  | 155.4  |
| 15.6   | 8.3    | 1.9    | 0.6    | 39.8   | 16.4   | 3.4    | 1.3    | 0.6    |
| 17.9   | 26.3   | 10.2   | 3.1    | 15.6   | 15.3   | 12.2   | 7.8    | 4.7    |
| 13.5   | 2.9    | 13.9   | 12.6   | 11.3   | 9.5    | 39.7   | 15.5   | 31.9   |
| 2.5    | 1.6    | 2.0    | 4.0    | 14.9   | 4.3    | 12.6   | 6.5    | 8.1    |
| 91.7   | 96.6   | 4.4    | 10.0   | 115.5  | 86.5   | 214.6  | 223.1  | 247.0  |
| 0.7    | 0.9    | 0.5    | 0.7    | 0.6    | 5.0    | 24.4   | 53.1   | 77.7   |
| 5.1    | 11.5   | 15.7   | 1.4    | 4.3    | 15.7   | 7.1    | 24.1   | 13.0   |
| 1.1    | 7.2    | 1.1    | 1.3    | 1.1    | 2.6    | 11.2   | 19.8   | 3.7    |
| 1.0    | 1.3    | 5.3    | 1.7    | 1.7    | 1.1    | 7.0    | 7.5    | 9.5    |
| 117.5  | 113.3  | 27.3   | 27.5   | 151.4  | 110.9  | 161.5  | 146.5  | 153.3  |
| 1.9    | 2.1    | 3.6    | 1.3    | 26.7   | 2.7    | 2.2    | 1.8    | 8.1    |
| 1.4    | 1.9    | 1.4    | 0.8    | 0.9    | 1.5    | 2.4    | 1.8    | 2.6    |
| 1.6    | 0.9    | 6.0    | 1.1    | 0.9    | 1.0    | 2.9    | 6.9    | 2.4    |
| 10.9   | 11.7   | 24.2   | 3.8    | 3.0    | 9.2    | 7.0    | 2.9    | 3.7    |
| 18.2   | 9.3    | 3.3    | 9.2    | 10.6   | 22.5   | 10.7   | 19.6   | 21.2   |
| 2.1    | 2.9    | 1.0    | 1.3    | 4.8    | 1.7    | 10.2   | 3.3    | 4.8    |



|        |        |        |        |        |        |        |        |        |
|--------|--------|--------|--------|--------|--------|--------|--------|--------|
| 6.6    | 14.9   | 0.7    | 0.8    | 9.8    | 11.2   | 7.9    | 1.3    | 9.2    |
| 17.9   | 25.0   | 1.2    | 1.2    | 30.3   | 13.2   | 22.2   | 40.2   | 33.7   |
| 1.6    | 14.8   | 7.5    | 8.0    | 14.6   | 7.7    | 15.1   | 18.9   | 22.9   |
| 16.6   | 12.8   | 1.8    | 2.2    | 13.1   | 19.4   | 33.8   | 56.4   | 59.3   |
| 4.3    | 6.3    | 0.6    | 1.1    | 1.6    | 5.0    | 1.2    | 1.5    | 1.1    |
| 1.0    | 2.8    | 0.6    | 0.8    | 2.0    | 1.2    | 1.2    | 1.2    | 1.1    |
| 29.5   | 11.9   | 31.9   | 33.0   | 31.3   | 24.6   | 12.7   | 15.1   | 12.9   |
| 1.7    | 1.6    | 5.8    | 6.9    | 8.5    | 3.8    | 5.2    | 8.1    | 4.2    |
| 37.9   | 45.6   | 11.5   | 20.3   | 25.9   | 20.3   | 44.8   | 46.4   | 48.8   |
| 72.6   | 93.1   | 20.9   | 20.6   | 110.0  | 44.8   | 185.1  | 112.5  | 115.9  |
| 28.9   | 19.1   | 67.4   | 103.9  | 34.6   | 21.5   | 92.2   | 104.7  | 109.2  |
| 15.4   | 15.3   | 15.3   | 30.4   | 28.6   | 20.8   | 208.1  | 142.6  | 145.1  |
| 1.2    | 2.5    | 12.6   | 2.0    | 7.1    | 3.7    | 7.7    | 5.3    | 8.6    |
| 2864.5 | 2846.0 | 3522.3 | 4316.8 | 3444.8 | 2293.0 | 4108.1 | 4059.5 | 4267.2 |
| 1.0    | 0.6    | 2.8    | 1.9    | 0.3    | 1.2    | 0.9    | 4.0    | 1.1    |
| 70.9   | 135.6  | 39.0   | 47.5   | 98.6   | 95.1   | 70.4   | 132.6  | 173.9  |
| 23.3   | 21.6   | 7.4    | 5.2    | 19.9   | 25.0   | 66.8   | 66.3   | 77.8   |
| 442.8  | 651.9  | 113.4  | 165.2  | 625.9  | 421.2  | 97.7   | 48.9   | 54.3   |
| 26.2   | 12.7   | 22.2   | 22.8   | 20.4   | 3.5    | 50.0   | 54.6   | 64.1   |
| 24.7   | 16.7   | 11.5   | 14.5   | 15.4   | 18.7   | 48.8   | 56.9   | 66.1   |
| 7.8    | 1.2    | 2.8    | 0.9    | 1.2    | 6.7    | 6.0    | 11.2   | 1.2    |
| 12.1   | 28.8   | 5.0    | 8.0    | 5.1    | 14.4   | 8.7    | 5.2    | 4.1    |
| 0.9    | 1.0    | 0.6    | 0.6    | 1.0    | 0.7    | 1.4    | 2.2    | 0.9    |
| 3.2    | 1.0    | 1.0    | 6.0    | 1.8    | 1.4    | 5.5    | 3.8    | 2.5    |
| 49.5   | 48.3   | 20.8   | 18.1   | 89.4   | 55.4   | 70.9   | 48.8   | 61.1   |
| 8.6    | 0.8    | 1.6    | 10.6   | 9.3    | 1.8    | 12.9   | 9.3    | 18.3   |
| 1.6    | 6.5    | 1.8    | 1.4    | 3.4    | 9.6    | 4.6    | 8.4    | 3.8    |
| 28.7   | 21.2   | 23.9   | 28.0   | 11.8   | 19.3   | 73.9   | 98.8   | 101.5  |
| 0.7    | 2.0    | 0.9    | 0.7    | 1.0    | 1.2    | 2.3    | 1.6    | 1.3    |
| 1.7    | 7.6    | 0.9    | 8.7    | 10.1   | 6.0    | 6.8    | 5.2    | 1.5    |
| 2.8    | 1.5    | 0.6    | 0.4    | 4.9    | 1.2    | 0.8    | 5.0    | 1.6    |
| 0.9    | 8.6    | 1.2    | 6.8    | 0.7    | 2.1    | 5.4    | 4.3    | 0.9    |
| 2.7    | 3.3    | 8.3    | 1.2    | 2.2    | 1.3    | 2.8    | 3.0    | 11.1   |
| 15.4   | 2.7    | 9.7    | 13.0   | 8.1    | 3.1    | 17.2   | 14.2   | 12.7   |
| 1.1    | 14.2   | 10.3   | 15.8   | 12.7   | 8.5    | 22.4   | 20.1   | 15.8   |
| 4.7    | 11.6   | 1.8    | 2.0    | 29.6   | 4.2    | 175.9  | 238.2  | 260.3  |
| 22.8   | 33.8   | 18.3   | 19.1   | 50.9   | 24.8   | 113.0  | 68.0   | 76.7   |
| 1.7    | 1.1    | 2.6    | 1.0    | 1.5    | 2.1    | 17.9   | 8.9    | 6.9    |
| 4.9    | 3.7    | 0.8    | 1.4    | 16.4   | 14.5   | 185.4  | 242.4  | 253.7  |
| 5.6    | 23.2   | 7.5    | 10.2   | 6.9    | 19.9   | 9.3    | 14.3   | 15.4   |
| 8.0    | 1.0    | 2.2    | 5.1    | 1.5    | 1.8    | 12.4   | 7.4    | 3.9    |
| 9.2    | 1.4    | 3.7    | 3.6    | 3.6    | 3.7    | 18.7   | 27.8   | 27.3   |
| 20.0   | 13.9   | 14.9   | 21.5   | 41.8   | 16.6   | 72.7   | 43.6   | 56.3   |
| 1.6    | 0.6    | 0.5    | 2.8    | 3.4    | 1.1    | 13.3   | 13.2   | 38.2   |
| 22.9   | 18.2   | 6.7    | 13.0   | 17.9   | 19.0   | 12.4   | 10.7   | 8.0    |
| 8.8    | 9.6    | 12.8   | 6.5    | 2.8    | 1.3    | 33.0   | 17.5   | 18.2   |
| 6.6    | 4.0    | 0.7    | 3.2    | 4.8    | 3.3    | 6.3    | 5.2    | 6.2    |
| 6.8    | 16.2   | 13.0   | 10.0   | 2.9    | 33.8   | 31.8   | 14.1   | 17.6   |
| 14.2   | 10.3   | 9.7    | 0.5    | 15.9   | 7.6    | 9.7    | 7.0    | 7.4    |
| 1.3    | 1.0    | 1.8    | 1.3    | 1.3    | 1.8    | 3.5    | 8.1    | 3.9    |
| 1.2    | 2.6    | 0.7    | 0.9    | 1.0    | 0.8    | 4.3    | 2.2    | 3.2    |
| 41.5   | 38.4   | 119.1  | 165.9  | 38.3   | 12.1   | 225.4  | 174.4  | 175.7  |
| 26.1   | 16.3   | 5.6    | 16.0   | 20.4   | 9.5    | 17.7   | 18.0   | 18.9   |

|        |        |        |        |        |        |         |         |         |
|--------|--------|--------|--------|--------|--------|---------|---------|---------|
| 3.2    | 1.4    | 1.4    | 1.3    | 11.5   | 2.3    | 17.4    | 4.7     | 9.3     |
| 3.0    | 12.4   | 7.7    | 4.2    | 11.9   | 15.3   | 12.5    | 7.2     | 13.6    |
| 7.8    | 9.5    | 3.6    | 5.6    | 8.3    | 2.6    | 1.2     | 1.1     | 11.1    |
| 12.3   | 14.8   | 0.8    | 2.5    | 24.7   | 8.4    | 18.5    | 25.6    | 22.7    |
| 23.2   | 20.9   | 14.2   | 20.5   | 23.8   | 9.9    | 134.1   | 108.2   | 104.8   |
| 3.6    | 0.4    | 0.2    | 0.4    | 4.0    | 1.7    | 1.4     | 5.0     | 0.5     |
| 14.6   | 1.6    | 11.2   | 9.3    | 0.9    | 1.9    | 20.8    | 26.0    | 22.7    |
| 0.9    | 2.4    | 6.4    | 2.3    | 0.9    | 1.6    | 6.1     | 3.1     | 1.5     |
| 0.7    | 11.2   | 2.6    | 1.8    | 4.0    | 1.9    | 1.5     | 1.5     | 2.1     |
| 2.3    | 3.0    | 2.2    | 1.4    | 4.2    | 1.7    | 3.1     | 2.8     | 2.3     |
| 3643.8 | 4379.1 | 162.4  | 185.4  | 4654.9 | 3129.8 | 2501.1  | 2860.0  | 3321.8  |
| 13.0   | 2.1    | 11.0   | 3.8    | 3.0    | 11.1   | 1.5     | 9.1     | 11.9    |
| 34.8   | 35.0   | 10.2   | 8.2    | 84.6   | 32.4   | 19.5    | 35.6    | 31.7    |
| 8.6    | 1.5    | 19.0   | 16.0   | 1.1    | 6.9    | 13.8    | 19.8    | 21.4    |
| 1.1    | 0.7    | 0.5    | 0.5    | 1.1    | 1.3    | 1.7     | 1.6     | 5.7     |
| 13.0   | 12.0   | 16.5   | 16.2   | 11.8   | 9.7    | 100.8   | 263.9   | 295.9   |
| 3.3    | 0.6    | 11.4   | 15.5   | 6.3    | 3.6    | 8.3     | 3.6     | 11.7    |
| 18.6   | 17.7   | 24.1   | 19.4   | 38.8   | 38.1   | 76.5    | 56.7    | 61.1    |
| 34.7   | 12.1   | 76.8   | 59.9   | 25.3   | 23.2   | 190.8   | 190.6   | 203.1   |
| 0.9    | 2.1    | 2.9    | 2.2    | 1.1    | 2.1    | 1.3     | 3.0     | 3.1     |
| 4851.9 | 6044.4 | 1956.1 | 2442.6 | 4832.0 | 6485.2 | 9322.8  | 6856.5  | 6778.4  |
| 56.1   | 64.8   | 123.3  | 222.7  | 60.5   | 52.5   | 527.3   | 843.5   | 917.4   |
| 5.1    | 1.1    | 6.2    | 5.9    | 0.8    | 1.7    | 2.0     | 3.1     | 2.1     |
| 607.0  | 829.6  | 15.1   | 16.1   | 917.0  | 567.3  | 47.6    | 37.1    | 45.0    |
| 1.1    | 2.3    | 1.0    | 0.4    | 1.9    | 6.0    | 21.7    | 27.5    | 29.2    |
| 757.8  | 972.9  | 185.1  | 297.4  | 974.6  | 592.6  | 451.6   | 458.0   | 521.1   |
| 5434.8 | 6121.9 | 3448.1 | 4193.4 | 6224.8 | 5594.5 | 8743.8  | 8469.1  | 8540.0  |
| 587.9  | 764.3  | 144.3  | 216.6  | 812.0  | 668.2  | 146.1   | 173.2   | 194.0   |
| 371.0  | 492.2  | 50.9   | 58.0   | 419.2  | 525.5  | 1524.2  | 827.1   | 1052.9  |
| 62.8   | 176.9  | 31.7   | 45.9   | 122.6  | 115.7  | 561.8   | 440.6   | 478.7   |
| 922.5  | 1394.0 | 312.2  | 486.8  | 1375.7 | 1610.0 | 3253.3  | 2308.4  | 2419.4  |
| 299.3  | 424.8  | 69.7   | 93.3   | 313.1  | 439.8  | 1072.5  | 697.7   | 792.7   |
| 556.5  | 745.5  | 336.9  | 567.3  | 732.8  | 822.2  | 2126.2  | 1548.5  | 1659.8  |
| 990.9  | 952.7  | 444.2  | 691.9  | 1295.6 | 549.0  | 2328.2  | 2202.7  | 2425.1  |
| 577.9  | 1201.6 | 646.4  | 699.7  | 1131.1 | 1221.5 | 6227.7  | 6815.1  | 6932.4  |
| 2569.7 | 3720.6 | 1273.9 | 1511.2 | 3707.9 | 3324.6 | 10793.4 | 6726.9  | 6678.3  |
| 518.9  | 641.1  | 599.4  | 708.3  | 990.2  | 775.4  | 2414.6  | 2637.3  | 2897.2  |
| 638.9  | 923.3  | 561.3  | 709.3  | 853.8  | 851.6  | 1841.7  | 2090.9  | 2230.5  |
| 4547.5 | 5545.6 | 1462.4 | 1778.4 | 5844.3 | 5025.6 | 8614.7  | 7557.6  | 7438.6  |
| 3838.8 | 5036.9 | 2972.2 | 4336.9 | 5121.5 | 5279.8 | 10147.0 | 10160.2 | 9961.0  |
| 399.3  | 417.0  | 1350.8 | 1892.5 | 528.9  | 452.2  | 2064.9  | 1859.7  | 2232.0  |
| 3667.6 | 4744.8 | 1932.7 | 2732.9 | 4748.1 | 4393.5 | 6880.5  | 6621.1  | 6626.5  |
| 5519.3 | 6803.6 | 2307.1 | 3041.3 | 6565.2 | 6177.9 | 10814.3 | 10878.6 | 10711.9 |
| 166.1  | 244.1  | 41.1   | 48.0   | 236.4  | 551.1  | 208.1   | 191.7   | 204.3   |
| 2704.0 | 3250.8 | 485.9  | 541.9  | 3891.4 | 2871.2 | 3221.4  | 3668.0  | 3501.6  |
| 1076.6 | 1583.1 | 125.9  | 114.9  | 1632.8 | 1441.7 | 1547.4  | 1606.5  | 1673.6  |
| 10.5   | 16.6   | 28.6   | 34.1   | 20.2   | 29.7   | 50.0    | 38.7    | 66.7    |
| 324.1  | 386.8  | 97.0   | 139.1  | 370.0  | 397.0  | 224.7   | 227.0   | 254.7   |
| 106.6  | 114.3  | 77.4   | 94.7   | 137.0  | 93.9   | 267.1   | 94.3    | 98.7    |
| 541.7  | 644.0  | 110.5  | 174.1  | 932.4  | 550.6  | 2651.1  | 1292.6  | 1648.6  |
| 939.2  | 1239.2 | 191.2  | 268.8  | 1371.0 | 1411.3 | 2333.8  | 874.5   | 955.9   |
| 106.7  | 135.7  | 19.6   | 39.6   | 148.3  | 118.1  | 333.5   | 183.0   | 197.1   |
| 487.9  | 579.6  | 50.0   | 77.4   | 598.6  | 486.5  | 1381.3  | 682.5   | 697.8   |

|        |        |        |        |        |        |         |         |         |
|--------|--------|--------|--------|--------|--------|---------|---------|---------|
| 797.7  | 908.9  | 122.4  | 249.2  | 1141.4 | 778.7  | 1695.4  | 954.6   | 1130.4  |
| 822.3  | 804.2  | 179.7  | 275.5  | 1094.4 | 705.3  | 1655.0  | 987.5   | 1097.7  |
| 6374.1 | 7146.3 | 2411.6 | 3132.8 | 7337.8 | 6349.7 | 9558.1  | 9041.0  | 9235.9  |
| 9.7    | 12.9   | 197.4  | 332.1  | 5.0    | 4.4    | 17.6    | 16.3    | 7.2     |
| 0.9    | 1.0    | 1699.5 | 2077.1 | 1.6    | 0.3    | 2.7     | 4.4     | 3.4     |
| 733.8  | 858.3  | 116.1  | 165.3  | 844.1  | 760.9  | 1438.9  | 1217.1  | 1423.1  |
| 586.9  | 817.3  | 341.0  | 496.8  | 951.4  | 641.2  | 2002.6  | 1959.0  | 2314.6  |
| 410.0  | 565.1  | 223.6  | 269.3  | 536.3  | 459.2  | 1747.4  | 1409.9  | 1571.7  |
| 957.3  | 1121.1 | 238.0  | 323.2  | 1509.9 | 862.7  | 2841.4  | 2857.7  | 2899.3  |
| 28.4   | 4.8    | 5.6    | 17.5   | 52.1   | 29.9   | 165.4   | 63.5    | 79.2    |
| 34.8   | 45.7   | 64.7   | 109.5  | 55.1   | 63.7   | 134.1   | 125.6   | 132.9   |
| 9.8    | 3.8    | 1.5    | 9.1    | 9.5    | 1.1    | 75.1    | 41.1    | 45.2    |
| 546.5  | 817.3  | 420.1  | 493.6  | 836.9  | 601.1  | 2992.7  | 2033.1  | 2223.8  |
| 3874.0 | 4950.5 | 1485.4 | 2674.0 | 4430.9 | 3602.0 | 6184.2  | 3957.2  | 4038.3  |
| 6779.0 | 8520.0 | 1446.2 | 2013.2 | 8588.1 | 7771.2 | 8538.8  | 5840.0  | 5933.1  |
| 5965.8 | 6859.7 | 4240.7 | 5066.8 | 6205.4 | 6305.9 | 9690.3  | 9124.5  | 9384.2  |
| 1084.8 | 1362.8 | 469.3  | 569.2  | 1871.8 | 1614.4 | 2296.7  | 1882.0  | 1993.6  |
| 6166.6 | 6790.4 | 3393.1 | 4827.8 | 6995.2 | 6270.2 | 10330.2 | 10186.7 | 10468.9 |
| 25.9   | 15.6   | 48.3   | 36.8   | 17.1   | 7.7    | 123.5   | 86.7    | 113.8   |
| 499.1  | 699.5  | 141.7  | 179.4  | 723.9  | 537.9  | 527.1   | 496.2   | 528.4   |
| 408.3  | 443.1  | 235.8  | 333.0  | 335.1  | 343.1  | 544.5   | 483.9   | 541.5   |
| 146.4  | 207.8  | 181.9  | 194.7  | 185.6  | 177.4  | 374.0   | 361.3   | 397.2   |
| 98.8   | 110.2  | 101.8  | 100.2  | 169.7  | 125.6  | 153.1   | 138.6   | 158.3   |
| 8876.3 | 9617.1 | 5482.0 | 6670.4 | 9863.3 | 8813.7 | 11259.7 | 10622.3 | 10665.0 |
| 70.3   | 83.0   | 232.5  | 328.0  | 94.4   | 73.2   | 146.3   | 182.6   | 212.7   |
| 17.1   | 24.7   | 14.0   | 6.4    | 13.7   | 15.4   | 6.5     | 7.3     | 8.7     |
| 1.3    | 1.9    | 2.0    | 0.9    | 2.3    | 1.1    | 3.4     | 1.8     | 3.0     |
| 529.4  | 559.0  | 153.8  | 238.1  | 721.6  | 513.1  | 466.6   | 279.9   | 361.5   |
| 5813.9 | 6792.5 | 4201.8 | 5082.5 | 5629.4 | 6088.9 | 10457.3 | 10034.5 | 10207.7 |
| 585.6  | 795.0  | 800.0  | 1109.9 | 700.5  | 604.6  | 884.2   | 691.4   | 777.2   |
| 381.5  | 490.1  | 531.0  | 743.6  | 514.3  | 486.4  | 1005.3  | 754.6   | 829.6   |
| 644.0  | 743.8  | 244.4  | 323.0  | 783.9  | 641.7  | 161.2   | 285.2   | 395.5   |
| 190.6  | 218.8  | 77.4   | 83.0   | 317.4  | 264.7  | 801.6   | 797.7   | 863.0   |
| 412.1  | 463.2  | 126.7  | 176.7  | 464.9  | 352.8  | 1259.5  | 1230.6  | 1376.0  |
| 681.3  | 817.6  | 146.2  | 182.2  | 993.6  | 843.7  | 1012.1  | 787.3   | 893.7   |
| 171.5  | 166.6  | 8.6    | 4.7    | 224.8  | 131.4  | 10.4    | 7.4     | 3.6     |
| 59.0   | 51.1   | 0.6    | 3.6    | 81.1   | 42.1   | 6.8     | 9.8     | 2.9     |
| 672.1  | 640.6  | 78.5   | 123.8  | 865.3  | 691.0  | 513.6   | 622.0   | 731.3   |
| 20.3   | 42.2   | 18.5   | 13.9   | 23.7   | 36.5   | 59.1    | 68.8    | 76.8    |
| 375.9  | 416.3  | 71.3   | 99.7   | 472.0  | 333.2  | 475.5   | 488.9   | 536.8   |
| 6234.6 | 7282.5 | 4723.9 | 5877.3 | 6686.6 | 6797.9 | 10015.4 | 9456.8  | 9284.0  |
| 211.8  | 528.4  | 29.7   | 64.9   | 254.5  | 198.4  | 168.4   | 283.6   | 339.6   |
| 5240.1 | 6110.2 | 2785.3 | 3305.1 | 5810.0 | 5936.0 | 7754.5  | 7827.2  | 7860.1  |
| 99.5   | 124.7  | 41.0   | 58.1   | 106.5  | 114.9  | 432.9   | 327.7   | 404.9   |
| 2448.8 | 3309.3 | 1362.0 | 1833.8 | 3563.6 | 3305.5 | 7352.3  | 6883.3  | 7050.0  |
| 17.6   | 43.5   | 13.6   | 15.1   | 29.1   | 28.5   | 71.9    | 65.5    | 69.9    |
| 56.9   | 82.0   | 39.9   | 49.9   | 83.1   | 68.9   | 168.5   | 131.5   | 137.6   |
| 71.9   | 79.5   | 119.0  | 151.3  | 90.6   | 81.6   | 394.6   | 307.7   | 363.2   |
| 229.5  | 258.8  | 57.1   | 60.7   | 284.8  | 228.4  | 384.1   | 210.2   | 235.1   |
| 315.7  | 352.9  | 81.2   | 118.8  | 451.5  | 291.5  | 545.3   | 388.7   | 452.4   |
| 130.3  | 141.2  | 78.6   | 93.8   | 182.6  | 116.4  | 326.8   | 243.0   | 254.3   |
| 251.2  | 280.2  | 170.1  | 341.1  | 367.3  | 293.0  | 1177.4  | 1137.6  | 1229.0  |
| 157.3  | 140.6  | 165.2  | 223.4  | 181.2  | 223.0  | 781.1   | 745.0   | 789.2   |

|        |        |        |        |        |        |         |         |         |
|--------|--------|--------|--------|--------|--------|---------|---------|---------|
| 123.8  | 131.4  | 250.0  | 337.0  | 180.7  | 120.3  | 511.2   | 475.1   | 479.5   |
| 485.8  | 655.9  | 501.1  | 784.8  | 697.8  | 325.9  | 1324.9  | 509.5   | 572.0   |
| 1935.4 | 3266.2 | 216.2  | 358.1  | 2372.9 | 2373.7 | 3128.8  | 1845.7  | 2114.1  |
| 2.2    | 2.6    | 121.2  | 159.1  | 12.5   | 18.5   | 26.2    | 27.6    | 6.6     |
| 5.3    | 7.1    | 90.3   | 86.0   | 3.6    | 14.6   | 12.3    | 9.9     | 11.0    |
| 1042.4 | 1263.5 | 27.3   | 26.4   | 1799.0 | 1593.4 | 372.2   | 265.4   | 298.2   |
| 657.5  | 884.8  | 482.9  | 883.7  | 1073.8 | 871.9  | 2495.0  | 1787.7  | 2042.8  |
| 157.4  | 202.9  | 257.7  | 451.1  | 232.2  | 132.7  | 1244.3  | 796.9   | 764.8   |
| 360.3  | 460.2  | 133.1  | 181.5  | 404.4  | 359.6  | 893.4   | 720.2   | 832.1   |
| 1194.2 | 1563.8 | 118.2  | 163.0  | 1814.4 | 1417.5 | 1556.2  | 672.0   | 798.6   |
| 19.9   | 35.0   | 53.0   | 53.5   | 38.8   | 30.1   | 47.4    | 30.8    | 35.0    |
| 93.1   | 124.3  | 47.5   | 46.7   | 88.1   | 89.3   | 192.1   | 204.3   | 216.1   |
| 221.4  | 295.6  | 96.6   | 117.5  | 291.8  | 240.2  | 598.5   | 578.7   | 637.9   |
| 310.4  | 392.1  | 45.1   | 64.6   | 377.9  | 390.7  | 638.9   | 525.4   | 573.7   |
| 55.7   | 71.0   | 31.4   | 27.2   | 72.4   | 91.2   | 218.3   | 250.3   | 277.7   |
| 854.5  | 1045.5 | 134.2  | 245.7  | 1163.5 | 935.1  | 280.0   | 182.9   | 214.0   |
| 380.7  | 479.3  | 147.0  | 245.1  | 624.1  | 363.0  | 246.7   | 161.6   | 177.1   |
| 54.2   | 53.9   | 18.8   | 5.7    | 75.2   | 35.1   | 85.6    | 77.0    | 84.7    |
| 363.1  | 456.1  | 20.1   | 41.6   | 407.7  | 746.6  | 700.3   | 449.1   | 492.6   |
| 271.0  | 337.6  | 62.2   | 117.6  | 299.1  | 379.1  | 532.0   | 373.0   | 427.1   |
| 1.5    | 8.6    | 1.2    | 2.4    | 3.9    | 8.4    | 1.2     | 1.1     | 1.8     |
| 86.6   | 114.8  | 23.0   | 47.7   | 92.2   | 103.9  | 418.6   | 259.6   | 318.5   |
| 195.6  | 379.7  | 58.2   | 110.5  | 337.5  | 330.9  | 462.4   | 376.1   | 411.1   |
| 105.6  | 152.5  | 209.4  | 402.0  | 139.7  | 147.1  | 177.0   | 207.4   | 223.5   |
| 169.8  | 297.6  | 83.8   | 96.2   | 208.6  | 311.0  | 786.3   | 527.6   | 588.9   |
| 228.5  | 229.9  | 72.9   | 94.8   | 399.0  | 242.9  | 351.6   | 435.7   | 585.6   |
| 64.2   | 61.7   | 32.2   | 49.1   | 75.3   | 39.8   | 147.0   | 169.5   | 175.3   |
| 551.4  | 831.1  | 244.6  | 384.7  | 1093.6 | 768.6  | 876.2   | 530.7   | 586.9   |
| 570.8  | 663.7  | 124.8  | 221.6  | 604.0  | 628.2  | 741.3   | 373.8   | 421.0   |
| 1755.9 | 2630.2 | 446.3  | 682.1  | 2595.7 | 2432.8 | 8988.0  | 8589.3  | 8659.9  |
| 6325.8 | 7497.6 | 4261.3 | 4508.4 | 7297.2 | 7582.3 | 9427.0  | 9054.6  | 9064.3  |
| 134.6  | 201.6  | 51.1   | 68.1   | 218.9  | 154.2  | 341.5   | 412.0   | 475.5   |
| 434.6  | 393.5  | 926.3  | 1046.5 | 698.1  | 351.5  | 1952.0  | 2088.4  | 2434.3  |
| 6479.1 | 7623.8 | 1398.9 | 1757.3 | 8005.7 | 7619.2 | 11394.2 | 10966.5 | 11019.6 |
| 708.1  | 696.8  | 131.8  | 140.4  | 989.7  | 665.4  | 1785.9  | 1996.6  | 2164.1  |
| 129.1  | 130.9  | 34.5   | 50.6   | 144.8  | 131.3  | 225.0   | 220.1   | 181.4   |
| 148.1  | 211.8  | 56.6   | 52.8   | 287.1  | 245.2  | 64.0    | 73.3    | 105.7   |
| 105.2  | 51.1   | 192.9  | 232.8  | 106.9  | 85.1   | 183.5   | 309.6   | 392.4   |
| 272.4  | 218.6  | 105.0  | 176.2  | 252.9  | 285.9  | 634.5   | 613.1   | 669.1   |
| 591.6  | 639.5  | 417.6  | 463.2  | 778.3  | 616.2  | 1949.0  | 1070.5  | 1008.6  |
| 90.7   | 98.6   | 61.0   | 68.4   | 142.2  | 174.6  | 216.5   | 240.1   | 290.0   |
| 167.5  | 227.1  | 84.9   | 123.0  | 269.1  | 208.6  | 589.7   | 735.4   | 815.6   |
| 173.1  | 222.3  | 130.2  | 127.9  | 255.0  | 233.1  | 377.8   | 521.6   | 599.8   |
| 169.5  | 223.0  | 217.1  | 319.7  | 184.9  | 206.4  | 640.2   | 609.6   | 665.3   |
| 545.6  | 604.0  | 314.4  | 398.8  | 814.8  | 576.6  | 1037.1  | 1359.5  | 1411.1  |
| 130.2  | 153.7  | 138.7  | 166.9  | 136.1  | 99.4   | 417.4   | 338.4   | 410.1   |
| 131.4  | 150.1  | 300.5  | 468.7  | 201.4  | 140.1  | 865.2   | 793.2   | 840.6   |
| 63.5   | 100.8  | 84.2   | 154.0  | 146.3  | 112.2  | 457.6   | 673.2   | 755.5   |
| 153.5  | 160.9  | 350.4  | 448.8  | 260.8  | 223.1  | 1070.9  | 1283.0  | 1400.1  |
| 913.8  | 1336.2 | 195.7  | 240.5  | 1540.1 | 1126.7 | 2231.3  | 1133.2  | 1294.5  |
| 123.9  | 196.6  | 309.0  | 450.1  | 285.6  | 115.5  | 303.1   | 300.5   | 341.2   |
| 288.9  | 424.8  | 40.8   | 33.0   | 469.8  | 373.4  | 888.7   | 527.7   | 554.0   |
| 90.8   | 159.1  | 23.7   | 37.6   | 81.4   | 183.2  | 471.0   | 262.8   | 295.9   |

|        |        |        |        |        |        |        |        |        |
|--------|--------|--------|--------|--------|--------|--------|--------|--------|
| 144.4  | 180.3  | 269.5  | 355.1  | 193.9  | 103.7  | 436.0  | 939.3  | 945.4  |
| 2047.4 | 2256.6 | 17.9   | 26.7   | 2569.1 | 2024.8 | 1080.0 | 724.7  | 805.7  |
| 379.8  | 357.8  | 245.1  | 269.9  | 342.4  | 499.4  | 716.3  | 529.8  | 571.5  |
| 51.4   | 43.8   | 9.7    | 15.3   | 61.1   | 27.5   | 93.1   | 113.0  | 129.4  |
| 237.8  | 309.5  | 68.3   | 66.2   | 312.9  | 298.7  | 309.4  | 404.9  | 457.1  |
| 11.8   | 5.7    | 24.8   | 18.5   | 9.9    | 23.8   | 13.2   | 7.4    | 24.0   |
| 164.8  | 112.1  | 233.1  | 203.1  | 188.0  | 150.4  | 350.2  | 345.4  | 381.9  |
| 36.7   | 91.0   | 160.2  | 144.2  | 90.3   | 68.3   | 306.5  | 272.8  | 272.6  |
| 543.7  | 759.6  | 359.4  | 501.5  | 798.1  | 614.4  | 2360.0 | 3066.6 | 3949.6 |
| 1298.6 | 1705.8 | 200.9  | 398.3  | 2442.7 | 1804.7 | 3593.0 | 4804.0 | 5004.3 |
| 403.4  | 610.9  | 339.8  | 387.7  | 616.1  | 651.0  | 1463.3 | 1308.2 | 1245.4 |
| 58.3   | 68.7   | 83.9   | 119.4  | 94.2   | 123.7  | 416.7  | 340.8  | 433.9  |
| 1023.1 | 1530.6 | 123.8  | 139.8  | 1665.4 | 1317.0 | 903.1  | 726.3  | 855.7  |
| 111.6  | 139.5  | 271.7  | 355.3  | 202.2  | 96.4   | 837.1  | 640.1  | 696.3  |
| 66.1   | 71.2   | 22.8   | 14.1   | 109.9  | 42.1   | 54.7   | 65.4   | 61.0   |
| 702.2  | 1034.8 | 1.0    | 3.5    | 1119.0 | 937.3  | 2.6    | 1.2    | 3.7    |
| 42.4   | 47.5   | 20.9   | 31.5   | 81.6   | 58.4   | 52.4   | 60.4   | 65.8   |
| 14.2   | 16.0   | 7.4    | 9.3    | 30.9   | 16.7   | 21.2   | 26.8   | 21.4   |
| 146.0  | 217.3  | 13.6   | 30.6   | 250.9  | 166.8  | 80.1   | 91.1   | 95.9   |
| 228.1  | 264.2  | 132.4  | 173.5  | 298.3  | 189.2  | 306.6  | 243.1  | 259.2  |
| 3521.1 | 4426.8 | 1588.9 | 2195.1 | 4827.5 | 4686.4 | 5245.7 | 6000.0 | 6352.8 |
| 381.8  | 366.9  | 117.6  | 238.4  | 553.6  | 247.3  | 1042.8 | 866.7  | 988.9  |
| 40.9   | 38.9   | 21.5   | 31.9   | 56.4   | 25.9   | 142.6  | 114.6  | 124.3  |
| 1491.8 | 1799.0 | 1500.9 | 2071.4 | 1745.9 | 1543.3 | 3976.4 | 3959.1 | 4169.2 |
| 705.0  | 1184.0 | 352.1  | 440.1  | 719.3  | 611.4  | 913.0  | 624.7  | 789.9  |
| 133.5  | 166.8  | 147.8  | 213.3  | 183.0  | 147.2  | 445.3  | 328.1  | 336.6  |
| 269.0  | 316.7  | 108.2  | 139.2  | 431.9  | 275.4  | 1043.6 | 574.3  | 654.3  |
| 215.0  | 301.6  | 117.8  | 226.1  | 278.6  | 318.7  | 444.1  | 263.6  | 321.9  |
| 214.8  | 271.1  | 235.7  | 423.4  | 326.9  | 205.9  | 179.1  | 123.9  | 163.7  |
| 179.3  | 226.9  | 2.5    | 6.8    | 316.2  | 128.0  | 4.7    | 3.8    | 7.7    |
| 69.3   | 104.0  | 176.8  | 321.4  | 154.6  | 64.0   | 17.5   | 11.2   | 9.9    |
| 26.5   | 38.5   | 49.2   | 44.8   | 34.4   | 26.6   | 92.7   | 143.3  | 150.0  |
| 533.8  | 640.2  | 117.0  | 183.5  | 1059.8 | 648.2  | 5.3    | 4.8    | 1.4    |
| 23.9   | 44.0   | 19.2   | 20.8   | 16.4   | 20.4   | 75.6   | 109.2  | 111.1  |
| 72.7   | 171.1  | 51.7   | 82.5   | 126.4  | 117.9  | 309.3  | 499.7  | 529.8  |
| 1433.6 | 2428.7 | 5.9    | 3.2    | 2148.0 | 2166.0 | 100.5  | 120.3  | 122.2  |
| 300.3  | 378.2  | 62.1   | 67.0   | 409.4  | 327.8  | 1608.3 | 1333.0 | 1640.9 |
| 191.5  | 210.1  | 480.8  | 690.4  | 261.3  | 190.4  | 511.0  | 818.9  | 932.6  |
| 208.4  | 327.4  | 314.6  | 412.9  | 314.2  | 303.3  | 524.5  | 507.7  | 551.3  |
| 219.2  | 270.3  | 181.4  | 253.6  | 264.4  | 406.0  | 299.1  | 306.2  | 269.3  |
| 39.5   | 62.0   | 42.0   | 48.3   | 54.8   | 58.6   | 126.6  | 104.7  | 111.3  |
| 154.3  | 172.0  | 131.9  | 106.9  | 196.0  | 156.5  | 136.6  | 122.7  | 130.9  |
| 344.2  | 363.0  | 62.4   | 64.7   | 551.3  | 384.3  | 194.8  | 239.5  | 235.5  |
| 52.3   | 71.5   | 51.7   | 88.2   | 71.2   | 30.1   | 470.4  | 284.9  | 310.4  |
| 84.3   | 89.2   | 40.7   | 43.7   | 102.4  | 99.5   | 199.9  | 202.3  | 188.3  |
| 145.0  | 146.7  | 99.3   | 196.3  | 204.6  | 119.3  | 702.4  | 409.2  | 406.2  |
| 472.8  | 624.4  | 108.4  | 132.4  | 693.2  | 408.8  | 1102.8 | 948.0  | 974.9  |
| 245.7  | 396.2  | 37.8   | 45.5   | 347.8  | 439.6  | 437.4  | 238.7  | 296.6  |
| 694.1  | 818.5  | 51.0   | 61.7   | 1088.8 | 809.7  | 1375.5 | 1455.5 | 1504.5 |
| 117.7  | 135.2  | 26.4   | 63.3   | 185.3  | 137.1  | 179.8  | 227.0  | 228.0  |
| 268.9  | 283.3  | 75.2   | 64.7   | 439.1  | 251.9  | 325.3  | 402.5  | 355.7  |
| 3.3    | 7.6    | 44.9   | 65.1   | 5.6    | 2.6    | 91.2   | 82.8   | 64.6   |
| 333.1  | 380.4  | 265.0  | 336.7  | 446.1  | 282.1  | 420.1  | 457.6  | 478.3  |

|        |        |        |        |        |        |        |        |        |
|--------|--------|--------|--------|--------|--------|--------|--------|--------|
| 1624.5 | 1854.3 | 568.6  | 719.3  | 1894.5 | 1757.7 | 2643.7 | 1613.8 | 1703.6 |
| 487.5  | 647.2  | 118.9  | 115.2  | 753.7  | 536.0  | 763.0  | 483.4  | 539.5  |
| 104.8  | 162.6  | 37.8   | 50.9   | 166.5  | 159.7  | 158.0  | 140.6  | 155.6  |
| 245.2  | 383.5  | 40.2   | 37.1   | 420.4  | 342.2  | 271.6  | 205.9  | 221.8  |
| 162.5  | 203.9  | 68.0   | 88.1   | 179.6  | 251.3  | 159.6  | 137.3  | 130.6  |
| 96.1   | 183.6  | 55.5   | 70.7   | 163.3  | 150.1  | 122.5  | 87.7   | 78.7   |
| 133.3  | 235.2  | 138.6  | 167.5  | 190.5  | 152.8  | 446.2  | 320.6  | 417.1  |
| 16.0   | 22.8   | 9.0    | 4.4    | 16.6   | 18.1   | 29.6   | 14.5   | 25.8   |
| 103.6  | 122.0  | 81.3   | 94.8   | 120.8  | 144.5  | 233.9  | 163.5  | 206.6  |
| 163.4  | 202.2  | 106.3  | 175.6  | 228.5  | 218.9  | 325.3  | 522.2  | 547.2  |
| 168.3  | 216.9  | 174.6  | 357.2  | 180.8  | 133.2  | 686.6  | 289.7  | 303.5  |
| 203.0  | 253.3  | 118.7  | 136.2  | 341.3  | 154.4  | 296.4  | 349.2  | 403.6  |
| 78.6   | 122.4  | 148.9  | 244.0  | 110.3  | 146.9  | 211.4  | 143.2  | 126.5  |
| 44.6   | 44.9   | 64.9   | 111.4  | 53.5   | 41.1   | 108.2  | 74.5   | 98.1   |
| 1153.1 | 1258.8 | 400.4  | 538.4  | 1554.1 | 1040.4 | 2414.8 | 1764.9 | 1890.9 |
| 1948.6 | 1998.2 | 1391.4 | 1817.8 | 2324.5 | 1915.0 | 3802.7 | 2775.8 | 2828.9 |
| 598.8  | 680.2  | 116.1  | 183.2  | 698.2  | 740.3  | 1134.8 | 924.1  | 986.8  |
| 386.9  | 668.4  | 227.1  | 303.3  | 529.6  | 813.6  | 1233.9 | 977.6  | 975.3  |
| 47.6   | 142.9  | 42.2   | 49.9   | 123.5  | 128.5  | 381.1  | 286.7  | 336.9  |
| 70.5   | 75.0   | 35.6   | 8.2    | 87.0   | 79.5   | 53.8   | 68.3   | 73.1   |
| 28.5   | 32.7   | 42.5   | 53.8   | 42.4   | 20.1   | 95.2   | 214.5  | 238.7  |
| 28.3   | 28.3   | 33.4   | 27.0   | 34.0   | 27.6   | 104.9  | 262.3  | 255.4  |
| 1436.4 | 2347.8 | 281.0  | 436.9  | 1996.5 | 2334.3 | 2747.4 | 1941.2 | 2143.2 |
| 324.9  | 404.6  | 165.7  | 234.3  | 439.7  | 406.5  | 1246.3 | 817.8  | 909.7  |
| 276.0  | 307.9  | 91.6   | 109.4  | 377.6  | 325.2  | 645.9  | 447.8  | 606.9  |
| 116.4  | 220.9  | 102.1  | 125.0  | 188.5  | 197.6  | 627.5  | 491.9  | 495.9  |
| 470.1  | 431.8  | 112.0  | 233.2  | 510.6  | 450.5  | 1077.6 | 272.4  | 341.7  |
| 60.3   | 82.9   | 77.1   | 112.8  | 93.4   | 44.6   | 381.1  | 155.3  | 163.9  |
| 61.2   | 150.0  | 2.4    | 10.3   | 145.2  | 141.9  | 142.5  | 41.1   | 37.1   |
| 46.7   | 109.5  | 92.8   | 96.4   | 80.6   | 135.4  | 149.8  | 167.3  | 167.5  |
| 285.9  | 363.4  | 123.2  | 164.3  | 353.6  | 401.4  | 1160.8 | 1010.2 | 1030.4 |
| 73.1   | 86.2   | 47.9   | 65.1   | 91.8   | 51.7   | 86.0   | 62.3   | 87.7   |
| 50.0   | 71.8   | 78.0   | 64.8   | 61.2   | 45.9   | 164.7  | 101.6  | 120.5  |
| 8.2    | 0.6    | 518.7  | 730.2  | 1.4    | 16.3   | 32.2   | 89.1   | 125.5  |
| 762.1  | 1048.7 | 107.6  | 119.5  | 1152.5 | 1058.7 | 1624.5 | 1767.0 | 1857.7 |
| 356.0  | 479.6  | 65.3   | 74.3   | 510.9  | 438.7  | 472.4  | 533.1  | 585.3  |
| 12.4   | 16.9   | 563.3  | 687.3  | 33.9   | 16.3   | 106.3  | 155.8  | 182.6  |
| 247.8  | 343.1  | 139.2  | 191.0  | 373.8  | 304.1  | 461.6  | 503.9  | 515.5  |
| 77.3   | 117.2  | 34.5   | 47.1   | 95.0   | 92.2   | 202.8  | 218.9  | 203.9  |
| 145.9  | 163.5  | 41.8   | 46.2   | 441.7  | 197.3  | 7.1    | 11.2   | 5.7    |
| 180.7  | 196.5  | 512.5  | 608.9  | 229.6  | 178.8  | 865.0  | 685.2  | 927.9  |
| 63.4   | 53.7   | 50.6   | 77.6   | 58.0   | 41.4   | 153.7  | 179.6  | 211.3  |
| 59.2   | 61.1   | 19.0   | 13.5   | 143.7  | 52.2   | 11.3   | 7.4    | 10.8   |
| 144.0  | 179.1  | 15.1   | 15.9   | 438.6  | 173.9  | 1.0    | 2.8    | 1.3    |
| 342.8  | 414.5  | 202.3  | 238.5  | 523.4  | 396.1  | 470.2  | 520.2  | 609.6  |
| 482.5  | 641.8  | 305.0  | 346.9  | 672.3  | 611.3  | 2120.7 | 1138.3 | 1075.5 |
| 38.6   | 38.8   | 17.7   | 26.5   | 43.8   | 32.9   | 67.4   | 64.3   | 83.1   |
| 68.3   | 83.6   | 52.3   | 62.6   | 90.5   | 72.6   | 159.0  | 217.6  | 283.3  |
| 180.7  | 183.4  | 71.1   | 97.5   | 184.2  | 186.5  | 483.5  | 670.0  | 804.2  |
| 49.9   | 10.8   | 36.1   | 35.5   | 47.9   | 32.0   | 238.5  | 218.7  | 232.8  |
| 183.9  | 237.3  | 479.4  | 630.0  | 187.6  | 239.9  | 997.2  | 846.9  | 900.7  |
| 185.3  | 263.0  | 189.0  | 279.1  | 327.3  | 264.7  | 694.4  | 541.5  | 591.9  |
| 283.2  | 306.6  | 123.6  | 183.7  | 321.1  | 263.1  | 529.4  | 376.6  | 432.4  |

|        |        |        |        |        |        |        |        |        |
|--------|--------|--------|--------|--------|--------|--------|--------|--------|
| 332.3  | 450.6  | 113.8  | 125.3  | 500.4  | 496.5  | 1710.9 | 903.6  | 1040.7 |
| 244.5  | 260.6  | 224.8  | 302.4  | 346.2  | 239.0  | 300.5  | 314.9  | 382.2  |
| 51.3   | 60.7   | 32.2   | 20.8   | 68.9   | 62.8   | 154.0  | 78.2   | 89.6   |
| 248.6  | 256.9  | 108.8  | 150.0  | 332.6  | 184.7  | 188.5  | 204.3  | 180.2  |
| 8.8    | 33.9   | 7.7    | 0.8    | 25.1   | 28.8   | 23.5   | 20.6   | 17.1   |
| 58.2   | 94.7   | 1.8    | 0.6    | 80.4   | 89.2   | 41.3   | 25.7   | 19.0   |
| 260.9  | 344.5  | 39.8   | 32.2   | 248.5  | 255.5  | 400.8  | 203.0  | 226.5  |
| 571.8  | 718.2  | 195.1  | 248.5  | 625.9  | 664.1  | 1391.5 | 786.8  | 860.7  |
| 69.6   | 147.9  | 23.9   | 32.1   | 155.7  | 224.7  | 256.0  | 233.2  | 228.4  |
| 51.2   | 79.7   | 12.1   | 13.1   | 84.6   | 100.9  | 97.7   | 93.9   | 85.5   |
| 122.5  | 141.1  | 170.6  | 216.8  | 147.5  | 112.6  | 306.5  | 179.5  | 226.3  |
| 45.5   | 75.3   | 12.2   | 14.2   | 82.3   | 56.3   | 168.3  | 165.2  | 186.7  |
| 470.2  | 611.5  | 80.8   | 80.3   | 637.1  | 623.1  | 826.1  | 726.8  | 798.4  |
| 206.4  | 219.0  | 329.2  | 392.3  | 291.9  | 181.9  | 1374.3 | 1973.6 | 1788.4 |
| 5.6    | 12.3   | 0.3    | 0.7    | 7.9    | 11.0   | 15.2   | 11.8   | 19.6   |
| 89.9   | 85.7   | 69.0   | 101.8  | 106.9  | 90.2   | 168.5  | 177.9  | 188.8  |
| 280.0  | 475.4  | 66.6   | 80.7   | 616.7  | 480.9  | 174.0  | 219.5  | 249.7  |
| 7523.1 | 9093.9 | 1119.4 | 1527.4 | 8215.3 | 8401.0 | 1668.0 | 1040.0 | 1579.8 |
| 117.4  | 228.4  | 281.3  | 336.1  | 240.1  | 226.9  | 591.5  | 578.4  | 632.8  |
| 10.6   | 2.9    | 4.6    | 1.8    | 6.4    | 7.4    | 19.2   | 13.5   | 33.6   |
| 74.9   | 83.3   | 5.3    | 7.1    | 96.0   | 158.8  | 2.3    | 1.2    | 5.0    |
| 213.8  | 310.0  | 100.4  | 155.3  | 388.6  | 251.5  | 428.8  | 374.7  | 459.4  |
| 561.1  | 556.5  | 30.8   | 31.6   | 735.1  | 554.1  | 40.7   | 21.7   | 15.8   |
| 5413.0 | 5973.7 | 2447.5 | 3751.3 | 6442.4 | 5514.4 | 8780.1 | 8251.5 | 8382.7 |
| 136.0  | 178.6  | 0.5    | 1.5    | 251.4  | 200.7  | 0.5    | 0.6    | 0.4    |
| 129.8  | 247.8  | 63.8   | 127.5  | 207.5  | 172.1  | 472.6  | 330.4  | 404.1  |
| 151.5  | 183.9  | 213.8  | 299.3  | 206.9  | 130.4  | 625.9  | 578.7  | 704.7  |
| 811.7  | 1098.6 | 16.2   | 24.2   | 1200.4 | 975.3  | 624.5  | 992.0  | 1186.0 |
| 242.0  | 247.1  | 10.8   | 13.8   | 338.4  | 175.3  | 151.7  | 185.0  | 208.9  |
| 799.7  | 998.2  | 123.8  | 138.2  | 1338.7 | 905.8  | 769.1  | 637.1  | 707.8  |
| 110.7  | 86.4   | 185.2  | 245.5  | 112.4  | 79.4   | 329.5  | 331.7  | 336.3  |
| 456.6  | 599.1  | 133.8  | 165.0  | 592.8  | 550.4  | 921.8  | 790.0  | 857.9  |
| 123.4  | 192.7  | 34.7   | 25.4   | 230.7  | 187.7  | 326.8  | 213.2  | 220.0  |
| 125.2  | 147.7  | 44.6   | 59.0   | 211.1  | 90.9   | 246.1  | 170.6  | 163.4  |
| 168.5  | 206.4  | 133.5  | 241.4  | 259.4  | 286.9  | 755.1  | 782.6  | 861.8  |
| 1492.2 | 1679.6 | 98.5   | 85.5   | 2467.7 | 1862.6 | 259.6  | 364.6  | 385.2  |
| 439.5  | 542.6  | 297.3  | 437.3  | 647.1  | 510.9  | 1093.0 | 1133.4 | 1275.7 |
| 446.3  | 501.3  | 245.0  | 319.4  | 507.7  | 416.8  | 1196.3 | 1011.8 | 1140.5 |
| 201.9  | 195.3  | 162.9  | 217.1  | 237.1  | 176.0  | 308.8  | 259.9  | 288.2  |
| 27.7   | 18.1   | 2.7    | 3.3    | 13.3   | 27.6   | 57.9   | 81.8   | 84.1   |
| 49.2   | 57.7   | 41.6   | 49.3   | 45.6   | 66.0   | 96.5   | 97.1   | 114.8  |
| 43.1   | 71.9   | 32.2   | 31.9   | 88.7   | 56.4   | 158.7  | 217.6  | 269.3  |
| 1.1    | 3.1    | 23.3   | 25.5   | 15.0   | 2.9    | 11.5   | 13.8   | 11.7   |
| 116.3  | 143.1  | 56.9   | 66.4   | 180.9  | 124.7  | 616.3  | 758.0  | 833.3  |
| 113.8  | 151.5  | 84.1   | 112.8  | 187.7  | 143.4  | 291.3  | 205.0  | 253.0  |
| 249.8  | 326.3  | 133.5  | 127.1  | 371.2  | 292.1  | 564.5  | 475.0  | 514.1  |
| 107.7  | 114.0  | 114.1  | 126.8  | 141.2  | 114.0  | 460.1  | 403.4  | 472.1  |
| 192.3  | 236.1  | 53.4   | 84.8   | 347.9  | 201.2  | 837.5  | 770.8  | 847.8  |
| 107.8  | 99.9   | 110.9  | 143.4  | 167.0  | 114.3  | 439.9  | 529.4  | 535.9  |
| 91.5   | 103.8  | 64.8   | 77.8   | 141.2  | 89.3   | 511.3  | 579.7  | 638.0  |
| 157.2  | 188.6  | 829.9  | 1196.6 | 202.8  | 219.8  | 516.3  | 388.2  | 481.2  |
| 360.5  | 455.2  | 62.4   | 120.4  | 600.4  | 413.3  | 547.4  | 335.9  | 393.7  |
| 33.6   | 55.6   | 22.3   | 25.4   | 66.6   | 32.2   | 146.3  | 92.2   | 116.6  |

|        |        |        |        |        |        |        |        |        |
|--------|--------|--------|--------|--------|--------|--------|--------|--------|
| 431.6  | 595.2  | 28.7   | 35.1   | 495.3  | 514.6  | 197.7  | 200.8  | 272.1  |
| 92.3   | 125.7  | 24.7   | 33.9   | 135.4  | 116.3  | 162.7  | 109.4  | 119.2  |
| 178.2  | 138.1  | 23.6   | 25.1   | 186.3  | 224.4  | 159.5  | 174.8  | 189.9  |
| 2.9    | 1.3    | 14.1   | 9.7    | 1.1    | 1.3    | 5039.3 | 7787.0 | 7272.8 |
| 3.3    | 6.9    | 4.1    | 2.2    | 5.7    | 2.2    | 9.0    | 11.2   | 15.6   |
| 165.5  | 223.4  | 60.4   | 79.9   | 235.4  | 182.9  | 360.5  | 678.7  | 767.3  |
| 2219.0 | 2170.9 | 1313.7 | 1688.9 | 2695.3 | 2084.8 | 4430.8 | 3123.7 | 3145.5 |
| 481.6  | 432.1  | 328.5  | 511.8  | 570.6  | 408.7  | 1006.3 | 1043.6 | 1122.2 |
| 172.8  | 221.3  | 235.2  | 286.7  | 235.6  | 190.9  | 1015.6 | 883.9  | 1055.4 |
| 117.2  | 158.4  | 31.3   | 23.2   | 164.5  | 76.5   | 358.8  | 649.5  | 723.6  |
| 169.5  | 207.3  | 252.5  | 330.5  | 240.7  | 189.9  | 816.3  | 715.6  | 778.1  |
| 113.9  | 218.8  | 62.9   | 100.3  | 225.1  | 212.3  | 222.4  | 213.8  | 211.2  |
| 207.4  | 195.0  | 24.9   | 27.9   | 242.2  | 143.6  | 7.5    | 11.4   | 9.5    |
| 113.2  | 147.4  | 40.5   | 37.3   | 169.2  | 149.9  | 206.9  | 190.9  | 215.8  |
| 35.8   | 35.1   | 4.3    | 15.8   | 53.7   | 17.2   | 2.2    | 1.3    | 1.1    |
| 254.4  | 300.3  | 10.2   | 14.8   | 251.0  | 225.6  | 38.7   | 35.0   | 24.7   |
| 133.6  | 165.5  | 76.6   | 75.0   | 193.1  | 139.1  | 340.8  | 287.6  | 281.4  |
| 82.5   | 107.3  | 59.9   | 73.9   | 106.1  | 82.6   | 253.6  | 222.1  | 265.8  |
| 50.2   | 50.8   | 21.7   | 14.9   | 71.5   | 46.0   | 234.0  | 327.9  | 384.0  |
| 43.9   | 49.7   | 42.7   | 58.0   | 47.1   | 42.5   | 304.2  | 446.3  | 555.6  |
| 97.3   | 101.4  | 39.9   | 81.5   | 96.4   | 100.5  | 279.5  | 269.2  | 269.9  |
| 1362.7 | 1709.9 | 80.4   | 79.2   | 2390.1 | 1702.2 | 2589.3 | 694.0  | 959.4  |
| 166.7  | 189.9  | 71.7   | 83.0   | 191.5  | 194.9  | 535.8  | 511.1  | 517.2  |
| 180.1  | 246.7  | 100.7  | 127.4  | 231.5  | 222.4  | 769.8  | 803.2  | 855.1  |
| 1208.5 | 1857.9 | 16.6   | 24.9   | 2092.3 | 1487.9 | 1111.4 | 567.8  | 624.5  |
| 644.1  | 743.4  | 34.1   | 36.6   | 1004.5 | 771.0  | 382.3  | 195.0  | 203.7  |
| 295.3  | 374.4  | 186.2  | 304.8  | 424.1  | 329.9  | 583.4  | 361.2  | 367.3  |
| 413.8  | 464.6  | 69.4   | 85.1   | 515.6  | 476.9  | 1255.7 | 948.0  | 1247.0 |
| 10.8   | 6.5    | 9.0    | 13.6   | 9.9    | 18.5   | 76.9   | 125.8  | 183.1  |
| 911.2  | 1269.9 | 220.1  | 234.5  | 1306.0 | 1258.7 | 2210.2 | 1581.7 | 1675.4 |
| 834.4  | 1416.9 | 351.2  | 405.2  | 1111.1 | 1102.9 | 1079.3 | 762.6  | 861.1  |
| 87.0   | 107.2  | 73.0   | 84.8   | 110.3  | 76.0   | 150.1  | 120.5  | 134.2  |
| 76.1   | 116.3  | 4.7    | 12.1   | 135.5  | 58.9   | 25.4   | 34.5   | 52.7   |
| 302.1  | 390.0  | 29.5   | 30.5   | 431.6  | 399.1  | 174.0  | 258.9  | 326.6  |
| 255.5  | 316.5  | 29.7   | 31.9   | 390.9  | 304.5  | 361.1  | 378.9  | 418.0  |
| 349.1  | 518.3  | 122.2  | 133.0  | 348.6  | 507.0  | 72.1   | 53.9   | 72.4   |
| 13.2   | 12.3   | 22.4   | 39.1   | 12.4   | 17.6   | 128.5  | 169.2  | 195.4  |
| 4.7    | 4.6    | 4.3    | 1.6    | 1.5    | 15.1   | 17.7   | 23.7   | 16.5   |
| 7.7    | 16.5   | 39.2   | 69.0   | 11.3   | 1.7    | 132.6  | 278.7  | 265.2  |
| 79.3   | 90.6   | 68.2   | 66.9   | 87.8   | 84.3   | 154.1  | 167.2  | 181.1  |
| 107.7  | 122.9  | 103.1  | 105.9  | 159.4  | 137.4  | 230.4  | 233.4  | 262.9  |
| 228.8  | 368.9  | 12.7   | 19.8   | 422.9  | 422.9  | 1.7    | 8.0    | 3.5    |
| 575.9  | 734.5  | 27.1   | 30.2   | 831.4  | 774.3  | 4.4    | 6.1    | 1.4    |
| 215.0  | 323.0  | 48.3   | 56.3   | 329.7  | 305.4  | 460.9  | 339.7  | 360.0  |
| 561.6  | 764.3  | 45.4   | 60.0   | 1057.1 | 763.3  | 1.4    | 4.7    | 0.9    |
| 490.2  | 721.0  | 234.8  | 369.3  | 686.1  | 618.1  | 1160.2 | 989.6  | 1070.2 |
| 97.5   | 134.8  | 42.1   | 44.6   | 138.6  | 149.2  | 483.2  | 408.2  | 480.0  |
| 158.6  | 202.7  | 33.6   | 30.5   | 374.0  | 183.2  | 2053.7 | 2427.3 | 2664.1 |
| 172.4  | 193.5  | 40.4   | 61.5   | 242.9  | 217.6  | 236.6  | 151.3  | 179.6  |
| 4004.4 | 4613.5 | 3016.7 | 3490.1 | 4759.1 | 4717.9 | 7931.8 | 6768.6 | 7212.3 |
| 403.2  | 397.9  | 292.9  | 409.1  | 699.4  | 422.0  | 651.0  | 556.5  | 590.6  |
| 14.8   | 10.7   | 8.1    | 11.8   | 22.6   | 19.2   | 53.2   | 65.0   | 84.5   |
| 4172.4 | 4452.4 | 3596.9 | 4863.0 | 5127.6 | 3718.2 | 6169.1 | 6593.4 | 6817.3 |



|        |        |        |        |        |        |         |         |         |
|--------|--------|--------|--------|--------|--------|---------|---------|---------|
| 105.9  | 135.2  | 25.2   | 16.6   | 174.9  | 123.2  | 283.2   | 343.7   | 552.4   |
| 43.3   | 34.6   | 12.5   | 16.6   | 6.7    | 22.7   | 54.7    | 59.6    | 68.0    |
| 181.9  | 204.1  | 27.8   | 38.3   | 302.5  | 234.2  | 463.2   | 581.0   | 723.8   |
| 52.9   | 87.8   | 162.5  | 152.6  | 105.2  | 97.7   | 475.2   | 474.9   | 522.4   |
| 2.6    | 2.2    | 1.8    | 2.0    | 1.5    | 0.9    | 16.9    | 2.1     | 11.5    |
| 477.0  | 346.0  | 227.4  | 433.1  | 467.5  | 505.6  | 2723.7  | 1595.9  | 1625.3  |
| 108.1  | 150.5  | 67.2   | 84.4   | 194.1  | 103.4  | 285.9   | 269.4   | 270.5   |
| 263.2  | 193.5  | 198.6  | 273.8  | 284.1  | 207.6  | 2714.4  | 1658.8  | 1748.4  |
| 254.5  | 221.7  | 246.9  | 360.0  | 314.0  | 216.4  | 3009.5  | 1808.4  | 1922.3  |
| 13.0   | 4.3    | 17.2   | 11.4   | 24.2   | 17.9   | 26.4    | 20.8    | 10.5    |
| 7651.4 | 9050.6 | 3412.6 | 4435.0 | 8625.1 | 8255.0 | 11947.2 | 12105.4 | 11902.3 |
| 524.7  | 455.3  | 185.9  | 202.8  | 430.0  | 464.5  | 283.2   | 247.7   | 352.8   |
| 34.1   | 72.2   | 27.1   | 25.3   | 72.1   | 49.8   | 83.1    | 114.5   | 113.7   |
| 681.2  | 726.8  | 172.9  | 229.7  | 994.3  | 715.5  | 1751.9  | 1002.2  | 1160.3  |
| 108.0  | 154.4  | 40.4   | 49.1   | 272.3  | 197.9  | 28.4    | 22.1    | 27.7    |
| 36.9   | 86.9   | 14.7   | 14.6   | 69.2   | 48.0   | 63.4    | 93.8    | 97.6    |
| 190.7  | 231.5  | 76.2   | 74.7   | 206.3  | 402.1  | 466.9   | 253.9   | 247.2   |
| 19.1   | 24.0   | 42.6   | 37.8   | 43.1   | 41.0   | 83.7    | 107.6   | 146.1   |
| 30.7   | 35.9   | 18.6   | 30.9   | 34.2   | 51.9   | 154.5   | 89.0    | 79.7    |
| 87.2   | 104.2  | 70.1   | 83.8   | 262.4  | 105.3  | 376.8   | 339.1   | 297.7   |
| 367.5  | 615.7  | 82.2   | 143.0  | 743.7  | 553.0  | 914.0   | 887.7   | 913.3   |
| 1020.5 | 1275.4 | 316.7  | 316.6  | 1222.2 | 1232.6 | 3108.4  | 1782.2  | 1901.8  |
| 1940.4 | 2422.0 | 562.4  | 847.3  | 2948.6 | 2211.7 | 2882.4  | 1675.9  | 1861.4  |
| 635.0  | 664.7  | 34.0   | 36.9   | 807.0  | 590.4  | 1516.6  | 904.1   | 1038.1  |
| 231.8  | 362.4  | 12.7   | 13.2   | 325.4  | 293.4  | 47.9    | 33.7    | 36.0    |
| 97.0   | 116.1  | 70.0   | 147.2  | 171.9  | 108.6  | 254.9   | 306.1   | 324.1   |
| 110.2  | 125.8  | 50.8   | 88.7   | 115.1  | 97.9   | 279.3   | 206.6   | 249.0   |
| 165.2  | 221.4  | 95.0   | 111.4  | 282.3  | 202.4  | 1063.7  | 1079.5  | 1167.8  |
| 60.3   | 102.6  | 103.3  | 93.6   | 88.4   | 61.9   | 142.9   | 171.5   | 162.9   |
| 110.9  | 128.1  | 58.6   | 124.8  | 173.3  | 119.3  | 169.2   | 105.4   | 117.2   |
| 121.5  | 183.3  | 48.7   | 57.5   | 178.3  | 131.3  | 193.3   | 216.2   | 211.1   |
| 86.0   | 141.8  | 49.5   | 44.3   | 142.2  | 112.5  | 237.6   | 203.1   | 256.4   |
| 36.0   | 46.4   | 32.4   | 45.4   | 42.2   | 41.5   | 225.3   | 230.0   | 262.2   |
| 18.3   | 23.2   | 0.8    | 3.5    | 19.2   | 17.2   | 74.6    | 76.3    | 87.6    |
| 53.2   | 63.1   | 31.7   | 15.5   | 60.2   | 43.4   | 129.9   | 132.0   | 153.2   |
| 13.1   | 27.4   | 6.4    | 16.3   | 27.2   | 30.4   | 48.1    | 92.2    | 88.4    |
| 354.2  | 403.0  | 24.5   | 29.7   | 471.5  | 289.6  | 504.0   | 570.2   | 632.1   |
| 478.3  | 598.5  | 191.8  | 302.3  | 652.2  | 553.2  | 599.3   | 532.1   | 577.0   |
| 98.1   | 134.1  | 115.9  | 130.6  | 175.9  | 134.3  | 210.6   | 192.7   | 203.4   |
| 1072.6 | 1158.5 | 13.8   | 32.3   | 1417.9 | 1073.5 | 1090.2  | 1283.4  | 1459.6  |
| 35.0   | 44.7   | 25.2   | 28.9   | 46.5   | 36.9   | 18.4    | 32.9    | 38.1    |
| 84.7   | 106.4  | 90.5   | 144.8  | 135.6  | 76.3   | 199.8   | 137.3   | 137.9   |
| 156.8  | 152.5  | 73.9   | 81.4   | 157.4  | 187.4  | 230.9   | 182.1   | 189.4   |
| 253.8  | 351.9  | 110.5  | 127.7  | 326.9  | 272.4  | 647.5   | 506.1   | 537.5   |
| 56.7   | 48.2   | 49.8   | 68.1   | 67.4   | 59.2   | 50.6    | 85.8    | 99.3    |
| 2131.7 | 3037.6 | 614.9  | 675.5  | 2628.1 | 2383.0 | 4394.7  | 2068.6  | 2427.1  |
| 61.9   | 87.5   | 170.9  | 258.5  | 87.9   | 75.3   | 323.1   | 270.3   | 327.1   |
| 148.3  | 210.5  | 159.2  | 190.8  | 166.2  | 224.7  | 663.0   | 639.0   | 697.8   |
| 54.7   | 79.7   | 55.4   | 44.0   | 76.8   | 56.7   | 65.9    | 107.1   | 103.2   |
| 42.4   | 35.9   | 21.1   | 29.7   | 79.2   | 44.8   | 57.2    | 102.3   | 102.5   |
| 120.3  | 161.6  | 34.1   | 45.5   | 197.3  | 147.3  | 68.6    | 92.6    | 103.0   |
| 32.8   | 21.4   | 2.7    | 4.4    | 41.5   | 21.2   | 37.6    | 73.1    | 80.9    |
| 126.9  | 209.9  | 36.1   | 55.5   | 223.3  | 205.8  | 164.2   | 192.4   | 235.9   |

|        |        |        |        |        |        |        |        |        |
|--------|--------|--------|--------|--------|--------|--------|--------|--------|
| 263.6  | 333.8  | 29.1   | 38.8   | 342.1  | 293.1  | 106.7  | 120.5  | 131.1  |
| 94.9   | 89.4   | 110.2  | 130.4  | 141.7  | 117.8  | 412.5  | 393.0  | 398.2  |
| 1274.4 | 1359.5 | 224.8  | 340.7  | 1698.5 | 1365.3 | 1749.3 | 897.3  | 997.2  |
| 150.9  | 240.6  | 36.5   | 32.6   | 279.2  | 229.5  | 902.1  | 1153.9 | 1192.5 |
| 12.3   | 24.9   | 40.2   | 58.5   | 43.9   | 19.5   | 194.8  | 206.8  | 265.2  |
| 574.3  | 704.6  | 40.3   | 56.6   | 810.2  | 551.4  | 764.0  | 506.6  | 564.3  |
| 251.1  | 325.3  | 133.5  | 216.7  | 377.1  | 287.8  | 704.7  | 1101.8 | 1255.5 |
| 147.6  | 178.7  | 156.7  | 166.5  | 250.8  | 182.2  | 554.7  | 838.1  | 943.8  |
| 23.8   | 34.3   | 19.0   | 21.4   | 42.7   | 27.3   | 243.0  | 274.4  | 283.4  |
| 189.9  | 224.4  | 138.4  | 200.8  | 363.3  | 184.1  | 340.5  | 458.2  | 473.9  |
| 117.1  | 156.1  | 56.7   | 87.0   | 189.1  | 136.1  | 264.3  | 288.7  | 332.6  |
| 19.0   | 22.4   | 40.1   | 38.9   | 25.5   | 25.7   | 298.6  | 376.0  | 370.0  |
| 53.0   | 97.8   | 70.1   | 91.6   | 90.8   | 87.2   | 221.8  | 207.7  | 203.9  |
| 357.1  | 511.8  | 150.4  | 192.2  | 475.3  | 502.1  | 592.3  | 554.6  | 603.1  |
| 69.2   | 93.0   | 27.1   | 29.8   | 92.1   | 89.1   | 167.2  | 150.0  | 157.7  |
| 56.1   | 54.1   | 19.2   | 42.3   | 70.2   | 66.7   | 102.8  | 108.1  | 113.6  |
| 1.0    | 0.6    | 3.3    | 13.1   | 1.1    | 0.6    | 5.6    | 2.3    | 4.9    |
| 372.9  | 504.8  | 122.8  | 140.6  | 644.4  | 520.1  | 1002.6 | 1495.5 | 1535.6 |
| 16.1   | 11.7   | 53.7   | 51.0   | 3.0    | 11.5   | 17.5   | 57.3   | 55.6   |
| 25.8   | 21.1   | 49.7   | 73.4   | 7.6    | 24.5   | 98.4   | 110.0  | 145.3  |
| 194.8  | 214.9  | 156.3  | 277.0  | 334.4  | 254.6  | 496.7  | 377.5  | 455.0  |
| 124.1  | 173.1  | 45.5   | 55.8   | 184.6  | 182.0  | 158.4  | 116.0  | 131.3  |
| 151.9  | 167.2  | 18.9   | 27.9   | 285.0  | 172.1  | 392.7  | 405.2  | 432.7  |
| 188.8  | 241.1  | 105.1  | 157.8  | 216.9  | 252.7  | 514.4  | 303.2  | 385.3  |
| 1251.5 | 1810.6 | 453.8  | 518.5  | 1419.5 | 1552.6 | 2798.6 | 2178.8 | 2361.3 |
| 2.2    | 4.1    | 3.0    | 7.4    | 1.4    | 0.4    | 3.3    | 5.9    | 9.2    |
| 2.5    | 1.7    | 13.6   | 5.8    | 1.0    | 6.9    | 3.3    | 5.2    | 2.8    |
| 270.9  | 275.8  | 100.8  | 92.9   | 320.6  | 277.6  | 332.4  | 359.1  | 386.1  |
| 64.1   | 60.5   | 58.2   | 76.3   | 68.9   | 60.9   | 315.3  | 384.0  | 436.3  |
| 43.3   | 55.9   | 111.5  | 145.4  | 55.0   | 37.7   | 148.6  | 161.6  | 179.2  |
| 3.4    | 1.5    | 4.6    | 2.2    | 3.7    | 1.3    | 6.0    | 6.9    | 11.2   |
| 81.3   | 48.8   | 69.4   | 113.8  | 86.8   | 59.5   | 98.5   | 191.4  | 214.6  |
| 94.8   | 134.3  | 10.8   | 3.5    | 144.1  | 139.6  | 148.7  | 105.6  | 113.9  |
| 320.1  | 444.4  | 39.0   | 55.9   | 395.0  | 371.0  | 618.5  | 487.2  | 487.8  |
| 28.1   | 21.3   | 17.7   | 12.5   | 36.4   | 10.2   | 86.6   | 56.8   | 50.3   |
| 5948.9 | 6573.2 | 4405.5 | 5221.2 | 6084.4 | 6099.1 | 9309.4 | 8270.2 | 8528.1 |
| 513.2  | 752.0  | 49.6   | 57.0   | 1014.6 | 609.0  | 349.8  | 198.6  | 207.1  |
| 371.0  | 503.2  | 131.4  | 179.4  | 688.6  | 464.8  | 273.4  | 208.7  | 214.3  |
| 51.4   | 90.1   | 17.6   | 14.2   | 69.8   | 72.6   | 157.8  | 264.5  | 309.0  |
| 102.4  | 121.0  | 90.9   | 106.2  | 153.0  | 140.0  | 369.2  | 337.9  | 393.9  |
| 276.7  | 376.8  | 41.5   | 48.1   | 378.1  | 335.5  | 354.1  | 559.0  | 544.0  |
| 257.3  | 321.6  | 114.5  | 162.6  | 293.2  | 216.9  | 245.8  | 257.6  | 266.7  |
| 94.1   | 117.6  | 85.7   | 114.5  | 157.4  | 107.1  | 632.6  | 911.6  | 1017.7 |
| 447.6  | 545.2  | 218.1  | 261.6  | 591.4  | 498.5  | 1344.6 | 930.6  | 1089.3 |
| 532.8  | 401.6  | 84.4   | 108.1  | 678.7  | 368.1  | 16.4   | 19.3   | 16.3   |
| 47.1   | 52.3   | 25.9   | 32.7   | 56.2   | 72.5   | 259.6  | 213.6  | 245.8  |
| 21.3   | 32.5   | 39.5   | 73.7   | 29.5   | 30.2   | 60.6   | 50.6   | 55.2   |
| 86.0   | 83.7   | 25.8   | 31.9   | 75.8   | 108.7  | 104.5  | 134.5  | 152.8  |
| 88.6   | 72.1   | 34.8   | 30.4   | 95.7   | 92.0   | 77.2   | 81.3   | 89.7   |
| 367.4  | 473.5  | 104.7  | 85.3   | 593.3  | 481.0  | 282.9  | 250.4  | 292.9  |
| 745.0  | 758.8  | 81.3   | 99.7   | 1149.7 | 815.7  | 1278.1 | 484.9  | 563.8  |
| 301.0  | 383.5  | 94.4   | 116.0  | 591.2  | 278.9  | 806.3  | 371.2  | 372.8  |
| 168.8  | 170.9  | 82.6   | 80.9   | 250.6  | 140.9  | 146.1  | 145.7  | 158.3  |

|        |         |        |        |         |        |         |         |         |
|--------|---------|--------|--------|---------|--------|---------|---------|---------|
| 90.1   | 130.0   | 29.9   | 41.8   | 93.6    | 112.0  | 230.4   | 210.1   | 208.8   |
| 3.0    | 10.6    | 6.5    | 2.6    | 11.6    | 6.9    | 5.1     | 5.8     | 8.3     |
| 39.6   | 93.9    | 75.1   | 85.6   | 92.0    | 80.8   | 318.1   | 430.4   | 531.5   |
| 2.0    | 13.5    | 2.2    | 15.1   | 12.1    | 1.0    | 32.3    | 26.9    | 34.0    |
| 0.9    | 10.0    | 2.1    | 1.7    | 1.8     | 9.1    | 11.8    | 2.7     | 13.2    |
| 7.2    | 9.7     | 3.6    | 0.4    | 14.9    | 9.4    | 9.1     | 5.0     | 7.6     |
| 1.3    | 2.2     | 2.8    | 2.6    | 7.7     | 1.7    | 3.9     | 7.0     | 3.4     |
| 78.7   | 117.7   | 17.7   | 5.7    | 95.2    | 83.9   | 139.3   | 141.1   | 137.4   |
| 3.1    | 2.0     | 4.6    | 7.6    | 2.3     | 1.2    | 23.6    | 26.9    | 9.9     |
| 52.7   | 59.0    | 3.5    | 14.3   | 66.0    | 51.4   | 14.5    | 11.0    | 29.6    |
| 8937.9 | 10052.9 | 3905.6 | 5024.1 | 10490.2 | 9160.6 | 12791.6 | 12564.5 | 12417.9 |
| 10.0   | 28.2    | 14.7   | 14.5   | 27.6    | 24.7   | 47.2    | 51.9    | 53.8    |
| 61.8   | 105.6   | 24.2   | 30.0   | 127.8   | 62.6   | 365.7   | 194.0   | 262.4   |
| 64.3   | 80.8    | 10.6   | 13.0   | 82.2    | 71.5   | 74.8    | 59.6    | 61.5    |
| 116.9  | 123.9   | 35.4   | 41.3   | 178.0   | 148.7  | 117.5   | 109.1   | 110.3   |
| 244.3  | 289.9   | 58.6   | 103.9  | 387.9   | 270.9  | 352.5   | 223.7   | 294.7   |
| 1099.5 | 1166.7  | 43.2   | 88.8   | 1616.7  | 929.0  | 0.4     | 6.2     | 0.7     |
| 237.7  | 240.6   | 29.9   | 37.7   | 372.6   | 211.0  | 10.4    | 17.6    | 5.3     |
| 92.6   | 87.4    | 180.9  | 253.4  | 138.6   | 73.0   | 653.3   | 504.7   | 695.6   |
| 248.1  | 168.5   | 201.4  | 198.2  | 259.4   | 216.6  | 433.9   | 541.9   | 567.7   |
| 179.0  | 274.2   | 89.5   | 122.6  | 275.7   | 235.7  | 530.3   | 442.8   | 423.1   |
| 206.4  | 207.0   | 51.5   | 72.0   | 259.6   | 148.0  | 987.0   | 873.9   | 995.4   |
| 78.4   | 107.0   | 44.7   | 52.6   | 116.7   | 110.6  | 171.8   | 248.2   | 247.6   |
| 6.5    | 11.3    | 22.3   | 17.3   | 13.4    | 4.3    | 76.6    | 84.8    | 89.6    |
| 347.9  | 390.8   | 133.6  | 138.8  | 420.2   | 380.9  | 649.1   | 517.3   | 584.0   |
| 72.3   | 96.7    | 47.9   | 69.3   | 110.3   | 78.5   | 1371.7  | 1550.5  | 1660.4  |
| 151.8  | 199.9   | 105.9  | 109.5  | 243.6   | 202.5  | 440.4   | 352.5   | 397.2   |
| 490.0  | 545.2   | 91.7   | 129.5  | 728.6   | 566.5  | 1196.2  | 1113.8  | 1196.5  |
| 116.0  | 107.6   | 44.6   | 65.9   | 163.0   | 113.6  | 410.8   | 359.4   | 374.4   |
| 405.3  | 595.0   | 110.9  | 151.4  | 732.8   | 645.6  | 5432.6  | 5358.8  | 5338.4  |
| 569.0  | 711.3   | 183.3  | 252.2  | 734.8   | 700.7  | 718.9   | 424.0   | 458.1   |
| 801.9  | 1132.5  | 100.7  | 138.1  | 1136.5  | 966.0  | 1014.9  | 1109.3  | 1194.4  |
| 4.4    | 10.3    | 2.8    | 12.2   | 22.1    | 14.4   | 41.5    | 54.9    | 58.9    |
| 28.6   | 23.1    | 20.6   | 28.0   | 37.4    | 32.9   | 83.0    | 99.9    | 106.5   |
| 15.1   | 3.9     | 22.0   | 37.2   | 13.8    | 4.6    | 69.2    | 79.2    | 89.8    |
| 276.8  | 386.9   | 243.4  | 345.6  | 474.4   | 383.4  | 787.9   | 756.1   | 836.2   |
| 34.3   | 50.5    | 20.8   | 31.5   | 76.0    | 42.6   | 579.0   | 540.9   | 577.2   |
| 147.5  | 179.2   | 123.7  | 116.9  | 197.9   | 114.2  | 1737.0  | 2091.0  | 2313.2  |
| 42.5   | 48.1    | 24.5   | 14.4   | 75.5    | 46.6   | 82.4    | 40.8    | 72.0    |
| 67.6   | 84.0    | 126.8  | 160.0  | 82.9    | 114.1  | 1024.8  | 1235.1  | 1267.3  |
| 38.8   | 53.7    | 32.6   | 24.7   | 64.9    | 45.3   | 91.8    | 73.7    | 101.9   |
| 109.5  | 147.7   | 56.2   | 85.5   | 181.0   | 118.9  | 181.7   | 102.3   | 124.5   |
| 62.4   | 70.3    | 11.8   | 14.1   | 115.1   | 68.6   | 113.1   | 68.5    | 93.8    |
| 70.2   | 105.3   | 32.5   | 50.8   | 126.8   | 95.4   | 110.3   | 72.2    | 97.4    |
| 21.3   | 29.8    | 14.3   | 11.1   | 22.0    | 20.7   | 49.1    | 47.3    | 52.1    |
| 2325.5 | 2869.7  | 552.1  | 740.0  | 3578.3  | 2955.7 | 7278.4  | 5427.3  | 5949.2  |
| 7.5    | 12.4    | 10.7   | 12.5   | 11.4    | 9.1    | 26.2    | 22.8    | 26.3    |
| 278.4  | 338.5   | 106.8  | 95.3   | 317.7   | 365.5  | 412.5   | 347.6   | 408.6   |
| 283.1  | 421.7   | 158.8  | 194.0  | 416.3   | 412.4  | 750.4   | 594.2   | 647.6   |
| 87.7   | 100.9   | 134.7  | 213.7  | 109.7   | 92.4   | 147.4   | 95.9    | 106.4   |
| 52.6   | 68.0    | 42.0   | 47.4   | 107.5   | 83.2   | 120.8   | 132.3   | 160.0   |
| 958.9  | 1123.9  | 108.0  | 128.3  | 1332.6  | 1097.0 | 946.1   | 362.0   | 413.2   |
| 7514.5 | 8198.4  | 3370.9 | 4189.3 | 9448.4  | 8186.5 | 9685.9  | 9602.9  | 10045.3 |

|        |        |       |       |        |        |        |        |        |
|--------|--------|-------|-------|--------|--------|--------|--------|--------|
| 578.9  | 737.5  | 86.0  | 90.6  | 977.3  | 780.3  | 716.7  | 360.2  | 381.5  |
| 102.0  | 189.6  | 27.1  | 35.9  | 146.1  | 170.0  | 239.7  | 242.5  | 288.6  |
| 74.8   | 72.0   | 25.0  | 43.7  | 109.6  | 73.8   | 120.5  | 118.5  | 129.3  |
| 64.5   | 132.9  | 61.7  | 126.9 | 106.7  | 106.3  | 1030.8 | 628.9  | 783.4  |
| 349.8  | 454.2  | 94.4  | 137.6 | 592.7  | 435.4  | 788.3  | 576.0  | 598.4  |
| 35.0   | 38.3   | 30.0  | 39.8  | 31.8   | 40.3   | 107.5  | 103.9  | 130.1  |
| 347.3  | 516.9  | 95.1  | 148.2 | 632.8  | 519.4  | 877.3  | 705.9  | 663.4  |
| 143.3  | 219.7  | 83.5  | 67.8  | 225.4  | 188.9  | 632.3  | 531.8  | 603.2  |
| 393.2  | 514.3  | 406.6 | 573.5 | 561.2  | 438.4  | 1070.4 | 1080.1 | 1138.3 |
| 56.3   | 74.4   | 33.9  | 47.3  | 57.4   | 44.8   | 175.2  | 87.1   | 91.5   |
| 427.8  | 550.1  | 12.3  | 16.5  | 1034.6 | 580.7  | 570.0  | 647.5  | 701.3  |
| 164.1  | 214.5  | 166.4 | 193.1 | 499.2  | 205.7  | 181.2  | 216.6  | 235.9  |
| 217.9  | 275.4  | 72.8  | 115.3 | 373.9  | 265.8  | 731.8  | 740.2  | 737.6  |
| 236.3  | 300.0  | 111.8 | 146.4 | 322.1  | 290.2  | 305.1  | 200.9  | 229.8  |
| 16.9   | 51.1   | 46.7  | 62.3  | 44.8   | 38.2   | 30.1   | 45.6   | 37.5   |
| 1507.4 | 2037.4 | 171.7 | 192.9 | 2464.7 | 1771.9 | 3207.0 | 2407.1 | 2530.8 |
| 37.9   | 57.9   | 18.3  | 19.6  | 67.0   | 49.6   | 149.2  | 280.6  | 301.8  |
| 30.9   | 26.7   | 13.8  | 16.9  | 43.9   | 89.6   | 116.6  | 198.5  | 213.7  |
| 24.3   | 20.2   | 41.7  | 46.3  | 32.7   | 17.8   | 122.8  | 157.3  | 169.5  |
| 228.9  | 304.3  | 117.7 | 128.4 | 397.7  | 295.9  | 654.8  | 396.1  | 445.8  |
| 344.7  | 592.2  | 104.4 | 181.6 | 481.6  | 551.8  | 619.7  | 461.2  | 453.5  |
| 457.4  | 582.3  | 229.2 | 285.4 | 620.7  | 560.1  | 1502.1 | 1256.8 | 1478.6 |
| 208.0  | 204.0  | 184.5 | 242.0 | 252.0  | 215.3  | 406.8  | 322.2  | 359.6  |
| 57.8   | 167.5  | 47.4  | 54.3  | 166.1  | 149.7  | 356.5  | 397.9  | 418.4  |
| 336.6  | 387.5  | 35.7  | 39.8  | 540.8  | 341.1  | 498.1  | 158.8  | 267.3  |
| 123.4  | 186.9  | 148.8 | 188.6 | 195.5  | 154.8  | 1079.7 | 1300.8 | 1396.1 |
| 349.1  | 516.7  | 316.2 | 358.7 | 796.4  | 484.3  | 1878.3 | 2996.6 | 3011.8 |
| 775.6  | 1110.6 | 558.6 | 743.6 | 883.9  | 1016.2 | 1483.2 | 1157.5 | 1211.4 |
| 39.6   | 42.3   | 27.9  | 59.6  | 35.4   | 30.0   | 210.2  | 292.6  | 285.5  |
| 232.2  | 250.7  | 50.4  | 62.5  | 336.2  | 263.9  | 69.1   | 148.0  | 142.9  |
| 1168.2 | 979.9  | 7.0   | 1.5   | 1916.2 | 771.7  | 10.8   | 1.6    | 3.5    |
| 315.6  | 326.2  | 196.8 | 231.2 | 444.9  | 378.8  | 638.3  | 560.4  | 674.3  |
| 18.5   | 21.6   | 11.2  | 10.7  | 24.7   | 13.3   | 43.9   | 11.7   | 19.1   |
| 203.9  | 283.3  | 41.9  | 35.9  | 237.3  | 326.6  | 504.9  | 564.2  | 667.3  |
| 23.9   | 24.3   | 11.1  | 19.2  | 35.6   | 40.3   | 119.7  | 160.2  | 171.3  |
| 79.5   | 83.4   | 40.8  | 49.7  | 102.4  | 57.4   | 122.2  | 217.9  | 208.1  |
| 289.7  | 402.2  | 69.3  | 71.0  | 534.6  | 418.1  | 752.3  | 932.6  | 952.4  |
| 39.7   | 37.9   | 30.7  | 57.2  | 79.7   | 43.5   | 70.9   | 72.9   | 80.1   |
| 796.1  | 1174.6 | 18.4  | 22.4  | 951.9  | 934.9  | 217.6  | 211.4  | 242.8  |
| 2217.4 | 2812.5 | 7.6   | 20.0  | 2312.1 | 2083.6 | 514.8  | 593.1  | 685.7  |
| 237.3  | 340.9  | 120.1 | 124.1 | 377.9  | 343.2  | 799.5  | 785.5  | 921.0  |
| 22.7   | 46.7   | 39.0  | 43.4  | 60.2   | 39.7   | 93.8   | 110.5  | 112.5  |
| 210.9  | 309.2  | 19.4  | 34.0  | 316.0  | 267.0  | 986.2  | 1207.2 | 1215.0 |
| 2.1    | 4.2    | 5.5   | 4.5   | 7.1    | 8.7    | 8.6    | 12.5   | 11.5   |
| 13.9   | 16.2   | 24.5  | 31.7  | 15.2   | 6.1    | 29.0   | 20.7   | 32.3   |
| 87.8   | 116.5  | 85.7  | 140.7 | 149.8  | 110.0  | 274.9  | 266.9  | 243.4  |
| 188.5  | 177.0  | 58.1  | 70.3  | 235.2  | 192.3  | 136.7  | 103.6  | 141.3  |
| 389.8  | 620.4  | 133.8 | 193.2 | 538.1  | 575.6  | 594.4  | 308.3  | 369.2  |
| 90.2   | 137.3  | 74.1  | 78.5  | 122.9  | 97.1   | 328.6  | 300.6  | 335.6  |
| 48.2   | 58.1   | 26.0  | 25.2  | 76.5   | 71.0   | 140.6  | 197.9  | 216.4  |
| 62.0   | 82.4   | 153.3 | 266.6 | 132.9  | 78.1   | 167.0  | 154.8  | 246.4  |
| 135.0  | 183.5  | 45.1  | 54.9  | 204.8  | 195.3  | 285.5  | 255.1  | 262.4  |
| 18.6   | 35.4   | 3.7   | 1.0   | 45.7   | 48.3   | 60.5   | 51.9   | 54.3   |

|        |        |        |        |        |        |        |        |        |
|--------|--------|--------|--------|--------|--------|--------|--------|--------|
| 51.6   | 51.9   | 14.1   | 18.3   | 63.8   | 38.6   | 120.9  | 78.4   | 87.2   |
| 7.8    | 9.5    | 5.6    | 1.5    | 15.0   | 15.3   | 20.5   | 21.5   | 18.5   |
| 2.5    | 1.6    | 1.0    | 2.6    | 8.2    | 0.8    | 5.5    | 8.4    | 3.7    |
| 28.3   | 52.4   | 13.2   | 16.8   | 44.0   | 58.1   | 114.2  | 79.5   | 93.6   |
| 272.2  | 300.7  | 100.0  | 105.5  | 427.9  | 252.4  | 447.4  | 285.2  | 355.3  |
| 30.1   | 21.8   | 39.5   | 61.2   | 56.2   | 79.6   | 114.3  | 134.9  | 141.3  |
| 62.4   | 72.2   | 35.2   | 59.2   | 110.7  | 72.9   | 163.9  | 199.9  | 210.3  |
| 53.3   | 17.7   | 29.7   | 55.6   | 73.2   | 27.6   | 45.7   | 50.4   | 50.3   |
| 19.9   | 15.6   | 23.5   | 53.4   | 27.1   | 29.3   | 40.4   | 52.6   | 54.3   |
| 41.5   | 69.3   | 84.8   | 96.4   | 85.7   | 77.6   | 123.5  | 153.3  | 159.9  |
| 30.0   | 31.5   | 17.5   | 18.7   | 76.2   | 39.4   | 101.9  | 56.6   | 69.0   |
| 142.5  | 173.6  | 103.3  | 141.0  | 235.0  | 162.2  | 597.1  | 572.9  | 656.2  |
| 196.1  | 315.2  | 28.9   | 22.0   | 294.1  | 314.4  | 881.2  | 689.6  | 814.8  |
| 127.6  | 150.0  | 19.4   | 30.9   | 187.6  | 88.1   | 263.1  | 192.4  | 208.0  |
| 1336.7 | 1531.6 | 895.1  | 826.7  | 2093.2 | 1410.5 | 4268.6 | 3585.4 | 3686.6 |
| 201.7  | 233.8  | 100.3  | 120.5  | 307.2  | 227.0  | 762.5  | 461.9  | 541.4  |
| 53.6   | 55.0   | 34.3   | 41.1   | 55.4   | 42.2   | 24.7   | 24.4   | 25.9   |
| 52.9   | 58.7   | 39.7   | 48.4   | 44.6   | 32.8   | 9.0    | 11.7   | 20.4   |
| 75.8   | 74.0   | 59.2   | 70.8   | 90.3   | 68.3   | 182.2  | 203.7  | 228.6  |
| 910.8  | 1411.6 | 119.0  | 92.0   | 1556.3 | 1502.6 | 1037.7 | 1092.0 | 1103.2 |
| 274.4  | 415.5  | 26.4   | 33.2   | 482.8  | 297.6  | 678.4  | 756.5  | 958.1  |
| 206.7  | 212.2  | 92.4   | 127.0  | 363.4  | 201.2  | 411.0  | 497.3  | 487.2  |
| 1391.6 | 1477.7 | 42.2   | 35.9   | 2219.0 | 1441.5 | 922.9  | 1477.8 | 1804.6 |
| 40.1   | 49.0   | 497.8  | 588.3  | 64.0   | 42.2   | 292.2  | 278.1  | 341.5  |
| 101.2  | 155.8  | 6.2    | 12.2   | 164.2  | 149.9  | 234.2  | 230.5  | 239.7  |
| 158.2  | 248.2  | 100.9  | 127.7  | 190.9  | 239.1  | 249.0  | 211.7  | 286.5  |
| 239.7  | 304.2  | 78.1   | 84.1   | 386.1  | 285.8  | 624.0  | 635.5  | 746.1  |
| 160.1  | 279.1  | 55.7   | 63.5   | 257.1  | 246.1  | 796.9  | 497.6  | 555.3  |
| 321.3  | 497.7  | 64.7   | 66.9   | 526.6  | 440.0  | 1648.9 | 985.9  | 1121.3 |
| 64.4   | 76.6   | 37.3   | 54.6   | 81.1   | 73.4   | 82.2   | 95.8   | 119.5  |
| 28.0   | 49.6   | 38.7   | 51.5   | 75.7   | 48.2   | 60.6   | 59.6   | 73.9   |
| 77.6   | 78.1   | 91.3   | 111.0  | 108.1  | 84.1   | 131.0  | 123.0  | 155.7  |
| 866.7  | 1062.0 | 211.0  | 300.9  | 1357.5 | 1115.8 | 1950.7 | 1537.4 | 1569.6 |
| 250.6  | 320.2  | 221.8  | 324.2  | 375.5  | 420.5  | 332.9  | 282.2  | 342.5  |
| 121.1  | 205.1  | 14.9   | 15.1   | 266.2  | 135.2  | 189.7  | 196.1  | 168.9  |
| 193.5  | 334.2  | 10.1   | 11.3   | 366.6  | 263.5  | 347.9  | 365.5  | 380.5  |
| 20.5   | 64.8   | 10.3   | 20.8   | 51.9   | 24.8   | 128.6  | 106.3  | 121.2  |
| 2.7    | 7.4    | 1.4    | 5.5    | 14.0   | 5.9    | 4.2    | 4.0    | 2.2    |
| 56.9   | 131.5  | 64.1   | 73.1   | 80.8   | 103.5  | 451.1  | 235.5  | 299.2  |
| 105.9  | 146.7  | 1.1    | 0.9    | 162.8  | 131.7  | 0.8    | 4.9    | 1.3    |
| 269.2  | 280.6  | 59.5   | 47.8   | 463.8  | 265.7  | 310.6  | 217.2  | 195.7  |
| 162.4  | 205.4  | 25.1   | 30.8   | 296.7  | 164.7  | 189.0  | 99.4   | 100.9  |
| 50.9   | 47.9   | 18.7   | 41.5   | 77.4   | 88.5   | 374.9  | 325.7  | 288.9  |
| 414.8  | 463.1  | 102.2  | 160.3  | 599.8  | 383.8  | 823.5  | 888.4  | 901.1  |
| 7449.2 | 8268.9 | 17.4   | 34.5   | 8675.7 | 7624.5 | 549.8  | 1019.8 | 684.2  |
| 162.7  | 231.2  | 108.4  | 153.6  | 285.2  | 166.4  | 1131.7 | 787.5  | 844.3  |
| 268.7  | 451.4  | 129.1  | 128.6  | 317.0  | 404.6  | 962.7  | 556.4  | 538.6  |
| 96.7   | 108.9  | 243.0  | 403.7  | 106.5  | 107.7  | 283.5  | 243.3  | 279.2  |
| 146.7  | 174.3  | 22.5   | 37.7   | 235.8  | 133.7  | 250.0  | 259.9  | 252.6  |
| 121.1  | 209.4  | 30.6   | 12.4   | 152.6  | 134.4  | 343.3  | 307.9  | 336.1  |
| 4219.1 | 4579.5 | 3005.0 | 3563.2 | 4771.2 | 4786.7 | 8199.4 | 7276.7 | 7482.6 |
| 338.1  | 583.8  | 15.0   | 24.0   | 606.0  | 642.6  | 679.1  | 530.1  | 660.2  |
| 398.4  | 481.2  | 112.3  | 191.0  | 627.9  | 467.0  | 605.9  | 476.0  | 467.7  |

|        |        |        |        |        |        |        |        |        |
|--------|--------|--------|--------|--------|--------|--------|--------|--------|
| 141.6  | 183.6  | 177.0  | 289.2  | 220.8  | 171.6  | 208.5  | 142.5  | 173.6  |
| 243.7  | 234.5  | 77.0   | 121.9  | 323.9  | 220.2  | 853.3  | 401.7  | 465.1  |
| 409.0  | 503.5  | 30.1   | 64.5   | 520.9  | 536.5  | 179.2  | 169.1  | 178.9  |
| 556.0  | 709.8  | 191.3  | 203.5  | 739.0  | 794.4  | 344.3  | 440.4  | 473.2  |
| 449.8  | 501.6  | 560.0  | 722.6  | 787.9  | 512.0  | 1324.8 | 1014.6 | 1108.0 |
| 22.7   | 13.9   | 2.2    | 1.7    | 4.9    | 11.8   | 14.1   | 8.7    | 7.8    |
| 166.9  | 207.5  | 12.4   | 20.0   | 231.3  | 157.6  | 130.3  | 214.5  | 231.4  |
| 63.9   | 83.6   | 159.8  | 191.4  | 80.8   | 96.4   | 538.1  | 471.0  | 497.8  |
| 138.7  | 166.8  | 35.5   | 21.9   | 247.9  | 172.9  | 168.6  | 255.1  | 252.7  |
| 77.0   | 67.1   | 38.8   | 43.7   | 66.0   | 52.9   | 193.0  | 195.5  | 224.7  |
| 28.2   | 29.3   | 18.2   | 24.0   | 25.6   | 24.8   | 91.1   | 102.2  | 98.6   |
| 71.9   | 97.3   | 183.6  | 252.7  | 135.5  | 100.0  | 54.1   | 42.6   | 49.4   |
| 1160.1 | 1743.3 | 381.5  | 581.5  | 1844.5 | 1558.2 | 1716.2 | 1059.8 | 1203.0 |
| 184.7  | 220.0  | 95.6   | 109.3  | 188.4  | 199.3  | 282.0  | 385.5  | 343.1  |
| 93.8   | 137.3  | 102.5  | 148.2  | 228.6  | 143.6  | 94.7   | 64.7   | 79.0   |
| 55.7   | 58.3   | 6.4    | 12.7   | 99.4   | 48.3   | 139.7  | 82.8   | 91.0   |
| 307.4  | 424.9  | 72.1   | 59.8   | 532.8  | 396.4  | 354.2  | 270.6  | 348.4  |
| 58.5   | 91.0   | 56.7   | 73.4   | 78.6   | 86.2   | 229.5  | 194.7  | 207.9  |
| 30.7   | 66.6   | 31.5   | 45.8   | 39.7   | 65.2   | 239.8  | 118.5  | 150.9  |
| 68.6   | 54.6   | 26.6   | 51.9   | 95.4   | 98.3   | 116.5  | 65.1   | 81.6   |
| 155.3  | 213.2  | 26.3   | 21.9   | 220.6  | 175.5  | 610.0  | 671.2  | 857.5  |
| 88.2   | 101.1  | 100.1  | 105.9  | 137.3  | 92.6   | 55.6   | 32.2   | 30.2   |
| 16.0   | 2.0    | 16.9   | 3.1    | 37.2   | 12.4   | 5.1    | 8.5    | 5.3    |
| 361.5  | 429.1  | 86.9   | 159.1  | 498.5  | 516.5  | 394.8  | 97.3   | 124.8  |
| 35.5   | 33.1   | 30.8   | 33.7   | 50.8   | 30.5   | 98.1   | 108.3  | 155.6  |
| 32.5   | 46.0   | 3.7    | 2.8    | 103.6  | 64.2   | 332.2  | 429.4  | 534.8  |
| 143.6  | 158.6  | 96.9   | 141.1  | 225.3  | 163.4  | 206.1  | 170.1  | 236.4  |
| 34.8   | 50.0   | 59.4   | 87.1   | 59.7   | 45.3   | 54.3   | 23.1   | 48.6   |
| 332.4  | 509.7  | 58.6   | 98.5   | 474.5  | 455.2  | 1213.4 | 937.5  | 1093.0 |
| 201.8  | 182.2  | 11.1   | 21.7   | 249.8  | 207.8  | 233.0  | 156.0  | 170.1  |
| 84.9   | 62.0   | 39.9   | 39.5   | 65.0   | 74.2   | 133.4  | 78.0   | 103.6  |
| 193.4  | 199.4  | 154.9  | 167.6  | 228.7  | 243.6  | 219.2  | 227.3  | 239.8  |
| 218.5  | 227.7  | 52.0   | 72.4   | 364.5  | 182.2  | 926.3  | 1284.5 | 1767.6 |
| 217.4  | 217.1  | 89.9   | 81.3   | 227.0  | 209.5  | 280.4  | 217.6  | 301.9  |
| 39.2   | 49.2   | 100.8  | 80.7   | 49.7   | 29.0   | 170.8  | 148.6  | 152.0  |
| 0.9    | 3.4    | 21.2   | 32.0   | 4.1    | 1.1    | 88.9   | 37.5   | 63.1   |
| 200.0  | 178.5  | 114.5  | 193.2  | 288.8  | 187.9  | 169.7  | 168.1  | 219.5  |
| 202.8  | 218.2  | 53.5   | 62.7   | 298.7  | 171.5  | 188.3  | 125.1  | 128.6  |
| 6388.6 | 7547.7 | 2116.2 | 3773.9 | 7479.8 | 7048.1 | 7766.2 | 7054.9 | 6987.8 |
| 171.0  | 223.3  | 13.2   | 17.7   | 245.8  | 219.6  | 166.0  | 119.4  | 123.4  |
| 17.0   | 17.6   | 11.2   | 0.5    | 10.9   | 17.1   | 39.8   | 33.3   | 39.3   |
| 7322.2 | 7931.8 | 3950.7 | 5132.0 | 7879.4 | 7018.1 | 9382.1 | 9082.8 | 9353.6 |
| 387.8  | 395.8  | 141.9  | 147.4  | 503.0  | 408.2  | 788.2  | 565.0  | 607.8  |
| 18.0   | 33.9   | 5.2    | 13.6   | 26.7   | 23.8   | 90.1   | 79.4   | 91.2   |
| 217.2  | 274.6  | 86.8   | 121.1  | 302.4  | 242.2  | 521.0  | 493.2  | 506.6  |
| 199.6  | 256.3  | 50.5   | 61.5   | 338.6  | 246.6  | 803.0  | 551.8  | 715.5  |
| 688.9  | 704.8  | 68.2   | 98.0   | 1005.1 | 629.0  | 2058.7 | 1809.3 | 2348.8 |
| 10.3   | 9.8    | 1.2    | 1.5    | 2.4    | 2.9    | 4.2    | 5.7    | 8.0    |
| 2.4    | 4.1    | 3.0    | 0.4    | 0.4    | 9.3    | 2.9    | 6.0    | 4.2    |
| 526.0  | 638.3  | 43.9   | 70.6   | 760.4  | 599.7  | 160.9  | 112.6  | 118.3  |
| 589.3  | 772.7  | 61.8   | 110.5  | 1121.6 | 865.7  | 189.9  | 125.9  | 114.6  |
| 587.2  | 616.7  | 138.8  | 246.4  | 797.1  | 564.7  | 1236.4 | 971.4  | 1072.8 |
| 0.8    | 0.5    | 4.5    | 2.8    | 5.4    | 5.7    | 0.4    | 0.3    | 1.3    |

|        |        |        |        |        |        |         |         |         |
|--------|--------|--------|--------|--------|--------|---------|---------|---------|
| 54.4   | 68.5   | 240.3  | 249.2  | 103.0  | 60.4   | 1563.8  | 3313.6  | 2992.2  |
| 7.1    | 10.0   | 31.9   | 27.9   | 10.3   | 12.3   | 716.1   | 1339.9  | 1385.6  |
| 220.2  | 302.9  | 464.3  | 655.9  | 288.0  | 191.9  | 1196.1  | 1330.8  | 1395.8  |
| 216.0  | 289.7  | 115.5  | 88.8   | 264.9  | 287.1  | 347.9   | 285.7   | 305.5   |
| 160.1  | 240.3  | 103.2  | 134.2  | 265.2  | 233.7  | 399.7   | 340.6   | 351.9   |
| 24.6   | 22.8   | 2.9    | 5.4    | 34.6   | 22.3   | 28.0    | 40.8    | 45.8    |
| 93.1   | 115.9  | 92.1   | 151.5  | 121.8  | 118.1  | 142.3   | 120.4   | 124.7   |
| 1709.0 | 2043.7 | 497.6  | 690.3  | 2277.4 | 2043.2 | 3140.4  | 3022.2  | 3093.7  |
| 77.0   | 91.5   | 23.0   | 25.6   | 90.1   | 98.5   | 189.5   | 214.6   | 236.0   |
| 52.9   | 67.8   | 37.6   | 39.8   | 101.5  | 57.9   | 128.9   | 173.7   | 184.0   |
| 239.8  | 222.5  | 36.7   | 25.7   | 360.7  | 394.4  | 1471.7  | 1036.3  | 1093.8  |
| 332.2  | 366.7  | 29.3   | 28.8   | 539.4  | 752.4  | 2117.6  | 1544.4  | 1619.5  |
| 78.3   | 134.6  | 82.3   | 86.3   | 68.3   | 112.5  | 307.7   | 222.5   | 310.6   |
| 41.8   | 70.2   | 10.4   | 15.2   | 66.5   | 59.4   | 39.3    | 62.4    | 70.6    |
| 186.5  | 195.7  | 19.8   | 17.3   | 329.9  | 196.0  | 16.3    | 8.4     | 8.6     |
| 132.3  | 149.7  | 79.5   | 108.5  | 97.1   | 196.1  | 252.5   | 140.3   | 180.7   |
| 77.8   | 106.9  | 0.4    | 1.2    | 118.8  | 96.9   | 28.3    | 14.4    | 12.3    |
| 1081.1 | 1435.6 | 232.8  | 282.5  | 1559.1 | 1187.6 | 2330.8  | 1745.0  | 1929.3  |
| 247.7  | 395.9  | 57.0   | 65.3   | 393.0  | 391.9  | 564.1   | 850.3   | 943.4   |
| 182.9  | 226.2  | 68.8   | 79.2   | 257.4  | 221.6  | 440.8   | 508.1   | 510.2   |
| 35.0   | 42.4   | 1.2    | 1.7    | 29.0   | 14.4   | 69.8    | 103.2   | 124.4   |
| 20.6   | 7.0    | 175.9  | 197.5  | 42.8   | 5.7    | 182.6   | 161.3   | 203.8   |
| 59.7   | 74.7   | 8.9    | 10.3   | 85.6   | 86.9   | 172.4   | 240.8   | 278.3   |
| 229.8  | 267.6  | 24.0   | 27.6   | 252.0  | 243.6  | 361.7   | 465.0   | 494.5   |
| 48.7   | 52.2   | 14.5   | 20.4   | 58.7   | 48.7   | 87.6    | 83.6    | 88.2    |
| 7.7    | 7.3    | 2.7    | 12.6   | 35.0   | 31.3   | 96.8    | 78.1    | 92.6    |
| 60.7   | 55.7   | 45.9   | 65.7   | 112.1  | 42.3   | 179.3   | 115.8   | 111.2   |
| 28.8   | 35.2   | 19.9   | 19.3   | 31.2   | 33.1   | 78.0    | 72.8    | 65.5    |
| 399.5  | 318.0  | 56.0   | 89.3   | 577.7  | 289.9  | 652.7   | 318.0   | 383.7   |
| 301.3  | 270.7  | 114.9  | 158.7  | 380.4  | 276.5  | 613.6   | 603.4   | 631.0   |
| 210.0  | 288.4  | 174.6  | 242.5  | 353.0  | 265.5  | 876.9   | 838.7   | 864.6   |
| 115.3  | 115.6  | 35.9   | 51.5   | 153.6  | 125.4  | 72.1    | 61.0    | 69.1    |
| 69.5   | 124.8  | 71.5   | 89.1   | 122.9  | 88.3   | 339.5   | 293.9   | 326.3   |
| 1927.3 | 2356.1 | 904.8  | 1028.1 | 2778.2 | 2520.5 | 2712.9  | 2116.4  | 2016.4  |
| 220.9  | 335.6  | 164.6  | 224.7  | 334.4  | 389.1  | 529.9   | 233.0   | 301.0   |
| 204.6  | 268.8  | 29.4   | 31.9   | 314.0  | 241.9  | 314.4   | 297.1   | 317.5   |
| 59.2   | 88.1   | 49.4   | 64.3   | 83.9   | 91.7   | 126.1   | 143.5   | 137.7   |
| 105.5  | 128.0  | 92.7   | 131.3  | 161.6  | 98.2   | 302.9   | 342.2   | 375.1   |
| 145.3  | 210.6  | 102.6  | 167.4  | 232.1  | 207.2  | 231.7   | 270.7   | 320.3   |
| 151.8  | 203.8  | 107.7  | 198.7  | 242.3  | 161.2  | 159.8   | 194.4   | 214.6   |
| 238.7  | 388.1  | 17.8   | 23.1   | 331.4  | 346.9  | 513.5   | 599.2   | 571.1   |
| 69.4   | 80.1   | 30.2   | 26.1   | 85.1   | 101.0  | 257.7   | 318.6   | 307.2   |
| 310.8  | 450.1  | 25.2   | 40.2   | 499.6  | 484.9  | 417.8   | 284.1   | 339.9   |
| 176.9  | 412.1  | 1.2    | 2.9    | 256.4  | 415.9  | 0.9     | 0.7     | 1.7     |
| 81.9   | 163.9  | 9.0    | 10.7   | 173.0  | 139.1  | 230.0   | 221.0   | 222.5   |
| 643.5  | 1027.8 | 109.5  | 120.0  | 972.8  | 1082.7 | 835.0   | 792.1   | 841.8   |
| 6582.9 | 7484.5 | 3435.2 | 4502.0 | 8006.9 | 7247.0 | 12523.9 | 10114.7 | 10075.4 |
| 699.7  | 899.4  | 153.3  | 210.9  | 966.8  | 836.9  | 1273.6  | 1185.2  | 1200.4  |
| 104.9  | 91.9   | 13.3   | 14.7   | 215.9  | 74.7   | 24.3    | 27.7    | 35.3    |
| 146.3  | 135.3  | 29.1   | 16.3   | 357.4  | 156.2  | 76.4    | 58.9    | 63.5    |
| 1158.9 | 1055.3 | 304.8  | 392.7  | 1541.4 | 1176.5 | 2300.6  | 1755.7  | 1850.5  |
| 192.8  | 217.5  | 60.4   | 59.3   | 313.5  | 201.0  | 646.0   | 411.4   | 497.6   |
| 134.4  | 133.9  | 63.9   | 125.8  | 168.8  | 168.4  | 167.8   | 208.0   | 235.8   |

|        |        |        |        |         |        |         |         |         |
|--------|--------|--------|--------|---------|--------|---------|---------|---------|
| 85.4   | 78.5   | 15.6   | 24.5   | 94.7    | 79.7   | 7.9     | 3.8     | 6.7     |
| 164.8  | 179.3  | 52.1   | 59.1   | 239.4   | 122.3  | 78.6    | 98.6    | 116.5   |
| 262.4  | 315.1  | 31.7   | 42.8   | 371.4   | 367.4  | 584.3   | 466.6   | 519.6   |
| 39.2   | 33.6   | 15.1   | 20.8   | 24.5    | 57.3   | 62.8    | 66.7    | 66.2    |
| 30.3   | 29.8   | 18.0   | 13.6   | 26.5    | 37.4   | 78.0    | 57.3    | 65.4    |
| 18.5   | 24.8   | 24.5   | 13.9   | 35.4    | 20.8   | 9.8     | 1.5     | 4.1     |
| 150.4  | 197.6  | 117.2  | 132.3  | 274.5   | 161.5  | 624.2   | 662.6   | 702.3   |
| 295.7  | 476.6  | 38.5   | 30.7   | 355.0   | 442.3  | 403.6   | 269.6   | 311.5   |
| 16.7   | 27.4   | 0.4    | 4.9    | 38.8    | 40.7   | 36.4    | 22.3    | 24.4    |
| 92.9   | 89.3   | 43.4   | 74.1   | 102.0   | 103.9  | 237.4   | 208.6   | 236.2   |
| 247.3  | 259.3  | 163.0  | 154.5  | 239.5   | 339.9  | 646.3   | 411.9   | 517.4   |
| 64.0   | 71.0   | 27.5   | 28.3   | 263.8   | 49.7   | 10.8    | 12.4    | 13.6    |
| 103.6  | 161.6  | 66.2   | 55.9   | 156.8   | 141.6  | 207.9   | 265.6   | 261.4   |
| 22.2   | 26.2   | 20.3   | 21.0   | 31.7    | 14.5   | 20.3    | 14.3    | 13.1    |
| 105.4  | 229.0  | 43.1   | 40.5   | 154.8   | 209.9  | 684.4   | 586.4   | 743.7   |
| 9190.7 | 9816.6 | 4875.0 | 6609.6 | 10158.4 | 9354.2 | 11607.6 | 10877.4 | 11042.4 |
| 163.3  | 251.5  | 4.4    | 13.0   | 395.7   | 366.8  | 120.3   | 84.2    | 81.4    |
| 164.9  | 156.8  | 55.5   | 54.6   | 194.2   | 139.9  | 354.0   | 337.6   | 390.0   |
| 10.1   | 8.8    | 5.8    | 2.5    | 4.9     | 18.5   | 24.3    | 20.7    | 18.9    |
| 421.0  | 455.8  | 48.0   | 83.5   | 644.8   | 366.6  | 639.6   | 599.8   | 673.3   |
| 72.9   | 114.7  | 25.7   | 31.6   | 140.2   | 97.6   | 158.6   | 171.3   | 183.5   |
| 0.9    | 6.0    | 3.9    | 4.2    | 7.7     | 2.2    | 6.6     | 4.9     | 1.3     |
| 27.3   | 12.7   | 10.1   | 4.3    | 38.5    | 26.9   | 33.8    | 40.1    | 43.4    |
| 57.7   | 79.1   | 52.4   | 75.8   | 83.4    | 63.8   | 107.0   | 145.4   | 174.5   |
| 3.8    | 1.9    | 2.6    | 1.3    | 3.9     | 2.3    | 6.5     | 6.0     | 7.8     |
| 0.4    | 0.5    | 1.3    | 1.4    | 0.8     | 10.1   | 1.7     | 1.5     | 1.3     |
| 53.8   | 112.2  | 6.8    | 11.1   | 100.9   | 100.8  | 112.9   | 104.5   | 136.4   |
| 462.8  | 619.9  | 101.9  | 165.4  | 784.0   | 708.3  | 1166.2  | 1045.6  | 1207.4  |
| 184.0  | 191.6  | 119.5  | 184.4  | 228.0   | 254.6  | 325.0   | 192.6   | 202.8   |
| 50.1   | 47.8   | 23.0   | 17.2   | 60.8    | 33.4   | 119.2   | 172.3   | 226.2   |
| 169.9  | 214.2  | 49.5   | 54.7   | 207.7   | 193.5  | 353.7   | 358.4   | 387.5   |
| 64.2   | 79.8   | 42.9   | 37.7   | 79.8    | 68.4   | 68.2    | 124.5   | 162.8   |
| 39.8   | 66.8   | 38.7   | 41.9   | 63.0    | 44.3   | 162.2   | 157.9   | 190.5   |
| 1.7    | 12.7   | 20.3   | 8.0    | 6.3     | 2.8    | 23.5    | 17.1    | 12.3    |
| 684.7  | 805.8  | 826.5  | 1272.1 | 796.8   | 827.9  | 945.0   | 427.8   | 558.2   |
| 7.5    | 9.2    | 0.5    | 2.8    | 19.1    | 9.6    | 3.4     | 2.6     | 2.6     |
| 118.6  | 131.0  | 74.0   | 95.2   | 165.5   | 64.0   | 154.6   | 132.5   | 152.0   |
| 66.9   | 96.1   | 105.1  | 110.2  | 114.7   | 99.7   | 248.6   | 219.3   | 222.3   |
| 37.7   | 58.1   | 15.2   | 19.5   | 80.8    | 30.6   | 110.2   | 97.7    | 103.2   |
| 428.7  | 749.4  | 124.0  | 175.4  | 638.8   | 851.7  | 1139.9  | 897.5   | 1048.6  |
| 27.1   | 32.4   | 40.4   | 23.5   | 29.4    | 22.5   | 211.4   | 230.4   | 284.8   |
| 923.1  | 1283.8 | 75.2   | 101.2  | 1675.1  | 1269.0 | 866.4   | 792.3   | 854.2   |
| 231.8  | 408.3  | 59.1   | 61.8   | 374.9   | 442.9  | 569.1   | 523.2   | 589.3   |
| 63.2   | 102.6  | 131.5  | 152.3  | 110.8   | 97.4   | 294.9   | 345.6   | 386.6   |
| 95.6   | 150.7  | 63.3   | 65.3   | 121.4   | 138.8  | 153.3   | 139.8   | 178.1   |
| 183.0  | 148.8  | 232.6  | 311.7  | 197.5   | 126.0  | 440.9   | 243.1   | 269.5   |
| 262.5  | 312.3  | 120.6  | 123.8  | 393.4   | 288.6  | 493.8   | 797.4   | 848.1   |
| 166.8  | 183.0  | 30.3   | 31.3   | 181.3   | 222.1  | 63.6    | 34.2    | 47.5    |
| 212.7  | 269.2  | 438.4  | 627.1  | 338.0   | 262.8  | 938.7   | 853.1   | 1009.9  |
| 2.2    | 1.3    | 2.1    | 1.7    | 28.7    | 1.5    | 5.7     | 37.6    | 23.1    |
| 413.9  | 542.6  | 257.2  | 339.8  | 621.9   | 447.4  | 823.3   | 587.2   | 631.7   |
| 224.0  | 244.1  | 284.1  | 341.2  | 366.9   | 268.5  | 365.6   | 414.5   | 455.6   |
| 574.0  | 789.3  | 50.1   | 63.2   | 1084.0  | 682.4  | 1053.3  | 1067.7  | 1220.9  |



|        |        |        |        |        |        |        |        |        |
|--------|--------|--------|--------|--------|--------|--------|--------|--------|
| 27.9   | 30.9   | 43.5   | 46.0   | 37.7   | 20.5   | 139.3  | 105.6  | 125.7  |
| 30.5   | 50.9   | 8.8    | 7.5    | 59.9   | 21.0   | 93.0   | 73.5   | 49.5   |
| 5.3    | 3.7    | 8.1    | 4.2    | 2.1    | 12.7   | 12.7   | 6.6    | 4.4    |
| 89.8   | 92.7   | 33.6   | 62.8   | 149.4  | 139.9  | 165.8  | 130.6  | 156.5  |
| 4.1    | 11.4   | 21.7   | 28.1   | 18.5   | 8.2    | 17.6   | 5.2    | 5.7    |
| 48.1   | 86.9   | 27.8   | 19.6   | 102.5  | 61.5   | 137.5  | 164.6  | 171.3  |
| 57.2   | 46.5   | 63.1   | 95.6   | 75.5   | 33.3   | 29.0   | 65.9   | 56.0   |
| 12.2   | 19.5   | 10.2   | 10.2   | 14.6   | 21.5   | 61.7   | 164.5  | 185.0  |
| 3.0    | 10.9   | 25.4   | 17.5   | 5.2    | 12.4   | 23.8   | 33.1   | 41.0   |
| 292.8  | 335.6  | 122.4  | 177.7  | 343.2  | 377.0  | 582.5  | 476.5  | 441.4  |
| 200.0  | 313.3  | 8.5    | 15.9   | 271.5  | 223.1  | 632.4  | 370.3  | 423.1  |
| 66.6   | 86.0   | 33.6   | 33.2   | 117.8  | 78.0   | 157.5  | 117.8  | 123.8  |
| 105.7  | 101.4  | 66.2   | 68.4   | 166.7  | 120.9  | 143.1  | 99.1   | 114.9  |
| 94.6   | 114.6  | 54.4   | 50.4   | 132.7  | 98.0   | 132.9  | 101.2  | 124.4  |
| 1.2    | 3.0    | 2.2    | 0.8    | 1.4    | 0.8    | 3.2    | 2.4    | 1.1    |
| 250.2  | 355.2  | 161.2  | 160.4  | 433.6  | 288.8  | 960.3  | 646.9  | 699.3  |
| 56.6   | 49.5   | 8.5    | 4.6    | 68.9   | 57.8   | 43.1   | 39.0   | 51.3   |
| 1492.4 | 1967.5 | 510.5  | 806.6  | 2155.1 | 1933.7 | 4567.4 | 3744.4 | 4043.9 |
| 99.5   | 102.2  | 33.4   | 20.8   | 115.0  | 115.6  | 197.4  | 151.5  | 190.1  |
| 958.9  | 1269.6 | 248.7  | 398.4  | 1322.2 | 1110.2 | 2818.1 | 2848.6 | 2914.8 |
| 27.4   | 34.3   | 29.3   | 32.0   | 33.3   | 27.4   | 94.5   | 77.2   | 77.5   |
| 169.5  | 192.3  | 40.7   | 80.9   | 236.9  | 142.2  | 923.5  | 807.8  | 784.8  |
| 369.2  | 460.3  | 42.9   | 78.2   | 432.6  | 445.1  | 1004.5 | 903.0  | 957.5  |
| 118.0  | 162.1  | 25.2   | 47.2   | 193.5  | 140.2  | 232.7  | 125.4  | 159.1  |
| 263.8  | 427.9  | 69.6   | 63.1   | 562.1  | 438.0  | 672.3  | 390.5  | 446.7  |
| 1408.0 | 1741.1 | 88.9   | 104.1  | 1857.5 | 1376.1 | 666.7  | 424.3  | 454.6  |
| 352.7  | 464.2  | 116.2  | 147.4  | 588.9  | 413.6  | 661.7  | 778.3  | 870.5  |
| 100.9  | 135.9  | 50.2   | 70.2   | 165.5  | 137.6  | 240.8  | 199.4  | 233.1  |
| 42.0   | 60.2   | 86.4   | 110.1  | 68.4   | 55.8   | 228.9  | 153.3  | 186.5  |
| 46.8   | 52.9   | 74.9   | 90.7   | 78.1   | 57.0   | 209.2  | 131.2  | 143.6  |
| 60.1   | 72.4   | 87.6   | 133.7  | 70.2   | 68.3   | 268.5  | 151.5  | 159.7  |
| 160.9  | 139.7  | 20.4   | 20.0   | 130.3  | 134.5  | 15.5   | 13.4   | 12.3   |
| 152.5  | 194.8  | 79.7   | 76.6   | 243.4  | 185.9  | 143.7  | 146.5  | 168.3  |
| 8.1    | 7.6    | 10.3   | 3.8    | 6.2    | 17.2   | 14.8   | 9.7    | 5.9    |
| 110.0  | 112.3  | 51.2   | 55.4   | 153.4  | 108.5  | 304.2  | 243.6  | 282.5  |
| 6825.4 | 7541.2 | 3038.4 | 3774.6 | 7516.2 | 7049.8 | 9554.8 | 9130.9 | 9569.2 |
| 28.3   | 21.0   | 28.4   | 34.0   | 29.2   | 25.5   | 48.8   | 53.1   | 57.7   |
| 15.8   | 2.2    | 3.8    | 8.0    | 3.3    | 13.0   | 19.0   | 13.7   | 9.8    |
| 367.9  | 332.2  | 131.5  | 133.0  | 602.2  | 271.4  | 158.6  | 291.1  | 328.1  |
| 52.9   | 80.5   | 24.3   | 38.8   | 66.3   | 101.5  | 227.4  | 208.3  | 220.8  |
| 242.1  | 221.4  | 292.4  | 537.8  | 359.6  | 250.6  | 19.7   | 26.1   | 24.3   |
| 224.2  | 251.7  | 76.2   | 64.1   | 307.7  | 208.2  | 424.5  | 323.9  | 343.9  |
| 256.5  | 377.0  | 7.8    | 8.9    | 604.8  | 317.0  | 224.6  | 525.4  | 558.3  |
| 198.9  | 256.4  | 68.1   | 91.6   | 306.2  | 230.2  | 541.5  | 518.8  | 614.7  |
| 21.8   | 22.6   | 67.6   | 94.5   | 22.6   | 7.4    | 37.6   | 32.4   | 34.8   |
| 36.9   | 46.1   | 28.7   | 28.8   | 64.5   | 44.3   | 133.2  | 167.1  | 168.1  |
| 26.1   | 33.9   | 13.9   | 19.3   | 45.2   | 18.9   | 83.4   | 127.0  | 141.5  |
| 91.3   | 190.4  | 24.1   | 26.8   | 147.4  | 219.4  | 47.1   | 39.5   | 69.3   |
| 193.2  | 207.1  | 39.6   | 46.4   | 296.9  | 183.8  | 231.3  | 183.6  | 223.0  |
| 77.7   | 63.7   | 21.6   | 20.1   | 92.8   | 68.6   | 92.9   | 82.5   | 83.1   |
| 513.3  | 608.7  | 287.8  | 423.0  | 853.0  | 671.1  | 685.2  | 599.7  | 641.0  |
| 9.3    | 2.2    | 0.8    | 0.6    | 11.8   | 7.2    | 5.1    | 6.5    | 1.8    |
| 214.1  | 309.0  | 57.5   | 73.8   | 319.9  | 236.8  | 697.1  | 417.2  | 461.2  |

|        |        |        |        |        |        |         |         |         |
|--------|--------|--------|--------|--------|--------|---------|---------|---------|
| 59.2   | 94.4   | 20.1   | 12.8   | 81.6   | 73.7   | 161.9   | 159.8   | 216.1   |
| 68.8   | 123.7  | 29.1   | 32.1   | 125.8  | 110.5  | 157.0   | 197.3   | 210.4   |
| 111.2  | 126.1  | 42.2   | 43.0   | 133.6  | 84.8   | 135.2   | 155.1   | 162.9   |
| 2.4    | 10.3   | 1.4    | 7.1    | 4.5    | 8.2    | 11.2    | 16.2    | 15.9    |
| 140.7  | 215.7  | 80.0   | 89.5   | 266.8  | 200.5  | 569.8   | 712.3   | 734.3   |
| 101.2  | 111.5  | 91.1   | 111.2  | 172.5  | 100.6  | 174.9   | 218.1   | 239.5   |
| 2.8    | 8.1    | 7.2    | 8.9    | 2.3    | 2.2    | 9.2     | 2.9     | 11.3    |
| 37.0   | 35.0   | 3.7    | 5.4    | 25.1   | 58.9   | 51.7    | 46.2    | 45.6    |
| 106.6  | 135.7  | 28.2   | 32.5   | 146.7  | 117.2  | 795.2   | 1209.7  | 1221.1  |
| 208.1  | 344.2  | 28.8   | 36.5   | 348.9  | 343.8  | 975.8   | 817.9   | 979.5   |
| 85.7   | 111.3  | 5.6    | 13.4   | 133.0  | 111.2  | 222.3   | 179.5   | 235.4   |
| 40.6   | 37.1   | 18.9   | 21.3   | 43.0   | 31.7   | 63.3    | 54.3    | 47.9    |
| 1.2    | 18.9   | 2.3    | 5.9    | 13.8   | 12.5   | 5.2     | 10.4    | 12.9    |
| 196.5  | 233.6  | 28.1   | 25.7   | 335.8  | 192.0  | 194.7   | 143.8   | 144.7   |
| 490.5  | 613.8  | 69.4   | 79.5   | 734.6  | 502.1  | 462.8   | 268.3   | 313.9   |
| 86.9   | 125.0  | 23.8   | 34.1   | 129.3  | 106.5  | 247.6   | 168.0   | 187.7   |
| 6.7    | 8.6    | 1.7    | 5.0    | 8.2    | 2.5    | 8.7     | 10.8    | 15.8    |
| 67.1   | 78.7   | 22.2   | 36.8   | 101.5  | 66.5   | 148.3   | 120.4   | 150.1   |
| 121.7  | 112.6  | 103.0  | 167.7  | 120.2  | 85.1   | 283.8   | 315.0   | 328.8   |
| 152.0  | 158.8  | 15.3   | 10.5   | 119.9  | 142.8  | 127.5   | 134.9   | 158.9   |
| 30.0   | 18.2   | 44.2   | 42.5   | 30.7   | 26.4   | 49.0    | 45.9    | 54.2    |
| 614.2  | 884.4  | 555.0  | 699.3  | 1025.9 | 1055.9 | 2521.0  | 2333.7  | 2498.1  |
| 171.8  | 276.3  | 84.8   | 127.0  | 367.8  | 347.9  | 1893.6  | 1975.7  | 2207.6  |
| 107.4  | 83.4   | 67.2   | 108.3  | 168.9  | 82.5   | 104.9   | 103.7   | 136.2   |
| 62.8   | 33.9   | 101.4  | 172.2  | 83.2   | 25.6   | 66.0    | 57.0    | 64.5    |
| 41.7   | 39.9   | 15.1   | 17.3   | 55.7   | 24.4   | 48.2    | 63.4    | 66.8    |
| 62.0   | 59.2   | 71.4   | 93.5   | 100.9  | 66.4   | 117.1   | 93.8    | 133.9   |
| 53.2   | 69.3   | 11.2   | 10.6   | 92.4   | 72.0   | 105.7   | 235.0   | 252.7   |
| 121.4  | 137.7  | 16.8   | 15.6   | 147.2  | 109.3  | 111.3   | 138.0   | 143.2   |
| 252.3  | 302.9  | 53.9   | 14.4   | 403.4  | 253.7  | 473.4   | 429.8   | 468.8   |
| 1172.2 | 1123.9 | 621.4  | 792.5  | 1643.6 | 1040.4 | 2215.6  | 1897.9  | 2041.7  |
| 226.1  | 293.4  | 52.7   | 49.9   | 364.2  | 266.7  | 228.3   | 199.3   | 232.2   |
| 42.6   | 38.3   | 20.8   | 51.2   | 43.1   | 7.8    | 136.1   | 81.5    | 143.7   |
| 230.8  | 315.8  | 78.1   | 91.8   | 321.7  | 260.4  | 744.0   | 666.2   | 696.6   |
| 53.2   | 59.0   | 16.8   | 29.1   | 71.8   | 45.3   | 111.0   | 84.5    | 99.8    |
| 325.0  | 371.6  | 56.6   | 57.4   | 457.4  | 382.4  | 421.1   | 365.6   | 373.1   |
| 6031.4 | 7411.5 | 2143.2 | 2765.2 | 6776.5 | 6338.8 | 11383.3 | 11695.0 | 11251.2 |
| 240.1  | 344.4  | 71.6   | 78.7   | 370.2  | 251.9  | 476.7   | 241.2   | 285.5   |
| 6462.6 | 7542.8 | 3936.2 | 5019.2 | 7706.6 | 6844.0 | 10963.4 | 10811.6 | 11307.1 |
| 109.6  | 137.7  | 33.0   | 31.7   | 154.8  | 147.9  | 160.3   | 93.0    | 111.2   |
| 252.3  | 295.4  | 19.4   | 16.5   | 332.1  | 273.0  | 334.1   | 182.5   | 159.2   |
| 12.4   | 10.9   | 7.8    | 2.4    | 13.5   | 4.1    | 25.6    | 18.9    | 7.3     |
| 275.2  | 283.0  | 34.1   | 48.9   | 371.4  | 483.6  | 421.7   | 566.8   | 620.4   |
| 257.9  | 265.8  | 35.0   | 47.7   | 419.9  | 228.7  | 425.4   | 548.6   | 632.4   |
| 189.6  | 158.3  | 35.1   | 36.2   | 210.0  | 158.1  | 268.4   | 210.6   | 274.6   |
| 8.1    | 10.3   | 16.7   | 22.5   | 5.8    | 16.1   | 111.9   | 137.1   | 146.7   |
| 371.8  | 412.3  | 142.7  | 140.6  | 579.2  | 409.1  | 335.6   | 512.9   | 604.1   |
| 123.3  | 205.6  | 67.1   | 67.9   | 219.2  | 157.5  | 336.2   | 317.8   | 343.6   |
| 35.3   | 35.6   | 30.0   | 31.9   | 68.0   | 40.8   | 168.8   | 154.9   | 173.7   |
| 110.1  | 145.0  | 144.2  | 161.3  | 148.2  | 145.8  | 335.7   | 340.1   | 364.1   |
| 150.5  | 152.3  | 118.4  | 155.7  | 242.7  | 150.4  | 544.6   | 512.4   | 571.0   |
| 36.5   | 33.9   | 28.6   | 35.4   | 40.4   | 28.0   | 27.4    | 20.9    | 19.4    |
| 90.0   | 93.3   | 74.4   | 84.7   | 119.4  | 117.5  | 483.6   | 463.7   | 488.5   |

|        |        |        |        |        |        |        |        |        |
|--------|--------|--------|--------|--------|--------|--------|--------|--------|
| 19.7   | 23.7   | 17.7   | 13.4   | 33.5   | 18.9   | 8.1    | 15.0   | 11.9   |
| 0.5    | 7.1    | 13.0   | 0.9    | 7.8    | 11.7   | 8.2    | 8.7    | 6.8    |
| 73.2   | 70.8   | 101.2  | 96.3   | 119.1  | 77.4   | 219.7  | 349.7  | 368.7  |
| 53.9   | 67.2   | 29.0   | 37.0   | 63.6   | 44.7   | 113.4  | 81.4   | 96.6   |
| 239.6  | 230.8  | 60.3   | 54.7   | 376.4  | 180.5  | 175.3  | 138.4  | 135.7  |
| 63.8   | 31.2   | 121.4  | 194.3  | 44.0   | 24.1   | 747.3  | 538.2  | 647.1  |
| 120.9  | 84.6   | 317.6  | 338.8  | 112.0  | 61.6   | 1227.5 | 965.5  | 1169.8 |
| 161.7  | 194.1  | 101.0  | 81.9   | 249.6  | 172.2  | 2880.1 | 4585.2 | 4539.4 |
| 18.5   | 12.5   | 10.9   | 5.8    | 12.3   | 15.3   | 7.1    | 14.1   | 13.0   |
| 35.5   | 50.6   | 28.6   | 40.3   | 49.1   | 37.0   | 91.9   | 115.0  | 143.7  |
| 292.7  | 320.2  | 82.8   | 121.5  | 445.0  | 337.8  | 229.6  | 148.6  | 165.6  |
| 179.5  | 171.2  | 54.3   | 49.1   | 339.6  | 166.2  | 62.1   | 83.2   | 122.0  |
| 21.2   | 20.5   | 33.2   | 16.4   | 50.6   | 40.7   | 26.6   | 28.0   | 22.8   |
| 179.6  | 168.0  | 18.8   | 32.6   | 217.6  | 147.1  | 121.6  | 111.5  | 121.1  |
| 51.6   | 93.5   | 4.3    | 6.0    | 84.0   | 48.9   | 72.0   | 55.6   | 67.9   |
| 118.6  | 158.5  | 12.5   | 17.0   | 216.9  | 123.1  | 167.5  | 137.4  | 188.5  |
| 14.9   | 11.6   | 3.0    | 1.7    | 1.8    | 3.5    | 4.3    | 7.3    | 3.1    |
| 66.3   | 103.2  | 6.8    | 3.4    | 88.7   | 65.8   | 3.2    | 10.4   | 5.5    |
| 107.7  | 129.7  | 66.4   | 56.5   | 171.2  | 132.3  | 109.4  | 110.3  | 127.4  |
| 134.5  | 203.6  | 31.2   | 50.7   | 196.5  | 187.9  | 1164.0 | 1127.5 | 1236.2 |
| 140.4  | 198.2  | 68.2   | 88.5   | 169.5  | 198.0  | 521.2  | 364.0  | 422.8  |
| 1492.5 | 1932.3 | 1437.0 | 1876.1 | 1689.9 | 2177.1 | 2800.4 | 3240.5 | 3743.9 |
| 31.0   | 11.9   | 2.7    | 10.3   | 23.3   | 14.3   | 21.8   | 23.3   | 4.2    |
| 270.3  | 317.7  | 34.8   | 37.7   | 426.1  | 284.4  | 376.3  | 385.2  | 491.2  |
| 137.7  | 149.5  | 43.1   | 45.7   | 222.3  | 146.8  | 398.2  | 564.9  | 627.5  |
| 73.3   | 91.1   | 162.1  | 196.3  | 120.6  | 67.8   | 324.2  | 403.1  | 449.4  |
| 6.4    | 15.7   | 22.0   | 37.5   | 17.3   | 11.0   | 59.2   | 68.2   | 68.7   |
| 217.4  | 330.5  | 237.2  | 284.8  | 356.2  | 318.4  | 285.4  | 297.9  | 373.1  |
| 504.5  | 470.5  | 49.7   | 77.2   | 785.1  | 475.8  | 1461.6 | 1162.1 | 1289.7 |
| 91.7   | 90.5   | 35.2   | 90.8   | 174.0  | 154.0  | 233.4  | 150.9  | 155.9  |
| 51.6   | 81.1   | 18.7   | 26.8   | 83.3   | 41.4   | 247.6  | 219.3  | 233.2  |
| 263.2  | 209.3  | 150.0  | 173.6  | 330.0  | 217.5  | 426.0  | 232.0  | 239.4  |
| 105.5  | 149.4  | 39.1   | 57.5   | 178.8  | 124.2  | 310.1  | 287.4  | 324.2  |
| 280.2  | 362.9  | 51.7   | 53.9   | 372.4  | 349.1  | 265.9  | 445.4  | 483.0  |
| 18.5   | 18.3   | 12.2   | 16.3   | 25.3   | 13.0   | 40.9   | 33.3   | 27.4   |
| 144.9  | 156.3  | 44.1   | 45.6   | 269.0  | 159.2  | 168.0  | 173.5  | 210.0  |
| 8.0    | 35.8   | 104.3  | 101.2  | 21.6   | 17.3   | 67.8   | 132.3  | 150.2  |
| 213.6  | 211.5  | 67.7   | 53.5   | 235.1  | 237.9  | 345.8  | 409.3  | 406.9  |
| 2.4    | 5.4    | 20.6   | 3.9    | 2.7    | 2.6    | 8.6    | 7.3    | 13.3   |
| 43.3   | 50.8   | 27.0   | 44.2   | 77.7   | 16.5   | 101.5  | 55.5   | 64.7   |
| 90.6   | 157.7  | 8.6    | 13.3   | 201.9  | 138.4  | 20.3   | 5.9    | 10.4   |
| 583.3  | 851.7  | 79.1   | 79.5   | 958.0  | 809.9  | 1581.4 | 899.0  | 983.9  |
| 72.4   | 144.1  | 14.4   | 15.1   | 96.4   | 93.3   | 405.6  | 248.8  | 281.4  |
| 85.1   | 143.9  | 24.4   | 25.3   | 134.0  | 129.3  | 1259.2 | 983.7  | 1226.9 |
| 63.6   | 45.0   | 101.3  | 113.8  | 59.1   | 66.5   | 91.0   | 76.4   | 90.9   |
| 2.4    | 7.8    | 6.6    | 6.9    | 2.0    | 2.7    | 383.0  | 1387.5 | 1427.7 |
| 64.9   | 63.5   | 29.4   | 49.4   | 88.3   | 49.7   | 92.0   | 69.2   | 75.3   |
| 826.3  | 852.5  | 146.3  | 164.0  | 1017.4 | 1015.2 | 919.3  | 776.6  | 917.2  |
| 38.8   | 51.3   | 31.2   | 27.6   | 42.8   | 30.3   | 46.6   | 55.8   | 43.1   |
| 486.6  | 450.8  | 310.5  | 305.1  | 760.0  | 382.2  | 829.8  | 962.9  | 996.8  |
| 81.3   | 104.4  | 5.6    | 13.2   | 172.5  | 124.8  | 303.1  | 194.6  | 205.9  |
| 63.7   | 106.9  | 68.7   | 96.3   | 72.1   | 96.1   | 106.6  | 90.9   | 118.2  |
| 2077.9 | 2510.8 | 676.7  | 761.0  | 3604.9 | 2724.1 | 5446.6 | 4723.3 | 4738.9 |

|        |        |        |        |        |        |         |         |         |
|--------|--------|--------|--------|--------|--------|---------|---------|---------|
| 74.4   | 116.7  | 63.5   | 70.6   | 103.1  | 117.5  | 156.4   | 115.7   | 109.0   |
| 4395.0 | 5163.4 | 32.1   | 38.6   | 4657.8 | 4732.9 | 124.6   | 120.8   | 126.7   |
| 76.0   | 83.1   | 39.9   | 47.2   | 101.7  | 86.9   | 173.0   | 105.1   | 122.2   |
| 85.5   | 134.3  | 41.2   | 50.1   | 141.4  | 116.0  | 323.8   | 326.9   | 337.3   |
| 42.2   | 44.1   | 54.3   | 75.8   | 51.8   | 28.3   | 248.3   | 270.3   | 268.2   |
| 352.4  | 426.9  | 431.1  | 652.1  | 431.2  | 213.7  | 2092.5  | 1857.5  | 2247.5  |
| 56.3   | 70.7   | 53.5   | 103.7  | 61.7   | 68.5   | 212.5   | 235.1   | 294.5   |
| 0.5    | 2.1    | 4.9    | 3.0    | 9.2    | 3.2    | 7.4     | 0.8     | 5.4     |
| 102.7  | 108.8  | 24.0   | 50.3   | 96.9   | 113.6  | 351.6   | 238.9   | 287.6   |
| 87.7   | 109.5  | 27.2   | 28.5   | 138.0  | 73.2   | 387.4   | 587.0   | 636.1   |
| 3.3    | 16.1   | 31.0   | 28.1   | 8.3    | 8.3    | 23.2    | 23.4    | 21.6    |
| 8237.8 | 9258.4 | 4517.7 | 4990.8 | 8871.1 | 9174.2 | 10940.7 | 11200.7 | 11125.6 |
| 63.5   | 66.8   | 40.4   | 23.7   | 160.2  | 61.7   | 158.3   | 346.3   | 341.3   |
| 133.5  | 173.5  | 120.9  | 163.2  | 254.3  | 186.0  | 498.2   | 238.3   | 334.3   |
| 540.1  | 523.2  | 77.2   | 122.4  | 801.6  | 528.8  | 1256.5  | 1185.2  | 1355.1  |
| 88.3   | 118.3  | 2.9    | 7.5    | 158.6  | 110.9  | 22.1    | 25.7    | 45.8    |
| 0.7    | 0.9    | 0.7    | 0.8    | 0.8    | 0.8    | 1.0     | 0.7     | 0.9     |
| 91.1   | 144.5  | 64.6   | 58.2   | 123.3  | 115.2  | 84.1    | 69.2    | 69.8    |
| 201.2  | 263.5  | 54.9   | 64.1   | 293.6  | 229.8  | 269.1   | 278.7   | 453.9   |
| 170.9  | 213.2  | 146.5  | 204.7  | 262.1  | 212.2  | 206.0   | 128.8   | 180.2   |
| 304.0  | 414.4  | 186.1  | 261.1  | 420.4  | 321.6  | 374.2   | 263.5   | 325.0   |
| 23.2   | 13.0   | 3.3    | 30.3   | 32.4   | 18.1   | 65.2    | 60.4    | 71.7    |
| 29.3   | 33.1   | 48.3   | 63.8   | 27.4   | 36.1   | 74.6    | 79.7    | 102.9   |
| 44.3   | 56.6   | 31.8   | 31.9   | 60.5   | 58.8   | 122.3   | 144.4   | 139.9   |
| 81.7   | 118.1  | 33.2   | 33.5   | 152.6  | 134.8  | 94.0    | 85.6    | 80.2    |
| 6.7    | 7.6    | 3.0    | 6.3    | 1.6    | 2.3    | 2.1     | 2.3     | 4.7     |
| 57.9   | 67.8   | 17.7   | 31.3   | 86.4   | 95.0   | 35.8    | 37.3    | 37.1    |
| 222.0  | 278.1  | 61.3   | 58.6   | 346.7  | 292.3  | 396.7   | 301.3   | 315.4   |
| 26.1   | 29.9   | 6.5    | 8.7    | 62.4   | 36.3   | 10.0    | 12.2    | 18.1    |
| 268.3  | 496.4  | 57.2   | 74.0   | 424.9  | 364.7  | 783.7   | 1045.4  | 982.4   |
| 279.2  | 399.3  | 18.2   | 16.3   | 280.6  | 299.1  | 399.4   | 336.5   | 346.3   |
| 2.0    | 1.8    | 1.7    | 4.9    | 3.6    | 2.8    | 7.9     | 3.5     | 5.0     |
| 117.1  | 136.6  | 63.5   | 72.7   | 197.1  | 141.2  | 272.6   | 313.8   | 376.7   |
| 167.3  | 186.2  | 56.0   | 107.7  | 318.3  | 263.9  | 499.0   | 233.7   | 260.3   |
| 68.2   | 41.9   | 89.8   | 112.5  | 100.5  | 57.3   | 118.6   | 125.6   | 147.1   |
| 239.9  | 345.1  | 45.4   | 32.3   | 350.0  | 308.5  | 329.2   | 245.9   | 281.0   |
| 58.4   | 65.7   | 60.2   | 72.6   | 94.0   | 79.0   | 193.9   | 119.3   | 153.3   |
| 345.2  | 385.3  | 113.8  | 133.4  | 432.8  | 440.2  | 485.9   | 522.8   | 588.4   |
| 434.6  | 589.3  | 73.0   | 107.5  | 667.5  | 597.8  | 1570.4  | 1148.3  | 1200.7  |
| 43.4   | 82.2   | 63.1   | 80.5   | 63.0   | 59.2   | 57.2    | 110.7   | 103.6   |
| 476.0  | 599.7  | 42.4   | 45.8   | 705.0  | 582.0  | 762.3   | 437.1   | 441.0   |
| 55.3   | 93.4   | 103.3  | 110.8  | 80.8   | 72.4   | 117.2   | 213.2   | 241.8   |
| 137.8  | 198.7  | 40.1   | 50.1   | 249.1  | 160.8  | 618.3   | 749.5   | 809.2   |
| 38.5   | 40.8   | 19.0   | 40.3   | 29.3   | 22.7   | 136.6   | 120.1   | 116.7   |
| 72.9   | 116.7  | 67.8   | 80.5   | 139.8  | 74.4   | 194.1   | 267.8   | 275.9   |
| 839.6  | 1130.6 | 261.3  | 323.5  | 1409.0 | 1054.8 | 1722.4  | 1304.6  | 1414.5  |
| 28.4   | 28.2   | 31.1   | 34.5   | 27.0   | 21.2   | 326.0   | 296.4   | 295.3   |
| 62.0   | 149.2  | 7.1    | 4.2    | 156.9  | 103.8  | 121.6   | 160.4   | 180.4   |
| 251.5  | 354.0  | 11.8   | 24.2   | 340.9  | 327.7  | 1167.0  | 970.8   | 1300.0  |
| 157.3  | 155.1  | 34.8   | 31.8   | 175.7  | 174.4  | 208.7   | 237.3   | 246.3   |
| 33.2   | 55.0   | 7.6    | 17.6   | 48.8   | 43.2   | 1.8     | 1.2     | 1.3     |
| 204.8  | 306.1  | 76.5   | 90.2   | 216.3  | 307.8  | 429.7   | 232.8   | 305.0   |
| 43.3   | 64.2   | 14.8   | 7.6    | 65.7   | 67.6   | 111.6   | 144.6   | 145.2   |

|        |        |        |        |        |        |        |        |        |
|--------|--------|--------|--------|--------|--------|--------|--------|--------|
| 356.1  | 753.7  | 7.5    | 13.6   | 523.0  | 681.5  | 46.0   | 83.5   | 106.1  |
| 26.8   | 32.4   | 13.1   | 10.1   | 37.4   | 42.0   | 71.4   | 50.2   | 41.2   |
| 41.0   | 55.7   | 17.8   | 23.8   | 68.3   | 58.5   | 122.9  | 139.0  | 170.9  |
| 4.6    | 3.6    | 5.6    | 9.3    | 8.4    | 3.5    | 5.2    | 21.4   | 25.1   |
| 18.2   | 35.8   | 43.2   | 42.5   | 59.4   | 39.3   | 113.1  | 129.3  | 137.3  |
| 530.4  | 561.7  | 26.6   | 17.8   | 804.8  | 663.1  | 1018.1 | 877.6  | 863.3  |
| 626.5  | 691.1  | 35.3   | 36.2   | 1009.6 | 534.5  | 703.5  | 569.6  | 576.0  |
| 239.2  | 397.2  | 60.2   | 88.1   | 440.6  | 369.6  | 526.5  | 627.7  | 640.5  |
| 77.6   | 112.3  | 18.4   | 25.4   | 111.5  | 112.6  | 253.7  | 315.0  | 319.8  |
| 6.2    | 16.4   | 7.6    | 8.8    | 8.2    | 13.7   | 38.5   | 18.4   | 17.7   |
| 547.2  | 665.1  | 216.4  | 328.8  | 800.1  | 708.2  | 1360.3 | 638.7  | 828.0  |
| 88.6   | 94.4   | 9.8    | 12.6   | 103.8  | 104.3  | 14.4   | 7.0    | 8.7    |
| 27.6   | 4.4    | 1.7    | 11.1   | 31.7   | 28.9   | 13.6   | 7.8    | 19.4   |
| 212.9  | 224.1  | 193.9  | 231.0  | 380.6  | 263.6  | 694.6  | 680.5  | 680.7  |
| 71.8   | 46.1   | 16.9   | 17.8   | 62.4   | 79.1   | 262.3  | 197.4  | 209.3  |
| 50.4   | 59.4   | 7.8    | 9.7    | 61.3   | 60.7   | 369.3  | 248.3  | 287.2  |
| 150.6  | 187.6  | 42.6   | 43.9   | 273.0  | 189.3  | 195.2  | 201.0  | 202.5  |
| 31.9   | 53.9   | 11.0   | 31.7   | 43.5   | 47.2   | 245.5  | 321.0  | 380.5  |
| 69.0   | 108.0  | 1.2    | 4.9    | 116.4  | 76.8   | 84.4   | 54.3   | 67.1   |
| 188.5  | 219.6  | 58.0   | 77.2   | 200.1  | 267.3  | 430.6  | 321.4  | 340.6  |
| 44.2   | 102.9  | 41.1   | 70.8   | 123.1  | 71.3   | 175.8  | 216.3  | 216.0  |
| 4052.1 | 5272.2 | 1547.4 | 1847.6 | 4704.6 | 4853.2 | 7474.5 | 6813.6 | 6978.5 |
| 103.2  | 140.0  | 29.3   | 53.8   | 103.5  | 119.0  | 438.9  | 478.9  | 539.9  |
| 5.3    | 23.8   | 72.0   | 96.6   | 36.8   | 30.7   | 146.1  | 122.9  | 211.3  |
| 93.6   | 68.8   | 17.3   | 19.3   | 105.5  | 132.0  | 471.5  | 564.0  | 591.5  |
| 25.2   | 25.5   | 2.6    | 3.8    | 24.6   | 10.2   | 3.0    | 2.5    | 9.1    |
| 11.8   | 21.0   | 6.9    | 10.4   | 31.5   | 16.4   | 10.6   | 20.4   | 10.2   |
| 1.7    | 7.9    | 2.6    | 6.7    | 13.2   | 4.7    | 2.3    | 3.4    | 2.0    |
| 14.8   | 20.4   | 10.4   | 14.2   | 9.9    | 4.3    | 16.8   | 6.8    | 3.3    |
| 29.6   | 9.5    | 1.4    | 1.9    | 66.6   | 11.1   | 1332.9 | 41.7   | 42.8   |
| 359.2  | 482.5  | 54.8   | 53.6   | 402.0  | 515.8  | 819.9  | 862.0  | 972.9  |
| 128.8  | 158.7  | 18.8   | 11.8   | 226.7  | 143.2  | 234.3  | 229.3  | 260.7  |
| 154.7  | 161.5  | 19.1   | 16.3   | 181.3  | 172.1  | 54.9   | 56.1   | 68.2   |
| 104.7  | 103.3  | 53.5   | 43.0   | 134.4  | 133.0  | 424.2  | 571.0  | 683.4  |
| 59.7   | 141.5  | 36.9   | 18.2   | 97.1   | 109.7  | 197.1  | 177.5  | 203.5  |
| 48.0   | 48.9   | 45.2   | 60.2   | 71.0   | 72.4   | 136.7  | 128.1  | 117.6  |
| 147.1  | 213.0  | 73.6   | 111.3  | 237.9  | 193.7  | 585.9  | 313.4  | 335.9  |
| 24.7   | 19.5   | 7.5    | 7.6    | 81.0   | 28.3   | 7.1    | 9.4    | 6.4    |
| 4.4    | 1.6    | 2.0    | 2.6    | 28.1   | 13.2   | 1.6    | 2.0    | 2.8    |
| 536.7  | 757.5  | 78.3   | 92.0   | 779.0  | 1977.9 | 808.8  | 996.6  | 1024.9 |
| 389.5  | 464.6  | 568.7  | 620.1  | 506.4  | 139.6  | 1861.6 | 1395.0 | 1386.6 |
| 22.3   | 12.7   | 32.1   | 47.3   | 27.6   | 9.5    | 71.1   | 56.8   | 75.3   |
| 1773.0 | 1898.3 | 212.6  | 317.3  | 2258.3 | 1923.3 | 1061.4 | 616.7  | 704.1  |
| 33.6   | 46.9   | 58.6   | 70.9   | 62.1   | 47.4   | 7.0    | 2.3    | 0.9    |
| 10.3   | 17.4   | 29.3   | 28.3   | 24.1   | 6.0    | 38.4   | 44.4   | 48.3   |
| 310.8  | 306.9  | 29.3   | 42.7   | 478.2  | 316.1  | 750.5  | 964.9  | 1072.6 |
| 107.5  | 171.2  | 19.2   | 30.5   | 128.2  | 146.0  | 300.1  | 352.3  | 417.3  |
| 14.6   | 18.4   | 32.4   | 30.5   | 26.9   | 17.1   | 9.8    | 3.9    | 14.5   |
| 154.5  | 166.4  | 155.8  | 181.3  | 201.2  | 165.9  | 592.4  | 552.2  | 556.7  |
| 1.4    | 5.1    | 1.8    | 2.9    | 3.8    | 1.2    | 1.8    | 2.2    | 1.6    |
| 15.7   | 17.2   | 8.9    | 12.7   | 18.0   | 29.6   | 30.8   | 40.3   | 37.9   |
| 85.7   | 127.8  | 26.1   | 20.4   | 184.4  | 124.6  | 175.1  | 154.7  | 162.9  |
| 30.3   | 35.8   | 2.4    | 13.5   | 41.6   | 29.7   | 43.1   | 36.2   | 29.0   |

|        |        |        |        |        |        |        |        |        |
|--------|--------|--------|--------|--------|--------|--------|--------|--------|
| 120.1  | 123.4  | 16.6   | 12.8   | 176.1  | 129.7  | 175.5  | 157.8  | 155.6  |
| 1612.6 | 1978.3 | 693.8  | 941.4  | 2274.6 | 2106.0 | 3899.6 | 3868.4 | 4029.5 |
| 41.1   | 44.2   | 96.9   | 157.8  | 98.3   | 60.7   | 141.3  | 160.0  | 165.8  |
| 70.6   | 63.9   | 24.8   | 32.2   | 72.1   | 64.5   | 101.0  | 117.8  | 123.1  |
| 69.1   | 96.8   | 33.1   | 32.4   | 80.6   | 89.2   | 67.0   | 63.8   | 59.9   |
| 1118.8 | 1292.1 | 285.0  | 391.6  | 1716.1 | 1259.5 | 1703.6 | 1415.0 | 1457.1 |
| 7.9    | 13.1   | 27.6   | 4.2    | 13.8   | 17.8   | 45.3   | 30.5   | 25.9   |
| 237.0  | 396.8  | 68.8   | 81.5   | 391.5  | 454.7  | 661.6  | 392.8  | 380.0  |
| 22.4   | 34.6   | 12.8   | 3.6    | 55.2   | 25.7   | 26.7   | 33.7   | 32.5   |
| 66.9   | 97.4   | 8.2    | 2.2    | 79.3   | 120.6  | 35.4   | 45.5   | 52.1   |
| 12.8   | 20.8   | 0.2    | 3.4    | 17.2   | 22.2   | 23.6   | 11.7   | 14.3   |
| 1.6    | 2.1    | 65.8   | 58.8   | 0.4    | 1.7    | 2.2    | 2.0    | 3.8    |
| 119.6  | 159.0  | 38.8   | 47.3   | 129.0  | 135.4  | 208.9  | 118.2  | 136.2  |
| 59.1   | 96.0   | 66.5   | 113.2  | 102.4  | 61.4   | 83.1   | 94.6   | 102.6  |
| 14.1   | 32.9   | 1.7    | 3.0    | 23.0   | 34.9   | 35.6   | 32.4   | 29.2   |
| 89.7   | 177.6  | 22.1   | 19.8   | 153.0  | 162.7  | 336.6  | 417.8  | 435.4  |
| 70.7   | 134.2  | 21.0   | 27.2   | 133.0  | 127.7  | 183.0  | 160.1  | 176.7  |
| 380.7  | 534.3  | 128.8  | 269.0  | 439.2  | 532.2  | 286.2  | 149.4  | 191.5  |
| 69.5   | 119.9  | 27.4   | 34.1   | 104.9  | 110.1  | 576.0  | 723.5  | 801.6  |
| 92.4   | 161.3  | 15.3   | 14.2   | 126.9  | 119.7  | 73.7   | 89.1   | 94.9   |
| 119.3  | 129.5  | 83.7   | 79.9   | 140.1  | 125.8  | 233.2  | 249.5  | 259.4  |
| 367.9  | 395.5  | 83.6   | 68.9   | 682.0  | 414.8  | 2507.2 | 2081.0 | 2219.4 |
| 5656.8 | 6339.5 | 3762.1 | 4316.2 | 5931.6 | 5901.5 | 9817.9 | 9411.8 | 9471.3 |
| 57.9   | 97.7   | 12.8   | 14.2   | 99.5   | 89.1   | 154.4  | 83.8   | 105.9  |
| 66.4   | 55.1   | 5.5    | 6.6    | 95.4   | 53.0   | 112.2  | 131.6  | 126.4  |
| 7.2    | 23.5   | 9.7    | 0.4    | 10.9   | 9.7    | 51.4   | 45.9   | 43.5   |
| 174.6  | 207.6  | 8.3    | 4.1    | 175.9  | 145.6  | 21.8   | 60.0   | 82.0   |
| 120.9  | 141.6  | 12.1   | 11.2   | 155.9  | 140.0  | 444.4  | 347.4  | 376.4  |
| 62.0   | 70.5   | 50.2   | 58.3   | 71.0   | 88.5   | 251.4  | 244.5  | 268.4  |
| 1113.1 | 1281.6 | 492.9  | 662.5  | 1324.5 | 1483.5 | 1646.1 | 1480.3 | 1723.6 |
| 49.4   | 46.4   | 9.3    | 19.3   | 79.5   | 71.2   | 116.7  | 80.3   | 97.5   |
| 138.5  | 165.4  | 54.4   | 69.5   | 174.3  | 182.1  | 323.0  | 371.1  | 426.4  |
| 3.9    | 6.3    | 0.6    | 0.8    | 20.2   | 1.4    | 147.6  | 258.5  | 273.0  |
| 3.5    | 1.1    | 2.1    | 1.0    | 13.1   | 6.5    | 48.5   | 97.1   | 86.2   |
| 103.7  | 160.4  | 14.8   | 13.0   | 221.6  | 120.7  | 304.7  | 285.1  | 332.3  |
| 9.3    | 6.4    | 10.6   | 13.8   | 19.7   | 8.2    | 24.9   | 14.1   | 20.5   |
| 65.4   | 93.3   | 49.7   | 56.6   | 96.5   | 133.8  | 36.5   | 40.1   | 50.5   |
| 1.6    | 9.3    | 2.2    | 9.0    | 29.4   | 13.2   | 8.7    | 9.1    | 10.9   |
| 12.3   | 12.4   | 9.4    | 7.4    | 15.1   | 15.7   | 12.5   | 7.1    | 14.2   |
| 72.9   | 95.7   | 10.9   | 8.7    | 104.6  | 81.0   | 788.5  | 1019.5 | 1031.3 |
| 3.3    | 6.0    | 2.5    | 4.9    | 6.8    | 0.9    | 19.3   | 2.8    | 4.1    |
| 490.3  | 520.6  | 47.3   | 104.4  | 843.2  | 571.3  | 1079.9 | 583.8  | 626.9  |
| 370.1  | 280.4  | 80.4   | 148.8  | 437.6  | 240.9  | 838.2  | 471.4  | 455.2  |
| 220.4  | 233.2  | 454.2  | 517.8  | 306.6  | 192.7  | 757.3  | 558.2  | 681.1  |
| 260.1  | 315.5  | 5.1    | 5.6    | 347.9  | 442.5  | 233.2  | 138.1  | 195.1  |
| 3432.8 | 3770.2 | 1093.8 | 1733.9 | 4430.7 | 3504.8 | 5450.1 | 4544.6 | 4871.6 |
| 102.8  | 126.9  | 23.7   | 25.7   | 177.1  | 104.2  | 221.4  | 184.9  | 203.9  |
| 38.1   | 35.4   | 26.9   | 28.8   | 24.6   | 36.1   | 5.2    | 3.3    | 6.2    |
| 1.7    | 17.0   | 12.3   | 20.7   | 11.2   | 2.6    | 8.4    | 10.4   | 5.6    |
| 85.2   | 138.5  | 49.3   | 54.8   | 132.1  | 193.7  | 139.0  | 187.2  | 171.8  |
| 269.8  | 399.0  | 42.2   | 38.2   | 285.8  | 462.4  | 363.9  | 491.6  | 518.0  |
| 397.3  | 566.8  | 32.3   | 35.0   | 568.2  | 417.6  | 1170.4 | 1306.6 | 1344.8 |
| 66.3   | 94.4   | 38.6   | 51.1   | 113.7  | 103.5  | 160.1  | 168.8  | 178.0  |

|        |        |        |        |        |        |        |        |        |
|--------|--------|--------|--------|--------|--------|--------|--------|--------|
| 168.6  | 178.2  | 3.9    | 3.2    | 253.3  | 187.5  | 310.3  | 249.4  | 280.3  |
| 43.5   | 106.3  | 49.8   | 22.5   | 63.6   | 106.8  | 342.8  | 349.4  | 387.7  |
| 216.1  | 285.6  | 104.8  | 160.9  | 339.4  | 296.4  | 675.1  | 654.0  | 703.5  |
| 31.8   | 35.4   | 19.8   | 32.3   | 35.8   | 14.2   | 47.9   | 76.2   | 69.4   |
| 19.6   | 22.8   | 8.6    | 12.4   | 15.8   | 14.8   | 21.5   | 38.7   | 39.7   |
| 34.7   | 55.7   | 12.4   | 14.4   | 63.6   | 50.5   | 282.9  | 326.6  | 316.4  |
| 124.2  | 225.6  | 32.9   | 45.4   | 183.9  | 204.2  | 410.7  | 426.2  | 433.9  |
| 247.2  | 300.0  | 47.3   | 53.8   | 424.9  | 404.0  | 840.2  | 895.0  | 966.7  |
| 175.0  | 229.2  | 58.6   | 45.1   | 291.2  | 238.5  | 430.4  | 377.1  | 416.0  |
| 71.5   | 94.4   | 58.3   | 86.6   | 148.1  | 89.6   | 142.2  | 143.9  | 163.1  |
| 82.2   | 93.0   | 25.4   | 21.3   | 85.1   | 104.8  | 37.7   | 21.2   | 31.8   |
| 45.7   | 78.6   | 14.1   | 3.4    | 49.5   | 48.3   | 86.6   | 149.0  | 164.0  |
| 367.4  | 472.5  | 40.4   | 79.1   | 486.4  | 346.6  | 312.0  | 275.0  | 276.9  |
| 13.8   | 19.7   | 0.9    | 4.1    | 15.0   | 24.5   | 14.6   | 4.6    | 2.2    |
| 7.1    | 2.8    | 0.6    | 1.8    | 3.9    | 1.8    | 2.0    | 1.3    | 1.8    |
| 81.4   | 92.6   | 15.5   | 12.6   | 135.1  | 83.8   | 123.3  | 153.1  | 168.2  |
| 53.0   | 64.0   | 35.3   | 29.6   | 62.6   | 47.4   | 126.9  | 111.2  | 120.3  |
| 2.6    | 7.9    | 384.5  | 471.5  | 7.9    | 2.3    | 232.3  | 747.0  | 800.8  |
| 1367.9 | 1484.6 | 1221.1 | 1605.7 | 1845.0 | 1499.2 | 1961.7 | 1990.0 | 2066.7 |
| 62.0   | 55.8   | 26.3   | 47.2   | 94.6   | 47.4   | 247.7  | 270.9  | 285.5  |
| 279.6  | 380.3  | 102.0  | 121.6  | 453.0  | 330.8  | 540.5  | 571.5  | 648.9  |
| 29.5   | 11.7   | 15.0   | 22.2   | 38.8   | 8.8    | 1.4    | 1.5    | 1.7    |
| 263.0  | 299.6  | 132.9  | 173.8  | 391.4  | 298.9  | 904.9  | 770.0  | 913.9  |
| 3.9    | 1.8    | 71.6   | 140.5  | 1.0    | 1.5    | 39.9   | 67.8   | 86.6   |
| 95.2   | 113.8  | 699.5  | 1017.9 | 135.2  | 100.4  | 470.5  | 372.6  | 428.4  |
| 622.5  | 833.0  | 141.7  | 145.7  | 832.8  | 773.0  | 409.4  | 370.0  | 459.0  |
| 10.6   | 4.4    | 1.3    | 2.5    | 30.9   | 6.5    | 88.0   | 91.6   | 123.9  |
| 31.8   | 47.0   | 69.7   | 64.6   | 39.1   | 27.5   | 71.3   | 72.9   | 66.6   |
| 1736.1 | 2215.4 | 1420.9 | 2170.6 | 2190.0 | 2341.4 | 4329.6 | 2608.3 | 2850.7 |
| 3794.0 | 4817.6 | 1365.6 | 1936.0 | 4509.2 | 4629.7 | 8212.8 | 5859.0 | 5826.6 |
| 39.0   | 43.8   | 22.2   | 16.6   | 40.2   | 44.0   | 142.2  | 145.8  | 166.7  |
| 80.9   | 102.8  | 92.2   | 175.6  | 107.8  | 93.7   | 222.0  | 234.9  | 306.2  |
| 421.7  | 482.5  | 40.3   | 27.8   | 415.9  | 407.8  | 237.2  | 275.5  | 313.4  |
| 299.8  | 310.3  | 135.3  | 174.2  | 422.5  | 306.7  | 548.6  | 411.3  | 489.4  |
| 196.6  | 146.2  | 41.6   | 32.1   | 225.1  | 149.9  | 140.0  | 88.3   | 95.7   |
| 37.0   | 46.6   | 4.6    | 9.5    | 75.2   | 40.0   | 99.1   | 76.7   | 70.9   |
| 37.0   | 31.3   | 24.4   | 20.1   | 43.5   | 35.4   | 43.2   | 44.6   | 42.3   |
| 18.4   | 23.7   | 1.8    | 9.5    | 34.5   | 22.2   | 188.4  | 243.2  | 279.6  |
| 32.5   | 62.3   | 31.8   | 49.3   | 68.1   | 41.2   | 108.2  | 107.1  | 127.7  |
| 16.8   | 8.3    | 15.1   | 1.4    | 10.3   | 11.3   | 21.0   | 19.5   | 11.1   |
| 13.3   | 14.8   | 103.9  | 148.3  | 31.1   | 5.3    | 76.2   | 262.1  | 244.0  |
| 1.2    | 2.2    | 11.9   | 8.3    | 22.5   | 17.6   | 17.2   | 26.0   | 18.7   |
| 209.6  | 205.6  | 71.3   | 96.4   | 383.5  | 190.6  | 215.2  | 226.3  | 274.0  |
| 151.4  | 165.3  | 34.9   | 56.6   | 292.3  | 202.5  | 131.0  | 130.3  | 154.0  |
| 163.8  | 153.2  | 83.9   | 96.9   | 219.7  | 191.4  | 184.8  | 157.0  | 176.6  |
| 323.5  | 428.9  | 42.3   | 72.9   | 481.1  | 418.2  | 583.1  | 541.9  | 583.8  |
| 69.8   | 118.0  | 29.4   | 30.8   | 131.3  | 102.1  | 216.2  | 256.3  | 241.1  |
| 8.9    | 40.2   | 2.9    | 5.0    | 50.6   | 44.1   | 2.1    | 4.3    | 3.7    |
| 14.2   | 24.4   | 1.5    | 8.6    | 47.5   | 43.6   | 6.9    | 4.3    | 1.7    |
| 8.2    | 8.1    | 8.2    | 0.9    | 2.0    | 7.5    | 12.1   | 2.7    | 6.5    |
| 256.6  | 317.9  | 0.9    | 0.7    | 352.2  | 308.1  | 2.7    | 3.6    | 2.4    |
| 276.1  | 433.5  | 45.4   | 52.5   | 461.6  | 357.6  | 784.3  | 895.8  | 932.8  |
| 2.1    | 1.4    | 1.1    | 2.9    | 10.0   | 2.2    | 2.3    | 1.8    | 9.8    |

|         |         |        |        |         |         |         |         |         |
|---------|---------|--------|--------|---------|---------|---------|---------|---------|
| 35.4    | 24.3    | 49.5   | 60.5   | 33.7    | 10.1    | 57.7    | 56.8    | 59.7    |
| 32.1    | 59.3    | 20.7   | 19.5   | 44.4    | 32.2    | 92.2    | 164.0   | 168.5   |
| 384.9   | 424.6   | 52.7   | 90.9   | 524.6   | 502.3   | 260.2   | 250.8   | 232.1   |
| 16.9    | 25.8    | 14.9   | 0.7    | 32.4    | 9.8     | 17.2    | 16.1    | 13.2    |
| 452.3   | 441.4   | 88.6   | 72.7   | 796.2   | 442.0   | 50.1    | 73.0    | 80.7    |
| 100.3   | 159.8   | 22.1   | 22.5   | 156.6   | 136.1   | 343.7   | 332.9   | 362.8   |
| 49.8    | 48.9    | 24.5   | 15.2   | 106.6   | 40.1    | 114.2   | 109.4   | 135.2   |
| 112.6   | 118.1   | 116.9  | 147.9  | 154.5   | 109.1   | 662.5   | 561.3   | 628.5   |
| 5536.1  | 7234.5  | 1389.4 | 1597.4 | 7179.6  | 6463.3  | 10057.3 | 10168.4 | 10041.5 |
| 15.2    | 24.2    | 47.8   | 43.0   | 37.7    | 27.7    | 25.3    | 36.5    | 29.5    |
| 93.7    | 79.5    | 10.9   | 28.5   | 112.1   | 83.4    | 720.2   | 922.8   | 1060.4  |
| 132.1   | 212.0   | 35.5   | 35.2   | 234.3   | 143.4   | 853.2   | 1494.5  | 1603.4  |
| 10123.6 | 10745.4 | 4863.5 | 6073.6 | 11147.3 | 10224.5 | 13486.9 | 12702.0 | 12863.7 |
| 186.1   | 318.0   | 119.8  | 123.2  | 359.1   | 347.9   | 436.1   | 213.7   | 323.0   |
| 779.7   | 1018.2  | 440.8  | 664.4  | 1070.7  | 973.7   | 1758.8  | 1637.2  | 1816.3  |
| 44.5    | 43.6    | 29.1   | 23.7   | 49.8    | 31.9    | 23.7    | 33.0    | 32.8    |
| 1030.0  | 906.1   | 281.8  | 446.5  | 1255.0  | 904.9   | 1781.1  | 981.3   | 1067.3  |
| 4.3     | 44.7    | 7.6    | 8.3    | 35.5    | 46.1    | 38.4    | 47.7    | 46.2    |
| 196.4   | 267.6   | 38.7   | 51.3   | 296.8   | 247.8   | 495.2   | 435.2   | 443.5   |
| 2.6     | 4.4     | 5.4    | 5.4    | 5.4     | 6.7     | 23.1    | 29.8    | 22.8    |
| 311.1   | 333.0   | 25.8   | 51.5   | 368.1   | 329.7   | 866.6   | 482.7   | 477.3   |
| 76.6    | 129.6   | 15.1   | 12.4   | 91.5    | 144.8   | 1408.9  | 1407.1  | 1542.5  |
| 198.2   | 248.2   | 28.4   | 37.4   | 448.3   | 297.3   | 137.9   | 137.7   | 149.3   |
| 1.6     | 1.4     | 2.7    | 1.8    | 2.1     | 4.3     | 2.1     | 2.3     | 1.9     |
| 21.7    | 17.6    | 4.7    | 3.1    | 18.3    | 39.0    | 22.4    | 23.0    | 27.4    |
| 754.5   | 997.7   | 105.5  | 192.1  | 1021.0  | 1074.7  | 822.3   | 397.8   | 438.3   |
| 103.5   | 82.0    | 10.3   | 13.5   | 128.7   | 97.6    | 130.2   | 88.2    | 70.2    |
| 84.3    | 97.1    | 85.1   | 114.4  | 132.6   | 99.8    | 169.8   | 144.8   | 154.1   |
| 7.7     | 3.8     | 75.1   | 70.4   | 3.8     | 12.0    | 7.2     | 17.1    | 8.9     |
| 2585.6  | 3371.0  | 720.3  | 977.4  | 3308.5  | 3050.5  | 5072.2  | 4813.9  | 4968.9  |
| 933.0   | 1583.8  | 87.7   | 95.2   | 1511.7  | 1391.0  | 2489.3  | 2324.7  | 2369.1  |
| 60.3    | 61.2    | 29.2   | 20.7   | 99.3    | 60.2    | 24.5    | 51.7    | 62.2    |
| 187.4   | 185.0   | 56.6   | 99.5   | 224.1   | 198.6   | 326.9   | 227.8   | 270.2   |
| 205.5   | 319.7   | 67.1   | 103.4  | 360.6   | 388.9   | 435.2   | 372.1   | 452.5   |
| 11.2    | 4.6     | 8.3    | 6.0    | 1.4     | 6.4     | 36.6    | 71.2    | 69.3    |
| 198.3   | 206.7   | 12.8   | 17.5   | 310.3   | 235.4   | 437.7   | 423.9   | 467.4   |
| 9.5     | 1.9     | 2.4    | 1.8    | 1.8     | 2.7     | 10.6    | 12.5    | 2.2     |
| 49.2    | 71.2    | 11.3   | 7.2    | 77.9    | 65.9    | 140.5   | 154.2   | 173.2   |
| 84.7    | 108.5   | 5.5    | 1.5    | 144.9   | 126.8   | 4.2     | 1.2     | 8.3     |
| 35.2    | 66.4    | 13.7   | 20.7   | 85.0    | 51.2    | 201.9   | 221.0   | 244.1   |
| 89.4    | 183.5   | 17.6   | 17.0   | 144.8   | 112.4   | 265.8   | 237.0   | 211.6   |
| 928.7   | 1264.7  | 18.6   | 6.3    | 1547.6  | 1256.5  | 15.6    | 8.0     | 4.7     |
| 14.9    | 13.1    | 19.4   | 3.0    | 12.1    | 24.5    | 33.7    | 28.3    | 31.1    |
| 56.5    | 83.3    | 34.4   | 59.5   | 84.7    | 39.4    | 207.6   | 217.7   | 212.0   |
| 4.7     | 14.4    | 21.2   | 28.4   | 23.4    | 2.8     | 379.9   | 248.3   | 312.1   |
| 11.2    | 3.4     | 6.5    | 10.4   | 6.5     | 1.7     | 185.0   | 191.5   | 188.4   |
| 58.9    | 54.0    | 17.3   | 37.8   | 76.0    | 65.7    | 73.5    | 60.4    | 78.7    |
| 48.6    | 63.1    | 14.2   | 3.8    | 51.3    | 30.5    | 106.3   | 104.0   | 95.6    |
| 10.5    | 13.2    | 4.8    | 7.2    | 9.0     | 2.1     | 10.5    | 11.7    | 13.1    |
| 0.8     | 2.0     | 3.6    | 2.1    | 1.0     | 6.7     | 13.1    | 12.0    | 7.1     |
| 5.2     | 2.2     | 6.0    | 4.3    | 9.0     | 4.0     | 9.7     | 6.4     | 10.3    |
| 188.5   | 211.1   | 31.9   | 45.9   | 292.4   | 212.6   | 312.1   | 331.9   | 357.7   |
| 926.8   | 978.0   | 25.0   | 25.7   | 1056.4  | 634.9   | 136.4   | 95.0    | 85.2    |



|        |        |        |        |        |        |        |        |        |
|--------|--------|--------|--------|--------|--------|--------|--------|--------|
| 5.4    | 7.8    | 9.1    | 8.8    | 11.8   | 1.1    | 5.8    | 7.6    | 8.3    |
| 50.5   | 65.4   | 8.3    | 13.0   | 92.7   | 46.8   | 226.2  | 243.6  | 270.0  |
| 58.8   | 104.2  | 34.1   | 48.8   | 137.6  | 109.1  | 346.0  | 247.8  | 266.1  |
| 181.1  | 247.4  | 25.6   | 34.8   | 237.5  | 212.1  | 633.2  | 553.0  | 562.9  |
| 1760.1 | 2073.0 | 183.0  | 230.5  | 2548.5 | 2085.9 | 2804.1 | 1856.6 | 1989.7 |
| 132.9  | 198.9  | 20.5   | 7.9    | 190.6  | 154.5  | 95.3   | 62.0   | 74.8   |
| 1.1    | 0.8    | 29.1   | 47.6   | 7.3    | 1.1    | 14.8   | 4.9    | 2.8    |
| 131.8  | 141.4  | 58.4   | 62.0   | 182.7  | 134.8  | 346.2  | 210.8  | 260.9  |
| 1026.0 | 1361.1 | 94.7   | 132.4  | 1470.9 | 1474.8 | 1617.6 | 901.9  | 1045.6 |
| 1243.5 | 1222.5 | 128.9  | 202.8  | 1673.8 | 1470.4 | 439.4  | 142.4  | 132.5  |
| 228.6  | 224.8  | 61.7   | 74.5   | 318.1  | 228.7  | 411.0  | 248.9  | 251.3  |
| 439.7  | 482.3  | 71.7   | 104.9  | 621.8  | 560.9  | 423.3  | 368.8  | 422.3  |
| 214.1  | 268.4  | 40.2   | 61.9   | 357.9  | 321.1  | 245.6  | 194.1  | 240.0  |
| 24.3   | 17.6   | 4.7    | 5.8    | 33.9   | 33.4   | 58.8   | 18.3   | 24.4   |
| 319.3  | 241.5  | 3.7    | 7.5    | 380.4  | 251.0  | 4.2    | 2.8    | 3.4    |
| 199.8  | 245.9  | 27.0   | 15.1   | 305.1  | 265.6  | 275.0  | 211.4  | 212.7  |
| 70.9   | 75.6   | 85.2   | 72.6   | 74.5   | 64.6   | 86.0   | 84.6   | 109.7  |
| 142.0  | 218.4  | 13.5   | 24.1   | 388.3  | 194.9  | 119.0  | 104.7  | 129.1  |
| 12.2   | 10.3   | 22.9   | 24.4   | 27.3   | 13.1   | 265.9  | 379.5  | 287.1  |
| 46.4   | 68.8   | 4.7    | 16.7   | 84.9   | 48.7   | 107.4  | 82.4   | 81.4   |
| 354.5  | 550.3  | 62.0   | 96.6   | 436.2  | 546.4  | 751.2  | 572.1  | 583.1  |
| 21.3   | 29.5   | 17.8   | 28.7   | 44.3   | 23.8   | 30.8   | 52.8   | 60.8   |
| 66.1   | 57.1   | 15.1   | 3.4    | 73.5   | 83.5   | 232.5  | 208.2  | 260.2  |
| 12.9   | 1.6    | 18.1   | 24.7   | 10.2   | 12.2   | 67.3   | 60.8   | 78.7   |
| 193.6  | 376.5  | 37.9   | 51.8   | 303.0  | 284.8  | 832.7  | 653.1  | 753.0  |
| 118.1  | 128.1  | 0.9    | 6.8    | 187.2  | 179.8  | 810.9  | 697.7  | 783.8  |
| 1965.0 | 2332.2 | 697.5  | 1043.0 | 2946.5 | 2464.1 | 2211.6 | 1777.8 | 1872.5 |
| 113.0  | 150.5  | 48.7   | 73.7   | 138.7  | 107.5  | 398.9  | 337.9  | 373.6  |
| 101.2  | 122.6  | 62.8   | 45.8   | 174.7  | 151.4  | 271.7  | 391.9  | 407.7  |
| 179.2  | 277.1  | 31.2   | 42.4   | 328.9  | 245.5  | 407.8  | 292.9  | 380.1  |
| 45.6   | 51.1   | 1.1    | 2.3    | 41.3   | 80.1   | 5.5    | 1.7    | 1.7    |
| 30.2   | 41.1   | 3.0    | 2.0    | 49.1   | 35.2   | 16.8   | 32.9   | 34.4   |
| 34.9   | 40.5   | 2.7    | 2.8    | 58.2   | 62.5   | 31.7   | 24.3   | 11.9   |
| 65.3   | 58.3   | 2.1    | 2.6    | 84.9   | 75.4   | 36.5   | 89.1   | 99.9   |
| 24.9   | 26.9   | 17.7   | 15.3   | 60.0   | 31.5   | 31.4   | 55.5   | 49.8   |
| 29.4   | 34.2   | 0.8    | 0.9    | 42.0   | 27.8   | 1.0    | 2.0    | 1.0    |
| 70.7   | 78.4   | 59.4   | 60.9   | 98.1   | 62.3   | 280.7  | 290.0  | 309.7  |
| 9.9    | 13.9   | 3.6    | 12.0   | 16.9   | 24.5   | 11.2   | 7.2    | 11.3   |
| 188.4  | 299.9  | 24.4   | 33.8   | 316.5  | 210.8  | 181.6  | 202.4  | 240.8  |
| 85.6   | 118.6  | 32.9   | 28.6   | 154.8  | 119.1  | 299.4  | 344.3  | 410.1  |
| 1020.8 | 1271.1 | 506.8  | 710.8  | 1405.1 | 1277.6 | 1605.7 | 1432.5 | 1549.3 |
| 3.6    | 14.7   | 8.6    | 7.4    | 18.5   | 19.2   | 25.1   | 27.0   | 25.3   |
| 320.0  | 410.1  | 112.6  | 153.3  | 430.4  | 449.0  | 1366.6 | 1488.3 | 1606.7 |
| 19.7   | 1.8    | 16.2   | 30.4   | 4.7    | 4.4    | 10.2   | 12.6   | 2.5    |
| 78.3   | 90.7   | 4.3    | 7.4    | 102.4  | 107.0  | 13.1   | 10.8   | 4.7    |
| 1.7    | 7.9    | 5.7    | 9.8    | 0.9    | 2.3    | 2.6    | 7.4    | 5.8    |
| 20.1   | 18.8   | 5.5    | 9.7    | 33.4   | 16.9   | 95.1   | 201.4  | 194.1  |
| 18.6   | 22.3   | 0.4    | 4.6    | 33.6   | 15.2   | 29.1   | 38.7   | 30.8   |
| 43.6   | 62.5   | 30.0   | 41.1   | 88.8   | 56.5   | 53.7   | 129.2  | 108.3  |
| 1328.9 | 1411.6 | 1218.9 | 1859.0 | 1493.9 | 1321.4 | 6768.2 | 4588.0 | 5163.4 |
| 50.3   | 61.4   | 3.2    | 6.1    | 111.4  | 35.1   | 18.2   | 15.8   | 26.0   |
| 14.3   | 13.8   | 7.0    | 22.5   | 16.3   | 15.1   | 22.4   | 13.3   | 27.1   |
| 67.8   | 70.0   | 25.0   | 27.9   | 101.0  | 82.2   | 69.0   | 80.6   | 85.3   |

|        |        |        |        |        |        |         |         |         |
|--------|--------|--------|--------|--------|--------|---------|---------|---------|
| 148.4  | 175.8  | 56.3   | 77.5   | 193.2  | 156.1  | 274.3   | 192.8   | 216.7   |
| 112.6  | 93.8   | 19.4   | 29.8   | 162.6  | 89.4   | 134.4   | 111.5   | 102.4   |
| 48.6   | 59.0   | 11.5   | 16.7   | 67.6   | 42.0   | 6.3     | 3.2     | 2.8     |
| 1.4    | 26.0   | 3.4    | 3.2    | 10.5   | 23.3   | 44.2    | 488.6   | 381.0   |
| 16.7   | 25.4   | 6.6    | 10.3   | 19.9   | 27.4   | 38.9    | 182.7   | 175.6   |
| 164.6  | 222.2  | 37.1   | 34.5   | 232.1  | 183.7  | 229.4   | 187.5   | 197.1   |
| 80.4   | 89.7   | 38.3   | 41.8   | 92.4   | 73.0   | 160.6   | 171.9   | 185.2   |
| 114.4  | 203.7  | 20.8   | 17.2   | 177.9  | 137.2  | 120.0   | 203.9   | 198.1   |
| 3743.0 | 5510.1 | 937.8  | 1259.3 | 5162.1 | 4340.7 | 9532.8  | 9659.1  | 9401.7  |
| 505.1  | 751.9  | 26.0   | 39.9   | 728.3  | 803.3  | 609.1   | 295.7   | 337.2   |
| 298.3  | 465.4  | 50.8   | 69.6   | 462.7  | 495.9  | 552.0   | 253.3   | 304.3   |
| 52.7   | 111.3  | 28.5   | 42.6   | 91.4   | 38.9   | 112.1   | 127.7   | 123.2   |
| 62.2   | 46.9   | 23.3   | 29.8   | 85.1   | 35.1   | 45.3    | 46.6    | 43.9    |
| 5.2    | 24.6   | 7.4    | 16.7   | 8.0    | 18.4   | 17.2    | 13.8    | 36.7    |
| 113.3  | 92.4   | 11.1   | 10.3   | 148.7  | 121.0  | 26.5    | 33.8    | 29.7    |
| 42.4   | 57.5   | 5.5    | 7.2    | 82.2   | 75.7   | 4.7     | 8.9     | 4.5     |
| 13.8   | 27.6   | 34.3   | 19.9   | 16.3   | 22.2   | 46.0    | 52.5    | 48.6    |
| 121.7  | 138.7  | 76.9   | 73.4   | 181.2  | 160.3  | 137.9   | 139.6   | 156.6   |
| 0.5    | 4.8    | 0.9    | 1.5    | 1.1    | 5.0    | 1.0     | 1.8     | 3.7     |
| 123.7  | 111.0  | 206.6  | 210.1  | 141.7  | 107.7  | 514.3   | 770.4   | 797.5   |
| 84.7   | 72.0   | 44.2   | 46.6   | 105.1  | 81.2   | 163.5   | 164.1   | 167.1   |
| 1.6    | 2.7    | 20.5   | 11.0   | 2.1    | 1.2    | 3.0     | 3.0     | 2.7     |
| 19.1   | 19.1   | 8.6    | 2.2    | 58.1   | 11.7   | 32.5    | 48.1    | 38.8    |
| 32.9   | 12.9   | 19.6   | 8.0    | 16.3   | 32.8   | 29.8    | 29.6    | 33.4    |
| 343.6  | 418.5  | 100.1  | 106.0  | 526.7  | 543.3  | 1050.1  | 708.8   | 887.5   |
| 53.6   | 53.7   | 30.1   | 52.3   | 51.5   | 39.9   | 22.7    | 42.1    | 34.5    |
| 42.1   | 28.2   | 2.5    | 4.5    | 43.1   | 9.7    | 8.7     | 12.2    | 27.2    |
| 19.9   | 35.3   | 5.3    | 5.9    | 67.3   | 28.5   | 59.9    | 55.0    | 57.2    |
| 20.1   | 41.9   | 20.9   | 23.8   | 64.7   | 31.7   | 81.8    | 64.3    | 70.2    |
| 34.5   | 71.3   | 32.2   | 29.8   | 82.3   | 78.5   | 433.5   | 543.5   | 589.9   |
| 18.7   | 17.5   | 26.1   | 38.4   | 25.0   | 12.0   | 82.8    | 72.7    | 77.4    |
| 1.5    | 1.4    | 1.3    | 1.9    | 2.8    | 2.1    | 39.7    | 44.5    | 36.7    |
| 15.9   | 16.7   | 3.3    | 14.3   | 16.2   | 21.4   | 70.6    | 67.9    | 69.0    |
| 28.9   | 60.9   | 4.9    | 6.0    | 66.8   | 49.2   | 157.7   | 221.5   | 209.6   |
| 17.0   | 63.0   | 17.3   | 10.3   | 46.6   | 43.1   | 82.2    | 68.8    | 70.2    |
| 5024.4 | 6196.3 | 4294.9 | 5350.1 | 5505.2 | 5707.0 | 10315.7 | 10032.6 | 10205.6 |
| 49.6   | 50.4   | 61.7   | 80.2   | 58.2   | 61.4   | 290.0   | 251.5   | 301.6   |
| 21.2   | 29.8   | 15.7   | 11.2   | 60.1   | 29.8   | 84.2    | 130.7   | 110.0   |
| 2.3    | 17.2   | 7.8    | 6.8    | 26.0   | 3.4    | 17.2    | 6.4     | 1.5     |
| 34.6   | 36.1   | 12.6   | 16.1   | 25.4   | 32.3   | 36.3    | 51.3    | 50.4    |
| 8.1    | 6.9    | 0.5    | 0.8    | 11.2   | 9.5    | 6.8     | 6.3     | 7.8     |
| 157.6  | 193.1  | 0.3    | 7.4    | 255.5  | 223.8  | 850.3   | 636.5   | 682.6   |
| 48.6   | 65.2   | 28.7   | 13.0   | 47.3   | 52.7   | 108.3   | 107.8   | 118.5   |
| 15.4   | 14.2   | 26.5   | 18.1   | 16.7   | 15.0   | 233.8   | 282.2   | 342.4   |
| 43.1   | 88.9   | 67.7   | 80.8   | 74.5   | 92.1   | 154.9   | 169.1   | 172.3   |
| 37.7   | 40.9   | 13.4   | 11.6   | 67.4   | 57.6   | 437.7   | 537.8   | 551.4   |
| 86.8   | 197.4  | 15.7   | 22.0   | 166.2  | 122.2  | 491.9   | 632.1   | 616.7   |
| 313.1  | 553.0  | 180.3  | 201.4  | 562.2  | 654.3  | 1857.8  | 1352.6  | 1456.6  |
| 71.8   | 104.6  | 20.9   | 21.5   | 104.2  | 79.6   | 274.9   | 301.2   | 373.8   |
| 29.0   | 43.1   | 16.7   | 13.6   | 89.2   | 62.5   | 17.2    | 10.2    | 12.2    |
| 720.7  | 1020.2 | 29.1   | 14.3   | 830.4  | 1013.9 | 548.9   | 464.1   | 545.6   |
| 74.4   | 37.5   | 108.4  | 112.7  | 81.6   | 33.0   | 83.6    | 48.6    | 74.6    |
| 0.9    | 13.8   | 4.6    | 16.5   | 37.5   | 21.4   | 25.4    | 18.2    | 29.5    |

|       |       |       |       |       |       |        |        |        |
|-------|-------|-------|-------|-------|-------|--------|--------|--------|
| 10.2  | 3.4   | 13.0  | 7.2   | 6.7   | 2.3   | 11.1   | 14.0   | 7.5    |
| 1.8   | 2.4   | 29.5  | 30.8  | 20.7  | 1.6   | 507.1  | 475.4  | 530.8  |
| 71.7  | 80.2  | 48.7  | 65.2  | 86.0  | 67.3  | 87.5   | 72.8   | 85.0   |
| 64.5  | 79.4  | 29.6  | 32.9  | 68.8  | 101.4 | 62.9   | 46.2   | 53.7   |
| 72.4  | 71.1  | 42.6  | 50.9  | 131.4 | 82.2  | 71.8   | 63.8   | 69.6   |
| 151.4 | 248.7 | 37.6  | 44.2  | 216.8 | 195.2 | 153.4  | 80.7   | 96.6   |
| 41.0  | 55.9  | 1.1   | 7.3   | 115.6 | 53.3  | 153.2  | 200.8  | 237.2  |
| 69.6  | 98.7  | 15.6  | 12.7  | 134.0 | 112.4 | 530.5  | 502.4  | 563.8  |
| 1.0   | 8.8   | 6.5   | 1.9   | 2.5   | 2.2   | 3.1    | 6.0    | 2.0    |
| 20.1  | 26.4  | 9.0   | 8.3   | 30.6  | 24.7  | 11.6   | 336.5  | 326.3  |
| 181.1 | 184.9 | 126.7 | 179.9 | 169.1 | 142.3 | 88.4   | 61.0   | 73.7   |
| 74.4  | 76.9  | 17.8  | 13.0  | 104.0 | 80.6  | 95.3   | 172.7  | 215.4  |
| 47.1  | 62.5  | 53.4  | 79.2  | 61.9  | 59.6  | 121.0  | 115.9  | 146.7  |
| 11.4  | 12.8  | 18.2  | 10.4  | 1.3   | 6.3   | 9.3    | 14.1   | 8.5    |
| 137.0 | 204.5 | 53.3  | 92.5  | 280.7 | 194.7 | 790.1  | 501.6  | 603.8  |
| 7.6   | 14.2  | 3.8   | 1.4   | 2.7   | 3.7   | 2.5    | 1.6    | 1.5    |
| 50.3  | 51.9  | 16.1  | 22.4  | 69.5  | 43.2  | 314.2  | 344.2  | 328.0  |
| 11.6  | 10.8  | 25.2  | 30.0  | 9.6   | 8.7   | 11.6   | 10.1   | 12.7   |
| 17.6  | 25.5  | 4.4   | 1.8   | 19.5  | 25.0  | 27.3   | 21.1   | 19.6   |
| 293.8 | 314.6 | 25.8  | 53.0  | 434.8 | 315.4 | 829.6  | 595.5  | 678.6  |
| 16.3  | 20.2  | 7.6   | 18.2  | 15.7  | 25.5  | 64.3   | 61.9   | 67.5   |
| 84.7  | 112.2 | 36.2  | 38.7  | 94.0  | 106.0 | 589.4  | 401.6  | 383.2  |
| 85.5  | 81.2  | 27.5  | 24.7  | 134.1 | 60.4  | 85.0   | 126.0  | 154.8  |
| 45.6  | 37.3  | 1.1   | 1.2   | 104.6 | 47.4  | 33.7   | 33.0   | 25.7   |
| 10.3  | 7.3   | 14.1  | 13.1  | 13.7  | 12.2  | 50.2   | 49.2   | 62.3   |
| 316.0 | 657.1 | 4.8   | 2.1   | 412.5 | 516.3 | 268.6  | 473.3  | 461.0  |
| 13.7  | 16.3  | 10.0  | 7.6   | 16.0  | 24.3  | 42.4   | 43.5   | 44.7   |
| 51.7  | 77.6  | 14.8  | 19.2  | 159.2 | 60.6  | 244.9  | 174.5  | 189.2  |
| 16.9  | 18.7  | 11.2  | 7.8   | 33.0  | 26.5  | 43.0   | 85.7   | 79.2   |
| 185.7 | 232.2 | 3.9   | 5.8   | 255.6 | 252.8 | 238.2  | 100.2  | 126.4  |
| 81.3  | 111.2 | 47.0  | 76.8  | 121.5 | 71.6  | 228.2  | 221.7  | 209.8  |
| 98.7  | 105.0 | 18.9  | 18.8  | 98.8  | 67.5  | 212.0  | 179.4  | 204.1  |
| 3.1   | 19.8  | 15.4  | 5.1   | 3.3   | 4.8   | 19.1   | 10.4   | 14.7   |
| 46.6  | 37.0  | 37.6  | 20.3  | 49.2  | 45.8  | 98.9   | 128.9  | 148.5  |
| 5.7   | 3.1   | 0.2   | 0.1   | 5.6   | 4.6   | 12.0   | 12.7   | 16.4   |
| 0.9   | 1.3   | 14.4  | 11.2  | 8.8   | 5.8   | 0.9    | 5.0    | 5.8    |
| 16.2  | 23.9  | 13.5  | 4.9   | 32.9  | 15.1  | 18.0   | 23.5   | 21.3   |
| 17.4  | 16.4  | 17.8  | 8.0   | 16.7  | 20.1  | 21.7   | 17.1   | 23.1   |
| 60.1  | 68.8  | 29.8  | 26.6  | 70.9  | 94.0  | 64.5   | 78.3   | 71.8   |
| 27.9  | 41.5  | 56.8  | 45.5  | 57.6  | 32.7  | 65.2   | 100.9  | 105.3  |
| 2.1   | 9.8   | 8.0   | 2.7   | 11.1  | 14.3  | 1.6    | 4.8    | 3.0    |
| 82.1  | 99.6  | 31.8  | 43.0  | 132.7 | 81.0  | 1085.2 | 947.7  | 1070.3 |
| 160.8 | 233.6 | 15.6  | 20.1  | 261.7 | 267.2 | 2296.4 | 2628.8 | 2444.0 |
| 1.4   | 1.4   | 4.2   | 28.9  | 3.3   | 5.2   | 2.2    | 1.3    | 1.4    |
| 1.3   | 1.2   | 6.4   | 6.0   | 2.2   | 2.9   | 18.1   | 6.4    | 8.3    |
| 35.2  | 42.3  | 15.2  | 8.8   | 33.9  | 36.9  | 66.7   | 60.2   | 57.7   |
| 106.2 | 164.0 | 104.6 | 130.6 | 216.9 | 125.6 | 260.0  | 359.9  | 418.2  |
| 93.7  | 126.4 | 22.7  | 26.0  | 206.8 | 137.1 | 62.8   | 68.7   | 72.2   |
| 61.9  | 73.8  | 12.4  | 13.1  | 33.1  | 28.5  | 40.8   | 40.5   | 37.3   |
| 40.8  | 51.4  | 41.8  | 51.1  | 45.6  | 41.9  | 411.0  | 455.9  | 514.3  |
| 22.3  | 24.5  | 27.0  | 26.4  | 49.5  | 37.5  | 13.7   | 26.5   | 20.7   |
| 1.0   | 1.9   | 12.1  | 3.0   | 12.5  | 3.6   | 6.9    | 4.9    | 10.2   |
| 536.2 | 528.3 | 124.9 | 161.5 | 635.3 | 480.1 | 813.1  | 782.3  | 828.7  |

|        |        |       |       |        |       |        |        |        |
|--------|--------|-------|-------|--------|-------|--------|--------|--------|
| 28.2   | 24.0   | 38.6  | 77.4  | 24.9   | 13.8  | 100.5  | 74.2   | 72.7   |
| 556.3  | 784.2  | 113.1 | 141.4 | 948.4  | 740.1 | 1723.4 | 1431.6 | 1532.6 |
| 104.9  | 91.1   | 124.1 | 165.1 | 144.6  | 79.2  | 554.8  | 1023.6 | 1220.2 |
| 31.5   | 37.6   | 37.1  | 64.6  | 24.7   | 12.2  | 246.4  | 264.6  | 278.1  |
| 62.7   | 67.8   | 15.4  | 16.1  | 69.4   | 60.2  | 19.0   | 7.0    | 12.0   |
| 366.8  | 461.4  | 115.6 | 141.5 | 397.4  | 385.5 | 825.8  | 668.5  | 697.4  |
| 111.0  | 131.9  | 91.1  | 73.5  | 163.3  | 128.9 | 231.4  | 287.6  | 286.3  |
| 2.4    | 13.5   | 3.6   | 4.0   | 37.3   | 11.3  | 1.6    | 5.5    | 9.6    |
| 298.0  | 344.1  | 69.9  | 81.3  | 390.8  | 364.0 | 494.7  | 486.2  | 536.0  |
| 37.3   | 26.2   | 22.3  | 26.6  | 38.8   | 31.7  | 74.3   | 116.4  | 117.7  |
| 65.2   | 65.2   | 19.5  | 41.7  | 101.4  | 72.5  | 252.6  | 271.9  | 317.7  |
| 29.2   | 35.3   | 14.9  | 22.1  | 38.4   | 54.2  | 53.9   | 61.4   | 64.3   |
| 12.5   | 25.6   | 18.2  | 26.9  | 17.3   | 6.8   | 19.1   | 25.1   | 21.1   |
| 1.3    | 2.0    | 10.1  | 11.8  | 8.5    | 5.9   | 20.2   | 21.6   | 24.5   |
| 89.0   | 88.1   | 108.4 | 181.1 | 108.4  | 101.0 | 134.9  | 114.9  | 132.7  |
| 125.3  | 121.6  | 71.7  | 80.0  | 152.8  | 125.3 | 537.3  | 840.2  | 896.4  |
| 228.4  | 274.6  | 25.2  | 32.6  | 347.0  | 326.5 | 240.3  | 107.6  | 124.5  |
| 10.8   | 23.3   | 8.0   | 1.0   | 15.0   | 18.0  | 30.6   | 27.1   | 16.8   |
| 72.0   | 81.8   | 12.7  | 11.7  | 85.5   | 55.5  | 138.9  | 183.9  | 207.9  |
| 174.6  | 320.3  | 70.6  | 108.2 | 340.0  | 276.9 | 716.0  | 639.8  | 661.3  |
| 0.5    | 0.4    | 3.1   | 3.6   | 0.7    | 0.6   | 1.0    | 1.4    | 0.6    |
| 8.7    | 14.2   | 17.0  | 28.8  | 7.0    | 11.4  | 22.0   | 61.8   | 60.2   |
| 51.7   | 41.6   | 59.6  | 72.4  | 44.7   | 39.0  | 67.0   | 112.1  | 149.2  |
| 62.6   | 71.4   | 0.6   | 0.5   | 74.8   | 41.0  | 1.8    | 1.2    | 0.7    |
| 133.6  | 171.9  | 39.7  | 26.7  | 216.9  | 221.2 | 219.4  | 122.2  | 156.8  |
| 199.2  | 184.8  | 103.9 | 111.9 | 164.0  | 292.3 | 493.0  | 568.2  | 628.4  |
| 52.5   | 73.3   | 40.6  | 44.4  | 73.6   | 69.6  | 132.4  | 117.2  | 131.4  |
| 141.4  | 193.4  | 331.7 | 484.6 | 218.1  | 220.4 | 469.7  | 656.9  | 733.5  |
| 19.1   | 27.4   | 13.4  | 14.7  | 17.4   | 20.9  | 53.2   | 46.8   | 56.5   |
| 154.8  | 166.7  | 144.9 | 163.5 | 233.9  | 166.4 | 713.3  | 676.9  | 726.7  |
| 76.5   | 112.1  | 3.8   | 5.6   | 107.8  | 122.0 | 2.5    | 2.8    | 5.3    |
| 27.7   | 20.8   | 6.6   | 5.1   | 51.4   | 12.1  | 8.0    | 7.7    | 4.9    |
| 1147.2 | 1215.0 | 746.3 | 927.1 | 1356.6 | 999.0 | 1281.8 | 1123.6 | 1264.3 |
| 15.7   | 9.6    | 3.4   | 6.6   | 24.7   | 15.7  | 15.5   | 15.5   | 10.5   |
| 304.5  | 517.2  | 15.3  | 22.2  | 539.5  | 438.1 | 784.2  | 435.0  | 419.7  |
| 3.2    | 33.3   | 1.1   | 23.5  | 46.1   | 33.4  | 85.5   | 99.7   | 131.3  |
| 115.7  | 171.8  | 78.2  | 148.1 | 197.3  | 164.3 | 2326.5 | 2978.6 | 3074.7 |
| 31.4   | 39.3   | 24.7  | 32.8  | 32.9   | 32.2  | 90.6   | 59.0   | 64.5   |
| 74.2   | 79.4   | 3.7   | 12.9  | 107.4  | 65.4  | 358.0  | 407.4  | 392.0  |
| 88.0   | 118.5  | 9.1   | 5.2   | 137.8  | 109.3 | 7.0    | 4.4    | 3.0    |
| 32.4   | 43.0   | 20.5  | 16.4  | 44.4   | 43.7  | 39.1   | 47.2   | 45.4   |
| 232.1  | 271.8  | 15.1  | 24.4  | 299.9  | 309.0 | 331.5  | 476.4  | 462.0  |
| 33.2   | 25.2   | 16.3  | 3.6   | 27.3   | 33.6  | 69.5   | 98.5   | 109.0  |
| 37.2   | 44.2   | 25.9  | 21.4  | 65.7   | 55.1  | 83.3   | 103.6  | 84.6   |
| 956.8  | 1323.7 | 431.0 | 693.2 | 1070.7 | 975.3 | 1734.7 | 632.7  | 731.7  |
| 98.6   | 75.7   | 8.9   | 6.0   | 142.8  | 82.3  | 138.8  | 164.5  | 207.5  |
| 30.2   | 32.0   | 20.4  | 11.7  | 57.5   | 36.7  | 15.1   | 22.5   | 19.7   |
| 63.2   | 75.0   | 84.8  | 134.0 | 73.6   | 83.1  | 286.7  | 271.4  | 295.1  |
| 94.6   | 93.1   | 38.3  | 64.6  | 115.5  | 108.6 | 243.2  | 102.8  | 121.0  |
| 5.2    | 1.1    | 1.5   | 3.5   | 1.4    | 1.8   | 1.3    | 2.3    | 2.9    |
| 8.8    | 12.8   | 4.4   | 15.3  | 2.2    | 21.7  | 28.7   | 17.5   | 14.6   |
| 24.5   | 12.3   | 14.6  | 25.3  | 22.7   | 15.2  | 8.5    | 16.3   | 18.7   |
| 137.1  | 155.1  | 4.8   | 15.2  | 163.6  | 188.5 | 22.0   | 3.3    | 3.7    |

|        |        |        |        |        |        |         |         |         |
|--------|--------|--------|--------|--------|--------|---------|---------|---------|
| 10.7   | 10.9   | 3.6    | 0.6    | 5.7    | 11.7   | 1.5     | 1.1     | 1.6     |
| 173.0  | 182.2  | 74.0   | 43.8   | 253.4  | 193.6  | 7.6     | 13.2    | 11.6    |
| 164.7  | 168.3  | 28.4   | 29.5   | 218.7  | 154.2  | 876.1   | 1144.0  | 1184.7  |
| 162.9  | 253.5  | 151.9  | 183.8  | 341.6  | 210.0  | 438.4   | 298.8   | 376.4   |
| 58.4   | 88.1   | 1.8    | 2.2    | 131.2  | 99.1   | 57.4    | 57.4    | 56.4    |
| 38.8   | 47.3   | 23.0   | 21.5   | 32.8   | 44.9   | 71.2    | 59.1    | 54.7    |
| 8.2    | 15.1   | 28.7   | 17.3   | 26.9   | 36.6   | 7.7     | 11.1    | 31.7    |
| 449.0  | 456.0  | 58.5   | 95.7   | 719.9  | 448.8  | 866.2   | 337.3   | 334.8   |
| 5947.6 | 6981.8 | 1955.9 | 2381.6 | 6704.9 | 6184.2 | 10735.2 | 10521.3 | 10297.6 |
| 48.3   | 73.6   | 45.2   | 21.9   | 86.3   | 75.3   | 96.6    | 1283.7  | 1045.5  |
| 106.8  | 113.3  | 88.4   | 84.9   | 166.6  | 68.6   | 537.2   | 288.4   | 299.8   |
| 68.2   | 135.5  | 39.9   | 62.8   | 115.6  | 1025.3 | 150.5   | 185.0   | 132.7   |
| 72.1   | 152.6  | 22.8   | 20.5   | 135.9  | 86.0   | 88.1    | 66.1    | 86.9    |
| 43.3   | 85.6   | 13.7   | 41.7   | 80.9   | 40.2   | 84.9    | 57.0    | 78.9    |
| 24.5   | 36.3   | 14.0   | 6.8    | 57.0   | 25.4   | 93.8    | 155.3   | 169.6   |
| 0.5    | 0.5    | 1.0    | 0.7    | 1.0    | 0.4    | 0.6     | 0.8     | 0.5     |
| 61.6   | 60.9   | 0.3    | 1.2    | 83.6   | 51.2   | 0.9     | 0.8     | 0.7     |
| 5387.3 | 5857.5 | 2451.7 | 3176.8 | 5560.7 | 5752.6 | 9488.9  | 9273.9  | 9082.5  |
| 938.9  | 1270.9 | 49.1   | 59.3   | 1627.5 | 1290.8 | 992.5   | 911.8   | 937.0   |
| 237.0  | 331.2  | 17.3   | 14.2   | 366.7  | 290.2  | 185.3   | 151.8   | 191.1   |
| 51.6   | 92.9   | 20.8   | 54.4   | 121.8  | 83.6   | 159.2   | 202.0   | 184.3   |
| 717.5  | 961.0  | 297.2  | 365.3  | 930.1  | 850.1  | 1875.6  | 1330.9  | 1330.6  |
| 43.2   | 53.7   | 14.9   | 30.4   | 77.5   | 52.7   | 255.8   | 390.5   | 419.5   |
| 7.7    | 10.0   | 2.7    | 7.4    | 4.1    | 13.0   | 2.7     | 0.7     | 9.4     |
| 4.3    | 29.2   | 19.1   | 22.6   | 37.8   | 34.2   | 43.3    | 37.5    | 36.0    |
| 27.5   | 49.4   | 2.6    | 12.8   | 32.1   | 29.7   | 58.0    | 85.9    | 100.5   |
| 264.9  | 380.7  | 71.8   | 113.2  | 332.5  | 332.8  | 898.9   | 707.6   | 715.4   |
| 1834.9 | 2054.6 | 1265.9 | 1493.9 | 2442.2 | 2038.1 | 6291.8  | 6014.0  | 6336.6  |
| 25.9   | 18.6   | 17.9   | 9.3    | 42.1   | 14.4   | 39.3    | 40.5    | 36.8    |
| 18.9   | 40.3   | 32.5   | 19.8   | 30.1   | 30.5   | 87.0    | 76.9    | 76.1    |
| 0.7    | 2.0    | 0.6    | 2.3    | 3.2    | 0.8    | 1.9     | 1.7     | 4.1     |
| 85.0   | 115.4  | 25.4   | 15.3   | 154.9  | 117.0  | 154.9   | 173.2   | 176.4   |
| 10.0   | 4.7    | 7.3    | 6.0    | 7.7    | 6.1    | 12.1    | 4.4     | 11.4    |
| 303.0  | 383.7  | 10.0   | 10.5   | 467.7  | 455.7  | 299.0   | 197.7   | 202.0   |
| 328.2  | 429.1  | 48.2   | 47.5   | 516.0  | 356.4  | 801.3   | 671.9   | 847.7   |
| 152.5  | 194.2  | 38.2   | 55.7   | 234.7  | 178.0  | 526.4   | 448.9   | 529.2   |
| 8.0    | 18.1   | 8.8    | 1.5    | 24.5   | 1.7    | 27.3    | 106.5   | 106.5   |
| 114.4  | 116.4  | 26.4   | 37.1   | 179.6  | 121.8  | 400.3   | 371.3   | 387.1   |
| 7993.1 | 9127.6 | 2868.1 | 3759.2 | 9302.6 | 8645.1 | 10474.9 | 10069.4 | 10247.8 |
| 293.9  | 374.0  | 64.2   | 69.1   | 453.8  | 310.8  | 253.4   | 146.3   | 157.1   |
| 314.0  | 369.1  | 47.1   | 77.5   | 438.4  | 427.3  | 422.1   | 349.3   | 412.7   |
| 29.9   | 21.1   | 15.8   | 12.7   | 37.4   | 26.5   | 9.1     | 23.5    | 19.9    |
| 1.5    | 0.7    | 0.7    | 2.0    | 1.5    | 1.7    | 2.6     | 1.3     | 1.9     |
| 1.1    | 7.5    | 9.9    | 4.9    | 4.5    | 6.8    | 1.9     | 4.5     | 6.9     |
| 47.7   | 48.1   | 19.6   | 18.4   | 52.1   | 47.2   | 137.0   | 85.3    | 114.6   |
| 83.0   | 65.4   | 69.4   | 89.9   | 96.1   | 72.6   | 70.7    | 69.7    | 76.0    |
| 18.4   | 25.5   | 13.1   | 1.9    | 32.5   | 16.0   | 113.1   | 81.3    | 114.4   |
| 51.5   | 57.1   | 13.7   | 13.7   | 53.1   | 48.5   | 133.2   | 88.8    | 101.0   |
| 38.2   | 48.0   | 8.6    | 9.9    | 64.4   | 41.7   | 93.1    | 97.8    | 95.1    |
| 34.8   | 24.2   | 25.7   | 25.2   | 28.4   | 32.1   | 31.7    | 49.9    | 55.9    |
| 69.6   | 81.0   | 34.8   | 49.4   | 87.4   | 88.3   | 112.0   | 120.5   | 135.2   |
| 205.8  | 273.2  | 69.3   | 84.6   | 235.1  | 267.5  | 586.7   | 733.2   | 748.9   |
| 236.0  | 274.0  | 53.3   | 73.2   | 392.5  | 209.7  | 357.5   | 386.8   | 427.0   |

|        |        |        |        |        |        |         |         |         |
|--------|--------|--------|--------|--------|--------|---------|---------|---------|
| 90.1   | 141.9  | 27.2   | 55.4   | 136.1  | 141.4  | 171.4   | 128.9   | 149.6   |
| 26.9   | 31.6   | 28.3   | 15.9   | 50.3   | 31.9   | 108.8   | 99.1    | 114.8   |
| 27.0   | 52.7   | 5.9    | 2.5    | 82.4   | 58.4   | 101.4   | 130.2   | 102.4   |
| 4.3    | 0.9    | 1.1    | 1.0    | 9.7    | 2.2    | 4.1     | 1.0     | 5.1     |
| 81.5   | 106.5  | 42.5   | 42.3   | 115.7  | 108.9  | 155.9   | 131.7   | 152.6   |
| 11.0   | 8.6    | 58.0   | 75.2   | 9.2    | 5.9    | 212.1   | 668.7   | 628.4   |
| 205.4  | 213.8  | 158.5  | 193.6  | 275.6  | 150.7  | 363.1   | 313.1   | 380.8   |
| 3169.4 | 3751.1 | 757.5  | 1068.4 | 3716.0 | 2759.0 | 5549.2  | 5008.4  | 5278.1  |
| 51.0   | 60.1   | 164.1  | 157.6  | 62.7   | 68.4   | 1.5     | 1.7     | 1.8     |
| 8.4    | 5.6    | 20.5   | 5.6    | 12.8   | 14.8   | 4.1     | 4.4     | 2.7     |
| 34.8   | 65.6   | 21.0   | 34.8   | 65.6   | 44.3   | 101.2   | 59.7    | 79.4    |
| 12.2   | 17.7   | 10.6   | 10.0   | 2.8    | 5.4    | 118.9   | 117.6   | 123.7   |
| 653.3  | 1110.6 | 327.2  | 353.8  | 1312.9 | 1012.2 | 1641.5  | 1333.5  | 1291.2  |
| 174.0  | 208.6  | 344.8  | 436.7  | 178.3  | 157.5  | 321.9   | 332.5   | 417.3   |
| 7.7    | 12.4   | 7.1    | 1.6    | 11.0   | 10.0   | 20.4    | 17.9    | 14.8    |
| 68.5   | 68.2   | 55.4   | 56.1   | 72.0   | 64.8   | 41.0    | 26.1    | 30.3    |
| 411.8  | 442.1  | 158.5  | 273.2  | 549.9  | 344.4  | 783.5   | 890.0   | 974.2   |
| 25.6   | 45.3   | 24.5   | 18.9   | 45.0   | 70.7   | 28.8    | 31.6    | 26.0    |
| 101.2  | 134.1  | 18.2   | 13.2   | 185.8  | 123.7  | 311.3   | 229.2   | 245.6   |
| 1.9    | 0.8    | 0.8    | 1.2    | 5.4    | 1.8    | 42.9    | 38.9    | 44.2    |
| 1.9    | 8.5    | 72.5   | 114.7  | 13.6   | 2.5    | 117.8   | 220.6   | 216.1   |
| 8.0    | 8.9    | 16.9   | 18.8   | 14.2   | 3.6    | 1.2     | 4.6     | 6.7     |
| 5236.3 | 7062.5 | 3436.4 | 4607.3 | 8029.0 | 5896.0 | 12521.5 | 12500.7 | 12397.5 |
| 0.6    | 3.7    | 0.4    | 0.1    | 9.6    | 7.5    | 9.5     | 14.0    | 11.7    |
| 6.7    | 13.0   | 1.2    | 0.9    | 19.8   | 10.0   | 7.3     | 5.2     | 11.3    |
| 18.2   | 5.3    | 16.6   | 12.1   | 1.7    | 1.7    | 5.3     | 3.2     | 4.1     |
| 22.7   | 37.3   | 3.4    | 31.9   | 12.7   | 34.2   | 14.3    | 26.2    | 6.9     |
| 54.1   | 70.1   | 10.0   | 24.9   | 91.3   | 50.8   | 52.5    | 43.3    | 50.6    |
| 39.0   | 50.7   | 4.4    | 18.0   | 62.6   | 50.9   | 59.9    | 69.0    | 73.6    |
| 799.8  | 760.1  | 12.0   | 11.6   | 953.4  | 709.7  | 2334.9  | 1825.1  | 2060.4  |
| 22.9   | 27.4   | 20.2   | 32.2   | 17.9   | 13.8   | 15.6    | 19.3    | 30.1    |
| 766.0  | 950.9  | 1.8    | 0.5    | 1236.0 | 843.8  | 2.8     | 7.9     | 1.6     |
| 8.2    | 16.6   | 7.3    | 7.7    | 20.4   | 19.2   | 106.1   | 89.5    | 88.5    |
| 0.8    | 7.5    | 3.2    | 0.5    | 3.0    | 1.2    | 4.4     | 5.6     | 4.9     |
| 33.0   | 25.2   | 7.9    | 1.8    | 19.5   | 33.2   | 7.8     | 15.4    | 13.0    |
| 242.6  | 286.3  | 35.6   | 62.0   | 402.3  | 346.6  | 235.4   | 113.7   | 104.2   |
| 1830.7 | 2248.5 | 41.3   | 33.8   | 2550.7 | 2095.0 | 13.5    | 18.6    | 18.7    |
| 6.2    | 10.3   | 9.0    | 5.7    | 11.8   | 1.5    | 11.7    | 21.9    | 30.1    |
| 3.8    | 6.1    | 0.9    | 6.2    | 10.4   | 5.9    | 17.1    | 22.1    | 18.4    |
| 37.9   | 28.6   | 23.8   | 20.6   | 34.7   | 35.7   | 91.3    | 63.1    | 57.1    |
| 1.6    | 1.0    | 1.4    | 3.4    | 1.8    | 10.3   | 4.5     | 3.7     | 2.7     |
| 8.8    | 9.2    | 9.8    | 14.6   | 14.2   | 8.1    | 26.9    | 26.7    | 28.9    |
| 123.9  | 173.7  | 18.8   | 33.0   | 186.6  | 171.8  | 47.3    | 32.2    | 41.0    |
| 83.8   | 110.8  | 6.7    | 1.8    | 130.6  | 102.7  | 581.6   | 232.0   | 235.0   |
| 1.1    | 2.4    | 4.8    | 5.8    | 0.4    | 6.1    | 3.6     | 7.4     | 5.0     |
| 24.2   | 16.5   | 3.7    | 3.0    | 33.3   | 20.9   | 19.1    | 29.4    | 22.6    |
| 1.7    | 6.0    | 5.5    | 1.7    | 12.4   | 0.8    | 1.7     | 3.6     | 6.5     |
| 16.4   | 3.1    | 4.2    | 3.1    | 31.2   | 7.1    | 22.0    | 49.3    | 47.4    |
| 155.8  | 186.3  | 74.7   | 98.2   | 238.9  | 180.5  | 492.8   | 452.4   | 519.6   |
| 270.7  | 276.5  | 604.6  | 671.8  | 465.6  | 314.7  | 176.0   | 125.1   | 186.6   |
| 9.2    | 22.7   | 27.2   | 32.5   | 11.6   | 14.4   | 27.9    | 28.4    | 17.3    |
| 0.8    | 2.0    | 2.5    | 0.6    | 1.8    | 1.6    | 6.3     | 1.5     | 2.6     |
| 19.7   | 6.9    | 20.6   | 25.3   | 1.4    | 4.0    | 17.6    | 33.5    | 18.6    |

|        |        |        |        |        |        |         |         |         |
|--------|--------|--------|--------|--------|--------|---------|---------|---------|
| 99.8   | 73.3   | 57.7   | 74.5   | 93.6   | 69.2   | 111.7   | 100.1   | 99.3    |
| 42.7   | 39.5   | 102.1  | 142.5  | 52.7   | 51.3   | 273.7   | 335.4   | 351.0   |
| 140.7  | 56.9   | 48.2   | 63.0   | 140.2  | 80.3   | 8.7     | 9.8     | 14.8    |
| 54.3   | 38.1   | 29.7   | 28.8   | 65.1   | 41.1   | 123.3   | 166.5   | 218.3   |
| 106.8  | 97.0   | 18.9   | 15.0   | 180.6  | 84.9   | 212.2   | 150.4   | 151.8   |
| 25.5   | 25.8   | 14.5   | 6.8    | 25.8   | 8.6    | 47.5    | 36.6    | 39.3    |
| 16.3   | 8.8    | 9.9    | 3.3    | 35.2   | 16.7   | 8.3     | 11.2    | 8.8     |
| 27.1   | 16.3   | 8.3    | 4.2    | 31.3   | 26.7   | 267.1   | 272.2   | 253.3   |
| 6755.7 | 7321.5 | 3732.0 | 4541.5 | 7640.0 | 6360.5 | 9765.0  | 9354.1  | 9518.1  |
| 221.3  | 302.0  | 56.2   | 52.6   | 364.1  | 274.4  | 697.9   | 479.1   | 508.2   |
| 226.3  | 283.7  | 68.0   | 67.9   | 324.8  | 208.1  | 119.2   | 227.4   | 252.2   |
| 0.8    | 0.8    | 0.9    | 0.7    | 3.3    | 8.0    | 1.4     | 2.6     | 1.0     |
| 96.9   | 125.6  | 16.2   | 28.9   | 151.2  | 171.9  | 466.4   | 390.9   | 471.8   |
| 1.6    | 0.9    | 3.3    | 0.2    | 0.5    | 0.8    | 3.5     | 0.6     | 2.9     |
| 38.1   | 59.4   | 5.7    | 16.3   | 66.7   | 67.6   | 46.0    | 29.7    | 34.7    |
| 109.2  | 131.6  | 84.9   | 94.0   | 165.3  | 99.0   | 186.8   | 118.6   | 142.0   |
| 99.3   | 131.6  | 64.4   | 104.9  | 206.1  | 99.1   | 573.5   | 464.8   | 465.5   |
| 113.0  | 157.3  | 10.2   | 1.3    | 159.1  | 136.2  | 140.1   | 121.5   | 134.4   |
| 19.4   | 16.2   | 12.1   | 7.2    | 15.7   | 15.0   | 81.5    | 176.5   | 157.0   |
| 10.2   | 2.7    | 33.6   | 42.2   | 15.1   | 5.6    | 38.0    | 39.3    | 50.3    |
| 725.8  | 699.5  | 130.8  | 228.2  | 988.9  | 585.9  | 1650.6  | 1500.3  | 1605.4  |
| 4.2    | 4.5    | 3.7    | 4.7    | 2.8    | 5.5    | 10.7    | 18.0    | 36.5    |
| 10.5   | 11.2   | 3.1    | 4.0    | 11.4   | 8.4    | 18.0    | 9.6     | 17.3    |
| 50.5   | 51.2   | 77.4   | 70.0   | 51.1   | 31.9   | 85.0    | 79.0    | 68.1    |
| 10.9   | 13.6   | 9.4    | 0.4    | 23.2   | 18.4   | 46.0    | 46.1    | 46.6    |
| 55.3   | 82.0   | 30.7   | 46.1   | 62.3   | 80.6   | 654.1   | 455.5   | 495.8   |
| 45.1   | 43.0   | 19.8   | 19.4   | 64.6   | 39.5   | 154.0   | 67.1    | 83.4    |
| 5.6    | 4.5    | 0.8    | 0.5    | 0.9    | 2.5    | 27.4    | 35.6    | 25.0    |
| 31.5   | 21.1   | 22.6   | 30.8   | 50.5   | 45.2   | 193.8   | 235.1   | 260.5   |
| 20.1   | 32.9   | 21.2   | 23.8   | 40.5   | 20.1   | 47.8    | 48.0    | 50.2    |
| 10.7   | 8.2    | 7.4    | 14.5   | 15.8   | 9.1    | 4.1     | 15.3    | 7.4     |
| 1896.5 | 1964.9 | 592.8  | 734.7  | 2560.6 | 2068.0 | 3900.6  | 2079.1  | 2451.2  |
| 6656.3 | 7900.5 | 3290.8 | 4629.5 | 7699.3 | 7296.0 | 10510.6 | 11512.7 | 10711.8 |
| 22.3   | 48.5   | 20.8   | 64.0   | 39.0   | 45.1   | 60.8    | 22.6    | 24.9    |
| 0.9    | 2.3    | 12.6   | 8.4    | 1.3    | 7.7    | 4.8     | 0.9     | 2.5     |
| 35.0   | 69.5   | 32.0   | 49.3   | 86.3   | 43.2   | 186.6   | 223.5   | 254.2   |
| 26.6   | 26.8   | 10.5   | 13.0   | 33.6   | 56.7   | 30.0    | 33.4    | 25.1    |
| 4.4    | 1.7    | 1.0    | 1.1    | 15.1   | 5.8    | 2.3     | 1.2     | 3.1     |
| 209.9  | 214.2  | 15.2   | 16.0   | 263.6  | 221.2  | 385.2   | 294.1   | 309.2   |
| 14.5   | 6.4    | 8.6    | 5.9    | 2.1    | 9.0    | 15.1    | 18.9    | 12.1    |
| 183.7  | 272.2  | 52.9   | 55.9   | 234.8  | 209.2  | 152.3   | 128.7   | 121.0   |
| 8.7    | 7.6    | 8.3    | 8.7    | 11.3   | 19.0   | 28.2    | 16.9    | 14.3    |
| 1.2    | 3.5    | 3.1    | 2.8    | 2.3    | 3.5    | 2.6     | 2.9     | 2.7     |
| 2.2    | 4.3    | 19.0   | 17.1   | 7.3    | 9.7    | 7.5     | 13.0    | 5.8     |
| 2.0    | 7.0    | 1.7    | 2.0    | 1.0    | 4.0    | 50.6    | 57.3    | 54.5    |
| 36.7   | 45.0   | 58.1   | 147.7  | 56.8   | 32.6   | 146.2   | 135.9   | 162.9   |
| 3009.9 | 3540.5 | 800.2  | 1051.2 | 3911.0 | 2818.4 | 5186.4  | 4591.1  | 4847.8  |
| 3.9    | 5.6    | 4.0    | 5.0    | 5.7    | 13.1   | 14.2    | 10.3    | 9.7     |
| 6.9    | 0.7    | 1.6    | 0.7    | 1.6    | 8.0    | 1.0     | 5.1     | 4.4     |
| 50.3   | 52.8   | 43.0   | 34.2   | 62.1   | 52.3   | 85.4    | 81.9    | 77.8    |
| 9.2    | 19.1   | 9.1    | 5.6    | 10.7   | 9.7    | 12.9    | 20.8    | 25.2    |
| 4.3    | 1.0    | 7.3    | 4.6    | 4.0    | 7.0    | 4.3     | 7.4     | 5.9     |
| 160.2  | 196.7  | 38.0   | 54.0   | 209.9  | 185.5  | 185.7   | 173.8   | 203.6   |

|        |        |        |        |        |        |        |        |        |
|--------|--------|--------|--------|--------|--------|--------|--------|--------|
| 6.2    | 3.1    | 24.1   | 25.7   | 1.6    | 4.6    | 26.5   | 52.3   | 60.1   |
| 50.0   | 32.8   | 35.4   | 40.9   | 67.9   | 44.5   | 50.1   | 52.3   | 37.0   |
| 36.0   | 30.5   | 8.1    | 43.6   | 29.7   | 38.6   | 173.8  | 140.9  | 182.8  |
| 73.6   | 80.8   | 25.6   | 50.7   | 129.9  | 77.8   | 360.2  | 485.7  | 526.6  |
| 43.4   | 23.9   | 9.0    | 4.8    | 17.4   | 11.6   | 65.0   | 41.8   | 54.1   |
| 6815.8 | 7551.4 | 1133.3 | 1376.8 | 7439.9 | 6950.0 | 8360.8 | 8460.2 | 8479.6 |
| 219.0  | 257.8  | 123.9  | 220.0  | 302.2  | 224.7  | 572.4  | 400.3  | 447.5  |
| 94.7   | 144.9  | 35.1   | 44.5   | 135.3  | 102.3  | 156.4  | 99.6   | 115.3  |
| 2481.8 | 3481.9 | 6.1    | 9.4    | 3645.2 | 2886.4 | 527.9  | 490.7  | 575.9  |
| 2327.4 | 4004.7 | 672.6  | 1129.5 | 3380.3 | 4707.2 | 3146.6 | 2007.7 | 2120.8 |
| 98.8   | 127.6  | 211.2  | 248.2  | 246.4  | 148.1  | 417.0  | 757.8  | 764.8  |
| 156.2  | 182.0  | 79.3   | 103.0  | 259.7  | 150.7  | 167.7  | 149.1  | 166.0  |
| 76.2   | 46.2   | 58.5   | 47.6   | 110.4  | 52.9   | 372.9  | 365.9  | 439.6  |
| 234.6  | 276.5  | 57.7   | 104.2  | 334.8  | 324.2  | 747.8  | 476.8  | 574.7  |
| 28.2   | 23.5   | 11.7   | 14.1   | 24.5   | 26.2   | 22.5   | 12.7   | 28.0   |
| 1711.5 | 2284.3 | 226.5  | 275.1  | 2334.8 | 2171.0 | 2872.4 | 2592.1 | 2594.6 |
| 90.6   | 123.4  | 54.3   | 84.2   | 158.0  | 145.5  | 326.5  | 238.5  | 294.4  |
| 3.4    | 2.1    | 10.3   | 10.6   | 6.7    | 2.7    | 10.8   | 16.2   | 5.9    |
| 2.6    | 2.5    | 3.7    | 6.4    | 4.2    | 3.9    | 6.0    | 4.3    | 2.2    |
| 30.7   | 57.1   | 15.5   | 14.9   | 46.7   | 64.7   | 81.5   | 119.2  | 110.3  |
| 166.6  | 169.9  | 81.3   | 115.8  | 277.9  | 171.3  | 596.9  | 613.5  | 742.9  |
| 16.9   | 24.1   | 1.3    | 2.0    | 43.5   | 25.4   | 10.2   | 6.9    | 9.4    |
| 99.2   | 83.1   | 43.3   | 32.2   | 94.8   | 72.4   | 110.5  | 87.1   | 67.9   |
| 99.4   | 127.2  | 50.1   | 56.1   | 166.5  | 108.1  | 318.9  | 253.9  | 310.0  |
| 28.0   | 35.5   | 5.3    | 3.6    | 29.6   | 44.7   | 20.3   | 8.6    | 4.9    |
| 616.8  | 415.0  | 30.4   | 30.8   | 559.9  | 359.7  | 123.2  | 32.9   | 46.0   |
| 471.1  | 484.4  | 2.5    | 7.5    | 963.2  | 431.2  | 57.5   | 198.6  | 161.9  |
| 16.2   | 9.0    | 20.8   | 0.5    | 14.8   | 22.1   | 7.8    | 3.0    | 6.7    |
| 211.1  | 208.4  | 19.4   | 19.9   | 291.5  | 179.9  | 148.3  | 164.5  | 139.8  |
| 39.3   | 68.4   | 38.2   | 55.7   | 63.8   | 54.3   | 72.5   | 78.7   | 81.0   |
| 60.2   | 94.6   | 88.7   | 79.5   | 96.2   | 88.5   | 442.3  | 417.2  | 425.8  |
| 15.2   | 30.1   | 24.5   | 26.1   | 31.7   | 27.8   | 31.8   | 42.9   | 53.9   |
| 88.4   | 129.8  | 40.4   | 62.8   | 172.4  | 157.3  | 203.7  | 239.4  | 236.5  |
| 488.6  | 524.9  | 203.2  | 283.1  | 720.3  | 652.2  | 875.3  | 977.4  | 1062.2 |
| 263.7  | 390.1  | 56.3   | 84.9   | 387.8  | 371.6  | 393.0  | 415.8  | 420.7  |
| 1.6    | 1.0    | 2.3    | 13.7   | 13.7   | 1.7    | 15.1   | 4.1    | 3.2    |
| 63.2   | 48.9   | 15.2   | 18.6   | 64.3   | 39.0   | 94.9   | 49.7   | 65.9   |
| 1815.7 | 2229.8 | 673.5  | 910.1  | 2624.8 | 2261.3 | 5078.6 | 3079.6 | 3214.8 |
| 12.9   | 30.0   | 4.0    | 5.6    | 39.0   | 34.5   | 22.3   | 24.1   | 24.8   |
| 9.1    | 6.0    | 10.8   | 6.4    | 11.7   | 10.9   | 1.7    | 2.1    | 0.7    |
| 111.2  | 147.0  | 40.9   | 60.2   | 113.1  | 150.9  | 138.0  | 118.3  | 132.3  |
| 24.8   | 26.6   | 9.3    | 10.7   | 53.1   | 30.6   | 18.6   | 5.4    | 7.1    |
| 130.3  | 173.6  | 182.0  | 204.0  | 172.3  | 153.0  | 307.7  | 259.4  | 291.1  |
| 8.3    | 2.6    | 10.9   | 7.3    | 12.8   | 3.5    | 11.4   | 2.3    | 13.1   |
| 77.7   | 129.6  | 64.0   | 88.7   | 117.1  | 92.5   | 100.0  | 138.4  | 151.9  |
| 1.5    | 0.8    | 1.2    | 0.4    | 0.7    | 8.6    | 5.0    | 8.5    | 6.2    |
| 1.1    | 14.9   | 13.6   | 10.7   | 7.7    | 8.7    | 10.5   | 3.9    | 7.0    |
| 587.8  | 591.4  | 269.2  | 369.5  | 791.1  | 524.1  | 721.4  | 717.9  | 810.8  |
| 57.6   | 78.2   | 71.3   | 91.3   | 49.5   | 44.8   | 80.5   | 83.9   | 83.2   |
| 8.9    | 8.6    | 1.6    | 11.0   | 21.3   | 2.8    | 8.4    | 15.8   | 15.6   |
| 65.0   | 118.4  | 58.4   | 70.5   | 115.2  | 63.7   | 524.8  | 264.5  | 311.9  |
| 116.3  | 171.7  | 8.4    | 9.6    | 144.5  | 143.2  | 298.0  | 512.6  | 603.7  |
| 31.2   | 38.3   | 26.6   | 28.5   | 48.4   | 33.8   | 46.1   | 56.7   | 54.5   |



|        |        |        |        |        |        |        |        |         |
|--------|--------|--------|--------|--------|--------|--------|--------|---------|
| 99.4   | 104.3  | 571.9  | 854.9  | 95.4   | 109.9  | 134.4  | 118.5  | 129.3   |
| 62.4   | 52.7   | 7.1    | 8.2    | 90.2   | 74.1   | 350.6  | 576.7  | 589.2   |
| 37.5   | 22.2   | 4.9    | 2.1    | 32.3   | 14.8   | 52.4   | 43.6   | 52.3    |
| 294.0  | 407.2  | 180.9  | 210.0  | 438.3  | 433.8  | 734.7  | 422.0  | 494.0   |
| 36.2   | 57.3   | 28.5   | 27.0   | 62.4   | 46.4   | 43.9   | 46.1   | 45.8    |
| 23.0   | 2.8    | 1.6    | 1.5    | 27.4   | 9.2    | 12.6   | 2.8    | 5.7     |
| 17.9   | 27.3   | 127.5  | 168.2  | 24.2   | 32.2   | 72.2   | 92.5   | 103.8   |
| 14.1   | 20.3   | 6.6    | 14.5   | 8.0    | 16.9   | 10.2   | 11.1   | 7.2     |
| 1.4    | 0.8    | 1.5    | 3.7    | 0.8    | 2.6    | 4.8    | 4.3    | 1.1     |
| 14.9   | 19.1   | 10.9   | 7.1    | 24.6   | 3.7    | 13.3   | 3.2    | 4.7     |
| 38.5   | 44.9   | 23.5   | 18.5   | 26.7   | 56.7   | 45.3   | 28.6   | 34.6    |
| 79.8   | 145.2  | 81.2   | 136.3  | 159.1  | 125.6  | 361.7  | 228.3  | 255.6   |
| 11.7   | 11.9   | 1.7    | 9.9    | 1.3    | 14.0   | 4.9    | 11.9   | 11.2    |
| 6613.2 | 7374.5 | 118.3  | 183.5  | 7816.4 | 7208.9 | 4.7    | 4.9    | 8.2     |
| 2.5    | 0.8    | 3.7    | 5.9    | 11.8   | 1.2    | 37.4   | 18.8   | 27.5    |
| 2.0    | 13.7   | 0.9    | 2.2    | 34.0   | 18.0   | 5.0    | 7.8    | 4.0     |
| 134.1  | 153.2  | 21.2   | 23.4   | 214.0  | 166.3  | 216.4  | 160.0  | 201.6   |
| 24.1   | 31.2   | 19.7   | 21.2   | 52.7   | 16.4   | 188.5  | 337.6  | 348.1   |
| 4.8    | 22.7   | 5.8    | 23.8   | 5.0    | 15.9   | 40.2   | 11.8   | 28.9    |
| 21.2   | 32.0   | 21.5   | 11.7   | 21.0   | 16.4   | 61.0   | 64.0   | 54.0    |
| 624.1  | 873.6  | 119.4  | 147.3  | 858.3  | 976.2  | 773.4  | 605.7  | 632.5   |
| 119.7  | 155.7  | 14.2   | 12.8   | 264.8  | 164.2  | 1783.6 | 2154.3 | 2458.1  |
| 195.6  | 320.1  | 56.2   | 60.7   | 375.4  | 399.8  | 854.7  | 501.5  | 557.8   |
| 447.2  | 449.5  | 146.9  | 222.8  | 506.6  | 484.6  | 1289.3 | 756.9  | 871.7   |
| 30.8   | 21.4   | 8.8    | 6.4    | 27.2   | 18.5   | 8.7    | 15.4   | 11.2    |
| 133.7  | 174.5  | 142.5  | 139.7  | 205.2  | 405.7  | 402.3  | 172.7  | 310.0   |
| 83.5   | 83.7   | 40.6   | 25.6   | 101.0  | 67.4   | 307.6  | 284.6  | 341.9   |
| 29.5   | 39.7   | 33.3   | 44.7   | 46.9   | 32.3   | 99.2   | 94.7   | 94.6    |
| 0.3    | 3.0    | 0.5    | 2.9    | 0.2    | 0.2    | 5.5    | 6.0    | 2.9     |
| 114.0  | 281.5  | 13.4   | 25.2   | 365.3  | 340.3  | 425.2  | 261.2  | 295.3   |
| 30.7   | 40.6   | 8.5    | 4.6    | 57.8   | 56.2   | 212.9  | 188.4  | 210.8   |
| 5552.3 | 6372.6 | 2511.0 | 3118.6 | 6142.9 | 5762.4 | 9926.0 | 9993.8 | 10058.0 |
| 19.0   | 21.1   | 34.4   | 43.8   | 20.3   | 34.3   | 101.2  | 74.4   | 80.2    |
| 7.8    | 22.8   | 18.4   | 12.7   | 4.0    | 12.5   | 9.3    | 15.2   | 17.5    |
| 1.2    | 1.5    | 1.6    | 1.9    | 2.6    | 4.7    | 2.9    | 7.6    | 2.0     |
| 162.6  | 160.8  | 489.8  | 778.9  | 185.1  | 200.2  | 221.8  | 209.7  | 250.6   |
| 3708.3 | 4312.6 | 1103.5 | 1238.0 | 4292.0 | 4474.6 | 4452.2 | 3953.0 | 4061.1  |
| 26.3   | 36.1   | 0.7    | 0.8    | 69.6   | 24.4   | 183.2  | 149.4  | 138.8   |
| 42.9   | 65.6   | 70.3   | 85.4   | 94.2   | 36.9   | 69.7   | 86.0   | 105.8   |
| 17.9   | 25.9   | 23.0   | 16.2   | 25.0   | 24.2   | 26.8   | 29.9   | 36.1    |
| 2.0    | 2.7    | 5.0    | 2.6    | 2.7    | 13.5   | 2.9    | 4.3    | 2.9     |
| 41.4   | 54.8   | 14.5   | 16.5   | 71.9   | 75.8   | 29.0   | 52.8   | 38.8    |
| 216.9  | 256.8  | 76.5   | 167.6  | 293.6  | 340.6  | 673.8  | 323.0  | 299.6   |
| 24.6   | 32.2   | 11.6   | 6.7    | 25.6   | 31.5   | 88.6   | 89.3   | 89.6    |
| 22.4   | 29.2   | 5.4    | 7.8    | 27.2   | 28.7   | 20.4   | 37.8   | 31.1    |
| 3.0    | 2.1    | 2.4    | 1.7    | 3.0    | 2.6    | 7.7    | 14.2   | 7.1     |
| 190.5  | 155.8  | 34.3   | 38.2   | 183.4  | 117.0  | 467.9  | 333.5  | 371.8   |
| 275.7  | 462.5  | 49.2   | 70.2   | 412.8  | 515.3  | 1613.3 | 1140.6 | 1197.3  |
| 93.0   | 129.7  | 73.2   | 77.2   | 138.1  | 156.0  | 91.5   | 112.6  | 175.6   |
| 26.4   | 23.5   | 15.5   | 12.2   | 29.4   | 21.5   | 39.2   | 39.2   | 31.8    |
| 11.2   | 1.5    | 1.1    | 1.3    | 1.1    | 3.3    | 3.2    | 2.7    | 2.3     |
| 1280.9 | 1895.6 | 6.1    | 17.6   | 2168.9 | 1689.7 | 861.4  | 740.9  | 970.8   |
| 276.5  | 331.6  | 104.1  | 78.5   | 351.9  | 313.5  | 312.9  | 231.0  | 247.0   |

|        |        |        |        |        |        |         |         |         |
|--------|--------|--------|--------|--------|--------|---------|---------|---------|
| 17.3   | 36.9   | 13.8   | 15.5   | 9.8    | 35.1   | 15.1    | 18.6    | 20.9    |
| 42.7   | 84.2   | 83.3   | 140.6  | 56.6   | 39.9   | 552.8   | 288.4   | 308.0   |
| 36.9   | 47.8   | 63.3   | 93.8   | 58.3   | 52.3   | 273.4   | 194.7   | 238.4   |
| 255.4  | 264.9  | 46.5   | 45.7   | 366.4  | 262.5  | 320.7   | 175.7   | 194.9   |
| 4.4    | 1.7    | 7.2    | 1.7    | 2.6    | 1.0    | 5.4     | 2.3     | 6.5     |
| 293.3  | 246.4  | 16.2   | 8.0    | 473.4  | 270.9  | 685.8   | 490.2   | 428.8   |
| 6.4    | 2.1    | 4.2    | 1.4    | 2.9    | 1.5    | 3.2     | 2.8     | 3.3     |
| 890.7  | 996.7  | 265.3  | 281.2  | 1179.0 | 914.9  | 1223.6  | 1079.2  | 1173.6  |
| 22.4   | 11.9   | 25.5   | 9.7    | 26.9   | 22.9   | 20.0    | 16.1    | 15.1    |
| 6979.3 | 9399.2 | 3111.3 | 4397.1 | 8737.8 | 6516.4 | 12346.6 | 12417.2 | 12292.7 |
| 39.1   | 39.3   | 27.1   | 34.0   | 57.1   | 51.0   | 72.3    | 50.8    | 59.4    |
| 35.9   | 45.3   | 57.5   | 58.5   | 80.1   | 69.8   | 184.2   | 187.2   | 173.4   |
| 107.1  | 116.8  | 201.7  | 289.2  | 164.5  | 87.8   | 935.1   | 787.4   | 880.2   |
| 225.1  | 258.2  | 7.3    | 5.1    | 264.6  | 272.2  | 89.3    | 62.9    | 67.2    |
| 3586.5 | 3814.2 | 591.8  | 736.0  | 3749.1 | 4500.6 | 5673.0  | 5172.6  | 4912.7  |
| 334.2  | 302.3  | 2.4    | 0.7    | 831.5  | 451.2  | 1.9     | 3.1     | 4.8     |
| 14.4   | 14.1   | 7.9    | 16.2   | 22.9   | 15.5   | 5.1     | 19.1    | 15.6    |
| 21.3   | 22.5   | 44.3   | 62.1   | 37.1   | 31.0   | 21.8    | 27.1    | 19.8    |
| 39.5   | 55.9   | 13.4   | 8.9    | 61.9   | 68.7   | 106.4   | 92.8    | 126.6   |
| 45.6   | 50.4   | 38.7   | 59.9   | 56.7   | 57.6   | 217.3   | 436.6   | 498.6   |
| 28.5   | 44.8   | 14.8   | 17.4   | 67.6   | 53.0   | 82.5    | 98.3    | 118.4   |
| 54.8   | 73.0   | 22.3   | 29.5   | 111.1  | 78.4   | 495.9   | 435.1   | 470.4   |
| 70.8   | 70.1   | 666.1  | 801.5  | 70.8   | 33.1   | 208.4   | 340.5   | 357.5   |
| 152.8  | 169.6  | 37.5   | 27.4   | 150.4  | 213.1  | 53.5    | 46.8    | 53.0    |
| 2108.5 | 2101.4 | 146.6  | 178.2  | 1102.7 | 1106.3 | 272.3   | 204.2   | 258.7   |
| 3.8    | 3.4    | 1.2    | 1.1    | 18.9   | 11.9   | 4.0     | 2.6     | 3.1     |
| 14.5   | 25.2   | 10.4   | 10.4   | 23.4   | 24.7   | 24.0    | 14.7    | 12.8    |
| 84.0   | 124.1  | 24.4   | 28.7   | 101.2  | 102.5  | 76.3    | 37.7    | 34.9    |
| 44.8   | 51.4   | 11.0   | 25.3   | 70.4   | 37.4   | 104.7   | 74.1    | 88.6    |
| 72.4   | 85.9   | 10.7   | 23.8   | 122.6  | 101.7  | 161.8   | 66.2    | 86.3    |
| 22.0   | 17.6   | 8.1    | 2.9    | 35.2   | 22.9   | 25.1    | 25.4    | 21.7    |
| 4.5    | 5.5    | 9.2    | 16.8   | 3.1    | 3.7    | 14.9    | 9.0     | 13.8    |
| 100.4  | 112.2  | 50.2   | 76.9   | 136.8  | 107.3  | 239.7   | 222.2   | 226.1   |
| 3.2    | 0.6    | 1.0    | 0.7    | 11.9   | 5.1    | 8.3     | 1.1     | 1.5     |
| 28.6   | 43.8   | 40.0   | 33.9   | 36.5   | 40.6   | 49.7    | 40.7    | 61.3    |
| 1.9    | 1.8    | 11.0   | 1.4    | 23.1   | 1.5    | 2.1     | 1.3     | 1.1     |
| 2.8    | 19.4   | 2.4    | 1.3    | 7.0    | 22.3   | 16.0    | 15.0    | 13.0    |
| 75.3   | 110.3  | 34.7   | 30.7   | 96.0   | 129.2  | 246.1   | 274.4   | 258.5   |
| 1.1    | 2.4    | 10.6   | 14.2   | 1.4    | 1.6    | 32.8    | 28.1    | 41.3    |
| 8.4    | 15.9   | 0.5    | 1.6    | 19.8   | 33.7   | 27.9    | 51.3    | 55.5    |
| 117.6  | 178.7  | 60.6   | 80.0   | 138.2  | 147.4  | 91.8    | 95.6    | 110.0   |
| 6513.6 | 6923.9 | 3738.2 | 4941.8 | 6938.5 | 5963.5 | 10589.0 | 8695.7  | 8587.5  |
| 69.1   | 65.3   | 35.9   | 35.8   | 101.5  | 61.3   | 203.7   | 117.0   | 102.0   |
| 65.5   | 47.1   | 18.2   | 33.3   | 72.3   | 77.2   | 118.8   | 84.9    | 73.0    |
| 114.5  | 152.2  | 48.7   | 49.2   | 176.5  | 169.9  | 231.4   | 153.7   | 163.9   |
| 16.6   | 18.4   | 15.7   | 12.2   | 22.2   | 21.5   | 29.7    | 41.0    | 39.1    |
| 3.3    | 8.8    | 66.8   | 93.9   | 2.4    | 6.0    | 20.3    | 18.1    | 29.1    |
| 3.6    | 5.4    | 0.6    | 0.3    | 5.8    | 0.9    | 8.7     | 15.6    | 19.4    |
| 38.6   | 50.8   | 16.4   | 15.8   | 71.5   | 55.2   | 77.4    | 74.8    | 96.7    |
| 145.5  | 174.5  | 47.4   | 45.2   | 206.4  | 155.0  | 206.3   | 174.5   | 140.6   |
| 2022.3 | 2242.6 | 976.9  | 1074.5 | 2620.0 | 3999.8 | 2741.1  | 2606.8  | 2711.5  |
| 158.7  | 348.2  | 60.2   | 82.8   | 202.1  | 365.9  | 197.3   | 189.1   | 226.0   |
| 30.0   | 29.8   | 45.0   | 30.2   | 32.7   | 23.1   | 157.4   | 228.5   | 276.7   |

|        |        |        |        |        |        |        |        |        |
|--------|--------|--------|--------|--------|--------|--------|--------|--------|
| 7.7    | 15.3   | 24.9   | 14.7   | 19.8   | 19.3   | 92.9   | 126.5  | 162.1  |
| 9.6    | 19.3   | 2.8    | 16.8   | 27.1   | 15.4   | 49.5   | 71.7   | 78.9   |
| 6.5    | 20.2   | 2.0    | 23.0   | 12.7   | 4.1    | 34.5   | 29.7   | 44.8   |
| 1.0    | 0.9    | 3.1    | 5.9    | 19.5   | 1.2    | 6.4    | 16.9   | 8.1    |
| 7.4    | 1.9    | 2.6    | 1.0    | 8.8    | 4.9    | 9.3    | 6.5    | 11.1   |
| 1.1    | 0.1    | 3.0    | 4.2    | 0.4    | 1.1    | 4.1    | 5.4    | 2.9    |
| 16.6   | 23.7   | 20.4   | 25.2   | 26.8   | 11.7   | 22.1   | 19.7   | 23.5   |
| 10.7   | 9.6    | 6.6    | 8.8    | 8.7    | 4.3    | 21.0   | 12.3   | 10.3   |
| 3.6    | 12.3   | 21.4   | 14.0   | 10.1   | 3.7    | 41.9   | 43.2   | 46.3   |
| 136.5  | 115.4  | 90.0   | 98.2   | 176.3  | 116.5  | 59.9   | 89.9   | 77.4   |
| 7.9    | 19.2   | 36.3   | 57.2   | 17.7   | 15.1   | 102.3  | 92.3   | 93.3   |
| 56.6   | 70.6   | 12.0   | 1.2    | 86.2   | 43.1   | 3.8    | 4.5    | 4.7    |
| 49.3   | 104.6  | 64.8   | 81.9   | 124.0  | 51.4   | 151.0  | 94.4   | 129.9  |
| 537.3  | 690.8  | 160.4  | 178.0  | 768.6  | 757.3  | 1391.2 | 630.3  | 699.0  |
| 10.7   | 9.1    | 14.7   | 16.0   | 13.4   | 10.3   | 25.1   | 20.8   | 4.9    |
| 17.1   | 13.2   | 20.0   | 14.8   | 19.0   | 1.7    | 5.2    | 5.5    | 9.1    |
| 1.0    | 4.2    | 1.6    | 2.6    | 1.0    | 1.9    | 1.1    | 6.7    | 2.3    |
| 54.7   | 48.4   | 10.1   | 19.8   | 53.9   | 40.7   | 59.9   | 50.8   | 74.5   |
| 6.5    | 4.7    | 8.8    | 6.6    | 10.0   | 1.0    | 8.7    | 9.0    | 13.9   |
| 136.5  | 166.9  | 34.5   | 26.5   | 209.7  | 192.8  | 301.8  | 145.4  | 172.6  |
| 2.7    | 10.1   | 4.7    | 11.6   | 12.9   | 11.2   | 16.1   | 6.9    | 9.8    |
| 19.5   | 27.2   | 8.0    | 13.4   | 20.4   | 13.7   | 84.6   | 76.2   | 116.7  |
| 50.1   | 41.1   | 11.8   | 9.1    | 100.9  | 27.5   | 900.5  | 748.2  | 827.2  |
| 29.6   | 38.8   | 51.5   | 69.2   | 26.5   | 25.0   | 50.9   | 62.5   | 74.0   |
| 520.1  | 672.8  | 57.0   | 73.1   | 663.9  | 643.0  | 1228.2 | 869.8  | 899.3  |
| 0.7    | 5.7    | 4.0    | 4.5    | 4.0    | 0.7    | 8.3    | 2.2    | 1.7    |
| 12.3   | 21.9   | 2.9    | 8.8    | 20.4   | 17.7   | 18.3   | 17.3   | 23.5   |
| 48.0   | 45.0   | 36.3   | 37.2   | 49.5   | 43.9   | 89.5   | 62.6   | 77.5   |
| 13.1   | 24.7   | 13.4   | 19.5   | 1.9    | 18.7   | 61.0   | 53.1   | 55.7   |
| 5042.6 | 5712.5 | 1544.4 | 1904.4 | 6526.1 | 6551.8 | 8200.4 | 7274.7 | 7301.7 |
| 39.7   | 37.5   | 59.2   | 65.5   | 33.1   | 32.3   | 80.4   | 57.2   | 66.1   |
| 40.8   | 52.8   | 15.6   | 13.7   | 68.1   | 54.1   | 273.0  | 234.5  | 272.3  |
| 21.1   | 16.9   | 5.7    | 12.5   | 18.3   | 8.9    | 9.9    | 2.3    | 11.1   |
| 14.6   | 36.3   | 4.0    | 6.9    | 15.5   | 12.2   | 22.7   | 24.4   | 14.1   |
| 4.0    | 8.4    | 24.0   | 13.8   | 6.4    | 17.8   | 26.2   | 13.8   | 10.4   |
| 4.1    | 19.8   | 91.6   | 149.8  | 19.2   | 4.5    | 717.9  | 1254.8 | 1315.8 |
| 36.3   | 79.3   | 12.1   | 18.3   | 68.2   | 56.3   | 139.7  | 159.6  | 167.4  |
| 219.0  | 204.3  | 9.2    | 0.8    | 361.9  | 206.4  | 375.2  | 376.9  | 442.0  |
| 184.3  | 243.3  | 63.0   | 108.4  | 278.6  | 216.1  | 385.5  | 299.4  | 309.9  |
| 13.8   | 8.8    | 10.7   | 6.2    | 1.4    | 7.5    | 10.9   | 6.2    | 3.9    |
| 236.5  | 291.2  | 16.9   | 15.2   | 459.8  | 302.2  | 449.2  | 399.3  | 431.7  |
| 2761.7 | 3681.2 | 1931.8 | 2344.5 | 4230.6 | 3293.1 | 7124.3 | 6244.3 | 6334.9 |
| 58.7   | 77.0   | 15.6   | 34.2   | 67.2   | 72.2   | 64.9   | 56.9   | 51.6   |
| 174.9  | 215.5  | 39.4   | 37.4   | 277.6  | 239.5  | 476.3  | 250.8  | 255.5  |
| 581.8  | 735.2  | 420.9  | 437.8  | 764.9  | 619.0  | 1858.0 | 2686.4 | 2773.9 |
| 5.9    | 27.1   | 3.0    | 4.6    | 31.1   | 29.9   | 20.4   | 36.6   | 35.7   |
| 87.9   | 127.3  | 25.1   | 28.3   | 127.3  | 137.5  | 212.6  | 129.7  | 142.5  |
| 26.2   | 68.8   | 8.8    | 6.9    | 39.9   | 55.4   | 68.9   | 60.3   | 79.6   |
| 2.3    | 1.3    | 1.7    | 0.8    | 4.6    | 2.0    | 11.7   | 3.6    | 3.9    |
| 2.0    | 1.2    | 4.7    | 8.7    | 10.4   | 2.3    | 3.8    | 6.0    | 3.0    |
| 416.2  | 642.5  | 130.9  | 164.9  | 522.2  | 664.5  | 975.8  | 594.6  | 703.4  |
| 6.4    | 18.5   | 0.7    | 1.4    | 21.4   | 14.8   | 31.4   | 43.1   | 44.0   |
| 161.0  | 251.6  | 97.6   | 142.3  | 285.4  | 303.2  | 165.6  | 173.6  | 176.4  |

|        |        |        |        |        |        |        |        |        |
|--------|--------|--------|--------|--------|--------|--------|--------|--------|
| 2850.8 | 3876.0 | 2.9    | 11.2   | 4111.4 | 2879.2 | 2.9    | 1.7    | 2.7    |
| 1.5    | 1.5    | 3.3    | 8.7    | 18.0   | 1.1    | 2.3    | 1.0    | 1.0    |
| 86.6   | 73.3   | 5.4    | 19.1   | 123.8  | 67.6   | 450.2  | 317.4  | 330.9  |
| 5.7    | 1.3    | 1.9    | 5.6    | 2.0    | 2.8    | 2.5    | 5.0    | 2.2    |
| 5.2    | 1.1    | 11.9   | 1.0    | 2.3    | 1.8    | 1.6    | 1.9    | 5.2    |
| 46.6   | 34.9   | 46.1   | 34.4   | 39.4   | 40.7   | 72.0   | 98.8   | 147.0  |
| 3.9    | 2.1    | 4.2    | 2.2    | 4.7    | 1.6    | 1.8    | 9.1    | 3.5    |
| 21.1   | 20.0   | 10.4   | 23.3   | 25.4   | 29.7   | 69.3   | 52.4   | 58.0   |
| 6.5    | 15.6   | 4.0    | 9.2    | 9.3    | 1.3    | 11.2   | 3.6    | 10.4   |
| 228.4  | 284.3  | 476.7  | 696.1  | 339.2  | 334.7  | 586.1  | 460.5  | 546.2  |
| 8.6    | 10.2   | 11.7   | 2.7    | 16.4   | 18.8   | 7.5    | 9.8    | 9.9    |
| 6.1    | 3.4    | 0.6    | 3.7    | 1.0    | 12.6   | 8.4    | 2.7    | 3.6    |
| 3.1    | 4.1    | 3.4    | 1.3    | 13.8   | 3.3    | 5.8    | 16.2   | 3.0    |
| 28.6   | 20.9   | 111.6  | 118.3  | 9.4    | 5.5    | 140.1  | 144.5  | 148.3  |
| 7.0    | 8.4    | 10.7   | 2.4    | 1.9    | 1.5    | 166.4  | 440.2  | 476.5  |
| 3603.2 | 3574.0 | 1195.8 | 1100.8 | 3861.7 | 3667.8 | 8181.8 | 5522.5 | 5932.9 |
| 99.5   | 78.9   | 153.9  | 226.2  | 123.9  | 72.9   | 141.8  | 181.4  | 192.7  |
| 84.9   | 92.5   | 28.6   | 25.5   | 98.6   | 59.5   | 104.6  | 189.1  | 211.5  |
| 632.1  | 805.4  | 384.0  | 497.7  | 834.8  | 1018.5 | 1533.1 | 1174.8 | 1255.8 |
| 94.1   | 93.7   | 251.4  | 333.1  | 144.8  | 97.5   | 153.8  | 95.6   | 108.9  |
| 9.1    | 1.8    | 3.5    | 3.1    | 19.7   | 18.9   | 3.2    | 4.6    | 3.4    |
| 15.3   | 9.4    | 7.1    | 3.4    | 16.0   | 7.9    | 6.1    | 11.7   | 7.2    |
| 9.7    | 10.6   | 2.0    | 23.6   | 21.0   | 19.9   | 39.3   | 21.8   | 32.0   |
| 392.1  | 527.7  | 54.2   | 47.5   | 545.6  | 369.8  | 1078.4 | 1025.3 | 943.1  |
| 1273.0 | 1674.3 | 823.7  | 1213.5 | 1829.1 | 1595.3 | 4878.2 | 5719.2 | 5936.4 |
| 28.2   | 20.0   | 4.3    | 20.1   | 25.1   | 8.1    | 47.4   | 52.4   | 49.3   |
| 49.0   | 58.9   | 16.7   | 20.4   | 87.6   | 50.5   | 97.2   | 74.2   | 85.7   |
| 1625.3 | 1987.6 | 1774.0 | 2311.7 | 2285.0 | 2013.7 | 7111.0 | 6907.7 | 7215.4 |
| 24.4   | 27.4   | 2.3    | 2.6    | 24.7   | 22.9   | 92.5   | 81.3   | 78.7   |
| 1.8    | 2.2    | 1.3    | 2.9    | 2.3    | 1.2    | 3.0    | 7.3    | 2.2    |
| 109.6  | 197.8  | 45.0   | 72.0   | 209.9  | 170.6  | 465.4  | 506.1  | 464.6  |
| 14.1   | 33.6   | 14.0   | 22.8   | 32.5   | 50.9   | 19.1   | 30.7   | 21.3   |
| 62.7   | 111.7  | 15.8   | 17.1   | 113.3  | 86.4   | 202.8  | 194.8  | 203.5  |
| 1.6    | 14.9   | 7.1    | 1.8    | 8.2    | 4.4    | 16.5   | 10.3   | 16.1   |
| 0.4    | 0.3    | 0.6    | 2.1    | 0.9    | 2.5    | 2.6    | 6.4    | 2.2    |
| 343.1  | 396.3  | 143.0  | 177.6  | 370.3  | 295.4  | 86.0   | 53.5   | 71.9   |
| 103.7  | 181.3  | 36.4   | 62.7   | 161.6  | 576.5  | 91.7   | 69.3   | 71.0   |
| 15.2   | 13.2   | 18.1   | 10.1   | 17.6   | 34.7   | 26.3   | 24.9   | 22.6   |
| 1.8    | 17.9   | 1.3    | 6.9    | 3.1    | 2.0    | 5.5    | 1.5    | 1.3    |
| 85.0   | 108.6  | 106.3  | 150.5  | 83.8   | 98.5   | 218.9  | 161.4  | 183.2  |
| 14.4   | 11.6   | 21.9   | 19.7   | 17.0   | 3.2    | 30.1   | 25.1   | 26.4   |
| 2.4    | 1.9    | 2.0    | 11.0   | 14.1   | 7.9    | 2.5    | 2.1    | 5.0    |
| 208.1  | 232.9  | 79.8   | 46.5   | 218.2  | 121.0  | 192.9  | 168.1  | 188.0  |
| 255.3  | 440.9  | 124.1  | 192.4  | 439.0  | 433.8  | 770.1  | 622.7  | 697.8  |
| 22.9   | 22.9   | 6.4    | 3.7    | 6.1    | 22.2   | 11.0   | 7.2    | 10.4   |
| 30.2   | 21.8   | 80.1   | 97.8   | 44.2   | 21.0   | 136.5  | 100.3  | 114.8  |
| 1462.1 | 1691.8 | 368.5  | 499.9  | 1853.1 | 3821.4 | 2277.4 | 1134.9 | 1241.7 |
| 18.8   | 43.8   | 16.0   | 8.7    | 44.2   | 36.1   | 50.3   | 53.0   | 58.3   |
| 4.2    | 1.5    | 2.6    | 1.4    | 0.9    | 0.8    | 10.8   | 3.7    | 2.4    |
| 78.0   | 91.0   | 38.3   | 32.8   | 121.9  | 62.8   | 272.9  | 242.5  | 250.7  |
| 47.0   | 52.1   | 6.4    | 15.3   | 50.0   | 53.3   | 208.6  | 183.1  | 201.1  |
| 802.9  | 954.8  | 465.0  | 662.2  | 1021.6 | 993.0  | 2448.7 | 1982.0 | 2237.3 |
| 19.3   | 26.8   | 26.7   | 28.2   | 28.3   | 5.2    | 84.8   | 82.0   | 88.2   |

|        |        |        |        |        |        |        |        |        |
|--------|--------|--------|--------|--------|--------|--------|--------|--------|
| 2.2    | 0.9    | 1.3    | 0.1    | 0.8    | 0.1    | 4.1    | 0.6    | 0.4    |
| 5.8    | 1.2    | 9.3    | 7.3    | 6.9    | 3.7    | 1.5    | 3.8    | 2.5    |
| 200.7  | 282.8  | 134.8  | 125.4  | 281.0  | 328.3  | 434.5  | 406.4  | 447.3  |
| 5.0    | 2.6    | 3.7    | 12.3   | 17.1   | 10.1   | 8.4    | 1.8    | 1.7    |
| 3.9    | 2.5    | 2.6    | 1.1    | 3.5    | 3.0    | 10.6   | 22.4   | 16.9   |
| 22.5   | 9.9    | 1.0    | 1.6    | 4.4    | 2.8    | 7.4    | 4.6    | 15.6   |
| 4.9    | 8.0    | 7.6    | 7.7    | 15.8   | 2.5    | 5.4    | 6.3    | 4.6    |
| 29.3   | 39.6   | 37.2   | 65.2   | 43.4   | 23.1   | 99.7   | 86.6   | 73.5   |
| 116.9  | 124.4  | 4.9    | 25.7   | 178.9  | 103.4  | 124.2  | 99.2   | 162.5  |
| 450.9  | 438.8  | 331.8  | 390.9  | 502.7  | 378.2  | 555.8  | 337.3  | 395.0  |
| 2.4    | 0.8    | 3.0    | 5.2    | 8.9    | 1.5    | 8.5    | 8.8    | 7.8    |
| 275.7  | 336.9  | 53.0   | 71.2   | 342.3  | 384.7  | 606.9  | 738.0  | 776.0  |
| 12.7   | 30.3   | 10.2   | 9.4    | 18.6   | 39.7   | 36.0   | 55.3   | 48.1   |
| 1.3    | 3.3    | 4.6    | 0.5    | 7.7    | 3.9    | 12.7   | 14.6   | 16.1   |
| 18.3   | 37.4   | 8.0    | 13.0   | 42.5   | 23.6   | 18.4   | 27.6   | 23.9   |
| 20.3   | 17.2   | 32.5   | 26.1   | 30.6   | 11.1   | 4.8    | 16.5   | 8.3    |
| 1.2    | 3.4    | 8.9    | 0.9    | 1.3    | 6.4    | 16.4   | 24.6   | 30.7   |
| 1.8    | 3.2    | 4.1    | 14.7   | 1.2    | 4.6    | 21.1   | 21.6   | 6.7    |
| 0.3    | 0.4    | 0.5    | 0.2    | 0.4    | 0.9    | 1.3    | 2.1    | 2.2    |
| 1.0    | 2.6    | 6.5    | 2.4    | 14.1   | 1.8    | 7.7    | 10.6   | 13.7   |
| 20.6   | 19.2   | 19.5   | 19.3   | 15.2   | 18.3   | 22.8   | 33.7   | 37.4   |
| 34.4   | 45.7   | 32.8   | 29.2   | 60.3   | 22.7   | 180.5  | 151.7  | 139.9  |
| 86.9   | 160.3  | 31.4   | 24.8   | 217.1  | 161.5  | 354.7  | 493.7  | 489.8  |
| 281.2  | 290.0  | 306.1  | 454.0  | 405.0  | 239.7  | 1119.7 | 781.7  | 968.3  |
| 51.1   | 35.4   | 60.4   | 93.0   | 53.0   | 71.9   | 260.7  | 211.7  | 272.2  |
| 59.8   | 63.5   | 90.9   | 122.8  | 84.8   | 124.0  | 391.6  | 304.0  | 353.1  |
| 13.0   | 7.8    | 4.5    | 1.3    | 1.7    | 5.2    | 3.8    | 2.2    | 4.4    |
| 9.0    | 4.9    | 8.5    | 8.3    | 7.9    | 8.8    | 9.1    | 13.8   | 14.5   |
| 1.7    | 3.5    | 32.2   | 40.7   | 2.1    | 0.8    | 64.6   | 86.4   | 106.2  |
| 338.1  | 436.7  | 30.4   | 36.1   | 440.5  | 508.6  | 664.9  | 220.0  | 273.9  |
| 403.6  | 502.9  | 238.3  | 287.1  | 510.0  | 425.6  | 633.6  | 402.4  | 405.7  |
| 47.9   | 65.8   | 70.6   | 112.5  | 78.7   | 69.5   | 362.3  | 413.5  | 437.9  |
| 0.5    | 0.6    | 0.5    | 0.4    | 1.7    | 2.2    | 1198.4 | 4454.9 | 4323.7 |
| 30.9   | 21.6   | 2.1    | 5.7    | 74.6   | 27.7   | 8.3    | 4.1    | 1.2    |
| 1247.1 | 1727.0 | 590.9  | 848.7  | 1841.9 | 1205.2 | 2418.1 | 2171.6 | 2494.1 |
| 20.9   | 23.3   | 41.1   | 51.8   | 11.4   | 14.7   | 151.7  | 177.9  | 213.2  |
| 14.0   | 16.9   | 2.5    | 1.6    | 42.7   | 20.8   | 2.3    | 2.5    | 3.9    |
| 5342.2 | 6419.4 | 2302.7 | 3024.7 | 6459.0 | 5907.0 | 9178.3 | 8735.9 | 9007.1 |
| 17.0   | 12.4   | 1.9    | 1.7    | 19.9   | 12.3   | 123.5  | 165.3  | 169.7  |
| 156.1  | 221.0  | 44.1   | 93.9   | 256.5  | 233.6  | 958.9  | 512.7  | 577.4  |
| 36.9   | 33.0   | 13.7   | 26.5   | 34.5   | 20.7   | 56.3   | 39.3   | 45.7   |
| 27.8   | 29.9   | 11.9   | 10.3   | 39.4   | 28.8   | 65.4   | 51.5   | 49.5   |
| 2.2    | 6.5    | 1.7    | 0.7    | 2.0    | 4.3    | 6.8    | 2.9    | 1.6    |
| 116.2  | 79.2   | 47.6   | 67.3   | 116.8  | 40.1   | 181.7  | 212.6  | 227.9  |
| 11.9   | 10.9   | 1.0    | 3.6    | 7.3    | 9.0    | 1.6    | 0.8    | 0.7    |
| 1.8    | 1.8    | 15.6   | 5.3    | 1.1    | 3.2    | 2.8    | 4.6    | 3.6    |
| 41.1   | 69.0   | 16.1   | 14.5   | 76.9   | 130.6  | 26.6   | 22.6   | 20.6   |
| 132.5  | 135.2  | 252.2  | 410.8  | 172.7  | 174.3  | 187.2  | 125.1  | 148.2  |
| 98.4   | 115.1  | 60.4   | 53.7   | 113.8  | 210.3  | 605.2  | 500.8  | 548.7  |
| 77.8   | 73.6   | 18.2   | 20.1   | 68.7   | 64.9   | 131.0  | 140.5  | 130.8  |
| 1.0    | 1.1    | 6.0    | 5.4    | 17.5   | 9.3    | 7.1    | 2.5    | 7.8    |
| 38.3   | 56.3   | 30.0   | 38.6   | 64.4   | 34.2   | 106.0  | 80.1   | 84.4   |
| 14.2   | 11.4   | 10.3   | 5.5    | 23.5   | 19.9   | 39.9   | 37.6   | 39.0   |

|        |        |        |        |        |         |         |         |         |
|--------|--------|--------|--------|--------|---------|---------|---------|---------|
| 19.3   | 24.5   | 1.2    | 0.3    | 39.6   | 33.5    | 0.8     | 0.3     | 2.8     |
| 7.9    | 12.0   | 15.2   | 2.7    | 14.0   | 0.9     | 6.9     | 8.1     | 2.1     |
| 20.4   | 11.9   | 10.7   | 5.0    | 18.5   | 23.1    | 4.8     | 6.9     | 10.2    |
| 17.8   | 21.1   | 23.3   | 23.2   | 20.9   | 20.0    | 44.6    | 71.0    | 67.6    |
| 2.3    | 2.6    | 5.6    | 0.8    | 1.5    | 9.3     | 9.2     | 8.7     | 3.5     |
| 81.1   | 91.4   | 88.9   | 83.1   | 111.8  | 85.5    | 142.2   | 97.1    | 121.7   |
| 2.7    | 1.6    | 10.4   | 2.1    | 1.7    | 3.0     | 210.0   | 127.3   | 148.3   |
| 11.5   | 11.1   | 2.8    | 8.9    | 1.2    | 10.8    | 9.1     | 5.8     | 4.2     |
| 7.3    | 11.9   | 6.7    | 2.2    | 11.3   | 9.2     | 5.4     | 4.8     | 6.6     |
| 70.5   | 84.9   | 30.1   | 30.0   | 87.9   | 34.5    | 157.3   | 131.2   | 150.2   |
| 30.1   | 18.5   | 34.2   | 49.6   | 34.9   | 23.5    | 21.6    | 38.2    | 43.3    |
| 4345.1 | 5280.6 | 4102.5 | 4793.0 | 5765.8 | 5369.2  | 10247.7 | 10665.6 | 10507.5 |
| 52.9   | 69.3   | 39.0   | 39.7   | 57.7   | 40.7    | 80.8    | 63.2    | 60.1    |
| 2.1    | 2.0    | 11.8   | 2.6    | 3.5    | 7.7     | 5.5     | 6.1     | 11.9    |
| 3.1    | 12.4   | 7.2    | 5.0    | 1.4    | 4.2     | 8.5     | 3.4     | 6.1     |
| 5.6    | 8.0    | 11.2   | 20.8   | 6.1    | 11.1    | 5.4     | 6.2     | 6.7     |
| 19.4   | 28.8   | 4.5    | 18.5   | 14.6   | 24.1    | 26.0    | 29.3    | 28.7    |
| 13.3   | 5.6    | 3.4    | 3.4    | 10.5   | 3.8     | 6.3     | 8.7     | 9.8     |
| 101.0  | 172.1  | 83.8   | 86.5   | 174.4  | 121.6   | 418.4   | 218.3   | 200.7   |
| 31.0   | 64.5   | 31.8   | 20.2   | 164.3  | 81.1    | 144.1   | 283.0   | 295.8   |
| 17.6   | 18.8   | 11.6   | 5.6    | 19.9   | 2.0     | 18.2    | 21.5    | 25.1    |
| 86.8   | 120.6  | 32.5   | 79.1   | 117.9  | 89.7    | 379.1   | 267.5   | 317.7   |
| 37.4   | 42.8   | 32.8   | 27.6   | 24.8   | 54.5    | 67.0    | 84.8    | 105.8   |
| 21.2   | 25.1   | 14.8   | 12.7   | 22.8   | 32.5    | 24.9    | 32.0    | 23.3    |
| 3.3    | 4.6    | 3.8    | 1.3    | 3.9    | 1.9     | 13.2    | 5.5     | 8.4     |
| 312.3  | 375.7  | 159.1  | 217.1  | 438.3  | 295.8   | 505.0   | 263.1   | 361.8   |
| 67.7   | 56.8   | 185.8  | 228.5  | 80.7   | 58.5    | 56.7    | 89.6    | 91.5    |
| 84.2   | 124.7  | 1.7    | 5.3    | 110.6  | 125.9   | 119.9   | 207.0   | 245.8   |
| 2.8    | 3.4    | 1.5    | 1.0    | 8.6    | 1.4     | 1.4     | 1.0     | 1.2     |
| 456.8  | 613.0  | 96.5   | 95.8   | 652.0  | 657.4   | 1267.2  | 1321.4  | 1526.4  |
| 19.0   | 6.7    | 5.9    | 17.9   | 27.6   | 4.4     | 35.3    | 30.6    | 21.3    |
| 104.5  | 118.2  | 22.4   | 10.5   | 130.2  | 133.5   | 99.5    | 42.1    | 45.0    |
| 7.1    | 12.2   | 10.7   | 8.2    | 14.6   | 1.7     | 11.4    | 10.5    | 11.8    |
| 91.4   | 99.8   | 133.2  | 127.2  | 103.8  | 151.0   | 475.5   | 482.4   | 594.8   |
| 46.9   | 45.4   | 14.2   | 22.3   | 72.6   | 54.0    | 93.3    | 63.5    | 68.1    |
| 164.4  | 178.0  | 64.8   | 83.9   | 167.9  | 217.0   | 1447.2  | 1324.0  | 1402.6  |
| 134.1  | 160.7  | 17.1   | 17.4   | 142.2  | 194.4   | 183.8   | 146.9   | 174.0   |
| 10.0   | 4.1    | 13.3   | 17.3   | 3.9    | 5.8     | 12.0    | 13.6    | 9.5     |
| 16.3   | 12.6   | 9.7    | 8.7    | 3.9    | 10.7    | 31.7    | 28.5    | 30.9    |
| 0.3    | 10.3   | 0.3    | 0.2    | 0.6    | 13.2    | 1.1     | 5.1     | 4.6     |
| 1269.7 | 1902.6 | 75.1   | 94.4   | 2399.6 | 2137.9  | 1958.6  | 1896.6  | 2063.9  |
| 28.1   | 24.5   | 26.4   | 18.4   | 29.1   | 31.6    | 53.7    | 54.1    | 63.7    |
| 108.7  | 181.9  | 21.1   | 27.3   | 211.7  | 170.5   | 362.5   | 321.0   | 300.1   |
| 1357.5 | 1590.9 | 574.4  | 664.6  | 1773.1 | 1581.4  | 3061.3  | 2978.5  | 2894.8  |
| 95.5   | 88.1   | 62.4   | 77.0   | 148.0  | 85.5    | 84.5    | 96.5    | 102.8   |
| 1.3    | 1.1    | 0.6    | 1.2    | 17.9   | 0.9     | 7.1     | 4.4     | 8.1     |
| 8.7    | 4.6    | 3.6    | 5.4    | 1.2    | 9.4     | 6.5     | 1.4     | 4.9     |
| 1801.1 | 2048.9 | 754.0  | 1166.4 | 2696.7 | 2164.5  | 3922.1  | 4090.1  | 3844.4  |
| 91.3   | 187.8  | 0.9    | 1.7    | 138.1  | 128.5   | 64.2    | 34.2    | 17.5    |
| 8.6    | 12.8   | 9.8    | 11.8   | 19.6   | 2.2     | 2.1     | 8.6     | 15.0    |
| 9146.6 | 9924.3 | 4251.9 | 5434.1 | 9346.4 | 10200.0 | 10272.2 | 9838.2  | 9858.4  |
| 7.5    | 5.9    | 2.0    | 3.3    | 2.9    | 2.1     | 6.1     | 9.2     | 13.7    |
| 37.5   | 49.3   | 2.8    | 2.5    | 61.1   | 34.9    | 3.8     | 3.6     | 3.4     |

|         |         |        |        |         |        |        |        |        |
|---------|---------|--------|--------|---------|--------|--------|--------|--------|
| 1.2     | 1.2     | 1.3    | 1.7    | 2.4     | 12.9   | 23.2   | 38.0   | 13.6   |
| 12.6    | 16.0    | 2.1    | 9.9    | 7.0     | 35.5   | 20.3   | 12.0   | 13.0   |
| 1136.8  | 1434.6  | 401.1  | 345.4  | 1880.8  | 2094.5 | 3559.9 | 3516.1 | 3653.8 |
| 26.1    | 37.6    | 17.9   | 13.3   | 28.2    | 30.0   | 16.0   | 15.2   | 16.0   |
| 3.5     | 17.4    | 13.6   | 16.9   | 20.1    | 19.1   | 174.5  | 218.3  | 247.8  |
| 46.9    | 57.0    | 50.2   | 40.7   | 52.4    | 35.6   | 193.9  | 220.9  | 213.7  |
| 92.2    | 107.4   | 35.2   | 38.2   | 112.8   | 111.0  | 114.8  | 106.6  | 107.2  |
| 50.5    | 59.2    | 5.8    | 18.8   | 74.2    | 93.7   | 184.5  | 122.3  | 142.3  |
| 73.5    | 172.4   | 35.4   | 52.2   | 69.5    | 168.5  | 692.5  | 666.8  | 671.6  |
| 325.7   | 342.6   | 29.0   | 25.8   | 409.2   | 356.7  | 478.4  | 416.4  | 464.9  |
| 1.3     | 4.0     | 4.3    | 0.6    | 10.7    | 0.5    | 205.8  | 38.8   | 70.7   |
| 3450.3  | 3883.1  | 1169.8 | 1500.4 | 4072.2  | 3696.6 | 7290.2 | 6630.6 | 6610.0 |
| 20.4    | 21.9    | 7.1    | 17.0   | 25.3    | 12.7   | 37.1   | 58.7   | 48.1   |
| 226.6   | 375.9   | 35.4   | 39.7   | 426.0   | 333.0  | 1043.2 | 1096.0 | 997.6  |
| 8.5     | 6.1     | 39.4   | 65.6   | 35.6    | 5.5    | 36.3   | 53.4   | 38.5   |
| 34.9    | 28.8    | 69.7   | 101.4  | 52.0    | 24.9   | 81.8   | 94.4   | 83.0   |
| 665.9   | 630.8   | 226.0  | 359.7  | 794.4   | 365.3  | 1065.2 | 785.2  | 896.1  |
| 1.2     | 1.1     | 1.5    | 2.1    | 7.1     | 0.5    | 9.5    | 2.6    | 1.5    |
| 30.1    | 46.9    | 40.9   | 44.4   | 50.6    | 43.0   | 222.9  | 157.8  | 186.3  |
| 10561.5 | 11010.0 | 2588.0 | 3259.2 | 10792.9 | 9918.9 | 8387.4 | 7794.3 | 7823.1 |
| 6.9     | 8.5     | 4.5    | 9.8    | 5.2     | 7.6    | 7.3    | 9.8    | 11.7   |
| 541.5   | 725.7   | 209.4  | 410.3  | 815.7   | 857.9  | 1787.8 | 1374.4 | 1704.9 |
| 119.5   | 135.9   | 293.3  | 344.9  | 211.4   | 157.3  | 336.2  | 329.9  | 378.7  |
| 14.0    | 24.6    | 3.1    | 5.3    | 22.6    | 16.5   | 2.0    | 1.5    | 1.9    |
| 107.3   | 89.4    | 8.4    | 8.3    | 155.7   | 116.2  | 6.6    | 7.6    | 7.2    |
| 24.8    | 19.6    | 11.9   | 9.8    | 37.7    | 24.6   | 96.8   | 106.4  | 115.0  |
| 738.0   | 878.2   | 153.9  | 243.9  | 904.4   | 920.3  | 2161.6 | 1844.6 | 1968.2 |
| 9.6     | 9.3     | 16.6   | 11.1   | 19.6    | 15.8   | 14.4   | 15.2   | 12.1   |
| 167.9   | 113.9   | 10.2   | 4.5    | 146.2   | 120.2  | 130.4  | 64.3   | 96.5   |
| 30.1    | 28.8    | 26.1   | 17.3   | 37.2    | 19.0   | 18.2   | 28.6   | 24.1   |
| 254.8   | 226.6   | 62.1   | 73.1   | 397.1   | 232.1  | 152.2  | 202.4  | 174.9  |
| 78.6    | 71.8    | 50.2   | 88.1   | 93.9    | 90.5   | 409.7  | 425.0  | 488.8  |
| 22.0    | 12.3    | 0.5    | 1.6    | 19.0    | 31.8   | 22.1   | 7.8    | 8.4    |
| 1.0     | 2.1     | 5.9    | 1.2    | 7.4     | 5.4    | 3.9    | 6.6    | 4.2    |
| 2.4     | 9.8     | 8.0    | 9.3    | 9.9     | 2.3    | 0.9    | 1.5    | 1.0    |
| 126.3   | 114.4   | 12.6   | 11.7   | 193.8   | 101.1  | 31.9   | 22.6   | 15.7   |
| 26.3    | 29.2    | 21.6   | 18.6   | 39.6    | 23.3   | 73.4   | 35.5   | 36.2   |
| 13.4    | 21.2    | 9.0    | 4.6    | 17.7    | 13.5   | 7.4    | 3.1    | 5.6    |
| 11.8    | 11.9    | 9.7    | 3.5    | 9.3     | 5.7    | 11.5   | 22.9   | 18.7   |
| 9.4     | 0.2     | 3.4    | 0.7    | 1.2     | 1.0    | 2.7    | 0.7    | 0.4    |
| 4239.1  | 4791.9  | 1106.0 | 1171.3 | 5033.7  | 4505.1 | 7012.1 | 5648.7 | 5624.9 |
| 22.9    | 34.7    | 50.6   | 71.7   | 34.9    | 44.4   | 116.1  | 53.5   | 66.8   |
| 14.8    | 63.5    | 35.8   | 49.6   | 25.4    | 46.8   | 116.2  | 69.6   | 78.2   |
| 2.6     | 10.0    | 3.1    | 5.1    | 0.9     | 14.7   | 13.4   | 10.5   | 10.4   |
| 2.2     | 0.5     | 1.0    | 0.4    | 0.6     | 0.4    | 1.2    | 1.3    | 6.0    |
| 16.9    | 28.6    | 34.8   | 31.6   | 40.7    | 31.6   | 123.5  | 140.6  | 129.9  |
| 19.2    | 3.6     | 9.0    | 21.8   | 18.3    | 10.6   | 17.9   | 22.5   | 24.7   |
| 142.9   | 202.2   | 39.5   | 53.2   | 125.6   | 165.5  | 621.4  | 703.9  | 751.2  |
| 15.6    | 11.2    | 21.6   | 15.9   | 22.5    | 8.2    | 29.7   | 23.2   | 30.8   |
| 6.7     | 0.6     | 0.8    | 1.1    | 1.3     | 2.4    | 5.1    | 9.8    | 0.8    |
| 2.5     | 2.1     | 2.2    | 6.0    | 11.5    | 2.4    | 2.6    | 4.4    | 7.8    |
| 3.0     | 4.4     | 5.7    | 7.4    | 5.1     | 8.3    | 25.4   | 26.5   | 30.8   |
| 519.0   | 724.4   | 90.9   | 128.7  | 745.2   | 794.9  | 826.2  | 762.6  | 766.1  |

|        |        |        |        |        |        |        |        |        |
|--------|--------|--------|--------|--------|--------|--------|--------|--------|
| 25.9   | 27.9   | 2.7    | 7.4    | 45.4   | 19.8   | 67.1   | 114.1  | 132.7  |
| 2.7    | 2.8    | 2.0    | 7.2    | 12.7   | 6.6    | 15.3   | 20.7   | 16.3   |
| 48.2   | 68.9   | 28.0   | 36.8   | 90.6   | 37.7   | 144.9  | 76.0   | 76.0   |
| 62.2   | 98.5   | 16.8   | 10.0   | 141.1  | 88.7   | 141.4  | 158.9  | 162.4  |
| 23.8   | 26.5   | 11.4   | 13.0   | 21.4   | 30.0   | 8.4    | 9.9    | 8.4    |
| 88.0   | 175.7  | 10.2   | 8.2    | 117.9  | 158.2  | 273.8  | 534.9  | 521.0  |
| 21.9   | 33.1   | 8.7    | 15.6   | 43.7   | 31.9   | 155.0  | 161.9  | 179.9  |
| 6.6    | 17.6   | 7.9    | 18.0   | 7.8    | 1.6    | 18.2   | 23.7   | 26.2   |
| 4296.6 | 5095.5 | 87.7   | 119.5  | 5688.9 | 5375.6 | 6440.0 | 6870.6 | 6974.7 |
| 8.3    | 6.3    | 9.8    | 12.1   | 6.6    | 2.5    | 10.6   | 5.5    | 4.4    |
| 60.1   | 85.0   | 15.3   | 10.9   | 82.5   | 84.9   | 55.6   | 48.9   | 52.6   |
| 42.1   | 29.3   | 9.9    | 10.3   | 34.9   | 44.9   | 34.8   | 31.4   | 35.3   |
| 26.7   | 36.5   | 19.0   | 16.4   | 39.5   | 39.7   | 60.3   | 71.8   | 64.0   |
| 123.6  | 145.8  | 49.7   | 72.1   | 171.4  | 108.4  | 246.6  | 114.8  | 122.8  |
| 6.1    | 0.3    | 2.4    | 0.5    | 0.8    | 0.4    | 2.7    | 2.6    | 0.6    |
| 18.4   | 42.2   | 13.1   | 9.7    | 21.3   | 16.8   | 83.0   | 82.3   | 80.3   |
| 168.3  | 244.6  | 76.4   | 68.7   | 249.3  | 270.3  | 4.8    | 7.8    | 7.7    |
| 5364.8 | 6583.9 | 1571.6 | 2193.9 | 6528.9 | 6339.0 | 8732.5 | 8336.1 | 8040.3 |
| 27.4   | 19.6   | 1.8    | 18.8   | 24.7   | 20.0   | 5.1    | 42.1   | 35.3   |
| 0.8    | 3.8    | 43.2   | 47.0   | 7.5    | 1.8    | 5.3    | 5.2    | 3.1    |
| 212.2  | 135.1  | 152.2  | 200.4  | 179.6  | 127.6  | 193.6  | 175.2  | 183.2  |
| 27.5   | 18.5   | 14.0   | 16.3   | 38.8   | 40.4   | 43.4   | 32.6   | 27.9   |
| 17.1   | 14.7   | 2.2    | 2.6    | 33.4   | 16.4   | 8.5    | 2.0    | 0.9    |
| 125.9  | 134.1  | 110.3  | 90.1   | 156.8  | 115.1  | 197.8  | 154.2  | 140.0  |
| 1.8    | 2.5    | 3.1    | 5.4    | 6.7    | 16.1   | 11.0   | 16.8   | 11.8   |
| 4.2    | 12.5   | 9.3    | 2.1    | 8.7    | 2.9    | 14.3   | 11.9   | 2.5    |
| 2.2    | 12.2   | 2.6    | 5.1    | 8.7    | 11.9   | 5.8    | 0.9    | 7.1    |
| 161.8  | 108.9  | 10.4   | 20.3   | 208.4  | 120.9  | 240.4  | 83.7   | 79.4   |
| 3.5    | 4.4    | 9.9    | 6.8    | 15.6   | 9.9    | 14.9   | 13.5   | 13.7   |
| 3.1    | 1.8    | 1.0    | 3.1    | 6.6    | 10.5   | 30.6   | 10.3   | 9.2    |
| 49.9   | 75.4   | 5.6    | 1.5    | 40.9   | 77.4   | 274.5  | 148.2  | 215.9  |
| 1.4    | 1.9    | 4.1    | 0.6    | 2.2    | 2.2    | 4.3    | 8.0    | 2.0    |
| 47.9   | 58.0   | 13.9   | 22.3   | 55.4   | 95.7   | 74.9   | 96.3   | 108.0  |
| 14.3   | 9.6    | 26.6   | 11.6   | 20.8   | 27.9   | 62.5   | 63.0   | 63.2   |
| 11.7   | 4.2    | 27.9   | 3.3    | 11.2   | 17.5   | 9.6    | 12.7   | 17.0   |
| 54.3   | 61.3   | 7.6    | 3.1    | 90.5   | 54.0   | 66.8   | 58.7   | 69.5   |
| 5.5    | 1.0    | 4.9    | 9.9    | 1.6    | 3.7    | 6.3    | 3.4    | 10.2   |
| 2.3    | 1.5    | 2.4    | 1.6    | 1.3    | 3.2    | 2.8    | 3.9    | 3.0    |
| 3.4    | 13.8   | 1.4    | 7.3    | 7.3    | 18.5   | 18.0   | 6.8    | 9.3    |
| 4.4    | 6.9    | 28.0   | 19.4   | 16.2   | 4.3    | 23.0   | 14.9   | 24.9   |
| 2.2    | 1.3    | 0.2    | 0.2    | 18.2   | 8.0    | 21.2   | 12.4   | 17.7   |
| 9.3    | 2.7    | 5.9    | 3.7    | 8.0    | 2.1    | 1.9    | 3.7    | 3.0    |
| 0.5    | 7.5    | 1.8    | 5.7    | 1.7    | 13.6   | 2.2    | 4.5    | 4.7    |
| 15.2   | 1.4    | 1.8    | 0.5    | 1.5    | 1.5    | 5.5    | 1.5    | 1.5    |
| 11.1   | 8.4    | 3.6    | 4.3    | 6.2    | 5.1    | 8.9    | 20.3   | 10.7   |
| 2805.5 | 3359.9 | 1737.0 | 2448.0 | 3445.4 | 3067.1 | 6515.4 | 6135.5 | 6613.4 |
| 30.1   | 35.8   | 40.5   | 78.1   | 58.9   | 52.0   | 193.5  | 155.2  | 167.4  |
| 55.1   | 82.1   | 34.6   | 56.8   | 134.6  | 84.2   | 480.1  | 255.5  | 298.1  |
| 7.9    | 10.8   | 1.5    | 1.5    | 11.8   | 11.4   | 2.5    | 3.0    | 1.5    |
| 13.5   | 25.1   | 15.3   | 20.6   | 20.0   | 18.6   | 28.6   | 38.8   | 34.3   |
| 13.9   | 6.3    | 4.1    | 16.8   | 11.1   | 16.6   | 6.8    | 4.6    | 4.8    |
| 2.0    | 10.1   | 1.5    | 0.3    | 14.2   | 5.0    | 5738.4 | 5994.2 | 5858.9 |
| 12.2   | 26.3   | 10.2   | 10.6   | 8.2    | 7.3    | 32.3   | 31.0   | 18.6   |



|        |         |        |        |        |        |         |         |         |
|--------|---------|--------|--------|--------|--------|---------|---------|---------|
| 149.5  | 128.2   | 334.0  | 451.0  | 145.2  | 129.4  | 337.4   | 304.3   | 334.5   |
| 4.3    | 3.2     | 7.5    | 4.7    | 3.1    | 6.8    | 18.2    | 16.0    | 14.9    |
| 348.1  | 457.8   | 32.4   | 21.5   | 522.6  | 1083.2 | 138.0   | 170.1   | 189.2   |
| 297.1  | 444.0   | 118.9  | 157.9  | 396.2  | 211.8  | 1288.2  | 1282.3  | 1497.4  |
| 46.5   | 41.9    | 2.5    | 17.4   | 47.1   | 26.6   | 34.7    | 23.1    | 21.6    |
| 49.9   | 97.8    | 21.0   | 21.0   | 110.9  | 74.5   | 140.7   | 196.4   | 228.2   |
| 43.8   | 71.9    | 64.3   | 101.4  | 39.0   | 53.6   | 173.6   | 149.9   | 121.3   |
| 26.3   | 45.3    | 14.2   | 13.7   | 39.6   | 48.2   | 173.1   | 123.8   | 110.0   |
| 2.2    | 2.7     | 0.8    | 1.8    | 13.3   | 1.9    | 1.7     | 1.5     | 1.7     |
| 29.1   | 33.2    | 54.9   | 99.7   | 27.3   | 14.6   | 150.9   | 131.4   | 144.3   |
| 6.0    | 1.0     | 0.9    | 2.3    | 1.0    | 1.2    | 2.2     | 2.4     | 1.6     |
| 189.3  | 287.2   | 695.9  | 1155.6 | 599.8  | 272.2  | 1954.1  | 1696.0  | 1633.7  |
| 37.8   | 69.2    | 19.9   | 29.5   | 69.4   | 68.8   | 91.4    | 49.5    | 54.1    |
| 4.3    | 5.6     | 3.7    | 3.5    | 1.3    | 11.1   | 7.8     | 5.9     | 3.4     |
| 34.2   | 16.5    | 15.1   | 1.5    | 6.5    | 17.6   | 5.6     | 2.7     | 3.8     |
| 78.5   | 87.3    | 14.1   | 14.0   | 105.0  | 104.9  | 8.9     | 10.7    | 5.1     |
| 0.3    | 0.6     | 0.4    | 1.0    | 1.8    | 7.3    | 0.9     | 2.5     | 1.4     |
| 2.9    | 1.4     | 0.4    | 0.3    | 6.0    | 1.0    | 1.6     | 1.8     | 4.5     |
| 175.9  | 245.1   | 34.7   | 44.4   | 275.8  | 275.1  | 578.8   | 611.1   | 616.6   |
| 10.2   | 8.2     | 53.1   | 59.5   | 2.8    | 5.6    | 15.4    | 32.7    | 30.2    |
| 1.0    | 2.7     | 24.6   | 4.2    | 4.8    | 3.3    | 75.3    | 86.5    | 104.5   |
| 39.8   | 82.2    | 81.8   | 112.1  | 80.1   | 76.9   | 95.0    | 125.1   | 130.4   |
| 15.5   | 16.1    | 16.4   | 21.1   | 20.1   | 18.4   | 19.3    | 16.4    | 21.0    |
| 5.2    | 21.7    | 4.6    | 7.1    | 21.4   | 13.6   | 1.5     | 1.1     | 4.1     |
| 41.2   | 49.0    | 18.8   | 31.7   | 81.4   | 55.0   | 121.3   | 126.4   | 136.4   |
| 28.0   | 44.0    | 32.6   | 37.6   | 40.6   | 24.2   | 36.9    | 45.5    | 56.8    |
| 8241.0 | 10512.3 | 2247.2 | 2926.7 | 9915.0 | 9543.3 | 11696.2 | 12107.5 | 11862.8 |
| 86.5   | 90.0    | 137.9  | 141.2  | 92.5   | 104.8  | 489.9   | 388.5   | 458.7   |
| 92.0   | 114.6   | 67.9   | 89.7   | 157.4  | 158.8  | 324.8   | 269.1   | 264.6   |
| 56.2   | 63.9    | 80.4   | 97.9   | 102.3  | 74.0   | 205.3   | 173.5   | 190.6   |
| 131.1  | 140.2   | 135.3  | 195.9  | 191.9  | 137.1  | 584.7   | 516.0   | 500.6   |
| 13.0   | 14.2    | 14.8   | 16.7   | 7.5    | 9.8    | 28.5    | 25.7    | 28.7    |
| 2.3    | 20.3    | 19.9   | 27.5   | 22.6   | 9.4    | 58.8    | 50.1    | 59.1    |
| 3.0    | 3.9     | 4.7    | 4.5    | 2.7    | 2.8    | 142.0   | 161.3   | 212.8   |
| 702.5  | 793.8   | 156.1  | 176.1  | 935.0  | 897.6  | 1297.7  | 473.4   | 492.1   |
| 7.6    | 7.3     | 4.6    | 5.2    | 6.0    | 8.0    | 314.9   | 279.1   | 301.2   |
| 5.2    | 0.8     | 2.6    | 0.7    | 2.4    | 0.9    | 7.4     | 8.2     | 7.7     |
| 73.9   | 117.9   | 4.1    | 14.0   | 84.2   | 106.9  | 5.5     | 6.7     | 28.8    |
| 3.5    | 21.1    | 23.1   | 37.0   | 22.4   | 22.6   | 32.3    | 22.7    | 21.1    |
| 137.8  | 317.9   | 17.0   | 47.9   | 253.3  | 455.7  | 206.6   | 192.4   | 277.6   |
| 57.0   | 62.6    | 18.3   | 27.2   | 60.6   | 44.0   | 96.2    | 59.9    | 60.5    |
| 1.6    | 0.7     | 5.1    | 1.1    | 2.2    | 2.2    | 1.5     | 0.6     | 0.8     |
| 4.6    | 2.4     | 1.0    | 1.5    | 2.3    | 1.9    | 23.9    | 20.5    | 12.5    |
| 152.8  | 144.3   | 32.0   | 44.4   | 112.8  | 125.2  | 129.5   | 192.4   | 135.4   |
| 10.2   | 17.4    | 9.9    | 11.6   | 12.8   | 14.0   | 22.3    | 13.9    | 16.9    |
| 112.5  | 151.7   | 6.4    | 11.5   | 298.0  | 163.8  | 15.5    | 22.2    | 12.2    |
| 2.6    | 8.4     | 0.7    | 9.4    | 38.1   | 20.5   | 17.0    | 56.9    | 53.8    |
| 9.9    | 12.1    | 1.5    | 3.0    | 8.8    | 14.3   | 6.1     | 2.4     | 7.8     |
| 3.7    | 5.5     | 16.6   | 4.4    | 7.9    | 0.8    | 17.5    | 12.8    | 6.6     |
| 0.4    | 1.2     | 0.3    | 1.5    | 1.3    | 4.2    | 2.5     | 1.0     | 0.6     |
| 7.7    | 6.4     | 2.5    | 4.4    | 7.6    | 4.0    | 7.2     | 6.2     | 5.9     |
| 10.4   | 18.1    | 4.0    | 8.3    | 13.9   | 22.6   | 122.0   | 134.2   | 180.7   |
| 0.8    | 3.6     | 0.4    | 1.6    | 3.6    | 0.7    | 1.0     | 1.0     | 2.5     |

|        |        |        |        |        |        |        |        |        |
|--------|--------|--------|--------|--------|--------|--------|--------|--------|
| 94.0   | 112.8  | 17.5   | 6.4    | 135.7  | 128.0  | 168.3  | 164.9  | 179.7  |
| 22.7   | 29.7   | 5.2    | 3.1    | 29.8   | 35.1   | 0.9    | 1.0    | 1.1    |
| 0.9    | 2.5    | 1.6    | 1.5    | 5.8    | 3.4    | 7.6    | 10.2   | 5.4    |
| 23.6   | 6.0    | 10.9   | 8.0    | 27.8   | 18.5   | 144.4  | 153.0  | 166.1  |
| 1.8    | 3.2    | 6.5    | 3.8    | 0.9    | 8.1    | 4.8    | 10.9   | 7.0    |
| 319.7  | 435.3  | 181.8  | 104.1  | 457.5  | 379.5  | 224.3  | 224.8  | 241.4  |
| 73.7   | 97.4   | 27.1   | 28.4   | 90.6   | 80.0   | 47.1   | 40.2   | 50.4   |
| 20.6   | 23.4   | 29.8   | 40.3   | 19.6   | 31.3   | 101.9  | 90.8   | 83.5   |
| 3.9    | 11.1   | 0.7    | 5.2    | 9.2    | 7.1    | 3.3    | 7.7    | 6.5    |
| 2901.8 | 3574.8 | 1209.1 | 1443.5 | 4444.0 | 3233.5 | 827.6  | 961.0  | 1042.2 |
| 3.2    | 13.4   | 72.7   | 96.9   | 33.1   | 6.8    | 182.5  | 234.8  | 284.0  |
| 86.1   | 145.2  | 16.3   | 19.8   | 145.5  | 108.0  | 570.0  | 645.8  | 732.4  |
| 896.9  | 1300.9 | 449.5  | 704.3  | 1322.1 | 1437.5 | 3097.0 | 3052.0 | 3198.5 |
| 8.7    | 12.2   | 8.6    | 1.3    | 13.9   | 14.6   | 9.5    | 6.7    | 3.5    |
| 13.0   | 12.4   | 6.0    | 0.7    | 22.9   | 9.6    | 10.8   | 9.6    | 7.2    |
| 26.0   | 52.1   | 20.0   | 13.3   | 54.7   | 46.5   | 301.3  | 288.1  | 306.4  |
| 70.5   | 69.2   | 12.1   | 6.7    | 79.9   | 57.0   | 7.4    | 2.4    | 5.4    |
| 379.2  | 351.7  | 38.7   | 44.8   | 541.7  | 354.9  | 697.6  | 624.8  | 635.0  |
| 18.5   | 28.6   | 7.1    | 3.4    | 44.3   | 23.3   | 78.1   | 81.9   | 79.9   |
| 3.4    | 12.3   | 10.7   | 3.9    | 14.0   | 4.9    | 18.6   | 7.4    | 14.0   |
| 13.4   | 1.1    | 4.1    | 18.6   | 11.4   | 12.2   | 10.4   | 15.1   | 22.2   |
| 10.2   | 16.7   | 13.8   | 6.9    | 7.4    | 10.2   | 16.0   | 18.1   | 17.9   |
| 30.0   | 48.2   | 15.8   | 14.7   | 25.9   | 39.3   | 26.8   | 46.0   | 33.8   |
| 3.7    | 7.0    | 11.2   | 16.0   | 6.9    | 5.7    | 6.5    | 9.9    | 4.7    |
| 0.9    | 2.4    | 9.5    | 3.4    | 3.0    | 6.7    | 6.8    | 10.9   | 15.3   |
| 253.8  | 426.6  | 57.7   | 52.1   | 357.1  | 482.7  | 259.2  | 266.2  | 308.4  |
| 73.7   | 86.5   | 32.5   | 36.8   | 91.8   | 102.7  | 55.9   | 53.5   | 59.5   |
| 39.4   | 52.1   | 16.9   | 17.8   | 52.8   | 50.7   | 33.8   | 46.9   | 38.2   |
| 10.8   | 10.8   | 61.7   | 51.4   | 13.2   | 23.3   | 152.9  | 238.9  | 304.5  |
| 9.0    | 19.1   | 5.0    | 5.6    | 19.0   | 23.3   | 4.6    | 6.3    | 6.5    |
| 6.6    | 18.9   | 11.9   | 14.5   | 25.6   | 1.8    | 20.3   | 22.8   | 17.1   |
| 109.6  | 108.5  | 20.4   | 28.4   | 128.8  | 116.7  | 285.7  | 240.1  | 248.5  |
| 374.7  | 334.6  | 7.5    | 29.2   | 615.9  | 338.7  | 168.5  | 86.2   | 109.9  |
| 7.7    | 7.5    | 2.1    | 1.0    | 1.9    | 6.5    | 5.8    | 6.1    | 7.1    |
| 7.9    | 18.7   | 15.6   | 6.6    | 14.5   | 14.3   | 7.4    | 7.3    | 4.9    |
| 12.2   | 1.9    | 1.3    | 0.6    | 21.7   | 9.1    | 8.8    | 9.7    | 2.3    |
| 15.1   | 19.7   | 19.9   | 1.3    | 24.7   | 22.4   | 38.3   | 36.0   | 37.5   |
| 7.5    | 1.2    | 2.7    | 1.5    | 6.4    | 1.6    | 1.6    | 1.9    | 2.7    |
| 2.1    | 13.0   | 17.5   | 6.0    | 16.1   | 11.6   | 19.1   | 15.7   | 7.6    |
| 3.3    | 2.5    | 5.9    | 1.4    | 12.6   | 5.7    | 19.2   | 6.9    | 11.2   |
| 15.2   | 20.0   | 24.5   | 11.0   | 20.2   | 20.8   | 59.4   | 252.6  | 214.4  |
| 19.6   | 29.5   | 0.7    | 0.8    | 41.9   | 34.1   | 40.0   | 87.2   | 91.9   |
| 19.1   | 21.6   | 15.9   | 14.8   | 3.1    | 30.4   | 31.3   | 31.9   | 29.5   |
| 71.4   | 98.8   | 264.6  | 313.5  | 86.2   | 98.1   | 62.8   | 53.4   | 56.1   |
| 61.1   | 103.7  | 136.6  | 160.0  | 63.7   | 97.4   | 112.2  | 87.3   | 103.8  |
| 116.3  | 139.2  | 43.0   | 47.4   | 165.7  | 145.7  | 145.7  | 132.9  | 132.5  |
| 47.3   | 56.6   | 33.4   | 50.2   | 53.2   | 37.6   | 56.1   | 53.7   | 61.9   |
| 135.0  | 163.5  | 17.8   | 12.2   | 191.2  | 166.5  | 32.0   | 50.2   | 43.9   |
| 5.9    | 6.4    | 1.9    | 3.8    | 8.4    | 12.3   | 2.2    | 1.9    | 1.7    |
| 14.6   | 53.1   | 1340.7 | 1775.7 | 10.6   | 44.2   | 19.7   | 52.8   | 51.3   |
| 346.5  | 332.7  | 247.5  | 298.0  | 420.6  | 377.1  | 822.8  | 728.6  | 902.3  |
| 11.2   | 7.2    | 9.4    | 16.7   | 19.1   | 3.3    | 14.2   | 12.9   | 12.6   |
| 1.3    | 6.3    | 8.5    | 12.2   | 1.1    | 9.7    | 5.1    | 6.4    | 18.7   |

|       |       |       |       |        |        |        |        |        |
|-------|-------|-------|-------|--------|--------|--------|--------|--------|
| 27.4  | 33.1  | 114.5 | 150.0 | 47.1   | 28.6   | 27.7   | 35.5   | 29.6   |
| 13.8  | 28.7  | 3.4   | 1.1   | 19.4   | 21.8   | 1.9    | 3.3    | 1.3    |
| 320.8 | 456.9 | 14.6  | 14.3  | 487.8  | 371.4  | 69.2   | 47.7   | 41.2   |
| 358.6 | 430.8 | 98.7  | 129.4 | 550.6  | 420.8  | 684.2  | 326.1  | 345.4  |
| 12.3  | 7.7   | 7.5   | 0.8   | 6.5    | 7.3    | 12.8   | 9.6    | 9.9    |
| 63.3  | 74.9  | 16.7  | 8.3   | 113.4  | 106.4  | 287.5  | 380.9  | 386.6  |
| 1.1   | 0.7   | 1.4   | 0.7   | 0.9    | 1.0    | 2.4    | 3.4    | 5.8    |
| 6.3   | 6.1   | 1.7   | 7.7   | 6.5    | 7.1    | 2.7    | 7.3    | 4.2    |
| 252.4 | 218.7 | 20.2  | 15.1  | 440.5  | 200.8  | 218.2  | 284.5  | 305.1  |
| 107.6 | 122.9 | 47.4  | 64.4  | 143.7  | 95.3   | 177.0  | 124.9  | 156.7  |
| 59.6  | 111.4 | 21.2  | 55.4  | 73.1   | 61.4   | 344.7  | 235.8  | 240.0  |
| 2.3   | 8.9   | 2.0   | 3.3   | 2.9    | 10.4   | 24.1   | 14.8   | 9.2    |
| 130.7 | 137.7 | 46.1  | 37.0  | 149.3  | 131.8  | 275.4  | 198.4  | 223.3  |
| 879.1 | 840.2 | 622.1 | 657.4 | 1198.4 | 934.5  | 1887.4 | 1313.6 | 1460.4 |
| 721.0 | 974.9 | 64.7  | 142.6 | 990.9  | 1001.5 | 946.0  | 720.6  | 871.8  |
| 0.9   | 8.6   | 4.5   | 7.4   | 12.4   | 6.9    | 32.4   | 37.7   | 37.9   |
| 14.2  | 59.6  | 2.9   | 1.3   | 62.9   | 42.4   | 3.6    | 15.9   | 3.0    |
| 112.6 | 169.2 | 64.0  | 113.8 | 194.8  | 106.6  | 188.8  | 125.1  | 146.7  |
| 73.1  | 149.5 | 8.6   | 10.9  | 186.9  | 336.2  | 185.6  | 352.5  | 416.2  |
| 19.3  | 26.4  | 7.4   | 9.2   | 16.5   | 32.0   | 48.2   | 27.7   | 28.4   |
| 1.6   | 2.5   | 2.8   | 3.3   | 2.1    | 4.4    | 2.6    | 1.5    | 2.1    |
| 34.4  | 30.2  | 10.7  | 14.3  | 72.1   | 47.7   | 24.7   | 150.6  | 155.2  |
| 10.9  | 12.3  | 12.1  | 5.7   | 13.7   | 8.8    | 15.1   | 10.2   | 9.7    |
| 49.8  | 92.8  | 109.9 | 157.7 | 83.4   | 77.5   | 1689.3 | 1513.4 | 1585.2 |
| 81.0  | 144.4 | 292.4 | 504.0 | 176.9  | 113.0  | 296.0  | 317.6  | 348.1  |
| 12.4  | 2.6   | 15.7  | 3.4   | 12.9   | 5.9    | 45.5   | 36.0   | 38.4   |
| 98.9  | 95.5  | 55.4  | 69.2  | 119.5  | 114.9  | 266.5  | 422.6  | 478.5  |
| 38.8  | 64.7  | 27.4  | 30.4  | 48.0   | 60.0   | 110.4  | 84.2   | 104.6  |
| 0.3   | 0.7   | 5.4   | 2.5   | 6.2    | 1.1    | 3.0    | 1.4    | 1.2    |
| 168.4 | 158.6 | 88.2  | 111.8 | 211.4  | 171.9  | 483.3  | 388.2  | 417.6  |
| 394.9 | 482.5 | 55.8  | 78.6  | 462.5  | 409.8  | 1566.2 | 1314.6 | 1373.0 |
| 191.2 | 210.3 | 120.6 | 151.4 | 210.7  | 179.2  | 332.4  | 366.1  | 403.1  |
| 1.0   | 9.6   | 0.7   | 0.5   | 1.3    | 4.5    | 1.3    | 1.7    | 1.2    |
| 17.9  | 21.9  | 10.3  | 16.8  | 7.7    | 2.3    | 85.6   | 75.6   | 94.5   |
| 9.1   | 24.8  | 15.0  | 18.1  | 23.2   | 12.4   | 85.3   | 102.4  | 94.2   |
| 82.8  | 74.5  | 53.0  | 53.4  | 103.0  | 83.3   | 233.1  | 314.6  | 229.5  |
| 254.9 | 259.3 | 206.3 | 325.5 | 423.6  | 254.6  | 2245.3 | 1717.1 | 1880.5 |
| 0.5   | 0.5   | 2.0   | 1.0   | 8.2    | 5.9    | 0.4    | 2.2    | 0.5    |
| 116.8 | 123.3 | 20.5  | 24.1  | 157.4  | 131.1  | 67.1   | 41.0   | 50.6   |
| 3.0   | 4.1   | 9.2   | 13.5  | 4.8    | 3.5    | 21.4   | 4.1    | 15.4   |
| 23.1  | 31.6  | 2.5   | 7.1   | 34.7   | 32.6   | 13.4   | 11.5   | 12.5   |
| 221.9 | 298.1 | 13.8  | 7.5   | 263.4  | 252.4  | 492.1  | 365.1  | 388.1  |
| 4.0   | 4.1   | 7.2   | 6.5   | 2.0    | 13.0   | 7.2    | 2.6    | 8.5    |
| 47.5  | 52.0  | 13.0  | 16.0  | 61.8   | 42.8   | 100.6  | 67.0   | 88.2   |
| 1.7   | 1.9   | 1.1   | 0.8   | 5.5    | 2.5    | 1.3    | 0.9    | 2.0    |
| 21.1  | 25.5  | 4.8   | 10.6  | 40.5   | 14.0   | 59.4   | 69.7   | 94.9   |
| 125.4 | 211.1 | 34.3  | 47.3  | 247.6  | 215.1  | 302.5  | 351.6  | 373.4  |
| 50.9  | 77.2  | 12.1  | 14.0  | 100.0  | 71.1   | 95.8   | 95.4   | 114.0  |
| 4.5   | 0.7   | 5.6   | 10.7  | 2.0    | 10.6   | 63.4   | 54.3   | 59.4   |
| 13.0  | 26.2  | 16.4  | 10.5  | 27.9   | 14.6   | 52.0   | 56.0   | 61.7   |
| 1.6   | 18.2  | 37.8  | 33.4  | 30.7   | 4.8    | 16.1   | 18.9   | 17.7   |
| 4.2   | 2.3   | 2.4   | 1.9   | 0.7    | 1.0    | 7.6    | 2.2    | 4.4    |
| 15.1  | 15.4  | 15.2  | 14.5  | 22.2   | 24.5   | 28.8   | 22.9   | 17.0   |

|        |        |        |        |        |        |         |        |        |
|--------|--------|--------|--------|--------|--------|---------|--------|--------|
| 6.4    | 11.1   | 8.3    | 7.1    | 11.1   | 10.0   | 42.9    | 57.0   | 37.9   |
| 7.9    | 14.3   | 14.2   | 8.8    | 2.4    | 1.3    | 22.1    | 29.0   | 27.8   |
| 22.3   | 19.5   | 8.0    | 15.3   | 20.2   | 14.2   | 38.9    | 38.9   | 38.7   |
| 6.5    | 0.6    | 9.7    | 12.2   | 5.0    | 9.3    | 13.5    | 9.8    | 17.3   |
| 34.8   | 37.8   | 9.9    | 12.9   | 37.0   | 38.2   | 80.8    | 77.6   | 72.2   |
| 1879.3 | 2837.7 | 373.2  | 460.7  | 1777.7 | 2279.2 | 3795.5  | 1863.6 | 2010.9 |
| 1.3    | 7.6    | 2.1    | 4.0    | 10.6   | 15.9   | 6.1     | 7.9    | 8.8    |
| 7660.7 | 8763.8 | 1733.1 | 2479.0 | 9448.6 | 8423.0 | 10136.5 | 9527.0 | 9593.6 |
| 103.4  | 110.2  | 14.1   | 14.8   | 139.2  | 133.4  | 105.7   | 60.2   | 69.3   |
| 3.6    | 2.0    | 6.3    | 9.1    | 4.1    | 3.3    | 6.1     | 1.8    | 2.7    |
| 3.3    | 1.0    | 8.8    | 5.2    | 3.7    | 1.5    | 3.2     | 0.4    | 0.4    |
| 3.6    | 2.7    | 2.8    | 2.4    | 2.2    | 4.2    | 9.7     | 3.0    | 3.8    |
| 23.9   | 25.4   | 20.0   | 9.3    | 29.6   | 31.2   | 39.7    | 34.4   | 36.5   |
| 88.3   | 106.3  | 29.8   | 29.2   | 104.8  | 180.0  | 185.1   | 190.9  | 183.8  |
| 1147.6 | 1715.1 | 431.8  | 467.8  | 1993.2 | 1547.9 | 2504.1  | 2779.0 | 3142.3 |
| 47.5   | 45.9   | 14.7   | 12.4   | 36.2   | 44.0   | 116.7   | 128.3  | 132.3  |
| 44.8   | 46.8   | 16.4   | 14.4   | 36.4   | 59.5   | 151.6   | 186.5  | 209.7  |
| 20.9   | 17.0   | 5.0    | 13.1   | 11.3   | 13.5   | 19.9    | 15.4   | 15.3   |
| 17.5   | 16.4   | 9.5    | 1.6    | 8.5    | 8.5    | 38.4    | 38.9   | 37.9   |
| 64.3   | 122.6  | 4.2    | 14.4   | 167.4  | 111.6  | 420.5   | 309.4  | 299.1  |
| 1.2    | 0.3    | 10.8   | 15.1   | 2.1    | 8.1    | 4.2     | 2.6    | 3.3    |
| 10.2   | 11.4   | 65.1   | 116.8  | 20.5   | 16.7   | 846.2   | 660.1  | 662.6  |
| 1.1    | 2.9    | 2.3    | 9.2    | 13.3   | 2.7    | 11.6    | 6.2    | 2.9    |
| 10.9   | 8.2    | 5.3    | 3.7    | 2.4    | 8.9    | 5.8     | 4.7    | 3.8    |
| 8.7    | 7.0    | 0.5    | 6.9    | 2.5    | 4.4    | 10.9    | 6.9    | 8.9    |
| 18.5   | 9.1    | 1.3    | 8.5    | 19.4   | 8.3    | 9.9     | 5.2    | 6.3    |
| 0.5    | 1.1    | 1.0    | 4.2    | 3.0    | 1.0    | 1.9     | 3.4    | 2.0    |
| 8.6    | 13.5   | 3.9    | 3.0    | 11.6   | 11.0   | 8.2     | 8.5    | 7.2    |
| 29.0   | 29.1   | 132.4  | 138.7  | 54.7   | 39.2   | 431.8   | 190.6  | 206.6  |
| 1.3    | 1.0    | 0.6    | 0.7    | 0.8    | 1.0    | 0.9     | 1.3    | 1.3    |
| 1.0    | 2.8    | 9.5    | 5.6    | 11.2   | 2.8    | 4.5     | 5.5    | 5.2    |
| 4478.4 | 4935.7 | 2130.4 | 2676.4 | 5536.5 | 4779.5 | 8943.3  | 9222.2 | 9259.0 |
| 136.7  | 158.9  | 25.0   | 43.9   | 248.6  | 143.7  | 175.3   | 112.5  | 119.7  |
| 31.3   | 56.8   | 38.4   | 43.3   | 40.6   | 55.0   | 54.7    | 49.0   | 49.1   |
| 703.6  | 933.1  | 590.9  | 1211.2 | 1243.9 | 786.4  | 2340.9  | 1771.8 | 1874.8 |
| 6.2    | 13.6   | 4.3    | 4.2    | 25.9   | 19.8   | 6.7     | 3.6    | 17.1   |
| 121.8  | 193.2  | 64.9   | 70.2   | 225.7  | 175.6  | 297.4   | 267.6  | 268.5  |
| 533.9  | 712.1  | 171.3  | 173.8  | 723.0  | 575.7  | 949.5   | 568.0  | 702.0  |
| 25.1   | 13.3   | 14.7   | 12.5   | 18.9   | 24.9   | 12.8    | 21.5   | 12.0   |
| 187.5  | 115.5  | 11.9   | 15.3   | 217.7  | 79.4   | 2.7     | 3.1    | 6.9    |
| 5.5    | 14.0   | 17.7   | 15.8   | 2.7    | 8.0    | 58.2    | 95.7   | 106.1  |
| 4.8    | 7.5    | 52.3   | 66.6   | 3.9    | 8.0    | 233.7   | 489.2  | 590.1  |
| 12.8   | 21.0   | 14.5   | 6.5    | 4.3    | 1.5    | 7.6     | 9.3    | 11.0   |
| 270.1  | 309.7  | 229.8  | 278.2  | 328.4  | 321.7  | 469.7   | 473.1  | 583.8  |
| 21.5   | 12.8   | 22.3   | 2.4    | 13.9   | 17.9   | 17.3    | 18.4   | 18.2   |
| 1.0    | 1.7    | 2.1    | 1.5    | 2.2    | 5.0    | 1.1     | 1.5    | 1.3    |
| 481.5  | 617.3  | 92.5   | 113.9  | 667.4  | 750.1  | 930.0   | 836.5  | 885.2  |
| 11.1   | 1.3    | 2.3    | 0.3    | 13.2   | 1.1    | 11.7    | 9.4    | 17.4   |
| 0.9    | 6.4    | 5.0    | 0.5    | 9.0    | 15.2   | 4.4     | 5.4    | 4.4    |
| 14.1   | 34.2   | 16.7   | 20.0   | 16.7   | 13.8   | 19.8    | 23.4   | 20.7   |
| 35.9   | 37.6   | 15.9   | 6.7    | 42.3   | 39.7   | 30.9    | 35.6   | 34.0   |
| 2.2    | 6.5    | 14.4   | 4.4    | 3.6    | 10.6   | 11.3    | 7.9    | 2.9    |
| 23.6   | 29.7   | 1.1    | 1.2    | 37.8   | 23.1   | 2.6     | 1.2    | 1.9    |

|        |        |       |        |        |        |        |        |        |
|--------|--------|-------|--------|--------|--------|--------|--------|--------|
| 10.5   | 9.6    | 6.9   | 2.2    | 8.9    | 9.3    | 11.1   | 10.6   | 11.9   |
| 39.0   | 47.6   | 22.1  | 11.9   | 56.1   | 16.8   | 98.8   | 79.0   | 74.5   |
| 10.7   | 18.4   | 11.9  | 12.5   | 25.9   | 8.3    | 5.9    | 6.5    | 3.0    |
| 1.2    | 1.6    | 1.8   | 0.9    | 3.2    | 1.8    | 3.1    | 3.5    | 4.6    |
| 114.2  | 146.1  | 14.0  | 14.8   | 138.5  | 117.7  | 219.5  | 133.5  | 125.2  |
| 33.0   | 46.8   | 17.4  | 20.9   | 36.8   | 40.2   | 244.0  | 201.2  | 216.7  |
| 5.0    | 20.7   | 4.9   | 1.4    | 2.1    | 2.3    | 35.0   | 29.3   | 35.5   |
| 34.5   | 60.5   | 58.6  | 80.8   | 51.1   | 25.7   | 160.2  | 253.9  | 236.8  |
| 19.3   | 24.2   | 38.9  | 19.4   | 31.1   | 22.8   | 77.4   | 66.8   | 57.3   |
| 199.2  | 249.0  | 65.0  | 84.7   | 279.7  | 260.0  | 288.7  | 295.0  | 299.0  |
| 8.9    | 5.5    | 1.8   | 0.6    | 10.1   | 2.3    | 0.9    | 3.8    | 3.8    |
| 11.5   | 11.7   | 5.1   | 0.7    | 14.3   | 17.7   | 5.0    | 1.3    | 4.3    |
| 108.8  | 167.1  | 60.0  | 77.9   | 197.8  | 166.1  | 174.9  | 131.3  | 132.5  |
| 54.2   | 44.0   | 26.9  | 15.7   | 70.7   | 64.4   | 285.1  | 272.6  | 305.7  |
| 10.7   | 22.7   | 215.2 | 333.6  | 19.0   | 21.1   | 140.9  | 318.7  | 365.8  |
| 4.0    | 4.4    | 6.1   | 0.7    | 0.4    | 5.8    | 2.1    | 0.6    | 0.6    |
| 258.3  | 268.4  | 114.0 | 146.2  | 368.0  | 219.6  | 612.5  | 424.1  | 426.2  |
| 11.3   | 1.2    | 2.0   | 1.1    | 2.7    | 0.9    | 1.7    | 2.0    | 4.7    |
| 0.6    | 7.4    | 1.4   | 2.3    | 2.0    | 9.9    | 3.1    | 6.2    | 8.4    |
| 2.8    | 4.4    | 1.5   | 2.8    | 3.1    | 4.1    | 5.6    | 8.1    | 11.3   |
| 14.4   | 19.0   | 28.9  | 27.7   | 7.2    | 5.7    | 89.5   | 123.0  | 107.5  |
| 57.1   | 39.3   | 24.5  | 19.7   | 88.3   | 44.4   | 71.2   | 39.7   | 39.8   |
| 684.8  | 801.2  | 840.6 | 1091.1 | 766.8  | 672.1  | 5019.2 | 7824.4 | 7674.0 |
| 24.9   | 42.3   | 6.9   | 18.9   | 47.8   | 76.7   | 1.4    | 1.6    | 4.2    |
| 113.7  | 114.7  | 106.2 | 146.6  | 117.7  | 107.4  | 75.8   | 62.7   | 70.2   |
| 1733.2 | 2167.9 | 230.9 | 216.2  | 2311.5 | 2400.1 | 3711.1 | 1780.2 | 1761.2 |
| 0.9    | 2.0    | 2.0   | 1.6    | 1.0    | 1.9    | 4.6    | 4.5    | 2.5    |
| 18.0   | 11.6   | 17.7  | 31.0   | 18.2   | 8.1    | 112.8  | 92.7   | 83.7   |
| 17.1   | 22.6   | 1.0   | 5.1    | 15.2   | 14.4   | 1.1    | 9.7    | 5.0    |
| 60.0   | 156.3  | 1.0   | 2.9    | 130.8  | 92.4   | 6.1    | 2.0    | 3.7    |
| 2.2    | 2.0    | 1.0   | 1.3    | 1.3    | 2.1    | 2.1    | 2.3    | 3.0    |
| 56.4   | 47.3   | 9.6   | 17.9   | 58.6   | 57.0   | 75.5   | 76.3   | 77.4   |
| 31.6   | 35.1   | 11.2  | 11.8   | 28.2   | 51.8   | 91.9   | 93.8   | 93.6   |
| 10.2   | 19.5   | 12.1  | 15.1   | 17.2   | 9.5    | 15.7   | 12.3   | 11.2   |
| 26.2   | 4.3    | 30.7  | 11.2   | 6.1    | 15.1   | 12.9   | 2.8    | 11.9   |
| 375.1  | 560.3  | 118.4 | 173.6  | 637.7  | 578.8  | 1151.4 | 1015.9 | 1134.0 |
| 8.9    | 20.7   | 9.9   | 16.3   | 9.0    | 6.4    | 27.4   | 23.3   | 22.6   |
| 11.5   | 22.7   | 9.7   | 3.4    | 16.0   | 7.8    | 10.5   | 7.6    | 12.7   |
| 1.7    | 0.7    | 1.1   | 1.8    | 0.9    | 1.9    | 2.9    | 4.8    | 2.6    |
| 2.7    | 5.3    | 3.3   | 4.2    | 2.8    | 2.5    | 8.9    | 2.9    | 1.8    |
| 15.4   | 3.8    | 5.2   | 1.5    | 1.8    | 15.9   | 4.4    | 8.3    | 3.9    |
| 1.0    | 11.3   | 8.9   | 7.0    | 13.1   | 4.5    | 38.8   | 32.5   | 28.8   |
| 26.1   | 41.6   | 16.1  | 28.9   | 32.4   | 38.2   | 244.3  | 165.3  | 196.7  |
| 43.4   | 64.0   | 13.2  | 24.5   | 48.4   | 48.4   | 42.2   | 36.1   | 41.6   |
| 20.9   | 1.2    | 13.5  | 8.7    | 17.4   | 2.6    | 5.2    | 12.4   | 6.7    |
| 65.4   | 92.6   | 9.5   | 6.9    | 178.0  | 87.6   | 132.7  | 216.0  | 196.2  |
| 52.3   | 98.6   | 7.5   | 8.0    | 176.3  | 104.6  | 70.1   | 133.1  | 130.7  |
| 9.2    | 1.7    | 7.1   | 14.0   | 9.0    | 1.4    | 13.7   | 7.4    | 20.4   |
| 29.4   | 27.3   | 23.2  | 30.6   | 24.6   | 22.5   | 59.5   | 56.0   | 65.6   |
| 2.4    | 8.5    | 4.0   | 6.7    | 22.0   | 8.7    | 9.9    | 7.2    | 7.7    |
| 127.7  | 179.5  | 903.6 | 1191.8 | 185.5  | 204.2  | 201.4  | 184.5  | 189.2  |
| 542.2  | 705.7  | 14.2  | 27.7   | 962.1  | 624.4  | 2.0    | 5.2    | 10.1   |
| 13.7   | 11.7   | 14.2  | 20.5   | 19.0   | 14.8   | 40.0   | 32.0   | 29.4   |

|        |        |        |        |        |        |        |        |        |
|--------|--------|--------|--------|--------|--------|--------|--------|--------|
| 5.8    | 2.0    | 2.6    | 2.5    | 9.1    | 3.5    | 3.9    | 7.9    | 4.5    |
| 4.5    | 6.3    | 4.4    | 3.2    | 3.4    | 1.4    | 2.4    | 1.9    | 3.3    |
| 30.0   | 28.9   | 12.2   | 15.8   | 37.2   | 51.5   | 43.2   | 37.3   | 54.3   |
| 15.4   | 13.3   | 18.7   | 34.2   | 11.2   | 5.7    | 32.9   | 15.7   | 20.1   |
| 182.9  | 200.2  | 190.1  | 236.7  | 260.4  | 320.1  | 541.7  | 429.7  | 551.2  |
| 320.0  | 384.7  | 0.7    | 0.6    | 564.1  | 361.2  | 8.0    | 11.2   | 14.9   |
| 0.8    | 1.3    | 1.6    | 2.2    | 1.9    | 1.3    | 56.9   | 70.7   | 59.5   |
| 8.5    | 1.1    | 1.2    | 0.8    | 7.9    | 4.5    | 8.8    | 23.3   | 22.7   |
| 0.7    | 2.2    | 0.4    | 7.4    | 0.7    | 1.4    | 0.6    | 6.8    | 4.0    |
| 12.5   | 29.1   | 41.4   | 81.7   | 24.0   | 7.9    | 87.9   | 91.3   | 124.0  |
| 53.4   | 66.4   | 15.7   | 28.2   | 77.2   | 60.1   | 610.0  | 631.3  | 710.4  |
| 2.9    | 2.0    | 2.3    | 3.6    | 3.9    | 2.4    | 6.6    | 12.2   | 8.5    |
| 4.4    | 3.6    | 4.8    | 5.3    | 10.0   | 5.0    | 3.2    | 6.5    | 2.8    |
| 1.6    | 5.9    | 3.2    | 0.8    | 3.4    | 5.0    | 7.4    | 6.1    | 7.6    |
| 9.5    | 11.2   | 13.3   | 10.2   | 13.5   | 3.2    | 25.1   | 17.1   | 9.3    |
| 1077.1 | 1317.1 | 51.5   | 115.7  | 1818.2 | 1339.9 | 1452.2 | 1755.8 | 1782.5 |
| 60.8   | 87.8   | 247.6  | 308.9  | 86.3   | 70.4   | 371.8  | 350.4  | 419.0  |
| 561.6  | 687.5  | 174.5  | 203.7  | 946.7  | 608.4  | 940.4  | 1091.1 | 1278.4 |
| 26.2   | 31.4   | 10.6   | 9.6    | 40.0   | 33.8   | 57.2   | 48.8   | 56.1   |
| 1.8    | 18.3   | 18.7   | 11.7   | 3.0    | 0.8    | 14.2   | 9.9    | 16.1   |
| 4.1    | 25.2   | 12.3   | 7.5    | 3.8    | 3.3    | 16.8   | 9.3    | 11.6   |
| 663.9  | 662.4  | 116.5  | 179.0  | 841.9  | 684.4  | 779.5  | 586.1  | 606.8  |
| 182.8  | 235.2  | 97.1   | 115.4  | 274.0  | 353.0  | 640.4  | 601.4  | 600.4  |
| 8.4    | 3.0    | 12.9   | 8.4    | 13.8   | 2.1    | 4.2    | 6.1    | 9.0    |
| 78.2   | 98.3   | 19.2   | 24.4   | 73.3   | 52.7   | 62.7   | 37.0   | 47.9   |
| 1.4    | 2.8    | 2.2    | 4.5    | 0.6    | 2.3    | 3.9    | 4.4    | 3.4    |
| 63.9   | 87.5   | 193.8  | 222.3  | 97.5   | 110.9  | 363.5  | 301.1  | 333.9  |
| 8.0    | 18.0   | 9.1    | 0.7    | 10.1   | 15.4   | 2.2    | 1.6    | 5.5    |
| 21.4   | 36.1   | 1.0    | 2.8    | 19.4   | 7.9    | 51.9   | 34.9   | 30.7   |
| 5120.1 | 6004.3 | 3186.1 | 3951.8 | 6134.5 | 5366.6 | 7150.5 | 6703.5 | 6953.5 |
| 2.0    | 13.1   | 19.1   | 8.7    | 27.5   | 9.3    | 27.3   | 28.0   | 13.1   |
| 87.3   | 95.9   | 39.2   | 54.8   | 133.5  | 92.8   | 123.1  | 103.2  | 114.3  |
| 305.3  | 327.0  | 45.6   | 46.7   | 433.8  | 440.3  | 512.7  | 473.7  | 591.6  |
| 1.3    | 3.8    | 6.9    | 13.7   | 3.9    | 9.2    | 2.0    | 2.6    | 4.6    |
| 16.3   | 19.2   | 5.0    | 3.1    | 23.0   | 31.4   | 15.5   | 17.8   | 15.2   |
| 9.4    | 19.8   | 10.3   | 14.9   | 22.5   | 14.0   | 143.7  | 42.2   | 55.1   |
| 8.4    | 14.8   | 1.9    | 5.3    | 9.6    | 7.0    | 9.9    | 6.4    | 2.7    |
| 13.7   | 8.5    | 28.8   | 33.6   | 9.0    | 7.6    | 219.5  | 355.2  | 365.2  |
| 528.0  | 662.1  | 461.9  | 797.1  | 695.8  | 727.3  | 1340.6 | 1321.9 | 1382.0 |
| 343.8  | 517.7  | 212.3  | 275.6  | 585.8  | 519.2  | 465.6  | 406.4  | 452.5  |
| 1.2    | 0.8    | 4.8    | 2.7    | 8.6    | 7.8    | 4.0    | 3.9    | 3.4    |
| 36.4   | 27.9   | 45.4   | 42.5   | 56.7   | 30.1   | 302.7  | 207.0  | 216.3  |
| 1.3    | 1.3    | 12.3   | 1.2    | 0.6    | 4.5    | 4.6    | 12.3   | 4.7    |
| 10.2   | 6.4    | 8.0    | 2.1    | 8.8    | 7.9    | 10.6   | 8.6    | 8.6    |
| 1.0    | 2.6    | 1.4    | 2.1    | 0.6    | 10.8   | 6.4    | 5.9    | 2.5    |
| 9.6    | 7.0    | 10.0   | 7.3    | 12.9   | 7.8    | 15.1   | 10.3   | 9.6    |
| 3795.5 | 4910.4 | 595.3  | 758.1  | 5402.9 | 4793.8 | 4341.9 | 3261.8 | 3461.9 |
| 10.5   | 14.8   | 1.0    | 0.4    | 9.9    | 0.9    | 3.4    | 13.1   | 1.2    |
| 168.0  | 273.5  | 506.1  | 918.2  | 169.5  | 243.0  | 497.3  | 663.9  | 686.0  |
| 24.5   | 8.2    | 31.8   | 30.5   | 7.6    | 11.0   | 28.2   | 22.8   | 19.9   |
| 3.3    | 1.4    | 1.4    | 1.0    | 2.4    | 1.9    | 1.5    | 3.6    | 2.9    |
| 49.7   | 64.1   | 20.1   | 12.5   | 85.4   | 75.2   | 45.2   | 21.8   | 26.7   |
| 1.5    | 10.7   | 5.2    | 3.1    | 17.1   | 9.5    | 15.9   | 7.9    | 9.4    |

|        |        |        |        |        |        |        |         |        |
|--------|--------|--------|--------|--------|--------|--------|---------|--------|
| 0.9    | 4.6    | 1.3    | 6.8    | 6.3    | 13.3   | 3.2    | 1.7     | 5.9    |
| 4.7    | 3.5    | 7.2    | 2.5    | 8.8    | 13.6   | 3.3    | 7.9     | 5.6    |
| 9.7    | 1.3    | 3.9    | 2.7    | 12.3   | 1.7    | 7.4    | 3.9     | 4.7    |
| 0.9    | 16.4   | 17.4   | 16.5   | 22.2   | 7.7    | 22.3   | 22.4    | 21.2   |
| 32.6   | 28.2   | 22.3   | 16.3   | 50.8   | 35.3   | 80.9   | 46.1    | 54.5   |
| 8.4    | 13.3   | 15.1   | 17.0   | 20.4   | 18.6   | 42.7   | 25.2    | 29.8   |
| 12.9   | 1.8    | 13.1   | 11.8   | 12.1   | 1.5    | 3.5    | 3.4     | 20.5   |
| 2.2    | 2.2    | 1.0    | 1.3    | 3.5    | 1.3    | 2.1    | 2.0     | 1.5    |
| 14.1   | 38.6   | 3.0    | 3.6    | 4.6    | 4.9    | 1.6    | 2.2     | 1.1    |
| 1.1    | 0.6    | 0.4    | 0.3    | 0.9    | 0.7    | 0.7    | 0.4     | 0.5    |
| 136.6  | 212.9  | 183.7  | 200.0  | 215.5  | 260.9  | 596.0  | 532.5   | 580.4  |
| 64.9   | 87.5   | 46.6   | 53.7   | 84.1   | 61.9   | 198.5  | 153.5   | 179.7  |
| 1.0    | 1.0    | 24.5   | 18.7   | 0.6    | 7.7    | 289.5  | 261.6   | 291.0  |
| 15.9   | 6.2    | 33.0   | 38.9   | 6.2    | 3.4    | 698.3  | 875.6   | 1013.9 |
| 16.4   | 10.6   | 2.5    | 3.4    | 3.3    | 4.1    | 13.0   | 10.3    | 9.2    |
| 53.8   | 47.8   | 51.1   | 63.0   | 74.4   | 35.1   | 100.6  | 107.0   | 102.1  |
| 6.0    | 7.3    | 24.8   | 32.3   | 9.0    | 3.7    | 21.3   | 20.3    | 14.9   |
| 13.2   | 13.8   | 13.9   | 2.7    | 16.0   | 16.2   | 18.0   | 27.4    | 16.0   |
| 12.1   | 20.3   | 6.3    | 2.9    | 19.7   | 26.1   | 25.8   | 16.4    | 20.4   |
| 188.3  | 285.2  | 5.7    | 10.7   | 222.8  | 369.2  | 258.5  | 138.7   | 170.4  |
| 249.5  | 384.6  | 442.3  | 575.0  | 404.8  | 82.7   | 1361.5 | 1329.0  | 1317.6 |
| 109.3  | 158.0  | 47.1   | 32.0   | 158.1  | 287.4  | 235.1  | 168.7   | 193.6  |
| 1736.9 | 2609.0 | 755.0  | 870.3  | 4357.6 | 3191.6 | 5246.2 | 3217.6  | 3772.4 |
| 18.6   | 2.5    | 5.5    | 7.2    | 7.2    | 9.3    | 2.6    | 10.8    | 4.8    |
| 4.1    | 4.0    | 10.3   | 6.1    | 1.2    | 4.9    | 5.2    | 3.5     | 1.2    |
| 18.7   | 20.8   | 2.3    | 16.9   | 15.4   | 12.8   | 26.5   | 21.5    | 23.0   |
| 16.8   | 12.6   | 4.2    | 7.8    | 19.9   | 9.4    | 2.5    | 4.0     | 1.4    |
| 9.3    | 21.1   | 10.6   | 11.7   | 17.7   | 13.0   | 34.7   | 28.8    | 29.0   |
| 229.9  | 322.2  | 172.0  | 283.1  | 276.8  | 271.1  | 563.5  | 550.9   | 524.4  |
| 6.6    | 1.2    | 7.5    | 2.8    | 0.8    | 1.8    | 6.4    | 2.7     | 1.2    |
| 0.8    | 1.4    | 2.1    | 2.1    | 1.6    | 1.9    | 2.2    | 1.6     | 5.3    |
| 11.0   | 1.7    | 32.7   | 78.3   | 5.3    | 0.8    | 162.6  | 215.2   | 244.6  |
| 4051.7 | 4960.5 | 2088.2 | 2435.4 | 5161.3 | 4939.6 | 9525.5 | 10050.3 | 9697.1 |
| 6528.4 | 7819.2 | 2255.0 | 3233.2 | 7730.3 | 6769.8 | 9739.2 | 7793.7  | 8557.8 |
| 8.7    | 10.6   | 8.4    | 13.5   | 14.3   | 12.6   | 95.9   | 284.6   | 275.4  |
| 11.7   | 14.3   | 4.8    | 7.5    | 7.1    | 14.0   | 27.4   | 23.8    | 29.0   |
| 14.5   | 26.2   | 2.1    | 15.0   | 29.0   | 40.1   | 150.3  | 76.9    | 110.5  |
| 14.1   | 17.7   | 12.6   | 21.4   | 22.8   | 22.1   | 66.7   | 43.8    | 43.2   |
| 31.2   | 29.6   | 82.6   | 72.8   | 61.1   | 26.0   | 113.7  | 122.0   | 147.2  |
| 967.9  | 802.8  | 468.5  | 435.9  | 803.6  | 563.9  | 1459.4 | 1574.5  | 1637.5 |
| 17.7   | 5.0    | 20.3   | 49.8   | 10.4   | 16.1   | 31.9   | 30.3    | 34.0   |
| 37.0   | 76.5   | 313.4  | 388.2  | 87.3   | 45.6   | 353.1  | 540.2   | 487.6  |
| 9.9    | 13.4   | 4.6    | 2.1    | 18.4   | 15.1   | 24.0   | 31.6    | 25.9   |
| 23.8   | 26.0   | 25.6   | 9.2    | 5.0    | 20.3   | 72.1   | 54.8    | 58.5   |
| 23.3   | 15.8   | 6.9    | 13.7   | 24.6   | 17.3   | 29.6   | 30.5    | 29.9   |
| 17.2   | 16.3   | 4.2    | 4.5    | 23.4   | 14.6   | 9.8    | 0.9     | 0.9    |
| 2.1    | 13.2   | 1.3    | 1.8    | 1.9    | 15.9   | 6.3    | 4.2     | 21.4   |
| 7.7    | 2.2    | 1.7    | 3.8    | 18.0   | 3.2    | 12.6   | 18.8    | 18.4   |
| 9.1    | 10.3   | 2.0    | 1.5    | 19.2   | 1.0    | 20.3   | 16.1    | 24.6   |
| 11.1   | 1.6    | 1.9    | 22.0   | 6.3    | 10.4   | 5.4    | 3.7     | 4.8    |
| 15.3   | 18.7   | 19.3   | 14.0   | 6.7    | 17.7   | 20.3   | 4.5     | 14.5   |
| 0.5    | 0.8    | 0.7    | 0.4    | 0.6    | 1.2    | 4.3    | 0.8     | 1.1    |
| 1.9    | 1.0    | 1.6    | 8.1    | 5.6    | 2.0    | 149.3  | 121.1   | 183.1  |

|        |        |        |        |        |        |         |        |         |
|--------|--------|--------|--------|--------|--------|---------|--------|---------|
| 2.6    | 4.5    | 2.2    | 6.5    | 11.9   | 7.4    | 14.4    | 5.7    | 6.5     |
| 34.8   | 28.3   | 29.9   | 21.9   | 40.2   | 27.0   | 35.7    | 19.9   | 21.0    |
| 1.6    | 3.4    | 2.8    | 4.1    | 7.6    | 15.0   | 5.0     | 5.4    | 5.5     |
| 5555.8 | 6428.8 | 1746.4 | 2395.6 | 6642.2 | 5905.5 | 10669.3 | 9930.8 | 10181.2 |
| 1147.5 | 1517.2 | 237.5  | 244.1  | 1643.9 | 1948.8 | 986.6   | 1071.6 | 1238.0  |
| 7.1    | 29.0   | 2.1    | 1.0    | 17.1   | 25.7   | 17.9    | 15.1   | 18.7    |
| 10.6   | 2.2    | 30.4   | 28.1   | 41.8   | 22.2   | 14.5    | 53.9   | 50.0    |
| 92.0   | 76.3   | 54.8   | 80.9   | 76.2   | 79.8   | 212.7   | 247.4  | 256.2   |
| 234.7  | 351.9  | 45.2   | 54.5   | 390.8  | 455.0  | 464.9   | 362.4  | 411.2   |
| 17.8   | 30.2   | 12.1   | 2.1    | 33.2   | 29.5   | 18.1    | 19.6   | 13.3    |
| 17.8   | 31.1   | 83.3   | 101.5  | 33.9   | 46.3   | 94.8    | 66.6   | 72.1    |
| 2437.2 | 3725.9 | 1031.9 | 1318.0 | 3644.5 | 2871.5 | 3446.6  | 1810.7 | 1905.9  |
| 2.2    | 8.7    | 5.9    | 1.0    | 7.2    | 1.1    | 4.0     | 4.6    | 4.9     |
| 1.1    | 7.8    | 12.3   | 15.4   | 18.8   | 5.2    | 17.9    | 21.5   | 18.0    |
| 7.2    | 13.7   | 4.1    | 3.3    | 6.3    | 7.6    | 12.7    | 8.4    | 8.6     |
| 1639.4 | 1968.7 | 705.4  | 894.0  | 2102.1 | 1761.5 | 4342.9  | 3889.1 | 4095.0  |
| 25.8   | 41.6   | 5.3    | 13.4   | 36.3   | 33.5   | 77.0    | 56.7   | 70.8    |
| 9.4    | 13.9   | 2.1    | 10.4   | 21.0   | 17.1   | 10.2    | 13.6   | 10.6    |
| 1.0    | 2.5    | 0.5    | 4.3    | 21.6   | 3.8    | 0.6     | 3.1    | 8.3     |
| 10.5   | 3.8    | 3.9    | 4.8    | 14.1   | 3.8    | 15.2    | 11.0   | 10.2    |
| 7.4    | 4.6    | 5.5    | 3.4    | 3.0    | 8.7    | 10.0    | 5.1    | 11.4    |
| 25.3   | 7.1    | 9.9    | 8.6    | 12.7   | 12.0   | 12.2    | 17.9   | 18.3    |
| 0.3    | 0.9    | 0.9    | 0.5    | 0.9    | 1.4    | 0.9     | 0.4    | 0.8     |
| 2.6    | 6.6    | 6.6    | 1.3    | 8.1    | 5.8    | 18.2    | 14.9   | 5.3     |
| 52.5   | 94.0   | 3.1    | 3.6    | 58.8   | 71.7   | 268.6   | 288.1  | 316.0   |
| 11.4   | 34.4   | 13.3   | 26.2   | 33.7   | 34.8   | 44.0    | 62.2   | 44.1    |
| 20.9   | 25.5   | 11.6   | 10.6   | 12.1   | 26.7   | 34.6    | 40.2   | 49.3    |
| 18.8   | 29.9   | 6.0    | 2.7    | 13.2   | 41.4   | 13.1    | 21.7   | 20.0    |
| 2.7    | 5.6    | 10.1   | 1.6    | 5.8    | 0.5    | 19.6    | 5.1    | 7.5     |
| 12.7   | 15.4   | 14.1   | 2.1    | 18.3   | 24.0   | 12.1    | 17.3   | 18.7    |
| 12.9   | 10.7   | 1.3    | 1.0    | 18.6   | 10.2   | 7.1     | 12.6   | 19.8    |
| 1.0    | 8.8    | 6.8    | 7.8    | 18.6   | 9.2    | 12.8    | 9.9    | 7.9     |
| 1.4    | 1.4    | 3.6    | 3.3    | 1.5    | 4.9    | 1.7     | 1.9    | 1.9     |
| 2.5    | 6.6    | 4.4    | 11.6   | 17.2   | 6.4    | 17.7    | 24.7   | 22.5    |
| 0.6    | 1.6    | 1.1    | 1.1    | 0.8    | 1.1    | 119.1   | 222.1  | 271.0   |
| 403.4  | 421.0  | 313.0  | 512.0  | 545.3  | 202.2  | 417.0   | 354.9  | 405.2   |
| 2.6    | 7.1    | 1.9    | 10.5   | 12.8   | 13.2   | 10.3    | 10.6   | 13.5    |
| 18.6   | 18.1   | 1.9    | 2.1    | 28.0   | 8.4    | 11.3    | 8.2    | 1.5     |
| 1.9    | 4.0    | 22.5   | 10.4   | 1.9    | 2.9    | 4.1     | 2.7    | 10.0    |
| 2.3    | 1.6    | 2.5    | 3.0    | 1.3    | 1.4    | 2.3     | 2.1    | 3.1     |
| 1.4    | 5.9    | 0.8    | 0.7    | 1.6    | 8.5    | 13.5    | 15.9   | 9.9     |
| 0.6    | 1.1    | 1.7    | 2.2    | 6.9    | 5.5    | 0.9     | 0.4    | 1.5     |
| 226.5  | 348.0  | 2.4    | 1.9    | 413.7  | 345.5  | 3.3     | 5.4    | 7.0     |
| 3.1    | 6.1    | 4.5    | 5.3    | 3.2    | 6.3    | 6.2     | 6.6    | 5.8     |
| 1.6    | 0.6    | 9.2    | 0.6    | 0.7    | 1.6    | 1.8     | 4.0    | 6.8     |
| 6.3    | 4.7    | 3.4    | 4.4    | 11.2   | 10.0   | 5.1     | 4.9    | 10.5    |
| 6076.2 | 7218.4 | 1545.9 | 2072.5 | 7356.0 | 7051.2 | 5430.8  | 4624.7 | 4991.5  |
| 32.6   | 34.7   | 15.5   | 16.5   | 54.7   | 54.3   | 49.3    | 36.7   | 49.4    |
| 2.8    | 1.9    | 10.3   | 24.2   | 0.4    | 14.3   | 20.3    | 4.8    | 14.8    |
| 5.0    | 1.2    | 10.4   | 14.3   | 5.9    | 6.1    | 6.5     | 8.2    | 4.3     |
| 71.6   | 101.0  | 14.9   | 15.4   | 88.7   | 77.4   | 99.2    | 95.1   | 83.5    |
| 7.1    | 1.7    | 0.9    | 0.7    | 10.0   | 1.2    | 2.2     | 1.7    | 2.0     |
| 0.9    | 0.7    | 1.0    | 0.4    | 1.0    | 5.6    | 4.3     | 1.0    | 4.9     |



|        |        |       |       |        |        |        |        |        |
|--------|--------|-------|-------|--------|--------|--------|--------|--------|
| 3.0    | 5.3    | 8.8   | 6.8   | 11.2   | 14.6   | 18.1   | 15.5   | 7.5    |
| 2.7    | 20.3   | 4.1   | 1.5   | 22.3   | 14.4   | 27.8   | 34.1   | 25.7   |
| 29.8   | 52.7   | 12.8  | 7.8   | 44.7   | 42.9   | 45.8   | 19.0   | 43.0   |
| 224.5  | 291.0  | 590.5 | 676.5 | 543.3  | 259.8  | 134.9  | 100.5  | 163.7  |
| 0.5    | 3.2    | 0.2   | 0.2   | 0.6    | 3.2    | 5.0    | 1.5    | 3.0    |
| 2.1    | 1.9    | 2.3   | 1.4   | 2.7    | 2.3    | 3.1    | 2.9    | 2.8    |
| 2.5    | 3.1    | 16.4  | 11.9  | 13.5   | 1.8    | 13.0   | 6.6    | 10.3   |
| 2.2    | 5.2    | 14.6  | 0.8   | 16.8   | 8.0    | 12.6   | 9.7    | 10.5   |
| 4.4    | 0.6    | 2.5   | 0.2   | 5.9    | 4.6    | 2.8    | 3.0    | 3.1    |
| 9.6    | 0.6    | 0.4   | 1.3   | 7.5    | 0.5    | 6.3    | 3.2    | 3.4    |
| 21.4   | 26.2   | 20.1  | 12.7  | 28.5   | 6.2    | 13.1   | 28.0   | 20.4   |
| 12.2   | 12.0   | 2.3   | 1.7   | 28.5   | 11.6   | 1.1    | 1.6    | 1.3    |
| 1.6    | 1.2    | 1.9   | 0.5   | 0.8    | 7.4    | 5.8    | 9.9    | 6.1    |
| 16.1   | 8.1    | 1.0   | 14.7  | 18.8   | 23.6   | 17.1   | 19.9   | 21.1   |
| 1.7    | 8.0    | 0.5   | 1.6   | 6.3    | 0.9    | 9.7    | 7.1    | 11.4   |
| 8.9    | 0.3    | 0.8   | 4.2   | 2.9    | 1.0    | 2.4    | 6.3    | 10.2   |
| 10.0   | 5.2    | 12.5  | 9.5   | 1.2    | 4.6    | 10.8   | 13.8   | 7.2    |
| 2.2    | 2.1    | 2.2   | 3.0   | 3.9    | 1.2    | 0.6    | 2.2    | 12.0   |
| 2.9    | 16.6   | 12.8  | 6.9   | 1.1    | 1.9    | 13.0   | 11.9   | 5.6    |
| 0.5    | 8.8    | 1.7   | 0.7   | 1.6    | 6.8    | 2.8    | 1.5    | 5.9    |
| 2.8    | 0.7    | 17.7  | 13.6  | 23.2   | 1.7    | 12.3   | 13.1   | 23.1   |
| 6.7    | 6.2    | 0.4   | 0.3   | 0.6    | 0.4    | 7.2    | 9.9    | 6.8    |
| 27.9   | 25.0   | 13.8  | 10.3  | 19.7   | 30.1   | 44.3   | 38.2   | 34.8   |
| 2.3    | 6.5    | 1.6   | 7.5   | 4.6    | 6.1    | 9.7    | 6.1    | 12.4   |
| 3.2    | 6.8    | 3.7   | 7.9   | 26.6   | 12.4   | 33.1   | 23.1   | 21.2   |
| 166.3  | 144.7  | 69.2  | 93.0  | 185.3  | 142.6  | 291.7  | 116.8  | 161.7  |
| 596.5  | 675.6  | 94.4  | 109.8 | 661.3  | 524.8  | 486.5  | 186.9  | 174.1  |
| 27.2   | 22.3   | 24.8  | 22.4  | 30.6   | 39.9   | 17.7   | 20.1   | 12.5   |
| 267.9  | 523.4  | 34.9  | 56.8  | 470.3  | 485.4  | 1535.7 | 1404.0 | 1609.1 |
| 395.0  | 532.2  | 43.6  | 70.2  | 570.8  | 523.7  | 1012.2 | 643.6  | 701.7  |
| 1071.2 | 973.8  | 293.9 | 468.0 | 1216.6 | 1072.8 | 1474.7 | 682.2  | 758.6  |
| 5.8    | 13.0   | 9.1   | 8.4   | 1.5    | 9.3    | 17.6   | 23.5   | 28.1   |
| 2.1    | 9.5    | 133.2 | 226.5 | 7.2    | 3.8    | 373.2  | 607.0  | 708.6  |
| 7.3    | 2.9    | 11.5  | 7.7   | 9.3    | 5.8    | 918.0  | 145.6  | 278.2  |
| 921.4  | 1277.2 | 111.3 | 160.8 | 2014.6 | 1559.3 | 818.3  | 704.3  | 698.5  |
| 22.5   | 37.8   | 3.9   | 8.0   | 32.1   | 30.2   | 6.5    | 6.4    | 2.1    |
| 290.1  | 233.9  | 145.1 | 228.6 | 354.7  | 270.8  | 1109.4 | 758.6  | 816.5  |
| 16.3   | 18.2   | 8.4   | 2.7   | 16.4   | 9.3    | 5.8    | 1.5    | 8.3    |
| 172.6  | 165.7  | 4.3   | 1.5   | 225.0  | 172.9  | 530.2  | 426.9  | 486.4  |
| 196.6  | 188.7  | 37.8  | 29.1  | 321.4  | 207.2  | 457.3  | 586.0  | 617.0  |
| 30.7   | 61.5   | 24.5  | 16.5  | 58.6   | 36.0   | 69.9   | 80.1   | 89.6   |
| 21.2   | 31.1   | 47.3  | 55.3  | 34.1   | 32.1   | 179.1  | 118.0  | 106.6  |
| 29.5   | 33.9   | 9.4   | 7.3   | 57.0   | 22.9   | 56.4   | 34.8   | 36.0   |
| 58.5   | 52.1   | 11.3  | 21.1  | 112.2  | 36.9   | 65.0   | 25.8   | 29.9   |
| 5.5    | 8.9    | 13.1  | 4.8   | 12.9   | 23.4   | 10.1   | 3.0    | 3.2    |
| 112.1  | 72.6   | 2.6   | 7.6   | 132.7  | 62.0   | 40.9   | 32.1   | 47.3   |
| 39.6   | 52.3   | 4.0   | 17.3  | 61.4   | 36.4   | 11.0   | 26.8   | 21.7   |
| 301.3  | 312.6  | 38.5  | 44.4  | 586.9  | 248.6  | 193.7  | 146.5  | 158.9  |
| 39.2   | 91.4   | 10.7  | 15.3  | 89.4   | 104.3  | 66.6   | 52.5   | 55.1   |
| 1.8    | 7.5    | 0.9   | 2.2   | 1.9    | 3.4    | 5.6    | 4.1    | 4.5    |
| 2.5    | 0.3    | 4.5   | 0.5   | 2.7    | 0.8    | 7.9    | 1.7    | 1.1    |
| 508.1  | 876.2  | 5.5   | 0.4   | 845.6  | 972.6  | 7.0    | 3.0    | 1.9    |
| 244.1  | 353.5  | 7.6   | 5.2   | 446.4  | 494.1  | 13.3   | 9.6    | 8.8    |

|        |        |       |       |        |        |        |        |        |
|--------|--------|-------|-------|--------|--------|--------|--------|--------|
| 3.8    | 7.2    | 5.6   | 3.5   | 3.6    | 1.6    | 4.4    | 7.5    | 9.2    |
| 7.2    | 20.2   | 2.4   | 13.2  | 6.3    | 12.5   | 41.4   | 55.9   | 57.4   |
| 901.0  | 1310.8 | 3.3   | 2.4   | 2130.4 | 1756.1 | 2.1    | 1.9    | 7.3    |
| 10.6   | 10.2   | 1.1   | 0.8   | 25.6   | 18.0   | 17.7   | 11.8   | 21.0   |
| 17.3   | 17.0   | 7.4   | 5.1   | 19.4   | 10.2   | 32.5   | 30.7   | 25.6   |
| 4898.3 | 5477.2 | 708.6 | 979.0 | 5514.1 | 4423.0 | 4151.6 | 4801.9 | 5245.5 |
| 0.9    | 0.7    | 0.7   | 0.5   | 0.8    | 0.6    | 2.8    | 3.6    | 1.6    |
| 1.5    | 2.5    | 0.5   | 0.4   | 9.7    | 1.0    | 1.7    | 2.6    | 2.7    |
| 10.5   | 23.2   | 28.4  | 24.1  | 17.1   | 17.9   | 105.3  | 101.8  | 105.5  |
| 14.0   | 43.7   | 8.4   | 43.3  | 20.6   | 46.5   | 141.8  | 139.6  | 143.4  |
| 21.5   | 26.3   | 24.7  | 14.4  | 18.3   | 35.3   | 507.1  | 496.3  | 478.9  |
| 1.5    | 0.8    | 0.9   | 1.0   | 0.8    | 1.3    | 1.8    | 1.4    | 2.0    |
| 3.6    | 6.6    | 7.1   | 3.9   | 5.0    | 3.2    | 2.3    | 7.7    | 3.5    |
| 9.7    | 11.2   | 4.3   | 11.8  | 27.0   | 9.3    | 6.4    | 4.5    | 3.8    |
| 1.0    | 0.8    | 0.5   | 0.9   | 2.0    | 21.2   | 7.1    | 3.2    | 3.0    |
| 1.0    | 5.6    | 2.5   | 39.0  | 0.4    | 0.6    | 27.1   | 48.4   | 34.5   |
| 2.1    | 0.5    | 1.0   | 5.5   | 1.3    | 10.5   | 1.3    | 1.9    | 1.7    |
| 13.2   | 27.9   | 32.7  | 36.9  | 49.7   | 13.6   | 4.6    | 6.2    | 9.0    |
| 2.1    | 4.4    | 3.4   | 8.5   | 8.8    | 1.6    | 22.2   | 53.8   | 42.7   |
| 87.1   | 122.8  | 200.0 | 250.0 | 187.0  | 121.9  | 330.2  | 292.1  | 336.7  |
| 6.6    | 14.5   | 33.2  | 24.1  | 5.3    | 12.0   | 35.7   | 44.2   | 59.0   |
| 0.6    | 0.7    | 0.4   | 0.4   | 1.6    | 0.3    | 1.3    | 12.2   | 23.5   |
| 102.7  | 185.1  | 4.6   | 13.0  | 271.9  | 145.9  | 155.7  | 109.9  | 136.2  |
| 0.8    | 1.1    | 0.9   | 1.0   | 1.5    | 2.1    | 3.4    | 4.8    | 2.0    |
| 5.3    | 2.6    | 14.5  | 9.0   | 1.4    | 17.8   | 11.1   | 13.7   | 17.8   |
| 1.9    | 1.8    | 2.4   | 1.9   | 3.5    | 0.9    | 4.2    | 1.2    | 1.9    |
| 1.7    | 1.2    | 1.9   | 1.4   | 1.2    | 1.1    | 4.3    | 6.4    | 1.2    |
| 1.3    | 2.0    | 6.3   | 1.0   | 3.0    | 15.5   | 44.0   | 47.1   | 53.6   |
| 20.5   | 21.9   | 6.6   | 4.3   | 23.8   | 17.4   | 37.4   | 32.4   | 20.6   |
| 41.8   | 78.6   | 85.0  | 118.3 | 123.6  | 54.3   | 420.0  | 324.0  | 382.9  |
| 283.3  | 269.3  | 24.2  | 30.5  | 441.1  | 289.5  | 1099.6 | 311.5  | 426.6  |
| 1.0    | 15.4   | 14.2  | 5.3   | 15.8   | 12.4   | 9.3    | 13.0   | 6.9    |
| 44.8   | 75.1   | 31.1  | 27.6  | 92.7   | 83.8   | 35.5   | 65.0   | 79.8   |
| 39.8   | 44.4   | 18.9  | 30.5  | 74.4   | 21.4   | 410.7  | 232.6  | 227.3  |
| 3.4    | 0.6    | 5.9   | 0.7   | 3.0    | 0.5    | 19.4   | 16.6   | 15.3   |
| 4.5    | 6.8    | 4.6   | 5.3   | 1.2    | 1.6    | 6.1    | 7.2    | 3.2    |
| 2.2    | 3.0    | 9.5   | 3.0   | 12.1   | 3.2    | 7.0    | 9.3    | 2.3    |
| 1.5    | 2.9    | 3.9   | 5.0   | 3.7    | 2.6    | 4.9    | 3.0    | 2.7    |
| 4.5    | 2.1    | 2.5   | 2.2   | 14.4   | 9.7    | 8.9    | 8.3    | 11.6   |
| 7.6    | 28.5   | 2.4   | 6.4   | 12.4   | 27.4   | 30.6   | 25.3   | 27.3   |
| 179.1  | 330.4  | 63.9  | 105.0 | 372.1  | 241.9  | 398.8  | 373.7  | 447.3  |
| 2.8    | 1.8    | 2.2   | 4.5   | 2.7    | 1.7    | 3.6    | 5.6    | 14.5   |
| 18.8   | 19.0   | 25.4  | 25.7  | 17.2   | 13.2   | 77.2   | 95.5   | 87.9   |
| 1.1    | 0.9    | 0.5   | 1.3   | 2.0    | 1.5    | 1.3    | 1.7    | 1.3    |
| 19.0   | 0.7    | 1.2   | 3.6   | 0.9    | 7.9    | 6.6    | 2.2    | 3.7    |
| 115.7  | 117.9  | 34.0  | 35.5  | 184.3  | 138.5  | 457.8  | 439.0  | 445.7  |
| 220.2  | 275.8  | 101.6 | 150.1 | 275.8  | 163.5  | 395.0  | 351.3  | 433.4  |
| 572.7  | 649.4  | 579.1 | 817.4 | 839.6  | 619.7  | 2809.4 | 2272.2 | 2499.7 |
| 1.5    | 1.6    | 11.7  | 5.7   | 4.9    | 1.0    | 18.4   | 9.5    | 8.4    |
| 0.7    | 2.0    | 1.0   | 0.4   | 1.0    | 2.1    | 2.5    | 1.6    | 3.1    |
| 2.4    | 2.3    | 3.0   | 1.1   | 2.1    | 1.9    | 10.4   | 23.0   | 32.5   |
| 290.0  | 279.8  | 9.7   | 7.8   | 425.9  | 234.5  | 10.5   | 2.6    | 3.8    |
| 13.3   | 10.4   | 13.7  | 10.8  | 10.7   | 2.5    | 26.8   | 26.5   | 22.3   |

|        |        |        |        |        |        |        |        |        |
|--------|--------|--------|--------|--------|--------|--------|--------|--------|
| 180.1  | 159.8  | 86.0   | 184.9  | 274.4  | 177.6  | 460.0  | 151.6  | 165.2  |
| 32.8   | 39.8   | 34.4   | 30.1   | 49.4   | 29.2   | 79.4   | 66.5   | 66.8   |
| 1.9    | 9.5    | 1.2    | 6.6    | 1.7    | 19.5   | 17.4   | 27.7   | 21.2   |
| 8.0    | 4.3    | 1.7    | 2.9    | 2.9    | 2.4    | 10.3   | 6.4    | 4.2    |
| 1.5    | 7.3    | 6.6    | 1.2    | 14.5   | 2.4    | 8.7    | 12.6   | 5.8    |
| 2082.7 | 2815.4 | 545.3  | 675.2  | 2604.5 | 2577.3 | 3363.3 | 2290.5 | 2235.2 |
| 54.5   | 82.5   | 33.3   | 38.6   | 103.4  | 70.5   | 143.2  | 164.6  | 145.0  |
| 1.3    | 1.8    | 0.5    | 0.8    | 1.4    | 0.5    | 0.8    | 2.6    | 1.3    |
| 3.7    | 4.2    | 1.2    | 9.1    | 7.4    | 10.7   | 5.6    | 6.1    | 9.9    |
| 6.3    | 12.2   | 7.9    | 6.5    | 13.0   | 3.1    | 5.2    | 7.5    | 7.8    |
| 3.0    | 7.1    | 2.4    | 2.3    | 3.7    | 17.2   | 12.4   | 10.4   | 5.6    |
| 8.2    | 13.8   | 14.8   | 10.3   | 9.4    | 7.9    | 16.6   | 16.0   | 14.6   |
| 17.5   | 22.9   | 17.3   | 3.7    | 41.7   | 26.2   | 8.8    | 10.3   | 4.3    |
| 1.8    | 2.1    | 3.2    | 9.6    | 2.8    | 1.4    | 3.1    | 2.8    | 7.0    |
| 17.1   | 3.8    | 8.5    | 5.1    | 14.0   | 10.8   | 10.8   | 21.0   | 17.0   |
| 2.3    | 12.0   | 3.9    | 9.4    | 8.7    | 3.5    | 45.4   | 81.1   | 63.6   |
| 22.6   | 16.0   | 16.0   | 19.3   | 17.3   | 27.5   | 18.6   | 9.3    | 8.2    |
| 0.6    | 10.5   | 9.9    | 3.6    | 6.8    | 1.3    | 6.9    | 4.0    | 6.1    |
| 42.8   | 64.7   | 21.8   | 22.0   | 57.5   | 28.4   | 95.8   | 82.4   | 65.8   |
| 106.2  | 130.7  | 232.5  | 272.1  | 158.6  | 145.1  | 274.2  | 272.0  | 271.5  |
| 441.9  | 488.0  | 120.1  | 198.2  | 656.2  | 454.9  | 781.8  | 607.6  | 773.1  |
| 12.0   | 1.1    | 2.0    | 1.0    | 2.5    | 5.7    | 6.6    | 9.4    | 10.0   |
| 1.1    | 11.5   | 24.6   | 20.3   | 10.3   | 1.4    | 11.2   | 12.0   | 11.7   |
| 0.8    | 0.7    | 0.8    | 0.6    | 0.7    | 0.7    | 3.2    | 9.6    | 12.9   |
| 140.0  | 175.4  | 43.3   | 55.9   | 288.1  | 171.2  | 743.7  | 749.8  | 761.8  |
| 5.8    | 19.9   | 12.3   | 5.0    | 23.6   | 32.4   | 9.9    | 9.7    | 13.5   |
| 1.0    | 4.3    | 1.2    | 1.0    | 4.3    | 2.0    | 6.4    | 6.2    | 6.8    |
| 0.9    | 5.1    | 6.9    | 2.9    | 2.2    | 2.3    | 17.2   | 10.0   | 14.9   |
| 2.8    | 1.1    | 1.9    | 11.4   | 3.3    | 22.3   | 21.6   | 13.5   | 7.7    |
| 7.3    | 2.9    | 16.2   | 4.1    | 15.1   | 2.0    | 6.4    | 4.8    | 7.3    |
| 8.6    | 4.5    | 10.9   | 19.6   | 3.9    | 4.8    | 34.6   | 32.5   | 38.4   |
| 4.7    | 3.7    | 2.6    | 5.5    | 2.1    | 4.3    | 3.5    | 5.5    | 5.3    |
| 6.8    | 1.8    | 11.3   | 2.9    | 12.2   | 3.6    | 16.4   | 13.1   | 3.2    |
| 0.7    | 1.2    | 0.4    | 0.7    | 3.2    | 3.4    | 8.2    | 13.7   | 11.8   |
| 3.0    | 3.2    | 1.1    | 0.4    | 12.1   | 8.2    | 1.5    | 1.4    | 4.2    |
| 16.8   | 20.1   | 15.6   | 24.1   | 28.1   | 25.6   | 59.0   | 61.6   | 51.4   |
| 126.2  | 170.7  | 20.7   | 37.7   | 176.1  | 125.0  | 24.9   | 21.6   | 22.0   |
| 110.4  | 139.0  | 34.6   | 37.4   | 212.0  | 92.5   | 504.6  | 609.3  | 610.9  |
| 64.2   | 107.9  | 18.7   | 36.1   | 117.1  | 53.7   | 178.1  | 139.4  | 162.6  |
| 19.8   | 2.7    | 1.5    | 1.5    | 11.3   | 0.8    | 27.1   | 15.4   | 10.9   |
| 11.9   | 7.0    | 2.0    | 0.9    | 3.1    | 1.0    | 1.1    | 0.7    | 3.0    |
| 3412.5 | 3839.3 | 3113.2 | 3647.8 | 4768.3 | 3047.6 | 6105.6 | 6154.7 | 6308.6 |
| 73.8   | 50.8   | 27.7   | 19.8   | 232.5  | 77.7   | 269.0  | 1132.5 | 1075.6 |
| 107.0  | 135.0  | 65.3   | 74.0   | 140.5  | 106.6  | 562.6  | 443.7  | 492.1  |
| 14.1   | 4.9    | 1.5    | 5.9    | 8.7    | 9.3    | 1.9    | 1.1    | 1.0    |
| 62.3   | 80.0   | 41.5   | 52.5   | 106.6  | 62.2   | 110.6  | 84.4   | 92.3   |
| 142.3  | 147.2  | 62.0   | 97.3   | 187.2  | 200.3  | 439.4  | 302.0  | 301.9  |
| 9.5    | 8.8    | 2.8    | 7.0    | 9.9    | 8.2    | 17.7   | 20.6   | 14.6   |
| 2.7    | 10.0   | 6.0    | 4.5    | 12.7   | 1.6    | 4.1    | 2.7    | 3.2    |
| 9.2    | 2.1    | 7.6    | 1.2    | 3.9    | 1.8    | 5.1    | 1.2    | 7.1    |
| 0.4    | 3.1    | 0.9    | 1.5    | 11.0   | 16.0   | 16.2   | 6.5    | 12.6   |
| 2.4    | 14.6   | 20.5   | 17.0   | 16.5   | 22.0   | 28.3   | 18.0   | 10.2   |
| 0.8    | 0.6    | 1.1    | 1.3    | 1.1    | 0.8    | 8.7    | 1.4    | 0.6    |

|       |       |       |       |       |       |       |       |       |
|-------|-------|-------|-------|-------|-------|-------|-------|-------|
| 2.4   | 6.5   | 4.6   | 1.1   | 3.7   | 3.8   | 2.6   | 7.5   | 9.0   |
| 3.6   | 1.2   | 11.3  | 0.6   | 1.0   | 15.1  | 8.1   | 12.0  | 9.6   |
| 3.2   | 1.6   | 4.3   | 0.4   | 1.3   | 0.8   | 6.2   | 3.6   | 6.1   |
| 11.6  | 8.7   | 3.1   | 1.7   | 2.9   | 5.2   | 16.7  | 12.8  | 11.2  |
| 7.6   | 10.6  | 19.3  | 21.6  | 18.3  | 1.7   | 15.6  | 10.7  | 2.2   |
| 2.3   | 1.9   | 12.5  | 0.9   | 6.6   | 13.3  | 5.5   | 0.8   | 2.1   |
| 2.4   | 6.3   | 1.3   | 8.1   | 7.8   | 1.4   | 9.3   | 1.1   | 2.4   |
| 8.5   | 1.7   | 1.1   | 0.4   | 2.9   | 9.1   | 0.9   | 0.9   | 0.7   |
| 2.3   | 2.0   | 8.4   | 3.7   | 1.1   | 1.3   | 3.9   | 2.8   | 4.1   |
| 1.1   | 0.7   | 7.3   | 3.8   | 3.1   | 1.0   | 7.0   | 4.7   | 7.9   |
| 14.3  | 6.4   | 12.7  | 7.6   | 20.9  | 10.9  | 14.7  | 4.5   | 9.1   |
| 2.2   | 1.1   | 0.8   | 0.6   | 0.9   | 0.9   | 37.1  | 38.9  | 50.7  |
| 5.4   | 8.6   | 11.3  | 3.9   | 13.5  | 5.2   | 8.4   | 10.1  | 9.9   |
| 4.7   | 5.3   | 2.7   | 2.8   | 1.6   | 8.0   | 4.0   | 3.5   | 7.2   |
| 3.0   | 2.5   | 1.1   | 1.0   | 12.4  | 1.5   | 7.7   | 19.2  | 23.2  |
| 0.6   | 2.1   | 0.4   | 0.3   | 0.4   | 0.4   | 0.7   | 0.7   | 1.0   |
| 20.3  | 26.1  | 0.6   | 3.7   | 25.7  | 18.5  | 1.2   | 4.1   | 7.0   |
| 92.0  | 126.1 | 48.4  | 64.0  | 149.6 | 116.9 | 82.8  | 75.1  | 102.8 |
| 51.4  | 13.8  | 4.1   | 13.6  | 52.1  | 49.8  | 55.0  | 56.9  | 69.1  |
| 128.9 | 67.1  | 1.9   | 1.9   | 457.3 | 53.8  | 2.5   | 2.1   | 5.8   |
| 561.4 | 718.6 | 8.3   | 6.8   | 813.5 | 709.6 | 154.9 | 40.8  | 39.0  |
| 13.6  | 19.1  | 10.6  | 8.3   | 13.5  | 21.3  | 91.8  | 80.0  | 92.9  |
| 49.2  | 58.0  | 11.7  | 12.1  | 79.6  | 63.1  | 138.3 | 135.1 | 126.3 |
| 1.9   | 11.9  | 1.8   | 1.0   | 1.2   | 0.7   | 23.0  | 48.0  | 45.0  |
| 500.6 | 513.6 | 220.4 | 332.7 | 622.1 | 556.0 | 475.8 | 477.3 | 433.2 |
| 0.4   | 3.2   | 0.7   | 0.5   | 1.3   | 5.1   | 0.4   | 2.0   | 0.4   |
| 12.3  | 12.2  | 2.2   | 0.2   | 6.7   | 9.6   | 2.6   | 0.5   | 6.6   |
| 11.7  | 10.5  | 8.8   | 2.9   | 13.9  | 5.8   | 66.3  | 63.5  | 65.2  |
| 10.1  | 7.0   | 2.6   | 4.9   | 9.4   | 8.2   | 4.0   | 1.4   | 4.4   |
| 13.1  | 13.1  | 9.4   | 6.5   | 22.4  | 7.2   | 148.0 | 109.6 | 129.1 |
| 4.1   | 11.9  | 6.7   | 5.9   | 5.9   | 7.7   | 4.1   | 1.5   | 0.9   |
| 8.2   | 20.1  | 1.1   | 0.7   | 16.6  | 16.6  | 22.1  | 21.1  | 14.3  |
| 0.8   | 0.4   | 0.4   | 0.8   | 1.2   | 1.0   | 7.9   | 12.1  | 18.8  |
| 82.9  | 318.8 | 24.1  | 25.1  | 172.0 | 153.8 | 289.4 | 340.2 | 377.9 |
| 55.7  | 44.3  | 31.5  | 31.6  | 113.0 | 42.5  | 8.5   | 6.9   | 1.8   |
| 18.0  | 14.1  | 4.9   | 7.9   | 22.1  | 31.8  | 8.9   | 11.8  | 8.6   |
| 14.3  | 7.2   | 1.9   | 5.8   | 10.9  | 21.3  | 7.6   | 8.3   | 6.0   |
| 6.2   | 4.3   | 75.7  | 62.1  | 1.4   | 1.2   | 6.2   | 3.2   | 1.3   |
| 35.4  | 20.3  | 18.3  | 9.2   | 82.3  | 32.9  | 18.3  | 16.8  | 9.7   |
| 24.2  | 27.0  | 5.7   | 9.4   | 32.0  | 36.8  | 53.4  | 69.2  | 61.2  |
| 1.0   | 2.6   | 0.4   | 0.5   | 5.6   | 0.3   | 0.8   | 3.1   | 0.6   |
| 1.2   | 0.5   | 2.2   | 0.4   | 1.4   | 1.6   | 1.0   | 1.7   | 0.7   |
| 9.5   | 3.6   | 1.7   | 3.7   | 38.3  | 13.5  | 4.6   | 1.0   | 5.8   |
| 7.9   | 4.8   | 8.3   | 1.7   | 18.1  | 2.8   | 12.1  | 3.0   | 1.2   |
| 25.9  | 35.0  | 3.1   | 11.4  | 59.3  | 38.3  | 8.4   | 7.4   | 5.4   |
| 18.6  | 30.8  | 0.5   | 0.2   | 34.6  | 29.9  | 5.3   | 2.1   | 1.8   |
| 18.2  | 12.6  | 0.8   | 10.3  | 19.4  | 7.3   | 7.5   | 3.6   | 10.4  |
| 17.6  | 18.1  | 4.0   | 7.1   | 18.8  | 36.1  | 2.1   | 7.4   | 10.1  |
| 0.9   | 16.6  | 13.3  | 12.2  | 12.8  | 7.3   | 13.4  | 16.0  | 15.5  |
| 8.7   | 8.7   | 4.2   | 5.8   | 0.5   | 1.0   | 9.3   | 1.9   | 5.1   |
| 0.9   | 4.4   | 0.9   | 1.6   | 2.1   | 1.8   | 9.3   | 12.9  | 10.3  |
| 31.8  | 31.8  | 1.6   | 0.8   | 34.0  | 38.5  | 5.9   | 5.1   | 7.6   |
| 15.0  | 14.0  | 2.6   | 10.0  | 20.4  | 21.2  | 6.7   | 11.4  | 5.1   |

|        |        |       |       |        |        |        |        |        |
|--------|--------|-------|-------|--------|--------|--------|--------|--------|
| 79.3   | 61.9   | 217.3 | 188.0 | 70.7   | 90.5   | 226.1  | 166.5  | 225.9  |
| 0.6    | 10.6   | 6.4   | 14.6  | 4.4    | 1.3    | 6.2    | 4.1    | 2.8    |
| 2.8    | 15.7   | 14.4  | 18.2  | 9.6    | 10.5   | 22.6   | 51.6   | 43.2   |
| 9.3    | 19.9   | 13.9  | 7.3   | 21.6   | 7.6    | 191.2  | 29.3   | 29.5   |
| 5.1    | 0.9    | 1.5   | 2.1   | 11.6   | 5.3    | 7.8    | 3.9    | 8.0    |
| 5.6    | 9.3    | 19.0  | 9.0   | 5.4    | 10.1   | 20.8   | 17.2   | 31.6   |
| 70.1   | 78.4   | 9.6   | 6.4   | 162.7  | 112.9  | 243.3  | 434.3  | 396.3  |
| 0.4    | 1.0    | 0.3   | 0.5   | 9.1    | 1.1    | 0.4    | 0.3    | 3.8    |
| 3.0    | 2.3    | 3.1   | 2.6   | 2.3    | 9.3    | 2.5    | 2.7    | 2.7    |
| 2.1    | 24.3   | 3.0   | 1.9   | 1.3    | 13.0   | 2.2    | 1.3    | 6.2    |
| 1.4    | 7.2    | 27.0  | 38.8  | 2.2    | 1.0    | 4.9    | 6.6    | 6.9    |
| 2.5    | 2.1    | 2.6   | 5.4   | 2.8    | 5.2    | 39.7   | 15.6   | 28.1   |
| 442.3  | 560.9  | 160.9 | 247.8 | 621.3  | 397.3  | 1056.4 | 998.5  | 1235.9 |
| 10.1   | 3.7    | 8.3   | 9.0   | 14.8   | 9.9    | 18.5   | 12.7   | 12.7   |
| 8.6    | 4.9    | 5.6   | 2.9   | 2.8    | 2.8    | 19.2   | 8.2    | 3.2    |
| 3199.6 | 4668.8 | 616.1 | 642.0 | 4652.2 | 4384.7 | 5021.0 | 4940.4 | 5326.7 |
| 7.1    | 1.4    | 3.9   | 5.8   | 8.6    | 2.6    | 11.1   | 4.9    | 17.2   |
| 2.0    | 0.2    | 0.3   | 3.3   | 1.5    | 5.5    | 34.1   | 36.2   | 28.4   |
| 31.5   | 23.7   | 9.5   | 1.7   | 44.1   | 29.1   | 25.5   | 15.1   | 11.4   |
| 4.8    | 7.8    | 1.2   | 7.3   | 5.9    | 2.3    | 1.8    | 4.7    | 1.1    |
| 13.9   | 10.3   | 4.7   | 11.7  | 21.0   | 6.4    | 26.1   | 23.5   | 21.4   |
| 18.9   | 23.3   | 14.0  | 15.7  | 41.8   | 33.4   | 17.4   | 30.8   | 29.1   |
| 0.6    | 0.6    | 7.5   | 4.8   | 10.0   | 5.2    | 6.9    | 6.3    | 4.3    |
| 2.1    | 1.0    | 1.6   | 1.2   | 1.2    | 1.2    | 1.7    | 1.4    | 1.4    |
| 21.4   | 30.8   | 11.3  | 17.4  | 30.8   | 22.1   | 59.7   | 61.2   | 56.9   |
| 57.3   | 63.1   | 0.5   | 0.4   | 119.0  | 59.7   | 147.2  | 134.7  | 156.7  |
| 4.1    | 0.4    | 0.4   | 0.9   | 0.9    | 7.4    | 9.2    | 17.2   | 12.6   |
| 1.2    | 1.5    | 3.8   | 4.4   | 10.8   | 0.9    | 5.2    | 1.7    | 2.2    |
| 1.4    | 6.1    | 12.6  | 1.3   | 15.0   | 12.7   | 6.0    | 6.5    | 2.0    |
| 59.0   | 50.9   | 20.2  | 2.3   | 59.8   | 54.5   | 250.0  | 224.6  | 258.3  |
| 5.9    | 11.1   | 1.1   | 4.4   | 7.9    | 3.6    | 6.4    | 5.8    | 1.3    |
| 5.0    | 0.6    | 4.5   | 4.8   | 2.2    | 0.6    | 7.1    | 7.9    | 14.6   |
| 0.7    | 4.3    | 2.1   | 3.6   | 1.6    | 0.8    | 1.5    | 1.9    | 4.8    |
| 20.8   | 32.2   | 9.4   | 7.9   | 22.6   | 15.1   | 80.3   | 109.4  | 125.4  |
| 4.3    | 6.0    | 5.8   | 9.8   | 5.0    | 0.6    | 10.3   | 5.3    | 12.2   |
| 143.1  | 213.7  | 19.1  | 45.3  | 165.8  | 179.7  | 509.5  | 321.5  | 338.9  |
| 4.9    | 9.2    | 9.3   | 0.7   | 11.0   | 10.3   | 10.5   | 8.7    | 9.1    |
| 21.4   | 30.9   | 3.4   | 4.5   | 34.7   | 23.3   | 1196.0 | 1204.7 | 1255.6 |
| 0.7    | 4.4    | 0.7   | 1.5   | 6.2    | 1.1    | 1.4    | 1.1    | 5.9    |
| 1.1    | 1.7    | 1.5   | 2.0   | 2.1    | 10.1   | 2.6    | 8.4    | 6.5    |
| 167.9  | 218.2  | 42.0  | 84.2  | 201.7  | 148.2  | 313.7  | 257.4  | 261.5  |
| 8.5    | 28.0   | 23.9  | 24.4  | 21.3   | 11.7   | 28.8   | 60.1   | 51.2   |
| 241.7  | 394.2  | 17.4  | 24.2  | 411.8  | 318.4  | 1476.9 | 1124.8 | 1078.7 |
| 91.4   | 115.8  | 12.7  | 39.5  | 127.0  | 87.6   | 157.8  | 144.4  | 153.7  |
| 9.9    | 8.4    | 2.3   | 3.7   | 13.2   | 11.2   | 54.7   | 97.7   | 81.2   |
| 221.6  | 246.1  | 53.3  | 92.7  | 309.9  | 373.6  | 371.3  | 185.8  | 211.1  |
| 119.4  | 170.2  | 11.9  | 28.7  | 181.1  | 173.6  | 263.0  | 121.7  | 151.2  |
| 26.0   | 23.2   | 13.2  | 14.1  | 41.1   | 26.7   | 100.6  | 119.2  | 149.1  |
| 19.7   | 24.2   | 3.7   | 13.4  | 12.7   | 25.2   | 32.1   | 18.0   | 14.7   |
| 440.6  | 523.9  | 200.0 | 306.3 | 569.4  | 381.3  | 2236.7 | 2583.7 | 2786.0 |
| 60.2   | 137.7  | 7.5   | 20.3  | 77.3   | 65.7   | 295.9  | 288.4  | 279.1  |
| 15.4   | 7.8    | 59.5  | 146.6 | 31.2   | 5.2    | 6.6    | 5.9    | 4.7    |
| 8.8    | 19.3   | 16.4  | 9.4   | 14.7   | 11.3   | 71.5   | 52.6   | 74.1   |

|        |        |        |        |        |        |        |        |        |
|--------|--------|--------|--------|--------|--------|--------|--------|--------|
| 11.2   | 2.8    | 3.2    | 1.4    | 17.4   | 15.1   | 11.0   | 3.6    | 7.0    |
| 129.6  | 185.5  | 64.7   | 50.9   | 210.9  | 126.2  | 391.4  | 1096.5 | 1136.7 |
| 55.5   | 73.2   | 20.6   | 22.3   | 73.7   | 49.5   | 100.2  | 112.8  | 114.6  |
| 112.4  | 96.4   | 34.0   | 85.2   | 163.4  | 81.2   | 261.5  | 241.1  | 258.1  |
| 5.5    | 2.8    | 21.8   | 31.7   | 7.8    | 2.3    | 15.2   | 11.7   | 14.7   |
| 16.9   | 14.3   | 18.3   | 20.4   | 37.2   | 22.0   | 59.8   | 36.8   | 47.1   |
| 1.5    | 1.6    | 2.7    | 6.8    | 1.6    | 3.1    | 3.2    | 2.5    | 2.5    |
| 3.4    | 14.5   | 4.7    | 9.6    | 15.9   | 3.1    | 28.9   | 54.0   | 51.1   |
| 7.8    | 2.8    | 0.9    | 1.7    | 2.2    | 2.2    | 2.1    | 3.2    | 2.8    |
| 31.6   | 83.0   | 10.6   | 7.9    | 67.3   | 63.0   | 236.2  | 180.8  | 192.4  |
| 165.9  | 160.0  | 109.5  | 119.8  | 98.9   | 113.4  | 239.5  | 176.1  | 198.7  |
| 1.0    | 2.4    | 3.1    | 0.6    | 0.6    | 2.0    | 3.4    | 4.9    | 2.1    |
| 10.8   | 13.1   | 16.0   | 18.1   | 21.1   | 15.8   | 112.4  | 111.7  | 113.3  |
| 14.5   | 25.4   | 2.0    | 2.6    | 13.9   | 22.6   | 6.1    | 2.6    | 1.7    |
| 104.7  | 121.5  | 13.9   | 29.2   | 148.1  | 133.4  | 307.0  | 290.5  | 265.9  |
| 165.2  | 244.6  | 10.1   | 8.8    | 158.6  | 183.9  | 248.2  | 178.0  | 215.1  |
| 1.5    | 0.8    | 1.2    | 0.6    | 5.0    | 0.6    | 4.8    | 4.0    | 3.5    |
| 86.8   | 85.1   | 72.4   | 73.0   | 87.1   | 65.6   | 244.9  | 253.4  | 256.2  |
| 3559.1 | 4020.8 | 1912.7 | 3042.9 | 4309.9 | 3880.3 | 7701.1 | 7128.3 | 7635.2 |
| 8.6    | 6.4    | 5.2    | 4.3    | 4.4    | 6.9    | 19.4   | 17.5   | 15.5   |
| 7.3    | 2.3    | 18.8   | 7.3    | 4.7    | 17.5   | 24.4   | 2.9    | 14.3   |
| 15.7   | 40.7   | 4.4    | 3.4    | 27.5   | 46.3   | 59.1   | 46.8   | 53.9   |
| 36.9   | 36.1   | 14.0   | 8.9    | 54.7   | 43.8   | 81.9   | 129.1  | 119.8  |
| 29.6   | 75.6   | 12.6   | 13.2   | 46.3   | 73.9   | 67.0   | 72.9   | 71.4   |
| 186.0  | 176.5  | 119.1  | 151.3  | 291.8  | 180.2  | 246.9  | 318.7  | 377.0  |
| 19.8   | 4.8    | 24.1   | 13.8   | 12.3   | 22.9   | 40.0   | 30.4   | 34.2   |
| 47.8   | 64.6   | 27.4   | 51.4   | 89.0   | 61.3   | 88.9   | 83.8   | 93.3   |
| 136.1  | 236.0  | 1.1    | 9.8    | 225.3  | 153.3  | 118.4  | 217.7  | 209.6  |
| 101.8  | 112.9  | 80.7   | 108.9  | 182.1  | 133.7  | 853.3  | 875.2  | 865.0  |
| 64.4   | 81.0   | 55.6   | 66.8   | 127.8  | 96.1   | 574.1  | 511.9  | 564.0  |
| 24.3   | 27.7   | 45.9   | 38.2   | 32.5   | 29.8   | 47.2   | 52.3   | 51.1   |
| 148.1  | 163.0  | 19.4   | 19.0   | 206.5  | 162.8  | 265.9  | 133.8  | 164.2  |
| 15.6   | 10.6   | 16.3   | 10.9   | 28.3   | 15.0   | 17.0   | 15.7   | 6.9    |
| 0.3    | 7.7    | 9.6    | 3.7    | 12.8   | 9.2    | 2.3    | 4.1    | 4.3    |
| 148.3  | 145.9  | 64.4   | 74.3   | 220.0  | 141.9  | 125.1  | 172.1  | 212.0  |
| 1.1    | 1.0    | 1.7    | 1.2    | 3.2    | 2.1    | 2.0    | 1.6    | 4.6    |
| 4.8    | 17.8   | 5.1    | 1.9    | 6.8    | 5.4    | 15.4   | 18.7   | 21.4   |
| 88.4   | 120.5  | 19.5   | 17.7   | 130.7  | 127.0  | 242.2  | 157.2  | 147.4  |
| 61.4   | 89.0   | 18.0   | 14.8   | 70.1   | 48.6   | 68.7   | 75.6   | 85.8   |
| 16.6   | 19.8   | 12.0   | 4.1    | 17.9   | 21.6   | 404.5  | 216.4  | 247.6  |
| 953.3  | 1477.4 | 101.9  | 140.2  | 1497.4 | 1326.2 | 1486.4 | 1285.5 | 1405.1 |
| 800.8  | 1910.4 | 277.5  | 334.7  | 1447.7 | 1813.1 | 4349.8 | 3171.9 | 3316.7 |
| 106.5  | 134.2  | 30.0   | 38.0   | 184.3  | 124.0  | 648.3  | 397.8  | 435.9  |
| 12.7   | 8.7    | 0.1    | 1.4    | 16.8   | 4.2    | 2.7    | 7.6    | 1.3    |
| 23.8   | 12.8   | 19.2   | 5.3    | 5.8    | 9.1    | 44.5   | 46.6   | 63.7   |
| 69.5   | 85.5   | 43.3   | 31.1   | 126.6  | 88.7   | 184.0  | 201.1  | 238.5  |
| 161.3  | 319.6  | 13.6   | 17.6   | 175.5  | 216.2  | 319.3  | 239.2  | 304.9  |
| 6.7    | 5.1    | 4.8    | 0.7    | 11.2   | 9.5    | 12.8   | 15.1   | 9.1    |
| 29.6   | 31.9   | 8.8    | 14.8   | 26.2   | 28.9   | 18.1   | 16.6   | 30.1   |
| 83.4   | 207.1  | 18.2   | 14.3   | 101.1  | 179.3  | 306.1  | 304.2  | 358.2  |
| 1.8    | 14.0   | 0.5    | 4.6    | 24.7   | 17.7   | 501.3  | 715.7  | 782.9  |
| 137.2  | 162.3  | 26.2   | 34.4   | 208.0  | 118.4  | 245.6  | 227.1  | 232.7  |
| 38.0   | 56.9   | 64.4   | 59.6   | 70.6   | 45.9   | 1156.7 | 908.8  | 1009.7 |

|        |        |        |        |        |        |        |        |        |
|--------|--------|--------|--------|--------|--------|--------|--------|--------|
| 312.0  | 461.2  | 26.0   | 26.1   | 520.6  | 301.8  | 173.4  | 182.6  | 213.6  |
| 3.4    | 25.5   | 4.2    | 6.2    | 18.3   | 23.9   | 20.6   | 24.8   | 36.3   |
| 2.6    | 4.7    | 23.5   | 11.2   | 16.2   | 13.0   | 126.8  | 104.2  | 132.6  |
| 4.2    | 2.4    | 0.2    | 0.1    | 5.9    | 0.1    | 1.6    | 3.7    | 5.0    |
| 106.0  | 73.0   | 113.3  | 158.6  | 126.7  | 98.4   | 209.4  | 229.7  | 263.7  |
| 51.7   | 38.8   | 9.2    | 3.9    | 60.9   | 41.8   | 336.1  | 184.5  | 187.1  |
| 660.4  | 722.9  | 448.3  | 722.6  | 907.5  | 824.8  | 967.5  | 771.5  | 864.6  |
| 26.8   | 45.6   | 6.0    | 12.0   | 32.4   | 42.8   | 46.1   | 37.8   | 42.1   |
| 504.5  | 549.7  | 124.3  | 199.1  | 645.9  | 530.9  | 898.2  | 936.1  | 1068.6 |
| 13.6   | 37.0   | 2.6    | 2.4    | 14.8   | 22.5   | 16.9   | 13.5   | 15.7   |
| 15.6   | 23.3   | 46.8   | 41.3   | 24.6   | 7.8    | 56.3   | 57.0   | 49.6   |
| 59.6   | 59.9   | 89.2   | 140.0  | 87.0   | 62.1   | 160.5  | 169.6  | 198.0  |
| 131.6  | 256.1  | 56.6   | 49.3   | 155.9  | 313.4  | 338.6  | 709.9  | 751.5  |
| 8.8    | 10.2   | 8.1    | 8.4    | 9.3    | 8.2    | 6.2    | 4.2    | 4.5    |
| 442.0  | 406.0  | 142.0  | 186.8  | 517.9  | 385.3  | 462.8  | 555.9  | 610.0  |
| 1812.8 | 2315.5 | 1109.1 | 1466.8 | 2792.5 | 2429.8 | 3903.2 | 3043.0 | 3226.1 |
| 10.0   | 14.6   | 11.1   | 27.5   | 15.2   | 5.4    | 60.0   | 55.2   | 67.9   |
| 52.8   | 113.8  | 8.4    | 10.9   | 99.1   | 90.0   | 83.3   | 104.2  | 101.0  |
| 2.7    | 3.2    | 3.6    | 5.8    | 12.8   | 9.3    | 7.4    | 13.9   | 10.4   |
| 96.9   | 127.9  | 26.4   | 42.0   | 139.0  | 88.2   | 247.4  | 152.6  | 187.8  |
| 53.9   | 47.2   | 11.2   | 21.1   | 39.6   | 51.4   | 51.6   | 46.4   | 56.2   |
| 88.1   | 104.2  | 26.0   | 24.9   | 113.5  | 111.5  | 118.7  | 107.3  | 137.7  |
| 24.0   | 23.4   | 47.9   | 66.5   | 29.9   | 27.6   | 104.3  | 47.1   | 54.2   |
| 9.3    | 7.9    | 31.5   | 17.6   | 9.6    | 8.9    | 183.8  | 251.0  | 257.7  |
| 15.2   | 7.6    | 80.4   | 113.1  | 14.8   | 18.1   | 14.5   | 20.3   | 12.4   |
| 6.2    | 14.8   | 17.8   | 10.0   | 16.8   | 15.5   | 17.5   | 27.4   | 25.6   |
| 17.3   | 33.6   | 18.5   | 9.2    | 37.9   | 30.7   | 58.9   | 129.4  | 128.9  |
| 388.1  | 461.5  | 156.2  | 170.4  | 477.9  | 447.7  | 590.8  | 702.5  | 826.9  |
| 28.3   | 21.1   | 3.3    | 1.9    | 35.4   | 19.6   | 13.1   | 7.8    | 8.7    |
| 81.8   | 94.4   | 20.3   | 12.9   | 169.9  | 96.4   | 380.8  | 369.8  | 388.7  |
| 324.0  | 400.7  | 204.7  | 303.5  | 359.0  | 323.9  | 96.4   | 53.8   | 47.3   |
| 27.3   | 55.5   | 1.5    | 10.1   | 49.6   | 35.8   | 105.3  | 161.4  | 162.0  |
| 30.9   | 23.0   | 16.8   | 38.3   | 23.4   | 28.3   | 52.8   | 71.9   | 76.4   |
| 20.3   | 26.1   | 74.8   | 111.8  | 24.2   | 27.8   | 64.7   | 87.3   | 134.1  |
| 124.0  | 137.0  | 215.8  | 253.8  | 193.1  | 155.0  | 313.6  | 331.3  | 370.6  |
| 26.5   | 28.1   | 2.7    | 12.2   | 17.0   | 22.3   | 63.7   | 60.5   | 66.2   |
| 12.9   | 9.4    | 4.8    | 15.9   | 2.7    | 16.4   | 17.5   | 6.7    | 7.0    |
| 13.3   | 18.1   | 17.4   | 13.8   | 23.7   | 16.9   | 26.9   | 27.3   | 23.8   |
| 38.6   | 62.0   | 45.3   | 33.9   | 35.7   | 58.4   | 73.2   | 72.1   | 86.7   |
| 1.2    | 3.4    | 1.9    | 5.4    | 9.1    | 0.5    | 1.9    | 14.8   | 5.8    |
| 11.2   | 12.5   | 5.2    | 12.2   | 9.1    | 3.7    | 4.4    | 16.9   | 14.0   |
| 46.3   | 58.8   | 9.6    | 10.1   | 81.0   | 61.0   | 78.2   | 54.9   | 96.3   |
| 71.5   | 98.7   | 4.9    | 10.7   | 85.3   | 65.9   | 136.3  | 56.5   | 72.6   |
| 56.0   | 66.8   | 137.9  | 203.8  | 86.0   | 57.6   | 75.8   | 43.2   | 61.6   |
| 102.1  | 164.5  | 49.2   | 57.5   | 206.4  | 157.2  | 286.4  | 168.0  | 191.4  |
| 6.3    | 13.7   | 10.6   | 1.6    | 2.3    | 21.2   | 16.2   | 15.3   | 5.3    |
| 2.6    | 9.6    | 3.7    | 2.0    | 8.0    | 5.0    | 8.1    | 4.2    | 5.9    |
| 53.7   | 84.3   | 0.4    | 3.3    | 94.2   | 77.0   | 68.8   | 100.7  | 100.7  |
| 5.5    | 3.5    | 4.5    | 2.9    | 8.4    | 0.9    | 3.0    | 2.5    | 6.3    |
| 682.3  | 862.5  | 134.0  | 108.7  | 1129.0 | 797.5  | 968.3  | 740.1  | 740.7  |
| 107.4  | 98.4   | 1.9    | 3.6    | 100.2  | 86.4   | 7.1    | 7.0    | 1.9    |
| 71.3   | 91.5   | 123.8  | 141.2  | 75.5   | 100.4  | 388.0  | 499.1  | 555.0  |
| 46.6   | 63.8   | 152.0  | 158.3  | 112.3  | 72.6   | 1715.8 | 2390.4 | 2393.8 |

|        |        |       |       |        |        |        |        |        |
|--------|--------|-------|-------|--------|--------|--------|--------|--------|
| 12.4   | 11.6   | 22.7  | 9.1   | 10.1   | 14.5   | 13.1   | 13.5   | 13.7   |
| 3.3    | 6.4    | 0.3   | 0.3   | 10.8   | 11.9   | 9.4    | 6.2    | 9.1    |
| 1.1    | 1.4    | 1.1   | 1.5   | 1.7    | 0.9    | 2.5    | 8.3    | 2.8    |
| 24.6   | 28.9   | 5.2   | 15.0  | 25.6   | 40.9   | 21.1   | 40.3   | 51.7   |
| 85.9   | 97.5   | 69.6  | 94.2  | 129.1  | 99.9   | 154.9  | 214.8  | 239.1  |
| 96.1   | 67.0   | 63.7  | 76.7  | 88.2   | 74.4   | 132.3  | 115.5  | 131.6  |
| 1.0    | 4.7    | 1.4   | 3.9   | 2.6    | 0.9    | 1.9    | 2.7    | 1.5    |
| 8.0    | 19.1   | 1.4   | 8.0   | 16.6   | 24.1   | 14.5   | 13.2   | 12.4   |
| 52.1   | 73.8   | 24.9  | 31.2  | 69.7   | 74.9   | 140.8  | 143.1  | 180.2  |
| 285.7  | 341.6  | 126.3 | 112.6 | 374.6  | 361.9  | 496.6  | 337.1  | 344.2  |
| 16.0   | 29.8   | 6.1   | 11.4  | 26.7   | 19.6   | 45.5   | 51.8   | 57.8   |
| 7.7    | 8.4    | 0.6   | 8.4   | 20.6   | 1.9    | 60.0   | 52.6   | 53.3   |
| 7.4    | 12.7   | 5.3   | 4.6   | 8.4    | 11.6   | 137.7  | 111.2  | 127.8  |
| 4.3    | 2.7    | 10.5  | 3.9   | 3.8    | 3.0    | 5.5    | 3.9    | 5.7    |
| 397.6  | 481.2  | 129.1 | 170.3 | 525.0  | 506.4  | 1407.4 | 1123.8 | 1103.1 |
| 24.7   | 45.9   | 11.6  | 12.8  | 38.1   | 39.1   | 37.3   | 21.0   | 23.8   |
| 153.7  | 220.2  | 12.4  | 6.8   | 275.1  | 155.8  | 178.9  | 286.6  | 299.1  |
| 21.2   | 33.0   | 68.6  | 103.6 | 32.2   | 36.9   | 35.2   | 47.7   | 40.1   |
| 1.3    | 1.0    | 2.8   | 3.6   | 10.8   | 10.5   | 26.7   | 9.2    | 10.1   |
| 400.9  | 528.9  | 127.3 | 176.9 | 641.6  | 517.7  | 970.5  | 354.4  | 464.7  |
| 10.0   | 18.5   | 30.3  | 42.6  | 21.0   | 6.1    | 32.1   | 37.0   | 33.2   |
| 1.2    | 1.7    | 2.6   | 1.2   | 2.5    | 4.6    | 5.1    | 12.3   | 10.3   |
| 45.4   | 31.5   | 2.0   | 8.2   | 69.4   | 59.2   | 40.4   | 76.7   | 71.6   |
| 62.1   | 81.8   | 15.0  | 34.5  | 67.2   | 72.4   | 59.8   | 45.5   | 61.8   |
| 10.7   | 8.4    | 1.4   | 2.0   | 2.2    | 2.1    | 3.9    | 2.1    | 2.2    |
| 1362.0 | 2102.8 | 231.8 | 268.3 | 1834.4 | 1932.5 | 3990.5 | 2824.8 | 3060.2 |
| 211.4  | 327.6  | 21.1  | 25.4  | 478.0  | 406.3  | 435.9  | 415.3  | 420.6  |
| 11.7   | 25.6   | 2.6   | 2.8   | 36.5   | 15.8   | 42.7   | 52.3   | 42.7   |
| 42.2   | 53.0   | 3.0   | 2.3   | 38.8   | 23.2   | 2.2    | 1.8    | 1.1    |
| 55.9   | 62.9   | 10.9  | 18.3  | 77.7   | 72.1   | 200.7  | 157.1  | 189.7  |
| 74.9   | 175.6  | 14.9  | 42.1  | 117.6  | 168.1  | 161.4  | 82.8   | 84.1   |
| 24.4   | 23.7   | 2.3   | 9.0   | 11.7   | 24.2   | 17.1   | 8.7    | 15.1   |
| 7.0    | 9.0    | 5.3   | 3.4   | 5.2    | 8.2    | 5.2    | 6.0    | 4.1    |
| 32.3   | 44.3   | 11.4  | 21.4  | 59.5   | 49.9   | 105.1  | 139.1  | 157.0  |
| 11.6   | 14.2   | 8.3   | 8.4   | 9.7    | 13.9   | 4.6    | 11.7   | 7.8    |
| 1.7    | 8.2    | 1.2   | 3.8   | 7.1    | 2.3    | 32.8   | 55.5   | 63.5   |
| 340.0  | 442.2  | 182.2 | 224.3 | 515.9  | 314.6  | 1057.9 | 1109.1 | 1130.3 |
| 10.2   | 7.6    | 17.8  | 13.9  | 7.4    | 11.5   | 57.1   | 73.7   | 79.6   |
| 10.4   | 12.2   | 0.2   | 6.5   | 16.9   | 12.9   | 22.1   | 26.7   | 26.4   |
| 10.3   | 13.2   | 4.0   | 1.4   | 23.6   | 15.6   | 13.8   | 9.9    | 5.2    |
| 60.7   | 75.1   | 17.6  | 19.5  | 63.0   | 61.0   | 106.8  | 67.9   | 91.9   |
| 1.1    | 2.4    | 2.1   | 1.0   | 10.4   | 4.0    | 1.5    | 1.1    | 1.8    |
| 2.6    | 2.3    | 3.1   | 7.1   | 1.2    | 2.1    | 12.6   | 20.1   | 24.6   |
| 25.4   | 23.9   | 13.0  | 2.7   | 12.0   | 25.2   | 13.3   | 6.4    | 15.6   |
| 15.3   | 25.2   | 8.5   | 5.1   | 28.1   | 27.5   | 59.6   | 73.3   | 65.9   |
| 2.1    | 9.2    | 13.7  | 1.5   | 7.2    | 2.0    | 16.1   | 15.6   | 15.9   |
| 2.0    | 2.8    | 11.6  | 10.1  | 1.6    | 1.4    | 3.5    | 1.7    | 1.4    |
| 9.7    | 9.3    | 1.4   | 3.2   | 15.3   | 12.3   | 36.7   | 60.0   | 79.4   |
| 1.7    | 1.3    | 1.2   | 1.1   | 3.6    | 1.5    | 2.6    | 2.2    | 1.4    |
| 14.6   | 17.3   | 9.1   | 5.5   | 23.2   | 11.3   | 2.0    | 3.4    | 2.7    |
| 11.9   | 6.6    | 9.8   | 7.8   | 19.7   | 10.9   | 50.4   | 29.8   | 31.7   |
| 5.1    | 5.7    | 1.1   | 1.0   | 1.4    | 1.4    | 48.1   | 55.5   | 39.6   |
| 59.4   | 76.5   | 9.0   | 28.4  | 85.9   | 39.2   | 78.7   | 43.8   | 32.6   |



|        |        |       |       |        |        |        |        |        |
|--------|--------|-------|-------|--------|--------|--------|--------|--------|
| 1.3    | 14.6   | 1.6   | 4.5   | 14.2   | 16.9   | 2.8    | 18.8   | 10.3   |
| 30.5   | 81.2   | 9.7   | 13.6  | 112.3  | 79.0   | 382.7  | 348.4  | 377.1  |
| 21.4   | 21.0   | 5.5   | 1.1   | 34.9   | 18.0   | 37.1   | 28.9   | 25.5   |
| 1.6    | 1.4    | 1.0   | 1.5   | 1.7    | 1.2    | 37.8   | 33.2   | 45.8   |
| 12.9   | 39.6   | 17.3  | 19.1  | 47.2   | 9.0    | 35.5   | 28.3   | 41.5   |
| 7.8    | 6.4    | 4.3   | 4.1   | 12.7   | 5.5    | 2.4    | 2.9    | 0.6    |
| 94.3   | 185.1  | 57.9  | 63.5  | 125.3  | 141.6  | 782.2  | 1028.9 | 1134.9 |
| 12.4   | 4.0    | 13.9  | 16.2  | 27.7   | 15.8   | 17.6   | 9.7    | 4.6    |
| 0.8    | 2.0    | 0.8   | 11.5  | 5.3    | 5.6    | 4.9    | 8.5    | 6.4    |
| 60.7   | 68.1   | 24.8  | 23.4  | 94.3   | 67.5   | 199.1  | 174.8  | 143.1  |
| 5.8    | 1.0    | 10.5  | 3.9   | 20.4   | 4.6    | 6.6    | 4.9    | 11.8   |
| 3.5    | 3.3    | 11.5  | 24.8  | 2.1    | 2.0    | 6.3    | 13.5   | 11.6   |
| 55.5   | 161.1  | 9.5   | 16.6  | 138.6  | 148.1  | 32.1   | 4.8    | 2.4    |
| 1.0    | 1.1    | 0.9   | 1.0   | 1.7    | 4.3    | 5.1    | 1.8    | 1.9    |
| 86.8   | 84.9   | 29.7  | 45.6  | 96.9   | 63.0   | 165.1  | 170.2  | 179.2  |
| 5.6    | 5.4    | 178.7 | 230.9 | 18.1   | 6.3    | 14.8   | 19.3   | 15.0   |
| 322.1  | 447.8  | 135.0 | 203.9 | 557.2  | 290.6  | 503.6  | 417.1  | 426.9  |
| 8.1    | 8.4    | 3.2   | 2.7   | 8.9    | 6.9    | 11.5   | 9.0    | 9.1    |
| 20.9   | 43.6   | 31.5  | 14.6  | 39.2   | 35.5   | 22.3   | 30.2   | 35.2   |
| 83.7   | 96.1   | 7.2   | 18.4  | 71.5   | 57.0   | 117.4  | 107.1  | 118.4  |
| 66.6   | 79.9   | 79.9  | 85.3  | 80.4   | 45.2   | 109.5  | 80.9   | 88.9   |
| 8.3    | 9.9    | 6.1   | 2.8   | 13.9   | 7.8    | 45.9   | 59.5   | 52.9   |
| 1.5    | 2.2    | 1.9   | 1.0   | 2.8    | 4.1    | 16.9   | 15.2   | 11.2   |
| 4.1    | 5.7    | 6.2   | 12.3  | 7.3    | 5.8    | 7.8    | 10.1   | 12.5   |
| 1410.2 | 2030.7 | 227.3 | 276.5 | 2895.7 | 2169.4 | 2624.3 | 1930.2 | 1895.0 |
| 0.8    | 0.7    | 4.2   | 0.3   | 6.2    | 2.4    | 1.1    | 0.4    | 1.4    |
| 20.3   | 23.7   | 28.3  | 38.8  | 37.5   | 26.8   | 104.9  | 103.8  | 113.3  |
| 13.1   | 10.6   | 0.5   | 0.3   | 3.1    | 20.0   | 2.8    | 1.6    | 4.7    |
| 23.5   | 18.9   | 11.8  | 16.7  | 22.5   | 23.1   | 98.6   | 80.9   | 83.6   |
| 6.2    | 12.4   | 30.5  | 48.4  | 9.7    | 19.7   | 9.4    | 5.0    | 5.4    |
| 10.4   | 4.0    | 2.9   | 2.3   | 3.1    | 13.3   | 3.7    | 2.9    | 2.9    |
| 9.0    | 15.4   | 12.2  | 14.5  | 21.7   | 15.3   | 33.0   | 46.3   | 41.8   |
| 2.7    | 4.5    | 2.0   | 1.4   | 5.2    | 7.5    | 18.9   | 18.0   | 15.0   |
| 0.4    | 1.8    | 0.2   | 0.5   | 1.0    | 2.8    | 5.1    | 8.8    | 17.8   |
| 6.2    | 1.0    | 4.7   | 1.5   | 1.8    | 7.2    | 3.0    | 7.0    | 9.1    |
| 361.7  | 328.8  | 150.8 | 195.5 | 457.8  | 376.7  | 745.6  | 591.1  | 722.4  |
| 3.4    | 1.3    | 1.6   | 4.3   | 1.6    | 2.0    | 4.9    | 2.1    | 3.8    |
| 121.8  | 196.7  | 14.2  | 2.7   | 205.7  | 176.9  | 46.2   | 37.2   | 39.0   |
| 6.2    | 3.8    | 7.5   | 2.5   | 5.7    | 20.6   | 33.9   | 28.9   | 30.1   |
| 7.8    | 2.3    | 0.5   | 1.9   | 1.8    | 7.1    | 1803.0 | 102.4  | 153.7  |
| 55.2   | 52.6   | 109.0 | 115.8 | 95.6   | 56.1   | 254.1  | 221.5  | 237.5  |
| 596.7  | 788.9  | 172.9 | 211.0 | 711.1  | 660.2  | 202.9  | 224.9  | 254.3  |
| 16.3   | 15.0   | 3.4   | 10.2  | 23.1   | 25.3   | 47.8   | 43.7   | 42.4   |
| 0.6    | 0.4    | 1.0   | 0.4   | 12.6   | 1.2    | 4.1    | 2.8    | 5.5    |
| 1.5    | 27.6   | 3.9   | 6.4   | 22.6   | 24.8   | 73.8   | 31.7   | 39.9   |
| 2.8    | 0.8    | 1.9   | 3.0   | 1.7    | 3.6    | 32.7   | 20.5   | 10.5   |
| 301.7  | 301.2  | 479.0 | 669.9 | 466.4  | 248.8  | 1320.5 | 1044.1 | 1244.7 |
| 62.6   | 86.7   | 20.5  | 43.9  | 66.6   | 73.0   | 122.0  | 78.7   | 86.6   |
| 24.6   | 34.3   | 6.8   | 22.9  | 29.3   | 3.7    | 119.9  | 113.1  | 117.1  |
| 3.7    | 10.3   | 5.1   | 3.7   | 1.1    | 9.1    | 14.0   | 7.7    | 13.0   |
| 143.6  | 144.8  | 82.6  | 86.2  | 181.5  | 226.6  | 274.6  | 248.5  | 274.7  |
| 27.8   | 32.1   | 8.3   | 2.8   | 53.6   | 40.4   | 5.3    | 1.7    | 0.9    |
| 32.9   | 62.0   | 17.2  | 31.2  | 33.5   | 42.1   | 132.4  | 94.9   | 107.7  |

|        |        |       |       |        |        |        |        |        |
|--------|--------|-------|-------|--------|--------|--------|--------|--------|
| 1647.0 | 1890.0 | 471.2 | 723.0 | 1619.3 | 1830.2 | 3636.8 | 1919.3 | 2278.5 |
| 6.4    | 15.2   | 6.6   | 11.5  | 11.1   | 9.0    | 16.3   | 6.1    | 12.9   |
| 1.4    | 3.7    | 2.9   | 6.9   | 11.6   | 1.4    | 7.6    | 8.1    | 4.1    |
| 32.4   | 29.9   | 27.8  | 17.9  | 19.5   | 22.9   | 83.8   | 54.8   | 53.3   |
| 1.3    | 0.6    | 4.6   | 0.7   | 0.7    | 1.1    | 0.7    | 4.7    | 1.7    |
| 0.3    | 3.5    | 0.4   | 0.2   | 0.2    | 0.4    | 2.5    | 0.6    | 0.2    |
| 4.0    | 19.4   | 15.6  | 8.6   | 26.4   | 35.5   | 20.5   | 13.8   | 17.6   |
| 35.2   | 39.5   | 5.9   | 3.4   | 42.6   | 24.6   | 14.0   | 23.2   | 14.2   |
| 36.1   | 29.8   | 1.0   | 0.5   | 50.3   | 20.7   | 1.8    | 10.9   | 9.0    |
| 7.4    | 4.9    | 2.7   | 9.8   | 1.5    | 3.2    | 5.7    | 8.6    | 1.6    |
| 54.2   | 62.0   | 39.6  | 40.0  | 81.8   | 46.9   | 125.4  | 93.1   | 117.6  |
| 8.4    | 11.2   | 2.1   | 16.5  | 3.7    | 16.6   | 10.1   | 11.5   | 16.3   |
| 214.4  | 283.4  | 68.6  | 69.8  | 345.4  | 221.8  | 339.9  | 242.6  | 272.5  |
| 74.5   | 90.7   | 31.7  | 55.3  | 123.6  | 67.4   | 431.1  | 610.7  | 640.0  |
| 16.0   | 13.3   | 14.1  | 10.8  | 23.6   | 13.1   | 17.4   | 5.2    | 12.1   |
| 7.0    | 1.5    | 0.7   | 3.4   | 4.4    | 2.9    | 5.1    | 3.9    | 4.7    |
| 3.5    | 7.7    | 1.8   | 8.3   | 4.2    | 4.3    | 40.2   | 76.3   | 81.4   |
| 5.8    | 9.6    | 3.2   | 2.7   | 10.6   | 13.8   | 13.1   | 6.6    | 9.3    |
| 15.9   | 25.1   | 39.8  | 47.1  | 20.4   | 9.2    | 91.3   | 170.9  | 192.1  |
| 47.0   | 34.0   | 22.1  | 29.7  | 44.3   | 38.3   | 56.7   | 70.0   | 61.0   |
| 76.8   | 102.0  | 10.1  | 8.2   | 86.8   | 135.2  | 116.1  | 109.2  | 111.2  |
| 4.9    | 4.5    | 7.4   | 8.3   | 9.8    | 4.4    | 10.2   | 9.5    | 7.4    |
| 1.7    | 6.1    | 0.3   | 2.2   | 11.1   | 10.4   | 17.8   | 13.2   | 23.7   |
| 2.8    | 6.7    | 7.7   | 1.1   | 10.8   | 3.1    | 8.4    | 6.5    | 3.6    |
| 8.1    | 12.6   | 18.8  | 11.2  | 15.6   | 8.6    | 32.6   | 65.2   | 42.0   |
| 3.9    | 7.5    | 2.7   | 10.0  | 2.4    | 4.5    | 11.2   | 9.8    | 5.9    |
| 16.0   | 22.2   | 43.5  | 67.4  | 31.1   | 20.0   | 88.7   | 77.2   | 98.4   |
| 122.4  | 114.1  | 230.4 | 289.1 | 144.2  | 122.8  | 111.0  | 73.9   | 87.1   |
| 15.9   | 10.2   | 18.3  | 15.2  | 16.8   | 9.2    | 87.9   | 79.3   | 76.8   |
| 536.1  | 640.7  | 178.9 | 238.2 | 571.9  | 691.3  | 741.6  | 666.2  | 707.3  |
| 7.5    | 1.1    | 10.3  | 8.9   | 1.6    | 13.2   | 2.8    | 1.3    | 0.8    |
| 65.1   | 100.4  | 12.8  | 0.5   | 105.0  | 113.9  | 3.2    | 6.8    | 3.2    |
| 0.2    | 2.2    | 0.2   | 0.2   | 0.2    | 0.4    | 2.9    | 3.3    | 4.2    |
| 7.6    | 10.9   | 6.5   | 10.0  | 5.1    | 6.9    | 8.0    | 6.5    | 11.4   |
| 3.2    | 14.5   | 3.7   | 2.7   | 10.6   | 3.8    | 19.7   | 14.5   | 20.6   |
| 4.9    | 24.3   | 0.6   | 0.4   | 5.3    | 18.4   | 11.9   | 23.8   | 20.2   |
| 1.5    | 19.4   | 2.2   | 0.9   | 12.3   | 10.7   | 22.4   | 16.0   | 21.7   |
| 66.6   | 68.0   | 21.0  | 18.0  | 69.0   | 49.9   | 201.2  | 221.4  | 238.5  |
| 11.4   | 30.4   | 0.4   | 2.5   | 21.1   | 18.5   | 4.1    | 4.2    | 2.7    |
| 3.7    | 5.3    | 6.5   | 1.7   | 3.2    | 2.9    | 3.4    | 2.0    | 5.3    |
| 1.0    | 18.5   | 2.4   | 12.7  | 7.6    | 1.3    | 29.4   | 18.8   | 24.9   |
| 19.0   | 15.6   | 22.9  | 16.7  | 18.7   | 15.8   | 42.7   | 32.3   | 32.7   |
| 119.8  | 135.4  | 114.5 | 117.8 | 203.7  | 119.3  | 279.4  | 266.8  | 339.1  |
| 13.9   | 18.4   | 17.4  | 19.2  | 22.7   | 20.7   | 14.7   | 30.1   | 21.5   |
| 5.6    | 1.3    | 1.4   | 1.8   | 1.4    | 2.4    | 9.9    | 10.7   | 2.9    |
| 104.5  | 159.5  | 7.8   | 3.1   | 121.6  | 144.9  | 14.6   | 6.3    | 9.8    |
| 7.0    | 5.2    | 6.1   | 5.8   | 2.3    | 1.7    | 4.0    | 7.5    | 4.2    |
| 2.0    | 6.0    | 15.1  | 4.9   | 7.7    | 3.1    | 13.1   | 23.2   | 20.3   |
| 12.0   | 1.1    | 4.6   | 1.0   | 2.1    | 7.7    | 4.0    | 3.2    | 1.2    |
| 28.9   | 37.8   | 49.0  | 65.6  | 67.8   | 57.7   | 101.3  | 78.0   | 85.0   |
| 0.3    | 9.2    | 12.2  | 1.1   | 1.7    | 6.1    | 5.3    | 8.2    | 8.2    |
| 15.5   | 3.8    | 13.4  | 5.7   | 17.8   | 12.6   | 23.4   | 27.2   | 18.2   |
| 15.2   | 19.9   | 9.0   | 8.4   | 23.9   | 18.5   | 821.9  | 883.4  | 937.2  |

|        |        |        |        |        |        |        |        |        |
|--------|--------|--------|--------|--------|--------|--------|--------|--------|
| 12.0   | 2.8    | 1.8    | 1.2    | 8.3    | 2.9    | 8.8    | 2.9    | 8.9    |
| 1.9    | 6.3    | 2.1    | 5.2    | 9.7    | 9.6    | 41.6   | 41.9   | 31.1   |
| 214.1  | 277.7  | 58.6   | 71.4   | 345.2  | 257.2  | 322.6  | 400.1  | 451.4  |
| 4878.3 | 5595.8 | 2059.8 | 2530.4 | 4641.2 | 4824.2 | 8011.4 | 7356.2 | 7177.8 |
| 38.4   | 43.1   | 4.1    | 21.5   | 37.2   | 5.9    | 20.0   | 39.3   | 33.9   |
| 37.6   | 37.1   | 10.6   | 6.6    | 53.7   | 26.1   | 23.3   | 38.2   | 47.8   |
| 407.6  | 420.2  | 281.5  | 371.3  | 486.6  | 408.1  | 884.9  | 681.1  | 750.7  |
| 0.5    | 9.2    | 4.4    | 6.6    | 8.8    | 5.9    | 17.5   | 13.2   | 8.8    |
| 132.7  | 145.0  | 10.3   | 18.1   | 202.6  | 124.6  | 403.6  | 250.2  | 352.5  |
| 9.2    | 6.6    | 14.5   | 7.8    | 9.3    | 24.7   | 18.6   | 15.5   | 16.0   |
| 1.8    | 10.9   | 6.1    | 4.3    | 6.4    | 6.2    | 9.8    | 11.1   | 19.7   |
| 60.8   | 87.8   | 83.2   | 114.6  | 99.6   | 71.2   | 468.2  | 760.7  | 807.5  |
| 7.5    | 1.2    | 1.9    | 1.2    | 5.9    | 3.3    | 13.6   | 8.1    | 3.3    |
| 436.1  | 682.7  | 102.4  | 130.3  | 546.2  | 554.0  | 292.0  | 204.1  | 224.1  |
| 439.2  | 621.7  | 55.2   | 72.4   | 483.2  | 475.9  | 226.4  | 196.5  | 213.4  |
| 17.5   | 11.4   | 10.4   | 1.8    | 2.8    | 18.4   | 27.8   | 22.7   | 8.0    |
| 7.7    | 2.0    | 3.4    | 15.0   | 3.4    | 10.8   | 5.4    | 8.0    | 11.3   |
| 5.6    | 1.4    | 1.4    | 2.8    | 6.6    | 0.7    | 2.4    | 5.9    | 6.0    |
| 819.1  | 960.5  | 701.3  | 835.2  | 1235.7 | 991.1  | 1469.5 | 1917.0 | 2203.3 |
| 30.2   | 33.3   | 0.2    | 0.1    | 41.7   | 39.5   | 3.2    | 2.6    | 5.3    |
| 23.1   | 21.5   | 13.3   | 17.5   | 16.0   | 28.5   | 35.8   | 32.8   | 34.9   |
| 0.7    | 0.3    | 5.2    | 0.9    | 0.6    | 2.2    | 0.9    | 1.0    | 0.8    |
| 1.9    | 9.5    | 8.3    | 2.7    | 1.7    | 3.3    | 16.2   | 4.8    | 14.8   |
| 71.3   | 85.3   | 56.5   | 65.8   | 102.8  | 69.9   | 254.6  | 205.3  | 305.9  |
| 115.4  | 212.7  | 47.2   | 85.6   | 192.7  | 122.2  | 292.1  | 201.7  | 209.8  |
| 94.3   | 115.0  | 3.0    | 12.5   | 101.5  | 149.2  | 163.0  | 96.8   | 103.7  |
| 0.6    | 0.3    | 0.4    | 0.4    | 0.3    | 1.9    | 4.9    | 0.7    | 0.5    |
| 38.5   | 52.3   | 15.6   | 33.5   | 60.6   | 21.2   | 142.8  | 78.3   | 71.2   |
| 9.4    | 26.4   | 8.2    | 3.9    | 16.8   | 14.0   | 58.2   | 32.6   | 25.2   |
| 8.3    | 12.4   | 7.3    | 1.5    | 16.5   | 13.8   | 8.8    | 14.7   | 21.8   |
| 107.9  | 173.4  | 56.9   | 52.7   | 139.4  | 109.1  | 158.8  | 167.8  | 179.7  |
| 0.9    | 0.8    | 4.2    | 4.9    | 3.9    | 1.7    | 0.8    | 1.3    | 1.5    |
| 0.8    | 13.7   | 0.5    | 3.9    | 14.2   | 8.7    | 6.8    | 1.9    | 3.3    |
| 16.6   | 4.0    | 21.3   | 33.4   | 13.5   | 6.2    | 35.6   | 8.1    | 20.9   |
| 25.2   | 28.8   | 18.7   | 17.1   | 31.4   | 34.2   | 58.1   | 59.1   | 58.3   |
| 2.0    | 10.4   | 10.1   | 0.8    | 12.4   | 13.9   | 9.4    | 2.6    | 10.9   |
| 0.8    | 15.2   | 9.0    | 20.8   | 2.3    | 1.4    | 34.1   | 22.3   | 36.4   |
| 14.0   | 18.1   | 23.1   | 30.5   | 19.4   | 14.5   | 23.5   | 24.1   | 16.0   |
| 13.4   | 3.1    | 5.0    | 12.7   | 3.2    | 1.9    | 10.8   | 10.9   | 12.9   |
| 1182.8 | 2800.3 | 7.7    | 0.2    | 2281.8 | 2401.7 | 5.0    | 4.1    | 2.7    |
| 16.9   | 24.2   | 22.6   | 41.6   | 26.6   | 9.6    | 180.4  | 122.2  | 126.1  |
| 15.3   | 14.2   | 5.6    | 18.5   | 16.5   | 19.7   | 29.7   | 20.2   | 18.0   |
| 1.5    | 2.7    | 0.6    | 4.0    | 1.7    | 2.5    | 1.0    | 1.6    | 1.7    |
| 2.0    | 0.5    | 1.3    | 0.7    | 0.9    | 2.6    | 1.8    | 0.8    | 1.0    |
| 12.3   | 7.1    | 13.8   | 17.6   | 17.7   | 12.0   | 18.9   | 19.6   | 15.8   |
| 7.6    | 19.0   | 2.5    | 5.1    | 12.9   | 2.2    | 9.9    | 12.3   | 18.8   |
| 0.7    | 0.9    | 2.6    | 3.7    | 0.4    | 3.6    | 0.6    | 0.9    | 0.6    |
| 4.3    | 7.3    | 2.4    | 5.6    | 1.2    | 6.8    | 7.0    | 3.7    | 3.0    |
| 1.1    | 0.5    | 11.4   | 5.2    | 4.5    | 3.0    | 10.0   | 8.7    | 2.2    |
| 4.5    | 0.2    | 5.3    | 0.5    | 0.7    | 5.7    | 7.5    | 9.4    | 9.6    |
| 5.4    | 7.2    | 7.5    | 2.4    | 1.3    | 1.6    | 23.0   | 30.7   | 34.4   |
| 55.4   | 76.0   | 41.5   | 39.9   | 86.0   | 74.5   | 95.2   | 100.5  | 104.8  |
| 15.3   | 8.7    | 6.5    | 2.8    | 12.0   | 11.2   | 17.3   | 12.0   | 15.4   |

|        |        |       |       |        |        |        |        |        |
|--------|--------|-------|-------|--------|--------|--------|--------|--------|
| 725.1  | 1220.4 | 131.4 | 130.4 | 1097.2 | 1176.0 | 1395.3 | 1248.3 | 1351.8 |
| 68.2   | 151.8  | 38.2  | 30.5  | 131.2  | 143.8  | 92.7   | 115.6  | 94.2   |
| 2.2    | 8.8    | 3.0   | 9.0   | 19.6   | 7.9    | 12.3   | 11.7   | 7.7    |
| 23.6   | 35.1   | 96.8  | 164.4 | 39.0   | 32.5   | 117.5  | 101.9  | 108.5  |
| 24.9   | 30.8   | 101.0 | 106.8 | 24.6   | 27.8   | 319.8  | 374.5  | 443.1  |
| 40.2   | 61.1   | 1.2   | 2.9   | 94.9   | 78.4   | 2.4    | 1.9    | 3.1    |
| 22.6   | 30.4   | 9.5   | 6.3   | 58.9   | 31.7   | 16.0   | 13.2   | 13.1   |
| 48.8   | 28.2   | 0.6   | 1.7   | 102.4  | 41.9   | 35.8   | 34.8   | 37.7   |
| 9.3    | 1.6    | 11.1  | 2.4   | 3.9    | 13.4   | 9.3    | 5.9    | 16.1   |
| 9.9    | 7.5    | 8.7   | 5.6   | 5.8    | 3.6    | 35.9   | 32.2   | 33.1   |
| 8.7    | 7.7    | 5.5   | 11.5  | 11.3   | 6.5    | 6.4    | 4.1    | 3.9    |
| 21.2   | 33.5   | 1.9   | 1.6   | 12.0   | 17.6   | 100.5  | 86.4   | 69.4   |
| 445.6  | 639.7  | 148.3 | 215.8 | 583.0  | 674.8  | 296.2  | 255.1  | 295.9  |
| 451.4  | 527.4  | 110.3 | 166.9 | 796.6  | 561.1  | 84.1   | 228.4  | 205.0  |
| 2.2    | 0.9    | 1.4   | 1.8   | 0.4    | 4.4    | 3.9    | 8.2    | 3.4    |
| 1.6    | 13.3   | 3.2   | 3.7   | 11.3   | 3.2    | 11.1   | 10.0   | 11.6   |
| 55.8   | 80.7   | 26.0  | 50.9  | 80.6   | 67.8   | 157.4  | 122.6  | 135.6  |
| 2.2    | 3.4    | 2.3   | 1.2   | 10.1   | 13.0   | 11.7   | 23.9   | 13.3   |
| 29.1   | 36.1   | 2.6   | 8.3   | 24.2   | 27.5   | 34.9   | 22.5   | 29.8   |
| 1.2    | 3.4    | 0.9   | 2.0   | 4.4    | 1.1    | 2.6    | 1.8    | 1.1    |
| 167.9  | 250.1  | 44.0  | 57.0  | 259.7  | 215.0  | 482.0  | 360.6  | 409.7  |
| 4.2    | 2.1    | 2.0   | 2.2   | 3.3    | 1.6    | 9.1    | 5.2    | 4.3    |
| 6.7    | 26.7   | 9.9   | 7.8   | 22.1   | 39.9   | 56.6   | 24.0   | 31.4   |
| 11.1   | 24.5   | 9.2   | 14.9  | 22.5   | 32.9   | 52.2   | 53.6   | 54.8   |
| 1.5    | 2.0    | 0.8   | 1.0   | 1.0    | 8.1    | 6.9    | 8.7    | 1.9    |
| 0.3    | 0.4    | 0.3   | 0.7   | 2.8    | 5.1    | 2.0    | 2.2    | 0.5    |
| 16.5   | 14.1   | 21.1  | 34.2  | 22.7   | 5.3    | 54.8   | 40.7   | 75.5   |
| 283.6  | 439.8  | 33.5  | 24.2  | 449.0  | 417.9  | 152.4  | 275.4  | 362.3  |
| 135.5  | 171.8  | 55.7  | 61.4  | 273.2  | 161.0  | 536.1  | 678.2  | 739.0  |
| 14.8   | 11.2   | 3.4   | 0.3   | 10.0   | 12.2   | 4.0    | 4.4    | 3.0    |
| 10.5   | 16.8   | 2.8   | 13.7  | 22.1   | 7.8    | 27.8   | 39.1   | 29.6   |
| 9.4    | 1.5    | 0.7   | 1.2   | 1.4    | 2.0    | 1.9    | 2.5    | 1.8    |
| 0.6    | 2.5    | 4.1   | 2.2   | 4.7    | 1.3    | 7.8    | 3.6    | 5.8    |
| 27.1   | 48.2   | 15.0  | 19.5  | 51.1   | 53.5   | 59.4   | 88.7   | 94.0   |
| 39.5   | 27.3   | 30.7  | 40.7  | 60.6   | 28.4   | 190.6  | 174.0  | 189.5  |
| 6.6    | 14.3   | 5.5   | 5.2   | 1.3    | 14.1   | 15.4   | 18.0   | 18.0   |
| 3.0    | 0.8    | 1.5   | 1.6   | 0.6    | 2.6    | 1.4    | 7.6    | 2.3    |
| 2.9    | 6.4    | 57.9  | 77.6  | 9.4    | 10.2   | 9.2    | 19.2   | 35.4   |
| 9.6    | 6.8    | 8.8   | 11.7  | 4.0    | 3.4    | 11.6   | 3.2    | 6.3    |
| 3.2    | 0.5    | 1.8   | 1.0   | 4.4    | 4.9    | 5.1    | 28.8   | 21.5   |
| 14.6   | 33.3   | 1.6   | 6.2   | 33.0   | 36.5   | 37.0   | 33.0   | 38.1   |
| 69.4   | 72.3   | 9.8   | 22.1  | 77.3   | 77.9   | 225.9  | 181.7  | 210.9  |
| 116.8  | 106.8  | 60.9  | 77.7  | 137.1  | 88.6   | 162.4  | 94.8   | 98.4   |
| 26.4   | 25.8   | 15.0  | 9.7   | 13.4   | 31.5   | 33.3   | 35.8   | 31.3   |
| 6.3    | 5.8    | 0.8   | 2.9   | 11.3   | 9.3    | 3.5    | 6.2    | 6.0    |
| 1424.3 | 2043.0 | 115.0 | 153.2 | 2236.2 | 1658.7 | 1145.2 | 818.0  | 788.7  |
| 1.8    | 0.9    | 5.3   | 0.5   | 0.9    | 2.6    | 1.5    | 1.1    | 0.8    |
| 7.7    | 3.7    | 7.5   | 3.0   | 10.2   | 2.3    | 4.7    | 1.9    | 3.5    |
| 121.0  | 174.5  | 104.2 | 188.8 | 190.4  | 48.5   | 401.8  | 294.2  | 359.8  |
| 54.6   | 54.3   | 39.1  | 38.6  | 63.2   | 46.9   | 111.8  | 118.9  | 134.4  |
| 4.0    | 1.2    | 3.2   | 9.0   | 1.4    | 7.3    | 10.0   | 13.4   | 13.1   |
| 8.6    | 19.4   | 17.6  | 16.6  | 32.6   | 24.0   | 67.7   | 74.7   | 82.9   |
| 5.7    | 20.5   | 2.9   | 1.9   | 15.2   | 16.7   | 28.0   | 22.7   | 19.8   |

|        |        |       |       |        |        |        |        |        |
|--------|--------|-------|-------|--------|--------|--------|--------|--------|
| 10.9   | 9.6    | 1.7   | 3.0   | 15.4   | 4.5    | 5.6    | 0.9    | 2.3    |
| 14.6   | 1.1    | 3.1   | 0.7   | 8.7    | 1.0    | 98.1   | 91.2   | 100.2  |
| 47.9   | 79.1   | 38.0  | 47.1  | 83.0   | 65.5   | 121.7  | 143.4  | 140.2  |
| 6.7    | 1.4    | 4.7   | 10.6  | 4.0    | 4.2    | 2.4    | 4.2    | 7.6    |
| 1.7    | 17.4   | 2.8   | 0.3   | 13.0   | 17.9   | 28.8   | 114.7  | 102.8  |
| 4.4    | 13.3   | 0.4   | 2.3   | 1.6    | 0.6    | 3.4    | 3.3    | 0.8    |
| 2.4    | 2.2    | 1.6   | 1.1   | 3.1    | 3.4    | 5.3    | 12.6   | 11.7   |
| 0.8    | 1.0    | 5.2   | 7.1   | 2.9    | 6.5    | 1.9    | 3.7    | 6.3    |
| 31.5   | 37.5   | 16.8  | 48.3  | 50.6   | 24.7   | 50.4   | 56.8   | 54.2   |
| 2.6    | 1.4    | 3.6   | 2.4   | 1.9    | 7.1    | 1.7    | 1.5    | 3.5    |
| 1.1    | 2.7    | 2.4   | 3.1   | 7.5    | 2.3    | 2.0    | 4.2    | 1.7    |
| 6.5    | 6.7    | 13.8  | 17.4  | 2.9    | 13.1   | 8.7    | 10.1   | 12.4   |
| 8.5    | 19.9   | 19.7  | 22.6  | 21.4   | 27.3   | 84.9   | 67.0   | 74.7   |
| 14.8   | 32.2   | 17.0  | 5.1   | 23.7   | 22.8   | 22.3   | 21.8   | 10.6   |
| 12.9   | 10.5   | 12.4  | 9.6   | 7.6    | 15.1   | 8.3    | 13.2   | 11.7   |
| 7.2    | 0.9    | 19.4  | 7.8   | 14.0   | 12.7   | 17.3   | 14.7   | 15.9   |
| 1.2    | 1.2    | 1.4   | 1.6   | 9.6    | 1.2    | 4.0    | 3.1    | 2.9    |
| 1.6    | 1.3    | 2.1   | 0.5   | 3.7    | 1.4    | 2.1    | 3.2    | 1.5    |
| 1.8    | 1.3    | 8.9   | 12.6  | 6.8    | 0.9    | 10.4   | 2.9    | 6.1    |
| 1.4    | 3.7    | 1.3   | 3.5   | 1.1    | 1.3    | 5.7    | 2.7    | 3.0    |
| 2.9    | 17.2   | 5.4   | 3.0   | 13.3   | 0.9    | 10.5   | 11.0   | 11.5   |
| 36.1   | 19.6   | 14.4  | 24.0  | 66.5   | 65.6   | 62.7   | 50.0   | 58.2   |
| 0.9    | 1.0    | 11.4  | 1.9   | 6.3    | 13.6   | 40.2   | 61.1   | 60.8   |
| 7.6    | 10.8   | 11.7  | 10.9  | 2.1    | 0.8    | 8.3    | 10.7   | 5.4    |
| 10.7   | 36.6   | 19.5  | 11.3  | 25.9   | 47.9   | 27.3   | 33.7   | 37.9   |
| 31.1   | 53.7   | 5.4   | 1.0   | 33.7   | 51.6   | 25.4   | 25.1   | 39.8   |
| 152.3  | 194.1  | 38.9  | 52.2  | 288.6  | 152.4  | 72.0   | 103.7  | 112.5  |
| 7.9    | 13.0   | 3.0   | 14.3  | 14.1   | 14.0   | 5.6    | 12.8   | 8.6    |
| 2.6    | 15.8   | 9.4   | 1.6   | 10.1   | 15.2   | 14.9   | 16.9   | 16.0   |
| 8.1    | 48.4   | 31.6  | 69.3  | 3.8    | 22.6   | 416.5  | 1222.7 | 1327.8 |
| 16.7   | 15.6   | 11.2  | 6.2   | 15.7   | 12.5   | 21.5   | 14.1   | 19.6   |
| 185.9  | 383.0  | 10.2  | 9.3   | 327.4  | 363.6  | 266.8  | 211.9  | 244.5  |
| 5.6    | 8.1    | 1.0   | 0.6   | 6.3    | 6.6    | 8.8    | 4.5    | 3.9    |
| 157.0  | 155.6  | 73.6  | 116.1 | 231.7  | 184.5  | 629.9  | 521.0  | 601.6  |
| 3.4    | 1.4    | 6.4   | 15.1  | 11.0   | 1.2    | 4.3    | 5.9    | 1.9    |
| 7.3    | 10.0   | 13.1  | 10.0  | 1.6    | 2.5    | 4.0    | 1.0    | 1.4    |
| 0.9    | 5.4    | 3.4   | 2.1   | 3.6    | 4.8    | 7.4    | 1.6    | 8.4    |
| 12.5   | 20.8   | 14.8  | 13.8  | 17.2   | 14.4   | 17.9   | 15.8   | 21.3   |
| 1.7    | 6.2    | 0.9   | 0.6   | 7.4    | 0.9    | 10.3   | 6.5    | 3.0    |
| 7.2    | 1.3    | 1.1   | 1.1   | 0.7    | 1.9    | 25.0   | 11.2   | 3.5    |
| 22.6   | 19.2   | 22.3  | 30.2  | 26.2   | 12.4   | 32.3   | 20.3   | 22.0   |
| 9.6    | 12.0   | 3.4   | 0.7   | 7.6    | 11.0   | 2.3    | 5.2    | 3.5    |
| 378.7  | 256.0  | 44.7  | 54.7  | 535.5  | 326.7  | 317.3  | 178.4  | 194.3  |
| 3.6    | 3.4    | 11.9  | 3.4   | 3.8    | 5.8    | 4.5    | 4.9    | 4.9    |
| 5.9    | 9.7    | 0.5   | 0.3   | 1.7    | 8.8    | 3.7    | 1.9    | 0.2    |
| 5.5    | 5.6    | 8.7   | 4.4   | 11.6   | 13.2   | 23.9   | 18.7   | 23.0   |
| 438.2  | 928.9  | 286.9 | 501.9 | 808.0  | 887.3  | 2243.3 | 2358.7 | 2483.2 |
| 141.5  | 213.3  | 104.8 | 139.7 | 237.2  | 282.6  | 567.8  | 494.8  | 569.0  |
| 110.5  | 135.8  | 336.1 | 548.4 | 176.5  | 131.0  | 278.0  | 318.0  | 300.9  |
| 1087.9 | 1320.5 | 324.6 | 651.2 | 1584.3 | 1437.7 | 5836.9 | 4525.4 | 4836.2 |
| 1.4    | 17.8   | 4.1   | 0.6   | 14.0   | 4.6    | 10.2   | 20.5   | 32.1   |
| 46.8   | 104.4  | 47.5  | 43.1  | 98.8   | 95.7   | 358.8  | 238.6  | 313.2  |
| 3.2    | 1.6    | 6.3   | 3.7   | 11.4   | 2.7    | 9.5    | 9.6    | 5.5    |

|        |        |       |       |        |        |         |         |         |
|--------|--------|-------|-------|--------|--------|---------|---------|---------|
| 17.3   | 13.8   | 0.5   | 3.2   | 14.0   | 15.9   | 19.4    | 18.5    | 16.1    |
| 1025.5 | 1090.6 | 2.9   | 3.6   | 1419.8 | 1295.2 | 5582.4  | 4809.5  | 5227.9  |
| 1.4    | 1.0    | 4.6   | 5.9   | 1.2    | 4.7    | 2.0     | 5.7     | 2.1     |
| 1.2    | 10.1   | 8.2   | 5.9   | 0.7    | 9.4    | 15.3    | 13.9    | 10.7    |
| 18.0   | 36.5   | 17.8  | 40.5  | 36.2   | 15.6   | 74.2    | 78.7    | 86.3    |
| 32.6   | 55.8   | 23.7  | 15.6  | 77.5   | 39.0   | 26.2    | 33.9    | 20.1    |
| 346.6  | 1018.0 | 2.7   | 0.5   | 844.3  | 498.8  | 2.7     | 0.7     | 0.4     |
| 2.5    | 1.9    | 1.4   | 1.1   | 1.0    | 7.0    | 11.9    | 10.7    | 15.2    |
| 3.3    | 1.0    | 1.2   | 4.0   | 0.8    | 0.7    | 29.2    | 31.3    | 33.3    |
| 5.8    | 4.5    | 5.2   | 10.5  | 12.4   | 5.7    | 1.2     | 2.0     | 5.7     |
| 4.7    | 4.2    | 2.2   | 1.9   | 2.6    | 6.5    | 2.3     | 13.3    | 9.8     |
| 2.8    | 1.4    | 8.0   | 3.7   | 2.9    | 15.9   | 12.1    | 18.0    | 11.9    |
| 0.4    | 0.6    | 0.2   | 0.3   | 3.4    | 0.8    | 27.4    | 13.9    | 29.2    |
| 37.3   | 36.6   | 121.6 | 91.9  | 86.7   | 48.1   | 1020.6  | 1411.4  | 1595.1  |
| 19.0   | 17.2   | 38.3  | 18.2  | 19.6   | 16.7   | 21.6    | 18.8    | 26.8    |
| 2.0    | 3.1    | 0.8   | 1.8   | 2.3    | 1.5    | 4.3     | 1.7     | 2.2     |
| 1663.4 | 1544.2 | 452.5 | 523.3 | 2049.9 | 1320.0 | 10424.3 | 11988.2 | 12137.5 |
| 0.2    | 0.2    | 2.0   | 0.3   | 1.3    | 1.3    | 3.7     | 1.2     | 0.1     |
| 87.1   | 105.8  | 74.5  | 113.3 | 130.3  | 80.8   | 249.9   | 121.3   | 144.6   |
| 13.8   | 28.6   | 5.3   | 7.1   | 17.8   | 18.1   | 11.1    | 10.3    | 4.7     |
| 8.5    | 12.2   | 19.0  | 12.6  | 18.4   | 1.7    | 21.8    | 15.2    | 10.1    |
| 44.9   | 33.4   | 33.4  | 16.9  | 41.0   | 21.2   | 141.2   | 205.4   | 260.7   |
| 2.3    | 8.3    | 0.1   | 5.4   | 4.5    | 2.8    | 1.0     | 3.1     | 3.4     |
| 5.5    | 1.2    | 10.3  | 8.6   | 6.5    | 3.5    | 5.9     | 4.1     | 2.5     |
| 2.1    | 1.6    | 1.3   | 1.7   | 1.8    | 1.5    | 2.4     | 4.4     | 10.8    |
| 1.4    | 5.5    | 1.1   | 0.5   | 13.4   | 9.4    | 9.3     | 1.0     | 1.6     |
| 11.6   | 2.4    | 6.1   | 1.4   | 1.8    | 6.1    | 24.5    | 20.1    | 26.5    |
| 5.6    | 9.1    | 4.4   | 0.6   | 2.9    | 3.8    | 9.4     | 13.0    | 4.5     |
| 41.1   | 121.2  | 2.5   | 2.6   | 81.1   | 114.0  | 30.9    | 66.0    | 85.0    |
| 12.8   | 2.5    | 6.1   | 10.7  | 9.4    | 10.2   | 9.0     | 16.0    | 11.9    |
| 4.2    | 7.1    | 16.2  | 6.4   | 12.7   | 13.2   | 3794.6  | 4161.0  | 4142.3  |
| 7.9    | 13.7   | 13.1  | 9.7   | 15.1   | 12.5   | 8.3     | 11.7    | 7.9     |
| 1029.4 | 1629.7 | 34.0  | 36.7  | 1715.9 | 1505.6 | 176.7   | 126.2   | 161.5   |
| 32.1   | 34.9   | 28.2  | 17.6  | 38.4   | 38.1   | 67.3    | 52.1    | 59.3    |
| 10.3   | 5.3    | 9.3   | 10.5  | 12.1   | 9.2    | 4.4     | 12.7    | 13.4    |
| 43.4   | 51.7   | 11.2  | 21.6  | 50.9   | 41.7   | 71.0    | 60.5    | 56.0    |
| 18.0   | 24.1   | 25.6  | 16.0  | 26.5   | 24.4   | 37.9    | 35.5    | 27.9    |
| 4.0    | 18.9   | 6.5   | 6.9   | 14.1   | 16.7   | 2.0     | 3.0     | 4.2     |
| 0.6    | 7.4    | 11.6  | 2.4   | 3.7    | 12.7   | 6.8     | 14.8    | 11.2    |
| 15.5   | 19.1   | 13.2  | 13.1  | 25.8   | 13.7   | 51.4    | 53.7    | 51.2    |
| 6.9    | 19.8   | 10.3  | 5.0   | 4.6    | 15.1   | 10.6    | 8.4     | 7.1     |
| 662.9  | 894.3  | 43.1  | 85.0  | 836.8  | 1040.7 | 2521.2  | 1390.1  | 1491.2  |
| 7.4    | 2.7    | 11.8  | 7.5   | 1.8    | 22.9   | 6.4     | 4.9     | 3.7     |
| 8.0    | 3.4    | 2.6   | 22.9  | 5.1    | 5.0    | 12.7    | 14.4    | 3.0     |
| 15.4   | 23.4   | 1.4   | 1.5   | 31.7   | 18.7   | 10.3    | 5.2     | 6.2     |
| 2.2    | 3.6    | 2.5   | 1.8   | 1.8    | 2.4    | 7.1     | 2.4     | 2.6     |
| 21.1   | 23.8   | 7.0   | 2.0   | 7.7    | 14.7   | 3.6     | 10.5    | 10.8    |
| 3.3    | 9.9    | 0.7   | 0.9   | 7.1    | 1.2    | 1.4     | 2.6     | 4.1     |
| 8.1    | 6.0    | 3.2   | 2.9   | 15.2   | 5.4    | 1.2     | 6.7     | 5.2     |
| 2.1    | 0.8    | 2.1   | 1.3   | 1.3    | 2.8    | 4.0     | 2.4     | 1.8     |
| 2.8    | 1.0    | 30.6  | 49.8  | 3.1    | 2.4    | 61.2    | 34.5    | 52.2    |
| 7.6    | 0.8    | 3.1   | 1.0   | 6.0    | 2.5    | 6.9     | 0.4     | 3.4     |
| 2.4    | 21.3   | 4.3   | 1.3   | 9.0    | 16.7   | 16.3    | 5.4     | 13.9    |

|        |        |        |        |        |        |        |        |        |
|--------|--------|--------|--------|--------|--------|--------|--------|--------|
| 84.8   | 84.6   | 45.9   | 55.4   | 112.6  | 89.5   | 106.5  | 83.2   | 93.9   |
| 5.3    | 16.6   | 1.2    | 2.3    | 1.7    | 5.6    | 4.1    | 2.0    | 5.3    |
| 13.8   | 21.2   | 3.6    | 6.8    | 26.0   | 16.0   | 78.4   | 48.7   | 40.5   |
| 1.1    | 11.6   | 0.9    | 7.4    | 2.3    | 4.2    | 1.0    | 0.7    | 1.0    |
| 0.8    | 0.9    | 24.7   | 19.9   | 0.5    | 2.4    | 45.2   | 39.2   | 40.4   |
| 1.2    | 2.2    | 1.7    | 1.5    | 3.2    | 1.9    | 2.6    | 2.6    | 2.7    |
| 13.3   | 6.1    | 8.2    | 9.4    | 7.4    | 16.5   | 2.1    | 7.2    | 6.9    |
| 2.3    | 2.6    | 2.0    | 1.3    | 4.6    | 19.9   | 34.0   | 33.8   | 38.6   |
| 27.5   | 41.3   | 11.1   | 11.3   | 32.1   | 28.8   | 26.2   | 38.9   | 31.9   |
| 4975.1 | 5329.3 | 2560.9 | 3263.5 | 5700.6 | 4967.7 | 7155.9 | 7403.9 | 7304.5 |
| 118.6  | 153.0  | 147.9  | 190.0  | 174.7  | 170.2  | 709.0  | 565.8  | 577.1  |
| 30.1   | 21.8   | 31.6   | 56.3   | 32.9   | 19.3   | 78.7   | 65.7   | 78.9   |
| 215.4  | 263.5  | 23.3   | 20.3   | 262.0  | 209.7  | 186.1  | 167.5  | 180.7  |
| 1.0    | 1.4    | 4.5    | 0.7    | 2.1    | 1.7    | 2.3    | 2.1    | 2.1    |
| 13.4   | 12.1   | 5.0    | 11.4   | 1.2    | 4.1    | 6.2    | 11.6   | 10.5   |
| 14.8   | 25.6   | 3.7    | 0.5    | 17.1   | 27.7   | 1.3    | 3.8    | 3.7    |
| 0.6    | 0.5    | 11.3   | 4.0    | 1.4    | 0.4    | 1.2    | 2.8    | 3.0    |
| 767.3  | 887.7  | 132.2  | 128.8  | 1288.7 | 877.8  | 1198.5 | 585.9  | 628.9  |
| 1.8    | 0.4    | 1.6    | 0.8    | 0.8    | 1.3    | 2.2    | 2.0    | 1.5    |
| 24.9   | 5.4    | 9.7    | 7.6    | 13.7   | 12.4   | 36.5   | 34.6   | 32.6   |
| 3.1    | 5.1    | 0.2    | 0.6    | 0.2    | 3.1    | 6.9    | 1.2    | 1.1    |
| 0.5    | 9.3    | 13.0   | 1.2    | 11.5   | 3.8    | 17.1   | 20.5   | 24.9   |
| 24.6   | 43.5   | 10.7   | 10.4   | 33.7   | 37.5   | 55.3   | 36.8   | 46.1   |
| 1014.1 | 1381.8 | 204.9  | 281.1  | 1573.9 | 1419.1 | 4193.4 | 2788.7 | 3144.3 |
| 14.4   | 25.2   | 1.1    | 2.0    | 34.8   | 27.0   | 2.7    | 1.0    | 1.9    |
| 1.2    | 7.1    | 1.9    | 1.1    | 1.2    | 3.3    | 4.9    | 13.7   | 7.1    |
| 0.7    | 9.8    | 7.3    | 0.5    | 12.6   | 7.9    | 1.9    | 1.3    | 3.0    |
| 9.9    | 28.4   | 5.9    | 4.7    | 21.6   | 22.9   | 10.9   | 14.2   | 19.4   |
| 4.7    | 1.2    | 2.0    | 3.0    | 1.2    | 3.4    | 6.3    | 1.9    | 1.8    |
| 394.1  | 429.8  | 21.8   | 44.0   | 474.7  | 368.2  | 2334.3 | 1426.7 | 1549.0 |
| 24.7   | 50.5   | 53.5   | 49.0   | 26.8   | 33.3   | 40.3   | 47.7   | 59.1   |
| 164.1  | 215.6  | 36.1   | 34.7   | 238.8  | 301.1  | 268.0  | 242.0  | 268.0  |
| 1.5    | 16.2   | 9.0    | 2.0    | 14.1   | 2.1    | 1.4    | 5.3    | 10.8   |
| 8.8    | 2.1    | 3.1    | 2.5    | 1.5    | 1.8    | 14.8   | 13.2   | 14.0   |
| 14.8   | 36.8   | 38.2   | 32.9   | 43.8   | 14.5   | 101.6  | 97.2   | 86.0   |
| 6.6    | 6.9    | 12.0   | 8.6    | 7.2    | 10.7   | 9.3    | 12.6   | 7.1    |
| 1.1    | 3.2    | 4.2    | 11.5   | 2.8    | 2.7    | 4.2    | 3.4    | 4.7    |
| 7.8    | 11.7   | 3.1    | 19.8   | 4.2    | 2.6    | 14.9   | 27.5   | 35.8   |
| 2.7    | 17.7   | 3.5    | 10.1   | 16.5   | 2.8    | 19.5   | 9.2    | 13.4   |
| 6.5    | 9.6    | 5.9    | 5.4    | 5.7    | 0.9    | 2.5    | 12.0   | 1.5    |
| 3.7    | 1.8    | 8.5    | 0.6    | 2.1    | 10.3   | 16.6   | 27.0   | 30.3   |
| 60.0   | 97.0   | 17.8   | 18.5   | 147.5  | 96.9   | 26.7   | 23.5   | 21.1   |
| 9.5    | 23.0   | 4.2    | 4.2    | 12.9   | 18.8   | 18.7   | 17.4   | 12.1   |
| 6.1    | 18.0   | 3.3    | 2.9    | 7.8    | 10.7   | 7.4    | 17.6   | 14.6   |
| 0.5    | 6.7    | 1.6    | 2.8    | 0.5    | 0.5    | 2.2    | 1.1    | 0.5    |
| 36.9   | 31.0   | 21.2   | 23.0   | 56.1   | 24.8   | 489.4  | 445.7  | 480.1  |
| 2.0    | 1.6    | 2.9    | 1.9    | 10.1   | 4.3    | 9.7    | 2.9    | 2.2    |
| 77.2   | 146.1  | 23.8   | 19.2   | 117.4  | 108.2  | 266.0  | 274.6  | 276.6  |
| 7.7    | 9.0    | 5.2    | 5.0    | 12.5   | 6.3    | 12.6   | 9.1    | 13.6   |
| 8.2    | 0.5    | 1.3    | 0.3    | 1.7    | 2.0    | 10.3   | 8.9    | 7.9    |
| 17.5   | 15.2   | 9.0    | 8.1    | 17.2   | 19.0   | 6.0    | 2.5    | 10.4   |
| 3.2    | 6.2    | 4.6    | 1.1    | 0.7    | 3.3    | 8.5    | 8.8    | 6.1    |
| 16.5   | 41.4   | 1.0    | 0.6    | 28.0   | 32.8   | 6.8    | 4.1    | 10.7   |

|        |        |       |        |        |        |        |        |        |
|--------|--------|-------|--------|--------|--------|--------|--------|--------|
| 6.4    | 20.4   | 0.5   | 4.9    | 10.4   | 21.7   | 10.2   | 10.8   | 14.3   |
| 1.9    | 2.6    | 3.0   | 1.6    | 3.5    | 1.9    | 4.7    | 5.2    | 7.0    |
| 15.8   | 36.0   | 1.1   | 9.2    | 22.6   | 23.2   | 15.4   | 18.6   | 23.3   |
| 7.2    | 17.1   | 2.2   | 4.2    | 4.7    | 14.1   | 8.0    | 5.5    | 5.5    |
| 23.1   | 26.2   | 4.6   | 34.3   | 27.4   | 5.5    | 11.8   | 13.1   | 21.6   |
| 17.1   | 26.8   | 4.5   | 4.8    | 25.3   | 32.7   | 5.1    | 15.6   | 19.2   |
| 87.8   | 143.9  | 35.2  | 42.1   | 130.0  | 120.4  | 207.9  | 162.6  | 127.7  |
| 20.1   | 17.0   | 1.6   | 5.4    | 11.4   | 29.5   | 12.8   | 23.0   | 23.5   |
| 8.1    | 10.8   | 0.7   | 0.7    | 16.4   | 16.1   | 1.5    | 9.8    | 5.8    |
| 658.7  | 686.6  | 288.0 | 460.0  | 911.2  | 625.4  | 666.8  | 544.7  | 611.5  |
| 1.2    | 2.3    | 0.5   | 0.9    | 0.4    | 0.6    | 2.1    | 2.0    | 6.2    |
| 1.4    | 5.3    | 4.4   | 2.4    | 0.5    | 1.2    | 3.4    | 7.9    | 11.4   |
| 8.0    | 1.5    | 6.9   | 0.8    | 2.8    | 0.9    | 9.2    | 4.2    | 5.2    |
| 9.4    | 14.5   | 5.7   | 3.4    | 0.9    | 5.9    | 6.4    | 15.7   | 2.6    |
| 63.1   | 41.3   | 42.2  | 52.1   | 68.0   | 33.9   | 151.7  | 136.4  | 121.2  |
| 0.8    | 8.8    | 1.0   | 1.1    | 0.5    | 0.5    | 8.1    | 6.4    | 3.8    |
| 9.9    | 17.4   | 8.9   | 12.5   | 7.5    | 4.5    | 11.9   | 8.0    | 3.5    |
| 54.6   | 54.7   | 38.9  | 34.8   | 60.8   | 58.4   | 66.1   | 47.3   | 57.5   |
| 8.3    | 10.4   | 6.1   | 1.4    | 0.8    | 8.3    | 10.3   | 11.3   | 11.2   |
| 12.3   | 28.5   | 0.8   | 15.0   | 31.6   | 12.3   | 110.5  | 110.1  | 104.3  |
| 14.6   | 5.0    | 14.8  | 15.2   | 12.1   | 33.7   | 36.6   | 43.5   | 40.5   |
| 207.1  | 285.9  | 76.9  | 97.0   | 388.9  | 226.4  | 276.0  | 185.6  | 193.6  |
| 261.7  | 408.9  | 24.0  | 39.1   | 435.7  | 497.3  | 152.2  | 102.8  | 156.5  |
| 17.6   | 17.6   | 20.6  | 37.2   | 34.3   | 45.3   | 25.8   | 21.3   | 23.6   |
| 0.9    | 1.3    | 1.8   | 0.9    | 2.0    | 2.1    | 7.4    | 6.7    | 2.9    |
| 6.7    | 5.7    | 11.0  | 7.2    | 5.6    | 13.1   | 8.2    | 9.8    | 3.9    |
| 735.6  | 854.4  | 341.8 | 461.4  | 1141.0 | 1095.5 | 1454.3 | 1137.8 | 1173.5 |
| 5.8    | 9.7    | 6.1   | 0.6    | 7.9    | 6.3    | 9.8    | 7.8    | 7.3    |
| 1.4    | 8.6    | 0.8   | 0.6    | 7.7    | 2.9    | 2.7    | 2.6    | 0.6    |
| 3700.7 | 4218.2 | 920.1 | 1177.6 | 4630.0 | 3486.3 | 3227.8 | 2184.1 | 2757.1 |
| 0.5    | 0.6    | 0.2   | 3.2    | 5.4    | 4.8    | 2.2    | 2.5    | 1.3    |
| 19.5   | 13.5   | 32.2  | 14.4   | 21.0   | 12.6   | 23.4   | 21.6   | 23.1   |
| 12.9   | 22.6   | 1.0   | 2.1    | 12.4   | 17.5   | 31.7   | 20.4   | 21.2   |
| 3.0    | 7.3    | 6.9   | 8.7    | 0.9    | 7.0    | 5.5    | 2.0    | 3.9    |
| 212.3  | 211.2  | 103.8 | 214.8  | 292.0  | 214.1  | 334.1  | 571.7  | 599.7  |
| 208.0  | 316.7  | 57.3  | 153.0  | 373.1  | 173.3  | 316.3  | 291.2  | 297.7  |
| 15.9   | 30.6   | 2.8   | 2.4    | 30.9   | 16.3   | 21.8   | 14.9   | 22.2   |
| 6.5    | 5.5    | 18.2  | 12.5   | 27.1   | 16.2   | 60.6   | 43.6   | 58.7   |
| 27.9   | 38.3   | 9.3   | 12.7   | 34.5   | 35.9   | 88.5   | 83.1   | 72.1   |
| 5.2    | 4.1    | 4.0   | 2.9    | 1.2    | 9.7    | 2.7    | 8.2    | 5.5    |
| 17.4   | 32.9   | 0.5   | 3.7    | 17.3   | 26.9   | 8.7    | 5.7    | 6.6    |
| 7.4    | 14.4   | 1.4   | 1.9    | 11.7   | 10.2   | 6.5    | 6.5    | 8.3    |
| 425.3  | 514.4  | 24.0  | 21.9   | 597.2  | 443.9  | 372.3  | 285.6  | 347.0  |
| 8.5    | 6.0    | 19.6  | 4.3    | 2.0    | 12.6   | 6.9    | 18.4   | 8.9    |
| 243.7  | 253.2  | 29.2  | 32.0   | 311.3  | 235.3  | 717.9  | 615.1  | 677.6  |
| 9.6    | 14.9   | 15.1  | 13.4   | 7.3    | 21.7   | 19.2   | 19.2   | 21.1   |
| 11.8   | 15.8   | 8.1   | 10.5   | 15.7   | 7.7    | 16.8   | 15.6   | 15.2   |
| 14.8   | 13.1   | 4.4   | 4.5    | 15.5   | 6.5    | 7.5    | 1.4    | 5.2    |
| 5.2    | 5.4    | 6.9   | 8.2    | 2.5    | 6.2    | 4.9    | 8.6    | 7.0    |
| 9.5    | 4.3    | 7.9   | 2.0    | 0.8    | 12.1   | 18.0   | 14.0   | 10.6   |
| 6.5    | 4.2    | 4.3   | 1.6    | 2.8    | 0.9    | 8.9    | 5.1    | 8.1    |
| 28.0   | 55.2   | 10.7  | 3.0    | 44.0   | 70.8   | 28.6   | 34.3   | 38.9   |
| 156.3  | 168.4  | 14.0  | 26.7   | 331.0  | 143.4  | 137.9  | 116.7  | 129.5  |



|       |       |       |       |       |       |       |       |       |
|-------|-------|-------|-------|-------|-------|-------|-------|-------|
| 9.1   | 13.0  | 5.0   | 1.7   | 17.7  | 6.2   | 8.2   | 9.4   | 7.5   |
| 11.0  | 5.2   | 9.6   | 3.3   | 3.3   | 11.5  | 26.0  | 13.1  | 15.3  |
| 28.2  | 10.7  | 10.0  | 17.8  | 5.8   | 4.3   | 25.4  | 22.8  | 28.0  |
| 1.4   | 3.2   | 0.8   | 3.6   | 1.4   | 1.0   | 5.0   | 7.7   | 1.3   |
| 2.3   | 4.4   | 13.9  | 5.6   | 2.0   | 4.2   | 5.5   | 2.3   | 7.4   |
| 0.6   | 0.5   | 9.0   | 17.2  | 3.6   | 2.5   | 3.2   | 0.3   | 0.5   |
| 18.9  | 21.2  | 46.7  | 73.2  | 22.5  | 28.7  | 67.3  | 54.7  | 56.6  |
| 2.9   | 6.5   | 3.4   | 8.1   | 4.4   | 4.2   | 7.3   | 4.0   | 6.0   |
| 7.6   | 9.7   | 5.0   | 1.3   | 8.4   | 0.9   | 23.2  | 14.6  | 15.9  |
| 6.5   | 14.6  | 9.0   | 13.6  | 15.3  | 10.8  | 17.5  | 14.0  | 19.3  |
| 1.6   | 0.6   | 1.2   | 2.2   | 0.8   | 3.6   | 3.5   | 4.9   | 5.3   |
| 2.2   | 4.3   | 5.6   | 7.6   | 5.5   | 3.2   | 8.2   | 8.4   | 5.1   |
| 16.7  | 14.8  | 2.9   | 18.2  | 3.2   | 4.4   | 8.9   | 8.8   | 10.8  |
| 1.3   | 1.3   | 2.5   | 6.7   | 1.4   | 6.2   | 2.2   | 1.3   | 3.7   |
| 1.2   | 17.8  | 0.4   | 0.2   | 5.3   | 12.8  | 2.6   | 5.8   | 1.3   |
| 18.4  | 44.0  | 3.8   | 5.4   | 36.0  | 26.1  | 26.5  | 25.4  | 18.4  |
| 9.8   | 5.6   | 11.1  | 25.2  | 3.1   | 6.8   | 34.2  | 37.8  | 35.7  |
| 0.4   | 6.9   | 10.1  | 5.7   | 17.2  | 10.4  | 13.7  | 8.9   | 9.6   |
| 15.8  | 17.6  | 11.7  | 6.2   | 8.8   | 14.9  | 6.8   | 11.1  | 0.9   |
| 153.2 | 172.7 | 198.4 | 387.4 | 245.1 | 146.1 | 269.9 | 271.9 | 275.5 |
| 8.3   | 11.6  | 24.4  | 17.2  | 22.3  | 15.7  | 14.7  | 11.5  | 11.5  |
| 1.1   | 10.1  | 8.7   | 4.4   | 0.6   | 12.8  | 17.5  | 14.5  | 14.5  |
| 10.5  | 14.3  | 16.2  | 9.9   | 8.7   | 11.0  | 18.6  | 10.3  | 3.9   |
| 1.6   | 22.3  | 17.5  | 13.0  | 11.9  | 17.5  | 11.1  | 20.9  | 20.1  |
| 1.2   | 1.2   | 1.8   | 0.7   | 0.8   | 1.3   | 4.0   | 4.5   | 2.0   |
| 12.9  | 5.0   | 10.1  | 2.4   | 5.2   | 4.4   | 10.6  | 18.8  | 4.1   |
| 29.5  | 17.5  | 45.6  | 42.8  | 32.6  | 15.4  | 63.8  | 76.2  | 76.3  |
| 8.9   | 12.0  | 9.4   | 2.9   | 9.3   | 14.8  | 7.3   | 16.3  | 22.5  |
| 4.4   | 1.0   | 0.4   | 0.2   | 8.7   | 7.0   | 5.5   | 5.5   | 4.8   |
| 28.3  | 25.2  | 15.0  | 2.3   | 35.5  | 26.7  | 35.5  | 34.2  | 41.5  |
| 5.8   | 7.4   | 8.6   | 8.0   | 8.2   | 2.4   | 7.4   | 6.6   | 9.8   |
| 65.5  | 59.8  | 0.5   | 0.6   | 122.9 | 64.5  | 159.9 | 101.6 | 112.8 |
| 30.7  | 62.9  | 38.0  | 31.5  | 51.2  | 44.8  | 97.6  | 48.6  | 50.8  |
| 28.9  | 41.1  | 6.1   | 11.2  | 33.8  | 37.6  | 86.1  | 98.7  | 84.5  |
| 1.1   | 3.2   | 1.0   | 0.4   | 1.8   | 2.1   | 9.9   | 6.3   | 1.6   |
| 4.3   | 7.8   | 1.5   | 7.7   | 12.3  | 3.2   | 10.6  | 10.2  | 11.0  |
| 4.3   | 2.3   | 0.8   | 0.5   | 6.0   | 0.8   | 1.5   | 3.4   | 2.9   |
| 13.7  | 14.6  | 1.4   | 3.3   | 15.7  | 8.7   | 3.7   | 8.7   | 2.3   |
| 9.6   | 24.8  | 3.1   | 10.9  | 39.8  | 13.0  | 42.8  | 33.8  | 36.3  |
| 147.0 | 188.0 | 69.6  | 123.7 | 190.2 | 148.4 | 377.1 | 298.4 | 352.3 |
| 44.4  | 57.7  | 0.9   | 0.3   | 126.6 | 48.1  | 12.3  | 23.1  | 25.6  |
| 1.3   | 0.5   | 11.1  | 1.4   | 7.4   | 4.4   | 6.5   | 8.5   | 7.4   |
| 16.3  | 17.4  | 5.6   | 5.9   | 21.7  | 13.3  | 17.4  | 19.2  | 18.7  |
| 0.4   | 0.3   | 0.6   | 1.2   | 0.4   | 0.6   | 1.2   | 1.3   | 1.4   |
| 17.5  | 17.4  | 9.4   | 4.0   | 15.7  | 6.3   | 8.1   | 14.7  | 9.9   |
| 123.1 | 123.4 | 88.3  | 112.4 | 143.3 | 123.4 | 694.9 | 675.7 | 810.2 |
| 0.8   | 2.1   | 5.6   | 4.6   | 1.4   | 2.2   | 60.2  | 142.4 | 170.4 |
| 6.5   | 16.2  | 3.4   | 0.6   | 16.1  | 10.9  | 7.8   | 1.0   | 0.7   |
| 18.1  | 22.7  | 11.6  | 8.4   | 27.7  | 23.3  | 36.0  | 59.6  | 58.9  |
| 1.1   | 7.0   | 8.6   | 15.8  | 5.7   | 7.1   | 3.2   | 5.0   | 7.7   |
| 20.4  | 18.4  | 10.5  | 13.6  | 28.2  | 24.6  | 13.0  | 6.0   | 19.1  |
| 11.3  | 3.2   | 2.1   | 1.2   | 20.3  | 4.5   | 3.4   | 3.3   | 1.7   |
| 3.8   | 1.2   | 9.6   | 11.8  | 1.1   | 4.1   | 3.9   | 6.8   | 2.0   |

|        |        |      |       |        |        |        |        |        |
|--------|--------|------|-------|--------|--------|--------|--------|--------|
| 5.9    | 0.8    | 10.4 | 12.2  | 5.2    | 11.1   | 7.7    | 1.2    | 4.8    |
| 7.1    | 15.2   | 0.7  | 6.0   | 14.4   | 10.5   | 17.8   | 19.4   | 16.9   |
| 0.3    | 2.2    | 0.1  | 0.6   | 0.3    | 0.9    | 0.9    | 5.3    | 4.9    |
| 2.9    | 2.2    | 2.0  | 13.8  | 10.5   | 2.5    | 23.8   | 36.8   | 43.7   |
| 2.7    | 10.2   | 3.8  | 7.5   | 7.6    | 5.7    | 11.9   | 6.4    | 5.1    |
| 0.6    | 6.8    | 0.2  | 0.2   | 4.2    | 6.2    | 0.8    | 0.8    | 0.3    |
| 4433.4 | 4903.1 | 78.1 | 95.8  | 5049.4 | 4225.9 | 6468.0 | 6797.8 | 7333.6 |
| 0.9    | 9.8    | 5.7  | 8.5   | 2.9    | 3.1    | 12.5   | 10.1   | 10.8   |
| 3.1    | 1.7    | 5.9  | 6.1   | 1.4    | 0.8    | 2.2    | 1.2    | 1.5    |
| 3.0    | 10.3   | 0.3  | 3.8   | 9.6    | 12.4   | 4.1    | 1.5    | 2.3    |
| 5.1    | 8.5    | 6.4  | 3.4   | 11.4   | 0.9    | 7.8    | 8.3    | 7.5    |
| 11.1   | 11.1   | 1.7  | 2.1   | 4.8    | 6.7    | 9.1    | 14.4   | 17.2   |
| 4.5    | 5.8    | 4.0  | 3.6   | 3.6    | 11.9   | 3.0    | 7.1    | 10.3   |
| 4.3    | 0.6    | 0.8  | 0.2   | 0.5    | 2.0    | 0.6    | 0.6    | 0.7    |
| 4.2    | 3.0    | 4.3  | 7.6   | 11.4   | 8.6    | 1.7    | 0.6    | 2.8    |
| 8.6    | 17.6   | 12.5 | 7.3   | 2.0    | 17.3   | 6.6    | 6.2    | 9.9    |
| 2.4    | 3.2    | 6.4  | 2.7   | 3.8    | 3.9    | 9.1    | 11.5   | 11.1   |
| 0.6    | 3.5    | 0.5  | 1.1   | 3.0    | 1.2    | 2.6    | 2.7    | 1.9    |
| 6.4    | 4.3    | 7.0  | 1.0   | 15.4   | 1.8    | 15.2   | 3.6    | 5.4    |
| 7.5    | 24.1   | 2.5  | 0.6   | 20.6   | 13.1   | 3.9    | 5.0    | 5.0    |
| 3.2    | 3.1    | 1.3  | 1.2   | 1.4    | 1.3    | 4.4    | 4.0    | 2.4    |
| 2.3    | 13.1   | 9.3  | 9.1   | 1.1    | 13.1   | 16.7   | 10.7   | 6.5    |
| 64.5   | 65.6   | 36.1 | 49.9  | 60.2   | 50.9   | 198.7  | 172.4  | 209.6  |
| 0.7    | 0.7    | 5.8  | 3.6   | 8.4    | 8.6    | 0.8    | 3.7    | 2.8    |
| 10.1   | 17.7   | 12.4 | 7.2   | 25.9   | 15.2   | 14.9   | 9.8    | 17.4   |
| 0.6    | 8.8    | 2.3  | 6.1   | 7.4    | 6.0    | 6.0    | 2.0    | 1.2    |
| 23.3   | 23.8   | 48.7 | 80.3  | 23.4   | 22.5   | 240.8  | 226.0  | 295.3  |
| 15.0   | 0.8    | 11.4 | 12.1  | 8.2    | 4.5    | 32.1   | 20.9   | 11.2   |
| 1.3    | 3.9    | 5.8  | 1.5   | 1.1    | 1.2    | 6.4    | 1.0    | 3.0    |
| 21.6   | 17.1   | 13.9 | 6.4   | 17.1   | 29.2   | 72.1   | 76.0   | 77.4   |
| 1.6    | 2.3    | 8.6  | 7.6   | 3.8    | 2.2    | 20.8   | 12.2   | 9.5    |
| 84.2   | 80.1   | 7.9  | 12.0  | 87.9   | 110.2  | 98.7   | 122.1  | 138.1  |
| 0.2    | 0.2    | 0.3  | 0.7   | 0.6    | 0.2    | 2.6    | 0.3    | 7.0    |
| 0.9    | 0.8    | 6.3  | 5.1   | 13.5   | 10.7   | 3.1    | 7.2    | 2.8    |
| 6.6    | 4.0    | 5.2  | 2.0   | 9.3    | 2.1    | 12.4   | 8.8    | 7.5    |
| 1.1    | 14.2   | 8.2  | 8.7   | 6.1    | 1.0    | 59.2   | 106.8  | 109.2  |
| 35.6   | 33.1   | 7.1  | 5.7   | 63.4   | 48.6   | 35.8   | 41.7   | 58.8   |
| 1.2    | 1.2    | 3.4  | 4.1   | 1.1    | 1.4    | 1.0    | 1.8    | 6.7    |
| 5.8    | 1.3    | 1.7  | 9.0   | 1.9    | 6.1    | 6.4    | 3.9    | 8.9    |
| 246.9  | 283.6  | 1.2  | 1.9   | 432.9  | 304.8  | 4.6    | 1.8    | 2.4    |
| 1.6    | 0.5    | 1.3  | 0.7   | 0.4    | 1.4    | 1.6    | 4.1    | 1.3    |
| 14.9   | 2.9    | 13.8 | 2.6   | 15.5   | 7.5    | 7.2    | 11.6   | 9.0    |
| 0.6    | 1.7    | 1.3  | 0.9   | 0.4    | 0.9    | 4.5    | 3.0    | 1.3    |
| 1.1    | 1.5    | 1.5  | 0.3   | 2.9    | 0.4    | 3.1    | 3.2    | 1.2    |
| 13.9   | 0.8    | 2.2  | 0.8   | 14.4   | 14.5   | 7.2    | 4.5    | 3.0    |
| 0.6    | 0.8    | 1.2  | 0.7   | 0.9    | 1.8    | 0.5    | 1.2    | 0.9    |
| 7.2    | 10.9   | 6.4  | 2.9   | 3.5    | 12.6   | 17.6   | 11.6   | 13.7   |
| 147.9  | 202.5  | 26.7 | 23.9  | 228.7  | 223.6  | 210.7  | 108.3  | 122.5  |
| 9.7    | 0.2    | 3.2  | 1.2   | 0.6    | 0.2    | 0.8    | 0.9    | 0.7    |
| 1.8    | 0.9    | 1.0  | 1.1   | 1.3    | 0.7    | 3.4    | 1.8    | 1.6    |
| 70.9   | 88.3   | 92.3 | 121.7 | 91.6   | 44.9   | 192.1  | 147.5  | 174.6  |
| 7.3    | 24.8   | 1.5  | 0.2   | 14.4   | 25.9   | 13.5   | 12.8   | 17.6   |
| 16.9   | 36.9   | 36.4 | 33.9  | 33.4   | 23.3   | 239.3  | 342.6  | 349.9  |

|        |        |        |        |        |        |        |        |        |
|--------|--------|--------|--------|--------|--------|--------|--------|--------|
| 8.3    | 0.3    | 1.2    | 0.5    | 0.8    | 0.7    | 2.6    | 3.6    | 1.7    |
| 1.0    | 2.9    | 1.6    | 0.2    | 0.4    | 1.0    | 0.9    | 6.9    | 0.8    |
| 0.9    | 3.8    | 1.7    | 0.5    | 0.6    | 1.4    | 1.7    | 1.5    | 1.8    |
| 1.5    | 13.6   | 17.0   | 9.0    | 8.6    | 5.1    | 8.3    | 5.5    | 2.3    |
| 29.8   | 22.8   | 19.0   | 24.8   | 34.3   | 23.6   | 23.3   | 46.7   | 38.9   |
| 2.5    | 7.7    | 1.1    | 4.1    | 1.8    | 1.4    | 2.4    | 1.2    | 1.4    |
| 24.7   | 21.5   | 20.8   | 15.1   | 21.0   | 24.4   | 28.1   | 18.5   | 20.6   |
| 1.6    | 1.2    | 1.9    | 1.6    | 3.7    | 3.2    | 12.0   | 4.4    | 7.1    |
| 12.5   | 6.9    | 1.7    | 0.6    | 2.2    | 5.2    | 10.1   | 13.8   | 6.7    |
| 2.2    | 0.5    | 1.3    | 3.0    | 1.6    | 2.2    | 1.7    | 1.3    | 4.2    |
| 16.5   | 1.5    | 20.3   | 12.8   | 12.8   | 17.3   | 10.9   | 6.8    | 9.0    |
| 5.6    | 18.9   | 12.8   | 14.7   | 16.1   | 14.5   | 12.0   | 8.4    | 15.5   |
| 2.4    | 24.2   | 4.4    | 15.3   | 4.6    | 3.3    | 28.9   | 22.0   | 4.1    |
| 61.3   | 96.3   | 20.5   | 9.0    | 82.6   | 81.4   | 77.7   | 84.2   | 82.1   |
| 11.0   | 16.1   | 7.6    | 8.6    | 10.7   | 14.3   | 30.2   | 28.4   | 24.0   |
| 12.5   | 12.1   | 1.0    | 4.2    | 9.5    | 17.2   | 13.8   | 16.2   | 17.6   |
| 7.9    | 11.7   | 9.8    | 7.1    | 12.1   | 12.9   | 16.9   | 13.3   | 16.4   |
| 2.4    | 2.1    | 3.1    | 1.9    | 3.0    | 2.7    | 5.5    | 7.7    | 6.9    |
| 7.5    | 10.0   | 4.7    | 1.9    | 8.3    | 3.5    | 6.6    | 7.3    | 6.3    |
| 1.7    | 1.1    | 1.0    | 3.2    | 1.1    | 1.4    | 19.5   | 10.4   | 9.1    |
| 1922.9 | 1988.1 | 1129.5 | 1610.0 | 2798.5 | 2318.3 | 4066.6 | 2657.8 | 2909.4 |
| 17.3   | 2.5    | 5.7    | 0.6    | 1.1    | 2.5    | 9.3    | 8.2    | 7.0    |
| 4.5    | 7.2    | 1.2    | 1.0    | 1.4    | 1.4    | 29.9   | 27.1   | 22.9   |
| 106.7  | 113.3  | 27.5   | 39.0   | 118.7  | 107.2  | 102.0  | 90.3   | 82.0   |
| 6.8    | 5.0    | 2.4    | 8.6    | 9.1    | 21.4   | 21.0   | 13.7   | 10.8   |
| 20.8   | 22.7   | 2.9    | 0.3    | 20.6   | 22.7   | 4.4    | 8.2    | 9.8    |
| 0.9    | 3.8    | 7.4    | 0.5    | 1.8    | 2.1    | 10.3   | 5.8    | 1.7    |
| 25.0   | 34.4   | 11.4   | 1.9    | 25.7   | 37.4   | 14.6   | 19.1   | 14.4   |
| 6.7    | 16.4   | 2.2    | 3.0    | 31.1   | 22.1   | 2.1    | 2.7    | 5.7    |
| 7.2    | 7.4    | 12.6   | 6.9    | 8.1    | 3.0    | 13.7   | 30.5   | 34.2   |
| 0.9    | 9.7    | 9.2    | 3.5    | 12.5   | 17.0   | 23.1   | 15.5   | 18.9   |
| 4.9    | 0.9    | 1.5    | 4.7    | 1.3    | 0.4    | 5.3    | 0.5    | 5.2    |
| 9.5    | 14.3   | 4.8    | 0.2    | 10.8   | 13.2   | 10.4   | 14.3   | 14.7   |
| 3.0    | 9.2    | 13.7   | 7.2    | 7.8    | 10.6   | 15.1   | 14.0   | 10.9   |
| 11.4   | 15.4   | 7.0    | 7.2    | 8.1    | 14.3   | 16.5   | 13.8   | 5.4    |
| 276.6  | 249.7  | 4.8    | 28.3   | 299.1  | 256.4  | 1603.5 | 1413.4 | 1328.8 |
| 4.6    | 7.8    | 4.1    | 0.2    | 3.4    | 8.8    | 0.4    | 0.7    | 0.4    |
| 11.0   | 7.9    | 7.1    | 6.6    | 16.8   | 15.3   | 12.4   | 15.1   | 13.9   |
| 3.6    | 2.1    | 7.5    | 7.8    | 9.3    | 22.6   | 3.1    | 7.6    | 10.2   |
| 161.2  | 312.2  | 154.3  | 178.0  | 307.0  | 262.9  | 1076.9 | 1406.6 | 1468.5 |
| 2.5    | 2.7    | 12.3   | 5.7    | 1.4    | 2.3    | 8.8    | 7.3    | 9.2    |
| 21.4   | 5.4    | 0.6    | 0.6    | 12.1   | 29.3   | 13.7   | 8.1    | 8.4    |
| 6.7    | 0.9    | 0.8    | 1.8    | 3.0    | 3.0    | 1.6    | 5.5    | 1.7    |
| 3.0    | 8.7    | 5.2    | 1.7    | 1.9    | 9.4    | 12.6   | 3.2    | 3.0    |
| 24.8   | 54.9   | 3.2    | 2.5    | 42.4   | 64.8   | 45.1   | 55.9   | 63.0   |
| 3.4    | 6.5    | 7.4    | 6.3    | 5.3    | 7.7    | 9.8    | 5.1    | 3.3    |
| 7.3    | 1.3    | 1.5    | 5.7    | 1.0    | 2.3    | 4.3    | 2.9    | 3.4    |
| 18.9   | 12.6   | 30.4   | 37.4   | 27.0   | 27.6   | 55.7   | 54.0   | 52.4   |
| 5.3    | 1.5    | 0.7    | 0.5    | 0.5    | 5.8    | 1.8    | 1.7    | 5.0    |
| 2.3    | 10.0   | 3.1    | 2.0    | 10.4   | 9.1    | 12.9   | 15.7   | 7.3    |
| 4.8    | 12.0   | 8.7    | 6.0    | 11.4   | 5.9    | 8.5    | 12.6   | 8.0    |
| 149.4  | 171.3  | 168.8  | 171.1  | 319.1  | 234.1  | 356.8  | 428.8  | 539.0  |
| 35.7   | 36.8   | 74.5   | 90.4   | 64.3   | 58.5   | 63.1   | 73.4   | 79.3   |

|        |        |        |        |        |        |        |        |        |
|--------|--------|--------|--------|--------|--------|--------|--------|--------|
| 2.3    | 0.9    | 3.5    | 0.9    | 1.4    | 0.9    | 10.4   | 3.7    | 16.1   |
| 1.5    | 2.0    | 0.9    | 0.9    | 1.8    | 0.7    | 3.4    | 9.4    | 3.6    |
| 18.6   | 1.5    | 6.9    | 5.8    | 5.6    | 5.8    | 3.8    | 10.0   | 7.9    |
| 693.5  | 763.5  | 1034.1 | 1279.9 | 983.9  | 773.1  | 1471.7 | 1000.3 | 1074.2 |
| 18.7   | 16.7   | 6.0    | 3.0    | 27.8   | 17.8   | 11.5   | 19.6   | 19.1   |
| 18.0   | 25.9   | 4.5    | 9.4    | 22.6   | 30.5   | 23.7   | 25.7   | 19.1   |
| 7.4    | 8.5    | 2.6    | 9.5    | 3.5    | 9.6    | 11.9   | 10.0   | 24.9   |
| 5.0    | 18.2   | 14.4   | 15.7   | 6.8    | 41.0   | 23.7   | 16.2   | 14.1   |
| 13.1   | 11.8   | 3.1    | 6.5    | 1.9    | 11.4   | 19.2   | 18.0   | 16.8   |
| 6.1    | 7.0    | 0.8    | 3.3    | 1.2    | 1.5    | 10.9   | 10.3   | 12.0   |
| 2.4    | 0.7    | 3.7    | 1.0    | 14.7   | 0.9    | 18.4   | 3.3    | 9.8    |
| 301.4  | 410.0  | 107.0  | 156.6  | 573.9  | 375.8  | 639.6  | 505.3  | 592.6  |
| 31.3   | 24.9   | 3.5    | 7.0    | 36.9   | 28.2   | 12.4   | 9.3    | 3.2    |
| 1.0    | 0.9    | 0.5    | 0.8    | 0.8    | 0.8    | 1.6    | 5.6    | 3.7    |
| 14.3   | 3.9    | 3.0    | 1.3    | 5.3    | 10.6   | 31.5   | 27.1   | 25.0   |
| 1.6    | 5.8    | 1.6    | 1.4    | 8.4    | 9.9    | 11.7   | 10.8   | 3.8    |
| 26.4   | 32.7   | 10.9   | 40.0   | 45.6   | 14.6   | 47.3   | 34.3   | 49.3   |
| 13.6   | 14.2   | 10.5   | 10.5   | 16.8   | 24.7   | 18.5   | 4.7    | 9.5    |
| 0.5    | 1.7    | 2.2    | 1.7    | 1.0    | 1.7    | 3.6    | 2.1    | 2.0    |
| 2.0    | 1.4    | 2.1    | 2.5    | 0.7    | 7.1    | 2.2    | 3.4    | 4.6    |
| 2.7    | 3.3    | 10.5   | 0.5    | 0.5    | 8.8    | 5.9    | 6.2    | 2.0    |
| 74.8   | 86.7   | 80.4   | 111.7  | 103.1  | 87.7   | 155.5  | 182.6  | 204.7  |
| 0.4    | 16.7   | 4.2    | 1.6    | 18.3   | 15.2   | 4.7    | 4.6    | 3.9    |
| 15.5   | 14.9   | 10.1   | 7.1    | 20.0   | 9.2    | 171.0  | 159.6  | 191.5  |
| 3.4    | 2.2    | 3.2    | 24.8   | 2.2    | 3.7    | 16.0   | 12.5   | 8.2    |
| 1033.0 | 1453.0 | 202.5  | 329.9  | 1557.4 | 1441.2 | 2563.0 | 1704.7 | 1747.1 |
| 2.4    | 12.6   | 5.6    | 8.5    | 7.7    | 18.0   | 8.7    | 10.4   | 8.9    |
| 156.7  | 213.5  | 3.0    | 9.7    | 275.7  | 232.5  | 7.1    | 6.0    | 3.1    |
| 3.7    | 0.7    | 4.9    | 9.2    | 0.9    | 0.8    | 4.3    | 3.6    | 0.9    |
| 2.6    | 0.5    | 0.5    | 1.8    | 8.1    | 0.5    | 0.5    | 1.1    | 0.5    |
| 1.6    | 0.6    | 0.9    | 0.8    | 0.4    | 0.6    | 3.0    | 0.5    | 1.6    |
| 1.8    | 2.4    | 1.9    | 1.9    | 13.7   | 10.7   | 44.8   | 134.7  | 118.8  |
| 20.0   | 10.2   | 5.5    | 11.0   | 13.2   | 5.3    | 15.4   | 14.5   | 15.0   |
| 72.4   | 77.3   | 7.8    | 6.3    | 152.7  | 55.4   | 4.5    | 2.6    | 4.8    |
| 12.0   | 1.9    | 6.4    | 7.3    | 11.5   | 7.9    | 14.2   | 12.7   | 13.1   |
| 0.5    | 6.7    | 0.5    | 6.6    | 1.2    | 0.9    | 5.4    | 1.0    | 1.0    |
| 1.9    | 3.9    | 3.3    | 1.2    | 2.1    | 16.6   | 106.7  | 187.2  | 201.0  |
| 176.8  | 169.1  | 42.2   | 56.9   | 155.2  | 136.1  | 440.7  | 339.1  | 368.6  |
| 8.5    | 10.8   | 13.2   | 17.3   | 10.7   | 10.8   | 27.8   | 36.2   | 23.8   |
| 211.2  | 325.8  | 107.6  | 149.0  | 329.7  | 334.2  | 853.3  | 671.8  | 696.0  |
| 3.9    | 15.0   | 5.0    | 20.1   | 4.5    | 3.5    | 3.8    | 10.0   | 11.1   |
| 13.8   | 11.9   | 5.0    | 1.6    | 18.7   | 29.6   | 19.2   | 12.3   | 21.1   |
| 6.8    | 8.0    | 15.0   | 3.6    | 4.8    | 2.7    | 3.3    | 5.9    | 7.5    |
| 2.2    | 6.3    | 2.7    | 0.2    | 2.7    | 3.6    | 3.0    | 11.1   | 4.4    |
| 49.5   | 38.5   | 30.6   | 19.8   | 61.5   | 41.1   | 66.5   | 63.9   | 64.0   |
| 0.4    | 13.2   | 4.7    | 1.4    | 8.5    | 12.4   | 7.6    | 7.0    | 5.0    |
| 54.4   | 101.7  | 48.7   | 91.1   | 74.2   | 109.8  | 180.4  | 285.5  | 259.3  |
| 1.9    | 12.8   | 3.6    | 4.1    | 13.7   | 1.0    | 17.7   | 5.5    | 11.5   |
| 18.8   | 23.3   | 12.8   | 9.4    | 34.6   | 38.2   | 29.4   | 23.5   | 21.1   |
| 1.2    | 6.4    | 7.5    | 8.5    | 5.5    | 5.8    | 15.2   | 9.9    | 12.5   |
| 307.4  | 368.7  | 138.4  | 215.2  | 412.8  | 235.5  | 301.6  | 329.6  | 306.4  |
| 15.8   | 19.3   | 17.3   | 17.3   | 45.8   | 8.1    | 114.1  | 224.1  | 237.0  |
| 1.4    | 15.7   | 1.2    | 10.7   | 0.4    | 11.9   | 20.5   | 13.0   | 16.0   |

|       |       |       |       |       |       |        |        |        |
|-------|-------|-------|-------|-------|-------|--------|--------|--------|
| 33.5  | 47.8  | 10.6  | 12.9  | 47.1  | 33.8  | 24.2   | 29.8   | 24.2   |
| 3.4   | 0.4   | 1.4   | 7.4   | 2.2   | 8.9   | 2.6    | 5.5    | 3.4    |
| 1.4   | 4.8   | 0.6   | 5.5   | 1.8   | 3.6   | 3.1    | 3.2    | 3.2    |
| 7.9   | 21.1  | 3.2   | 8.7   | 8.7   | 14.0  | 6.9    | 12.1   | 10.2   |
| 166.1 | 175.3 | 78.1  | 107.1 | 230.7 | 185.2 | 1406.7 | 1639.8 | 1531.6 |
| 11.4  | 11.3  | 5.8   | 1.3   | 14.2  | 7.1   | 9.3    | 14.6   | 10.2   |
| 0.9   | 0.6   | 2.5   | 2.6   | 5.3   | 4.2   | 1.6    | 2.0    | 5.3    |
| 2.0   | 12.2  | 3.8   | 0.2   | 0.8   | 0.7   | 10.2   | 3.1    | 8.0    |
| 8.2   | 3.4   | 4.2   | 6.8   | 1.2   | 0.9   | 7.6    | 3.1    | 2.9    |
| 13.6  | 16.5  | 22.9  | 14.4  | 17.6  | 12.1  | 20.2   | 20.3   | 32.9   |
| 0.4   | 1.9   | 10.4  | 7.7   | 2.9   | 1.3   | 8.7    | 6.0    | 9.3    |
| 5.6   | 5.6   | 5.1   | 4.3   | 9.5   | 9.8   | 4.7    | 5.0    | 10.6   |
| 19.7  | 13.5  | 17.3  | 11.1  | 24.7  | 23.9  | 26.1   | 19.5   | 29.1   |
| 7.0   | 1.8   | 9.6   | 7.7   | 2.8   | 8.2   | 7.4    | 8.2    | 6.9    |
| 29.2  | 14.8  | 12.7  | 27.1  | 15.6  | 2.4   | 70.4   | 64.9   | 74.3   |
| 317.9 | 337.2 | 145.3 | 195.2 | 424.6 | 390.4 | 444.0  | 304.7  | 311.0  |
| 2.9   | 5.6   | 4.3   | 9.5   | 1.1   | 9.0   | 11.5   | 22.4   | 21.8   |
| 5.5   | 6.6   | 11.0  | 16.7  | 11.4  | 3.4   | 18.9   | 14.7   | 5.2    |
| 5.2   | 18.7  | 18.7  | 3.5   | 35.7  | 30.4  | 46.5   | 29.2   | 21.4   |
| 0.4   | 6.4   | 6.7   | 11.8  | 5.3   | 4.2   | 19.4   | 11.4   | 7.0    |
| 2.0   | 7.7   | 8.4   | 1.1   | 11.5  | 11.7  | 2.5    | 5.8    | 11.1   |
| 8.5   | 2.1   | 2.5   | 4.4   | 2.6   | 2.0   | 2.0    | 2.6    | 2.4    |
| 26.0  | 23.5  | 85.8  | 141.0 | 45.1  | 16.3  | 31.4   | 24.2   | 26.0   |
| 19.7  | 24.8  | 20.3  | 4.5   | 27.8  | 41.4  | 32.6   | 36.5   | 27.0   |
| 1.6   | 1.5   | 20.7  | 14.4  | 9.2   | 8.2   | 62.0   | 75.3   | 77.5   |
| 25.1  | 44.0  | 25.5  | 46.0  | 60.5  | 60.6  | 79.6   | 94.7   | 80.9   |
| 99.9  | 137.0 | 63.8  | 84.0  | 145.9 | 118.5 | 132.7  | 130.8  | 131.2  |
| 5.9   | 1.2   | 4.0   | 4.3   | 0.7   | 1.3   | 6.3    | 3.0    | 5.9    |
| 24.4  | 11.1  | 1.7   | 7.5   | 32.6  | 18.6  | 5.5    | 3.9    | 5.2    |
| 19.4  | 11.6  | 7.5   | 12.9  | 7.8   | 13.5  | 4.2    | 2.2    | 4.9    |
| 5.1   | 4.1   | 39.1  | 47.9  | 23.7  | 23.8  | 70.5   | 74.7   | 71.0   |
| 183.5 | 366.6 | 82.0  | 79.4  | 295.2 | 371.5 | 299.6  | 169.3  | 209.5  |
| 201.9 | 320.7 | 110.4 | 127.6 | 353.2 | 346.8 | 210.1  | 123.0  | 184.7  |
| 2.2   | 0.9   | 0.8   | 0.7   | 4.7   | 7.2   | 5.1    | 2.1    | 3.7    |
| 156.3 | 138.4 | 17.4  | 38.1  | 246.4 | 135.5 | 179.1  | 202.2  | 273.7  |
| 1.0   | 1.2   | 2.2   | 1.3   | 2.2   | 12.7  | 4.3    | 6.1    | 5.2    |
| 1.6   | 1.6   | 2.3   | 1.3   | 0.6   | 1.5   | 4.7    | 2.0    | 0.9    |
| 63.5  | 199.1 | 24.9  | 35.7  | 173.8 | 218.3 | 143.8  | 131.4  | 137.6  |
| 14.0  | 20.9  | 12.9  | 24.9  | 19.3  | 15.0  | 32.0   | 29.3   | 27.8   |
| 138.1 | 156.9 | 4.2   | 2.4   | 173.3 | 184.2 | 24.9   | 21.8   | 26.7   |
| 25.1  | 34.6  | 17.5  | 11.9  | 25.9  | 31.4  | 44.9   | 37.2   | 42.6   |
| 3.4   | 4.6   | 10.0  | 0.2   | 0.5   | 6.2   | 7.0    | 1.4    | 4.1    |
| 37.3  | 109.3 | 104.1 | 153.4 | 81.7  | 61.5  | 393.5  | 276.8  | 269.5  |
| 14.5  | 13.8  | 6.9   | 9.7   | 18.6  | 5.3   | 17.9   | 29.4   | 30.8   |
| 9.4   | 15.5  | 24.7  | 10.2  | 18.4  | 20.5  | 24.8   | 32.1   | 17.5   |
| 0.4   | 10.9  | 20.2  | 22.2  | 8.2   | 1.0   | 18.5   | 27.5   | 19.9   |
| 11.1  | 6.0   | 0.8   | 5.8   | 7.7   | 10.6  | 3.3    | 2.7    | 4.9    |
| 0.4   | 1.8   | 2.7   | 1.4   | 0.2   | 3.1   | 2.1    | 0.4    | 1.1    |
| 2.4   | 9.7   | 1.1   | 0.8   | 8.4   | 6.5   | 2.8    | 8.4    | 4.0    |
| 4.3   | 0.9   | 5.5   | 0.5   | 7.9   | 4.6   | 3.9    | 1.8    | 3.6    |
| 21.6  | 11.5  | 5.6   | 0.9   | 32.9  | 11.0  | 7.2    | 7.5    | 2.7    |
| 7.7   | 6.4   | 15.4  | 7.0   | 4.9   | 6.8   | 18.5   | 11.8   | 7.3    |
| 17.6  | 30.5  | 69.1  | 96.6  | 47.0  | 24.1  | 102.9  | 86.7   | 110.9  |

|       |       |       |       |       |       |       |       |       |
|-------|-------|-------|-------|-------|-------|-------|-------|-------|
| 1.8   | 0.6   | 3.6   | 1.3   | 4.0   | 0.9   | 3.8   | 5.0   | 5.6   |
| 11.8  | 15.1  | 6.4   | 6.7   | 14.7  | 13.5  | 17.5  | 16.9  | 21.1  |
| 0.7   | 1.1   | 0.4   | 0.7   | 7.6   | 8.4   | 3.5   | 2.5   | 1.5   |
| 5.7   | 12.1  | 5.6   | 3.2   | 6.4   | 6.7   | 11.7  | 17.2  | 9.5   |
| 2.5   | 6.4   | 1.3   | 2.0   | 0.4   | 2.4   | 1.4   | 2.5   | 0.9   |
| 0.8   | 1.5   | 10.3  | 0.8   | 3.2   | 12.9  | 17.6  | 12.2  | 9.9   |
| 6.0   | 1.2   | 1.0   | 6.8   | 9.4   | 5.9   | 6.3   | 1.3   | 6.4   |
| 10.4  | 2.9   | 7.4   | 1.6   | 14.8  | 2.1   | 8.6   | 6.8   | 5.2   |
| 15.0  | 21.7  | 12.9  | 11.6  | 28.2  | 18.0  | 20.5  | 24.6  | 24.0  |
| 65.3  | 119.3 | 8.7   | 14.0  | 122.5 | 141.0 | 108.2 | 102.9 | 93.8  |
| 36.4  | 28.8  | 19.9  | 32.2  | 29.5  | 16.3  | 28.5  | 23.0  | 16.7  |
| 2.0   | 0.7   | 8.2   | 1.6   | 1.8   | 6.2   | 5.2   | 6.5   | 4.2   |
| 2.6   | 10.0  | 5.6   | 1.1   | 0.1   | 5.6   | 10.1  | 7.4   | 7.8   |
| 39.1  | 35.3  | 23.8  | 22.2  | 46.4  | 34.5  | 206.2 | 237.2 | 253.7 |
| 5.8   | 24.3  | 5.7   | 0.5   | 8.0   | 10.3  | 6.9   | 4.7   | 5.5   |
| 190.0 | 194.6 | 115.3 | 220.4 | 339.0 | 155.4 | 511.0 | 463.0 | 485.2 |
| 9.5   | 17.2  | 13.6  | 1.3   | 13.2  | 14.8  | 19.5  | 18.3  | 16.6  |
| 112.3 | 66.6  | 357.1 | 490.7 | 129.7 | 122.6 | 105.4 | 64.4  | 74.1  |
| 3.0   | 14.5  | 10.0  | 11.3  | 11.8  | 2.5   | 13.5  | 7.9   | 16.6  |
| 2.9   | 0.9   | 4.4   | 1.9   | 7.9   | 0.5   | 2.5   | 2.5   | 1.7   |
| 2.5   | 3.2   | 14.8  | 3.8   | 3.5   | 1.1   | 12.8  | 8.7   | 12.5  |
| 78.6  | 75.3  | 46.9  | 56.9  | 101.0 | 88.3  | 289.8 | 225.5 | 218.7 |
| 2.0   | 8.4   | 4.4   | 0.9   | 0.9   | 6.3   | 8.9   | 9.3   | 3.9   |
| 2.7   | 1.8   | 77.1  | 85.2  | 15.5  | 3.4   | 68.9  | 92.1  | 92.0  |
| 44.9  | 24.3  | 72.6  | 59.9  | 31.1  | 28.6  | 61.1  | 79.9  | 99.2  |
| 28.9  | 18.0  | 10.8  | 12.9  | 15.7  | 30.6  | 14.5  | 29.0  | 24.4  |
| 0.8   | 1.3   | 0.7   | 0.8   | 9.0   | 6.8   | 6.0   | 1.9   | 3.9   |
| 1.4   | 3.4   | 1.2   | 6.5   | 1.1   | 10.0  | 9.9   | 7.8   | 5.4   |
| 500.8 | 616.4 | 112.5 | 203.9 | 685.7 | 566.5 | 710.4 | 672.4 | 709.9 |
| 63.0  | 65.2  | 39.6  | 50.1  | 90.3  | 40.4  | 186.9 | 237.7 | 246.7 |
| 4.9   | 6.2   | 6.4   | 1.4   | 5.8   | 7.5   | 2.9   | 8.7   | 6.4   |
| 18.2  | 15.3  | 12.5  | 18.4  | 16.3  | 11.9  | 16.9  | 16.4  | 20.7  |
| 6.3   | 5.0   | 24.4  | 24.2  | 10.9  | 10.8  | 5.7   | 10.0  | 8.8   |
| 44.5  | 57.5  | 16.0  | 17.9  | 51.0  | 63.3  | 90.9  | 61.5  | 60.4  |
| 3.1   | 1.7   | 0.5   | 3.8   | 2.1   | 5.8   | 3.7   | 0.8   | 3.9   |
| 0.4   | 11.0  | 0.6   | 0.5   | 3.1   | 1.6   | 6.2   | 5.7   | 11.1  |
| 8.0   | 15.6  | 14.7  | 15.1  | 1.4   | 2.6   | 8.9   | 9.0   | 8.6   |
| 9.9   | 17.6  | 31.6  | 18.2  | 12.7  | 17.9  | 18.8  | 19.3  | 11.7  |
| 10.4  | 12.6  | 0.8   | 3.1   | 2.5   | 19.2  | 53.2  | 63.8  | 61.4  |
| 2.5   | 1.3   | 0.6   | 5.0   | 0.7   | 2.5   | 27.5  | 38.5  | 43.2  |
| 6.8   | 14.9  | 0.9   | 12.6  | 10.3  | 15.4  | 17.2  | 13.8  | 8.0   |
| 2.2   | 10.6  | 4.7   | 5.6   | 14.9  | 5.6   | 14.7  | 12.9  | 14.5  |
| 2.1   | 2.9   | 6.6   | 2.5   | 18.0  | 3.6   | 3.3   | 2.5   | 3.5   |
| 11.7  | 9.4   | 6.1   | 0.7   | 5.8   | 5.0   | 4.6   | 6.7   | 8.3   |
| 0.2   | 0.9   | 0.3   | 5.0   | 0.7   | 6.0   | 0.4   | 2.0   | 2.9   |
| 1.0   | 1.2   | 5.9   | 3.0   | 2.2   | 1.9   | 5.2   | 1.9   | 1.7   |
| 125.4 | 135.4 | 127.7 | 174.0 | 176.2 | 139.0 | 378.8 | 307.2 | 365.1 |
| 9.7   | 34.3  | 4.3   | 6.6   | 23.5  | 17.9  | 13.3  | 12.5  | 13.2  |
| 63.8  | 88.0  | 81.5  | 75.0  | 105.2 | 80.0  | 171.0 | 133.7 | 140.3 |
| 1.4   | 7.4   | 9.3   | 13.2  | 4.7   | 11.6  | 13.9  | 29.6  | 28.1  |
| 26.5  | 40.7  | 7.4   | 5.9   | 51.6  | 17.7  | 52.7  | 62.1  | 79.7  |
| 8.8   | 2.9   | 4.1   | 2.6   | 6.8   | 0.9   | 12.8  | 3.8   | 2.2   |
| 2.5   | 1.7   | 0.5   | 1.5   | 1.9   | 1.6   | 0.8   | 2.8   | 1.7   |

|       |       |      |      |       |       |       |       |       |
|-------|-------|------|------|-------|-------|-------|-------|-------|
| 4.7   | 1.4   | 2.9  | 0.8  | 6.8   | 1.3   | 12.2  | 6.8   | 4.6   |
| 6.4   | 3.3   | 6.6  | 1.9  | 1.4   | 5.0   | 3.1   | 7.0   | 3.6   |
| 0.7   | 0.7   | 3.3  | 0.6  | 6.9   | 4.5   | 0.8   | 3.6   | 1.4   |
| 11.6  | 11.3  | 5.7  | 2.6  | 9.4   | 12.0  | 15.2  | 13.7  | 14.7  |
| 15.6  | 12.5  | 21.3 | 5.7  | 18.9  | 17.3  | 21.2  | 19.7  | 16.6  |
| 7.9   | 18.5  | 3.0  | 0.8  | 4.8   | 7.8   | 2.9   | 2.5   | 5.2   |
| 4.9   | 3.6   | 5.6  | 2.4  | 2.7   | 2.9   | 5.9   | 11.0  | 6.0   |
| 2.7   | 7.1   | 2.3  | 1.9  | 1.2   | 5.7   | 4.1   | 2.6   | 4.0   |
| 10.2  | 8.4   | 21.6 | 24.1 | 10.1  | 9.8   | 75.8  | 46.3  | 46.8  |
| 51.4  | 70.3  | 28.3 | 22.9 | 71.7  | 58.1  | 100.9 | 101.0 | 107.5 |
| 18.4  | 7.9   | 4.4  | 15.7 | 12.0  | 27.7  | 10.3  | 24.0  | 22.8  |
| 25.6  | 11.9  | 44.3 | 32.3 | 25.8  | 10.0  | 39.5  | 36.9  | 37.0  |
| 9.3   | 11.5  | 11.9 | 5.6  | 5.4   | 2.5   | 9.7   | 6.6   | 4.0   |
| 6.5   | 6.2   | 0.8  | 1.0  | 0.9   | 2.4   | 4.3   | 5.7   | 5.7   |
| 16.2  | 43.9  | 2.3  | 2.3  | 6.2   | 33.7  | 34.6  | 42.5  | 38.2  |
| 90.5  | 114.7 | 34.2 | 32.8 | 99.0  | 129.5 | 124.8 | 113.7 | 108.3 |
| 5.2   | 9.5   | 0.6  | 4.4  | 0.5   | 2.7   | 5.2   | 6.4   | 3.3   |
| 15.7  | 11.5  | 10.0 | 2.3  | 1.2   | 7.7   | 19.3  | 11.2  | 21.9  |
| 5.6   | 10.9  | 4.4  | 0.1  | 9.6   | 13.6  | 7.9   | 8.5   | 13.3  |
| 2.1   | 1.3   | 1.9  | 1.9  | 1.5   | 2.5   | 2.8   | 8.8   | 7.6   |
| 1.0   | 1.8   | 1.1  | 0.6  | 10.1  | 1.0   | 3.4   | 5.0   | 1.8   |
| 9.0   | 14.7  | 9.4  | 12.7 | 11.4  | 10.2  | 3.6   | 13.7  | 16.8  |
| 41.1  | 25.8  | 9.1  | 3.9  | 36.7  | 20.3  | 16.2  | 35.6  | 29.4  |
| 218.3 | 330.1 | 40.2 | 46.9 | 359.8 | 270.9 | 585.4 | 584.6 | 616.8 |
| 9.7   | 4.7   | 0.9  | 2.6  | 8.5   | 3.8   | 2.1   | 6.2   | 6.3   |
| 8.8   | 5.7   | 11.8 | 5.0  | 13.6  | 9.1   | 12.1  | 14.3  | 24.5  |
| 17.7  | 46.0  | 4.3  | 3.5  | 18.5  | 40.2  | 39.2  | 56.5  | 68.6  |
| 146.4 | 206.6 | 26.3 | 35.5 | 208.6 | 190.5 | 149.0 | 141.4 | 165.7 |
| 2.1   | 1.1   | 1.1  | 2.5  | 1.5   | 1.5   | 3.1   | 0.9   | 0.4   |
| 6.4   | 5.5   | 11.3 | 6.7  | 10.4  | 11.5  | 2.3   | 1.2   | 4.4   |
| 132.9 | 156.8 | 74.8 | 81.1 | 170.3 | 138.0 | 166.0 | 180.7 | 208.5 |
| 65.9  | 97.4  | 17.0 | 10.9 | 60.6  | 79.1  | 78.7  | 84.6  | 89.2  |
| 17.9  | 28.9  | 25.0 | 13.7 | 32.7  | 21.6  | 22.0  | 32.4  | 24.0  |
| 8.3   | 2.0   | 32.2 | 16.0 | 17.7  | 1.5   | 83.2  | 99.6  | 135.9 |
| 7.3   | 12.0  | 15.8 | 13.9 | 26.8  | 11.0  | 28.7  | 14.8  | 19.1  |
| 27.8  | 15.6  | 9.4  | 9.8  | 32.8  | 27.3  | 41.0  | 35.5  | 48.3  |
| 10.8  | 9.5   | 3.9  | 1.3  | 3.0   | 12.9  | 9.8   | 8.1   | 4.6   |
| 7.1   | 18.1  | 10.1 | 3.2  | 4.9   | 10.3  | 18.2  | 11.9  | 18.7  |
| 14.4  | 13.9  | 0.9  | 4.3  | 8.3   | 4.7   | 2.7   | 2.9   | 4.4   |
| 0.9   | 10.0  | 3.2  | 8.4  | 4.1   | 0.3   | 6.1   | 7.1   | 4.1   |
| 3.1   | 1.9   | 9.2  | 1.1  | 2.2   | 2.5   | 5.3   | 2.6   | 1.3   |
| 4.4   | 2.5   | 9.4  | 1.0  | 7.8   | 1.1   | 5.2   | 7.0   | 1.8   |
| 8.3   | 11.2  | 1.9  | 6.1  | 2.1   | 6.7   | 7.6   | 3.3   | 1.0   |
| 23.9  | 8.0   | 17.7 | 20.0 | 15.5  | 8.8   | 35.8  | 26.7  | 56.5  |
| 33.9  | 72.8  | 1.5  | 1.7  | 46.8  | 30.7  | 6.2   | 16.1  | 15.0  |
| 2.9   | 2.0   | 1.7  | 2.3  | 4.9   | 1.6   | 4.5   | 4.5   | 4.4   |
| 4.2   | 4.8   | 2.6  | 1.2  | 2.9   | 3.6   | 2.2   | 4.0   | 5.0   |
| 20.5  | 16.9  | 5.2  | 5.7  | 7.4   | 16.9  | 17.5  | 20.6  | 22.7  |
| 4.8   | 1.0   | 9.9  | 2.7  | 8.8   | 5.9   | 2.7   | 12.9  | 3.1   |
| 13.7  | 12.2  | 19.7 | 14.6 | 20.0  | 21.1  | 44.7  | 43.8  | 36.2  |
| 13.1  | 33.9  | 10.5 | 7.4  | 19.6  | 16.7  | 75.1  | 57.2  | 50.3  |
| 1.5   | 1.3   | 1.7  | 6.9  | 2.6   | 21.0  | 5.7   | 12.7  | 8.9   |
| 2.4   | 9.1   | 17.5 | 4.8  | 2.6   | 1.7   | 2.9   | 15.9  | 9.6   |

|       |       |       |       |       |       |       |       |       |
|-------|-------|-------|-------|-------|-------|-------|-------|-------|
| 7.8   | 18.7  | 0.6   | 3.8   | 18.9  | 21.6  | 11.2  | 12.4  | 7.1   |
| 1.4   | 0.3   | 7.6   | 0.3   | 5.1   | 1.0   | 5.4   | 9.2   | 7.1   |
| 51.5  | 79.2  | 37.2  | 21.6  | 60.5  | 66.6  | 102.7 | 112.2 | 113.3 |
| 63.5  | 79.1  | 3.3   | 10.3  | 98.5  | 96.3  | 174.1 | 98.8  | 84.9  |
| 6.8   | 2.4   | 5.5   | 2.8   | 14.3  | 15.3  | 6.1   | 1.8   | 7.4   |
| 210.0 | 226.1 | 110.9 | 126.6 | 272.0 | 213.6 | 623.2 | 413.7 | 471.0 |
| 0.9   | 0.5   | 1.0   | 0.6   | 0.8   | 0.6   | 2.2   | 1.3   | 0.8   |
| 4.1   | 2.7   | 2.8   | 1.4   | 2.9   | 1.6   | 3.2   | 1.8   | 3.3   |
| 10.4  | 0.8   | 0.2   | 0.6   | 2.0   | 1.1   | 0.8   | 3.7   | 2.4   |
| 13.7  | 13.2  | 3.8   | 1.1   | 5.1   | 5.5   | 9.7   | 6.0   | 4.7   |
| 3.6   | 2.0   | 2.9   | 1.5   | 20.3  | 6.1   | 4.4   | 1.7   | 5.2   |
| 0.9   | 9.6   | 10.8  | 7.9   | 3.4   | 8.5   | 10.7  | 16.1  | 10.8  |
| 17.8  | 24.6  | 15.4  | 7.3   | 7.7   | 18.3  | 20.4  | 17.4  | 14.6  |
| 1.2   | 5.7   | 10.4  | 0.8   | 2.9   | 8.8   | 6.2   | 5.6   | 8.0   |
| 24.0  | 27.5  | 25.8  | 32.0  | 24.1  | 12.0  | 39.7  | 22.3  | 22.9  |
| 5.8   | 11.3  | 1.0   | 8.4   | 5.0   | 8.1   | 3.7   | 4.5   | 6.0   |
| 2.2   | 1.1   | 8.5   | 1.6   | 2.0   | 0.7   | 3.3   | 6.0   | 2.5   |
| 0.5   | 6.1   | 0.3   | 1.5   | 3.0   | 0.8   | 5.7   | 1.5   | 2.5   |
| 6.0   | 3.2   | 15.3  | 5.5   | 6.6   | 10.4  | 4.5   | 8.7   | 15.2  |
| 17.6  | 38.9  | 1.2   | 10.1  | 21.0  | 22.6  | 30.8  | 38.6  | 32.0  |
| 4.2   | 5.3   | 0.3   | 0.8   | 10.8  | 12.2  | 1.1   | 1.6   | 2.4   |
| 2.3   | 3.0   | 5.9   | 0.9   | 1.7   | 1.4   | 3.4   | 4.9   | 1.9   |
| 5.4   | 10.3  | 1.4   | 1.6   | 8.6   | 21.1  | 6.5   | 6.1   | 8.1   |
| 3.4   | 11.0  | 22.9  | 24.5  | 13.1  | 7.0   | 160.8 | 98.8  | 149.8 |
| 8.7   | 5.1   | 5.0   | 4.4   | 8.8   | 2.2   | 2.0   | 5.5   | 9.1   |
| 6.2   | 16.5  | 11.1  | 8.0   | 3.5   | 3.0   | 46.9  | 48.8  | 48.9  |
| 1.0   | 12.6  | 1.9   | 3.9   | 2.5   | 5.4   | 14.2  | 5.8   | 14.6  |
| 3.9   | 0.7   | 0.1   | 3.3   | 0.6   | 0.5   | 1.5   | 1.3   | 2.1   |
| 5.6   | 8.2   | 1.6   | 14.6  | 17.7  | 6.6   | 21.0  | 22.1  | 17.6  |
| 0.7   | 0.2   | 0.1   | 0.8   | 5.1   | 8.9   | 1.7   | 0.4   | 1.4   |
| 2.0   | 2.1   | 7.4   | 0.9   | 3.5   | 1.7   | 2.9   | 5.9   | 3.4   |
| 10.7  | 1.1   | 1.4   | 3.5   | 0.6   | 0.2   | 2.4   | 0.6   | 3.1   |
| 12.4  | 7.0   | 2.9   | 9.3   | 12.7  | 8.2   | 15.0  | 17.7  | 18.8  |
| 1.3   | 6.4   | 16.2  | 38.5  | 2.0   | 9.7   | 17.5  | 39.4  | 27.5  |
| 14.4  | 22.3  | 31.5  | 40.3  | 33.3  | 22.9  | 54.8  | 47.4  | 44.8  |
| 3.9   | 14.2  | 3.7   | 1.3   | 16.4  | 2.7   | 20.9  | 11.8  | 24.4  |
| 27.5  | 14.9  | 22.2  | 3.4   | 23.3  | 19.8  | 31.8  | 28.8  | 22.6  |
| 1.9   | 6.4   | 6.4   | 1.6   | 5.2   | 1.1   | 1.3   | 8.3   | 5.0   |
| 0.7   | 0.7   | 1.9   | 0.2   | 3.0   | 0.9   | 0.8   | 2.3   | 1.8   |
| 1.0   | 0.6   | 1.9   | 0.6   | 2.5   | 1.3   | 6.1   | 2.9   | 0.5   |
| 0.6   | 4.4   | 0.2   | 0.3   | 6.1   | 0.3   | 1.4   | 1.0   | 2.7   |
| 136.8 | 137.4 | 189.5 | 218.0 | 162.5 | 134.6 | 404.5 | 430.0 | 408.5 |
| 8.9   | 13.8  | 6.8   | 26.9  | 16.4  | 10.3  | 6.0   | 7.1   | 14.9  |
| 1.9   | 0.6   | 5.2   | 4.4   | 1.5   | 11.4  | 9.1   | 8.0   | 9.8   |
| 23.8  | 18.1  | 1.4   | 1.6   | 44.2  | 22.2  | 29.0  | 27.4  | 20.0  |
| 7.6   | 9.1   | 7.2   | 6.7   | 0.4   | 0.7   | 3.6   | 1.0   | 1.4   |
| 7.6   | 17.0  | 30.5  | 39.8  | 21.1  | 16.4  | 30.5  | 27.0  | 34.4  |
| 0.5   | 1.4   | 0.8   | 0.7   | 0.3   | 0.8   | 4.5   | 1.8   | 5.0   |
| 0.4   | 5.5   | 4.7   | 0.2   | 4.8   | 5.0   | 5.2   | 4.6   | 2.6   |
| 8.4   | 0.8   | 1.2   | 1.8   | 2.2   | 8.1   | 12.3  | 8.7   | 1.4   |
| 1.0   | 5.0   | 11.5  | 12.1  | 5.0   | 6.5   | 8.3   | 2.1   | 2.4   |
| 1.5   | 3.5   | 12.4  | 9.6   | 15.1  | 3.0   | 1.4   | 1.4   | 1.7   |
| 1.3   | 2.0   | 1.3   | 1.4   | 4.2   | 10.5  | 8.2   | 3.2   | 2.2   |



|        |        |       |       |        |        |        |       |       |
|--------|--------|-------|-------|--------|--------|--------|-------|-------|
| 0.6    | 9.6    | 5.8   | 7.8   | 11.0   | 8.7    | 5.3    | 4.1   | 6.4   |
| 3.8    | 0.9    | 2.8   | 8.7   | 1.2    | 1.4    | 7.4    | 9.9   | 4.0   |
| 1.1    | 1.3    | 2.0   | 8.1   | 7.6    | 6.6    | 10.4   | 17.0  | 22.0  |
| 4.9    | 13.5   | 3.0   | 3.7   | 5.0    | 2.0    | 4.4    | 14.5  | 4.8   |
| 3.6    | 5.7    | 3.7   | 2.4   | 30.0   | 3.7    | 6.0    | 9.6   | 25.4  |
| 149.3  | 160.4  | 60.9  | 109.3 | 268.4  | 112.5  | 245.5  | 191.7 | 226.7 |
| 8.9    | 12.5   | 10.9  | 14.2  | 7.7    | 17.3   | 13.0   | 24.4  | 13.8  |
| 1.8    | 6.0    | 5.7   | 6.7   | 2.2    | 4.7    | 1.0    | 4.5   | 1.3   |
| 8.7    | 9.1    | 14.9  | 16.3  | 7.9    | 3.7    | 33.0   | 34.0  | 49.7  |
| 15.9   | 19.8   | 5.8   | 10.1  | 21.1   | 7.3    | 25.8   | 13.8  | 15.2  |
| 2.5    | 1.3    | 1.2   | 1.2   | 1.3    | 8.9    | 3.9    | 3.8   | 4.5   |
| 435.4  | 403.0  | 371.9 | 484.9 | 618.3  | 407.4  | 644.2  | 583.4 | 696.8 |
| 1937.1 | 2171.1 | 76.3  | 125.1 | 3185.3 | 2324.2 | 1307.9 | 844.3 | 867.4 |
| 8.1    | 6.7    | 27.7  | 18.2  | 3.8    | 0.7    | 2.8    | 1.5   | 1.5   |
| 950.4  | 1084.3 | 518.7 | 599.5 | 1347.5 | 1257.1 | 530.7  | 376.3 | 517.9 |
| 11.4   | 21.2   | 0.5   | 2.8   | 15.8   | 12.8   | 21.7   | 21.2  | 25.2  |
| 17.7   | 34.2   | 11.0  | 8.1   | 30.2   | 22.2   | 92.7   | 110.9 | 127.8 |
| 173.7  | 258.4  | 211.0 | 274.0 | 343.4  | 237.3  | 590.0  | 548.4 | 588.7 |
| 11.8   | 2.5    | 3.2   | 1.1   | 1.4    | 1.1    | 6.9    | 3.9   | 4.5   |
| 31.1   | 47.7   | 10.1  | 13.5  | 62.1   | 62.1   | 136.5  | 176.3 | 212.6 |
| 38.7   | 37.3   | 24.1  | 23.1  | 21.7   | 13.7   | 81.5   | 40.9  | 54.5  |
| 2.6    | 9.9    | 5.3   | 2.1   | 2.7    | 2.2    | 3.7    | 3.6   | 3.3   |
| 8.0    | 6.0    | 18.6  | 2.4   | 11.3   | 12.9   | 10.7   | 13.2  | 10.8  |
| 0.7    | 2.1    | 4.1   | 5.0   | 6.3    | 0.3    | 0.5    | 2.0   | 3.6   |
| 0.2    | 1.6    | 4.3   | 0.5   | 5.7    | 5.9    | 0.6    | 6.2   | 0.5   |
| 3.4    | 7.2    | 2.7   | 1.8   | 4.1    | 4.2    | 3.6    | 2.9   | 6.8   |
| 25.5   | 32.2   | 36.1  | 11.7  | 33.9   | 13.9   | 22.4   | 9.6   | 17.6  |
| 241.2  | 251.5  | 151.1 | 250.2 | 284.1  | 186.8  | 104.7  | 86.1  | 100.3 |
| 207.8  | 232.6  | 55.8  | 69.7  | 345.2  | 182.7  | 334.7  | 134.8 | 129.9 |
| 35.6   | 32.4   | 23.2  | 28.7  | 57.4   | 29.1   | 493.0  | 338.2 | 374.4 |
| 6.6    | 5.1    | 13.0  | 4.3   | 17.2   | 3.5    | 4.9    | 11.5  | 4.9   |
| 2.5    | 12.7   | 5.2   | 5.3   | 9.0    | 19.2   | 6.6    | 1.8   | 4.3   |
| 54.5   | 106.0  | 156.7 | 188.4 | 81.3   | 84.1   | 330.5  | 205.6 | 214.3 |
| 17.9   | 9.2    | 6.9   | 15.7  | 14.3   | 15.9   | 9.3    | 17.6  | 12.6  |
| 0.3    | 3.7    | 0.2   | 1.0   | 0.5    | 5.2    | 2.3    | 2.0   | 5.1   |
| 406.9  | 355.2  | 312.0 | 683.0 | 622.6  | 465.8  | 588.5  | 441.2 | 507.2 |
| 5.0    | 3.5    | 10.6  | 2.2   | 2.6    | 2.7    | 3.8    | 3.1   | 6.5   |
| 348.1  | 401.9  | 4.4   | 12.6  | 421.6  | 355.2  | 285.9  | 164.4 | 186.8 |
| 4.5    | 0.4    | 6.3   | 4.6   | 0.8    | 0.7    | 4.5    | 2.1   | 4.8   |
| 56.9   | 85.5   | 11.9  | 8.1   | 87.1   | 88.1   | 233.0  | 252.8 | 256.7 |
| 24.9   | 22.7   | 4.4   | 1.9   | 57.6   | 21.3   | 29.4   | 19.5  | 24.7  |
| 21.0   | 37.8   | 20.7  | 24.6  | 24.2   | 22.7   | 133.3  | 90.7  | 87.7  |
| 0.7    | 1.5    | 2.3   | 0.9   | 1.6    | 1.5    | 3.2    | 1.8   | 1.8   |
| 662.8  | 772.3  | 88.5  | 122.5 | 970.9  | 808.1  | 1139.6 | 441.1 | 531.7 |
| 19.0   | 43.4   | 8.7   | 10.4  | 44.0   | 30.5   | 40.8   | 65.8  | 73.2  |
| 6.2    | 16.5   | 0.5   | 0.5   | 15.4   | 15.7   | 2.7    | 4.1   | 5.2   |
| 71.7   | 87.6   | 10.9  | 16.8  | 100.1  | 70.8   | 39.3   | 37.9  | 22.7  |
| 105.1  | 127.8  | 95.2  | 133.7 | 175.8  | 131.4  | 1343.9 | 843.0 | 953.9 |
| 13.1   | 5.7    | 17.2  | 3.5   | 14.4   | 1.4    | 15.0   | 10.9  | 7.8   |
| 130.9  | 167.1  | 47.1  | 64.6  | 235.0  | 141.0  | 484.0  | 286.1 | 391.6 |
| 76.4   | 94.3   | 5.4   | 0.3   | 184.9  | 114.5  | 0.4    | 0.7   | 1.0   |
| 4.5    | 1.3    | 4.2   | 1.2   | 9.2    | 3.8    | 12.4   | 12.7  | 6.6   |
| 20.5   | 45.5   | 4.7   | 8.6   | 28.4   | 27.9   | 228.5  | 154.1 | 160.9 |

|       |       |       |       |       |       |        |        |        |
|-------|-------|-------|-------|-------|-------|--------|--------|--------|
| 45.2  | 55.5  | 9.9   | 22.3  | 67.6  | 36.5  | 197.1  | 177.8  | 186.0  |
| 1.1   | 2.4   | 2.1   | 2.0   | 3.8   | 3.3   | 2.5    | 1.9    | 2.5    |
| 8.9   | 21.1  | 0.9   | 9.5   | 15.2  | 28.7  | 22.1   | 18.1   | 14.1   |
| 113.3 | 130.3 | 42.5  | 97.6  | 179.5 | 114.4 | 126.6  | 184.5  | 212.8  |
| 9.7   | 5.7   | 8.7   | 13.7  | 11.6  | 7.5   | 11.0   | 10.8   | 9.0    |
| 129.9 | 150.1 | 59.2  | 103.5 | 150.5 | 160.1 | 294.3  | 307.9  | 284.6  |
| 5.6   | 5.6   | 19.2  | 8.3   | 3.8   | 1.5   | 16.3   | 13.9   | 10.3   |
| 47.6  | 70.0  | 4.6   | 13.7  | 67.0  | 59.7  | 460.6  | 259.9  | 314.4  |
| 0.6   | 1.4   | 3.7   | 0.7   | 2.5   | 9.5   | 4.8    | 4.0    | 4.4    |
| 1.8   | 13.8  | 11.5  | 3.8   | 30.4  | 2.2   | 17.4   | 10.0   | 22.6   |
| 0.7   | 0.9   | 1.2   | 5.2   | 2.1   | 4.9   | 1.4    | 0.6    | 5.3    |
| 9.2   | 10.8  | 8.6   | 0.4   | 13.3  | 11.0  | 4.4    | 7.8    | 5.5    |
| 38.6  | 47.7  | 7.1   | 8.4   | 35.7  | 27.3  | 44.3   | 34.6   | 26.9   |
| 7.0   | 10.1  | 5.8   | 8.3   | 4.5   | 6.9   | 19.8   | 11.4   | 16.2   |
| 1.0   | 2.6   | 1.5   | 1.0   | 10.0  | 5.9   | 6.1    | 8.3    | 3.2    |
| 137.0 | 132.5 | 54.8  | 82.8  | 134.0 | 113.1 | 243.2  | 109.1  | 107.2  |
| 1.0   | 0.9   | 14.4  | 8.3   | 0.8   | 4.2   | 16.9   | 13.5   | 5.5    |
| 94.2  | 82.0  | 70.1  | 92.1  | 110.8 | 66.7  | 208.2  | 234.8  | 251.2  |
| 4.8   | 15.7  | 9.4   | 3.5   | 14.4  | 5.7   | 7.5    | 7.2    | 7.5    |
| 3.0   | 2.2   | 0.8   | 1.1   | 4.6   | 1.0   | 9.7    | 12.0   | 4.8    |
| 0.8   | 3.7   | 0.9   | 0.7   | 0.9   | 1.0   | 1.2    | 1.7    | 0.9    |
| 3.1   | 8.6   | 2.3   | 3.4   | 9.4   | 1.0   | 1.2    | 3.7    | 2.1    |
| 7.3   | 2.0   | 17.0  | 11.9  | 5.0   | 10.0  | 26.5   | 16.5   | 22.7   |
| 6.4   | 0.7   | 12.9  | 6.6   | 6.2   | 14.9  | 9.4    | 12.3   | 14.0   |
| 18.5  | 15.3  | 9.6   | 13.2  | 15.0  | 19.1  | 36.4   | 28.4   | 26.6   |
| 8.0   | 1.7   | 10.5  | 5.7   | 1.2   | 6.0   | 11.1   | 13.4   | 5.6    |
| 31.8  | 45.3  | 67.6  | 65.1  | 47.7  | 29.7  | 128.1  | 112.7  | 111.6  |
| 0.8   | 1.4   | 2.8   | 4.8   | 1.6   | 7.1   | 2.2    | 1.3    | 0.6    |
| 35.7  | 26.9  | 27.0  | 59.1  | 40.6  | 24.5  | 41.3   | 45.9   | 34.3   |
| 18.1  | 24.6  | 1.2   | 6.3   | 20.7  | 27.7  | 10.3   | 11.4   | 17.0   |
| 3.2   | 0.9   | 3.0   | 7.1   | 2.7   | 3.1   | 3.4    | 2.0    | 2.2    |
| 11.5  | 1.9   | 0.4   | 0.6   | 6.3   | 7.5   | 6.6    | 4.1    | 1.5    |
| 123.0 | 80.1  | 65.6  | 71.3  | 96.8  | 113.2 | 132.9  | 130.2  | 160.6  |
| 37.8  | 20.6  | 10.8  | 17.0  | 46.8  | 33.6  | 17.1   | 8.9    | 17.0   |
| 11.0  | 15.8  | 22.1  | 23.5  | 17.2  | 10.5  | 39.8   | 54.9   | 54.7   |
| 2.0   | 6.8   | 4.0   | 3.2   | 22.1  | 11.5  | 6.7    | 2.7    | 6.0    |
| 1.7   | 4.8   | 1.2   | 4.4   | 6.0   | 0.3   | 3.7    | 2.7    | 5.0    |
| 2.9   | 10.9  | 6.0   | 8.0   | 6.4   | 2.3   | 4.9    | 6.6    | 10.0   |
| 3.8   | 5.1   | 11.2  | 8.4   | 4.8   | 5.8   | 7.5    | 7.9    | 9.2    |
| 11.6  | 26.5  | 66.4  | 100.7 | 19.7  | 23.9  | 36.3   | 11.0   | 7.3    |
| 114.3 | 162.6 | 148.7 | 169.0 | 158.9 | 153.1 | 1197.1 | 1338.5 | 1444.2 |
| 500.2 | 458.8 | 298.0 | 326.0 | 583.7 | 426.9 | 836.4  | 417.4  | 455.1  |
| 7.0   | 5.2   | 2.2   | 7.1   | 1.6   | 0.6   | 8.8    | 17.0   | 8.7    |
| 3.0   | 1.5   | 23.4  | 13.6  | 1.6   | 4.4   | 9.2    | 7.5    | 15.2   |
| 2.2   | 1.1   | 3.7   | 1.2   | 1.6   | 1.8   | 3.2    | 4.7    | 4.2    |
| 1.3   | 3.0   | 5.2   | 7.3   | 16.9  | 12.9  | 7.0    | 2.8    | 2.0    |
| 24.7  | 39.9  | 33.9  | 30.0  | 40.4  | 31.5  | 19.7   | 26.8   | 5.1    |
| 1.3   | 11.6  | 1.2   | 28.3  | 4.4   | 7.2   | 71.2   | 135.4  | 97.9   |
| 254.7 | 410.1 | 414.0 | 608.7 | 393.9 | 448.0 | 1639.6 | 1045.3 | 1166.7 |
| 30.2  | 25.4  | 19.3  | 12.3  | 26.1  | 17.1  | 68.6   | 62.0   | 66.9   |
| 7.5   | 0.5   | 1.0   | 0.5   | 9.1   | 4.8   | 12.0   | 12.0   | 3.4    |
| 16.6  | 12.2  | 2.1   | 1.7   | 17.9  | 16.3  | 11.0   | 12.6   | 11.8   |
| 1.6   | 7.8   | 4.0   | 5.4   | 0.6   | 1.3   | 0.6    | 5.4    | 2.7    |

|        |        |       |       |        |        |        |        |        |
|--------|--------|-------|-------|--------|--------|--------|--------|--------|
| 23.2   | 35.4   | 59.3  | 104.3 | 45.6   | 33.6   | 151.0  | 239.2  | 256.8  |
| 13.7   | 12.7   | 3.1   | 1.2   | 7.1    | 10.0   | 15.7   | 11.4   | 10.5   |
| 13.4   | 6.0    | 10.1  | 5.2   | 5.9    | 11.2   | 12.4   | 1.7    | 2.5    |
| 21.9   | 33.5   | 31.2  | 14.2  | 24.3   | 10.5   | 29.4   | 26.3   | 30.7   |
| 0.9    | 0.9    | 2.5   | 2.5   | 1.3    | 1.4    | 6.4    | 7.1    | 2.8    |
| 0.5    | 1.1    | 1.5   | 0.6   | 0.6    | 0.5    | 1.0    | 0.7    | 0.5    |
| 11.5   | 12.2   | 4.1   | 0.6   | 13.2   | 11.4   | 8.4    | 9.1    | 6.3    |
| 178.9  | 236.5  | 66.5  | 99.4  | 275.0  | 180.7  | 486.6  | 294.6  | 360.9  |
| 4.7    | 6.3    | 2.1   | 3.2   | 9.1    | 6.2    | 4.3    | 6.2    | 3.0    |
| 88.7   | 108.6  | 213.2 | 282.8 | 124.6  | 103.8  | 227.4  | 181.3  | 206.0  |
| 5.8    | 9.0    | 6.8   | 2.0   | 1.2    | 1.6    | 2.5    | 3.0    | 7.0    |
| 5.5    | 0.4    | 7.7   | 4.1   | 11.0   | 1.2    | 5.0    | 10.2   | 4.5    |
| 9.8    | 2.1    | 7.6   | 1.5   | 8.9    | 6.1    | 6.9    | 13.4   | 7.8    |
| 7.2    | 15.3   | 16.1  | 8.7   | 10.7   | 21.9   | 32.9   | 33.8   | 33.9   |
| 1.7    | 2.9    | 3.1   | 1.6   | 2.9    | 7.3    | 2.4    | 2.0    | 2.4    |
| 8.5    | 8.9    | 3.3   | 5.1   | 2.3    | 4.5    | 3.0    | 8.4    | 7.3    |
| 0.4    | 0.9    | 2.0   | 8.2   | 3.6    | 1.1    | 2.2    | 6.0    | 9.2    |
| 9.1    | 11.8   | 1.7   | 1.0   | 4.0    | 6.4    | 5.1    | 7.0    | 8.2    |
| 0.2    | 1.2    | 5.1   | 0.5   | 0.2    | 0.3    | 1.9    | 6.7    | 6.3    |
| 7.1    | 9.0    | 1.2   | 0.9   | 2.3    | 7.6    | 4.2    | 2.2    | 13.8   |
| 13.9   | 3.2    | 4.3   | 8.2   | 10.4   | 3.4    | 4.2    | 7.3    | 4.5    |
| 0.6    | 6.7    | 55.8  | 150.6 | 8.6    | 0.5    | 18.2   | 6.6    | 5.8    |
| 1.4    | 2.4    | 36.3  | 53.3  | 2.0    | 1.4    | 63.8   | 80.6   | 75.8   |
| 0.8    | 1.2    | 12.4  | 13.0  | 14.9   | 1.7    | 18.2   | 8.1    | 13.4   |
| 4.6    | 2.3    | 10.2  | 2.9   | 3.3    | 8.2    | 4.4    | 23.4   | 6.6    |
| 10.1   | 11.8   | 4.9   | 3.4   | 7.6    | 14.3   | 9.7    | 11.9   | 10.2   |
| 6.2    | 5.0    | 2.8   | 1.3   | 2.9    | 1.3    | 14.5   | 3.3    | 4.9    |
| 32.5   | 18.8   | 88.2  | 106.2 | 77.4   | 31.6   | 65.9   | 63.1   | 83.1   |
| 40.2   | 26.9   | 16.3  | 16.4  | 95.1   | 28.0   | 14.0   | 8.1    | 12.3   |
| 8.2    | 1.3    | 3.2   | 9.1   | 8.1    | 8.4    | 7.5    | 5.5    | 4.2    |
| 4.1    | 1.5    | 4.3   | 3.6   | 3.3    | 5.7    | 2.0    | 5.8    | 4.5    |
| 9.9    | 1.4    | 14.1  | 10.4  | 8.7    | 13.6   | 11.6   | 17.0   | 17.8   |
| 5.3    | 3.1    | 13.5  | 7.8   | 7.1    | 1.9    | 12.2   | 11.5   | 8.8    |
| 1.2    | 7.5    | 9.4   | 2.5   | 2.9    | 3.0    | 15.9   | 12.0   | 7.4    |
| 3.1    | 18.4   | 15.4  | 7.4   | 16.3   | 18.6   | 11.6   | 11.2   | 11.6   |
| 2.3    | 25.0   | 10.1  | 15.7  | 25.7   | 21.2   | 84.8   | 86.5   | 86.9   |
| 7.3    | 16.2   | 11.0  | 18.3  | 15.5   | 17.1   | 28.3   | 20.7   | 22.0   |
| 2.4    | 10.9   | 9.5   | 13.8  | 3.5    | 3.5    | 40.1   | 51.2   | 53.4   |
| 3538.5 | 4057.8 | 664.7 | 938.1 | 4355.8 | 4023.7 | 5615.3 | 6044.6 | 6243.4 |
| 1.5    | 5.8    | 1.5   | 1.1   | 1.1    | 13.0   | 1.7    | 6.2    | 1.8    |
| 14.2   | 24.1   | 10.5  | 11.5  | 9.7    | 18.2   | 18.2   | 13.6   | 13.7   |
| 0.8    | 0.5    | 1.3   | 0.9   | 2.2    | 0.7    | 2.8    | 9.4    | 3.5    |
| 4.4    | 1.4    | 2.0   | 1.2   | 1.9    | 1.9    | 3.7    | 3.1    | 3.8    |
| 2.1    | 19.9   | 10.9  | 6.3   | 1.0    | 11.0   | 8.0    | 8.4    | 3.0    |
| 9.7    | 9.2    | 10.5  | 8.2   | 8.7    | 10.0   | 16.6   | 13.6   | 11.4   |
| 1.0    | 1.3    | 9.2   | 3.8   | 10.5   | 2.7    | 2.5    | 6.1    | 0.7    |
| 2.5    | 0.8    | 5.7   | 4.3   | 0.3    | 3.6    | 5.1    | 4.0    | 3.7    |
| 112.9  | 144.7  | 60.7  | 76.4  | 179.4  | 149.0  | 196.3  | 217.7  | 194.1  |
| 7.4    | 12.5   | 27.5  | 51.2  | 20.8   | 30.7   | 83.3   | 117.0  | 107.0  |
| 17.9   | 16.4   | 1.7   | 14.2  | 27.9   | 4.6    | 79.0   | 50.4   | 66.1   |
| 8.3    | 8.0    | 4.2   | 2.5   | 1.8    | 8.7    | 6.6    | 3.4    | 6.7    |
| 112.5  | 110.8  | 49.1  | 95.2  | 115.4  | 94.8   | 17.3   | 22.5   | 26.1   |
| 5.5    | 4.8    | 1.8   | 6.5   | 0.8    | 2.0    | 8.7    | 4.6    | 6.5    |

|       |       |       |       |       |       |       |       |       |
|-------|-------|-------|-------|-------|-------|-------|-------|-------|
| 3.5   | 3.8   | 11.8  | 3.8   | 9.0   | 4.4   | 16.1  | 10.2  | 12.6  |
| 1.3   | 1.6   | 3.0   | 1.7   | 2.1   | 9.5   | 9.7   | 3.8   | 5.4   |
| 1.9   | 5.6   | 3.3   | 1.1   | 3.1   | 0.9   | 5.1   | 2.3   | 5.3   |
| 16.2  | 12.1  | 11.8  | 7.8   | 13.9  | 14.6  | 30.6  | 19.9  | 31.0  |
| 36.5  | 60.5  | 6.0   | 3.4   | 36.4  | 39.5  | 98.4  | 86.8  | 99.1  |
| 1.4   | 2.9   | 3.0   | 9.1   | 1.6   | 3.3   | 5.8   | 7.9   | 17.9  |
| 2.3   | 4.9   | 18.4  | 15.7  | 18.6  | 3.2   | 6.5   | 7.6   | 2.1   |
| 14.2  | 26.8  | 11.4  | 1.8   | 24.2  | 11.7  | 23.1  | 35.2  | 35.5  |
| 5.6   | 4.6   | 0.5   | 3.0   | 1.3   | 8.2   | 10.1  | 4.8   | 5.6   |
| 0.8   | 0.9   | 8.6   | 0.6   | 1.3   | 14.8  | 2.7   | 1.5   | 1.7   |
| 8.6   | 20.6  | 12.7  | 9.9   | 12.3  | 10.1  | 27.9  | 32.4  | 20.0  |
| 24.1  | 1.4   | 4.9   | 3.3   | 9.8   | 41.5  | 36.9  | 27.5  | 30.0  |
| 4.2   | 10.5  | 8.3   | 6.5   | 4.1   | 1.2   | 10.2  | 9.3   | 11.1  |
| 2.2   | 1.7   | 0.6   | 2.5   | 0.2   | 6.0   | 11.2  | 7.4   | 13.9  |
| 14.3  | 23.6  | 15.3  | 11.6  | 28.9  | 27.0  | 18.0  | 12.4  | 10.7  |
| 4.6   | 11.1  | 3.1   | 3.9   | 8.7   | 5.8   | 1.2   | 5.8   | 5.4   |
| 10.8  | 18.9  | 9.8   | 11.7  | 12.6  | 9.2   | 17.5  | 16.5  | 12.7  |
| 12.0  | 31.5  | 9.8   | 11.9  | 17.9  | 1.0   | 10.3  | 16.6  | 24.4  |
| 40.4  | 30.6  | 21.8  | 16.6  | 77.7  | 49.1  | 123.5 | 98.2  | 141.2 |
| 4.2   | 1.7   | 0.5   | 0.6   | 1.4   | 4.2   | 3.2   | 8.0   | 3.3   |
| 11.6  | 8.1   | 15.4  | 5.6   | 12.4  | 13.0  | 4.5   | 14.5  | 13.8  |
| 8.9   | 11.6  | 3.0   | 2.8   | 9.3   | 15.6  | 7.3   | 6.5   | 6.2   |
| 14.9  | 1.0   | 2.0   | 1.7   | 7.9   | 7.2   | 14.5  | 3.2   | 5.1   |
| 9.0   | 12.6  | 12.4  | 19.3  | 16.1  | 14.0  | 10.4  | 13.9  | 13.7  |
| 2.8   | 11.5  | 9.8   | 11.2  | 5.8   | 13.1  | 8.7   | 8.2   | 5.4   |
| 6.2   | 19.1  | 15.5  | 2.1   | 15.4  | 16.9  | 8.6   | 7.6   | 16.5  |
| 14.2  | 11.3  | 5.3   | 4.4   | 13.6  | 15.6  | 10.4  | 14.8  | 15.3  |
| 3.6   | 6.4   | 2.5   | 9.5   | 3.5   | 17.6  | 23.6  | 21.6  | 13.4  |
| 5.4   | 17.7  | 14.2  | 11.0  | 14.0  | 8.8   | 13.5  | 23.4  | 11.1  |
| 26.7  | 26.2  | 134.4 | 151.7 | 45.3  | 20.8  | 420.1 | 237.7 | 232.0 |
| 11.8  | 13.5  | 8.0   | 3.9   | 4.8   | 7.7   | 9.8   | 14.1  | 3.5   |
| 1.8   | 2.6   | 2.2   | 1.7   | 1.1   | 4.2   | 5.1   | 2.0   | 3.9   |
| 1.1   | 0.5   | 0.7   | 0.5   | 0.7   | 3.2   | 3.5   | 3.3   | 3.6   |
| 4.8   | 1.4   | 9.6   | 0.6   | 4.1   | 4.1   | 3.7   | 2.0   | 3.0   |
| 0.8   | 1.4   | 1.3   | 2.7   | 1.2   | 1.2   | 3.3   | 2.0   | 1.2   |
| 104.8 | 123.1 | 44.0  | 58.1  | 111.6 | 108.2 | 77.8  | 69.1  | 81.3  |
| 12.0  | 23.0  | 2.5   | 6.7   | 18.5  | 18.0  | 1.6   | 2.7   | 2.3   |
| 15.4  | 5.3   | 10.9  | 12.1  | 8.7   | 13.7  | 22.7  | 24.4  | 13.7  |
| 11.2  | 5.4   | 2.8   | 1.5   | 3.0   | 1.6   | 3.8   | 2.3   | 2.6   |
| 1.7   | 4.1   | 3.8   | 3.1   | 6.6   | 5.8   | 3.6   | 12.2  | 9.4   |
| 2.7   | 4.0   | 0.8   | 0.4   | 8.1   | 4.9   | 0.8   | 3.3   | 4.3   |
| 5.6   | 4.3   | 2.0   | 1.7   | 0.1   | 5.5   | 0.6   | 5.3   | 0.3   |
| 1.4   | 0.8   | 1.2   | 7.5   | 1.9   | 1.1   | 4.9   | 2.5   | 3.5   |
| 5.1   | 7.8   | 11.9  | 8.7   | 10.5  | 9.0   | 24.9  | 14.1  | 14.6  |
| 15.7  | 21.6  | 6.9   | 10.4  | 22.5  | 19.2  | 18.5  | 19.7  | 18.9  |
| 26.0  | 22.1  | 19.7  | 14.6  | 15.8  | 15.2  | 31.5  | 22.5  | 31.4  |
| 153.2 | 162.0 | 87.3  | 110.4 | 235.0 | 198.5 | 922.3 | 885.0 | 999.4 |
| 1.3   | 0.8   | 4.8   | 2.9   | 4.9   | 7.7   | 1.8   | 9.9   | 3.2   |
| 11.0  | 4.1   | 1.2   | 10.9  | 26.6  | 13.0  | 75.0  | 85.9  | 88.4  |
| 20.0  | 19.4  | 16.8  | 4.1   | 8.6   | 19.6  | 25.3  | 29.6  | 26.6  |
| 13.4  | 22.4  | 10.5  | 9.7   | 20.7  | 26.2  | 55.8  | 54.6  | 57.1  |
| 5.2   | 7.2   | 7.8   | 2.5   | 5.4   | 0.9   | 8.3   | 12.7  | 7.1   |
| 2.1   | 1.3   | 3.7   | 10.0  | 9.7   | 15.3  | 19.8  | 13.7  | 3.2   |

|       |       |      |       |       |       |       |       |       |
|-------|-------|------|-------|-------|-------|-------|-------|-------|
| 24.4  | 20.3  | 28.8 | 28.7  | 48.2  | 14.0  | 49.5  | 70.1  | 101.8 |
| 1.9   | 2.0   | 0.5  | 1.4   | 6.0   | 7.3   | 12.6  | 15.4  | 18.2  |
| 3.2   | 2.8   | 7.0  | 0.8   | 14.6  | 11.8  | 11.5  | 9.0   | 11.4  |
| 1.1   | 0.9   | 3.7  | 4.3   | 4.0   | 4.1   | 6.2   | 5.0   | 2.6   |
| 8.5   | 5.4   | 0.9  | 1.3   | 14.6  | 20.5  | 17.6  | 36.0  | 15.2  |
| 14.0  | 14.5  | 4.0  | 1.1   | 6.6   | 16.2  | 10.2  | 5.8   | 10.2  |
| 3.5   | 8.9   | 1.6  | 1.5   | 2.8   | 8.5   | 24.7  | 26.8  | 21.8  |
| 4.3   | 8.1   | 1.5  | 6.4   | 9.3   | 0.7   | 5.1   | 6.4   | 7.6   |
| 14.6  | 21.0  | 15.5 | 8.7   | 13.0  | 13.3  | 18.5  | 20.1  | 14.3  |
| 1.0   | 1.1   | 4.6  | 5.8   | 7.9   | 5.8   | 13.8  | 12.0  | 11.3  |
| 2.5   | 8.3   | 4.5  | 1.7   | 4.5   | 7.3   | 4.4   | 4.4   | 1.2   |
| 7.5   | 0.9   | 0.8  | 6.7   | 2.3   | 0.4   | 12.3  | 13.9  | 7.8   |
| 104.3 | 84.2  | 58.8 | 76.2  | 184.5 | 117.1 | 238.8 | 219.0 | 260.3 |
| 6.4   | 7.4   | 3.4  | 7.9   | 12.2  | 12.5  | 12.9  | 8.5   | 12.5  |
| 107.3 | 111.0 | 54.9 | 93.0  | 173.9 | 114.2 | 713.9 | 385.8 | 432.5 |
| 9.1   | 3.7   | 16.1 | 15.0  | 9.6   | 2.9   | 16.3  | 11.3  | 11.1  |
| 25.0  | 42.7  | 2.0  | 7.4   | 21.3  | 62.8  | 19.9  | 18.6  | 18.6  |
| 1.9   | 3.1   | 0.9  | 3.3   | 7.9   | 14.0  | 15.4  | 11.8  | 7.5   |
| 26.8  | 40.3  | 54.8 | 49.0  | 57.6  | 36.4  | 87.1  | 78.8  | 87.5  |
| 30.8  | 14.3  | 5.5  | 2.9   | 38.6  | 18.1  | 145.0 | 212.3 | 211.3 |
| 1.3   | 0.7   | 0.5  | 1.0   | 0.4   | 9.0   | 1.2   | 5.3   | 4.8   |
| 1.9   | 6.6   | 3.0  | 1.3   | 1.8   | 0.4   | 2.2   | 1.0   | 1.5   |
| 114.8 | 300.8 | 13.7 | 36.0  | 152.8 | 139.5 | 100.0 | 59.6  | 45.4  |
| 1.3   | 1.2   | 4.1  | 1.2   | 11.9  | 10.4  | 13.4  | 8.2   | 6.0   |
| 1.7   | 1.0   | 10.4 | 9.3   | 10.1  | 5.5   | 4.2   | 3.0   | 0.9   |
| 6.7   | 16.7  | 24.5 | 13.3  | 5.0   | 3.9   | 12.0  | 15.3  | 10.5  |
| 6.9   | 1.6   | 4.1  | 0.8   | 2.3   | 7.1   | 2.1   | 1.7   | 5.9   |
| 106.0 | 225.7 | 12.0 | 16.2  | 159.7 | 166.6 | 42.6  | 48.0  | 35.7  |
| 19.2  | 33.3  | 8.8  | 6.3   | 40.1  | 22.9  | 43.7  | 32.4  | 22.5  |
| 7.7   | 11.5  | 8.3  | 22.3  | 25.4  | 16.8  | 9.7   | 1.5   | 11.2  |
| 4.3   | 22.2  | 7.3  | 17.8  | 34.5  | 12.5  | 22.9  | 19.3  | 11.9  |
| 1.4   | 1.0   | 5.6  | 1.4   | 3.0   | 0.7   | 10.2  | 3.6   | 8.4   |
| 42.3  | 31.2  | 12.3 | 31.0  | 37.4  | 4.7   | 125.9 | 91.4  | 94.9  |
| 0.3   | 1.2   | 0.1  | 2.6   | 4.4   | 0.2   | 2.8   | 0.8   | 3.2   |
| 2.2   | 0.8   | 1.0  | 0.6   | 2.6   | 3.8   | 2.1   | 1.9   | 2.7   |
| 66.1  | 98.0  | 5.2  | 13.3  | 111.5 | 56.2  | 52.9  | 53.1  | 27.6  |
| 4.8   | 15.1  | 8.9  | 10.9  | 8.2   | 17.7  | 11.7  | 18.4  | 13.3  |
| 3.4   | 8.1   | 6.0  | 0.3   | 8.7   | 4.2   | 1.0   | 3.4   | 2.1   |
| 0.5   | 4.5   | 0.2  | 0.8   | 0.8   | 2.0   | 3.4   | 1.3   | 1.3   |
| 35.3  | 38.5  | 16.8 | 16.6  | 38.7  | 32.8  | 161.2 | 182.0 | 192.7 |
| 44.7  | 60.0  | 80.9 | 118.7 | 120.8 | 47.4  | 159.5 | 153.9 | 159.8 |
| 1.4   | 1.2   | 1.1  | 1.0   | 6.2   | 12.2  | 5.0   | 6.5   | 3.4   |
| 61.2  | 87.9  | 4.1  | 4.9   | 106.2 | 98.3  | 67.0  | 22.8  | 25.0  |
| 1.7   | 4.9   | 0.7  | 1.0   | 2.1   | 0.6   | 9.6   | 3.3   | 5.3   |
| 6.6   | 9.9   | 6.0  | 3.8   | 13.7  | 8.1   | 9.6   | 11.3  | 14.1  |
| 122.8 | 180.6 | 21.6 | 14.8  | 210.6 | 249.7 | 259.7 | 358.8 | 372.3 |
| 1.2   | 0.6   | 1.4  | 1.3   | 0.4   | 0.4   | 4.0   | 1.7   | 0.6   |
| 28.5  | 22.0  | 18.8 | 13.9  | 22.6  | 12.6  | 37.8  | 37.0  | 30.8  |
| 9.8   | 4.9   | 7.9  | 1.6   | 6.1   | 2.9   | 4.8   | 3.1   | 1.5   |
| 0.9   | 0.6   | 4.7  | 0.8   | 1.3   | 1.2   | 0.7   | 0.8   | 3.5   |
| 1.1   | 0.8   | 1.1  | 4.4   | 1.5   | 2.0   | 2.8   | 6.1   | 5.4   |
| 102.3 | 170.7 | 44.2 | 64.1  | 178.2 | 156.9 | 147.8 | 125.8 | 106.8 |
| 4.7   | 1.3   | 2.8  | 1.3   | 1.8   | 1.3   | 1.4   | 1.2   | 5.8   |

|        |        |        |        |        |        |        |        |        |
|--------|--------|--------|--------|--------|--------|--------|--------|--------|
| 7.5    | 0.2    | 2.9    | 0.7    | 2.8    | 5.1    | 3.8    | 3.9    | 3.4    |
| 18.9   | 29.3   | 19.7   | 18.2   | 4.6    | 5.6    | 189.9  | 338.9  | 356.6  |
| 21.4   | 24.4   | 1.9    | 14.3   | 15.9   | 13.4   | 32.3   | 28.0   | 35.8   |
| 612.5  | 836.2  | 44.9   | 101.6  | 953.8  | 645.5  | 1078.3 | 567.9  | 766.9  |
| 58.7   | 51.4   | 20.0   | 33.1   | 77.1   | 49.9   | 121.0  | 118.2  | 128.4  |
| 16.1   | 4.2    | 4.9    | 10.6   | 3.3    | 2.0    | 5.6    | 2.3    | 2.2    |
| 18.1   | 19.9   | 8.4    | 8.4    | 2.0    | 16.4   | 16.9   | 17.6   | 17.0   |
| 3199.3 | 4407.6 | 831.5  | 1464.8 | 4794.5 | 3360.9 | 7318.1 | 6453.3 | 6512.3 |
| 3.5    | 2.3    | 3.0    | 9.3    | 4.8    | 6.6    | 9.2    | 15.2   | 3.6    |
| 32.6   | 43.9   | 19.4   | 31.6   | 51.8   | 39.0   | 93.3   | 109.7  | 76.2   |
| 14.7   | 15.7   | 0.8    | 2.9    | 12.7   | 0.7    | 74.2   | 77.7   | 114.9  |
| 1.7    | 2.5    | 1.5    | 7.1    | 12.8   | 1.7    | 5.2    | 8.2    | 15.8   |
| 0.8    | 8.8    | 4.1    | 2.4    | 0.8    | 7.5    | 4.9    | 1.3    | 2.3    |
| 3.0    | 2.2    | 1.7    | 2.1    | 0.8    | 5.1    | 3.6    | 1.4    | 5.3    |
| 15.5   | 1.4    | 17.4   | 18.9   | 7.9    | 12.6   | 21.3   | 16.9   | 10.2   |
| 0.7    | 4.9    | 5.0    | 1.7    | 2.5    | 0.5    | 2.7    | 5.7    | 1.9    |
| 0.8    | 2.5    | 0.8    | 0.9    | 1.6    | 2.6    | 11.8   | 13.4   | 9.9    |
| 0.2    | 0.2    | 2.4    | 0.6    | 4.3    | 6.5    | 5.5    | 0.3    | 2.7    |
| 5551.5 | 6381.8 | 3611.7 | 4851.6 | 6394.6 | 5696.4 | 8196.4 | 8359.0 | 8581.7 |
| 4.6    | 2.7    | 0.8    | 0.9    | 4.8    | 0.6    | 3.3    | 1.8    | 6.4    |
| 4.5    | 1.8    | 0.9    | 4.1    | 0.7    | 1.5    | 1.6    | 0.7    | 1.8    |
| 20.0   | 19.5   | 20.1   | 22.8   | 35.7   | 11.1   | 104.9  | 95.1   | 109.1  |
| 1.0    | 2.0    | 2.1    | 1.8    | 3.7    | 8.4    | 3.5    | 2.0    | 2.1    |
| 3.1    | 10.7   | 3.8    | 7.0    | 9.2    | 3.3    | 19.6   | 9.0    | 13.4   |
| 3.3    | 0.8    | 1.0    | 5.0    | 0.3    | 0.9    | 8.8    | 5.7    | 0.9    |
| 7.8    | 1.2    | 5.1    | 1.9    | 7.9    | 0.4    | 5.9    | 2.3    | 6.0    |
| 3.1    | 11.0   | 10.3   | 1.8    | 2.2    | 1.2    | 12.1   | 6.8    | 11.0   |
| 9.2    | 12.3   | 6.0    | 6.6    | 3.8    | 1.6    | 3.5    | 6.5    | 7.3    |
| 5.4    | 6.9    | 3.5    | 2.1    | 3.9    | 12.1   | 15.5   | 5.6    | 9.6    |
| 15.8   | 17.3   | 3.5    | 2.6    | 19.8   | 3.6    | 10.8   | 3.6    | 5.7    |
| 1.5    | 11.9   | 18.4   | 1.7    | 8.6    | 12.1   | 31.3   | 23.7   | 19.0   |
| 3.4    | 6.3    | 7.6    | 1.5    | 13.4   | 4.2    | 6.2    | 9.4    | 4.3    |
| 8.7    | 19.8   | 6.8    | 27.8   | 26.9   | 10.7   | 101.3  | 97.8   | 85.7   |
| 189.1  | 410.8  | 27.9   | 18.2   | 355.5  | 499.4  | 354.1  | 379.9  | 412.1  |
| 10.1   | 14.7   | 8.9    | 2.1    | 6.0    | 27.8   | 21.6   | 13.4   | 4.6    |
| 38.3   | 38.8   | 17.1   | 16.8   | 38.6   | 34.9   | 50.9   | 46.4   | 35.2   |
| 0.7    | 1.2    | 2.1    | 0.8    | 1.6    | 0.4    | 0.9    | 0.6    | 0.9    |
| 101.1  | 89.7   | 49.4   | 64.1   | 135.7  | 81.7   | 188.8  | 144.3  | 182.4  |
| 55.1   | 50.7   | 39.5   | 39.1   | 71.1   | 56.6   | 163.5  | 105.5  | 115.2  |
| 163.5  | 243.4  | 60.6   | 90.4   | 179.1  | 149.0  | 180.1  | 117.9  | 135.4  |
| 17.3   | 49.3   | 9.5    | 18.7   | 32.7   | 46.9   | 24.3   | 23.2   | 21.4   |
| 5.1    | 16.4   | 1.3    | 0.4    | 6.3    | 9.9    | 4.7    | 5.3    | 4.8    |
| 14.5   | 8.3    | 6.4    | 2.1    | 8.8    | 10.9   | 8.4    | 7.0    | 11.5   |
| 1.5    | 1.5    | 3.1    | 2.1    | 0.7    | 1.5    | 2.6    | 2.5    | 2.1    |
| 2.3    | 1.5    | 1.3    | 13.5   | 1.2    | 3.0    | 29.5   | 16.9   | 14.4   |
| 4.3    | 1.0    | 27.9   | 41.5   | 19.7   | 3.8    | 21.7   | 46.3   | 50.7   |
| 15.6   | 18.4   | 11.3   | 8.1    | 19.5   | 13.4   | 69.5   | 49.4   | 41.5   |
| 6.8    | 6.5    | 1.3    | 4.7    | 6.3    | 7.1    | 8.0    | 6.7    | 8.6    |
| 1.5    | 6.0    | 3.3    | 5.5    | 3.0    | 7.0    | 5.6    | 1.4    | 5.0    |
| 158.4  | 156.7  | 148.0  | 173.9  | 217.7  | 145.0  | 507.0  | 442.6  | 488.7  |
| 8.4    | 7.2    | 17.9   | 9.7    | 12.4   | 6.1    | 17.4   | 23.0   | 18.0   |
| 3.0    | 1.9    | 1.2    | 0.9    | 7.6    | 2.0    | 3.0    | 2.8    | 1.9    |
| 19.1   | 37.4   | 26.5   | 26.8   | 29.3   | 32.1   | 145.2  | 186.5  | 199.0  |

|        |        |       |       |        |        |        |        |        |
|--------|--------|-------|-------|--------|--------|--------|--------|--------|
| 1.2    | 0.9    | 4.5   | 1.3   | 1.3    | 2.9    | 1.1    | 3.5    | 2.3    |
| 7.4    | 11.8   | 8.3   | 5.6   | 14.6   | 10.6   | 13.6   | 14.3   | 13.9   |
| 0.6    | 0.5    | 0.7   | 0.8   | 1.0    | 0.9    | 1.0    | 2.4    | 1.8    |
| 3.9    | 8.0    | 7.0   | 5.3   | 9.5    | 22.5   | 16.8   | 15.2   | 13.3   |
| 9.6    | 1.1    | 2.4   | 1.4   | 4.0    | 1.6    | 2.1    | 4.9    | 6.9    |
| 2.7    | 10.4   | 2.7   | 0.6   | 0.9    | 1.3    | 1.0    | 2.2    | 3.4    |
| 0.6    | 8.1    | 7.2   | 1.1   | 12.8   | 1.1    | 51.9   | 41.2   | 25.8   |
| 7.8    | 16.7   | 8.9   | 8.4   | 17.3   | 13.6   | 10.6   | 8.5    | 2.1    |
| 9.4    | 14.4   | 3.9   | 4.2   | 12.8   | 2.9    | 7.9    | 13.2   | 13.7   |
| 1.9    | 16.4   | 3.5   | 0.6   | 1.5    | 1.0    | 6.1    | 3.8    | 5.1    |
| 56.6   | 57.3   | 12.0  | 25.9  | 72.6   | 46.3   | 90.4   | 45.5   | 59.1   |
| 12.0   | 18.3   | 7.9   | 9.2   | 1.0    | 13.8   | 24.7   | 23.1   | 19.9   |
| 27.8   | 28.4   | 1.2   | 8.4   | 41.0   | 20.9   | 209.4  | 254.6  | 283.5  |
| 0.7    | 18.9   | 7.4   | 1.8   | 2.9    | 5.2    | 1.3    | 5.1    | 5.2    |
| 9.3    | 15.7   | 13.1  | 9.9   | 12.2   | 17.5   | 14.9   | 8.0    | 11.7   |
| 5.8    | 1.6    | 7.7   | 12.1  | 6.4    | 1.3    | 9.6    | 14.8   | 5.8    |
| 1.4    | 1.2    | 1.8   | 7.9   | 1.4    | 2.5    | 3.5    | 2.2    | 1.3    |
| 16.2   | 15.4   | 2.0   | 5.7   | 46.0   | 9.4    | 1.0    | 1.1    | 0.8    |
| 0.8    | 0.3    | 4.6   | 1.1   | 5.7    | 5.0    | 1.0    | 2.2    | 0.4    |
| 3.1    | 3.6    | 18.8  | 18.4  | 5.3    | 1.8    | 12.7   | 2.2    | 1.9    |
| 5.7    | 3.8    | 10.9  | 2.5   | 17.8   | 3.5    | 8.2    | 4.0    | 15.4   |
| 3.9    | 4.8    | 4.8   | 2.8   | 3.5    | 4.8    | 9.6    | 4.6    | 27.1   |
| 0.5    | 6.5    | 0.2   | 0.3   | 3.0    | 9.0    | 4.5    | 4.9    | 4.8    |
| 1.8    | 6.3    | 7.0   | 9.4   | 10.7   | 9.3    | 15.1   | 5.3    | 9.8    |
| 9.0    | 11.8   | 3.7   | 0.9   | 14.3   | 18.6   | 5.9    | 13.7   | 15.1   |
| 13.2   | 5.0    | 3.2   | 2.0   | 7.8    | 9.4    | 5.8    | 4.7    | 4.9    |
| 2.1    | 5.7    | 0.7   | 2.2   | 15.8   | 2.6    | 2.2    | 8.3    | 2.6    |
| 17.4   | 23.1   | 28.8  | 12.1  | 2.3    | 13.6   | 22.9   | 22.4   | 34.3   |
| 106.8  | 108.2  | 52.6  | 99.4  | 167.2  | 94.8   | 147.8  | 108.1  | 125.7  |
| 1.3    | 10.5   | 1.5   | 0.3   | 8.9    | 3.0    | 3.5    | 3.0    | 6.4    |
| 63.1   | 69.5   | 29.1  | 48.3  | 58.3   | 88.2   | 148.0  | 84.8   | 117.9  |
| 15.2   | 21.0   | 16.3  | 10.7  | 15.1   | 10.0   | 16.4   | 18.8   | 9.0    |
| 9.8    | 0.9    | 3.2   | 0.4   | 5.1    | 5.6    | 0.6    | 4.5    | 5.9    |
| 34.7   | 67.8   | 16.7  | 10.0  | 85.7   | 52.5   | 108.8  | 75.5   | 80.8   |
| 1229.9 | 1324.4 | 167.3 | 240.2 | 1686.7 | 1127.7 | 2073.2 | 2249.1 | 2324.1 |
| 114.3  | 99.8   | 2.2   | 0.6   | 239.8  | 140.0  | 228.6  | 163.0  | 181.2  |
| 12.7   | 24.1   | 12.8  | 9.4   | 32.1   | 17.2   | 31.2   | 29.6   | 23.0   |
| 116.0  | 201.8  | 15.7  | 17.5  | 181.3  | 150.1  | 284.5  | 267.3  | 306.0  |
| 29.2   | 38.0   | 48.3  | 70.8  | 34.8   | 17.7   | 116.8  | 122.6  | 150.8  |
| 98.2   | 192.4  | 19.6  | 29.5  | 158.6  | 145.8  | 306.7  | 267.0  | 296.8  |
| 98.2   | 125.0  | 59.9  | 121.9 | 162.7  | 192.1  | 107.8  | 95.0   | 101.2  |
| 14.0   | 1.0    | 5.0   | 4.9   | 18.2   | 12.2   | 2.4    | 1.7    | 0.5    |
| 0.9    | 9.1    | 6.3   | 5.0   | 2.5    | 15.8   | 10.5   | 11.8   | 14.4   |
| 198.0  | 181.2  | 202.0 | 218.7 | 244.7  | 153.5  | 847.1  | 1744.0 | 1899.2 |
| 6.3    | 6.4    | 20.8  | 22.1  | 5.4    | 25.4   | 44.2   | 55.5   | 44.3   |
| 16.8   | 12.9   | 13.8  | 10.7  | 20.8   | 9.5    | 30.3   | 31.5   | 14.7   |
| 34.8   | 43.3   | 6.6   | 8.6   | 80.4   | 46.5   | 295.2  | 248.1  | 273.5  |
| 0.9    | 7.3    | 0.4   | 0.9   | 3.9    | 0.8    | 7.0    | 7.6    | 4.0    |
| 0.8    | 2.1    | 3.3   | 16.2  | 2.2    | 3.7    | 4.4    | 3.2    | 2.3    |
| 9.7    | 11.5   | 8.6   | 2.0   | 23.7   | 3.6    | 11.8   | 5.2    | 19.9   |
| 146.5  | 232.4  | 13.2  | 21.8  | 167.8  | 204.0  | 803.6  | 850.3  | 932.5  |
| 10.7   | 21.6   | 10.8  | 7.1   | 12.4   | 20.8   | 37.0   | 39.8   | 30.2   |
| 0.2    | 2.1    | 0.4   | 2.7   | 0.4    | 0.9    | 1.7    | 0.2    | 2.1    |

|        |        |       |       |        |        |        |        |        |
|--------|--------|-------|-------|--------|--------|--------|--------|--------|
| 13.9   | 36.1   | 20.5  | 21.1  | 31.3   | 34.0   | 54.6   | 48.5   | 61.0   |
| 3.5    | 4.7    | 5.0   | 0.5   | 25.9   | 16.0   | 52.9   | 39.8   | 35.9   |
| 4.2    | 11.0   | 2.2   | 14.5  | 8.7    | 1.6    | 7.2    | 2.1    | 2.2    |
| 20.5   | 21.9   | 23.2  | 21.2  | 16.5   | 33.1   | 33.3   | 36.7   | 42.4   |
| 16.3   | 20.3   | 7.7   | 2.4   | 16.3   | 19.2   | 17.0   | 17.6   | 10.3   |
| 4.0    | 7.5    | 5.8   | 1.6   | 6.2    | 7.8    | 2.0    | 2.1    | 7.4    |
| 1.0    | 4.8    | 0.4   | 4.9   | 10.7   | 10.1   | 1.8    | 7.1    | 6.8    |
| 4.4    | 2.2    | 3.7   | 1.8   | 4.8    | 15.6   | 16.4   | 14.3   | 14.8   |
| 1.2    | 1.8    | 5.0   | 0.5   | 1.1    | 0.8    | 4.0    | 1.4    | 1.1    |
| 194.1  | 218.2  | 57.7  | 41.1  | 401.4  | 186.2  | 386.3  | 609.9  | 694.2  |
| 107.3  | 128.7  | 30.4  | 37.7  | 106.8  | 109.6  | 28.5   | 30.2   | 30.5   |
| 2.5    | 3.8    | 5.6   | 4.8   | 10.0   | 13.4   | 11.7   | 6.6    | 8.3    |
| 7.1    | 5.0    | 11.5  | 7.9   | 5.8    | 6.5    | 12.5   | 7.0    | 14.5   |
| 93.1   | 75.3   | 236.1 | 384.9 | 118.6  | 87.8   | 407.6  | 448.3  | 461.2  |
| 2.8    | 8.1    | 8.6   | 5.7   | 10.3   | 6.2    | 4.6    | 15.2   | 13.1   |
| 1.3    | 3.3    | 9.6   | 1.5   | 6.7    | 12.0   | 1.2    | 11.3   | 3.2    |
| 1.1    | 5.6    | 4.3   | 2.7   | 6.7    | 9.6    | 2.3    | 4.0    | 4.1    |
| 0.4    | 1.1    | 1.2   | 0.2   | 0.4    | 5.8    | 2.1    | 1.8    | 4.2    |
| 5.6    | 3.4    | 4.5   | 0.4   | 5.1    | 5.8    | 14.2   | 13.6   | 10.8   |
| 8.5    | 6.4    | 1.0   | 2.6   | 6.8    | 1.8    | 8.2    | 1.3    | 5.4    |
| 15.6   | 20.4   | 37.4  | 47.7  | 30.7   | 27.9   | 76.4   | 98.4   | 111.2  |
| 7.1    | 9.2    | 10.0  | 7.2   | 10.0   | 17.5   | 10.9   | 7.0    | 5.9    |
| 8.9    | 0.7    | 3.0   | 3.3   | 0.4    | 6.3    | 6.7    | 3.4    | 7.0    |
| 35.8   | 76.0   | 25.8  | 51.6  | 89.1   | 37.3   | 110.7  | 32.5   | 76.8   |
| 2.3    | 8.5    | 1.3   | 1.0   | 2.2    | 1.9    | 11.8   | 11.5   | 13.9   |
| 7.6    | 1.8    | 3.1   | 19.1  | 4.2    | 10.1   | 4.4    | 5.3    | 8.9    |
| 1.9    | 11.2   | 12.5  | 7.9   | 1.0    | 16.9   | 7.7    | 8.4    | 3.4    |
| 2.6    | 4.6    | 2.5   | 2.3   | 7.4    | 4.3    | 3.4    | 3.3    | 7.4    |
| 3.1    | 2.2    | 8.5   | 4.3   | 1.2    | 10.1   | 3.6    | 7.6    | 3.5    |
| 66.0   | 66.6   | 25.5  | 31.7  | 105.2  | 28.1   | 58.8   | 79.2   | 92.3   |
| 13.9   | 11.2   | 15.9  | 12.4  | 20.9   | 12.8   | 11.8   | 14.6   | 16.0   |
| 13.8   | 9.0    | 13.6  | 10.3  | 5.1    | 5.2    | 10.9   | 7.7    | 5.5    |
| 2.2    | 2.3    | 3.9   | 18.6  | 1.5    | 3.5    | 6.8    | 6.0    | 23.6   |
| 6.8    | 0.3    | 7.1   | 4.3   | 6.7    | 7.3    | 7.7    | 6.6    | 7.5    |
| 7.2    | 13.6   | 2.4   | 7.7   | 7.1    | 14.1   | 3.1    | 14.7   | 4.4    |
| 5.3    | 0.8    | 4.2   | 8.2   | 12.2   | 13.7   | 4.6    | 7.1    | 8.1    |
| 0.2    | 1.1    | 0.4   | 0.2   | 0.8    | 0.3    | 2.5    | 0.8    | 0.5    |
| 1275.8 | 1996.8 | 80.3  | 80.9  | 2243.3 | 1553.4 | 1374.8 | 777.8  | 859.3  |
| 1.0    | 1.0    | 0.2   | 0.1   | 3.5    | 6.0    | 7.6    | 3.4    | 1.9    |
| 9.9    | 1.1    | 3.7   | 10.1  | 16.4   | 0.4    | 21.7   | 16.2   | 16.2   |
| 22.7   | 18.2   | 20.1  | 21.6  | 41.2   | 23.7   | 44.2   | 58.6   | 54.2   |
| 31.4   | 18.7   | 259.2 | 261.7 | 27.4   | 25.2   | 1084.8 | 1309.8 | 1405.3 |
| 0.5    | 3.7    | 3.4   | 3.3   | 9.1    | 0.4    | 1.6    | 4.7    | 3.1    |
| 1.9    | 8.2    | 4.0   | 5.3   | 2.5    | 1.2    | 5.5    | 4.1    | 6.9    |
| 317.1  | 341.3  | 83.6  | 118.5 | 416.7  | 325.8  | 826.2  | 505.6  | 609.0  |
| 0.8    | 0.4    | 5.9   | 3.8   | 6.1    | 10.5   | 4.1    | 4.8    | 8.0    |
| 8.3    | 4.1    | 5.3   | 3.8   | 1.7    | 0.4    | 2.2    | 5.2    | 5.1    |
| 1.1    | 1.9    | 0.6   | 0.6   | 0.6    | 1.6    | 1.3    | 0.5    | 0.6    |
| 0.7    | 1.0    | 1.3   | 0.7   | 0.7    | 0.5    | 1.4    | 0.7    | 4.2    |
| 56.9   | 65.8   | 10.5  | 11.2  | 77.8   | 70.9   | 342.0  | 292.7  | 341.6  |
| 2.3    | 11.7   | 10.6  | 1.2   | 10.8   | 18.3   | 21.2   | 11.5   | 20.9   |
| 7.4    | 4.6    | 1.4   | 1.6   | 1.2    | 0.9    | 2.9    | 3.7    | 3.0    |
| 3.8    | 11.5   | 0.5   | 6.2   | 6.0    | 5.3    | 4.9    | 8.5    | 7.4    |



|      |       |       |       |       |      |       |       |       |
|------|-------|-------|-------|-------|------|-------|-------|-------|
| 0.4  | 2.8   | 4.3   | 1.1   | 2.2   | 1.1  | 3.7   | 0.9   | 4.2   |
| 52.1 | 120.1 | 331.5 | 440.0 | 93.1  | 92.3 | 294.1 | 253.2 | 313.4 |
| 6.0  | 2.9   | 3.0   | 6.4   | 2.3   | 10.7 | 5.5   | 6.4   | 1.9   |
| 4.3  | 9.7   | 4.6   | 3.4   | 5.3   | 4.4  | 8.4   | 10.2  | 6.4   |
| 0.5  | 4.1   | 0.4   | 0.7   | 4.5   | 2.4  | 9.3   | 3.5   | 1.7   |
| 0.2  | 9.8   | 3.7   | 0.6   | 4.1   | 0.8  | 7.8   | 19.8  | 17.1  |
| 7.3  | 9.6   | 14.8  | 4.5   | 0.9   | 13.9 | 8.0   | 6.6   | 8.0   |
| 57.2 | 67.8  | 87.2  | 84.5  | 61.7  | 64.4 | 127.8 | 125.2 | 116.1 |
| 18.3 | 17.4  | 7.9   | 4.9   | 20.8  | 27.0 | 21.0  | 18.3  | 25.4  |
| 2.7  | 5.8   | 0.5   | 0.8   | 3.2   | 0.9  | 1.9   | 0.7   | 1.6   |
| 17.8 | 9.2   | 3.6   | 3.9   | 23.8  | 4.7  | 26.9  | 26.7  | 22.1  |
| 10.3 | 11.8  | 5.0   | 9.6   | 23.0  | 10.0 | 20.3  | 24.5  | 23.5  |
| 2.0  | 3.0   | 1.0   | 0.6   | 2.4   | 3.0  | 2.0   | 1.2   | 2.3   |
| 9.0  | 2.6   | 3.3   | 2.2   | 7.0   | 3.9  | 8.0   | 6.0   | 6.1   |
| 15.0 | 10.1  | 14.0  | 2.4   | 3.4   | 13.2 | 15.8  | 10.5  | 8.8   |
| 22.0 | 18.1  | 17.2  | 15.9  | 22.9  | 2.2  | 35.2  | 27.0  | 32.7  |
| 1.3  | 2.9   | 10.1  | 0.5   | 2.2   | 2.4  | 8.6   | 12.2  | 8.1   |
| 4.6  | 5.2   | 6.8   | 10.3  | 8.8   | 8.5  | 6.6   | 6.8   | 9.6   |
| 1.8  | 1.2   | 1.3   | 1.1   | 1.8   | 1.9  | 1.7   | 2.6   | 1.4   |
| 10.9 | 9.1   | 3.8   | 7.0   | 8.6   | 10.0 | 4.6   | 8.4   | 8.0   |
| 0.4  | 0.1   | 0.3   | 0.2   | 0.4   | 4.6  | 4.0   | 1.2   | 0.8   |
| 78.9 | 81.8  | 105.2 | 123.3 | 125.0 | 71.0 | 208.4 | 167.2 | 153.4 |
| 29.1 | 19.7  | 21.3  | 17.3  | 25.6  | 21.0 | 26.6  | 19.4  | 36.3  |
| 1.6  | 0.9   | 2.3   | 1.4   | 1.1   | 1.8  | 1.6   | 0.9   | 2.1   |
| 23.4 | 5.3   | 20.0  | 18.7  | 4.3   | 19.6 | 10.8  | 23.5  | 14.6  |
| 11.5 | 10.7  | 2.7   | 5.5   | 16.2  | 11.6 | 14.5  | 21.9  | 14.5  |
| 2.0  | 0.9   | 10.8  | 2.5   | 1.8   | 3.5  | 2.3   | 2.2   | 1.7   |
| 2.3  | 3.1   | 8.6   | 7.7   | 6.3   | 4.7  | 1.7   | 1.2   | 0.7   |
| 7.1  | 5.3   | 1.2   | 0.6   | 0.7   | 10.9 | 11.2  | 11.6  | 5.7   |
| 13.5 | 5.0   | 1.3   | 1.3   | 7.9   | 10.5 | 11.7  | 18.3  | 12.3  |
| 1.6  | 0.9   | 1.7   | 0.9   | 5.5   | 7.4  | 0.9   | 3.0   | 0.7   |
| 4.3  | 11.5  | 3.1   | 0.4   | 5.9   | 6.5  | 4.8   | 4.0   | 6.2   |
| 2.2  | 0.4   | 0.6   | 0.2   | 0.2   | 1.7  | 0.4   | 0.4   | 1.8   |
| 1.3  | 1.1   | 1.2   | 1.1   | 2.9   | 1.2  | 3.5   | 1.5   | 1.9   |
| 3.1  | 5.3   | 2.0   | 2.2   | 4.6   | 3.3  | 4.8   | 2.8   | 3.5   |
| 6.6  | 14.7  | 3.6   | 8.2   | 1.1   | 5.5  | 8.9   | 7.3   | 9.5   |
| 1.0  | 0.8   | 1.1   | 1.0   | 0.8   | 2.4  | 3.8   | 4.7   | 3.1   |
| 1.8  | 3.2   | 14.8  | 21.5  | 9.4   | 25.7 | 19.3  | 11.0  | 7.3   |
| 4.4  | 14.9  | 10.1  | 6.8   | 3.3   | 10.5 | 5.5   | 6.2   | 4.9   |
| 4.0  | 1.1   | 2.7   | 2.5   | 3.8   | 3.6  | 4.0   | 3.9   | 2.2   |
| 2.1  | 6.5   | 6.0   | 3.2   | 12.1  | 2.0  | 7.0   | 8.0   | 5.1   |
| 2.8  | 1.9   | 6.2   | 3.8   | 5.8   | 3.1  | 12.9  | 4.6   | 4.6   |
| 5.7  | 5.2   | 6.2   | 0.6   | 0.5   | 2.2  | 11.9  | 8.7   | 7.8   |
| 12.3 | 22.8  | 4.1   | 0.5   | 17.5  | 33.0 | 9.2   | 5.6   | 12.7  |
| 0.7  | 1.5   | 6.8   | 0.5   | 0.6   | 10.0 | 5.0   | 5.8   | 10.8  |
| 9.3  | 11.6  | 8.8   | 9.7   | 1.3   | 3.9  | 9.8   | 3.1   | 6.9   |
| 9.5  | 21.5  | 6.7   | 3.6   | 13.1  | 5.9  | 19.6  | 20.0  | 18.1  |
| 0.9  | 5.8   | 0.3   | 0.4   | 7.3   | 0.2  | 0.3   | 5.1   | 1.0   |
| 20.6 | 14.2  | 30.3  | 17.9  | 8.6   | 24.1 | 34.9  | 38.1  | 34.7  |
| 70.1 | 91.3  | 221.0 | 142.8 | 111.0 | 62.1 | 110.1 | 98.6  | 95.5  |
| 0.9  | 6.7   | 7.1   | 1.5   | 1.3   | 1.1  | 3.7   | 7.8   | 7.3   |
| 0.4  | 4.3   | 2.7   | 0.7   | 9.7   | 1.4  | 11.8  | 19.8  | 22.1  |
| 0.3  | 1.3   | 0.3   | 5.8   | 0.4   | 0.9  | 1.1   | 0.8   | 5.3   |

|        |        |       |       |        |        |       |       |       |
|--------|--------|-------|-------|--------|--------|-------|-------|-------|
| 5.4    | 16.2   | 3.0   | 0.6   | 6.9    | 7.2    | 12.0  | 20.5  | 9.8   |
| 5.3    | 1.8    | 0.4   | 0.5   | 0.2    | 0.2    | 2.9   | 2.7   | 6.4   |
| 9.2    | 14.5   | 20.0  | 6.9   | 3.0    | 14.4   | 23.0  | 22.7  | 13.4  |
| 6.2    | 6.5    | 1.4   | 1.9   | 12.5   | 5.9    | 5.4   | 7.6   | 6.2   |
| 6.2    | 14.8   | 0.6   | 0.7   | 15.6   | 15.9   | 16.0  | 17.2  | 10.6  |
| 6.6    | 9.2    | 9.5   | 0.7   | 1.5    | 3.1    | 10.3  | 13.7  | 8.9   |
| 7.9    | 3.8    | 5.6   | 12.3  | 12.5   | 2.1    | 1.8   | 6.6   | 13.4  |
| 16.2   | 11.4   | 20.0  | 21.5  | 14.8   | 21.9   | 24.7  | 19.3  | 18.2  |
| 1.9    | 5.0    | 1.3   | 1.9   | 4.8    | 10.2   | 1.3   | 1.0   | 0.8   |
| 9.8    | 8.5    | 8.3   | 2.1   | 1.3    | 1.8    | 2.6   | 6.9   | 7.1   |
| 0.4    | 0.4    | 0.6   | 3.2   | 3.5    | 8.2    | 0.9   | 0.8   | 0.4   |
| 2.9    | 1.4    | 3.3   | 2.9   | 1.2    | 3.5    | 6.5   | 11.4  | 5.3   |
| 4.4    | 6.4    | 0.8   | 1.3   | 3.0    | 9.5    | 4.4   | 1.0   | 8.6   |
| 11.5   | 8.4    | 8.0   | 9.5   | 12.2   | 11.0   | 10.0  | 8.9   | 7.8   |
| 1.1    | 0.3    | 0.8   | 7.0   | 0.3    | 5.0    | 2.5   | 1.4   | 0.3   |
| 3.5    | 1.8    | 15.1  | 25.3  | 8.3    | 12.2   | 15.4  | 19.8  | 14.6  |
| 2.9    | 4.5    | 2.4   | 5.3   | 6.5    | 12.3   | 5.4   | 4.2   | 2.4   |
| 12.2   | 25.3   | 10.3  | 10.4  | 36.3   | 20.9   | 67.1  | 36.9  | 42.5  |
| 19.5   | 33.6   | 11.4  | 10.6  | 27.1   | 30.1   | 12.8  | 16.9  | 17.6  |
| 11.8   | 24.3   | 14.6  | 10.9  | 25.0   | 18.0   | 15.3  | 23.5  | 31.9  |
| 29.8   | 50.9   | 9.9   | 14.1  | 51.3   | 29.7   | 142.8 | 126.3 | 113.2 |
| 5.4    | 16.4   | 6.0   | 4.8   | 19.8   | 9.5    | 38.0  | 47.0  | 41.4  |
| 23.1   | 20.9   | 3.2   | 0.8   | 22.0   | 25.0   | 23.4  | 17.7  | 33.6  |
| 258.3  | 286.8  | 44.6  | 58.8  | 377.1  | 278.4  | 73.2  | 53.2  | 65.1  |
| 17.3   | 35.9   | 2.0   | 6.7   | 36.0   | 21.2   | 7.4   | 3.3   | 6.5   |
| 3.6    | 3.1    | 5.8   | 1.5   | 9.4    | 8.8    | 3.2   | 1.4   | 6.7   |
| 19.7   | 20.0   | 13.6  | 2.4   | 2.7    | 22.4   | 3.7   | 10.9  | 3.1   |
| 0.9    | 0.8    | 7.2   | 0.6   | 1.9    | 7.7    | 2.1   | 1.9   | 2.7   |
| 9.0    | 1.1    | 2.3   | 1.3   | 1.9    | 1.2    | 1.6   | 6.5   | 1.1   |
| 2.4    | 11.3   | 21.6  | 17.3  | 4.4    | 4.3    | 6.0   | 12.1  | 4.9   |
| 203.7  | 356.0  | 52.2  | 31.9  | 276.3  | 301.0  | 273.8 | 311.1 | 301.4 |
| 4.2    | 12.7   | 1.6   | 6.2   | 0.9    | 3.2    | 8.0   | 4.3   | 3.3   |
| 1.5    | 0.8    | 1.4   | 0.6   | 0.6    | 2.4    | 4.2   | 9.6   | 6.9   |
| 8.6    | 4.1    | 0.3   | 6.3   | 14.8   | 4.6    | 3.8   | 4.0   | 5.1   |
| 9.7    | 4.8    | 0.6   | 7.1   | 3.2    | 3.7    | 5.2   | 3.8   | 7.0   |
| 5.5    | 3.7    | 0.7   | 8.2   | 1.6    | 6.4    | 7.3   | 1.7   | 7.1   |
| 0.7    | 1.8    | 2.7   | 1.9   | 7.7    | 4.7    | 2.7   | 3.6   | 4.3   |
| 1802.9 | 1950.3 | 266.3 | 467.0 | 1955.9 | 1803.2 | 721.8 | 579.5 | 606.5 |
| 1.8    | 1.1    | 7.2   | 1.2   | 7.7    | 1.1    | 4.4   | 11.7  | 2.3   |
| 9.3    | 2.3    | 8.7   | 5.6   | 3.5    | 12.3   | 14.1  | 15.8  | 13.6  |
| 0.4    | 9.9    | 3.2   | 2.6   | 3.4    | 14.5   | 4.8   | 9.2   | 7.8   |
| 0.3    | 3.3    | 3.5   | 4.6   | 0.6    | 1.2    | 6.2   | 3.4   | 5.0   |
| 206.8  | 345.4  | 27.6  | 30.8  | 277.2  | 264.2  | 125.9 | 78.5  | 104.8 |
| 8.5    | 12.2   | 8.7   | 14.3  | 10.5   | 13.3   | 7.9   | 1.4   | 10.6  |
| 2.1    | 4.9    | 1.3   | 0.6   | 3.6    | 1.4    | 3.4   | 1.5   | 1.8   |
| 100.0  | 92.1   | 85.1  | 99.4  | 146.5  | 82.5   | 173.2 | 130.8 | 158.0 |
| 9.5    | 12.2   | 13.6  | 9.5   | 11.3   | 12.7   | 12.8  | 15.2  | 11.9  |
| 15.8   | 16.6   | 5.4   | 5.6   | 20.2   | 6.7    | 15.0  | 14.4  | 4.2   |
| 56.0   | 53.1   | 104.2 | 138.7 | 77.7   | 31.8   | 276.6 | 193.6 | 169.7 |
| 6.0    | 15.6   | 1.9   | 2.4   | 18.0   | 18.2   | 20.4  | 16.4  | 17.2  |
| 31.7   | 20.2   | 21.7  | 22.0  | 45.7   | 38.0   | 47.3  | 19.6  | 41.1  |
| 3.7    | 2.5    | 3.0   | 5.4   | 0.6    | 6.2    | 16.4  | 33.5  | 21.2  |
| 0.7    | 0.9    | 0.7   | 1.7   | 0.9    | 1.1    | 1.6   | 0.8   | 0.4   |

|        |        |       |        |        |        |         |         |         |
|--------|--------|-------|--------|--------|--------|---------|---------|---------|
| 596.8  | 535.1  | 93.6  | 137.6  | 666.8  | 526.3  | 320.8   | 398.9   | 399.1   |
| 9.2    | 10.1   | 5.8   | 2.8    | 6.0    | 13.7   | 10.9    | 9.2     | 16.2    |
| 209.9  | 292.3  | 73.6  | 124.8  | 274.6  | 329.1  | 795.8   | 260.1   | 296.9   |
| 3.8    | 3.3    | 12.7  | 7.7    | 3.5    | 0.9    | 3.8     | 10.1    | 4.1     |
| 5.8    | 1.7    | 0.7   | 0.5    | 1.3    | 3.3    | 1.9     | 5.4     | 1.0     |
| 146.7  | 211.0  | 84.0  | 101.9  | 298.6  | 277.5  | 255.8   | 237.2   | 276.4   |
| 1.4    | 1.1    | 0.7   | 6.3    | 1.3    | 1.6    | 7.8     | 4.6     | 2.3     |
| 1.5    | 4.7    | 13.9  | 10.8   | 5.3    | 9.5    | 5.3     | 6.7     | 5.7     |
| 28.6   | 46.0   | 0.3   | 0.6    | 57.9   | 44.0   | 9.0     | 3.7     | 6.8     |
| 8.8    | 15.4   | 11.2  | 10.9   | 3.3    | 8.4    | 12.4    | 24.9    | 13.3    |
| 13.5   | 14.1   | 24.2  | 16.1   | 25.2   | 22.3   | 14.1    | 26.9    | 17.0    |
| 206.9  | 267.0  | 200.2 | 211.6  | 273.5  | 242.4  | 844.3   | 888.1   | 1118.3  |
| 14.4   | 3.6    | 18.0  | 2.8    | 13.0   | 15.5   | 93.2    | 96.6    | 114.9   |
| 5.9    | 4.1    | 7.1   | 1.6    | 13.3   | 13.9   | 3.8     | 2.0     | 8.6     |
| 1.4    | 2.1    | 7.9   | 28.8   | 5.0    | 1.9    | 41.5    | 54.0    | 50.0    |
| 1.1    | 1.4    | 11.3  | 3.2    | 5.7    | 3.5    | 1.8     | 1.3     | 1.5     |
| 25.6   | 42.7   | 15.8  | 10.5   | 34.9   | 23.2   | 34.1    | 26.8    | 23.5    |
| 2.3    | 1.3    | 6.6   | 0.7    | 1.2    | 1.3    | 5.9     | 6.1     | 2.2     |
| 98.1   | 88.7   | 18.7  | 13.6   | 136.8  | 95.9   | 203.9   | 90.8    | 93.2    |
| 11.5   | 40.4   | 13.9  | 10.0   | 34.7   | 37.4   | 44.1    | 47.6    | 36.4    |
| 22.1   | 10.2   | 14.1  | 21.7   | 30.8   | 5.6    | 24.9    | 49.0    | 54.8    |
| 6402.3 | 7529.2 | 968.4 | 1162.4 | 8508.3 | 6694.8 | 10746.0 | 11266.9 | 11289.6 |
| 173.3  | 197.5  | 109.2 | 143.7  | 223.8  | 163.2  | 511.6   | 380.8   | 456.8   |
| 0.7    | 0.5    | 1.1   | 0.4    | 0.4    | 1.8    | 2.6     | 1.4     | 0.7     |
| 9.0    | 18.2   | 20.3  | 39.5   | 5.3    | 9.5    | 15.7    | 23.0    | 29.1    |
| 2.2    | 7.0    | 1.8   | 1.6    | 2.0    | 1.7    | 20.5    | 12.4    | 8.1     |
| 29.7   | 37.3   | 10.3  | 1.5    | 41.0   | 31.3   | 16.9    | 21.7    | 20.9    |
| 458.3  | 495.8  | 195.2 | 309.8  | 428.6  | 427.8  | 1016.9  | 369.7   | 378.4   |
| 5.3    | 4.1    | 2.2   | 1.5    | 5.1    | 7.6    | 9.4     | 6.5     | 6.6     |
| 5.7    | 0.4    | 7.8   | 2.1    | 2.5    | 10.2   | 10.9    | 10.1    | 9.1     |
| 8.7    | 6.9    | 10.2  | 3.3    | 15.9   | 12.5   | 11.6    | 13.1    | 3.5     |
| 1364.4 | 1743.6 | 958.2 | 1036.8 | 2221.4 | 1514.0 | 3248.4  | 3093.2  | 3065.8  |
| 78.1   | 88.9   | 165.4 | 180.1  | 94.5   | 90.1   | 383.8   | 361.1   | 374.6   |
| 11.1   | 18.0   | 33.7  | 23.2   | 29.4   | 9.2    | 4.7     | 23.6    | 9.0     |
| 0.8    | 1.4    | 3.9   | 0.3    | 0.7    | 0.3    | 0.7     | 1.0     | 1.0     |
| 3.2    | 1.0    | 1.4   | 1.9    | 3.9    | 2.7    | 3.0     | 2.6     | 1.5     |
| 74.8   | 64.6   | 22.4  | 32.8   | 109.8  | 108.7  | 145.7   | 144.6   | 135.1   |
| 14.0   | 7.2    | 13.2  | 16.0   | 1.1    | 12.4   | 33.4    | 31.2    | 30.2    |
| 8.9    | 8.4    | 8.6   | 16.0   | 18.1   | 8.9    | 29.2    | 16.3    | 24.5    |
| 13.0   | 12.3   | 10.3  | 8.2    | 9.3    | 18.3   | 19.7    | 7.7     | 12.4    |
| 654.7  | 954.8  | 46.8  | 48.8   | 1117.1 | 912.8  | 3788.6  | 1289.9  | 1749.7  |
| 391.9  | 365.5  | 188.5 | 314.2  | 446.1  | 443.3  | 1097.5  | 511.4   | 577.7   |
| 10.9   | 17.3   | 6.8   | 9.3    | 27.1   | 14.7   | 23.4    | 16.5    | 17.9    |
| 54.6   | 40.0   | 28.2  | 49.0   | 62.7   | 46.7   | 37.2    | 29.7    | 32.0    |
| 5.8    | 0.9    | 1.3   | 1.5    | 9.8    | 6.3    | 2.8     | 5.6     | 0.3     |
| 5.7    | 0.5    | 0.7   | 1.5    | 10.3   | 0.4    | 108.6   | 77.6    | 85.0    |
| 20.0   | 18.9   | 3.6   | 8.6    | 30.5   | 19.7   | 68.6    | 54.4    | 43.7    |
| 1.7    | 5.3    | 1.6   | 1.1    | 1.0    | 1.7    | 0.9     | 2.4     | 2.6     |
| 0.4    | 2.9    | 4.6   | 0.4    | 0.9    | 1.1    | 1.2     | 5.3     | 4.5     |
| 9.5    | 6.2    | 2.2   | 9.5    | 7.6    | 7.7    | 9.2     | 9.8     | 8.3     |
| 6.3    | 14.4   | 9.8   | 4.4    | 6.5    | 14.3   | 13.5    | 6.3     | 10.7    |
| 13.1   | 1.5    | 6.0   | 3.7    | 18.0   | 0.5    | 15.2    | 10.9    | 14.3    |
| 63.1   | 71.5   | 45.6  | 46.6   | 84.3   | 60.2   | 87.5    | 72.4    | 80.3    |

|        |        |       |        |        |        |        |        |        |
|--------|--------|-------|--------|--------|--------|--------|--------|--------|
| 9.0    | 12.9   | 10.1  | 6.0    | 6.0    | 6.0    | 11.6   | 3.5    | 8.0    |
| 26.1   | 45.4   | 40.2  | 53.9   | 50.6   | 29.4   | 26.4   | 37.7   | 43.5   |
| 15.2   | 4.0    | 4.6   | 4.7    | 5.8    | 5.8    | 20.1   | 12.3   | 5.3    |
| 106.9  | 152.8  | 161.2 | 190.3  | 148.6  | 83.3   | 276.3  | 349.1  | 343.0  |
| 62.0   | 88.6   | 60.8  | 55.2   | 89.2   | 68.8   | 133.8  | 113.3  | 138.5  |
| 393.4  | 556.1  | 6.9   | 8.1    | 573.5  | 491.1  | 707.2  | 256.4  | 252.0  |
| 10.6   | 15.5   | 8.0   | 14.8   | 3.9    | 20.4   | 15.5   | 7.6    | 11.0   |
| 1.4    | 1.1    | 1.1   | 1.1    | 2.0    | 0.9    | 1.7    | 1.0    | 0.8    |
| 7.9    | 15.5   | 16.4  | 8.5    | 2.1    | 25.7   | 20.9   | 26.2   | 33.5   |
| 3.2    | 13.5   | 13.6  | 20.7   | 23.1   | 25.5   | 12.1   | 13.6   | 15.0   |
| 3.6    | 6.9    | 2.4   | 2.4    | 10.7   | 2.9    | 15.7   | 22.0   | 10.3   |
| 1769.1 | 1931.8 | 604.5 | 668.3  | 2472.2 | 1950.9 | 2388.9 | 2152.3 | 2382.2 |
| 3.3    | 3.1    | 16.6  | 7.5    | 15.1   | 21.4   | 15.6   | 15.0   | 17.6   |
| 1.1    | 1.1    | 0.5   | 1.5    | 0.3    | 9.0    | 2.8    | 0.5    | 6.7    |
| 2.3    | 9.8    | 4.0   | 6.9    | 8.3    | 8.2    | 11.6   | 5.7    | 10.7   |
| 2.8    | 5.2    | 0.3   | 0.3    | 8.2    | 2.3    | 4.8    | 7.6    | 5.9    |
| 1.1    | 5.7    | 6.7   | 2.4    | 8.5    | 9.6    | 16.2   | 23.8   | 18.0   |
| 11.7   | 9.4    | 6.5   | 8.1    | 13.5   | 0.6    | 4.9    | 5.1    | 5.3    |
| 0.6    | 1.4    | 1.0   | 1.0    | 1.5    | 1.2    | 1.0    | 0.9    | 0.5    |
| 49.5   | 81.7   | 63.6  | 43.2   | 86.1   | 75.2   | 75.6   | 78.2   | 86.7   |
| 34.7   | 46.3   | 3.7   | 13.5   | 53.0   | 22.5   | 74.6   | 45.2   | 34.3   |
| 1.1    | 1.9    | 1.4   | 1.7    | 1.0    | 12.4   | 18.0   | 9.5    | 1.8    |
| 1.7    | 1.7    | 8.7   | 8.8    | 4.9    | 3.0    | 4.0    | 4.2    | 2.9    |
| 8.8    | 14.0   | 5.9   | 0.2    | 6.5    | 6.6    | 1.7    | 6.7    | 2.6    |
| 2.9    | 6.2    | 3.5   | 5.6    | 1.0    | 7.1    | 6.9    | 2.9    | 3.6    |
| 0.8    | 5.6    | 5.7   | 6.5    | 9.4    | 5.4    | 9.5    | 12.7   | 4.2    |
| 4.1    | 10.2   | 2.0   | 10.0   | 2.0    | 1.9    | 6.1    | 8.5    | 2.3    |
| 12.6   | 11.9   | 0.8   | 0.5    | 7.5    | 10.9   | 19.4   | 16.7   | 9.3    |
| 1.4    | 14.0   | 1.4   | 7.8    | 8.2    | 2.5    | 7.2    | 4.9    | 1.5    |
| 20.3   | 16.9   | 17.9  | 22.1   | 17.1   | 26.5   | 17.8   | 21.0   | 24.1   |
| 19.1   | 6.6    | 8.7   | 35.7   | 52.7   | 35.7   | 16.6   | 28.7   | 6.6    |
| 4.1    | 22.7   | 21.6  | 23.6   | 20.0   | 9.3    | 26.1   | 36.2   | 36.8   |
| 1268.8 | 1415.8 | 449.0 | 613.5  | 1865.4 | 1319.6 | 3084.3 | 2817.9 | 3125.1 |
| 11.6   | 9.3    | 6.6   | 9.8    | 18.2   | 6.3    | 22.7   | 24.6   | 22.6   |
| 0.3    | 0.7    | 0.9   | 1.4    | 0.7    | 2.9    | 10.6   | 13.3   | 10.5   |
| 1.5    | 1.7    | 1.1   | 4.2    | 0.7    | 7.2    | 1.1    | 1.2    | 3.6    |
| 28.9   | 20.0   | 12.1  | 26.3   | 53.0   | 44.3   | 67.7   | 26.6   | 24.1   |
| 26.1   | 34.2   | 37.3  | 54.6   | 31.7   | 28.6   | 22.9   | 37.4   | 40.7   |
| 26.6   | 15.9   | 22.8  | 28.3   | 40.3   | 25.4   | 30.1   | 30.2   | 28.9   |
| 21.6   | 4.5    | 14.3  | 20.5   | 13.4   | 19.0   | 44.3   | 41.7   | 38.3   |
| 1.5    | 1.7    | 1.7   | 1.2    | 1.7    | 9.7    | 10.1   | 5.0    | 8.6    |
| 749.5  | 901.3  | 374.6 | 384.0  | 1086.1 | 980.3  | 1942.7 | 1783.6 | 1823.2 |
| 77.4   | 100.0  | 30.9  | 40.0   | 98.3   | 79.1   | 143.4  | 74.0   | 77.2   |
| 1468.6 | 1733.9 | 838.0 | 1300.1 | 1987.2 | 1717.5 | 4768.4 | 3650.1 | 3831.5 |
| 0.6    | 4.0    | 4.0   | 3.1    | 0.3    | 0.9    | 1.0    | 2.7    | 0.7    |
| 346.7  | 301.9  | 149.4 | 204.5  | 424.4  | 337.3  | 563.5  | 450.4  | 552.8  |
| 79.8   | 96.2   | 52.9  | 32.1   | 96.8   | 116.0  | 94.4   | 104.2  | 120.8  |
| 5.3    | 20.5   | 4.1   | 1.5    | 16.7   | 22.3   | 2.9    | 3.4    | 7.0    |
| 1.1    | 2.2    | 0.9   | 0.9    | 1.1    | 1.2    | 1.6    | 1.5    | 2.4    |
| 16.8   | 2.3    | 2.8   | 2.2    | 1.9    | 0.9    | 4.0    | 1.4    | 5.6    |
| 2.3    | 10.3   | 0.6   | 0.8    | 0.7    | 1.3    | 2.0    | 1.3    | 0.7    |
| 9.0    | 0.1    | 1.4   | 3.3    | 4.2    | 2.5    | 4.9    | 0.7    | 2.3    |
| 41.0   | 72.7   | 15.3  | 15.2   | 67.8   | 61.4   | 104.9  | 107.1  | 71.6   |

|        |        |       |       |        |        |        |        |        |
|--------|--------|-------|-------|--------|--------|--------|--------|--------|
| 18.1   | 14.8   | 20.9  | 20.9  | 12.4   | 15.6   | 79.2   | 54.3   | 77.5   |
| 9.7    | 12.0   | 28.3  | 13.6  | 11.4   | 6.1    | 16.3   | 15.3   | 17.4   |
| 16.4   | 10.2   | 9.5   | 9.0   | 14.8   | 14.8   | 4.4    | 4.9    | 7.4    |
| 2.2    | 5.7    | 1.4   | 1.4   | 12.1   | 10.8   | 4.6    | 5.8    | 4.7    |
| 17.5   | 31.0   | 6.7   | 5.0   | 41.7   | 15.1   | 26.3   | 27.6   | 37.0   |
| 131.1  | 193.3  | 18.5  | 15.1  | 234.1  | 165.7  | 1.0    | 0.5    | 0.8    |
| 8.1    | 16.4   | 4.7   | 3.7   | 17.5   | 9.6    | 21.0   | 14.6   | 19.0   |
| 102.4  | 93.6   | 26.4  | 33.5  | 159.2  | 119.5  | 261.3  | 170.0  | 160.1  |
| 1.7    | 2.4    | 0.7   | 0.5   | 1.4    | 8.3    | 3.5    | 12.8   | 1.7    |
| 52.4   | 71.7   | 4.3   | 15.0  | 75.9   | 41.4   | 26.0   | 11.3   | 22.0   |
| 212.0  | 194.2  | 102.7 | 160.1 | 331.6  | 216.2  | 570.6  | 445.8  | 483.0  |
| 5.1    | 6.5    | 3.1   | 11.9  | 3.9    | 10.5   | 10.3   | 1.4    | 10.2   |
| 3.8    | 1.2    | 0.9   | 1.3   | 4.8    | 2.4    | 3.9    | 1.0    | 3.0    |
| 1.6    | 9.8    | 2.5   | 2.3   | 11.9   | 1.0    | 11.2   | 12.3   | 5.5    |
| 7.3    | 4.9    | 2.4   | 2.4   | 7.9    | 2.5    | 11.9   | 4.4    | 5.3    |
| 2.5    | 14.3   | 1.7   | 1.2   | 11.0   | 3.4    | 16.9   | 14.7   | 16.6   |
| 2.2    | 1.9    | 1.7   | 5.0   | 2.4    | 1.4    | 3.2    | 3.4    | 3.4    |
| 6.9    | 12.1   | 6.7   | 3.6   | 30.2   | 5.9    | 15.1   | 8.0    | 14.1   |
| 0.5    | 5.3    | 1.1   | 1.3   | 2.5    | 0.3    | 1.5    | 4.5    | 4.4    |
| 3607.9 | 4591.4 | 67.9  | 72.8  | 4043.8 | 3685.7 | 178.3  | 134.2  | 210.4  |
| 1.9    | 1.7    | 1.3   | 1.0   | 1.6    | 5.2    | 2.8    | 2.3    | 7.2    |
| 253.2  | 406.4  | 70.7  | 107.8 | 401.8  | 325.3  | 288.4  | 353.6  | 394.2  |
| 1.1    | 2.1    | 1.1   | 1.1   | 1.2    | 0.9    | 1.7    | 1.0    | 0.9    |
| 1.6    | 1.7    | 6.5   | 8.1   | 3.3    | 1.6    | 9.5    | 7.3    | 4.3    |
| 7.8    | 11.2   | 10.7  | 5.1   | 7.9    | 7.0    | 19.7   | 10.4   | 14.2   |
| 2777.8 | 3198.5 | 825.2 | 825.3 | 3258.5 | 3265.0 | 5668.8 | 6066.8 | 5418.5 |
| 1.0    | 1.9    | 14.6  | 2.7   | 1.3    | 0.9    | 3.0    | 2.0    | 2.3    |
| 2.1    | 5.9    | 7.3   | 4.0   | 3.0    | 2.7    | 13.8   | 4.9    | 14.9   |
| 2.2    | 3.3    | 2.9   | 10.4  | 2.0    | 0.7    | 3.3    | 2.1    | 1.5    |
| 4.5    | 0.5    | 1.3   | 0.3   | 0.5    | 1.2    | 0.8    | 2.1    | 0.6    |
| 42.7   | 43.4   | 25.3  | 28.4  | 57.7   | 42.9   | 62.0   | 75.8   | 103.4  |
| 389.1  | 507.2  | 58.2  | 69.3  | 551.3  | 563.7  | 974.4  | 719.8  | 696.8  |
| 21.8   | 30.2   | 16.9  | 17.7  | 41.2   | 25.5   | 51.3   | 45.0   | 44.0   |
| 23.6   | 26.4   | 7.7   | 3.5   | 35.7   | 29.5   | 22.8   | 26.7   | 31.7   |
| 1.0    | 5.9    | 5.8   | 4.8   | 4.7    | 0.6    | 18.9   | 15.6   | 10.4   |
| 7.7    | 4.8    | 1.5   | 5.6   | 5.2    | 1.6    | 4.9    | 6.2    | 2.1    |
| 0.6    | 2.0    | 0.4   | 5.3   | 0.5    | 1.0    | 0.9    | 1.0    | 3.6    |
| 28.4   | 32.1   | 13.1  | 26.4  | 29.9   | 23.2   | 55.4   | 44.0   | 40.5   |
| 3.5    | 10.5   | 9.0   | 1.7   | 4.9    | 3.1    | 12.3   | 11.7   | 12.6   |
| 5.1    | 9.3    | 4.3   | 2.1   | 4.5    | 5.6    | 8.1    | 7.4    | 7.1    |
| 1.8    | 8.1    | 1.6   | 2.8   | 4.5    | 1.7    | 7.0    | 3.9    | 3.1    |
| 13.4   | 14.8   | 13.0  | 2.9   | 21.8   | 3.2    | 22.4   | 11.1   | 16.3   |
| 13.2   | 0.8    | 2.4   | 4.2   | 0.5    | 8.6    | 7.6    | 3.5    | 4.9    |
| 11.4   | 11.7   | 16.2  | 40.7  | 27.6   | 17.5   | 61.9   | 36.3   | 35.5   |
| 6.2    | 12.7   | 9.4   | 18.2  | 1.9    | 3.5    | 17.3   | 20.4   | 18.9   |
| 6.0    | 11.1   | 1.6   | 0.6   | 12.4   | 2.1    | 1.7    | 7.8    | 17.2   |
| 12.2   | 6.1    | 11.9  | 10.7  | 9.0    | 2.8    | 13.4   | 14.6   | 18.4   |
| 1.0    | 0.7    | 7.1   | 2.3   | 5.8    | 1.1    | 1.5    | 1.3    | 0.9    |
| 4.0    | 7.4    | 2.8   | 1.6   | 1.5    | 2.8    | 1.9    | 1.8    | 2.7    |
| 29.4   | 22.2   | 30.5  | 34.2  | 23.6   | 24.5   | 60.6   | 64.6   | 58.6   |
| 6.1    | 1.3    | 8.4   | 0.4   | 0.5    | 1.0    | 4.3    | 3.6    | 1.0    |
| 7.8    | 10.4   | 6.9   | 5.2   | 12.3   | 8.7    | 14.4   | 7.6    | 14.3   |
| 6.6    | 6.5    | 10.6  | 2.4   | 6.8    | 0.6    | 3.2    | 10.7   | 3.6    |

|        |        |        |        |        |        |        |         |         |
|--------|--------|--------|--------|--------|--------|--------|---------|---------|
| 1.6    | 2.8    | 2.7    | 2.5    | 2.7    | 2.3    | 13.3   | 9.7     | 14.3    |
| 17.5   | 8.2    | 7.8    | 14.9   | 7.2    | 20.6   | 27.1   | 35.7    | 23.6    |
| 7.2    | 19.6   | 13.3   | 7.8    | 6.5    | 12.8   | 15.2   | 8.2     | 15.6    |
| 0.3    | 3.7    | 0.2    | 0.5    | 7.4    | 3.0    | 2.6    | 0.5     | 0.7     |
| 14.5   | 8.1    | 6.8    | 4.4    | 11.7   | 15.0   | 10.4   | 9.4     | 3.9     |
| 36.8   | 37.6   | 9.7    | 20.0   | 36.1   | 38.9   | 127.2  | 27.1    | 10.9    |
| 27.1   | 12.0   | 11.6   | 19.0   | 16.1   | 13.9   | 29.2   | 23.1    | 21.5    |
| 10.3   | 15.7   | 25.7   | 23.1   | 10.2   | 27.1   | 30.2   | 29.8    | 31.4    |
| 1.0    | 1.2    | 0.4    | 0.7    | 1.5    | 1.1    | 2.2    | 0.9     | 1.1     |
| 1740.6 | 1452.0 | 2833.5 | 3728.1 | 3408.1 | 1446.0 | 8029.8 | 10260.1 | 10290.0 |
| 165.2  | 222.3  | 101.9  | 149.5  | 244.1  | 215.4  | 751.0  | 724.0   | 829.2   |
| 82.5   | 76.2   | 41.9   | 38.7   | 129.6  | 68.0   | 517.3  | 468.3   | 578.0   |
| 3.6    | 2.0    | 2.4    | 1.7    | 5.5    | 2.2    | 2.7    | 3.7     | 3.3     |
| 118.1  | 128.0  | 19.5   | 29.2   | 139.5  | 98.2   | 346.6  | 235.3   | 270.6   |
| 2718.6 | 3329.7 | 227.0  | 305.4  | 2937.9 | 4147.4 | 7398.3 | 5441.4  | 5582.4  |
| 3.1    | 12.2   | 3.6    | 4.6    | 7.4    | 4.5    | 27.8   | 8.9     | 17.3    |
| 2.1    | 3.9    | 0.9    | 0.7    | 7.6    | 1.1    | 5.9    | 11.7    | 2.8     |
| 91.4   | 191.8  | 54.3   | 109.7  | 253.3  | 141.9  | 178.5  | 106.6   | 123.8   |
| 15.5   | 19.9   | 6.8    | 17.6   | 23.7   | 3.8    | 27.5   | 18.7    | 36.0    |
| 42.1   | 44.3   | 168.0  | 187.3  | 42.7   | 31.1   | 248.9  | 305.5   | 301.6   |
| 13.1   | 3.7    | 1.9    | 1.6    | 3.4    | 1.7    | 3.0    | 2.8     | 2.3     |
| 4.4    | 2.7    | 16.1   | 4.7    | 1.8    | 1.2    | 16.3   | 21.3    | 12.9    |
| 61.8   | 143.4  | 30.3   | 31.4   | 158.9  | 106.5  | 305.4  | 279.0   | 297.1   |
| 9.9    | 2.7    | 9.4    | 1.8    | 2.8    | 8.8    | 9.4    | 8.8     | 2.0     |
| 2.7    | 1.7    | 1.3    | 3.1    | 2.8    | 2.6    | 2.1    | 1.8     | 6.2     |
| 10.4   | 2.0    | 7.2    | 2.0    | 2.6    | 9.9    | 17.1   | 18.1    | 9.8     |
| 290.0  | 443.4  | 146.3  | 189.7  | 416.6  | 339.5  | 487.1  | 281.1   | 319.8   |
| 134.8  | 99.3   | 72.4   | 85.6   | 134.0  | 71.6   | 170.4  | 70.2    | 64.1    |
| 18.6   | 17.7   | 24.4   | 9.7    | 12.9   | 13.7   | 10.7   | 13.5    | 9.8     |
| 24.8   | 25.4   | 10.2   | 17.7   | 26.5   | 27.1   | 95.9   | 110.7   | 119.7   |
| 2.5    | 4.9    | 6.4    | 5.0    | 3.8    | 2.4    | 9.3    | 3.5     | 1.5     |
| 1.7    | 3.9    | 1.0    | 1.7    | 12.7   | 1.7    | 10.4   | 7.4     | 4.7     |
| 4.0    | 15.8   | 13.7   | 3.3    | 17.4   | 14.8   | 3.2    | 7.8     | 4.7     |
| 4.6    | 1.5    | 5.8    | 1.3    | 1.9    | 2.0    | 2.9    | 4.6     | 2.6     |
| 2.2    | 15.2   | 7.7    | 10.9   | 1.6    | 1.1    | 9.6    | 5.7     | 8.3     |
| 1.1    | 1.9    | 0.6    | 1.7    | 10.1   | 4.9    | 3.5    | 5.4     | 5.9     |
| 4.4    | 4.2    | 0.5    | 0.7    | 7.0    | 0.9    | 2.3    | 2.4     | 4.0     |
| 17.6   | 44.2   | 18.0   | 28.6   | 37.0   | 23.4   | 22.0   | 31.2    | 18.8    |
| 0.4    | 5.0    | 8.3    | 6.0    | 0.8    | 3.5    | 6.9    | 6.8     | 8.4     |
| 16.1   | 11.4   | 10.7   | 8.1    | 6.7    | 11.8   | 16.6   | 13.1    | 11.3    |
| 5.5    | 2.5    | 0.8    | 4.9    | 2.2    | 0.9    | 1.2    | 2.6     | 2.2     |
| 15.3   | 18.3   | 7.4    | 16.4   | 22.3   | 21.6   | 113.7  | 105.7   | 108.1   |
| 16.9   | 3.9    | 14.6   | 10.8   | 14.8   | 4.5    | 2.4    | 11.8    | 8.8     |
| 9.4    | 0.7    | 0.5    | 2.2    | 7.8    | 6.6    | 4.7    | 3.7     | 4.5     |
| 1.0    | 4.9    | 0.9    | 0.9    | 0.7    | 5.2    | 8.5    | 9.1     | 1.2     |
| 13.1   | 0.7    | 0.6    | 0.3    | 5.0    | 9.6    | 6.2    | 3.8     | 7.7     |
| 15.4   | 1.5    | 1.3    | 4.1    | 1.2    | 9.0    | 10.4   | 11.1    | 11.6    |
| 20.8   | 36.5   | 12.6   | 15.0   | 29.3   | 31.9   | 55.3   | 58.4    | 50.7    |
| 2.1    | 4.0    | 1.3    | 2.4    | 9.7    | 4.6    | 3.5    | 5.0     | 8.3     |
| 2.6    | 3.5    | 3.0    | 6.4    | 2.6    | 13.1   | 10.6   | 12.7    | 4.0     |
| 3.4    | 3.7    | 6.3    | 6.1    | 6.2    | 6.9    | 10.0   | 9.9     | 4.9     |
| 39.6   | 83.9   | 10.8   | 6.3    | 62.3   | 75.7   | 128.3  | 96.2    | 116.9   |
| 27.5   | 37.1   | 5.2    | 6.9    | 42.6   | 21.7   | 67.1   | 26.0    | 31.8    |

|        |        |        |        |        |        |         |        |        |
|--------|--------|--------|--------|--------|--------|---------|--------|--------|
| 5.2    | 11.9   | 10.9   | 1.5    | 4.7    | 12.9   | 4.9     | 9.3    | 9.0    |
| 0.7    | 0.8    | 1.2    | 0.3    | 2.7    | 0.4    | 1.4     | 0.9    | 0.5    |
| 12.1   | 5.1    | 8.7    | 1.2    | 10.0   | 3.2    | 5.7     | 3.8    | 7.5    |
| 1.6    | 17.8   | 10.7   | 1.4    | 11.3   | 4.4    | 6.3     | 4.5    | 3.1    |
| 0.9    | 1.4    | 3.2    | 2.3    | 2.3    | 1.8    | 1.4     | 0.9    | 1.4    |
| 2.8    | 5.0    | 13.6   | 15.7   | 3.3    | 11.5   | 12.6    | 15.0   | 22.2   |
| 2.4    | 3.7    | 11.5   | 16.2   | 14.5   | 11.1   | 2.3     | 7.1    | 2.7    |
| 1.0    | 1.4    | 1.5    | 1.8    | 1.5    | 1.1    | 2.1     | 1.4    | 1.3    |
| 0.8    | 1.1    | 2.0    | 5.5    | 0.7    | 4.7    | 6.1     | 3.2    | 6.8    |
| 3.6    | 1.4    | 2.3    | 1.4    | 2.7    | 11.0   | 5.9     | 1.9    | 5.6    |
| 0.5    | 1.7    | 0.5    | 4.5    | 0.5    | 2.3    | 4.9     | 7.8    | 8.9    |
| 3.3    | 2.2    | 1.4    | 1.5    | 3.0    | 3.7    | 2.8     | 2.0    | 3.5    |
| 0.3    | 0.3    | 4.7    | 1.2    | 0.3    | 1.2    | 0.4     | 4.2    | 1.4    |
| 1.4    | 3.2    | 1.3    | 0.6    | 2.4    | 1.2    | 5.3     | 2.2    | 4.0    |
| 11.2   | 8.2    | 6.7    | 3.9    | 12.5   | 18.0   | 15.7    | 12.3   | 9.4    |
| 3769.6 | 5734.7 | 1584.6 | 2082.3 | 6066.5 | 5062.5 | 10244.4 | 7867.7 | 8382.8 |
| 12.0   | 1.7    | 2.1    | 2.3    | 1.7    | 1.3    | 1.9     | 9.0    | 1.6    |
| 5.5    | 11.4   | 7.5    | 6.3    | 6.5    | 6.3    | 8.1     | 8.4    | 7.2    |
| 0.6    | 0.4    | 6.0    | 1.0    | 5.6    | 0.2    | 0.8     | 2.1    | 2.3    |
| 1625.4 | 1239.4 | 8.9    | 1.0    | 2503.8 | 1043.3 | 4.0     | 8.0    | 4.1    |
| 3.1    | 9.4    | 4.4    | 6.0    | 4.7    | 2.8    | 2.7     | 5.6    | 6.2    |
| 5.8    | 3.4    | 6.0    | 6.5    | 11.5   | 6.0    | 6.3     | 4.7    | 3.1    |
| 1.3    | 1.2    | 7.5    | 2.9    | 1.7    | 1.4    | 1.8     | 2.1    | 2.3    |
| 11.5   | 3.7    | 3.5    | 3.1    | 5.0    | 2.9    | 17.8    | 14.1   | 8.6    |
| 1.3    | 0.4    | 5.9    | 0.3    | 2.0    | 0.4    | 1.4     | 1.1    | 1.2    |
| 3.4    | 11.7   | 16.6   | 7.2    | 9.3    | 2.5    | 2.3     | 5.7    | 19.4   |
| 715.0  | 1272.1 | 115.0  | 106.2  | 1374.0 | 945.3  | 4282.4  | 2586.9 | 2619.5 |
| 88.2   | 100.1  | 40.1   | 43.3   | 111.2  | 78.2   | 246.7   | 150.9  | 155.6  |
| 3.3    | 1.7    | 3.5    | 0.9    | 2.9    | 2.6    | 14.5    | 11.4   | 12.4   |
| 2.9    | 15.5   | 16.8   | 10.4   | 0.4    | 1.2    | 9.1     | 4.8    | 5.8    |
| 10.0   | 5.0    | 11.3   | 6.1    | 9.7    | 13.8   | 8.7     | 14.0   | 8.6    |
| 1.8    | 3.6    | 2.1    | 2.8    | 1.4    | 20.8   | 2.3     | 1.8    | 1.3    |
| 1.6    | 5.0    | 3.2    | 15.4   | 18.7   | 15.8   | 23.7    | 20.7   | 13.4   |
| 0.6    | 1.0    | 4.1    | 1.6    | 3.1    | 1.3    | 5.1     | 3.8    | 6.2    |
| 533.1  | 636.5  | 140.3  | 195.6  | 708.8  | 650.5  | 889.6   | 678.7  | 771.3  |
| 5.4    | 10.3   | 5.3    | 3.6    | 3.8    | 3.2    | 6.5     | 5.6    | 5.7    |
| 18.2   | 12.3   | 5.1    | 1.3    | 15.6   | 9.1    | 18.5    | 3.4    | 14.1   |
| 2.1    | 2.2    | 9.1    | 3.2    | 3.5    | 1.1    | 5.0     | 2.4    | 2.3    |
| 2.1    | 3.0    | 1.2    | 9.2    | 18.8   | 14.8   | 13.9    | 4.1    | 11.4   |
| 5.2    | 0.2    | 1.6    | 2.3    | 5.7    | 0.7    | 0.7     | 0.7    | 0.4    |
| 1.3    | 6.5    | 7.5    | 0.5    | 2.1    | 8.3    | 2.9     | 4.1    | 4.5    |
| 2.8    | 3.3    | 1.9    | 2.3    | 0.9    | 16.2   | 10.3    | 15.2   | 8.7    |
| 1.1    | 5.0    | 0.7    | 5.1    | 13.9   | 1.4    | 3.7     | 4.8    | 2.6    |
| 7.2    | 16.5   | 7.4    | 0.5    | 18.1   | 17.9   | 0.2     | 4.0    | 2.0    |
| 16.7   | 16.8   | 10.5   | 8.7    | 23.7   | 19.4   | 8.0     | 9.1    | 13.9   |
| 0.5    | 0.4    | 1.2    | 0.3    | 1.1    | 1.0    | 4.9     | 4.3    | 5.2    |
| 0.7    | 0.6    | 4.1    | 0.7    | 0.9    | 3.3    | 0.4     | 2.7    | 2.3    |
| 231.2  | 199.9  | 1.1    | 5.7    | 264.3  | 166.8  | 1921.3  | 1751.9 | 1687.8 |
| 2.2    | 21.5   | 1.5    | 2.6    | 3.8    | 4.2    | 18.2    | 11.3   | 6.7    |
| 0.9    | 1.7    | 11.8   | 0.9    | 1.5    | 2.0    | 2.1     | 3.5    | 4.6    |
| 2.8    | 6.8    | 7.0    | 16.2   | 26.9   | 17.9   | 12.0    | 10.6   | 14.5   |
| 3.2    | 12.3   | 2.6    | 1.9    | 11.8   | 3.8    | 44.4    | 42.6   | 42.2   |
| 30.0   | 20.8   | 12.5   | 12.7   | 17.9   | 12.7   | 68.2    | 45.1   | 52.2   |

|        |        |        |        |        |        |         |         |         |
|--------|--------|--------|--------|--------|--------|---------|---------|---------|
| 29.3   | 30.6   | 11.3   | 11.0   | 39.1   | 5.2    | 85.5    | 85.0    | 93.0    |
| 1.2    | 2.2    | 8.5    | 1.5    | 1.5    | 0.4    | 7.9     | 8.7     | 4.8     |
| 0.8    | 9.3    | 7.3    | 3.0    | 8.3    | 1.1    | 5.7     | 10.3    | 3.9     |
| 8.4    | 23.7   | 10.4   | 11.2   | 28.3   | 23.7   | 30.3    | 44.0    | 34.3    |
| 2.6    | 6.0    | 12.2   | 1.7    | 9.2    | 11.5   | 17.9    | 12.3    | 12.5    |
| 10.2   | 4.4    | 4.2    | 9.9    | 14.9   | 4.1    | 10.0    | 10.2    | 4.8     |
| 4.4    | 13.6   | 15.5   | 9.1    | 10.1   | 13.6   | 10.4    | 16.1    | 9.1     |
| 595.9  | 848.0  | 103.3  | 161.6  | 889.4  | 687.5  | 889.1   | 518.6   | 592.2   |
| 487.4  | 786.6  | 404.1  | 559.4  | 758.8  | 580.4  | 1428.4  | 1102.6  | 1178.5  |
| 1.9    | 3.1    | 4.5    | 1.8    | 0.9    | 1.0    | 3.1     | 2.7     | 2.1     |
| 28.9   | 54.8   | 30.7   | 33.1   | 37.6   | 18.5   | 68.9    | 64.4    | 56.6    |
| 1.1    | 1.3    | 1.6    | 1.3    | 1.5    | 2.2    | 8.0     | 4.2     | 3.4     |
| 37.8   | 59.0   | 9.0    | 6.5    | 80.4   | 31.8   | 205.8   | 173.2   | 203.3   |
| 13.2   | 7.3    | 10.7   | 5.7    | 8.3    | 9.1    | 17.8    | 12.5    | 18.9    |
| 14.5   | 36.7   | 11.6   | 13.5   | 41.5   | 30.5   | 43.9    | 31.0    | 44.9    |
| 1.4    | 1.2    | 5.2    | 0.7    | 1.1    | 2.3    | 3.9     | 1.4     | 2.3     |
| 3.2    | 21.8   | 8.1    | 13.0   | 18.3   | 21.3   | 21.6    | 18.1    | 13.0    |
| 32.7   | 21.1   | 1.2    | 1.3    | 56.6   | 26.7   | 47.9    | 61.9    | 49.5    |
| 9.7    | 5.3    | 1.3    | 1.8    | 9.5    | 11.0   | 2.6     | 5.2     | 5.0     |
| 3.3    | 3.6    | 24.0   | 4.5    | 2.4    | 3.1    | 6.7     | 3.6     | 11.0    |
| 4.0    | 2.4    | 5.7    | 0.7    | 8.1    | 1.1    | 1.1     | 2.7     | 1.4     |
| 29.3   | 36.4   | 12.5   | 8.0    | 22.1   | 30.7   | 104.4   | 95.1    | 75.1    |
| 1.1    | 1.4    | 0.8    | 3.2    | 5.6    | 11.2   | 6.4     | 14.5    | 3.9     |
| 12.0   | 8.8    | 18.1   | 9.9    | 8.8    | 17.2   | 13.3    | 31.3    | 15.0    |
| 7.2    | 1.7    | 4.7    | 2.9    | 8.1    | 1.0    | 19.0    | 28.6    | 13.6    |
| 2.9    | 1.3    | 2.0    | 0.4    | 1.0    | 0.7    | 0.9     | 1.0     | 0.7     |
| 10.4   | 11.7   | 10.2   | 10.5   | 5.9    | 3.5    | 4.4     | 3.6     | 6.0     |
| 19.9   | 32.0   | 10.1   | 18.1   | 49.2   | 35.1   | 101.8   | 84.6    | 83.1    |
| 29.4   | 23.9   | 6.2    | 7.2    | 48.2   | 30.7   | 24.7    | 10.0    | 9.3     |
| 1008.5 | 1291.5 | 191.0  | 246.1  | 1310.8 | 1300.1 | 1218.5  | 1020.3  | 1026.5  |
| 25.6   | 33.0   | 29.1   | 38.9   | 25.1   | 32.7   | 87.1    | 66.1    | 72.3    |
| 1.7    | 7.6    | 9.3    | 8.4    | 3.2    | 2.1    | 2.8     | 5.6     | 6.8     |
| 649.1  | 762.3  | 136.2  | 103.2  | 1089.5 | 1279.8 | 5092.7  | 3562.8  | 3632.3  |
| 20.0   | 3.5    | 4.4    | 4.3    | 12.9   | 16.0   | 17.3    | 18.2    | 15.9    |
| 0.8    | 0.7    | 1.3    | 0.7    | 2.2    | 0.6    | 1.4     | 1.3     | 3.1     |
| 92.1   | 157.1  | 19.4   | 20.1   | 133.3  | 128.4  | 357.6   | 282.2   | 285.1   |
| 2.1    | 6.5    | 10.9   | 9.5    | 4.6    | 2.5    | 21.5    | 23.3    | 20.1    |
| 3.5    | 1.3    | 0.5    | 0.9    | 0.6    | 4.0    | 8.2     | 5.1     | 6.5     |
| 18.9   | 3.7    | 3.1    | 10.1   | 2.4    | 10.9   | 11.5    | 8.2     | 15.2    |
| 1607.5 | 1926.1 | 920.5  | 1200.0 | 1908.6 | 2002.3 | 6110.8  | 5416.8  | 5493.6  |
| 0.3    | 12.9   | 5.6    | 0.8    | 10.4   | 6.1    | 19.4    | 15.6    | 13.0    |
| 1.2    | 1.4    | 7.4    | 6.8    | 1.0    | 6.3    | 6.9     | 7.3     | 4.1     |
| 4.2    | 1.0    | 2.4    | 4.2    | 0.6    | 1.2    | 2.8     | 2.3     | 2.9     |
| 0.8    | 6.2    | 8.8    | 11.2   | 5.5    | 3.7    | 14.0    | 13.9    | 15.2    |
| 7025.9 | 8088.9 | 2454.8 | 3055.2 | 8175.5 | 7075.3 | 11481.7 | 11521.8 | 11657.3 |
| 47.0   | 73.2   | 44.2   | 46.9   | 68.2   | 50.6   | 284.0   | 249.1   | 258.8   |
| 8.3    | 14.0   | 9.0    | 17.6   | 14.0   | 7.7    | 14.1    | 15.1    | 2.9     |
| 51.6   | 64.1   | 14.8   | 4.3    | 32.0   | 82.5   | 73.7    | 97.0    | 87.8    |
| 114.0  | 155.2  | 195.0  | 237.1  | 191.8  | 142.1  | 563.8   | 546.5   | 502.2   |
| 3943.2 | 4607.2 | 1457.6 | 1438.6 | 5014.5 | 4073.1 | 6514.1  | 7217.6  | 7682.5  |
| 5.2    | 10.4   | 9.5    | 3.8    | 3.8    | 7.2    | 9.3     | 10.1    | 11.0    |
| 2.8    | 15.1   | 7.5    | 5.2    | 2.9    | 1.8    | 12.4    | 8.6     | 19.9    |
| 0.4    | 4.1    | 5.6    | 4.3    | 0.1    | 0.6    | 10.7    | 6.3     | 2.6     |



|       |       |       |       |       |       |        |        |        |
|-------|-------|-------|-------|-------|-------|--------|--------|--------|
| 23.3  | 3.5   | 9.9   | 10.6  | 11.5  | 12.1  | 24.4   | 20.5   | 9.0    |
| 17.0  | 13.0  | 12.3  | 22.5  | 17.0  | 13.2  | 55.8   | 47.9   | 47.3   |
| 234.5 | 113.8 | 16.0  | 44.5  | 127.1 | 241.2 | 746.2  | 377.2  | 223.4  |
| 1.5   | 1.2   | 0.2   | 0.1   | 0.3   | 0.6   | 7.0    | 5.4    | 7.7    |
| 3.3   | 5.1   | 1.5   | 3.4   | 1.1   | 2.3   | 5.0    | 2.6    | 1.1    |
| 9.3   | 2.4   | 11.2  | 2.4   | 2.5   | 2.7   | 3.7    | 7.3    | 14.3   |
| 3.1   | 1.6   | 1.0   | 3.6   | 2.7   | 1.9   | 0.8    | 1.0    | 1.3    |
| 3.5   | 7.2   | 10.1  | 10.2  | 6.4   | 6.7   | 17.0   | 5.8    | 20.0   |
| 7.8   | 21.1  | 4.4   | 6.9   | 13.2  | 10.4  | 18.9   | 15.0   | 20.5   |
| 7.4   | 2.5   | 5.9   | 0.8   | 6.6   | 0.3   | 10.2   | 9.9    | 10.4   |
| 4.6   | 7.1   | 7.4   | 9.8   | 15.1  | 13.6  | 13.1   | 10.9   | 6.7    |
| 2.9   | 1.6   | 3.2   | 9.9   | 3.2   | 7.2   | 2.4    | 2.3    | 4.1    |
| 14.9  | 31.6  | 5.4   | 24.7  | 22.0  | 25.4  | 16.5   | 10.0   | 7.6    |
| 0.5   | 1.2   | 0.6   | 0.5   | 1.3   | 0.9   | 1.2    | 0.7    | 1.3    |
| 1.3   | 6.0   | 2.1   | 0.8   | 11.4  | 1.3   | 12.8   | 5.1    | 7.9    |
| 14.8  | 26.6  | 25.5  | 23.6  | 29.2  | 26.5  | 41.7   | 36.3   | 27.2   |
| 2.9   | 7.2   | 9.5   | 2.2   | 4.9   | 16.5  | 13.9   | 4.9    | 7.1    |
| 104.6 | 126.3 | 53.7  | 56.3  | 126.1 | 126.4 | 191.3  | 140.5  | 191.7  |
| 51.2  | 108.9 | 19.1  | 57.7  | 114.6 | 105.0 | 310.2  | 183.0  | 179.7  |
| 7.0   | 3.2   | 4.7   | 5.4   | 1.1   | 1.2   | 24.9   | 27.1   | 25.9   |
| 27.6  | 34.1  | 7.4   | 2.8   | 26.0  | 86.5  | 77.7   | 76.2   | 75.1   |
| 44.4  | 53.0  | 33.0  | 41.9  | 85.4  | 51.3  | 90.1   | 68.2   | 56.2   |
| 1.5   | 1.5   | 1.4   | 1.9   | 2.6   | 2.5   | 2.2    | 2.4    | 3.3    |
| 11.0  | 11.7  | 12.0  | 5.1   | 8.1   | 6.2   | 7.9    | 8.5    | 8.8    |
| 102.1 | 80.4  | 39.0  | 32.6  | 117.8 | 92.3  | 139.3  | 111.3  | 96.2   |
| 6.0   | 8.5   | 13.2  | 9.4   | 7.0   | 9.9   | 21.7   | 23.0   | 30.2   |
| 25.1  | 44.4  | 5.7   | 8.3   | 33.7  | 30.9  | 39.5   | 35.3   | 25.1   |
| 10.9  | 9.3   | 7.9   | 11.7  | 15.4  | 10.0  | 10.4   | 10.0   | 5.3    |
| 0.5   | 1.0   | 4.5   | 6.4   | 1.3   | 7.8   | 1.9    | 1.5    | 0.7    |
| 351.8 | 384.1 | 98.4  | 52.6  | 397.7 | 408.3 | 1588.6 | 1290.7 | 1175.8 |
| 1.0   | 1.4   | 0.9   | 1.3   | 1.4   | 2.1   | 3.0    | 2.0    | 2.5    |
| 12.6  | 6.1   | 4.7   | 8.0   | 7.0   | 6.9   | 3.9    | 0.7    | 3.7    |
| 25.9  | 4.6   | 1.5   | 8.6   | 14.3  | 16.7  | 16.1   | 19.4   | 14.0   |
| 28.0  | 27.1  | 13.6  | 14.9  | 15.0  | 47.3  | 12.0   | 17.4   | 25.2   |
| 11.7  | 17.2  | 7.5   | 2.0   | 11.8  | 12.2  | 32.7   | 16.3   | 35.6   |
| 153.5 | 143.6 | 22.3  | 19.9  | 240.2 | 201.7 | 19.4   | 32.4   | 26.0   |
| 6.8   | 12.6  | 2.2   | 5.5   | 6.7   | 11.9  | 7.1    | 9.4    | 3.1    |
| 0.9   | 1.0   | 0.7   | 0.6   | 0.8   | 1.4   | 1.6    | 0.8    | 0.9    |
| 50.5  | 71.0  | 27.6  | 25.9  | 80.7  | 69.9  | 245.4  | 94.1   | 161.2  |
| 8.0   | 14.5  | 16.4  | 16.8  | 11.5  | 1.0   | 23.3   | 10.2   | 9.8    |
| 477.3 | 583.7 | 189.7 | 225.4 | 677.8 | 465.8 | 1669.6 | 1332.2 | 1438.3 |
| 18.5  | 6.3   | 2.4   | 15.4  | 13.1  | 3.0   | 6.2    | 3.9    | 3.6    |
| 0.9   | 0.7   | 1.2   | 1.0   | 0.7   | 0.7   | 1.1    | 0.9    | 1.2    |
| 8.5   | 8.2   | 1.2   | 6.9   | 13.8  | 7.8   | 10.2   | 3.9    | 6.5    |
| 121.7 | 156.1 | 24.7  | 35.2  | 247.1 | 159.4 | 179.6  | 117.9  | 124.1  |
| 4.7   | 1.0   | 1.3   | 0.6   | 4.5   | 12.6  | 6.5    | 3.7    | 9.5    |
| 2.6   | 2.1   | 0.7   | 2.2   | 1.6   | 3.5   | 5.8    | 5.0    | 2.8    |
| 4.1   | 13.4  | 5.0   | 10.4  | 9.0   | 8.8   | 30.8   | 23.2   | 22.7   |
| 1.9   | 1.7   | 2.1   | 2.3   | 3.2   | 2.1   | 3.3    | 2.4    | 2.4    |
| 3.4   | 4.5   | 2.0   | 1.3   | 1.6   | 3.1   | 3.4    | 3.9    | 3.8    |
| 7.6   | 13.1  | 8.5   | 4.2   | 8.9   | 14.0  | 24.3   | 13.4   | 17.8   |
| 23.8  | 7.7   | 5.4   | 1.7   | 9.9   | 13.5  | 14.8   | 13.6   | 3.3    |
| 22.8  | 8.3   | 10.9  | 1.8   | 19.4  | 28.8  | 30.6   | 34.0   | 23.9   |

|        |        |       |       |       |        |        |        |        |
|--------|--------|-------|-------|-------|--------|--------|--------|--------|
| 115.5  | 124.4  | 48.8  | 50.8  | 100.7 | 100.3  | 249.5  | 176.5  | 114.1  |
| 7.4    | 2.0    | 1.7   | 2.2   | 6.0   | 6.5    | 1.9    | 2.6    | 1.6    |
| 1.9    | 2.8    | 0.4   | 1.9   | 1.7   | 2.7    | 17.0   | 19.9   | 23.2   |
| 11.5   | 9.1    | 14.5  | 8.7   | 3.0   | 6.2    | 1.3    | 5.9    | 12.5   |
| 1.3    | 1.7    | 1.1   | 6.8   | 1.5   | 1.1    | 5.0    | 1.7    | 1.6    |
| 1.0    | 1.5    | 2.9   | 4.8   | 4.1   | 7.9    | 6.9    | 3.8    | 7.3    |
| 19.7   | 18.8   | 16.4  | 13.0  | 16.4  | 7.1    | 29.8   | 27.1   | 22.6   |
| 0.3    | 4.6    | 5.9   | 5.4   | 5.8   | 6.1    | 8.7    | 8.8    | 3.1    |
| 451.1  | 546.4  | 311.1 | 412.7 | 647.7 | 315.1  | 1254.2 | 1305.6 | 1420.8 |
| 6.5    | 0.5    | 7.6   | 1.3   | 1.9   | 6.0    | 2.2    | 5.6    | 7.0    |
| 59.7   | 81.1   | 59.3  | 68.5  | 108.3 | 93.3   | 542.4  | 468.4  | 552.1  |
| 1052.8 | 2105.2 | 21.0  | 25.2  | 968.2 | 1154.8 | 7150.9 | 7390.2 | 7336.8 |
| 7.0    | 14.9   | 8.5   | 0.5   | 21.2  | 9.2    | 26.9   | 28.1   | 26.5   |
| 13.5   | 16.0   | 14.8  | 5.2   | 10.9  | 10.9   | 8.8    | 10.3   | 8.2    |
| 7.0    | 1.6    | 1.4   | 1.0   | 10.2  | 1.1    | 5.9    | 8.0    | 8.9    |
| 0.5    | 1.2    | 0.7   | 0.9   | 2.6   | 0.9    | 6.1    | 3.6    | 3.6    |
| 1.0    | 1.5    | 6.9   | 2.6   | 1.9   | 2.5    | 2.9    | 2.7    | 3.5    |
| 21.2   | 41.9   | 21.3  | 13.4  | 21.1  | 25.3   | 45.1   | 56.5   | 57.5   |
| 3.4    | 4.7    | 4.4   | 4.2   | 5.1   | 5.4    | 23.0   | 9.4    | 12.6   |
| 194.3  | 209.9  | 78.4  | 144.2 | 238.4 | 131.7  | 888.6  | 377.9  | 428.7  |
| 1.3    | 3.4    | 2.3   | 2.7   | 2.1   | 1.4    | 310.5  | 325.1  | 388.2  |
| 12.6   | 12.9   | 25.9  | 10.1  | 21.8  | 15.9   | 829.3  | 901.6  | 977.6  |
| 2.0    | 2.3    | 1.6   | 1.3   | 2.5   | 0.7    | 7.0    | 3.5    | 9.6    |
| 65.6   | 141.1  | 104.0 | 149.3 | 136.1 | 86.5   | 170.7  | 163.5  | 170.6  |
| 87.8   | 84.5   | 179.4 | 253.5 | 153.6 | 97.2   | 843.8  | 536.2  | 648.6  |
| 11.3   | 8.8    | 17.7  | 5.3   | 15.5  | 5.4    | 3.3    | 4.1    | 7.2    |
| 99.8   | 176.1  | 22.4  | 21.6  | 175.5 | 105.2  | 290.0  | 322.6  | 314.0  |
| 0.8    | 0.4    | 13.6  | 10.0  | 0.9   | 0.3    | 4.6    | 9.4    | 9.1    |
| 3.2    | 6.0    | 2.5   | 2.3   | 1.8   | 1.7    | 2.4    | 10.5   | 8.5    |
| 5.5    | 5.6    | 5.1   | 1.9   | 1.6   | 10.5   | 4.6    | 4.2    | 6.0    |
| 3.8    | 0.9    | 4.4   | 3.4   | 9.4   | 0.3    | 4.5    | 3.8    | 2.1    |
| 6.9    | 12.4   | 0.3   | 7.1   | 10.1  | 6.8    | 7.9    | 8.1    | 4.0    |
| 10.3   | 7.2    | 11.0  | 9.3   | 11.9  | 19.1   | 15.9   | 25.9   | 22.7   |
| 9.1    | 2.9    | 0.3   | 0.6   | 1.7   | 0.4    | 0.5    | 3.0    | 0.9    |
| 1.6    | 17.8   | 1.2   | 1.0   | 3.9   | 3.8    | 1.1    | 0.9    | 0.9    |
| 5.5    | 0.8    | 8.2   | 6.9   | 10.6  | 13.0   | 10.0   | 8.2    | 4.9    |
| 0.3    | 0.3    | 0.2   | 3.3   | 10.1  | 6.1    | 2.8    | 4.7    | 3.2    |
| 77.1   | 57.2   | 17.3  | 15.9  | 95.5  | 54.5   | 139.0  | 111.4  | 143.9  |
| 10.3   | 12.6   | 3.6   | 3.1   | 10.2  | 7.8    | 10.6   | 9.4    | 5.7    |
| 12.6   | 2.2    | 1.7   | 5.7   | 18.1  | 18.2   | 1.5    | 5.0    | 2.7    |
| 45.1   | 70.8   | 169.5 | 176.9 | 137.3 | 71.3   | 1643.5 | 2413.0 | 2387.5 |
| 17.7   | 10.5   | 10.4  | 17.0  | 7.8   | 9.2    | 19.6   | 15.4   | 15.5   |
| 6.1    | 0.7    | 1.7   | 0.2   | 2.3   | 1.5    | 5.3    | 3.8    | 2.4    |
| 9.9    | 12.0   | 1.2   | 10.2  | 9.2   | 3.9    | 7.3    | 1.0    | 1.5    |
| 5.5    | 2.6    | 21.6  | 19.4  | 11.5  | 1.3    | 50.2   | 44.2   | 42.1   |
| 5.1    | 11.6   | 3.7   | 7.3   | 19.1  | 7.0    | 4.3    | 4.0    | 11.7   |
| 9.0    | 9.8    | 10.6  | 12.4  | 8.3   | 3.1    | 9.9    | 7.2    | 1.6    |
| 2.4    | 1.6    | 3.3   | 2.3   | 2.4   | 2.5    | 2.7    | 2.4    | 2.2    |
| 14.3   | 8.2    | 13.3  | 15.1  | 5.8   | 21.2   | 14.6   | 15.9   | 20.1   |
| 0.6    | 1.1    | 0.8   | 0.7   | 0.6   | 0.9    | 0.7    | 1.1    | 0.5    |
| 2.5    | 15.9   | 3.3   | 9.1   | 22.2  | 1.9    | 25.9   | 45.3   | 29.1   |
| 0.8    | 0.3    | 4.6   | 3.3   | 1.7   | 1.4    | 22.5   | 28.5   | 30.4   |
| 19.8   | 12.8   | 11.7  | 0.7   | 14.1  | 9.4    | 5.5    | 4.7    | 8.4    |

|        |        |       |       |        |        |        |        |        |
|--------|--------|-------|-------|--------|--------|--------|--------|--------|
| 1.7    | 0.3    | 3.1   | 0.7   | 1.0    | 2.1    | 4.9    | 5.0    | 4.3    |
| 2.2    | 16.1   | 2.1   | 1.8   | 1.3    | 1.5    | 15.2   | 6.8    | 3.7    |
| 6.7    | 0.7    | 10.7  | 11.8  | 6.9    | 0.5    | 1.3    | 1.2    | 1.0    |
| 0.6    | 7.7    | 2.2   | 7.7   | 7.0    | 2.5    | 4.4    | 5.0    | 2.7    |
| 1449.1 | 2138.5 | 330.1 | 426.1 | 2315.9 | 1721.1 | 4805.3 | 3176.4 | 3229.9 |
| 225.5  | 252.7  | 73.6  | 118.2 | 358.5  | 203.3  | 1445.7 | 1109.4 | 1211.3 |
| 1.4    | 8.3    | 3.7   | 5.3   | 6.3    | 1.6    | 5.6    | 4.9    | 6.4    |
| 6.3    | 2.6    | 6.2   | 9.6   | 1.3    | 13.5   | 7.6    | 6.0    | 2.6    |
| 6.8    | 2.0    | 1.0   | 7.5   | 11.8   | 0.8    | 8.3    | 6.7    | 11.5   |
| 17.2   | 29.4   | 3.2   | 15.0  | 16.2   | 5.2    | 17.5   | 19.4   | 12.0   |
| 2.0    | 1.8    | 2.6   | 1.1   | 1.0    | 2.9    | 2.6    | 1.9    | 3.4    |
| 36.7   | 26.0   | 47.6  | 29.6  | 23.5   | 23.4   | 21.1   | 25.4   | 13.1   |
| 1.2    | 3.3    | 6.6   | 1.4   | 3.3    | 1.1    | 7.1    | 5.8    | 8.3    |
| 0.5    | 1.0    | 0.7   | 3.9   | 7.1    | 2.4    | 0.9    | 1.0    | 2.8    |
| 22.7   | 21.8   | 1.3   | 0.9   | 21.3   | 19.5   | 80.0   | 55.7   | 46.3   |
| 4.3    | 7.6    | 12.8  | 9.9   | 0.3    | 0.6    | 17.0   | 13.2   | 15.7   |
| 232.4  | 285.9  | 76.4  | 104.9 | 325.0  | 281.2  | 283.9  | 244.8  | 236.3  |
| 1.8    | 3.7    | 1.0   | 7.4   | 7.5    | 0.8    | 4.2    | 1.9    | 7.4    |
| 4.6    | 7.2    | 2.6   | 6.0   | 1.6    | 13.8   | 4.7    | 13.3   | 9.9    |
| 1.9    | 3.7    | 11.3  | 9.0   | 10.5   | 1.1    | 12.5   | 3.1    | 7.5    |
| 1.1    | 1.4    | 0.9   | 0.7   | 1.7    | 1.1    | 1.2    | 1.3    | 1.3    |
| 1.2    | 5.0    | 2.2   | 5.6   | 8.1    | 3.8    | 10.1   | 17.0   | 8.5    |
| 19.3   | 14.1   | 9.7   | 16.4  | 12.3   | 19.7   | 13.7   | 17.3   | 20.3   |
| 2.1    | 0.3    | 3.5   | 0.2   | 0.4    | 3.8    | 4.3    | 3.6    | 7.0    |
| 8.2    | 0.9    | 1.3   | 4.7   | 1.6    | 0.3    | 3.5    | 5.4    | 1.3    |
| 3.9    | 5.7    | 34.9  | 10.0  | 15.8   | 8.0    | 31.2   | 25.5   | 30.6   |
| 9.0    | 5.2    | 10.4  | 12.8  | 0.9    | 9.7    | 17.9   | 20.6   | 17.8   |
| 9.3    | 0.9    | 7.9   | 4.1   | 12.8   | 5.3    | 25.4   | 32.8   | 31.0   |
| 0.8    | 1.3    | 0.5   | 1.5   | 2.0    | 1.6    | 2.7    | 1.9    | 5.0    |
| 0.6    | 1.3    | 0.6   | 1.0   | 10.7   | 0.3    | 1.2    | 0.5    | 0.4    |
| 9.2    | 9.3    | 6.1   | 9.3   | 0.7    | 6.2    | 16.1   | 17.5   | 16.5   |
| 15.3   | 1.7    | 1.7   | 5.0   | 1.9    | 11.5   | 9.0    | 2.7    | 6.7    |
| 6.7    | 22.6   | 12.7  | 8.9   | 10.1   | 21.1   | 38.0   | 25.1   | 33.9   |
| 1.0    | 5.5    | 0.7   | 4.0   | 3.3    | 8.0    | 8.1    | 6.6    | 5.8    |
| 1.4    | 1.5    | 2.4   | 7.2   | 1.2    | 5.2    | 1.6    | 1.0    | 1.1    |
| 6.7    | 5.0    | 3.5   | 2.4   | 3.7    | 3.1    | 4.8    | 4.5    | 5.7    |
| 0.8    | 4.4    | 0.7   | 1.3   | 1.3    | 2.0    | 0.6    | 2.1    | 2.6    |
| 10.1   | 7.5    | 8.7   | 6.5   | 16.4   | 6.2    | 10.0   | 12.1   | 14.8   |
| 1.4    | 0.6    | 3.0   | 1.7   | 2.0    | 7.2    | 3.0    | 8.4    | 4.8    |
| 1.9    | 2.7    | 11.5  | 2.3   | 15.5   | 9.3    | 24.6   | 19.4   | 21.0   |
| 2.4    | 1.2    | 11.5  | 3.8   | 1.1    | 2.2    | 2.1    | 3.2    | 2.8    |
| 11.6   | 7.1    | 12.3  | 10.0  | 12.8   | 1.8    | 26.2   | 15.4   | 22.3   |
| 45.6   | 44.5   | 24.4  | 21.9  | 42.2   | 33.1   | 68.4   | 56.4   | 71.9   |
| 3.2    | 4.8    | 1.6   | 2.2   | 6.2    | 14.9   | 17.7   | 14.0   | 11.1   |
| 50.6   | 12.3   | 61.5  | 50.5  | 55.2   | 45.5   | 82.5   | 80.5   | 107.9  |
| 0.6    | 0.3    | 2.8   | 3.3   | 1.1    | 0.4    | 5.9    | 7.1    | 8.0    |
| 10.4   | 24.5   | 3.9   | 1.8   | 16.5   | 30.9   | 28.0   | 31.6   | 33.8   |
| 6.8    | 5.1    | 0.2   | 0.3   | 0.3    | 0.6    | 3.6    | 3.6    | 5.4    |
| 45.5   | 76.1   | 34.1  | 55.4  | 82.3   | 65.0   | 93.2   | 88.6   | 87.7   |
| 8.2    | 1.7    | 9.1   | 9.6   | 6.5    | 2.6    | 148.5  | 81.5   | 106.6  |
| 0.8    | 7.5    | 1.5   | 0.3   | 5.2    | 2.3    | 4.0    | 1.4    | 1.6    |
| 6.1    | 6.0    | 2.9   | 5.8   | 7.7    | 2.7    | 9.4    | 20.2   | 13.1   |
| 6.8    | 12.7   | 10.2  | 11.2  | 8.8    | 10.8   | 6.7    | 7.6    | 10.9   |

|       |       |       |       |       |       |        |        |        |
|-------|-------|-------|-------|-------|-------|--------|--------|--------|
| 41.1  | 38.6  | 81.6  | 110.4 | 46.0  | 18.2  | 219.4  | 203.4  | 194.6  |
| 1.1   | 1.4   | 12.8  | 5.6   | 5.9   | 0.7   | 6.7    | 4.6    | 3.2    |
| 2.1   | 1.6   | 5.7   | 6.7   | 1.1   | 1.3   | 1.7    | 1.4    | 1.1    |
| 19.7  | 13.9  | 3.6   | 16.1  | 18.2  | 16.1  | 21.6   | 25.9   | 23.1   |
| 465.4 | 474.2 | 139.0 | 189.9 | 629.2 | 482.5 | 11.0   | 12.7   | 10.0   |
| 3.1   | 5.3   | 17.1  | 15.7  | 12.4  | 13.0  | 19.1   | 27.2   | 28.9   |
| 8.9   | 13.4  | 1.2   | 2.0   | 3.7   | 1.8   | 18.8   | 9.9    | 8.7    |
| 3.7   | 26.1  | 17.7  | 15.5  | 23.6  | 22.3  | 31.2   | 19.8   | 22.3   |
| 6.1   | 16.2  | 0.9   | 5.0   | 10.7  | 12.6  | 9.6    | 13.4   | 10.5   |
| 33.4  | 36.0  | 32.6  | 25.5  | 58.8  | 49.4  | 96.6   | 94.3   | 83.8   |
| 32.8  | 35.9  | 9.7   | 8.8   | 23.7  | 22.2  | 71.1   | 73.0   | 86.3   |
| 13.7  | 7.5   | 16.9  | 10.1  | 12.8  | 18.2  | 6.6    | 7.4    | 4.4    |
| 5.0   | 10.2  | 8.0   | 1.8   | 18.1  | 11.4  | 4.2    | 7.7    | 2.9    |
| 2.3   | 2.8   | 14.8  | 5.4   | 28.7  | 12.6  | 20.9   | 8.3    | 10.2   |
| 6.1   | 7.2   | 6.7   | 8.8   | 10.4  | 2.5   | 11.2   | 6.5    | 9.4    |
| 8.3   | 3.7   | 10.3  | 3.5   | 1.5   | 1.8   | 3.6    | 1.7    | 1.8    |
| 106.1 | 182.6 | 28.5  | 33.8  | 172.4 | 157.9 | 1460.0 | 1014.1 | 1043.6 |
| 1.2   | 1.5   | 2.3   | 1.8   | 2.3   | 2.6   | 4.7    | 7.2    | 2.9    |
| 1.5   | 0.9   | 0.6   | 0.4   | 0.8   | 0.9   | 0.9    | 0.9    | 0.9    |
| 2.9   | 0.6   | 7.1   | 0.9   | 1.4   | 3.9   | 3.6    | 1.1    | 5.7    |
| 4.3   | 4.8   | 4.3   | 1.2   | 1.5   | 4.7   | 1.7    | 1.2    | 4.2    |
| 13.7  | 1.6   | 14.4  | 14.9  | 15.0  | 18.2  | 8.5    | 17.4   | 14.5   |
| 18.6  | 6.9   | 19.4  | 15.6  | 22.6  | 18.5  | 45.5   | 54.9   | 51.4   |
| 0.7   | 7.9   | 3.2   | 2.2   | 0.5   | 3.9   | 9.8    | 3.5    | 2.1    |
| 60.9  | 120.6 | 5.6   | 6.8   | 126.0 | 92.0  | 479.1  | 426.6  | 490.6  |
| 1.1   | 0.9   | 3.1   | 1.3   | 1.0   | 0.8   | 2.0    | 1.1    | 1.8    |
| 9.6   | 34.4  | 11.6  | 13.3  | 16.3  | 7.3   | 49.1   | 24.5   | 35.6   |
| 8.2   | 15.3  | 11.7  | 3.9   | 19.8  | 11.9  | 9.7    | 13.9   | 8.4    |
| 0.5   | 0.5   | 0.4   | 1.9   | 0.5   | 1.3   | 1.3    | 2.9    | 0.6    |
| 0.4   | 0.4   | 1.0   | 5.6   | 1.5   | 0.6   | 1.4    | 1.0    | 1.4    |
| 2.7   | 1.8   | 0.7   | 0.4   | 5.6   | 5.7   | 3.3    | 3.9    | 2.5    |
| 0.8   | 0.4   | 0.7   | 1.3   | 0.6   | 1.0   | 0.6    | 0.7    | 0.8    |
| 14.8  | 18.6  | 5.7   | 9.3   | 21.0  | 12.4  | 33.0   | 22.8   | 18.7   |
| 7.4   | 4.2   | 4.3   | 4.5   | 1.3   | 3.3   | 0.4    | 2.3    | 4.6    |
| 7.2   | 8.5   | 9.9   | 4.3   | 7.9   | 0.5   | 8.8    | 9.7    | 4.5    |
| 1.4   | 3.9   | 3.9   | 6.6   | 9.7   | 1.1   | 12.1   | 12.0   | 9.1    |
| 4.6   | 1.9   | 1.4   | 1.8   | 0.9   | 2.1   | 2.5    | 3.0    | 4.0    |
| 1.8   | 1.0   | 0.8   | 0.5   | 1.4   | 2.3   | 3.3    | 1.7    | 2.1    |
| 1.5   | 1.0   | 4.8   | 3.0   | 1.8   | 2.0   | 2.2    | 6.0    | 2.9    |
| 2.2   | 14.9  | 1.4   | 5.6   | 6.9   | 1.1   | 15.1   | 7.5    | 3.3    |
| 14.0  | 7.3   | 6.4   | 8.0   | 5.6   | 6.5   | 6.6    | 3.3    | 3.1    |
| 12.0  | 30.8  | 21.1  | 17.1  | 12.4  | 16.9  | 44.1   | 42.6   | 39.7   |
| 1.8   | 10.2  | 1.0   | 0.4   | 0.7   | 1.6   | 1.7    | 2.8    | 2.4    |
| 1.0   | 0.9   | 1.1   | 0.8   | 0.7   | 5.3   | 1.9    | 3.1    | 0.9    |
| 51.1  | 69.0  | 2.9   | 8.7   | 86.3  | 58.6  | 26.7   | 33.8   | 48.6   |
| 1.7   | 6.6   | 2.3   | 2.2   | 5.1   | 4.4   | 2.6    | 3.0    | 1.4    |
| 4.4   | 10.7  | 0.6   | 6.4   | 15.7  | 15.5  | 19.1   | 9.6    | 12.4   |
| 4.1   | 5.7   | 5.3   | 3.4   | 5.8   | 5.1   | 26.2   | 9.4    | 15.2   |
| 0.4   | 10.0  | 0.6   | 0.5   | 9.0   | 4.9   | 1.4    | 1.0    | 2.0    |
| 11.8  | 4.9   | 12.9  | 12.5  | 15.1  | 23.4  | 9.3    | 17.0   | 13.6   |
| 16.1  | 20.9  | 31.7  | 29.4  | 13.3  | 17.9  | 21.2   | 30.1   | 25.2   |
| 18.6  | 33.9  | 7.6   | 3.0   | 37.4  | 37.0  | 67.2   | 62.4   | 84.5   |
| 1.5   | 2.2   | 3.7   | 2.3   | 2.1   | 13.7  | 2.1    | 2.6    | 2.5    |

|      |      |      |      |      |      |      |      |      |
|------|------|------|------|------|------|------|------|------|
| 5.2  | 0.9  | 2.0  | 4.6  | 0.6  | 6.9  | 1.0  | 4.4  | 5.0  |
| 1.8  | 2.4  | 7.3  | 8.4  | 2.4  | 2.4  | 2.5  | 2.4  | 2.5  |
| 2.0  | 3.7  | 5.2  | 0.9  | 3.1  | 1.0  | 2.4  | 0.9  | 2.1  |
| 34.8 | 52.6 | 8.3  | 3.1  | 48.8 | 60.1 | 30.9 | 41.1 | 30.1 |
| 7.7  | 0.5  | 2.3  | 4.0  | 1.1  | 1.3  | 13.9 | 11.9 | 9.4  |
| 8.0  | 10.1 | 1.1  | 5.0  | 4.5  | 9.4  | 12.2 | 7.2  | 4.7  |
| 0.3  | 3.3  | 22.0 | 13.6 | 9.7  | 7.7  | 11.2 | 8.4  | 14.1 |
| 1.8  | 9.8  | 1.6  | 6.4  | 1.2  | 6.8  | 22.1 | 10.9 | 17.6 |
| 22.7 | 14.7 | 3.1  | 6.0  | 6.1  | 8.6  | 17.2 | 13.1 | 23.0 |
| 16.4 | 24.9 | 7.5  | 7.4  | 5.5  | 30.3 | 23.1 | 28.4 | 11.1 |
| 3.6  | 0.9  | 0.9  | 1.7  | 1.5  | 2.6  | 2.7  | 3.9  | 1.4  |
| 4.9  | 1.1  | 22.5 | 0.9  | 8.6  | 0.9  | 11.7 | 12.8 | 4.3  |
| 3.2  | 1.1  | 13.8 | 4.6  | 4.8  | 2.7  | 3.6  | 9.8  | 3.0  |
| 6.7  | 15.1 | 20.1 | 8.5  | 8.6  | 11.5 | 3.0  | 17.7 | 20.1 |
| 13.0 | 6.8  | 9.8  | 5.0  | 10.7 | 9.4  | 10.8 | 6.9  | 11.5 |
| 15.6 | 17.5 | 15.8 | 5.9  | 9.9  | 12.3 | 12.1 | 13.7 | 15.1 |
| 2.4  | 4.6  | 0.7  | 0.6  | 4.7  | 1.5  | 2.8  | 1.3  | 3.5  |
| 1.4  | 3.7  | 10.2 | 14.1 | 1.8  | 9.4  | 11.3 | 11.4 | 12.2 |
| 2.4  | 2.1  | 3.6  | 2.7  | 4.4  | 4.1  | 2.0  | 3.6  | 2.9  |
| 1.0  | 1.8  | 3.2  | 1.4  | 0.5  | 10.5 | 1.6  | 5.1  | 2.0  |
| 6.2  | 4.5  | 3.8  | 1.2  | 6.3  | 14.0 | 11.6 | 17.3 | 8.0  |
| 1.4  | 2.1  | 1.4  | 3.9  | 1.3  | 3.9  | 13.0 | 6.4  | 8.0  |
| 1.0  | 7.7  | 3.7  | 6.1  | 7.4  | 4.0  | 7.8  | 4.5  | 2.3  |
| 12.0 | 17.0 | 0.7  | 0.5  | 0.4  | 11.0 | 2.4  | 2.1  | 3.3  |
| 6.0  | 11.9 | 0.8  | 0.3  | 11.2 | 8.8  | 3.5  | 1.3  | 6.1  |
| 2.8  | 7.3  | 6.1  | 1.3  | 13.6 | 3.0  | 17.7 | 17.5 | 6.4  |
| 4.9  | 12.4 | 15.8 | 19.5 | 16.4 | 9.4  | 27.3 | 12.7 | 24.4 |
| 5.6  | 8.3  | 0.5  | 1.8  | 4.8  | 11.5 | 12.9 | 12.8 | 14.7 |
| 11.2 | 15.7 | 7.0  | 9.1  | 8.0  | 12.8 | 16.9 | 20.6 | 14.5 |
| 6.7  | 3.7  | 6.4  | 5.8  | 15.1 | 9.8  | 8.3  | 13.8 | 8.6  |
| 4.2  | 1.0  | 9.3  | 6.9  | 2.8  | 2.9  | 4.9  | 5.3  | 7.2  |
| 12.9 | 3.8  | 2.8  | 1.1  | 13.2 | 6.2  | 13.9 | 9.4  | 13.6 |
| 9.3  | 12.8 | 8.6  | 17.6 | 6.4  | 2.9  | 9.2  | 11.7 | 9.6  |
| 0.5  | 2.0  | 0.2  | 1.7  | 2.7  | 8.4  | 2.1  | 4.9  | 6.1  |
| 2.5  | 13.2 | 3.5  | 2.4  | 14.6 | 7.9  | 6.4  | 12.6 | 3.8  |
| 3.2  | 5.7  | 5.8  | 4.3  | 0.8  | 8.0  | 1.8  | 0.4  | 0.6  |
| 9.2  | 3.4  | 0.3  | 3.7  | 4.8  | 1.6  | 4.1  | 7.1  | 3.2  |
| 1.1  | 23.2 | 7.2  | 2.4  | 4.0  | 12.8 | 18.0 | 12.2 | 17.6 |
| 1.7  | 3.2  | 1.5  | 0.9  | 0.5  | 1.4  | 0.8  | 1.3  | 1.1  |
| 1.4  | 0.6  | 0.5  | 0.7  | 0.8  | 1.0  | 1.7  | 0.9  | 1.8  |
| 0.9  | 1.5  | 1.4  | 0.6  | 5.7  | 2.0  | 3.8  | 2.3  | 1.5  |
| 4.7  | 8.7  | 0.7  | 5.9  | 4.2  | 3.6  | 9.2  | 2.8  | 5.7  |
| 5.3  | 6.7  | 7.6  | 3.8  | 6.3  | 16.6 | 11.0 | 10.2 | 9.4  |
| 5.2  | 7.9  | 2.1  | 1.1  | 1.2  | 1.1  | 9.3  | 6.9  | 6.7  |
| 0.6  | 0.8  | 5.0  | 1.8  | 8.0  | 8.6  | 8.8  | 8.6  | 3.8  |
| 0.9  | 0.7  | 6.2  | 0.7  | 13.2 | 9.8  | 8.6  | 3.1  | 13.1 |
| 1.2  | 9.0  | 1.9  | 1.8  | 3.6  | 5.2  | 7.3  | 12.2 | 3.2  |
| 1.9  | 1.8  | 1.3  | 1.3  | 2.7  | 4.2  | 1.3  | 1.9  | 2.3  |
| 2.4  | 1.8  | 0.9  | 5.6  | 2.0  | 5.1  | 7.4  | 2.2  | 1.1  |
| 28.5 | 28.5 | 52.4 | 30.9 | 35.3 | 61.7 | 23.2 | 22.1 | 31.2 |
| 1.6  | 19.4 | 8.8  | 14.3 | 16.7 | 1.5  | 16.0 | 10.1 | 13.6 |
| 0.8  | 2.0  | 2.5  | 9.4  | 1.8  | 1.7  | 6.3  | 4.9  | 3.8  |
| 5.5  | 2.1  | 7.6  | 4.8  | 3.7  | 10.1 | 15.1 | 7.5  | 4.7  |

|       |       |        |        |       |       |       |       |        |
|-------|-------|--------|--------|-------|-------|-------|-------|--------|
| 2.8   | 3.0   | 1.0    | 5.4    | 3.2   | 6.0   | 7.2   | 3.1   | 5.4    |
| 0.6   | 1.2   | 0.5    | 0.6    | 0.6   | 6.6   | 0.8   | 0.7   | 1.1    |
| 1.0   | 1.4   | 1.3    | 0.7    | 1.1   | 5.4   | 6.1   | 3.5   | 1.2    |
| 1.9   | 4.1   | 6.3    | 3.8    | 8.7   | 4.3   | 3.4   | 11.1  | 6.9    |
| 12.5  | 7.0   | 3.1    | 5.6    | 7.9   | 14.2  | 7.5   | 7.7   | 1.7    |
| 3.1   | 17.7  | 1.7    | 1.9    | 2.5   | 1.8   | 3.4   | 12.6  | 4.2    |
| 7.1   | 17.7  | 5.0    | 1.5    | 16.0  | 16.3  | 18.4  | 11.7  | 17.9   |
| 7.0   | 2.8   | 6.8    | 0.9    | 1.5   | 1.0   | 0.6   | 3.4   | 2.3    |
| 7.3   | 10.6  | 3.5    | 0.8    | 7.4   | 9.9   | 11.6  | 2.7   | 5.7    |
| 195.9 | 325.3 | 60.7   | 96.9   | 375.9 | 285.6 | 304.4 | 328.2 | 346.6  |
| 8.7   | 23.0  | 3.3    | 1.2    | 9.6   | 21.6  | 5.0   | 3.6   | 0.3    |
| 44.6  | 63.9  | 34.8   | 22.0   | 39.8  | 56.1  | 102.6 | 81.9  | 81.6   |
| 2.8   | 1.4   | 10.6   | 8.4    | 15.8  | 11.4  | 12.6  | 9.1   | 10.9   |
| 11.7  | 16.2  | 1.0    | 1.0    | 12.7  | 18.6  | 5.5   | 2.8   | 2.7    |
| 9.1   | 7.8   | 13.9   | 6.4    | 11.0  | 5.1   | 10.9  | 9.2   | 12.0   |
| 0.6   | 5.8   | 9.8    | 8.0    | 0.8   | 10.1  | 4.5   | 7.9   | 3.7    |
| 5.4   | 14.5  | 9.1    | 1.1    | 2.6   | 6.4   | 4.9   | 1.7   | 3.8    |
| 0.5   | 0.5   | 5.6    | 0.8    | 2.1   | 15.4  | 6.5   | 6.9   | 2.9    |
| 3.2   | 11.8  | 0.9    | 2.7    | 4.2   | 1.6   | 5.2   | 5.4   | 2.6    |
| 6.3   | 11.5  | 5.8    | 0.6    | 7.7   | 6.9   | 11.0  | 14.9  | 10.2   |
| 0.9   | 0.9   | 1.7    | 1.6    | 5.2   | 0.9   | 6.4   | 3.0   | 1.6    |
| 1.9   | 3.6   | 7.3    | 17.4   | 4.7   | 5.0   | 8.1   | 14.7  | 1.9    |
| 5.0   | 2.5   | 3.6    | 1.3    | 23.4  | 4.5   | 13.7  | 14.1  | 7.6    |
| 1.7   | 9.8   | 1.7    | 0.5    | 1.1   | 5.5   | 8.0   | 2.8   | 3.9    |
| 1.0   | 1.1   | 5.5    | 0.7    | 4.5   | 0.7   | 5.1   | 0.8   | 0.4    |
| 3.6   | 3.2   | 1.5    | 2.7    | 1.2   | 2.4   | 4.2   | 2.7   | 3.1    |
| 35.7  | 11.0  | 17.6   | 15.6   | 15.9  | 18.7  | 34.4  | 32.3  | 27.3   |
| 29.5  | 52.5  | 9.7    | 8.7    | 34.7  | 63.6  | 71.9  | 22.4  | 24.2   |
| 43.4  | 29.9  | 14.6   | 13.2   | 24.1  | 21.6  | 114.4 | 95.1  | 87.6   |
| 9.5   | 0.9   | 3.6    | 2.0    | 14.6  | 0.9   | 5.5   | 7.8   | 5.5    |
| 2.2   | 1.0   | 2.5    | 1.0    | 1.3   | 2.6   | 2.2   | 4.0   | 4.3    |
| 0.8   | 3.9   | 2.1    | 1.1    | 1.7   | 15.5  | 1.8   | 1.3   | 1.1    |
| 1.7   | 12.0  | 10.6   | 0.5    | 2.6   | 9.9   | 2.0   | 1.3   | 6.3    |
| 1.4   | 6.1   | 5.8    | 1.1    | 4.9   | 5.6   | 12.8  | 9.2   | 8.8    |
| 1.5   | 0.7   | 0.8    | 0.5    | 5.6   | 0.5   | 1.2   | 1.3   | 1.8    |
| 0.6   | 2.0   | 11.3   | 8.2    | 8.6   | 1.6   | 9.4   | 9.0   | 12.3   |
| 0.6   | 1.1   | 0.8    | 0.3    | 1.8   | 0.8   | 0.8   | 1.0   | 0.9    |
| 4.5   | 9.5   | 32.8   | 3.4    | 8.5   | 2.9   | 9.8   | 19.9  | 13.2   |
| 11.1  | 9.0   | 7.3    | 4.9    | 18.9  | 17.0  | 23.1  | 21.5  | 39.2   |
| 0.2   | 2.9   | 0.9    | 2.8    | 0.5   | 0.3   | 1.0   | 1.4   | 0.4    |
| 67.2  | 48.7  | 29.2   | 22.0   | 84.0  | 103.1 | 62.9  | 67.6  | 65.3   |
| 65.5  | 58.3  | 2884.3 | 3774.4 | 85.0  | 58.1  | 677.8 | 966.2 | 1101.2 |
| 5.7   | 2.1   | 10.8   | 8.7    | 13.6  | 14.7  | 8.3   | 8.5   | 2.1    |
| 5.0   | 5.2   | 14.6   | 14.6   | 2.6   | 15.0  | 20.6  | 9.8   | 11.3   |
| 0.5   | 0.6   | 0.5    | 2.0    | 0.5   | 1.4   | 4.3   | 3.0   | 3.4    |
| 24.2  | 29.9  | 4.5    | 5.3    | 40.5  | 32.3  | 7.5   | 2.2   | 8.9    |
| 101.9 | 235.9 | 16.9   | 18.4   | 245.6 | 188.6 | 188.9 | 159.9 | 214.0  |
| 14.1  | 9.7   | 33.9   | 12.5   | 4.7   | 38.9  | 14.4  | 8.1   | 9.6    |
| 117.2 | 145.3 | 198.9  | 195.5  | 169.8 | 112.3 | 343.3 | 313.2 | 315.2  |
| 1.1   | 1.9   | 0.6    | 0.5    | 3.8   | 5.1   | 1.3   | 2.9   | 1.0    |
| 3.6   | 9.6   | 1.9    | 1.3    | 3.6   | 3.4   | 2.1   | 7.4   | 3.1    |
| 3.2   | 1.7   | 4.5    | 2.7    | 9.2   | 2.7   | 1.7   | 2.1   | 3.4    |
| 18.2  | 13.2  | 4.2    | 0.5    | 2.4   | 2.7   | 13.9  | 12.7  | 8.9    |

|       |       |      |       |       |       |       |       |       |
|-------|-------|------|-------|-------|-------|-------|-------|-------|
| 2.3   | 4.2   | 5.2  | 7.3   | 3.8   | 2.6   | 8.8   | 12.2  | 5.1   |
| 6.0   | 3.2   | 25.3 | 17.3  | 3.0   | 7.4   | 43.7  | 45.4  | 33.3  |
| 1.2   | 13.9  | 2.0  | 4.9   | 13.1  | 11.8  | 5.7   | 6.3   | 5.2   |
| 4.6   | 6.4   | 5.1  | 5.4   | 1.2   | 10.9  | 9.0   | 12.7  | 13.7  |
| 3.9   | 2.4   | 2.0  | 1.1   | 3.9   | 4.6   | 6.6   | 3.1   | 5.2   |
| 1.3   | 2.0   | 2.9  | 2.6   | 2.5   | 8.8   | 6.3   | 1.4   | 5.4   |
| 1.6   | 2.0   | 1.4  | 1.2   | 3.7   | 2.6   | 3.6   | 2.1   | 1.5   |
| 30.6  | 18.9  | 40.6 | 57.3  | 23.9  | 20.1  | 161.1 | 118.0 | 122.8 |
| 11.8  | 7.2   | 5.2  | 8.3   | 11.2  | 6.4   | 16.9  | 9.6   | 11.6  |
| 10.6  | 5.9   | 5.7  | 0.7   | 4.7   | 1.7   | 12.5  | 4.5   | 9.5   |
| 46.1  | 87.5  | 12.5 | 11.8  | 74.7  | 60.1  | 65.7  | 79.8  | 84.8  |
| 14.9  | 46.4  | 4.5  | 9.3   | 36.2  | 31.4  | 54.7  | 69.6  | 57.7  |
| 19.6  | 18.7  | 1.5  | 1.7   | 47.4  | 30.9  | 26.9  | 32.4  | 29.1  |
| 1.2   | 0.5   | 0.3  | 0.3   | 1.4   | 0.5   | 2.8   | 0.8   | 0.8   |
| 103.0 | 91.9  | 93.9 | 149.2 | 151.7 | 110.8 | 227.0 | 181.7 | 233.8 |
| 145.9 | 199.3 | 55.9 | 75.3  | 259.0 | 138.6 | 156.7 | 108.5 | 112.2 |
| 1.3   | 0.5   | 1.3  | 5.2   | 0.2   | 6.0   | 1.9   | 7.2   | 9.6   |
| 13.1  | 14.1  | 3.4  | 13.9  | 4.0   | 11.4  | 6.0   | 3.0   | 6.7   |
| 1.7   | 1.5   | 10.2 | 1.6   | 1.2   | 7.1   | 4.3   | 3.7   | 11.0  |
| 16.1  | 16.9  | 5.4  | 8.5   | 3.5   | 15.3  | 30.7  | 40.8  | 45.7  |
| 1.0   | 0.5   | 1.6  | 0.5   | 0.7   | 1.4   | 2.2   | 0.6   | 0.7   |
| 22.1  | 1.9   | 12.4 | 19.0  | 22.3  | 10.8  | 15.7  | 16.6  | 12.5  |
| 48.2  | 98.6  | 14.1 | 13.5  | 81.7  | 104.9 | 150.9 | 90.4  | 77.3  |
| 1.1   | 9.2   | 5.3  | 10.2  | 0.7   | 1.5   | 10.5  | 11.5  | 10.1  |
| 4.0   | 5.1   | 1.5  | 1.5   | 0.8   | 6.3   | 8.2   | 1.8   | 1.3   |
| 19.5  | 17.2  | 23.0 | 42.3  | 28.7  | 19.8  | 22.9  | 24.4  | 24.3  |
| 2.7   | 0.4   | 6.8  | 0.7   | 0.4   | 0.9   | 6.9   | 3.4   | 5.3   |
| 3.5   | 5.6   | 1.6  | 1.7   | 7.4   | 27.4  | 4.1   | 3.4   | 3.0   |
| 0.2   | 2.2   | 0.7  | 0.2   | 0.3   | 2.6   | 2.3   | 0.2   | 0.7   |
| 12.4  | 1.4   | 10.7 | 8.4   | 3.1   | 12.0  | 13.5  | 9.5   | 7.4   |
| 2.9   | 20.1  | 14.9 | 22.4  | 11.7  | 21.8  | 30.9  | 45.8  | 29.2  |
| 2.8   | 4.0   | 13.5 | 7.3   | 5.7   | 0.6   | 2.8   | 9.5   | 10.3  |
| 19.9  | 24.6  | 0.7  | 5.0   | 32.7  | 10.4  | 41.8  | 26.5  | 22.3  |
| 6.3   | 9.8   | 3.0  | 2.4   | 8.4   | 7.2   | 5.3   | 7.5   | 10.2  |
| 22.5  | 12.3  | 38.9 | 28.0  | 23.3  | 11.1  | 38.4  | 31.3  | 27.8  |
| 49.1  | 62.4  | 43.6 | 64.7  | 97.5  | 69.5  | 219.4 | 197.7 | 234.5 |
| 8.1   | 5.6   | 0.6  | 3.9   | 16.7  | 16.4  | 3.1   | 0.6   | 3.6   |
| 39.3  | 49.9  | 89.8 | 90.9  | 45.1  | 40.5  | 121.2 | 105.5 | 112.3 |
| 1.2   | 7.6   | 6.7  | 2.3   | 7.5   | 6.1   | 14.2  | 6.7   | 6.7   |
| 5.3   | 16.7  | 12.5 | 0.6   | 0.4   | 1.3   | 4.3   | 10.7  | 20.7  |
| 1.4   | 1.8   | 11.1 | 2.7   | 3.2   | 3.4   | 20.2  | 3.6   | 9.9   |
| 3.2   | 1.2   | 2.0  | 2.5   | 2.0   | 2.0   | 32.2  | 37.3  | 47.6  |
| 1.7   | 1.1   | 1.8  | 2.6   | 2.3   | 1.6   | 1.5   | 2.7   | 1.5   |
| 6.7   | 3.3   | 0.9  | 4.4   | 11.7  | 2.7   | 7.6   | 9.7   | 10.1  |
| 1.3   | 6.4   | 4.3  | 1.2   | 1.3   | 2.5   | 2.1   | 1.8   | 3.2   |
| 0.4   | 6.1   | 0.5  | 3.3   | 9.5   | 3.3   | 9.2   | 11.7  | 9.3   |
| 8.0   | 10.7  | 11.9 | 8.7   | 29.9  | 30.3  | 52.2  | 390.8 | 338.6 |
| 14.2  | 2.9   | 12.3 | 3.3   | 6.5   | 9.5   | 9.4   | 6.6   | 9.7   |
| 1.1   | 0.7   | 1.2  | 0.3   | 0.7   | 0.5   | 2.3   | 0.7   | 4.0   |
| 13.3  | 17.8  | 5.8  | 2.4   | 2.5   | 6.9   | 27.0  | 34.2  | 26.1  |
| 8.8   | 3.8   | 16.5 | 4.3   | 1.1   | 1.8   | 7.2   | 5.1   | 10.0  |
| 97.7  | 118.8 | 19.3 | 25.1  | 181.0 | 125.3 | 312.8 | 414.9 | 419.0 |
| 0.7   | 0.8   | 0.7  | 0.4   | 0.5   | 0.8   | 1.7   | 0.7   | 0.8   |

|       |       |       |       |       |       |       |       |        |
|-------|-------|-------|-------|-------|-------|-------|-------|--------|
| 5.8   | 10.9  | 3.3   | 9.2   | 6.5   | 2.0   | 1.5   | 1.3   | 3.4    |
| 33.5  | 49.0  | 40.2  | 48.8  | 80.5  | 33.0  | 263.7 | 214.0 | 254.3  |
| 88.1  | 126.4 | 161.9 | 245.8 | 134.2 | 108.7 | 792.6 | 931.2 | 1056.5 |
| 1.5   | 5.7   | 2.0   | 3.9   | 1.5   | 10.6  | 1.7   | 2.9   | 5.8    |
| 443.6 | 466.2 | 61.9  | 82.9  | 717.5 | 525.9 | 747.9 | 636.4 | 701.7  |
| 1.5   | 1.6   | 2.9   | 0.5   | 8.8   | 1.6   | 1.5   | 4.1   | 7.6    |
| 1.4   | 3.5   | 2.7   | 4.8   | 2.5   | 2.6   | 11.8  | 1.8   | 3.3    |
| 50.2  | 73.5  | 34.3  | 42.9  | 117.2 | 63.4  | 159.0 | 120.5 | 118.7  |
| 15.2  | 15.2  | 13.4  | 1.1   | 15.5  | 13.7  | 5.6   | 11.1  | 5.0    |
| 11.4  | 2.3   | 6.3   | 5.1   | 6.7   | 5.9   | 4.6   | 15.8  | 2.0    |
| 1.0   | 1.9   | 0.8   | 1.5   | 2.1   | 1.0   | 5.5   | 2.2   | 1.6    |
| 17.5  | 9.9   | 1.2   | 3.9   | 4.1   | 3.1   | 2.2   | 2.3   | 2.7    |
| 105.7 | 115.5 | 3.2   | 36.5  | 164.3 | 117.0 | 168.3 | 33.0  | 46.6   |
| 0.7   | 8.8   | 13.4  | 1.9   | 1.7   | 2.5   | 9.1   | 6.5   | 4.9    |
| 36.1  | 93.6  | 26.8  | 23.5  | 87.9  | 53.5  | 118.4 | 48.9  | 59.5   |
| 1.4   | 0.7   | 1.5   | 1.4   | 3.0   | 1.6   | 1.3   | 2.6   | 2.0    |
| 0.3   | 1.1   | 0.3   | 0.5   | 8.4   | 0.8   | 2.5   | 0.8   | 3.3    |
| 31.8  | 26.2  | 3.7   | 1.3   | 12.6  | 23.9  | 5.6   | 4.6   | 5.5    |
| 6.9   | 10.6  | 15.0  | 18.4  | 6.9   | 10.2  | 19.8  | 19.5  | 13.8   |
| 1.9   | 4.8   | 65.7  | 127.4 | 1.1   | 6.0   | 11.5  | 14.0  | 5.8    |
| 1.0   | 0.8   | 6.7   | 0.7   | 11.4  | 0.6   | 10.0  | 2.6   | 6.1    |
| 4.8   | 6.4   | 5.5   | 9.0   | 5.9   | 1.3   | 6.0   | 11.8  | 15.2   |
| 2.4   | 16.0  | 1.7   | 5.0   | 1.7   | 10.0  | 15.9  | 8.0   | 7.1    |
| 9.8   | 2.6   | 9.1   | 2.7   | 9.5   | 2.5   | 10.6  | 16.2  | 8.8    |
| 6.4   | 3.2   | 10.8  | 14.9  | 13.9  | 4.0   | 19.5  | 5.4   | 10.5   |
| 2.5   | 1.1   | 8.1   | 5.7   | 0.7   | 0.5   | 22.8  | 20.3  | 19.1   |
| 10.0  | 8.1   | 9.2   | 8.0   | 4.8   | 3.2   | 2.3   | 2.2   | 4.4    |
| 2.2   | 1.6   | 3.7   | 1.7   | 2.9   | 1.4   | 1.7   | 1.5   | 1.8    |
| 8.8   | 10.2  | 15.6  | 6.9   | 8.8   | 10.7  | 52.5  | 43.1  | 46.0   |
| 5.4   | 9.3   | 5.8   | 9.5   | 6.9   | 8.8   | 40.5  | 31.4  | 32.5   |
| 11.0  | 1.1   | 14.3  | 6.1   | 6.8   | 9.0   | 8.3   | 7.0   | 7.9    |
| 3.0   | 14.5  | 5.6   | 11.5  | 2.8   | 6.1   | 11.1  | 6.2   | 4.6    |
| 3.0   | 12.0  | 6.0   | 0.3   | 14.6  | 6.5   | 58.1  | 82.7  | 85.0   |
| 10.1  | 5.5   | 14.7  | 1.0   | 14.5  | 17.0  | 5.2   | 6.2   | 11.1   |
| 1.4   | 1.6   | 6.4   | 3.8   | 1.0   | 2.7   | 5.2   | 1.1   | 0.9    |
| 19.4  | 8.7   | 8.6   | 5.4   | 3.2   | 8.3   | 14.9  | 3.7   | 11.0   |
| 15.1  | 1.4   | 1.6   | 0.9   | 4.6   | 1.1   | 8.5   | 9.3   | 11.3   |
| 15.4  | 30.3  | 14.2  | 8.8   | 26.6  | 8.3   | 27.9  | 23.7  | 26.8   |
| 1.9   | 1.4   | 1.1   | 9.1   | 1.2   | 2.9   | 3.7   | 6.4   | 4.4    |
| 16.4  | 51.1  | 25.2  | 16.9  | 16.4  | 12.2  | 30.0  | 12.2  | 0.8    |
| 67.5  | 89.7  | 15.4  | 14.3  | 78.5  | 89.0  | 155.5 | 114.8 | 126.0  |
| 219.5 | 272.3 | 14.1  | 12.7  | 403.4 | 300.5 | 529.6 | 423.8 | 469.3  |
| 1.0   | 5.5   | 1.1   | 8.6   | 3.2   | 1.0   | 12.7  | 6.8   | 7.5    |
| 26.3  | 44.1  | 10.6  | 6.5   | 43.1  | 37.1  | 97.3  | 75.3  | 67.2   |
| 56.5  | 42.0  | 23.6  | 22.4  | 53.8  | 36.3  | 70.6  | 37.5  | 46.2   |
| 1.1   | 8.8   | 10.0  | 12.7  | 13.2  | 2.7   | 2.1   | 13.8  | 5.4    |
| 0.8   | 3.3   | 5.9   | 1.8   | 9.5   | 1.8   | 4.5   | 3.6   | 5.4    |
| 1.7   | 0.6   | 3.5   | 1.2   | 3.0   | 2.8   | 4.5   | 1.0   | 1.0    |
| 4.8   | 2.5   | 2.5   | 4.8   | 2.0   | 2.4   | 4.3   | 3.3   | 4.9    |
| 1.1   | 9.9   | 16.3  | 7.8   | 8.1   | 8.6   | 23.9  | 17.4  | 9.6    |
| 0.6   | 5.6   | 0.8   | 5.8   | 0.8   | 4.9   | 0.5   | 1.2   | 1.0    |
| 187.1 | 232.8 | 113.0 | 154.5 | 266.5 | 199.4 | 473.9 | 260.5 | 323.3  |
| 0.9   | 1.9   | 0.9   | 0.6   | 3.6   | 1.9   | 99.3  | 48.2  | 56.3   |



|        |        |       |       |        |        |        |        |        |
|--------|--------|-------|-------|--------|--------|--------|--------|--------|
| 245.7  | 328.5  | 57.4  | 72.4  | 309.2  | 338.2  | 716.2  | 547.5  | 635.6  |
| 2.8    | 12.5   | 7.5   | 9.2   | 12.3   | 17.1   | 13.7   | 30.6   | 16.0   |
| 1.2    | 3.4    | 1.4   | 3.7   | 5.6    | 1.7    | 1.9    | 2.8    | 2.2    |
| 0.6    | 6.0    | 0.6   | 0.4   | 10.4   | 2.5    | 6.2    | 1.4    | 8.5    |
| 111.8  | 210.1  | 40.9  | 60.0  | 247.0  | 177.1  | 260.6  | 205.7  | 258.1  |
| 0.6    | 7.2    | 68.3  | 57.1  | 7.3    | 21.4   | 30.4   | 86.7   | 100.7  |
| 44.3   | 48.2   | 42.8  | 55.0  | 65.5   | 41.9   | 95.4   | 108.7  | 109.6  |
| 18.9   | 29.9   | 6.7   | 15.6  | 15.0   | 18.2   | 23.8   | 15.1   | 17.1   |
| 29.2   | 18.8   | 10.9  | 2.0   | 29.6   | 27.3   | 31.5   | 8.8    | 11.7   |
| 26.7   | 5.8    | 14.9  | 10.8  | 12.0   | 8.5    | 14.3   | 13.2   | 10.5   |
| 9.1    | 18.4   | 3.3   | 6.8   | 10.7   | 8.3    | 16.2   | 14.2   | 16.6   |
| 2.8    | 3.2    | 3.6   | 2.6   | 6.0    | 21.8   | 9.0    | 19.8   | 12.0   |
| 1.5    | 0.5    | 1.2   | 6.4   | 1.3    | 0.7    | 2.5    | 1.4    | 6.6    |
| 1.5    | 2.2    | 4.3   | 0.9   | 1.9    | 2.3    | 2.1    | 1.6    | 3.2    |
| 7.9    | 1.7    | 2.6   | 1.8   | 3.4    | 3.1    | 3.8    | 2.4    | 5.3    |
| 78.5   | 85.1   | 104.0 | 138.6 | 98.9   | 55.9   | 166.5  | 106.0  | 104.8  |
| 4.6    | 1.1    | 4.0   | 7.3   | 2.3    | 1.1    | 4.0    | 3.7    | 2.7    |
| 209.0  | 245.8  | 65.4  | 82.0  | 187.9  | 66.8   | 166.3  | 72.1   | 79.6   |
| 9.8    | 1.8    | 1.6   | 0.6   | 3.2    | 1.9    | 3.6    | 4.4    | 0.7    |
| 698.2  | 1004.1 | 296.3 | 391.9 | 1019.5 | 1244.7 | 883.5  | 907.6  | 1003.2 |
| 0.9    | 0.6    | 0.4   | 0.3   | 0.7    | 0.2    | 0.3    | 2.9    | 0.4    |
| 1.2    | 1.5    | 13.3  | 2.5   | 1.4    | 1.3    | 11.4   | 6.7    | 6.9    |
| 74.5   | 93.4   | 95.7  | 110.3 | 134.2  | 75.5   | 281.2  | 172.3  | 234.0  |
| 1835.8 | 1875.1 | 190.5 | 228.6 | 1998.0 | 1939.0 | 1784.8 | 813.3  | 838.9  |
| 4.8    | 1.2    | 1.6   | 1.1   | 1.2    | 7.7    | 1.1    | 1.5    | 3.9    |
| 14.7   | 7.6    | 2.7   | 11.3  | 14.3   | 10.5   | 15.7   | 10.6   | 7.5    |
| 2.3    | 9.0    | 4.2   | 9.5   | 3.0    | 18.4   | 7.9    | 11.4   | 6.2    |
| 4.5    | 4.3    | 28.7  | 23.0  | 5.9    | 6.7    | 166.9  | 145.3  | 153.2  |
| 7.0    | 4.5    | 8.5   | 1.1   | 4.4    | 6.1    | 2.5    | 1.1    | 0.6    |
| 11.9   | 15.3   | 7.7   | 6.1   | 19.1   | 17.5   | 17.0   | 27.7   | 31.7   |
| 2.9    | 2.6    | 2.0   | 5.4   | 3.1    | 1.8    | 5.3    | 6.6    | 4.1    |
| 45.1   | 75.4   | 61.9  | 117.3 | 90.1   | 43.7   | 285.1  | 281.2  | 309.9  |
| 4.3    | 2.9    | 16.3  | 5.8   | 2.7    | 3.3    | 11.1   | 7.1    | 9.4    |
| 0.2    | 0.3    | 1.6   | 0.3   | 0.1    | 0.6    | 0.6    | 1.8    | 0.5    |
| 1626.9 | 2447.5 | 268.8 | 339.6 | 2366.0 | 2215.3 | 2857.9 | 1955.6 | 2168.9 |
| 11.6   | 4.9    | 10.3  | 6.2   | 3.8    | 11.0   | 9.6    | 10.6   | 6.5    |
| 0.5    | 10.2   | 1.0   | 6.1   | 7.8    | 5.1    | 1.0    | 1.9    | 1.0    |
| 10.7   | 11.5   | 1.9   | 2.3   | 1.3    | 1.2    | 6.5    | 3.9    | 12.5   |
| 4.3    | 9.5    | 0.6   | 1.3   | 8.5    | 11.7   | 169.3  | 175.0  | 169.8  |
| 53.1   | 44.4   | 30.9  | 37.2  | 40.2   | 47.4   | 56.5   | 61.9   | 40.9   |
| 1.8    | 6.9    | 1.2   | 2.6   | 10.4   | 7.8    | 5.4    | 5.6    | 3.4    |
| 8.2    | 1.2    | 5.5   | 1.4   | 2.8    | 7.6    | 2.9    | 1.0    | 0.9    |
| 373.9  | 517.2  | 75.7  | 95.9  | 528.4  | 474.2  | 606.3  | 282.3  | 327.4  |
| 0.7    | 5.7    | 2.7   | 4.1   | 2.4    | 5.1    | 15.1   | 10.3   | 13.1   |
| 4.8    | 4.2    | 13.8  | 11.1  | 3.8    | 25.1   | 10.1   | 1.7    | 13.0   |
| 0.8    | 0.6    | 5.3   | 0.9   | 0.6    | 0.4    | 0.9    | 2.1    | 0.9    |
| 16.0   | 1.2    | 5.4   | 3.3   | 17.4   | 7.4    | 22.5   | 5.2    | 9.6    |
| 10.1   | 2.4    | 23.1  | 10.3  | 4.7    | 1.8    | 30.2   | 34.1   | 32.9   |
| 1.5    | 1.6    | 1.8   | 5.0   | 2.0    | 7.8    | 8.1    | 3.1    | 2.5    |
| 12.1   | 11.9   | 11.1  | 4.4   | 0.6    | 2.2    | 14.5   | 12.8   | 3.4    |
| 11.1   | 3.6    | 9.1   | 5.2   | 21.7   | 15.8   | 9.1    | 18.9   | 13.9   |
| 5.9    | 10.9   | 1.4   | 4.1   | 2.0    | 3.9    | 7.0    | 9.7    | 1.9    |
| 0.9    | 1.9    | 12.3  | 17.7  | 3.3    | 9.3    | 15.5   | 8.3    | 13.0   |

|       |       |       |       |       |       |       |       |       |
|-------|-------|-------|-------|-------|-------|-------|-------|-------|
| 37.4  | 50.2  | 177.1 | 259.9 | 58.4  | 30.1  | 154.8 | 131.5 | 135.2 |
| 15.8  | 7.5   | 2.7   | 11.0  | 8.0   | 1.3   | 13.8  | 13.4  | 8.0   |
| 12.0  | 7.9   | 1.1   | 4.4   | 9.1   | 13.9  | 18.1  | 22.8  | 15.7  |
| 18.5  | 34.2  | 18.4  | 16.6  | 34.4  | 31.8  | 127.8 | 146.4 | 161.1 |
| 1.3   | 3.4   | 3.4   | 6.2   | 1.9   | 1.9   | 2.6   | 1.7   | 3.0   |
| 2.2   | 2.2   | 2.6   | 2.8   | 3.2   | 0.5   | 5.5   | 3.8   | 2.8   |
| 5.0   | 0.8   | 7.0   | 14.7  | 1.4   | 2.5   | 14.1  | 3.5   | 9.3   |
| 22.1  | 5.3   | 49.8  | 28.9  | 19.8  | 21.4  | 365.4 | 408.7 | 418.0 |
| 4.0   | 0.4   | 4.0   | 0.8   | 0.8   | 0.5   | 12.5  | 8.4   | 5.0   |
| 32.0  | 17.5  | 18.6  | 7.3   | 24.8  | 5.6   | 21.3  | 6.6   | 25.3  |
| 10.2  | 1.9   | 0.6   | 4.8   | 7.3   | 1.7   | 5.5   | 17.5  | 14.6  |
| 8.3   | 1.5   | 0.7   | 1.4   | 3.8   | 6.3   | 1.5   | 4.3   | 5.7   |
| 34.1  | 54.2  | 13.2  | 5.8   | 45.9  | 55.2  | 160.1 | 123.3 | 53.5  |
| 12.6  | 13.6  | 17.4  | 13.0  | 5.5   | 17.5  | 20.0  | 19.7  | 8.9   |
| 0.3   | 1.1   | 0.4   | 4.6   | 0.3   | 1.1   | 13.2  | 3.5   | 6.1   |
| 0.9   | 1.1   | 0.5   | 0.4   | 1.3   | 0.7   | 2.2   | 1.5   | 1.0   |
| 11.8  | 8.6   | 3.5   | 6.0   | 3.8   | 7.6   | 33.6  | 31.8  | 28.3  |
| 3.9   | 5.4   | 15.7  | 3.1   | 18.9  | 16.7  | 18.9  | 16.7  | 10.0  |
| 77.7  | 115.8 | 97.2  | 164.5 | 137.2 | 96.9  | 44.6  | 38.5  | 37.5  |
| 9.9   | 6.5   | 6.8   | 0.9   | 5.4   | 1.4   | 3.1   | 7.4   | 6.1   |
| 139.4 | 196.0 | 14.7  | 29.2  | 193.1 | 310.1 | 335.4 | 194.5 | 211.8 |
| 18.0  | 15.9  | 20.4  | 27.2  | 73.5  | 19.3  | 401.1 | 344.1 | 385.1 |
| 1.5   | 1.2   | 2.1   | 1.1   | 1.7   | 2.0   | 2.3   | 3.3   | 1.8   |
| 5.7   | 2.3   | 14.9  | 4.1   | 23.2  | 5.3   | 13.8  | 20.6  | 14.2  |
| 1.6   | 0.9   | 0.6   | 3.3   | 1.3   | 3.8   | 2.2   | 1.9   | 1.1   |
| 5.7   | 6.3   | 2.1   | 7.4   | 6.6   | 0.7   | 1.8   | 3.5   | 2.2   |
| 8.1   | 13.5  | 25.3  | 15.5  | 11.4  | 4.5   | 15.8  | 23.6  | 17.1  |
| 2.8   | 3.9   | 1.8   | 2.7   | 9.4   | 5.4   | 6.2   | 3.7   | 10.8  |
| 20.3  | 3.1   | 17.6  | 13.0  | 16.9  | 30.3  | 9.6   | 10.5  | 12.6  |
| 1.0   | 5.5   | 7.9   | 7.4   | 0.6   | 6.5   | 2.9   | 1.1   | 3.4   |
| 0.5   | 0.5   | 1.3   | 1.3   | 3.4   | 0.8   | 0.9   | 0.8   | 0.7   |
| 1.9   | 6.5   | 1.1   | 0.8   | 9.2   | 2.9   | 25.5  | 8.9   | 12.7  |
| 30.6  | 27.3  | 29.9  | 54.5  | 22.4  | 32.9  | 68.8  | 73.0  | 98.8  |
| 67.2  | 97.2  | 66.6  | 97.3  | 89.6  | 53.4  | 93.3  | 64.0  | 70.0  |
| 14.7  | 24.2  | 29.7  | 12.4  | 25.0  | 22.1  | 31.6  | 35.2  | 27.7  |
| 12.7  | 20.0  | 13.6  | 13.4  | 24.9  | 23.7  | 21.5  | 22.2  | 15.1  |
| 151.0 | 275.7 | 76.6  | 66.0  | 265.9 | 216.0 | 493.0 | 476.7 | 504.0 |
| 3.9   | 2.2   | 23.1  | 8.4   | 5.0   | 4.1   | 13.7  | 2.0   | 7.1   |
| 29.2  | 38.9  | 30.4  | 28.9  | 44.1  | 59.5  | 71.1  | 62.4  | 62.7  |
| 6.5   | 1.6   | 6.9   | 1.7   | 3.3   | 1.9   | 4.8   | 14.9  | 7.3   |
| 50.3  | 89.8  | 34.7  | 29.1  | 116.2 | 98.0  | 15.8  | 20.5  | 23.1  |
| 22.0  | 15.6  | 10.4  | 18.9  | 16.2  | 33.6  | 29.7  | 20.8  | 21.0  |
| 17.9  | 9.2   | 8.0   | 9.3   | 13.6  | 14.1  | 16.2  | 15.5  | 16.9  |
| 21.3  | 22.1  | 6.9   | 2.3   | 35.5  | 23.6  | 49.0  | 40.7  | 43.1  |
| 7.2   | 10.6  | 23.3  | 11.4  | 20.4  | 1.3   | 10.7  | 20.3  | 23.9  |
| 39.5  | 30.0  | 37.2  | 28.2  | 52.4  | 34.8  | 89.9  | 124.1 | 85.8  |
| 6.1   | 20.2  | 11.7  | 8.7   | 20.3  | 13.8  | 22.2  | 19.2  | 12.0  |
| 12.1  | 21.2  | 28.1  | 13.6  | 24.5  | 24.6  | 25.4  | 22.8  | 13.5  |
| 2.7   | 2.9   | 12.5  | 1.9   | 1.7   | 2.2   | 4.0   | 4.5   | 7.8   |
| 2.3   | 1.1   | 6.4   | 2.3   | 3.3   | 0.6   | 9.8   | 3.8   | 5.0   |
| 11.6  | 7.5   | 9.0   | 15.4  | 3.2   | 7.8   | 14.1  | 11.3  | 5.8   |
| 19.7  | 11.2  | 2.3   | 13.7  | 14.3  | 10.6  | 2.0   | 1.1   | 1.8   |
| 1.1   | 1.0   | 1.1   | 0.4   | 0.4   | 0.4   | 0.7   | 0.7   | 2.3   |

|        |        |       |       |        |        |        |        |        |
|--------|--------|-------|-------|--------|--------|--------|--------|--------|
| 14.5   | 5.0    | 8.2   | 8.4   | 6.8    | 2.1    | 3.2    | 6.9    | 6.6    |
| 18.9   | 19.8   | 2.6   | 11.0  | 24.7   | 8.6    | 13.1   | 10.2   | 4.2    |
| 1.3    | 2.0    | 2.7   | 1.7   | 1.6    | 1.1    | 1.9    | 2.7    | 5.2    |
| 10.2   | 7.0    | 9.7   | 5.4   | 11.6   | 0.7    | 7.0    | 8.8    | 3.9    |
| 0.8    | 15.5   | 4.3   | 4.4   | 2.1    | 1.9    | 12.5   | 8.1    | 6.5    |
| 1.5    | 4.7    | 27.4  | 33.4  | 2.8    | 4.2    | 6.4    | 3.5    | 5.5    |
| 4.3    | 3.8    | 3.9   | 0.3   | 0.6    | 14.1   | 6.6    | 1.1    | 3.0    |
| 7.3    | 0.3    | 1.4   | 3.7   | 2.7    | 3.7    | 5.9    | 6.1    | 7.7    |
| 4.1    | 2.9    | 2.6   | 2.0   | 19.1   | 16.5   | 8.8    | 1.5    | 2.6    |
| 7.1    | 3.5    | 1.2   | 1.9   | 11.0   | 2.0    | 6.0    | 2.5    | 5.1    |
| 16.5   | 7.6    | 5.6   | 3.4   | 12.0   | 7.9    | 5.8    | 8.8    | 4.4    |
| 2.0    | 1.4    | 7.6   | 1.9   | 10.1   | 2.7    | 10.7   | 19.1   | 11.9   |
| 15.3   | 14.5   | 2.6   | 1.7   | 4.7    | 20.2   | 5.7    | 5.0    | 6.3    |
| 5.1    | 4.4    | 3.2   | 2.5   | 3.9    | 15.4   | 13.5   | 11.6   | 8.9    |
| 7.4    | 3.8    | 1.7   | 1.2   | 1.5    | 11.3   | 3.7    | 4.6    | 10.3   |
| 6.6    | 0.7    | 2.5   | 0.3   | 1.4    | 1.2    | 4.3    | 2.2    | 1.5    |
| 9.1    | 16.6   | 10.2  | 8.6   | 32.4   | 15.8   | 6.4    | 6.5    | 5.1    |
| 0.4    | 0.4    | 0.3   | 0.3   | 1.0    | 2.2    | 0.8    | 0.5    | 1.9    |
| 2.5    | 2.1    | 10.6  | 2.2   | 12.8   | 5.1    | 1.7    | 4.3    | 3.1    |
| 67.8   | 58.6   | 67.4  | 103.3 | 95.1   | 52.4   | 15.5   | 31.7   | 27.7   |
| 12.3   | 6.8    | 7.3   | 6.8   | 8.3    | 7.3    | 8.1    | 8.7    | 8.0    |
| 7.2    | 1.6    | 11.2  | 1.9   | 1.0    | 0.9    | 2.3    | 1.7    | 1.3    |
| 0.6    | 0.9    | 0.4   | 0.6   | 1.7    | 0.9    | 1.2    | 1.0    | 0.7    |
| 0.9    | 0.3    | 1.0   | 0.9   | 1.0    | 0.6    | 0.5    | 3.6    | 4.5    |
| 4.4    | 0.8    | 2.9   | 2.0   | 3.0    | 3.1    | 3.4    | 5.3    | 2.5    |
| 0.4    | 1.2    | 0.5   | 1.0   | 0.9    | 0.4    | 4.6    | 2.7    | 4.6    |
| 15.0   | 1.8    | 1.4   | 3.5   | 0.8    | 13.6   | 12.5   | 2.8    | 9.0    |
| 2.3    | 1.8    | 2.9   | 1.2   | 11.5   | 7.0    | 1.6    | 1.0    | 4.3    |
| 1.0    | 3.1    | 1.5   | 5.4   | 10.4   | 0.9    | 6.5    | 10.3   | 3.1    |
| 4.4    | 0.6    | 5.2   | 0.4   | 0.2    | 2.5    | 2.2    | 0.7    | 0.5    |
| 1051.2 | 1310.0 | 267.2 | 264.5 | 1010.8 | 1402.4 | 3804.3 | 3069.9 | 3751.9 |
| 1.2    | 4.6    | 0.1   | 0.3   | 1.1    | 9.7    | 2.0    | 6.2    | 2.3    |
| 221.2  | 319.8  | 187.3 | 222.5 | 514.3  | 366.4  | 153.2  | 155.9  | 152.0  |
| 3.6    | 3.7    | 0.9   | 1.7   | 3.9    | 6.5    | 9.7    | 2.4    | 15.2   |
| 6.2    | 8.6    | 0.8   | 0.7   | 5.7    | 14.8   | 4.9    | 2.0    | 5.5    |
| 15.8   | 12.2   | 24.8  | 60.7  | 27.8   | 24.0   | 96.5   | 50.1   | 55.3   |
| 9.2    | 1.6    | 0.3   | 0.8   | 5.6    | 0.8    | 0.4    | 0.5    | 0.3    |
| 196.6  | 177.0  | 55.9  | 72.8  | 220.0  | 120.9  | 407.4  | 170.9  | 205.5  |
| 88.3   | 122.8  | 62.3  | 74.6  | 112.7  | 94.9   | 135.7  | 149.6  | 173.9  |
| 13.3   | 5.5    | 1.0   | 1.1   | 0.7    | 3.1    | 3.5    | 1.8    | 1.4    |
| 9.3    | 17.3   | 2.1   | 6.2   | 16.5   | 9.0    | 29.5   | 23.6   | 22.4   |
| 0.9    | 0.8    | 1.1   | 0.9   | 1.2    | 1.2    | 0.7    | 1.0    | 0.7    |
| 11.2   | 18.8   | 8.4   | 6.9   | 24.5   | 10.0   | 10.7   | 9.0    | 10.3   |
| 3.6    | 0.8    | 0.6   | 0.5   | 0.4    | 1.0    | 3.3    | 0.6    | 2.0    |
| 599.9  | 732.2  | 70.7  | 114.5 | 909.7  | 892.3  | 1239.4 | 512.0  | 655.4  |
| 34.0   | 25.0   | 15.8  | 7.5   | 20.7   | 32.2   | 48.3   | 48.2   | 51.6   |
| 1.1    | 0.9    | 1.9   | 0.6   | 3.0    | 1.8    | 1.0    | 1.1    | 0.8    |
| 126.7  | 163.3  | 5.8   | 1.7   | 237.9  | 150.5  | 1.4    | 1.9    | 7.6    |
| 49.1   | 65.0   | 0.2   | 1.8   | 96.7   | 54.8   | 4.1    | 5.2    | 4.3    |
| 9.8    | 10.1   | 4.7   | 5.7   | 9.2    | 9.9    | 19.3   | 33.2   | 34.5   |
| 1.9    | 0.7    | 2.4   | 0.6   | 2.7    | 2.4    | 1.5    | 1.7    | 3.9    |
| 1.6    | 3.2    | 8.8   | 6.7   | 1.9    | 2.4    | 10.5   | 13.7   | 20.9   |
| 9.3    | 13.6   | 12.8  | 6.8   | 4.3    | 11.8   | 21.9   | 18.5   | 20.4   |

|        |        |       |       |        |        |        |        |        |
|--------|--------|-------|-------|--------|--------|--------|--------|--------|
| 2.4    | 2.0    | 1.0   | 3.0   | 11.3   | 1.1    | 1.4    | 2.6    | 1.8    |
| 33.1   | 26.2   | 50.6  | 26.4  | 29.2   | 28.4   | 76.7   | 78.9   | 88.8   |
| 149.3  | 162.2  | 65.4  | 118.9 | 233.5  | 181.6  | 419.2  | 339.7  | 385.4  |
| 1.4    | 2.5    | 4.2   | 4.8   | 13.7   | 11.1   | 265.8  | 185.0  | 225.6  |
| 13.9   | 11.1   | 9.5   | 15.3  | 12.0   | 11.9   | 24.0   | 17.9   | 21.1   |
| 1.6    | 14.5   | 2.4   | 1.7   | 2.1    | 0.9    | 10.0   | 10.7   | 7.8    |
| 247.2  | 274.2  | 125.6 | 168.2 | 304.6  | 230.8  | 467.9  | 916.6  | 1012.4 |
| 6.7    | 7.2    | 6.6   | 0.3   | 1.6    | 1.7    | 7.0    | 2.6    | 7.5    |
| 34.5   | 28.4   | 10.5  | 23.5  | 31.0   | 25.4   | 68.8   | 42.6   | 35.5   |
| 27.0   | 51.9   | 10.7  | 7.2   | 66.1   | 48.8   | 76.7   | 51.0   | 42.3   |
| 0.4    | 0.2    | 1.0   | 0.6   | 3.8    | 2.5    | 2.7    | 0.8    | 2.2    |
| 12.5   | 24.1   | 9.8   | 4.9   | 38.4   | 17.4   | 26.4   | 26.9   | 26.9   |
| 10.6   | 12.2   | 14.7  | 13.6  | 3.9    | 5.9    | 18.2   | 14.8   | 15.3   |
| 31.6   | 3.3    | 12.3  | 10.7  | 22.5   | 14.8   | 38.0   | 24.6   | 23.2   |
| 13.7   | 16.7   | 14.4  | 1.7   | 14.4   | 9.1    | 21.3   | 6.4    | 17.6   |
| 0.9    | 11.9   | 0.7   | 4.3   | 7.6    | 1.6    | 2.5    | 6.1    | 9.2    |
| 3.4    | 4.8    | 3.3   | 4.6   | 0.1    | 0.5    | 1.5    | 2.2    | 1.9    |
| 4.2    | 5.4    | 13.2  | 7.4   | 3.5    | 12.6   | 178.0  | 106.1  | 127.0  |
| 1.8    | 3.8    | 5.9   | 11.0  | 1.8    | 6.9    | 10.7   | 2.6    | 3.3    |
| 28.5   | 48.2   | 19.9  | 7.2   | 43.0   | 40.7   | 67.0   | 67.6   | 47.3   |
| 16.6   | 8.3    | 2.4   | 7.8   | 8.2    | 7.5    | 14.5   | 12.1   | 6.3    |
| 4.2    | 4.0    | 17.0  | 1.9   | 5.0    | 12.0   | 15.4   | 7.3    | 9.5    |
| 2.8    | 0.8    | 1.2   | 2.6   | 0.8    | 0.9    | 2.4    | 2.6    | 4.8    |
| 17.0   | 30.7   | 12.6  | 13.2  | 19.7   | 26.0   | 83.3   | 70.5   | 55.6   |
| 848.2  | 1016.5 | 469.3 | 872.1 | 984.3  | 811.0  | 5641.2 | 4710.4 | 4923.4 |
| 10.4   | 12.6   | 1.2   | 4.5   | 9.4    | 19.0   | 2.9    | 10.2   | 3.4    |
| 31.3   | 29.4   | 45.2  | 32.0  | 44.9   | 18.2   | 85.3   | 66.5   | 91.1   |
| 6.4    | 4.7    | 1.7   | 5.5   | 1.0    | 12.2   | 11.5   | 3.0    | 2.2    |
| 373.8  | 560.6  | 93.3  | 116.7 | 608.5  | 420.6  | 594.9  | 513.8  | 480.3  |
| 6.0    | 13.0   | 5.0   | 10.6  | 3.5    | 18.7   | 3.8    | 3.6    | 9.7    |
| 0.8    | 3.1    | 1.1   | 0.9   | 1.4    | 1.2    | 0.7    | 4.9    | 0.8    |
| 0.3    | 3.1    | 5.1   | 0.5   | 1.5    | 0.5    | 0.5    | 1.5    | 0.9    |
| 7.7    | 6.7    | 23.6  | 7.1   | 14.7   | 34.9   | 20.9   | 10.7   | 23.3   |
| 109.2  | 70.8   | 76.0  | 61.3  | 94.6   | 64.3   | 164.9  | 177.1  | 174.1  |
| 155.6  | 165.4  | 36.5  | 28.4  | 168.5  | 220.6  | 77.2   | 64.5   | 58.5   |
| 0.4    | 0.9    | 0.3   | 0.3   | 1.8    | 0.4    | 1.2    | 0.5    | 0.7    |
| 2.4    | 4.1    | 2.6   | 2.6   | 16.9   | 8.3    | 18.0   | 20.0   | 26.2   |
| 19.2   | 22.7   | 2.5   | 13.0  | 15.5   | 11.8   | 11.2   | 13.5   | 10.2   |
| 2.3    | 2.3    | 3.4   | 1.6   | 1.8    | 2.3    | 1.6    | 7.3    | 7.8    |
| 12.2   | 0.8    | 3.7   | 0.7   | 9.7    | 4.5    | 10.8   | 1.6    | 12.1   |
| 22.5   | 3.0    | 20.2  | 15.9  | 24.6   | 23.5   | 40.2   | 36.5   | 31.4   |
| 5.5    | 6.0    | 5.5   | 11.4  | 1.4    | 8.2    | 15.7   | 10.4   | 8.1    |
| 2.0    | 1.7    | 1.7   | 1.0   | 1.1    | 2.3    | 5.0    | 1.7    | 2.9    |
| 1.6    | 3.0    | 1.7   | 1.5   | 3.8    | 2.8    | 6.8    | 3.3    | 5.6    |
| 6.6    | 21.2   | 1.2   | 2.5   | 1.4    | 2.2    | 3.2    | 2.7    | 2.5    |
| 8.8    | 4.5    | 12.8  | 12.8  | 10.9   | 4.5    | 8.0    | 6.8    | 17.9   |
| 2.6    | 3.9    | 0.8   | 5.3   | 13.7   | 1.4    | 3.1    | 2.8    | 3.6    |
| 0.7    | 0.6    | 0.9   | 1.8   | 7.1    | 8.2    | 6.3    | 3.2    | 1.9    |
| 8.8    | 23.6   | 8.0   | 6.3   | 21.9   | 19.7   | 16.1   | 14.0   | 19.6   |
| 3030.8 | 3324.7 | 115.1 | 122.6 | 2802.9 | 2736.5 | 410.1  | 287.7  | 426.6  |
| 22.3   | 43.0   | 14.9  | 9.2   | 17.1   | 26.6   | 40.7   | 40.8   | 35.2   |
| 10.2   | 11.6   | 19.1  | 15.1  | 22.0   | 21.9   | 75.6   | 89.1   | 80.2   |
| 568.1  | 634.4  | 658.1 | 726.7 | 1004.9 | 687.2  | 3187.4 | 1966.3 | 1938.8 |

|       |       |       |       |       |       |       |       |       |
|-------|-------|-------|-------|-------|-------|-------|-------|-------|
| 0.7   | 5.4   | 1.8   | 10.5  | 1.6   | 11.4  | 6.8   | 4.5   | 5.6   |
| 0.7   | 1.6   | 1.2   | 4.4   | 1.8   | 1.1   | 3.3   | 1.2   | 4.1   |
| 0.9   | 13.7  | 7.9   | 1.3   | 6.8   | 8.7   | 17.9  | 4.2   | 14.1  |
| 2.4   | 7.9   | 1.2   | 2.6   | 0.5   | 2.0   | 4.7   | 3.6   | 4.2   |
| 49.6  | 134.9 | 74.6  | 124.8 | 108.4 | 74.9  | 101.8 | 58.5  | 53.6  |
| 1.8   | 1.4   | 0.4   | 0.9   | 1.2   | 7.7   | 2.9   | 2.5   | 5.4   |
| 0.4   | 0.4   | 0.5   | 0.3   | 3.5   | 0.8   | 4.0   | 1.3   | 4.5   |
| 7.1   | 18.3  | 11.2  | 7.1   | 11.3  | 4.0   | 41.7  | 39.1  | 37.9  |
| 5.7   | 7.0   | 4.8   | 0.6   | 2.6   | 6.6   | 5.2   | 6.5   | 7.5   |
| 3.2   | 1.4   | 0.6   | 2.3   | 8.1   | 1.8   | 6.9   | 6.3   | 5.1   |
| 3.7   | 3.2   | 6.6   | 3.4   | 4.6   | 4.4   | 4.7   | 3.4   | 4.0   |
| 3.1   | 3.4   | 1.8   | 2.4   | 3.3   | 3.0   | 2.6   | 16.4  | 2.8   |
| 0.7   | 0.6   | 0.7   | 1.0   | 1.2   | 1.2   | 1.0   | 1.0   | 2.1   |
| 10.3  | 16.7  | 14.2  | 9.1   | 18.5  | 12.8  | 21.6  | 14.8  | 8.6   |
| 2.2   | 6.1   | 3.4   | 1.7   | 3.7   | 5.0   | 3.5   | 2.3   | 4.7   |
| 10.7  | 7.2   | 9.8   | 9.6   | 3.8   | 1.8   | 9.7   | 14.9  | 13.8  |
| 189.8 | 211.9 | 25.4  | 35.5  | 338.3 | 187.9 | 247.6 | 122.9 | 160.0 |
| 1.9   | 7.6   | 0.4   | 1.2   | 0.7   | 10.1  | 11.8  | 7.0   | 3.3   |
| 3.7   | 18.7  | 21.1  | 18.7  | 4.3   | 20.7  | 30.1  | 39.0  | 18.4  |
| 116.8 | 140.5 | 139.3 | 202.5 | 166.3 | 100.5 | 385.3 | 401.0 | 435.7 |
| 31.7  | 27.3  | 27.1  | 37.4  | 39.2  | 25.6  | 96.4  | 79.8  | 97.1  |
| 14.2  | 9.2   | 2.4   | 2.5   | 10.6  | 5.5   | 3.2   | 2.7   | 4.7   |
| 39.9  | 55.7  | 11.7  | 22.0  | 47.0  | 50.7  | 114.9 | 97.3  | 109.1 |
| 16.5  | 2.6   | 13.5  | 8.6   | 34.0  | 19.1  | 28.3  | 7.9   | 27.8  |
| 10.7  | 13.2  | 13.3  | 1.3   | 16.9  | 8.2   | 9.7   | 22.0  | 22.9  |
| 0.2   | 0.3   | 2.2   | 0.2   | 1.1   | 7.0   | 0.5   | 3.9   | 1.6   |
| 8.8   | 2.7   | 2.9   | 6.9   | 14.8  | 1.2   | 11.7  | 11.8  | 9.8   |
| 107.1 | 131.9 | 12.2  | 10.6  | 194.4 | 128.4 | 201.3 | 139.3 | 137.3 |
| 24.4  | 15.3  | 11.0  | 10.0  | 12.4  | 18.8  | 31.9  | 62.0  | 73.9  |
| 5.6   | 3.4   | 7.4   | 9.0   | 2.6   | 1.2   | 5.2   | 1.7   | 3.1   |
| 2.8   | 3.6   | 9.4   | 7.8   | 7.0   | 1.7   | 5.8   | 13.0  | 6.9   |
| 244.3 | 418.5 | 198.6 | 225.2 | 307.0 | 445.2 | 678.2 | 472.2 | 564.9 |
| 0.5   | 5.2   | 1.4   | 6.4   | 1.5   | 1.4   | 5.2   | 3.2   | 1.7   |
| 63.4  | 76.7  | 76.1  | 90.5  | 119.9 | 53.6  | 24.4  | 51.3  | 54.9  |
| 4.0   | 11.7  | 16.0  | 3.4   | 3.4   | 11.9  | 3.6   | 2.7   | 3.0   |
| 8.4   | 4.7   | 6.7   | 2.0   | 3.0   | 0.3   | 6.9   | 4.9   | 3.4   |
| 34.2  | 62.2  | 14.6  | 15.3  | 41.6  | 47.5  | 58.2  | 39.9  | 36.4  |
| 1.3   | 3.3   | 5.8   | 1.0   | 6.4   | 4.8   | 13.3  | 6.6   | 4.0   |
| 19.8  | 36.3  | 27.5  | 23.7  | 29.1  | 44.1  | 78.9  | 170.6 | 134.1 |
| 29.0  | 37.6  | 31.2  | 61.4  | 54.5  | 30.4  | 166.6 | 157.1 | 150.8 |
| 16.4  | 1.4   | 9.1   | 5.7   | 7.6   | 14.0  | 17.1  | 14.3  | 22.6  |
| 5.3   | 18.0  | 1.3   | 1.3   | 34.0  | 15.6  | 43.0  | 27.3  | 22.8  |
| 64.9  | 95.2  | 46.5  | 63.8  | 86.1  | 68.5  | 201.4 | 245.0 | 222.4 |
| 8.0   | 14.3  | 12.1  | 11.6  | 23.0  | 1.4   | 21.3  | 20.6  | 22.7  |
| 0.5   | 6.9   | 8.5   | 0.2   | 1.7   | 1.0   | 3.7   | 3.9   | 0.7   |
| 2.7   | 11.4  | 4.5   | 0.5   | 8.1   | 1.3   | 2.2   | 8.1   | 6.5   |
| 1.5   | 1.0   | 2.0   | 0.5   | 1.9   | 1.3   | 1.0   | 3.4   | 1.4   |
| 41.6  | 71.7  | 19.3  | 32.5  | 78.9  | 57.5  | 79.1  | 78.9  | 74.0  |
| 1.8   | 1.4   | 1.6   | 0.9   | 11.9  | 1.5   | 3.8   | 3.1   | 9.4   |
| 9.8   | 5.9   | 5.4   | 0.6   | 18.1  | 4.5   | 4.7   | 11.6  | 13.1  |
| 3.2   | 2.0   | 2.6   | 1.7   | 3.4   | 1.8   | 3.1   | 3.1   | 3.4   |
| 6.9   | 2.0   | 8.5   | 0.7   | 7.9   | 0.5   | 4.5   | 0.9   | 1.7   |
| 111.7 | 136.5 | 74.6  | 131.5 | 180.1 | 209.4 | 451.6 | 393.0 | 404.3 |

|        |        |       |       |        |        |        |        |        |
|--------|--------|-------|-------|--------|--------|--------|--------|--------|
| 0.9    | 4.6    | 5.7   | 0.5   | 1.7    | 10.6   | 5.8    | 5.3    | 5.1    |
| 102.8  | 165.3  | 30.8  | 48.6  | 150.2  | 84.0   | 166.1  | 101.7  | 109.9  |
| 7.0    | 10.9   | 4.1   | 13.4  | 16.4   | 18.5   | 11.4   | 4.2    | 9.5    |
| 1210.6 | 1387.8 | 458.8 | 546.9 | 1665.5 | 1328.3 | 2328.1 | 2024.8 | 2117.9 |
| 91.9   | 122.0  | 12.0  | 20.0  | 116.0  | 127.5  | 293.4  | 215.9  | 318.1  |
| 4.1    | 1.9    | 10.1  | 2.6   | 2.5    | 1.1    | 2.4    | 6.3    | 12.6   |
| 7.9    | 1.0    | 7.7   | 2.2   | 7.0    | 1.3    | 591.1  | 156.6  | 170.0  |
| 0.2    | 0.6    | 2.7   | 1.0   | 0.3    | 1.2    | 0.5    | 0.9    | 0.8    |
| 28.2   | 40.8   | 2.2   | 6.6   | 70.3   | 72.2   | 11.2   | 12.1   | 9.2    |
| 2.4    | 5.2    | 0.9   | 0.5   | 3.1    | 0.9    | 2.0    | 1.9    | 3.4    |
| 27.1   | 24.4   | 15.6  | 12.7  | 20.6   | 26.8   | 33.1   | 43.0   | 37.3   |
| 6.3    | 4.4    | 4.1   | 1.4   | 7.3    | 0.8    | 3.8    | 1.0    | 5.1    |
| 731.1  | 1106.6 | 186.0 | 277.3 | 1091.7 | 598.3  | 840.1  | 591.6  | 638.8  |
| 15.9   | 10.7   | 9.4   | 7.1   | 21.8   | 25.0   | 7.4    | 8.2    | 6.6    |
| 1.4    | 8.7    | 13.3  | 5.8   | 2.5    | 3.7    | 7.0    | 14.8   | 11.6   |
| 1.1    | 1.2    | 1.7   | 1.0   | 2.5    | 0.3    | 2.0    | 0.7    | 1.5    |
| 3.9    | 0.6    | 4.4   | 0.4   | 0.6    | 6.8    | 1.3    | 1.1    | 0.8    |
| 7.8    | 9.1    | 14.0  | 4.5   | 4.3    | 11.1   | 2.0    | 4.6    | 1.5    |
| 15.6   | 6.1    | 2.7   | 1.7   | 7.4    | 21.0   | 6.8    | 7.8    | 1.8    |
| 7.6    | 5.0    | 1.3   | 0.8   | 13.9   | 2.0    | 6.7    | 1.8    | 1.9    |
| 6.2    | 1.1    | 4.4   | 2.3   | 13.9   | 8.2    | 2.6    | 3.6    | 6.9    |
| 0.5    | 0.9    | 11.4  | 6.8   | 0.4    | 0.8    | 3.6    | 6.6    | 7.8    |
| 1.4    | 9.3    | 15.2  | 6.5   | 6.1    | 8.1    | 32.1   | 29.1   | 32.9   |
| 2.4    | 17.5   | 4.7   | 8.3   | 14.2   | 6.3    | 47.0   | 35.3   | 32.9   |
| 1.4    | 12.3   | 60.2  | 67.0  | 1.4    | 1.0    | 186.4  | 198.6  | 198.7  |
| 429.8  | 508.2  | 212.2 | 254.4 | 698.5  | 635.6  | 887.0  | 813.9  | 954.1  |
| 1.0    | 0.8    | 2.2   | 0.5   | 7.6    | 2.6    | 8.4    | 8.7    | 11.4   |
| 1.3    | 3.1    | 2.8   | 2.9   | 2.2    | 3.2    | 2.8    | 3.6    | 4.0    |
| 1.0    | 2.0    | 9.7   | 7.0   | 11.3   | 3.1    | 2.1    | 2.7    | 5.8    |
| 41.0   | 41.2   | 26.7  | 18.7  | 91.2   | 52.9   | 64.2   | 80.8   | 77.2   |
| 8.0    | 10.9   | 5.8   | 11.9  | 18.6   | 19.8   | 8.9    | 12.1   | 13.1   |
| 1.0    | 2.7    | 2.5   | 1.9   | 1.2    | 2.6    | 1.2    | 1.1    | 1.6    |
| 1024.8 | 1372.2 | 205.7 | 239.5 | 1320.9 | 1359.2 | 3173.8 | 2672.1 | 2718.1 |
| 15.5   | 14.0   | 7.2   | 1.8   | 17.0   | 26.6   | 11.7   | 14.5   | 18.7   |
| 2.8    | 6.2    | 10.5  | 2.4   | 2.9    | 7.8    | 1.3    | 1.3    | 3.0    |
| 0.9    | 1.2    | 0.6   | 0.9   | 1.3    | 0.8    | 1.7    | 0.5    | 3.6    |
| 1.4    | 8.7    | 0.7   | 1.2   | 0.7    | 2.1    | 3.6    | 4.1    | 2.7    |
| 7.2    | 9.1    | 12.6  | 11.2  | 8.3    | 2.0    | 15.3   | 17.4   | 10.2   |
| 14.8   | 13.5   | 3.7   | 15.7  | 11.9   | 12.9   | 16.6   | 14.5   | 8.0    |
| 7.3    | 7.8    | 2.2   | 1.1   | 12.4   | 11.5   | 15.7   | 12.1   | 14.1   |
| 13.9   | 25.6   | 31.1  | 39.8  | 30.6   | 13.3   | 22.0   | 15.9   | 26.4   |
| 0.9    | 0.7    | 0.5   | 0.6   | 1.0    | 0.8    | 1.0    | 1.0    | 1.1    |
| 188.1  | 285.3  | 50.3  | 45.7  | 255.3  | 242.5  | 629.5  | 587.7  | 556.8  |
| 6.9    | 0.9    | 0.3   | 0.2   | 6.0    | 0.5    | 0.6    | 0.4    | 1.0    |
| 5.0    | 10.9   | 0.3   | 3.0   | 1.8    | 0.4    | 0.5    | 1.3    | 0.9    |
| 16.1   | 23.5   | 40.7  | 34.3  | 32.6   | 4.6    | 49.7   | 33.5   | 42.1   |
| 5.9    | 20.2   | 7.3   | 30.7  | 30.9   | 12.4   | 13.4   | 7.1    | 10.9   |
| 3.2    | 1.5    | 4.0   | 1.7   | 2.6    | 1.6    | 7.7    | 1.0    | 4.1    |
| 5.8    | 7.0    | 17.7  | 8.7   | 7.4    | 0.6    | 13.1   | 9.6    | 2.3    |
| 2.8    | 3.8    | 2.5   | 2.0   | 1.7    | 0.8    | 3.9    | 18.6   | 9.6    |
| 15.1   | 8.3    | 21.8  | 16.5  | 18.4   | 12.5   | 20.1   | 22.7   | 18.3   |
| 4.8    | 5.3    | 3.6   | 3.0   | 4.2    | 4.4    | 6.5    | 5.3    | 6.1    |
| 8.9    | 22.7   | 7.0   | 11.5  | 37.9   | 5.5    | 2.2    | 4.0    | 3.9    |

|        |        |       |       |        |        |        |        |        |
|--------|--------|-------|-------|--------|--------|--------|--------|--------|
| 2.7    | 0.9    | 1.5   | 1.7   | 1.3    | 1.7    | 16.7   | 11.3   | 7.7    |
| 0.7    | 0.9    | 1.5   | 7.8   | 2.0    | 0.6    | 1.2    | 0.4    | 0.8    |
| 24.6   | 59.1   | 4.7   | 1.3   | 37.8   | 11.5   | 22.9   | 24.6   | 31.7   |
| 0.9    | 2.8    | 1.3   | 1.2   | 10.2   | 10.1   | 6.1    | 6.6    | 6.7    |
| 2.4    | 1.9    | 1.2   | 1.3   | 1.0    | 8.2    | 0.8    | 0.9    | 1.2    |
| 3.8    | 6.7    | 5.4   | 1.0   | 0.8    | 6.3    | 4.6    | 4.0    | 3.0    |
| 1.2    | 1.8    | 1.7   | 1.6   | 6.0    | 1.0    | 4.8    | 1.5    | 1.6    |
| 27.5   | 11.0   | 1.4   | 7.5   | 28.6   | 19.6   | 12.1   | 19.9   | 23.6   |
| 1.7    | 3.7    | 3.4   | 4.0   | 2.2    | 3.4    | 7.1    | 5.9    | 20.2   |
| 453.8  | 664.3  | 57.6  | 82.3  | 629.5  | 719.3  | 1110.9 | 1329.3 | 1424.3 |
| 0.9    | 0.9    | 1.6   | 11.3  | 7.5    | 6.2    | 6.3    | 7.4    | 3.9    |
| 4.0    | 0.7    | 3.8   | 9.8   | 3.8    | 4.4    | 25.0   | 17.5   | 23.5   |
| 44.6   | 64.7   | 48.1  | 95.4  | 52.8   | 37.4   | 343.5  | 310.6  | 299.3  |
| 0.9    | 1.4    | 6.3   | 0.4   | 2.4    | 1.6    | 2.3    | 2.0    | 1.7    |
| 13.6   | 21.4   | 23.4  | 18.0  | 17.5   | 21.3   | 18.2   | 16.8   | 27.5   |
| 1.6    | 8.1    | 3.5   | 2.6   | 3.8    | 0.6    | 4.0    | 5.5    | 5.1    |
| 12.3   | 7.8    | 9.9   | 13.3  | 17.2   | 19.9   | 14.2   | 17.0   | 17.3   |
| 2246.6 | 3128.5 | 615.8 | 948.2 | 3261.5 | 1885.3 | 6714.7 | 4871.5 | 5119.6 |
| 19.6   | 3.8    | 3.0   | 1.8   | 4.0    | 24.8   | 19.8   | 5.1    | 2.9    |
| 5.2    | 4.0    | 4.1   | 5.1   | 0.5    | 3.3    | 11.6   | 7.8    | 8.6    |
| 30.9   | 25.9   | 24.9  | 47.4  | 46.5   | 16.4   | 109.9  | 87.4   | 100.3  |
| 0.8    | 0.7    | 1.3   | 1.1   | 0.7    | 0.9    | 4.0    | 1.8    | 3.7    |
| 106.3  | 125.1  | 25.5  | 27.3  | 149.2  | 125.1  | 411.9  | 310.8  | 369.1  |
| 13.7   | 4.0    | 13.6  | 13.0  | 9.3    | 10.0   | 16.8   | 18.4   | 14.1   |
| 273.2  | 298.8  | 387.0 | 598.5 | 445.8  | 209.4  | 2264.4 | 1659.4 | 1837.1 |
| 6.4    | 3.3    | 8.3   | 5.1   | 6.4    | 4.7    | 3.3    | 9.5    | 15.6   |
| 2.4    | 0.9    | 1.8   | 2.2   | 2.7    | 1.7    | 1.6    | 1.7    | 1.9    |
| 4.8    | 8.4    | 3.6   | 7.3   | 12.9   | 9.3    | 13.6   | 11.0   | 4.1    |
| 1.8    | 7.4    | 11.2  | 0.7   | 4.0    | 1.8    | 10.3   | 8.4    | 4.6    |
| 4.1    | 4.8    | 5.1   | 3.8   | 5.4    | 4.8    | 6.9    | 9.6    | 10.4   |
| 14.8   | 12.3   | 16.4  | 18.9  | 5.1    | 15.9   | 34.4   | 24.4   | 33.7   |
| 3.0    | 1.0    | 2.0   | 1.1   | 0.9    | 1.8    | 1.6    | 1.4    | 0.9    |
| 28.3   | 33.6   | 19.4  | 34.1  | 40.2   | 42.9   | 135.8  | 112.9  | 133.1  |
| 18.2   | 31.1   | 26.1  | 27.1  | 29.5   | 23.0   | 82.7   | 70.3   | 65.0   |
| 1.6    | 0.7    | 5.1   | 0.6   | 1.6    | 1.1    | 4.1    | 1.1    | 1.2    |
| 64.6   | 125.7  | 4.2   | 4.2   | 138.0  | 68.6   | 22.6   | 28.2   | 16.1   |
| 75.9   | 83.5   | 20.9  | 29.0  | 69.5   | 65.8   | 214.7  | 153.6  | 181.2  |
| 1.8    | 1.6    | 1.5   | 2.5   | 3.3    | 1.5    | 1.7    | 1.5    | 1.7    |
| 7.0    | 11.5   | 23.6  | 9.3   | 16.9   | 6.5    | 8.1    | 8.3    | 9.8    |
| 8.9    | 10.5   | 2.6   | 1.6   | 4.8    | 0.9    | 8.7    | 8.3    | 10.0   |
| 125.7  | 158.0  | 65.8  | 90.3  | 247.6  | 121.1  | 284.1  | 252.2  | 244.2  |
| 6.3    | 1.5    | 14.6  | 12.2  | 1.5    | 8.7    | 5.7    | 3.3    | 2.0    |
| 13.0   | 5.7    | 4.2   | 10.1  | 10.9   | 8.2    | 10.2   | 5.5    | 10.4   |
| 0.8    | 0.4    | 4.5   | 0.5   | 0.3    | 0.4    | 1.4    | 0.7    | 2.5    |
| 5.8    | 5.8    | 4.7   | 1.3   | 0.5    | 0.8    | 2.8    | 4.6    | 4.6    |
| 52.7   | 50.3   | 42.9  | 52.8  | 49.5   | 26.0   | 39.3   | 63.6   | 67.6   |
| 1.9    | 0.5    | 1.9   | 1.8   | 1.9    | 0.5    | 3.6    | 7.6    | 6.7    |
| 22.2   | 19.0   | 16.7  | 8.2   | 19.7   | 10.1   | 16.3   | 35.7   | 31.2   |
| 8.2    | 8.8    | 7.5   | 4.3   | 8.7    | 10.3   | 8.2    | 4.2    | 5.3    |
| 2.5    | 3.1    | 1.5   | 2.0   | 1.7    | 6.5    | 12.0   | 3.1    | 4.9    |
| 1.8    | 1.5    | 0.7   | 3.3   | 1.3    | 2.1    | 0.9    | 1.4    | 1.5    |
| 11.0   | 8.7    | 4.6   | 4.7   | 13.5   | 8.8    | 1.9    | 2.1    | 0.8    |
| 106.9  | 173.2  | 92.3  | 188.3 | 150.8  | 119.1  | 783.1  | 933.4  | 801.8  |

|        |        |       |       |        |        |        |        |        |
|--------|--------|-------|-------|--------|--------|--------|--------|--------|
| 7.5    | 2.2    | 15.0  | 6.1   | 9.3    | 9.1    | 4.1    | 10.8   | 8.5    |
| 18.5   | 3.0    | 7.9   | 14.9  | 13.1   | 14.4   | 25.9   | 25.3   | 35.2   |
| 12.1   | 5.8    | 1.3   | 2.1   | 13.1   | 9.2    | 6.9    | 13.5   | 9.8    |
| 2.2    | 2.3    | 0.5   | 1.3   | 8.9    | 2.4    | 9.4    | 3.5    | 6.8    |
| 0.8    | 0.6    | 0.8   | 3.2   | 1.1    | 2.3    | 0.9    | 1.1    | 0.7    |
| 8.6    | 4.1    | 12.1  | 3.8   | 3.9    | 13.3   | 8.8    | 16.1   | 9.8    |
| 104.1  | 90.9   | 27.0  | 28.3  | 138.3  | 123.8  | 93.2   | 90.1   | 91.8   |
| 7.8    | 9.2    | 10.7  | 12.3  | 14.6   | 19.4   | 75.3   | 52.7   | 63.6   |
| 1.2    | 9.5    | 4.7   | 5.9   | 0.9    | 0.9    | 4.1    | 3.4    | 5.8    |
| 0.8    | 1.9    | 1.5   | 2.4   | 2.7    | 1.8    | 1.2    | 1.6    | 3.3    |
| 10.9   | 30.8   | 5.9   | 8.5   | 4.7    | 18.1   | 74.4   | 60.2   | 64.2   |
| 2.5    | 1.0    | 6.4   | 5.0   | 1.8    | 1.7    | 16.3   | 8.0    | 18.7   |
| 15.2   | 5.4    | 12.3  | 7.2   | 15.0   | 5.0    | 16.9   | 16.9   | 14.3   |
| 1.4    | 5.0    | 10.1  | 3.3   | 3.2    | 1.8    | 5.8    | 3.5    | 2.4    |
| 9.4    | 11.0   | 2.0   | 0.9   | 34.1   | 17.9   | 55.7   | 29.7   | 33.6   |
| 3.0    | 5.7    | 6.5   | 2.0   | 6.1    | 5.4    | 5.0    | 6.7    | 3.9    |
| 31.0   | 47.0   | 27.7  | 22.9  | 58.5   | 76.2   | 155.7  | 114.6  | 133.9  |
| 57.7   | 88.9   | 19.8  | 25.8  | 97.2   | 83.8   | 228.2  | 214.2  | 214.1  |
| 27.2   | 23.1   | 16.6  | 14.3  | 23.3   | 22.5   | 23.2   | 16.8   | 25.8   |
| 22.5   | 24.3   | 15.4  | 25.1  | 30.7   | 30.8   | 73.5   | 48.7   | 62.7   |
| 5.2    | 14.9   | 8.8   | 10.5  | 17.3   | 11.6   | 16.8   | 7.4    | 11.0   |
| 27.9   | 25.0   | 5.8   | 17.1  | 29.2   | 27.2   | 48.9   | 14.8   | 13.9   |
| 26.8   | 48.9   | 7.7   | 11.1  | 73.3   | 33.1   | 67.4   | 47.8   | 79.6   |
| 38.6   | 17.7   | 5.6   | 6.2   | 20.8   | 19.0   | 71.2   | 66.3   | 70.6   |
| 23.2   | 23.5   | 22.0  | 22.2  | 30.7   | 20.4   | 48.3   | 43.3   | 61.3   |
| 13.7   | 2.0    | 7.0   | 6.5   | 10.4   | 12.1   | 11.6   | 8.0    | 3.5    |
| 1164.2 | 1217.9 | 692.7 | 904.1 | 1429.0 | 1098.2 | 5432.2 | 4355.4 | 4432.8 |
| 0.8    | 1.0    | 0.6   | 0.7   | 1.0    | 4.1    | 1.6    | 1.8    | 1.7    |
| 4.8    | 3.9    | 20.7  | 11.3  | 16.0   | 15.9   | 14.9   | 9.7    | 17.5   |
| 9.0    | 2.5    | 12.7  | 6.7   | 0.6    | 6.6    | 12.9   | 20.6   | 14.7   |
| 2.3    | 0.6    | 0.8   | 0.9   | 9.5    | 0.9    | 3.1    | 4.1    | 4.7    |
| 4.5    | 1.5    | 10.5  | 4.8   | 1.5    | 6.4    | 12.1   | 10.5   | 6.9    |
| 30.8   | 23.0   | 16.6  | 12.8  | 30.5   | 11.6   | 82.8   | 84.3   | 100.6  |
| 14.0   | 63.9   | 59.0  | 44.1  | 21.8   | 20.6   | 114.1  | 85.7   | 41.0   |
| 81.5   | 101.6  | 11.6  | 15.6  | 105.5  | 117.6  | 168.7  | 88.9   | 95.2   |
| 21.0   | 26.5   | 18.1  | 5.4   | 21.6   | 28.1   | 16.7   | 23.6   | 20.6   |
| 0.9    | 1.1    | 0.4   | 0.7   | 7.8    | 1.9    | 14.5   | 4.6    | 7.3    |
| 22.8   | 22.6   | 4.4   | 5.3   | 39.6   | 8.6    | 48.6   | 45.0   | 57.3   |
| 23.5   | 32.9   | 20.5  | 21.4  | 35.2   | 11.7   | 49.5   | 37.0   | 52.4   |
| 13.0   | 23.7   | 6.7   | 1.5   | 12.5   | 12.9   | 25.4   | 21.3   | 24.2   |
| 277.4  | 294.7  | 91.8  | 152.2 | 321.0  | 187.3  | 514.3  | 389.0  | 382.5  |
| 21.3   | 46.8   | 0.3   | 0.7   | 53.8   | 27.7   | 24.4   | 36.0   | 42.1   |
| 0.6    | 0.6    | 7.4   | 0.6   | 0.6    | 3.6    | 5.4    | 0.7    | 1.1    |
| 6.0    | 11.3   | 15.2  | 16.3  | 8.3    | 1.5    | 23.3   | 25.9   | 24.0   |
| 1.0    | 1.5    | 0.7   | 0.7   | 1.7    | 3.3    | 3.9    | 3.5    | 3.2    |
| 5.5    | 3.5    | 5.3   | 6.9   | 0.7    | 3.0    | 7.6    | 6.0    | 2.9    |
| 5.6    | 1.4    | 4.8   | 5.2   | 2.1    | 1.7    | 10.9   | 14.0   | 14.0   |
| 4.2    | 18.7   | 24.0  | 25.1  | 17.5   | 21.0   | 23.4   | 17.3   | 12.3   |
| 2.2    | 2.1    | 2.2   | 1.0   | 3.2    | 1.5    | 2.0    | 2.3    | 2.1    |
| 538.5  | 1020.6 | 130.2 | 172.7 | 1086.2 | 824.1  | 2106.2 | 2306.4 | 2379.1 |
| 5.2    | 6.4    | 1.6   | 0.7   | 1.2    | 0.7    | 10.6   | 15.9   | 13.6   |
| 1.3    | 5.1    | 10.7  | 26.4  | 1.2    | 1.1    | 7.0    | 3.3    | 1.9    |
| 27.9   | 21.1   | 1.3   | 1.0   | 12.1   | 15.1   | 19.2   | 13.4   | 7.9    |



|        |        |        |        |        |        |        |        |        |
|--------|--------|--------|--------|--------|--------|--------|--------|--------|
| 21.4   | 22.4   | 23.7   | 11.7   | 24.4   | 15.4   | 38.6   | 43.0   | 56.2   |
| 3.0    | 2.0    | 1.7    | 1.3    | 1.6    | 1.4    | 3.6    | 3.8    | 6.6    |
| 1.2    | 1.7    | 6.3    | 7.7    | 5.8    | 1.8    | 6.7    | 10.2   | 1.9    |
| 4.4    | 6.8    | 3.8    | 6.4    | 15.1   | 14.2   | 11.3   | 5.4    | 7.6    |
| 0.4    | 1.0    | 0.4    | 0.7    | 0.4    | 0.6    | 2.8    | 3.2    | 5.4    |
| 1366.8 | 2535.4 | 13.5   | 11.9   | 1534.3 | 2358.2 | 316.9  | 320.9  | 325.4  |
| 14.3   | 11.1   | 8.9    | 6.7    | 13.5   | 3.3    | 18.0   | 6.0    | 8.1    |
| 19.8   | 22.4   | 17.6   | 18.8   | 33.3   | 27.9   | 34.3   | 26.6   | 31.7   |
| 4.6    | 9.6    | 1.2    | 1.4    | 2.5    | 10.4   | 8.2    | 4.7    | 13.1   |
| 5.4    | 0.4    | 0.8    | 0.4    | 0.3    | 0.6    | 0.5    | 3.0    | 0.6    |
| 229.8  | 254.0  | 56.0   | 63.8   | 372.8  | 273.8  | 397.7  | 174.0  | 173.4  |
| 7.2    | 2.6    | 4.1    | 1.6    | 1.9    | 9.9    | 5.5    | 7.7    | 3.4    |
| 8.9    | 10.9   | 4.4    | 7.7    | 3.9    | 1.1    | 5.4    | 10.1   | 2.0    |
| 7.2    | 6.7    | 1.3    | 2.6    | 2.9    | 2.1    | 10.4   | 2.8    | 2.4    |
| 10.4   | 11.0   | 22.5   | 19.1   | 18.7   | 8.5    | 13.9   | 9.3    | 4.4    |
| 7359.1 | 8027.9 | 3908.5 | 4795.2 | 8163.5 | 7501.7 | 9166.5 | 8813.0 | 9049.9 |
| 2.1    | 9.1    | 27.9   | 30.7   | 11.1   | 7.4    | 16.9   | 26.1   | 24.6   |
| 3.6    | 8.1    | 5.1    | 3.2    | 7.0    | 5.5    | 11.0   | 5.5    | 5.8    |
| 0.8    | 1.7    | 0.2    | 0.7    | 14.2   | 2.8    | 3.3    | 5.1    | 7.1    |
| 0.7    | 0.2    | 2.0    | 0.6    | 2.9    | 6.7    | 2.8    | 1.9    | 0.7    |
| 19.5   | 30.5   | 17.0   | 21.7   | 34.4   | 28.1   | 56.1   | 83.2   | 86.3   |
| 0.6    | 0.3    | 0.3    | 0.7    | 0.8    | 0.4    | 1.0    | 2.4    | 1.0    |
| 19.5   | 2.6    | 13.7   | 13.1   | 11.4   | 12.7   | 16.4   | 11.2   | 15.4   |
| 20.9   | 23.6   | 21.8   | 23.5   | 24.7   | 11.3   | 29.5   | 23.7   | 40.0   |
| 66.9   | 87.4   | 40.7   | 41.7   | 86.6   | 82.1   | 119.8  | 107.2  | 139.7  |
| 791.2  | 1086.3 | 162.9  | 157.5  | 1044.5 | 1038.3 | 2269.8 | 1263.5 | 1783.1 |
| 10.9   | 0.4    | 0.5    | 1.2    | 0.4    | 0.5    | 2.3    | 2.4    | 0.7    |
| 8.3    | 4.2    | 15.9   | 16.6   | 13.5   | 6.2    | 3.5    | 4.7    | 2.9    |
| 1.1    | 1.0    | 2.6    | 2.6    | 2.9    | 0.9    | 6.8    | 5.3    | 8.0    |
| 0.5    | 1.3    | 6.2    | 4.7    | 1.7    | 1.9    | 4.6    | 6.8    | 4.5    |
| 15.4   | 20.6   | 2.3    | 1.9    | 7.5    | 18.1   | 11.9   | 21.6   | 12.4   |
| 2.7    | 1.5    | 2.0    | 4.4    | 2.4    | 2.6    | 2.5    | 2.8    | 3.4    |
| 7.0    | 5.2    | 7.2    | 0.5    | 4.8    | 2.3    | 5.9    | 5.4    | 9.8    |
| 38.1   | 32.0   | 12.0   | 3.5    | 59.2   | 70.0   | 118.9  | 76.9   | 98.8   |
| 5.0    | 0.6    | 0.7    | 0.8    | 1.4    | 0.4    | 1.1    | 6.3    | 5.3    |
| 0.4    | 3.4    | 6.4    | 9.8    | 1.5    | 4.2    | 12.2   | 8.1    | 16.9   |
| 259.9  | 280.0  | 121.0  | 121.9  | 289.4  | 272.2  | 184.5  | 160.3  | 202.5  |
| 17.8   | 12.1   | 9.1    | 13.1   | 25.3   | 6.0    | 5.2    | 12.0   | 11.5   |
| 1.6    | 3.2    | 2.3    | 1.4    | 1.1    | 1.2    | 2.1    | 2.6    | 2.6    |
| 6.6    | 17.6   | 0.8    | 0.4    | 4.8    | 14.5   | 1.4    | 1.2    | 1.8    |
| 9.8    | 16.1   | 11.4   | 8.5    | 13.7   | 11.5   | 14.9   | 20.6   | 10.0   |
| 2.2    | 1.7    | 0.6    | 1.1    | 0.6    | 0.4    | 1.4    | 1.0    | 1.5    |
| 14.0   | 8.4    | 2.1    | 0.5    | 0.8    | 0.4    | 3.0    | 1.5    | 1.1    |
| 28.3   | 16.0   | 2.0    | 7.5    | 18.9   | 3.3    | 36.3   | 10.6   | 6.6    |
| 349.6  | 379.9  | 33.4   | 41.8   | 499.1  | 298.7  | 735.1  | 377.2  | 508.1  |
| 4.5    | 6.7    | 7.3    | 1.9    | 2.2    | 0.9    | 6.2    | 3.8    | 2.0    |
| 5.8    | 12.2   | 13.1   | 2.6    | 11.1   | 6.4    | 12.6   | 4.9    | 7.3    |
| 25.2   | 43.4   | 38.0   | 38.3   | 4.3    | 31.4   | 136.5  | 122.6  | 140.0  |
| 1.2    | 5.3    | 0.5    | 0.3    | 1.1    | 2.5    | 3.1    | 7.1    | 0.7    |
| 42.1   | 61.7   | 9.5    | 22.0   | 61.2   | 60.6   | 27.5   | 46.4   | 40.6   |
| 2.0    | 10.8   | 0.6    | 0.4    | 0.7    | 8.0    | 1.9    | 2.6    | 1.2    |
| 7.1    | 2.9    | 2.0    | 0.8    | 1.3    | 1.8    | 7.3    | 4.3    | 5.7    |
| 4.7    | 14.3   | 9.8    | 12.1   | 11.2   | 6.6    | 13.0   | 1.6    | 9.7    |

|        |        |       |       |        |        |        |        |        |
|--------|--------|-------|-------|--------|--------|--------|--------|--------|
| 739.4  | 765.7  | 47.4  | 63.6  | 802.6  | 505.2  | 768.5  | 828.0  | 904.8  |
| 109.3  | 175.1  | 3.5   | 6.9   | 187.3  | 206.7  | 146.5  | 87.8   | 105.2  |
| 15.4   | 5.7    | 1.7   | 1.8   | 2.4    | 0.6    | 10.5   | 7.5    | 8.5    |
| 1.2    | 6.9    | 7.2   | 9.3   | 11.2   | 4.9    | 10.4   | 10.1   | 2.0    |
| 0.9    | 8.7    | 6.4   | 5.6   | 0.1    | 0.9    | 3.5    | 4.3    | 0.5    |
| 11.2   | 11.9   | 10.4  | 11.7  | 18.5   | 17.9   | 23.8   | 15.6   | 20.7   |
| 1.7    | 0.8    | 0.8   | 0.7   | 1.1    | 1.8    | 2.6    | 1.0    | 1.7    |
| 1.1    | 1.7    | 1.2   | 7.4   | 5.8    | 7.0    | 0.9    | 2.4    | 2.4    |
| 3.0    | 2.2    | 1.3   | 1.9   | 3.3    | 14.0   | 4.9    | 10.9   | 8.0    |
| 83.8   | 132.2  | 13.7  | 14.6  | 190.1  | 99.6   | 458.7  | 192.4  | 167.1  |
| 40.1   | 43.0   | 6.2   | 9.8   | 37.8   | 43.8   | 21.8   | 13.7   | 18.4   |
| 3.9    | 7.0    | 2.9   | 1.2   | 3.1    | 2.6    | 16.6   | 16.4   | 4.7    |
| 54.7   | 78.3   | 53.7  | 77.3  | 89.2   | 39.3   | 248.4  | 229.3  | 249.8  |
| 13.7   | 11.0   | 8.1   | 10.7  | 9.2    | 2.5    | 15.3   | 11.9   | 17.2   |
| 2.8    | 1.3    | 2.4   | 5.5   | 11.4   | 12.6   | 4.7    | 23.3   | 11.6   |
| 3.1    | 0.8    | 1.2   | 0.9   | 2.7    | 1.0    | 8.9    | 5.7    | 4.5    |
| 4.2    | 10.3   | 0.5   | 2.4   | 0.5    | 3.7    | 3.7    | 0.4    | 4.0    |
| 6.3    | 14.8   | 13.4  | 1.4   | 22.0   | 17.3   | 15.1   | 8.9    | 15.6   |
| 0.8    | 0.5    | 1.0   | 3.5   | 1.5    | 6.9    | 1.7    | 5.9    | 0.7    |
| 6.3    | 9.9    | 15.2  | 10.2  | 9.5    | 5.1    | 19.0   | 16.5   | 15.2   |
| 438.6  | 519.9  | 106.6 | 158.9 | 531.1  | 568.3  | 476.7  | 640.4  | 670.8  |
| 193.8  | 211.3  | 85.2  | 133.6 | 368.5  | 251.7  | 361.1  | 293.0  | 328.6  |
| 1.1    | 1.9    | 3.1   | 0.6   | 3.4    | 3.1    | 2.2    | 2.3    | 6.6    |
| 2.4    | 3.3    | 2.6   | 3.7   | 0.8    | 2.1    | 7.9    | 2.0    | 10.8   |
| 8.3    | 1.7    | 3.7   | 3.9   | 1.1    | 0.8    | 1.4    | 4.0    | 2.8    |
| 18.4   | 37.4   | 10.7  | 6.3   | 44.6   | 30.2   | 115.1  | 95.0   | 75.5   |
| 5.5    | 6.3    | 3.6   | 7.1   | 12.2   | 7.2    | 9.0    | 10.3   | 3.6    |
| 0.9    | 1.9    | 0.3   | 0.5   | 2.4    | 1.2    | 0.9    | 3.6    | 5.9    |
| 1.9    | 0.9    | 0.5   | 0.8   | 4.9    | 6.4    | 2.0    | 7.7    | 6.3    |
| 38.1   | 66.3   | 16.1  | 22.1  | 55.1   | 63.5   | 42.0   | 34.5   | 38.3   |
| 3536.1 | 4118.1 | 975.3 | 499.4 | 4683.8 | 4131.3 | 4973.2 | 5006.1 | 5994.5 |
| 21.5   | 18.3   | 7.6   | 5.2   | 25.9   | 28.9   | 48.4   | 40.4   | 37.9   |
| 18.8   | 22.3   | 1.4   | 1.1   | 15.8   | 16.3   | 8.0    | 19.9   | 19.5   |
| 2.4    | 1.7    | 2.0   | 2.2   | 3.5    | 3.0    | 2.6    | 3.1    | 1.6    |
| 6.7    | 0.4    | 0.5   | 0.8   | 2.1    | 0.7    | 2.3    | 3.3    | 4.6    |
| 10.8   | 11.9   | 8.2   | 9.4   | 7.5    | 4.3    | 18.7   | 13.8   | 17.4   |
| 2.1    | 0.9    | 10.6  | 6.1   | 15.2   | 5.6    | 25.0   | 13.5   | 14.8   |
| 30.5   | 27.4   | 35.2  | 35.0  | 47.0   | 46.2   | 55.5   | 70.9   | 91.4   |
| 8.4    | 11.4   | 14.8  | 7.4   | 6.9    | 13.0   | 15.5   | 17.7   | 12.6   |
| 22.5   | 17.1   | 20.0  | 38.5  | 38.4   | 15.9   | 169.2  | 127.0  | 126.5  |
| 2.8    | 0.5    | 2.1   | 2.8   | 0.9    | 7.5    | 1.5    | 2.2    | 2.4    |
| 2.4    | 4.6    | 4.7   | 11.3  | 15.3   | 7.0    | 23.8   | 25.5   | 25.6   |
| 51.4   | 45.2   | 2.0   | 7.9   | 66.7   | 38.8   | 63.6   | 102.0  | 102.3  |
| 0.4    | 7.0    | 9.7   | 1.2   | 5.3    | 5.2    | 4.0    | 4.3    | 7.9    |
| 50.8   | 39.6   | 19.1  | 20.3  | 42.6   | 52.2   | 74.9   | 66.5   | 54.9   |
| 11.7   | 11.1   | 8.4   | 6.4   | 16.8   | 10.5   | 13.3   | 12.6   | 16.1   |
| 10.2   | 19.0   | 11.6  | 8.6   | 13.6   | 25.4   | 23.1   | 21.5   | 28.1   |
| 7.7    | 2.3    | 2.4   | 6.2   | 4.0    | 1.1    | 3.7    | 8.4    | 9.1    |
| 11.8   | 4.7    | 18.4  | 11.0  | 9.4    | 14.1   | 27.8   | 21.2   | 16.2   |
| 120.8  | 130.6  | 172.9 | 201.5 | 200.0  | 166.7  | 331.0  | 386.7  | 345.7  |
| 2.9    | 6.5    | 11.9  | 17.2  | 17.9   | 19.4   | 5.8    | 13.8   | 11.7   |
| 12.6   | 16.9   | 21.7  | 28.3  | 19.0   | 16.2   | 25.4   | 19.7   | 12.7   |
| 1.5    | 2.5    | 2.2   | 3.0   | 1.5    | 3.6    | 1.2    | 1.5    | 1.1    |

|        |        |       |       |        |        |        |        |        |
|--------|--------|-------|-------|--------|--------|--------|--------|--------|
| 0.9    | 1.5    | 0.8   | 0.8   | 5.3    | 1.8    | 11.1   | 37.5   | 34.1   |
| 1.6    | 14.7   | 9.8   | 3.1   | 6.5    | 2.8    | 5.7    | 2.7    | 1.0    |
| 2888.8 | 4058.8 | 502.3 | 605.3 | 4031.9 | 3692.3 | 8406.4 | 8593.2 | 8540.6 |
| 193.0  | 252.6  | 130.5 | 150.8 | 364.3  | 232.8  | 956.3  | 1185.9 | 1102.2 |
| 42.3   | 35.6   | 16.7  | 14.7  | 41.0   | 35.5   | 69.4   | 50.2   | 44.6   |
| 9.5    | 10.9   | 15.0  | 8.0   | 12.8   | 7.4    | 16.2   | 20.1   | 14.7   |
| 1.2    | 1.4    | 2.0   | 1.4   | 1.5    | 1.1    | 2.4    | 1.7    | 1.5    |
| 102.9  | 141.0  | 96.8  | 157.2 | 153.7  | 112.4  | 515.7  | 346.8  | 348.9  |
| 5.5    | 14.8   | 2.1   | 5.2   | 6.9    | 12.6   | 4.8    | 11.9   | 9.0    |
| 6.4    | 2.8    | 7.6   | 8.4   | 1.0    | 10.1   | 6.8    | 7.4    | 1.6    |
| 139.7  | 163.5  | 105.3 | 166.2 | 247.4  | 189.7  | 206.8  | 182.3  | 193.6  |
| 8.7    | 2.7    | 12.6  | 5.6   | 5.8    | 11.2   | 26.7   | 21.6   | 23.1   |
| 104.1  | 156.6  | 27.2  | 30.2  | 211.9  | 145.9  | 348.3  | 368.0  | 384.6  |
| 11.9   | 1.1    | 13.1  | 9.1   | 34.0   | 14.5   | 35.2   | 61.2   | 63.1   |
| 5.1    | 15.5   | 7.8   | 15.2  | 18.5   | 10.5   | 36.0   | 42.1   | 29.6   |
| 9.3    | 0.2    | 2.8   | 10.8  | 1.1    | 1.2    | 1.9    | 1.0    | 2.2    |
| 0.4    | 5.6    | 0.7   | 0.3   | 0.4    | 1.1    | 1.9    | 5.3    | 1.6    |
| 25.7   | 31.1   | 0.9   | 0.4   | 25.7   | 39.8   | 56.9   | 64.1   | 66.4   |
| 5.0    | 11.2   | 1.2   | 6.8   | 1.1    | 4.4    | 6.4    | 1.2    | 8.1    |
| 18.1   | 15.3   | 23.0  | 28.1  | 23.0   | 32.0   | 51.8   | 45.7   | 38.6   |
| 28.0   | 14.5   | 27.9  | 11.6  | 22.7   | 32.3   | 59.4   | 65.0   | 67.0   |
| 7.0    | 11.0   | 4.7   | 1.1   | 4.1    | 2.5    | 2.7    | 1.0    | 1.0    |
| 22.1   | 20.8   | 33.7  | 39.0  | 41.6   | 24.6   | 82.1   | 52.5   | 69.4   |
| 10.8   | 2.4    | 10.0  | 1.1   | 2.4    | 2.2    | 8.4    | 9.7    | 1.3    |
| 24.8   | 40.5   | 0.5   | 1.0   | 67.8   | 37.1   | 40.1   | 17.0   | 29.4   |
| 7.5    | 6.7    | 14.2  | 14.4  | 5.8    | 13.1   | 13.6   | 7.1    | 15.1   |
| 1.9    | 5.2    | 9.2   | 1.8   | 2.6    | 15.3   | 5.3    | 3.8    | 8.3    |
| 90.1   | 65.8   | 48.1  | 60.1  | 88.3   | 40.0   | 11.1   | 28.5   | 18.8   |
| 8.6    | 2.0    | 5.0   | 21.0  | 4.7    | 7.1    | 12.3   | 12.7   | 12.8   |
| 9.6    | 30.4   | 2.5   | 2.3   | 33.3   | 34.7   | 2.3    | 3.5    | 6.2    |
| 7.2    | 12.9   | 5.4   | 6.0   | 4.3    | 5.1    | 4.6    | 5.9    | 7.0    |
| 23.0   | 34.7   | 11.9  | 4.2   | 31.5   | 25.3   | 185.8  | 130.5  | 153.6  |
| 5.1    | 15.5   | 5.7   | 5.3   | 5.8    | 2.4    | 7.1    | 10.5   | 7.8    |
| 1.5    | 4.4    | 0.6   | 6.3   | 7.6    | 3.5    | 2.7    | 5.0    | 3.0    |
| 101.4  | 171.7  | 0.7   | 5.0   | 142.0  | 109.9  | 26.9   | 29.6   | 29.8   |
| 0.1    | 0.3    | 3.6   | 4.9   | 0.6    | 0.6    | 3.9    | 3.0    | 5.8    |
| 3.5    | 6.4    | 3.4   | 0.7   | 7.9    | 0.5    | 7.7    | 0.6    | 3.6    |
| 242.9  | 299.5  | 24.4  | 24.3  | 331.9  | 307.9  | 284.4  | 199.7  | 239.9  |
| 435.7  | 532.2  | 50.5  | 60.8  | 524.8  | 546.0  | 357.6  | 225.7  | 282.7  |
| 4.7    | 0.7    | 18.1  | 25.9  | 6.1    | 10.4   | 1.2    | 0.8    | 3.6    |
| 23.0   | 41.5   | 12.1  | 13.8  | 35.5   | 28.3   | 52.7   | 73.7   | 82.5   |
| 7.9    | 7.6    | 7.0   | 7.3   | 7.8    | 11.0   | 4.6    | 5.1    | 10.8   |
| 5.0    | 4.3    | 4.7   | 3.2   | 1.6    | 1.9    | 7.9    | 1.9    | 1.6    |
| 1.5    | 3.3    | 1.3   | 1.1   | 2.7    | 4.6    | 6.1    | 3.5    | 3.6    |
| 17.4   | 0.9    | 5.0   | 8.2   | 1.4    | 3.6    | 11.4   | 9.5    | 5.2    |
| 9.6    | 21.7   | 15.9  | 1.7   | 23.0   | 21.3   | 10.6   | 8.0    | 7.2    |
| 2.2    | 13.9   | 3.3   | 2.3   | 7.4    | 8.1    | 3.5    | 2.8    | 3.0    |
| 3.2    | 8.0    | 0.4   | 8.5   | 4.0    | 10.9   | 2.4    | 4.2    | 10.1   |
| 1.7    | 1.1    | 0.8   | 1.6   | 3.4    | 1.2    | 8.6    | 6.2    | 3.2    |
| 10.3   | 22.9   | 4.2   | 1.7   | 17.8   | 15.0   | 17.2   | 17.2   | 10.8   |
| 4.2    | 9.6    | 17.3  | 18.2  | 2.9    | 10.9   | 38.1   | 36.8   | 32.7   |
| 12.1   | 19.7   | 4.6   | 4.3   | 17.9   | 7.3    | 44.4   | 46.2   | 45.8   |
| 21.8   | 23.5   | 52.1  | 31.0  | 21.9   | 11.5   | 73.1   | 77.3   | 77.7   |

|       |       |       |       |       |       |       |       |       |
|-------|-------|-------|-------|-------|-------|-------|-------|-------|
| 19.9  | 17.2  | 4.9   | 6.0   | 14.7  | 12.3  | 22.2  | 43.2  | 35.4  |
| 132.0 | 145.2 | 127.0 | 137.7 | 202.1 | 104.3 | 322.9 | 371.1 | 395.0 |
| 9.9   | 7.4   | 3.1   | 5.0   | 6.6   | 7.6   | 12.2  | 12.6  | 17.4  |
| 2.3   | 4.8   | 2.4   | 11.6  | 2.8   | 9.6   | 1.8   | 11.0  | 15.0  |
| 904.5 | 903.1 | 0.9   | 0.4   | 245.1 | 225.5 | 1.0   | 0.8   | 1.6   |
| 10.4  | 18.3  | 8.9   | 7.9   | 8.4   | 15.1  | 53.9  | 61.8  | 54.0  |
| 22.9  | 21.8  | 23.9  | 18.3  | 36.1  | 23.8  | 32.7  | 26.3  | 47.8  |
| 5.2   | 2.3   | 2.6   | 3.5   | 3.5   | 9.6   | 16.4  | 17.0  | 13.8  |
| 36.1  | 28.8  | 26.7  | 28.4  | 46.3  | 37.9  | 89.3  | 121.3 | 125.1 |
| 32.0  | 38.7  | 33.7  | 59.0  | 68.3  | 44.7  | 168.3 | 146.7 | 141.1 |
| 0.8   | 3.1   | 4.1   | 1.5   | 2.3   | 5.4   | 2.1   | 0.5   | 5.2   |
| 21.8  | 47.0  | 13.4  | 0.4   | 54.9  | 5.0   | 11.9  | 19.5  | 9.4   |
| 32.0  | 35.0  | 10.1  | 13.5  | 48.6  | 68.4  | 24.0  | 23.3  | 28.6  |
| 23.3  | 15.5  | 9.3   | 16.8  | 8.1   | 18.9  | 41.2  | 40.4  | 34.3  |
| 23.6  | 18.2  | 3.5   | 0.9   | 22.5  | 13.8  | 42.6  | 52.0  | 51.4  |
| 21.5  | 16.4  | 8.2   | 24.8  | 18.6  | 14.4  | 9.5   | 4.0   | 7.3   |
| 5.1   | 0.5   | 4.1   | 5.7   | 4.2   | 13.3  | 8.0   | 10.7  | 8.0   |
| 25.7  | 24.5  | 11.9  | 15.0  | 10.6  | 12.5  | 57.3  | 29.5  | 56.4  |
| 1.2   | 6.4   | 1.2   | 9.2   | 15.6  | 6.8   | 27.1  | 17.6  | 12.4  |
| 28.3  | 12.2  | 2.7   | 5.1   | 29.5  | 9.3   | 11.2  | 6.1   | 5.5   |
| 2.2   | 4.2   | 0.4   | 0.4   | 0.7   | 0.9   | 2.7   | 0.4   | 1.2   |
| 4.9   | 4.6   | 4.2   | 9.1   | 4.0   | 4.3   | 12.3  | 13.8  | 6.4   |
| 2.8   | 4.1   | 6.4   | 0.3   | 1.2   | 11.7  | 5.1   | 3.2   | 10.4  |
| 2.1   | 0.6   | 6.3   | 7.0   | 2.5   | 1.2   | 1.0   | 3.2   | 3.1   |
| 2.4   | 8.9   | 2.4   | 6.7   | 15.0  | 5.7   | 15.4  | 7.1   | 6.3   |
| 15.4  | 0.9   | 5.7   | 9.8   | 1.7   | 1.0   | 4.2   | 3.7   | 4.9   |
| 1.9   | 1.0   | 10.4  | 4.8   | 10.4  | 1.5   | 8.2   | 5.9   | 2.9   |
| 9.5   | 6.1   | 11.3  | 13.1  | 1.3   | 9.1   | 16.1  | 14.1  | 26.7  |
| 14.3  | 13.7  | 6.8   | 1.1   | 14.1  | 7.6   | 3.8   | 7.3   | 1.7   |
| 1.1   | 0.4   | 6.0   | 4.6   | 5.7   | 1.2   | 2.5   | 1.0   | 2.1   |
| 2.2   | 1.8   | 1.5   | 0.7   | 2.2   | 1.4   | 4.8   | 1.3   | 2.7   |
| 21.3  | 17.6  | 6.0   | 9.6   | 18.0  | 16.6  | 31.2  | 22.1  | 30.3  |
| 8.7   | 8.2   | 5.0   | 5.2   | 7.7   | 6.6   | 6.5   | 6.9   | 4.9   |
| 3.1   | 0.8   | 0.3   | 3.4   | 0.3   | 0.2   | 1.1   | 1.0   | 0.9   |
| 23.5  | 7.3   | 28.2  | 29.9  | 13.7  | 5.8   | 32.9  | 38.7  | 41.7  |
| 0.8   | 7.8   | 6.9   | 2.3   | 1.2   | 3.9   | 6.8   | 6.0   | 1.0   |
| 1.9   | 3.5   | 0.6   | 1.1   | 3.4   | 6.0   | 0.8   | 4.7   | 5.8   |
| 18.9  | 43.4  | 8.7   | 14.7  | 40.2  | 56.3  | 40.8  | 35.5  | 32.0  |
| 29.9  | 23.8  | 46.8  | 51.5  | 23.1  | 23.9  | 54.2  | 63.3  | 31.4  |
| 1.4   | 2.1   | 2.7   | 1.1   | 1.6   | 2.0   | 8.4   | 4.2   | 3.8   |
| 1.1   | 5.9   | 5.7   | 0.4   | 0.9   | 4.3   | 4.9   | 3.2   | 0.7   |
| 3.2   | 1.4   | 0.7   | 2.9   | 1.0   | 6.3   | 2.8   | 1.8   | 5.0   |
| 7.5   | 2.8   | 1.8   | 1.5   | 15.6  | 9.6   | 12.3  | 11.8  | 10.5  |
| 3.3   | 1.8   | 7.4   | 2.1   | 0.5   | 4.9   | 12.5  | 11.0  | 11.3  |
| 31.5  | 67.1  | 2.9   | 8.4   | 43.9  | 21.6  | 35.2  | 37.8  | 31.9  |
| 0.9   | 0.9   | 4.6   | 1.1   | 1.3   | 1.1   | 3.1   | 1.0   | 2.0   |
| 8.7   | 22.4  | 24.5  | 13.0  | 14.4  | 15.6  | 25.2  | 42.8  | 37.5  |
| 1.4   | 1.1   | 9.3   | 1.8   | 1.3   | 1.9   | 4.4   | 6.4   | 5.3   |
| 3.5   | 0.4   | 9.4   | 1.3   | 1.2   | 8.3   | 2.8   | 8.5   | 1.3   |
| 79.6  | 117.5 | 8.3   | 12.5  | 109.3 | 99.8  | 104.5 | 119.9 | 115.2 |
| 22.0  | 7.4   | 11.3  | 12.2  | 15.5  | 13.5  | 36.4  | 47.9  | 59.5  |
| 13.5  | 14.9  | 19.6  | 10.0  | 1.7   | 1.6   | 7.5   | 6.2   | 13.4  |
| 8.5   | 11.3  | 5.8   | 1.2   | 14.4  | 10.4  | 8.5   | 14.2  | 14.0  |

|       |       |      |      |       |       |       |       |       |
|-------|-------|------|------|-------|-------|-------|-------|-------|
| 23.0  | 27.3  | 5.9  | 6.6  | 30.4  | 20.5  | 79.7  | 51.0  | 54.8  |
| 6.8   | 21.2  | 0.7  | 8.4  | 4.8   | 13.3  | 42.0  | 13.3  | 13.9  |
| 29.9  | 21.9  | 5.0  | 19.8 | 43.1  | 4.9   | 141.4 | 156.1 | 214.2 |
| 22.7  | 23.4  | 10.1 | 11.3 | 15.8  | 21.4  | 59.5  | 33.6  | 41.9  |
| 18.5  | 19.0  | 1.4  | 5.8  | 25.6  | 20.8  | 3.4   | 3.9   | 3.9   |
| 0.8   | 2.9   | 12.1 | 0.7  | 5.5   | 14.2  | 4.2   | 6.2   | 2.9   |
| 4.8   | 2.3   | 40.3 | 75.6 | 7.4   | 1.9   | 52.3  | 21.5  | 24.0  |
| 11.0  | 12.9  | 1.4  | 1.0  | 9.7   | 19.0  | 26.9  | 13.1  | 16.8  |
| 3.7   | 10.0  | 16.4 | 8.2  | 5.8   | 1.8   | 2.4   | 8.1   | 2.6   |
| 28.2  | 56.3  | 5.2  | 6.8  | 65.3  | 56.7  | 101.9 | 90.3  | 101.1 |
| 8.4   | 8.9   | 8.4  | 7.3  | 3.2   | 4.3   | 8.9   | 7.2   | 9.8   |
| 13.8  | 13.2  | 1.6  | 1.9  | 43.2  | 6.3   | 41.6  | 35.6  | 57.9  |
| 12.1  | 5.2   | 6.7  | 9.1  | 25.9  | 16.5  | 10.9  | 12.1  | 13.5  |
| 109.6 | 125.0 | 15.5 | 16.2 | 112.0 | 162.9 | 103.2 | 97.5  | 128.6 |
| 13.4  | 16.0  | 6.8  | 3.7  | 6.8   | 14.2  | 46.1  | 80.6  | 77.8  |
| 13.2  | 14.7  | 3.5  | 9.0  | 23.9  | 19.9  | 31.6  | 39.5  | 38.6  |
| 1.8   | 1.1   | 0.9  | 0.6  | 2.7   | 11.5  | 3.5   | 4.1   | 5.5   |
| 99.5  | 111.9 | 14.5 | 37.3 | 106.3 | 111.1 | 46.3  | 26.1  | 46.1  |
| 3.0   | 1.8   | 0.3  | 1.2  | 7.0   | 0.5   | 1.2   | 7.5   | 0.9   |
| 6.9   | 8.0   | 17.6 | 11.0 | 17.0  | 11.8  | 14.3  | 11.3  | 14.2  |
| 2.2   | 1.7   | 1.0  | 2.3  | 12.5  | 2.4   | 4.2   | 7.9   | 8.2   |
| 7.5   | 0.8   | 1.3  | 7.8  | 10.1  | 5.7   | 6.5   | 2.1   | 4.6   |
| 1.8   | 1.3   | 0.4  | 1.5  | 1.8   | 6.0   | 2.4   | 1.4   | 1.2   |
| 40.1  | 37.5  | 9.6  | 11.2 | 76.4  | 97.7  | 132.8 | 77.5  | 82.8  |
| 56.5  | 59.6  | 21.6 | 12.9 | 47.1  | 81.2  | 95.2  | 124.2 | 130.1 |
| 12.5  | 9.7   | 24.2 | 10.7 | 19.4  | 13.0  | 136.3 | 123.6 | 136.8 |
| 1.9   | 0.3   | 0.9  | 4.7  | 0.2   | 0.3   | 2.3   | 0.5   | 3.1   |
| 34.4  | 24.4  | 3.2  | 14.7 | 21.6  | 35.2  | 19.2  | 30.2  | 32.7  |
| 6.1   | 3.4   | 5.8  | 2.5  | 3.1   | 5.9   | 4.6   | 1.9   | 4.9   |
| 16.2  | 9.0   | 0.8  | 0.3  | 9.5   | 0.8   | 15.9  | 18.3  | 19.5  |
| 20.7  | 20.3  | 12.2 | 8.4  | 31.0  | 8.2   | 29.7  | 38.5  | 45.5  |
| 0.9   | 12.6  | 3.0  | 6.1  | 7.5   | 3.2   | 94.9  | 121.8 | 112.9 |
| 21.0  | 26.4  | 8.9  | 3.8  | 27.1  | 21.6  | 57.1  | 60.6  | 70.7  |
| 5.9   | 9.2   | 4.6  | 4.9  | 20.3  | 8.6   | 10.4  | 13.7  | 7.3   |
| 2.4   | 14.2  | 19.4 | 17.7 | 28.6  | 13.3  | 23.3  | 29.7  | 22.2  |
| 2.5   | 19.9  | 19.5 | 18.9 | 14.7  | 24.3  | 21.9  | 16.5  | 18.3  |
| 36.8  | 61.7  | 6.2  | 22.8 | 84.4  | 39.0  | 65.0  | 63.9  | 54.2  |
| 16.4  | 5.3   | 2.8  | 6.4  | 2.4   | 10.9  | 30.0  | 14.6  | 33.2  |
| 4.8   | 14.7  | 17.3 | 3.6  | 1.7   | 12.0  | 25.2  | 14.7  | 17.8  |
| 21.6  | 15.2  | 15.7 | 2.4  | 3.5   | 1.6   | 7.4   | 23.7  | 8.0   |
| 23.3  | 26.9  | 27.4 | 82.0 | 62.7  | 45.9  | 75.6  | 55.5  | 77.8  |
| 1.6   | 9.1   | 2.2  | 4.0  | 1.0   | 7.1   | 9.6   | 3.5   | 7.0   |
| 10.5  | 11.4  | 9.9  | 10.1 | 10.1  | 12.2  | 31.4  | 21.5  | 18.6  |
| 8.2   | 3.1   | 13.2 | 2.9  | 2.7   | 9.2   | 16.7  | 8.7   | 14.1  |
| 5.4   | 1.3   | 7.3  | 16.0 | 5.7   | 7.8   | 10.4  | 14.6  | 10.8  |
| 33.3  | 41.3  | 16.5 | 33.0 | 47.1  | 30.2  | 220.9 | 164.6 | 160.7 |
| 4.8   | 1.9   | 2.9  | 1.9  | 0.8   | 5.1   | 2.7   | 6.8   | 4.3   |
| 2.7   | 11.3  | 4.1  | 2.0  | 3.3   | 2.4   | 1.4   | 2.4   | 1.7   |
| 16.2  | 13.6  | 3.7  | 0.8  | 14.7  | 13.4  | 23.6  | 22.8  | 20.5  |
| 2.5   | 2.0   | 17.5 | 13.8 | 12.1  | 0.9   | 32.5  | 54.0  | 45.3  |
| 50.1  | 68.3  | 48.9 | 50.7 | 51.2  | 63.1  | 259.4 | 266.2 | 304.1 |
| 3.6   | 9.0   | 0.7  | 0.6  | 7.8   | 1.3   | 3.7   | 3.1   | 3.3   |
| 27.1  | 29.4  | 2.1  | 6.2  | 20.2  | 25.8  | 39.8  | 19.8  | 20.6  |

|        |        |       |       |        |        |        |        |        |
|--------|--------|-------|-------|--------|--------|--------|--------|--------|
| 1.4    | 0.6    | 1.0   | 0.9   | 1.7    | 0.6    | 2.0    | 1.7    | 3.2    |
| 3.6    | 13.6   | 7.2   | 1.9   | 11.6   | 1.5    | 7.6    | 9.3    | 8.0    |
| 42.1   | 100.0  | 5.6   | 1.2   | 66.9   | 62.5   | 58.8   | 25.0   | 25.2   |
| 1.7    | 12.5   | 0.9   | 4.4   | 16.6   | 9.0    | 24.9   | 18.2   | 21.3   |
| 1.2    | 0.6    | 5.6   | 8.7   | 0.6    | 4.7    | 11.4   | 9.6    | 9.6    |
| 28.7   | 77.1   | 3.3   | 5.5   | 50.4   | 44.0   | 47.4   | 64.6   | 76.5   |
| 3.3    | 17.7   | 1.6   | 5.3   | 1.7    | 13.1   | 1.1    | 2.0    | 4.2    |
| 24.6   | 26.5   | 1.5   | 1.8   | 41.7   | 35.3   | 21.1   | 22.5   | 21.7   |
| 12.2   | 23.5   | 1.3   | 6.3   | 18.0   | 20.6   | 27.4   | 34.0   | 29.3   |
| 11.2   | 18.7   | 5.6   | 3.4   | 14.7   | 14.1   | 23.6   | 22.9   | 26.0   |
| 13.7   | 8.0    | 13.5  | 2.5   | 6.5    | 14.9   | 4.5    | 2.2    | 2.6    |
| 1.7    | 1.9    | 1.1   | 1.0   | 9.4    | 11.2   | 8.9    | 15.5   | 13.9   |
| 4.6    | 22.7   | 3.2   | 1.7   | 14.6   | 5.9    | 3.9    | 9.4    | 21.6   |
| 1.8    | 1.8    | 1.9   | 5.8   | 3.2    | 6.8    | 1.1    | 1.7    | 1.8    |
| 30.2   | 35.7   | 5.1   | 6.8   | 31.8   | 41.9   | 31.3   | 21.7   | 21.5   |
| 5.9    | 1.5    | 4.4   | 5.6   | 11.3   | 8.4    | 15.5   | 7.8    | 20.9   |
| 0.9    | 1.5    | 2.1   | 0.8   | 11.0   | 0.6    | 1.2    | 3.2    | 1.8    |
| 42.2   | 20.0   | 9.9   | 9.8   | 46.4   | 31.3   | 10.5   | 10.4   | 13.8   |
| 5.0    | 10.7   | 0.6   | 1.7   | 5.4    | 8.2    | 50.1   | 34.2   | 33.9   |
| 8.9    | 11.2   | 0.8   | 1.0   | 4.7    | 0.9    | 5.2    | 5.3    | 5.6    |
| 12.7   | 9.7    | 3.1   | 1.7   | 2.2    | 5.4    | 16.1   | 9.4    | 10.3   |
| 0.7    | 1.6    | 0.6   | 0.4   | 6.4    | 4.6    | 9.7    | 2.1    | 1.1    |
| 7.2    | 9.7    | 2.3   | 8.7   | 13.6   | 21.0   | 11.0   | 5.7    | 4.7    |
| 2.7    | 12.3   | 1.7   | 0.7   | 12.7   | 2.3    | 8.0    | 11.6   | 13.6   |
| 37.1   | 72.5   | 13.8  | 22.5  | 68.7   | 72.7   | 130.1  | 129.0  | 91.2   |
| 580.1  | 703.9  | 192.6 | 263.1 | 1079.8 | 633.3  | 1628.7 | 1414.2 | 1742.2 |
| 4.9    | 3.3    | 7.7   | 1.6   | 3.3    | 1.0    | 0.9    | 2.7    | 0.7    |
| 1.4    | 4.1    | 16.3  | 18.8  | 1.9    | 0.6    | 42.1   | 60.2   | 68.2   |
| 6.9    | 3.0    | 7.7   | 7.5   | 2.1    | 7.6    | 5.5    | 8.6    | 3.1    |
| 10.2   | 15.8   | 14.0  | 2.3   | 20.3   | 26.8   | 48.2   | 39.4   | 53.6   |
| 1691.1 | 2624.4 | 13.9  | 7.2   | 1233.3 | 1743.9 | 110.5  | 88.2   | 64.4   |
| 141.3  | 238.9  | 11.8  | 25.2  | 170.2  | 220.0  | 155.7  | 103.4  | 155.8  |
| 9.7    | 18.5   | 14.8  | 8.5   | 22.8   | 18.0   | 12.1   | 20.6   | 15.7   |
| 44.2   | 38.2   | 11.8  | 9.4   | 38.3   | 26.6   | 4.2    | 5.5    | 10.3   |
| 43.7   | 35.6   | 9.8   | 12.1  | 76.9   | 58.4   | 144.9  | 111.6  | 103.5  |
| 2.9    | 8.8    | 0.8   | 1.0   | 2.9    | 2.0    | 19.3   | 14.6   | 7.1    |
| 22.4   | 6.8    | 16.3  | 9.5   | 14.8   | 5.7    | 14.3   | 6.4    | 4.6    |
| 18.1   | 14.3   | 2.6   | 6.3   | 24.5   | 19.6   | 11.3   | 17.5   | 9.0    |
| 7.0    | 1.7    | 4.8   | 1.9   | 3.3    | 1.5    | 10.4   | 9.7    | 2.6    |
| 10.5   | 10.0   | 11.9  | 2.2   | 9.8    | 7.5    | 22.8   | 28.6   | 16.0   |
| 0.9    | 10.7   | 0.9   | 4.5   | 1.5    | 6.5    | 8.7    | 9.3    | 5.7    |
| 2.8    | 8.3    | 1.3   | 1.9   | 5.8    | 1.5    | 2.9    | 5.1    | 5.6    |
| 38.2   | 82.9   | 10.3  | 24.0  | 52.6   | 91.5   | 33.3   | 26.5   | 17.3   |
| 176.7  | 248.4  | 36.6  | 65.7  | 238.3  | 197.6  | 174.6  | 125.3  | 104.2  |
| 11.8   | 8.1    | 8.7   | 9.4   | 10.8   | 15.6   | 15.4   | 17.5   | 16.7   |
| 66.0   | 100.2  | 16.9  | 10.0  | 62.4   | 59.4   | 104.5  | 60.0   | 71.1   |
| 1.0    | 4.0    | 0.1   | 0.1   | 0.2    | 2.9    | 3.6    | 3.2    | 2.8    |
| 8.7    | 7.7    | 13.2  | 14.1  | 13.2   | 2.0    | 27.5   | 16.8   | 18.2   |
| 4.1    | 3.2    | 7.2   | 7.1   | 11.2   | 9.5    | 8.4    | 7.9    | 20.5   |
| 7.7    | 0.4    | 1.0   | 2.9   | 7.6    | 1.1    | 3.6    | 7.0    | 4.4    |
| 2.5    | 1.2    | 0.3   | 0.3   | 1.4    | 3.7    | 1.5    | 2.7    | 2.8    |
| 7.9    | 10.5   | 2.5   | 3.9   | 7.9    | 10.4   | 13.2   | 13.2   | 10.8   |
| 1.8    | 1.5    | 11.7  | 6.7   | 2.0    | 2.6    | 6.5    | 10.9   | 9.8    |

|        |        |        |        |        |        |         |         |         |
|--------|--------|--------|--------|--------|--------|---------|---------|---------|
| 1.2    | 4.9    | 1.2    | 0.6    | 8.3    | 1.4    | 9.8     | 2.6     | 2.3     |
| 18.9   | 4.2    | 12.6   | 2.4    | 18.5   | 0.8    | 1.8     | 11.9    | 20.3    |
| 95.9   | 124.0  | 30.9   | 11.1   | 119.0  | 170.3  | 121.4   | 113.6   | 139.3   |
| 20.8   | 51.2   | 4.1    | 9.6    | 23.1   | 38.4   | 25.6    | 32.1    | 42.7    |
| 3.7    | 3.2    | 0.5    | 0.5    | 0.4    | 0.7    | 0.9     | 3.6     | 2.1     |
| 11.9   | 21.8   | 8.5    | 6.0    | 13.7   | 6.6    | 5.9     | 10.5    | 4.8     |
| 56.9   | 68.6   | 13.9   | 17.1   | 78.1   | 64.1   | 367.4   | 462.6   | 525.2   |
| 12.5   | 16.3   | 13.9   | 15.6   | 28.9   | 2.1    | 14.8    | 33.7    | 10.8    |
| 0.5    | 0.4    | 3.5    | 0.2    | 0.2    | 2.2    | 4.1     | 1.9     | 2.9     |
| 3.5    | 5.2    | 13.6   | 7.9    | 2.2    | 5.1    | 4.1     | 6.4     | 6.2     |
| 1.6    | 2.5    | 2.8    | 1.5    | 7.1    | 3.5    | 2.5     | 5.4     | 10.6    |
| 0.4    | 4.6    | 2.2    | 3.4    | 0.4    | 6.7    | 3.8     | 4.8     | 2.0     |
| 35.8   | 49.7   | 14.8   | 14.4   | 48.1   | 56.3   | 45.5    | 37.9    | 47.8    |
| 106.2  | 104.3  | 99.2   | 91.8   | 130.2  | 99.8   | 89.6    | 123.1   | 129.4   |
| 25.8   | 36.3   | 12.6   | 15.1   | 38.6   | 20.5   | 43.5    | 35.4    | 42.5    |
| 947.7  | 1202.3 | 182.8  | 225.5  | 1307.3 | 748.1  | 1469.5  | 1066.4  | 1159.6  |
| 1386.7 | 1570.2 | 1081.9 | 1530.4 | 1728.4 | 1969.5 | 4391.2  | 4002.0  | 4094.7  |
| 3099.4 | 3929.3 | 2167.2 | 2762.4 | 4164.2 | 3541.9 | 5321.7  | 4843.3  | 5286.5  |
| 2758.8 | 3471.2 | 783.9  | 1204.3 | 3701.6 | 3312.0 | 5157.1  | 5055.6  | 5312.0  |
| 4675.9 | 5310.0 | 3471.3 | 3920.4 | 5591.4 | 5023.6 | 8189.6  | 7186.5  | 6858.2  |
| 25.7   | 40.4   | 20.6   | 18.8   | 22.1   | 37.9   | 57.5    | 46.6    | 41.5    |
| 1968.2 | 3280.5 | 303.0  | 508.2  | 3497.8 | 3359.0 | 2372.8  | 1566.7  | 1644.9  |
| 3.1    | 4.2    | 3.8    | 5.7    | 2.3    | 1.6    | 7.5     | 4.0     | 5.1     |
| 2118.0 | 2540.3 | 514.9  | 650.1  | 2638.6 | 2229.9 | 4524.1  | 2701.4  | 2945.0  |
| 1293.3 | 1434.6 | 187.2  | 315.7  | 1500.8 | 1340.3 | 3602.9  | 2036.8  | 2123.6  |
| 703.3  | 918.2  | 297.7  | 415.2  | 1025.1 | 716.3  | 1465.1  | 1385.3  | 1643.7  |
| 1137.5 | 1433.0 | 689.0  | 977.2  | 1726.9 | 2048.5 | 1699.1  | 1576.1  | 1815.4  |
| 4895.2 | 5954.3 | 619.2  | 576.5  | 5897.2 | 5053.1 | 11574.6 | 11851.2 | 11933.4 |
| 105.9  | 147.2  | 218.6  | 393.8  | 202.9  | 137.8  | 287.0   | 264.7   | 355.6   |
| 529.6  | 674.5  | 158.5  | 165.6  | 1068.1 | 889.2  | 856.4   | 840.6   | 947.6   |
| 578.2  | 878.1  | 91.0   | 119.8  | 891.5  | 633.8  | 5033.7  | 6953.1  | 7095.3  |
| 992.4  | 1264.2 | 691.4  | 891.0  | 1664.6 | 1009.1 | 5844.8  | 7445.3  | 7608.4  |
| 6732.3 | 7756.2 | 2348.3 | 2987.4 | 7927.6 | 7260.7 | 7698.6  | 6390.2  | 6518.5  |
| 160.8  | 192.0  | 53.0   | 67.2   | 235.1  | 184.9  | 290.1   | 288.0   | 324.6   |
| 50.1   | 53.1   | 12.4   | 23.4   | 58.6   | 47.7   | 89.5    | 107.2   | 111.4   |
| 772.6  | 1021.5 | 968.4  | 1414.3 | 1070.3 | 840.7  | 1422.2  | 1489.2  | 1660.1  |
| 411.5  | 618.4  | 540.0  | 793.7  | 487.1  | 422.8  | 1235.7  | 1102.1  | 1302.0  |
| 414.0  | 558.7  | 186.0  | 187.7  | 657.7  | 456.3  | 360.9   | 241.9   | 250.8   |
| 787.1  | 1153.7 | 184.3  | 238.6  | 1235.0 | 1032.1 | 507.1   | 272.9   | 313.5   |
| 5991.2 | 7304.0 | 3556.1 | 4399.3 | 7066.7 | 6893.5 | 11485.1 | 11383.4 | 11244.1 |
| 547.3  | 658.0  | 229.9  | 301.8  | 846.0  | 630.5  | 1006.2  | 883.7   | 919.9   |
| 259.7  | 370.4  | 396.1  | 620.7  | 360.1  | 416.2  | 578.7   | 576.1   | 601.1   |
| 695.2  | 995.0  | 131.1  | 168.2  | 1087.6 | 907.6  | 375.3   | 482.2   | 483.1   |
| 758.1  | 1087.7 | 319.8  | 388.4  | 1324.2 | 972.3  | 7225.1  | 7497.8  | 7272.0  |
| 2167.1 | 3077.4 | 196.2  | 189.3  | 3813.1 | 3275.6 | 6059.6  | 3881.6  | 3560.4  |
| 475.2  | 664.2  | 255.1  | 325.1  | 819.6  | 651.6  | 1146.1  | 1299.9  | 1537.4  |
| 3337.7 | 3980.2 | 1388.6 | 1957.8 | 4450.8 | 3729.3 | 6834.7  | 6543.4  | 6872.2  |
| 277.3  | 370.1  | 229.7  | 275.4  | 493.2  | 312.2  | 1157.0  | 1002.9  | 997.2   |
| 55.1   | 80.1   | 120.2  | 188.4  | 76.6   | 69.8   | 691.7   | 840.3   | 927.8   |
| 437.1  | 640.8  | 1248.0 | 1846.6 | 559.1  | 555.7  | 757.7   | 654.3   | 706.9   |
| 205.2  | 196.4  | 223.1  | 340.3  | 280.3  | 162.7  | 1707.3  | 1959.8  | 2397.4  |
| 258.7  | 401.4  | 130.8  | 241.1  | 293.1  | 332.4  | 1172.6  | 1238.2  | 1399.9  |
| 4095.6 | 4661.9 | 662.5  | 997.2  | 5246.3 | 4330.3 | 8079.0  | 7546.5  | 7926.1  |

|        |        |        |        |        |        |        |        |        |
|--------|--------|--------|--------|--------|--------|--------|--------|--------|
| 354.0  | 375.5  | 132.6  | 241.6  | 414.2  | 354.9  | 487.5  | 243.0  | 253.6  |
| 930.2  | 1336.0 | 327.6  | 485.3  | 1454.1 | 1400.5 | 2009.4 | 1189.0 | 1356.1 |
| 1367.5 | 1889.6 | 1401.5 | 2002.7 | 2104.5 | 1646.6 | 3939.5 | 4398.7 | 4673.7 |
| 8.3    | 8.5    | 1.5    | 2.2    | 0.7    | 11.8   | 5.3    | 1.5    | 0.9    |
| 485.4  | 582.4  | 234.4  | 336.1  | 689.1  | 589.7  | 2486.9 | 2564.0 | 2636.4 |
| 632.2  | 833.1  | 169.5  | 123.2  | 954.4  | 910.1  | 1146.7 | 887.9  | 930.4  |
| 258.8  | 296.6  | 75.8   | 63.8   | 363.7  | 303.1  | 630.3  | 518.8  | 573.7  |
| 604.8  | 782.7  | 73.4   | 116.9  | 1188.8 | 706.6  | 833.4  | 689.5  | 769.2  |
| 923.6  | 1526.3 | 13.2   | 1.4    | 1284.2 | 1097.7 | 32.7   | 16.9   | 22.9   |
| 1235.8 | 2059.5 | 6.1    | 5.5    | 1834.7 | 1414.2 | 11.0   | 2.6    | 17.0   |
| 809.5  | 1158.2 | 9.4    | 13.3   | 1229.9 | 1019.3 | 42.3   | 22.3   | 29.3   |
| 86.6   | 110.8  | 73.8   | 128.7  | 105.3  | 64.7   | 181.3  | 169.9  | 203.0  |
| 237.5  | 317.7  | 44.0   | 52.8   | 332.1  | 264.7  | 661.9  | 623.2  | 663.3  |
| 882.4  | 1054.0 | 1.2    | 2.1    | 1290.5 | 771.5  | 15.5   | 19.8   | 27.3   |
| 2047.8 | 2544.6 | 788.7  | 1057.2 | 2877.7 | 2503.1 | 3716.5 | 2834.4 | 2991.4 |
| 2861.8 | 3883.1 | 455.1  | 537.8  | 4436.9 | 4009.1 | 8729.5 | 7617.5 | 7651.0 |
| 316.9  | 391.1  | 229.1  | 305.8  | 440.4  | 303.1  | 1322.7 | 1385.8 | 1744.4 |
| 366.1  | 466.7  | 3.2    | 19.3   | 627.8  | 420.8  | 850.4  | 1310.3 | 1339.8 |
| 1617.3 | 1678.5 | 551.7  | 731.4  | 2301.4 | 1641.4 | 3769.6 | 2514.7 | 2923.8 |
| 1762.9 | 2127.1 | 862.0  | 1627.4 | 2611.7 | 2146.8 | 4662.1 | 4624.4 | 5072.5 |
| 1297.4 | 1669.9 | 1635.8 | 2159.2 | 1437.8 | 1662.1 | 3141.6 | 1942.8 | 1944.6 |
| 182.5  | 338.7  | 62.0   | 86.7   | 326.9  | 236.0  | 248.4  | 176.4  | 241.1  |
| 429.3  | 688.9  | 140.8  | 174.8  | 986.7  | 943.8  | 898.1  | 855.2  | 896.5  |
| 227.1  | 247.2  | 171.8  | 325.4  | 384.2  | 221.4  | 1326.1 | 772.8  | 829.5  |
| 119.0  | 139.3  | 72.7   | 140.7  | 210.8  | 139.3  | 420.8  | 407.3  | 522.6  |
| 345.5  | 537.8  | 166.1  | 192.8  | 636.7  | 687.7  | 1675.3 | 1641.1 | 1714.2 |
| 365.6  | 419.0  | 721.1  | 995.3  | 501.3  | 345.8  | 882.6  | 959.8  | 1039.5 |
| 260.0  | 297.6  | 83.0   | 87.7   | 429.1  | 414.5  | 355.9  | 360.2  | 427.9  |
| 175.9  | 180.0  | 309.0  | 437.1  | 233.0  | 139.3  | 510.4  | 332.8  | 422.8  |
| 121.9  | 122.3  | 189.5  | 253.9  | 223.0  | 113.2  | 396.2  | 1046.1 | 1041.1 |
| 284.9  | 357.7  | 113.6  | 234.9  | 441.9  | 258.0  | 282.3  | 211.7  | 289.5  |
| 117.2  | 158.0  | 95.3   | 138.8  | 189.3  | 157.4  | 205.4  | 157.4  | 146.1  |
| 821.1  | 1056.6 | 281.5  | 456.6  | 1203.2 | 839.6  | 1241.4 | 536.1  | 633.3  |
| 152.1  | 187.9  | 19.9   | 29.6   | 201.4  | 147.8  | 244.9  | 187.1  | 239.9  |
| 533.7  | 806.1  | 45.8   | 50.2   | 772.7  | 923.1  | 447.0  | 498.8  | 515.3  |
| 216.4  | 241.4  | 71.5   | 108.8  | 304.4  | 312.6  | 284.7  | 271.0  | 376.0  |
| 98.4   | 130.4  | 21.1   | 35.0   | 197.5  | 157.7  | 459.5  | 305.5  | 353.1  |
| 166.6  | 189.6  | 285.2  | 393.8  | 225.8  | 109.0  | 891.5  | 818.5  | 873.1  |
| 352.1  | 398.5  | 271.7  | 287.1  | 466.3  | 360.1  | 1310.6 | 902.7  | 1003.2 |
| 36.9   | 24.7   | 40.5   | 58.3   | 45.9   | 17.4   | 62.7   | 62.8   | 87.4   |
| 660.3  | 846.5  | 338.8  | 582.7  | 1295.4 | 736.8  | 2731.2 | 2713.5 | 2948.8 |
| 241.3  | 361.0  | 164.1  | 164.7  | 327.8  | 247.3  | 149.8  | 137.2  | 169.7  |
| 172.7  | 215.9  | 92.1   | 119.4  | 355.9  | 215.2  | 539.1  | 379.1  | 405.1  |
| 775.4  | 921.2  | 411.4  | 746.9  | 973.2  | 1024.6 | 2661.6 | 2543.0 | 2670.4 |
| 191.9  | 278.8  | 115.3  | 117.4  | 280.9  | 285.9  | 587.7  | 521.5  | 571.4  |
| 131.2  | 146.2  | 239.8  | 304.7  | 197.3  | 165.9  | 186.6  | 362.4  | 356.4  |
| 507.4  | 547.3  | 236.0  | 280.1  | 680.5  | 526.8  | 3060.0 | 3248.2 | 3470.4 |
| 3713.6 | 4462.9 | 501.9  | 562.8  | 5280.0 | 5032.7 | 7728.3 | 6958.1 | 7149.4 |
| 985.2  | 1596.7 | 451.3  | 615.8  | 1294.4 | 881.9  | 2212.6 | 2056.5 | 2267.1 |
| 477.0  | 639.9  | 523.8  | 677.6  | 774.0  | 838.8  | 2974.4 | 2586.7 | 2757.5 |
| 145.8  | 230.7  | 103.2  | 183.6  | 161.2  | 213.1  | 163.4  | 159.8  | 198.6  |
| 397.6  | 554.9  | 249.1  | 312.6  | 508.8  | 457.7  | 982.7  | 657.2  | 712.3  |
| 309.6  | 333.4  | 196.9  | 381.8  | 402.4  | 391.6  | 825.2  | 745.7  | 794.4  |



|        |        |        |        |        |        |        |        |        |
|--------|--------|--------|--------|--------|--------|--------|--------|--------|
| 891.5  | 1209.6 | 1605.9 | 1755.7 | 1140.1 | 1317.5 | 2958.7 | 3337.6 | 3681.0 |
| 160.0  | 170.3  | 125.6  | 121.7  | 269.7  | 161.0  | 500.3  | 413.7  | 573.5  |
| 1888.7 | 2318.3 | 809.8  | 961.5  | 2622.2 | 2414.9 | 1691.9 | 984.4  | 1205.8 |
| 220.0  | 282.8  | 64.3   | 86.6   | 284.0  | 278.1  | 947.7  | 775.0  | 922.3  |
| 1252.0 | 1458.9 | 468.7  | 657.5  | 1670.5 | 1480.8 | 1737.2 | 1449.3 | 1557.9 |
| 574.0  | 759.4  | 147.9  | 190.3  | 778.3  | 666.3  | 1582.0 | 1157.8 | 1313.1 |
| 42.4   | 67.5   | 55.9   | 34.1   | 70.4   | 139.4  | 311.5  | 276.6  | 318.0  |
| 364.2  | 490.2  | 132.0  | 166.7  | 575.3  | 355.4  | 1288.7 | 1035.5 | 1228.7 |
| 601.3  | 638.8  | 349.1  | 529.3  | 917.8  | 528.0  | 1413.7 | 775.7  | 889.3  |
| 853.3  | 952.3  | 204.9  | 232.0  | 1155.9 | 816.7  | 2852.4 | 2040.7 | 2338.7 |
| 64.2   | 100.3  | 221.4  | 243.6  | 127.2  | 23.9   | 653.0  | 700.2  | 669.7  |
| 19.3   | 28.0   | 54.6   | 88.6   | 57.5   | 33.9   | 228.9  | 202.9  | 316.3  |
| 285.6  | 352.2  | 129.0  | 173.9  | 491.0  | 288.8  | 855.8  | 849.9  | 967.0  |
| 187.5  | 288.6  | 158.2  | 205.3  | 351.5  | 473.3  | 17.7   | 13.4   | 9.9    |
| 454.5  | 508.8  | 282.8  | 345.5  | 691.4  | 337.5  | 565.5  | 405.1  | 448.3  |
| 1044.2 | 1135.0 | 151.1  | 229.0  | 1327.1 | 923.0  | 1742.0 | 1256.3 | 1243.5 |
| 220.1  | 354.6  | 48.3   | 60.2   | 448.3  | 324.8  | 300.4  | 178.7  | 196.3  |
| 68.1   | 68.1   | 10.4   | 19.4   | 120.7  | 69.8   | 147.2  | 102.2  | 135.5  |
| 129.4  | 162.2  | 47.9   | 62.4   | 224.8  | 128.5  | 221.0  | 160.2  | 145.8  |
| 203.1  | 298.7  | 72.4   | 91.3   | 391.1  | 211.6  | 345.8  | 217.0  | 233.6  |
| 372.4  | 534.3  | 667.3  | 865.0  | 566.9  | 497.8  | 2024.4 | 1548.9 | 1869.2 |
| 242.7  | 454.9  | 54.3   | 75.5   | 419.8  | 358.1  | 951.1  | 978.6  | 1109.0 |
| 191.2  | 205.1  | 72.4   | 134.7  | 259.1  | 199.2  | 451.2  | 264.5  | 305.2  |
| 66.1   | 75.0   | 91.4   | 127.9  | 82.5   | 91.0   | 309.0  | 215.0  | 231.1  |
| 139.8  | 198.4  | 61.3   | 83.0   | 170.2  | 104.6  | 586.2  | 454.3  | 501.6  |
| 615.2  | 938.6  | 212.8  | 300.0  | 867.8  | 933.1  | 1551.9 | 786.8  | 965.2  |
| 546.6  | 637.3  | 79.1   | 96.6   | 614.2  | 611.3  | 643.7  | 311.8  | 329.8  |
| 1010.3 | 1503.4 | 43.1   | 61.4   | 1851.9 | 1790.6 | 1087.7 | 413.6  | 502.9  |
| 4529.2 | 5725.3 | 330.4  | 474.5  | 6510.0 | 4851.1 | 8643.4 | 7073.7 | 7095.7 |
| 424.8  | 447.0  | 130.0  | 120.9  | 581.4  | 363.7  | 920.8  | 884.6  | 989.8  |
| 579.8  | 709.1  | 469.4  | 605.4  | 845.0  | 586.9  | 1322.7 | 1675.0 | 1914.4 |
| 21.7   | 18.9   | 132.7  | 198.1  | 16.3   | 26.5   | 121.0  | 103.6  | 112.8  |
| 1298.3 | 1804.1 | 254.6  | 351.5  | 2094.3 | 1414.4 | 2119.6 | 2190.4 | 2370.7 |
| 234.1  | 274.8  | 332.0  | 415.5  | 286.3  | 246.5  | 906.7  | 695.2  | 783.3  |
| 194.7  | 190.0  | 216.2  | 266.4  | 345.7  | 191.7  | 280.2  | 200.0  | 205.1  |
| 150.8  | 193.2  | 27.7   | 44.6   | 234.4  | 225.6  | 533.0  | 357.2  | 378.3  |
| 87.6   | 148.0  | 25.9   | 26.1   | 175.8  | 168.4  | 1833.0 | 1450.0 | 1745.5 |
| 151.8  | 175.7  | 90.2   | 141.1  | 175.2  | 175.0  | 405.9  | 293.6  | 338.3  |
| 1290.7 | 1837.2 | 367.0  | 504.4  | 1845.5 | 1535.6 | 3626.8 | 2547.3 | 2603.2 |
| 586.5  | 617.8  | 480.7  | 544.5  | 776.3  | 490.1  | 2060.9 | 2411.3 | 2717.2 |
| 2.6    | 3.9    | 9.5    | 17.3   | 4.3    | 2.4    | 8.9    | 28.0   | 43.2   |
| 1732.5 | 2269.6 | 1317.4 | 1594.8 | 2350.7 | 1965.0 | 6882.1 | 5721.0 | 6049.0 |
| 70.7   | 143.6  | 79.1   | 113.2  | 142.4  | 128.5  | 102.0  | 129.1  | 150.0  |
| 452.5  | 571.9  | 218.4  | 301.8  | 670.8  | 539.2  | 939.6  | 354.1  | 407.6  |
| 396.3  | 520.9  | 24.1   | 50.4   | 371.6  | 379.6  | 1771.4 | 1479.5 | 1684.0 |
| 418.1  | 464.9  | 274.1  | 379.6  | 680.6  | 515.7  | 1244.8 | 1224.0 | 1297.5 |
| 512.6  | 671.9  | 57.7   | 56.6   | 843.8  | 793.3  | 304.7  | 460.0  | 586.6  |
| 693.7  | 808.3  | 300.6  | 536.4  | 1114.4 | 671.8  | 1654.8 | 978.6  | 1223.8 |
| 387.8  | 436.9  | 254.1  | 274.9  | 686.8  | 416.6  | 851.6  | 794.4  | 1021.4 |
| 44.8   | 42.2   | 25.4   | 33.1   | 34.8   | 30.7   | 388.4  | 328.0  | 419.6  |
| 90.7   | 125.3  | 39.9   | 71.2   | 121.8  | 117.9  | 447.5  | 377.9  | 366.4  |
| 103.9  | 181.1  | 12.2   | 9.1    | 248.8  | 139.9  | 606.6  | 1071.3 | 968.3  |
| 28.8   | 43.4   | 48.3   | 49.8   | 54.3   | 41.9   | 210.2  | 218.4  | 245.5  |

|        |        |        |        |        |        |        |        |        |
|--------|--------|--------|--------|--------|--------|--------|--------|--------|
| 671.5  | 726.4  | 415.4  | 552.4  | 974.7  | 587.4  | 1520.3 | 1701.8 | 1999.4 |
| 242.6  | 272.1  | 135.0  | 204.2  | 332.9  | 208.6  | 634.1  | 442.9  | 532.5  |
| 34.9   | 49.5   | 45.5   | 37.6   | 50.6   | 73.3   | 206.1  | 229.9  | 258.8  |
| 26.8   | 47.8   | 19.2   | 12.9   | 44.1   | 43.2   | 304.4  | 271.6  | 332.8  |
| 64.8   | 106.4  | 57.4   | 42.1   | 125.8  | 73.2   | 275.1  | 273.0  | 254.6  |
| 98.9   | 96.5   | 193.4  | 275.5  | 149.4  | 91.5   | 494.4  | 407.6  | 527.7  |
| 269.9  | 331.1  | 201.3  | 293.5  | 319.6  | 312.6  | 687.2  | 488.6  | 514.4  |
| 284.6  | 337.4  | 62.8   | 86.5   | 421.3  | 327.0  | 513.5  | 566.5  | 667.9  |
| 1042.1 | 1411.6 | 164.4  | 195.2  | 1686.5 | 1242.7 | 1306.9 | 875.3  | 1004.5 |
| 1307.5 | 1591.0 | 294.8  | 443.1  | 1822.5 | 1477.5 | 3111.1 | 1738.2 | 1973.9 |
| 493.7  | 676.6  | 300.6  | 473.6  | 625.0  | 585.9  | 2917.2 | 3041.0 | 2941.7 |
| 2840.9 | 2882.8 | 1648.9 | 2109.5 | 3424.0 | 2634.4 | 4905.7 | 4096.3 | 4650.9 |
| 444.8  | 435.8  | 240.3  | 349.8  | 615.7  | 392.9  | 916.1  | 619.4  | 644.6  |
| 797.1  | 1142.1 | 145.8  | 201.0  | 1211.1 | 1137.1 | 1441.5 | 955.8  | 1081.9 |
| 771.1  | 732.3  | 461.3  | 689.0  | 1071.6 | 859.1  | 2302.7 | 2171.1 | 2407.3 |
| 298.5  | 434.9  | 88.6   | 95.7   | 337.1  | 353.4  | 46.8   | 25.0   | 9.8    |
| 41.7   | 41.7   | 16.4   | 9.9    | 81.3   | 42.3   | 305.9  | 280.1  | 269.1  |
| 97.1   | 167.9  | 163.5  | 146.1  | 140.2  | 130.4  | 393.7  | 510.5  | 539.2  |
| 32.2   | 38.3   | 22.1   | 55.3   | 56.7   | 42.4   | 217.1  | 162.2  | 185.7  |
| 173.5  | 286.7  | 48.7   | 71.2   | 308.7  | 311.7  | 561.0  | 439.1  | 464.9  |
| 152.2  | 252.0  | 17.6   | 24.7   | 306.8  | 253.1  | 590.7  | 472.3  | 482.5  |
| 97.2   | 155.1  | 35.5   | 34.5   | 171.0  | 127.2  | 351.1  | 267.2  | 282.9  |
| 482.4  | 567.6  | 316.7  | 443.8  | 761.4  | 569.7  | 965.3  | 971.5  | 1017.0 |
| 2457.1 | 3267.5 | 548.9  | 718.7  | 3317.8 | 3086.3 | 3897.4 | 3478.6 | 3353.6 |
| 369.2  | 465.4  | 187.9  | 224.7  | 475.6  | 499.5  | 471.8  | 229.1  | 268.3  |
| 485.0  | 484.1  | 119.4  | 165.6  | 758.2  | 466.8  | 771.4  | 440.1  | 506.1  |
| 72.6   | 114.7  | 23.1   | 19.0   | 95.9   | 82.8   | 234.3  | 207.1  | 237.2  |
| 261.6  | 417.2  | 65.3   | 80.1   | 417.5  | 479.4  | 448.4  | 406.4  | 478.2  |
| 154.0  | 206.8  | 112.7  | 107.5  | 221.0  | 224.5  | 231.2  | 199.5  | 203.3  |
| 1.9    | 21.7   | 0.6    | 5.5    | 38.6   | 2.1    | 1.1    | 0.8    | 0.7    |
| 185.5  | 314.3  | 60.5   | 80.8   | 392.7  | 257.0  | 232.9  | 201.9  | 218.2  |
| 121.7  | 131.1  | 179.4  | 168.4  | 135.8  | 108.1  | 212.4  | 241.5  | 286.5  |
| 676.4  | 983.8  | 285.4  | 314.3  | 1279.7 | 911.1  | 1399.3 | 2262.4 | 2253.4 |
| 473.6  | 641.6  | 34.4   | 56.0   | 872.5  | 853.9  | 405.8  | 332.2  | 378.0  |
| 92.1   | 146.7  | 47.2   | 51.7   | 195.3  | 133.5  | 1205.1 | 1340.5 | 1363.4 |
| 176.5  | 241.9  | 124.7  | 129.1  | 310.7  | 252.0  | 771.8  | 582.3  | 636.6  |
| 136.5  | 161.4  | 90.5   | 98.0   | 206.5  | 173.5  | 199.3  | 130.8  | 181.3  |
| 2.9    | 2.3    | 12.6   | 9.2    | 2.0    | 2.1    | 5.9    | 2.1    | 2.3    |
| 804.1  | 889.0  | 291.6  | 369.7  | 1364.0 | 988.9  | 2683.4 | 2338.5 | 2462.1 |
| 305.1  | 387.7  | 110.0  | 189.7  | 428.1  | 258.9  | 787.2  | 597.9  | 655.9  |
| 797.6  | 1128.4 | 305.0  | 439.7  | 1029.3 | 1067.8 | 2661.3 | 2275.1 | 2442.3 |
| 480.5  | 582.5  | 191.3  | 193.3  | 683.6  | 524.6  | 1550.2 | 1702.0 | 1782.9 |
| 135.2  | 114.0  | 35.4   | 38.7   | 133.7  | 130.5  | 166.2  | 185.9  | 182.2  |
| 79.8   | 104.5  | 173.8  | 237.9  | 98.1   | 101.0  | 139.2  | 100.4  | 132.7  |
| 38.2   | 24.2   | 28.6   | 32.1   | 49.3   | 24.7   | 28.6   | 24.2   | 22.1   |
| 118.3  | 94.0   | 30.3   | 27.9   | 105.4  | 98.2   | 168.4  | 95.3   | 97.7   |
| 186.4  | 240.5  | 468.1  | 549.2  | 258.2  | 235.0  | 844.9  | 1200.9 | 1265.5 |
| 1796.1 | 2381.8 | 165.9  | 251.2  | 2705.4 | 2556.5 | 1792.8 | 942.9  | 1008.8 |
| 137.7  | 196.8  | 55.9   | 65.2   | 292.2  | 213.9  | 530.4  | 860.5  | 905.7  |
| 254.9  | 321.5  | 86.1   | 113.4  | 313.4  | 241.7  | 692.1  | 483.0  | 419.2  |
| 296.5  | 390.5  | 135.1  | 169.8  | 327.5  | 490.7  | 674.4  | 503.4  | 506.6  |
| 556.8  | 962.5  | 38.2   | 51.6   | 894.0  | 712.1  | 578.4  | 519.5  | 541.7  |
| 221.1  | 241.0  | 214.8  | 439.0  | 290.9  | 333.6  | 754.7  | 383.8  | 475.0  |

|        |        |        |        |        |        |        |        |        |
|--------|--------|--------|--------|--------|--------|--------|--------|--------|
| 639.4  | 653.3  | 180.2  | 235.2  | 862.0  | 665.1  | 356.0  | 311.1  | 296.6  |
| 134.2  | 275.9  | 73.3   | 70.4   | 209.3  | 287.0  | 318.2  | 340.9  | 449.6  |
| 701.7  | 1059.6 | 232.8  | 263.9  | 1346.6 | 1218.2 | 2935.1 | 2200.0 | 2299.0 |
| 614.2  | 710.9  | 119.4  | 255.1  | 683.6  | 832.6  | 998.3  | 767.8  | 926.8  |
| 1411.2 | 1708.4 | 1318.8 | 1783.8 | 2137.6 | 1518.2 | 2792.6 | 2799.4 | 2747.9 |
| 1515.5 | 1899.9 | 2007.2 | 2640.3 | 2262.4 | 1749.1 | 2788.0 | 2666.0 | 2665.7 |
| 839.8  | 992.8  | 307.5  | 455.0  | 1407.5 | 1261.3 | 1844.4 | 1106.8 | 1087.7 |
| 72.8   | 58.2   | 18.9   | 14.6   | 99.1   | 67.9   | 55.9   | 63.0   | 74.2   |
| 54.8   | 76.9   | 11.8   | 8.3    | 87.2   | 59.7   | 71.3   | 78.6   | 79.3   |
| 225.6  | 269.0  | 79.7   | 59.2   | 281.2  | 246.8  | 346.6  | 383.3  | 406.8  |
| 314.3  | 348.2  | 175.0  | 287.9  | 398.3  | 308.2  | 789.5  | 572.3  | 629.7  |
| 95.8   | 80.6   | 87.7   | 127.4  | 93.4   | 62.4   | 202.6  | 209.3  | 187.3  |
| 103.0  | 124.3  | 128.9  | 207.2  | 194.4  | 161.4  | 217.9  | 209.3  | 240.5  |
| 740.1  | 781.1  | 504.6  | 579.4  | 968.7  | 830.6  | 1379.5 | 1023.4 | 1122.5 |
| 1441.1 | 1772.6 | 546.5  | 698.0  | 2070.9 | 1640.1 | 3356.8 | 2834.0 | 2950.1 |
| 120.5  | 183.8  | 107.8  | 149.9  | 201.7  | 158.4  | 229.2  | 182.6  | 223.6  |
| 23.0   | 74.3   | 35.0   | 51.7   | 38.4   | 22.8   | 138.1  | 163.6  | 216.3  |
| 84.6   | 94.8   | 43.8   | 65.9   | 113.3  | 54.3   | 301.0  | 289.1  | 274.5  |
| 216.8  | 265.6  | 32.7   | 82.1   | 255.6  | 238.1  | 116.0  | 114.3  | 136.2  |
| 509.2  | 580.8  | 245.5  | 445.3  | 771.3  | 578.0  | 1711.5 | 1018.8 | 1138.1 |
| 608.8  | 681.9  | 106.3  | 157.7  | 901.7  | 578.6  | 2198.8 | 1699.0 | 1871.0 |
| 906.7  | 1032.6 | 291.0  | 347.6  | 1163.6 | 899.9  | 876.0  | 848.0  | 916.1  |
| 343.8  | 422.5  | 168.4  | 232.8  | 565.7  | 385.3  | 418.9  | 452.3  | 438.0  |
| 110.1  | 150.2  | 40.5   | 38.9   | 152.2  | 139.7  | 432.2  | 485.2  | 511.4  |
| 25.9   | 27.8   | 39.0   | 19.3   | 34.1   | 45.9   | 32.8   | 35.1   | 33.9   |
| 1329.2 | 1681.5 | 462.2  | 530.9  | 1785.8 | 1760.0 | 1483.6 | 1247.5 | 1229.3 |
| 216.1  | 240.0  | 240.8  | 277.4  | 249.4  | 228.7  | 732.9  | 924.7  | 954.9  |
| 318.3  | 385.4  | 266.1  | 287.5  | 353.5  | 280.7  | 1398.3 | 1459.1 | 1638.1 |
| 339.6  | 475.3  | 44.6   | 48.7   | 579.5  | 456.9  | 1211.3 | 1384.4 | 1357.5 |
| 2017.1 | 2527.3 | 540.2  | 801.1  | 2681.7 | 2298.2 | 2148.2 | 1714.5 | 1915.6 |
| 522.2  | 521.2  | 128.4  | 214.5  | 833.0  | 516.1  | 282.7  | 249.3  | 274.1  |
| 93.0   | 121.8  | 44.6   | 37.4   | 148.6  | 107.3  | 237.5  | 148.7  | 192.3  |
| 1075.4 | 1299.1 | 160.6  | 206.4  | 1425.5 | 1258.0 | 2190.8 | 1687.7 | 1949.0 |
| 550.8  | 696.1  | 470.4  | 687.3  | 830.9  | 597.5  | 1757.4 | 1179.8 | 1308.9 |
| 1214.6 | 1713.7 | 76.1   | 136.5  | 2186.0 | 1779.6 | 2271.8 | 1847.5 | 2146.1 |
| 40.6   | 45.2   | 35.7   | 45.4   | 69.5   | 34.8   | 55.0   | 56.3   | 53.5   |
| 407.6  | 392.4  | 337.9  | 466.9  | 536.7  | 376.5  | 462.4  | 325.5  | 397.4  |
| 438.9  | 526.4  | 110.6  | 152.8  | 706.6  | 565.4  | 540.3  | 481.4  | 535.2  |
| 19.8   | 20.0   | 16.4   | 17.2   | 17.4   | 21.1   | 104.7  | 125.7  | 131.7  |
| 201.7  | 264.3  | 52.6   | 56.3   | 262.2  | 249.8  | 757.9  | 918.2  | 983.5  |
| 6.0    | 8.2    | 0.2    | 0.1    | 11.8   | 6.3    | 65.7   | 69.1   | 67.4   |
| 257.9  | 393.2  | 40.2   | 45.6   | 340.4  | 395.2  | 1261.3 | 1543.3 | 1651.2 |
| 274.7  | 353.0  | 96.0   | 131.9  | 430.6  | 300.0  | 355.6  | 371.7  | 405.7  |
| 1265.8 | 1814.0 | 251.0  | 351.9  | 1928.6 | 1702.9 | 3130.0 | 1635.7 | 1833.0 |
| 1073.9 | 1007.0 | 219.0  | 268.6  | 1464.7 | 1156.9 | 1138.7 | 875.4  | 893.3  |
| 576.2  | 648.1  | 254.5  | 248.9  | 823.4  | 729.7  | 664.1  | 457.0  | 480.2  |
| 564.9  | 605.3  | 216.3  | 190.1  | 677.0  | 644.4  | 550.7  | 376.5  | 385.7  |
| 154.2  | 177.4  | 63.3   | 120.9  | 191.1  | 144.2  | 846.1  | 604.1  | 548.6  |
| 95.0   | 81.3   | 48.3   | 63.2   | 102.3  | 93.1   | 246.0  | 251.4  | 264.5  |
| 1378.1 | 1745.8 | 492.6  | 671.3  | 2900.6 | 1643.5 | 2927.5 | 2215.2 | 2638.4 |
| 1934.6 | 2332.2 | 813.4  | 1305.8 | 3134.8 | 2119.0 | 7.1    | 2.0    | 6.4    |
| 696.8  | 762.1  | 350.0  | 463.3  | 951.5  | 752.3  | 443.5  | 361.9  | 439.7  |
| 246.6  | 279.2  | 78.4   | 92.5   | 406.3  | 243.2  | 512.8  | 390.5  | 430.0  |

|        |        |        |        |        |        |        |        |        |
|--------|--------|--------|--------|--------|--------|--------|--------|--------|
| 68.4   | 52.0   | 20.7   | 30.6   | 74.9   | 66.8   | 4.9    | 10.2   | 5.6    |
| 135.7  | 107.5  | 56.7   | 55.6   | 238.4  | 107.3  | 3.7    | 6.4    | 4.3    |
| 169.3  | 202.7  | 99.9   | 149.2  | 226.1  | 174.0  | 363.9  | 319.2  | 370.5  |
| 250.4  | 312.7  | 607.3  | 652.9  | 381.7  | 267.4  | 700.8  | 610.9  | 713.1  |
| 227.7  | 299.7  | 31.6   | 38.3   | 291.1  | 262.7  | 696.2  | 597.4  | 679.4  |
| 430.3  | 463.5  | 113.8  | 139.2  | 737.6  | 510.2  | 1209.9 | 1403.2 | 1600.1 |
| 671.6  | 765.2  | 145.1  | 226.9  | 813.4  | 799.8  | 1976.6 | 1294.6 | 1417.7 |
| 228.3  | 223.0  | 1620.8 | 2457.2 | 409.8  | 224.4  | 1013.3 | 847.4  | 985.2  |
| 75.6   | 94.4   | 13.1   | 18.2   | 126.9  | 94.7   | 73.5   | 42.5   | 54.9   |
| 522.3  | 556.1  | 4.2    | 4.6    | 805.5  | 447.0  | 89.5   | 97.4   | 109.0  |
| 145.5  | 155.0  | 15.3   | 27.1   | 190.6  | 179.3  | 212.1  | 126.7  | 136.3  |
| 388.7  | 389.3  | 62.7   | 89.2   | 589.6  | 371.2  | 1619.4 | 2234.6 | 2355.2 |
| 443.6  | 532.4  | 264.7  | 385.7  | 738.8  | 480.5  | 1045.0 | 968.3  | 1024.5 |
| 1923.0 | 3031.4 | 1262.2 | 1605.6 | 3208.4 | 3316.3 | 2120.7 | 2434.9 | 2538.2 |
| 622.5  | 643.2  | 193.5  | 255.4  | 810.6  | 657.7  | 1051.1 | 665.9  | 739.3  |
| 96.9   | 129.0  | 59.2   | 101.2  | 149.8  | 112.5  | 362.5  | 231.2  | 261.6  |
| 2508.9 | 3403.1 | 434.4  | 533.5  | 3097.5 | 2683.3 | 6749.9 | 6186.8 | 6233.4 |
| 2208.2 | 2656.6 | 212.2  | 246.8  | 3021.6 | 2424.1 | 755.4  | 968.5  | 1128.8 |
| 1453.2 | 1751.7 | 167.2  | 273.7  | 1678.5 | 1535.5 | 284.4  | 353.5  | 462.7  |
| 396.9  | 477.3  | 31.7   | 39.7   | 612.4  | 472.4  | 470.0  | 365.5  | 355.6  |
| 301.0  | 327.9  | 62.0   | 99.3   | 449.1  | 304.1  | 425.4  | 371.2  | 409.3  |
| 356.7  | 386.5  | 58.0   | 93.0   | 452.8  | 382.1  | 761.9  | 534.8  | 617.6  |
| 288.6  | 387.5  | 440.1  | 432.9  | 339.4  | 321.4  | 831.0  | 704.2  | 809.9  |
| 289.5  | 374.8  | 7.6    | 7.5    | 391.2  | 406.3  | 2045.6 | 1819.0 | 2231.0 |
| 170.6  | 170.2  | 251.5  | 298.5  | 233.3  | 153.5  | 433.8  | 474.9  | 495.6  |
| 46.0   | 36.3   | 69.1   | 71.6   | 64.9   | 52.0   | 440.4  | 333.4  | 408.4  |
| 667.7  | 908.3  | 66.2   | 60.4   | 895.8  | 1005.8 | 1471.5 | 1275.5 | 1318.6 |
| 797.4  | 1258.0 | 319.3  | 376.1  | 1334.6 | 1249.4 | 2058.8 | 2037.7 | 2130.3 |
| 198.5  | 204.7  | 103.0  | 153.7  | 230.3  | 159.1  | 561.4  | 377.4  | 458.5  |
| 1017.2 | 1558.3 | 315.8  | 465.0  | 1372.4 | 1120.4 | 2002.5 | 2212.6 | 2555.1 |
| 1132.1 | 1675.2 | 6.7    | 6.4    | 1634.5 | 1590.0 | 4359.2 | 2548.5 | 2369.1 |
| 346.5  | 431.8  | 0.5    | 0.6    | 361.2  | 402.1  | 1169.1 | 685.1  | 650.4  |
| 70.3   | 130.7  | 17.7   | 14.7   | 103.0  | 117.5  | 489.4  | 341.7  | 347.4  |
| 136.3  | 230.8  | 1.2    | 8.7    | 161.6  | 190.5  | 818.2  | 391.2  | 393.5  |
| 268.1  | 342.8  | 1.6    | 0.7    | 376.2  | 284.2  | 1111.0 | 505.5  | 532.1  |
| 185.9  | 262.3  | 177.1  | 264.4  | 263.7  | 272.6  | 1126.5 | 510.6  | 627.8  |
| 0.5    | 0.9    | 26.5   | 51.2   | 1.1    | 0.9    | 1.9    | 1.3    | 1.0    |
| 802.0  | 1078.6 | 209.4  | 299.4  | 1435.1 | 1156.0 | 3036.1 | 2682.3 | 2910.4 |
| 91.2   | 97.0   | 107.7  | 144.2  | 152.4  | 111.0  | 233.9  | 312.0  | 382.3  |
| 78.7   | 114.3  | 65.7   | 73.4   | 95.5   | 127.3  | 271.5  | 188.9  | 173.5  |
| 21.2   | 42.8   | 16.3   | 18.3   | 44.4   | 68.6   | 118.3  | 78.1   | 89.5   |
| 731.3  | 1046.0 | 144.6  | 183.1  | 1234.2 | 940.4  | 3102.8 | 3040.8 | 3189.5 |
| 280.1  | 303.4  | 309.0  | 438.1  | 428.4  | 224.0  | 696.9  | 503.0  | 519.7  |
| 980.0  | 1563.9 | 455.9  | 614.8  | 1453.7 | 1523.0 | 2361.7 | 2075.7 | 2290.7 |
| 168.5  | 287.6  | 761.2  | 1390.9 | 314.9  | 261.7  | 421.1  | 439.2  | 512.9  |
| 737.1  | 830.3  | 231.2  | 465.3  | 1027.7 | 740.8  | 1939.9 | 1804.4 | 1867.8 |
| 76.0   | 77.2   | 62.0   | 68.9   | 100.4  | 55.3   | 147.7  | 158.1  | 139.5  |
| 69.3   | 76.7   | 113.5  | 125.1  | 99.3   | 62.8   | 238.7  | 262.4  | 274.0  |
| 389.5  | 401.6  | 108.9  | 180.5  | 550.1  | 404.2  | 1250.4 | 697.7  | 776.8  |
| 0.9    | 14.8   | 8.5    | 10.5   | 1.2    | 4.1    | 12.7   | 9.4    | 10.9   |
| 450.9  | 635.0  | 79.9   | 113.6  | 769.8  | 725.2  | 643.1  | 317.3  | 386.1  |
| 103.6  | 140.7  | 8.8    | 21.5   | 138.9  | 84.1   | 82.8   | 139.7  | 162.3  |
| 163.0  | 252.2  | 77.8   | 173.0  | 289.0  | 258.5  | 497.9  | 556.5  | 647.1  |

|        |        |       |       |        |        |        |        |        |
|--------|--------|-------|-------|--------|--------|--------|--------|--------|
| 157.8  | 340.8  | 56.4  | 59.0  | 243.9  | 155.0  | 842.7  | 790.8  | 949.1  |
| 236.4  | 192.9  | 154.2 | 209.3 | 306.6  | 169.0  | 204.1  | 265.6  | 317.6  |
| 89.6   | 95.8   | 110.4 | 149.6 | 155.9  | 100.6  | 753.2  | 595.1  | 848.3  |
| 56.6   | 65.6   | 67.9  | 78.9  | 71.1   | 56.7   | 259.3  | 320.3  | 369.3  |
| 162.2  | 139.9  | 169.2 | 172.3 | 310.5  | 121.1  | 507.1  | 443.5  | 491.1  |
| 332.4  | 368.4  | 91.0  | 75.2  | 749.7  | 304.6  | 978.2  | 624.2  | 683.1  |
| 150.6  | 173.4  | 393.8 | 504.8 | 292.7  | 153.0  | 456.1  | 389.3  | 430.2  |
| 956.4  | 1041.7 | 325.6 | 496.4 | 1315.0 | 860.6  | 2816.3 | 2980.4 | 3170.2 |
| 1535.9 | 1988.5 | 221.5 | 274.8 | 2458.8 | 2127.9 | 2073.0 | 1326.5 | 1603.0 |
| 375.3  | 509.6  | 121.3 | 157.2 | 555.8  | 425.6  | 657.6  | 424.4  | 509.0  |
| 221.5  | 317.0  | 72.4  | 106.9 | 410.1  | 254.7  | 24.0   | 32.1   | 12.8   |
| 36.5   | 31.0   | 115.8 | 175.3 | 69.5   | 15.2   | 126.8  | 90.7   | 84.3   |
| 7.5    | 13.1   | 123.2 | 121.2 | 24.4   | 17.4   | 158.3  | 214.1  | 243.2  |
| 274.6  | 361.9  | 122.0 | 129.5 | 585.5  | 449.9  | 290.2  | 308.8  | 348.5  |
| 37.0   | 40.2   | 23.5  | 20.9  | 57.9   | 36.9   | 35.0   | 44.8   | 37.2   |
| 472.2  | 489.5  | 503.1 | 791.5 | 637.0  | 639.5  | 1028.6 | 817.2  | 903.5  |
| 337.6  | 405.4  | 524.5 | 543.8 | 467.8  | 363.2  | 1438.9 | 1722.9 | 1836.9 |
| 319.7  | 406.8  | 229.2 | 269.0 | 480.0  | 298.2  | 560.2  | 465.0  | 460.9  |
| 98.9   | 99.8   | 227.2 | 337.3 | 83.0   | 94.6   | 552.8  | 588.8  | 766.2  |
| 102.0  | 101.8  | 94.4  | 154.1 | 152.4  | 66.1   | 451.9  | 331.5  | 414.9  |
| 553.4  | 813.5  | 220.2 | 242.9 | 950.7  | 894.7  | 3374.0 | 3115.6 | 3122.6 |
| 103.0  | 137.2  | 18.9  | 26.7  | 156.3  | 149.7  | 252.4  | 175.2  | 184.4  |
| 929.2  | 1349.7 | 358.2 | 359.4 | 1320.1 | 1214.7 | 1383.1 | 1488.4 | 1462.2 |
| 468.2  | 575.1  | 186.4 | 205.3 | 684.3  | 560.7  | 1111.9 | 880.7  | 932.3  |
| 41.2   | 58.8   | 15.1  | 7.3   | 44.4   | 69.0   | 198.1  | 214.7  | 205.0  |
| 1.3    | 4.9    | 2.5   | 1.1   | 9.2    | 1.1    | 2.0    | 1.1    | 2.9    |
| 18.3   | 27.6   | 48.7  | 43.2  | 21.8   | 23.9   | 22.5   | 32.4   | 29.9   |
| 342.4  | 387.6  | 193.6 | 249.7 | 497.1  | 483.0  | 1266.3 | 964.8  | 1045.6 |
| 627.1  | 915.5  | 204.7 | 190.3 | 962.5  | 896.5  | 782.6  | 858.7  | 950.7  |
| 346.7  | 441.4  | 208.7 | 310.5 | 482.1  | 426.8  | 592.2  | 553.4  | 623.1  |
| 757.6  | 965.4  | 153.9 | 202.0 | 1280.6 | 1072.8 | 2385.3 | 1850.4 | 2037.6 |
| 462.7  | 668.2  | 41.3  | 55.1  | 666.6  | 623.8  | 1795.2 | 1647.5 | 1578.4 |
| 418.3  | 403.4  | 52.4  | 78.1  | 605.0  | 381.4  | 516.9  | 303.0  | 347.0  |
| 100.4  | 109.1  | 48.1  | 67.2  | 160.3  | 113.4  | 595.1  | 461.8  | 559.1  |
| 1032.0 | 1431.6 | 164.1 | 264.5 | 1348.6 | 1600.4 | 2364.0 | 1697.6 | 1902.8 |
| 5.7    | 2.3    | 16.3  | 9.4   | 19.4   | 13.5   | 7.4    | 4.2    | 9.6    |
| 90.9   | 90.2   | 29.6  | 32.5  | 124.8  | 93.2   | 199.7  | 148.1  | 177.3  |
| 519.7  | 761.0  | 83.9  | 88.6  | 771.3  | 632.9  | 623.5  | 613.9  | 707.9  |
| 958.3  | 1085.2 | 183.6 | 294.8 | 1252.1 | 985.0  | 1428.0 | 714.5  | 744.3  |
| 40.1   | 45.8   | 81.8  | 105.6 | 39.3   | 31.6   | 117.7  | 111.1  | 171.8  |
| 993.2  | 1363.9 | 787.8 | 954.5 | 1627.4 | 1339.8 | 3119.6 | 1820.1 | 2107.3 |
| 161.1  | 190.7  | 70.7  | 79.0  | 240.5  | 173.4  | 145.5  | 87.5   | 79.1   |
| 2406.0 | 2306.1 | 412.2 | 679.0 | 3471.4 | 2316.2 | 1007.2 | 615.0  | 693.5  |
| 61.3   | 76.5   | 105.6 | 121.7 | 55.3   | 74.5   | 810.0  | 725.1  | 751.5  |
| 1.2    | 1.6    | 1.9   | 8.4   | 1.8    | 1.0    | 64.2   | 39.5   | 54.3   |
| 64.6   | 77.0   | 51.9  | 85.5  | 94.9   | 69.6   | 155.5  | 134.7  | 131.3  |
| 460.0  | 589.6  | 136.9 | 164.9 | 685.6  | 574.1  | 1266.5 | 1211.3 | 1298.0 |
| 208.5  | 229.2  | 287.3 | 403.0 | 242.2  | 288.6  | 1145.1 | 1460.8 | 1619.7 |
| 307.7  | 516.7  | 30.1  | 52.7  | 491.1  | 652.0  | 2639.7 | 2213.9 | 2045.8 |
| 105.9  | 110.4  | 88.5  | 95.3  | 127.1  | 97.1   | 324.6  | 254.7  | 294.6  |
| 725.1  | 883.6  | 282.1 | 332.5 | 940.2  | 931.9  | 1937.8 | 1238.6 | 1260.5 |
| 127.4  | 157.6  | 87.2  | 100.7 | 158.9  | 105.6  | 292.2  | 286.3  | 352.7  |
| 135.5  | 144.0  | 64.0  | 62.4  | 212.7  | 205.9  | 234.5  | 175.4  | 210.1  |

|        |        |       |       |        |        |        |        |        |
|--------|--------|-------|-------|--------|--------|--------|--------|--------|
| 123.3  | 130.3  | 71.2  | 101.6 | 206.1  | 134.9  | 365.5  | 358.8  | 394.7  |
| 152.3  | 250.3  | 32.4  | 43.1  | 299.3  | 254.7  | 1097.2 | 655.0  | 729.0  |
| 1437.4 | 1717.4 | 453.6 | 623.5 | 1977.4 | 1501.8 | 1912.4 | 1164.8 | 1222.8 |
| 46.7   | 64.5   | 54.8  | 105.4 | 66.4   | 82.7   | 223.2  | 142.1  | 177.6  |
| 170.7  | 217.9  | 38.0  | 53.3  | 328.4  | 230.6  | 197.6  | 237.5  | 212.4  |
| 47.0   | 74.6   | 43.9  | 35.0  | 75.3   | 58.5   | 321.9  | 283.9  | 292.6  |
| 81.8   | 123.0  | 78.1  | 87.9  | 144.6  | 124.9  | 668.1  | 498.4  | 510.8  |
| 353.9  | 406.6  | 496.4 | 606.7 | 440.7  | 477.7  | 712.5  | 797.0  | 772.7  |
| 375.7  | 385.5  | 136.5 | 224.7 | 479.0  | 479.7  | 641.5  | 379.9  | 406.8  |
| 55.0   | 36.5   | 50.5  | 98.2  | 97.0   | 65.1   | 218.7  | 136.0  | 182.8  |
| 237.5  | 227.6  | 81.2  | 92.1  | 306.7  | 306.5  | 617.3  | 501.7  | 573.2  |
| 79.0   | 138.1  | 261.2 | 397.0 | 125.9  | 98.4   | 332.4  | 221.9  | 246.1  |
| 2524.6 | 2650.6 | 18.6  | 18.6  | 3755.0 | 2769.8 | 833.7  | 700.2  | 689.0  |
| 318.8  | 496.1  | 117.8 | 109.0 | 540.8  | 437.9  | 1166.6 | 1237.0 | 1191.1 |
| 77.4   | 99.7   | 216.9 | 403.0 | 144.8  | 84.6   | 5.0    | 13.2   | 11.6   |
| 17.4   | 26.5   | 2.0   | 0.2   | 43.3   | 28.0   | 1128.2 | 1406.6 | 1508.4 |
| 307.7  | 411.2  | 149.4 | 168.6 | 478.2  | 310.3  | 464.2  | 638.3  | 711.1  |
| 186.0  | 270.0  | 76.9  | 84.7  | 338.9  | 256.5  | 446.5  | 397.8  | 449.9  |
| 82.6   | 102.8  | 7.0   | 7.4   | 111.1  | 101.3  | 667.6  | 705.3  | 801.2  |
| 195.2  | 269.4  | 55.4  | 50.6  | 266.4  | 259.2  | 265.6  | 163.8  | 183.1  |
| 224.3  | 500.6  | 93.3  | 111.7 | 504.4  | 428.8  | 437.2  | 297.0  | 327.0  |
| 49.2   | 98.1   | 62.5  | 79.8  | 62.4   | 54.0   | 1214.2 | 1255.8 | 1382.3 |
| 606.6  | 669.5  | 4.7   | 16.0  | 847.6  | 701.0  | 1002.1 | 819.9  | 892.3  |
| 222.3  | 270.4  | 42.3  | 51.0  | 298.1  | 277.0  | 963.5  | 788.6  | 863.5  |
| 372.2  | 456.4  | 13.3  | 13.4  | 450.4  | 515.4  | 913.1  | 398.5  | 471.5  |
| 244.3  | 173.1  | 258.5 | 323.1 | 240.4  | 263.0  | 488.2  | 430.1  | 406.3  |
| 612.1  | 809.7  | 261.4 | 295.5 | 935.6  | 636.3  | 1366.9 | 1513.9 | 1710.6 |
| 148.1  | 108.3  | 89.4  | 108.6 | 188.9  | 147.9  | 398.7  | 271.9  | 285.0  |
| 348.6  | 391.9  | 4.0   | 1.0   | 584.5  | 496.3  | 347.9  | 233.6  | 255.6  |
| 1916.6 | 2342.9 | 534.4 | 680.2 | 2879.6 | 2105.4 | 3650.0 | 3224.2 | 3384.5 |
| 936.6  | 1264.4 | 93.8  | 122.1 | 1541.4 | 1137.1 | 1481.7 | 1355.8 | 1420.0 |
| 437.6  | 466.8  | 71.0  | 91.7  | 610.6  | 542.7  | 737.7  | 379.4  | 485.9  |
| 243.7  | 261.8  | 59.8  | 71.9  | 324.3  | 237.6  | 594.4  | 318.1  | 373.3  |
| 163.4  | 186.1  | 247.4 | 382.3 | 235.9  | 194.1  | 743.1  | 366.7  | 471.7  |
| 819.3  | 1121.2 | 73.2  | 108.8 | 1170.0 | 1004.9 | 6636.1 | 4514.5 | 4747.0 |
| 514.2  | 771.0  | 234.7 | 253.3 | 1118.8 | 656.4  | 566.8  | 623.5  | 624.6  |
| 359.3  | 259.1  | 90.0  | 173.2 | 411.5  | 204.8  | 942.2  | 580.6  | 615.7  |
| 573.4  | 622.2  | 84.0  | 114.2 | 893.6  | 547.9  | 1476.1 | 1944.2 | 2035.7 |
| 23.1   | 19.8   | 34.5  | 81.8  | 32.5   | 31.3   | 53.9   | 48.2   | 50.1   |
| 558.9  | 860.1  | 31.3  | 36.8  | 843.6  | 711.2  | 400.7  | 362.0  | 393.3  |
| 330.3  | 286.4  | 125.2 | 198.4 | 397.7  | 460.0  | 728.8  | 365.0  | 534.6  |
| 90.7   | 130.8  | 2.7   | 11.3  | 239.2  | 155.4  | 210.6  | 312.7  | 259.4  |
| 104.7  | 85.4   | 71.4  | 123.2 | 111.1  | 114.5  | 174.9  | 111.9  | 144.8  |
| 439.1  | 260.2  | 185.3 | 237.9 | 434.2  | 223.9  | 1330.0 | 673.4  | 704.6  |
| 120.6  | 162.7  | 122.5 | 196.2 | 186.7  | 174.9  | 387.3  | 270.8  | 345.2  |
| 1639.0 | 1920.2 | 268.8 | 452.0 | 2381.4 | 2127.6 | 2371.2 | 1706.3 | 1881.0 |
| 216.4  | 252.0  | 76.0  | 113.5 | 351.7  | 312.5  | 1187.9 | 490.8  | 669.9  |
| 176.2  | 175.4  | 132.6 | 165.2 | 227.9  | 194.1  | 912.7  | 441.7  | 477.8  |
| 938.0  | 1034.7 | 67.6  | 107.7 | 1502.6 | 936.0  | 697.3  | 339.3  | 410.1  |
| 67.3   | 92.7   | 24.4  | 30.5  | 96.1   | 75.9   | 115.4  | 81.5   | 87.7   |
| 97.8   | 109.6  | 58.0  | 55.6  | 157.0  | 98.0   | 271.2  | 239.6  | 229.9  |
| 556.1  | 567.6  | 247.0 | 320.8 | 746.1  | 586.7  | 871.3  | 475.5  | 594.0  |
| 134.5  | 141.4  | 172.4 | 216.9 | 222.8  | 146.8  | 313.3  | 462.4  | 530.5  |

|       |       |       |       |        |        |        |        |        |
|-------|-------|-------|-------|--------|--------|--------|--------|--------|
| 35.8  | 53.3  | 31.9  | 39.1  | 63.9   | 76.6   | 174.2  | 147.8  | 149.7  |
| 236.0 | 284.6 | 101.0 | 113.4 | 420.3  | 285.0  | 440.7  | 314.3  | 356.1  |
| 141.9 | 159.8 | 48.8  | 82.7  | 192.6  | 164.0  | 326.7  | 184.2  | 190.8  |
| 101.8 | 108.2 | 12.1  | 15.8  | 148.0  | 120.9  | 236.2  | 133.6  | 141.8  |
| 142.4 | 214.9 | 46.7  | 67.1  | 235.1  | 199.7  | 220.7  | 148.5  | 174.7  |
| 136.5 | 118.7 | 38.4  | 77.0  | 127.7  | 108.4  | 206.1  | 205.5  | 224.4  |
| 305.3 | 401.0 | 63.0  | 95.4  | 462.9  | 446.3  | 450.1  | 294.2  | 320.5  |
| 423.9 | 472.7 | 433.1 | 471.5 | 575.6  | 443.4  | 725.4  | 615.5  | 676.1  |
| 365.8 | 479.4 | 173.4 | 167.3 | 539.7  | 477.8  | 884.7  | 558.8  | 611.2  |
| 269.1 | 371.1 | 85.4  | 123.2 | 417.6  | 378.4  | 926.1  | 692.6  | 800.3  |
| 625.0 | 797.5 | 77.7  | 138.3 | 865.5  | 709.7  | 595.4  | 417.1  | 436.6  |
| 59.1  | 99.3  | 20.9  | 29.0  | 88.5   | 70.4   | 42.4   | 34.8   | 31.3   |
| 294.5 | 356.9 | 93.6  | 162.4 | 410.2  | 357.1  | 513.2  | 626.8  | 635.0  |
| 69.1  | 75.7  | 65.5  | 83.0  | 45.3   | 80.8   | 966.5  | 605.6  | 780.8  |
| 179.1 | 239.0 | 85.7  | 99.6  | 308.2  | 191.1  | 1520.2 | 1649.6 | 1837.0 |
| 654.1 | 651.6 | 141.0 | 239.6 | 752.6  | 517.3  | 1488.5 | 704.6  | 783.2  |
| 56.1  | 61.5  | 11.3  | 27.0  | 74.3   | 69.9   | 114.3  | 84.5   | 98.2   |
| 62.1  | 94.4  | 105.8 | 156.5 | 99.4   | 92.8   | 155.5  | 248.8  | 286.5  |
| 216.4 | 219.7 | 151.0 | 243.8 | 298.6  | 196.3  | 539.7  | 557.6  | 582.5  |
| 106.1 | 122.6 | 132.9 | 136.0 | 139.9  | 86.0   | 211.0  | 152.8  | 207.6  |
| 267.6 | 245.7 | 722.8 | 772.7 | 342.6  | 220.5  | 2170.5 | 1593.7 | 1544.5 |
| 142.9 | 205.9 | 48.0  | 56.4  | 171.8  | 159.5  | 301.3  | 366.3  | 417.3  |
| 84.5  | 133.4 | 9.8   | 11.5  | 79.1   | 94.4   | 255.9  | 261.5  | 268.6  |
| 38.9  | 40.3  | 36.1  | 48.5  | 43.9   | 24.0   | 45.8   | 41.5   | 45.5   |
| 128.4 | 181.7 | 73.5  | 115.8 | 179.0  | 193.9  | 314.9  | 334.7  | 400.9  |
| 476.6 | 672.5 | 90.7  | 124.2 | 709.5  | 668.4  | 1130.5 | 681.8  | 770.8  |
| 331.8 | 503.9 | 127.8 | 147.3 | 534.6  | 408.1  | 1722.2 | 891.9  | 1174.6 |
| 76.8  | 90.8  | 51.0  | 55.2  | 139.8  | 72.5   | 394.2  | 422.4  | 465.4  |
| 185.3 | 229.3 | 57.6  | 86.1  | 324.8  | 251.9  | 761.1  | 522.8  | 625.8  |
| 72.9  | 108.3 | 49.8  | 58.3  | 120.0  | 89.7   | 193.1  | 161.9  | 175.2  |
| 102.9 | 199.8 | 34.3  | 27.9  | 185.9  | 140.2  | 199.2  | 93.2   | 109.9  |
| 489.8 | 634.0 | 32.6  | 30.6  | 673.7  | 574.7  | 748.7  | 260.5  | 300.6  |
| 111.4 | 174.9 | 96.3  | 167.3 | 167.2  | 151.9  | 487.9  | 416.9  | 439.6  |
| 62.6  | 81.0  | 28.5  | 28.3  | 126.4  | 64.1   | 238.2  | 218.2  | 271.1  |
| 147.5 | 144.0 | 164.3 | 170.4 | 266.9  | 190.6  | 804.7  | 625.2  | 721.1  |
| 600.5 | 591.6 | 422.1 | 565.6 | 884.0  | 558.7  | 1942.6 | 1793.8 | 2055.2 |
| 83.8  | 63.1  | 19.6  | 52.6  | 69.0   | 55.3   | 393.2  | 182.6  | 215.9  |
| 1.6   | 6.3   | 2.7   | 4.7   | 11.1   | 3.3    | 353.8  | 246.1  | 362.6  |
| 735.4 | 883.0 | 151.2 | 209.9 | 1135.8 | 1043.3 | 2860.2 | 1902.7 | 2025.0 |
| 148.3 | 151.2 | 604.8 | 760.1 | 215.4  | 146.7  | 219.5  | 229.5  | 287.7  |
| 172.7 | 246.1 | 148.8 | 183.1 | 304.4  | 240.2  | 535.4  | 452.3  | 490.6  |
| 49.4  | 67.6  | 6.7   | 9.3   | 106.8  | 73.6   | 113.0  | 141.6  | 134.7  |
| 637.0 | 957.5 | 300.1 | 435.0 | 1002.1 | 842.0  | 1640.9 | 1385.2 | 1538.2 |
| 46.1  | 67.7  | 127.3 | 159.8 | 60.4   | 70.9   | 1020.7 | 1304.5 | 1364.4 |
| 191.3 | 223.0 | 67.9  | 92.6  | 214.0  | 147.5  | 243.0  | 202.7  | 244.1  |
| 784.4 | 947.6 | 195.0 | 189.8 | 863.0  | 850.0  | 1845.8 | 1361.2 | 1361.2 |
| 259.9 | 385.6 | 117.6 | 142.9 | 354.4  | 364.9  | 1200.3 | 1347.0 | 1420.1 |
| 227.8 | 458.3 | 45.2  | 58.0  | 515.9  | 392.9  | 1099.6 | 918.1  | 993.5  |
| 15.4  | 20.2  | 11.0  | 11.8  | 24.2   | 16.9   | 35.6   | 34.6   | 31.4   |
| 12.3  | 24.4  | 17.0  | 20.1  | 20.0   | 18.5   | 73.2   | 93.3   | 93.5   |
| 109.4 | 94.1  | 99.6  | 168.2 | 141.1  | 100.4  | 98.1   | 158.1  | 168.9  |
| 213.9 | 265.6 | 79.1  | 91.4  | 383.8  | 240.2  | 484.7  | 383.6  | 445.2  |
| 50.8  | 50.8  | 66.6  | 70.8  | 52.3   | 51.0   | 71.4   | 109.8  | 107.6  |

|        |        |        |        |        |        |        |        |        |
|--------|--------|--------|--------|--------|--------|--------|--------|--------|
| 244.2  | 284.2  | 315.3  | 477.8  | 292.0  | 262.3  | 594.0  | 756.6  | 775.6  |
| 56.1   | 67.2   | 25.0   | 22.1   | 94.6   | 47.3   | 275.8  | 282.1  | 317.9  |
| 378.4  | 451.9  | 44.6   | 46.1   | 462.0  | 465.7  | 169.7  | 299.7  | 359.6  |
| 150.4  | 168.1  | 23.4   | 24.3   | 257.9  | 199.0  | 329.6  | 196.7  | 232.5  |
| 114.0  | 218.9  | 4.6    | 2.2    | 178.4  | 123.9  | 6.0    | 3.7    | 4.6    |
| 54.2   | 34.6   | 7.6    | 2.9    | 90.2   | 48.4   | 8.6    | 20.3   | 5.1    |
| 78.3   | 103.5  | 50.3   | 34.3   | 115.5  | 81.4   | 96.8   | 105.7  | 116.0  |
| 483.3  | 633.9  | 139.6  | 180.6  | 689.8  | 435.7  | 1181.3 | 880.9  | 870.0  |
| 466.8  | 649.0  | 434.7  | 588.1  | 783.9  | 501.8  | 1478.9 | 1745.3 | 1913.3 |
| 323.5  | 317.8  | 213.8  | 280.6  | 430.8  | 233.8  | 874.0  | 419.6  | 506.0  |
| 510.2  | 628.2  | 251.9  | 462.1  | 593.1  | 609.6  | 832.2  | 417.1  | 499.3  |
| 453.9  | 517.4  | 220.6  | 325.3  | 801.4  | 580.1  | 1833.3 | 1555.4 | 1685.2 |
| 1377.7 | 1789.8 | 843.4  | 1051.3 | 2132.7 | 1731.7 | 6506.5 | 5245.3 | 5798.0 |
| 219.4  | 296.6  | 212.1  | 270.9  | 334.3  | 245.6  | 820.2  | 972.1  | 1048.8 |
| 84.7   | 70.8   | 10.7   | 25.8   | 148.1  | 83.6   | 154.5  | 166.4  | 171.6  |
| 580.0  | 793.9  | 58.5   | 81.1   | 937.8  | 789.4  | 690.2  | 429.3  | 481.4  |
| 1402.4 | 2294.3 | 214.1  | 317.3  | 2096.8 | 1821.9 | 1101.0 | 692.1  | 772.6  |
| 399.4  | 451.7  | 83.6   | 117.5  | 664.8  | 390.6  | 689.2  | 677.2  | 675.0  |
| 134.2  | 235.0  | 19.4   | 18.4   | 265.5  | 216.8  | 126.0  | 84.6   | 102.7  |
| 82.6   | 107.3  | 47.4   | 45.3   | 113.5  | 101.3  | 296.1  | 333.8  | 351.1  |
| 386.0  | 438.2  | 75.1   | 82.9   | 471.1  | 419.0  | 574.4  | 637.0  | 712.2  |
| 69.3   | 68.6   | 62.5   | 84.2   | 95.6   | 66.7   | 97.5   | 49.3   | 73.2   |
| 1364.6 | 1436.9 | 898.6  | 1258.9 | 1984.7 | 1512.3 | 2589.9 | 2413.8 | 2679.8 |
| 493.9  | 667.9  | 192.0  | 264.2  | 765.1  | 663.8  | 1727.9 | 1342.8 | 1604.8 |
| 39.1   | 41.1   | 26.3   | 29.7   | 30.9   | 37.3   | 259.8  | 249.0  | 229.5  |
| 963.9  | 1094.9 | 138.1  | 210.1  | 1270.5 | 1282.8 | 5481.7 | 3886.5 | 4074.0 |
| 39.3   | 66.4   | 52.4   | 49.1   | 74.2   | 86.4   | 62.0   | 81.0   | 97.1   |
| 559.6  | 1099.2 | 329.2  | 323.4  | 1022.0 | 913.3  | 1169.1 | 1403.0 | 1649.7 |
| 207.4  | 252.6  | 125.1  | 222.7  | 314.6  | 224.3  | 1041.2 | 975.2  | 1034.8 |
| 3.5    | 5.9    | 19.9   | 30.8   | 14.6   | 3.9    | 7.9    | 3.2    | 6.8    |
| 43.6   | 34.9   | 82.2   | 112.7  | 46.2   | 30.4   | 121.7  | 103.7  | 138.8  |
| 39.1   | 53.1   | 146.6  | 213.4  | 111.6  | 68.6   | 435.5  | 311.1  | 333.5  |
| 344.5  | 285.7  | 124.3  | 196.6  | 350.1  | 246.3  | 695.0  | 585.6  | 616.4  |
| 1119.5 | 1416.1 | 391.7  | 429.7  | 1618.2 | 1254.1 | 1444.3 | 2349.5 | 2512.2 |
| 360.0  | 380.1  | 10.6   | 27.4   | 550.8  | 443.2  | 486.6  | 410.4  | 441.8  |
| 1881.7 | 2624.3 | 1127.9 | 1587.1 | 2704.7 | 3010.3 | 3683.5 | 2958.8 | 2949.2 |
| 344.0  | 376.9  | 139.9  | 214.0  | 509.0  | 335.9  | 529.8  | 371.8  | 468.8  |
| 46.5   | 37.4   | 52.6   | 63.6   | 42.0   | 38.5   | 128.3  | 111.9  | 121.6  |
| 595.0  | 661.2  | 176.1  | 360.3  | 757.6  | 689.1  | 1018.3 | 801.8  | 1015.9 |
| 43.7   | 51.0   | 23.6   | 22.3   | 84.3   | 33.9   | 615.7  | 972.9  | 1161.1 |
| 48.2   | 77.7   | 34.9   | 34.7   | 96.4   | 56.9   | 136.7  | 195.9  | 195.0  |
| 386.4  | 318.5  | 129.0  | 204.9  | 326.8  | 312.9  | 348.8  | 241.5  | 262.9  |
| 216.0  | 239.6  | 68.5   | 123.9  | 265.9  | 261.1  | 474.8  | 406.2  | 431.6  |
| 44.0   | 54.2   | 18.9   | 22.9   | 72.7   | 39.9   | 136.5  | 167.8  | 179.4  |
| 17.2   | 16.3   | 26.8   | 28.0   | 29.8   | 14.1   | 50.5   | 83.7   | 93.4   |
| 6.4    | 6.4    | 7.5    | 5.5    | 6.5    | 2.5    | 2.7    | 1.5    | 0.8    |
| 447.2  | 571.4  | 91.8   | 118.1  | 652.9  | 550.2  | 454.2  | 385.3  | 429.7  |
| 60.5   | 70.0   | 177.8  | 241.4  | 64.9   | 67.0   | 362.9  | 244.6  | 356.9  |
| 2739.2 | 3112.7 | 1254.7 | 1786.8 | 3829.7 | 3151.1 | 6494.5 | 6729.5 | 6493.7 |
| 179.6  | 193.9  | 138.9  | 113.9  | 262.8  | 169.4  | 239.7  | 161.9  | 185.2  |
| 108.1  | 159.5  | 95.4   | 115.6  | 239.2  | 135.0  | 537.1  | 530.0  | 551.3  |
| 270.6  | 351.1  | 169.4  | 225.8  | 337.0  | 260.6  | 526.8  | 333.9  | 385.8  |
| 322.6  | 407.4  | 90.5   | 118.4  | 654.4  | 472.8  | 888.8  | 763.0  | 908.6  |



|        |        |       |        |        |        |        |        |        |
|--------|--------|-------|--------|--------|--------|--------|--------|--------|
| 574.0  | 564.7  | 93.9  | 145.1  | 945.5  | 439.3  | 497.6  | 535.3  | 640.0  |
| 3.9    | 3.3    | 1.5   | 5.6    | 2.6    | 2.0    | 2.6    | 9.1    | 2.5    |
| 2913.5 | 3591.6 | 790.4 | 1084.2 | 3613.2 | 3531.8 | 7990.7 | 7071.3 | 7400.2 |
| 17.8   | 24.7   | 44.9  | 35.4   | 40.7   | 32.6   | 69.0   | 195.3  | 205.2  |
| 672.9  | 811.9  | 62.0  | 99.4   | 889.6  | 860.1  | 840.1  | 513.3  | 499.0  |
| 133.8  | 133.2  | 12.6  | 17.7   | 261.9  | 131.8  | 388.0  | 333.9  | 372.2  |
| 359.1  | 633.6  | 320.7 | 402.8  | 522.8  | 525.5  | 513.4  | 377.5  | 426.3  |
| 467.7  | 793.5  | 163.7 | 218.4  | 856.7  | 776.4  | 766.1  | 389.6  | 456.1  |
| 746.3  | 1130.4 | 64.7  | 95.3   | 1198.6 | 992.1  | 1611.4 | 729.9  | 761.5  |
| 137.3  | 181.3  | 65.6  | 93.9   | 236.4  | 143.5  | 256.6  | 267.8  | 285.2  |
| 277.9  | 338.6  | 256.9 | 300.2  | 383.6  | 298.1  | 605.7  | 796.4  | 774.6  |
| 86.3   | 136.5  | 142.9 | 127.5  | 131.9  | 122.3  | 338.6  | 448.8  | 524.1  |
| 103.3  | 194.0  | 56.2  | 66.3   | 140.9  | 146.7  | 421.4  | 422.9  | 484.5  |
| 181.3  | 271.1  | 31.4  | 29.4   | 340.1  | 222.6  | 442.9  | 360.3  | 393.5  |
| 74.5   | 108.6  | 198.7 | 256.3  | 120.8  | 62.1   | 349.4  | 286.4  | 416.7  |
| 95.6   | 99.2   | 66.3  | 73.4   | 120.0  | 98.4   | 170.3  | 172.6  | 168.5  |
| 105.4  | 125.9  | 35.7  | 44.5   | 158.6  | 104.6  | 413.3  | 396.1  | 396.9  |
| 835.7  | 710.3  | 83.1  | 96.2   | 1124.2 | 681.2  | 921.3  | 714.3  | 764.8  |
| 366.3  | 315.8  | 41.1  | 80.7   | 398.0  | 324.8  | 1410.0 | 1019.3 | 1155.0 |
| 433.5  | 607.6  | 253.1 | 345.1  | 601.1  | 696.1  | 1049.6 | 761.2  | 805.3  |
| 79.2   | 79.0   | 155.2 | 154.6  | 103.1  | 145.2  | 407.6  | 526.9  | 650.0  |
| 197.1  | 384.7  | 88.0  | 107.4  | 331.3  | 352.7  | 2372.8 | 2006.5 | 2172.6 |
| 255.1  | 303.7  | 51.2  | 52.4   | 380.5  | 228.9  | 743.9  | 698.6  | 802.7  |
| 299.6  | 364.5  | 67.3  | 76.2   | 527.2  | 388.7  | 1863.2 | 1655.0 | 1689.1 |
| 66.4   | 71.5   | 34.6  | 32.7   | 73.2   | 95.5   | 62.8   | 55.2   | 63.3   |
| 626.9  | 791.7  | 99.6  | 108.3  | 993.7  | 751.3  | 1347.1 | 891.7  | 938.2  |
| 97.4   | 105.9  | 27.4  | 37.6   | 162.4  | 97.7   | 351.0  | 342.4  | 397.6  |
| 773.5  | 935.1  | 283.0 | 438.0  | 1036.3 | 1222.1 | 4280.3 | 4192.3 | 4372.3 |
| 142.0  | 177.0  | 47.4  | 50.9   | 210.6  | 182.2  | 323.4  | 371.3  | 446.6  |
| 345.1  | 411.6  | 185.3 | 251.5  | 589.1  | 237.1  | 452.3  | 347.8  | 353.8  |
| 166.9  | 179.3  | 316.9 | 378.2  | 227.3  | 147.1  | 824.1  | 854.3  | 880.2  |
| 88.9   | 79.7   | 100.2 | 142.5  | 68.3   | 75.7   | 274.9  | 241.4  | 248.8  |
| 226.3  | 311.2  | 48.8  | 55.1   | 368.8  | 311.7  | 635.3  | 650.5  | 671.2  |
| 64.0   | 102.8  | 37.4  | 51.3   | 131.5  | 118.5  | 765.8  | 451.4  | 502.3  |
| 60.0   | 78.1   | 18.1  | 32.0   | 79.4   | 77.2   | 184.0  | 149.0  | 162.5  |
| 15.8   | 10.4   | 21.4  | 29.5   | 42.1   | 17.9   | 2.4    | 2.1    | 1.6    |
| 72.2   | 112.7  | 34.6  | 40.4   | 112.6  | 73.7   | 106.4  | 76.3   | 90.8   |
| 129.2  | 175.7  | 97.2  | 125.8  | 194.9  | 127.4  | 416.4  | 338.7  | 347.9  |
| 352.9  | 392.9  | 98.3  | 159.2  | 541.9  | 399.9  | 906.8  | 647.6  | 755.3  |
| 453.4  | 548.3  | 172.8 | 197.9  | 599.0  | 529.2  | 924.0  | 520.0  | 591.3  |
| 612.0  | 925.7  | 395.0 | 433.8  | 950.3  | 877.0  | 1144.4 | 944.5  | 1012.5 |
| 35.1   | 55.1   | 52.4  | 48.3   | 60.2   | 65.4   | 100.1  | 106.1  | 137.0  |
| 124.3  | 150.9  | 31.1  | 33.7   | 191.4  | 151.9  | 79.8   | 89.9   | 96.7   |
| 51.7   | 66.6   | 13.7  | 41.6   | 70.4   | 65.2   | 69.5   | 72.5   | 80.5   |
| 63.7   | 72.7   | 100.4 | 146.7  | 98.9   | 71.1   | 312.4  | 161.8  | 210.9  |
| 190.4  | 260.0  | 37.4  | 65.0   | 400.6  | 185.5  | 249.1  | 223.3  | 225.8  |
| 97.4   | 163.3  | 303.1 | 388.0  | 178.0  | 159.7  | 902.6  | 1003.2 | 1066.9 |
| 212.5  | 361.4  | 40.4  | 24.6   | 200.8  | 327.6  | 217.8  | 54.2   | 42.3   |
| 16.1   | 14.7   | 9.9   | 14.1   | 13.7   | 11.6   | 19.0   | 15.5   | 28.2   |
| 71.0   | 137.5  | 144.0 | 288.8  | 83.0   | 107.4  | 231.9  | 342.5  | 311.5  |
| 297.8  | 384.0  | 351.0 | 513.7  | 379.5  | 408.8  | 1483.6 | 1160.9 | 1257.7 |
| 74.6   | 126.5  | 177.8 | 198.1  | 113.5  | 110.4  | 282.6  | 271.6  | 313.2  |
| 336.6  | 374.9  | 101.4 | 137.6  | 513.8  | 441.0  | 676.0  | 424.9  | 442.8  |

|        |        |       |       |        |        |        |        |        |
|--------|--------|-------|-------|--------|--------|--------|--------|--------|
| 225.2  | 374.2  | 25.9  | 40.6  | 331.1  | 310.9  | 151.5  | 182.7  | 215.7  |
| 41.1   | 30.6   | 117.7 | 121.6 | 69.5   | 28.5   | 189.1  | 240.9  | 281.9  |
| 274.2  | 485.4  | 135.7 | 180.6 | 436.8  | 509.5  | 952.0  | 977.4  | 1021.6 |
| 138.4  | 156.3  | 64.1  | 97.9  | 184.4  | 166.8  | 167.4  | 171.0  | 204.3  |
| 467.4  | 604.7  | 88.4  | 88.2  | 768.8  | 617.9  | 627.3  | 603.1  | 640.2  |
| 232.7  | 304.0  | 101.5 | 214.9 | 285.7  | 269.8  | 525.1  | 402.3  | 401.1  |
| 120.9  | 145.1  | 135.3 | 202.0 | 135.3  | 140.1  | 358.1  | 272.2  | 337.7  |
| 207.5  | 161.3  | 175.4 | 167.2 | 202.7  | 233.8  | 664.0  | 601.5  | 715.2  |
| 31.9   | 58.0   | 24.1  | 18.9  | 79.8   | 66.4   | 135.1  | 104.1  | 101.7  |
| 7.8    | 0.6    | 8.5   | 8.8   | 16.0   | 11.2   | 4.9    | 2.7    | 8.0    |
| 58.9   | 93.1   | 16.2  | 17.0  | 68.5   | 48.7   | 345.3  | 256.0  | 271.5  |
| 159.5  | 155.4  | 47.3  | 62.9  | 239.9  | 123.1  | 262.1  | 161.2  | 156.5  |
| 123.8  | 128.8  | 36.3  | 53.8  | 140.4  | 129.0  | 281.9  | 123.3  | 141.9  |
| 61.9   | 49.2   | 7.4   | 36.6  | 75.5   | 48.5   | 92.2   | 97.0   | 54.5   |
| 112.8  | 164.4  | 60.6  | 114.8 | 165.1  | 143.9  | 63.7   | 56.2   | 93.5   |
| 151.0  | 190.2  | 63.3  | 80.9  | 232.6  | 137.5  | 212.6  | 98.6   | 118.6  |
| 248.7  | 320.0  | 55.7  | 72.6  | 249.4  | 317.2  | 343.8  | 148.1  | 167.8  |
| 17.8   | 34.4   | 28.3  | 60.9  | 42.7   | 47.3   | 116.9  | 129.5  | 154.9  |
| 666.5  | 707.3  | 115.9 | 168.7 | 930.3  | 524.1  | 494.3  | 529.4  | 575.6  |
| 441.7  | 546.9  | 89.1  | 112.5 | 724.5  | 488.2  | 725.5  | 1264.3 | 1332.7 |
| 191.1  | 195.5  | 27.6  | 42.6  | 235.4  | 165.7  | 326.1  | 279.4  | 337.9  |
| 279.0  | 339.2  | 100.0 | 181.1 | 387.9  | 353.5  | 347.9  | 127.4  | 136.1  |
| 58.9   | 54.0   | 29.2  | 27.0  | 75.6   | 49.9   | 115.2  | 146.6  | 156.7  |
| 53.5   | 120.7  | 189.7 | 290.2 | 66.5   | 98.7   | 361.1  | 217.1  | 306.7  |
| 379.6  | 516.8  | 112.6 | 152.6 | 478.5  | 592.0  | 577.0  | 353.4  | 450.0  |
| 267.3  | 263.1  | 566.0 | 831.8 | 356.6  | 243.0  | 378.1  | 933.5  | 892.3  |
| 185.0  | 164.8  | 57.9  | 61.1  | 213.2  | 146.0  | 195.1  | 181.4  | 216.8  |
| 169.8  | 303.2  | 25.3  | 21.6  | 298.7  | 237.0  | 258.9  | 264.1  | 286.0  |
| 21.8   | 11.6   | 171.6 | 188.1 | 28.1   | 23.4   | 3.1    | 7.4    | 7.5    |
| 558.7  | 787.9  | 107.9 | 146.3 | 818.7  | 763.2  | 932.1  | 1306.6 | 1311.3 |
| 56.0   | 85.4   | 36.7  | 31.1  | 79.7   | 56.7   | 258.7  | 273.5  | 278.1  |
| 416.5  | 509.2  | 79.6  | 143.3 | 555.3  | 489.3  | 528.7  | 321.8  | 382.8  |
| 264.2  | 371.2  | 103.4 | 75.8  | 415.8  | 346.2  | 469.5  | 262.4  | 292.4  |
| 192.8  | 170.8  | 167.2 | 179.4 | 213.0  | 162.4  | 324.8  | 223.2  | 266.5  |
| 45.2   | 46.4   | 18.8  | 15.4  | 58.0   | 64.5   | 176.8  | 194.1  | 214.2  |
| 61.8   | 76.2   | 12.4  | 22.2  | 133.2  | 57.9   | 381.5  | 618.0  | 602.3  |
| 437.5  | 522.0  | 625.3 | 830.0 | 801.5  | 548.6  | 2508.3 | 2450.5 | 2567.9 |
| 335.6  | 428.2  | 173.2 | 234.5 | 519.1  | 368.2  | 337.9  | 283.5  | 327.0  |
| 242.4  | 292.7  | 11.0  | 3.0   | 397.1  | 315.8  | 1354.2 | 1523.5 | 1589.4 |
| 94.5   | 153.6  | 176.5 | 177.2 | 163.5  | 178.2  | 817.6  | 951.4  | 974.4  |
| 47.5   | 47.3   | 26.5  | 51.3  | 92.0   | 60.6   | 172.9  | 185.9  | 227.1  |
| 156.6  | 220.5  | 74.2  | 61.4  | 258.1  | 182.4  | 178.1  | 165.4  | 162.2  |
| 158.2  | 267.3  | 15.3  | 12.0  | 221.6  | 217.4  | 398.7  | 666.6  | 711.3  |
| 399.1  | 326.6  | 101.9 | 119.4 | 704.6  | 343.2  | 281.8  | 255.6  | 271.8  |
| 58.4   | 82.7   | 95.6  | 155.4 | 117.5  | 62.7   | 387.4  | 281.3  | 298.7  |
| 135.4  | 134.0  | 82.3  | 107.5 | 160.2  | 103.7  | 191.6  | 229.7  | 229.1  |
| 170.4  | 294.2  | 6.7   | 9.7   | 318.6  | 348.9  | 861.5  | 1013.1 | 1088.5 |
| 203.3  | 376.6  | 26.6  | 28.0  | 383.0  | 303.9  | 466.3  | 333.2  | 395.0  |
| 458.3  | 439.6  | 17.6  | 17.8  | 886.3  | 616.5  | 17.9   | 17.2   | 26.9   |
| 665.1  | 840.2  | 62.7  | 131.9 | 890.5  | 734.1  | 477.4  | 412.4  | 432.0  |
| 676.7  | 839.2  | 51.6  | 61.2  | 1079.5 | 848.6  | 1381.4 | 1105.3 | 1078.9 |
| 226.2  | 191.0  | 78.0  | 149.4 | 271.7  | 224.6  | 382.0  | 375.3  | 448.1  |
| 1132.5 | 1354.5 | 472.3 | 710.4 | 1931.6 | 1616.3 | 1095.9 | 600.2  | 687.2  |

|        |        |       |       |        |        |        |        |        |
|--------|--------|-------|-------|--------|--------|--------|--------|--------|
| 81.7   | 75.2   | 24.1  | 32.3  | 41.2   | 73.1   | 99.5   | 76.2   | 78.8   |
| 41.7   | 28.3   | 45.3  | 28.4  | 40.3   | 33.2   | 45.4   | 32.4   | 56.1   |
| 577.3  | 695.8  | 137.4 | 187.7 | 775.2  | 738.4  | 1096.0 | 856.1  | 929.9  |
| 90.5   | 118.7  | 24.9  | 34.1  | 146.7  | 101.9  | 349.3  | 247.7  | 283.0  |
| 330.8  | 449.1  | 124.7 | 189.6 | 658.7  | 507.7  | 783.7  | 787.9  | 902.2  |
| 112.7  | 177.0  | 99.5  | 81.0  | 149.2  | 161.4  | 1565.2 | 1866.5 | 2032.4 |
| 256.4  | 336.6  | 48.8  | 69.1  | 368.3  | 260.9  | 480.5  | 386.2  | 465.6  |
| 43.9   | 65.1   | 20.3  | 22.8  | 70.3   | 45.7   | 73.5   | 117.8  | 112.2  |
| 3.3    | 3.5    | 11.6  | 21.6  | 2.5    | 4.7    | 48.8   | 54.6   | 47.4   |
| 33.0   | 50.1   | 94.9  | 123.4 | 52.1   | 41.6   | 297.9  | 853.7  | 980.1  |
| 125.9  | 174.3  | 77.5  | 99.4  | 163.5  | 178.0  | 279.7  | 188.8  | 228.0  |
| 286.6  | 357.1  | 22.5  | 27.8  | 394.2  | 364.5  | 421.2  | 404.6  | 389.0  |
| 244.6  | 250.3  | 64.8  | 122.4 | 356.1  | 319.0  | 1126.9 | 548.9  | 625.6  |
| 712.7  | 746.2  | 132.5 | 160.6 | 891.8  | 758.8  | 2586.6 | 1141.8 | 1335.7 |
| 404.3  | 592.2  | 29.9  | 38.8  | 489.1  | 570.0  | 2116.5 | 2027.7 | 2157.4 |
| 58.7   | 66.1   | 16.7  | 24.6  | 98.1   | 59.9   | 905.8  | 972.2  | 1068.7 |
| 5.0    | 5.7    | 2.2   | 6.8   | 9.8    | 5.4    | 18.6   | 23.5   | 18.8   |
| 827.8  | 1245.6 | 162.9 | 232.3 | 1357.5 | 1290.9 | 1167.1 | 891.2  | 1049.5 |
| 219.1  | 338.5  | 84.0  | 158.1 | 350.3  | 287.6  | 669.6  | 599.7  | 667.4  |
| 665.6  | 764.9  | 105.7 | 76.9  | 1143.3 | 983.1  | 949.9  | 494.0  | 581.4  |
| 1209.3 | 1479.7 | 297.4 | 311.0 | 1701.0 | 1489.8 | 1863.6 | 1408.2 | 1375.4 |
| 1089.5 | 1088.3 | 236.6 | 366.0 | 1577.3 | 1176.5 | 1057.9 | 588.3  | 662.5  |
| 22.6   | 17.2   | 59.9  | 93.7  | 55.3   | 56.2   | 208.2  | 192.4  | 204.0  |
| 450.3  | 464.8  | 509.8 | 734.7 | 644.7  | 469.9  | 624.5  | 624.5  | 665.7  |
| 99.1   | 127.0  | 32.3  | 59.7  | 164.7  | 148.3  | 559.2  | 992.5  | 902.5  |
| 20.8   | 35.9   | 6.8   | 8.6   | 16.4   | 21.7   | 117.4  | 111.6  | 120.9  |
| 74.3   | 92.1   | 66.4  | 81.5  | 61.6   | 60.3   | 264.6  | 259.0  | 253.1  |
| 86.2   | 114.5  | 54.0  | 51.3  | 103.6  | 131.9  | 146.1  | 154.6  | 160.7  |
| 118.3  | 164.8  | 123.3 | 152.2 | 211.4  | 124.9  | 476.2  | 382.5  | 416.7  |
| 323.8  | 281.3  | 133.1 | 196.7 | 313.8  | 330.0  | 619.9  | 439.0  | 521.2  |
| 74.4   | 74.4   | 185.2 | 203.3 | 65.0   | 72.7   | 390.0  | 310.9  | 340.6  |
| 1246.1 | 1707.4 | 217.5 | 238.6 | 1491.1 | 1624.5 | 291.5  | 84.2   | 93.7   |
| 5.6    | 9.4    | 4.6   | 0.8   | 2.8    | 0.8    | 7.4    | 5.2    | 5.4    |
| 44.5   | 70.6   | 21.4  | 24.1  | 95.9   | 56.6   | 243.4  | 178.4  | 182.8  |
| 101.1  | 152.9  | 38.5  | 54.8  | 177.3  | 145.9  | 415.0  | 393.1  | 366.6  |
| 54.6   | 40.2   | 44.5  | 53.8  | 45.3   | 48.6   | 83.9   | 93.7   | 71.5   |
| 139.5  | 198.9  | 104.8 | 125.0 | 230.0  | 237.2  | 233.2  | 173.7  | 223.4  |
| 146.5  | 164.7  | 33.1  | 37.8  | 186.2  | 163.9  | 180.0  | 127.6  | 127.4  |
| 288.6  | 354.2  | 93.6  | 127.2 | 417.4  | 329.2  | 544.4  | 519.4  | 685.4  |
| 53.5   | 38.0   | 1.2   | 17.0  | 89.7   | 61.9   | 26.7   | 57.9   | 69.2   |
| 101.1  | 111.2  | 57.7  | 82.1  | 141.9  | 126.6  | 218.0  | 202.7  | 203.5  |
| 46.0   | 94.8   | 43.8  | 41.9  | 96.6   | 130.6  | 98.1   | 90.6   | 103.2  |
| 248.1  | 408.9  | 54.9  | 64.4  | 405.2  | 364.1  | 549.8  | 710.5  | 763.1  |
| 10.3   | 24.2   | 18.0  | 9.4   | 48.9   | 28.5   | 17.8   | 13.6   | 7.3    |
| 579.7  | 825.4  | 132.9 | 176.1 | 1095.0 | 681.7  | 1962.3 | 1313.0 | 1503.2 |
| 46.2   | 94.3   | 58.4  | 120.0 | 93.2   | 37.1   | 347.8  | 270.3  | 297.8  |
| 301.0  | 246.6  | 124.7 | 198.5 | 386.4  | 344.3  | 446.3  | 399.0  | 428.9  |
| 725.7  | 960.1  | 90.8  | 148.3 | 889.8  | 985.4  | 897.5  | 750.0  | 734.1  |
| 466.4  | 587.7  | 101.3 | 103.9 | 671.0  | 534.5  | 371.9  | 234.5  | 284.4  |
| 313.1  | 452.5  | 72.0  | 97.5  | 463.1  | 475.7  | 920.3  | 789.9  | 858.8  |
| 105.5  | 132.8  | 108.1 | 160.1 | 153.6  | 147.4  | 559.8  | 616.1  | 780.9  |
| 116.0  | 137.2  | 95.6  | 171.3 | 185.9  | 161.0  | 895.6  | 873.7  | 956.0  |
| 199.9  | 271.1  | 230.4 | 297.5 | 292.7  | 304.0  | 694.6  | 923.7  | 1012.4 |

|       |       |        |        |       |       |        |        |        |
|-------|-------|--------|--------|-------|-------|--------|--------|--------|
| 17.7  | 10.9  | 3.5    | 6.6    | 13.5  | 3.9   | 38.8   | 39.2   | 41.7   |
| 315.2 | 344.6 | 1299.1 | 2008.1 | 438.7 | 370.6 | 1077.6 | 975.6  | 1137.1 |
| 217.2 | 229.8 | 42.0   | 64.2   | 253.8 | 284.6 | 740.8  | 442.1  | 498.5  |
| 83.4  | 88.6  | 56.3   | 49.4   | 107.1 | 92.5  | 258.7  | 197.5  | 230.3  |
| 82.3  | 81.0  | 77.9   | 101.6  | 85.4  | 78.3  | 149.7  | 173.5  | 175.7  |
| 117.9 | 209.4 | 47.2   | 51.6   | 233.8 | 219.8 | 840.2  | 669.6  | 674.7  |
| 88.1  | 113.0 | 31.3   | 47.9   | 135.7 | 87.0  | 321.7  | 531.8  | 612.8  |
| 254.2 | 365.7 | 15.2   | 16.7   | 631.7 | 418.3 | 1038.7 | 538.8  | 578.6  |
| 486.0 | 735.6 | 201.2  | 292.3  | 994.1 | 750.1 | 2034.0 | 1217.3 | 1417.6 |
| 452.8 | 545.0 | 108.1  | 118.7  | 544.7 | 527.3 | 468.9  | 195.3  | 191.8  |
| 123.2 | 138.3 | 52.9   | 37.6   | 255.2 | 115.0 | 313.5  | 269.7  | 326.2  |
| 71.1  | 84.1  | 14.6   | 16.7   | 102.2 | 56.5  | 73.2   | 76.2   | 83.9   |
| 35.8  | 103.9 | 13.0   | 35.1   | 61.8  | 66.9  | 77.2   | 88.3   | 113.7  |
| 405.1 | 463.6 | 277.9  | 372.8  | 580.9 | 577.5 | 951.2  | 557.8  | 646.9  |
| 201.5 | 225.1 | 20.3   | 45.0   | 254.4 | 194.9 | 208.0  | 143.4  | 183.0  |
| 68.6  | 66.6  | 90.1   | 77.5   | 108.4 | 83.6  | 328.4  | 236.9  | 245.3  |
| 1.5   | 2.1   | 12.9   | 9.1    | 2.0   | 2.6   | 26.5   | 25.6   | 8.6    |
| 299.3 | 327.3 | 158.7  | 245.7  | 415.2 | 335.1 | 434.4  | 451.4  | 483.0  |
| 388.1 | 507.2 | 104.6  | 181.7  | 560.1 | 615.0 | 529.5  | 253.2  | 274.3  |
| 151.6 | 139.0 | 110.6  | 121.0  | 160.1 | 151.3 | 197.9  | 148.4  | 159.2  |
| 18.5  | 38.0  | 1.7    | 17.0   | 38.2  | 22.8  | 39.4   | 9.4    | 19.2   |
| 62.0  | 77.4  | 50.0   | 37.6   | 97.6  | 74.0  | 135.8  | 105.2  | 117.1  |
| 143.8 | 165.3 | 297.2  | 322.9  | 221.2 | 176.6 | 707.2  | 767.5  | 888.1  |
| 21.0  | 17.5  | 3.4    | 9.3    | 25.6  | 14.5  | 11.4   | 5.3    | 7.7    |
| 95.1  | 134.0 | 94.0   | 100.5  | 88.3  | 177.9 | 149.5  | 147.1  | 163.0  |
| 58.2  | 86.2  | 39.7   | 41.4   | 92.5  | 80.9  | 212.9  | 208.6  | 253.7  |
| 14.3  | 11.0  | 38.3   | 45.1   | 27.3  | 11.8  | 75.6   | 41.0   | 47.7   |
| 56.2  | 53.5  | 42.7   | 58.5   | 73.7  | 51.0  | 83.2   | 71.3   | 75.7   |
| 161.5 | 93.1  | 102.4  | 131.5  | 245.1 | 92.3  | 113.7  | 82.7   | 95.8   |
| 30.2  | 53.2  | 29.4   | 36.9   | 100.5 | 60.6  | 252.4  | 273.8  | 305.0  |
| 103.2 | 90.5  | 69.5   | 99.3   | 117.7 | 79.8  | 546.4  | 425.1  | 484.4  |
| 198.6 | 219.9 | 52.0   | 66.8   | 237.5 | 168.3 | 353.6  | 286.6  | 339.8  |
| 117.3 | 206.1 | 8.6    | 13.8   | 202.3 | 224.9 | 672.0  | 617.4  | 671.7  |
| 165.9 | 250.3 | 33.9   | 34.5   | 280.7 | 223.5 | 448.8  | 432.9  | 459.8  |
| 307.8 | 486.1 | 48.1   | 44.0   | 385.7 | 407.5 | 324.1  | 336.3  | 508.1  |
| 60.8  | 67.5  | 38.1   | 30.3   | 67.9  | 63.0  | 77.9   | 54.9   | 64.8   |
| 71.8  | 70.2  | 28.1   | 29.2   | 85.2  | 65.6  | 58.4   | 55.3   | 53.2   |
| 88.2  | 89.5  | 54.3   | 77.7   | 122.6 | 108.8 | 345.4  | 220.3  | 287.9  |
| 81.7  | 118.8 | 33.6   | 27.7   | 115.7 | 105.5 | 254.3  | 240.3  | 253.4  |
| 49.3  | 40.7  | 61.2   | 51.1   | 69.4  | 36.7  | 84.0   | 155.1  | 135.7  |
| 21.8  | 22.7  | 12.4   | 6.0    | 34.7  | 24.6  | 87.9   | 93.9   | 101.5  |
| 131.8 | 141.5 | 60.4   | 78.4   | 173.1 | 137.4 | 228.4  | 242.8  | 268.9  |
| 113.1 | 112.0 | 37.6   | 42.6   | 187.6 | 87.9  | 463.2  | 596.2  | 648.1  |
| 22.7  | 38.5  | 55.1   | 57.4   | 44.9  | 41.9  | 172.6  | 154.5  | 168.6  |
| 230.8 | 296.2 | 65.9   | 94.7   | 350.9 | 283.6 | 2377.6 | 2093.0 | 2370.4 |
| 498.1 | 703.2 | 236.9  | 274.9  | 705.2 | 734.3 | 8108.9 | 6693.9 | 6583.6 |
| 121.7 | 159.7 | 37.4   | 46.6   | 178.5 | 168.6 | 305.6  | 263.5  | 305.9  |
| 23.4  | 38.4  | 24.1   | 25.5   | 27.0  | 35.6  | 282.7  | 217.3  | 254.6  |
| 293.3 | 295.3 | 41.0   | 57.8   | 347.0 | 329.4 | 480.5  | 430.4  | 428.5  |
| 113.8 | 175.8 | 129.2  | 196.2  | 149.6 | 204.2 | 514.9  | 464.3  | 533.9  |
| 204.8 | 275.0 | 159.1  | 214.4  | 334.4 | 229.2 | 487.5  | 599.9  | 714.0  |
| 92.8  | 102.8 | 45.0   | 42.5   | 140.8 | 128.1 | 194.2  | 139.0  | 153.7  |
| 107.5 | 234.4 | 33.9   | 47.1   | 184.9 | 144.4 | 240.9  | 133.4  | 181.3  |

|        |        |       |        |        |        |        |        |        |
|--------|--------|-------|--------|--------|--------|--------|--------|--------|
| 208.4  | 287.6  | 120.2 | 113.3  | 286.8  | 360.3  | 598.9  | 519.5  | 550.8  |
| 31.4   | 37.2   | 10.4  | 12.0   | 65.7   | 43.1   | 133.7  | 101.1  | 114.8  |
| 8.2    | 24.7   | 81.0  | 83.5   | 10.7   | 8.4    | 261.3  | 204.9  | 240.6  |
| 338.3  | 665.1  | 31.9  | 42.2   | 649.9  | 599.2  | 769.8  | 790.1  | 777.5  |
| 1027.9 | 1140.0 | 333.3 | 475.9  | 1636.1 | 1355.5 | 1536.0 | 878.2  | 914.8  |
| 242.3  | 302.4  | 312.6 | 470.2  | 297.6  | 293.8  | 824.8  | 807.1  | 947.8  |
| 199.3  | 220.0  | 74.4  | 90.8   | 255.3  | 215.9  | 390.7  | 414.4  | 456.2  |
| 767.0  | 791.3  | 342.7 | 446.9  | 1103.8 | 651.5  | 442.4  | 437.3  | 513.3  |
| 547.7  | 704.0  | 46.9  | 58.1   | 745.1  | 688.9  | 310.3  | 274.2  | 257.7  |
| 116.3  | 125.8  | 12.2  | 16.7   | 162.3  | 141.7  | 123.9  | 187.1  | 188.7  |
| 43.9   | 39.5   | 18.1  | 24.5   | 69.8   | 35.6   | 52.7   | 52.3   | 57.8   |
| 451.8  | 526.5  | 20.5  | 21.5   | 604.7  | 557.3  | 4.2    | 19.7   | 14.8   |
| 137.7  | 239.1  | 65.1  | 123.8  | 245.5  | 264.8  | 570.1  | 515.0  | 652.3  |
| 239.2  | 509.7  | 11.8  | 11.8   | 338.1  | 401.9  | 61.7   | 56.5   | 68.1   |
| 3.3    | 11.4   | 14.8  | 14.7   | 35.7   | 15.6   | 41.8   | 48.0   | 66.3   |
| 35.6   | 44.3   | 25.8  | 28.3   | 60.5   | 38.1   | 343.1  | 297.9  | 322.3  |
| 295.9  | 316.6  | 69.4  | 83.5   | 291.8  | 268.6  | 526.3  | 291.9  | 357.0  |
| 305.2  | 402.7  | 175.7 | 227.9  | 362.9  | 424.5  | 731.9  | 441.9  | 579.9  |
| 338.3  | 404.4  | 70.1  | 132.5  | 439.1  | 563.5  | 599.0  | 359.1  | 367.9  |
| 1044.5 | 1251.5 | 323.8 | 426.3  | 1238.5 | 1091.0 | 1119.8 | 733.8  | 749.8  |
| 138.6  | 196.4  | 72.7  | 84.8   | 191.9  | 178.2  | 310.7  | 236.2  | 262.8  |
| 110.0  | 121.4  | 52.6  | 57.0   | 120.8  | 126.4  | 268.4  | 246.2  | 247.1  |
| 231.1  | 337.4  | 67.1  | 99.7   | 360.2  | 337.4  | 575.8  | 481.6  | 511.7  |
| 23.9   | 44.1   | 26.3  | 49.4   | 30.0   | 12.5   | 70.0   | 77.4   | 84.9   |
| 1410.1 | 1786.7 | 942.7 | 1207.2 | 2002.7 | 1773.7 | 2530.9 | 1971.8 | 2078.4 |
| 651.8  | 942.5  | 6.1   | 3.0    | 691.1  | 594.7  | 6.9    | 2.8    | 4.2    |
| 611.2  | 820.2  | 1.2   | 1.9    | 656.5  | 587.4  | 6.6    | 0.7    | 2.2    |
| 642.9  | 634.0  | 15.4  | 21.2   | 590.4  | 406.7  | 267.4  | 148.7  | 158.0  |
| 79.1   | 53.5   | 88.5  | 107.6  | 100.3  | 54.8   | 178.6  | 234.2  | 256.6  |
| 455.2  | 557.9  | 69.7  | 86.4   | 658.2  | 533.5  | 561.5  | 357.1  | 369.3  |
| 152.4  | 166.8  | 115.4 | 145.2  | 178.0  | 124.8  | 450.9  | 255.2  | 272.7  |
| 705.5  | 866.4  | 146.1 | 157.8  | 1308.0 | 850.8  | 753.0  | 624.8  | 675.4  |
| 58.6   | 52.9   | 27.9  | 27.3   | 106.3  | 39.2   | 142.7  | 63.2   | 68.6   |
| 26.1   | 29.5   | 69.2  | 86.8   | 27.7   | 8.5    | 83.7   | 130.1  | 154.3  |
| 627.9  | 578.0  | 140.5 | 251.7  | 905.2  | 692.4  | 6387.3 | 5676.2 | 6520.6 |
| 196.7  | 268.7  | 89.1  | 63.5   | 256.8  | 215.4  | 556.1  | 472.3  | 483.8  |
| 60.9   | 83.6   | 14.7  | 14.3   | 100.9  | 79.3   | 281.6  | 164.7  | 174.8  |
| 47.8   | 47.3   | 37.7  | 52.3   | 46.3   | 55.2   | 182.8  | 186.2  | 242.1  |
| 230.6  | 198.5  | 99.3  | 130.1  | 284.2  | 160.6  | 393.9  | 164.7  | 174.8  |
| 1808.8 | 1809.4 | 478.7 | 638.7  | 2495.7 | 1909.7 | 1287.5 | 920.6  | 1055.9 |
| 96.5   | 95.6   | 52.3  | 64.2   | 100.2  | 92.7   | 282.5  | 269.5  | 281.4  |
| 2.9    | 1.5    | 3.4   | 2.4    | 3.1    | 1.3    | 39.2   | 11.7   | 3.4    |
| 64.3   | 66.7   | 20.1  | 25.4   | 78.5   | 57.5   | 106.7  | 83.6   | 90.0   |
| 45.2   | 26.9   | 41.9  | 63.3   | 38.8   | 33.2   | 78.3   | 68.9   | 89.8   |
| 27.4   | 24.5   | 20.0  | 14.9   | 35.3   | 43.9   | 364.3  | 672.1  | 715.2  |
| 301.8  | 364.8  | 77.8  | 100.5  | 511.5  | 485.3  | 327.6  | 154.9  | 181.9  |
| 17.7   | 21.1   | 30.4  | 34.9   | 35.5   | 18.6   | 89.1   | 129.7  | 165.5  |
| 99.2   | 117.7  | 12.4  | 9.1    | 158.7  | 155.4  | 317.2  | 355.4  | 383.6  |
| 192.6  | 223.7  | 81.8  | 89.5   | 311.5  | 228.9  | 557.2  | 444.2  | 529.2  |
| 168.2  | 187.7  | 57.2  | 85.7   | 224.1  | 203.2  | 185.2  | 122.8  | 123.4  |
| 1680.0 | 1373.4 | 370.4 | 621.5  | 2401.5 | 1346.7 | 1987.9 | 1394.7 | 1540.1 |
| 433.0  | 495.0  | 481.6 | 648.7  | 766.0  | 367.2  | 344.0  | 280.6  | 359.4  |
| 547.1  | 663.9  | 423.7 | 617.6  | 716.9  | 653.6  | 2620.6 | 2276.4 | 2431.2 |

|       |        |       |       |       |        |        |        |        |
|-------|--------|-------|-------|-------|--------|--------|--------|--------|
| 259.1 | 445.9  | 35.2  | 31.9  | 349.3 | 372.1  | 422.9  | 204.6  | 219.9  |
| 694.0 | 1034.0 | 118.4 | 135.5 | 944.2 | 1038.4 | 666.2  | 290.1  | 295.1  |
| 114.4 | 160.4  | 49.0  | 56.5  | 207.7 | 157.0  | 425.2  | 357.4  | 391.5  |
| 237.7 | 302.9  | 37.9  | 39.0  | 344.6 | 281.3  | 1165.3 | 1014.6 | 1030.0 |
| 68.4  | 75.4   | 123.9 | 281.8 | 92.8  | 114.3  | 379.0  | 236.9  | 300.3  |
| 81.6  | 128.8  | 71.0  | 73.0  | 155.3 | 137.0  | 449.5  | 381.2  | 458.2  |
| 15.2  | 30.7   | 53.3  | 41.6  | 38.8  | 40.3   | 35.6   | 35.9   | 47.6   |
| 1.4   | 1.2    | 10.0  | 11.2  | 0.6   | 2.1    | 134.3  | 121.1  | 172.7  |
| 159.2 | 161.8  | 64.8  | 89.9  | 140.8 | 142.2  | 211.1  | 162.9  | 198.2  |
| 76.3  | 121.4  | 60.3  | 55.1  | 134.6 | 116.6  | 157.9  | 189.0  | 219.4  |
| 282.8 | 593.9  | 83.6  | 76.6  | 584.1 | 589.0  | 911.0  | 806.8  | 850.1  |
| 79.3  | 97.6   | 500.7 | 719.8 | 138.7 | 105.0  | 190.8  | 194.7  | 216.8  |
| 83.7  | 123.8  | 44.2  | 35.5  | 117.3 | 88.1   | 138.2  | 110.8  | 126.3  |
| 4.7   | 29.3   | 65.8  | 116.1 | 43.1  | 15.9   | 43.2   | 49.9   | 49.4   |
| 6.1   | 16.1   | 16.0  | 17.6  | 15.8  | 3.3    | 1.4    | 5.1    | 0.9    |
| 211.0 | 264.0  | 82.2  | 104.3 | 273.8 | 226.0  | 880.2  | 711.1  | 772.0  |
| 677.3 | 850.5  | 145.0 | 169.3 | 891.1 | 858.0  | 1013.9 | 472.1  | 553.8  |
| 61.0  | 90.9   | 7.8   | 9.1   | 110.6 | 113.9  | 225.2  | 94.1   | 107.9  |
| 154.0 | 210.1  | 570.9 | 658.9 | 252.8 | 196.6  | 371.9  | 301.4  | 349.4  |
| 128.3 | 133.5  | 40.7  | 31.7  | 193.8 | 145.8  | 329.8  | 242.7  | 242.9  |
| 110.1 | 173.5  | 43.5  | 67.0  | 174.0 | 171.6  | 202.6  | 151.5  | 151.3  |
| 50.6  | 140.8  | 27.8  | 26.2  | 76.0  | 119.2  | 77.4   | 42.4   | 74.0   |
| 77.7  | 86.4   | 19.4  | 16.7  | 107.4 | 76.3   | 180.6  | 240.5  | 270.2  |
| 214.3 | 239.0  | 13.2  | 27.0  | 307.7 | 211.7  | 717.1  | 830.1  | 936.5  |
| 162.4 | 261.6  | 82.7  | 87.5  | 287.4 | 233.2  | 440.7  | 409.9  | 419.6  |
| 25.4  | 36.4   | 31.8  | 32.3  | 41.0  | 34.0   | 74.7   | 82.2   | 65.4   |
| 74.7  | 69.7   | 57.9  | 72.9  | 114.5 | 59.2   | 156.4  | 96.5   | 130.3  |
| 36.2  | 44.5   | 14.3  | 15.4  | 25.3  | 33.8   | 54.0   | 66.5   | 78.3   |
| 97.4  | 111.2  | 32.2  | 44.8  | 101.8 | 113.2  | 80.6   | 83.0   | 80.9   |
| 14.6  | 39.9   | 5.5   | 18.3  | 26.6  | 57.5   | 159.7  | 142.0  | 165.9  |
| 181.3 | 177.9  | 51.9  | 85.9  | 314.6 | 186.4  | 432.4  | 267.2  | 321.2  |
| 204.5 | 250.6  | 55.6  | 80.5  | 336.6 | 277.8  | 560.4  | 399.7  | 483.7  |
| 91.5  | 118.1  | 33.1  | 34.7  | 125.9 | 105.5  | 337.8  | 392.0  | 454.0  |
| 58.8  | 73.8   | 64.6  | 112.7 | 100.2 | 60.6   | 407.7  | 146.3  | 204.4  |
| 142.5 | 222.3  | 73.7  | 117.9 | 162.1 | 172.6  | 80.4   | 58.0   | 78.9   |
| 101.7 | 145.3  | 259.9 | 326.1 | 143.9 | 112.2  | 150.2  | 125.5  | 152.0  |
| 9.7   | 17.0   | 20.1  | 18.4  | 17.8  | 13.2   | 1.7    | 5.6    | 6.0    |
| 185.5 | 255.4  | 181.5 | 298.9 | 270.1 | 209.7  | 428.0  | 333.1  | 419.9  |
| 104.5 | 132.5  | 28.2  | 20.3  | 147.5 | 111.5  | 740.1  | 749.8  | 806.4  |
| 307.2 | 350.1  | 51.2  | 55.3  | 398.0 | 367.4  | 306.3  | 263.4  | 298.3  |
| 158.7 | 165.4  | 25.2  | 53.0  | 209.0 | 154.8  | 368.8  | 267.1  | 342.7  |
| 12.1  | 2.8    | 71.5  | 82.8  | 48.6  | 8.8    | 98.2   | 122.8  | 147.2  |
| 109.4 | 168.4  | 21.8  | 26.1  | 202.5 | 143.1  | 363.6  | 297.0  | 331.9  |
| 118.5 | 149.8  | 123.1 | 139.3 | 160.6 | 115.7  | 670.6  | 779.0  | 854.4  |
| 47.9  | 63.7   | 129.2 | 102.5 | 50.2  | 39.1   | 230.6  | 155.1  | 186.3  |
| 105.8 | 161.3  | 0.1   | 0.2   | 275.7 | 120.3  | 2.1    | 1.8    | 1.0    |
| 242.7 | 423.9  | 125.5 | 144.6 | 454.2 | 444.0  | 1744.7 | 1213.2 | 1350.5 |
| 262.0 | 370.3  | 37.6  | 57.0  | 311.4 | 251.6  | 367.3  | 408.5  | 485.8  |
| 118.0 | 140.1  | 12.9  | 16.6  | 165.7 | 173.6  | 197.9  | 80.8   | 119.4  |
| 430.0 | 607.6  | 17.0  | 28.4  | 652.0 | 622.1  | 224.1  | 225.6  | 224.4  |
| 27.5  | 34.1   | 110.6 | 120.5 | 45.4  | 33.5   | 6.5    | 8.1    | 5.7    |
| 141.5 | 180.2  | 55.9  | 61.6  | 216.6 | 168.0  | 280.6  | 277.8  | 300.4  |
| 68.2  | 78.8   | 37.2  | 59.1  | 102.4 | 68.1   | 259.3  | 193.8  | 274.3  |

|        |        |       |       |        |        |        |        |        |
|--------|--------|-------|-------|--------|--------|--------|--------|--------|
| 478.4  | 568.1  | 92.2  | 112.1 | 709.0  | 606.1  | 462.8  | 485.5  | 526.7  |
| 102.2  | 186.2  | 42.4  | 38.9  | 253.2  | 159.7  | 279.7  | 131.2  | 173.1  |
| 27.7   | 51.5   | 33.9  | 45.3  | 40.3   | 38.7   | 56.0   | 22.9   | 42.3   |
| 73.6   | 56.7   | 30.1  | 23.7  | 75.5   | 92.4   | 265.7  | 284.2  | 286.2  |
| 10.6   | 11.0   | 34.6  | 44.8  | 3.2    | 1.0    | 49.3   | 20.7   | 12.6   |
| 9.2    | 19.7   | 18.9  | 9.3   | 31.1   | 16.6   | 38.6   | 48.1   | 46.6   |
| 58.4   | 45.4   | 61.2  | 95.7  | 69.9   | 38.9   | 221.1  | 164.1  | 216.1  |
| 1020.2 | 1129.9 | 214.0 | 286.8 | 1370.2 | 1099.7 | 1548.3 | 1148.4 | 1153.1 |
| 879.4  | 1139.2 | 254.6 | 360.9 | 1324.3 | 998.6  | 1228.8 | 761.2  | 853.6  |
| 813.9  | 1028.4 | 112.7 | 168.7 | 1098.2 | 1131.5 | 1853.7 | 1081.0 | 1018.8 |
| 6.8    | 1.4    | 46.3  | 36.1  | 0.7    | 0.5    | 35.7   | 123.4  | 175.0  |
| 69.5   | 71.0   | 36.3  | 21.8  | 80.1   | 62.3   | 107.7  | 61.5   | 72.8   |
| 185.2  | 287.3  | 84.4  | 107.1 | 271.7  | 241.1  | 546.9  | 305.7  | 352.7  |
| 53.2   | 66.6   | 23.7  | 22.6  | 62.6   | 40.2   | 240.4  | 212.8  | 214.5  |
| 372.2  | 397.0  | 184.1 | 314.5 | 538.4  | 444.4  | 1224.8 | 1016.1 | 1219.6 |
| 136.2  | 120.2  | 18.3  | 30.6  | 187.5  | 119.2  | 186.2  | 111.1  | 126.6  |
| 55.0   | 85.1   | 67.4  | 78.5  | 96.6   | 64.4   | 138.7  | 97.0   | 78.1   |
| 691.0  | 1202.3 | 22.9  | 21.8  | 1117.4 | 1212.7 | 1763.3 | 809.5  | 905.7  |
| 421.4  | 459.2  | 243.3 | 430.6 | 550.6  | 362.7  | 642.0  | 528.2  | 588.3  |
| 73.4   | 96.2   | 24.9  | 42.9  | 134.3  | 107.7  | 78.4   | 65.7   | 63.8   |
| 45.4   | 66.0   | 32.2  | 24.5  | 64.5   | 48.9   | 184.1  | 159.9  | 208.0  |
| 90.7   | 127.5  | 21.4  | 18.6  | 118.3  | 100.9  | 360.7  | 335.9  | 355.8  |
| 271.9  | 362.7  | 216.0 | 287.9 | 415.4  | 433.9  | 899.9  | 722.5  | 816.0  |
| 196.7  | 271.5  | 71.7  | 79.6  | 315.1  | 298.0  | 774.2  | 693.5  | 700.3  |
| 22.4   | 13.6   | 23.0  | 17.9  | 28.8   | 9.2    | 11.5   | 2.5    | 4.5    |
| 58.8   | 42.5   | 40.1  | 53.2  | 67.4   | 51.9   | 200.0  | 198.2  | 209.1  |
| 182.8  | 239.9  | 34.7  | 68.1  | 291.0  | 203.1  | 353.6  | 123.0  | 185.8  |
| 359.0  | 493.8  | 116.0 | 162.0 | 451.1  | 468.3  | 481.6  | 175.3  | 239.7  |
| 366.8  | 381.4  | 37.0  | 61.4  | 528.0  | 408.6  | 703.2  | 504.2  | 550.7  |
| 113.8  | 167.5  | 38.7  | 24.4  | 161.4  | 206.7  | 673.1  | 597.5  | 590.0  |
| 53.1   | 79.4   | 9.9   | 16.9  | 99.9   | 89.2   | 118.9  | 67.9   | 98.5   |
| 1597.8 | 1755.8 | 332.1 | 518.3 | 2164.8 | 1968.6 | 2170.9 | 1578.3 | 1816.7 |
| 104.6  | 137.6  | 53.5  | 79.9  | 125.2  | 109.4  | 378.6  | 482.9  | 566.6  |
| 136.3  | 153.2  | 260.2 | 311.3 | 197.9  | 156.4  | 336.8  | 318.6  | 343.1  |
| 197.6  | 236.0  | 102.4 | 140.5 | 326.5  | 245.2  | 507.7  | 517.4  | 538.7  |
| 62.2   | 87.1   | 58.2  | 74.5  | 116.6  | 63.2   | 57.8   | 48.7   | 64.1   |
| 780.6  | 532.0  | 103.8 | 156.2 | 724.4  | 526.0  | 1411.3 | 385.1  | 382.6  |
| 419.1  | 492.0  | 72.5  | 76.3  | 529.7  | 462.3  | 249.6  | 151.9  | 191.7  |
| 49.5   | 65.9   | 1.6   | 4.0   | 100.6  | 55.9   | 86.5   | 73.3   | 80.5   |
| 35.8   | 53.1   | 17.0  | 23.0  | 48.3   | 52.5   | 122.0  | 127.7  | 145.5  |
| 16.5   | 19.7   | 11.2  | 12.6  | 32.7   | 25.0   | 22.7   | 24.6   | 22.5   |
| 70.6   | 103.4  | 38.0  | 19.3  | 133.6  | 82.6   | 211.8  | 75.5   | 82.3   |
| 6.7    | 14.5   | 0.6   | 2.5   | 17.3   | 16.3   | 20.2   | 14.0   | 14.6   |
| 242.6  | 313.3  | 226.9 | 279.1 | 240.2  | 254.6  | 704.5  | 405.0  | 474.3  |
| 325.9  | 369.4  | 48.5  | 66.0  | 423.3  | 325.4  | 468.5  | 309.8  | 291.6  |
| 450.3  | 529.5  | 71.3  | 87.7  | 628.0  | 611.0  | 439.0  | 243.7  | 268.0  |
| 388.0  | 509.1  | 46.8  | 58.1  | 507.3  | 565.9  | 415.7  | 294.4  | 353.2  |
| 23.9   | 33.6   | 38.7  | 43.9  | 60.1   | 19.5   | 125.3  | 119.5  | 135.4  |
| 145.6  | 175.0  | 51.9  | 84.0  | 232.6  | 271.4  | 1052.8 | 875.6  | 1029.0 |
| 134.5  | 165.3  | 29.0  | 36.4  | 192.2  | 144.0  | 397.0  | 313.4  | 321.8  |
| 12.8   | 18.0   | 3.6   | 11.0  | 31.3   | 20.3   | 35.4   | 43.1   | 32.4   |
| 19.3   | 18.2   | 4.2   | 13.8  | 31.0   | 20.0   | 14.7   | 2.6    | 2.4    |
| 167.6  | 181.4  | 85.5  | 119.6 | 234.9  | 209.5  | 235.8  | 196.2  | 190.5  |

|        |        |       |       |        |        |        |        |        |
|--------|--------|-------|-------|--------|--------|--------|--------|--------|
| 28.7   | 60.2   | 4.9   | 0.9   | 84.5   | 63.6   | 294.7  | 143.9  | 149.2  |
| 131.7  | 124.7  | 103.2 | 111.4 | 178.9  | 132.8  | 137.7  | 224.6  | 245.6  |
| 248.8  | 297.2  | 62.8  | 112.6 | 342.9  | 278.2  | 564.2  | 446.0  | 446.6  |
| 454.0  | 608.6  | 214.0 | 264.5 | 813.6  | 547.9  | 1265.5 | 747.3  | 858.7  |
| 583.0  | 839.6  | 268.9 | 262.8 | 996.6  | 825.4  | 690.0  | 672.9  | 813.8  |
| 153.6  | 179.5  | 195.2 | 332.3 | 214.9  | 208.9  | 458.7  | 332.0  | 358.0  |
| 114.2  | 94.5   | 17.2  | 12.5  | 171.7  | 111.3  | 124.5  | 107.9  | 112.9  |
| 46.3   | 59.2   | 56.8  | 67.2  | 69.2   | 63.2   | 187.4  | 181.9  | 199.4  |
| 4.5    | 14.4   | 1.3   | 1.1   | 13.3   | 11.6   | 123.0  | 199.5  | 199.9  |
| 741.9  | 840.5  | 24.4  | 24.0  | 1208.9 | 774.0  | 986.4  | 325.0  | 432.8  |
| 70.0   | 94.8   | 20.4  | 30.8  | 121.6  | 144.6  | 148.9  | 86.7   | 93.3   |
| 44.1   | 59.1   | 19.7  | 19.2  | 70.4   | 68.5   | 117.8  | 74.2   | 77.0   |
| 40.8   | 89.9   | 27.0  | 31.1  | 63.9   | 58.3   | 88.9   | 74.5   | 74.1   |
| 132.1  | 229.5  | 51.5  | 49.0  | 188.5  | 202.1  | 139.1  | 128.9  | 125.6  |
| 203.0  | 195.9  | 116.1 | 120.3 | 215.4  | 170.7  | 224.7  | 176.5  | 170.5  |
| 165.0  | 207.6  | 48.4  | 57.4  | 252.4  | 255.7  | 430.9  | 302.3  | 358.8  |
| 609.6  | 915.2  | 42.1  | 63.6  | 1082.6 | 968.3  | 308.1  | 294.4  | 281.3  |
| 89.8   | 79.6   | 80.0  | 99.1  | 106.2  | 90.2   | 350.5  | 187.1  | 215.6  |
| 25.6   | 41.6   | 3.4   | 21.2  | 46.6   | 39.8   | 196.7  | 139.2  | 186.6  |
| 12.6   | 14.0   | 8.4   | 6.7   | 5.9    | 4.5    | 15.0   | 12.0   | 14.8   |
| 848.0  | 1299.1 | 111.4 | 117.0 | 1181.2 | 1193.0 | 1701.8 | 1165.6 | 1268.3 |
| 3.3    | 4.3    | 2.4   | 2.3   | 8.7    | 8.7    | 5.4    | 3.1    | 1.4    |
| 35.6   | 45.8   | 42.9  | 55.7  | 24.0   | 64.9   | 150.7  | 142.8  | 155.6  |
| 9.0    | 9.0    | 8.7   | 6.2   | 19.7   | 18.5   | 32.3   | 48.7   | 60.3   |
| 121.7  | 99.3   | 59.4  | 61.1  | 132.1  | 100.0  | 264.8  | 177.6  | 242.1  |
| 100.3  | 128.8  | 22.3  | 26.4  | 120.2  | 153.2  | 26.1   | 24.8   | 30.0   |
| 234.5  | 315.2  | 33.0  | 54.0  | 399.7  | 355.9  | 578.5  | 755.0  | 831.7  |
| 16.0   | 34.3   | 38.7  | 60.7  | 29.9   | 31.2   | 14.7   | 20.4   | 15.6   |
| 42.2   | 46.7   | 72.4  | 39.5  | 62.3   | 31.8   | 72.9   | 79.4   | 78.3   |
| 104.6  | 73.9   | 40.8  | 47.4  | 135.0  | 137.8  | 193.3  | 219.4  | 250.3  |
| 95.0   | 115.8  | 57.0  | 72.7  | 114.5  | 112.9  | 250.4  | 297.0  | 391.5  |
| 276.2  | 276.7  | 179.5 | 209.1 | 350.0  | 301.9  | 567.4  | 535.6  | 592.3  |
| 56.9   | 66.9   | 54.5  | 45.9  | 93.9   | 69.2   | 152.5  | 153.9  | 153.9  |
| 89.4   | 112.6  | 56.3  | 70.0  | 103.1  | 67.0   | 154.3  | 159.7  | 193.9  |
| 39.8   | 60.2   | 10.3  | 10.2  | 38.8   | 70.5   | 157.2  | 162.8  | 156.0  |
| 15.1   | 13.5   | 21.6  | 23.8  | 26.6   | 10.5   | 453.1  | 1977.4 | 2910.5 |
| 92.8   | 121.8  | 4.9   | 26.8  | 135.1  | 79.1   | 174.4  | 188.9  | 272.4  |
| 118.5  | 137.7  | 196.8 | 244.5 | 193.3  | 132.8  | 493.2  | 656.0  | 733.3  |
| 51.3   | 87.6   | 43.6  | 47.4  | 109.8  | 70.8   | 79.9   | 76.7   | 94.5   |
| 161.3  | 245.2  | 26.8  | 31.3  | 394.2  | 199.2  | 483.9  | 405.5  | 431.1  |
| 45.1   | 56.3   | 27.8  | 40.8  | 65.0   | 53.0   | 203.4  | 209.8  | 207.0  |
| 1509.5 | 1471.6 | 41.6  | 64.2  | 1853.8 | 1566.2 | 1362.2 | 652.3  | 733.9  |
| 90.6   | 145.4  | 45.6  | 47.8  | 195.4  | 124.9  | 272.2  | 428.6  | 451.9  |
| 329.3  | 385.6  | 130.8 | 125.5 | 540.0  | 415.1  | 852.2  | 607.3  | 752.0  |
| 366.9  | 673.4  | 32.4  | 56.7  | 466.1  | 703.8  | 378.0  | 152.1  | 164.2  |
| 226.1  | 250.2  | 147.0 | 172.0 | 310.8  | 231.4  | 291.8  | 336.6  | 329.5  |
| 115.4  | 210.5  | 35.3  | 50.1  | 199.4  | 207.1  | 430.8  | 411.9  | 502.5  |
| 82.1   | 108.9  | 33.4  | 48.0  | 88.5   | 97.0   | 152.9  | 84.5   | 101.3  |
| 75.2   | 98.4   | 27.3  | 28.9  | 169.6  | 79.3   | 15.0   | 8.2    | 10.9   |
| 289.4  | 320.0  | 73.6  | 105.8 | 539.3  | 306.9  | 600.2  | 666.6  | 759.4  |
| 208.8  | 257.8  | 52.1  | 80.7  | 257.6  | 317.0  | 864.7  | 335.4  | 410.3  |
| 753.3  | 1008.9 | 273.5 | 372.8 | 1169.5 | 1129.1 | 1340.1 | 1106.6 | 1134.1 |
| 76.2   | 78.9   | 117.5 | 169.6 | 81.1   | 79.0   | 139.6  | 124.8  | 137.7  |



|       |       |       |       |       |       |        |        |        |
|-------|-------|-------|-------|-------|-------|--------|--------|--------|
| 27.6  | 20.1  | 8.7   | 4.4   | 36.3  | 23.3  | 2.7    | 7.1    | 3.8    |
| 1.3   | 2.4   | 2.2   | 3.6   | 5.6   | 2.1   | 88.5   | 154.6  | 136.6  |
| 15.5  | 33.1  | 10.9  | 23.6  | 31.0  | 26.9  | 39.4   | 51.3   | 52.1   |
| 383.8 | 516.1 | 82.1  | 92.2  | 656.5 | 490.8 | 917.1  | 926.5  | 1050.3 |
| 104.7 | 115.9 | 8.8   | 3.3   | 139.2 | 88.9  | 16.9   | 37.1   | 18.6   |
| 75.5  | 122.4 | 61.5  | 67.4  | 139.8 | 120.7 | 189.1  | 216.3  | 252.0  |
| 424.8 | 579.2 | 35.4  | 46.5  | 650.3 | 562.1 | 685.7  | 362.9  | 461.5  |
| 309.7 | 507.7 | 44.9  | 61.8  | 626.8 | 553.5 | 963.8  | 507.7  | 568.6  |
| 121.6 | 153.1 | 37.3  | 86.9  | 153.5 | 99.8  | 184.7  | 146.5  | 157.4  |
| 31.2  | 24.0  | 40.9  | 48.2  | 26.9  | 41.3  | 10.6   | 19.6   | 21.4   |
| 35.6  | 66.1  | 29.1  | 41.5  | 66.0  | 53.8  | 172.8  | 162.3  | 149.7  |
| 130.4 | 150.2 | 57.6  | 75.2  | 187.5 | 153.4 | 455.2  | 434.3  | 476.1  |
| 120.2 | 160.1 | 15.8  | 9.5   | 185.6 | 211.4 | 486.2  | 471.7  | 466.9  |
| 121.8 | 159.9 | 42.8  | 41.4  | 186.4 | 128.6 | 499.5  | 536.5  | 496.2  |
| 149.9 | 174.1 | 30.8  | 46.6  | 224.8 | 197.8 | 379.0  | 91.4   | 169.4  |
| 568.4 | 698.9 | 277.6 | 312.5 | 934.4 | 713.9 | 1725.5 | 1688.2 | 1591.6 |
| 266.5 | 300.3 | 78.3  | 105.9 | 396.6 | 277.2 | 480.5  | 437.6  | 476.9  |
| 80.6  | 104.8 | 29.7  | 44.9  | 100.1 | 86.6  | 134.0  | 132.1  | 134.3  |
| 39.9  | 54.6  | 7.5   | 9.8   | 61.7  | 47.9  | 236.1  | 222.7  | 256.5  |
| 5.3   | 2.0   | 19.3  | 20.4  | 1.8   | 0.9   | 6.8    | 4.7    | 3.6    |
| 138.2 | 106.2 | 127.9 | 164.0 | 166.4 | 100.7 | 511.2  | 729.5  | 852.9  |
| 156.0 | 143.0 | 737.9 | 815.2 | 315.5 | 109.2 | 329.2  | 454.4  | 554.4  |
| 56.0  | 90.3  | 2.0   | 6.3   | 189.0 | 135.2 | 48.6   | 26.2   | 15.1   |
| 254.2 | 313.1 | 324.5 | 522.4 | 209.1 | 221.5 | 649.0  | 744.6  | 814.1  |
| 699.3 | 823.1 | 135.3 | 191.1 | 841.0 | 886.9 | 993.4  | 476.3  | 536.2  |
| 614.8 | 714.3 | 74.9  | 83.1  | 860.1 | 762.0 | 854.0  | 217.2  | 245.8  |
| 208.2 | 292.0 | 58.7  | 63.8  | 327.8 | 275.9 | 350.4  | 323.9  | 322.3  |
| 55.4  | 91.4  | 7.7   | 26.5  | 92.0  | 88.5  | 128.1  | 129.8  | 124.9  |
| 168.0 | 223.8 | 150.0 | 145.7 | 256.6 | 350.9 | 604.0  | 396.1  | 443.1  |
| 76.2  | 88.6  | 36.8  | 62.7  | 135.4 | 95.1  | 147.9  | 127.8  | 145.0  |
| 179.3 | 222.2 | 75.1  | 88.2  | 258.1 | 169.3 | 128.9  | 117.1  | 118.1  |
| 56.9  | 82.1  | 5.6   | 5.9   | 143.4 | 72.8  | 1184.6 | 2009.8 | 2137.4 |
| 46.7  | 49.7  | 48.6  | 69.7  | 59.7  | 47.4  | 173.4  | 170.1  | 204.5  |
| 58.3  | 99.4  | 64.7  | 72.1  | 82.1  | 95.2  | 397.7  | 336.8  | 380.9  |
| 13.6  | 9.1   | 9.6   | 11.8  | 13.5  | 22.9  | 13.9   | 10.7   | 3.4    |
| 21.9  | 16.2  | 0.6   | 1.1   | 63.9  | 7.6   | 2.7    | 2.8    | 0.9    |
| 35.5  | 38.4  | 127.0 | 164.6 | 50.5  | 24.1  | 64.8   | 261.6  | 290.0  |
| 46.5  | 65.7  | 46.5  | 76.9  | 72.9  | 63.8  | 155.0  | 218.0  | 257.1  |
| 93.2  | 146.7 | 1.1   | 0.6   | 161.5 | 132.7 | 11.9   | 8.3    | 9.7    |
| 197.8 | 240.3 | 49.8  | 72.3  | 366.2 | 246.9 | 351.1  | 162.3  | 175.8  |
| 80.0  | 122.7 | 37.2  | 22.4  | 141.1 | 96.5  | 423.2  | 464.6  | 481.3  |
| 114.8 | 106.2 | 51.1  | 62.6  | 138.9 | 115.3 | 239.2  | 159.7  | 205.1  |
| 443.4 | 580.4 | 76.0  | 123.6 | 580.8 | 605.9 | 644.3  | 492.6  | 550.7  |
| 125.2 | 145.9 | 55.6  | 60.6  | 278.8 | 132.1 | 704.2  | 630.4  | 784.0  |
| 61.4  | 77.9  | 27.6  | 23.4  | 134.6 | 77.5  | 503.5  | 473.7  | 568.3  |
| 270.0 | 350.7 | 34.4  | 34.7  | 503.4 | 363.6 | 732.6  | 630.3  | 647.6  |
| 355.1 | 518.9 | 50.8  | 77.0  | 514.6 | 453.2 | 284.1  | 191.7  | 224.9  |
| 97.0  | 107.2 | 31.8  | 31.6  | 123.4 | 135.8 | 170.7  | 195.0  | 204.2  |
| 17.6  | 17.1  | 120.3 | 155.5 | 28.5  | 30.5  | 726.3  | 864.9  | 856.5  |
| 125.6 | 148.1 | 20.4  | 15.9  | 234.5 | 156.1 | 102.5  | 98.4   | 126.4  |
| 232.0 | 239.9 | 26.2  | 37.6  | 331.5 | 214.7 | 462.5  | 468.6  | 570.6  |
| 30.0  | 23.5  | 27.8  | 40.4  | 20.5  | 27.7  | 84.3   | 62.9   | 81.0   |
| 348.2 | 342.6 | 184.7 | 203.1 | 416.1 | 335.8 | 1192.4 | 354.7  | 401.9  |

|       |       |       |       |       |       |        |        |        |
|-------|-------|-------|-------|-------|-------|--------|--------|--------|
| 283.9 | 279.4 | 20.2  | 31.7  | 350.8 | 299.4 | 356.0  | 368.6  | 414.9  |
| 226.5 | 295.1 | 69.5  | 62.0  | 268.5 | 356.2 | 248.4  | 116.9  | 129.6  |
| 7.8   | 1.3   | 6.7   | 4.8   | 13.1  | 6.9   | 23.6   | 15.1   | 22.6   |
| 86.0  | 143.9 | 12.1  | 17.0  | 132.4 | 117.8 | 301.1  | 158.3  | 153.3  |
| 106.6 | 132.6 | 18.5  | 20.7  | 117.0 | 142.4 | 524.1  | 412.1  | 467.5  |
| 112.7 | 116.4 | 98.1  | 125.6 | 137.8 | 104.9 | 171.7  | 167.3  | 202.3  |
| 627.9 | 717.8 | 131.8 | 232.2 | 802.3 | 671.4 | 1083.2 | 452.9  | 518.1  |
| 253.0 | 284.1 | 145.3 | 167.7 | 347.3 | 220.1 | 483.5  | 282.6  | 314.9  |
| 29.7  | 16.1  | 2.7   | 9.1   | 36.4  | 26.1  | 0.9    | 1.4    | 1.3    |
| 334.4 | 338.2 | 40.1  | 46.8  | 452.8 | 321.6 | 6.5    | 2.9    | 3.6    |
| 125.8 | 108.1 | 24.5  | 39.4  | 223.4 | 109.8 | 180.2  | 74.1   | 90.8   |
| 72.0  | 66.2  | 25.6  | 25.1  | 79.7  | 47.1  | 10.3   | 15.4   | 30.8   |
| 285.9 | 341.8 | 44.2  | 40.7  | 426.8 | 335.9 | 740.4  | 648.4  | 712.4  |
| 276.7 | 282.0 | 108.2 | 145.6 | 402.7 | 302.0 | 517.0  | 344.3  | 442.3  |
| 200.6 | 200.4 | 1.3   | 0.9   | 311.5 | 203.0 | 104.8  | 52.9   | 33.4   |
| 42.6  | 33.8  | 14.4  | 21.5  | 52.0  | 58.8  | 43.7   | 40.3   | 33.3   |
| 185.4 | 150.7 | 40.0  | 61.7  | 177.8 | 155.0 | 125.3  | 49.8   | 95.6   |
| 294.8 | 468.5 | 134.3 | 120.0 | 425.8 | 432.2 | 667.4  | 420.3  | 503.9  |
| 30.9  | 50.5  | 21.6  | 26.5  | 59.0  | 28.1  | 66.2   | 59.7   | 79.9   |
| 495.8 | 617.4 | 149.9 | 164.0 | 675.4 | 650.5 | 1484.8 | 1013.7 | 1109.7 |
| 49.1  | 48.5  | 50.4  | 59.3  | 72.5  | 54.6  | 503.5  | 821.7  | 890.0  |
| 0.2   | 4.2   | 3.6   | 0.7   | 0.8   | 0.4   | 4.3    | 2.9    | 4.9    |
| 68.9  | 68.8  | 16.2  | 23.0  | 67.6  | 67.0  | 107.9  | 96.4   | 105.5  |
| 438.2 | 459.0 | 242.8 | 282.9 | 816.8 | 525.5 | 803.7  | 325.1  | 437.2  |
| 41.5  | 87.7  | 29.2  | 49.4  | 81.6  | 78.6  | 226.3  | 243.6  | 263.8  |
| 127.4 | 109.9 | 117.7 | 151.0 | 143.8 | 149.1 | 222.9  | 188.8  | 165.0  |
| 178.0 | 209.4 | 53.0  | 47.0  | 246.0 | 238.2 | 292.3  | 194.7  | 220.4  |
| 1.7   | 1.3   | 4.2   | 6.6   | 2.1   | 3.5   | 1.4    | 6.1    | 3.8    |
| 44.3  | 92.5  | 19.7  | 14.4  | 105.6 | 94.6  | 173.1  | 147.3  | 193.6  |
| 246.9 | 277.7 | 207.3 | 266.0 | 314.7 | 237.9 | 705.0  | 336.5  | 337.9  |
| 80.0  | 90.4  | 29.2  | 30.2  | 105.0 | 84.5  | 112.2  | 60.7   | 92.4   |
| 293.1 | 331.5 | 144.5 | 187.9 | 441.3 | 277.3 | 827.8  | 697.2  | 702.5  |
| 263.2 | 183.5 | 49.5  | 72.9  | 287.9 | 193.4 | 592.9  | 315.2  | 300.3  |
| 29.8  | 54.0  | 39.9  | 60.9  | 63.3  | 46.9  | 144.2  | 127.1  | 164.7  |
| 88.2  | 92.1  | 28.1  | 33.4  | 72.1  | 59.6  | 99.5   | 67.9   | 81.2   |
| 103.9 | 90.1  | 46.7  | 81.9  | 137.2 | 110.1 | 27.4   | 26.2   | 10.2   |
| 79.7  | 55.4  | 26.6  | 62.3  | 71.0  | 26.5  | 221.0  | 167.2  | 246.6  |
| 91.6  | 133.1 | 21.0  | 17.2  | 115.8 | 63.3  | 42.3   | 75.5   | 77.0   |
| 93.4  | 104.2 | 20.7  | 36.1  | 118.9 | 83.5  | 49.6   | 89.2   | 106.3  |
| 73.9  | 84.7  | 58.8  | 96.5  | 150.6 | 84.5  | 304.9  | 235.2  | 267.2  |
| 58.3  | 74.2  | 50.5  | 33.2  | 82.8  | 45.3  | 80.2   | 65.0   | 75.7   |
| 34.5  | 95.1  | 11.4  | 18.8  | 66.6  | 71.1  | 98.2   | 75.6   | 74.2   |
| 68.5  | 72.0  | 18.6  | 15.3  | 65.9  | 61.4  | 64.7   | 50.2   | 56.9   |
| 24.1  | 23.3  | 42.5  | 55.3  | 11.9  | 37.0  | 142.2  | 123.5  | 206.3  |
| 128.0 | 133.8 | 70.0  | 65.5  | 151.5 | 149.7 | 176.2  | 182.7  | 198.0  |
| 398.1 | 444.2 | 48.7  | 60.1  | 532.1 | 463.2 | 337.1  | 237.6  | 266.7  |
| 71.5  | 323.9 | 256.2 | 332.9 | 105.9 | 326.6 | 543.5  | 502.7  | 639.4  |
| 51.3  | 54.3  | 56.2  | 73.4  | 88.7  | 44.6  | 311.6  | 235.7  | 266.4  |
| 137.8 | 122.1 | 47.8  | 41.6  | 182.7 | 104.3 | 569.7  | 579.5  | 572.5  |
| 111.6 | 125.6 | 36.6  | 10.5  | 147.0 | 91.6  | 100.5  | 83.6   | 71.8   |
| 20.5  | 52.5  | 17.2  | 32.5  | 45.0  | 24.6  | 108.1  | 115.8  | 181.4  |
| 60.1  | 78.1  | 54.8  | 96.3  | 86.8  | 64.5  | 95.4   | 80.6   | 76.7   |
| 216.6 | 271.9 | 24.2  | 28.1  | 407.1 | 260.1 | 453.8  | 467.5  | 478.3  |

|       |       |       |       |       |       |        |       |        |
|-------|-------|-------|-------|-------|-------|--------|-------|--------|
| 71.3  | 49.8  | 31.8  | 40.7  | 43.1  | 92.3  | 138.3  | 106.1 | 105.6  |
| 229.5 | 250.1 | 55.9  | 76.1  | 288.8 | 267.9 | 411.6  | 311.2 | 370.9  |
| 242.0 | 271.0 | 113.6 | 106.4 | 514.2 | 268.9 | 79.8   | 97.9  | 121.6  |
| 31.3  | 29.8  | 69.2  | 56.6  | 11.1  | 25.6  | 85.0   | 86.0  | 97.9   |
| 53.7  | 68.2  | 34.5  | 35.1  | 63.4  | 63.3  | 102.8  | 96.8  | 112.1  |
| 146.9 | 193.3 | 50.6  | 64.4  | 249.9 | 136.1 | 435.7  | 248.3 | 317.5  |
| 628.1 | 693.4 | 160.5 | 233.7 | 891.7 | 623.0 | 1096.9 | 629.4 | 693.0  |
| 55.8  | 55.2  | 70.0  | 37.5  | 76.7  | 23.8  | 280.0  | 411.0 | 431.9  |
| 110.8 | 149.5 | 25.8  | 24.2  | 156.8 | 126.7 | 172.5  | 101.1 | 131.6  |
| 117.1 | 145.7 | 65.0  | 74.5  | 178.3 | 132.2 | 242.0  | 188.1 | 200.8  |
| 59.7  | 75.3  | 59.6  | 84.6  | 123.2 | 43.8  | 798.3  | 561.6 | 565.8  |
| 321.4 | 367.0 | 277.3 | 407.3 | 428.3 | 416.2 | 466.4  | 566.9 | 650.4  |
| 196.2 | 225.7 | 57.5  | 87.9  | 231.2 | 227.6 | 541.1  | 325.4 | 356.7  |
| 76.3  | 127.1 | 9.0   | 5.2   | 120.4 | 144.0 | 103.2  | 105.7 | 108.7  |
| 102.9 | 113.9 | 50.9  | 82.1  | 118.2 | 95.6  | 611.9  | 170.1 | 330.2  |
| 99.8  | 141.3 | 84.9  | 112.4 | 89.9  | 139.5 | 359.2  | 321.5 | 364.6  |
| 23.1  | 14.2  | 26.3  | 37.4  | 24.1  | 4.3   | 47.7   | 31.7  | 33.8   |
| 88.2  | 76.5  | 95.8  | 120.2 | 104.3 | 82.7  | 75.6   | 66.4  | 73.7   |
| 106.9 | 164.7 | 123.6 | 150.2 | 155.9 | 160.3 | 286.6  | 432.5 | 351.8  |
| 382.5 | 335.4 | 33.2  | 60.2  | 416.2 | 276.3 | 273.9  | 190.3 | 212.0  |
| 435.8 | 441.7 | 102.2 | 121.6 | 655.9 | 338.2 | 1031.8 | 451.8 | 474.5  |
| 41.6  | 58.1  | 2.1   | 22.5  | 71.4  | 37.0  | 99.5   | 82.5  | 84.2   |
| 37.3  | 33.2  | 20.4  | 40.1  | 42.4  | 50.9  | 315.6  | 358.3 | 410.2  |
| 15.5  | 20.0  | 15.2  | 24.7  | 22.5  | 8.9   | 37.4   | 36.0  | 29.0   |
| 38.3  | 48.4  | 12.6  | 15.3  | 69.1  | 54.8  | 103.4  | 83.7  | 90.6   |
| 44.9  | 58.8  | 52.4  | 61.3  | 66.6  | 38.2  | 274.3  | 186.3 | 230.6  |
| 255.2 | 313.5 | 75.5  | 85.9  | 266.7 | 264.9 | 889.8  | 949.8 | 1109.9 |
| 18.0  | 15.2  | 22.5  | 23.3  | 24.8  | 6.8   | 77.3   | 69.4  | 77.8   |
| 2.3   | 4.2   | 3.8   | 2.5   | 10.6  | 3.6   | 30.4   | 32.7  | 34.3   |
| 53.5  | 68.6  | 17.9  | 19.7  | 73.5  | 80.4  | 98.3   | 90.3  | 96.9   |
| 57.5  | 105.0 | 86.0  | 89.2  | 70.0  | 84.3  | 741.7  | 838.1 | 969.6  |
| 70.7  | 87.8  | 42.6  | 51.4  | 122.4 | 82.7  | 367.2  | 255.7 | 248.5  |
| 73.3  | 69.7  | 23.6  | 37.6  | 122.1 | 70.1  | 149.6  | 147.0 | 170.3  |
| 308.7 | 465.6 | 132.2 | 117.0 | 554.0 | 470.0 | 747.8  | 636.6 | 750.6  |
| 389.2 | 548.6 | 2.6   | 2.4   | 662.6 | 327.8 | 1627.4 | 737.6 | 925.4  |
| 157.4 | 190.6 | 136.5 | 137.5 | 198.9 | 194.3 | 373.4  | 495.7 | 471.4  |
| 33.2  | 71.2  | 33.5  | 45.1  | 42.7  | 36.0  | 98.6   | 50.6  | 59.7   |
| 219.4 | 223.5 | 46.8  | 53.8  | 286.8 | 185.0 | 380.4  | 296.2 | 305.3  |
| 23.0  | 33.5  | 3.6   | 8.1   | 27.8  | 25.8  | 37.7   | 49.2  | 58.5   |
| 98.8  | 95.9  | 14.2  | 34.2  | 120.2 | 70.0  | 260.6  | 191.4 | 195.2  |
| 253.9 | 247.2 | 154.4 | 253.4 | 366.9 | 253.9 | 220.1  | 175.1 | 226.9  |
| 133.3 | 139.9 | 112.4 | 143.3 | 165.8 | 104.0 | 11.7   | 16.8  | 18.0   |
| 122.1 | 181.7 | 141.6 | 179.2 | 215.0 | 201.0 | 619.8  | 382.9 | 441.0  |
| 8.6   | 9.7   | 5.6   | 9.4   | 13.5  | 5.9   | 16.8   | 19.4  | 10.9   |
| 13.9  | 20.0  | 91.1  | 122.8 | 29.3  | 15.3  | 1.1    | 5.7   | 7.0    |
| 32.1  | 43.5  | 247.3 | 270.8 | 53.0  | 40.5  | 18.6   | 19.8  | 18.4   |
| 15.2  | 27.2  | 31.5  | 28.1  | 24.5  | 25.1  | 25.2   | 18.7  | 32.5   |
| 261.5 | 281.1 | 128.5 | 148.6 | 361.8 | 322.9 | 751.8  | 498.1 | 561.6  |
| 176.6 | 353.6 | 3.0   | 19.6  | 312.5 | 313.3 | 197.4  | 193.0 | 209.2  |
| 17.3  | 26.9  | 6.2   | 3.2   | 27.9  | 17.5  | 79.4   | 77.6  | 79.1   |
| 64.7  | 66.7  | 18.6  | 8.7   | 104.3 | 50.1  | 135.8  | 131.9 | 151.0  |
| 25.2  | 20.5  | 214.6 | 326.9 | 53.5  | 19.3  | 156.9  | 129.7 | 187.8  |
| 13.1  | 14.2  | 8.1   | 6.5   | 16.9  | 18.7  | 17.0   | 19.0  | 12.2   |

|        |        |       |       |        |        |        |        |        |
|--------|--------|-------|-------|--------|--------|--------|--------|--------|
| 158.2  | 292.1  | 30.3  | 46.8  | 240.4  | 199.7  | 264.5  | 321.7  | 343.0  |
| 65.5   | 129.7  | 83.6  | 94.8  | 135.9  | 109.5  | 988.5  | 1043.1 | 1087.5 |
| 156.5  | 265.4  | 20.0  | 24.2  | 263.4  | 234.9  | 272.3  | 169.9  | 172.8  |
| 67.3   | 62.6   | 9.1   | 13.2  | 88.0   | 31.1   | 45.1   | 33.2   | 47.9   |
| 190.1  | 226.6  | 15.9  | 35.2  | 290.3  | 219.8  | 703.4  | 657.3  | 702.0  |
| 5.4    | 16.3   | 103.7 | 148.1 | 7.4    | 4.2    | 7.2    | 6.6    | 3.3    |
| 6.9    | 17.0   | 69.3  | 101.9 | 34.0   | 18.2   | 62.2   | 67.4   | 74.8   |
| 12.1   | 9.7    | 56.4  | 128.0 | 21.4   | 20.7   | 31.5   | 37.8   | 47.0   |
| 163.4  | 228.9  | 28.3  | 27.7  | 270.7  | 202.1  | 360.1  | 348.0  | 365.0  |
| 1.1    | 0.7    | 7.8   | 12.0  | 1.3    | 6.2    | 4.5    | 9.5    | 14.8   |
| 27.1   | 37.7   | 53.2  | 58.0  | 50.1   | 29.2   | 18.7   | 14.5   | 8.6    |
| 269.3  | 375.2  | 70.7  | 89.6  | 397.6  | 339.4  | 281.6  | 143.0  | 163.5  |
| 57.9   | 81.6   | 27.0  | 21.0  | 103.9  | 68.5   | 103.4  | 108.6  | 110.2  |
| 319.4  | 411.9  | 58.5  | 68.3  | 573.5  | 479.0  | 51.5   | 61.8   | 46.3   |
| 126.5  | 210.8  | 28.2  | 27.1  | 141.4  | 151.2  | 137.9  | 115.9  | 126.0  |
| 709.1  | 883.9  | 134.9 | 193.8 | 989.4  | 897.4  | 1608.3 | 1271.8 | 1403.9 |
| 29.5   | 4.4    | 2.6   | 5.6   | 48.0   | 18.7   | 880.6  | 1343.6 | 1409.8 |
| 6.8    | 13.9   | 19.6  | 29.4  | 27.7   | 2.4    | 60.9   | 98.8   | 104.5  |
| 39.2   | 41.2   | 5.1   | 12.0  | 33.1   | 66.5   | 107.7  | 54.8   | 65.0   |
| 165.6  | 225.4  | 317.0 | 479.2 | 258.6  | 210.5  | 26.1   | 20.7   | 16.7   |
| 9.8    | 5.7    | 6.3   | 13.4  | 8.1    | 7.4    | 247.4  | 568.0  | 691.4  |
| 434.6  | 517.2  | 199.5 | 237.7 | 519.5  | 443.7  | 438.6  | 278.3  | 359.2  |
| 175.3  | 169.3  | 52.5  | 70.3  | 206.1  | 150.8  | 163.3  | 102.8  | 128.3  |
| 75.8   | 92.7   | 50.2  | 85.1  | 105.8  | 72.5   | 156.7  | 164.7  | 191.1  |
| 3.6    | 6.0    | 2.7   | 1.4   | 8.4    | 2.3    | 304.1  | 97.8   | 113.0  |
| 56.8   | 83.2   | 2.2   | 21.4  | 103.0  | 62.3   | 174.3  | 158.6  | 210.3  |
| 17.4   | 24.7   | 24.8  | 37.5  | 31.4   | 67.4   | 66.7   | 106.9  | 114.5  |
| 160.1  | 232.6  | 42.4  | 51.6  | 306.6  | 202.0  | 769.0  | 543.0  | 607.2  |
| 18.7   | 35.7   | 4.9   | 3.2   | 41.3   | 6.4    | 7.0    | 3.7    | 2.9    |
| 98.6   | 123.7  | 307.4 | 396.8 | 154.6  | 111.0  | 76.5   | 121.6  | 122.5  |
| 81.9   | 67.0   | 40.1  | 46.8  | 103.8  | 81.1   | 1272.3 | 1933.9 | 2128.4 |
| 76.0   | 137.9  | 36.7  | 46.9  | 105.5  | 98.4   | 171.6  | 231.0  | 231.6  |
| 506.2  | 622.7  | 4.2   | 5.5   | 845.0  | 663.6  | 328.1  | 268.7  | 297.3  |
| 32.3   | 29.1   | 34.6  | 68.2  | 49.2   | 12.2   | 183.8  | 100.7  | 125.1  |
| 123.3  | 148.5  | 69.5  | 77.8  | 209.7  | 168.0  | 164.6  | 159.2  | 195.7  |
| 29.2   | 32.9   | 39.7  | 37.8  | 24.3   | 32.7   | 101.6  | 96.1   | 100.2  |
| 16.5   | 17.4   | 16.5  | 17.4  | 18.7   | 14.4   | 23.7   | 22.0   | 21.2   |
| 145.6  | 244.8  | 22.9  | 44.2  | 263.7  | 243.3  | 687.2  | 449.8  | 477.1  |
| 95.9   | 128.7  | 37.7  | 47.8  | 156.4  | 116.3  | 238.3  | 211.7  | 256.1  |
| 539.8  | 742.0  | 1.3   | 1.1   | 958.3  | 703.2  | 23.3   | 30.3   | 40.0   |
| 91.9   | 141.2  | 60.1  | 64.0  | 150.9  | 92.3   | 186.3  | 151.6  | 179.7  |
| 1506.1 | 1974.2 | 19.9  | 40.8  | 2357.5 | 1901.1 | 249.9  | 89.7   | 119.6  |
| 101.1  | 99.0   | 14.9  | 11.9  | 92.7   | 91.4   | 192.9  | 181.1  | 172.0  |
| 10.4   | 20.2   | 236.0 | 180.2 | 5.1    | 7.5    | 279.3  | 419.5  | 488.4  |
| 158.5  | 210.9  | 40.5  | 38.7  | 179.9  | 303.3  | 764.4  | 384.8  | 444.8  |
| 85.9   | 123.6  | 49.7  | 81.1  | 128.2  | 134.3  | 421.2  | 226.3  | 283.4  |
| 59.1   | 53.7   | 14.5  | 7.7   | 61.3   | 37.6   | 94.6   | 74.0   | 78.4   |
| 61.0   | 60.2   | 32.8  | 35.0  | 59.6   | 82.6   | 574.4  | 434.7  | 532.7  |
| 0.5    | 4.9    | 5.7   | 1.8   | 7.4    | 0.7    | 1.5    | 0.6    | 1.2    |
| 0.8    | 2.9    | 2.2   | 1.8   | 4.0    | 2.3    | 10.2   | 3.9    | 1.9    |
| 124.3  | 140.1  | 6.9   | 43.2  | 176.9  | 158.0  | 2.6    | 2.0    | 2.5    |
| 1135.5 | 878.8  | 96.3  | 121.0 | 1526.2 | 1151.4 | 1072.1 | 349.9  | 401.7  |
| 64.5   | 87.2   | 67.2  | 73.0  | 68.6   | 65.0   | 233.1  | 258.5  | 280.6  |

|        |        |       |       |        |        |        |        |        |
|--------|--------|-------|-------|--------|--------|--------|--------|--------|
| 42.1   | 57.1   | 16.3  | 27.8  | 55.0   | 51.6   | 119.1  | 77.5   | 83.3   |
| 71.8   | 64.7   | 33.8  | 37.3  | 91.6   | 34.7   | 150.5  | 155.1  | 163.0  |
| 0.6    | 1.4    | 0.7   | 1.7   | 0.7    | 0.8    | 3.3    | 1.0    | 1.2    |
| 61.2   | 67.3   | 18.8  | 22.1  | 101.6  | 58.7   | 298.2  | 164.1  | 165.2  |
| 17.7   | 15.4   | 0.6   | 11.9  | 4.4    | 13.7   | 290.5  | 106.2  | 136.3  |
| 62.1   | 80.4   | 25.3  | 26.9  | 76.0   | 70.5   | 172.3  | 188.5  | 198.4  |
| 26.7   | 36.5   | 19.6  | 26.0  | 39.4   | 27.7   | 54.6   | 65.1   | 63.9   |
| 372.7  | 330.5  | 37.3  | 26.4  | 456.1  | 281.6  | 536.0  | 239.5  | 244.6  |
| 1.1    | 1.7    | 0.9   | 2.7   | 1.0    | 2.8    | 117.6  | 387.7  | 474.4  |
| 349.1  | 473.1  | 46.1  | 44.7  | 654.8  | 509.6  | 361.8  | 207.4  | 207.9  |
| 87.1   | 105.1  | 40.1  | 26.9  | 127.0  | 102.2  | 247.5  | 236.4  | 240.2  |
| 33.6   | 42.4   | 36.2  | 31.2  | 77.5   | 35.5   | 83.3   | 88.3   | 70.4   |
| 78.6   | 99.0   | 63.9  | 83.2  | 93.4   | 81.2   | 118.7  | 215.3  | 204.0  |
| 15.8   | 5.1    | 32.7  | 45.9  | 26.6   | 6.7    | 34.5   | 92.6   | 106.6  |
| 398.3  | 513.1  | 50.1  | 63.5  | 611.2  | 504.2  | 325.7  | 132.0  | 157.3  |
| 1642.1 | 1252.7 | 537.7 | 871.6 | 2068.0 | 1267.0 | 3231.3 | 1623.0 | 1616.6 |
| 57.6   | 90.9   | 14.9  | 18.3  | 90.8   | 64.7   | 288.1  | 237.1  | 284.0  |
| 233.3  | 228.5  | 39.9  | 35.5  | 374.5  | 260.8  | 320.1  | 292.3  | 357.1  |
| 159.6  | 119.4  | 4.1   | 13.0  | 233.6  | 154.9  | 337.4  | 132.3  | 154.8  |
| 149.2  | 155.0  | 95.0  | 137.4 | 237.1  | 220.7  | 201.6  | 161.9  | 144.8  |
| 1128.4 | 1410.8 | 52.9  | 115.9 | 1617.2 | 1173.1 | 395.5  | 126.0  | 126.2  |
| 342.4  | 404.0  | 43.0  | 49.7  | 630.9  | 435.2  | 570.3  | 218.0  | 246.0  |
| 329.8  | 369.2  | 60.6  | 115.2 | 507.4  | 423.7  | 950.6  | 711.8  | 773.0  |
| 63.4   | 46.2   | 43.6  | 64.1  | 47.5   | 80.5   | 203.7  | 204.4  | 231.3  |
| 9.8    | 6.9    | 10.5  | 7.4   | 15.0   | 6.1    | 5.2    | 1.7    | 6.7    |
| 84.5   | 106.6  | 129.8 | 164.4 | 122.2  | 97.0   | 573.0  | 462.4  | 539.8  |
| 93.3   | 171.1  | 17.1  | 22.2  | 186.3  | 150.5  | 341.1  | 137.7  | 154.7  |
| 59.6   | 60.7   | 20.8  | 40.2  | 86.3   | 53.2   | 128.8  | 131.2  | 144.4  |
| 81.7   | 123.5  | 38.5  | 36.4  | 122.0  | 135.5  | 140.6  | 118.8  | 136.3  |
| 138.5  | 168.0  | 47.9  | 46.5  | 213.3  | 159.7  | 360.1  | 229.9  | 265.9  |
| 228.4  | 199.1  | 22.2  | 17.4  | 171.8  | 189.9  | 161.2  | 67.6   | 87.8   |
| 0.8    | 1.3    | 0.9   | 0.9   | 5.9    | 1.4    | 3.7    | 3.0    | 1.6    |
| 28.7   | 41.9   | 62.8  | 98.4  | 34.3   | 38.5   | 119.6  | 152.3  | 200.7  |
| 36.0   | 45.8   | 4.8   | 0.3   | 45.2   | 38.6   | 78.4   | 68.1   | 100.5  |
| 43.7   | 68.4   | 22.0  | 31.2  | 57.4   | 68.4   | 266.3  | 325.0  | 336.9  |
| 259.9  | 241.8  | 79.7  | 123.8 | 321.0  | 238.4  | 527.5  | 350.6  | 429.0  |
| 27.8   | 37.7   | 5.7   | 8.0   | 45.6   | 30.1   | 69.3   | 44.4   | 40.1   |
| 191.3  | 336.8  | 129.8 | 172.5 | 449.3  | 305.8  | 778.9  | 724.4  | 780.7  |
| 104.5  | 116.0  | 81.3  | 102.7 | 121.8  | 116.5  | 115.0  | 55.7   | 53.0   |
| 67.3   | 101.1  | 24.7  | 50.0  | 99.8   | 119.9  | 100.2  | 63.5   | 125.0  |
| 45.5   | 50.3   | 120.4 | 182.8 | 67.3   | 44.2   | 163.1  | 159.5  | 196.6  |
| 100.1  | 133.6  | 27.3  | 30.1  | 162.6  | 138.3  | 201.0  | 264.6  | 283.4  |
| 48.4   | 72.8   | 65.2  | 44.6  | 85.7   | 64.2   | 89.3   | 104.4  | 126.8  |
| 66.6   | 124.3  | 22.1  | 34.2  | 118.9  | 112.0  | 370.8  | 267.3  | 297.1  |
| 118.2  | 130.9  | 81.2  | 85.5  | 172.8  | 110.8  | 202.0  | 200.8  | 239.8  |
| 55.0   | 35.3   | 6.0   | 16.6  | 55.5   | 38.4   | 174.4  | 130.4  | 178.9  |
| 53.0   | 69.4   | 49.2  | 51.7  | 72.3   | 51.4   | 126.3  | 98.6   | 111.7  |
| 336.5  | 441.1  | 26.2  | 42.3  | 459.1  | 413.7  | 263.4  | 176.7  | 202.8  |
| 52.3   | 70.0   | 65.8  | 76.9  | 52.4   | 54.4   | 96.7   | 117.0  | 138.4  |
| 212.3  | 320.1  | 83.8  | 103.8 | 364.0  | 261.7  | 449.2  | 473.0  | 552.2  |
| 6.5    | 1.5    | 7.0   | 19.1  | 1.0    | 0.5    | 2.2    | 4.4    | 5.4    |
| 286.6  | 453.8  | 69.5  | 83.7  | 433.8  | 497.3  | 458.3  | 351.0  | 337.7  |
| 63.8   | 62.9   | 75.8  | 77.3  | 82.7   | 61.2   | 160.6  | 166.7  | 180.8  |

|       |       |       |       |       |       |        |       |        |
|-------|-------|-------|-------|-------|-------|--------|-------|--------|
| 100.2 | 105.8 | 18.9  | 40.8  | 117.8 | 108.6 | 206.4  | 207.7 | 261.2  |
| 1.4   | 1.2   | 45.3  | 77.0  | 4.0   | 1.7   | 1.5    | 3.3   | 2.8    |
| 25.3  | 52.0  | 13.4  | 14.6  | 53.7  | 41.6  | 65.4   | 78.5  | 86.9   |
| 80.2  | 111.8 | 26.9  | 30.3  | 115.4 | 99.3  | 97.7   | 126.2 | 134.6  |
| 4.4   | 3.5   | 4.6   | 6.0   | 1.3   | 1.2   | 6.3    | 6.7   | 6.1    |
| 73.6  | 102.6 | 52.4  | 39.8  | 126.9 | 97.2  | 232.3  | 221.2 | 234.1  |
| 157.9 | 109.3 | 47.0  | 71.6  | 237.2 | 93.0  | 60.5   | 63.7  | 84.5   |
| 111.8 | 163.0 | 28.9  | 61.4  | 147.0 | 136.7 | 185.7  | 182.7 | 224.6  |
| 94.4  | 95.6  | 91.0  | 72.7  | 129.8 | 87.5  | 305.9  | 270.8 | 282.4  |
| 244.0 | 374.8 | 72.5  | 91.5  | 372.5 | 373.3 | 641.2  | 810.4 | 834.6  |
| 64.1  | 76.1  | 88.4  | 78.5  | 107.3 | 86.9  | 147.5  | 188.9 | 213.3  |
| 403.6 | 599.8 | 26.7  | 48.5  | 621.3 | 483.4 | 307.4  | 134.3 | 168.1  |
| 65.8  | 64.7  | 26.2  | 29.3  | 97.7  | 72.4  | 279.4  | 192.7 | 240.9  |
| 18.4  | 4.7   | 2.1   | 1.4   | 24.1  | 6.5   | 5.0    | 11.8  | 12.7   |
| 62.6  | 67.1  | 12.4  | 8.9   | 106.1 | 79.9  | 9.8    | 12.6  | 7.1    |
| 401.5 | 599.5 | 46.1  | 84.3  | 656.6 | 541.3 | 724.0  | 419.5 | 465.1  |
| 97.6  | 144.9 | 49.3  | 33.3  | 153.2 | 120.5 | 210.3  | 190.1 | 199.7  |
| 2.1   | 2.8   | 33.5  | 50.9  | 6.5   | 7.6   | 144.2  | 168.3 | 210.5  |
| 43.5  | 63.0  | 22.9  | 18.7  | 66.2  | 57.1  | 84.8   | 46.0  | 58.1   |
| 47.8  | 88.3  | 11.9  | 24.7  | 65.7  | 84.9  | 160.9  | 94.2  | 100.9  |
| 93.9  | 130.4 | 80.1  | 91.4  | 139.9 | 109.6 | 205.2  | 171.1 | 173.5  |
| 301.2 | 355.2 | 207.3 | 249.0 | 541.7 | 330.9 | 428.5  | 479.2 | 501.4  |
| 74.0  | 127.9 | 1.8   | 6.0   | 152.2 | 110.6 | 24.2   | 31.0  | 31.3   |
| 107.5 | 88.1  | 0.8   | 16.4  | 97.5  | 90.0  | 128.7  | 45.9  | 45.3   |
| 98.8  | 125.1 | 42.6  | 39.5  | 141.0 | 78.9  | 112.8  | 87.3  | 104.9  |
| 485.7 | 548.5 | 72.8  | 112.3 | 744.2 | 628.7 | 748.7  | 612.1 | 674.0  |
| 104.1 | 91.2  | 68.6  | 95.8  | 109.4 | 89.6  | 250.9  | 142.8 | 160.3  |
| 59.2  | 68.0  | 54.6  | 57.9  | 82.5  | 42.0  | 69.3   | 37.3  | 50.7   |
| 242.0 | 261.6 | 110.7 | 180.6 | 377.8 | 298.4 | 342.0  | 284.4 | 320.2  |
| 162.1 | 205.6 | 14.9  | 12.1  | 240.2 | 208.5 | 141.3  | 126.8 | 128.9  |
| 156.1 | 85.1  | 47.2  | 74.6  | 175.2 | 128.6 | 186.2  | 151.9 | 160.3  |
| 23.9  | 26.4  | 81.7  | 95.2  | 47.8  | 35.1  | 41.7   | 22.9  | 27.2   |
| 125.9 | 97.4  | 61.6  | 51.5  | 140.3 | 110.5 | 90.4   | 101.2 | 107.1  |
| 23.2  | 24.3  | 9.6   | 21.9  | 38.8  | 24.6  | 126.8  | 91.4  | 96.8   |
| 105.9 | 83.5  | 118.3 | 111.5 | 122.6 | 92.3  | 218.3  | 191.1 | 208.7  |
| 88.4  | 113.9 | 69.7  | 96.4  | 129.2 | 96.8  | 156.5  | 104.8 | 151.1  |
| 301.8 | 364.8 | 457.6 | 593.5 | 508.6 | 351.4 | 533.2  | 410.6 | 475.1  |
| 48.0  | 61.8  | 35.8  | 51.6  | 65.9  | 64.8  | 136.0  | 107.2 | 123.6  |
| 9.5   | 11.5  | 266.1 | 389.3 | 15.3  | 12.1  | 26.9   | 19.7  | 27.6   |
| 4.3   | 2.1   | 8.6   | 4.4   | 46.5  | 12.4  | 1081.5 | 685.4 | 782.9  |
| 127.8 | 120.8 | 116.4 | 151.2 | 127.2 | 107.0 | 186.4  | 159.6 | 184.9  |
| 69.0  | 78.8  | 25.2  | 36.5  | 73.7  | 72.8  | 299.4  | 316.0 | 311.1  |
| 70.7  | 77.4  | 3.9   | 5.3   | 270.1 | 85.5  | 777.4  | 424.4 | 599.5  |
| 69.5  | 57.2  | 2.7   | 2.3   | 131.8 | 46.9  | 101.6  | 49.9  | 79.6   |
| 34.9  | 42.7  | 6.8   | 21.5  | 61.3  | 43.1  | 38.7   | 41.0  | 36.6   |
| 394.0 | 519.3 | 161.0 | 272.6 | 527.8 | 426.3 | 987.3  | 995.3 | 1159.7 |
| 226.2 | 375.5 | 24.3  | 37.5  | 407.4 | 445.2 | 459.9  | 486.0 | 505.8  |
| 164.0 | 228.0 | 41.4  | 47.4  | 299.1 | 197.0 | 728.1  | 842.2 | 924.2  |
| 178.3 | 208.7 | 69.3  | 110.0 | 258.4 | 171.9 | 354.6  | 150.6 | 183.6  |
| 73.2  | 109.2 | 84.2  | 75.9  | 72.8  | 115.6 | 257.0  | 139.4 | 144.7  |
| 14.4  | 26.4  | 22.2  | 21.4  | 19.2  | 28.3  | 33.9   | 27.0  | 40.0   |
| 172.5 | 228.0 | 62.3  | 58.3  | 258.5 | 237.6 | 258.9  | 222.4 | 240.9  |
| 146.0 | 144.9 | 77.7  | 114.7 | 145.8 | 137.1 | 215.7  | 174.7 | 222.3  |

|       |        |       |       |        |        |        |        |        |
|-------|--------|-------|-------|--------|--------|--------|--------|--------|
| 42.8  | 72.0   | 8.4   | 7.0   | 93.4   | 36.8   | 4.8    | 10.5   | 6.0    |
| 1.4   | 1.0    | 1.7   | 1.1   | 1.6    | 1.6    | 2.9    | 2.9    | 2.4    |
| 1.8   | 5.3    | 30.5  | 30.1  | 2.4    | 7.6    | 41.7   | 75.5   | 56.9   |
| 112.4 | 120.9  | 44.0  | 42.7  | 248.7  | 189.7  | 150.3  | 138.1  | 144.4  |
| 2.2   | 1.6    | 1.6   | 2.2   | 12.4   | 5.0    | 10.4   | 4.7    | 5.2    |
| 245.6 | 241.8  | 69.8  | 96.4  | 266.0  | 224.6  | 869.1  | 478.5  | 532.6  |
| 36.9  | 37.9   | 2.2   | 1.2   | 50.9   | 31.8   | 1.1    | 4.9    | 1.4    |
| 25.6  | 36.1   | 0.1   | 0.6   | 37.3   | 23.0   | 299.9  | 217.6  | 188.7  |
| 690.0 | 1013.2 | 145.1 | 163.8 | 1018.7 | 1038.6 | 970.7  | 403.7  | 485.4  |
| 73.0  | 94.3   | 6.8   | 8.1   | 138.3  | 86.1   | 123.6  | 224.5  | 228.1  |
| 266.8 | 397.2  | 133.6 | 184.6 | 417.3  | 414.3  | 633.2  | 127.8  | 183.1  |
| 27.0  | 43.9   | 40.1  | 60.3  | 25.2   | 14.9   | 57.2   | 38.8   | 49.9   |
| 88.9  | 181.3  | 10.2  | 4.9   | 212.1  | 219.2  | 100.4  | 111.8  | 129.1  |
| 67.9  | 110.7  | 48.0  | 40.1  | 103.9  | 110.4  | 167.6  | 197.7  | 210.2  |
| 71.6  | 96.8   | 23.2  | 20.9  | 174.5  | 111.7  | 245.0  | 345.6  | 374.5  |
| 238.3 | 298.5  | 40.1  | 60.0  | 325.0  | 278.9  | 928.7  | 853.0  | 882.8  |
| 51.0  | 26.7   | 5.4   | 6.7   | 67.6   | 26.9   | 418.6  | 590.0  | 640.2  |
| 30.7  | 32.1   | 85.5  | 106.9 | 25.7   | 38.6   | 75.1   | 69.3   | 85.6   |
| 294.7 | 484.0  | 58.8  | 67.4  | 529.8  | 438.7  | 675.9  | 439.1  | 541.3  |
| 255.1 | 277.6  | 84.9  | 92.2  | 407.0  | 357.9  | 432.7  | 238.2  | 294.9  |
| 5.5   | 12.2   | 17.3  | 15.9  | 3.3    | 8.9    | 31.4   | 33.8   | 34.0   |
| 108.0 | 225.0  | 2.6   | 18.3  | 207.3  | 190.5  | 9.1    | 4.0    | 4.5    |
| 201.1 | 239.2  | 122.0 | 127.8 | 249.0  | 221.3  | 70.1   | 49.1   | 47.6   |
| 177.8 | 172.4  | 35.1  | 40.1  | 282.8  | 178.3  | 227.7  | 122.9  | 126.5  |
| 148.5 | 144.1  | 30.9  | 45.5  | 214.3  | 125.4  | 560.9  | 522.5  | 537.1  |
| 14.9  | 18.7   | 9.6   | 4.6   | 12.7   | 13.6   | 7.9    | 35.6   | 25.3   |
| 513.7 | 320.0  | 41.8  | 57.1  | 619.8  | 317.6  | 948.6  | 310.7  | 331.4  |
| 58.4  | 66.3   | 16.4  | 12.4  | 78.8   | 66.7   | 155.5  | 175.2  | 199.7  |
| 253.3 | 294.6  | 16.3  | 25.1  | 355.0  | 307.0  | 1097.8 | 1005.4 | 1180.3 |
| 50.0  | 65.8   | 5.5   | 11.7  | 95.3   | 67.4   | 163.1  | 101.9  | 113.4  |
| 173.7 | 293.9  | 78.2  | 103.8 | 229.8  | 222.6  | 442.0  | 271.6  | 319.8  |
| 8.2   | 6.3    | 4.5   | 3.7   | 6.6    | 1.8    | 4.0    | 3.0    | 2.5    |
| 688.2 | 1014.5 | 40.1  | 39.4  | 1042.8 | 1035.5 | 810.1  | 282.1  | 328.6  |
| 597.4 | 885.2  | 104.8 | 138.8 | 885.6  | 748.6  | 809.4  | 506.2  | 577.7  |
| 55.8  | 84.0   | 8.5   | 25.0  | 80.2   | 64.1   | 266.9  | 255.1  | 280.9  |
| 23.1  | 29.9   | 30.2  | 24.0  | 23.5   | 21.8   | 67.8   | 76.7   | 75.5   |
| 476.4 | 613.1  | 32.4  | 33.3  | 719.0  | 430.2  | 1046.2 | 1392.3 | 1364.3 |
| 1.2   | 2.8    | 2.6   | 1.4   | 2.0    | 1.6    | 5.3    | 2.7    | 3.8    |
| 12.4  | 15.9   | 14.6  | 11.0  | 15.9   | 13.8   | 32.3   | 33.2   | 27.7   |
| 153.9 | 140.8  | 85.4  | 118.2 | 160.6  | 232.2  | 242.6  | 190.9  | 288.3  |
| 631.8 | 986.4  | 13.4  | 1.0   | 1157.1 | 875.7  | 525.5  | 610.6  | 578.4  |
| 92.9  | 90.9   | 24.0  | 28.0  | 133.0  | 90.3   | 381.7  | 252.0  | 260.6  |
| 78.5  | 100.4  | 45.6  | 40.5  | 125.4  | 96.7   | 662.3  | 509.4  | 580.1  |
| 528.0 | 686.2  | 46.7  | 72.2  | 1082.5 | 726.9  | 514.1  | 525.6  | 531.6  |
| 36.0  | 70.1   | 11.4  | 20.0  | 66.4   | 85.6   | 43.9   | 47.9   | 46.9   |
| 43.6  | 57.8   | 17.7  | 5.0   | 80.7   | 67.9   | 56.4   | 30.0   | 32.8   |
| 63.2  | 65.7   | 168.3 | 193.6 | 74.4   | 40.3   | 315.5  | 435.8  | 597.5  |
| 61.5  | 56.3   | 19.6  | 32.9  | 63.4   | 57.5   | 76.9   | 85.7   | 78.9   |
| 150.2 | 176.3  | 24.3  | 31.4  | 239.3  | 172.9  | 289.8  | 189.7  | 186.4  |
| 61.0  | 86.1   | 22.5  | 28.5  | 86.3   | 92.2   | 461.4  | 440.5  | 533.8  |
| 52.6  | 36.8   | 4.4   | 8.8   | 98.1   | 37.1   | 178.9  | 148.4  | 169.3  |
| 16.5  | 4.0    | 18.4  | 16.8  | 14.5   | 7.5    | 32.2   | 26.2   | 23.9   |
| 31.0  | 58.0   | 1.4   | 0.6   | 55.1   | 38.5   | 31.8   | 41.1   | 49.3   |

|       |        |       |       |        |        |        |        |        |
|-------|--------|-------|-------|--------|--------|--------|--------|--------|
| 18.1  | 15.4   | 33.2  | 28.9  | 28.6   | 20.5   | 38.0   | 49.5   | 45.1   |
| 48.0  | 19.8   | 18.7  | 11.9  | 48.9   | 41.2   | 32.3   | 37.2   | 43.2   |
| 114.2 | 138.1  | 27.8  | 20.6  | 179.6  | 138.2  | 342.0  | 252.3  | 267.0  |
| 843.3 | 1075.4 | 104.8 | 161.0 | 1407.7 | 1200.2 | 1829.8 | 1332.9 | 1346.6 |
| 881.0 | 1255.7 | 19.8  | 21.1  | 1228.6 | 1371.8 | 1053.7 | 318.4  | 456.2  |
| 207.5 | 348.5  | 162.7 | 217.7 | 327.1  | 305.1  | 198.7  | 158.8  | 195.5  |
| 83.1  | 65.6   | 22.6  | 23.6  | 119.4  | 79.4   | 93.4   | 138.9  | 113.9  |
| 61.1  | 57.6   | 21.4  | 30.3  | 72.2   | 47.1   | 220.5  | 167.8  | 206.6  |
| 417.6 | 448.3  | 155.8 | 191.0 | 633.0  | 412.1  | 934.1  | 756.1  | 768.2  |
| 32.7  | 88.4   | 41.3  | 35.4  | 87.6   | 98.5   | 167.8  | 310.3  | 291.3  |
| 463.7 | 666.2  | 27.6  | 34.4  | 778.2  | 672.6  | 711.7  | 258.2  | 298.8  |
| 96.6  | 83.6   | 74.9  | 131.1 | 146.6  | 91.3   | 743.5  | 191.7  | 237.0  |
| 54.8  | 46.2   | 30.9  | 48.6  | 35.7   | 42.9   | 15.5   | 2.7    | 8.4    |
| 11.0  | 18.0   | 31.3  | 19.4  | 31.2   | 22.9   | 45.6   | 36.4   | 40.6   |
| 298.5 | 476.3  | 450.8 | 626.2 | 551.0  | 466.1  | 2315.8 | 2734.7 | 2721.5 |
| 3.8   | 1.0    | 6.0   | 0.7   | 2.2    | 0.9    | 1.0    | 1.1    | 1.0    |
| 274.9 | 382.0  | 67.2  | 84.0  | 417.7  | 453.4  | 684.9  | 388.1  | 468.9  |
| 20.5  | 33.0   | 42.2  | 39.8  | 35.1   | 22.0   | 70.2   | 88.3   | 96.7   |
| 310.0 | 446.5  | 18.1  | 14.8  | 414.1  | 278.2  | 63.7   | 63.8   | 108.0  |
| 2.6   | 4.5    | 7.2   | 19.4  | 6.4    | 9.8    | 3.4    | 4.2    | 10.3   |
| 52.4  | 37.0   | 20.4  | 19.7  | 49.7   | 31.3   | 64.4   | 40.6   | 47.0   |
| 14.9  | 15.9   | 108.1 | 180.5 | 26.1   | 9.7    | 103.1  | 122.2  | 136.4  |
| 36.3  | 56.3   | 4.8   | 5.9   | 105.3  | 48.9   | 252.0  | 307.0  | 269.1  |
| 37.9  | 75.7   | 44.7  | 70.4  | 67.8   | 81.6   | 102.8  | 61.9   | 64.3   |
| 138.9 | 164.4  | 87.1  | 172.6 | 114.4  | 162.6  | 142.1  | 88.9   | 134.6  |
| 120.0 | 105.8  | 67.9  | 46.3  | 119.4  | 134.1  | 215.0  | 164.5  | 217.7  |
| 219.8 | 268.7  | 303.5 | 391.6 | 188.4  | 304.7  | 353.8  | 335.8  | 404.7  |
| 37.4  | 46.1   | 213.1 | 284.2 | 41.4   | 53.1   | 5.2    | 11.7   | 11.7   |
| 113.9 | 130.6  | 14.2  | 19.2  | 123.9  | 171.2  | 235.1  | 185.0  | 194.6  |
| 40.1  | 55.5   | 10.1  | 8.5   | 57.0   | 55.1   | 346.9  | 171.6  | 198.8  |
| 7.8   | 24.3   | 17.9  | 21.6  | 46.8   | 28.2   | 6.0    | 31.2   | 33.0   |
| 208.5 | 214.0  | 18.8  | 1.5   | 357.1  | 202.0  | 317.8  | 206.7  | 198.5  |
| 1.6   | 9.2    | 5.6   | 11.4  | 1.1    | 1.2    | 9.7    | 9.5    | 5.6    |
| 171.1 | 201.6  | 153.3 | 253.7 | 232.0  | 242.9  | 387.8  | 185.7  | 198.9  |
| 196.0 | 204.6  | 108.6 | 133.2 | 267.3  | 164.6  | 913.5  | 894.6  | 925.8  |
| 14.9  | 44.0   | 33.7  | 22.0  | 20.6   | 25.3   | 85.7   | 69.1   | 78.0   |
| 105.8 | 123.4  | 70.6  | 77.1  | 167.0  | 97.4   | 171.7  | 117.7  | 133.0  |
| 7.5   | 2.0    | 5.7   | 1.2   | 16.8   | 18.9   | 4.0    | 3.3    | 5.9    |
| 408.9 | 602.0  | 71.8  | 118.2 | 661.5  | 596.5  | 1068.4 | 708.2  | 717.7  |
| 162.1 | 149.5  | 51.3  | 53.4  | 269.3  | 126.1  | 327.0  | 270.3  | 284.4  |
| 164.6 | 201.7  | 45.7  | 68.1  | 170.3  | 235.4  | 886.6  | 584.5  | 680.3  |
| 104.1 | 84.7   | 45.5  | 80.7  | 153.8  | 89.6   | 276.1  | 133.5  | 154.9  |
| 146.5 | 183.2  | 51.5  | 57.3  | 197.9  | 157.9  | 335.7  | 335.7  | 349.2  |
| 55.9  | 60.6   | 78.9  | 99.1  | 48.7   | 42.0   | 107.5  | 185.0  | 138.5  |
| 339.7 | 323.0  | 194.6 | 313.9 | 327.9  | 358.0  | 331.0  | 179.9  | 186.9  |
| 267.7 | 244.8  | 169.2 | 143.7 | 461.1  | 347.2  | 225.0  | 179.7  | 200.2  |
| 166.8 | 215.9  | 91.6  | 112.3 | 262.5  | 219.4  | 1117.1 | 1202.8 | 1151.5 |
| 86.7  | 123.2  | 27.2  | 38.0  | 159.2  | 239.4  | 382.1  | 531.1  | 453.6  |
| 41.1  | 29.1   | 34.0  | 52.5  | 45.1   | 35.2   | 64.5   | 70.8   | 87.3   |
| 361.2 | 326.6  | 119.7 | 149.9 | 548.4  | 280.9  | 653.5  | 563.7  | 651.9  |
| 5.3   | 11.3   | 28.2  | 49.9  | 15.5   | 3.2    | 290.9  | 344.3  | 411.7  |
| 90.8  | 84.3   | 25.6  | 28.0  | 97.4   | 67.7   | 94.6   | 74.6   | 92.5   |
| 128.5 | 161.9  | 68.4  | 102.7 | 181.6  | 123.0  | 250.9  | 249.4  | 266.6  |



|       |       |       |       |        |        |        |        |        |
|-------|-------|-------|-------|--------|--------|--------|--------|--------|
| 95.6  | 120.7 | 99.8  | 119.8 | 152.7  | 119.2  | 229.4  | 177.1  | 196.5  |
| 212.1 | 233.3 | 196.8 | 254.9 | 246.3  | 183.7  | 220.7  | 191.5  | 192.9  |
| 58.4  | 57.0  | 15.0  | 32.7  | 43.0   | 48.4   | 98.3   | 110.3  | 124.8  |
| 124.1 | 152.6 | 21.3  | 26.5  | 190.1  | 132.2  | 438.5  | 296.0  | 376.1  |
| 52.7  | 58.1  | 23.5  | 24.8  | 42.9   | 57.5   | 76.1   | 47.1   | 65.7   |
| 12.6  | 9.3   | 14.0  | 6.3   | 3.9    | 14.7   | 2.8    | 5.2    | 1.6    |
| 26.7  | 38.8  | 30.6  | 22.4  | 36.6   | 23.3   | 19.2   | 20.9   | 24.7   |
| 0.8   | 0.4   | 1.3   | 0.7   | 4.9    | 1.4    | 3.5    | 7.6    | 1.1    |
| 43.2  | 38.1  | 20.5  | 28.3  | 53.8   | 49.8   | 150.3  | 94.2   | 114.6  |
| 62.5  | 74.4  | 30.8  | 26.7  | 62.1   | 61.8   | 180.7  | 118.9  | 132.4  |
| 2.0   | 0.7   | 146.8 | 164.1 | 3.4    | 1.3    | 64.0   | 224.1  | 224.5  |
| 15.0  | 16.9  | 17.0  | 10.2  | 19.2   | 14.6   | 11.1   | 13.1   | 16.2   |
| 58.0  | 65.9  | 28.0  | 33.0  | 84.1   | 117.4  | 106.1  | 74.2   | 62.5   |
| 274.3 | 283.2 | 2.4   | 2.6   | 426.6  | 247.4  | 8.2    | 5.7    | 5.5    |
| 44.0  | 56.3  | 6.7   | 17.3  | 44.8   | 50.8   | 56.0   | 33.5   | 40.3   |
| 4.9   | 14.5  | 4.7   | 15.0  | 1.8    | 13.2   | 43.9   | 49.2   | 54.2   |
| 73.3  | 104.2 | 38.5  | 40.8  | 67.3   | 81.3   | 204.8  | 218.7  | 253.1  |
| 184.9 | 266.5 | 152.9 | 188.0 | 265.9  | 296.5  | 901.2  | 765.5  | 840.2  |
| 206.6 | 290.9 | 39.3  | 73.1  | 265.8  | 319.9  | 177.9  | 96.7   | 96.6   |
| 345.5 | 445.8 | 17.0  | 20.4  | 480.1  | 398.7  | 520.3  | 282.9  | 311.0  |
| 107.0 | 105.7 | 64.3  | 84.1  | 137.2  | 136.1  | 367.3  | 272.2  | 286.4  |
| 13.9  | 3.4   | 2.4   | 15.8  | 31.7   | 4.0    | 57.5   | 46.9   | 42.5   |
| 18.7  | 2.3   | 1.9   | 1.9   | 11.6   | 17.1   | 9.7    | 17.2   | 12.5   |
| 30.2  | 12.8  | 34.3  | 19.8  | 19.2   | 3.2    | 1.5    | 8.9    | 7.3    |
| 97.7  | 167.9 | 55.3  | 83.9  | 174.9  | 200.4  | 362.5  | 215.3  | 285.7  |
| 525.9 | 669.9 | 26.2  | 53.7  | 799.0  | 667.6  | 530.7  | 367.8  | 356.7  |
| 2.5   | 4.7   | 0.8   | 0.1   | 5.7    | 1.8    | 1.4    | 3.1    | 3.0    |
| 4.5   | 4.4   | 18.5  | 16.3  | 3.9    | 5.9    | 5.2    | 5.5    | 8.0    |
| 766.8 | 804.7 | 441.8 | 459.3 | 947.7  | 921.2  | 626.8  | 475.7  | 492.3  |
| 141.0 | 248.1 | 13.6  | 14.8  | 288.9  | 272.5  | 225.5  | 276.9  | 294.5  |
| 442.6 | 877.5 | 64.8  | 74.7  | 579.1  | 604.4  | 667.3  | 430.8  | 519.4  |
| 122.3 | 126.7 | 155.1 | 160.4 | 173.7  | 164.7  | 186.8  | 107.5  | 129.7  |
| 21.1  | 29.7  | 2.7   | 7.5   | 27.7   | 39.4   | 39.8   | 32.4   | 42.0   |
| 14.3  | 30.2  | 11.2  | 15.1  | 40.2   | 21.6   | 16.5   | 3.3    | 5.0    |
| 5.7   | 5.2   | 22.6  | 23.2  | 15.7   | 6.2    | 5.9    | 20.7   | 45.9   |
| 47.7  | 82.1  | 3.8   | 1.9   | 95.4   | 105.5  | 505.1  | 145.6  | 183.9  |
| 58.0  | 56.4  | 32.8  | 29.9  | 64.9   | 36.9   | 50.7   | 52.2   | 46.7   |
| 665.1 | 901.1 | 40.2  | 64.3  | 1078.6 | 1023.5 | 489.2  | 297.8  | 393.0  |
| 184.5 | 237.0 | 21.7  | 28.8  | 368.7  | 301.6  | 202.8  | 126.1  | 151.8  |
| 420.1 | 609.1 | 150.0 | 222.6 | 698.9  | 693.6  | 1096.9 | 802.3  | 826.7  |
| 57.3  | 63.4  | 12.6  | 1.4   | 113.6  | 114.8  | 106.5  | 72.0   | 79.4   |
| 285.7 | 516.7 | 518.5 | 691.7 | 517.2  | 383.5  | 2211.1 | 2352.6 | 2357.8 |
| 119.4 | 135.4 | 33.0  | 39.5  | 142.4  | 132.1  | 246.3  | 205.5  | 191.7  |
| 164.2 | 162.6 | 39.5  | 35.9  | 244.8  | 201.5  | 727.5  | 421.2  | 503.2  |
| 55.7  | 74.3  | 51.7  | 70.1  | 78.3   | 96.8   | 147.5  | 126.6  | 143.7  |
| 110.8 | 127.9 | 206.0 | 278.7 | 204.5  | 152.4  | 671.4  | 670.5  | 660.6  |
| 384.8 | 475.6 | 67.9  | 89.5  | 526.1  | 478.1  | 281.7  | 230.1  | 233.1  |
| 2.8   | 14.8  | 218.9 | 295.7 | 19.5   | 3.8    | 860.7  | 1667.5 | 1789.8 |
| 35.8  | 54.5  | 15.3  | 17.4  | 66.0   | 51.9   | 76.2   | 93.6   | 86.3   |
| 39.4  | 61.3  | 22.9  | 43.5  | 109.8  | 64.9   | 222.3  | 186.6  | 198.1  |
| 56.3  | 63.1  | 13.9  | 7.0   | 80.9   | 54.7   | 182.1  | 111.7  | 128.6  |
| 96.5  | 93.0  | 19.8  | 33.7  | 121.7  | 87.6   | 109.0  | 58.7   | 54.8   |
| 15.2  | 4.9   | 2.1   | 1.3   | 19.0   | 12.4   | 79.4   | 85.3   | 82.6   |

|       |       |       |       |        |       |        |        |        |
|-------|-------|-------|-------|--------|-------|--------|--------|--------|
| 88.5  | 120.8 | 105.1 | 134.8 | 126.4  | 118.3 | 343.5  | 284.5  | 347.5  |
| 5.3   | 0.5   | 0.3   | 0.2   | 0.8    | 1.2   | 2.3    | 2.1    | 6.1    |
| 2.1   | 2.9   | 15.3  | 25.1  | 4.9    | 2.8   | 76.0   | 79.7   | 107.5  |
| 1.9   | 2.1   | 3.8   | 7.0   | 2.4    | 1.6   | 23.6   | 50.7   | 57.0   |
| 182.3 | 220.0 | 53.6  | 63.1  | 281.9  | 215.8 | 375.8  | 360.0  | 427.8  |
| 19.5  | 14.3  | 1.8   | 11.7  | 41.3   | 19.4  | 78.8   | 74.6   | 83.3   |
| 6.3   | 5.6   | 11.4  | 9.7   | 2.9    | 3.1   | 5.8    | 8.7    | 7.7    |
| 20.7  | 20.5  | 1.3   | 0.3   | 29.2   | 21.7  | 19.4   | 8.0    | 19.1   |
| 86.8  | 95.8  | 36.8  | 71.5  | 105.5  | 101.1 | 130.4  | 161.7  | 160.0  |
| 31.1  | 14.9  | 29.3  | 26.5  | 36.8   | 26.2  | 13.4   | 21.0   | 20.0   |
| 128.0 | 144.9 | 55.6  | 78.5  | 129.8  | 129.8 | 892.6  | 396.1  | 461.5  |
| 9.5   | 11.9  | 3.3   | 6.7   | 13.2   | 11.1  | 5.3    | 2.1    | 10.3   |
| 20.9  | 28.1  | 28.4  | 25.2  | 31.1   | 12.7  | 113.1  | 76.2   | 70.0   |
| 156.1 | 195.5 | 41.7  | 42.7  | 280.8  | 193.4 | 468.3  | 361.9  | 367.4  |
| 41.6  | 52.5  | 31.2  | 31.7  | 76.3   | 45.4  | 188.6  | 255.2  | 297.5  |
| 428.4 | 479.4 | 312.5 | 253.6 | 525.1  | 427.5 | 1477.0 | 853.3  | 941.8  |
| 88.4  | 118.5 | 25.2  | 19.0  | 158.3  | 102.1 | 512.0  | 358.5  | 417.6  |
| 71.1  | 84.7  | 48.5  | 62.3  | 89.7   | 92.4  | 538.6  | 217.8  | 306.2  |
| 67.4  | 90.7  | 8.7   | 20.6  | 115.0  | 97.1  | 238.9  | 199.5  | 197.2  |
| 10.5  | 16.4  | 29.9  | 26.7  | 17.3   | 17.7  | 37.1   | 14.3   | 15.6   |
| 7.9   | 14.8  | 19.8  | 24.3  | 9.2    | 5.5   | 16.6   | 8.5    | 16.0   |
| 20.2  | 13.8  | 24.5  | 20.8  | 20.7   | 23.3  | 76.3   | 51.1   | 64.3   |
| 52.7  | 52.4  | 111.5 | 141.4 | 91.0   | 67.4  | 150.4  | 72.1   | 90.1   |
| 152.2 | 195.8 | 21.5  | 40.0  | 255.7  | 311.9 | 767.1  | 1351.8 | 1415.0 |
| 185.9 | 242.3 | 10.6  | 22.0  | 202.7  | 155.0 | 349.1  | 310.8  | 315.5  |
| 407.9 | 393.1 | 58.2  | 64.5  | 481.1  | 580.9 | 601.4  | 247.4  | 296.4  |
| 2.8   | 2.7   | 5.0   | 3.4   | 4.9    | 8.4   | 10.4   | 22.0   | 14.3   |
| 12.3  | 3.6   | 7.3   | 8.3   | 11.0   | 1.5   | 23.3   | 32.4   | 26.9   |
| 621.5 | 740.4 | 115.1 | 112.1 | 1976.3 | 838.5 | 1384.3 | 631.9  | 805.1  |
| 472.7 | 515.3 | 191.8 | 195.6 | 744.8  | 649.0 | 920.1  | 653.7  | 699.7  |
| 42.1  | 57.7  | 11.8  | 29.2  | 56.4   | 47.0  | 170.1  | 115.3  | 153.8  |
| 34.5  | 43.8  | 10.0  | 13.8  | 48.6   | 26.5  | 59.5   | 85.7   | 87.6   |
| 98.9  | 122.2 | 21.4  | 25.3  | 147.7  | 116.8 | 25.5   | 42.6   | 49.1   |
| 40.9  | 53.8  | 17.4  | 11.3  | 88.9   | 73.2  | 602.7  | 281.4  | 338.9  |
| 6.5   | 2.9   | 6.3   | 0.7   | 4.7    | 1.1   | 3.7    | 2.0    | 1.9    |
| 20.8  | 17.6  | 18.0  | 30.5  | 16.7   | 16.2  | 169.1  | 273.8  | 275.4  |
| 285.5 | 403.1 | 52.7  | 30.3  | 444.0  | 436.2 | 222.2  | 169.5  | 203.9  |
| 12.8  | 9.9   | 4.4   | 0.8   | 29.7   | 8.7   | 5.2    | 3.7    | 12.8   |
| 5.8   | 4.7   | 7.9   | 6.7   | 8.3    | 11.4  | 30.1   | 24.7   | 28.8   |
| 45.2  | 47.0  | 16.5  | 28.3  | 41.5   | 35.7  | 51.9   | 56.8   | 60.3   |
| 1.4   | 8.9   | 26.2  | 7.0   | 3.1    | 7.3   | 168.4  | 237.3  | 313.9  |
| 20.5  | 46.6  | 0.1   | 1.0   | 45.5   | 48.4  | 83.8   | 79.4   | 84.7   |
| 86.3  | 83.7  | 60.3  | 99.8  | 84.5   | 70.3  | 212.5  | 287.2  | 326.1  |
| 512.0 | 609.2 | 154.4 | 191.1 | 660.6  | 609.6 | 1060.0 | 710.7  | 818.3  |
| 157.1 | 311.2 | 56.4  | 60.7  | 265.2  | 253.2 | 435.0  | 114.7  | 125.0  |
| 206.0 | 259.5 | 18.6  | 26.9  | 259.7  | 251.0 | 393.0  | 241.8  | 261.5  |
| 7.5   | 2.4   | 6.3   | 0.9   | 1.8    | 0.8   | 4.6    | 9.3    | 1.2    |
| 93.0  | 84.4  | 74.4  | 78.6  | 130.2  | 74.8  | 125.9  | 89.2   | 133.9  |
| 159.7 | 229.4 | 1.8   | 1.2   | 201.7  | 277.5 | 150.4  | 144.5  | 157.7  |
| 34.6  | 41.2  | 24.1  | 25.6  | 34.7   | 37.5  | 40.3   | 36.5   | 35.4   |
| 37.3  | 33.2  | 13.7  | 1.3   | 58.8   | 40.9  | 34.4   | 48.8   | 40.1   |
| 26.4  | 57.5  | 21.4  | 21.9  | 55.3   | 56.0  | 95.1   | 65.9   | 73.1   |
| 64.6  | 94.5  | 28.0  | 44.1  | 122.5  | 83.2  | 183.0  | 157.5  | 193.9  |

|        |        |       |       |        |        |        |        |        |
|--------|--------|-------|-------|--------|--------|--------|--------|--------|
| 30.7   | 71.9   | 26.1  | 28.7  | 56.0   | 55.0   | 108.6  | 111.4  | 84.4   |
| 71.2   | 97.7   | 45.7  | 52.4  | 113.9  | 71.1   | 133.6  | 93.5   | 91.4   |
| 62.4   | 73.9   | 271.8 | 337.2 | 89.2   | 70.6   | 169.9  | 175.5  | 200.0  |
| 91.3   | 114.8  | 53.8  | 63.1  | 132.9  | 98.6   | 378.7  | 294.8  | 368.9  |
| 11.6   | 12.9   | 14.5  | 19.2  | 13.4   | 5.3    | 40.0   | 35.9   | 44.6   |
| 2.4    | 1.6    | 1.5   | 1.5   | 1.7    | 1.4    | 10.6   | 14.8   | 25.8   |
| 312.2  | 301.6  | 69.8  | 57.7  | 592.0  | 312.6  | 654.7  | 494.9  | 580.4  |
| 75.6   | 76.1   | 77.3  | 113.0 | 111.6  | 95.5   | 248.9  | 250.2  | 280.0  |
| 17.2   | 29.7   | 17.7  | 19.8  | 21.9   | 15.0   | 131.8  | 178.0  | 195.9  |
| 1.5    | 4.4    | 11.8  | 10.5  | 17.1   | 1.7    | 391.2  | 631.6  | 761.0  |
| 2.6    | 0.2    | 6.1   | 0.2   | 0.2    | 0.3    | 1.9    | 0.4    | 0.3    |
| 7.5    | 1.3    | 3.8   | 21.6  | 1.4    | 9.3    | 5.7    | 2.5    | 6.1    |
| 55.8   | 92.2   | 98.8  | 107.3 | 93.1   | 79.3   | 233.2  | 155.5  | 172.5  |
| 44.8   | 58.9   | 36.5  | 40.1  | 40.8   | 9.5    | 38.4   | 37.3   | 48.3   |
| 213.0  | 242.4  | 42.3  | 48.7  | 243.1  | 223.0  | 703.2  | 507.7  | 596.4  |
| 88.0   | 65.8   | 25.0  | 34.3  | 160.3  | 64.3   | 45.7   | 30.5   | 27.8   |
| 157.3  | 210.0  | 7.3   | 34.5  | 224.3  | 147.7  | 146.7  | 138.9  | 151.1  |
| 113.3  | 141.2  | 181.6 | 272.1 | 129.0  | 180.1  | 469.5  | 381.3  | 366.2  |
| 76.0   | 93.7   | 18.6  | 35.2  | 80.7   | 83.9   | 71.9   | 71.3   | 84.6   |
| 49.3   | 81.4   | 31.2  | 32.5  | 53.7   | 80.7   | 62.9   | 82.3   | 73.3   |
| 196.4  | 303.0  | 73.3  | 89.4  | 294.4  | 377.3  | 1013.2 | 1020.1 | 1196.4 |
| 86.0   | 77.6   | 35.1  | 62.1  | 99.4   | 60.6   | 160.7  | 134.1  | 171.3  |
| 17.1   | 27.9   | 3.8   | 5.0   | 17.0   | 9.8    | 45.8   | 20.9   | 20.8   |
| 56.2   | 104.0  | 3.9   | 12.5  | 105.4  | 84.8   | 148.0  | 210.8  | 247.9  |
| 75.6   | 109.8  | 13.3  | 15.9  | 178.6  | 104.7  | 51.4   | 58.8   | 65.4   |
| 119.6  | 122.5  | 73.9  | 73.2  | 236.1  | 119.9  | 91.0   | 75.1   | 73.8   |
| 268.4  | 312.5  | 182.9 | 231.2 | 398.4  | 356.8  | 830.0  | 435.9  | 478.4  |
| 2.7    | 2.0    | 2.0   | 1.6   | 5.6    | 11.1   | 5.7    | 1.8    | 2.4    |
| 58.5   | 81.9   | 16.2  | 25.5  | 88.8   | 78.7   | 253.7  | 196.9  | 197.5  |
| 209.5  | 216.3  | 42.1  | 53.3  | 290.4  | 241.6  | 462.9  | 292.0  | 364.9  |
| 34.8   | 30.8   | 0.7   | 3.6   | 52.1   | 36.2   | 90.5   | 80.5   | 89.5   |
| 371.1  | 455.7  | 66.5  | 89.6  | 483.6  | 426.4  | 528.2  | 339.3  | 392.1  |
| 24.8   | 23.6   | 4.4   | 1.5   | 23.3   | 28.3   | 47.8   | 47.4   | 46.7   |
| 57.7   | 67.7   | 102.5 | 147.3 | 73.2   | 61.3   | 235.2  | 243.4  | 253.8  |
| 1190.7 | 1031.9 | 197.1 | 243.2 | 1203.4 | 1111.8 | 1660.5 | 1209.7 | 1347.3 |
| 165.9  | 203.2  | 50.2  | 59.9  | 225.9  | 203.9  | 217.6  | 388.4  | 364.9  |
| 105.7  | 117.0  | 20.7  | 13.7  | 139.8  | 111.1  | 47.5   | 100.8  | 108.0  |
| 22.8   | 16.9   | 83.7  | 149.3 | 11.9   | 15.3   | 68.5   | 134.5  | 127.4  |
| 111.8  | 103.2  | 51.5  | 58.2  | 156.8  | 93.6   | 82.3   | 86.7   | 92.6   |
| 253.8  | 274.9  | 1.9   | 2.4   | 515.3  | 211.8  | 4.0    | 3.8    | 1.3    |
| 149.0  | 181.7  | 68.5  | 78.7  | 221.9  | 164.3  | 259.1  | 221.0  | 223.8  |
| 30.2   | 31.5   | 27.5  | 29.8  | 40.6   | 39.5   | 22.8   | 14.3   | 15.6   |
| 86.5   | 83.2   | 36.8  | 48.0  | 75.7   | 80.2   | 21.6   | 19.9   | 19.0   |
| 124.3  | 197.4  | 1.5   | 1.2   | 188.6  | 222.4  | 1.7    | 1.3    | 2.3    |
| 6.9    | 5.2    | 8.5   | 7.7   | 7.6    | 8.2    | 4.8    | 4.9    | 5.0    |
| 147.7  | 208.9  | 26.6  | 27.0  | 213.7  | 201.0  | 328.0  | 290.2  | 270.2  |
| 16.4   | 19.8   | 17.2  | 12.2  | 26.3   | 19.6   | 102.6  | 63.7   | 60.2   |
| 43.7   | 71.1   | 75.0  | 85.6  | 104.8  | 45.7   | 250.3  | 582.5  | 533.9  |
| 7.7    | 7.2    | 22.3  | 25.2  | 12.5   | 0.9    | 47.7   | 51.8   | 72.9   |
| 50.2   | 57.7   | 41.1  | 54.2  | 74.0   | 41.0   | 126.6  | 155.5  | 168.2  |
| 16.0   | 6.8    | 25.1  | 30.3  | 14.1   | 3.5    | 13.0   | 59.6   | 51.7   |
| 101.2  | 128.5  | 19.3  | 21.6  | 194.0  | 172.6  | 366.9  | 355.8  | 416.3  |
| 118.8  | 110.1  | 62.5  | 69.5  | 205.1  | 131.1  | 234.8  | 290.5  | 331.0  |

|        |        |       |       |        |        |        |        |        |
|--------|--------|-------|-------|--------|--------|--------|--------|--------|
| 6.9    | 12.2   | 12.6  | 5.3   | 13.3   | 11.2   | 30.3   | 24.9   | 31.1   |
| 43.7   | 62.3   | 5.0   | 13.7  | 78.5   | 67.9   | 97.9   | 92.8   | 88.5   |
| 69.3   | 65.1   | 213.3 | 312.4 | 79.4   | 66.4   | 123.0  | 110.0  | 133.7  |
| 125.0  | 183.5  | 15.6  | 19.4  | 145.9  | 164.0  | 254.9  | 256.7  | 275.6  |
| 0.6    | 0.6    | 1.8   | 6.2   | 0.7    | 6.9    | 1.8    | 4.4    | 4.5    |
| 479.3  | 562.3  | 57.4  | 54.5  | 890.7  | 590.9  | 836.1  | 520.0  | 594.5  |
| 52.9   | 72.3   | 52.2  | 52.0  | 94.5   | 77.6   | 222.4  | 210.2  | 211.2  |
| 10.5   | 22.8   | 16.6  | 13.8  | 59.6   | 18.5   | 102.3  | 104.6  | 131.1  |
| 57.8   | 58.5   | 3.3   | 4.0   | 79.4   | 86.6   | 7.0    | 4.2    | 5.2    |
| 133.9  | 170.3  | 47.5  | 38.8  | 220.0  | 183.3  | 255.1  | 181.7  | 209.8  |
| 80.4   | 75.5   | 1.7   | 1.6   | 121.9  | 70.0   | 2.3    | 1.6    | 2.5    |
| 13.6   | 12.3   | 6.2   | 4.5   | 25.0   | 20.8   | 7.2    | 15.6   | 10.2   |
| 32.8   | 43.0   | 8.1   | 8.5   | 15.6   | 28.6   | 65.7   | 50.0   | 80.7   |
| 11.8   | 16.4   | 20.2  | 8.3   | 15.8   | 14.7   | 69.3   | 54.4   | 63.6   |
| 263.0  | 398.8  | 17.8  | 10.1  | 396.6  | 361.7  | 540.0  | 335.2  | 391.6  |
| 24.1   | 41.3   | 37.5  | 81.2  | 39.8   | 38.3   | 67.4   | 59.4   | 72.4   |
| 75.4   | 48.0   | 40.9  | 84.6  | 55.8   | 51.8   | 291.7  | 143.4  | 170.2  |
| 25.3   | 22.8   | 18.6  | 19.5  | 38.1   | 18.0   | 116.0  | 111.5  | 127.5  |
| 67.6   | 40.8   | 23.6  | 22.7  | 91.6   | 54.7   | 34.4   | 20.3   | 26.3   |
| 485.0  | 546.6  | 17.8  | 26.1  | 743.5  | 695.5  | 1010.3 | 293.7  | 307.1  |
| 21.5   | 18.5   | 34.2  | 65.3  | 37.8   | 14.1   | 29.5   | 46.6   | 42.9   |
| 265.9  | 286.9  | 56.6  | 70.4  | 378.9  | 272.7  | 315.4  | 216.7  | 263.6  |
| 62.9   | 75.5   | 103.2 | 148.6 | 56.8   | 67.6   | 151.5  | 94.5   | 144.2  |
| 9.0    | 7.4    | 0.4   | 2.7   | 11.8   | 6.6    | 57.4   | 25.2   | 32.7   |
| 9.9    | 18.7   | 6.4   | 10.0  | 30.4   | 11.0   | 2269.9 | 2565.7 | 3000.7 |
| 16.8   | 24.6   | 33.5  | 31.6  | 28.6   | 15.2   | 22.4   | 23.6   | 24.0   |
| 42.0   | 33.1   | 14.8  | 12.7  | 58.3   | 58.4   | 36.3   | 25.8   | 18.6   |
| 22.4   | 29.2   | 19.8  | 17.1  | 33.1   | 38.1   | 23.4   | 39.1   | 38.7   |
| 105.7  | 128.9  | 37.4  | 41.0  | 121.5  | 126.9  | 124.3  | 124.8  | 134.4  |
| 46.3   | 61.1   | 127.5 | 157.0 | 55.9   | 54.6   | 14.1   | 16.7   | 17.3   |
| 31.9   | 50.2   | 23.5  | 30.6  | 37.3   | 58.9   | 59.0   | 72.9   | 75.5   |
| 72.0   | 42.2   | 48.2  | 45.2  | 96.0   | 27.0   | 83.6   | 54.5   | 35.2   |
| 395.2  | 449.6  | 6.5   | 18.3  | 532.9  | 478.2  | 11.9   | 7.4    | 5.9    |
| 15.0   | 22.9   | 11.6  | 18.1  | 23.2   | 29.4   | 35.5   | 42.1   | 40.8   |
| 2.1    | 7.1    | 0.7   | 1.4   | 3.4    | 3.2    | 25.9   | 9.7    | 9.7    |
| 41.4   | 41.4   | 11.3  | 14.4  | 49.7   | 33.0   | 38.1   | 69.7   | 74.4   |
| 1038.4 | 1061.6 | 51.3  | 106.3 | 1349.4 | 1149.0 | 314.9  | 124.6  | 156.9  |
| 121.4  | 160.9  | 9.7   | 9.0   | 170.7  | 118.3  | 1001.6 | 919.1  | 1045.6 |
| 1.8    | 0.9    | 4.2   | 11.7  | 3.4    | 1.1    | 2.5    | 1.7    | 1.4    |
| 82.6   | 37.0   | 32.1  | 54.8  | 92.1   | 32.3   | 47.0   | 43.7   | 47.8   |
| 112.6  | 216.3  | 1.1   | 0.2   | 152.6  | 149.9  | 0.5    | 0.6    | 1.2    |
| 22.2   | 22.3   | 3.9   | 11.8  | 27.6   | 22.5   | 58.6   | 59.6   | 71.3   |
| 92.2   | 79.0   | 13.2  | 10.0  | 120.4  | 96.3   | 213.6  | 204.4  | 209.7  |
| 231.7  | 278.5  | 11.8  | 9.7   | 383.8  | 275.9  | 33.4   | 9.1    | 4.6    |
| 88.0   | 152.8  | 23.6  | 23.3  | 181.2  | 169.5  | 1410.6 | 1340.5 | 1386.9 |
| 70.6   | 79.2   | 10.1  | 3.5   | 102.3  | 79.2   | 118.4  | 91.1   | 99.3   |
| 16.1   | 1.2    | 6.3   | 4.4   | 9.9    | 7.5    | 10.8   | 8.3    | 6.4    |
| 455.6  | 485.6  | 126.6 | 135.2 | 523.1  | 519.7  | 583.2  | 461.4  | 487.9  |
| 34.9   | 45.9   | 24.4  | 15.8  | 49.2   | 39.7   | 25.2   | 29.1   | 28.1   |
| 159.0  | 133.8  | 340.3 | 476.7 | 161.1  | 173.3  | 6.3    | 3.2    | 8.3    |
| 210.5  | 273.9  | 14.0  | 36.1  | 282.3  | 318.3  | 506.5  | 339.9  | 412.6  |
| 215.5  | 267.0  | 5.7   | 13.1  | 453.5  | 240.0  | 43.2   | 30.8   | 29.7   |
| 103.0  | 162.7  | 13.6  | 12.8  | 166.1  | 153.6  | 218.9  | 163.2  | 180.6  |

|        |        |       |       |        |        |        |        |        |
|--------|--------|-------|-------|--------|--------|--------|--------|--------|
| 60.5   | 92.3   | 15.4  | 30.8  | 102.4  | 94.5   | 128.6  | 136.9  | 158.3  |
| 2246.3 | 2744.7 | 591.7 | 715.9 | 3121.5 | 2739.9 | 3284.4 | 2188.1 | 2275.6 |
| 89.1   | 87.6   | 11.2  | 9.0   | 141.0  | 67.7   | 144.2  | 81.3   | 88.3   |
| 34.1   | 46.7   | 3.7   | 0.7   | 56.0   | 42.7   | 6.8    | 1.8    | 3.1    |
| 125.2  | 182.0  | 49.6  | 52.9  | 270.1  | 203.8  | 332.5  | 358.8  | 352.4  |
| 42.3   | 65.7   | 15.0  | 8.9   | 59.7   | 52.8   | 318.5  | 387.5  | 416.4  |
| 156.1  | 223.0  | 32.1  | 17.0  | 196.3  | 219.9  | 12.6   | 5.6    | 9.3    |
| 139.3  | 157.0  | 74.2  | 69.9  | 287.8  | 260.9  | 228.7  | 176.5  | 274.1  |
| 15.4   | 20.4   | 91.8  | 70.8  | 11.2   | 29.2   | 108.1  | 66.5   | 91.9   |
| 7.0    | 12.3   | 28.8  | 37.0  | 14.7   | 0.9    | 150.7  | 90.3   | 128.0  |
| 5.8    | 4.3    | 20.7  | 40.4  | 7.4    | 7.5    | 51.3   | 31.8   | 37.4   |
| 236.5  | 247.4  | 24.4  | 21.7  | 288.8  | 219.3  | 1364.9 | 798.5  | 905.6  |
| 33.0   | 37.7   | 17.4  | 9.5   | 25.7   | 28.6   | 11.5   | 13.9   | 10.0   |
| 85.5   | 84.1   | 15.5  | 21.2  | 119.9  | 104.8  | 23.0   | 50.5   | 43.2   |
| 98.3   | 118.6  | 34.2  | 51.5  | 112.2  | 108.9  | 239.1  | 148.5  | 173.9  |
| 80.8   | 127.2  | 36.9  | 55.0  | 153.8  | 159.1  | 257.7  | 241.8  | 290.7  |
| 1.8    | 5.5    | 4.8   | 5.2   | 4.8    | 12.3   | 5.8    | 4.8    | 9.6    |
| 8.9    | 33.9   | 2.8   | 2.7   | 12.0   | 20.1   | 29.2   | 31.5   | 21.6   |
| 3.2    | 5.5    | 8.7   | 1.1   | 12.4   | 10.7   | 16.3   | 16.7   | 8.8    |
| 67.3   | 93.5   | 132.9 | 143.1 | 98.3   | 114.7  | 153.3  | 102.0  | 125.0  |
| 10.2   | 23.8   | 26.6  | 16.6  | 26.9   | 23.8   | 90.5   | 156.0  | 156.5  |
| 18.1   | 28.6   | 18.2  | 8.2   | 30.7   | 21.0   | 204.8  | 413.0  | 372.0  |
| 22.1   | 31.3   | 38.5  | 34.8  | 34.5   | 24.8   | 127.9  | 142.0  | 168.8  |
| 198.6  | 295.6  | 13.5  | 1.3   | 335.9  | 276.9  | 11.4   | 12.4   | 6.6    |
| 7.9    | 11.0   | 16.8  | 22.7  | 13.3   | 8.7    | 69.4   | 54.6   | 81.7   |
| 14.7   | 16.6   | 17.7  | 25.4  | 17.1   | 9.2    | 45.2   | 43.9   | 48.1   |
| 13.7   | 7.5    | 12.3  | 10.2  | 26.8   | 29.2   | 37.3   | 29.9   | 31.2   |
| 2.3    | 20.5   | 3.1   | 1.7   | 5.5    | 2.9    | 8.7    | 4.8    | 2.9    |
| 46.1   | 56.1   | 80.1  | 92.2  | 61.5   | 56.1   | 126.1  | 74.9   | 74.6   |
| 76.6   | 111.8  | 42.2  | 37.6  | 191.4  | 71.3   | 280.0  | 357.6  | 337.2  |
| 94.4   | 100.9  | 31.5  | 67.3  | 132.6  | 97.0   | 204.5  | 152.7  | 192.6  |
| 3.2    | 12.9   | 4.2   | 17.2  | 2.6    | 4.9    | 3.6    | 9.4    | 3.7    |
| 127.9  | 141.5  | 30.3  | 54.1  | 140.8  | 130.9  | 285.0  | 155.4  | 167.8  |
| 5.2    | 10.1   | 7.5   | 4.6   | 11.2   | 14.8   | 23.8   | 17.0   | 21.6   |
| 65.7   | 71.1   | 72.8  | 89.7  | 95.3   | 59.4   | 415.7  | 226.5  | 290.4  |
| 55.4   | 40.0   | 62.5  | 99.6  | 68.7   | 32.1   | 130.1  | 249.3  | 253.8  |
| 48.8   | 67.7   | 34.8  | 43.6  | 67.2   | 48.2   | 111.2  | 32.3   | 43.8   |
| 702.8  | 974.6  | 587.6 | 756.5 | 912.2  | 731.5  | 1773.7 | 1592.8 | 1781.3 |
| 168.3  | 239.9  | 56.5  | 52.5  | 231.5  | 245.3  | 369.1  | 350.3  | 329.7  |
| 9.0    | 2.1    | 1.8   | 12.0  | 22.5   | 2.3    | 6.9    | 1.7    | 7.3    |
| 102.6  | 107.5  | 39.9  | 62.6  | 143.9  | 133.0  | 81.1   | 53.0   | 73.7   |
| 28.7   | 48.2   | 24.5  | 31.4  | 62.9   | 54.8   | 64.4   | 55.3   | 56.3   |
| 28.1   | 46.9   | 2.1   | 0.3   | 72.6   | 46.2   | 18.5   | 12.8   | 13.8   |
| 86.5   | 76.6   | 37.2  | 38.9  | 72.9   | 79.8   | 294.2  | 287.1  | 297.0  |
| 112.5  | 138.1  | 63.4  | 47.0  | 195.7  | 123.8  | 391.0  | 341.5  | 384.3  |
| 5.2    | 27.2   | 17.2  | 27.2  | 30.2   | 31.2   | 53.4   | 38.7   | 41.9   |
| 30.7   | 33.5   | 8.6   | 11.0  | 45.4   | 26.4   | 80.2   | 71.5   | 60.2   |
| 16.2   | 11.3   | 35.3  | 34.0  | 14.2   | 3.6    | 35.4   | 37.9   | 39.0   |
| 18.5   | 39.4   | 7.7   | 13.4  | 22.9   | 59.8   | 85.1   | 82.5   | 86.2   |
| 1.0    | 12.9   | 5.1   | 4.2   | 0.8    | 11.2   | 13.0   | 26.3   | 31.1   |
| 59.4   | 110.8  | 18.0  | 27.3  | 127.1  | 82.8   | 101.0  | 123.1  | 129.4  |
| 33.2   | 55.2   | 17.4  | 8.8   | 35.6   | 49.0   | 178.1  | 165.6  | 201.1  |
| 62.8   | 55.9   | 17.3  | 12.8  | 117.8  | 41.8   | 83.7   | 142.8  | 156.7  |

|       |       |       |       |        |       |        |        |        |
|-------|-------|-------|-------|--------|-------|--------|--------|--------|
| 32.2  | 41.6  | 29.1  | 18.1  | 61.4   | 29.8  | 172.0  | 123.0  | 149.7  |
| 63.0  | 53.6  | 17.2  | 17.5  | 66.7   | 32.8  | 44.0   | 40.0   | 48.9   |
| 353.6 | 481.9 | 41.8  | 63.1  | 511.9  | 550.8 | 1796.1 | 1063.0 | 1140.8 |
| 47.5  | 72.7  | 50.5  | 60.5  | 83.8   | 77.7  | 142.3  | 120.0  | 137.6  |
| 47.0  | 54.0  | 22.9  | 37.6  | 54.8   | 72.5  | 158.2  | 146.4  | 170.5  |
| 559.4 | 592.6 | 342.0 | 403.6 | 731.5  | 641.1 | 2080.2 | 1549.7 | 1691.8 |
| 87.8  | 99.7  | 31.7  | 27.4  | 148.9  | 93.9  | 352.1  | 339.6  | 354.8  |
| 74.0  | 110.7 | 14.2  | 21.8  | 141.4  | 129.4 | 57.8   | 73.8   | 87.6   |
| 53.4  | 95.7  | 14.6  | 7.4   | 68.4   | 109.2 | 236.6  | 187.4  | 209.4  |
| 26.4  | 20.9  | 31.1  | 36.2  | 14.6   | 22.3  | 59.3   | 79.6   | 65.0   |
| 8.0   | 15.2  | 0.4   | 4.2   | 28.2   | 13.5  | 143.3  | 102.0  | 107.6  |
| 488.7 | 665.7 | 223.7 | 339.4 | 881.7  | 611.5 | 1387.2 | 1517.8 | 1475.4 |
| 202.7 | 225.7 | 170.3 | 184.7 | 324.6  | 290.3 | 263.7  | 207.0  | 214.5  |
| 33.1  | 53.2  | 6.6   | 1.9   | 34.9   | 51.7  | 7.8    | 18.6   | 16.4   |
| 24.5  | 17.9  | 5.5   | 0.7   | 26.4   | 20.7  | 52.4   | 67.3   | 59.5   |
| 12.4  | 10.4  | 101.6 | 108.5 | 6.7    | 2.2   | 53.1   | 57.5   | 63.3   |
| 253.9 | 289.6 | 28.9  | 26.9  | 467.8  | 282.6 | 216.9  | 25.6   | 31.9   |
| 109.9 | 150.3 | 19.7  | 18.5  | 161.0  | 118.3 | 181.0  | 163.2  | 186.8  |
| 504.0 | 618.4 | 47.5  | 52.4  | 1019.2 | 582.2 | 813.5  | 284.5  | 334.5  |
| 3.0   | 2.4   | 5.2   | 5.1   | 11.8   | 1.9   | 2.4    | 1.9    | 2.8    |
| 11.3  | 22.0  | 24.1  | 15.0  | 30.3   | 3.7   | 11.3   | 19.3   | 6.4    |
| 282.6 | 324.8 | 31.3  | 70.8  | 400.9  | 330.2 | 557.7  | 292.4  | 348.2  |
| 20.5  | 24.0  | 15.5  | 1.8   | 37.4   | 25.6  | 36.9   | 21.5   | 18.2   |
| 0.5   | 5.3   | 0.8   | 9.1   | 3.3    | 6.4   | 3.7    | 3.8    | 2.4    |
| 78.5  | 73.3  | 17.2  | 14.7  | 131.3  | 74.9  | 244.9  | 112.0  | 122.1  |
| 11.6  | 22.0  | 11.6  | 13.8  | 14.5   | 19.5  | 6.3    | 5.0    | 12.6   |
| 50.0  | 27.7  | 62.7  | 62.7  | 45.9   | 45.8  | 396.6  | 75.0   | 79.0   |
| 36.2  | 50.0  | 1.9   | 13.6  | 54.6   | 64.0  | 281.0  | 328.4  | 325.1  |
| 55.3  | 51.3  | 164.1 | 174.3 | 86.7   | 57.9  | 365.9  | 320.0  | 411.3  |
| 119.4 | 163.8 | 32.5  | 54.5  | 133.9  | 140.4 | 407.9  | 329.9  | 352.4  |
| 61.4  | 90.1  | 40.1  | 50.9  | 101.7  | 73.2  | 337.3  | 314.6  | 344.3  |
| 34.5  | 38.2  | 32.0  | 35.9  | 35.7   | 28.2  | 155.5  | 160.5  | 192.1  |
| 26.8  | 22.9  | 26.1  | 29.2  | 28.4   | 14.4  | 108.3  | 117.1  | 131.6  |
| 68.7  | 117.4 | 22.1  | 22.0  | 111.5  | 139.4 | 509.6  | 427.7  | 418.1  |
| 30.4  | 14.4  | 49.9  | 77.4  | 42.1   | 31.5  | 5.5    | 12.3   | 43.4   |
| 52.2  | 92.6  | 11.3  | 5.7   | 78.1   | 86.6  | 65.4   | 52.1   | 50.8   |
| 8.6   | 10.1  | 3.5   | 0.9   | 19.0   | 16.7  | 1.0    | 0.7    | 1.8    |
| 69.1  | 110.5 | 96.2  | 103.4 | 154.5  | 48.6  | 111.6  | 122.3  | 157.2  |
| 26.6  | 13.9  | 7.6   | 0.6   | 88.2   | 29.3  | 130.5  | 137.7  | 152.1  |
| 148.4 | 145.9 | 45.1  | 44.0  | 221.2  | 165.3 | 187.7  | 140.8  | 156.5  |
| 18.4  | 2.8   | 15.1  | 7.8   | 17.2   | 26.0  | 19.5   | 20.6   | 16.1   |
| 13.0  | 1.2   | 1.5   | 0.6   | 0.9    | 2.0   | 1.0    | 0.7    | 1.0    |
| 3.3   | 8.1   | 0.4   | 0.3   | 5.2    | 9.6   | 16.2   | 19.9   | 17.5   |
| 236.0 | 411.7 | 41.9  | 44.4  | 410.8  | 418.4 | 437.1  | 533.2  | 562.9  |
| 8.5   | 15.5  | 12.9  | 3.0   | 4.7    | 4.2   | 4.4    | 2.1    | 2.6    |
| 162.4 | 195.5 | 52.9  | 62.0  | 204.0  | 192.3 | 66.7   | 53.9   | 54.0   |
| 0.9   | 1.0   | 1.0   | 0.9   | 3.1    | 1.0   | 6.5    | 3.4    | 7.6    |
| 368.2 | 813.1 | 266.9 | 320.5 | 709.1  | 894.1 | 527.5  | 540.0  | 539.3  |
| 19.6  | 21.7  | 8.2   | 7.4   | 29.2   | 20.6  | 16.4   | 12.0   | 7.5    |
| 71.3  | 104.5 | 19.5  | 21.3  | 113.8  | 100.6 | 250.8  | 203.5  | 223.7  |
| 269.0 | 409.2 | 155.9 | 186.2 | 314.1  | 371.0 | 267.9  | 290.8  | 279.3  |
| 11.1  | 11.9  | 3.4   | 2.3   | 19.4   | 9.4   | 30.4   | 29.9   | 34.2   |
| 233.4 | 320.0 | 128.3 | 166.6 | 402.4  | 324.2 | 419.1  | 424.6  | 450.6  |

|        |        |       |       |        |        |        |        |        |
|--------|--------|-------|-------|--------|--------|--------|--------|--------|
| 37.8   | 27.5   | 12.3  | 19.7  | 30.8   | 26.1   | 28.4   | 33.6   | 31.3   |
| 145.1  | 193.7  | 36.5  | 63.1  | 237.1  | 227.6  | 696.8  | 541.8  | 579.0  |
| 8.9    | 9.8    | 3.2   | 9.6   | 5.9    | 17.1   | 4.5    | 4.9    | 4.1    |
| 51.7   | 51.7   | 51.3  | 88.6  | 42.4   | 54.9   | 51.5   | 38.1   | 60.8   |
| 486.1  | 612.1  | 256.2 | 406.4 | 909.3  | 554.4  | 1348.9 | 1180.6 | 1104.1 |
| 96.3   | 86.6   | 2.5   | 1.3   | 201.4  | 91.6   | 192.6  | 132.0  | 113.5  |
| 34.6   | 37.2   | 6.5   | 14.1  | 38.3   | 38.1   | 622.6  | 406.4  | 499.5  |
| 102.3  | 106.8  | 26.6  | 31.4  | 134.1  | 115.2  | 159.2  | 218.3  | 234.8  |
| 70.9   | 72.1   | 17.2  | 23.0  | 127.0  | 74.0   | 88.6   | 82.8   | 98.5   |
| 12.1   | 8.7    | 6.1   | 7.9   | 6.7    | 3.7    | 20.6   | 19.7   | 19.7   |
| 58.9   | 56.0   | 30.1  | 45.9  | 87.5   | 52.2   | 178.1  | 85.9   | 105.6  |
| 44.5   | 65.8   | 29.7  | 39.0  | 71.3   | 73.4   | 115.4  | 109.4  | 126.2  |
| 171.4  | 315.2  | 7.7   | 6.2   | 247.3  | 217.0  | 7.2    | 10.8   | 6.7    |
| 91.9   | 116.1  | 89.7  | 101.3 | 116.2  | 125.6  | 253.6  | 295.2  | 401.0  |
| 204.1  | 233.8  | 2.3   | 14.1  | 491.5  | 287.1  | 3.9    | 2.2    | 2.3    |
| 18.6   | 24.9   | 38.4  | 24.9  | 25.8   | 35.5   | 68.5   | 70.2   | 77.7   |
| 1.1    | 0.5    | 38.1  | 55.5  | 1.0    | 1.0    | 8.7    | 4.5    | 5.7    |
| 1.0    | 1.1    | 0.9   | 3.4   | 1.0    | 0.9    | 1.7    | 1.5    | 1.0    |
| 3.3    | 8.9    | 33.0  | 58.1  | 16.3   | 12.0   | 12.5   | 5.2    | 10.1   |
| 3.0    | 3.6    | 22.2  | 36.3  | 13.1   | 5.6    | 28.9   | 46.1   | 60.9   |
| 55.5   | 56.8   | 34.0  | 24.8  | 48.9   | 28.0   | 88.8   | 78.1   | 80.8   |
| 79.8   | 78.1   | 59.8  | 93.2  | 95.1   | 77.6   | 176.3  | 94.3   | 118.3  |
| 128.2  | 165.9  | 23.2  | 20.7  | 183.9  | 210.4  | 182.5  | 142.6  | 145.4  |
| 23.1   | 30.4   | 20.4  | 17.0  | 42.0   | 22.6   | 190.8  | 203.6  | 224.7  |
| 14.8   | 1.5    | 2.4   | 2.9   | 3.4    | 3.3    | 10.1   | 10.7   | 12.5   |
| 40.3   | 35.9   | 2.9   | 1.0   | 56.7   | 38.7   | 53.7   | 71.1   | 81.8   |
| 2.0    | 3.3    | 1.5   | 1.2   | 9.9    | 4.3    | 1.4    | 1.6    | 0.7    |
| 10.1   | 35.3   | 10.5  | 12.3  | 24.5   | 13.3   | 6.5    | 3.6    | 4.5    |
| 55.9   | 92.5   | 12.6  | 12.8  | 106.7  | 106.6  | 99.7   | 85.9   | 94.2   |
| 14.2   | 8.0    | 7.9   | 8.6   | 13.8   | 14.7   | 8.0    | 10.8   | 9.4    |
| 135.4  | 129.9  | 30.2  | 22.3  | 149.0  | 134.9  | 408.3  | 408.7  | 490.6  |
| 103.2  | 122.7  | 101.3 | 106.3 | 155.6  | 90.1   | 441.5  | 514.0  | 514.1  |
| 7.7    | 16.8   | 40.4  | 57.1  | 22.1   | 14.6   | 44.7   | 31.8   | 26.1   |
| 76.9   | 82.5   | 43.4  | 37.1  | 122.3  | 84.7   | 29.0   | 29.4   | 23.6   |
| 1.1    | 0.8    | 1.6   | 1.3   | 0.7    | 1.2    | 1.4    | 0.6    | 0.6    |
| 37.4   | 63.8   | 22.1  | 15.6  | 81.0   | 55.1   | 113.5  | 97.9   | 103.4  |
| 17.1   | 6.1    | 9.9   | 13.0  | 8.4    | 9.9    | 10.1   | 10.5   | 5.8    |
| 29.4   | 28.2   | 33.1  | 25.7  | 37.1   | 36.2   | 43.9   | 74.6   | 64.7   |
| 1.5    | 1.5    | 0.6   | 2.4   | 1.5    | 7.8    | 0.9    | 1.0    | 1.3    |
| 129.3  | 118.6  | 27.8  | 12.1  | 146.7  | 154.7  | 96.0   | 63.9   | 94.7   |
| 10.5   | 3.2    | 25.6  | 20.9  | 3.5    | 21.9   | 13.9   | 10.9   | 4.5    |
| 182.0  | 329.5  | 20.7  | 15.3  | 295.3  | 275.1  | 406.3  | 308.8  | 295.2  |
| 8.1    | 1.2    | 21.9  | 24.1  | 4.5    | 9.0    | 2.2    | 1.2    | 5.8    |
| 41.5   | 40.6   | 21.6  | 4.9   | 44.3   | 25.2   | 44.6   | 35.8   | 34.3   |
| 9.0    | 32.1   | 29.7  | 24.5  | 28.1   | 10.0   | 26.8   | 26.1   | 26.5   |
| 60.8   | 93.2   | 15.8  | 15.7  | 103.7  | 95.8   | 321.1  | 260.5  | 283.5  |
| 50.0   | 30.7   | 20.7  | 22.6  | 61.7   | 57.7   | 75.0   | 94.5   | 97.6   |
| 17.5   | 28.3   | 72.6  | 33.8  | 40.6   | 29.3   | 70.1   | 77.3   | 76.6   |
| 62.8   | 45.2   | 22.0  | 19.9  | 59.7   | 44.4   | 123.9  | 79.2   | 106.1  |
| 81.2   | 90.5   | 50.4  | 67.3  | 125.8  | 76.2   | 253.1  | 202.3  | 228.9  |
| 20.1   | 33.9   | 0.8   | 8.4   | 21.8   | 21.9   | 112.1  | 58.9   | 67.1   |
| 1388.7 | 1332.9 | 199.1 | 217.3 | 1963.2 | 1451.9 | 2126.8 | 1324.0 | 1472.3 |
| 150.1  | 204.5  | 9.0   | 17.3  | 316.8  | 173.5  | 208.5  | 233.2  | 248.9  |

|       |       |       |       |       |       |        |        |        |
|-------|-------|-------|-------|-------|-------|--------|--------|--------|
| 34.5  | 45.1  | 1.8   | 10.5  | 41.7  | 33.0  | 17.3   | 25.5   | 22.0   |
| 0.8   | 0.9   | 0.7   | 0.6   | 1.8   | 0.8   | 1.5    | 2.2    | 2.0    |
| 44.1  | 48.5  | 35.9  | 52.5  | 83.8  | 92.6  | 64.4   | 62.2   | 95.6   |
| 8.6   | 1.4   | 2.9   | 2.8   | 11.1  | 1.9   | 4.2    | 3.8    | 11.8   |
| 22.8  | 13.9  | 1.7   | 10.7  | 13.0  | 8.8   | 32.3   | 40.5   | 38.1   |
| 5.6   | 17.3  | 2.0   | 6.9   | 11.9  | 5.2   | 32.8   | 23.6   | 36.9   |
| 25.1  | 43.9  | 0.9   | 0.8   | 50.3  | 48.5  | 103.1  | 79.2   | 86.9   |
| 82.6  | 128.9 | 43.5  | 33.3  | 161.9 | 122.3 | 267.5  | 283.7  | 258.6  |
| 186.9 | 335.3 | 28.7  | 28.2  | 268.9 | 375.4 | 244.7  | 216.2  | 241.3  |
| 107.0 | 153.6 | 46.5  | 58.1  | 186.9 | 135.4 | 229.1  | 298.4  | 320.6  |
| 114.2 | 118.9 | 69.1  | 85.4  | 156.0 | 94.4  | 173.8  | 129.6  | 137.5  |
| 43.5  | 39.4  | 34.3  | 33.0  | 73.8  | 46.9  | 132.7  | 163.5  | 150.3  |
| 0.8   | 1.5   | 3.5   | 1.4   | 2.7   | 3.1   | 10.3   | 8.7    | 5.8    |
| 13.4  | 19.7  | 4.0   | 15.8  | 14.6  | 4.5   | 26.0   | 4.7    | 11.6   |
| 4.7   | 1.7   | 0.8   | 0.4   | 2.7   | 11.2  | 9.8    | 2.0    | 9.2    |
| 0.9   | 2.2   | 1.1   | 0.8   | 10.0  | 15.7  | 3.8    | 4.9    | 5.1    |
| 107.7 | 119.2 | 41.2  | 29.4  | 130.2 | 107.2 | 249.5  | 191.6  | 194.6  |
| 45.6  | 55.4  | 150.7 | 140.9 | 65.2  | 66.4  | 60.2   | 59.2   | 76.2   |
| 19.9  | 21.6  | 15.4  | 10.2  | 29.1  | 22.2  | 11.2   | 9.5    | 7.9    |
| 31.3  | 48.1  | 14.0  | 14.9  | 59.5  | 60.5  | 91.9   | 59.2   | 62.8   |
| 1.4   | 12.2  | 12.1  | 10.5  | 25.2  | 1.2   | 6.8    | 1.7    | 9.5    |
| 31.0  | 34.4  | 15.1  | 30.6  | 46.9  | 31.4  | 53.4   | 56.9   | 62.1   |
| 29.5  | 26.0  | 19.7  | 21.7  | 29.7  | 35.2  | 23.7   | 29.0   | 31.1   |
| 446.5 | 439.3 | 32.4  | 26.5  | 582.2 | 378.8 | 160.1  | 155.3  | 188.7  |
| 23.4  | 37.3  | 3.4   | 20.3  | 50.9  | 33.4  | 50.0   | 32.9   | 33.8   |
| 134.4 | 119.1 | 4.7   | 5.4   | 188.0 | 168.2 | 180.3  | 341.4  | 382.1  |
| 47.0  | 54.8  | 25.1  | 3.2   | 66.8  | 53.7  | 187.8  | 227.6  | 165.2  |
| 2.1   | 10.8  | 0.8   | 0.6   | 0.7   | 0.6   | 1.4    | 2.3    | 2.0    |
| 41.8  | 50.1  | 0.8   | 0.8   | 51.4  | 56.1  | 270.0  | 186.2  | 205.7  |
| 21.8  | 3.2   | 2.7   | 5.6   | 8.2   | 16.2  | 32.5   | 16.1   | 18.1   |
| 97.4  | 111.3 | 35.5  | 36.6  | 141.7 | 82.0  | 425.3  | 211.5  | 261.5  |
| 39.4  | 49.2  | 2.4   | 4.4   | 66.5  | 39.9  | 46.9   | 59.2   | 67.0   |
| 187.6 | 185.3 | 73.9  | 75.8  | 225.5 | 163.9 | 54.1   | 58.7   | 66.8   |
| 50.5  | 43.2  | 15.5  | 18.2  | 62.1  | 45.6  | 81.0   | 85.0   | 99.6   |
| 278.4 | 402.7 | 267.7 | 305.3 | 475.7 | 387.7 | 1509.3 | 1185.6 | 1272.4 |
| 111.4 | 100.5 | 65.3  | 62.1  | 168.3 | 74.6  | 261.3  | 199.5  | 206.6  |
| 25.9  | 37.0  | 9.5   | 7.2   | 52.1  | 42.9  | 109.5  | 149.5  | 135.9  |
| 36.6  | 22.1  | 4.9   | 13.4  | 43.8  | 21.0  | 5.0    | 3.4    | 3.1    |
| 70.5  | 78.1  | 6.5   | 7.1   | 206.9 | 82.3  | 261.0  | 184.1  | 215.0  |
| 53.4  | 52.5  | 32.6  | 33.3  | 69.0  | 49.3  | 82.4   | 55.4   | 61.0   |
| 70.7  | 91.4  | 93.9  | 102.1 | 63.9  | 111.7 | 62.7   | 43.6   | 61.5   |
| 183.1 | 166.1 | 44.4  | 38.9  | 345.3 | 144.9 | 307.1  | 374.5  | 354.7  |
| 321.3 | 452.0 | 36.1  | 36.5  | 520.8 | 486.3 | 525.8  | 316.3  | 295.9  |
| 138.2 | 128.2 | 64.6  | 58.1  | 204.6 | 121.6 | 274.3  | 170.4  | 162.6  |
| 38.8  | 41.1  | 2.0   | 8.1   | 36.8  | 38.3  | 96.5   | 75.1   | 99.8   |
| 245.1 | 379.0 | 74.1  | 67.0  | 286.9 | 281.2 | 178.3  | 113.4  | 138.2  |
| 13.3  | 20.8  | 1.1   | 6.7   | 13.2  | 22.8  | 74.2   | 81.3   | 89.4   |
| 8.0   | 29.2  | 3.7   | 1.3   | 7.2   | 14.3  | 58.7   | 55.9   | 64.3   |
| 6.8   | 15.6  | 29.7  | 50.5  | 38.6  | 9.3   | 50.3   | 38.2   | 46.5   |
| 70.7  | 91.3  | 4.1   | 32.0  | 80.5  | 65.6  | 42.2   | 35.1   | 40.7   |
| 11.1  | 15.7  | 12.3  | 6.2   | 18.0  | 13.4  | 17.4   | 27.0   | 23.8   |
| 106.8 | 95.5  | 24.1  | 26.2  | 153.2 | 124.4 | 227.3  | 127.1  | 147.2  |
| 12.9  | 10.9  | 17.3  | 11.2  | 18.7  | 16.1  | 12.7   | 16.7   | 12.8   |



|        |        |       |       |        |        |        |        |        |
|--------|--------|-------|-------|--------|--------|--------|--------|--------|
| 1.5    | 34.4   | 8.6   | 14.3  | 33.7   | 4.4    | 39.8   | 47.8   | 59.6   |
| 2.5    | 3.2    | 3.1   | 4.3   | 6.3    | 1.3    | 1.9    | 2.0    | 7.1    |
| 20.9   | 20.7   | 11.6  | 12.0  | 13.3   | 14.9   | 23.0   | 28.6   | 32.6   |
| 86.7   | 140.5  | 36.8  | 31.6  | 119.3  | 179.7  | 411.5  | 292.8  | 339.2  |
| 31.7   | 24.4   | 2.9   | 6.0   | 57.2   | 28.8   | 1651.9 | 1595.1 | 1837.0 |
| 2.0    | 15.1   | 19.2  | 7.3   | 8.9    | 4.3    | 13.8   | 19.1   | 12.5   |
| 178.6  | 202.4  | 31.8  | 21.6  | 205.7  | 146.3  | 326.6  | 207.5  | 201.2  |
| 19.4   | 4.0    | 1.4   | 0.8   | 16.6   | 5.5    | 1.2    | 1.7    | 2.8    |
| 174.4  | 151.7  | 14.8  | 13.5  | 273.4  | 151.8  | 649.7  | 410.2  | 407.7  |
| 89.2   | 139.9  | 14.5  | 10.7  | 142.3  | 138.8  | 83.9   | 55.7   | 66.2   |
| 8.7    | 1.7    | 7.4   | 6.7   | 6.8    | 3.8    | 5.8    | 6.5    | 2.0    |
| 93.8   | 92.7   | 30.2  | 40.3  | 136.3  | 93.1   | 100.2  | 125.3  | 130.9  |
| 16.7   | 5.4    | 4.8   | 13.7  | 27.4   | 5.4    | 5.9    | 1.1    | 2.4    |
| 27.0   | 53.3   | 31.5  | 21.2  | 58.9   | 49.4   | 404.7  | 443.4  | 477.2  |
| 18.9   | 31.3   | 30.4  | 43.5  | 31.8   | 36.4   | 202.0  | 220.6  | 239.4  |
| 1.3    | 0.7    | 1.2   | 1.2   | 1.6    | 1.7    | 1.4    | 2.6    | 6.0    |
| 46.7   | 68.6   | 124.8 | 155.7 | 61.1   | 90.7   | 70.4   | 76.2   | 103.2  |
| 1.9    | 1.3    | 2.5   | 3.3   | 2.0    | 2.0    | 3.7    | 2.1    | 3.4    |
| 159.5  | 283.8  | 1.7   | 8.3   | 243.2  | 308.9  | 43.3   | 11.8   | 9.3    |
| 43.3   | 53.1   | 4.1   | 6.1   | 95.9   | 66.7   | 6.7    | 1.4    | 2.1    |
| 1.6    | 9.4    | 2.1   | 9.9   | 5.5    | 3.0    | 8.4    | 5.4    | 11.2   |
| 1.1    | 3.0    | 1.2   | 1.1   | 9.4    | 2.5    | 4.3    | 7.1    | 4.1    |
| 253.5  | 304.0  | 124.6 | 119.9 | 383.6  | 363.1  | 543.0  | 285.2  | 337.6  |
| 55.0   | 53.7   | 36.4  | 56.5  | 67.5   | 56.5   | 10.9   | 17.4   | 17.0   |
| 1.5    | 6.4    | 9.9   | 2.2   | 7.6    | 13.9   | 258.7  | 300.2  | 337.4  |
| 0.6    | 3.6    | 2.8   | 14.1  | 7.9    | 1.8    | 25.8   | 117.8  | 146.4  |
| 200.0  | 185.7  | 35.6  | 21.1  | 222.9  | 239.6  | 273.2  | 135.5  | 156.7  |
| 27.0   | 37.2   | 31.8  | 57.8  | 35.6   | 23.2   | 162.4  | 80.9   | 101.0  |
| 70.3   | 41.7   | 0.4   | 0.7   | 109.1  | 44.8   | 2.9    | 1.2    | 0.6    |
| 0.6    | 1.2    | 0.3   | 0.9   | 0.7    | 5.4    | 0.9    | 0.9    | 0.9    |
| 14.0   | 15.0   | 20.6  | 4.6   | 1.4    | 17.0   | 59.7   | 525.6  | 536.8  |
| 9.5    | 9.0    | 12.0  | 8.4   | 5.8    | 11.1   | 17.1   | 12.4   | 5.6    |
| 51.6   | 69.3   | 22.8  | 3.3   | 67.8   | 67.1   | 27.6   | 40.2   | 41.9   |
| 13.0   | 14.0   | 2.1   | 2.4   | 8.4    | 6.8    | 11.9   | 6.3    | 12.0   |
| 33.9   | 56.6   | 32.1  | 27.0  | 55.2   | 46.7   | 112.0  | 139.8  | 136.1  |
| 407.9  | 403.3  | 39.9  | 49.7  | 475.6  | 497.4  | 398.5  | 187.3  | 205.1  |
| 127.5  | 186.6  | 15.3  | 14.6  | 224.1  | 138.8  | 284.5  | 237.1  | 268.6  |
| 10.9   | 35.5   | 13.0  | 5.4   | 56.1   | 24.5   | 135.4  | 138.7  | 220.8  |
| 38.5   | 55.9   | 19.4  | 17.8  | 43.8   | 49.1   | 46.7   | 65.5   | 48.7   |
| 42.8   | 45.2   | 19.9  | 25.2  | 59.4   | 27.6   | 71.7   | 110.8  | 131.2  |
| 197.5  | 396.9  | 65.2  | 55.4  | 331.7  | 445.2  | 1031.3 | 816.9  | 853.4  |
| 85.1   | 57.6   | 2.0   | 6.4   | 122.5  | 49.1   | 242.4  | 235.3  | 230.6  |
| 36.5   | 39.1   | 3.6   | 7.9   | 49.0   | 50.8   | 100.6  | 93.2   | 96.3   |
| 145.4  | 171.4  | 82.7  | 115.6 | 207.4  | 124.9  | 333.3  | 403.6  | 405.8  |
| 65.2   | 62.4   | 44.1  | 64.9  | 49.9   | 63.1   | 70.0   | 70.9   | 78.0   |
| 162.2  | 194.3  | 445.9 | 688.4 | 271.8  | 213.5  | 1498.1 | 1591.1 | 1811.3 |
| 71.6   | 55.5   | 2.2   | 1.2   | 48.9   | 47.7   | 2.1    | 1.7    | 1.4    |
| 80.0   | 87.7   | 16.5  | 19.7  | 97.6   | 67.2   | 308.5  | 559.3  | 468.7  |
| 0.4    | 4.0    | 0.2   | 4.5   | 9.0    | 7.0    | 2.8    | 2.6    | 2.9    |
| 604.2  | 849.5  | 22.5  | 22.3  | 804.1  | 787.1  | 608.8  | 584.1  | 641.8  |
| 1.8    | 16.5   | 1.1   | 2.0   | 19.2   | 10.4   | 9.5    | 3.6    | 15.0   |
| 1277.7 | 1161.7 | 98.5  | 171.8 | 1721.2 | 1229.4 | 1169.9 | 678.6  | 695.7  |
| 119.4  | 97.5   | 20.1  | 19.0  | 136.3  | 57.6   | 118.1  | 33.8   | 47.5   |

|       |        |       |       |        |        |       |       |       |
|-------|--------|-------|-------|--------|--------|-------|-------|-------|
| 294.6 | 215.2  | 24.7  | 17.6  | 535.2  | 379.6  | 114.9 | 88.0  | 92.1  |
| 47.3  | 78.2   | 98.1  | 120.9 | 102.9  | 60.7   | 311.3 | 280.7 | 212.6 |
| 146.4 | 273.1  | 8.9   | 10.4  | 272.8  | 197.4  | 144.9 | 71.6  | 69.1  |
| 54.7  | 114.5  | 40.7  | 35.4  | 103.0  | 92.6   | 66.5  | 36.4  | 38.9  |
| 7.2   | 28.6   | 10.9  | 2.3   | 39.8   | 36.1   | 36.2  | 31.8  | 50.3  |
| 17.1  | 18.2   | 31.0  | 40.1  | 60.6   | 24.5   | 42.2  | 221.2 | 201.7 |
| 38.9  | 43.8   | 27.8  | 13.7  | 97.0   | 44.9   | 166.3 | 125.9 | 160.1 |
| 1.0   | 1.3    | 8.4   | 3.5   | 8.0    | 6.4    | 3.2   | 6.7   | 5.5   |
| 26.9  | 60.2   | 8.4   | 24.3  | 51.2   | 41.8   | 173.3 | 166.7 | 196.7 |
| 87.2  | 111.3  | 16.2  | 4.0   | 138.4  | 103.2  | 75.9  | 35.5  | 59.4  |
| 4.6   | 12.6   | 3.8   | 2.2   | 17.3   | 20.5   | 5.6   | 7.5   | 6.4   |
| 1.6   | 7.5    | 8.7   | 7.5   | 4.1    | 7.4    | 5.9   | 5.7   | 3.1   |
| 354.2 | 405.3  | 7.6   | 9.1   | 459.4  | 322.5  | 12.6  | 11.1  | 11.4  |
| 29.7  | 60.2   | 44.5  | 43.3  | 51.0   | 35.4   | 200.5 | 260.7 | 243.5 |
| 192.4 | 236.5  | 83.8  | 71.2  | 267.8  | 219.6  | 263.3 | 284.1 | 315.0 |
| 68.6  | 76.3   | 132.7 | 129.7 | 68.3   | 90.3   | 228.2 | 178.0 | 189.4 |
| 57.8  | 65.8   | 51.9  | 53.5  | 57.8   | 49.7   | 177.5 | 252.7 | 251.0 |
| 2.0   | 5.7    | 4.2   | 1.3   | 1.4    | 1.9    | 6.0   | 5.5   | 1.4   |
| 293.7 | 391.0  | 77.3  | 127.5 | 456.0  | 488.2  | 525.3 | 298.4 | 333.7 |
| 45.0  | 38.3   | 1.8   | 1.8   | 61.3   | 60.3   | 15.1  | 6.9   | 10.9  |
| 30.7  | 47.2   | 20.1  | 12.3  | 50.5   | 22.6   | 62.1  | 68.4  | 77.5  |
| 1.9   | 2.5    | 4.5   | 1.0   | 22.7   | 6.3    | 2.3   | 1.6   | 2.1   |
| 48.8  | 34.9   | 45.8  | 57.0  | 49.7   | 35.2   | 51.1  | 54.9  | 58.3  |
| 105.5 | 137.9  | 26.4  | 25.9  | 237.3  | 127.1  | 346.6 | 567.2 | 597.2 |
| 78.9  | 119.3  | 12.4  | 2.4   | 137.7  | 101.6  | 128.4 | 49.3  | 64.6  |
| 272.9 | 258.2  | 16.3  | 8.0   | 384.0  | 354.2  | 2.6   | 5.8   | 3.0   |
| 20.0  | 37.1   | 9.5   | 7.8   | 35.9   | 38.6   | 72.6  | 104.9 | 105.4 |
| 0.4   | 1.3    | 0.5   | 0.4   | 0.5    | 0.5    | 33.0  | 123.8 | 171.1 |
| 4.7   | 20.1   | 2.0   | 10.4  | 8.3    | 9.1    | 4.6   | 2.4   | 2.1   |
| 14.9  | 14.2   | 14.4  | 8.4   | 6.7    | 6.2    | 20.1  | 17.3  | 25.5  |
| 29.0  | 35.0   | 23.0  | 24.6  | 46.0   | 35.5   | 69.0  | 44.4  | 47.9  |
| 377.8 | 316.0  | 209.9 | 285.1 | 447.8  | 339.3  | 658.4 | 424.3 | 440.6 |
| 7.1   | 1.6    | 3.1   | 1.8   | 7.6    | 1.3    | 9.6   | 5.8   | 10.6  |
| 259.6 | 270.9  | 185.6 | 200.9 | 370.2  | 437.9  | 378.1 | 248.5 | 303.2 |
| 13.6  | 3.5    | 19.8  | 7.5   | 17.4   | 22.8   | 28.0  | 29.3  | 10.5  |
| 14.2  | 20.9   | 2.0   | 3.4   | 8.4    | 15.3   | 42.0  | 32.5  | 42.4  |
| 18.6  | 7.9    | 2.9   | 15.4  | 31.0   | 16.5   | 2.3   | 2.1   | 2.1   |
| 23.1  | 66.7   | 1.0   | 2.8   | 55.5   | 45.7   | 226.1 | 178.3 | 213.7 |
| 55.4  | 82.5   | 63.6  | 71.1  | 87.2   | 73.4   | 68.0  | 61.8  | 83.6  |
| 165.7 | 138.2  | 12.1  | 14.6  | 231.7  | 156.3  | 176.0 | 138.1 | 137.0 |
| 6.6   | 20.8   | 5.2   | 8.0   | 6.9    | 0.7    | 5.2   | 2.9   | 2.9   |
| 788.2 | 1017.9 | 187.8 | 243.8 | 1167.9 | 1140.0 | 733.5 | 524.0 | 604.0 |
| 85.0  | 94.6   | 58.3  | 72.0  | 111.9  | 208.8  | 216.8 | 234.9 | 256.3 |
| 211.0 | 189.0  | 298.3 | 375.7 | 327.8  | 239.8  | 777.8 | 529.2 | 560.4 |
| 3.2   | 16.5   | 1.3   | 3.5   | 6.1    | 19.0   | 22.7  | 13.4  | 8.8   |
| 7.6   | 3.4    | 3.3   | 5.5   | 5.3    | 4.3    | 17.7  | 13.0  | 9.3   |
| 31.9  | 69.7   | 54.4  | 50.0  | 50.5   | 93.9   | 59.4  | 103.4 | 97.4  |
| 11.0  | 1.8    | 9.3   | 3.9   | 3.0    | 8.2    | 7.7   | 4.7   | 14.4  |
| 7.2   | 6.8    | 13.4  | 8.8   | 2.0    | 5.0    | 4.1   | 11.7  | 7.3   |
| 11.2  | 1.4    | 7.3   | 0.2   | 17.3   | 21.8   | 6.0   | 7.0   | 12.9  |
| 1.8   | 2.1    | 4.7   | 0.4   | 4.5    | 4.2    | 0.5   | 2.5   | 1.9   |
| 14.4  | 18.2   | 0.8   | 2.1   | 19.9   | 8.1    | 44.5  | 49.3  | 51.5  |
| 30.6  | 15.6   | 3.0   | 16.6  | 33.4   | 19.0   | 18.7  | 15.3  | 27.1  |

|       |       |       |       |       |       |        |        |        |
|-------|-------|-------|-------|-------|-------|--------|--------|--------|
| 39.2  | 45.0  | 13.5  | 4.9   | 94.7  | 27.5  | 42.0   | 89.8   | 91.9   |
| 65.1  | 85.7  | 60.2  | 91.2  | 105.7 | 61.9  | 171.8  | 141.7  | 134.1  |
| 0.8   | 1.2   | 4.2   | 0.7   | 8.0   | 2.3   | 2.2    | 5.7    | 1.8    |
| 35.0  | 43.6  | 38.1  | 39.8  | 54.1  | 43.8  | 108.4  | 112.1  | 82.9   |
| 0.3   | 0.8   | 2.2   | 0.3   | 1.2   | 3.6   | 0.9    | 3.3    | 3.2    |
| 65.4  | 77.1  | 14.0  | 5.3   | 108.5 | 87.6  | 803.8  | 2076.7 | 1860.8 |
| 6.4   | 16.4  | 19.2  | 17.6  | 17.8  | 21.1  | 18.2   | 16.0   | 10.5   |
| 23.2  | 25.5  | 8.1   | 8.3   | 24.7  | 22.4  | 128.1  | 92.5   | 115.3  |
| 32.8  | 14.6  | 22.1  | 17.5  | 42.7  | 17.2  | 127.7  | 112.1  | 137.0  |
| 1.5   | 6.1   | 0.4   | 4.5   | 5.8   | 0.3   | 7.2    | 8.7    | 3.0    |
| 90.9  | 112.0 | 11.7  | 23.8  | 161.2 | 104.3 | 267.6  | 196.4  | 176.6  |
| 33.0  | 5.2   | 1.3   | 6.8   | 19.9  | 24.7  | 33.3   | 8.6    | 7.6    |
| 257.1 | 265.6 | 97.2  | 122.2 | 334.3 | 255.6 | 951.5  | 645.4  | 860.8  |
| 85.8  | 100.0 | 10.6  | 17.8  | 111.2 | 86.1  | 296.7  | 251.0  | 320.4  |
| 17.6  | 29.5  | 18.8  | 17.9  | 41.9  | 36.1  | 45.8   | 29.6   | 32.0   |
| 78.6  | 128.3 | 45.1  | 46.6  | 152.0 | 175.9 | 519.2  | 509.8  | 601.3  |
| 48.8  | 53.1  | 24.8  | 14.2  | 69.2  | 59.1  | 29.5   | 23.3   | 16.6   |
| 14.0  | 32.4  | 23.5  | 26.7  | 25.6  | 14.7  | 47.0   | 38.2   | 42.4   |
| 77.3  | 127.2 | 27.0  | 12.9  | 149.5 | 96.1  | 205.8  | 240.7  | 253.3  |
| 22.0  | 23.9  | 18.1  | 13.2  | 37.7  | 32.3  | 76.7   | 86.4   | 79.8   |
| 6.0   | 21.6  | 1.2   | 2.1   | 17.8  | 5.4   | 14.4   | 29.9   | 44.2   |
| 230.9 | 287.8 | 1.6   | 7.1   | 262.1 | 201.4 | 15.0   | 14.8   | 12.8   |
| 18.8  | 29.3  | 7.0   | 10.3  | 49.9  | 22.2  | 28.6   | 29.3   | 45.3   |
| 201.1 | 150.0 | 46.9  | 57.7  | 258.6 | 134.6 | 205.8  | 179.8  | 216.0  |
| 146.9 | 163.4 | 15.5  | 9.4   | 220.8 | 139.7 | 3311.8 | 342.7  | 322.9  |
| 33.3  | 32.3  | 48.2  | 31.0  | 35.5  | 26.9  | 6.5    | 11.4   | 15.6   |
| 18.7  | 17.6  | 9.3   | 9.0   | 44.3  | 33.0  | 68.0   | 51.1   | 63.7   |
| 55.2  | 79.2  | 23.1  | 22.5  | 113.8 | 58.0  | 98.1   | 93.7   | 100.7  |
| 6.0   | 28.2  | 16.2  | 21.7  | 20.2  | 23.7  | 37.0   | 18.6   | 19.9   |
| 132.5 | 134.7 | 125.0 | 142.5 | 148.3 | 128.9 | 132.7  | 163.3  | 162.6  |
| 5.2   | 29.3  | 29.5  | 35.8  | 39.9  | 23.7  | 184.9  | 523.7  | 531.5  |
| 58.5  | 110.1 | 27.0  | 31.5  | 64.9  | 99.2  | 154.1  | 158.6  | 147.2  |
| 1.7   | 0.7   | 2.1   | 1.4   | 8.2   | 11.3  | 1.5    | 5.1    | 1.5    |
| 0.9   | 0.9   | 3.0   | 2.4   | 0.6   | 5.0   | 3.5    | 1.3    | 2.1    |
| 32.4  | 34.6  | 4.7   | 13.5  | 44.1  | 46.6  | 164.0  | 130.7  | 136.0  |
| 0.8   | 6.2   | 12.4  | 4.8   | 4.8   | 0.3   | 4.5    | 4.0    | 10.7   |
| 281.8 | 336.2 | 40.6  | 91.8  | 417.8 | 405.0 | 251.2  | 163.6  | 189.2  |
| 5.7   | 14.6  | 3.9   | 0.9   | 9.3   | 2.0   | 1.4    | 1.5    | 0.9    |
| 157.3 | 248.3 | 104.3 | 125.9 | 273.5 | 266.7 | 526.1  | 391.5  | 471.6  |
| 209.8 | 302.6 | 44.4  | 59.0  | 335.9 | 303.3 | 916.2  | 830.9  | 911.5  |
| 71.8  | 96.9  | 21.6  | 23.1  | 98.8  | 69.0  | 244.8  | 77.7   | 133.7  |
| 0.3   | 0.4   | 5.3   | 4.3   | 8.5   | 0.4   | 1.1    | 0.8    | 0.5    |
| 0.9   | 1.5   | 1.7   | 1.6   | 1.0   | 1.2   | 1.4    | 1.9    | 1.0    |
| 42.1  | 34.4  | 22.1  | 25.2  | 57.9  | 45.0  | 99.6   | 108.7  | 108.3  |
| 145.7 | 146.6 | 15.9  | 22.4  | 226.8 | 176.5 | 41.0   | 27.7   | 23.8   |
| 10.9  | 13.6  | 8.3   | 1.3   | 6.9   | 6.1   | 1.6    | 1.0    | 2.1    |
| 14.3  | 28.1  | 13.0  | 3.6   | 17.1  | 8.8   | 39.1   | 32.9   | 34.0   |
| 19.6  | 19.0  | 47.3  | 39.9  | 42.1  | 25.5  | 148.9  | 161.2  | 154.0  |
| 15.3  | 39.9  | 1.3   | 1.5   | 55.6  | 39.3  | 66.7   | 61.6   | 42.7   |
| 20.6  | 14.8  | 10.5  | 12.7  | 24.6  | 18.5  | 7.6    | 2.5    | 12.6   |
| 12.6  | 7.4   | 10.1  | 17.0  | 29.2  | 9.4   | 1.9    | 5.4    | 5.5    |
| 3.2   | 11.3  | 19.7  | 18.8  | 5.3   | 3.7   | 69.9   | 46.8   | 60.9   |
| 122.9 | 178.0 | 36.9  | 45.8  | 275.6 | 179.6 | 201.0  | 181.6  | 166.5  |

|       |       |       |       |       |       |       |        |        |
|-------|-------|-------|-------|-------|-------|-------|--------|--------|
| 2.4   | 2.3   | 18.2  | 3.2   | 16.6  | 6.3   | 1.9   | 2.8    | 4.0    |
| 87.4  | 80.1  | 141.4 | 135.1 | 78.4  | 59.0  | 161.2 | 178.0  | 252.3  |
| 21.5  | 19.0  | 25.6  | 13.5  | 16.4  | 29.2  | 36.8  | 35.6   | 49.9   |
| 1.0   | 8.7   | 14.0  | 6.2   | 6.0   | 7.6   | 5.7   | 1.8    | 8.1    |
| 16.6  | 24.9  | 0.6   | 7.7   | 17.4  | 18.6  | 10.0  | 5.6    | 5.8    |
| 23.6  | 3.6   | 3.9   | 11.7  | 9.8   | 18.6  | 15.5  | 3.7    | 7.0    |
| 13.2  | 5.4   | 13.5  | 8.9   | 13.9  | 13.6  | 3.7   | 8.1    | 4.1    |
| 2.6   | 1.9   | 3.9   | 0.5   | 3.8   | 3.4   | 2.7   | 10.2   | 4.2    |
| 6.6   | 7.3   | 16.8  | 11.3  | 17.6  | 12.4  | 13.1  | 13.2   | 6.0    |
| 14.1  | 14.6  | 14.6  | 16.3  | 10.6  | 12.2  | 31.5  | 28.6   | 25.3   |
| 57.4  | 75.4  | 13.5  | 14.7  | 62.7  | 61.6  | 151.2 | 126.7  | 148.9  |
| 25.2  | 19.5  | 9.9   | 16.9  | 15.4  | 21.8  | 12.5  | 16.1   | 10.7   |
| 303.1 | 367.9 | 47.6  | 56.1  | 529.7 | 395.0 | 493.5 | 346.6  | 387.8  |
| 18.0  | 30.3  | 23.4  | 24.3  | 28.5  | 24.9  | 108.9 | 132.8  | 148.8  |
| 84.0  | 52.4  | 11.5  | 13.5  | 134.8 | 72.1  | 241.5 | 204.3  | 245.6  |
| 114.0 | 202.6 | 39.5  | 29.9  | 193.1 | 252.0 | 133.1 | 111.0  | 84.9   |
| 87.5  | 114.0 | 180.6 | 301.8 | 120.8 | 95.3  | 208.7 | 187.7  | 210.4  |
| 82.7  | 122.2 | 37.0  | 51.1  | 117.6 | 107.3 | 78.6  | 84.8   | 90.4   |
| 262.9 | 267.9 | 99.8  | 122.2 | 461.5 | 373.6 | 602.8 | 1004.5 | 1063.8 |
| 0.6   | 0.8   | 118.4 | 137.4 | 0.8   | 9.8   | 155.5 | 203.5  | 255.3  |
| 11.0  | 8.3   | 11.0  | 17.4  | 11.8  | 21.7  | 47.8  | 45.3   | 49.2   |
| 62.3  | 55.2  | 3.2   | 2.0   | 117.2 | 64.6  | 53.3  | 109.9  | 120.7  |
| 5.5   | 5.1   | 7.7   | 7.9   | 5.0   | 4.2   | 3.4   | 1.7    | 6.7    |
| 0.7   | 1.8   | 1.5   | 2.3   | 1.7   | 1.0   | 3.2   | 2.6    | 2.8    |
| 34.0  | 30.1  | 12.6  | 14.1  | 66.4  | 44.0  | 22.5  | 44.8   | 44.1   |
| 41.6  | 55.4  | 4.8   | 6.6   | 54.8  | 42.5  | 96.6  | 89.1   | 98.6   |
| 2.9   | 4.7   | 9.9   | 15.0  | 2.2   | 9.2   | 8.0   | 6.0    | 5.9    |
| 133.9 | 89.1  | 51.8  | 53.5  | 113.3 | 90.2  | 115.4 | 81.9   | 117.0  |
| 54.9  | 47.1  | 0.6   | 0.9   | 125.5 | 46.5  | 96.2  | 134.0  | 121.3  |
| 22.8  | 4.8   | 15.3  | 21.3  | 3.6   | 3.6   | 11.0  | 8.9    | 4.3    |
| 12.2  | 26.0  | 2.7   | 2.5   | 31.8  | 8.3   | 2.6   | 3.0    | 2.2    |
| 38.4  | 46.4  | 1.2   | 4.3   | 67.2  | 62.6  | 4.4   | 6.2    | 8.9    |
| 4.0   | 4.1   | 5.1   | 4.0   | 9.5   | 16.1  | 26.2  | 78.8   | 111.3  |
| 89.9  | 132.6 | 35.2  | 41.5  | 139.5 | 127.4 | 76.7  | 95.1   | 97.1   |
| 12.5  | 19.1  | 17.6  | 12.0  | 18.3  | 7.9   | 9.8   | 15.7   | 15.6   |
| 79.5  | 120.8 | 33.3  | 40.1  | 121.0 | 108.2 | 134.0 | 119.2  | 116.5  |
| 1.9   | 2.4   | 2.1   | 2.9   | 2.3   | 2.3   | 3.5   | 3.3    | 2.1    |
| 5.3   | 9.7   | 9.2   | 4.8   | 8.9   | 6.6   | 7.5   | 10.0   | 12.9   |
| 7.3   | 2.0   | 6.0   | 2.1   | 8.0   | 4.1   | 0.8   | 2.5    | 0.6    |
| 15.7  | 1.4   | 9.2   | 2.5   | 11.5  | 8.2   | 16.5  | 11.6   | 6.2    |
| 77.3  | 50.5  | 7.8   | 13.0  | 99.9  | 53.0  | 229.9 | 108.4  | 103.9  |
| 11.7  | 3.0   | 47.3  | 45.5  | 2.2   | 8.8   | 558.8 | 581.3  | 601.2  |
| 15.0  | 18.1  | 12.4  | 17.6  | 22.5  | 20.6  | 29.7  | 27.6   | 29.6   |
| 55.8  | 52.5  | 46.5  | 40.3  | 97.8  | 71.4  | 242.2 | 226.2  | 233.1  |
| 66.4  | 78.6  | 33.8  | 45.7  | 98.4  | 65.9  | 48.0  | 41.6   | 54.9   |
| 8.0   | 1.1   | 3.9   | 17.6  | 10.4  | 4.0   | 11.5  | 3.2    | 6.9    |
| 133.2 | 144.7 | 72.0  | 100.8 | 126.3 | 122.1 | 358.8 | 228.0  | 243.2  |
| 25.6  | 14.9  | 7.7   | 7.9   | 60.9  | 30.9  | 74.3  | 26.0   | 31.1   |
| 13.3  | 18.9  | 15.6  | 9.9   | 10.2  | 2.7   | 101.5 | 92.1   | 99.8   |
| 1.8   | 1.3   | 14.3  | 7.0   | 2.7   | 4.2   | 10.4  | 7.1    | 11.7   |
| 46.4  | 62.3  | 41.2  | 28.6  | 47.7  | 51.2  | 91.6  | 54.0   | 77.3   |
| 0.6   | 0.4   | 1.6   | 1.3   | 0.3   | 0.7   | 2.2   | 3.3    | 4.4    |
| 132.5 | 183.3 | 147.9 | 143.4 | 160.4 | 181.0 | 370.7 | 298.9  | 305.7  |

|        |        |       |        |        |        |        |        |        |
|--------|--------|-------|--------|--------|--------|--------|--------|--------|
| 54.9   | 55.7   | 2.3   | 12.7   | 85.5   | 96.5   | 118.4  | 137.5  | 152.1  |
| 24.8   | 24.6   | 19.4  | 9.5    | 25.5   | 40.6   | 53.5   | 45.5   | 46.9   |
| 47.9   | 43.9   | 30.6  | 53.1   | 84.7   | 59.2   | 144.9  | 157.3  | 150.8  |
| 2.5    | 7.6    | 13.1  | 3.3    | 1.5    | 3.0    | 4.9    | 6.6    | 4.7    |
| 18.4   | 31.5   | 17.5  | 7.4    | 23.0   | 19.0   | 29.3   | 31.4   | 21.0   |
| 1.3    | 0.9    | 2.2   | 1.4    | 0.8    | 1.0    | 2.3    | 1.2    | 1.6    |
| 71.3   | 67.6   | 42.4  | 35.5   | 142.9  | 73.4   | 65.6   | 54.2   | 65.5   |
| 13.4   | 28.0   | 25.8  | 23.8   | 10.3   | 18.5   | 64.0   | 68.4   | 84.9   |
| 15.3   | 23.0   | 8.0   | 1.4    | 17.2   | 14.5   | 20.6   | 16.6   | 14.3   |
| 4.5    | 2.5    | 2.5   | 4.7    | 1.3    | 1.4    | 14.4   | 8.5    | 9.8    |
| 7.6    | 8.6    | 3.0   | 2.1    | 2.5    | 6.9    | 11.2   | 20.9   | 11.3   |
| 1.0    | 2.3    | 1.9   | 1.0    | 7.7    | 4.2    | 8.1    | 3.3    | 5.7    |
| 0.5    | 0.4    | 2.4   | 0.2    | 0.2    | 0.3    | 7.4    | 4.8    | 5.4    |
| 30.7   | 13.1   | 15.8  | 4.8    | 19.6   | 20.4   | 3.9    | 3.7    | 5.1    |
| 0.5    | 7.5    | 0.9   | 10.0   | 15.6   | 10.5   | 52.5   | 64.9   | 57.8   |
| 62.4   | 52.3   | 48.5  | 55.2   | 69.8   | 78.7   | 96.6   | 61.0   | 65.5   |
| 13.5   | 11.5   | 9.1   | 14.0   | 5.3    | 10.4   | 90.0   | 77.9   | 94.2   |
| 30.0   | 22.2   | 3.1   | 5.1    | 23.9   | 29.8   | 161.9  | 93.1   | 91.9   |
| 30.4   | 48.1   | 32.1  | 35.9   | 59.2   | 28.6   | 9.5    | 22.2   | 17.9   |
| 23.6   | 17.9   | 21.2  | 15.3   | 45.4   | 25.5   | 180.9  | 157.9  | 188.6  |
| 32.8   | 38.2   | 13.9  | 17.6   | 40.7   | 35.9   | 16.7   | 23.6   | 22.7   |
| 17.4   | 10.8   | 7.6   | 0.5    | 27.5   | 2.9    | 6.2    | 1.0    | 12.7   |
| 1.3    | 5.7    | 3.1   | 0.5    | 0.9    | 1.5    | 4.4    | 7.2    | 3.6    |
| 0.7    | 2.1    | 9.6   | 4.6    | 4.3    | 4.8    | 17.1   | 43.2   | 43.8   |
| 3.9    | 1.9    | 5.6   | 8.1    | 2.4    | 5.0    | 4.3    | 9.8    | 1.8    |
| 35.9   | 35.4   | 43.7  | 37.3   | 63.5   | 49.9   | 126.6  | 146.8  | 146.6  |
| 34.7   | 26.6   | 23.8  | 22.7   | 35.1   | 41.6   | 85.3   | 17.8   | 29.4   |
| 2.4    | 6.0    | 11.1  | 7.3    | 15.4   | 3.2    | 1.1    | 2.7    | 2.2    |
| 1.5    | 2.2    | 7.4   | 11.2   | 2.2    | 3.5    | 9.1    | 3.1    | 5.0    |
| 26.2   | 31.2   | 6.9   | 16.0   | 43.0   | 30.5   | 142.0  | 92.3   | 114.6  |
| 16.9   | 6.8    | 17.3  | 14.5   | 7.0    | 7.8    | 20.1   | 20.2   | 16.6   |
| 2.6    | 18.6   | 13.5  | 7.2    | 10.4   | 16.7   | 11.2   | 20.0   | 20.2   |
| 5.4    | 5.0    | 1.4   | 1.6    | 2.0    | 8.8    | 4.4    | 19.8   | 10.2   |
| 216.9  | 176.2  | 46.7  | 46.4   | 294.4  | 225.8  | 180.5  | 130.0  | 134.5  |
| 0.7    | 1.2    | 5.5   | 0.3    | 0.4    | 7.4    | 30.8   | 62.2   | 58.9   |
| 63.3   | 137.6  | 18.0  | 17.6   | 75.9   | 125.9  | 137.5  | 63.5   | 69.0   |
| 16.9   | 24.6   | 8.9   | 2.7    | 26.2   | 13.1   | 31.9   | 22.4   | 23.2   |
| 13.9   | 26.7   | 10.6  | 5.4    | 15.9   | 21.4   | 16.3   | 5.2    | 5.2    |
| 42.2   | 52.8   | 20.0  | 7.0    | 51.1   | 67.5   | 95.3   | 103.4  | 105.8  |
| 18.7   | 21.3   | 4.0   | 5.0    | 4.8    | 10.0   | 74.7   | 69.0   | 68.2   |
| 28.4   | 21.7   | 24.6  | 26.9   | 48.8   | 29.8   | 350.5  | 767.4  | 869.4  |
| 50.9   | 79.2   | 31.0  | 37.0   | 76.6   | 56.4   | 186.1  | 258.1  | 249.8  |
| 41.4   | 48.4   | 14.5  | 13.3   | 77.9   | 49.7   | 84.5   | 66.9   | 62.0   |
| 134.2  | 196.5  | 0.8   | 0.8    | 314.4  | 214.4  | 405.4  | 569.5  | 608.8  |
| 12.5   | 17.9   | 13.1  | 28.8   | 6.2    | 17.0   | 19.5   | 13.3   | 11.6   |
| 3.2    | 16.3   | 15.4  | 10.5   | 15.8   | 6.8    | 5.6    | 7.8    | 4.5    |
| 1561.0 | 1993.8 | 938.3 | 1361.5 | 2070.8 | 2432.3 | 3642.9 | 3073.6 | 3460.9 |
| 26.3   | 36.3   | 85.6  | 107.3  | 63.7   | 34.4   | 83.8   | 52.5   | 52.5   |
| 7.4    | 1.1    | 1.1   | 0.5    | 1.1    | 0.7    | 173.2  | 90.6   | 157.1  |
| 0.4    | 3.3    | 10.8  | 7.0    | 6.4    | 1.7    | 51.1   | 71.1   | 83.5   |
| 10.7   | 1.4    | 4.9   | 2.6    | 11.7   | 9.2    | 50.7   | 44.8   | 57.9   |
| 94.4   | 128.7  | 13.2  | 40.9   | 129.4  | 136.2  | 171.5  | 188.2  | 213.2  |
| 11.2   | 3.7    | 52.5  | 86.3   | 24.4   | 4.0    | 20.7   | 41.5   | 55.1   |

|       |       |       |       |       |       |        |       |        |
|-------|-------|-------|-------|-------|-------|--------|-------|--------|
| 1.3   | 13.1  | 39.3  | 40.2  | 32.6  | 20.6  | 94.7   | 72.4  | 73.6   |
| 86.6  | 96.5  | 24.3  | 27.8  | 63.6  | 121.2 | 104.6  | 116.5 | 126.9  |
| 15.2  | 12.9  | 14.8  | 8.5   | 20.6  | 13.7  | 104.0  | 144.3 | 156.7  |
| 4.5   | 8.0   | 1.3   | 0.5   | 4.6   | 13.2  | 12.0   | 29.6  | 23.5   |
| 4.7   | 2.0   | 4.7   | 2.2   | 1.0   | 4.3   | 2.4    | 1.4   | 2.9    |
| 115.1 | 81.5  | 37.7  | 28.0  | 144.2 | 96.7  | 95.5   | 94.7  | 109.7  |
| 1.3   | 5.9   | 3.7   | 1.5   | 9.4   | 2.4   | 5.0    | 3.0   | 3.0    |
| 1.7   | 10.5  | 2.9   | 2.4   | 7.8   | 10.5  | 4.6    | 5.8   | 3.0    |
| 3.3   | 1.7   | 0.5   | 0.3   | 7.0   | 3.1   | 2.5    | 2.7   | 0.5    |
| 22.8  | 18.2  | 2.4   | 1.8   | 25.5  | 19.2  | 5.0    | 3.4   | 2.3    |
| 13.4  | 20.2  | 15.7  | 12.2  | 12.6  | 10.7  | 28.1   | 25.9  | 19.5   |
| 1.8   | 0.7   | 4.8   | 7.0   | 1.1   | 0.5   | 6.4    | 3.7   | 1.1    |
| 8.6   | 23.8  | 6.3   | 5.8   | 15.8  | 8.8   | 31.3   | 26.9  | 42.3   |
| 1.9   | 1.0   | 0.2   | 0.2   | 1.2   | 2.8   | 1.5    | 0.8   | 3.8    |
| 53.5  | 64.2  | 17.5  | 22.5  | 65.1  | 71.1  | 84.1   | 90.7  | 97.3   |
| 31.0  | 48.0  | 2.6   | 4.8   | 62.3  | 38.5  | 34.0   | 23.2  | 41.5   |
| 48.2  | 47.2  | 7.4   | 11.4  | 82.1  | 63.3  | 105.1  | 95.1  | 93.6   |
| 1.5   | 10.3  | 30.8  | 45.9  | 22.2  | 19.4  | 167.9  | 163.9 | 197.9  |
| 326.4 | 821.5 | 104.0 | 135.6 | 586.1 | 741.0 | 2354.3 | 918.2 | 930.3  |
| 11.4  | 13.2  | 8.3   | 3.8   | 12.2  | 9.0   | 8.2    | 7.0   | 6.8    |
| 25.8  | 14.1  | 116.3 | 171.4 | 20.0  | 25.8  | 5.0    | 7.8   | 11.3   |
| 1.3   | 18.7  | 63.9  | 59.8  | 10.3  | 13.5  | 2.4    | 1.6   | 1.7    |
| 0.8   | 0.4   | 0.4   | 0.8   | 0.5   | 0.5   | 0.7    | 0.7   | 0.7    |
| 20.7  | 13.3  | 17.5  | 12.9  | 35.8  | 20.1  | 20.9   | 21.1  | 20.0   |
| 23.5  | 18.8  | 7.1   | 4.5   | 48.8  | 22.1  | 91.5   | 119.4 | 119.8  |
| 5.5   | 12.5  | 2.2   | 1.2   | 6.1   | 2.5   | 9.9    | 2.0   | 9.9    |
| 4.1   | 1.2   | 32.0  | 38.4  | 0.8   | 4.5   | 6.8    | 3.3   | 7.2    |
| 1.1   | 0.8   | 1.2   | 2.7   | 3.5   | 2.1   | 2.7    | 15.1  | 12.9   |
| 11.6  | 14.9  | 27.8  | 36.9  | 22.0  | 14.1  | 202.6  | 158.6 | 187.5  |
| 225.2 | 213.8 | 97.4  | 120.7 | 259.7 | 230.3 | 619.0  | 490.4 | 541.9  |
| 398.3 | 344.2 | 11.3  | 5.9   | 565.0 | 439.7 | 12.3   | 17.4  | 19.5   |
| 9.8   | 21.9  | 4.8   | 6.4   | 10.8  | 28.1  | 19.9   | 15.4  | 13.8   |
| 30.6  | 26.9  | 23.5  | 24.7  | 37.1  | 25.3  | 23.0   | 23.2  | 23.5   |
| 39.7  | 87.0  | 16.9  | 28.1  | 50.6  | 66.9  | 375.3  | 343.3 | 375.5  |
| 0.5   | 1.0   | 6.6   | 0.4   | 1.3   | 2.1   | 1.4    | 1.2   | 3.0    |
| 2.4   | 2.4   | 1.9   | 6.9   | 4.7   | 11.8  | 5.0    | 1.7   | 4.1    |
| 25.3  | 33.3  | 19.2  | 16.9  | 48.5  | 22.4  | 110.4  | 82.1  | 92.3   |
| 216.4 | 221.1 | 31.9  | 44.3  | 204.2 | 274.3 | 990.1  | 792.8 | 1018.2 |
| 231.0 | 308.9 | 68.6  | 102.7 | 386.5 | 242.2 | 146.9  | 149.9 | 162.1  |
| 40.1  | 29.7  | 8.0   | 2.3   | 38.5  | 24.0  | 8.0    | 4.7   | 9.9    |
| 95.6  | 92.9  | 139.3 | 174.4 | 136.2 | 110.5 | 345.8  | 282.9 | 323.8  |
| 11.8  | 12.7  | 8.0   | 8.8   | 26.9  | 14.9  | 35.3   | 38.3  | 36.2   |
| 3.4   | 25.5  | 7.9   | 4.3   | 19.3  | 9.9   | 28.0   | 12.9  | 24.8   |
| 6.7   | 5.6   | 5.4   | 6.7   | 11.9  | 15.6  | 22.5   | 23.0  | 20.9   |
| 14.5  | 15.4  | 14.4  | 18.8  | 11.0  | 12.5  | 18.6   | 23.4  | 12.7   |
| 9.3   | 6.1   | 0.5   | 0.3   | 13.8  | 13.3  | 31.2   | 31.5  | 37.2   |
| 3.5   | 12.4  | 10.9  | 1.3   | 18.6  | 15.1  | 37.4   | 43.9  | 54.1   |
| 382.8 | 438.0 | 178.6 | 280.0 | 480.1 | 382.9 | 831.6  | 732.3 | 848.5  |
| 53.5  | 80.8  | 80.5  | 84.7  | 118.8 | 53.2  | 269.7  | 210.3 | 234.2  |
| 94.3  | 139.0 | 10.4  | 22.8  | 171.4 | 136.6 | 198.6  | 161.3 | 187.7  |
| 677.8 | 789.5 | 180.5 | 236.6 | 878.2 | 847.5 | 1420.1 | 785.8 | 899.5  |
| 1.4   | 1.5   | 1.8   | 10.1  | 2.1   | 1.3   | 8.0    | 8.3   | 8.0    |
| 85.0  | 90.7  | 32.5  | 29.6  | 125.1 | 61.9  | 65.8   | 43.8  | 45.4   |

|       |       |       |       |        |       |       |       |       |
|-------|-------|-------|-------|--------|-------|-------|-------|-------|
| 30.7  | 50.4  | 11.9  | 11.4  | 58.8   | 39.0  | 440.3 | 495.5 | 494.4 |
| 2.6   | 13.5  | 6.6   | 1.5   | 9.0    | 9.4   | 9.6   | 2.1   | 5.2   |
| 8.0   | 11.1  | 12.7  | 11.1  | 11.6   | 3.2   | 22.5  | 14.9  | 13.5  |
| 1.9   | 1.8   | 1.2   | 0.9   | 3.2    | 10.1  | 3.2   | 5.2   | 1.1   |
| 57.5  | 69.4  | 35.6  | 49.2  | 76.2   | 71.8  | 39.0  | 52.5  | 54.7  |
| 7.3   | 17.9  | 3.9   | 2.9   | 5.8    | 13.5  | 14.6  | 4.4   | 9.6   |
| 42.7  | 41.2  | 38.0  | 33.8  | 25.8   | 37.4  | 59.6  | 48.8  | 67.8  |
| 1.5   | 0.7   | 0.5   | 1.1   | 7.1    | 2.5   | 14.8  | 9.2   | 1.9   |
| 15.1  | 3.1   | 0.9   | 6.6   | 22.1   | 20.8  | 5.8   | 4.1   | 5.5   |
| 31.4  | 31.9  | 1.8   | 6.4   | 31.3   | 31.0  | 40.6  | 43.8  | 52.0  |
| 1.6   | 1.1   | 5.3   | 11.0  | 1.3    | 2.5   | 3.3   | 2.1   | 8.4   |
| 86.2  | 86.5  | 11.5  | 7.1   | 141.5  | 79.6  | 282.2 | 293.6 | 332.7 |
| 4.2   | 2.2   | 3.5   | 5.0   | 4.5    | 8.1   | 32.6  | 45.0  | 62.0  |
| 1.5   | 0.9   | 1.2   | 0.8   | 1.3    | 1.0   | 1.4   | 0.9   | 1.4   |
| 590.6 | 483.4 | 1.1   | 0.7   | 1183.9 | 439.5 | 2.4   | 1.6   | 7.2   |
| 1.7   | 0.7   | 1.1   | 1.4   | 2.0    | 1.8   | 1.6   | 2.7   | 1.7   |
| 49.0  | 55.7  | 10.0  | 14.8  | 52.2   | 51.7  | 168.5 | 166.9 | 196.1 |
| 2.2   | 3.9   | 1.5   | 1.3   | 2.3    | 15.9  | 1.2   | 1.5   | 2.4   |
| 5.4   | 7.9   | 1.6   | 1.8   | 20.2   | 0.8   | 1.2   | 1.0   | 2.0   |
| 6.5   | 0.7   | 4.3   | 0.8   | 6.3    | 1.9   | 9.8   | 5.5   | 3.3   |
| 9.4   | 9.7   | 0.8   | 4.1   | 15.1   | 15.4  | 40.8  | 58.7  | 61.9  |
| 43.5  | 67.9  | 32.3  | 42.9  | 75.6   | 55.7  | 131.0 | 158.2 | 172.0 |
| 2.2   | 15.6  | 12.3  | 14.9  | 19.5   | 1.2   | 33.2  | 49.1  | 51.3  |
| 7.6   | 17.4  | 7.1   | 12.0  | 1.9    | 14.3  | 6.6   | 2.7   | 7.7   |
| 15.2  | 8.9   | 4.4   | 6.1   | 10.8   | 11.7  | 30.8  | 37.8  | 38.7  |
| 13.6  | 2.0   | 7.6   | 44.2  | 6.3    | 18.5  | 11.7  | 10.9  | 12.9  |
| 19.7  | 26.8  | 11.0  | 10.2  | 34.6   | 21.8  | 70.9  | 86.7  | 112.5 |
| 3.9   | 7.8   | 2.3   | 9.6   | 19.6   | 3.7   | 4.6   | 5.6   | 9.2   |
| 61.1  | 106.3 | 79.9  | 85.7  | 115.7  | 77.4  | 393.6 | 414.2 | 435.1 |
| 4.8   | 1.0   | 3.0   | 1.1   | 1.3    | 1.1   | 16.8  | 24.9  | 26.7  |
| 17.3  | 5.7   | 2.0   | 4.4   | 4.3    | 6.6   | 5.3   | 15.1  | 8.6   |
| 1.2   | 1.3   | 1.2   | 1.3   | 23.8   | 9.1   | 7.7   | 14.4  | 3.4   |
| 23.5  | 31.3  | 22.4  | 18.2  | 36.5   | 26.3  | 50.0  | 60.0  | 61.9  |
| 2.5   | 1.8   | 2.9   | 2.5   | 1.1    | 3.3   | 2.9   | 2.2   | 2.6   |
| 120.3 | 98.8  | 1.0   | 2.2   | 174.2  | 73.4  | 174.2 | 189.3 | 208.6 |
| 0.5   | 3.7   | 0.2   | 0.5   | 1.1    | 1.2   | 36.6  | 64.7  | 71.9  |
| 28.6  | 33.4  | 15.5  | 22.9  | 50.6   | 22.4  | 130.1 | 182.8 | 164.2 |
| 6.3   | 2.3   | 7.3   | 6.0   | 1.6    | 10.1  | 5.6   | 6.9   | 7.9   |
| 33.8  | 37.6  | 28.3  | 22.9  | 56.4   | 47.9  | 72.2  | 55.1  | 85.2  |
| 20.3  | 21.4  | 26.3  | 40.5  | 22.7   | 29.8  | 67.8  | 44.5  | 62.3  |
| 66.0  | 126.5 | 115.8 | 161.3 | 111.4  | 119.9 | 735.1 | 568.9 | 641.4 |
| 135.8 | 159.3 | 11.4  | 1.2   | 216.2  | 192.8 | 10.3  | 4.3   | 2.1   |
| 3.8   | 11.4  | 6.8   | 13.2  | 17.9   | 6.9   | 54.1  | 39.1  | 54.5  |
| 26.0  | 16.8  | 15.0  | 19.2  | 36.2   | 6.9   | 26.6  | 23.2  | 21.0  |
| 19.9  | 16.9  | 19.5  | 3.9   | 45.4   | 27.8  | 7.5   | 8.6   | 18.4  |
| 2.0   | 12.4  | 5.8   | 8.3   | 5.5    | 1.4   | 12.4  | 6.7   | 8.3   |
| 59.7  | 73.2  | 50.8  | 48.1  | 90.6   | 34.8  | 139.0 | 165.2 | 147.6 |
| 233.7 | 264.9 | 14.6  | 28.7  | 482.0  | 226.0 | 243.5 | 52.1  | 61.1  |
| 22.1  | 42.5  | 21.7  | 4.6   | 37.3   | 55.6  | 39.2  | 47.4  | 41.9  |
| 2.2   | 0.7   | 0.5   | 3.1   | 4.7    | 5.6   | 5.5   | 10.3  | 5.4   |
| 4.6   | 8.2   | 5.2   | 11.6  | 9.0    | 9.5   | 5.4   | 3.6   | 4.8   |
| 1.0   | 5.1   | 6.3   | 12.3  | 13.8   | 12.5  | 11.2  | 8.3   | 10.3  |
| 174.3 | 200.3 | 35.7  | 35.6  | 195.7  | 198.5 | 111.3 | 49.6  | 74.2  |

|       |        |       |       |        |        |       |        |        |
|-------|--------|-------|-------|--------|--------|-------|--------|--------|
| 24.9  | 37.1   | 14.2  | 17.2  | 25.7   | 25.5   | 170.4 | 121.7  | 83.2   |
| 2.7   | 1.1    | 14.6  | 8.0   | 8.0    | 1.0    | 17.7  | 22.3   | 23.5   |
| 2.3   | 2.3    | 2.9   | 0.9   | 2.4    | 1.2    | 6.0   | 4.0    | 3.1    |
| 1.0   | 1.4    | 1.8   | 2.3   | 1.9    | 1.3    | 65.9  | 49.0   | 83.7   |
| 35.4  | 30.0   | 3.9   | 22.5  | 24.2   | 37.2   | 70.6  | 25.6   | 47.4   |
| 40.9  | 87.5   | 84.2  | 53.7  | 119.0  | 73.7   | 113.3 | 109.0  | 135.7  |
| 29.1  | 3.6    | 10.9  | 9.4   | 14.4   | 7.4    | 44.4  | 41.6   | 37.6   |
| 15.4  | 9.2    | 22.6  | 13.9  | 25.7   | 5.7    | 2.3   | 1.3    | 1.4    |
| 23.1  | 28.4   | 10.4  | 18.4  | 35.9   | 32.2   | 62.9  | 43.0   | 43.0   |
| 28.4  | 41.8   | 17.8  | 20.0  | 32.2   | 17.5   | 21.2  | 22.5   | 3.5    |
| 26.0  | 32.3   | 1.5   | 10.2  | 40.5   | 17.3   | 5.2   | 4.7    | 0.8    |
| 19.5  | 16.6   | 12.7  | 1.3   | 30.1   | 10.3   | 53.6  | 48.3   | 47.2   |
| 1.5   | 2.0    | 0.9   | 2.3   | 4.2    | 1.9    | 2.9   | 3.5    | 14.4   |
| 44.3  | 29.6   | 10.0  | 4.0   | 46.2   | 28.7   | 88.0  | 78.7   | 87.6   |
| 19.4  | 18.6   | 23.5  | 29.0  | 15.4   | 15.2   | 52.7  | 110.3  | 111.5  |
| 11.2  | 7.3    | 11.9  | 9.7   | 8.7    | 8.8    | 4.7   | 1.9    | 3.3    |
| 29.3  | 24.3   | 17.1  | 18.3  | 35.6   | 31.6   | 87.4  | 121.8  | 124.2  |
| 40.8  | 59.5   | 6.8   | 14.2  | 93.1   | 52.8   | 11.4  | 4.7    | 5.8    |
| 2.0   | 13.3   | 45.2  | 37.7  | 20.1   | 10.7   | 23.7  | 16.2   | 18.7   |
| 0.4   | 1.1    | 14.0  | 6.6   | 1.2    | 2.6    | 3.4   | 2.0    | 1.6    |
| 7.7   | 21.1   | 0.1   | 0.2   | 26.4   | 21.7   | 3.4   | 0.3    | 0.5    |
| 10.5  | 8.4    | 2.8   | 1.9   | 2.9    | 10.6   | 7.2   | 6.6    | 4.7    |
| 11.7  | 3.5    | 36.0  | 30.0  | 13.7   | 9.7    | 10.0  | 33.1   | 16.3   |
| 3.6   | 4.1    | 3.3   | 0.2   | 0.9    | 6.0    | 5.4   | 5.1    | 0.3    |
| 18.4  | 16.5   | 5.0   | 4.6   | 10.6   | 3.4    | 34.8  | 20.7   | 22.0   |
| 2.9   | 6.3    | 16.1  | 20.3  | 16.7   | 4.3    | 33.4  | 33.8   | 49.8   |
| 268.4 | 342.0  | 10.6  | 6.4   | 597.4  | 304.0  | 53.9  | 54.8   | 51.5   |
| 1.1   | 0.9    | 1.6   | 0.4   | 4.6    | 4.7    | 7.4   | 6.5    | 6.6    |
| 0.4   | 1.7    | 2.6   | 4.8   | 2.2    | 1.0    | 7.4   | 3.6    | 2.4    |
| 27.1  | 35.3   | 16.7  | 9.8   | 19.7   | 34.7   | 116.1 | 96.8   | 115.0  |
| 17.1  | 15.8   | 13.9  | 15.5  | 19.6   | 30.0   | 31.4  | 56.5   | 57.1   |
| 2.7   | 17.0   | 4.5   | 7.6   | 2.7    | 1.2    | 4.5   | 3.2    | 9.8    |
| 34.8  | 20.6   | 14.6  | 18.7  | 30.7   | 24.7   | 73.2  | 72.6   | 66.2   |
| 1.2   | 13.3   | 0.5   | 0.4   | 29.2   | 15.9   | 3.5   | 0.6    | 3.7    |
| 1.5   | 1.0    | 1.2   | 3.6   | 1.7    | 1.6    | 6.4   | 1.2    | 3.8    |
| 89.3  | 118.4  | 17.5  | 15.9  | 110.8  | 99.2   | 83.9  | 75.5   | 78.0   |
| 851.3 | 1399.0 | 43.0  | 81.3  | 1261.0 | 1247.9 | 894.1 | 277.9  | 342.5  |
| 9.2   | 7.9    | 5.6   | 3.5   | 4.2    | 11.5   | 11.2  | 10.2   | 7.5    |
| 72.0  | 96.6   | 56.7  | 113.2 | 103.8  | 79.4   | 545.8 | 518.6  | 549.1  |
| 2.5   | 2.0    | 2.5   | 11.7  | 3.5    | 2.6    | 3.8   | 3.5    | 4.0    |
| 17.8  | 12.4   | 10.0  | 2.6   | 14.1   | 1.0    | 27.3  | 16.3   | 17.8   |
| 18.1  | 34.7   | 41.6  | 77.4  | 38.0   | 13.2   | 16.7  | 24.6   | 13.8   |
| 29.7  | 29.0   | 13.0  | 3.9   | 28.1   | 30.4   | 69.9  | 69.7   | 69.7   |
| 117.1 | 442.8  | 116.7 | 174.1 | 206.0  | 503.6  | 919.9 | 1046.6 | 1202.8 |
| 50.3  | 53.6   | 138.0 | 183.3 | 64.1   | 55.5   | 84.7  | 88.5   | 109.2  |
| 290.4 | 238.4  | 42.1  | 58.0  | 298.3  | 327.6  | 189.6 | 141.0  | 150.9  |
| 3.6   | 24.6   | 2.5   | 4.8   | 40.3   | 34.1   | 20.5  | 20.6   | 22.0   |
| 144.8 | 172.2  | 73.8  | 117.7 | 212.4  | 138.4  | 176.0 | 101.5  | 131.8  |
| 45.2  | 40.8   | 29.8  | 30.3  | 43.5   | 43.1   | 35.0  | 44.6   | 43.3   |
| 128.8 | 195.3  | 21.4  | 13.4  | 326.0  | 199.2  | 389.2 | 332.8  | 346.4  |
| 25.0  | 22.8   | 6.6   | 4.7   | 19.2   | 19.0   | 39.3  | 51.0   | 53.0   |
| 651.3 | 897.8  | 3.5   | 3.0   | 850.6  | 803.6  | 6.1   | 5.6    | 1.6    |
| 9.1   | 20.3   | 1.8   | 16.4  | 13.2   | 8.3    | 215.1 | 150.9  | 181.8  |



|       |       |       |       |        |       |        |        |        |
|-------|-------|-------|-------|--------|-------|--------|--------|--------|
| 37.4  | 41.8  | 9.3   | 12.8  | 42.7   | 40.5  | 13.1   | 11.1   | 12.1   |
| 143.5 | 160.3 | 50.4  | 82.3  | 236.4  | 146.7 | 151.1  | 128.0  | 150.9  |
| 1.5   | 10.0  | 6.8   | 9.8   | 4.5    | 11.1  | 3.0    | 2.2    | 2.0    |
| 46.8  | 45.9  | 74.5  | 113.5 | 55.0   | 49.5  | 117.9  | 160.6  | 172.6  |
| 1.7   | 0.9   | 2.3   | 3.5   | 0.9    | 3.6   | 3.2    | 0.7    | 3.6    |
| 566.2 | 598.2 | 50.8  | 66.0  | 916.9  | 562.3 | 1705.4 | 1068.0 | 1041.5 |
| 13.1  | 7.5   | 0.8   | 4.8   | 7.9    | 0.9   | 3.2    | 7.2    | 3.5    |
| 4.9   | 0.2   | 8.8   | 6.5   | 5.9    | 3.9   | 7.5    | 7.6    | 4.3    |
| 380.2 | 478.9 | 0.7   | 5.1   | 682.0  | 547.8 | 0.5    | 1.0    | 0.8    |
| 85.5  | 95.1  | 4.6   | 0.3   | 142.8  | 119.3 | 0.8    | 1.9    | 2.4    |
| 16.0  | 8.5   | 21.9  | 29.2  | 21.4   | 18.6  | 15.2   | 13.3   | 18.1   |
| 639.5 | 878.0 | 593.7 | 774.2 | 1013.2 | 504.3 | 1256.9 | 1214.4 | 1270.7 |
| 251.9 | 322.8 | 136.0 | 159.4 | 450.1  | 357.0 | 449.8  | 246.7  | 257.0  |
| 0.6   | 9.0   | 8.3   | 3.3   | 12.2   | 15.7  | 26.0   | 20.4   | 23.9   |
| 2.7   | 2.3   | 1.3   | 2.2   | 2.9    | 11.0  | 1.5    | 4.4    | 2.5    |
| 1.1   | 2.3   | 10.3  | 3.8   | 3.6    | 3.7   | 2.3    | 2.1    | 2.3    |
| 63.3  | 68.3  | 6.1   | 3.5   | 93.5   | 79.1  | 12.9   | 2.9    | 12.7   |
| 10.2  | 1.1   | 4.2   | 2.8   | 1.6    | 10.1  | 10.0   | 6.3    | 8.2    |
| 129.2 | 145.8 | 87.9  | 127.7 | 197.8  | 177.3 | 228.6  | 399.5  | 483.2  |
| 4.6   | 2.9   | 7.1   | 6.8   | 8.2    | 5.6   | 7.1    | 7.1    | 8.6    |
| 6.6   | 0.3   | 0.3   | 2.1   | 1.8    | 0.5   | 117.0  | 563.1  | 407.5  |
| 0.7   | 5.4   | 0.1   | 3.1   | 3.0    | 3.9   | 74.8   | 29.2   | 33.1   |
| 9.8   | 12.3  | 13.1  | 7.9   | 15.6   | 18.5  | 16.5   | 16.8   | 9.2    |
| 11.3  | 11.6  | 3.8   | 2.7   | 1.4    | 7.6   | 34.5   | 44.6   | 38.6   |
| 51.5  | 58.6  | 25.9  | 38.4  | 69.3   | 37.1  | 176.0  | 223.9  | 202.1  |
| 317.7 | 342.1 | 76.3  | 104.8 | 590.6  | 435.7 | 274.5  | 304.3  | 358.5  |
| 0.8   | 6.0   | 5.6   | 12.2  | 8.7    | 1.3   | 9.9    | 9.4    | 6.6    |
| 15.3  | 6.6   | 8.0   | 11.9  | 19.3   | 13.3  | 7.6    | 17.6   | 7.8    |
| 418.3 | 522.6 | 78.5  | 168.8 | 457.2  | 620.2 | 217.0  | 264.1  | 293.4  |
| 17.9  | 44.8  | 7.0   | 7.5   | 29.6   | 14.1  | 4.0    | 12.4   | 8.8    |
| 2.9   | 2.9   | 21.1  | 17.5  | 22.7   | 2.8   | 57.6   | 67.2   | 77.7   |
| 97.4  | 87.7  | 44.7  | 60.4  | 136.1  | 83.3  | 363.9  | 343.8  | 361.2  |
| 457.1 | 566.9 | 60.5  | 115.5 | 859.7  | 605.3 | 1245.4 | 513.4  | 571.4  |
| 26.4  | 21.3  | 6.0   | 15.9  | 24.5   | 26.2  | 478.3  | 299.8  | 334.4  |
| 7.9   | 10.5  | 1.1   | 6.2   | 8.6    | 4.3   | 5.2    | 3.5    | 3.8    |
| 18.4  | 16.8  | 20.3  | 11.4  | 22.0   | 20.9  | 24.9   | 16.3   | 24.5   |
| 2.1   | 4.0   | 18.5  | 15.0  | 2.4    | 1.4   | 3.7    | 11.5   | 7.6    |
| 8.8   | 12.0  | 0.6   | 5.9   | 8.5    | 3.5   | 3.7    | 8.2    | 8.4    |
| 240.9 | 325.0 | 79.2  | 89.0  | 336.4  | 312.3 | 175.7  | 170.8  | 186.4  |
| 43.9  | 61.1  | 27.1  | 29.9  | 73.1   | 60.9  | 128.4  | 61.0   | 71.8   |
| 6.7   | 10.2  | 23.8  | 16.8  | 20.7   | 14.3  | 55.9   | 53.3   | 47.1   |
| 28.2  | 37.0  | 9.0   | 24.1  | 47.7   | 28.1  | 79.6   | 37.9   | 33.2   |
| 29.5  | 48.0  | 1.8   | 4.0   | 58.5   | 43.4  | 435.4  | 417.9  | 500.3  |
| 1.2   | 0.9   | 1.7   | 1.1   | 5.9    | 2.2   | 1.8    | 5.9    | 3.8    |
| 120.3 | 168.3 | 0.8   | 9.1   | 185.6  | 167.2 | 148.3  | 167.7  | 151.0  |
| 93.0  | 169.5 | 7.6   | 6.2   | 108.9  | 168.0 | 59.6   | 45.3   | 54.0   |
| 356.1 | 401.1 | 0.9   | 0.7   | 591.7  | 436.7 | 562.9  | 383.2  | 420.0  |
| 7.4   | 6.3   | 1.7   | 5.9   | 7.6    | 5.5   | 10.3   | 4.2    | 5.9    |
| 35.2  | 36.7  | 19.0  | 33.6  | 41.5   | 45.4  | 138.0  | 107.1  | 133.8  |
| 12.9  | 6.5   | 6.9   | 6.9   | 8.0    | 22.9  | 19.3   | 9.5    | 17.7   |
| 80.5  | 102.0 | 108.5 | 148.5 | 158.3  | 116.5 | 1482.6 | 1386.2 | 1446.6 |
| 223.3 | 286.6 | 15.1  | 22.0  | 388.5  | 278.7 | 431.7  | 323.1  | 326.5  |
| 28.0  | 43.1  | 14.1  | 6.3   | 54.1   | 45.4  | 60.0   | 50.4   | 58.3   |

|       |       |       |       |       |       |       |       |       |
|-------|-------|-------|-------|-------|-------|-------|-------|-------|
| 93.6  | 105.4 | 50.2  | 38.5  | 128.5 | 164.9 | 282.0 | 367.0 | 380.2 |
| 50.5  | 57.7  | 17.4  | 26.6  | 65.7  | 58.7  | 76.6  | 72.5  | 68.5  |
| 202.1 | 207.4 | 9.5   | 18.1  | 225.4 | 245.6 | 16.0  | 4.1   | 13.3  |
| 75.3  | 101.4 | 6.6   | 10.7  | 98.2  | 115.7 | 6.9   | 7.7   | 4.5   |
| 3.7   | 1.9   | 1.5   | 1.4   | 0.9   | 1.8   | 0.7   | 2.9   | 0.9   |
| 22.0  | 25.6  | 49.3  | 38.7  | 19.1  | 29.8  | 57.7  | 80.8  | 85.2  |
| 178.7 | 155.2 | 11.1  | 8.9   | 201.9 | 203.5 | 32.8  | 12.0  | 24.2  |
| 137.8 | 126.5 | 119.6 | 161.2 | 130.9 | 182.8 | 502.6 | 290.0 | 401.6 |
| 0.6   | 0.4   | 0.7   | 3.9   | 5.3   | 1.0   | 2.3   | 1.0   | 0.8   |
| 351.4 | 251.6 | 13.1  | 8.4   | 435.6 | 284.8 | 464.3 | 246.3 | 256.5 |
| 24.6  | 20.4  | 26.9  | 30.9  | 19.0  | 24.5  | 27.6  | 29.1  | 33.3  |
| 17.8  | 48.0  | 29.3  | 14.5  | 28.3  | 22.5  | 47.3  | 54.7  | 50.2  |
| 73.6  | 104.5 | 4.3   | 1.3   | 117.4 | 78.3  | 6.5   | 2.9   | 7.2   |
| 6.8   | 1.2   | 4.3   | 3.2   | 2.0   | 5.4   | 14.9  | 6.5   | 5.1   |
| 4.9   | 0.3   | 4.5   | 5.1   | 6.5   | 0.2   | 304.2 | 558.2 | 530.8 |
| 45.0  | 45.4  | 8.9   | 7.4   | 48.2  | 34.9  | 67.5  | 60.2  | 66.8  |
| 55.9  | 61.8  | 47.2  | 47.5  | 74.7  | 45.7  | 224.6 | 115.6 | 126.3 |
| 45.4  | 63.1  | 17.3  | 27.8  | 86.7  | 37.5  | 222.2 | 166.5 | 193.1 |
| 11.8  | 9.5   | 6.3   | 9.2   | 22.7  | 15.6  | 38.2  | 40.4  | 50.1  |
| 5.6   | 3.2   | 3.0   | 3.6   | 6.7   | 5.6   | 5.5   | 6.2   | 5.7   |
| 1.3   | 1.7   | 10.5  | 0.4   | 4.8   | 5.0   | 1.1   | 4.7   | 1.2   |
| 7.0   | 10.8  | 8.0   | 1.6   | 5.7   | 1.0   | 4.4   | 12.8  | 6.3   |
| 7.2   | 1.7   | 5.7   | 2.6   | 2.4   | 1.4   | 82.3  | 122.0 | 128.7 |
| 4.8   | 1.2   | 2.0   | 0.3   | 6.9   | 1.0   | 0.8   | 2.0   | 2.8   |
| 0.6   | 0.7   | 0.9   | 1.0   | 0.5   | 1.4   | 0.8   | 2.3   | 2.1   |
| 1.6   | 1.0   | 1.5   | 0.8   | 1.5   | 0.9   | 1.0   | 1.6   | 1.3   |
| 62.1  | 79.5  | 11.3  | 11.5  | 89.5  | 67.3  | 108.0 | 48.0  | 70.6  |
| 2.6   | 2.4   | 3.0   | 2.9   | 8.6   | 22.1  | 5.9   | 11.3  | 7.0   |
| 27.7  | 41.5  | 18.1  | 23.0  | 55.4  | 42.9  | 136.8 | 93.9  | 81.4  |
| 1.9   | 0.6   | 0.4   | 5.7   | 7.7   | 6.8   | 6.8   | 1.2   | 1.9   |
| 149.2 | 146.7 | 27.0  | 33.6  | 232.9 | 179.7 | 199.7 | 72.0  | 93.1  |
| 13.3  | 21.0  | 15.9  | 4.5   | 15.5  | 7.4   | 27.4  | 18.2  | 21.2  |
| 1.4   | 10.5  | 1.2   | 1.2   | 4.3   | 1.9   | 2.8   | 6.5   | 7.5   |
| 10.3  | 17.4  | 0.6   | 1.3   | 14.5  | 10.2  | 0.8   | 0.7   | 2.8   |
| 47.8  | 54.4  | 72.3  | 63.9  | 73.2  | 66.4  | 98.2  | 96.0  | 83.1  |
| 27.7  | 38.9  | 93.5  | 108.2 | 21.7  | 41.2  | 25.6  | 16.8  | 28.2  |
| 2.7   | 3.4   | 15.4  | 5.2   | 5.3   | 3.6   | 22.9  | 31.4  | 24.4  |
| 49.8  | 73.3  | 11.8  | 5.5   | 98.5  | 63.8  | 181.5 | 159.0 | 169.4 |
| 12.5  | 8.5   | 19.4  | 15.0  | 17.5  | 19.5  | 44.2  | 67.3  | 64.3  |
| 18.8  | 43.6  | 20.8  | 51.8  | 39.6  | 36.6  | 101.6 | 100.6 | 119.5 |
| 13.2  | 31.6  | 3.0   | 7.9   | 35.2  | 21.1  | 51.3  | 45.0  | 46.5  |
| 14.1  | 16.8  | 1.0   | 7.3   | 25.6  | 27.1  | 0.8   | 0.9   | 0.4   |
| 1.3   | 2.6   | 9.3   | 6.9   | 13.8  | 12.2  | 3.8   | 8.0   | 9.6   |
| 39.3  | 14.5  | 28.4  | 42.2  | 25.3  | 2.8   | 1.9   | 3.6   | 1.9   |
| 0.4   | 6.7   | 6.3   | 5.2   | 3.2   | 0.9   | 9.5   | 2.1   | 3.1   |
| 0.7   | 1.2   | 5.4   | 4.4   | 1.1   | 0.5   | 3.7   | 2.4   | 1.7   |
| 9.4   | 11.2  | 10.7  | 13.0  | 16.5  | 10.3  | 16.1  | 17.8  | 19.1  |
| 31.2  | 23.4  | 23.2  | 22.0  | 16.7  | 34.3  | 60.3  | 54.0  | 50.3  |
| 1.9   | 2.4   | 11.7  | 6.9   | 10.9  | 11.6  | 19.5  | 14.3  | 14.2  |
| 260.6 | 299.1 | 6.9   | 6.9   | 516.8 | 369.5 | 65.5  | 44.3  | 50.4  |
| 0.9   | 0.9   | 0.6   | 1.3   | 0.7   | 1.8   | 1.4   | 4.8   | 2.2   |
| 16.4  | 10.2  | 17.4  | 16.4  | 25.4  | 6.0   | 16.6  | 14.0  | 8.9   |
| 19.7  | 27.3  | 24.3  | 44.5  | 24.3  | 38.2  | 120.3 | 91.1  | 110.9 |

|       |       |       |       |        |        |        |        |        |
|-------|-------|-------|-------|--------|--------|--------|--------|--------|
| 40.3  | 61.8  | 1.3   | 1.0   | 73.9   | 57.2   | 7.6    | 8.5    | 1.1    |
| 29.8  | 80.6  | 17.3  | 25.7  | 53.9   | 46.9   | 25.4   | 13.1   | 20.5   |
| 53.0  | 56.0  | 30.6  | 35.4  | 47.2   | 48.4   | 101.1  | 114.4  | 110.8  |
| 0.4   | 1.7   | 1.4   | 0.7   | 0.7    | 0.7    | 0.4    | 2.8    | 0.7    |
| 78.3  | 113.4 | 8.7   | 10.8  | 119.4  | 119.7  | 424.2  | 308.9  | 340.7  |
| 5.0   | 11.6  | 8.8   | 6.2   | 6.3    | 10.6   | 58.2   | 60.6   | 54.0   |
| 3.0   | 5.8   | 3.6   | 2.2   | 8.4    | 10.0   | 97.4   | 54.3   | 77.5   |
| 23.6  | 14.6  | 25.1  | 13.9  | 19.8   | 16.0   | 35.2   | 49.1   | 47.8   |
| 28.5  | 36.0  | 24.2  | 3.6   | 39.1   | 33.9   | 68.8   | 37.8   | 25.0   |
| 35.9  | 28.0  | 1.3   | 0.7   | 35.3   | 12.5   | 68.1   | 55.5   | 44.7   |
| 893.5 | 862.8 | 89.3  | 161.2 | 1293.1 | 1080.1 | 2013.6 | 1562.1 | 1506.1 |
| 3.7   | 12.0  | 9.6   | 7.1   | 2.8    | 2.4    | 7.1    | 6.7    | 5.8    |
| 207.5 | 255.4 | 68.6  | 120.3 | 223.7  | 190.5  | 336.3  | 327.7  | 341.5  |
| 1.7   | 5.2   | 6.4   | 7.2   | 6.1    | 1.1    | 7.2    | 27.9   | 34.4   |
| 21.9  | 19.9  | 31.9  | 14.2  | 18.7   | 17.7   | 198.3  | 253.1  | 216.5  |
| 20.9  | 15.2  | 0.8   | 1.1   | 24.5   | 1.0    | 1.6    | 1.1    | 1.4    |
| 29.9  | 33.4  | 14.8  | 17.5  | 30.5   | 34.6   | 69.9   | 83.5   | 87.4   |
| 46.2  | 54.4  | 8.5   | 5.5   | 83.7   | 57.7   | 17.3   | 15.3   | 26.5   |
| 107.6 | 131.8 | 124.2 | 208.0 | 124.0  | 84.9   | 217.5  | 182.7  | 183.3  |
| 9.1   | 7.1   | 7.6   | 14.9  | 1.1    | 3.4    | 15.1   | 13.3   | 14.7   |
| 90.6  | 113.9 | 1.4   | 1.6   | 299.4  | 124.2  | 66.5   | 74.6   | 54.5   |
| 0.9   | 6.5   | 0.7   | 1.1   | 0.6    | 3.6    | 8.5    | 1.8    | 2.2    |
| 47.9  | 37.6  | 10.0  | 14.3  | 74.3   | 38.8   | 91.9   | 92.4   | 109.4  |
| 3.4   | 3.9   | 1.5   | 1.1   | 4.6    | 1.6    | 2.7    | 5.1    | 2.4    |
| 9.2   | 26.9  | 13.1  | 6.5   | 29.6   | 25.1   | 42.6   | 26.3   | 24.2   |
| 1.1   | 10.5  | 1.4   | 1.8   | 0.5    | 1.2    | 5.9    | 1.2    | 0.5    |
| 56.1  | 64.8  | 14.0  | 26.6  | 48.9   | 65.0   | 377.2  | 229.7  | 266.7  |
| 2.0   | 6.7   | 3.6   | 2.1   | 1.3    | 2.4    | 2.1    | 2.0    | 2.9    |
| 1.0   | 1.2   | 13.0  | 7.5   | 1.0    | 5.2    | 10.7   | 9.9    | 7.0    |
| 16.2  | 26.1  | 13.8  | 6.8   | 18.2   | 18.0   | 37.6   | 29.3   | 27.7   |
| 1.1   | 6.1   | 0.8   | 3.4   | 5.9    | 7.7    | 4.5    | 0.5    | 1.7    |
| 0.9   | 3.1   | 2.2   | 0.8   | 1.7    | 0.9    | 1.1    | 1.0    | 0.9    |
| 22.1  | 34.3  | 7.3   | 7.9   | 26.5   | 9.5    | 83.6   | 121.3  | 90.6   |
| 2.7   | 5.8   | 18.6  | 13.9  | 1.7    | 11.4   | 26.7   | 30.8   | 37.1   |
| 7.9   | 5.6   | 11.4  | 13.5  | 8.9    | 4.0    | 19.9   | 8.1    | 18.9   |
| 1.3   | 4.0   | 6.6   | 8.0   | 9.9    | 4.5    | 5.5    | 19.0   | 7.4    |
| 17.6  | 18.8  | 10.9  | 6.1   | 18.0   | 7.2    | 26.1   | 14.7   | 14.7   |
| 213.5 | 235.5 | 38.9  | 38.0  | 243.2  | 237.8  | 219.2  | 245.3  | 237.7  |
| 42.2  | 36.5  | 11.5  | 12.5  | 43.3   | 157.7  | 83.7   | 54.9   | 72.7   |
| 31.7  | 28.7  | 120.3 | 112.6 | 56.8   | 43.4   | 73.9   | 68.0   | 80.5   |
| 2.4   | 1.0   | 2.0   | 1.4   | 1.5    | 1.4    | 1.4    | 1.3    | 2.6    |
| 1.5   | 0.6   | 0.8   | 0.3   | 2.0    | 0.8    | 1.5    | 10.5   | 10.5   |
| 10.4  | 5.0   | 0.4   | 0.6   | 3.0    | 2.0    | 35.9   | 29.7   | 24.2   |
| 22.3  | 18.0  | 14.5  | 6.5   | 21.7   | 15.5   | 19.0   | 11.1   | 14.6   |
| 19.8  | 28.1  | 8.6   | 10.2  | 31.1   | 37.7   | 32.3   | 29.8   | 26.6   |
| 144.4 | 228.5 | 52.3  | 93.3  | 332.3  | 300.8  | 587.4  | 583.2  | 666.9  |
| 1.7   | 9.8   | 16.9  | 25.1  | 5.0    | 4.5    | 8.1    | 4.1    | 7.1    |
| 51.0  | 95.1  | 68.4  | 87.3  | 101.1  | 126.8  | 852.5  | 605.6  | 651.5  |
| 23.6  | 4.9   | 29.5  | 24.0  | 29.1   | 12.5   | 46.5   | 50.3   | 58.0   |
| 201.2 | 242.6 | 14.6  | 14.4  | 338.4  | 317.3  | 484.9  | 199.1  | 207.6  |
| 6.1   | 0.7   | 3.6   | 0.2   | 11.4   | 2.6    | 12.9   | 12.6   | 15.6   |
| 50.9  | 48.6  | 13.0  | 12.0  | 66.0   | 57.2   | 239.1  | 142.3  | 163.5  |
| 23.2  | 26.0  | 13.8  | 16.5  | 42.1   | 26.5   | 116.2  | 113.5  | 87.7   |

|       |       |       |       |       |       |        |        |        |
|-------|-------|-------|-------|-------|-------|--------|--------|--------|
| 0.5   | 0.6   | 6.0   | 9.8   | 3.5   | 11.0  | 26.2   | 136.1  | 151.3  |
| 10.8  | 1.4   | 12.2  | 3.4   | 10.8  | 2.8   | 4.9    | 11.1   | 8.6    |
| 54.8  | 86.2  | 17.1  | 5.7   | 65.1  | 45.5  | 98.5   | 67.7   | 54.9   |
| 3.7   | 3.7   | 5.9   | 0.7   | 1.2   | 3.3   | 10.4   | 1.9    | 6.8    |
| 30.0  | 57.6  | 0.5   | 1.0   | 66.2  | 43.3  | 26.9   | 15.7   | 35.8   |
| 7.0   | 16.7  | 1.6   | 0.9   | 14.5  | 11.1  | 3.1    | 2.6    | 3.1    |
| 11.8  | 6.1   | 6.5   | 0.9   | 13.0  | 7.7   | 4.0    | 2.3    | 3.1    |
| 518.4 | 494.0 | 225.8 | 271.9 | 799.1 | 598.9 | 962.3  | 520.7  | 504.4  |
| 12.3  | 6.9   | 1.3   | 1.6   | 12.7  | 5.2   | 12.8   | 14.3   | 11.1   |
| 16.0  | 15.9  | 18.6  | 19.6  | 15.6  | 16.4  | 7.7    | 14.9   | 12.3   |
| 16.5  | 42.4  | 16.8  | 8.4   | 68.1  | 57.1  | 101.0  | 81.6   | 79.3   |
| 3.1   | 2.1   | 5.2   | 2.8   | 1.7   | 1.7   | 1.2    | 16.3   | 10.9   |
| 297.2 | 390.2 | 173.4 | 282.8 | 449.0 | 488.7 | 1264.1 | 1111.8 | 1096.8 |
| 1.1   | 1.7   | 0.9   | 1.3   | 4.0   | 1.3   | 6.4    | 2.7    | 2.5    |
| 2.6   | 3.0   | 15.9  | 13.4  | 4.6   | 8.5   | 7.8    | 11.7   | 6.6    |
| 29.7  | 45.7  | 2.4   | 2.6   | 50.8  | 48.3  | 4.9    | 4.2    | 4.9    |
| 3.7   | 5.3   | 6.8   | 6.7   | 6.8   | 6.9   | 18.2   | 17.5   | 18.0   |
| 38.1  | 17.9  | 28.2  | 29.5  | 43.8  | 22.2  | 67.2   | 49.6   | 53.4   |
| 0.9   | 0.8   | 0.7   | 0.4   | 5.9   | 0.9   | 0.8    | 1.5    | 2.2    |
| 1.2   | 3.5   | 8.4   | 8.1   | 3.4   | 9.4   | 4.6    | 7.0    | 13.1   |
| 41.3  | 21.5  | 5.2   | 1.7   | 32.8  | 19.8  | 43.1   | 51.5   | 59.7   |
| 2.3   | 9.3   | 14.8  | 14.3  | 4.5   | 9.5   | 13.3   | 13.0   | 15.5   |
| 2.7   | 0.2   | 4.9   | 4.4   | 0.2   | 0.4   | 2.6    | 0.6    | 0.8    |
| 0.8   | 1.2   | 0.9   | 0.7   | 2.1   | 6.1   | 1.4    | 1.4    | 0.9    |
| 5.4   | 7.1   | 10.4  | 17.1  | 1.8   | 1.2   | 8.5    | 2.6    | 7.0    |
| 6.4   | 8.6   | 5.5   | 7.2   | 18.0  | 10.6  | 16.2   | 17.1   | 16.5   |
| 64.6  | 73.5  | 14.8  | 15.3  | 58.7  | 72.7  | 87.7   | 75.9   | 77.1   |
| 6.5   | 1.8   | 4.1   | 7.4   | 2.5   | 1.8   | 4.6    | 4.6    | 15.4   |
| 7.5   | 13.6  | 12.4  | 7.6   | 14.4  | 5.0   | 8.8    | 6.6    | 14.8   |
| 0.9   | 9.4   | 5.9   | 7.3   | 6.4   | 10.0  | 6.6    | 1.2    | 3.6    |
| 2.3   | 3.9   | 0.8   | 3.1   | 4.2   | 4.5   | 1.1    | 0.7    | 5.6    |
| 2.8   | 2.9   | 1.4   | 0.6   | 6.1   | 10.7  | 4.4    | 3.5    | 3.4    |
| 11.2  | 17.0  | 7.5   | 5.3   | 9.5   | 13.8  | 8.7    | 8.1    | 6.7    |
| 6.7   | 1.0   | 5.4   | 5.3   | 0.9   | 1.3   | 3.2    | 1.1    | 3.7    |
| 22.9  | 21.2  | 6.1   | 7.9   | 30.0  | 17.9  | 34.6   | 33.7   | 34.8   |
| 33.3  | 39.8  | 0.2   | 1.9   | 72.4  | 40.8  | 119.7  | 53.5   | 66.3   |
| 2.5   | 12.4  | 10.5  | 15.2  | 15.2  | 2.7   | 18.1   | 15.2   | 14.7   |
| 18.8  | 10.0  | 10.3  | 13.8  | 35.9  | 19.7  | 28.8   | 36.1   | 33.1   |
| 1.7   | 1.8   | 1.7   | 4.5   | 2.8   | 9.4   | 12.3   | 1.9    | 3.8    |
| 11.0  | 0.9   | 6.4   | 14.0  | 8.4   | 11.6  | 5.0    | 11.9   | 16.3   |
| 186.7 | 178.8 | 87.4  | 82.6  | 258.5 | 197.4 | 395.9  | 427.7  | 480.1  |
| 6.8   | 36.5  | 26.8  | 58.9  | 24.2  | 15.7  | 137.8  | 127.4  | 133.5  |
| 136.7 | 197.9 | 4.2   | 9.8   | 236.3 | 227.3 | 2.0    | 12.2   | 7.5    |
| 15.0  | 1.0   | 2.0   | 6.1   | 1.5   | 2.0   | 4.4    | 2.1    | 2.3    |
| 2.7   | 1.1   | 8.1   | 7.2   | 2.6   | 11.1  | 11.5   | 8.5    | 5.3    |
| 3.0   | 5.0   | 7.9   | 9.6   | 14.3  | 9.0   | 10.9   | 7.1    | 12.4   |
| 0.3   | 3.3   | 12.3  | 4.4   | 3.3   | 6.8   | 5.3    | 2.6    | 3.5    |
| 40.9  | 32.3  | 28.1  | 36.9  | 57.1  | 33.5  | 21.9   | 16.6   | 19.0   |
| 2.8   | 13.0  | 20.2  | 16.3  | 12.5  | 17.2  | 11.9   | 25.3   | 9.4    |
| 0.8   | 1.6   | 0.6   | 4.2   | 1.5   | 1.2   | 1.5    | 1.8    | 1.2    |
| 56.5  | 50.3  | 18.4  | 27.0  | 77.8  | 72.9  | 134.1  | 123.2  | 147.7  |
| 15.5  | 8.2   | 8.5   | 8.9   | 15.7  | 16.5  | 45.6   | 28.7   | 36.7   |
| 3.0   | 3.5   | 4.8   | 1.6   | 1.3   | 1.0   | 14.3   | 7.2    | 11.9   |

|       |        |       |       |        |        |        |        |        |
|-------|--------|-------|-------|--------|--------|--------|--------|--------|
| 71.1  | 95.0   | 31.0  | 49.3  | 82.1   | 90.2   | 214.2  | 223.2  | 268.3  |
| 25.1  | 24.0   | 1.8   | 1.3   | 30.3   | 43.6   | 21.0   | 14.1   | 26.0   |
| 6.4   | 6.8    | 2.7   | 1.6   | 3.7    | 15.4   | 7.2    | 6.4    | 5.0    |
| 116.4 | 151.2  | 34.5  | 47.7  | 130.4  | 123.1  | 113.0  | 65.6   | 77.5   |
| 81.8  | 142.2  | 6.1   | 9.0   | 135.6  | 95.9   | 342.8  | 233.0  | 253.5  |
| 63.1  | 73.4   | 0.1   | 0.2   | 86.1   | 81.1   | 2.4    | 2.9    | 2.3    |
| 0.4   | 0.2    | 4.6   | 1.4   | 0.4    | 0.2    | 5.4    | 2.6    | 0.5    |
| 990.7 | 1553.6 | 505.7 | 630.6 | 1533.7 | 1715.3 | 1206.9 | 802.8  | 898.9  |
| 5.0   | 2.3    | 1.4   | 0.5   | 4.5    | 3.5    | 54.5   | 85.2   | 92.3   |
| 6.9   | 8.4    | 27.4  | 23.0  | 21.1   | 8.7    | 39.8   | 90.7   | 119.9  |
| 39.9  | 29.6   | 14.6  | 15.4  | 54.8   | 29.2   | 12.0   | 17.3   | 12.1   |
| 2.1   | 9.7    | 8.5   | 8.7   | 2.4    | 3.4    | 12.9   | 11.5   | 8.8    |
| 2.0   | 5.0    | 4.1   | 1.6   | 7.2    | 13.1   | 8.6    | 10.6   | 9.1    |
| 32.4  | 39.5   | 8.7   | 10.4  | 40.1   | 31.8   | 98.2   | 96.0   | 99.4   |
| 8.0   | 8.4    | 0.4   | 0.7   | 4.6    | 10.2   | 10.2   | 9.8    | 16.6   |
| 185.3 | 270.8  | 107.2 | 133.8 | 249.4  | 261.4  | 198.6  | 136.4  | 144.7  |
| 3.9   | 6.8    | 8.5   | 4.0   | 0.6    | 2.8    | 12.7   | 9.4    | 1.7    |
| 30.8  | 30.3   | 12.1  | 12.1  | 66.5   | 39.5   | 74.1   | 58.0   | 67.2   |
| 197.2 | 184.9  | 10.6  | 10.3  | 228.4  | 152.0  | 18.7   | 19.7   | 14.9   |
| 61.9  | 87.4   | 7.2   | 8.5   | 77.3   | 98.2   | 36.2   | 34.3   | 34.8   |
| 75.4  | 56.0   | 66.3  | 93.2  | 103.1  | 88.5   | 96.6   | 73.2   | 95.5   |
| 278.0 | 363.9  | 140.2 | 131.0 | 407.8  | 291.5  | 3677.3 | 4240.9 | 4606.5 |
| 28.5  | 36.7   | 1.5   | 11.1  | 41.4   | 44.2   | 6.9    | 7.3    | 7.3    |
| 5.0   | 11.7   | 10.9  | 16.7  | 6.0    | 19.4   | 29.4   | 25.9   | 22.5   |
| 1.1   | 1.8    | 2.2   | 1.3   | 6.1    | 3.1    | 1.2    | 1.5    | 1.3    |
| 16.8  | 16.1   | 18.2  | 13.1  | 12.4   | 21.3   | 22.6   | 24.2   | 36.2   |
| 16.5  | 13.7   | 10.3  | 10.8  | 23.5   | 15.0   | 15.8   | 15.9   | 12.7   |
| 17.3  | 14.8   | 23.0  | 9.5   | 22.3   | 11.1   | 32.4   | 16.0   | 29.5   |
| 9.5   | 3.0    | 3.6   | 0.6   | 0.7    | 5.9    | 4.7    | 5.1    | 4.0    |
| 133.5 | 134.6  | 0.6   | 1.0   | 261.2  | 148.5  | 1.3    | 2.8    | 3.1    |
| 0.3   | 3.5    | 0.3   | 4.5   | 0.6    | 4.0    | 0.7    | 1.3    | 5.4    |
| 104.2 | 144.4  | 7.2   | 7.4   | 191.9  | 196.4  | 510.2  | 402.0  | 435.8  |
| 17.4  | 38.4   | 8.9   | 6.4   | 54.6   | 44.4   | 44.9   | 39.4   | 45.7   |
| 26.6  | 18.4   | 30.2  | 22.8  | 24.0   | 24.7   | 43.2   | 71.3   | 73.7   |
| 67.6  | 59.6   | 23.2  | 35.7  | 90.7   | 93.3   | 108.0  | 87.0   | 83.3   |
| 214.7 | 295.1  | 8.0   | 26.4  | 308.7  | 345.8  | 932.4  | 703.3  | 742.0  |
| 88.3  | 185.8  | 27.2  | 27.9  | 143.3  | 174.9  | 432.6  | 339.8  | 407.0  |
| 35.8  | 41.3   | 45.3  | 26.6  | 69.5   | 53.1   | 61.6   | 49.7   | 58.3   |
| 76.2  | 87.5   | 26.4  | 31.1  | 107.4  | 58.3   | 50.9   | 4.0    | 30.0   |
| 1.4   | 1.3    | 0.8   | 0.9   | 1.6    | 1.8    | 1.1    | 7.3    | 2.3    |
| 16.3  | 25.6   | 0.7   | 5.7   | 26.0   | 14.1   | 86.5   | 68.5   | 77.5   |
| 31.8  | 69.5   | 33.4  | 61.7  | 71.6   | 44.3   | 191.7  | 134.2  | 137.5  |
| 7.3   | 23.3   | 19.3  | 20.1  | 17.8   | 28.2   | 104.6  | 107.4  | 118.7  |
| 14.9  | 28.9   | 3.6   | 11.0  | 16.6   | 21.0   | 89.8   | 73.1   | 95.5   |
| 0.3   | 0.8    | 0.9   | 0.8   | 2.8    | 1.9    | 1.1    | 2.8    | 1.3    |
| 37.4  | 48.0   | 22.4  | 8.7   | 70.6   | 47.7   | 8.8    | 23.2   | 27.2   |
| 18.7  | 12.6   | 24.1  | 15.8  | 18.9   | 16.7   | 125.9  | 178.6  | 209.3  |
| 5.5   | 4.4    | 0.6   | 0.3   | 5.9    | 9.1    | 6.5    | 7.5    | 3.7    |
| 12.7  | 1.5    | 5.3   | 0.9   | 5.1    | 1.5    | 8.3    | 10.4   | 8.4    |
| 322.1 | 426.8  | 254.7 | 301.4 | 361.6  | 268.1  | 1540.2 | 1499.2 | 1759.2 |
| 3.8   | 1.1    | 5.6   | 0.5   | 1.3    | 4.9    | 0.3    | 0.4    | 1.9    |
| 0.5   | 12.9   | 5.3   | 1.3   | 2.2    | 17.6   | 8.8    | 5.1    | 5.7    |
| 242.9 | 256.3  | 589.9 | 775.7 | 461.0  | 277.7  | 159.1  | 108.1  | 161.7  |

|       |       |       |       |       |       |        |       |       |
|-------|-------|-------|-------|-------|-------|--------|-------|-------|
| 11.0  | 5.3   | 13.5  | 10.6  | 9.1   | 5.4   | 9.0    | 47.8  | 24.3  |
| 12.9  | 14.7  | 5.8   | 12.2  | 9.7   | 9.8   | 19.0   | 16.7  | 16.8  |
| 42.4  | 53.5  | 26.0  | 29.2  | 65.5  | 43.6  | 142.3  | 127.4 | 112.5 |
| 0.8   | 1.1   | 0.9   | 0.7   | 9.2   | 2.2   | 1.7    | 1.5   | 1.5   |
| 13.9  | 2.4   | 138.8 | 205.5 | 14.8  | 6.9   | 111.3  | 68.5  | 97.8  |
| 96.9  | 104.2 | 8.6   | 2.6   | 124.3 | 117.5 | 157.6  | 53.5  | 59.3  |
| 235.4 | 327.2 | 69.7  | 73.6  | 447.5 | 248.8 | 1141.8 | 872.6 | 970.8 |
| 39.3  | 55.7  | 37.6  | 59.9  | 74.9  | 59.1  | 149.0  | 99.7  | 107.7 |
| 58.7  | 54.8  | 62.1  | 77.2  | 72.4  | 38.9  | 150.4  | 156.5 | 188.0 |
| 155.8 | 202.5 | 134.8 | 152.1 | 229.6 | 142.3 | 304.7  | 293.6 | 310.5 |
| 2.1   | 2.6   | 13.8  | 3.4   | 4.7   | 2.2   | 5.9    | 3.8   | 6.6   |
| 1.4   | 3.3   | 0.9   | 1.1   | 3.8   | 4.0   | 3.1    | 2.5   | 2.3   |
| 5.9   | 2.4   | 0.8   | 2.6   | 5.7   | 6.0   | 3.0    | 3.0   | 1.2   |
| 66.5  | 135.7 | 18.0  | 12.0  | 87.8  | 127.4 | 104.0  | 77.0  | 86.9  |
| 56.6  | 66.9  | 20.0  | 23.2  | 65.4  | 41.3  | 33.1   | 17.4  | 16.1  |
| 22.0  | 19.3  | 9.8   | 13.8  | 8.4   | 20.1  | 24.8   | 44.5  | 30.2  |
| 6.2   | 3.4   | 2.4   | 1.3   | 2.8   | 3.7   | 5.6    | 3.7   | 2.4   |
| 14.5  | 5.5   | 8.6   | 3.6   | 23.5  | 18.7  | 20.1   | 12.9  | 14.6  |
| 0.8   | 5.1   | 1.0   | 1.8   | 3.2   | 1.7   | 1.9    | 2.9   | 1.9   |
| 67.6  | 83.8  | 25.6  | 32.9  | 70.3  | 44.9  | 130.0  | 111.5 | 116.5 |
| 7.4   | 2.2   | 7.8   | 11.0  | 8.9   | 11.7  | 7.3    | 10.6  | 2.4   |
| 65.9  | 91.4  | 1.2   | 0.7   | 140.2 | 90.3  | 3.8    | 1.4   | 2.6   |
| 25.6  | 35.5  | 16.6  | 14.7  | 38.1  | 43.5  | 52.9   | 59.0  | 62.6  |
| 1.5   | 4.1   | 8.8   | 0.4   | 25.0  | 10.4  | 22.4   | 18.8  | 28.3  |
| 385.3 | 536.5 | 6.4   | 7.3   | 491.5 | 473.1 | 23.8   | 19.7  | 22.0  |
| 0.6   | 6.1   | 2.2   | 4.6   | 8.8   | 2.7   | 7.3    | 9.6   | 7.4   |
| 16.4  | 36.2  | 12.2  | 15.5  | 39.9  | 25.4  | 46.4   | 51.1  | 54.2  |
| 3.7   | 14.2  | 6.9   | 1.4   | 1.1   | 8.9   | 45.7   | 52.2  | 53.9  |
| 6.7   | 4.8   | 5.3   | 7.4   | 7.3   | 8.2   | 9.2    | 4.9   | 9.2   |
| 0.6   | 0.8   | 0.5   | 1.0   | 1.6   | 13.2  | 2.1    | 1.2   | 0.8   |
| 38.2  | 23.0  | 16.3  | 24.1  | 51.2  | 38.3  | 128.2  | 70.5  | 69.9  |
| 0.9   | 1.9   | 6.4   | 1.7   | 0.4   | 1.8   | 4.3    | 7.2   | 2.2   |
| 16.3  | 13.1  | 152.0 | 179.7 | 28.4  | 15.2  | 2.1    | 3.9   | 1.1   |
| 3.1   | 14.2  | 10.8  | 12.8  | 6.3   | 3.7   | 12.3   | 27.6  | 13.3  |
| 5.8   | 5.1   | 9.8   | 0.8   | 7.1   | 10.6  | 9.8    | 12.1  | 3.5   |
| 0.9   | 0.6   | 3.5   | 9.2   | 0.4   | 1.0   | 1.0    | 0.8   | 4.5   |
| 1.2   | 0.9   | 3.3   | 4.3   | 10.3  | 0.9   | 23.3   | 22.5  | 16.7  |
| 208.9 | 222.2 | 23.4  | 24.7  | 392.5 | 193.4 | 18.9   | 5.8   | 13.5  |
| 12.9  | 15.0  | 2.4   | 7.8   | 1.6   | 4.8   | 16.1   | 2.5   | 14.6  |
| 11.4  | 14.8  | 90.1  | 84.7  | 27.0  | 19.3  | 24.4   | 23.9  | 30.1  |
| 298.3 | 362.7 | 0.7   | 0.6   | 427.9 | 275.2 | 4.1    | 1.4   | 3.1   |
| 62.7  | 82.8  | 18.8  | 42.7  | 102.7 | 82.0  | 118.4  | 62.4  | 61.9  |
| 80.6  | 137.2 | 34.3  | 36.6  | 144.4 | 111.4 | 406.3  | 318.8 | 357.5 |
| 19.6  | 12.6  | 24.7  | 17.4  | 13.0  | 22.0  | 23.2   | 34.5  | 33.3  |
| 7.5   | 16.9  | 7.3   | 8.8   | 14.7  | 11.1  | 87.0   | 71.2  | 83.2  |
| 102.9 | 110.6 | 25.3  | 24.8  | 197.6 | 116.3 | 196.5  | 139.7 | 163.7 |
| 254.9 | 261.4 | 122.9 | 117.9 | 451.1 | 258.8 | 190.5  | 115.7 | 140.8 |
| 87.3  | 90.2  | 104.9 | 95.7  | 120.7 | 95.0  | 228.7  | 267.6 | 320.3 |
| 25.9  | 52.3  | 12.7  | 12.9  | 30.7  | 45.4  | 32.3   | 29.4  | 24.1  |
| 27.4  | 19.3  | 8.7   | 9.2   | 44.9  | 26.4  | 25.8   | 30.4  | 24.2  |
| 2.2   | 16.3  | 7.4   | 1.2   | 1.1   | 6.0   | 2.8    | 5.0   | 10.5  |
| 18.7  | 10.1  | 13.9  | 17.6  | 10.2  | 3.8   | 22.1   | 23.9  | 24.6  |
| 1.2   | 11.6  | 4.4   | 1.3   | 1.7   | 3.7   | 15.7   | 7.7   | 14.8  |

|       |       |       |       |       |       |        |       |        |
|-------|-------|-------|-------|-------|-------|--------|-------|--------|
| 3.6   | 1.8   | 2.4   | 0.8   | 0.7   | 3.5   | 13.6   | 12.5  | 7.3    |
| 4.5   | 1.0   | 3.2   | 0.4   | 3.1   | 0.2   | 1.1    | 1.7   | 3.5    |
| 271.8 | 377.1 | 175.3 | 262.7 | 415.4 | 330.7 | 1084.1 | 857.9 | 1038.6 |
| 7.1   | 16.5  | 2.5   | 10.5  | 23.1  | 3.2   | 0.8    | 0.9   | 1.3    |
| 15.2  | 17.9  | 10.4  | 4.9   | 18.8  | 25.9  | 45.2   | 58.9  | 46.9   |
| 24.7  | 33.2  | 27.4  | 22.6  | 36.0  | 47.7  | 70.8   | 61.5  | 64.4   |
| 10.2  | 13.1  | 11.3  | 1.5   | 2.8   | 8.2   | 10.7   | 10.3  | 15.1   |
| 98.8  | 113.1 | 0.4   | 1.3   | 110.7 | 105.2 | 9.1    | 3.5   | 9.4    |
| 43.2  | 62.9  | 0.4   | 0.6   | 60.5  | 36.0  | 3.4    | 4.4   | 3.1    |
| 105.8 | 100.4 | 59.2  | 39.2  | 134.9 | 89.3  | 85.9   | 51.8  | 52.4   |
| 11.5  | 6.0   | 9.7   | 8.2   | 4.6   | 5.1   | 10.8   | 2.9   | 19.9   |
| 15.1  | 16.1  | 3.3   | 7.3   | 21.6  | 4.7   | 24.8   | 22.7  | 20.2   |
| 64.0  | 62.4  | 27.7  | 39.0  | 65.1  | 57.4  | 185.5  | 90.3  | 117.6  |
| 0.7   | 1.2   | 2.8   | 10.3  | 1.2   | 1.4   | 0.7    | 1.0   | 1.4    |
| 9.3   | 0.9   | 2.5   | 5.5   | 2.6   | 2.1   | 8.3    | 2.9   | 12.5   |
| 194.2 | 244.3 | 183.9 | 243.8 | 261.1 | 208.2 | 324.4  | 282.1 | 410.4  |
| 67.8  | 62.0  | 4.3   | 13.7  | 81.3  | 75.7  | 17.7   | 25.1  | 5.3    |
| 11.3  | 5.9   | 1.8   | 1.1   | 14.1  | 18.3  | 15.1   | 13.8  | 9.7    |
| 9.3   | 4.5   | 13.1  | 4.6   | 14.9  | 5.0   | 66.4   | 51.4  | 58.6   |
| 2.9   | 7.9   | 6.9   | 5.9   | 16.3  | 10.0  | 69.2   | 38.3  | 39.0   |
| 38.3  | 48.0  | 45.2  | 46.2  | 50.5  | 45.0  | 77.3   | 117.5 | 121.2  |
| 1.6   | 1.7   | 11.9  | 8.4   | 4.6   | 0.9   | 5.3    | 3.5   | 10.1   |
| 1.2   | 6.7   | 1.8   | 5.1   | 6.2   | 0.8   | 3.1    | 0.7   | 7.7    |
| 1.7   | 0.9   | 1.9   | 2.5   | 0.6   | 0.3   | 0.8    | 0.7   | 0.9    |
| 9.4   | 5.2   | 0.8   | 8.7   | 1.2   | 6.5   | 6.2    | 1.0   | 1.9    |
| 1.2   | 2.2   | 1.4   | 2.6   | 1.6   | 1.2   | 8.1    | 3.0   | 4.5    |
| 6.6   | 13.3  | 25.0  | 8.9   | 12.9  | 3.2   | 9.9    | 7.3   | 9.0    |
| 14.1  | 18.6  | 0.5   | 1.0   | 5.8   | 9.8   | 8.9    | 3.5   | 2.2    |
| 2.3   | 9.4   | 13.7  | 3.2   | 2.1   | 8.1   | 9.4    | 9.4   | 8.0    |
| 12.4  | 1.1   | 6.7   | 9.8   | 17.1  | 13.4  | 19.8   | 22.4  | 17.4   |
| 1.0   | 0.6   | 2.8   | 0.5   | 1.4   | 3.1   | 0.6    | 0.5   | 0.9    |
| 3.2   | 8.9   | 4.2   | 3.0   | 12.0  | 20.0  | 19.9   | 29.3  | 41.4   |
| 11.7  | 13.2  | 6.2   | 0.8   | 38.8  | 14.4  | 21.1   | 9.8   | 12.9   |
| 2.8   | 2.5   | 1.2   | 8.9   | 3.5   | 6.0   | 3.2    | 10.2  | 8.5    |
| 6.3   | 5.9   | 21.1  | 11.0  | 11.2  | 6.7   | 14.7   | 32.5  | 39.5   |
| 4.6   | 1.4   | 3.6   | 1.7   | 4.0   | 1.2   | 3.8    | 2.6   | 3.2    |
| 6.2   | 17.0  | 3.0   | 4.9   | 5.1   | 2.0   | 17.2   | 7.0   | 16.6   |
| 18.2  | 18.2  | 18.3  | 11.6  | 20.4  | 9.2   | 14.4   | 19.4  | 14.1   |
| 2.9   | 1.3   | 3.7   | 2.5   | 2.9   | 1.9   | 26.9   | 4.5   | 8.8    |
| 8.1   | 18.5  | 59.4  | 42.0  | 22.2  | 5.5   | 115.7  | 95.0  | 96.5   |
| 3.1   | 2.3   | 2.1   | 1.7   | 1.0   | 1.7   | 4.7    | 2.0   | 2.9    |
| 12.8  | 16.6  | 21.3  | 17.1  | 16.8  | 12.9  | 17.0   | 19.4  | 24.3   |
| 13.9  | 8.2   | 10.1  | 4.6   | 2.1   | 9.4   | 14.0   | 17.5  | 9.9    |
| 115.0 | 129.9 | 6.5   | 1.0   | 165.1 | 91.6  | 84.0   | 139.7 | 131.7  |
| 6.4   | 3.4   | 2.9   | 1.8   | 16.8  | 4.6   | 30.7   | 32.8  | 26.7   |
| 6.0   | 4.3   | 5.8   | 5.1   | 4.8   | 2.9   | 9.9    | 6.5   | 10.9   |
| 17.9  | 17.2  | 10.3  | 15.3  | 30.6  | 1.5   | 40.3   | 39.2  | 41.8   |
| 6.8   | 7.8   | 18.3  | 30.4  | 11.6  | 3.4   | 22.0   | 69.5  | 52.8   |
| 6.8   | 9.0   | 5.9   | 0.5   | 13.4  | 1.6   | 53.6   | 42.8  | 49.0   |
| 30.4  | 151.1 | 54.7  | 76.8  | 53.7  | 100.2 | 335.6  | 265.7 | 237.5  |
| 88.4  | 105.7 | 6.5   | 1.5   | 181.8 | 91.7  | 5.3    | 4.1   | 7.0    |
| 61.4  | 49.4  | 7.3   | 0.9   | 84.6  | 26.0  | 36.4   | 32.1  | 35.2   |
| 2.3   | 4.5   | 9.5   | 1.3   | 1.6   | 7.3   | 11.5   | 15.6  | 15.6   |

|       |       |       |       |       |       |       |       |       |
|-------|-------|-------|-------|-------|-------|-------|-------|-------|
| 5.2   | 10.5  | 13.6  | 9.8   | 6.5   | 1.3   | 23.2  | 29.9  | 33.9  |
| 4.0   | 14.4  | 10.2  | 5.2   | 14.5  | 23.4  | 24.2  | 24.5  | 26.8  |
| 0.3   | 0.1   | 0.5   | 4.1   | 3.8   | 1.2   | 2.0   | 1.9   | 7.7   |
| 3.6   | 8.5   | 2.9   | 1.1   | 12.3  | 8.0   | 1.6   | 3.7   | 4.7   |
| 1.6   | 1.5   | 1.9   | 2.7   | 2.6   | 1.2   | 3.7   | 6.3   | 5.4   |
| 14.7  | 17.5  | 13.6  | 15.3  | 8.0   | 22.2  | 12.1  | 2.3   | 2.9   |
| 78.1  | 51.1  | 24.5  | 26.8  | 110.6 | 60.2  | 704.6 | 854.1 | 886.8 |
| 7.0   | 12.9  | 30.9  | 34.2  | 11.0  | 15.9  | 33.0  | 50.0  | 52.5  |
| 5.5   | 2.5   | 10.4  | 3.1   | 5.5   | 1.0   | 150.7 | 112.2 | 177.0 |
| 42.2  | 40.7  | 22.7  | 10.4  | 53.8  | 48.4  | 24.1  | 6.9   | 8.1   |
| 1.1   | 10.6  | 1.8   | 6.2   | 2.6   | 9.3   | 16.6  | 5.0   | 16.5  |
| 13.5  | 13.0  | 15.1  | 7.9   | 2.1   | 16.4  | 255.3 | 169.5 | 226.8 |
| 96.5  | 127.4 | 14.6  | 20.4  | 145.1 | 130.9 | 84.3  | 37.2  | 40.2  |
| 1.8   | 1.1   | 27.7  | 31.1  | 4.5   | 1.7   | 4.1   | 18.9  | 11.5  |
| 4.4   | 6.0   | 10.3  | 7.3   | 0.1   | 3.8   | 10.8  | 7.5   | 3.4   |
| 1.1   | 2.4   | 3.3   | 3.9   | 11.0  | 1.6   | 9.3   | 12.0  | 8.5   |
| 2.3   | 4.4   | 1.7   | 6.1   | 5.6   | 6.4   | 21.6  | 30.4  | 26.0  |
| 3.0   | 8.5   | 4.7   | 11.6  | 4.4   | 4.0   | 9.8   | 2.8   | 6.6   |
| 2.4   | 1.3   | 2.1   | 9.3   | 9.2   | 5.5   | 7.7   | 7.8   | 5.8   |
| 43.5  | 40.2  | 84.2  | 110.9 | 91.6  | 43.8  | 129.0 | 111.6 | 135.0 |
| 34.9  | 37.1  | 140.4 | 186.6 | 37.0  | 24.0  | 275.0 | 430.4 | 479.1 |
| 1.9   | 8.6   | 2.7   | 4.9   | 4.2   | 7.1   | 14.8  | 12.5  | 9.6   |
| 5.2   | 8.4   | 7.3   | 7.1   | 1.6   | 18.8  | 13.4  | 17.8  | 23.6  |
| 25.4  | 25.3  | 4.8   | 0.4   | 43.8  | 22.7  | 7.3   | 13.0  | 8.4   |
| 26.9  | 15.5  | 19.3  | 17.8  | 19.2  | 36.2  | 35.3  | 7.3   | 23.5  |
| 1.0   | 15.7  | 6.2   | 0.3   | 14.9  | 25.1  | 5.3   | 0.4   | 0.9   |
| 2.1   | 7.8   | 4.3   | 7.6   | 15.1  | 9.6   | 6.2   | 7.2   | 8.6   |
| 13.1  | 18.3  | 13.1  | 28.3  | 49.7  | 23.5  | 139.5 | 160.7 | 186.3 |
| 20.6  | 27.2  | 2.9   | 0.3   | 34.3  | 23.8  | 4.7   | 2.1   | 0.3   |
| 2.4   | 0.2   | 2.0   | 0.6   | 2.1   | 0.3   | 10.9  | 6.3   | 9.7   |
| 185.0 | 203.4 | 41.4  | 52.0  | 282.8 | 224.3 | 185.9 | 173.6 | 190.6 |
| 23.6  | 30.5  | 0.2   | 2.2   | 48.1  | 30.6  | 4.6   | 3.0   | 1.9   |
| 3.1   | 3.1   | 2.2   | 1.5   | 8.9   | 1.5   | 2.7   | 1.6   | 9.6   |
| 8.9   | 12.1  | 6.9   | 0.6   | 1.0   | 3.5   | 32.0  | 15.6  | 6.8   |
| 3.0   | 12.7  | 3.3   | 0.6   | 2.9   | 12.2  | 49.6  | 33.9  | 37.6  |
| 124.3 | 234.0 | 1.4   | 2.7   | 204.0 | 137.3 | 5.6   | 8.6   | 2.2   |
| 35.0  | 46.5  | 22.9  | 12.9  | 55.7  | 47.1  | 46.4  | 44.5  | 69.5  |
| 7.7   | 12.6  | 1.8   | 3.5   | 13.0  | 2.1   | 20.4  | 9.0   | 17.1  |
| 8.8   | 5.3   | 2.2   | 1.6   | 7.6   | 0.8   | 9.0   | 5.9   | 1.1   |
| 9.3   | 7.2   | 0.4   | 5.5   | 9.7   | 8.1   | 11.3  | 12.3  | 15.5  |
| 4.5   | 2.8   | 4.2   | 2.9   | 6.7   | 13.7  | 47.7  | 30.0  | 28.4  |
| 4.7   | 19.8  | 13.8  | 5.5   | 22.8  | 6.9   | 2.3   | 11.0  | 7.9   |
| 19.2  | 7.7   | 14.9  | 17.5  | 24.5  | 36.4  | 42.7  | 62.3  | 48.5  |
| 97.9  | 111.3 | 23.1  | 11.7  | 119.0 | 94.4  | 385.9 | 405.4 | 368.2 |
| 4.2   | 11.6  | 9.9   | 12.9  | 5.9   | 9.0   | 15.1  | 17.6  | 16.6  |
| 4.1   | 3.4   | 3.9   | 3.2   | 15.2  | 4.7   | 8.1   | 18.4  | 24.0  |
| 0.7   | 3.5   | 3.6   | 4.9   | 3.0   | 6.0   | 3.1   | 1.7   | 6.3   |
| 40.5  | 84.4  | 5.8   | 11.2  | 74.3  | 73.6  | 121.6 | 52.8  | 51.5  |
| 7.6   | 5.2   | 17.1  | 13.5  | 6.1   | 18.6  | 9.6   | 7.5   | 5.0   |
| 2.1   | 1.0   | 8.2   | 1.6   | 4.8   | 13.6  | 14.1  | 9.5   | 13.8  |
| 41.4  | 38.1  | 19.0  | 14.5  | 80.0  | 51.1  | 187.2 | 164.2 | 187.3 |
| 2.2   | 11.1  | 2.5   | 1.2   | 2.1   | 3.6   | 18.2  | 24.1  | 35.2  |
| 2.4   | 0.2   | 1.1   | 5.4   | 4.7   | 2.9   | 47.8  | 105.0 | 112.3 |



|       |       |      |      |       |       |       |       |       |
|-------|-------|------|------|-------|-------|-------|-------|-------|
| 78.0  | 115.4 | 14.4 | 13.8 | 74.8  | 111.0 | 77.3  | 99.1  | 94.5  |
| 27.1  | 51.3  | 10.6 | 8.1  | 27.0  | 45.0  | 69.4  | 44.8  | 45.1  |
| 2.1   | 18.4  | 13.7 | 27.1 | 28.4  | 17.0  | 37.5  | 23.4  | 46.7  |
| 133.7 | 167.8 | 64.2 | 54.6 | 133.8 | 156.9 | 270.8 | 273.0 | 286.1 |
| 3.0   | 1.8   | 0.6  | 0.4  | 4.9   | 0.3   | 3.8   | 0.4   | 5.3   |
| 10.7  | 15.3  | 12.5 | 12.9 | 14.1  | 4.1   | 523.2 | 574.3 | 613.8 |
| 34.2  | 25.5  | 28.3 | 14.4 | 43.6  | 16.2  | 27.0  | 22.0  | 36.7  |
| 0.9   | 7.8   | 1.7  | 2.6  | 2.0   | 6.2   | 1.6   | 1.2   | 2.2   |
| 10.4  | 5.2   | 0.8  | 0.5  | 4.0   | 11.1  | 15.9  | 22.4  | 24.8  |
| 3.8   | 1.8   | 3.5  | 3.9  | 5.0   | 10.1  | 10.6  | 15.0  | 17.1  |
| 19.6  | 5.5   | 1.1  | 3.6  | 45.7  | 36.5  | 3.1   | 8.7   | 8.5   |
| 25.3  | 42.9  | 32.9 | 34.6 | 55.0  | 30.0  | 76.3  | 84.9  | 89.4  |
| 1.2   | 1.0   | 1.1  | 2.1  | 8.9   | 4.2   | 3.5   | 2.5   | 2.6   |
| 1.2   | 22.4  | 5.7  | 12.0 | 17.3  | 19.2  | 3.7   | 8.8   | 11.0  |
| 4.5   | 9.9   | 19.6 | 14.6 | 7.1   | 16.9  | 18.8  | 16.4  | 20.7  |
| 164.9 | 174.1 | 67.1 | 70.5 | 237.4 | 154.0 | 276.1 | 244.5 | 277.8 |
| 55.3  | 68.9  | 28.3 | 45.2 | 76.6  | 60.0  | 353.2 | 321.6 | 353.4 |
| 0.9   | 8.7   | 2.3  | 0.9  | 1.8   | 13.2  | 7.3   | 8.2   | 13.3  |
| 17.2  | 31.3  | 3.0  | 7.9  | 35.7  | 24.0  | 24.7  | 17.0  | 21.0  |
| 66.9  | 65.2  | 50.3 | 52.2 | 70.4  | 68.3  | 110.9 | 73.5  | 108.6 |
| 3.2   | 12.6  | 2.3  | 2.7  | 14.6  | 15.8  | 13.3  | 27.1  | 28.5  |
| 1.5   | 1.5   | 1.6  | 0.9  | 1.9   | 1.9   | 2.8   | 1.5   | 2.2   |
| 0.8   | 8.9   | 18.1 | 2.7  | 2.1   | 8.8   | 7.8   | 23.7  | 14.7  |
| 44.4  | 51.0  | 36.2 | 26.3 | 50.4  | 36.8  | 84.5  | 86.0  | 95.1  |
| 0.8   | 0.2   | 3.0  | 0.9  | 6.2   | 6.2   | 5.2   | 14.7  | 12.5  |
| 1.0   | 2.0   | 1.1  | 0.7  | 2.3   | 2.1   | 2.5   | 1.6   | 2.0   |
| 0.7   | 12.9  | 0.9  | 2.5  | 18.9  | 12.3  | 15.1  | 11.2  | 11.6  |
| 8.8   | 20.8  | 17.2 | 16.0 | 1.6   | 8.5   | 22.7  | 16.8  | 11.6  |
| 1.7   | 0.5   | 8.9  | 4.5  | 0.5   | 1.0   | 1.0   | 2.5   | 0.8   |
| 1.0   | 6.7   | 1.6  | 0.8  | 4.2   | 4.1   | 7.6   | 5.3   | 2.4   |
| 0.5   | 4.4   | 6.6  | 3.9  | 0.9   | 7.9   | 1.5   | 2.3   | 1.8   |
| 0.5   | 1.5   | 1.5  | 0.7  | 11.3  | 0.9   | 2.6   | 5.5   | 1.9   |
| 0.8   | 0.7   | 0.4  | 0.9  | 1.1   | 0.6   | 0.6   | 1.2   | 0.6   |
| 1.4   | 10.2  | 1.2  | 0.5  | 27.9  | 1.2   | 1.1   | 1.1   | 0.9   |
| 112.7 | 127.6 | 44.4 | 64.3 | 192.7 | 115.1 | 529.0 | 486.0 | 573.7 |
| 63.6  | 67.2  | 3.5  | 15.4 | 102.0 | 63.4  | 39.6  | 53.9  | 62.8  |
| 3.6   | 1.7   | 4.9  | 8.1  | 1.5   | 1.5   | 3.5   | 2.2   | 1.3   |
| 1.3   | 0.8   | 12.8 | 3.3  | 3.5   | 12.0  | 2.2   | 10.6  | 5.4   |
| 12.1  | 1.1   | 1.5  | 4.4  | 13.5  | 9.8   | 8.1   | 15.4  | 20.1  |
| 14.7  | 17.8  | 6.3  | 4.3  | 17.4  | 25.4  | 60.6  | 84.8  | 84.0  |
| 2.7   | 0.8   | 1.2  | 1.0  | 1.9   | 5.9   | 2.5   | 4.2   | 6.5   |
| 0.3   | 1.1   | 1.6  | 0.3  | 5.8   | 4.2   | 5.8   | 2.1   | 2.1   |
| 0.9   | 1.3   | 0.9  | 0.2  | 1.2   | 0.6   | 5.7   | 1.4   | 1.2   |
| 14.1  | 39.3  | 16.2 | 29.0 | 37.0  | 40.7  | 81.2  | 102.8 | 58.6  |
| 5.7   | 13.5  | 2.1  | 2.3  | 6.4   | 19.0  | 3.5   | 7.6   | 2.4   |
| 21.7  | 18.7  | 2.3  | 14.5 | 28.3  | 28.0  | 97.6  | 54.0  | 52.7  |
| 5.9   | 7.5   | 19.8 | 16.5 | 17.6  | 11.5  | 30.7  | 17.3  | 28.8  |
| 3.5   | 7.1   | 11.5 | 9.5  | 5.4   | 11.2  | 14.9  | 15.9  | 13.0  |
| 3.7   | 2.4   | 7.6  | 15.5 | 0.6   | 1.8   | 11.4  | 14.4  | 11.9  |
| 5.1   | 8.5   | 2.5  | 0.2  | 2.8   | 2.3   | 5.4   | 7.5   | 7.5   |
| 0.7   | 6.4   | 0.4  | 1.7  | 0.6   | 2.9   | 6.8   | 3.2   | 7.6   |
| 2.8   | 0.8   | 1.9  | 1.3  | 0.6   | 0.5   | 2.0   | 1.9   | 1.8   |
| 10.4  | 14.5  | 8.6  | 10.0 | 8.2   | 14.3  | 21.4  | 20.6  | 11.8  |

|       |       |       |       |       |       |       |       |       |
|-------|-------|-------|-------|-------|-------|-------|-------|-------|
| 4.3   | 7.1   | 8.5   | 2.1   | 3.2   | 4.6   | 8.8   | 6.4   | 1.3   |
| 21.4  | 9.1   | 11.2  | 11.4  | 13.8  | 6.1   | 18.2  | 13.5  | 15.1  |
| 20.9  | 66.0  | 9.0   | 6.5   | 46.5  | 38.9  | 1.5   | 3.1   | 1.5   |
| 127.8 | 194.6 | 42.1  | 52.5  | 189.5 | 159.5 | 370.0 | 337.7 | 367.8 |
| 3.5   | 2.3   | 3.2   | 6.8   | 4.5   | 3.6   | 4.3   | 7.0   | 9.4   |
| 1.0   | 2.6   | 1.8   | 8.3   | 1.7   | 1.5   | 10.2  | 10.3  | 4.4   |
| 10.2  | 38.9  | 2.2   | 3.8   | 27.4  | 34.3  | 14.0  | 7.9   | 16.4  |
| 1.9   | 2.4   | 2.1   | 1.9   | 1.8   | 3.5   | 4.3   | 3.0   | 2.8   |
| 1.5   | 1.8   | 3.5   | 2.5   | 2.0   | 6.6   | 22.1  | 39.9  | 49.8  |
| 0.8   | 5.4   | 65.1  | 129.7 | 2.5   | 2.5   | 22.4  | 18.2  | 27.1  |
| 3.9   | 18.9  | 1.0   | 5.0   | 6.7   | 6.7   | 6.2   | 6.6   | 12.6  |
| 0.8   | 8.9   | 4.8   | 3.1   | 1.0   | 2.4   | 7.4   | 7.7   | 5.2   |
| 267.2 | 277.1 | 109.6 | 146.3 | 390.6 | 290.0 | 491.6 | 426.4 | 492.5 |
| 9.3   | 9.4   | 5.7   | 0.5   | 1.1   | 2.4   | 2.4   | 4.2   | 0.5   |
| 145.7 | 195.7 | 54.3  | 44.8  | 248.0 | 179.8 | 365.1 | 443.9 | 452.6 |
| 1.4   | 2.1   | 1.3   | 1.7   | 2.3   | 2.0   | 2.6   | 4.0   | 2.9   |
| 22.6  | 18.8  | 2.0   | 0.7   | 20.0  | 3.9   | 7.5   | 3.4   | 2.8   |
| 2.3   | 7.2   | 2.7   | 5.0   | 1.9   | 1.0   | 3.9   | 8.4   | 6.4   |
| 1.7   | 1.0   | 1.8   | 1.9   | 2.1   | 1.7   | 2.4   | 1.5   | 2.0   |
| 2.2   | 13.2  | 9.0   | 1.2   | 1.1   | 1.8   | 11.0  | 14.2  | 9.8   |
| 1.8   | 5.8   | 5.4   | 1.6   | 1.7   | 1.8   | 31.7  | 39.3  | 57.5  |
| 10.1  | 2.5   | 0.7   | 1.4   | 4.6   | 3.5   | 14.0  | 12.8  | 9.2   |
| 1.7   | 6.5   | 2.8   | 0.9   | 5.3   | 1.6   | 18.6  | 3.9   | 5.6   |
| 1.6   | 1.3   | 11.9  | 7.4   | 0.7   | 2.2   | 6.6   | 8.1   | 11.6  |
| 1.8   | 9.9   | 9.8   | 7.8   | 6.7   | 12.2  | 13.0  | 8.7   | 11.4  |
| 3.6   | 4.1   | 10.8  | 14.3  | 10.7  | 15.6  | 10.0  | 12.7  | 9.4   |
| 114.1 | 127.9 | 1.2   | 5.1   | 244.3 | 106.4 | 133.1 | 166.0 | 151.8 |
| 3.4   | 10.2  | 1.0   | 2.8   | 4.0   | 17.5  | 32.3  | 38.7  | 44.6  |
| 1.6   | 12.0  | 15.0  | 8.4   | 1.8   | 21.6  | 3.7   | 5.8   | 4.6   |
| 18.4  | 36.3  | 0.9   | 3.5   | 21.9  | 47.3  | 19.0  | 10.1  | 13.4  |
| 1.1   | 4.0   | 3.8   | 0.3   | 4.5   | 7.2   | 0.9   | 1.7   | 1.1   |
| 25.7  | 19.3  | 11.2  | 7.0   | 23.6  | 10.8  | 9.6   | 11.2  | 7.5   |
| 0.9   | 1.1   | 1.2   | 0.7   | 2.2   | 2.6   | 2.2   | 1.7   | 1.5   |
| 1.6   | 3.8   | 9.4   | 10.5  | 1.4   | 3.9   | 23.0  | 9.4   | 18.1  |
| 8.8   | 14.3  | 13.0  | 5.6   | 16.9  | 12.6  | 23.5  | 11.4  | 19.2  |
| 6.6   | 3.4   | 4.1   | 2.3   | 12.8  | 7.8   | 11.9  | 6.1   | 4.4   |
| 28.8  | 34.0  | 11.1  | 16.3  | 41.2  | 19.0  | 218.0 | 206.6 | 257.8 |
| 22.6  | 19.6  | 9.1   | 3.2   | 17.4  | 21.5  | 62.7  | 66.1  | 73.5  |
| 12.0  | 20.7  | 20.3  | 24.1  | 13.3  | 14.3  | 6.3   | 12.9  | 14.8  |
| 76.9  | 53.9  | 9.5   | 6.8   | 71.8  | 67.0  | 49.9  | 58.0  | 53.5  |
| 12.5  | 6.4   | 0.6   | 1.9   | 10.3  | 5.4   | 0.9   | 1.1   | 1.4   |
| 28.9  | 21.1  | 20.5  | 13.1  | 54.2  | 34.7  | 26.4  | 20.6  | 18.7  |
| 1.2   | 0.9   | 2.0   | 1.5   | 3.3   | 1.3   | 1.9   | 2.5   | 2.7   |
| 1.6   | 1.6   | 0.4   | 1.0   | 6.2   | 1.5   | 3.2   | 0.7   | 3.3   |
| 54.2  | 50.4  | 5.4   | 15.9  | 104.1 | 51.2  | 74.4  | 87.2  | 88.1  |
| 1.6   | 5.2   | 1.5   | 0.9   | 0.5   | 4.1   | 9.7   | 7.5   | 7.8   |
| 25.3  | 27.5  | 17.5  | 10.5  | 11.2  | 32.4  | 19.5  | 4.8   | 11.6  |
| 28.0  | 26.3  | 36.4  | 35.2  | 26.2  | 16.0  | 80.1  | 79.1  | 82.1  |
| 15.2  | 21.1  | 10.0  | 21.5  | 24.2  | 24.6  | 14.7  | 17.9  | 17.4  |
| 2.4   | 10.9  | 21.2  | 13.8  | 10.5  | 7.5   | 27.4  | 65.3  | 54.9  |
| 2.3   | 4.0   | 2.7   | 3.0   | 4.0   | 3.0   | 3.6   | 9.4   | 3.6   |
| 5.0   | 1.0   | 6.5   | 0.5   | 3.7   | 6.0   | 10.0  | 4.7   | 6.3   |
| 3.4   | 5.5   | 2.5   | 2.3   | 39.1  | 12.8  | 5.8   | 5.7   | 12.7  |

|       |       |       |       |       |       |        |        |        |
|-------|-------|-------|-------|-------|-------|--------|--------|--------|
| 6.2   | 7.7   | 7.5   | 7.5   | 13.9  | 3.6   | 17.7   | 16.1   | 15.1   |
| 20.9  | 54.8  | 5.7   | 9.7   | 48.8  | 58.3  | 58.4   | 62.1   | 74.2   |
| 8.4   | 11.4  | 6.2   | 7.7   | 1.7   | 5.1   | 8.2    | 9.8    | 9.9    |
| 0.7   | 1.0   | 1.4   | 0.5   | 0.4   | 1.3   | 1.4    | 2.0    | 0.9    |
| 11.3  | 3.6   | 1.5   | 6.4   | 1.5   | 8.8   | 4.3    | 10.9   | 5.7    |
| 11.6  | 11.4  | 22.7  | 8.7   | 13.6  | 14.9  | 25.1   | 21.7   | 16.3   |
| 2.1   | 16.0  | 32.6  | 22.6  | 23.6  | 15.6  | 5.5    | 22.9   | 20.8   |
| 34.0  | 44.8  | 47.6  | 39.0  | 48.1  | 39.0  | 41.7   | 36.8   | 58.3   |
| 81.4  | 43.8  | 9.0   | 12.5  | 66.5  | 53.0  | 88.2   | 65.2   | 71.6   |
| 23.2  | 21.7  | 13.8  | 8.1   | 26.7  | 17.5  | 17.0   | 29.4   | 31.8   |
| 101.9 | 214.6 | 0.3   | 6.6   | 380.6 | 223.1 | 75.7   | 60.8   | 60.4   |
| 3.0   | 9.6   | 3.5   | 0.5   | 3.2   | 1.3   | 9.8    | 2.8    | 5.4    |
| 30.2  | 33.5  | 19.4  | 21.8  | 32.5  | 20.8  | 76.0   | 53.1   | 55.0   |
| 1.7   | 2.5   | 10.0  | 11.5  | 2.0   | 2.6   | 5.7    | 4.6    | 12.1   |
| 1.9   | 2.6   | 1.4   | 3.9   | 16.2  | 2.8   | 17.7   | 27.1   | 20.9   |
| 30.9  | 30.7  | 0.3   | 4.3   | 33.5  | 41.2  | 70.0   | 63.1   | 41.9   |
| 0.4   | 11.3  | 6.1   | 3.4   | 20.4  | 10.1  | 5.7    | 4.7    | 5.6    |
| 6.4   | 12.5  | 15.2  | 13.3  | 8.0   | 14.0  | 28.9   | 24.6   | 24.6   |
| 12.4  | 9.0   | 1.4   | 3.1   | 15.6  | 17.4  | 2.4    | 8.2    | 8.9    |
| 179.1 | 181.8 | 252.9 | 380.5 | 275.0 | 140.8 | 1057.9 | 1028.4 | 1003.1 |
| 1.8   | 2.0   | 2.2   | 3.7   | 3.7   | 1.7   | 2.1    | 1.8    | 1.4    |
| 2.0   | 1.7   | 3.1   | 7.1   | 2.3   | 1.4   | 2.7    | 0.9    | 6.3    |
| 1.9   | 1.0   | 1.8   | 8.3   | 2.5   | 10.5  | 0.9    | 0.7    | 1.5    |
| 1.9   | 1.5   | 2.4   | 4.5   | 10.0  | 8.3   | 3.4    | 6.1    | 1.5    |
| 9.9   | 28.9  | 2.6   | 15.1  | 21.0  | 21.4  | 87.1   | 73.1   | 71.3   |
| 1.5   | 13.6  | 42.0  | 59.0  | 9.4   | 1.0   | 9.3    | 15.3   | 18.9   |
| 67.2  | 86.7  | 2.5   | 1.1   | 130.8 | 53.9  | 8.9    | 10.1   | 10.7   |
| 6.6   | 0.6   | 1.3   | 0.7   | 1.4   | 1.6   | 3.6    | 2.2    | 1.7    |
| 134.9 | 147.9 | 197.1 | 231.5 | 168.1 | 132.8 | 293.3  | 296.0  | 335.0  |
| 0.6   | 0.8   | 1.1   | 0.7   | 2.3   | 2.4   | 1.1    | 1.3    | 0.5    |
| 23.9  | 5.1   | 75.6  | 89.4  | 11.6  | 16.2  | 49.7   | 67.7   | 57.5   |
| 10.8  | 18.3  | 2.3   | 8.0   | 16.2  | 12.1  | 8.6    | 10.7   | 8.3    |
| 7.5   | 11.3  | 10.9  | 6.0   | 15.6  | 9.0   | 6.3    | 8.7    | 16.6   |
| 26.4  | 23.7  | 20.3  | 17.9  | 39.1  | 22.9  | 19.5   | 14.0   | 12.0   |
| 1.6   | 0.9   | 1.5   | 1.0   | 1.5   | 2.0   | 4.0    | 1.6    | 1.5    |
| 1.8   | 2.6   | 14.1  | 2.6   | 4.3   | 1.0   | 4.4    | 0.7    | 2.0    |
| 219.7 | 293.5 | 105.4 | 125.3 | 299.5 | 325.0 | 223.8  | 231.5  | 231.8  |
| 326.0 | 395.8 | 41.2  | 53.3  | 479.1 | 484.5 | 644.0  | 512.9  | 833.0  |
| 4.9   | 6.5   | 14.4  | 2.2   | 2.4   | 9.4   | 4.1    | 7.8    | 6.2    |
| 5.1   | 3.7   | 8.4   | 4.1   | 6.4   | 9.3   | 20.5   | 24.9   | 27.9   |
| 2.0   | 1.5   | 3.6   | 1.4   | 1.8   | 3.5   | 2.5    | 1.2    | 5.8    |
| 2.7   | 1.0   | 3.1   | 5.1   | 2.1   | 1.6   | 10.0   | 7.9    | 3.4    |
| 44.2  | 45.0  | 12.2  | 20.7  | 54.0  | 32.1  | 177.8  | 119.8  | 139.5  |
| 2.5   | 8.6   | 2.1   | 0.9   | 3.3   | 2.7   | 3.0    | 2.7    | 3.1    |
| 4.1   | 4.8   | 0.3   | 5.5   | 0.6   | 0.4   | 1.2    | 4.8    | 6.4    |
| 0.2   | 0.5   | 1.3   | 0.4   | 0.2   | 0.5   | 1.5    | 1.6    | 0.4    |
| 1.2   | 9.0   | 0.7   | 8.3   | 0.5   | 0.1   | 3.0    | 6.1    | 5.3    |
| 7.2   | 1.3   | 1.8   | 1.0   | 6.5   | 8.1   | 1.8    | 2.2    | 1.3    |
| 0.9   | 4.9   | 1.9   | 7.0   | 13.3  | 2.2   | 5.8    | 11.9   | 4.6    |
| 0.8   | 10.0  | 0.7   | 2.6   | 0.9   | 0.9   | 2.5    | 1.8    | 1.6    |
| 19.3  | 1.8   | 2.1   | 3.5   | 5.5   | 12.1  | 2.8    | 2.3    | 4.6    |
| 3.4   | 7.9   | 7.4   | 0.8   | 1.1   | 1.8   | 8.4    | 5.7    | 6.4    |
| 13.1  | 4.4   | 3.5   | 3.4   | 3.6   | 3.3   | 4.1    | 3.7    | 3.5    |

|       |        |       |       |        |        |        |        |        |
|-------|--------|-------|-------|--------|--------|--------|--------|--------|
| 8.0   | 12.9   | 12.1  | 5.6   | 2.4    | 12.7   | 8.0    | 5.1    | 7.2    |
| 13.7  | 16.1   | 3.8   | 2.8   | 13.2   | 9.1    | 11.4   | 10.0   | 6.0    |
| 8.6   | 3.0    | 0.5   | 3.1   | 27.7   | 7.7    | 13.8   | 6.2    | 1.3    |
| 3.9   | 3.8    | 1.5   | 2.6   | 6.2    | 2.9    | 2.2    | 2.4    | 3.7    |
| 1.2   | 0.7    | 1.2   | 1.7   | 2.3    | 1.6    | 4.9    | 6.1    | 1.7    |
| 2.5   | 9.1    | 4.1   | 6.3   | 9.4    | 18.0   | 12.5   | 11.2   | 15.8   |
| 4.2   | 8.4    | 8.6   | 10.4  | 9.5    | 8.6    | 9.2    | 8.5    | 4.8    |
| 8.7   | 0.4    | 9.1   | 6.8   | 7.5    | 7.5    | 2.7    | 5.6    | 6.4    |
| 9.7   | 9.5    | 6.5   | 8.0   | 9.1    | 11.3   | 14.8   | 7.9    | 12.1   |
| 39.7  | 34.3   | 3.2   | 0.5   | 77.0   | 41.6   | 519.6  | 249.7  | 285.2  |
| 15.0  | 12.8   | 6.2   | 12.4  | 11.4   | 9.9    | 20.3   | 10.2   | 11.8   |
| 2.2   | 8.9    | 7.1   | 1.9   | 4.0    | 6.5    | 13.3   | 6.8    | 9.8    |
| 4.1   | 0.4    | 0.5   | 1.2   | 0.4    | 4.2    | 1.2    | 3.2    | 4.2    |
| 3.0   | 8.2    | 12.9  | 1.6   | 13.2   | 11.0   | 23.2   | 16.1   | 7.0    |
| 512.9 | 658.8  | 118.1 | 126.9 | 660.2  | 636.9  | 1178.2 | 835.1  | 959.8  |
| 954.7 | 1121.8 | 94.4  | 158.6 | 1312.9 | 1019.6 | 2982.5 | 1583.4 | 1797.4 |
| 4.0   | 7.6    | 0.5   | 0.5   | 2.3    | 8.4    | 10.8   | 3.9    | 5.1    |
| 7.9   | 5.4    | 5.9   | 1.0   | 0.9    | 1.3    | 1.7    | 1.2    | 3.4    |
| 2.5   | 11.6   | 3.4   | 6.2   | 7.4    | 10.7   | 23.7   | 20.5   | 17.2   |
| 1.7   | 1.0    | 3.3   | 3.2   | 7.4    | 8.3    | 9.0    | 4.7    | 2.8    |
| 1.7   | 1.1    | 1.3   | 0.6   | 1.3    | 0.7    | 3.9    | 1.7    | 0.9    |
| 9.9   | 3.6    | 6.5   | 0.9   | 0.5    | 2.9    | 54.9   | 77.0   | 98.0   |
| 17.5  | 10.6   | 7.3   | 6.2   | 16.7   | 2.8    | 18.3   | 17.9   | 13.1   |
| 11.3  | 8.8    | 11.4  | 10.7  | 9.1    | 10.6   | 13.0   | 12.9   | 8.1    |
| 1.2   | 3.7    | 1.4   | 1.3   | 2.9    | 2.2    | 2.8    | 3.3    | 1.7    |
| 11.7  | 10.8   | 2.5   | 16.3  | 4.9    | 5.2    | 4.6    | 13.1   | 10.1   |
| 5.8   | 2.5    | 1.5   | 6.5   | 6.7    | 5.8    | 9.8    | 9.0    | 8.4    |
| 25.0  | 19.1   | 31.6  | 17.2  | 1.7    | 39.1   | 41.9   | 51.6   | 43.9   |
| 1.4   | 0.7    | 0.6   | 0.7   | 1.8    | 2.0    | 0.7    | 1.1    | 5.3    |
| 0.5   | 5.6    | 3.1   | 0.5   | 1.3    | 0.5    | 1.0    | 0.3    | 4.0    |
| 17.5  | 20.2   | 11.2  | 7.7   | 20.4   | 10.1   | 10.7   | 13.6   | 16.0   |
| 6.0   | 6.9    | 14.0  | 16.3  | 16.1   | 5.5    | 22.2   | 27.1   | 26.0   |
| 5.2   | 3.5    | 4.1   | 6.3   | 9.0    | 6.1    | 17.0   | 15.0   | 13.0   |
| 0.6   | 2.2    | 1.0   | 5.9   | 1.1    | 19.2   | 1.6    | 3.2    | 1.6    |
| 4.2   | 6.7    | 9.9   | 2.9   | 2.0    | 7.6    | 12.7   | 13.4   | 5.5    |
| 7.8   | 3.5    | 2.2   | 1.2   | 1.1    | 1.8    | 5.6    | 1.9    | 1.9    |
| 306.9 | 426.3  | 163.6 | 200.9 | 308.4  | 387.8  | 1201.1 | 489.3  | 616.5  |
| 1.0   | 2.0    | 1.7   | 1.3   | 4.6    | 0.7    | 2.7    | 1.2    | 2.5    |
| 14.3  | 12.0   | 3.6   | 3.6   | 24.9   | 19.4   | 20.3   | 26.0   | 24.7   |
| 4.1   | 6.3    | 0.4   | 5.1   | 3.9    | 0.8    | 10.1   | 10.8   | 8.9    |
| 1.5   | 6.6    | 3.3   | 0.9   | 1.3    | 0.9    | 8.0    | 8.5    | 6.0    |
| 0.7   | 6.0    | 4.3   | 4.9   | 1.0    | 1.2    | 5.5    | 4.1    | 3.5    |
| 47.7  | 78.2   | 10.1  | 7.2   | 69.2   | 39.2   | 206.6  | 187.5  | 181.2  |
| 6.4   | 6.0    | 15.1  | 19.2  | 11.4   | 4.2    | 8.3    | 11.7   | 8.9    |
| 18.7  | 3.7    | 15.3  | 3.7   | 5.7    | 11.1   | 4.0    | 23.8   | 17.4   |
| 5.3   | 4.6    | 6.8   | 1.6   | 2.0    | 1.4    | 3.9    | 4.7    | 4.9    |
| 13.5  | 2.8    | 17.2  | 29.4  | 6.2    | 3.0    | 15.6   | 18.9   | 16.0   |
| 2.6   | 26.6   | 10.6  | 12.7  | 25.1   | 18.3   | 124.9  | 150.7  | 180.3  |
| 1.5   | 5.0    | 1.8   | 10.0  | 6.2    | 7.2    | 10.8   | 11.7   | 10.5   |
| 9.4   | 13.0   | 20.0  | 11.3  | 29.8   | 4.5    | 273.7  | 310.9  | 344.7  |
| 4.7   | 5.7    | 2.9   | 1.9   | 9.2    | 4.6    | 9.8    | 15.5   | 9.8    |
| 7.9   | 19.3   | 4.3   | 7.4   | 12.0   | 19.9   | 17.5   | 15.7   | 17.4   |
| 6.1   | 7.5    | 10.3  | 5.5   | 6.3    | 2.7    | 5.5    | 6.8    | 1.9    |

|       |       |       |       |        |       |        |        |        |
|-------|-------|-------|-------|--------|-------|--------|--------|--------|
| 7.8   | 7.0   | 4.3   | 6.9   | 10.3   | 12.4  | 6.0    | 4.3    | 10.2   |
| 9.1   | 13.0  | 2.2   | 6.2   | 12.6   | 4.8   | 9.9    | 7.1    | 1.5    |
| 17.7  | 24.6  | 37.5  | 17.0  | 19.4   | 28.7  | 55.0   | 50.9   | 50.2   |
| 10.8  | 0.7   | 0.9   | 1.2   | 2.1    | 2.9   | 1.0    | 1.8    | 5.6    |
| 3.2   | 8.4   | 1.3   | 0.8   | 4.8    | 0.7   | 2.5    | 3.5    | 2.6    |
| 3.0   | 2.0   | 1.6   | 1.0   | 2.6    | 7.2   | 6.0    | 2.8    | 8.0    |
| 7.9   | 14.6  | 1.7   | 1.1   | 2.6    | 2.4   | 11.7   | 11.7   | 15.2   |
| 24.6  | 11.5  | 9.8   | 5.3   | 12.0   | 17.0  | 14.1   | 13.6   | 5.0    |
| 9.0   | 12.3  | 5.3   | 4.3   | 9.2    | 13.7  | 18.0   | 14.4   | 14.3   |
| 1.6   | 1.6   | 1.7   | 0.9   | 1.8    | 1.7   | 3.3    | 2.6    | 1.8    |
| 10.8  | 18.1  | 12.5  | 9.2   | 1.8    | 11.2  | 8.2    | 10.4   | 7.3    |
| 5.6   | 6.8   | 1.2   | 1.1   | 2.3    | 3.1   | 12.2   | 14.1   | 11.3   |
| 9.1   | 7.4   | 1.0   | 3.0   | 14.0   | 8.1   | 8.4    | 9.1    | 11.1   |
| 12.1  | 2.4   | 12.6  | 10.0  | 14.8   | 10.5  | 11.7   | 16.6   | 6.9    |
| 8.1   | 16.5  | 2.3   | 2.1   | 3.0    | 11.8  | 6.2    | 27.0   | 10.6   |
| 1.0   | 0.8   | 0.8   | 1.0   | 7.3    | 0.8   | 2.1    | 1.1    | 1.0    |
| 5.7   | 7.9   | 12.6  | 12.6  | 6.8    | 11.4  | 23.3   | 32.7   | 36.8   |
| 5.9   | 1.6   | 31.3  | 27.3  | 6.4    | 4.3   | 1.9    | 6.0    | 6.5    |
| 5.2   | 5.5   | 1.3   | 4.6   | 1.8    | 1.0   | 4.5    | 7.0    | 4.6    |
| 3.8   | 4.1   | 2.7   | 3.1   | 23.3   | 28.6  | 4.1    | 16.6   | 10.4   |
| 2.0   | 1.4   | 19.0  | 23.4  | 1.7    | 1.7   | 4.5    | 4.9    | 4.6    |
| 23.8  | 47.1  | 2.0   | 1.1   | 30.8   | 16.1  | 405.2  | 388.4  | 403.5  |
| 1.3   | 3.2   | 0.3   | 0.5   | 0.9    | 6.5   | 3.7    | 10.7   | 10.9   |
| 150.4 | 183.9 | 85.1  | 154.0 | 177.6  | 158.5 | 318.8  | 260.2  | 342.0  |
| 29.4  | 33.3  | 78.3  | 130.3 | 37.1   | 28.3  | 30.2   | 37.2   | 25.9   |
| 20.8  | 37.3  | 14.8  | 11.9  | 17.1   | 20.2  | 35.8   | 27.0   | 37.0   |
| 26.4  | 38.5  | 0.5   | 6.1   | 15.3   | 24.1  | 21.8   | 21.8   | 12.6   |
| 7.1   | 2.6   | 9.1   | 10.4  | 9.1    | 4.0   | 10.3   | 5.3    | 3.5    |
| 4.6   | 15.3  | 22.5  | 18.7  | 10.8   | 13.1  | 21.7   | 21.7   | 17.2   |
| 16.9  | 25.5  | 2.0   | 1.4   | 11.0   | 15.9  | 10.4   | 11.4   | 15.9   |
| 4.6   | 7.8   | 10.0  | 2.0   | 2.1    | 7.9   | 18.4   | 7.4    | 13.7   |
| 3.0   | 4.0   | 8.7   | 3.4   | 8.3    | 1.7   | 2.9    | 2.8    | 5.8    |
| 11.5  | 23.5  | 16.7  | 14.6  | 21.8   | 18.6  | 20.2   | 19.4   | 16.0   |
| 222.2 | 244.6 | 126.0 | 158.9 | 270.6  | 275.5 | 542.5  | 472.5  | 534.2  |
| 3.0   | 1.3   | 6.4   | 1.7   | 1.9    | 8.4   | 2.1    | 1.5    | 1.9    |
| 4.3   | 11.7  | 7.6   | 4.0   | 9.6    | 14.0  | 21.3   | 32.1   | 16.6   |
| 17.7  | 7.7   | 10.3  | 4.2   | 15.2   | 21.2  | 20.0   | 11.7   | 16.3   |
| 2.1   | 2.6   | 1.3   | 1.5   | 2.1    | 2.3   | 7.9    | 1.1    | 1.4    |
| 15.3  | 33.1  | 39.1  | 49.4  | 40.0   | 29.4  | 79.7   | 87.0   | 87.5   |
| 49.3  | 67.9  | 14.8  | 10.2  | 67.4   | 58.2  | 171.0  | 138.7  | 160.6  |
| 2.5   | 4.4   | 3.2   | 3.4   | 8.8    | 3.8   | 9.3    | 9.3    | 3.1    |
| 152.8 | 214.0 | 87.6  | 74.0  | 303.0  | 131.6 | 222.4  | 280.9  | 284.3  |
| 30.3  | 47.0  | 44.4  | 47.5  | 39.6   | 40.9  | 68.1   | 93.0   | 86.1   |
| 826.7 | 915.6 | 256.8 | 410.6 | 1002.8 | 668.5 | 1846.5 | 1368.0 | 1443.3 |
| 16.2  | 17.0  | 10.5  | 11.7  | 17.2   | 27.2  | 38.1   | 42.4   | 31.4   |
| 8.2   | 3.3   | 0.7   | 2.9   | 13.0   | 1.6   | 10.4   | 21.1   | 20.6   |
| 89.8  | 99.8  | 33.0  | 48.2  | 125.2  | 97.2  | 87.8   | 56.8   | 74.5   |
| 1.3   | 1.3   | 1.3   | 1.2   | 1.8    | 1.9   | 1.3    | 1.3    | 1.9    |
| 7.9   | 17.8  | 3.3   | 1.3   | 7.5    | 5.7   | 5.3    | 1.2    | 2.8    |
| 9.7   | 10.0  | 18.1  | 19.9  | 18.1   | 9.9   | 16.0   | 19.3   | 19.0   |
| 5.3   | 0.6   | 0.4   | 3.6   | 1.6    | 5.0   | 3.5    | 2.2    | 4.0    |
| 320.2 | 523.4 | 34.7  | 76.9  | 367.6  | 652.5 | 4.5    | 6.6    | 3.1    |
| 2.2   | 9.9   | 3.5   | 2.0   | 14.5   | 20.1  | 13.0   | 9.8    | 5.8    |

|       |       |       |       |       |       |       |       |       |
|-------|-------|-------|-------|-------|-------|-------|-------|-------|
| 6.8   | 30.7  | 18.6  | 36.3  | 32.1  | 17.9  | 46.6  | 48.9  | 68.7  |
| 21.9  | 18.8  | 6.0   | 18.9  | 28.4  | 19.7  | 2.1   | 17.7  | 5.0   |
| 5.1   | 0.6   | 1.3   | 0.2   | 0.8   | 4.7   | 1.3   | 1.3   | 1.0   |
| 1.1   | 0.9   | 4.0   | 3.5   | 6.6   | 4.3   | 1.6   | 1.5   | 1.1   |
| 1.5   | 3.8   | 0.8   | 1.1   | 1.5   | 1.1   | 2.4   | 1.5   | 2.1   |
| 5.0   | 0.3   | 0.6   | 0.4   | 0.9   | 7.7   | 31.2  | 30.6  | 23.2  |
| 1.0   | 12.5  | 12.0  | 11.1  | 20.7  | 10.3  | 16.9  | 31.1  | 30.3  |
| 0.8   | 10.4  | 24.6  | 27.4  | 1.8   | 0.8   | 4.3   | 3.5   | 5.1   |
| 10.3  | 19.9  | 75.5  | 96.2  | 27.6  | 15.7  | 6.9   | 6.5   | 10.8  |
| 2.8   | 6.5   | 2.2   | 3.7   | 4.1   | 7.9   | 6.5   | 8.1   | 16.7  |
| 3.0   | 11.4  | 7.9   | 11.8  | 13.2  | 19.2  | 10.1  | 14.8  | 18.0  |
| 1.2   | 2.5   | 2.9   | 1.7   | 2.1   | 3.7   | 17.4  | 2.3   | 10.7  |
| 1.6   | 1.9   | 12.4  | 15.6  | 5.5   | 1.5   | 2.1   | 3.0   | 2.4   |
| 5.6   | 14.4  | 5.5   | 5.8   | 7.8   | 4.2   | 14.5  | 19.5  | 16.1  |
| 32.9  | 43.0  | 23.7  | 15.3  | 36.6  | 31.2  | 181.9 | 116.5 | 124.3 |
| 21.4  | 9.1   | 5.1   | 14.4  | 49.5  | 33.4  | 33.0  | 33.2  | 39.4  |
| 14.2  | 25.9  | 75.2  | 131.5 | 71.0  | 5.5   | 265.5 | 281.3 | 297.6 |
| 3.3   | 2.7   | 2.1   | 2.0   | 2.3   | 1.0   | 4.7   | 3.4   | 3.6   |
| 4.5   | 4.2   | 6.0   | 3.4   | 26.6  | 7.0   | 7.1   | 6.4   | 4.4   |
| 2.9   | 3.4   | 6.0   | 1.8   | 1.1   | 6.2   | 2.6   | 3.7   | 7.2   |
| 4.5   | 1.9   | 1.2   | 1.1   | 0.9   | 0.6   | 5.8   | 4.7   | 5.0   |
| 21.0  | 49.1  | 0.8   | 0.8   | 27.0  | 53.5  | 99.3  | 145.1 | 169.0 |
| 1.6   | 1.7   | 1.8   | 1.5   | 1.8   | 4.3   | 5.5   | 3.3   | 8.7   |
| 1.3   | 12.9  | 8.7   | 11.4  | 10.7  | 5.7   | 6.4   | 11.0  | 11.1  |
| 2.5   | 3.5   | 23.7  | 12.7  | 9.1   | 6.1   | 28.3  | 13.3  | 23.3  |
| 258.0 | 286.8 | 116.5 | 123.4 | 412.9 | 297.8 | 749.6 | 542.6 | 574.0 |
| 345.5 | 422.8 | 20.5  | 34.0  | 488.3 | 383.2 | 642.7 | 329.0 | 378.1 |
| 3.0   | 4.6   | 3.7   | 0.5   | 5.2   | 2.7   | 6.8   | 3.3   | 1.3   |
| 1.3   | 1.6   | 1.1   | 0.7   | 1.3   | 0.8   | 1.5   | 2.8   | 2.9   |
| 15.6  | 32.9  | 6.4   | 5.1   | 27.5  | 18.7  | 2.7   | 3.8   | 1.3   |
| 430.4 | 462.3 | 185.6 | 284.8 | 655.3 | 513.5 | 748.1 | 431.5 | 452.6 |
| 2.3   | 1.7   | 1.7   | 7.5   | 5.7   | 1.4   | 9.6   | 6.5   | 7.5   |
| 2.9   | 3.4   | 0.4   | 0.3   | 0.2   | 0.2   | 1.4   | 4.1   | 4.1   |
| 22.0  | 16.8  | 3.2   | 1.7   | 25.9  | 28.1  | 13.1  | 12.9  | 10.7  |
| 243.2 | 167.7 | 59.4  | 102.5 | 241.0 | 171.0 | 461.1 | 86.0  | 95.2  |
| 12.7  | 1.1   | 5.7   | 0.7   | 17.6  | 1.1   | 7.8   | 5.8   | 3.1   |
| 14.3  | 4.1   | 19.7  | 12.8  | 21.8  | 10.4  | 25.7  | 34.7  | 19.0  |
| 2.0   | 1.3   | 2.1   | 5.7   | 1.9   | 0.6   | 1.3   | 4.0   | 1.4   |
| 24.1  | 58.3  | 1.0   | 0.7   | 72.3  | 75.0  | 6.6   | 4.1   | 2.7   |
| 0.3   | 5.5   | 0.8   | 0.2   | 4.3   | 2.2   | 8.2   | 4.6   | 4.4   |
| 4.9   | 6.3   | 9.7   | 12.1  | 17.6  | 14.7  | 20.6  | 19.2  | 10.7  |
| 652.1 | 945.3 | 8.4   | 1.2   | 855.3 | 913.2 | 138.6 | 80.0  | 89.9  |
| 41.3  | 29.8  | 18.3  | 6.7   | 48.8  | 38.1  | 61.3  | 36.2  | 56.5  |
| 0.7   | 13.0  | 0.8   | 6.7   | 1.3   | 1.7   | 1.5   | 2.6   | 2.2   |
| 44.3  | 81.3  | 60.0  | 65.3  | 71.6  | 67.5  | 142.9 | 128.0 | 118.3 |
| 5.8   | 6.5   | 2.1   | 4.1   | 3.8   | 3.3   | 4.0   | 3.9   | 2.6   |
| 52.6  | 74.9  | 3.9   | 7.7   | 110.3 | 66.7  | 11.1  | 10.4  | 7.5   |
| 32.5  | 17.2  | 1.8   | 1.5   | 76.1  | 25.3  | 3.6   | 1.5   | 3.7   |
| 11.9  | 1.8   | 2.0   | 8.0   | 3.8   | 1.3   | 7.6   | 3.9   | 4.1   |
| 0.3   | 7.4   | 2.6   | 5.4   | 0.4   | 2.4   | 3.4   | 2.7   | 0.9   |
| 1.2   | 1.0   | 0.7   | 2.8   | 6.3   | 3.8   | 8.0   | 6.0   | 6.5   |
| 118.6 | 139.0 | 39.1  | 41.2  | 178.1 | 101.7 | 49.0  | 52.6  | 48.9  |
| 6.2   | 12.6  | 10.4  | 8.5   | 8.2   | 10.4  | 52.5  | 35.7  | 44.9  |

|       |       |      |      |       |       |       |       |       |
|-------|-------|------|------|-------|-------|-------|-------|-------|
| 0.6   | 7.9   | 4.9  | 1.8  | 1.4   | 0.6   | 3.6   | 0.7   | 0.8   |
| 17.1  | 24.2  | 16.9 | 13.3 | 21.6  | 20.6  | 42.1  | 28.2  | 26.9  |
| 0.7   | 20.7  | 9.3  | 0.9  | 10.1  | 8.0   | 5.6   | 3.9   | 3.1   |
| 0.3   | 0.9   | 0.2  | 1.1  | 4.0   | 0.6   | 1.3   | 0.8   | 1.0   |
| 2.5   | 9.6   | 8.9  | 7.3  | 3.9   | 1.5   | 2.5   | 6.2   | 6.2   |
| 8.7   | 19.7  | 1.9  | 0.5  | 43.1  | 19.3  | 56.4  | 76.6  | 79.5  |
| 1.7   | 6.9   | 4.4  | 4.6  | 9.8   | 3.6   | 3.3   | 9.6   | 4.2   |
| 5.5   | 3.7   | 2.7  | 2.9  | 3.8   | 5.6   | 11.0  | 3.1   | 3.8   |
| 1.8   | 1.7   | 0.7  | 0.8  | 1.9   | 3.1   | 6.4   | 3.8   | 5.7   |
| 1.0   | 2.3   | 1.1  | 1.2  | 1.0   | 2.6   | 1.0   | 1.4   | 2.8   |
| 1.3   | 3.9   | 1.4  | 1.6  | 0.6   | 1.9   | 2.9   | 1.1   | 3.5   |
| 9.7   | 4.1   | 1.8  | 5.1  | 3.0   | 10.1  | 8.8   | 10.7  | 8.5   |
| 15.1  | 9.0   | 0.6  | 6.7  | 15.1  | 21.5  | 52.2  | 60.0  | 48.7  |
| 14.9  | 11.1  | 1.4  | 13.7 | 3.6   | 18.1  | 25.5  | 15.7  | 13.0  |
| 1.4   | 12.7  | 9.5  | 10.7 | 5.0   | 11.7  | 18.8  | 18.8  | 12.6  |
| 10.2  | 4.5   | 1.1  | 11.1 | 25.8  | 4.2   | 27.7  | 20.9  | 24.5  |
| 18.1  | 17.6  | 22.8 | 13.8 | 17.6  | 4.6   | 15.9  | 17.8  | 18.6  |
| 8.6   | 10.0  | 7.6  | 7.3  | 2.3   | 3.2   | 8.3   | 2.0   | 8.4   |
| 665.6 | 801.6 | 87.0 | 96.7 | 846.8 | 941.1 | 658.2 | 152.2 | 191.4 |
| 1.3   | 11.7  | 8.9  | 9.4  | 6.7   | 6.3   | 7.9   | 4.3   | 6.8   |
| 97.4  | 92.5  | 44.4 | 56.2 | 145.5 | 95.1  | 510.9 | 408.9 | 416.1 |
| 10.7  | 11.4  | 46.2 | 22.9 | 17.5  | 5.0   | 17.2  | 21.3  | 28.6  |
| 14.2  | 6.1   | 9.1  | 9.3  | 19.1  | 14.7  | 34.4  | 32.7  | 31.6  |
| 8.3   | 14.6  | 1.3  | 3.7  | 16.9  | 7.9   | 21.9  | 6.3   | 15.5  |
| 5.1   | 9.2   | 5.6  | 1.1  | 19.4  | 3.4   | 6.4   | 18.7  | 1.9   |
| 9.1   | 2.3   | 2.2  | 1.6  | 11.6  | 3.0   | 2.0   | 2.9   | 6.1   |
| 7.0   | 13.0  | 4.3  | 1.0  | 16.4  | 7.3   | 5.1   | 8.4   | 6.2   |
| 3.9   | 2.2   | 1.7  | 0.7  | 1.0   | 3.2   | 3.4   | 2.2   | 0.8   |
| 1.9   | 17.7  | 1.8  | 9.8  | 14.3  | 13.6  | 3.0   | 2.2   | 3.0   |
| 9.3   | 11.3  | 6.7  | 7.7  | 1.4   | 7.0   | 5.4   | 8.3   | 4.5   |
| 0.3   | 1.2   | 7.6  | 1.1  | 2.2   | 4.2   | 3.5   | 3.3   | 3.0   |
| 6.0   | 10.3  | 15.0 | 4.9  | 2.3   | 5.2   | 17.3  | 9.9   | 14.6  |
| 10.6  | 21.7  | 0.2  | 1.9  | 26.2  | 15.8  | 11.9  | 10.4  | 13.5  |
| 10.8  | 10.1  | 15.2 | 13.2 | 14.1  | 7.3   | 30.3  | 43.0  | 46.5  |
| 3.3   | 3.8   | 4.3  | 3.6  | 0.7   | 1.1   | 3.5   | 1.8   | 2.3   |
| 12.7  | 19.9  | 2.9  | 1.0  | 10.9  | 10.5  | 9.3   | 18.0  | 17.0  |
| 1.8   | 2.3   | 3.1  | 10.4 | 9.5   | 3.9   | 7.8   | 2.2   | 1.7   |
| 48.1  | 55.3  | 5.0  | 2.9  | 62.2  | 42.2  | 71.0  | 83.2  | 87.9  |
| 20.8  | 10.0  | 13.6 | 18.6 | 1.0   | 15.1  | 26.7  | 24.2  | 23.2  |
| 1.2   | 1.7   | 1.3  | 1.3  | 3.4   | 1.9   | 8.8   | 13.5  | 13.0  |
| 6.8   | 8.0   | 1.1  | 0.6  | 5.8   | 16.3  | 12.7  | 11.3  | 15.8  |
| 1.7   | 10.9  | 1.0  | 1.1  | 3.5   | 10.5  | 12.5  | 10.7  | 7.3   |
| 22.8  | 28.0  | 20.9 | 10.5 | 30.7  | 36.8  | 39.9  | 31.7  | 21.1  |
| 19.6  | 27.4  | 27.9 | 15.5 | 23.2  | 15.0  | 11.4  | 9.3   | 16.3  |
| 4.6   | 1.7   | 5.3  | 13.6 | 15.7  | 5.9   | 19.2  | 28.0  | 14.0  |
| 5.9   | 8.0   | 0.5  | 5.9  | 8.8   | 2.1   | 24.4  | 32.5  | 33.7  |
| 27.6  | 42.9  | 1.9  | 2.2  | 50.5  | 45.5  | 57.4  | 38.1  | 29.5  |
| 0.1   | 5.1   | 5.5  | 3.1  | 3.6   | 0.3   | 6.3   | 3.6   | 2.5   |
| 0.9   | 3.6   | 6.5  | 0.7  | 0.8   | 1.7   | 4.4   | 10.6  | 8.9   |
| 9.2   | 20.7  | 7.8  | 2.7  | 16.9  | 2.2   | 11.3  | 7.5   | 8.7   |
| 45.0  | 70.4  | 3.2  | 15.5 | 97.0  | 80.7  | 72.1  | 71.4  | 56.0  |
| 23.7  | 27.0  | 14.8 | 17.6 | 28.2  | 19.4  | 75.3  | 47.0  | 67.6  |
| 1.5   | 2.5   | 0.8  | 5.2  | 2.8   | 0.5   | 1.8   | 1.3   | 5.4   |

|        |        |        |        |        |        |        |        |        |
|--------|--------|--------|--------|--------|--------|--------|--------|--------|
| 5.5    | 9.5    | 2.4    | 3.1    | 12.0   | 4.2    | 3.3    | 1.7    | 1.5    |
| 3.2    | 5.8    | 0.2    | 6.7    | 7.0    | 0.2    | 2.1    | 0.4    | 0.5    |
| 85.9   | 78.9   | 85.9   | 92.3   | 116.7  | 98.8   | 187.2  | 152.5  | 160.2  |
| 1.0    | 0.4    | 3.3    | 0.7    | 5.0    | 0.5    | 1.5    | 5.3    | 0.4    |
| 18.3   | 12.5   | 2.6    | 3.2    | 12.6   | 1.9    | 39.8   | 66.2   | 58.0   |
| 7.3    | 21.0   | 0.3    | 0.5    | 17.3   | 11.9   | 4.1    | 7.4    | 5.5    |
| 12.7   | 12.7   | 0.7    | 5.2    | 13.5   | 21.7   | 12.5   | 13.1   | 4.7    |
| 40.3   | 31.7   | 23.9   | 7.0    | 21.1   | 18.7   | 39.8   | 38.4   | 38.0   |
| 147.8  | 221.0  | 66.7   | 86.3   | 221.2  | 205.2  | 207.0  | 243.1  | 274.5  |
| 7.6    | 3.6    | 1.4    | 1.5    | 14.6   | 3.0    | 9.1    | 8.2    | 4.8    |
| 2.3    | 1.4    | 1.1    | 0.7    | 1.1    | 1.0    | 2.5    | 3.3    | 3.7    |
| 127.7  | 140.0  | 70.2   | 56.7   | 136.5  | 125.7  | 116.4  | 103.7  | 137.3  |
| 1.6    | 2.5    | 12.2   | 14.4   | 1.1    | 9.8    | 35.8   | 39.9   | 53.1   |
| 12.3   | 10.4   | 9.7    | 9.0    | 10.3   | 4.2    | 11.8   | 4.5    | 10.2   |
| 14.8   | 9.2    | 5.3    | 2.2    | 6.1    | 12.0   | 10.6   | 16.1   | 13.6   |
| 2.6    | 3.8    | 2.7    | 7.8    | 9.4    | 6.6    | 1.5    | 1.7    | 1.3    |
| 64.4   | 55.2   | 42.8   | 49.3   | 74.9   | 40.0   | 288.4  | 242.9  | 295.4  |
| 39.1   | 36.0   | 15.9   | 10.8   | 65.5   | 40.6   | 44.7   | 57.9   | 57.5   |
| 686.6  | 727.1  | 457.2  | 604.8  | 859.8  | 715.8  | 2295.3 | 1933.7 | 2061.4 |
| 261.1  | 324.1  | 156.0  | 192.8  | 341.1  | 325.4  | 390.4  | 348.9  | 407.9  |
| 19.1   | 4.3    | 7.7    | 8.1    | 10.1   | 12.7   | 19.5   | 34.6   | 16.7   |
| 34.2   | 56.2   | 35.2   | 94.6   | 59.6   | 28.7   | 186.0  | 237.0  | 260.9  |
| 3.0    | 2.1    | 5.6    | 8.7    | 5.7    | 9.7    | 5.4    | 6.5    | 9.9    |
| 90.6   | 121.5  | 62.9   | 90.3   | 132.4  | 150.0  | 270.7  | 206.4  | 238.2  |
| 1.2    | 3.9    | 3.5    | 1.5    | 2.9    | 9.0    | 11.5   | 8.4    | 15.0   |
| 21.4   | 38.5   | 122.5  | 116.5  | 22.6   | 32.3   | 78.2   | 92.8   | 96.6   |
| 18.0   | 2.8    | 8.9    | 3.6    | 1.1    | 6.6    | 10.3   | 22.4   | 17.1   |
| 60.4   | 59.9   | 25.0   | 19.5   | 112.4  | 91.9   | 93.8   | 110.8  | 115.5  |
| 39.1   | 13.5   | 1.9    | 2.4    | 67.6   | 34.5   | 62.9   | 110.1  | 109.9  |
| 10.8   | 1.3    | 2.9    | 7.2    | 6.0    | 2.8    | 5.8    | 7.2    | 3.2    |
| 45.6   | 40.3   | 61.8   | 64.1   | 41.0   | 50.0   | 941.6  | 798.1  | 953.1  |
| 1.2    | 0.4    | 0.5    | 1.2    | 1.3    | 0.4    | 4.5    | 3.0    | 5.8    |
| 1256.8 | 1699.1 | 1012.5 | 1057.1 | 1695.8 | 1462.2 | 890.0  | 1111.0 | 947.3  |
| 9.4    | 0.9    | 0.8    | 0.8    | 8.7    | 13.3   | 9.2    | 4.0    | 12.9   |
| 36.6   | 37.0   | 45.2   | 69.5   | 59.9   | 25.5   | 116.1  | 160.7  | 176.9  |
| 11.4   | 37.5   | 17.8   | 19.1   | 11.0   | 17.2   | 20.8   | 25.4   | 23.5   |
| 0.9    | 1.3    | 1.6    | 1.1    | 1.4    | 1.0    | 3.7    | 1.4    | 1.1    |
| 72.5   | 97.5   | 38.3   | 33.0   | 105.4  | 63.9   | 136.4  | 146.4  | 146.7  |
| 248.3  | 311.7  | 63.7   | 66.4   | 398.9  | 349.2  | 466.7  | 629.7  | 634.4  |
| 33.5   | 65.9   | 7.6    | 20.4   | 31.1   | 44.7   | 66.2   | 47.9   | 45.2   |
| 0.8    | 1.7    | 0.9    | 0.8    | 6.1    | 1.3    | 2.8    | 1.9    | 1.8    |
| 1.2    | 3.3    | 1.0    | 0.9    | 15.1   | 14.2   | 40.0   | 26.9   | 28.9   |
| 12.5   | 32.9   | 27.9   | 11.4   | 30.2   | 33.9   | 20.0   | 12.5   | 17.0   |
| 7.7    | 15.4   | 1.5    | 0.9    | 31.2   | 19.5   | 5.1    | 3.2    | 1.5    |
| 0.7    | 5.0    | 8.4    | 7.0    | 3.2    | 9.9    | 10.0   | 5.7    | 3.8    |
| 135.4  | 195.4  | 45.1   | 50.6   | 208.6  | 225.8  | 652.7  | 704.6  | 732.1  |
| 12.9   | 7.3    | 8.3    | 9.3    | 16.3   | 13.0   | 11.5   | 13.6   | 11.3   |
| 33.8   | 28.7   | 13.4   | 11.4   | 72.7   | 32.3   | 89.1   | 86.8   | 85.0   |
| 0.8    | 3.0    | 0.4    | 0.4    | 7.8    | 7.6    | 9.3    | 6.2    | 8.4    |
| 4.6    | 4.3    | 0.4    | 2.5    | 1.2    | 0.3    | 0.4    | 2.9    | 2.8    |
| 61.2   | 52.4   | 50.1   | 66.7   | 82.5   | 50.2   | 118.5  | 88.3   | 91.2   |
| 4.0    | 8.5    | 7.5    | 3.1    | 14.5   | 4.4    | 6.0    | 8.4    | 7.7    |
| 116.6  | 163.7  | 30.0   | 48.8   | 211.1  | 176.8  | 265.9  | 276.6  | 310.7  |



|       |       |       |       |       |       |       |       |       |
|-------|-------|-------|-------|-------|-------|-------|-------|-------|
| 20.9  | 18.2  | 17.9  | 7.6   | 11.5  | 11.9  | 27.3  | 22.8  | 18.9  |
| 1.0   | 7.3   | 3.6   | 4.2   | 2.4   | 1.9   | 4.9   | 2.1   | 3.4   |
| 12.4  | 17.7  | 2.5   | 7.2   | 15.2  | 21.0  | 24.5  | 19.2  | 15.2  |
| 1.5   | 7.6   | 3.6   | 2.0   | 16.4  | 12.8  | 11.6  | 15.7  | 9.9   |
| 7.4   | 2.0   | 1.9   | 1.3   | 2.8   | 2.9   | 19.7  | 13.7  | 12.3  |
| 1.4   | 3.9   | 11.4  | 2.9   | 9.4   | 12.1  | 8.9   | 7.5   | 7.5   |
| 24.6  | 22.7  | 8.2   | 4.6   | 31.4  | 10.9  | 51.7  | 42.8  | 41.4  |
| 5.0   | 8.9   | 11.1  | 8.2   | 10.4  | 0.8   | 18.5  | 13.2  | 7.3   |
| 8.0   | 6.7   | 5.2   | 2.4   | 0.7   | 3.9   | 2.0   | 2.7   | 1.5   |
| 0.8   | 8.8   | 6.2   | 0.2   | 1.0   | 4.3   | 3.0   | 5.2   | 4.6   |
| 0.2   | 0.4   | 0.6   | 2.8   | 0.3   | 5.5   | 1.7   | 3.5   | 2.7   |
| 0.9   | 0.4   | 0.2   | 3.7   | 2.3   | 4.6   | 1.2   | 6.4   | 0.6   |
| 34.4  | 43.5  | 51.3  | 53.0  | 55.7  | 38.4  | 82.2  | 87.9  | 98.2  |
| 167.1 | 272.8 | 134.3 | 175.3 | 233.2 | 248.7 | 478.8 | 256.5 | 282.6 |
| 0.9   | 5.7   | 2.5   | 0.8   | 0.6   | 2.2   | 6.9   | 1.7   | 1.3   |
| 5.1   | 6.1   | 5.8   | 5.1   | 4.9   | 9.0   | 9.9   | 19.4  | 18.8  |
| 23.2  | 12.1  | 17.5  | 9.0   | 14.6  | 20.5  | 9.4   | 12.0  | 6.5   |
| 1.7   | 0.5   | 0.8   | 3.8   | 4.9   | 3.9   | 1.1   | 3.7   | 6.4   |
| 0.5   | 2.3   | 2.0   | 0.7   | 1.2   | 0.5   | 4.5   | 6.7   | 4.7   |
| 2.1   | 14.6  | 1.5   | 10.1  | 16.6  | 10.0  | 13.3  | 12.7  | 11.9  |
| 225.6 | 316.8 | 22.5  | 31.6  | 282.6 | 362.1 | 276.4 | 283.6 | 313.6 |
| 14.6  | 18.9  | 10.3  | 11.7  | 13.4  | 14.5  | 79.6  | 46.4  | 54.4  |
| 1.8   | 3.3   | 8.9   | 9.6   | 9.8   | 1.8   | 10.2  | 12.1  | 16.1  |
| 0.6   | 3.6   | 1.1   | 3.3   | 0.4   | 3.1   | 4.6   | 5.9   | 0.4   |
| 74.4  | 94.4  | 19.3  | 30.0  | 146.7 | 100.6 | 456.7 | 434.2 | 437.6 |
| 2.8   | 1.0   | 19.2  | 12.2  | 4.3   | 3.7   | 16.0  | 10.2  | 6.1   |
| 4.5   | 2.8   | 11.6  | 15.8  | 6.7   | 15.1  | 13.9  | 16.4  | 15.1  |
| 0.8   | 0.4   | 0.7   | 0.6   | 1.0   | 2.1   | 8.1   | 4.6   | 8.7   |
| 5.3   | 2.0   | 1.1   | 4.2   | 1.1   | 1.1   | 4.7   | 2.7   | 1.8   |
| 12.9  | 1.1   | 2.9   | 10.2  | 1.4   | 13.7  | 22.0  | 22.1  | 13.1  |
| 1.2   | 0.9   | 1.5   | 2.2   | 1.2   | 5.6   | 8.4   | 1.5   | 1.3   |
| 1.0   | 1.2   | 0.7   | 2.1   | 6.8   | 0.9   | 7.3   | 2.7   | 1.8   |
| 3.8   | 2.3   | 3.1   | 3.1   | 10.0  | 7.7   | 6.9   | 2.7   | 5.7   |
| 13.4  | 19.5  | 6.6   | 4.0   | 7.6   | 6.9   | 2.2   | 1.3   | 0.8   |
| 9.0   | 0.3   | 0.9   | 2.4   | 2.2   | 1.7   | 1.1   | 3.4   | 3.5   |
| 9.3   | 7.8   | 2.7   | 5.5   | 8.2   | 2.6   | 4.5   | 15.1  | 1.8   |
| 9.1   | 9.3   | 2.3   | 4.6   | 11.4  | 9.9   | 2.2   | 6.8   | 5.3   |
| 2.6   | 6.9   | 2.2   | 2.6   | 19.3  | 2.5   | 6.7   | 8.3   | 12.0  |
| 10.3  | 6.4   | 0.6   | 0.9   | 0.8   | 3.5   | 7.6   | 4.9   | 8.1   |
| 3.6   | 2.8   | 7.5   | 1.8   | 1.8   | 2.1   | 2.9   | 5.5   | 6.3   |
| 20.4  | 14.1  | 2.9   | 2.3   | 16.2  | 22.3  | 14.2  | 5.9   | 12.3  |
| 4.1   | 7.7   | 6.1   | 1.1   | 6.9   | 0.9   | 4.4   | 1.8   | 1.2   |
| 1.2   | 1.2   | 1.8   | 1.8   | 2.5   | 2.4   | 0.8   | 1.4   | 4.0   |
| 1.7   | 3.6   | 5.0   | 2.4   | 6.3   | 3.4   | 9.5   | 5.6   | 8.4   |
| 7.6   | 4.6   | 3.9   | 1.3   | 7.3   | 3.8   | 8.9   | 1.7   | 4.3   |
| 0.8   | 3.3   | 0.7   | 9.4   | 0.6   | 4.7   | 1.0   | 0.9   | 3.1   |
| 4.4   | 1.4   | 7.7   | 3.9   | 9.2   | 7.7   | 9.5   | 6.3   | 4.0   |
| 8.8   | 11.2  | 2.0   | 9.2   | 16.7  | 4.7   | 20.6  | 10.7  | 14.5  |
| 3.8   | 14.9  | 12.9  | 7.3   | 1.5   | 26.6  | 5.5   | 2.7   | 5.1   |
| 12.7  | 2.3   | 1.1   | 7.8   | 1.2   | 8.2   | 2.0   | 1.3   | 1.6   |
| 6.4   | 1.7   | 10.3  | 7.9   | 8.9   | 13.2  | 22.0  | 11.6  | 15.4  |
| 5.4   | 3.3   | 6.7   | 0.9   | 0.9   | 1.4   | 3.0   | 1.4   | 7.6   |
| 3.8   | 0.3   | 7.7   | 0.7   | 0.8   | 0.6   | 16.7  | 8.2   | 8.0   |

|       |       |       |       |        |        |        |        |        |
|-------|-------|-------|-------|--------|--------|--------|--------|--------|
| 3.5   | 0.7   | 1.9   | 1.0   | 0.7    | 1.0    | 1.5    | 0.8    | 0.6    |
| 1.7   | 1.1   | 2.4   | 4.9   | 2.0    | 3.7    | 4.6    | 0.5    | 2.9    |
| 1.9   | 8.5   | 11.3  | 8.1   | 11.1   | 2.6    | 2.0    | 4.0    | 7.3    |
| 2.2   | 1.6   | 3.9   | 1.5   | 7.1    | 1.5    | 4.8    | 4.6    | 2.7    |
| 9.8   | 10.3  | 4.6   | 7.8   | 6.4    | 12.4   | 12.8   | 6.5    | 5.7    |
| 1.8   | 0.7   | 1.5   | 0.5   | 2.6    | 7.0    | 2.2    | 11.6   | 4.6    |
| 0.6   | 0.9   | 3.9   | 7.4   | 0.9    | 1.2    | 11.4   | 8.3    | 10.5   |
| 0.4   | 0.3   | 5.3   | 1.8   | 0.7    | 4.9    | 0.6    | 8.4    | 2.2    |
| 0.3   | 0.6   | 2.3   | 0.2   | 0.6    | 0.7    | 0.9    | 2.4    | 5.1    |
| 4.4   | 29.7  | 19.0  | 14.1  | 19.2   | 14.6   | 48.5   | 46.0   | 44.2   |
| 22.1  | 25.3  | 7.5   | 9.7   | 22.0   | 29.1   | 27.0   | 25.2   | 26.9   |
| 155.8 | 182.2 | 39.4  | 53.9  | 261.6  | 193.2  | 431.1  | 204.4  | 240.5  |
| 18.6  | 30.3  | 15.4  | 10.9  | 16.9   | 24.2   | 195.5  | 228.4  | 205.9  |
| 10.4  | 11.3  | 2.9   | 0.8   | 9.1    | 10.3   | 28.5   | 21.4   | 23.6   |
| 7.6   | 2.1   | 5.7   | 2.4   | 8.7    | 12.4   | 6.8    | 8.8    | 8.8    |
| 4.8   | 8.1   | 2.4   | 6.0   | 12.5   | 7.3    | 6.5    | 9.4    | 10.2   |
| 5.0   | 14.6  | 0.7   | 4.2   | 20.6   | 14.3   | 2.0    | 1.6    | 1.3    |
| 1.5   | 1.8   | 2.4   | 1.8   | 1.9    | 2.5    | 3.5    | 2.1    | 2.4    |
| 0.6   | 1.3   | 1.3   | 1.0   | 1.1    | 0.8    | 2.0    | 1.9    | 6.4    |
| 5.3   | 1.7   | 1.3   | 1.2   | 2.8    | 1.5    | 3.9    | 3.6    | 2.1    |
| 21.4  | 1.0   | 1.7   | 2.3   | 31.0   | 12.3   | 8.6    | 7.2    | 8.5    |
| 0.1   | 1.1   | 3.7   | 1.4   | 0.3    | 0.3    | 1.3    | 5.8    | 1.2    |
| 2.9   | 3.7   | 3.8   | 0.3   | 1.3    | 8.0    | 6.8    | 9.4    | 9.0    |
| 2.4   | 2.8   | 14.7  | 2.2   | 0.8    | 2.3    | 4.0    | 2.0    | 3.1    |
| 2.0   | 1.2   | 5.5   | 10.5  | 9.9    | 8.0    | 20.8   | 15.4   | 21.2   |
| 1.3   | 9.3   | 3.0   | 1.0   | 7.9    | 4.2    | 3.8    | 6.1    | 8.2    |
| 0.7   | 14.2  | 0.9   | 3.3   | 6.1    | 12.5   | 9.0    | 11.2   | 16.2   |
| 428.9 | 637.3 | 66.7  | 98.6  | 534.3  | 533.2  | 698.6  | 869.0  | 800.0  |
| 1.6   | 6.7   | 15.1  | 0.4   | 1.5    | 3.7    | 13.5   | 7.3    | 13.2   |
| 8.3   | 9.0   | 1.2   | 12.7  | 9.8    | 7.8    | 10.6   | 11.3   | 10.2   |
| 3.3   | 6.9   | 24.8  | 1.9   | 2.0    | 13.8   | 9.9    | 6.2    | 11.8   |
| 7.4   | 7.2   | 3.1   | 1.0   | 7.0    | 7.4    | 2.8    | 5.6    | 1.9    |
| 6.8   | 0.8   | 7.7   | 7.6   | 4.7    | 1.2    | 4.6    | 2.5    | 4.8    |
| 4.2   | 2.0   | 1.0   | 8.8   | 6.5    | 22.7   | 2.7    | 11.8   | 3.9    |
| 13.6  | 3.7   | 6.0   | 9.2   | 4.2    | 5.6    | 14.3   | 17.3   | 9.1    |
| 946.3 | 908.8 | 582.7 | 732.0 | 1256.8 | 1056.4 | 3352.7 | 3291.1 | 3515.4 |
| 97.4  | 116.9 | 39.9  | 50.8  | 151.7  | 102.7  | 368.8  | 163.2  | 211.4  |
| 11.4  | 9.7   | 4.7   | 10.9  | 8.0    | 10.5   | 7.7    | 3.1    | 4.6    |
| 13.4  | 11.1  | 14.0  | 10.1  | 3.5    | 9.8    | 5.5    | 14.1   | 8.2    |
| 0.8   | 1.3   | 3.1   | 3.7   | 3.2    | 1.2    | 2.5    | 1.8    | 2.0    |
| 3.8   | 6.7   | 2.3   | 13.7  | 16.5   | 10.0   | 7.7    | 13.9   | 11.5   |
| 9.6   | 10.6  | 16.6  | 8.6   | 8.7    | 9.1    | 8.5    | 11.3   | 10.4   |
| 13.0  | 1.6   | 1.1   | 11.0  | 1.9    | 2.2    | 12.4   | 7.8    | 4.8    |
| 4.3   | 5.0   | 7.5   | 5.4   | 10.2   | 1.6    | 8.9    | 2.1    | 7.3    |
| 12.5  | 12.5  | 12.1  | 11.4  | 11.8   | 2.1    | 8.1    | 8.4    | 12.4   |
| 3.8   | 2.4   | 5.3   | 6.9   | 12.3   | 4.6    | 4.8    | 8.5    | 5.2    |
| 4.2   | 1.9   | 10.2  | 4.6   | 1.9    | 4.9    | 8.5    | 8.3    | 6.7    |
| 0.3   | 2.3   | 3.0   | 0.9   | 1.4    | 0.5    | 1.2    | 4.2    | 1.0    |
| 2.3   | 3.9   | 3.3   | 8.6   | 1.1    | 5.4    | 8.7    | 8.1    | 3.6    |
| 0.4   | 5.8   | 5.6   | 1.0   | 7.6    | 1.7    | 0.9    | 0.8    | 0.7    |
| 1.8   | 7.0   | 5.8   | 5.1   | 6.9    | 8.4    | 2.3    | 6.0    | 2.6    |
| 2.6   | 4.8   | 0.7   | 3.6   | 5.4    | 7.6    | 1.7    | 4.2    | 0.7    |
| 11.9  | 12.1  | 8.4   | 11.1  | 11.4   | 10.7   | 11.7   | 14.6   | 12.8   |

|        |        |       |       |        |        |        |        |        |
|--------|--------|-------|-------|--------|--------|--------|--------|--------|
| 1.0    | 1.8    | 1.3   | 1.2   | 2.0    | 1.5    | 1.7    | 1.8    | 1.9    |
| 7.7    | 3.0    | 12.1  | 5.6   | 2.0    | 6.6    | 10.9   | 3.6    | 2.9    |
| 4.5    | 0.5    | 1.2   | 2.7   | 3.9    | 0.3    | 5.3    | 2.9    | 3.6    |
| 39.2   | 46.9   | 15.6  | 13.4  | 41.3   | 30.4   | 205.7  | 144.3  | 122.6  |
| 2.3    | 2.6    | 3.1   | 7.4   | 13.2   | 8.0    | 16.0   | 12.9   | 14.9   |
| 10.1   | 16.1   | 2.4   | 7.9   | 1.1    | 2.7    | 17.2   | 21.1   | 14.6   |
| 8.0    | 3.8    | 1.3   | 6.0   | 1.8    | 2.2    | 12.7   | 8.1    | 10.0   |
| 0.7    | 7.7    | 7.5   | 2.5   | 2.2    | 5.2    | 7.3    | 0.7    | 1.3    |
| 1996.7 | 2291.4 | 296.5 | 417.1 | 2414.4 | 2242.5 | 1017.0 | 501.9  | 607.5  |
| 5.2    | 1.2    | 6.1   | 2.8   | 8.3    | 5.8    | 10.1   | 8.7    | 5.3    |
| 152.7  | 145.9  | 395.2 | 451.0 | 237.4  | 94.0   | 1014.2 | 277.5  | 297.1  |
| 3.3    | 7.4    | 5.5   | 3.0   | 10.3   | 0.7    | 3.6    | 6.7    | 2.5    |
| 13.6   | 23.2   | 1.0   | 1.0   | 4.3    | 18.6   | 3.5    | 2.6    | 2.1    |
| 0.6    | 2.0    | 4.5   | 1.7   | 1.7    | 12.4   | 4.2    | 6.9    | 3.2    |
| 37.1   | 32.1   | 5.8   | 26.7  | 27.6   | 40.9   | 21.5   | 4.4    | 19.4   |
| 0.3    | 5.5    | 7.1   | 1.8   | 10.3   | 7.9    | 8.6    | 7.4    | 5.9    |
| 1.1    | 4.2    | 9.1   | 0.4   | 8.4    | 10.7   | 5.4    | 7.6    | 4.7    |
| 2.6    | 4.9    | 6.9   | 1.0   | 0.5    | 2.8    | 5.8    | 10.3   | 7.8    |
| 1.1    | 0.7    | 0.6   | 0.6   | 0.5    | 7.4    | 4.3    | 1.1    | 1.9    |
| 20.8   | 10.0   | 6.0   | 16.6  | 5.8    | 4.6    | 12.3   | 14.7   | 18.6   |
| 0.9    | 1.2    | 2.7   | 2.3   | 0.7    | 1.1    | 3.5    | 4.4    | 4.4    |
| 1.7    | 0.8    | 3.4   | 7.6   | 4.8    | 1.3    | 1.5    | 2.3    | 1.7    |
| 6.2    | 4.7    | 2.7   | 2.9   | 4.4    | 2.8    | 3.2    | 5.8    | 18.1   |
| 15.8   | 16.8   | 13.0  | 20.0  | 40.7   | 18.8   | 38.1   | 27.9   | 23.4   |
| 4.3    | 7.8    | 10.9  | 7.7   | 7.9    | 7.1    | 8.5    | 7.8    | 4.7    |
| 22.7   | 25.5   | 5.9   | 4.6   | 43.3   | 34.9   | 3.7    | 2.7    | 7.5    |
| 7.5    | 11.5   | 12.1  | 1.4   | 9.1    | 9.2    | 14.6   | 11.4   | 7.3    |
| 5.6    | 7.4    | 3.7   | 8.7   | 7.0    | 1.6    | 4.1    | 1.5    | 1.6    |
| 4.7    | 4.3    | 17.6  | 12.0  | 12.7   | 11.3   | 3.7    | 6.2    | 10.3   |
| 12.3   | 22.1   | 1.7   | 1.1   | 49.8   | 24.3   | 11.7   | 20.1   | 11.2   |
| 0.9    | 1.4    | 12.1  | 4.6   | 11.8   | 14.6   | 22.1   | 19.5   | 16.4   |
| 1.3    | 0.9    | 7.7   | 0.8   | 3.4    | 2.2    | 5.4    | 5.6    | 2.6    |
| 0.7    | 8.0    | 1.3   | 1.1   | 1.2    | 9.0    | 29.5   | 35.4   | 34.5   |
| 8.5    | 7.3    | 9.7   | 11.6  | 12.4   | 11.2   | 45.6   | 57.8   | 63.5   |
| 0.5    | 1.8    | 10.9  | 3.2   | 2.4    | 4.1    | 4.6    | 4.1    | 0.9    |
| 20.6   | 20.8   | 15.5  | 10.2  | 33.7   | 20.4   | 58.2   | 119.4  | 130.0  |
| 28.9   | 4.6    | 14.6  | 2.4   | 21.3   | 12.9   | 14.6   | 26.3   | 25.1   |
| 0.4    | 0.3    | 0.2   | 0.2   | 0.5    | 5.7    | 0.5    | 0.5    | 2.7    |
| 3.6    | 1.4    | 3.1   | 1.7   | 1.4    | 1.6    | 2.4    | 7.5    | 11.6   |
| 148.6  | 214.2  | 3.5   | 7.0   | 266.7  | 262.2  | 12.3   | 5.1    | 2.4    |
| 650.6  | 704.0  | 2.4   | 1.6   | 819.8  | 830.8  | 1.7    | 3.2    | 2.2    |
| 10.6   | 1.9    | 15.6  | 1.2   | 21.2   | 1.7    | 26.5   | 24.8   | 32.8   |
| 876.0  | 1107.6 | 323.2 | 301.2 | 1070.8 | 1010.2 | 1182.1 | 1289.1 | 1297.9 |
| 178.5  | 255.4  | 45.4  | 56.6  | 236.1  | 144.5  | 431.5  | 365.5  | 439.4  |
| 56.4   | 82.0   | 6.1   | 9.3   | 118.0  | 47.0   | 421.0  | 410.3  | 414.5  |
| 8.1    | 1.3    | 8.2   | 1.7   | 2.8    | 1.6    | 1.7    | 1.7    | 4.9    |
| 4.8    | 0.8    | 2.2   | 2.4   | 0.9    | 0.8    | 6.7    | 3.8    | 9.2    |
| 1.4    | 7.7    | 10.4  | 11.5  | 2.5    | 10.0   | 22.3   | 15.1   | 13.4   |
| 2.9    | 0.4    | 0.9   | 1.6   | 6.9    | 1.1    | 8.1    | 10.6   | 9.0    |
| 1.3    | 7.9    | 1.0   | 9.3   | 9.7    | 6.6    | 9.4    | 8.8    | 5.1    |
| 0.6    | 1.7    | 2.4   | 0.5   | 0.8    | 0.6    | 1.2    | 0.8    | 0.6    |
| 93.8   | 106.7  | 24.6  | 15.3  | 127.0  | 94.2   | 217.1  | 278.0  | 316.5  |
| 133.9  | 208.4  | 42.1  | 57.5  | 179.2  | 171.3  | 328.2  | 181.5  | 247.5  |

|        |        |        |        |        |        |        |        |        |
|--------|--------|--------|--------|--------|--------|--------|--------|--------|
| 69.4   | 99.2   | 42.5   | 54.1   | 107.2  | 61.6   | 245.3  | 230.3  | 231.2  |
| 11.7   | 28.8   | 7.9    | 5.3    | 30.9   | 35.6   | 13.0   | 18.0   | 19.6   |
| 60.0   | 80.7   | 12.4   | 10.6   | 103.9  | 48.7   | 361.8  | 220.2  | 268.2  |
| 15.9   | 41.0   | 23.1   | 28.5   | 35.9   | 74.2   | 97.6   | 79.1   | 96.5   |
| 339.0  | 423.0  | 82.2   | 91.8   | 410.9  | 470.5  | 785.6  | 728.4  | 771.7  |
| 21.5   | 55.1   | 4.3    | 8.2    | 50.3   | 64.5   | 77.6   | 115.8  | 146.3  |
| 52.5   | 46.8   | 5.5    | 8.8    | 84.7   | 36.6   | 35.0   | 26.8   | 12.4   |
| 1052.9 | 895.3  | 296.1  | 390.3  | 1259.4 | 1075.8 | 3421.5 | 3616.8 | 3652.7 |
| 19.7   | 28.7   | 3.4    | 5.4    | 46.5   | 30.6   | 261.0  | 166.9  | 201.8  |
| 19.1   | 8.7    | 15.9   | 12.7   | 2.4    | 2.6    | 22.8   | 22.7   | 18.8   |
| 156.8  | 185.8  | 22.5   | 24.3   | 254.2  | 199.7  | 1737.6 | 1410.3 | 1472.5 |
| 9.1    | 16.3   | 4.6    | 7.8    | 15.7   | 1.5    | 33.4   | 35.9   | 30.5   |
| 219.2  | 218.9  | 97.8   | 129.1  | 260.1  | 212.3  | 428.6  | 363.6  | 337.2  |
| 939.9  | 1136.2 | 425.5  | 470.2  | 1428.0 | 1001.8 | 3064.9 | 2196.7 | 2499.4 |
| 301.5  | 340.5  | 98.1   | 110.2  | 354.2  | 323.9  | 290.5  | 175.3  | 196.0  |
| 14.5   | 2.6    | 3.5    | 14.7   | 4.6    | 3.8    | 20.0   | 14.9   | 27.1   |
| 21.3   | 13.4   | 20.6   | 15.3   | 19.1   | 24.7   | 244.3  | 358.2  | 355.2  |
| 286.5  | 414.1  | 27.8   | 32.8   | 479.5  | 508.3  | 447.8  | 772.1  | 819.2  |
| 32.2   | 46.4   | 81.9   | 103.4  | 46.3   | 33.5   | 96.1   | 68.8   | 68.1   |
| 41.9   | 47.0   | 21.3   | 42.4   | 61.8   | 54.9   | 96.1   | 106.5  | 111.0  |
| 40.9   | 34.4   | 3.1    | 8.9    | 46.1   | 26.5   | 173.5  | 107.2  | 114.9  |
| 1267.0 | 1581.1 | 324.5  | 380.8  | 1890.2 | 1558.9 | 356.5  | 248.2  | 347.3  |
| 3.3    | 3.2    | 4.2    | 8.2    | 3.3    | 5.8    | 9.6    | 10.3   | 7.5    |
| 1.0    | 1.6    | 9.0    | 1.8    | 8.0    | 5.2    | 20.8   | 17.3   | 18.8   |
| 2.2    | 2.8    | 5.1    | 3.2    | 6.5    | 8.5    | 9.0    | 10.8   | 8.8    |
| 5563.1 | 6909.4 | 2013.1 | 2821.1 | 6205.2 | 5972.2 | 7852.1 | 7564.7 | 7481.0 |
| 15.0   | 3.8    | 1.2    | 6.6    | 9.5    | 17.3   | 35.2   | 31.2   | 37.9   |
| 37.1   | 30.2   | 25.4   | 30.6   | 45.7   | 42.0   | 158.4  | 157.6  | 180.9  |
| 32.7   | 25.3   | 15.3   | 10.0   | 30.9   | 26.6   | 24.9   | 25.1   | 18.5   |
| 257.5  | 409.6  | 635.2  | 1005.5 | 382.8  | 373.4  | 744.4  | 706.7  | 828.2  |
| 16.7   | 24.3   | 11.6   | 6.8    | 6.4    | 13.9   | 18.0   | 13.4   | 9.1    |
| 1177.4 | 1420.7 | 667.0  | 996.9  | 1848.4 | 1449.7 | 2179.2 | 1373.9 | 1386.8 |
| 33.5   | 48.0   | 13.1   | 19.1   | 61.2   | 67.7   | 51.8   | 39.3   | 44.6   |
| 55.2   | 57.7   | 51.6   | 78.5   | 112.2  | 60.4   | 42.6   | 52.9   | 56.8   |
| 35.0   | 48.6   | 5.7    | 10.6   | 38.9   | 40.9   | 24.1   | 16.9   | 23.6   |
| 2.7    | 1.2    | 1.5    | 1.0    | 0.6    | 1.3    | 1.7    | 1.3    | 1.3    |
| 2.2    | 14.7   | 14.9   | 1.8    | 7.2    | 1.5    | 5.6    | 6.2    | 5.5    |
| 0.8    | 0.6    | 4.5    | 2.4    | 0.2    | 0.4    | 0.5    | 2.6    | 6.4    |
| 99.5   | 76.7   | 97.7   | 149.8  | 123.1  | 93.4   | 114.5  | 114.7  | 142.8  |
| 88.8   | 118.3  | 12.1   | 6.6    | 120.6  | 104.6  | 315.5  | 239.0  | 386.5  |
| 41.7   | 42.9   | 13.7   | 16.0   | 27.7   | 38.3   | 66.9   | 61.4   | 60.1   |
| 4.3    | 2.6    | 10.5   | 2.7    | 9.4    | 8.2    | 8.8    | 12.9   | 10.1   |
| 3.4    | 3.0    | 14.2   | 1.6    | 9.0    | 6.5    | 14.3   | 9.5    | 9.6    |
| 3.9    | 8.1    | 1.4    | 0.6    | 8.0    | 11.9   | 2.1    | 1.9    | 4.9    |
| 54.9   | 53.3   | 1.2    | 8.7    | 80.8   | 52.5   | 15.5   | 18.1   | 17.5   |
| 503.8  | 514.4  | 106.1  | 118.4  | 516.0  | 551.3  | 516.6  | 406.5  | 471.1  |
| 2.9    | 4.6    | 14.0   | 9.4    | 8.8    | 3.0    | 13.8   | 22.6   | 15.2   |
| 1.0    | 0.5    | 0.5    | 0.9    | 1.8    | 2.0    | 2.9    | 1.9    | 1.6    |
| 8.5    | 1.7    | 10.1   | 1.3    | 1.0    | 1.8    | 0.7    | 7.4    | 1.8    |
| 1.8    | 1.1    | 3.8    | 6.8    | 0.7    | 5.1    | 6.3    | 2.0    | 5.8    |
| 32.8   | 45.5   | 5.5    | 6.4    | 42.4   | 44.3   | 176.3  | 256.8  | 258.0  |
| 4.3    | 8.2    | 7.7    | 3.1    | 1.5    | 14.2   | 11.7   | 13.6   | 14.4   |
| 81.3   | 136.0  | 40.6   | 30.7   | 140.6  | 166.0  | 113.6  | 159.9  | 181.0  |

|       |       |       |       |        |       |        |        |        |
|-------|-------|-------|-------|--------|-------|--------|--------|--------|
| 3.6   | 10.1  | 13.3  | 13.1  | 6.6    | 5.7   | 41.5   | 44.5   | 53.6   |
| 30.1  | 34.7  | 39.9  | 36.4  | 24.2   | 33.2  | 41.3   | 28.1   | 37.4   |
| 671.3 | 930.9 | 644.6 | 820.6 | 1353.3 | 801.2 | 2354.1 | 1958.1 | 2091.8 |
| 9.1   | 12.6  | 2.1   | 0.3   | 10.6   | 14.9  | 26.5   | 65.1   | 69.3   |
| 48.6  | 55.9  | 9.0   | 4.3   | 75.2   | 50.4  | 166.2  | 233.5  | 276.8  |
| 27.5  | 33.3  | 1.8   | 6.5   | 29.7   | 19.5  | 11.9   | 7.0    | 10.4   |
| 1.0   | 6.0   | 8.1   | 7.5   | 2.8    | 3.2   | 1.9    | 1.7    | 1.6    |
| 3.0   | 2.8   | 17.4  | 8.8   | 17.8   | 12.0  | 22.8   | 9.8    | 12.2   |
| 1.1   | 2.0   | 1.2   | 0.9   | 1.6    | 8.4   | 5.6    | 1.6    | 1.0    |
| 1.1   | 0.4   | 1.1   | 6.1   | 3.4    | 0.5   | 4.4    | 6.9    | 5.6    |
| 23.6  | 47.4  | 18.0  | 11.2  | 51.0   | 23.1  | 154.8  | 132.5  | 164.3  |
| 1.7   | 1.5   | 48.2  | 73.2  | 1.7    | 5.2   | 31.8   | 49.9   | 69.0   |
| 10.8  | 4.1   | 15.7  | 23.0  | 14.7   | 22.0  | 56.3   | 40.6   | 59.2   |
| 2.8   | 2.5   | 3.6   | 6.0   | 2.5    | 3.1   | 3.6    | 4.8    | 11.8   |
| 75.9  | 102.9 | 143.8 | 193.0 | 117.4  | 96.9  | 421.4  | 363.4  | 427.9  |
| 1.1   | 1.8   | 19.6  | 25.2  | 2.1    | 12.3  | 42.8   | 48.6   | 57.9   |
| 162.8 | 135.3 | 31.8  | 60.6  | 361.3  | 153.1 | 381.2  | 427.3  | 540.9  |
| 34.5  | 72.3  | 9.3   | 20.2  | 95.4   | 57.0  | 59.7   | 53.7   | 64.5   |
| 32.8  | 55.3  | 56.9  | 54.2  | 44.2   | 58.0  | 204.3  | 284.7  | 329.4  |
| 228.9 | 321.8 | 37.6  | 35.5  | 311.7  | 330.2 | 339.8  | 252.3  | 282.5  |
| 1.6   | 9.9   | 5.6   | 3.1   | 14.7   | 8.0   | 4.6    | 4.8    | 1.1    |
| 13.5  | 22.9  | 1.9   | 10.5  | 35.3   | 16.1  | 13.7   | 3.2    | 7.1    |
| 2.8   | 8.2   | 3.2   | 9.7   | 1.6    | 14.4  | 19.3   | 39.9   | 39.6   |
| 6.0   | 5.7   | 9.9   | 10.4  | 40.1   | 3.8   | 13.3   | 8.4    | 12.6   |
| 230.4 | 361.8 | 48.1  | 49.0  | 470.7  | 481.8 | 253.4  | 394.6  | 381.1  |
| 13.1  | 22.7  | 20.5  | 33.3  | 27.2   | 20.7  | 18.9   | 21.7   | 16.9   |
| 39.7  | 25.3  | 28.5  | 28.8  | 66.9   | 17.3  | 110.9  | 143.4  | 142.8  |
| 5.6   | 0.5   | 8.1   | 8.6   | 2.0    | 0.6   | 44.3   | 46.9   | 58.3   |
| 9.9   | 15.2  | 37.1  | 39.2  | 25.9   | 10.8  | 24.1   | 16.8   | 15.9   |
| 2.0   | 2.8   | 1.5   | 1.9   | 1.7    | 1.5   | 2.0    | 1.9    | 5.6    |
| 6.8   | 7.6   | 5.5   | 5.9   | 5.4    | 1.3   | 3.7    | 7.0    | 3.5    |
| 9.7   | 5.7   | 86.1  | 124.9 | 11.5   | 8.1   | 10.0   | 10.4   | 5.7    |
| 626.1 | 958.9 | 34.3  | 44.4  | 1052.5 | 919.3 | 1033.7 | 432.6  | 483.6  |
| 374.5 | 424.9 | 65.9  | 74.1  | 497.7  | 392.9 | 437.2  | 392.5  | 321.0  |
| 1.0   | 6.0   | 4.1   | 1.0   | 1.3    | 5.7   | 10.3   | 15.4   | 26.1   |
| 7.2   | 9.9   | 4.2   | 1.1   | 6.3    | 13.3  | 9.4    | 10.2   | 12.9   |
| 187.0 | 233.7 | 289.0 | 369.1 | 337.1  | 187.6 | 0.9    | 1.5    | 6.4    |
| 23.4  | 12.1  | 17.3  | 12.1  | 55.3   | 48.5  | 110.3  | 68.1   | 71.8   |
| 1.7   | 1.2   | 0.6   | 0.5   | 3.2    | 1.7   | 1.9    | 4.7    | 3.4    |
| 170.9 | 241.8 | 26.6  | 26.6  | 308.9  | 285.8 | 524.2  | 492.4  | 491.5  |
| 28.1  | 54.9  | 28.5  | 38.5  | 76.9   | 45.9  | 57.2   | 29.8   | 47.3   |
| 0.7   | 0.9   | 1.0   | 0.8   | 1.9    | 3.2   | 1.1    | 1.0    | 1.3    |
| 14.8  | 9.5   | 12.7  | 4.6   | 22.3   | 22.3  | 5.4    | 2.3    | 2.3    |
| 81.1  | 110.5 | 39.1  | 22.0  | 177.4  | 106.3 | 92.8   | 77.5   | 79.8   |
| 6.0   | 4.2   | 11.1  | 15.5  | 15.4   | 4.8   | 15.8   | 20.6   | 17.9   |
| 0.8   | 6.7   | 11.1  | 7.7   | 6.6    | 1.2   | 1.8    | 4.3    | 3.0    |
| 6.1   | 2.3   | 5.1   | 2.8   | 2.6    | 2.1   | 5.8    | 14.3   | 16.1   |
| 1.8   | 3.0   | 0.6   | 1.1   | 5.3    | 0.8   | 2.4    | 6.7    | 2.4    |
| 44.4  | 63.7  | 17.6  | 13.4  | 69.6   | 45.7  | 21.3   | 34.9   | 29.6   |
| 0.1   | 1.5   | 3.5   | 5.2   | 1.6    | 2.3   | 2.0    | 2.1    | 9.0    |
| 18.9  | 27.4  | 7.2   | 3.1   | 33.4   | 19.5  | 29.5   | 19.9   | 18.9   |
| 192.8 | 336.6 | 21.2  | 26.8  | 287.1  | 206.4 | 61.2   | 41.5   | 37.0   |
| 9.0   | 10.2  | 4.6   | 7.3   | 7.1    | 11.4  | 80.1   | 59.2   | 53.9   |

|        |        |       |       |        |        |        |        |        |
|--------|--------|-------|-------|--------|--------|--------|--------|--------|
| 72.1   | 121.7  | 94.7  | 90.5  | 102.0  | 103.8  | 68.6   | 111.0  | 117.1  |
| 89.1   | 117.8  | 18.8  | 55.8  | 116.7  | 123.6  | 38.4   | 55.6   | 58.0   |
| 22.8   | 10.3   | 13.7  | 9.2   | 8.2    | 12.4   | 14.6   | 13.8   | 13.5   |
| 47.3   | 70.5   | 67.2  | 81.1  | 104.6  | 65.7   | 188.1  | 164.3  | 180.6  |
| 38.9   | 38.7   | 17.4  | 28.4  | 28.7   | 39.6   | 287.8  | 297.7  | 347.0  |
| 250.3  | 328.1  | 38.3  | 64.5  | 397.5  | 392.1  | 622.0  | 526.8  | 504.3  |
| 57.2   | 37.2   | 22.1  | 20.4  | 66.8   | 40.2   | 19.5   | 7.4    | 7.9    |
| 20.6   | 28.1   | 9.2   | 2.3   | 26.3   | 18.9   | 47.5   | 49.8   | 43.6   |
| 4.7    | 2.2    | 5.1   | 7.3   | 9.4    | 9.6    | 35.8   | 17.9   | 62.6   |
| 258.3  | 236.0  | 169.5 | 242.5 | 353.0  | 177.2  | 117.1  | 124.0  | 111.2  |
| 14.5   | 10.3   | 0.5   | 6.4   | 16.9   | 4.4    | 22.4   | 26.2   | 32.2   |
| 1.9    | 13.8   | 14.8  | 9.4   | 9.2    | 14.0   | 34.2   | 30.9   | 27.5   |
| 3.5    | 3.8    | 10.5  | 11.1  | 7.3    | 4.8    | 37.2   | 35.1   | 38.9   |
| 0.5    | 1.2    | 0.6   | 0.8   | 0.7    | 1.1    | 0.7    | 1.9    | 3.0    |
| 32.7   | 46.2   | 19.1  | 25.0  | 39.1   | 39.4   | 72.1   | 60.8   | 71.4   |
| 3.6    | 0.3    | 1.7   | 3.7   | 3.4    | 4.1    | 3.1    | 5.4    | 2.6    |
| 527.4  | 482.0  | 73.0  | 84.8  | 838.8  | 445.7  | 584.7  | 329.0  | 303.2  |
| 2088.5 | 2664.9 | 27.8  | 56.5  | 3310.7 | 2552.8 | 2483.8 | 1994.8 | 2204.4 |
| 40.0   | 50.3   | 7.1   | 8.4   | 77.9   | 39.4   | 36.1   | 18.3   | 12.9   |
| 2.2    | 19.3   | 16.9  | 11.1  | 26.8   | 10.4   | 21.7   | 12.6   | 19.5   |
| 1.2    | 11.3   | 5.7   | 7.3   | 11.5   | 14.1   | 8.3    | 7.7    | 9.7    |
| 69.0   | 50.8   | 42.0  | 38.6  | 76.5   | 49.5   | 109.2  | 111.1  | 128.9  |
| 166.8  | 184.0  | 22.8  | 29.8  | 154.8  | 153.0  | 105.0  | 83.7   | 87.6   |
| 19.1   | 4.3    | 28.6  | 42.0  | 4.1    | 4.7    | 19.2   | 23.2   | 21.0   |
| 1.0    | 0.9    | 0.7   | 0.9   | 2.0    | 1.8    | 1.1    | 1.6    | 1.3    |
| 39.2   | 29.2   | 4.4   | 10.1  | 4.9    | 34.0   | 22.7   | 22.0   | 21.5   |
| 14.6   | 17.8   | 1.5   | 3.1   | 3.5    | 15.8   | 2.2    | 6.2    | 2.1    |
| 162.5  | 220.9  | 78.1  | 88.1  | 236.9  | 204.1  | 556.0  | 420.7  | 495.1  |
| 6.3    | 1.9    | 0.9   | 6.3   | 1.2    | 0.9    | 7.2    | 0.8    | 2.5    |
| 6.3    | 27.4   | 5.1   | 0.8   | 26.9   | 20.5   | 9.9    | 7.9    | 14.1   |
| 1.1    | 2.5    | 1.1   | 2.3   | 2.5    | 1.6    | 1.8    | 3.9    | 10.8   |
| 37.8   | 36.3   | 58.4  | 46.8  | 59.9   | 33.9   | 48.8   | 59.9   | 52.6   |
| 1.7    | 3.6    | 7.8   | 2.1   | 6.9    | 4.7    | 4.4    | 3.5    | 1.5    |
| 6.6    | 1.5    | 1.4   | 4.0   | 7.5    | 2.8    | 1.3    | 1.9    | 0.9    |
| 6.0    | 0.6    | 0.8   | 0.5   | 4.2    | 8.7    | 9.6    | 1.3    | 2.1    |
| 19.5   | 15.7   | 20.7  | 20.1  | 7.1    | 5.7    | 12.8   | 14.4   | 28.6   |
| 18.5   | 25.5   | 7.1   | 1.6   | 32.8   | 19.8   | 30.8   | 25.0   | 17.8   |
| 84.0   | 79.5   | 5.3   | 14.9  | 126.9  | 132.6  | 404.4  | 229.6  | 230.5  |
| 25.7   | 26.4   | 10.9  | 9.5   | 40.5   | 20.0   | 18.0   | 11.1   | 4.7    |
| 120.6  | 132.1  | 22.4  | 28.3  | 170.0  | 143.1  | 172.9  | 92.6   | 110.6  |
| 50.9   | 84.4   | 28.2  | 42.4  | 80.3   | 60.6   | 405.1  | 363.8  | 399.7  |
| 1.4    | 2.9    | 2.6   | 13.4  | 15.6   | 2.6    | 7.4    | 4.2    | 6.4    |
| 3.1    | 7.3    | 0.7   | 6.1   | 8.7    | 3.9    | 10.1   | 6.1    | 5.3    |
| 41.4   | 48.8   | 8.6   | 3.4   | 88.8   | 35.5   | 74.0   | 37.6   | 61.8   |
| 3.1    | 6.1    | 5.0   | 0.5   | 8.4    | 0.9    | 1.3    | 2.3    | 6.7    |
| 61.6   | 89.4   | 4.3   | 9.0   | 76.5   | 85.9   | 17.3   | 15.0   | 12.0   |
| 11.7   | 17.0   | 6.9   | 9.3   | 17.4   | 24.3   | 4.9    | 5.7    | 5.0    |
| 1.7    | 0.6    | 0.4   | 0.3   | 0.9    | 1.1    | 1.2    | 2.6    | 0.4    |
| 277.6  | 316.8  | 83.7  | 103.7 | 372.8  | 350.9  | 337.5  | 211.3  | 225.6  |
| 8.0    | 3.8    | 1.9   | 2.0   | 2.1    | 1.6    | 6.1    | 2.0    | 5.7    |
| 1.1    | 1.3    | 9.7   | 8.5   | 5.1    | 0.5    | 4.9    | 8.8    | 6.8    |
| 1.0    | 1.8    | 2.0   | 2.5   | 2.4    | 1.1    | 1.1    | 2.9    | 2.3    |
| 93.4   | 122.2  | 35.4  | 49.2  | 138.7  | 104.1  | 251.6  | 240.6  | 263.4  |

|      |      |      |      |       |      |       |       |       |
|------|------|------|------|-------|------|-------|-------|-------|
| 1.4  | 3.3  | 1.8  | 1.5  | 3.2   | 2.9  | 14.6  | 5.8   | 5.4   |
| 74.4 | 88.2 | 28.3 | 33.0 | 94.4  | 89.8 | 124.0 | 89.8  | 125.8 |
| 9.1  | 3.5  | 4.0  | 13.8 | 12.4  | 12.9 | 8.7   | 9.7   | 4.6   |
| 13.5 | 17.0 | 3.0  | 6.7  | 26.9  | 20.7 | 52.2  | 41.3  | 35.7  |
| 5.1  | 5.7  | 8.8  | 10.3 | 36.5  | 22.5 | 22.4  | 4.0   | 5.4   |
| 56.2 | 18.7 | 5.2  | 4.1  | 101.5 | 10.0 | 28.2  | 12.7  | 15.2  |
| 1.3  | 0.9  | 7.1  | 1.2  | 1.4   | 0.9  | 1.9   | 2.0   | 2.6   |
| 6.7  | 4.8  | 1.7  | 3.3  | 1.5   | 5.7  | 12.1  | 7.2   | 11.8  |
| 5.0  | 0.6  | 6.2  | 4.3  | 7.5   | 3.1  | 32.4  | 37.0  | 29.2  |
| 8.9  | 4.7  | 6.4  | 8.2  | 6.9   | 6.4  | 8.7   | 7.6   | 9.4   |
| 0.7  | 1.7  | 8.3  | 7.7  | 0.9   | 1.1  | 1.1   | 1.2   | 1.0   |
| 4.0  | 5.5  | 7.3  | 8.8  | 14.6  | 12.6 | 16.9  | 16.2  | 11.2  |
| 42.3 | 10.2 | 12.8 | 10.3 | 33.4  | 14.0 | 14.8  | 19.5  | 12.0  |
| 1.7  | 5.9  | 1.5  | 3.7  | 2.9   | 1.3  | 10.0  | 4.0   | 4.8   |
| 2.3  | 2.8  | 2.1  | 1.5  | 2.0   | 2.3  | 10.0  | 13.1  | 5.2   |
| 8.3  | 12.7 | 12.9 | 5.9  | 9.8   | 14.1 | 18.7  | 12.2  | 22.1  |
| 3.7  | 2.1  | 1.4  | 3.6  | 0.5   | 4.3  | 12.0  | 0.7   | 0.9   |
| 11.6 | 17.6 | 17.9 | 5.0  | 9.2   | 15.1 | 28.3  | 30.9  | 32.9  |
| 7.9  | 11.5 | 3.8  | 3.9  | 13.4  | 24.3 | 35.1  | 22.0  | 19.5  |
| 1.4  | 2.6  | 4.3  | 4.0  | 3.1   | 15.8 | 10.7  | 10.5  | 3.6   |
| 22.0 | 11.2 | 6.9  | 2.3  | 40.7  | 3.9  | 14.4  | 8.1   | 13.8  |
| 6.6  | 7.3  | 2.7  | 2.2  | 10.1  | 2.3  | 13.6  | 4.2   | 7.3   |
| 1.1  | 1.5  | 0.4  | 0.3  | 0.7   | 2.3  | 2.3   | 2.3   | 1.1   |
| 10.2 | 3.3  | 3.5  | 3.5  | 2.6   | 0.7  | 9.0   | 5.1   | 12.2  |
| 4.4  | 3.7  | 17.2 | 21.3 | 8.0   | 1.4  | 24.9  | 20.5  | 5.5   |
| 16.8 | 12.9 | 7.8  | 10.5 | 12.9  | 19.6 | 19.4  | 15.8  | 17.3  |
| 1.8  | 2.1  | 4.5  | 1.6  | 1.6   | 3.2  | 2.3   | 3.3   | 7.9   |
| 10.6 | 22.6 | 41.3 | 31.6 | 27.5  | 16.7 | 19.3  | 21.0  | 33.7  |
| 76.2 | 56.1 | 70.1 | 66.8 | 74.1  | 90.0 | 167.4 | 160.9 | 186.0 |
| 2.3  | 2.3  | 2.4  | 3.1  | 2.2   | 3.0  | 2.6   | 6.1   | 0.9   |
| 30.5 | 21.0 | 20.3 | 18.2 | 42.4  | 22.2 | 49.5  | 39.8  | 62.6  |
| 1.2  | 0.7  | 7.8  | 0.7  | 0.3   | 2.6  | 5.6   | 9.2   | 5.6   |
| 14.9 | 20.7 | 0.4  | 1.7  | 32.2  | 18.4 | 0.5   | 1.6   | 4.1   |
| 6.0  | 12.9 | 8.9  | 9.2  | 20.9  | 17.2 | 17.7  | 16.5  | 14.2  |
| 6.6  | 1.7  | 2.3  | 1.8  | 18.5  | 2.8  | 10.1  | 4.1   | 7.5   |
| 0.9  | 1.9  | 5.2  | 6.0  | 10.9  | 1.2  | 1.8   | 6.2   | 1.8   |
| 1.1  | 13.1 | 14.1 | 10.7 | 19.3  | 6.7  | 17.8  | 18.6  | 16.9  |
| 1.2  | 1.3  | 0.9  | 0.5  | 0.7   | 2.2  | 2.6   | 1.1   | 1.2   |
| 1.4  | 2.2  | 1.6  | 1.5  | 0.8   | 2.8  | 2.0   | 6.4   | 4.0   |
| 1.1  | 11.1 | 1.8  | 2.6  | 22.6  | 1.7  | 11.6  | 26.9  | 17.0  |
| 51.7 | 55.7 | 13.8 | 7.0  | 54.9  | 34.9 | 101.6 | 85.0  | 82.5  |
| 18.6 | 3.1  | 3.6  | 4.3  | 5.6   | 12.9 | 15.3  | 11.9  | 12.5  |
| 12.5 | 1.7  | 0.9  | 2.9  | 0.8   | 5.7  | 20.5  | 11.5  | 7.9   |
| 1.5  | 1.3  | 1.4  | 0.6  | 4.2   | 6.5  | 2.4   | 4.9   | 5.4   |
| 15.7 | 25.6 | 12.1 | 13.0 | 23.5  | 7.2  | 34.1  | 41.1  | 47.5  |
| 1.1  | 2.6  | 2.5  | 1.2  | 2.3   | 1.0  | 3.9   | 4.3   | 8.6   |
| 35.5 | 22.8 | 25.0 | 61.0 | 28.0  | 19.5 | 22.1  | 40.2  | 41.2  |
| 42.6 | 12.4 | 19.8 | 24.9 | 45.4  | 37.8 | 116.0 | 132.8 | 126.8 |
| 3.8  | 6.7  | 1.3  | 3.0  | 6.0   | 11.4 | 5.1   | 3.9   | 2.9   |
| 3.0  | 3.8  | 5.7  | 3.4  | 0.6   | 4.1  | 2.3   | 3.9   | 4.1   |
| 2.3  | 0.6  | 1.4  | 3.2  | 4.9   | 0.2  | 13.7  | 1.4   | 0.7   |
| 2.7  | 4.3  | 1.5  | 2.9  | 2.5   | 0.7  | 2.0   | 0.8   | 1.5   |
| 3.2  | 12.8 | 20.0 | 28.0 | 2.8   | 1.2  | 87.5  | 90.1  | 92.1  |

|       |       |       |       |       |       |        |       |       |
|-------|-------|-------|-------|-------|-------|--------|-------|-------|
| 2.4   | 14.3  | 9.9   | 3.7   | 1.1   | 4.9   | 16.2   | 8.1   | 9.9   |
| 5.5   | 9.5   | 13.1  | 6.1   | 13.4  | 1.5   | 4.6    | 3.3   | 3.4   |
| 1.8   | 1.0   | 2.5   | 2.9   | 3.7   | 1.5   | 2.4    | 6.1   | 6.5   |
| 0.8   | 0.6   | 2.4   | 1.7   | 0.6   | 3.0   | 1.4    | 6.1   | 4.9   |
| 1.1   | 0.5   | 3.5   | 3.8   | 3.2   | 0.6   | 5.5    | 2.4   | 2.1   |
| 1.3   | 8.9   | 7.1   | 6.7   | 5.6   | 12.9  | 5.5    | 4.8   | 6.8   |
| 2.1   | 0.5   | 11.2  | 0.2   | 3.2   | 4.4   | 5.1    | 4.9   | 5.2   |
| 19.2  | 22.9  | 20.2  | 19.7  | 24.7  | 15.0  | 22.5   | 27.8  | 12.4  |
| 30.3  | 40.7  | 9.8   | 9.2   | 48.8  | 43.8  | 163.6  | 220.7 | 186.5 |
| 4.0   | 5.1   | 1.3   | 6.2   | 7.3   | 6.4   | 4.0    | 1.9   | 2.8   |
| 130.8 | 152.2 | 19.1  | 20.0  | 200.9 | 131.9 | 171.6  | 123.5 | 138.8 |
| 9.6   | 11.0  | 6.7   | 4.8   | 22.5  | 15.8  | 8.1    | 11.0  | 7.1   |
| 6.1   | 5.9   | 1.6   | 0.7   | 1.7   | 1.3   | 2.6    | 0.6   | 1.3   |
| 11.0  | 8.8   | 3.1   | 2.6   | 5.0   | 11.9  | 5.2    | 2.4   | 4.6   |
| 4.6   | 7.2   | 5.7   | 4.2   | 20.1  | 22.2  | 7.2    | 31.2  | 25.3  |
| 19.9  | 3.7   | 45.0  | 23.8  | 17.0  | 3.6   | 77.9   | 68.1  | 90.2  |
| 3.2   | 19.0  | 13.2  | 9.0   | 16.5  | 2.1   | 28.8   | 26.6  | 40.5  |
| 11.2  | 13.5  | 14.1  | 3.2   | 11.8  | 8.7   | 21.5   | 21.9  | 15.7  |
| 1.9   | 1.0   | 1.2   | 1.7   | 2.2   | 2.6   | 7.1    | 4.3   | 5.8   |
| 7.4   | 8.5   | 0.6   | 1.9   | 0.8   | 0.9   | 15.6   | 11.0  | 9.4   |
| 84.3  | 129.3 | 0.6   | 1.1   | 110.1 | 129.0 | 6.6    | 4.3   | 6.8   |
| 1.3   | 3.0   | 4.5   | 5.4   | 8.5   | 2.4   | 2.9    | 4.7   | 3.8   |
| 4.2   | 1.1   | 4.5   | 5.3   | 1.8   | 4.3   | 5.4    | 0.7   | 5.1   |
| 8.8   | 4.7   | 7.2   | 0.9   | 13.1  | 13.8  | 13.0   | 15.9  | 8.6   |
| 2.4   | 3.4   | 9.5   | 0.6   | 11.1  | 1.2   | 6.4    | 6.3   | 3.8   |
| 6.2   | 5.1   | 6.3   | 9.3   | 5.1   | 1.1   | 43.9   | 66.7  | 63.2  |
| 11.2  | 4.7   | 0.3   | 0.4   | 0.6   | 4.6   | 4.3    | 2.4   | 5.7   |
| 1.4   | 1.9   | 3.0   | 4.6   | 3.6   | 0.8   | 1.7    | 5.0   | 4.3   |
| 16.9  | 22.0  | 9.5   | 21.4  | 11.4  | 13.9  | 32.7   | 52.6  | 32.7  |
| 3.5   | 7.4   | 5.6   | 5.8   | 1.8   | 7.7   | 24.3   | 64.1  | 66.3  |
| 1.3   | 8.5   | 2.3   | 1.1   | 29.3  | 21.9  | 119.8  | 64.4  | 84.6  |
| 1.4   | 6.1   | 3.4   | 2.3   | 2.5   | 1.9   | 1.6    | 2.7   | 2.2   |
| 2.8   | 10.0  | 3.9   | 4.4   | 4.0   | 3.9   | 13.3   | 12.0  | 14.2  |
| 3.4   | 0.9   | 8.3   | 3.8   | 3.9   | 3.0   | 4.1    | 4.8   | 4.2   |
| 0.2   | 0.4   | 1.7   | 1.5   | 3.9   | 9.9   | 5.3    | 1.2   | 4.1   |
| 2.9   | 1.5   | 1.8   | 4.9   | 2.6   | 0.6   | 5.1    | 3.4   | 2.1   |
| 10.5  | 4.7   | 6.3   | 1.4   | 8.5   | 5.7   | 4.4    | 2.1   | 9.0   |
| 29.5  | 33.2  | 25.9  | 27.6  | 28.1  | 31.6  | 141.4  | 131.6 | 156.1 |
| 10.8  | 1.7   | 3.3   | 8.3   | 2.8   | 5.1   | 9.9    | 4.0   | 6.9   |
| 38.3  | 32.2  | 12.3  | 26.0  | 48.9  | 35.3  | 8.5    | 10.1  | 13.1  |
| 2.7   | 9.7   | 21.4  | 6.5   | 3.1   | 19.3  | 18.6   | 105.1 | 109.5 |
| 46.1  | 73.5  | 131.1 | 139.8 | 96.1  | 59.8  | 312.2  | 274.7 | 317.6 |
| 94.1  | 99.6  | 53.3  | 93.8  | 151.9 | 100.7 | 181.3  | 131.2 | 128.3 |
| 9.6   | 33.6  | 14.5  | 14.8  | 21.0  | 23.4  | 7.0    | 18.3  | 17.8  |
| 30.5  | 53.8  | 13.5  | 12.7  | 64.5  | 49.9  | 71.0   | 72.8  | 65.4  |
| 100.3 | 138.0 | 16.8  | 14.9  | 141.4 | 118.5 | 655.6  | 520.8 | 579.3 |
| 27.4  | 26.8  | 69.7  | 71.2  | 40.3  | 29.8  | 361.7  | 346.3 | 376.0 |
| 5.4   | 6.5   | 5.6   | 6.1   | 12.4  | 8.4   | 27.7   | 42.7  | 29.6  |
| 284.3 | 292.4 | 39.8  | 65.8  | 408.6 | 326.7 | 1009.3 | 886.8 | 992.4 |
| 6.0   | 1.0   | 3.4   | 1.6   | 13.0  | 1.4   | 16.6   | 12.7  | 9.2   |
| 0.9   | 1.0   | 1.3   | 1.1   | 1.0   | 1.0   | 1.1    | 1.0   | 0.8   |
| 1.8   | 4.5   | 1.4   | 1.3   | 1.5   | 5.5   | 3.8    | 2.7   | 3.8   |
| 8.0   | 1.7   | 0.3   | 0.5   | 1.2   | 2.1   | 5.1    | 3.3   | 4.3   |



|        |        |       |       |        |        |        |        |        |
|--------|--------|-------|-------|--------|--------|--------|--------|--------|
| 13.1   | 12.4   | 5.3   | 14.0  | 6.6    | 9.4    | 12.2   | 8.7    | 12.3   |
| 5.8    | 1.6    | 4.7   | 13.5  | 1.0    | 11.5   | 7.8    | 5.5    | 5.4    |
| 139.1  | 165.2  | 23.1  | 29.7  | 180.6  | 163.5  | 169.7  | 150.1  | 162.6  |
| 18.0   | 2.0    | 13.8  | 16.3  | 6.7    | 2.6    | 19.4   | 15.3   | 16.1   |
| 0.6    | 11.1   | 3.9   | 0.7   | 8.6    | 6.9    | 7.5    | 4.6    | 9.6    |
| 94.2   | 77.1   | 127.0 | 91.9  | 100.4  | 68.2   | 94.9   | 96.5   | 103.7  |
| 12.8   | 18.0   | 14.9  | 8.9   | 24.9   | 26.6   | 5.3    | 8.9    | 7.5    |
| 63.7   | 96.2   | 3.1   | 11.9  | 122.3  | 102.2  | 56.2   | 50.9   | 68.4   |
| 1.9    | 2.6    | 12.7  | 14.7  | 4.1    | 4.7    | 4.8    | 9.2    | 5.8    |
| 14.1   | 25.4   | 0.7   | 2.0   | 24.7   | 24.2   | 115.5  | 120.1  | 122.1  |
| 1.7    | 8.8    | 6.5   | 2.5   | 11.0   | 7.3    | 1.7    | 5.7    | 8.2    |
| 1.1    | 2.6    | 0.3   | 0.5   | 3.7    | 7.5    | 3.9    | 6.1    | 6.8    |
| 13.7   | 27.7   | 1.5   | 5.1   | 16.9   | 24.8   | 73.4   | 92.7   | 108.9  |
| 78.0   | 96.0   | 179.4 | 195.6 | 120.4  | 80.1   | 255.0  | 110.7  | 169.0  |
| 236.5  | 281.3  | 70.8  | 90.6  | 390.7  | 248.0  | 612.9  | 674.9  | 887.3  |
| 102.0  | 108.5  | 73.4  | 93.4  | 96.1   | 108.3  | 145.0  | 130.4  | 132.6  |
| 4.8    | 6.5    | 18.5  | 6.9   | 3.4    | 11.8   | 3.8    | 6.8    | 3.0    |
| 35.1   | 52.2   | 10.0  | 21.2  | 50.6   | 66.4   | 104.6  | 93.3   | 109.2  |
| 123.7  | 148.5  | 70.7  | 89.2  | 151.7  | 158.6  | 215.8  | 129.0  | 134.6  |
| 34.0   | 50.8   | 54.9  | 80.3  | 58.3   | 23.7   | 235.0  | 262.0  | 260.9  |
| 17.3   | 36.2   | 3.0   | 4.5   | 20.0   | 41.8   | 140.1  | 55.2   | 74.7   |
| 30.5   | 39.5   | 29.6  | 25.4  | 58.2   | 38.4   | 118.7  | 122.4  | 122.4  |
| 15.7   | 47.3   | 151.0 | 200.4 | 41.5   | 27.0   | 96.3   | 91.7   | 97.9   |
| 18.7   | 6.8    | 16.0  | 23.9  | 26.6   | 27.2   | 32.4   | 35.4   | 24.0   |
| 0.8    | 1.2    | 4.1   | 1.3   | 0.7    | 4.0    | 2.7    | 1.2    | 3.6    |
| 2.1    | 19.5   | 1.4   | 3.4   | 2.8    | 1.9    | 2.8    | 5.2    | 9.5    |
| 155.3  | 175.8  | 64.2  | 69.9  | 169.2  | 232.4  | 298.6  | 211.4  | 227.3  |
| 1.9    | 2.0    | 2.2   | 2.2   | 1.0    | 0.6    | 1.5    | 1.5    | 1.9    |
| 94.9   | 144.4  | 41.9  | 45.6  | 191.7  | 136.4  | 470.5  | 283.9  | 340.9  |
| 127.4  | 160.6  | 71.9  | 60.6  | 200.7  | 144.4  | 429.6  | 518.0  | 540.2  |
| 1.1    | 1.2    | 1.5   | 1.9   | 0.5    | 5.4    | 2.8    | 6.6    | 2.0    |
| 12.8   | 1.1    | 2.5   | 2.5   | 8.7    | 2.5    | 9.9    | 7.6    | 6.9    |
| 2.0    | 0.7    | 0.3   | 2.0   | 5.9    | 5.1    | 7.6    | 2.2    | 3.9    |
| 9.6    | 12.9   | 6.6   | 9.4   | 30.1   | 15.8   | 3.4    | 3.2    | 4.0    |
| 112.8  | 144.0  | 54.1  | 59.5  | 169.5  | 133.8  | 193.1  | 137.5  | 166.3  |
| 13.3   | 9.0    | 10.6  | 9.6   | 17.3   | 22.3   | 10.3   | 9.5    | 13.5   |
| 4.2    | 1.6    | 3.9   | 2.0   | 1.9    | 3.4    | 5.4    | 7.6    | 5.6    |
| 4.7    | 3.4    | 19.9  | 11.5  | 0.8    | 0.5    | 25.6   | 22.4   | 30.0   |
| 5.3    | 2.0    | 9.8   | 3.4   | 1.9    | 2.6    | 2.5    | 7.9    | 4.4    |
| 22.7   | 13.9   | 18.2  | 24.8  | 4.8    | 4.7    | 21.3   | 45.5   | 46.7   |
| 18.9   | 2.6    | 23.6  | 18.3  | 24.2   | 5.1    | 60.6   | 91.6   | 94.0   |
| 17.1   | 20.7   | 3.9   | 6.7   | 17.1   | 30.4   | 15.1   | 3.8    | 2.9    |
| 14.6   | 1.0    | 7.7   | 8.1   | 6.6    | 2.8    | 1.8    | 8.4    | 12.2   |
| 6.4    | 10.6   | 9.5   | 4.2   | 2.9    | 12.7   | 28.4   | 21.1   | 31.3   |
| 52.7   | 90.6   | 18.8  | 35.7  | 84.9   | 105.9  | 1231.1 | 1890.2 | 1914.4 |
| 15.2   | 24.3   | 13.8  | 14.4  | 13.1   | 9.4    | 11.2   | 14.0   | 14.2   |
| 256.0  | 292.1  | 262.9 | 374.9 | 338.3  | 224.8  | 314.1  | 244.1  | 275.6  |
| 4.5    | 37.4   | 3.2   | 6.4   | 4.9    | 16.9   | 25.1   | 17.2   | 13.3   |
| 36.8   | 59.5   | 142.8 | 165.6 | 76.2   | 49.8   | 155.4  | 267.0  | 312.1  |
| 4.7    | 8.6    | 37.6  | 56.7  | 4.6    | 7.6    | 89.3   | 152.8  | 128.3  |
| 32.2   | 7.1    | 6.8   | 4.4   | 27.1   | 7.4    | 39.7   | 20.8   | 44.4   |
| 3.3    | 1.3    | 5.7   | 0.9   | 2.8    | 5.0    | 8.1    | 6.5    | 2.3    |
| 1182.9 | 1295.2 | 573.9 | 650.7 | 1505.2 | 1397.7 | 2786.4 | 1900.3 | 2080.9 |

|        |        |       |       |        |        |        |        |        |
|--------|--------|-------|-------|--------|--------|--------|--------|--------|
| 0.7    | 0.7    | 0.7   | 0.8   | 0.7    | 0.8    | 1.3    | 1.2    | 0.8    |
| 650.6  | 681.8  | 167.1 | 149.0 | 1004.7 | 774.4  | 1110.0 | 659.1  | 659.8  |
| 23.7   | 35.9   | 46.3  | 43.5  | 45.7   | 24.4   | 339.0  | 489.9  | 523.1  |
| 38.6   | 78.7   | 8.0   | 9.7   | 121.7  | 88.3   | 240.3  | 304.0  | 321.7  |
| 80.3   | 148.8  | 14.1  | 24.3  | 118.5  | 129.5  | 229.2  | 198.8  | 206.0  |
| 2.0    | 5.4    | 1.5   | 0.8   | 4.1    | 2.5    | 1.4    | 2.0    | 0.8    |
| 73.5   | 79.6   | 48.6  | 82.4  | 126.9  | 62.6   | 85.1   | 82.2   | 105.4  |
| 30.8   | 44.4   | 37.7  | 38.6  | 73.7   | 43.2   | 4.6    | 3.7    | 7.1    |
| 14.9   | 21.4   | 11.7  | 15.6  | 21.4   | 20.3   | 12.1   | 16.9   | 21.7   |
| 1102.4 | 1471.9 | 169.0 | 187.1 | 1501.7 | 1121.0 | 1760.0 | 1291.0 | 1605.4 |
| 59.7   | 61.7   | 17.0  | 25.5  | 73.7   | 45.4   | 257.9  | 153.2  | 138.3  |
| 172.7  | 242.4  | 62.3  | 99.0  | 247.9  | 213.9  | 549.0  | 503.7  | 553.8  |
| 12.6   | 1.6    | 8.7   | 7.9   | 4.9    | 3.6    | 10.0   | 10.7   | 8.2    |
| 223.8  | 269.6  | 282.8 | 353.0 | 387.2  | 183.9  | 498.1  | 406.1  | 479.4  |
| 93.1   | 116.5  | 22.3  | 32.6  | 154.0  | 105.1  | 175.8  | 75.1   | 82.5   |
| 993.5  | 1174.5 | 136.7 | 193.3 | 1358.1 | 1277.1 | 1172.1 | 1073.0 | 1138.1 |
| 97.7   | 125.5  | 54.1  | 90.5  | 122.0  | 105.8  | 103.1  | 56.4   | 97.6   |
| 1.3    | 1.5    | 1.6   | 7.0   | 1.2    | 8.9    | 1.9    | 3.9    | 7.0    |
| 1.1    | 0.7    | 1.8   | 0.9   | 8.2    | 2.0    | 15.3   | 18.1   | 19.8   |
| 21.7   | 20.4   | 63.2  | 102.7 | 30.8   | 16.6   | 24.3   | 33.6   | 42.6   |
| 225.6  | 239.9  | 57.8  | 90.0  | 234.8  | 203.9  | 295.4  | 310.7  | 324.0  |
| 0.7    | 1.9    | 1.7   | 1.3   | 1.8    | 1.7    | 3.1    | 1.9    | 14.0   |
| 2.3    | 12.0   | 9.1   | 13.9  | 19.5   | 19.1   | 35.6   | 28.6   | 30.5   |
| 154.7  | 174.0  | 37.8  | 28.0  | 199.7  | 122.5  | 256.5  | 203.2  | 241.4  |
| 2.3    | 13.4   | 1.6   | 1.7   | 1.6    | 1.2    | 7.7    | 5.0    | 8.4    |
| 29.3   | 31.9   | 19.5  | 25.2  | 33.5   | 15.9   | 31.9   | 38.8   | 34.6   |
| 1.2    | 5.0    | 3.3   | 22.8  | 16.3   | 6.6    | 12.9   | 3.8    | 17.4   |
| 2.7    | 1.8    | 2.8   | 1.2   | 4.4    | 14.1   | 4.4    | 10.5   | 7.7    |
| 5.0    | 2.3    | 2.3   | 1.2   | 2.1    | 11.3   | 2.9    | 1.8    | 2.4    |
| 1.8    | 2.5    | 5.2   | 2.3   | 1.4    | 1.2    | 9.9    | 5.3    | 5.6    |
| 2.0    | 7.0    | 5.0   | 3.1   | 3.7    | 3.3    | 54.1   | 47.8   | 55.5   |
| 1.4    | 1.5    | 2.9   | 0.7   | 2.0    | 2.0    | 1.5    | 1.1    | 1.4    |
| 2.2    | 4.0    | 5.3   | 7.9   | 4.3    | 2.7    | 11.2   | 2.8    | 2.8    |
| 10.8   | 11.4   | 6.3   | 3.0   | 21.2   | 1.2    | 56.2   | 108.4  | 102.7  |
| 2.6    | 0.9    | 0.3   | 2.7   | 0.4    | 1.2    | 3.4    | 0.9    | 1.7    |
| 3.1    | 2.9    | 1.5   | 0.5   | 1.1    | 0.8    | 2.7    | 2.1    | 6.8    |
| 42.8   | 28.9   | 18.1  | 19.5  | 34.7   | 36.4   | 50.6   | 34.3   | 36.7   |
| 269.1  | 196.4  | 1.8   | 11.5  | 459.9  | 196.7  | 58.0   | 59.3   | 55.9   |
| 3.7    | 3.5    | 12.9  | 2.5   | 4.0    | 1.0    | 4.9    | 8.5    | 3.0    |
| 45.3   | 41.4   | 12.8  | 22.5  | 69.3   | 31.6   | 36.8   | 32.2   | 34.7   |
| 21.0   | 33.8   | 14.1  | 21.1  | 13.8   | 14.3   | 32.1   | 22.6   | 29.4   |
| 2.2    | 9.5    | 11.1  | 2.1   | 3.1    | 4.1    | 13.1   | 13.3   | 17.0   |
| 0.8    | 1.4    | 7.5   | 2.9   | 7.4    | 5.1    | 3.5    | 7.2    | 6.1    |
| 5.8    | 17.2   | 31.7  | 17.0  | 17.1   | 22.0   | 36.4   | 28.3   | 22.1   |
| 2.1    | 2.0    | 2.8   | 1.7   | 3.0    | 0.8    | 2.7    | 2.6    | 1.9    |
| 15.5   | 2.1    | 1.9   | 14.6  | 11.3   | 3.6    | 24.2   | 12.0   | 13.4   |
| 15.1   | 5.3    | 10.7  | 8.7   | 9.8    | 3.0    | 24.2   | 32.9   | 28.4   |
| 7.1    | 1.6    | 2.9   | 3.5   | 2.2    | 1.8    | 11.1   | 3.6    | 2.7    |
| 14.9   | 19.4   | 14.0  | 12.1  | 12.5   | 8.1    | 11.9   | 11.3   | 9.4    |
| 10.4   | 9.7    | 11.4  | 9.7   | 1.5    | 1.9    | 16.6   | 11.3   | 16.4   |
| 5.1    | 0.9    | 8.5   | 1.8   | 8.7    | 2.0    | 20.0   | 14.8   | 22.8   |
| 1.1    | 1.0    | 0.6   | 2.3   | 0.9    | 3.6    | 254.3  | 309.2  | 311.9  |
| 30.1   | 18.4   | 22.4  | 18.9  | 24.9   | 30.7   | 20.6   | 34.3   | 37.4   |

|       |       |      |      |       |       |       |       |       |
|-------|-------|------|------|-------|-------|-------|-------|-------|
| 7.1   | 10.4  | 5.9  | 5.5  | 8.3   | 7.7   | 15.1  | 9.4   | 7.8   |
| 4.2   | 19.9  | 5.6  | 11.5 | 20.9  | 17.5  | 31.5  | 31.7  | 29.6  |
| 4.7   | 2.4   | 3.0  | 13.6 | 1.2   | 3.3   | 20.8  | 10.8  | 21.3  |
| 0.9   | 0.5   | 0.8  | 0.5  | 0.6   | 0.7   | 4.1   | 1.3   | 0.7   |
| 224.3 | 339.0 | 25.4 | 29.8 | 347.8 | 322.4 | 324.2 | 275.6 | 256.0 |
| 1.7   | 2.9   | 2.1  | 3.3  | 1.6   | 0.9   | 1.6   | 2.1   | 2.9   |
| 1.5   | 1.2   | 1.9  | 0.9  | 1.9   | 2.8   | 2.1   | 1.3   | 1.7   |
| 8.2   | 10.6  | 5.5  | 13.7 | 13.0  | 13.6  | 21.5  | 25.2  | 13.5  |
| 3.0   | 1.5   | 11.3 | 1.0  | 0.7   | 1.1   | 14.9  | 14.8  | 6.4   |
| 1.6   | 8.3   | 8.4  | 8.3  | 4.8   | 11.3  | 4.8   | 1.1   | 4.7   |
| 4.9   | 3.4   | 2.5  | 3.3  | 4.5   | 3.8   | 2.9   | 4.0   | 3.1   |
| 22.1  | 6.9   | 10.7 | 8.4  | 20.5  | 16.4  | 13.9  | 21.7  | 10.3  |
| 0.6   | 4.5   | 3.4  | 2.7  | 2.5   | 0.8   | 7.9   | 0.8   | 2.0   |
| 10.2  | 13.3  | 0.8  | 0.8  | 3.8   | 10.6  | 4.0   | 6.5   | 5.2   |
| 9.9   | 2.3   | 5.5  | 9.7  | 11.2  | 1.2   | 12.2  | 4.0   | 7.3   |
| 3.2   | 4.1   | 3.0  | 0.7  | 1.5   | 1.1   | 6.5   | 7.7   | 8.1   |
| 10.7  | 18.5  | 12.1 | 7.0  | 12.6  | 7.3   | 8.7   | 7.7   | 14.9  |
| 1.8   | 2.2   | 16.6 | 13.8 | 4.1   | 1.5   | 9.6   | 14.8  | 18.6  |
| 2.7   | 2.1   | 3.8  | 1.3  | 2.5   | 11.2  | 2.9   | 4.1   | 3.7   |
| 24.0  | 34.8  | 43.4 | 18.6 | 30.5  | 32.0  | 160.5 | 131.2 | 135.1 |
| 2.4   | 6.6   | 1.1  | 1.3  | 1.6   | 1.8   | 0.9   | 1.5   | 4.3   |
| 6.6   | 2.8   | 4.2  | 19.7 | 4.2   | 13.1  | 2.0   | 6.7   | 9.8   |
| 1.9   | 4.5   | 17.6 | 6.7  | 3.5   | 7.6   | 10.9  | 10.0  | 8.3   |
| 0.8   | 4.1   | 7.2  | 1.0  | 0.8   | 0.5   | 1.0   | 2.0   | 0.8   |
| 3.6   | 3.8   | 6.3  | 13.5 | 7.8   | 6.4   | 1.6   | 7.2   | 2.2   |
| 11.5  | 15.7  | 12.8 | 14.9 | 9.4   | 9.2   | 14.6  | 22.1  | 8.9   |
| 5.8   | 2.6   | 3.2  | 5.1  | 3.2   | 1.9   | 1.4   | 5.4   | 3.5   |
| 20.7  | 7.5   | 9.3  | 18.2 | 5.7   | 4.9   | 13.1  | 18.2  | 16.7  |
| 41.3  | 46.2  | 41.0 | 51.8 | 66.9  | 36.3  | 187.6 | 135.8 | 156.1 |
| 8.4   | 10.8  | 1.0  | 2.0  | 9.5   | 3.5   | 4.8   | 6.9   | 4.8   |
| 2.4   | 1.0   | 3.6  | 1.1  | 1.9   | 9.3   | 6.4   | 4.9   | 2.0   |
| 0.7   | 1.0   | 2.0  | 3.7  | 0.6   | 0.6   | 3.9   | 4.1   | 3.0   |
| 1.5   | 10.4  | 12.4 | 9.8  | 1.6   | 16.5  | 11.0  | 7.4   | 8.8   |
| 1.1   | 6.3   | 4.0  | 0.8  | 2.0   | 0.7   | 3.1   | 3.8   | 1.2   |
| 1.9   | 3.1   | 0.4  | 0.9  | 2.4   | 0.9   | 3.2   | 1.4   | 6.8   |
| 10.6  | 6.5   | 1.4  | 7.0  | 7.0   | 14.5  | 8.3   | 6.7   | 14.3  |
| 0.8   | 1.2   | 2.1  | 1.5  | 0.6   | 2.0   | 1.7   | 5.4   | 4.5   |
| 6.9   | 10.4  | 17.1 | 15.7 | 12.6  | 22.6  | 24.1  | 17.2  | 23.7  |
| 5.2   | 0.5   | 2.6  | 14.7 | 12.8  | 14.6  | 13.7  | 22.7  | 18.6  |
| 4.2   | 5.0   | 20.1 | 31.9 | 4.8   | 2.7   | 19.9  | 27.6  | 16.7  |
| 2.6   | 12.8  | 8.0  | 6.1  | 8.8   | 2.0   | 9.7   | 7.1   | 7.7   |
| 0.9   | 5.4   | 1.5  | 1.2  | 1.3   | 0.9   | 1.0   | 0.6   | 1.0   |
| 9.4   | 10.2  | 4.9  | 2.2  | 6.5   | 5.9   | 6.6   | 3.7   | 8.0   |
| 18.4  | 4.4   | 3.1  | 10.5 | 11.0  | 16.5  | 9.5   | 10.1  | 8.1   |
| 8.1   | 1.0   | 4.3  | 0.5  | 13.6  | 3.1   | 6.3   | 6.6   | 9.5   |
| 6.9   | 5.1   | 8.9  | 7.4  | 6.8   | 1.8   | 7.4   | 7.4   | 4.9   |
| 2.0   | 0.6   | 1.3  | 0.6  | 1.5   | 1.2   | 2.6   | 0.6   | 0.8   |
| 7.0   | 2.2   | 10.7 | 7.0  | 2.4   | 0.8   | 4.6   | 6.6   | 2.3   |
| 13.5  | 22.8  | 3.1  | 8.9  | 20.5  | 32.3  | 24.8  | 19.1  | 23.4  |
| 8.5   | 7.7   | 11.8 | 17.6 | 25.5  | 9.8   | 16.7  | 18.6  | 19.2  |
| 4.3   | 2.7   | 2.4  | 2.2  | 23.0  | 3.0   | 7.4   | 39.2  | 9.6   |
| 1.0   | 1.8   | 1.5  | 1.4  | 8.6   | 0.9   | 9.4   | 9.9   | 8.2   |
| 15.8  | 2.0   | 4.9  | 4.8  | 11.2  | 12.5  | 3.0   | 8.1   | 6.4   |

|       |       |       |       |       |       |        |        |        |
|-------|-------|-------|-------|-------|-------|--------|--------|--------|
| 11.3  | 1.0   | 2.0   | 0.4   | 1.0   | 1.0   | 1.0    | 1.0    | 1.9    |
| 1.2   | 1.2   | 1.1   | 2.1   | 1.0   | 1.1   | 1.2    | 1.3    | 1.4    |
| 6.4   | 1.2   | 0.9   | 0.8   | 2.3   | 2.4   | 1.5    | 1.6    | 1.0    |
| 1.2   | 0.8   | 0.7   | 1.8   | 3.1   | 0.8   | 2.4    | 7.2    | 4.8    |
| 2.2   | 1.2   | 3.2   | 0.6   | 1.9   | 1.4   | 5.1    | 9.7    | 2.7    |
| 1.2   | 1.4   | 0.4   | 0.3   | 5.2   | 1.6   | 6.1    | 8.8    | 6.9    |
| 2.0   | 4.6   | 1.9   | 2.3   | 1.6   | 3.8   | 0.9    | 1.5    | 1.0    |
| 5.6   | 11.6  | 10.8  | 11.4  | 11.2  | 5.2   | 21.3   | 20.0   | 17.2   |
| 1.8   | 1.4   | 0.7   | 1.7   | 1.6   | 3.1   | 5.7    | 6.5    | 12.4   |
| 1.3   | 2.2   | 2.1   | 0.3   | 1.6   | 9.5   | 3.3    | 6.8    | 6.1    |
| 10.9  | 1.2   | 2.6   | 1.1   | 1.3   | 11.3  | 2.4    | 5.5    | 2.7    |
| 6.7   | 22.4  | 5.4   | 5.8   | 6.7   | 2.5   | 8.2    | 13.6   | 3.4    |
| 6.9   | 4.3   | 8.3   | 9.2   | 13.4  | 6.9   | 16.1   | 11.1   | 13.0   |
| 2.9   | 12.8  | 1.4   | 3.3   | 14.3  | 19.7  | 20.1   | 19.6   | 19.5   |
| 2.6   | 2.2   | 5.5   | 0.7   | 2.3   | 4.1   | 16.4   | 9.6    | 12.3   |
| 1.2   | 1.1   | 3.0   | 4.1   | 5.9   | 6.8   | 6.0    | 4.5    | 3.2    |
| 4.0   | 5.6   | 3.0   | 1.9   | 4.4   | 4.0   | 15.2   | 9.5    | 6.6    |
| 9.0   | 4.7   | 2.3   | 2.2   | 6.7   | 10.8  | 12.0   | 7.9    | 6.6    |
| 4.1   | 18.7  | 25.3  | 12.2  | 4.5   | 4.5   | 26.2   | 19.8   | 17.9   |
| 22.6  | 13.2  | 3.7   | 7.6   | 5.8   | 9.5   | 34.2   | 13.4   | 38.5   |
| 1.1   | 2.3   | 1.0   | 1.0   | 4.8   | 0.7   | 8.3    | 2.3    | 2.6    |
| 490.8 | 870.0 | 125.0 | 224.5 | 868.2 | 776.5 | 2622.4 | 2520.5 | 2576.7 |
| 14.3  | 16.0  | 16.4  | 15.9  | 5.8   | 4.3   | 4.0    | 7.8    | 3.7    |
| 1.2   | 1.9   | 0.5   | 0.5   | 1.6   | 1.2   | 2.3    | 2.5    | 1.3    |
| 1.4   | 1.3   | 5.0   | 7.2   | 3.7   | 2.1   | 7.4    | 2.5    | 2.0    |
| 1.1   | 6.9   | 1.6   | 1.2   | 1.8   | 3.8   | 8.8    | 6.4    | 4.8    |
| 10.6  | 0.5   | 5.7   | 7.1   | 12.7  | 9.3   | 3.1    | 8.1    | 11.3   |
| 7.9   | 10.6  | 5.2   | 14.0  | 14.5  | 13.1  | 23.5   | 20.4   | 22.6   |
| 3.1   | 4.0   | 1.5   | 2.2   | 8.9   | 3.6   | 3.5    | 1.6    | 1.8    |
| 2.3   | 1.9   | 2.4   | 6.2   | 1.7   | 3.4   | 4.8    | 2.2    | 8.9    |
| 9.3   | 6.4   | 5.5   | 3.1   | 25.7  | 2.8   | 14.8   | 18.4   | 13.8   |
| 4.3   | 15.4  | 4.5   | 12.9  | 5.2   | 20.1  | 9.2    | 7.7    | 11.3   |
| 5.2   | 7.3   | 6.1   | 7.0   | 8.8   | 0.6   | 8.3    | 8.8    | 4.0    |
| 2.4   | 1.1   | 1.2   | 1.5   | 1.7   | 1.0   | 4.3    | 6.9    | 0.6    |
| 9.8   | 1.2   | 11.2  | 8.5   | 1.2   | 6.0   | 10.9   | 11.3   | 10.4   |
| 0.6   | 5.8   | 0.9   | 7.3   | 0.6   | 1.8   | 6.8    | 1.5    | 1.4    |
| 0.8   | 0.8   | 2.6   | 6.1   | 0.9   | 1.6   | 1.8    | 3.8    | 0.3    |
| 0.3   | 0.7   | 3.6   | 2.8   | 3.8   | 1.1   | 6.4    | 12.0   | 8.3    |
| 1.6   | 1.0   | 0.9   | 1.0   | 1.1   | 0.7   | 1.2    | 0.6    | 2.1    |
| 5.1   | 15.7  | 6.8   | 6.9   | 19.1  | 1.4   | 8.2    | 14.8   | 11.6   |
| 0.6   | 0.5   | 0.8   | 0.5   | 3.2   | 2.6   | 2.4    | 0.7    | 0.6    |
| 2.6   | 9.6   | 2.4   | 1.6   | 2.2   | 1.2   | 6.7    | 2.8    | 2.4    |
| 11.9  | 31.2  | 41.6  | 26.3  | 16.1  | 23.8  | 2.2    | 17.1   | 8.4    |
| 1.1   | 1.3   | 0.4   | 0.3   | 0.9   | 2.3   | 3.1    | 2.5    | 6.0    |
| 8.5   | 18.2  | 21.2  | 15.4  | 1.2   | 20.3  | 13.7   | 18.7   | 17.6   |
| 6.9   | 6.4   | 11.8  | 11.2  | 25.2  | 9.2   | 8.1    | 13.2   | 12.2   |
| 1.9   | 2.3   | 4.1   | 0.9   | 2.6   | 0.9   | 1.6    | 0.9    | 3.1    |
| 22.9  | 14.1  | 16.7  | 3.6   | 22.3  | 20.7  | 43.2   | 32.0   | 26.0   |
| 4.9   | 2.3   | 7.9   | 2.5   | 3.2   | 5.1   | 9.2    | 3.9    | 1.2    |
| 16.6  | 7.0   | 18.9  | 10.2  | 15.6  | 2.6   | 22.1   | 22.9   | 15.1   |
| 25.4  | 7.8   | 0.9   | 2.6   | 2.9   | 17.4  | 4.7    | 8.4    | 4.5    |
| 0.5   | 1.1   | 0.5   | 0.5   | 0.8   | 1.3   | 0.5    | 1.0    | 1.0    |
| 2.4   | 8.1   | 6.9   | 5.7   | 1.6   | 7.3   | 10.3   | 12.5   | 9.6    |

|        |        |       |       |        |        |        |        |        |
|--------|--------|-------|-------|--------|--------|--------|--------|--------|
| 3.8    | 7.7    | 8.7   | 11.2  | 14.6   | 11.0   | 12.4   | 13.4   | 19.6   |
| 1.2    | 0.6    | 9.8   | 3.1   | 6.8    | 0.7    | 14.2   | 6.5    | 8.2    |
| 14.2   | 14.1   | 5.8   | 11.1  | 22.2   | 15.4   | 14.2   | 17.6   | 18.2   |
| 3.5    | 10.1   | 2.2   | 5.3   | 3.1    | 2.8    | 31.6   | 74.4   | 55.0   |
| 0.9    | 0.6    | 0.5   | 0.4   | 0.8    | 0.8    | 1.8    | 0.9    | 0.9    |
| 16.5   | 24.8   | 16.3  | 33.1  | 29.4   | 16.5   | 54.2   | 59.3   | 79.8   |
| 142.3  | 237.3  | 137.4 | 136.7 | 272.8  | 239.2  | 632.4  | 860.2  | 847.5  |
| 0.4    | 3.6    | 0.7   | 0.4   | 0.6    | 0.7    | 1.5    | 3.8    | 4.4    |
| 21.5   | 28.3   | 14.5  | 14.5  | 8.9    | 11.7   | 29.3   | 21.4   | 28.6   |
| 9.6    | 8.7    | 7.0   | 12.0  | 1.1    | 8.6    | 11.8   | 20.1   | 15.2   |
| 189.5  | 253.2  | 83.1  | 101.8 | 307.3  | 174.0  | 325.5  | 445.0  | 474.6  |
| 1.8    | 1.9    | 1.5   | 1.7   | 1.6    | 3.6    | 1.9    | 1.3    | 1.2    |
| 102.4  | 155.2  | 14.3  | 16.0  | 176.7  | 154.9  | 330.4  | 220.6  | 268.8  |
| 20.1   | 27.6   | 19.2  | 18.9  | 4.6    | 26.4   | 11.3   | 23.5   | 15.5   |
| 65.0   | 85.2   | 32.5  | 53.3  | 99.1   | 46.1   | 96.4   | 95.8   | 109.2  |
| 80.9   | 161.1  | 68.8  | 82.2  | 150.7  | 122.0  | 1149.8 | 1175.0 | 1186.3 |
| 2.4    | 10.4   | 8.1   | 1.0   | 13.6   | 9.2    | 4.7    | 5.9    | 2.0    |
| 93.4   | 120.0  | 57.5  | 100.5 | 139.3  | 90.0   | 47.6   | 68.3   | 70.9   |
| 1.0    | 0.8    | 3.6   | 0.6   | 1.0    | 1.2    | 2.3    | 1.4    | 1.9    |
| 74.3   | 69.3   | 63.5  | 74.7  | 100.0  | 51.3   | 100.2  | 65.1   | 81.0   |
| 2.8    | 14.2   | 16.8  | 13.5  | 9.0    | 9.3    | 7.6    | 12.2   | 4.4    |
| 3388.0 | 3385.8 | 504.6 | 806.9 | 4776.4 | 4734.0 | 4705.7 | 2843.5 | 3406.4 |
| 123.8  | 128.3  | 42.4  | 46.8  | 135.1  | 148.2  | 118.6  | 120.0  | 133.4  |
| 138.0  | 241.0  | 110.4 | 111.9 | 284.5  | 267.5  | 464.2  | 293.5  | 313.1  |
| 599.0  | 679.8  | 79.8  | 119.5 | 839.5  | 772.2  | 1035.8 | 609.5  | 741.2  |
| 2.0    | 1.3    | 0.5   | 0.5   | 0.6    | 1.9    | 5.7    | 1.8    | 1.4    |
| 11.5   | 4.8    | 13.9  | 1.1   | 1.0    | 0.8    | 2.6    | 4.8    | 1.7    |
| 3.3    | 1.1    | 10.8  | 10.5  | 12.0   | 1.5    | 39.9   | 36.1   | 31.8   |
| 0.3    | 8.1    | 3.5   | 2.7   | 1.1    | 3.9    | 0.8    | 0.9    | 0.5    |
| 0.7    | 2.2    | 9.4   | 6.7   | 0.5    | 8.4    | 8.8    | 6.2    | 2.0    |
| 11.3   | 28.8   | 13.7  | 6.6   | 8.7    | 19.3   | 19.2   | 18.7   | 20.0   |
| 7.2    | 3.3    | 7.7   | 10.2  | 3.0    | 8.0    | 6.5    | 7.0    | 9.1    |
| 5.4    | 5.7    | 10.0  | 0.8   | 2.7    | 2.0    | 5.8    | 1.7    | 9.6    |
| 10.1   | 8.8    | 14.2  | 12.4  | 19.7   | 5.6    | 22.9   | 12.0   | 11.8   |
| 20.6   | 2.4    | 2.4   | 3.3   | 19.4   | 11.3   | 6.5    | 15.1   | 8.8    |
| 2.4    | 2.0    | 14.0  | 3.0   | 6.8    | 9.2    | 14.1   | 12.1   | 3.2    |
| 302.1  | 390.0  | 253.1 | 282.8 | 402.3  | 332.6  | 523.6  | 698.7  | 720.7  |
| 4.8    | 18.4   | 2.3   | 1.7   | 15.7   | 14.0   | 12.7   | 2.5    | 5.5    |
| 3.8    | 7.8    | 9.7   | 1.2   | 0.7    | 7.9    | 8.0    | 7.2    | 8.9    |
| 892.6  | 1201.1 | 185.7 | 297.9 | 1405.4 | 1252.4 | 3285.8 | 2910.1 | 2863.6 |
| 14.0   | 11.6   | 7.6   | 10.0  | 6.1    | 10.5   | 24.3   | 23.0   | 13.5   |
| 2.8    | 1.6    | 1.6   | 0.9   | 0.9    | 1.3    | 2.1    | 1.8    | 1.6    |
| 3.4    | 3.6    | 6.0   | 5.6   | 14.4   | 8.2    | 17.3   | 10.5   | 5.3    |
| 1.0    | 0.6    | 0.8   | 0.6   | 1.4    | 0.7    | 1.0    | 1.0    | 2.2    |
| 1.7    | 2.1    | 1.3   | 2.1   | 2.4    | 0.9    | 3.4    | 3.1    | 3.3    |
| 12.6   | 13.5   | 8.7   | 6.5   | 13.7   | 14.5   | 9.7    | 14.2   | 5.9    |
| 5.3    | 3.1    | 5.6   | 1.9   | 11.5   | 14.8   | 6.0    | 3.7    | 3.2    |
| 5.5    | 16.6   | 13.8  | 13.9  | 8.4    | 13.6   | 19.3   | 5.5    | 13.2   |
| 1.4    | 0.8    | 10.2  | 0.9   | 2.1    | 1.5    | 4.8    | 5.9    | 7.4    |
| 5.9    | 1.6    | 1.6   | 0.9   | 7.4    | 7.4    | 11.2   | 6.6    | 11.1   |
| 2.9    | 11.8   | 1.1   | 1.0   | 3.4    | 6.7    | 38.7   | 34.1   | 22.3   |
| 9.5    | 25.8   | 15.3  | 19.8  | 16.2   | 13.9   | 33.9   | 26.7   | 11.6   |
| 8.0    | 1.6    | 18.4  | 13.7  | 3.8    | 1.9    | 2.1    | 11.5   | 2.8    |

|        |        |        |        |        |        |        |        |        |
|--------|--------|--------|--------|--------|--------|--------|--------|--------|
| 13.0   | 13.0   | 9.4    | 10.3   | 10.5   | 14.9   | 18.3   | 11.3   | 13.4   |
| 8.8    | 7.1    | 7.3    | 8.5    | 1.6    | 7.9    | 12.2   | 5.1    | 6.9    |
| 12.8   | 2.2    | 1.1    | 0.3    | 4.1    | 13.3   | 11.9   | 3.4    | 8.7    |
| 6.8    | 2.2    | 7.4    | 6.0    | 3.7    | 1.6    | 2.0    | 3.1    | 2.8    |
| 26.3   | 36.6   | 0.6    | 0.5    | 72.8   | 15.2   | 1.3    | 0.9    | 2.7    |
| 756.7  | 977.2  | 389.8  | 553.2  | 1209.8 | 926.3  | 2075.7 | 2149.0 | 2399.3 |
| 523.2  | 499.0  | 437.2  | 585.2  | 577.5  | 524.4  | 926.8  | 1021.7 | 999.7  |
| 698.1  | 888.2  | 881.5  | 1185.0 | 861.2  | 931.1  | 1221.1 | 1460.7 | 1534.0 |
| 3727.9 | 4791.6 | 724.9  | 1014.6 | 4636.8 | 4222.4 | 4131.8 | 3758.9 | 3885.8 |
| 3728.5 | 4620.7 | 1702.8 | 2213.4 | 4709.1 | 4306.1 | 6148.5 | 5925.0 | 6048.7 |
| 1107.6 | 1261.7 | 1410.5 | 1974.4 | 1258.4 | 1123.0 | 3983.3 | 4038.6 | 4158.1 |
| 119.4  | 165.0  | 29.3   | 72.5   | 288.5  | 177.0  | 196.5  | 261.8  | 291.8  |
| 76.2   | 112.8  | 112.2  | 143.9  | 199.9  | 94.3   | 692.9  | 645.0  | 781.0  |
| 43.5   | 66.4   | 138.4  | 167.5  | 104.9  | 61.1   | 317.3  | 364.8  | 374.0  |
| 202.9  | 251.3  | 16.9   | 27.5   | 239.8  | 229.0  | 568.3  | 300.6  | 336.4  |
| 2065.3 | 2787.9 | 360.3  | 492.5  | 2151.4 | 2436.8 | 2889.4 | 1918.2 | 1868.7 |
| 298.3  | 475.1  | 85.7   | 123.7  | 465.6  | 446.3  | 1382.1 | 965.1  | 1026.5 |
| 789.8  | 939.3  | 371.1  | 500.8  | 1060.0 | 959.9  | 2054.3 | 1487.2 | 1740.1 |
| 575.4  | 1038.3 | 158.5  | 222.2  | 830.4  | 774.0  | 1567.4 | 1112.4 | 1123.6 |
| 623.4  | 942.3  | 104.1  | 154.6  | 1145.3 | 1013.4 | 2236.7 | 1626.0 | 1696.2 |
| 176.9  | 228.7  | 74.3   | 104.7  | 281.6  | 268.3  | 436.4  | 415.9  | 428.2  |
| 44.7   | 84.8   | 27.3   | 47.9   | 85.1   | 81.2   | 271.7  | 216.0  | 223.9  |
| 659.7  | 809.7  | 448.9  | 567.0  | 1207.8 | 571.4  | 1702.9 | 1521.1 | 1657.6 |
| 135.7  | 159.7  | 34.6   | 25.6   | 241.7  | 125.8  | 265.8  | 35.9   | 20.8   |
| 84.5   | 101.6  | 117.8  | 118.9  | 146.1  | 123.8  | 304.5  | 273.4  | 257.0  |
| 1.6    | 7.5    | 8.5    | 8.7    | 4.9    | 12.7   | 6.7    | 4.6    | 1.9    |
| 1269.1 | 1418.3 | 142.4  | 252.7  | 1860.6 | 1471.3 | 3084.4 | 2163.7 | 2211.4 |
| 620.1  | 938.4  | 117.3  | 148.8  | 1012.2 | 672.1  | 1910.1 | 2134.1 | 2240.7 |
| 1890.9 | 2030.7 | 759.1  | 1057.4 | 2442.7 | 2006.4 | 3183.9 | 2791.8 | 3070.5 |
| 493.6  | 591.4  | 231.3  | 321.9  | 643.2  | 512.9  | 704.7  | 682.0  | 879.9  |
| 109.8  | 108.7  | 34.8   | 33.4   | 156.8  | 205.2  | 91.4   | 109.5  | 126.8  |
| 51.2   | 77.9   | 14.3   | 20.3   | 82.0   | 68.1   | 324.5  | 278.2  | 313.1  |
| 174.8  | 203.3  | 54.6   | 71.5   | 232.7  | 194.5  | 282.6  | 349.8  | 400.9  |
| 156.9  | 260.1  | 205.2  | 203.6  | 227.4  | 226.9  | 414.3  | 336.5  | 453.6  |
| 267.7  | 407.9  | 452.9  | 566.2  | 442.0  | 338.2  | 341.3  | 377.7  | 381.3  |
| 653.2  | 941.3  | 158.5  | 214.0  | 892.3  | 714.7  | 350.8  | 379.1  | 441.1  |
| 318.2  | 447.6  | 123.8  | 188.9  | 424.0  | 398.3  | 1912.5 | 1227.3 | 1464.0 |
| 109.4  | 130.8  | 92.8   | 104.8  | 115.2  | 126.4  | 622.3  | 388.0  | 432.4  |
| 233.2  | 284.4  | 264.9  | 331.8  | 417.0  | 255.2  | 545.4  | 587.8  | 670.2  |
| 757.7  | 976.4  | 39.3   | 51.2   | 851.2  | 930.9  | 2527.3 | 2252.7 | 2254.6 |
| 315.2  | 304.1  | 257.1  | 325.5  | 403.9  | 320.7  | 322.9  | 204.7  | 216.0  |
| 120.3  | 171.2  | 115.2  | 187.5  | 184.9  | 144.4  | 190.4  | 135.7  | 137.1  |
| 41.3   | 56.5   | 10.5   | 21.7   | 53.8   | 45.3   | 63.5   | 71.0   | 71.3   |
| 1087.6 | 1365.9 | 196.8  | 307.7  | 1566.5 | 1395.5 | 2207.2 | 1468.2 | 1620.8 |
| 298.2  | 420.9  | 13.6   | 6.9    | 709.6  | 405.9  | 289.4  | 90.9   | 102.8  |
| 49.4   | 27.7   | 41.7   | 37.0   | 27.7   | 26.4   | 136.0  | 170.3  | 152.3  |
| 117.5  | 109.3  | 85.0   | 124.1  | 169.8  | 110.9  | 487.2  | 409.4  | 427.0  |
| 142.3  | 180.0  | 29.6   | 41.4   | 210.1  | 205.9  | 460.8  | 288.7  | 354.0  |
| 161.3  | 232.0  | 19.7   | 25.5   | 264.4  | 199.4  | 524.6  | 281.4  | 319.9  |
| 376.0  | 481.2  | 134.2  | 205.5  | 568.2  | 444.7  | 440.6  | 392.6  | 490.7  |
| 256.3  | 452.7  | 130.5  | 127.4  | 477.2  | 413.2  | 472.9  | 362.1  | 388.7  |
| 223.4  | 362.3  | 27.9   | 36.5   | 408.1  | 313.6  | 507.6  | 416.5  | 473.4  |
| 352.8  | 474.7  | 111.0  | 111.9  | 530.7  | 402.3  | 322.5  | 330.0  | 344.6  |

|        |        |       |       |        |        |        |        |        |
|--------|--------|-------|-------|--------|--------|--------|--------|--------|
| 66.4   | 121.5  | 70.9  | 105.5 | 90.6   | 93.5   | 180.3  | 223.7  | 249.6  |
| 257.9  | 368.4  | 255.6 | 298.7 | 314.9  | 422.8  | 689.5  | 501.7  | 551.2  |
| 466.7  | 454.7  | 85.3  | 132.4 | 518.0  | 449.8  | 1890.0 | 634.3  | 750.9  |
| 303.9  | 450.3  | 146.6 | 166.0 | 487.4  | 448.1  | 888.7  | 750.7  | 837.2  |
| 35.6   | 29.4   | 30.0  | 44.8  | 52.8   | 14.6   | 5.4    | 5.8    | 3.7    |
| 62.2   | 41.4   | 54.0  | 75.9  | 121.4  | 44.6   | 3.4    | 3.5    | 2.0    |
| 47.1   | 86.6   | 23.8  | 86.4  | 92.3   | 75.4   | 50.6   | 37.0   | 58.7   |
| 133.8  | 142.2  | 166.4 | 196.4 | 225.0  | 159.4  | 149.7  | 92.8   | 89.3   |
| 7.5    | 15.1   | 26.3  | 33.9  | 13.1   | 8.0    | 25.8   | 24.0   | 29.6   |
| 82.1   | 112.3  | 48.1  | 66.9  | 142.2  | 113.5  | 183.0  | 217.9  | 252.4  |
| 2.1    | 8.1    | 16.6  | 2.5   | 12.9   | 7.7    | 24.2   | 14.9   | 19.2   |
| 239.8  | 361.4  | 10.6  | 4.9   | 459.6  | 352.0  | 67.1   | 126.1  | 118.6  |
| 288.3  | 314.0  | 73.3  | 125.6 | 447.5  | 305.8  | 1153.1 | 950.1  | 1019.0 |
| 687.4  | 810.3  | 252.0 | 336.4 | 988.7  | 770.7  | 2076.4 | 1557.3 | 1802.9 |
| 21.2   | 7.4    | 6.4   | 9.5   | 16.7   | 16.8   | 29.9   | 45.6   | 42.4   |
| 182.4  | 229.3  | 123.9 | 138.9 | 158.9  | 221.1  | 228.6  | 191.1  | 220.2  |
| 340.5  | 426.6  | 72.0  | 107.2 | 464.9  | 313.8  | 380.1  | 227.3  | 300.5  |
| 355.6  | 407.1  | 73.8  | 90.7  | 497.5  | 361.9  | 476.8  | 284.0  | 349.4  |
| 105.3  | 135.8  | 35.9  | 42.2  | 115.6  | 144.4  | 80.6   | 66.2   | 80.4   |
| 339.8  | 580.8  | 25.5  | 33.8  | 378.5  | 413.7  | 184.7  | 162.9  | 174.8  |
| 253.5  | 256.9  | 268.2 | 281.4 | 373.3  | 262.0  | 1234.2 | 602.2  | 699.0  |
| 125.9  | 244.2  | 27.5  | 21.2  | 178.1  | 218.4  | 345.4  | 228.9  | 271.7  |
| 101.7  | 98.2   | 46.3  | 50.5  | 205.8  | 109.8  | 111.9  | 127.4  | 141.0  |
| 62.4   | 94.2   | 47.7  | 56.1  | 94.4   | 66.6   | 181.5  | 189.6  | 224.7  |
| 116.7  | 209.5  | 52.1  | 47.4  | 193.0  | 185.4  | 420.9  | 496.9  | 596.4  |
| 4.8    | 12.9   | 21.3  | 31.5  | 3.5    | 9.7    | 50.3   | 38.9   | 38.8   |
| 57.6   | 71.0   | 120.1 | 121.3 | 58.5   | 55.9   | 94.7   | 109.7  | 139.4  |
| 10.2   | 9.2    | 11.3  | 14.1  | 12.7   | 1.6    | 12.6   | 7.4    | 13.9   |
| 168.6  | 207.7  | 42.6  | 55.3  | 224.9  | 209.7  | 262.8  | 252.2  | 279.4  |
| 189.3  | 190.2  | 43.1  | 80.6  | 227.4  | 163.8  | 336.1  | 194.6  | 214.0  |
| 151.8  | 187.9  | 79.3  | 46.9  | 183.1  | 197.2  | 245.9  | 73.4   | 99.4   |
| 76.1   | 82.7   | 48.9  | 69.1  | 115.3  | 127.2  | 215.6  | 235.2  | 226.8  |
| 47.8   | 67.1   | 9.2   | 5.7   | 85.2   | 68.7   | 299.7  | 193.8  | 207.5  |
| 9.4    | 3.2    | 16.3  | 2.7   | 19.1   | 2.3    | 44.4   | 36.7   | 29.7   |
| 126.8  | 209.7  | 31.6  | 44.7  | 278.1  | 267.5  | 1003.7 | 939.1  | 977.3  |
| 72.3   | 71.2   | 49.6  | 57.5  | 102.6  | 43.4   | 165.6  | 176.1  | 177.9  |
| 22.5   | 49.1   | 22.1  | 20.5  | 42.3   | 28.9   | 182.9  | 312.0  | 323.7  |
| 52.4   | 58.5   | 17.7  | 22.3  | 75.5   | 48.6   | 575.7  | 925.1  | 1027.8 |
| 1.5    | 2.8    | 5.5   | 4.4   | 5.6    | 1.1    | 8.9    | 6.8    | 3.1    |
| 43.2   | 34.2   | 7.1   | 8.6   | 93.4   | 34.5   | 123.2  | 52.4   | 63.9   |
| 302.7  | 335.8  | 22.9  | 26.9  | 424.3  | 331.5  | 674.0  | 361.3  | 335.0  |
| 8.1    | 16.0   | 33.6  | 32.7  | 7.5    | 4.7    | 10.3   | 45.1   | 32.7   |
| 180.5  | 254.2  | 6.8   | 0.5   | 367.6  | 300.6  | 3.1    | 1.7    | 0.3    |
| 39.9   | 45.1   | 37.1  | 28.6  | 54.9   | 44.2   | 57.7   | 62.0   | 76.1   |
| 177.2  | 144.5  | 16.6  | 12.0  | 225.0  | 149.0  | 201.3  | 255.9  | 252.9  |
| 86.6   | 112.8  | 37.3  | 34.8  | 106.2  | 106.8  | 196.5  | 196.1  | 260.1  |
| 3.3    | 2.0    | 24.2  | 24.4  | 6.0    | 4.4    | 89.7   | 76.1   | 60.5   |
| 128.9  | 141.7  | 32.8  | 43.2  | 221.6  | 132.3  | 99.5   | 78.7   | 84.9   |
| 136.7  | 112.3  | 77.0  | 86.7  | 147.5  | 108.8  | 80.7   | 74.2   | 91.7   |
| 532.2  | 875.5  | 30.1  | 36.5  | 830.4  | 832.4  | 1048.7 | 935.9  | 1106.8 |
| 57.4   | 71.2   | 30.3  | 24.0  | 101.2  | 74.5   | 313.6  | 293.5  | 305.5  |
| 2028.8 | 2309.6 | 316.6 | 428.8 | 2786.0 | 2525.5 | 3047.1 | 1740.5 | 1893.1 |
| 136.0  | 196.5  | 10.6  | 9.7   | 248.7  | 183.5  | 119.7  | 63.4   | 82.5   |

|        |        |        |        |        |        |         |         |         |
|--------|--------|--------|--------|--------|--------|---------|---------|---------|
| 23.9   | 11.0   | 31.3   | 40.6   | 28.1   | 5.9    | 64.8    | 49.5    | 56.4    |
| 77.5   | 97.1   | 21.5   | 35.7   | 96.1   | 103.3  | 105.3   | 84.6    | 103.9   |
| 81.9   | 77.5   | 22.5   | 28.3   | 105.0  | 97.4   | 307.8   | 187.3   | 204.7   |
| 1.0    | 0.6    | 0.5    | 0.6    | 0.9    | 1.0    | 4.4     | 2.7     | 2.6     |
| 59.5   | 111.8  | 228.0  | 422.4  | 129.7  | 76.7   | 446.0   | 578.2   | 218.2   |
| 7.8    | 2.9    | 4.2    | 3.6    | 5.4    | 9.1    | 24.0    | 15.3    | 12.6    |
| 164.3  | 242.8  | 143.9  | 146.0  | 262.2  | 181.7  | 333.0   | 257.3   | 261.3   |
| 569.1  | 1059.3 | 107.4  | 133.4  | 744.7  | 987.5  | 986.6   | 732.9   | 733.4   |
| 87.5   | 68.4   | 1.8    | 6.1    | 179.7  | 128.0  | 81.1    | 35.0    | 51.3    |
| 42.8   | 98.3   | 228.5  | 262.8  | 49.4   | 105.4  | 249.2   | 274.2   | 273.9   |
| 7.8    | 8.5    | 27.3   | 58.1   | 25.9   | 14.5   | 5.3     | 4.4     | 2.5     |
| 10.3   | 13.5   | 67.8   | 72.5   | 19.7   | 14.9   | 3.5     | 4.5     | 10.3    |
| 1.2    | 1.1    | 43.7   | 70.8   | 1.3    | 2.0    | 2.3     | 2.9     | 2.5     |
| 68.8   | 109.4  | 21.0   | 17.7   | 150.1  | 91.8   | 49.7    | 24.6    | 32.4    |
| 96.7   | 178.0  | 46.2   | 53.6   | 191.5  | 187.6  | 209.6   | 99.8    | 109.7   |
| 44.0   | 54.7   | 108.1  | 122.1  | 48.4   | 39.9   | 123.4   | 307.6   | 328.2   |
| 27.4   | 50.5   | 73.7   | 74.8   | 55.2   | 45.2   | 210.5   | 432.3   | 444.6   |
| 12.4   | 12.7   | 29.2   | 28.4   | 11.9   | 12.5   | 63.8    | 142.5   | 148.2   |
| 194.9  | 303.2  | 221.0  | 278.9  | 297.6  | 279.3  | 405.1   | 286.5   | 298.4   |
| 1.0    | 1.5    | 2.2    | 1.5    | 0.8    | 2.4    | 12.2    | 10.8    | 24.2    |
| 110.6  | 232.7  | 69.6   | 66.1   | 178.4  | 177.6  | 330.5   | 299.2   | 322.3   |
| 3.3    | 5.2    | 8.8    | 14.0   | 18.8   | 17.8   | 9.7     | 12.4    | 12.0    |
| 6.7    | 11.7   | 48.6   | 36.3   | 20.1   | 13.9   | 65.5    | 61.9    | 60.0    |
| 49.8   | 76.0   | 23.6   | 25.5   | 81.0   | 49.8   | 171.4   | 183.6   | 202.2   |
| 453.4  | 513.3  | 163.6  | 159.2  | 541.7  | 520.7  | 1024.9  | 822.3   | 925.9   |
| 98.7   | 143.7  | 34.4   | 51.2   | 157.0  | 112.3  | 208.1   | 117.7   | 150.5   |
| 84.3   | 113.9  | 44.5   | 64.4   | 129.0  | 106.5  | 173.4   | 207.4   | 228.3   |
| 62.2   | 72.6   | 39.4   | 57.9   | 104.0  | 70.0   | 126.5   | 144.6   | 157.0   |
| 5.4    | 21.8   | 5.3    | 6.6    | 35.4   | 15.5   | 10.4    | 5.8     | 11.3    |
| 5.5    | 4.5    | 3.5    | 1.9    | 10.8   | 1.5    | 4.3     | 3.2     | 1.5     |
| 11.5   | 26.0   | 1.3    | 11.3   | 2.9    | 5.6    | 35.7    | 33.5    | 49.0    |
| 75.6   | 73.7   | 48.9   | 68.2   | 100.0  | 60.8   | 184.5   | 190.8   | 204.3   |
| 16.1   | 24.5   | 16.4   | 6.4    | 13.3   | 14.1   | 11.0    | 8.4     | 15.3    |
| 0.8    | 3.6    | 9.6    | 17.5   | 5.9    | 7.0    | 272.4   | 332.3   | 329.1   |
| 6232.8 | 7096.3 | 3807.6 | 5017.0 | 6599.3 | 6224.7 | 11254.1 | 10393.4 | 10571.8 |
| 8.4    | 9.4    | 2.1    | 0.4    | 5.2    | 7.3    | 1.4     | 1.9     | 1.2     |
| 1.0    | 9.3    | 1.4    | 2.1    | 1.6    | 2.0    | 1.6     | 1.7     | 1.6     |
| 146.3  | 169.7  | 111.1  | 169.1  | 258.4  | 164.0  | 313.8   | 351.1   | 447.7   |
| 2.6    | 11.8   | 13.5   | 15.5   | 2.7    | 20.5   | 26.7    | 24.7    | 30.9    |
| 6.2    | 5.3    | 11.4   | 9.8    | 6.9    | 20.9   | 14.3    | 10.7    | 9.2     |
| 648.3  | 877.0  | 183.0  | 241.9  | 1144.4 | 902.0  | 1855.7  | 2043.6  | 2273.5  |
| 79.6   | 95.4   | 53.3   | 51.2   | 137.6  | 116.5  | 143.6   | 165.1   | 171.0   |
| 27.1   | 28.0   | 3.2    | 3.1    | 21.7   | 22.5   | 27.9    | 31.9    | 29.9    |
| 13.4   | 22.9   | 15.2   | 13.4   | 17.1   | 18.7   | 13.6    | 29.4    | 17.7    |
| 19.4   | 17.4   | 12.3   | 1.3    | 14.0   | 25.7   | 29.7    | 32.4    | 25.2    |
| 29.3   | 31.2   | 61.3   | 80.9   | 58.1   | 24.2   | 342.3   | 324.3   | 353.0   |
| 2145.1 | 2433.2 | 1128.3 | 1624.2 | 3263.3 | 2320.4 | 2384.1  | 2080.3  | 2316.2  |
| 276.5  | 280.9  | 219.3  | 298.4  | 306.8  | 246.7  | 668.9   | 517.8   | 578.5   |
| 11.1   | 21.8   | 6.2    | 10.6   | 17.5   | 12.6   | 61.2    | 49.9    | 45.7    |
| 576.9  | 696.6  | 164.0  | 205.5  | 929.2  | 727.7  | 2417.9  | 1755.8  | 1769.6  |
| 6.8    | 9.8    | 4.7    | 0.5    | 15.0   | 0.7    | 1.4     | 9.2     | 1.2     |
| 14.3   | 2.4    | 7.6    | 1.9    | 2.0    | 0.7    | 4.1     | 2.2     | 4.1     |
| 1.9    | 1.9    | 3.7    | 1.0    | 0.3    | 4.3    | 5.0     | 8.2     | 4.0     |



|        |        |       |       |        |        |        |        |        |
|--------|--------|-------|-------|--------|--------|--------|--------|--------|
| 1.0    | 1.6    | 9.0   | 8.1   | 11.2   | 11.3   | 29.1   | 48.8   | 55.6   |
| 23.8   | 19.4   | 26.6  | 16.9  | 51.3   | 22.9   | 34.8   | 37.2   | 34.2   |
| 9.6    | 43.9   | 47.3  | 71.1  | 46.7   | 4.3    | 142.2  | 119.1  | 113.8  |
| 122.9  | 125.4  | 143.4 | 114.8 | 138.6  | 114.2  | 176.3  | 94.0   | 86.2   |
| 1.5    | 0.8    | 0.5   | 1.7   | 1.6    | 3.1    | 1.3    | 0.8    | 1.2    |
| 18.2   | 19.0   | 5.4   | 6.3   | 18.8   | 29.6   | 27.3   | 23.6   | 32.1   |
| 32.9   | 50.1   | 11.6  | 4.3   | 57.3   | 46.2   | 76.1   | 30.3   | 30.8   |
| 14.2   | 15.9   | 27.4  | 30.5  | 11.4   | 16.8   | 36.5   | 19.8   | 12.1   |
| 167.5  | 250.3  | 8.6   | 10.8  | 121.1  | 121.9  | 243.4  | 162.0  | 141.7  |
| 80.6   | 83.8   | 75.1  | 104.3 | 121.8  | 89.4   | 20.9   | 21.8   | 22.1   |
| 735.5  | 830.2  | 97.0  | 143.8 | 1035.2 | 924.9  | 975.8  | 539.9  | 621.8  |
| 23.4   | 40.7   | 72.4  | 107.6 | 63.4   | 27.9   | 153.6  | 126.9  | 132.0  |
| 0.9    | 22.5   | 13.1  | 13.3  | 7.4    | 11.5   | 2.4    | 7.4    | 3.3    |
| 23.2   | 37.7   | 9.1   | 12.3  | 52.8   | 32.9   | 56.0   | 40.2   | 27.0   |
| 329.8  | 325.2  | 164.3 | 163.8 | 464.3  | 391.6  | 276.5  | 223.6  | 182.3  |
| 23.6   | 8.0    | 14.3  | 9.7   | 17.3   | 16.4   | 21.8   | 25.6   | 24.3   |
| 3.4    | 17.6   | 35.7  | 53.2  | 18.1   | 17.4   | 46.2   | 59.6   | 80.9   |
| 1.6    | 4.0    | 1.8   | 0.5   | 1.4    | 7.5    | 4.5    | 6.9    | 8.9    |
| 22.4   | 48.9   | 12.5  | 12.5  | 39.1   | 44.9   | 3.9    | 1.1    | 2.3    |
| 6.8    | 24.7   | 25.9  | 63.5  | 21.6   | 16.2   | 166.7  | 184.8  | 225.6  |
| 602.9  | 673.6  | 86.3  | 136.6 | 885.1  | 570.7  | 591.7  | 458.4  | 588.3  |
| 36.3   | 66.2   | 6.1   | 6.9   | 91.7   | 71.0   | 901.4  | 449.7  | 563.3  |
| 105.8  | 167.6  | 50.7  | 68.0  | 181.1  | 206.7  | 265.1  | 59.2   | 78.5   |
| 4.4    | 20.3   | 22.1  | 20.2  | 13.5   | 4.6    | 102.8  | 110.6  | 133.5  |
| 2.9    | 19.1   | 6.9   | 7.8   | 21.5   | 23.1   | 33.2   | 36.3   | 30.6   |
| 1302.8 | 1415.2 | 45.0  | 67.2  | 1937.2 | 1474.8 | 1104.9 | 682.0  | 672.4  |
| 100.1  | 76.7   | 2.9   | 10.4  | 123.2  | 72.5   | 81.7   | 101.3  | 110.6  |
| 228.6  | 356.5  | 146.5 | 171.0 | 321.5  | 374.4  | 773.3  | 894.9  | 948.8  |
| 58.6   | 57.2   | 72.9  | 56.4  | 106.8  | 68.8   | 53.2   | 49.3   | 48.1   |
| 43.2   | 58.9   | 42.9  | 40.3  | 87.3   | 64.9   | 355.4  | 506.8  | 537.1  |
| 53.0   | 70.2   | 74.5  | 67.3  | 92.0   | 65.6   | 134.7  | 100.2  | 115.1  |
| 3.0    | 0.8    | 1.9   | 1.4   | 1.6    | 1.0    | 2.0    | 3.3    | 4.9    |
| 10.6   | 10.9   | 7.7   | 9.3   | 10.7   | 5.8    | 14.4   | 8.2    | 8.0    |
| 8.0    | 32.7   | 6.4   | 42.9  | 37.2   | 13.1   | 55.1   | 59.0   | 13.3   |
| 12.5   | 7.1    | 5.5   | 9.0   | 12.8   | 9.0    | 3.4    | 1.2    | 5.9    |
| 14.8   | 22.3   | 1.9   | 8.7   | 27.2   | 15.4   | 45.1   | 40.5   | 39.4   |
| 2.4    | 2.7    | 6.2   | 5.3   | 10.9   | 9.1    | 35.4   | 17.6   | 20.2   |
| 450.1  | 579.2  | 378.7 | 482.4 | 733.1  | 633.3  | 1103.9 | 1291.9 | 1429.2 |
| 43.4   | 55.4   | 54.4  | 77.9  | 65.7   | 60.6   | 67.8   | 48.2   | 44.9   |
| 173.9  | 154.6  | 57.6  | 71.2  | 259.6  | 166.4  | 610.4  | 860.8  | 1079.2 |
| 158.1  | 202.5  | 36.5  | 47.8  | 447.0  | 157.3  | 6.1    | 1.2    | 2.3    |
| 2.4    | 2.4    | 0.8   | 3.0   | 7.9    | 7.3    | 14.9   | 14.1   | 6.0    |
| 139.1  | 131.3  | 55.7  | 73.3  | 206.8  | 119.2  | 179.3  | 222.4  | 243.6  |
| 15.6   | 13.8   | 28.1  | 11.0  | 9.8    | 21.4   | 20.3   | 31.0   | 21.5   |
| 4.8    | 3.5    | 3.2   | 4.3   | 5.0    | 36.6   | 12.3   | 15.4   | 8.4    |
| 13.6   | 5.5    | 20.0  | 31.2  | 5.4    | 1.6    | 19.1   | 9.9    | 15.7   |
| 23.2   | 22.7   | 17.0  | 16.8  | 24.7   | 19.0   | 59.2   | 61.4   | 63.7   |
| 3.8    | 13.9   | 9.5   | 8.7   | 8.2    | 9.5    | 5.9    | 7.0    | 1.9    |
| 304.4  | 371.8  | 133.2 | 202.7 | 528.2  | 460.7  | 791.9  | 493.0  | 568.2  |
| 965.2  | 1160.7 | 161.5 | 201.4 | 1470.3 | 1106.8 | 1827.8 | 1223.7 | 1312.9 |
| 600.3  | 497.3  | 86.7  | 148.4 | 824.7  | 477.1  | 966.6  | 460.5  | 485.2  |
| 1.5    | 1.8    | 0.9   | 0.5   | 2.3    | 2.5    | 6.8    | 1.5    | 2.8    |
| 12.5   | 16.0   | 3.2   | 6.2   | 14.2   | 3.8    | 51.4   | 35.8   | 38.8   |

|        |        |        |        |        |        |        |        |        |
|--------|--------|--------|--------|--------|--------|--------|--------|--------|
| 18.7   | 25.6   | 25.0   | 25.0   | 37.4   | 7.7    | 34.0   | 27.0   | 30.2   |
| 8.7    | 15.7   | 11.6   | 10.4   | 12.5   | 17.2   | 23.6   | 18.7   | 24.5   |
| 0.5    | 1.0    | 0.5    | 2.3    | 0.6    | 9.6    | 1.0    | 0.9    | 0.9    |
| 10.3   | 4.2    | 4.2    | 4.7    | 11.4   | 12.1   | 31.5   | 25.4   | 23.1   |
| 4.1    | 4.0    | 14.7   | 1.3    | 3.2    | 8.3    | 8.1    | 10.6   | 1.4    |
| 685.3  | 885.5  | 51.8   | 57.1   | 1119.7 | 833.6  | 680.2  | 456.2  | 438.5  |
| 19.1   | 46.5   | 17.7   | 37.7   | 46.6   | 36.4   | 97.3   | 114.6  | 108.2  |
| 15.9   | 19.9   | 35.4   | 32.1   | 13.8   | 7.0    | 160.8  | 64.1   | 99.6   |
| 275.3  | 254.1  | 111.8  | 151.9  | 437.3  | 323.6  | 1218.7 | 760.3  | 845.2  |
| 590.8  | 790.6  | 163.3  | 226.7  | 870.5  | 947.4  | 1266.9 | 1231.6 | 1183.1 |
| 1.5    | 2.2    | 110.8  | 171.0  | 1.9    | 2.0    | 6.2    | 5.5    | 2.5    |
| 4249.1 | 5030.5 | 1194.3 | 1682.5 | 5249.9 | 4854.4 | 7611.2 | 5422.6 | 5559.8 |
| 157.1  | 179.2  | 210.2  | 298.3  | 219.3  | 152.6  | 879.0  | 657.6  | 839.1  |
| 341.3  | 369.0  | 66.1   | 101.4  | 483.9  | 357.5  | 477.2  | 397.7  | 349.1  |
| 43.4   | 72.7   | 15.3   | 21.2   | 63.2   | 39.1   | 164.4  | 171.0  | 175.1  |
| 209.9  | 238.0  | 9.9    | 15.2   | 298.3  | 239.0  | 98.0   | 52.3   | 77.2   |
| 2.2    | 7.3    | 4.5    | 1.6    | 15.4   | 4.4    | 8.3    | 9.4    | 8.5    |
| 8.4    | 8.7    | 1.9    | 2.3    | 13.2   | 12.1   | 8.4    | 6.5    | 8.6    |
| 341.6  | 436.6  | 201.9  | 271.5  | 426.3  | 393.2  | 794.8  | 508.8  | 585.5  |
| 2822.6 | 3152.0 | 1127.9 | 1583.7 | 3870.7 | 2299.8 | 5607.7 | 5300.7 | 5578.6 |
| 107.8  | 125.0  | 3.3    | 7.9    | 174.2  | 93.7   | 50.0   | 56.4   | 48.5   |
| 548.4  | 688.0  | 140.4  | 139.7  | 825.1  | 576.9  | 981.7  | 917.5  | 1075.8 |
| 35.4   | 39.7   | 10.0   | 13.6   | 65.4   | 20.4   | 215.0  | 123.9  | 126.8  |
| 419.7  | 514.6  | 200.2  | 274.1  | 606.9  | 448.4  | 1115.3 | 1096.3 | 1121.1 |
| 18.8   | 14.5   | 7.1    | 12.6   | 18.1   | 18.0   | 67.0   | 57.4   | 71.1   |
| 69.3   | 70.1   | 36.9   | 55.4   | 80.6   | 58.2   | 148.2  | 124.0  | 166.1  |
| 10.0   | 8.2    | 7.0    | 5.9    | 2.9    | 2.0    | 25.4   | 16.5   | 18.4   |
| 154.6  | 184.3  | 79.6   | 69.8   | 252.3  | 150.0  | 250.1  | 318.4  | 377.8  |
| 38.9   | 40.9   | 1.6    | 15.9   | 50.3   | 39.2   | 6.4    | 3.2    | 15.2   |
| 34.4   | 37.4   | 17.9   | 23.6   | 50.1   | 40.8   | 5.9    | 20.3   | 15.9   |
| 213.4  | 271.9  | 482.3  | 571.1  | 369.2  | 254.2  | 644.3  | 583.9  | 660.9  |
| 331.0  | 448.6  | 86.9   | 109.0  | 438.9  | 450.0  | 459.5  | 111.2  | 127.3  |
| 70.2   | 44.9   | 21.0   | 32.2   | 77.2   | 58.1   | 17.1   | 15.6   | 21.4   |
| 3.2    | 2.7    | 2.0    | 1.6    | 2.2    | 17.6   | 4.8    | 3.3    | 4.4    |
| 9.9    | 25.1   | 16.8   | 29.2   | 45.9   | 12.7   | 8.5    | 10.4   | 12.0   |
| 2.8    | 8.1    | 12.2   | 1.5    | 9.7    | 3.0    | 6.9    | 18.1   | 13.4   |
| 8.9    | 19.1   | 20.6   | 15.0   | 12.3   | 7.6    | 14.0   | 36.3   | 26.4   |
| 167.9  | 214.5  | 23.9   | 31.6   | 205.6  | 213.6  | 110.2  | 168.0  | 200.0  |
| 3.7    | 3.8    | 1.7    | 1.9    | 8.8    | 3.1    | 2.9    | 5.0    | 1.4    |
| 1.3    | 0.6    | 1.9    | 0.7    | 2.5    | 2.6    | 1.8    | 1.5    | 1.4    |
| 0.6    | 0.6    | 0.3    | 0.4    | 0.6    | 0.7    | 0.5    | 0.6    | 0.5    |
| 1.1    | 1.0    | 0.8    | 0.4    | 1.2    | 2.2    | 1.2    | 1.5    | 1.1    |
| 7.7    | 29.3   | 4.6    | 11.4   | 23.0   | 10.0   | 21.3   | 8.2    | 17.7   |
| 0.9    | 1.0    | 1.7    | 1.1    | 1.4    | 1.8    | 8.3    | 1.5    | 1.7    |
| 256.6  | 398.1  | 327.4  | 480.9  | 381.7  | 354.4  | 414.9  | 486.2  | 558.5  |
| 509.3  | 682.7  | 903.0  | 1131.3 | 717.7  | 598.4  | 2824.2 | 2614.9 | 2744.2 |
| 128.6  | 121.0  | 94.1   | 175.7  | 149.3  | 88.6   | 780.7  | 474.3  | 535.9  |
| 165.1  | 370.0  | 8.2    | 4.9    | 242.0  | 318.7  | 10.2   | 9.7    | 4.9    |
| 6.1    | 10.1   | 30.1   | 30.8   | 2.3    | 15.0   | 8.0    | 11.9   | 17.8   |
| 0.5    | 6.9    | 21.7   | 29.5   | 16.5   | 3.8    | 4.7    | 9.3    | 6.9    |
| 20.5   | 9.3    | 1.7    | 6.0    | 35.3   | 18.5   | 10.4   | 10.9   | 6.1    |
| 634.7  | 824.9  | 447.8  | 590.0  | 890.2  | 675.0  | 1350.9 | 936.0  | 1031.8 |
| 2.1    | 2.0    | 7.6    | 7.6    | 11.7   | 1.6    | 24.9   | 11.1   | 9.1    |

|        |        |        |        |        |        |        |        |        |
|--------|--------|--------|--------|--------|--------|--------|--------|--------|
| 104.6  | 114.0  | 120.3  | 173.1  | 128.4  | 105.1  | 338.4  | 376.9  | 397.8  |
| 31.9   | 36.6   | 33.4   | 79.2   | 39.5   | 5.5    | 146.4  | 172.8  | 151.3  |
| 149.0  | 174.8  | 42.0   | 44.7   | 189.9  | 159.2  | 315.0  | 331.8  | 343.9  |
| 138.8  | 142.1  | 41.7   | 55.3   | 147.6  | 119.8  | 81.9   | 48.7   | 65.5   |
| 79.1   | 89.4   | 16.0   | 22.2   | 115.3  | 81.2   | 128.7  | 128.1  | 146.8  |
| 771.2  | 994.3  | 266.5  | 270.7  | 1036.6 | 937.4  | 1010.5 | 534.2  | 670.9  |
| 55.6   | 57.6   | 6.9    | 12.6   | 89.5   | 62.1   | 119.0  | 133.3  | 146.0  |
| 1250.6 | 1509.6 | 546.1  | 689.9  | 1757.3 | 1437.8 | 1294.0 | 962.2  | 1082.8 |
| 225.3  | 235.6  | 63.2   | 96.7   | 242.5  | 314.8  | 255.0  | 198.1  | 224.7  |
| 907.6  | 1210.2 | 170.8  | 279.9  | 1447.5 | 1277.0 | 1311.7 | 1061.4 | 1291.9 |
| 141.4  | 209.6  | 53.6   | 61.1   | 224.5  | 184.7  | 457.7  | 457.9  | 558.1  |
| 58.2   | 70.8   | 68.5   | 74.8   | 59.8   | 65.2   | 415.7  | 466.1  | 517.1  |
| 112.8  | 190.1  | 113.4  | 119.0  | 140.2  | 144.4  | 462.5  | 256.7  | 311.4  |
| 6.8    | 10.9   | 11.3   | 11.6   | 6.9    | 3.7    | 10.0   | 5.7    | 7.3    |
| 1.7    | 2.6    | 20.4   | 18.8   | 4.8    | 4.5    | 6.7    | 6.9    | 2.8    |
| 454.5  | 689.4  | 62.2   | 61.8   | 701.0  | 602.8  | 1183.7 | 1237.6 | 1385.1 |
| 55.6   | 127.3  | 146.1  | 130.9  | 137.8  | 133.6  | 811.1  | 665.7  | 787.0  |
| 268.2  | 391.8  | 143.5  | 140.1  | 405.0  | 412.0  | 1591.8 | 1471.1 | 1740.8 |
| 111.8  | 149.9  | 27.1   | 28.6   | 140.8  | 163.6  | 87.6   | 67.3   | 78.0   |
| 175.8  | 256.1  | 27.2   | 25.4   | 181.5  | 253.1  | 93.4   | 95.1   | 101.8  |
| 48.2   | 42.9   | 175.2  | 243.3  | 65.9   | 45.0   | 170.2  | 228.8  | 272.0  |
| 65.9   | 62.3   | 0.9    | 0.6    | 118.3  | 39.5   | 84.7   | 67.0   | 61.2   |
| 4.7    | 23.6   | 195.2  | 243.9  | 31.4   | 6.8    | 14.0   | 41.8   | 71.7   |
| 9.5    | 24.5   | 123.4  | 185.8  | 44.0   | 24.2   | 64.9   | 101.8  | 126.4  |
| 61.9   | 87.0   | 31.2   | 34.7   | 84.0   | 76.4   | 134.6  | 74.0   | 99.0   |
| 122.0  | 170.9  | 104.6  | 121.5  | 210.4  | 107.4  | 264.9  | 280.7  | 280.7  |
| 38.1   | 51.0   | 14.1   | 17.2   | 79.9   | 45.6   | 1468.0 | 1801.7 | 2132.5 |
| 197.2  | 398.6  | 209.2  | 266.8  | 379.5  | 369.7  | 826.3  | 543.9  | 620.6  |
| 52.0   | 87.7   | 51.6   | 54.1   | 83.1   | 97.5   | 243.1  | 218.2  | 268.6  |
| 67.3   | 91.0   | 23.9   | 34.6   | 130.0  | 101.2  | 203.5  | 374.8  | 382.0  |
| 133.6  | 160.3  | 86.7   | 188.2  | 218.0  | 128.8  | 342.6  | 239.7  | 301.2  |
| 25.5   | 37.2   | 19.9   | 10.5   | 43.9   | 53.5   | 188.0  | 133.9  | 164.3  |
| 217.6  | 245.7  | 19.5   | 28.3   | 314.4  | 268.3  | 120.3  | 209.6  | 227.0  |
| 559.9  | 990.1  | 348.5  | 508.1  | 1169.4 | 533.3  | 1010.2 | 1159.1 | 1560.0 |
| 61.3   | 155.8  | 5.5    | 4.9    | 108.2  | 136.9  | 91.0   | 95.3   | 96.1   |
| 31.3   | 35.5   | 43.7   | 60.5   | 51.1   | 38.6   | 42.4   | 66.0   | 73.2   |
| 217.7  | 290.9  | 56.4   | 66.1   | 413.0  | 270.0  | 383.2  | 262.2  | 273.5  |
| 107.5  | 143.8  | 20.2   | 34.4   | 164.9  | 111.4  | 616.6  | 625.2  | 754.7  |
| 47.8   | 62.2   | 4.0    | 20.1   | 54.2   | 54.1   | 175.8  | 110.9  | 155.4  |
| 672.8  | 928.8  | 3.2    | 4.1    | 1168.1 | 930.1  | 263.4  | 289.9  | 345.1  |
| 139.8  | 167.6  | 68.4   | 58.9   | 214.6  | 128.8  | 468.1  | 438.1  | 424.5  |
| 5900.5 | 6960.0 | 2508.9 | 3160.8 | 6577.8 | 6377.1 | 7839.5 | 7594.4 | 7214.2 |
| 459.9  | 594.3  | 168.8  | 244.8  | 566.9  | 412.8  | 741.7  | 628.3  | 677.7  |
| 154.4  | 192.6  | 134.7  | 175.8  | 206.9  | 217.6  | 542.1  | 373.6  | 483.4  |
| 4.7    | 11.6   | 62.1   | 73.2   | 11.9   | 5.0    | 67.0   | 82.9   | 103.0  |
| 187.1  | 254.6  | 5.5    | 6.5    | 193.4  | 175.0  | 140.5  | 153.7  | 122.7  |
| 510.8  | 550.9  | 190.1  | 307.6  | 634.7  | 657.7  | 480.4  | 360.8  | 405.0  |
| 266.2  | 405.6  | 124.9  | 192.1  | 489.8  | 306.0  | 288.7  | 188.5  | 180.1  |
| 241.0  | 413.4  | 38.1   | 46.8   | 552.9  | 391.1  | 311.3  | 222.8  | 234.7  |
| 92.5   | 95.6   | 182.9  | 214.9  | 116.3  | 68.3   | 109.3  | 64.7   | 65.0   |
| 1.9    | 2.4    | 2.8    | 3.6    | 2.2    | 1.3    | 2.7    | 3.0    | 3.1    |
| 10.5   | 12.4   | 105.2  | 203.7  | 17.2   | 12.5   | 47.7   | 31.3   | 33.3   |
| 141.1  | 305.1  | 33.0   | 28.6   | 251.0  | 278.7  | 195.7  | 186.0  | 179.6  |

|        |         |        |        |         |        |         |         |         |
|--------|---------|--------|--------|---------|--------|---------|---------|---------|
| 43.7   | 68.6    | 23.5   | 19.2   | 63.2    | 62.0   | 123.3   | 119.8   | 131.0   |
| 97.2   | 111.9   | 29.0   | 47.9   | 106.7   | 98.5   | 111.3   | 110.9   | 98.1    |
| 101.7  | 121.8   | 64.2   | 80.4   | 111.0   | 109.0  | 194.6   | 135.0   | 179.4   |
| 108.8  | 91.2    | 65.4   | 71.0   | 112.5   | 60.4   | 228.3   | 202.7   | 177.2   |
| 2896.4 | 3297.3  | 873.6  | 1056.7 | 3874.0  | 3983.1 | 6698.7  | 5181.8  | 5928.5  |
| 28.8   | 30.1    | 16.0   | 14.5   | 50.4    | 33.2   | 10.6    | 9.5     | 19.3    |
| 2.1    | 3.5     | 2.2    | 0.8    | 4.2     | 4.9    | 3.5     | 7.2     | 1.7     |
| 47.0   | 59.2    | 72.6   | 76.5   | 70.7    | 55.4   | 120.2   | 142.3   | 127.6   |
| 1.5    | 15.1    | 0.6    | 8.5    | 5.9     | 15.6   | 2.0     | 6.8     | 3.9     |
| 1.3    | 5.0     | 2.4    | 4.0    | 2.4     | 0.5    | 5.7     | 1.9     | 4.2     |
| 90.9   | 53.1    | 42.2   | 39.2   | 95.3    | 71.8   | 206.8   | 151.4   | 181.3   |
| 9867.4 | 10281.0 | 4635.2 | 6152.2 | 10704.2 | 9469.2 | 11529.1 | 11537.1 | 11462.6 |
| 45.0   | 61.3    | 28.0   | 19.0   | 89.7    | 52.6   | 94.2    | 78.2    | 94.2    |
| 76.7   | 85.8    | 39.0   | 51.2   | 105.4   | 90.4   | 139.0   | 95.6    | 149.8   |
| 1.3    | 0.7     | 1.8    | 0.8    | 3.4     | 0.4    | 6.7     | 1.5     | 2.5     |
| 113.9  | 199.6   | 35.8   | 52.5   | 169.9   | 213.8  | 661.7   | 684.2   | 814.7   |
| 157.3  | 193.1   | 19.0   | 26.8   | 286.6   | 175.8  | 387.8   | 412.3   | 455.4   |
| 308.8  | 477.4   | 119.9  | 162.8  | 584.5   | 462.2  | 442.4   | 464.9   | 527.4   |
| 6.8    | 0.5     | 0.3    | 0.6    | 0.7     | 5.4    | 8.1     | 6.4     | 3.6     |
| 242.8  | 341.9   | 177.2  | 208.2  | 331.0   | 296.3  | 260.1   | 271.3   | 257.0   |
| 27.4   | 56.7    | 5.0    | 28.4   | 53.3    | 25.8   | 211.9   | 125.0   | 142.0   |
| 292.7  | 262.9   | 266.7  | 328.6  | 468.9   | 274.3  | 819.4   | 1056.8  | 1010.5  |
| 57.0   | 73.9    | 14.3   | 29.2   | 63.6    | 62.0   | 76.0    | 75.1    | 101.7   |
| 74.0   | 23.0    | 45.6   | 41.1   | 84.1    | 37.4   | 541.6   | 730.9   | 748.2   |
| 11.7   | 26.1    | 595.6  | 893.7  | 31.4    | 14.9   | 151.4   | 172.2   | 242.3   |
| 15.0   | 23.2    | 9.8    | 30.2   | 44.6    | 19.4   | 54.2    | 61.2    | 66.6    |
| 101.9  | 114.6   | 56.3   | 51.8   | 160.4   | 69.9   | 149.1   | 129.8   | 154.3   |
| 4.8    | 1.2     | 3.0    | 1.5    | 9.0     | 8.0    | 3.5     | 10.6    | 3.1     |
| 112.1  | 127.8   | 19.8   | 3.3    | 118.3   | 214.3  | 2286.5  | 1760.9  | 2016.5  |
| 141.1  | 180.3   | 43.4   | 50.1   | 164.4   | 160.7  | 776.2   | 853.6   | 910.7   |
| 117.3  | 148.6   | 178.3  | 196.6  | 174.1   | 133.0  | 608.9   | 452.3   | 490.4   |
| 60.2   | 87.7    | 35.0   | 42.0   | 72.3    | 65.5   | 213.9   | 140.0   | 167.1   |
| 149.4  | 197.6   | 90.4   | 105.1  | 253.7   | 238.4  | 372.6   | 321.0   | 352.2   |
| 106.3  | 188.8   | 78.4   | 112.5  | 150.8   | 161.3  | 370.3   | 358.0   | 384.5   |
| 129.0  | 172.6   | 133.2  | 154.0  | 157.4   | 120.4  | 466.0   | 311.3   | 348.0   |
| 72.9   | 61.9    | 56.0   | 59.9   | 98.9    | 80.8   | 140.0   | 84.4    | 97.6    |
| 140.4  | 208.4   | 80.1   | 106.9  | 253.8   | 178.8  | 114.7   | 62.2    | 72.3    |
| 7.4    | 15.1    | 23.7   | 20.7   | 29.0    | 18.9   | 144.3   | 265.0   | 290.7   |
| 76.2   | 104.7   | 29.7   | 27.4   | 111.2   | 101.9  | 220.4   | 212.7   | 224.9   |
| 48.7   | 59.8    | 16.1   | 13.9   | 59.2    | 45.0   | 103.9   | 107.9   | 135.1   |
| 395.1  | 507.6   | 738.2  | 731.8  | 632.5   | 598.0  | 3931.9  | 3508.2  | 3713.1  |
| 1.7    | 3.7     | 2.3    | 24.6   | 3.8     | 2.2    | 119.0   | 58.5    | 57.6    |
| 1896.0 | 2374.9  | 164.9  | 185.9  | 2329.1  | 3206.4 | 1961.1  | 1465.2  | 1677.1  |
| 271.7  | 335.0   | 84.7   | 107.8  | 375.0   | 369.8  | 2156.5  | 1323.8  | 1385.8  |
| 102.5  | 121.6   | 23.0   | 3.9    | 167.2   | 108.6  | 49.8    | 78.4    | 74.9    |
| 131.2  | 112.8   | 25.9   | 16.1   | 170.2   | 105.5  | 64.1    | 78.2    | 101.0   |
| 7.2    | 3.4     | 10.2   | 10.8   | 1.5     | 16.0   | 26.2    | 55.8    | 50.0    |
| 32.5   | 37.6    | 28.8   | 29.6   | 40.3    | 44.3   | 84.4    | 126.7   | 149.0   |
| 8.2    | 9.0     | 17.6   | 18.2   | 16.4    | 12.2   | 11.6    | 8.7     | 7.7     |
| 20.3   | 22.1    | 78.4   | 90.9   | 29.3    | 32.5   | 91.5    | 71.0    | 85.7    |
| 21.9   | 19.5    | 18.0   | 35.5   | 30.8    | 2.2    | 13.5    | 16.6    | 20.2    |
| 73.3   | 63.9    | 31.1   | 39.0   | 87.6    | 82.2   | 38.4    | 40.3    | 57.3    |
| 330.8  | 289.2   | 80.4   | 66.3   | 386.5   | 325.9  | 504.1   | 393.1   | 510.3   |

|        |        |       |        |        |        |         |        |        |
|--------|--------|-------|--------|--------|--------|---------|--------|--------|
| 60.0   | 82.8   | 7.0   | 8.2    | 117.9  | 87.0   | 107.7   | 132.5  | 135.6  |
| 422.1  | 441.2  | 91.5  | 110.2  | 514.7  | 438.6  | 512.2   | 743.5  | 736.8  |
| 130.1  | 163.7  | 60.1  | 84.2   | 168.5  | 201.2  | 301.7   | 215.2  | 261.3  |
| 134.9  | 146.0  | 24.3  | 14.5   | 284.0  | 145.7  | 92.0    | 124.6  | 154.1  |
| 849.1  | 927.2  | 81.4  | 105.5  | 1276.6 | 883.9  | 2201.5  | 1282.2 | 1530.2 |
| 27.8   | 38.5   | 58.1  | 93.6   | 75.4   | 49.2   | 180.6   | 146.2  | 180.5  |
| 39.8   | 37.0   | 18.4  | 28.8   | 29.9   | 30.0   | 99.4    | 76.3   | 123.7  |
| 1167.0 | 1415.7 | 41.3  | 64.7   | 1585.5 | 1475.8 | 1318.0  | 998.8  | 1057.4 |
| 154.8  | 167.2  | 28.8  | 32.1   | 196.5  | 173.6  | 228.0   | 155.5  | 170.9  |
| 24.5   | 46.8   | 91.9  | 123.6  | 74.0   | 40.7   | 168.9   | 121.7  | 130.7  |
| 43.4   | 58.3   | 46.8  | 66.6   | 65.5   | 44.5   | 125.8   | 166.3  | 178.7  |
| 34.1   | 44.6   | 61.8  | 106.9  | 22.5   | 21.6   | 174.4   | 121.7  | 119.2  |
| 1.7    | 0.7    | 3.4   | 2.4    | 1.0    | 3.2    | 1.3     | 0.8    | 3.8    |
| 554.2  | 614.7  | 196.6 | 282.6  | 780.0  | 477.0  | 1347.9  | 1159.8 | 1253.5 |
| 3.5    | 4.5    | 23.8  | 42.9   | 3.3    | 1.1    | 275.9   | 290.0  | 383.7  |
| 283.4  | 336.7  | 112.4 | 106.2  | 448.3  | 255.1  | 285.9   | 262.7  | 292.6  |
| 26.4   | 25.3   | 43.4  | 49.1   | 12.8   | 35.4   | 231.2   | 337.8  | 344.2  |
| 16.6   | 32.6   | 32.7  | 32.9   | 44.5   | 29.9   | 31.1    | 22.9   | 25.5   |
| 21.8   | 34.3   | 50.3  | 42.3   | 43.8   | 22.0   | 123.7   | 135.9  | 167.0  |
| 16.9   | 29.5   | 13.1  | 22.2   | 20.3   | 20.6   | 53.6    | 68.4   | 73.5   |
| 109.6  | 400.4  | 9.9   | 24.4   | 197.1  | 230.5  | 51.0    | 55.3   | 51.4   |
| 13.2   | 11.8   | 76.9  | 80.7   | 41.7   | 6.1    | 39.5    | 119.5  | 124.4  |
| 14.9   | 14.3   | 17.9  | 10.4   | 4.6    | 19.6   | 21.9    | 9.2    | 11.9   |
| 11.4   | 15.2   | 3.7   | 7.8    | 27.5   | 37.5   | 8.6     | 3.4    | 3.8    |
| 97.1   | 103.2  | 42.0  | 54.2   | 184.6  | 102.3  | 139.5   | 169.1  | 232.8  |
| 38.3   | 37.9   | 31.4  | 50.7   | 46.9   | 28.1   | 76.0    | 47.4   | 55.7   |
| 6.4    | 15.2   | 18.7  | 9.7    | 32.1   | 5.5    | 145.9   | 134.1  | 194.5  |
| 34.8   | 66.9   | 14.2  | 13.4   | 81.8   | 57.4   | 57.0    | 56.5   | 73.9   |
| 2.4    | 2.3    | 17.4  | 16.4   | 2.7    | 13.3   | 67.9    | 103.7  | 144.1  |
| 96.5   | 97.5   | 31.9  | 31.5   | 126.2  | 94.4   | 9.7     | 8.7    | 4.7    |
| 8.3    | 9.4    | 1.4   | 1.7    | 46.9   | 4.5    | 4.3     | 5.7    | 4.9    |
| 70.9   | 85.1   | 18.2  | 23.0   | 86.3   | 168.1  | 88.0    | 105.0  | 114.4  |
| 18.3   | 18.5   | 5.9   | 9.6    | 14.8   | 13.8   | 135.4   | 238.6  | 237.3  |
| 76.2   | 97.6   | 60.7  | 65.4   | 151.9  | 121.9  | 284.9   | 226.6  | 264.2  |
| 13.9   | 3.2    | 54.0  | 78.7   | 6.6    | 12.4   | 13.0    | 77.2   | 55.0   |
| 1848.1 | 1941.0 | 85.9  | 112.6  | 2329.3 | 1632.3 | 1654.2  | 1848.9 | 2053.6 |
| 34.6   | 43.1   | 30.8  | 49.0   | 34.8   | 35.0   | 67.9    | 47.0   | 59.5   |
| 56.4   | 64.6   | 102.7 | 94.5   | 80.6   | 45.6   | 204.3   | 195.5  | 192.8  |
| 16.0   | 21.3   | 12.5  | 3.0    | 3.6    | 11.0   | 66.6    | 58.3   | 83.0   |
| 97.5   | 89.9   | 49.7  | 45.6   | 163.8  | 93.1   | 290.9   | 585.5  | 542.1  |
| 113.2  | 79.1   | 52.2  | 64.5   | 156.4  | 129.7  | 144.3   | 184.8  | 199.5  |
| 29.6   | 53.8   | 65.9  | 96.4   | 94.5   | 55.6   | 76.6    | 59.7   | 58.7   |
| 224.4  | 236.3  | 90.0  | 105.7  | 363.7  | 173.2  | 759.1   | 787.5  | 851.2  |
| 49.2   | 48.6   | 16.6  | 13.6   | 62.7   | 50.7   | 223.7   | 156.7  | 175.2  |
| 61.0   | 59.9   | 4.6   | 5.4    | 104.4  | 72.3   | 190.5   | 442.1  | 416.8  |
| 31.5   | 42.2   | 6.4   | 1.4    | 56.0   | 40.3   | 2.8     | 7.0    | 1.5    |
| 8.7    | 1.9    | 1.0   | 4.0    | 2.5    | 1.4    | 3.4     | 2.7    | 3.8    |
| 3.4    | 3.3    | 27.6  | 38.1   | 2.4    | 1.8    | 4.2     | 3.1    | 3.5    |
| 32.8   | 32.8   | 60.1  | 65.1   | 66.5   | 24.4   | 141.6   | 105.1  | 157.0  |
| 48.6   | 42.2   | 35.8  | 67.8   | 67.1   | 64.8   | 47.6    | 40.3   | 43.2   |
| 40.4   | 40.4   | 22.5  | 48.9   | 55.9   | 36.2   | 129.5   | 105.6  | 91.2   |
| 5458.8 | 7515.0 | 896.0 | 1272.8 | 6400.5 | 6105.8 | 11293.5 | 7777.0 | 7711.1 |
| 36.4   | 29.4   | 20.1  | 53.3   | 27.8   | 51.2   | 135.4   | 62.3   | 76.4   |

|        |        |       |        |        |        |        |        |        |
|--------|--------|-------|--------|--------|--------|--------|--------|--------|
| 114.5  | 130.3  | 110.6 | 104.7  | 164.2  | 114.2  | 188.1  | 115.2  | 145.1  |
| 71.0   | 73.6   | 28.9  | 23.0   | 101.3  | 70.9   | 121.8  | 72.9   | 88.7   |
| 31.2   | 31.2   | 45.0  | 34.2   | 40.8   | 31.5   | 126.6  | 126.5  | 142.6  |
| 835.2  | 1028.0 | 359.5 | 537.7  | 1329.4 | 840.4  | 2064.8 | 1413.2 | 1505.3 |
| 17.3   | 19.6   | 9.2   | 12.9   | 20.2   | 16.7   | 83.1   | 129.8  | 146.3  |
| 6.4    | 1.7    | 3.0   | 1.0    | 0.5    | 2.4    | 5.0    | 3.7    | 3.2    |
| 39.2   | 97.1   | 4.4   | 7.4    | 76.5   | 82.4   | 113.6  | 181.3  | 169.7  |
| 2.3    | 6.3    | 1.8   | 6.7    | 2.8    | 9.7    | 2.1    | 1.0    | 2.3    |
| 5.0    | 2.2    | 1.4   | 2.2    | 4.1    | 2.2    | 2.9    | 4.2    | 3.1    |
| 51.3   | 48.6   | 23.3  | 13.2   | 73.1   | 30.7   | 37.9   | 27.8   | 40.3   |
| 60.6   | 59.8   | 18.7  | 19.3   | 89.4   | 68.2   | 64.2   | 131.7  | 146.0  |
| 114.1  | 168.2  | 63.4  | 87.1   | 112.0  | 176.8  | 103.0  | 112.1  | 107.7  |
| 23.1   | 23.5   | 2.9   | 1.8    | 25.2   | 23.1   | 64.2   | 104.7  | 106.2  |
| 73.6   | 79.8   | 20.9  | 23.5   | 91.4   | 67.6   | 38.7   | 26.0   | 41.8   |
| 94.6   | 110.9  | 67.1  | 94.0   | 153.6  | 91.9   | 128.5  | 79.1   | 81.7   |
| 20.4   | 26.8   | 23.1  | 31.8   | 3.1    | 25.3   | 126.2  | 99.2   | 126.5  |
| 7.4    | 19.2   | 22.3  | 23.1   | 1.4    | 29.3   | 162.8  | 153.3  | 207.1  |
| 3.7    | 8.8    | 11.2  | 5.2    | 1.4    | 8.3    | 7.4    | 8.3    | 1.3    |
| 32.8   | 36.0   | 0.5   | 0.4    | 47.0   | 59.7   | 32.4   | 3.9    | 0.8    |
| 57.0   | 42.2   | 14.5  | 4.9    | 57.9   | 44.8   | 20.4   | 13.0   | 12.7   |
| 9.4    | 22.6   | 8.1   | 21.8   | 25.2   | 7.5    | 25.2   | 49.0   | 36.2   |
| 13.9   | 10.5   | 3.0   | 1.3    | 24.8   | 21.8   | 11.9   | 20.0   | 8.7    |
| 35.0   | 31.5   | 12.4  | 13.6   | 47.3   | 23.4   | 35.0   | 24.8   | 22.4   |
| 3.6    | 1.1    | 3.5   | 7.8    | 6.7    | 7.6    | 13.5   | 5.5    | 4.3    |
| 22.9   | 17.1   | 13.7  | 16.5   | 17.6   | 41.1   | 28.1   | 26.1   | 23.7   |
| 241.7  | 284.0  | 28.6  | 28.7   | 334.0  | 369.9  | 254.5  | 188.4  | 212.8  |
| 28.0   | 70.0   | 4.8   | 7.0    | 52.6   | 53.6   | 93.9   | 65.8   | 66.2   |
| 22.9   | 43.5   | 9.0   | 12.5   | 44.4   | 19.0   | 37.2   | 31.1   | 34.4   |
| 0.9    | 4.4    | 0.7   | 2.3    | 20.7   | 5.9    | 1.6    | 1.6    | 2.6    |
| 60.4   | 190.3  | 60.1  | 104.5  | 89.5   | 187.1  | 529.0  | 638.4  | 773.6  |
| 2759.3 | 3770.6 | 758.8 | 1227.8 | 3302.0 | 3610.4 | 5188.8 | 3485.4 | 3603.9 |
| 73.1   | 94.0   | 30.8  | 23.7   | 133.1  | 96.7   | 41.0   | 67.7   | 88.7   |
| 31.6   | 48.4   | 17.5  | 23.1   | 62.7   | 36.4   | 63.4   | 61.3   | 69.5   |
| 1.7    | 5.6    | 34.9  | 25.7   | 4.5    | 3.7    | 53.3   | 54.5   | 76.2   |
| 287.7  | 242.6  | 436.6 | 558.1  | 435.7  | 303.3  | 535.6  | 339.7  | 412.9  |
| 1.6    | 13.7   | 2.3   | 1.5    | 1.5    | 4.7    | 69.8   | 88.7   | 113.1  |
| 2.0    | 1.7    | 16.7  | 16.6   | 11.6   | 12.8   | 17.5   | 18.1   | 15.6   |
| 1.1    | 10.5   | 1.5   | 2.8    | 5.6    | 8.3    | 13.3   | 9.0    | 9.2    |
| 1052.0 | 1274.4 | 110.4 | 178.1  | 1373.8 | 1409.5 | 1461.4 | 544.7  | 696.2  |
| 517.6  | 837.5  | 472.2 | 655.8  | 874.2  | 668.2  | 1308.0 | 990.6  | 1117.8 |
| 4.0    | 6.3    | 1.5   | 2.2    | 0.3    | 0.4    | 0.5    | 3.6    | 2.7    |
| 139.8  | 144.1  | 305.5 | 410.5  | 137.3  | 124.5  | 281.6  | 210.4  | 339.9  |
| 73.7   | 79.2   | 3.5   | 0.1    | 91.3   | 63.1   | 167.9  | 153.0  | 163.3  |
| 1.2    | 2.3    | 4.5   | 6.8    | 6.0    | 1.4    | 7.9    | 3.8    | 3.5    |
| 185.1  | 193.5  | 531.1 | 616.2  | 193.8  | 189.7  | 300.3  | 410.1  | 410.3  |
| 82.0   | 73.1   | 75.5  | 83.6   | 76.1   | 94.6   | 88.4   | 91.6   | 96.9   |
| 98.1   | 130.5  | 68.6  | 77.4   | 157.0  | 152.7  | 232.9  | 285.1  | 356.0  |
| 73.0   | 88.4   | 29.0  | 20.9   | 109.6  | 93.2   | 197.9  | 115.2  | 128.7  |
| 25.3   | 18.8   | 5.8   | 6.0    | 23.9   | 26.8   | 17.4   | 20.6   | 20.3   |
| 14.3   | 28.7   | 27.7  | 36.2   | 17.9   | 25.1   | 3.5    | 6.3    | 6.0    |
| 214.5  | 245.0  | 117.0 | 109.8  | 272.1  | 401.3  | 414.7  | 552.8  | 511.6  |
| 38.1   | 54.5   | 1.7   | 1.1    | 57.0   | 48.1   | 32.7   | 37.7   | 49.8   |
| 18.8   | 17.1   | 15.0  | 12.2   | 34.1   | 18.0   | 15.4   | 22.8   | 20.2   |

|        |        |        |        |        |        |        |        |        |
|--------|--------|--------|--------|--------|--------|--------|--------|--------|
| 4.0    | 3.2    | 4.0    | 1.2    | 10.8   | 10.3   | 27.6   | 10.1   | 24.6   |
| 10.2   | 11.3   | 4.6    | 8.6    | 15.6   | 31.2   | 25.8   | 25.8   | 24.2   |
| 1.3    | 1.9    | 2.5    | 1.0    | 1.1    | 0.9    | 1.0    | 2.5    | 1.9    |
| 32.5   | 49.9   | 21.2   | 25.2   | 44.4   | 34.9   | 67.4   | 63.3   | 57.3   |
| 1.1    | 2.6    | 0.7    | 0.3    | 0.6    | 0.5    | 0.7    | 0.5    | 2.8    |
| 73.6   | 100.1  | 25.9   | 45.7   | 117.4  | 54.6   | 122.5  | 134.3  | 152.9  |
| 3132.1 | 3797.0 | 1418.0 | 2021.6 | 4305.9 | 3548.6 | 6382.4 | 6260.9 | 6197.1 |
| 79.3   | 123.6  | 46.1   | 61.4   | 101.3  | 88.5   | 198.1  | 203.0  | 227.7  |
| 66.9   | 74.8   | 42.8   | 69.5   | 72.8   | 72.4   | 214.3  | 215.9  | 203.9  |
| 0.7    | 8.7    | 0.6    | 0.4    | 2.1    | 1.0    | 1.6    | 3.5    | 1.3    |
| 21.4   | 23.2   | 8.0    | 49.4   | 40.5   | 31.9   | 20.6   | 35.7   | 32.0   |
| 29.2   | 45.9   | 137.3  | 119.1  | 37.8   | 24.7   | 393.0  | 302.8  | 369.6  |
| 147.4  | 165.2  | 86.1   | 99.2   | 253.9  | 138.0  | 472.0  | 499.5  | 590.6  |
| 19.0   | 25.0   | 43.4   | 43.3   | 34.3   | 10.4   | 5.5    | 1.2    | 2.6    |
| 65.7   | 90.9   | 53.2   | 45.8   | 84.5   | 120.9  | 66.9   | 83.3   | 64.5   |
| 24.2   | 22.3   | 13.2   | 9.9    | 34.4   | 23.8   | 23.3   | 23.6   | 21.0   |
| 193.7  | 249.1  | 247.6  | 348.9  | 370.8  | 213.1  | 191.3  | 300.1  | 265.1  |
| 86.0   | 116.6  | 17.2   | 4.5    | 102.2  | 129.5  | 139.5  | 109.1  | 133.3  |
| 141.6  | 172.4  | 31.9   | 53.2   | 202.1  | 93.6   | 85.0   | 99.5   | 91.3   |
| 47.7   | 62.3   | 27.1   | 25.9   | 62.1   | 70.9   | 405.2  | 272.4  | 301.9  |
| 34.3   | 40.3   | 64.0   | 97.7   | 55.6   | 22.4   | 15.8   | 19.5   | 28.9   |
| 26.0   | 20.1   | 29.7   | 29.8   | 36.3   | 25.0   | 38.1   | 28.2   | 42.0   |
| 1.5    | 3.1    | 1.0    | 1.6    | 1.7    | 1.5    | 1.5    | 2.0    | 2.2    |
| 6.9    | 10.8   | 11.5   | 1.3    | 3.0    | 3.5    | 24.0   | 23.1   | 19.4   |
| 547.5  | 823.6  | 174.2  | 312.2  | 848.4  | 886.2  | 1319.3 | 639.1  | 778.7  |
| 60.3   | 61.8   | 45.5   | 61.3   | 52.6   | 51.7   | 110.4  | 127.6  | 119.3  |
| 178.6  | 206.6  | 123.7  | 123.4  | 251.4  | 140.3  | 758.0  | 647.3  | 696.0  |
| 17.6   | 22.5   | 7.2    | 3.5    | 31.8   | 22.3   | 67.6   | 87.1   | 99.9   |
| 36.6   | 79.0   | 11.0   | 9.3    | 106.8  | 88.5   | 0.9    | 1.0    | 0.6    |
| 13.6   | 12.0   | 13.7   | 9.2    | 13.6   | 7.3    | 7.5    | 6.8    | 8.0    |
| 17.3   | 15.7   | 7.9    | 4.1    | 10.6   | 23.0   | 4.2    | 6.1    | 0.8    |
| 0.9    | 0.5    | 0.5    | 2.9    | 2.2    | 1.3    | 0.6    | 1.4    | 1.1    |
| 15.9   | 39.8   | 14.9   | 6.5    | 44.9   | 37.2   | 14.7   | 30.7   | 46.8   |
| 21.1   | 11.3   | 5.6    | 5.5    | 66.0   | 8.8    | 80.9   | 89.7   | 95.8   |
| 2.4    | 14.6   | 2.5    | 6.6    | 8.1    | 2.4    | 14.9   | 16.7   | 7.1    |
| 4.1    | 25.3   | 22.7   | 35.3   | 7.2    | 1.5    | 33.3   | 36.4   | 50.9   |
| 7.4    | 4.5    | 4.4    | 5.9    | 11.9   | 5.7    | 3.6    | 3.3    | 3.3    |
| 73.5   | 103.2  | 45.1   | 43.3   | 96.1   | 82.8   | 277.3  | 412.7  | 445.1  |
| 198.7  | 242.3  | 173.8  | 202.3  | 220.7  | 280.9  | 1251.4 | 1580.5 | 1798.6 |
| 12.9   | 15.6   | 92.4   | 117.1  | 11.7   | 10.7   | 77.8   | 219.5  | 227.7  |
| 0.3    | 4.1    | 35.7   | 46.5   | 8.6    | 5.7    | 64.2   | 203.1  | 202.3  |
| 230.6  | 288.3  | 7.3    | 18.5   | 319.8  | 257.2  | 303.9  | 121.6  | 138.6  |
| 25.9   | 47.3   | 21.4   | 38.0   | 32.2   | 51.2   | 64.3   | 58.1   | 74.8   |
| 50.7   | 90.2   | 24.9   | 61.1   | 92.0   | 69.6   | 142.3  | 80.7   | 83.1   |
| 1.6    | 2.2    | 6.2    | 4.3    | 1.3    | 2.0    | 12.9   | 10.9   | 18.0   |
| 24.9   | 25.7   | 16.8   | 25.5   | 11.4   | 19.1   | 29.1   | 41.5   | 39.4   |
| 16.2   | 31.4   | 26.1   | 30.5   | 30.5   | 45.0   | 19.7   | 13.9   | 19.4   |
| 3.5    | 1.3    | 0.9    | 2.3    | 6.4    | 8.5    | 2.7    | 1.2    | 1.1    |
| 11.3   | 11.3   | 19.1   | 16.4   | 12.9   | 13.7   | 12.0   | 11.3   | 18.7   |
| 37.7   | 66.5   | 15.6   | 10.3   | 76.3   | 72.0   | 142.7  | 131.9  | 145.4  |
| 13.1   | 6.7    | 3.5    | 8.0    | 21.7   | 17.4   | 21.2   | 7.0    | 15.2   |
| 55.1   | 58.9   | 18.2   | 26.1   | 55.8   | 28.7   | 41.3   | 36.9   | 39.5   |
| 49.9   | 79.8   | 43.5   | 77.3   | 84.6   | 68.8   | 327.8  | 399.3  | 474.1  |

|       |        |       |       |        |       |        |        |        |
|-------|--------|-------|-------|--------|-------|--------|--------|--------|
| 64.1  | 62.7   | 39.4  | 47.6  | 81.0   | 67.1  | 134.2  | 158.8  | 177.0  |
| 301.8 | 376.3  | 49.6  | 80.3  | 360.3  | 389.7 | 1005.8 | 661.4  | 776.5  |
| 122.2 | 165.6  | 70.5  | 57.1  | 285.2  | 154.7 | 618.0  | 656.2  | 683.1  |
| 0.9   | 6.0    | 1.7   | 0.5   | 3.3    | 22.3  | 3.9    | 1.4    | 2.0    |
| 14.0  | 17.6   | 50.3  | 57.4  | 26.2   | 13.7  | 71.3   | 85.1   | 92.8   |
| 1.6   | 1.5    | 2.4   | 1.5   | 2.2    | 3.5   | 3.4    | 1.5    | 3.2    |
| 16.4  | 16.1   | 21.6  | 13.5  | 4.3    | 14.7  | 27.0   | 32.7   | 31.4   |
| 157.1 | 146.9  | 74.1  | 52.0  | 175.1  | 165.0 | 216.1  | 161.5  | 144.3  |
| 2.2   | 0.9    | 0.5   | 1.7   | 3.0    | 2.2   | 2.4    | 1.7    | 2.3    |
| 1.2   | 2.1    | 3.7   | 0.9   | 1.2    | 1.9   | 1.9    | 2.2    | 1.9    |
| 3.5   | 2.4    | 1.5   | 2.8   | 1.7    | 2.6   | 2.4    | 1.7    | 3.6    |
| 232.2 | 266.2  | 65.3  | 111.2 | 264.2  | 271.0 | 370.5  | 209.8  | 245.1  |
| 262.6 | 338.9  | 39.1  | 65.1  | 350.3  | 298.4 | 560.4  | 302.3  | 338.9  |
| 2.3   | 3.7    | 2.2   | 4.0   | 4.9    | 7.8   | 2.1    | 4.8    | 8.6    |
| 39.5  | 125.8  | 2.1   | 15.0  | 52.1   | 64.0  | 53.5   | 8.8    | 33.8   |
| 177.1 | 217.3  | 40.1  | 56.5  | 296.1  | 199.0 | 437.8  | 289.5  | 307.1  |
| 27.2  | 74.9   | 4.2   | 20.5  | 54.1   | 73.7  | 45.4   | 30.9   | 36.8   |
| 12.0  | 33.4   | 22.6  | 15.7  | 16.9   | 16.5  | 123.3  | 182.2  | 187.6  |
| 47.5  | 25.7   | 5.3   | 6.2   | 28.5   | 37.6  | 34.1   | 35.0   | 53.6   |
| 14.1  | 42.8   | 17.7  | 42.6  | 22.9   | 38.1  | 30.8   | 31.2   | 25.4   |
| 32.9  | 32.5   | 13.0  | 18.1  | 29.1   | 28.3  | 32.5   | 30.6   | 33.4   |
| 2.9   | 1.8    | 0.8   | 0.4   | 2.3    | 5.6   | 1.5    | 1.2    | 2.0    |
| 628.9 | 535.2  | 683.0 | 939.9 | 702.3  | 606.2 | 1863.8 | 2321.1 | 2387.4 |
| 15.7  | 9.6    | 20.6  | 16.0  | 20.7   | 15.7  | 19.9   | 19.2   | 10.1   |
| 5.5   | 0.6    | 5.5   | 7.7   | 2.2    | 17.7  | 4.2    | 2.1    | 5.8    |
| 67.4  | 81.4   | 9.8   | 12.2  | 99.0   | 71.8  | 52.7   | 81.7   | 108.9  |
| 40.9  | 43.5   | 5.5   | 5.3   | 33.8   | 30.7  | 97.9   | 104.2  | 127.5  |
| 26.7  | 34.0   | 36.4  | 45.1  | 51.4   | 28.0  | 75.3   | 44.9   | 55.6   |
| 28.2  | 31.5   | 20.4  | 18.0  | 44.9   | 49.0  | 61.9   | 59.5   | 65.9   |
| 47.9  | 41.9   | 20.2  | 24.0  | 59.2   | 50.8  | 63.4   | 115.0  | 126.9  |
| 314.0 | 367.2  | 126.4 | 118.5 | 505.7  | 400.7 | 251.4  | 151.0  | 164.3  |
| 47.6  | 48.0   | 36.0  | 55.4  | 57.5   | 37.1  | 61.2   | 67.4   | 56.7   |
| 6.8   | 6.8    | 9.6   | 2.2   | 8.0    | 5.1   | 19.1   | 6.3    | 15.8   |
| 26.0  | 42.7   | 5.0   | 15.7  | 29.4   | 25.0  | 60.4   | 29.2   | 59.5   |
| 4.3   | 2.4    | 2.6   | 2.1   | 9.6    | 13.5  | 14.6   | 13.2   | 7.6    |
| 34.2  | 64.0   | 27.1  | 39.0  | 43.8   | 64.8  | 65.3   | 44.6   | 53.3   |
| 485.2 | 822.6  | 368.0 | 446.3 | 557.1  | 781.5 | 1823.2 | 1522.0 | 1518.3 |
| 587.3 | 577.4  | 98.8  | 217.4 | 804.5  | 596.7 | 2147.8 | 883.5  | 1053.4 |
| 248.8 | 206.5  | 71.4  | 148.2 | 292.6  | 195.7 | 809.6  | 313.4  | 366.5  |
| 17.6  | 13.0   | 7.6   | 9.0   | 15.3   | 13.3  | 16.8   | 14.5   | 13.1   |
| 156.5 | 243.9  | 43.8  | 67.5  | 243.0  | 390.8 | 427.6  | 336.1  | 361.6  |
| 33.7  | 79.5   | 12.2  | 25.5  | 45.7   | 62.3  | 52.0   | 36.3   | 24.6   |
| 41.9  | 45.7   | 14.8  | 18.9  | 27.4   | 44.8  | 45.3   | 40.1   | 35.7   |
| 5.1   | 10.0   | 16.7  | 24.7  | 15.4   | 5.0   | 4.0    | 5.3    | 2.9    |
| 3.4   | 7.8    | 3.2   | 6.4   | 14.4   | 12.0  | 7.6    | 10.0   | 9.3    |
| 25.1  | 37.4   | 44.8  | 65.3  | 44.3   | 41.7  | 114.2  | 77.3   | 65.4   |
| 21.4  | 40.7   | 57.2  | 52.3  | 26.8   | 29.0  | 120.4  | 109.2  | 109.3  |
| 10.3  | 23.9   | 18.7  | 17.7  | 22.7   | 18.1  | 22.7   | 17.8   | 21.8   |
| 730.4 | 1153.6 | 156.7 | 269.5 | 1020.3 | 996.2 | 1973.2 | 1145.3 | 1411.2 |
| 50.6  | 78.3   | 3.3   | 8.9   | 75.9   | 69.3  | 85.6   | 42.3   | 55.3   |
| 1.9   | 3.9    | 1.8   | 2.0   | 0.9    | 4.1   | 0.9    | 0.9    | 1.6    |
| 7.7   | 14.1   | 9.1   | 2.5   | 21.4   | 12.1  | 17.0   | 22.0   | 13.8   |
| 0.6   | 11.9   | 6.8   | 3.3   | 6.5    | 12.0  | 8.8    | 1.3    | 5.7    |



|       |        |       |       |        |        |        |        |        |
|-------|--------|-------|-------|--------|--------|--------|--------|--------|
| 720.9 | 1050.9 | 63.8  | 57.2  | 912.5  | 937.4  | 200.0  | 237.3  | 258.5  |
| 8.9   | 2.1    | 16.8  | 1.4   | 7.4    | 15.6   | 5.3    | 6.8    | 11.3   |
| 3.6   | 4.6    | 7.0   | 1.9   | 5.2    | 14.1   | 3.1    | 3.1    | 1.5    |
| 0.9   | 0.8    | 0.9   | 0.6   | 2.5    | 1.5    | 13.7   | 5.5    | 1.3    |
| 146.8 | 252.1  | 44.2  | 47.0  | 256.7  | 262.8  | 289.7  | 245.5  | 292.6  |
| 1.6   | 19.2   | 3.5   | 0.6   | 10.1   | 7.0    | 17.2   | 14.5   | 10.6   |
| 1.6   | 8.8    | 4.9   | 6.2   | 2.2    | 1.6    | 14.7   | 14.1   | 14.4   |
| 1.0   | 6.5    | 1.4   | 0.5   | 1.7    | 1.5    | 1.6    | 1.4    | 1.4    |
| 37.8  | 68.4   | 15.9  | 22.8  | 85.9   | 51.2   | 118.2  | 56.3   | 92.0   |
| 1.9   | 5.1    | 1.6   | 1.1   | 2.5    | 17.9   | 7.3    | 11.2   | 12.3   |
| 62.6  | 60.4   | 0.9   | 0.8   | 83.7   | 66.0   | 72.5   | 41.4   | 49.4   |
| 2.7   | 9.7    | 2.1   | 8.1   | 12.3   | 12.7   | 9.0    | 5.8    | 6.4    |
| 242.0 | 261.4  | 53.4  | 66.0  | 251.5  | 269.9  | 266.9  | 154.6  | 177.3  |
| 928.0 | 1473.0 | 189.8 | 267.4 | 1392.6 | 1055.0 | 347.0  | 299.1  | 351.6  |
| 5.6   | 2.7    | 11.1  | 2.2   | 7.2    | 25.6   | 15.9   | 12.6   | 12.0   |
| 22.3  | 71.5   | 83.5  | 104.1 | 23.3   | 48.1   | 278.8  | 846.9  | 818.7  |
| 1.1   | 1.3    | 6.0   | 4.5   | 1.1    | 3.6    | 3.4    | 3.6    | 4.4    |
| 1.2   | 1.7    | 0.6   | 0.9   | 2.2    | 6.6    | 2.6    | 3.6    | 2.4    |
| 49.4  | 78.8   | 47.2  | 57.9  | 75.8   | 90.6   | 62.9   | 40.1   | 56.8   |
| 9.6   | 4.7    | 0.5   | 2.1   | 2.8    | 11.1   | 7.0    | 6.4    | 3.8    |
| 1.3   | 1.2    | 10.9  | 1.0   | 2.0    | 3.7    | 4.7    | 8.8    | 18.5   |
| 7.2   | 3.2    | 8.0   | 3.5   | 6.6    | 0.6    | 8.9    | 7.3    | 6.2    |
| 1.1   | 5.2    | 4.8   | 6.2   | 15.7   | 11.8   | 16.4   | 13.6   | 16.6   |
| 19.9  | 23.8   | 8.2   | 11.4  | 30.8   | 13.0   | 33.1   | 24.7   | 36.1   |
| 1.3   | 0.9    | 0.9   | 0.7   | 2.0    | 1.4    | 2.9    | 0.9    | 2.0    |
| 318.7 | 513.3  | 166.3 | 249.1 | 457.6  | 505.0  | 2179.2 | 1820.8 | 1818.1 |
| 5.8   | 2.0    | 14.4  | 5.9   | 3.0    | 1.9    | 8.8    | 9.7    | 22.3   |
| 7.2   | 7.5    | 10.5  | 5.5   | 6.7    | 18.4   | 6.7    | 3.3    | 6.8    |
| 8.9   | 12.6   | 16.2  | 12.9  | 2.8    | 6.1    | 3.3    | 5.4    | 2.3    |
| 2.2   | 3.0    | 15.3  | 12.9  | 2.6    | 2.5    | 5.6    | 9.5    | 2.1    |
| 4.3   | 3.4    | 16.8  | 7.5   | 1.2    | 9.5    | 13.1   | 9.4    | 5.2    |
| 7.2   | 1.7    | 1.1   | 0.8   | 0.7    | 2.0    | 1.3    | 1.7    | 1.6    |
| 1.2   | 1.0    | 1.7   | 0.5   | 3.8    | 2.7    | 1.7    | 1.8    | 3.8    |
| 18.3  | 5.9    | 1.9   | 1.7   | 3.5    | 20.6   | 13.5   | 14.2   | 17.0   |
| 0.8   | 1.6    | 0.5   | 1.6   | 3.5    | 3.0    | 1.3    | 1.3    | 1.5    |
| 2.2   | 2.3    | 1.9   | 4.4   | 3.1    | 5.6    | 10.0   | 9.5    | 4.8    |
| 10.0  | 9.5    | 5.3   | 8.3   | 19.3   | 7.4    | 13.6   | 10.1   | 10.1   |
| 2.6   | 18.8   | 2.4   | 9.2   | 9.3    | 16.5   | 2.3    | 2.5    | 2.1    |
| 25.3  | 26.3   | 0.5   | 10.0  | 46.0   | 36.5   | 15.7   | 18.9   | 10.1   |
| 3.7   | 2.1    | 2.8   | 1.1   | 2.5    | 2.2    | 4.1    | 2.5    | 3.9    |
| 2.9   | 5.5    | 4.8   | 0.6   | 0.9    | 1.0    | 11.7   | 3.0    | 14.2   |
| 17.0  | 56.1   | 25.8  | 27.7  | 54.9   | 33.3   | 94.0   | 87.0   | 122.6  |
| 17.9  | 27.8   | 15.7  | 3.7   | 29.7   | 10.3   | 23.1   | 24.9   | 19.6   |
| 2.4   | 3.6    | 1.2   | 1.8   | 0.7    | 1.0    | 2.6    | 4.7    | 2.9    |
| 37.9  | 31.7   | 16.6  | 14.5  | 22.6   | 32.3   | 31.2   | 27.9   | 37.2   |
| 6.3   | 0.9    | 2.0   | 12.0  | 4.4    | 1.2    | 6.9    | 7.6    | 7.2    |
| 0.8   | 7.8    | 1.6   | 1.7   | 7.5    | 2.2    | 4.8    | 1.1    | 2.2    |
| 92.4  | 105.2  | 111.3 | 136.8 | 138.3  | 99.2   | 213.5  | 238.5  | 252.7  |
| 1.1   | 2.8    | 2.3   | 8.9   | 1.4    | 8.9    | 1.3    | 2.2    | 1.7    |
| 26.4  | 23.9   | 6.8   | 2.3   | 24.5   | 16.6   | 10.2   | 10.0   | 2.3    |
| 1.3   | 1.1    | 1.6   | 0.4   | 2.2    | 0.7    | 3.8    | 4.5    | 6.6    |
| 238.9 | 346.9  | 44.4  | 40.2  | 358.9  | 354.0  | 876.5  | 782.7  | 804.2  |
| 313.5 | 462.2  | 4.1   | 11.6  | 359.8  | 493.6  | 350.2  | 348.2  | 355.2  |

|        |        |       |       |        |        |        |        |        |
|--------|--------|-------|-------|--------|--------|--------|--------|--------|
| 109.4  | 156.3  | 38.2  | 63.5  | 188.1  | 132.7  | 194.4  | 203.9  | 198.0  |
| 2.2    | 2.6    | 11.4  | 10.2  | 6.7    | 11.4   | 14.9   | 9.6    | 13.3   |
| 1.2    | 11.4   | 15.8  | 9.6   | 20.5   | 4.7    | 8.1    | 36.4   | 17.3   |
| 869.3  | 1217.6 | 24.4  | 28.8  | 833.2  | 969.3  | 1392.0 | 1659.0 | 1904.2 |
| 8.5    | 13.7   | 11.5  | 8.1   | 13.2   | 26.5   | 71.3   | 59.0   | 55.6   |
| 21.5   | 16.4   | 15.5  | 16.0  | 22.3   | 22.5   | 27.4   | 17.0   | 20.4   |
| 74.9   | 92.9   | 8.3   | 11.3  | 60.3   | 88.2   | 92.2   | 145.8  | 144.4  |
| 1.2    | 1.3    | 0.7   | 0.4   | 4.9    | 7.8    | 4.2    | 2.2    | 3.4    |
| 37.3   | 54.9   | 17.4  | 25.1  | 60.3   | 54.2   | 61.5   | 64.4   | 61.2   |
| 3.4    | 7.3    | 3.7   | 25.6  | 5.1    | 3.1    | 23.7   | 7.0    | 19.2   |
| 25.7   | 31.9   | 47.3  | 56.2  | 47.8   | 1.4    | 96.1   | 84.1   | 94.4   |
| 87.4   | 95.1   | 185.5 | 148.7 | 144.6  | 97.5   | 240.0  | 258.9  | 295.4  |
| 18.7   | 5.5    | 3.3   | 1.9   | 15.9   | 14.9   | 3.7    | 12.2   | 12.6   |
| 71.9   | 97.7   | 16.0  | 6.0   | 133.3  | 97.0   | 229.7  | 119.8  | 125.6  |
| 93.2   | 138.1  | 30.0  | 40.5  | 150.8  | 112.2  | 308.0  | 378.2  | 407.2  |
| 33.4   | 45.0   | 13.2  | 19.0  | 47.5   | 64.0   | 42.9   | 53.0   | 43.8   |
| 31.3   | 34.9   | 1.0   | 13.5  | 49.7   | 33.1   | 7.0    | 4.0    | 5.6    |
| 79.1   | 125.1  | 27.8  | 38.9  | 137.3  | 86.0   | 260.5  | 265.6  | 284.2  |
| 12.7   | 5.1    | 3.5   | 18.2  | 13.2   | 10.4   | 13.2   | 14.3   | 13.6   |
| 6.2    | 14.4   | 7.7   | 6.8   | 7.0    | 15.8   | 12.2   | 2.1    | 9.7    |
| 105.7  | 107.5  | 148.5 | 200.4 | 144.1  | 109.7  | 320.5  | 372.0  | 397.3  |
| 18.3   | 22.1   | 15.8  | 25.4  | 43.7   | 28.0   | 254.8  | 480.7  | 484.1  |
| 191.4  | 281.5  | 55.5  | 83.0  | 287.8  | 262.8  | 952.1  | 1173.4 | 1304.5 |
| 5.5    | 1.8    | 3.6   | 2.8   | 25.4   | 7.8    | 15.1   | 6.5    | 13.0   |
| 27.2   | 29.1   | 20.5  | 19.6  | 45.5   | 42.9   | 66.2   | 121.0  | 131.6  |
| 342.6  | 346.6  | 84.5  | 102.4 | 437.7  | 342.0  | 407.4  | 203.3  | 240.4  |
| 109.1  | 128.4  | 73.7  | 112.5 | 103.1  | 93.0   | 181.9  | 125.6  | 118.2  |
| 112.9  | 150.6  | 128.6 | 189.1 | 186.8  | 126.3  | 100.5  | 88.4   | 83.9   |
| 48.9   | 45.6   | 19.5  | 16.3  | 53.9   | 44.8   | 37.4   | 41.0   | 38.2   |
| 46.4   | 46.5   | 0.4   | 0.9   | 80.9   | 48.0   | 7.3    | 3.8    | 4.4    |
| 2.1    | 6.1    | 7.9   | 3.0   | 2.9    | 4.2    | 2.3    | 5.0    | 9.1    |
| 19.1   | 19.7   | 18.9  | 15.1  | 24.2   | 2.8    | 39.6   | 25.1   | 21.5   |
| 1.2    | 5.1    | 3.4   | 3.8   | 0.6    | 2.4    | 14.3   | 12.8   | 21.2   |
| 93.2   | 112.7  | 68.8  | 127.3 | 135.1  | 66.6   | 196.2  | 243.9  | 336.5  |
| 2.5    | 10.8   | 2.0   | 0.7   | 4.3    | 9.4    | 5.7    | 11.6   | 6.0    |
| 198.7  | 263.4  | 45.1  | 46.1  | 354.8  | 230.9  | 721.6  | 502.7  | 559.0  |
| 7.5    | 10.1   | 1.9   | 2.6   | 8.3    | 12.4   | 6.3    | 11.5   | 8.6    |
| 14.6   | 9.1    | 0.6   | 3.1   | 3.2    | 0.6    | 11.0   | 10.5   | 10.4   |
| 118.7  | 146.7  | 66.2  | 95.2  | 140.0  | 110.4  | 189.9  | 197.5  | 210.8  |
| 0.9    | 2.1    | 3.9   | 4.3   | 3.7    | 1.8    | 2.0    | 1.8    | 2.8    |
| 14.5   | 25.2   | 12.3  | 3.3   | 23.4   | 14.2   | 14.4   | 32.8   | 31.5   |
| 0.8    | 8.1    | 0.8   | 1.0   | 4.2    | 1.3    | 4.5    | 2.7    | 1.3    |
| 57.0   | 64.8   | 15.4  | 13.7  | 46.0   | 70.2   | 267.7  | 236.0  | 267.2  |
| 109.7  | 119.5  | 274.1 | 415.1 | 107.3  | 185.0  | 612.1  | 678.7  | 750.7  |
| 31.9   | 34.3   | 9.5   | 1.6   | 60.3   | 26.7   | 66.5   | 61.9   | 73.2   |
| 129.6  | 179.8  | 9.1   | 19.8  | 281.7  | 179.5  | 102.6  | 80.4   | 100.9  |
| 58.3   | 101.1  | 18.7  | 26.1  | 98.3   | 85.4   | 191.8  | 175.9  | 203.5  |
| 11.1   | 28.6   | 3.0   | 7.9   | 23.6   | 4.4    | 4.6    | 12.5   | 5.4    |
| 0.5    | 1.9    | 1.7   | 1.7   | 7.2    | 0.4    | 6.1    | 5.7    | 2.7    |
| 2186.9 | 2624.0 | 107.6 | 195.6 | 3081.2 | 2684.0 | 3048.7 | 4407.3 | 4411.0 |
| 261.0  | 312.2  | 171.7 | 313.1 | 355.3  | 234.4  | 2005.2 | 953.7  | 1336.0 |
| 16.4   | 20.2   | 12.7  | 9.1   | 39.7   | 20.5   | 93.5   | 129.8  | 104.1  |
| 21.9   | 32.3   | 37.4  | 39.0  | 38.0   | 26.3   | 77.8   | 74.5   | 96.0   |

|       |       |       |       |       |       |        |        |        |
|-------|-------|-------|-------|-------|-------|--------|--------|--------|
| 229.7 | 194.1 | 73.8  | 73.2  | 166.6 | 301.2 | 778.7  | 591.4  | 685.4  |
| 18.8  | 24.5  | 16.2  | 13.7  | 25.4  | 28.3  | 32.4   | 34.8   | 38.4   |
| 7.3   | 13.5  | 23.1  | 21.1  | 25.4  | 2.2   | 22.6   | 5.5    | 3.2    |
| 4.9   | 17.8  | 0.9   | 2.1   | 12.5  | 4.4   | 3.0    | 4.4    | 2.4    |
| 184.9 | 227.3 | 3.0   | 1.0   | 161.9 | 163.8 | 1.1    | 0.8    | 1.1    |
| 166.7 | 241.9 | 35.1  | 51.2  | 263.3 | 247.8 | 1121.0 | 638.1  | 710.9  |
| 26.8  | 38.0  | 16.8  | 15.9  | 34.7  | 34.1  | 62.4   | 67.8   | 48.7   |
| 65.5  | 91.4  | 135.3 | 211.2 | 140.2 | 84.2  | 449.2  | 597.6  | 625.7  |
| 11.5  | 1.3   | 9.3   | 4.4   | 13.9  | 15.9  | 8.3    | 12.5   | 6.0    |
| 12.6  | 23.4  | 16.1  | 13.6  | 19.1  | 22.1  | 11.5   | 18.1   | 14.6   |
| 29.9  | 61.7  | 5.4   | 4.8   | 49.8  | 42.8  | 2.7    | 6.8    | 1.4    |
| 13.1  | 52.6  | 16.9  | 4.6   | 38.7  | 33.6  | 70.5   | 61.5   | 65.5   |
| 20.9  | 17.5  | 0.4   | 8.0   | 34.1  | 18.2  | 20.2   | 19.1   | 23.7   |
| 2.3   | 2.2   | 0.7   | 5.7   | 10.2  | 7.7   | 13.1   | 7.5    | 4.6    |
| 10.9  | 0.3   | 9.3   | 2.1   | 1.4   | 1.4   | 4.7    | 3.4    | 7.3    |
| 27.1  | 29.9  | 16.4  | 15.2  | 78.2  | 37.4  | 46.8   | 72.5   | 67.6   |
| 1.6   | 1.7   | 1.3   | 1.2   | 0.5   | 0.5   | 3.1    | 1.9    | 0.7    |
| 234.8 | 234.2 | 94.5  | 156.9 | 336.0 | 194.8 | 220.9  | 191.4  | 233.9  |
| 0.6   | 1.1   | 3.8   | 0.6   | 0.6   | 7.9   | 6.8    | 1.8    | 4.0    |
| 4.3   | 13.9  | 0.9   | 0.7   | 10.6  | 3.2   | 10.1   | 8.1    | 7.0    |
| 0.8   | 0.9   | 6.3   | 1.5   | 0.4   | 3.7   | 1.5    | 2.9    | 3.1    |
| 3.6   | 12.2  | 20.2  | 6.8   | 5.8   | 13.3  | 14.9   | 14.6   | 17.0   |
| 10.1  | 14.4  | 7.2   | 6.6   | 23.4  | 9.8   | 8.4    | 9.9    | 10.2   |
| 0.8   | 9.3   | 2.7   | 2.3   | 10.1  | 7.9   | 19.4   | 15.2   | 15.9   |
| 356.9 | 505.9 | 54.7  | 94.5  | 484.2 | 628.8 | 654.3  | 614.9  | 666.0  |
| 27.9  | 17.4  | 10.6  | 15.2  | 39.1  | 29.4  | 54.2   | 25.5   | 16.2   |
| 13.0  | 6.1   | 5.5   | 5.9   | 1.8   | 1.4   | 20.6   | 12.7   | 15.7   |
| 3.0   | 10.0  | 11.2  | 7.7   | 3.8   | 3.6   | 17.0   | 22.0   | 5.1    |
| 15.4  | 33.7  | 5.4   | 1.2   | 18.7  | 20.5  | 21.9   | 29.3   | 21.2   |
| 19.9  | 35.6  | 13.4  | 26.7  | 32.7  | 28.9  | 75.7   | 80.0   | 59.8   |
| 0.5   | 9.6   | 2.0   | 0.8   | 0.6   | 5.6   | 7.6    | 4.8    | 9.1    |
| 4.0   | 0.7   | 0.8   | 5.5   | 1.9   | 2.5   | 1.6    | 2.9    | 7.8    |
| 68.3  | 76.8  | 118.2 | 123.2 | 69.3  | 47.8  | 106.6  | 122.2  | 135.4  |
| 61.1  | 81.5  | 29.6  | 43.4  | 81.2  | 67.2  | 136.8  | 86.6   | 114.0  |
| 76.7  | 85.0  | 18.4  | 26.7  | 107.0 | 69.0  | 317.2  | 231.4  | 268.9  |
| 35.6  | 49.4  | 11.4  | 15.4  | 39.5  | 39.3  | 104.9  | 73.2   | 73.1   |
| 1.3   | 3.5   | 1.1   | 1.6   | 14.0  | 13.8  | 8.4    | 1.9    | 2.0    |
| 38.7  | 52.2  | 2.9   | 10.1  | 33.5  | 44.0  | 179.1  | 166.2  | 193.7  |
| 3.6   | 8.7   | 1.8   | 0.2   | 1.7   | 0.3   | 6.1    | 4.4    | 4.3    |
| 1.7   | 5.0   | 12.8  | 4.3   | 12.3  | 2.5   | 1.8    | 6.8    | 10.6   |
| 1.2   | 1.0   | 1.7   | 1.4   | 4.1   | 1.4   | 1.8    | 2.6    | 1.6    |
| 108.2 | 126.9 | 34.8  | 30.0  | 206.8 | 105.7 | 294.0  | 194.7  | 210.4  |
| 69.0  | 82.8  | 53.6  | 94.7  | 121.0 | 73.1  | 247.1  | 366.6  | 438.5  |
| 127.7 | 121.8 | 45.7  | 30.3  | 165.4 | 109.0 | 196.7  | 110.6  | 116.9  |
| 2.5   | 0.6   | 0.4   | 0.5   | 0.4   | 0.7   | 0.5    | 1.2    | 0.3    |
| 283.8 | 436.7 | 76.8  | 66.5  | 425.0 | 503.3 | 705.3  | 599.4  | 653.6  |
| 273.8 | 365.3 | 29.6  | 51.0  | 365.4 | 358.6 | 605.9  | 468.3  | 488.8  |
| 4.3   | 8.3   | 18.9  | 10.7  | 10.3  | 0.5   | 3.2    | 6.8    | 1.2    |
| 66.4  | 74.8  | 57.1  | 90.6  | 114.9 | 62.6  | 228.5  | 94.6   | 137.5  |
| 94.8  | 138.1 | 36.6  | 18.7  | 112.5 | 98.0  | 81.4   | 112.6  | 105.1  |
| 18.4  | 14.8  | 26.9  | 13.0  | 18.0  | 13.5  | 37.4   | 21.8   | 27.2   |
| 113.2 | 145.7 | 46.7  | 61.6  | 186.1 | 118.8 | 788.3  | 1005.3 | 1194.4 |
| 4.5   | 3.7   | 3.1   | 4.7   | 12.2  | 16.8  | 13.3   | 6.6    | 6.1    |

|        |        |        |        |        |        |        |        |        |
|--------|--------|--------|--------|--------|--------|--------|--------|--------|
| 9.8    | 12.0   | 17.7   | 13.5   | 13.5   | 21.2   | 4.9    | 8.6    | 18.8   |
| 654.8  | 710.0  | 304.2  | 454.5  | 907.0  | 708.6  | 1366.1 | 971.6  | 1094.0 |
| 3.3    | 0.7    | 0.9    | 6.5    | 10.7   | 5.4    | 7.0    | 16.2   | 7.0    |
| 2.0    | 14.8   | 1.5    | 7.2    | 2.0    | 14.1   | 15.1   | 27.1   | 19.9   |
| 3.7    | 9.2    | 10.1   | 4.9    | 2.9    | 1.2    | 8.6    | 8.1    | 7.1    |
| 759.7  | 910.5  | 237.8  | 307.0  | 1128.3 | 936.7  | 940.7  | 464.3  | 500.9  |
| 38.8   | 37.7   | 134.6  | 215.3  | 47.4   | 25.9   | 165.9  | 124.7  | 151.0  |
| 20.1   | 33.0   | 7.6    | 10.6   | 17.0   | 21.0   | 21.1   | 11.7   | 21.4   |
| 7.4    | 9.8    | 4.9    | 5.4    | 17.0   | 5.5    | 19.0   | 13.9   | 19.1   |
| 19.1   | 6.8    | 12.8   | 2.3    | 17.2   | 4.7    | 24.5   | 26.7   | 21.9   |
| 193.4  | 223.2  | 98.8   | 135.7  | 325.7  | 154.1  | 105.7  | 68.3   | 92.4   |
| 2.3    | 2.3    | 14.8   | 21.6   | 1.1    | 1.2    | 2.6    | 2.4    | 1.8    |
| 3.9    | 8.5    | 1.1    | 8.6    | 19.3   | 2.1    | 13.5   | 8.1    | 11.9   |
| 13.6   | 9.8    | 1.6    | 0.4    | 11.5   | 8.9    | 13.9   | 27.4   | 18.8   |
| 3.9    | 3.3    | 15.6   | 14.6   | 1.7    | 1.7    | 10.3   | 5.1    | 6.7    |
| 2.3    | 10.1   | 10.7   | 0.8    | 2.7    | 9.9    | 2.3    | 4.5    | 3.7    |
| 2.7    | 0.2    | 5.7    | 7.2    | 1.1    | 4.3    | 0.7    | 2.8    | 4.3    |
| 38.4   | 51.8   | 39.8   | 24.9   | 47.2   | 48.0   | 85.7   | 94.6   | 105.1  |
| 2385.7 | 3239.4 | 287.0  | 370.5  | 3577.3 | 3670.0 | 6271.2 | 5005.4 | 5945.4 |
| 619.7  | 713.2  | 311.7  | 388.3  | 831.3  | 679.5  | 1004.8 | 929.5  | 959.1  |
| 1272.7 | 1685.4 | 1904.8 | 2707.1 | 1768.8 | 1228.2 | 4472.2 | 2790.2 | 2975.2 |
| 83.1   | 99.3   | 12.4   | 14.7   | 100.8  | 114.3  | 94.3   | 78.9   | 74.5   |
| 28.7   | 104.6  | 26.6   | 47.9   | 106.1  | 90.0   | 57.6   | 30.0   | 51.3   |
| 65.0   | 54.0   | 16.0   | 18.3   | 130.6  | 49.3   | 277.9  | 166.0  | 173.7  |
| 24.5   | 21.3   | 46.4   | 42.6   | 59.7   | 11.0   | 4.6    | 12.2   | 4.8    |
| 17.1   | 34.4   | 7.3    | 14.8   | 9.8    | 26.9   | 38.1   | 69.9   | 56.0   |
| 153.9  | 220.0  | 19.3   | 34.9   | 217.7  | 116.0  | 35.3   | 38.8   | 53.5   |
| 110.8  | 144.4  | 15.2   | 15.7   | 200.0  | 161.2  | 541.9  | 525.8  | 545.0  |
| 81.7   | 91.9   | 51.7   | 47.8   | 126.8  | 73.6   | 31.9   | 30.5   | 43.1   |
| 16.3   | 15.3   | 2.4    | 2.6    | 16.3   | 7.9    | 6.8    | 20.6   | 19.6   |
| 24.0   | 21.8   | 8.0    | 7.9    | 30.9   | 13.5   | 26.3   | 17.7   | 17.9   |
| 140.8  | 229.4  | 31.4   | 46.6   | 257.9  | 235.1  | 337.1  | 403.5  | 445.3  |
| 521.3  | 895.3  | 174.2  | 250.6  | 1037.1 | 688.2  | 763.1  | 972.6  | 989.5  |
| 63.4   | 98.4   | 8.5    | 3.3    | 151.6  | 80.5   | 73.4   | 94.4   | 77.5   |
| 1.1    | 9.0    | 0.8    | 1.0    | 1.5    | 2.7    | 5.4    | 2.9    | 0.4    |
| 1.6    | 9.7    | 9.3    | 4.7    | 0.6    | 0.4    | 10.3   | 5.4    | 4.9    |
| 1.9    | 1.6    | 4.2    | 11.2   | 0.7    | 1.0    | 12.6   | 35.1   | 33.2   |
| 0.2    | 0.2    | 5.1    | 3.5    | 1.4    | 8.5    | 3.1    | 4.9    | 4.5    |
| 111.0  | 103.2  | 27.1   | 31.2   | 189.0  | 96.9   | 494.6  | 358.3  | 385.6  |
| 129.7  | 147.3  | 101.2  | 75.7   | 157.2  | 139.4  | 194.9  | 181.8  | 240.3  |
| 29.6   | 23.9   | 25.5   | 23.8   | 26.5   | 8.3    | 49.1   | 31.3   | 44.9   |
| 8.8    | 1.7    | 4.7    | 0.8    | 5.3    | 4.7    | 3.4    | 3.2    | 6.6    |
| 5.3    | 1.8    | 4.5    | 1.3    | 6.8    | 2.7    | 11.5   | 5.7    | 16.2   |
| 0.6    | 0.7    | 0.4    | 0.8    | 1.1    | 0.5    | 0.8    | 1.1    | 1.2    |
| 81.8   | 72.9   | 20.5   | 38.6   | 65.1   | 79.9   | 262.0  | 170.7  | 210.4  |
| 4.0    | 2.6    | 5.9    | 10.1   | 9.3    | 2.0    | 3.7    | 7.6    | 6.6    |
| 491.7  | 598.9  | 293.3  | 334.2  | 760.1  | 553.2  | 909.8  | 804.1  | 931.4  |
| 3.7    | 8.8    | 1.2    | 7.5    | 4.8    | 1.9    | 13.0   | 7.9    | 4.6    |
| 1.4    | 2.8    | 2.6    | 1.4    | 2.4    | 2.3    | 3.6    | 2.7    | 2.8    |
| 2.6    | 1.2    | 1.6    | 1.2    | 4.9    | 1.1    | 2.3    | 6.4    | 5.8    |
| 216.3  | 342.2  | 15.9   | 32.1   | 440.9  | 362.9  | 264.1  | 268.5  | 254.7  |
| 42.1   | 54.8   | 34.2   | 39.1   | 39.8   | 49.0   | 105.0  | 85.5   | 90.0   |
| 56.5   | 50.9   | 42.9   | 25.5   | 71.2   | 31.6   | 104.5  | 110.6  | 122.7  |

|       |       |      |      |       |       |       |       |       |
|-------|-------|------|------|-------|-------|-------|-------|-------|
| 82.0  | 63.4  | 4.3  | 4.2  | 130.2 | 92.9  | 282.9 | 25.3  | 19.8  |
| 215.1 | 308.0 | 16.6 | 19.1 | 270.3 | 336.2 | 196.3 | 141.9 | 157.0 |
| 4.5   | 7.5   | 8.9  | 13.2 | 5.8   | 0.9   | 77.9  | 74.3  | 73.8  |
| 0.9   | 1.0   | 1.0  | 8.8  | 1.5   | 1.3   | 4.7   | 8.0   | 10.0  |
| 42.2  | 54.8  | 6.1  | 17.0 | 63.2  | 82.1  | 81.9  | 76.1  | 90.3  |
| 14.7  | 15.0  | 10.1 | 7.9  | 25.5  | 15.1  | 63.2  | 34.3  | 35.3  |
| 3.1   | 12.7  | 11.6 | 4.2  | 16.0  | 3.6   | 16.0  | 14.3  | 17.7  |
| 23.7  | 26.9  | 1.9  | 1.2  | 19.5  | 14.8  | 14.7  | 10.5  | 19.8  |
| 19.8  | 37.9  | 4.8  | 7.9  | 17.2  | 43.0  | 109.8 | 112.0 | 149.2 |
| 8.7   | 9.9   | 6.9  | 14.1 | 8.5   | 7.7   | 3.9   | 4.7   | 5.8   |
| 58.2  | 79.7  | 54.9 | 80.9 | 67.0  | 59.5  | 305.5 | 261.9 | 313.4 |
| 19.8  | 27.2  | 2.5  | 12.4 | 37.0  | 27.9  | 68.7  | 38.6  | 37.8  |
| 4.7   | 8.6   | 26.0 | 16.8 | 22.2  | 14.1  | 86.1  | 90.8  | 77.8  |
| 2.5   | 2.2   | 3.5  | 3.6  | 12.8  | 2.7   | 29.2  | 67.6  | 70.8  |
| 115.4 | 52.6  | 20.0 | 33.0 | 129.1 | 52.1  | 285.3 | 284.1 | 246.3 |
| 141.3 | 172.5 | 25.4 | 51.1 | 277.9 | 296.7 | 115.4 | 71.2  | 66.8  |
| 41.6  | 24.1  | 1.9  | 4.6  | 61.1  | 18.6  | 3.7   | 11.4  | 6.7   |
| 24.9  | 31.5  | 11.5 | 12.2 | 35.1  | 26.9  | 23.6  | 43.4  | 41.4  |
| 1.2   | 14.3  | 13.5 | 11.9 | 19.1  | 10.6  | 54.3  | 48.0  | 51.4  |
| 24.0  | 50.3  | 4.1  | 5.3  | 45.0  | 51.3  | 15.6  | 17.1  | 10.2  |
| 0.8   | 0.7   | 2.0  | 1.9  | 5.3   | 8.9   | 1.2   | 9.5   | 2.5   |
| 11.9  | 12.5  | 7.3  | 7.4  | 18.3  | 18.0  | 36.8  | 43.7  | 35.1  |
| 4.1   | 0.6   | 0.2  | 3.3  | 0.9   | 0.2   | 1.1   | 0.7   | 0.2   |
| 3.4   | 16.0  | 1.2  | 0.7  | 7.4   | 15.3  | 3.8   | 1.8   | 16.5  |
| 6.0   | 2.3   | 3.4  | 3.1  | 1.9   | 10.5  | 6.1   | 3.4   | 1.0   |
| 29.6  | 15.8  | 12.1 | 10.5 | 7.8   | 15.0  | 17.8  | 17.8  | 19.9  |
| 18.4  | 16.4  | 6.7  | 0.7  | 19.7  | 12.8  | 8.8   | 9.0   | 5.6   |
| 8.5   | 19.3  | 7.7  | 8.1  | 16.5  | 20.0  | 1.2   | 4.5   | 6.4   |
| 1.4   | 0.8   | 8.9  | 10.6 | 13.9  | 1.7   | 10.4  | 5.8   | 10.9  |
| 124.4 | 109.7 | 2.6  | 0.6  | 143.6 | 120.1 | 146.7 | 176.8 | 168.7 |
| 2.3   | 14.2  | 1.9  | 9.7  | 8.2   | 8.9   | 10.4  | 8.3   | 11.5  |
| 1.5   | 2.5   | 2.1  | 4.7  | 2.4   | 1.4   | 7.3   | 2.6   | 2.4   |
| 99.4  | 140.2 | 57.3 | 36.5 | 162.9 | 193.6 | 290.7 | 256.7 | 281.1 |
| 0.4   | 9.7   | 3.8  | 0.8  | 3.9   | 1.4   | 9.2   | 8.7   | 0.7   |
| 0.9   | 0.5   | 0.2  | 0.1  | 0.3   | 1.0   | 0.6   | 1.7   | 0.4   |
| 0.8   | 7.2   | 0.9  | 7.6  | 6.6   | 9.1   | 4.7   | 3.3   | 2.2   |
| 20.5  | 24.1  | 24.2 | 13.2 | 27.9  | 19.0  | 26.1  | 27.0  | 20.7  |
| 57.0  | 51.0  | 35.1 | 30.0 | 40.2  | 44.9  | 55.1  | 33.0  | 26.8  |
| 25.6  | 26.3  | 0.8  | 0.5  | 37.5  | 32.8  | 46.5  | 52.9  | 50.1  |
| 19.7  | 9.6   | 13.6 | 20.0 | 36.9  | 3.3   | 56.0  | 49.5  | 46.7  |
| 58.2  | 77.6  | 7.0  | 14.2 | 94.7  | 89.4  | 22.8  | 13.2  | 18.7  |
| 8.0   | 0.8   | 7.5  | 7.4  | 3.0   | 10.8  | 12.2  | 9.8   | 12.5  |
| 0.7   | 2.3   | 4.1  | 0.8  | 8.6   | 17.0  | 36.7  | 56.7  | 43.4  |
| 4.0   | 4.9   | 5.3  | 0.2  | 0.3   | 8.2   | 2.3   | 2.9   | 3.7   |
| 25.6  | 50.7  | 3.3  | 0.7  | 60.6  | 40.3  | 159.6 | 80.9  | 71.3  |
| 13.2  | 30.3  | 4.9  | 0.2  | 24.4  | 25.6  | 17.2  | 22.4  | 9.6   |
| 17.9  | 24.4  | 17.7 | 25.6 | 30.4  | 20.5  | 44.8  | 26.1  | 30.9  |
| 12.6  | 37.3  | 13.9 | 9.3  | 41.6  | 48.7  | 31.8  | 34.6  | 51.8  |
| 8.0   | 1.1   | 8.0  | 2.7  | 1.8   | 10.3  | 13.0  | 13.4  | 13.7  |
| 2.1   | 0.7   | 2.8  | 1.7  | 6.2   | 0.8   | 9.1   | 7.9   | 4.7   |
| 6.6   | 2.5   | 6.5  | 24.7 | 1.2   | 1.0   | 12.1  | 37.7  | 34.4  |
| 7.1   | 35.0  | 9.2  | 8.1  | 17.7  | 13.5  | 16.4  | 27.2  | 20.9  |
| 4.5   | 4.6   | 1.4  | 4.4  | 8.9   | 7.3   | 55.7  | 64.0  | 66.3  |

|       |       |      |      |       |       |       |       |       |
|-------|-------|------|------|-------|-------|-------|-------|-------|
| 23.3  | 24.0  | 25.3 | 18.5 | 33.8  | 10.2  | 33.2  | 28.1  | 32.0  |
| 16.7  | 9.1   | 13.2 | 11.1 | 10.4  | 10.1  | 21.6  | 6.7   | 15.5  |
| 2.2   | 1.9   | 0.2  | 3.0  | 4.4   | 0.4   | 4.9   | 8.7   | 7.5   |
| 10.3  | 5.9   | 10.4 | 8.9  | 2.1   | 7.7   | 16.0  | 17.2  | 16.2  |
| 1.9   | 0.2   | 0.7  | 2.3  | 6.1   | 0.9   | 2.2   | 2.5   | 3.3   |
| 2.9   | 3.4   | 12.7 | 1.8  | 9.3   | 2.0   | 5.1   | 3.5   | 4.3   |
| 3.9   | 1.5   | 12.7 | 1.6  | 21.1  | 13.4  | 4.6   | 10.8  | 14.1  |
| 0.7   | 7.8   | 0.9  | 0.5  | 8.4   | 5.2   | 4.5   | 0.9   | 0.7   |
| 5.7   | 1.0   | 5.7  | 7.5  | 5.6   | 0.4   | 5.2   | 4.3   | 7.3   |
| 30.0  | 35.6  | 13.6 | 18.5 | 39.8  | 31.7  | 86.6  | 82.1  | 84.8  |
| 4.6   | 4.7   | 9.3  | 5.9  | 3.6   | 0.7   | 10.0  | 9.7   | 17.0  |
| 17.3  | 18.5  | 39.4 | 40.0 | 29.1  | 20.3  | 60.9  | 53.3  | 65.5  |
| 1.2   | 2.0   | 5.6  | 0.5  | 0.8   | 2.2   | 0.7   | 0.7   | 0.4   |
| 2.2   | 2.7   | 2.7  | 0.9  | 1.0   | 2.2   | 5.5   | 9.6   | 2.3   |
| 0.4   | 1.0   | 3.3  | 5.7  | 1.4   | 0.6   | 0.3   | 2.4   | 0.5   |
| 79.2  | 84.4  | 42.1 | 39.0 | 89.6  | 62.5  | 47.1  | 48.6  | 59.1  |
| 16.5  | 31.6  | 8.4  | 9.6  | 26.2  | 8.9   | 7.6   | 5.6   | 4.2   |
| 43.0  | 36.7  | 5.6  | 7.0  | 52.6  | 54.6  | 62.6  | 40.3  | 53.4  |
| 0.7   | 7.9   | 0.4  | 5.2  | 5.0   | 8.3   | 2.1   | 13.4  | 3.8   |
| 1.0   | 9.8   | 4.2  | 8.7  | 14.6  | 6.6   | 6.9   | 9.1   | 9.4   |
| 70.9  | 61.3  | 55.3 | 63.0 | 97.2  | 76.9  | 167.4 | 200.7 | 172.0 |
| 13.0  | 16.6  | 11.7 | 8.9  | 11.9  | 20.4  | 12.8  | 24.8  | 23.7  |
| 5.8   | 6.1   | 1.5  | 5.5  | 11.6  | 3.8   | 4.6   | 3.6   | 4.2   |
| 9.6   | 9.3   | 5.6  | 4.5  | 11.7  | 10.8  | 14.0  | 10.1  | 13.0  |
| 2.3   | 0.9   | 3.9  | 0.9  | 1.2   | 0.9   | 0.8   | 1.4   | 0.9   |
| 24.6  | 18.4  | 22.9 | 49.7 | 22.3  | 15.4  | 75.4  | 101.9 | 104.5 |
| 6.6   | 0.8   | 0.2  | 1.5  | 3.4   | 2.7   | 5.7   | 5.8   | 3.2   |
| 1.6   | 10.9  | 2.7  | 2.8  | 8.8   | 4.7   | 6.9   | 28.5  | 15.3  |
| 7.1   | 1.5   | 2.6  | 1.5  | 3.9   | 2.3   | 2.8   | 6.4   | 13.2  |
| 0.9   | 0.6   | 10.6 | 11.2 | 9.9   | 8.1   | 5.5   | 5.1   | 5.2   |
| 1.7   | 12.4  | 0.4  | 0.3  | 14.9  | 2.2   | 2.1   | 1.2   | 7.9   |
| 41.1  | 55.3  | 5.0  | 16.2 | 58.1  | 14.4  | 52.9  | 37.2  | 37.2  |
| 0.7   | 1.4   | 9.0  | 7.6  | 5.6   | 6.1   | 15.3  | 17.3  | 19.6  |
| 4.4   | 12.5  | 0.5  | 0.6  | 17.7  | 1.9   | 33.6  | 28.6  | 40.2  |
| 12.2  | 17.5  | 30.1 | 24.4 | 7.8   | 23.2  | 37.0  | 39.9  | 39.0  |
| 4.6   | 0.3   | 11.1 | 1.1  | 1.8   | 0.4   | 2.0   | 7.2   | 2.6   |
| 48.5  | 61.2  | 10.2 | 11.4 | 64.7  | 54.6  | 127.5 | 119.3 | 145.7 |
| 1.3   | 2.7   | 2.6  | 0.6  | 8.9   | 6.4   | 6.4   | 1.5   | 1.5   |
| 14.4  | 9.0   | 14.0 | 1.1  | 25.0  | 6.7   | 6.1   | 12.4  | 7.7   |
| 3.2   | 6.2   | 1.0  | 1.8  | 5.3   | 4.1   | 4.7   | 11.4  | 18.9  |
| 12.0  | 13.9  | 5.8  | 5.9  | 17.2  | 27.7  | 15.3  | 13.7  | 11.4  |
| 2.1   | 6.3   | 0.6  | 0.2  | 0.7   | 9.4   | 3.2   | 1.3   | 0.9   |
| 33.7  | 43.8  | 8.0  | 5.0  | 51.6  | 36.6  | 43.5  | 32.2  | 26.6  |
| 1.5   | 10.0  | 14.0 | 18.1 | 4.0   | 3.6   | 66.3  | 60.8  | 70.4  |
| 2.0   | 14.5  | 11.1 | 18.2 | 15.5  | 4.3   | 48.6  | 111.4 | 131.1 |
| 2.5   | 5.9   | 2.9  | 6.6  | 1.8   | 2.2   | 14.3  | 11.6  | 11.5  |
| 20.5  | 17.7  | 5.6  | 0.3  | 24.7  | 28.9  | 43.2  | 70.2  | 82.8  |
| 7.7   | 1.1   | 2.5  | 6.8  | 1.9   | 13.9  | 3.2   | 12.8  | 14.4  |
| 21.9  | 38.8  | 21.0 | 17.5 | 25.0  | 55.1  | 35.0  | 42.5  | 37.2  |
| 7.5   | 15.2  | 8.6  | 4.2  | 8.8   | 10.1  | 9.4   | 8.9   | 10.6  |
| 16.2  | 16.3  | 18.9 | 19.2 | 13.7  | 4.1   | 35.2  | 39.3  | 37.7  |
| 169.2 | 165.0 | 32.1 | 36.9 | 266.4 | 192.4 | 360.4 | 236.8 | 252.3 |
| 12.7  | 14.2  | 10.4 | 14.8 | 15.7  | 13.4  | 20.8  | 25.1  | 22.2  |

|       |       |       |       |        |       |        |        |        |
|-------|-------|-------|-------|--------|-------|--------|--------|--------|
| 12.3  | 11.3  | 6.3   | 1.1   | 10.0   | 20.0  | 17.4   | 15.6   | 16.9   |
| 1.2   | 13.1  | 3.2   | 0.4   | 17.3   | 0.7   | 9.4    | 3.2    | 5.9    |
| 4.6   | 8.1   | 0.9   | 0.9   | 1.5    | 0.6   | 5.3    | 3.6    | 0.8    |
| 14.2  | 2.1   | 5.3   | 5.8   | 9.7    | 11.7  | 4.7    | 7.7    | 1.1    |
| 6.8   | 10.9  | 1.2   | 5.1   | 13.6   | 9.2   | 11.5   | 14.1   | 8.6    |
| 42.8  | 52.9  | 15.7  | 14.0  | 116.2  | 60.4  | 19.3   | 15.2   | 15.4   |
| 12.1  | 3.5   | 15.6  | 23.6  | 18.0   | 13.4  | 12.3   | 17.4   | 12.5   |
| 4.6   | 0.3   | 1.2   | 0.3   | 1.3    | 1.8   | 1.6    | 3.6    | 4.8    |
| 8.4   | 2.7   | 1.7   | 1.8   | 12.9   | 4.6   | 5.6    | 1.2    | 2.7    |
| 28.4  | 94.9  | 15.0  | 10.2  | 80.5   | 51.7  | 25.4   | 54.6   | 46.0   |
| 14.5  | 21.8  | 7.7   | 3.9   | 35.2   | 6.1   | 8.6    | 7.7    | 10.1   |
| 23.7  | 31.6  | 27.2  | 15.7  | 41.2   | 23.3  | 79.9   | 50.6   | 65.3   |
| 29.2  | 36.4  | 0.8   | 0.5   | 44.2   | 33.9  | 0.8    | 1.1    | 0.7    |
| 0.3   | 8.6   | 3.3   | 8.0   | 4.1    | 0.6   | 14.0   | 11.4   | 10.7   |
| 251.4 | 340.7 | 114.2 | 137.2 | 374.8  | 445.8 | 342.2  | 312.6  | 377.5  |
| 460.5 | 467.8 | 485.7 | 567.5 | 1025.3 | 475.9 | 4720.4 | 6965.9 | 6502.7 |
| 33.4  | 52.5  | 60.4  | 55.0  | 55.4   | 94.9  | 154.8  | 119.4  | 119.5  |
| 15.2  | 25.2  | 6.5   | 4.5   | 24.2   | 20.8  | 130.2  | 125.6  | 151.3  |
| 193.2 | 175.7 | 89.4  | 112.6 | 202.4  | 220.9 | 400.5  | 313.6  | 357.6  |
| 152.3 | 130.1 | 62.4  | 54.7  | 228.2  | 107.3 | 272.8  | 289.8  | 326.7  |
| 17.6  | 15.0  | 14.3  | 11.0  | 24.0   | 17.6  | 9.1    | 8.5    | 7.3    |
| 295.7 | 199.7 | 126.5 | 220.5 | 361.7  | 190.6 | 226.0  | 221.9  | 207.8  |
| 209.0 | 210.9 | 18.5  | 19.7  | 292.0  | 191.2 | 425.4  | 357.9  | 382.6  |
| 397.8 | 362.6 | 302.1 | 391.6 | 586.1  | 309.3 | 557.9  | 475.3  | 434.4  |
| 78.8  | 76.8  | 109.0 | 110.5 | 107.9  | 74.8  | 146.7  | 113.9  | 124.9  |
| 361.5 | 422.3 | 78.8  | 97.1  | 461.3  | 432.6 | 115.8  | 179.8  | 217.5  |
| 42.7  | 39.7  | 42.2  | 59.5  | 89.0   | 51.0  | 26.7   | 28.9   | 29.8   |
| 60.4  | 66.4  | 30.1  | 38.5  | 45.0   | 97.6  | 114.7  | 93.9   | 126.4  |
| 153.3 | 156.3 | 55.1  | 45.8  | 306.5  | 151.3 | 185.9  | 195.9  | 237.5  |
| 27.7  | 41.3  | 4.5   | 8.1   | 27.5   | 40.5  | 136.5  | 132.8  | 152.8  |
| 31.3  | 77.1  | 19.0  | 43.6  | 60.2   | 49.6  | 40.1   | 25.7   | 61.0   |
| 342.7 | 515.7 | 22.3  | 28.3  | 586.4  | 462.3 | 204.7  | 231.2  | 266.2  |
| 54.4  | 84.6  | 2.9   | 1.3   | 122.1  | 68.7  | 112.0  | 111.6  | 121.4  |
| 171.4 | 172.5 | 60.0  | 78.6  | 277.8  | 213.5 | 580.0  | 447.5  | 512.3  |
| 52.0  | 47.5  | 50.2  | 49.8  | 71.0   | 51.0  | 10.4   | 17.0   | 6.3    |
| 146.5 | 155.2 | 41.1  | 65.5  | 185.4  | 178.8 | 404.1  | 364.6  | 445.5  |
| 8.9   | 2.0   | 5.0   | 7.4   | 12.9   | 7.4   | 5.1    | 7.4    | 7.2    |
| 87.0  | 75.0  | 66.7  | 72.6  | 95.6   | 73.1  | 61.7   | 62.8   | 68.3   |
| 84.4  | 97.7  | 345.7 | 519.7 | 120.8  | 91.0  | 243.9  | 236.3  | 263.9  |
| 39.1  | 59.6  | 21.9  | 19.4  | 31.3   | 66.5  | 101.7  | 129.9  | 119.1  |
| 24.9  | 34.4  | 26.6  | 34.1  | 46.1   | 28.7  | 110.2  | 102.4  | 116.7  |
| 76.1  | 115.1 | 9.7   | 19.5  | 137.6  | 108.5 | 87.8   | 67.7   | 93.8   |
| 12.1  | 11.2  | 13.5  | 10.1  | 13.1   | 11.7  | 7.9    | 13.1   | 8.9    |
| 40.1  | 42.7  | 3.0   | 4.3   | 57.4   | 46.7  | 41.9   | 27.0   | 31.6   |
| 4.1   | 18.3  | 14.9  | 5.6   | 25.6   | 12.0  | 13.6   | 12.2   | 10.2   |
| 59.9  | 54.1  | 22.1  | 31.7  | 89.5   | 45.9  | 126.2  | 71.3   | 69.3   |
| 123.5 | 179.3 | 81.6  | 53.6  | 181.0  | 204.6 | 581.4  | 446.1  | 493.5  |
| 143.2 | 171.2 | 98.0  | 152.7 | 177.4  | 122.1 | 154.5  | 184.8  | 226.8  |
| 223.9 | 195.1 | 232.1 | 295.9 | 326.4  | 221.5 | 540.9  | 524.9  | 550.2  |
| 167.9 | 140.5 | 201.9 | 232.5 | 218.7  | 91.3  | 784.9  | 785.5  | 903.4  |
| 170.7 | 183.2 | 280.5 | 356.3 | 256.3  | 168.9 | 430.1  | 347.9  | 388.9  |
| 16.8  | 16.4  | 15.8  | 15.1  | 24.1   | 21.2  | 93.7   | 66.4   | 74.5   |
| 8.8   | 12.9  | 12.4  | 7.0   | 13.4   | 1.3   | 19.0   | 13.8   | 21.4   |

|        |        |       |       |        |        |        |        |        |
|--------|--------|-------|-------|--------|--------|--------|--------|--------|
| 324.5  | 433.1  | 34.2  | 51.2  | 693.1  | 498.1  | 173.8  | 222.4  | 244.6  |
| 148.5  | 216.5  | 40.2  | 50.3  | 245.3  | 235.1  | 253.6  | 131.8  | 129.9  |
| 3764.6 | 2995.9 | 692.1 | 840.1 | 4141.2 | 2738.1 | 4045.3 | 2133.3 | 2497.6 |
| 3204.2 | 2576.6 | 305.1 | 397.5 | 3535.5 | 2095.1 | 3309.6 | 1585.9 | 1884.5 |
| 28.9   | 23.9   | 15.0  | 16.6  | 37.8   | 26.5   | 485.7  | 466.8  | 506.6  |
| 33.5   | 5.4    | 16.9  | 6.1   | 13.0   | 18.9   | 43.2   | 27.0   | 28.6   |
| 24.0   | 17.4   | 16.7  | 3.0   | 53.7   | 6.2    | 8.0    | 10.8   | 5.6    |
| 13.6   | 25.5   | 23.2  | 31.6  | 46.0   | 19.4   | 66.0   | 91.9   | 88.5   |
| 110.4  | 80.3   | 24.0  | 22.1  | 116.3  | 101.3  | 144.5  | 180.5  | 191.8  |
| 179.1  | 259.3  | 49.5  | 41.9  | 281.0  | 298.0  | 525.2  | 389.9  | 472.4  |
| 1.5    | 2.2    | 2.6   | 0.8   | 1.8    | 1.2    | 1.0    | 3.1    | 1.1    |
| 53.7   | 64.7   | 74.2  | 74.2  | 75.5   | 62.4   | 100.6  | 103.4  | 113.4  |
| 122.6  | 156.4  | 68.3  | 55.8  | 170.8  | 154.1  | 420.7  | 457.4  | 485.9  |
| 592.4  | 822.5  | 269.0 | 317.8 | 1160.6 | 688.4  | 824.6  | 775.5  | 852.3  |
| 41.9   | 34.2   | 28.5  | 45.6  | 42.1   | 37.7   | 58.9   | 71.3   | 66.4   |
| 103.8  | 203.1  | 21.9  | 29.5  | 208.8  | 214.1  | 629.0  | 673.5  | 772.4  |
| 13.2   | 14.9   | 8.0   | 16.1  | 16.9   | 11.0   | 57.3   | 66.9   | 84.3   |
| 99.7   | 130.6  | 5.8   | 7.7   | 180.2  | 109.7  | 6.7    | 9.6    | 7.9    |
| 80.8   | 99.7   | 53.7  | 54.8  | 109.1  | 108.1  | 148.1  | 168.8  | 186.2  |
| 3.1    | 1.1    | 0.5   | 0.3   | 1.7    | 0.6    | 1.7    | 4.1    | 3.0    |
| 73.8   | 113.3  | 37.1  | 53.6  | 147.9  | 108.5  | 165.7  | 148.8  | 132.0  |
| 102.5  | 134.7  | 114.7 | 127.0 | 132.2  | 165.3  | 376.4  | 386.3  | 406.4  |
| 206.2  | 161.6  | 30.0  | 36.4  | 268.0  | 158.2  | 120.8  | 65.4   | 76.9   |
| 62.3   | 71.2   | 52.0  | 61.8  | 83.4   | 55.5   | 118.0  | 91.9   | 108.8  |
| 19.7   | 22.3   | 22.2  | 14.6  | 47.9   | 38.6   | 51.4   | 81.4   | 99.0   |
| 12.0   | 6.6    | 11.3  | 11.6  | 11.4   | 13.8   | 54.2   | 52.5   | 53.7   |
| 1.6    | 3.5    | 1.6   | 7.1   | 2.4    | 2.1    | 2.6    | 5.9    | 3.3    |
| 12.2   | 10.9   | 44.7  | 70.7  | 16.3   | 1.6    | 78.2   | 83.6   | 71.0   |
| 74.6   | 92.0   | 54.6  | 72.5  | 138.6  | 75.1   | 223.1  | 175.0  | 170.2  |
| 20.1   | 20.9   | 11.2  | 10.9  | 33.8   | 25.9   | 109.1  | 138.6  | 142.6  |
| 34.4   | 39.2   | 71.8  | 104.3 | 61.8   | 34.0   | 68.3   | 79.2   | 86.8   |
| 126.5  | 173.9  | 34.4  | 44.3  | 214.3  | 168.6  | 346.5  | 260.4  | 286.1  |
| 43.0   | 24.7   | 32.9  | 30.4  | 28.6   | 37.0   | 57.1   | 66.4   | 47.9   |
| 63.4   | 87.9   | 52.6  | 65.4  | 76.3   | 55.7   | 218.4  | 227.5  | 262.0  |
| 133.4  | 183.4  | 87.7  | 118.4 | 196.3  | 179.7  | 338.5  | 330.4  | 334.5  |
| 45.2   | 44.6   | 68.8  | 84.0  | 67.4   | 39.5   | 246.8  | 238.5  | 293.8  |
| 18.7   | 29.1   | 67.8  | 97.8  | 34.9   | 20.4   | 160.9  | 315.9  | 325.7  |
| 380.4  | 429.7  | 58.6  | 35.4  | 758.6  | 353.2  | 59.5   | 52.4   | 39.2   |
| 173.6  | 197.4  | 53.5  | 63.1  | 214.2  | 202.6  | 507.4  | 337.5  | 420.3  |
| 28.1   | 30.4   | 79.2  | 40.9  | 29.9   | 13.1   | 67.0   | 104.2  | 80.1   |
| 34.8   | 51.2   | 27.7  | 52.5  | 67.0   | 63.9   | 93.8   | 58.2   | 88.0   |
| 102.3  | 178.2  | 196.6 | 271.2 | 148.2  | 194.7  | 1027.4 | 1127.4 | 1160.6 |
| 104.0  | 112.1  | 92.1  | 122.0 | 166.5  | 100.8  | 146.1  | 187.1  | 215.1  |
| 114.7  | 129.8  | 113.0 | 145.0 | 208.1  | 147.2  | 190.9  | 171.5  | 195.9  |
| 98.0   | 128.1  | 211.7 | 203.7 | 116.0  | 151.7  | 302.8  | 529.8  | 582.7  |
| 76.9   | 55.6   | 28.0  | 32.3  | 75.4   | 49.9   | 79.5   | 71.6   | 90.7   |
| 109.1  | 94.6   | 77.4  | 130.0 | 118.5  | 70.6   | 25.9   | 30.5   | 40.2   |
| 20.0   | 36.5   | 116.3 | 101.1 | 55.2   | 19.4   | 75.8   | 56.9   | 59.3   |
| 160.1  | 200.0  | 85.4  | 134.4 | 334.2  | 121.2  | 157.6  | 157.6  | 218.9  |
| 200.2  | 190.8  | 108.8 | 145.2 | 244.3  | 180.6  | 290.9  | 247.4  | 248.6  |
| 45.9   | 51.6   | 40.6  | 38.0  | 57.7   | 65.2   | 86.6   | 82.8   | 107.3  |
| 151.7  | 204.9  | 130.9 | 90.0  | 327.8  | 177.3  | 89.6   | 121.0  | 177.5  |
| 21.0   | 22.8   | 35.0  | 46.4  | 22.4   | 8.2    | 46.3   | 58.2   | 60.5   |



|       |        |       |       |        |        |        |        |        |
|-------|--------|-------|-------|--------|--------|--------|--------|--------|
| 3.7   | 6.9    | 0.5   | 1.9   | 8.4    | 1.7    | 4.3    | 2.2    | 4.2    |
| 70.5  | 88.1   | 100.9 | 83.8  | 89.6   | 76.7   | 173.5  | 154.5  | 173.0  |
| 139.1 | 131.2  | 148.5 | 147.3 | 170.2  | 142.2  | 194.8  | 192.5  | 213.3  |
| 27.0  | 11.9   | 7.3   | 1.7   | 37.8   | 25.5   | 34.2   | 35.4   | 31.2   |
| 175.0 | 197.7  | 149.3 | 136.7 | 202.3  | 132.8  | 75.9   | 99.4   | 98.5   |
| 186.7 | 284.2  | 103.4 | 127.9 | 357.6  | 254.3  | 222.4  | 276.6  | 325.4  |
| 61.9  | 69.5   | 94.8  | 170.0 | 100.2  | 81.1   | 109.0  | 92.5   | 106.8  |
| 26.1  | 26.3   | 36.2  | 27.0  | 31.6   | 25.2   | 65.7   | 93.1   | 96.6   |
| 41.4  | 41.2   | 19.9  | 19.7  | 35.2   | 39.8   | 68.1   | 68.3   | 80.5   |
| 99.1  | 87.1   | 32.6  | 41.4  | 109.8  | 91.4   | 138.8  | 135.9  | 146.4  |
| 66.6  | 92.8   | 101.2 | 97.6  | 86.7   | 94.3   | 109.7  | 96.7   | 100.7  |
| 26.4  | 25.3   | 133.6 | 180.5 | 20.5   | 29.6   | 63.5   | 53.1   | 63.7   |
| 29.6  | 40.3   | 30.7  | 38.3  | 70.5   | 20.6   | 272.1  | 292.3  | 292.1  |
| 90.1  | 72.5   | 7.1   | 22.9  | 65.4   | 57.3   | 111.8  | 86.5   | 114.4  |
| 16.3  | 21.3   | 16.6  | 11.3  | 30.2   | 33.6   | 136.8  | 134.1  | 193.1  |
| 860.1 | 938.6  | 23.4  | 30.6  | 1398.1 | 858.5  | 93.1   | 40.8   | 6.7    |
| 46.6  | 44.9   | 9.6   | 3.2   | 107.5  | 38.2   | 91.7   | 69.4   | 84.0   |
| 57.0  | 72.8   | 86.6  | 125.8 | 70.3   | 85.2   | 61.9   | 56.2   | 64.6   |
| 76.9  | 83.2   | 96.8  | 136.5 | 113.3  | 123.4  | 921.6  | 722.1  | 924.2  |
| 62.2  | 71.3   | 43.2  | 59.3  | 107.2  | 51.2   | 144.9  | 92.3   | 90.4   |
| 131.6 | 118.9  | 91.9  | 105.3 | 151.1  | 134.6  | 143.8  | 167.7  | 151.6  |
| 86.5  | 90.6   | 75.6  | 104.7 | 108.0  | 121.3  | 345.4  | 310.6  | 333.0  |
| 10.4  | 19.6   | 1.0   | 0.8   | 36.1   | 17.8   | 221.8  | 317.8  | 333.5  |
| 646.0 | 666.8  | 215.0 | 375.8 | 789.5  | 542.7  | 856.9  | 706.4  | 767.8  |
| 972.2 | 1140.5 | 465.3 | 688.6 | 1445.5 | 903.2  | 1963.0 | 2002.2 | 2086.3 |
| 9.7   | 6.7    | 10.5  | 5.6   | 16.3   | 7.4    | 18.2   | 19.3   | 15.1   |
| 319.6 | 318.4  | 68.6  | 112.8 | 412.4  | 342.3  | 871.9  | 795.1  | 972.5  |
| 879.7 | 1151.1 | 279.8 | 455.6 | 1442.5 | 1216.1 | 2155.2 | 2281.6 | 2492.0 |
| 1.5   | 5.8    | 1.4   | 1.3   | 0.5    | 0.8    | 1.2    | 3.0    | 1.1    |
| 15.0  | 22.7   | 27.0  | 26.5  | 11.0   | 14.5   | 21.3   | 10.1   | 34.4   |
| 394.9 | 359.0  | 53.8  | 97.6  | 465.5  | 289.1  | 114.4  | 158.2  | 124.6  |
| 36.2  | 68.3   | 9.2   | 12.0  | 85.2   | 46.6   | 156.2  | 78.8   | 92.2   |
| 144.8 | 180.6  | 133.4 | 187.8 | 216.2  | 186.3  | 271.7  | 145.3  | 161.4  |
| 2.7   | 0.6    | 2.0   | 4.1   | 0.9    | 2.3    | 7.6    | 4.6    | 13.1   |
| 472.6 | 365.4  | 32.9  | 23.8  | 799.9  | 336.9  | 192.6  | 211.6  | 217.8  |
| 13.8  | 18.5   | 5.5   | 3.9   | 18.3   | 17.0   | 30.1   | 23.2   | 28.7   |
| 1.1   | 4.7    | 7.6   | 9.2   | 9.8    | 2.8    | 15.7   | 5.4    | 15.5   |
| 40.9  | 41.8   | 24.8  | 31.1  | 54.7   | 46.4   | 135.6  | 102.6  | 114.7  |
| 22.1  | 29.6   | 20.1  | 18.7  | 32.8   | 38.0   | 62.0   | 54.2   | 57.8   |
| 29.4  | 44.2   | 47.2  | 65.3  | 50.3   | 33.8   | 91.2   | 111.3  | 139.0  |
| 26.8  | 34.7   | 27.7  | 30.2  | 40.8   | 34.8   | 102.0  | 116.5  | 102.2  |
| 73.9  | 102.2  | 25.5  | 24.2  | 146.0  | 111.5  | 92.3   | 56.5   | 56.8   |
| 23.2  | 24.5   | 29.9  | 35.5  | 40.3   | 29.8   | 31.3   | 23.7   | 25.4   |
| 255.6 | 173.4  | 19.6  | 40.5  | 304.3  | 193.3  | 148.3  | 147.6  | 145.1  |
| 170.9 | 145.5  | 45.6  | 45.2  | 263.5  | 121.0  | 107.6  | 84.8   | 133.4  |
| 7.6   | 4.2    | 4.5   | 2.1   | 3.6    | 7.7    | 41.3   | 40.9   | 44.2   |
| 93.3  | 125.3  | 148.3 | 164.5 | 144.4  | 123.4  | 240.0  | 218.6  | 250.2  |
| 14.7  | 19.0   | 5.4   | 2.3   | 24.1   | 15.7   | 13.5   | 9.4    | 8.9    |
| 1.7   | 6.3    | 0.5   | 3.6   | 0.7    | 7.8    | 15.0   | 36.5   | 44.0   |
| 12.4  | 20.2   | 2.5   | 9.9   | 26.9   | 19.0   | 54.8   | 75.1   | 109.4  |
| 4.2   | 6.7    | 1.6   | 2.1   | 9.1    | 6.3    | 3.6    | 5.6    | 3.8    |
| 30.9  | 57.5   | 15.3  | 12.1  | 53.0   | 56.0   | 208.5  | 167.4  | 196.9  |
| 24.8  | 37.1   | 16.8  | 9.3   | 38.1   | 28.0   | 75.7   | 49.1   | 60.6   |

|        |        |        |        |        |        |        |        |        |
|--------|--------|--------|--------|--------|--------|--------|--------|--------|
| 15.8   | 23.3   | 26.4   | 27.5   | 17.4   | 15.5   | 138.1  | 185.9  | 211.2  |
| 55.9   | 75.9   | 44.6   | 60.4   | 78.9   | 83.7   | 158.0  | 156.1  | 182.8  |
| 11.5   | 16.9   | 24.1   | 25.5   | 20.4   | 17.4   | 71.6   | 39.0   | 43.7   |
| 25.6   | 38.9   | 32.5   | 27.2   | 22.9   | 32.5   | 39.4   | 36.9   | 38.6   |
| 6.1    | 22.4   | 7.2    | 3.2    | 25.4   | 18.0   | 15.3   | 48.1   | 37.7   |
| 76.4   | 111.4  | 59.5   | 77.5   | 126.6  | 112.5  | 126.6  | 149.2  | 163.8  |
| 25.3   | 46.0   | 28.1   | 21.3   | 47.8   | 33.3   | 68.0   | 80.3   | 74.8   |
| 69.5   | 80.1   | 48.6   | 40.4   | 75.7   | 85.3   | 77.2   | 94.2   | 94.9   |
| 8.5    | 6.3    | 1.8    | 6.7    | 10.8   | 11.0   | 1.0    | 1.0    | 1.1    |
| 39.0   | 35.2   | 10.7   | 10.7   | 37.5   | 27.8   | 102.4  | 168.2  | 179.8  |
| 81.7   | 109.3  | 23.0   | 50.3   | 109.9  | 116.6  | 126.7  | 91.5   | 106.7  |
| 2.5    | 8.6    | 12.8   | 4.8    | 22.9   | 12.2   | 34.1   | 15.8   | 18.6   |
| 85.5   | 106.1  | 51.1   | 93.4   | 140.2  | 93.8   | 175.3  | 130.7  | 131.8  |
| 62.8   | 79.6   | 36.0   | 47.1   | 106.5  | 87.7   | 101.9  | 81.7   | 71.6   |
| 16.5   | 25.4   | 14.0   | 13.0   | 25.6   | 23.0   | 44.9   | 51.8   | 53.4   |
| 26.2   | 36.8   | 49.8   | 69.8   | 41.3   | 30.5   | 47.5   | 61.0   | 57.2   |
| 623.8  | 583.9  | 10.0   | 2.7    | 923.4  | 483.5  | 28.0   | 25.7   | 5.2    |
| 66.3   | 60.3   | 57.4   | 107.3  | 76.0   | 67.3   | 180.7  | 187.6  | 218.8  |
| 103.7  | 113.6  | 53.3   | 80.1   | 143.3  | 88.9   | 298.9  | 341.9  | 378.9  |
| 10.4   | 3.5    | 3.8    | 4.4    | 16.4   | 11.6   | 16.5   | 8.1    | 9.5    |
| 48.9   | 76.1   | 54.8   | 49.5   | 92.5   | 44.9   | 126.1  | 112.8  | 118.7  |
| 192.5  | 220.5  | 166.6  | 187.4  | 196.8  | 234.7  | 300.5  | 296.0  | 344.2  |
| 19.2   | 39.5   | 2.8    | 0.9    | 23.6   | 27.3   | 77.6   | 115.8  | 137.0  |
| 169.2  | 217.2  | 162.5  | 189.5  | 236.0  | 222.4  | 291.5  | 311.9  | 353.6  |
| 37.8   | 24.9   | 21.3   | 21.8   | 53.6   | 32.7   | 219.5  | 101.6  | 142.9  |
| 103.6  | 113.5  | 145.3  | 179.6  | 152.8  | 141.4  | 439.7  | 504.5  | 539.1  |
| 66.5   | 100.6  | 64.6   | 81.6   | 108.1  | 107.1  | 132.9  | 144.3  | 148.5  |
| 75.2   | 82.1   | 100.6  | 98.8   | 69.9   | 74.4   | 130.0  | 116.3  | 133.8  |
| 5.2    | 17.4   | 21.8   | 19.9   | 14.9   | 13.5   | 32.6   | 25.8   | 21.9   |
| 24.9   | 14.4   | 20.6   | 18.2   | 34.8   | 41.8   | 14.6   | 21.6   | 10.9   |
| 105.0  | 71.3   | 26.5   | 35.0   | 125.1  | 110.7  | 40.5   | 19.1   | 26.7   |
| 7.0    | 24.0   | 33.4   | 27.7   | 15.9   | 7.8    | 52.2   | 36.4   | 37.2   |
| 361.5  | 508.4  | 163.1  | 209.0  | 502.2  | 506.0  | 684.3  | 542.2  | 591.5  |
| 261.5  | 287.0  | 243.4  | 242.9  | 306.4  | 224.4  | 384.2  | 404.0  | 352.0  |
| 227.2  | 221.8  | 1508.9 | 2310.4 | 316.2  | 286.7  | 403.9  | 370.9  | 385.7  |
| 187.5  | 300.5  | 150.5  | 199.2  | 327.1  | 231.5  | 95.4   | 124.9  | 149.6  |
| 59.3   | 116.8  | 9.0    | 11.3   | 94.8   | 116.6  | 419.0  | 546.4  | 609.8  |
| 83.1   | 98.6   | 70.4   | 90.7   | 98.2   | 82.8   | 146.0  | 128.1  | 159.1  |
| 12.9   | 12.8   | 40.1   | 46.4   | 13.4   | 10.7   | 46.3   | 33.4   | 39.1   |
| 32.9   | 27.5   | 10.5   | 5.2    | 85.3   | 25.6   | 702.9  | 676.1  | 673.5  |
| 5.1    | 13.1   | 4.0    | 5.3    | 19.7   | 5.9    | 68.0   | 73.3   | 83.2   |
| 13.9   | 13.6   | 5.0    | 3.1    | 16.9   | 23.6   | 12.8   | 11.6   | 9.7    |
| 7.9    | 13.5   | 11.1   | 2.1    | 10.1   | 18.5   | 7.8    | 4.5    | 4.3    |
| 1200.2 | 1452.3 | 18.5   | 6.9    | 2585.2 | 1253.7 | 20.4   | 21.8   | 21.0   |
| 40.7   | 55.6   | 11.1   | 4.1    | 48.2   | 56.8   | 67.0   | 68.8   | 69.2   |
| 91.9   | 134.1  | 1.1    | 6.5    | 123.8  | 133.3  | 123.7  | 126.9  | 138.0  |
| 17.1   | 18.1   | 13.0   | 7.6    | 18.9   | 17.6   | 45.5   | 77.2   | 82.5   |
| 91.7   | 85.3   | 171.2  | 189.3  | 106.9  | 72.9   | 177.2  | 233.9  | 223.3  |
| 24.7   | 33.0   | 1.8    | 9.7    | 39.1   | 40.0   | 44.4   | 47.1   | 45.2   |
| 38.6   | 33.2   | 28.0   | 19.9   | 41.4   | 45.5   | 48.1   | 66.1   | 62.2   |
| 1184.0 | 1173.9 | 805.4  | 1223.1 | 1790.8 | 969.2  | 4586.9 | 4289.7 | 4765.0 |
| 19.6   | 30.0   | 20.9   | 35.5   | 35.3   | 10.1   | 85.9   | 81.4   | 85.0   |
| 420.4  | 484.8  | 157.5  | 208.4  | 633.3  | 445.4  | 315.4  | 297.0  | 329.9  |

|        |        |       |        |        |        |        |        |        |
|--------|--------|-------|--------|--------|--------|--------|--------|--------|
| 151.3  | 192.7  | 101.6 | 86.9   | 202.8  | 184.0  | 482.1  | 376.6  | 416.3  |
| 226.5  | 269.3  | 233.3 | 254.7  | 339.1  | 257.8  | 294.9  | 395.7  | 418.1  |
| 96.7   | 143.6  | 18.2  | 19.5   | 148.8  | 165.3  | 168.6  | 182.6  | 195.9  |
| 45.9   | 33.4   | 10.6  | 10.3   | 61.1   | 30.2   | 16.8   | 7.0    | 7.1    |
| 135.5  | 92.3   | 14.2  | 10.9   | 191.0  | 131.5  | 55.6   | 94.4   | 119.2  |
| 23.5   | 16.2   | 27.1  | 34.6   | 21.4   | 28.4   | 36.5   | 48.0   | 63.1   |
| 19.1   | 21.7   | 210.0 | 344.1  | 37.4   | 28.2   | 16.6   | 34.6   | 19.6   |
| 56.9   | 68.7   | 12.1  | 9.7    | 60.8   | 73.8   | 39.2   | 49.6   | 54.8   |
| 59.5   | 94.2   | 21.5  | 24.1   | 96.9   | 72.3   | 143.8  | 141.3  | 156.7  |
| 1528.2 | 1846.9 | 694.3 | 1027.9 | 1831.4 | 1995.4 | 3342.1 | 2235.7 | 2524.4 |
| 355.4  | 450.5  | 144.0 | 237.9  | 551.1  | 453.5  | 823.1  | 872.2  | 926.0  |
| 85.6   | 112.5  | 38.5  | 30.4   | 121.3  | 116.4  | 306.6  | 127.6  | 171.1  |
| 41.7   | 76.6   | 18.5  | 29.6   | 68.3   | 49.9   | 220.6  | 242.8  | 278.1  |
| 127.6  | 244.4  | 0.7   | 1.1    | 169.9  | 199.2  | 467.6  | 262.3  | 324.8  |
| 249.5  | 270.2  | 80.9  | 109.4  | 358.0  | 291.3  | 416.0  | 358.2  | 378.0  |
| 112.3  | 147.9  | 8.1   | 15.9   | 233.5  | 155.4  | 226.7  | 159.3  | 204.6  |
| 295.6  | 234.2  | 189.9 | 183.8  | 311.3  | 260.1  | 281.9  | 254.3  | 256.7  |
| 125.2  | 153.9  | 34.6  | 54.2   | 197.8  | 147.2  | 494.0  | 421.0  | 442.9  |
| 83.4   | 89.6   | 2.0   | 10.5   | 169.1  | 102.3  | 177.0  | 212.3  | 251.6  |
| 69.9   | 70.4   | 54.2  | 107.5  | 89.7   | 52.3   | 101.3  | 92.8   | 96.9   |
| 14.0   | 14.5   | 6.7   | 6.3    | 10.7   | 10.6   | 10.6   | 9.0    | 13.9   |
| 5.9    | 17.8   | 15.7  | 13.9   | 24.2   | 3.4    | 11.6   | 10.4   | 13.3   |
| 119.6  | 129.0  | 51.0  | 72.2   | 115.6  | 73.9   | 229.3  | 167.8  | 211.8  |
| 18.2   | 49.3   | 43.5  | 36.4   | 34.8   | 42.9   | 103.9  | 115.5  | 133.5  |
| 22.5   | 27.5   | 4.1   | 3.1    | 38.9   | 39.8   | 30.5   | 28.3   | 38.7   |
| 32.0   | 18.4   | 25.8  | 10.2   | 26.9   | 25.9   | 53.4   | 49.4   | 57.2   |
| 0.2    | 5.3    | 0.7   | 3.9    | 2.0    | 0.6    | 4.4    | 3.2    | 1.5    |
| 1.8    | 1.6    | 4.8   | 1.4    | 10.5   | 6.2    | 8.1    | 12.0   | 10.6   |
| 46.9   | 79.0   | 132.4 | 127.8  | 67.8   | 46.3   | 301.2  | 323.7  | 311.5  |
| 14.7   | 19.1   | 98.7  | 69.6   | 18.5   | 7.5    | 28.9   | 28.5   | 23.1   |
| 22.7   | 27.8   | 64.1  | 84.2   | 42.8   | 8.4    | 147.8  | 143.7  | 169.1  |
| 490.4  | 570.8  | 71.7  | 102.2  | 649.2  | 615.2  | 490.9  | 212.5  | 255.6  |
| 211.3  | 214.8  | 526.1 | 719.2  | 278.4  | 204.4  | 1024.4 | 1162.7 | 1217.4 |
| 21.6   | 27.4   | 20.6  | 17.1   | 26.2   | 24.1   | 36.1   | 35.4   | 41.6   |
| 152.4  | 162.3  | 84.2  | 122.0  | 181.0  | 185.2  | 507.5  | 324.3  | 364.2  |
| 2147.3 | 2864.6 | 971.4 | 1383.8 | 2661.5 | 2414.3 | 3089.0 | 2889.5 | 3232.0 |
| 28.2   | 53.5   | 54.4  | 68.6   | 47.3   | 50.9   | 285.8  | 325.6  | 342.0  |
| 50.4   | 65.0   | 99.0  | 167.7  | 80.5   | 59.2   | 88.5   | 92.6   | 108.8  |
| 61.3   | 88.0   | 33.2  | 51.3   | 59.6   | 64.0   | 124.7  | 161.0  | 156.5  |
| 5.6    | 2.0    | 39.4  | 47.9   | 4.4    | 1.5    | 28.8   | 33.8   | 31.0   |
| 523.3  | 824.4  | 15.8  | 16.1   | 808.6  | 692.0  | 18.4   | 10.1   | 13.5   |
| 32.1   | 27.6   | 10.2  | 15.3   | 41.0   | 33.8   | 123.1  | 132.3  | 146.1  |
| 12.7   | 27.1   | 18.1  | 15.4   | 26.9   | 28.3   | 27.1   | 31.9   | 18.3   |
| 3.9    | 1.5    | 1.1   | 1.2    | 4.2    | 1.7    | 1.8    | 1.9    | 3.9    |
| 85.2   | 106.8  | 52.1  | 47.9   | 190.8  | 104.8  | 73.4   | 58.4   | 65.0   |
| 35.4   | 32.2   | 73.4  | 56.1   | 26.2   | 59.5   | 126.1  | 119.3  | 136.8  |
| 60.8   | 77.9   | 23.2  | 36.7   | 91.3   | 98.1   | 47.3   | 23.8   | 30.7   |
| 30.8   | 30.5   | 94.8  | 86.6   | 29.2   | 37.4   | 40.9   | 56.3   | 46.2   |
| 120.2  | 160.7  | 57.6  | 64.3   | 140.6  | 136.2  | 397.3  | 265.0  | 319.4  |
| 174.6  | 135.4  | 16.1  | 12.0   | 237.7  | 138.7  | 119.0  | 120.8  | 135.9  |
| 11.8   | 3.8    | 9.6   | 4.8    | 2.0    | 9.5    | 67.8   | 130.8  | 179.7  |
| 22.8   | 34.4   | 136.9 | 129.3  | 46.5   | 39.8   | 67.3   | 139.2  | 147.2  |
| 100.6  | 127.6  | 65.1  | 110.4  | 129.1  | 122.9  | 173.4  | 179.5  | 237.6  |

|       |       |       |       |        |       |        |        |        |
|-------|-------|-------|-------|--------|-------|--------|--------|--------|
| 24.9  | 39.5  | 89.3  | 147.7 | 67.7   | 36.3  | 93.7   | 96.2   | 111.0  |
| 113.4 | 124.0 | 82.3  | 117.6 | 122.7  | 116.2 | 366.4  | 300.6  | 319.7  |
| 66.8  | 78.4  | 24.3  | 23.8  | 75.2   | 80.4  | 51.6   | 40.7   | 48.0   |
| 105.4 | 140.5 | 36.4  | 44.7  | 144.6  | 142.9 | 168.9  | 115.9  | 132.7  |
| 128.7 | 194.2 | 24.8  | 31.7  | 169.7  | 169.8 | 420.2  | 509.6  | 502.1  |
| 146.8 | 172.5 | 54.5  | 70.8  | 249.0  | 171.0 | 264.4  | 175.5  | 220.2  |
| 167.9 | 231.6 | 168.3 | 163.0 | 258.7  | 201.6 | 321.3  | 271.2  | 302.9  |
| 129.7 | 169.0 | 67.7  | 71.2  | 163.0  | 164.0 | 392.0  | 244.9  | 256.0  |
| 77.6  | 89.5  | 91.2  | 67.6  | 121.5  | 103.0 | 285.3  | 256.5  | 275.8  |
| 371.4 | 513.7 | 227.0 | 305.8 | 521.7  | 451.9 | 765.8  | 573.8  | 675.9  |
| 276.6 | 291.5 | 43.9  | 63.2  | 393.6  | 261.9 | 220.4  | 176.0  | 220.1  |
| 20.1  | 9.0   | 14.3  | 16.1  | 18.7   | 23.7  | 28.1   | 25.1   | 22.7   |
| 55.1  | 57.9  | 72.6  | 79.2  | 89.9   | 94.7  | 224.7  | 215.2  | 242.4  |
| 53.7  | 43.7  | 30.3  | 33.9  | 58.6   | 55.2  | 37.7   | 37.2   | 49.9   |
| 29.4  | 41.9  | 24.4  | 14.9  | 38.9   | 23.4  | 444.3  | 146.5  | 202.5  |
| 0.7   | 0.5   | 3.7   | 3.6   | 11.9   | 3.5   | 5.2    | 3.5    | 3.4    |
| 37.1  | 61.1  | 23.3  | 26.7  | 68.9   | 69.1  | 65.2   | 55.6   | 53.8   |
| 7.4   | 14.3  | 10.3  | 7.7   | 19.6   | 15.6  | 38.5   | 27.3   | 26.7   |
| 44.5  | 20.6  | 10.2  | 3.2   | 78.6   | 28.9  | 6.6    | 8.9    | 9.8    |
| 437.4 | 445.2 | 278.9 | 335.4 | 488.9  | 525.9 | 721.5  | 818.9  | 890.5  |
| 423.0 | 437.0 | 445.7 | 489.2 | 617.5  | 627.5 | 631.4  | 484.1  | 540.7  |
| 134.6 | 141.8 | 12.5  | 22.9  | 206.4  | 89.5  | 320.6  | 148.9  | 157.4  |
| 40.8  | 68.8  | 53.2  | 60.8  | 86.6   | 65.3  | 33.5   | 37.7   | 45.7   |
| 159.3 | 186.4 | 106.4 | 114.4 | 172.2  | 155.0 | 237.6  | 226.3  | 240.9  |
| 67.1  | 68.2  | 100.7 | 123.8 | 92.6   | 98.8  | 204.5  | 210.4  | 240.0  |
| 668.5 | 590.6 | 164.3 | 183.7 | 1014.6 | 669.9 | 127.3  | 143.5  | 125.8  |
| 144.9 | 210.8 | 141.7 | 199.3 | 247.8  | 166.0 | 840.6  | 627.1  | 756.5  |
| 6.0   | 1.3   | 17.4  | 33.9  | 0.9    | 1.7   | 87.8   | 80.9   | 102.5  |
| 256.5 | 343.1 | 32.3  | 49.5  | 314.7  | 339.8 | 328.9  | 207.2  | 238.6  |
| 169.6 | 174.1 | 236.5 | 192.9 | 267.7  | 167.9 | 218.6  | 332.3  | 344.6  |
| 125.5 | 150.9 | 101.5 | 92.4  | 212.4  | 154.3 | 282.2  | 292.1  | 305.4  |
| 566.5 | 762.9 | 347.7 | 431.7 | 861.8  | 710.7 | 1379.1 | 978.9  | 1169.7 |
| 157.1 | 332.9 | 113.4 | 130.9 | 307.0  | 336.9 | 11.9   | 5.3    | 19.8   |
| 29.1  | 35.3  | 11.9  | 19.4  | 31.3   | 25.4  | 135.7  | 94.7   | 101.6  |
| 44.7  | 44.4  | 80.8  | 112.7 | 64.0   | 38.6  | 241.8  | 452.5  | 504.0  |
| 103.8 | 131.8 | 83.1  | 122.4 | 91.0   | 141.9 | 260.3  | 192.8  | 208.8  |
| 77.0  | 112.5 | 13.2  | 14.2  | 153.1  | 92.0  | 220.1  | 166.4  | 180.8  |
| 41.7  | 67.5  | 16.7  | 25.8  | 44.3   | 57.7  | 241.4  | 199.5  | 234.4  |
| 1.8   | 1.8   | 3.4   | 1.8   | 11.3   | 12.1  | 7.5    | 6.6    | 5.4    |
| 1.9   | 2.7   | 20.1  | 25.8  | 3.8    | 2.7   | 4.9    | 2.3    | 3.3    |
| 28.5  | 24.1  | 59.5  | 65.2  | 58.6   | 34.8  | 137.6  | 96.3   | 96.9   |
| 21.7  | 19.8  | 26.0  | 25.4  | 26.2   | 22.1  | 104.7  | 96.9   | 98.4   |
| 364.1 | 447.1 | 58.8  | 52.8  | 516.7  | 340.8 | 198.3  | 214.6  | 218.2  |
| 32.6  | 42.0  | 16.7  | 17.2  | 62.9   | 43.1  | 86.4   | 86.5   | 92.3   |
| 142.4 | 84.5  | 214.7 | 148.7 | 134.6  | 140.9 | 251.8  | 281.4  | 232.0  |
| 45.4  | 72.8  | 11.5  | 4.5   | 120.8  | 74.5  | 121.5  | 206.2  | 237.7  |
| 56.5  | 67.5  | 64.4  | 92.2  | 95.3   | 65.8  | 93.1   | 83.2   | 95.0   |
| 72.0  | 65.9  | 49.7  | 49.0  | 90.2   | 35.9  | 141.3  | 112.0  | 107.7  |
| 237.4 | 290.9 | 41.9  | 66.4  | 380.6  | 341.9 | 437.4  | 415.6  | 502.8  |
| 110.1 | 143.2 | 149.6 | 213.0 | 145.7  | 109.3 | 337.1  | 326.2  | 356.4  |
| 177.5 | 188.6 | 127.7 | 95.5  | 246.4  | 195.4 | 339.9  | 256.6  | 255.3  |
| 90.7  | 122.4 | 77.8  | 97.4  | 128.8  | 99.2  | 279.0  | 188.0  | 221.3  |
| 544.2 | 516.6 | 47.5  | 91.1  | 858.5  | 351.5 | 3368.8 | 2224.7 | 2437.3 |

|       |       |       |       |       |       |       |       |       |
|-------|-------|-------|-------|-------|-------|-------|-------|-------|
| 9.0   | 33.4  | 11.1  | 37.2  | 63.7  | 41.5  | 88.5  | 130.4 | 152.2 |
| 1.4   | 14.1  | 31.6  | 33.4  | 20.5  | 15.2  | 4.4   | 16.8  | 11.9  |
| 3.2   | 6.9   | 14.6  | 15.2  | 6.9   | 3.2   | 12.2  | 11.4  | 11.5  |
| 194.4 | 218.1 | 269.9 | 371.9 | 282.9 | 177.3 | 360.1 | 322.8 | 315.2 |
| 19.4  | 19.5  | 83.3  | 58.3  | 48.6  | 26.2  | 54.2  | 90.5  | 109.7 |
| 1.7   | 0.7   | 1.7   | 5.1   | 2.4   | 2.9   | 4.7   | 5.3   | 6.1   |
| 52.7  | 44.3  | 66.7  | 65.0  | 74.9  | 48.9  | 106.1 | 126.3 | 118.9 |
| 128.8 | 116.2 | 59.2  | 74.8  | 168.4 | 116.7 | 54.6  | 54.6  | 55.8  |
| 1.6   | 4.5   | 9.1   | 17.1  | 1.6   | 9.5   | 85.8  | 155.1 | 212.6 |
| 60.1  | 86.2  | 38.0  | 50.5  | 78.1  | 76.1  | 128.3 | 130.0 | 143.5 |
| 63.3  | 94.4  | 51.0  | 88.5  | 82.4  | 101.4 | 155.0 | 186.6 | 211.3 |
| 260.1 | 262.8 | 104.5 | 132.7 | 350.2 | 225.5 | 448.0 | 512.0 | 571.3 |
| 13.1  | 5.7   | 2.6   | 2.5   | 33.4  | 11.1  | 332.2 | 373.3 | 454.7 |
| 443.1 | 477.1 | 453.5 | 519.6 | 550.7 | 610.5 | 592.9 | 471.2 | 530.5 |
| 89.8  | 90.2  | 115.1 | 218.5 | 110.9 | 84.0  | 439.3 | 230.7 | 262.4 |
| 138.8 | 161.6 | 103.8 | 120.6 | 218.1 | 140.9 | 387.6 | 304.1 | 338.6 |
| 82.4  | 95.0  | 82.8  | 93.7  | 108.4 | 76.9  | 84.8  | 105.8 | 112.7 |
| 36.4  | 27.0  | 17.0  | 17.6  | 37.2  | 27.4  | 20.9  | 33.5  | 40.0  |
| 37.6  | 24.8  | 42.5  | 42.5  | 51.9  | 27.3  | 48.3  | 221.6 | 225.4 |
| 76.5  | 109.8 | 14.3  | 21.7  | 166.0 | 105.5 | 209.5 | 258.5 | 271.1 |
| 120.7 | 171.3 | 92.6  | 121.4 | 194.5 | 179.6 | 245.7 | 260.8 | 282.5 |
| 265.7 | 316.4 | 180.5 | 286.7 | 328.3 | 280.4 | 467.0 | 299.1 | 318.0 |
| 88.4  | 108.7 | 168.5 | 191.2 | 101.4 | 98.7  | 138.8 | 123.6 | 140.7 |
| 118.7 | 178.5 | 129.6 | 183.9 | 195.8 | 211.6 | 462.3 | 327.1 | 381.5 |
| 5.0   | 7.1   | 5.9   | 1.9   | 3.2   | 2.4   | 8.5   | 4.2   | 6.1   |
| 41.0  | 49.8  | 19.3  | 12.0  | 54.1  | 72.2  | 174.5 | 180.0 | 195.3 |
| 114.1 | 141.5 | 125.0 | 107.9 | 160.9 | 171.5 | 178.1 | 179.7 | 192.7 |
| 103.6 | 119.2 | 126.1 | 141.4 | 148.4 | 121.4 | 136.6 | 97.8  | 116.7 |
| 142.9 | 216.5 | 107.4 | 110.5 | 160.7 | 181.9 | 365.8 | 270.1 | 313.3 |
| 54.8  | 81.3  | 23.8  | 16.9  | 85.9  | 71.4  | 204.9 | 201.1 | 233.6 |
| 282.2 | 324.2 | 75.8  | 72.2  | 428.9 | 297.5 | 511.5 | 226.0 | 263.9 |
| 103.1 | 103.0 | 116.4 | 129.6 | 158.1 | 90.2  | 241.2 | 282.9 | 260.2 |
| 1.5   | 1.8   | 14.4  | 16.9  | 3.3   | 1.2   | 3.6   | 7.2   | 9.5   |
| 72.9  | 151.6 | 44.9  | 43.9  | 149.9 | 147.4 | 211.5 | 146.6 | 155.0 |
| 10.2  | 13.8  | 13.0  | 12.7  | 7.0   | 4.2   | 17.4  | 14.9  | 14.1  |
| 55.8  | 68.1  | 23.6  | 16.1  | 101.4 | 101.5 | 202.4 | 229.9 | 226.7 |
| 59.7  | 70.0  | 26.7  | 31.8  | 92.4  | 51.9  | 84.2  | 43.2  | 49.7  |
| 7.8   | 1.4   | 2.5   | 1.1   | 2.3   | 2.7   | 12.5  | 3.0   | 3.5   |
| 246.1 | 301.0 | 80.1  | 93.4  | 270.2 | 341.3 | 680.6 | 532.5 | 626.1 |
| 29.6  | 36.9  | 47.4  | 37.7  | 42.8  | 39.0  | 290.3 | 200.2 | 205.1 |
| 108.6 | 144.7 | 93.8  | 100.5 | 188.5 | 149.7 | 639.5 | 503.1 | 563.1 |
| 88.0  | 116.1 | 38.6  | 38.3  | 132.0 | 120.2 | 148.7 | 128.2 | 145.7 |
| 40.6  | 51.1  | 2.9   | 8.6   | 51.3  | 51.9  | 61.8  | 59.1  | 54.3  |
| 37.5  | 53.0  | 29.2  | 33.7  | 52.5  | 47.0  | 87.2  | 127.9 | 127.5 |
| 75.6  | 146.9 | 53.8  | 31.4  | 86.4  | 147.1 | 240.6 | 229.8 | 180.7 |
| 108.8 | 156.9 | 42.3  | 66.5  | 174.9 | 165.8 | 342.7 | 275.2 | 361.6 |
| 61.3  | 74.0  | 42.4  | 54.2  | 77.5  | 59.2  | 95.9  | 83.7  | 104.2 |
| 36.8  | 52.0  | 2.1   | 2.5   | 63.0  | 49.2  | 4.1   | 6.7   | 3.8   |
| 52.8  | 80.3  | 14.7  | 17.6  | 48.4  | 65.5  | 75.2  | 80.3  | 96.4  |
| 27.7  | 54.0  | 7.3   | 4.1   | 46.0  | 43.7  | 73.2  | 71.4  | 63.3  |
| 76.4  | 99.3  | 16.3  | 42.3  | 112.0 | 104.4 | 138.4 | 135.6 | 151.1 |
| 487.9 | 647.3 | 295.2 | 393.8 | 629.8 | 843.5 | 418.9 | 385.7 | 478.3 |
| 51.5  | 58.0  | 114.3 | 105.7 | 124.8 | 80.5  | 94.4  | 166.8 | 179.6 |

|        |        |       |        |        |        |        |       |        |
|--------|--------|-------|--------|--------|--------|--------|-------|--------|
| 286.5  | 309.1  | 10.3  | 13.7   | 401.6  | 304.6  | 195.2  | 200.3 | 169.6  |
| 65.4   | 84.9   | 33.7  | 43.9   | 103.4  | 71.3   | 152.5  | 134.7 | 156.2  |
| 60.5   | 53.8   | 78.3  | 96.0   | 66.7   | 54.4   | 171.1  | 170.4 | 156.7  |
| 52.7   | 50.1   | 755.9 | 1020.5 | 50.8   | 51.0   | 248.3  | 272.4 | 336.8  |
| 23.9   | 38.3   | 21.5  | 32.7   | 44.7   | 29.3   | 136.1  | 137.1 | 162.9  |
| 146.1  | 173.1  | 30.1  | 39.0   | 187.8  | 166.7  | 224.6  | 257.3 | 299.3  |
| 315.1  | 374.0  | 461.5 | 551.6  | 449.6  | 352.8  | 655.5  | 542.9 | 577.1  |
| 328.8  | 385.1  | 93.2  | 111.7  | 636.0  | 439.0  | 12.5   | 14.7  | 13.1   |
| 1010.8 | 1162.4 | 222.4 | 204.8  | 1343.9 | 1157.9 | 245.4  | 294.7 | 289.6  |
| 107.9  | 128.1  | 161.3 | 182.2  | 109.9  | 89.1   | 179.9  | 256.9 | 315.9  |
| 127.6  | 166.4  | 86.3  | 102.6  | 158.3  | 113.6  | 269.4  | 222.2 | 224.1  |
| 10.0   | 11.5   | 6.6   | 3.7    | 6.0    | 7.4    | 11.5   | 9.6   | 14.5   |
| 47.0   | 67.7   | 23.7  | 18.9   | 46.8   | 38.9   | 79.7   | 79.9  | 109.4  |
| 30.7   | 53.0   | 177.3 | 216.6  | 39.2   | 48.3   | 199.0  | 164.2 | 171.1  |
| 43.2   | 47.5   | 21.3  | 15.0   | 60.5   | 45.6   | 147.2  | 176.6 | 187.9  |
| 144.5  | 203.9  | 75.5  | 119.8  | 210.0  | 194.7  | 274.4  | 269.6 | 329.6  |
| 478.6  | 645.5  | 72.0  | 92.7   | 656.2  | 584.8  | 826.8  | 630.3 | 604.6  |
| 57.0   | 75.2   | 11.3  | 10.8   | 82.8   | 66.9   | 85.1   | 68.5  | 78.3   |
| 150.5  | 176.0  | 71.4  | 94.9   | 195.6  | 151.8  | 293.7  | 367.9 | 438.9  |
| 157.5  | 168.2  | 31.2  | 49.0   | 180.9  | 207.7  | 207.8  | 167.2 | 181.1  |
| 107.1  | 118.3  | 4.5   | 10.4   | 163.1  | 119.7  | 49.9   | 93.4  | 107.1  |
| 1.4    | 4.9    | 41.1  | 53.3   | 5.3    | 1.6    | 63.8   | 151.0 | 167.6  |
| 77.4   | 103.3  | 18.0  | 18.7   | 95.9   | 98.1   | 68.3   | 55.4  | 62.6   |
| 2.7    | 15.7   | 25.5  | 25.7   | 3.1    | 12.7   | 87.1   | 67.0  | 74.2   |
| 91.6   | 95.0   | 39.6  | 48.4   | 159.0  | 133.1  | 135.1  | 128.9 | 145.0  |
| 18.9   | 25.8   | 20.1  | 23.5   | 34.4   | 33.1   | 45.9   | 47.5  | 50.6   |
| 98.2   | 138.4  | 74.6  | 65.8   | 119.0  | 144.3  | 86.1   | 82.6  | 77.8   |
| 281.8  | 287.8  | 80.6  | 99.7   | 425.1  | 320.7  | 478.7  | 223.0 | 281.2  |
| 40.9   | 41.2   | 16.4  | 19.1   | 64.1   | 17.0   | 259.9  | 323.5 | 355.8  |
| 131.4  | 122.5  | 95.6  | 91.5   | 145.7  | 114.3  | 165.5  | 141.6 | 163.4  |
| 64.7   | 43.9   | 6.1   | 3.8    | 124.7  | 58.5   | 259.9  | 277.9 | 299.5  |
| 77.3   | 66.5   | 74.0  | 112.3  | 95.6   | 61.7   | 289.6  | 206.8 | 243.6  |
| 16.8   | 23.3   | 18.2  | 21.1   | 30.4   | 20.2   | 283.9  | 321.3 | 385.1  |
| 8.0    | 23.9   | 24.7  | 15.5   | 15.2   | 8.9    | 22.4   | 21.3  | 23.3   |
| 27.9   | 15.4   | 12.2  | 5.7    | 37.0   | 12.8   | 71.8   | 49.3  | 62.5   |
| 156.5  | 169.2  | 47.8  | 49.7   | 207.6  | 169.7  | 123.6  | 104.5 | 116.4  |
| 81.3   | 81.6   | 16.8  | 19.4   | 109.4  | 80.7   | 54.6   | 31.4  | 24.8   |
| 39.6   | 57.4   | 9.1   | 5.9    | 61.0   | 54.7   | 152.9  | 96.0  | 119.2  |
| 91.0   | 57.9   | 72.6  | 125.2  | 136.3  | 49.7   | 743.1  | 853.1 | 917.4  |
| 97.6   | 75.3   | 10.4  | 5.7    | 100.3  | 81.2   | 37.9   | 19.0  | 16.6   |
| 63.9   | 60.6   | 35.2  | 50.7   | 71.5   | 92.4   | 182.4  | 171.2 | 176.9  |
| 8.5    | 7.2    | 4.7   | 5.1    | 8.9    | 7.9    | 11.0   | 11.1  | 12.6   |
| 65.6   | 95.3   | 9.8   | 8.3    | 114.0  | 86.4   | 182.8  | 162.4 | 189.9  |
| 310.9  | 467.2  | 1.1   | 4.1    | 494.0  | 314.3  | 1949.9 | 820.9 | 1010.6 |
| 52.5   | 55.4   | 50.6  | 55.2   | 57.2   | 62.0   | 154.5  | 154.4 | 155.6  |
| 56.8   | 108.4  | 5.1   | 3.5    | 103.4  | 144.8  | 128.9  | 146.4 | 150.4  |
| 11.1   | 10.8   | 2.3   | 2.9    | 16.4   | 4.5    | 41.4   | 44.1  | 48.0   |
| 26.2   | 20.5   | 24.4  | 34.3   | 39.1   | 30.0   | 98.6   | 83.9  | 85.9   |
| 10.1   | 15.6   | 0.7   | 0.4    | 15.6   | 14.5   | 23.7   | 29.4  | 23.5   |
| 15.5   | 14.7   | 1.7   | 1.2    | 5.8    | 2.9    | 33.2   | 46.3  | 58.7   |
| 31.6   | 42.5   | 244.5 | 215.1  | 17.8   | 11.8   | 153.9  | 181.2 | 181.6  |
| 90.3   | 93.9   | 25.4  | 26.1   | 126.6  | 91.1   | 143.7  | 127.5 | 129.6  |
| 114.4  | 67.8   | 335.4 | 438.2  | 41.0   | 126.5  | 116.4  | 115.5 | 44.8   |

|       |       |       |        |       |       |        |        |        |
|-------|-------|-------|--------|-------|-------|--------|--------|--------|
| 68.0  | 90.4  | 19.8  | 24.9   | 95.1  | 70.7  | 230.6  | 146.3  | 175.8  |
| 90.6  | 84.5  | 90.4  | 112.5  | 109.5 | 103.2 | 163.0  | 129.4  | 132.8  |
| 20.2  | 17.2  | 5.5   | 10.8   | 29.3  | 14.5  | 29.9   | 21.4   | 28.4   |
| 37.6  | 28.3  | 23.8  | 35.0   | 57.7  | 32.4  | 39.9   | 41.1   | 43.6   |
| 290.6 | 375.7 | 32.5  | 44.9   | 354.9 | 491.1 | 2516.8 | 2033.7 | 2215.5 |
| 3.0   | 4.6   | 7.5   | 4.1    | 24.0  | 21.9  | 25.6   | 36.1   | 24.1   |
| 15.8  | 32.5  | 14.0  | 15.5   | 28.6  | 28.4  | 92.0   | 62.9   | 73.7   |
| 35.6  | 52.1  | 16.5  | 12.4   | 83.9  | 82.4  | 119.2  | 297.4  | 311.8  |
| 81.5  | 127.4 | 173.3 | 228.0  | 204.5 | 150.0 | 250.2  | 361.5  | 471.6  |
| 59.8  | 111.9 | 37.4  | 48.0   | 167.8 | 78.7  | 277.8  | 243.0  | 270.6  |
| 97.3  | 109.4 | 54.3  | 59.1   | 115.3 | 131.3 | 192.7  | 149.2  | 132.2  |
| 77.9  | 80.2  | 71.7  | 86.0   | 80.3  | 59.4  | 149.9  | 176.0  | 178.5  |
| 71.0  | 141.7 | 28.4  | 33.3   | 111.1 | 162.0 | 238.0  | 139.9  | 168.7  |
| 199.4 | 289.4 | 769.9 | 1003.9 | 318.0 | 284.3 | 624.6  | 905.8  | 1022.0 |
| 30.1  | 42.2  | 28.5  | 57.3   | 62.2  | 33.9  | 160.1  | 150.0  | 189.4  |
| 26.2  | 42.2  | 28.8  | 27.9   | 26.2  | 24.7  | 123.2  | 155.8  | 145.0  |
| 34.8  | 34.8  | 121.5 | 143.6  | 58.6  | 26.5  | 64.8   | 59.4   | 53.2   |
| 17.2  | 36.2  | 1.9   | 10.1   | 32.2  | 29.8  | 41.4   | 34.4   | 33.5   |
| 71.5  | 64.1  | 27.9  | 42.3   | 95.8  | 69.0  | 107.2  | 102.5  | 97.2   |
| 95.3  | 117.6 | 97.3  | 89.6   | 135.9 | 80.8  | 177.9  | 197.8  | 204.6  |
| 33.9  | 43.1  | 19.2  | 27.7   | 44.5  | 28.1  | 61.1   | 60.3   | 59.6   |
| 44.1  | 86.0  | 7.2   | 7.5    | 117.7 | 67.4  | 48.0   | 57.4   | 78.3   |
| 11.3  | 13.9  | 7.7   | 1.2    | 7.3   | 21.4  | 44.0   | 48.3   | 51.6   |
| 20.9  | 32.3  | 71.3  | 65.6   | 30.4  | 38.2  | 59.4   | 63.9   | 71.2   |
| 87.1  | 109.4 | 200.9 | 274.6  | 114.8 | 96.3  | 515.7  | 622.3  | 681.0  |
| 103.7 | 107.4 | 49.3  | 73.1   | 129.9 | 102.4 | 175.4  | 163.6  | 131.7  |
| 148.1 | 208.9 | 22.5  | 22.2   | 163.6 | 126.5 | 118.2  | 79.3   | 80.3   |
| 150.5 | 203.2 | 26.3  | 41.5   | 184.0 | 139.5 | 310.2  | 137.1  | 145.5  |
| 43.2  | 56.5  | 39.2  | 58.5   | 64.3  | 43.0  | 180.7  | 210.1  | 191.7  |
| 41.7  | 55.7  | 11.5  | 12.6   | 73.1  | 61.3  | 158.9  | 163.2  | 174.3  |
| 90.9  | 106.3 | 76.2  | 79.9   | 120.6 | 126.1 | 291.3  | 240.7  | 262.6  |
| 16.0  | 5.2   | 7.6   | 6.3    | 12.2  | 2.6   | 16.5   | 15.3   | 22.4   |
| 154.6 | 177.4 | 100.6 | 144.7  | 201.0 | 207.7 | 239.9  | 234.8  | 241.6  |
| 93.5  | 85.4  | 83.6  | 113.3  | 107.8 | 74.6  | 213.2  | 262.4  | 313.1  |
| 9.4   | 5.8   | 9.7   | 10.1   | 11.6  | 13.2  | 76.8   | 76.1   | 88.1   |
| 22.1  | 17.5  | 72.4  | 47.6   | 33.7  | 26.8  | 33.9   | 46.7   | 45.8   |
| 128.5 | 144.0 | 47.5  | 85.2   | 185.4 | 136.7 | 156.4  | 163.7  | 202.2  |
| 13.4  | 15.9  | 17.3  | 17.9   | 29.0  | 13.8  | 81.4   | 78.1   | 74.5   |
| 53.7  | 45.7  | 103.6 | 110.9  | 83.1  | 61.6  | 113.3  | 94.6   | 101.9  |
| 157.6 | 157.0 | 247.5 | 360.7  | 196.8 | 164.3 | 363.2  | 424.0  | 393.4  |
| 8.7   | 12.9  | 8.6   | 7.5    | 13.1  | 11.1  | 16.2   | 18.7   | 21.5   |
| 26.4  | 25.8  | 19.6  | 19.6   | 40.3  | 51.4  | 71.8   | 70.7   | 82.8   |
| 57.5  | 50.4  | 21.9  | 27.0   | 54.1  | 68.4  | 108.0  | 60.7   | 89.2   |
| 74.8  | 96.7  | 67.5  | 79.1   | 98.3  | 71.3  | 166.3  | 139.0  | 182.2  |
| 17.9  | 26.5  | 3.0   | 3.5    | 19.3  | 19.1  | 20.6   | 27.8   | 33.9   |
| 45.8  | 57.6  | 11.2  | 11.5   | 44.3  | 49.0  | 48.8   | 54.6   | 58.8   |
| 8.1   | 9.8   | 67.0  | 82.4   | 18.2  | 7.8   | 12.3   | 9.5    | 12.2   |
| 35.9  | 51.6  | 9.3   | 17.5   | 59.9  | 57.1  | 1327.3 | 1027.2 | 1194.4 |
| 27.9  | 54.8  | 110.3 | 141.8  | 62.3  | 71.7  | 46.1   | 22.3   | 36.9   |
| 23.1  | 38.2  | 40.8  | 47.0   | 34.6  | 41.9  | 103.9  | 78.9   | 95.7   |
| 14.1  | 17.5  | 8.3   | 2.6    | 5.9   | 3.2   | 3.2    | 5.7    | 12.7   |
| 310.5 | 462.0 | 111.6 | 87.4   | 319.9 | 495.8 | 1368.0 | 744.5  | 812.0  |
| 105.5 | 185.3 | 26.7  | 44.6   | 224.7 | 240.3 | 239.6  | 183.3  | 237.0  |

|       |       |       |       |       |       |       |       |       |
|-------|-------|-------|-------|-------|-------|-------|-------|-------|
| 1.2   | 0.9   | 0.8   | 0.6   | 1.2   | 1.4   | 2.5   | 2.2   | 3.6   |
| 73.3  | 94.5  | 1.8   | 17.2  | 59.2  | 75.8  | 128.7 | 83.3  | 82.5  |
| 18.1  | 40.1  | 51.6  | 59.7  | 20.8  | 45.3  | 46.2  | 28.8  | 35.7  |
| 148.0 | 157.6 | 44.3  | 50.8  | 226.0 | 142.8 | 158.7 | 91.7  | 91.0  |
| 80.3  | 78.9  | 4.4   | 1.7   | 142.2 | 69.5  | 116.4 | 86.5  | 87.7  |
| 37.0  | 39.2  | 106.4 | 159.6 | 60.7  | 42.4  | 116.5 | 71.3  | 78.4  |
| 65.0  | 76.6  | 61.6  | 66.7  | 120.5 | 93.4  | 88.6  | 60.0  | 77.8  |
| 17.9  | 34.9  | 40.7  | 31.2  | 21.3  | 19.5  | 43.9  | 7.9   | 34.0  |
| 55.3  | 49.0  | 96.3  | 168.6 | 61.7  | 35.1  | 207.3 | 124.1 | 151.7 |

---



| Batch.8 V | Batch.8 P | Batch.8 E | Batch.9 V | Batch.9 C | Batch.9 T | Batch.10 \ | Batch.10 f | Batch.10 C |
|-----------|-----------|-----------|-----------|-----------|-----------|------------|------------|------------|
| 1253.0    | 1295.6    | 1183.2    | 877.2     | 854.8     | 950.0     | 662.5      | 832.7      | 824.6      |
| 1131.4    | 1336.8    | 683.8     | 621.2     | 270.1     | 298.1     | 396.0      | 235.5      | 261.4      |
| 25.4      | 44.6      | 17.2      | 32.4      | 27.0      | 23.3      | 19.6       | 15.1       | 22.8       |
| 287.2     | 423.9     | 353.7     | 172.4     | 136.6     | 146.0     | 111.5      | 91.6       | 130.1      |
| 5.0       | 8.0       | 2.8       | 10.4      | 6.5       | 9.7       | 2.6        | 2.2        | 7.5        |
| 43.0      | 74.2      | 75.5      | 27.3      | 27.0      | 28.8      | 31.1       | 29.3       | 32.1       |
| 42.1      | 53.9      | 45.5      | 31.0      | 30.4      | 32.3      | 15.6       | 11.6       | 19.9       |
| 3.2       | 27.2      | 7.7       | 10.3      | 8.3       | 7.4       | 9.3        | 23.4       | 13.4       |
| 0.8       | 1.1       | 0.7       | 5.9       | 4.9       | 2.2       | 1.3        | 0.7        | 1.9        |
| 8.3       | 12.2      | 7.6       | 6.9       | 8.2       | 8.8       | 4.7        | 8.1        | 8.1        |
| 431.8     | 423.7     | 162.8     | 153.9     | 112.3     | 136.2     | 152.4      | 132.8      | 142.7      |
| 390.6     | 492.4     | 357.7     | 611.0     | 523.3     | 560.3     | 353.4      | 349.6      | 407.6      |
| 26.1      | 33.7      | 24.9      | 59.6      | 41.8      | 59.8      | 31.1       | 33.4       | 34.5       |
| 298.5     | 503.7     | 476.9     | 109.3     | 109.2     | 97.3      | 81.8       | 98.3       | 98.7       |
| 177.4     | 196.3     | 151.7     | 100.0     | 69.8      | 81.7      | 63.4       | 42.6       | 53.2       |
| 125.6     | 182.6     | 174.7     | 149.5     | 147.1     | 181.7     | 89.7       | 153.0      | 120.5      |
| 72.2      | 127.1     | 126.7     | 20.0      | 19.3      | 23.1      | 16.6       | 21.0       | 22.7       |
| 113.6     | 148.8     | 109.1     | 88.4      | 71.7      | 84.9      | 130.7      | 96.0       | 109.1      |
| 189.0     | 220.4     | 173.8     | 176.9     | 170.8     | 192.4     | 107.9      | 88.3       | 106.5      |
| 118.5     | 149.6     | 113.4     | 347.9     | 278.6     | 294.1     | 238.2      | 199.7      | 240.0      |
| 882.4     | 1054.5    | 905.9     | 1011.5    | 752.7     | 857.1     | 740.3      | 766.9      | 802.8      |
| 2010.5    | 2631.9    | 2116.5    | 2851.5    | 2779.5    | 3237.2    | 1896.6     | 2005.2     | 2207.6     |
| 8443.1    | 8920.0    | 7366.6    | 9106.4    | 8410.8    | 8156.6    | 5396.1     | 5626.0     | 5650.0     |
| 10211.4   | 11640.4   | 9820.9    | 10096.2   | 9650.0    | 9527.0    | 6474.1     | 6422.0     | 6835.6     |
| 7768.1    | 7713.0    | 6456.8    | 7007.5    | 5591.4    | 5357.7    | 6380.5     | 4954.6     | 5961.8     |
| 3663.8    | 3846.2    | 2755.5    | 1941.3    | 1551.9    | 1740.5    | 1277.0     | 1429.9     | 1359.9     |
| 6806.2    | 7342.9    | 5836.5    | 4414.2    | 3684.5    | 3876.2    | 2716.5     | 2515.0     | 2931.2     |
| 4472.0    | 5614.8    | 5079.7    | 3939.8    | 3525.1    | 3494.7    | 2913.7     | 2875.7     | 3294.0     |
| 2379.1    | 2602.4    | 1833.4    | 1291.7    | 1006.6    | 1226.2    | 1294.8     | 1120.8     | 1265.5     |
| 3942.6    | 4291.0    | 3159.4    | 3615.9    | 2996.1    | 3383.5    | 2209.2     | 2120.2     | 2275.6     |
| 8264.9    | 8890.9    | 7536.0    | 6739.4    | 6299.6    | 6235.2    | 4190.5     | 4439.2     | 4605.5     |
| 2179.5    | 2691.5    | 2279.4    | 1417.8    | 1228.9    | 1372.9    | 1081.1     | 1017.3     | 1258.1     |
| 8704.3    | 8957.8    | 8065.5    | 6204.6    | 5620.9    | 5627.8    | 4291.0     | 3885.3     | 4183.9     |
| 11978.4   | 11905.1   | 10837.9   | 5335.3    | 4345.4    | 4497.0    | 3532.4     | 3760.3     | 3962.9     |
| 3157.0    | 3906.1    | 2689.3    | 2613.4    | 1850.7    | 2039.2    | 1977.3     | 1643.0     | 1874.4     |
| 3557.9    | 4447.4    | 3621.2    | 2600.4    | 2195.1    | 2229.6    | 1914.3     | 1905.7     | 2031.3     |
| 9885.1    | 9739.1    | 8669.1    | 7794.0    | 6980.7    | 6970.4    | 5032.8     | 4859.0     | 5174.7     |
| 10937.3   | 11566.5   | 9981.9    | 8229.7    | 7357.4    | 7175.3    | 6288.9     | 5986.9     | 6678.8     |
| 10683.0   | 11280.1   | 9776.9    | 8524.6    | 8019.5    | 8001.8    | 5990.5     | 6026.7     | 6268.0     |
| 7024.7    | 7543.2    | 6062.4    | 10298.6   | 8959.3    | 9038.0    | 6309.1     | 5733.5     | 6291.3     |
| 2226.4    | 2398.7    | 1559.7    | 1910.9    | 1306.5    | 1523.3    | 985.3      | 844.6      | 998.7      |
| 8671.0    | 9097.6    | 8492.7    | 10524.0   | 10309.5   | 10260.6   | 7190.3     | 6918.1     | 7362.3     |
| 9286.9    | 9950.0    | 8877.4    | 7660.3    | 7252.8    | 7098.0    | 5170.3     | 5299.2     | 5684.4     |
| 3790.3    | 4556.0    | 4021.6    | 3311.4    | 3413.8    | 3570.8    | 1994.0     | 2628.3     | 2501.9     |
| 6538.4    | 7094.0    | 6037.1    | 6481.5    | 6047.5    | 6267.6    | 4435.6     | 4299.0     | 5006.3     |
| 11343.6   | 10687.9   | 9773.6    | 6285.5    | 5801.3    | 5553.1    | 5056.3     | 4883.2     | 5207.1     |
| 7086.7    | 7967.0    | 7562.0    | 6128.2    | 6215.4    | 6584.3    | 2586.7     | 3813.4     | 3614.1     |
| 5026.0    | 5797.9    | 4626.9    | 3488.9    | 3055.2    | 3149.7    | 2439.2     | 2478.6     | 2644.5     |
| 2102.1    | 2494.4    | 1524.3    | 2378.4    | 1864.1    | 2130.7    | 986.0      | 1015.2     | 1119.0     |
| 9063.1    | 9501.3    | 8528.0    | 13065.8   | 12799.8   | 12599.4   | 8431.5     | 8246.1     | 8737.3     |
| 5622.8    | 6047.5    | 5339.2    | 2602.3    | 2194.3    | 2463.8    | 1508.0     | 1496.1     | 1649.8     |
| 11652.3   | 12245.4   | 11268.6   | 6922.7    | 6664.6    | 6672.6    | 5916.6     | 5949.0     | 6585.1     |

|         |         |         |         |         |         |        |        |        |
|---------|---------|---------|---------|---------|---------|--------|--------|--------|
| 9958.5  | 10542.8 | 9048.2  | 9418.6  | 8726.0  | 8396.4  | 5601.8 | 5804.0 | 6046.7 |
| 4757.7  | 4783.5  | 3274.7  | 3808.7  | 3733.9  | 3717.0  | 2962.5 | 3168.5 | 3558.5 |
| 8917.1  | 9139.4  | 8028.3  | 8227.2  | 7450.3  | 7208.9  | 5877.3 | 5781.5 | 6235.2 |
| 355.7   | 501.6   | 409.7   | 371.5   | 292.9   | 289.6   | 184.7  | 158.4  | 183.1  |
| 4960.6  | 5946.7  | 4769.4  | 5093.4  | 4842.4  | 5299.3  | 2748.7 | 3274.2 | 3372.8 |
| 6899.6  | 6616.6  | 4040.2  | 3126.0  | 2413.2  | 2331.1  | 3665.4 | 3107.5 | 3569.4 |
| 11630.2 | 11615.8 | 9936.8  | 9401.3  | 8593.2  | 8614.3  | 6568.9 | 6375.3 | 6794.3 |
| 4114.6  | 4177.4  | 3059.5  | 2587.8  | 2262.1  | 2405.4  | 1436.5 | 1288.5 | 1566.8 |
| 3398.1  | 3968.1  | 3083.6  | 2612.7  | 2175.5  | 2121.5  | 1667.4 | 1691.1 | 1755.0 |
| 3540.1  | 3718.1  | 2540.9  | 2789.7  | 1998.7  | 2286.1  | 1625.2 | 1288.9 | 1577.0 |
| 1069.5  | 1241.7  | 832.1   | 864.8   | 703.2   | 772.6   | 465.1  | 455.2  | 505.4  |
| 4874.6  | 5586.0  | 4031.5  | 4506.8  | 3890.2  | 3564.5  | 3118.8 | 2791.5 | 3519.5 |
| 3247.5  | 3872.5  | 2625.4  | 2258.6  | 1892.7  | 2010.8  | 2093.6 | 1939.6 | 2301.1 |
| 739.0   | 872.7   | 576.5   | 1003.2  | 854.4   | 940.2   | 540.7  | 522.9  | 594.1  |
| 3311.8  | 3970.5  | 2934.3  | 2633.4  | 2340.9  | 2548.6  | 1367.4 | 1493.3 | 1744.1 |
| 2827.1  | 3368.4  | 2241.1  | 3059.0  | 2318.4  | 2469.5  | 2359.5 | 2401.2 | 2623.9 |
| 5223.6  | 5975.8  | 4426.0  | 5218.0  | 4286.0  | 4284.2  | 3159.5 | 2664.8 | 3093.5 |
| 350.4   | 518.7   | 431.0   | 1572.1  | 1346.1  | 1424.5  | 1077.5 | 1216.8 | 1261.8 |
| 1728.9  | 1998.0  | 1082.0  | 1242.0  | 905.2   | 989.1   | 1297.4 | 1202.7 | 1398.0 |
| 248.4   | 300.2   | 194.7   | 378.3   | 291.5   | 292.2   | 228.6  | 201.4  | 251.1  |
| 2782.5  | 2935.5  | 1635.5  | 2538.3  | 1947.6  | 2204.6  | 2191.9 | 1945.0 | 2173.9 |
| 388.0   | 403.3   | 428.0   | 578.3   | 490.5   | 528.0   | 336.1  | 371.6  | 348.4  |
| 367.3   | 379.2   | 212.2   | 244.1   | 166.7   | 213.2   | 139.3  | 107.6  | 132.0  |
| 1750.2  | 2161.2  | 1594.3  | 2536.8  | 2259.2  | 2559.2  | 1223.3 | 1292.8 | 1458.6 |
| 1130.0  | 1252.0  | 950.5   | 275.8   | 237.5   | 246.9   | 300.5  | 318.1  | 312.4  |
| 4913.9  | 5516.0  | 4621.4  | 3729.8  | 3236.3  | 3597.5  | 2383.7 | 2515.8 | 2732.1 |
| 1593.6  | 1970.3  | 1627.1  | 1385.8  | 1068.2  | 1220.3  | 1256.1 | 1303.6 | 1394.9 |
| 4142.1  | 4855.4  | 4053.0  | 3554.8  | 3010.5  | 3180.5  | 2899.0 | 2742.5 | 3060.6 |
| 2421.5  | 2625.2  | 1480.6  | 1453.1  | 1143.9  | 1177.3  | 1023.9 | 923.4  | 1065.6 |
| 9199.0  | 9478.4  | 9072.0  | 8012.8  | 7379.2  | 7405.6  | 5260.8 | 5226.3 | 5531.8 |
| 11159.8 | 11622.6 | 10965.9 | 11184.1 | 10892.7 | 10738.8 | 7167.1 | 7446.1 | 7869.2 |
| 9424.3  | 9088.8  | 8181.1  | 7413.7  | 6369.8  | 6879.9  | 5554.5 | 5026.5 | 5315.3 |
| 5767.8  | 5643.3  | 4194.2  | 6353.6  | 5435.3  | 5873.1  | 4358.8 | 3882.9 | 4351.0 |
| 5733.5  | 6242.2  | 5147.3  | 5119.4  | 4401.0  | 5049.9  | 3082.5 | 2999.8 | 3415.0 |
| 860.2   | 1107.2  | 934.0   | 501.1   | 479.4   | 526.4   | 334.6  | 441.4  | 466.6  |
| 1406.0  | 1890.0  | 1350.4  | 1696.4  | 1306.6  | 1388.2  | 1152.5 | 1055.6 | 1306.6 |
| 6542.1  | 7049.7  | 5951.0  | 4397.6  | 3700.6  | 3985.4  | 2685.4 | 2779.6 | 3006.8 |
| 388.1   | 454.9   | 310.8   | 174.1   | 146.0   | 156.7   | 106.1  | 116.1  | 109.1  |
| 486.9   | 684.0   | 554.7   | 551.1   | 505.0   | 583.7   | 334.4  | 442.6  | 444.2  |
| 1207.7  | 1452.7  | 942.6   | 446.7   | 354.4   | 339.3   | 353.3  | 363.9  | 369.1  |
| 2774.2  | 3290.4  | 2357.6  | 2412.7  | 1868.2  | 2133.6  | 1727.7 | 1566.4 | 1735.7 |
| 3497.8  | 3739.3  | 2218.3  | 2255.0  | 1616.6  | 1575.9  | 2055.1 | 1699.5 | 2023.6 |
| 4135.7  | 4788.9  | 3835.0  | 3354.3  | 2847.8  | 2881.0  | 2055.4 | 2115.5 | 2310.2 |
| 813.7   | 1115.9  | 871.3   | 2019.5  | 1645.4  | 1801.2  | 1241.9 | 928.7  | 1300.7 |
| 642.1   | 789.5   | 536.8   | 393.8   | 328.5   | 377.4   | 163.7  | 153.3  | 214.5  |
| 7777.7  | 7965.7  | 6723.6  | 5370.8  | 4894.1  | 5071.8  | 4136.6 | 3810.9 | 4220.2 |
| 2763.6  | 3096.5  | 1916.2  | 705.3   | 541.8   | 563.0   | 454.0  | 431.8  | 461.9  |
| 3583.0  | 3779.1  | 2600.7  | 1951.8  | 1457.1  | 1749.3  | 1495.2 | 1296.9 | 1627.5 |
| 9755.6  | 10349.7 | 9492.8  | 7753.3  | 6676.1  | 6639.0  | 6764.9 | 6832.0 | 7294.6 |
| 9891.1  | 10294.9 | 9254.2  | 6406.7  | 5778.4  | 5968.7  | 3794.2 | 3752.7 | 4045.6 |
| 9179.9  | 9313.8  | 7962.8  | 7965.1  | 7320.0  | 7590.1  | 5309.8 | 5141.3 | 5617.8 |
| 1307.2  | 1643.4  | 1259.8  | 1260.0  | 1057.6  | 1149.5  | 1088.9 | 1039.1 | 1158.6 |
| 2685.3  | 2893.4  | 2097.3  | 2494.2  | 2078.5  | 2076.8  | 2094.4 | 1910.1 | 2172.3 |

|         |         |         |         |         |         |        |        |        |
|---------|---------|---------|---------|---------|---------|--------|--------|--------|
| 3256.5  | 3937.0  | 3275.6  | 2783.2  | 2233.4  | 2387.9  | 1318.3 | 1245.3 | 1395.5 |
| 4357.8  | 5338.3  | 4663.5  | 4551.4  | 3707.1  | 3880.6  | 2803.9 | 2548.5 | 3024.1 |
| 7154.0  | 7712.6  | 6393.0  | 4264.1  | 3617.4  | 3590.4  | 4259.9 | 4054.1 | 4663.6 |
| 8731.3  | 9241.6  | 8268.1  | 10519.3 | 9826.5  | 10077.6 | 5911.4 | 5948.6 | 6102.5 |
| 9023.6  | 9688.1  | 8079.8  | 4925.9  | 4566.8  | 4586.8  | 3883.0 | 4085.0 | 4195.5 |
| 1616.8  | 1875.7  | 1516.1  | 1114.5  | 925.4   | 955.3   | 601.5  | 602.3  | 712.5  |
| 7888.9  | 8692.2  | 7344.9  | 3692.1  | 3330.0  | 3261.8  | 3481.8 | 3627.3 | 4035.2 |
| 10315.1 | 10864.6 | 10116.9 | 10130.2 | 9651.4  | 9743.2  | 6780.5 | 6991.5 | 7228.5 |
| 4196.9  | 4670.9  | 3800.4  | 3083.4  | 2333.9  | 2257.0  | 1868.5 | 1630.2 | 1971.1 |
| 3756.1  | 5026.7  | 4467.1  | 4072.7  | 4235.6  | 4683.2  | 2775.7 | 3314.5 | 3401.8 |
| 9268.0  | 9505.2  | 8415.5  | 10160.5 | 9137.9  | 9195.0  | 6267.1 | 6179.1 | 6643.2 |
| 2518.1  | 3132.5  | 2665.8  | 1890.7  | 2081.8  | 2127.6  | 1113.8 | 1404.8 | 1518.1 |
| 3865.4  | 4156.8  | 2860.8  | 1605.2  | 1425.0  | 1456.7  | 1483.6 | 1592.4 | 1735.3 |
| 2576.4  | 3016.5  | 2094.7  | 1676.0  | 1320.8  | 1428.5  | 964.2  | 1004.4 | 1097.1 |
| 11953.0 | 12132.3 | 11085.2 | 9275.5  | 9231.6  | 8833.8  | 6936.3 | 7007.5 | 7429.3 |
| 1970.0  | 2179.3  | 1389.1  | 1100.8  | 873.3   | 876.7   | 1059.7 | 1038.2 | 1169.6 |
| 3985.7  | 4362.6  | 3167.6  | 3620.7  | 3004.1  | 3145.9  | 2894.9 | 2738.9 | 2910.8 |
| 3323.9  | 3702.8  | 2628.8  | 654.2   | 532.9   | 520.9   | 551.6  | 585.7  | 634.1  |
| 1090.7  | 1298.6  | 806.9   | 218.6   | 156.5   | 199.0   | 203.9  | 218.5  | 208.5  |
| 289.1   | 347.7   | 214.1   | 108.4   | 89.5    | 90.3    | 82.1   | 80.5   | 79.0   |
| 3213.1  | 3111.8  | 2139.3  | 257.0   | 233.8   | 287.1   | 356.9  | 426.3  | 413.2  |
| 7080.2  | 6892.3  | 5367.3  | 1604.1  | 1316.5  | 1601.9  | 1451.7 | 1865.2 | 1691.7 |
| 21.7    | 11.4    | 8.1     | 12.1    | 12.3    | 11.5    | 1.9    | 4.2    | 4.4    |
| 4199.7  | 3217.2  | 2405.9  | 2007.5  | 1568.1  | 1828.2  | 537.1  | 846.4  | 827.2  |
| 2469.2  | 3199.0  | 2319.9  | 537.1   | 416.7   | 409.5   | 766.3  | 804.0  | 820.3  |
| 2030.3  | 2493.4  | 2212.6  | 1933.7  | 1622.6  | 1648.2  | 1924.4 | 1945.2 | 2090.2 |
| 657.0   | 787.7   | 622.6   | 475.8   | 357.9   | 434.9   | 503.9  | 414.7  | 485.7  |
| 1443.1  | 1712.0  | 1350.3  | 1802.6  | 1622.4  | 1864.7  | 1323.1 | 1345.1 | 1421.1 |
| 1813.4  | 2776.0  | 3518.0  | 1776.7  | 1579.6  | 1737.2  | 2149.4 | 2774.2 | 2468.5 |
| 1389.3  | 1666.3  | 1257.0  | 867.6   | 681.5   | 753.4   | 721.7  | 650.0  | 557.7  |
| 4331.3  | 4806.7  | 3686.1  | 2364.3  | 1886.6  | 1752.6  | 3015.5 | 2669.5 | 2802.8 |
| 3098.7  | 3500.0  | 3029.4  | 1358.5  | 1010.0  | 1286.3  | 936.4  | 889.6  | 920.5  |
| 3684.8  | 3958.3  | 1975.7  | 3099.2  | 2438.3  | 2553.0  | 2637.5 | 2184.9 | 2581.9 |
| 2914.7  | 3524.1  | 2908.6  | 1347.7  | 1060.7  | 1168.2  | 1039.0 | 934.5  | 1074.5 |
| 623.3   | 1043.8  | 938.6   | 829.7   | 719.0   | 830.2   | 492.5  | 521.4  | 655.6  |
| 3442.2  | 4478.5  | 4050.3  | 2175.6  | 1832.8  | 1955.7  | 1379.5 | 1334.2 | 1614.6 |
| 4450.5  | 5061.5  | 4649.1  | 10648.3 | 10068.9 | 10274.0 | 7398.6 | 7151.7 | 8009.8 |
| 396.9   | 634.5   | 457.2   | 578.2   | 491.1   | 535.7   | 470.5  | 476.5  | 584.4  |
| 979.9   | 1261.7  | 785.5   | 414.6   | 346.5   | 407.0   | 262.6  | 226.0  | 322.0  |
| 1395.2  | 1941.5  | 1355.2  | 658.8   | 579.2   | 619.5   | 430.8  | 438.5  | 507.0  |
| 5236.3  | 5190.3  | 4540.4  | 8211.0  | 7504.0  | 7063.2  | 7576.7 | 7393.4 | 8085.5 |
| 870.9   | 1023.4  | 744.0   | 1146.2  | 840.1   | 1034.7  | 700.0  | 632.4  | 705.0  |
| 2401.2  | 3282.6  | 3024.2  | 1459.7  | 1396.6  | 1560.1  | 994.0  | 1332.6 | 1249.4 |
| 1484.6  | 1800.8  | 1201.4  | 875.1   | 736.6   | 826.7   | 615.5  | 559.9  | 632.0  |
| 538.1   | 749.3   | 691.7   | 548.6   | 447.3   | 518.7   | 398.7  | 314.9  | 405.2  |
| 602.7   | 1083.1  | 889.0   | 998.4   | 824.8   | 974.9   | 251.5  | 258.1  | 283.9  |
| 2560.1  | 2968.0  | 2211.0  | 1450.6  | 1269.3  | 1361.3  | 1651.1 | 1653.9 | 1752.0 |
| 2702.4  | 3103.5  | 2528.2  | 1952.5  | 1642.5  | 1886.2  | 1428.0 | 1458.9 | 1633.6 |
| 3189.5  | 3588.9  | 2686.4  | 2250.2  | 2037.4  | 2042.2  | 1926.4 | 2095.3 | 2235.9 |
| 8289.2  | 8264.5  | 5890.2  | 5454.0  | 4348.8  | 4649.8  | 3887.2 | 3367.4 | 3780.0 |
| 360.4   | 374.5   | 208.7   | 129.3   | 88.0    | 119.0   | 114.5  | 73.0   | 101.8  |
| 458.7   | 515.1   | 289.7   | 294.9   | 219.9   | 281.8   | 150.2  | 126.2  | 158.3  |
| 2317.2  | 2374.0  | 1900.0  | 1410.4  | 1455.9  | 1317.1  | 771.8  | 1066.5 | 1166.1 |

|         |         |         |         |         |         |        |        |        |
|---------|---------|---------|---------|---------|---------|--------|--------|--------|
| 3919.0  | 3896.3  | 2764.8  | 4069.8  | 3428.6  | 3834.4  | 2791.7 | 2694.1 | 3073.0 |
| 115.1   | 169.1   | 286.0   | 628.5   | 629.5   | 676.4   | 332.6  | 644.4  | 509.3  |
| 10363.0 | 10052.3 | 9082.4  | 11417.4 | 10965.6 | 11012.7 | 6786.3 | 7392.7 | 7915.8 |
| 6311.1  | 6738.5  | 5439.3  | 4654.8  | 4001.3  | 4152.0  | 3123.7 | 2597.8 | 3051.8 |
| 282.9   | 513.4   | 503.3   | 355.4   | 369.1   | 435.0   | 286.9  | 393.3  | 395.8  |
| 1041.2  | 1780.5  | 1812.8  | 1274.4  | 1422.7  | 1419.6  | 879.1  | 1705.3 | 1530.3 |
| 233.7   | 437.6   | 448.3   | 168.3   | 159.6   | 229.5   | 231.5  | 302.9  | 326.8  |
| 8898.4  | 8786.3  | 7397.0  | 2985.5  | 2663.2  | 2797.0  | 3849.1 | 3405.0 | 3779.9 |
| 6066.9  | 6486.7  | 6158.4  | 4158.5  | 3663.1  | 3589.4  | 3294.4 | 3422.1 | 3749.1 |
| 7633.9  | 7899.2  | 6488.3  | 4209.4  | 3616.8  | 3968.6  | 3127.5 | 3003.6 | 3476.9 |
| 6771.3  | 6980.5  | 5924.5  | 1975.4  | 1749.2  | 1969.6  | 2351.1 | 2048.5 | 2383.7 |
| 6910.6  | 8116.0  | 6331.3  | 6149.9  | 5442.4  | 5652.1  | 3728.0 | 4168.9 | 4340.0 |
| 476.2   | 699.0   | 595.9   | 690.6   | 629.1   | 697.5   | 562.0  | 539.6  | 645.2  |
| 4316.2  | 5009.0  | 3276.9  | 3036.1  | 3038.5  | 2999.0  | 2584.6 | 2650.1 | 3052.5 |
| 3647.6  | 4716.6  | 4267.6  | 3109.6  | 3051.0  | 3276.3  | 1875.6 | 2405.0 | 2383.4 |
| 245.9   | 412.6   | 350.0   | 13.1    | 10.5    | 5.1     | 4.7    | 11.3   | 4.0    |
| 4026.1  | 4429.9  | 3345.8  | 5297.6  | 4266.0  | 4936.4  | 3116.8 | 2951.8 | 3314.5 |
| 41.4    | 161.6   | 170.5   | 116.6   | 118.1   | 127.5   | 132.8  | 292.2  | 207.7  |
| 458.9   | 627.8   | 627.4   | 14.9    | 14.3    | 15.8    | 6.9    | 13.0   | 5.3    |
| 7242.6  | 7588.4  | 5470.2  | 6259.1  | 4679.6  | 5260.4  | 4424.3 | 2999.0 | 3802.2 |
| 10636.4 | 10591.0 | 10655.0 | 8201.0  | 7865.1  | 8190.5  | 5914.0 | 5917.8 | 6359.3 |
| 3495.0  | 3753.8  | 2702.1  | 1073.2  | 983.2   | 1083.3  | 647.2  | 722.6  | 706.6  |
| 2594.5  | 2912.4  | 1883.1  | 7576.3  | 6685.1  | 6828.8  | 4146.5 | 3955.7 | 4246.3 |
| 7092.8  | 7874.5  | 7245.0  | 4472.8  | 3786.5  | 4289.5  | 3184.4 | 3216.0 | 3514.9 |
| 2488.1  | 2815.8  | 2270.1  | 4461.8  | 3644.6  | 3855.3  | 3087.0 | 2885.9 | 3464.5 |
| 4356.4  | 5718.7  | 4481.8  | 1406.9  | 1101.0  | 1292.0  | 2230.3 | 2112.6 | 2336.4 |
| 6908.7  | 7287.9  | 5949.7  | 4855.2  | 3753.8  | 4045.2  | 2878.5 | 2267.6 | 2725.9 |
| 3191.6  | 3620.6  | 2505.8  | 5459.8  | 4445.4  | 4856.3  | 3910.9 | 3408.3 | 3895.1 |
| 648.6   | 782.1   | 539.1   | 1684.9  | 1414.8  | 1661.2  | 1210.4 | 1183.1 | 1288.8 |
| 9376.3  | 8222.5  | 6919.7  | 3022.2  | 2872.2  | 2823.9  | 2529.8 | 2368.0 | 2639.1 |
| 1149.9  | 1946.1  | 2245.0  | 408.7   | 473.4   | 521.7   | 376.8  | 612.8  | 589.4  |
| 4961.5  | 5516.0  | 4376.4  | 3570.3  | 2974.2  | 3171.3  | 2738.5 | 2690.9 | 2893.0 |
| 3323.8  | 3928.1  | 3453.5  | 4142.7  | 3630.3  | 3889.2  | 2457.6 | 2214.7 | 2564.1 |
| 1795.3  | 1977.9  | 1052.5  | 772.1   | 544.6   | 667.2   | 654.0  | 561.9  | 676.0  |
| 1.8     | 4.1     | 3.5     | 11.4    | 6.8     | 8.9     | 0.4    | 1.1    | 0.6    |
| 3189.1  | 3433.5  | 1856.1  | 1814.3  | 1494.9  | 1551.8  | 1216.2 | 1082.5 | 1381.9 |
| 1626.3  | 1816.4  | 1187.7  | 711.7   | 651.4   | 676.8   | 536.5  | 557.2  | 606.5  |
| 4375.1  | 4814.7  | 3470.7  | 2500.0  | 2060.3  | 2180.4  | 2017.3 | 1852.6 | 2149.1 |
| 2612.0  | 2752.8  | 1903.7  | 1070.3  | 895.5   | 1041.3  | 1066.4 | 990.6  | 1075.8 |
| 1478.9  | 1932.3  | 1113.5  | 2423.1  | 2195.1  | 2200.6  | 2861.2 | 2469.6 | 2979.3 |
| 282.9   | 365.4   | 328.3   | 22.2    | 13.9    | 23.0    | 74.4   | 71.1   | 69.9   |
| 597.2   | 741.5   | 671.3   | 75.9    | 63.4    | 67.0    | 100.2  | 133.5  | 137.1  |
| 2987.8  | 3862.0  | 3113.1  | 2983.6  | 2859.2  | 3043.1  | 2221.6 | 2637.0 | 2563.5 |
| 6102.8  | 6468.7  | 6148.2  | 8217.0  | 7700.6  | 7731.7  | 4548.1 | 4533.9 | 5167.7 |
| 600.9   | 820.4   | 670.1   | 1753.1  | 1599.6  | 1648.3  | 1413.6 | 1514.5 | 1667.6 |
| 263.1   | 356.2   | 264.7   | 105.5   | 103.3   | 116.8   | 64.8   | 89.3   | 92.1   |
| 2859.6  | 3075.7  | 2352.1  | 1891.2  | 1683.3  | 1830.4  | 1244.0 | 1466.3 | 1502.1 |
| 788.1   | 1261.2  | 1338.1  | 635.6   | 826.1   | 1056.6  | 492.5  | 937.4  | 844.0  |
| 7073.5  | 7320.6  | 4828.1  | 1890.4  | 1384.9  | 1465.5  | 1726.3 | 1527.5 | 1590.7 |
| 10231.1 | 9840.1  | 8280.6  | 7009.6  | 5996.7  | 6270.0  | 3605.2 | 3256.0 | 3585.1 |
| 9199.4  | 9182.9  | 6959.2  | 4918.7  | 4282.8  | 4658.0  | 2886.3 | 3022.2 | 3163.2 |
| 3268.6  | 3508.4  | 2601.5  | 2167.1  | 1925.0  | 1996.3  | 1603.3 | 1496.9 | 1744.9 |
| 921.8   | 1212.0  | 865.8   | 579.1   | 519.2   | 588.6   | 445.3  | 475.1  | 511.4  |

|         |         |         |         |         |         |        |        |        |
|---------|---------|---------|---------|---------|---------|--------|--------|--------|
| 484.9   | 632.7   | 455.8   | 335.7   | 292.5   | 359.3   | 207.0  | 238.5  | 276.1  |
| 348.2   | 396.0   | 257.2   | 61.3    | 72.1    | 76.0    | 51.3   | 81.7   | 85.2   |
| 2643.2  | 3071.5  | 2015.4  | 1215.4  | 1158.1  | 1119.2  | 1482.5 | 1927.4 | 1999.8 |
| 1055.6  | 1230.8  | 744.8   | 753.2   | 589.5   | 643.4   | 502.8  | 411.2  | 487.2  |
| 86.1    | 124.0   | 98.4    | 276.2   | 220.9   | 234.0   | 161.4  | 160.0  | 179.9  |
| 6612.9  | 7319.3  | 6412.4  | 6934.2  | 6511.9  | 7068.7  | 3963.7 | 4148.7 | 4405.3 |
| 511.2   | 603.6   | 325.7   | 365.9   | 277.8   | 274.4   | 273.4  | 202.0  | 253.9  |
| 3231.4  | 3604.8  | 2357.0  | 2823.2  | 2060.8  | 2170.7  | 1948.6 | 1694.9 | 2009.3 |
| 2651.7  | 2827.9  | 1618.7  | 1340.4  | 1026.3  | 1098.7  | 1248.5 | 994.4  | 1162.0 |
| 6446.9  | 7010.6  | 5184.2  | 5483.4  | 4571.1  | 4686.1  | 4302.9 | 3908.8 | 4434.1 |
| 514.6   | 562.7   | 371.1   | 1104.9  | 891.6   | 951.5   | 731.4  | 712.8  | 845.8  |
| 498.3   | 584.2   | 511.1   | 616.7   | 508.5   | 665.9   | 482.6  | 403.0  | 439.4  |
| 858.4   | 1125.1  | 1323.2  | 993.6   | 1046.8  | 1084.5  | 1120.8 | 1569.1 | 1476.1 |
| 372.6   | 423.2   | 210.8   | 1489.7  | 1177.4  | 1443.2  | 971.6  | 946.7  | 1067.6 |
| 2943.5  | 3177.4  | 2047.4  | 1776.6  | 1442.5  | 1390.1  | 2271.9 | 1589.3 | 2166.6 |
| 985.3   | 1269.2  | 848.5   | 1108.5  | 936.0   | 1077.7  | 450.9  | 389.2  | 481.6  |
| 2386.9  | 2555.5  | 1769.3  | 2545.2  | 2050.6  | 2200.8  | 2163.8 | 1655.7 | 2059.1 |
| 401.4   | 796.7   | 806.4   | 1738.6  | 1662.7  | 1810.2  | 935.8  | 1124.5 | 1159.7 |
| 140.8   | 161.4   | 87.7    | 79.6    | 66.2    | 81.0    | 107.9  | 106.6  | 119.1  |
| 6306.4  | 6380.4  | 4582.7  | 3632.9  | 3412.6  | 2976.4  | 2718.0 | 2488.4 | 3025.9 |
| 557.2   | 844.3   | 829.8   | 1689.9  | 1408.2  | 1610.3  | 1030.0 | 1127.3 | 1090.6 |
| 7138.0  | 7946.0  | 6089.4  | 4467.5  | 3569.2  | 3645.7  | 2430.8 | 2554.9 | 2418.8 |
| 308.3   | 466.6   | 423.6   | 1313.9  | 1094.1  | 1298.6  | 841.1  | 1030.5 | 1006.2 |
| 710.9   | 915.6   | 796.9   | 1124.9  | 834.7   | 930.8   | 681.4  | 706.4  | 740.2  |
| 1863.4  | 2147.7  | 1468.9  | 3171.6  | 2042.1  | 2584.7  | 1228.1 | 1072.1 | 1252.7 |
| 3515.3  | 4350.5  | 3437.6  | 1683.4  | 1583.1  | 1644.6  | 897.9  | 979.2  | 1213.3 |
| 1692.5  | 2163.3  | 1788.3  | 1036.2  | 936.1   | 1113.6  | 697.6  | 740.5  | 948.7  |
| 2301.8  | 2623.8  | 1995.0  | 1852.7  | 1659.7  | 1770.7  | 1168.9 | 1211.4 | 1307.1 |
| 1960.0  | 2076.2  | 1448.1  | 412.4   | 324.2   | 407.3   | 596.2  | 476.2  | 581.3  |
| 3470.3  | 3806.7  | 2782.0  | 2024.9  | 1632.3  | 1830.6  | 1197.6 | 1032.7 | 1289.1 |
| 913.3   | 1332.0  | 1190.6  | 1464.2  | 1300.9  | 1657.2  | 679.3  | 927.6  | 882.8  |
| 3215.2  | 4965.6  | 4341.4  | 3394.1  | 4200.6  | 4401.4  | 1652.0 | 2922.5 | 2691.3 |
| 8879.5  | 9737.7  | 8666.2  | 9738.7  | 9347.6  | 9804.8  | 5218.4 | 5916.3 | 6065.4 |
| 13037.3 | 13026.0 | 12012.5 | 10844.2 | 10295.9 | 10390.5 | 7350.0 | 7702.9 | 8046.3 |
| 9830.3  | 10047.8 | 9212.5  | 6842.5  | 6313.7  | 6287.6  | 4977.8 | 5105.5 | 5522.7 |
| 496.2   | 576.5   | 412.3   | 247.2   | 238.3   | 234.2   | 142.0  | 159.2  | 194.5  |
| 569.8   | 651.6   | 468.5   | 277.2   | 216.9   | 253.4   | 289.9  | 266.7  | 336.8  |
| 468.2   | 553.7   | 345.8   | 577.7   | 480.1   | 556.4   | 326.1  | 305.7  | 335.3  |
| 1594.8  | 1928.1  | 1413.6  | 526.0   | 420.0   | 560.5   | 669.5  | 645.4  | 693.2  |
| 4409.3  | 4917.8  | 3761.5  | 2137.6  | 1878.3  | 2123.4  | 1927.6 | 1974.2 | 1975.2 |
| 29.6    | 36.2    | 26.5    | 17.1    | 19.6    | 17.2    | 12.7   | 4.6    | 6.9    |
| 5296.2  | 5714.9  | 5189.8  | 5651.1  | 5316.8  | 5127.0  | 3131.8 | 3244.1 | 3557.9 |
| 4259.0  | 5211.8  | 4144.3  | 2713.4  | 2136.6  | 2202.6  | 2136.2 | 1677.2 | 2098.7 |
| 913.8   | 1039.9  | 830.9   | 196.4   | 176.6   | 184.8   | 218.4  | 178.3  | 255.7  |
| 2962.3  | 3485.6  | 3053.3  | 1244.7  | 1166.1  | 1334.0  | 1328.8 | 1341.6 | 1466.5 |
| 3388.0  | 3798.9  | 3320.0  | 854.6   | 801.2   | 854.7   | 1284.2 | 1231.5 | 1365.5 |
| 1730.5  | 1957.0  | 1085.9  | 459.2   | 349.3   | 350.2   | 481.6  | 320.3  | 449.7  |
| 988.4   | 1094.3  | 696.4   | 377.6   | 388.8   | 351.9   | 359.6  | 304.6  | 400.9  |
| 1348.2  | 1416.1  | 1093.4  | 843.3   | 783.8   | 802.6   | 543.5  | 546.4  | 670.7  |
| 5126.2  | 5113.7  | 3633.9  | 1028.1  | 646.4   | 651.9   | 1533.4 | 1106.8 | 1395.2 |
| 1121.7  | 1433.4  | 980.4   | 655.9   | 531.8   | 660.9   | 484.9  | 372.8  | 495.7  |
| 7976.8  | 8565.6  | 7262.0  | 6376.4  | 5963.9  | 6258.3  | 4217.6 | 4406.1 | 4566.7 |
| 2507.9  | 3009.2  | 2183.7  | 2764.1  | 2166.8  | 2349.9  | 1985.8 | 1642.2 | 1930.2 |

|         |         |         |         |         |         |        |        |        |
|---------|---------|---------|---------|---------|---------|--------|--------|--------|
| 2244.9  | 2758.0  | 1981.1  | 1046.0  | 839.0   | 809.9   | 743.1  | 703.0  | 771.9  |
| 7016.1  | 7306.1  | 6419.1  | 4582.6  | 4107.9  | 4067.6  | 3306.3 | 3157.6 | 3635.2 |
| 363.1   | 377.4   | 270.3   | 511.5   | 402.9   | 474.6   | 341.2  | 298.6  | 318.0  |
| 1273.1  | 1552.1  | 1016.8  | 2047.3  | 1554.9  | 1729.1  | 1304.7 | 1123.6 | 1287.2 |
| 10721.3 | 11392.4 | 10413.9 | 10301.2 | 10190.2 | 9754.0  | 7102.3 | 7690.0 | 7736.8 |
| 392.6   | 559.9   | 586.5   | 537.0   | 626.9   | 755.2   | 339.1  | 623.0  | 564.7  |
| 629.3   | 1004.7  | 845.3   | 437.7   | 529.1   | 593.8   | 245.1  | 536.5  | 487.9  |
| 1456.1  | 1640.7  | 1101.6  | 964.7   | 695.1   | 814.3   | 954.3  | 706.8  | 922.5  |
| 2411.5  | 2609.7  | 1913.8  | 1503.2  | 1264.2  | 1515.1  | 1071.8 | 875.3  | 1110.3 |
| 2063.3  | 2406.7  | 1669.1  | 1913.9  | 1570.9  | 1866.3  | 1053.1 | 985.7  | 1218.9 |
| 253.9   | 364.3   | 287.0   | 291.8   | 277.3   | 318.0   | 180.2  | 250.0  | 218.8  |
| 10603.6 | 12276.7 | 12269.7 | 13978.8 | 13179.6 | 13069.7 | 8642.6 | 8480.7 | 9087.6 |
| 1648.6  | 1862.2  | 931.3   | 1668.9  | 1219.3  | 1226.3  | 1059.2 | 885.5  | 1062.4 |
| 8459.6  | 8223.2  | 5065.5  | 5803.9  | 4651.5  | 4874.5  | 3398.0 | 3005.3 | 3339.2 |
| 3034.4  | 3699.6  | 2651.2  | 1315.2  | 950.0   | 1114.1  | 2172.8 | 1761.4 | 1833.6 |
| 883.7   | 839.5   | 681.1   | 915.2   | 923.2   | 1073.0  | 536.3  | 618.9  | 713.6  |
| 2531.9  | 2737.0  | 1386.1  | 959.1   | 644.1   | 726.3   | 877.6  | 563.3  | 739.9  |
| 4618.2  | 4875.7  | 2885.8  | 2863.1  | 2075.9  | 2340.3  | 1584.7 | 1125.7 | 1448.5 |
| 752.5   | 805.2   | 514.6   | 1000.2  | 730.7   | 817.0   | 485.8  | 368.5  | 477.9  |
| 501.7   | 568.2   | 347.7   | 352.7   | 274.1   | 347.4   | 357.5  | 275.1  | 287.2  |
| 930.7   | 1100.8  | 717.3   | 973.4   | 748.9   | 828.6   | 623.7  | 495.5  | 612.4  |
| 539.1   | 743.6   | 462.2   | 491.0   | 446.0   | 511.4   | 220.3  | 243.3  | 291.1  |
| 1018.9  | 1246.0  | 928.5   | 662.2   | 596.3   | 656.1   | 306.3  | 392.2  | 443.6  |
| 498.9   | 910.8   | 896.9   | 535.0   | 452.7   | 492.0   | 384.1  | 357.8  | 403.4  |
| 778.5   | 1488.3  | 1509.9  | 990.4   | 861.5   | 920.6   | 730.1  | 755.7  | 843.4  |
| 2535.2  | 2628.9  | 1037.4  | 132.8   | 77.7    | 100.7   | 64.4   | 65.2   | 64.8   |
| 10646.3 | 11370.7 | 10312.6 | 10597.4 | 9976.1  | 9995.7  | 6224.7 | 6488.5 | 6700.5 |
| 2234.5  | 2245.2  | 1887.8  | 1023.6  | 868.0   | 949.5   | 946.1  | 981.2  | 1026.8 |
| 3380.4  | 3531.6  | 2966.1  | 1970.2  | 1672.4  | 1864.8  | 1551.3 | 1593.9 | 1566.7 |
| 1244.1  | 1857.3  | 1668.0  | 354.8   | 309.9   | 347.7   | 210.7  | 234.3  | 269.5  |
| 259.6   | 286.8   | 215.4   | 139.3   | 122.1   | 153.9   | 88.2   | 98.0   | 103.6  |
| 1818.1  | 1902.6  | 805.1   | 872.9   | 741.9   | 749.0   | 516.4  | 562.4  | 600.1  |
| 562.2   | 566.1   | 245.5   | 153.1   | 126.6   | 166.5   | 152.8  | 148.4  | 168.8  |
| 179.5   | 221.2   | 169.1   | 113.7   | 92.1    | 92.8    | 87.3   | 120.0  | 109.9  |
| 274.3   | 257.9   | 225.2   | 266.7   | 221.6   | 235.8   | 148.2  | 156.0  | 191.2  |
| 7013.1  | 7235.6  | 4534.0  | 4711.9  | 3799.6  | 4042.2  | 2627.0 | 2487.2 | 2542.6 |
| 7216.3  | 7084.2  | 5723.1  | 5684.9  | 5008.8  | 5038.0  | 3694.8 | 3705.0 | 3888.2 |
| 4805.4  | 5745.9  | 4707.1  | 1997.4  | 1714.7  | 1785.9  | 1616.1 | 1635.5 | 1803.5 |
| 5549.3  | 5793.8  | 4628.7  | 4824.0  | 4360.5  | 4354.2  | 2754.5 | 2839.1 | 3251.2 |
| 3445.4  | 3197.4  | 1963.2  | 1377.8  | 855.1   | 1143.3  | 2035.2 | 1449.1 | 1590.6 |
| 3418.8  | 3421.5  | 2255.6  | 2066.0  | 1546.6  | 1634.6  | 1887.6 | 1566.8 | 1842.5 |
| 2190.1  | 2557.6  | 2101.0  | 1176.4  | 909.7   | 1105.9  | 905.3  | 799.8  | 862.0  |
| 4295.8  | 4600.6  | 3362.1  | 3492.8  | 2706.0  | 2750.1  | 1992.4 | 1628.9 | 1948.1 |
| 5803.1  | 6928.2  | 6144.7  | 8386.6  | 7685.0  | 8409.0  | 5966.1 | 5660.3 | 6399.1 |
| 8180.4  | 8535.4  | 7677.6  | 7812.4  | 7396.7  | 7392.3  | 3944.6 | 4197.4 | 4317.1 |
| 870.0   | 1109.7  | 797.9   | 1420.4  | 1017.5  | 1116.6  | 1152.7 | 1105.3 | 1257.0 |
| 372.5   | 495.4   | 355.8   | 436.8   | 304.2   | 288.2   | 246.7  | 191.9  | 239.6  |
| 5.3     | 6.9     | 6.8     | 8.9     | 8.1     | 8.5     | 4.4    | 3.2    | 5.7    |
| 19.7    | 12.4    | 7.5     | 13.7    | 16.3    | 14.1    | 12.3   | 17.1   | 8.3    |
| 4935.4  | 4729.0  | 3862.5  | 3867.0  | 3276.3  | 3573.8  | 2474.5 | 2370.4 | 2512.5 |
| 696.2   | 698.5   | 365.0   | 585.6   | 430.6   | 476.2   | 375.7  | 323.6  | 406.8  |
| 845.1   | 922.0   | 448.2   | 785.1   | 613.1   | 681.7   | 452.5  | 460.5  | 500.6  |
| 1389.5  | 1949.1  | 1913.1  | 1382.4  | 1297.8  | 1338.8  | 815.5  | 756.4  | 853.3  |

|         |         |         |         |         |         |        |        |        |
|---------|---------|---------|---------|---------|---------|--------|--------|--------|
| 3607.7  | 3930.6  | 2264.8  | 1170.3  | 582.0   | 682.2   | 632.2  | 267.6  | 414.5  |
| 922.8   | 1123.0  | 995.6   | 787.7   | 681.7   | 786.8   | 455.9  | 532.6  | 517.1  |
| 4367.6  | 5117.5  | 4325.0  | 3328.8  | 2784.7  | 3006.8  | 2127.8 | 1962.1 | 2228.8 |
| 1688.4  | 2046.7  | 1888.0  | 748.5   | 648.9   | 803.1   | 690.0  | 670.8  | 731.5  |
| 2787.6  | 3739.7  | 3380.5  | 2621.9  | 2592.1  | 2779.2  | 1927.1 | 2423.8 | 2350.2 |
| 6.3     | 8.7     | 3.2     | 4.2     | 9.9     | 8.3     | 6.0    | 5.1    | 12.4   |
| 144.3   | 172.2   | 129.0   | 108.0   | 100.0   | 146.2   | 188.4  | 212.7  | 214.0  |
| 1488.5  | 1513.6  | 1208.1  | 2236.0  | 2112.2  | 2321.7  | 1427.2 | 1679.9 | 1731.3 |
| 1249.7  | 1186.2  | 937.4   | 1167.2  | 963.1   | 1183.9  | 1517.1 | 1427.3 | 1514.4 |
| 63.4    | 74.6    | 44.7    | 4399.9  | 4384.0  | 4337.1  | 3425.0 | 3595.5 | 3872.8 |
| 756.8   | 944.4   | 462.7   | 1853.4  | 1595.1  | 1767.9  | 1609.3 | 1930.1 | 2092.9 |
| 13122.5 | 12568.8 | 11159.2 | 13837.9 | 12568.0 | 13414.3 | 9111.1 | 9028.2 | 9272.7 |
| 934.0   | 1311.1  | 866.6   | 1350.1  | 1008.9  | 1048.9  | 633.8  | 553.2  | 643.9  |
| 2739.3  | 3387.9  | 2788.4  | 2122.8  | 1832.1  | 2096.4  | 2138.4 | 2125.7 | 2259.7 |
| 2874.1  | 3664.1  | 3166.9  | 3634.8  | 3228.7  | 3744.2  | 2253.1 | 2410.8 | 2556.3 |
| 975.8   | 1190.8  | 959.4   | 440.1   | 363.0   | 383.7   | 300.5  | 342.2  | 340.0  |
| 6842.6  | 6779.7  | 4469.0  | 2659.9  | 1836.8  | 2236.6  | 2614.4 | 1936.5 | 2332.8 |
| 11332.6 | 10625.8 | 8195.0  | 6549.5  | 5140.2  | 5190.6  | 5558.1 | 4496.0 | 5327.6 |
| 145.1   | 155.6   | 153.0   | 337.6   | 307.2   | 344.4   | 263.0  | 298.6  | 317.3  |
| 7210.7  | 8047.9  | 7145.7  | 9570.0  | 8658.7  | 9176.6  | 5234.7 | 5287.2 | 5511.5 |
| 527.6   | 689.5   | 379.8   | 2208.3  | 1981.7  | 2164.7  | 1057.4 | 1283.7 | 1272.4 |
| 272.5   | 343.1   | 198.7   | 753.7   | 713.5   | 794.0   | 568.4  | 717.9  | 706.8  |
| 2796.4  | 2905.7  | 1823.4  | 1592.8  | 1145.4  | 1272.0  | 926.4  | 782.1  | 917.1  |
| 475.0   | 487.7   | 387.8   | 249.2   | 192.8   | 238.4   | 230.6  | 203.0  | 239.5  |
| 785.2   | 1307.7  | 1153.0  | 2498.0  | 2346.5  | 2691.5  | 1098.1 | 1322.8 | 1397.1 |
| 792.4   | 824.2   | 607.7   | 466.7   | 334.6   | 323.7   | 261.2  | 194.8  | 229.0  |
| 807.7   | 926.6   | 679.4   | 412.2   | 344.8   | 367.2   | 275.7  | 341.2  | 359.3  |
| 9831.7  | 10059.9 | 8885.5  | 11688.6 | 10560.4 | 11089.4 | 6604.1 | 6649.9 | 7149.6 |
| 4528.7  | 5282.6  | 4784.4  | 2906.7  | 2398.6  | 2399.6  | 1626.5 | 1415.4 | 1653.2 |
| 8267.9  | 8871.6  | 7797.5  | 10368.2 | 9384.6  | 9548.6  | 5163.3 | 5001.0 | 5518.7 |
| 1891.6  | 2063.4  | 1442.1  | 2002.7  | 1632.3  | 1855.9  | 1083.6 | 961.6  | 1143.8 |
| 1455.1  | 2031.7  | 1761.2  | 580.9   | 503.2   | 538.0   | 681.2  | 669.2  | 754.3  |
| 4357.2  | 5165.2  | 4094.8  | 4544.9  | 3859.9  | 4111.0  | 2377.3 | 1965.6 | 2322.8 |
| 4260.7  | 5057.9  | 4197.9  | 3441.8  | 3405.3  | 3276.3  | 2370.7 | 2598.1 | 2911.0 |
| 2390.0  | 3200.3  | 2533.3  | 60.3    | 32.5    | 46.4    | 35.2   | 26.8   | 30.7   |
| 2032.9  | 1896.1  | 1102.9  | 743.4   | 631.8   | 631.5   | 554.0  | 446.1  | 529.4  |
| 5748.1  | 6049.4  | 4948.7  | 5436.3  | 4667.8  | 4796.2  | 2615.9 | 2486.6 | 2881.4 |
| 350.9   | 480.0   | 313.1   | 248.7   | 183.1   | 202.1   | 145.5  | 115.8  | 136.9  |
| 3922.0  | 3922.9  | 2883.6  | 1458.7  | 1148.1  | 1328.1  | 1352.1 | 1128.3 | 1349.8 |
| 2752.4  | 2698.6  | 1817.1  | 1339.2  | 1021.1  | 1108.8  | 905.1  | 760.5  | 1026.0 |
| 3173.5  | 3237.0  | 2342.2  | 2060.2  | 1504.2  | 1751.3  | 1162.7 | 1108.2 | 1343.1 |
| 1859.5  | 2538.6  | 1955.6  | 553.0   | 306.1   | 422.9   | 839.8  | 281.1  | 620.6  |
| 6355.2  | 7225.5  | 6697.7  | 2399.8  | 1608.7  | 1728.2  | 2779.7 | 1521.4 | 2510.1 |
| 2106.4  | 2184.9  | 1859.6  | 1518.8  | 1231.0  | 1276.1  | 1178.8 | 1050.2 | 1100.9 |
| 10112.7 | 10781.5 | 10364.6 | 8175.3  | 7260.2  | 7154.5  | 3617.2 | 4200.5 | 4198.2 |
| 7.1     | 29.8    | 24.9    | 3.4     | 2.7     | 3.1     | 5.2    | 4.8    | 6.0    |
| 78.4    | 131.7   | 70.9    | 73.3    | 95.8    | 109.8   | 95.9   | 87.9   | 105.1  |
| 2150.0  | 2482.1  | 1839.0  | 1031.4  | 799.8   | 973.3   | 718.1  | 671.4  | 742.9  |
| 6177.9  | 6581.1  | 5580.4  | 315.3   | 330.4   | 360.1   | 246.0  | 335.3  | 324.5  |
| 6601.9  | 7117.1  | 6322.0  | 540.4   | 479.0   | 550.7   | 326.5  | 466.2  | 469.2  |
| 6585.6  | 6511.0  | 5341.4  | 3928.7  | 3107.1  | 3236.8  | 2535.3 | 2294.4 | 2616.5 |
| 574.8   | 732.4   | 507.9   | 70.4    | 46.8    | 57.7    | 58.3   | 39.8   | 59.9   |
| 1740.7  | 2163.8  | 1648.0  | 353.8   | 302.8   | 323.6   | 256.8  | 254.4  | 293.7  |

|        |         |        |        |        |        |        |        |        |
|--------|---------|--------|--------|--------|--------|--------|--------|--------|
| 1288.0 | 1738.6  | 1212.0 | 752.0  | 617.9  | 665.6  | 426.9  | 440.5  | 456.5  |
| 2766.7 | 3193.5  | 2598.3 | 2810.9 | 2355.8 | 2667.5 | 1636.0 | 1699.6 | 1727.8 |
| 2925.1 | 3308.1  | 2700.9 | 2726.1 | 2435.9 | 2561.0 | 2197.8 | 2297.5 | 2429.2 |
| 2421.1 | 2773.3  | 2255.4 | 2988.3 | 2344.6 | 2592.6 | 2357.5 | 2063.7 | 2347.6 |
| 3313.6 | 3796.9  | 2960.9 | 1287.9 | 1152.0 | 1231.8 | 1339.7 | 1363.8 | 1434.1 |
| 638.3  | 758.9   | 638.2  | 392.4  | 323.3  | 372.5  | 301.6  | 271.3  | 300.4  |
| 791.3  | 889.4   | 773.2  | 621.7  | 497.6  | 489.7  | 576.4  | 538.8  | 574.0  |
| 1259.9 | 1551.6  | 1286.8 | 2251.8 | 1695.8 | 1885.2 | 1452.6 | 1445.1 | 1427.7 |
| 1183.2 | 1536.0  | 1216.2 | 1377.2 | 1199.3 | 1349.9 | 716.3  | 823.2  | 795.2  |
| 1552.1 | 2142.5  | 1620.0 | 1335.8 | 1113.6 | 1289.6 | 1414.4 | 1032.0 | 1218.7 |
| 7436.3 | 7757.9  | 5379.9 | 5381.3 | 3660.2 | 3628.4 | 3402.1 | 2519.4 | 2871.7 |
| 491.3  | 648.8   | 565.2  | 262.1  | 233.9  | 260.9  | 238.5  | 279.7  | 303.8  |
| 179.3  | 201.6   | 145.5  | 85.8   | 54.1   | 86.5   | 47.9   | 47.8   | 58.0   |
| 179.7  | 223.9   | 213.5  | 82.5   | 66.0   | 78.1   | 77.7   | 82.1   | 83.9   |
| 362.1  | 453.9   | 429.2  | 185.1  | 140.4  | 174.5  | 158.6  | 198.5  | 181.7  |
| 6361.0 | 7813.6  | 5655.1 | 6464.9 | 5801.0 | 5296.6 | 4096.9 | 4485.8 | 4647.0 |
| 211.0  | 223.5   | 182.2  | 894.7  | 845.1  | 999.4  | 463.2  | 710.8  | 654.7  |
| 1160.0 | 1521.9  | 1295.0 | 1315.5 | 962.8  | 1326.9 | 869.3  | 835.4  | 873.8  |
| 321.6  | 471.6   | 330.6  | 565.8  | 402.6  | 495.4  | 292.8  | 317.0  | 364.8  |
| 2160.8 | 2511.3  | 1784.4 | 1943.4 | 1357.5 | 1479.2 | 2012.8 | 1157.9 | 1733.5 |
| 4354.7 | 4636.8  | 4298.2 | 2147.4 | 1979.7 | 2238.9 | 1446.5 | 1535.1 | 1558.6 |
| 1718.8 | 2149.2  | 1716.1 | 864.9  | 744.9  | 832.0  | 816.8  | 933.3  | 910.7  |
| 2.0    | 0.7     | 0.9    | 5.9    | 2.8    | 4.8    | 1.4    | 1.3    | 2.4    |
| 3094.5 | 4595.3  | 4459.5 | 1334.3 | 1295.1 | 1601.9 | 1116.5 | 1537.8 | 1479.8 |
| 1068.7 | 1356.4  | 1036.9 | 710.7  | 594.7  | 641.4  | 727.9  | 699.4  | 759.7  |
| 1168.4 | 1357.1  | 961.1  | 1169.3 | 980.6  | 1027.0 | 832.8  | 763.9  | 863.8  |
| 9631.3 | 10174.7 | 8842.6 | 4890.0 | 4532.6 | 4648.8 | 3144.0 | 3123.2 | 3449.5 |
| 4459.4 | 4340.7  | 2940.5 | 2617.8 | 1947.9 | 2081.9 | 2422.0 | 1953.9 | 2186.7 |
| 4663.6 | 6076.9  | 5903.3 | 3404.9 | 3466.8 | 3973.1 | 2022.6 | 2931.4 | 2885.0 |
| 7482.3 | 7478.1  | 6738.3 | 1998.1 | 2393.0 | 2369.2 | 1223.5 | 1872.4 | 1690.4 |
| 4850.1 | 4655.9  | 3124.6 | 3160.3 | 2340.5 | 2468.7 | 2621.6 | 2188.6 | 2400.6 |
| 316.9  | 339.7   | 135.7  | 190.3  | 160.0  | 169.0  | 146.5  | 137.6  | 151.1  |
| 2415.3 | 2307.0  | 1005.6 | 2021.2 | 1329.2 | 1451.0 | 1127.2 | 786.6  | 918.6  |
| 3979.0 | 4342.2  | 3227.9 | 2085.8 | 1888.6 | 1963.0 | 1517.2 | 1629.1 | 1700.2 |
| 4129.4 | 3971.5  | 2678.6 | 2844.9 | 2111.3 | 2381.2 | 1722.1 | 1591.5 | 1725.6 |
| 178.2  | 207.6   | 192.2  | 154.9  | 109.2  | 141.4  | 163.1  | 149.3  | 158.4  |
| 24.6   | 28.2    | 17.1   | 24.0   | 20.4   | 25.4   | 27.9   | 24.2   | 28.1   |
| 1625.2 | 1589.1  | 981.5  | 1496.7 | 1181.1 | 1215.5 | 1034.3 | 894.5  | 1108.9 |
| 3825.0 | 3665.0  | 2235.6 | 2898.8 | 2277.5 | 2285.9 | 2177.0 | 1772.3 | 2104.9 |
| 3269.7 | 3447.9  | 2762.2 | 1419.8 | 1159.3 | 1299.4 | 743.5  | 767.7  | 808.8  |
| 1830.7 | 2520.8  | 2038.7 | 787.5  | 707.3  | 680.1  | 807.6  | 680.1  | 768.2  |
| 72.0   | 129.2   | 104.7  | 32.9   | 20.7   | 43.4   | 28.4   | 22.1   | 15.6   |
| 591.3  | 758.3   | 556.1  | 1293.0 | 1084.6 | 1191.3 | 980.5  | 699.2  | 918.3  |
| 4323.9 | 4494.2  | 3103.4 | 2288.1 | 1765.7 | 1867.5 | 1273.1 | 1086.7 | 1378.6 |
| 1218.8 | 1583.0  | 1231.1 | 804.4  | 671.7  | 753.6  | 488.2  | 449.6  | 553.7  |
| 7134.3 | 7392.3  | 6239.6 | 8248.4 | 7698.7 | 7400.3 | 7891.1 | 7989.0 | 8175.3 |
| 1183.0 | 1209.2  | 724.8  | 378.5  | 309.7  | 308.0  | 537.8  | 409.5  | 530.6  |
| 692.4  | 745.2   | 402.4  | 281.9  | 212.4  | 229.7  | 336.1  | 238.5  | 313.7  |
| 2519.5 | 2712.4  | 1637.3 | 3409.4 | 2615.4 | 2406.2 | 2099.1 | 1946.4 | 2409.9 |
| 3211.0 | 3664.7  | 1792.9 | 1348.8 | 933.1  | 920.2  | 1108.7 | 720.3  | 1034.8 |
| 5779.8 | 5903.1  | 3917.2 | 3156.3 | 2291.9 | 2442.2 | 2154.9 | 1522.5 | 1900.7 |
| 937.7  | 983.5   | 432.0  | 701.4  | 578.2  | 619.8  | 594.7  | 518.2  | 628.5  |
| 1808.2 | 1859.1  | 920.0  | 3146.8 | 2640.9 | 2842.2 | 1323.4 | 1139.3 | 1421.6 |



|         |         |         |         |         |         |        |        |        |
|---------|---------|---------|---------|---------|---------|--------|--------|--------|
| 3710.6  | 4690.3  | 3270.7  | 1683.8  | 1210.6  | 1333.5  | 1168.3 | 1004.8 | 1140.9 |
| 312.0   | 471.9   | 428.5   | 1007.6  | 914.0   | 1010.8  | 566.4  | 839.4  | 731.7  |
| 348.7   | 458.2   | 367.4   | 300.4   | 232.3   | 291.5   | 238.4  | 300.9  | 299.3  |
| 666.2   | 907.0   | 858.9   | 709.2   | 581.7   | 674.7   | 424.8  | 554.7  | 513.9  |
| 691.6   | 892.7   | 652.8   | 369.7   | 304.3   | 384.6   | 345.1  | 348.3  | 387.9  |
| 935.8   | 1340.7  | 931.8   | 1064.5  | 887.4   | 895.3   | 535.0  | 600.4  | 651.9  |
| 3417.4  | 4144.3  | 3275.0  | 1023.7  | 898.3   | 816.8   | 1065.8 | 993.8  | 1045.4 |
| 2449.7  | 2916.4  | 2112.6  | 530.8   | 393.7   | 431.3   | 283.3  | 250.0  | 291.2  |
| 190.0   | 399.1   | 443.6   | 123.6   | 124.9   | 130.3   | 66.1   | 119.8  | 98.3   |
| 969.5   | 1349.4  | 1177.1  | 486.6   | 452.1   | 520.3   | 328.6  | 391.7  | 356.2  |
| 53.9    | 63.9    | 65.8    | 87.2    | 83.6    | 99.6    | 62.6   | 77.6   | 71.1   |
| 285.2   | 346.8   | 353.4   | 611.4   | 532.4   | 653.9   | 452.5  | 633.7  | 485.9  |
| 49.1    | 47.3    | 44.1    | 57.7    | 45.8    | 44.1    | 23.5   | 23.8   | 13.1   |
| 8620.9  | 9682.6  | 8487.8  | 5858.7  | 5083.3  | 5403.7  | 3715.5 | 3817.8 | 3985.0 |
| 4862.2  | 4991.8  | 3283.4  | 4483.0  | 3509.6  | 3719.3  | 3048.3 | 2633.0 | 3051.6 |
| 860.1   | 909.9   | 559.3   | 426.2   | 378.2   | 403.1   | 214.8  | 279.0  | 264.2  |
| 3499.3  | 4618.8  | 3325.8  | 3830.7  | 3594.0  | 3834.0  | 2969.3 | 3548.8 | 3595.5 |
| 618.8   | 588.6   | 298.8   | 320.1   | 200.3   | 226.4   | 201.2  | 173.5  | 187.2  |
| 712.4   | 836.3   | 479.2   | 1153.2  | 927.7   | 802.0   | 881.4  | 832.0  | 948.0  |
| 1566.5  | 1818.1  | 1459.2  | 1411.3  | 1131.7  | 1199.1  | 1490.0 | 1345.0 | 1498.3 |
| 4299.4  | 5210.4  | 4110.6  | 2095.7  | 1283.8  | 1424.0  | 1217.2 | 814.7  | 994.5  |
| 438.8   | 421.3   | 260.7   | 64.2    | 44.9    | 69.1    | 80.4   | 62.8   | 81.9   |
| 1703.0  | 1675.5  | 1203.5  | 902.6   | 724.6   | 852.9   | 591.4  | 578.8  | 655.9  |
| 2174.1  | 1790.9  | 996.0   | 587.0   | 567.4   | 584.7   | 394.3  | 437.4  | 461.4  |
| 671.4   | 1273.5  | 1035.6  | 746.1   | 642.1   | 714.5   | 429.3  | 694.3  | 537.4  |
| 968.8   | 1754.3  | 1482.2  | 730.0   | 640.0   | 656.8   | 704.9  | 1062.7 | 839.3  |
| 661.7   | 935.9   | 700.2   | 466.0   | 399.8   | 517.3   | 488.2  | 469.9  | 519.2  |
| 5816.5  | 6829.1  | 6674.4  | 126.0   | 126.4   | 154.4   | 110.8  | 108.6  | 111.1  |
| 1871.2  | 2299.9  | 1576.6  | 401.5   | 321.8   | 397.4   | 442.0  | 364.7  | 439.2  |
| 8470.9  | 9566.9  | 8821.8  | 7943.2  | 6973.8  | 7187.8  | 4319.6 | 4137.1 | 4795.0 |
| 12745.2 | 13088.4 | 11564.8 | 7278.0  | 6428.6  | 6650.2  | 4288.4 | 4335.8 | 4687.9 |
| 1403.5  | 1589.8  | 1212.0  | 1242.2  | 1040.7  | 1152.4  | 1070.4 | 998.9  | 1092.7 |
| 29.5    | 34.1    | 25.6    | 21.5    | 26.6    | 27.0    | 21.1   | 20.1   | 28.6   |
| 2347.6  | 2857.2  | 2048.4  | 1665.1  | 1382.6  | 1449.1  | 1330.0 | 1108.6 | 1288.3 |
| 9.4     | 17.8    | 4.4     | 14.3    | 12.2    | 7.0     | 8.4    | 11.0   | 9.5    |
| 861.2   | 832.7   | 494.5   | 736.1   | 635.5   | 708.5   | 401.3  | 394.9  | 447.9  |
| 532.7   | 751.5   | 669.0   | 907.2   | 791.0   | 996.9   | 493.8  | 653.3  | 605.8  |
| 10975.5 | 10975.2 | 9928.3  | 8986.5  | 8903.9  | 8830.2  | 5746.3 | 6015.6 | 6193.5 |
| 3896.7  | 4706.4  | 2628.0  | 1982.0  | 1166.8  | 1202.2  | 1423.1 | 1064.2 | 1151.1 |
| 492.7   | 781.0   | 523.3   | 268.2   | 296.5   | 328.2   | 109.5  | 135.7  | 168.3  |
| 10271.1 | 10984.3 | 9737.7  | 12322.8 | 11186.7 | 11538.6 | 7263.8 | 6848.2 | 7534.7 |
| 6189.9  | 6851.6  | 5188.4  | 4612.3  | 4101.0  | 4383.9  | 3823.3 | 3924.9 | 4141.0 |
| 5.8     | 2.6     | 3.3     | 5.2     | 11.3    | 5.7     | 5.5    | 5.6    | 7.9    |
| 9.1     | 22.9    | 25.6    | 14.7    | 12.5    | 12.0    | 35.0   | 35.1   | 33.4   |
| 119.4   | 222.4   | 217.9   | 389.5   | 308.9   | 369.8   | 229.9  | 315.1  | 250.9  |
| 551.2   | 719.1   | 650.0   | 878.3   | 726.7   | 825.1   | 446.9  | 440.0  | 521.3  |
| 2402.4  | 2801.9  | 2248.4  | 2739.8  | 2476.0  | 2485.0  | 1734.9 | 1609.2 | 1709.5 |
| 2454.9  | 3262.1  | 2170.8  | 4873.2  | 3977.1  | 4293.9  | 3378.8 | 3117.3 | 3237.6 |
| 4101.7  | 4702.9  | 3592.4  | 3972.5  | 3076.4  | 3300.7  | 2669.5 | 2198.8 | 2574.9 |
| 1228.4  | 1618.3  | 1676.2  | 1362.5  | 1143.3  | 1278.4  | 1322.4 | 1326.8 | 1481.0 |
| 501.5   | 633.9   | 382.8   | 438.8   | 391.1   | 437.7   | 458.0  | 477.4  | 496.4  |
| 631.7   | 764.3   | 492.4   | 567.6   | 499.3   | 524.8   | 516.9  | 518.3  | 566.9  |
| 1461.9  | 1865.3  | 1504.0  | 2166.6  | 1726.6  | 1841.3  | 1664.1 | 1499.9 | 1795.6 |

|         |         |        |        |        |        |        |        |        |
|---------|---------|--------|--------|--------|--------|--------|--------|--------|
| 7742.2  | 8245.4  | 7606.3 | 6883.3 | 6296.4 | 6307.4 | 3936.4 | 4099.5 | 4230.1 |
| 2167.2  | 2824.2  | 2111.7 | 1381.6 | 1041.3 | 1315.9 | 993.2  | 853.6  | 1031.5 |
| 2.8     | 1.5     | 3.6    | 4.1    | 1.6    | 3.0    | 2.0    | 0.8    | 3.1    |
| 2.2     | 1.0     | 1.0    | 10.4   | 4.5    | 17.0   | 7.6    | 1.3    | 4.9    |
| 10.1    | 13.3    | 2.2    | 16.8   | 15.9   | 10.4   | 11.8   | 8.1    | 9.9    |
| 1241.9  | 1478.0  | 1074.0 | 502.9  | 445.0  | 534.2  | 388.3  | 383.3  | 444.1  |
| 1323.7  | 1546.1  | 1138.5 | 1127.9 | 848.6  | 903.4  | 604.5  | 552.7  | 577.9  |
| 1191.0  | 1309.2  | 826.4  | 582.8  | 341.3  | 416.7  | 540.2  | 399.4  | 426.5  |
| 1174.6  | 1277.5  | 755.6  | 1335.8 | 843.2  | 952.6  | 584.2  | 483.3  | 490.0  |
| 4352.0  | 5386.0  | 4994.8 | 1899.8 | 1863.5 | 1971.7 | 2011.7 | 2205.9 | 2348.0 |
| 1292.5  | 1488.5  | 1052.7 | 1150.1 | 892.6  | 936.3  | 1055.9 | 909.1  | 1109.1 |
| 4097.8  | 4756.3  | 3985.5 | 2200.4 | 1817.4 | 2071.4 | 1121.1 | 1145.9 | 1264.1 |
| 1416.4  | 2157.4  | 1934.5 | 1202.5 | 1094.8 | 1074.1 | 915.5  | 965.0  | 1085.9 |
| 173.8   | 271.8   | 246.7  | 79.0   | 102.1  | 105.7  | 61.7   | 98.4   | 103.9  |
| 10071.9 | 11305.3 | 9496.8 | 8501.0 | 8169.1 | 8269.6 | 4973.1 | 5674.0 | 5933.4 |
| 2508.4  | 3274.7  | 2533.5 | 3314.1 | 2902.5 | 3528.7 | 1997.8 | 2042.1 | 2267.7 |
| 1957.6  | 2765.5  | 2309.1 | 135.4  | 100.1  | 121.4  | 81.5   | 65.3   | 70.0   |
| 7536.4  | 8042.5  | 7413.3 | 6127.2 | 5208.7 | 5611.9 | 4234.2 | 3807.7 | 4354.5 |
| 7770.1  | 7172.8  | 5749.3 | 1644.8 | 1621.8 | 1646.8 | 1370.0 | 1501.6 | 1653.5 |
| 4616.2  | 4559.3  | 3000.3 | 953.8  | 918.2  | 970.8  | 571.0  | 611.5  | 662.9  |
| 2332.2  | 2653.1  | 1761.7 | 1463.7 | 1218.0 | 1275.0 | 1078.3 | 957.3  | 1148.3 |
| 2635.8  | 2941.7  | 1940.2 | 1610.3 | 1348.1 | 1571.2 | 1362.4 | 1232.4 | 1524.1 |
| 6062.5  | 6154.4  | 4716.7 | 3157.6 | 2637.2 | 2956.9 | 1751.5 | 1446.9 | 1784.9 |
| 1891.6  | 2909.9  | 2516.6 | 189.2  | 118.2  | 130.3  | 239.1  | 168.2  | 221.0  |
| 975.6   | 1473.7  | 1305.5 | 73.5   | 41.6   | 55.3   | 92.4   | 62.8   | 68.4   |
| 27.9    | 47.7    | 37.2   | 55.7   | 49.1   | 55.3   | 24.4   | 21.9   | 31.3   |
| 2362.3  | 2862.8  | 2261.3 | 1978.1 | 1767.7 | 1815.8 | 1353.8 | 1741.5 | 1701.0 |
| 1097.7  | 1355.6  | 1360.0 | 2599.0 | 2456.1 | 2798.7 | 1120.3 | 1474.6 | 1420.1 |
| 1801.0  | 2252.5  | 2239.9 | 1856.3 | 1755.0 | 1864.3 | 1315.3 | 1524.5 | 1527.6 |
| 3116.7  | 4088.8  | 3233.5 | 2545.9 | 2242.9 | 2440.6 | 1348.6 | 1453.0 | 1573.0 |
| 352.1   | 453.2   | 350.1  | 499.7  | 405.9  | 390.5  | 380.0  | 445.6  | 460.1  |
| 1969.4  | 2441.2  | 2007.0 | 2211.1 | 1661.4 | 1906.6 | 1335.9 | 1152.5 | 1398.7 |
| 5725.3  | 6913.3  | 5795.0 | 7630.9 | 7280.2 | 7940.2 | 5832.3 | 5618.4 | 6314.2 |
| 235.2   | 359.2   | 381.2  | 862.4  | 895.8  | 1075.9 | 471.0  | 605.2  | 753.3  |
| 401.7   | 623.8   | 593.3  | 488.7  | 513.6  | 594.1  | 338.0  | 489.2  | 458.6  |
| 440.4   | 666.9   | 602.1  | 451.8  | 447.5  | 522.5  | 368.8  | 483.8  | 465.8  |
| 490.9   | 740.7   | 718.8  | 696.1  | 590.8  | 725.4  | 467.0  | 648.9  | 590.8  |
| 1.8     | 1.9     | 2.7    | 7.5    | 4.5    | 8.0    | 1.3    | 2.1    | 2.2    |
| 1369.9  | 1385.0  | 715.1  | 455.0  | 314.3  | 427.9  | 470.3  | 295.8  | 406.4  |
| 410.2   | 465.5   | 227.0  | 111.4  | 86.4   | 91.7   | 64.2   | 50.6   | 63.9   |
| 3009.7  | 2946.6  | 2164.1 | 3028.2 | 2487.0 | 2602.0 | 2615.2 | 2155.1 | 2684.7 |
| 1710.9  | 2145.6  | 1376.2 | 2186.4 | 1784.3 | 1876.5 | 1161.9 | 1089.3 | 1343.2 |
| 698.9   | 927.2   | 677.6  | 647.5  | 531.6  | 616.3  | 460.7  | 470.8  | 524.6  |
| 1936.4  | 2101.9  | 1216.9 | 1875.1 | 1495.8 | 1583.7 | 1471.3 | 1310.2 | 1465.8 |
| 2010.0  | 2153.8  | 1160.2 | 1323.8 | 1080.0 | 1155.1 | 1188.6 | 1145.0 | 1245.4 |
| 1695.3  | 1787.8  | 1023.8 | 1095.0 | 929.8  | 924.1  | 1473.2 | 1391.4 | 1420.3 |
| 524.8   | 500.6   | 244.8  | 379.7  | 292.0  | 310.1  | 236.5  | 249.5  | 268.8  |
| 3479.9  | 3678.9  | 2785.4 | 2011.3 | 1676.2 | 1818.4 | 1759.6 | 1584.8 | 1798.1 |
| 874.3   | 1081.1  | 804.1  | 1161.9 | 1036.8 | 1165.4 | 746.8  | 730.9  | 850.4  |
| 1331.2  | 1567.7  | 923.4  | 212.6  | 165.4  | 191.9  | 137.4  | 125.1  | 167.2  |
| 871.6   | 1242.4  | 794.3  | 651.5  | 496.8  | 463.0  | 271.1  | 216.6  | 290.8  |
| 1534.0  | 2149.6  | 1522.4 | 1417.9 | 1096.1 | 1247.5 | 935.9  | 799.6  | 932.9  |
| 1893.8  | 2091.8  | 1496.0 | 1621.2 | 1323.2 | 1556.5 | 1246.5 | 1132.5 | 1290.7 |

|        |         |        |         |         |         |        |        |        |
|--------|---------|--------|---------|---------|---------|--------|--------|--------|
| 2152.6 | 2613.3  | 1997.2 | 2181.9  | 1839.2  | 2017.0  | 1558.6 | 1552.0 | 1702.0 |
| 1339.5 | 1653.7  | 1358.3 | 1113.7  | 950.5   | 1169.0  | 894.7  | 741.7  | 910.1  |
| 3390.9 | 4012.9  | 3512.7 | 2146.9  | 1706.4  | 1946.4  | 1323.1 | 1056.2 | 1334.2 |
| 8469.3 | 8934.3  | 7331.1 | 4105.2  | 3839.4  | 4188.4  | 3246.5 | 3596.3 | 3805.6 |
| 41.9   | 55.4    | 36.6   | 45.2    | 46.7    | 48.7    | 98.4   | 53.4   | 43.0   |
| 1796.7 | 2572.8  | 2433.4 | 1949.4  | 1738.8  | 1866.4  | 1467.0 | 1722.1 | 1769.7 |
| 328.8  | 920.8   | 2253.7 | 388.2   | 315.3   | 387.3   | 484.8  | 652.8  | 612.8  |
| 305.2  | 747.1   | 1847.0 | 920.5   | 879.0   | 899.0   | 576.4  | 713.6  | 730.8  |
| 429.6  | 1210.4  | 2660.1 | 1774.8  | 1520.9  | 1748.2  | 1014.6 | 1315.7 | 1232.7 |
| 3151.4 | 3712.9  | 2621.4 | 856.5   | 640.1   | 690.9   | 867.0  | 759.2  | 922.3  |
| 1219.4 | 1408.4  | 1132.1 | 772.0   | 624.5   | 721.1   | 566.5  | 732.4  | 635.9  |
| 3550.7 | 3739.6  | 2170.3 | 2158.0  | 1513.6  | 1589.9  | 1496.3 | 1121.6 | 1489.7 |
| 3041.9 | 3065.9  | 1512.3 | 1009.1  | 646.1   | 729.5   | 1020.6 | 693.0  | 904.6  |
| 912.0  | 1475.8  | 1769.2 | 1487.1  | 1358.1  | 1412.3  | 1158.6 | 1247.5 | 1332.2 |
| 1635.7 | 1636.2  | 858.7  | 1364.9  | 1011.7  | 942.3   | 1444.6 | 1106.8 | 1367.9 |
| 990.3  | 1138.1  | 580.7  | 822.0   | 700.4   | 752.8   | 627.2  | 608.7  | 691.2  |
| 1171.0 | 1344.3  | 752.0  | 671.6   | 532.8   | 517.0   | 592.8  | 541.1  | 613.5  |
| 2754.4 | 2810.4  | 1567.7 | 2271.3  | 1850.1  | 1685.6  | 2093.2 | 1866.0 | 2185.5 |
| 795.6  | 1146.5  | 782.9  | 553.8   | 400.8   | 456.6   | 441.4  | 461.5  | 449.4  |
| 9204.4 | 10263.1 | 8668.9 | 5419.7  | 4786.7  | 4631.1  | 5334.6 | 5428.5 | 5610.4 |
| 8635.6 | 9405.4  | 8305.4 | 6487.8  | 5784.1  | 6026.1  | 4990.8 | 5315.5 | 5414.4 |
| 1573.7 | 2037.3  | 1826.4 | 1121.1  | 1058.5  | 1093.0  | 756.9  | 921.6  | 947.6  |
| 806.9  | 852.3   | 517.0  | 610.8   | 434.2   | 481.5   | 258.4  | 226.6  | 269.3  |
| 287.5  | 317.8   | 168.4  | 153.3   | 121.2   | 141.7   | 171.8  | 144.9  | 191.6  |
| 103.1  | 113.2   | 80.9   | 66.7    | 60.7    | 59.9    | 31.7   | 24.7   | 32.0   |
| 463.2  | 478.8   | 283.0  | 399.2   | 303.8   | 365.2   | 296.0  | 324.3  | 311.6  |
| 611.1  | 994.2   | 1052.8 | 1964.7  | 1825.7  | 2095.2  | 1345.3 | 1580.6 | 1617.6 |
| 1151.4 | 1831.9  | 1706.5 | 3491.9  | 3345.7  | 3432.7  | 2140.8 | 2506.8 | 2539.1 |
| 15.8   | 13.7    | 19.7   | 692.3   | 383.4   | 464.1   | 373.4  | 273.7  | 316.3  |
| 4907.0 | 5336.0  | 3868.3 | 1892.7  | 1598.8  | 1428.7  | 1741.1 | 1502.9 | 1876.5 |
| 628.1  | 878.7   | 830.8  | 326.6   | 268.6   | 297.1   | 164.8  | 183.4  | 209.0  |
| 9615.3 | 10185.5 | 9190.6 | 10331.3 | 9509.2  | 9863.4  | 6217.8 | 6335.5 | 6657.2 |
| 3063.4 | 4285.9  | 3877.1 | 481.4   | 528.1   | 609.5   | 318.9  | 439.3  | 491.4  |
| 475.9  | 649.6   | 465.6  | 403.9   | 253.0   | 315.1   | 235.5  | 243.9  | 233.7  |
| 1433.3 | 1945.8  | 1448.0 | 1274.8  | 984.8   | 1032.8  | 922.8  | 821.2  | 1004.1 |
| 2628.0 | 2440.8  | 1568.4 | 1266.9  | 925.3   | 1027.9  | 893.3  | 808.5  | 884.9  |
| 872.0  | 1018.8  | 519.8  | 262.8   | 211.7   | 209.6   | 205.6  | 187.1  | 220.6  |
| 852.2  | 910.1   | 598.5  | 252.1   | 214.5   | 244.7   | 325.8  | 291.9  | 326.8  |
| 144.8  | 182.1   | 170.0  | 164.2   | 127.1   | 143.2   | 113.2  | 93.9   | 124.9  |
| 81.9   | 113.6   | 81.4   | 478.9   | 425.3   | 506.8   | 370.2  | 484.7  | 442.3  |
| 2.1    | 4.2     | 5.1    | 3.7     | 11.4    | 15.2    | 4.1    | 4.4    | 13.9   |
| 890.2  | 1006.3  | 577.5  | 274.4   | 192.2   | 211.8   | 217.1  | 154.7  | 242.0  |
| 3.5    | 4.2     | 3.1    | 10.6    | 6.5     | 7.3     | 19.8   | 22.2   | 18.1   |
| 56.2   | 61.4    | 27.2   | 40.3    | 24.5    | 21.7    | 50.2   | 49.5   | 53.1   |
| 923.5  | 1046.5  | 696.9  | 998.6   | 750.7   | 846.9   | 433.3  | 430.1  | 444.3  |
| 2918.0 | 3146.8  | 2270.2 | 3712.5  | 3230.1  | 3357.4  | 2898.5 | 2778.3 | 2926.1 |
| 430.2  | 509.5   | 303.6  | 232.9   | 189.3   | 233.0   | 412.6  | 370.3  | 417.8  |
| 9171.0 | 9278.9  | 8990.0 | 10893.5 | 10819.5 | 10624.8 | 7209.3 | 7339.3 | 7757.7 |
| 191.2  | 259.6   | 320.8  | 227.8   | 296.8   | 346.9   | 145.2  | 249.1  | 236.0  |
| 2616.0 | 2980.9  | 1716.6 | 662.9   | 497.9   | 533.9   | 556.6  | 575.2  | 555.3  |
| 1499.1 | 1623.8  | 1179.7 | 824.3   | 667.5   | 760.6   | 690.4  | 621.7  | 728.6  |
| 1202.5 | 1524.5  | 1129.7 | 476.6   | 424.0   | 429.3   | 472.2  | 455.5  | 511.5  |
| 2416.6 | 2238.5  | 1401.4 | 1822.1  | 1482.9  | 1565.5  | 1055.0 | 1030.9 | 1185.7 |

|        |        |        |        |        |        |        |        |        |
|--------|--------|--------|--------|--------|--------|--------|--------|--------|
| 541.0  | 656.9  | 385.6  | 295.3  | 254.6  | 283.7  | 198.7  | 183.3  | 217.7  |
| 230.2  | 352.1  | 353.6  | 158.4  | 133.5  | 156.4  | 120.1  | 156.9  | 164.0  |
| 483.2  | 762.5  | 789.9  | 576.8  | 497.9  | 577.0  | 354.8  | 410.8  | 444.1  |
| 0.9    | 1.6    | 1.1    | 1.7    | 1.6    | 2.2    | 0.8    | 1.1    | 1.1    |
| 784.9  | 944.5  | 732.3  | 417.7  | 428.6  | 447.3  | 453.3  | 576.4  | 767.9  |
| 320.0  | 323.2  | 294.7  | 1102.8 | 1014.2 | 1091.8 | 685.9  | 1271.7 | 856.4  |
| 282.4  | 317.5  | 289.9  | 1564.7 | 1386.6 | 1502.1 | 771.1  | 1328.4 | 1046.2 |
| 0.9    | 3.1    | 4.2    | 6.0    | 4.7    | 8.0    | 3.3    | 3.0    | 0.9    |
| 2123.1 | 2803.1 | 1503.8 | 453.8  | 324.8  | 361.5  | 380.1  | 393.3  | 423.5  |
| 1169.4 | 1441.7 | 895.2  | 1066.0 | 920.3  | 1058.6 | 1006.2 | 1061.2 | 1155.4 |
| 2093.7 | 2832.7 | 2483.1 | 1054.8 | 981.0  | 1132.9 | 1207.5 | 1553.2 | 1400.9 |
| 4243.9 | 5047.4 | 3649.0 | 3323.4 | 2583.1 | 2759.0 | 2041.9 | 1551.6 | 1853.6 |
| 556.8  | 681.1  | 546.2  | 565.3  | 510.5  | 582.7  | 268.8  | 327.9  | 377.3  |
| 4092.4 | 3822.2 | 2667.4 | 3076.6 | 2362.1 | 2678.1 | 1693.1 | 1619.7 | 1918.9 |
| 13.6   | 17.6   | 10.8   | 32.4   | 23.6   | 32.3   | 16.0   | 14.6   | 17.2   |
| 420.0  | 527.1  | 382.3  | 250.2  | 245.5  | 264.0  | 216.3  | 240.3  | 284.2  |
| 3012.3 | 3245.6 | 2638.2 | 2335.7 | 1920.1 | 2129.1 | 1578.2 | 1690.4 | 1767.7 |
| 192.0  | 239.7  | 135.4  | 66.2   | 56.0   | 76.1   | 96.3   | 93.7   | 118.3  |
| 307.8  | 321.0  | 229.0  | 204.5  | 171.0  | 220.3  | 163.1  | 185.9  | 208.0  |
| 991.3  | 1073.0 | 703.3  | 1172.5 | 914.0  | 901.0  | 888.9  | 968.0  | 1026.8 |
| 547.6  | 629.6  | 438.6  | 613.0  | 477.7  | 577.2  | 432.2  | 423.0  | 468.7  |
| 433.4  | 561.3  | 337.8  | 749.7  | 666.4  | 699.8  | 299.4  | 318.7  | 458.6  |
| 3159.3 | 3359.8 | 2019.5 | 1659.4 | 1375.9 | 1483.9 | 1135.6 | 960.3  | 1098.6 |
| 7038.4 | 7698.0 | 7256.9 | 2117.0 | 1878.5 | 1996.9 | 1722.8 | 1676.5 | 1915.5 |
| 2525.2 | 3253.8 | 2554.5 | 1008.3 | 832.6  | 1062.6 | 644.5  | 606.5  | 721.4  |
| 140.8  | 221.8  | 134.2  | 2224.8 | 1953.3 | 2143.9 | 1335.1 | 1448.6 | 1548.1 |
| 71.1   | 90.1   | 63.0   | 363.4  | 268.0  | 335.0  | 671.1  | 572.7  | 770.8  |
| 215.8  | 325.6  | 329.2  | 250.6  | 190.2  | 220.5  | 135.0  | 124.7  | 151.9  |
| 545.8  | 725.6  | 429.8  | 129.6  | 110.2  | 111.6  | 239.4  | 264.6  | 317.3  |
| 3191.3 | 3750.4 | 2506.0 | 2143.2 | 1866.2 | 1993.7 | 1530.9 | 1592.1 | 1615.6 |
| 250.9  | 349.1  | 221.6  | 80.9   | 72.9   | 78.8   | 127.5  | 139.8  | 140.4  |
| 1043.9 | 1269.6 | 936.8  | 978.9  | 761.9  | 861.1  | 612.5  | 770.4  | 658.2  |
| 363.0  | 467.6  | 414.4  | 273.1  | 202.4  | 386.3  | 150.5  | 158.9  | 214.7  |
| 4510.8 | 4676.7 | 2954.9 | 2390.3 | 1817.6 | 1763.5 | 2582.7 | 1830.3 | 2205.1 |
| 981.7  | 1286.9 | 1033.9 | 824.3  | 717.6  | 846.7  | 434.4  | 458.5  | 512.0  |
| 8455.8 | 7933.2 | 6350.7 | 8737.9 | 7365.6 | 7632.1 | 5435.9 | 4742.4 | 5432.8 |
| 4209.8 | 4417.4 | 2745.3 | 1110.6 | 822.0  | 831.2  | 1631.3 | 1404.9 | 1516.3 |
| 3816.7 | 4660.3 | 3634.2 | 3012.0 | 2295.2 | 2449.0 | 2166.3 | 2116.1 | 2223.2 |
| 1562.8 | 2423.2 | 2336.8 | 1949.4 | 1534.7 | 1701.6 | 1230.4 | 1245.2 | 1350.9 |
| 8026.6 | 8804.0 | 7871.1 | 8149.7 | 7535.8 | 7721.2 | 5469.3 | 5717.0 | 6049.5 |
| 1168.3 | 1363.6 | 1299.8 | 719.4  | 621.1  | 695.9  | 553.0  | 448.3  | 531.1  |
| 2273.4 | 2155.5 | 1554.4 | 1122.7 | 941.2  | 1014.5 | 1022.0 | 902.4  | 1036.7 |
| 3138.1 | 3333.9 | 2307.1 | 1792.5 | 1607.4 | 1599.6 | 1563.3 | 1445.7 | 1688.9 |
| 3647.1 | 4228.5 | 3686.3 | 1982.4 | 1743.9 | 1912.5 | 1562.8 | 1488.3 | 1690.5 |
| 376.6  | 491.5  | 410.0  | 594.4  | 485.9  | 540.9  | 381.5  | 389.2  | 423.6  |
| 650.0  | 788.2  | 775.0  | 1397.4 | 1119.3 | 1169.7 | 896.0  | 1017.5 | 942.6  |
| 687.3  | 800.5  | 495.5  | 154.5  | 135.3  | 179.7  | 253.7  | 239.6  | 274.9  |
| 203.8  | 285.7  | 213.9  | 423.3  | 343.0  | 376.1  | 242.5  | 253.9  | 258.8  |
| 961.4  | 1253.5 | 924.3  | 1795.7 | 1495.4 | 1687.1 | 1317.0 | 1279.8 | 1354.4 |
| 346.5  | 412.9  | 330.5  | 803.3  | 644.5  | 756.2  | 478.1  | 530.3  | 524.3  |
| 3602.7 | 3240.6 | 2564.9 | 9.7    | 2.0    | 2.9    | 1.1    | 1.9    | 2.8    |
| 1940.3 | 2987.3 | 1895.0 | 2541.2 | 2007.9 | 2147.3 | 1459.8 | 1376.2 | 1579.3 |
| 1.2    | 4.9    | 2.6    | 2.7    | 3.8    | 2.6    | 2.8    | 5.0    | 3.6    |

|        |        |        |        |        |        |        |        |        |
|--------|--------|--------|--------|--------|--------|--------|--------|--------|
| 25.4   | 38.0   | 23.3   | 68.0   | 56.5   | 65.9   | 59.1   | 68.0   | 77.0   |
| 25.6   | 21.0   | 28.9   | 72.4   | 74.5   | 72.9   | 89.1   | 111.4  | 95.8   |
| 26.2   | 23.6   | 34.4   | 105.5  | 95.9   | 97.8   | 165.2  | 235.0  | 234.4  |
| 1893.4 | 1909.6 | 943.9  | 2733.0 | 1706.2 | 1892.9 | 1574.6 | 1229.0 | 1410.9 |
| 5380.3 | 5366.0 | 3124.7 | 6573.3 | 4711.1 | 5007.4 | 4690.9 | 3645.2 | 4051.6 |
| 2609.4 | 3168.0 | 2432.2 | 2082.6 | 1752.6 | 1990.3 | 1419.7 | 1324.4 | 1513.2 |
| 3417.6 | 3688.3 | 2315.1 | 2101.7 | 1688.7 | 1815.6 | 993.5  | 846.7  | 1006.1 |
| 723.9  | 897.0  | 563.7  | 826.5  | 509.6  | 584.7  | 851.9  | 510.2  | 672.1  |
| 3.2    | 2.3    | 1.2    | 125.3  | 77.4   | 101.5  | 120.0  | 96.8   | 97.1   |
| 1.7    | 0.5    | 2.0    | 133.2  | 73.6   | 75.1   | 150.7  | 99.3   | 124.5  |
| 2020.3 | 2846.2 | 2181.0 | 1075.2 | 858.2  | 1042.5 | 977.0  | 897.4  | 1105.6 |
| 4056.4 | 4937.8 | 4048.9 | 7151.8 | 6407.2 | 6661.9 | 3793.8 | 3415.2 | 3929.3 |
| 2200.8 | 2395.7 | 1803.4 | 416.5  | 364.8  | 376.0  | 768.6  | 723.3  | 810.4  |
| 3792.9 | 4244.5 | 3171.6 | 2310.5 | 1866.9 | 1973.9 | 1930.9 | 1808.7 | 1982.7 |
| 318.4  | 356.6  | 273.7  | 180.0  | 177.1  | 149.1  | 116.1  | 124.4  | 182.4  |
| 1194.3 | 1508.6 | 937.1  | 269.2  | 252.7  | 220.0  | 328.9  | 214.4  | 306.8  |
| 81.2   | 102.1  | 88.4   | 56.1   | 49.4   | 57.2   | 32.2   | 37.3   | 29.6   |
| 745.7  | 986.8  | 717.6  | 539.7  | 458.7  | 532.2  | 300.2  | 281.5  | 291.2  |
| 550.8  | 755.8  | 374.9  | 254.8  | 201.5  | 241.4  | 145.4  | 155.7  | 165.6  |
| 557.0  | 663.3  | 402.7  | 339.1  | 273.0  | 249.2  | 380.8  | 225.1  | 363.5  |
| 3325.6 | 3662.3 | 2258.5 | 1957.1 | 1369.5 | 1518.4 | 1526.0 | 1026.3 | 1466.6 |
| 966.2  | 1164.0 | 497.8  | 455.1  | 352.7  | 409.9  | 228.9  | 209.5  | 260.5  |
| 336.6  | 621.2  | 559.6  | 234.6  | 188.6  | 218.0  | 540.2  | 513.6  | 592.4  |
| 3292.4 | 4585.5 | 4801.5 | 3950.6 | 3476.8 | 3494.5 | 3586.5 | 3802.9 | 3935.5 |
| 1702.6 | 2229.7 | 1812.1 | 341.8  | 378.0  | 362.1  | 580.1  | 757.5  | 809.6  |
| 383.5  | 633.7  | 555.9  | 249.6  | 239.2  | 260.8  | 237.3  | 266.1  | 258.3  |
| 6837.1 | 7844.7 | 7334.8 | 3561.5 | 3504.1 | 3479.3 | 1675.6 | 1800.4 | 1957.6 |
| 2336.2 | 3065.8 | 2445.7 | 1138.4 | 916.7  | 997.9  | 614.0  | 609.8  | 697.5  |
| 1534.8 | 1561.3 | 1029.6 | 2588.2 | 1831.2 | 1998.6 | 1214.2 | 981.5  | 1231.8 |
| 2.7    | 8.9    | 4.6    | 7.5    | 4.9    | 5.1    | 3.2    | 5.9    | 9.2    |
| 1460.2 | 1569.1 | 1043.7 | 658.9  | 497.0  | 482.7  | 474.9  | 448.5  | 483.1  |
| 1524.6 | 1783.7 | 1126.5 | 651.2  | 546.9  | 530.4  | 738.1  | 724.1  | 787.5  |
| 695.0  | 958.9  | 657.6  | 489.4  | 562.4  | 588.3  | 401.8  | 369.3  | 454.1  |
| 19.8   | 24.9   | 22.4   | 2277.2 | 2628.9 | 2843.5 | 1631.5 | 2693.2 | 2591.6 |
| 447.7  | 426.3  | 274.7  | 847.8  | 701.7  | 736.6  | 487.5  | 491.0  | 557.0  |
| 349.4  | 339.7  | 189.5  | 977.5  | 724.6  | 753.8  | 484.4  | 424.3  | 502.2  |
| 1792.3 | 1776.5 | 816.6  | 1790.1 | 1305.4 | 1452.5 | 1027.3 | 802.2  | 1014.9 |
| 2180.5 | 2441.2 | 1479.7 | 2182.2 | 1806.0 | 1918.2 | 1022.0 | 975.4  | 1249.8 |
| 2078.6 | 2348.9 | 1586.9 | 636.2  | 594.2  | 628.4  | 706.0  | 783.1  | 827.6  |
| 1.0    | 2.3    | 2.1    | 15.8   | 9.8    | 8.2    | 2.2    | 6.4    | 2.2    |
| 11.9   | 20.3   | 17.9   | 16.8   | 10.7   | 9.3    | 6.5    | 6.5    | 5.0    |
| 14.9   | 23.2   | 18.3   | 32.7   | 21.2   | 37.7   | 17.3   | 18.1   | 20.6   |
| 2.7    | 1.5    | 1.4    | 11.0   | 8.9    | 7.1    | 0.9    | 1.2    | 6.6    |
| 647.7  | 718.5  | 462.0  | 125.5  | 87.1   | 82.0   | 182.5  | 142.0  | 163.6  |
| 1504.7 | 1474.8 | 1019.3 | 425.6  | 349.8  | 388.2  | 450.2  | 387.7  | 436.1  |
| 1388.7 | 1561.6 | 1117.0 | 527.2  | 424.2  | 451.7  | 428.3  | 367.7  | 430.2  |
| 7692.2 | 8154.6 | 6725.8 | 4982.6 | 4925.9 | 5213.1 | 3536.9 | 3541.0 | 3882.9 |
| 436.4  | 548.2  | 347.6  | 331.4  | 288.1  | 328.1  | 238.8  | 220.6  | 244.6  |
| 713.2  | 908.6  | 701.6  | 345.9  | 365.0  | 442.8  | 336.8  | 319.0  | 390.7  |
| 1945.4 | 1824.0 | 1074.1 | 582.0  | 452.7  | 537.4  | 391.1  | 349.7  | 410.4  |
| 273.6  | 417.9  | 309.8  | 203.4  | 165.9  | 185.4  | 127.6  | 151.5  | 174.8  |
| 95.7   | 136.7  | 102.2  | 50.8   | 47.8   | 53.2   | 53.1   | 57.6   | 43.6   |
| 3779.4 | 3403.4 | 1610.1 | 1578.1 | 1255.1 | 1315.2 | 1364.5 | 1385.7 | 1505.4 |

|        |        |        |        |        |        |        |        |        |
|--------|--------|--------|--------|--------|--------|--------|--------|--------|
| 1534.9 | 1245.8 | 525.3  | 605.3  | 493.7  | 562.8  | 589.7  | 517.9  | 578.3  |
| 4.6    | 4.5    | 2.9    | 3.8    | 2.5    | 3.8    | 3.2    | 2.0    | 1.6    |
| 3.3    | 2.4    | 1.4    | 5.0    | 3.1    | 5.5    | 0.3    | 2.1    | 1.2    |
| 619.0  | 1076.5 | 695.4  | 451.9  | 378.8  | 455.9  | 449.6  | 575.3  | 525.9  |
| 873.1  | 1232.5 | 988.7  | 594.3  | 622.7  | 526.8  | 480.7  | 539.5  | 525.4  |
| 1298.7 | 1754.6 | 1387.8 | 1196.0 | 1011.5 | 1120.3 | 803.7  | 842.0  | 830.0  |
| 289.7  | 345.2  | 229.2  | 192.3  | 152.0  | 215.6  | 182.0  | 142.8  | 199.4  |
| 1019.9 | 858.1  | 682.5  | 1260.4 | 927.1  | 1171.3 | 645.2  | 536.9  | 651.8  |
| 272.1  | 303.1  | 192.0  | 13.4   | 19.7   | 17.3   | 6.8    | 14.0   | 17.6   |
| 1147.7 | 1041.0 | 784.4  | 28.7   | 32.4   | 27.9   | 41.2   | 22.7   | 46.7   |
| 55.1   | 77.6   | 79.0   | 63.3   | 63.2   | 67.2   | 25.0   | 35.0   | 34.8   |
| 2256.7 | 2783.8 | 2253.7 | 1884.4 | 1917.1 | 2034.7 | 1131.7 | 1321.6 | 1382.5 |
| 2192.3 | 2414.5 | 1141.3 | 940.7  | 621.4  | 760.8  | 512.9  | 331.3  | 407.1  |
| 371.6  | 413.7  | 281.1  | 625.5  | 539.2  | 567.4  | 381.5  | 343.1  | 372.3  |
| 2617.3 | 2657.7 | 1682.8 | 1478.7 | 1095.5 | 1196.9 | 747.4  | 629.3  | 785.4  |
| 1268.1 | 1329.5 | 993.9  | 972.0  | 766.9  | 884.5  | 628.1  | 576.4  | 672.5  |
| 3578.7 | 3687.4 | 1856.2 | 1275.3 | 902.6  | 832.3  | 1475.3 | 1206.5 | 1404.0 |
| 1178.2 | 1585.4 | 1229.9 | 770.7  | 686.3  | 775.6  | 452.3  | 563.1  | 568.6  |
| 530.8  | 549.5  | 391.0  | 320.6  | 240.6  | 263.8  | 276.2  | 273.7  | 280.4  |
| 1663.9 | 1894.0 | 1377.0 | 1380.7 | 1130.6 | 1278.2 | 905.3  | 879.9  | 900.3  |
| 273.7  | 281.7  | 202.5  | 153.7  | 126.2  | 129.0  | 85.9   | 112.9  | 106.7  |
| 179.3  | 207.6  | 146.4  | 45.1   | 60.3   | 48.6   | 86.6   | 66.6   | 93.4   |
| 668.0  | 756.2  | 580.9  | 254.9  | 217.7  | 242.5  | 234.9  | 180.8  | 231.1  |
| 599.0  | 626.4  | 483.6  | 555.4  | 351.0  | 392.8  | 344.3  | 287.6  | 306.6  |
| 7.3    | 10.4   | 6.9    | 56.7   | 59.9   | 66.6   | 34.3   | 43.2   | 37.4   |
| 598.6  | 759.8  | 675.7  | 309.7  | 263.2  | 290.2  | 176.0  | 204.2  | 205.6  |
| 23.2   | 26.1   | 18.6   | 16.3   | 12.1   | 31.2   | 18.3   | 19.8   | 17.3   |
| 187.9  | 239.1  | 232.6  | 161.8  | 132.4  | 161.3  | 146.6  | 139.1  | 165.1  |
| 332.1  | 410.6  | 311.4  | 560.7  | 360.2  | 398.8  | 312.8  | 312.4  | 330.0  |
| 566.8  | 649.9  | 463.1  | 414.8  | 350.8  | 388.9  | 236.5  | 216.1  | 234.5  |
| 350.0  | 419.9  | 312.2  | 239.1  | 206.4  | 217.5  | 176.9  | 167.3  | 206.7  |
| 614.1  | 626.2  | 372.8  | 305.2  | 198.6  | 248.5  | 235.6  | 205.9  | 234.7  |
| 4679.5 | 6530.1 | 6647.7 | 2321.4 | 1973.8 | 1895.3 | 1808.4 | 1545.6 | 2039.9 |
| 829.1  | 915.3  | 591.1  | 1402.3 | 1371.5 | 1453.1 | 682.7  | 816.2  | 909.5  |
| 5133.9 | 6340.0 | 5007.5 | 1476.4 | 977.8  | 1132.5 | 774.8  | 592.8  | 778.4  |
| 951.4  | 947.5  | 346.2  | 509.8  | 384.3  | 408.8  | 441.5  | 347.0  | 428.6  |
| 1854.5 | 1840.2 | 700.4  | 800.7  | 539.0  | 495.7  | 683.2  | 497.2  | 647.7  |
| 1351.4 | 1175.9 | 705.3  | 935.3  | 658.4  | 837.5  | 506.7  | 529.4  | 575.5  |
| 1549.7 | 1361.9 | 832.1  | 1705.7 | 1388.5 | 1521.9 | 795.3  | 756.8  | 827.2  |
| 4744.5 | 5171.0 | 3921.4 | 1318.0 | 1194.8 | 1160.9 | 1296.7 | 1695.2 | 1622.3 |
| 4305.4 | 4864.8 | 4645.9 | 2711.3 | 2520.3 | 2675.4 | 1217.4 | 1539.4 | 1570.0 |
| 6889.4 | 6727.6 | 4353.4 | 2795.2 | 1509.8 | 1402.6 | 2235.6 | 1251.7 | 1621.2 |
| 102.2  | 128.3  | 148.5  | 63.4   | 59.4   | 74.2   | 98.4   | 73.3   | 91.8   |
| 947.6  | 1180.2 | 1228.2 | 920.4  | 670.1  | 778.8  | 667.7  | 503.9  | 686.2  |
| 38.4   | 32.3   | 31.9   | 57.5   | 39.7   | 42.9   | 15.6   | 22.6   | 23.3   |
| 242.1  | 325.9  | 382.8  | 230.7  | 166.5  | 198.3  | 144.2  | 117.0  | 153.6  |
| 226.7  | 313.4  | 283.0  | 373.3  | 414.3  | 451.6  | 262.7  | 384.8  | 370.3  |
| 108.4  | 128.7  | 100.1  | 75.9   | 69.8   | 105.5  | 76.1   | 98.5   | 106.6  |
| 4048.2 | 4529.3 | 3672.2 | 1132.0 | 910.0  | 998.1  | 873.6  | 810.2  | 918.7  |
| 3326.4 | 3280.9 | 1871.2 | 3084.3 | 2450.6 | 2338.2 | 2095.4 | 1766.6 | 2129.0 |
| 346.1  | 303.7  | 204.3  | 106.0  | 96.6   | 97.3   | 195.7  | 133.1  | 200.0  |
| 423.7  | 730.1  | 514.0  | 182.9  | 163.6  | 168.3  | 124.4  | 150.4  | 205.3  |
| 129.9  | 195.9  | 118.6  | 143.8  | 119.9  | 129.6  | 87.4   | 87.3   | 95.1   |

|         |         |         |         |         |         |        |        |        |
|---------|---------|---------|---------|---------|---------|--------|--------|--------|
| 1048.6  | 1296.3  | 972.1   | 530.5   | 429.0   | 472.1   | 376.3  | 363.3  | 448.0  |
| 3157.4  | 3986.1  | 3754.5  | 495.0   | 398.6   | 425.5   | 469.0  | 557.9  | 497.9  |
| 1662.5  | 2257.1  | 2001.3  | 2008.9  | 1776.7  | 2071.4  | 1157.1 | 1278.0 | 1363.0 |
| 9154.1  | 10335.4 | 9007.7  | 9085.6  | 9083.4  | 10017.3 | 5647.5 | 5828.2 | 6026.5 |
| 2614.2  | 3107.6  | 1717.5  | 906.0   | 744.8   | 859.7   | 736.7  | 810.3  | 820.9  |
| 469.7   | 487.6   | 296.9   | 172.9   | 149.2   | 156.3   | 99.9   | 107.7  | 121.7  |
| 2458.1  | 2371.9  | 1828.9  | 1344.5  | 1122.9  | 1276.0  | 602.3  | 640.7  | 716.4  |
| 770.0   | 842.5   | 571.0   | 878.0   | 711.3   | 856.0   | 407.8  | 370.0  | 449.8  |
| 4493.0  | 4194.3  | 2908.8  | 3078.4  | 2911.5  | 2889.0  | 2326.4 | 2193.7 | 2539.2 |
| 2886.0  | 2722.9  | 1828.0  | 1643.5  | 1341.9  | 1275.8  | 1172.5 | 1140.4 | 1343.3 |
| 331.8   | 397.1   | 217.8   | 297.8   | 302.3   | 275.6   | 207.6  | 155.8  | 172.2  |
| 1607.5  | 1686.6  | 1076.6  | 1292.6  | 974.9   | 950.6   | 780.7  | 625.1  | 764.8  |
| 1749.0  | 2173.9  | 1689.2  | 1707.3  | 1347.2  | 1374.5  | 894.6  | 680.7  | 837.1  |
| 2201.2  | 2850.6  | 2194.2  | 1629.2  | 1261.5  | 1307.1  | 1022.1 | 919.9  | 1018.7 |
| 85.5    | 112.7   | 60.1    | 85.8    | 69.0    | 71.7    | 66.5   | 56.7   | 49.9   |
| 206.3   | 253.2   | 152.5   | 228.3   | 164.4   | 190.0   | 198.6  | 172.0  | 201.1  |
| 227.8   | 345.1   | 173.8   | 134.3   | 100.2   | 125.4   | 86.9   | 87.1   | 85.9   |
| 7763.6  | 8134.4  | 5775.3  | 3819.2  | 3046.2  | 3351.4  | 2983.4 | 2544.7 | 2892.3 |
| 1330.8  | 1283.2  | 807.0   | 435.2   | 356.4   | 396.8   | 290.5  | 267.0  | 282.7  |
| 833.0   | 688.1   | 422.9   | 157.2   | 122.7   | 134.8   | 138.0  | 129.9  | 124.2  |
| 572.9   | 667.2   | 602.9   | 906.9   | 856.3   | 1007.4  | 496.2  | 548.9  | 576.8  |
| 21.7    | 27.3    | 33.0    | 73.9    | 59.6    | 66.3    | 55.1   | 63.4   | 90.4   |
| 48.3    | 96.9    | 90.2    | 238.3   | 279.9   | 334.5   | 135.4  | 226.4  | 220.4  |
| 1616.6  | 1949.7  | 1464.7  | 463.0   | 396.9   | 418.9   | 606.8  | 585.5  | 649.2  |
| 3742.7  | 4453.9  | 3621.9  | 1533.8  | 1238.9  | 1299.1  | 1663.7 | 1713.9 | 1692.6 |
| 2183.5  | 2345.6  | 1791.5  | 2133.0  | 1790.9  | 1977.3  | 1475.0 | 1560.6 | 1650.7 |
| 3351.5  | 3993.6  | 2922.6  | 3809.8  | 3313.6  | 3673.2  | 2347.5 | 2465.1 | 2533.7 |
| 1912.7  | 1970.6  | 1482.1  | 1390.9  | 1196.7  | 1255.7  | 887.9  | 870.5  | 953.4  |
| 6030.1  | 5594.7  | 3730.1  | 3340.0  | 2904.5  | 2848.1  | 3100.1 | 2535.2 | 3155.2 |
| 2649.1  | 2592.0  | 1740.3  | 1624.5  | 1309.0  | 1293.8  | 841.2  | 829.4  | 1039.7 |
| 286.1   | 380.0   | 241.9   | 630.4   | 468.3   | 525.7   | 412.8  | 397.6  | 433.1  |
| 647.9   | 755.1   | 537.5   | 1146.1  | 909.9   | 1062.0  | 1068.4 | 879.1  | 1098.9 |
| 185.5   | 239.1   | 152.6   | 556.9   | 433.4   | 490.9   | 414.6  | 403.2  | 454.7  |
| 411.2   | 719.3   | 601.9   | 319.3   | 286.9   | 300.8   | 240.5  | 190.0  | 226.8  |
| 308.5   | 491.1   | 426.3   | 165.1   | 134.8   | 176.3   | 108.4  | 104.8  | 129.2  |
| 61.0    | 27.2    | 10.0    | 13.9    | 21.1    | 13.5    | 12.6   | 15.5   | 16.3   |
| 577.1   | 319.4   | 169.4   | 236.2   | 206.7   | 245.7   | 145.5  | 118.6  | 135.4  |
| 6923.9  | 6904.4  | 6208.1  | 4673.8  | 4026.3  | 4464.8  | 2803.5 | 2351.9 | 2912.7 |
| 938.1   | 945.1   | 550.8   | 654.3   | 503.4   | 581.6   | 441.6  | 379.8  | 445.2  |
| 1641.5  | 2368.9  | 1675.8  | 1064.3  | 993.7   | 1022.6  | 985.0  | 1423.5 | 1275.2 |
| 11749.3 | 11987.1 | 10706.3 | 7718.0  | 6885.6  | 7214.0  | 4440.8 | 4555.9 | 4923.2 |
| 1021.5  | 1189.3  | 945.8   | 848.4   | 738.4   | 936.4   | 590.4  | 597.7  | 670.9  |
| 1358.3  | 1644.7  | 1355.7  | 847.8   | 755.0   | 821.1   | 379.0  | 507.9  | 497.6  |
| 11776.0 | 12128.7 | 11284.1 | 11813.0 | 11052.4 | 11386.4 | 7229.1 | 7435.3 | 7987.7 |
| 7925.9  | 8665.3  | 7119.2  | 5528.8  | 5158.4  | 5258.2  | 3372.5 | 3783.3 | 3963.0 |
| 3265.4  | 3603.3  | 2294.7  | 1095.3  | 851.8   | 1002.6  | 1103.6 | 981.7  | 1052.1 |
| 2985.4  | 3633.7  | 2100.6  | 1134.2  | 864.9   | 872.9   | 1376.0 | 1281.8 | 1431.0 |
| 3.3     | 5.2     | 1.6     | 16.9    | 15.5    | 16.5    | 2.2    | 6.4    | 3.4    |
| 9.8     | 3.0     | 8.7     | 13.2    | 11.6    | 15.4    | 1.9    | 2.5    | 2.7    |
| 3194.8  | 3804.6  | 2646.3  | 1950.7  | 1631.4  | 1679.5  | 1661.0 | 1425.5 | 1780.7 |
| 1743.6  | 2207.9  | 1824.5  | 1194.2  | 1041.6  | 1220.8  | 766.4  | 671.6  | 829.1  |
| 6.5     | 15.2    | 7.0     | 17.4    | 11.6    | 14.6    | 17.2   | 9.6    | 18.5   |
| 3822.4  | 3784.8  | 2360.8  | 1058.1  | 948.1   | 1040.7  | 737.0  | 933.4  | 923.6  |

|         |         |         |         |         |         |        |        |        |
|---------|---------|---------|---------|---------|---------|--------|--------|--------|
| 1462.6  | 1508.1  | 972.9   | 1253.2  | 787.9   | 953.7   | 830.1  | 571.2  | 690.0  |
| 4422.8  | 5306.9  | 4513.4  | 4369.4  | 3415.1  | 3683.0  | 2524.4 | 2099.4 | 2464.4 |
| 16.8    | 25.3    | 14.2    | 35.4    | 27.3    | 28.3    | 28.7   | 23.4   | 39.3   |
| 359.6   | 518.6   | 368.1   | 788.8   | 743.4   | 830.1   | 475.9  | 525.5  | 602.9  |
| 835.5   | 916.5   | 725.7   | 317.1   | 226.3   | 273.8   | 182.0  | 168.4  | 173.1  |
| 98.9    | 154.6   | 128.3   | 38.5    | 9.0     | 15.5    | 34.5   | 19.6   | 25.5   |
| 7654.7  | 8285.0  | 6937.1  | 5536.9  | 4540.8  | 4335.4  | 4637.7 | 4138.8 | 4834.8 |
| 1454.9  | 1444.4  | 918.3   | 1339.8  | 1153.0  | 1210.8  | 621.6  | 562.0  | 664.9  |
| 3001.1  | 3247.5  | 2494.5  | 1272.2  | 809.0   | 941.7   | 1121.2 | 723.9  | 966.7  |
| 446.9   | 692.3   | 665.7   | 532.6   | 581.6   | 620.7   | 484.9  | 569.9  | 595.8  |
| 7545.8  | 7291.2  | 4555.6  | 4318.4  | 3123.1  | 3511.8  | 2587.8 | 2058.4 | 2371.5 |
| 284.0   | 464.2   | 727.3   | 19.6    | 12.0    | 18.2    | 16.1   | 15.2   | 9.3    |
| 401.2   | 572.2   | 943.7   | 17.0    | 14.2    | 17.4    | 8.9    | 12.0   | 14.5   |
| 303.4   | 513.7   | 792.1   | 10.9    | 11.8    | 8.5     | 0.9    | 7.3    | 1.4    |
| 1235.8  | 1084.5  | 556.0   | 842.3   | 680.0   | 790.4   | 474.6  | 404.3  | 493.9  |
| 637.9   | 753.3   | 619.5   | 525.5   | 418.7   | 502.6   | 416.2  | 392.6  | 474.6  |
| 56.0    | 78.6    | 65.0    | 16.3    | 16.5    | 24.0    | 20.6   | 21.6   | 32.3   |
| 676.3   | 913.4   | 599.5   | 595.8   | 474.5   | 506.7   | 422.2  | 413.8  | 446.6  |
| 1840.8  | 2924.6  | 2898.2  | 1320.9  | 1266.4  | 1458.7  | 705.4  | 1004.9 | 930.6  |
| 2674.9  | 3307.0  | 2706.0  | 429.9   | 302.4   | 336.9   | 211.3  | 183.8  | 213.6  |
| 5893.6  | 6475.1  | 5485.0  | 1319.8  | 986.4   | 1274.6  | 695.1  | 616.9  | 547.6  |
| 42.7    | 62.8    | 68.2    | 438.7   | 402.3   | 423.3   | 378.3  | 341.7  | 419.9  |
| 12.8    | 10.2    | 2.1     | 145.4   | 109.0   | 89.0    | 88.9   | 80.9   | 82.7   |
| 2363.7  | 2916.3  | 2417.6  | 1776.0  | 1600.5  | 1658.7  | 983.0  | 1112.9 | 1191.3 |
| 2548.9  | 2742.0  | 1917.2  | 431.3   | 295.7   | 303.4   | 386.4  | 294.3  | 303.4  |
| 2213.0  | 2695.2  | 1715.6  | 915.3   | 561.8   | 602.5   | 778.9  | 591.4  | 591.0  |
| 11795.7 | 11664.3 | 10881.7 | 13335.6 | 12411.0 | 12827.6 | 7995.0 | 7237.3 | 8159.7 |
| 35.3    | 47.8    | 45.2    | 18.1    | 26.8    | 26.0    | 25.6   | 26.1   | 30.2   |
| 28.8    | 26.3    | 32.3    | 6.2     | 9.2     | 14.6    | 7.8    | 17.1   | 9.9    |
| 587.8   | 930.7   | 734.2   | 451.9   | 400.6   | 395.6   | 322.0  | 309.5  | 338.2  |
| 499.2   | 682.7   | 477.8   | 156.8   | 112.6   | 135.7   | 257.1  | 200.0  | 224.3  |
| 1294.6  | 1493.4  | 1048.7  | 499.5   | 368.3   | 404.3   | 452.1  | 388.2  | 416.5  |
| 471.1   | 608.6   | 506.8   | 98.1    | 74.3    | 99.0    | 154.4  | 133.2  | 161.2  |
| 2697.1  | 2397.0  | 1275.5  | 242.7   | 245.6   | 210.9   | 284.8  | 327.3  | 367.6  |
| 3477.8  | 4742.3  | 4772.8  | 819.6   | 761.6   | 816.4   | 636.8  | 796.7  | 783.9  |
| 3261.2  | 4589.4  | 4722.6  | 755.8   | 756.3   | 796.8   | 626.6  | 793.5  | 826.2  |
| 2362.8  | 2968.1  | 1943.4  | 1510.8  | 1136.8  | 1265.1  | 976.3  | 1044.1 | 1132.6 |
| 1406.4  | 2042.5  | 1682.9  | 1176.4  | 1120.8  | 1100.3  | 1398.0 | 1334.5 | 1496.6 |
| 3891.4  | 4022.2  | 2615.8  | 1102.5  | 828.1   | 894.6   | 792.4  | 759.4  | 798.8  |
| 5010.8  | 5409.5  | 4194.3  | 2813.4  | 2206.3  | 2596.0  | 1190.9 | 1217.4 | 1253.8 |
| 897.3   | 832.9   | 429.4   | 1926.3  | 1390.8  | 1615.0  | 1145.6 | 1002.9 | 1203.8 |
| 296.7   | 282.8   | 123.7   | 220.6   | 127.3   | 159.9   | 341.3  | 237.8  | 348.1  |
| 42.0    | 74.6    | 40.6    | 28.1    | 24.4    | 16.3    | 36.1   | 22.8   | 34.7   |
| 142.7   | 190.7   | 142.6   | 142.3   | 98.8    | 101.6   | 82.9   | 63.6   | 85.0   |
| 293.2   | 443.9   | 431.8   | 366.0   | 313.2   | 385.6   | 237.0  | 285.8  | 293.3  |
| 943.8   | 1525.7  | 1552.6  | 788.0   | 804.0   | 832.3   | 816.4  | 1015.4 | 1085.1 |
| 155.6   | 183.9   | 109.0   | 114.4   | 72.2    | 75.9    | 41.6   | 44.7   | 50.1   |
| 145.1   | 167.4   | 144.2   | 228.3   | 196.6   | 210.3   | 135.9  | 158.6  | 140.3  |
| 102.3   | 133.8   | 156.7   | 219.1   | 197.3   | 223.6   | 72.4   | 78.7   | 75.4   |
| 430.2   | 539.6   | 394.1   | 322.2   | 292.8   | 334.1   | 163.0  | 221.1  | 233.5  |
| 4548.7  | 4987.7  | 3521.8  | 3468.7  | 2852.9  | 2983.5  | 2684.7 | 2484.4 | 2889.5 |
| 5409.8  | 5714.5  | 4377.2  | 5829.7  | 5613.0  | 5609.8  | 4286.3 | 4821.1 | 4766.9 |
| 1864.0  | 1644.6  | 1012.3  | 1478.6  | 1226.3  | 1169.1  | 1112.9 | 1717.3 | 1817.5 |



|        |        |        |        |        |        |        |        |        |
|--------|--------|--------|--------|--------|--------|--------|--------|--------|
| 185.0  | 245.4  | 229.3  | 242.0  | 185.7  | 215.6  | 116.9  | 116.7  | 150.0  |
| 335.3  | 489.4  | 419.4  | 589.8  | 451.0  | 468.1  | 500.3  | 590.3  | 597.2  |
| 5313.9 | 5870.5 | 5209.1 | 5570.9 | 4716.8 | 5102.9 | 3769.3 | 3324.1 | 3835.3 |
| 953.7  | 894.5  | 492.8  | 252.6  | 155.5  | 173.0  | 158.0  | 133.9  | 137.9  |
| 47.0   | 27.0   | 6.5    | 67.7   | 63.5   | 63.3   | 77.7   | 119.0  | 87.6   |
| 5.1    | 3.1    | 3.5    | 41.2   | 58.1   | 43.4   | 25.2   | 42.4   | 40.2   |
| 2120.8 | 1932.0 | 1140.4 | 2046.3 | 1483.4 | 1518.3 | 1329.2 | 1005.8 | 1216.6 |
| 5070.7 | 4595.4 | 2527.6 | 2394.1 | 1613.2 | 1592.1 | 2424.2 | 1797.2 | 2137.0 |
| 283.5  | 378.8  | 292.3  | 25.3   | 24.5   | 15.7   | 22.5   | 19.5   | 16.3   |
| 256.6  | 308.0  | 185.6  | 40.1   | 39.5   | 49.3   | 26.5   | 23.2   | 21.2   |
| 3054.8 | 3390.6 | 2341.7 | 1191.3 | 986.1  | 859.5  | 768.9  | 761.0  | 817.2  |
| 599.1  | 925.4  | 860.5  | 26.0   | 37.6   | 42.2   | 23.8   | 32.9   | 32.9   |
| 99.4   | 139.5  | 117.3  | 10.9   | 7.0    | 10.8   | 2.6    | 1.7    | 2.6    |
| 83.8   | 103.4  | 74.6   | 73.8   | 65.5   | 63.4   | 58.2   | 57.3   | 66.7   |
| 1142.2 | 1192.2 | 983.2  | 1073.4 | 841.8  | 964.9  | 825.5  | 965.5  | 949.9  |
| 39.6   | 49.2   | 30.0   | 28.2   | 9.2    | 9.6    | 16.9   | 14.1   | 14.7   |
| 1213.5 | 1534.0 | 1223.8 | 1065.5 | 938.6  | 1004.5 | 640.4  | 690.2  | 729.0  |
| 702.0  | 950.7  | 754.9  | 280.1  | 250.4  | 311.7  | 331.3  | 379.3  | 352.9  |
| 7020.7 | 7848.9 | 6199.7 | 2095.3 | 1648.3 | 1743.5 | 1207.9 | 997.9  | 1214.1 |
| 2182.4 | 2798.5 | 2598.3 | 826.0  | 831.2  | 885.8  | 771.2  | 900.6  | 934.7  |
| 234.7  | 194.4  | 216.5  | 90.0   | 71.6   | 52.8   | 72.5   | 43.9   | 61.8   |
| 505.9  | 463.5  | 438.4  | 355.9  | 271.5  | 285.1  | 198.0  | 147.9  | 195.4  |
| 774.7  | 956.7  | 593.8  | 946.3  | 661.6  | 782.7  | 534.8  | 437.0  | 523.7  |
| 1617.5 | 1950.5 | 1325.6 | 1192.4 | 866.5  | 872.7  | 914.6  | 768.3  | 841.5  |
| 194.2  | 224.1  | 148.8  | 132.6  | 119.9  | 108.8  | 91.2   | 79.0   | 101.1  |
| 1978.7 | 2297.8 | 1474.3 | 1382.2 | 983.0  | 1116.2 | 738.8  | 617.4  | 713.7  |
| 724.0  | 948.2  | 627.9  | 787.0  | 722.8  | 768.5  | 390.8  | 444.2  | 380.6  |
| 625.5  | 856.4  | 706.0  | 560.2  | 515.4  | 575.6  | 343.2  | 324.7  | 359.1  |
| 761.9  | 973.9  | 996.0  | 23.5   | 18.3   | 13.5   | 8.8    | 3.9    | 8.8    |
| 1321.5 | 1616.7 | 1175.6 | 1973.4 | 1953.5 | 2135.6 | 1499.3 | 1642.0 | 1868.3 |
| 384.5  | 713.3  | 564.0  | 723.1  | 636.4  | 717.3  | 335.3  | 354.6  | 412.7  |
| 1736.8 | 2063.0 | 1575.0 | 1480.3 | 1117.9 | 1254.3 | 1436.4 | 1222.3 | 1353.6 |
| 1378.9 | 1768.2 | 1464.3 | 1697.5 | 1439.5 | 1514.9 | 1315.1 | 1116.2 | 1401.4 |
| 166.2  | 208.3  | 165.6  | 222.3  | 204.7  | 236.9  | 141.8  | 155.7  | 193.7  |
| 58.9   | 93.1   | 62.7   | 137.7  | 128.4  | 138.3  | 59.2   | 60.1   | 55.5   |
| 43.2   | 30.8   | 21.1   | 42.7   | 47.3   | 38.2   | 35.9   | 30.5   | 24.4   |
| 893.7  | 1094.5 | 677.3  | 616.1  | 411.8  | 482.9  | 332.2  | 317.0  | 357.8  |
| 259.0  | 297.7  | 203.7  | 212.6  | 156.1  | 210.1  | 125.3  | 121.5  | 129.2  |
| 3484.6 | 4057.2 | 3701.4 | 3353.0 | 2910.3 | 2902.5 | 2778.5 | 2809.8 | 3004.8 |
| 2086.3 | 2646.5 | 2445.7 | 1889.5 | 1623.9 | 1702.8 | 1686.9 | 1759.3 | 1891.2 |
| 5715.2 | 6655.3 | 5848.5 | 2316.4 | 2427.2 | 2549.0 | 1364.9 | 1743.8 | 1844.6 |
| 388.1  | 411.3  | 219.0  | 750.0  | 554.1  | 617.8  | 349.4  | 289.0  | 351.8  |
| 234.1  | 293.0  | 132.1  | 141.7  | 115.6  | 132.3  | 94.3   | 113.8  | 116.9  |
| 246.0  | 268.2  | 155.9  | 110.1  | 107.5  | 100.7  | 102.1  | 134.5  | 124.8  |
| 850.4  | 1052.6 | 749.9  | 302.7  | 292.3  | 348.3  | 250.5  | 265.5  | 315.3  |
| 694.9  | 926.6  | 677.9  | 267.0  | 233.3  | 310.3  | 174.5  | 199.7  | 204.4  |
| 1361.1 | 1689.0 | 1215.8 | 1058.4 | 967.4  | 980.8  | 862.3  | 890.9  | 1017.5 |
| 752.3  | 828.3  | 530.1  | 102.4  | 59.6   | 93.2   | 265.0  | 370.5  | 286.8  |
| 2617.1 | 2733.2 | 1645.5 | 931.1  | 660.0  | 718.1  | 798.6  | 1038.8 | 876.5  |
| 330.6  | 325.4  | 190.5  | 342.8  | 246.1  | 264.0  | 170.4  | 213.6  | 177.4  |
| 266.4  | 290.2  | 181.3  | 193.5  | 151.2  | 152.7  | 144.2  | 152.0  | 161.5  |
| 2181.3 | 2342.7 | 1766.0 | 1712.2 | 1371.9 | 1526.7 | 1186.1 | 1193.5 | 1323.0 |
| 17.5   | 18.9   | 11.5   | 5.2    | 11.0   | 8.0    | 7.6    | 2.4    | 12.7   |

|        |        |        |         |         |         |        |        |        |
|--------|--------|--------|---------|---------|---------|--------|--------|--------|
| 295.3  | 148.8  | 86.6   | 148.4   | 160.2   | 150.5   | 101.1  | 154.4  | 175.0  |
| 13.4   | 14.2   | 12.1   | 6.1     | 4.6     | 2.5     | 2.1    | 2.3    | 1.0    |
| 2546.9 | 2540.7 | 1968.3 | 1746.5  | 1429.6  | 1508.7  | 1428.5 | 1448.5 | 1583.3 |
| 1631.6 | 1937.6 | 1190.4 | 889.4   | 706.8   | 746.8   | 788.9  | 836.0  | 819.0  |
| 998.7  | 1207.6 | 714.3  | 952.2   | 773.4   | 808.9   | 533.9  | 533.2  | 624.9  |
| 796.6  | 942.6  | 655.8  | 947.0   | 767.9   | 957.8   | 702.7  | 663.6  | 760.2  |
| 922.1  | 1098.0 | 672.0  | 673.6   | 564.3   | 676.2   | 413.6  | 409.3  | 485.2  |
| 155.4  | 203.2  | 143.0  | 78.3    | 51.4    | 60.5    | 58.8   | 53.7   | 67.5   |
| 4070.3 | 4028.3 | 2277.6 | 2637.1  | 1903.6  | 1925.3  | 2365.0 | 1676.1 | 2134.2 |
| 64.5   | 51.4   | 29.7   | 65.8    | 54.3    | 56.8    | 44.6   | 40.7   | 56.8   |
| 484.2  | 809.7  | 858.7  | 209.2   | 165.9   | 218.3   | 198.7  | 253.1  | 250.9  |
| 1233.2 | 1888.5 | 2030.2 | 626.9   | 607.0   | 643.0   | 494.8  | 721.4  | 643.4  |
| 5615.7 | 5387.3 | 3311.9 | 2575.1  | 2048.8  | 2394.8  | 1981.8 | 1881.9 | 2095.9 |
| 2874.5 | 2786.5 | 1579.6 | 1419.2  | 1102.1  | 1255.7  | 1106.3 | 970.9  | 1085.8 |
| 16.5   | 13.8   | 3.9    | 58.0    | 59.2    | 61.4    | 44.1   | 43.3   | 37.4   |
| 1707.1 | 1781.0 | 1094.0 | 6295.9  | 5633.4  | 6128.9  | 5037.4 | 5027.6 | 5468.5 |
| 62.9   | 71.6   | 57.2   | 24.6    | 28.7    | 32.9    | 4.9    | 10.7   | 14.8   |
| 2258.6 | 2774.3 | 1985.0 | 3109.2  | 2523.6  | 2784.4  | 1425.8 | 1333.7 | 1547.5 |
| 1785.1 | 1923.2 | 1117.0 | 1189.7  | 803.9   | 876.7   | 485.2  | 366.0  | 495.4  |
| 365.1  | 400.1  | 437.3  | 113.7   | 105.6   | 118.6   | 119.9  | 126.6  | 145.3  |
| 795.7  | 1108.5 | 1085.2 | 363.7   | 295.3   | 325.2   | 306.1  | 361.4  | 350.1  |
| 198.0  | 289.3  | 215.7  | 209.1   | 182.4   | 247.7   | 139.6  | 182.9  | 189.1  |
| 324.1  | 464.0  | 373.1  | 381.4   | 328.2   | 391.2   | 201.7  | 261.5  | 240.4  |
| 185.7  | 207.5  | 125.0  | 158.3   | 132.9   | 138.9   | 99.0   | 82.6   | 95.4   |
| 384.8  | 625.2  | 503.3  | 750.3   | 474.7   | 582.7   | 519.3  | 323.3  | 403.6  |
| 2767.0 | 3176.6 | 2496.4 | 2183.3  | 1951.8  | 2043.1  | 1984.5 | 2156.8 | 2257.6 |
| 1584.3 | 1806.3 | 1234.9 | 758.4   | 626.1   | 768.5   | 874.1  | 894.7  | 900.6  |
| 6127.0 | 6262.0 | 4813.0 | 13566.0 | 12551.1 | 12941.3 | 8979.0 | 8488.7 | 9405.7 |
| 416.6  | 405.2  | 138.6  | 64.5    | 40.7    | 63.7    | 165.9  | 128.5  | 171.4  |
| 4.8    | 4.1    | 6.2    | 8.2     | 9.6     | 6.1     | 3.4    | 5.3    | 3.9    |
| 2697.6 | 3475.2 | 2931.1 | 3023.5  | 2812.8  | 2880.3  | 1753.6 | 2112.2 | 2130.4 |
| 670.1  | 676.0  | 425.3  | 171.6   | 136.3   | 169.9   | 118.1  | 98.2   | 131.4  |
| 1848.8 | 2110.6 | 1477.6 | 1375.2  | 994.4   | 1124.6  | 779.0  | 624.5  | 715.5  |
| 8452.8 | 9595.3 | 8372.4 | 6816.5  | 6368.0  | 6407.9  | 3914.2 | 4299.3 | 4552.3 |
| 1082.1 | 1321.0 | 800.7  | 516.6   | 436.3   | 394.0   | 718.6  | 638.3  | 747.8  |
| 698.1  | 729.5  | 572.0  | 196.5   | 162.2   | 175.3   | 157.7  | 154.6  | 169.3  |
| 1287.5 | 1468.4 | 1017.0 | 494.7   | 417.8   | 413.3   | 379.7  | 370.0  | 443.4  |
| 1918.9 | 2560.0 | 2096.1 | 705.2   | 603.3   | 651.4   | 501.1  | 546.7  | 613.9  |
| 1469.7 | 2002.5 | 1784.0 | 320.1   | 283.5   | 339.8   | 284.3  | 311.8  | 322.8  |
| 782.4  | 891.5  | 632.8  | 941.4   | 920.0   | 1144.4  | 546.8  | 932.6  | 817.2  |
| 1633.2 | 2088.6 | 1862.9 | 619.7   | 715.1   | 784.4   | 516.0  | 717.9  | 749.2  |
| 596.9  | 704.5  | 401.1  | 549.2   | 466.1   | 462.9   | 231.2  | 237.0  | 239.7  |
| 1521.3 | 1780.5 | 1435.2 | 3552.3  | 3066.9  | 3319.9  | 1874.0 | 1669.9 | 2052.4 |
| 399.0  | 275.5  | 154.9  | 1409.6  | 1229.5  | 1407.2  | 458.8  | 604.9  | 589.2  |
| 1917.9 | 1321.7 | 818.6  | 1710.3  | 1705.4  | 1658.3  | 1324.3 | 1579.9 | 1652.9 |
| 242.6  | 184.3  | 92.7   | 639.9   | 518.4   | 591.7   | 226.6  | 291.3  | 290.8  |
| 196.0  | 265.7  | 176.5  | 203.4   | 171.2   | 240.4   | 141.7  | 140.1  | 149.7  |
| 656.1  | 668.0  | 366.1  | 334.9   | 246.5   | 274.9   | 238.8  | 176.5  | 245.2  |
| 546.0  | 600.3  | 378.4  | 215.4   | 180.3   | 201.8   | 187.4  | 141.2  | 165.2  |
| 802.9  | 1942.0 | 1410.1 | 1516.6  | 1447.4  | 1574.3  | 766.4  | 756.8  | 922.7  |
| 363.5  | 439.3  | 271.4  | 497.5   | 406.5   | 508.2   | 378.8  | 411.8  | 445.6  |
| 677.3  | 862.1  | 493.4  | 630.7   | 515.9   | 524.2   | 772.9  | 775.1  | 870.6  |
| 1869.7 | 2674.8 | 2478.2 | 3849.8  | 3547.0  | 3802.9  | 2070.1 | 2264.3 | 2453.5 |

|         |         |         |         |         |         |        |        |        |
|---------|---------|---------|---------|---------|---------|--------|--------|--------|
| 13.7    | 22.9    | 11.7    | 356.4   | 433.3   | 520.9   | 188.2  | 381.5  | 308.3  |
| 13.7    | 106.4   | 268.7   | 944.4   | 1281.5  | 1308.1  | 1215.4 | 2769.2 | 2192.9 |
| 657.2   | 744.0   | 581.4   | 393.3   | 367.6   | 445.4   | 393.0  | 402.6  | 429.7  |
| 11656.5 | 12133.5 | 11301.0 | 13719.2 | 12937.3 | 12533.4 | 7421.0 | 7382.6 | 7674.9 |
| 2.7     | 11.3    | 3.4     | 22.6    | 14.4    | 17.9    | 16.7   | 9.8    | 16.5   |
| 6.7     | 4.0     | 2.3     | 32.2    | 23.4    | 37.3    | 22.2   | 17.5   | 28.0   |
| 1593.7  | 2486.0  | 2803.6  | 1391.3  | 1460.8  | 1661.0  | 907.4  | 1189.4 | 1159.6 |
| 2294.9  | 2319.2  | 1248.0  | 1693.3  | 1166.7  | 1286.2  | 757.7  | 642.8  | 758.1  |
| 619.9   | 717.2   | 472.5   | 514.8   | 519.0   | 536.0   | 257.4  | 293.9  | 294.1  |
| 2076.9  | 2130.4  | 1200.5  | 751.9   | 570.4   | 565.5   | 738.3  | 549.8  | 702.5  |
| 413.2   | 406.0   | 235.4   | 136.2   | 118.7   | 102.0   | 134.0  | 109.8  | 137.4  |
| 1657.1  | 1806.3  | 987.7   | 619.5   | 524.6   | 480.6   | 693.7  | 560.4  | 690.2  |
| 10.1    | 14.0    | 13.6    | 6.5     | 6.8     | 11.7    | 5.5    | 6.2    | 1.2    |
| 119.8   | 176.1   | 148.6   | 201.0   | 164.2   | 192.1   | 113.7  | 105.1  | 135.3  |
| 492.9   | 553.6   | 405.0   | 466.2   | 329.9   | 353.7   | 279.5  | 264.0  | 293.3  |
| 3500.2  | 4196.0  | 3645.5  | 3645.9  | 3122.5  | 3182.5  | 1884.4 | 1736.4 | 2090.8 |
| 13.7    | 19.6    | 13.0    | 23.8    | 24.7    | 23.7    | 14.1   | 6.7    | 11.2   |
| 3392.2  | 4247.2  | 3675.5  | 2500.6  | 2194.1  | 2226.1  | 2277.6 | 2378.7 | 2707.0 |
| 1256.7  | 1737.8  | 1440.9  | 908.5   | 829.5   | 941.1   | 871.8  | 940.5  | 979.8  |
| 465.3   | 591.6   | 378.7   | 189.2   | 146.4   | 129.8   | 223.4  | 171.5  | 199.7  |
| 293.0   | 335.7   | 247.2   | 348.5   | 270.5   | 318.0   | 356.9  | 299.5  | 330.6  |
| 148.0   | 186.0   | 162.7   | 212.2   | 187.6   | 187.9   | 180.9  | 203.2  | 203.2  |
| 425.5   | 543.1   | 386.1   | 540.0   | 480.5   | 477.9   | 508.0  | 502.9  | 584.5  |
| 148.7   | 174.5   | 135.5   | 106.8   | 94.1    | 87.4    | 71.7   | 85.6   | 94.4   |
| 239.2   | 251.1   | 163.3   | 295.1   | 240.9   | 233.0   | 345.0  | 291.2  | 369.3  |
| 17.8    | 16.3    | 10.2    | 30.8    | 26.0    | 27.0    | 7.8    | 14.6   | 4.9    |
| 44.6    | 71.2    | 34.3    | 35.1    | 47.8    | 34.1    | 18.5   | 16.2   | 29.7   |
| 3116.9  | 3028.8  | 1599.7  | 3445.0  | 2487.4  | 3155.4  | 2079.9 | 2003.9 | 2052.9 |
| 420.5   | 530.7   | 601.9   | 262.6   | 212.3   | 219.2   | 201.2  | 232.5  | 252.8  |
| 413.7   | 667.1   | 593.3   | 463.1   | 381.1   | 446.9   | 238.9  | 299.4  | 328.9  |
| 1141.5  | 1291.6  | 870.4   | 219.3   | 181.1   | 181.5   | 216.5  | 205.7  | 211.9  |
| 3251.7  | 3269.4  | 2354.9  | 1132.7  | 800.2   | 888.1   | 839.6  | 660.6  | 761.7  |
| 1747.8  | 2044.7  | 1411.3  | 634.4   | 527.4   | 549.2   | 417.9  | 417.0  | 441.3  |
| 1393.7  | 1546.2  | 988.0   | 680.8   | 492.6   | 533.7   | 381.2  | 270.2  | 366.1  |
| 397.5   | 391.3   | 244.2   | 302.6   | 256.2   | 251.9   | 193.9  | 151.9  | 165.3  |
| 201.2   | 217.6   | 167.6   | 62.8    | 46.6    | 60.3    | 105.4  | 91.0   | 114.1  |
| 197.6   | 276.0   | 234.1   | 1714.9  | 1345.4  | 1537.6  | 832.8  | 887.5  | 932.9  |
| 5050.5  | 5482.0  | 4518.1  | 2180.6  | 1942.6  | 2244.4  | 1582.5 | 1776.6 | 1823.1 |
| 512.1   | 723.5   | 1110.5  | 883.1   | 754.7   | 818.7   | 458.3  | 539.4  | 549.7  |
| 79.4    | 108.0   | 144.8   | 72.1    | 57.5    | 72.0    | 54.6   | 67.0   | 74.2   |
| 151.8   | 173.8   | 363.2   | 146.0   | 137.4   | 132.4   | 121.4  | 169.0  | 141.3  |
| 2506.3  | 3316.3  | 2827.4  | 817.7   | 684.5   | 728.3   | 615.8  | 617.9  | 674.9  |
| 4604.3  | 5306.2  | 5269.8  | 1849.4  | 1607.9  | 1639.2  | 1113.0 | 1117.5 | 1227.1 |
| 975.8   | 848.3   | 534.4   | 91.4    | 90.5    | 101.0   | 135.5  | 128.8  | 157.7  |
| 3569.7  | 3920.5  | 3016.0  | 1046.0  | 895.1   | 959.4   | 453.6  | 471.5  | 540.2  |
| 5263.3  | 5057.5  | 4289.2  | 1418.4  | 1386.9  | 1516.8  | 1017.2 | 1222.5 | 1293.1 |
| 2821.1  | 2864.0  | 1980.9  | 1455.8  | 1132.1  | 1192.0  | 868.5  | 748.7  | 901.6  |
| 221.8   | 236.5   | 133.1   | 173.3   | 190.2   | 212.0   | 187.2  | 198.1  | 237.1  |
| 97.9    | 75.2    | 77.4    | 230.5   | 185.7   | 211.8   | 127.9  | 130.7  | 138.1  |
| 1154.0  | 1340.2  | 786.5   | 1085.3  | 761.4   | 921.3   | 621.3  | 456.7  | 538.1  |
| 1131.8  | 1218.9  | 876.8   | 430.9   | 228.1   | 292.4   | 364.3  | 233.5  | 249.8  |
| 3183.9  | 3591.8  | 2498.7  | 1377.4  | 617.9   | 674.9   | 837.8  | 497.0  | 610.5  |
| 1361.1  | 1433.4  | 612.7   | 925.4   | 576.3   | 694.0   | 490.8  | 333.5  | 387.0  |

|         |         |         |         |         |         |        |        |        |
|---------|---------|---------|---------|---------|---------|--------|--------|--------|
| 2047.0  | 2211.7  | 1013.1  | 1578.9  | 994.8   | 1108.8  | 934.0  | 725.9  | 879.8  |
| 383.9   | 480.7   | 405.2   | 447.4   | 434.0   | 447.1   | 217.5  | 240.0  | 254.4  |
| 523.1   | 612.7   | 565.1   | 684.3   | 556.6   | 674.2   | 472.8  | 501.5  | 556.9  |
| 255.1   | 318.1   | 232.2   | 137.8   | 109.5   | 121.5   | 93.9   | 86.2   | 88.4   |
| 958.6   | 1145.3  | 750.5   | 1247.2  | 1213.0  | 1224.5  | 755.6  | 923.3  | 950.6  |
| 408.9   | 523.4   | 333.5   | 709.8   | 696.1   | 785.9   | 452.7  | 527.2  | 554.4  |
| 1423.1  | 1572.1  | 932.0   | 601.4   | 585.4   | 596.4   | 532.9  | 533.9  | 577.4  |
| 2785.7  | 2993.7  | 2056.1  | 1030.8  | 870.2   | 810.8   | 1236.6 | 1151.1 | 1316.7 |
| 2181.6  | 2470.0  | 1876.0  | 194.0   | 186.4   | 205.0   | 133.9  | 167.5  | 187.5  |
| 1402.7  | 1729.4  | 1212.3  | 1212.7  | 871.2   | 880.9   | 592.9  | 683.8  | 697.3  |
| 1466.3  | 1526.7  | 1031.1  | 1208.5  | 826.4   | 871.3   | 623.4  | 420.4  | 521.3  |
| 1211.7  | 1403.0  | 750.2   | 525.2   | 358.7   | 454.3   | 489.8  | 311.9  | 404.2  |
| 1417.9  | 1492.5  | 750.2   | 1757.4  | 1420.0  | 1590.9  | 924.2  | 823.0  | 1011.0 |
| 11770.0 | 11340.8 | 11135.2 | 11835.4 | 11061.9 | 11644.5 | 7854.6 | 7651.7 | 8184.1 |
| 1303.3  | 1704.2  | 1351.0  | 798.7   | 619.1   | 678.2   | 660.8  | 809.0  | 777.2  |
| 264.3   | 422.1   | 378.0   | 421.1   | 388.8   | 423.8   | 211.0  | 253.6  | 260.0  |
| 1.2     | 1.2     | 1.9     | 2.9     | 2.6     | 3.0     | 1.8    | 1.3    | 1.3    |
| 15.7    | 13.4    | 5.5     | 8.5     | 5.2     | 14.0    | 7.9    | 11.1   | 4.1    |
| 2.7     | 8.0     | 4.1     | 26.4    | 24.2    | 10.4    | 9.2    | 7.2    | 8.2    |
| 1310.5  | 1342.7  | 978.8   | 666.2   | 515.0   | 526.4   | 459.2  | 455.3  | 506.9  |
| 1159.5  | 1340.7  | 844.5   | 1266.6  | 947.8   | 1002.8  | 889.3  | 796.0  | 984.7  |
| 1362.0  | 1520.9  | 1144.4  | 1292.1  | 1120.7  | 1282.9  | 712.3  | 730.5  | 876.4  |
| 913.1   | 1215.7  | 878.9   | 654.9   | 498.4   | 555.9   | 499.8  | 478.0  | 545.4  |
| 160.7   | 234.2   | 196.9   | 1225.3  | 1156.9  | 1224.8  | 454.6  | 577.6  | 649.6  |
| 2560.5  | 2560.2  | 1557.9  | 1306.9  | 1079.9  | 1181.5  | 774.1  | 862.2  | 948.3  |
| 760.7   | 1033.7  | 658.3   | 275.9   | 187.3   | 233.0   | 258.0  | 254.2  | 261.7  |
| 545.9   | 708.1   | 534.6   | 241.9   | 190.3   | 207.0   | 274.0  | 322.4  | 301.8  |
| 6167.1  | 5009.3  | 3147.0  | 144.8   | 95.1    | 124.2   | 93.6   | 106.5  | 85.4   |
| 586.4   | 870.7   | 504.1   | 439.0   | 336.1   | 456.9   | 181.6  | 209.0  | 222.4  |
| 1882.1  | 2078.1  | 1067.8  | 2352.6  | 2077.0  | 2373.4  | 861.9  | 1045.6 | 1066.4 |
| 898.1   | 977.9   | 776.1   | 512.2   | 421.7   | 498.4   | 247.4  | 294.3  | 323.6  |
| 292.1   | 573.6   | 601.4   | 175.9   | 139.5   | 152.0   | 96.3   | 95.9   | 117.8  |
| 849.7   | 792.7   | 662.4   | 485.3   | 398.7   | 485.3   | 347.2  | 399.6  | 402.1  |
| 1472.3  | 1630.5  | 1079.6  | 249.1   | 187.6   | 236.1   | 239.0  | 214.4  | 234.6  |
| 295.4   | 380.4   | 283.4   | 135.3   | 98.9    | 94.2    | 131.6  | 114.6  | 129.0  |
| 730.1   | 801.6   | 475.3   | 342.4   | 299.3   | 379.1   | 273.2  | 282.5  | 305.5  |
| 1687.7  | 2171.7  | 1783.5  | 1223.4  | 1041.3  | 1046.6  | 835.1  | 834.5  | 886.9  |
| 576.0   | 565.6   | 204.1   | 810.2   | 586.8   | 676.1   | 410.4  | 278.8  | 386.3  |
| 1889.3  | 2184.0  | 1575.6  | 400.9   | 397.9   | 463.2   | 364.3  | 423.0  | 461.0  |
| 1834.8  | 2217.3  | 1463.1  | 1494.7  | 1143.0  | 1227.1  | 900.4  | 816.2  | 904.4  |
| 2917.8  | 3372.2  | 2364.6  | 912.3   | 821.9   | 886.3   | 656.2  | 663.2  | 708.7  |
| 1823.4  | 2275.9  | 1788.0  | 969.2   | 765.4   | 887.6   | 689.0  | 662.3  | 719.2  |
| 1069.5  | 1388.6  | 842.7   | 210.7   | 224.9   | 231.6   | 193.3  | 175.6  | 215.1  |
| 39.4    | 52.4    | 24.1    | 920.8   | 794.4   | 899.8   | 572.7  | 510.1  | 602.2  |
| 1343.6  | 1334.5  | 775.8   | 808.3   | 692.7   | 779.5   | 478.8  | 401.9  | 519.4  |
| 3228.9  | 3248.6  | 1989.2  | 1637.8  | 1438.4  | 1502.7  | 1019.7 | 930.2  | 1091.2 |
| 14.1    | 33.7    | 41.0    | 32.5    | 15.9    | 32.2    | 13.8   | 13.8   | 27.1   |
| 603.5   | 773.1   | 719.6   | 1187.7  | 1079.3  | 1228.9  | 636.1  | 637.3  | 732.7  |
| 1720.8  | 2152.1  | 1844.2  | 2585.8  | 2274.6  | 2509.4  | 1180.7 | 1326.1 | 1417.1 |
| 2174.2  | 2730.0  | 1861.2  | 1170.2  | 766.5   | 852.0   | 708.0  | 606.0  | 660.5  |
| 1432.8  | 1732.0  | 1148.3  | 507.6   | 319.2   | 384.2   | 490.4  | 392.5  | 411.4  |
| 8018.9  | 7646.1  | 5232.3  | 5124.4  | 3985.1  | 4285.8  | 3906.5 | 3005.1 | 3830.7 |
| 424.4   | 471.8   | 431.3   | 263.8   | 217.6   | 255.0   | 223.9  | 256.7  | 237.4  |

|         |         |        |         |        |         |        |        |        |
|---------|---------|--------|---------|--------|---------|--------|--------|--------|
| 3298.6  | 3155.6  | 2118.8 | 2465.6  | 2135.8 | 2214.5  | 1847.3 | 1648.4 | 1863.2 |
| 1768.4  | 1886.0  | 1408.2 | 596.4   | 580.1  | 488.2   | 539.5  | 619.4  | 645.7  |
| 1327.6  | 1923.8  | 2563.2 | 763.7   | 811.1  | 783.3   | 824.7  | 869.8  | 928.7  |
| 1046.7  | 1381.7  | 1495.5 | 715.1   | 726.2  | 771.2   | 453.9  | 491.5  | 530.0  |
| 175.4   | 280.4   | 331.0  | 280.9   | 242.3  | 239.4   | 159.4  | 197.2  | 213.4  |
| 84.4    | 112.5   | 116.1  | 124.8   | 107.7  | 109.4   | 89.2   | 82.4   | 105.5  |
| 51.4    | 88.7    | 82.4   | 49.6    | 45.2   | 56.8    | 76.7   | 75.8   | 78.2   |
| 21.2    | 25.4    | 18.2   | 15.7    | 19.2   | 15.8    | 13.0   | 11.3   | 21.2   |
| 11.9    | 7.4     | 5.6    | 21.4    | 19.7   | 15.6    | 4.5    | 7.1    | 12.1   |
| 1719.3  | 2020.0  | 1637.6 | 402.3   | 419.7  | 436.9   | 358.3  | 384.2  | 402.7  |
| 650.9   | 722.6   | 571.1  | 997.9   | 892.8  | 888.4   | 590.1  | 612.5  | 715.9  |
| 453.1   | 479.3   | 292.5  | 487.0   | 434.7  | 420.4   | 374.4  | 333.4  | 385.5  |
| 1053.9  | 1261.3  | 868.4  | 2425.8  | 1964.3 | 2168.0  | 1194.1 | 1243.7 | 1384.1 |
| 247.5   | 313.5   | 187.3  | 388.9   | 317.1  | 322.3   | 209.8  | 199.3  | 266.9  |
| 1186.4  | 1214.1  | 1022.3 | 822.4   | 664.3  | 739.0   | 568.3  | 570.8  | 628.8  |
| 1.8     | 3.8     | 1.0    | 6.9     | 3.8    | 3.7     | 3.4    | 2.3    | 8.5    |
| 132.8   | 217.4   | 207.9  | 357.3   | 388.9  | 406.0   | 399.1  | 481.1  | 492.2  |
| 166.0   | 230.6   | 248.1  | 743.0   | 775.9  | 843.8   | 412.7  | 534.2  | 561.9  |
| 10617.5 | 10041.5 | 8698.8 | 10213.6 | 9561.3 | 10153.9 | 6488.4 | 6513.6 | 6523.7 |
| 424.3   | 692.7   | 588.7  | 232.7   | 230.2  | 331.3   | 412.0  | 447.0  | 436.5  |
| 1355.0  | 2075.9  | 1739.1 | 1495.1  | 1361.1 | 1365.9  | 1179.4 | 1277.1 | 1417.5 |
| 2885.3  | 3628.1  | 3355.2 | 4690.7  | 4270.6 | 4574.4  | 1907.8 | 2254.4 | 2474.8 |
| 1990.7  | 2448.2  | 1851.3 | 807.6   | 658.4  | 741.9   | 602.7  | 630.0  | 735.9  |
| 5489.7  | 5976.6  | 2719.0 | 1412.1  | 632.3  | 698.9   | 789.8  | 418.7  | 518.9  |
| 80.8    | 126.2   | 99.9   | 119.0   | 112.3  | 132.1   | 45.0   | 48.4   | 60.9   |
| 87.1    | 137.5   | 100.5  | 122.6   | 117.7  | 106.1   | 60.4   | 82.9   | 83.9   |
| 2364.3  | 2633.4  | 1809.6 | 4957.2  | 4478.3 | 4618.9  | 2604.2 | 2662.0 | 2758.6 |
| 170.6   | 205.4   | 146.1  | 211.0   | 146.2  | 212.0   | 267.6  | 233.4  | 265.4  |
| 434.4   | 599.8   | 368.2  | 1348.9  | 1114.9 | 1067.2  | 936.4  | 945.7  | 992.3  |
| 439.9   | 654.9   | 580.0  | 738.5   | 614.9  | 721.1   | 479.1  | 495.6  | 532.8  |
| 528.0   | 757.8   | 552.9  | 235.3   | 216.6  | 228.3   | 187.9  | 153.5  | 215.4  |
| 2063.0  | 2745.6  | 1951.0 | 844.3   | 622.1  | 701.5   | 588.6  | 490.5  | 613.2  |
| 398.0   | 368.4   | 248.1  | 57.3    | 55.0   | 61.1    | 47.3   | 45.4   | 48.7   |
| 527.8   | 656.9   | 530.8  | 1557.1  | 1333.4 | 1399.3  | 933.4  | 914.3  | 1107.6 |
| 101.9   | 163.5   | 150.4  | 244.8   | 209.3  | 189.3   | 365.2  | 332.2  | 429.6  |
| 346.8   | 532.0   | 336.0  | 501.6   | 389.0  | 454.4   | 467.4  | 434.9  | 514.4  |
| 5667.8  | 6047.9  | 5180.2 | 2711.9  | 2097.0 | 2248.7  | 1307.3 | 1169.8 | 1433.9 |
| 902.9   | 1052.1  | 861.2  | 768.3   | 582.3  | 644.4   | 307.7  | 333.4  | 359.6  |
| 1242.8  | 1587.4  | 1140.7 | 723.9   | 557.2  | 668.3   | 468.8  | 503.1  | 464.0  |
| 637.0   | 824.8   | 495.2  | 64.5    | 56.1   | 60.4    | 62.0   | 70.0   | 74.1   |
| 930.0   | 1130.5  | 664.1  | 156.2   | 135.0  | 149.5   | 88.1   | 104.2  | 114.4  |
| 1136.0  | 1236.6  | 642.9  | 676.5   | 469.3  | 559.3   | 444.6  | 407.4  | 458.3  |
| 2639.6  | 2661.8  | 1518.2 | 1442.9  | 1117.7 | 1196.1  | 764.2  | 684.2  | 866.5  |
| 985.9   | 1266.5  | 918.5  | 1119.5  | 892.9  | 928.4   | 910.9  | 965.4  | 985.2  |
| 503.8   | 816.2   | 766.5  | 205.9   | 172.6  | 190.2   | 162.7  | 188.4  | 193.2  |
| 4750.9  | 4921.3  | 3062.4 | 3980.9  | 2575.3 | 2892.4  | 1767.3 | 1080.0 | 1627.4 |
| 104.9   | 165.4   | 117.9  | 321.0   | 223.9  | 247.5   | 196.1  | 230.2  | 228.3  |
| 1627.2  | 1700.8  | 1225.4 | 326.9   | 275.8  | 305.3   | 196.9  | 202.6  | 206.1  |
| 423.8   | 537.4   | 379.8  | 59.0    | 38.3   | 52.1    | 54.5   | 40.7   | 50.2   |
| 637.6   | 880.0   | 630.6  | 99.6    | 69.6   | 85.1    | 62.5   | 76.5   | 70.6   |
| 478.2   | 531.7   | 398.7  | 252.3   | 188.7  | 201.7   | 209.4  | 157.4  | 191.1  |
| 1653.1  | 1642.8  | 1153.6 | 874.7   | 655.7  | 752.4   | 661.3  | 543.3  | 639.0  |
| 2965.1  | 2980.8  | 1709.4 | 1666.8  | 1095.8 | 1171.2  | 1141.7 | 771.8  | 978.4  |

|         |         |        |         |        |        |        |        |        |
|---------|---------|--------|---------|--------|--------|--------|--------|--------|
| 1394.5  | 1596.6  | 933.4  | 646.9   | 544.9  | 577.7  | 536.9  | 608.9  | 655.9  |
| 2710.3  | 3063.6  | 2178.2 | 2771.8  | 2312.0 | 2494.4 | 1546.8 | 1600.9 | 1741.2 |
| 2602.2  | 2564.0  | 1614.6 | 949.2   | 738.6  | 801.3  | 557.3  | 560.2  | 616.7  |
| 3566.7  | 3356.8  | 2386.8 | 3209.9  | 2723.7 | 2844.7 | 1832.2 | 1829.3 | 1968.4 |
| 2685.1  | 3010.7  | 1773.2 | 1278.0  | 715.8  | 779.0  | 861.0  | 614.9  | 708.2  |
| 8980.2  | 8667.7  | 8279.0 | 3840.4  | 3644.8 | 4139.9 | 2322.4 | 2610.4 | 2779.1 |
| 110.1   | 159.3   | 127.6  | 275.3   | 238.4  | 261.6  | 145.5  | 160.5  | 172.8  |
| 3946.3  | 4587.1  | 3928.8 | 3520.6  | 3371.2 | 3571.9 | 1874.9 | 2335.4 | 2331.9 |
| 2275.4  | 2407.2  | 1619.0 | 1027.2  | 921.1  | 894.6  | 608.9  | 584.7  | 658.0  |
| 512.7   | 535.5   | 316.7  | 1303.3  | 935.4  | 1063.9 | 701.2  | 713.2  | 788.4  |
| 1910.8  | 2037.6  | 1237.3 | 895.8   | 711.9  | 811.3  | 704.8  | 680.7  | 759.5  |
| 12924.3 | 11271.9 | 6029.0 | 10153.6 | 8802.9 | 9175.3 | 6184.3 | 5766.2 | 6355.4 |
| 4461.5  | 5277.0  | 4490.1 | 4162.9  | 3379.1 | 3386.1 | 2767.8 | 2403.8 | 2865.9 |
| 120.4   | 185.4   | 116.1  | 381.2   | 302.2  | 354.2  | 265.7  | 279.9  | 288.3  |
| 900.1   | 1094.6  | 739.8  | 155.4   | 144.7  | 149.9  | 161.7  | 149.7  | 160.0  |
| 4164.0  | 4503.3  | 3356.4 | 3006.3  | 2560.0 | 2868.3 | 2028.8 | 2169.5 | 2256.9 |
| 17.8    | 18.4    | 17.6   | 19.3    | 22.3   | 23.0   | 12.0   | 13.9   | 18.0   |
| 230.8   | 270.1   | 203.8  | 168.3   | 172.8  | 135.1  | 124.6  | 157.5  | 162.8  |
| 859.2   | 970.2   | 793.9  | 763.0   | 591.1  | 561.7  | 519.1  | 562.9  | 658.7  |
| 267.3   | 324.9   | 307.1  | 296.6   | 257.6  | 286.5  | 226.9  | 260.2  | 274.8  |
| 803.5   | 784.9   | 465.2  | 134.6   | 103.7  | 123.5  | 88.7   | 72.7   | 95.7   |
| 849.5   | 987.6   | 680.9  | 737.4   | 635.1  | 636.7  | 338.2  | 364.6  | 385.1  |
| 178.5   | 220.4   | 158.8  | 128.7   | 135.4  | 127.0  | 93.0   | 106.4  | 106.0  |
| 527.4   | 590.0   | 432.2  | 482.0   | 442.7  | 527.4  | 270.3  | 272.2  | 273.4  |
| 950.6   | 866.2   | 373.3  | 517.6   | 354.9  | 403.8  | 395.9  | 270.4  | 340.8  |
| 5.3     | 14.7    | 5.0    | 17.5    | 5.8    | 6.1    | 5.7    | 5.7    | 2.1    |
| 582.9   | 664.1   | 379.1  | 422.2   | 297.7  | 296.4  | 193.6  | 164.5  | 192.0  |
| 1470.1  | 1987.5  | 1565.6 | 2087.8  | 1810.7 | 2022.2 | 1309.9 | 1641.4 | 1658.7 |
| 425.5   | 585.8   | 548.7  | 1369.1  | 1183.3 | 1180.1 | 727.5  | 738.4  | 897.1  |
| 1540.9  | 1825.3  | 806.4  | 229.2   | 174.4  | 191.6  | 264.9  | 214.1  | 278.3  |
| 3.9     | 8.8     | 5.8    | 15.8    | 4.5    | 14.6   | 3.0    | 9.0    | 2.1    |
| 5.2     | 6.5     | 2.2    | 3.1     | 3.5    | 7.9    | 2.2    | 2.8    | 1.8    |
| 3.4     | 4.3     | 0.3    | 5.3     | 5.5    | 11.1   | 5.4    | 3.2    | 4.2    |
| 588.1   | 847.8   | 625.3  | 547.8   | 460.9  | 514.2  | 262.4  | 302.2  | 328.4  |
| 2563.2  | 3194.8  | 2743.8 | 1150.3  | 989.8  | 1112.5 | 806.4  | 850.8  | 909.9  |
| 438.3   | 650.6   | 546.8  | 422.6   | 424.4  | 518.9  | 301.3  | 396.1  | 362.2  |
| 671.9   | 1038.8  | 1011.2 | 29.7    | 12.8   | 27.4   | 9.8    | 14.2   | 6.2    |
| 808.5   | 984.2   | 818.9  | 406.3   | 388.6  | 462.2  | 250.1  | 287.8  | 270.9  |
| 1671.2  | 2019.2  | 1477.7 | 1038.4  | 836.4  | 875.1  | 534.1  | 552.9  | 585.8  |
| 1483.6  | 2152.6  | 1285.0 | 664.8   | 503.6  | 528.7  | 537.0  | 529.4  | 619.3  |
| 281.6   | 671.9   | 489.3  | 91.4    | 65.9   | 89.7   | 165.7  | 74.5   | 139.3  |
| 695.7   | 1535.2  | 1120.6 | 396.7   | 352.3  | 325.2  | 668.1  | 349.5  | 645.0  |
| 567.6   | 1442.0  | 977.0  | 303.8   | 237.8  | 271.9  | 465.6  | 207.3  | 401.3  |
| 1396.9  | 1725.0  | 1227.0 | 407.7   | 431.0  | 459.0  | 261.6  | 372.6  | 370.6  |
| 1350.0  | 1509.7  | 1029.0 | 428.2   | 279.5  | 303.8  | 280.8  | 175.2  | 249.1  |
| 1818.5  | 2259.2  | 1584.5 | 662.4   | 568.3  | 648.1  | 460.1  | 481.4  | 497.8  |
| 7019.6  | 3939.8  | 1430.7 | 564.6   | 400.9  | 431.2  | 338.4  | 274.5  | 349.7  |
| 1210.3  | 1431.5  | 1038.1 | 678.0   | 569.0  | 529.5  | 498.6  | 550.0  | 623.6  |
| 1571.6  | 2415.3  | 1726.9 | 197.3   | 145.0  | 159.0  | 300.9  | 216.0  | 282.2  |
| 1589.4  | 2344.9  | 1679.8 | 275.2   | 196.0  | 201.8  | 293.3  | 190.0  | 242.0  |
| 1430.7  | 1574.3  | 1211.5 | 297.4   | 300.2  | 324.0  | 378.3  | 442.6  | 466.8  |
| 622.6   | 632.9   | 508.3  | 539.8   | 471.2  | 468.7  | 275.7  | 320.5  | 345.0  |
| 2049.9  | 2310.2  | 1913.5 | 786.0   | 709.1  | 805.1  | 603.1  | 797.3  | 745.2  |

|        |        |        |        |        |        |        |        |        |
|--------|--------|--------|--------|--------|--------|--------|--------|--------|
| 42.4   | 64.1   | 48.2   | 10.6   | 9.1    | 29.4   | 43.2   | 41.4   | 50.3   |
| 341.6  | 610.3  | 409.0  | 561.8  | 494.5  | 551.7  | 310.9  | 434.2  | 415.7  |
| 416.5  | 453.3  | 342.6  | 402.3  | 316.3  | 349.5  | 261.3  | 213.4  | 269.5  |
| 1054.8 | 1331.0 | 883.4  | 2.6    | 2.9    | 2.8    | 1.8    | 4.0    | 4.5    |
| 1419.9 | 1236.6 | 904.8  | 410.9  | 371.6  | 390.6  | 384.8  | 463.6  | 463.1  |
| 584.2  | 786.2  | 678.4  | 462.4  | 421.8  | 463.2  | 416.5  | 477.9  | 478.4  |
| 653.9  | 827.8  | 591.4  | 975.7  | 669.2  | 715.0  | 653.7  | 470.3  | 589.1  |
| 748.5  | 888.4  | 790.5  | 266.9  | 149.6  | 163.4  | 274.8  | 194.0  | 198.0  |
| 630.2  | 1012.7 | 1169.8 | 694.7  | 594.4  | 731.4  | 952.4  | 1157.4 | 1151.6 |
| 280.1  | 442.8  | 437.9  | 296.8  | 246.1  | 316.7  | 321.1  | 316.3  | 360.3  |
| 1525.4 | 1905.2 | 1870.9 | 668.7  | 614.4  | 659.0  | 530.1  | 669.2  | 615.4  |
| 266.2  | 422.3  | 401.7  | 59.1   | 36.4   | 41.5   | 10.7   | 16.5   | 16.0   |
| 7427.5 | 7284.8 | 6756.2 | 7915.0 | 7588.1 | 7709.2 | 5408.8 | 5522.9 | 5667.1 |
| 2585.5 | 3431.3 | 3294.7 | 1515.7 | 1155.7 | 1416.0 | 765.9  | 752.0  | 784.0  |
| 2513.4 | 2925.8 | 2105.9 | 1584.9 | 1369.7 | 1427.8 | 1635.5 | 1663.0 | 1796.6 |
| 2846.3 | 3002.4 | 1988.6 | 1353.9 | 1024.3 | 1112.7 | 1386.2 | 1152.9 | 1447.1 |
| 11.2   | 17.8   | 11.2   | 5.8    | 2.2    | 3.4    | 3.4    | 3.6    | 10.8   |
| 50.6   | 69.1   | 74.2   | 30.2   | 33.2   | 21.7   | 18.1   | 32.3   | 26.8   |
| 6306.3 | 5874.3 | 3615.8 | 124.9  | 90.5   | 118.3  | 140.6  | 106.2  | 111.2  |
| 340.6  | 427.1  | 361.9  | 159.1  | 157.5  | 189.9  | 208.1  | 225.9  | 232.8  |
| 333.0  | 457.3  | 367.7  | 247.8  | 211.6  | 220.3  | 168.8  | 194.6  | 224.8  |
| 796.7  | 959.1  | 760.8  | 396.4  | 357.3  | 397.7  | 382.8  | 395.6  | 437.7  |
| 871.7  | 1062.0 | 801.8  | 603.1  | 420.0  | 512.2  | 294.0  | 246.5  | 277.8  |
| 673.2  | 857.5  | 638.5  | 671.8  | 467.2  | 512.1  | 323.9  | 273.8  | 349.0  |
| 1943.7 | 2446.9 | 2066.2 | 1291.5 | 948.4  | 958.1  | 1182.4 | 897.6  | 1120.4 |
| 1635.6 | 1458.4 | 834.5  | 988.1  | 495.7  | 596.5  | 631.6  | 413.1  | 470.6  |
| 2892.1 | 2936.8 | 1764.8 | 1547.6 | 810.7  | 924.1  | 1294.9 | 835.0  | 927.7  |
| 8135.3 | 8477.2 | 7589.2 | 9208.8 | 8547.2 | 8858.2 | 5341.6 | 5118.8 | 5407.6 |
| 2434.2 | 2954.4 | 2439.0 | 51.1   | 43.6   | 48.3   | 32.7   | 36.0   | 49.1   |
| 1.0    | 4.1    | 2.2    | 9.5    | 8.7    | 5.1    | 1.8    | 4.6    | 5.7    |
| 44.7   | 42.1   | 43.0   | 263.8  | 251.3  | 242.1  | 237.0  | 202.9  | 270.4  |
| 613.4  | 823.3  | 605.3  | 2589.0 | 2153.9 | 2251.7 | 2903.0 | 2635.6 | 2853.5 |
| 146.7  | 207.2  | 159.0  | 883.2  | 719.5  | 732.0  | 792.9  | 795.4  | 937.2  |
| 678.7  | 910.7  | 500.0  | 800.3  | 660.4  | 751.0  | 519.3  | 590.5  | 620.1  |
| 2061.6 | 2117.2 | 1229.5 | 3070.8 | 2391.5 | 2598.5 | 1815.3 | 1722.5 | 1945.8 |
| 164.4  | 268.4  | 233.1  | 410.3  | 347.8  | 427.7  | 191.1  | 209.5  | 239.3  |
| 779.4  | 1026.6 | 826.1  | 514.9  | 371.0  | 407.2  | 214.2  | 187.3  | 216.6  |
| 1152.6 | 1617.4 | 1295.9 | 667.0  | 475.2  | 557.0  | 371.1  | 346.8  | 422.5  |
| 3352.8 | 3360.8 | 2334.6 | 2814.1 | 2503.9 | 2638.8 | 1606.8 | 1614.9 | 1742.3 |
| 310.1  | 388.7  | 269.8  | 124.6  | 104.8  | 104.0  | 78.2   | 75.1   | 92.3   |
| 1284.3 | 1539.6 | 1173.4 | 610.3  | 383.5  | 467.0  | 305.0  | 266.9  | 280.0  |
| 221.3  | 252.0  | 140.8  | 42.2   | 29.9   | 42.2   | 88.9   | 87.3   | 97.6   |
| 915.5  | 987.9  | 643.0  | 806.9  | 559.3  | 702.7  | 437.2  | 408.0  | 499.6  |
| 363.1  | 479.6  | 430.9  | 725.3  | 550.5  | 596.5  | 423.5  | 398.9  | 425.3  |
| 2089.1 | 2431.4 | 1908.2 | 1177.6 | 1033.5 | 1126.7 | 669.8  | 781.4  | 777.9  |
| 186.4  | 256.8  | 156.6  | 249.4  | 259.0  | 269.5  | 354.0  | 310.5  | 393.9  |
| 429.4  | 524.3  | 391.9  | 759.2  | 620.7  | 762.0  | 535.4  | 568.5  | 571.5  |
| 188.2  | 281.9  | 277.7  | 392.1  | 371.0  | 426.6  | 305.7  | 451.3  | 406.3  |
| 238.5  | 236.0  | 194.2  | 182.9  | 152.2  | 187.7  | 171.0  | 153.3  | 152.8  |
| 1244.3 | 1440.4 | 1127.1 | 841.2  | 701.8  | 710.1  | 912.4  | 874.2  | 970.1  |
| 1316.0 | 1535.2 | 1248.1 | 1019.9 | 765.6  | 969.7  | 1037.3 | 846.2  | 1003.3 |
| 2433.8 | 2945.0 | 2371.6 | 1305.0 | 1072.2 | 1075.6 | 2343.4 | 1838.3 | 2236.4 |
| 3364.0 | 3602.1 | 3263.2 | 2662.9 | 2093.6 | 2170.9 | 2739.0 | 2126.0 | 2586.4 |

|        |        |        |        |        |        |        |        |        |
|--------|--------|--------|--------|--------|--------|--------|--------|--------|
| 137.3  | 180.2  | 145.8  | 96.4   | 75.8   | 87.0   | 99.2   | 76.1   | 92.3   |
| 921.3  | 1095.9 | 412.3  | 119.9  | 94.4   | 95.9   | 63.7   | 38.0   | 62.9   |
| 48.9   | 22.3   | 6.5    | 32.6   | 25.0   | 18.6   | 14.7   | 19.3   | 20.7   |
| 300.7  | 75.4   | 21.9   | 50.3   | 45.6   | 40.5   | 28.4   | 26.1   | 26.9   |
| 603.5  | 649.1  | 276.5  | 569.9  | 377.1  | 383.6  | 331.4  | 180.7  | 252.1  |
| 966.1  | 1093.2 | 707.6  | 651.3  | 423.0  | 522.8  | 426.5  | 360.9  | 404.0  |
| 1273.9 | 1228.1 | 652.7  | 1400.9 | 785.8  | 882.0  | 1028.8 | 657.0  | 796.0  |
| 3008.2 | 3431.0 | 2480.5 | 2383.7 | 1920.4 | 1999.7 | 1623.8 | 1404.5 | 1547.1 |
| 2358.3 | 2236.8 | 1405.7 | 1678.9 | 1286.9 | 1361.2 | 1521.9 | 1343.5 | 1527.8 |
| 3887.0 | 3705.7 | 2085.8 | 474.1  | 256.0  | 291.1  | 228.5  | 129.3  | 174.8  |
| 270.2  | 451.5  | 305.9  | 157.8  | 148.1  | 134.1  | 203.8  | 187.8  | 211.9  |
| 93.2   | 108.1  | 78.7   | 35.7   | 38.9   | 48.0   | 47.5   | 35.2   | 50.2   |
| 253.3  | 366.1  | 247.2  | 263.4  | 237.6  | 281.9  | 258.3  | 299.7  | 268.0  |
| 496.4  | 797.0  | 664.7  | 556.1  | 458.7  | 523.6  | 237.7  | 257.9  | 267.8  |
| 1954.1 | 2221.5 | 1275.0 | 1142.7 | 1044.0 | 1079.7 | 879.2  | 984.8  | 976.4  |
| 678.5  | 749.1  | 525.6  | 518.7  | 394.9  | 469.5  | 359.0  | 360.1  | 405.0  |
| 473.1  | 378.4  | 258.9  | 304.2  | 228.8  | 264.1  | 188.9  | 186.0  | 212.8  |
| 269.6  | 444.0  | 400.4  | 439.6  | 381.1  | 482.1  | 368.3  | 276.6  | 370.1  |
| 860.4  | 1189.6 | 1028.5 | 1165.0 | 967.0  | 1117.8 | 780.4  | 622.7  | 724.5  |
| 433.6  | 443.5  | 230.4  | 286.9  | 131.8  | 166.1  | 156.0  | 66.0   | 73.8   |
| 389.0  | 477.3  | 359.5  | 239.1  | 186.0  | 230.2  | 310.8  | 291.6  | 318.3  |
| 155.6  | 191.4  | 135.4  | 152.1  | 136.0  | 139.2  | 110.4  | 121.3  | 119.0  |
| 770.7  | 922.2  | 622.1  | 512.1  | 365.7  | 364.5  | 447.5  | 436.9  | 459.6  |
| 1444.4 | 1435.8 | 574.2  | 816.2  | 481.3  | 520.2  | 488.0  | 287.7  | 392.3  |
| 209.3  | 269.6  | 196.2  | 373.0  | 288.7  | 301.2  | 202.7  | 202.8  | 258.9  |
| 660.1  | 966.6  | 781.1  | 434.2  | 417.4  | 479.2  | 241.5  | 312.6  | 340.4  |
| 1726.1 | 1958.5 | 1302.7 | 4377.5 | 3592.1 | 3947.2 | 2293.4 | 2112.8 | 2423.9 |
| 62.7   | 78.0   | 60.4   | 9.0    | 23.1   | 22.3   | 18.5   | 19.0   | 17.9   |
| 76.5   | 122.2  | 77.2   | 48.1   | 36.6   | 37.4   | 39.3   | 15.2   | 24.1   |
| 18.6   | 3.7    | 12.9   | 6.0    | 7.9    | 22.0   | 1.7    | 3.8    | 9.2    |
| 31.0   | 28.9   | 32.8   | 18.7   | 17.4   | 19.9   | 16.2   | 10.9   | 10.7   |
| 1172.4 | 1321.3 | 939.2  | 1114.5 | 995.4  | 1031.4 | 774.6  | 893.9  | 935.1  |
| 711.1  | 743.5  | 609.3  | 469.2  | 420.4  | 466.0  | 425.7  | 512.3  | 530.1  |
| 572.1  | 547.2  | 384.6  | 490.0  | 459.5  | 492.7  | 287.0  | 311.1  | 357.7  |
| 1741.3 | 1778.6 | 1023.7 | 918.6  | 766.2  | 811.8  | 666.6  | 587.1  | 663.9  |
| 2267.2 | 2545.7 | 1451.0 | 2102.1 | 1674.5 | 1839.9 | 1304.2 | 1086.9 | 1334.8 |
| 483.9  | 524.4  | 322.3  | 182.8  | 201.8  | 220.9  | 187.4  | 208.7  | 225.8  |
| 178.5  | 195.6  | 125.5  | 59.6   | 57.2   | 79.6   | 96.3   | 65.5   | 84.3   |
| 1191.1 | 1388.3 | 935.6  | 1066.2 | 784.5  | 921.0  | 694.7  | 583.0  | 733.1  |
| 387.6  | 530.9  | 438.0  | 272.5  | 256.4  | 244.1  | 195.2  | 234.0  | 242.5  |
| 633.1  | 653.9  | 529.3  | 497.4  | 418.3  | 460.3  | 378.4  | 428.8  | 400.8  |
| 361.1  | 434.1  | 385.7  | 122.1  | 123.4  | 121.5  | 95.1   | 132.9  | 134.4  |
| 421.8  | 476.6  | 373.6  | 61.4   | 34.1   | 49.3   | 94.0   | 118.1  | 118.2  |
| 1290.4 | 1444.5 | 1295.9 | 586.9  | 499.0  | 567.1  | 356.3  | 419.1  | 457.4  |
| 1096.7 | 1259.2 | 1220.5 | 489.8  | 456.7  | 540.5  | 412.6  | 461.4  | 496.3  |
| 870.8  | 1031.6 | 753.9  | 758.9  | 640.1  | 768.0  | 471.6  | 545.5  | 527.5  |
| 897.5  | 1013.1 | 844.9  | 1116.3 | 999.7  | 992.7  | 1147.8 | 1220.5 | 1177.8 |
| 844.7  | 1109.0 | 724.8  | 395.8  | 354.7  | 367.4  | 459.8  | 479.4  | 551.8  |
| 269.1  | 271.3  | 193.9  | 35.3   | 35.3   | 36.1   | 32.4   | 27.2   | 48.0   |
| 1318.3 | 1606.3 | 1214.8 | 1652.6 | 1299.4 | 1474.8 | 820.5  | 800.4  | 918.3  |
| 53.8   | 73.4   | 31.1   | 33.6   | 11.1   | 25.2   | 28.8   | 23.5   | 41.8   |
| 2861.0 | 2896.6 | 1730.6 | 1048.1 | 750.5  | 873.8  | 1355.0 | 854.1  | 1162.1 |
| 1.4    | 2.3    | 1.7    | 2.5    | 15.7   | 9.4    | 0.7    | 1.3    | 0.8    |



|        |        |        |        |        |        |        |        |        |
|--------|--------|--------|--------|--------|--------|--------|--------|--------|
| 24.4   | 58.9   | 65.4   | 6.3    | 0.6    | 2.5    | 0.3    | 0.1    | 0.9    |
| 2032.4 | 2332.5 | 1805.0 | 893.6  | 783.8  | 811.6  | 1199.5 | 1148.1 | 1393.2 |
| 279.0  | 681.3  | 496.6  | 1050.3 | 715.0  | 794.9  | 684.8  | 714.4  | 704.9  |
| 170.8  | 175.7  | 114.5  | 66.2   | 47.9   | 62.0   | 106.4  | 112.9  | 127.4  |
| 314.5  | 366.8  | 232.1  | 336.4  | 281.8  | 342.8  | 211.6  | 201.9  | 239.7  |
| 224.0  | 225.7  | 135.8  | 197.2  | 171.7  | 161.5  | 53.9   | 51.4   | 70.9   |
| 80.5   | 94.9   | 94.8   | 38.9   | 55.8   | 31.7   | 69.7   | 52.5   | 43.6   |
| 448.3  | 564.3  | 360.5  | 559.9  | 445.8  | 553.7  | 325.5  | 422.2  | 407.2  |
| 1638.8 | 2414.5 | 2070.2 | 217.0  | 264.0  | 329.1  | 166.8  | 238.5  | 261.3  |
| 2136.9 | 3149.1 | 2782.5 | 380.0  | 424.2  | 446.7  | 300.5  | 450.5  | 465.3  |
| 7449.9 | 8614.7 | 7627.4 | 7064.0 | 6318.9 | 6501.5 | 4793.5 | 4784.2 | 5087.9 |
| 442.8  | 449.3  | 160.5  | 233.4  | 101.6  | 107.1  | 118.0  | 50.6   | 63.8   |
| 1219.7 | 1489.6 | 684.8  | 560.8  | 418.1  | 450.5  | 345.0  | 333.0  | 343.6  |
| 2934.0 | 3351.6 | 2906.7 | 4206.5 | 3334.2 | 3502.3 | 1401.0 | 1153.9 | 1484.4 |
| 1541.4 | 1794.3 | 1574.6 | 1049.9 | 940.9  | 996.8  | 694.1  | 900.7  | 886.1  |
| 104.2  | 122.1  | 102.9  | 75.1   | 60.7   | 73.5   | 43.9   | 51.2   | 56.3   |
| 4220.6 | 3959.0 | 2946.1 | 2077.2 | 1467.1 | 1568.5 | 1332.6 | 1074.8 | 1351.3 |
| 3047.9 | 4285.6 | 3008.1 | 1879.4 | 1266.9 | 1289.0 | 1545.6 | 1100.0 | 1305.4 |
| 1630.2 | 1986.7 | 1574.0 | 2763.1 | 2099.5 | 2130.1 | 1476.0 | 1158.3 | 1461.6 |
| 158.3  | 220.0  | 115.0  | 255.5  | 186.0  | 247.1  | 172.0  | 173.2  | 160.2  |
| 2318.8 | 2899.7 | 1869.8 | 2261.6 | 1929.4 | 2071.2 | 1376.6 | 1610.9 | 1825.1 |
| 801.9  | 1221.1 | 1110.7 | 685.8  | 735.3  | 878.9  | 450.3  | 684.0  | 665.5  |
| 24.0   | 28.5   | 18.3   | 52.0   | 43.6   | 56.9   | 18.6   | 9.4    | 18.4   |
| 460.9  | 485.2  | 305.7  | 230.2  | 202.0  | 207.7  | 181.2  | 198.3  | 212.3  |
| 350.7  | 387.1  | 370.2  | 195.9  | 147.2  | 198.2  | 240.6  | 220.3  | 236.4  |
| 887.5  | 1078.2 | 929.0  | 638.7  | 561.5  | 566.2  | 626.4  | 646.2  | 737.7  |
| 1101.7 | 1272.9 | 870.9  | 980.8  | 722.6  | 794.2  | 486.7  | 348.8  | 490.8  |
| 988.5  | 1160.9 | 770.4  | 634.5  | 530.0  | 619.7  | 389.2  | 387.6  | 431.8  |
| 2623.1 | 3240.7 | 1864.0 | 907.1  | 789.0  | 821.4  | 1420.5 | 1261.9 | 1317.1 |
| 1484.1 | 1775.1 | 1439.1 | 1756.3 | 1345.6 | 1357.8 | 1390.3 | 1304.3 | 1380.2 |
| 455.3  | 553.0  | 426.4  | 287.2  | 193.2  | 224.2  | 240.4  | 195.9  | 214.5  |
| 322.4  | 422.6  | 333.9  | 163.7  | 144.4  | 136.4  | 163.1  | 151.2  | 130.0  |
| 676.7  | 883.6  | 724.1  | 279.7  | 228.4  | 269.2  | 304.7  | 326.2  | 341.4  |
| 230.6  | 295.3  | 220.3  | 84.7   | 58.5   | 80.2   | 115.5  | 100.1  | 115.0  |
| 1084.6 | 1530.0 | 1216.5 | 715.1  | 652.0  | 778.1  | 458.0  | 588.8  | 576.7  |
| 1584.8 | 1784.1 | 1596.4 | 614.4  | 596.3  | 650.4  | 366.8  | 518.0  | 483.2  |
| 1376.3 | 1656.1 | 1412.5 | 370.8  | 339.4  | 346.6  | 326.0  | 414.9  | 395.6  |
| 405.8  | 474.9  | 290.8  | 322.5  | 266.5  | 309.5  | 225.5  | 229.8  | 243.4  |
| 588.5  | 697.0  | 440.3  | 740.1  | 590.3  | 638.2  | 338.7  | 381.6  | 385.2  |
| 445.3  | 602.1  | 428.4  | 1180.2 | 1017.5 | 1086.4 | 575.4  | 652.4  | 706.5  |
| 2767.9 | 3245.8 | 2112.1 | 2015.0 | 1736.3 | 1781.9 | 1943.2 | 1679.7 | 1979.4 |
| 30.4   | 37.7   | 25.2   | 30.6   | 29.2   | 40.1   | 26.3   | 19.8   | 20.2   |
| 1401.3 | 1792.2 | 1553.0 | 1700.1 | 1532.2 | 1752.3 | 1058.8 | 1179.2 | 1300.1 |
| 2.1    | 2.6    | 4.0    | 118.2  | 87.8   | 112.9  | 44.7   | 54.7   | 45.2   |
| 497.4  | 618.2  | 457.5  | 564.7  | 476.1  | 491.6  | 377.1  | 381.6  | 408.5  |
| 0.7    | 7.0    | 7.0    | 13.5   | 9.9    | 13.4   | 5.2    | 2.9    | 3.2    |
| 730.3  | 1036.5 | 689.4  | 409.9  | 331.6  | 398.1  | 589.3  | 311.7  | 541.5  |
| 514.7  | 1025.2 | 644.1  | 649.6  | 485.2  | 554.5  | 409.9  | 237.5  | 457.2  |
| 5.0    | 3.6    | 3.4    | 10.2   | 8.9    | 8.1    | 3.1    | 2.7    | 2.8    |
| 53.2   | 71.4   | 65.8   | 16.1   | 14.9   | 24.0   | 7.3    | 12.5   | 17.1   |
| 538.0  | 714.0  | 524.9  | 387.8  | 351.2  | 402.4  | 200.3  | 200.7  | 244.0  |
| 3370.4 | 3823.9 | 2281.7 | 706.7  | 533.8  | 543.1  | 583.7  | 477.9  | 635.0  |
| 150.8  | 158.3  | 111.1  | 33.3   | 15.5   | 22.6   | 86.9   | 40.8   | 68.1   |

|        |        |        |        |        |        |        |        |        |
|--------|--------|--------|--------|--------|--------|--------|--------|--------|
| 519.0  | 633.4  | 354.2  | 336.8  | 219.2  | 248.8  | 184.3  | 145.2  | 194.6  |
| 562.0  | 461.8  | 319.1  | 860.9  | 916.4  | 972.9  | 686.9  | 1037.8 | 998.7  |
| 478.5  | 619.1  | 468.2  | 413.8  | 318.0  | 436.7  | 458.8  | 469.9  | 451.1  |
| 724.9  | 961.1  | 806.7  | 722.2  | 624.2  | 719.0  | 570.9  | 657.3  | 705.0  |
| 336.2  | 667.1  | 484.3  | 211.4  | 165.5  | 226.0  | 210.4  | 221.4  | 203.9  |
| 187.5  | 281.6  | 205.8  | 216.8  | 149.4  | 186.7  | 100.3  | 99.1   | 99.8   |
| 1865.4 | 2219.7 | 1604.7 | 1331.9 | 1110.7 | 1219.5 | 821.7  | 805.8  | 879.4  |
| 849.1  | 968.0  | 656.3  | 1231.8 | 959.3  | 1123.8 | 573.9  | 506.4  | 546.1  |
| 639.3  | 812.7  | 671.4  | 575.6  | 556.0  | 622.3  | 338.7  | 467.6  | 437.7  |
| 68.8   | 91.7   | 55.7   | 64.9   | 57.9   | 74.9   | 60.7   | 42.4   | 47.8   |
| 2548.8 | 2863.6 | 2177.0 | 2258.9 | 1971.5 | 2138.7 | 1284.0 | 1400.2 | 1524.2 |
| 14.2   | 16.0   | 10.4   | 7.4    | 13.1   | 5.4    | 12.2   | 11.3   | 5.9    |
| 7.4    | 9.3    | 2.9    | 8.1    | 11.3   | 7.3    | 5.7    | 1.6    | 7.3    |
| 219.2  | 217.0  | 188.4  | 350.8  | 252.3  | 290.7  | 203.5  | 157.5  | 207.0  |
| 554.0  | 677.5  | 617.8  | 571.0  | 438.3  | 475.3  | 401.8  | 378.2  | 435.4  |
| 3543.8 | 4298.9 | 3429.7 | 2476.4 | 2454.9 | 2573.6 | 1323.0 | 1688.2 | 1642.4 |
| 267.1  | 381.4  | 349.8  | 421.7  | 388.1  | 410.5  | 284.8  | 373.0  | 364.8  |
| 307.7  | 426.1  | 371.9  | 458.7  | 421.4  | 481.4  | 265.5  | 330.2  | 331.5  |
| 83.5   | 96.7   | 76.6   | 87.8   | 90.7   | 95.5   | 93.6   | 110.6  | 102.1  |
| 2467.3 | 3322.5 | 2757.2 | 2980.5 | 2457.8 | 2748.1 | 2841.2 | 3150.9 | 3262.7 |
| 762.1  | 869.0  | 534.9  | 586.3  | 423.0  | 491.8  | 459.7  | 427.4  | 472.6  |
| 1906.2 | 4228.3 | 4294.0 | 2330.1 | 1766.3 | 1997.0 | 1360.2 | 1189.2 | 1378.6 |
| 778.1  | 1178.4 | 817.0  | 172.2  | 139.0  | 154.7  | 119.5  | 107.4  | 127.6  |
| 11.3   | 5.1    | 10.2   | 5.8    | 4.3    | 8.2    | 1.8    | 1.4    | 2.5    |
| 2703.0 | 2671.1 | 1626.7 | 746.1  | 573.1  | 611.1  | 601.9  | 454.4  | 567.3  |
| 63.5   | 71.1   | 42.7   | 44.8   | 33.2   | 36.0   | 23.4   | 21.7   | 23.3   |
| 660.6  | 767.2  | 613.7  | 433.2  | 340.9  | 411.0  | 459.6  | 480.8  | 520.3  |
| 667.0  | 849.0  | 675.1  | 452.6  | 424.7  | 517.5  | 529.8  | 575.3  | 634.9  |
| 259.2  | 286.2  | 194.5  | 533.0  | 444.0  | 520.6  | 333.1  | 336.6  | 346.8  |
| 62.4   | 64.9   | 49.1   | 164.5  | 152.5  | 181.4  | 82.9   | 102.6  | 84.8   |
| 489.7  | 676.7  | 481.6  | 531.1  | 351.0  | 410.9  | 254.7  | 228.0  | 273.8  |
| 34.5   | 39.3   | 39.6   | 541.8  | 629.8  | 748.6  | 340.1  | 456.8  | 448.8  |
| 4723.0 | 4077.8 | 3095.3 | 811.6  | 699.4  | 728.0  | 686.2  | 858.9  | 785.5  |
| 4583.7 | 4492.5 | 3534.9 | 1031.7 | 883.1  | 907.1  | 932.8  | 1093.2 | 1111.0 |
| 617.0  | 653.7  | 470.1  | 480.6  | 493.2  | 488.4  | 502.3  | 508.3  | 564.4  |
| 1241.0 | 1360.5 | 1033.4 | 2028.9 | 1732.3 | 1965.5 | 1467.7 | 1602.1 | 1749.2 |
| 1767.4 | 1715.7 | 1031.1 | 1659.9 | 1327.9 | 1367.6 | 1457.6 | 1247.5 | 1497.8 |
| 302.6  | 455.2  | 420.7  | 167.5  | 143.8  | 148.3  | 123.5  | 143.4  | 161.9  |
| 241.0  | 358.0  | 330.6  | 106.1  | 96.9   | 134.0  | 91.0   | 92.7   | 105.5  |
| 71.9   | 111.1  | 86.8   | 74.4   | 63.5   | 71.1   | 55.7   | 53.8   | 67.1   |
| 374.4  | 434.9  | 358.7  | 295.6  | 275.7  | 263.7  | 229.1  | 250.5  | 268.0  |
| 36.9   | 47.5   | 34.5   | 44.3   | 40.7   | 50.2   | 20.6   | 29.3   | 29.4   |
| 8715.7 | 9115.5 | 7789.5 | 3371.2 | 2762.7 | 2644.2 | 2835.8 | 2554.1 | 2686.9 |
| 1951.2 | 2329.8 | 1763.2 | 3524.4 | 2889.8 | 3308.8 | 2403.4 | 2325.7 | 2675.0 |
| 2427.4 | 4691.2 | 5817.1 | 6521.2 | 6150.3 | 6527.2 | 4285.2 | 4771.5 | 4868.1 |
| 4.1    | 14.0   | 2.3    | 81.8   | 54.9   | 51.5   | 58.8   | 50.1   | 36.3   |
| 3.0    | 4.0    | 4.7    | 18.0   | 19.5   | 15.6   | 14.8   | 15.0   | 13.0   |
| 172.8  | 188.4  | 130.8  | 306.9  | 254.1  | 285.6  | 164.6  | 143.7  | 193.3  |
| 478.1  | 490.3  | 338.8  | 512.9  | 419.7  | 446.9  | 360.1  | 378.2  | 394.2  |
| 282.0  | 306.2  | 215.0  | 563.8  | 525.9  | 495.8  | 303.2  | 253.5  | 350.5  |
| 1744.1 | 2235.1 | 2128.2 | 327.0  | 318.8  | 343.2  | 286.6  | 318.0  | 385.8  |
| 7.2    | 6.4    | 3.5    | 220.0  | 157.6  | 188.8  | 149.5  | 174.2  | 214.9  |
| 5.1    | 4.3    | 4.0    | 521.7  | 448.3  | 482.9  | 445.0  | 483.4  | 509.0  |

|        |        |        |        |        |        |        |        |        |
|--------|--------|--------|--------|--------|--------|--------|--------|--------|
| 422.1  | 699.9  | 613.8  | 23.0   | 16.4   | 33.5   | 30.8   | 30.6   | 24.9   |
| 194.3  | 205.2  | 180.3  | 336.4  | 233.2  | 327.7  | 177.6  | 181.8  | 191.7  |
| 8.6    | 2.3    | 3.2    | 10.9   | 5.6    | 10.4   | 12.9   | 6.1    | 4.4    |
| 1982.4 | 2056.6 | 1362.3 | 1357.6 | 836.1  | 974.0  | 597.9  | 422.2  | 450.5  |
| 326.4  | 354.1  | 270.2  | 388.0  | 274.8  | 302.7  | 271.8  | 261.1  | 258.8  |
| 286.7  | 355.9  | 292.5  | 781.0  | 641.5  | 714.1  | 627.4  | 703.5  | 734.5  |
| 239.4  | 261.9  | 171.1  | 173.1  | 147.1  | 193.5  | 167.4  | 161.0  | 168.9  |
| 1410.1 | 1548.3 | 1040.4 | 1324.0 | 1029.7 | 1146.4 | 982.5  | 941.2  | 1062.2 |
| 3.4    | 7.1    | 6.5    | 2.9    | 1.8    | 2.7    | 1.0    | 0.8    | 1.3    |
| 35.7   | 38.4   | 20.4   | 1.7    | 5.5    | 8.2    | 1.8    | 1.2    | 4.6    |
| 7.6    | 1.3    | 1.0    | 41.6   | 43.6   | 42.3   | 28.8   | 27.9   | 36.0   |
| 455.2  | 451.5  | 369.0  | 627.5  | 495.0  | 513.7  | 266.2  | 305.5  | 288.4  |
| 1514.0 | 1630.4 | 1254.5 | 1152.9 | 963.1  | 1044.6 | 1338.4 | 1320.1 | 1464.1 |
| 648.2  | 853.2  | 591.4  | 368.7  | 317.9  | 366.4  | 236.0  | 244.1  | 276.5  |
| 491.1  | 580.6  | 348.8  | 455.2  | 357.7  | 449.7  | 249.0  | 213.4  | 255.2  |
| 9.6    | 13.4   | 3.8    | 232.7  | 225.5  | 233.3  | 193.7  | 242.2  | 206.2  |
| 13.8   | 16.0   | 10.5   | 58.9   | 55.6   | 54.8   | 54.8   | 61.9   | 50.9   |
| 17.8   | 32.5   | 15.5   | 113.0  | 103.8  | 108.6  | 131.2  | 130.9  | 155.1  |
| 1.9    | 11.8   | 2.6    | 93.9   | 70.7   | 91.7   | 92.6   | 109.9  | 124.0  |
| 5.7    | 8.9    | 5.5    | 272.6  | 213.9  | 288.6  | 140.2  | 138.1  | 141.4  |
| 984.6  | 982.9  | 570.9  | 1178.1 | 978.5  | 1051.0 | 748.1  | 695.2  | 787.1  |
| 574.1  | 703.8  | 561.5  | 356.4  | 335.1  | 344.2  | 201.0  | 267.7  | 251.8  |
| 1803.0 | 1657.8 | 726.4  | 750.1  | 526.0  | 570.6  | 750.8  | 554.5  | 724.3  |
| 1152.4 | 1149.1 | 529.5  | 541.8  | 381.7  | 419.9  | 519.8  | 431.1  | 537.1  |
| 627.9  | 770.5  | 439.8  | 842.9  | 651.1  | 792.5  | 632.5  | 542.5  | 576.3  |
| 343.5  | 426.2  | 294.1  | 483.2  | 390.7  | 454.0  | 337.7  | 290.3  | 346.2  |
| 3553.8 | 3425.3 | 2310.5 | 513.3  | 485.6  | 521.7  | 437.8  | 465.6  | 492.1  |
| 636.7  | 827.5  | 876.9  | 638.2  | 535.5  | 564.1  | 476.8  | 541.4  | 543.2  |
| 302.4  | 327.8  | 231.0  | 249.3  | 215.0  | 224.3  | 222.9  | 198.7  | 233.7  |
| 494.6  | 567.4  | 469.8  | 346.5  | 346.8  | 342.8  | 288.9  | 316.5  | 332.3  |
| 799.7  | 937.9  | 796.7  | 657.5  | 588.7  | 605.9  | 547.4  | 563.6  | 614.4  |
| 405.4  | 420.4  | 307.5  | 276.7  | 224.0  | 219.9  | 249.4  | 240.7  | 247.7  |
| 17.4   | 21.3   | 2.4    | 12.6   | 15.7   | 8.2    | 9.2    | 3.4    | 12.5   |
| 139.6  | 179.2  | 159.3  | 144.4  | 116.0  | 126.3  | 52.7   | 53.6   | 59.8   |
| 65.1   | 53.3   | 30.8   | 62.6   | 45.0   | 36.0   | 58.6   | 67.3   | 81.1   |
| 1386.5 | 1570.9 | 1322.7 | 1048.1 | 887.6  | 931.4  | 632.7  | 639.6  | 717.3  |
| 255.7  | 417.3  | 376.5  | 449.1  | 443.9  | 527.0  | 323.4  | 371.4  | 419.7  |
| 291.7  | 385.5  | 345.2  | 257.8  | 208.4  | 250.6  | 185.3  | 218.5  | 221.1  |
| 101.5  | 138.9  | 101.8  | 65.6   | 52.1   | 61.0   | 78.0   | 62.0   | 70.6   |
| 1589.0 | 1631.5 | 1092.3 | 424.1  | 350.8  | 383.5  | 473.1  | 464.0  | 538.6  |
| 5816.7 | 4709.2 | 1995.2 | 2750.3 | 1119.7 | 1049.4 | 1054.1 | 400.0  | 606.3  |
| 9092.0 | 9920.1 | 9521.7 | 3334.1 | 2990.9 | 3010.5 | 2556.0 | 2573.0 | 2870.8 |
| 1846.2 | 2145.5 | 1492.6 | 1949.0 | 1642.7 | 1918.2 | 1064.1 | 1192.7 | 1190.5 |
| 37.3   | 27.9   | 18.9   | 22.4   | 13.5   | 19.7   | 25.8   | 24.1   | 16.5   |
| 833.3  | 874.1  | 576.2  | 809.3  | 643.9  | 771.4  | 622.7  | 560.2  | 632.5  |
| 455.7  | 560.1  | 380.1  | 273.9  | 251.8  | 266.2  | 239.9  | 257.3  | 250.9  |
| 277.2  | 396.4  | 270.0  | 180.5  | 130.9  | 150.9  | 120.4  | 73.6   | 88.0   |
| 4536.6 | 4670.4 | 2743.3 | 2855.1 | 1624.2 | 1667.6 | 1295.6 | 679.1  | 885.1  |
| 1583.6 | 1848.5 | 1143.4 | 714.3  | 541.6  | 623.0  | 543.9  | 483.8  | 519.9  |
| 2567.4 | 2867.0 | 1930.4 | 913.5  | 769.1  | 795.6  | 931.7  | 846.4  | 1026.3 |
| 879.8  | 1189.9 | 992.9  | 1237.0 | 1192.7 | 1258.4 | 619.4  | 651.7  | 725.2  |
| 1267.2 | 1519.1 | 1062.2 | 1321.4 | 1036.2 | 1064.7 | 950.8  | 1058.6 | 1167.9 |
| 13.5   | 10.8   | 14.3   | 30.6   | 20.4   | 17.8   | 15.3   | 23.4   | 18.6   |

|        |        |        |        |        |        |        |        |        |
|--------|--------|--------|--------|--------|--------|--------|--------|--------|
| 2045.6 | 2423.4 | 2011.0 | 2058.0 | 1520.2 | 1754.8 | 1152.4 | 978.2  | 1128.2 |
| 182.3  | 237.6  | 165.5  | 328.5  | 254.5  | 323.9  | 156.2  | 152.4  | 170.3  |
| 110.3  | 114.0  | 84.6   | 130.5  | 70.2   | 100.0  | 77.6   | 67.2   | 84.3   |
| 482.7  | 621.7  | 441.1  | 230.8  | 202.9  | 226.3  | 109.0  | 113.4  | 144.0  |
| 94.5   | 105.8  | 70.0   | 94.7   | 87.7   | 78.2   | 30.1   | 31.3   | 37.1   |
| 411.2  | 465.3  | 355.4  | 486.0  | 422.4  | 453.2  | 281.6  | 296.6  | 349.1  |
| 18.1   | 32.0   | 14.0   | 44.7   | 29.7   | 14.0   | 16.0   | 12.7   | 22.1   |
| 319.0  | 533.4  | 413.0  | 240.5  | 192.3  | 247.3  | 93.1   | 116.2  | 121.5  |
| 297.8  | 507.9  | 380.5  | 453.0  | 368.1  | 423.1  | 340.7  | 367.1  | 394.7  |
| 1882.4 | 2116.3 | 1223.8 | 1526.4 | 1240.1 | 1328.0 | 1381.9 | 1208.2 | 1464.0 |
| 1409.1 | 1734.5 | 1140.0 | 284.3  | 213.3  | 232.6  | 129.6  | 138.2  | 184.5  |
| 340.3  | 397.4  | 279.8  | 230.4  | 174.3  | 208.3  | 271.5  | 231.6  | 252.7  |
| 83.0   | 105.2  | 65.3   | 97.1   | 72.0   | 74.5   | 81.0   | 100.6  | 106.4  |
| 851.4  | 1028.8 | 725.7  | 737.9  | 547.7  | 588.6  | 650.4  | 547.3  | 605.7  |
| 562.2  | 882.9  | 595.7  | 531.7  | 517.5  | 507.9  | 418.1  | 394.8  | 466.1  |
| 543.4  | 773.2  | 580.7  | 408.4  | 369.7  | 388.2  | 301.0  | 313.7  | 347.1  |
| 811.1  | 1149.5 | 895.7  | 928.6  | 821.0  | 868.3  | 673.4  | 703.9  | 784.4  |
| 1852.0 | 1683.5 | 813.5  | 1017.8 | 732.1  | 748.3  | 568.4  | 477.5  | 546.8  |
| 702.8  | 932.0  | 778.1  | 492.1  | 366.2  | 380.3  | 421.1  | 468.5  | 540.6  |
| 3325.7 | 3714.8 | 2812.9 | 2065.6 | 1747.2 | 1902.0 | 1160.4 | 1228.3 | 1272.8 |
| 4336.8 | 4795.7 | 3752.5 | 2809.2 | 2076.4 | 2182.5 | 1825.6 | 1527.6 | 1730.9 |
| 1395.6 | 2143.7 | 1669.0 | 405.6  | 353.3  | 381.5  | 415.0  | 431.5  | 471.3  |
| 34.9   | 43.6   | 19.9   | 80.2   | 84.7   | 92.5   | 80.6   | 177.1  | 119.4  |
| 32.9   | 46.5   | 27.3   | 99.5   | 103.1  | 115.3  | 68.8   | 177.1  | 119.2  |
| 191.2  | 218.1  | 167.3  | 130.0  | 99.8   | 95.7   | 138.0  | 123.4  | 137.4  |
| 357.3  | 461.4  | 335.3  | 509.4  | 357.1  | 376.4  | 305.2  | 300.5  | 288.5  |
| 198.5  | 275.4  | 194.1  | 272.1  | 209.0  | 245.1  | 204.1  | 193.9  | 200.4  |
| 3691.3 | 3778.7 | 1334.8 | 1825.3 | 816.3  | 933.3  | 905.2  | 391.8  | 581.9  |
| 3676.2 | 4490.7 | 3791.9 | 4137.9 | 3470.9 | 3571.3 | 2941.8 | 2783.6 | 3172.1 |
| 128.7  | 196.3  | 195.2  | 518.1  | 454.0  | 566.4  | 361.6  | 438.6  | 452.4  |
| 657.2  | 783.9  | 628.5  | 455.4  | 423.0  | 420.7  | 399.8  | 468.1  | 476.8  |
| 1262.8 | 1784.6 | 1277.2 | 1348.2 | 1019.6 | 995.4  | 969.9  | 941.1  | 888.4  |
| 264.0  | 319.0  | 191.2  | 156.9  | 129.4  | 142.1  | 124.4  | 123.3  | 137.5  |
| 177.6  | 240.8  | 138.7  | 84.8   | 77.1   | 66.3   | 119.7  | 106.3  | 134.5  |
| 446.2  | 549.1  | 369.1  | 607.7  | 457.5  | 486.7  | 311.9  | 292.3  | 324.7  |
| 2998.9 | 3587.3 | 2270.3 | 4328.5 | 3403.0 | 3479.4 | 2403.7 | 1993.2 | 2435.9 |
| 73.9   | 25.4   | 26.6   | 315.6  | 162.6  | 174.0  | 465.0  | 296.0  | 312.4  |
| 663.2  | 943.9  | 778.1  | 244.1  | 202.4  | 218.5  | 269.7  | 323.4  | 308.6  |
| 1077.6 | 1418.9 | 1329.7 | 529.4  | 473.9  | 523.5  | 395.9  | 524.5  | 484.7  |
| 344.6  | 496.7  | 449.3  | 81.8   | 58.7   | 86.0   | 116.5  | 130.3  | 111.8  |
| 664.9  | 906.7  | 787.9  | 151.2  | 103.4  | 113.8  | 240.7  | 245.0  | 223.6  |
| 2642.6 | 3232.1 | 2808.5 | 1005.5 | 795.3  | 889.2  | 575.0  | 659.5  | 667.2  |
| 61.2   | 75.0   | 79.4   | 32.4   | 41.0   | 57.4   | 18.7   | 22.9   | 8.5    |
| 3189.6 | 2927.1 | 1493.7 | 1490.0 | 1161.1 | 1296.9 | 1444.9 | 1118.3 | 1336.3 |
| 5128.2 | 4858.6 | 2910.6 | 3631.0 | 2929.5 | 3057.8 | 2439.2 | 2114.4 | 2476.7 |
| 447.1  | 521.3  | 306.9  | 244.6  | 197.1  | 174.6  | 278.5  | 249.5  | 275.7  |
| 1838.1 | 2738.3 | 2235.4 | 799.3  | 733.6  | 745.0  | 642.8  | 547.4  | 699.0  |
| 1906.4 | 2672.1 | 2298.8 | 919.1  | 814.1  | 965.2  | 856.2  | 716.2  | 865.6  |
| 687.5  | 1174.4 | 1385.2 | 298.1  | 345.6  | 351.0  | 365.2  | 604.2  | 543.4  |
| 1072.5 | 1728.2 | 1987.0 | 1410.1 | 1494.1 | 1684.3 | 764.6  | 1235.8 | 1177.0 |
| 1162.9 | 1398.1 | 1095.7 | 425.9  | 368.2  | 380.0  | 277.4  | 219.2  | 300.4  |
| 2725.7 | 3179.6 | 2555.7 | 356.5  | 311.9  | 371.8  | 414.1  | 389.6  | 436.8  |
| 1771.9 | 1710.7 | 1212.1 | 1163.7 | 994.7  | 1052.0 | 1100.1 | 1002.6 | 1149.6 |

|        |        |        |        |        |        |        |        |        |
|--------|--------|--------|--------|--------|--------|--------|--------|--------|
| 813.0  | 1129.4 | 1028.9 | 489.6  | 411.3  | 496.3  | 283.8  | 340.2  | 311.1  |
| 104.0  | 177.5  | 171.1  | 40.5   | 49.9   | 56.8   | 35.9   | 46.8   | 43.8   |
| 3.5    | 2.0    | 1.3    | 3.9    | 2.5    | 4.2    | 2.1    | 2.1    | 1.9    |
| 338.0  | 456.1  | 348.3  | 188.3  | 151.1  | 163.6  | 114.8  | 139.2  | 119.8  |
| 719.9  | 1006.0 | 822.0  | 242.1  | 195.0  | 226.2  | 184.4  | 209.8  | 199.8  |
| 92.7   | 112.3  | 90.6   | 144.7  | 130.7  | 140.2  | 97.4   | 118.4  | 122.2  |
| 132.0  | 183.3  | 117.8  | 139.8  | 128.4  | 146.1  | 95.3   | 85.5   | 95.2   |
| 1269.0 | 2431.6 | 2591.0 | 986.5  | 838.3  | 871.0  | 1864.6 | 1487.3 | 1875.6 |
| 333.3  | 378.7  | 265.5  | 482.8  | 418.1  | 490.2  | 321.2  | 406.6  | 426.3  |
| 140.0  | 135.2  | 87.1   | 201.0  | 204.6  | 202.8  | 143.2  | 144.5  | 148.9  |
| 1934.8 | 2681.7 | 2517.4 | 2240.8 | 2030.1 | 2290.5 | 1328.9 | 1271.9 | 1399.7 |
| 190.4  | 222.4  | 146.8  | 215.3  | 183.6  | 191.6  | 115.7  | 116.4  | 126.3  |
| 768.7  | 1051.2 | 708.0  | 196.3  | 155.8  | 158.1  | 158.3  | 132.1  | 163.0  |
| 177.8  | 231.2  | 111.4  | 190.6  | 123.3  | 125.3  | 115.0  | 86.4   | 107.8  |
| 1759.9 | 2003.5 | 1016.0 | 1095.0 | 623.7  | 695.3  | 727.2  | 471.7  | 552.0  |
| 1192.2 | 1489.4 | 1136.0 | 311.2  | 305.4  | 371.4  | 348.3  | 337.5  | 410.6  |
| 2161.1 | 2572.0 | 2079.1 | 1280.4 | 1192.7 | 1284.3 | 1044.9 | 920.7  | 1166.0 |
| 4062.5 | 4296.4 | 3442.2 | 3144.5 | 2642.6 | 2697.7 | 2511.2 | 2489.9 | 2728.7 |
| 26.5   | 43.4   | 26.1   | 56.3   | 36.6   | 51.6   | 30.8   | 25.8   | 21.8   |
| 440.2  | 402.9  | 257.8  | 435.9  | 396.8  | 373.8  | 371.3  | 478.6  | 449.0  |
| 1353.8 | 1918.1 | 1503.0 | 630.9  | 506.8  | 581.9  | 478.1  | 459.3  | 481.1  |
| 146.4  | 182.7  | 137.4  | 79.6   | 68.0   | 86.6   | 50.8   | 61.5   | 54.3   |
| 381.1  | 511.7  | 415.3  | 174.0  | 164.1  | 170.8  | 121.0  | 137.4  | 137.1  |
| 441.0  | 409.8  | 241.4  | 124.7  | 98.4   | 122.1  | 139.0  | 109.1  | 125.0  |
| 477.9  | 580.0  | 488.9  | 437.9  | 398.0  | 403.7  | 415.4  | 452.5  | 474.6  |
| 10.5   | 8.0    | 5.3    | 6.7    | 10.8   | 4.7    | 2.8    | 3.6    | 2.7    |
| 29.5   | 15.2   | 6.8    | 24.0   | 19.0   | 11.4   | 16.6   | 13.0   | 14.0   |
| 171.4  | 196.9  | 187.6  | 239.9  | 198.5  | 214.7  | 157.2  | 236.7  | 184.8  |
| 117.8  | 111.1  | 89.5   | 82.1   | 64.2   | 85.4   | 49.9   | 60.4   | 77.0   |
| 611.2  | 890.7  | 707.7  | 484.1  | 490.6  | 518.3  | 369.7  | 520.8  | 508.7  |
| 654.3  | 749.5  | 595.2  | 428.9  | 376.9  | 398.2  | 452.1  | 541.5  | 565.1  |
| 1467.6 | 1497.3 | 1394.6 | 878.0  | 712.0  | 875.2  | 597.6  | 655.3  | 696.7  |
| 259.2  | 463.1  | 282.2  | 168.2  | 145.3  | 165.4  | 129.5  | 134.6  | 140.5  |
| 644.3  | 853.5  | 685.2  | 649.9  | 571.3  | 659.6  | 331.8  | 358.3  | 368.6  |
| 410.1  | 533.4  | 465.3  | 225.6  | 211.2  | 214.7  | 162.4  | 172.7  | 195.1  |
| 1799.1 | 1751.6 | 1160.5 | 2449.7 | 1809.4 | 1877.8 | 1989.7 | 1895.9 | 2058.8 |
| 243.9  | 282.6  | 160.1  | 190.6  | 143.2  | 180.2  | 207.3  | 178.0  | 177.7  |
| 1259.4 | 1434.7 | 687.7  | 1501.5 | 1076.1 | 1227.1 | 1126.4 | 842.4  | 1029.8 |
| 6604.0 | 6305.5 | 5060.7 | 3764.7 | 3323.2 | 3538.5 | 2751.8 | 2528.5 | 2978.8 |
| 520.3  | 746.9  | 747.4  | 202.6  | 172.6  | 191.1  | 144.3  | 160.0  | 148.2  |
| 173.8  | 195.0  | 130.9  | 62.2   | 54.2   | 52.7   | 78.4   | 66.1   | 77.6   |
| 391.4  | 425.4  | 253.1  | 293.1  | 212.6  | 257.5  | 215.7  | 216.4  | 203.2  |
| 310.5  | 504.3  | 426.7  | 163.8  | 180.6  | 182.6  | 118.5  | 158.1  | 130.4  |
| 1344.7 | 1598.5 | 1218.9 | 2338.2 | 1778.9 | 2041.4 | 1257.1 | 1210.0 | 1376.8 |
| 321.2  | 409.5  | 300.7  | 470.6  | 396.7  | 457.1  | 254.1  | 206.6  | 255.7  |
| 2707.1 | 3129.6 | 2470.9 | 2975.0 | 2218.1 | 2185.9 | 1758.3 | 1335.5 | 1640.1 |
| 66.8   | 81.3   | 75.6   | 58.2   | 45.4   | 51.6   | 32.7   | 46.7   | 33.9   |
| 578.1  | 789.0  | 701.2  | 436.8  | 366.1  | 404.8  | 151.8  | 259.7  | 172.6  |
| 1801.7 | 2202.7 | 1927.1 | 1792.8 | 1748.6 | 1970.3 | 769.4  | 842.6  | 953.5  |
| 965.1  | 1164.0 | 1008.5 | 557.4  | 476.7  | 555.7  | 317.3  | 312.3  | 307.3  |
| 1161.2 | 977.1  | 529.2  | 605.1  | 487.0  | 503.3  | 648.6  | 613.9  | 651.5  |
| 0.8    | 2.2    | 0.2    | 2.5    | 4.2    | 3.2    | 2.5    | 0.4    | 2.4    |
| 9.2    | 12.4   | 8.9    | 13.7   | 13.4   | 8.0    | 9.3    | 5.4    | 2.9    |

|        |         |        |        |        |        |        |        |        |
|--------|---------|--------|--------|--------|--------|--------|--------|--------|
| 189.3  | 217.4   | 177.8  | 92.7   | 108.1  | 113.6  | 71.5   | 79.4   | 83.1   |
| 393.4  | 440.6   | 308.5  | 668.5  | 501.8  | 582.4  | 486.5  | 408.4  | 481.3  |
| 1300.6 | 1214.2  | 720.8  | 1624.6 | 1311.6 | 1395.3 | 1543.7 | 1466.7 | 1604.0 |
| 334.6  | 418.4   | 354.3  | 421.3  | 369.2  | 407.3  | 282.7  | 317.5  | 327.7  |
| 97.4   | 95.4    | 79.1   | 129.5  | 107.1  | 136.5  | 91.4   | 86.8   | 100.1  |
| 80.5   | 91.6    | 59.3   | 87.2   | 83.5   | 92.6   | 42.0   | 81.6   | 68.7   |
| 3.1    | 5.3     | 8.3    | 13.6   | 11.1   | 11.8   | 9.3    | 7.2    | 6.9    |
| 2113.7 | 2265.8  | 1376.4 | 1840.2 | 1635.5 | 1782.5 | 1322.1 | 1306.3 | 1427.8 |
| 2162.8 | 3080.6  | 2524.1 | 815.5  | 690.4  | 839.6  | 441.2  | 532.4  | 446.5  |
| 1.8    | 2.3     | 2.1    | 3.9    | 4.4    | 3.9    | 1.2    | 1.5    | 1.2    |
| 175.8  | 243.4   | 206.3  | 63.4   | 54.7   | 81.7   | 69.3   | 77.5   | 84.8   |
| 528.4  | 836.0   | 770.0  | 519.6  | 521.5  | 558.5  | 328.8  | 440.4  | 434.4  |
| 4110.4 | 3721.2  | 2564.2 | 3121.4 | 2233.9 | 2508.3 | 1643.0 | 1404.8 | 1556.0 |
| 415.6  | 634.5   | 576.9  | 44.3   | 41.1   | 21.1   | 25.4   | 29.3   | 34.2   |
| 134.1  | 173.2   | 271.2  | 552.2  | 598.7  | 671.1  | 280.9  | 515.1  | 450.4  |
| 654.9  | 824.5   | 617.7  | 821.6  | 713.1  | 858.5  | 501.1  | 553.6  | 581.7  |
| 236.5  | 272.8   | 264.6  | 212.1  | 191.8  | 210.9  | 100.6  | 94.0   | 106.1  |
| 2579.1 | 3169.5  | 2672.1 | 753.4  | 631.3  | 619.7  | 907.9  | 981.3  | 1034.1 |
| 178.4  | 246.9   | 210.4  | 417.0  | 353.5  | 414.7  | 299.7  | 347.1  | 357.2  |
| 519.6  | 586.5   | 494.5  | 572.5  | 487.6  | 384.4  | 144.3  | 134.4  | 149.6  |
| 9678.0 | 10134.6 | 9216.0 | 4447.9 | 3979.5 | 4251.7 | 3193.0 | 3431.3 | 3633.3 |
| 204.3  | 280.4   | 199.0  | 262.3  | 234.3  | 254.6  | 181.3  | 187.4  | 202.4  |
| 589.5  | 814.6   | 573.0  | 1226.2 | 1030.5 | 1168.9 | 527.2  | 727.4  | 677.0  |
| 142.5  | 147.4   | 160.5  | 199.4  | 181.0  | 196.3  | 94.1   | 95.7   | 112.9  |
| 1118.8 | 1490.5  | 1158.0 | 522.1  | 504.3  | 483.6  | 554.9  | 779.7  | 691.4  |
| 931.4  | 955.8   | 773.8  | 215.9  | 168.5  | 179.3  | 186.4  | 248.0  | 203.8  |
| 5.2    | 5.3     | 10.0   | 11.1   | 4.2    | 13.5   | 3.2    | 1.3    | 1.0    |
| 6.9    | 13.3    | 7.0    | 10.3   | 3.4    | 14.8   | 4.9    | 1.3    | 4.0    |
| 16.0   | 16.7    | 14.3   | 23.2   | 18.2   | 24.1   | 11.9   | 18.9   | 20.2   |
| 1430.5 | 1732.0  | 1409.3 | 808.5  | 635.9  | 722.8  | 561.0  | 700.5  | 613.9  |
| 425.9  | 541.4   | 502.5  | 322.3  | 238.8  | 285.6  | 221.0  | 205.6  | 230.4  |
| 224.7  | 321.1   | 302.2  | 177.5  | 178.9  | 179.2  | 105.8  | 131.0  | 162.7  |
| 1064.5 | 1304.7  | 1011.7 | 1382.6 | 1173.6 | 1323.3 | 830.2  | 797.7  | 917.0  |
| 1076.2 | 1056.7  | 698.9  | 502.8  | 350.1  | 419.4  | 306.6  | 255.0  | 303.6  |
| 2124.4 | 2478.8  | 1646.2 | 1868.7 | 1611.0 | 1657.5 | 1716.1 | 1839.7 | 1729.3 |
| 63.5   | 63.9    | 57.0   | 58.9   | 38.4   | 69.6   | 50.9   | 52.7   | 50.6   |
| 75.3   | 68.1    | 88.1   | 91.3   | 82.2   | 87.7   | 61.9   | 73.9   | 85.6   |
| 77.0   | 96.6    | 58.6   | 55.3   | 51.4   | 56.8   | 61.8   | 59.0   | 66.6   |
| 235.2  | 286.8   | 193.6  | 320.0  | 405.4  | 485.9  | 162.0  | 348.8  | 281.7  |
| 149.1  | 187.8   | 121.4  | 79.8   | 147.7  | 159.3  | 89.6   | 120.2  | 137.5  |
| 252.1  | 375.5   | 254.0  | 209.7  | 149.9  | 173.9  | 123.7  | 140.2  | 126.1  |
| 294.0  | 372.0   | 325.1  | 211.4  | 155.4  | 187.7  | 189.9  | 165.0  | 194.4  |
| 335.5  | 462.9   | 391.3  | 256.2  | 214.4  | 232.4  | 163.5  | 173.0  | 191.9  |
| 301.8  | 308.9   | 128.3  | 306.1  | 216.1  | 253.3  | 124.4  | 155.0  | 151.4  |
| 2291.3 | 2801.8  | 2462.8 | 611.8  | 606.2  | 749.3  | 445.3  | 579.6  | 514.7  |
| 1105.4 | 1198.9  | 1289.8 | 579.0  | 618.1  | 624.9  | 291.4  | 486.1  | 449.4  |
| 750.5  | 789.3   | 564.3  | 301.5  | 234.3  | 245.3  | 223.7  | 207.7  | 239.5  |
| 711.6  | 722.1   | 502.4  | 255.4  | 208.5  | 224.3  | 179.9  | 147.0  | 172.4  |
| 150.2  | 191.1   | 148.0  | 95.3   | 58.1   | 58.3   | 44.8   | 50.9   | 45.8   |
| 747.1  | 875.5   | 675.5  | 259.2  | 214.6  | 255.6  | 190.4  | 179.6  | 201.1  |
| 1248.2 | 1626.0  | 1183.2 | 600.7  | 520.0  | 503.9  | 380.5  | 425.5  | 468.9  |
| 2766.9 | 2951.1  | 2100.8 | 689.6  | 635.5  | 682.4  | 709.2  | 933.7  | 848.4  |
| 629.5  | 775.8   | 508.7  | 1110.7 | 1058.7 | 1186.1 | 827.7  | 1120.5 | 1188.4 |

|        |        |        |        |        |        |        |        |        |
|--------|--------|--------|--------|--------|--------|--------|--------|--------|
| 174.2  | 215.7  | 138.1  | 318.6  | 329.9  | 339.7  | 220.8  | 227.5  | 268.8  |
| 32.1   | 37.3   | 22.1   | 43.6   | 44.7   | 52.1   | 28.5   | 42.8   | 45.4   |
| 167.0  | 196.4  | 133.7  | 234.1  | 217.6  | 271.9  | 171.4  | 182.5  | 210.1  |
| 150.4  | 147.7  | 95.7   | 93.4   | 74.3   | 92.6   | 106.4  | 100.4  | 111.7  |
| 580.2  | 651.9  | 402.6  | 687.7  | 542.6  | 558.2  | 501.1  | 509.5  | 563.8  |
| 139.2  | 117.3  | 53.8   | 180.8  | 181.7  | 185.7  | 104.3  | 77.5   | 127.3  |
| 1400.4 | 1012.5 | 455.3  | 1115.0 | 920.5  | 1004.6 | 747.8  | 483.2  | 764.9  |
| 1437.9 | 1314.6 | 742.2  | 501.1  | 331.3  | 351.0  | 547.4  | 330.5  | 454.8  |
| 545.0  | 515.7  | 261.2  | 202.6  | 155.8  | 146.2  | 160.3  | 109.4  | 169.2  |
| 1519.7 | 1791.1 | 1573.7 | 760.2  | 769.8  | 789.3  | 480.8  | 754.3  | 808.2  |
| 542.2  | 750.4  | 564.5  | 178.6  | 181.1  | 125.6  | 119.3  | 109.0  | 171.0  |
| 61.2   | 122.7  | 160.2  | 31.5   | 36.6   | 31.2   | 27.2   | 65.0   | 36.8   |
| 160.4  | 240.8  | 260.1  | 104.8  | 100.8  | 112.1  | 78.9   | 119.9  | 92.6   |
| 7.1    | 9.3    | 2.3    | 6.8    | 8.2    | 8.4    | 2.4    | 0.8    | 6.7    |
| 906.8  | 1211.9 | 1310.1 | 1169.3 | 886.6  | 1060.1 | 744.3  | 852.5  | 933.2  |
| 6025.5 | 6095.2 | 4614.5 | 3035.1 | 2739.3 | 2569.1 | 1860.8 | 1749.1 | 1990.1 |
| 1231.1 | 1246.9 | 599.5  | 688.7  | 427.5  | 462.7  | 604.1  | 364.2  | 481.1  |
| 114.0  | 143.6  | 120.9  | 48.6   | 66.5   | 58.4   | 48.1   | 67.5   | 41.8   |
| 268.2  | 354.0  | 284.2  | 103.7  | 84.9   | 96.9   | 69.6   | 89.0   | 93.2   |
| 2192.9 | 2003.0 | 1345.9 | 1218.8 | 1237.7 | 1198.3 | 730.0  | 746.7  | 855.0  |
| 144.8  | 201.2  | 141.7  | 37.5   | 27.6   | 35.0   | 26.3   | 23.2   | 36.0   |
| 137.1  | 181.8  | 143.5  | 17.7   | 22.4   | 13.1   | 18.0   | 14.1   | 18.6   |
| 540.3  | 797.3  | 696.3  | 153.0  | 131.1  | 143.5  | 75.7   | 95.4   | 85.0   |
| 1379.5 | 1699.3 | 1423.3 | 726.8  | 593.1  | 678.5  | 574.1  | 619.0  | 682.7  |
| 40.8   | 88.3   | 74.4   | 38.5   | 29.5   | 30.7   | 13.6   | 18.2   | 15.0   |
| 103.2  | 136.6  | 109.7  | 309.0  | 319.5  | 374.6  | 262.6  | 451.9  | 343.6  |
| 2251.1 | 2455.4 | 1863.1 | 3783.7 | 3172.5 | 2961.2 | 2303.5 | 2086.1 | 2459.7 |
| 1101.1 | 1209.7 | 808.1  | 1200.3 | 910.5  | 1123.4 | 1130.8 | 951.4  | 1156.1 |
| 2595.4 | 2946.5 | 2497.5 | 2841.4 | 2499.8 | 2518.9 | 1737.1 | 1753.6 | 2072.8 |
| 16.2   | 21.1   | 8.1    | 23.9   | 27.3   | 38.3   | 14.8   | 13.9   | 19.3   |
| 365.8  | 417.5  | 298.9  | 405.6  | 384.6  | 459.1  | 322.3  | 346.2  | 370.7  |
| 190.4  | 219.1  | 137.9  | 263.5  | 180.3  | 221.2  | 113.6  | 99.8   | 127.5  |
| 369.9  | 477.4  | 307.9  | 209.8  | 130.0  | 139.2  | 162.3  | 93.0   | 118.0  |
| 2042.1 | 2581.4 | 1747.7 | 513.9  | 305.9  | 340.5  | 225.6  | 174.5  | 197.2  |
| 2581.5 | 3452.9 | 2799.9 | 1620.0 | 1542.2 | 1784.6 | 709.2  | 823.9  | 919.9  |
| 1269.6 | 1287.5 | 724.2  | 694.8  | 529.7  | 560.5  | 672.9  | 623.3  | 666.1  |
| 219.6  | 396.1  | 320.0  | 208.2  | 222.8  | 253.1  | 120.5  | 133.2  | 135.6  |
| 62.9   | 91.9   | 72.1   | 10.5   | 19.0   | 16.0   | 48.4   | 54.4   | 49.9   |
| 883.8  | 1078.7 | 1004.3 | 477.4  | 429.9  | 475.6  | 432.6  | 435.1  | 446.4  |
| 415.4  | 547.2  | 473.3  | 204.8  | 149.5  | 205.2  | 267.4  | 194.1  | 234.0  |
| 442.5  | 580.5  | 413.5  | 949.1  | 691.4  | 814.9  | 467.2  | 434.3  | 482.1  |
| 126.9  | 152.6  | 84.7   | 289.1  | 190.8  | 262.1  | 216.2  | 164.7  | 217.1  |
| 258.5  | 363.4  | 322.4  | 223.1  | 206.6  | 241.9  | 185.8  | 218.9  | 211.9  |
| 464.4  | 786.6  | 760.3  | 332.3  | 376.6  | 443.5  | 175.9  | 318.4  | 250.4  |
| 175.6  | 248.6  | 218.5  | 459.0  | 457.9  | 491.5  | 239.1  | 266.2  | 264.1  |
| 3684.9 | 4118.1 | 1960.2 | 1692.0 | 785.1  | 916.3  | 679.8  | 354.2  | 456.1  |
| 216.2  | 425.0  | 327.5  | 855.8  | 838.8  | 945.2  | 523.9  | 542.0  | 627.3  |
| 533.0  | 603.5  | 519.4  | 1175.3 | 1022.6 | 1099.2 | 733.7  | 661.3  | 817.2  |
| 5842.4 | 6977.8 | 5866.6 | 3065.7 | 2501.1 | 2652.2 | 1953.1 | 1730.3 | 2054.5 |
| 560.1  | 711.4  | 458.1  | 631.5  | 456.8  | 507.4  | 205.0  | 167.2  | 206.2  |
| 2.2    | 3.9    | 3.1    | 146.0  | 114.1  | 143.3  | 108.3  | 88.7   | 86.2   |
| 1826.6 | 2405.0 | 2065.5 | 457.3  | 398.2  | 476.1  | 459.1  | 533.7  | 516.6  |
| 656.3  | 1094.0 | 1272.6 | 289.1  | 279.8  | 282.3  | 208.9  | 251.1  | 275.7  |

|        |        |        |        |        |        |        |        |        |
|--------|--------|--------|--------|--------|--------|--------|--------|--------|
| 293.5  | 301.9  | 221.7  | 230.8  | 189.3  | 199.9  | 172.1  | 146.0  | 167.3  |
| 280.2  | 353.7  | 280.4  | 1264.6 | 1056.5 | 1192.3 | 620.5  | 677.2  | 724.8  |
| 1132.9 | 1264.7 | 1086.5 | 1835.1 | 1635.8 | 1811.9 | 990.4  | 1037.3 | 1172.4 |
| 816.2  | 1112.4 | 954.8  | 1246.0 | 1222.8 | 1246.9 | 1122.3 | 1221.7 | 1375.6 |
| 911.6  | 1332.3 | 1157.0 | 2061.2 | 1891.5 | 2044.9 | 1562.1 | 1707.2 | 1765.9 |
| 972.3  | 1049.0 | 788.6  | 590.6  | 500.1  | 499.8  | 418.7  | 358.1  | 406.1  |
| 1824.9 | 2249.6 | 2007.7 | 1652.4 | 1558.2 | 1653.7 | 913.5  | 1043.5 | 1069.1 |
| 495.6  | 672.5  | 514.7  | 390.3  | 346.5  | 349.7  | 242.4  | 265.9  | 287.6  |
| 302.9  | 365.7  | 288.0  | 1014.7 | 838.7  | 1004.9 | 545.4  | 602.1  | 609.7  |
| 210.0  | 283.1  | 262.3  | 312.4  | 363.2  | 301.4  | 335.6  | 389.9  | 450.2  |
| 325.1  | 472.8  | 448.2  | 532.3  | 534.3  | 595.9  | 384.4  | 597.0  | 522.3  |
| 653.6  | 891.4  | 669.5  | 704.5  | 573.9  | 599.2  | 569.8  | 572.2  | 609.5  |
| 152.3  | 182.2  | 146.1  | 126.4  | 94.4   | 93.8   | 88.0   | 84.9   | 102.5  |
| 206.5  | 258.9  | 230.4  | 389.9  | 334.3  | 358.2  | 255.3  | 272.8  | 300.5  |
| 292.1  | 436.2  | 389.7  | 172.9  | 145.2  | 179.6  | 234.5  | 221.7  | 254.0  |
| 946.8  | 1334.8 | 1250.4 | 790.6  | 662.0  | 690.3  | 620.1  | 737.7  | 797.1  |
| 505.7  | 758.8  | 763.8  | 166.3  | 142.5  | 159.8  | 463.8  | 507.3  | 469.1  |
| 103.8  | 57.8   | 47.3   | 51.1   | 31.8   | 48.5   | 35.6   | 45.9   | 40.9   |
| 446.5  | 286.2  | 224.2  | 139.9  | 124.0  | 133.1  | 136.3  | 197.2  | 181.1  |
| 161.2  | 76.8   | 47.7   | 64.4   | 49.3   | 60.8   | 54.2   | 54.6   | 44.8   |
| 358.3  | 493.6  | 385.5  | 305.7  | 298.8  | 364.0  | 188.0  | 242.9  | 258.4  |
| 786.1  | 956.2  | 661.5  | 1311.5 | 1187.0 | 1290.4 | 799.2  | 827.7  | 932.3  |
| 164.4  | 221.2  | 143.8  | 151.9  | 138.3  | 152.8  | 188.6  | 167.9  | 184.6  |
| 1250.7 | 1380.0 | 737.1  | 1332.9 | 1053.2 | 1235.7 | 702.2  | 653.9  | 759.5  |
| 989.0  | 1488.4 | 1187.9 | 647.0  | 524.6  | 615.2  | 358.0  | 450.1  | 454.1  |
| 300.5  | 357.4  | 250.7  | 191.2  | 187.5  | 193.6  | 141.7  | 168.6  | 175.9  |
| 1348.2 | 1533.2 | 1009.3 | 949.4  | 768.3  | 847.0  | 440.9  | 499.5  | 528.0  |
| 823.0  | 871.9  | 650.1  | 417.8  | 275.6  | 318.8  | 334.5  | 360.8  | 380.0  |
| 604.2  | 671.5  | 414.1  | 440.3  | 379.1  | 402.9  | 382.9  | 381.8  | 442.1  |
| 1707.2 | 1906.2 | 1113.3 | 1259.9 | 898.8  | 969.8  | 559.3  | 492.9  | 585.2  |
| 442.5  | 608.1  | 400.7  | 2922.2 | 1936.3 | 2343.3 | 1303.4 | 971.4  | 1343.4 |
| 666.2  | 702.5  | 506.3  | 1285.3 | 728.8  | 681.6  | 1277.2 | 652.1  | 977.5  |
| 333.0  | 322.9  | 174.9  | 443.3  | 229.3  | 253.0  | 480.4  | 227.2  | 347.8  |
| 828.9  | 1078.0 | 636.9  | 1357.6 | 1022.1 | 1106.0 | 632.4  | 517.6  | 690.4  |
| 679.8  | 1400.9 | 1341.2 | 181.3  | 199.0  | 208.2  | 170.6  | 278.2  | 215.7  |
| 158.4  | 287.8  | 330.5  | 59.1   | 75.2   | 67.5   | 42.9   | 87.2   | 64.1   |
| 592.1  | 833.9  | 645.2  | 396.0  | 295.7  | 352.6  | 192.3  | 167.0  | 209.3  |
| 278.1  | 368.4  | 278.3  | 398.2  | 283.7  | 333.2  | 197.7  | 142.5  | 234.5  |
| 787.5  | 1011.1 | 533.0  | 835.2  | 545.4  | 600.6  | 337.8  | 239.1  | 306.3  |
| 6047.8 | 5272.1 | 2316.5 | 2968.0 | 2412.9 | 2702.5 | 1677.5 | 1510.0 | 1858.2 |
| 233.2  | 260.5  | 241.4  | 350.6  | 300.6  | 338.7  | 201.5  | 203.5  | 217.8  |
| 1.4    | 4.0    | 0.8    | 4.2    | 6.4    | 12.9   | 3.0    | 3.2    | 6.9    |
| 12.9   | 11.5   | 9.8    | 57.0   | 45.5   | 55.9   | 31.0   | 40.2   | 28.7   |
| 6.7    | 8.1    | 7.4    | 13.1   | 8.7    | 11.1   | 14.1   | 14.2   | 11.4   |
| 492.7  | 543.8  | 215.6  | 244.2  | 171.8  | 171.5  | 142.1  | 131.7  | 144.5  |
| 465.7  | 516.6  | 461.0  | 412.3  | 329.9  | 353.1  | 411.4  | 421.0  | 425.8  |
| 105.6  | 223.2  | 191.7  | 415.2  | 353.4  | 415.1  | 202.8  | 218.4  | 229.0  |
| 573.0  | 519.7  | 470.4  | 238.5  | 208.5  | 238.6  | 178.5  | 260.5  | 233.9  |
| 433.7  | 508.7  | 398.3  | 173.3  | 166.5  | 204.1  | 184.5  | 212.7  | 224.7  |
| 706.2  | 859.4  | 688.0  | 313.3  | 291.9  | 328.5  | 250.2  | 328.0  | 321.6  |
| 1164.5 | 1366.3 | 1187.9 | 193.2  | 175.3  | 179.7  | 131.7  | 152.4  | 162.2  |
| 3934.0 | 4389.5 | 3688.4 | 473.7  | 391.3  | 392.2  | 531.9  | 504.5  | 575.7  |
| 225.8  | 318.3  | 258.5  | 370.4  | 314.7  | 376.9  | 212.4  | 246.0  | 237.4  |



|        |        |        |        |        |        |        |        |        |
|--------|--------|--------|--------|--------|--------|--------|--------|--------|
| 1706.7 | 2040.4 | 1364.3 | 423.9  | 328.8  | 342.0  | 285.0  | 299.2  | 324.7  |
| 1219.4 | 1342.0 | 846.0  | 823.0  | 731.6  | 800.2  | 727.4  | 752.4  | 788.9  |
| 523.9  | 576.2  | 326.1  | 248.7  | 205.8  | 238.0  | 232.7  | 238.1  | 247.2  |
| 839.3  | 967.9  | 825.6  | 555.4  | 522.0  | 520.1  | 464.5  | 555.0  | 549.3  |
| 524.4  | 729.8  | 594.4  | 549.0  | 491.7  | 503.7  | 366.1  | 455.8  | 443.3  |
| 748.6  | 954.1  | 769.5  | 635.3  | 551.1  | 551.6  | 518.8  | 655.4  | 619.7  |
| 748.2  | 1078.8 | 902.9  | 879.6  | 666.1  | 744.6  | 540.9  | 614.9  | 607.5  |
| 158.2  | 150.5  | 101.5  | 179.6  | 166.1  | 169.9  | 61.8   | 73.4   | 79.9   |
| 242.1  | 259.1  | 174.6  | 173.3  | 148.6  | 174.4  | 152.2  | 154.9  | 144.9  |
| 154.1  | 301.6  | 237.3  | 18.0   | 16.6   | 20.9   | 3.5    | 6.1    | 4.6    |
| 365.3  | 476.6  | 478.5  | 347.1  | 365.3  | 388.1  | 179.3  | 257.4  | 268.3  |
| 274.8  | 378.8  | 258.1  | 249.6  | 214.1  | 261.9  | 175.9  | 190.9  | 195.7  |
| 1158.3 | 1522.5 | 1558.9 | 193.7  | 230.9  | 275.5  | 145.4  | 251.0  | 245.7  |
| 183.2  | 255.9  | 309.4  | 596.8  | 534.0  | 582.8  | 365.3  | 516.9  | 448.5  |
| 302.1  | 354.8  | 195.6  | 135.6  | 105.0  | 151.3  | 70.5   | 72.6   | 99.5   |
| 360.1  | 426.3  | 200.0  | 319.6  | 212.5  | 229.2  | 252.3  | 194.8  | 204.6  |
| 520.5  | 753.5  | 526.5  | 430.5  | 323.6  | 355.8  | 282.0  | 307.0  | 303.6  |
| 894.9  | 983.7  | 687.0  | 408.4  | 307.0  | 354.6  | 213.9  | 242.2  | 266.1  |
| 9.7    | 19.5   | 25.4   | 5.8    | 3.8    | 7.6    | 1.3    | 1.6    | 6.5    |
| 513.2  | 706.1  | 644.6  | 398.6  | 292.6  | 317.4  | 188.3  | 264.6  | 282.2  |
| 429.4  | 432.1  | 238.5  | 499.7  | 357.2  | 394.5  | 268.9  | 214.9  | 242.0  |
| 2719.2 | 2923.9 | 2063.7 | 2080.8 | 1405.0 | 1718.1 | 1167.1 | 1010.3 | 1059.7 |
| 396.2  | 469.7  | 296.4  | 635.3  | 530.3  | 646.0  | 469.7  | 527.3  | 491.4  |
| 16.1   | 13.4   | 14.5   | 18.4   | 19.0   | 15.1   | 6.8    | 12.3   | 4.0    |
| 27.2   | 57.9   | 38.2   | 87.3   | 72.6   | 81.2   | 27.0   | 40.2   | 19.4   |
| 862.3  | 1307.7 | 872.8  | 450.5  | 397.0  | 409.8  | 315.2  | 378.1  | 384.5  |
| 2440.6 | 2215.3 | 1418.4 | 615.0  | 447.8  | 476.3  | 715.2  | 591.5  | 667.4  |
| 316.5  | 378.1  | 222.1  | 71.2   | 44.7   | 61.5   | 117.5  | 93.2   | 105.1  |
| 3.8    | 4.1    | 8.6    | 2.1    | 2.9    | 1.8    | 1.7    | 1.5    | 0.5    |
| 183.4  | 264.2  | 217.1  | 226.7  | 198.5  | 214.5  | 130.5  | 179.1  | 172.6  |
| 45.8   | 62.0   | 53.2   | 28.2   | 25.6   | 35.3   | 42.5   | 49.7   | 57.9   |
| 294.8  | 390.2  | 232.2  | 208.1  | 140.3  | 150.2  | 160.3  | 117.1  | 155.9  |
| 1172.5 | 1660.5 | 999.1  | 809.4  | 544.7  | 575.3  | 459.0  | 323.7  | 428.9  |
| 319.3  | 611.7  | 634.3  | 2554.5 | 2299.9 | 2412.8 | 1313.6 | 1210.2 | 1553.1 |
| 4.1    | 5.2    | 2.1    | 10.1   | 11.1   | 9.9    | 6.1    | 3.7    | 8.3    |
| 161.9  | 204.1  | 137.2  | 52.8   | 46.2   | 29.2   | 48.8   | 48.8   | 52.8   |
| 134.1  | 159.5  | 144.9  | 167.5  | 157.5  | 166.8  | 99.0   | 89.4   | 118.4  |
| 526.8  | 550.4  | 413.8  | 211.2  | 175.3  | 180.0  | 184.0  | 176.7  | 158.8  |
| 3285.1 | 2951.6 | 1462.6 | 167.6  | 127.7  | 135.5  | 137.7  | 110.6  | 145.7  |
| 4918.5 | 4613.9 | 2514.5 | 237.2  | 159.4  | 174.1  | 189.5  | 141.0  | 152.0  |
| 1267.6 | 1322.0 | 608.5  | 148.6  | 106.9  | 135.8  | 74.2   | 55.6   | 76.9   |
| 1460.8 | 1625.4 | 1183.2 | 1797.5 | 1248.4 | 1288.5 | 914.3  | 779.4  | 893.3  |
| 59.6   | 51.6   | 36.5   | 63.9   | 36.0   | 82.1   | 29.2   | 46.8   | 30.6   |
| 1233.5 | 1481.1 | 1175.6 | 235.8  | 187.8  | 207.7  | 318.8  | 307.2  | 315.5  |
| 698.5  | 740.8  | 366.1  | 337.4  | 279.9  | 344.5  | 190.7  | 173.4  | 183.3  |
| 514.1  | 709.6  | 616.4  | 83.3   | 62.6   | 83.2   | 108.2  | 139.1  | 116.0  |
| 363.3  | 558.8  | 564.8  | 215.0  | 214.2  | 255.0  | 128.6  | 212.7  | 189.4  |
| 255.5  | 321.4  | 265.5  | 165.8  | 138.9  | 162.4  | 112.1  | 114.6  | 120.8  |
| 222.5  | 238.2  | 169.2  | 149.1  | 121.2  | 127.7  | 101.6  | 90.3   | 99.3   |
| 364.0  | 715.0  | 594.1  | 996.5  | 980.0  | 1101.5 | 442.3  | 578.2  | 725.1  |
| 18.4   | 21.7   | 14.3   | 865.1  | 658.3  | 759.3  | 418.4  | 253.2  | 358.2  |
| 15.5   | 26.4   | 43.5   | 481.3  | 407.6  | 475.0  | 249.0  | 266.7  | 319.1  |
| 682.6  | 803.2  | 548.7  | 295.9  | 242.2  | 271.0  | 212.9  | 228.5  | 239.9  |

|        |        |        |        |        |        |        |        |        |
|--------|--------|--------|--------|--------|--------|--------|--------|--------|
| 251.4  | 298.2  | 259.1  | 171.3  | 142.4  | 150.6  | 229.8  | 221.6  | 225.4  |
| 25.2   | 21.3   | 19.4   | 13.3   | 10.8   | 14.2   | 10.2   | 6.1    | 9.4    |
| 995.7  | 1174.4 | 751.0  | 129.4  | 86.5   | 84.1   | 111.4  | 125.5  | 135.0  |
| 333.3  | 400.7  | 291.0  | 651.5  | 558.5  | 574.8  | 364.8  | 397.5  | 416.7  |
| 603.9  | 694.3  | 545.8  | 509.1  | 433.3  | 440.2  | 497.6  | 455.6  | 522.9  |
| 315.5  | 367.8  | 291.0  | 714.8  | 616.9  | 745.2  | 382.0  | 376.1  | 470.5  |
| 961.1  | 1275.2 | 969.8  | 536.9  | 448.8  | 484.0  | 335.0  | 430.8  | 362.0  |
| 4176.0 | 5296.1 | 4512.8 | 2281.6 | 2064.8 | 2054.6 | 2168.4 | 2248.1 | 2590.9 |
| 58.2   | 48.6   | 42.1   | 31.1   | 24.0   | 14.8   | 16.4   | 20.5   | 29.5   |
| 1298.4 | 1258.5 | 751.6  | 490.6  | 387.2  | 462.3  | 451.1  | 406.4  | 470.9  |
| 4812.4 | 5122.5 | 3278.7 | 1756.8 | 1507.9 | 1419.9 | 1767.9 | 1840.7 | 1914.5 |
| 3659.6 | 3952.5 | 2583.8 | 1211.4 | 982.9  | 972.4  | 1527.7 | 1509.1 | 1771.4 |
| 5045.4 | 5796.7 | 5149.1 | 4397.0 | 3436.0 | 3682.1 | 2227.3 | 1831.1 | 2178.1 |
| 47.2   | 62.4   | 31.6   | 4.8    | 13.4   | 10.3   | 5.9    | 8.7    | 5.9    |
| 28.4   | 39.6   | 22.1   | 4.1    | 4.3    | 5.3    | 2.4    | 3.9    | 1.5    |
| 218.0  | 264.2  | 128.8  | 20.8   | 13.2   | 22.9   | 10.6   | 19.5   | 19.3   |
| 6.3    | 14.7   | 1.5    | 18.0   | 8.8    | 15.0   | 3.3    | 2.4    | 8.3    |
| 5.1    | 2.7    | 2.5    | 10.9   | 11.6   | 13.9   | 4.0    | 2.1    | 6.1    |
| 2504.0 | 3133.2 | 3725.6 | 271.4  | 295.8  | 293.0  | 181.3  | 280.5  | 289.1  |
| 551.3  | 614.3  | 351.3  | 224.9  | 164.9  | 197.3  | 133.6  | 105.8  | 114.9  |
| 2382.8 | 1526.7 | 1057.7 | 1223.9 | 1210.1 | 1259.8 | 761.8  | 1125.5 | 947.3  |
| 34.4   | 58.8   | 67.4   | 48.7   | 40.4   | 45.7   | 30.7   | 23.2   | 24.7   |
| 3393.6 | 3383.4 | 2694.5 | 756.8  | 810.3  | 974.7  | 956.0  | 1002.1 | 1118.8 |
| 4499.3 | 4716.2 | 3862.1 | 1697.9 | 1691.1 | 1743.1 | 1647.1 | 1863.0 | 2093.7 |
| 754.7  | 1482.9 | 1350.6 | 670.6  | 752.8  | 890.4  | 629.1  | 727.3  | 872.2  |
| 1904.4 | 2362.6 | 1362.0 | 2207.2 | 1660.1 | 1804.5 | 1216.5 | 1120.1 | 1305.4 |
| 53.0   | 81.5   | 45.3   | 101.3  | 88.8   | 113.1  | 75.5   | 72.1   | 81.8   |
| 150.8  | 155.4  | 87.8   | 65.6   | 59.0   | 61.0   | 48.2   | 22.5   | 55.0   |
| 198.0  | 256.2  | 263.1  | 282.9  | 240.9  | 318.7  | 113.5  | 146.0  | 143.5  |
| 149.9  | 217.9  | 197.7  | 202.7  | 198.4  | 214.1  | 119.4  | 162.6  | 168.3  |
| 324.9  | 410.6  | 240.7  | 342.8  | 236.7  | 260.5  | 243.3  | 175.9  | 228.8  |
| 1402.8 | 2014.4 | 1812.7 | 2166.0 | 2247.8 | 2518.0 | 871.0  | 979.6  | 1001.5 |
| 339.8  | 457.4  | 425.8  | 270.3  | 213.1  | 238.8  | 264.2  | 287.0  | 293.9  |
| 42.4   | 58.5   | 41.2   | 60.2   | 35.3   | 30.9   | 36.2   | 37.2   | 36.8   |
| 64.3   | 83.7   | 73.0   | 110.5  | 68.4   | 101.5  | 73.0   | 70.9   | 81.2   |
| 158.7  | 199.8  | 152.0  | 243.2  | 186.7  | 215.4  | 129.2  | 117.3  | 128.0  |
| 216.9  | 262.5  | 166.8  | 378.0  | 272.6  | 377.3  | 212.2  | 174.6  | 211.0  |
| 1809.5 | 2051.1 | 1433.8 | 296.3  | 208.2  | 247.0  | 133.4  | 137.5  | 125.1  |
| 468.3  | 498.4  | 350.7  | 55.3   | 42.9   | 54.8   | 47.8   | 38.5   | 45.9   |
| 1958.9 | 1733.6 | 844.7  | 473.4  | 384.3  | 489.4  | 246.5  | 291.7  | 269.1  |
| 459.5  | 606.1  | 392.5  | 442.5  | 397.6  | 425.4  | 249.9  | 275.9  | 287.4  |
| 118.0  | 141.8  | 91.2   | 483.8  | 416.4  | 495.3  | 326.6  | 339.7  | 339.7  |
| 431.5  | 551.1  | 437.3  | 527.1  | 513.8  | 648.2  | 393.5  | 529.2  | 536.4  |
| 604.6  | 630.7  | 275.1  | 680.5  | 492.4  | 527.8  | 344.5  | 244.1  | 326.5  |
| 661.7  | 792.5  | 552.8  | 818.6  | 632.5  | 642.9  | 577.2  | 525.9  | 617.7  |
| 2072.7 | 2364.7 | 2066.5 | 788.1  | 671.4  | 808.9  | 618.4  | 674.6  | 726.9  |
| 245.5  | 176.7  | 175.7  | 11.6   | 14.9   | 18.3   | 14.2   | 12.6   | 11.3   |
| 2947.0 | 2966.1 | 1705.8 | 2162.3 | 1660.0 | 1604.3 | 1771.6 | 1497.4 | 1635.5 |
| 14.9   | 37.1   | 35.2   | 16.1   | 16.9   | 29.7   | 8.5    | 14.1   | 12.0   |
| 9.1    | 8.9    | 13.7   | 10.6   | 10.2   | 3.8    | 1.6    | 2.7    | 2.7    |
| 587.8  | 691.1  | 577.1  | 232.6  | 180.7  | 217.8  | 186.6  | 181.0  | 209.4  |
| 788.1  | 821.8  | 567.3  | 557.2  | 383.2  | 464.9  | 370.1  | 317.9  | 354.5  |
| 5.5    | 27.5   | 31.3   | 6.3    | 12.3   | 5.2    | 4.2    | 2.1    | 2.6    |

|        |        |        |        |        |        |        |        |        |
|--------|--------|--------|--------|--------|--------|--------|--------|--------|
| 28.2   | 27.1   | 20.4   | 24.2   | 28.2   | 37.6   | 17.3   | 11.9   | 22.0   |
| 1183.3 | 1419.3 | 971.0  | 584.0  | 458.3  | 520.1  | 438.7  | 302.5  | 449.8  |
| 3223.2 | 3447.6 | 2361.5 | 1515.7 | 1239.6 | 1297.6 | 646.8  | 695.6  | 707.0  |
| 2852.2 | 3370.0 | 2720.9 | 785.8  | 680.5  | 733.3  | 763.6  | 810.4  | 820.9  |
| 456.9  | 491.4  | 439.8  | 110.0  | 108.9  | 130.8  | 123.3  | 130.1  | 130.9  |
| 864.4  | 1187.6 | 868.7  | 560.2  | 485.4  | 508.1  | 338.5  | 341.8  | 376.8  |
| 0.9    | 2.7    | 2.0    | 18.9   | 11.2   | 18.0   | 1.2    | 1.1    | 2.3    |
| 351.8  | 418.9  | 367.0  | 292.6  | 258.6  | 291.4  | 158.2  | 159.7  | 194.9  |
| 1971.8 | 2291.5 | 1670.8 | 1777.1 | 1437.6 | 1520.1 | 969.6  | 759.9  | 1011.1 |
| 125.5  | 179.7  | 213.5  | 16.8   | 13.1   | 10.4   | 6.5    | 18.1   | 12.0   |
| 75.2   | 143.2  | 176.8  | 160.6  | 106.7  | 104.6  | 94.4   | 72.8   | 48.7   |
| 15.9   | 11.8   | 7.7    | 5.0    | 10.7   | 19.4   | 15.5   | 3.5    | 5.3    |
| 3884.7 | 2935.2 | 1756.1 | 1050.8 | 1159.1 | 1299.0 | 766.4  | 1147.2 | 1124.4 |
| 14.0   | 19.7   | 9.2    | 20.3   | 13.3   | 14.4   | 5.1    | 2.1    | 2.6    |
| 73.3   | 91.1   | 74.8   | 76.9   | 65.0   | 76.7   | 59.8   | 63.0   | 70.7   |
| 388.4  | 439.8  | 416.2  | 133.8  | 106.8  | 101.4  | 109.8  | 125.9  | 134.4  |
| 1134.5 | 1288.7 | 1027.9 | 560.6  | 442.0  | 515.9  | 410.6  | 326.5  | 491.1  |
| 1.4    | 8.1    | 2.1    | 968.3  | 802.2  | 871.9  | 1050.6 | 1036.2 | 1056.9 |
| 516.0  | 680.4  | 563.6  | 508.9  | 453.4  | 584.9  | 283.4  | 288.6  | 325.8  |
| 524.0  | 560.4  | 383.7  | 198.2  | 152.6  | 160.9  | 167.3  | 123.1  | 121.7  |
| 441.4  | 491.8  | 382.3  | 199.5  | 148.0  | 180.3  | 141.5  | 114.1  | 125.6  |
| 2618.3 | 4231.5 | 4395.5 | 387.0  | 355.4  | 327.9  | 256.4  | 192.4  | 237.6  |
| 1564.7 | 1853.7 | 1347.1 | 610.2  | 475.6  | 545.7  | 377.1  | 370.4  | 377.4  |
| 1123.2 | 1345.3 | 886.4  | 479.1  | 382.4  | 412.8  | 367.4  | 325.7  | 371.0  |
| 3151.0 | 4309.6 | 3896.0 | 3205.7 | 2845.1 | 2953.6 | 1635.8 | 1895.5 | 2157.6 |
| 1853.6 | 2245.7 | 1832.0 | 1630.5 | 1583.2 | 1680.6 | 815.8  | 1021.1 | 1107.3 |
| 1772.1 | 1832.0 | 1535.6 | 1287.4 | 1265.7 | 1270.4 | 866.5  | 1001.6 | 1098.8 |
| 487.2  | 578.4  | 402.8  | 254.8  | 223.7  | 241.7  | 240.4  | 233.8  | 261.9  |
| 1350.7 | 1711.0 | 1107.7 | 814.9  | 680.7  | 726.3  | 618.9  | 615.5  | 641.2  |
| 865.6  | 974.0  | 715.1  | 428.1  | 345.1  | 357.8  | 433.4  | 423.4  | 470.1  |
| 1351.2 | 1702.8 | 1592.3 | 240.5  | 182.1  | 192.9  | 176.0  | 168.4  | 203.9  |
| 150.1  | 210.3  | 153.2  | 319.6  | 249.5  | 271.2  | 182.8  | 164.8  | 201.9  |
| 2042.3 | 2253.7 | 1478.5 | 1961.2 | 1639.2 | 1642.9 | 921.2  | 761.7  | 925.8  |
| 172.3  | 267.4  | 245.8  | 122.3  | 123.7  | 136.3  | 81.9   | 97.7   | 127.4  |
| 599.2  | 1119.2 | 900.6  | 215.9  | 195.3  | 233.6  | 198.0  | 207.2  | 262.3  |
| 1638.9 | 1582.5 | 1017.4 | 1534.4 | 944.8  | 948.4  | 1198.4 | 862.9  | 1048.3 |
| 1.1    | 3.8    | 6.9    | 170.3  | 126.3  | 158.0  | 111.3  | 109.6  | 117.0  |
| 4.3    | 4.2    | 0.4    | 23.0   | 15.2   | 22.1   | 10.8   | 10.0   | 15.6   |
| 2.6    | 5.4    | 4.2    | 27.1   | 17.0   | 13.0   | 7.6    | 4.1    | 8.0    |
| 1527.9 | 1605.7 | 1021.1 | 831.4  | 671.6  | 736.5  | 562.4  | 523.4  | 590.1  |
| 1063.7 | 1421.9 | 854.9  | 815.3  | 596.0  | 557.7  | 931.4  | 596.0  | 837.9  |
| 318.2  | 398.2  | 298.1  | 268.5  | 204.7  | 250.0  | 175.5  | 168.9  | 185.6  |
| 204.6  | 248.1  | 254.9  | 100.9  | 87.8   | 104.2  | 127.0  | 132.7  | 137.2  |
| 416.6  | 575.3  | 526.4  | 323.4  | 256.3  | 317.2  | 150.7  | 170.4  | 190.2  |
| 299.2  | 373.3  | 245.8  | 410.5  | 344.8  | 360.0  | 429.3  | 449.6  | 487.1  |
| 60.1   | 86.6   | 63.6   | 40.8   | 47.4   | 38.9   | 50.9   | 64.5   | 58.8   |
| 155.9  | 216.3  | 116.9  | 214.4  | 168.5  | 225.2  | 128.1  | 193.4  | 222.3  |
| 221.6  | 319.4  | 259.3  | 350.7  | 314.2  | 337.3  | 261.6  | 271.0  | 320.7  |
| 913.5  | 1087.7 | 811.1  | 1351.2 | 1149.2 | 1319.9 | 1050.6 | 1014.8 | 1180.0 |
| 339.0  | 447.3  | 382.3  | 165.2  | 160.3  | 157.1  | 190.5  | 162.2  | 192.5  |
| 982.4  | 1181.9 | 1061.9 | 648.0  | 517.9  | 550.2  | 399.7  | 455.5  | 460.2  |
| 5166.8 | 5904.1 | 4695.5 | 2899.0 | 2608.0 | 2524.3 | 2342.3 | 2218.8 | 2618.2 |
| 198.8  | 279.7  | 252.8  | 355.3  | 262.8  | 332.0  | 193.4  | 204.8  | 229.7  |

|        |        |        |        |        |        |        |        |        |
|--------|--------|--------|--------|--------|--------|--------|--------|--------|
| 19.8   | 23.0   | 7.2    | 14.0   | 24.0   | 13.9   | 11.9   | 10.3   | 14.2   |
| 41.1   | 54.8   | 48.2   | 41.3   | 48.2   | 49.2   | 28.7   | 34.7   | 32.5   |
| 1128.5 | 1439.6 | 1059.4 | 458.0  | 348.1  | 336.6  | 353.5  | 360.2  | 420.8  |
| 2039.1 | 2475.2 | 1105.3 | 601.4  | 369.1  | 339.2  | 542.0  | 352.9  | 437.5  |
| 270.5  | 468.6  | 403.7  | 352.6  | 307.1  | 413.8  | 176.6  | 235.4  | 262.5  |
| 100.1  | 118.2  | 59.4   | 191.6  | 174.6  | 160.1  | 84.5   | 105.4  | 118.5  |
| 1700.8 | 1722.8 | 1210.2 | 731.9  | 601.3  | 607.7  | 565.6  | 701.9  | 668.2  |
| 541.1  | 657.2  | 476.3  | 218.3  | 205.3  | 219.8  | 151.5  | 185.2  | 193.7  |
| 30.2   | 33.0   | 27.6   | 16.1   | 13.9   | 17.0   | 12.2   | 10.7   | 14.0   |
| 1741.7 | 2626.1 | 2499.9 | 147.1  | 112.8  | 130.5  | 113.3  | 132.7  | 144.7  |
| 614.9  | 793.6  | 568.5  | 1036.5 | 848.3  | 953.3  | 487.0  | 515.4  | 530.1  |
| 1116.7 | 1410.2 | 898.7  | 542.4  | 279.9  | 256.7  | 335.4  | 191.9  | 204.3  |
| 65.9   | 83.9   | 65.9   | 56.5   | 48.0   | 59.2   | 26.2   | 44.5   | 41.9   |
| 23.6   | 35.8   | 18.8   | 104.4  | 82.8   | 111.3  | 40.7   | 60.4   | 55.4   |
| 214.2  | 458.7  | 352.5  | 56.3   | 43.5   | 62.8   | 13.8   | 39.1   | 22.7   |
| 1321.0 | 2333.1 | 1989.2 | 60.6   | 72.1   | 65.5   | 68.3   | 127.1  | 97.1   |
| 3079.6 | 3933.1 | 3621.1 | 3179.3 | 2559.2 | 2804.3 | 1496.6 | 1535.8 | 1723.5 |
| 426.5  | 614.4  | 415.9  | 269.9  | 235.1  | 256.4  | 173.1  | 189.5  | 213.8  |
| 3380.3 | 3417.3 | 1827.5 | 90.5   | 68.8   | 86.1   | 66.5   | 44.9   | 69.1   |
| 1151.1 | 1216.4 | 777.6  | 557.5  | 429.9  | 440.4  | 563.7  | 542.1  | 592.6  |
| 1502.8 | 1764.7 | 1051.0 | 632.4  | 519.6  | 540.4  | 463.2  | 447.8  | 510.9  |
| 651.5  | 575.9  | 391.5  | 546.1  | 432.6  | 454.9  | 419.1  | 364.2  | 387.4  |
| 321.6  | 404.0  | 251.7  | 535.3  | 429.1  | 534.9  | 340.8  | 382.4  | 414.2  |
| 14.0   | 20.7   | 10.1   | 151.0  | 154.3  | 149.8  | 161.6  | 228.0  | 232.4  |
| 651.1  | 790.8  | 609.5  | 489.1  | 390.5  | 388.8  | 467.3  | 511.0  | 573.7  |
| 2142.9 | 1938.7 | 1056.7 | 1365.3 | 1078.8 | 1094.9 | 1151.8 | 1063.3 | 1193.6 |
| 589.1  | 617.4  | 406.5  | 861.3  | 715.5  | 802.6  | 568.2  | 606.0  | 687.7  |
| 262.2  | 380.9  | 288.3  | 64.9   | 45.5   | 72.3   | 93.6   | 77.1   | 108.8  |
| 563.5  | 728.2  | 488.2  | 231.9  | 190.2  | 281.1  | 191.2  | 154.8  | 178.4  |
| 408.0  | 538.1  | 435.6  | 196.1  | 156.4  | 180.3  | 117.5  | 109.0  | 118.6  |
| 9.9    | 19.8   | 22.9   | 7.9    | 4.7    | 12.0   | 3.0    | 4.7    | 3.8    |
| 188.0  | 242.1  | 191.3  | 208.2  | 174.1  | 206.6  | 110.7  | 133.1  | 142.8  |
| 150.6  | 188.6  | 147.1  | 95.6   | 92.7   | 97.7   | 105.9  | 124.0  | 133.4  |
| 514.5  | 592.8  | 478.4  | 645.9  | 563.0  | 602.7  | 481.6  | 534.6  | 595.9  |
| 750.0  | 843.1  | 664.1  | 507.2  | 449.1  | 477.9  | 326.2  | 320.4  | 366.6  |
| 1139.1 | 1556.9 | 1088.6 | 748.6  | 562.6  | 641.3  | 908.4  | 707.9  | 849.7  |
| 7.6    | 10.8   | 17.6   | 24.3   | 24.2   | 24.9   | 10.6   | 14.0   | 6.2    |
| 308.1  | 542.6  | 467.7  | 117.1  | 172.7  | 156.6  | 69.8   | 203.4  | 141.0  |
| 904.5  | 1179.0 | 948.3  | 648.0  | 491.7  | 607.4  | 328.9  | 335.6  | 376.5  |
| 98.8   | 106.9  | 129.4  | 18.4   | 14.1   | 17.6   | 13.5   | 7.8    | 8.4    |
| 223.5  | 259.7  | 240.8  | 273.0  | 240.1  | 300.9  | 218.3  | 247.9  | 257.4  |
| 100.7  | 140.5  | 91.2   | 105.8  | 102.1  | 90.1   | 83.1   | 86.2   | 101.8  |
| 706.7  | 1008.2 | 733.5  | 381.7  | 277.4  | 336.4  | 319.4  | 308.7  | 331.3  |
| 2559.5 | 2410.4 | 1320.5 | 1110.6 | 797.1  | 849.2  | 499.6  | 439.5  | 491.1  |
| 774.4  | 1146.2 | 964.8  | 1233.1 | 1220.9 | 1196.8 | 949.8  | 1180.4 | 1294.6 |
| 484.5  | 616.3  | 663.5  | 192.4  | 158.1  | 184.0  | 155.0  | 191.3  | 182.0  |
| 397.2  | 488.1  | 436.0  | 329.4  | 284.6  | 331.4  | 208.5  | 247.9  | 224.9  |
| 172.7  | 271.9  | 174.0  | 90.2   | 71.1   | 99.3   | 68.6   | 86.3   | 97.3   |
| 448.7  | 545.2  | 374.8  | 97.7   | 75.6   | 54.5   | 241.5  | 144.6  | 216.5  |
| 64.3   | 73.7   | 47.7   | 41.4   | 48.7   | 39.7   | 41.4   | 38.7   | 39.8   |
| 573.1  | 691.2  | 574.0  | 624.8  | 621.6  | 651.1  | 496.2  | 725.8  | 599.7  |
| 319.8  | 332.0  | 299.0  | 585.6  | 571.7  | 572.7  | 244.0  | 354.5  | 354.3  |
| 173.9  | 246.6  | 146.6  | 197.6  | 201.8  | 184.5  | 146.6  | 159.7  | 171.7  |

|        |        |        |        |        |        |        |        |        |
|--------|--------|--------|--------|--------|--------|--------|--------|--------|
| 74.3   | 96.5   | 72.5   | 119.6  | 97.7   | 125.3  | 68.1   | 74.7   | 76.9   |
| 2414.5 | 2689.9 | 2522.6 | 556.4  | 495.3  | 536.4  | 697.4  | 814.0  | 792.6  |
| 1265.9 | 1992.1 | 1493.5 | 372.6  | 425.7  | 462.8  | 211.3  | 362.6  | 337.1  |
| 163.8  | 191.3  | 116.4  | 290.9  | 244.4  | 278.3  | 140.3  | 129.8  | 150.0  |
| 106.5  | 116.2  | 58.0   | 165.6  | 94.3   | 108.6  | 56.8   | 45.5   | 57.5   |
| 170.9  | 157.7  | 89.0   | 300.1  | 176.9  | 190.0  | 111.0  | 87.5   | 102.9  |
| 168.1  | 245.6  | 279.4  | 200.2  | 192.1  | 229.2  | 130.6  | 179.7  | 141.4  |
| 316.7  | 544.3  | 387.0  | 381.8  | 420.1  | 427.2  | 262.3  | 292.2  | 338.4  |
| 114.4  | 146.9  | 78.8   | 24.8   | 21.1   | 33.4   | 15.2   | 12.2   | 24.2   |
| 66.7   | 95.8   | 72.2   | 165.1  | 113.7  | 133.3  | 76.7   | 81.5   | 87.2   |
| 17.9   | 31.4   | 29.1   | 67.9   | 68.0   | 65.3   | 11.0   | 29.7   | 36.4   |
| 7.6    | 9.1    | 4.6    | 4323.6 | 4200.6 | 4399.4 | 2094.5 | 2737.0 | 2697.4 |
| 99.7   | 118.2  | 92.4   | 97.6   | 96.6   | 113.4  | 61.9   | 102.5  | 99.6   |
| 831.3  | 686.1  | 532.6  | 643.6  | 445.8  | 455.1  | 512.3  | 416.9  | 464.3  |
| 253.7  | 317.5  | 238.6  | 210.1  | 175.0  | 195.8  | 141.9  | 138.3  | 156.7  |
| 1424.5 | 1794.4 | 1666.9 | 1088.2 | 929.4  | 1064.2 | 586.0  | 618.2  | 669.4  |
| 1325.5 | 1467.7 | 877.4  | 625.8  | 440.2  | 415.8  | 467.8  | 337.3  | 445.2  |
| 1862.1 | 2077.1 | 1449.0 | 793.1  | 740.0  | 698.8  | 529.9  | 457.6  | 692.7  |
| 64.8   | 80.5   | 49.4   | 35.4   | 47.6   | 47.2   | 31.5   | 31.6   | 30.3   |
| 609.6  | 749.8  | 535.2  | 626.7  | 522.5  | 595.1  | 376.3  | 386.2  | 449.3  |
| 39.6   | 49.4   | 24.3   | 43.7   | 42.0   | 35.4   | 30.1   | 34.6   | 35.8   |
| 66.6   | 64.6   | 56.9   | 126.9  | 116.4  | 115.4  | 53.1   | 51.1   | 63.8   |
| 361.7  | 450.0  | 323.2  | 180.3  | 147.9  | 175.0  | 92.9   | 96.5   | 94.7   |
| 13.3   | 11.1   | 20.9   | 17.8   | 20.1   | 30.4   | 11.0   | 8.8    | 12.9   |
| 4.9    | 3.1    | 0.4    | 8.0    | 7.6    | 1.7    | 4.3    | 4.1    | 1.0    |
| 88.8   | 98.7   | 73.7   | 72.9   | 57.1   | 67.0   | 40.1   | 34.2   | 52.9   |
| 1266.7 | 1293.6 | 831.6  | 453.3  | 357.7  | 385.1  | 267.2  | 260.2  | 275.9  |
| 208.4  | 260.5  | 172.6  | 122.4  | 87.1   | 118.8  | 119.5  | 119.3  | 145.2  |
| 631.1  | 765.3  | 505.8  | 441.8  | 359.9  | 400.8  | 359.3  | 337.0  | 377.3  |
| 11.4   | 16.8   | 9.6    | 18.9   | 6.9    | 18.5   | 14.3   | 7.1    | 13.8   |
| 5.4    | 3.0    | 3.6    | 4.3    | 2.9    | 2.7    | 1.6    | 2.4    | 1.8    |
| 14.1   | 14.5   | 10.3   | 5.8    | 8.0    | 6.7    | 5.1    | 1.6    | 9.2    |
| 1055.3 | 1026.9 | 513.8  | 311.8  | 180.3  | 182.4  | 236.6  | 153.6  | 196.4  |
| 2304.5 | 2309.1 | 1202.3 | 1334.5 | 800.4  | 930.4  | 855.9  | 653.9  | 685.0  |
| 468.6  | 649.6  | 606.9  | 160.7  | 136.8  | 149.9  | 110.9  | 147.2  | 144.8  |
| 443.1  | 512.6  | 236.3  | 237.5  | 174.4  | 212.4  | 131.0  | 101.0  | 133.5  |
| 713.5  | 843.6  | 608.3  | 631.2  | 440.5  | 485.6  | 214.4  | 173.0  | 270.3  |
| 776.1  | 884.0  | 634.3  | 542.9  | 458.4  | 503.6  | 312.9  | 381.7  | 384.8  |
| 706.6  | 1018.0 | 703.2  | 1079.0 | 978.8  | 1125.6 | 625.4  | 607.1  | 699.7  |
| 504.3  | 535.8  | 400.8  | 365.4  | 271.6  | 282.0  | 195.7  | 237.2  | 255.9  |
| 939.9  | 1077.0 | 652.5  | 486.5  | 394.2  | 376.4  | 461.5  | 466.3  | 484.5  |
| 254.1  | 375.2  | 373.9  | 620.3  | 512.4  | 587.6  | 347.8  | 386.0  | 415.3  |
| 526.9  | 583.4  | 274.5  | 5.2    | 5.4    | 5.0    | 4.2    | 3.1    | 2.2    |
| 527.8  | 583.1  | 410.3  | 752.6  | 553.7  | 657.5  | 366.4  | 392.3  | 394.4  |
| 566.2  | 792.1  | 650.5  | 643.4  | 545.5  | 678.5  | 412.1  | 385.7  | 451.1  |
| 459.6  | 494.8  | 356.4  | 481.3  | 383.8  | 410.8  | 254.5  | 259.6  | 338.6  |
| 105.3  | 149.3  | 111.0  | 55.5   | 45.7   | 39.9   | 57.5   | 60.0   | 62.9   |
| 1677.4 | 2345.9 | 2038.1 | 2272.9 | 1720.0 | 1866.0 | 1440.3 | 1172.5 | 1417.3 |
| 5648.3 | 6586.2 | 5837.5 | 4840.6 | 4445.4 | 4712.8 | 2986.5 | 2611.7 | 3312.2 |
| 1456.7 | 1748.3 | 1329.0 | 1297.2 | 1311.4 | 1402.0 | 1120.5 | 1220.9 | 1442.9 |
| 1095.5 | 1062.0 | 804.6  | 140.7  | 77.3   | 68.9   | 103.5  | 108.5  | 97.9   |
| 1275.1 | 1794.4 | 593.1  | 434.7  | 456.8  | 495.4  | 389.8  | 553.2  | 455.9  |
| 214.3  | 265.2  | 226.4  | 393.2  | 311.3  | 349.8  | 252.7  | 276.6  | 280.4  |

|        |        |        |        |        |        |        |       |        |
|--------|--------|--------|--------|--------|--------|--------|-------|--------|
| 1098.9 | 1072.2 | 635.0  | 1411.6 | 1165.4 | 1295.3 | 950.6  | 910.3 | 1030.9 |
| 0.8    | 1.6    | 1.2    | 3.7    | 2.7    | 2.4    | 0.9    | 2.9   | 1.8    |
| 12.9   | 13.8   | 22.4   | 112.5  | 75.8   | 70.9   | 52.1   | 41.0  | 67.0   |
| 22.1   | 25.1   | 28.3   | 145.3  | 89.8   | 111.9  | 70.1   | 72.5  | 62.0   |
| 11.7   | 13.6   | 20.7   | 92.2   | 80.1   | 74.5   | 114.6  | 115.1 | 117.2  |
| 60.1   | 64.8   | 63.4   | 22.6   | 15.9   | 15.4   | 14.8   | 17.1  | 14.1   |
| 104.5  | 146.5  | 153.2  | 46.9   | 41.1   | 49.7   | 33.3   | 46.7  | 49.4   |
| 143.2  | 158.4  | 156.8  | 105.7  | 73.8   | 78.2   | 49.3   | 52.9  | 65.4   |
| 1035.7 | 1202.1 | 731.1  | 421.2  | 266.8  | 295.1  | 344.0  | 237.2 | 297.4  |
| 2176.7 | 2998.6 | 2526.0 | 976.1  | 773.7  | 803.7  | 597.4  | 614.2 | 722.1  |
| 475.6  | 498.7  | 362.2  | 786.0  | 636.3  | 712.5  | 625.7  | 710.4 | 692.0  |
| 314.9  | 404.9  | 230.1  | 91.7   | 65.3   | 83.5   | 113.9  | 86.6  | 97.1   |
| 22.7   | 25.2   | 20.1   | 45.5   | 31.8   | 34.0   | 26.5   | 31.1  | 28.1   |
| 1775.9 | 1948.8 | 1319.9 | 341.4  | 196.7  | 242.1  | 209.9  | 170.3 | 158.5  |
| 1054.4 | 1548.1 | 1413.2 | 949.0  | 870.1  | 923.6  | 630.4  | 747.8 | 752.0  |
| 48.9   | 69.8   | 60.7   | 59.4   | 41.2   | 61.9   | 95.2   | 89.7  | 124.7  |
| 632.3  | 998.2  | 954.2  | 434.1  | 485.1  | 617.8  | 301.4  | 600.0 | 568.0  |
| 32.6   | 52.6   | 51.7   | 40.1   | 39.3   | 29.5   | 27.8   | 31.9  | 37.0   |
| 553.7  | 770.6  | 634.6  | 395.2  | 357.7  | 379.8  | 252.4  | 321.7 | 322.7  |
| 85.6   | 108.2  | 90.8   | 148.7  | 163.4  | 179.5  | 93.2   | 144.6 | 118.9  |
| 306.3  | 397.8  | 297.4  | 173.4  | 156.1  | 175.1  | 130.0  | 131.1 | 147.5  |
| 421.6  | 710.2  | 941.2  | 1234.8 | 1191.9 | 1333.2 | 542.9  | 816.6 | 826.1  |
| 11.3   | 28.8   | 39.9   | 39.4   | 65.0   | 69.1   | 29.0   | 76.4  | 37.4   |
| 48.1   | 88.0   | 85.4   | 100.0  | 88.7   | 117.1  | 108.9  | 108.4 | 148.4  |
| 1082.8 | 1251.4 | 992.3  | 1097.6 | 1036.6 | 1086.3 | 806.2  | 862.9 | 956.6  |
| 369.7  | 930.4  | 1545.1 | 368.9  | 230.2  | 288.3  | 511.3  | 345.6 | 372.4  |
| 144.3  | 261.2  | 230.5  | 225.8  | 206.3  | 275.9  | 161.3  | 169.8 | 164.9  |
| 168.0  | 234.2  | 240.2  | 245.0  | 228.9  | 235.7  | 201.3  | 217.1 | 213.3  |
| 405.2  | 415.0  | 230.6  | 408.7  | 313.6  | 340.7  | 255.3  | 243.6 | 270.4  |
| 1568.6 | 1880.4 | 1201.1 | 745.4  | 506.2  | 549.8  | 654.6  | 661.5 | 759.0  |
| 74.3   | 112.1  | 56.2   | 122.8  | 113.0  | 125.9  | 67.8   | 79.3  | 68.3   |
| 185.4  | 170.0  | 108.0  | 88.0   | 64.4   | 65.2   | 67.9   | 68.8  | 61.7   |
| 5.9    | 13.1   | 7.1    | 11.0   | 6.5    | 5.6    | 3.7    | 2.6   | 3.3    |
| 414.2  | 493.4  | 289.7  | 703.4  | 563.3  | 619.9  | 364.3  | 335.6 | 395.8  |
| 1741.7 | 1988.8 | 1511.6 | 1065.2 | 924.4  | 1043.1 | 742.2  | 701.1 | 828.9  |
| 785.1  | 847.5  | 538.1  | 370.5  | 241.7  | 241.5  | 254.7  | 166.3 | 178.2  |
| 1366.6 | 1567.2 | 1024.1 | 1033.7 | 770.6  | 832.8  | 827.4  | 739.7 | 797.3  |
| 138.1  | 168.2  | 85.4   | 117.5  | 109.7  | 120.1  | 72.7   | 83.6  | 85.5   |
| 1130.3 | 1322.0 | 1050.3 | 734.7  | 630.7  | 752.1  | 532.3  | 485.6 | 594.6  |
| 152.2  | 189.1  | 134.7  | 142.1  | 137.6  | 163.0  | 90.2   | 118.9 | 100.8  |
| 18.4   | 11.9   | 13.7   | 9.3    | 14.8   | 17.0   | 14.4   | 5.1   | 20.0   |
| 441.7  | 475.1  | 290.8  | 315.9  | 225.7  | 310.5  | 132.2  | 120.9 | 140.5  |
| 1055.6 | 1303.0 | 828.0  | 1832.9 | 1472.8 | 1575.2 | 806.2  | 723.7 | 765.3  |
| 95.1   | 107.7  | 109.9  | 54.3   | 40.5   | 37.1   | 37.9   | 50.5  | 58.9   |
| 498.1  | 667.3  | 448.7  | 306.2  | 220.0  | 272.4  | 158.6  | 153.6 | 168.8  |
| 63.3   | 43.5   | 22.7   | 49.5   | 15.1   | 39.2   | 20.0   | 16.7  | 20.5   |
| 48.1   | 43.3   | 16.0   | 41.7   | 27.1   | 42.5   | 28.1   | 20.2  | 29.8   |
| 226.4  | 259.9  | 189.2  | 107.3  | 79.6   | 79.1   | 103.9  | 107.7 | 126.0  |
| 290.6  | 479.9  | 551.9  | 41.1   | 47.6   | 46.0   | 45.0   | 46.8  | 37.7   |
| 72.4   | 74.6   | 43.6   | 41.3   | 39.7   | 41.3   | 16.1   | 12.5  | 17.6   |
| 4448.8 | 4603.7 | 2410.2 | 1622.8 | 1028.1 | 1000.2 | 1225.8 | 643.9 | 883.9  |
| 1768.9 | 1989.3 | 1438.8 | 1469.6 | 1260.6 | 1165.4 | 1030.7 | 916.9 | 1059.1 |
| 23.5   | 33.7   | 21.9   | 24.9   | 16.0   | 17.2   | 20.3   | 18.5  | 20.7   |

|        |        |        |        |        |        |        |        |        |
|--------|--------|--------|--------|--------|--------|--------|--------|--------|
| 439.4  | 542.7  | 335.9  | 806.3  | 616.8  | 708.0  | 366.2  | 392.2  | 406.6  |
| 2498.0 | 2903.9 | 2279.6 | 2789.1 | 2306.4 | 2528.5 | 1311.2 | 1273.0 | 1403.0 |
| 128.2  | 195.9  | 205.5  | 381.3  | 374.4  | 427.3  | 275.0  | 328.7  | 342.0  |
| 353.6  | 579.7  | 532.7  | 2133.7 | 2031.9 | 2173.5 | 1409.9 | 2155.5 | 1965.7 |
| 14.3   | 9.1    | 7.4    | 13.1   | 8.3    | 4.1    | 6.3    | 7.2    | 6.6    |
| 587.9  | 686.9  | 476.8  | 388.1  | 324.7  | 317.6  | 346.3  | 325.5  | 369.8  |
| 150.0  | 175.4  | 125.1  | 233.5  | 210.9  | 235.1  | 128.3  | 222.4  | 163.9  |
| 0.5    | 0.9    | 0.6    | 1.3    | 1.1    | 1.9    | 0.6    | 0.5    | 0.7    |
| 287.6  | 348.3  | 204.3  | 236.2  | 179.4  | 193.1  | 145.9  | 119.8  | 150.4  |
| 1955.9 | 2008.9 | 1374.0 | 365.8  | 357.0  | 351.8  | 352.4  | 360.1  | 443.9  |
| 167.7  | 256.4  | 158.0  | 201.6  | 169.9  | 190.6  | 127.7  | 144.3  | 142.7  |
| 10.7   | 1.8    | 4.3    | 7.5    | 7.0    | 4.5    | 4.5    | 7.1    | 10.2   |
| 6.7    | 3.4    | 4.1    | 4.7    | 5.6    | 8.3    | 5.3    | 2.2    | 3.0    |
| 2.0    | 7.1    | 1.8    | 13.0   | 4.8    | 1.4    | 2.9    | 1.2    | 0.3    |
| 118.0  | 198.2  | 231.6  | 157.8  | 147.8  | 194.7  | 82.8   | 114.0  | 118.6  |
| 782.3  | 927.9  | 944.2  | 163.9  | 118.6  | 155.2  | 119.6  | 115.6  | 130.4  |
| 1369.3 | 1865.0 | 1430.1 | 387.7  | 358.1  | 333.6  | 478.5  | 634.6  | 658.1  |
| 6013.5 | 6095.4 | 4360.5 | 3255.0 | 1546.5 | 1712.5 | 1251.9 | 627.6  | 824.9  |
| 346.2  | 321.7  | 379.4  | 158.2  | 157.7  | 147.4  | 170.9  | 273.5  | 208.4  |
| 3559.0 | 3975.0 | 2855.7 | 2112.1 | 1797.0 | 1917.6 | 1462.1 | 1435.7 | 1590.8 |
| 604.2  | 612.5  | 444.7  | 165.5  | 149.4  | 141.2  | 202.3  | 213.2  | 226.9  |
| 30.5   | 42.8   | 28.1   | 58.7   | 46.5   | 42.8   | 37.6   | 18.1   | 24.0   |
| 4.5    | 2.1    | 0.7    | 7.1    | 9.2    | 5.1    | 2.7    | 7.0    | 4.4    |
| 2.1    | 8.5    | 3.7    | 37.1   | 21.9   | 33.7   | 3.5    | 2.9    | 1.4    |
| 36.5   | 44.8   | 32.6   | 65.5   | 49.5   | 59.0   | 29.8   | 36.3   | 28.2   |
| 635.6  | 768.0  | 627.5  | 622.5  | 550.5  | 595.7  | 503.2  | 522.1  | 578.8  |
| 143.6  | 154.5  | 130.5  | 88.8   | 73.9   | 98.3   | 46.2   | 79.5   | 70.1   |
| 185.6  | 279.0  | 212.6  | 290.0  | 262.2  | 351.8  | 213.5  | 185.5  | 229.7  |
| 679.0  | 866.0  | 648.2  | 357.5  | 279.6  | 294.5  | 306.9  | 288.1  | 301.4  |
| 1362.6 | 1738.1 | 1327.1 | 682.6  | 527.4  | 592.7  | 388.8  | 413.4  | 427.0  |
| 464.4  | 586.4  | 402.9  | 82.7   | 65.6   | 81.6   | 116.4  | 118.1  | 123.0  |
| 23.8   | 17.6   | 24.4   | 27.0   | 22.6   | 33.2   | 16.7   | 31.7   | 41.0   |
| 369.7  | 425.1  | 287.8  | 393.5  | 311.8  | 331.2  | 189.3  | 162.4  | 178.9  |
| 312.2  | 612.0  | 461.5  | 344.9  | 275.8  | 358.8  | 139.1  | 208.3  | 198.0  |
| 821.6  | 938.4  | 574.0  | 516.2  | 342.8  | 406.6  | 313.1  | 302.0  | 302.0  |
| 630.5  | 769.6  | 544.6  | 735.7  | 587.3  | 659.9  | 488.5  | 463.5  | 492.4  |
| 1524.6 | 1643.1 | 987.9  | 964.3  | 771.4  | 853.4  | 574.9  | 529.4  | 604.5  |
| 36.2   | 33.6   | 26.7   | 46.9   | 39.4   | 18.9   | 26.3   | 29.0   | 25.7   |
| 23.8   | 42.7   | 22.6   | 16.5   | 40.2   | 35.5   | 37.4   | 40.7   | 23.3   |
| 203.6  | 436.8  | 522.5  | 440.7  | 477.5  | 520.3  | 384.8  | 479.9  | 508.3  |
| 6.1    | 12.9   | 5.6    | 40.2   | 41.6   | 35.8   | 50.4   | 50.9   | 49.5   |
| 90.6   | 106.4  | 78.6   | 503.8  | 393.0  | 396.4  | 602.7  | 629.5  | 600.9  |
| 936.2  | 806.9  | 575.2  | 356.7  | 180.7  | 225.9  | 301.4  | 129.0  | 249.4  |
| 706.6  | 1078.3 | 860.6  | 629.5  | 519.6  | 575.6  | 332.2  | 374.1  | 350.5  |
| 257.2  | 337.2  | 236.8  | 438.7  | 356.7  | 397.9  | 244.7  | 222.5  | 230.6  |
| 160.0  | 200.7  | 220.0  | 92.6   | 85.5   | 96.8   | 59.8   | 70.9   | 80.6   |
| 868.1  | 1102.7 | 697.9  | 648.8  | 325.3  | 316.0  | 403.9  | 239.0  | 292.7  |
| 686.1  | 799.7  | 437.4  | 305.3  | 142.4  | 158.5  | 230.6  | 139.5  | 168.4  |
| 2742.3 | 3686.5 | 2407.4 | 1077.2 | 521.8  | 477.7  | 715.7  | 405.0  | 535.8  |
| 568.0  | 618.7  | 450.3  | 593.1  | 501.9  | 526.7  | 298.5  | 280.9  | 336.0  |
| 887.1  | 974.9  | 689.9  | 698.0  | 576.9  | 608.3  | 605.4  | 584.1  | 625.4  |
| 850.8  | 1073.7 | 727.0  | 734.4  | 658.1  | 634.6  | 641.4  | 704.7  | 781.3  |
| 994.7  | 1092.7 | 810.6  | 719.5  | 617.8  | 684.0  | 594.6  | 554.7  | 641.2  |

|        |        |        |        |        |        |        |        |        |
|--------|--------|--------|--------|--------|--------|--------|--------|--------|
| 1600.0 | 2212.4 | 1552.5 | 467.7  | 371.8  | 396.1  | 547.2  | 349.5  | 534.8  |
| 891.6  | 1358.9 | 877.9  | 474.4  | 395.7  | 411.4  | 346.8  | 256.0  | 349.7  |
| 1363.3 | 1460.2 | 1016.3 | 401.4  | 306.2  | 321.0  | 428.9  | 339.1  | 409.1  |
| 1680.6 | 1861.2 | 1227.4 | 758.3  | 637.6  | 720.1  | 577.8  | 564.6  | 573.8  |
| 523.1  | 500.0  | 334.6  | 527.3  | 438.5  | 464.3  | 533.8  | 504.8  | 529.1  |
| 815.7  | 904.5  | 617.2  | 1211.0 | 1054.8 | 1150.6 | 728.6  | 786.3  | 845.2  |
| 237.2  | 274.2  | 248.0  | 135.8  | 147.3  | 201.9  | 108.5  | 121.9  | 127.6  |
| 1521.1 | 2017.1 | 1864.7 | 1615.9 | 1582.5 | 1641.4 | 905.0  | 1155.2 | 1096.3 |
| 243.5  | 338.6  | 249.4  | 86.0   | 73.2   | 94.4   | 68.4   | 79.4   | 67.1   |
| 835.6  | 1004.7 | 807.5  | 458.5  | 413.8  | 474.6  | 236.4  | 264.5  | 267.0  |
| 17.8   | 28.7   | 17.5   | 5.9    | 4.3    | 12.0   | 24.0   | 17.8   | 15.9   |
| 1386.4 | 1707.4 | 1116.4 | 3042.9 | 2498.8 | 2674.3 | 1870.1 | 1885.1 | 2060.1 |
| 95.2   | 128.8  | 82.1   | 80.8   | 56.3   | 52.7   | 70.7   | 115.8  | 74.4   |
| 50.6   | 82.7   | 75.5   | 72.7   | 76.4   | 62.3   | 54.6   | 77.1   | 69.5   |
| 722.8  | 1056.1 | 1051.1 | 343.6  | 386.8  | 372.8  | 254.9  | 425.1  | 382.9  |
| 14.0   | 17.2   | 5.7    | 734.1  | 722.7  | 792.3  | 387.4  | 593.4  | 522.1  |
| 10.4   | 7.1    | 16.2   | 15.5   | 3.8    | 11.4   | 3.3    | 1.7    | 3.3    |
| 307.2  | 355.6  | 270.4  | 251.6  | 220.2  | 253.0  | 217.9  | 224.4  | 266.5  |
| 467.2  | 492.9  | 214.6  | 201.0  | 155.5  | 159.9  | 158.0  | 156.7  | 169.4  |
| 350.9  | 342.7  | 164.8  | 65.7   | 43.6   | 47.2   | 84.2   | 77.8   | 82.2   |
| 928.1  | 1028.2 | 606.5  | 482.0  | 411.1  | 469.2  | 238.5  | 238.7  | 291.4  |
| 1012.3 | 1309.1 | 983.0  | 789.2  | 650.2  | 703.8  | 584.9  | 576.9  | 600.3  |
| 171.6  | 214.8  | 185.0  | 101.5  | 88.1   | 101.5  | 69.0   | 81.9   | 81.4   |
| 661.2  | 962.1  | 826.8  | 1053.6 | 922.7  | 1018.4 | 542.2  | 542.3  | 595.1  |
| 3.8    | 15.9   | 13.3   | 16.8   | 12.7   | 17.7   | 6.8    | 8.6    | 10.4   |
| 361.7  | 468.4  | 273.2  | 929.7  | 801.8  | 914.3  | 619.7  | 522.3  | 624.8  |
| 215.8  | 200.3  | 141.8  | 248.7  | 191.2  | 231.5  | 178.1  | 203.3  | 188.0  |
| 105.9  | 107.1  | 63.9   | 98.6   | 78.1   | 88.0   | 70.9   | 82.0   | 82.9   |
| 3335.9 | 3797.6 | 2565.6 | 1885.9 | 1325.5 | 1381.4 | 1051.9 | 871.9  | 1025.6 |
| 191.2  | 238.6  | 167.0  | 431.0  | 330.2  | 374.0  | 307.8  | 280.5  | 306.9  |
| 137.6  | 180.5  | 123.7  | 253.2  | 196.2  | 209.9  | 296.4  | 262.5  | 315.0  |
| 184.5  | 182.5  | 160.8  | 93.0   | 71.0   | 77.6   | 61.2   | 55.2   | 61.1   |
| 73.8   | 85.7   | 69.4   | 107.0  | 84.7   | 105.6  | 58.5   | 32.8   | 40.7   |
| 108.9  | 156.7  | 162.6  | 228.1  | 202.1  | 257.0  | 77.3   | 76.6   | 103.8  |
| 226.3  | 364.1  | 174.8  | 276.9  | 270.7  | 263.8  | 201.9  | 197.0  | 208.4  |
| 124.2  | 142.4  | 82.3   | 96.3   | 70.9   | 90.3   | 95.0   | 94.4   | 103.8  |
| 36.6   | 28.3   | 23.8   | 134.3  | 106.7  | 133.0  | 160.4  | 97.8   | 151.7  |
| 343.7  | 385.5  | 245.9  | 470.1  | 435.1  | 442.0  | 312.9  | 326.8  | 321.6  |
| 316.6  | 345.3  | 208.3  | 279.3  | 233.6  | 291.1  | 286.5  | 279.8  | 301.8  |
| 196.0  | 214.2  | 131.8  | 203.7  | 165.3  | 199.1  | 214.8  | 199.9  | 216.9  |
| 1602.7 | 2063.9 | 1745.8 | 549.3  | 556.1  | 639.1  | 367.2  | 607.5  | 514.2  |
| 599.1  | 670.0  | 386.3  | 651.7  | 304.0  | 328.9  | 288.9  | 175.0  | 219.7  |
| 1360.7 | 1639.4 | 858.6  | 470.1  | 464.5  | 430.4  | 452.4  | 535.8  | 629.7  |
| 1757.7 | 1859.5 | 1280.7 | 1482.3 | 1269.6 | 1209.4 | 1245.3 | 1144.0 | 1323.0 |
| 604.1  | 653.5  | 490.5  | 522.1  | 410.8  | 491.7  | 408.5  | 382.3  | 410.7  |
| 189.2  | 182.5  | 115.9  | 241.4  | 171.1  | 189.9  | 138.1  | 128.6  | 155.8  |
| 79.8   | 100.4  | 63.3   | 84.5   | 62.8   | 88.4   | 72.1   | 57.2   | 67.9   |
| 63.9   | 91.3   | 54.7   | 69.0   | 52.5   | 58.4   | 36.2   | 32.3   | 30.6   |
| 1188.4 | 1484.4 | 1300.7 | 1007.6 | 793.6  | 848.0  | 663.4  | 531.9  | 688.4  |
| 65.8   | 65.1   | 57.4   | 69.9   | 58.9   | 68.5   | 24.4   | 36.3   | 48.1   |
| 2998.4 | 3110.2 | 1571.5 | 3553.2 | 1805.8 | 1955.2 | 1769.2 | 917.4  | 1147.4 |
| 111.1  | 161.2  | 131.3  | 350.0  | 391.3  | 460.8  | 179.8  | 356.3  | 275.4  |
| 7288.9 | 7172.1 | 5384.8 | 3333.7 | 2675.0 | 2632.4 | 2209.5 | 1904.2 | 2286.0 |



|        |        |        |        |        |        |        |        |        |
|--------|--------|--------|--------|--------|--------|--------|--------|--------|
| 771.7  | 1023.3 | 826.7  | 563.7  | 493.7  | 564.0  | 212.7  | 249.0  | 247.8  |
| 706.1  | 993.6  | 855.6  | 652.7  | 471.7  | 541.9  | 491.7  | 405.6  | 478.7  |
| 776.4  | 928.1  | 599.9  | 402.8  | 299.2  | 358.9  | 253.5  | 232.3  | 265.2  |
| 1050.8 | 1171.3 | 667.2  | 276.5  | 205.1  | 230.2  | 219.6  | 199.5  | 248.2  |
| 1521.7 | 1723.1 | 1670.5 | 2135.4 | 1690.6 | 1743.0 | 1233.6 | 1263.7 | 1410.7 |
| 276.3  | 418.5  | 495.5  | 459.3  | 412.4  | 519.0  | 285.0  | 426.7  | 385.0  |
| 615.3  | 740.1  | 629.9  | 1402.8 | 1428.5 | 1557.8 | 587.1  | 882.7  | 849.4  |
| 950.0  | 1489.9 | 1457.6 | 434.3  | 435.9  | 432.0  | 485.1  | 594.2  | 595.7  |
| 1096.9 | 1679.8 | 1525.7 | 475.6  | 490.0  | 460.9  | 553.7  | 667.2  | 744.4  |
| 130.4  | 146.6  | 129.0  | 67.7   | 26.1   | 48.4   | 51.3   | 49.8   | 60.0   |
| 1277.5 | 1583.4 | 1166.4 | 665.2  | 479.4  | 463.1  | 525.2  | 488.0  | 513.4  |
| 2713.9 | 3439.8 | 3228.0 | 880.4  | 723.7  | 810.2  | 880.9  | 1067.5 | 1038.3 |
| 451.5  | 594.2  | 487.4  | 90.3   | 69.0   | 91.9   | 125.8  | 135.4  | 120.9  |
| 885.5  | 1015.1 | 891.0  | 682.0  | 632.1  | 677.7  | 399.2  | 614.9  | 497.7  |
| 796.5  | 1073.5 | 889.2  | 506.7  | 437.3  | 469.8  | 375.8  | 419.3  | 452.9  |
| 27.0   | 26.5   | 22.8   | 187.3  | 213.7  | 222.7  | 103.1  | 146.4  | 142.0  |
| 6.1    | 8.6    | 6.2    | 24.1   | 32.5   | 34.7   | 39.9   | 51.0   | 59.9   |
| 1799.4 | 2324.6 | 2272.3 | 647.7  | 501.0  | 549.1  | 562.4  | 474.4  | 532.8  |
| 446.1  | 520.4  | 396.7  | 181.7  | 139.6  | 154.0  | 184.2  | 194.0  | 204.6  |
| 198.8  | 292.3  | 192.0  | 90.1   | 93.2   | 87.3   | 94.0   | 98.9   | 87.5   |
| 5.7    | 3.2    | 8.1    | 17.1   | 7.8    | 12.0   | 4.7    | 2.6    | 7.1    |
| 1236.7 | 1054.9 | 304.4  | 276.8  | 169.4  | 180.6  | 150.5  | 84.4   | 124.1  |
| 839.1  | 1132.3 | 1028.4 | 682.7  | 558.9  | 531.7  | 585.8  | 647.0  | 736.3  |
| 239.2  | 283.3  | 246.2  | 1017.1 | 907.0  | 1068.5 | 572.0  | 622.6  | 649.1  |
| 43.8   | 63.4   | 53.2   | 79.1   | 63.5   | 78.8   | 10.9   | 30.7   | 27.8   |
| 51.0   | 79.4   | 65.9   | 68.7   | 57.5   | 64.1   | 33.3   | 32.5   | 28.0   |
| 162.0  | 184.4  | 144.9  | 79.8   | 62.7   | 76.1   | 40.6   | 40.4   | 56.7   |
| 457.3  | 582.2  | 384.0  | 72.4   | 55.6   | 56.5   | 57.4   | 47.8   | 60.4   |
| 883.4  | 1078.1 | 707.2  | 206.4  | 117.6  | 140.9  | 142.1  | 121.4  | 126.9  |
| 472.9  | 529.1  | 328.7  | 413.1  | 343.6  | 359.5  | 245.6  | 192.0  | 246.6  |
| 196.5  | 197.9  | 148.4  | 382.4  | 335.6  | 395.7  | 248.1  | 264.2  | 268.9  |
| 395.3  | 538.2  | 460.1  | 1143.6 | 1088.9 | 1178.2 | 687.5  | 910.6  | 892.5  |
| 111.9  | 161.2  | 108.9  | 175.6  | 157.5  | 177.2  | 113.5  | 98.4   | 97.5   |
| 542.1  | 602.7  | 466.7  | 13.3   | 16.3   | 11.5   | 13.3   | 26.2   | 19.8   |
| 495.5  | 460.3  | 339.7  | 22.6   | 17.4   | 23.0   | 9.9    | 21.5   | 14.8   |
| 21.9   | 20.3   | 11.3   | 15.1   | 14.5   | 16.9   | 16.9   | 15.6   | 11.7   |
| 2.8    | 3.1    | 3.0    | 5.9    | 5.2    | 5.1    | 2.0    | 3.2    | 4.2    |
| 252.2  | 359.8  | 373.5  | 2141.5 | 1809.1 | 1953.8 | 1224.3 | 1279.6 | 1414.3 |
| 124.6  | 225.0  | 233.4  | 1013.5 | 929.9  | 914.0  | 746.4  | 872.5  | 921.5  |
| 109.7  | 153.9  | 130.2  | 566.9  | 477.6  | 513.0  | 718.5  | 651.2  | 754.1  |
| 354.5  | 436.2  | 292.5  | 511.4  | 350.5  | 442.5  | 246.2  | 262.9  | 265.9  |
| 1516.7 | 1591.7 | 872.0  | 692.5  | 392.8  | 394.3  | 368.9  | 282.8  | 288.2  |
| 1515.2 | 1488.0 | 1049.5 | 494.4  | 419.8  | 428.7  | 455.1  | 411.7  | 454.2  |
| 3241.9 | 3262.7 | 2098.8 | 1274.6 | 962.6  | 1007.6 | 943.7  | 907.4  | 997.6  |
| 344.7  | 425.7  | 348.5  | 354.1  | 303.4  | 357.0  | 312.3  | 320.0  | 355.2  |
| 36.8   | 20.6   | 29.6   | 18.5   | 16.3   | 34.8   | 28.9   | 33.4   | 28.1   |
| 26.7   | 37.1   | 30.8   | 9.9    | 18.1   | 13.2   | 10.7   | 3.1    | 19.3   |
| 242.2  | 254.3  | 153.5  | 63.8   | 51.3   | 50.1   | 66.5   | 49.8   | 43.2   |
| 114.1  | 145.7  | 89.8   | 130.4  | 98.8   | 122.8  | 44.0   | 56.7   | 83.5   |
| 437.1  | 665.8  | 571.2  | 210.5  | 155.5  | 173.7  | 109.0  | 106.8  | 99.0   |
| 301.2  | 393.7  | 340.5  | 280.3  | 216.1  | 242.7  | 284.5  | 271.6  | 291.2  |
| 71.0   | 108.8  | 85.0   | 5.5    | 8.8    | 10.6   | 9.0    | 5.1    | 2.2    |
| 126.2  | 152.3  | 145.4  | 27.2   | 23.7   | 23.4   | 14.6   | 18.3   | 28.1   |

|        |         |        |        |        |        |        |        |        |
|--------|---------|--------|--------|--------|--------|--------|--------|--------|
| 264.1  | 415.5   | 297.2  | 810.8  | 762.5  | 900.8  | 536.8  | 753.8  | 740.2  |
| 658.3  | 926.9   | 711.2  | 1309.1 | 1016.1 | 1186.9 | 922.8  | 873.9  | 954.9  |
| 514.8  | 589.9   | 403.1  | 209.9  | 153.3  | 171.2  | 232.4  | 212.5  | 246.4  |
| 51.0   | 55.0    | 53.9   | 66.0   | 56.0   | 50.9   | 8.7    | 4.2    | 12.6   |
| 9558.2 | 10454.5 | 9449.1 | 8884.8 | 8096.5 | 8440.5 | 5366.2 | 5431.3 | 5754.9 |
| 147.0  | 230.4   | 280.6  | 106.4  | 105.0  | 143.8  | 99.0   | 158.5  | 155.6  |
| 911.6  | 1040.8  | 642.4  | 225.6  | 194.1  | 214.5  | 220.5  | 231.0  | 252.5  |
| 3.6    | 8.1     | 8.3    | 15.9   | 16.4   | 22.3   | 19.6   | 19.0   | 10.8   |
| 895.8  | 1026.4  | 782.7  | 726.9  | 613.0  | 581.1  | 998.1  | 909.3  | 1027.9 |
| 625.7  | 726.6   | 546.9  | 381.1  | 311.9  | 359.7  | 534.4  | 490.5  | 524.1  |
| 2077.1 | 1649.7  | 741.8  | 468.5  | 410.2  | 498.4  | 266.6  | 259.6  | 291.8  |
| 225.4  | 212.3   | 186.2  | 283.0  | 232.1  | 248.8  | 135.4  | 134.5  | 159.1  |
| 276.3  | 314.1   | 285.6  | 303.8  | 254.1  | 263.8  | 143.2  | 146.2  | 166.4  |
| 479.6  | 748.8   | 654.9  | 293.1  | 335.4  | 324.1  | 205.4  | 261.7  | 248.5  |
| 568.7  | 845.0   | 795.2  | 142.3  | 143.0  | 155.0  | 64.9   | 108.0  | 95.1   |
| 120.9  | 264.2   | 220.4  | 96.9   | 78.9   | 75.1   | 87.3   | 101.6  | 105.1  |
| 33.4   | 77.8    | 68.8   | 19.1   | 19.3   | 24.5   | 17.3   | 25.1   | 18.9   |
| 54.7   | 110.9   | 110.9  | 58.0   | 68.3   | 81.2   | 75.0   | 62.5   | 68.3   |
| 2.8    | 3.5     | 0.9    | 4.0    | 5.5    | 19.7   | 2.6    | 4.6    | 4.0    |
| 1.9    | 3.7     | 2.2    | 9.7    | 9.0    | 4.9    | 3.3    | 0.8    | 5.8    |
| 12.6   | 12.5    | 9.2    | 27.1   | 16.6   | 37.9   | 14.6   | 13.4   | 13.1   |
| 2854.4 | 3424.2  | 2052.0 | 842.1  | 621.6  | 578.0  | 995.9  | 780.7  | 945.6  |
| 166.4  | 226.1   | 186.7  | 222.2  | 224.4  | 205.0  | 141.1  | 107.2  | 150.7  |
| 5102.9 | 3253.3  | 1272.7 | 436.7  | 372.0  | 425.1  | 294.6  | 331.3  | 354.8  |
| 3006.1 | 1828.8  | 652.8  | 174.7  | 172.1  | 169.2  | 91.8   | 100.8  | 116.1  |
| 1386.7 | 1378.4  | 878.4  | 397.6  | 283.1  | 351.2  | 209.3  | 201.7  | 236.0  |
| 1261.2 | 1575.9  | 1287.7 | 479.4  | 346.0  | 387.5  | 326.5  | 252.5  | 293.6  |
| 31.3   | 110.4   | 92.1   | 72.7   | 61.2   | 76.2   | 55.1   | 84.1   | 59.2   |
| 5365.4 | 5533.6  | 4059.8 | 2256.2 | 1827.3 | 1951.0 | 2336.3 | 2142.6 | 2290.0 |
| 104.3  | 108.7   | 82.9   | 16.2   | 18.7   | 8.1    | 9.4    | 5.0    | 3.9    |
| 956.7  | 1162.4  | 969.8  | 772.2  | 616.2  | 635.3  | 456.1  | 392.8  | 456.2  |
| 136.2  | 172.6   | 142.1  | 307.7  | 265.7  | 365.5  | 155.5  | 167.0  | 186.0  |
| 2285.3 | 2125.6  | 1482.1 | 364.4  | 321.1  | 328.4  | 253.2  | 272.5  | 286.9  |
| 2068.9 | 2202.4  | 1367.5 | 893.3  | 758.0  | 789.6  | 600.3  | 499.8  | 581.7  |
| 246.7  | 301.5   | 209.8  | 306.2  | 208.1  | 226.8  | 186.6  | 179.6  | 197.4  |
| 761.0  | 813.7   | 591.7  | 331.5  | 265.2  | 287.7  | 194.1  | 179.7  | 206.2  |
| 127.7  | 131.4   | 100.0  | 165.4  | 130.3  | 157.7  | 80.5   | 73.5   | 88.9   |
| 169.9  | 188.2   | 122.6  | 184.5  | 143.8  | 179.1  | 113.0  | 127.3  | 140.7  |
| 260.0  | 354.0   | 256.6  | 466.2  | 423.0  | 492.7  | 330.7  | 418.1  | 424.7  |
| 53.9   | 60.6    | 50.4   | 55.1   | 39.1   | 51.3   | 71.1   | 66.4   | 63.8   |
| 12.6   | 9.4     | 2.4    | 21.9   | 15.5   | 20.2   | 3.1    | 7.9    | 4.8    |
| 11.4   | 9.7     | 5.4    | 8.5    | 11.9   | 9.3    | 6.3    | 9.0    | 9.5    |
| 139.3  | 213.4   | 256.3  | 51.9   | 61.0   | 66.2   | 58.8   | 122.7  | 77.6   |
| 304.4  | 429.5   | 552.5  | 118.2  | 141.5  | 169.1  | 106.3  | 196.1  | 158.4  |
| 260.1  | 293.0   | 226.0  | 326.6  | 299.4  | 298.9  | 188.9  | 198.8  | 244.3  |
| 4393.3 | 4723.4  | 2785.5 | 1650.9 | 1155.0 | 1145.0 | 1429.4 | 1125.1 | 1236.9 |
| 609.1  | 674.0   | 317.8  | 505.6  | 370.2  | 378.2  | 273.2  | 203.5  | 249.1  |
| 103.6  | 145.1   | 91.6   | 186.9  | 138.3  | 158.9  | 121.3  | 108.9  | 121.8  |
| 345.6  | 241.7   | 115.8  | 250.9  | 225.8  | 195.8  | 275.7  | 283.2  | 303.7  |
| 3.9    | 7.0     | 4.9    | 16.4   | 11.1   | 16.2   | 9.6    | 9.8    | 8.8    |
| 31.5   | 28.2    | 17.4   | 68.5   | 54.1   | 64.4   | 49.7   | 57.4   | 53.0   |
| 347.7  | 436.2   | 313.1  | 258.4  | 248.5  | 296.5  | 171.0  | 174.1  | 187.9  |
| 1304.5 | 1461.2  | 934.4  | 632.9  | 447.3  | 524.4  | 443.8  | 427.7  | 462.0  |

|        |        |        |        |        |        |        |        |        |
|--------|--------|--------|--------|--------|--------|--------|--------|--------|
| 5653.1 | 6431.6 | 5916.4 | 6973.5 | 5894.6 | 6356.7 | 3596.4 | 3396.8 | 4041.1 |
| 239.6  | 185.4  | 97.7   | 93.6   | 63.9   | 77.7   | 51.1   | 35.9   | 50.9   |
| 92.9   | 89.9   | 66.7   | 90.0   | 79.5   | 68.2   | 43.6   | 37.6   | 38.8   |
| 32.0   | 33.1   | 57.3   | 33.4   | 35.6   | 26.4   | 23.0   | 24.8   | 12.8   |
| 250.8  | 344.7  | 250.9  | 498.5  | 467.9  | 498.5  | 267.9  | 285.3  | 342.8  |
| 446.1  | 546.7  | 420.1  | 305.6  | 263.7  | 305.4  | 213.2  | 257.7  | 279.9  |
| 4138.4 | 4871.4 | 3591.7 | 2550.6 | 2489.6 | 2452.2 | 3299.5 | 3347.9 | 3638.4 |
| 1734.4 | 2326.7 | 1795.5 | 1246.0 | 924.4  | 986.2  | 775.4  | 650.3  | 675.7  |
| 1301.3 | 1327.2 | 654.8  | 627.4  | 449.3  | 492.4  | 363.1  | 293.1  | 333.0  |
| 65.0   | 81.6   | 47.4   | 29.8   | 17.6   | 31.5   | 16.5   | 16.3   | 28.4   |
| 79.7   | 130.7  | 114.4  | 171.1  | 244.7  | 275.1  | 87.7   | 172.0  | 151.2  |
| 55.8   | 58.2   | 31.7   | 145.9  | 118.0  | 134.3  | 112.7  | 112.2  | 109.1  |
| 472.0  | 622.2  | 489.4  | 288.9  | 291.0  | 315.2  | 200.7  | 238.3  | 228.2  |
| 126.9  | 128.0  | 103.1  | 12.5   | 13.7   | 8.2    | 10.0   | 5.3    | 14.6   |
| 748.0  | 1164.2 | 1128.4 | 595.4  | 495.8  | 574.0  | 429.7  | 371.6  | 457.7  |
| 323.3  | 424.5  | 287.3  | 1020.5 | 809.4  | 890.7  | 530.4  | 515.5  | 605.6  |
| 25.4   | 42.9   | 39.0   | 76.4   | 65.1   | 73.4   | 50.5   | 42.9   | 55.3   |
| 272.7  | 343.2  | 150.5  | 379.6  | 304.8  | 329.0  | 264.4  | 277.1  | 317.9  |
| 177.4  | 166.8  | 123.2  | 238.2  | 217.6  | 200.4  | 136.1  | 116.0  | 148.3  |
| 436.9  | 509.8  | 374.4  | 320.1  | 273.6  | 303.7  | 335.9  | 357.2  | 365.6  |
| 522.6  | 865.5  | 651.0  | 827.9  | 754.2  | 832.6  | 541.3  | 628.9  | 626.0  |
| 329.2  | 399.0  | 263.7  | 307.2  | 282.6  | 281.8  | 235.7  | 241.8  | 267.0  |
| 1792.9 | 2094.1 | 1567.0 | 1451.4 | 1198.8 | 1288.9 | 959.4  | 1117.9 | 1210.9 |
| 866.8  | 1307.9 | 981.6  | 222.4  | 187.4  | 221.0  | 241.0  | 163.5  | 200.5  |
| 1707.3 | 2300.0 | 1826.3 | 587.1  | 399.6  | 455.3  | 526.1  | 404.4  | 460.8  |
| 8.9    | 4.3    | 6.2    | 19.4   | 5.0    | 15.7   | 7.8    | 13.5   | 3.6    |
| 39.4   | 54.8   | 36.7   | 29.7   | 40.0   | 42.1   | 19.1   | 35.8   | 30.9   |
| 307.4  | 278.1  | 231.5  | 332.3  | 284.2  | 356.5  | 162.2  | 236.7  | 199.7  |
| 299.0  | 413.9  | 275.9  | 339.1  | 193.3  | 174.8  | 155.4  | 74.6   | 110.2  |
| 2727.5 | 3503.3 | 2823.9 | 310.0  | 283.8  | 307.9  | 383.2  | 371.3  | 396.8  |
| 1.4    | 2.2    | 1.3    | 19.4   | 10.4   | 20.9   | 3.9    | 8.9    | 9.3    |
| 16.1   | 23.8   | 8.2    | 179.8  | 176.6  | 177.0  | 117.2  | 139.1  | 131.7  |
| 419.8  | 818.3  | 799.2  | 192.3  | 162.1  | 154.9  | 269.1  | 273.1  | 304.2  |
| 693.2  | 1410.8 | 1362.6 | 329.5  | 278.2  | 301.3  | 499.9  | 559.0  | 651.4  |
| 33.8   | 62.0   | 58.5   | 396.1  | 367.7  | 409.9  | 249.2  | 327.1  | 322.8  |
| 744.5  | 928.2  | 861.2  | 300.9  | 207.8  | 254.3  | 222.0  | 188.2  | 211.6  |
| 157.7  | 246.3  | 183.6  | 51.6   | 36.8   | 57.4   | 31.4   | 35.1   | 47.4   |
| 603.6  | 786.8  | 546.9  | 485.2  | 312.5  | 334.7  | 290.8  | 137.8  | 230.7  |
| 2163.5 | 2652.2 | 1803.7 | 805.9  | 589.7  | 726.6  | 597.8  | 459.3  | 555.4  |
| 2015.5 | 2784.9 | 1684.3 | 1224.3 | 905.1  | 954.8  | 560.4  | 495.0  | 604.0  |
| 302.9  | 439.7  | 425.3  | 547.6  | 451.6  | 514.4  | 429.9  | 439.0  | 485.8  |
| 126.1  | 196.7  | 172.6  | 244.6  | 224.6  | 209.4  | 258.3  | 284.1  | 301.0  |
| 784.8  | 983.5  | 611.1  | 379.0  | 329.9  | 377.7  | 257.0  | 239.5  | 310.9  |
| 15.2   | 18.0   | 10.1   | 532.4  | 540.4  | 600.3  | 336.4  | 421.3  | 465.3  |
| 7.1    | 7.2    | 6.3    | 98.6   | 101.3  | 123.2  | 113.6  | 146.6  | 143.2  |
| 140.8  | 246.3  | 286.2  | 1038.3 | 946.4  | 1028.7 | 969.4  | 940.7  | 1073.2 |
| 117.4  | 123.9  | 111.2  | 120.0  | 86.9   | 96.0   | 118.2  | 106.8  | 139.5  |
| 599.2  | 898.8  | 758.1  | 247.2  | 228.2  | 233.5  | 276.0  | 324.0  | 352.0  |
| 4.7    | 0.8    | 4.9    | 13.7   | 6.3    | 9.2    | 2.9    | 6.6    | 4.9    |
| 12.1   | 2.4    | 15.1   | 18.1   | 27.0   | 32.6   | 18.7   | 7.0    | 4.1    |
| 108.7  | 164.5  | 183.2  | 159.0  | 170.5  | 211.5  | 125.3  | 176.0  | 166.3  |
| 1090.3 | 1241.4 | 1003.0 | 602.3  | 420.7  | 441.8  | 473.7  | 382.3  | 410.2  |
| 183.2  | 254.1  | 213.7  | 164.2  | 147.5  | 176.7  | 110.1  | 117.8  | 95.6   |

|        |        |        |        |        |        |        |        |        |
|--------|--------|--------|--------|--------|--------|--------|--------|--------|
| 24.1   | 44.8   | 45.1   | 13.4   | 25.6   | 29.3   | 10.8   | 18.5   | 21.6   |
| 671.7  | 1163.4 | 1121.0 | 289.7  | 233.2  | 295.7  | 234.0  | 262.9  | 256.1  |
| 1212.9 | 1117.0 | 739.9  | 1014.0 | 849.8  | 969.4  | 567.8  | 572.4  | 627.8  |
| 834.5  | 980.2  | 608.0  | 495.3  | 331.2  | 320.9  | 451.3  | 254.9  | 364.8  |
| 3.8    | 19.7   | 8.9    | 10.9   | 7.2    | 6.9    | 8.6    | 5.4    | 9.9    |
| 89.4   | 69.4   | 39.4   | 139.8  | 140.6  | 154.2  | 59.7   | 75.1   | 90.4   |
| 690.8  | 936.6  | 628.8  | 713.0  | 599.4  | 685.7  | 354.2  | 387.8  | 424.0  |
| 483.4  | 580.9  | 439.5  | 310.3  | 240.4  | 281.6  | 142.0  | 134.4  | 158.4  |
| 226.8  | 361.6  | 311.8  | 28.6   | 21.1   | 26.1   | 21.0   | 19.1   | 18.6   |
| 220.6  | 310.8  | 277.7  | 12.8   | 9.8    | 15.9   | 10.0   | 10.8   | 14.3   |
| 142.6  | 247.1  | 250.1  | 407.3  | 286.0  | 283.8  | 322.8  | 327.0  | 289.4  |
| 760.6  | 814.4  | 675.8  | 157.9  | 149.6  | 174.8  | 99.0   | 134.9  | 121.2  |
| 646.0  | 730.4  | 613.9  | 470.2  | 400.3  | 400.0  | 442.3  | 472.0  | 444.6  |
| 57.8   | 73.7   | 56.2   | 48.9   | 57.2   | 53.4   | 30.0   | 31.2   | 31.4   |
| 7.1    | 2.7    | 2.4    | 4.8    | 3.4    | 4.1    | 2.0    | 2.4    | 1.4    |
| 32.4   | 28.5   | 19.6   | 24.7   | 17.1   | 21.4   | 15.8   | 14.3   | 16.3   |
| 267.8  | 322.7  | 267.1  | 255.7  | 211.2  | 279.9  | 174.5  | 215.8  | 196.5  |
| 3.2    | 5.3    | 8.2    | 4.0    | 3.0    | 3.8    | 3.2    | 4.9    | 3.1    |
| 220.5  | 299.0  | 434.5  | 2130.6 | 2469.7 | 2394.9 | 2096.7 | 3413.7 | 2991.0 |
| 114.1  | 176.1  | 198.0  | 1133.1 | 1307.3 | 1412.2 | 1448.5 | 2154.2 | 1826.7 |
| 302.9  | 413.3  | 260.0  | 325.0  | 368.0  | 440.8  | 168.4  | 246.7  | 236.5  |
| 484.4  | 791.7  | 810.7  | 474.3  | 533.4  | 611.6  | 244.8  | 416.3  | 331.6  |
| 69.0   | 83.6   | 52.9   | 39.5   | 25.2   | 40.2   | 61.1   | 65.9   | 70.6   |
| 174.8  | 182.5  | 141.1  | 290.9  | 238.9  | 259.5  | 156.2  | 178.6  | 194.9  |
| 107.4  | 127.8  | 104.9  | 191.4  | 169.9  | 175.2  | 108.9  | 111.1  | 118.6  |
| 964.0  | 1068.2 | 632.1  | 865.5  | 711.2  | 714.5  | 601.0  | 640.0  | 665.5  |
| 791.6  | 922.7  | 758.9  | 399.3  | 289.8  | 347.3  | 295.7  | 294.7  | 308.3  |
| 1657.1 | 2155.5 | 1554.1 | 406.2  | 367.3  | 375.0  | 429.8  | 437.6  | 463.5  |
| 2448.8 | 2425.6 | 1360.8 | 1555.8 | 1027.6 | 1241.7 | 1157.5 | 685.9  | 892.6  |
| 80.9   | 84.7   | 74.8   | 987.2  | 631.8  | 695.9  | 773.1  | 727.8  | 678.8  |
| 244.8  | 251.3  | 231.7  | 126.7  | 130.7  | 159.3  | 125.9  | 145.7  | 174.1  |
| 162.3  | 225.8  | 152.4  | 138.1  | 156.9  | 182.0  | 99.7   | 148.8  | 107.7  |
| 569.1  | 934.8  | 992.7  | 293.0  | 245.0  | 232.5  | 240.2  | 273.4  | 274.0  |
| 269.0  | 464.3  | 427.7  | 122.1  | 97.2   | 120.0  | 101.8  | 132.8  | 137.8  |
| 782.6  | 1118.7 | 877.0  | 243.7  | 281.8  | 230.4  | 139.9  | 159.4  | 216.6  |
| 1504.4 | 2306.0 | 1725.8 | 167.8  | 107.1  | 129.3  | 146.8  | 113.6  | 144.5  |
| 163.8  | 170.9  | 101.7  | 69.4   | 47.6   | 64.9   | 85.3   | 70.6   | 70.3   |
| 295.6  | 278.4  | 242.1  | 334.3  | 267.6  | 319.6  | 170.6  | 177.7  | 206.5  |
| 150.3  | 156.3  | 106.8  | 159.5  | 122.0  | 154.3  | 74.3   | 58.4   | 79.6   |
| 1800.8 | 2368.0 | 1909.3 | 1143.0 | 752.7  | 1008.9 | 665.5  | 537.8  | 661.6  |
| 103.5  | 119.5  | 117.0  | 143.2  | 132.2  | 163.4  | 72.8   | 79.5   | 111.1  |
| 35.9   | 74.3   | 59.0   | 39.4   | 35.9   | 45.5   | 24.5   | 27.2   | 24.3   |
| 214.9  | 381.9  | 236.2  | 46.2   | 43.3   | 55.7   | 84.3   | 84.8   | 83.6   |
| 685.5  | 599.7  | 308.9  | 52.3   | 40.9   | 39.4   | 22.6   | 27.2   | 30.7   |
| 402.2  | 470.6  | 301.2  | 393.7  | 297.1  | 374.0  | 204.5  | 256.9  | 254.0  |
| 10.4   | 18.6   | 35.4   | 31.5   | 20.0   | 12.9   | 17.0   | 23.6   | 14.9   |
| 643.9  | 760.5  | 632.3  | 351.3  | 276.1  | 299.6  | 298.6  | 325.8  | 353.8  |
| 740.4  | 809.3  | 633.9  | 466.0  | 361.3  | 397.3  | 402.6  | 418.1  | 470.6  |
| 609.5  | 737.9  | 445.5  | 417.3  | 327.0  | 339.5  | 253.9  | 199.3  | 236.2  |
| 250.9  | 249.5  | 83.7   | 103.0  | 59.8   | 66.5   | 52.1   | 30.5   | 37.0   |
| 5.7    | 15.7   | 8.5    | 11.1   | 12.8   | 16.2   | 5.6    | 3.1    | 10.3   |
| 188.9  | 203.5  | 152.9  | 307.0  | 238.1  | 311.5  | 156.2  | 156.6  | 187.9  |
| 365.3  | 366.3  | 200.4  | 369.0  | 304.8  | 322.6  | 209.3  | 224.9  | 217.9  |

|        |        |        |        |        |        |        |        |        |
|--------|--------|--------|--------|--------|--------|--------|--------|--------|
| 5.8    | 9.8    | 1.7    | 18.0   | 24.1   | 23.2   | 16.3   | 19.9   | 16.4   |
| 1141.8 | 828.6  | 380.6  | 204.0  | 169.8  | 192.2  | 138.2  | 132.4  | 140.6  |
| 433.7  | 263.5  | 152.3  | 67.3   | 56.3   | 73.5   | 62.5   | 50.0   | 63.0   |
| 545.0  | 547.6  | 301.7  | 770.8  | 650.1  | 684.0  | 491.2  | 489.6  | 577.1  |
| 111.4  | 187.4  | 214.8  | 80.4   | 82.5   | 113.2  | 66.2   | 87.9   | 74.0   |
| 313.2  | 341.0  | 361.4  | 358.0  | 330.0  | 373.1  | 198.5  | 180.1  | 185.5  |
| 332.8  | 451.8  | 342.4  | 470.6  | 415.3  | 506.8  | 172.0  | 187.4  | 225.8  |
| 1530.5 | 1726.3 | 1139.3 | 1332.6 | 1025.7 | 1152.8 | 699.1  | 598.8  | 722.6  |
| 867.9  | 1032.2 | 859.1  | 361.7  | 295.3  | 301.2  | 248.8  | 239.1  | 272.8  |
| 60.1   | 104.2  | 97.1   | 310.8  | 283.9  | 336.2  | 177.8  | 199.8  | 218.7  |
| 191.4  | 284.5  | 194.5  | 51.0   | 59.9   | 60.3   | 46.3   | 67.0   | 42.7   |
| 368.3  | 396.5  | 288.5  | 455.7  | 421.2  | 458.1  | 370.0  | 364.6  | 409.4  |
| 41.2   | 44.7   | 27.5   | 89.8   | 90.0   | 93.4   | 43.7   | 46.2   | 51.6   |
| 464.1  | 550.4  | 453.7  | 465.6  | 393.8  | 455.4  | 583.7  | 588.8  | 585.5  |
| 518.4  | 660.4  | 447.6  | 284.2  | 235.2  | 255.8  | 392.2  | 307.8  | 409.1  |
| 200.7  | 209.8  | 128.3  | 116.3  | 99.4   | 119.3  | 110.4  | 88.2   | 111.2  |
| 233.9  | 223.0  | 155.0  | 256.7  | 203.3  | 213.2  | 155.5  | 142.4  | 166.9  |
| 294.9  | 266.6  | 170.4  | 215.0  | 152.5  | 158.2  | 180.6  | 237.3  | 218.6  |
| 62.2   | 82.8   | 81.7   | 20.6   | 25.4   | 32.1   | 31.7   | 28.5   | 29.5   |
| 264.9  | 425.4  | 481.4  | 460.6  | 349.5  | 424.3  | 228.8  | 238.7  | 243.3  |
| 654.3  | 795.1  | 437.2  | 175.6  | 168.1  | 119.1  | 292.4  | 242.7  | 308.7  |
| 4138.6 | 4135.7 | 2623.9 | 1948.9 | 1451.5 | 1526.7 | 1270.4 | 1051.4 | 1292.1 |
| 700.4  | 722.6  | 428.5  | 1139.6 | 994.8  | 1132.4 | 763.0  | 785.3  | 870.8  |
| 1144.4 | 1182.3 | 1227.5 | 742.8  | 672.8  | 770.5  | 640.2  | 797.8  | 816.8  |
| 87.7   | 75.8   | 64.6   | 9.5    | 5.7    | 6.7    | 2.5    | 8.3    | 6.5    |
| 64.1   | 69.6   | 51.3   | 6.9    | 4.8    | 6.8    | 2.9    | 3.1    | 2.4    |
| 1589.3 | 1796.3 | 1406.6 | 480.6  | 404.5  | 419.2  | 415.4  | 435.3  | 475.9  |
| 456.3  | 710.0  | 486.7  | 215.4  | 182.5  | 201.9  | 136.5  | 134.0  | 138.9  |
| 8202.4 | 7951.0 | 6480.4 | 72.9   | 75.1   | 68.3   | 42.3   | 54.1   | 70.4   |
| 326.0  | 519.1  | 591.2  | 132.0  | 135.6  | 146.9  | 128.4  | 166.0  | 149.2  |
| 1.6    | 3.3    | 7.2    | 65.3   | 57.4   | 86.7   | 83.7   | 104.9  | 116.1  |
| 172.7  | 263.7  | 181.9  | 13.7   | 19.6   | 27.3   | 18.7   | 15.7   | 13.2   |
| 110.8  | 128.9  | 98.0   | 48.4   | 48.8   | 48.8   | 34.8   | 27.3   | 37.2   |
| 2469.1 | 2713.4 | 1639.0 | 1523.6 | 1066.2 | 1199.5 | 793.2  | 600.5  | 768.1  |
| 43.2   | 64.4   | 71.1   | 85.9   | 87.8   | 124.1  | 55.6   | 78.6   | 81.9   |
| 400.1  | 671.1  | 553.1  | 207.3  | 232.4  | 257.7  | 127.0  | 168.7  | 173.7  |
| 902.0  | 1211.7 | 982.6  | 728.5  | 604.0  | 619.7  | 460.2  | 451.7  | 518.4  |
| 173.3  | 237.8  | 157.3  | 206.2  | 158.6  | 170.1  | 64.6   | 54.4   | 68.4   |
| 191.5  | 218.6  | 169.2  | 186.1  | 165.0  | 209.5  | 97.6   | 104.8  | 98.9   |
| 731.4  | 886.3  | 349.4  | 277.6  | 243.7  | 245.9  | 216.7  | 270.6  | 256.6  |
| 217.7  | 218.9  | 80.5   | 42.6   | 42.4   | 37.6   | 44.8   | 47.0   | 48.5   |
| 340.7  | 424.2  | 340.0  | 440.4  | 373.8  | 349.8  | 167.6  | 259.5  | 233.9  |
| 630.5  | 864.8  | 694.8  | 1018.4 | 695.5  | 968.4  | 457.7  | 708.8  | 645.6  |
| 956.5  | 1171.0 | 1058.8 | 587.8  | 470.0  | 551.8  | 391.5  | 436.4  | 456.2  |
| 186.7  | 320.4  | 234.0  | 802.4  | 502.7  | 544.4  | 313.2  | 246.5  | 282.8  |
| 120.5  | 163.7  | 124.5  | 126.1  | 93.0   | 87.0   | 79.0   | 68.9   | 78.6   |
| 125.1  | 194.1  | 145.7  | 197.6  | 136.0  | 194.3  | 78.5   | 67.4   | 103.1  |
| 2304.4 | 2643.4 | 1951.4 | 511.3  | 466.6  | 464.6  | 519.9  | 549.6  | 619.9  |
| 87.9   | 109.3  | 74.0   | 11.0   | 15.1   | 10.0   | 11.6   | 10.6   | 27.1   |
| 800.7  | 939.2  | 619.9  | 475.2  | 373.3  | 421.8  | 251.8  | 261.5  | 313.6  |
| 1724.3 | 1986.8 | 1390.0 | 443.9  | 365.0  | 373.2  | 446.3  | 396.7  | 487.6  |
| 1871.5 | 2060.0 | 1264.7 | 630.7  | 410.9  | 416.2  | 336.6  | 302.8  | 403.7  |
| 1500.7 | 1161.1 | 537.6  | 26.1   | 29.7   | 36.7   | 60.4   | 42.0   | 62.3   |

|        |        |        |        |        |        |        |        |        |
|--------|--------|--------|--------|--------|--------|--------|--------|--------|
| 3276.2 | 2520.5 | 1402.6 | 103.2  | 84.1   | 131.5  | 136.6  | 114.7  | 131.0  |
| 965.5  | 1231.5 | 919.5  | 2038.5 | 1767.9 | 1837.5 | 982.0  | 950.3  | 1108.1 |
| 2160.8 | 2136.3 | 1384.7 | 1406.6 | 951.4  | 1018.4 | 749.9  | 617.2  | 810.0  |
| 134.0  | 77.0   | 16.7   | 20.2   | 13.0   | 13.3   | 19.9   | 12.2   | 10.7   |
| 274.1  | 314.2  | 190.2  | 385.5  | 320.1  | 344.1  | 196.4  | 246.0  | 236.1  |
| 29.3   | 53.5   | 40.5   | 11.9   | 11.3   | 11.9   | 11.1   | 25.8   | 14.0   |
| 465.5  | 587.9  | 438.7  | 112.2  | 70.9   | 85.1   | 78.3   | 51.0   | 76.2   |
| 244.7  | 278.6  | 230.8  | 71.0   | 87.7   | 84.7   | 94.3   | 90.3   | 73.6   |
| 291.1  | 305.0  | 294.1  | 93.1   | 76.4   | 80.1   | 51.1   | 99.8   | 75.7   |
| 77.8   | 121.3  | 78.5   | 33.1   | 30.7   | 35.5   | 64.4   | 60.7   | 65.8   |
| 248.6  | 312.0  | 234.8  | 254.5  | 219.6  | 264.1  | 197.8  | 228.1  | 208.1  |
| 350.5  | 427.0  | 295.5  | 189.2  | 139.3  | 166.6  | 169.2  | 157.9  | 166.7  |
| 1116.5 | 1240.9 | 897.8  | 734.8  | 580.7  | 672.2  | 392.0  | 428.2  | 422.0  |
| 134.6  | 152.6  | 224.2  | 21.2   | 20.6   | 13.7   | 10.4   | 4.9    | 9.4    |
| 1163.6 | 1214.6 | 767.3  | 1061.3 | 706.1  | 812.3  | 634.2  | 354.6  | 447.3  |
| 471.8  | 491.0  | 301.2  | 302.3  | 221.1  | 274.4  | 141.1  | 117.5  | 171.5  |
| 967.4  | 1332.5 | 991.0  | 233.3  | 223.5  | 258.1  | 254.1  | 348.6  | 357.4  |
| 236.8  | 253.5  | 226.2  | 41.3   | 44.6   | 50.0   | 61.4   | 63.9   | 91.1   |
| 1760.9 | 2128.6 | 1720.1 | 477.6  | 470.1  | 563.5  | 458.9  | 641.1  | 612.7  |
| 52.1   | 69.4   | 37.8   | 52.6   | 62.2   | 61.1   | 45.8   | 35.2   | 56.3   |
| 78.3   | 80.4   | 98.8   | 108.2  | 89.7   | 124.7  | 47.6   | 50.5   | 52.1   |
| 7.6    | 14.0   | 14.1   | 9.2    | 21.2   | 11.9   | 11.7   | 11.8   | 8.2    |
| 5.3    | 12.7   | 4.1    | 19.0   | 17.0   | 14.5   | 10.6   | 11.2   | 10.5   |
| 43.6   | 15.4   | 46.8   | 12.0   | 7.0    | 11.7   | 18.9   | 29.0   | 19.4   |
| 219.7  | 241.5  | 253.6  | 100.0  | 75.9   | 97.0   | 49.8   | 62.8   | 62.0   |
| 6.3    | 10.8   | 4.6    | 19.4   | 12.4   | 31.2   | 10.7   | 7.7    | 8.8    |
| 2268.8 | 2155.6 | 1535.0 | 1118.7 | 879.3  | 841.7  | 902.7  | 732.5  | 824.6  |
| 615.8  | 619.7  | 331.4  | 384.6  | 274.3  | 287.4  | 272.4  | 225.8  | 285.4  |
| 467.6  | 468.1  | 251.6  | 72.2   | 46.9   | 62.4   | 95.4   | 64.5   | 79.3   |
| 18.5   | 12.3   | 5.3    | 39.5   | 29.5   | 10.4   | 25.3   | 3.8    | 14.1   |
| 569.0  | 549.5  | 305.2  | 173.4  | 119.4  | 133.2  | 176.1  | 133.5  | 144.9  |
| 223.9  | 813.9  | 436.6  | 235.1  | 298.8  | 351.7  | 235.3  | 220.1  | 277.0  |
| 5.2    | 3.4    | 5.1    | 4.6    | 9.3    | 7.4    | 2.9    | 4.6    | 1.8    |
| 1362.5 | 1623.5 | 1367.0 | 131.2  | 110.2  | 129.9  | 116.9  | 143.8  | 159.1  |
| 2945.5 | 3549.5 | 3425.6 | 420.7  | 353.7  | 378.9  | 436.8  | 411.4  | 534.4  |
| 501.3  | 628.5  | 509.6  | 418.1  | 379.1  | 444.3  | 272.4  | 303.2  | 332.4  |
| 725.1  | 892.6  | 552.6  | 399.8  | 293.1  | 314.5  | 331.7  | 316.7  | 335.8  |
| 190.2  | 244.0  | 189.6  | 971.4  | 869.1  | 1066.5 | 552.2  | 687.8  | 768.4  |
| 390.3  | 576.7  | 434.0  | 443.2  | 354.4  | 396.0  | 327.7  | 321.6  | 398.3  |
| 15.6   | 12.1   | 13.0   | 21.7   | 27.5   | 19.9   | 23.5   | 12.8   | 21.5   |
| 10.4   | 19.3   | 11.7   | 45.8   | 22.2   | 50.8   | 31.6   | 21.7   | 20.7   |
| 6.2    | 6.1    | 3.6    | 19.8   | 12.2   | 4.9    | 14.9   | 7.4    | 22.1   |
| 55.8   | 71.8   | 42.4   | 32.6   | 27.9   | 42.1   | 35.7   | 59.7   | 45.3   |
| 3501.3 | 3836.3 | 2104.4 | 2292.8 | 1601.6 | 1812.4 | 1585.2 | 1005.9 | 1322.4 |
| 1558.3 | 1624.5 | 1036.0 | 593.5  | 371.9  | 390.3  | 435.9  | 362.1  | 348.8  |
| 113.2  | 197.9  | 225.8  | 5.2    | 8.7    | 7.3    | 3.7    | 0.4    | 2.2    |
| 300.6  | 507.3  | 592.7  | 10.1   | 5.6    | 12.5   | 3.4    | 1.0    | 2.0    |
| 321.1  | 286.5  | 144.3  | 181.8  | 156.2  | 146.6  | 162.7  | 122.2  | 126.3  |
| 528.3  | 625.6  | 339.5  | 238.8  | 156.7  | 161.2  | 236.4  | 180.4  | 217.5  |
| 638.4  | 665.0  | 514.2  | 161.3  | 143.7  | 175.5  | 173.2  | 147.0  | 177.5  |
| 1058.1 | 1083.6 | 789.8  | 289.9  | 209.9  | 198.2  | 317.8  | 291.3  | 356.6  |
| 1675.7 | 1809.6 | 1377.3 | 1114.6 | 923.1  | 966.2  | 747.0  | 762.1  | 888.8  |
| 1629.9 | 2003.6 | 952.1  | 250.8  | 220.7  | 262.2  | 181.5  | 156.3  | 206.5  |

|        |        |        |        |        |        |        |        |        |
|--------|--------|--------|--------|--------|--------|--------|--------|--------|
| 168.3  | 236.1  | 165.0  | 315.1  | 344.5  | 408.1  | 336.8  | 350.2  | 368.1  |
| 526.3  | 616.0  | 446.5  | 3.6    | 3.8    | 3.3    | 7.0    | 6.4    | 4.9    |
| 1437.6 | 1544.0 | 493.4  | 922.7  | 570.8  | 596.6  | 622.0  | 463.5  | 553.9  |
| 362.0  | 322.2  | 84.9   | 140.9  | 115.6  | 133.0  | 100.6  | 159.4  | 130.4  |
| 122.4  | 162.7  | 130.1  | 110.2  | 93.9   | 123.0  | 72.4   | 91.0   | 72.4   |
| 78.5   | 88.7   | 63.5   | 39.2   | 48.0   | 44.5   | 24.8   | 40.8   | 34.7   |
| 942.4  | 937.1  | 610.9  | 208.1  | 162.1  | 189.3  | 142.2  | 118.9  | 127.0  |
| 527.4  | 572.5  | 358.5  | 170.5  | 133.4  | 145.9  | 70.8   | 57.9   | 77.9   |
| 7.8    | 14.9   | 3.1    | 72.3   | 46.5   | 43.5   | 156.5  | 55.0   | 87.9   |
| 2210.7 | 2273.9 | 1573.5 | 1105.5 | 895.8  | 942.2  | 1089.0 | 937.9  | 1081.8 |
| 516.6  | 460.4  | 256.7  | 598.0  | 399.6  | 457.2  | 358.7  | 325.7  | 371.2  |
| 13.2   | 12.6   | 15.9   | 17.8   | 9.9    | 9.8    | 6.0    | 6.9    | 3.7    |
| 10.7   | 16.8   | 13.5   | 22.0   | 11.2   | 23.4   | 13.1   | 11.8   | 9.9    |
| 1255.9 | 1437.6 | 1155.0 | 299.7  | 265.9  | 270.3  | 168.2  | 206.5  | 204.1  |
| 3272.2 | 3302.6 | 2639.5 | 659.8  | 543.5  | 610.1  | 432.2  | 476.6  | 504.8  |
| 100.6  | 124.9  | 91.0   | 93.8   | 67.0   | 93.0   | 65.6   | 43.3   | 67.4   |
| 218.2  | 339.1  | 248.1  | 162.8  | 127.7  | 139.9  | 119.6  | 105.3  | 132.0  |
| 132.9  | 195.9  | 230.8  | 232.3  | 187.2  | 219.2  | 137.8  | 190.4  | 191.9  |
| 570.8  | 691.1  | 490.7  | 289.8  | 242.2  | 226.0  | 197.0  | 165.4  | 213.1  |
| 50.6   | 61.5   | 19.0   | 50.2   | 32.8   | 41.9   | 13.9   | 17.1   | 6.1    |
| 720.3  | 994.6  | 724.8  | 452.1  | 417.8  | 441.8  | 270.5  | 310.8  | 325.2  |
| 3844.1 | 4174.7 | 3151.4 | 615.6  | 441.1  | 450.3  | 729.3  | 562.9  | 620.2  |
| 779.3  | 748.4  | 599.2  | 27.6   | 30.6   | 23.1   | 24.7   | 17.4   | 12.8   |
| 562.7  | 621.5  | 440.1  | 958.7  | 728.5  | 732.0  | 927.3  | 883.5  | 966.0  |
| 844.0  | 1095.6 | 710.5  | 1279.0 | 974.0  | 937.6  | 1504.8 | 1354.5 | 1506.1 |
| 1052.8 | 889.1  | 387.5  | 237.5  | 192.4  | 197.9  | 203.9  | 232.1  | 234.9  |
| 2529.8 | 3252.1 | 2088.4 | 258.5  | 238.6  | 217.8  | 212.2  | 208.1  | 300.6  |
| 3231.1 | 3917.6 | 2719.9 | 294.6  | 217.8  | 249.6  | 251.3  | 193.9  | 246.4  |
| 532.5  | 495.4  | 230.6  | 123.2  | 87.2   | 118.9  | 96.9   | 52.2   | 82.3   |
| 90.5   | 112.7  | 64.9   | 48.3   | 40.1   | 46.5   | 42.3   | 32.2   | 33.6   |
| 1948.6 | 2078.7 | 1442.8 | 1679.3 | 1326.7 | 1464.2 | 1165.6 | 1003.0 | 1162.5 |
| 22.1   | 23.2   | 22.0   | 32.1   | 27.1   | 21.7   | 11.4   | 19.6   | 13.3   |
| 2533.6 | 2885.7 | 2123.4 | 2317.4 | 2127.4 | 2164.0 | 1807.5 | 1791.1 | 1981.5 |
| 1687.2 | 2079.8 | 1559.4 | 923.7  | 687.2  | 709.7  | 451.8  | 392.0  | 436.8  |
| 177.1  | 272.4  | 209.1  | 184.6  | 153.0  | 179.9  | 177.3  | 139.4  | 158.4  |
| 97.0   | 195.6  | 179.9  | 190.2  | 151.5  | 138.5  | 87.6   | 76.5   | 107.9  |
| 241.0  | 276.5  | 176.1  | 228.4  | 166.4  | 214.5  | 125.6  | 97.9   | 114.2  |
| 679.8  | 724.0  | 402.5  | 350.9  | 277.9  | 296.7  | 304.6  | 285.1  | 314.3  |
| 15.8   | 5.9    | 15.9   | 42.9   | 40.1   | 23.1   | 11.5   | 4.6    | 15.8   |
| 11.7   | 18.8   | 27.9   | 192.0  | 161.2  | 202.5  | 179.6  | 267.2  | 248.0  |
| 1546.7 | 1972.9 | 1493.9 | 92.8   | 53.3   | 57.0   | 63.1   | 34.8   | 52.2   |
| 1143.6 | 1480.6 | 1762.0 | 389.2  | 355.5  | 427.3  | 411.0  | 434.3  | 477.0  |
| 293.0  | 484.9  | 469.2  | 617.4  | 507.7  | 583.6  | 436.5  | 479.6  | 519.9  |
| 4.6    | 1.2    | 4.4    | 8.6    | 1.8    | 9.4    | 1.2    | 3.5    | 13.3   |
| 8.0    | 14.6   | 10.0   | 21.6   | 8.6    | 24.2   | 15.8   | 8.6    | 13.7   |
| 2167.3 | 2349.9 | 1538.2 | 1847.5 | 1205.2 | 1504.5 | 1021.5 | 722.0  | 847.5  |
| 349.1  | 464.3  | 365.3  | 240.0  | 215.1  | 276.1  | 270.9  | 360.5  | 329.5  |
| 799.7  | 986.9  | 884.9  | 661.7  | 658.0  | 721.4  | 570.5  | 840.4  | 849.1  |
| 5.4    | 12.0   | 7.3    | 28.6   | 22.4   | 32.7   | 13.5   | 24.4   | 20.2   |
| 162.8  | 212.3  | 172.7  | 221.5  | 165.5  | 219.8  | 96.5   | 109.5  | 121.1  |
| 79.7   | 144.0  | 163.9  | 159.7  | 155.0  | 172.6  | 135.0  | 203.3  | 207.5  |
| 190.2  | 371.2  | 449.1  | 759.1  | 677.1  | 736.1  | 541.7  | 681.3  | 662.3  |
| 5286.9 | 5592.8 | 5069.1 | 4441.5 | 3835.6 | 4014.7 | 2528.7 | 2349.1 | 2763.8 |

|        |        |        |        |        |        |        |        |        |
|--------|--------|--------|--------|--------|--------|--------|--------|--------|
| 314.7  | 337.8  | 320.9  | 250.1  | 172.9  | 204.3  | 158.8  | 187.9  | 176.8  |
| 953.6  | 1299.5 | 994.7  | 233.2  | 206.2  | 259.5  | 131.4  | 204.8  | 180.2  |
| 273.8  | 451.4  | 388.0  | 174.3  | 175.9  | 257.1  | 106.7  | 160.7  | 132.7  |
| 11.5   | 62.2   | 61.3   | 3.1    | 3.1    | 4.7    | 1.6    | 2.1    | 2.3    |
| 16.7   | 30.9   | 40.3   | 14.6   | 5.2    | 15.6   | 4.6    | 0.9    | 6.2    |
| 250.1  | 350.3  | 291.0  | 389.7  | 494.6  | 565.3  | 241.0  | 391.6  | 423.7  |
| 179.1  | 267.9  | 194.8  | 132.7  | 129.2  | 131.8  | 116.8  | 108.3  | 129.5  |
| 210.5  | 254.0  | 154.7  | 155.4  | 112.1  | 146.2  | 121.4  | 107.9  | 122.5  |
| 99.9   | 151.4  | 107.4  | 59.3   | 37.4   | 45.0   | 61.8   | 39.2   | 57.6   |
| 224.8  | 280.4  | 182.8  | 117.3  | 95.6   | 98.9   | 111.9  | 127.3  | 150.8  |
| 21.7   | 24.7   | 26.3   | 56.5   | 51.2   | 48.7   | 65.8   | 53.5   | 61.4   |
| 18.1   | 42.6   | 61.1   | 208.3  | 147.8  | 184.1  | 263.7  | 270.2  | 290.6  |
| 144.6  | 311.9  | 337.8  | 9.9    | 11.4   | 16.8   | 11.6   | 17.3   | 22.7   |
| 3011.5 | 3376.2 | 2862.1 | 236.3  | 249.1  | 242.7  | 164.0  | 194.1  | 217.1  |
| 2103.2 | 2575.9 | 2064.9 | 503.3  | 397.6  | 425.6  | 232.1  | 291.9  | 287.3  |
| 26.8   | 31.8   | 26.9   | 3.6    | 5.4    | 2.9    | 2.9    | 7.8    | 8.8    |
| 131.8  | 185.7  | 140.5  | 77.5   | 74.5   | 68.7   | 97.7   | 65.9   | 103.8  |
| 216.8  | 308.3  | 193.1  | 72.8   | 61.7   | 52.7   | 119.2  | 104.1  | 116.1  |
| 113.0  | 144.3  | 108.3  | 131.9  | 95.6   | 99.3   | 129.0  | 137.0  | 144.1  |
| 459.6  | 581.8  | 425.2  | 847.2  | 660.9  | 669.2  | 478.7  | 558.8  | 603.7  |
| 163.5  | 195.4  | 137.2  | 691.5  | 638.4  | 710.8  | 540.5  | 614.4  | 654.4  |
| 13.9   | 10.5   | 13.1   | 842.0  | 577.0  | 637.9  | 610.4  | 480.3  | 541.3  |
| 226.8  | 256.7  | 171.4  | 223.3  | 192.6  | 176.3  | 274.6  | 223.2  | 291.9  |
| 605.8  | 716.6  | 475.9  | 1413.4 | 1064.5 | 1207.5 | 781.0  | 752.6  | 798.1  |
| 21.9   | 40.9   | 9.9    | 32.4   | 23.6   | 15.6   | 14.2   | 11.8   | 19.2   |
| 16.1   | 26.6   | 28.2   | 23.7   | 21.7   | 20.1   | 10.4   | 12.0   | 18.3   |
| 4.6    | 1.4    | 1.8    | 2.2    | 5.1    | 7.5    | 2.6    | 2.3    | 1.6    |
| 2.2    | 0.4    | 1.8    | 7.2    | 5.8    | 2.9    | 1.0    | 0.3    | 0.1    |
| 209.6  | 296.4  | 215.1  | 27.5   | 22.7   | 27.4   | 19.1   | 17.3   | 20.1   |
| 141.1  | 171.7  | 124.5  | 1694.3 | 1485.5 | 1547.4 | 785.1  | 874.4  | 1135.6 |
| 0.7    | 2.0    | 2.5    | 9.1    | 7.9    | 8.0    | 4.3    | 1.5    | 1.0    |
| 447.8  | 640.4  | 454.5  | 483.4  | 371.9  | 417.8  | 351.9  | 284.5  | 345.3  |
| 2.8    | 2.9    | 1.1    | 13.7   | 17.3   | 11.3   | 3.5    | 5.4    | 3.9    |
| 11.5   | 8.8    | 0.7    | 42.2   | 32.8   | 37.4   | 20.9   | 20.6   | 26.3   |
| 357.6  | 385.9  | 325.1  | 404.0  | 412.2  | 531.1  | 180.2  | 245.5  | 254.5  |
| 1.1    | 1.2    | 2.1    | 2.7    | 3.3    | 3.9    | 1.1    | 1.3    | 1.1    |
| 35.8   | 46.6   | 31.8   | 12.0   | 15.1   | 23.8   | 13.0   | 16.7   | 25.3   |
| 8.4    | 3.9    | 2.8    | 9.8    | 5.2    | 7.2    | 6.4    | 2.1    | 9.1    |
| 1.3    | 5.4    | 4.7    | 2.5    | 3.5    | 8.1    | 1.7    | 1.6    | 1.6    |
| 3.7    | 8.5    | 4.5    | 16.7   | 9.3    | 10.1   | 4.1    | 7.4    | 2.3    |
| 200.2  | 219.9  | 151.5  | 310.9  | 265.0  | 278.1  | 183.9  | 274.4  | 213.6  |
| 51.9   | 33.2   | 29.3   | 60.1   | 28.2   | 56.9   | 23.8   | 43.6   | 38.4   |
| 22.6   | 31.7   | 14.5   | 11.2   | 7.0    | 12.2   | 23.2   | 26.1   | 16.2   |
| 308.0  | 429.1  | 238.7  | 239.1  | 246.7  | 197.3  | 158.5  | 154.0  | 195.2  |
| 220.2  | 387.6  | 418.0  | 210.2  | 183.8  | 197.0  | 119.7  | 104.0  | 129.9  |
| 2521.7 | 2685.1 | 1865.4 | 1014.9 | 929.9  | 862.5  | 1117.9 | 1195.3 | 1291.3 |
| 1526.6 | 1509.6 | 1131.3 | 626.6  | 489.3  | 525.9  | 655.0  | 534.5  | 649.5  |
| 3.2    | 8.9    | 8.6    | 188.5  | 191.2  | 219.7  | 48.4   | 69.5   | 64.8   |
| 52.3   | 68.2   | 86.6   | 16.7   | 5.8    | 14.7   | 27.6   | 15.9   | 8.9    |
| 1601.0 | 1488.3 | 1058.6 | 294.1  | 287.5  | 287.6  | 221.2  | 246.2  | 271.5  |
| 9902.4 | 9972.4 | 9215.6 | 9946.2 | 9369.2 | 9427.9 | 6303.1 | 6278.6 | 6820.6 |
| 336.2  | 375.5  | 250.2  | 224.5  | 184.8  | 210.0  | 139.8  | 161.5  | 173.9  |
| 170.5  | 207.3  | 187.7  | 196.0  | 214.5  | 252.7  | 105.0  | 119.4  | 122.1  |



|         |         |         |         |         |         |        |        |        |
|---------|---------|---------|---------|---------|---------|--------|--------|--------|
| 73.7    | 109.8   | 55.5    | 133.7   | 63.9    | 104.5   | 101.8  | 62.4   | 77.7   |
| 153.5   | 205.8   | 133.5   | 381.8   | 243.8   | 271.0   | 197.0  | 151.0  | 167.9  |
| 72.4    | 121.9   | 64.9    | 231.4   | 137.5   | 166.7   | 156.6  | 102.5  | 124.3  |
| 39.1    | 70.9    | 34.4    | 170.0   | 103.3   | 96.4    | 143.6  | 97.2   | 113.3  |
| 26.2    | 40.0    | 18.5    | 80.2    | 62.9    | 58.7    | 45.8   | 37.6   | 45.3   |
| 436.9   | 593.5   | 588.2   | 258.2   | 281.4   | 292.0   | 172.8  | 190.2  | 215.3  |
| 1453.7  | 1721.4  | 1317.7  | 183.1   | 115.7   | 157.8   | 156.2  | 142.1  | 153.4  |
| 1616.2  | 1562.7  | 865.6   | 1629.3  | 852.4   | 878.3   | 864.8  | 447.3  | 513.5  |
| 961.5   | 971.0   | 379.0   | 379.5   | 295.5   | 282.6   | 286.0  | 196.7  | 284.9  |
| 941.7   | 1344.1  | 1206.3  | 570.1   | 522.8   | 545.8   | 503.3  | 608.1  | 632.2  |
| 525.4   | 560.5   | 321.9   | 309.9   | 251.8   | 283.5   | 185.0  | 150.4  | 176.4  |
| 232.4   | 326.9   | 253.5   | 228.6   | 223.7   | 283.7   | 130.0  | 150.8  | 167.9  |
| 89.8    | 147.4   | 110.5   | 52.7    | 47.5    | 69.3    | 131.3  | 48.1   | 108.9  |
| 2315.2  | 2794.9  | 2550.4  | 638.9   | 558.5   | 592.6   | 437.9  | 284.6  | 415.1  |
| 527.7   | 434.0   | 224.9   | 83.9    | 125.2   | 129.9   | 73.1   | 113.1  | 126.2  |
| 284.9   | 280.2   | 179.7   | 12.0    | 5.1     | 22.6    | 7.7    | 8.6    | 12.0   |
| 279.3   | 413.8   | 300.3   | 218.7   | 183.4   | 199.1   | 131.7  | 120.9  | 138.0  |
| 619.7   | 779.6   | 479.8   | 355.9   | 253.1   | 337.5   | 426.3  | 348.1  | 415.4  |
| 2040.2  | 2227.3  | 1372.4  | 2106.9  | 1431.9  | 1723.8  | 1303.8 | 1037.0 | 1285.9 |
| 11233.2 | 11990.7 | 10969.7 | 12038.9 | 11771.9 | 11602.7 | 7336.7 | 7697.9 | 8022.4 |
| 172.1   | 210.0   | 181.4   | 179.4   | 145.0   | 151.6   | 104.7  | 104.1  | 135.3  |
| 6.9     | 22.6    | 55.3    | 49.3    | 21.0    | 20.5    | 29.8   | 23.0   | 15.4   |
| 355.0   | 667.8   | 1175.0  | 555.9   | 470.4   | 527.1   | 354.0  | 377.9  | 411.0  |
| 181.4   | 216.0   | 221.0   | 1843.7  | 1545.0  | 1704.5  | 1025.2 | 1223.1 | 1141.7 |
| 1195.6  | 1485.9  | 1135.1  | 482.9   | 369.9   | 385.7   | 455.5  | 339.8  | 425.8  |
| 704.7   | 763.3   | 382.1   | 325.5   | 270.8   | 280.3   | 215.4  | 163.4  | 205.0  |
| 333.3   | 493.1   | 499.4   | 709.0   | 681.1   | 726.3   | 548.6  | 749.7  | 730.3  |
| 225.8   | 416.5   | 431.4   | 354.0   | 331.8   | 318.7   | 333.4  | 430.3  | 401.1  |
| 195.7   | 297.0   | 232.1   | 526.8   | 459.8   | 548.2   | 223.4  | 309.0  | 312.2  |
| 329.3   | 300.3   | 149.9   | 457.9   | 324.5   | 347.9   | 313.8  | 254.3  | 322.1  |
| 75.7    | 109.0   | 85.0    | 551.0   | 580.2   | 644.1   | 313.1  | 433.8  | 397.0  |
| 789.8   | 1085.3  | 629.7   | 759.1   | 398.9   | 452.9   | 382.1  | 223.0  | 282.9  |
| 200.4   | 165.0   | 124.9   | 13.2    | 16.9    | 4.9     | 6.9    | 7.2    | 5.4    |
| 639.6   | 848.5   | 730.9   | 154.1   | 121.1   | 137.3   | 162.4  | 191.5  | 177.7  |
| 1235.4  | 1819.9  | 1407.5  | 236.1   | 217.5   | 183.5   | 356.3  | 375.4  | 420.1  |
| 186.8   | 286.4   | 237.6   | 138.0   | 142.6   | 121.1   | 112.9  | 131.1  | 141.0  |
| 106.0   | 124.6   | 85.8    | 97.0    | 90.4    | 107.3   | 61.9   | 62.6   | 68.1   |
| 53.1    | 70.2    | 61.8    | 31.9    | 28.5    | 34.9    | 22.5   | 21.6   | 18.6   |
| 1044.8  | 1200.9  | 829.1   | 797.1   | 638.1   | 626.8   | 547.4  | 521.8  | 569.9  |
| 181.2   | 279.4   | 191.2   | 284.6   | 302.8   | 319.9   | 153.2  | 181.7  | 206.7  |
| 164.8   | 141.3   | 97.5    | 130.4   | 120.6   | 117.7   | 66.2   | 75.0   | 78.8   |
| 63.2    | 62.3    | 52.0    | 48.7    | 58.2    | 70.9    | 49.7   | 53.7   | 65.2   |
| 337.2   | 356.9   | 249.5   | 315.3   | 297.4   | 283.9   | 177.3  | 231.3  | 232.2  |
| 3.2     | 4.9     | 11.3    | 33.3    | 21.6    | 20.5    | 10.2   | 15.1   | 13.6   |
| 24.7    | 20.9    | 14.7    | 32.5    | 23.9    | 40.9    | 17.3   | 10.1   | 9.1    |
| 6.3     | 13.8    | 12.0    | 23.5    | 15.5    | 18.4    | 27.6   | 21.8   | 24.2   |
| 118.8   | 127.3   | 86.1    | 140.7   | 75.7    | 91.1    | 69.7   | 43.9   | 60.4   |
| 366.8   | 380.4   | 222.6   | 366.7   | 205.8   | 253.1   | 168.1  | 147.7  | 166.0  |
| 63.4    | 78.9    | 40.7    | 13.8    | 10.5    | 18.2    | 17.1   | 19.3   | 17.2   |
| 472.0   | 539.5   | 329.9   | 651.5   | 492.3   | 572.8   | 288.3  | 254.2  | 290.0  |
| 15.9    | 35.1    | 33.3    | 30.2    | 30.9    | 45.5    | 7.4    | 11.0   | 8.8    |
| 1021.1  | 960.1   | 472.0   | 202.1   | 199.7   | 204.7   | 176.7  | 223.7  | 218.9  |
| 815.2   | 1008.9  | 787.5   | 622.8   | 448.3   | 507.3   | 620.8  | 547.2  | 595.1  |

|         |         |        |         |         |         |        |        |        |
|---------|---------|--------|---------|---------|---------|--------|--------|--------|
| 175.7   | 212.7   | 133.2  | 84.6    | 102.5   | 89.3    | 59.9   | 117.4  | 99.0   |
| 3.4     | 4.1     | 2.0    | 6.1     | 2.7     | 4.5     | 1.5    | 1.2    | 1.5    |
| 1.8     | 6.4     | 2.3    | 15.6    | 5.0     | 11.5    | 2.4    | 7.7    | 3.4    |
| 3.6     | 4.1     | 1.6    | 14.5    | 20.1    | 18.0    | 3.3    | 3.4    | 5.0    |
| 372.1   | 439.1   | 423.8  | 52.6    | 39.1    | 61.2    | 47.9   | 42.4   | 47.9   |
| 714.7   | 867.2   | 652.7  | 308.4   | 238.2   | 294.8   | 207.1  | 219.5  | 220.8  |
| 36.6    | 31.7    | 27.6   | 36.0    | 27.8    | 47.3    | 35.3   | 26.1   | 31.0   |
| 808.7   | 1016.5  | 746.9  | 860.3   | 692.5   | 726.8   | 680.8  | 701.4  | 765.3  |
| 705.1   | 960.0   | 695.3  | 754.1   | 565.8   | 731.0   | 539.0  | 507.0  | 561.7  |
| 502.6   | 649.7   | 487.4  | 393.5   | 307.1   | 320.9   | 387.2  | 351.4  | 369.4  |
| 87.2    | 92.9    | 77.0   | 90.5    | 61.3    | 67.2    | 84.0   | 75.0   | 83.0   |
| 258.8   | 314.8   | 209.8  | 348.1   | 268.8   | 316.6   | 265.9  | 262.0  | 288.2  |
| 146.7   | 192.5   | 214.2  | 181.8   | 160.1   | 203.4   | 155.2  | 230.9  | 209.3  |
| 276.0   | 354.7   | 168.6  | 183.0   | 157.1   | 174.6   | 67.1   | 94.2   | 101.1  |
| 412.3   | 443.5   | 266.8  | 520.4   | 359.9   | 430.8   | 215.3  | 170.8  | 228.8  |
| 2.6     | 8.2     | 10.2   | 31.2    | 18.1    | 13.9    | 11.1   | 7.1    | 3.2    |
| 3.7     | 8.2     | 6.3    | 21.5    | 5.9     | 17.6    | 8.1    | 4.4    | 3.7    |
| 22.9    | 31.8    | 20.5   | 21.0    | 15.2    | 12.3    | 2.0    | 8.8    | 15.0   |
| 261.2   | 328.8   | 197.8  | 93.8    | 66.9    | 64.5    | 72.9   | 60.0   | 71.1   |
| 1155.6  | 1163.9  | 741.6  | 370.4   | 227.0   | 233.0   | 289.7  | 209.6  | 256.8  |
| 9.3     | 8.4     | 4.9    | 19.1    | 8.7     | 28.1    | 26.3   | 17.3   | 19.2   |
| 231.5   | 318.9   | 207.6  | 228.3   | 199.1   | 211.4   | 161.2  | 176.3  | 176.6  |
| 597.5   | 821.5   | 645.9  | 301.7   | 274.0   | 308.9   | 176.7  | 199.1  | 193.5  |
| 501.2   | 428.7   | 260.9  | 285.7   | 243.3   | 251.0   | 247.8  | 211.2  | 258.3  |
| 204.1   | 254.1   | 145.8  | 184.8   | 155.6   | 177.1   | 128.8  | 96.6   | 124.3  |
| 283.7   | 336.9   | 231.5  | 150.9   | 107.1   | 153.8   | 133.6  | 122.7  | 142.7  |
| 324.1   | 386.2   | 318.6  | 425.1   | 370.8   | 426.9   | 227.2  | 259.4  | 249.5  |
| 1243.1  | 1523.4  | 1154.5 | 442.4   | 380.0   | 437.5   | 303.0  | 357.9  | 365.3  |
| 51.3    | 64.4    | 49.5   | 79.1    | 60.2    | 87.1    | 73.1   | 77.7   | 88.0   |
| 336.8   | 410.0   | 357.2  | 333.3   | 313.9   | 356.1   | 219.7  | 305.1  | 290.1  |
| 333.9   | 380.7   | 251.1  | 269.1   | 201.2   | 209.7   | 137.2  | 111.5  | 150.4  |
| 122.8   | 134.2   | 80.1   | 91.5    | 78.8    | 77.4    | 60.1   | 59.9   | 64.5   |
| 407.4   | 497.4   | 303.1  | 159.0   | 121.0   | 136.9   | 222.9  | 206.9  | 231.2  |
| 32.8    | 29.0    | 18.9   | 9.1     | 18.0    | 19.8    | 15.6   | 7.3    | 13.0   |
| 596.7   | 783.0   | 600.1  | 284.0   | 257.6   | 239.7   | 354.5  | 349.2  | 415.2  |
| 900.4   | 1244.6  | 605.2  | 1930.1  | 1462.8  | 1609.2  | 816.4  | 731.1  | 915.1  |
| 19.2    | 24.0    | 18.2   | 22.4    | 14.2    | 9.8     | 19.0   | 11.1   | 5.6    |
| 464.2   | 502.9   | 296.8  | 353.5   | 239.0   | 283.1   | 239.5  | 217.4  | 236.9  |
| 41.7    | 63.1    | 74.7   | 53.8    | 52.7    | 58.2    | 59.6   | 88.0   | 78.6   |
| 10323.3 | 10079.6 | 9878.9 | 11461.4 | 10999.5 | 11189.3 | 7877.1 | 7309.0 | 7893.6 |
| 1083.3  | 1066.7  | 739.8  | 398.0   | 287.5   | 319.9   | 190.1  | 234.3  | 226.3  |
| 1638.2  | 1594.3  | 778.7  | 552.3   | 379.4   | 414.3   | 619.9  | 424.1  | 627.1  |
| 81.6    | 113.9   | 92.1   | 40.4    | 46.3    | 40.0    | 25.5   | 25.8   | 24.5   |
| 15.7    | 25.8    | 17.8   | 16.3    | 4.4     | 8.2     | 11.6   | 2.9    | 3.1    |
| 352.6   | 469.9   | 372.8  | 183.2   | 155.6   | 165.1   | 164.6  | 191.1  | 178.8  |
| 4329.4  | 5160.7  | 4185.9 | 6046.5  | 5310.4  | 5767.2  | 3800.2 | 3303.3 | 3663.9 |
| 300.2   | 275.1   | 171.6  | 810.6   | 618.6   | 631.9   | 296.1  | 297.0  | 367.6  |
| 187.1   | 248.7   | 177.2  | 278.5   | 295.6   | 269.7   | 167.1  | 194.8  | 227.3  |
| 260.0   | 352.2   | 293.1  | 492.8   | 427.9   | 475.1   | 292.9  | 339.3  | 349.0  |
| 99.7    | 136.6   | 123.7  | 96.0    | 77.5    | 92.8    | 57.4   | 90.4   | 74.1   |
| 155.4   | 121.9   | 144.2  | 116.5   | 113.4   | 154.9   | 80.1   | 78.3   | 99.2   |
| 480.7   | 474.8   | 162.7  | 726.1   | 502.0   | 555.1   | 402.1  | 286.6  | 368.0  |
| 332.5   | 386.2   | 300.7  | 157.7   | 131.3   | 139.5   | 106.4  | 118.9  | 106.9  |

|        |        |        |        |        |        |        |       |        |
|--------|--------|--------|--------|--------|--------|--------|-------|--------|
| 192.3  | 180.3  | 133.5  | 170.3  | 155.1  | 158.7  | 72.4   | 122.2 | 85.6   |
| 225.5  | 312.8  | 254.9  | 128.1  | 96.8   | 104.2  | 138.1  | 130.8 | 133.6  |
| 281.9  | 411.6  | 336.2  | 209.0  | 166.9  | 166.2  | 171.6  | 147.8 | 179.0  |
| 180.6  | 279.6  | 183.0  | 144.4  | 109.5  | 122.2  | 96.6   | 98.2  | 99.9   |
| 2201.9 | 3502.8 | 3204.0 | 1062.7 | 659.0  | 783.7  | 462.7  | 387.7 | 438.7  |
| 204.3  | 230.5  | 164.0  | 292.3  | 237.9  | 249.9  | 219.5  | 214.4 | 264.9  |
| 110.0  | 170.3  | 122.2  | 240.8  | 238.1  | 242.1  | 151.5  | 208.2 | 185.8  |
| 1.3    | 3.0    | 0.9    | 3.1    | 4.1    | 2.4    | 2.0    | 1.9   | 2.0    |
| 14.8   | 16.3   | 10.5   | 26.7   | 21.7   | 39.2   | 17.2   | 16.0  | 18.2   |
| 2.7    | 9.1    | 2.2    | 7.9    | 7.6    | 15.3   | 6.0    | 3.2   | 7.4    |
| 2795.6 | 3373.5 | 2258.4 | 336.9  | 238.5  | 227.7  | 372.1  | 360.0 | 398.3  |
| 4327.5 | 4664.7 | 3485.3 | 1373.3 | 1197.7 | 1273.7 | 1017.9 | 933.0 | 1362.5 |
| 137.4  | 132.9  | 114.6  | 98.7   | 101.7  | 96.9   | 81.3   | 44.0  | 103.2  |
| 191.6  | 230.9  | 142.0  | 170.2  | 138.0  | 164.6  | 84.6   | 80.1  | 88.9   |
| 353.9  | 544.7  | 466.0  | 1536.7 | 1368.7 | 1604.6 | 823.9  | 876.1 | 993.5  |
| 796.1  | 980.7  | 611.3  | 508.7  | 377.2  | 391.4  | 360.0  | 286.6 | 311.1  |
| 2936.5 | 3127.5 | 2043.5 | 940.2  | 528.4  | 609.2  | 734.3  | 515.0 | 622.3  |
| 25.3   | 45.1   | 57.1   | 31.2   | 30.9   | 36.0   | 43.5   | 41.7  | 46.1   |
| 88.5   | 153.7  | 117.2  | 116.9  | 92.9   | 90.2   | 67.2   | 97.6  | 80.0   |
| 256.6  | 286.0  | 245.7  | 42.8   | 37.7   | 39.1   | 60.4   | 58.5  | 51.2   |
| 868.6  | 1144.8 | 1045.7 | 417.6  | 354.7  | 446.2  | 238.8  | 281.8 | 313.1  |
| 85.2   | 90.0   | 83.2   | 201.5  | 160.0  | 191.1  | 141.7  | 156.7 | 165.9  |
| 70.7   | 6.1    | 57.3   | 158.9  | 133.9  | 114.3  | 85.9   | 64.6  | 99.1   |
| 758.4  | 807.3  | 551.2  | 762.6  | 380.7  | 452.8  | 375.8  | 215.7 | 265.2  |
| 8.6    | 11.6   | 17.3   | 68.9   | 63.6   | 68.8   | 41.2   | 44.0  | 46.3   |
| 46.8   | 63.6   | 27.0   | 61.8   | 39.9   | 45.0   | 58.6   | 34.0  | 63.2   |
| 110.7  | 128.5  | 92.8   | 143.8  | 93.9   | 98.3   | 92.9   | 73.4  | 98.2   |
| 188.5  | 180.0  | 110.6  | 299.4  | 253.5  | 314.4  | 162.0  | 194.3 | 179.9  |
| 566.2  | 686.0  | 436.6  | 550.4  | 443.0  | 470.5  | 272.0  | 185.3 | 256.5  |
| 26.6   | 28.2   | 12.3   | 64.5   | 48.6   | 45.3   | 26.6   | 23.9  | 32.4   |
| 892.3  | 1063.1 | 784.5  | 519.8  | 432.0  | 464.5  | 235.7  | 262.1 | 276.6  |
| 6.4    | 47.5   | 106.1  | 5.0    | 2.9    | 2.8    | 5.5    | 3.2   | 3.7    |
| 307.1  | 429.4  | 328.6  | 558.2  | 498.5  | 541.8  | 310.1  | 283.2 | 333.5  |
| 172.7  | 269.4  | 233.6  | 186.5  | 164.8  | 179.2  | 90.8   | 113.3 | 102.2  |
| 1524.3 | 1602.3 | 1152.5 | 253.8  | 218.0  | 226.3  | 211.7  | 231.3 | 223.8  |
| 128.7  | 139.3  | 89.4   | 130.6  | 112.0  | 137.0  | 105.5  | 91.0  | 133.3  |
| 122.3  | 111.7  | 70.3   | 78.1   | 69.0   | 70.8   | 81.0   | 70.5  | 70.7   |
| 292.4  | 252.6  | 160.5  | 360.0  | 329.0  | 362.5  | 209.4  | 196.7 | 240.2  |
| 169.1  | 212.2  | 146.7  | 229.6  | 196.9  | 208.3  | 111.1  | 118.4 | 139.3  |
| 1.5    | 1.9    | 1.5    | 8.2    | 3.8    | 2.7    | 2.2    | 0.9   | 2.8    |
| 235.1  | 305.1  | 176.9  | 268.5  | 174.7  | 196.5  | 131.5  | 109.7 | 122.3  |
| 82.1   | 112.5  | 74.9   | 70.5   | 49.3   | 59.9   | 48.9   | 38.6  | 38.0   |
| 758.7  | 879.7  | 651.6  | 121.2  | 128.9  | 127.5  | 95.0   | 130.3 | 121.4  |
| 509.5  | 641.3  | 470.6  | 104.1  | 105.1  | 102.0  | 97.4   | 131.3 | 122.1  |
| 535.5  | 638.4  | 529.4  | 602.5  | 527.7  | 565.9  | 410.5  | 435.2 | 458.5  |
| 143.1  | 242.6  | 193.3  | 13.2   | 11.7   | 6.9    | 3.5    | 6.6   | 4.8    |
| 54.9   | 74.0   | 67.1   | 36.9   | 51.6   | 55.0   | 39.7   | 44.4  | 41.4   |
| 115.4  | 166.6  | 123.6  | 86.6   | 79.9   | 104.9  | 57.4   | 73.9  | 70.0   |
| 16.6   | 16.1   | 12.1   | 20.1   | 22.8   | 19.9   | 21.0   | 17.1  | 18.0   |
| 139.7  | 176.9  | 124.1  | 332.3  | 282.4  | 315.9  | 134.0  | 154.3 | 158.1  |
| 128.8  | 133.0  | 56.8   | 111.4  | 63.0   | 55.7   | 84.6   | 64.2  | 55.6   |
| 3.6    | 13.4   | 11.4   | 35.8   | 36.3   | 40.3   | 26.4   | 28.6  | 35.7   |
| 52.0   | 69.1   | 55.7   | 158.7  | 150.1  | 155.6  | 54.3   | 58.3  | 72.6   |

|         |         |         |        |        |        |        |        |        |
|---------|---------|---------|--------|--------|--------|--------|--------|--------|
| 401.7   | 605.5   | 401.9   | 276.3  | 250.7  | 263.4  | 135.5  | 160.4  | 181.2  |
| 497.9   | 574.9   | 269.2   | 283.0  | 228.1  | 227.0  | 193.8  | 170.8  | 185.7  |
| 719.2   | 802.1   | 426.9   | 487.5  | 348.6  | 346.4  | 369.2  | 330.9  | 369.1  |
| 17.0    | 28.8    | 32.2    | 1.8    | 3.3    | 10.9   | 4.2    | 3.4    | 5.9    |
| 152.7   | 230.9   | 205.0   | 254.7  | 247.1  | 254.2  | 170.5  | 171.2  | 211.9  |
| 1.3     | 1.2     | 1.9     | 42.7   | 17.5   | 34.3   | 33.9   | 44.4   | 26.9   |
| 121.4   | 156.9   | 108.9   | 334.3  | 316.9  | 307.4  | 108.0  | 127.1  | 132.0  |
| 435.1   | 570.4   | 448.0   | 736.9  | 637.1  | 679.9  | 563.2  | 627.7  | 683.5  |
| 64.4    | 104.3   | 67.7    | 161.1  | 149.8  | 167.9  | 68.6   | 59.3   | 59.6   |
| 2.4     | 5.8     | 8.3     | 19.9   | 12.8   | 23.1   | 7.6    | 13.5   | 8.9    |
| 12.2    | 7.9     | 7.4     | 231.6  | 208.3  | 239.3  | 94.7   | 142.3  | 138.2  |
| 12685.4 | 12260.2 | 11556.2 | 130.7  | 127.0  | 103.1  | 151.9  | 119.6  | 155.7  |
| 62.5    | 74.4    | 81.7    | 48.8   | 36.7   | 57.9   | 37.1   | 41.8   | 54.3   |
| 146.1   | 236.7   | 218.2   | 155.7  | 122.1  | 130.5  | 122.6  | 110.7  | 126.9  |
| 761.5   | 1025.6  | 680.3   | 1624.4 | 1213.4 | 1311.7 | 1204.0 | 960.9  | 1196.6 |
| 1000.4  | 1411.5  | 1015.2  | 4330.8 | 3395.6 | 3461.4 | 2256.8 | 1848.5 | 2397.4 |
| 5.9     | 1.1     | 2.0     | 9.5    | 2.1    | 2.6    | 2.0    | 2.0    | 1.7    |
| 169.4   | 174.1   | 122.1   | 199.8  | 181.1  | 199.6  | 91.0   | 99.5   | 106.9  |
| 79.4    | 101.7   | 72.7    | 109.9  | 80.0   | 108.7  | 68.9   | 56.1   | 79.6   |
| 313.1   | 331.5   | 224.8   | 165.3  | 128.6  | 138.2  | 178.4  | 152.8  | 164.1  |
| 189.6   | 233.8   | 151.1   | 114.9  | 89.5   | 89.7   | 63.6   | 62.4   | 68.7   |
| 429.6   | 412.2   | 376.0   | 68.3   | 29.7   | 46.3   | 45.3   | 31.2   | 29.3   |
| 301.1   | 417.8   | 279.1   | 169.3  | 147.9  | 164.5  | 84.5   | 107.4  | 105.9  |
| 237.0   | 315.6   | 165.1   | 134.8  | 131.5  | 141.2  | 148.5  | 128.0  | 182.1  |
| 424.5   | 419.7   | 207.7   | 85.8   | 74.1   | 89.9   | 85.4   | 78.8   | 88.5   |
| 1169.2  | 1261.8  | 701.2   | 439.7  | 345.8  | 383.3  | 269.2  | 262.5  | 310.0  |
| 333.6   | 371.4   | 243.4   | 207.1  | 174.8  | 162.6  | 153.0  | 118.0  | 165.2  |
| 1037.9  | 820.3   | 493.4   | 337.3  | 297.3  | 323.7  | 207.4  | 216.7  | 255.0  |
| 1493.1  | 1233.3  | 733.1   | 349.9  | 298.4  | 279.7  | 399.3  | 375.4  | 432.1  |
| 142.0   | 167.1   | 158.4   | 137.3  | 113.1  | 159.0  | 87.6   | 89.1   | 116.1  |
| 126.8   | 158.9   | 133.8   | 211.6  | 207.1  | 212.8  | 113.4  | 123.8  | 145.4  |
| 246.6   | 305.2   | 308.2   | 123.5  | 117.1  | 136.7  | 63.2   | 75.1   | 72.1   |
| 552.7   | 671.9   | 389.4   | 655.1  | 526.5  | 582.1  | 552.7  | 491.3  | 550.8  |
| 748.4   | 978.2   | 573.7   | 1380.3 | 1045.4 | 1194.1 | 752.2  | 720.3  | 826.5  |
| 1018.2  | 1058.7  | 526.5   | 548.4  | 249.4  | 269.0  | 337.7  | 169.1  | 215.3  |
| 596.6   | 553.6   | 267.0   | 272.6  | 133.7  | 150.0  | 185.2  | 80.3   | 109.2  |
| 1262.7  | 1231.1  | 847.6   | 258.7  | 210.5  | 219.5  | 198.6  | 191.7  | 204.9  |
| 330.2   | 352.9   | 228.5   | 95.9   | 75.4   | 89.3   | 58.9   | 48.7   | 69.6   |
| 2717.5  | 2856.3  | 1768.3  | 2097.7 | 1269.3 | 1359.7 | 1072.9 | 678.3  | 790.9  |
| 1425.9  | 1495.2  | 853.2   | 552.4  | 322.0  | 364.7  | 453.4  | 259.7  | 302.5  |
| 151.1   | 241.3   | 198.2   | 97.1   | 86.1   | 105.0  | 85.0   | 118.2  | 139.1  |
| 403.2   | 620.2   | 521.6   | 593.4  | 520.1  | 523.1  | 610.5  | 737.1  | 745.3  |
| 72.9    | 62.6    | 90.5    | 73.8   | 59.4   | 71.6   | 47.4   | 38.0   | 58.4   |
| 883.6   | 982.4   | 543.1   | 685.3  | 401.6  | 420.4  | 467.6  | 300.0  | 399.5  |
| 877.3   | 1243.6  | 944.3   | 927.2  | 828.1  | 942.2  | 299.6  | 300.3  | 360.2  |
| 24.1    | 33.9    | 24.8    | 54.2   | 53.3   | 56.7   | 107.5  | 102.0  | 89.1   |
| 52.1    | 99.1    | 78.7    | 522.3  | 395.8  | 422.4  | 387.2  | 549.4  | 442.0  |
| 13.7    | 32.3    | 25.3    | 128.9  | 105.4  | 117.3  | 172.3  | 208.5  | 184.4  |
| 94.7    | 114.7   | 79.4    | 65.1   | 50.4   | 56.2   | 95.9   | 113.0  | 109.0  |
| 1682.2  | 2551.9  | 2123.8  | 353.1  | 384.7  | 380.0  | 258.7  | 281.2  | 300.2  |
| 1622.1  | 2205.2  | 1734.7  | 325.1  | 265.4  | 276.6  | 171.2  | 176.8  | 181.2  |
| 450.7   | 557.7   | 508.0   | 194.1  | 238.9  | 261.9  | 145.9  | 194.1  | 182.8  |
| 566.7   | 778.9   | 653.8   | 249.8  | 287.3  | 302.6  | 203.0  | 288.8  | 288.2  |

|        |        |       |        |        |        |       |       |       |
|--------|--------|-------|--------|--------|--------|-------|-------|-------|
| 597.2  | 647.9  | 507.3 | 813.8  | 590.8  | 621.2  | 373.4 | 271.5 | 348.2 |
| 375.5  | 393.7  | 286.5 | 272.9  | 271.5  | 307.0  | 186.3 | 191.7 | 198.6 |
| 262.1  | 273.9  | 151.6 | 155.2  | 149.4  | 180.7  | 114.4 | 117.9 | 126.1 |
| 145.5  | 210.2  | 208.1 | 90.6   | 98.7   | 118.6  | 74.3  | 116.9 | 96.2  |
| 338.5  | 492.9  | 507.0 | 133.1  | 129.9  | 146.1  | 140.6 | 220.8 | 185.9 |
| 167.2  | 171.3  | 190.0 | 126.7  | 137.3  | 114.2  | 62.2  | 67.2  | 65.5  |
| 154.6  | 109.1  | 42.5  | 63.9   | 43.3   | 43.7   | 34.8  | 31.8  | 37.8  |
| 262.9  | 334.0  | 220.9 | 154.8  | 99.0   | 105.3  | 106.1 | 59.7  | 83.0  |
| 223.2  | 287.6  | 166.3 | 18.5   | 15.9   | 13.1   | 5.8   | 3.7   | 4.5   |
| 15.7   | 22.3   | 17.4  | 13.6   | 13.1   | 13.6   | 15.1  | 4.6   | 16.1  |
| 56.2   | 71.9   | 54.6  | 416.6  | 458.1  | 498.8  | 204.5 | 268.1 | 292.0 |
| 276.9  | 320.4  | 232.9 | 188.6  | 181.3  | 205.0  | 139.1 | 142.3 | 150.2 |
| 3.5    | 4.3    | 8.8   | 16.2   | 10.7   | 10.8   | 13.9  | 11.9  | 9.3   |
| 177.3  | 266.4  | 205.1 | 201.9  | 148.5  | 153.1  | 116.8 | 111.2 | 106.6 |
| 203.3  | 245.7  | 187.2 | 102.5  | 103.8  | 105.4  | 131.9 | 151.4 | 141.6 |
| 571.4  | 752.3  | 627.2 | 831.8  | 592.6  | 737.9  | 443.1 | 546.5 | 538.9 |
| 276.4  | 435.7  | 499.2 | 221.2  | 167.8  | 190.4  | 161.1 | 181.0 | 207.2 |
| 89.9   | 159.6  | 155.6 | 250.7  | 241.6  | 251.7  | 179.0 | 197.3 | 205.7 |
| 266.0  | 350.0  | 228.6 | 242.6  | 255.7  | 243.4  | 183.0 | 189.5 | 187.5 |
| 360.0  | 471.3  | 397.6 | 833.7  | 865.4  | 752.6  | 750.3 | 961.4 | 900.6 |
| 229.9  | 261.7  | 187.5 | 170.2  | 165.0  | 194.4  | 255.5 | 317.3 | 218.3 |
| 69.0   | 84.2   | 72.1  | 54.7   | 69.5   | 80.6   | 26.0  | 55.4  | 65.0  |
| 662.4  | 796.3  | 558.4 | 388.1  | 322.5  | 359.4  | 340.9 | 355.3 | 378.1 |
| 598.0  | 787.0  | 536.3 | 493.5  | 455.9  | 505.3  | 394.7 | 418.2 | 465.0 |
| 760.2  | 929.1  | 744.2 | 252.4  | 201.8  | 204.6  | 223.6 | 267.1 | 284.6 |
| 128.9  | 165.8  | 159.8 | 109.5  | 93.8   | 113.8  | 58.1  | 76.1  | 76.7  |
| 191.7  | 247.7  | 141.4 | 246.0  | 152.3  | 172.1  | 129.8 | 111.1 | 136.6 |
| 3.0    | 5.8    | 3.3   | 273.1  | 186.1  | 271.8  | 236.7 | 238.0 | 272.1 |
| 471.4  | 819.4  | 686.8 | 206.2  | 170.8  | 199.9  | 112.7 | 125.1 | 136.0 |
| 383.7  | 439.4  | 223.4 | 556.9  | 404.4  | 484.5  | 307.7 | 295.5 | 370.0 |
| 1070.3 | 1225.3 | 843.3 | 1275.4 | 1106.2 | 1214.4 | 653.8 | 612.4 | 730.9 |
| 67.9   | 74.4   | 57.4  | 76.7   | 69.0   | 61.0   | 48.5  | 38.9  | 59.4  |
| 1387.6 | 1324.5 | 826.3 | 645.4  | 524.3  | 552.3  | 380.4 | 370.2 | 386.5 |
| 580.7  | 701.6  | 521.4 | 693.4  | 516.7  | 581.8  | 294.8 | 293.6 | 313.5 |
| 100.0  | 117.5  | 91.3  | 93.7   | 103.2  | 89.7   | 85.4  | 84.6  | 97.2  |
| 95.8   | 119.9  | 73.3  | 112.5  | 79.9   | 99.8   | 55.7  | 62.1  | 69.0  |
| 197.1  | 237.8  | 150.9 | 138.5  | 109.9  | 121.3  | 131.2 | 118.1 | 135.2 |
| 324.9  | 339.9  | 242.3 | 313.1  | 264.0  | 293.2  | 187.7 | 191.8 | 213.3 |
| 325.5  | 382.0  | 296.0 | 84.4   | 83.8   | 92.7   | 103.5 | 122.3 | 129.3 |
| 164.5  | 241.5  | 172.3 | 127.9  | 119.8  | 159.7  | 100.3 | 103.0 | 109.5 |
| 779.3  | 801.3  | 564.1 | 581.1  | 499.6  | 494.6  | 402.1 | 433.2 | 467.1 |
| 494.8  | 537.1  | 276.2 | 361.6  | 230.1  | 261.0  | 122.5 | 71.6  | 99.3  |
| 76.2   | 115.1  | 105.7 | 108.9  | 117.3  | 94.4   | 31.6  | 66.0  | 58.8  |
| 309.1  | 417.0  | 244.6 | 124.5  | 98.5   | 118.5  | 103.5 | 84.2  | 86.8  |
| 187.2  | 232.5  | 145.0 | 114.8  | 94.4   | 109.4  | 98.1  | 81.5  | 96.7  |
| 897.5  | 1209.4 | 866.9 | 643.6  | 579.0  | 653.4  | 407.4 | 447.1 | 479.8 |
| 298.5  | 436.3  | 295.1 | 153.5  | 135.7  | 160.6  | 149.8 | 214.9 | 200.0 |
| 1047.3 | 1591.8 | 725.3 | 297.4  | 222.3  | 181.2  | 326.4 | 175.2 | 218.4 |
| 251.2  | 359.7  | 249.9 | 431.6  | 348.8  | 372.6  | 185.6 | 210.0 | 213.9 |
| 96.8   | 157.6  | 125.7 | 78.0   | 81.1   | 79.8   | 73.3  | 72.6  | 91.1  |
| 175.9  | 153.0  | 126.5 | 106.8  | 99.3   | 98.0   | 64.3  | 77.1  | 82.2  |
| 51.6   | 83.8   | 57.2  | 92.5   | 69.9   | 95.0   | 55.9  | 74.4  | 68.2  |
| 42.8   | 69.1   | 80.0  | 6.7    | 4.0    | 5.4    | 4.4   | 5.4   | 13.4  |

|        |        |        |        |        |        |        |        |        |
|--------|--------|--------|--------|--------|--------|--------|--------|--------|
| 450.5  | 527.4  | 409.2  | 157.9  | 131.6  | 129.9  | 106.5  | 100.9  | 124.6  |
| 169.7  | 240.7  | 228.7  | 44.4   | 38.4   | 25.3   | 52.6   | 32.7   | 45.6   |
| 374.7  | 516.8  | 422.1  | 97.0   | 85.6   | 93.0   | 100.0  | 93.9   | 115.6  |
| 149.1  | 189.6  | 170.5  | 43.1   | 34.6   | 34.8   | 30.1   | 27.3   | 40.6   |
| 686.7  | 1036.5 | 751.5  | 489.4  | 405.0  | 491.6  | 313.6  | 415.2  | 372.3  |
| 1726.6 | 1951.0 | 1453.7 | 413.0  | 281.2  | 318.9  | 203.3  | 151.4  | 188.6  |
| 106.0  | 123.7  | 99.9   | 133.4  | 146.3  | 176.4  | 73.7   | 108.2  | 104.4  |
| 77.4   | 97.9   | 65.5   | 116.8  | 85.1   | 111.1  | 85.2   | 73.4   | 78.4   |
| 4.8    | 2.9    | 0.7    | 6.5    | 2.8    | 3.0    | 2.0    | 2.2    | 1.6    |
| 266.9  | 390.3  | 306.3  | 336.8  | 291.3  | 306.1  | 236.2  | 219.3  | 254.8  |
| 110.9  | 198.5  | 177.7  | 170.0  | 166.0  | 174.6  | 88.8   | 115.2  | 133.4  |
| 383.4  | 433.6  | 279.3  | 164.3  | 152.5  | 181.8  | 247.0  | 155.4  | 231.0  |
| 216.8  | 294.4  | 177.0  | 91.6   | 73.7   | 94.5   | 133.2  | 121.2  | 103.9  |
| 7.9    | 4.1    | 7.6    | 30.6   | 15.9   | 23.3   | 11.0   | 11.8   | 2.4    |
| 2.4    | 4.3    | 1.5    | 2.1    | 8.4    | 8.2    | 3.9    | 6.3    | 2.8    |
| 107.2  | 138.9  | 121.0  | 676.5  | 579.1  | 606.6  | 378.8  | 388.3  | 382.7  |
| 85.6   | 128.2  | 94.4   | 268.7  | 223.8  | 260.6  | 136.9  | 134.2  | 133.9  |
| 22.4   | 18.6   | 11.7   | 34.7   | 11.6   | 19.3   | 12.2   | 9.3    | 13.4   |
| 66.8   | 65.6   | 48.5   | 179.0  | 128.3  | 138.1  | 76.0   | 64.0   | 64.4   |
| 277.9  | 260.4  | 179.1  | 196.8  | 171.6  | 202.9  | 168.8  | 159.3  | 173.8  |
| 1169.8 | 1256.1 | 837.1  | 491.1  | 281.5  | 256.2  | 375.4  | 242.5  | 258.7  |
| 998.4  | 1146.8 | 1113.5 | 154.9  | 128.5  | 128.7  | 101.0  | 84.5   | 104.7  |
| 3176.0 | 4697.9 | 4520.3 | 2267.3 | 2154.4 | 2240.6 | 1596.9 | 1782.3 | 1918.5 |
| 9.4    | 12.4   | 11.0   | 9.1    | 14.7   | 6.4    | 4.5    | 8.5    | 12.5   |
| 520.1  | 693.5  | 594.4  | 918.1  | 887.7  | 942.9  | 1033.0 | 1210.0 | 1166.0 |
| 81.1   | 99.7   | 73.9   | 89.9   | 65.1   | 79.4   | 42.2   | 46.4   | 38.7   |
| 112.1  | 155.8  | 151.7  | 145.2  | 144.2  | 157.9  | 70.3   | 88.1   | 96.4   |
| 37.6   | 73.1   | 69.2   | 81.3   | 68.1   | 91.9   | 43.0   | 50.4   | 60.1   |
| 527.3  | 747.5  | 690.3  | 400.6  | 398.9  | 342.4  | 440.8  | 544.7  | 573.8  |
| 581.8  | 708.4  | 374.7  | 307.7  | 254.3  | 259.9  | 453.6  | 444.8  | 498.0  |
| 1162.2 | 1191.1 | 879.8  | 974.4  | 727.8  | 869.7  | 591.7  | 553.4  | 655.1  |
| 1389.5 | 1696.6 | 1314.1 | 489.5  | 430.0  | 435.0  | 478.7  | 593.5  | 549.7  |
| 292.7  | 374.2  | 233.6  | 343.4  | 303.8  | 345.3  | 210.5  | 212.4  | 230.1  |
| 374.3  | 500.0  | 414.5  | 672.8  | 557.2  | 615.6  | 383.6  | 419.7  | 456.7  |
| 6113.1 | 6379.4 | 4727.7 | 4911.4 | 4169.0 | 4033.6 | 3732.4 | 3437.2 | 3884.8 |
| 168.9  | 187.1  | 148.3  | 99.6   | 111.5  | 101.7  | 51.4   | 68.0   | 75.9   |
| 722.6  | 893.0  | 702.1  | 397.5  | 389.1  | 412.3  | 208.9  | 243.5  | 257.2  |
| 824.3  | 1039.2 | 820.3  | 393.6  | 331.2  | 404.0  | 241.5  | 242.9  | 277.2  |
| 209.2  | 216.8  | 102.8  | 44.4   | 29.4   | 30.9   | 18.3   | 19.6   | 23.4   |
| 468.5  | 618.4  | 401.7  | 450.6  | 333.2  | 350.3  | 312.2  | 284.4  | 332.3  |
| 344.2  | 417.4  | 322.6  | 430.4  | 321.7  | 406.0  | 251.4  | 231.5  | 286.1  |
| 83.0   | 117.4  | 149.7  | 11.6   | 21.5   | 26.1   | 12.0   | 12.5   | 12.2   |
| 185.2  | 254.5  | 296.0  | 18.5   | 18.7   | 15.6   | 7.0    | 14.4   | 10.9   |
| 5.4    | 4.9    | 2.6    | 5.3    | 7.4    | 11.9   | 10.7   | 6.1    | 11.2   |
| 3.9    | 5.9    | 4.0    | 10.3   | 13.6   | 11.7   | 3.3    | 2.5    | 4.8    |
| 540.4  | 601.2  | 375.1  | 444.4  | 365.2  | 383.4  | 307.8  | 324.1  | 343.9  |
| 446.1  | 429.0  | 288.7  | 278.9  | 214.6  | 248.9  | 247.4  | 192.9  | 232.2  |
| 42.1   | 46.0   | 77.5   | 10.7   | 15.4   | 13.5   | 9.6    | 7.4    | 10.0   |
| 210.7  | 274.2  | 209.3  | 177.5  | 135.8  | 152.7  | 144.1  | 151.1  | 153.5  |
| 84.3   | 79.3   | 74.9   | 5.9    | 2.7    | 3.7    | 2.0    | 2.4    | 1.5    |
| 243.9  | 273.5  | 243.9  | 26.6   | 26.6   | 31.3   | 33.1   | 40.3   | 36.0   |
| 295.4  | 389.2  | 364.8  | 502.8  | 551.4  | 540.3  | 537.6  | 822.3  | 760.5  |
| 205.8  | 241.8  | 182.3  | 139.0  | 120.4  | 141.1  | 91.3   | 100.1  | 99.3   |

|        |        |        |        |        |        |        |        |        |
|--------|--------|--------|--------|--------|--------|--------|--------|--------|
| 218.1  | 346.4  | 327.2  | 520.4  | 514.4  | 577.2  | 454.5  | 665.0  | 631.4  |
| 499.8  | 552.9  | 390.0  | 513.0  | 364.7  | 374.5  | 293.6  | 252.5  | 309.2  |
| 125.3  | 131.8  | 139.3  | 300.9  | 279.1  | 330.3  | 231.8  | 202.7  | 266.7  |
| 643.2  | 779.8  | 583.7  | 972.6  | 723.4  | 731.5  | 848.8  | 724.7  | 827.0  |
| 248.9  | 320.0  | 232.9  | 33.6   | 35.9   | 34.7   | 19.2   | 26.3   | 30.4   |
| 287.6  | 395.2  | 321.7  | 96.9   | 85.3   | 73.9   | 66.9   | 67.1   | 62.0   |
| 964.0  | 994.3  | 588.7  | 342.8  | 271.7  | 275.7  | 256.2  | 268.1  | 258.3  |
| 694.2  | 859.3  | 605.6  | 730.9  | 543.0  | 688.2  | 276.9  | 265.8  | 286.6  |
| 1591.0 | 1509.8 | 1295.6 | 568.4  | 432.8  | 484.6  | 516.1  | 499.9  | 513.0  |
| 1389.3 | 1329.5 | 746.1  | 959.7  | 569.8  | 622.9  | 544.2  | 441.4  | 540.9  |
| 675.3  | 654.2  | 418.8  | 687.9  | 496.4  | 531.7  | 263.7  | 241.4  | 265.6  |
| 267.7  | 291.8  | 183.4  | 268.2  | 214.3  | 202.2  | 194.4  | 154.5  | 198.4  |
| 324.1  | 348.9  | 223.4  | 134.0  | 87.6   | 109.8  | 143.7  | 116.9  | 119.5  |
| 828.8  | 843.4  | 59.3   | 32.4   | 25.2   | 21.7   | 27.2   | 9.5    | 14.4   |
| 943.4  | 1243.5 | 54.9   | 61.2   | 16.2   | 24.8   | 43.8   | 21.3   | 20.1   |
| 416.1  | 539.2  | 449.6  | 766.0  | 646.1  | 692.1  | 749.8  | 709.9  | 800.7  |
| 995.9  | 984.3  | 788.3  | 682.2  | 586.5  | 596.1  | 438.7  | 455.2  | 484.5  |
| 86.5   | 93.1   | 75.4   | 76.7   | 87.8   | 99.1   | 73.5   | 76.7   | 81.8   |
| 293.5  | 295.1  | 209.4  | 466.2  | 346.2  | 403.1  | 298.8  | 283.2  | 330.2  |
| 107.5  | 81.5   | 46.3   | 79.3   | 75.6   | 83.1   | 65.4   | 73.5   | 84.3   |
| 171.7  | 101.4  | 69.2   | 167.4  | 151.2  | 172.7  | 78.8   | 108.1  | 107.6  |
| 280.9  | 345.3  | 296.9  | 511.1  | 421.7  | 437.9  | 512.0  | 547.1  | 579.9  |
| 236.0  | 275.8  | 232.7  | 250.6  | 218.5  | 281.7  | 295.6  | 268.5  | 261.6  |
| 701.5  | 804.5  | 419.3  | 525.5  | 288.1  | 315.1  | 451.9  | 314.8  | 350.8  |
| 1377.8 | 1502.0 | 1074.6 | 493.0  | 359.9  | 392.6  | 380.1  | 284.8  | 344.0  |
| 1021.0 | 1201.0 | 844.1  | 374.7  | 287.4  | 286.0  | 242.2  | 212.9  | 255.0  |
| 176.3  | 182.7  | 143.7  | 133.0  | 101.6  | 105.9  | 63.6   | 72.6   | 60.5   |
| 3416.0 | 3325.4 | 1596.5 | 699.4  | 403.6  | 365.7  | 985.8  | 528.5  | 631.9  |
| 290.7  | 336.1  | 257.5  | 245.8  | 238.6  | 244.1  | 261.6  | 232.8  | 274.8  |
| 299.3  | 369.4  | 296.9  | 278.2  | 263.4  | 309.8  | 162.6  | 224.2  | 199.7  |
| 65.3   | 81.5   | 45.6   | 223.2  | 168.1  | 204.4  | 73.7   | 85.7   | 99.1   |
| 122.6  | 161.6  | 111.1  | 211.9  | 147.2  | 144.2  | 136.9  | 132.6  | 152.6  |
| 256.9  | 290.7  | 197.7  | 1928.4 | 1703.7 | 1888.1 | 1242.3 | 1555.0 | 1454.9 |
| 67.5   | 93.2   | 73.3   | 54.4   | 42.5   | 43.9   | 26.0   | 41.7   | 36.6   |
| 48.8   | 38.3   | 48.4   | 15.5   | 12.8   | 31.8   | 28.1   | 19.1   | 20.1   |
| 219.7  | 177.6  | 134.9  | 164.5  | 114.2  | 126.8  | 67.8   | 66.6   | 93.2   |
| 1955.3 | 2350.0 | 1810.4 | 976.8  | 803.3  | 909.2  | 419.4  | 437.4  | 480.1  |
| 10.1   | 2.3    | 7.0    | 90.2   | 111.7  | 137.3  | 85.1   | 155.1  | 130.7  |
| 15.0   | 15.3   | 9.7    | 232.8  | 292.4  | 298.5  | 186.7  | 375.6  | 339.0  |
| 714.7  | 967.5  | 596.9  | 164.0  | 140.1  | 124.3  | 107.9  | 139.3  | 115.9  |
| 960.1  | 1116.7 | 752.9  | 144.4  | 125.2  | 138.2  | 88.7   | 108.5  | 111.1  |
| 277.2  | 379.4  | 329.9  | 377.4  | 369.3  | 416.5  | 247.5  | 295.5  | 278.4  |
| 88.1   | 116.2  | 76.1   | 57.9   | 50.1   | 47.4   | 85.7   | 96.4   | 94.5   |
| 155.5  | 209.1  | 156.5  | 148.4  | 139.9  | 137.8  | 114.7  | 146.0  | 161.4  |
| 292.6  | 340.3  | 248.0  | 248.3  | 197.1  | 215.1  | 135.8  | 133.4  | 157.2  |
| 728.7  | 872.7  | 642.4  | 817.5  | 730.8  | 743.3  | 503.0  | 490.0  | 598.6  |
| 6.2    | 9.2    | 9.8    | 14.9   | 18.4   | 15.7   | 6.0    | 12.9   | 6.7    |
| 2.9    | 3.4    | 2.8    | 2.4    | 1.8    | 4.2    | 2.1    | 1.8    | 2.8    |
| 162.7  | 182.6  | 158.2  | 253.8  | 202.9  | 269.5  | 187.4  | 226.9  | 225.6  |
| 98.8   | 125.0  | 116.1  | 192.4  | 171.2  | 208.6  | 126.0  | 176.7  | 164.7  |
| 88.4   | 119.2  | 93.5   | 35.0   | 54.7   | 49.3   | 43.6   | 31.3   | 47.6   |
| 765.6  | 913.3  | 406.3  | 324.6  | 243.2  | 326.3  | 218.2  | 223.6  | 204.7  |
| 736.0  | 815.5  | 412.6  | 225.3  | 172.4  | 204.7  | 208.0  | 201.9  | 201.7  |

|        |        |        |        |        |        |        |        |        |
|--------|--------|--------|--------|--------|--------|--------|--------|--------|
| 61.8   | 101.6  | 86.3   | 100.2  | 71.9   | 74.3   | 40.6   | 56.9   | 64.8   |
| 84.0   | 127.0  | 78.0   | 57.9   | 54.2   | 60.8   | 46.6   | 31.3   | 35.8   |
| 302.3  | 325.4  | 241.3  | 111.9  | 103.8  | 112.7  | 67.9   | 67.5   | 84.6   |
| 312.1  | 548.6  | 411.4  | 624.1  | 530.1  | 638.0  | 232.0  | 294.2  | 316.6  |
| 1966.0 | 2604.7 | 1916.5 | 1375.2 | 1051.4 | 1254.9 | 1037.3 | 911.8  | 1130.7 |
| 1.5    | 6.0    | 2.8    | 4.3    | 5.1    | 6.0    | 0.9    | 1.6    | 1.0    |
| 331.2  | 176.9  | 55.9   | 314.4  | 315.2  | 395.0  | 267.1  | 346.8  | 384.0  |
| 337.0  | 223.2  | 64.3   | 264.7  | 263.3  | 252.1  | 329.6  | 391.1  | 406.3  |
| 5207.6 | 5319.2 | 4057.5 | 2414.6 | 2060.8 | 2063.1 | 2248.2 | 2254.1 | 2545.5 |
| 1988.4 | 2452.2 | 1991.7 | 1505.5 | 1205.5 | 1360.3 | 1461.2 | 1429.1 | 1583.5 |
| 13.1   | 11.1   | 5.9    | 14.3   | 26.5   | 13.7   | 14.5   | 12.3   | 13.7   |
| 6.6    | 8.3    | 1.5    | 6.4    | 8.2    | 15.8   | 4.0    | 10.0   | 7.4    |
| 7.3    | 5.8    | 7.5    | 8.2    | 2.5    | 6.6    | 1.3    | 0.5    | 3.1    |
| 1540.4 | 1796.1 | 1353.8 | 833.9  | 568.5  | 604.7  | 578.8  | 551.5  | 591.6  |
| 435.7  | 507.2  | 299.3  | 24.8   | 20.3   | 20.5   | 8.0    | 17.8   | 17.6   |
| 5119.1 | 5479.6 | 4427.9 | 801.0  | 658.8  | 645.0  | 788.4  | 755.1  | 845.3  |
| 0.4    | 0.5    | 0.6    | 1.8    | 9.8    | 8.9    | 1.8    | 1.8    | 2.8    |
| 2305.3 | 2148.1 | 1181.3 | 985.8  | 681.3  | 712.9  | 731.0  | 580.6  | 777.6  |
| 1183.6 | 1425.9 | 989.6  | 506.4  | 399.7  | 451.4  | 344.5  | 392.2  | 380.5  |
| 138.5  | 185.9  | 207.4  | 417.0  | 367.7  | 428.2  | 276.5  | 324.0  | 331.1  |
| 124.0  | 139.3  | 131.3  | 277.9  | 355.0  | 369.7  | 186.0  | 319.5  | 254.1  |
| 244.2  | 366.2  | 217.1  | 197.0  | 109.2  | 115.6  | 103.8  | 55.8   | 65.0   |
| 193.3  | 214.1  | 115.2  | 280.1  | 187.2  | 202.5  | 131.9  | 108.8  | 118.7  |
| 3780.7 | 3453.8 | 2695.0 | 1371.7 | 1262.0 | 1452.7 | 1088.4 | 1340.6 | 1271.8 |
| 95.4   | 107.1  | 94.8   | 210.5  | 211.6  | 223.6  | 97.2   | 110.0  | 128.8  |
| 3.3    | 5.6    | 10.8   | 31.6   | 21.5   | 35.9   | 19.2   | 14.0   | 14.6   |
| 493.0  | 442.0  | 107.9  | 611.9  | 362.1  | 370.1  | 194.0  | 158.8  | 186.4  |
| 2442.4 | 4649.5 | 4078.2 | 3758.8 | 3593.6 | 3710.3 | 2322.8 | 2231.3 | 2482.5 |
| 39.6   | 26.2   | 26.5   | 48.9   | 29.4   | 37.3   | 34.3   | 21.0   | 20.4   |
| 42.0   | 53.9   | 44.7   | 33.3   | 18.1   | 19.5   | 10.0   | 13.5   | 11.2   |
| 1069.3 | 1126.6 | 611.3  | 356.9  | 184.8  | 249.6  | 216.2  | 136.3  | 148.9  |
| 103.0  | 119.4  | 88.4   | 142.7  | 91.4   | 156.5  | 71.5   | 84.6   | 91.2   |
| 700.2  | 603.3  | 357.2  | 178.4  | 168.8  | 184.5  | 165.0  | 203.2  | 220.7  |
| 1.9    | 3.6    | 1.4    | 201.3  | 155.7  | 161.8  | 75.7   | 95.8   | 60.3   |
| 356.7  | 446.2  | 219.1  | 295.2  | 173.9  | 208.0  | 134.9  | 83.0   | 103.4  |
| 15.1   | 8.6    | 9.1    | 162.9  | 134.9  | 140.8  | 53.3   | 60.7   | 55.3   |
| 2.4    | 12.5   | 2.1    | 98.1   | 129.4  | 126.5  | 69.1   | 88.4   | 106.6  |
| 23.5   | 14.2   | 15.1   | 315.4  | 346.5  | 423.7  | 183.0  | 233.5  | 324.7  |
| 1.1    | 4.9    | 2.1    | 204.5  | 204.4  | 247.2  | 191.2  | 220.8  | 270.8  |
| 357.2  | 363.4  | 223.6  | 375.1  | 299.6  | 326.0  | 457.6  | 413.8  | 466.6  |
| 408.7  | 412.8  | 215.2  | 534.4  | 463.1  | 497.0  | 382.3  | 358.2  | 401.5  |
| 1090.5 | 999.5  | 715.9  | 602.4  | 404.0  | 439.0  | 577.3  | 511.0  | 552.4  |
| 1080.2 | 1412.3 | 1169.4 | 1063.7 | 841.5  | 938.1  | 621.3  | 568.4  | 644.5  |
| 91.2   | 126.4  | 108.8  | 204.3  | 196.9  | 229.0  | 113.7  | 136.4  | 161.1  |
| 1825.8 | 1908.7 | 937.3  | 1096.3 | 649.3  | 756.5  | 667.1  | 412.1  | 489.4  |
| 488.2  | 660.3  | 356.4  | 302.1  | 234.6  | 250.7  | 199.4  | 179.3  | 199.1  |
| 3.8    | 8.5    | 7.4    | 28.3   | 9.6    | 11.2   | 7.2    | 4.8    | 9.6    |
| 3.4    | 3.5    | 7.7    | 14.7   | 9.8    | 14.6   | 4.1    | 2.3    | 8.0    |
| 689.4  | 690.4  | 446.8  | 513.0  | 379.1  | 425.0  | 277.6  | 253.6  | 242.7  |
| 459.1  | 510.4  | 274.7  | 385.0  | 322.8  | 366.1  | 160.6  | 142.4  | 145.4  |
| 1.3    | 1.4    | 2.2    | 308.1  | 359.2  | 391.6  | 137.4  | 271.6  | 205.3  |
| 21.2   | 23.6   | 20.5   | 196.6  | 155.5  | 215.9  | 89.9   | 90.5   | 112.9  |
| 4.2    | 6.0    | 0.7    | 84.2   | 117.6  | 88.0   | 78.4   | 86.2   | 106.6  |



|        |        |        |        |        |        |        |        |        |
|--------|--------|--------|--------|--------|--------|--------|--------|--------|
| 13.6   | 12.6   | 7.9    | 55.4   | 40.6   | 45.3   | 22.6   | 24.0   | 37.0   |
| 127.6  | 174.3  | 122.5  | 57.9   | 44.3   | 47.8   | 39.7   | 48.7   | 46.2   |
| 4.3    | 2.6    | 8.1    | 12.5   | 5.4    | 9.5    | 6.9    | 6.9    | 10.6   |
| 34.0   | 57.0   | 22.1   | 16.8   | 22.7   | 13.3   | 10.8   | 11.9   | 10.1   |
| 281.3  | 420.9  | 428.5  | 664.0  | 647.8  | 793.4  | 430.0  | 709.5  | 562.8  |
| 191.9  | 295.4  | 186.1  | 169.5  | 152.9  | 158.4  | 141.0  | 150.3  | 149.2  |
| 844.8  | 1006.5 | 885.8  | 1360.9 | 983.1  | 1118.7 | 822.6  | 758.5  | 859.4  |
| 905.7  | 858.4  | 507.5  | 415.5  | 307.0  | 316.7  | 319.5  | 243.7  | 309.3  |
| 929.3  | 896.3  | 546.6  | 330.7  | 287.7  | 292.2  | 301.3  | 283.1  | 318.8  |
| 92.7   | 179.7  | 120.2  | 203.1  | 173.7  | 191.7  | 115.2  | 124.8  | 136.5  |
| 74.9   | 78.5   | 64.1   | 161.8  | 132.3  | 161.5  | 110.1  | 90.0   | 113.0  |
| 106.1  | 148.6  | 85.6   | 81.3   | 66.0   | 80.6   | 34.6   | 36.5   | 31.9   |
| 1124.8 | 1501.5 | 1584.2 | 1055.8 | 933.3  | 1077.3 | 701.3  | 607.9  | 741.7  |
| 1190.4 | 1238.3 | 760.5  | 632.5  | 460.5  | 506.9  | 271.2  | 283.7  | 318.9  |
| 7263.8 | 6131.3 | 4083.7 | 1057.1 | 1085.0 | 1114.0 | 1218.8 | 1841.9 | 1510.5 |
| 73.0   | 103.5  | 80.2   | 171.4  | 172.1  | 181.2  | 106.9  | 138.1  | 123.8  |
| 67.6   | 164.0  | 75.5   | 60.1   | 66.1   | 93.8   | 61.9   | 103.4  | 90.8   |
| 630.9  | 778.1  | 580.6  | 418.3  | 348.4  | 439.8  | 234.8  | 247.4  | 266.3  |
| 421.9  | 573.1  | 516.9  | 314.2  | 271.8  | 289.4  | 143.7  | 193.2  | 213.8  |
| 262.0  | 398.2  | 345.1  | 561.1  | 519.1  | 550.4  | 511.9  | 587.4  | 651.3  |
| 6.0    | 17.8   | 7.4    | 16.5   | 24.8   | 20.6   | 15.8   | 9.0    | 9.5    |
| 1950.1 | 2221.1 | 1175.7 | 2643.5 | 2020.2 | 2324.5 | 1546.2 | 1406.9 | 1586.6 |
| 19.1   | 25.8   | 31.7   | 80.0   | 69.1   | 69.3   | 62.3   | 61.6   | 65.0   |
| 68.3   | 78.0   | 70.2   | 175.6  | 149.6  | 185.5  | 94.2   | 91.5   | 101.8  |
| 555.3  | 540.2  | 329.4  | 493.6  | 411.2  | 373.9  | 643.9  | 440.2  | 566.5  |
| 264.9  | 380.2  | 302.1  | 156.8  | 171.0  | 194.3  | 77.3   | 113.8  | 115.8  |
| 100.2  | 221.2  | 209.7  | 176.5  | 122.7  | 142.6  | 81.5   | 95.5   | 98.4   |
| 123.1  | 153.4  | 137.4  | 87.6   | 64.4   | 86.3   | 38.8   | 46.2   | 62.8   |
| 54.6   | 107.2  | 84.7   | 48.8   | 34.9   | 53.1   | 13.2   | 26.5   | 36.2   |
| 39.7   | 23.9   | 33.1   | 24.1   | 12.6   | 18.4   | 5.8    | 5.6    | 4.3    |
| 37.9   | 39.1   | 34.3   | 19.0   | 14.9   | 20.2   | 14.8   | 18.1   | 12.8   |
| 84.2   | 44.3   | 43.7   | 1.6    | 1.2    | 1.4    | 2.0    | 1.2    | 3.1    |
| 222.3  | 155.0  | 119.8  | 36.4   | 31.7   | 28.9   | 27.7   | 21.7   | 21.6   |
| 0.8    | 5.6    | 0.7    | 48.9   | 42.6   | 34.4   | 28.1   | 30.6   | 29.8   |
| 3.5    | 3.1    | 5.1    | 12.3   | 6.5    | 18.7   | 8.9    | 6.2    | 2.3    |
| 267.0  | 404.6  | 335.2  | 1387.5 | 1296.8 | 1366.3 | 1063.4 | 1125.5 | 1223.0 |
| 3.1    | 1.2    | 3.6    | 6.3    | 4.1    | 10.0   | 7.6    | 6.9    | 4.9    |
| 2907.6 | 3699.2 | 2949.3 | 2655.0 | 2315.7 | 2380.2 | 1267.0 | 1170.6 | 1374.0 |
| 20.3   | 35.1   | 22.9   | 10.9   | 8.1    | 6.0    | 9.7    | 16.4   | 13.5   |
| 483.8  | 631.2  | 376.4  | 443.4  | 317.2  | 305.8  | 183.0  | 208.4  | 201.7  |
| 149.9  | 170.7  | 144.4  | 182.7  | 110.4  | 130.9  | 122.4  | 90.5   | 114.0  |
| 159.4  | 219.5  | 134.6  | 147.9  | 116.2  | 124.7  | 102.9  | 116.4  | 95.5   |
| 7.3    | 4.3    | 2.9    | 12.6   | 7.1    | 6.6    | 5.1    | 5.4    | 10.5   |
| 3073.6 | 3154.0 | 2219.5 | 2178.6 | 1980.1 | 2030.7 | 1809.5 | 1564.4 | 1793.8 |
| 1.3    | 0.9    | 0.9    | 8.9    | 14.6   | 3.8    | 9.6    | 10.4   | 12.3   |
| 365.2  | 456.8  | 337.9  | 276.0  | 250.8  | 224.4  | 208.2  | 187.4  | 197.5  |
| 138.6  | 187.4  | 147.8  | 138.9  | 95.6   | 103.1  | 79.6   | 80.4   | 81.3   |
| 88.9   | 86.0   | 38.2   | 173.4  | 144.0  | 164.6  | 66.8   | 64.5   | 95.5   |
| 416.0  | 522.8  | 297.8  | 719.4  | 478.2  | 560.2  | 332.3  | 225.1  | 291.8  |
| 128.6  | 147.3  | 103.8  | 10.9   | 11.0   | 6.9    | 12.8   | 25.4   | 8.2    |
| 250.5  | 401.9  | 287.4  | 76.3   | 66.9   | 57.6   | 94.9   | 88.9   | 98.4   |
| 400.3  | 571.3  | 413.4  | 275.9  | 182.9  | 209.5  | 172.0  | 209.4  | 206.0  |
| 495.4  | 716.3  | 533.8  | 218.4  | 155.0  | 148.8  | 256.6  | 256.9  | 271.8  |

|        |        |        |        |        |        |        |        |        |
|--------|--------|--------|--------|--------|--------|--------|--------|--------|
| 485.3  | 745.0  | 595.7  | 372.6  | 290.2  | 313.3  | 270.7  | 276.0  | 274.5  |
| 37.3   | 54.5   | 41.1   | 46.1   | 57.0   | 62.1   | 24.5   | 31.8   | 39.5   |
| 128.5  | 162.4  | 97.6   | 1004.6 | 967.1  | 880.4  | 692.3  | 658.0  | 846.0  |
| 918.4  | 1007.7 | 666.7  | 5145.5 | 4377.3 | 4364.5 | 4093.9 | 3951.6 | 4198.0 |
| 30.9   | 29.5   | 24.0   | 8.4    | 10.7   | 24.8   | 12.3   | 14.0   | 13.5   |
| 419.4  | 161.1  | 18.5   | 63.3   | 48.2   | 44.8   | 54.9   | 39.1   | 41.1   |
| 138.0  | 136.4  | 120.1  | 252.1  | 212.8  | 221.8  | 132.2  | 148.5  | 159.1  |
| 17.1   | 23.9   | 17.5   | 26.4   | 19.6   | 28.5   | 14.5   | 35.6   | 27.0   |
| 253.7  | 346.1  | 237.7  | 92.3   | 90.5   | 96.0   | 88.2   | 98.3   | 111.1  |
| 296.9  | 373.0  | 245.9  | 288.2  | 178.7  | 256.3  | 128.2  | 103.1  | 80.5   |
| 12.6   | 23.4   | 53.3   | 20.1   | 22.2   | 17.8   | 14.4   | 27.1   | 18.7   |
| 15.7   | 34.8   | 72.8   | 8.8    | 4.8    | 13.2   | 9.3    | 25.0   | 10.4   |
| 89.3   | 93.5   | 87.1   | 97.6   | 69.0   | 91.6   | 67.0   | 63.0   | 51.1   |
| 156.1  | 196.9  | 182.8  | 4.7    | 3.7    | 5.4    | 1.7    | 6.9    | 5.9    |
| 576.4  | 500.2  | 304.8  | 9.0    | 6.1    | 4.7    | 2.2    | 2.3    | 5.2    |
| 550.7  | 654.8  | 617.6  | 299.1  | 221.7  | 243.0  | 194.3  | 237.1  | 201.9  |
| 1244.3 | 1334.7 | 1335.0 | 586.0  | 422.4  | 338.7  | 417.7  | 359.9  | 371.0  |
| 995.6  | 1228.7 | 831.8  | 560.2  | 488.3  | 533.3  | 381.0  | 389.8  | 432.1  |
| 527.8  | 718.5  | 492.2  | 351.8  | 337.7  | 308.0  | 203.4  | 215.4  | 240.6  |
| 598.7  | 1017.5 | 1145.8 | 72.2   | 82.6   | 86.2   | 58.1   | 72.9   | 62.0   |
| 43.1   | 56.6   | 36.5   | 78.3   | 51.6   | 61.5   | 43.0   | 43.6   | 45.7   |
| 1046.1 | 1268.7 | 899.3  | 653.2  | 580.8  | 625.4  | 353.2  | 358.2  | 443.5  |
| 33.1   | 46.2   | 30.5   | 125.6  | 110.8  | 143.3  | 76.8   | 98.7   | 83.5   |
| 1129.9 | 1158.1 | 844.2  | 517.0  | 411.9  | 460.9  | 356.6  | 336.9  | 372.1  |
| 28.6   | 42.3   | 47.3   | 31.6   | 29.3   | 35.5   | 28.8   | 28.5   | 34.1   |
| 244.2  | 367.2  | 297.3  | 214.6  | 220.3  | 229.8  | 171.9  | 217.8  | 249.6  |
| 138.5  | 194.8  | 124.0  | 81.7   | 55.1   | 71.1   | 70.8   | 66.6   | 75.2   |
| 208.6  | 279.5  | 172.5  | 137.0  | 122.0  | 130.3  | 92.6   | 101.5  | 107.7  |
| 156.0  | 183.1  | 158.2  | 159.4  | 145.3  | 171.9  | 124.0  | 153.0  | 137.3  |
| 2.3    | 2.1    | 1.3    | 4.7    | 4.4    | 10.7   | 2.0    | 1.8    | 1.9    |
| 1567.6 | 1703.4 | 1146.6 | 333.0  | 271.0  | 336.4  | 152.9  | 153.0  | 160.1  |
| 164.8  | 230.0  | 175.7  | 70.4   | 54.3   | 58.6   | 108.4  | 109.0  | 101.3  |
| 63.3   | 71.6   | 57.3   | 31.0   | 22.0   | 29.2   | 35.8   | 37.3   | 38.6   |
| 10.8   | 21.7   | 22.2   | 28.8   | 23.5   | 25.7   | 6.6    | 22.4   | 22.2   |
| 353.3  | 414.3  | 291.4  | 76.1   | 76.4   | 84.6   | 49.5   | 64.6   | 62.4   |
| 1568.3 | 1807.0 | 1350.2 | 2452.4 | 2067.8 | 2203.0 | 1262.7 | 1239.0 | 1329.6 |
| 311.8  | 400.0  | 381.2  | 322.5  | 268.9  | 319.7  | 196.0  | 246.2  | 269.7  |
| 829.3  | 979.5  | 734.3  | 604.7  | 528.3  | 542.4  | 443.5  | 454.0  | 501.1  |
| 105.1  | 113.7  | 102.1  | 71.8   | 42.5   | 61.1   | 72.3   | 62.6   | 73.9   |
| 194.4  | 286.9  | 182.6  | 165.9  | 186.6  | 188.1  | 164.2  | 174.0  | 204.3  |
| 978.0  | 1077.3 | 720.2  | 986.5  | 832.4  | 832.7  | 560.2  | 521.2  | 613.4  |
| 6.4    | 2.7    | 4.6    | 30.5   | 26.5   | 24.7   | 22.4   | 6.4    | 9.0    |
| 326.1  | 360.3  | 207.1  | 187.7  | 167.0  | 154.8  | 110.9  | 74.3   | 113.4  |
| 509.2  | 665.4  | 582.8  | 327.9  | 258.8  | 297.1  | 237.4  | 226.6  | 250.7  |
| 569.4  | 803.9  | 701.3  | 480.0  | 398.4  | 422.9  | 330.5  | 414.5  | 393.2  |
| 2.3    | 2.7    | 2.0    | 5.3    | 3.2    | 2.1    | 1.8    | 1.4    | 2.2    |
| 2.0    | 1.6    | 2.1    | 5.0    | 3.2    | 7.3    | 5.4    | 4.5    | 2.7    |
| 14.7   | 10.6   | 9.4    | 18.6   | 10.9   | 20.7   | 8.1    | 16.5   | 12.0   |
| 46.9   | 63.0   | 54.5   | 155.7  | 164.9  | 163.5  | 117.3  | 130.4  | 137.9  |
| 52.2   | 94.4   | 77.4   | 142.3  | 144.8  | 148.6  | 163.3  | 216.8  | 220.7  |
| 594.5  | 584.9  | 389.1  | 320.3  | 213.3  | 237.5  | 325.6  | 258.9  | 310.1  |
| 1097.9 | 1298.2 | 727.5  | 387.4  | 286.3  | 313.8  | 317.2  | 270.7  | 341.8  |
| 151.5  | 160.2  | 140.9  | 158.7  | 149.4  | 172.4  | 90.5   | 104.2  | 105.0  |

|        |        |        |        |        |        |        |        |        |
|--------|--------|--------|--------|--------|--------|--------|--------|--------|
| 6.6    | 3.6    | 11.3   | 12.3   | 13.0   | 14.3   | 10.6   | 8.7    | 14.1   |
| 0.9    | 0.8    | 0.8    | 5.4    | 1.3    | 4.8    | 3.3    | 0.9    | 1.2    |
| 17.8   | 12.5   | 10.7   | 23.0   | 17.5   | 32.6   | 13.7   | 13.2   | 14.0   |
| 432.6  | 605.7  | 438.3  | 419.2  | 353.6  | 321.1  | 187.7  | 195.9  | 210.3  |
| 358.0  | 385.6  | 251.0  | 572.4  | 491.0  | 552.5  | 153.1  | 253.8  | 274.2  |
| 298.2  | 323.5  | 231.6  | 152.8  | 124.9  | 133.5  | 209.9  | 194.6  | 213.8  |
| 255.6  | 308.2  | 246.6  | 176.1  | 125.9  | 140.9  | 183.5  | 168.8  | 179.8  |
| 2764.1 | 3171.9 | 2190.7 | 1723.6 | 1257.7 | 1396.9 | 922.7  | 668.2  | 767.5  |
| 211.1  | 248.0  | 211.3  | 148.0  | 131.5  | 145.5  | 106.1  | 107.8  | 133.7  |
| 376.7  | 398.0  | 386.0  | 820.9  | 776.3  | 800.2  | 506.8  | 608.2  | 691.4  |
| 1499.7 | 1892.4 | 1155.1 | 779.5  | 658.7  | 713.1  | 365.1  | 429.7  | 469.5  |
| 5.9    | 12.2   | 20.9   | 60.5   | 71.3   | 91.6   | 40.4   | 58.5   | 73.7   |
| 1425.2 | 2335.3 | 2402.9 | 14.9   | 6.6    | 3.3    | 10.0   | 6.9    | 5.4    |
| 2736.8 | 3126.4 | 2330.0 | 706.2  | 356.4  | 353.4  | 571.2  | 315.4  | 384.5  |
| 4.2    | 12.6   | 5.6    | 5.4    | 4.9    | 5.9    | 5.6    | 8.1    | 6.5    |
| 11.5   | 16.1   | 15.1   | 16.9   | 17.5   | 25.0   | 12.5   | 19.1   | 14.1   |
| 20.8   | 21.9   | 16.8   | 43.1   | 27.1   | 28.7   | 49.6   | 54.8   | 57.9   |
| 444.5  | 525.5  | 297.6  | 1651.2 | 942.9  | 957.4  | 829.5  | 521.6  | 615.3  |
| 121.5  | 152.4  | 95.2   | 242.1  | 193.7  | 202.0  | 112.5  | 122.5  | 138.6  |
| 847.9  | 1099.3 | 917.4  | 211.9  | 189.9  | 210.3  | 266.1  | 296.7  | 311.2  |
| 221.3  | 333.2  | 311.9  | 68.2   | 55.0   | 71.4   | 41.1   | 47.6   | 59.4   |
| 208.7  | 318.1  | 366.0  | 73.3   | 61.4   | 67.2   | 47.9   | 80.2   | 77.3   |
| 399.4  | 556.5  | 473.5  | 561.5  | 460.7  | 492.2  | 378.5  | 462.8  | 449.5  |
| 193.8  | 212.6  | 102.4  | 70.8   | 47.6   | 52.6   | 36.2   | 19.5   | 30.3   |
| 1.5    | 1.1    | 1.5    | 1970.1 | 2012.3 | 2035.4 | 1125.2 | 1163.1 | 1396.3 |
| 537.5  | 760.2  | 515.7  | 501.8  | 340.0  | 465.7  | 284.5  | 245.4  | 279.1  |
| 178.9  | 211.3  | 146.8  | 215.6  | 186.2  | 220.0  | 150.2  | 166.3  | 158.9  |
| 288.8  | 511.2  | 477.7  | 312.3  | 250.3  | 271.3  | 222.0  | 198.0  | 226.6  |
| 245.2  | 332.4  | 273.1  | 313.3  | 263.2  | 286.3  | 174.7  | 225.7  | 209.3  |
| 435.1  | 781.6  | 749.3  | 663.2  | 733.6  | 809.0  | 738.5  | 779.7  | 969.6  |
| 148.2  | 204.2  | 158.0  | 155.7  | 140.9  | 156.8  | 101.9  | 116.1  | 127.4  |
| 63.4   | 71.5   | 49.6   | 57.2   | 44.7   | 55.6   | 78.5   | 72.2   | 72.5   |
| 116.7  | 137.3  | 91.2   | 79.1   | 70.1   | 71.2   | 82.2   | 70.9   | 82.4   |
| 179.3  | 254.0  | 163.6  | 244.5  | 219.3  | 262.9  | 242.7  | 217.7  | 197.5  |
| 1035.0 | 1440.8 | 1173.7 | 291.0  | 227.7  | 273.3  | 314.2  | 306.2  | 334.5  |
| 947.8  | 1199.4 | 1023.9 | 283.3  | 233.8  | 275.2  | 225.0  | 237.2  | 251.4  |
| 860.9  | 1121.9 | 819.9  | 350.3  | 345.1  | 366.4  | 291.4  | 378.3  | 379.1  |
| 1744.3 | 2085.2 | 1608.5 | 649.4  | 583.9  | 608.9  | 624.9  | 691.2  | 707.1  |
| 75.8   | 191.0  | 217.0  | 461.0  | 426.8  | 446.2  | 229.1  | 282.6  | 306.6  |
| 145.9  | 124.7  | 84.8   | 71.2   | 67.6   | 73.9   | 26.6   | 32.3   | 40.6   |
| 10.0   | 7.6    | 5.9    | 3.9    | 7.7    | 9.9    | 6.1    | 7.9    | 8.3    |
| 258.1  | 340.6  | 250.1  | 234.9  | 197.4  | 229.8  | 128.3  | 148.5  | 144.0  |
| 114.1  | 124.1  | 126.5  | 78.4   | 62.4   | 61.8   | 47.3   | 49.1   | 64.6   |
| 413.8  | 443.4  | 362.0  | 854.4  | 700.4  | 782.2  | 411.2  | 498.1  | 530.2  |
| 8.6    | 5.4    | 10.5   | 17.6   | 7.3    | 6.9    | 12.5   | 8.9    | 6.7    |
| 56.7   | 58.5   | 45.0   | 86.2   | 67.6   | 73.3   | 48.6   | 55.0   | 56.3   |
| 1166.4 | 1661.3 | 1216.6 | 645.5  | 539.4  | 525.9  | 754.0  | 765.7  | 813.2  |
| 1058.4 | 1119.8 | 851.3  | 462.5  | 370.7  | 380.4  | 391.1  | 354.5  | 408.7  |
| 143.3  | 187.2  | 171.6  | 20.3   | 21.3   | 25.1   | 15.9   | 12.7   | 16.6   |
| 38.4   | 45.4   | 60.0   | 4.2    | 3.8    | 9.9    | 4.6    | 4.3    | 5.7    |
| 357.2  | 379.5  | 272.3  | 89.8   | 87.1   | 86.5   | 53.9   | 61.9   | 62.2   |
| 658.8  | 687.5  | 467.4  | 89.0   | 85.9   | 76.8   | 82.9   | 79.6   | 90.2   |
| 374.3  | 421.5  | 351.4  | 117.7  | 95.7   | 108.4  | 82.2   | 86.8   | 95.3   |

|        |        |        |        |        |        |        |        |        |
|--------|--------|--------|--------|--------|--------|--------|--------|--------|
| 110.4  | 150.5  | 146.6  | 279.9  | 229.5  | 266.9  | 152.3  | 143.3  | 145.6  |
| 8.7    | 11.5   | 15.3   | 13.0   | 8.5    | 16.0   | 29.0   | 21.3   | 29.8   |
| 133.1  | 157.2  | 115.6  | 184.3  | 176.7  | 179.0  | 93.4   | 111.4  | 120.7  |
| 5.2    | 6.5    | 6.0    | 2.1    | 3.7    | 5.6    | 0.5    | 1.9    | 1.8    |
| 49.9   | 53.1   | 52.4   | 8.3    | 11.1   | 22.3   | 8.2    | 2.7    | 10.5   |
| 717.8  | 897.5  | 624.9  | 969.0  | 786.6  | 978.9  | 589.5  | 710.9  | 724.7  |
| 5249.1 | 5945.5 | 4719.9 | 5359.7 | 4245.7 | 4284.6 | 2554.5 | 2094.6 | 2395.2 |
| 93.1   | 107.9  | 66.5   | 71.1   | 39.9   | 48.9   | 41.4   | 26.2   | 31.9   |
| 297.3  | 479.2  | 409.2  | 192.6  | 182.6  | 202.3  | 160.8  | 241.1  | 242.1  |
| 16.1   | 37.8   | 34.3   | 7.7    | 4.3    | 4.5    | 6.8    | 7.8    | 2.8    |
| 152.4  | 215.8  | 214.4  | 60.5   | 48.5   | 59.1   | 46.1   | 53.7   | 61.1   |
| 437.2  | 673.2  | 536.3  | 478.3  | 390.3  | 459.8  | 258.0  | 284.8  | 284.7  |
| 2186.7 | 1813.2 | 949.0  | 380.7  | 308.3  | 354.2  | 216.0  | 186.3  | 223.8  |
| 2523.6 | 2628.8 | 1972.5 | 427.6  | 320.2  | 329.6  | 292.8  | 272.2  | 305.9  |
| 887.1  | 1140.6 | 1064.6 | 479.4  | 433.7  | 482.6  | 317.4  | 311.1  | 371.8  |
| 645.6  | 900.3  | 818.7  | 361.5  | 299.1  | 358.2  | 244.7  | 261.9  | 280.5  |
| 691.0  | 705.2  | 482.9  | 566.7  | 453.8  | 541.7  | 413.8  | 369.1  | 443.6  |
| 347.1  | 470.1  | 276.3  | 206.6  | 185.8  | 222.9  | 108.5  | 129.9  | 122.4  |
| 106.8  | 53.4   | 33.3   | 44.5   | 39.1   | 44.8   | 27.8   | 19.5   | 28.2   |
| 301.4  | 168.5  | 74.4   | 45.1   | 19.3   | 22.5   | 22.5   | 8.5    | 17.8   |
| 84.1   | 120.2  | 85.0   | 127.7  | 102.3  | 93.2   | 85.7   | 86.0   | 92.1   |
| 4936.9 | 5752.0 | 5295.8 | 1994.9 | 1841.7 | 1909.3 | 1295.2 | 1385.4 | 1482.1 |
| 929.2  | 871.6  | 365.8  | 493.3  | 350.3  | 368.5  | 374.5  | 260.9  | 342.6  |
| 24.8   | 54.3   | 38.7   | 110.7  | 99.5   | 110.7  | 63.7   | 83.3   | 95.9   |
| 336.1  | 481.6  | 284.2  | 256.8  | 221.0  | 206.2  | 254.5  | 254.3  | 242.0  |
| 1418.6 | 1697.3 | 1223.0 | 777.4  | 467.8  | 545.1  | 327.6  | 249.9  | 297.8  |
| 426.4  | 499.2  | 348.1  | 56.3   | 13.1   | 44.9   | 88.8   | 66.6   | 79.7   |
| 250.0  | 376.7  | 303.6  | 193.6  | 190.4  | 220.8  | 204.2  | 330.5  | 262.7  |
| 147.4  | 306.8  | 269.2  | 371.8  | 364.5  | 419.1  | 232.6  | 461.9  | 347.2  |
| 297.6  | 400.7  | 331.3  | 184.2  | 187.3  | 162.4  | 215.1  | 216.1  | 258.1  |
| 482.4  | 654.0  | 507.8  | 276.5  | 250.2  | 264.9  | 282.4  | 307.9  | 324.3  |
| 10.2   | 9.1    | 11.5   | 31.2   | 27.5   | 20.6   | 16.0   | 12.2   | 16.1   |
| 5.6    | 1.4    | 5.7    | 73.9   | 51.9   | 48.2   | 37.6   | 44.0   | 50.6   |
| 570.3  | 806.8  | 524.5  | 1226.4 | 1062.4 | 1056.0 | 675.6  | 689.9  | 753.7  |
| 92.2   | 111.3  | 87.2   | 82.9   | 63.8   | 73.1   | 63.3   | 55.7   | 78.2   |
| 331.6  | 443.8  | 319.2  | 160.3  | 150.5  | 120.8  | 149.5  | 142.6  | 180.0  |
| 289.9  | 317.7  | 298.2  | 202.2  | 180.5  | 174.8  | 172.2  | 222.8  | 180.0  |
| 311.2  | 340.9  | 367.1  | 288.9  | 247.7  | 258.7  | 261.8  | 295.3  | 297.1  |
| 1.0    | 2.6    | 1.0    | 19.2   | 4.5    | 5.7    | 9.0    | 19.2   | 3.1    |
| 0.7    | 1.1    | 0.6    | 6.9    | 1.9    | 1.9    | 0.9    | 2.1    | 1.9    |
| 2517.0 | 2879.7 | 2499.5 | 391.5  | 326.1  | 359.1  | 454.6  | 510.4  | 493.6  |
| 41.5   | 61.3   | 41.1   | 36.9   | 47.4   | 57.6   | 54.7   | 48.5   | 51.2   |
| 106.0  | 138.3  | 96.5   | 142.6  | 112.2  | 119.2  | 122.9  | 125.9  | 123.0  |
| 124.9  | 160.7  | 114.1  | 214.0  | 182.2  | 181.3  | 124.8  | 94.7   | 128.6  |
| 157.8  | 238.0  | 164.9  | 66.9   | 76.0   | 79.9   | 65.6   | 66.1   | 92.0   |
| 6.2    | 1.6    | 2.1    | 6.0    | 8.5    | 13.2   | 4.9    | 7.0    | 3.6    |
| 273.9  | 362.2  | 239.2  | 208.3  | 147.0  | 193.4  | 185.0  | 127.6  | 187.1  |
| 712.2  | 779.1  | 602.4  | 395.6  | 304.6  | 354.8  | 270.1  | 247.7  | 273.4  |
| 281.2  | 333.5  | 241.2  | 436.5  | 341.9  | 372.1  | 237.0  | 231.1  | 272.4  |
| 8438.3 | 9421.9 | 9635.5 | 554.1  | 358.2  | 402.9  | 384.3  | 222.9  | 305.5  |
| 544.8  | 499.4  | 404.6  | 5.1    | 12.9   | 9.7    | 0.7    | 0.5    | 6.4    |
| 161.1  | 197.0  | 151.3  | 168.4  | 127.3  | 152.2  | 130.7  | 126.8  | 159.5  |
| 323.3  | 428.1  | 364.3  | 503.3  | 399.4  | 441.7  | 246.2  | 252.2  | 274.1  |

|        |        |        |        |        |        |        |        |        |
|--------|--------|--------|--------|--------|--------|--------|--------|--------|
| 181.3  | 212.0  | 131.0  | 86.0   | 67.4   | 67.4   | 64.7   | 52.1   | 65.9   |
| 677.9  | 875.1  | 573.8  | 446.1  | 340.4  | 373.1  | 271.7  | 255.6  | 301.4  |
| 184.4  | 264.5  | 186.0  | 141.5  | 103.6  | 100.3  | 72.3   | 64.8   | 75.1   |
| 218.3  | 292.1  | 271.2  | 128.6  | 151.0  | 156.3  | 87.3   | 111.2  | 120.9  |
| 3.0    | 6.5    | 4.2    | 37.3   | 47.5   | 67.2   | 28.5   | 61.1   | 48.5   |
| 236.3  | 325.9  | 309.1  | 96.7   | 93.2   | 96.5   | 81.0   | 68.9   | 82.1   |
| 486.8  | 577.2  | 439.4  | 115.3  | 139.6  | 140.2  | 97.2   | 125.2  | 127.3  |
| 168.8  | 177.0  | 118.6  | 240.1  | 130.9  | 158.9  | 134.0  | 99.8   | 96.7   |
| 52.2   | 45.7   | 42.7   | 53.7   | 49.0   | 51.2   | 36.2   | 26.0   | 26.4   |
| 28.5   | 22.5   | 19.6   | 4.0    | 2.9    | 2.5    | 1.1    | 6.6    | 8.2    |
| 6684.4 | 8773.8 | 6989.8 | 4308.1 | 3530.4 | 3550.0 | 2759.3 | 2439.7 | 2847.3 |
| 651.6  | 708.2  | 376.4  | 297.0  | 199.9  | 234.2  | 191.5  | 139.7  | 167.3  |
| 280.8  | 312.5  | 242.1  | 95.5   | 65.6   | 76.3   | 54.5   | 61.5   | 71.8   |
| 25.5   | 26.0   | 17.2   | 74.2   | 59.9   | 71.9   | 38.2   | 40.7   | 56.0   |
| 4350.7 | 4889.5 | 3509.1 | 2659.4 | 2355.4 | 2358.8 | 1420.6 | 1558.1 | 1699.0 |
| 99.3   | 143.7  | 127.8  | 122.0  | 114.1  | 150.3  | 73.0   | 96.1   | 129.8  |
| 470.4  | 554.2  | 512.9  | 129.7  | 104.0  | 121.7  | 74.3   | 87.4   | 100.7  |
| 6.7    | 6.0    | 6.4    | 9.1    | 25.5   | 18.1   | 1.2    | 8.0    | 1.3    |
| 42.5   | 47.3   | 35.0   | 45.3   | 61.5   | 51.4   | 48.9   | 43.9   | 48.6   |
| 405.8  | 514.9  | 410.3  | 247.6  | 239.1  | 254.3  | 181.6  | 165.0  | 209.3  |
| 11.8   | 11.7   | 19.5   | 22.0   | 27.2   | 27.6   | 17.0   | 21.1   | 23.6   |
| 161.4  | 215.6  | 179.8  | 292.3  | 254.2  | 324.1  | 255.5  | 263.4  | 295.1  |
| 1135.5 | 1760.4 | 1263.3 | 400.0  | 320.9  | 343.1  | 384.9  | 357.3  | 404.4  |
| 172.1  | 226.9  | 226.8  | 51.0   | 67.1   | 88.4   | 120.8  | 199.8  | 166.3  |
| 211.8  | 297.3  | 219.2  | 282.6  | 213.4  | 241.2  | 127.3  | 125.6  | 134.6  |
| 192.2  | 248.4  | 167.8  | 131.1  | 113.7  | 127.5  | 76.2   | 96.8   | 95.4   |
| 251.9  | 277.1  | 187.2  | 214.3  | 173.9  | 196.8  | 130.5  | 133.0  | 141.3  |
| 1.2    | 4.3    | 4.1    | 36.4   | 25.0   | 27.7   | 27.7   | 24.0   | 19.5   |
| 1.0    | 1.1    | 4.7    | 4.8    | 5.7    | 3.9    | 0.6    | 3.1    | 0.9    |
| 199.1  | 249.2  | 192.8  | 151.6  | 125.3  | 163.4  | 121.8  | 107.8  | 130.3  |
| 81.6   | 126.5  | 123.8  | 183.8  | 154.1  | 189.4  | 98.6   | 96.5   | 124.9  |
| 2.2    | 2.5    | 1.7    | 19.7   | 12.2   | 15.0   | 24.0   | 16.3   | 18.4   |
| 13.2   | 22.1   | 7.1    | 216.1  | 170.9  | 167.8  | 90.2   | 85.6   | 94.4   |
| 482.1  | 529.7  | 414.1  | 409.5  | 350.0  | 424.5  | 230.8  | 229.3  | 240.2  |
| 7.9    | 3.9    | 3.9    | 73.0   | 60.3   | 78.5   | 45.4   | 72.6   | 65.5   |
| 75.8   | 76.2   | 62.0   | 104.3  | 74.7   | 83.8   | 76.5   | 90.1   | 83.8   |
| 461.3  | 526.6  | 357.5  | 369.1  | 276.9  | 291.8  | 288.8  | 316.6  | 335.8  |
| 2298.6 | 2264.4 | 1394.9 | 292.8  | 183.1  | 191.5  | 297.8  | 215.8  | 246.9  |
| 10.4   | 9.1    | 3.2    | 16.7   | 19.4   | 14.3   | 6.9    | 6.2    | 2.2    |
| 188.7  | 149.5  | 78.3   | 147.2  | 127.0  | 146.6  | 117.5  | 88.7   | 108.2  |
| 392.0  | 374.8  | 124.7  | 225.4  | 136.5  | 143.2  | 141.0  | 97.6   | 122.5  |
| 494.4  | 569.3  | 385.9  | 369.5  | 290.4  | 319.0  | 299.3  | 305.0  | 302.8  |
| 11.6   | 11.2   | 12.1   | 26.4   | 12.7   | 23.7   | 12.5   | 16.8   | 20.5   |
| 1658.9 | 1963.3 | 1051.4 | 847.2  | 470.9  | 473.2  | 674.4  | 322.8  | 421.5  |
| 6.6    | 2.1    | 2.3    | 8.5    | 15.1   | 17.8   | 1.8    | 3.6    | 7.1    |
| 0.6    | 6.1    | 1.4    | 3.4    | 2.5    | 3.7    | 1.2    | 0.8    | 1.8    |
| 13.2   | 12.3   | 2.7    | 11.4   | 9.3    | 7.8    | 13.8   | 9.2    | 7.3    |
| 15.4   | 19.3   | 13.4   | 46.1   | 21.3   | 39.1   | 13.7   | 18.1   | 17.3   |
| 223.4  | 256.9  | 133.5  | 131.4  | 114.0  | 118.6  | 70.1   | 56.6   | 81.4   |
| 172.0  | 197.5  | 110.1  | 60.7   | 57.7   | 42.6   | 29.9   | 22.2   | 37.1   |
| 44.6   | 55.8   | 41.2   | 35.0   | 30.7   | 31.4   | 16.2   | 17.3   | 8.9    |
| 830.5  | 925.3  | 848.9  | 611.9  | 509.7  | 526.4  | 353.4  | 417.8  | 493.1  |
| 197.1  | 285.2  | 138.7  | 32.4   | 22.2   | 33.5   | 25.1   | 32.9   | 24.8   |

|        |        |        |        |        |        |        |        |        |
|--------|--------|--------|--------|--------|--------|--------|--------|--------|
| 241.8  | 322.5  | 145.7  | 48.6   | 46.4   | 53.4   | 30.5   | 47.6   | 42.7   |
| 272.5  | 357.0  | 235.5  | 287.0  | 226.4  | 255.2  | 167.3  | 180.2  | 182.7  |
| 2.2    | 3.3    | 2.7    | 3.5    | 6.3    | 3.1    | 1.8    | 1.4    | 1.5    |
| 61.3   | 120.0  | 86.1   | 97.6   | 99.8   | 106.3  | 65.4   | 78.5   | 39.2   |
| 149.7  | 163.4  | 117.9  | 20.6   | 14.0   | 19.1   | 26.7   | 25.0   | 21.3   |
| 239.1  | 304.3  | 289.8  | 137.5  | 125.5  | 145.5  | 190.3  | 189.2  | 212.3  |
| 531.3  | 536.2  | 249.7  | 123.9  | 84.4   | 110.3  | 61.1   | 50.9   | 66.4   |
| 517.9  | 703.2  | 551.5  | 240.7  | 226.4  | 244.6  | 181.2  | 191.5  | 197.5  |
| 657.9  | 785.1  | 604.7  | 610.2  | 486.5  | 545.9  | 464.8  | 440.3  | 519.5  |
| 224.4  | 315.7  | 246.8  | 229.5  | 206.0  | 176.7  | 222.6  | 228.3  | 247.0  |
| 17.2   | 44.0   | 63.9   | 4.2    | 2.8    | 2.8    | 1.2    | 1.1    | 1.0    |
| 100.9  | 158.4  | 193.1  | 12.2   | 13.1   | 15.2   | 4.1    | 5.2    | 11.2   |
| 208.2  | 300.3  | 291.0  | 116.4  | 136.7  | 160.7  | 45.0   | 77.6   | 73.7   |
| 272.1  | 342.6  | 261.9  | 294.6  | 280.0  | 302.2  | 175.4  | 221.0  | 205.6  |
| 355.9  | 424.9  | 330.8  | 366.7  | 354.2  | 415.2  | 211.9  | 264.7  | 292.5  |
| 1867.4 | 1991.6 | 986.5  | 899.0  | 630.1  | 678.2  | 676.9  | 568.5  | 675.1  |
| 294.3  | 399.9  | 311.3  | 1053.6 | 1005.2 | 1223.3 | 519.9  | 597.0  | 659.9  |
| 84.9   | 89.0   | 102.2  | 259.7  | 245.4  | 260.8  | 173.1  | 172.3  | 201.8  |
| 50.5   | 72.3   | 52.0   | 16.3   | 7.9    | 5.2    | 10.2   | 8.2    | 4.4    |
| 774.1  | 937.5  | 757.1  | 161.8  | 165.4  | 195.9  | 165.4  | 137.2  | 174.5  |
| 723.0  | 544.9  | 577.8  | 4.2    | 4.7    | 4.2    | 1.3    | 8.9    | 8.5    |
| 217.9  | 320.0  | 254.0  | 271.6  | 186.5  | 210.7  | 168.8  | 179.2  | 176.4  |
| 123.0  | 181.6  | 125.0  | 171.3  | 132.4  | 132.9  | 122.4  | 104.5  | 121.8  |
| 203.3  | 147.7  | 63.7   | 12.0   | 8.6    | 5.9    | 5.9    | 1.6    | 12.3   |
| 138.0  | 196.2  | 159.3  | 67.2   | 57.4   | 61.6   | 61.9   | 58.5   | 71.4   |
| 77.4   | 92.6   | 82.0   | 49.1   | 39.5   | 58.3   | 37.3   | 25.4   | 40.2   |
| 468.1  | 615.5  | 571.2  | 277.6  | 250.6  | 272.7  | 207.3  | 241.0  | 236.3  |
| 242.5  | 376.1  | 264.0  | 152.4  | 149.1  | 179.0  | 87.1   | 88.9   | 110.8  |
| 121.9  | 152.8  | 121.2  | 214.4  | 182.3  | 204.8  | 108.8  | 116.6  | 144.4  |
| 818.5  | 1011.9 | 746.3  | 217.0  | 157.6  | 192.4  | 201.0  | 217.9  | 221.3  |
| 251.1  | 323.9  | 224.6  | 29.7   | 30.4   | 33.0   | 50.3   | 51.5   | 52.4   |
| 202.7  | 219.4  | 79.4   | 211.3  | 155.9  | 181.2  | 123.3  | 84.4   | 109.8  |
| 1055.0 | 1063.4 | 687.4  | 905.8  | 699.1  | 800.8  | 668.0  | 645.0  | 691.1  |
| 460.4  | 605.8  | 494.9  | 1571.8 | 1434.4 | 1425.9 | 1465.6 | 1708.8 | 1651.5 |
| 927.1  | 1002.0 | 539.6  | 1055.9 | 880.2  | 878.3  | 528.6  | 444.9  | 548.7  |
| 27.5   | 31.1   | 35.5   | 20.6   | 18.3   | 15.9   | 12.4   | 10.3   | 14.0   |
| 89.9   | 105.2  | 86.5   | 103.0  | 115.4  | 95.8   | 86.8   | 80.2   | 94.8   |
| 1020.4 | 1040.6 | 562.4  | 782.8  | 603.7  | 647.0  | 594.3  | 468.1  | 586.0  |
| 983.1  | 1079.0 | 479.3  | 715.8  | 514.3  | 598.0  | 464.0  | 407.5  | 432.7  |
| 371.7  | 464.0  | 341.5  | 567.9  | 532.6  | 543.6  | 451.1  | 459.5  | 531.7  |
| 888.8  | 779.7  | 513.1  | 679.8  | 537.8  | 605.1  | 553.8  | 464.6  | 525.9  |
| 32.2   | 11.4   | 16.8   | 24.5   | 10.4   | 8.8    | 15.7   | 13.7   | 21.5   |
| 97.8   | 94.0   | 53.1   | 425.2  | 311.1  | 398.1  | 231.4  | 253.6  | 233.0  |
| 80.2   | 125.8  | 126.8  | 371.5  | 328.5  | 380.1  | 259.9  | 268.1  | 341.4  |
| 41.2   | 44.2   | 36.9   | 59.0   | 46.0   | 70.3   | 27.2   | 25.7   | 33.3   |
| 128.4  | 247.1  | 258.2  | 95.4   | 86.7   | 88.7   | 141.1  | 163.9  | 149.6  |
| 1804.5 | 3235.9 | 3114.0 | 3180.5 | 2674.4 | 2682.7 | 1530.0 | 1646.0 | 1788.8 |
| 7.1    | 6.7    | 2.5    | 13.8   | 11.5   | 14.2   | 7.7    | 8.4    | 12.0   |
| 32.6   | 47.0   | 33.2   | 219.6  | 160.9  | 153.2  | 97.9   | 70.7   | 95.0   |
| 1278.0 | 1266.0 | 744.0  | 753.6  | 353.8  | 403.1  | 432.7  | 255.0  | 289.8  |
| 4.8    | 5.4    | 3.8    | 242.0  | 202.9  | 261.4  | 126.0  | 177.2  | 179.0  |
| 36.8   | 30.3   | 16.4   | 2336.6 | 2032.9 | 2241.9 | 1893.0 | 1616.2 | 1889.0 |
| 33.8   | 81.8   | 73.5   | 95.6   | 113.7  | 125.2  | 69.2   | 132.2  | 129.2  |

|        |        |        |        |        |        |        |       |        |
|--------|--------|--------|--------|--------|--------|--------|-------|--------|
| 149.3  | 96.3   | 50.7   | 111.5  | 75.8   | 129.5  | 37.2   | 32.8  | 52.3   |
| 2.7    | 1.9    | 2.3    | 4.6    | 2.4    | 7.4    | 1.3    | 1.2   | 1.7    |
| 19.4   | 12.1   | 14.1   | 35.5   | 20.1   | 25.2   | 14.0   | 18.3  | 13.1   |
| 213.0  | 317.9  | 300.7  | 37.5   | 59.3   | 49.9   | 54.4   | 74.2  | 82.7   |
| 292.9  | 413.0  | 394.0  | 63.6   | 67.6   | 64.9   | 70.3   | 94.1  | 96.4   |
| 551.0  | 626.1  | 449.4  | 344.9  | 253.8  | 288.3  | 315.6  | 197.1 | 210.5  |
| 422.0  | 687.4  | 537.5  | 210.2  | 244.2  | 268.3  | 252.4  | 301.3 | 342.7  |
| 4.0    | 4.1    | 1.3    | 6.5    | 10.4   | 3.4    | 7.5    | 1.8   | 4.2    |
| 728.7  | 777.9  | 205.5  | 362.2  | 401.8  | 406.5  | 409.8  | 357.1 | 447.9  |
| 258.9  | 294.0  | 72.5   | 179.6  | 217.5  | 213.8  | 85.4   | 103.4 | 123.2  |
| 320.7  | 334.2  | 100.1  | 103.0  | 121.6  | 133.9  | 63.2   | 64.5  | 73.1   |
| 60.7   | 67.8   | 19.5   | 76.7   | 77.3   | 79.7   | 51.7   | 31.4  | 56.3   |
| 89.6   | 106.2  | 88.0   | 266.7  | 255.4  | 297.3  | 214.2  | 236.5 | 222.8  |
| 3.4    | 1.0    | 5.8    | 13.8   | 8.0    | 4.1    | 7.4    | 10.2  | 7.9    |
| 359.0  | 449.6  | 383.6  | 1394.7 | 1349.8 | 1503.8 | 658.6  | 931.8 | 879.4  |
| 317.3  | 355.4  | 212.2  | 250.9  | 188.1  | 220.0  | 205.7  | 203.5 | 232.2  |
| 749.4  | 889.8  | 601.1  | 483.4  | 379.0  | 397.2  | 474.9  | 438.9 | 501.6  |
| 394.5  | 442.2  | 344.2  | 261.6  | 219.2  | 260.8  | 175.2  | 179.2 | 178.5  |
| 143.2  | 177.3  | 134.6  | 245.7  | 180.4  | 183.0  | 148.3  | 129.3 | 153.7  |
| 156.3  | 203.1  | 161.6  | 163.6  | 138.5  | 155.9  | 102.3  | 119.5 | 146.7  |
| 118.2  | 137.9  | 78.6   | 17.8   | 13.4   | 15.5   | 29.6   | 26.6  | 24.6   |
| 622.2  | 652.8  | 407.3  | 94.4   | 86.9   | 93.9   | 94.9   | 113.9 | 123.2  |
| 2157.6 | 2494.1 | 1849.2 | 694.3  | 643.8  | 669.4  | 538.9  | 644.5 | 731.2  |
| 264.7  | 301.8  | 222.3  | 219.0  | 206.9  | 228.2  | 168.1  | 171.1 | 190.2  |
| 27.1   | 40.2   | 19.0   | 22.3   | 5.1    | 10.2   | 12.5   | 9.1   | 23.3   |
| 31.7   | 62.8   | 29.8   | 22.6   | 31.6   | 26.0   | 40.7   | 24.7  | 23.7   |
| 135.7  | 196.0  | 105.0  | 227.5  | 178.1  | 192.8  | 150.7  | 156.2 | 175.0  |
| 895.0  | 1135.9 | 781.5  | 2101.6 | 1623.5 | 1970.8 | 1183.1 | 834.9 | 1128.7 |
| 18.3   | 22.9   | 21.8   | 118.0  | 113.6  | 115.8  | 118.0  | 119.6 | 126.7  |
| 27.8   | 36.3   | 31.1   | 73.0   | 58.3   | 68.6   | 117.9  | 96.0  | 96.0   |
| 66.9   | 84.0   | 85.9   | 632.6  | 546.5  | 553.5  | 610.9  | 612.0 | 736.3  |
| 686.0  | 1086.3 | 886.7  | 447.2  | 439.5  | 455.7  | 323.1  | 367.2 | 346.4  |
| 258.8  | 290.1  | 264.5  | 148.3  | 146.1  | 135.6  | 157.9  | 188.8 | 191.7  |
| 64.2   | 91.0   | 59.4   | 1962.8 | 1568.9 | 1777.0 | 599.3  | 534.1 | 691.7  |
| 82.4   | 101.6  | 103.0  | 1019.7 | 730.4  | 879.6  | 364.4  | 341.7 | 382.4  |
| 706.9  | 874.9  | 729.2  | 260.4  | 208.4  | 216.5  | 163.3  | 228.3 | 209.5  |
| 71.8   | 80.9   | 46.7   | 273.7  | 211.8  | 226.2  | 211.0  | 265.1 | 263.3  |
| 82.6   | 74.7   | 43.1   | 244.7  | 222.7  | 214.1  | 131.8  | 138.3 | 196.1  |
| 1067.0 | 818.5  | 685.1  | 33.4   | 54.1   | 43.4   | 21.2   | 32.8  | 32.2   |
| 509.8  | 407.7  | 321.3  | 2.8    | 4.0    | 2.2    | 8.6    | 4.6   | 4.9    |
| 287.2  | 457.6  | 322.1  | 6.5    | 5.9    | 4.0    | 0.9    | 2.8   | 7.0    |
| 1010.0 | 1164.2 | 987.8  | 1411.7 | 1243.0 | 1357.8 | 514.9  | 649.1 | 719.0  |
| 105.7  | 187.6  | 186.6  | 89.8   | 85.6   | 91.8   | 85.1   | 100.6 | 96.6   |
| 604.9  | 575.3  | 379.2  | 557.7  | 451.9  | 481.5  | 342.3  | 288.3 | 370.5  |
| 96.6   | 203.3  | 248.1  | 189.8  | 165.4  | 176.2  | 220.7  | 270.9 | 308.8  |
| 1504.1 | 1633.3 | 927.3  | 963.9  | 847.5  | 775.3  | 1037.8 | 950.0 | 1050.2 |
| 241.7  | 279.3  | 166.5  | 128.8  | 70.0   | 84.1   | 82.8   | 52.7  | 59.9   |
| 61.2   | 75.6   | 52.2   | 107.7  | 47.7   | 54.8   | 41.4   | 16.5  | 26.8   |
| 0.7    | 0.8    | 1.4    | 2.1    | 1.8    | 2.9    | 2.7    | 0.8   | 1.5    |
| 17.6   | 18.8   | 12.6   | 57.3   | 44.3   | 49.3   | 11.5   | 4.2   | 8.5    |
| 58.5   | 109.6  | 85.2   | 39.4   | 30.8   | 50.1   | 52.9   | 46.1  | 47.7   |
| 103.7  | 111.1  | 88.4   | 60.8   | 57.0   | 54.6   | 65.5   | 84.8  | 77.8   |
| 77.9   | 73.5   | 60.9   | 15.9   | 16.8   | 7.8    | 36.0   | 51.3  | 45.4   |

|        |        |        |        |        |        |       |       |       |
|--------|--------|--------|--------|--------|--------|-------|-------|-------|
| 23.9   | 34.1   | 30.6   | 45.6   | 34.4   | 15.0   | 19.5  | 12.4  | 16.5  |
| 13.0   | 13.4   | 36.8   | 9.9    | 9.6    | 6.2    | 2.3   | 0.8   | 0.8   |
| 643.8  | 758.9  | 498.4  | 564.1  | 400.4  | 425.2  | 213.0 | 191.3 | 232.8 |
| 296.5  | 422.0  | 412.6  | 351.5  | 395.1  | 439.5  | 180.5 | 303.1 | 315.0 |
| 401.7  | 515.1  | 392.7  | 224.1  | 222.3  | 227.4  | 156.4 | 189.2 | 193.5 |
| 1.3    | 2.5    | 4.2    | 11.4   | 17.2   | 11.8   | 9.5   | 0.7   | 1.2   |
| 466.7  | 481.3  | 340.3  | 288.9  | 226.2  | 236.0  | 140.9 | 156.3 | 154.1 |
| 300.1  | 488.3  | 419.3  | 1.9    | 3.9    | 4.3    | 0.9   | 0.7   | 1.6   |
| 420.0  | 691.0  | 565.3  | 12.9   | 10.7   | 10.0   | 4.7   | 4.0   | 4.2   |
| 56.3   | 57.2   | 20.5   | 14.7   | 11.0   | 22.5   | 2.1   | 12.2  | 6.8   |
| 213.6  | 295.7  | 183.0  | 157.0  | 138.0  | 137.8  | 112.2 | 97.5  | 112.6 |
| 159.9  | 295.9  | 192.0  | 215.5  | 153.0  | 146.8  | 125.4 | 78.1  | 125.3 |
| 5159.9 | 7579.1 | 8078.2 | 18.1   | 11.4   | 20.8   | 24.6  | 31.8  | 28.3  |
| 345.3  | 474.4  | 355.1  | 1612.2 | 1300.0 | 1308.9 | 766.5 | 825.0 | 864.4 |
| 73.3   | 95.6   | 71.2   | 102.6  | 95.8   | 112.0  | 65.5  | 58.3  | 83.6  |
| 240.2  | 300.9  | 204.6  | 151.8  | 156.2  | 158.4  | 113.4 | 118.2 | 122.1 |
| 1.0    | 1.7    | 1.5    | 2.6    | 1.8    | 2.2    | 0.9   | 1.1   | 1.2   |
| 418.7  | 430.0  | 282.8  | 258.5  | 182.9  | 226.0  | 169.8 | 166.2 | 173.1 |
| 635.6  | 721.6  | 491.3  | 58.5   | 40.0   | 42.0   | 61.4  | 75.0  | 66.7  |
| 168.4  | 237.7  | 225.0  | 500.2  | 453.8  | 471.7  | 238.5 | 253.7 | 281.1 |
| 1902.7 | 2254.3 | 1168.2 | 1981.9 | 1517.9 | 1596.2 | 913.0 | 734.0 | 770.3 |
| 397.3  | 500.1  | 351.4  | 98.8   | 96.0   | 92.8   | 95.9  | 91.5  | 98.8  |
| 244.1  | 336.5  | 232.9  | 101.6  | 89.3   | 119.2  | 88.7  | 91.6  | 96.0  |
| 2.5    | 6.1    | 13.6   | 11.4   | 5.6    | 12.8   | 5.1   | 12.4  | 4.0   |
| 372.8  | 323.0  | 160.8  | 36.0   | 21.2   | 11.8   | 23.0  | 20.7  | 18.6  |
| 490.1  | 447.5  | 232.1  | 44.9   | 28.4   | 29.4   | 30.2  | 24.4  | 31.1  |
| 214.2  | 242.8  | 134.5  | 18.0   | 3.1    | 15.5   | 17.9  | 9.4   | 10.9  |
| 642.1  | 682.5  | 420.1  | 96.7   | 80.4   | 75.1   | 27.8  | 33.2  | 42.8  |
| 406.7  | 448.9  | 322.5  | 124.1  | 110.0  | 110.3  | 270.5 | 320.6 | 333.2 |
| 43.9   | 26.5   | 17.9   | 3.0    | 3.4    | 2.1    | 2.6   | 6.7   | 5.8   |
| 11.6   | 17.7   | 5.8    | 9.7    | 7.1    | 11.3   | 2.1   | 2.7   | 3.4   |
| 660.1  | 682.4  | 474.2  | 188.2  | 146.4  | 170.2  | 165.9 | 179.0 | 179.0 |
| 8.1    | 8.5    | 4.7    | 29.5   | 9.8    | 19.0   | 6.1   | 5.4   | 6.8   |
| 57.4   | 84.8   | 68.8   | 21.7   | 30.8   | 29.6   | 30.0  | 23.2  | 24.2  |
| 484.4  | 636.1  | 443.0  | 259.5  | 249.8  | 279.5  | 152.7 | 173.7 | 193.4 |
| 266.8  | 334.9  | 229.0  | 376.2  | 287.3  | 313.6  | 208.1 | 157.6 | 204.0 |
| 238.4  | 285.0  | 230.9  | 292.8  | 226.1  | 252.4  | 186.2 | 202.7 | 208.3 |
| 6.8    | 8.1    | 9.9    | 43.1   | 30.5   | 36.9   | 38.5  | 40.6  | 42.7  |
| 4.2    | 6.9    | 0.4    | 15.9   | 14.2   | 15.7   | 5.3   | 4.3   | 5.2   |
| 57.8   | 71.4   | 59.9   | 22.0   | 15.3   | 12.5   | 4.3   | 15.5  | 7.5   |
| 435.1  | 479.3  | 276.7  | 252.6  | 188.4  | 191.6  | 306.9 | 269.7 | 325.6 |
| 32.0   | 80.1   | 55.8   | 72.7   | 39.4   | 54.0   | 36.2  | 61.9  | 43.9  |
| 2.3    | 2.1    | 5.0    | 3.7    | 8.7    | 11.7   | 7.2   | 13.2  | 1.0   |
| 115.4  | 102.9  | 78.0   | 138.0  | 111.9  | 108.8  | 77.1  | 83.1  | 103.9 |
| 780.5  | 818.4  | 410.7  | 260.1  | 139.2  | 130.1  | 237.4 | 129.0 | 143.9 |
| 959.8  | 1070.2 | 894.2  | 257.1  | 241.0  | 273.7  | 224.0 | 226.9 | 258.1 |
| 405.4  | 312.1  | 366.6  | 337.5  | 306.5  | 297.9  | 210.7 | 183.6 | 208.5 |
| 25.5   | 14.0   | 13.9   | 118.5  | 116.1  | 133.2  | 60.3  | 68.1  | 78.2  |
| 375.2  | 598.9  | 490.0  | 287.7  | 259.7  | 285.4  | 270.6 | 277.6 | 317.7 |
| 3.3    | 4.1    | 3.3    | 3.3    | 2.8    | 3.3    | 3.0   | 2.1   | 2.8   |
| 0.8    | 1.7    | 0.9    | 6.1    | 4.2    | 11.4   | 0.8   | 4.9   | 1.5   |
| 2.8    | 1.5    | 0.7    | 5.7    | 9.7    | 7.1    | 1.3   | 3.9   | 0.9   |
| 20.0   | 31.2   | 11.9   | 38.2   | 26.4   | 34.5   | 19.5  | 13.7  | 21.2  |



|        |        |        |        |       |       |       |       |       |
|--------|--------|--------|--------|-------|-------|-------|-------|-------|
| 22.7   | 38.0   | 38.8   | 74.8   | 69.4  | 84.7  | 44.0  | 62.3  | 60.4  |
| 46.9   | 64.6   | 36.1   | 111.3  | 83.0  | 99.1  | 48.2  | 41.2  | 48.8  |
| 183.1  | 197.3  | 85.0   | 235.4  | 165.0 | 186.8 | 139.0 | 99.0  | 133.8 |
| 8.2    | 2.6    | 9.3    | 13.9   | 9.3   | 12.3  | 6.2   | 4.8   | 5.4   |
| 209.8  | 225.4  | 149.7  | 140.8  | 98.7  | 113.1 | 145.1 | 109.9 | 143.2 |
| 134.4  | 153.3  | 138.8  | 175.2  | 142.6 | 131.1 | 185.6 | 162.6 | 182.1 |
| 420.3  | 424.4  | 233.0  | 203.2  | 173.4 | 192.1 | 137.8 | 123.2 | 135.3 |
| 10.1   | 18.7   | 10.8   | 17.7   | 21.2  | 25.5  | 10.6  | 6.4   | 11.3  |
| 10.2   | 10.2   | 9.1    | 18.4   | 15.9  | 16.0  | 7.7   | 7.5   | 1.5   |
| 25.7   | 43.3   | 34.3   | 19.0   | 9.6   | 17.3  | 6.2   | 14.1  | 14.9  |
| 33.7   | 51.1   | 45.8   | 11.6   | 13.8  | 11.9  | 5.8   | 5.7   | 8.5   |
| 4.3    | 1.4    | 1.9    | 5.3    | 6.3   | 6.0   | 4.3   | 5.2   | 1.8   |
| 3.8    | 4.0    | 3.4    | 6.2    | 3.7   | 3.1   | 2.9   | 1.7   | 7.1   |
| 21.6   | 28.2   | 17.8   | 50.6   | 40.6  | 33.1  | 27.5  | 28.4  | 23.6  |
| 4.5    | 17.2   | 9.7    | 13.4   | 12.6  | 4.0   | 8.6   | 10.6  | 17.2  |
| 2742.0 | 2746.9 | 1758.6 | 1162.2 | 856.9 | 876.5 | 559.8 | 500.8 | 586.6 |
| 4.6    | 11.4   | 5.9    | 36.7   | 30.5  | 26.5  | 54.9  | 43.1  | 53.0  |
| 73.4   | 103.9  | 97.8   | 90.4   | 116.8 | 107.0 | 68.5  | 73.4  | 82.2  |
| 145.2  | 148.9  | 95.4   | 64.3   | 34.6  | 52.0  | 35.9  | 35.8  | 43.1  |
| 119.7  | 147.5  | 82.4   | 31.7   | 37.8  | 19.1  | 24.1  | 25.1  | 29.8  |
| 728.1  | 771.4  | 524.7  | 603.8  | 516.1 | 581.8 | 440.6 | 421.6 | 490.3 |
| 3.0    | 1.8    | 1.0    | 1.9    | 2.2   | 6.8   | 3.3   | 1.2   | 1.6   |
| 8.8    | 4.3    | 1.0    | 11.5   | 17.5  | 23.5  | 14.0  | 12.4  | 16.7  |
| 5.8    | 17.9   | 7.8    | 4.9    | 5.4   | 4.9   | 12.7  | 16.7  | 17.7  |
| 6.2    | 6.8    | 4.4    | 21.1   | 12.5  | 7.4   | 8.0   | 11.9  | 7.7   |
| 110.2  | 138.5  | 130.8  | 38.6   | 42.7  | 53.2  | 115.3 | 142.6 | 153.0 |
| 51.5   | 45.4   | 39.2   | 101.5  | 89.5  | 98.0  | 39.6  | 53.0  | 59.0  |
| 36.6   | 47.5   | 34.6   | 40.0   | 30.0  | 44.9  | 18.3  | 28.9  | 25.3  |
| 1447.9 | 1638.5 | 1154.1 | 815.2  | 725.5 | 702.2 | 459.4 | 408.1 | 450.3 |
| 27.5   | 50.9   | 39.6   | 50.6   | 34.5  | 40.4  | 45.0  | 36.7  | 42.7  |
| 3.9    | 8.3    | 0.9    | 678.7  | 522.5 | 587.0 | 527.3 | 537.3 | 577.1 |
| 0.7    | 1.3    | 0.6    | 184.0  | 142.8 | 157.3 | 245.3 | 261.1 | 275.4 |
| 1147.0 | 1484.6 | 940.6  | 434.5  | 366.0 | 403.1 | 236.8 | 288.1 | 301.5 |
| 432.9  | 712.6  | 420.3  | 238.7  | 187.5 | 213.1 | 328.2 | 357.1 | 407.4 |
| 133.6  | 181.3  | 110.0  | 91.0   | 102.1 | 112.7 | 106.5 | 84.8  | 113.6 |
| 34.2   | 41.9   | 35.9   | 31.1   | 27.9  | 43.8  | 22.6  | 33.6  | 37.8  |
| 59.6   | 72.3   | 60.1   | 104.6  | 87.5  | 92.9  | 50.2  | 63.9  | 63.6  |
| 5.8    | 8.8    | 5.5    | 6.3    | 4.1   | 7.2   | 2.6   | 2.4   | 2.0   |
| 7.4    | 4.7    | 4.9    | 10.4   | 16.5  | 5.4   | 4.2   | 5.0   | 4.5   |
| 171.0  | 203.1  | 119.3  | 255.1  | 230.4 | 321.2 | 264.0 | 238.1 | 320.7 |
| 511.2  | 672.6  | 526.3  | 443.9  | 375.3 | 425.2 | 238.5 | 271.4 | 288.5 |
| 77.0   | 101.4  | 105.7  | 203.8  | 180.9 | 176.8 | 141.2 | 151.1 | 158.0 |
| 56.9   | 71.8   | 76.1   | 227.3  | 167.9 | 200.6 | 125.3 | 151.7 | 157.5 |
| 21.1   | 26.5   | 15.7   | 15.0   | 8.2   | 18.1  | 6.5   | 7.9   | 5.9   |
| 262.1  | 319.5  | 258.2  | 77.7   | 62.3  | 63.1  | 52.2  | 45.1  | 49.7  |
| 11.2   | 11.7   | 12.0   | 440.3  | 371.8 | 408.0 | 266.3 | 343.6 | 325.3 |
| 253.5  | 233.0  | 131.9  | 375.6  | 279.3 | 340.1 | 215.2 | 202.0 | 222.5 |
| 164.7  | 246.5  | 265.1  | 128.2  | 118.4 | 141.0 | 76.2  | 108.9 | 110.9 |
| 187.2  | 260.6  | 271.1  | 18.2   | 17.6  | 16.3  | 20.4  | 29.6  | 30.3  |
| 135.8  | 210.2  | 273.9  | 28.4   | 33.1  | 48.1  | 23.7  | 23.1  | 23.2  |
| 12.0   | 8.7    | 11.8   | 25.6   | 28.0  | 34.2  | 12.6  | 7.0   | 18.7  |
| 101.9  | 110.2  | 86.7   | 116.3  | 129.4 | 126.9 | 66.1  | 90.4  | 106.0 |
| 162.1  | 136.8  | 76.3   | 1247.8 | 914.2 | 993.3 | 625.6 | 622.6 | 649.8 |

|        |        |        |        |       |       |       |       |       |
|--------|--------|--------|--------|-------|-------|-------|-------|-------|
| 414.9  | 461.6  | 287.7  | 30.4   | 24.3  | 24.9  | 22.7  | 26.2  | 25.0  |
| 11.0   | 42.2   | 27.9   | 164.0  | 190.6 | 212.8 | 88.9  | 117.3 | 123.9 |
| 247.4  | 291.1  | 233.1  | 66.2   | 52.3  | 61.5  | 46.8  | 61.7  | 67.2  |
| 9.9    | 5.3    | 8.9    | 35.4   | 24.5  | 23.9  | 8.3   | 11.8  | 12.5  |
| 11.2   | 12.6   | 10.6   | 14.7   | 9.7   | 20.5  | 12.9  | 8.7   | 11.8  |
| 14.9   | 26.9   | 16.2   | 13.9   | 12.9  | 22.2  | 10.6  | 8.1   | 6.5   |
| 2.4    | 11.5   | 30.5   | 6.2    | 5.5   | 11.3  | 2.0   | 1.6   | 2.1   |
| 1202.0 | 1223.8 | 765.4  | 270.9  | 219.2 | 270.5 | 301.8 | 233.4 | 297.4 |
| 183.8  | 206.2  | 171.5  | 207.0  | 168.1 | 217.8 | 110.0 | 91.4  | 118.6 |
| 62.7   | 61.9   | 55.2   | 73.5   | 70.5  | 74.3  | 46.5  | 51.1  | 56.4  |
| 22.7   | 26.9   | 24.6   | 106.4  | 107.7 | 115.1 | 93.3  | 89.8  | 129.0 |
| 12.8   | 18.7   | 12.8   | 289.8  | 231.1 | 281.7 | 100.9 | 122.5 | 135.5 |
| 11.4   | 7.5    | 3.1    | 36.5   | 34.4  | 39.6  | 15.7  | 24.4  | 26.9  |
| 1572.5 | 1665.1 | 899.6  | 729.7  | 558.8 | 631.1 | 437.6 | 354.9 | 471.2 |
| 34.0   | 39.0   | 23.6   | 63.4   | 40.2  | 57.8  | 32.3  | 29.6  | 33.5  |
| 105.0  | 206.5  | 172.9  | 199.3  | 181.1 | 194.2 | 148.2 | 165.1 | 188.4 |
| 8.0    | 17.6   | 9.8    | 12.3   | 8.3   | 10.6  | 8.2   | 4.6   | 4.5   |
| 240.0  | 274.4  | 265.1  | 136.2  | 128.2 | 133.6 | 133.2 | 177.0 | 162.3 |
| 42.3   | 39.9   | 17.0   | 54.0   | 39.9  | 42.6  | 34.4  | 26.9  | 41.4  |
| 36.6   | 31.5   | 30.3   | 42.3   | 54.7  | 50.7  | 12.1  | 28.3  | 24.0  |
| 115.9  | 157.5  | 112.5  | 69.9   | 65.2  | 88.0  | 67.2  | 75.3  | 89.7  |
| 405.8  | 855.3  | 566.1  | 9.7    | 5.1   | 12.5  | 10.0  | 8.0   | 9.8   |
| 20.5   | 22.7   | 16.5   | 37.5   | 31.8  | 42.3  | 21.0  | 38.0  | 33.4  |
| 243.8  | 362.4  | 273.8  | 191.0  | 153.4 | 218.0 | 95.6  | 94.2  | 112.2 |
| 81.5   | 98.2   | 77.1   | 467.5  | 373.6 | 442.3 | 254.2 | 248.6 | 246.3 |
| 274.5  | 363.4  | 328.1  | 217.0  | 179.1 | 203.4 | 157.6 | 190.5 | 203.6 |
| 141.2  | 170.4  | 132.8  | 124.0  | 122.2 | 142.9 | 82.5  | 88.4  | 117.7 |
| 30.2   | 48.4   | 43.1   | 84.0   | 70.2  | 79.3  | 44.1  | 35.6  | 44.9  |
| 45.5   | 79.3   | 48.1   | 326.1  | 194.8 | 219.9 | 173.5 | 200.7 | 194.7 |
| 707.3  | 892.3  | 508.3  | 844.1  | 798.9 | 857.4 | 413.5 | 443.3 | 531.8 |
| 8.0    | 8.9    | 1.3    | 13.8   | 11.8  | 16.4  | 5.9   | 5.2   | 4.6   |
| 14.1   | 17.1   | 12.2   | 19.6   | 28.8  | 9.7   | 14.1  | 8.7   | 10.0  |
| 14.2   | 45.6   | 40.1   | 33.7   | 44.6  | 55.0  | 29.2  | 39.9  | 34.3  |
| 6.7    | 5.2    | 4.8    | 8.3    | 7.2   | 6.5   | 2.6   | 2.0   | 3.1   |
| 204.7  | 228.1  | 165.6  | 378.1  | 395.0 | 388.2 | 191.5 | 275.0 | 213.8 |
| 628.6  | 1243.5 | 1343.0 | 328.4  | 311.0 | 411.5 | 317.4 | 416.5 | 422.1 |
| 472.6  | 986.1  | 927.8  | 253.2  | 338.1 | 319.9 | 240.5 | 337.6 | 348.6 |
| 152.4  | 161.1  | 112.4  | 240.6  | 179.6 | 226.8 | 165.8 | 148.8 | 157.5 |
| 591.1  | 797.1  | 416.2  | 728.2  | 581.6 | 526.5 | 490.7 | 536.8 | 567.4 |
| 547.7  | 535.7  | 296.8  | 188.8  | 166.9 | 170.6 | 153.0 | 160.1 | 164.3 |
| 50.0   | 88.2   | 61.5   | 33.5   | 32.2  | 37.6  | 35.7  | 28.5  | 24.0  |
| 142.4  | 196.8  | 143.0  | 152.3  | 141.2 | 117.7 | 87.6  | 91.9  | 109.5 |
| 458.0  | 488.1  | 310.9  | 278.1  | 236.5 | 230.3 | 160.8 | 203.8 | 185.2 |
| 219.0  | 301.3  | 329.5  | 914.9  | 824.9 | 953.3 | 409.2 | 574.4 | 546.9 |
| 352.6  | 473.0  | 446.1  | 796.7  | 729.8 | 810.1 | 624.9 | 789.9 | 769.6 |
| 13.9   | 6.0    | 11.0   | 1190.5 | 853.0 | 964.0 | 570.9 | 463.9 | 552.0 |
| 1740.8 | 2197.8 | 1768.7 | 330.2  | 368.2 | 410.7 | 224.5 | 357.6 | 333.8 |
| 37.5   | 80.7   | 88.1   | 153.6  | 133.8 | 150.1 | 65.2  | 90.3  | 76.2  |
| 244.2  | 368.5  | 285.1  | 966.8  | 781.7 | 867.6 | 459.6 | 604.4 | 680.2 |
| 1341.8 | 1017.6 | 230.2  | 391.7  | 145.5 | 159.1 | 291.3 | 96.6  | 153.8 |
| 1278.8 | 963.0  | 262.6  | 284.3  | 121.1 | 130.0 | 180.7 | 71.1  | 120.4 |
| 31.6   | 36.2   | 21.2   | 17.0   | 11.3  | 13.4  | 16.0  | 16.0  | 14.3  |
| 390.8  | 443.3  | 314.9  | 105.6  | 96.1  | 98.8  | 110.5 | 125.0 | 138.8 |

|        |        |        |        |        |        |        |        |        |
|--------|--------|--------|--------|--------|--------|--------|--------|--------|
| 706.2  | 951.1  | 628.9  | 205.1  | 143.5  | 182.7  | 172.0  | 104.3  | 161.5  |
| 331.5  | 358.5  | 269.3  | 219.9  | 178.7  | 207.5  | 163.3  | 172.2  | 177.0  |
| 368.7  | 592.6  | 228.4  | 34.4   | 23.4   | 33.6   | 29.0   | 17.4   | 34.7   |
| 952.5  | 1120.9 | 792.1  | 604.9  | 508.4  | 578.4  | 359.2  | 327.3  | 385.0  |
| 164.4  | 179.7  | 75.8   | 156.1  | 80.6   | 88.1   | 70.7   | 45.4   | 49.2   |
| 229.5  | 242.0  | 79.5   | 194.1  | 94.0   | 114.5  | 81.6   | 48.6   | 49.5   |
| 8.3    | 17.9   | 13.4   | 7.6    | 4.9    | 7.7    | 2.7    | 4.1    | 2.3    |
| 291.7  | 341.6  | 232.6  | 242.5  | 206.2  | 195.4  | 163.5  | 142.2  | 147.4  |
| 261.7  | 522.0  | 540.0  | 42.4   | 38.5   | 27.0   | 17.8   | 16.8   | 16.8   |
| 7.4    | 1.4    | 2.0    | 5.0    | 4.5    | 2.8    | 1.1    | 2.7    | 0.9    |
| 65.6   | 113.9  | 117.3  | 134.6  | 133.1  | 130.6  | 86.9   | 145.4  | 109.4  |
| 18.1   | 20.2   | 10.9   | 16.9   | 25.3   | 23.2   | 13.2   | 12.0   | 13.3   |
| 1142.3 | 1323.3 | 1042.0 | 406.1  | 358.8  | 359.8  | 296.6  | 307.1  | 375.8  |
| 150.1  | 212.6  | 220.4  | 105.3  | 103.2  | 127.2  | 55.0   | 73.8   | 86.4   |
| 145.1  | 175.5  | 142.5  | 209.1  | 179.3  | 207.7  | 124.5  | 177.8  | 157.8  |
| 49.0   | 70.6   | 70.3   | 297.3  | 241.8  | 295.7  | 137.3  | 182.8  | 180.2  |
| 477.2  | 566.2  | 378.6  | 83.7   | 64.5   | 79.7   | 79.2   | 80.2   | 80.0   |
| 927.5  | 876.2  | 603.3  | 199.5  | 168.4  | 173.5  | 187.0  | 246.2  | 248.8  |
| 2.9    | 6.0    | 1.5    | 25.4   | 19.6   | 22.5   | 25.4   | 18.4   | 22.2   |
| 88.0   | 94.9   | 71.4   | 28.0   | 35.9   | 39.3   | 59.0   | 65.6   | 58.9   |
| 84.2   | 98.7   | 83.7   | 63.2   | 57.2   | 49.8   | 49.6   | 77.0   | 68.2   |
| 186.8  | 216.9  | 150.7  | 120.8  | 109.4  | 118.6  | 130.1  | 174.2  | 172.1  |
| 2.9    | 3.7    | 1.1    | 3.9    | 3.8    | 3.7    | 1.9    | 1.7    | 2.4    |
| 19.6   | 50.9   | 21.1   | 3.1    | 5.0    | 12.6   | 2.2    | 2.9    | 2.7    |
| 7.5    | 15.1   | 12.1   | 24.7   | 13.6   | 24.1   | 6.9    | 14.9   | 16.0   |
| 27.5   | 32.5   | 36.9   | 32.9   | 24.2   | 53.0   | 20.7   | 30.0   | 11.2   |
| 583.5  | 618.5  | 416.3  | 212.8  | 169.2  | 211.8  | 113.2  | 110.0  | 107.7  |
| 117.7  | 126.7  | 137.6  | 26.1   | 20.7   | 25.0   | 20.7   | 11.2   | 25.0   |
| 210.9  | 268.6  | 360.4  | 143.8  | 144.2  | 171.4  | 77.3   | 63.3   | 105.7  |
| 122.8  | 142.4  | 85.3   | 92.6   | 72.3   | 73.5   | 36.2   | 49.8   | 60.8   |
| 346.1  | 361.5  | 260.2  | 58.7   | 56.7   | 49.2   | 38.1   | 43.8   | 47.9   |
| 54.8   | 61.7   | 46.3   | 139.3  | 134.9  | 151.9  | 90.3   | 78.4   | 85.6   |
| 242.0  | 294.6  | 166.9  | 93.8   | 84.1   | 103.7  | 87.2   | 118.5  | 104.2  |
| 741.4  | 925.4  | 598.8  | 1623.8 | 1335.5 | 1448.5 | 811.9  | 1133.6 | 953.0  |
| 441.9  | 506.1  | 308.7  | 509.3  | 363.5  | 396.1  | 510.3  | 532.0  | 502.3  |
| 1.0    | 8.3    | 1.4    | 11.6   | 13.0   | 6.4    | 4.7    | 1.1    | 0.8    |
| 6.4    | 8.2    | 5.2    | 26.5   | 20.9   | 16.7   | 10.9   | 6.2    | 4.2    |
| 109.3  | 179.4  | 149.4  | 57.1   | 53.0   | 55.5   | 26.6   | 51.1   | 50.4   |
| 1000.3 | 1372.1 | 1245.4 | 1098.4 | 938.1  | 975.1  | 810.1  | 909.6  | 956.0  |
| 30.3   | 28.3   | 25.4   | 27.3   | 25.6   | 32.9   | 11.3   | 14.9   | 22.5   |
| 507.6  | 450.3  | 227.6  | 45.9   | 28.3   | 33.5   | 30.9   | 34.2   | 31.8   |
| 547.9  | 628.9  | 339.6  | 295.3  | 219.5  | 289.5  | 222.5  | 229.5  | 267.6  |
| 5.7    | 5.5    | 4.3    | 21.1   | 4.3    | 12.2   | 1.9    | 3.3    | 4.5    |
| 1420.2 | 1079.1 | 314.7  | 2307.8 | 1312.1 | 1318.9 | 792.8  | 396.8  | 687.3  |
| 1251.4 | 973.9  | 317.7  | 949.6  | 586.5  | 548.4  | 720.5  | 304.8  | 527.3  |
| 157.6  | 212.5  | 138.1  | 206.1  | 158.7  | 167.9  | 118.2  | 113.8  | 129.4  |
| 873.5  | 916.5  | 696.5  | 429.2  | 327.2  | 371.4  | 346.8  | 281.9  | 331.8  |
| 64.1   | 67.2   | 48.2   | 15.1   | 9.7    | 9.3    | 10.3   | 23.0   | 7.2    |
| 2128.5 | 2947.7 | 2431.0 | 1720.8 | 1650.4 | 1664.8 | 1112.0 | 1823.4 | 1536.9 |
| 554.7  | 590.7  | 377.3  | 649.0  | 530.0  | 583.8  | 372.0  | 372.2  | 381.0  |
| 139.2  | 169.9  | 116.0  | 217.6  | 170.8  | 181.7  | 79.5   | 83.8   | 78.1   |
| 308.9  | 441.5  | 324.6  | 211.5  | 206.9  | 225.1  | 147.2  | 156.8  | 172.8  |
| 3083.5 | 2870.6 | 1202.2 | 1180.9 | 603.3  | 581.0  | 588.8  | 303.7  | 388.6  |

|        |        |        |        |        |        |        |        |        |
|--------|--------|--------|--------|--------|--------|--------|--------|--------|
| 162.1  | 164.6  | 114.0  | 58.3   | 44.9   | 53.0   | 50.3   | 52.2   | 58.4   |
| 277.1  | 334.2  | 214.8  | 173.1  | 138.6  | 149.2  | 204.7  | 192.4  | 248.9  |
| 4252.6 | 4395.0 | 2375.0 | 2960.5 | 1620.7 | 1670.1 | 1491.1 | 899.2  | 1056.1 |
| 145.2  | 137.8  | 65.4   | 197.9  | 169.9  | 160.9  | 147.7  | 124.5  | 140.0  |
| 631.1  | 991.1  | 918.3  | 1456.7 | 1199.6 | 1497.3 | 722.4  | 898.5  | 990.1  |
| 49.7   | 76.2   | 52.8   | 115.3  | 109.7  | 129.6  | 65.8   | 81.8   | 86.4   |
| 42.0   | 36.0   | 22.5   | 23.6   | 20.0   | 18.1   | 12.9   | 14.8   | 17.0   |
| 3369.4 | 4256.8 | 3189.9 | 4302.9 | 3604.8 | 3677.0 | 2982.5 | 2645.0 | 3069.7 |
| 242.2  | 270.4  | 247.8  | 125.1  | 115.5  | 120.9  | 144.3  | 171.3  | 162.2  |
| 642.2  | 779.1  | 363.7  | 967.3  | 432.3  | 473.7  | 568.9  | 309.5  | 299.4  |
| 274.6  | 316.2  | 282.0  | 625.5  | 451.6  | 564.2  | 293.6  | 298.7  | 359.6  |
| 6.4    | 8.9    | 9.1    | 15.5   | 4.7    | 9.1    | 10.3   | 11.8   | 7.0    |
| 27.9   | 58.8   | 45.4   | 9.0    | 5.4    | 7.5    | 9.7    | 4.6    | 2.9    |
| 36.3   | 50.3   | 29.7   | 28.8   | 14.2   | 26.1   | 13.7   | 11.6   | 18.6   |
| 42.2   | 54.5   | 44.2   | 67.2   | 64.1   | 81.3   | 45.1   | 41.0   | 49.7   |
| 125.2  | 313.8  | 259.8  | 399.5  | 316.4  | 315.4  | 200.5  | 214.1  | 252.3  |
| 21.6   | 36.0   | 25.7   | 160.3  | 108.5  | 140.5  | 85.5   | 90.9   | 88.6   |
| 189.1  | 199.9  | 313.6  | 8.5    | 5.3    | 10.1   | 2.9    | 1.8    | 3.2    |
| 7.2    | 12.2   | 6.5    | 209.5  | 174.6  | 174.6  | 94.6   | 93.8   | 121.6  |
| 108.7  | 129.1  | 149.6  | 29.3   | 26.0   | 21.5   | 13.0   | 18.4   | 27.2   |
| 328.9  | 649.1  | 684.2  | 381.7  | 284.9  | 324.2  | 322.9  | 176.0  | 266.7  |
| 460.7  | 631.3  | 515.6  | 218.0  | 222.6  | 208.6  | 260.8  | 313.5  | 347.1  |
| 8.6    | 27.1   | 14.0   | 13.1   | 9.2    | 16.0   | 8.5    | 10.0   | 7.5    |
| 42.7   | 48.2   | 49.6   | 13.3   | 6.3    | 11.5   | 15.8   | 15.1   | 17.6   |
| 200.0  | 247.7  | 258.1  | 96.3   | 83.6   | 81.1   | 69.8   | 81.4   | 74.6   |
| 217.8  | 281.5  | 256.5  | 89.3   | 61.9   | 89.5   | 86.4   | 96.8   | 100.6  |
| 2154.4 | 2429.6 | 1975.8 | 1168.5 | 949.6  | 1042.1 | 720.2  | 726.3  | 754.0  |
| 13.4   | 12.9   | 12.9   | 21.9   | 15.3   | 21.6   | 18.6   | 18.0   | 15.6   |
| 1.7    | 8.0    | 1.8    | 7.3    | 8.2    | 11.1   | 4.9    | 5.8    | 4.8    |
| 568.9  | 790.7  | 683.3  | 399.6  | 298.4  | 339.2  | 388.1  | 305.7  | 382.9  |
| 121.8  | 186.7  | 201.4  | 223.1  | 163.4  | 216.6  | 174.7  | 124.0  | 132.7  |
| 15.2   | 10.9   | 12.4   | 4.3    | 6.1    | 12.2   | 5.9    | 7.8    | 2.4    |
| 76.5   | 95.7   | 73.0   | 92.3   | 89.1   | 106.7  | 88.2   | 61.1   | 71.6   |
| 391.5  | 639.7  | 499.1  | 65.2   | 31.9   | 45.1   | 50.4   | 37.0   | 43.5   |
| 1011.1 | 915.2  | 469.3  | 142.8  | 124.0  | 118.2  | 320.2  | 219.4  | 289.3  |
| 1511.8 | 1505.5 | 832.8  | 333.1  | 286.9  | 271.1  | 523.8  | 437.2  | 507.4  |
| 196.4  | 236.5  | 126.1  | 142.8  | 127.4  | 142.0  | 92.0   | 109.9  | 103.1  |
| 191.1  | 210.7  | 137.0  | 117.4  | 92.9   | 121.8  | 92.0   | 106.8  | 106.5  |
| 2.1    | 11.8   | 4.6    | 94.4   | 72.6   | 82.4   | 54.4   | 81.6   | 81.8   |
| 8.9    | 10.0   | 5.1    | 55.7   | 40.4   | 48.2   | 30.7   | 38.0   | 32.4   |
| 434.1  | 533.1  | 295.4  | 562.7  | 418.6  | 470.6  | 359.8  | 321.9  | 341.2  |
| 19.9   | 18.8   | 27.6   | 82.9   | 56.8   | 61.4   | 41.7   | 47.9   | 54.3   |
| 361.6  | 486.9  | 340.3  | 367.1  | 317.4  | 360.9  | 229.9  | 222.5  | 258.1  |
| 135.7  | 230.5  | 200.8  | 210.3  | 260.8  | 256.1  | 137.1  | 176.3  | 205.0  |
| 1091.1 | 1397.7 | 1165.9 | 604.8  | 536.8  | 570.6  | 387.2  | 466.0  | 495.9  |
| 5.5    | 5.2    | 1.8    | 48.1   | 44.4   | 38.7   | 29.3   | 33.5   | 32.4   |
| 26.4   | 29.6   | 37.1   | 55.3   | 70.7   | 83.5   | 42.8   | 60.1   | 53.0   |
| 523.0  | 619.1  | 419.5  | 38.7   | 50.6   | 37.2   | 58.5   | 64.5   | 62.4   |
| 14.5   | 13.5   | 12.4   | 11.5   | 15.4   | 14.4   | 7.6    | 11.0   | 6.6    |
| 223.9  | 297.7  | 273.8  | 15.7   | 7.2    | 25.5   | 4.8    | 2.2    | 2.0    |
| 144.5  | 166.6  | 118.8  | 89.3   | 89.3   | 84.2   | 77.1   | 59.8   | 71.9   |
| 131.4  | 177.8  | 93.5   | 95.6   | 64.9   | 70.6   | 105.9  | 106.6  | 119.8  |
| 454.2  | 546.8  | 426.4  | 175.6  | 183.7  | 194.9  | 111.9  | 165.7  | 155.3  |

|        |        |        |        |        |        |        |        |        |
|--------|--------|--------|--------|--------|--------|--------|--------|--------|
| 73.3   | 77.4   | 60.8   | 28.6   | 28.6   | 19.6   | 22.3   | 21.8   | 28.1   |
| 48.3   | 68.0   | 49.3   | 47.0   | 42.0   | 44.6   | 14.7   | 31.4   | 36.2   |
| 130.8  | 183.1  | 98.9   | 56.1   | 42.7   | 50.2   | 53.2   | 48.1   | 52.4   |
| 191.7  | 157.2  | 80.8   | 67.1   | 45.4   | 38.3   | 66.1   | 50.4   | 47.0   |
| 12.8   | 10.4   | 12.1   | 63.6   | 21.4   | 24.4   | 17.2   | 13.8   | 20.8   |
| 315.0  | 377.5  | 213.7  | 568.6  | 432.5  | 516.9  | 271.8  | 255.0  | 245.2  |
| 895.8  | 1077.5 | 700.5  | 1.5    | 1.1    | 2.1    | 1.5    | 0.6    | 0.9    |
| 805.1  | 958.1  | 852.1  | 73.3   | 83.2   | 81.8   | 61.4   | 97.6   | 88.6   |
| 484.2  | 658.9  | 656.2  | 28.5   | 30.2   | 32.1   | 30.3   | 35.9   | 36.0   |
| 5.2    | 7.8    | 6.8    | 12.6   | 5.3    | 24.5   | 10.8   | 6.6    | 9.6    |
| 218.8  | 213.6  | 118.2  | 920.7  | 733.8  | 802.4  | 436.4  | 413.3  | 454.7  |
| 76.0   | 173.6  | 172.2  | 289.5  | 253.6  | 342.2  | 241.6  | 264.6  | 271.6  |
| 141.3  | 132.3  | 122.9  | 164.2  | 154.2  | 173.7  | 108.9  | 109.6  | 111.8  |
| 90.3   | 142.7  | 121.3  | 187.1  | 171.5  | 205.5  | 102.8  | 121.6  | 114.0  |
| 434.9  | 596.1  | 498.9  | 217.3  | 159.4  | 165.4  | 212.7  | 194.9  | 218.4  |
| 1879.1 | 2198.1 | 1567.8 | 2844.6 | 2040.2 | 2251.0 | 1755.5 | 1338.2 | 1462.6 |
| 1552.0 | 1655.5 | 1049.1 | 222.5  | 171.3  | 199.2  | 151.1  | 147.3  | 164.2  |
| 507.0  | 566.8  | 401.9  | 348.2  | 292.6  | 302.9  | 275.7  | 291.6  | 336.1  |
| 38.9   | 62.6   | 40.0   | 22.0   | 27.0   | 17.2   | 16.8   | 20.3   | 27.6   |
| 51.8   | 66.9   | 39.6   | 41.5   | 36.2   | 31.5   | 16.6   | 27.1   | 30.1   |
| 294.3  | 359.5  | 288.3  | 168.9  | 125.6  | 123.1  | 79.0   | 102.2  | 80.2   |
| 249.3  | 325.4  | 214.0  | 145.9  | 122.2  | 115.0  | 74.7   | 73.8   | 80.9   |
| 13.8   | 18.4   | 11.4   | 46.0   | 49.8   | 46.1   | 28.7   | 27.2   | 33.1   |
| 1.8    | 15.5   | 23.8   | 7.8    | 5.8    | 10.6   | 4.8    | 6.3    | 3.5    |
| 127.5  | 163.2  | 157.7  | 39.8   | 47.3   | 38.3   | 41.8   | 32.0   | 43.2   |
| 6203.6 | 7273.5 | 6516.9 | 5382.0 | 5025.8 | 5288.4 | 4430.7 | 4932.6 | 5096.1 |
| 2.5    | 3.1    | 1.2    | 11.8   | 3.0    | 8.5    | 1.3    | 2.0    | 2.1    |
| 44.1   | 71.8   | 41.6   | 92.2   | 104.1  | 87.2   | 30.9   | 37.4   | 37.6   |
| 83.2   | 241.0  | 346.2  | 1556.7 | 1454.7 | 1536.7 | 1013.2 | 1406.6 | 1429.2 |
| 115.9  | 96.3   | 63.7   | 143.8  | 117.1  | 129.1  | 91.3   | 93.1   | 115.9  |
| 472.3  | 517.4  | 324.3  | 83.0   | 79.8   | 86.1   | 100.4  | 98.4   | 109.2  |
| 1032.3 | 1101.5 | 697.9  | 269.0  | 254.1  | 254.7  | 190.2  | 195.1  | 220.5  |
| 473.4  | 467.2  | 267.3  | 79.0   | 68.6   | 80.0   | 92.3   | 86.5   | 103.9  |
| 6.0    | 11.0   | 5.9    | 23.5   | 15.7   | 21.7   | 14.0   | 19.0   | 10.0   |
| 8.3    | 20.0   | 14.5   | 6.0    | 22.3   | 4.5    | 6.4    | 11.9   | 10.8   |
| 448.8  | 632.5  | 627.8  | 430.1  | 532.1  | 589.3  | 503.9  | 783.2  | 753.1  |
| 186.8  | 228.2  | 134.4  | 156.0  | 121.7  | 136.5  | 126.7  | 101.3  | 110.0  |
| 1.5    | 1.9    | 7.6    | 8.9    | 1.6    | 16.2   | 5.8    | 7.6    | 1.9    |
| 2.5    | 4.5    | 2.0    | 1.8    | 2.6    | 9.3    | 1.7    | 2.9    | 3.0    |
| 14.7   | 14.5   | 14.0   | 16.5   | 30.0   | 38.5   | 17.1   | 24.6   | 19.0   |
| 187.1  | 259.9  | 205.6  | 360.1  | 322.5  | 305.4  | 172.0  | 222.4  | 204.7  |
| 20.3   | 26.5   | 17.9   | 30.8   | 22.3   | 28.2   | 17.2   | 4.7    | 21.2   |
| 685.5  | 842.3  | 720.6  | 848.4  | 683.2  | 756.5  | 498.4  | 474.6  | 497.7  |
| 125.2  | 242.7  | 170.3  | 78.1   | 68.0   | 75.3   | 270.4  | 173.2  | 215.4  |
| 38.0   | 93.5   | 106.9  | 102.7  | 67.3   | 80.8   | 41.3   | 42.6   | 45.9   |
| 10.9   | 9.8    | 6.0    | 10.5   | 7.7    | 4.0    | 6.1    | 8.6    | 8.3    |
| 168.8  | 178.3  | 116.0  | 214.9  | 167.2  | 199.7  | 122.5  | 112.5  | 140.1  |
| 7.6    | 7.7    | 7.8    | 9.0    | 16.5   | 12.0   | 3.7    | 7.7    | 3.3    |
| 797.8  | 902.6  | 703.2  | 340.5  | 328.1  | 344.7  | 276.0  | 409.3  | 354.3  |
| 603.0  | 485.1  | 186.8  | 385.8  | 169.1  | 193.6  | 138.0  | 65.8   | 76.6   |
| 2748.5 | 2709.3 | 1250.9 | 689.1  | 369.7  | 380.9  | 437.7  | 261.3  | 308.4  |
| 1663.4 | 1541.4 | 681.2  | 198.0  | 91.2   | 100.8  | 239.3  | 129.5  | 149.1  |
| 119.1  | 128.2  | 89.6   | 86.2   | 80.4   | 85.9   | 39.8   | 55.9   | 61.6   |

|        |        |        |        |        |        |        |        |        |
|--------|--------|--------|--------|--------|--------|--------|--------|--------|
| 48.3   | 93.1   | 106.6  | 48.8   | 42.8   | 58.5   | 32.1   | 28.6   | 39.4   |
| 78.6   | 159.2  | 185.4  | 1710.6 | 1732.0 | 2103.3 | 665.8  | 1250.2 | 967.9  |
| 60.8   | 130.5  | 151.4  | 527.6  | 556.2  | 664.2  | 480.0  | 751.0  | 659.2  |
| 128.6  | 149.6  | 61.4   | 97.9   | 71.7   | 90.0   | 51.0   | 45.6   | 48.4   |
| 3.5    | 5.4    | 9.0    | 9.6    | 10.0   | 16.0   | 3.6    | 15.0   | 12.5   |
| 8.8    | 13.3   | 12.6   | 16.2   | 23.4   | 18.4   | 14.3   | 21.9   | 23.4   |
| 17.3   | 12.5   | 9.5    | 53.5   | 71.2   | 64.2   | 24.2   | 57.8   | 50.8   |
| 133.3  | 132.3  | 111.9  | 204.3  | 198.3  | 212.1  | 153.9  | 255.0  | 208.1  |
| 9.2    | 15.5   | 23.6   | 18.8   | 7.1    | 13.4   | 13.7   | 3.9    | 15.5   |
| 65.4   | 78.2   | 69.6   | 56.0   | 69.3   | 79.2   | 45.8   | 57.4   | 73.1   |
| 7.5    | 12.9   | 6.7    | 43.0   | 38.8   | 29.6   | 38.6   | 35.0   | 35.7   |
| 685.9  | 612.1  | 371.6  | 2150.6 | 1960.5 | 2014.6 | 1605.2 | 1441.6 | 2024.7 |
| 352.3  | 429.9  | 364.7  | 159.5  | 122.7  | 123.1  | 92.6   | 87.9   | 111.3  |
| 315.3  | 393.5  | 321.2  | 203.8  | 183.6  | 199.7  | 138.9  | 129.6  | 166.9  |
| 44.8   | 71.4   | 50.1   | 53.6   | 43.0   | 56.1   | 45.9   | 48.4   | 40.0   |
| 711.5  | 758.4  | 444.0  | 298.1  | 231.3  | 235.1  | 220.8  | 218.9  | 224.0  |
| 889.5  | 880.0  | 484.8  | 358.9  | 174.2  | 163.5  | 360.7  | 196.3  | 222.7  |
| 292.7  | 336.0  | 184.9  | 145.7  | 96.3   | 117.1  | 98.8   | 64.4   | 70.0   |
| 729.7  | 932.6  | 705.3  | 62.5   | 62.6   | 77.1   | 33.9   | 39.2   | 42.6   |
| 208.9  | 309.5  | 283.3  | 127.3  | 117.9  | 137.9  | 101.2  | 123.9  | 122.8  |
| 16.4   | 8.7    | 14.1   | 29.4   | 27.1   | 26.7   | 15.6   | 10.8   | 3.1    |
| 7805.5 | 7884.4 | 7133.6 | 36.3   | 35.3   | 51.5   | 22.2   | 17.8   | 23.7   |
| 4.7    | 17.6   | 12.7   | 9.9    | 17.4   | 8.1    | 4.8    | 2.4    | 14.9   |
| 19.0   | 22.8   | 17.2   | 20.4   | 23.7   | 27.7   | 19.0   | 9.0    | 14.2   |
| 12.6   | 20.4   | 8.7    | 18.3   | 12.0   | 16.9   | 10.3   | 5.2    | 11.2   |
| 32.2   | 65.7   | 56.5   | 67.0   | 45.3   | 47.7   | 40.6   | 38.6   | 37.0   |
| 77.4   | 106.6  | 94.9   | 44.7   | 29.5   | 46.7   | 35.7   | 44.9   | 44.8   |
| 99.4   | 137.6  | 114.8  | 81.2   | 58.1   | 73.1   | 53.7   | 54.7   | 62.9   |
| 228.8  | 359.0  | 277.6  | 162.6  | 144.5  | 188.5  | 67.3   | 64.4   | 82.5   |
| 142.2  | 193.2  | 135.2  | 209.6  | 140.9  | 135.3  | 156.5  | 116.7  | 139.5  |
| 200.0  | 241.5  | 232.4  | 92.0   | 86.7   | 99.5   | 74.4   | 86.4   | 88.9   |
| 75.0   | 103.5  | 73.6   | 48.4   | 42.0   | 42.9   | 39.1   | 56.8   | 56.6   |
| 1088.0 | 1208.4 | 807.2  | 531.5  | 288.8  | 309.8  | 483.6  | 322.8  | 324.0  |
| 2.4    | 1.9    | 1.7    | 3.5    | 5.5    | 3.2    | 1.6    | 2.4    | 1.8    |
| 27.4   | 33.0   | 21.1   | 7.4    | 12.3   | 6.4    | 6.0    | 1.7    | 1.3    |
| 127.1  | 188.3  | 119.5  | 100.0  | 102.0  | 99.8   | 99.9   | 117.3  | 124.5  |
| 66.5   | 64.4   | 62.4   | 166.6  | 161.4  | 197.9  | 84.2   | 99.9   | 127.6  |
| 43.8   | 54.1   | 51.4   | 65.5   | 64.1   | 57.5   | 44.8   | 77.1   | 63.6   |
| 1482.8 | 1646.0 | 1128.3 | 235.5  | 232.2  | 274.9  | 149.7  | 190.4  | 187.1  |
| 185.9  | 216.1  | 132.3  | 571.3  | 483.8  | 557.8  | 227.5  | 283.7  | 258.3  |
| 4780.2 | 5182.1 | 3360.4 | 1848.1 | 1365.6 | 1331.0 | 1253.4 | 926.9  | 1065.9 |
| 237.7  | 267.5  | 203.6  | 785.8  | 622.7  | 505.0  | 1171.9 | 1131.5 | 1345.8 |
| 1169.2 | 1351.2 | 873.8  | 225.8  | 191.6  | 165.6  | 159.7  | 171.8  | 176.1  |
| 600.9  | 761.8  | 628.5  | 537.3  | 432.5  | 486.7  | 215.0  | 182.1  | 193.5  |
| 32.4   | 45.7   | 52.9   | 15.2   | 17.3   | 24.2   | 17.7   | 8.4    | 17.4   |
| 642.5  | 618.6  | 282.8  | 364.1  | 312.1  | 309.4  | 167.6  | 155.5  | 172.8  |
| 182.6  | 205.9  | 139.5  | 112.4  | 108.3  | 98.5   | 209.8  | 224.2  | 261.1  |
| 132.9  | 150.4  | 110.1  | 229.3  | 199.3  | 222.1  | 121.3  | 153.9  | 159.5  |
| 664.4  | 612.9  | 324.8  | 579.8  | 448.6  | 527.5  | 383.2  | 304.1  | 388.9  |
| 14.5   | 15.2   | 41.7   | 914.0  | 1055.3 | 1160.3 | 437.1  | 686.7  | 700.4  |
| 77.7   | 81.3   | 53.1   | 126.7  | 115.2  | 131.7  | 77.8   | 72.0   | 96.1   |
| 101.7  | 133.2  | 104.9  | 182.6  | 151.9  | 178.3  | 107.3  | 127.0  | 115.4  |
| 89.7   | 106.5  | 79.8   | 251.6  | 227.1  | 233.6  | 141.0  | 162.2  | 194.5  |

|        |        |        |        |        |        |        |        |        |
|--------|--------|--------|--------|--------|--------|--------|--------|--------|
| 47.8   | 57.6   | 24.5   | 43.7   | 28.6   | 29.6   | 19.7   | 23.9   | 21.2   |
| 19.8   | 15.5   | 8.8    | 29.6   | 22.6   | 16.2   | 8.5    | 11.7   | 14.8   |
| 1500.8 | 1768.2 | 998.1  | 719.3  | 586.6  | 627.2  | 615.0  | 594.3  | 660.6  |
| 1248.4 | 1238.5 | 793.4  | 371.7  | 280.8  | 319.4  | 390.0  | 329.2  | 381.2  |
| 44.7   | 80.0   | 57.3   | 33.2   | 34.2   | 32.3   | 27.6   | 24.7   | 15.7   |
| 63.7   | 96.9   | 81.0   | 68.8   | 67.3   | 89.4   | 94.6   | 87.0   | 114.6  |
| 31.4   | 61.0   | 57.0   | 107.5  | 42.4   | 87.5   | 69.3   | 53.0   | 50.6   |
| 331.7  | 433.0  | 243.0  | 134.9  | 122.4  | 129.9  | 86.5   | 100.7  | 99.4   |
| 66.9   | 72.6   | 57.0   | 23.0   | 24.1   | 28.4   | 14.9   | 21.6   | 17.4   |
| 2.2    | 4.0    | 5.1    | 6.3    | 4.3    | 4.2    | 5.0    | 1.0    | 3.1    |
| 137.6  | 128.9  | 97.8   | 150.1  | 116.3  | 152.6  | 77.0   | 91.0   | 93.8   |
| 299.7  | 368.0  | 292.3  | 184.2  | 183.3  | 205.4  | 166.2  | 250.2  | 215.3  |
| 88.3   | 105.4  | 66.2   | 50.3   | 24.8   | 48.3   | 34.5   | 37.3   | 32.9   |
| 33.7   | 50.4   | 38.4   | 19.2   | 14.4   | 18.7   | 21.0   | 22.1   | 19.4   |
| 58.3   | 53.1   | 49.8   | 16.6   | 16.8   | 14.3   | 17.5   | 12.0   | 13.2   |
| 46.5   | 49.9   | 46.4   | 7.1    | 3.3    | 6.0    | 1.6    | 1.2    | 1.5    |
| 57.6   | 139.1  | 183.1  | 219.3  | 212.9  | 238.2  | 114.4  | 185.4  | 192.5  |
| 25.0   | 12.9   | 28.5   | 83.6   | 72.9   | 81.8   | 56.5   | 37.4   | 64.6   |
| 6.4    | 9.4    | 5.1    | 141.1  | 126.6  | 127.8  | 127.7  | 150.4  | 162.5  |
| 247.6  | 375.1  | 355.5  | 224.5  | 177.6  | 192.9  | 173.5  | 155.9  | 193.5  |
| 237.1  | 295.1  | 156.4  | 250.4  | 157.4  | 169.0  | 166.6  | 117.3  | 141.2  |
| 114.2  | 213.8  | 119.7  | 48.9   | 43.0   | 49.2   | 36.8   | 32.2   | 41.4   |
| 41.5   | 19.1   | 11.3   | 19.2   | 9.4    | 11.4   | 3.4    | 4.7    | 4.0    |
| 152.4  | 246.1  | 221.3  | 315.7  | 299.0  | 292.0  | 199.9  | 277.2  | 267.2  |
| 271.9  | 286.1  | 196.2  | 151.0  | 108.9  | 112.6  | 166.8  | 129.0  | 137.9  |
| 245.5  | 240.6  | 166.6  | 149.1  | 123.2  | 111.5  | 119.6  | 91.0   | 124.5  |
| 212.0  | 252.2  | 204.2  | 81.2   | 67.7   | 95.7   | 87.5   | 70.6   | 96.3   |
| 178.9  | 192.9  | 135.3  | 11.4   | 8.8    | 13.0   | 30.6   | 29.7   | 41.8   |
| 723.1  | 883.4  | 647.1  | 259.2  | 226.0  | 230.8  | 241.1  | 237.2  | 264.9  |
| 344.1  | 481.7  | 424.0  | 281.5  | 259.5  | 307.0  | 120.5  | 163.3  | 146.3  |
| 45.6   | 45.5   | 33.1   | 69.4   | 56.2   | 67.2   | 44.5   | 51.8   | 43.6   |
| 16.3   | 44.8   | 16.4   | 255.2  | 217.5  | 221.4  | 161.0  | 207.1  | 176.4  |
| 704.4  | 928.0  | 550.6  | 286.2  | 239.0  | 260.8  | 231.2  | 268.5  | 249.2  |
| 361.1  | 386.5  | 270.0  | 617.5  | 480.4  | 542.1  | 527.1  | 526.7  | 548.2  |
| 16.6   | 34.6   | 26.4   | 26.2   | 26.1   | 25.8   | 8.0    | 28.2   | 8.1    |
| 359.6  | 448.2  | 339.2  | 627.8  | 517.9  | 607.5  | 327.2  | 343.0  | 324.1  |
| 1526.4 | 1645.7 | 1002.3 | 3402.5 | 3045.9 | 3274.9 | 2139.5 | 2079.0 | 2294.8 |
| 4.3    | 4.7    | 2.0    | 5.4    | 3.9    | 3.3    | 1.1    | 1.0    | 1.6    |
| 25.6   | 26.0   | 15.8   | 39.3   | 17.9   | 20.1   | 12.8   | 10.3   | 17.0   |
| 6.2    | 3.6    | 1.4    | 3.1    | 4.6    | 5.6    | 1.4    | 3.7    | 4.5    |
| 3.6    | 3.7    | 3.5    | 17.9   | 8.8    | 9.4    | 3.6    | 3.5    | 5.6    |
| 553.1  | 429.3  | 223.0  | 686.9  | 501.8  | 534.7  | 423.6  | 335.7  | 417.1  |
| 1071.9 | 1077.7 | 399.4  | 109.8  | 79.2   | 71.5   | 85.9   | 69.3   | 77.8   |
| 192.5  | 194.2  | 107.0  | 289.5  | 232.8  | 257.5  | 146.3  | 155.9  | 190.9  |
| 72.8   | 85.7   | 57.0   | 79.4   | 68.2   | 80.5   | 67.3   | 58.2   | 68.0   |
| 815.2  | 921.0  | 632.3  | 550.5  | 377.4  | 423.0  | 233.0  | 217.6  | 230.6  |
| 36.0   | 27.2   | 5.3    | 12.8   | 8.6    | 11.9   | 8.2    | 8.5    | 13.7   |
| 26.8   | 36.0   | 16.0   | 46.9   | 28.3   | 30.0   | 25.5   | 24.0   | 23.4   |
| 94.7   | 173.9  | 118.7  | 99.9   | 124.9  | 123.4  | 62.1   | 74.4   | 71.5   |
| 20.4   | 26.9   | 16.4   | 28.2   | 23.5   | 36.7   | 15.3   | 15.0   | 18.2   |
| 267.1  | 553.7  | 407.7  | 241.1  | 183.8  | 243.0  | 199.2  | 204.3  | 233.6  |
| 198.0  | 247.0  | 190.0  | 112.7  | 111.8  | 112.1  | 107.2  | 95.4   | 123.2  |
| 358.3  | 367.0  | 250.8  | 524.1  | 460.4  | 466.7  | 470.4  | 660.3  | 586.1  |

|        |        |        |        |        |        |        |        |        |
|--------|--------|--------|--------|--------|--------|--------|--------|--------|
| 5.1    | 1.7    | 1.6    | 4.1    | 2.2    | 1.8    | 4.2    | 2.0    | 3.0    |
| 822.2  | 831.8  | 564.4  | 519.3  | 420.6  | 409.8  | 525.5  | 739.9  | 648.2  |
| 266.9  | 361.3  | 287.6  | 356.3  | 420.9  | 449.7  | 139.9  | 203.4  | 215.7  |
| 9.2    | 17.0   | 15.9   | 14.1   | 18.6   | 19.6   | 2.6    | 10.0   | 14.3   |
| 1058.2 | 1257.3 | 692.7  | 174.5  | 111.8  | 121.7  | 199.2  | 125.0  | 143.8  |
| 117.8  | 155.9  | 142.5  | 85.4   | 59.6   | 62.2   | 53.6   | 32.9   | 49.7   |
| 63.0   | 101.2  | 100.7  | 46.6   | 36.4   | 34.8   | 22.8   | 15.8   | 27.3   |
| 149.9  | 159.3  | 139.4  | 230.0  | 200.9  | 208.8  | 128.8  | 141.3  | 136.4  |
| 1449.6 | 1563.4 | 750.8  | 626.9  | 418.6  | 399.4  | 743.1  | 478.6  | 576.6  |
| 189.4  | 255.4  | 152.4  | 140.7  | 117.6  | 132.1  | 101.8  | 92.7   | 99.5   |
| 867.3  | 1198.3 | 1043.8 | 3268.4 | 2918.9 | 3097.0 | 1579.8 | 1719.9 | 1931.5 |
| 293.0  | 396.5  | 335.2  | 390.7  | 334.0  | 447.8  | 277.7  | 313.3  | 353.9  |
| 97.6   | 133.4  | 99.2   | 223.7  | 182.5  | 181.5  | 210.8  | 237.9  | 238.5  |
| 17.7   | 15.2   | 24.4   | 56.4   | 45.8   | 54.7   | 44.4   | 63.0   | 54.8   |
| 18.9   | 34.3   | 24.5   | 14.7   | 17.1   | 17.3   | 17.3   | 20.4   | 22.1   |
| 56.1   | 54.9   | 32.7   | 60.2   | 51.6   | 59.4   | 43.6   | 29.1   | 42.5   |
| 929.0  | 1034.2 | 504.5  | 672.9  | 363.5  | 400.7  | 401.0  | 226.5  | 291.5  |
| 41.5   | 33.3   | 14.6   | 137.9  | 113.2  | 117.0  | 48.1   | 40.5   | 51.7   |
| 301.0  | 235.1  | 165.0  | 368.9  | 363.0  | 408.4  | 324.3  | 334.6  | 349.8  |
| 115.4  | 98.3   | 66.3   | 415.1  | 318.4  | 342.8  | 186.0  | 176.9  | 197.4  |
| 983.6  | 1272.5 | 660.3  | 276.8  | 191.0  | 194.4  | 221.3  | 154.8  | 247.2  |
| 31.8   | 57.9   | 57.7   | 163.9  | 149.9  | 167.7  | 82.6   | 126.5  | 135.7  |
| 908.5  | 923.4  | 526.8  | 185.0  | 148.8  | 147.4  | 171.8  | 170.3  | 179.8  |
| 50.7   | 63.9   | 54.8   | 13.3   | 14.4   | 12.0   | 11.2   | 7.7    | 8.7    |
| 12.5   | 3.6    | 1.6    | 10.5   | 6.4    | 8.6    | 11.5   | 5.5    | 7.3    |
| 86.4   | 100.2  | 120.0  | 90.3   | 51.7   | 89.6   | 66.4   | 58.7   | 63.9   |
| 228.2  | 284.8  | 323.7  | 131.1  | 125.8  | 144.2  | 132.7  | 100.3  | 135.7  |
| 174.9  | 228.8  | 245.1  | 156.5  | 147.3  | 152.3  | 74.2   | 129.7  | 125.7  |
| 449.3  | 702.9  | 578.5  | 179.3  | 165.3  | 162.5  | 222.9  | 262.8  | 259.7  |
| 35.1   | 34.7   | 29.5   | 56.6   | 32.5   | 38.4   | 12.8   | 21.3   | 9.6    |
| 224.4  | 526.7  | 424.9  | 442.7  | 344.9  | 398.6  | 188.2  | 226.7  | 233.4  |
| 367.7  | 380.4  | 191.5  | 612.3  | 289.2  | 347.2  | 171.0  | 114.0  | 145.7  |
| 254.7  | 185.4  | 136.3  | 21.1   | 5.6    | 7.7    | 19.4   | 11.5   | 3.4    |
| 47.9   | 83.2   | 43.7   | 61.5   | 51.1   | 71.1   | 46.8   | 35.4   | 48.6   |
| 30.8   | 40.0   | 34.5   | 46.2   | 52.7   | 56.4   | 13.0   | 32.2   | 26.6   |
| 17.2   | 18.3   | 7.3    | 25.1   | 20.3   | 29.7   | 9.2    | 6.0    | 9.4    |
| 806.6  | 1333.8 | 1464.6 | 31.0   | 21.6   | 19.7   | 13.0   | 10.1   | 15.9   |
| 0.3    | 1.2    | 1.8    | 5.6    | 6.2    | 1.8    | 0.9    | 0.3    | 2.9    |
| 1937.2 | 2338.7 | 1902.8 | 719.0  | 675.1  | 713.8  | 572.8  | 647.7  | 642.8  |
| 198.6  | 260.1  | 227.7  | 85.9   | 71.2   | 78.4   | 60.7   | 43.0   | 42.1   |
| 86.6   | 99.5   | 69.5   | 115.0  | 107.0  | 97.1   | 69.0   | 77.8   | 78.4   |
| 28.3   | 27.9   | 17.2   | 42.7   | 23.9   | 37.0   | 20.5   | 14.5   | 27.3   |
| 640.3  | 764.7  | 595.1  | 171.6  | 166.6  | 159.6  | 146.0  | 169.0  | 179.8  |
| 315.7  | 541.9  | 574.7  | 38.5   | 34.4   | 31.6   | 11.9   | 19.3   | 18.2   |
| 134.9  | 148.6  | 88.3   | 42.4   | 33.3   | 49.5   | 18.4   | 22.2   | 41.6   |
| 340.5  | 368.5  | 196.2  | 446.1  | 280.6  | 335.7  | 192.8  | 135.2  | 167.7  |
| 147.3  | 221.1  | 145.5  | 164.5  | 139.6  | 143.8  | 103.0  | 93.3   | 104.1  |
| 377.3  | 471.0  | 354.3  | 279.0  | 227.0  | 258.3  | 208.7  | 221.5  | 213.8  |
| 8.8    | 16.5   | 9.7    | 109.4  | 137.7  | 161.3  | 62.7   | 75.2   | 91.7   |
| 1242.9 | 1452.4 | 1037.6 | 253.7  | 170.6  | 176.1  | 171.3  | 131.7  | 169.4  |
| 713.9  | 835.7  | 595.7  | 135.2  | 108.8  | 96.8   | 127.7  | 93.3   | 126.7  |
| 6.0    | 9.3    | 7.1    | 98.9   | 85.5   | 120.0  | 45.9   | 63.0   | 85.5   |
| 118.2  | 256.3  | 222.3  | 151.3  | 158.6  | 190.7  | 109.8  | 184.5  | 162.7  |



|        |        |        |        |        |        |        |        |        |
|--------|--------|--------|--------|--------|--------|--------|--------|--------|
| 7.9    | 6.7    | 6.5    | 30.5   | 21.2   | 18.3   | 3.1    | 12.0   | 14.7   |
| 80.2   | 172.1  | 201.7  | 638.5  | 661.2  | 741.6  | 372.4  | 638.6  | 582.7  |
| 180.6  | 261.1  | 201.3  | 99.4   | 102.8  | 80.1   | 98.9   | 118.0  | 126.8  |
| 21.2   | 14.9   | 26.5   | 19.6   | 19.2   | 20.9   | 4.0    | 3.9    | 11.4   |
| 2.5    | 2.4    | 10.0   | 6.5    | 4.1    | 7.7    | 13.3   | 3.8    | 19.3   |
| 29.4   | 33.6   | 30.4   | 30.7   | 29.3   | 46.0   | 30.7   | 31.0   | 23.2   |
| 1337.4 | 1723.2 | 1442.4 | 1847.4 | 1643.7 | 1774.0 | 1216.1 | 1259.0 | 1409.7 |
| 11.8   | 15.7   | 11.4   | 10.8   | 11.4   | 9.2    | 2.8    | 7.3    | 5.9    |
| 428.0  | 570.2  | 475.9  | 344.5  | 349.6  | 371.9  | 288.6  | 394.7  | 368.9  |
| 3.4    | 3.5    | 3.0    | 11.7   | 10.8   | 11.6   | 9.2    | 6.5    | 4.8    |
| 729.4  | 821.5  | 431.4  | 256.9  | 179.9  | 175.4  | 311.7  | 242.2  | 282.5  |
| 196.4  | 320.5  | 252.8  | 187.9  | 155.9  | 189.7  | 132.9  | 143.2  | 152.5  |
| 122.8  | 233.2  | 226.0  | 17.4   | 6.9    | 11.4   | 12.6   | 7.9    | 15.8   |
| 26.0   | 54.7   | 52.5   | 45.1   | 52.0   | 59.0   | 26.9   | 32.7   | 34.8   |
| 65.8   | 72.9   | 73.6   | 68.8   | 61.6   | 72.0   | 31.7   | 37.8   | 42.9   |
| 138.4  | 231.0  | 209.6  | 10.4   | 18.2   | 11.3   | 9.2    | 15.4   | 11.8   |
| 746.4  | 1082.6 | 849.4  | 928.5  | 919.5  | 1044.1 | 541.8  | 749.1  | 732.2  |
| 495.3  | 632.9  | 619.6  | 402.1  | 380.3  | 394.1  | 279.1  | 313.2  | 340.4  |
| 11.2   | 31.2   | 16.2   | 16.7   | 16.7   | 17.5   | 13.1   | 18.0   | 19.3   |
| 42.2   | 53.9   | 44.9   | 156.6  | 123.0  | 147.5  | 84.3   | 123.4  | 107.0  |
| 8.8    | 17.1   | 14.4   | 16.9   | 12.6   | 9.6    | 11.7   | 9.1    | 9.7    |
| 28.5   | 37.5   | 26.5   | 11.0   | 11.4   | 13.2   | 2.2    | 3.5    | 1.7    |
| 9.8    | 16.2   | 5.3    | 12.0   | 9.7    | 16.0   | 3.9    | 3.0    | 9.8    |
| 173.6  | 235.8  | 162.4  | 157.8  | 142.1  | 163.4  | 146.3  | 151.0  | 143.1  |
| 308.2  | 368.6  | 340.9  | 383.0  | 271.3  | 349.5  | 344.3  | 399.7  | 378.4  |
| 222.8  | 304.2  | 274.1  | 339.3  | 296.8  | 290.2  | 314.4  | 395.2  | 363.4  |
| 120.4  | 128.6  | 77.1   | 62.5   | 41.4   | 44.1   | 51.9   | 35.6   | 49.1   |
| 8.1    | 14.4   | 11.3   | 38.0   | 27.6   | 38.2   | 25.8   | 26.8   | 30.0   |
| 90.1   | 111.5  | 65.5   | 61.0   | 46.7   | 50.3   | 36.3   | 32.0   | 36.3   |
| 305.1  | 383.6  | 253.9  | 217.5  | 144.8  | 154.7  | 127.6  | 96.1   | 106.1  |
| 12.2   | 22.2   | 13.5   | 150.0  | 123.8  | 146.8  | 89.0   | 96.7   | 106.6  |
| 11.6   | 3.4    | 2.9    | 8.8    | 9.5    | 7.0    | 5.0    | 2.3    | 0.7    |
| 140.1  | 167.8  | 114.4  | 187.1  | 114.8  | 148.3  | 123.1  | 110.6  | 113.1  |
| 2.7    | 3.5    | 2.2    | 7.9    | 7.1    | 6.2    | 2.7    | 1.8    | 1.4    |
| 40.4   | 33.8   | 38.3   | 35.6   | 32.1   | 35.1   | 24.2   | 17.1   | 30.2   |
| 77.9   | 96.7   | 72.1   | 12.5   | 23.2   | 27.9   | 24.3   | 22.6   | 26.3   |
| 54.8   | 61.2   | 58.9   | 32.9   | 19.0   | 35.1   | 22.2   | 17.3   | 26.2   |
| 1490.9 | 2150.3 | 2367.8 | 647.6  | 488.1  | 475.0  | 380.9  | 384.0  | 390.0  |
| 94.4   | 116.4  | 72.5   | 112.3  | 87.7   | 107.1  | 62.2   | 52.8   | 59.5   |
| 973.0  | 845.3  | 610.3  | 94.1   | 82.8   | 102.6  | 89.0   | 95.6   | 102.8  |
| 32.2   | 35.4   | 18.6   | 37.5   | 27.7   | 28.0   | 24.3   | 21.5   | 26.9   |
| 140.8  | 180.4  | 85.3   | 55.4   | 43.9   | 42.5   | 37.6   | 18.5   | 41.0   |
| 3102.0 | 3342.4 | 2246.8 | 1187.4 | 989.9  | 1098.1 | 639.7  | 520.8  | 646.7  |
| 642.4  | 834.8  | 758.3  | 925.2  | 812.5  | 950.1  | 677.1  | 827.6  | 793.9  |
| 253.6  | 374.6  | 322.0  | 631.0  | 580.4  | 590.3  | 587.5  | 694.1  | 700.1  |
| 22.0   | 23.0   | 20.2   | 117.4  | 107.8  | 122.6  | 58.0   | 78.5   | 68.1   |
| 68.6   | 92.7   | 61.6   | 115.2  | 110.3  | 115.3  | 78.4   | 79.8   | 77.3   |
| 431.7  | 460.4  | 265.5  | 285.5  | 220.3  | 206.5  | 187.0  | 150.2  | 190.5  |
| 3.8    | 10.5   | 3.7    | 10.9   | 7.0    | 6.0    | 4.0    | 11.8   | 8.3    |
| 0.7    | 1.2    | 0.4    | 5.1    | 1.6    | 2.3    | 1.0    | 1.2    | 1.2    |
| 12.0   | 5.1    | 2.3    | 12.2   | 4.4    | 4.7    | 2.8    | 4.2    | 3.3    |
| 112.0  | 187.3  | 149.9  | 93.6   | 75.6   | 93.5   | 54.2   | 84.8   | 72.7   |
| 441.5  | 385.2  | 246.5  | 357.7  | 278.1  | 326.0  | 255.1  | 222.3  | 277.2  |

|        |        |        |        |        |        |        |        |        |
|--------|--------|--------|--------|--------|--------|--------|--------|--------|
| 890.3  | 1294.6 | 1077.1 | 1086.0 | 996.0  | 873.5  | 1253.1 | 1266.9 | 1242.1 |
| 9.5    | 4.0    | 17.0   | 59.7   | 40.2   | 49.2   | 32.6   | 67.1   | 52.7   |
| 111.6  | 109.4  | 70.9   | 125.0  | 110.9  | 132.3  | 115.3  | 125.4  | 120.9  |
| 2.3    | 2.9    | 1.6    | 12.2   | 16.2   | 10.2   | 18.1   | 7.6    | 16.5   |
| 85.7   | 107.5  | 71.2   | 99.9   | 71.9   | 88.6   | 59.0   | 46.8   | 67.8   |
| 12.5   | 5.7    | 3.1    | 79.8   | 69.8   | 68.6   | 78.1   | 62.9   | 77.4   |
| 60.4   | 58.8   | 27.2   | 247.9  | 218.3  | 206.7  | 164.4  | 134.5  | 161.5  |
| 287.6  | 370.0  | 278.7  | 191.0  | 142.9  | 154.8  | 174.4  | 170.8  | 202.6  |
| 312.8  | 392.3  | 285.8  | 257.5  | 236.6  | 248.2  | 177.7  | 192.1  | 222.0  |
| 4427.7 | 4613.4 | 3609.8 | 367.8  | 236.2  | 265.8  | 216.0  | 228.9  | 240.0  |
| 815.1  | 1030.8 | 731.0  | 256.6  | 204.3  | 211.1  | 145.1  | 134.5  | 156.1  |
| 398.8  | 553.6  | 450.7  | 144.7  | 127.8  | 156.2  | 141.8  | 173.0  | 157.4  |
| 606.6  | 812.7  | 698.5  | 271.9  | 214.5  | 243.9  | 187.0  | 231.7  | 213.2  |
| 296.5  | 318.0  | 190.8  | 281.8  | 246.2  | 266.0  | 186.6  | 179.7  | 219.5  |
| 3.8    | 3.1    | 1.9    | 5.2    | 4.4    | 3.5    | 1.5    | 1.7    | 2.2    |
| 77.9   | 109.9  | 60.0   | 71.1   | 35.0   | 48.4   | 29.4   | 30.1   | 25.2   |
| 11.2   | 23.4   | 19.2   | 24.0   | 29.6   | 41.8   | 17.1   | 3.9    | 21.5   |
| 9.8    | 5.2    | 4.5    | 6.5    | 11.4   | 13.7   | 7.6    | 6.5    | 4.1    |
| 103.1  | 141.5  | 94.6   | 83.4   | 98.0   | 91.7   | 49.7   | 60.2   | 65.3   |
| 317.2  | 385.9  | 343.2  | 70.8   | 44.7   | 67.1   | 55.0   | 70.7   | 71.7   |
| 704.5  | 922.7  | 857.4  | 290.6  | 225.5  | 244.5  | 146.3  | 184.3  | 194.3  |
| 339.4  | 193.9  | 85.0   | 12.5   | 8.6    | 13.5   | 11.2   | 14.0   | 21.9   |
| 6.6    | 9.2    | 7.4    | 693.0  | 833.4  | 890.8  | 298.6  | 389.4  | 426.2  |
| 20.8   | 34.6   | 21.8   | 410.9  | 426.5  | 480.6  | 161.5  | 205.3  | 239.3  |
| 866.3  | 1002.5 | 700.4  | 895.7  | 683.4  | 773.6  | 484.4  | 478.4  | 504.1  |
| 499.9  | 629.6  | 299.0  | 197.2  | 118.7  | 157.4  | 222.6  | 323.6  | 269.1  |
| 23.5   | 18.4   | 25.2   | 27.2   | 22.7   | 34.3   | 20.4   | 18.8   | 24.2   |
| 279.0  | 365.7  | 270.5  | 134.4  | 130.5  | 140.2  | 129.4  | 189.1  | 163.6  |
| 485.4  | 616.2  | 470.0  | 340.7  | 296.5  | 321.5  | 253.4  | 311.4  | 297.6  |
| 82.0   | 111.9  | 60.0   | 37.3   | 35.4   | 38.2   | 52.6   | 40.6   | 49.0   |
| 1068.9 | 1483.5 | 919.9  | 934.8  | 669.1  | 683.6  | 549.9  | 533.9  | 619.5  |
| 343.2  | 430.5  | 332.0  | 319.9  | 216.7  | 235.9  | 164.6  | 163.1  | 203.4  |
| 61.9   | 137.3  | 116.3  | 37.3   | 28.0   | 28.8   | 36.0   | 16.5   | 28.0   |
| 36.0   | 31.6   | 34.0   | 67.0   | 43.6   | 53.1   | 28.5   | 37.5   | 40.2   |
| 15.6   | 19.2   | 3.2    | 14.6   | 10.6   | 8.8    | 1.0    | 5.1    | 2.4    |
| 18.5   | 12.1   | 11.9   | 30.5   | 19.7   | 17.1   | 3.1    | 12.6   | 14.1   |
| 70.2   | 417.0  | 960.5  | 524.1  | 517.1  | 572.0  | 792.4  | 1205.9 | 1023.4 |
| 242.1  | 321.6  | 254.6  | 137.4  | 105.1  | 103.2  | 92.7   | 64.2   | 80.5   |
| 27.7   | 38.0   | 31.6   | 20.8   | 16.2   | 6.2    | 11.1   | 13.2   | 21.0   |
| 4.7    | 3.5    | 5.2    | 198.2  | 217.7  | 207.0  | 131.0  | 96.7   | 131.5  |
| 300.9  | 361.9  | 237.7  | 149.2  | 151.9  | 179.1  | 96.0   | 101.9  | 113.5  |
| 97.4   | 139.1  | 97.1   | 122.0  | 93.6   | 101.8  | 66.0   | 74.4   | 67.8   |
| 149.0  | 188.1  | 160.2  | 134.8  | 115.4  | 141.1  | 143.3  | 137.6  | 158.1  |
| 273.4  | 256.4  | 161.9  | 52.5   | 34.0   | 50.1   | 44.9   | 29.3   | 46.8   |
| 6685.4 | 6911.6 | 5600.8 | 1886.5 | 1550.2 | 1667.2 | 1003.6 | 1009.5 | 1164.3 |
| 573.8  | 735.9  | 442.9  | 183.3  | 150.7  | 156.1  | 96.1   | 96.8   | 95.9   |
| 24.4   | 44.7   | 54.4   | 8.5    | 13.1   | 11.0   | 1.5    | 9.5    | 2.2    |
| 20.6   | 39.0   | 23.0   | 17.0   | 8.1    | 17.3   | 7.5    | 9.9    | 4.2    |
| 5.2    | 1.7    | 1.0    | 2.7    | 2.7    | 2.7    | 0.7    | 1.1    | 1.0    |
| 516.5  | 700.1  | 779.5  | 572.3  | 516.4  | 530.2  | 442.2  | 447.9  | 494.0  |
| 9.0    | 10.2   | 6.8    | 14.2   | 4.5    | 8.1    | 3.4    | 2.1    | 3.3    |
| 313.7  | 493.9  | 305.1  | 37.1   | 29.4   | 28.3   | 23.3   | 24.1   | 24.9   |
| 151.1  | 205.3  | 112.0  | 55.4   | 48.4   | 59.7   | 33.7   | 45.7   | 49.2   |

|        |        |        |       |       |       |        |        |        |
|--------|--------|--------|-------|-------|-------|--------|--------|--------|
| 4.7    | 7.5    | 14.3   | 41.5  | 5.8   | 8.5   | 5.7    | 3.7    | 3.5    |
| 8.7    | 16.4   | 12.4   | 6.2   | 9.7   | 3.5   | 2.4    | 3.2    | 8.1    |
| 29.0   | 36.5   | 33.5   | 32.3  | 30.8  | 28.4  | 36.7   | 24.5   | 21.4   |
| 237.2  | 291.7  | 260.0  | 108.5 | 89.6  | 98.5  | 45.0   | 45.4   | 67.0   |
| 83.9   | 92.9   | 92.6   | 13.7  | 6.0   | 26.4  | 19.3   | 29.6   | 18.8   |
| 1.6    | 0.7    | 3.9    | 241.4 | 176.1 | 179.2 | 174.4  | 136.9  | 169.2  |
| 79.7   | 83.7   | 64.0   | 120.5 | 84.8  | 94.7  | 118.0  | 91.0   | 115.7  |
| 96.2   | 117.6  | 80.5   | 113.1 | 92.8  | 106.8 | 71.6   | 67.4   | 84.7   |
| 171.0  | 243.2  | 200.7  | 326.1 | 322.2 | 290.7 | 203.0  | 293.8  | 309.8  |
| 738.7  | 823.4  | 762.1  | 504.7 | 407.8 | 427.8 | 422.8  | 276.9  | 376.3  |
| 1491.3 | 1364.1 | 671.2  | 522.1 | 390.6 | 504.4 | 422.4  | 282.5  | 390.8  |
| 9.8    | 8.0    | 1.5    | 6.2   | 5.2   | 3.1   | 5.5    | 1.5    | 4.3    |
| 304.7  | 260.6  | 151.6  | 147.8 | 75.1  | 93.5  | 166.3  | 89.7   | 117.6  |
| 216.6  | 237.6  | 143.3  | 246.5 | 213.8 | 284.3 | 149.1  | 130.1  | 145.6  |
| 2434.6 | 2472.1 | 1530.7 | 9.9   | 10.5  | 9.6   | 2.7    | 1.0    | 4.8    |
| 518.3  | 569.5  | 412.7  | 2.2   | 10.7  | 11.7  | 5.5    | 2.6    | 2.1    |
| 163.6  | 134.0  | 81.4   | 5.8   | 2.8   | 4.5   | 8.0    | 2.4    | 2.4    |
| 5.1    | 2.2    | 2.6    | 8.7   | 5.6   | 5.9   | 4.7    | 2.1    | 3.0    |
| 76.1   | 83.9   | 62.1   | 89.2  | 68.1  | 65.5  | 37.0   | 33.9   | 28.5   |
| 1.5    | 4.7    | 4.1    | 5.8   | 3.1   | 3.4   | 6.8    | 10.2   | 6.8    |
| 159.3  | 274.3  | 224.7  | 24.8  | 23.6  | 31.1  | 21.2   | 25.0   | 32.8   |
| 20.4   | 48.6   | 41.0   | 8.3   | 3.8   | 10.9  | 4.6    | 2.8    | 3.4    |
| 7.4    | 6.4    | 1.1    | 173.5 | 194.9 | 219.1 | 110.5  | 194.3  | 156.7  |
| 193.4  | 229.3  | 189.5  | 207.7 | 198.2 | 185.6 | 120.9  | 145.4  | 143.4  |
| 11.8   | 8.8    | 7.1    | 8.8   | 13.7  | 10.3  | 11.3   | 6.5    | 11.7   |
| 579.9  | 297.7  | 21.4   | 25.3  | 9.4   | 8.2   | 7.1    | 9.9    | 2.8    |
| 2.1    | 9.7    | 1.8    | 6.6   | 13.5  | 12.5  | 2.0    | 7.7    | 5.2    |
| 0.7    | 5.1    | 2.4    | 6.8   | 8.0   | 5.7   | 6.6    | 1.3    | 2.6    |
| 288.1  | 358.7  | 264.7  | 85.9  | 65.6  | 74.9  | 71.6   | 82.6   | 83.6   |
| 2.9    | 9.9    | 2.0    | 224.1 | 210.1 | 245.1 | 101.9  | 118.4  | 137.6  |
| 122.2  | 153.8  | 76.3   | 9.8   | 14.2  | 22.3  | 2.4    | 3.2    | 2.2    |
| 2482.7 | 2952.0 | 2191.5 | 891.0 | 661.6 | 674.8 | 1421.3 | 1229.9 | 1430.8 |
| 2781.7 | 3216.7 | 2413.4 | 979.0 | 776.9 | 831.3 | 1380.6 | 1228.0 | 1368.3 |
| 0.8    | 0.9    | 1.0    | 2.8   | 4.5   | 4.9   | 2.4    | 1.3    | 1.9    |
| 30.8   | 26.7   | 24.6   | 38.7  | 24.8  | 36.5  | 26.3   | 22.1   | 35.7   |
| 1.8    | 3.4    | 2.6    | 14.4  | 10.9  | 4.2   | 2.2    | 1.9    | 3.8    |
| 7.8    | 7.3    | 6.7    | 86.9  | 75.7  | 87.6  | 54.6   | 47.7   | 57.6   |
| 52.0   | 100.0  | 78.5   | 168.0 | 152.9 | 197.7 | 98.0   | 97.4   | 104.4  |
| 343.2  | 314.2  | 212.7  | 210.3 | 149.4 | 159.9 | 137.0  | 144.5  | 153.6  |
| 197.8  | 183.0  | 124.8  | 173.9 | 131.1 | 140.1 | 99.6   | 78.0   | 98.0   |
| 632.7  | 528.2  | 203.7  | 128.1 | 97.5  | 94.7  | 123.8  | 66.1   | 104.9  |
| 54.9   | 68.6   | 43.6   | 61.4  | 37.0  | 74.8  | 35.7   | 42.0   | 39.6   |
| 39.4   | 108.0  | 212.4  | 13.5  | 26.2  | 30.2  | 17.2   | 12.5   | 19.9   |
| 6.9    | 4.8    | 5.2    | 19.2  | 14.0  | 3.8   | 3.4    | 6.9    | 3.0    |
| 1.4    | 1.0    | 0.7    | 4.9   | 2.9   | 5.0   | 3.0    | 0.7    | 3.0    |
| 65.3   | 74.2   | 35.8   | 55.8  | 26.5  | 45.8  | 31.3   | 29.2   | 35.1   |
| 545.4  | 484.0  | 218.5  | 747.0 | 347.1 | 384.0 | 361.6  | 148.8  | 209.6  |
| 22.2   | 35.1   | 20.5   | 15.5  | 10.4  | 10.4  | 2.9    | 3.4    | 3.2    |
| 57.1   | 62.4   | 60.1   | 19.9  | 21.5  | 20.8  | 24.8   | 27.2   | 27.3   |
| 934.8  | 1088.8 | 684.9  | 333.7 | 185.7 | 204.9 | 305.3  | 231.3  | 221.0  |
| 4.2    | 8.3    | 15.5   | 27.5  | 10.1  | 28.0  | 2.9    | 11.0   | 10.6   |
| 8.7    | 9.5    | 24.4   | 10.3  | 13.2  | 6.6   | 4.6    | 4.8    | 3.1    |
| 93.9   | 149.6  | 199.6  | 40.8  | 36.0  | 37.3  | 42.9   | 41.1   | 41.9   |

|        |        |        |        |        |        |        |        |        |
|--------|--------|--------|--------|--------|--------|--------|--------|--------|
| 240.5  | 324.2  | 238.9  | 228.7  | 199.3  | 198.3  | 125.8  | 168.4  | 152.2  |
| 264.8  | 293.8  | 262.6  | 230.6  | 178.4  | 178.0  | 157.8  | 208.8  | 184.0  |
| 4.1    | 5.6    | 5.9    | 26.9   | 7.9    | 23.6   | 9.2    | 6.3    | 12.4   |
| 48.7   | 76.0   | 44.6   | 216.3  | 177.6  | 182.8  | 145.4  | 149.1  | 147.8  |
| 25.3   | 26.6   | 14.0   | 44.5   | 40.6   | 56.8   | 48.3   | 36.1   | 42.2   |
| 149.8  | 221.7  | 212.8  | 313.3  | 288.2  | 305.8  | 216.0  | 231.5  | 255.5  |
| 3.7    | 6.6    | 4.2    | 372.1  | 397.7  | 417.8  | 259.9  | 305.6  | 339.5  |
| 33.6   | 36.3   | 32.4   | 18.8   | 8.8    | 9.7    | 7.4    | 8.6    | 9.7    |
| 1.2    | 2.4    | 0.9    | 2.1    | 1.6    | 3.3    | 1.1    | 1.4    | 1.5    |
| 0.9    | 3.1    | 1.5    | 6.8    | 6.6    | 3.3    | 1.2    | 1.6    | 1.2    |
| 54.1   | 87.8   | 88.2   | 106.9  | 118.2  | 102.5  | 56.6   | 74.4   | 85.6   |
| 429.9  | 446.0  | 259.1  | 238.9  | 168.4  | 206.1  | 173.0  | 148.0  | 137.5  |
| 619.6  | 695.5  | 340.5  | 881.2  | 560.9  | 625.5  | 397.5  | 322.0  | 363.6  |
| 1195.4 | 1444.3 | 797.0  | 930.8  | 611.2  | 616.8  | 659.1  | 580.5  | 632.8  |
| 15.2   | 11.1   | 12.8   | 141.2  | 138.7  | 157.0  | 107.8  | 115.8  | 122.0  |
| 1.6    | 0.5    | 0.4    | 2.7    | 1.3    | 1.6    | 1.1    | 0.4    | 0.5    |
| 6.5    | 11.6   | 7.1    | 17.6   | 19.1   | 15.9   | 9.2    | 8.7    | 5.8    |
| 12.5   | 7.5    | 2.7    | 10.0   | 19.2   | 6.5    | 27.3   | 11.7   | 14.3   |
| 5.8    | 9.5    | 5.7    | 6.3    | 7.6    | 4.3    | 15.8   | 12.4   | 11.3   |
| 12.4   | 5.8    | 8.6    | 17.3   | 9.2    | 16.3   | 9.5    | 8.6    | 5.4    |
| 1.1    | 1.0    | 0.7    | 5.7    | 4.8    | 5.2    | 0.6    | 1.2    | 1.3    |
| 7.6    | 1.7    | 3.8    | 9.0    | 12.3   | 8.2    | 2.9    | 3.8    | 3.4    |
| 53.3   | 54.8   | 28.6   | 10.5   | 7.0    | 10.1   | 3.0    | 4.7    | 5.4    |
| 0.7    | 1.3    | 1.6    | 3.8    | 3.5    | 3.7    | 1.1    | 2.2    | 3.0    |
| 172.5  | 226.0  | 211.8  | 20.4   | 13.3   | 12.4   | 8.5    | 8.7    | 8.9    |
| 113.4  | 125.1  | 79.5   | 97.7   | 78.8   | 105.6  | 78.5   | 78.4   | 79.2   |
| 177.7  | 175.6  | 132.7  | 178.8  | 121.1  | 124.3  | 106.2  | 90.8   | 101.6  |
| 3.7    | 6.5    | 2.2    | 7.7    | 11.0   | 3.4    | 0.9    | 0.5    | 4.7    |
| 127.5  | 223.4  | 162.5  | 120.6  | 85.1   | 90.8   | 94.1   | 53.2   | 76.3   |
| 89.0   | 111.2  | 78.9   | 149.7  | 119.7  | 130.3  | 92.7   | 87.5   | 108.0  |
| 338.9  | 397.2  | 235.8  | 359.3  | 289.6  | 302.5  | 208.5  | 169.5  | 241.2  |
| 395.3  | 427.7  | 359.5  | 192.7  | 158.1  | 160.9  | 103.2  | 77.0   | 112.1  |
| 868.2  | 1245.5 | 934.5  | 1179.8 | 1093.7 | 1269.0 | 693.9  | 747.4  | 821.1  |
| 91.6   | 84.4   | 65.6   | 198.6  | 166.1  | 133.7  | 106.9  | 111.5  | 118.1  |
| 5.0    | 9.4    | 3.0    | 8.4    | 9.7    | 14.1   | 3.5    | 3.2    | 9.8    |
| 39.8   | 43.2   | 32.6   | 23.9   | 20.6   | 22.9   | 23.0   | 14.5   | 21.1   |
| 365.5  | 495.5  | 598.9  | 475.1  | 397.3  | 394.1  | 253.6  | 250.7  | 273.9  |
| 1015.8 | 1290.2 | 1045.6 | 3399.2 | 2771.6 | 3022.1 | 2335.0 | 2422.5 | 2724.9 |
| 2.3    | 1.8    | 6.0    | 5.7    | 4.0    | 8.9    | 5.6    | 5.1    | 5.0    |
| 89.3   | 141.7  | 277.4  | 10.4   | 9.6    | 15.6   | 2.1    | 1.5    | 1.6    |
| 243.3  | 308.2  | 197.1  | 358.5  | 352.1  | 403.5  | 362.3  | 340.1  | 387.9  |
| 99.4   | 146.8  | 82.7   | 60.3   | 69.3   | 88.3   | 81.3   | 104.6  | 108.0  |
| 66.9   | 110.1  | 65.7   | 47.7   | 26.6   | 39.1   | 35.9   | 49.2   | 40.3   |
| 221.7  | 144.4  | 95.0   | 26.0   | 23.8   | 19.7   | 29.1   | 23.3   | 23.9   |
| 102.1  | 88.9   | 57.3   | 21.3   | 15.3   | 19.5   | 15.3   | 11.9   | 10.8   |
| 418.5  | 562.1  | 440.3  | 122.9  | 92.8   | 113.4  | 96.2   | 71.2   | 101.6  |
| 184.8  | 179.1  | 157.7  | 126.3  | 90.3   | 115.1  | 93.6   | 76.3   | 102.8  |
| 204.5  | 273.2  | 186.9  | 212.8  | 146.1  | 191.0  | 96.4   | 101.3  | 123.6  |
| 339.7  | 305.6  | 202.5  | 344.7  | 274.6  | 262.1  | 382.2  | 354.8  | 420.3  |
| 12.6   | 23.7   | 21.6   | 102.3  | 104.9  | 103.7  | 66.1   | 64.2   | 80.8   |
| 6.3    | 18.8   | 17.2   | 23.3   | 24.5   | 35.2   | 34.7   | 31.7   | 28.0   |
| 19.9   | 18.0   | 11.6   | 10.6   | 6.4    | 8.1    | 4.6    | 5.4    | 12.3   |
| 197.7  | 261.4  | 211.3  | 110.5  | 79.6   | 67.3   | 72.4   | 82.9   | 76.0   |

|        |        |        |        |        |        |        |        |        |
|--------|--------|--------|--------|--------|--------|--------|--------|--------|
| 14.4   | 17.1   | 13.0   | 19.3   | 24.6   | 51.9   | 21.5   | 32.0   | 29.2   |
| 58.4   | 62.1   | 45.5   | 16.8   | 12.2   | 21.4   | 16.7   | 7.7    | 10.9   |
| 248.5  | 255.1  | 181.5  | 119.4  | 123.8  | 121.8  | 71.1   | 91.3   | 89.6   |
| 390.2  | 416.6  | 227.6  | 458.2  | 387.7  | 375.2  | 267.0  | 219.5  | 254.5  |
| 280.6  | 338.7  | 286.5  | 41.1   | 43.9   | 44.7   | 26.4   | 25.0   | 40.7   |
| 95.9   | 110.6  | 64.5   | 46.3   | 48.6   | 41.5   | 27.2   | 27.3   | 31.8   |
| 160.9  | 153.0  | 88.0   | 52.1   | 37.7   | 37.1   | 40.3   | 32.3   | 44.4   |
| 6.3    | 2.1    | 1.1    | 235.3  | 176.0  | 203.5  | 91.0   | 75.3   | 84.9   |
| 15.5   | 15.9   | 13.2   | 102.2  | 90.3   | 82.2   | 39.6   | 42.4   | 45.3   |
| 369.9  | 380.7  | 187.1  | 274.0  | 184.5  | 171.6  | 172.5  | 117.8  | 146.5  |
| 37.4   | 88.7   | 76.6   | 80.5   | 90.3   | 91.7   | 48.3   | 69.1   | 76.8   |
| 103.0  | 131.8  | 86.2   | 123.5  | 113.5  | 118.2  | 111.2  | 135.2  | 126.4  |
| 8.4    | 8.8    | 5.0    | 16.9   | 14.8   | 12.6   | 6.1    | 5.1    | 10.4   |
| 192.0  | 226.7  | 135.1  | 82.8   | 57.6   | 80.6   | 60.4   | 52.0   | 55.1   |
| 107.1  | 52.1   | 21.3   | 8.7    | 3.4    | 12.1   | 3.7    | 8.2    | 0.7    |
| 210.8  | 226.8  | 226.8  | 79.8   | 86.5   | 83.7   | 149.7  | 159.7  | 143.7  |
| 1685.8 | 2517.0 | 2178.4 | 1361.9 | 1152.8 | 1138.8 | 1119.6 | 988.7  | 1315.1 |
| 526.7  | 820.6  | 725.6  | 326.0  | 288.8  | 330.8  | 243.7  | 197.4  | 259.4  |
| 97.8   | 91.8   | 39.1   | 40.6   | 48.1   | 26.4   | 18.1   | 29.3   | 28.6   |
| 224.8  | 279.4  | 193.6  | 192.8  | 176.8  | 179.9  | 197.6  | 215.2  | 208.0  |
| 303.1  | 320.3  | 105.2  | 48.7   | 33.5   | 46.1   | 28.1   | 20.0   | 22.8   |
| 81.9   | 116.0  | 77.8   | 59.3   | 44.4   | 48.6   | 34.0   | 41.6   | 49.4   |
| 190.5  | 298.4  | 280.2  | 181.6  | 155.3  | 170.4  | 171.0  | 198.0  | 212.9  |
| 122.6  | 165.0  | 119.2  | 182.8  | 138.5  | 186.0  | 61.8   | 74.3   | 73.6   |
| 31.0   | 36.6   | 25.0   | 32.2   | 25.6   | 19.5   | 27.1   | 32.1   | 27.5   |
| 208.9  | 260.9  | 194.1  | 239.5  | 187.3  | 234.8  | 170.1  | 157.5  | 164.1  |
| 43.5   | 44.6   | 36.6   | 86.1   | 69.6   | 71.0   | 66.2   | 64.3   | 77.4   |
| 1279.5 | 1626.2 | 1255.0 | 851.1  | 835.5  | 729.9  | 602.3  | 786.0  | 719.0  |
| 5.7    | 9.2    | 6.8    | 9.3    | 7.5    | 15.2   | 4.7    | 4.4    | 5.2    |
| 5.2    | 4.6    | 5.1    | 13.4   | 12.2   | 8.6    | 4.4    | 2.0    | 6.4    |
| 720.8  | 784.9  | 369.0  | 323.6  | 127.6  | 142.0  | 164.2  | 79.4   | 100.0  |
| 4566.6 | 5145.2 | 4579.1 | 70.9   | 56.1   | 72.9   | 51.4   | 82.5   | 70.7   |
| 11.8   | 7.7    | 13.3   | 16.5   | 13.5   | 20.3   | 10.6   | 9.8    | 17.2   |
| 4.5    | 1.0    | 1.0    | 5.0    | 10.0   | 7.9    | 5.3    | 4.0    | 1.7    |
| 7.6    | 40.0   | 10.8   | 63.3   | 49.0   | 29.5   | 23.7   | 10.6   | 18.4   |
| 8.4    | 17.2   | 8.6    | 10.8   | 18.4   | 12.3   | 14.7   | 5.9    | 10.9   |
| 29.1   | 32.2   | 19.9   | 2.2    | 6.5    | 18.5   | 6.4    | 6.9    | 18.3   |
| 230.8  | 375.4  | 279.5  | 641.2  | 686.0  | 791.0  | 274.3  | 450.0  | 457.0  |
| 7.3    | 3.7    | 1.6    | 1.7    | 2.7    | 9.4    | 4.2    | 1.9    | 2.1    |
| 21.6   | 25.6   | 20.9   | 3850.9 | 3350.4 | 3939.9 | 2966.2 | 2764.4 | 3098.4 |
| 43.3   | 47.5   | 33.6   | 34.3   | 34.3   | 42.0   | 25.6   | 15.9   | 23.8   |
| 17.2   | 18.2   | 26.2   | 571.0  | 432.7  | 342.6  | 312.5  | 345.9  | 366.8  |
| 22.2   | 35.0   | 20.4   | 17.9   | 22.4   | 35.4   | 36.3   | 34.3   | 45.1   |
| 346.8  | 355.4  | 259.6  | 119.0  | 84.8   | 97.7   | 120.1  | 127.6  | 129.6  |
| 1.8    | 11.2   | 7.1    | 121.7  | 120.6  | 133.9  | 84.0   | 101.5  | 102.9  |
| 19.2   | 21.5   | 31.5   | 49.5   | 54.3   | 89.2   | 38.1   | 59.4   | 49.3   |
| 296.4  | 959.7  | 1133.6 | 298.2  | 295.6  | 348.6  | 172.5  | 257.0  | 234.4  |
| 2.1    | 3.2    | 1.3    | 2.6    | 2.8    | 3.4    | 1.5    | 1.5    | 2.7    |
| 175.6  | 248.7  | 194.3  | 30.6   | 30.6   | 36.0   | 39.7   | 43.9   | 43.1   |
| 122.5  | 178.0  | 160.7  | 117.2  | 117.5  | 157.2  | 75.1   | 86.5   | 87.1   |
| 3.5    | 4.7    | 1.8    | 8.6    | 10.6   | 16.0   | 1.9    | 3.5    | 3.6    |
| 45.2   | 66.8   | 62.9   | 71.9   | 62.8   | 78.2   | 35.9   | 38.7   | 39.6   |
| 37.0   | 47.8   | 34.6   | 35.1   | 32.6   | 35.3   | 24.2   | 19.4   | 26.8   |

|        |        |        |        |        |        |       |       |       |
|--------|--------|--------|--------|--------|--------|-------|-------|-------|
| 169.0  | 267.7  | 222.0  | 183.2  | 158.9  | 152.3  | 136.0 | 132.2 | 163.8 |
| 25.4   | 51.5   | 27.7   | 22.1   | 27.5   | 22.2   | 4.6   | 9.1   | 8.5   |
| 8.3    | 4.4    | 2.8    | 10.5   | 6.8    | 4.9    | 20.4  | 10.9  | 7.4   |
| 5.5    | 1.0    | 3.1    | 6.9    | 1.4    | 6.3    | 1.8   | 1.5   | 1.6   |
| 197.7  | 212.7  | 86.1   | 111.3  | 43.0   | 53.5   | 29.0  | 22.6  | 33.8  |
| 1364.0 | 1476.6 | 1191.7 | 1660.8 | 1393.0 | 1394.5 | 817.0 | 792.7 | 829.1 |
| 48.6   | 95.6   | 49.6   | 3.1    | 1.7    | 2.5    | 0.8   | 0.9   | 0.7   |
| 2.5    | 2.3    | 2.8    | 6.3    | 7.7    | 7.7    | 3.8   | 2.6   | 2.7   |
| 24.3   | 38.9   | 40.1   | 21.1   | 24.7   | 19.0   | 16.2  | 14.2  | 16.6  |
| 12.1   | 13.1   | 10.4   | 5.6    | 4.1    | 17.3   | 2.8   | 6.4   | 12.0  |
| 109.1  | 126.1  | 82.9   | 47.1   | 45.3   | 60.3   | 61.2  | 40.9  | 55.4  |
| 788.7  | 1051.1 | 816.2  | 636.0  | 583.4  | 612.2  | 324.6 | 372.8 | 408.6 |
| 323.9  | 359.6  | 240.8  | 989.4  | 726.4  | 762.7  | 713.4 | 694.1 | 755.1 |
| 183.5  | 244.9  | 242.1  | 127.4  | 122.9  | 125.2  | 143.3 | 193.0 | 175.3 |
| 62.8   | 112.4  | 111.7  | 180.6  | 175.5  | 186.1  | 139.8 | 190.8 | 173.6 |
| 2725.0 | 3243.9 | 1707.7 | 114.8  | 104.0  | 90.2   | 246.6 | 235.6 | 261.3 |
| 2.7    | 4.5    | 4.5    | 7.8    | 5.2    | 15.5   | 1.5   | 1.7   | 1.7   |
| 1013.0 | 1228.7 | 919.1  | 853.6  | 709.2  | 715.9  | 353.6 | 448.3 | 473.2 |
| 83.1   | 83.4   | 83.5   | 63.0   | 55.0   | 66.0   | 37.2  | 64.3  | 49.5  |
| 43.0   | 48.8   | 42.7   | 279.8  | 292.3  | 434.4  | 159.5 | 197.8 | 202.5 |
| 24.8   | 32.3   | 17.0   | 14.4   | 26.4   | 32.4   | 5.5   | 14.5  | 10.6  |
| 1.0    | 9.4    | 8.0    | 5.8    | 3.0    | 5.0    | 0.8   | 8.8   | 1.1   |
| 134.6  | 146.5  | 135.7  | 130.5  | 100.2  | 123.2  | 94.5  | 91.6  | 92.8  |
| 56.7   | 79.5   | 58.7   | 43.0   | 37.1   | 49.2   | 38.7  | 31.8  | 35.8  |
| 92.8   | 98.3   | 107.6  | 63.3   | 60.9   | 67.7   | 43.4  | 38.4  | 40.9  |
| 866.4  | 1072.5 | 699.3  | 285.9  | 309.5  | 389.5  | 178.0 | 105.0 | 176.6 |
| 8.2    | 9.3    | 5.5    | 17.1   | 10.1   | 16.8   | 9.5   | 9.1   | 5.7   |
| 2.2    | 6.0    | 1.5    | 3.4    | 5.1    | 4.3    | 2.1   | 3.0   | 3.0   |
| 2.5    | 8.2    | 9.4    | 8.5    | 12.2   | 7.2    | 6.3   | 3.1   | 13.6  |
| 16.9   | 23.1   | 5.6    | 15.8   | 6.4    | 5.9    | 14.8  | 6.3   | 2.2   |
| 4.2    | 6.3    | 5.9    | 22.4   | 35.3   | 35.3   | 24.3  | 45.7  | 28.2  |
| 5.8    | 2.0    | 6.6    | 5.8    | 4.3    | 4.9    | 2.2   | 1.2   | 2.1   |
| 2.7    | 3.5    | 1.9    | 17.4   | 11.8   | 15.7   | 6.7   | 6.7   | 8.4   |
| 263.7  | 338.9  | 243.3  | 147.2  | 135.4  | 139.1  | 88.6  | 81.5  | 100.9 |
| 148.0  | 231.5  | 206.0  | 27.6   | 24.4   | 15.8   | 17.5  | 5.8   | 11.1  |
| 38.5   | 33.1   | 24.2   | 30.3   | 26.8   | 19.1   | 17.3  | 18.4  | 16.2  |
| 177.3  | 216.1  | 169.6  | 90.4   | 95.1   | 78.3   | 38.3  | 56.2  | 53.7  |
| 2.7    | 2.7    | 3.5    | 14.9   | 4.0    | 8.5    | 5.6   | 0.6   | 1.9   |
| 10.8   | 10.8   | 7.3    | 15.2   | 11.8   | 9.9    | 6.3   | 5.3   | 1.5   |
| 313.3  | 406.3  | 253.1  | 193.4  | 150.9  | 155.5  | 179.0 | 147.9 | 174.9 |
| 278.0  | 373.4  | 246.7  | 235.6  | 184.2  | 235.0  | 141.7 | 128.7 | 149.0 |
| 12.8   | 3.8    | 10.1   | 21.2   | 15.9   | 23.9   | 14.2  | 14.9  | 11.3  |
| 13.3   | 15.3   | 12.1   | 17.9   | 13.0   | 15.2   | 19.0  | 8.4   | 13.1  |
| 7.7    | 6.5    | 1.4    | 15.0   | 7.2    | 11.2   | 9.5   | 7.4   | 1.9   |
| 88.5   | 109.1  | 98.9   | 136.9  | 89.0   | 121.7  | 73.4  | 53.6  | 66.2  |
| 381.2  | 493.8  | 330.6  | 271.2  | 240.5  | 280.0  | 129.9 | 130.3 | 167.1 |
| 662.8  | 565.7  | 225.2  | 504.7  | 383.1  | 385.3  | 252.9 | 162.6 | 210.4 |
| 66.1   | 60.0   | 49.2   | 111.9  | 101.6  | 90.3   | 93.5  | 87.0  | 100.8 |
| 9.7    | 18.1   | 9.2    | 233.4  | 212.2  | 222.1  | 308.0 | 527.1 | 360.1 |
| 495.5  | 492.7  | 141.9  | 347.1  | 135.7  | 144.9  | 210.0 | 94.4  | 106.5 |
| 23.9   | 76.6   | 97.6   | 248.0  | 221.2  | 244.4  | 139.5 | 179.8 | 171.3 |
| 105.8  | 114.2  | 70.2   | 182.7  | 142.4  | 154.6  | 127.8 | 132.0 | 153.0 |
| 9.3    | 9.4    | 1.8    | 7.8    | 14.8   | 7.0    | 2.7   | 7.4   | 7.9   |

|        |        |        |        |        |        |        |        |        |
|--------|--------|--------|--------|--------|--------|--------|--------|--------|
| 326.5  | 787.0  | 1569.8 | 80.1   | 101.0  | 115.3  | 67.7   | 231.0  | 159.2  |
| 556.2  | 828.2  | 718.7  | 299.7  | 297.8  | 306.3  | 191.8  | 220.5  | 274.7  |
| 5.3    | 0.8    | 2.5    | 3.5    | 1.3    | 1.4    | 2.5    | 3.9    | 0.5    |
| 361.2  | 448.1  | 212.8  | 431.8  | 310.6  | 342.4  | 213.0  | 155.9  | 189.7  |
| 35.9   | 37.3   | 38.4   | 119.2  | 124.2  | 89.4   | 65.7   | 82.2   | 54.2   |
| 206.1  | 171.3  | 100.5  | 943.5  | 990.9  | 1059.3 | 565.3  | 720.4  | 903.1  |
| 68.2   | 141.8  | 127.6  | 47.2   | 52.2   | 52.4   | 29.6   | 20.9   | 33.2   |
| 0.9    | 1.2    | 4.5    | 6.7    | 8.2    | 14.1   | 2.6    | 8.7    | 1.3    |
| 2454.6 | 3082.0 | 1794.1 | 1241.2 | 912.6  | 1070.4 | 889.9  | 571.0  | 894.6  |
| 3725.0 | 3716.1 | 2445.5 | 813.0  | 596.0  | 647.8  | 459.5  | 349.2  | 442.5  |
| 295.9  | 328.9  | 199.0  | 329.7  | 226.0  | 227.2  | 200.8  | 186.3  | 172.4  |
| 299.6  | 356.2  | 179.7  | 315.6  | 219.4  | 238.9  | 214.2  | 157.8  | 184.3  |
| 2.8    | 7.2    | 4.1    | 18.0   | 13.1   | 8.4    | 7.3    | 2.9    | 0.7    |
| 20.2   | 19.0   | 15.0   | 23.5   | 18.4   | 23.0   | 14.5   | 22.2   | 14.7   |
| 42.3   | 42.7   | 23.8   | 31.1   | 16.0   | 20.4   | 26.6   | 27.0   | 24.7   |
| 30.6   | 38.0   | 20.5   | 55.5   | 42.1   | 42.2   | 35.2   | 33.7   | 45.4   |
| 1406.2 | 1886.7 | 1894.0 | 4437.9 | 4367.3 | 4869.1 | 2087.9 | 2545.9 | 2748.0 |
| 85.5   | 148.0  | 125.6  | 233.5  | 205.8  | 237.8  | 238.0  | 262.6  | 277.8  |
| 2.3    | 3.3    | 5.1    | 7.0    | 8.3    | 6.4    | 1.3    | 2.3    | 2.1    |
| 15.3   | 29.3   | 13.9   | 34.9   | 19.8   | 28.7   | 10.1   | 31.4   | 23.7   |
| 1.4    | 6.8    | 4.4    | 6.8    | 3.8    | 2.3    | 9.4    | 1.0    | 9.2    |
| 13.3   | 25.5   | 11.1   | 22.3   | 16.1   | 28.6   | 10.4   | 11.5   | 20.9   |
| 171.5  | 231.3  | 158.4  | 132.0  | 114.2  | 135.3  | 98.3   | 92.0   | 100.8  |
| 1353.4 | 1723.3 | 1486.2 | 1412.7 | 1073.2 | 1067.4 | 841.0  | 918.1  | 921.4  |
| 11.0   | 10.8   | 10.4   | 13.9   | 14.2   | 11.6   | 11.0   | 7.8    | 13.2   |
| 212.7  | 215.2  | 164.4  | 253.1  | 206.8  | 262.8  | 168.6  | 156.2  | 188.8  |
| 71.7   | 72.9   | 46.8   | 404.0  | 317.3  | 374.9  | 185.3  | 213.2  | 229.4  |
| 376.0  | 437.2  | 295.5  | 194.3  | 137.1  | 146.7  | 146.5  | 142.3  | 147.8  |
| 56.2   | 70.7   | 33.0   | 222.5  | 168.2  | 196.7  | 124.3  | 141.4  | 173.0  |
| 4.1    | 3.0    | 2.3    | 2.0    | 2.1    | 2.9    | 1.6    | 2.1    | 3.0    |
| 4.4    | 2.1    | 1.8    | 6.4    | 2.9    | 6.7    | 2.9    | 2.4    | 3.8    |
| 123.8  | 201.3  | 208.3  | 17.8   | 15.1   | 14.9   | 8.4    | 13.0   | 18.3   |
| 1145.8 | 1449.8 | 842.2  | 27.4   | 31.4   | 30.4   | 24.7   | 21.5   | 21.7   |
| 522.4  | 719.8  | 528.0  | 1826.4 | 1695.8 | 1895.4 | 1075.1 | 1389.8 | 1322.6 |
| 1624.2 | 2162.8 | 1393.0 | 387.0  | 272.8  | 268.9  | 351.4  | 254.7  | 257.1  |
| 3.9    | 6.3    | 6.5    | 2.4    | 12.7   | 9.3    | 4.3    | 0.4    | 1.1    |
| 242.3  | 304.4  | 245.1  | 106.0  | 79.8   | 83.6   | 53.7   | 39.3   | 62.4   |
| 35.0   | 35.4   | 18.1   | 16.9   | 20.2   | 20.9   | 13.2   | 15.5   | 15.3   |
| 252.3  | 258.3  | 161.1  | 125.1  | 107.0  | 142.9  | 156.9  | 146.5  | 173.9  |
| 3.9    | 0.6    | 5.4    | 10.6   | 12.2   | 11.2   | 4.9    | 13.3   | 9.2    |
| 76.0   | 110.9  | 42.4   | 186.8  | 141.0  | 156.3  | 136.7  | 136.4  | 145.7  |
| 5.0    | 5.1    | 4.0    | 10.5   | 11.6   | 9.7    | 6.9    | 3.8    | 3.6    |
| 176.5  | 230.4  | 144.3  | 239.4  | 175.3  | 169.3  | 173.9  | 125.1  | 145.2  |
| 27.1   | 51.1   | 34.1   | 75.4   | 74.1   | 80.6   | 35.1   | 24.2   | 39.4   |
| 118.2  | 121.9  | 86.7   | 113.9  | 92.9   | 94.7   | 89.0   | 82.2   | 90.0   |
| 93.1   | 103.7  | 59.5   | 95.1   | 76.5   | 77.1   | 56.6   | 59.6   | 57.5   |
| 109.0  | 140.3  | 80.4   | 1342.5 | 995.5  | 1009.9 | 601.4  | 458.5  | 565.5  |
| 31.4   | 36.9   | 29.2   | 197.2  | 172.7  | 182.1  | 230.8  | 158.1  | 232.5  |
| 8.5    | 9.7    | 7.5    | 15.0   | 10.7   | 21.7   | 8.7    | 6.6    | 16.1   |
| 309.6  | 302.2  | 144.0  | 147.8  | 112.4  | 102.0  | 76.3   | 65.5   | 72.2   |
| 433.1  | 347.8  | 196.7  | 104.2  | 95.4   | 102.5  | 64.4   | 53.0   | 73.4   |
| 518.5  | 792.1  | 608.3  | 582.2  | 426.3  | 449.3  | 577.7  | 417.2  | 664.6  |
| 209.3  | 201.9  | 138.3  | 120.6  | 93.0   | 92.4   | 72.4   | 51.5   | 59.2   |

|        |        |        |       |       |       |       |        |        |
|--------|--------|--------|-------|-------|-------|-------|--------|--------|
| 16.0   | 30.0   | 33.1   | 34.0  | 17.8  | 21.6  | 9.0   | 5.3    | 4.2    |
| 4.5    | 2.1    | 6.3    | 10.1  | 7.4   | 5.8   | 1.0   | 2.3    | 1.7    |
| 226.1  | 275.9  | 168.0  | 98.8  | 72.0  | 71.1  | 59.7  | 56.5   | 45.9   |
| 153.8  | 226.8  | 210.4  | 18.7  | 7.9   | 1.8   | 8.0   | 1.4    | 8.2    |
| 0.8    | 0.9    | 0.6    | 1.6   | 1.4   | 1.6   | 0.7   | 0.8    | 0.8    |
| 13.6   | 19.2   | 10.8   | 22.8  | 13.3  | 14.7  | 9.2   | 8.6    | 9.2    |
| 58.4   | 69.5   | 40.6   | 21.5  | 21.2  | 26.1  | 40.9  | 33.9   | 26.1   |
| 48.0   | 59.0   | 33.9   | 805.1 | 645.1 | 763.3 | 925.2 | 1089.0 | 1003.6 |
| 48.6   | 71.5   | 29.6   | 101.8 | 77.8  | 105.1 | 75.8  | 66.6   | 76.2   |
| 43.4   | 56.3   | 28.8   | 172.1 | 138.1 | 165.3 | 74.0  | 95.5   | 84.4   |
| 370.0  | 467.5  | 347.7  | 58.5  | 77.7  | 76.3  | 57.8  | 51.6   | 68.6   |
| 3.9    | 4.0    | 3.1    | 16.2  | 20.1  | 23.9  | 15.1  | 8.9    | 12.4   |
| 4.6    | 3.5    | 4.1    | 20.7  | 11.6  | 14.8  | 12.7  | 12.0   | 15.6   |
| 28.7   | 26.0   | 17.2   | 28.9  | 18.8  | 16.3  | 17.7  | 18.4   | 16.0   |
| 6.2    | 2.9    | 1.6    | 3.1   | 3.3   | 5.1   | 5.9   | 4.1    | 2.9    |
| 1824.3 | 2632.1 | 1739.1 | 786.8 | 636.2 | 635.9 | 575.7 | 569.0  | 631.8  |
| 331.0  | 410.2  | 301.1  | 189.6 | 185.7 | 190.4 | 162.4 | 150.8  | 184.0  |
| 5.1    | 1.5    | 1.1    | 8.5   | 5.7   | 3.2   | 2.7   | 2.0    | 5.1    |
| 191.7  | 229.2  | 179.3  | 180.0 | 156.9 | 186.5 | 136.7 | 147.7  | 156.6  |
| 756.3  | 813.5  | 652.0  | 714.3 | 590.3 | 605.8 | 785.4 | 813.7  | 851.0  |
| 43.7   | 47.7   | 38.1   | 34.8  | 23.5  | 25.5  | 24.2  | 27.0   | 24.2   |
| 160.1  | 148.8  | 102.4  | 68.0  | 38.5  | 40.8  | 45.6  | 29.4   | 41.0   |
| 7.1    | 16.3   | 16.4   | 29.6  | 20.9  | 19.5  | 13.7  | 17.6   | 20.6   |
| 18.6   | 26.7   | 8.1    | 17.8  | 10.7  | 11.0  | 24.1  | 10.0   | 14.1   |
| 12.9   | 18.0   | 6.2    | 11.0  | 13.1  | 6.4   | 8.0   | 11.8   | 4.6    |
| 1.4    | 11.3   | 6.0    | 14.8  | 13.4  | 6.6   | 11.7  | 6.1    | 5.5    |
| 15.5   | 39.5   | 50.3   | 201.7 | 150.5 | 150.7 | 161.9 | 168.6  | 179.0  |
| 13.5   | 30.3   | 7.5    | 58.3  | 29.4  | 37.4  | 22.4  | 23.7   | 22.4   |
| 11.5   | 5.8    | 11.7   | 43.2  | 29.0  | 36.2  | 24.6  | 25.2   | 30.4   |
| 57.1   | 77.1   | 31.3   | 25.1  | 21.2  | 18.8  | 11.0  | 5.7    | 6.8    |
| 680.3  | 930.6  | 795.9  | 405.3 | 391.6 | 425.4 | 249.9 | 321.1  | 268.7  |
| 94.6   | 105.0  | 105.4  | 91.0  | 71.1  | 76.9  | 55.5  | 55.7   | 61.6   |
| 57.2   | 80.1   | 55.5   | 68.8  | 58.9  | 86.1  | 39.0  | 37.4   | 28.7   |
| 296.0  | 360.5  | 147.9  | 193.7 | 123.3 | 159.9 | 122.8 | 95.9   | 125.4  |
| 6.5    | 7.3    | 8.9    | 12.7  | 9.5   | 10.2  | 5.5   | 8.9    | 14.8   |
| 231.5  | 210.2  | 21.4   | 183.9 | 90.9  | 98.5  | 62.2  | 13.3   | 27.2   |
| 100.8  | 89.4   | 30.3   | 68.9  | 34.9  | 37.5  | 52.8  | 28.7   | 40.2   |
| 12.2   | 8.4    | 11.1   | 29.8  | 18.8  | 29.4  | 22.8  | 14.1   | 16.5   |
| 304.9  | 278.5  | 204.6  | 50.9  | 47.6  | 41.6  | 18.8  | 18.7   | 49.6   |
| 283.8  | 347.8  | 192.6  | 60.9  | 64.9  | 68.8  | 56.3  | 73.5   | 52.5   |
| 391.3  | 428.3  | 248.3  | 129.5 | 105.3 | 110.1 | 83.2  | 85.1   | 101.6  |
| 45.4   | 80.3   | 67.3   | 52.2  | 34.6  | 44.6  | 16.6  | 21.7   | 29.9   |
| 181.0  | 217.5  | 107.6  | 24.5  | 20.9  | 17.9  | 9.1   | 11.4   | 11.3   |
| 711.1  | 821.5  | 614.5  | 78.2  | 68.7  | 74.9  | 61.6  | 55.4   | 62.7   |
| 5.4    | 0.6    | 2.5    | 4.9   | 1.0   | 1.0   | 1.6   | 3.1    | 0.2    |
| 2.3    | 1.9    | 1.7    | 3.5   | 3.2   | 2.8   | 1.8   | 1.5    | 1.4    |
| 166.1  | 202.0  | 136.3  | 321.9 | 243.1 | 283.7 | 159.0 | 127.0  | 197.2  |
| 5.4    | 4.5    | 1.7    | 9.5   | 15.3  | 9.0   | 16.1  | 6.0    | 10.0   |
| 6.6    | 2.2    | 4.0    | 12.9  | 6.3   | 8.8   | 0.9   | 1.8    | 1.6    |
| 506.5  | 557.2  | 320.2  | 157.1 | 93.3  | 87.2  | 141.6 | 103.9  | 95.8   |
| 901.9  | 1321.9 | 981.2  | 733.7 | 682.2 | 812.3 | 528.6 | 892.4  | 833.0  |
| 190.8  | 225.7  | 165.9  | 133.9 | 118.3 | 146.2 | 138.8 | 137.6  | 140.7  |
| 1.6    | 1.7    | 3.3    | 8.6   | 8.1   | 5.4   | 2.0   | 2.3    | 0.3    |



|        |        |        |        |        |        |        |        |        |
|--------|--------|--------|--------|--------|--------|--------|--------|--------|
| 71.0   | 104.5  | 101.3  | 12.9   | 19.6   | 19.8   | 3.9    | 5.9    | 7.1    |
| 105.8  | 173.2  | 223.7  | 17.0   | 7.9    | 18.3   | 8.5    | 15.6   | 12.6   |
| 185.2  | 199.9  | 115.9  | 137.8  | 105.0  | 129.0  | 96.1   | 84.1   | 110.6  |
| 280.4  | 446.7  | 414.0  | 327.0  | 234.1  | 279.8  | 409.5  | 329.5  | 350.4  |
| 144.4  | 262.7  | 120.2  | 435.7  | 295.4  | 359.2  | 357.8  | 246.7  | 402.8  |
| 1000.9 | 452.8  | 225.7  | 72.7   | 73.7   | 63.8   | 35.9   | 46.7   | 41.9   |
| 5.7    | 3.9    | 0.6    | 11.3   | 3.8    | 5.1    | 4.1    | 4.8    | 5.5    |
| 122.6  | 116.8  | 51.8   | 96.8   | 86.1   | 95.4   | 65.0   | 115.3  | 82.6   |
| 7.5    | 7.2    | 6.9    | 14.8   | 13.0   | 17.7   | 6.5    | 9.1    | 5.0    |
| 1.5    | 1.2    | 1.8    | 1.8    | 2.9    | 4.7    | 0.8    | 0.5    | 0.8    |
| 3.2    | 7.8    | 3.6    | 7.6    | 8.1    | 8.4    | 5.1    | 5.0    | 3.2    |
| 2.9    | 5.0    | 6.3    | 7.6    | 4.1    | 16.3   | 2.4    | 2.8    | 2.4    |
| 374.6  | 535.6  | 423.7  | 197.2  | 177.7  | 183.3  | 144.5  | 157.8  | 162.5  |
| 1.8    | 1.9    | 3.3    | 4.0    | 4.5    | 6.2    | 1.3    | 0.7    | 1.1    |
| 70.0   | 62.0   | 24.0   | 67.2   | 47.1   | 31.2   | 56.0   | 24.0   | 37.8   |
| 172.1  | 209.0  | 86.9   | 112.7  | 64.0   | 68.0   | 91.1   | 62.2   | 61.1   |
| 132.6  | 135.9  | 76.1   | 81.7   | 67.5   | 73.5   | 46.9   | 60.4   | 62.1   |
| 409.9  | 396.6  | 430.9  | 44.0   | 45.9   | 60.4   | 21.2   | 34.2   | 38.1   |
| 154.1  | 233.9  | 106.1  | 13.9   | 9.4    | 25.5   | 7.3    | 7.1    | 10.9   |
| 79.2   | 88.6   | 77.3   | 24.0   | 31.4   | 27.2   | 52.4   | 72.4   | 63.5   |
| 3345.2 | 2928.2 | 2043.6 | 19.8   | 23.3   | 9.1    | 7.4    | 5.5    | 16.6   |
| 54.9   | 42.4   | 53.4   | 389.0  | 302.4  | 337.1  | 327.2  | 433.0  | 354.5  |
| 93.2   | 157.8  | 150.1  | 20.6   | 9.8    | 10.3   | 6.4    | 5.8    | 9.4    |
| 4.8    | 4.2    | 2.9    | 5.2    | 4.9    | 3.3    | 0.8    | 4.8    | 1.4    |
| 0.5    | 0.6    | 0.4    | 1.0    | 4.9    | 2.0    | 0.4    | 0.9    | 0.9    |
| 100.6  | 116.1  | 97.5   | 124.0  | 80.8   | 85.9   | 66.5   | 85.0   | 68.1   |
| 131.4  | 182.1  | 150.7  | 68.9   | 64.4   | 72.7   | 63.1   | 88.6   | 79.6   |
| 118.4  | 194.1  | 169.2  | 18.6   | 11.1   | 11.6   | 15.2   | 6.3    | 7.3    |
| 36.8   | 32.5   | 35.8   | 19.5   | 16.4   | 15.7   | 9.5    | 20.0   | 10.8   |
| 239.5  | 236.2  | 146.6  | 84.6   | 65.0   | 62.2   | 47.7   | 65.8   | 63.4   |
| 7.6    | 17.4   | 12.9   | 29.2   | 28.3   | 33.4   | 27.5   | 12.5   | 19.3   |
| 3434.2 | 4391.3 | 2881.4 | 2546.6 | 1692.2 | 1841.5 | 1426.1 | 1041.8 | 1246.1 |
| 733.8  | 1000.9 | 1184.3 | 406.2  | 288.0  | 333.4  | 165.0  | 164.1  | 198.2  |
| 45.6   | 47.4   | 47.6   | 87.6   | 67.8   | 74.4   | 41.2   | 33.4   | 32.5   |
| 84.9   | 129.0  | 187.7  | 20.9   | 22.5   | 23.7   | 22.2   | 16.8   | 7.9    |
| 9.2    | 9.2    | 5.5    | 2.7    | 4.0    | 2.6    | 3.8    | 5.4    | 2.9    |
| 1.0    | 3.4    | 3.5    | 7.9    | 18.8   | 8.5    | 9.9    | 15.9   | 17.3   |
| 170.1  | 182.5  | 163.7  | 59.6   | 47.8   | 52.2   | 91.3   | 98.0   | 92.6   |
| 230.7  | 254.5  | 215.8  | 222.2  | 184.0  | 192.2  | 159.6  | 164.5  | 167.3  |
| 591.8  | 566.6  | 310.4  | 1071.4 | 667.6  | 715.8  | 566.3  | 428.8  | 496.7  |
| 7.9    | 6.6    | 10.8   | 34.7   | 37.0   | 31.4   | 18.6   | 18.2   | 15.1   |
| 5.8    | 4.5    | 5.1    | 18.5   | 10.9   | 18.4   | 12.5   | 9.2    | 12.4   |
| 1.9    | 10.7   | 1.5    | 21.1   | 11.1   | 8.4    | 12.0   | 16.6   | 15.4   |
| 85.7   | 129.9  | 106.2  | 87.4   | 80.6   | 93.2   | 49.1   | 49.3   | 54.0   |
| 84.7   | 58.8   | 59.0   | 143.8  | 93.8   | 122.3  | 71.6   | 89.2   | 80.9   |
| 1.0    | 2.6    | 2.1    | 7.0    | 7.2    | 13.0   | 3.2    | 6.8    | 10.5   |
| 91.9   | 133.9  | 116.7  | 46.9   | 40.5   | 45.9   | 47.2   | 44.4   | 49.4   |
| 93.6   | 88.7   | 44.1   | 5.7    | 4.1    | 5.1    | 12.0   | 10.8   | 7.4    |
| 93.9   | 140.5  | 104.7  | 104.8  | 69.3   | 83.3   | 105.5  | 101.7  | 116.1  |
| 24.9   | 25.8   | 9.4    | 19.5   | 19.3   | 20.8   | 17.9   | 15.9   | 15.9   |
| 9.6    | 3.0    | 2.4    | 47.8   | 16.9   | 19.7   | 5.4    | 4.3    | 8.1    |
| 115.9  | 134.8  | 108.3  | 93.2   | 66.7   | 78.6   | 103.3  | 108.4  | 120.9  |
| 316.1  | 435.8  | 343.7  | 346.3  | 310.0  | 284.9  | 175.8  | 215.3  | 194.7  |

|        |        |        |        |        |        |        |        |        |
|--------|--------|--------|--------|--------|--------|--------|--------|--------|
| 197.3  | 268.3  | 167.3  | 316.1  | 165.0  | 179.6  | 101.5  | 59.1   | 70.6   |
| 1873.1 | 1947.7 | 687.6  | 1442.8 | 659.8  | 690.2  | 517.7  | 251.3  | 319.5  |
| 1560.2 | 1532.7 | 575.2  | 909.8  | 438.9  | 483.2  | 535.2  | 249.5  | 330.0  |
| 85.0   | 129.7  | 73.3   | 46.6   | 40.1   | 48.7   | 31.5   | 33.5   | 45.1   |
| 16.7   | 19.4   | 22.7   | 10.2   | 12.7   | 22.2   | 14.9   | 5.0    | 9.7    |
| 269.2  | 313.3  | 214.6  | 754.9  | 628.0  | 603.8  | 301.6  | 336.1  | 380.3  |
| 331.6  | 395.3  | 219.2  | 334.9  | 233.8  | 287.8  | 264.1  | 281.3  | 286.4  |
| 22.1   | 33.0   | 27.5   | 23.7   | 31.8   | 22.3   | 13.0   | 18.6   | 26.9   |
| 5.1    | 7.4    | 5.0    | 11.4   | 8.4    | 5.4    | 8.0    | 5.6    | 2.8    |
| 267.9  | 243.2  | 126.1  | 132.3  | 68.6   | 64.4   | 51.1   | 38.7   | 37.2   |
| 33.0   | 67.0   | 38.4   | 36.4   | 25.8   | 19.8   | 22.3   | 30.3   | 29.8   |
| 11.5   | 21.8   | 6.6    | 30.0   | 23.1   | 33.2   | 26.4   | 14.5   | 23.6   |
| 200.9  | 290.1  | 197.3  | 554.5  | 452.9  | 482.1  | 330.9  | 387.9  | 389.9  |
| 781.6  | 1048.5 | 855.0  | 2396.5 | 1892.9 | 2110.2 | 1443.8 | 1565.7 | 1734.3 |
| 74.7   | 96.1   | 57.4   | 19.2   | 12.7   | 9.9    | 4.3    | 7.4    | 4.6    |
| 39.4   | 82.9   | 31.9   | 9.4    | 3.7    | 6.6    | 8.7    | 6.2    | 5.1    |
| 4.0    | 11.3   | 8.8    | 24.7   | 9.6    | 20.7   | 8.1    | 10.3   | 7.2    |
| 123.7  | 161.5  | 110.5  | 140.6  | 113.6  | 117.9  | 87.0   | 88.3   | 98.4   |
| 264.5  | 378.6  | 288.3  | 275.5  | 257.4  | 257.1  | 182.9  | 197.2  | 220.5  |
| 200.6  | 298.2  | 287.2  | 102.3  | 68.6   | 85.1   | 47.0   | 52.5   | 65.9   |
| 44.3   | 76.2   | 74.5   | 70.5   | 59.5   | 76.0   | 27.4   | 20.7   | 25.9   |
| 9.5    | 2.2    | 3.5    | 4.8    | 17.7   | 13.3   | 4.3    | 3.2    | 3.5    |
| 123.2  | 199.7  | 134.5  | 233.4  | 235.1  | 247.9  | 151.1  | 234.2  | 191.4  |
| 4.2    | 6.7    | 2.6    | 17.3   | 16.0   | 15.5   | 13.7   | 5.3    | 17.6   |
| 71.8   | 91.0   | 99.5   | 180.0  | 177.1  | 184.0  | 108.0  | 139.8  | 137.7  |
| 173.5  | 222.4  | 153.7  | 118.2  | 113.7  | 119.1  | 98.9   | 125.9  | 125.8  |
| 40.0   | 83.9   | 50.6   | 101.5  | 70.1   | 80.9   | 56.1   | 65.0   | 69.6   |
| 8.8    | 16.0   | 8.6    | 17.3   | 21.5   | 15.8   | 17.3   | 8.5    | 16.1   |
| 51.0   | 55.8   | 27.1   | 18.2   | 5.2    | 7.5    | 6.3    | 2.4    | 3.3    |
| 50.8   | 73.3   | 37.8   | 76.1   | 53.5   | 72.0   | 74.9   | 46.6   | 60.9   |
| 1.5    | 3.6    | 0.4    | 21.5   | 12.9   | 22.3   | 17.6   | 12.7   | 16.0   |
| 7.4    | 7.7    | 2.0    | 67.0   | 37.4   | 45.9   | 40.2   | 39.2   | 38.6   |
| 2441.7 | 4001.2 | 2542.9 | 587.2  | 423.3  | 486.3  | 225.5  | 212.4  | 267.0  |
| 226.6  | 245.6  | 172.7  | 120.5  | 109.6  | 122.3  | 108.5  | 105.4  | 129.2  |
| 82.8   | 163.9  | 199.4  | 87.5   | 99.0   | 105.1  | 71.6   | 107.7  | 104.9  |
| 11.3   | 21.3   | 23.3   | 28.2   | 29.6   | 43.2   | 27.2   | 23.2   | 26.8   |
| 0.8    | 1.3    | 0.6    | 3.3    | 8.0    | 3.4    | 1.2    | 2.0    | 1.0    |
| 7.3    | 5.7    | 1.2    | 9.8    | 2.9    | 13.8   | 7.8    | 5.7    | 12.4   |
| 104.7  | 142.2  | 143.0  | 54.3   | 55.7   | 56.3   | 30.2   | 62.3   | 52.9   |
| 1079.5 | 1470.7 | 990.6  | 1178.1 | 839.6  | 1054.7 | 630.9  | 696.0  | 643.2  |
| 1391.1 | 1747.3 | 1487.5 | 272.3  | 231.2  | 251.0  | 148.9  | 184.0  | 238.5  |
| 166.8  | 210.6  | 102.7  | 113.5  | 83.8   | 92.3   | 88.0   | 104.0  | 104.5  |
| 736.4  | 887.8  | 471.0  | 247.5  | 208.8  | 225.8  | 141.8  | 155.0  | 178.2  |
| 702.9  | 837.4  | 658.2  | 269.5  | 222.7  | 244.9  | 331.3  | 350.4  | 338.8  |
| 1.6    | 2.5    | 2.6    | 2.8    | 3.3    | 4.3    | 3.8    | 2.0    | 1.8    |
| 45.7   | 27.0   | 26.5   | 61.8   | 37.5   | 53.1   | 25.7   | 14.2   | 34.9   |
| 368.8  | 481.5  | 289.2  | 354.2  | 269.4  | 288.7  | 215.6  | 159.9  | 180.4  |
| 33.2   | 27.9   | 20.4   | 244.5  | 186.1  | 211.8  | 105.3  | 97.6   | 139.9  |
| 7.5    | 5.8    | 3.7    | 12.9   | 7.3    | 5.6    | 2.9    | 0.7    | 1.7    |
| 74.2   | 90.5   | 58.4   | 2.5    | 3.0    | 3.9    | 48.4   | 42.9   | 44.1   |
| 3.9    | 1.6    | 4.3    | 37.3   | 40.6   | 48.4   | 17.9   | 21.2   | 23.6   |
| 270.2  | 375.1  | 238.6  | 297.7  | 197.5  | 219.6  | 145.5  | 113.9  | 105.4  |
| 153.9  | 208.1  | 186.4  | 5.4    | 2.5    | 2.6    | 3.3    | 0.8    | 1.2    |

|        |        |        |        |        |        |       |       |       |
|--------|--------|--------|--------|--------|--------|-------|-------|-------|
| 28.2   | 49.1   | 26.9   | 306.0  | 236.3  | 218.0  | 198.4 | 160.8 | 197.8 |
| 305.0  | 462.1  | 435.6  | 57.8   | 93.9   | 106.4  | 33.0  | 98.5  | 86.0  |
| 61.5   | 92.4   | 94.7   | 15.4   | 17.3   | 15.2   | 1.1   | 17.9  | 8.7   |
| 520.2  | 624.5  | 358.1  | 445.7  | 323.7  | 309.3  | 366.7 | 268.6 | 284.8 |
| 1.9    | 2.6    | 4.2    | 9.5    | 10.5   | 17.0   | 2.7   | 8.0   | 5.4   |
| 291.2  | 353.7  | 239.6  | 576.5  | 574.5  | 570.9  | 276.1 | 344.6 | 353.6 |
| 1919.2 | 1929.5 | 996.7  | 666.6  | 240.6  | 280.0  | 398.2 | 197.3 | 229.5 |
| 305.5  | 344.2  | 170.6  | 318.2  | 187.7  | 237.9  | 118.5 | 89.4  | 101.8 |
| 111.4  | 142.7  | 68.1   | 46.3   | 22.0   | 33.1   | 56.2  | 39.4  | 41.5  |
| 261.0  | 283.8  | 150.0  | 308.6  | 233.9  | 294.7  | 225.7 | 221.0 | 248.8 |
| 11.2   | 4.2    | 10.0   | 15.3   | 25.1   | 19.2   | 10.5  | 14.7  | 5.6   |
| 12.7   | 16.3   | 11.1   | 19.7   | 16.3   | 14.6   | 10.8  | 9.3   | 13.9  |
| 992.7  | 1260.9 | 813.6  | 188.8  | 149.6  | 151.8  | 219.4 | 186.4 | 217.0 |
| 172.8  | 272.4  | 189.4  | 141.6  | 143.3  | 138.2  | 187.5 | 187.5 | 198.0 |
| 389.4  | 434.4  | 279.3  | 72.1   | 70.4   | 76.0   | 72.3  | 60.6  | 67.8  |
| 8.2    | 6.8    | 7.0    | 13.2   | 11.1   | 10.7   | 7.3   | 5.6   | 7.1   |
| 444.3  | 529.3  | 320.3  | 479.1  | 266.5  | 305.2  | 342.5 | 238.1 | 235.6 |
| 10.0   | 20.4   | 13.1   | 11.7   | 7.4    | 8.6    | 8.8   | 9.5   | 10.6  |
| 78.3   | 84.5   | 57.6   | 78.0   | 74.9   | 75.1   | 62.1  | 46.6  | 56.9  |
| 50.5   | 68.6   | 51.8   | 180.9  | 148.6  | 161.4  | 117.6 | 108.0 | 126.9 |
| 2371.9 | 2500.9 | 1480.7 | 1223.2 | 1001.9 | 1078.4 | 639.2 | 592.4 | 660.8 |
| 4.9    | 9.2    | 6.8    | 5.7    | 4.8    | 8.5    | 10.2  | 8.7   | 10.0  |
| 18.7   | 20.6   | 14.9   | 34.9   | 29.6   | 32.9   | 44.4  | 42.6  | 40.7  |
| 872.4  | 1102.9 | 753.5  | 502.0  | 465.4  | 467.5  | 331.1 | 291.5 | 334.5 |
| 70.2   | 67.6   | 50.8   | 4.1    | 7.9    | 17.6   | 4.7   | 3.0   | 17.1  |
| 72.0   | 136.8  | 136.0  | 7.4    | 3.9    | 6.7    | 3.0   | 2.0   | 0.5   |
| 37.5   | 66.3   | 65.2   | 3.8    | 5.9    | 9.0    | 3.5   | 0.8   | 3.1   |
| 5.7    | 3.4    | 1.7    | 10.6   | 8.7    | 5.1    | 2.1   | 1.1   | 2.0   |
| 532.9  | 656.3  | 550.5  | 295.8  | 221.5  | 268.7  | 254.7 | 250.3 | 285.1 |
| 5.4    | 5.0    | 2.5    | 3.9    | 6.1    | 3.8    | 3.4   | 4.8   | 3.8   |
| 572.7  | 864.7  | 597.8  | 340.2  | 301.7  | 301.4  | 225.4 | 233.6 | 274.1 |
| 4.8    | 11.4   | 15.4   | 20.2   | 19.5   | 18.0   | 10.4  | 6.8   | 7.3   |
| 1.4    | 0.9    | 2.4    | 7.7    | 4.5    | 5.5    | 0.7   | 7.8   | 8.2   |
| 15.2   | 9.2    | 13.7   | 15.5   | 8.6    | 23.1   | 9.0   | 9.6   | 3.2   |
| 373.0  | 447.1  | 289.4  | 171.0  | 163.7  | 155.4  | 137.2 | 115.3 | 146.1 |
| 3.4    | 3.4    | 2.4    | 7.3    | 2.7    | 13.1   | 13.5  | 10.2  | 7.6   |
| 1930.9 | 1455.2 | 995.5  | 4.9    | 1.7    | 1.2    | 1.1   | 1.9   | 3.8   |
| 397.2  | 295.5  | 148.8  | 18.1   | 11.0   | 16.5   | 10.5  | 8.0   | 11.2  |
| 988.5  | 1135.3 | 775.8  | 142.2  | 112.3  | 134.2  | 134.7 | 114.6 | 136.2 |
| 29.3   | 37.2   | 37.0   | 48.5   | 50.5   | 54.0   | 27.7  | 21.1  | 15.8  |
| 140.9  | 192.5  | 161.7  | 57.9   | 46.6   | 54.9   | 50.0  | 71.0  | 62.4  |
| 28.0   | 29.6   | 27.2   | 22.4   | 12.0   | 21.0   | 23.3  | 26.1  | 23.9  |
| 30.0   | 46.6   | 37.4   | 36.3   | 27.6   | 28.6   | 24.1  | 26.9  | 31.7  |
| 68.5   | 113.8  | 70.7   | 406.3  | 398.4  | 432.7  | 249.3 | 293.8 | 335.4 |
| 60.5   | 71.4   | 57.3   | 19.3   | 6.5    | 18.2   | 14.5  | 16.1  | 12.9  |
| 31.0   | 31.6   | 30.0   | 14.6   | 18.2   | 11.9   | 18.1  | 13.4  | 17.5  |
| 6.7    | 10.0   | 9.0    | 4.1    | 8.6    | 4.9    | 2.8   | 1.8   | 1.8   |
| 272.8  | 413.6  | 346.2  | 477.0  | 433.7  | 436.2  | 326.1 | 431.2 | 386.1 |
| 622.7  | 699.3  | 448.4  | 313.3  | 234.4  | 288.3  | 139.7 | 120.7 | 157.8 |
| 1548.8 | 1443.7 | 1028.6 | 688.3  | 467.8  | 492.3  | 346.2 | 307.3 | 353.8 |
| 3.7    | 5.7    | 3.4    | 19.3   | 4.8    | 14.2   | 4.8   | 1.0   | 6.3   |
| 3.9    | 2.0    | 3.2    | 4.5    | 2.9    | 3.4    | 1.6   | 2.4   | 1.6   |
| 44.4   | 47.1   | 42.1   | 95.9   | 87.4   | 80.4   | 79.8  | 102.1 | 104.6 |

|         |         |         |         |        |         |        |        |        |
|---------|---------|---------|---------|--------|---------|--------|--------|--------|
| 37.4    | 56.1    | 44.7    | 4.7     | 10.8   | 6.7     | 12.7   | 11.1   | 8.1    |
| 269.4   | 379.1   | 295.8   | 121.3   | 98.9   | 96.8    | 173.4  | 198.5  | 180.4  |
| 2.6     | 2.6     | 3.9     | 3.7     | 3.6    | 3.9     | 1.8    | 1.5    | 2.1    |
| 1596.8  | 2098.1  | 1734.4  | 373.7   | 322.3  | 353.0   | 388.0  | 287.3  | 382.3  |
| 20.4    | 29.1    | 31.8    | 46.1    | 50.1   | 59.4    | 25.8   | 30.9   | 21.6   |
| 59.6    | 65.1    | 52.1    | 17.7    | 29.7   | 37.6    | 44.7   | 40.9   | 40.9   |
| 39.2    | 67.4    | 35.9    | 62.9    | 39.5   | 54.9    | 33.9   | 41.6   | 39.1   |
| 1.0     | 1.5     | 2.1     | 9.6     | 7.2    | 5.7     | 1.4    | 1.6    | 2.3    |
| 287.9   | 365.8   | 304.1   | 121.5   | 112.8  | 125.1   | 70.1   | 89.8   | 103.8  |
| 882.7   | 966.4   | 634.8   | 546.2   | 476.3  | 491.9   | 339.4  | 379.5  | 445.6  |
| 1.9     | 2.5     | 1.5     | 3.0     | 3.2    | 3.3     | 1.7    | 1.7    | 1.4    |
| 385.3   | 383.5   | 222.7   | 138.9   | 105.1  | 109.5   | 91.9   | 63.9   | 81.0   |
| 65.2    | 57.8    | 44.4    | 18.7    | 12.8   | 19.1    | 17.6   | 13.3   | 12.5   |
| 182.9   | 274.6   | 332.2   | 19.5    | 1.8    | 4.4     | 1.8    | 0.4    | 2.9    |
| 210.5   | 203.9   | 122.9   | 58.9    | 29.5   | 25.8    | 67.2   | 41.5   | 41.9   |
| 361.3   | 392.4   | 185.0   | 174.6   | 85.3   | 106.1   | 110.9  | 61.3   | 80.4   |
| 17.7    | 9.6     | 11.5    | 32.8    | 20.8   | 25.2    | 16.0   | 15.5   | 16.1   |
| 17.3    | 36.1    | 29.6    | 36.4    | 29.2   | 41.9    | 21.7   | 26.3   | 23.9   |
| 2386.1  | 2185.8  | 1177.6  | 8.4     | 5.9    | 10.5    | 2.0    | 1.7    | 3.6    |
| 4925.5  | 4547.8  | 2693.3  | 5.2     | 3.3    | 3.4     | 2.1    | 2.0    | 2.4    |
| 10838.9 | 10928.2 | 10004.2 | 10146.0 | 9878.9 | 10342.6 | 7246.2 | 7022.1 | 7308.7 |
| 63.8    | 91.0    | 63.0    | 125.1   | 130.9  | 136.2   | 58.1   | 53.4   | 61.9   |
| 2.2     | 9.2     | 9.4     | 7.8     | 7.4    | 20.5    | 4.8    | 15.8   | 14.3   |
| 7.1     | 9.4     | 2.8     | 13.2    | 7.2    | 4.0     | 9.0    | 7.3    | 3.3    |
| 3.7     | 3.8     | 3.7     | 15.4    | 4.8    | 5.1     | 5.9    | 17.0   | 15.4   |
| 3.4     | 7.3     | 10.6    | 87.4    | 68.0   | 78.3    | 59.4   | 110.7  | 86.0   |
| 2.7     | 26.4    | 6.8     | 29.2    | 9.5    | 12.1    | 11.1   | 12.2   | 8.9    |
| 67.8    | 86.1    | 46.1    | 168.3   | 122.2  | 149.5   | 83.3   | 74.9   | 83.4   |
| 395.2   | 512.9   | 280.9   | 574.1   | 343.3  | 331.3   | 549.0  | 420.0  | 472.5  |
| 22.8    | 38.9    | 31.4    | 34.1    | 16.3   | 32.2    | 28.2   | 20.9   | 19.0   |
| 92.0    | 137.2   | 102.2   | 95.6    | 77.9   | 97.4    | 50.4   | 54.9   | 71.2   |
| 486.9   | 568.2   | 442.8   | 307.2   | 267.6  | 307.8   | 268.5  | 271.9  | 280.2  |
| 10.9    | 7.5     | 10.2    | 14.2    | 10.9   | 8.6     | 4.7    | 6.5    | 18.9   |
| 1226.3  | 1176.2  | 473.1   | 716.1   | 559.7  | 576.3   | 442.7  | 318.6  | 420.5  |
| 42.8    | 69.9    | 82.2    | 107.7   | 103.1  | 127.7   | 53.2   | 57.0   | 68.5   |
| 38.4    | 39.4    | 33.5    | 71.0    | 57.6   | 66.9    | 70.0   | 67.1   | 79.0   |
| 72.8    | 78.4    | 58.1    | 416.7   | 337.1  | 408.1   | 176.3  | 183.5  | 244.2  |
| 25.6    | 22.2    | 18.7    | 31.2    | 27.3   | 23.9    | 20.8   | 21.8   | 27.1   |
| 2.4     | 2.6     | 2.4     | 35.5    | 27.3   | 30.0    | 32.5   | 29.5   | 34.9   |
| 46.2    | 65.4    | 54.3    | 183.6   | 155.2  | 171.7   | 146.8  | 123.8  | 145.4  |
| 26.7    | 37.4    | 19.0    | 38.6    | 27.8   | 22.9    | 19.2   | 17.4   | 25.2   |
| 4.4     | 1.5     | 1.7     | 265.6   | 224.5  | 194.3   | 164.7  | 134.8  | 168.6  |
| 1.0     | 0.7     | 0.8     | 257.2   | 190.2  | 212.6   | 126.0  | 106.1  | 124.8  |
| 13.6    | 8.9     | 8.8     | 153.0   | 118.7  | 143.6   | 78.8   | 79.3   | 75.3   |
| 46.6    | 38.3    | 26.8    | 41.1    | 49.9   | 55.0    | 28.9   | 22.5   | 27.5   |
| 16.8    | 47.9    | 55.3    | 11.9    | 28.4   | 21.5    | 21.1   | 15.3   | 21.3   |
| 27.8    | 42.0    | 55.9    | 16.9    | 14.6   | 15.0    | 12.3   | 13.8   | 16.8   |
| 83.1    | 105.5   | 72.0    | 72.5    | 63.5   | 72.2    | 42.9   | 42.0   | 45.8   |
| 4.8     | 11.5    | 8.1     | 19.5    | 13.4   | 21.3    | 10.0   | 13.7   | 11.5   |
| 108.7   | 129.7   | 99.8    | 67.8    | 65.9   | 82.7    | 45.4   | 44.9   | 51.7   |
| 59.3    | 93.3    | 80.6    | 245.6   | 185.0  | 229.8   | 180.9  | 160.2  | 174.8  |
| 26.0    | 33.4    | 18.7    | 63.9    | 45.8   | 60.5    | 22.5   | 20.5   | 23.7   |
| 3.3     | 16.0    | 5.1     | 11.6    | 10.2   | 7.3     | 11.0   | 13.7   | 8.5    |

|       |       |       |        |        |        |        |        |        |
|-------|-------|-------|--------|--------|--------|--------|--------|--------|
| 75.9  | 88.6  | 58.2  | 84.9   | 67.6   | 73.2   | 50.7   | 45.0   | 53.0   |
| 6.2   | 9.7   | 4.6   | 16.0   | 7.4    | 10.7   | 1.7    | 1.5    | 13.1   |
| 223.7 | 225.6 | 241.2 | 210.8  | 172.1  | 205.1  | 110.8  | 90.7   | 99.8   |
| 155.3 | 189.4 | 117.3 | 140.9  | 97.5   | 131.3  | 94.3   | 85.1   | 91.2   |
| 49.5  | 57.8  | 59.0  | 37.5   | 40.0   | 33.5   | 25.7   | 26.5   | 26.8   |
| 111.2 | 137.6 | 92.4  | 73.8   | 56.5   | 65.7   | 44.6   | 50.0   | 51.6   |
| 24.3  | 30.5  | 24.0  | 8.0    | 9.1    | 5.6    | 5.4    | 4.6    | 3.0    |
| 357.8 | 198.7 | 55.7  | 12.0   | 11.9   | 20.9   | 10.9   | 19.1   | 19.8   |
| 209.2 | 84.6  | 25.4  | 10.3   | 4.9    | 6.2    | 6.1    | 15.7   | 6.5    |
| 25.2  | 39.3  | 30.1  | 18.2   | 15.0   | 18.9   | 15.7   | 13.8   | 19.6   |
| 53.2  | 50.5  | 28.5  | 25.2   | 16.3   | 18.2   | 43.1   | 27.3   | 33.2   |
| 27.9  | 61.9  | 54.1  | 144.9  | 99.5   | 111.8  | 96.1   | 80.9   | 89.7   |
| 134.4 | 169.2 | 133.1 | 234.4  | 214.4  | 199.5  | 170.9  | 185.0  | 182.2  |
| 2.1   | 0.8   | 0.3   | 4.5    | 6.0    | 4.5    | 0.6    | 3.2    | 2.4    |
| 3.0   | 5.6   | 4.2   | 7.2    | 1.5    | 3.8    | 5.0    | 2.0    | 0.9    |
| 3.5   | 4.9   | 1.7   | 8.8    | 3.0    | 3.7    | 6.1    | 1.5    | 3.5    |
| 7.1   | 29.3  | 18.9  | 312.6  | 241.6  | 380.2  | 910.6  | 704.9  | 934.8  |
| 37.1  | 70.5  | 53.7  | 3152.1 | 2533.5 | 2862.3 | 3110.9 | 2778.1 | 3475.5 |
| 15.2  | 7.6   | 10.2  | 21.7   | 15.2   | 24.4   | 21.8   | 21.8   | 14.2   |
| 36.9  | 26.5  | 12.7  | 79.8   | 76.7   | 88.1   | 56.3   | 100.7  | 96.5   |
| 9.6   | 22.8  | 8.9   | 24.5   | 16.4   | 22.1   | 17.3   | 10.3   | 17.1   |
| 113.8 | 98.3  | 65.5  | 146.2  | 113.4  | 109.1  | 83.7   | 67.2   | 71.6   |
| 288.3 | 285.7 | 81.0  | 74.2   | 24.7   | 34.0   | 30.9   | 16.3   | 17.8   |
| 38.9  | 41.8  | 28.7  | 15.7   | 15.0   | 14.9   | 20.1   | 12.2   | 8.3    |
| 241.1 | 306.3 | 179.6 | 814.9  | 633.7  | 675.6  | 389.8  | 290.7  | 386.4  |
| 55.4  | 68.9  | 54.1  | 62.2   | 64.1   | 71.7   | 56.0   | 45.3   | 46.3   |
| 61.4  | 76.4  | 60.0  | 67.6   | 41.9   | 45.7   | 44.6   | 40.3   | 39.5   |
| 98.4  | 80.7  | 57.0  | 361.1  | 345.0  | 386.4  | 276.3  | 333.5  | 379.1  |
| 2.0   | 4.1   | 0.9   | 1.6    | 2.0    | 2.4    | 7.4    | 1.3    | 4.1    |
| 5.5   | 3.5   | 3.3   | 26.8   | 43.1   | 29.3   | 3.8    | 22.0   | 6.4    |
| 1.1   | 5.8   | 2.5   | 37.5   | 33.5   | 47.8   | 21.6   | 28.5   | 28.6   |
| 301.5 | 277.4 | 112.8 | 17.2   | 15.7   | 24.5   | 21.8   | 19.5   | 27.9   |
| 552.9 | 648.0 | 380.4 | 566.4  | 442.7  | 530.6  | 346.1  | 336.2  | 366.7  |
| 42.7  | 27.0  | 10.8  | 20.8   | 13.2   | 19.1   | 18.3   | 5.1    | 7.8    |
| 4.7   | 4.8   | 3.2   | 3.5    | 6.2    | 6.0    | 2.4    | 0.5    | 4.6    |
| 11.6  | 13.7  | 6.4   | 11.8   | 10.9   | 5.6    | 4.2    | 4.0    | 3.1    |
| 1.9   | 6.9   | 1.5   | 1.4    | 2.5    | 1.6    | 2.6    | 3.3    | 1.4    |
| 797.6 | 799.6 | 561.3 | 688.3  | 439.6  | 479.5  | 342.0  | 245.6  | 254.9  |
| 9.3   | 5.9   | 8.1   | 47.2   | 35.7   | 41.7   | 33.2   | 41.2   | 40.0   |
| 3.1   | 1.0   | 2.1   | 18.8   | 15.4   | 21.0   | 7.5    | 20.2   | 9.0    |
| 0.9   | 0.9   | 0.6   | 11.7   | 10.8   | 2.4    | 1.4    | 1.0    | 2.9    |
| 7.6   | 9.4   | 12.8  | 34.6   | 25.9   | 22.5   | 21.4   | 9.1    | 18.5   |
| 12.4  | 24.0  | 10.0  | 226.9  | 180.1  | 214.0  | 136.6  | 139.9  | 154.8  |
| 65.5  | 75.9  | 61.3  | 123.6  | 111.3  | 122.7  | 69.0   | 54.2   | 63.4   |
| 0.7   | 2.4   | 2.0   | 20.3   | 12.3   | 13.2   | 15.7   | 7.9    | 20.1   |
| 256.3 | 187.3 | 95.6  | 131.3  | 137.3  | 139.3  | 67.9   | 65.8   | 86.8   |
| 7.0   | 11.8  | 10.2  | 23.3   | 23.4   | 23.4   | 12.0   | 5.3    | 8.1    |
| 14.0  | 18.6  | 25.7  | 9.3    | 26.1   | 12.6   | 12.1   | 4.7    | 11.3   |
| 176.1 | 307.7 | 329.9 | 39.7   | 13.5   | 25.8   | 23.4   | 11.6   | 4.2    |
| 24.7  | 39.1  | 26.4  | 58.1   | 48.1   | 57.9   | 32.5   | 24.0   | 38.2   |
| 724.0 | 954.1 | 725.3 | 1372.3 | 1096.5 | 1264.6 | 733.5  | 764.3  | 820.4  |
| 538.6 | 596.3 | 427.3 | 507.8  | 365.9  | 404.7  | 399.8  | 381.4  | 412.3  |
| 479.6 | 528.6 | 257.6 | 290.5  | 239.8  | 282.7  | 170.8  | 143.7  | 163.4  |

|        |        |        |        |        |        |        |        |        |
|--------|--------|--------|--------|--------|--------|--------|--------|--------|
| 183.9  | 230.9  | 127.7  | 249.7  | 204.6  | 206.0  | 111.9  | 116.5  | 126.7  |
| 67.3   | 91.8   | 110.2  | 48.9   | 42.5   | 70.3   | 36.3   | 47.4   | 39.6   |
| 196.5  | 200.9  | 173.4  | 306.9  | 240.2  | 314.7  | 197.2  | 199.0  | 214.0  |
| 603.7  | 883.2  | 906.5  | 126.7  | 108.6  | 133.0  | 76.9   | 109.4  | 94.9   |
| 19.8   | 43.1   | 26.9   | 5.7    | 8.0    | 7.0    | 11.5   | 13.8   | 6.0    |
| 185.5  | 231.6  | 137.9  | 22.5   | 20.4   | 11.9   | 26.5   | 23.9   | 22.2   |
| 363.5  | 398.2  | 283.2  | 40.4   | 25.6   | 17.2   | 37.3   | 26.0   | 23.1   |
| 245.6  | 434.6  | 362.0  | 663.4  | 874.7  | 987.1  | 336.2  | 515.6  | 528.6  |
| 96.7   | 95.7   | 65.8   | 155.9  | 121.2  | 142.9  | 76.3   | 82.5   | 95.0   |
| 14.5   | 17.6   | 17.8   | 42.4   | 24.6   | 26.6   | 13.8   | 17.8   | 25.6   |
| 5.9    | 9.7    | 7.0    | 16.1   | 8.0    | 7.4    | 5.1    | 5.0    | 8.6    |
| 1071.5 | 786.6  | 694.6  | 47.4   | 26.6   | 44.8   | 68.6   | 75.6   | 66.9   |
| 2982.6 | 2081.6 | 1697.6 | 152.1  | 111.7  | 145.2  | 92.9   | 124.2  | 112.0  |
| 35.2   | 42.6   | 34.9   | 28.4   | 18.9   | 23.8   | 12.3   | 4.5    | 10.8   |
| 49.8   | 60.4   | 30.4   | 1666.2 | 1495.3 | 1638.6 | 845.0  | 853.3  | 996.8  |
| 22.6   | 19.7   | 29.9   | 77.9   | 60.9   | 59.9   | 28.2   | 28.3   | 38.3   |
| 23.5   | 38.7   | 60.2   | 266.8  | 254.6  | 277.5  | 169.7  | 174.6  | 194.3  |
| 90.3   | 116.9  | 57.3   | 53.4   | 36.0   | 42.5   | 51.4   | 54.2   | 41.8   |
| 1.9    | 2.4    | 1.8    | 4.2    | 2.6    | 5.0    | 1.5    | 1.1    | 2.7    |
| 2.7    | 1.6    | 1.0    | 3.9    | 3.5    | 5.9    | 1.2    | 1.1    | 1.0    |
| 49.2   | 67.2   | 47.1   | 279.1  | 228.5  | 285.1  | 123.3  | 125.8  | 123.5  |
| 24.5   | 34.4   | 12.4   | 130.0  | 86.7   | 110.7  | 51.0   | 52.0   | 50.9   |
| 716.3  | 770.4  | 533.9  | 2.4    | 1.8    | 2.5    | 7.7    | 5.0    | 8.5    |
| 196.3  | 226.8  | 136.7  | 9.5    | 10.4   | 9.1    | 7.4    | 2.4    | 2.2    |
| 45.1   | 70.3   | 47.4   | 76.9   | 72.5   | 77.3   | 48.6   | 53.4   | 64.7   |
| 66.5   | 48.0   | 22.3   | 28.9   | 35.4   | 32.7   | 38.4   | 37.3   | 48.1   |
| 265.0  | 280.1  | 179.9  | 122.5  | 110.5  | 104.6  | 82.5   | 86.3   | 100.9  |
| 12.3   | 15.5   | 8.9    | 91.7   | 58.9   | 74.9   | 79.9   | 80.7   | 79.0   |
| 10.3   | 18.8   | 8.9    | 59.6   | 47.8   | 43.6   | 35.4   | 38.6   | 48.4   |
| 18.6   | 9.9    | 22.7   | 16.0   | 20.5   | 10.0   | 10.0   | 6.1    | 12.8   |
| 24.2   | 22.8   | 19.7   | 38.0   | 28.3   | 28.7   | 19.4   | 19.8   | 19.4   |
| 488.9  | 425.0  | 295.3  | 4467.9 | 4112.1 | 4225.5 | 2886.7 | 2650.6 | 3501.6 |
| 465.3  | 509.6  | 306.5  | 221.4  | 124.5  | 203.1  | 106.9  | 89.4   | 115.0  |
| 35.5   | 65.5   | 74.6   | 27.2   | 21.1   | 11.8   | 23.8   | 27.4   | 23.2   |
| 295.8  | 313.9  | 239.6  | 285.1  | 217.4  | 260.1  | 145.1  | 131.7  | 142.0  |
| 19.5   | 25.7   | 21.3   | 33.2   | 38.8   | 25.9   | 31.0   | 23.5   | 24.2   |
| 39.3   | 59.0   | 47.0   | 12.3   | 12.8   | 13.2   | 12.6   | 5.6    | 17.5   |
| 74.0   | 49.1   | 38.1   | 5.1    | 2.3    | 2.8    | 2.7    | 1.8    | 3.3    |
| 695.9  | 439.2  | 284.7  | 101.2  | 66.3   | 70.7   | 89.2   | 75.1   | 91.3   |
| 357.0  | 493.3  | 378.6  | 34.8   | 30.6   | 37.4   | 52.2   | 65.5   | 39.5   |
| 1071.4 | 1371.7 | 1000.5 | 48.5   | 39.7   | 53.6   | 131.6  | 128.3  | 109.8  |
| 119.1  | 123.9  | 94.1   | 143.7  | 157.7  | 163.6  | 125.6  | 120.8  | 140.6  |
| 1199.1 | 1351.1 | 1119.7 | 378.9  | 317.3  | 330.5  | 313.9  | 362.8  | 343.3  |
| 60.1   | 53.0   | 55.3   | 120.0  | 85.9   | 127.1  | 75.0   | 76.2   | 73.6   |
| 52.3   | 85.6   | 77.1   | 767.8  | 642.6  | 795.7  | 293.3  | 452.5  | 408.6  |
| 58.6   | 82.1   | 32.9   | 20.1   | 5.1    | 11.7   | 12.6   | 6.0    | 11.6   |
| 622.2  | 727.5  | 348.5  | 564.2  | 270.0  | 270.8  | 275.6  | 134.9  | 175.1  |
| 64.0   | 98.5   | 78.8   | 86.3   | 85.7   | 102.3  | 40.9   | 42.5   | 43.2   |
| 43.1   | 60.4   | 42.3   | 42.9   | 32.9   | 37.3   | 21.1   | 29.2   | 29.9   |
| 198.4  | 305.6  | 192.9  | 21.8   | 18.5   | 21.7   | 28.7   | 37.1   | 37.6   |
| 1.9    | 1.9    | 4.5    | 15.1   | 14.3   | 10.7   | 4.2    | 4.5    | 1.3    |
| 0.8    | 1.3    | 1.0    | 13.6   | 5.8    | 6.2    | 5.9    | 6.8    | 6.9    |
| 7.8    | 16.7   | 11.9   | 23.9   | 14.5   | 21.2   | 16.9   | 4.6    | 11.7   |

|        |        |        |        |        |        |        |        |        |
|--------|--------|--------|--------|--------|--------|--------|--------|--------|
| 11.9   | 5.6    | 4.9    | 20.0   | 14.3   | 19.5   | 13.0   | 10.1   | 14.5   |
| 258.5  | 254.4  | 155.4  | 35.7   | 48.9   | 38.7   | 35.7   | 39.3   | 32.5   |
| 15.0   | 17.9   | 9.7    | 9.7    | 18.1   | 15.9   | 9.8    | 10.8   | 5.5    |
| 1197.4 | 875.4  | 169.1  | 884.4  | 389.2  | 385.7  | 713.4  | 337.4  | 484.3  |
| 86.6   | 102.7  | 64.7   | 123.6  | 113.9  | 135.9  | 75.6   | 87.7   | 88.2   |
| 804.8  | 898.6  | 493.8  | 408.4  | 339.7  | 341.9  | 304.0  | 305.2  | 343.3  |
| 303.3  | 430.7  | 386.8  | 291.5  | 266.4  | 262.1  | 202.5  | 178.5  | 216.3  |
| 2.7    | 1.6    | 3.8    | 5.4    | 13.3   | 24.2   | 9.5    | 4.7    | 12.0   |
| 19.8   | 24.2   | 35.3   | 67.2   | 37.3   | 64.7   | 19.1   | 27.9   | 47.2   |
| 2.3    | 1.1    | 1.6    | 4.3    | 3.6    | 2.8    | 2.4    | 1.5    | 7.1    |
| 2.3    | 10.7   | 4.8    | 7.4    | 8.2    | 11.0   | 4.5    | 1.8    | 4.6    |
| 286.3  | 320.9  | 193.5  | 65.7   | 61.0   | 53.9   | 41.2   | 53.7   | 52.5   |
| 1.1    | 5.2    | 0.8    | 3.9    | 3.4    | 3.5    | 1.4    | 1.6    | 1.8    |
| 2.5    | 4.4    | 4.6    | 13.1   | 7.1    | 2.5    | 1.1    | 1.2    | 1.3    |
| 74.7   | 92.0   | 64.7   | 44.7   | 41.1   | 44.0   | 38.6   | 49.9   | 42.5   |
| 361.2  | 386.5  | 280.7  | 168.3  | 118.1  | 123.3  | 117.4  | 69.2   | 88.6   |
| 608.1  | 1211.1 | 807.3  | 627.3  | 399.3  | 453.3  | 310.0  | 213.2  | 294.7  |
| 829.5  | 1132.5 | 746.4  | 1648.7 | 1407.4 | 1389.6 | 1463.1 | 1381.5 | 1625.3 |
| 16.5   | 12.3   | 10.8   | 12.3   | 13.3   | 8.6    | 4.7    | 13.9   | 5.2    |
| 15.7   | 12.4   | 10.8   | 130.7  | 105.7  | 114.1  | 65.0   | 73.8   | 85.5   |
| 141.8  | 154.2  | 220.0  | 10.0   | 4.9    | 14.3   | 3.8    | 6.7    | 10.5   |
| 274.0  | 424.0  | 368.7  | 202.1  | 173.7  | 208.1  | 173.9  | 186.5  | 165.3  |
| 726.0  | 747.9  | 369.8  | 498.9  | 221.1  | 247.9  | 273.3  | 165.5  | 175.9  |
| 15.2   | 20.1   | 18.6   | 11.6   | 12.7   | 15.7   | 14.5   | 13.2   | 13.9   |
| 1809.3 | 2027.5 | 1252.1 | 1070.2 | 794.3  | 848.6  | 485.3  | 355.0  | 502.1  |
| 8.6    | 1.9    | 2.5    | 4.5    | 4.7    | 5.9    | 3.4    | 1.8    | 2.9    |
| 2.7    | 4.1    | 2.9    | 4.2    | 2.8    | 2.9    | 1.0    | 1.6    | 1.8    |
| 4.0    | 18.1   | 1.4    | 31.0   | 25.9   | 26.2   | 12.1   | 10.7   | 13.5   |
| 82.6   | 119.8  | 102.2  | 50.6   | 50.4   | 63.2   | 28.3   | 31.7   | 37.2   |
| 223.1  | 262.1  | 175.7  | 401.8  | 246.6  | 271.1  | 177.8  | 176.9  | 177.0  |
| 662.5  | 636.2  | 334.1  | 141.3  | 96.4   | 104.3  | 168.2  | 124.6  | 108.9  |
| 73.6   | 96.5   | 87.7   | 87.1   | 71.2   | 93.6   | 72.2   | 101.2  | 103.7  |
| 159.3  | 209.2  | 127.3  | 227.0  | 173.5  | 164.2  | 307.6  | 229.4  | 275.2  |
| 47.2   | 35.9   | 34.9   | 23.3   | 27.0   | 18.6   | 15.1   | 13.3   | 12.9   |
| 1.3    | 4.4    | 1.3    | 6.1    | 9.0    | 9.1    | 17.3   | 14.7   | 14.2   |
| 19.5   | 31.6   | 31.2   | 160.9  | 133.4  | 123.1  | 159.2  | 153.7  | 169.3  |
| 30.1   | 35.9   | 23.9   | 63.5   | 12.5   | 52.2   | 23.0   | 41.3   | 31.5   |
| 407.2  | 540.9  | 404.5  | 42.0   | 34.2   | 42.6   | 23.0   | 28.7   | 32.2   |
| 25.9   | 39.0   | 50.3   | 10.4   | 12.9   | 5.8    | 8.7    | 5.4    | 6.5    |
| 370.7  | 479.4  | 347.5  | 263.0  | 192.5  | 215.4  | 152.5  | 137.6  | 144.6  |
| 371.2  | 376.9  | 272.7  | 29.6   | 12.8   | 27.2   | 14.5   | 14.0   | 23.7   |
| 337.8  | 371.7  | 239.8  | 34.6   | 21.0   | 20.7   | 35.9   | 32.4   | 26.2   |
| 80.1   | 139.2  | 113.5  | 217.0  | 196.8  | 218.7  | 134.7  | 133.5  | 140.2  |
| 131.0  | 181.6  | 171.5  | 219.7  | 197.4  | 205.9  | 115.8  | 112.7  | 133.5  |
| 27.4   | 38.1   | 45.3   | 23.7   | 24.3   | 28.6   | 15.4   | 12.3   | 9.6    |
| 204.5  | 344.8  | 441.3  | 32.8   | 20.0   | 37.4   | 23.6   | 29.5   | 23.5   |
| 329.5  | 515.0  | 402.9  | 215.6  | 204.0  | 236.6  | 152.7  | 192.5  | 187.4  |
| 304.5  | 419.0  | 335.7  | 164.1  | 149.7  | 154.0  | 102.4  | 129.0  | 138.4  |
| 10.1   | 8.8    | 2.3    | 19.7   | 21.3   | 20.6   | 29.8   | 24.6   | 29.4   |
| 21.2   | 20.9   | 24.7   | 55.0   | 33.2   | 37.1   | 33.0   | 33.6   | 27.3   |
| 230.6  | 454.5  | 417.3  | 4665.3 | 3707.7 | 4107.8 | 1961.5 | 1729.3 | 1974.8 |
| 10.1   | 18.8   | 19.5   | 8.8    | 13.6   | 10.9   | 8.4    | 4.7    | 12.0   |
| 13.4   | 5.9    | 6.5    | 7.9    | 12.7   | 14.4   | 10.7   | 3.8    | 8.3    |

|        |        |        |        |        |        |        |        |        |
|--------|--------|--------|--------|--------|--------|--------|--------|--------|
| 411.6  | 390.4  | 268.3  | 167.7  | 125.8  | 121.2  | 188.5  | 163.9  | 182.0  |
| 287.8  | 316.8  | 125.9  | 84.2   | 38.9   | 44.7   | 74.4   | 24.0   | 39.0   |
| 249.1  | 245.7  | 151.9  | 106.3  | 61.4   | 87.0   | 63.3   | 33.4   | 37.3   |
| 169.2  | 251.5  | 261.7  | 126.0  | 104.5  | 104.2  | 147.7  | 191.3  | 141.3  |
| 5.2    | 6.4    | 3.6    | 52.9   | 43.2   | 59.0   | 27.8   | 36.7   | 40.3   |
| 163.6  | 192.3  | 156.9  | 203.3  | 182.8  | 184.6  | 174.0  | 209.2  | 209.1  |
| 93.3   | 158.2  | 160.9  | 59.8   | 48.2   | 64.2   | 40.2   | 50.8   | 50.8   |
| 412.4  | 463.3  | 319.1  | 103.1  | 70.3   | 84.5   | 152.5  | 150.4  | 176.3  |
| 13.9   | 19.9   | 17.3   | 31.6   | 34.4   | 22.2   | 29.6   | 45.5   | 41.8   |
| 163.6  | 236.0  | 205.6  | 37.3   | 47.9   | 40.3   | 35.7   | 47.1   | 44.4   |
| 190.0  | 256.3  | 211.8  | 114.6  | 114.8  | 124.9  | 84.6   | 125.5  | 110.6  |
| 128.2  | 253.9  | 262.2  | 58.9   | 46.8   | 66.3   | 83.1   | 76.4   | 98.4   |
| 56.7   | 55.4   | 61.3   | 49.5   | 57.3   | 47.3   | 35.2   | 33.8   | 33.6   |
| 76.6   | 99.7   | 80.0   | 90.4   | 98.5   | 109.9  | 46.9   | 61.4   | 74.1   |
| 296.2  | 352.2  | 269.2  | 30.1   | 28.5   | 27.2   | 19.8   | 22.2   | 16.9   |
| 142.0  | 171.0  | 108.9  | 8.1    | 10.2   | 11.0   | 5.0    | 6.0    | 6.7    |
| 17.3   | 23.2   | 18.2   | 21.2   | 15.3   | 15.1   | 15.0   | 19.6   | 14.9   |
| 1.6    | 1.3    | 1.4    | 3.5    | 6.7    | 8.8    | 0.9    | 1.0    | 4.1    |
| 210.4  | 229.3  | 232.9  | 36.6   | 27.4   | 44.6   | 50.8   | 50.5   | 49.6   |
| 36.8   | 30.8   | 26.2   | 38.9   | 52.4   | 54.6   | 39.2   | 31.3   | 34.7   |
| 3.4    | 3.1    | 4.6    | 29.5   | 27.3   | 26.2   | 24.1   | 44.7   | 38.6   |
| 388.4  | 741.6  | 863.9  | 166.0  | 127.1  | 156.0  | 104.0  | 97.4   | 110.9  |
| 31.4   | 48.5   | 36.2   | 29.6   | 3.4    | 8.0    | 13.5   | 13.6   | 1.7    |
| 178.9  | 294.4  | 216.6  | 348.2  | 296.9  | 349.5  | 191.8  | 200.6  | 230.6  |
| 8.8    | 2.3    | 9.5    | 11.9   | 17.1   | 23.2   | 5.6    | 10.0   | 11.3   |
| 27.5   | 25.1   | 24.8   | 54.5   | 35.8   | 34.7   | 30.2   | 27.2   | 26.1   |
| 12.9   | 9.7    | 6.7    | 308.7  | 286.9  | 318.6  | 182.5  | 203.8  | 220.0  |
| 9.2    | 12.7   | 17.9   | 51.8   | 52.6   | 55.8   | 30.0   | 50.8   | 32.1   |
| 4.5    | 19.0   | 12.5   | 43.0   | 29.2   | 41.0   | 29.5   | 45.2   | 39.5   |
| 3.9    | 7.0    | 7.6    | 13.9   | 7.8    | 12.9   | 0.9    | 3.2    | 1.6    |
| 11.4   | 4.2    | 2.3    | 10.2   | 11.5   | 6.4    | 6.3    | 4.1    | 2.2    |
| 129.7  | 141.9  | 98.6   | 184.8  | 175.3  | 209.8  | 126.2  | 151.2  | 152.0  |
| 11.1   | 14.2   | 3.4    | 17.1   | 20.7   | 17.1   | 9.7    | 7.7    | 15.5   |
| 3.6    | 3.5    | 3.9    | 15.0   | 18.9   | 7.8    | 5.5    | 7.9    | 4.0    |
| 3.2    | 5.6    | 3.9    | 6.2    | 9.2    | 18.2   | 4.7    | 2.1    | 6.3    |
| 8.4    | 5.8    | 4.0    | 24.7   | 19.6   | 17.7   | 2.9    | 15.4   | 4.8    |
| 148.5  | 144.8  | 99.9   | 60.9   | 37.2   | 39.9   | 24.1   | 23.4   | 30.0   |
| 35.3   | 31.6   | 13.5   | 2.8    | 12.3   | 8.1    | 5.1    | 4.2    | 4.4    |
| 120.6  | 111.9  | 92.7   | 34.8   | 20.4   | 19.6   | 49.4   | 31.1   | 45.7   |
| 34.7   | 38.6   | 31.2   | 14.5   | 11.8   | 10.2   | 12.1   | 18.7   | 15.9   |
| 10.2   | 8.1    | 12.7   | 4.5    | 5.2    | 4.7    | 5.7    | 3.0    | 6.5    |
| 53.7   | 69.7   | 69.3   | 39.5   | 59.6   | 63.4   | 35.9   | 48.5   | 47.4   |
| 467.6  | 480.6  | 346.1  | 292.4  | 245.9  | 242.4  | 249.0  | 242.1  | 279.1  |
| 8.0    | 5.4    | 3.0    | 4.2    | 3.5    | 8.6    | 2.5    | 3.2    | 1.7    |
| 12.2   | 12.2   | 13.1   | 34.2   | 18.1   | 26.1   | 21.9   | 13.3   | 16.4   |
| 314.0  | 350.9  | 180.6  | 197.0  | 163.3  | 186.6  | 92.8   | 77.4   | 104.2  |
| 27.1   | 64.1   | 42.1   | 52.0   | 42.9   | 53.1   | 30.6   | 32.4   | 21.1   |
| 845.8  | 1030.2 | 571.9  | 20.0   | 27.1   | 31.2   | 17.3   | 11.7   | 11.1   |
| 46.8   | 57.4   | 17.2   | 53.6   | 27.6   | 50.9   | 45.8   | 40.2   | 50.7   |
| 6379.2 | 6213.2 | 3681.6 | 2623.0 | 2009.8 | 2072.4 | 1891.9 | 1737.0 | 2132.8 |
| 327.1  | 442.5  | 244.4  | 94.3   | 81.5   | 74.6   | 49.1   | 58.3   | 67.2   |
| 469.4  | 580.2  | 330.6  | 106.4  | 95.8   | 101.3  | 81.8   | 95.6   | 99.9   |
| 265.1  | 291.3  | 153.4  | 97.1   | 80.3   | 87.4   | 57.1   | 61.7   | 61.8   |



|        |        |        |       |       |       |       |       |       |
|--------|--------|--------|-------|-------|-------|-------|-------|-------|
| 461.0  | 749.8  | 822.9  | 7.7   | 8.6   | 8.4   | 2.9   | 1.9   | 8.9   |
| 0.8    | 1.0    | 0.8    | 9.4   | 16.0  | 21.3  | 23.3  | 24.8  | 31.0  |
| 1.8    | 6.3    | 3.6    | 105.9 | 120.8 | 129.0 | 100.2 | 119.9 | 146.0 |
| 298.4  | 323.8  | 286.1  | 139.8 | 139.7 | 129.2 | 165.2 | 195.9 | 193.9 |
| 8.4    | 44.7   | 30.7   | 15.5  | 12.1  | 10.6  | 8.5   | 12.4  | 19.2  |
| 416.1  | 307.2  | 169.5  | 73.5  | 98.6  | 80.7  | 70.6  | 58.2  | 67.6  |
| 11.6   | 11.1   | 8.4    | 20.0  | 8.6   | 14.3  | 10.4  | 10.1  | 11.8  |
| 18.9   | 22.7   | 7.4    | 28.7  | 29.1  | 36.1  | 20.8  | 23.2  | 15.0  |
| 56.2   | 79.5   | 58.9   | 79.1  | 104.3 | 117.5 | 43.0  | 56.5  | 47.8  |
| 18.8   | 46.7   | 32.9   | 43.2  | 33.3  | 45.4  | 19.3  | 11.2  | 26.1  |
| 23.5   | 23.3   | 23.7   | 31.6  | 15.6  | 16.4  | 18.0  | 2.4   | 16.2  |
| 30.8   | 61.2   | 47.5   | 4.6   | 8.4   | 21.6  | 3.0   | 2.4   | 8.3   |
| 29.5   | 44.9   | 37.5   | 6.0   | 7.2   | 7.1   | 3.9   | 2.1   | 4.7   |
| 13.6   | 13.6   | 9.5    | 420.1 | 263.9 | 316.0 | 250.3 | 223.8 | 228.6 |
| 9.3    | 12.4   | 5.2    | 225.6 | 152.4 | 186.3 | 121.1 | 107.0 | 132.0 |
| 7.4    | 5.4    | 3.1    | 10.3  | 15.6  | 5.9   | 0.7   | 2.4   | 2.9   |
| 3.5    | 2.3    | 3.1    | 6.1   | 4.6   | 6.4   | 2.6   | 2.9   | 3.5   |
| 2.9    | 6.5    | 1.7    | 57.6  | 41.1  | 57.2  | 9.5   | 32.8  | 31.8  |
| 40.9   | 61.9   | 56.3   | 105.7 | 94.2  | 121.4 | 56.6  | 54.2  | 69.1  |
| 83.4   | 55.8   | 39.6   | 37.8  | 18.8  | 18.8  | 4.8   | 13.9  | 6.6   |
| 2.1    | 2.9    | 3.5    | 11.2  | 16.2  | 5.8   | 2.6   | 3.0   | 8.8   |
| 25.4   | 81.0   | 148.7  | 30.4  | 35.8  | 38.5  | 35.0  | 49.4  | 41.1  |
| 10.4   | 4.7    | 6.1    | 14.0  | 14.6  | 18.9  | 7.3   | 9.5   | 10.5  |
| 97.5   | 178.4  | 187.2  | 127.9 | 170.6 | 182.9 | 96.5  | 119.4 | 126.8 |
| 56.8   | 72.2   | 71.3   | 48.4  | 58.0  | 78.1  | 22.7  | 43.4  | 49.1  |
| 82.7   | 149.8  | 83.2   | 73.8  | 68.5  | 81.3  | 60.8  | 70.5  | 73.7  |
| 3.7    | 11.3   | 8.0    | 6.6   | 6.4   | 11.0  | 2.6   | 3.2   | 4.0   |
| 75.6   | 68.4   | 50.1   | 390.1 | 316.8 | 344.5 | 188.6 | 149.9 | 194.6 |
| 6.2    | 22.7   | 17.4   | 36.3  | 41.4  | 33.7  | 18.5  | 37.3  | 33.4  |
| 185.2  | 227.1  | 229.6  | 36.7  | 35.5  | 29.1  | 39.0  | 23.5  | 19.4  |
| 288.3  | 358.6  | 235.9  | 170.6 | 116.9 | 123.8 | 89.8  | 86.3  | 73.6  |
| 5.0    | 8.3    | 2.6    | 12.3  | 9.6   | 5.8   | 4.9   | 7.4   | 19.7  |
| 438.8  | 513.8  | 402.6  | 71.8  | 68.2  | 64.6  | 46.9  | 55.1  | 58.8  |
| 53.8   | 95.9   | 84.5   | 33.7  | 27.0  | 50.4  | 40.1  | 45.7  | 48.7  |
| 258.0  | 287.3  | 197.2  | 77.0  | 65.2  | 68.9  | 75.3  | 56.1  | 67.0  |
| 313.7  | 332.4  | 204.3  | 319.6 | 264.4 | 352.0 | 238.0 | 170.9 | 236.0 |
| 1480.3 | 1295.9 | 1050.8 | 183.3 | 137.2 | 139.5 | 136.6 | 146.3 | 145.5 |
| 286.0  | 440.1  | 413.6  | 5.9   | 2.8   | 5.6   | 2.9   | 5.6   | 5.4   |
| 1.5    | 1.7    | 1.3    | 5.3   | 4.5   | 3.7   | 3.5   | 1.1   | 3.4   |
| 1058.6 | 1260.7 | 843.1  | 348.9 | 230.5 | 228.3 | 174.8 | 172.8 | 173.2 |
| 1.5    | 2.0    | 1.2    | 3.6   | 2.5   | 2.3   | 1.6   | 1.1   | 1.2   |
| 143.8  | 186.0  | 149.6  | 380.3 | 293.5 | 293.8 | 194.2 | 186.9 | 219.0 |
| 124.6  | 147.4  | 112.9  | 5.8   | 4.7   | 14.9  | 5.5   | 6.1   | 8.9   |
| 272.5  | 272.9  | 277.0  | 10.0  | 13.5  | 11.6  | 9.6   | 12.7  | 6.5   |
| 23.3   | 38.8   | 24.5   | 106.3 | 74.7  | 87.7  | 56.8  | 68.6  | 70.4  |
| 13.9   | 56.5   | 16.9   | 52.2  | 33.3  | 57.8  | 51.7  | 68.0  | 68.5  |
| 2.3    | 1.7    | 9.0    | 4.6   | 2.6   | 8.4   | 0.6   | 1.8   | 2.4   |
| 12.4   | 16.5   | 7.0    | 39.6  | 47.0  | 39.6  | 31.1  | 24.0  | 24.6  |
| 45.1   | 35.3   | 26.1   | 18.1  | 12.1  | 14.6  | 10.0  | 6.6   | 11.9  |
| 2.3    | 4.4    | 0.9    | 2.1   | 1.9   | 2.6   | 1.6   | 1.3   | 1.8   |
| 487.3  | 572.5  | 371.9  | 68.0  | 57.6  | 58.1  | 165.0 | 152.3 | 211.4 |
| 280.6  | 300.6  | 215.8  | 68.7  | 48.1  | 54.3  | 85.7  | 56.9  | 81.5  |
| 84.4   | 98.9   | 64.2   | 135.5 | 84.9  | 94.0  | 68.0  | 47.9  | 53.1  |

|        |        |        |       |       |       |       |       |       |
|--------|--------|--------|-------|-------|-------|-------|-------|-------|
| 4488.4 | 5099.5 | 5147.4 | 319.4 | 261.7 | 268.2 | 278.4 | 286.3 | 288.0 |
| 416.6  | 526.3  | 367.9  | 47.2  | 45.1  | 49.1  | 58.5  | 79.4  | 79.3  |
| 26.7   | 39.1   | 25.2   | 48.3  | 33.5  | 49.4  | 19.8  | 18.1  | 14.7  |
| 88.5   | 102.6  | 12.4   | 41.2  | 23.4  | 33.6  | 28.3  | 37.3  | 33.2  |
| 1372.0 | 1879.9 | 1267.8 | 434.7 | 319.4 | 332.2 | 641.3 | 480.6 | 598.4 |
| 310.1  | 354.8  | 287.2  | 86.2  | 93.9  | 109.5 | 72.5  | 72.2  | 114.3 |
| 350.0  | 436.8  | 355.0  | 130.0 | 123.9 | 140.9 | 93.0  | 103.1 | 131.8 |
| 88.1   | 111.6  | 111.6  | 134.7 | 144.0 | 164.3 | 83.5  | 126.2 | 127.6 |
| 26.7   | 47.6   | 47.8   | 58.5  | 58.1  | 66.6  | 42.4  | 63.8  | 59.1  |
| 27.1   | 31.7   | 15.7   | 43.7  | 28.6  | 43.7  | 13.6  | 27.4  | 12.7  |
| 18.7   | 17.6   | 5.9    | 3.4   | 4.0   | 6.3   | 2.7   | 8.5   | 7.2   |
| 36.0   | 14.9   | 21.4   | 162.9 | 118.8 | 144.3 | 76.0  | 71.0  | 67.6  |
| 1104.6 | 1416.2 | 948.3  | 875.5 | 669.1 | 712.7 | 680.7 | 650.3 | 715.4 |
| 88.4   | 161.8  | 165.7  | 30.8  | 28.6  | 30.2  | 21.7  | 35.6  | 44.4  |
| 257.6  | 308.3  | 230.8  | 198.3 | 129.3 | 141.3 | 113.1 | 67.1  | 71.1  |
| 45.8   | 38.7   | 21.7   | 37.0  | 31.5  | 36.7  | 15.1  | 16.7  | 18.6  |
| 9.4    | 5.9    | 6.5    | 161.7 | 159.4 | 195.2 | 105.6 | 151.8 | 162.8 |
| 13.6   | 17.9   | 13.0   | 25.8  | 18.5  | 12.9  | 12.7  | 9.5   | 3.6   |
| 21.5   | 32.6   | 30.3   | 35.2  | 24.9  | 22.7  | 18.5  | 22.2  | 22.8  |
| 121.7  | 156.4  | 129.8  | 47.3  | 32.1  | 36.3  | 52.5  | 55.0  | 53.4  |
| 137.7  | 161.3  | 126.9  | 43.4  | 48.1  | 67.6  | 50.8  | 53.7  | 71.0  |
| 50.5   | 102.2  | 68.4   | 111.8 | 98.0  | 96.5  | 63.2  | 64.5  | 70.9  |
| 18.1   | 5.6    | 5.1    | 23.0  | 19.7  | 21.2  | 2.4   | 6.3   | 13.1  |
| 2.9    | 1.7    | 1.4    | 2.9   | 3.7   | 3.6   | 1.8   | 1.6   | 2.2   |
| 67.1   | 68.5   | 51.4   | 23.7  | 13.3  | 21.3  | 26.8  | 17.3  | 17.1  |
| 31.8   | 43.4   | 36.4   | 31.4  | 33.1  | 26.8  | 14.8  | 22.8  | 16.5  |
| 114.8  | 218.9  | 206.5  | 10.9  | 19.9  | 12.9  | 13.7  | 6.4   | 12.4  |
| 197.2  | 231.8  | 98.4   | 88.8  | 56.2  | 78.6  | 48.8  | 39.4  | 57.4  |
| 355.1  | 354.4  | 170.7  | 153.6 | 104.3 | 116.6 | 151.9 | 117.0 | 163.2 |
| 500.3  | 569.1  | 396.4  | 208.7 | 182.9 | 220.8 | 177.8 | 229.7 | 243.7 |
| 9.4    | 14.2   | 4.5    | 51.0  | 57.0  | 64.8  | 36.6  | 76.5  | 53.8  |
| 968.3  | 1314.8 | 1411.0 | 68.4  | 82.9  | 93.0  | 119.6 | 118.3 | 137.0 |
| 372.1  | 770.1  | 897.0  | 15.1  | 18.3  | 26.4  | 22.9  | 32.8  | 31.0  |
| 71.4   | 100.3  | 80.5   | 36.4  | 37.7  | 32.6  | 18.0  | 19.2  | 27.7  |
| 220.1  | 220.4  | 130.5  | 185.9 | 101.6 | 133.3 | 103.3 | 52.6  | 79.0  |
| 3.8    | 10.9   | 0.7    | 466.4 | 414.6 | 481.4 | 269.2 | 284.2 | 341.5 |
| 3.9    | 1.3    | 4.2    | 41.1  | 45.7  | 42.3  | 28.0  | 24.7  | 36.5  |
| 78.1   | 53.9   | 70.2   | 41.3  | 45.5  | 42.5  | 34.8  | 35.7  | 34.3  |
| 3.0    | 13.1   | 1.6    | 30.2  | 20.1  | 32.4  | 16.6  | 26.4  | 29.8  |
| 6.4    | 2.0    | 3.9    | 152.4 | 96.2  | 97.7  | 90.9  | 78.2  | 67.1  |
| 33.7   | 33.0   | 18.4   | 23.1  | 21.7  | 25.4  | 16.0  | 19.5  | 14.8  |
| 41.6   | 50.5   | 33.2   | 37.9  | 41.3  | 41.2  | 21.0  | 21.3  | 44.5  |
| 113.3  | 198.0  | 186.7  | 69.7  | 66.6  | 80.5  | 85.8  | 107.0 | 109.8 |
| 74.1   | 98.6   | 94.6   | 73.9  | 58.0  | 78.5  | 48.6  | 56.1  | 64.5  |
| 160.0  | 353.7  | 467.6  | 4.8   | 1.9   | 9.9   | 7.8   | 19.6  | 13.0  |
| 642.6  | 668.7  | 356.0  | 164.2 | 105.7 | 109.7 | 99.9  | 83.9  | 98.1  |
| 33.5   | 15.7   | 20.2   | 90.9  | 65.0  | 95.2  | 37.2  | 42.8  | 37.2  |
| 9.7    | 16.7   | 3.9    | 17.2  | 10.6  | 16.5  | 4.2   | 9.9   | 17.5  |
| 329.9  | 423.0  | 326.6  | 150.8 | 84.2  | 124.9 | 58.6  | 51.1  | 75.3  |
| 5256.1 | 3539.0 | 1713.4 | 228.9 | 144.5 | 140.0 | 269.8 | 186.5 | 217.7 |
| 183.6  | 284.1  | 219.8  | 138.8 | 87.9  | 102.4 | 139.4 | 97.5  | 108.5 |
| 529.4  | 612.7  | 460.0  | 454.6 | 346.7 | 411.1 | 247.5 | 209.0 | 286.1 |
| 2.6    | 3.2    | 2.7    | 3.6   | 1.4   | 3.7   | 1.2   | 0.7   | 0.4   |

|        |        |        |        |        |        |        |        |        |
|--------|--------|--------|--------|--------|--------|--------|--------|--------|
| 13.5   | 23.6   | 3.5    | 8.8    | 12.5   | 12.5   | 5.9    | 12.9   | 10.0   |
| 10.1   | 10.1   | 18.1   | 16.6   | 12.4   | 10.4   | 5.0    | 20.2   | 5.5    |
| 55.3   | 84.2   | 74.0   | 128.8  | 78.4   | 98.7   | 50.7   | 38.9   | 59.3   |
| 199.8  | 312.9  | 207.7  | 119.3  | 107.0  | 108.1  | 167.3  | 134.0  | 168.5  |
| 28.9   | 24.1   | 23.2   | 26.4   | 27.3   | 29.0   | 15.7   | 19.2   | 13.6   |
| 97.4   | 200.4  | 214.2  | 177.1  | 145.0  | 174.3  | 179.4  | 182.6  | 209.2  |
| 6.2    | 13.1   | 5.1    | 4.2    | 6.9    | 8.9    | 2.5    | 6.8    | 1.0    |
| 90.8   | 109.4  | 84.1   | 53.0   | 41.8   | 45.2   | 43.8   | 53.4   | 56.8   |
| 175.3  | 337.9  | 394.3  | 254.6  | 195.4  | 198.2  | 160.1  | 121.8  | 151.5  |
| 67.0   | 93.2   | 76.0   | 94.6   | 88.6   | 83.4   | 62.2   | 80.3   | 74.6   |
| 1.1    | 6.9    | 11.6   | 320.3  | 273.9  | 359.1  | 303.9  | 353.8  | 360.5  |
| 850.7  | 1468.7 | 1163.3 | 7.7    | 4.8    | 8.6    | 2.5    | 8.5    | 12.3   |
| 5290.4 | 6510.6 | 6472.3 | 113.6  | 82.9   | 92.0   | 73.6   | 80.1   | 66.6   |
| 51.3   | 66.2   | 46.8   | 95.8   | 60.5   | 88.0   | 55.5   | 52.1   | 56.5   |
| 23.4   | 13.7   | 9.6    | 36.5   | 22.9   | 29.8   | 20.6   | 17.2   | 13.3   |
| 943.8  | 1298.1 | 2053.8 | 1390.9 | 1036.4 | 1431.3 | 509.6  | 1050.5 | 914.8  |
| 21.8   | 24.0   | 22.4   | 38.7   | 43.1   | 49.0   | 23.0   | 40.5   | 37.5   |
| 585.4  | 622.0  | 336.0  | 86.5   | 56.6   | 53.1   | 51.1   | 43.2   | 48.9   |
| 154.9  | 261.5  | 249.6  | 29.2   | 34.9   | 35.1   | 33.9   | 7.4    | 30.6   |
| 160.0  | 181.0  | 155.7  | 12.7   | 3.0    | 10.0   | 9.0    | 5.3    | 5.9    |
| 517.9  | 630.6  | 547.0  | 418.3  | 396.0  | 375.3  | 348.8  | 415.4  | 420.7  |
| 371.2  | 448.8  | 135.3  | 287.7  | 197.7  | 209.3  | 173.1  | 145.0  | 167.8  |
| 2.0    | 5.2    | 3.4    | 15.7   | 13.7   | 13.5   | 5.5    | 9.6    | 15.1   |
| 430.9  | 212.1  | 44.3   | 30.1   | 21.6   | 18.7   | 3.3    | 9.1    | 1.9    |
| 26.3   | 25.9   | 21.0   | 6.0    | 8.2    | 6.8    | 14.2   | 5.6    | 4.0    |
| 2.2    | 5.6    | 14.1   | 5.0    | 4.2    | 4.7    | 11.8   | 6.6    | 2.6    |
| 1.6    | 0.8    | 5.3    | 7.3    | 4.1    | 6.1    | 4.1    | 0.4    | 3.1    |
| 1.6    | 10.3   | 2.0    | 9.9    | 8.3    | 15.9   | 1.6    | 1.2    | 2.2    |
| 37.0   | 43.4   | 54.0   | 45.1   | 39.8   | 47.7   | 27.4   | 23.1   | 27.0   |
| 1.6    | 2.8    | 1.3    | 6.9    | 3.7    | 4.4    | 2.6    | 1.8    | 1.4    |
| 1195.9 | 1338.8 | 1125.8 | 755.1  | 604.0  | 724.1  | 610.7  | 557.3  | 675.6  |
| 3.2    | 2.1    | 2.4    | 13.5   | 16.5   | 8.0    | 2.6    | 3.2    | 3.4    |
| 9.2    | 21.5   | 11.8   | 7.5    | 3.4    | 4.3    | 8.6    | 14.5   | 6.2    |
| 5.5    | 11.3   | 3.9    | 11.6   | 6.2    | 12.1   | 9.0    | 6.8    | 4.0    |
| 40.0   | 36.5   | 32.7   | 45.8   | 52.2   | 55.6   | 33.6   | 35.3   | 39.2   |
| 99.8   | 123.3  | 75.6   | 5.2    | 3.7    | 7.2    | 4.6    | 2.4    | 2.8    |
| 14.3   | 14.3   | 5.1    | 47.6   | 44.1   | 45.4   | 48.3   | 54.1   | 50.3   |
| 0.3    | 0.6    | 0.5    | 37.5   | 36.0   | 36.9   | 47.4   | 63.1   | 62.3   |
| 562.5  | 615.3  | 315.3  | 183.0  | 142.8  | 123.4  | 144.9  | 137.9  | 161.7  |
| 565.2  | 444.0  | 65.9   | 158.7  | 88.4   | 111.9  | 142.1  | 62.3   | 109.3  |
| 164.3  | 237.9  | 226.3  | 135.2  | 102.9  | 110.1  | 79.6   | 81.9   | 78.1   |
| 206.3  | 204.5  | 93.1   | 101.1  | 77.3   | 89.8   | 59.2   | 56.0   | 76.1   |
| 4.1    | 4.7    | 0.9    | 13.3   | 10.6   | 7.3    | 8.5    | 10.2   | 5.9    |
| 168.1  | 231.0  | 187.4  | 2090.0 | 1848.8 | 1826.0 | 1151.9 | 1341.6 | 1538.7 |
| 9.4    | 27.8   | 17.0   | 260.4  | 263.5  | 288.0  | 249.8  | 299.1  | 334.2  |
| 11.8   | 13.1   | 13.2   | 16.2   | 17.0   | 20.0   | 17.6   | 8.1    | 16.1   |
| 2.7    | 2.6    | 4.4    | 10.6   | 1.1    | 2.4    | 1.0    | 2.1    | 0.4    |
| 6.7    | 9.4    | 5.6    | 9.7    | 16.2   | 8.6    | 4.5    | 3.3    | 2.1    |
| 37.6   | 33.4   | 21.7   | 43.4   | 37.9   | 74.6   | 26.5   | 45.3   | 36.6   |
| 7722.9 | 8185.9 | 6090.0 | 5140.0 | 4150.2 | 3900.2 | 5352.1 | 4133.7 | 4952.5 |
| 140.4  | 142.8  | 131.1  | 59.4   | 44.6   | 58.9   | 33.6   | 30.4   | 39.6   |
| 117.2  | 112.9  | 83.6   | 85.3   | 59.6   | 63.6   | 29.4   | 39.8   | 43.6   |
| 11.7   | 26.3   | 8.0    | 9.9    | 18.2   | 19.0   | 16.8   | 7.5    | 12.5   |

|        |        |        |       |       |       |       |       |       |
|--------|--------|--------|-------|-------|-------|-------|-------|-------|
| 244.2  | 236.5  | 101.2  | 10.7  | 3.0   | 12.2  | 10.3  | 4.8   | 8.8   |
| 3.4    | 6.8    | 7.6    | 21.5  | 12.6  | 28.7  | 1.7   | 8.3   | 4.4   |
| 83.3   | 107.6  | 77.5   | 80.6  | 60.2  | 76.6  | 42.5  | 44.3  | 45.7  |
| 15.9   | 17.8   | 16.2   | 17.1  | 13.3  | 11.4  | 4.4   | 1.5   | 0.8   |
| 194.3  | 220.9  | 150.8  | 180.9 | 193.6 | 190.2 | 112.3 | 134.1 | 128.3 |
| 81.1   | 92.7   | 55.8   | 110.2 | 82.9  | 87.4  | 60.9  | 56.8  | 64.2  |
| 9.0    | 24.2   | 6.5    | 8.3   | 15.6  | 4.1   | 3.2   | 12.0  | 3.5   |
| 3.6    | 11.0   | 4.0    | 9.6   | 7.4   | 15.8  | 6.9   | 9.7   | 8.8   |
| 1.6    | 1.9    | 4.2    | 9.6   | 2.3   | 3.0   | 1.0   | 1.4   | 1.3   |
| 17.2   | 13.5   | 11.4   | 29.9  | 10.3  | 15.8  | 7.5   | 12.5  | 17.9  |
| 10.6   | 15.8   | 11.4   | 219.9 | 173.5 | 192.7 | 271.6 | 188.5 | 234.9 |
| 9.0    | 12.2   | 5.5    | 44.4  | 25.8  | 51.1  | 45.5  | 33.6  | 49.2  |
| 48.5   | 59.6   | 39.4   | 268.9 | 303.1 | 317.9 | 117.3 | 175.3 | 156.2 |
| 1.0    | 2.3    | 10.6   | 68.2  | 71.1  | 79.8  | 48.8  | 49.8  | 60.6  |
| 146.8  | 177.9  | 136.7  | 268.2 | 212.3 | 254.7 | 119.1 | 121.0 | 128.9 |
| 444.6  | 867.9  | 1456.7 | 9.5   | 8.4   | 14.9  | 4.6   | 8.8   | 18.3  |
| 4.4    | 7.5    | 1.6    | 10.1  | 7.2   | 5.7   | 1.7   | 2.2   | 2.0   |
| 148.7  | 223.3  | 280.6  | 65.6  | 48.7  | 66.7  | 27.8  | 14.5  | 22.2  |
| 0.5    | 0.9    | 2.9    | 4.8   | 7.2   | 4.8   | 0.6   | 0.4   | 0.9   |
| 113.9  | 134.2  | 89.0   | 287.5 | 237.9 | 256.9 | 149.9 | 151.6 | 166.5 |
| 67.0   | 128.3  | 109.1  | 31.7  | 29.1  | 38.6  | 28.8  | 30.5  | 32.5  |
| 50.3   | 83.4   | 64.1   | 36.4  | 26.4  | 36.6  | 17.3  | 16.4  | 7.5   |
| 23.7   | 15.9   | 8.5    | 41.0  | 37.2  | 36.5  | 23.0  | 8.7   | 14.9  |
| 129.8  | 222.5  | 271.5  | 174.3 | 265.0 | 306.2 | 91.5  | 238.2 | 208.3 |
| 22.8   | 17.6   | 16.9   | 13.1  | 18.1  | 6.7   | 10.7  | 18.5  | 16.0  |
| 971.6  | 1254.1 | 831.8  | 234.5 | 222.3 | 273.5 | 344.7 | 363.7 | 445.4 |
| 67.2   | 93.1   | 54.1   | 89.5  | 59.0  | 87.6  | 50.5  | 58.0  | 54.7  |
| 120.5  | 132.9  | 95.9   | 171.2 | 142.5 | 138.9 | 91.3  | 75.3  | 87.5  |
| 719.4  | 923.9  | 523.4  | 475.9 | 352.7 | 395.8 | 420.1 | 373.7 | 401.4 |
| 2.8    | 1.9    | 6.0    | 9.9   | 14.7  | 9.3   | 4.1   | 1.8   | 2.6   |
| 18.2   | 17.8   | 14.7   | 23.8  | 26.5  | 37.1  | 19.1  | 21.2  | 5.6   |
| 80.9   | 91.9   | 77.2   | 106.9 | 89.0  | 106.2 | 82.6  | 84.3  | 97.2  |
| 14.2   | 24.5   | 14.4   | 26.1  | 13.5  | 27.6  | 12.3  | 14.5  | 14.0  |
| 531.4  | 682.2  | 555.8  | 138.6 | 112.2 | 144.0 | 124.6 | 159.6 | 154.3 |
| 2.0    | 1.9    | 1.2    | 7.2   | 2.2   | 5.1   | 1.9   | 2.0   | 1.8   |
| 5.1    | 4.3    | 3.4    | 27.2  | 22.1  | 29.8  | 19.8  | 10.6  | 7.4   |
| 6.3    | 20.6   | 8.1    | 17.7  | 6.3   | 27.2  | 3.4   | 8.3   | 4.9   |
| 117.9  | 129.6  | 90.8   | 198.2 | 165.5 | 187.6 | 106.7 | 61.2  | 95.4  |
| 7.4    | 11.1   | 10.1   | 6.2   | 5.6   | 6.3   | 2.8   | 7.2   | 8.7   |
| 1485.7 | 1665.5 | 1040.1 | 700.0 | 599.8 | 599.1 | 396.9 | 360.1 | 414.2 |
| 5.7    | 14.6   | 8.2    | 58.0  | 50.4  | 58.7  | 19.2  | 17.2  | 13.0  |
| 2.8    | 9.4    | 12.6   | 5.6   | 12.6  | 6.6   | 1.7   | 0.6   | 0.6   |
| 18.1   | 17.5   | 21.0   | 29.1  | 23.3  | 29.3  | 20.9  | 22.3  | 20.8  |
| 692.4  | 790.4  | 430.4  | 294.2 | 169.5 | 159.2 | 273.1 | 145.8 | 181.5 |
| 126.4  | 173.6  | 91.9   | 210.2 | 158.2 | 178.2 | 147.5 | 171.3 | 171.4 |
| 28.6   | 30.6   | 15.3   | 31.7  | 25.2  | 17.5  | 19.6  | 15.6  | 16.3  |
| 48.1   | 89.9   | 135.0  | 13.7  | 16.6  | 11.9  | 8.8   | 7.6   | 9.0   |
| 12.2   | 21.6   | 30.0   | 7.3   | 13.2  | 8.4   | 9.8   | 13.5  | 5.5   |
| 2.7    | 2.3    | 1.2    | 4.5   | 4.1   | 5.2   | 2.3   | 2.4   | 2.6   |
| 329.9  | 391.2  | 192.9  | 774.6 | 449.0 | 394.6 | 326.9 | 195.4 | 235.7 |
| 12.8   | 2.6    | 10.3   | 8.9   | 9.1   | 9.5   | 8.8   | 4.0   | 6.6   |
| 16.3   | 12.1   | 10.8   | 141.7 | 89.3  | 98.9  | 31.3  | 25.3  | 30.8  |
| 22.3   | 25.4   | 5.1    | 31.3  | 21.5  | 24.9  | 14.9  | 11.2  | 14.5  |

|        |        |        |        |        |        |        |        |        |
|--------|--------|--------|--------|--------|--------|--------|--------|--------|
| 100.3  | 129.6  | 94.6   | 15.2   | 12.4   | 23.9   | 3.1    | 4.1    | 2.4    |
| 7.3    | 2.9    | 10.5   | 20.6   | 18.9   | 10.0   | 20.6   | 13.5   | 17.6   |
| 188.4  | 222.1  | 171.4  | 90.2   | 76.9   | 77.5   | 70.8   | 69.6   | 71.8   |
| 733.2  | 391.1  | 254.8  | 177.6  | 159.0  | 173.3  | 53.5   | 67.7   | 89.5   |
| 979.8  | 1801.5 | 1547.9 | 2904.3 | 2706.2 | 2751.1 | 1556.1 | 1748.5 | 1997.8 |
| 7.7    | 20.7   | 13.2   | 147.0  | 112.3  | 135.2  | 118.8  | 68.8   | 86.2   |
| 76.6   | 90.4   | 87.0   | 64.9   | 56.2   | 95.0   | 106.8  | 161.5  | 149.4  |
| 410.1  | 527.7  | 319.7  | 512.9  | 340.8  | 431.9  | 303.9  | 285.0  | 328.4  |
| 8.9    | 11.8   | 4.6    | 23.3   | 14.2   | 15.8   | 6.0    | 10.0   | 6.2    |
| 0.7    | 0.6    | 0.8    | 1.8    | 0.9    | 1.0    | 0.4    | 0.7    | 0.9    |
| 7.1    | 16.7   | 18.5   | 27.0   | 36.5   | 27.3   | 17.0   | 12.7   | 18.3   |
| 25.7   | 5.6    | 15.5   | 55.6   | 59.5   | 84.4   | 41.1   | 48.2   | 43.0   |
| 2716.0 | 2549.8 | 1502.5 | 4313.4 | 3745.3 | 3445.9 | 4465.0 | 4504.7 | 4461.3 |
| 170.8  | 190.9  | 82.0   | 408.8  | 300.8  | 261.5  | 424.5  | 425.6  | 469.3  |
| 1.5    | 0.7    | 1.3    | 21.9   | 24.2   | 13.3   | 21.1   | 19.1   | 19.0   |
| 20.0   | 21.3   | 11.6   | 20.9   | 13.5   | 16.8   | 25.2   | 10.0   | 1.7    |
| 13.0   | 15.7   | 15.6   | 13.1   | 11.8   | 10.0   | 8.2    | 8.7    | 4.6    |
| 120.1  | 126.9  | 118.9  | 75.6   | 67.4   | 78.0   | 47.1   | 55.6   | 62.0   |
| 65.7   | 94.2   | 61.1   | 150.9  | 113.0  | 122.1  | 100.4  | 91.4   | 105.9  |
| 1.6    | 6.2    | 4.8    | 5.5    | 12.3   | 16.3   | 8.1    | 7.3    | 16.8   |
| 112.3  | 154.1  | 120.9  | 103.1  | 94.7   | 110.8  | 139.8  | 135.4  | 158.7  |
| 506.7  | 636.8  | 509.3  | 744.8  | 699.6  | 783.0  | 562.7  | 588.4  | 615.8  |
| 88.0   | 128.5  | 90.8   | 68.0   | 64.3   | 73.3   | 155.7  | 142.3  | 162.1  |
| 19.8   | 21.2   | 19.0   | 13.7   | 6.7    | 5.3    | 4.4    | 2.4    | 8.5    |
| 26.4   | 17.0   | 7.2    | 7.2    | 7.7    | 1.2    | 3.6    | 3.2    | 1.8    |
| 15.8   | 8.5    | 4.9    | 31.9   | 12.7   | 13.4   | 16.2   | 10.8   | 15.4   |
| 328.7  | 376.1  | 301.2  | 5.8    | 18.0   | 35.5   | 3.9    | 9.9    | 2.9    |
| 77.0   | 116.7  | 138.7  | 441.3  | 435.1  | 461.1  | 292.7  | 421.2  | 369.2  |
| 4.1    | 4.2    | 3.7    | 9.8    | 14.0   | 5.8    | 3.8    | 3.5    | 9.0    |
| 6.7    | 1.1    | 1.6    | 3.4    | 1.6    | 3.9    | 0.7    | 1.0    | 0.9    |
| 18.4   | 21.0   | 17.4   | 341.2  | 258.0  | 269.8  | 194.8  | 245.1  | 227.1  |
| 1021.4 | 1544.0 | 1481.1 | 8.9    | 13.9   | 11.3   | 7.5    | 4.4    | 10.6   |
| 8.5    | 12.0   | 7.3    | 14.4   | 10.9   | 14.3   | 8.1    | 15.7   | 8.9    |
| 68.4   | 120.3  | 127.6  | 7.6    | 10.2   | 10.7   | 9.6    | 11.9   | 12.8   |
| 126.3  | 179.3  | 186.8  | 41.9   | 55.3   | 57.1   | 54.7   | 69.5   | 46.6   |
| 3.9    | 10.9   | 2.3    | 8.0    | 6.3    | 8.1    | 1.3    | 3.6    | 11.9   |
| 10.9   | 12.2   | 8.4    | 10.4   | 19.2   | 18.5   | 5.4    | 10.0   | 5.6    |
| 25.7   | 28.4   | 22.5   | 23.9   | 9.9    | 21.5   | 28.9   | 14.0   | 18.5   |
| 5.1    | 9.4    | 6.9    | 9.0    | 5.2    | 6.0    | 2.6    | 2.4    | 2.3    |
| 4.7    | 11.2   | 5.7    | 25.3   | 9.4    | 13.4   | 9.1    | 8.0    | 8.4    |
| 8.7    | 1.8    | 1.9    | 5.6    | 3.8    | 2.4    | 1.7    | 1.2    | 3.2    |
| 1.5    | 5.3    | 7.4    | 5.6    | 4.6    | 7.6    | 2.1    | 3.1    | 1.8    |
| 3.2    | 8.6    | 13.2   | 3.0    | 2.8    | 3.7    | 5.0    | 1.7    | 2.3    |
| 44.2   | 69.6   | 66.2   | 16.0   | 34.9   | 36.1   | 2.2    | 7.2    | 4.6    |
| 858.0  | 943.8  | 415.9  | 173.8  | 86.8   | 107.3  | 215.5  | 123.3  | 127.0  |
| 853.1  | 935.0  | 369.0  | 280.5  | 159.0  | 178.9  | 218.6  | 144.8  | 161.8  |
| 401.3  | 491.1  | 351.6  | 133.4  | 100.4  | 111.5  | 130.5  | 108.7  | 110.4  |
| 48.3   | 57.1   | 53.2   | 28.5   | 23.1   | 28.1   | 18.8   | 14.3   | 25.6   |
| 28.2   | 44.5   | 71.9   | 7.3    | 6.4    | 16.5   | 5.4    | 4.2    | 7.5    |
| 131.9  | 140.3  | 145.5  | 66.7   | 49.9   | 51.9   | 31.8   | 44.8   | 38.1   |
| 6.7    | 7.1    | 9.4    | 245.6  | 184.5  | 255.3  | 174.3  | 152.9  | 169.0  |
| 3.7    | 6.6    | 3.9    | 11.1   | 16.5   | 17.1   | 1.8    | 1.6    | 6.9    |
| 551.4  | 585.7  | 404.5  | 97.0   | 71.5   | 85.1   | 107.7  | 150.3  | 128.3  |

|        |        |        |        |        |        |        |        |       |
|--------|--------|--------|--------|--------|--------|--------|--------|-------|
| 9045.9 | 8721.2 | 8340.1 | 8.7    | 15.1   | 11.0   | 12.8   | 10.8   | 14.3  |
| 682.0  | 732.4  | 420.2  | 14.7   | 10.6   | 14.1   | 2.9    | 16.2   | 8.5   |
| 7.9    | 8.8    | 7.3    | 22.7   | 15.2   | 19.1   | 8.5    | 8.7    | 8.0   |
| 13.3   | 5.2    | 3.4    | 162.8  | 118.8  | 135.4  | 105.0  | 88.3   | 102.7 |
| 142.0  | 208.1  | 163.0  | 100.2  | 85.3   | 87.5   | 74.0   | 74.0   | 82.4  |
| 1.6    | 2.0    | 0.6    | 8.8    | 8.2    | 6.0    | 0.9    | 2.4    | 2.6   |
| 95.1   | 144.0  | 118.1  | 81.5   | 76.3   | 74.8   | 67.1   | 103.9  | 82.4  |
| 38.7   | 65.7   | 54.7   | 64.2   | 74.4   | 87.0   | 54.2   | 60.2   | 79.0  |
| 6.3    | 15.7   | 14.1   | 23.6   | 12.0   | 21.2   | 20.8   | 21.3   | 13.6  |
| 43.3   | 47.5   | 35.3   | 46.4   | 31.8   | 40.3   | 41.1   | 28.0   | 32.8  |
| 1555.6 | 2081.7 | 1646.3 | 1050.4 | 892.9  | 1036.4 | 691.7  | 757.6  | 786.4 |
| 3.2    | 1.1    | 0.6    | 334.3  | 388.3  | 407.4  | 256.2  | 380.8  | 385.9 |
| 10.4   | 16.7   | 13.7   | 42.2   | 19.3   | 29.0   | 31.3   | 20.9   | 32.4  |
| 138.2  | 158.8  | 123.6  | 85.6   | 77.2   | 80.6   | 81.1   | 123.3  | 102.4 |
| 77.7   | 127.6  | 97.9   | 124.0  | 122.8  | 114.9  | 88.2   | 107.9  | 91.3  |
| 664.9  | 768.9  | 433.9  | 1382.9 | 1175.1 | 1242.4 | 728.3  | 756.7  | 755.8 |
| 1.0    | 1.0    | 13.3   | 3.4    | 4.5    | 3.4    | 1.0    | 1.0    | 1.0   |
| 5.1    | 2.4    | 6.0    | 20.2   | 15.7   | 14.4   | 9.0    | 3.2    | 4.6   |
| 817.9  | 1035.3 | 737.6  | 68.1   | 58.5   | 80.9   | 86.0   | 90.1   | 97.0  |
| 22.2   | 26.2   | 24.3   | 3.0    | 2.0    | 6.5    | 1.2    | 0.2    | 0.3   |
| 0.8    | 0.8    | 0.6    | 4.0    | 2.9    | 4.5    | 1.1    | 0.5    | 2.4   |
| 291.8  | 397.7  | 282.7  | 347.6  | 264.6  | 308.8  | 223.0  | 214.8  | 241.2 |
| 10.6   | 21.9   | 21.1   | 42.5   | 25.5   | 38.3   | 18.1   | 18.3   | 20.5  |
| 77.8   | 83.5   | 30.4   | 116.7  | 101.9  | 111.2  | 122.0  | 102.8  | 118.6 |
| 39.7   | 44.9   | 19.1   | 87.7   | 68.7   | 73.2   | 39.1   | 33.5   | 44.8  |
| 138.2  | 166.9  | 136.3  | 222.2  | 181.6  | 184.8  | 183.0  | 165.2  | 212.0 |
| 63.4   | 49.5   | 34.4   | 29.3   | 27.6   | 35.3   | 17.0   | 15.7   | 25.4  |
| 192.7  | 186.3  | 81.4   | 4.5    | 3.5    | 2.4    | 1.9    | 2.1    | 0.8   |
| 2.7    | 12.6   | 4.2    | 3.8    | 11.2   | 3.6    | 1.4    | 3.3    | 0.5   |
| 14.3   | 21.5   | 10.7   | 31.4   | 30.8   | 28.7   | 8.5    | 8.4    | 16.0  |
| 92.6   | 179.7  | 187.1  | 59.0   | 48.9   | 60.5   | 21.4   | 22.5   | 26.6  |
| 4.7    | 9.6    | 10.7   | 3.0    | 8.6    | 5.9    | 4.8    | 5.2    | 1.3   |
| 89.1   | 131.4  | 119.9  | 179.0  | 119.8  | 161.5  | 60.9   | 71.7   | 65.8  |
| 20.2   | 27.3   | 23.2   | 66.0   | 50.4   | 65.4   | 26.6   | 18.5   | 26.1  |
| 2671.9 | 2918.8 | 1482.2 | 2154.4 | 1498.4 | 1663.3 | 1096.6 | 815.5  | 992.9 |
| 40.4   | 56.0   | 66.6   | 118.5  | 113.9  | 134.0  | 82.2   | 109.6  | 107.2 |
| 2.3    | 8.0    | 1.5    | 21.7   | 16.6   | 10.5   | 8.6    | 9.0    | 7.7   |
| 8.8    | 5.7    | 1.3    | 4.0    | 2.5    | 3.6    | 1.8    | 0.9    | 2.3   |
| 7.3    | 1.7    | 0.4    | 339.9  | 413.7  | 428.9  | 627.8  | 1021.0 | 972.9 |
| 95.9   | 160.2  | 154.2  | 325.0  | 326.8  | 336.9  | 224.3  | 241.5  | 248.1 |
| 59.1   | 94.9   | 99.0   | 51.4   | 41.7   | 32.4   | 52.9   | 36.1   | 45.6  |
| 138.9  | 119.7  | 84.5   | 88.6   | 83.6   | 91.7   | 67.2   | 92.0   | 80.8  |
| 22.8   | 19.0   | 27.6   | 12.9   | 11.2   | 22.5   | 14.1   | 4.9    | 8.1   |
| 11.5   | 19.8   | 14.2   | 27.5   | 15.5   | 21.9   | 18.6   | 12.7   | 20.6  |
| 133.1  | 213.0  | 157.5  | 73.2   | 61.9   | 79.7   | 97.6   | 106.7  | 103.9 |
| 5.1    | 8.5    | 4.0    | 10.2   | 3.8    | 6.3    | 2.5    | 2.2    | 2.4   |
| 47.6   | 58.2   | 33.4   | 50.9   | 56.5   | 53.3   | 41.5   | 42.8   | 38.9  |
| 715.0  | 1109.8 | 550.2  | 1948.7 | 1242.0 | 1201.8 | 874.2  | 661.8  | 765.2 |
| 122.5  | 143.8  | 100.4  | 172.7  | 131.4  | 144.7  | 135.0  | 139.6  | 143.2 |
| 38.5   | 79.9   | 76.2   | 33.2   | 27.5   | 42.6   | 8.1    | 40.7   | 35.2  |
| 404.6  | 503.2  | 432.7  | 51.6   | 48.7   | 50.3   | 51.3   | 50.8   | 60.6  |
| 23.9   | 20.8   | 13.1   | 15.3   | 8.3    | 14.2   | 4.2    | 17.0   | 7.9   |
| 7.6    | 8.3    | 6.9    | 16.6   | 25.3   | 18.8   | 7.2    | 12.1   | 3.5   |

|        |        |        |       |       |       |       |       |       |
|--------|--------|--------|-------|-------|-------|-------|-------|-------|
| 179.0  | 150.9  | 95.6   | 46.9  | 42.0  | 31.3  | 23.3  | 30.2  | 35.6  |
| 22.1   | 15.1   | 19.6   | 33.2  | 30.4  | 39.9  | 22.8  | 10.2  | 13.5  |
| 63.0   | 99.8   | 74.8   | 60.0  | 35.0  | 52.1  | 58.8  | 43.7  | 59.0  |
| 22.4   | 25.6   | 22.0   | 50.9  | 41.8  | 52.2  | 31.8  | 42.1  | 40.2  |
| 157.5  | 142.3  | 90.5   | 35.9  | 34.7  | 38.8  | 23.3  | 10.8  | 20.6  |
| 98.9   | 84.5   | 52.8   | 1.9   | 2.2   | 3.8   | 0.9   | 1.2   | 0.7   |
| 162.0  | 193.9  | 101.3  | 52.5  | 43.9  | 61.2  | 99.3  | 79.3  | 110.0 |
| 1017.3 | 646.6  | 375.7  | 243.7 | 162.7 | 222.3 | 198.7 | 173.1 | 218.4 |
| 62.2   | 91.0   | 111.7  | 263.0 | 258.4 | 238.7 | 116.0 | 125.0 | 151.4 |
| 6.4    | 9.4    | 5.5    | 16.0  | 5.2   | 16.6  | 9.7   | 13.2  | 23.9  |
| 1.1    | 7.4    | 6.3    | 5.2   | 4.5   | 2.3   | 1.1   | 2.2   | 1.7   |
| 49.5   | 55.4   | 44.9   | 5.6   | 6.6   | 4.7   | 3.9   | 8.7   | 3.2   |
| 35.6   | 45.9   | 45.8   | 18.5  | 15.0  | 14.9  | 7.3   | 8.6   | 6.9   |
| 7.6    | 5.0    | 3.5    | 9.9   | 5.5   | 6.2   | 2.6   | 3.2   | 2.2   |
| 40.9   | 49.8   | 45.5   | 61.9  | 41.0  | 50.4  | 44.7  | 35.0  | 49.9  |
| 7.7    | 4.5    | 1.7    | 44.3  | 67.9  | 81.5  | 32.9  | 90.1  | 64.9  |
| 7.7    | 14.6   | 26.9   | 38.0  | 36.4  | 33.7  | 13.0  | 18.4  | 20.3  |
| 1.1    | 5.0    | 7.9    | 2.9   | 8.2   | 14.1  | 3.3   | 0.8   | 1.8   |
| 3.3    | 10.9   | 0.7    | 50.5  | 45.5  | 44.6  | 42.5  | 66.9  | 56.8  |
| 761.4  | 792.0  | 533.9  | 203.0 | 191.3 | 197.1 | 128.8 | 152.0 | 146.5 |
| 19.9   | 19.6   | 15.8   | 27.0  | 23.5  | 25.7  | 14.9  | 14.5  | 21.6  |
| 54.2   | 46.0   | 3.0    | 1.6   | 7.0   | 1.8   | 1.1   | 1.7   | 1.1   |
| 7.3    | 4.3    | 2.9    | 3.1   | 6.9   | 5.0   | 6.4   | 1.4   | 1.0   |
| 3.1    | 0.9    | 3.7    | 42.7  | 7.2   | 20.2  | 4.7   | 1.7   | 8.2   |
| 37.4   | 33.0   | 40.8   | 28.5  | 16.5  | 12.7  | 4.0   | 12.3  | 16.2  |
| 2278.6 | 3029.9 | 2289.8 | 911.3 | 765.7 | 866.7 | 883.2 | 864.2 | 910.5 |
| 10.9   | 9.4    | 8.2    | 48.7  | 23.0  | 21.1  | 13.6  | 19.2  | 20.2  |
| 187.5  | 264.0  | 172.2  | 311.2 | 260.8 | 299.2 | 244.0 | 260.5 | 269.8 |
| 452.6  | 571.9  | 495.1  | 31.4  | 29.9  | 27.1  | 25.6  | 25.0  | 32.0  |
| 9.1    | 8.1    | 5.8    | 14.5  | 8.4   | 9.1   | 6.5   | 7.6   | 9.2   |
| 6.5    | 8.9    | 5.4    | 20.4  | 14.9  | 12.1  | 4.1   | 1.7   | 8.1   |
| 66.9   | 129.3  | 135.0  | 99.4  | 92.1  | 112.2 | 81.1  | 91.0  | 89.1  |
| 4.4    | 2.5    | 1.9    | 7.6   | 6.6   | 10.2  | 7.1   | 9.5   | 7.7   |
| 18.0   | 17.8   | 10.2   | 14.0  | 17.8  | 12.0  | 4.5   | 5.0   | 10.8  |
| 22.3   | 23.8   | 23.0   | 86.4  | 112.6 | 143.7 | 31.3  | 85.9  | 39.4  |
| 388.9  | 387.2  | 281.5  | 19.3  | 7.5   | 18.2  | 13.8  | 9.8   | 9.5   |
| 18.5   | 10.9   | 12.3   | 17.4  | 11.6  | 18.9  | 5.2   | 5.7   | 5.8   |
| 7.3    | 5.6    | 2.8    | 11.5  | 8.0   | 11.3  | 6.7   | 9.9   | 8.9   |
| 13.7   | 15.3   | 17.4   | 11.8  | 13.4  | 5.1   | 7.9   | 2.3   | 3.6   |
| 23.2   | 23.2   | 21.1   | 48.0  | 60.8  | 52.0  | 50.3  | 39.9  | 46.6  |
| 7.8    | 5.6    | 1.3    | 11.0  | 6.9   | 4.8   | 4.5   | 4.9   | 3.8   |
| 0.4    | 0.8    | 0.5    | 1.2   | 4.3   | 2.8   | 1.6   | 0.4   | 0.7   |
| 81.0   | 69.2   | 83.6   | 299.8 | 277.6 | 352.1 | 140.0 | 209.5 | 205.3 |
| 2.8    | 2.4    | 2.4    | 542.9 | 401.0 | 446.5 | 336.0 | 253.4 | 327.3 |
| 25.4   | 28.1   | 19.1   | 9.7   | 5.2   | 8.7   | 8.3   | 6.7   | 7.4   |
| 120.8  | 210.8  | 156.0  | 66.3  | 50.9  | 52.7  | 22.8  | 40.9  | 37.1  |
| 4.5    | 7.1    | 10.0   | 6.6   | 6.6   | 5.0   | 0.6   | 3.5   | 3.6   |
| 26.4   | 17.3   | 24.5   | 32.2  | 34.6  | 23.2  | 14.1  | 20.9  | 14.5  |
| 66.0   | 66.8   | 48.0   | 30.0  | 25.5  | 39.1  | 30.1  | 31.7  | 34.3  |
| 2.7    | 2.9    | 1.7    | 9.0   | 7.5   | 6.2   | 4.6   | 4.8   | 2.2   |
| 69.1   | 99.9   | 99.4   | 99.7  | 86.5  | 90.9  | 89.5  | 92.3  | 93.1  |
| 632.3  | 866.7  | 817.9  | 8.8   | 8.1   | 17.8  | 1.8   | 1.5   | 3.6   |
| 18.7   | 26.6   | 16.5   | 16.9  | 21.2  | 24.2  | 31.5  | 20.9  | 25.9  |

|        |        |        |        |        |        |        |        |        |
|--------|--------|--------|--------|--------|--------|--------|--------|--------|
| 18.0   | 21.7   | 10.1   | 33.4   | 28.2   | 25.2   | 21.0   | 14.0   | 18.2   |
| 5.7    | 36.9   | 52.1   | 9.0    | 4.1    | 12.7   | 11.3   | 1.3    | 7.0    |
| 52.0   | 76.8   | 45.7   | 45.7   | 46.1   | 40.8   | 23.3   | 35.0   | 30.3   |
| 6.4    | 15.0   | 15.8   | 7.4    | 6.5    | 9.3    | 7.5    | 6.7    | 5.4    |
| 786.2  | 1049.1 | 831.8  | 482.5  | 382.7  | 460.4  | 434.6  | 347.9  | 413.0  |
| 6.3    | 11.5   | 11.9   | 5488.0 | 6147.8 | 6381.0 | 1855.8 | 3209.5 | 3013.6 |
| 5.4    | 4.5    | 3.0    | 96.2   | 81.5   | 86.8   | 65.1   | 81.3   | 84.9   |
| 37.1   | 47.3   | 44.0   | 10.3   | 5.0    | 3.7    | 5.9    | 5.9    | 7.1    |
| 308.2  | 490.2  | 461.5  | 1394.4 | 985.9  | 1190.4 | 651.8  | 566.4  | 672.8  |
| 7.5    | 17.4   | 2.9    | 194.0  | 141.7  | 146.7  | 117.0  | 111.3  | 121.4  |
| 4.1    | 7.5    | 7.4    | 61.5   | 44.5   | 50.8   | 64.2   | 85.0   | 67.7   |
| 173.5  | 212.2  | 60.1   | 103.3  | 43.7   | 39.6   | 52.6   | 19.4   | 33.3   |
| 46.8   | 50.1   | 46.7   | 25.8   | 25.8   | 22.5   | 27.7   | 21.6   | 22.8   |
| 50.8   | 58.6   | 32.3   | 13.6   | 26.2   | 19.2   | 3.8    | 5.1    | 17.0   |
| 11.8   | 2.3    | 10.7   | 11.7   | 11.3   | 18.4   | 7.1    | 13.8   | 5.3    |
| 1.0    | 1.1    | 7.4    | 3.5    | 2.4    | 9.2    | 3.5    | 2.7    | 2.7    |
| 3.3    | 7.9    | 2.2    | 4.9    | 4.5    | 4.0    | 5.3    | 5.3    | 11.5   |
| 4.6    | 5.8    | 3.4    | 13.2   | 12.0   | 18.9   | 4.6    | 2.7    | 3.8    |
| 146.0  | 184.5  | 130.3  | 144.9  | 107.2  | 126.7  | 104.2  | 94.5   | 96.8   |
| 446.7  | 478.2  | 201.4  | 169.6  | 113.8  | 125.2  | 104.0  | 76.7   | 83.7   |
| 5.1    | 3.6    | 2.1    | 11.2   | 11.0   | 15.3   | 4.3    | 8.2    | 6.7    |
| 9.2    | 4.8    | 0.7    | 18.0   | 6.2    | 10.7   | 2.7    | 5.4    | 11.0   |
| 332.2  | 480.6  | 434.8  | 69.0   | 66.8   | 72.5   | 84.9   | 116.4  | 105.5  |
| 160.0  | 210.2  | 106.1  | 79.0   | 76.1   | 95.2   | 62.2   | 58.5   | 75.7   |
| 3.1    | 7.1    | 0.5    | 5.5    | 8.5    | 9.7    | 3.0    | 2.2    | 4.4    |
| 3.3    | 0.8    | 1.0    | 3.5    | 7.9    | 15.8   | 0.7    | 0.5    | 0.9    |
| 6.6    | 6.7    | 4.3    | 16.1   | 16.1   | 7.0    | 10.2   | 13.3   | 9.9    |
| 1.4    | 2.6    | 1.7    | 3.7    | 10.5   | 14.1   | 2.1    | 5.0    | 1.8    |
| 67.9   | 90.2   | 78.2   | 127.7  | 102.9  | 114.1  | 85.6   | 92.1   | 101.5  |
| 26.1   | 21.8   | 13.4   | 14.0   | 5.4    | 11.6   | 25.6   | 13.0   | 30.8   |
| 18.8   | 32.3   | 19.5   | 71.4   | 71.3   | 53.0   | 52.4   | 55.8   | 69.6   |
| 7.8    | 9.8    | 6.9    | 19.2   | 21.5   | 22.8   | 18.3   | 25.3   | 22.2   |
| 19.4   | 26.3   | 28.5   | 48.4   | 58.4   | 52.0   | 48.4   | 68.7   | 66.9   |
| 5.2    | 2.5    | 6.2    | 2.4    | 3.6    | 4.3    | 5.4    | 1.9    | 9.2    |
| 1522.7 | 1514.1 | 1582.6 | 15.7   | 14.9   | 17.8   | 4.1    | 0.8    | 4.7    |
| 594.5  | 689.7  | 368.4  | 17.5   | 15.4   | 12.1   | 15.5   | 2.7    | 12.0   |
| 2.1    | 2.0    | 2.2    | 7.4    | 2.1    | 9.8    | 3.9    | 2.4    | 4.2    |
| 818.9  | 972.3  | 651.6  | 658.4  | 566.8  | 617.5  | 325.3  | 354.4  | 384.2  |
| 196.1  | 210.5  | 176.8  | 339.7  | 259.4  | 354.5  | 150.8  | 170.2  | 162.4  |
| 9.9    | 19.5   | 11.3   | 37.3   | 34.6   | 37.9   | 21.1   | 23.3   | 33.9   |
| 395.6  | 272.1  | 92.2   | 192.3  | 116.2  | 104.7  | 111.0  | 47.2   | 75.3   |
| 67.5   | 110.6  | 206.6  | 25.4   | 20.1   | 13.5   | 7.4    | 2.6    | 8.7    |
| 438.3  | 642.7  | 592.5  | 505.1  | 468.6  | 538.1  | 241.1  | 270.8  | 324.3  |
| 2.0    | 3.3    | 1.4    | 3.6    | 3.0    | 7.5    | 1.3    | 0.8    | 1.5    |
| 158.7  | 143.6  | 169.1  | 7.2    | 16.6   | 16.4   | 11.9   | 12.6   | 10.0   |
| 0.6    | 0.6    | 0.4    | 2.1    | 3.5    | 1.6    | 0.7    | 0.4    | 0.6    |
| 16.8   | 16.2   | 11.5   | 24.6   | 19.0   | 25.8   | 12.6   | 14.2   | 14.5   |
| 393.2  | 323.8  | 213.2  | 250.0  | 275.9  | 276.9  | 193.7  | 194.5  | 242.1  |
| 4.8    | 6.6    | 4.8    | 11.7   | 10.2   | 16.2   | 4.0    | 9.4    | 7.4    |
| 16.4   | 12.3   | 7.2    | 6.2    | 4.4    | 8.8    | 3.4    | 6.5    | 2.1    |
| 132.6  | 157.3  | 136.0  | 134.8  | 109.3  | 133.5  | 91.0   | 95.6   | 81.0   |
| 14.9   | 1.3    | 9.0    | 5.3    | 4.0    | 12.3   | 5.7    | 0.8    | 5.1    |
| 8.7    | 3.6    | 10.6   | 10.9   | 9.3    | 11.9   | 2.2    | 5.7    | 5.0    |



|       |       |       |       |       |       |       |       |       |
|-------|-------|-------|-------|-------|-------|-------|-------|-------|
| 40.4  | 45.9  | 21.2  | 23.8  | 21.1  | 20.0  | 2.5   | 17.5  | 4.1   |
| 255.1 | 292.5 | 227.9 | 334.2 | 285.1 | 326.1 | 209.3 | 201.3 | 249.1 |
| 16.6  | 23.5  | 19.3  | 4.7   | 3.9   | 5.7   | 2.9   | 1.9   | 3.8   |
| 7.4   | 7.8   | 5.3   | 18.3  | 19.3  | 22.0  | 7.3   | 9.9   | 5.5   |
| 235.7 | 222.9 | 110.8 | 89.5  | 70.7  | 80.8  | 63.4  | 62.3  | 75.1  |
| 848.6 | 957.9 | 650.9 | 56.8  | 44.4  | 52.0  | 51.9  | 36.4  | 49.6  |
| 7.3   | 25.4  | 8.7   | 33.9  | 33.1  | 31.8  | 23.1  | 29.8  | 30.7  |
| 6.9   | 6.1   | 1.7   | 3.2   | 3.6   | 4.1   | 2.6   | 2.4   | 1.9   |
| 38.3  | 120.3 | 138.0 | 19.9  | 15.9  | 4.9   | 12.3  | 14.2  | 13.1  |
| 52.0  | 63.3  | 51.3  | 73.5  | 54.6  | 54.5  | 35.1  | 37.3  | 39.7  |
| 148.4 | 246.1 | 187.1 | 113.8 | 119.3 | 118.1 | 75.9  | 134.6 | 115.5 |
| 0.7   | 2.2   | 1.2   | 2.2   | 2.2   | 2.9   | 1.1   | 0.8   | 1.7   |
| 485.5 | 682.0 | 601.2 | 429.3 | 337.2 | 384.5 | 300.8 | 352.3 | 355.1 |
| 33.4  | 45.5  | 29.8  | 18.3  | 16.3  | 29.6  | 21.8  | 22.8  | 27.1  |
| 20.7  | 18.1  | 11.8  | 60.9  | 52.2  | 61.5  | 28.3  | 26.3  | 15.3  |
| 139.4 | 129.1 | 74.1  | 3.8   | 6.0   | 5.8   | 2.9   | 1.7   | 1.2   |
| 3.3   | 8.6   | 3.9   | 10.0  | 3.5   | 8.6   | 18.4  | 7.3   | 8.7   |
| 2.5   | 2.1   | 4.7   | 8.8   | 7.0   | 15.5  | 2.7   | 4.8   | 2.6   |
| 79.2  | 60.0  | 38.8  | 10.7  | 13.8  | 17.2  | 17.8  | 18.9  | 14.9  |
| 43.5  | 39.4  | 17.3  | 10.1  | 7.9   | 7.2   | 18.7  | 15.7  | 14.1  |
| 5.1   | 1.8   | 5.2   | 7.7   | 6.6   | 11.9  | 4.4   | 15.4  | 4.5   |
| 1.1   | 2.3   | 1.2   | 9.6   | 6.9   | 4.6   | 1.8   | 1.0   | 1.5   |
| 104.6 | 132.7 | 101.4 | 47.0  | 52.6  | 48.4  | 39.8  | 44.7  | 55.7  |
| 54.6  | 85.6  | 71.6  | 32.8  | 23.6  | 32.0  | 22.5  | 32.6  | 36.1  |
| 62.4  | 92.0  | 77.6  | 29.0  | 17.8  | 26.0  | 27.4  | 23.1  | 32.1  |
| 15.8  | 20.7  | 6.8   | 38.3  | 23.3  | 27.0  | 18.7  | 7.5   | 21.7  |
| 2.7   | 1.9   | 2.0   | 4.4   | 2.7   | 5.0   | 0.6   | 2.0   | 1.3   |
| 240.4 | 302.5 | 193.9 | 112.4 | 66.3  | 80.7  | 80.8  | 48.3  | 60.3  |
| 19.8  | 34.2  | 21.9  | 6.8   | 4.5   | 8.5   | 4.0   | 4.4   | 3.9   |
| 7.3   | 10.9  | 4.1   | 13.5  | 25.4  | 20.6  | 6.8   | 27.0  | 26.2  |
| 2.3   | 2.3   | 0.6   | 233.4 | 211.2 | 209.9 | 148.1 | 154.1 | 159.7 |
| 6.2   | 4.4   | 6.7   | 13.1  | 16.9  | 19.0  | 15.8  | 14.7  | 8.9   |
| 1.8   | 4.2   | 1.7   | 18.3  | 8.1   | 11.9  | 2.1   | 2.5   | 3.6   |
| 154.7 | 225.2 | 232.2 | 839.8 | 740.1 | 764.7 | 591.9 | 706.8 | 740.0 |
| 35.9  | 48.5  | 51.8  | 2.9   | 15.7  | 9.8   | 6.0   | 5.5   | 14.8  |
| 880.4 | 672.1 | 325.1 | 377.3 | 318.3 | 309.7 | 321.8 | 340.8 | 398.5 |
| 364.2 | 669.0 | 819.1 | 16.7  | 20.0  | 17.9  | 12.4  | 7.8   | 16.7  |
| 52.4  | 64.5  | 29.6  | 59.9  | 36.0  | 34.9  | 45.7  | 24.3  | 28.2  |
| 14.7  | 28.0  | 24.9  | 30.4  | 28.6  | 21.8  | 19.1  | 8.5   | 14.4  |
| 95.9  | 136.8 | 108.8 | 37.9  | 35.3  | 41.4  | 36.8  | 40.4  | 34.5  |
| 47.5  | 55.4  | 62.2  | 38.4  | 31.2  | 30.6  | 25.7  | 21.8  | 22.3  |
| 13.6  | 27.7  | 13.5  | 29.0  | 31.3  | 26.3  | 20.4  | 45.1  | 26.8  |
| 212.2 | 239.3 | 175.7 | 26.4  | 28.5  | 26.8  | 25.4  | 27.8  | 32.7  |
| 12.1  | 17.3  | 11.9  | 55.1  | 43.3  | 50.3  | 15.8  | 33.6  | 23.4  |
| 7.7   | 2.2   | 1.4   | 14.9  | 8.3   | 6.8   | 4.6   | 1.1   | 1.9   |
| 108.8 | 128.5 | 130.1 | 82.9  | 51.4  | 53.4  | 47.6  | 37.9  | 48.4  |
| 164.1 | 222.4 | 184.1 | 256.6 | 241.1 | 260.8 | 185.6 | 271.3 | 257.2 |
| 19.8  | 17.4  | 15.6  | 32.3  | 27.0  | 33.2  | 19.0  | 13.6  | 22.3  |
| 7.3   | 8.7   | 0.5   | 4.5   | 9.3   | 5.9   | 5.3   | 1.8   | 6.6   |
| 1.3   | 11.8  | 14.5  | 17.1  | 22.1  | 13.1  | 3.9   | 0.9   | 0.7   |
| 1.7   | 10.9  | 5.7   | 3.4   | 3.1   | 2.9   | 1.8   | 2.4   | 2.1   |
| 4.8   | 6.1   | 3.1   | 9.7   | 12.5  | 9.7   | 5.7   | 7.2   | 4.3   |
| 2.8   | 3.4   | 5.2   | 234.1 | 233.5 | 243.4 | 140.2 | 155.8 | 173.4 |

|        |        |        |        |        |        |        |        |        |
|--------|--------|--------|--------|--------|--------|--------|--------|--------|
| 6.3    | 10.0   | 26.1   | 41.4   | 53.0   | 65.0   | 23.7   | 21.8   | 15.6   |
| 1.1    | 2.7    | 1.5    | 2.0    | 8.0    | 2.3    | 1.5    | 1.8    | 3.9    |
| 9.9    | 19.3   | 3.7    | 13.8   | 13.3   | 7.7    | 10.1   | 3.6    | 15.1   |
| 76.2   | 141.1  | 95.0   | 90.2   | 72.8   | 74.6   | 42.5   | 61.4   | 58.5   |
| 229.6  | 227.8  | 161.2  | 84.2   | 90.4   | 82.2   | 79.6   | 107.6  | 128.6  |
| 6.8    | 7.5    | 5.9    | 9.1    | 7.0    | 5.5    | 3.7    | 5.3    | 2.6    |
| 1.3    | 3.2    | 1.4    | 4.2    | 10.0   | 8.1    | 4.4    | 4.9    | 1.8    |
| 224.1  | 274.6  | 179.3  | 406.3  | 289.1  | 390.2  | 203.3  | 202.7  | 187.4  |
| 98.3   | 116.4  | 78.2   | 70.9   | 70.3   | 95.0   | 49.7   | 45.6   | 66.2   |
| 4359.9 | 4093.5 | 3734.8 | 8.5    | 5.4    | 12.0   | 1.8    | 1.1    | 1.2    |
| 5.7    | 11.8   | 0.8    | 12.8   | 7.7    | 7.9    | 7.0    | 3.9    | 4.5    |
| 1.9    | 3.8    | 6.0    | 4.1    | 5.6    | 7.1    | 6.7    | 1.4    | 4.9    |
| 6.3    | 9.6    | 6.7    | 14.2   | 15.0   | 8.1    | 6.4    | 5.0    | 7.5    |
| 32.4   | 94.6   | 148.1  | 8.1    | 8.8    | 10.2   | 1.1    | 1.0    | 1.3    |
| 563.5  | 702.1  | 401.1  | 128.7  | 80.2   | 72.9   | 118.3  | 90.3   | 107.0  |
| 3.3    | 6.6    | 4.5    | 19.1   | 20.4   | 13.5   | 2.0    | 5.1    | 2.9    |
| 9.8    | 9.9    | 3.8    | 10.4   | 11.2   | 14.1   | 2.2    | 2.7    | 6.7    |
| 75.6   | 74.7   | 52.3   | 151.1  | 110.4  | 124.6  | 72.3   | 65.2   | 70.1   |
| 603.5  | 1130.2 | 1342.7 | 115.9  | 82.9   | 79.3   | 80.4   | 67.2   | 88.5   |
| 1137.0 | 1137.8 | 720.0  | 426.3  | 379.1  | 408.0  | 367.1  | 337.1  | 451.7  |
| 138.3  | 182.0  | 139.3  | 230.5  | 195.7  | 236.5  | 122.0  | 130.1  | 123.8  |
| 13.1   | 13.7   | 6.9    | 29.9   | 22.4   | 19.9   | 22.0   | 18.6   | 16.7   |
| 13.6   | 12.0   | 13.0   | 27.2   | 21.9   | 15.7   | 14.5   | 17.3   | 9.1    |
| 15.8   | 11.9   | 18.3   | 32.6   | 18.0   | 28.2   | 17.3   | 15.7   | 11.2   |
| 2.9    | 5.6    | 6.6    | 8.9    | 7.8    | 11.1   | 4.5    | 2.4    | 0.9    |
| 5.2    | 6.2    | 8.2    | 24.3   | 11.5   | 14.9   | 8.5    | 8.8    | 2.5    |
| 62.6   | 118.5  | 236.9  | 4.7    | 6.5    | 12.5   | 7.0    | 14.2   | 11.3   |
| 135.4  | 161.6  | 154.5  | 216.7  | 187.1  | 241.0  | 104.4  | 164.0  | 169.5  |
| 116.7  | 132.1  | 112.3  | 51.3   | 55.2   | 69.7   | 40.1   | 47.5   | 37.7   |
| 13.5   | 12.3   | 11.2   | 17.8   | 26.2   | 17.4   | 9.4    | 5.4    | 22.3   |
| 6005.1 | 6223.2 | 4666.4 | 3346.7 | 2661.1 | 2725.6 | 1746.0 | 1661.8 | 1802.9 |
| 74.3   | 84.8   | 123.0  | 43.5   | 44.6   | 53.1   | 30.6   | 42.3   | 37.1   |
| 17.0   | 21.3   | 7.9    | 13.3   | 12.2   | 8.8    | 24.4   | 8.4    | 6.1    |
| 32.0   | 44.8   | 36.1   | 28.5   | 27.7   | 29.0   | 12.9   | 28.7   | 24.5   |
| 2.9    | 9.6    | 10.2   | 20.3   | 25.7   | 14.0   | 9.5    | 13.9   | 9.9    |
| 0.4    | 1.8    | 3.3    | 12.5   | 5.1    | 14.7   | 2.6    | 0.5    | 0.8    |
| 29.2   | 10.1   | 21.7   | 8.2    | 15.2   | 11.8   | 15.5   | 3.9    | 7.8    |
| 0.2    | 2.3    | 3.7    | 9.5    | 4.3    | 9.0    | 5.4    | 2.2    | 5.5    |
| 49.5   | 90.8   | 88.0   | 117.4  | 109.5  | 138.4  | 63.6   | 85.5   | 105.5  |
| 11.8   | 8.4    | 12.3   | 44.6   | 27.6   | 30.5   | 6.1    | 11.8   | 13.9   |
| 76.5   | 99.0   | 63.2   | 14.8   | 15.9   | 31.5   | 18.6   | 7.6    | 18.8   |
| 21.9   | 31.1   | 16.6   | 13.7   | 17.0   | 14.7   | 19.0   | 30.0   | 32.1   |
| 30.2   | 25.3   | 23.1   | 40.3   | 27.7   | 40.7   | 17.4   | 26.8   | 20.0   |
| 15.9   | 31.5   | 12.6   | 11.2   | 15.4   | 18.0   | 10.2   | 15.4   | 17.5   |
| 90.2   | 94.5   | 55.0   | 133.1  | 101.4  | 109.6  | 62.5   | 63.2   | 77.2   |
| 3.9    | 7.2    | 12.5   | 5.8    | 5.5    | 9.1    | 9.5    | 5.8    | 5.5    |
| 79.0   | 95.0   | 62.1   | 45.1   | 34.5   | 31.6   | 32.7   | 24.9   | 31.2   |
| 918.9  | 782.1  | 378.6  | 388.3  | 271.7  | 343.4  | 280.3  | 231.5  | 296.1  |
| 100.3  | 119.8  | 59.8   | 46.6   | 29.7   | 30.6   | 10.7   | 20.6   | 15.2   |
| 29.9   | 6.4    | 10.6   | 16.1   | 16.0   | 18.0   | 7.9    | 3.7    | 2.8    |
| 382.4  | 534.6  | 370.2  | 154.4  | 143.2  | 147.0  | 163.8  | 168.4  | 196.2  |
| 26.7   | 22.3   | 26.2   | 90.5   | 90.2   | 106.5  | 63.9   | 64.5   | 74.5   |
| 4.9    | 3.0    | 2.5    | 21.8   | 11.6   | 18.3   | 13.4   | 22.4   | 26.1   |

|        |        |        |        |        |        |        |        |        |
|--------|--------|--------|--------|--------|--------|--------|--------|--------|
| 122.2  | 146.4  | 106.3  | 116.7  | 85.3   | 87.2   | 98.7   | 100.1  | 91.5   |
| 404.7  | 737.9  | 739.8  | 0.9    | 2.0    | 9.1    | 2.4    | 0.3    | 0.6    |
| 2.2    | 3.5    | 3.8    | 73.9   | 85.9   | 90.3   | 41.7   | 74.0   | 59.2   |
| 77.1   | 139.5  | 147.1  | 3.3    | 1.6    | 2.1    | 1.0    | 1.1    | 1.1    |
| 1.9    | 11.8   | 7.9    | 13.4   | 5.6    | 6.0    | 6.0    | 11.0   | 6.6    |
| 282.1  | 379.9  | 316.8  | 174.3  | 118.0  | 153.5  | 92.1   | 100.9  | 120.8  |
| 58.0   | 144.9  | 342.9  | 68.9   | 60.4   | 51.2   | 65.2   | 50.8   | 62.6   |
| 282.2  | 407.6  | 519.8  | 47.6   | 23.1   | 33.6   | 12.6   | 14.6   | 18.8   |
| 0.6    | 1.7    | 3.9    | 9.4    | 5.6    | 8.1    | 4.5    | 4.4    | 2.7    |
| 137.3  | 195.0  | 135.5  | 17.2   | 6.6    | 15.1   | 11.7   | 17.9   | 9.4    |
| 1185.0 | 1312.2 | 663.6  | 191.3  | 127.0  | 144.5  | 118.3  | 66.9   | 82.2   |
| 6.0    | 3.6    | 3.5    | 9.7    | 7.1    | 16.2   | 5.6    | 2.9    | 5.0    |
| 8.6    | 14.4   | 15.5   | 30.0   | 25.9   | 16.5   | 10.0   | 10.7   | 15.5   |
| 4.6    | 4.8    | 6.6    | 6.4    | 5.8    | 1.7    | 2.9    | 1.9    | 5.6    |
| 4.7    | 6.9    | 4.8    | 7.8    | 8.9    | 3.8    | 3.6    | 2.4    | 1.9    |
| 132.7  | 161.4  | 131.0  | 57.2   | 56.6   | 64.0   | 35.5   | 41.2   | 45.4   |
| 16.2   | 24.0   | 12.9   | 15.8   | 12.1   | 25.2   | 5.8    | 6.2    | 3.6    |
| 281.6  | 401.2  | 426.3  | 86.2   | 84.8   | 86.4   | 75.8   | 87.6   | 82.2   |
| 12.2   | 11.9   | 14.8   | 33.3   | 31.0   | 23.5   | 8.1    | 11.4   | 4.1    |
| 10.7   | 7.3    | 2.8    | 5.9    | 2.3    | 2.2    | 2.7    | 2.2    | 1.8    |
| 153.6  | 188.0  | 159.8  | 208.1  | 200.3  | 203.4  | 182.3  | 186.4  | 212.8  |
| 12.7   | 46.5   | 21.2   | 36.7   | 47.4   | 43.8   | 16.5   | 25.9   | 29.4   |
| 5.2    | 8.1    | 13.6   | 12.1   | 9.7    | 4.8    | 8.0    | 4.1    | 8.1    |
| 1799.0 | 2109.2 | 1567.6 | 986.4  | 815.0  | 863.8  | 551.2  | 543.4  | 588.1  |
| 7.6    | 31.2   | 29.0   | 4.6    | 4.1    | 7.8    | 3.9    | 7.0    | 5.8    |
| 1.6    | 1.7    | 1.8    | 9.2    | 14.4   | 9.5    | 11.9   | 3.7    | 2.3    |
| 14.9   | 29.1   | 10.0   | 8.3    | 8.2    | 6.0    | 4.4    | 2.4    | 9.0    |
| 29.0   | 15.5   | 9.1    | 12.8   | 10.0   | 12.8   | 6.2    | 4.6    | 9.6    |
| 28.0   | 33.9   | 21.0   | 15.9   | 16.0   | 12.9   | 13.4   | 18.5   | 12.4   |
| 3.6    | 8.1    | 4.8    | 61.8   | 63.1   | 71.4   | 32.1   | 26.8   | 34.0   |
| 5.4    | 5.0    | 8.4    | 89.4   | 92.3   | 117.4  | 54.0   | 81.8   | 85.0   |
| 571.2  | 839.6  | 1062.3 | 52.0   | 59.1   | 61.3   | 29.7   | 36.9   | 45.3   |
| 34.0   | 49.5   | 69.4   | 22.2   | 14.6   | 15.4   | 4.3    | 6.6    | 7.9    |
| 4.7    | 6.4    | 3.2    | 11.5   | 7.4    | 4.1    | 1.6    | 3.8    | 6.6    |
| 53.1   | 78.2   | 65.3   | 55.3   | 36.5   | 44.1   | 51.7   | 51.4   | 47.3   |
| 164.3  | 163.2  | 99.9   | 31.2   | 26.9   | 22.0   | 16.7   | 17.4   | 18.7   |
| 1.4    | 3.9    | 1.8    | 3.4    | 5.6    | 6.7    | 1.2    | 6.5    | 1.2    |
| 268.7  | 261.9  | 150.1  | 139.8  | 86.4   | 91.1   | 129.2  | 108.1  | 119.1  |
| 27.6   | 39.0   | 20.5   | 26.6   | 14.3   | 23.2   | 19.2   | 17.8   | 17.2   |
| 46.3   | 44.6   | 35.2   | 27.1   | 38.9   | 29.8   | 32.9   | 29.1   | 38.0   |
| 118.1  | 142.4  | 124.9  | 174.7  | 146.2  | 196.8  | 85.5   | 99.9   | 114.7  |
| 158.0  | 209.4  | 90.6   | 205.9  | 194.2  | 201.7  | 127.7  | 101.4  | 150.7  |
| 177.5  | 174.7  | 145.4  | 340.1  | 279.1  | 250.2  | 238.2  | 234.6  | 250.8  |
| 22.9   | 13.6   | 23.9   | 47.2   | 35.3   | 36.5   | 53.7   | 21.8   | 44.1   |
| 4920.3 | 5804.3 | 4615.1 | 3811.8 | 3246.1 | 3583.8 | 2141.9 | 1985.9 | 2304.0 |
| 8.3    | 3.8    | 7.3    | 16.3   | 18.1   | 15.5   | 3.4    | 1.6    | 5.7    |
| 3.3    | 2.2    | 4.1    | 7.1    | 5.7    | 5.3    | 4.4    | 9.1    | 3.7    |
| 8.2    | 20.3   | 12.0   | 18.2   | 16.1   | 30.5   | 12.5   | 4.3    | 5.8    |
| 5.5    | 15.2   | 22.5   | 5.4    | 11.0   | 13.3   | 13.6   | 13.0   | 11.0   |
| 250.7  | 313.0  | 205.9  | 86.0   | 56.1   | 64.9   | 69.5   | 77.0   | 61.7   |
| 28.2   | 40.0   | 20.8   | 194.4  | 185.0  | 257.3  | 98.5   | 110.2  | 117.6  |
| 93.8   | 76.0   | 67.4   | 17.5   | 7.0    | 7.0    | 2.4    | 2.7    | 2.2    |
| 10.1   | 17.8   | 21.3   | 7.5    | 2.1    | 5.2    | 0.5    | 2.6    | 2.6    |

|        |        |       |       |       |       |       |       |       |
|--------|--------|-------|-------|-------|-------|-------|-------|-------|
| 1.5    | 3.6    | 1.9   | 7.0   | 3.6   | 14.4  | 1.5   | 2.2   | 2.9   |
| 6.2    | 3.9    | 4.5   | 4.6   | 3.4   | 10.0  | 3.2   | 2.3   | 2.7   |
| 1.7    | 1.8    | 2.6   | 12.8  | 8.2   | 6.5   | 1.9   | 2.8   | 2.4   |
| 22.9   | 44.4   | 21.0  | 43.3  | 37.2  | 34.5  | 13.5  | 18.0  | 20.8  |
| 65.5   | 76.4   | 54.2  | 20.7  | 19.4  | 11.4  | 18.7  | 12.7  | 17.3  |
| 1.7    | 4.5    | 1.2   | 4.8   | 4.0   | 8.6   | 4.5   | 7.1   | 8.4   |
| 142.0  | 239.9  | 226.3 | 56.1  | 57.7  | 58.0  | 38.8  | 54.2  | 49.6  |
| 24.8   | 27.7   | 24.9  | 22.0  | 10.2  | 5.1   | 13.7  | 18.8  | 22.5  |
| 0.7    | 3.0    | 2.9   | 7.5   | 3.9   | 5.2   | 2.0   | 2.3   | 1.2   |
| 8.4    | 13.1   | 7.7   | 19.5  | 18.0  | 20.6  | 13.8  | 16.6  | 17.9  |
| 80.4   | 62.3   | 33.8  | 13.4  | 19.3  | 16.7  | 10.4  | 4.6   | 12.8  |
| 47.4   | 47.7   | 63.6  | 34.7  | 37.4  | 32.9  | 43.5  | 45.8  | 42.9  |
| 82.4   | 107.7  | 107.1 | 42.1  | 44.2  | 68.6  | 90.1  | 98.1  | 85.9  |
| 284.9  | 274.0  | 127.0 | 270.3 | 164.9 | 190.7 | 128.4 | 81.3  | 91.1  |
| 0.9    | 0.8    | 1.0   | 1.7   | 1.3   | 1.6   | 0.7   | 0.9   | 1.5   |
| 1.7    | 2.4    | 1.2   | 5.8   | 6.3   | 6.2   | 3.0   | 2.1   | 3.2   |
| 12.0   | 9.0    | 8.2   | 7.8   | 3.5   | 5.4   | 1.3   | 1.3   | 1.1   |
| 9.2    | 9.0    | 11.8  | 21.8  | 6.2   | 11.9  | 2.3   | 5.2   | 5.6   |
| 14.9   | 8.5    | 9.5   | 14.8  | 6.3   | 10.9  | 4.9   | 17.5  | 12.1  |
| 161.8  | 181.6  | 109.7 | 108.9 | 78.9  | 80.2  | 152.9 | 91.4  | 128.8 |
| 624.2  | 730.5  | 561.8 | 554.8 | 465.3 | 514.4 | 419.6 | 411.5 | 451.2 |
| 3.4    | 6.4    | 8.4   | 167.4 | 111.2 | 128.3 | 100.7 | 78.0  | 93.3  |
| 19.6   | 19.8   | 19.0  | 16.8  | 17.0  | 18.6  | 14.7  | 15.7  | 11.2  |
| 23.6   | 28.0   | 19.3  | 37.9  | 26.3  | 29.7  | 24.1  | 22.7  | 11.3  |
| 21.9   | 23.7   | 13.1  | 21.5  | 14.7  | 12.0  | 15.7  | 3.9   | 16.9  |
| 323.5  | 423.1  | 301.4 | 217.0 | 166.2 | 171.4 | 146.5 | 150.5 | 161.8 |
| 91.6   | 123.5  | 92.8  | 45.7  | 37.8  | 50.2  | 48.9  | 45.0  | 60.1  |
| 6.3    | 15.3   | 10.5  | 30.1  | 17.1  | 17.7  | 13.4  | 10.5  | 11.7  |
| 439.1  | 394.7  | 200.5 | 169.3 | 118.3 | 139.7 | 144.4 | 119.6 | 140.7 |
| 10.7   | 40.9   | 64.1  | 191.1 | 253.1 | 299.1 | 178.4 | 617.7 | 298.7 |
| 95.5   | 140.0  | 133.6 | 232.8 | 207.2 | 248.4 | 143.3 | 167.8 | 208.7 |
| 0.8    | 4.5    | 1.5   | 10.9  | 10.0  | 5.4   | 3.4   | 4.6   | 3.9   |
| 39.3   | 38.3   | 28.3  | 85.7  | 56.4  | 74.0  | 40.6  | 28.1  | 35.6  |
| 3.7    | 1.4    | 3.1   | 6.6   | 7.5   | 6.1   | 5.6   | 1.2   | 1.5   |
| 4.6    | 12.4   | 7.6   | 13.5  | 10.6  | 9.3   | 2.9   | 8.3   | 2.7   |
| 11.3   | 7.4    | 15.1  | 6.2   | 11.5  | 6.3   | 5.6   | 5.3   | 2.4   |
| 62.7   | 101.0  | 98.8  | 44.5  | 50.2  | 43.4  | 31.7  | 48.6  | 40.8  |
| 51.7   | 70.2   | 79.5  | 93.7  | 86.3  | 86.7  | 62.1  | 68.1  | 61.3  |
| 13.6   | 13.6   | 2.0   | 14.4  | 10.9  | 13.5  | 4.4   | 3.1   | 3.7   |
| 109.4  | 165.4  | 167.3 | 420.3 | 325.6 | 350.5 | 243.5 | 184.9 | 264.2 |
| 47.2   | 81.3   | 73.7  | 78.7  | 59.3  | 67.3  | 37.3  | 58.5  | 54.1  |
| 370.7  | 477.9  | 329.8 | 308.4 | 234.3 | 269.1 | 190.5 | 203.1 | 205.8 |
| 116.2  | 150.1  | 108.4 | 53.2  | 38.7  | 41.8  | 53.5  | 53.2  | 59.6  |
| 572.5  | 688.5  | 372.8 | 292.9 | 231.4 | 261.9 | 202.9 | 179.7 | 203.4 |
| 1.3    | 9.0    | 4.0   | 10.2  | 6.2   | 8.9   | 3.3   | 3.0   | 4.6   |
| 140.3  | 163.8  | 254.7 | 7.7   | 10.1  | 7.0   | 1.3   | 1.9   | 1.8   |
| 3.9    | 15.5   | 11.1  | 54.1  | 48.8  | 54.4  | 36.3  | 49.5  | 28.9  |
| 2944.7 | 1821.7 | 906.8 | 7.8   | 4.6   | 5.1   | 7.6   | 7.6   | 8.4   |
| 619.6  | 643.8  | 312.2 | 173.8 | 127.0 | 152.2 | 189.8 | 124.0 | 147.1 |
| 523.4  | 578.0  | 274.5 | 237.2 | 186.7 | 215.3 | 172.5 | 137.4 | 172.7 |
| 1099.7 | 1165.9 | 854.8 | 319.5 | 262.2 | 286.4 | 462.6 | 342.0 | 437.2 |
| 26.2   | 29.4   | 14.0  | 37.8  | 27.9  | 33.6  | 31.1  | 31.1  | 35.9  |
| 8.8    | 5.9    | 4.6   | 12.5  | 9.5   | 7.8   | 7.7   | 7.6   | 6.9   |

|        |        |        |        |        |        |        |        |        |
|--------|--------|--------|--------|--------|--------|--------|--------|--------|
| 38.8   | 70.0   | 51.1   | 17.6   | 16.2   | 21.7   | 19.1   | 28.1   | 23.3   |
| 478.7  | 387.2  | 231.7  | 18.8   | 15.7   | 14.0   | 11.9   | 8.6    | 14.5   |
| 13.3   | 34.0   | 19.6   | 77.2   | 65.3   | 56.7   | 47.6   | 46.6   | 41.4   |
| 96.4   | 144.4  | 178.9  | 33.9   | 33.6   | 44.9   | 30.3   | 42.7   | 37.9   |
| 10.1   | 11.0   | 6.5    | 6.1    | 19.8   | 17.6   | 14.3   | 6.0    | 9.1    |
| 26.4   | 17.4   | 21.8   | 14.3   | 13.7   | 22.7   | 18.1   | 9.5    | 17.6   |
| 3.0    | 4.0    | 2.0    | 9.1    | 6.6    | 12.1   | 2.1    | 1.4    | 1.8    |
| 1816.9 | 2076.1 | 1586.9 | 593.5  | 591.3  | 632.5  | 325.8  | 486.8  | 454.7  |
| 50.4   | 67.1   | 50.9   | 96.3   | 98.4   | 104.1  | 60.3   | 55.0   | 62.9   |
| 6.3    | 5.0    | 2.0    | 15.2   | 11.5   | 13.6   | 3.9    | 6.2    | 7.8    |
| 22.0   | 11.1   | 11.7   | 39.4   | 33.8   | 45.2   | 22.8   | 15.6   | 16.0   |
| 13.1   | 13.9   | 9.6    | 14.0   | 13.4   | 16.8   | 4.9    | 16.0   | 11.7   |
| 19.7   | 29.6   | 17.7   | 33.4   | 19.2   | 12.9   | 16.9   | 13.0   | 19.6   |
| 4.4    | 5.4    | 3.4    | 13.7   | 10.3   | 14.9   | 1.8    | 2.8    | 5.9    |
| 211.7  | 230.2  | 175.1  | 203.4  | 176.8  | 207.4  | 224.4  | 208.3  | 248.0  |
| 1255.8 | 1473.5 | 1188.8 | 2294.0 | 2029.6 | 2142.6 | 1481.2 | 1654.6 | 1655.9 |
| 5.0    | 2.9    | 0.5    | 3.3    | 5.2    | 9.6    | 7.0    | 4.8    | 2.9    |
| 460.2  | 422.2  | 277.6  | 36.7   | 15.9   | 28.9   | 17.9   | 17.4   | 23.3   |
| 41.3   | 68.8   | 64.2   | 32.8   | 28.3   | 30.8   | 31.0   | 27.4   | 35.0   |
| 8.8    | 10.8   | 2.9    | 5.4    | 7.7    | 12.8   | 2.7    | 1.7    | 2.8    |
| 73.3   | 96.6   | 91.4   | 210.7  | 225.9  | 220.0  | 71.1   | 84.0   | 109.0  |
| 11.8   | 6.2    | 7.5    | 69.7   | 56.4   | 55.4   | 30.1   | 35.1   | 33.5   |
| 1.7    | 0.9    | 2.1    | 45.8   | 29.3   | 43.1   | 22.3   | 34.9   | 33.9   |
| 63.9   | 79.7   | 47.6   | 28.8   | 7.5    | 10.7   | 19.2   | 14.7   | 13.8   |
| 44.7   | 46.0   | 28.8   | 13.3   | 15.0   | 6.3    | 11.5   | 11.4   | 7.4    |
| 15.2   | 12.9   | 8.4    | 29.7   | 14.6   | 11.6   | 8.3    | 12.7   | 13.3   |
| 24.3   | 37.3   | 33.0   | 30.2   | 23.4   | 37.7   | 9.1    | 18.1   | 12.5   |
| 1.3    | 1.7    | 0.5    | 3.0    | 4.5    | 3.0    | 0.7    | 1.3    | 1.0    |
| 1.4    | 3.9    | 2.7    | 2.9    | 4.1    | 4.5    | 1.0    | 1.1    | 1.3    |
| 5.0    | 6.9    | 9.5    | 5.7    | 7.2    | 9.3    | 2.9    | 3.2    | 2.3    |
| 1.7    | 6.1    | 0.3    | 6.1    | 9.9    | 8.4    | 6.0    | 5.7    | 7.9    |
| 12.7   | 3.5    | 2.9    | 8.4    | 3.0    | 3.9    | 2.0    | 4.2    | 2.1    |
| 3.2    | 7.8    | 8.1    | 14.9   | 8.0    | 10.3   | 10.9   | 6.6    | 13.6   |
| 11.5   | 23.2   | 20.8   | 30.2   | 17.4   | 23.7   | 10.0   | 20.0   | 8.1    |
| 739.4  | 839.1  | 757.5  | 730.0  | 655.0  | 712.0  | 331.5  | 429.7  | 412.6  |
| 420.1  | 341.0  | 248.7  | 37.8   | 34.8   | 47.0   | 42.7   | 39.1   | 33.5   |
| 188.2  | 218.4  | 223.3  | 49.0   | 51.0   | 37.4   | 109.9  | 158.3  | 153.7  |
| 20.5   | 48.6   | 34.5   | 18.6   | 15.2   | 11.3   | 44.4   | 37.9   | 52.5   |
| 160.2  | 233.4  | 150.9  | 139.4  | 139.3  | 153.8  | 103.3  | 137.1  | 142.9  |
| 4556.0 | 5392.0 | 4311.2 | 2524.0 | 1996.4 | 2123.6 | 1264.4 | 1183.5 | 1431.2 |
| 5.4    | 7.1    | 2.6    | 22.4   | 10.1   | 11.8   | 3.1    | 2.9    | 3.9    |
| 1.4    | 1.3    | 2.2    | 3.2    | 2.0    | 4.4    | 5.3    | 1.6    | 1.0    |
| 17.7   | 14.9   | 10.0   | 12.5   | 14.9   | 15.1   | 10.6   | 7.3    | 10.4   |
| 13.0   | 14.7   | 8.5    | 9.3    | 1.6    | 8.1    | 6.4    | 6.3    | 8.0    |
| 5.0    | 1.7    | 4.4    | 111.5  | 74.3   | 85.7   | 42.4   | 40.6   | 56.5   |
| 12.0   | 13.9   | 4.9    | 54.1   | 46.7   | 61.7   | 21.6   | 14.0   | 25.3   |
| 12.6   | 16.0   | 41.3   | 5.7    | 4.2    | 10.6   | 3.1    | 6.8    | 4.7    |
| 5.0    | 4.4    | 2.2    | 9.2    | 9.7    | 19.1   | 5.3    | 14.0   | 3.6    |
| 6.5    | 13.0   | 5.7    | 19.8   | 5.5    | 8.2    | 2.5    | 4.2    | 4.3    |
| 320.7  | 500.2  | 270.4  | 185.9  | 124.6  | 173.0  | 133.6  | 65.9   | 173.6  |
| 44.4   | 59.0   | 39.1   | 82.2   | 61.9   | 82.0   | 42.7   | 40.5   | 44.4   |
| 1.7    | 1.6    | 1.1    | 9.3    | 7.4    | 2.3    | 0.9    | 1.4    | 1.5    |
| 2.0    | 2.3    | 0.9    | 5.2    | 4.0    | 2.0    | 3.8    | 0.9    | 1.1    |

|        |        |        |        |        |        |        |        |        |
|--------|--------|--------|--------|--------|--------|--------|--------|--------|
| 123.7  | 168.3  | 152.0  | 17.3   | 17.4   | 10.2   | 10.2   | 15.2   | 17.3   |
| 288.5  | 241.0  | 235.3  | 9.9    | 5.7    | 6.0    | 21.0   | 18.1   | 12.6   |
| 7.2    | 5.9    | 3.0    | 16.5   | 3.4    | 17.5   | 11.1   | 4.6    | 13.8   |
| 46.3   | 58.8   | 49.2   | 42.1   | 38.3   | 43.2   | 10.0   | 24.6   | 11.3   |
| 7.9    | 8.0    | 5.3    | 10.1   | 7.1    | 8.6    | 6.6    | 1.0    | 2.1    |
| 14.8   | 19.3   | 16.4   | 23.3   | 27.3   | 13.1   | 9.3    | 14.9   | 14.4   |
| 28.2   | 34.6   | 34.4   | 21.8   | 29.7   | 33.1   | 30.6   | 20.0   | 30.2   |
| 4.2    | 6.0    | 6.2    | 28.7   | 28.8   | 23.9   | 27.3   | 21.1   | 21.5   |
| 10.2   | 19.8   | 7.7    | 15.1   | 23.4   | 24.0   | 21.1   | 24.5   | 19.1   |
| 63.3   | 74.2   | 64.2   | 22.6   | 12.0   | 27.7   | 22.8   | 22.3   | 26.7   |
| 114.3  | 155.3  | 119.8  | 43.1   | 39.3   | 29.2   | 51.5   | 37.9   | 48.7   |
| 6.1    | 3.7    | 2.7    | 8.9    | 4.8    | 12.8   | 4.1    | 0.3    | 2.7    |
| 1.8    | 2.2    | 5.9    | 15.4   | 2.7    | 15.0   | 4.1    | 4.1    | 12.7   |
| 7.4    | 15.7   | 7.2    | 52.5   | 61.6   | 73.0   | 28.6   | 48.9   | 40.9   |
| 3.1    | 11.6   | 5.3    | 23.7   | 14.3   | 8.3    | 9.7    | 16.3   | 19.7   |
| 35.3   | 38.3   | 38.4   | 4.6    | 1.6    | 3.9    | 0.3    | 0.6    | 0.6    |
| 72.5   | 78.8   | 75.6   | 8.9    | 11.6   | 4.6    | 4.1    | 9.9    | 8.1    |
| 56.5   | 97.8   | 123.8  | 927.1  | 741.1  | 814.8  | 516.1  | 380.2  | 506.7  |
| 0.8    | 1.2    | 5.3    | 5.4    | 2.9    | 7.1    | 2.3    | 2.4    | 1.5    |
| 4.9    | 5.2    | 4.6    | 11.2   | 9.8    | 10.3   | 10.7   | 24.0   | 9.5    |
| 16.1   | 15.6   | 8.7    | 12.3   | 12.4   | 10.1   | 5.2    | 2.3    | 6.4    |
| 216.0  | 227.8  | 166.6  | 131.1  | 109.8  | 127.7  | 79.6   | 77.2   | 98.9   |
| 372.0  | 849.8  | 829.0  | 12.9   | 27.1   | 24.5   | 11.0   | 18.4   | 21.8   |
| 7065.1 | 7950.1 | 6934.1 | 5347.5 | 4531.8 | 4912.2 | 3297.3 | 3278.4 | 3496.7 |
| 57.1   | 81.7   | 70.1   | 35.0   | 40.0   | 27.4   | 27.8   | 42.9   | 39.1   |
| 118.3  | 137.2  | 97.9   | 160.1  | 142.9  | 134.0  | 121.6  | 123.9  | 139.7  |
| 5.4    | 7.4    | 10.9   | 12.3   | 8.7    | 9.3    | 2.6    | 9.9    | 11.4   |
| 28.6   | 25.8   | 17.4   | 8.1    | 4.6    | 5.1    | 5.9    | 7.5    | 13.2   |
| 311.3  | 382.6  | 250.6  | 292.9  | 227.3  | 244.3  | 154.6  | 148.5  | 155.2  |
| 37.2   | 29.4   | 25.4   | 40.4   | 36.1   | 29.8   | 19.2   | 19.3   | 24.7   |
| 15.7   | 6.2    | 0.2    | 1.0    | 5.0    | 12.2   | 1.7    | 2.7    | 2.9    |
| 65.6   | 76.8   | 71.6   | 2.5    | 3.4    | 2.8    | 3.3    | 4.3    | 1.1    |
| 1.2    | 1.5    | 0.9    | 4.2    | 3.9    | 3.6    | 1.2    | 1.3    | 1.3    |
| 38.9   | 39.9   | 21.8   | 39.0   | 37.8   | 46.0   | 35.6   | 29.6   | 35.9   |
| 1.3    | 2.2    | 5.2    | 23.1   | 16.3   | 24.5   | 21.4   | 15.7   | 29.7   |
| 9.7    | 3.9    | 9.7    | 25.7   | 23.9   | 25.9   | 13.6   | 5.7    | 9.3    |
| 14.6   | 66.6   | 84.8   | 571.4  | 540.4  | 585.9  | 659.3  | 840.1  | 887.1  |
| 2.0    | 8.1    | 6.3    | 15.2   | 8.9    | 16.8   | 10.5   | 5.9    | 14.0   |
| 17.4   | 28.2   | 15.5   | 21.7   | 20.1   | 22.9   | 25.0   | 21.8   | 20.9   |
| 87.0   | 121.6  | 64.6   | 69.3   | 46.1   | 55.3   | 41.2   | 50.6   | 50.7   |
| 11.7   | 7.5    | 3.0    | 9.4    | 5.1    | 7.1    | 6.6    | 8.4    | 5.6    |
| 65.9   | 76.8   | 49.2   | 20.7   | 11.4   | 9.0    | 52.6   | 43.4   | 30.8   |
| 90.4   | 107.1  | 77.0   | 7.9    | 3.2    | 19.5   | 59.9   | 38.6   | 47.4   |
| 580.0  | 909.6  | 707.7  | 8.1    | 8.5    | 7.2    | 1.9    | 1.3    | 5.3    |
| 55.3   | 48.4   | 74.3   | 177.4  | 133.8  | 154.7  | 92.7   | 138.0  | 86.6   |
| 18.1   | 25.6   | 28.9   | 18.8   | 23.9   | 18.3   | 24.7   | 36.9   | 29.8   |
| 16.7   | 18.5   | 23.9   | 14.7   | 13.6   | 16.6   | 4.8    | 11.4   | 8.0    |
| 156.3  | 151.5  | 65.4   | 42.2   | 24.7   | 40.5   | 26.8   | 23.2   | 21.3   |
| 325.2  | 234.1  | 80.3   | 3.3    | 1.9    | 2.4    | 1.3    | 0.9    | 2.2    |
| 38.3   | 47.4   | 45.7   | 69.6   | 78.6   | 95.4   | 35.2   | 40.1   | 38.2   |
| 4.4    | 2.0    | 3.4    | 15.3   | 15.4   | 12.2   | 21.3   | 18.2   | 26.1   |
| 50.0   | 80.4   | 39.8   | 72.1   | 43.0   | 55.9   | 57.2   | 58.2   | 61.1   |
| 4.7    | 7.3    | 2.4    | 14.9   | 11.3   | 10.0   | 5.8    | 3.6    | 2.1    |

|        |        |        |       |       |       |       |       |       |
|--------|--------|--------|-------|-------|-------|-------|-------|-------|
| 14.2   | 16.3   | 26.1   | 419.9 | 281.1 | 360.7 | 215.2 | 132.5 | 203.2 |
| 3.8    | 11.4   | 7.1    | 58.9  | 54.6  | 48.2  | 37.5  | 42.9  | 36.8  |
| 38.2   | 66.4   | 46.6   | 83.3  | 58.5  | 83.4  | 42.6  | 53.3  | 71.6  |
| 1905.1 | 2958.1 | 2611.1 | 225.9 | 274.9 | 356.8 | 198.7 | 319.3 | 342.0 |
| 13.5   | 14.5   | 6.2    | 16.3  | 27.2  | 16.5  | 11.6  | 8.9   | 12.0  |
| 1.0    | 1.4    | 1.6    | 1.7   | 2.0   | 5.7   | 2.1   | 1.5   | 2.6   |
| 1.7    | 4.2    | 1.2    | 2.8   | 4.5   | 3.2   | 7.1   | 0.2   | 2.7   |
| 10.4   | 2.0    | 10.7   | 26.7  | 8.1   | 18.2  | 19.7  | 9.8   | 13.7  |
| 314.9  | 359.5  | 296.7  | 139.1 | 115.0 | 104.7 | 159.3 | 137.5 | 175.8 |
| 3.9    | 20.5   | 20.7   | 24.8  | 17.7  | 27.4  | 3.4   | 5.7   | 6.2   |
| 6.3    | 0.7    | 3.6    | 9.0   | 4.8   | 7.7   | 3.5   | 6.2   | 4.3   |
| 82.3   | 88.5   | 52.2   | 3.4   | 1.6   | 2.6   | 1.4   | 1.0   | 1.9   |
| 557.7  | 586.0  | 348.1  | 20.4  | 9.5   | 6.4   | 18.0  | 15.4  | 15.4  |
| 11.4   | 22.0   | 18.2   | 3.5   | 4.1   | 4.8   | 0.8   | 0.7   | 0.6   |
| 4.5    | 4.4    | 6.1    | 9.4   | 8.3   | 3.7   | 3.1   | 3.9   | 5.1   |
| 144.3  | 279.0  | 362.0  | 19.8  | 15.7  | 7.7   | 7.8   | 15.2  | 5.1   |
| 861.8  | 976.7  | 372.4  | 453.5 | 296.3 | 352.5 | 313.8 | 232.5 | 252.3 |
| 11.8   | 11.8   | 5.2    | 23.5  | 19.1  | 22.4  | 17.3  | 14.9  | 11.8  |
| 15.2   | 4.3    | 4.2    | 27.7  | 14.9  | 22.7  | 3.7   | 8.0   | 15.3  |
| 5.9    | 3.9    | 4.7    | 7.7   | 6.9   | 11.6  | 5.6   | 2.8   | 7.6   |
| 9.1    | 9.2    | 7.5    | 21.9  | 12.3  | 13.6  | 1.6   | 5.0   | 4.6   |
| 11.3   | 10.8   | 13.1   | 23.1  | 19.5  | 38.7  | 20.2  | 16.7  | 19.0  |
| 2.0    | 8.7    | 5.7    | 10.3  | 7.3   | 19.6  | 2.2   | 7.8   | 7.0   |
| 1.2    | 1.0    | 0.7    | 1.9   | 1.7   | 2.0   | 0.8   | 0.9   | 0.8   |
| 1.4    | 3.9    | 0.8    | 1.6   | 2.5   | 1.3   | 1.0   | 0.6   | 1.0   |
| 160.4  | 154.1  | 72.0   | 89.8  | 67.3  | 69.7  | 43.2  | 37.1  | 36.6  |
| 162.9  | 159.6  | 63.4   | 78.7  | 71.7  | 74.9  | 54.8  | 48.0  | 62.6  |
| 8.8    | 1.7    | 2.4    | 4.1   | 4.1   | 10.6  | 3.8   | 1.8   | 2.6   |
| 4.6    | 1.7    | 0.7    | 7.8   | 2.1   | 1.5   | 4.3   | 4.3   | 3.3   |
| 2.4    | 1.0    | 1.9    | 6.1   | 1.6   | 13.1  | 2.7   | 1.7   | 3.2   |
| 507.8  | 536.9  | 206.5  | 354.6 | 157.0 | 191.0 | 189.1 | 106.0 | 119.6 |
| 19.7   | 145.1  | 245.0  | 12.6  | 13.7  | 6.3   | 2.9   | 22.5  | 13.6  |
| 19.5   | 28.8   | 19.3   | 46.2  | 33.7  | 32.9  | 13.9  | 6.3   | 16.6  |
| 6.9    | 12.5   | 4.5    | 5.4   | 10.9  | 6.2   | 5.4   | 3.2   | 1.7   |
| 2.5    | 1.9    | 4.5    | 5.1   | 4.7   | 4.4   | 2.7   | 9.8   | 5.3   |
| 2.9    | 2.0    | 1.7    | 4.4   | 3.4   | 2.7   | 1.0   | 1.6   | 1.0   |
| 6.3    | 19.4   | 3.1    | 19.6  | 18.3  | 15.6  | 8.3   | 6.9   | 6.7   |
| 1.8    | 1.4    | 1.2    | 8.8   | 9.6   | 10.8  | 5.4   | 5.0   | 1.9   |
| 130.7  | 207.9  | 199.5  | 204.9 | 167.5 | 194.1 | 118.6 | 129.4 | 140.0 |
| 1.3    | 1.6    | 1.2    | 2.3   | 2.4   | 2.4   | 1.7   | 1.3   | 1.3   |
| 16.8   | 3.3    | 5.2    | 13.8  | 15.1  | 8.6   | 4.7   | 1.8   | 3.1   |
| 122.5  | 124.9  | 90.4   | 2.7   | 5.1   | 3.8   | 2.7   | 2.0   | 2.9   |
| 51.8   | 46.1   | 28.0   | 4.5   | 4.8   | 3.4   | 14.0  | 8.8   | 13.4  |
| 2.1    | 1.2    | 2.7    | 2.0   | 1.8   | 4.8   | 1.1   | 1.1   | 1.0   |
| 6.2    | 3.8    | 4.3    | 20.7  | 12.4  | 13.8  | 15.9  | 3.4   | 12.1  |
| 3.6    | 5.5    | 2.7    | 5.2   | 10.6  | 4.1   | 3.9   | 2.1   | 4.5   |
| 13.6   | 18.9   | 3.6    | 11.6  | 18.3  | 18.8  | 19.2  | 13.0  | 7.2   |
| 101.1  | 121.5  | 81.1   | 16.9  | 12.7  | 15.5  | 16.2  | 6.1   | 5.1   |
| 41.5   | 38.3   | 29.3   | 24.0  | 31.2  | 31.5  | 18.9  | 14.4  | 11.2  |
| 231.6  | 293.7  | 186.6  | 669.7 | 536.9 | 569.7 | 325.6 | 254.9 | 344.1 |
| 64.8   | 57.8   | 18.7   | 22.5  | 15.9  | 12.7  | 9.3   | 2.3   | 11.0  |
| 488.5  | 605.0  | 430.2  | 411.5 | 394.5 | 493.5 | 242.5 | 342.3 | 327.2 |
| 14.0   | 4.2    | 5.4    | 43.3  | 33.4  | 37.8  | 41.9  | 44.9  | 43.3  |

|        |       |       |        |       |       |       |       |       |
|--------|-------|-------|--------|-------|-------|-------|-------|-------|
| 187.1  | 168.5 | 76.6  | 80.2   | 36.8  | 53.7  | 46.5  | 35.5  | 46.2  |
| 4.2    | 3.7   | 3.3   | 83.8   | 70.3  | 71.6  | 54.8  | 57.7  | 62.4  |
| 10.6   | 9.2   | 5.7   | 12.7   | 16.3  | 26.7  | 11.7  | 23.6  | 17.0  |
| 3.6    | 14.0  | 11.3  | 11.0   | 11.1  | 9.3   | 4.4   | 2.1   | 12.2  |
| 2.2    | 2.7   | 1.7   | 3.1    | 2.8   | 3.4   | 2.5   | 2.2   | 2.0   |
| 9.0    | 19.4  | 6.1   | 60.8   | 59.0  | 69.3  | 36.9  | 42.5  | 43.2  |
| 4.9    | 6.1   | 3.6   | 13.9   | 15.0  | 6.5   | 5.0   | 9.7   | 8.0   |
| 10.3   | 14.0  | 16.5  | 10.3   | 8.5   | 15.5  | 5.3   | 10.9  | 7.1   |
| 1.6    | 3.3   | 6.6   | 8.5    | 2.2   | 3.3   | 5.8   | 5.1   | 5.9   |
| 2.9    | 6.7   | 0.8   | 29.4   | 17.7  | 16.4  | 15.4  | 5.1   | 12.3  |
| 39.9   | 91.4  | 88.1  | 10.5   | 9.1   | 6.8   | 9.1   | 7.8   | 19.3  |
| 5.3    | 7.2   | 3.0   | 9.8    | 8.4   | 4.8   | 2.3   | 5.6   | 5.4   |
| 17.9   | 13.5  | 5.4   | 27.1   | 25.8  | 14.4  | 9.1   | 10.1  | 20.5  |
| 148.4  | 172.3 | 169.4 | 59.2   | 49.0  | 37.0  | 38.9  | 65.2  | 63.6  |
| 4.5    | 7.6   | 4.7   | 43.6   | 41.2  | 43.1  | 7.8   | 17.5  | 5.5   |
| 4.8    | 1.3   | 2.6   | 5.0    | 6.7   | 8.2   | 8.2   | 6.6   | 7.1   |
| 8.0    | 14.8  | 7.5   | 18.8   | 10.7  | 20.6  | 11.1  | 3.0   | 20.2  |
| 13.5   | 8.2   | 6.8   | 5.5    | 12.3  | 20.0  | 8.9   | 5.0   | 5.2   |
| 23.3   | 27.8  | 15.5  | 67.0   | 43.2  | 54.8  | 27.7  | 18.3  | 26.7  |
| 2.5    | 6.6   | 0.8   | 6.1    | 7.4   | 14.9  | 1.5   | 2.8   | 0.6   |
| 0.5    | 3.5   | 1.2   | 23.3   | 15.5  | 22.1  | 23.8  | 11.6  | 15.9  |
| 42.9   | 65.1  | 46.8  | 65.7   | 38.5  | 55.0  | 48.7  | 44.1  | 53.2  |
| 5.3    | 14.3  | 9.1   | 15.0   | 16.0  | 9.5   | 13.0  | 11.0  | 7.1   |
| 18.6   | 22.2  | 20.4  | 17.4   | 23.2  | 22.4  | 18.4  | 15.1  | 20.8  |
| 313.1  | 258.4 | 109.9 | 158.9  | 73.8  | 85.2  | 80.8  | 43.8  | 69.8  |
| 45.7   | 50.8  | 55.4  | 31.1   | 24.0  | 22.8  | 27.5  | 21.1  | 19.2  |
| 0.8    | 2.2   | 1.3   | 3.2    | 13.5  | 3.4   | 1.6   | 5.4   | 3.5   |
| 1.4    | 2.1   | 0.7   | 2.3    | 8.3   | 8.2   | 4.9   | 3.2   | 1.5   |
| 10.8   | 13.5  | 10.0  | 8.6    | 6.3   | 10.8  | 7.2   | 3.1   | 8.1   |
| 493.7  | 733.7 | 457.5 | 84.5   | 62.6  | 60.3  | 69.4  | 55.6  | 48.4  |
| 6.9    | 4.3   | 4.7   | 4.1    | 16.5  | 4.7   | 6.1   | 4.6   | 10.1  |
| 855.4  | 999.9 | 467.1 | 641.8  | 447.1 | 518.1 | 295.8 | 276.8 | 317.8 |
| 81.6   | 128.2 | 114.7 | 100.5  | 90.9  | 93.9  | 117.1 | 151.5 | 159.1 |
| 341.9  | 402.3 | 293.4 | 613.8  | 509.6 | 601.8 | 234.2 | 226.3 | 253.8 |
| 22.6   | 20.5  | 14.6  | 5.3    | 1.6   | 5.3   | 5.7   | 7.5   | 11.1  |
| 1191.9 | 763.0 | 458.3 | 1034.9 | 571.1 | 505.2 | 619.2 | 236.0 | 281.9 |
| 553.4  | 724.9 | 588.9 | 118.8  | 64.8  | 72.7  | 78.4  | 68.5  | 70.6  |
| 5.2    | 2.7   | 1.5   | 12.1   | 4.7   | 10.9  | 1.7   | 2.1   | 2.4   |
| 43.5   | 46.4  | 27.8  | 33.4   | 18.1  | 36.8  | 29.8  | 22.1  | 34.3  |
| 3.8    | 1.3   | 0.9   | 15.3   | 10.3  | 13.1  | 3.9   | 1.5   | 2.7   |
| 9.8    | 2.4   | 5.8   | 29.1   | 10.7  | 30.4  | 18.7  | 22.6  | 20.7  |
| 9.7    | 18.0  | 12.7  | 31.9   | 25.7  | 24.9  | 8.8   | 9.1   | 11.9  |
| 4.0    | 4.7   | 10.8  | 6.5    | 3.7   | 13.0  | 0.9   | 2.8   | 1.5   |
| 24.5   | 25.0  | 20.7  | 39.6   | 33.9  | 16.0  | 19.2  | 27.7  | 31.9  |
| 15.1   | 19.7  | 13.5  | 7.2    | 6.8   | 5.2   | 4.4   | 6.4   | 12.1  |
| 76.9   | 79.6  | 84.1  | 225.7  | 217.1 | 209.3 | 134.5 | 110.4 | 141.4 |
| 1.3    | 3.5   | 2.5   | 4.8    | 8.9   | 5.0   | 5.0   | 3.5   | 6.1   |
| 16.1   | 33.1  | 26.4  | 32.2   | 38.0  | 58.2  | 36.4  | 57.9  | 52.0  |
| 164.9  | 209.0 | 122.6 | 425.1  | 352.6 | 421.6 | 253.2 | 290.8 | 293.4 |
| 278.4  | 293.7 | 181.6 | 465.7  | 370.8 | 414.8 | 343.8 | 237.2 | 294.0 |
| 1.9    | 2.7   | 2.0   | 3.5    | 4.0   | 3.8   | 2.1   | 1.5   | 1.8   |
| 174.7  | 419.6 | 314.2 | 11.2   | 21.9  | 9.0   | 8.3   | 10.2  | 7.4   |
| 4.4    | 9.1   | 9.6   | 14.4   | 5.5   | 12.2  | 3.9   | 0.6   | 0.9   |



|       |        |        |       |       |       |       |       |       |
|-------|--------|--------|-------|-------|-------|-------|-------|-------|
| 1.2   | 5.5    | 3.9    | 3.4   | 2.4   | 6.7   | 4.5   | 3.8   | 2.7   |
| 42.5  | 41.4   | 32.6   | 32.7  | 35.9  | 32.8  | 17.3  | 16.0  | 7.1   |
| 4.5   | 5.0    | 2.5    | 5.1   | 3.1   | 4.6   | 3.5   | 2.9   | 2.0   |
| 6.5   | 13.2   | 8.7    | 43.8  | 23.1  | 33.8  | 10.5  | 14.8  | 11.4  |
| 2.5   | 6.2    | 3.0    | 6.1   | 8.2   | 6.0   | 6.0   | 5.8   | 5.9   |
| 1.2   | 6.9    | 3.2    | 8.5   | 12.7  | 13.8  | 17.2  | 12.2  | 14.3  |
| 15.7  | 17.1   | 8.1    | 32.9  | 24.8  | 28.8  | 18.7  | 12.2  | 17.7  |
| 41.8  | 44.1   | 55.1   | 14.6  | 13.3  | 15.6  | 15.6  | 17.1  | 17.8  |
| 20.3  | 17.8   | 10.0   | 73.8  | 63.1  | 76.1  | 41.5  | 49.4  | 55.5  |
| 30.7  | 40.1   | 19.1   | 11.6  | 15.4  | 8.4   | 6.0   | 5.9   | 7.3   |
| 574.5 | 756.5  | 475.8  | 168.7 | 133.6 | 160.8 | 120.1 | 123.0 | 136.8 |
| 292.6 | 318.9  | 193.2  | 71.7  | 49.7  | 59.2  | 61.3  | 33.0  | 58.0  |
| 1.9   | 2.0    | 1.8    | 2.0   | 2.1   | 1.6   | 0.5   | 0.6   | 0.8   |
| 45.0  | 38.1   | 35.5   | 52.1  | 36.7  | 41.7  | 23.6  | 35.6  | 16.0  |
| 33.0  | 44.0   | 27.8   | 11.6  | 8.9   | 14.2  | 3.3   | 6.5   | 10.7  |
| 3.0   | 7.5    | 2.6    | 11.1  | 3.0   | 4.2   | 2.4   | 1.6   | 1.5   |
| 12.4  | 6.3    | 15.0   | 21.8  | 37.8  | 26.5  | 25.5  | 17.6  | 17.7  |
| 1.0   | 2.0    | 1.2    | 22.9  | 12.0  | 22.3  | 11.4  | 13.4  | 10.8  |
| 116.7 | 119.5  | 55.7   | 77.4  | 45.3  | 47.7  | 49.2  | 33.2  | 32.7  |
| 56.3  | 173.7  | 181.9  | 38.2  | 19.0  | 27.0  | 31.0  | 22.1  | 27.8  |
| 41.4  | 70.5   | 54.8   | 11.3  | 8.2   | 14.8  | 4.6   | 10.9  | 5.7   |
| 29.5  | 56.9   | 47.7   | 26.3  | 18.8  | 32.4  | 10.8  | 18.1  | 12.9  |
| 2.5   | 1.9    | 4.1    | 4.1   | 4.0   | 4.7   | 5.0   | 3.1   | 0.4   |
| 3.4   | 2.1    | 1.7    | 6.2   | 9.7   | 4.1   | 1.7   | 1.2   | 1.7   |
| 14.2  | 13.7   | 12.6   | 26.5  | 13.7  | 20.4  | 21.3  | 15.0  | 18.1  |
| 24.6  | 20.8   | 41.8   | 30.4  | 35.2  | 33.9  | 28.6  | 17.8  | 21.0  |
| 36.1  | 105.4  | 153.8  | 3.5   | 7.7   | 4.9   | 2.7   | 0.5   | 0.8   |
| 20.0  | 4.8    | 10.9   | 26.6  | 16.9  | 23.0  | 16.6  | 18.4  | 13.4  |
| 0.7   | 1.0    | 3.8    | 10.4  | 4.2   | 3.8   | 2.4   | 1.3   | 0.8   |
| 1.5   | 1.8    | 1.7    | 3.0   | 1.8   | 2.2   | 1.0   | 0.8   | 1.0   |
| 868.0 | 1136.9 | 806.9  | 547.9 | 457.6 | 497.9 | 346.8 | 350.1 | 379.6 |
| 332.3 | 411.1  | 342.3  | 197.9 | 145.9 | 181.8 | 133.8 | 146.9 | 155.2 |
| 15.7  | 3.5    | 15.6   | 11.1  | 6.4   | 5.6   | 2.1   | 1.3   | 6.5   |
| 2.4   | 1.2    | 1.2    | 5.0   | 3.5   | 3.8   | 0.7   | 1.7   | 1.3   |
| 37.6  | 60.6   | 40.4   | 7.3   | 24.3  | 15.9  | 8.5   | 23.3  | 24.2  |
| 251.2 | 326.3  | 255.0  | 133.2 | 89.3  | 99.0  | 158.4 | 149.9 | 154.8 |
| 4.1   | 9.7    | 11.8   | 11.3  | 11.1  | 13.6  | 9.6   | 4.7   | 6.6   |
| 29.7  | 15.9   | 13.1   | 9.1   | 14.1  | 11.4  | 5.6   | 5.3   | 7.7   |
| 813.8 | 1306.2 | 1079.2 | 96.6  | 74.7  | 89.6  | 49.4  | 43.9  | 45.4  |
| 3.0   | 6.9    | 4.0    | 4.4   | 3.2   | 4.3   | 2.3   | 2.5   | 5.9   |
| 7.8   | 2.7    | 6.5    | 11.5  | 12.5  | 19.5  | 7.8   | 6.3   | 9.6   |
| 3.5   | 2.7    | 3.7    | 14.8  | 12.2  | 13.6  | 10.3  | 5.7   | 5.2   |
| 52.0  | 40.2   | 28.8   | 4.1   | 11.5  | 7.3   | 2.7   | 4.8   | 7.8   |
| 11.8  | 11.3   | 15.3   | 112.7 | 126.6 | 126.7 | 97.1  | 144.8 | 131.3 |
| 3.0   | 6.6    | 7.4    | 17.4  | 8.0   | 8.4   | 6.4   | 4.5   | 5.3   |
| 6.7   | 3.0    | 5.9    | 5.4   | 5.5   | 4.0   | 1.2   | 4.8   | 2.0   |
| 184.9 | 230.0  | 105.5  | 175.1 | 136.9 | 150.8 | 147.1 | 109.2 | 140.2 |
| 9.5   | 8.5    | 11.5   | 20.0  | 16.9  | 18.9  | 10.7  | 17.8  | 16.8  |
| 7.7   | 8.0    | 6.2    | 21.6  | 16.4  | 15.3  | 9.9   | 12.5  | 8.1   |
| 135.6 | 90.9   | 40.2   | 42.3  | 31.5  | 32.1  | 40.4  | 28.9  | 33.7  |
| 16.3  | 19.1   | 18.9   | 12.0  | 11.0  | 9.4   | 7.6   | 8.8   | 8.0   |
| 147.0 | 201.6  | 171.3  | 63.5  | 46.0  | 55.9  | 47.5  | 59.6  | 55.0  |
| 262.9 | 267.1  | 168.2  | 27.0  | 31.6  | 40.8  | 22.1  | 30.7  | 32.1  |

|        |        |        |        |       |       |        |       |        |
|--------|--------|--------|--------|-------|-------|--------|-------|--------|
| 41.6   | 52.4   | 32.4   | 34.6   | 22.1  | 26.4  | 30.3   | 17.6  | 26.0   |
| 22.8   | 24.0   | 9.7    | 16.2   | 12.8  | 22.4  | 8.9    | 6.2   | 2.4    |
| 1.2    | 2.2    | 1.1    | 3.0    | 2.6   | 3.1   | 2.3    | 1.3   | 1.8    |
| 0.8    | 0.9    | 3.6    | 328.0  | 298.2 | 354.4 | 251.9  | 273.8 | 298.9  |
| 100.5  | 157.1  | 145.0  | 248.7  | 231.1 | 235.2 | 214.2  | 197.5 | 208.2  |
| 106.4  | 119.6  | 105.9  | 99.3   | 69.0  | 99.9  | 60.4   | 48.9  | 53.0   |
| 7.3    | 4.2    | 4.2    | 8.8    | 16.5  | 12.8  | 3.7    | 7.1   | 9.3    |
| 23.2   | 20.7   | 12.4   | 45.7   | 15.1  | 41.2  | 30.8   | 21.2  | 22.6   |
| 33.1   | 49.0   | 32.3   | 26.0   | 29.1  | 14.5  | 10.6   | 18.4  | 12.8   |
| 36.7   | 36.9   | 29.8   | 34.2   | 42.7  | 40.9  | 37.7   | 47.4  | 38.3   |
| 31.4   | 27.3   | 25.2   | 57.0   | 29.8  | 44.9  | 31.2   | 32.4  | 40.7   |
| 777.9  | 959.7  | 643.4  | 639.1  | 541.1 | 615.7 | 357.1  | 415.7 | 431.7  |
| 3.3    | 7.0    | 3.2    | 16.0   | 6.9   | 15.5  | 3.7    | 1.9   | 7.5    |
| 2472.1 | 2489.9 | 1241.6 | 1021.7 | 632.9 | 682.1 | 783.0  | 619.9 | 746.1  |
| 58.7   | 80.9   | 62.4   | 58.4   | 48.2  | 68.3  | 47.9   | 56.2  | 59.3   |
| 1.6    | 3.8    | 1.2    | 3.8    | 7.0   | 1.7   | 2.7    | 1.8   | 2.4    |
| 3246.2 | 2630.6 | 1261.6 | 1104.0 | 847.4 | 799.3 | 1170.0 | 899.5 | 1098.4 |
| 82.3   | 128.9  | 76.4   | 125.1  | 75.6  | 79.0  | 41.5   | 44.5  | 39.4   |
| 135.8  | 172.5  | 110.3  | 35.2   | 26.2  | 30.8  | 10.9   | 4.8   | 9.0    |
| 11.0   | 7.1    | 2.9    | 30.6   | 17.1  | 12.9  | 4.7    | 11.0  | 10.8   |
| 141.2  | 200.2  | 174.8  | 842.7  | 733.0 | 832.8 | 831.8  | 597.4 | 807.8  |
| 92.7   | 142.6  | 101.5  | 6.5    | 2.7   | 2.4   | 5.2    | 4.7   | 4.8    |
| 199.6  | 214.5  | 118.7  | 337.3  | 281.9 | 285.4 | 170.9  | 169.0 | 190.4  |
| 15.7   | 15.4   | 7.2    | 14.3   | 13.6  | 16.9  | 5.5    | 11.4  | 13.2   |
| 71.2   | 102.4  | 77.1   | 84.5   | 73.2  | 87.6  | 62.0   | 58.0  | 55.5   |
| 52.6   | 82.6   | 50.0   | 20.8   | 5.8   | 14.2  | 54.5   | 49.9  | 43.9   |
| 7.7    | 1.9    | 4.4    | 20.4   | 9.8   | 14.2  | 2.2    | 5.8   | 8.6    |
| 254.6  | 263.6  | 137.3  | 626.0  | 369.9 | 385.9 | 387.6  | 259.0 | 297.2  |
| 80.0   | 192.3  | 108.2  | 3.6    | 9.8   | 2.9   | 3.7    | 0.8   | 2.2    |
| 10.0   | 14.4   | 6.6    | 12.5   | 12.6  | 9.9   | 3.9    | 8.0   | 3.7    |
| 11.7   | 3.5    | 1.0    | 11.2   | 4.8   | 3.0   | 1.3    | 1.0   | 1.1    |
| 1.8    | 0.7    | 0.7    | 2.9    | 10.0  | 5.9   | 3.6    | 7.8   | 8.2    |
| 3.0    | 1.3    | 0.4    | 1.8    | 6.3   | 1.7   | 1.2    | 2.6   | 2.5    |
| 4.3    | 11.0   | 13.0   | 5.0    | 2.4   | 3.8   | 2.3    | 3.4   | 2.5    |
| 2.3    | 7.7    | 2.3    | 3.3    | 6.5   | 3.8   | 3.3    | 4.5   | 9.9    |
| 2261.0 | 2537.3 | 1615.0 | 709.9  | 510.1 | 491.2 | 441.9  | 314.7 | 421.3  |
| 725.8  | 980.1  | 562.9  | 514.1  | 410.8 | 456.7 | 400.2  | 304.3 | 392.3  |
| 36.0   | 72.4   | 65.7   | 32.7   | 28.6  | 30.0  | 21.3   | 27.4  | 26.3   |
| 19.4   | 4.7    | 16.8   | 6.8    | 20.5  | 24.9  | 4.4    | 2.7   | 4.1    |
| 175.4  | 130.3  | 96.6   | 27.9   | 24.5  | 24.5  | 12.8   | 16.3  | 19.5   |
| 63.6   | 65.8   | 27.3   | 27.3   | 26.8  | 26.6  | 30.7   | 25.2  | 26.6   |
| 17.2   | 26.7   | 25.0   | 26.8   | 16.6  | 19.7  | 11.1   | 16.4  | 21.3   |
| 125.6  | 191.2  | 225.7  | 35.1   | 39.9  | 46.6  | 26.7   | 44.0  | 36.2   |
| 138.5  | 166.4  | 164.7  | 3.0    | 4.1   | 1.9   | 1.0    | 2.0   | 1.2    |
| 2.8    | 6.1    | 2.3    | 27.3   | 20.0  | 24.6  | 1.6    | 1.8   | 5.0    |
| 3.6    | 3.0    | 1.1    | 12.0   | 7.6   | 4.3   | 3.0    | 0.9   | 3.7    |
| 11.5   | 17.3   | 14.9   | 23.3   | 25.2  | 34.8  | 17.6   | 23.2  | 23.4   |
| 57.1   | 97.8   | 90.7   | 32.4   | 24.8  | 23.3  | 16.8   | 18.3  | 8.7    |
| 323.9  | 398.5  | 355.9  | 13.4   | 11.8  | 27.7  | 17.0   | 14.0  | 16.3   |
| 14.1   | 21.0   | 18.2   | 28.8   | 19.1  | 21.0  | 14.0   | 15.4  | 13.2   |
| 1.5    | 3.1    | 0.8    | 3.2    | 2.2   | 7.2   | 4.1    | 1.7   | 1.2    |
| 24.8   | 44.8   | 56.8   | 22.3   | 20.2  | 4.2   | 9.9    | 13.0  | 4.4    |
| 5.8    | 10.6   | 5.4    | 2.0    | 7.1   | 5.6   | 4.2    | 3.0   | 1.2    |

|        |        |        |        |       |        |       |       |       |
|--------|--------|--------|--------|-------|--------|-------|-------|-------|
| 48.3   | 51.9   | 32.8   | 70.5   | 67.2  | 56.9   | 44.4  | 30.0  | 32.7  |
| 7.1    | 15.1   | 5.3    | 32.5   | 10.8  | 15.3   | 8.1   | 5.6   | 8.6   |
| 3995.3 | 4350.3 | 4075.0 | 61.9   | 58.0  | 67.1   | 46.3  | 60.2  | 53.4  |
| 1554.8 | 1666.8 | 968.7  | 826.0  | 571.7 | 614.7  | 661.0 | 476.5 | 617.2 |
| 84.6   | 86.0   | 56.8   | 93.5   | 76.7  | 89.4   | 64.1  | 43.4  | 61.9  |
| 193.4  | 233.0  | 264.7  | 54.6   | 45.0  | 44.2   | 24.7  | 23.4  | 31.3  |
| 148.2  | 175.1  | 118.5  | 74.6   | 52.7  | 77.7   | 213.9 | 183.0 | 205.2 |
| 44.2   | 56.2   | 42.8   | 131.8  | 106.2 | 128.6  | 108.1 | 103.6 | 92.4  |
| 3.8    | 2.6    | 1.5    | 15.0   | 6.1   | 5.6    | 3.0   | 1.3   | 4.0   |
| 9.6    | 5.8    | 7.3    | 9.7    | 11.0  | 11.0   | 3.6   | 3.7   | 2.1   |
| 2706.2 | 2883.8 | 1371.1 | 1117.1 | 581.8 | 636.4  | 579.4 | 345.2 | 443.7 |
| 55.0   | 102.4  | 50.7   | 148.3  | 115.8 | 174.4  | 104.2 | 103.3 | 114.0 |
| 23.1   | 31.8   | 23.4   | 6.7    | 5.0   | 7.6    | 5.6   | 2.9   | 3.1   |
| 12.6   | 26.6   | 16.0   | 23.0   | 15.0  | 13.1   | 16.4  | 12.5  | 9.3   |
| 35.2   | 36.0   | 25.5   | 91.4   | 72.3  | 69.9   | 52.2  | 45.6  | 49.6  |
| 6.7    | 7.4    | 11.3   | 31.0   | 24.9  | 40.4   | 17.1  | 22.9  | 18.8  |
| 435.3  | 543.8  | 267.0  | 147.1  | 126.5 | 118.4  | 138.5 | 126.2 | 198.7 |
| 30.9   | 57.0   | 23.3   | 103.0  | 75.0  | 89.7   | 53.0  | 47.8  | 60.6  |
| 22.3   | 55.4   | 63.1   | 57.2   | 66.1  | 75.5   | 67.1  | 133.1 | 106.3 |
| 14.6   | 7.3    | 8.9    | 18.8   | 22.4  | 22.7   | 9.4   | 13.9  | 11.2  |
| 0.7    | 2.8    | 0.5    | 6.8    | 13.1  | 8.2    | 3.0   | 1.9   | 5.0   |
| 290.5  | 375.9  | 302.7  | 250.3  | 215.0 | 247.6  | 366.1 | 394.3 | 357.6 |
| 152.5  | 110.6  | 60.1   | 34.1   | 37.4  | 30.4   | 36.2  | 36.0  | 42.4  |
| 72.5   | 26.6   | 8.1    | 16.4   | 15.2  | 20.4   | 23.5  | 13.9  | 17.8  |
| 559.2  | 519.7  | 392.6  | 1201.5 | 935.1 | 1097.2 | 819.0 | 729.5 | 797.7 |
| 32.7   | 49.8   | 32.1   | 82.8   | 66.8  | 71.0   | 46.7  | 45.9  | 58.1  |
| 24.1   | 21.7   | 17.4   | 17.2   | 20.9  | 30.7   | 11.5  | 21.7  | 17.3  |
| 8.8    | 10.0   | 9.4    | 13.5   | 14.5  | 22.1   | 3.3   | 10.4  | 5.3   |
| 3.1    | 1.6    | 1.4    | 5.5    | 4.4   | 3.2    | 3.5   | 1.2   | 1.8   |
| 7.7    | 14.3   | 6.7    | 17.3   | 10.5  | 5.1    | 8.8   | 7.1   | 14.0  |
| 4.0    | 3.7    | 3.6    | 326.1  | 273.2 | 279.8  | 170.6 | 181.2 | 206.8 |
| 12.3   | 24.1   | 7.5    | 14.5   | 15.7  | 15.8   | 10.4  | 16.5  | 6.6   |
| 27.5   | 26.5   | 17.0   | 30.7   | 29.4  | 31.0   | 8.6   | 19.1  | 20.4  |
| 219.1  | 212.5  | 207.7  | 10.9   | 12.7  | 22.8   | 20.4  | 16.5  | 13.6  |
| 8.1    | 7.8    | 6.7    | 10.3   | 10.7  | 14.0   | 5.2   | 3.7   | 6.2   |
| 22.1   | 24.3   | 29.2   | 13.8   | 16.5  | 4.2    | 7.0   | 3.3   | 4.1   |
| 21.6   | 30.5   | 43.1   | 72.4   | 88.4  | 71.8   | 40.7  | 53.5  | 53.1  |
| 29.8   | 23.4   | 15.0   | 16.6   | 15.3  | 16.4   | 11.8  | 6.0   | 11.9  |
| 6.8    | 7.7    | 10.5   | 9.3    | 8.2   | 7.9    | 2.1   | 5.0   | 3.5   |
| 18.4   | 28.2   | 22.3   | 27.7   | 33.8  | 24.8   | 22.0  | 22.1  | 22.6  |
| 50.5   | 49.7   | 43.9   | 69.0   | 33.8  | 52.6   | 56.2  | 40.6  | 37.8  |
| 75.8   | 66.6   | 45.8   | 18.9   | 14.2  | 18.1   | 9.9   | 4.2   | 8.6   |
| 8.5    | 9.3    | 3.6    | 18.9   | 14.2  | 13.9   | 6.5   | 3.9   | 8.2   |
| 0.5    | 4.2    | 0.3    | 8.2    | 3.2   | 2.6    | 0.2   | 0.5   | 0.3   |
| 37.0   | 59.3   | 51.2   | 5.4    | 4.9   | 4.0    | 3.7   | 3.3   | 11.8  |
| 33.0   | 33.0   | 11.9   | 106.5  | 72.4  | 92.3   | 57.2  | 53.1  | 68.9  |
| 554.8  | 898.9  | 850.3  | 415.8  | 318.3 | 366.5  | 269.7 | 322.7 | 341.8 |
| 86.4   | 136.4  | 102.9  | 97.5   | 74.6  | 106.7  | 55.2  | 67.4  | 73.8  |
| 0.9    | 3.0    | 3.4    | 21.4   | 5.9   | 8.0    | 7.5   | 5.7   | 1.7   |
| 147.6  | 194.9  | 169.4  | 127.0  | 105.8 | 129.2  | 164.0 | 185.0 | 211.5 |
| 0.7    | 1.9    | 0.7    | 22.0   | 17.7  | 26.1   | 11.8  | 24.2  | 23.4  |
| 1.4    | 0.8    | 2.4    | 4.0    | 3.9   | 3.4    | 5.1   | 0.7   | 0.4   |
| 12.4   | 16.0   | 10.4   | 18.8   | 12.6  | 18.0   | 10.6  | 11.8  | 8.5   |

|        |        |        |        |        |        |        |        |        |
|--------|--------|--------|--------|--------|--------|--------|--------|--------|
| 6.0    | 7.5    | 0.8    | 11.2   | 7.7    | 13.8   | 4.3    | 6.1    | 4.9    |
| 1.3    | 3.3    | 1.2    | 14.8   | 17.7   | 7.1    | 1.1    | 1.3    | 5.7    |
| 404.7  | 440.8  | 294.0  | 183.1  | 170.3  | 148.0  | 138.9  | 139.8  | 142.2  |
| 2.3    | 1.9    | 1.3    | 6.5    | 7.5    | 3.2    | 1.6    | 1.9    | 1.8    |
| 1.1    | 1.6    | 1.6    | 5.8    | 2.4    | 4.5    | 4.8    | 2.2    | 3.7    |
| 12.0   | 12.1   | 10.9   | 19.9   | 20.8   | 27.9   | 6.9    | 12.1   | 7.4    |
| 3.1    | 3.7    | 2.6    | 12.1   | 15.0   | 25.6   | 4.6    | 2.9    | 6.0    |
| 30.7   | 53.3   | 32.4   | 40.6   | 25.9   | 27.2   | 22.7   | 21.1   | 15.7   |
| 37.9   | 30.7   | 26.5   | 5.3    | 1.8    | 1.5    | 1.0    | 0.6    | 1.7    |
| 18.2   | 27.0   | 6.0    | 12.2   | 18.1   | 14.5   | 10.3   | 10.8   | 16.7   |
| 258.1  | 358.6  | 336.1  | 87.4   | 72.1   | 93.2   | 92.0   | 112.8  | 109.6  |
| 3.2    | 3.2    | 1.1    | 4.8    | 3.6    | 4.0    | 1.9    | 1.6    | 1.1    |
| 3.8    | 8.7    | 9.3    | 6.0    | 1.0    | 6.2    | 3.6    | 3.7    | 3.3    |
| 6362.2 | 6711.7 | 4560.8 | 2327.1 | 1996.8 | 2086.0 | 1998.9 | 1719.4 | 2017.1 |
| 9.1    | 6.1    | 1.4    | 15.1   | 11.4   | 18.9   | 8.9    | 1.1    | 5.6    |
| 28.8   | 26.4   | 21.5   | 49.8   | 38.1   | 28.8   | 22.4   | 15.7   | 13.5   |
| 16.3   | 17.9   | 6.5    | 30.2   | 18.9   | 17.7   | 10.9   | 6.6    | 8.4    |
| 2.4    | 3.0    | 4.4    | 4.1    | 9.8    | 8.5    | 8.2    | 2.1    | 5.9    |
| 10.4   | 8.3    | 4.8    | 12.5   | 10.6   | 12.9   | 5.8    | 0.8    | 4.9    |
| 2.7    | 4.9    | 0.8    | 40.1   | 18.3   | 43.6   | 37.0   | 19.8   | 44.4   |
| 5.5    | 1.7    | 2.1    | 92.4   | 66.0   | 61.0   | 97.2   | 67.4   | 84.2   |
| 3.7    | 9.7    | 10.4   | 68.2   | 30.1   | 41.1   | 57.1   | 32.2   | 43.9   |
| 6.2    | 2.8    | 3.0    | 31.9   | 23.2   | 37.7   | 17.1   | 22.2   | 22.0   |
| 20.1   | 11.2   | 4.5    | 17.3   | 15.2   | 9.1    | 4.6    | 10.3   | 11.6   |
| 32.0   | 27.6   | 27.8   | 42.1   | 27.5   | 31.1   | 34.9   | 31.3   | 36.4   |
| 12.5   | 12.6   | 2.7    | 28.0   | 20.8   | 20.2   | 8.1    | 16.7   | 13.8   |
| 9.8    | 14.0   | 11.4   | 9.7    | 17.4   | 18.5   | 14.3   | 16.0   | 13.1   |
| 1.2    | 3.5    | 7.5    | 6.0    | 3.0    | 4.0    | 1.2    | 0.7    | 1.1    |
| 218.2  | 180.9  | 74.9   | 99.9   | 57.7   | 71.2   | 109.0  | 61.8   | 69.5   |
| 1139.4 | 1304.4 | 963.0  | 1005.3 | 792.5  | 908.4  | 715.8  | 720.7  | 773.8  |
| 40.6   | 47.7   | 37.4   | 47.2   | 42.8   | 56.7   | 39.8   | 59.7   | 54.7   |
| 26.9   | 23.7   | 8.0    | 24.1   | 20.5   | 29.9   | 21.3   | 11.5   | 22.0   |
| 7.7    | 9.9    | 3.7    | 17.0   | 18.3   | 12.0   | 7.4    | 9.5    | 6.9    |
| 18.1   | 11.5   | 6.0    | 50.7   | 51.6   | 43.8   | 11.5   | 16.2   | 23.6   |
| 12.3   | 12.9   | 17.8   | 71.1   | 55.8   | 74.6   | 35.4   | 46.8   | 38.7   |
| 134.4  | 160.9  | 108.2  | 128.1  | 109.7  | 121.8  | 80.1   | 92.9   | 119.1  |
| 10.2   | 16.5   | 10.3   | 18.6   | 16.3   | 11.7   | 11.4   | 15.8   | 11.1   |
| 1.3    | 14.2   | 1.5    | 79.1   | 63.9   | 74.9   | 56.0   | 70.3   | 77.1   |
| 19.7   | 31.3   | 35.0   | 36.9   | 34.7   | 33.5   | 28.0   | 28.5   | 27.9   |
| 141.0  | 201.6  | 133.7  | 62.6   | 53.5   | 55.1   | 65.3   | 68.9   | 71.4   |
| 1.6    | 1.7    | 1.6    | 3.9    | 4.7    | 3.9    | 1.1    | 1.0    | 3.0    |
| 20.4   | 29.6   | 16.5   | 42.9   | 44.1   | 38.9   | 34.6   | 25.1   | 31.1   |
| 34.5   | 18.1   | 20.8   | 41.9   | 27.9   | 19.7   | 10.8   | 10.7   | 25.9   |
| 146.6  | 186.1  | 155.0  | 148.5  | 117.1  | 106.1  | 184.0  | 162.5  | 200.4  |
| 1.6    | 0.9    | 6.5    | 6.4    | 5.8    | 8.3    | 1.3    | 1.1    | 1.3    |
| 0.7    | 0.7    | 1.0    | 0.9    | 1.5    | 1.7    | 0.7    | 1.2    | 0.4    |
| 46.2   | 60.8   | 55.9   | 15.9   | 22.3   | 21.7   | 20.4   | 21.6   | 20.8   |
| 2.9    | 11.4   | 3.5    | 7.8    | 7.3    | 6.4    | 12.1   | 4.1    | 4.9    |
| 3.7    | 4.4    | 2.0    | 12.2   | 7.0    | 4.1    | 3.4    | 2.4    | 4.1    |
| 36.4   | 52.5   | 47.6   | 150.4  | 118.2  | 135.5  | 83.1   | 65.4   | 79.5   |
| 1.3    | 2.4    | 3.0    | 4.6    | 9.4    | 5.8    | 1.8    | 5.0    | 2.2    |
| 13.8   | 26.0   | 3.1    | 20.2   | 14.5   | 6.0    | 14.9   | 16.8   | 13.9   |
| 4.0    | 7.3    | 5.3    | 20.2   | 22.6   | 14.4   | 6.2    | 1.7    | 4.5    |

|        |        |        |       |       |       |       |       |       |
|--------|--------|--------|-------|-------|-------|-------|-------|-------|
| 2.2    | 1.8    | 2.8    | 43.0  | 25.4  | 33.6  | 51.3  | 29.9  | 46.9  |
| 9.3    | 14.5   | 7.8    | 257.5 | 202.1 | 222.5 | 204.7 | 137.3 | 194.3 |
| 2178.0 | 2887.7 | 3130.0 | 874.7 | 752.8 | 904.7 | 531.4 | 603.1 | 710.9 |
| 2.5    | 0.4    | 2.0    | 1.7   | 5.1   | 1.6   | 0.1   | 2.1   | 0.6   |
| 0.5    | 0.6    | 0.3    | 1.8   | 0.5   | 1.0   | 0.3   | 2.3   | 1.2   |
| 3.7    | 3.8    | 8.8    | 7.1   | 7.2   | 8.5   | 7.7   | 2.5   | 2.4   |
| 48.8   | 84.8   | 46.6   | 15.3  | 24.5  | 21.3  | 7.1   | 21.8  | 9.7   |
| 266.2  | 325.2  | 209.9  | 103.9 | 83.6  | 90.8  | 124.5 | 99.9  | 110.6 |
| 5.4    | 4.8    | 2.9    | 20.2  | 8.0   | 4.4   | 3.3   | 2.4   | 1.7   |
| 6.0    | 7.5    | 7.8    | 3.4   | 7.1   | 3.0   | 9.0   | 10.9  | 2.8   |
| 1.2    | 1.2    | 2.5    | 8.2   | 5.3   | 8.8   | 0.9   | 1.4   | 1.3   |
| 10.2   | 14.0   | 7.4    | 20.2  | 16.3  | 23.2  | 22.6  | 15.2  | 18.8  |
| 1.5    | 1.1    | 0.9    | 2.6   | 1.6   | 4.1   | 1.0   | 1.0   | 0.7   |
| 0.7    | 1.5    | 2.9    | 8.4   | 6.1   | 5.3   | 1.3   | 0.8   | 1.5   |
| 22.3   | 22.9   | 22.8   | 48.4  | 38.8  | 28.8  | 35.6  | 26.3  | 38.9  |
| 11.6   | 5.1    | 6.6    | 9.6   | 20.9  | 26.6  | 12.7  | 9.0   | 11.7  |
| 11.3   | 11.7   | 9.1    | 12.5  | 6.5   | 6.5   | 6.4   | 5.1   | 2.3   |
| 1.5    | 13.4   | 2.9    | 24.0  | 26.3  | 22.8  | 23.7  | 18.8  | 33.1  |
| 12.6   | 12.7   | 23.7   | 12.7  | 9.8   | 16.1  | 10.1  | 9.4   | 16.6  |
| 11.4   | 27.9   | 8.5    | 37.1  | 19.2  | 37.6  | 17.6  | 18.9  | 8.8   |
| 16.6   | 12.2   | 10.0   | 20.9  | 19.7  | 23.4  | 12.0  | 11.8  | 11.7  |
| 8.8    | 18.0   | 26.0   | 9.0   | 15.4  | 18.8  | 9.8   | 13.3  | 10.8  |
| 69.7   | 85.7   | 77.8   | 11.3  | 9.2   | 7.6   | 11.2  | 27.2  | 27.2  |
| 6.9    | 5.4    | 2.2    | 1.6   | 1.2   | 1.5   | 7.4   | 0.6   | 1.0   |
| 49.6   | 27.9   | 20.3   | 13.5  | 6.9   | 11.3  | 5.2   | 11.2  | 11.4  |
| 73.1   | 82.2   | 56.9   | 29.8  | 24.8  | 22.9  | 20.8  | 27.6  | 22.0  |
| 1.5    | 2.1    | 3.7    | 46.6  | 48.2  | 72.8  | 43.8  | 119.6 | 90.1  |
| 18.5   | 21.6   | 16.7   | 45.1  | 23.1  | 23.7  | 2.9   | 15.9  | 12.4  |
| 2.2    | 6.0    | 8.0    | 9.3   | 12.4  | 13.0  | 8.5   | 3.9   | 13.6  |
| 20.4   | 27.0   | 8.3    | 27.4  | 31.9  | 28.5  | 10.7  | 12.9  | 13.3  |
| 4.6    | 3.6    | 2.9    | 48.4  | 41.8  | 63.8  | 26.3  | 38.1  | 34.2  |
| 15.5   | 16.8   | 18.1   | 48.4  | 37.2  | 36.7  | 16.3  | 22.5  | 21.3  |
| 21.5   | 21.2   | 12.9   | 15.5  | 10.6  | 10.3  | 5.2   | 5.1   | 2.3   |
| 62.5   | 49.4   | 23.3   | 54.6  | 57.7  | 54.5  | 42.2  | 40.7  | 38.3  |
| 117.7  | 84.5   | 35.5   | 1.8   | 2.1   | 3.1   | 5.4   | 5.6   | 3.8   |
| 418.1  | 285.1  | 136.5  | 3.3   | 5.1   | 4.6   | 13.1  | 13.4  | 13.8  |
| 18.4   | 19.4   | 4.9    | 87.0  | 60.1  | 76.8  | 48.8  | 39.1  | 50.1  |
| 291.1  | 229.9  | 185.8  | 17.1  | 26.3  | 27.3  | 32.3  | 29.7  | 31.1  |
| 8.2    | 10.4   | 6.5    | 27.1  | 30.5  | 30.6  | 8.6   | 11.6  | 12.0  |
| 3.7    | 3.5    | 4.2    | 6.0   | 5.0   | 6.4   | 2.8   | 1.9   | 1.3   |
| 270.5  | 280.8  | 151.4  | 148.0 | 103.1 | 109.2 | 90.7  | 71.0  | 84.0  |
| 225.0  | 586.1  | 927.4  | 13.8  | 5.9   | 12.2  | 4.5   | 8.4   | 6.5   |
| 98.8   | 114.8  | 88.6   | 171.7 | 139.6 | 147.0 | 89.5  | 114.5 | 118.0 |
| 20.0   | 18.0   | 17.4   | 23.6  | 19.2  | 21.1  | 18.6  | 25.0  | 21.8  |
| 62.3   | 78.4   | 56.6   | 29.2  | 24.3  | 19.7  | 6.0   | 7.4   | 11.6  |
| 41.1   | 57.9   | 45.4   | 2.3   | 3.8   | 5.7   | 5.1   | 1.7   | 2.7   |
| 3.5    | 1.5    | 1.5    | 8.5   | 4.8   | 9.1   | 2.9   | 1.1   | 2.5   |
| 959.5  | 1022.1 | 515.2  | 300.2 | 256.8 | 278.8 | 230.7 | 273.3 | 312.1 |
| 4.5    | 8.8    | 3.9    | 11.5  | 15.1  | 19.1  | 16.2  | 3.9   | 4.8   |
| 294.8  | 305.8  | 145.7  | 60.6  | 38.2  | 20.2  | 41.3  | 21.4  | 33.1  |
| 17.0   | 25.2   | 11.5   | 29.4  | 25.7  | 22.3  | 10.5  | 19.8  | 21.1  |
| 23.8   | 15.8   | 23.2   | 33.3  | 41.1  | 57.3  | 32.3  | 32.5  | 35.4  |
| 2.5    | 9.9    | 3.4    | 4.9   | 11.6  | 2.6   | 2.2   | 4.9   | 2.7   |

|        |        |        |       |       |       |       |       |       |
|--------|--------|--------|-------|-------|-------|-------|-------|-------|
| 7.4    | 4.4    | 1.8    | 10.9  | 9.4   | 9.2   | 1.0   | 5.9   | 5.8   |
| 1.3    | 5.4    | 2.0    | 3.8   | 6.5   | 4.3   | 5.2   | 6.2   | 11.9  |
| 13.3   | 5.6    | 5.9    | 9.7   | 10.5  | 24.5  | 12.4  | 11.4  | 14.8  |
| 21.3   | 20.6   | 22.2   | 30.6  | 34.3  | 28.9  | 33.4  | 45.2  | 41.9  |
| 24.2   | 2.9    | 6.1    | 2.7   | 8.0   | 4.0   | 3.1   | 1.4   | 2.6   |
| 34.8   | 25.5   | 17.5   | 39.5  | 33.5  | 29.6  | 25.2  | 20.8  | 17.8  |
| 78.9   | 108.9  | 61.8   | 131.7 | 89.7  | 103.7 | 63.7  | 52.8  | 67.5  |
| 1.9    | 2.9    | 5.2    | 3.5   | 5.5   | 2.7   | 3.7   | 1.3   | 2.2   |
| 9.9    | 38.6   | 65.4   | 3.7   | 3.2   | 5.0   | 2.1   | 1.4   | 2.4   |
| 11.6   | 13.4   | 16.2   | 5.7   | 11.8  | 14.5  | 14.0  | 9.5   | 11.8  |
| 101.4  | 119.7  | 50.7   | 35.5  | 22.2  | 33.0  | 22.4  | 21.3  | 28.5  |
| 2.3    | 6.1    | 3.4    | 5.2   | 8.1   | 3.6   | 1.0   | 2.6   | 4.0   |
| 36.4   | 77.3   | 54.3   | 75.3  | 116.7 | 115.1 | 54.2  | 102.8 | 85.9  |
| 5.4    | 16.2   | 10.2   | 16.9  | 6.9   | 22.0  | 8.9   | 9.5   | 11.5  |
| 3.8    | 2.1    | 0.4    | 4.7   | 4.3   | 8.2   | 1.8   | 3.7   | 2.7   |
| 1.0    | 1.1    | 1.2    | 2.1   | 3.3   | 3.0   | 2.5   | 2.7   | 3.0   |
| 5.6    | 6.5    | 8.2    | 55.0  | 44.9  | 46.5  | 36.2  | 29.8  | 30.9  |
| 3.4    | 10.2   | 11.3   | 25.9  | 9.9   | 29.5  | 13.8  | 7.3   | 7.6   |
| 2.8    | 7.1    | 1.4    | 5.3   | 8.1   | 11.0  | 5.5   | 4.1   | 2.3   |
| 2.2    | 2.1    | 2.6    | 5.7   | 2.8   | 4.7   | 2.4   | 1.8   | 2.4   |
| 30.3   | 72.7   | 129.5  | 10.8  | 15.8  | 15.3  | 6.7   | 17.0  | 12.8  |
| 218.5  | 294.4  | 232.5  | 77.6  | 68.9  | 74.3  | 65.0  | 69.8  | 84.6  |
| 1.5    | 2.5    | 1.3    | 51.8  | 55.0  | 52.5  | 32.2  | 34.5  | 24.3  |
| 24.1   | 19.8   | 26.6   | 36.4  | 41.1  | 44.2  | 17.3  | 30.2  | 25.6  |
| 36.0   | 40.9   | 33.9   | 32.3  | 22.7  | 27.6  | 15.7  | 12.2  | 20.7  |
| 122.6  | 160.6  | 231.9  | 25.3  | 11.4  | 13.8  | 11.3  | 7.1   | 9.0   |
| 6.3    | 4.5    | 1.5    | 300.9 | 217.4 | 235.6 | 183.7 | 115.3 | 162.7 |
| 34.5   | 40.0   | 42.7   | 22.2  | 21.3  | 16.5  | 8.5   | 7.9   | 15.8  |
| 20.7   | 24.6   | 9.3    | 15.8  | 15.4  | 16.6  | 7.8   | 12.9  | 22.5  |
| 10.4   | 3.9    | 11.9   | 15.8  | 7.3   | 16.9  | 2.5   | 10.3  | 11.8  |
| 5.1    | 8.1    | 5.3    | 18.3  | 17.9  | 23.6  | 6.1   | 7.3   | 6.5   |
| 0.7    | 3.9    | 0.7    | 10.0  | 8.4   | 14.2  | 6.7   | 0.9   | 2.4   |
| 9.5    | 10.2   | 5.7    | 19.0  | 8.7   | 17.5  | 9.9   | 8.9   | 4.8   |
| 524.3  | 536.2  | 423.1  | 867.0 | 645.8 | 729.6 | 352.2 | 274.9 | 314.3 |
| 11.5   | 8.1    | 6.5    | 16.8  | 17.3  | 20.3  | 2.3   | 4.4   | 10.4  |
| 2392.5 | 2216.6 | 773.1  | 25.3  | 12.5  | 20.5  | 3.9   | 5.9   | 2.8   |
| 2.1    | 2.2    | 1.7    | 3.0   | 2.4   | 3.4   | 1.7   | 1.4   | 2.0   |
| 150.1  | 176.4  | 109.6  | 46.2  | 45.0  | 49.1  | 51.6  | 63.3  | 51.1  |
| 48.9   | 56.9   | 38.5   | 8.6   | 9.4   | 10.1  | 13.0  | 9.0   | 3.1   |
| 6.2    | 5.3    | 3.8    | 56.1  | 74.6  | 80.6  | 45.3  | 57.8  | 61.3  |
| 1.3    | 4.6    | 4.7    | 4.3   | 13.6  | 6.8   | 1.1   | 0.6   | 4.9   |
| 12.2   | 8.9    | 10.3   | 6.8   | 14.8  | 17.7  | 8.3   | 5.8   | 13.1  |
| 1.9    | 2.5    | 0.5    | 10.1  | 6.8   | 3.6   | 0.8   | 0.8   | 0.2   |
| 10.8   | 1.8    | 2.9    | 4.4   | 8.2   | 9.4   | 1.7   | 4.0   | 5.1   |
| 52.1   | 99.4   | 79.3   | 13.1  | 16.1  | 20.9  | 6.2   | 29.6  | 23.6  |
| 2.4    | 3.4    | 4.4    | 11.8  | 4.4   | 14.3  | 2.4   | 7.8   | 4.9   |
| 15.8   | 9.5    | 3.5    | 31.8  | 29.5  | 26.4  | 17.5  | 23.0  | 22.8  |
| 1.0    | 0.8    | 0.7    | 10.4  | 6.5   | 3.2   | 4.6   | 5.3   | 2.3   |
| 9.7    | 6.7    | 1.7    | 51.7  | 48.0  | 51.5  | 29.0  | 24.3  | 32.8  |
| 9.0    | 4.2    | 2.4    | 12.1  | 18.1  | 11.7  | 18.0  | 15.3  | 15.9  |
| 2.6    | 2.7    | 3.5    | 6.5   | 6.5   | 6.6   | 2.5   | 1.9   | 2.5   |
| 1157.0 | 1311.3 | 1002.7 | 632.5 | 497.9 | 521.9 | 784.9 | 804.6 | 771.0 |
| 427.7  | 605.3  | 319.3  | 246.9 | 201.8 | 228.0 | 271.0 | 246.5 | 194.2 |

|       |       |       |       |       |       |       |       |       |
|-------|-------|-------|-------|-------|-------|-------|-------|-------|
| 6.8   | 9.9   | 2.2   | 5.2   | 4.9   | 8.7   | 9.0   | 4.1   | 1.7   |
| 9.2   | 2.6   | 2.9   | 15.9  | 14.6  | 10.2  | 5.3   | 2.4   | 3.6   |
| 8.2   | 6.0   | 4.2   | 80.4  | 70.9  | 107.2 | 48.3  | 78.9  | 74.6  |
| 103.5 | 101.0 | 73.9  | 91.7  | 69.0  | 63.9  | 85.6  | 92.3  | 90.2  |
| 62.8  | 71.8  | 49.2  | 31.4  | 27.4  | 30.7  | 22.1  | 20.9  | 27.4  |
| 13.4  | 11.1  | 7.5   | 22.4  | 14.6  | 28.4  | 18.2  | 13.3  | 19.7  |
| 1.9   | 7.4   | 7.3   | 20.6  | 11.3  | 5.4   | 2.0   | 1.2   | 5.2   |
| 15.3  | 9.1   | 6.1   | 6.8   | 7.6   | 10.9  | 4.6   | 9.6   | 5.3   |
| 7.0   | 10.4  | 10.3  | 9.3   | 5.9   | 8.1   | 8.7   | 3.6   | 4.2   |
| 9.3   | 5.9   | 9.5   | 21.3  | 12.5  | 16.2  | 9.5   | 5.2   | 5.4   |
| 2.3   | 1.3   | 1.2   | 8.7   | 5.4   | 8.2   | 8.2   | 7.9   | 12.0  |
| 1.6   | 2.7   | 2.3   | 12.4  | 9.0   | 4.5   | 8.2   | 4.1   | 4.1   |
| 409.6 | 469.9 | 238.4 | 226.1 | 118.1 | 127.1 | 187.4 | 125.7 | 129.5 |
| 68.1  | 84.6  | 61.6  | 84.0  | 74.6  | 89.3  | 46.7  | 46.1  | 43.2  |
| 12.5  | 10.0  | 6.7   | 4.5   | 8.1   | 7.6   | 7.6   | 8.5   | 5.8   |
| 13.3  | 9.7   | 3.1   | 21.8  | 8.7   | 8.9   | 2.9   | 11.5  | 5.7   |
| 1.9   | 2.2   | 1.9   | 5.1   | 3.2   | 3.5   | 1.2   | 1.7   | 1.5   |
| 7.7   | 8.2   | 3.8   | 3.7   | 1.9   | 7.4   | 5.7   | 2.4   | 8.7   |
| 3.4   | 3.8   | 7.4   | 8.5   | 9.7   | 12.6  | 6.1   | 1.7   | 3.0   |
| 564.5 | 846.8 | 734.4 | 594.4 | 652.5 | 657.0 | 271.6 | 472.3 | 415.3 |
| 7.0   | 5.8   | 10.3  | 18.1  | 18.5  | 14.5  | 2.5   | 4.4   | 11.5  |
| 11.8  | 2.8   | 2.5   | 4.0   | 4.0   | 9.8   | 6.8   | 2.9   | 9.6   |
| 1.6   | 1.1   | 1.0   | 6.2   | 6.7   | 3.9   | 2.3   | 1.9   | 3.1   |
| 16.0  | 23.6  | 11.0  | 18.5  | 16.7  | 19.3  | 46.2  | 44.0  | 32.1  |
| 1.4   | 1.5   | 1.0   | 2.1   | 1.9   | 2.9   | 1.2   | 1.3   | 1.3   |
| 0.9   | 6.1   | 0.8   | 12.5  | 4.8   | 7.6   | 1.1   | 0.9   | 1.9   |
| 4.0   | 7.4   | 2.3   | 3.7   | 3.1   | 4.4   | 2.3   | 2.9   | 2.4   |
| 2.7   | 6.6   | 3.0   | 11.0  | 7.5   | 5.4   | 4.2   | 4.1   | 1.7   |
| 14.0  | 31.0  | 30.2  | 3.8   | 5.1   | 10.6  | 4.1   | 4.3   | 1.1   |
| 1.3   | 1.6   | 3.2   | 12.8  | 4.8   | 10.2  | 1.4   | 4.3   | 6.6   |
| 4.1   | 8.4   | 6.1   | 9.5   | 12.9  | 9.8   | 7.1   | 7.9   | 6.6   |
| 187.7 | 291.5 | 247.7 | 106.2 | 86.2  | 129.3 | 68.5  | 79.8  | 89.3  |
| 10.0  | 13.9  | 9.7   | 8.0   | 0.6   | 5.9   | 4.8   | 3.8   | 3.5   |
| 4.1   | 10.3  | 2.8   | 13.2  | 10.3  | 14.3  | 5.9   | 6.7   | 9.6   |
| 3.6   | 4.8   | 5.1   | 13.2  | 7.2   | 7.6   | 2.9   | 6.2   | 4.2   |
| 8.8   | 19.3  | 8.2   | 18.6  | 22.9  | 15.1  | 18.3  | 10.0  | 17.6  |
| 0.7   | 5.1   | 2.4   | 3.0   | 5.4   | 8.4   | 2.6   | 5.7   | 4.4   |
| 12.3  | 12.9  | 5.1   | 17.3  | 14.6  | 15.9  | 9.2   | 8.0   | 6.3   |
| 181.3 | 250.6 | 222.3 | 70.6  | 49.9  | 65.0  | 38.7  | 42.6  | 42.5  |
| 0.3   | 0.8   | 1.6   | 4.3   | 1.7   | 3.1   | 0.8   | 1.3   | 1.9   |
| 2.5   | 4.4   | 5.9   | 9.1   | 7.3   | 5.3   | 1.4   | 3.5   | 1.6   |
| 17.4  | 30.6  | 25.8  | 38.1  | 10.0  | 29.7  | 15.5  | 13.5  | 21.1  |
| 2.9   | 2.7   | 4.0   | 50.5  | 41.2  | 45.1  | 78.9  | 82.9  | 92.1  |
| 156.9 | 200.9 | 103.4 | 79.6  | 56.0  | 67.6  | 49.5  | 35.8  | 47.5  |
| 531.0 | 653.3 | 369.7 | 150.6 | 135.1 | 111.6 | 143.1 | 110.8 | 133.6 |
| 1.1   | 4.2   | 0.4   | 1.0   | 1.0   | 3.0   | 0.7   | 0.6   | 0.6   |
| 21.0  | 28.7  | 11.8  | 23.2  | 13.0  | 22.6  | 16.2  | 6.3   | 14.6  |
| 88.6  | 95.3  | 103.4 | 117.6 | 93.2  | 104.3 | 71.3  | 89.6  | 78.4  |
| 124.2 | 190.7 | 142.8 | 194.4 | 168.4 | 189.0 | 130.2 | 132.9 | 116.6 |
| 23.2  | 24.8  | 35.0  | 40.9  | 36.1  | 43.9  | 23.5  | 23.7  | 22.4  |
| 4.6   | 8.4   | 8.3   | 7.2   | 1.0   | 3.5   | 2.6   | 5.1   | 4.4   |
| 55.1  | 85.9  | 142.0 | 15.2  | 8.9   | 9.8   | 1.0   | 2.4   | 3.7   |
| 46.3  | 64.4  | 76.4  | 10.0  | 13.3  | 8.1   | 4.2   | 1.6   | 1.5   |

|       |       |       |        |        |        |        |        |        |
|-------|-------|-------|--------|--------|--------|--------|--------|--------|
| 50.6  | 59.3  | 54.8  | 68.8   | 45.5   | 57.0   | 44.6   | 35.2   | 45.1   |
| 15.1  | 2.9   | 9.9   | 17.0   | 17.6   | 15.2   | 2.6    | 4.0    | 2.4    |
| 10.1  | 3.4   | 1.4   | 9.3    | 9.3    | 7.3    | 1.3    | 3.4    | 1.2    |
| 19.4  | 37.1  | 18.6  | 50.0   | 48.0   | 53.1   | 15.5   | 24.6   | 26.4   |
| 20.8  | 24.4  | 5.2   | 12.2   | 23.9   | 35.1   | 19.7   | 20.2   | 9.1    |
| 11.5  | 11.1  | 8.0   | 9.6    | 6.1    | 11.9   | 5.1    | 5.1    | 4.6    |
| 2.2   | 24.0  | 53.6  | 12.7   | 3.4    | 3.3    | 1.7    | 13.1   | 4.6    |
| 906.3 | 832.0 | 504.0 | 246.9  | 155.0  | 175.3  | 161.3  | 115.1  | 107.9  |
| 2.5   | 7.0   | 5.9   | 10.2   | 1.4    | 8.7    | 8.4    | 8.6    | 4.8    |
| 2.8   | 5.2   | 6.2   | 10.0   | 6.4    | 10.8   | 3.0    | 2.0    | 1.8    |
| 10.6  | 5.5   | 2.2   | 15.2   | 17.1   | 29.6   | 15.3   | 15.4   | 11.0   |
| 10.2  | 13.8  | 9.3   | 14.9   | 9.8    | 14.1   | 3.4    | 6.6    | 3.1    |
| 2.8   | 1.6   | 1.7   | 2.8    | 2.8    | 2.2    | 1.6    | 2.0    | 1.5    |
| 2.3   | 4.6   | 1.0   | 6.2    | 1.0    | 8.1    | 0.6    | 1.8    | 0.6    |
| 30.3  | 19.4  | 9.0   | 4.6    | 11.2   | 5.2    | 9.8    | 3.1    | 4.1    |
| 6.9   | 3.8   | 3.8   | 20.7   | 10.5   | 16.2   | 6.3    | 6.2    | 9.2    |
| 0.9   | 0.6   | 0.6   | 3.0    | 0.9    | 2.3    | 0.7    | 0.7    | 0.5    |
| 18.6  | 39.5  | 40.0  | 103.5  | 85.7   | 93.9   | 63.5   | 69.4   | 60.1   |
| 4.6   | 18.5  | 5.4   | 8.6    | 9.4    | 9.3    | 6.8    | 9.4    | 8.2    |
| 1.6   | 1.4   | 1.7   | 1.7    | 7.1    | 1.9    | 0.9    | 0.6    | 1.2    |
| 1.0   | 15.9  | 7.7   | 22.0   | 20.6   | 29.0   | 10.5   | 6.2    | 11.9   |
| 3.1   | 4.9   | 5.2   | 718.4  | 524.8  | 603.1  | 998.2  | 782.5  | 845.2  |
| 29.4  | 46.0  | 32.6  | 48.6   | 33.3   | 26.7   | 4.7    | 6.3    | 10.0   |
| 0.9   | 0.8   | 0.5   | 2.4    | 1.4    | 1.7    | 0.8    | 0.5    | 0.8    |
| 6.0   | 3.6   | 3.3   | 8.1    | 11.8   | 8.6    | 6.6    | 4.3    | 6.3    |
| 4.5   | 2.5   | 2.6   | 5.8    | 8.5    | 8.8    | 7.4    | 1.2    | 2.9    |
| 349.6 | 390.9 | 221.5 | 282.0  | 226.4  | 243.7  | 274.3  | 239.3  | 272.5  |
| 1.3   | 1.8   | 1.0   | 3.2    | 4.6    | 4.5    | 1.2    | 1.2    | 1.4    |
| 119.9 | 225.6 | 240.8 | 1993.3 | 1657.1 | 1813.5 | 1447.9 | 1677.6 | 1644.3 |
| 20.8  | 20.3  | 11.4  | 8.0    | 14.4   | 6.8    | 9.6    | 1.8    | 7.1    |
| 29.2  | 45.9  | 75.9  | 12.9   | 4.9    | 7.1    | 3.1    | 3.6    | 2.8    |
| 16.8  | 17.8  | 8.4   | 19.1   | 14.1   | 16.8   | 2.7    | 6.2    | 13.1   |
| 2.0   | 1.3   | 0.8   | 4.4    | 3.3    | 10.0   | 1.1    | 1.7    | 2.5    |
| 4.4   | 12.0  | 5.2   | 15.5   | 13.0   | 28.6   | 20.9   | 17.8   | 23.1   |
| 27.4  | 49.6  | 40.6  | 5.3    | 8.6    | 5.8    | 8.5    | 2.0    | 1.5    |
| 54.8  | 134.2 | 114.1 | 32.7   | 22.9   | 22.6   | 21.0   | 27.3   | 32.5   |
| 2.3   | 1.4   | 2.0   | 3.4    | 2.2    | 2.5    | 1.1    | 1.1    | 1.2    |
| 3.3   | 6.4   | 7.1   | 4.3    | 3.5    | 4.9    | 1.5    | 3.6    | 5.5    |
| 67.6  | 76.4  | 14.6  | 11.3   | 4.3    | 3.2    | 1.8    | 2.3    | 2.0    |
| 17.6  | 19.6  | 9.4   | 20.9   | 19.8   | 5.1    | 22.8   | 14.5   | 10.7   |
| 11.0  | 18.3  | 4.1   | 104.6  | 91.3   | 100.9  | 55.0   | 64.5   | 70.3   |
| 7.4   | 9.3   | 5.8   | 16.8   | 17.1   | 17.9   | 17.5   | 16.6   | 16.3   |
| 4.9   | 3.2   | 2.7   | 3.6    | 3.0    | 3.3    | 1.7    | 2.0    | 2.0    |
| 12.1  | 24.8  | 8.0   | 2.7    | 8.5    | 6.0    | 4.9    | 4.1    | 2.9    |
| 20.9  | 15.0  | 10.6  | 108.8  | 98.5   | 118.3  | 83.9   | 84.7   | 87.6   |
| 2.4   | 3.4   | 2.6   | 6.1    | 4.2    | 6.3    | 3.4    | 2.4    | 2.4    |
| 12.9  | 6.3   | 5.9   | 18.5   | 21.6   | 7.8    | 15.0   | 6.4    | 10.9   |
| 734.2 | 750.1 | 710.2 | 7.9    | 3.9    | 5.1    | 11.2   | 10.5   | 8.3    |
| 100.2 | 128.0 | 99.9  | 163.3  | 131.3  | 182.6  | 134.5  | 137.0  | 154.7  |
| 1.8   | 2.3   | 1.9   | 5.3    | 3.7    | 4.2    | 3.0    | 2.0    | 2.3    |
| 10.3  | 8.8   | 14.1  | 15.7   | 6.0    | 3.5    | 6.7    | 8.9    | 5.9    |
| 3.9   | 4.9   | 0.7   | 8.9    | 9.8    | 8.3    | 9.4    | 5.3    | 7.0    |
| 69.9  | 78.2  | 51.7  | 44.2   | 34.8   | 28.4   | 21.2   | 26.2   | 32.0   |



|        |        |        |        |        |        |        |       |        |
|--------|--------|--------|--------|--------|--------|--------|-------|--------|
| 16.1   | 14.8   | 15.6   | 11.5   | 8.3    | 8.7    | 3.3    | 3.9   | 4.3    |
| 23.0   | 18.0   | 18.5   | 28.3   | 20.4   | 29.7   | 20.5   | 17.3  | 22.8   |
| 40.7   | 55.4   | 43.9   | 13.8   | 17.6   | 12.5   | 26.4   | 21.5  | 17.8   |
| 8.0    | 4.1    | 5.0    | 7.9    | 4.3    | 7.2    | 3.1    | 2.1   | 4.1    |
| 447.9  | 472.7  | 465.4  | 841.5  | 552.5  | 577.3  | 548.8  | 511.5 | 505.3  |
| 1.4    | 1.4    | 4.3    | 12.6   | 6.9    | 2.9    | 2.5    | 0.6   | 3.3    |
| 24.4   | 29.0   | 17.7   | 53.5   | 40.4   | 45.4   | 17.8   | 15.6  | 18.3   |
| 29.4   | 29.7   | 34.3   | 30.7   | 32.6   | 39.0   | 18.3   | 18.2  | 20.6   |
| 2.9    | 3.0    | 0.8    | 3.2    | 4.4    | 4.5    | 1.9    | 3.3   | 3.5    |
| 58.7   | 106.8  | 105.5  | 81.4   | 55.7   | 80.5   | 55.7   | 54.9  | 56.6   |
| 2.8    | 8.3    | 3.6    | 9.5    | 7.2    | 9.1    | 9.4    | 4.3   | 6.7    |
| 3.0    | 4.5    | 1.8    | 3.5    | 4.3    | 7.6    | 1.7    | 1.4   | 2.6    |
| 5.7    | 7.3    | 0.6    | 1.5    | 5.3    | 3.9    | 5.9    | 1.5   | 1.0    |
| 11.8   | 9.4    | 3.8    | 5.9    | 9.1    | 14.5   | 1.5    | 4.4   | 1.8    |
| 7.1    | 6.7    | 2.3    | 18.9   | 17.9   | 20.2   | 12.0   | 50.0  | 38.5   |
| 6.7    | 14.2   | 9.5    | 30.8   | 24.9   | 20.5   | 6.7    | 9.2   | 1.4    |
| 4.7    | 1.5    | 6.6    | 7.4    | 11.1   | 9.0    | 9.4    | 7.6   | 3.5    |
| 10.0   | 9.5    | 5.3    | 8.5    | 9.6    | 11.2   | 3.2    | 5.4   | 10.9   |
| 0.9    | 1.2    | 1.1    | 1.3    | 1.3    | 2.4    | 0.9    | 0.8   | 0.8    |
| 143.4  | 130.7  | 104.9  | 41.5   | 45.3   | 51.1   | 35.4   | 21.8  | 26.4   |
| 8.8    | 12.2   | 8.0    | 14.2   | 7.7    | 7.0    | 3.5    | 2.7   | 2.6    |
| 442.6  | 486.4  | 394.7  | 294.2  | 264.0  | 304.5  | 211.6  | 205.1 | 224.8  |
| 46.8   | 42.3   | 8.6    | 13.5   | 6.0    | 12.0   | 5.2    | 3.6   | 3.9    |
| 8.3    | 2.2    | 4.5    | 7.3    | 9.5    | 4.3    | 4.3    | 0.7   | 4.7    |
| 4.7    | 7.3    | 4.8    | 8.9    | 6.9    | 4.5    | 4.3    | 3.3   | 1.7    |
| 15.3   | 10.2   | 17.3   | 8.5    | 8.8    | 19.0   | 9.6    | 9.3   | 9.7    |
| 10.6   | 14.8   | 4.2    | 21.1   | 14.5   | 28.5   | 7.6    | 5.7   | 20.2   |
| 2.7    | 7.1    | 7.8    | 42.8   | 13.2   | 19.0   | 6.6    | 13.3  | 4.5    |
| 236.1  | 310.5  | 209.6  | 154.2  | 143.2  | 147.7  | 61.4   | 82.0  | 76.4   |
| 2.5    | 6.2    | 3.0    | 7.1    | 5.7    | 11.3   | 1.2    | 2.2   | 5.7    |
| 5.7    | 13.3   | 9.9    | 206.5  | 173.1  | 201.3  | 91.1   | 100.1 | 111.7  |
| 1265.7 | 1664.8 | 1386.4 | 678.7  | 539.9  | 573.4  | 232.5  | 265.7 | 264.7  |
| 1.0    | 0.9    | 1.2    | 10.6   | 5.5    | 4.8    | 2.2    | 4.1   | 5.0    |
| 1.1    | 0.7    | 0.8    | 8.5    | 2.7    | 2.5    | 2.5    | 0.6   | 3.5    |
| 3.5    | 1.9    | 3.5    | 8.0    | 6.0    | 7.8    | 2.1    | 2.2   | 1.9    |
| 1626.3 | 1586.6 | 981.6  | 2000.3 | 1592.3 | 1854.2 | 1214.9 | 895.6 | 1192.3 |
| 9.4    | 7.3    | 7.9    | 8.3    | 8.5    | 5.0    | 4.0    | 7.0   | 3.2    |
| 1.0    | 7.3    | 6.0    | 4.9    | 6.5    | 7.5    | 2.0    | 1.3   | 0.7    |
| 10.5   | 15.6   | 5.6    | 21.0   | 16.3   | 20.5   | 11.1   | 5.6   | 6.8    |
| 4.9    | 9.1    | 2.5    | 7.0    | 13.6   | 21.7   | 14.1   | 5.6   | 5.4    |
| 2.6    | 7.2    | 4.2    | 5.6    | 5.4    | 10.7   | 1.0    | 1.2   | 1.4    |
| 520.0  | 643.8  | 314.2  | 126.7  | 99.0   | 92.5   | 163.5  | 190.2 | 174.4  |
| 373.9  | 485.0  | 351.8  | 1027.7 | 954.3  | 1139.0 | 373.2  | 454.8 | 485.0  |
| 124.9  | 222.0  | 234.6  | 76.8   | 56.9   | 84.7   | 58.7   | 50.6  | 46.1   |
| 7.2    | 6.7    | 3.3    | 12.1   | 5.6    | 11.3   | 5.2    | 2.8   | 6.5    |
| 14.0   | 20.2   | 9.9    | 65.6   | 62.6   | 56.6   | 14.4   | 17.2  | 23.1   |
| 2.1    | 3.2    | 0.6    | 8.5    | 13.7   | 15.8   | 5.9    | 0.8   | 4.4    |
| 3.2    | 40.4   | 81.9   | 10.4   | 15.5   | 21.9   | 8.7    | 8.0   | 12.9   |
| 1.8    | 5.7    | 5.9    | 4.4    | 11.5   | 10.6   | 3.4    | 8.8   | 5.0    |
| 10.0   | 8.4    | 15.3   | 15.8   | 27.7   | 20.8   | 13.4   | 7.6   | 11.3   |
| 3.1    | 9.6    | 6.8    | 10.0   | 14.9   | 15.3   | 5.9    | 6.1   | 7.6    |
| 703.9  | 1304.5 | 1366.1 | 685.4  | 427.4  | 486.7  | 280.0  | 246.9 | 231.7  |
| 10.0   | 14.6   | 7.1    | 18.4   | 19.9   | 11.1   | 2.9    | 9.9   | 15.2   |

|       |       |       |        |        |        |        |        |        |
|-------|-------|-------|--------|--------|--------|--------|--------|--------|
| 2.1   | 4.9   | 8.4   | 2116.7 | 2044.3 | 2288.4 | 1413.7 | 1336.4 | 1528.8 |
| 8.9   | 4.0   | 4.1   | 3.2    | 5.5    | 6.1    | 1.2    | 4.9    | 2.3    |
| 4.4   | 2.4   | 6.2   | 8.3    | 8.3    | 8.0    | 6.7    | 4.0    | 2.3    |
| 14.7  | 6.1   | 4.2   | 12.0   | 8.2    | 12.6   | 1.3    | 4.2    | 9.0    |
| 67.3  | 69.6  | 51.9  | 56.0   | 48.2   | 49.0   | 39.3   | 36.5   | 42.0   |
| 398.9 | 494.1 | 317.5 | 286.9  | 224.4  | 265.3  | 226.1  | 207.9  | 244.6  |
| 376.4 | 416.1 | 442.0 | 103.7  | 86.4   | 95.1   | 64.3   | 85.9   | 79.1   |
| 4.4   | 1.5   | 2.4   | 2.9    | 3.1    | 2.6    | 1.3    | 0.7    | 0.8    |
| 2.5   | 5.9   | 10.8  | 15.2   | 10.6   | 15.3   | 7.7    | 3.9    | 7.2    |
| 329.7 | 340.7 | 292.8 | 207.5  | 171.4  | 175.8  | 191.5  | 177.4  | 211.6  |
| 147.5 | 152.9 | 134.7 | 73.8   | 47.7   | 88.6   | 111.3  | 102.1  | 99.2   |
| 62.1  | 63.5  | 30.7  | 27.5   | 21.5   | 29.9   | 25.0   | 26.3   | 16.4   |
| 1.4   | 2.5   | 5.3   | 3.1    | 2.3    | 2.7    | 2.5    | 2.4    | 3.2    |
| 0.7   | 1.6   | 0.6   | 7.6    | 1.8    | 4.5    | 0.8    | 1.6    | 1.1    |
| 33.5  | 40.6  | 30.7  | 15.9   | 7.6    | 12.3   | 20.5   | 28.5   | 18.4   |
| 5.0   | 11.8  | 9.3   | 15.5   | 16.6   | 19.0   | 10.7   | 11.6   | 8.2    |
| 5.9   | 1.6   | 1.5   | 8.5    | 10.0   | 10.2   | 0.6    | 1.8    | 0.7    |
| 1.9   | 2.1   | 3.0   | 4.6    | 5.8    | 10.4   | 0.7    | 5.6    | 1.8    |
| 0.9   | 4.4   | 2.8   | 4.1    | 5.5    | 5.7    | 0.8    | 0.7    | 0.8    |
| 419.7 | 612.4 | 333.7 | 199.1  | 142.4  | 149.1  | 150.2  | 143.2  | 157.1  |
| 31.8  | 57.1  | 62.8  | 21.0   | 17.3   | 26.4   | 23.3   | 20.9   | 19.8   |
| 15.0  | 11.7  | 8.8   | 17.9   | 11.0   | 6.0    | 14.0   | 3.1    | 6.1    |
| 47.6  | 47.6  | 23.7  | 38.0   | 31.0   | 49.8   | 22.0   | 5.3    | 16.5   |
| 12.5  | 16.6  | 7.3   | 3.8    | 2.9    | 3.1    | 4.1    | 6.8    | 2.7    |
| 9.0   | 11.3  | 13.1  | 35.1   | 26.0   | 6.2    | 5.3    | 12.0   | 17.0   |
| 2.4   | 7.7   | 0.8   | 5.3    | 5.7    | 9.6    | 7.7    | 5.1    | 8.0    |
| 15.4  | 15.6  | 7.9   | 10.2   | 4.1    | 3.9    | 1.7    | 5.0    | 0.8    |
| 15.2  | 16.8  | 6.6   | 9.1    | 5.0    | 6.8    | 2.9    | 6.8    | 1.9    |
| 621.2 | 918.3 | 766.2 | 539.9  | 474.7  | 599.0  | 441.4  | 495.9  | 522.1  |
| 24.3  | 28.8  | 19.5  | 22.3   | 23.4   | 21.1   | 15.5   | 14.6   | 18.1   |
| 10.2  | 10.4  | 12.8  | 30.4   | 23.1   | 23.4   | 30.7   | 24.5   | 16.4   |
| 1.2   | 3.5   | 2.0   | 8.8    | 7.2    | 6.6    | 0.9    | 0.5    | 1.4    |
| 117.8 | 133.8 | 125.6 | 123.3  | 95.6   | 117.4  | 91.2   | 100.1  | 104.7  |
| 4.3   | 5.7   | 1.5   | 3.6    | 4.4    | 6.7    | 4.5    | 4.6    | 0.9    |
| 31.3  | 42.1  | 29.5  | 49.4   | 36.5   | 36.3   | 59.4   | 48.2   | 56.4   |
| 10.9  | 13.2  | 9.1   | 39.7   | 11.7   | 18.0   | 8.2    | 13.9   | 14.6   |
| 634.3 | 685.8 | 305.6 | 592.7  | 405.6  | 494.4  | 331.1  | 283.3  | 367.2  |
| 94.7  | 96.0  | 67.4  | 8.2    | 8.8    | 15.3   | 48.8   | 34.2   | 39.8   |
| 32.2  | 41.3  | 13.7  | 28.8   | 12.9   | 10.3   | 26.1   | 20.0   | 4.7    |
| 0.9   | 5.0   | 3.5   | 28.7   | 11.1   | 22.0   | 15.2   | 13.1   | 21.3   |
| 93.2  | 158.6 | 121.8 | 7.1    | 2.6    | 7.4    | 3.3    | 2.5    | 4.4    |
| 86.4  | 64.5  | 36.0  | 10.5   | 10.3   | 11.4   | 4.1    | 3.1    | 6.8    |
| 19.2  | 74.9  | 65.5  | 3.1    | 4.4    | 4.2    | 1.3    | 0.5    | 0.9    |
| 33.5  | 37.6  | 31.9  | 52.2   | 60.7   | 68.5   | 29.0   | 41.0   | 35.6   |
| 78.5  | 138.2 | 106.4 | 113.2  | 77.7   | 86.2   | 87.2   | 69.6   | 86.0   |
| 19.9  | 40.0  | 41.5  | 25.5   | 18.0   | 20.1   | 5.0    | 14.2   | 11.5   |
| 14.7  | 17.9  | 10.0  | 259.8  | 257.8  | 264.5  | 186.8  | 386.8  | 357.2  |
| 30.7  | 16.3  | 13.4  | 82.0   | 54.5   | 64.7   | 33.4   | 29.0   | 36.5   |
| 10.5  | 5.2   | 5.4   | 26.4   | 17.8   | 13.6   | 15.6   | 18.2   | 14.3   |
| 2.2   | 8.7   | 1.6   | 11.7   | 8.2    | 7.6    | 15.5   | 7.8    | 15.8   |
| 5.5   | 12.9  | 6.0   | 20.5   | 22.6   | 28.8   | 5.9    | 6.9    | 7.8    |
| 98.4  | 120.7 | 102.2 | 9.4    | 3.2    | 5.9    | 1.7    | 2.5    | 9.0    |
| 232.1 | 209.5 | 271.6 | 4.2    | 8.3    | 15.6   | 9.0    | 8.8    | 6.5    |

|         |         |         |         |         |         |        |        |        |
|---------|---------|---------|---------|---------|---------|--------|--------|--------|
| 15.5    | 25.1    | 28.6    | 7.2     | 2.8     | 7.0     | 3.6    | 3.7    | 1.7    |
| 3.3     | 8.1     | 3.4     | 4.6     | 2.9     | 2.1     | 1.8    | 1.9    | 5.2    |
| 4.5     | 1.6     | 0.6     | 20.1    | 7.0     | 14.9    | 3.9    | 13.5   | 4.5    |
| 1.9     | 1.6     | 2.0     | 5.2     | 15.6    | 2.7     | 1.0    | 1.4    | 1.6    |
| 38.1    | 21.4    | 24.6    | 15.0    | 25.0    | 18.2    | 18.3   | 17.9   | 17.5   |
| 27.8    | 25.9    | 23.1    | 26.0    | 21.3    | 27.7    | 15.7   | 11.5   | 14.9   |
| 0.8     | 2.4     | 0.7     | 6.0     | 5.5     | 1.8     | 1.8    | 1.8    | 1.4    |
| 1.8     | 11.8    | 3.1     | 4.5     | 2.9     | 4.4     | 2.8    | 2.4    | 10.1   |
| 24.3    | 20.5    | 21.5    | 32.7    | 31.8    | 32.6    | 35.4   | 31.2   | 22.5   |
| 6.3     | 11.1    | 5.3     | 18.3    | 18.5    | 19.5    | 11.8   | 8.0    | 7.0    |
| 622.6   | 511.0   | 181.7   | 79.5    | 26.6    | 20.5    | 23.1   | 1.8    | 10.6   |
| 36.6    | 43.3    | 32.3    | 93.5    | 82.2    | 100.5   | 55.9   | 56.3   | 67.5   |
| 2.5     | 5.5     | 3.7     | 6.7     | 2.6     | 9.6     | 3.0    | 2.4    | 0.8    |
| 15.1    | 14.1    | 14.3    | 12.7    | 1.0     | 6.7     | 2.9    | 4.3    | 4.0    |
| 61.9    | 57.6    | 41.2    | 44.2    | 27.4    | 43.1    | 24.0   | 22.6   | 27.1   |
| 7.9     | 5.4     | 4.8     | 12.5    | 9.8     | 12.6    | 15.6   | 5.4    | 16.8   |
| 18.0    | 16.4    | 7.4     | 12.2    | 20.6    | 7.3     | 10.0   | 11.2   | 12.9   |
| 234.9   | 204.2   | 80.2    | 56.0    | 34.6    | 49.1    | 25.0   | 14.5   | 16.3   |
| 6.5     | 10.7    | 9.6     | 15.0    | 15.6    | 42.0    | 15.7   | 8.2    | 13.8   |
| 7.4     | 34.0    | 174.2   | 1.9     | 1.4     | 0.8     | 0.8    | 1.0    | 1.7    |
| 103.5   | 140.9   | 78.9    | 18.9    | 19.3    | 25.4    | 19.7   | 18.3   | 26.7   |
| 49.5    | 45.0    | 32.0    | 26.5    | 20.3    | 15.3    | 18.4   | 19.1   | 20.9   |
| 1.6     | 6.4     | 1.5     | 13.5    | 3.1     | 12.4    | 5.1    | 1.5    | 7.8    |
| 147.8   | 246.1   | 165.4   | 19.9    | 26.6    | 21.3    | 6.8    | 8.1    | 8.1    |
| 44.2    | 60.5    | 52.3    | 39.8    | 28.5    | 22.1    | 14.5   | 21.5   | 16.3   |
| 1.7     | 6.9     | 1.4     | 6.9     | 8.6     | 7.8     | 2.4    | 4.7    | 3.9    |
| 360.5   | 590.3   | 542.2   | 121.9   | 88.3    | 92.7    | 93.6   | 120.7  | 114.1  |
| 15.9    | 11.7    | 7.8     | 18.7    | 9.7     | 8.5     | 10.2   | 8.0    | 3.6    |
| 177.7   | 288.6   | 233.8   | 54.4    | 44.8    | 59.6    | 42.7   | 56.5   | 54.1   |
| 5.5     | 6.8     | 2.3     | 6.4     | 8.8     | 10.4    | 8.9    | 6.1    | 4.4    |
| 4.2     | 7.5     | 10.8    | 46.3    | 41.6    | 38.6    | 52.1   | 50.4   | 49.2   |
| 8.2     | 6.8     | 7.3     | 6.8     | 7.9     | 21.1    | 11.9   | 11.3   | 5.0    |
| 6.5     | 2.9     | 2.5     | 4.1     | 0.9     | 5.7     | 2.6    | 0.8    | 3.6    |
| 11.5    | 9.2     | 11.7    | 14.1    | 15.5    | 12.1    | 5.9    | 11.6   | 5.5    |
| 583.8   | 576.8   | 323.8   | 285.2   | 162.8   | 203.0   | 159.1  | 121.2  | 129.8  |
| 81.2    | 136.2   | 112.2   | 55.7    | 55.0    | 54.6    | 62.7   | 84.6   | 71.0   |
| 1.8     | 4.9     | 2.5     | 11.6    | 5.9     | 9.8     | 2.5    | 1.5    | 1.5    |
| 21.9    | 19.3    | 11.1    | 14.0    | 17.5    | 19.6    | 7.3    | 5.1    | 5.3    |
| 81.7    | 108.3   | 53.6    | 115.2   | 96.6    | 107.9   | 90.4   | 76.8   | 87.8   |
| 271.5   | 337.9   | 233.8   | 578.6   | 484.6   | 442.1   | 305.0  | 359.7  | 346.6  |
| 3.0     | 13.6    | 8.0     | 21.9    | 22.7    | 27.4    | 17.2   | 27.3   | 25.7   |
| 29.1    | 36.3    | 27.4    | 38.5    | 37.7    | 36.7    | 16.2   | 26.7   | 22.7   |
| 47.1    | 70.9    | 68.1    | 217.5   | 181.8   | 182.2   | 102.8  | 111.5  | 131.2  |
| 11384.2 | 10914.6 | 10992.0 | 11075.2 | 10405.1 | 11286.1 | 7428.7 | 7870.8 | 8575.9 |
| 17.8    | 15.9    | 9.5     | 20.0    | 9.5     | 6.2     | 18.5   | 12.0   | 12.1   |
| 295.5   | 253.4   | 85.8    | 56.4    | 25.1    | 26.9    | 98.2   | 41.3   | 54.2   |
| 1270.5  | 1582.4  | 1392.0  | 849.1   | 724.1   | 824.4   | 1043.3 | 946.6  | 1098.5 |
| 21.0    | 25.8    | 16.5    | 19.7    | 16.9    | 16.9    | 9.5    | 10.7   | 12.8   |
| 31.7    | 28.2    | 29.3    | 29.9    | 24.4    | 20.5    | 16.3   | 23.2   | 20.8   |
| 83.3    | 116.3   | 105.6   | 132.1   | 103.4   | 117.1   | 61.9   | 83.5   | 71.2   |
| 98.4    | 134.1   | 56.2    | 11.6    | 10.7    | 13.3    | 26.5   | 13.8   | 26.2   |
| 112.2   | 150.9   | 115.0   | 196.4   | 151.3   | 172.3   | 83.7   | 97.5   | 92.5   |
| 8.0     | 15.6    | 15.2    | 22.7    | 31.9    | 34.3    | 5.0    | 9.0    | 13.7   |

|        |        |        |        |        |        |        |        |        |
|--------|--------|--------|--------|--------|--------|--------|--------|--------|
| 19.2   | 18.2   | 4.9    | 7.7    | 8.6    | 8.5    | 2.1    | 7.7    | 1.6    |
| 15.6   | 8.3    | 12.0   | 12.7   | 20.5   | 31.7   | 9.8    | 13.8   | 15.7   |
| 441.2  | 389.3  | 254.3  | 238.8  | 169.2  | 189.3  | 127.8  | 123.0  | 141.3  |
| 27.8   | 31.7   | 26.6   | 134.0  | 108.8  | 112.9  | 117.6  | 87.1   | 106.0  |
| 11.4   | 10.2   | 9.7    | 25.6   | 31.0   | 32.1   | 16.0   | 16.8   | 16.9   |
| 38.4   | 53.9   | 36.1   | 74.8   | 85.2   | 104.2  | 70.5   | 99.6   | 118.4  |
| 6.6    | 3.8    | 5.4    | 5.3    | 3.8    | 3.8    | 2.5    | 5.9    | 2.7    |
| 124.7  | 119.5  | 64.8   | 41.3   | 28.6   | 32.4   | 15.5   | 21.4   | 13.3   |
| 5.3    | 0.8    | 2.8    | 7.4    | 4.1    | 7.3    | 1.2    | 4.1    | 4.7    |
| 7.7    | 10.6   | 7.4    | 20.6   | 10.1   | 19.8   | 5.0    | 3.2    | 2.9    |
| 21.4   | 23.0   | 17.1   | 17.2   | 12.5   | 13.1   | 18.3   | 13.4   | 13.8   |
| 21.9   | 19.3   | 18.2   | 32.6   | 31.1   | 25.6   | 21.3   | 21.2   | 23.9   |
| 4.9    | 5.3    | 1.1    | 7.6    | 6.4    | 12.0   | 6.0    | 8.8    | 10.4   |
| 325.0  | 563.6  | 562.7  | 152.2  | 123.3  | 164.7  | 225.0  | 182.4  | 217.9  |
| 59.3   | 70.0   | 64.9   | 36.7   | 27.6   | 47.0   | 30.6   | 27.3   | 28.8   |
| 25.6   | 27.9   | 37.1   | 13.4   | 3.1    | 6.2    | 3.8    | 1.8    | 3.2    |
| 5.5    | 14.8   | 5.9    | 21.9   | 10.6   | 15.7   | 9.0    | 8.6    | 5.0    |
| 28.7   | 40.1   | 20.5   | 55.3   | 37.3   | 56.8   | 23.4   | 25.7   | 26.1   |
| 55.5   | 77.6   | 74.6   | 112.5  | 110.6  | 118.6  | 95.9   | 135.4  | 112.7  |
| 2.3    | 8.0    | 4.4    | 15.6   | 6.9    | 15.2   | 4.7    | 4.8    | 1.4    |
| 17.6   | 18.4   | 16.3   | 8.9    | 3.2    | 3.2    | 2.8    | 1.8    | 1.5    |
| 53.8   | 69.4   | 33.2   | 50.5   | 27.2   | 29.1   | 37.6   | 19.5   | 24.4   |
| 18.4   | 28.7   | 30.8   | 4.3    | 3.7    | 1.9    | 9.0    | 7.6    | 9.3    |
| 757.7  | 899.8  | 687.0  | 1096.7 | 785.9  | 927.2  | 667.1  | 585.8  | 642.6  |
| 194.5  | 209.7  | 116.4  | 245.2  | 203.4  | 244.0  | 128.2  | 127.7  | 140.2  |
| 42.6   | 42.4   | 17.3   | 26.6   | 21.4   | 12.6   | 21.3   | 17.7   | 11.7   |
| 16.4   | 23.6   | 14.8   | 5.8    | 8.1    | 6.0    | 14.0   | 8.2    | 11.5   |
| 5.5    | 8.4    | 9.9    | 11.8   | 9.9    | 22.3   | 25.6   | 10.9   | 6.9    |
| 8.7    | 15.8   | 14.8   | 28.6   | 18.3   | 24.6   | 9.4    | 12.1   | 15.2   |
| 1.7    | 6.3    | 1.3    | 2.8    | 2.3    | 5.3    | 0.9    | 0.7    | 1.3    |
| 220.3  | 220.6  | 161.2  | 54.1   | 44.1   | 54.0   | 50.9   | 70.9   | 61.5   |
| 409.4  | 346.6  | 256.1  | 238.1  | 232.8  | 263.2  | 132.5  | 195.1  | 186.2  |
| 5.7    | 3.3    | 8.3    | 12.9   | 3.5    | 5.2    | 5.8    | 2.4    | 6.3    |
| 5.0    | 6.0    | 3.4    | 6.6    | 6.1    | 1.9    | 0.7    | 4.1    | 5.2    |
| 3.6    | 5.3    | 5.5    | 6.9    | 6.0    | 7.5    | 4.3    | 0.9    | 4.2    |
| 61.1   | 93.0   | 61.5   | 31.1   | 37.6   | 28.5   | 38.9   | 27.5   | 27.2   |
| 3.8    | 4.0    | 1.8    | 5.4    | 8.0    | 9.0    | 6.4    | 5.9    | 5.2    |
| 216.5  | 466.5  | 536.2  | 3.1    | 1.5    | 2.2    | 1.6    | 0.9    | 0.8    |
| 25.2   | 23.3   | 21.4   | 15.3   | 15.1   | 11.2   | 9.2    | 12.0   | 16.2   |
| 9.4    | 27.5   | 6.0    | 41.7   | 37.2   | 35.4   | 31.1   | 23.0   | 33.0   |
| 5.2    | 5.6    | 9.1    | 19.6   | 14.6   | 6.9    | 8.2    | 13.2   | 5.4    |
| 20.5   | 16.3   | 15.5   | 17.1   | 22.4   | 12.4   | 14.0   | 9.3    | 6.6    |
| 24.0   | 24.4   | 30.0   | 36.8   | 44.3   | 46.7   | 29.6   | 40.4   | 51.2   |
| 2.5    | 5.2    | 3.9    | 18.0   | 28.1   | 29.0   | 21.6   | 27.8   | 23.3   |
| 271.5  | 245.9  | 112.7  | 40.3   | 23.4   | 32.4   | 22.9   | 26.6   | 30.4   |
| 11.0   | 6.7    | 7.7    | 27.7   | 23.8   | 22.8   | 16.0   | 29.2   | 19.7   |
| 28.7   | 29.0   | 19.0   | 15.7   | 9.8    | 20.3   | 6.1    | 5.7    | 5.3    |
| 4.0    | 3.7    | 3.0    | 29.5   | 13.8   | 9.6    | 4.6    | 1.9    | 7.8    |
| 2.2    | 4.9    | 1.5    | 9.2    | 4.5    | 4.1    | 1.5    | 2.3    | 1.1    |
| 21.0   | 25.9   | 29.4   | 3.0    | 5.4    | 3.1    | 2.7    | 2.2    | 2.3    |
| 3.5    | 6.1    | 1.5    | 9.8    | 1.5    | 6.0    | 5.2    | 1.0    | 1.1    |
| 9.1    | 12.6   | 10.7   | 6.9    | 12.2   | 6.7    | 8.0    | 8.7    | 6.6    |
| 3196.5 | 3495.2 | 2581.8 | 3546.5 | 2858.2 | 2761.3 | 1860.4 | 1604.6 | 1864.9 |

|        |        |        |        |        |        |        |        |        |
|--------|--------|--------|--------|--------|--------|--------|--------|--------|
| 25.0   | 17.4   | 10.2   | 41.8   | 37.6   | 46.2   | 20.0   | 21.3   | 31.8   |
| 21.0   | 10.9   | 2.9    | 5.4    | 5.6    | 8.7    | 8.5    | 8.0    | 8.7    |
| 2.6    | 4.5    | 7.4    | 2.1    | 4.8    | 3.8    | 2.9    | 0.5    | 2.8    |
| 15.7   | 12.2   | 12.1   | 30.0   | 16.0   | 28.0   | 15.0   | 7.5    | 5.9    |
| 21.7   | 22.0   | 10.4   | 32.2   | 22.1   | 22.9   | 13.9   | 9.9    | 14.3   |
| 0.5    | 1.4    | 3.1    | 5.1    | 3.7    | 4.6    | 6.4    | 1.6    | 2.2    |
| 32.1   | 70.6   | 26.2   | 13.1   | 14.2   | 14.7   | 11.4   | 4.9    | 5.2    |
| 1.5    | 1.2    | 1.4    | 2.3    | 2.1    | 1.8    | 1.2    | 1.4    | 1.0    |
| 20.5   | 29.2   | 10.6   | 33.7   | 32.4   | 33.8   | 31.0   | 22.7   | 12.1   |
| 9.3    | 5.2    | 3.1    | 3.5    | 1.8    | 8.1    | 2.9    | 2.1    | 1.7    |
| 685.0  | 951.8  | 904.6  | 887.5  | 507.4  | 516.1  | 751.3  | 542.2  | 615.1  |
| 9.9    | 16.6   | 9.1    | 15.4   | 12.1   | 22.3   | 15.0   | 15.0   | 8.5    |
| 4.8    | 3.8    | 3.7    | 13.9   | 5.7    | 20.7   | 3.6    | 1.8    | 6.4    |
| 64.1   | 64.0   | 44.7   | 54.9   | 33.8   | 31.0   | 21.6   | 32.7   | 30.2   |
| 92.6   | 102.7  | 70.1   | 61.1   | 56.7   | 59.7   | 31.9   | 35.5   | 35.3   |
| 4.7    | 9.5    | 4.0    | 3.8    | 7.2    | 4.0    | 3.0    | 2.4    | 3.6    |
| 4.5    | 1.6    | 2.2    | 5.5    | 2.7    | 5.5    | 0.5    | 0.7    | 0.5    |
| 3.3    | 7.6    | 10.3   | 19.9   | 8.3    | 10.8   | 4.5    | 7.3    | 8.2    |
| 5.2    | 2.5    | 4.1    | 13.3   | 14.8   | 19.6   | 6.1    | 4.8    | 9.3    |
| 4.6    | 3.8    | 1.1    | 10.3   | 0.9    | 9.4    | 0.9    | 2.9    | 2.6    |
| 14.7   | 15.9   | 21.1   | 6.5    | 9.3    | 4.1    | 3.1    | 1.6    | 2.1    |
| 6.4    | 7.2    | 4.3    | 21.6   | 15.4   | 8.8    | 11.1   | 5.7    | 5.1    |
| 5.5    | 9.7    | 8.1    | 13.4   | 15.3   | 13.1   | 3.8    | 4.0    | 7.6    |
| 3.8    | 9.1    | 9.1    | 8.9    | 11.4   | 7.1    | 2.5    | 6.0    | 4.0    |
| 3.9    | 8.5    | 3.4    | 27.2   | 21.2   | 22.6   | 13.9   | 8.9    | 13.9   |
| 1.1    | 1.0    | 0.8    | 3.6    | 1.9    | 2.1    | 0.7    | 0.7    | 1.1    |
| 20.1   | 42.2   | 36.0   | 33.7   | 31.7   | 43.9   | 24.6   | 39.8   | 37.8   |
| 133.8  | 196.5  | 174.2  | 135.2  | 118.4  | 129.5  | 84.6   | 102.3  | 113.4  |
| 36.2   | 38.0   | 19.9   | 31.8   | 25.3   | 26.9   | 24.4   | 17.9   | 13.7   |
| 124.0  | 179.3  | 132.7  | 9.7    | 14.2   | 23.5   | 7.4    | 5.0    | 8.5    |
| 96.4   | 88.8   | 83.9   | 14.8   | 18.0   | 21.2   | 25.2   | 37.9   | 33.9   |
| 301.1  | 236.5  | 52.9   | 29.5   | 32.5   | 25.7   | 26.9   | 15.5   | 17.8   |
| 114.4  | 77.6   | 31.7   | 16.9   | 14.4   | 12.5   | 13.5   | 10.5   | 10.7   |
| 1.0    | 2.5    | 1.0    | 14.6   | 21.7   | 21.6   | 6.2    | 1.8    | 11.3   |
| 1230.1 | 1724.7 | 1457.8 | 2169.7 | 1905.6 | 2102.7 | 1051.9 | 1296.6 | 1330.0 |
| 7.1    | 7.4    | 8.5    | 6.6    | 7.0    | 7.0    | 3.5    | 3.0    | 2.1    |
| 14.1   | 31.5   | 25.2   | 16.2   | 13.3   | 9.1    | 8.2    | 2.1    | 12.6   |
| 37.3   | 38.5   | 32.2   | 45.8   | 46.8   | 38.1   | 21.6   | 27.7   | 24.8   |
| 5.2    | 16.0   | 6.2    | 15.5   | 5.1    | 14.5   | 4.9    | 7.3    | 1.7    |
| 24.1   | 21.6   | 17.5   | 29.9   | 13.1   | 20.9   | 10.7   | 4.4    | 5.4    |
| 2886.0 | 2869.9 | 2210.8 | 49.7   | 46.8   | 40.2   | 46.8   | 32.7   | 38.6   |
| 21.5   | 26.4   | 16.5   | 13.1   | 8.5    | 22.0   | 7.6    | 1.3    | 8.5    |
| 2.7    | 1.7    | 4.3    | 3.8    | 4.1    | 7.9    | 5.0    | 1.3    | 0.4    |
| 432.8  | 456.1  | 362.5  | 74.4   | 70.8   | 90.5   | 191.0  | 185.9  | 192.6  |
| 7.2    | 4.6    | 3.7    | 12.6   | 10.4   | 13.5   | 9.3    | 5.2    | 4.4    |
| 425.2  | 469.6  | 306.4  | 30.5   | 25.8   | 40.6   | 89.6   | 97.9   | 79.1   |
| 347.7  | 461.9  | 309.0  | 77.8   | 84.4   | 94.6   | 96.5   | 127.1  | 101.7  |
| 273.2  | 301.8  | 194.8  | 12.6   | 7.3    | 11.5   | 7.4    | 1.7    | 10.9   |
| 272.5  | 310.2  | 186.4  | 14.3   | 5.9    | 8.3    | 11.7   | 5.9    | 4.4    |
| 13.7   | 14.4   | 5.5    | 27.2   | 30.3   | 17.3   | 4.7    | 10.7   | 10.5   |
| 19.6   | 22.2   | 20.1   | 39.9   | 40.5   | 34.8   | 41.1   | 35.2   | 19.2   |
| 16.4   | 13.1   | 9.2    | 13.4   | 12.1   | 10.0   | 15.9   | 11.7   | 9.9    |
| 14.1   | 14.7   | 9.4    | 17.1   | 9.8    | 25.1   | 11.4   | 15.3   | 15.7   |

|       |       |       |       |       |       |       |       |       |
|-------|-------|-------|-------|-------|-------|-------|-------|-------|
| 70.7  | 59.3  | 50.1  | 20.6  | 11.6  | 11.6  | 13.2  | 18.2  | 13.5  |
| 0.6   | 1.9   | 0.4   | 2.1   | 2.2   | 4.2   | 5.5   | 8.2   | 6.0   |
| 9.3   | 12.7  | 10.9  | 21.0  | 18.0  | 12.1  | 12.9  | 12.6  | 12.4  |
| 10.2  | 2.2   | 1.9   | 2.7   | 4.1   | 4.8   | 3.5   | 1.1   | 1.3   |
| 12.7  | 18.2  | 16.2  | 26.8  | 23.2  | 27.0  | 3.7   | 8.9   | 16.5  |
| 5.4   | 1.9   | 7.0   | 7.4   | 17.7  | 13.5  | 8.2   | 4.8   | 4.5   |
| 7.4   | 3.5   | 12.3  | 14.4  | 4.7   | 17.9  | 3.7   | 7.0   | 7.4   |
| 4.9   | 11.2  | 5.0   | 17.3  | 7.3   | 17.9  | 4.7   | 8.9   | 8.5   |
| 314.4 | 343.6 | 210.6 | 41.5  | 37.2  | 33.7  | 37.8  | 48.6  | 47.2  |
| 24.4  | 33.4  | 13.7  | 27.9  | 25.0  | 18.7  | 17.3  | 19.0  | 22.6  |
| 3.1   | 4.9   | 8.3   | 8.2   | 1.8   | 4.6   | 0.6   | 2.5   | 2.3   |
| 128.0 | 108.5 | 62.9  | 20.0  | 12.1  | 11.5  | 28.5  | 12.8  | 16.0  |
| 263.1 | 429.2 | 399.4 | 230.1 | 220.6 | 263.5 | 104.0 | 136.3 | 152.0 |
| 459.6 | 600.6 | 330.1 | 465.2 | 357.7 | 355.5 | 228.8 | 238.1 | 236.2 |
| 185.9 | 298.7 | 234.7 | 359.8 | 337.4 | 384.6 | 268.7 | 318.6 | 306.1 |
| 7.0   | 14.3  | 8.2   | 11.7  | 9.1   | 12.7  | 4.0   | 3.4   | 5.5   |
| 2.6   | 3.8   | 4.3   | 36.8  | 29.5  | 40.6  | 16.4  | 16.4  | 15.8  |
| 15.4  | 12.0  | 7.4   | 12.2  | 8.8   | 5.3   | 2.4   | 6.0   | 3.7   |
| 10.3  | 16.9  | 14.7  | 10.7  | 16.7  | 15.0  | 9.4   | 11.7  | 12.0  |
| 9.6   | 6.5   | 2.3   | 15.4  | 19.1  | 15.7  | 2.2   | 3.4   | 2.7   |
| 28.7  | 41.0  | 15.7  | 138.6 | 128.7 | 120.1 | 199.9 | 144.5 | 177.6 |
| 5.0   | 1.1   | 1.3   | 130.5 | 121.8 | 132.8 | 85.6  | 94.3  | 98.3  |
| 5.1   | 3.1   | 8.1   | 13.8  | 10.7  | 14.2  | 15.8  | 4.8   | 6.2   |
| 231.6 | 324.0 | 230.2 | 18.3  | 13.7  | 16.2  | 17.5  | 13.4  | 19.1  |
| 3.6   | 3.0   | 2.0   | 23.4  | 26.8  | 14.0  | 4.8   | 13.5  | 20.7  |
| 458.3 | 601.3 | 546.9 | 11.6  | 5.3   | 9.1   | 5.4   | 4.5   | 2.5   |
| 4.6   | 1.9   | 1.4   | 2.1   | 7.6   | 5.3   | 3.4   | 8.2   | 2.7   |
| 5.6   | 6.6   | 1.2   | 11.6  | 8.0   | 3.4   | 1.5   | 0.2   | 4.8   |
| 33.8  | 57.2  | 55.7  | 44.6  | 45.4  | 37.3  | 32.3  | 36.4  | 31.1  |
| 35.2  | 37.4  | 31.2  | 35.7  | 25.7  | 29.9  | 27.6  | 18.6  | 23.1  |
| 6.3   | 7.9   | 9.4   | 24.0  | 16.5  | 13.9  | 3.2   | 6.4   | 3.6   |
| 10.3  | 6.0   | 4.6   | 4.7   | 5.5   | 12.3  | 8.6   | 12.0  | 15.5  |
| 9.1   | 12.8  | 8.1   | 19.2  | 6.8   | 13.1  | 7.5   | 7.1   | 8.8   |
| 41.0  | 33.1  | 27.4  | 19.7  | 19.8  | 13.2  | 11.9  | 10.6  | 13.9  |
| 13.0  | 21.5  | 18.2  | 6.9   | 8.3   | 20.1  | 10.2  | 17.7  | 7.6   |
| 1.4   | 0.6   | 1.2   | 1.7   | 4.3   | 6.9   | 0.7   | 0.6   | 2.0   |
| 2.1   | 3.1   | 1.2   | 3.5   | 1.5   | 2.3   | 1.3   | 3.5   | 2.4   |
| 16.2  | 21.4  | 20.7  | 14.6  | 15.9  | 17.2  | 16.8  | 8.6   | 15.1  |
| 15.0  | 14.3  | 4.1   | 16.3  | 14.6  | 11.0  | 7.0   | 13.6  | 5.0   |
| 5.5   | 11.8  | 11.4  | 167.6 | 173.4 | 206.9 | 112.4 | 154.4 | 194.8 |
| 8.3   | 6.6   | 4.0   | 5.3   | 11.4  | 7.8   | 0.9   | 3.1   | 4.6   |
| 8.4   | 1.9   | 1.1   | 4.8   | 3.1   | 2.8   | 4.1   | 3.0   | 1.6   |
| 2.3   | 1.0   | 0.9   | 4.2   | 3.1   | 6.3   | 1.5   | 4.6   | 1.4   |
| 9.0   | 10.6  | 11.8  | 28.5  | 23.4  | 23.1  | 13.2  | 12.3  | 9.0   |
| 30.9  | 37.3  | 26.0  | 21.9  | 17.6  | 9.9   | 17.2  | 14.5  | 14.5  |
| 11.8  | 13.1  | 10.7  | 8.3   | 3.8   | 10.9  | 8.1   | 1.6   | 6.4   |
| 7.4   | 3.1   | 4.3   | 10.1  | 6.7   | 13.1  | 5.3   | 7.8   | 6.5   |
| 162.6 | 194.4 | 115.4 | 90.2  | 79.4  | 104.5 | 99.6  | 97.8  | 101.0 |
| 178.1 | 271.2 | 155.2 | 178.0 | 132.3 | 155.5 | 89.5  | 76.8  | 105.0 |
| 229.8 | 389.2 | 253.3 | 120.9 | 90.5  | 109.9 | 114.2 | 88.1  | 114.8 |
| 4.8   | 10.2  | 4.4   | 8.6   | 7.7   | 5.6   | 1.9   | 3.8   | 3.5   |
| 7.5   | 2.3   | 4.7   | 4.8   | 7.2   | 13.0  | 8.5   | 10.3  | 6.6   |
| 2.2   | 4.8   | 3.1   | 7.2   | 6.8   | 6.8   | 4.1   | 0.3   | 1.5   |

|       |       |       |       |       |       |       |       |       |
|-------|-------|-------|-------|-------|-------|-------|-------|-------|
| 3.4   | 2.1   | 3.1   | 5.6   | 5.4   | 5.5   | 5.2   | 1.9   | 2.6   |
| 18.7  | 26.5  | 15.2  | 39.3  | 13.3  | 26.3  | 7.0   | 7.3   | 17.3  |
| 0.4   | 1.2   | 2.8   | 2.5   | 3.2   | 3.1   | 1.2   | 0.4   | 1.8   |
| 6.1   | 11.1  | 8.2   | 11.9  | 13.6  | 5.9   | 5.1   | 6.4   | 6.3   |
| 9.5   | 5.8   | 2.4   | 19.5  | 7.5   | 10.8  | 5.5   | 1.3   | 5.5   |
| 4.4   | 12.4  | 15.4  | 13.5  | 13.8  | 12.0  | 13.7  | 10.6  | 8.2   |
| 146.5 | 187.7 | 148.0 | 53.8  | 52.0  | 65.7  | 37.9  | 52.4  | 54.8  |
| 12.0  | 3.2   | 2.5   | 13.3  | 5.9   | 9.1   | 13.4  | 2.4   | 5.1   |
| 12.8  | 13.3  | 7.3   | 15.3  | 9.7   | 12.5  | 7.4   | 11.1  | 7.1   |
| 78.7  | 178.2 | 208.0 | 5.3   | 10.3  | 8.4   | 5.9   | 7.3   | 4.8   |
| 24.0  | 31.0  | 20.0  | 62.5  | 44.2  | 58.3  | 20.7  | 30.2  | 30.2  |
| 124.4 | 235.4 | 218.4 | 84.3  | 39.6  | 45.7  | 35.0  | 30.5  | 27.5  |
| 7.5   | 8.1   | 1.4   | 19.8  | 16.3  | 15.4  | 12.5  | 7.9   | 11.1  |
| 13.3  | 3.5   | 10.9  | 9.6   | 8.8   | 19.1  | 5.2   | 7.3   | 5.6   |
| 4.2   | 17.2  | 6.4   | 19.7  | 9.8   | 5.3   | 8.3   | 5.9   | 8.0   |
| 1.7   | 4.9   | 1.2   | 2.1   | 1.9   | 6.0   | 1.7   | 1.0   | 1.0   |
| 64.1  | 85.0  | 53.9  | 25.8  | 14.3  | 22.7  | 24.2  | 23.7  | 24.6  |
| 56.9  | 88.0  | 59.5  | 193.6 | 160.5 | 147.3 | 98.3  | 90.1  | 83.3  |
| 45.9  | 122.1 | 93.7  | 85.7  | 86.1  | 77.8  | 47.3  | 68.4  | 54.2  |
| 17.1  | 30.0  | 30.2  | 45.2  | 37.7  | 29.7  | 34.2  | 28.2  | 26.9  |
| 141.2 | 226.4 | 178.0 | 61.9  | 57.6  | 65.9  | 119.9 | 98.4  | 106.7 |
| 7.8   | 3.1   | 4.4   | 5.3   | 13.4  | 5.2   | 1.5   | 1.8   | 1.9   |
| 39.1  | 36.2  | 15.6  | 6.1   | 9.4   | 15.4  | 17.2  | 18.4  | 19.3  |
| 2.9   | 2.4   | 4.6   | 11.9  | 9.1   | 6.6   | 4.4   | 3.6   | 5.6   |
| 87.9  | 150.5 | 109.7 | 51.6  | 45.6  | 53.7  | 30.8  | 45.5  | 43.5  |
| 2.6   | 5.7   | 6.9   | 9.0   | 5.5   | 5.8   | 3.9   | 3.8   | 3.3   |
| 489.5 | 831.6 | 541.8 | 119.1 | 99.5  | 93.5  | 51.4  | 53.1  | 55.2  |
| 286.4 | 486.9 | 369.6 | 25.9  | 12.1  | 15.1  | 22.2  | 1.4   | 7.1   |
| 47.0  | 35.4  | 26.8  | 6.7   | 3.8   | 9.0   | 7.7   | 9.8   | 5.1   |
| 7.0   | 7.7   | 4.5   | 13.5  | 2.6   | 11.3  | 12.9  | 11.4  | 11.6  |
| 18.5  | 11.4  | 5.2   | 15.0  | 23.2  | 23.2  | 30.9  | 15.6  | 16.4  |
| 6.9   | 3.1   | 2.5   | 4.0   | 2.9   | 7.0   | 2.3   | 1.8   | 2.7   |
| 1.7   | 1.7   | 1.3   | 2.2   | 1.9   | 2.5   | 1.1   | 1.0   | 0.9   |
| 1.8   | 7.2   | 3.2   | 12.0  | 6.9   | 19.3  | 6.1   | 1.2   | 4.2   |
| 1.3   | 1.5   | 1.3   | 2.7   | 1.9   | 2.3   | 0.9   | 0.7   | 1.0   |
| 17.1  | 20.5  | 10.2  | 22.5  | 17.2  | 26.8  | 18.4  | 9.9   | 18.6  |
| 74.3  | 117.5 | 117.1 | 76.9  | 58.2  | 53.7  | 55.8  | 87.0  | 67.5  |
| 67.3  | 140.3 | 72.7  | 11.4  | 12.5  | 11.5  | 4.2   | 4.3   | 5.0   |
| 23.4  | 24.8  | 16.1  | 36.2  | 23.9  | 34.5  | 26.5  | 19.5  | 27.6  |
| 24.4  | 19.2  | 19.8  | 30.8  | 12.2  | 18.1  | 28.6  | 18.3  | 21.8  |
| 1.3   | 5.5   | 2.6   | 14.7  | 14.5  | 12.5  | 6.0   | 5.1   | 3.7   |
| 28.7  | 26.2  | 20.0  | 29.0  | 12.2  | 31.3  | 4.6   | 5.0   | 1.8   |
| 361.0 | 494.5 | 468.7 | 464.0 | 312.2 | 367.4 | 676.2 | 586.4 | 667.6 |
| 2.9   | 4.2   | 5.5   | 3.4   | 2.8   | 3.0   | 1.5   | 2.4   | 2.0   |
| 7.0   | 9.5   | 2.7   | 94.6  | 96.1  | 96.3  | 88.7  | 91.3  | 95.0  |
| 45.1  | 44.8  | 34.1  | 20.4  | 6.2   | 11.9  | 9.4   | 12.0  | 10.8  |
| 6.9   | 2.5   | 5.3   | 27.5  | 10.2  | 9.5   | 6.0   | 5.3   | 5.7   |
| 13.8  | 15.5  | 8.7   | 19.4  | 12.1  | 6.7   | 9.6   | 17.7  | 13.0  |
| 17.9  | 19.2  | 14.4  | 17.1  | 21.1  | 20.8  | 16.6  | 11.0  | 15.4  |
| 136.4 | 131.6 | 60.7  | 215.4 | 198.6 | 202.3 | 109.6 | 101.5 | 130.9 |
| 4.2   | 4.9   | 3.7   | 34.1  | 6.4   | 18.6  | 17.6  | 18.6  | 19.6  |
| 9.4   | 5.8   | 3.5   | 2.5   | 2.5   | 2.4   | 2.8   | 2.9   | 1.2   |
| 2.8   | 13.5  | 6.1   | 36.5  | 6.5   | 20.0  | 7.1   | 3.4   | 10.7  |

|        |        |        |        |        |        |        |        |        |
|--------|--------|--------|--------|--------|--------|--------|--------|--------|
| 11.7   | 24.6   | 7.0    | 19.3   | 27.1   | 19.6   | 11.6   | 3.1    | 6.0    |
| 61.3   | 97.6   | 107.3  | 202.6  | 219.5  | 249.7  | 130.2  | 163.9  | 164.8  |
| 21.3   | 22.0   | 22.4   | 38.8   | 36.8   | 45.0   | 14.5   | 17.4   | 32.4   |
| 6.8    | 4.5    | 3.5    | 9.2    | 5.5    | 9.7    | 8.7    | 2.4    | 1.6    |
| 63.8   | 86.8   | 62.9   | 2.6    | 0.9    | 2.6    | 5.3    | 4.8    | 5.9    |
| 2.1    | 0.5    | 0.4    | 1.3    | 4.0    | 4.6    | 0.4    | 0.5    | 0.8    |
| 8.1    | 9.0    | 7.6    | 2.5    | 11.2   | 6.4    | 3.1    | 3.0    | 6.3    |
| 769.6  | 757.4  | 343.8  | 134.8  | 86.6   | 95.4   | 158.3  | 120.7  | 133.1  |
| 178.3  | 154.3  | 96.2   | 137.1  | 99.2   | 122.6  | 103.1  | 99.0   | 101.1  |
| 3650.0 | 4466.0 | 3828.5 | 3395.6 | 3038.9 | 3121.9 | 1712.8 | 1807.9 | 1975.7 |
| 44.1   | 46.7   | 24.1   | 71.3   | 61.1   | 63.4   | 30.3   | 38.5   | 41.7   |
| 262.6  | 362.5  | 286.9  | 335.7  | 278.1  | 296.2  | 215.4  | 279.5  | 283.4  |
| 18.8   | 31.9   | 21.8   | 221.5  | 156.9  | 155.2  | 128.9  | 94.8   | 118.2  |
| 10.0   | 5.3    | 7.3    | 18.4   | 17.9   | 5.5    | 12.0   | 8.4    | 10.6   |
| 1.1    | 1.6    | 2.3    | 7.9    | 3.9    | 7.1    | 0.9    | 1.6    | 1.8    |
| 1.7    | 12.2   | 5.0    | 4.6    | 4.2    | 11.7   | 9.7    | 4.6    | 5.1    |
| 1.6    | 2.0    | 1.6    | 6.8    | 21.0   | 21.9   | 26.3   | 41.6   | 43.2   |
| 6.4    | 8.8    | 3.8    | 44.5   | 33.7   | 16.5   | 6.0    | 16.1   | 12.9   |
| 5.6    | 8.8    | 3.5    | 269.7  | 371.0  | 372.2  | 224.1  | 438.5  | 404.6  |
| 20.1   | 16.5   | 3.3    | 21.5   | 45.5   | 14.7   | 15.3   | 4.0    | 7.4    |
| 18.9   | 12.1   | 8.8    | 6.2    | 17.1   | 11.4   | 11.6   | 7.2    | 7.1    |
| 4.0    | 7.5    | 7.6    | 7.7    | 4.9    | 6.5    | 2.9    | 8.6    | 5.5    |
| 3.4    | 9.1    | 3.8    | 5.0    | 5.9    | 4.0    | 4.2    | 4.4    | 3.5    |
| 5.5    | 5.2    | 2.6    | 6.7    | 3.6    | 4.7    | 2.8    | 1.3    | 2.1    |
| 27.5   | 40.7   | 58.3   | 14.9   | 5.8    | 12.9   | 10.0   | 2.9    | 13.4   |
| 5.9    | 6.9    | 3.0    | 12.8   | 12.7   | 14.8   | 5.2    | 6.0    | 10.3   |
| 37.7   | 41.1   | 28.0   | 49.7   | 32.4   | 49.0   | 22.9   | 19.2   | 25.1   |
| 17.8   | 9.5    | 15.1   | 29.9   | 14.6   | 24.3   | 10.9   | 7.3    | 10.9   |
| 407.7  | 472.4  | 304.2  | 304.5  | 249.1  | 248.7  | 147.6  | 110.4  | 128.3  |
| 8.5    | 6.2    | 1.7    | 14.9   | 17.8   | 13.4   | 8.7    | 8.7    | 8.4    |
| 7.7    | 7.2    | 2.5    | 13.5   | 6.0    | 12.0   | 8.4    | 4.9    | 1.5    |
| 8.3    | 3.7    | 2.7    | 8.4    | 3.6    | 5.3    | 1.4    | 5.6    | 1.6    |
| 9.3    | 8.3    | 3.9    | 16.2   | 18.5   | 15.6   | 10.0   | 2.8    | 9.4    |
| 7.1    | 6.0    | 1.9    | 9.4    | 5.8    | 5.9    | 7.6    | 3.4    | 11.0   |
| 0.6    | 1.6    | 1.3    | 5.7    | 3.9    | 2.3    | 3.8    | 1.5    | 11.0   |
| 9.0    | 17.2   | 15.8   | 23.5   | 13.8   | 16.8   | 3.4    | 12.0   | 4.6    |
| 5.5    | 8.3    | 3.3    | 8.1    | 7.2    | 5.9    | 3.6    | 2.1    | 3.3    |
| 44.3   | 68.8   | 62.2   | 59.2   | 42.7   | 46.3   | 36.8   | 36.8   | 34.6   |
| 6.3    | 11.7   | 6.5    | 13.5   | 8.7    | 17.0   | 1.5    | 1.7    | 11.8   |
| 2.6    | 2.4    | 2.8    | 13.4   | 2.8    | 6.2    | 1.5    | 1.9    | 7.1    |
| 28.3   | 80.6   | 64.2   | 27.4   | 12.8   | 9.0    | 19.9   | 22.2   | 21.8   |
| 6.2    | 9.3    | 16.2   | 7.2    | 4.3    | 2.4    | 1.8    | 1.3    | 5.9    |
| 2.1    | 5.6    | 5.3    | 24.4   | 12.6   | 16.9   | 3.6    | 3.9    | 3.5    |
| 3.3    | 2.5    | 8.1    | 12.5   | 19.0   | 13.1   | 7.6    | 14.3   | 13.6   |
| 15.9   | 21.8   | 15.3   | 29.6   | 23.9   | 19.1   | 25.1   | 21.6   | 22.8   |
| 4.2    | 5.7    | 5.6    | 12.2   | 9.1    | 6.1    | 2.8    | 6.5    | 4.7    |
| 2.6    | 14.6   | 3.5    | 54.9   | 42.6   | 58.8   | 33.6   | 54.4   | 47.1   |
| 3.4    | 5.5    | 6.8    | 7.9    | 8.1    | 6.9    | 3.7    | 5.3    | 5.0    |
| 133.2  | 165.6  | 105.6  | 197.8  | 132.6  | 133.5  | 134.3  | 113.1  | 133.0  |
| 5.4    | 1.8    | 3.1    | 5.3    | 7.7    | 15.2   | 6.1    | 2.7    | 7.7    |
| 33.7   | 69.5   | 47.6   | 146.5  | 147.1  | 203.5  | 83.7   | 136.9  | 150.7  |
| 16.4   | 11.7   | 12.0   | 62.8   | 49.6   | 60.7   | 54.4   | 49.4   | 69.0   |
| 225.0  | 332.5  | 301.3  | 127.1  | 124.8  | 124.1  | 107.0  | 94.7   | 125.1  |



|        |       |       |       |       |       |       |       |       |
|--------|-------|-------|-------|-------|-------|-------|-------|-------|
| 9.2    | 14.1  | 7.0   | 11.2  | 8.5   | 7.8   | 12.8  | 3.4   | 2.6   |
| 5.0    | 7.0   | 4.4   | 14.9  | 13.2  | 8.1   | 1.2   | 1.7   | 0.8   |
| 31.9   | 22.3  | 34.2  | 87.8  | 96.9  | 114.6 | 57.7  | 72.3  | 54.2  |
| 4.2    | 9.3   | 1.4   | 9.9   | 6.2   | 7.7   | 3.1   | 2.1   | 2.0   |
| 24.8   | 36.8  | 33.5  | 79.5  | 49.5  | 61.0  | 34.8  | 32.1  | 26.6  |
| 12.4   | 17.7  | 19.8  | 24.3  | 17.2  | 28.0  | 7.8   | 7.7   | 8.9   |
| 10.7   | 2.1   | 3.1   | 14.9  | 14.4  | 6.4   | 10.3  | 2.0   | 8.0   |
| 2.6    | 3.0   | 1.5   | 1.6   | 2.0   | 2.4   | 2.1   | 3.1   | 1.1   |
| 3.1    | 3.4   | 2.0   | 3.7   | 5.4   | 3.2   | 1.4   | 2.1   | 2.1   |
| 0.8    | 1.1   | 2.4   | 2.4   | 2.6   | 1.3   | 1.0   | 0.8   | 1.0   |
| 1.6    | 2.9   | 2.7   | 3.4   | 3.3   | 3.2   | 1.1   | 2.1   | 0.9   |
| 301.8  | 440.8 | 343.6 | 317.9 | 238.0 | 318.0 | 234.2 | 224.5 | 247.5 |
| 253.4  | 316.8 | 264.1 | 341.2 | 307.2 | 328.9 | 216.5 | 206.3 | 253.7 |
| 56.6   | 77.7  | 57.7  | 12.9  | 9.2   | 4.6   | 12.5  | 5.9   | 14.2  |
| 59.4   | 86.2  | 56.6  | 59.0  | 78.8  | 56.9  | 45.5  | 50.4  | 62.6  |
| 8.5    | 5.6   | 3.2   | 13.2  | 7.1   | 7.4   | 3.4   | 5.2   | 14.4  |
| 5.0    | 12.2  | 16.6  | 32.8  | 27.0  | 17.7  | 22.5  | 25.2  | 20.8  |
| 12.4   | 4.8   | 2.3   | 7.2   | 4.1   | 13.6  | 8.7   | 2.6   | 11.2  |
| 0.5    | 1.6   | 0.9   | 7.7   | 6.9   | 13.3  | 9.6   | 10.8  | 9.6   |
| 127.4  | 140.9 | 99.7  | 110.7 | 89.0  | 109.9 | 69.6  | 90.5  | 87.7  |
| 233.4  | 307.6 | 215.9 | 289.1 | 249.7 | 232.0 | 298.2 | 316.2 | 312.1 |
| 256.5  | 251.0 | 143.1 | 197.6 | 164.7 | 153.6 | 109.7 | 114.9 | 125.8 |
| 4.5    | 8.6   | 2.8   | 15.3  | 8.1   | 12.6  | 2.4   | 1.6   | 6.8   |
| 2.4    | 3.8   | 9.1   | 12.1  | 3.7   | 8.2   | 3.8   | 2.6   | 6.4   |
| 696.4  | 981.1 | 975.4 | 454.4 | 425.4 | 440.2 | 314.3 | 365.4 | 417.5 |
| 5.9    | 2.8   | 7.3   | 13.5  | 5.0   | 11.5  | 2.9   | 1.2   | 1.1   |
| 258.3  | 302.3 | 175.8 | 455.5 | 327.5 | 344.5 | 327.3 | 295.9 | 288.7 |
| 271.6  | 312.3 | 186.5 | 223.0 | 184.1 | 204.5 | 164.2 | 163.5 | 183.0 |
| 25.4   | 30.7  | 21.2  | 21.5  | 23.3  | 17.5  | 36.9  | 32.2  | 37.8  |
| 14.0   | 8.3   | 5.0   | 18.9  | 20.5  | 10.4  | 8.0   | 9.5   | 12.4  |
| 1.1    | 3.5   | 5.5   | 7.7   | 12.3  | 5.0   | 11.8  | 9.8   | 5.4   |
| 2.6    | 2.3   | 1.5   | 3.5   | 2.0   | 4.2   | 1.5   | 1.2   | 5.6   |
| 4.5    | 0.9   | 4.6   | 6.6   | 5.1   | 6.0   | 6.0   | 3.1   | 1.8   |
| 3.9    | 16.9  | 9.2   | 15.6  | 7.0   | 13.2  | 5.5   | 11.2  | 5.3   |
| 22.9   | 15.7  | 25.8  | 41.7  | 50.5  | 48.7  | 13.5  | 21.7  | 23.7  |
| 4.2    | 3.1   | 1.4   | 6.4   | 3.7   | 8.4   | 1.9   | 2.9   | 2.4   |
| 55.6   | 77.2  | 52.9  | 16.8  | 19.0  | 19.3  | 14.6  | 8.2   | 3.3   |
| 3.8    | 2.3   | 4.1   | 6.0   | 9.5   | 3.4   | 3.8   | 2.0   | 6.8   |
| 21.9   | 9.0   | 9.9   | 8.5   | 7.6   | 15.4  | 5.3   | 9.2   | 2.4   |
| 24.5   | 5.4   | 11.7  | 12.0  | 8.5   | 25.3  | 16.6  | 13.4  | 16.8  |
| 890.6  | 734.9 | 569.5 | 115.2 | 115.6 | 124.7 | 92.5  | 122.6 | 110.8 |
| 1033.7 | 861.8 | 616.7 | 372.4 | 301.9 | 342.6 | 440.1 | 410.1 | 439.1 |
| 9.7    | 6.7   | 10.1  | 10.6  | 16.5  | 11.4  | 5.0   | 5.6   | 2.4   |
| 63.8   | 76.8  | 45.4  | 12.5  | 7.7   | 17.1  | 7.0   | 9.1   | 5.3   |
| 28.9   | 29.1  | 20.8  | 46.7  | 31.6  | 44.4  | 22.8  | 18.8  | 18.4  |
| 3.0    | 3.9   | 3.5   | 18.7  | 17.1  | 14.6  | 4.5   | 15.9  | 8.4   |
| 20.2   | 31.0  | 23.2  | 28.2  | 41.0  | 25.8  | 23.3  | 18.3  | 20.2  |
| 1.2    | 1.5   | 2.3   | 3.1   | 2.2   | 2.3   | 1.2   | 1.3   | 0.7   |
| 6.1    | 3.9   | 4.1   | 7.3   | 5.9   | 14.2  | 3.5   | 7.5   | 4.3   |
| 38.5   | 24.7  | 12.1  | 24.3  | 9.2   | 17.0  | 16.7  | 18.3  | 4.8   |
| 13.1   | 7.5   | 16.6  | 4.8   | 6.8   | 2.4   | 0.4   | 0.7   | 2.6   |
| 6.3    | 14.0  | 2.8   | 13.2  | 7.9   | 6.4   | 5.2   | 2.2   | 16.2  |
| 4.6    | 2.4   | 7.7   | 17.2  | 13.5  | 10.7  | 10.4  | 6.7   | 3.9   |

|       |       |       |       |       |       |       |       |       |
|-------|-------|-------|-------|-------|-------|-------|-------|-------|
| 27.5  | 17.0  | 17.0  | 14.5  | 19.3  | 27.7  | 11.2  | 16.6  | 14.3  |
| 29.2  | 33.1  | 18.6  | 97.6  | 77.5  | 85.4  | 45.8  | 32.2  | 47.9  |
| 7.9   | 5.5   | 6.0   | 12.2  | 7.6   | 10.2  | 8.4   | 3.9   | 2.1   |
| 14.3  | 29.9  | 15.0  | 42.1  | 44.0  | 28.9  | 15.0  | 3.2   | 5.1   |
| 15.4  | 14.4  | 12.1  | 15.7  | 26.9  | 31.0  | 17.3  | 21.5  | 11.9  |
| 3.9   | 3.1   | 3.5   | 3.8   | 3.6   | 5.2   | 1.6   | 1.7   | 3.5   |
| 3.4   | 1.9   | 3.4   | 5.0   | 9.0   | 6.8   | 1.5   | 0.5   | 1.6   |
| 13.2  | 9.5   | 8.8   | 22.5  | 11.6  | 29.8  | 13.5  | 3.9   | 17.8  |
| 2.6   | 1.1   | 2.8   | 4.7   | 3.3   | 4.7   | 2.0   | 1.1   | 0.7   |
| 5.1   | 4.9   | 6.2   | 37.6  | 40.1  | 38.3  | 13.8  | 22.8  | 23.4  |
| 12.1  | 17.8  | 5.1   | 9.4   | 14.6  | 10.3  | 9.0   | 9.9   | 1.6   |
| 5.4   | 8.3   | 0.9   | 13.1  | 10.4  | 11.5  | 1.2   | 2.1   | 4.8   |
| 0.8   | 0.7   | 0.8   | 1.8   | 1.3   | 1.5   | 0.7   | 0.6   | 0.6   |
| 69.3  | 79.9  | 63.6  | 78.7  | 53.6  | 74.3  | 99.8  | 68.3  | 94.5  |
| 154.2 | 197.9 | 91.9  | 23.2  | 16.3  | 26.0  | 14.0  | 4.0   | 12.0  |
| 28.3  | 32.7  | 31.2  | 9.0   | 7.3   | 3.2   | 9.4   | 2.4   | 7.4   |
| 5.9   | 9.0   | 1.6   | 5.0   | 10.2  | 16.7  | 4.7   | 3.1   | 4.9   |
| 19.2  | 24.0  | 9.7   | 12.1  | 10.7  | 10.4  | 1.6   | 8.3   | 7.2   |
| 4.3   | 2.4   | 3.6   | 19.3  | 4.2   | 4.6   | 11.0  | 3.4   | 7.8   |
| 9.4   | 9.8   | 5.8   | 13.2  | 10.0  | 21.5  | 7.8   | 5.1   | 1.6   |
| 81.5  | 103.9 | 70.2  | 11.0  | 10.4  | 25.7  | 17.6  | 16.1  | 9.9   |
| 18.3  | 31.4  | 14.9  | 18.2  | 10.7  | 21.8  | 10.7  | 14.8  | 4.9   |
| 4.4   | 1.8   | 4.7   | 9.1   | 8.9   | 9.5   | 0.9   | 1.0   | 5.1   |
| 21.0  | 22.1  | 14.7  | 22.3  | 19.7  | 20.1  | 19.4  | 15.4  | 16.0  |
| 78.1  | 80.7  | 51.9  | 54.0  | 25.8  | 40.3  | 24.5  | 22.1  | 22.3  |
| 4.1   | 4.9   | 3.3   | 8.9   | 6.9   | 3.4   | 2.5   | 2.1   | 2.1   |
| 127.3 | 194.0 | 209.9 | 11.1  | 9.4   | 14.9  | 5.6   | 1.7   | 2.5   |
| 0.9   | 5.6   | 0.7   | 6.5   | 4.6   | 2.1   | 0.2   | 2.6   | 0.9   |
| 1.5   | 7.6   | 0.7   | 8.0   | 5.4   | 8.3   | 3.4   | 4.9   | 2.9   |
| 45.3  | 28.6  | 20.2  | 44.5  | 43.4  | 29.9  | 17.1  | 25.5  | 19.1  |
| 105.6 | 120.3 | 86.3  | 140.9 | 97.7  | 130.7 | 138.4 | 133.4 | 135.5 |
| 464.8 | 674.6 | 569.0 | 385.0 | 326.3 | 385.5 | 287.6 | 269.8 | 301.7 |
| 27.9  | 26.6  | 12.6  | 5.8   | 7.0   | 14.6  | 5.2   | 8.1   | 10.3  |
| 418.4 | 522.1 | 434.3 | 324.4 | 233.1 | 302.3 | 421.5 | 355.3 | 405.4 |
| 53.9  | 78.0  | 66.9  | 26.8  | 25.4  | 29.3  | 27.3  | 23.2  | 23.9  |
| 17.9  | 16.7  | 21.9  | 70.7  | 49.4  | 54.2  | 19.0  | 26.6  | 18.7  |
| 57.7  | 72.3  | 69.7  | 4.9   | 2.6   | 6.0   | 7.6   | 5.9   | 5.2   |
| 6.5   | 6.3   | 3.7   | 10.7  | 4.9   | 9.1   | 1.5   | 1.2   | 0.9   |
| 5.7   | 1.7   | 1.1   | 10.0  | 3.6   | 5.4   | 2.0   | 3.0   | 1.1   |
| 5.1   | 11.6  | 10.1  | 11.8  | 18.4  | 27.9  | 21.2  | 13.3  | 11.6  |
| 13.4  | 6.7   | 7.7   | 23.5  | 20.0  | 27.0  | 25.6  | 18.6  | 22.7  |
| 168.0 | 208.9 | 120.0 | 199.0 | 211.4 | 181.9 | 313.6 | 275.4 | 388.0 |
| 55.3  | 44.5  | 34.6  | 152.5 | 100.1 | 105.9 | 58.9  | 51.6  | 56.7  |
| 10.2  | 7.6   | 10.6  | 33.4  | 8.0   | 20.9  | 13.6  | 12.8  | 19.0  |
| 3.2   | 7.9   | 4.0   | 18.2  | 14.3  | 16.2  | 20.4  | 15.3  | 14.6  |
| 9.4   | 8.3   | 0.8   | 4.2   | 5.8   | 7.8   | 0.9   | 4.1   | 8.1   |
| 13.6  | 11.2  | 3.9   | 5.0   | 6.6   | 9.0   | 3.2   | 3.6   | 3.8   |
| 1.5   | 2.1   | 2.7   | 13.1  | 5.4   | 10.6  | 12.2  | 5.9   | 5.7   |
| 4.5   | 1.8   | 2.6   | 5.2   | 2.9   | 2.2   | 2.7   | 2.0   | 0.8   |
| 197.9 | 174.0 | 148.1 | 120.6 | 116.6 | 121.1 | 112.2 | 105.3 | 113.2 |
| 11.0  | 9.5   | 5.3   | 14.6  | 7.8   | 15.8  | 10.1  | 7.6   | 8.4   |
| 8.0   | 11.0  | 7.1   | 22.7  | 13.2  | 18.2  | 12.7  | 8.2   | 10.1  |
| 10.3  | 12.4  | 5.0   | 11.4  | 4.6   | 9.6   | 9.9   | 2.1   | 8.0   |

|        |        |        |        |        |        |        |        |        |
|--------|--------|--------|--------|--------|--------|--------|--------|--------|
| 12.7   | 7.1    | 10.0   | 8.3    | 8.0    | 19.2   | 14.4   | 5.4    | 8.7    |
| 3.8    | 4.2    | 0.9    | 40.8   | 56.8   | 60.4   | 41.4   | 87.8   | 61.3   |
| 14.0   | 17.2   | 16.8   | 5.6    | 4.2    | 11.3   | 9.9    | 2.5    | 4.4    |
| 136.9  | 168.6  | 108.1  | 24.3   | 24.4   | 32.6   | 67.8   | 58.4   | 59.6   |
| 25.6   | 18.0   | 15.9   | 45.6   | 21.6   | 48.4   | 15.2   | 11.6   | 31.5   |
| 28.3   | 21.6   | 13.8   | 24.1   | 23.2   | 25.6   | 19.2   | 11.1   | 11.7   |
| 9.3    | 2.2    | 4.7    | 4.3    | 4.4    | 5.0    | 2.8    | 3.3    | 2.5    |
| 136.4  | 153.7  | 129.9  | 14.7   | 9.4    | 9.6    | 10.9   | 7.6    | 3.8    |
| 24.4   | 32.9   | 19.9   | 32.7   | 18.5   | 23.9   | 26.4   | 16.6   | 20.2   |
| 897.1  | 1104.3 | 669.9  | 1346.4 | 1049.0 | 1127.8 | 789.9  | 671.3  | 865.2  |
| 0.7    | 3.6    | 0.4    | 5.4    | 4.7    | 6.7    | 1.3    | 3.5    | 1.1    |
| 24.7   | 38.3   | 27.3   | 32.8   | 13.1   | 26.1   | 15.6   | 21.0   | 18.7   |
| 0.5    | 0.5    | 0.7    | 1.2    | 1.3    | 1.8    | 1.0    | 0.4    | 0.5    |
| 6.5    | 6.2    | 3.9    | 51.4   | 39.6   | 57.7   | 57.9   | 76.4   | 62.7   |
| 6.5    | 7.3    | 10.2   | 24.9   | 18.1   | 11.3   | 14.4   | 5.2    | 14.0   |
| 10.0   | 24.8   | 23.4   | 17.3   | 11.6   | 23.3   | 15.7   | 6.3    | 2.9    |
| 68.4   | 83.1   | 58.9   | 238.5  | 179.9  | 182.2  | 87.5   | 79.9   | 90.3   |
| 3.2    | 14.6   | 11.6   | 12.3   | 7.2    | 17.8   | 10.3   | 11.7   | 4.7    |
| 295.3  | 416.7  | 262.5  | 384.0  | 303.6  | 332.8  | 367.8  | 363.4  | 426.2  |
| 56.6   | 61.0   | 45.4   | 121.3  | 107.0  | 103.9  | 62.1   | 68.5   | 79.5   |
| 7.1    | 10.0   | 12.6   | 10.4   | 13.5   | 10.2   | 4.5    | 0.4    | 7.7    |
| 460.8  | 534.7  | 353.8  | 49.5   | 44.1   | 54.7   | 43.9   | 50.5   | 47.3   |
| 38.8   | 10.6   | 9.0    | 16.0   | 15.3   | 20.3   | 8.4    | 13.3   | 3.4    |
| 1.8    | 3.9    | 1.9    | 5.1    | 3.5    | 3.3    | 0.9    | 1.8    | 3.9    |
| 3.1    | 4.1    | 4.4    | 3.5    | 4.7    | 7.2    | 1.3    | 4.2    | 2.4    |
| 4.6    | 3.4    | 3.9    | 7.3    | 8.6    | 5.7    | 3.9    | 5.2    | 1.7    |
| 26.0   | 44.5   | 23.5   | 39.7   | 21.7   | 21.0   | 29.8   | 19.7   | 29.7   |
| 69.9   | 107.1  | 51.1   | 93.3   | 88.1   | 75.9   | 33.4   | 23.4   | 36.8   |
| 125.3  | 155.5  | 123.3  | 111.6  | 93.8   | 129.9  | 97.0   | 90.2   | 104.1  |
| 1.1    | 1.1    | 0.8    | 2.0    | 2.4    | 1.9    | 1.0    | 1.5    | 2.0    |
| 10.5   | 4.6    | 7.4    | 6.0    | 7.4    | 11.1   | 2.6    | 3.4    | 1.7    |
| 24.0   | 23.2   | 42.3   | 47.1   | 30.2   | 57.2   | 19.5   | 14.4   | 23.1   |
| 26.9   | 51.1   | 87.9   | 11.1   | 5.7    | 13.9   | 19.1   | 23.8   | 15.3   |
| 3.1    | 2.5    | 2.2    | 22.9   | 6.8    | 16.7   | 8.0    | 3.9    | 1.1    |
| 12.4   | 10.9   | 3.4    | 17.4   | 17.5   | 11.8   | 10.2   | 6.8    | 10.6   |
| 1.6    | 1.8    | 1.5    | 5.3    | 4.3    | 5.6    | 1.7    | 1.7    | 1.2    |
| 6863.3 | 5946.0 | 3492.5 | 2425.7 | 1903.5 | 2045.3 | 1330.1 | 1135.0 | 1382.5 |
| 6.3    | 0.9    | 5.3    | 8.4    | 6.2    | 4.0    | 2.7    | 0.6    | 0.3    |
| 14.4   | 20.6   | 26.0   | 26.5   | 23.3   | 21.1   | 10.3   | 13.6   | 14.8   |
| 12.4   | 12.9   | 14.8   | 24.7   | 13.0   | 20.0   | 17.9   | 18.1   | 12.5   |
| 2.2    | 2.0    | 2.4    | 2.3    | 3.0    | 6.0    | 4.1    | 1.9    | 2.0    |
| 8.1    | 7.5    | 2.9    | 4.6    | 7.6    | 7.9    | 1.4    | 1.1    | 2.6    |
| 1.5    | 1.3    | 0.9    | 2.7    | 2.3    | 6.1    | 1.0    | 0.8    | 5.6    |
| 236.0  | 245.9  | 123.1  | 4.1    | 13.8   | 7.8    | 5.5    | 2.7    | 2.0    |
| 5.9    | 1.3    | 5.8    | 2.3    | 10.1   | 8.6    | 2.8    | 4.4    | 1.5    |
| 4.7    | 17.2   | 23.0   | 27.8   | 22.1   | 37.7   | 14.3   | 5.6    | 10.0   |
| 8.4    | 8.1    | 6.5    | 27.4   | 13.4   | 15.7   | 4.2    | 3.1    | 12.6   |
| 36.2   | 39.8   | 19.3   | 3.0    | 3.0    | 6.6    | 3.9    | 2.2    | 3.4    |
| 7.6    | 8.3    | 3.5    | 23.2   | 26.1   | 8.9    | 6.8    | 4.4    | 2.7    |
| 1159.6 | 1576.6 | 1338.4 | 781.4  | 705.4  | 738.2  | 930.2  | 1139.9 | 1199.9 |
| 8.5    | 12.3   | 8.1    | 24.9   | 27.8   | 30.6   | 5.0    | 4.1    | 10.7   |
| 15.1   | 44.9   | 17.0   | 14.7   | 16.3   | 24.2   | 31.8   | 11.7   | 13.1   |
| 191.8  | 237.2  | 153.7  | 237.1  | 194.2  | 225.2  | 118.4  | 114.0  | 138.2  |

|        |        |        |        |        |        |        |        |        |
|--------|--------|--------|--------|--------|--------|--------|--------|--------|
| 81.8   | 97.0   | 56.3   | 73.9   | 67.4   | 69.5   | 48.4   | 54.5   | 60.2   |
| 54.1   | 67.6   | 51.1   | 217.7  | 218.8  | 226.1  | 197.8  | 260.0  | 258.9  |
| 2.1    | 7.5    | 9.5    | 10.8   | 4.3    | 8.1    | 4.4    | 7.1    | 8.0    |
| 17.2   | 17.5   | 5.4    | 19.6   | 21.2   | 32.9   | 16.4   | 17.6   | 12.0   |
| 38.0   | 58.4   | 55.2   | 21.0   | 21.2   | 12.5   | 36.8   | 35.7   | 29.8   |
| 21.3   | 23.9   | 28.9   | 19.2   | 13.9   | 17.2   | 14.5   | 7.4    | 17.1   |
| 6.8    | 8.4    | 5.1    | 13.4   | 14.5   | 3.8    | 5.1    | 4.1    | 1.8    |
| 40.6   | 43.3   | 39.6   | 54.0   | 42.3   | 49.4   | 33.3   | 31.8   | 38.0   |
| 19.9   | 54.3   | 42.4   | 56.7   | 53.1   | 58.5   | 50.5   | 64.6   | 54.5   |
| 3.2    | 8.5    | 6.2    | 2.9    | 4.8    | 2.8    | 3.1    | 3.6    | 0.2    |
| 40.7   | 53.5   | 29.7   | 32.0   | 21.9   | 34.2   | 24.3   | 9.0    | 13.9   |
| 17.5   | 16.9   | 19.6   | 22.4   | 14.4   | 13.9   | 9.1    | 7.6    | 19.8   |
| 13.7   | 5.7    | 2.4    | 12.3   | 13.7   | 5.0    | 6.2    | 3.5    | 15.1   |
| 1.9    | 2.4    | 2.0    | 3.0    | 3.2    | 4.1    | 1.7    | 1.7    | 1.5    |
| 11.4   | 15.3   | 10.9   | 12.4   | 10.2   | 12.3   | 17.1   | 15.8   | 17.5   |
| 0.7    | 1.9    | 1.7    | 3.9    | 1.8    | 3.1    | 1.0    | 1.2    | 0.7    |
| 7.4    | 15.1   | 5.1    | 5.6    | 6.9    | 6.7    | 9.4    | 3.4    | 11.1   |
| 1.8    | 2.2    | 1.2    | 2.8    | 6.4    | 6.1    | 1.3    | 7.7    | 1.9    |
| 84.9   | 117.1  | 97.2   | 185.7  | 172.9  | 226.4  | 123.1  | 165.0  | 147.4  |
| 6.2    | 6.8    | 4.5    | 16.9   | 19.7   | 14.7   | 9.2    | 8.2    | 9.9    |
| 12.4   | 20.6   | 10.6   | 12.8   | 8.7    | 23.1   | 18.3   | 6.2    | 12.5   |
| 5.8    | 7.3    | 4.8    | 10.7   | 7.0    | 10.4   | 9.0    | 4.7    | 5.4    |
| 10.7   | 23.4   | 10.5   | 18.3   | 14.1   | 12.9   | 8.0    | 5.6    | 3.3    |
| 8.2    | 9.4    | 10.9   | 10.3   | 8.0    | 8.6    | 4.8    | 6.1    | 11.9   |
| 8.9    | 15.7   | 11.9   | 46.1   | 57.9   | 62.6   | 72.8   | 99.3   | 100.9  |
| 21.5   | 26.8   | 33.2   | 102.6  | 103.0  | 107.6  | 160.6  | 192.8  | 180.8  |
| 4.0    | 2.4    | 1.4    | 5.5    | 7.8    | 9.2    | 2.1    | 8.6    | 3.1    |
| 23.9   | 26.6   | 7.1    | 32.2   | 16.5   | 25.7   | 20.3   | 17.2   | 14.4   |
| 8.1    | 9.4    | 7.7    | 5.7    | 4.0    | 3.3    | 5.7    | 1.8    | 2.5    |
| 37.7   | 45.8   | 21.6   | 24.3   | 26.6   | 29.1   | 47.3   | 35.1   | 32.4   |
| 1115.9 | 1287.9 | 923.2  | 753.6  | 633.3  | 708.4  | 454.4  | 429.8  | 500.7  |
| 2.3    | 1.5    | 3.3    | 8.7    | 6.9    | 15.0   | 1.8    | 2.5    | 4.7    |
| 4.5    | 6.6    | 2.8    | 7.7    | 14.7   | 23.1   | 9.0    | 9.6    | 6.5    |
| 8.7    | 10.0   | 9.6    | 5.2    | 3.6    | 6.4    | 3.3    | 5.2    | 3.5    |
| 7.0    | 5.8    | 1.7    | 7.8    | 3.9    | 4.3    | 2.2    | 6.1    | 8.0    |
| 6.4    | 4.1    | 7.1    | 5.0    | 5.0    | 6.0    | 3.9    | 3.3    | 2.2    |
| 140.6  | 247.5  | 214.5  | 34.8   | 24.8   | 31.6   | 33.5   | 26.2   | 38.5   |
| 41.0   | 39.3   | 10.4   | 127.2  | 100.6  | 93.7   | 50.7   | 40.0   | 47.4   |
| 7.0    | 28.0   | 15.2   | 7.8    | 6.9    | 8.3    | 4.9    | 12.9   | 3.1    |
| 2.5    | 5.7    | 6.2    | 4.9    | 12.0   | 7.3    | 5.8    | 4.9    | 6.4    |
| 7.3    | 4.4    | 1.4    | 3.8    | 8.3    | 8.8    | 3.1    | 4.0    | 5.0    |
| 1.3    | 8.9    | 4.2    | 7.7    | 16.9   | 13.7   | 6.8    | 10.0   | 9.3    |
| 5.8    | 6.6    | 3.0    | 5.3    | 3.9    | 8.5    | 6.1    | 3.3    | 4.2    |
| 12.2   | 26.0   | 10.0   | 9.7    | 7.2    | 10.5   | 1.4    | 0.6    | 2.3    |
| 3.8    | 3.2    | 0.4    | 13.8   | 7.2    | 17.2   | 7.5    | 5.0    | 11.2   |
| 22.6   | 12.5   | 8.5    | 64.6   | 50.7   | 42.8   | 41.3   | 31.0   | 38.4   |
| 185.9  | 263.0  | 208.3  | 31.1   | 20.5   | 10.1   | 15.7   | 14.6   | 19.8   |
| 3971.7 | 4826.9 | 4105.6 | 2067.4 | 1807.2 | 2047.0 | 1292.9 | 1496.7 | 1554.5 |
| 18.5   | 19.7   | 17.7   | 42.5   | 32.2   | 34.1   | 21.1   | 22.7   | 17.6   |
| 32.4   | 35.5   | 15.7   | 25.8   | 11.1   | 20.0   | 26.1   | 20.3   | 7.4    |
| 22.8   | 26.7   | 25.7   | 20.3   | 10.3   | 24.5   | 26.2   | 19.2   | 22.5   |
| 22.9   | 26.9   | 15.5   | 44.9   | 31.9   | 32.2   | 40.7   | 32.7   | 28.2   |
| 28.2   | 45.2   | 25.2   | 9.3    | 31.2   | 25.1   | 21.6   | 32.8   | 29.6   |

|        |        |        |       |       |       |       |       |       |
|--------|--------|--------|-------|-------|-------|-------|-------|-------|
| 31.7   | 42.2   | 35.0   | 22.2  | 21.7  | 21.4  | 17.8  | 21.2  | 28.3  |
| 5.7    | 10.3   | 8.3    | 5.6   | 9.2   | 12.9  | 13.5  | 11.9  | 11.9  |
| 19.4   | 22.0   | 12.2   | 20.6  | 20.5  | 19.1  | 22.8  | 24.8  | 23.2  |
| 2.0    | 1.0    | 1.8    | 2.9   | 2.0   | 2.3   | 1.2   | 1.2   | 1.3   |
| 3.2    | 10.6   | 7.0    | 6.0   | 7.3   | 8.6   | 8.6   | 15.3  | 13.7  |
| 11.2   | 21.9   | 16.0   | 28.0  | 20.4  | 11.3  | 12.8  | 7.3   | 3.6   |
| 8.8    | 12.3   | 1.1    | 13.1  | 6.0   | 14.3  | 7.6   | 6.4   | 13.0  |
| 0.8    | 0.7    | 1.2    | 1.6   | 1.5   | 1.8   | 0.7   | 0.7   | 0.8   |
| 0.4    | 3.0    | 0.7    | 1.1   | 2.5   | 1.4   | 0.9   | 0.5   | 2.8   |
| 5.9    | 11.3   | 10.2   | 16.4  | 6.3   | 7.1   | 4.3   | 5.4   | 3.2   |
| 3.9    | 8.8    | 2.2    | 14.6  | 6.5   | 9.6   | 11.3  | 8.4   | 6.8   |
| 1.6    | 1.9    | 1.8    | 5.9   | 13.3  | 8.2   | 5.6   | 1.3   | 4.8   |
| 2.0    | 8.8    | 7.9    | 9.7   | 25.2  | 15.0  | 5.9   | 12.5  | 5.2   |
| 31.7   | 40.2   | 21.6   | 68.2  | 57.3  | 83.4  | 62.5  | 67.6  | 72.2  |
| 7.1    | 6.0    | 6.2    | 43.6  | 23.3  | 34.2  | 31.8  | 26.1  | 20.5  |
| 36.0   | 42.2   | 33.3   | 47.9  | 45.5  | 36.4  | 21.2  | 32.1  | 25.5  |
| 2.0    | 1.9    | 4.1    | 8.1   | 14.6  | 8.1   | 2.2   | 0.6   | 0.9   |
| 0.8    | 1.7    | 0.9    | 11.3  | 1.8   | 4.0   | 0.8   | 1.1   | 0.6   |
| 5.2    | 16.0   | 18.0   | 14.4  | 17.9  | 16.6  | 21.3  | 18.8  | 13.5  |
| 20.0   | 33.0   | 15.6   | 34.1  | 22.1  | 22.2  | 19.7  | 13.2  | 17.8  |
| 3.8    | 2.0    | 7.1    | 6.4   | 11.6  | 12.4  | 2.6   | 3.5   | 8.1   |
| 25.5   | 26.4   | 17.4   | 18.8  | 14.9  | 23.5  | 4.0   | 4.6   | 14.0  |
| 1.5    | 1.5    | 0.7    | 15.4  | 10.8  | 14.1  | 5.0   | 6.7   | 7.4   |
| 102.8  | 143.4  | 185.2  | 95.1  | 82.6  | 88.8  | 48.8  | 39.6  | 51.7  |
| 8.1    | 4.0    | 7.0    | 24.8  | 13.5  | 9.3   | 11.5  | 12.6  | 12.2  |
| 449.9  | 564.0  | 417.2  | 103.0 | 94.6  | 105.4 | 89.9  | 80.3  | 95.6  |
| 3.1    | 7.6    | 6.7    | 7.9   | 8.8   | 17.5  | 8.1   | 2.6   | 8.8   |
| 2.1    | 9.7    | 4.9    | 3.5   | 6.6   | 8.8   | 3.3   | 1.7   | 3.7   |
| 4.7    | 13.8   | 6.7    | 7.7   | 5.4   | 14.6  | 2.7   | 4.2   | 3.5   |
| 6.8    | 5.6    | 1.7    | 4.9   | 3.1   | 2.2   | 2.7   | 2.1   | 6.6   |
| 1471.1 | 2806.3 | 3412.0 | 213.8 | 110.8 | 123.4 | 170.0 | 109.2 | 148.6 |
| 1.1    | 2.5    | 2.8    | 7.2   | 11.7  | 4.8   | 1.9   | 0.9   | 0.9   |
| 5.2    | 6.1    | 2.8    | 10.3  | 14.0  | 14.9  | 5.8   | 6.1   | 8.3   |
| 516.6  | 589.7  | 387.7  | 346.5 | 295.5 | 326.3 | 302.0 | 279.1 | 323.8 |
| 6.2    | 2.6    | 4.9    | 2.2   | 7.6   | 3.5   | 7.7   | 2.2   | 2.0   |
| 173.5  | 256.3  | 237.1  | 502.7 | 384.3 | 450.9 | 259.5 | 285.9 | 339.8 |
| 1.3    | 3.3    | 1.3    | 5.4   | 3.3   | 7.2   | 3.2   | 1.4   | 2.5   |
| 81.7   | 119.8  | 86.4   | 8.5   | 2.5   | 7.7   | 41.0  | 29.3  | 33.7  |
| 1.8    | 1.6    | 1.6    | 5.5   | 2.7   | 5.3   | 0.8   | 1.5   | 1.0   |
| 12.5   | 6.4    | 1.6    | 6.1   | 5.8   | 5.1   | 4.8   | 2.0   | 1.7   |
| 10.8   | 6.6    | 4.0    | 40.5  | 35.3  | 34.5  | 9.7   | 12.8  | 9.8   |
| 17.7   | 12.9   | 13.1   | 8.9   | 6.0   | 7.1   | 10.5  | 2.3   | 18.2  |
| 632.7  | 750.9  | 458.1  | 537.4 | 437.2 | 501.1 | 417.5 | 326.0 | 428.5 |
| 5.0    | 4.6    | 2.5    | 9.9   | 11.3  | 8.8   | 4.7   | 3.5   | 7.1   |
| 8.2    | 4.1    | 3.6    | 173.7 | 148.4 | 144.0 | 111.5 | 109.6 | 125.3 |
| 4.7    | 5.2    | 3.6    | 21.9  | 4.3   | 9.4   | 3.8   | 4.0   | 2.9   |
| 7.1    | 1.2    | 1.4    | 5.0   | 2.7   | 1.4   | 1.2   | 1.2   | 1.5   |
| 8.8    | 14.0   | 10.2   | 26.2  | 20.1  | 18.7  | 20.9  | 14.5  | 12.1  |
| 89.1   | 70.0   | 3.5    | 19.7  | 32.8  | 13.2  | 14.4  | 3.1   | 3.1   |
| 9.6    | 12.5   | 9.6    | 25.1  | 30.5  | 33.6  | 13.7  | 8.3   | 11.4  |
| 17.6   | 28.0   | 15.0   | 30.5  | 30.8  | 33.3  | 21.7  | 18.3  | 19.5  |
| 9.2    | 7.1    | 1.3    | 4.4   | 4.3   | 12.3  | 1.8   | 5.4   | 0.8   |
| 629.3  | 783.7  | 649.3  | 413.5 | 352.0 | 381.4 | 312.5 | 278.9 | 331.8 |

|        |        |        |        |        |        |        |        |        |
|--------|--------|--------|--------|--------|--------|--------|--------|--------|
| 66.3   | 73.2   | 72.8   | 3.3    | 5.5    | 9.8    | 3.4    | 5.0    | 5.5    |
| 4.8    | 3.4    | 12.0   | 7.4    | 20.7   | 27.0   | 3.0    | 13.0   | 13.8   |
| 16.8   | 25.6   | 18.4   | 20.8   | 19.5   | 19.7   | 11.5   | 16.7   | 22.8   |
| 6.0    | 3.8    | 4.4    | 14.7   | 8.8    | 9.2    | 1.8    | 3.4    | 5.8    |
| 3.4    | 0.6    | 3.6    | 15.2   | 16.1   | 10.6   | 17.9   | 19.5   | 25.1   |
| 2.6    | 5.4    | 3.5    | 4.4    | 2.8    | 6.2    | 2.5    | 1.3    | 1.5    |
| 65.7   | 105.9  | 71.7   | 128.2  | 116.0  | 133.6  | 86.0   | 80.8   | 90.5   |
| 4.6    | 14.4   | 11.2   | 14.8   | 16.0   | 22.2   | 4.4    | 4.0    | 4.7    |
| 1.0    | 6.7    | 5.1    | 5.1    | 4.3    | 5.9    | 5.1    | 4.4    | 0.2    |
| 282.5  | 354.7  | 332.6  | 232.6  | 181.1  | 239.7  | 315.9  | 336.8  | 307.9  |
| 4.5    | 2.5    | 2.5    | 30.3   | 29.4   | 28.8   | 18.3   | 31.5   | 29.7   |
| 5.9    | 6.5    | 3.3    | 3.6    | 8.0    | 12.3   | 5.4    | 3.9    | 1.1    |
| 10.9   | 11.5   | 17.0   | 25.3   | 10.8   | 32.5   | 9.7    | 13.0   | 13.9   |
| 6.3    | 16.5   | 5.3    | 38.8   | 40.1   | 37.1   | 24.8   | 24.4   | 26.4   |
| 16.7   | 7.1    | 4.5    | 13.9   | 10.1   | 31.6   | 17.2   | 8.8    | 8.9    |
| 19.9   | 23.9   | 11.5   | 71.7   | 41.2   | 46.5   | 34.0   | 17.5   | 31.8   |
| 24.8   | 36.5   | 25.4   | 12.3   | 16.1   | 20.6   | 18.6   | 20.3   | 18.3   |
| 4.5    | 13.7   | 2.7    | 6.4    | 3.8    | 4.8    | 3.0    | 2.9    | 3.6    |
| 8.7    | 12.2   | 7.9    | 14.7   | 10.7   | 13.7   | 6.8    | 8.5    | 9.8    |
| 0.9    | 0.8    | 1.2    | 3.1    | 2.9    | 3.1    | 1.3    | 1.0    | 1.2    |
| 0.4    | 1.4    | 0.3    | 0.8    | 1.0    | 1.6    | 2.5    | 1.8    | 2.2    |
| 4.1    | 1.5    | 2.3    | 2.0    | 5.3    | 1.5    | 0.7    | 0.5    | 0.4    |
| 1151.6 | 1215.6 | 792.7  | 1036.4 | 762.0  | 841.8  | 590.8  | 470.1  | 585.0  |
| 395.0  | 502.2  | 394.0  | 198.6  | 167.8  | 210.3  | 156.7  | 152.9  | 179.0  |
| 16.3   | 16.8   | 13.8   | 18.7   | 21.0   | 22.2   | 12.0   | 12.3   | 3.3    |
| 164.9  | 196.2  | 113.7  | 31.9   | 36.9   | 41.4   | 34.1   | 44.4   | 38.6   |
| 19.5   | 30.3   | 30.7   | 16.0   | 18.8   | 23.2   | 13.5   | 12.4   | 16.9   |
| 4595.0 | 5172.6 | 4526.6 | 69.2   | 70.2   | 73.6   | 37.7   | 70.6   | 62.7   |
| 766.3  | 771.7  | 484.1  | 347.3  | 277.0  | 261.3  | 540.9  | 348.0  | 375.1  |
| 29.9   | 40.8   | 42.2   | 13.0   | 18.6   | 14.6   | 2.8    | 4.5    | 6.5    |
| 10.3   | 13.0   | 8.9    | 64.8   | 53.0   | 60.3   | 67.5   | 102.4  | 92.2   |
| 19.1   | 23.7   | 22.5   | 61.6   | 53.1   | 50.2   | 44.4   | 39.0   | 37.9   |
| 94.1   | 144.5  | 135.0  | 177.2  | 123.9  | 151.8  | 103.3  | 69.4   | 107.6  |
| 1710.0 | 2086.0 | 1757.7 | 2236.9 | 2066.6 | 2228.9 | 1077.2 | 1170.0 | 1307.4 |
| 50.4   | 62.6   | 69.5   | 79.9   | 37.4   | 34.5   | 46.5   | 39.3   | 56.7   |
| 15.7   | 32.6   | 12.9   | 14.1   | 18.7   | 14.0   | 8.4    | 2.4    | 8.8    |
| 22.3   | 23.0   | 20.4   | 30.7   | 24.4   | 25.6   | 15.7   | 20.1   | 13.0   |
| 37.7   | 21.4   | 16.0   | 38.9   | 24.3   | 27.8   | 23.9   | 20.0   | 15.4   |
| 27.8   | 27.9   | 11.6   | 16.5   | 10.4   | 14.3   | 17.1   | 15.0   | 6.5    |
| 7.2    | 13.4   | 5.5    | 22.8   | 18.2   | 10.8   | 4.2    | 7.5    | 7.8    |
| 2.3    | 5.0    | 3.6    | 10.5   | 7.1    | 17.5   | 1.0    | 8.3    | 3.2    |
| 1.1    | 1.1    | 1.0    | 2.2    | 1.8    | 2.1    | 1.0    | 0.7    | 0.8    |
| 16.5   | 15.2   | 5.6    | 28.8   | 17.0   | 25.4   | 8.4    | 9.7    | 17.3   |
| 2.8    | 2.7    | 3.7    | 5.1    | 3.2    | 5.9    | 0.8    | 1.1    | 1.6    |
| 90.2   | 98.0   | 68.6   | 23.8   | 22.2   | 18.0   | 21.5   | 14.9   | 20.0   |
| 2.2    | 2.7    | 2.1    | 4.3    | 2.2    | 5.8    | 6.9    | 1.8    | 2.8    |
| 3.2    | 0.6    | 2.1    | 5.0    | 8.5    | 7.1    | 1.2    | 1.3    | 5.1    |
| 5.9    | 9.4    | 6.9    | 16.7   | 17.2   | 12.3   | 3.7    | 5.4    | 16.7   |
| 23.9   | 10.8   | 10.1   | 3.0    | 1.9    | 17.3   | 4.7    | 1.8    | 1.1    |
| 1.8    | 1.6    | 3.2    | 3.7    | 6.6    | 7.9    | 1.2    | 1.3    | 3.6    |
| 2.3    | 4.8    | 6.4    | 9.2    | 4.0    | 5.0    | 0.7    | 4.2    | 2.9    |
| 10.6   | 5.5    | 8.3    | 11.4   | 30.2   | 19.0   | 4.4    | 9.6    | 14.7   |
| 8.9    | 18.1   | 6.1    | 15.7   | 11.1   | 9.9    | 8.4    | 13.1   | 6.2    |

|        |        |        |        |        |        |        |        |        |
|--------|--------|--------|--------|--------|--------|--------|--------|--------|
| 28.3   | 35.2   | 25.2   | 27.7   | 25.7   | 25.7   | 17.2   | 26.3   | 20.2   |
| 157.1  | 151.0  | 103.4  | 194.0  | 143.8  | 149.1  | 162.2  | 143.7  | 171.7  |
| 10.1   | 12.0   | 14.1   | 27.7   | 16.5   | 29.5   | 27.4   | 48.9   | 53.3   |
| 4.0    | 2.2    | 0.9    | 13.5   | 7.7    | 8.4    | 9.5    | 8.7    | 2.3    |
| 59.7   | 133.2  | 164.4  | 56.1   | 65.1   | 60.0   | 101.3  | 108.1  | 126.6  |
| 2458.2 | 2947.3 | 2527.6 | 3195.9 | 2887.6 | 2954.6 | 1464.6 | 1451.0 | 1666.5 |
| 112.8  | 244.0  | 369.0  | 14.2   | 27.2   | 28.6   | 8.5    | 10.3   | 13.6   |
| 52.9   | 85.6   | 55.1   | 48.2   | 62.1   | 74.5   | 55.3   | 44.6   | 53.6   |
| 2.3    | 7.8    | 6.0    | 9.8    | 14.8   | 18.1   | 9.0    | 5.9    | 4.3    |
| 6.3    | 1.1    | 2.7    | 6.3    | 1.7    | 3.7    | 2.0    | 0.6    | 1.7    |
| 1.4    | 1.2    | 1.1    | 3.3    | 2.0    | 3.0    | 1.2    | 1.0    | 1.5    |
| 311.9  | 420.5  | 231.8  | 1368.8 | 1041.3 | 1195.8 | 726.6  | 610.3  | 750.9  |
| 131.2  | 218.4  | 134.7  | 41.8   | 28.6   | 37.7   | 31.9   | 26.0   | 31.2   |
| 2014.1 | 2515.2 | 1799.5 | 478.4  | 321.3  | 335.1  | 394.1  | 300.8  | 318.7  |
| 0.4    | 0.9    | 0.6    | 8.3    | 1.8    | 8.3    | 0.6    | 1.5    | 0.4    |
| 40.2   | 32.6   | 23.0   | 8.1    | 4.5    | 10.3   | 6.7    | 1.2    | 5.6    |
| 6040.0 | 6481.8 | 4894.3 | 4735.2 | 3859.7 | 3924.9 | 2964.5 | 2654.9 | 3098.4 |
| 1236.7 | 1216.5 | 1049.3 | 1057.0 | 954.9  | 1132.5 | 581.0  | 853.9  | 817.3  |
| 352.2  | 586.9  | 533.6  | 270.7  | 239.5  | 255.0  | 169.1  | 227.6  | 215.7  |
| 20.5   | 13.0   | 29.2   | 13.5   | 12.1   | 17.4   | 21.9   | 15.1   | 11.6   |
| 7.2    | 4.6    | 4.6    | 19.4   | 16.2   | 16.4   | 17.9   | 10.0   | 18.1   |
| 2.9    | 0.7    | 4.5    | 26.9   | 48.2   | 48.2   | 12.7   | 38.5   | 23.6   |
| 7.2    | 13.9   | 6.0    | 17.9   | 14.2   | 17.4   | 9.4    | 9.3    | 8.2    |
| 29.0   | 33.9   | 27.9   | 57.8   | 48.1   | 59.0   | 28.8   | 23.9   | 30.9   |
| 1.1    | 4.1    | 4.8    | 13.0   | 2.5    | 3.3    | 0.6    | 2.0    | 1.2    |
| 110.5  | 119.4  | 89.8   | 19.5   | 27.8   | 32.3   | 24.3   | 27.4   | 27.6   |
| 16.9   | 26.0   | 19.9   | 8.7    | 3.9    | 7.6    | 1.6    | 1.4    | 1.4    |
| 1586.1 | 1924.6 | 1599.6 | 98.9   | 115.7  | 117.7  | 101.3  | 120.5  | 127.1  |
| 238.9  | 298.2  | 300.0  | 120.5  | 97.5   | 109.7  | 120.1  | 113.6  | 124.6  |
| 0.3    | 0.3    | 0.5    | 1.4    | 1.2    | 4.1    | 2.2    | 0.6    | 0.7    |
| 107.6  | 129.0  | 56.9   | 83.2   | 27.3   | 41.8   | 49.6   | 27.1   | 32.9   |
| 29.7   | 23.8   | 17.4   | 55.5   | 50.1   | 47.7   | 26.3   | 23.3   | 20.1   |
| 10.4   | 15.1   | 16.6   | 30.2   | 16.9   | 47.9   | 22.5   | 21.4   | 25.5   |
| 232.5  | 260.3  | 244.3  | 358.4  | 339.2  | 344.8  | 212.2  | 254.2  | 288.4  |
| 56.3   | 65.9   | 51.0   | 64.4   | 46.3   | 73.9   | 43.7   | 41.0   | 49.7   |
| 16.4   | 5.0    | 22.9   | 7.7    | 9.0    | 19.7   | 7.2    | 14.6   | 2.8    |
| 26.1   | 41.6   | 23.4   | 25.7   | 33.8   | 26.4   | 30.1   | 21.7   | 26.5   |
| 1.1    | 2.1    | 1.6    | 5.9    | 2.3    | 4.4    | 1.4    | 1.3    | 1.1    |
| 7.7    | 2.2    | 4.5    | 14.7   | 12.2   | 6.0    | 5.8    | 7.5    | 11.4   |
| 12.9   | 15.8   | 9.0    | 15.3   | 18.0   | 14.1   | 12.8   | 19.2   | 12.6   |
| 17.9   | 21.8   | 10.8   | 36.6   | 23.4   | 6.3    | 3.9    | 10.8   | 13.7   |
| 3.3    | 8.3    | 4.1    | 2.9    | 4.6    | 2.4    | 3.4    | 1.2    | 5.6    |
| 3.3    | 5.9    | 3.7    | 12.9   | 6.0    | 29.3   | 5.8    | 8.3    | 1.2    |
| 345.8  | 522.2  | 426.3  | 213.6  | 184.0  | 218.5  | 153.9  | 204.8  | 195.1  |
| 3.0    | 3.4    | 6.2    | 9.0    | 4.9    | 9.1    | 4.0    | 8.6    | 4.8    |
| 543.2  | 548.7  | 457.8  | 132.8  | 77.5   | 85.4   | 195.8  | 146.9  | 168.9  |
| 9.8    | 24.3   | 25.7   | 9.7    | 7.0    | 19.6   | 3.4    | 5.9    | 5.0    |
| 0.6    | 1.3    | 1.8    | 6.4    | 9.1    | 7.9    | 2.2    | 1.3    | 2.2    |
| 9.1    | 6.2    | 7.1    | 18.3   | 17.7   | 17.5   | 7.8    | 9.6    | 10.9   |
| 11.6   | 12.5   | 3.4    | 10.6   | 6.7    | 9.6    | 3.0    | 2.3    | 8.1    |
| 7.5    | 6.6    | 11.9   | 11.7   | 15.4   | 19.1   | 9.6    | 5.3    | 11.9   |
| 1.8    | 2.2    | 1.5    | 5.5    | 2.2    | 1.7    | 2.8    | 1.5    | 1.1    |
| 18.1   | 34.8   | 24.3   | 63.5   | 44.7   | 54.0   | 9.3    | 12.4   | 9.3    |

|        |        |        |        |        |        |        |        |        |
|--------|--------|--------|--------|--------|--------|--------|--------|--------|
| 10.0   | 19.4   | 8.1    | 9.1    | 17.2   | 15.0   | 16.0   | 8.1    | 14.1   |
| 10.4   | 9.2    | 4.5    | 13.0   | 15.3   | 6.4    | 7.5    | 10.5   | 10.9   |
| 7.3    | 3.2    | 3.6    | 5.5    | 3.3    | 3.4    | 0.9    | 2.8    | 1.6    |
| 28.9   | 28.9   | 18.5   | 26.6   | 10.2   | 24.1   | 9.8    | 9.5    | 22.9   |
| 2.2    | 5.9    | 1.6    | 6.8    | 1.5    | 2.0    | 1.0    | 0.7    | 1.3    |
| 10.5   | 2.1    | 2.7    | 13.4   | 8.6    | 12.0   | 2.1    | 2.8    | 13.2   |
| 5.1    | 3.9    | 2.1    | 9.3    | 3.5    | 5.4    | 2.9    | 1.7    | 2.3    |
| 3.0    | 3.7    | 1.6    | 2.0    | 2.0    | 2.8    | 1.5    | 1.0    | 1.8    |
| 38.1   | 68.3   | 70.6   | 9.0    | 16.1   | 15.3   | 2.8    | 17.8   | 13.0   |
| 3.6    | 4.0    | 1.7    | 6.1    | 4.2    | 4.9    | 3.3    | 3.1    | 3.7    |
| 9.3    | 11.9   | 9.9    | 24.6   | 15.6   | 11.2   | 12.2   | 10.2   | 12.4   |
| 12.7   | 3.5    | 4.7    | 11.9   | 12.5   | 17.7   | 19.7   | 9.4    | 9.3    |
| 7.3    | 7.8    | 0.5    | 16.4   | 9.9    | 15.1   | 7.7    | 2.9    | 3.9    |
| 19.5   | 34.6   | 18.7   | 17.8   | 21.7   | 17.7   | 15.3   | 14.2   | 19.9   |
| 3.4    | 1.1    | 5.4    | 5.5    | 10.6   | 7.2    | 4.6    | 6.1    | 8.1    |
| 1.9    | 6.6    | 3.1    | 1.6    | 9.6    | 10.9   | 4.9    | 5.4    | 2.3    |
| 88.0   | 257.4  | 421.2  | 33.4   | 28.4   | 38.3   | 11.2   | 27.7   | 22.1   |
| 410.3  | 447.8  | 304.1  | 71.0   | 61.4   | 68.0   | 66.9   | 54.6   | 58.4   |
| 6.7    | 8.0    | 6.4    | 12.6   | 8.9    | 18.9   | 5.9    | 5.7    | 17.4   |
| 1.2    | 1.5    | 1.7    | 6.5    | 7.5    | 3.4    | 3.0    | 2.5    | 2.1    |
| 15.6   | 21.7   | 10.3   | 17.8   | 11.8   | 21.5   | 1.6    | 3.9    | 2.8    |
| 19.9   | 18.8   | 15.1   | 18.7   | 8.3    | 10.1   | 10.9   | 9.9    | 7.8    |
| 4.6    | 2.7    | 5.2    | 12.0   | 4.1    | 17.2   | 7.9    | 2.3    | 1.2    |
| 4.8    | 12.5   | 5.2    | 13.0   | 14.4   | 10.1   | 8.0    | 6.6    | 4.0    |
| 8.3    | 2.5    | 1.8    | 9.5    | 10.3   | 10.0   | 6.3    | 6.5    | 4.4    |
| 61.5   | 90.3   | 85.1   | 19.1   | 10.9   | 29.1   | 15.1   | 20.8   | 23.6   |
| 70.0   | 135.4  | 113.6  | 22.7   | 34.8   | 31.9   | 33.2   | 32.0   | 32.1   |
| 22.9   | 22.1   | 14.5   | 98.8   | 75.5   | 82.3   | 33.7   | 35.8   | 37.8   |
| 12.2   | 18.7   | 10.7   | 25.4   | 16.4   | 13.0   | 14.2   | 6.9    | 15.8   |
| 1.6    | 1.9    | 3.4    | 6.8    | 10.7   | 3.5    | 0.9    | 1.1    | 1.0    |
| 0.7    | 2.3    | 0.5    | 5.4    | 6.0    | 9.6    | 10.6   | 15.9   | 19.6   |
| 2.7    | 1.3    | 0.7    | 8.5    | 4.5    | 4.8    | 2.8    | 0.9    | 1.3    |
| 3.0    | 2.1    | 0.9    | 6.0    | 6.7    | 5.1    | 2.3    | 2.6    | 1.1    |
| 368.2  | 494.7  | 325.7  | 586.9  | 468.0  | 495.3  | 300.0  | 276.7  | 332.8  |
| 3.1    | 2.6    | 2.2    | 13.3   | 1.9    | 4.4    | 1.3    | 3.5    | 1.8    |
| 1.3    | 1.5    | 0.9    | 7.5    | 7.9    | 4.2    | 1.5    | 1.9    | 4.9    |
| 1.8    | 7.5    | 1.6    | 4.6    | 8.8    | 12.1   | 3.6    | 3.2    | 2.7    |
| 9206.1 | 9979.2 | 8378.8 | 7106.5 | 6043.0 | 6082.3 | 4817.1 | 4372.7 | 4743.5 |
| 7.5    | 3.9    | 8.3    | 10.6   | 17.4   | 13.5   | 7.0    | 10.8   | 12.0   |
| 6.5    | 9.8    | 17.2   | 6.9    | 11.7   | 11.5   | 2.5    | 5.4    | 10.2   |
| 5.4    | 1.7    | 6.5    | 6.2    | 7.0    | 11.1   | 7.7    | 2.7    | 7.6    |
| 32.2   | 35.7   | 24.5   | 17.2   | 13.7   | 15.6   | 24.5   | 23.1   | 27.9   |
| 7.0    | 5.2    | 9.1    | 14.0   | 6.6    | 10.5   | 1.8    | 6.5    | 9.3    |
| 1.2    | 1.6    | 0.9    | 2.8    | 3.7    | 2.0    | 1.2    | 0.9    | 1.2    |
| 5.2    | 4.6    | 1.4    | 5.3    | 12.6   | 8.4    | 5.2    | 3.1    | 4.0    |
| 11.3   | 5.4    | 4.8    | 25.2   | 9.2    | 10.0   | 11.5   | 7.1    | 8.7    |
| 29.7   | 26.7   | 9.6    | 17.5   | 20.5   | 10.2   | 15.3   | 17.1   | 19.9   |
| 225.6  | 303.0  | 214.7  | 193.6  | 160.0  | 170.4  | 114.7  | 108.5  | 137.7  |
| 3.4    | 10.8   | 3.0    | 12.1   | 9.6    | 7.3    | 5.3    | 3.8    | 9.4    |
| 13.3   | 16.9   | 9.2    | 21.8   | 24.8   | 13.5   | 8.8    | 9.9    | 3.1    |
| 6.0    | 1.1    | 1.5    | 2.5    | 5.7    | 6.5    | 0.6    | 0.6    | 1.8    |
| 1.5    | 2.7    | 5.3    | 11.4   | 3.7    | 14.0   | 7.6    | 2.0    | 1.9    |
| 1.8    | 3.6    | 4.2    | 4.0    | 4.0    | 5.7    | 1.5    | 1.8    | 2.1    |



|       |        |        |       |       |       |       |       |       |
|-------|--------|--------|-------|-------|-------|-------|-------|-------|
| 121.2 | 230.9  | 365.4  | 5.1   | 2.4   | 1.7   | 1.0   | 1.0   | 0.6   |
| 2.9   | 3.2    | 2.4    | 5.8   | 6.7   | 4.8   | 2.7   | 2.8   | 2.2   |
| 0.5   | 0.5    | 0.3    | 2.2   | 4.6   | 2.0   | 0.6   | 0.5   | 0.7   |
| 6.0   | 5.9    | 5.7    | 22.0  | 13.9  | 7.9   | 1.4   | 9.4   | 4.8   |
| 8.3   | 12.0   | 8.1    | 15.0  | 15.9  | 27.0  | 6.3   | 9.6   | 8.8   |
| 69.5  | 77.4   | 49.2   | 9.7   | 10.9  | 7.3   | 8.1   | 1.3   | 1.8   |
| 447.1 | 428.9  | 329.8  | 180.3 | 109.3 | 158.9 | 152.8 | 113.2 | 131.1 |
| 92.9  | 91.0   | 57.9   | 392.7 | 304.5 | 368.2 | 202.5 | 215.9 | 202.0 |
| 13.6  | 14.0   | 13.9   | 10.0  | 12.9  | 15.5  | 10.2  | 5.3   | 8.8   |
| 250.2 | 244.2  | 142.3  | 138.1 | 102.0 | 118.3 | 87.7  | 89.1  | 88.5  |
| 3.8   | 4.5    | 5.4    | 20.8  | 25.9  | 26.2  | 13.2  | 9.8   | 21.4  |
| 26.9  | 29.4   | 35.8   | 19.5  | 14.5  | 10.2  | 19.9  | 11.9  | 10.8  |
| 1.6   | 1.0    | 1.7    | 4.0   | 2.2   | 1.8   | 2.1   | 1.2   | 1.1   |
| 2.9   | 2.5    | 0.3    | 4.3   | 6.1   | 5.2   | 3.0   | 0.5   | 2.2   |
| 8.1   | 5.9    | 4.5    | 13.9  | 10.8  | 15.5  | 6.2   | 5.6   | 6.3   |
| 11.9  | 2.5    | 6.5    | 10.4  | 12.0  | 8.4   | 11.2  | 13.8  | 13.3  |
| 565.8 | 1158.0 | 1303.6 | 723.0 | 666.2 | 774.8 | 859.8 | 757.7 | 914.2 |
| 0.4   | 1.0    | 0.3    | 5.6   | 1.4   | 1.8   | 0.8   | 0.4   | 0.7   |
| 21.2  | 15.5   | 25.4   | 27.8  | 21.9  | 23.2  | 22.8  | 16.6  | 24.9  |
| 5.6   | 10.8   | 17.5   | 28.1  | 26.2  | 32.0  | 8.0   | 6.9   | 6.5   |
| 68.5  | 104.2  | 85.3   | 115.5 | 79.0  | 94.1  | 128.8 | 98.9  | 135.4 |
| 2.2   | 1.7    | 1.6    | 9.2   | 12.6  | 7.4   | 1.4   | 3.7   | 1.8   |
| 5.4   | 9.3    | 12.1   | 16.5  | 24.2  | 21.0  | 6.5   | 9.3   | 12.5  |
| 5.4   | 2.8    | 3.1    | 14.6  | 13.5  | 8.8   | 1.7   | 2.1   | 2.1   |
| 93.3  | 100.1  | 68.6   | 88.1  | 63.5  | 69.2  | 69.9  | 68.3  | 85.8  |
| 2.0   | 0.8    | 2.9    | 3.7   | 2.5   | 8.5   | 1.1   | 2.3   | 0.7   |
| 9.0   | 7.5    | 1.4    | 12.6  | 21.2  | 7.9   | 6.5   | 7.8   | 13.7  |
| 6.1   | 5.0    | 1.5    | 3.5   | 8.6   | 5.6   | 2.0   | 5.0   | 6.4   |
| 21.6  | 26.6   | 10.6   | 18.9  | 7.1   | 10.9  | 9.7   | 10.5  | 7.3   |
| 1.4   | 2.2    | 1.5    | 2.1   | 2.1   | 2.9   | 0.9   | 0.8   | 0.8   |
| 19.4  | 33.9   | 12.7   | 22.0  | 24.9  | 25.6  | 19.7  | 20.7  | 20.6  |
| 35.0  | 41.7   | 40.6   | 9.7   | 11.8  | 8.1   | 8.8   | 13.6  | 6.5   |
| 230.5 | 267.6  | 206.6  | 187.8 | 106.3 | 137.4 | 85.3  | 65.0  | 99.8  |
| 22.8  | 49.1   | 35.7   | 54.8  | 29.8  | 53.7  | 26.0  | 30.5  | 35.3  |
| 1.9   | 2.3    | 0.9    | 5.7   | 7.5   | 6.2   | 3.3   | 1.6   | 4.3   |
| 0.6   | 4.2    | 7.2    | 6.4   | 5.2   | 5.9   | 1.3   | 1.2   | 2.0   |
| 12.1  | 15.8   | 12.9   | 18.7  | 9.6   | 17.3  | 6.2   | 2.5   | 9.3   |
| 20.5  | 33.0   | 20.0   | 18.0  | 3.8   | 3.5   | 16.4  | 16.3  | 16.5  |
| 8.7   | 14.3   | 2.1    | 13.7  | 5.4   | 11.7  | 3.5   | 4.4   | 7.5   |
| 1.5   | 2.7    | 2.0    | 10.6  | 6.1   | 10.5  | 1.5   | 6.0   | 2.8   |
| 47.9  | 26.7   | 18.5   | 155.7 | 138.3 | 143.2 | 100.7 | 94.0  | 100.3 |
| 9.7   | 10.1   | 7.4    | 13.0  | 7.0   | 7.3   | 1.5   | 1.1   | 1.5   |
| 5.0   | 2.1    | 2.8    | 6.6   | 4.7   | 6.0   | 3.9   | 1.6   | 1.6   |
| 12.8  | 13.0   | 10.8   | 24.6  | 17.2  | 12.0  | 10.4  | 9.8   | 11.3  |
| 21.2  | 34.0   | 42.6   | 36.9  | 42.6  | 48.6  | 48.7  | 40.4  | 43.4  |
| 810.8 | 1002.0 | 834.0  | 531.9 | 479.1 | 485.7 | 421.9 | 534.5 | 529.7 |
| 3.7   | 9.7    | 5.0    | 7.3   | 5.4   | 10.9  | 3.3   | 8.6   | 7.3   |
| 4.4   | 2.6    | 1.2    | 1.8   | 8.8   | 3.4   | 2.1   | 2.5   | 0.8   |
| 3.5   | 8.1    | 6.4    | 15.0  | 10.2  | 14.6  | 3.2   | 4.5   | 6.2   |
| 23.8  | 29.9   | 11.4   | 61.3  | 48.0  | 50.2  | 17.6  | 20.3  | 24.8  |
| 4.0   | 2.9    | 5.6    | 14.5  | 7.9   | 19.2  | 3.6   | 5.5   | 3.6   |
| 8.2   | 3.8    | 2.1    | 14.5  | 10.5  | 8.0   | 1.7   | 1.6   | 4.2   |
| 11.9  | 11.8   | 8.4    | 17.0  | 12.4  | 26.4  | 11.8  | 17.6  | 21.1  |

|        |        |        |        |        |        |        |        |        |
|--------|--------|--------|--------|--------|--------|--------|--------|--------|
| 5.6    | 9.6    | 14.3   | 22.3   | 18.4   | 13.1   | 9.4    | 7.5    | 11.6   |
| 9.6    | 1.7    | 3.4    | 12.5   | 9.7    | 3.8    | 2.0    | 1.1    | 7.0    |
| 3.2    | 7.4    | 2.7    | 12.8   | 5.2    | 8.7    | 5.4    | 8.5    | 4.7    |
| 3.3    | 4.7    | 3.1    | 7.6    | 4.5    | 5.0    | 1.3    | 1.5    | 3.3    |
| 2.3    | 7.1    | 6.1    | 8.6    | 5.0    | 5.4    | 8.3    | 9.8    | 15.3   |
| 355.2  | 425.4  | 367.3  | 388.5  | 331.8  | 398.0  | 361.1  | 423.8  | 435.8  |
| 117.5  | 151.8  | 120.9  | 69.8   | 65.5   | 67.5   | 98.0   | 114.5  | 113.3  |
| 1955.6 | 2189.8 | 1706.3 | 2835.9 | 2229.8 | 2542.3 | 1671.6 | 1630.3 | 1752.5 |
| 68.9   | 119.8  | 90.8   | 24.5   | 21.4   | 10.1   | 16.7   | 6.2    | 17.9   |
| 1.8    | 4.1    | 6.6    | 19.0   | 8.9    | 8.7    | 3.4    | 5.6    | 4.9    |
| 31.1   | 35.2   | 29.1   | 52.8   | 44.1   | 43.0   | 21.1   | 15.7   | 29.5   |
| 0.8    | 2.2    | 3.9    | 7.2    | 9.9    | 11.4   | 13.1   | 7.3    | 13.0   |
| 2.6    | 1.8    | 8.3    | 2.9    | 4.8    | 10.0   | 10.5   | 6.3    | 5.5    |
| 73.6   | 73.4   | 56.2   | 12.7   | 13.9   | 16.1   | 20.1   | 22.3   | 14.3   |
| 4.2    | 3.3    | 4.4    | 17.5   | 2.7    | 12.0   | 3.5    | 4.2    | 1.2    |
| 6.0    | 25.1   | 16.5   | 6.0    | 6.4    | 6.5    | 3.0    | 5.8    | 1.7    |
| 8.7    | 8.9    | 3.7    | 19.1   | 9.7    | 15.6   | 8.3    | 9.4    | 7.4    |
| 12.3   | 18.4   | 5.4    | 15.6   | 33.7   | 32.1   | 8.6    | 3.8    | 10.7   |
| 15.3   | 14.3   | 11.7   | 14.9   | 11.3   | 12.3   | 4.7    | 6.4    | 7.2    |
| 7489.8 | 7351.6 | 5929.1 | 3677.6 | 2807.2 | 3116.7 | 2463.2 | 1847.5 | 2388.8 |
| 4.8    | 8.9    | 2.5    | 5.1    | 6.7    | 12.5   | 3.5    | 3.1    | 1.5    |
| 99.3   | 93.2   | 37.6   | 10.3   | 6.0    | 10.0   | 13.4   | 10.7   | 16.8   |
| 2404.5 | 2966.3 | 2264.3 | 1066.8 | 865.0  | 911.7  | 862.7  | 820.5  | 991.8  |
| 0.7    | 2.3    | 1.3    | 1.7    | 1.3    | 2.0    | 1.4    | 0.6    | 1.3    |
| 3.6    | 5.1    | 3.4    | 5.1    | 5.9    | 3.0    | 3.2    | 3.4    | 3.2    |
| 443.3  | 469.5  | 281.5  | 143.4  | 102.6  | 111.3  | 114.9  | 102.2  | 130.3  |
| 13.7   | 10.2   | 9.1    | 10.9   | 13.3   | 7.8    | 7.4    | 11.7   | 14.3   |
| 6.5    | 8.2    | 1.4    | 6.4    | 1.6    | 4.2    | 4.3    | 7.9    | 4.3    |
| 6.2    | 4.3    | 3.0    | 4.8    | 8.1    | 14.0   | 8.8    | 2.8    | 4.8    |
| 20.0   | 22.5   | 23.6   | 23.5   | 25.8   | 28.1   | 16.0   | 19.9   | 20.8   |
| 7.5    | 6.2    | 24.3   | 4.9    | 17.2   | 11.7   | 4.0    | 33.0   | 5.4    |
| 13.7   | 8.7    | 10.9   | 26.8   | 11.4   | 31.4   | 10.2   | 5.8    | 8.0    |
| 7.5    | 6.2    | 1.8    | 18.8   | 14.6   | 14.4   | 8.4    | 5.2    | 15.3   |
| 66.6   | 64.0   | 42.9   | 50.0   | 36.7   | 45.6   | 41.4   | 41.3   | 39.8   |
| 133.1  | 148.5  | 96.2   | 135.1  | 125.4  | 145.3  | 134.5  | 112.3  | 129.3  |
| 2.4    | 5.2    | 2.1    | 6.2    | 7.7    | 7.3    | 0.8    | 4.2    | 9.0    |
| 114.7  | 154.4  | 120.4  | 97.6   | 75.3   | 93.5   | 76.9   | 62.8   | 75.9   |
| 127.4  | 134.3  | 52.8   | 25.8   | 23.3   | 32.3   | 13.5   | 11.9   | 5.2    |
| 17.2   | 22.9   | 4.0    | 29.4   | 19.1   | 9.1    | 7.5    | 7.8    | 18.0   |
| 14.4   | 15.9   | 8.6    | 54.5   | 30.5   | 26.7   | 34.4   | 30.0   | 26.9   |
| 4.5    | 2.3    | 4.2    | 11.8   | 10.1   | 11.3   | 0.9    | 1.9    | 1.3    |
| 3.1    | 11.1   | 5.4    | 28.3   | 9.9    | 18.8   | 3.9    | 3.7    | 3.6    |
| 4.2    | 5.7    | 6.7    | 8.1    | 8.7    | 7.0    | 4.6    | 2.2    | 2.7    |
| 96.4   | 84.0   | 75.4   | 211.1  | 144.1  | 185.5  | 130.3  | 119.3  | 132.9  |
| 746.9  | 635.0  | 320.0  | 248.1  | 166.3  | 182.0  | 230.2  | 265.0  | 268.1  |
| 2.2    | 8.9    | 10.9   | 7.1    | 7.1    | 4.6    | 8.0    | 4.1    | 2.9    |
| 211.0  | 92.8   | 78.6   | 21.6   | 29.5   | 33.3   | 9.9    | 8.3    | 18.7   |
| 28.2   | 51.3   | 39.3   | 12.3   | 21.7   | 17.9   | 18.6   | 28.0   | 21.4   |
| 5.2    | 2.0    | 0.8    | 5.8    | 6.3    | 3.5    | 7.6    | 7.1    | 5.6    |
| 1.5    | 8.8    | 4.1    | 16.3   | 3.8    | 13.0   | 5.8    | 3.7    | 4.8    |
| 2.9    | 1.9    | 2.5    | 4.7    | 3.4    | 4.9    | 1.6    | 1.8    | 2.9    |
| 152.9  | 162.8  | 138.4  | 156.4  | 141.9  | 166.9  | 115.1  | 129.6  | 121.5  |
| 17.9   | 21.7   | 17.3   | 52.2   | 31.2   | 52.2   | 36.8   | 42.5   | 31.0   |

|        |        |       |       |       |       |       |       |       |
|--------|--------|-------|-------|-------|-------|-------|-------|-------|
| 11.2   | 10.6   | 8.2   | 6.2   | 12.7  | 14.5  | 4.7   | 15.0  | 10.5  |
| 10.3   | 1.6    | 7.3   | 13.3  | 4.4   | 13.4  | 4.4   | 3.8   | 1.2   |
| 7.2    | 7.3    | 13.4  | 28.2  | 16.7  | 8.5   | 4.4   | 10.9  | 12.4  |
| 13.9   | 14.0   | 12.4  | 22.7  | 9.2   | 24.6  | 1.6   | 6.1   | 9.3   |
| 1.5    | 1.2    | 3.4   | 1.7   | 1.4   | 2.2   | 0.8   | 0.7   | 2.3   |
| 3.8    | 2.1    | 1.4   | 5.3   | 2.8   | 5.1   | 1.9   | 2.4   | 6.3   |
| 0.6    | 2.3    | 0.6   | 2.0   | 5.6   | 3.6   | 1.1   | 1.5   | 2.2   |
| 12.1   | 19.6   | 8.3   | 10.7  | 11.7  | 10.9  | 4.1   | 3.1   | 13.3  |
| 100.6  | 109.5  | 64.4  | 18.1  | 35.0  | 16.3  | 21.1  | 7.0   | 18.2  |
| 3.0    | 3.5    | 3.2   | 21.5  | 10.6  | 13.4  | 3.3   | 3.1   | 9.1   |
| 1.5    | 1.2    | 1.2   | 3.0   | 2.6   | 3.8   | 1.0   | 0.8   | 1.3   |
| 1.0    | 1.5    | 2.2   | 4.2   | 2.2   | 5.3   | 1.1   | 1.3   | 0.8   |
| 11.0   | 7.3    | 1.2   | 24.0  | 13.6  | 11.2  | 14.1  | 12.7  | 12.4  |
| 3.3    | 16.7   | 13.5  | 14.8  | 15.9  | 9.4   | 10.1  | 13.4  | 15.6  |
| 5.2    | 34.1   | 34.5  | 6.2   | 3.9   | 8.8   | 1.4   | 4.2   | 2.6   |
| 10.8   | 4.8    | 10.5  | 28.5  | 12.9  | 14.0  | 6.6   | 10.5  | 2.1   |
| 7.4    | 34.3   | 49.9  | 2.2   | 1.7   | 4.1   | 0.9   | 1.2   | 1.2   |
| 2.5    | 4.7    | 1.8   | 6.6   | 3.0   | 3.1   | 1.3   | 2.6   | 1.8   |
| 1.6    | 4.0    | 3.5   | 2.8   | 3.5   | 7.9   | 0.8   | 1.0   | 1.3   |
| 8.2    | 10.5   | 0.8   | 11.9  | 14.2  | 17.9  | 5.7   | 5.1   | 7.0   |
| 79.3   | 108.5  | 69.4  | 38.6  | 22.4  | 38.1  | 32.0  | 17.5  | 27.6  |
| 16.7   | 30.9   | 36.7  | 72.7  | 70.4  | 70.7  | 69.2  | 61.4  | 82.4  |
| 20.3   | 44.7   | 30.7  | 81.0  | 40.6  | 63.5  | 38.7  | 33.3  | 29.7  |
| 143.6  | 224.7  | 154.5 | 115.8 | 84.9  | 89.0  | 59.4  | 39.0  | 51.3  |
| 385.0  | 396.2  | 256.0 | 263.3 | 231.4 | 285.6 | 140.0 | 136.9 | 179.3 |
| 42.3   | 65.7   | 87.7  | 33.3  | 50.6  | 45.8  | 42.7  | 59.9  | 75.7  |
| 4.8    | 2.1    | 1.2   | 14.5  | 14.8  | 10.8  | 6.1   | 8.3   | 8.9   |
| 10.3   | 16.6   | 7.8   | 65.8  | 64.6  | 79.6  | 31.3  | 57.5  | 43.2  |
| 12.4   | 11.6   | 2.2   | 6.3   | 7.9   | 12.1  | 8.8   | 1.1   | 5.8   |
| 1391.6 | 1397.3 | 745.0 | 503.4 | 369.3 | 458.7 | 250.2 | 234.1 | 277.1 |
| 0.3    | 0.9    | 0.4   | 1.1   | 3.8   | 4.2   | 0.3   | 0.6   | 0.3   |
| 10.9   | 18.7   | 5.0   | 2.8   | 2.7   | 3.1   | 6.0   | 1.6   | 1.0   |
| 6.4    | 2.4    | 2.4   | 26.7  | 17.3  | 18.9  | 14.3  | 15.6  | 9.2   |
| 7.1    | 6.7    | 11.8  | 23.0  | 14.4  | 15.7  | 14.2  | 13.1  | 11.3  |
| 334.1  | 216.8  | 163.0 | 6.7   | 9.6   | 13.4  | 9.2   | 6.9   | 6.3   |
| 3.4    | 4.9    | 6.1   | 6.3   | 11.2  | 12.7  | 4.4   | 3.7   | 6.1   |
| 15.8   | 11.0   | 12.1  | 39.8  | 32.7  | 38.8  | 8.3   | 11.1  | 16.5  |
| 9.9    | 8.9    | 2.4   | 9.5   | 19.9  | 13.1  | 12.1  | 3.0   | 4.1   |
| 541.0  | 833.9  | 684.0 | 215.1 | 153.1 | 163.2 | 226.1 | 235.5 | 250.6 |
| 3.1    | 3.7    | 3.4   | 6.5   | 4.7   | 2.2   | 2.6   | 4.8   | 0.7   |
| 8.7    | 8.7    | 11.5  | 4.7   | 7.5   | 20.6  | 3.0   | 0.9   | 8.1   |
| 45.6   | 52.7   | 29.2  | 73.9  | 58.9  | 84.1  | 48.3  | 38.0  | 56.5  |
| 1.1    | 4.8    | 0.4   | 7.0   | 2.7   | 2.0   | 5.9   | 1.2   | 1.5   |
| 1.0    | 0.7    | 0.7   | 6.9   | 2.9   | 4.1   | 0.5   | 1.3   | 0.8   |
| 4.1    | 29.3   | 74.8  | 10.9  | 9.3   | 7.9   | 1.6   | 6.9   | 3.2   |
| 18.3   | 17.9   | 8.4   | 14.1  | 18.3  | 21.4  | 4.6   | 14.4  | 5.3   |
| 171.5  | 206.9  | 160.6 | 36.5  | 18.2  | 19.7  | 25.7  | 21.8  | 9.9   |
| 3.8    | 2.0    | 5.2   | 6.0   | 2.2   | 11.9  | 7.2   | 4.9   | 10.9  |
| 91.4   | 127.0  | 88.7  | 235.5 | 177.5 | 201.3 | 138.4 | 127.5 | 130.2 |
| 29.7   | 48.9   | 34.9  | 56.6  | 54.7  | 62.3  | 35.4  | 44.9  | 39.9  |
| 1.3    | 3.0    | 1.6   | 2.2   | 2.0   | 2.8   | 0.9   | 1.1   | 1.0   |
| 142.4  | 218.7  | 205.0 | 17.2  | 2.8   | 3.5   | 5.4   | 1.5   | 2.0   |
| 9.3    | 11.9   | 13.1  | 16.9  | 10.2  | 20.7  | 12.2  | 9.2   | 6.5   |

|        |        |        |       |       |       |       |       |       |
|--------|--------|--------|-------|-------|-------|-------|-------|-------|
| 1.6    | 9.5    | 2.7    | 3.9   | 3.9   | 6.8   | 1.1   | 3.6   | 11.9  |
| 2.2    | 5.9    | 6.9    | 5.5   | 17.4  | 6.2   | 6.3   | 6.3   | 2.1   |
| 6.7    | 4.7    | 6.9    | 17.1  | 28.9  | 13.1  | 18.2  | 15.4  | 12.8  |
| 5.5    | 5.6    | 1.3    | 8.7   | 9.1   | 7.1   | 1.3   | 5.4   | 1.3   |
| 163.8  | 219.7  | 168.9  | 30.3  | 22.5  | 36.7  | 33.5  | 35.1  | 39.5  |
| 717.0  | 255.6  | 106.5  | 18.8  | 4.4   | 16.2  | 15.9  | 13.2  | 12.5  |
| 3.2    | 2.6    | 13.5   | 29.8  | 19.6  | 16.5  | 2.6   | 3.4   | 2.3   |
| 268.1  | 287.0  | 218.6  | 97.1  | 72.7  | 102.4 | 113.0 | 116.3 | 120.3 |
| 2.2    | 3.0    | 1.3    | 5.7   | 2.8   | 1.8   | 2.3   | 1.2   | 4.4   |
| 0.9    | 3.4    | 3.7    | 13.1  | 5.7   | 12.0  | 12.2  | 15.2  | 12.7  |
| 549.4  | 484.0  | 216.3  | 304.6 | 231.0 | 259.8 | 295.3 | 237.8 | 303.5 |
| 19.5   | 24.4   | 22.6   | 14.9  | 15.8  | 12.5  | 18.1  | 9.4   | 21.6  |
| 292.9  | 69.6   | 1.7    | 13.4  | 10.8  | 9.6   | 2.2   | 3.0   | 3.7   |
| 137.0  | 197.9  | 313.5  | 14.9  | 18.5  | 26.2  | 2.0   | 12.9  | 4.4   |
| 255.3  | 309.8  | 251.8  | 584.0 | 415.7 | 475.9 | 212.1 | 221.2 | 247.2 |
| 175.9  | 211.5  | 156.1  | 139.0 | 91.6  | 116.1 | 124.2 | 148.7 | 126.6 |
| 5.9    | 1.4    | 0.3    | 28.7  | 14.1  | 18.1  | 15.1  | 12.1  | 17.3  |
| 660.3  | 905.2  | 746.9  | 81.1  | 57.2  | 82.7  | 41.0  | 36.8  | 43.5  |
| 180.2  | 278.2  | 220.5  | 89.9  | 71.9  | 95.4  | 126.1 | 116.4 | 138.1 |
| 15.8   | 27.9   | 15.6   | 12.7  | 16.7  | 17.7  | 11.3  | 13.1  | 9.3   |
| 5.2    | 2.5    | 1.2    | 10.9  | 6.1   | 12.9  | 1.6   | 2.4   | 1.3   |
| 3.0    | 5.6    | 2.7    | 4.8   | 8.1   | 4.3   | 1.8   | 2.5   | 1.9   |
| 1.9    | 2.0    | 4.9    | 2.7   | 3.2   | 1.8   | 0.8   | 1.3   | 0.5   |
| 2.4    | 2.1    | 1.6    | 3.0   | 1.9   | 2.7   | 2.2   | 2.2   | 3.5   |
| 10.0   | 11.0   | 6.1    | 12.1  | 14.7  | 9.5   | 10.4  | 8.5   | 5.1   |
| 13.0   | 16.7   | 7.2    | 11.1  | 2.4   | 12.3  | 9.4   | 1.0   | 4.4   |
| 4.4    | 3.7    | 4.5    | 10.0  | 3.2   | 4.6   | 2.4   | 2.5   | 0.4   |
| 1.1    | 2.1    | 1.2    | 2.7   | 2.0   | 2.4   | 1.2   | 2.1   | 1.8   |
| 11.6   | 24.7   | 14.6   | 34.2  | 31.7  | 28.7  | 36.0  | 27.1  | 30.4  |
| 1.9    | 0.7    | 2.9    | 3.7   | 2.9   | 3.4   | 1.1   | 3.5   | 1.6   |
| 8.5    | 3.7    | 2.0    | 12.0  | 14.9  | 12.4  | 3.9   | 4.3   | 4.7   |
| 4.5    | 10.3   | 4.2    | 3.7   | 2.7   | 3.1   | 8.2   | 6.2   | 5.4   |
| 0.8    | 1.3    | 1.0    | 3.7   | 3.0   | 3.0   | 1.3   | 1.0   | 9.5   |
| 1.9    | 5.9    | 2.3    | 2.9   | 3.3   | 10.2  | 1.7   | 2.0   | 8.9   |
| 12.1   | 21.0   | 10.6   | 15.2  | 9.4   | 23.5  | 6.7   | 6.3   | 11.5  |
| 32.9   | 37.4   | 29.6   | 7.7   | 4.0   | 7.8   | 3.4   | 0.9   | 0.8   |
| 11.7   | 2.9    | 8.4    | 20.5  | 9.3   | 9.9   | 5.3   | 1.8   | 1.9   |
| 40.7   | 50.2   | 33.5   | 96.8  | 86.2  | 92.0  | 56.0  | 57.2  | 66.8  |
| 4.6    | 14.0   | 3.9    | 26.2  | 12.4  | 12.0  | 15.9  | 11.8  | 23.0  |
| 1.5    | 3.3    | 1.8    | 10.6  | 15.9  | 4.2   | 1.0   | 5.3   | 2.2   |
| 4.9    | 4.5    | 4.8    | 5.1   | 4.2   | 7.2   | 3.2   | 0.7   | 4.2   |
| 9.8    | 21.6   | 9.0    | 14.7  | 10.9  | 7.7   | 17.0  | 3.0   | 11.0  |
| 1705.1 | 1803.8 | 1657.0 | 5.6   | 11.1  | 17.9  | 4.3   | 15.0  | 19.4  |
| 10.1   | 12.8   | 9.8    | 10.3  | 14.7  | 19.1  | 8.1   | 7.2   | 8.2   |
| 3.8    | 0.5    | 0.8    | 0.8   | 0.6   | 5.2   | 2.7   | 3.6   | 0.4   |
| 13.9   | 14.7   | 6.5    | 18.7  | 11.3  | 19.5  | 13.5  | 15.3  | 22.7  |
| 1372.8 | 1600.3 | 1548.2 | 335.2 | 268.0 | 300.7 | 506.2 | 525.5 | 495.0 |
| 2.1    | 4.8    | 9.2    | 6.6   | 4.5   | 5.4   | 1.9   | 4.8   | 2.5   |
| 1049.2 | 1104.0 | 790.2  | 450.8 | 442.4 | 463.4 | 376.3 | 455.1 | 497.1 |
| 6.9    | 1.0    | 6.2    | 4.1   | 7.9   | 4.2   | 5.0   | 14.4  | 1.3   |
| 2.1    | 5.9    | 5.2    | 3.8   | 6.8   | 11.4  | 1.4   | 4.0   | 0.5   |
| 1.4    | 1.4    | 0.6    | 13.7  | 1.6   | 2.9   | 0.4   | 4.7   | 3.9   |
| 21.2   | 28.3   | 17.0   | 28.1  | 15.6  | 13.3  | 15.0  | 16.3  | 20.1  |

|        |        |        |        |        |        |        |        |        |
|--------|--------|--------|--------|--------|--------|--------|--------|--------|
| 1.6    | 7.1    | 4.6    | 10.4   | 8.5    | 10.2   | 4.9    | 5.7    | 8.4    |
| 7.1    | 5.1    | 8.3    | 17.9   | 14.5   | 12.7   | 11.8   | 2.5    | 5.1    |
| 6.2    | 6.8    | 4.0    | 11.6   | 6.7    | 14.7   | 1.1    | 2.9    | 2.7    |
| 4.2    | 1.4    | 2.9    | 19.8   | 7.3    | 19.7   | 9.8    | 6.5    | 4.3    |
| 5.7    | 6.0    | 0.3    | 17.6   | 11.6   | 25.0   | 3.8    | 3.1    | 2.1    |
| 5.0    | 7.7    | 8.4    | 2.8    | 6.4    | 7.4    | 2.2    | 3.9    | 3.4    |
| 560.8  | 1359.0 | 1280.9 | 115.8  | 77.5   | 84.5   | 116.8  | 96.3   | 111.1  |
| 3.3    | 3.0    | 4.8    | 4.7    | 8.4    | 7.3    | 1.7    | 4.6    | 4.6    |
| 18.9   | 15.1   | 17.0   | 29.3   | 30.1   | 42.7   | 12.6   | 17.0   | 21.9   |
| 742.6  | 1017.6 | 640.9  | 583.1  | 429.4  | 475.4  | 615.2  | 587.4  | 639.6  |
| 34.4   | 32.9   | 26.4   | 25.6   | 27.1   | 27.5   | 33.4   | 36.0   | 29.0   |
| 22.7   | 52.5   | 53.2   | 15.0   | 18.7   | 22.7   | 6.5    | 24.8   | 19.3   |
| 60.1   | 81.5   | 49.5   | 40.4   | 27.6   | 40.3   | 31.7   | 24.7   | 33.2   |
| 6.0    | 8.7    | 7.6    | 4.9    | 8.4    | 5.7    | 1.1    | 3.1    | 0.7    |
| 1.8    | 2.9    | 1.6    | 2.5    | 3.5    | 2.7    | 1.8    | 1.6    | 1.8    |
| 0.5    | 0.9    | 6.9    | 4.8    | 4.9    | 4.4    | 8.2    | 5.7    | 4.2    |
| 24.8   | 35.4   | 12.3   | 27.0   | 22.1   | 26.2   | 24.9   | 25.7   | 25.3   |
| 10.2   | 8.2    | 18.4   | 32.2   | 11.6   | 19.5   | 6.1    | 3.2    | 18.1   |
| 12.3   | 17.8   | 13.1   | 22.6   | 24.6   | 32.5   | 16.9   | 26.1   | 20.8   |
| 2.2    | 1.2    | 2.0    | 4.7    | 5.0    | 12.0   | 9.2    | 5.3    | 5.6    |
| 23.2   | 61.9   | 48.3   | 33.1   | 22.2   | 39.5   | 14.9   | 24.9   | 13.7   |
| 73.0   | 79.0   | 55.7   | 35.3   | 23.3   | 30.9   | 26.8   | 33.0   | 28.2   |
| 6.5    | 5.2    | 7.1    | 6.0    | 8.8    | 22.5   | 8.0    | 5.1    | 7.0    |
| 14.8   | 20.1   | 7.9    | 10.2   | 16.0   | 12.5   | 14.4   | 8.6    | 9.2    |
| 15.7   | 30.5   | 14.1   | 14.5   | 13.6   | 19.3   | 5.8    | 12.5   | 19.0   |
| 89.1   | 155.3  | 145.4  | 72.7   | 67.5   | 88.5   | 82.1   | 99.6   | 98.6   |
| 16.7   | 16.2   | 27.6   | 16.8   | 17.9   | 14.6   | 5.8    | 9.2    | 6.5    |
| 11.1   | 10.4   | 7.2    | 33.2   | 26.1   | 34.1   | 33.8   | 16.3   | 27.5   |
| 0.8    | 8.8    | 2.1    | 10.4   | 7.5    | 2.1    | 0.9    | 2.6    | 0.8    |
| 18.5   | 22.3   | 11.5   | 22.4   | 13.2   | 29.3   | 17.9   | 7.8    | 10.0   |
| 15.5   | 13.7   | 15.9   | 29.1   | 19.7   | 22.8   | 14.8   | 14.4   | 11.0   |
| 56.3   | 52.0   | 38.0   | 35.9   | 43.1   | 25.5   | 10.3   | 13.4   | 14.5   |
| 23.8   | 27.3   | 10.4   | 22.3   | 10.8   | 14.8   | 9.9    | 12.6   | 7.2    |
| 5312.7 | 5916.7 | 4859.5 | 3904.5 | 3178.7 | 3359.6 | 2476.1 | 1950.5 | 2556.9 |
| 5468.2 | 6162.3 | 5250.8 | 3938.0 | 3046.5 | 3399.1 | 2938.8 | 2387.0 | 3026.0 |
| 7.6    | 11.0   | 11.7   | 78.7   | 43.5   | 52.4   | 13.9   | 9.6    | 7.4    |
| 44.4   | 40.3   | 47.0   | 47.1   | 42.7   | 40.4   | 21.9   | 23.7   | 16.3   |
| 174.0  | 280.7  | 203.3  | 221.1  | 171.9  | 225.1  | 165.7  | 190.0  | 277.5  |
| 294.1  | 470.4  | 536.0  | 210.9  | 212.3  | 190.6  | 138.7  | 148.0  | 174.7  |
| 1.3    | 0.9    | 0.7    | 5.0    | 3.0    | 3.0    | 2.4    | 1.2    | 1.0    |
| 271.2  | 360.9  | 215.1  | 317.6  | 289.1  | 322.3  | 160.8  | 166.3  | 178.5  |
| 6.9    | 3.2    | 8.5    | 8.9    | 9.7    | 11.3   | 9.4    | 5.6    | 4.5    |
| 42.0   | 21.1   | 19.9   | 10.5   | 6.5    | 10.2   | 5.1    | 1.8    | 4.1    |
| 17.6   | 26.0   | 12.3   | 3.5    | 12.9   | 10.6   | 3.5    | 4.3    | 5.0    |
| 10.2   | 11.4   | 12.1   | 18.8   | 13.2   | 27.1   | 19.1   | 10.8   | 11.9   |
| 17.5   | 18.7   | 13.0   | 11.4   | 11.1   | 10.8   | 11.8   | 11.0   | 12.9   |
| 9.4    | 16.4   | 26.6   | 45.0   | 43.4   | 81.5   | 181.9  | 210.7  | 268.1  |
| 18.5   | 76.1   | 110.7  | 651.0  | 732.3  | 918.0  | 708.5  | 935.3  | 1075.2 |
| 1.7    | 3.6    | 3.3    | 12.3   | 6.3    | 8.8    | 6.0    | 3.0    | 4.0    |
| 87.6   | 80.4   | 51.1   | 124.8  | 106.5  | 130.2  | 67.5   | 53.7   | 64.7   |
| 589.4  | 772.3  | 581.3  | 623.2  | 552.1  | 652.6  | 422.2  | 402.6  | 468.0  |
| 2.1    | 6.9    | 10.1   | 13.6   | 12.4   | 14.2   | 5.7    | 7.0    | 5.6    |
| 16.0   | 11.9   | 3.4    | 15.1   | 9.3    | 14.4   | 10.5   | 13.8   | 8.1    |

|        |        |        |        |        |        |        |        |        |
|--------|--------|--------|--------|--------|--------|--------|--------|--------|
| 68.7   | 58.4   | 38.1   | 14.4   | 17.0   | 18.1   | 15.3   | 15.3   | 20.4   |
| 9.7    | 13.9   | 10.0   | 21.8   | 20.6   | 30.5   | 16.4   | 15.1   | 16.3   |
| 9.4    | 12.5   | 2.4    | 4.5    | 5.4    | 6.2    | 8.0    | 1.8    | 0.9    |
| 17.6   | 2.1    | 12.4   | 21.9   | 14.4   | 18.1   | 5.0    | 2.2    | 9.1    |
| 10.8   | 12.4   | 9.6    | 33.6   | 39.4   | 28.5   | 20.2   | 17.4   | 15.5   |
| 6.6    | 3.2    | 0.9    | 2.0    | 2.4    | 2.3    | 2.1    | 1.5    | 2.5    |
| 9.3    | 5.2    | 6.8    | 11.2   | 12.7   | 3.2    | 7.5    | 1.1    | 2.8    |
| 54.8   | 64.8   | 44.5   | 28.0   | 39.3   | 52.5   | 29.1   | 37.2   | 49.1   |
| 10.3   | 5.6    | 2.9    | 24.2   | 17.6   | 10.7   | 9.7    | 15.7   | 11.8   |
| 25.3   | 20.7   | 11.7   | 22.9   | 8.4    | 16.7   | 13.0   | 6.3    | 6.1    |
| 0.8    | 8.6    | 2.1    | 2.3    | 9.0    | 5.7    | 3.2    | 2.4    | 1.9    |
| 8.2    | 4.7    | 4.1    | 2.6    | 1.3    | 4.5    | 6.6    | 9.2    | 1.8    |
| 680.2  | 1025.3 | 993.8  | 104.3  | 78.4   | 102.3  | 52.0   | 49.9   | 41.5   |
| 418.7  | 538.5  | 358.5  | 453.8  | 345.9  | 347.9  | 269.2  | 263.3  | 281.5  |
| 64.1   | 126.4  | 118.4  | 9.2    | 24.8   | 24.3   | 22.4   | 18.6   | 12.6   |
| 350.0  | 367.4  | 242.3  | 293.5  | 205.1  | 245.6  | 256.0  | 173.5  | 235.4  |
| 3.3    | 5.4    | 5.3    | 6.4    | 13.9   | 11.7   | 6.6    | 9.6    | 6.6    |
| 201.8  | 272.9  | 258.9  | 108.8  | 102.1  | 109.5  | 127.7  | 145.7  | 155.7  |
| 4.9    | 6.3    | 7.0    | 12.6   | 7.9    | 10.0   | 6.7    | 3.9    | 4.8    |
| 11.2   | 16.8   | 8.1    | 28.6   | 15.0   | 22.5   | 18.4   | 9.3    | 6.7    |
| 2.2    | 2.6    | 3.4    | 3.3    | 4.9    | 10.8   | 1.3    | 1.7    | 1.1    |
| 1904.2 | 2295.9 | 1172.3 | 442.5  | 332.7  | 432.1  | 352.3  | 306.2  | 324.8  |
| 2.4    | 4.7    | 4.2    | 7.5    | 8.9    | 7.3    | 3.3    | 2.9    | 0.7    |
| 157.6  | 206.4  | 159.0  | 429.1  | 313.0  | 337.5  | 269.6  | 230.5  | 289.1  |
| 4.1    | 6.2    | 1.4    | 2.9    | 5.0    | 2.6    | 11.4   | 4.3    | 8.1    |
| 14.9   | 3.8    | 10.8   | 29.0   | 14.7   | 24.0   | 14.0   | 9.7    | 16.2   |
| 37.0   | 39.6   | 16.9   | 37.0   | 35.2   | 40.9   | 44.0   | 26.6   | 37.4   |
| 22.5   | 7.2    | 18.7   | 14.8   | 24.8   | 23.9   | 12.0   | 11.6   | 15.2   |
| 451.0  | 683.1  | 629.3  | 527.8  | 455.3  | 541.5  | 396.0  | 357.9  | 482.0  |
| 7.3    | 13.6   | 8.8    | 12.6   | 7.7    | 4.5    | 3.4    | 8.9    | 3.9    |
| 243.1  | 272.8  | 228.9  | 11.3   | 17.8   | 17.8   | 9.9    | 15.5   | 16.0   |
| 235.3  | 304.7  | 195.4  | 284.4  | 250.1  | 273.8  | 112.9  | 149.2  | 157.8  |
| 16.2   | 20.4   | 3.6    | 19.2   | 24.1   | 30.4   | 14.3   | 14.3   | 20.0   |
| 4.3    | 16.8   | 14.4   | 26.8   | 41.4   | 48.7   | 29.0   | 30.4   | 28.4   |
| 53.6   | 41.9   | 47.7   | 4.0    | 5.7    | 4.9    | 6.5    | 7.7    | 4.3    |
| 149.4  | 263.4  | 192.3  | 141.8  | 148.2  | 179.3  | 138.3  | 174.5  | 167.4  |
| 266.2  | 377.0  | 285.4  | 164.3  | 146.5  | 158.9  | 185.3  | 212.6  | 213.0  |
| 89.7   | 135.4  | 114.4  | 11.1   | 16.2   | 21.8   | 9.7    | 18.4   | 17.9   |
| 36.8   | 55.1   | 47.3   | 7.6    | 5.0    | 6.5    | 3.7    | 2.2    | 3.5    |
| 4.2    | 1.4    | 3.7    | 10.5   | 9.2    | 6.1    | 2.9    | 2.8    | 1.4    |
| 14.0   | 23.6   | 15.1   | 26.3   | 30.6   | 37.1   | 26.9   | 28.0   | 22.0   |
| 15.9   | 10.3   | 1.6    | 13.3   | 11.9   | 17.5   | 13.8   | 12.7   | 13.0   |
| 7.9    | 2.3    | 1.3    | 3.9    | 4.6    | 5.5    | 6.5    | 2.2    | 2.2    |
| 7.2    | 16.3   | 10.1   | 24.1   | 16.3   | 18.0   | 8.9    | 9.6    | 6.8    |
| 7.0    | 7.3    | 6.1    | 16.2   | 12.9   | 24.2   | 6.2    | 11.9   | 7.9    |
| 4634.2 | 5187.1 | 4054.1 | 3075.4 | 2500.1 | 2701.0 | 1580.4 | 1459.4 | 1590.4 |
| 54.5   | 73.3   | 66.0   | 215.7  | 187.9  | 189.3  | 113.9  | 131.3  | 136.4  |
| 4.6    | 13.4   | 3.8    | 10.6   | 3.7    | 8.2    | 5.8    | 6.0    | 8.9    |
| 8.1    | 12.6   | 11.0   | 12.8   | 9.4    | 12.8   | 18.8   | 12.0   | 6.0    |
| 3.9    | 8.8    | 5.7    | 12.3   | 9.2    | 6.9    | 7.6    | 4.4    | 9.0    |
| 77.0   | 70.6   | 51.5   | 77.9   | 61.0   | 67.1   | 84.6   | 48.7   | 51.1   |
| 3.1    | 8.0    | 1.0    | 4.3    | 7.0    | 3.2    | 3.2    | 7.4    | 1.4    |
| 0.9    | 4.3    | 0.4    | 3.6    | 4.2    | 3.9    | 0.8    | 1.8    | 0.9    |

|        |        |        |        |        |        |        |        |        |
|--------|--------|--------|--------|--------|--------|--------|--------|--------|
| 3.3    | 6.1    | 1.5    | 3.6    | 6.5    | 5.4    | 0.8    | 3.7    | 1.0    |
| 29.0   | 39.0   | 29.6   | 47.8   | 43.0   | 34.9   | 23.7   | 17.0   | 23.6   |
| 2.4    | 0.9    | 1.2    | 10.4   | 6.0    | 7.0    | 4.0    | 3.3    | 1.4    |
| 4.5    | 0.8    | 4.3    | 14.5   | 3.8    | 4.5    | 2.1    | 2.3    | 3.6    |
| 2948.0 | 3223.0 | 2180.4 | 2021.9 | 1737.9 | 1774.6 | 1507.9 | 1649.5 | 1836.6 |
| 6.5    | 17.0   | 2.2    | 9.2    | 9.0    | 9.7    | 4.1    | 2.0    | 6.0    |
| 11.9   | 12.5   | 6.6    | 13.7   | 2.7    | 10.7   | 2.1    | 3.3    | 6.7    |
| 3.7    | 8.6    | 1.6    | 6.0    | 8.1    | 12.7   | 1.9    | 0.5    | 0.9    |
| 12.2   | 7.7    | 4.2    | 6.6    | 6.7    | 5.3    | 2.6    | 3.7    | 3.0    |
| 137.3  | 201.0  | 99.7   | 42.9   | 24.1   | 40.7   | 32.7   | 21.5   | 31.7   |
| 32.9   | 19.9   | 30.9   | 30.5   | 24.1   | 21.4   | 28.5   | 16.6   | 22.0   |
| 15.6   | 23.8   | 13.0   | 11.3   | 5.9    | 14.5   | 2.8    | 4.2    | 3.6    |
| 23.4   | 15.0   | 17.0   | 29.9   | 9.0    | 11.2   | 7.1    | 13.0   | 9.5    |
| 41.4   | 45.7   | 37.3   | 35.9   | 22.1   | 28.1   | 16.9   | 19.0   | 16.4   |
| 38.2   | 41.4   | 35.2   | 28.3   | 23.9   | 30.8   | 25.9   | 25.0   | 25.3   |
| 6.4    | 7.7    | 5.6    | 16.0   | 8.2    | 18.4   | 6.3    | 5.4    | 6.5    |
| 14.8   | 13.8   | 12.2   | 11.4   | 11.3   | 13.8   | 9.8    | 8.9    | 9.0    |
| 98.6   | 83.9   | 55.0   | 53.1   | 46.1   | 60.9   | 47.0   | 80.0   | 70.3   |
| 1.2    | 4.2    | 0.5    | 2.0    | 5.0    | 5.9    | 2.0    | 2.1    | 0.6    |
| 15.5   | 31.0   | 17.4   | 36.4   | 19.3   | 22.5   | 11.4   | 7.0    | 4.2    |
| 31.9   | 34.3   | 20.9   | 30.9   | 34.6   | 36.4   | 25.7   | 25.6   | 23.1   |
| 24.1   | 34.5   | 23.3   | 31.4   | 20.1   | 23.1   | 20.3   | 23.2   | 14.1   |
| 3.7    | 1.5    | 2.5    | 2.1    | 0.8    | 2.4    | 6.9    | 2.4    | 6.7    |
| 60.6   | 33.6   | 19.4   | 61.9   | 39.3   | 40.3   | 28.8   | 29.5   | 25.8   |
| 44.3   | 43.3   | 43.4   | 63.7   | 57.0   | 59.0   | 54.4   | 48.7   | 49.4   |
| 499.4  | 637.9  | 451.8  | 270.2  | 222.0  | 253.5  | 235.1  | 284.3  | 294.6  |
| 20.4   | 37.9   | 37.4   | 20.6   | 18.9   | 11.2   | 17.6   | 17.8   | 17.4   |
| 60.5   | 67.2   | 41.3   | 52.5   | 55.8   | 62.1   | 58.0   | 80.3   | 67.6   |
| 3.8    | 4.4    | 1.5    | 10.5   | 7.6    | 10.0   | 5.5    | 10.0   | 4.6    |
| 4.9    | 6.0    | 2.9    | 10.1   | 2.8    | 12.5   | 6.4    | 2.5    | 6.5    |
| 1.5    | 3.1    | 2.2    | 16.0   | 8.5    | 22.7   | 3.2    | 3.6    | 3.5    |
| 4.2    | 2.8    | 3.3    | 4.8    | 5.0    | 6.4    | 3.2    | 1.3    | 1.3    |
| 2.8    | 1.1    | 1.0    | 6.1    | 4.5    | 4.6    | 1.3    | 1.0    | 1.5    |
| 472.8  | 566.7  | 311.3  | 536.0  | 443.3  | 517.2  | 394.2  | 366.5  | 378.3  |
| 2.7    | 3.0    | 6.1    | 5.0    | 12.4   | 5.5    | 2.3    | 2.4    | 1.8    |
| 768.8  | 755.5  | 511.1  | 297.5  | 273.3  | 330.3  | 235.3  | 231.5  | 281.6  |
| 10.0   | 5.1    | 11.4   | 12.6   | 3.4    | 12.1   | 1.8    | 7.2    | 6.4    |
| 413.7  | 423.6  | 264.8  | 343.8  | 301.9  | 309.7  | 178.7  | 172.5  | 202.2  |
| 1.7    | 1.4    | 2.2    | 12.7   | 3.4    | 8.7    | 2.0    | 4.4    | 3.2    |
| 187.3  | 237.2  | 174.2  | 128.4  | 99.8   | 111.0  | 119.5  | 124.4  | 139.6  |
| 214.3  | 295.1  | 179.0  | 244.9  | 197.6  | 204.8  | 105.7  | 115.2  | 122.4  |
| 520.4  | 526.3  | 270.6  | 325.4  | 261.4  | 331.3  | 394.6  | 313.7  | 372.1  |
| 6.0    | 8.6    | 2.0    | 11.7   | 3.0    | 4.5    | 2.5    | 3.9    | 1.9    |
| 100.5  | 91.0   | 56.5   | 86.0   | 74.5   | 66.4   | 54.3   | 50.6   | 54.1   |
| 112.6  | 170.7  | 154.8  | 142.0  | 108.0  | 144.6  | 89.1   | 106.9  | 83.0   |
| 2.4    | 3.6    | 0.9    | 12.4   | 10.9   | 23.9   | 15.2   | 22.8   | 24.8   |
| 240.9  | 298.7  | 241.2  | 209.5  | 169.5  | 204.5  | 165.2  | 158.2  | 160.4  |
| 2479.1 | 2841.9 | 1790.3 | 1423.1 | 1166.1 | 1330.9 | 1040.3 | 911.0  | 1058.2 |
| 386.8  | 270.9  | 174.6  | 81.1   | 60.0   | 59.0   | 50.1   | 41.0   | 52.4   |
| 114.0  | 140.7  | 113.7  | 182.6  | 149.0  | 157.3  | 158.4  | 155.3  | 140.9  |
| 25.4   | 32.0   | 27.5   | 7.3    | 12.3   | 11.0   | 1.9    | 6.3    | 8.5    |
| 4.7    | 4.1    | 0.9    | 7.0    | 2.9    | 8.4    | 1.7    | 1.0    | 2.3    |
| 9.6    | 8.4    | 2.5    | 17.1   | 9.8    | 14.2   | 3.4    | 8.7    | 8.3    |

|        |        |        |        |       |       |       |       |       |
|--------|--------|--------|--------|-------|-------|-------|-------|-------|
| 8.0    | 5.1    | 13.0   | 22.3   | 15.4  | 13.8  | 5.9   | 6.6   | 4.4   |
| 0.7    | 2.3    | 1.6    | 2.6    | 6.6   | 3.8   | 2.5   | 4.0   | 1.0   |
| 9.3    | 6.1    | 3.8    | 13.8   | 13.0  | 13.6  | 5.0   | 3.0   | 6.5   |
| 4.1    | 2.5    | 2.5    | 3.5    | 4.3   | 6.6   | 1.8   | 2.7   | 2.1   |
| 1.5    | 2.9    | 2.1    | 7.4    | 8.0   | 11.2  | 5.6   | 3.5   | 4.3   |
| 5.6    | 14.2   | 2.5    | 8.9    | 9.5   | 4.0   | 1.6   | 1.5   | 1.7   |
| 2.0    | 1.7    | 3.3    | 5.6    | 6.5   | 2.9   | 1.4   | 3.3   | 2.2   |
| 30.0   | 40.3   | 24.5   | 57.0   | 39.4  | 34.8  | 12.1  | 17.7  | 23.9  |
| 12.8   | 16.0   | 20.0   | 19.4   | 15.6  | 17.1  | 9.1   | 10.2  | 6.8   |
| 474.4  | 452.1  | 233.2  | 465.1  | 351.1 | 420.6 | 302.0 | 248.5 | 291.9 |
| 9.8    | 14.4   | 4.5    | 18.4   | 12.6  | 13.8  | 5.6   | 6.2   | 8.3   |
| 73.8   | 94.3   | 56.5   | 28.6   | 21.7  | 38.9  | 41.7  | 37.6  | 35.8  |
| 18.1   | 12.1   | 8.3    | 21.8   | 13.8  | 8.1   | 10.5  | 8.2   | 12.7  |
| 4.8    | 0.5    | 2.6    | 4.7    | 7.6   | 6.3   | 2.2   | 3.6   | 0.3   |
| 35.7   | 7.0    | 22.5   | 30.3   | 9.5   | 24.8  | 7.1   | 12.8  | 14.1  |
| 25.8   | 23.8   | 16.0   | 39.7   | 26.0  | 24.6  | 21.3  | 5.1   | 13.3  |
| 4.6    | 4.8    | 3.1    | 30.3   | 23.5  | 14.4  | 5.2   | 2.2   | 5.7   |
| 1.5    | 0.7    | 0.8    | 2.2    | 2.2   | 8.2   | 1.1   | 1.7   | 0.8   |
| 3.9    | 3.4    | 2.3    | 21.1   | 24.4  | 13.3  | 13.5  | 12.6  | 6.7   |
| 13.5   | 14.5   | 8.5    | 23.4   | 27.4  | 22.7  | 5.7   | 15.8  | 16.7  |
| 484.2  | 508.8  | 337.3  | 256.9  | 202.4 | 202.2 | 283.6 | 243.8 | 271.0 |
| 4.0    | 2.9    | 7.6    | 477.3  | 588.3 | 679.1 | 344.2 | 590.7 | 531.8 |
| 1.7    | 2.7    | 1.9    | 2.1    | 2.6   | 6.0   | 3.4   | 1.0   | 2.6   |
| 1209.0 | 1160.9 | 802.6  | 1008.8 | 829.3 | 858.2 | 634.7 | 585.4 | 667.5 |
| 10.2   | 13.8   | 5.5    | 22.9   | 15.2  | 16.4  | 9.2   | 11.5  | 12.1  |
| 5.9    | 7.6    | 4.5    | 11.1   | 15.5  | 27.9  | 8.1   | 12.3  | 6.6   |
| 2.9    | 11.4   | 6.8    | 6.1    | 9.4   | 14.9  | 10.2  | 13.0  | 10.5  |
| 41.1   | 48.1   | 28.2   | 10.8   | 5.6   | 8.6   | 15.0  | 5.9   | 9.8   |
| 13.4   | 10.6   | 1.1    | 6.4    | 8.5   | 10.0  | 4.8   | 4.3   | 3.7   |
| 4.0    | 2.6    | 2.1    | 23.7   | 14.8  | 20.4  | 7.4   | 7.6   | 10.5  |
| 1.5    | 0.9    | 2.1    | 9.0    | 14.2  | 7.1   | 2.3   | 3.7   | 2.2   |
| 15.5   | 25.1   | 17.2   | 24.6   | 13.8  | 16.5  | 11.3  | 11.5  | 14.8  |
| 5.3    | 10.9   | 2.7    | 19.0   | 10.0  | 16.7  | 3.8   | 6.8   | 1.7   |
| 314.1  | 277.9  | 232.6  | 204.1  | 167.3 | 214.5 | 155.3 | 135.1 | 199.2 |
| 4572.1 | 4817.7 | 3120.0 | 1035.1 | 854.9 | 860.7 | 644.1 | 769.9 | 925.4 |
| 2.0    | 3.9    | 3.1    | 10.9   | 9.1   | 14.5  | 4.1   | 2.6   | 3.1   |
| 14.9   | 9.6    | 10.0   | 14.9   | 24.3  | 16.7  | 5.2   | 19.1  | 9.7   |
| 10.1   | 8.4    | 10.8   | 22.3   | 16.5  | 25.0  | 14.5  | 7.6   | 15.1  |
| 0.8    | 1.3    | 2.0    | 12.4   | 5.4   | 6.8   | 2.7   | 1.0   | 2.3   |
| 2.3    | 2.3    | 4.9    | 10.5   | 3.8   | 4.8   | 2.2   | 1.8   | 1.9   |
| 5.1    | 6.7    | 5.3    | 6.0    | 5.8   | 5.4   | 4.4   | 2.1   | 4.5   |
| 57.5   | 87.1   | 52.2   | 35.4   | 19.6  | 29.2  | 26.6  | 13.7  | 22.7  |
| 9.4    | 13.0   | 12.2   | 12.0   | 24.4  | 15.1  | 14.9  | 5.4   | 11.0  |
| 0.6    | 1.2    | 1.1    | 5.2    | 2.9   | 8.3   | 1.1   | 0.8   | 1.6   |
| 184.8  | 127.9  | 101.5  | 12.5   | 7.3   | 15.6  | 8.3   | 12.2  | 6.9   |
| 4.0    | 8.6    | 2.4    | 11.3   | 17.6  | 17.6  | 11.2  | 0.9   | 6.0   |
| 12.8   | 10.7   | 14.3   | 41.3   | 40.4  | 37.2  | 8.8   | 13.7  | 11.9  |
| 294.0  | 396.2  | 236.9  | 13.0   | 9.9   | 6.2   | 10.2  | 7.7   | 7.5   |
| 7.6    | 3.7    | 2.2    | 2.8    | 6.7   | 9.6   | 1.2   | 1.8   | 2.2   |
| 1.1    | 2.5    | 1.2    | 3.8    | 4.1   | 4.1   | 2.9   | 1.8   | 2.8   |
| 21.0   | 20.0   | 20.0   | 20.4   | 19.3  | 23.7  | 29.1  | 17.6  | 15.6  |
| 2.0    | 1.6    | 1.4    | 3.3    | 2.5   | 3.4   | 1.8   | 1.3   | 1.6   |
| 232.0  | 271.2  | 182.5  | 40.6   | 45.5  | 55.1  | 82.8  | 80.1  | 111.3 |



|        |        |        |        |        |        |        |        |        |
|--------|--------|--------|--------|--------|--------|--------|--------|--------|
| 32.1   | 26.7   | 20.0   | 25.3   | 24.7   | 37.4   | 30.2   | 25.8   | 24.8   |
| 187.5  | 208.1  | 164.4  | 184.0  | 133.5  | 130.8  | 122.0  | 98.5   | 122.6  |
| 14.1   | 18.4   | 7.6    | 34.6   | 21.6   | 31.8   | 19.6   | 20.0   | 29.0   |
| 7.6    | 17.9   | 13.2   | 26.7   | 13.8   | 26.1   | 3.6    | 6.3    | 2.5    |
| 18.9   | 18.0   | 21.9   | 30.1   | 19.1   | 20.6   | 21.2   | 22.8   | 23.8   |
| 20.0   | 20.0   | 6.0    | 29.5   | 31.6   | 26.9   | 13.5   | 11.8   | 20.9   |
| 2.2    | 1.7    | 1.1    | 6.2    | 2.6    | 4.6    | 1.6    | 3.5    | 2.7    |
| 5.5    | 4.8    | 6.7    | 12.2   | 7.2    | 11.0   | 10.5   | 5.8    | 3.2    |
| 16.0   | 11.0   | 13.7   | 15.7   | 13.7   | 9.0    | 1.9    | 3.9    | 12.4   |
| 0.4    | 0.4    | 0.3    | 1.0    | 1.4    | 3.8    | 3.1    | 2.6    | 3.6    |
| 17.4   | 9.4    | 2.6    | 4.0    | 4.5    | 4.8    | 2.9    | 2.4    | 2.8    |
| 6.1    | 9.0    | 2.0    | 21.3   | 17.5   | 21.8   | 4.2    | 11.2   | 17.2   |
| 28.0   | 29.7   | 15.2   | 60.3   | 37.8   | 30.3   | 26.5   | 12.1   | 29.9   |
| 258.6  | 427.0  | 436.3  | 988.3  | 869.8  | 853.2  | 1066.5 | 1114.4 | 1397.4 |
| 30.0   | 32.0   | 11.0   | 44.1   | 27.5   | 24.0   | 26.9   | 13.0   | 29.6   |
| 0.9    | 2.9    | 2.8    | 2.0    | 1.2    | 1.4    | 0.8    | 0.5    | 0.5    |
| 3.8    | 1.0    | 1.9    | 11.7   | 10.2   | 7.2    | 3.2    | 0.5    | 0.3    |
| 16.1   | 18.8   | 5.4    | 9.0    | 10.4   | 8.5    | 15.0   | 4.3    | 3.0    |
| 20.8   | 32.8   | 15.0   | 75.6   | 64.2   | 83.3   | 46.6   | 59.4   | 64.1   |
| 2.3    | 5.3    | 3.7    | 4.6    | 4.0    | 1.3    | 1.9    | 3.2    | 5.3    |
| 1002.5 | 1017.9 | 665.7  | 1067.8 | 984.3  | 1045.9 | 713.5  | 507.6  | 576.4  |
| 34.0   | 41.3   | 30.7   | 23.9   | 46.9   | 47.6   | 21.3   | 19.1   | 28.6   |
| 5.1    | 9.6    | 3.1    | 10.8   | 8.6    | 21.9   | 18.4   | 15.6   | 9.6    |
| 16.0   | 8.9    | 8.3    | 4.7    | 7.5    | 9.1    | 6.9    | 6.1    | 5.7    |
| 2.8    | 5.5    | 6.7    | 9.2    | 10.7   | 8.8    | 12.7   | 2.3    | 8.7    |
| 5.2    | 8.6    | 4.2    | 10.3   | 9.6    | 12.8   | 10.0   | 5.8    | 9.4    |
| 428.6  | 597.8  | 484.7  | 102.5  | 106.6  | 111.6  | 75.8   | 90.9   | 85.9   |
| 95.6   | 160.3  | 93.6   | 779.0  | 676.8  | 736.8  | 527.6  | 485.8  | 601.9  |
| 6.0    | 7.5    | 10.4   | 20.6   | 11.9   | 18.2   | 12.1   | 2.1    | 6.7    |
| 23.2   | 32.6   | 11.1   | 41.9   | 38.6   | 37.1   | 17.0   | 8.9    | 13.0   |
| 397.6  | 668.7  | 629.9  | 109.6  | 100.8  | 108.2  | 144.9  | 208.8  | 205.4  |
| 20.2   | 26.8   | 20.7   | 21.0   | 13.7   | 22.2   | 18.8   | 20.3   | 19.5   |
| 284.2  | 333.2  | 240.0  | 449.4  | 404.2  | 400.6  | 523.7  | 586.2  | 652.6  |
| 3.9    | 1.4    | 2.0    | 10.1   | 4.7    | 18.8   | 1.7    | 1.8    | 1.1    |
| 4673.0 | 4902.3 | 4014.9 | 4893.0 | 3632.5 | 4426.6 | 1898.3 | 1679.1 | 1877.9 |
| 65.9   | 116.7  | 114.3  | 194.6  | 185.3  | 196.1  | 109.0  | 128.4  | 128.8  |
| 42.4   | 45.3   | 25.2   | 1.5    | 9.4    | 12.3   | 7.7    | 5.4    | 3.8    |
| 197.2  | 225.4  | 188.9  | 46.4   | 44.2   | 55.5   | 67.4   | 77.1   | 65.7   |
| 3.8    | 9.9    | 9.5    | 16.5   | 10.4   | 14.4   | 5.4    | 6.1    | 6.0    |
| 1.6    | 2.5    | 1.7    | 2.0    | 2.0    | 3.2    | 1.3    | 2.4    | 1.9    |
| 210.8  | 298.6  | 173.3  | 231.5  | 152.3  | 184.7  | 104.5  | 104.1  | 111.1  |
| 6.1    | 12.9   | 4.7    | 14.4   | 13.0   | 12.4   | 5.6    | 7.2    | 7.4    |
| 7.5    | 5.6    | 1.5    | 21.0   | 16.4   | 10.1   | 10.5   | 2.3    | 3.4    |
| 145.4  | 190.6  | 140.2  | 230.5  | 175.0  | 180.6  | 138.1  | 134.1  | 160.7  |
| 3.6    | 6.3    | 2.6    | 11.3   | 13.1   | 15.5   | 5.5    | 5.1    | 5.3    |
| 196.1  | 231.4  | 128.8  | 150.5  | 96.7   | 119.8  | 164.2  | 95.6   | 142.7  |
| 16.0   | 14.9   | 2.1    | 13.7   | 16.6   | 14.4   | 8.7    | 8.9    | 21.1   |
| 25.5   | 25.9   | 19.9   | 24.8   | 29.2   | 39.2   | 21.6   | 10.5   | 19.4   |
| 25.7   | 43.4   | 22.7   | 55.1   | 24.4   | 49.1   | 17.2   | 29.4   | 27.3   |
| 1.0    | 1.0    | 1.8    | 4.3    | 1.2    | 2.8    | 0.8    | 0.8    | 1.8    |
| 1.0    | 5.2    | 5.8    | 5.4    | 4.5    | 5.0    | 2.9    | 1.9    | 0.7    |
| 2560.0 | 2817.0 | 1852.1 | 2622.5 | 2178.5 | 2152.6 | 2586.0 | 2483.1 | 2652.1 |
| 6.9    | 12.4   | 6.5    | 9.3    | 5.5    | 8.2    | 8.3    | 5.0    | 5.5    |

|         |         |         |        |        |        |        |        |        |
|---------|---------|---------|--------|--------|--------|--------|--------|--------|
| 251.4   | 334.5   | 161.4   | 218.6  | 145.2  | 186.9  | 120.3  | 103.1  | 128.1  |
| 26.8    | 30.6    | 27.3    | 9.7    | 5.3    | 2.7    | 4.5    | 9.7    | 5.8    |
| 12.3    | 18.7    | 11.3    | 20.1   | 17.6   | 14.3   | 6.0    | 11.6   | 8.6    |
| 3.1     | 5.7     | 8.1     | 10.9   | 11.2   | 4.6    | 3.8    | 3.3    | 2.1    |
| 7.2     | 4.8     | 6.1     | 8.1    | 9.8    | 4.5    | 7.1    | 6.3    | 0.5    |
| 2.7     | 7.9     | 3.2     | 6.4    | 5.4    | 7.0    | 10.9   | 2.2    | 1.9    |
| 33.2    | 38.3    | 23.1    | 42.4   | 30.9   | 23.9   | 11.7   | 12.3   | 15.0   |
| 59.5    | 96.7    | 91.1    | 59.1   | 50.4   | 54.7   | 32.1   | 47.0   | 46.2   |
| 21.4    | 38.2    | 18.0    | 44.0   | 18.0   | 10.0   | 27.4   | 18.9   | 20.6   |
| 32.3    | 28.2    | 25.2    | 134.8  | 137.4  | 140.6  | 84.0   | 109.1  | 123.3  |
| 1.2     | 2.0     | 1.7     | 3.4    | 7.3    | 4.1    | 3.6    | 2.5    | 1.2    |
| 8.5     | 12.8    | 9.1     | 17.5   | 16.8   | 12.4   | 6.0    | 7.8    | 5.6    |
| 12.0    | 9.2     | 5.8     | 37.9   | 21.9   | 45.8   | 9.5    | 12.9   | 31.7   |
| 1.9     | 1.8     | 2.8     | 119.4  | 108.9  | 114.9  | 115.6  | 140.9  | 157.7  |
| 13.2    | 16.3    | 9.4     | 18.3   | 17.9   | 26.4   | 14.0   | 13.5   | 11.5   |
| 11.0    | 15.3    | 10.1    | 11.0   | 11.4   | 6.1    | 8.8    | 8.8    | 6.2    |
| 1.9     | 5.8     | 0.6     | 6.4    | 2.7    | 2.5    | 0.7    | 6.7    | 0.8    |
| 4.5     | 1.6     | 5.2     | 21.4   | 19.2   | 36.5   | 17.3   | 25.7   | 18.3   |
| 3.8     | 5.9     | 4.0     | 14.6   | 11.4   | 15.0   | 9.2    | 8.3    | 4.4    |
| 8.5     | 7.8     | 5.5     | 11.9   | 6.0    | 8.6    | 8.3    | 2.1    | 13.5   |
| 1082.8  | 1359.5  | 1216.2  | 1122.0 | 847.7  | 972.3  | 507.3  | 480.6  | 532.2  |
| 548.4   | 1299.3  | 1761.0  | 1063.4 | 848.9  | 940.2  | 602.6  | 715.3  | 662.6  |
| 4.1     | 2.6     | 5.2     | 4.3    | 10.5   | 4.0    | 2.3    | 1.5    | 2.3    |
| 127.8   | 132.7   | 83.7    | 2.5    | 1.8    | 2.3    | 0.7    | 0.7    | 0.8    |
| 52.6    | 66.9    | 41.9    | 26.2   | 17.6   | 16.5   | 32.0   | 26.8   | 29.3   |
| 81.8    | 82.2    | 71.5    | 92.4   | 109.3  | 123.1  | 51.3   | 67.4   | 57.7   |
| 1.3     | 5.2     | 6.8     | 2.2    | 1.6    | 2.0    | 0.9    | 0.9    | 1.0    |
| 25.7    | 33.1    | 27.4    | 44.4   | 34.4   | 36.7   | 19.8   | 21.3   | 25.7   |
| 8.1     | 3.7     | 1.9     | 2.9    | 1.7    | 3.5    | 0.6    | 1.6    | 1.1    |
| 506.0   | 528.8   | 356.1   | 618.6  | 418.5  | 468.6  | 387.8  | 272.4  | 351.7  |
| 7.9     | 32.2    | 23.1    | 25.8   | 11.3   | 10.3   | 16.4   | 25.6   | 8.9    |
| 11.2    | 32.1    | 42.8    | 41.3   | 23.0   | 32.8   | 36.9   | 36.3   | 25.6   |
| 3.8     | 3.0     | 9.9     | 20.1   | 25.6   | 22.9   | 1.4    | 9.4    | 7.5    |
| 8.2     | 15.1    | 4.4     | 12.6   | 5.5    | 9.1    | 6.3    | 3.9    | 7.3    |
| 21.4    | 16.5    | 7.8     | 16.2   | 14.5   | 27.7   | 24.0   | 8.6    | 8.4    |
| 3.4     | 0.7     | 5.5     | 5.5    | 8.3    | 5.4    | 2.0    | 5.5    | 1.3    |
| 11.2    | 7.4     | 6.1     | 19.8   | 12.1   | 14.2   | 6.0    | 3.3    | 12.1   |
| 15.7    | 14.1    | 7.8     | 18.8   | 8.7    | 18.8   | 4.9    | 6.5    | 7.4    |
| 3.0     | 4.2     | 2.8     | 9.9    | 14.0   | 10.3   | 7.5    | 6.6    | 1.4    |
| 10.4    | 7.5     | 5.3     | 10.0   | 13.2   | 13.4   | 2.4    | 5.9    | 7.7    |
| 9.8     | 5.2     | 5.6     | 13.8   | 16.6   | 16.2   | 9.1    | 4.9    | 9.4    |
| 2.9     | 8.4     | 5.3     | 12.9   | 10.5   | 13.6   | 10.6   | 7.4    | 9.6    |
| 153.9   | 225.2   | 202.6   | 302.7  | 277.4  | 321.3  | 329.0  | 375.0  | 429.3  |
| 10844.2 | 10923.4 | 10561.1 | 9372.3 | 9612.3 | 9253.6 | 3239.5 | 4367.7 | 4405.9 |
| 1.6     | 2.9     | 2.8     | 10.8   | 6.0    | 13.9   | 5.4    | 2.8    | 2.3    |
| 870.9   | 1163.2  | 876.2   | 511.3  | 387.2  | 447.0  | 345.3  | 410.8  | 403.3  |
| 114.8   | 132.9   | 82.6    | 47.2   | 37.5   | 47.5   | 39.9   | 38.9   | 38.4   |
| 8.5     | 12.7    | 2.6     | 5.2    | 2.9    | 5.1    | 1.8    | 8.4    | 1.7    |
| 51.8    | 91.0    | 86.0    | 38.2   | 41.4   | 34.1   | 47.5   | 47.3   | 48.8   |
| 10.0    | 9.4     | 7.0     | 28.8   | 19.1   | 31.2   | 12.2   | 12.8   | 6.6    |
| 19.0    | 18.5    | 18.8    | 22.1   | 19.5   | 25.2   | 17.7   | 23.6   | 19.3   |
| 1735.1  | 1799.9  | 1407.4  | 643.4  | 559.5  | 566.7  | 676.9  | 623.1  | 698.2  |
| 8.4     | 4.7     | 1.3     | 4.4    | 3.3    | 14.9   | 3.3    | 5.1    | 2.5    |

|        |        |        |        |       |        |       |       |       |
|--------|--------|--------|--------|-------|--------|-------|-------|-------|
| 56.6   | 102.2  | 75.3   | 11.9   | 6.5   | 6.4    | 23.7  | 21.7  | 32.6  |
| 8.1    | 12.4   | 8.3    | 10.8   | 7.3   | 22.0   | 7.3   | 6.1   | 6.0   |
| 5.6    | 7.1    | 2.0    | 4.9    | 13.3  | 15.1   | 1.8   | 5.3   | 2.2   |
| 16.5   | 16.8   | 4.8    | 12.2   | 13.7  | 9.6    | 9.7   | 13.4  | 6.7   |
| 11.0   | 18.2   | 3.8    | 2.4    | 3.4   | 8.3    | 4.9   | 6.5   | 3.6   |
| 50.5   | 61.5   | 43.5   | 19.2   | 18.6  | 22.9   | 40.0  | 32.8  | 38.4  |
| 2.3    | 5.7    | 2.2    | 16.6   | 10.0  | 6.1    | 3.1   | 2.7   | 4.3   |
| 11.6   | 5.7    | 3.4    | 15.7   | 7.1   | 10.6   | 1.7   | 4.1   | 2.2   |
| 779.9  | 1219.3 | 1149.1 | 814.0  | 817.6 | 847.8  | 809.5 | 851.7 | 968.4 |
| 4.1    | 8.5    | 1.2    | 0.8    | 4.9   | 4.6    | 10.0  | 19.2  | 14.0  |
| 2.0    | 3.0    | 7.1    | 4.6    | 3.0   | 5.2    | 3.1   | 3.9   | 2.4   |
| 1.9    | 3.1    | 3.4    | 7.0    | 6.5   | 4.8    | 6.6   | 1.3   | 4.2   |
| 805.1  | 810.6  | 671.6  | 864.9  | 723.1 | 787.8  | 492.2 | 541.9 | 601.7 |
| 1023.7 | 1611.6 | 1837.8 | 9.1    | 4.3   | 3.0    | 3.8   | 3.7   | 3.2   |
| 1005.2 | 1556.3 | 1373.3 | 1049.7 | 923.4 | 1106.2 | 690.3 | 748.3 | 826.7 |
| 1.8    | 5.1    | 4.3    | 7.8    | 5.5   | 7.8    | 5.5   | 4.6   | 2.7   |
| 5.1    | 2.4    | 0.9    | 10.3   | 3.1   | 7.8    | 1.0   | 1.4   | 3.2   |
| 1732.0 | 2031.8 | 1386.1 | 1086.4 | 866.4 | 952.0  | 748.5 | 707.1 | 844.8 |
| 375.5  | 644.2  | 572.7  | 55.4   | 57.7  | 50.3   | 35.1  | 24.8  | 29.7  |
| 3.7    | 5.0    | 3.1    | 4.5    | 4.6   | 3.4    | 1.4   | 2.7   | 2.0   |
| 5.0    | 1.3    | 4.3    | 6.8    | 10.1  | 7.5    | 3.9   | 0.8   | 6.1   |
| 2.7    | 15.5   | 12.0   | 10.1   | 10.2  | 6.9    | 2.8   | 3.5   | 7.1   |
| 9.8    | 4.0    | 5.6    | 5.8    | 5.0   | 8.1    | 2.5   | 3.7   | 2.4   |
| 4.6    | 9.6    | 0.9    | 18.0   | 10.6  | 16.3   | 2.3   | 4.2   | 5.1   |
| 8.2    | 11.7   | 5.6    | 12.2   | 12.2  | 20.0   | 8.5   | 4.7   | 13.2  |
| 5.5    | 5.3    | 1.1    | 13.3   | 6.0   | 9.3    | 7.3   | 6.0   | 7.1   |
| 609.6  | 833.2  | 617.7  | 351.3  | 288.2 | 348.0  | 382.0 | 432.2 | 434.2 |
| 7.8    | 9.3    | 5.5    | 25.4   | 27.5  | 35.0   | 14.5  | 8.8   | 12.5  |
| 6.6    | 2.2    | 3.0    | 10.9   | 16.7  | 15.8   | 19.1  | 10.3  | 8.3   |
| 143.8  | 206.0  | 127.9  | 168.4  | 130.7 | 172.3  | 146.7 | 149.7 | 205.2 |
| 14.1   | 8.0    | 1.4    | 6.5    | 6.5   | 7.5    | 3.8   | 2.2   | 1.3   |
| 1.1    | 5.0    | 1.4    | 114.6  | 104.9 | 110.3  | 33.9  | 56.5  | 36.9  |
| 25.2   | 16.0   | 8.7    | 23.3   | 29.6  | 22.7   | 4.7   | 10.6  | 11.4  |
| 898.3  | 939.8  | 732.8  | 728.3  | 476.9 | 561.3  | 408.2 | 342.0 | 309.4 |
| 105.9  | 144.1  | 78.2   | 70.5   | 80.2  | 80.0   | 47.5  | 42.0  | 69.0  |
| 865.0  | 1051.5 | 739.9  | 627.1  | 487.5 | 563.5  | 332.2 | 335.7 | 374.0 |
| 710.3  | 746.0  | 365.3  | 458.4  | 409.4 | 361.4  | 279.0 | 337.8 | 343.8 |
| 12.7   | 13.2   | 10.8   | 4.8    | 2.7   | 6.1    | 2.2   | 1.8   | 1.8   |
| 65.3   | 107.2  | 77.0   | 23.9   | 12.1  | 17.5   | 12.4  | 23.5  | 18.3  |
| 10.2   | 16.2   | 9.7    | 8.9    | 7.4   | 8.8    | 20.4  | 11.3  | 17.7  |
| 7.3    | 20.0   | 16.1   | 26.3   | 32.0  | 24.8   | 16.5  | 18.4  | 18.8  |
| 129.0  | 173.3  | 117.9  | 103.5  | 80.7  | 96.2   | 41.5  | 53.3  | 47.4  |
| 12.7   | 15.0   | 10.0   | 2.5    | 2.1   | 6.5    | 4.8   | 0.9   | 5.8   |
| 46.7   | 149.6  | 177.3  | 22.2   | 37.3  | 35.8   | 34.6  | 75.5  | 60.9  |
| 52.8   | 90.4   | 60.6   | 42.3   | 22.6  | 23.7   | 21.1  | 17.7  | 13.7  |
| 12.7   | 8.4    | 8.7    | 17.8   | 16.6  | 20.4   | 9.1   | 8.5   | 5.5   |
| 2.0    | 7.2    | 2.0    | 7.3    | 10.1  | 13.0   | 6.1   | 4.8   | 5.6   |
| 829.6  | 1019.8 | 723.3  | 658.7  | 517.0 | 532.4  | 411.2 | 431.3 | 461.4 |
| 1970.3 | 2405.7 | 1629.6 | 1179.9 | 926.1 | 986.7  | 639.7 | 447.9 | 607.4 |
| 31.3   | 34.9   | 24.1   | 34.7   | 27.3  | 32.6   | 15.3  | 3.9   | 10.8  |
| 535.7  | 505.5  | 294.1  | 181.7  | 166.3 | 143.1  | 164.2 | 159.2 | 171.2 |
| 2.3    | 2.2    | 3.2    | 6.4    | 4.5   | 2.9    | 0.9   | 1.3   | 3.9   |
| 220.3  | 361.0  | 310.1  | 437.3  | 464.0 | 533.4  | 222.3 | 271.9 | 335.8 |

|       |       |       |       |       |       |       |       |       |
|-------|-------|-------|-------|-------|-------|-------|-------|-------|
| 1.8   | 3.6   | 2.5   | 10.6  | 20.9  | 22.6  | 5.7   | 6.0   | 9.9   |
| 2.4   | 1.6   | 0.2   | 5.3   | 8.7   | 4.3   | 4.2   | 0.6   | 6.8   |
| 33.0  | 50.0  | 24.0  | 8.4   | 11.2  | 7.7   | 1.9   | 4.5   | 7.8   |
| 23.0  | 21.3  | 16.8  | 45.9  | 17.8  | 37.3  | 11.0  | 12.3  | 13.0  |
| 1.0   | 2.2   | 2.2   | 6.3   | 12.9  | 2.9   | 3.1   | 3.6   | 1.7   |
| 2.4   | 3.3   | 8.3   | 4.1   | 3.6   | 3.8   | 3.6   | 3.0   | 3.4   |
| 4.5   | 1.1   | 3.3   | 4.6   | 2.5   | 6.4   | 2.4   | 2.3   | 0.9   |
| 19.6  | 16.9  | 17.1  | 141.2 | 99.4  | 104.4 | 167.2 | 135.2 | 160.7 |
| 397.7 | 455.8 | 294.9 | 417.0 | 278.5 | 318.9 | 245.0 | 200.6 | 226.8 |
| 8.6   | 6.9   | 3.7   | 9.2   | 14.9  | 16.6  | 9.7   | 6.4   | 2.3   |
| 9.6   | 7.7   | 1.4   | 2.0   | 1.5   | 2.2   | 1.1   | 1.0   | 1.1   |
| 10.5  | 17.9  | 8.3   | 22.3  | 25.7  | 24.3  | 13.8  | 14.4  | 10.0  |
| 1.3   | 6.2   | 0.9   | 8.3   | 12.2  | 11.3  | 1.2   | 1.0   | 7.9   |
| 3.9   | 3.7   | 3.5   | 11.0  | 2.5   | 6.1   | 5.7   | 1.8   | 3.9   |
| 12.8  | 8.9   | 6.9   | 23.7  | 23.7  | 26.3  | 16.9  | 19.2  | 14.6  |
| 4.8   | 5.0   | 18.4  | 4.5   | 5.4   | 7.1   | 1.7   | 6.0   | 6.7   |
| 1.5   | 3.2   | 2.8   | 16.1  | 5.2   | 12.4  | 1.4   | 0.3   | 0.7   |
| 12.5  | 10.9  | 8.1   | 14.7  | 13.0  | 14.8  | 9.4   | 6.1   | 6.6   |
| 6.0   | 8.4   | 4.1   | 13.0  | 12.2  | 13.6  | 7.9   | 5.2   | 8.1   |
| 4.7   | 5.6   | 5.3   | 11.0  | 9.9   | 12.8  | 5.1   | 5.5   | 5.2   |
| 47.9  | 42.0  | 36.8  | 52.0  | 34.1  | 47.3  | 37.5  | 25.8  | 32.4  |
| 4.9   | 0.9   | 4.8   | 1.1   | 4.4   | 8.4   | 1.4   | 0.8   | 2.3   |
| 5.2   | 1.3   | 3.6   | 7.7   | 3.3   | 10.5  | 9.4   | 3.8   | 8.5   |
| 500.5 | 497.9 | 309.1 | 551.4 | 470.7 | 503.2 | 295.0 | 295.4 | 380.8 |
| 7.0   | 8.2   | 7.0   | 13.0  | 14.1  | 8.4   | 8.0   | 10.9  | 6.5   |
| 3.3   | 8.6   | 5.1   | 19.9  | 7.2   | 20.8  | 17.0  | 7.0   | 13.7  |
| 5.9   | 3.8   | 1.2   | 19.3  | 17.6  | 18.8  | 13.5  | 19.9  | 20.0  |
| 0.4   | 2.6   | 0.4   | 3.9   | 3.4   | 4.3   | 3.4   | 0.7   | 0.9   |
| 58.8  | 49.4  | 31.9  | 46.4  | 46.7  | 46.2  | 18.3  | 32.1  | 30.6  |
| 152.9 | 150.5 | 109.9 | 196.2 | 134.4 | 150.9 | 114.5 | 81.4  | 105.7 |
| 1.6   | 7.0   | 3.2   | 10.7  | 3.4   | 11.3  | 2.1   | 1.9   | 2.4   |
| 0.3   | 0.7   | 3.5   | 1.6   | 1.4   | 9.8   | 0.3   | 0.4   | 1.6   |
| 1.6   | 4.5   | 3.9   | 16.4  | 9.3   | 12.0  | 7.0   | 4.4   | 6.0   |
| 10.2  | 3.2   | 2.5   | 9.9   | 6.6   | 6.6   | 6.5   | 2.7   | 7.1   |
| 19.8  | 23.1  | 15.6  | 19.4  | 24.3  | 22.3  | 5.3   | 16.7  | 11.9  |
| 39.8  | 60.8  | 38.9  | 33.4  | 26.5  | 31.7  | 14.4  | 23.7  | 13.7  |
| 27.5  | 24.2  | 28.6  | 39.4  | 35.7  | 37.8  | 29.8  | 19.8  | 33.2  |
| 10.3  | 3.1   | 3.2   | 5.6   | 4.7   | 3.9   | 3.0   | 3.2   | 3.7   |
| 2.0   | 1.2   | 1.4   | 26.4  | 23.2  | 5.9   | 12.2  | 17.6  | 22.0  |
| 9.7   | 8.3   | 10.4  | 3.9   | 8.1   | 5.3   | 3.8   | 6.5   | 2.1   |
| 1.1   | 6.3   | 0.9   | 3.9   | 4.0   | 7.3   | 0.9   | 0.9   | 2.7   |
| 1.6   | 2.1   | 2.6   | 2.2   | 2.1   | 2.1   | 1.7   | 0.7   | 3.8   |
| 32.1  | 29.6  | 24.4  | 74.9  | 61.6  | 74.3  | 23.1  | 27.0  | 19.2  |
| 98.2  | 109.7 | 57.1  | 69.9  | 47.8  | 45.1  | 51.4  | 32.5  | 36.1  |
| 1.9   | 1.3   | 1.4   | 8.8   | 5.2   | 12.2  | 7.5   | 2.1   | 1.8   |
| 1.8   | 1.5   | 1.2   | 2.7   | 2.3   | 3.6   | 1.4   | 1.2   | 1.5   |
| 5.6   | 3.9   | 7.4   | 16.0  | 11.4  | 8.0   | 6.3   | 6.0   | 9.2   |
| 3.9   | 7.2   | 2.5   | 3.2   | 3.8   | 8.7   | 2.4   | 3.2   | 2.6   |
| 1.6   | 1.5   | 1.8   | 5.1   | 3.0   | 3.9   | 1.8   | 1.3   | 2.0   |
| 6.2   | 9.2   | 12.3  | 31.3  | 29.0  | 30.5  | 15.8  | 15.3  | 13.2  |
| 4.5   | 9.5   | 3.4   | 6.4   | 5.0   | 6.4   | 2.2   | 4.8   | 4.4   |
| 7.8   | 8.2   | 3.4   | 10.0  | 8.1   | 16.0  | 18.6  | 15.8  | 31.1  |
| 7.6   | 7.6   | 4.6   | 3.8   | 4.9   | 8.3   | 2.8   | 4.1   | 5.4   |

|        |        |        |        |        |        |        |        |        |
|--------|--------|--------|--------|--------|--------|--------|--------|--------|
| 3.8    | 6.8    | 8.5    | 7.3    | 18.4   | 17.2   | 3.9    | 10.7   | 8.8    |
| 112.2  | 128.0  | 73.5   | 15.1   | 12.0   | 24.7   | 21.2   | 16.9   | 16.2   |
| 1.0    | 3.1    | 0.6    | 5.5    | 2.1    | 2.1    | 0.7    | 1.7    | 1.1    |
| 1.4    | 1.0    | 1.3    | 2.5    | 2.4    | 6.2    | 1.3    | 1.3    | 2.2    |
| 13.7   | 18.1   | 9.7    | 25.0   | 10.5   | 25.5   | 10.8   | 5.1    | 8.7    |
| 1.3    | 4.8    | 0.5    | 6.5    | 4.3    | 5.1    | 1.3    | 2.5    | 1.0    |
| 12.6   | 6.7    | 1.1    | 3.0    | 7.5    | 6.7    | 1.1    | 6.6    | 3.2    |
| 161.3  | 185.9  | 126.2  | 37.0   | 22.7   | 39.2   | 30.7   | 9.2    | 19.7   |
| 1.2    | 4.0    | 3.1    | 6.1    | 4.0    | 1.9    | 0.9    | 0.4    | 3.0    |
| 4.9    | 4.9    | 1.4    | 11.6   | 13.8   | 9.9    | 3.7    | 1.7    | 8.4    |
| 6.1    | 6.4    | 5.4    | 9.7    | 6.1    | 10.1   | 5.0    | 5.1    | 4.4    |
| 8.1    | 13.4   | 8.1    | 13.9   | 7.9    | 8.7    | 5.8    | 10.3   | 10.2   |
| 10.4   | 12.7   | 6.9    | 14.8   | 12.1   | 15.9   | 7.8    | 5.9    | 9.3    |
| 31.5   | 29.7   | 28.3   | 47.7   | 30.4   | 21.4   | 14.1   | 15.0   | 15.0   |
| 1.1    | 1.5    | 1.1    | 2.7    | 9.0    | 1.9    | 0.9    | 1.0    | 1.3    |
| 24.4   | 25.0   | 16.7   | 34.0   | 30.9   | 27.4   | 18.2   | 13.3   | 32.0   |
| 61.8   | 64.4   | 52.7   | 92.1   | 49.3   | 77.5   | 38.9   | 59.9   | 39.0   |
| 35.4   | 32.7   | 35.8   | 8.7    | 16.4   | 26.2   | 10.6   | 19.0   | 13.6   |
| 1217.1 | 1526.5 | 1300.6 | 619.9  | 520.3  | 592.1  | 538.6  | 538.8  | 575.5  |
| 27.0   | 42.7   | 50.3   | 21.8   | 23.1   | 22.1   | 4.9    | 16.8   | 2.6    |
| 25.6   | 21.1   | 28.7   | 4.4    | 7.2    | 8.7    | 3.7    | 1.2    | 1.8    |
| 19.9   | 14.6   | 7.5    | 33.6   | 21.9   | 27.7   | 21.8   | 17.2   | 29.4   |
| 4.1    | 8.6    | 6.5    | 20.7   | 13.0   | 15.0   | 4.6    | 14.5   | 11.8   |
| 1.3    | 3.1    | 2.6    | 2.8    | 4.2    | 9.0    | 1.3    | 1.2    | 1.2    |
| 2.1    | 1.0    | 0.2    | 0.8    | 4.1    | 4.0    | 0.2    | 2.1    | 1.4    |
| 23.4   | 42.5   | 29.0   | 63.3   | 59.6   | 52.4   | 20.3   | 43.9   | 34.7   |
| 13.5   | 8.2    | 8.8    | 18.8   | 12.5   | 24.2   | 10.9   | 7.0    | 17.4   |
| 49.8   | 51.4   | 18.9   | 9.9    | 7.8    | 12.2   | 19.8   | 5.1    | 20.3   |
| 3.2    | 4.2    | 0.5    | 7.2    | 1.0    | 0.7    | 2.5    | 3.7    | 3.1    |
| 2.0    | 2.9    | 3.3    | 5.5    | 1.7    | 4.8    | 2.4    | 0.8    | 1.3    |
| 0.8    | 0.8    | 0.5    | 4.5    | 3.4    | 2.9    | 3.0    | 0.3    | 0.7    |
| 0.8    | 1.8    | 1.0    | 10.4   | 8.1    | 6.4    | 3.3    | 3.4    | 2.2    |
| 23.0   | 37.9   | 27.8   | 36.1   | 33.8   | 25.0   | 34.1   | 28.9   | 40.6   |
| 37.1   | 23.2   | 16.6   | 66.1   | 43.2   | 78.2   | 60.9   | 49.6   | 79.7   |
| 19.6   | 22.9   | 15.8   | 27.0   | 21.2   | 20.1   | 13.2   | 8.7    | 15.3   |
| 690.0  | 933.1  | 674.0  | 408.0  | 319.0  | 319.5  | 302.1  | 264.2  | 290.1  |
| 5.8    | 12.8   | 1.0    | 12.3   | 8.8    | 6.3    | 4.8    | 7.5    | 6.6    |
| 2034.8 | 2573.7 | 1899.2 | 1383.5 | 1244.5 | 1258.3 | 1312.5 | 1419.1 | 1569.8 |
| 17.6   | 7.0    | 3.3    | 14.1   | 8.7    | 5.8    | 7.9    | 4.1    | 5.6    |
| 2.8    | 8.8    | 5.2    | 7.5    | 7.5    | 8.5    | 5.1    | 4.0    | 8.2    |
| 1404.7 | 1801.3 | 1401.0 | 422.0  | 379.9  | 442.9  | 417.1  | 477.5  | 513.6  |
| 19.4   | 19.9   | 14.8   | 20.5   | 14.2   | 26.8   | 7.4    | 7.1    | 3.8    |
| 240.0  | 314.4  | 233.3  | 424.4  | 406.8  | 512.5  | 336.6  | 359.1  | 396.9  |
| 16.6   | 17.9   | 22.7   | 113.7  | 94.8   | 133.1  | 113.5  | 111.6  | 94.3   |
| 4.7    | 11.2   | 9.2    | 25.0   | 17.9   | 24.4   | 9.4    | 8.6    | 11.9   |
| 1.6    | 1.3    | 3.9    | 6.1    | 7.6    | 8.9    | 1.3    | 1.5    | 1.2    |
| 10.0   | 24.9   | 13.1   | 33.3   | 24.1   | 27.2   | 15.0   | 28.3   | 22.7   |
| 44.4   | 35.2   | 31.2   | 49.8   | 35.5   | 53.2   | 46.9   | 47.0   | 50.2   |
| 9.3    | 1.2    | 1.8    | 15.8   | 14.7   | 12.0   | 5.6    | 4.5    | 6.3    |
| 963.6  | 1152.8 | 701.2  | 579.7  | 455.3  | 483.3  | 373.6  | 450.6  | 380.7  |
| 4.9    | 1.1    | 2.0    | 4.1    | 6.7    | 8.7    | 3.3    | 3.5    | 3.5    |
| 14.4   | 9.0    | 6.1    | 9.8    | 14.9   | 7.5    | 4.7    | 5.7    | 6.5    |
| 12.0   | 3.7    | 2.2    | 5.1    | 1.3    | 2.7    | 0.8    | 2.6    | 0.7    |

|        |        |        |        |        |        |        |        |        |
|--------|--------|--------|--------|--------|--------|--------|--------|--------|
| 24.4   | 31.1   | 14.6   | 58.8   | 51.7   | 47.6   | 24.4   | 19.4   | 29.9   |
| 2.5    | 5.1    | 3.5    | 34.8   | 28.3   | 20.9   | 9.2    | 3.4    | 9.8    |
| 3.8    | 3.3    | 3.9    | 21.6   | 6.1    | 6.2    | 8.2    | 5.8    | 4.2    |
| 10.7   | 9.7    | 5.1    | 20.8   | 11.2   | 15.2   | 10.5   | 8.5    | 11.9   |
| 3.6    | 6.2    | 0.8    | 25.8   | 18.1   | 22.0   | 9.0    | 5.5    | 3.6    |
| 1.8    | 2.7    | 2.4    | 8.3    | 12.7   | 9.3    | 1.3    | 6.9    | 4.8    |
| 285.2  | 316.3  | 289.4  | 315.7  | 269.7  | 294.6  | 248.8  | 273.1  | 307.0  |
| 14.5   | 13.4   | 10.5   | 10.0   | 15.2   | 11.6   | 2.6    | 1.8    | 3.0    |
| 5.2    | 1.8    | 8.0    | 30.2   | 10.9   | 8.7    | 4.2    | 4.9    | 2.2    |
| 19.9   | 19.1   | 17.2   | 26.4   | 26.8   | 31.4   | 20.4   | 19.5   | 24.0   |
| 59.9   | 61.6   | 80.4   | 60.4   | 53.3   | 53.7   | 40.4   | 36.3   | 41.0   |
| 6.4    | 14.8   | 4.1    | 20.9   | 14.7   | 17.7   | 11.2   | 5.2    | 9.6    |
| 13.5   | 14.0   | 9.2    | 15.1   | 19.7   | 16.2   | 14.6   | 12.1   | 11.6   |
| 5612.3 | 6635.0 | 5409.2 | 3636.6 | 3482.2 | 3429.4 | 2733.9 | 2845.8 | 3139.3 |
| 15.2   | 21.1   | 11.3   | 22.0   | 21.6   | 21.3   | 17.9   | 14.5   | 7.5    |
| 6.0    | 1.0    | 3.7    | 9.1    | 3.3    | 7.6    | 1.2    | 6.2    | 1.0    |
| 1.4    | 1.8    | 1.5    | 21.4   | 15.9   | 16.5   | 8.9    | 11.5   | 7.2    |
| 3.7    | 2.6    | 2.3    | 13.6   | 13.6   | 9.3    | 11.9   | 8.0    | 2.5    |
| 56.5   | 61.9   | 64.9   | 93.3   | 88.9   | 95.9   | 109.9  | 189.3  | 149.1  |
| 1.1    | 9.8    | 4.3    | 61.6   | 83.5   | 86.7   | 58.2   | 95.3   | 98.0   |
| 2.7    | 6.2    | 7.5    | 13.7   | 16.3   | 12.8   | 2.9    | 2.3    | 2.5    |
| 641.7  | 734.9  | 585.9  | 731.5  | 594.8  | 655.4  | 375.9  | 449.6  | 437.7  |
| 58.3   | 69.4   | 41.2   | 21.0   | 16.4   | 26.9   | 26.4   | 18.2   | 16.2   |
| 6.3    | 3.5    | 3.8    | 5.4    | 9.6    | 7.6    | 10.5   | 10.9   | 3.3    |
| 510.5  | 680.6  | 509.5  | 810.2  | 422.5  | 577.6  | 180.1  | 300.6  | 277.9  |
| 2.2    | 4.0    | 6.1    | 7.3    | 12.1   | 6.4    | 6.1    | 5.5    | 7.5    |
| 2704.7 | 2828.1 | 2072.9 | 1318.6 | 1032.8 | 1068.5 | 888.2  | 780.5  | 938.7  |
| 4.2    | 9.4    | 2.2    | 5.4    | 4.5    | 10.3   | 6.2    | 3.1    | 4.3    |
| 20.4   | 19.7   | 7.5    | 26.5   | 28.6   | 14.5   | 19.7   | 14.8   | 18.0   |
| 16.9   | 14.6   | 12.6   | 19.2   | 9.9    | 19.2   | 8.3    | 12.9   | 12.2   |
| 239.2  | 321.1  | 300.2  | 85.0   | 80.6   | 74.4   | 55.3   | 81.6   | 64.0   |
| 268.1  | 401.0  | 356.9  | 59.1   | 49.2   | 83.8   | 72.7   | 59.2   | 65.0   |
| 1.4    | 1.2    | 0.6    | 5.7    | 2.1    | 2.0    | 3.0    | 1.3    | 1.2    |
| 15.9   | 14.6   | 8.8    | 18.1   | 11.8   | 18.8   | 12.9   | 10.0   | 12.6   |
| 5.9    | 7.4    | 7.2    | 13.9   | 18.4   | 20.0   | 13.1   | 27.6   | 24.3   |
| 16.0   | 31.8   | 27.3   | 25.3   | 20.0   | 21.4   | 28.1   | 31.9   | 24.7   |
| 32.4   | 38.9   | 26.3   | 34.4   | 23.0   | 26.4   | 14.9   | 13.8   | 21.1   |
| 20.9   | 23.7   | 12.3   | 13.2   | 30.2   | 27.1   | 11.1   | 12.4   | 13.0   |
| 1545.3 | 1874.4 | 1296.4 | 783.7  | 388.1  | 489.5  | 461.6  | 186.7  | 310.6  |
| 65.7   | 92.6   | 72.4   | 24.4   | 22.2   | 25.1   | 35.7   | 30.9   | 46.0   |
| 17.4   | 18.9   | 12.0   | 31.1   | 20.9   | 26.8   | 21.6   | 15.8   | 11.3   |
| 13.3   | 14.9   | 8.5    | 25.4   | 5.4    | 19.9   | 10.5   | 9.6    | 12.7   |
| 8.5    | 8.3    | 1.8    | 10.4   | 12.0   | 17.7   | 10.9   | 5.5    | 5.9    |
| 3.3    | 9.8    | 3.9    | 10.1   | 6.1    | 11.6   | 6.0    | 4.6    | 10.0   |
| 15.1   | 23.1   | 17.3   | 22.4   | 26.4   | 13.2   | 19.9   | 18.3   | 14.9   |
| 276.1  | 281.7  | 216.1  | 201.1  | 122.1  | 175.6  | 110.1  | 121.3  | 118.7  |
| 34.0   | 44.4   | 35.8   | 12.4   | 7.3    | 0.7    | 1.8    | 2.7    | 2.7    |
| 3.7    | 0.8    | 0.6    | 9.9    | 7.9    | 6.8    | 4.7    | 1.9    | 5.7    |
| 272.1  | 296.4  | 257.3  | 314.9  | 241.2  | 273.8  | 166.6  | 198.3  | 192.0  |
| 9.9    | 15.7   | 10.7   | 21.8   | 15.4   | 15.2   | 10.8   | 13.2   | 9.7    |
| 11.5   | 27.9   | 29.0   | 22.7   | 32.5   | 35.5   | 21.9   | 15.7   | 21.1   |
| 3.1    | 3.0    | 2.3    | 7.4    | 13.9   | 11.0   | 10.5   | 12.0   | 8.9    |
| 8.4    | 2.4    | 2.0    | 21.8   | 18.3   | 18.2   | 3.4    | 5.0    | 8.3    |

|       |       |       |        |        |        |        |        |        |
|-------|-------|-------|--------|--------|--------|--------|--------|--------|
| 5.2   | 1.4   | 3.4   | 14.9   | 6.0    | 6.9    | 3.3    | 2.8    | 7.1    |
| 13.2  | 25.8  | 10.9  | 27.7   | 22.1   | 28.4   | 6.5    | 8.6    | 9.7    |
| 1.3   | 1.8   | 3.0   | 5.8    | 1.9    | 3.1    | 0.3    | 1.5    | 0.9    |
| 29.3  | 29.2  | 26.1  | 9.9    | 2.4    | 12.2   | 3.1    | 5.4    | 5.7    |
| 325.0 | 518.6 | 343.7 | 251.3  | 165.5  | 185.5  | 137.6  | 129.2  | 118.4  |
| 153.9 | 268.7 | 297.8 | 37.1   | 22.5   | 21.3   | 23.1   | 31.2   | 22.5   |
| 11.1  | 13.1  | 15.0  | 29.0   | 21.5   | 15.6   | 8.7    | 12.0   | 18.0   |
| 382.5 | 594.8 | 608.1 | 598.4  | 461.2  | 551.5  | 356.1  | 319.8  | 344.1  |
| 217.2 | 143.4 | 59.4  | 18.1   | 12.9   | 7.7    | 10.3   | 6.2    | 9.5    |
| 7.6   | 5.8   | 4.3   | 19.0   | 18.7   | 17.7   | 6.8    | 9.2    | 8.4    |
| 5.6   | 4.5   | 2.4   | 6.2    | 2.9    | 7.0    | 5.7    | 6.1    | 5.8    |
| 3.7   | 8.6   | 11.9  | 11.2   | 10.5   | 5.7    | 2.2    | 1.7    | 7.1    |
| 111.2 | 227.7 | 241.5 | 3670.6 | 3324.5 | 3732.3 | 2805.7 | 2846.5 | 3121.2 |
| 400.7 | 539.3 | 482.7 | 396.4  | 350.1  | 347.2  | 356.8  | 392.4  | 458.3  |
| 26.4  | 29.8  | 24.0  | 14.1   | 14.1   | 10.1   | 5.9    | 4.2    | 8.0    |
| 11.4  | 4.9   | 5.6   | 3.6    | 6.1    | 3.0    | 4.1    | 1.2    | 3.3    |
| 23.9  | 47.5  | 46.7  | 143.7  | 137.8  | 170.0  | 74.8   | 94.6   | 96.4   |
| 11.5  | 10.7  | 6.2   | 10.8   | 10.4   | 15.8   | 13.5   | 20.0   | 10.7   |
| 15.1  | 18.9  | 10.6  | 19.5   | 21.2   | 20.7   | 24.7   | 16.1   | 15.7   |
| 6.6   | 15.8  | 2.9   | 11.8   | 3.6    | 6.9    | 7.3    | 6.3    | 10.0   |
| 30.7  | 40.6  | 33.5  | 25.4   | 23.9   | 30.6   | 20.7   | 24.5   | 32.7   |
| 11.5  | 14.3  | 9.2   | 7.1    | 6.8    | 17.0   | 1.5    | 7.8    | 6.5    |
| 30.3  | 25.4  | 19.0  | 53.4   | 29.8   | 55.0   | 22.6   | 12.1   | 17.9   |
| 21.4  | 25.1  | 34.2  | 22.3   | 17.7   | 20.9   | 9.5    | 7.7    | 7.6    |
| 4.1   | 10.7  | 6.3   | 7.4    | 11.1   | 12.2   | 17.1   | 13.6   | 11.1   |
| 392.7 | 570.5 | 457.5 | 43.9   | 28.2   | 36.9   | 45.5   | 62.1   | 74.6   |
| 1.4   | 1.9   | 0.9   | 3.7    | 8.3    | 6.6    | 1.1    | 1.2    | 2.9    |
| 40.6  | 50.8  | 38.3  | 95.1   | 74.1   | 83.2   | 36.2   | 37.2   | 28.1   |
| 5.0   | 5.2   | 5.9   | 7.5    | 17.1   | 9.7    | 6.8    | 2.6    | 4.3    |
| 17.2  | 14.7  | 12.1  | 7.5    | 12.2   | 10.0   | 8.9    | 2.6    | 6.0    |
| 250.9 | 215.6 | 79.4  | 8.2    | 6.8    | 13.2   | 15.8   | 13.4   | 13.2   |
| 8.2   | 5.9   | 6.7   | 11.6   | 17.2   | 9.9    | 4.1    | 7.7    | 3.4    |
| 5.4   | 2.4   | 1.4   | 5.1    | 3.9    | 7.4    | 1.2    | 1.7    | 11.0   |
| 113.1 | 134.1 | 87.1  | 96.9   | 81.8   | 80.1   | 77.6   | 64.5   | 77.3   |
| 706.1 | 977.7 | 648.6 | 1394.0 | 1370.1 | 1439.3 | 1246.4 | 1257.3 | 1517.1 |
| 42.5  | 42.9  | 15.3  | 48.4   | 48.0   | 59.5   | 36.9   | 28.2   | 34.8   |
| 3.2   | 2.5   | 1.2   | 7.8    | 3.6    | 6.5    | 4.1    | 4.4    | 1.3    |
| 5.8   | 6.8   | 7.2   | 6.7    | 4.8    | 3.4    | 3.9    | 4.3    | 3.9    |
| 166.3 | 255.2 | 206.9 | 70.1   | 67.3   | 58.2   | 117.5  | 141.0  | 131.1  |
| 13.7  | 13.0  | 10.5  | 195.1  | 151.2  | 155.1  | 81.0   | 87.7   | 84.7   |
| 17.5  | 4.5   | 6.2   | 14.2   | 5.5    | 11.2   | 3.2    | 3.2    | 12.9   |
| 14.5  | 9.9   | 22.5  | 6.4    | 3.9    | 11.4   | 3.8    | 5.5    | 3.5    |
| 13.1  | 8.3   | 10.9  | 3.7    | 1.9    | 3.4    | 1.8    | 1.6    | 2.5    |
| 5.3   | 11.4  | 11.3  | 14.5   | 22.5   | 10.6   | 1.5    | 15.0   | 6.5    |
| 2.9   | 9.9   | 4.8   | 6.3    | 5.3    | 11.7   | 1.6    | 3.4    | 1.3    |
| 10.6  | 8.7   | 7.2   | 12.6   | 2.9    | 2.3    | 0.6    | 0.9    | 0.9    |
| 51.0  | 107.9 | 91.9  | 57.8   | 43.8   | 45.8   | 33.0   | 42.2   | 48.7   |
| 15.6  | 10.9  | 4.3   | 2.9    | 7.1    | 6.0    | 5.3    | 5.3    | 8.9    |
| 4.3   | 10.0  | 4.2   | 5.8    | 3.8    | 5.8    | 1.5    | 1.5    | 1.9    |
| 485.7 | 571.5 | 466.0 | 346.0  | 369.2  | 400.2  | 255.1  | 324.0  | 349.6  |
| 135.0 | 166.8 | 177.2 | 13.2   | 19.6   | 27.3   | 33.1   | 28.5   | 21.8   |
| 9.6   | 15.6  | 9.5   | 22.5   | 15.3   | 22.0   | 10.0   | 10.6   | 13.6   |
| 2.7   | 2.7   | 2.5   | 10.3   | 5.4    | 3.3    | 2.9    | 3.5    | 8.3    |

|        |        |        |        |        |        |        |        |        |
|--------|--------|--------|--------|--------|--------|--------|--------|--------|
| 151.1  | 230.9  | 186.1  | 293.5  | 218.5  | 219.1  | 243.2  | 249.1  | 262.5  |
| 3.0    | 6.2    | 2.0    | 7.5    | 6.2    | 14.1   | 2.2    | 2.6    | 5.5    |
| 84.1   | 134.8  | 85.1   | 302.8  | 237.4  | 272.0  | 132.8  | 154.0  | 166.8  |
| 1737.3 | 2351.8 | 2107.3 | 1353.4 | 1167.2 | 1300.6 | 890.7  | 868.8  | 1002.0 |
| 2930.6 | 3362.9 | 2434.6 | 1711.5 | 1306.9 | 1516.0 | 1095.0 | 898.8  | 1079.7 |
| 7.5    | 4.6    | 5.8    | 20.1   | 12.0   | 11.1   | 1.0    | 3.3    | 6.4    |
| 19.0   | 21.9   | 18.2   | 22.0   | 22.2   | 24.8   | 10.8   | 9.7    | 12.0   |
| 8.2    | 6.0    | 5.7    | 13.8   | 9.2    | 7.1    | 4.3    | 3.9    | 5.5    |
| 179.1  | 258.3  | 233.6  | 65.2   | 34.7   | 40.6   | 32.9   | 33.3   | 33.3   |
| 2125.0 | 2508.8 | 1726.5 | 3009.3 | 2183.7 | 2276.8 | 1867.9 | 1269.0 | 1487.2 |
| 28.8   | 27.1   | 29.9   | 57.5   | 45.3   | 32.5   | 48.1   | 24.3   | 30.6   |
| 7.4    | 17.3   | 13.5   | 51.5   | 37.3   | 42.6   | 24.9   | 22.0   | 25.0   |
| 288.2  | 361.3  | 379.0  | 211.9  | 191.3  | 185.8  | 162.1  | 218.0  | 202.9  |
| 137.7  | 170.3  | 154.3  | 20.1   | 15.0   | 21.2   | 38.1   | 17.7   | 26.9   |
| 92.6   | 113.6  | 109.7  | 5.2    | 5.4    | 3.0    | 24.0   | 8.1    | 12.4   |
| 4.2    | 1.9    | 3.8    | 3.9    | 11.5   | 11.7   | 7.5    | 7.5    | 2.8    |
| 2.9    | 4.6    | 1.7    | 16.4   | 14.5   | 34.5   | 8.5    | 5.9    | 7.1    |
| 3.9    | 3.2    | 4.7    | 5.7    | 2.8    | 3.3    | 1.5    | 1.4    | 1.4    |
| 0.7    | 0.9    | 0.6    | 1.7    | 2.5    | 1.7    | 0.9    | 1.1    | 0.7    |
| 317.7  | 370.1  | 276.0  | 97.7   | 77.2   | 79.8   | 72.4   | 65.6   | 69.9   |
| 2.7    | 12.1   | 5.2    | 6.9    | 7.6    | 6.7    | 4.4    | 3.7    | 4.4    |
| 2698.9 | 2938.6 | 2221.3 | 884.1  | 596.5  | 659.3  | 556.7  | 481.2  | 517.0  |
| 12.5   | 27.9   | 31.3   | 34.1   | 20.2   | 19.9   | 12.5   | 8.3    | 21.1   |
| 272.4  | 321.7  | 201.8  | 286.5  | 240.9  | 267.6  | 192.7  | 184.2  | 222.0  |
| 72.4   | 116.4  | 70.6   | 186.0  | 164.7  | 185.1  | 96.9   | 96.0   | 106.6  |
| 1386.7 | 1328.8 | 894.6  | 1325.7 | 1064.9 | 1057.4 | 866.7  | 764.7  | 892.6  |
| 4.9    | 10.4   | 4.0    | 3.0    | 1.1    | 8.3    | 2.3    | 2.7    | 1.6    |
| 947.0  | 984.8  | 587.3  | 193.2  | 153.3  | 180.6  | 269.2  | 266.8  | 256.3  |
| 2.8    | 5.8    | 1.0    | 5.8    | 3.0    | 16.9   | 4.8    | 2.4    | 1.3    |
| 25.6   | 19.2   | 14.1   | 25.3   | 27.8   | 38.7   | 14.7   | 19.8   | 16.1   |
| 3.0    | 11.6   | 2.4    | 21.8   | 14.1   | 12.4   | 5.0    | 4.4    | 6.3    |
| 600.5  | 789.4  | 519.9  | 813.8  | 786.3  | 853.2  | 533.8  | 507.5  | 678.8  |
| 7.8    | 4.1    | 6.6    | 5.4    | 14.5   | 8.3    | 7.2    | 9.1    | 4.1    |
| 935.5  | 1064.0 | 608.2  | 94.4   | 49.9   | 54.3   | 67.7   | 50.9   | 53.8   |
| 23.9   | 58.4   | 39.2   | 71.9   | 73.8   | 94.5   | 45.3   | 54.3   | 44.0   |
| 5.3    | 7.7    | 3.0    | 9.1    | 14.5   | 7.5    | 4.3    | 7.1    | 6.2    |
| 29.0   | 43.9   | 15.9   | 32.9   | 23.4   | 28.5   | 25.0   | 26.6   | 39.2   |
| 266.9  | 355.3  | 235.2  | 100.0  | 65.4   | 60.0   | 53.1   | 36.7   | 55.8   |
| 3.3    | 3.8    | 4.9    | 4.6    | 3.6    | 5.0    | 1.9    | 3.1    | 3.5    |
| 4.9    | 6.7    | 0.9    | 7.5    | 2.8    | 8.8    | 1.2    | 2.1    | 0.7    |
| 8.8    | 13.3   | 11.5   | 7.7    | 7.0    | 7.4    | 4.0    | 3.1    | 3.9    |
| 1.9    | 2.3    | 2.7    | 3.1    | 9.8    | 2.7    | 4.0    | 1.1    | 1.5    |
| 143.8  | 110.2  | 95.0   | 369.5  | 351.2  | 398.9  | 148.7  | 164.0  | 189.4  |
| 6655.8 | 7967.1 | 7219.4 | 4952.4 | 4467.2 | 4902.1 | 4086.7 | 4596.5 | 4896.3 |
| 586.8  | 706.3  | 419.4  | 302.4  | 223.5  | 252.3  | 202.2  | 195.4  | 234.4  |
| 31.7   | 24.5   | 15.2   | 7.4    | 13.8   | 9.0    | 6.4    | 10.4   | 2.7    |
| 431.7  | 690.5  | 543.6  | 95.7   | 106.2  | 150.0  | 165.6  | 278.2  | 242.7  |
| 388.4  | 399.9  | 264.6  | 479.5  | 348.7  | 375.3  | 238.2  | 223.6  | 226.3  |
| 122.8  | 141.4  | 95.1   | 109.8  | 76.0   | 87.0   | 67.1   | 51.9   | 79.4   |
| 64.9   | 58.1   | 54.0   | 198.6  | 151.5  | 138.4  | 152.0  | 99.1   | 121.1  |
| 217.2  | 323.6  | 278.9  | 350.2  | 289.7  | 321.0  | 116.9  | 124.3  | 135.1  |
| 2.4    | 3.5    | 11.0   | 7.9    | 8.6    | 8.7    | 4.5    | 5.8    | 3.4    |
| 1.8    | 2.6    | 1.9    | 6.6    | 3.6    | 3.8    | 2.4    | 2.4    | 3.9    |



|        |        |       |       |       |       |       |       |       |
|--------|--------|-------|-------|-------|-------|-------|-------|-------|
| 3.0    | 6.1    | 3.1   | 8.3   | 6.2   | 2.2   | 5.3   | 6.0   | 2.2   |
| 48.8   | 46.3   | 43.4  | 37.4  | 27.7  | 34.7  | 25.4  | 25.1  | 33.7  |
| 25.3   | 25.5   | 24.3  | 3.8   | 5.2   | 5.7   | 16.2  | 4.6   | 8.4   |
| 139.5  | 177.1  | 149.2 | 96.5  | 77.9  | 93.2  | 81.4  | 78.0  | 105.2 |
| 30.3   | 31.6   | 12.5  | 24.1  | 10.5  | 19.3  | 13.4  | 7.1   | 3.9   |
| 81.0   | 90.9   | 46.6  | 30.0  | 16.4  | 17.2  | 15.2  | 15.9  | 12.8  |
| 33.9   | 26.6   | 16.3  | 16.9  | 21.8  | 21.7  | 2.8   | 12.5  | 10.8  |
| 8.8    | 2.8    | 2.2   | 8.5   | 8.8   | 10.0  | 5.6   | 3.4   | 6.5   |
| 294.3  | 373.0  | 255.1 | 550.9 | 409.3 | 508.7 | 303.4 | 293.8 | 318.3 |
| 3.1    | 2.0    | 9.1   | 10.6  | 5.6   | 4.9   | 1.0   | 1.6   | 7.7   |
| 1.3    | 5.5    | 5.0   | 13.4  | 10.6  | 11.7  | 4.8   | 8.4   | 6.1   |
| 7.0    | 6.3    | 10.6  | 10.4  | 16.1  | 22.1  | 4.6   | 5.9   | 3.5   |
| 5.9    | 14.2   | 11.9  | 30.4  | 15.7  | 23.8  | 17.1  | 17.0  | 19.2  |
| 152.9  | 206.5  | 149.0 | 184.9 | 139.4 | 158.9 | 145.1 | 148.5 | 156.8 |
| 22.7   | 30.3   | 20.2  | 36.0  | 28.1  | 42.9  | 20.1  | 15.6  | 35.9  |
| 7.3    | 8.7    | 4.2   | 20.6  | 17.8  | 16.0  | 8.7   | 2.7   | 6.1   |
| 31.6   | 42.2   | 28.5  | 55.3  | 52.6  | 61.7  | 27.1  | 31.6  | 24.2  |
| 124.6  | 160.0  | 99.6  | 92.4  | 63.6  | 65.2  | 78.3  | 53.3  | 74.0  |
| 2.6    | 3.6    | 1.9   | 6.3   | 9.3   | 9.1   | 6.2   | 2.9   | 9.2   |
| 1.3    | 3.9    | 0.8   | 9.3   | 4.0   | 8.6   | 2.8   | 0.7   | 7.2   |
| 18.7   | 18.0   | 13.6  | 30.3  | 35.1  | 28.7  | 13.3  | 8.6   | 16.9  |
| 10.9   | 4.4    | 4.2   | 12.9  | 5.7   | 10.2  | 3.4   | 10.2  | 2.3   |
| 124.0  | 198.8  | 189.3 | 82.8  | 73.7  | 97.1  | 51.7  | 54.1  | 75.6  |
| 7.2    | 0.8    | 4.0   | 10.9  | 7.1   | 2.0   | 0.5   | 1.6   | 3.6   |
| 8.7    | 1.7    | 7.0   | 3.6   | 6.1   | 8.4   | 4.1   | 0.9   | 1.8   |
| 294.1  | 339.3  | 208.3 | 291.2 | 215.1 | 236.9 | 153.4 | 130.9 | 126.7 |
| 105.0  | 156.2  | 124.9 | 688.2 | 804.3 | 661.4 | 689.4 | 689.0 | 865.9 |
| 1128.5 | 1155.0 | 495.8 | 910.2 | 632.1 | 673.3 | 607.1 | 474.1 | 572.3 |
| 15.4   | 9.9    | 8.9   | 26.9  | 21.7  | 15.9  | 12.9  | 11.5  | 21.4  |
| 7.7    | 12.9   | 6.2   | 18.1  | 5.7   | 7.4   | 10.5  | 8.0   | 5.0   |
| 9.2    | 6.8    | 4.7   | 33.8  | 27.0  | 34.2  | 9.5   | 7.9   | 10.4  |
| 32.8   | 49.5   | 38.1  | 78.9  | 90.6  | 111.5 | 71.8  | 78.9  | 80.9  |
| 5.7    | 5.6    | 3.4   | 3.8   | 3.9   | 5.2   | 3.6   | 10.2  | 1.5   |
| 116.6  | 194.9  | 166.0 | 208.0 | 198.6 | 206.2 | 191.1 | 202.2 | 218.5 |
| 256.8  | 239.2  | 124.4 | 289.4 | 196.0 | 219.4 | 136.0 | 99.6  | 99.8  |
| 1.7    | 2.1    | 2.4   | 4.6   | 4.0   | 9.9   | 2.1   | 2.0   | 2.1   |
| 798.3  | 850.7  | 706.5 | 814.7 | 514.6 | 531.6 | 563.0 | 340.2 | 375.8 |
| 1.1    | 3.4    | 0.8   | 11.1  | 5.5   | 3.7   | 1.2   | 1.4   | 3.1   |
| 27.1   | 52.0   | 54.6  | 18.6  | 15.2  | 28.4  | 12.9  | 22.2  | 13.0  |
| 3.0    | 3.6    | 12.9  | 2.8   | 4.7   | 7.3   | 11.7  | 6.8   | 6.6   |
| 86.3   | 128.4  | 139.7 | 2.6   | 6.8   | 12.2  | 4.9   | 6.0   | 1.7   |
| 1.7    | 1.4    | 1.2   | 12.4  | 8.6   | 6.8   | 7.4   | 3.6   | 3.0   |
| 9.0    | 5.3    | 4.3   | 22.8  | 12.1  | 9.6   | 9.2   | 9.0   | 11.3  |
| 2.9    | 2.5    | 2.6   | 4.8   | 5.9   | 3.1   | 2.8   | 2.0   | 2.9   |
| 7.6    | 3.5    | 6.9   | 8.0   | 6.7   | 12.8  | 14.3  | 26.8  | 15.0  |
| 21.7   | 45.0   | 68.9  | 14.5  | 5.9   | 5.2   | 3.5   | 3.6   | 1.8   |
| 6.3    | 13.3   | 10.7  | 24.9  | 27.5  | 27.9  | 22.3  | 20.8  | 9.3   |
| 1.4    | 1.4    | 0.7   | 5.4   | 4.3   | 3.2   | 1.3   | 1.0   | 2.8   |
| 104.4  | 145.0  | 95.1  | 156.8 | 121.6 | 146.5 | 111.4 | 100.1 | 114.9 |
| 0.5    | 1.8    | 3.1   | 1.6   | 1.3   | 2.4   | 2.6   | 0.9   | 2.7   |
| 13.6   | 10.0   | 3.7   | 6.9   | 4.6   | 6.7   | 5.4   | 2.0   | 4.0   |
| 8.0    | 29.1   | 10.5  | 15.7  | 15.5  | 10.3  | 9.3   | 5.8   | 3.9   |
| 122.4  | 183.9  | 125.2 | 128.8 | 100.6 | 141.7 | 147.3 | 136.5 | 145.7 |

|        |        |        |        |        |        |       |       |       |
|--------|--------|--------|--------|--------|--------|-------|-------|-------|
| 16.7   | 16.0   | 9.7    | 10.1   | 16.8   | 16.1   | 19.6  | 8.2   | 19.3  |
| 31.7   | 51.8   | 47.7   | 90.7   | 156.1  | 170.3  | 116.8 | 208.2 | 209.5 |
| 4.4    | 7.1    | 8.7    | 7.2    | 12.8   | 11.4   | 8.4   | 11.5  | 12.7  |
| 7.7    | 10.3   | 7.0    | 22.0   | 11.5   | 14.4   | 5.6   | 13.8  | 9.2   |
| 3.8    | 1.2    | 1.0    | 14.1   | 4.3    | 15.8   | 4.9   | 4.3   | 6.4   |
| 91.6   | 116.1  | 79.7   | 80.3   | 59.3   | 77.7   | 70.3  | 78.3  | 80.7  |
| 82.2   | 95.7   | 77.7   | 84.0   | 59.1   | 73.2   | 37.6  | 26.4  | 38.1  |
| 60.4   | 23.0   | 53.9   | 15.2   | 13.1   | 22.2   | 3.1   | 10.7  | 11.4  |
| 9.9    | 15.3   | 10.5   | 11.8   | 8.6    | 11.6   | 8.0   | 15.4  | 9.7   |
| 23.1   | 18.5   | 9.8    | 27.7   | 17.8   | 19.4   | 16.0  | 21.0  | 36.5  |
| 3.2    | 2.4    | 3.4    | 14.6   | 5.9    | 7.7    | 3.8   | 2.9   | 4.8   |
| 1091.8 | 1292.2 | 1083.6 | 1338.8 | 1092.0 | 1140.7 | 918.1 | 863.4 | 962.6 |
| 16.1   | 13.3   | 9.5    | 43.0   | 44.2   | 64.4   | 30.8  | 54.6  | 28.3  |
| 0.9    | 1.5    | 0.7    | 3.1    | 3.9    | 4.7    | 0.5   | 2.1   | 3.2   |
| 4.9    | 1.6    | 1.0    | 3.9    | 3.9    | 4.0    | 4.8   | 5.9   | 4.7   |
| 55.5   | 56.6   | 51.1   | 20.7   | 23.1   | 34.6   | 36.8  | 23.3  | 26.3  |
| 6.9    | 15.3   | 10.0   | 24.4   | 20.5   | 19.3   | 14.9  | 17.7  | 16.4  |
| 7.9    | 10.6   | 5.5    | 9.4    | 17.1   | 14.3   | 7.4   | 2.4   | 2.7   |
| 4.1    | 3.2    | 4.2    | 11.9   | 16.6   | 23.5   | 4.9   | 13.6  | 18.8  |
| 55.9   | 72.9   | 53.9   | 43.6   | 32.3   | 49.3   | 27.0  | 30.4  | 41.3  |
| 13.1   | 13.3   | 9.0    | 17.9   | 12.2   | 13.8   | 9.8   | 7.4   | 11.8  |
| 1.8    | 3.3    | 8.7    | 4.2    | 11.9   | 6.7    | 2.8   | 2.4   | 3.1   |
| 46.7   | 61.4   | 27.1   | 16.4   | 4.8    | 14.8   | 11.8  | 6.4   | 3.0   |
| 7.0    | 6.9    | 5.2    | 17.7   | 6.3    | 9.7    | 3.3   | 3.8   | 5.4   |
| 13.3   | 24.1   | 4.5    | 8.4    | 16.6   | 12.6   | 10.1  | 14.0  | 11.0  |
| 16.6   | 15.0   | 13.1   | 38.7   | 31.7   | 19.8   | 25.2  | 20.0  | 13.6  |
| 3.1    | 5.7    | 12.2   | 21.2   | 5.4    | 9.9    | 11.8  | 13.0  | 16.9  |
| 3.9    | 3.0    | 2.6    | 4.5    | 6.2    | 4.8    | 6.6   | 3.5   | 2.2   |
| 5.7    | 2.6    | 5.7    | 33.3   | 22.9   | 19.3   | 2.1   | 9.0   | 11.0  |
| 126.5  | 143.4  | 188.8  | 6.5    | 5.3    | 15.7   | 5.7   | 2.7   | 3.0   |
| 21.9   | 38.9   | 16.4   | 30.5   | 23.8   | 29.4   | 25.0  | 19.9  | 18.7  |
| 11.3   | 7.0    | 3.4    | 34.9   | 6.1    | 33.8   | 7.2   | 11.7  | 12.0  |
| 12.8   | 13.3   | 8.8    | 23.5   | 13.8   | 18.6   | 12.6  | 5.8   | 9.7   |
| 22.3   | 21.0   | 14.1   | 23.5   | 25.2   | 31.8   | 11.7  | 10.7  | 19.1  |
| 0.8    | 1.1    | 1.3    | 4.3    | 4.2    | 4.7    | 2.1   | 3.2   | 1.1   |
| 4.1    | 1.1    | 3.6    | 4.8    | 6.4    | 4.0    | 3.3   | 3.6   | 1.9   |
| 21.0   | 37.6   | 44.1   | 50.7   | 40.6   | 46.4   | 37.1  | 31.3  | 33.4  |
| 18.2   | 31.5   | 20.0   | 29.1   | 19.1   | 26.4   | 25.9  | 16.5  | 21.0  |
| 25.0   | 36.1   | 33.7   | 11.2   | 14.6   | 9.7    | 11.3  | 15.5  | 20.9  |
| 16.4   | 7.9    | 9.5    | 16.1   | 3.2    | 2.8    | 1.7   | 5.8   | 8.1   |
| 6.9    | 11.5   | 6.4    | 24.0   | 19.6   | 10.2   | 4.8   | 5.9   | 4.5   |
| 13.1   | 14.9   | 7.8    | 7.9    | 6.4    | 10.9   | 5.8   | 11.8  | 9.2   |
| 9.0    | 11.0   | 5.0    | 12.0   | 8.5    | 13.4   | 11.4  | 14.6  | 15.7  |
| 20.5   | 33.9   | 31.2   | 16.4   | 19.0   | 19.0   | 14.6  | 10.2  | 23.0  |
| 14.4   | 4.9    | 12.7   | 47.0   | 32.0   | 61.1   | 24.7  | 9.1   | 15.8  |
| 1.7    | 4.0    | 1.3    | 2.5    | 5.4    | 3.1    | 4.8   | 1.4   | 0.9   |
| 44.8   | 42.5   | 33.7   | 10.4   | 12.8   | 5.0    | 2.0   | 1.6   | 1.5   |
| 49.0   | 43.7   | 39.2   | 13.3   | 27.1   | 21.4   | 16.2  | 15.6  | 6.6   |
| 17.3   | 16.4   | 11.3   | 24.1   | 17.3   | 20.2   | 13.4  | 23.1  | 20.3  |
| 47.4   | 62.6   | 47.3   | 41.5   | 43.3   | 38.5   | 19.3  | 12.6  | 18.2  |
| 19.2   | 9.9    | 11.6   | 6.5    | 8.6    | 14.4   | 13.8  | 5.0   | 7.6   |
| 6.8    | 1.5    | 3.3    | 5.8    | 5.2    | 10.2   | 7.8   | 6.6   | 5.4   |
| 5.6    | 11.1   | 4.1    | 28.4   | 15.8   | 29.0   | 12.7  | 13.6  | 18.0  |

|        |        |        |        |        |        |        |        |        |
|--------|--------|--------|--------|--------|--------|--------|--------|--------|
| 2.8    | 4.4    | 2.6    | 9.6    | 4.7    | 9.9    | 6.8    | 3.9    | 5.6    |
| 4.5    | 6.7    | 5.7    | 5.6    | 6.8    | 4.6    | 3.4    | 2.6    | 4.6    |
| 2.7    | 4.9    | 3.7    | 16.3   | 8.8    | 17.4   | 7.4    | 7.4    | 8.6    |
| 47.2   | 36.9   | 40.4   | 8.4    | 15.2   | 4.9    | 10.1   | 7.2    | 9.3    |
| 160.6  | 161.3  | 154.0  | 177.8  | 155.6  | 144.1  | 126.9  | 126.7  | 141.5  |
| 2.5    | 1.3    | 0.6    | 6.6    | 9.6    | 4.7    | 1.1    | 4.7    | 5.5    |
| 14.2   | 7.3    | 11.1   | 16.7   | 21.0   | 17.9   | 4.0    | 3.3    | 12.0   |
| 12.3   | 15.0   | 11.2   | 23.9   | 7.7    | 21.5   | 10.4   | 7.6    | 10.2   |
| 3.0    | 3.4    | 2.4    | 6.2    | 6.5    | 10.2   | 3.3    | 2.3    | 2.2    |
| 1.4    | 2.2    | 0.8    | 3.5    | 4.6    | 5.3    | 2.0    | 1.0    | 0.9    |
| 2.0    | 6.2    | 2.1    | 7.0    | 6.9    | 12.2   | 1.4    | 1.3    | 2.0    |
| 0.7    | 0.8    | 5.2    | 5.3    | 6.4    | 6.7    | 1.6    | 1.0    | 1.6    |
| 242.5  | 252.4  | 209.9  | 221.6  | 179.0  | 178.8  | 137.4  | 180.6  | 185.3  |
| 6.5    | 9.5    | 1.2    | 15.5   | 14.2   | 22.3   | 5.8    | 11.3   | 8.9    |
| 3509.1 | 3976.7 | 3100.1 | 2775.7 | 2423.9 | 2687.5 | 1641.4 | 1927.8 | 2029.4 |
| 640.3  | 769.4  | 471.3  | 100.2  | 84.0   | 97.7   | 96.9   | 123.0  | 107.8  |
| 32.7   | 43.4   | 26.6   | 34.4   | 31.4   | 50.0   | 51.8   | 38.4   | 35.3   |
| 15.8   | 11.5   | 6.5    | 15.1   | 9.3    | 20.8   | 12.9   | 4.0    | 3.8    |
| 1.0    | 8.6    | 1.2    | 7.8    | 5.4    | 5.3    | 13.0   | 7.4    | 3.7    |
| 8.4    | 17.9   | 2.9    | 9.6    | 6.4    | 4.8    | 1.3    | 8.8    | 2.4    |
| 2.4    | 12.5   | 1.0    | 3.9    | 7.1    | 9.6    | 2.2    | 1.4    | 6.8    |
| 113.6  | 162.1  | 140.0  | 137.3  | 123.5  | 131.4  | 53.7   | 60.3   | 57.7   |
| 5.8    | 10.3   | 6.6    | 6.0    | 16.7   | 10.1   | 6.4    | 3.1    | 11.8   |
| 2.1    | 1.7    | 3.0    | 9.5    | 16.8   | 18.1   | 14.8   | 22.2   | 8.8    |
| 16.9   | 18.0   | 23.6   | 23.1   | 22.1   | 40.7   | 34.0   | 28.6   | 40.3   |
| 8.5    | 3.5    | 11.2   | 12.2   | 7.9    | 19.0   | 8.9    | 13.2   | 7.8    |
| 21.7   | 28.5   | 28.3   | 57.6   | 31.8   | 33.7   | 19.7   | 42.4   | 34.8   |
| 8.9    | 9.9    | 6.1    | 19.6   | 15.5   | 13.0   | 7.2    | 7.6    | 6.4    |
| 41.7   | 47.1   | 19.4   | 10.6   | 17.7   | 25.1   | 25.7   | 8.7    | 21.2   |
| 7.3    | 3.1    | 4.3    | 14.1   | 8.1    | 12.1   | 3.7    | 2.1    | 3.5    |
| 394.9  | 414.4  | 203.3  | 235.3  | 160.4  | 172.7  | 201.5  | 192.9  | 215.9  |
| 4.2    | 5.7    | 7.0    | 9.2    | 3.9    | 4.4    | 4.7    | 3.6    | 2.8    |
| 11.6   | 7.4    | 8.5    | 19.8   | 16.3   | 18.4   | 10.7   | 1.1    | 6.4    |
| 14.3   | 20.9   | 12.2   | 26.4   | 14.7   | 14.9   | 7.7    | 12.3   | 9.4    |
| 2.3    | 6.1    | 3.7    | 16.6   | 3.9    | 11.5   | 1.8    | 4.2    | 5.2    |
| 8.4    | 6.6    | 7.5    | 4.7    | 3.9    | 3.4    | 1.3    | 1.2    | 6.3    |
| 1382.1 | 2016.6 | 1839.6 | 1337.4 | 1102.6 | 1294.7 | 1127.5 | 1045.4 | 1241.6 |
| 1.9    | 3.1    | 1.2    | 7.2    | 3.5    | 7.1    | 5.1    | 1.7    | 4.9    |
| 16.2   | 12.6   | 21.2   | 26.2   | 24.5   | 20.8   | 13.2   | 8.1    | 12.3   |
| 11.1   | 19.4   | 9.9    | 11.3   | 18.2   | 10.5   | 23.8   | 14.2   | 18.3   |
| 18.7   | 16.2   | 9.2    | 17.7   | 30.0   | 11.6   | 14.6   | 12.0   | 13.2   |
| 8.6    | 7.3    | 5.4    | 11.7   | 15.4   | 13.7   | 6.0    | 12.9   | 3.4    |
| 24.5   | 23.5   | 19.6   | 19.2   | 19.1   | 11.6   | 12.9   | 9.1    | 8.2    |
| 2.9    | 3.5    | 2.7    | 8.0    | 6.7    | 5.0    | 3.2    | 2.2    | 2.8    |
| 1.5    | 2.0    | 4.2    | 2.5    | 6.7    | 6.6    | 2.3    | 3.8    | 1.7    |
| 8.6    | 6.0    | 9.2    | 19.1   | 13.5   | 7.6    | 11.8   | 6.5    | 7.6    |
| 8.3    | 13.6   | 4.5    | 24.6   | 22.2   | 12.3   | 11.2   | 5.0    | 16.4   |
| 23.8   | 24.5   | 13.0   | 23.8   | 12.8   | 16.4   | 12.7   | 11.7   | 8.3    |
| 1.1    | 5.7    | 8.2    | 13.5   | 2.7    | 2.4    | 4.7    | 1.1    | 1.3    |
| 0.8    | 4.4    | 0.6    | 6.2    | 6.1    | 2.6    | 4.1    | 1.6    | 1.2    |
| 95.7   | 136.6  | 136.0  | 177.7  | 124.9  | 152.0  | 102.7  | 75.3   | 104.0  |
| 5.1    | 5.0    | 2.7    | 14.2   | 11.0   | 7.2    | 3.0    | 2.2    | 1.8    |
| 35.0   | 33.4   | 23.1   | 26.1   | 30.1   | 28.4   | 10.0   | 17.1   | 7.4    |

|        |        |        |        |        |        |        |        |        |
|--------|--------|--------|--------|--------|--------|--------|--------|--------|
| 14.6   | 20.2   | 9.5    | 13.2   | 29.5   | 22.0   | 21.0   | 10.0   | 14.0   |
| 1.1    | 0.9    | 0.9    | 3.3    | 9.0    | 9.3    | 5.9    | 1.5    | 1.2    |
| 583.1  | 712.5  | 443.5  | 758.1  | 533.3  | 602.5  | 417.1  | 341.2  | 429.4  |
| 821.8  | 802.6  | 526.7  | 1683.6 | 1007.4 | 1160.5 | 1208.9 | 839.8  | 979.6  |
| 5.3    | 1.0    | 1.0    | 15.6   | 5.9    | 16.1   | 12.0   | 3.9    | 8.8    |
| 8.2    | 4.1    | 3.1    | 21.0   | 17.5   | 8.6    | 8.1    | 3.4    | 1.9    |
| 12.2   | 9.0    | 15.3   | 25.2   | 20.1   | 9.9    | 7.8    | 6.0    | 8.7    |
| 7.1    | 2.4    | 2.6    | 5.1    | 6.1    | 3.5    | 2.6    | 9.7    | 2.6    |
| 16.9   | 3.2    | 10.7   | 14.6   | 8.6    | 7.3    | 3.8    | 5.3    | 9.4    |
| 283.9  | 264.6  | 149.7  | 52.9   | 54.2   | 52.8   | 42.8   | 53.6   | 55.8   |
| 23.3   | 26.5   | 16.5   | 9.0    | 20.7   | 17.1   | 15.4   | 18.8   | 17.8   |
| 9.3    | 3.7    | 4.3    | 5.1    | 2.0    | 2.0    | 3.6    | 5.6    | 5.3    |
| 18.9   | 19.4   | 8.6    | 27.5   | 10.5   | 15.4   | 14.1   | 16.7   | 21.1   |
| 48.2   | 102.4  | 160.3  | 25.8   | 5.1    | 18.4   | 6.0    | 9.8    | 11.8   |
| 12.6   | 15.0   | 13.9   | 37.1   | 23.8   | 28.4   | 14.0   | 10.5   | 16.6   |
| 7.2    | 9.0    | 5.0    | 22.4   | 21.4   | 20.0   | 6.5    | 7.0    | 8.2    |
| 3.1    | 3.8    | 7.2    | 11.2   | 7.5    | 11.4   | 9.0    | 13.9   | 9.2    |
| 40.9   | 58.4   | 80.6   | 8.9    | 13.2   | 4.5    | 7.5    | 10.5   | 10.9   |
| 4.6    | 6.9    | 1.2    | 257.7  | 271.5  | 300.8  | 145.4  | 213.6  | 243.4  |
| 493.9  | 632.2  | 481.5  | 61.0   | 78.3   | 71.4   | 47.1   | 52.3   | 56.8   |
| 6.0    | 3.8    | 7.9    | 4.0    | 2.1    | 2.2    | 1.8    | 3.6    | 3.9    |
| 3088.9 | 3743.5 | 3142.3 | 2567.1 | 2196.5 | 2563.1 | 2039.3 | 1725.3 | 2152.8 |
| 542.9  | 479.5  | 229.6  | 110.3  | 85.5   | 86.5   | 102.6  | 89.1   | 106.8  |
| 1496.2 | 1665.6 | 1244.9 | 980.8  | 820.6  | 876.5  | 1092.7 | 1055.8 | 1124.9 |
| 2.7    | 3.1    | 3.8    | 4.5    | 8.0    | 12.3   | 3.4    | 3.5    | 5.4    |
| 5.5    | 8.2    | 3.1    | 7.2    | 6.0    | 5.7    | 6.5    | 1.9    | 2.7    |
| 1100.6 | 1161.3 | 723.1  | 1561.9 | 1183.3 | 1237.2 | 822.0  | 636.2  | 810.8  |
| 15.3   | 17.1   | 10.5   | 17.7   | 18.6   | 17.8   | 20.7   | 13.5   | 14.8   |
| 54.9   | 66.7   | 27.5   | 49.5   | 45.6   | 72.3   | 32.6   | 41.2   | 46.9   |
| 131.4  | 169.8  | 128.6  | 127.4  | 103.9  | 122.1  | 101.4  | 111.6  | 139.1  |
| 4.0    | 1.2    | 0.9    | 3.3    | 6.7    | 3.8    | 0.6    | 0.9    | 1.2    |
| 3.0    | 1.4    | 2.4    | 3.1    | 2.2    | 4.3    | 1.7    | 1.7    | 2.8    |
| 1766.6 | 2034.4 | 1458.1 | 686.2  | 563.8  | 593.1  | 1128.4 | 879.4  | 1115.8 |
| 0.7    | 2.4    | 1.5    | 4.5    | 6.1    | 8.1    | 0.7    | 1.3    | 3.2    |
| 1.1    | 3.4    | 4.5    | 4.4    | 8.2    | 3.0    | 2.4    | 1.4    | 2.6    |
| 5.7    | 7.5    | 5.7    | 73.9   | 45.6   | 58.1   | 49.1   | 31.5   | 47.0   |
| 30.8   | 157.1  | 299.1  | 14.9   | 7.1    | 17.2   | 4.4    | 1.7    | 2.2    |
| 12.8   | 16.7   | 15.7   | 21.9   | 12.3   | 11.0   | 9.0    | 8.9    | 8.1    |
| 29.6   | 38.3   | 30.2   | 27.0   | 15.8   | 28.0   | 29.2   | 28.5   | 26.9   |
| 5.3    | 11.8   | 8.2    | 24.6   | 14.8   | 16.1   | 1.8    | 2.0    | 4.1    |
| 74.5   | 71.4   | 39.3   | 14.9   | 15.9   | 16.2   | 23.7   | 24.3   | 28.6   |
| 3.1    | 4.8    | 2.1    | 11.6   | 2.6    | 3.1    | 1.5    | 1.8    | 1.0    |
| 10.3   | 10.5   | 3.6    | 4.8    | 4.4    | 4.8    | 2.8    | 7.9    | 3.0    |
| 4.8    | 10.8   | 1.0    | 12.0   | 8.8    | 6.8    | 2.2    | 2.1    | 1.4    |
| 16.9   | 23.1   | 14.8   | 24.5   | 36.6   | 32.7   | 8.7    | 10.6   | 15.8   |
| 3.0    | 4.1    | 5.7    | 5.6    | 5.4    | 5.0    | 3.4    | 1.7    | 2.1    |
| 11.4   | 10.0   | 2.4    | 122.5  | 121.2  | 132.6  | 39.8   | 50.5   | 55.3   |
| 1.8    | 1.3    | 1.7    | 5.7    | 8.1    | 6.6    | 4.0    | 1.1    | 1.7    |
| 1967.1 | 2767.3 | 2394.5 | 949.0  | 853.5  | 982.8  | 640.6  | 633.3  | 726.3  |
| 7.6    | 7.1    | 4.8    | 9.3    | 16.5   | 9.5    | 0.7    | 5.5    | 6.5    |
| 3.2    | 1.6    | 1.8    | 5.1    | 3.7    | 4.6    | 1.0    | 2.8    | 1.7    |
| 4.7    | 8.9    | 7.3    | 9.7    | 11.7   | 11.7   | 0.6    | 5.9    | 5.5    |
| 5.3    | 2.3    | 1.9    | 4.4    | 5.0    | 3.4    | 1.1    | 1.0    | 3.2    |

|        |        |        |        |        |        |        |        |        |
|--------|--------|--------|--------|--------|--------|--------|--------|--------|
| 2.0    | 3.2    | 2.0    | 6.3    | 11.9   | 3.6    | 7.7    | 6.3    | 3.6    |
| 0.8    | 3.6    | 1.6    | 2.8    | 1.8    | 1.8    | 2.9    | 1.5    | 3.9    |
| 0.6    | 3.1    | 0.6    | 0.7    | 2.8    | 5.4    | 4.1    | 0.5    | 0.9    |
| 13.2   | 14.1   | 3.0    | 40.9   | 30.0   | 32.5   | 10.7   | 3.1    | 17.5   |
| 7.6    | 4.3    | 3.6    | 37.6   | 22.3   | 26.1   | 6.6    | 6.0    | 5.0    |
| 1.6    | 2.8    | 1.1    | 2.7    | 1.9    | 2.2    | 2.2    | 1.5    | 5.6    |
| 47.0   | 77.2   | 38.6   | 44.7   | 29.4   | 38.2   | 45.6   | 19.2   | 43.2   |
| 0.8    | 5.4    | 0.7    | 4.5    | 5.4    | 7.2    | 4.1    | 2.1    | 3.0    |
| 13.6   | 21.5   | 9.4    | 15.3   | 18.4   | 19.3   | 18.1   | 13.2   | 12.5   |
| 1.4    | 2.8    | 0.9    | 3.8    | 3.7    | 5.5    | 1.5    | 5.2    | 2.4    |
| 206.2  | 282.9  | 200.4  | 142.4  | 121.9  | 141.9  | 175.3  | 169.7  | 191.4  |
| 15.1   | 11.7   | 9.6    | 6.0    | 11.9   | 11.1   | 5.2    | 6.9    | 1.4    |
| 15.3   | 14.3   | 20.6   | 15.2   | 20.8   | 22.2   | 15.7   | 7.8    | 8.4    |
| 1.8    | 2.2    | 1.8    | 3.8    | 3.2    | 4.4    | 1.6    | 1.5    | 1.6    |
| 2.8    | 2.9    | 1.2    | 1.7    | 4.6    | 1.8    | 1.7    | 1.2    | 0.8    |
| 4.5    | 4.0    | 3.1    | 3.0    | 2.6    | 2.3    | 2.9    | 1.1    | 1.8    |
| 685.5  | 863.6  | 633.5  | 3.2    | 5.8    | 1.8    | 2.4    | 3.4    | 1.8    |
| 5.6    | 8.7    | 8.6    | 15.0   | 5.1    | 2.5    | 5.9    | 3.2    | 4.4    |
| 15.9   | 17.0   | 20.4   | 42.4   | 34.2   | 47.1   | 13.9   | 17.6   | 15.7   |
| 126.6  | 133.8  | 72.2   | 73.8   | 72.7   | 65.6   | 48.5   | 61.5   | 54.2   |
| 41.6   | 40.9   | 41.0   | 42.6   | 30.3   | 28.9   | 32.5   | 30.8   | 29.2   |
| 11.7   | 19.7   | 12.2   | 12.5   | 13.5   | 24.0   | 14.4   | 5.9    | 14.9   |
| 7.7    | 13.6   | 8.8    | 45.1   | 30.6   | 41.4   | 23.7   | 34.6   | 28.1   |
| 3.6    | 4.6    | 4.5    | 7.8    | 10.2   | 14.8   | 12.2   | 7.3    | 1.8    |
| 5.2    | 3.0    | 3.9    | 3.7    | 6.3    | 13.4   | 1.0    | 1.5    | 1.6    |
| 443.8  | 448.9  | 256.3  | 39.1   | 23.1   | 24.3   | 32.6   | 20.3   | 27.9   |
| 115.0  | 147.7  | 89.1   | 235.6  | 189.2  | 224.9  | 116.4  | 120.9  | 132.7  |
| 274.4  | 471.8  | 338.5  | 377.2  | 313.4  | 295.4  | 251.5  | 298.0  | 259.2  |
| 158.4  | 189.6  | 130.3  | 331.5  | 287.0  | 349.9  | 180.8  | 195.1  | 220.0  |
| 45.3   | 50.2   | 31.6   | 21.5   | 17.6   | 13.6   | 26.2   | 20.5   | 31.5   |
| 14.3   | 10.4   | 7.9    | 65.8   | 48.6   | 56.6   | 42.9   | 34.4   | 55.0   |
| 3018.8 | 3542.7 | 2850.2 | 1968.8 | 1733.4 | 1809.4 | 1849.8 | 1740.0 | 2113.2 |
| 3.2    | 6.5    | 6.4    | 4.4    | 7.7    | 11.2   | 5.5    | 1.0    | 2.9    |
| 6.2    | 9.8    | 3.3    | 11.1   | 6.4    | 13.4   | 8.9    | 5.6    | 3.1    |
| 3.5    | 2.8    | 1.5    | 2.9    | 3.8    | 3.6    | 1.7    | 1.6    | 2.3    |
| 1.4    | 6.3    | 2.3    | 19.3   | 5.6    | 6.3    | 2.2    | 1.8    | 2.7    |
| 7.3    | 4.6    | 6.1    | 10.4   | 4.4    | 8.9    | 4.0    | 10.7   | 3.9    |
| 2.6    | 1.1    | 1.1    | 3.5    | 2.4    | 2.2    | 1.4    | 0.6    | 1.5    |
| 28.2   | 38.6   | 15.9   | 27.7   | 8.8    | 13.6   | 32.1   | 20.6   | 28.7   |
| 8.1    | 4.5    | 3.0    | 33.5   | 17.0   | 13.8   | 31.8   | 23.7   | 28.3   |
| 522.6  | 810.7  | 385.5  | 6.0    | 13.8   | 14.4   | 2.8    | 0.5    | 1.0    |
| 35.6   | 43.8   | 24.6   | 129.8  | 111.5  | 117.0  | 94.4   | 94.1   | 104.6  |
| 9.0    | 3.3    | 6.9    | 4.2    | 3.4    | 2.8    | 0.9    | 1.1    | 2.5    |
| 17.2   | 14.0   | 8.2    | 39.3   | 30.9   | 21.8   | 25.6   | 15.9   | 24.5   |
| 18.0   | 12.8   | 2.0    | 15.0   | 16.3   | 24.2   | 4.0    | 4.2    | 1.4    |
| 9.1    | 7.1    | 6.5    | 14.2   | 9.3    | 16.6   | 8.2    | 6.8    | 10.6   |
| 15.7   | 22.9   | 15.6   | 28.9   | 24.2   | 30.9   | 9.0    | 23.0   | 25.0   |
| 15.5   | 14.2   | 18.0   | 58.0   | 58.8   | 70.5   | 45.4   | 45.0   | 43.9   |
| 3.1    | 2.8    | 1.4    | 3.2    | 3.4    | 3.8    | 1.2    | 1.3    | 1.8    |
| 28.2   | 37.4   | 51.1   | 38.9   | 24.2   | 31.2   | 29.7   | 38.9   | 22.0   |
| 629.2  | 843.8  | 679.8  | 224.9  | 172.2  | 204.1  | 160.2  | 170.2  | 168.9  |
| 5.9    | 3.4    | 4.0    | 17.3   | 9.7    | 8.7    | 5.1    | 7.2    | 5.5    |
| 7.6    | 21.6   | 32.0   | 20.2   | 21.0   | 21.2   | 10.9   | 16.3   | 12.7   |

|        |        |        |        |        |        |        |        |        |
|--------|--------|--------|--------|--------|--------|--------|--------|--------|
| 1.1    | 1.5    | 6.7    | 9.2    | 6.1    | 8.5    | 7.7    | 3.3    | 5.2    |
| 3.0    | 2.7    | 2.5    | 10.1   | 9.2    | 10.3   | 4.1    | 1.6    | 2.4    |
| 3692.3 | 3753.4 | 2782.4 | 300.7  | 292.1  | 273.8  | 166.9  | 207.3  | 238.4  |
| 4.7    | 2.8    | 3.9    | 3.7    | 0.8    | 4.4    | 6.6    | 2.9    | 3.9    |
| 7.2    | 7.0    | 1.9    | 15.1   | 10.3   | 11.7   | 3.2    | 9.9    | 4.4    |
| 21.0   | 22.4   | 10.1   | 15.8   | 21.7   | 21.0   | 3.9    | 5.6    | 4.4    |
| 6.1    | 6.8    | 2.4    | 12.3   | 5.4    | 12.6   | 1.6    | 5.6    | 3.7    |
| 94.8   | 105.8  | 85.0   | 90.9   | 77.4   | 96.0   | 75.5   | 76.9   | 96.4   |
| 9.6    | 4.0    | 23.6   | 36.0   | 34.9   | 47.2   | 23.4   | 14.5   | 12.9   |
| 2644.3 | 4145.6 | 3732.5 | 3868.7 | 3722.4 | 3677.1 | 3589.5 | 4357.2 | 4408.1 |
| 1.5    | 1.5    | 1.2    | 2.7    | 2.4    | 3.4    | 1.3    | 1.2    | 1.3    |
| 431.5  | 553.9  | 648.2  | 469.7  | 426.5  | 452.7  | 417.3  | 512.2  | 488.0  |
| 8.4    | 3.8    | 5.8    | 13.6   | 11.1   | 19.5   | 7.0    | 5.1    | 11.2   |
| 8.4    | 1.9    | 5.9    | 23.8   | 7.0    | 11.2   | 3.8    | 13.8   | 6.8    |
| 12.1   | 15.1   | 10.3   | 22.5   | 14.8   | 19.8   | 14.5   | 5.7    | 9.2    |
| 1.7    | 1.4    | 3.0    | 2.4    | 3.2    | 3.1    | 7.5    | 2.4    | 6.3    |
| 2.5    | 6.4    | 5.0    | 6.7    | 6.3    | 7.3    | 8.4    | 5.4    | 5.0    |
| 0.7    | 2.0    | 1.5    | 2.0    | 2.5    | 5.8    | 0.7    | 1.2    | 0.8    |
| 19.3   | 31.5   | 23.8   | 19.8   | 8.0    | 21.6   | 2.0    | 10.0   | 8.1    |
| 516.7  | 498.4  | 351.1  | 326.4  | 254.4  | 267.0  | 191.9  | 140.6  | 222.8  |
| 22.9   | 31.7   | 3.9    | 33.1   | 28.6   | 19.5   | 14.7   | 11.4   | 30.0   |
| 25.5   | 25.7   | 21.1   | 30.4   | 25.8   | 25.0   | 17.1   | 15.8   | 24.5   |
| 351.8  | 438.7  | 316.8  | 408.7  | 321.5  | 410.1  | 247.7  | 239.1  | 292.9  |
| 11.2   | 12.4   | 4.9    | 18.8   | 23.4   | 26.7   | 13.6   | 8.0    | 14.8   |
| 1.6    | 2.4    | 9.5    | 22.3   | 11.6   | 7.4    | 4.1    | 5.4    | 0.9    |
| 14.1   | 13.2   | 3.5    | 11.3   | 6.2    | 5.6    | 6.1    | 8.5    | 13.9   |
| 310.4  | 396.5  | 254.8  | 443.5  | 376.3  | 416.7  | 306.5  | 273.0  | 346.4  |
| 13.9   | 21.0   | 22.9   | 6.7    | 3.5    | 3.3    | 20.8   | 22.2   | 21.8   |
| 8.4    | 7.3    | 3.7    | 19.4   | 9.3    | 14.7   | 12.4   | 7.3    | 18.5   |
| 4.0    | 10.0   | 7.4    | 5.5    | 10.9   | 11.6   | 4.2    | 7.4    | 10.7   |
| 0.9    | 1.0    | 5.0    | 8.8    | 4.6    | 7.6    | 2.8    | 5.6    | 1.4    |
| 43.4   | 57.7   | 49.6   | 38.4   | 37.6   | 30.3   | 27.7   | 19.8   | 28.8   |
| 6.4    | 2.6    | 9.7    | 41.5   | 37.3   | 48.1   | 44.9   | 57.5   | 64.5   |
| 20.6   | 13.0   | 10.1   | 15.3   | 21.0   | 24.2   | 14.2   | 13.4   | 19.2   |
| 3.9    | 1.1    | 1.8    | 4.0    | 3.3    | 5.6    | 1.8    | 1.3    | 2.4    |
| 549.5  | 422.3  | 74.6   | 144.5  | 91.9   | 117.7  | 93.5   | 45.1   | 66.2   |
| 1.0    | 1.0    | 1.6    | 3.3    | 2.4    | 1.1    | 1.1    | 0.8    | 0.9    |
| 4.6    | 2.7    | 2.6    | 5.1    | 3.2    | 4.0    | 2.2    | 2.3    | 2.3    |
| 142.4  | 175.0  | 202.1  | 80.0   | 73.1   | 70.9   | 53.2   | 67.4   | 57.9   |
| 13.9   | 17.8   | 11.3   | 19.2   | 11.0   | 6.0    | 7.1    | 6.0    | 4.6    |
| 6.4    | 15.1   | 9.3    | 9.0    | 12.6   | 10.0   | 22.5   | 7.6    | 14.8   |
| 18.8   | 25.8   | 10.2   | 50.0   | 25.7   | 27.1   | 10.4   | 14.7   | 17.0   |
| 2.4    | 2.6    | 1.3    | 3.7    | 2.5    | 3.3    | 2.1    | 1.8    | 1.9    |
| 19.7   | 16.2   | 7.6    | 16.4   | 11.3   | 22.2   | 12.0   | 13.5   | 12.0   |
| 75.8   | 100.5  | 86.2   | 49.8   | 42.6   | 44.0   | 25.8   | 29.3   | 25.6   |
| 10.4   | 16.1   | 14.3   | 15.3   | 9.8    | 19.4   | 12.8   | 11.4   | 9.3    |
| 541.8  | 668.1  | 366.6  | 816.5  | 517.3  | 565.3  | 453.8  | 403.9  | 432.6  |
| 13.1   | 25.5   | 14.9   | 24.3   | 16.5   | 19.0   | 15.2   | 13.5   | 19.3   |
| 612.5  | 608.9  | 258.5  | 190.0  | 149.3  | 203.9  | 142.6  | 151.7  | 164.8  |
| 10.1   | 8.3    | 4.0    | 17.8   | 12.4   | 8.9    | 6.1    | 8.3    | 4.9    |
| 2.2    | 1.2    | 1.4    | 1.8    | 1.6    | 3.1    | 1.1    | 1.0    | 1.3    |
| 3.9    | 3.0    | 1.8    | 4.0    | 4.2    | 10.0   | 1.9    | 3.4    | 4.6    |
| 11.8   | 18.4   | 12.9   | 29.5   | 21.8   | 31.2   | 16.3   | 25.0   | 30.0   |

|        |        |       |       |       |       |       |       |       |
|--------|--------|-------|-------|-------|-------|-------|-------|-------|
| 28.5   | 53.7   | 40.8  | 47.3  | 40.4  | 57.4  | 52.0  | 46.5  | 56.3  |
| 575.7  | 687.1  | 556.5 | 116.2 | 92.2  | 117.9 | 79.3  | 82.4  | 92.0  |
| 15.7   | 19.6   | 17.7  | 19.5  | 14.9  | 21.6  | 19.9  | 22.6  | 14.1  |
| 10.7   | 11.2   | 7.3   | 14.7  | 16.2  | 20.5  | 7.8   | 10.2  | 2.6   |
| 142.9  | 171.6  | 102.6 | 170.7 | 123.2 | 138.5 | 160.6 | 133.5 | 124.6 |
| 4.0    | 1.8    | 1.2   | 20.3  | 20.8  | 27.0  | 10.1  | 9.4   | 15.3  |
| 3.9    | 1.3    | 4.4   | 5.5   | 6.8   | 10.6  | 8.2   | 4.1   | 9.3   |
| 378.1  | 404.0  | 253.1 | 115.9 | 98.4  | 117.3 | 131.2 | 105.3 | 161.9 |
| 2.4    | 2.1    | 1.9   | 30.6  | 6.7   | 17.2  | 3.5   | 8.4   | 14.0  |
| 0.5    | 0.7    | 0.6   | 1.4   | 1.5   | 5.4   | 0.5   | 0.5   | 0.5   |
| 8.4    | 6.7    | 6.8   | 18.2  | 8.4   | 14.3  | 8.1   | 5.8   | 9.6   |
| 15.8   | 17.0   | 17.7  | 11.9  | 22.7  | 24.0  | 21.3  | 17.1  | 20.6  |
| 21.4   | 3.2    | 4.5   | 8.1   | 2.5   | 3.0   | 8.6   | 2.0   | 10.7  |
| 12.4   | 3.7    | 7.2   | 10.1  | 6.3   | 11.5  | 2.3   | 2.8   | 3.1   |
| 26.5   | 51.9   | 47.1  | 104.3 | 105.4 | 111.2 | 219.2 | 131.1 | 189.0 |
| 13.1   | 13.2   | 18.5  | 7.3   | 8.5   | 14.9  | 2.3   | 5.1   | 1.8   |
| 2.4    | 2.2    | 1.9   | 16.3  | 8.4   | 15.9  | 8.0   | 3.1   | 3.1   |
| 10.2   | 8.3    | 6.1   | 15.9  | 14.6  | 24.5  | 10.4  | 12.2  | 7.4   |
| 8.0    | 6.5    | 4.4   | 3.5   | 12.5  | 4.1   | 2.2   | 2.4   | 2.6   |
| 10.6   | 7.5    | 3.1   | 8.0   | 12.9  | 7.3   | 1.3   | 0.9   | 9.8   |
| 18.0   | 25.1   | 17.5  | 35.1  | 26.4  | 37.4  | 17.2  | 14.6  | 19.1  |
| 5.7    | 13.7   | 7.4   | 20.4  | 8.9   | 32.2  | 10.8  | 12.7  | 12.6  |
| 12.2   | 25.8   | 9.2   | 15.9  | 8.2   | 10.9  | 13.4  | 14.1  | 12.3  |
| 3.8    | 2.3    | 2.7   | 14.0  | 19.5  | 23.2  | 6.9   | 1.3   | 3.4   |
| 6.8    | 9.6    | 11.5  | 16.2  | 19.3  | 21.5  | 25.5  | 19.0  | 21.5  |
| 4.5    | 9.9    | 1.9   | 15.6  | 10.4  | 24.1  | 8.5   | 6.9   | 6.5   |
| 174.8  | 261.2  | 184.6 | 101.7 | 83.5  | 101.9 | 38.6  | 50.4  | 69.9  |
| 13.7   | 12.0   | 7.7   | 8.7   | 4.1   | 9.4   | 16.5  | 12.0  | 12.6  |
| 1.7    | 2.4    | 8.7   | 3.1   | 2.6   | 4.6   | 2.4   | 2.6   | 4.3   |
| 189.5  | 232.8  | 68.4  | 11.1  | 6.4   | 1.8   | 7.3   | 6.7   | 9.4   |
| 3.5    | 13.3   | 17.9  | 10.9  | 3.5   | 17.2  | 2.2   | 1.9   | 2.1   |
| 2.6    | 1.5    | 1.9   | 2.5   | 1.7   | 1.9   | 1.9   | 1.5   | 1.9   |
| 1.7    | 1.3    | 2.9   | 4.5   | 2.1   | 2.4   | 1.7   | 3.7   | 1.7   |
| 69.5   | 107.5  | 119.6 | 104.8 | 96.0  | 153.4 | 52.8  | 64.9  | 68.2  |
| 12.6   | 12.2   | 4.2   | 33.0  | 32.2  | 17.1  | 20.8  | 20.4  | 24.3  |
| 3.8    | 2.1    | 2.8   | 36.1  | 37.1  | 30.4  | 26.0  | 10.8  | 10.8  |
| 11.0   | 19.1   | 14.8  | 38.2  | 29.6  | 51.2  | 16.3  | 12.1  | 6.2   |
| 5.6    | 8.1    | 7.0   | 23.7  | 28.7  | 9.1   | 2.8   | 16.6  | 3.7   |
| 255.8  | 332.5  | 260.4 | 245.4 | 292.4 | 306.2 | 210.2 | 301.6 | 321.1 |
| 3.9    | 4.6    | 3.3   | 6.8   | 10.4  | 12.5  | 5.8   | 3.9   | 5.2   |
| 69.4   | 90.7   | 50.9  | 17.6  | 9.8   | 6.7   | 15.1  | 10.8  | 9.1   |
| 39.4   | 51.3   | 18.2  | 3.4   | 1.7   | 4.0   | 2.9   | 0.7   | 1.1   |
| 1.8    | 2.0    | 1.2   | 2.7   | 3.5   | 2.5   | 1.6   | 1.3   | 2.0   |
| 13.0   | 13.1   | 9.7   | 19.5  | 10.9  | 19.5  | 1.5   | 0.9   | 3.2   |
| 108.1  | 125.7  | 82.8  | 38.1  | 47.0  | 52.8  | 57.4  | 68.0  | 67.1  |
| 9.0    | 8.1    | 7.2   | 10.5  | 7.4   | 17.6  | 12.0  | 9.6   | 4.1   |
| 12.5   | 28.4   | 29.6  | 27.2  | 42.5  | 36.5  | 19.9  | 34.7  | 28.5  |
| 1211.6 | 1010.2 | 788.8 | 15.0  | 13.9  | 8.4   | 31.3  | 29.4  | 36.4  |
| 1.7    | 1.4    | 0.6   | 1.0   | 1.7   | 1.7   | 0.9   | 0.4   | 2.2   |
| 13.6   | 3.4    | 5.9   | 15.1  | 4.1   | 7.8   | 10.5  | 8.7   | 2.2   |
| 161.2  | 204.5  | 156.0 | 164.0 | 103.0 | 136.3 | 99.9  | 80.9  | 82.8  |
| 343.8  | 505.3  | 389.9 | 240.8 | 235.8 | 274.3 | 145.8 | 224.8 | 226.7 |
| 2.2    | 2.5    | 1.6   | 4.6   | 5.2   | 4.3   | 2.1   | 2.3   | 3.8   |

|        |        |        |        |        |        |        |        |        |
|--------|--------|--------|--------|--------|--------|--------|--------|--------|
| 44.7   | 77.2   | 62.5   | 32.6   | 14.8   | 39.5   | 22.5   | 28.3   | 21.5   |
| 31.8   | 25.6   | 14.7   | 24.2   | 19.0   | 16.4   | 15.4   | 6.5    | 13.0   |
| 3.1    | 3.1    | 3.2    | 3.9    | 3.2    | 3.9    | 1.8    | 1.6    | 2.0    |
| 4.6    | 1.7    | 6.2    | 8.7    | 6.6    | 10.5   | 0.9    | 1.1    | 4.8    |
| 10.1   | 12.7   | 5.6    | 23.9   | 8.2    | 14.0   | 9.6    | 4.6    | 11.3   |
| 799.9  | 672.4  | 327.6  | 3.0    | 1.4    | 5.4    | 6.8    | 3.3    | 2.1    |
| 146.7  | 197.5  | 83.8   | 87.5   | 84.9   | 64.0   | 72.2   | 66.9   | 66.5   |
| 4.5    | 4.5    | 3.0    | 3.7    | 4.3    | 3.5    | 3.2    | 1.5    | 3.4    |
| 1.9    | 1.4    | 1.8    | 6.5    | 5.2    | 4.1    | 1.8    | 2.0    | 0.8    |
| 10.4   | 6.0    | 7.2    | 19.6   | 3.6    | 29.8   | 13.7   | 6.6    | 14.2   |
| 18.2   | 21.4   | 13.9   | 24.6   | 25.7   | 27.4   | 22.8   | 16.0   | 17.8   |
| 1.8    | 2.6    | 2.2    | 3.1    | 3.8    | 3.7    | 1.3    | 2.8    | 2.9    |
| 6874.2 | 7306.3 | 5876.4 | 4611.0 | 4318.9 | 4639.1 | 2784.6 | 3127.5 | 3180.8 |
| 2.1    | 10.8   | 9.0    | 13.1   | 12.6   | 23.1   | 10.5   | 4.4    | 9.2    |
| 8.6    | 18.3   | 11.2   | 13.9   | 5.6    | 13.8   | 7.3    | 2.6    | 10.1   |
| 12.0   | 21.4   | 2.4    | 29.0   | 20.8   | 10.3   | 16.9   | 12.3   | 19.5   |
| 10.3   | 9.9    | 1.0    | 22.1   | 17.8   | 24.4   | 17.5   | 12.6   | 7.1    |
| 6.0    | 11.6   | 4.6    | 9.4    | 3.6    | 10.3   | 1.7    | 3.0    | 6.4    |
| 101.5  | 123.2  | 104.9  | 89.2   | 78.8   | 83.0   | 91.3   | 160.2  | 160.7  |
| 6.3    | 5.0    | 6.8    | 17.3   | 8.9    | 11.9   | 4.5    | 4.7    | 4.6    |
| 1.0    | 5.4    | 3.7    | 10.0   | 6.8    | 5.2    | 1.2    | 2.0    | 0.8    |
| 30.0   | 27.8   | 34.5   | 21.7   | 22.2   | 27.7   | 12.5   | 16.8   | 9.3    |
| 330.5  | 364.2  | 306.8  | 335.3  | 376.8  | 361.3  | 264.9  | 364.9  | 366.7  |
| 3.1    | 2.9    | 2.0    | 9.1    | 5.8    | 3.4    | 2.4    | 1.6    | 2.9    |
| 3.0    | 1.1    | 1.8    | 11.7   | 8.2    | 8.6    | 2.6    | 1.4    | 2.3    |
| 6.3    | 9.5    | 5.0    | 28.1   | 24.1   | 9.0    | 12.6   | 15.5   | 13.5   |
| 1.8    | 1.7    | 1.2    | 4.7    | 4.1    | 7.1    | 2.4    | 3.5    | 3.0    |
| 4.6    | 5.9    | 5.0    | 4.4    | 3.6    | 4.3    | 2.8    | 2.5    | 2.9    |
| 2.4    | 1.6    | 0.8    | 1.8    | 1.5    | 1.8    | 1.0    | 1.3    | 1.6    |
| 5.9    | 20.5   | 28.7   | 8.7    | 9.7    | 17.2   | 11.2   | 13.2   | 10.7   |
| 20.4   | 9.6    | 18.6   | 7.7    | 5.6    | 12.3   | 2.0    | 3.7    | 7.8    |
| 45.7   | 86.4   | 88.8   | 7.1    | 8.2    | 12.2   | 11.6   | 14.4   | 15.7   |
| 1.4    | 1.3    | 1.4    | 2.9    | 1.9    | 2.4    | 0.8    | 1.1    | 1.5    |
| 5.7    | 1.8    | 1.5    | 2.4    | 4.5    | 3.1    | 4.4    | 2.1    | 1.6    |
| 13.3   | 21.5   | 14.6   | 13.3   | 15.3   | 6.4    | 14.4   | 10.9   | 10.3   |
| 7067.0 | 5546.0 | 5602.1 | 1348.4 | 1125.3 | 1108.2 | 1724.9 | 2329.0 | 2472.6 |
| 171.7  | 199.5  | 101.2  | 165.8  | 114.8  | 122.6  | 80.2   | 60.0   | 82.4   |
| 7.2    | 9.6    | 5.2    | 18.6   | 7.0    | 8.4    | 6.0    | 6.3    | 8.6    |
| 2.2    | 2.8    | 2.8    | 3.0    | 2.4    | 4.1    | 5.0    | 1.8    | 1.9    |
| 16.1   | 5.0    | 16.7   | 10.8   | 13.4   | 15.3   | 7.2    | 7.1    | 7.0    |
| 22.9   | 19.3   | 9.7    | 16.2   | 19.3   | 10.2   | 5.4    | 1.2    | 1.7    |
| 264.9  | 323.1  | 312.1  | 229.9  | 289.0  | 320.2  | 266.6  | 455.4  | 415.5  |
| 14.0   | 15.2   | 15.0   | 6.4    | 11.5   | 4.0    | 8.0    | 9.9    | 12.8   |
| 9.0    | 6.0    | 2.5    | 14.0   | 4.0    | 13.0   | 1.8    | 7.8    | 1.0    |
| 4346.1 | 4882.1 | 2844.7 | 1602.9 | 1167.4 | 1234.6 | 812.8  | 860.4  | 924.4  |
| 1.7    | 3.2    | 1.2    | 2.1    | 2.9    | 2.5    | 1.7    | 1.9    | 0.9    |
| 11.8   | 10.6   | 8.1    | 14.9   | 17.2   | 25.2   | 12.4   | 5.7    | 6.9    |
| 8.9    | 3.5    | 4.5    | 6.0    | 14.1   | 10.7   | 7.6    | 6.2    | 5.0    |
| 15.8   | 19.7   | 2.9    | 9.3    | 7.1    | 4.1    | 0.8    | 8.1    | 2.0    |
| 2.0    | 1.1    | 1.8    | 9.8    | 4.3    | 3.7    | 0.9    | 1.2    | 1.3    |
| 20.9   | 14.6   | 19.8   | 70.6   | 78.3   | 101.0  | 62.7   | 70.8   | 90.5   |
| 2.4    | 2.6    | 2.0    | 3.5    | 3.7    | 4.0    | 1.8    | 1.9    | 2.6    |
| 22.1   | 21.0   | 9.0    | 27.1   | 14.7   | 25.2   | 5.8    | 6.8    | 20.3   |



|        |        |        |        |        |        |       |       |       |
|--------|--------|--------|--------|--------|--------|-------|-------|-------|
| 20.4   | 7.8    | 10.7   | 27.6   | 14.6   | 14.1   | 4.8   | 13.0  | 11.2  |
| 1.0    | 1.9    | 1.2    | 5.1    | 6.4    | 3.1    | 1.0   | 1.5   | 2.0   |
| 6.3    | 3.0    | 4.1    | 4.3    | 3.9    | 3.7    | 1.6   | 2.3   | 2.2   |
| 7.0    | 2.6    | 3.3    | 6.4    | 4.4    | 2.7    | 2.9   | 1.9   | 4.6   |
| 1.8    | 6.3    | 1.5    | 14.0   | 15.1   | 8.0    | 8.3   | 3.6   | 4.6   |
| 2.6    | 4.5    | 3.5    | 10.0   | 5.6    | 3.9    | 5.4   | 1.6   | 1.5   |
| 4.6    | 9.9    | 3.3    | 8.0    | 4.0    | 17.0   | 0.9   | 13.2  | 5.7   |
| 2.0    | 6.6    | 1.5    | 8.5    | 21.9   | 10.2   | 11.8  | 7.9   | 4.5   |
| 0.4    | 1.0    | 1.5    | 1.8    | 1.8    | 4.9    | 0.5   | 0.9   | 1.4   |
| 1.1    | 1.8    | 0.9    | 6.8    | 1.9    | 2.1    | 1.0   | 1.1   | 3.8   |
| 10.9   | 11.9   | 12.8   | 42.2   | 33.9   | 23.5   | 11.3  | 20.2  | 34.7  |
| 21.6   | 10.5   | 5.4    | 14.5   | 15.3   | 21.3   | 11.0  | 8.1   | 11.3  |
| 7.7    | 6.3    | 3.4    | 18.2   | 8.9    | 23.5   | 5.2   | 6.9   | 7.3   |
| 2.2    | 1.0    | 4.3    | 12.7   | 6.2    | 16.4   | 7.3   | 4.3   | 3.2   |
| 6.7    | 16.5   | 7.5    | 6.2    | 3.8    | 3.0    | 1.7   | 4.3   | 1.9   |
| 17.5   | 21.4   | 4.4    | 16.7   | 16.9   | 26.7   | 13.2  | 14.9  | 17.6  |
| 1.7    | 1.2    | 0.9    | 2.6    | 2.7    | 2.3    | 1.7   | 0.9   | 1.0   |
| 8.1    | 21.7   | 5.0    | 5.7    | 6.2    | 11.9   | 7.8   | 12.0  | 11.9  |
| 18.0   | 20.3   | 19.3   | 7.5    | 11.5   | 8.3    | 12.5  | 13.2  | 13.4  |
| 32.4   | 28.2   | 10.5   | 14.5   | 11.1   | 11.0   | 3.2   | 4.9   | 2.1   |
| 16.8   | 39.1   | 14.8   | 84.0   | 55.1   | 80.4   | 28.5  | 16.6  | 20.7  |
| 878.4  | 1080.9 | 937.2  | 928.0  | 1251.3 | 1337.1 | 735.9 | 956.4 | 997.6 |
| 81.6   | 91.0   | 81.3   | 71.5   | 63.1   | 53.5   | 25.7  | 13.9  | 30.3  |
| 1511.1 | 2092.7 | 2348.2 | 1261.8 | 968.5  | 1094.2 | 479.4 | 553.3 | 522.3 |
| 1.1    | 1.1    | 0.7    | 3.7    | 1.9    | 1.0    | 0.7   | 0.6   | 0.7   |
| 108.2  | 150.4  | 96.0   | 99.1   | 94.5   | 124.5  | 63.8  | 86.6  | 91.8  |
| 1.6    | 4.9    | 9.4    | 5.9    | 4.1    | 7.5    | 3.4   | 5.0   | 4.2   |
| 20.3   | 23.0   | 17.6   | 12.8   | 13.7   | 17.8   | 5.4   | 16.9  | 20.6  |
| 0.8    | 4.3    | 2.3    | 1.8    | 3.5    | 8.1    | 2.5   | 1.1   | 0.7   |
| 38.0   | 27.1   | 16.4   | 47.1   | 20.8   | 33.1   | 17.5  | 24.4  | 22.6  |
| 23.4   | 26.8   | 16.3   | 21.4   | 16.9   | 19.1   | 13.4  | 12.0  | 9.7   |
| 1.0    | 0.7    | 0.6    | 1.3    | 1.1    | 2.0    | 0.5   | 0.8   | 2.1   |
| 1.2    | 1.7    | 2.6    | 3.5    | 4.0    | 3.5    | 2.1   | 3.0   | 1.9   |
| 35.1   | 53.7   | 21.5   | 25.3   | 24.1   | 23.2   | 20.6  | 8.0   | 15.1  |
| 3.5    | 8.0    | 5.2    | 6.7    | 11.6   | 24.8   | 8.4   | 2.9   | 11.7  |
| 12.7   | 8.0    | 10.9   | 19.8   | 7.6    | 13.9   | 15.4  | 9.5   | 15.8  |
| 12.2   | 13.6   | 6.7    | 14.7   | 5.5    | 11.6   | 8.1   | 5.6   | 10.3  |
| 95.9   | 114.6  | 91.6   | 99.8   | 89.7   | 99.1   | 85.2  | 76.8  | 120.2 |
| 5536.5 | 6019.8 | 5513.8 | 19.3   | 34.8   | 34.3   | 29.2  | 45.9  | 37.1  |
| 5.7    | 13.4   | 8.2    | 17.5   | 8.2    | 13.6   | 5.0   | 7.7   | 12.5  |
| 602.7  | 766.3  | 734.8  | 1086.5 | 845.2  | 995.6  | 798.2 | 850.6 | 883.8 |
| 2.4    | 5.3    | 2.0    | 8.3    | 14.4   | 17.7   | 11.4  | 2.4   | 2.9   |
| 47.2   | 60.1   | 54.8   | 22.8   | 16.0   | 29.3   | 29.3  | 22.0  | 35.5  |
| 6.4    | 9.5    | 11.1   | 11.3   | 16.3   | 17.7   | 11.7  | 1.4   | 10.3  |
| 2.4    | 2.1    | 2.3    | 5.9    | 5.1    | 4.8    | 3.6   | 1.7   | 2.1   |
| 3.8    | 4.4    | 3.4    | 39.4   | 16.5   | 26.8   | 44.7  | 53.8  | 42.0  |
| 33.8   | 37.8   | 22.7   | 16.1   | 15.3   | 14.4   | 2.0   | 3.2   | 1.8   |
| 1.9    | 5.5    | 1.9    | 2.6    | 4.3    | 1.7    | 0.8   | 1.0   | 0.6   |
| 2.1    | 1.4    | 2.7    | 5.9    | 5.1    | 3.4    | 4.2   | 2.6   | 2.0   |
| 1.9    | 3.5    | 0.8    | 10.7   | 5.1    | 8.0    | 0.9   | 1.0   | 2.2   |
| 797.7  | 924.2  | 565.1  | 1.8    | 2.6    | 1.5    | 0.7   | 1.1   | 1.1   |
| 14.4   | 15.0   | 12.3   | 10.4   | 8.1    | 8.2    | 4.6   | 5.7   | 5.3   |
| 203.0  | 293.9  | 200.5  | 158.5  | 153.2  | 128.0  | 135.6 | 110.8 | 172.7 |

|         |         |        |         |         |         |        |        |        |
|---------|---------|--------|---------|---------|---------|--------|--------|--------|
| 461.7   | 595.4   | 651.0  | 1236.4  | 993.0   | 1173.5  | 832.7  | 1001.1 | 937.9  |
| 6907.8  | 7194.4  | 5871.3 | 2001.5  | 1842.7  | 2018.6  | 1487.4 | 1601.1 | 1773.7 |
| 81.7    | 89.4    | 98.5   | 186.5   | 146.3   | 180.9   | 98.4   | 118.6  | 142.7  |
| 144.5   | 148.9   | 154.8  | 158.5   | 143.5   | 164.7   | 117.1  | 151.3  | 160.3  |
| 1624.6  | 1746.6  | 1220.4 | 464.4   | 399.3   | 371.1   | 502.2  | 384.3  | 497.7  |
| 4805.3  | 4957.6  | 3754.1 | 4017.9  | 2909.8  | 3198.4  | 2468.7 | 1965.7 | 2386.1 |
| 2340.4  | 2546.0  | 2001.6 | 1557.9  | 1273.9  | 1239.5  | 888.4  | 738.8  | 781.6  |
| 1369.0  | 1646.1  | 1366.2 | 2803.8  | 2424.5  | 2711.7  | 1909.1 | 2085.3 | 2141.0 |
| 2594.5  | 2985.9  | 2110.0 | 1106.0  | 895.1   | 1025.6  | 976.4  | 950.4  | 1140.0 |
| 703.1   | 535.2   | 380.8  | 127.2   | 97.5    | 139.3   | 344.6  | 224.7  | 303.0  |
| 922.6   | 808.2   | 564.5  | 467.7   | 363.5   | 452.3   | 476.5  | 367.9  | 507.2  |
| 1975.9  | 1824.7  | 1328.7 | 1197.6  | 939.4   | 1018.7  | 950.2  | 933.0  | 1109.8 |
| 725.5   | 755.5   | 403.4  | 105.0   | 88.8    | 113.5   | 348.2  | 228.8  | 272.0  |
| 2183.7  | 2148.5  | 1147.0 | 1038.8  | 756.4   | 879.7   | 941.4  | 730.2  | 936.9  |
| 813.3   | 1157.7  | 1089.1 | 194.0   | 210.7   | 243.2   | 70.0   | 113.3  | 119.0  |
| 6166.4  | 6914.0  | 6137.9 | 3806.7  | 2933.9  | 3277.2  | 2513.0 | 1999.1 | 2413.2 |
| 8137.1  | 8729.1  | 8067.1 | 5377.1  | 4397.4  | 4421.2  | 3850.4 | 3105.8 | 3594.2 |
| 715.2   | 1014.7  | 850.6  | 284.5   | 208.0   | 282.6   | 429.3  | 308.5  | 395.0  |
| 499.5   | 789.9   | 630.9  | 832.2   | 606.9   | 682.9   | 347.2  | 429.4  | 389.7  |
| 1022.2  | 1476.2  | 1331.1 | 853.8   | 663.9   | 848.9   | 703.9  | 630.2  | 748.6  |
| 186.4   | 283.4   | 254.5  | 89.2    | 84.1    | 114.7   | 57.4   | 64.6   | 82.1   |
| 303.4   | 263.6   | 167.2  | 131.2   | 83.5    | 119.9   | 119.8  | 136.2  | 123.1  |
| 1064.5  | 983.6   | 539.8  | 559.5   | 407.9   | 486.7   | 307.3  | 357.7  | 348.6  |
| 7993.8  | 8760.4  | 7208.7 | 6938.4  | 6252.1  | 6631.3  | 4760.5 | 4861.6 | 5050.7 |
| 3496.1  | 3962.6  | 2567.0 | 1529.7  | 1269.7  | 1268.2  | 1393.6 | 1404.1 | 1644.3 |
| 1065.9  | 1145.0  | 830.3  | 760.5   | 642.3   | 746.7   | 542.7  | 623.2  | 640.4  |
| 3681.2  | 3636.0  | 2431.3 | 885.5   | 787.7   | 856.0   | 667.2  | 716.4  | 733.1  |
| 4480.3  | 4920.8  | 3006.9 | 886.4   | 759.0   | 821.1   | 636.6  | 781.6  | 848.6  |
| 4392.0  | 4649.3  | 3993.4 | 5142.7  | 4552.0  | 5009.8  | 3103.3 | 3212.3 | 3364.0 |
| 2517.5  | 2721.3  | 2240.5 | 5403.7  | 4755.0  | 5010.3  | 2737.0 | 2886.8 | 3030.8 |
| 4133.6  | 4312.5  | 3022.8 | 1947.6  | 1404.9  | 1548.8  | 1380.7 | 1166.8 | 1267.6 |
| 2597.8  | 2971.0  | 2105.2 | 1827.7  | 1521.7  | 1684.3  | 1105.5 | 1097.7 | 1183.4 |
| 1183.3  | 1745.9  | 1090.4 | 1464.8  | 1098.4  | 1070.0  | 1401.5 | 1322.2 | 1418.3 |
| 10432.6 | 10254.5 | 9905.1 | 11174.2 | 10618.3 | 10551.6 | 6472.5 | 6849.2 | 7102.2 |
| 3983.4  | 4808.9  | 3305.3 | 4617.6  | 4006.8  | 3584.5  | 3172.2 | 3358.0 | 3592.3 |
| 6142.0  | 7434.4  | 6129.9 | 2079.0  | 1793.8  | 1898.2  | 1592.0 | 1145.8 | 1586.1 |
| 541.4   | 590.2   | 367.5  | 1620.8  | 1458.9  | 1654.3  | 1218.7 | 1264.2 | 1517.8 |
| 1952.5  | 2031.7  | 1384.8 | 4286.7  | 3962.9  | 4396.1  | 3564.3 | 3601.5 | 3969.2 |
| 4653.7  | 6153.2  | 5900.1 | 3380.4  | 3052.9  | 3113.1  | 4658.3 | 4682.6 | 4715.1 |
| 3337.6  | 4662.4  | 4660.5 | 2848.7  | 2714.6  | 2753.4  | 4319.2 | 4381.4 | 4691.1 |
| 3784.9  | 3948.0  | 2693.5 | 2295.6  | 1953.6  | 2018.8  | 1756.2 | 1624.0 | 1828.7 |
| 1309.7  | 1855.5  | 1769.2 | 1164.5  | 1007.2  | 1064.8  | 1625.6 | 1817.4 | 1664.7 |
| 2242.8  | 3396.7  | 2981.8 | 2034.8  | 1984.0  | 1959.2  | 2275.0 | 2857.4 | 2644.5 |
| 2178.1  | 3029.5  | 2634.0 | 6090.1  | 5232.5  | 5243.8  | 4770.8 | 4532.7 | 4869.5 |
| 1498.6  | 1994.3  | 1823.4 | 8835.6  | 7772.4  | 8078.5  | 4975.5 | 4881.0 | 5134.3 |
| 496.0   | 584.0   | 445.9  | 319.3   | 245.6   | 324.6   | 111.8  | 97.2   | 137.2  |
| 858.7   | 960.3   | 615.3  | 522.9   | 357.5   | 439.3   | 182.8  | 229.8  | 232.5  |
| 5455.7  | 5513.0  | 3879.1 | 2585.6  | 2343.9  | 2572.2  | 1752.0 | 1852.0 | 2020.4 |
| 2456.1  | 3187.6  | 2207.9 | 2630.3  | 2318.6  | 2174.7  | 1626.0 | 1418.6 | 1762.4 |
| 957.1   | 1301.6  | 1319.1 | 721.0   | 625.6   | 671.3   | 561.9  | 636.6  | 691.7  |
| 1645.6  | 2210.3  | 2136.0 | 1767.4  | 1555.9  | 1627.6  | 1043.7 | 1158.2 | 1245.1 |
| 540.5   | 641.8   | 581.6  | 200.1   | 198.9   | 198.7   | 171.0  | 173.5  | 212.2  |
| 154.0   | 256.5   | 230.8  | 96.2    | 95.0    | 113.8   | 113.8  | 103.8  | 124.6  |

|         |         |         |         |         |         |        |        |        |
|---------|---------|---------|---------|---------|---------|--------|--------|--------|
| 1055.5  | 1346.0  | 1132.4  | 542.4   | 527.8   | 554.5   | 473.2  | 542.7  | 566.3  |
| 2265.7  | 3142.2  | 2593.6  | 1179.1  | 1211.5  | 1276.7  | 920.0  | 1102.9 | 1125.9 |
| 7830.9  | 8123.3  | 7284.4  | 7636.7  | 6720.5  | 6590.5  | 5248.6 | 4623.4 | 5163.5 |
| 484.3   | 584.2   | 445.0   | 925.9   | 896.1   | 850.5   | 900.7  | 1011.3 | 1034.4 |
| 93.7    | 129.6   | 101.6   | 143.5   | 188.4   | 207.4   | 204.1  | 194.0  | 189.2  |
| 1074.6  | 1313.8  | 1151.6  | 1078.5  | 964.8   | 982.2   | 1454.9 | 1635.4 | 1565.1 |
| 4857.2  | 5047.7  | 3175.7  | 3179.8  | 2431.1  | 2371.5  | 2448.4 | 1668.1 | 2265.3 |
| 995.6   | 1235.9  | 655.2   | 647.8   | 461.4   | 436.2   | 532.8  | 377.5  | 522.0  |
| 2474.4  | 3407.5  | 2821.7  | 856.3   | 673.1   | 686.3   | 790.9  | 875.2  | 1008.8 |
| 4121.9  | 5009.0  | 4975.1  | 1783.3  | 1573.0  | 1853.7  | 1175.3 | 1361.6 | 1381.4 |
| 1336.3  | 1502.8  | 679.5   | 1201.0  | 789.3   | 883.3   | 468.1  | 376.9  | 425.6  |
| 1413.2  | 1943.9  | 1632.0  | 1051.2  | 820.3   | 1063.5  | 805.8  | 608.5  | 751.4  |
| 1436.0  | 1713.2  | 1307.9  | 864.9   | 716.5   | 802.9   | 412.8  | 469.5  | 477.2  |
| 6292.9  | 5949.9  | 4825.6  | 3686.6  | 3081.9  | 3346.0  | 2108.8 | 1997.0 | 2316.8 |
| 8545.7  | 8817.3  | 7833.8  | 6727.5  | 6369.1  | 6757.8  | 3828.0 | 3825.1 | 4151.5 |
| 321.1   | 425.9   | 431.7   | 1282.1  | 1428.3  | 1628.9  | 857.7  | 1161.6 | 1183.5 |
| 4221.3  | 3697.2  | 3591.3  | 1682.9  | 1413.5  | 1571.0  | 1252.0 | 1353.5 | 1436.3 |
| 1238.1  | 1698.7  | 1661.5  | 1567.6  | 1313.2  | 1575.7  | 1040.5 | 1001.6 | 1170.4 |
| 591.3   | 663.9   | 470.4   | 712.8   | 634.4   | 733.5   | 487.8  | 526.7  | 570.3  |
| 358.1   | 368.6   | 232.5   | 401.5   | 420.2   | 445.5   | 385.3  | 505.4  | 569.0  |
| 12518.7 | 11916.5 | 7328.9  | 9330.5  | 7846.1  | 8501.4  | 7092.3 | 5730.8 | 7186.7 |
| 2070.2  | 2392.0  | 1267.1  | 2907.0  | 2320.8  | 2532.2  | 1637.4 | 1514.6 | 1764.0 |
| 4694.0  | 5422.5  | 4373.4  | 1012.3  | 732.4   | 877.5   | 922.2  | 764.5  | 939.3  |
| 255.0   | 406.2   | 497.4   | 1537.9  | 1392.5  | 1504.4  | 832.4  | 1369.7 | 1130.4 |
| 10736.4 | 10760.7 | 8201.0  | 4623.3  | 3967.1  | 3965.5  | 3849.1 | 2945.3 | 3617.5 |
| 9601.4  | 10124.5 | 9005.4  | 11848.3 | 11174.1 | 11290.2 | 7700.1 | 7490.4 | 7866.7 |
| 2525.6  | 3079.6  | 2022.7  | 1938.1  | 1599.5  | 1753.0  | 1121.8 | 877.2  | 1075.9 |
| 1161.2  | 1296.1  | 845.4   | 628.6   | 369.3   | 406.5   | 657.9  | 514.9  | 596.9  |
| 12565.0 | 12200.6 | 13094.1 | 9946.7  | 9882.2  | 9503.3  | 6732.3 | 7403.6 | 7935.2 |
| 4142.2  | 3962.9  | 2154.3  | 4883.8  | 3505.3  | 3898.9  | 2806.4 | 2012.5 | 2399.7 |
| 6210.1  | 6575.6  | 5332.4  | 2766.2  | 2391.1  | 2514.5  | 1754.6 | 1906.6 | 2043.4 |
| 2168.0  | 2520.5  | 1904.5  | 588.9   | 472.6   | 546.8   | 817.9  | 833.9  | 918.9  |
| 1735.7  | 2302.5  | 2158.6  | 1452.6  | 1156.6  | 1377.0  | 1019.9 | 865.8  | 1064.5 |
| 3045.2  | 3673.0  | 3816.0  | 2719.5  | 2000.7  | 2456.9  | 1717.6 | 1456.4 | 1710.1 |
| 87.8    | 87.1    | 64.6    | 374.2   | 283.8   | 297.4   | 51.2   | 49.6   | 47.2   |
| 2206.1  | 2519.6  | 2067.3  | 1624.6  | 1315.2  | 1632.5  | 1362.0 | 1449.7 | 1488.7 |
| 2163.0  | 2682.0  | 1986.2  | 1044.5  | 953.9   | 1103.4  | 1060.1 | 1135.0 | 1232.5 |
| 3490.6  | 4025.0  | 3276.5  | 2911.7  | 2468.6  | 3116.8  | 1635.0 | 1956.3 | 1898.8 |
| 1572.3  | 1618.3  | 1190.6  | 4773.6  | 3467.7  | 3637.6  | 1969.5 | 1656.8 | 1854.9 |
| 1003.6  | 1089.7  | 795.3   | 1344.1  | 933.0   | 972.8   | 1000.7 | 859.6  | 1042.1 |
| 55.3    | 66.4    | 39.4    | 54.6    | 53.6    | 51.0    | 35.2   | 27.7   | 40.4   |
| 1146.8  | 1107.3  | 818.5   | 2516.5  | 1497.6  | 1677.8  | 1555.9 | 1077.9 | 1307.1 |
| 982.5   | 1158.5  | 976.3   | 1042.6  | 811.7   | 900.9   | 646.5  | 637.1  | 651.4  |
| 133.4   | 172.8   | 131.0   | 6.8     | 5.3     | 7.7     | 80.3   | 63.7   | 71.0   |
| 378.8   | 318.5   | 98.1    | 296.2   | 239.1   | 231.9   | 278.1  | 186.0  | 265.9  |
| 724.0   | 511.5   | 152.7   | 960.5   | 736.5   | 840.0   | 590.9  | 414.0  | 595.9  |
| 1280.4  | 1600.6  | 1081.3  | 1846.6  | 1387.2  | 1444.0  | 1357.3 | 1346.3 | 1477.5 |
| 1701.8  | 2165.1  | 1806.3  | 2624.5  | 2296.9  | 2547.3  | 1571.0 | 1587.8 | 1749.7 |
| 710.8   | 894.5   | 681.8   | 9.7     | 5.0     | 7.8     | 10.3   | 9.3    | 8.5    |
| 3931.7  | 4320.2  | 3250.0  | 1.9     | 2.2     | 2.9     | 1.7    | 1.5    | 1.3    |
| 652.7   | 859.0   | 721.5   | 1736.9  | 1502.0  | 1721.6  | 1030.7 | 1110.5 | 1210.2 |
| 2838.2  | 3854.4  | 3535.5  | 3119.5  | 2742.9  | 2965.5  | 1665.2 | 1955.4 | 1898.8 |
| 83.4    | 123.9   | 97.8    | 352.9   | 399.5   | 367.3   | 543.2  | 552.7  | 677.1  |

|        |         |        |         |         |         |        |        |        |
|--------|---------|--------|---------|---------|---------|--------|--------|--------|
| 1484.4 | 1859.8  | 1314.9 | 769.3   | 727.7   | 778.6   | 752.4  | 808.9  | 876.9  |
| 623.4  | 774.9   | 496.0  | 238.9   | 192.4   | 241.1   | 280.4  | 246.4  | 273.4  |
| 908.6  | 1134.9  | 693.3  | 561.2   | 445.1   | 494.8   | 429.3  | 462.5  | 506.2  |
| 233.0  | 305.1   | 238.6  | 697.0   | 595.4   | 639.9   | 452.6  | 483.5  | 544.9  |
| 7303.5 | 7285.7  | 5984.3 | 3310.9  | 2863.5  | 2793.8  | 3005.2 | 2779.3 | 3436.3 |
| 159.6  | 240.8   | 135.8  | 7.8     | 5.3     | 6.5     | 2.8    | 8.8    | 2.1    |
| 5885.8 | 6035.8  | 3867.3 | 1448.2  | 1051.8  | 1119.7  | 682.0  | 596.2  | 673.8  |
| 2519.5 | 2935.7  | 2589.1 | 481.8   | 471.5   | 464.1   | 363.0  | 315.3  | 437.7  |
| 598.1  | 699.1   | 579.9  | 404.7   | 353.4   | 364.0   | 302.2  | 342.0  | 411.3  |
| 1726.7 | 2161.2  | 1991.9 | 276.4   | 230.1   | 295.2   | 218.0  | 209.9  | 214.9  |
| 97.8   | 152.9   | 86.0   | 195.6   | 159.8   | 177.9   | 68.5   | 68.7   | 80.0   |
| 1527.0 | 1955.1  | 1530.8 | 1969.2  | 1707.7  | 1725.3  | 1523.7 | 1660.8 | 1831.3 |
| 367.5  | 481.7   | 377.9  | 529.4   | 482.6   | 535.5   | 366.7  | 444.1  | 462.8  |
| 59.8   | 95.9    | 79.7   | 20.7    | 26.5    | 29.2    | 33.3   | 31.0   | 34.9   |
| 1691.0 | 2084.7  | 1480.0 | 831.9   | 739.9   | 838.6   | 859.3  | 841.3  | 936.5  |
| 71.2   | 83.5    | 72.5   | 109.4   | 84.9    | 110.5   | 98.0   | 110.2  | 121.5  |
| 3656.8 | 4293.6  | 3497.1 | 3182.7  | 2652.1  | 2937.6  | 2326.7 | 2472.3 | 2673.0 |
| 2819.4 | 3425.5  | 2573.6 | 2787.9  | 2603.2  | 2831.6  | 1824.5 | 1980.3 | 2124.4 |
| 5498.6 | 6076.4  | 3917.6 | 1757.2  | 1650.9  | 1481.9  | 2149.7 | 2123.2 | 2359.0 |
| 5238.1 | 5644.5  | 4268.7 | 1753.2  | 1552.7  | 1496.1  | 1602.3 | 1559.3 | 1710.5 |
| 1175.6 | 1688.7  | 1513.4 | 308.7   | 314.9   | 361.0   | 222.7  | 300.1  | 280.9  |
| 320.7  | 527.6   | 482.8  | 112.7   | 140.7   | 144.4   | 74.3   | 118.6  | 132.2  |
| 8352.0 | 8571.7  | 7487.2 | 2675.6  | 2247.0  | 2298.7  | 1730.0 | 1650.6 | 1751.9 |
| 3406.9 | 3557.6  | 2618.6 | 6702.2  | 6232.6  | 6083.5  | 4604.0 | 4406.9 | 4818.6 |
| 3407.3 | 2998.1  | 1520.0 | 336.6   | 272.7   | 306.4   | 529.7  | 462.8  | 531.3  |
| 717.0  | 942.6   | 671.7  | 314.1   | 332.9   | 327.3   | 234.0  | 289.5  | 266.4  |
| 5921.4 | 6532.4  | 5058.5 | 3774.9  | 2973.6  | 3346.8  | 1983.8 | 1797.9 | 2088.9 |
| 1.6    | 1.6     | 1.0    | 8.3     | 4.4     | 10.2    | 2.7    | 3.1    | 4.1    |
| 42.0   | 155.7   | 173.1  | 53.7    | 26.0    | 18.0    | 102.4  | 78.9   | 69.8   |
| 910.9  | 1475.0  | 1178.7 | 1253.3  | 907.8   | 1062.3  | 603.3  | 535.2  | 655.9  |
| 2802.9 | 3333.9  | 2508.3 | 1006.2  | 868.4   | 1062.2  | 1308.4 | 1219.5 | 1402.4 |
| 405.3  | 554.7   | 425.6  | 304.9   | 270.5   | 327.1   | 265.5  | 284.9  | 288.1  |
| 3644.2 | 4627.8  | 3392.4 | 1989.5  | 1681.1  | 1928.4  | 1373.6 | 1786.8 | 1691.7 |
| 819.8  | 1083.7  | 815.7  | 1029.5  | 852.1   | 836.1   | 525.7  | 529.1  | 572.9  |
| 1527.3 | 2166.5  | 1613.2 | 647.7   | 535.4   | 533.5   | 664.8  | 628.0  | 673.4  |
| 9987.1 | 10233.7 | 9709.3 | 11724.7 | 11437.3 | 11804.6 | 6760.4 | 7127.5 | 7477.6 |
| 3261.8 | 3577.9  | 2873.6 | 1068.7  | 830.8   | 1184.4  | 891.1  | 741.3  | 875.6  |
| 1267.7 | 1424.2  | 1254.3 | 841.1   | 681.9   | 804.0   | 466.0  | 360.4  | 420.9  |
| 3003.9 | 3095.1  | 1871.0 | 1537.4  | 1180.2  | 1354.2  | 875.6  | 803.1  | 905.7  |
| 383.7  | 658.2   | 487.9  | 396.9   | 357.4   | 462.6   | 285.6  | 369.5  | 378.2  |
| 174.7  | 243.6   | 175.6  | 120.9   | 119.6   | 151.3   | 58.1   | 87.7   | 73.5   |
| 2609.5 | 3121.5  | 2329.7 | 1123.3  | 1001.3  | 1100.6  | 803.9  | 950.0  | 952.6  |
| 197.9  | 315.8   | 207.4  | 61.2    | 52.8    | 47.7    | 124.1  | 126.4  | 139.4  |
| 129.4  | 506.4   | 395.7  | 717.2   | 591.2   | 699.4   | 459.5  | 481.3  | 529.7  |
| 2531.0 | 3357.9  | 2942.3 | 3256.5  | 2962.4  | 3253.3  | 1453.4 | 1635.2 | 1809.4 |
| 878.2  | 849.8   | 518.4  | 416.9   | 363.4   | 393.0   | 335.9  | 342.3  | 364.4  |
| 4699.5 | 5015.7  | 3529.5 | 2510.0  | 1977.5  | 2002.8  | 2124.4 | 1874.3 | 2119.5 |
| 180.8  | 379.5   | 356.3  | 3743.2  | 3328.7  | 3813.4  | 2889.5 | 2776.2 | 3180.6 |
| 7430.5 | 7572.2  | 7152.1 | 6193.1  | 5442.4  | 5834.2  | 3986.0 | 3849.4 | 4177.8 |
| 89.7   | 128.3   | 112.3  | 62.0    | 38.0    | 51.0    | 61.6   | 42.3   | 51.3   |
| 665.5  | 982.3   | 699.4  | 552.2   | 359.1   | 445.8   | 298.3  | 238.0  | 258.5  |
| 776.5  | 1154.4  | 1068.2 | 532.2   | 556.6   | 644.7   | 337.9  | 555.2  | 459.6  |
| 226.3  | 321.3   | 246.4  | 527.7   | 382.8   | 494.1   | 173.0  | 203.7  | 215.1  |

|         |         |         |         |         |         |        |        |        |
|---------|---------|---------|---------|---------|---------|--------|--------|--------|
| 615.0   | 933.6   | 867.7   | 657.6   | 516.7   | 562.5   | 558.8  | 649.4  | 652.5  |
| 412.9   | 594.3   | 608.2   | 1076.7  | 1023.9  | 1213.8  | 443.1  | 653.4  | 640.3  |
| 4140.7  | 4383.7  | 3383.7  | 2480.8  | 1688.5  | 1871.8  | 1830.4 | 1624.4 | 1755.3 |
| 237.2   | 273.4   | 143.6   | 58.5    | 51.8    | 26.4    | 23.6   | 28.8   | 34.4   |
| 3766.8  | 3650.9  | 2332.6  | 2402.5  | 2084.6  | 2409.9  | 1684.9 | 1499.1 | 1767.8 |
| 3046.4  | 2849.9  | 1453.6  | 2022.5  | 1414.0  | 1484.8  | 1222.4 | 945.7  | 1141.8 |
| 1255.9  | 1329.9  | 1089.7  | 1066.6  | 944.1   | 1111.0  | 675.6  | 966.8  | 906.9  |
| 4342.8  | 4313.0  | 2857.7  | 4436.2  | 3823.0  | 3969.2  | 3013.6 | 2714.0 | 3022.6 |
| 1337.2  | 1671.0  | 1314.0  | 1505.2  | 1165.3  | 1279.3  | 1196.9 | 931.5  | 1041.5 |
| 4.4     | 6.2     | 5.8     | 316.6   | 393.0   | 371.1   | 98.3   | 241.6  | 214.1  |
| 5105.3  | 6103.9  | 3410.3  | 1086.8  | 845.9   | 968.7   | 1056.3 | 876.8  | 1030.1 |
| 254.0   | 341.2   | 269.8   | 465.4   | 404.6   | 502.8   | 255.2  | 291.1  | 273.6  |
| 990.2   | 1436.5  | 1018.8  | 476.4   | 472.2   | 541.7   | 453.8  | 521.8  | 548.6  |
| 1039.9  | 1314.1  | 913.9   | 521.3   | 486.3   | 583.2   | 460.5  | 575.1  | 539.0  |
| 7346.6  | 7243.2  | 4719.0  | 3311.5  | 2514.5  | 2478.5  | 2677.7 | 2078.3 | 2575.1 |
| 2485.7  | 2836.2  | 1607.6  | 2931.3  | 2517.7  | 2690.9  | 2296.8 | 2265.1 | 2473.7 |
| 5.3     | 6.0     | 5.2     | 5.7     | 4.7     | 7.0     | 3.3    | 1.9    | 2.8    |
| 8.7     | 6.9     | 5.8     | 9.1     | 3.2     | 11.8    | 3.4    | 5.2    | 5.9    |
| 301.7   | 477.5   | 649.3   | 1248.1  | 1209.0  | 1386.9  | 1030.2 | 1351.3 | 1351.7 |
| 374.2   | 622.3   | 684.1   | 1249.9  | 1224.1  | 1372.7  | 1190.3 | 1566.8 | 1482.9 |
| 208.0   | 248.7   | 185.2   | 308.9   | 206.0   | 299.8   | 248.0  | 246.3  | 270.8  |
| 1260.9  | 1453.9  | 984.8   | 1936.2  | 1428.2  | 1624.7  | 1297.0 | 1115.5 | 1285.1 |
| 1738.6  | 1755.2  | 890.5   | 1280.7  | 610.9   | 665.7   | 596.0  | 342.8  | 402.7  |
| 1269.9  | 1897.3  | 1602.8  | 1027.2  | 883.5   | 953.3   | 722.8  | 737.5  | 814.1  |
| 6.8     | 10.2    | 13.2    | 15.6    | 17.8    | 14.1    | 13.0   | 10.7   | 16.1   |
| 36.3    | 41.0    | 48.0    | 142.3   | 140.2   | 137.0   | 126.9  | 184.5  | 186.1  |
| 1223.2  | 1216.7  | 747.8   | 3896.5  | 3283.5  | 3536.0  | 1998.4 | 1753.9 | 2141.0 |
| 1072.7  | 1207.7  | 724.9   | 748.3   | 491.6   | 625.8   | 490.7  | 441.9  | 509.1  |
| 2100.3  | 2198.5  | 1441.7  | 1735.7  | 1320.9  | 1489.7  | 1067.6 | 921.1  | 1088.4 |
| 601.4   | 636.1   | 373.3   | 280.3   | 237.1   | 233.0   | 289.6  | 271.3  | 299.4  |
| 573.5   | 622.6   | 377.4   | 328.4   | 221.3   | 269.0   | 273.5  | 247.2  | 251.5  |
| 1379.1  | 1433.0  | 909.3   | 493.0   | 398.7   | 434.9   | 304.7  | 325.7  | 404.0  |
| 3219.9  | 3406.2  | 2357.1  | 6402.4  | 5242.7  | 5613.6  | 4032.9 | 3527.2 | 4215.5 |
| 42.0    | 96.4    | 87.7    | 207.9   | 197.5   | 221.2   | 72.4   | 75.3   | 110.5  |
| 212.3   | 281.3   | 258.4   | 484.0   | 424.6   | 496.9   | 293.9  | 308.1  | 323.9  |
| 6806.1  | 7373.0  | 5868.0  | 2411.5  | 1484.6  | 1587.1  | 2099.4 | 1587.8 | 1525.8 |
| 1919.6  | 2108.1  | 1554.2  | 899.6   | 875.3   | 755.0   | 1070.7 | 1091.6 | 1283.8 |
| 606.7   | 688.3   | 362.1   | 365.5   | 322.8   | 272.2   | 634.2  | 537.4  | 605.2  |
| 526.0   | 587.8   | 364.9   | 365.8   | 298.9   | 322.4   | 489.8  | 456.5  | 527.9  |
| 3715.0  | 4789.8  | 4593.5  | 1793.4  | 1549.9  | 1657.6  | 1354.2 | 1760.3 | 1498.3 |
| 908.5   | 896.4   | 610.6   | 719.5   | 577.7   | 654.3   | 371.3  | 317.5  | 350.2  |
| 322.2   | 395.3   | 247.0   | 124.1   | 93.7    | 128.1   | 86.7   | 71.8   | 89.9   |
| 1784.0  | 1703.1  | 977.5   | 725.5   | 514.1   | 572.0   | 457.9  | 400.4  | 475.7  |
| 3361.8  | 3670.6  | 3148.2  | 804.2   | 553.1   | 632.7   | 408.4  | 494.8  | 583.4  |
| 723.5   | 830.5   | 634.2   | 893.9   | 756.3   | 802.0   | 641.5  | 542.2  | 672.9  |
| 1492.6  | 1803.2  | 1379.6  | 2373.4  | 2054.4  | 2437.5  | 1300.3 | 1144.3 | 1411.8 |
| 1288.4  | 1465.4  | 969.0   | 557.1   | 497.9   | 504.7   | 439.2  | 372.1  | 462.4  |
| 1136.4  | 1614.9  | 1260.7  | 803.8   | 718.0   | 758.9   | 770.4  | 874.1  | 909.5  |
| 4406.6  | 4504.1  | 3389.6  | 3481.6  | 2646.4  | 2848.8  | 1715.4 | 1398.7 | 1625.8 |
| 2986.6  | 2897.5  | 1806.2  | 1229.4  | 1009.5  | 1119.4  | 669.7  | 786.2  | 831.2  |
| 169.0   | 245.6   | 132.2   | 325.0   | 222.4   | 257.9   | 165.0  | 129.1  | 162.2  |
| 521.7   | 844.2   | 508.1   | 846.2   | 621.1   | 733.1   | 452.3  | 400.5  | 533.4  |
| 13075.2 | 13013.1 | 12189.7 | 14528.3 | 13720.1 | 14297.6 | 8589.5 | 8609.5 | 8736.1 |

|         |         |         |         |         |         |        |        |        |
|---------|---------|---------|---------|---------|---------|--------|--------|--------|
| 4683.1  | 5062.3  | 3996.6  | 3907.2  | 2957.8  | 3417.3  | 2050.7 | 1791.9 | 2069.5 |
| 2751.9  | 2826.3  | 2324.0  | 2735.6  | 2133.1  | 2255.6  | 1293.9 | 1127.1 | 1312.8 |
| 2130.7  | 2435.2  | 1327.2  | 624.9   | 406.0   | 447.7   | 460.0  | 335.6  | 402.7  |
| 340.1   | 557.6   | 656.3   | 830.6   | 858.2   | 999.2   | 440.4  | 618.0  | 635.7  |
| 248.5   | 320.1   | 256.5   | 179.3   | 164.8   | 182.2   | 136.9  | 142.6  | 160.0  |
| 296.9   | 366.0   | 274.5   | 282.7   | 233.1   | 300.2   | 155.3  | 169.3  | 186.5  |
| 208.4   | 249.8   | 187.1   | 143.3   | 111.0   | 127.7   | 70.2   | 61.4   | 81.4   |
| 2470.4  | 2989.4  | 1961.4  | 2322.3  | 1985.3  | 2067.4  | 1407.7 | 1414.9 | 1499.7 |
| 13362.6 | 13212.8 | 12476.3 | 14677.3 | 13918.2 | 14555.4 | 8505.4 | 8753.4 | 8967.7 |
| 809.1   | 873.3   | 528.4   | 598.0   | 512.6   | 482.5   | 474.9  | 444.2  | 555.4  |
| 4580.6  | 4998.2  | 3230.6  | 1700.7  | 1414.7  | 1474.6  | 1057.7 | 836.4  | 1062.0 |
| 1362.3  | 1690.9  | 1329.7  | 857.2   | 706.6   | 810.4   | 517.9  | 519.9  | 560.4  |
| 533.6   | 615.8   | 400.8   | 535.0   | 393.2   | 411.3   | 391.6  | 344.9  | 437.4  |
| 576.5   | 651.5   | 502.1   | 515.0   | 405.3   | 456.9   | 405.1  | 389.8  | 423.6  |
| 1137.6  | 1228.1  | 690.8   | 655.7   | 491.9   | 588.2   | 844.4  | 693.3  | 789.6  |
| 2142.1  | 2282.7  | 1506.2  | 2256.8  | 1881.2  | 1859.7  | 2075.4 | 1781.1 | 2209.0 |
| 1650.5  | 1924.8  | 1294.2  | 961.9   | 781.6   | 927.3   | 665.2  | 613.2  | 675.4  |
| 1837.6  | 2135.1  | 1398.6  | 1149.8  | 947.6   | 1015.1  | 678.4  | 651.4  | 795.9  |
| 39.0    | 47.7    | 22.1    | 36.9    | 30.1    | 41.9    | 25.6   | 20.9   | 27.5   |
| 4181.2  | 4450.3  | 3216.5  | 2541.1  | 2087.1  | 2262.5  | 1454.3 | 1440.1 | 1624.6 |
| 1802.9  | 1982.8  | 1369.3  | 730.6   | 599.6   | 621.8   | 614.4  | 598.2  | 667.2  |
| 1081.6  | 1305.9  | 1027.2  | 1439.3  | 1356.4  | 1275.9  | 668.9  | 765.2  | 776.2  |
| 387.8   | 479.5   | 358.1   | 513.0   | 501.0   | 537.5   | 422.8  | 503.8  | 547.6  |
| 10.3    | 16.1    | 15.0    | 30.9    | 23.7    | 16.3    | 8.5    | 6.5    | 8.0    |
| 22.7    | 24.4    | 15.3    | 22.0    | 19.2    | 20.7    | 23.8   | 21.4   | 34.9   |
| 23.0    | 15.9    | 12.9    | 29.2    | 30.7    | 27.9    | 15.2   | 19.6   | 24.0   |
| 5072.0  | 5947.5  | 4588.8  | 1984.6  | 1651.8  | 1688.3  | 2034.5 | 2005.6 | 2259.9 |
| 3182.1  | 3515.0  | 2865.7  | 708.6   | 537.4   | 701.5   | 1038.4 | 852.0  | 975.4  |
| 3461.0  | 4082.6  | 3480.2  | 609.0   | 455.7   | 496.2   | 463.8  | 370.7  | 417.2  |
| 7172.8  | 7566.3  | 6778.2  | 1760.9  | 1186.3  | 1418.2  | 1175.2 | 1014.2 | 1122.6 |
| 10177.9 | 10367.0 | 9668.9  | 10420.7 | 9643.9  | 10166.4 | 6399.8 | 6417.2 | 6691.2 |
| 858.0   | 1066.4  | 696.1   | 666.7   | 533.3   | 570.3   | 647.7  | 594.2  | 685.6  |
| 247.9   | 335.3   | 332.9   | 788.7   | 585.5   | 730.7   | 382.3  | 434.3  | 488.2  |
| 133.8   | 174.4   | 135.7   | 44.5    | 28.1    | 34.4    | 55.6   | 56.1   | 67.1   |
| 220.1   | 304.5   | 283.3   | 239.6   | 232.9   | 286.2   | 190.5  | 250.3  | 240.0  |
| 320.2   | 445.4   | 359.4   | 456.2   | 392.6   | 424.8   | 371.4  | 392.5  | 396.5  |
| 841.7   | 1019.3  | 944.2   | 1043.6  | 967.7   | 1122.3  | 622.6  | 761.1  | 782.1  |
| 1495.5  | 1549.5  | 839.9   | 834.1   | 571.5   | 674.0   | 683.7  | 447.9  | 645.3  |
| 10632.3 | 11295.1 | 8995.3  | 3528.6  | 2800.2  | 2893.0  | 2161.8 | 2248.4 | 2398.2 |
| 1803.5  | 2184.0  | 1704.0  | 1699.8  | 1528.0  | 1580.3  | 1207.0 | 1313.8 | 1425.9 |
| 233.7   | 238.3   | 179.1   | 201.9   | 149.2   | 161.9   | 155.5  | 152.6  | 172.7  |
| 533.1   | 595.8   | 448.5   | 465.1   | 385.7   | 419.5   | 322.0  | 341.1  | 361.9  |
| 126.9   | 148.2   | 132.1   | 29.4    | 45.9    | 51.3    | 48.3   | 88.4   | 62.4   |
| 144.8   | 219.1   | 208.7   | 118.5   | 125.0   | 155.2   | 74.8   | 140.9  | 120.0  |
| 5400.3  | 6140.1  | 5024.4  | 4480.2  | 3723.0  | 4110.4  | 2340.5 | 2316.3 | 2595.2 |
| 65.8    | 66.6    | 69.2    | 179.5   | 135.5   | 194.8   | 44.8   | 39.2   | 51.6   |
| 1806.0  | 2099.0  | 1638.1  | 1401.9  | 1231.2  | 1367.3  | 990.4  | 1135.3 | 1100.7 |
| 945.9   | 1339.4  | 1093.9  | 1297.9  | 1173.3  | 1284.9  | 832.3  | 1050.2 | 1034.9 |
| 574.0   | 806.4   | 689.1   | 1988.0  | 1690.8  | 1929.3  | 667.6  | 661.0  | 777.7  |
| 1504.0  | 1857.5  | 1372.4  | 760.7   | 596.8   | 711.5   | 467.6  | 457.3  | 471.8  |
| 560.8   | 678.7   | 485.0   | 222.5   | 168.4   | 188.4   | 155.0  | 166.3  | 173.7  |
| 1283.0  | 1376.8  | 1006.5  | 375.5   | 352.6   | 329.5   | 332.7  | 306.2  | 341.1  |
| 778.9   | 988.7   | 728.0   | 454.2   | 336.4   | 425.6   | 316.5  | 302.1  | 336.8  |

|        |        |        |        |        |        |        |        |        |
|--------|--------|--------|--------|--------|--------|--------|--------|--------|
| 266.1  | 357.5  | 234.0  | 92.0   | 71.0   | 104.8  | 201.8  | 175.2  | 177.5  |
| 714.2  | 952.1  | 664.9  | 868.5  | 746.4  | 886.9  | 509.3  | 610.0  | 604.3  |
| 2361.7 | 3278.7 | 1747.2 | 1362.2 | 1116.2 | 1265.7 | 880.3  | 563.6  | 858.4  |
| 224.8  | 325.2  | 241.3  | 387.1  | 331.9  | 335.3  | 280.0  | 341.5  | 327.9  |
| 134.3  | 143.4  | 121.6  | 103.8  | 82.3   | 107.5  | 85.0   | 113.8  | 101.4  |
| 494.3  | 643.3  | 464.4  | 546.2  | 489.7  | 476.5  | 608.8  | 612.2  | 635.9  |
| 38.3   | 33.9   | 25.9   | 115.5  | 107.9  | 115.6  | 92.3   | 83.9   | 83.6   |
| 2853.8 | 2754.1 | 1892.7 | 1128.0 | 874.3  | 1025.6 | 727.5  | 699.9  | 715.6  |
| 1353.1 | 1585.1 | 1071.6 | 1863.2 | 1566.9 | 1703.8 | 974.9  | 987.2  | 1065.0 |
| 1.9    | 6.0    | 3.3    | 6.7    | 2.1    | 4.8    | 1.2    | 3.1    | 1.5    |
| 23.1   | 28.3   | 30.4   | 28.8   | 19.2   | 30.1   | 19.9   | 18.4   | 23.3   |
| 642.4  | 958.5  | 787.3  | 820.2  | 698.4  | 782.5  | 422.1  | 614.7  | 601.9  |
| 2305.9 | 1177.7 | 99.2   | 161.1  | 55.4   | 53.1   | 176.3  | 50.9   | 59.6   |
| 2068.6 | 1087.7 | 89.5   | 116.7  | 51.5   | 39.0   | 138.6  | 51.5   | 65.6   |
| 746.3  | 373.8  | 8.9    | 39.6   | 4.0    | 11.2   | 26.9   | 5.3    | 5.2    |
| 3.2    | 3.5    | 4.2    | 8.0    | 4.1    | 8.6    | 2.7    | 2.4    | 2.9    |
| 1302.5 | 1368.7 | 914.9  | 840.5  | 640.4  | 632.7  | 490.8  | 545.9  | 554.5  |
| 775.0  | 933.2  | 552.5  | 368.1  | 304.6  | 307.2  | 300.6  | 297.4  | 335.8  |
| 997.4  | 1199.0 | 692.2  | 462.4  | 394.1  | 426.0  | 279.3  | 267.5  | 291.1  |
| 914.0  | 1123.0 | 847.0  | 808.0  | 713.1  | 766.0  | 532.4  | 587.8  | 615.8  |
| 933.7  | 1106.6 | 873.6  | 629.7  | 550.5  | 629.7  | 455.3  | 493.7  | 494.6  |
| 397.7  | 395.7  | 271.6  | 50.2   | 39.9   | 44.1   | 66.2   | 51.9   | 65.0   |
| 1680.6 | 1763.2 | 1203.4 | 551.1  | 486.8  | 456.5  | 442.5  | 395.1  | 473.3  |
| 21.2   | 15.4   | 19.6   | 27.6   | 18.2   | 21.3   | 13.0   | 14.6   | 3.0    |
| 28.1   | 44.5   | 31.2   | 41.7   | 44.7   | 46.0   | 29.0   | 35.9   | 38.9   |
| 6617.1 | 7052.3 | 6779.0 | 6785.0 | 6192.8 | 6585.0 | 3972.7 | 4141.5 | 4239.3 |
| 9148.9 | 9209.9 | 6838.1 | 5360.3 | 4621.9 | 4637.0 | 4281.7 | 3399.0 | 4291.5 |
| 502.5  | 598.4  | 408.3  | 539.5  | 482.2  | 513.3  | 301.7  | 290.8  | 351.3  |
| 738.8  | 962.5  | 637.1  | 457.0  | 382.2  | 485.9  | 375.5  | 434.0  | 384.1  |
| 722.0  | 879.6  | 896.7  | 262.5  | 204.2  | 237.4  | 236.3  | 228.8  | 252.3  |
| 4590.9 | 5209.4 | 4027.5 | 3559.8 | 3014.9 | 3194.5 | 1990.5 | 1889.4 | 2141.8 |
| 4757.8 | 5215.2 | 2923.5 | 2227.8 | 1687.4 | 1843.8 | 1902.5 | 1508.1 | 1845.7 |
| 386.9  | 441.5  | 378.0  | 434.2  | 380.0  | 454.7  | 249.5  | 261.8  | 263.4  |
| 533.6  | 656.2  | 519.0  | 215.4  | 209.2  | 249.9  | 129.8  | 122.2  | 157.7  |
| 243.4  | 397.7  | 264.3  | 127.0  | 103.1  | 94.5   | 106.6  | 87.4   | 96.8   |
| 193.4  | 268.1  | 192.7  | 93.4   | 91.5   | 83.8   | 53.1   | 56.2   | 61.6   |
| 193.7  | 215.4  | 147.2  | 93.8   | 80.0   | 85.7   | 70.9   | 63.8   | 82.7   |
| 4340.2 | 3948.8 | 1725.7 | 526.4  | 322.2  | 435.9  | 442.5  | 301.5  | 414.8  |
| 123.8  | 146.1  | 122.7  | 32.1   | 20.4   | 48.2   | 67.5   | 62.2   | 68.9   |
| 1350.8 | 1856.8 | 1257.0 | 397.0  | 336.2  | 315.0  | 429.2  | 394.4  | 482.8  |
| 796.3  | 1092.1 | 815.0  | 407.9  | 321.3  | 378.5  | 272.7  | 349.0  | 350.4  |
| 219.2  | 270.3  | 215.9  | 107.8  | 119.8  | 122.5  | 78.1   | 130.8  | 122.5  |
| 2287.4 | 3034.7 | 2647.7 | 1329.1 | 1331.6 | 1525.6 | 585.0  | 947.0  | 792.9  |
| 349.4  | 393.7  | 282.9  | 376.6  | 301.8  | 333.2  | 239.1  | 218.5  | 270.6  |
| 1596.1 | 1895.8 | 1605.4 | 4662.4 | 3844.7 | 4267.4 | 3185.7 | 3223.2 | 3378.2 |
| 1134.7 | 1379.9 | 1008.1 | 1039.8 | 859.8  | 901.8  | 1184.8 | 1112.1 | 1280.5 |
| 1081.6 | 1017.6 | 529.8  | 187.3  | 161.3  | 178.1  | 188.7  | 226.2  | 227.8  |
| 513.1  | 916.2  | 1054.8 | 426.1  | 399.7  | 428.9  | 379.3  | 416.3  | 420.2  |
| 471.1  | 678.0  | 548.9  | 774.6  | 755.5  | 833.7  | 665.5  | 893.4  | 923.2  |
| 270.6  | 480.2  | 791.1  | 348.9  | 309.6  | 385.3  | 237.4  | 241.2  | 289.3  |
| 7890.7 | 8518.4 | 7423.4 | 7683.9 | 7513.7 | 7883.7 | 4478.5 | 4702.7 | 5009.0 |
| 347.6  | 365.7  | 228.2  | 73.3   | 43.3   | 62.0   | 207.1  | 132.9  | 161.3  |
| 423.2  | 530.0  | 279.2  | 225.0  | 146.8  | 171.8  | 260.2  | 237.0  | 258.9  |

|        |        |        |        |        |        |        |        |        |
|--------|--------|--------|--------|--------|--------|--------|--------|--------|
| 867.2  | 1048.3 | 797.4  | 876.2  | 764.6  | 797.2  | 549.6  | 629.2  | 670.4  |
| 248.3  | 313.2  | 316.8  | 474.8  | 501.7  | 542.0  | 298.8  | 520.2  | 462.1  |
| 497.8  | 495.0  | 346.0  | 526.5  | 468.2  | 534.8  | 405.1  | 543.7  | 472.8  |
| 138.7  | 139.0  | 141.3  | 252.5  | 234.9  | 266.5  | 225.6  | 286.6  | 222.4  |
| 293.3  | 331.2  | 257.5  | 500.0  | 464.8  | 531.7  | 336.8  | 523.5  | 420.0  |
| 728.6  | 426.8  | 247.4  | 256.7  | 193.7  | 199.4  | 120.1  | 94.4   | 98.9   |
| 327.0  | 414.1  | 262.8  | 226.4  | 183.0  | 190.0  | 227.9  | 201.0  | 262.2  |
| 335.6  | 437.5  | 275.9  | 872.5  | 674.9  | 791.0  | 421.9  | 381.3  | 426.9  |
| 98.0   | 122.9  | 87.3   | 265.4  | 220.2  | 229.9  | 158.5  | 176.2  | 170.2  |
| 362.2  | 402.8  | 240.7  | 409.9  | 343.2  | 361.4  | 271.0  | 219.5  | 282.0  |
| 1551.2 | 1869.6 | 1290.2 | 1450.9 | 1534.6 | 1161.4 | 769.1  | 837.9  | 939.3  |
| 1739.4 | 2092.2 | 1693.2 | 804.2  | 770.5  | 769.5  | 725.2  | 740.0  | 815.8  |
| 1449.2 | 1077.5 | 558.0  | 180.2  | 199.8  | 207.1  | 117.4  | 183.3  | 155.9  |
| 628.5  | 840.7  | 714.7  | 292.6  | 234.4  | 279.9  | 250.5  | 299.2  | 306.5  |
| 1007.7 | 1354.4 | 1134.2 | 498.0  | 444.8  | 517.7  | 465.5  | 499.8  | 529.0  |
| 211.3  | 246.4  | 183.2  | 59.9   | 51.5   | 68.9   | 76.8   | 87.7   | 95.2   |
| 2376.0 | 2821.5 | 2188.3 | 3490.8 | 2770.6 | 3127.4 | 2119.9 | 2081.5 | 2253.8 |
| 4432.3 | 4515.4 | 3878.4 | 3379.4 | 3046.9 | 3362.1 | 2311.0 | 2467.6 | 2597.8 |
| 736.5  | 1132.6 | 878.5  | 648.3  | 526.8  | 582.4  | 546.0  | 618.4  | 619.5  |
| 480.6  | 803.1  | 582.8  | 529.0  | 444.4  | 499.6  | 396.8  | 438.0  | 491.4  |
| 409.2  | 527.3  | 402.2  | 520.5  | 422.0  | 415.8  | 213.7  | 244.4  | 321.6  |
| 594.7  | 726.7  | 508.5  | 372.0  | 305.1  | 303.2  | 238.9  | 263.4  | 293.6  |
| 266.0  | 353.1  | 232.3  | 275.1  | 185.0  | 238.3  | 130.4  | 142.4  | 142.5  |
| 420.8  | 551.5  | 340.0  | 270.3  | 149.5  | 153.1  | 117.4  | 60.4   | 73.0   |
| 4814.9 | 5511.8 | 3672.2 | 1887.8 | 1019.3 | 998.7  | 1341.1 | 855.8  | 976.1  |
| 98.6   | 116.4  | 80.9   | 83.7   | 60.9   | 64.8   | 41.1   | 48.8   | 45.4   |
| 49.2   | 62.0   | 44.1   | 9.2    | 12.9   | 12.2   | 12.6   | 11.2   | 15.7   |
| 1893.2 | 2237.5 | 1753.2 | 395.6  | 381.9  | 369.7  | 309.2  | 376.0  | 378.4  |
| 17.6   | 17.8   | 36.8   | 124.3  | 103.0  | 136.7  | 90.6   | 166.7  | 106.1  |
| 68.3   | 71.2   | 81.5   | 244.3  | 213.2  | 244.1  | 188.6  | 300.6  | 223.7  |
| 1.9    | 4.4    | 2.6    | 1001.2 | 693.3  | 775.1  | 596.5  | 340.7  | 548.5  |
| 12.6   | 4.5    | 1.5    | 526.3  | 342.7  | 398.1  | 247.1  | 143.1  | 282.1  |
| 29.8   | 19.9   | 11.1   | 733.3  | 535.1  | 580.0  | 547.7  | 327.3  | 516.8  |
| 7.4    | 19.5   | 16.7   | 5.1    | 2.8    | 5.8    | 2.3    | 2.2    | 1.2    |
| 18.0   | 22.0   | 23.1   | 12.6   | 6.0    | 9.4    | 1.1    | 1.0    | 6.1    |
| 2229.1 | 2331.9 | 1347.7 | 968.4  | 717.2  | 822.1  | 616.7  | 506.8  | 656.9  |
| 727.0  | 850.2  | 519.3  | 1246.4 | 988.5  | 1098.6 | 598.1  | 562.6  | 660.4  |
| 1305.4 | 1647.4 | 1256.7 | 1554.0 | 1135.5 | 1276.4 | 882.4  | 733.2  | 851.7  |
| 796.5  | 956.2  | 691.6  | 356.6  | 324.1  | 359.2  | 216.3  | 255.6  | 288.9  |
| 342.0  | 368.0  | 287.4  | 134.0  | 134.4  | 145.6  | 72.3   | 99.9   | 95.0   |
| 2031.1 | 2306.9 | 1512.8 | 3308.9 | 2794.9 | 2983.1 | 1483.0 | 1214.0 | 1748.8 |
| 309.2  | 430.2  | 264.5  | 250.6  | 216.9  | 230.9  | 168.7  | 161.6  | 159.5  |
| 3101.0 | 2893.8 | 1595.5 | 1548.6 | 995.8  | 1127.3 | 1092.3 | 815.7  | 1016.0 |
| 1008.0 | 1091.2 | 557.3  | 1056.6 | 656.0  | 645.9  | 609.7  | 397.5  | 535.7  |
| 7903.5 | 7073.3 | 4557.4 | 4842.4 | 3965.0 | 4446.4 | 2893.5 | 2363.1 | 2798.8 |
| 13.9   | 23.7   | 10.6   | 1151.6 | 893.5  | 1113.3 | 1226.6 | 1000.2 | 1192.3 |
| 500.8  | 697.4  | 573.8  | 2265.2 | 1737.6 | 1888.8 | 1677.8 | 1640.6 | 1640.2 |
| 9062.7 | 9486.6 | 8732.4 | 7861.8 | 7895.0 | 8097.6 | 7374.7 | 7825.5 | 7767.3 |
| 10.2   | 14.2   | 6.7    | 24.6   | 9.2    | 17.8   | 11.5   | 4.8    | 13.5   |
| 17.0   | 19.0   | 9.6    | 21.4   | 18.2   | 29.8   | 10.6   | 12.8   | 5.7    |
| 1.7    | 7.2    | 3.1    | 3.1    | 3.9    | 3.6    | 1.2    | 0.9    | 1.9    |
| 530.6  | 665.3  | 465.6  | 465.3  | 385.8  | 442.6  | 244.9  | 250.3  | 294.0  |
| 1701.5 | 1671.9 | 841.0  | 931.2  | 726.3  | 760.5  | 758.2  | 653.7  | 770.8  |



|        |        |        |        |        |        |        |        |        |
|--------|--------|--------|--------|--------|--------|--------|--------|--------|
| 795.5  | 929.0  | 642.8  | 436.0  | 359.8  | 390.3  | 370.0  | 363.8  | 386.1  |
| 185.1  | 187.4  | 135.6  | 623.2  | 537.2  | 599.9  | 291.2  | 329.0  | 373.1  |
| 482.5  | 561.1  | 460.8  | 770.5  | 663.0  | 714.7  | 827.2  | 949.7  | 978.4  |
| 83.0   | 103.4  | 60.7   | 453.5  | 403.4  | 451.6  | 290.8  | 303.9  | 340.2  |
| 1711.1 | 1809.2 | 1236.4 | 1585.6 | 1285.2 | 1411.4 | 1251.0 | 1220.9 | 1262.0 |
| 639.1  | 772.2  | 665.2  | 830.7  | 679.6  | 825.2  | 452.7  | 558.8  | 640.2  |
| 324.2  | 310.0  | 292.6  | 259.4  | 249.3  | 353.0  | 230.9  | 243.9  | 249.5  |
| 715.9  | 765.0  | 495.9  | 345.5  | 288.0  | 266.0  | 272.1  | 282.2  | 315.6  |
| 433.9  | 484.9  | 333.6  | 276.4  | 209.2  | 213.7  | 209.0  | 164.0  | 201.7  |
| 229.6  | 288.7  | 187.0  | 162.6  | 124.7  | 129.5  | 147.3  | 163.3  | 181.9  |
| 791.4  | 820.0  | 681.9  | 582.0  | 412.7  | 513.4  | 261.9  | 285.8  | 318.8  |
| 814.2  | 1465.5 | 1169.2 | 3417.4 | 3264.4 | 3945.4 | 2114.1 | 2216.4 | 2576.9 |
| 2088.5 | 3331.5 | 2872.6 | 7883.7 | 7418.6 | 7557.2 | 4952.2 | 4819.7 | 5381.7 |
| 446.3  | 715.7  | 558.9  | 398.7  | 316.5  | 348.5  | 211.9  | 205.0  | 232.4  |
| 217.1  | 318.7  | 230.2  | 80.1   | 65.9   | 66.7   | 66.6   | 54.4   | 65.5   |
| 3124.8 | 3376.0 | 2260.6 | 1430.8 | 1302.5 | 1340.5 | 917.2  | 920.7  | 1027.0 |
| 103.2  | 211.6  | 254.3  | 101.9  | 128.1  | 167.1  | 51.9   | 178.3  | 116.1  |
| 526.3  | 617.0  | 369.3  | 573.8  | 454.4  | 478.5  | 259.7  | 228.8  | 268.5  |
| 569.0  | 719.4  | 650.7  | 419.0  | 387.0  | 379.1  | 455.1  | 519.1  | 547.9  |
| 98.7   | 131.4  | 124.6  | 73.0   | 66.8   | 81.1   | 71.9   | 63.1   | 64.2   |
| 138.9  | 238.3  | 287.3  | 51.5   | 60.7   | 63.9   | 56.6   | 79.4   | 87.6   |
| 401.3  | 564.5  | 654.3  | 202.4  | 213.6  | 210.8  | 121.6  | 144.5  | 171.9  |
| 9576.1 | 7932.3 | 5360.3 | 5434.1 | 5012.7 | 5587.8 | 3881.9 | 3945.8 | 4201.8 |
| 5179.5 | 5600.7 | 4495.4 | 77.1   | 87.3   | 99.0   | 57.6   | 71.2   | 61.4   |
| 9.6    | 15.1   | 8.4    | 7.8    | 5.2    | 12.3   | 16.5   | 7.5    | 17.6   |
| 185.4  | 282.8  | 172.3  | 242.5  | 190.1  | 263.5  | 185.3  | 190.5  | 220.2  |
| 127.3  | 161.2  | 113.3  | 132.8  | 106.6  | 113.9  | 106.8  | 128.4  | 126.6  |
| 116.0  | 167.5  | 112.4  | 95.7   | 79.5   | 103.3  | 129.7  | 140.4  | 176.9  |
| 386.1  | 672.6  | 682.8  | 2350.1 | 2137.3 | 2464.5 | 1288.1 | 1307.4 | 1508.5 |
| 322.8  | 495.9  | 337.2  | 416.7  | 366.8  | 374.6  | 311.9  | 341.5  | 375.3  |
| 185.5  | 211.7  | 146.3  | 4503.7 | 3724.2 | 4001.6 | 2749.8 | 2469.8 | 2766.9 |
| 469.4  | 609.4  | 381.2  | 493.9  | 372.0  | 430.3  | 307.3  | 276.2  | 303.7  |
| 185.9  | 394.5  | 528.1  | 371.7  | 343.5  | 426.3  | 186.6  | 299.2  | 251.7  |
| 194.2  | 427.5  | 615.6  | 281.8  | 279.5  | 299.2  | 169.5  | 366.9  | 290.0  |
| 440.9  | 536.1  | 377.8  | 200.0  | 202.5  | 220.0  | 136.0  | 197.9  | 201.8  |
| 230.5  | 310.3  | 261.0  | 221.6  | 195.2  | 256.5  | 174.3  | 172.8  | 242.7  |
| 1843.7 | 2013.2 | 1752.7 | 1148.1 | 947.7  | 991.6  | 822.6  | 936.9  | 889.8  |
| 1012.7 | 1254.6 | 1094.8 | 572.3  | 489.7  | 445.1  | 635.9  | 737.4  | 712.1  |
| 1517.3 | 1584.8 | 831.0  | 909.0  | 668.7  | 754.2  | 1046.1 | 728.4  | 936.6  |
| 846.2  | 843.9  | 477.3  | 1106.4 | 786.4  | 851.6  | 1088.1 | 825.7  | 1033.4 |
| 6878.4 | 6266.5 | 3685.5 | 5800.8 | 4902.3 | 5772.4 | 3688.7 | 2757.0 | 3140.7 |
| 761.2  | 974.2  | 733.8  | 572.6  | 522.5  | 575.2  | 731.2  | 864.7  | 844.9  |
| 410.5  | 553.3  | 457.0  | 293.1  | 321.9  | 324.6  | 305.7  | 423.2  | 380.6  |
| 472.5  | 544.4  | 361.3  | 424.1  | 342.2  | 404.7  | 259.3  | 310.5  | 323.0  |
| 71.6   | 94.5   | 74.4   | 458.5  | 397.2  | 448.9  | 207.3  | 200.0  | 217.3  |
| 60.0   | 103.5  | 77.1   | 546.8  | 463.6  | 523.8  | 272.0  | 294.3  | 331.5  |
| 26.7   | 35.5   | 27.9   | 89.2   | 79.3   | 78.1   | 50.7   | 75.3   | 80.6   |
| 1174.5 | 1296.5 | 1004.5 | 624.4  | 478.7  | 527.2  | 431.3  | 421.7  | 456.9  |
| 63.3   | 192.8  | 237.6  | 304.8  | 486.0  | 445.6  | 372.9  | 950.6  | 782.1  |
| 1483.3 | 1579.2 | 1498.3 | 3025.3 | 2322.6 | 2665.2 | 2344.5 | 1790.0 | 2112.5 |
| 6781.0 | 7842.6 | 6283.0 | 4729.1 | 3906.0 | 3975.8 | 3656.2 | 3174.6 | 3731.5 |
| 192.0  | 169.5  | 127.6  | 140.2  | 128.2  | 143.7  | 268.7  | 268.3  | 296.6  |
| 41.4   | 32.1   | 34.3   | 115.3  | 89.2   | 114.5  | 67.1   | 61.6   | 68.0   |

|        |        |        |        |        |        |        |        |        |
|--------|--------|--------|--------|--------|--------|--------|--------|--------|
| 237.6  | 214.9  | 157.6  | 587.8  | 472.4  | 572.7  | 261.7  | 295.6  | 315.5  |
| 555.1  | 700.7  | 617.8  | 2.0    | 1.9    | 2.5    | 1.1    | 1.1    | 1.2    |
| 233.4  | 256.6  | 152.3  | 69.6   | 60.3   | 73.5   | 64.3   | 64.8   | 67.7   |
| 214.2  | 278.2  | 222.3  | 180.7  | 153.9  | 180.2  | 60.3   | 79.9   | 87.8   |
| 657.2  | 1035.9 | 878.0  | 645.6  | 657.9  | 754.8  | 434.8  | 573.0  | 609.3  |
| 1168.4 | 1314.9 | 796.8  | 694.0  | 584.2  | 619.6  | 521.2  | 450.0  | 536.4  |
| 991.2  | 1212.2 | 890.3  | 186.3  | 151.3  | 142.7  | 158.1  | 115.3  | 184.2  |
| 2068.9 | 2524.5 | 2114.2 | 1225.8 | 1088.9 | 1173.0 | 691.3  | 972.0  | 1007.0 |
| 99.5   | 291.1  | 249.5  | 17.7   | 29.3   | 20.8   | 12.5   | 8.4    | 13.7   |
| 623.8  | 791.1  | 673.2  | 720.4  | 617.6  | 680.7  | 323.7  | 371.2  | 395.3  |
| 1725.6 | 2170.9 | 1679.0 | 885.6  | 741.9  | 797.1  | 496.6  | 595.7  | 620.6  |
| 557.1  | 709.6  | 648.3  | 617.0  | 562.7  | 710.2  | 284.5  | 378.3  | 393.6  |
| 239.2  | 338.8  | 294.6  | 139.1  | 149.7  | 177.3  | 197.5  | 247.2  | 241.7  |
| 265.6  | 341.0  | 242.9  | 121.0  | 69.6   | 83.3   | 135.5  | 84.4   | 126.3  |
| 599.7  | 793.7  | 515.3  | 374.8  | 224.7  | 256.3  | 223.0  | 169.5  | 196.8  |
| 461.8  | 512.8  | 324.8  | 248.3  | 149.4  | 162.5  | 131.4  | 112.6  | 131.6  |
| 313.4  | 412.6  | 297.7  | 250.8  | 218.6  | 248.1  | 297.6  | 260.4  | 273.6  |
| 539.3  | 659.5  | 510.3  | 518.5  | 418.0  | 425.6  | 551.9  | 492.5  | 590.4  |
| 302.5  | 296.6  | 211.7  | 193.6  | 147.9  | 171.8  | 155.5  | 161.3  | 159.0  |
| 1616.8 | 2373.9 | 1764.1 | 1927.9 | 1625.5 | 1603.3 | 928.2  | 931.3  | 1078.5 |
| 1894.7 | 2275.1 | 1739.8 | 1776.8 | 1441.4 | 1520.7 | 904.1  | 847.5  | 997.3  |
| 175.0  | 262.7  | 268.0  | 477.0  | 451.9  | 490.7  | 598.2  | 610.4  | 695.4  |
| 243.5  | 364.7  | 348.7  | 1130.7 | 949.2  | 946.2  | 1109.0 | 1201.1 | 1196.9 |
| 108.5  | 129.9  | 132.1  | 385.2  | 311.2  | 355.4  | 364.6  | 298.5  | 344.1  |
| 1248.9 | 1472.6 | 1020.1 | 1259.2 | 1034.0 | 1051.8 | 1578.0 | 1478.7 | 1623.0 |
| 921.8  | 1095.9 | 760.7  | 1721.5 | 1554.7 | 1641.6 | 1331.8 | 1496.7 | 1682.5 |
| 425.1  | 558.1  | 440.7  | 353.2  | 309.7  | 305.2  | 252.9  | 274.1  | 314.5  |
| 6157.1 | 7286.0 | 5641.9 | 4448.3 | 4376.1 | 4003.5 | 3133.3 | 3084.6 | 3023.7 |
| 1513.6 | 1482.0 | 758.1  | 1669.1 | 1313.0 | 1145.9 | 1402.0 | 1052.1 | 1298.0 |
| 364.2  | 469.8  | 254.4  | 354.5  | 319.0  | 348.9  | 180.9  | 182.2  | 216.3  |
| 9120.5 | 8610.3 | 7143.6 | 2240.6 | 1855.4 | 1964.3 | 1678.5 | 1620.1 | 1724.7 |
| 42.4   | 60.1   | 61.3   | 7.2    | 20.3   | 20.9   | 5.1    | 15.0   | 7.4    |
| 77.6   | 110.5  | 108.5  | 33.1   | 29.1   | 34.0   | 15.7   | 21.2   | 26.0   |
| 20.8   | 31.2   | 24.2   | 29.7   | 18.0   | 22.6   | 3.5    | 2.3    | 2.9    |
| 258.7  | 409.7  | 334.6  | 209.6  | 181.9  | 199.2  | 195.1  | 228.5  | 237.7  |
| 1.3    | 1.9    | 1.0    | 6.6    | 6.9    | 10.4   | 1.2    | 2.7    | 1.4    |
| 3600.2 | 4338.2 | 3060.3 | 1187.4 | 907.3  | 1036.2 | 721.3  | 771.0  | 813.2  |
| 1862.2 | 2050.8 | 1549.6 | 1045.4 | 935.0  | 1066.2 | 687.9  | 712.7  | 805.5  |
| 523.4  | 675.5  | 581.2  | 704.0  | 648.3  | 665.0  | 267.9  | 296.7  | 356.7  |
| 572.4  | 664.3  | 556.2  | 328.4  | 258.7  | 327.4  | 277.3  | 249.9  | 298.8  |
| 22.2   | 13.6   | 20.4   | 255.9  | 228.4  | 294.3  | 99.5   | 116.5  | 150.9  |
| 2345.9 | 2164.0 | 1360.7 | 543.9  | 382.4  | 426.0  | 383.4  | 286.7  | 361.5  |
| 1.6    | 3.4    | 3.1    | 22.7   | 37.7   | 45.8   | 23.5   | 29.8   | 27.5   |
| 14.7   | 12.6   | 15.4   | 41.0   | 42.5   | 56.8   | 19.5   | 25.1   | 25.3   |
| 28.8   | 13.0   | 12.4   | 91.9   | 59.6   | 54.2   | 48.7   | 21.5   | 27.4   |
| 153.2  | 185.4  | 109.6  | 61.1   | 64.2   | 56.0   | 77.5   | 65.0   | 83.1   |
| 543.3  | 701.7  | 445.1  | 226.8  | 126.0  | 154.0  | 212.2  | 179.1  | 164.9  |
| 43.9   | 28.1   | 17.0   | 54.9   | 38.5   | 45.9   | 30.3   | 19.0   | 26.4   |
| 8.4    | 20.4   | 5.7    | 54.3   | 34.4   | 42.5   | 23.5   | 22.5   | 17.9   |
| 326.2  | 331.9  | 263.3  | 144.3  | 130.6  | 149.8  | 125.1  | 85.3   | 140.2  |
| 919.9  | 1105.7 | 874.0  | 2297.5 | 1850.5 | 2083.9 | 1113.3 | 1343.0 | 1298.6 |
| 190.3  | 288.9  | 303.8  | 310.2  | 284.5  | 316.3  | 234.0  | 274.0  | 279.3  |
| 475.3  | 611.7  | 584.8  | 757.1  | 688.5  | 772.7  | 562.7  | 603.5  | 618.3  |

|         |         |        |        |        |        |        |        |        |
|---------|---------|--------|--------|--------|--------|--------|--------|--------|
| 1062.9  | 1456.9  | 1079.8 | 669.0  | 521.1  | 599.1  | 492.6  | 569.2  | 555.3  |
| 343.8   | 479.3   | 360.3  | 271.3  | 245.1  | 333.2  | 196.8  | 270.8  | 252.4  |
| 922.5   | 1499.1  | 1214.6 | 995.0  | 833.5  | 886.1  | 447.5  | 460.5  | 506.9  |
| 3620.5  | 4354.9  | 3807.9 | 2349.2 | 1941.5 | 2026.1 | 2068.3 | 1927.5 | 2388.7 |
| 2882.9  | 2679.4  | 1674.1 | 817.0  | 643.6  | 608.1  | 822.3  | 714.6  | 800.6  |
| 14.0    | 8.6     | 7.5    | 9.9    | 9.2    | 6.0    | 4.6    | 2.9    | 1.1    |
| 341.7   | 138.6   | 44.1   | 7.9    | 9.7    | 13.0   | 14.8   | 26.1   | 17.8   |
| 1877.4  | 815.6   | 315.3  | 48.1   | 58.0   | 54.9   | 52.8   | 100.3  | 61.3   |
| 645.8   | 532.9   | 204.3  | 429.3  | 312.0  | 353.5  | 243.5  | 187.2  | 233.5  |
| 19.5    | 17.5    | 1.8    | 6.6    | 7.6    | 2.3    | 4.8    | 12.4   | 5.0    |
| 273.7   | 505.9   | 576.2  | 470.3  | 609.1  | 685.2  | 309.9  | 689.3  | 451.9  |
| 1950.8  | 1914.8  | 1317.3 | 1370.1 | 986.8  | 1110.4 | 726.4  | 648.2  | 740.7  |
| 4111.8  | 4690.9  | 3341.8 | 1814.1 | 1476.8 | 1562.9 | 909.2  | 982.2  | 1067.8 |
| 42.9    | 55.7    | 60.4   | 79.5   | 76.0   | 77.4   | 56.9   | 65.0   | 77.2   |
| 48.7    | 74.9    | 66.7   | 138.8  | 101.2  | 118.3  | 114.2  | 96.5   | 87.0   |
| 89.7    | 109.6   | 87.4   | 255.1  | 199.4  | 215.8  | 162.0  | 180.1  | 186.9  |
| 764.4   | 841.6   | 441.0  | 109.8  | 97.7   | 116.2  | 92.0   | 117.8  | 107.4  |
| 1126.4  | 1360.2  | 705.1  | 147.4  | 117.6  | 126.2  | 115.8  | 144.7  | 132.3  |
| 238.2   | 292.5   | 253.3  | 779.9  | 695.2  | 746.9  | 425.2  | 436.8  | 461.0  |
| 724.7   | 1149.2  | 860.8  | 638.0  | 549.2  | 588.9  | 371.9  | 399.0  | 443.8  |
| 636.7   | 1171.5  | 1153.0 | 1393.5 | 1011.3 | 1034.9 | 1444.7 | 1442.5 | 1456.0 |
| 122.5   | 146.9   | 136.2  | 178.3  | 167.8  | 206.5  | 232.4  | 208.8  | 231.4  |
| 41.6    | 111.3   | 155.3  | 1256.5 | 1311.2 | 1616.2 | 922.1  | 1150.7 | 1154.5 |
| 973.2   | 1345.2  | 1028.7 | 446.9  | 382.4  | 388.6  | 398.6  | 449.6  | 489.7  |
| 2.0     | 4.4     | 2.3    | 3.8    | 3.1    | 7.1    | 1.8    | 8.8    | 2.6    |
| 839.7   | 1112.8  | 842.2  | 324.8  | 298.5  | 329.2  | 226.0  | 226.9  | 259.0  |
| 8.9     | 7.7     | 7.1    | 770.2  | 1031.5 | 1099.9 | 459.7  | 1275.5 | 855.9  |
| 2.9     | 15.1    | 11.1   | 64.2   | 40.2   | 44.2   | 34.4   | 35.8   | 40.4   |
| 320.8   | 459.4   | 313.4  | 784.3  | 643.7  | 652.8  | 589.8  | 790.3  | 722.1  |
| 170.3   | 175.0   | 119.9  | 562.8  | 513.7  | 528.6  | 255.1  | 284.4  | 302.2  |
| 1986.1  | 1527.7  | 895.8  | 371.5  | 268.1  | 315.8  | 131.7  | 108.0  | 123.5  |
| 883.1   | 1123.1  | 861.1  | 865.8  | 775.6  | 828.5  | 599.3  | 541.3  | 625.7  |
| 496.4   | 557.1   | 498.0  | 246.8  | 217.7  | 228.5  | 187.2  | 176.2  | 199.3  |
| 20.1    | 19.6    | 21.1   | 15.1   | 10.7   | 18.1   | 6.8    | 7.6    | 5.5    |
| 286.6   | 243.7   | 153.2  | 24.2   | 27.0   | 27.2   | 17.0   | 11.9   | 13.4   |
| 403.6   | 473.7   | 266.7  | 76.6   | 63.3   | 77.9   | 99.3   | 91.6   | 113.1  |
| 704.4   | 818.8   | 546.6  | 362.5  | 271.6  | 344.2  | 247.5  | 245.5  | 276.6  |
| 489.8   | 673.1   | 566.0  | 313.3  | 293.3  | 359.9  | 220.0  | 233.7  | 237.2  |
| 1645.5  | 2133.7  | 1955.2 | 964.8  | 1014.4 | 966.5  | 813.3  | 1133.9 | 1156.7 |
| 336.5   | 394.6   | 364.4  | 95.8   | 101.6  | 106.0  | 127.8  | 172.4  | 130.7  |
| 1235.7  | 1640.2  | 1246.5 | 594.9  | 461.4  | 526.7  | 296.5  | 348.3  | 306.2  |
| 30.2    | 30.5    | 26.8   | 51.6   | 47.9   | 45.9   | 25.7   | 25.7   | 26.2   |
| 10680.7 | 10754.7 | 9619.6 | 7388.6 | 6757.0 | 6915.6 | 4761.5 | 4703.3 | 5112.1 |
| 5662.0  | 2149.0  | 1286.8 | 482.0  | 272.7  | 312.6  | 931.8  | 541.0  | 755.2  |
| 419.6   | 489.8   | 294.0  | 111.1  | 92.1   | 143.0  | 193.8  | 170.7  | 211.4  |
| 677.8   | 745.4   | 519.4  | 395.7  | 263.5  | 330.5  | 343.5  | 297.4  | 327.7  |
| 23.2    | 18.0    | 14.4   | 9.1    | 9.1    | 15.9   | 6.8    | 3.9    | 6.9    |
| 460.6   | 590.1   | 394.1  | 757.0  | 613.1  | 618.9  | 469.5  | 421.2  | 500.7  |
| 4114.5  | 5264.2  | 4442.5 | 1098.0 | 920.2  | 1081.9 | 1031.6 | 1116.7 | 1089.1 |
| 1083.0  | 1297.6  | 916.0  | 801.6  | 692.0  | 774.1  | 676.6  | 642.8  | 706.9  |
| 1225.7  | 1399.2  | 969.7  | 637.6  | 521.0  | 565.4  | 742.1  | 680.6  | 761.5  |
| 1857.5  | 2304.8  | 1413.9 | 564.7  | 491.2  | 530.3  | 299.5  | 354.3  | 389.3  |
| 29.2    | 47.8    | 52.0   | 43.9   | 34.1   | 29.7   | 27.1   | 27.8   | 18.4   |

|        |        |        |        |        |        |        |        |        |
|--------|--------|--------|--------|--------|--------|--------|--------|--------|
| 41.1   | 53.3   | 53.9   | 30.0   | 20.6   | 22.4   | 11.8   | 15.1   | 13.7   |
| 2046.4 | 3164.5 | 1960.8 | 1012.5 | 821.1  | 841.8  | 1185.5 | 604.7  | 1088.2 |
| 15.6   | 20.7   | 8.0    | 124.9  | 108.3  | 127.2  | 79.1   | 82.6   | 84.1   |
| 155.5  | 225.6  | 183.5  | 304.6  | 283.3  | 321.1  | 195.1  | 247.5  | 246.6  |
| 254.1  | 330.9  | 237.3  | 364.2  | 329.2  | 425.3  | 386.3  | 409.5  | 423.8  |
| 476.3  | 674.1  | 595.9  | 691.7  | 591.5  | 754.9  | 545.8  | 754.5  | 737.1  |
| 80.0   | 55.5   | 41.8   | 65.6   | 48.9   | 44.2   | 89.0   | 58.7   | 70.5   |
| 120.7  | 110.7  | 72.2   | 149.0  | 104.1  | 102.0  | 160.4  | 99.4   | 152.6  |
| 307.0  | 447.1  | 275.1  | 370.3  | 312.6  | 302.1  | 239.8  | 265.5  | 292.5  |
| 1423.1 | 1652.2 | 1524.5 | 2779.0 | 2547.2 | 2671.0 | 1772.2 | 1689.7 | 1880.4 |
| 686.4  | 950.3  | 828.3  | 534.3  | 360.4  | 430.0  | 662.1  | 673.6  | 710.6  |
| 1.7    | 1.9    | 1.8    | 5.1    | 4.6    | 7.8    | 2.4    | 1.7    | 2.8    |
| 1283.3 | 1398.1 | 934.2  | 592.6  | 504.8  | 507.8  | 734.2  | 778.4  | 891.0  |
| 319.3  | 314.1  | 212.1  | 308.4  | 238.2  | 237.8  | 211.9  | 175.4  | 203.6  |
| 13.9   | 7.6    | 4.5    | 67.7   | 51.1   | 53.7   | 32.9   | 28.6   | 33.7   |
| 6813.8 | 7417.0 | 6884.0 | 7.5    | 1.7    | 5.7    | 1.1    | 1.9    | 1.6    |
| 748.5  | 925.6  | 486.0  | 453.7  | 281.7  | 295.2  | 224.9  | 199.4  | 229.9  |
| 1004.8 | 1080.2 | 627.9  | 237.9  | 164.2  | 194.2  | 201.3  | 176.5  | 194.1  |
| 484.0  | 581.5  | 360.3  | 784.3  | 689.2  | 784.7  | 424.5  | 431.0  | 533.2  |
| 361.7  | 525.6  | 346.8  | 511.8  | 445.2  | 456.5  | 224.3  | 187.2  | 260.2  |
| 1542.4 | 1499.8 | 801.4  | 1027.6 | 741.6  | 800.9  | 678.0  | 579.6  | 682.8  |
| 231.3  | 336.0  | 289.2  | 272.9  | 258.2  | 388.2  | 169.3  | 228.2  | 206.1  |
| 2.4    | 5.6    | 0.8    | 33.3   | 9.7    | 11.4   | 2.7    | 8.9    | 3.2    |
| 12.4   | 11.3   | 6.7    | 35.4   | 26.5   | 29.8   | 19.7   | 26.9   | 25.8   |
| 9.9    | 2.6    | 0.9    | 12.3   | 17.4   | 17.2   | 11.9   | 9.0    | 13.0   |
| 2.6    | 7.7    | 6.6    | 9.3    | 7.2    | 11.6   | 8.1    | 2.0    | 3.8    |
| 1358.8 | 1404.8 | 933.7  | 875.0  | 817.0  | 889.4  | 553.9  | 587.0  | 556.2  |
| 150.4  | 166.2  | 118.8  | 128.8  | 92.1   | 114.9  | 134.8  | 88.3   | 115.0  |
| 3681.2 | 4016.8 | 3504.5 | 4751.8 | 3988.6 | 4175.3 | 3056.2 | 2322.0 | 2904.6 |
| 243.9  | 270.9  | 193.6  | 261.8  | 219.5  | 221.2  | 195.6  | 185.8  | 185.0  |
| 446.9  | 583.8  | 436.2  | 119.4  | 102.2  | 124.0  | 144.2  | 150.5  | 167.3  |
| 100.4  | 126.0  | 80.0   | 23.2   | 18.7   | 14.9   | 13.4   | 29.9   | 43.6   |
| 655.2  | 769.8  | 468.5  | 390.8  | 363.3  | 384.3  | 277.3  | 238.4  | 297.9  |
| 110.4  | 131.9  | 104.0  | 107.6  | 80.2   | 108.9  | 87.3   | 74.3   | 82.5   |
| 380.3  | 444.5  | 357.9  | 790.9  | 620.7  | 806.5  | 427.8  | 396.9  | 464.6  |
| 453.4  | 532.3  | 268.0  | 644.4  | 496.3  | 565.9  | 313.5  | 286.1  | 290.1  |
| 1813.9 | 1738.6 | 996.1  | 1198.5 | 913.7  | 932.4  | 781.2  | 670.3  | 790.3  |
| 23.8   | 17.3   | 8.8    | 30.2   | 23.2   | 25.3   | 22.6   | 32.2   | 30.1   |
| 2.5    | 7.7    | 6.8    | 5.8    | 27.7   | 11.8   | 4.9    | 84.6   | 35.2   |
| 464.5  | 539.2  | 331.6  | 60.7   | 58.0   | 73.4   | 35.8   | 76.9   | 34.7   |
| 2162.1 | 2312.4 | 1415.1 | 47.8   | 60.0   | 68.0   | 33.5   | 193.2  | 75.0   |
| 4219.7 | 3957.4 | 2590.3 | 2011.6 | 1526.2 | 1739.7 | 1430.8 | 1362.0 | 1467.2 |
| 793.8  | 978.2  | 604.6  | 645.5  | 559.1  | 562.3  | 667.1  | 676.4  | 778.6  |
| 466.3  | 524.5  | 335.2  | 283.2  | 216.7  | 221.8  | 290.7  | 240.1  | 268.6  |
| 145.9  | 80.9   | 1.8    | 9.0    | 5.9    | 8.3    | 5.7    | 5.1    | 1.7    |
| 1869.8 | 1878.3 | 1278.8 | 1104.5 | 750.7  | 884.8  | 566.4  | 558.4  | 593.8  |
| 2.8    | 3.0    | 11.5   | 356.7  | 304.5  | 319.5  | 196.8  | 201.0  | 226.7  |
| 215.5  | 275.9  | 222.7  | 352.4  | 333.4  | 390.8  | 254.4  | 291.3  | 279.8  |
| 71.2   | 81.2   | 55.7   | 67.5   | 52.0   | 61.0   | 32.7   | 38.6   | 42.1   |
| 923.5  | 1291.2 | 973.2  | 701.7  | 621.1  | 665.3  | 496.0  | 510.3  | 598.2  |
| 283.7  | 381.7  | 279.5  | 180.0  | 176.8  | 205.8  | 131.1  | 160.2  | 191.9  |
| 109.7  | 138.0  | 78.8   | 139.8  | 107.8  | 113.3  | 83.4   | 98.2   | 109.6  |
| 9.9    | 9.9    | 5.1    | 11.4   | 10.7   | 7.1    | 8.0    | 8.4    | 6.4    |

|        |        |        |        |        |        |        |        |        |
|--------|--------|--------|--------|--------|--------|--------|--------|--------|
| 9.4    | 7.4    | 2.4    | 8.8    | 15.1   | 19.6   | 8.3    | 11.4   | 8.4    |
| 18.5   | 13.9   | 11.1   | 17.4   | 11.9   | 8.0    | 12.5   | 4.1    | 8.8    |
| 1.2    | 1.3    | 0.7    | 6.0    | 1.8    | 3.5    | 1.8    | 1.2    | 1.9    |
| 144.0  | 294.6  | 168.2  | 20.6   | 27.6   | 50.2   | 53.4   | 58.2   | 62.4   |
| 61.9   | 56.5   | 43.4   | 60.3   | 41.4   | 52.0   | 27.6   | 36.0   | 36.3   |
| 110.9  | 138.9  | 98.5   | 36.3   | 26.9   | 53.9   | 35.6   | 35.9   | 42.6   |
| 16.7   | 18.0   | 16.5   | 122.6  | 100.2  | 114.9  | 76.8   | 59.2   | 73.1   |
| 95.9   | 123.0  | 117.6  | 1711.3 | 1476.4 | 1594.0 | 846.1  | 840.6  | 1200.0 |
| 267.8  | 381.2  | 334.3  | 266.8  | 249.1  | 250.6  | 258.5  | 286.8  | 305.0  |
| 221.1  | 310.8  | 258.7  | 206.3  | 149.7  | 198.9  | 102.6  | 85.1   | 134.9  |
| 1016.2 | 1097.6 | 699.2  | 641.8  | 538.0  | 579.6  | 528.9  | 434.4  | 509.9  |
| 2.0    | 0.9    | 0.6    | 61.8   | 46.9   | 52.2   | 59.4   | 57.4   | 60.0   |
| 3.8    | 4.3    | 0.8    | 211.4  | 199.0  | 201.0  | 135.4  | 146.3  | 150.4  |
| 1292.8 | 1853.8 | 1703.1 | 133.3  | 98.3   | 97.4   | 205.6  | 238.1  | 240.7  |
| 662.7  | 866.0  | 875.4  | 137.4  | 122.2  | 127.2  | 94.8   | 110.9  | 90.5   |
| 619.4  | 553.0  | 320.0  | 3.2    | 5.2    | 4.7    | 3.4    | 3.4    | 3.1    |
| 2109.7 | 2306.6 | 1543.6 | 1090.4 | 807.7  | 878.4  | 873.3  | 763.8  | 882.2  |
| 226.8  | 324.9  | 248.1  | 91.7   | 99.4   | 100.5  | 85.6   | 98.6   | 88.1   |
| 446.0  | 530.9  | 484.0  | 293.8  | 334.2  | 351.5  | 171.2  | 424.7  | 275.3  |
| 193.8  | 232.0  | 152.4  | 236.2  | 245.5  | 282.0  | 129.0  | 221.1  | 195.9  |
| 2551.2 | 3523.2 | 1840.3 | 1388.3 | 1024.5 | 1176.9 | 1225.2 | 630.3  | 998.5  |
| 944.0  | 1185.7 | 835.0  | 813.9  | 557.8  | 611.5  | 330.1  | 289.0  | 338.1  |
| 29.1   | 42.0   | 45.9   | 23.0   | 14.1   | 28.4   | 20.8   | 15.5   | 17.8   |
| 176.0  | 223.7  | 136.9  | 125.0  | 90.3   | 133.5  | 89.2   | 91.3   | 98.5   |
| 676.8  | 790.1  | 583.5  | 246.2  | 222.5  | 252.0  | 183.0  | 195.6  | 228.8  |
| 34.1   | 52.9   | 41.1   | 31.6   | 31.4   | 8.4    | 17.2   | 13.5   | 7.0    |
| 2011.9 | 2807.9 | 2377.9 | 2024.4 | 1878.3 | 1876.4 | 1005.7 | 1053.4 | 1210.0 |
| 981.0  | 983.9  | 614.2  | 767.0  | 647.7  | 701.9  | 497.3  | 485.3  | 580.9  |
| 1171.0 | 1177.0 | 766.4  | 861.0  | 687.4  | 746.4  | 645.9  | 642.7  | 742.4  |
| 1.8    | 4.6    | 5.6    | 9.9    | 12.9   | 14.6   | 3.7    | 5.7    | 3.3    |
| 3.8    | 4.0    | 12.2   | 15.4   | 11.5   | 17.4   | 8.1    | 11.3   | 16.3   |
| 923.0  | 820.3  | 520.6  | 365.0  | 296.3  | 295.3  | 299.8  | 262.0  | 287.5  |
| 9.8    | 44.0   | 47.8   | 1222.1 | 1355.5 | 1466.8 | 550.2  | 881.6  | 789.3  |
| 354.8  | 359.5  | 224.9  | 128.2  | 112.8  | 150.1  | 124.5  | 99.4   | 133.3  |
| 454.4  | 481.4  | 338.5  | 252.4  | 201.5  | 221.0  | 158.7  | 133.6  | 189.3  |
| 1287.0 | 1054.5 | 568.5  | 814.8  | 562.4  | 570.3  | 331.6  | 269.8  | 331.2  |
| 197.3  | 241.0  | 185.0  | 420.9  | 342.1  | 421.8  | 278.6  | 298.5  | 311.9  |
| 69.4   | 106.9  | 71.2   | 56.2   | 64.6   | 52.9   | 63.4   | 69.4   | 85.8   |
| 216.4  | 255.3  | 195.1  | 60.4   | 59.9   | 74.2   | 63.8   | 49.2   | 62.3   |
| 46.2   | 32.6   | 25.3   | 22.0   | 26.0   | 27.7   | 12.0   | 12.5   | 14.5   |
| 793.6  | 856.3  | 721.5  | 1074.6 | 938.7  | 1010.6 | 622.7  | 743.6  | 782.2  |
| 284.2  | 319.3  | 240.1  | 283.8  | 231.3  | 276.9  | 201.5  | 183.7  | 214.2  |
| 628.9  | 844.6  | 697.5  | 737.0  | 684.0  | 705.0  | 414.1  | 493.5  | 481.5  |
| 77.7   | 116.0  | 74.2   | 104.2  | 107.0  | 116.1  | 39.9   | 48.1   | 52.7   |
| 10.2   | 10.5   | 8.0    | 27.2   | 29.0   | 29.6   | 23.0   | 14.6   | 19.1   |
| 3.8    | 4.6    | 1.0    | 13.1   | 11.0   | 5.7    | 6.4    | 4.4    | 6.7    |
| 118.7  | 161.3  | 140.9  | 166.2  | 111.4  | 136.8  | 68.2   | 60.7   | 86.0   |
| 4.7    | 3.1    | 3.7    | 10.4   | 7.4    | 6.0    | 2.4    | 11.5   | 2.6    |
| 97.3   | 109.7  | 53.5   | 62.9   | 54.3   | 56.2   | 45.7   | 37.2   | 51.1   |
| 514.8  | 518.8  | 285.7  | 499.3  | 363.7  | 426.4  | 429.0  | 393.0  | 452.5  |
| 4262.7 | 4991.6 | 4351.0 | 2221.9 | 1908.0 | 1916.3 | 1677.5 | 1757.8 | 1863.8 |
| 4657.3 | 5561.9 | 4803.2 | 2005.2 | 1708.5 | 1905.9 | 1762.8 | 1715.8 | 1942.2 |
| 699.2  | 655.5  | 303.6  | 604.4  | 432.4  | 432.5  | 472.3  | 421.1  | 521.5  |

|        |        |        |        |        |        |        |        |        |
|--------|--------|--------|--------|--------|--------|--------|--------|--------|
| 7986.3 | 7192.3 | 5861.7 | 7157.7 | 6158.0 | 6473.3 | 4465.5 | 3731.4 | 4267.3 |
| 439.4  | 498.5  | 416.0  | 548.8  | 441.7  | 503.7  | 331.6  | 329.7  | 379.7  |
| 81.7   | 135.8  | 108.2  | 136.7  | 150.4  | 144.5  | 95.6   | 70.5   | 58.4   |
| 272.4  | 323.0  | 290.3  | 72.8   | 59.7   | 63.7   | 66.8   | 61.3   | 91.1   |
| 226.0  | 360.0  | 307.3  | 209.1  | 158.1  | 187.9  | 174.7  | 171.3  | 177.6  |
| 218.7  | 291.2  | 292.5  | 274.8  | 240.9  | 260.2  | 165.6  | 160.2  | 177.3  |
| 850.7  | 939.9  | 507.8  | 45.3   | 35.3   | 37.2   | 55.5   | 43.9   | 52.7   |
| 389.0  | 446.6  | 260.6  | 30.1   | 16.8   | 26.4   | 47.7   | 44.5   | 48.0   |
| 1430.6 | 1547.4 | 1091.3 | 289.4  | 200.2  | 198.6  | 258.2  | 230.0  | 226.2  |
| 500.5  | 434.4  | 270.5  | 211.2  | 133.3  | 154.0  | 108.8  | 72.1   | 118.9  |
| 76.0   | 137.2  | 116.4  | 94.4   | 71.3   | 93.1   | 191.6  | 150.9  | 179.9  |
| 575.7  | 798.1  | 557.5  | 1672.1 | 1097.8 | 1285.3 | 789.7  | 662.6  | 770.3  |
| 37.5   | 35.1   | 21.9   | 195.0  | 159.5  | 193.2  | 109.4  | 128.7  | 103.9  |
| 22.7   | 22.0   | 10.4   | 106.1  | 86.8   | 109.0  | 101.4  | 85.7   | 101.6  |
| 419.0  | 425.5  | 268.2  | 753.7  | 630.4  | 619.2  | 360.9  | 411.7  | 455.7  |
| 4.9    | 5.8    | 7.3    | 3.9    | 3.6    | 8.7    | 4.1    | 2.1    | 1.3    |
| 1248.7 | 841.3  | 269.6  | 89.4   | 51.5   | 58.6   | 153.2  | 68.9   | 130.2  |
| 405.5  | 551.0  | 507.6  | 311.5  | 255.4  | 283.2  | 286.0  | 289.4  | 306.2  |
| 167.0  | 289.1  | 308.3  | 37.4   | 29.1   | 30.8   | 23.3   | 31.7   | 25.6   |
| 336.5  | 410.3  | 573.0  | 11.7   | 17.9   | 22.6   | 13.8   | 14.6   | 5.6    |
| 281.1  | 394.6  | 420.8  | 448.7  | 391.0  | 390.2  | 354.9  | 482.2  | 425.7  |
| 578.4  | 428.7  | 206.6  | 70.8   | 57.9   | 63.1   | 46.2   | 55.4   | 51.4   |
| 449.1  | 476.4  | 355.8  | 271.0  | 209.6  | 256.5  | 168.9  | 265.2  | 203.1  |
| 770.5  | 859.7  | 650.9  | 407.5  | 337.9  | 364.0  | 325.2  | 464.3  | 400.5  |
| 251.2  | 339.9  | 313.2  | 478.9  | 401.9  | 626.8  | 238.2  | 353.8  | 326.2  |
| 1203.2 | 1032.4 | 785.3  | 56.2   | 49.0   | 49.6   | 31.1   | 35.3   | 40.0   |
| 1.7    | 1.1    | 1.8    | 4.7    | 6.1    | 14.0   | 7.2    | 8.6    | 7.2    |
| 0.5    | 0.7    | 0.5    | 5.5    | 6.6    | 7.3    | 14.8   | 3.0    | 1.9    |
| 332.5  | 423.4  | 239.8  | 218.8  | 185.7  | 190.8  | 182.3  | 124.9  | 181.6  |
| 3.1    | 3.8    | 2.0    | 15.6   | 13.2   | 20.3   | 9.3    | 4.5    | 10.9   |
| 182.6  | 246.9  | 132.8  | 59.7   | 48.4   | 49.7   | 95.7   | 98.1   | 87.4   |
| 239.4  | 333.2  | 216.2  | 210.8  | 166.5  | 177.0  | 143.9  | 137.5  | 128.9  |
| 51.5   | 37.0   | 23.5   | 16.6   | 13.9   | 10.6   | 3.8    | 6.3    | 6.5    |
| 787.4  | 913.8  | 599.2  | 318.9  | 239.5  | 293.2  | 343.8  | 317.9  | 344.3  |
| 118.7  | 154.9  | 118.5  | 50.4   | 42.9   | 41.7   | 38.4   | 36.9   | 42.1   |
| 81.6   | 97.3   | 102.3  | 83.9   | 78.8   | 83.8   | 53.7   | 80.9   | 61.2   |
| 69.3   | 97.1   | 87.8   | 49.7   | 45.5   | 58.2   | 55.9   | 55.3   | 58.6   |
| 218.4  | 274.3  | 265.4  | 128.0  | 107.9  | 123.6  | 147.4  | 183.3  | 182.3  |
| 43.8   | 63.8   | 24.7   | 321.3  | 213.2  | 234.0  | 175.5  | 145.5  | 158.5  |
| 34.6   | 51.1   | 24.1   | 331.4  | 255.2  | 280.4  | 142.9  | 105.5  | 132.7  |
| 3.4    | 3.4    | 5.2    | 74.7   | 56.5   | 65.3   | 35.8   | 70.4   | 47.4   |
| 5.6    | 4.4    | 2.9    | 10.4   | 13.1   | 13.3   | 6.0    | 14.7   | 5.9    |
| 3.3    | 9.7    | 7.8    | 40.0   | 30.2   | 29.4   | 31.6   | 31.9   | 37.8   |
| 271.6  | 259.6  | 133.0  | 29.6   | 11.6   | 19.8   | 28.5   | 27.8   | 22.3   |
| 2447.4 | 2381.5 | 1332.4 | 117.5  | 85.0   | 67.9   | 89.8   | 88.2   | 94.2   |
| 857.0  | 1040.4 | 800.3  | 648.7  | 525.7  | 573.1  | 373.7  | 375.1  | 401.9  |
| 106.6  | 152.5  | 118.3  | 96.0   | 80.6   | 94.4   | 67.9   | 93.1   | 82.6   |
| 75.7   | 99.6   | 106.8  | 72.7   | 62.2   | 58.1   | 81.7   | 93.8   | 92.2   |
| 69.9   | 108.5  | 113.9  | 108.0  | 86.6   | 74.6   | 43.8   | 48.1   | 52.1   |
| 400.8  | 391.4  | 279.4  | 259.8  | 225.8  | 214.3  | 223.5  | 232.9  | 255.9  |
| 20.6   | 20.3   | 7.2    | 43.2   | 32.5   | 34.0   | 57.6   | 46.3   | 61.4   |
| 2305.2 | 2393.1 | 1395.7 | 1148.0 | 932.1  | 996.7  | 476.7  | 508.3  | 579.2  |
| 1130.2 | 1501.4 | 1058.6 | 724.8  | 621.4  | 613.6  | 383.5  | 345.3  | 392.2  |

|        |        |        |        |        |        |        |        |        |
|--------|--------|--------|--------|--------|--------|--------|--------|--------|
| 26.2   | 45.1   | 36.2   | 158.5  | 136.8  | 175.4  | 45.3   | 68.0   | 83.3   |
| 44.8   | 52.8   | 40.9   | 102.5  | 74.2   | 88.2   | 51.3   | 63.7   | 77.6   |
| 285.5  | 412.1  | 333.3  | 369.4  | 291.0  | 339.0  | 427.0  | 526.5  | 484.3  |
| 143.0  | 215.9  | 154.5  | 216.1  | 191.7  | 211.1  | 244.0  | 312.6  | 271.5  |
| 296.3  | 339.4  | 262.8  | 168.3  | 102.2  | 130.0  | 132.5  | 111.0  | 112.5  |
| 724.5  | 1128.4 | 908.3  | 20.0   | 17.4   | 17.9   | 11.2   | 5.8    | 7.1    |
| 290.1  | 402.4  | 446.8  | 105.8  | 104.7  | 115.6  | 67.5   | 78.3   | 97.7   |
| 179.8  | 173.5  | 147.2  | 337.7  | 275.2  | 318.5  | 200.7  | 225.4  | 229.1  |
| 440.3  | 646.4  | 482.2  | 77.7   | 70.8   | 92.7   | 52.6   | 57.5   | 66.5   |
| 774.7  | 1004.7 | 721.4  | 337.5  | 301.6  | 368.2  | 226.5  | 249.5  | 260.5  |
| 2346.7 | 2575.8 | 1883.1 | 139.7  | 111.2  | 114.2  | 263.2  | 192.2  | 236.5  |
| 30.0   | 27.3   | 31.9   | 18.8   | 18.5   | 22.6   | 12.5   | 16.7   | 16.4   |
| 4712.9 | 5352.1 | 4093.4 | 569.6  | 447.4  | 471.8  | 515.4  | 456.5  | 499.4  |
| 237.1  | 295.5  | 151.7  | 267.5  | 222.7  | 221.5  | 158.1  | 149.8  | 166.7  |
| 22.0   | 10.3   | 11.2   | 11.1   | 3.2    | 7.7    | 8.7    | 10.1   | 4.9    |
| 15.0   | 31.3   | 8.2    | 55.8   | 29.8   | 56.3   | 19.5   | 23.1   | 21.1   |
| 51.3   | 55.5   | 16.1   | 20.9   | 15.3   | 23.4   | 13.2   | 6.9    | 13.4   |
| 37.2   | 55.6   | 43.6   | 22.2   | 25.8   | 17.8   | 15.9   | 20.6   | 16.2   |
| 889.5  | 1088.9 | 689.2  | 3479.8 | 2719.8 | 2985.3 | 1954.2 | 2067.6 | 2233.0 |
| 5.8    | 17.6   | 2.0    | 19.1   | 9.6    | 14.4   | 16.6   | 6.3    | 5.5    |
| 35.5   | 25.6   | 16.4   | 20.4   | 19.1   | 13.6   | 25.0   | 14.4   | 11.7   |
| 910.3  | 1242.8 | 954.6  | 551.9  | 484.7  | 511.2  | 374.8  | 393.4  | 437.8  |
| 14.6   | 8.0    | 16.0   | 38.1   | 37.0   | 42.2   | 11.5   | 12.0   | 10.3   |
| 110.2  | 128.8  | 114.2  | 57.7   | 68.9   | 77.3   | 55.9   | 40.1   | 55.0   |
| 2047.6 | 2870.0 | 2374.1 | 1438.6 | 1555.3 | 1554.3 | 882.2  | 1046.4 | 1131.0 |
| 2470.3 | 2549.5 | 1524.0 | 1214.2 | 867.4  | 897.0  | 1210.4 | 869.6  | 1082.8 |
| 253.9  | 314.7  | 288.5  | 496.4  | 470.3  | 520.5  | 272.1  | 343.1  | 423.4  |
| 794.4  | 1135.0 | 959.9  | 1312.9 | 1192.0 | 1216.5 | 638.2  | 688.2  | 797.2  |
| 51.4   | 83.0   | 67.4   | 205.3  | 204.8  | 194.7  | 120.4  | 150.1  | 179.0  |
| 29.5   | 37.3   | 25.8   | 31.1   | 32.9   | 41.0   | 26.6   | 19.6   | 32.8   |
| 6.4    | 8.0    | 5.5    | 11.9   | 9.6    | 16.2   | 10.4   | 4.6    | 7.5    |
| 142.7  | 164.2  | 130.9  | 274.0  | 212.0  | 211.7  | 111.2  | 126.6  | 138.3  |
| 773.6  | 1087.2 | 766.3  | 154.9  | 106.6  | 103.4  | 90.5   | 85.1   | 81.3   |
| 208.5  | 320.9  | 241.8  | 314.0  | 268.9  | 288.4  | 156.3  | 185.0  | 182.7  |
| 416.7  | 748.9  | 839.5  | 1081.6 | 966.3  | 1079.5 | 734.7  | 773.3  | 894.0  |
| 819.6  | 933.9  | 616.1  | 927.2  | 732.1  | 809.9  | 790.9  | 744.1  | 841.3  |
| 193.1  | 260.6  | 230.6  | 121.2  | 115.9  | 136.9  | 94.2   | 120.6  | 121.5  |
| 61.2   | 84.4   | 65.2   | 67.9   | 44.7   | 64.5   | 39.9   | 53.1   | 65.5   |
| 2.2    | 5.9    | 3.2    | 3268.0 | 2757.9 | 3039.3 | 1386.0 | 1543.9 | 1638.5 |
| 485.9  | 538.6  | 317.9  | 294.1  | 269.6  | 304.0  | 209.0  | 203.4  | 208.9  |
| 395.6  | 468.7  | 302.4  | 145.3  | 123.0  | 146.6  | 85.8   | 101.0  | 98.1   |
| 67.1   | 71.6   | 60.7   | 16.7   | 8.2    | 7.2    | 21.2   | 18.0   | 26.8   |
| 1.3    | 3.0    | 12.4   | 2.2    | 1.6    | 5.0    | 2.8    | 1.3    | 0.9    |
| 12.9   | 48.8   | 127.8  | 32.4   | 24.6   | 32.4   | 20.0   | 24.7   | 30.0   |
| 44.5   | 52.1   | 55.6   | 64.7   | 62.4   | 62.7   | 51.5   | 55.6   | 69.0   |
| 644.4  | 836.9  | 620.7  | 568.4  | 402.5  | 443.7  | 430.3  | 385.8  | 413.8  |
| 10.8   | 2.3    | 1.1    | 6.3    | 2.0    | 2.2    | 5.4    | 2.3    | 2.0    |
| 49.6   | 69.0   | 42.9   | 56.3   | 61.0   | 61.4   | 39.5   | 64.1   | 60.0   |
| 2.4    | 8.1    | 4.7    | 3.1    | 3.3    | 5.4    | 6.1    | 1.3    | 5.4    |
| 44.2   | 84.3   | 81.4   | 26.4   | 16.1   | 13.8   | 26.8   | 16.1   | 18.7   |
| 198.6  | 274.5  | 285.5  | 77.6   | 63.9   | 60.9   | 41.4   | 63.8   | 48.9   |
| 12.5   | 6.9    | 10.4   | 24.1   | 14.4   | 24.0   | 10.6   | 10.7   | 11.2   |
| 45.7   | 58.3   | 72.8   | 139.7  | 158.1  | 150.1  | 178.3  | 335.8  | 236.2  |

|        |        |        |        |        |        |        |        |        |
|--------|--------|--------|--------|--------|--------|--------|--------|--------|
| 342.4  | 394.6  | 348.5  | 489.1  | 367.9  | 356.6  | 452.3  | 434.0  | 490.3  |
| 65.3   | 70.2   | 42.0   | 30.1   | 9.6    | 18.3   | 21.0   | 16.8   | 15.6   |
| 797.4  | 905.4  | 543.8  | 183.7  | 139.5  | 156.5  | 122.6  | 108.6  | 130.1  |
| 116.2  | 148.5  | 104.4  | 162.4  | 118.0  | 125.0  | 108.1  | 82.7   | 97.1   |
| 642.5  | 824.4  | 548.1  | 334.6  | 241.5  | 258.8  | 229.7  | 171.4  | 220.5  |
| 344.6  | 437.1  | 255.0  | 169.6  | 139.0  | 144.5  | 138.4  | 92.8   | 129.6  |
| 162.1  | 206.6  | 152.2  | 539.5  | 413.9  | 458.1  | 344.4  | 335.2  | 433.3  |
| 790.9  | 1006.2 | 918.6  | 523.9  | 364.8  | 451.6  | 257.3  | 204.8  | 290.6  |
| 2260.8 | 2627.6 | 1721.5 | 1267.3 | 980.9  | 1071.0 | 630.3  | 483.3  | 654.5  |
| 306.4  | 465.8  | 467.9  | 6.7    | 6.0    | 5.9    | 6.9    | 2.8    | 5.1    |
| 67.1   | 215.5  | 333.7  | 4.1    | 11.9   | 13.3   | 2.9    | 1.8    | 8.9    |
| 1902.9 | 2472.4 | 2141.6 | 753.4  | 819.4  | 803.1  | 758.4  | 1211.3 | 1016.5 |
| 64.5   | 121.8  | 100.6  | 140.2  | 97.2   | 97.6   | 77.5   | 58.6   | 78.0   |
| 49.5   | 73.8   | 48.3   | 25.2   | 21.8   | 33.0   | 29.2   | 30.5   | 33.8   |
| 521.0  | 427.7  | 198.2  | 211.7  | 184.2  | 245.0  | 336.2  | 226.6  | 316.9  |
| 344.9  | 248.3  | 214.3  | 14.9   | 6.2    | 10.6   | 19.5   | 3.4    | 10.6   |
| 26.6   | 20.1   | 19.3   | 18.0   | 20.2   | 14.1   | 24.1   | 17.7   | 18.6   |
| 92.6   | 113.5  | 90.3   | 290.0  | 244.0  | 298.1  | 176.5  | 212.6  | 191.0  |
| 410.1  | 519.5  | 383.9  | 109.3  | 106.8  | 117.6  | 123.7  | 162.7  | 181.8  |
| 4.2    | 5.0    | 2.6    | 2986.4 | 2824.6 | 2772.5 | 1927.2 | 2004.5 | 2287.1 |
| 35.0   | 58.1   | 54.2   | 127.8  | 130.7  | 147.9  | 82.4   | 84.1   | 96.7   |
| 120.2  | 140.5  | 104.8  | 183.8  | 145.6  | 164.6  | 125.6  | 116.9  | 144.3  |
| 219.7  | 295.1  | 241.3  | 339.5  | 336.1  | 355.9  | 184.4  | 302.7  | 282.9  |
| 98.1   | 121.5  | 81.6   | 350.0  | 234.9  | 273.1  | 86.1   | 100.5  | 136.2  |
| 302.4  | 361.7  | 256.4  | 274.0  | 197.6  | 250.0  | 176.0  | 160.0  | 181.6  |
| 128.2  | 203.3  | 87.2   | 376.0  | 291.8  | 306.3  | 159.4  | 133.3  | 175.3  |
| 846.3  | 1156.3 | 816.7  | 637.6  | 525.4  | 527.9  | 347.3  | 351.3  | 382.8  |
| 835.3  | 1084.5 | 843.3  | 703.6  | 553.3  | 622.6  | 397.6  | 391.7  | 430.7  |
| 8446.0 | 7180.0 | 5017.7 | 466.2  | 278.8  | 310.2  | 419.8  | 328.8  | 344.4  |
| 4875.3 | 4123.3 | 2396.6 | 162.0  | 101.4  | 103.4  | 233.5  | 163.8  | 154.5  |
| 628.0  | 782.6  | 536.6  | 664.0  | 541.1  | 489.6  | 791.2  | 698.6  | 732.5  |
| 3433.1 | 4219.1 | 3545.7 | 2986.5 | 2522.1 | 2739.3 | 1475.8 | 1275.8 | 1663.7 |
| 225.6  | 311.3  | 308.4  | 285.0  | 279.2  | 289.9  | 199.8  | 310.2  | 281.0  |
| 579.3  | 594.2  | 328.5  | 609.3  | 475.4  | 517.3  | 320.9  | 295.7  | 348.8  |
| 6.4    | 7.3    | 5.1    | 15.8   | 11.7   | 9.1    | 2.1    | 1.9    | 4.0    |
| 600.4  | 627.8  | 445.9  | 442.4  | 371.5  | 391.5  | 243.9  | 217.7  | 261.6  |
| 44.5   | 93.0   | 38.2   | 171.3  | 154.5  | 178.4  | 96.7   | 99.6   | 100.2  |
| 40.2   | 43.4   | 71.9   | 3.1    | 5.7    | 4.8    | 0.5    | 0.5    | 0.6    |
| 24.4   | 41.6   | 51.9   | 16.6   | 17.4   | 9.4    | 1.9    | 1.6    | 3.3    |
| 972.3  | 1039.3 | 583.6  | 354.8  | 269.1  | 295.2  | 303.2  | 298.2  | 352.2  |
| 180.3  | 335.7  | 219.2  | 144.1  | 130.9  | 162.3  | 75.8   | 163.5  | 145.5  |
| 113.8  | 155.8  | 104.9  | 80.3   | 59.9   | 54.5   | 33.0   | 30.3   | 37.6   |
| 7.9    | 10.7   | 4.4    | 13.5   | 17.4   | 9.8    | 8.9    | 4.5    | 11.0   |
| 14.6   | 17.0   | 3.9    | 19.2   | 10.8   | 15.9   | 27.7   | 26.3   | 19.2   |
| 7.3    | 20.7   | 5.8    | 60.4   | 29.3   | 25.8   | 24.8   | 43.0   | 43.0   |
| 55.2   | 70.4   | 93.8   | 903.5  | 838.7  | 771.2  | 519.1  | 607.8  | 694.8  |
| 1371.5 | 1426.6 | 1013.4 | 110.6  | 90.8   | 103.2  | 143.8  | 129.7  | 117.9  |
| 92.3   | 133.8  | 120.1  | 153.8  | 114.7  | 118.3  | 51.6   | 64.1   | 56.0   |
| 1954.0 | 1721.0 | 741.3  | 18.9   | 18.1   | 17.9   | 21.7   | 19.3   | 22.1   |
| 102.6  | 149.5  | 156.2  | 101.5  | 115.8  | 119.9  | 77.3   | 94.3   | 89.7   |
| 1048.0 | 1087.0 | 674.1  | 481.2  | 309.4  | 346.5  | 318.3  | 243.3  | 241.4  |
| 217.0  | 219.6  | 120.1  | 734.3  | 675.8  | 769.7  | 426.5  | 571.4  | 580.9  |
| 120.1  | 119.4  | 66.9   | 165.3  | 158.4  | 173.6  | 123.4  | 145.4  | 155.4  |



|        |        |        |        |        |        |       |       |       |
|--------|--------|--------|--------|--------|--------|-------|-------|-------|
| 319.6  | 425.4  | 330.7  | 143.3  | 115.3  | 153.7  | 83.8  | 96.3  | 111.6 |
| 123.9  | 143.0  | 122.5  | 104.8  | 72.2   | 61.9   | 80.8  | 85.4  | 89.5  |
| 136.5  | 176.2  | 104.1  | 128.1  | 103.9  | 103.5  | 91.1  | 80.7  | 98.9  |
| 35.8   | 48.2   | 25.9   | 57.2   | 42.4   | 48.1   | 16.3  | 20.3  | 24.4  |
| 64.6   | 79.6   | 61.5   | 49.0   | 36.7   | 61.4   | 40.4  | 38.1  | 39.4  |
| 140.1  | 142.1  | 162.4  | 79.8   | 66.0   | 75.3   | 48.8  | 43.9  | 53.5  |
| 434.3  | 567.3  | 442.7  | 99.4   | 99.1   | 114.1  | 52.4  | 74.0  | 53.0  |
| 289.8  | 370.8  | 201.1  | 272.3  | 200.7  | 225.9  | 145.5 | 139.4 | 144.2 |
| 15.2   | 11.9   | 7.1    | 19.3   | 19.0   | 19.0   | 11.9  | 4.2   | 7.3   |
| 45.6   | 66.0   | 62.2   | 183.9  | 187.8  | 195.2  | 113.7 | 171.5 | 182.9 |
| 1222.2 | 1370.8 | 653.9  | 438.0  | 249.2  | 259.3  | 388.1 | 295.5 | 308.2 |
| 688.3  | 989.9  | 776.5  | 531.0  | 469.4  | 490.2  | 424.5 | 423.8 | 490.5 |
| 47.3   | 60.2   | 40.1   | 57.0   | 56.2   | 41.6   | 37.2  | 37.9  | 38.5  |
| 497.6  | 1920.4 | 3037.9 | 219.1  | 213.3  | 234.8  | 209.3 | 266.5 | 260.6 |
| 400.6  | 1825.0 | 2941.5 | 122.8  | 113.5  | 153.4  | 95.3  | 137.9 | 140.4 |
| 444.2  | 1750.4 | 2609.6 | 226.5  | 243.1  | 255.8  | 177.3 | 221.0 | 210.8 |
| 217.3  | 234.3  | 198.9  | 110.1  | 92.2   | 107.6  | 97.7  | 80.4  | 92.2  |
| 220.1  | 290.2  | 203.2  | 366.2  | 323.0  | 393.5  | 281.3 | 247.5 | 294.0 |
| 394.5  | 436.0  | 320.5  | 681.2  | 522.9  | 592.4  | 409.0 | 355.8 | 438.7 |
| 281.2  | 307.4  | 232.3  | 191.5  | 156.2  | 163.3  | 150.0 | 157.8 | 158.4 |
| 135.2  | 187.4  | 139.5  | 515.2  | 337.3  | 411.4  | 273.7 | 279.4 | 299.5 |
| 359.2  | 445.3  | 328.2  | 233.0  | 179.3  | 195.1  | 157.7 | 137.4 | 158.6 |
| 527.6  | 478.4  | 191.5  | 108.1  | 76.9   | 76.1   | 103.4 | 60.8  | 82.4  |
| 330.1  | 423.7  | 130.6  | 201.9  | 109.5  | 122.8  | 152.6 | 110.8 | 140.8 |
| 959.4  | 798.4  | 498.6  | 135.7  | 95.5   | 149.7  | 100.0 | 97.8  | 116.0 |
| 26.0   | 27.3   | 13.5   | 50.6   | 36.5   | 44.8   | 17.4  | 11.6  | 19.8  |
| 9.3    | 21.2   | 8.8    | 25.3   | 8.2    | 16.2   | 5.4   | 5.5   | 4.8   |
| 40.5   | 56.6   | 48.6   | 74.3   | 63.3   | 74.9   | 47.3  | 44.9  | 53.9  |
| 157.2  | 230.3  | 193.5  | 206.4  | 178.8  | 203.3  | 140.0 | 144.4 | 169.5 |
| 1005.9 | 1041.0 | 470.5  | 568.2  | 448.3  | 496.6  | 277.4 | 320.3 | 362.2 |
| 15.8   | 27.4   | 20.5   | 23.6   | 20.0   | 17.8   | 15.2  | 11.8  | 12.2  |
| 32.8   | 44.5   | 51.2   | 403.1  | 326.4  | 393.8  | 253.1 | 296.5 | 280.2 |
| 6.5    | 2.6    | 8.0    | 5.4    | 11.5   | 8.2    | 10.9  | 18.7  | 18.9  |
| 518.9  | 621.5  | 497.1  | 800.0  | 549.6  | 608.1  | 451.0 | 321.1 | 409.0 |
| 768.1  | 733.3  | 390.5  | 529.6  | 395.4  | 402.6  | 275.1 | 215.4 | 267.0 |
| 51.7   | 51.0   | 32.5   | 103.1  | 90.9   | 77.6   | 57.0  | 48.8  | 74.4  |
| 1.7    | 1.0    | 1.0    | 70.2   | 44.1   | 71.0   | 59.9  | 54.6  | 76.4  |
| 3225.1 | 3813.5 | 3083.4 | 250.2  | 241.3  | 254.0  | 292.6 | 429.5 | 400.1 |
| 738.6  | 950.0  | 535.7  | 627.2  | 414.6  | 434.9  | 209.8 | 175.7 | 229.1 |
| 141.7  | 156.3  | 103.4  | 284.6  | 210.8  | 254.9  | 145.5 | 125.8 | 146.3 |
| 941.9  | 904.3  | 683.4  | 141.1  | 113.7  | 106.7  | 240.3 | 252.5 | 264.7 |
| 606.3  | 745.3  | 585.3  | 1853.4 | 1539.1 | 1733.4 | 895.2 | 756.6 | 827.1 |
| 144.5  | 209.6  | 166.2  | 210.1  | 164.3  | 202.9  | 180.3 | 107.7 | 220.1 |
| 66.9   | 78.9   | 50.6   | 150.0  | 124.5  | 112.2  | 93.3  | 107.6 | 86.4  |
| 528.6  | 608.8  | 391.6  | 422.8  | 338.9  | 386.0  | 294.7 | 333.6 | 341.1 |
| 113.7  | 125.9  | 99.7   | 69.4   | 50.1   | 78.0   | 104.3 | 93.5  | 129.1 |
| 66.0   | 65.1   | 24.5   | 119.7  | 70.5   | 85.8   | 109.8 | 85.6  | 115.6 |
| 45.2   | 79.5   | 56.0   | 8.4    | 12.9   | 9.8    | 18.9  | 26.6  | 9.1   |
| 84.1   | 90.2   | 153.7  | 298.4  | 355.8  | 372.2  | 236.5 | 318.7 | 380.1 |
| 35.2   | 38.5   | 58.2   | 158.3  | 277.9  | 268.2  | 99.2  | 143.2 | 161.7 |
| 282.7  | 286.1  | 201.2  | 221.3  | 161.7  | 164.3  | 173.1 | 143.6 | 196.0 |
| 3.0    | 2.9    | 2.6    | 76.8   | 34.8   | 44.8   | 39.4  | 19.1  | 35.6  |
| 341.3  | 355.3  | 275.2  | 171.9  | 165.4  | 159.4  | 122.5 | 137.5 | 155.7 |

|        |        |        |        |        |        |        |        |        |
|--------|--------|--------|--------|--------|--------|--------|--------|--------|
| 839.8  | 829.0  | 433.9  | 287.5  | 157.6  | 206.3  | 171.1  | 111.2  | 132.0  |
| 4.0    | 0.8    | 4.6    | 12.2   | 7.4    | 7.1    | 7.1    | 3.4    | 4.6    |
| 31.6   | 34.7   | 33.6   | 64.7   | 53.1   | 60.5   | 33.3   | 23.1   | 36.9   |
| 295.8  | 376.8  | 247.3  | 466.7  | 411.5  | 465.5  | 319.9  | 367.5  | 384.7  |
| 438.5  | 557.3  | 329.9  | 136.5  | 96.2   | 137.4  | 64.7   | 88.2   | 101.1  |
| 0.9    | 2.9    | 0.6    | 9.0    | 17.7   | 16.2   | 4.8    | 4.5    | 7.8    |
| 2.0    | 6.3    | 2.2    | 9.8    | 12.5   | 12.0   | 9.7    | 7.8    | 6.2    |
| 712.0  | 963.0  | 741.4  | 376.5  | 328.4  | 356.7  | 297.3  | 318.6  | 319.4  |
| 336.8  | 467.8  | 377.4  | 622.5  | 503.6  | 567.7  | 531.5  | 546.1  | 549.5  |
| 15.5   | 16.5   | 19.4   | 51.3   | 54.2   | 47.8   | 27.3   | 28.2   | 42.8   |
| 5.3    | 2.4    | 1.5    | 7.9    | 8.3    | 10.9   | 9.7    | 16.3   | 6.7    |
| 120.9  | 132.3  | 102.8  | 104.3  | 105.0  | 101.1  | 86.2   | 75.4   | 90.1   |
| 2778.5 | 2961.2 | 2013.5 | 1219.8 | 960.0  | 1018.6 | 901.8  | 974.5  | 1043.4 |
| 253.2  | 351.9  | 262.3  | 237.9  | 200.8  | 207.8  | 72.8   | 79.8   | 118.8  |
| 1473.6 | 1521.3 | 972.6  | 3230.6 | 2477.9 | 2624.4 | 1334.9 | 1110.8 | 1423.2 |
| 350.6  | 703.8  | 792.2  | 132.0  | 108.8  | 119.6  | 51.2   | 131.1  | 81.8   |
| 96.0   | 151.8  | 105.0  | 8.8    | 13.1   | 14.4   | 7.0    | 11.8   | 6.0    |
| 203.8  | 247.7  | 211.9  | 563.9  | 470.0  | 537.5  | 304.6  | 330.2  | 412.4  |
| 1225.9 | 1185.4 | 586.2  | 944.1  | 698.7  | 759.9  | 467.3  | 399.3  | 488.9  |
| 22.8   | 30.9   | 18.7   | 17.1   | 14.8   | 7.4    | 4.9    | 2.4    | 5.0    |
| 1148.2 | 1455.4 | 1029.0 | 405.4  | 319.6  | 315.2  | 432.3  | 435.2  | 429.7  |
| 106.3  | 167.2  | 134.8  | 91.0   | 77.9   | 89.1   | 75.0   | 95.8   | 93.5   |
| 445.7  | 521.0  | 351.7  | 181.1  | 168.6  | 187.1  | 110.6  | 155.2  | 175.0  |
| 456.7  | 490.2  | 339.8  | 543.3  | 442.4  | 466.4  | 370.5  | 358.2  | 363.7  |
| 334.7  | 404.8  | 311.5  | 534.4  | 476.3  | 520.4  | 254.9  | 302.5  | 310.1  |
| 213.7  | 221.9  | 196.0  | 569.4  | 454.4  | 509.4  | 300.8  | 315.9  | 382.3  |
| 82.8   | 114.9  | 82.7   | 81.3   | 59.8   | 74.9   | 34.0   | 45.3   | 67.6   |
| 23.1   | 32.3   | 19.9   | 17.8   | 21.9   | 25.7   | 9.9    | 9.4    | 19.3   |
| 3435.8 | 4334.2 | 3420.7 | 2375.5 | 2206.6 | 2064.3 | 1557.4 | 1472.1 | 1818.4 |
| 1.3    | 2.2    | 0.9    | 162.4  | 140.8  | 167.4  | 163.5  | 138.1  | 138.7  |
| 192.4  | 270.6  | 189.8  | 688.6  | 578.3  | 666.7  | 410.4  | 452.8  | 448.4  |
| 108.0  | 148.0  | 126.0  | 352.1  | 344.5  | 402.0  | 203.0  | 234.8  | 265.7  |
| 5.4    | 14.4   | 51.8   | 3.5    | 7.3    | 8.8    | 2.4    | 4.1    | 1.2    |
| 134.2  | 183.4  | 124.3  | 202.2  | 141.4  | 160.7  | 111.5  | 113.1  | 138.1  |
| 371.7  | 318.9  | 204.6  | 34.3   | 24.5   | 20.2   | 24.2   | 23.6   | 25.2   |
| 74.1   | 118.0  | 113.3  | 56.4   | 66.7   | 90.4   | 77.2   | 85.0   | 92.2   |
| 84.8   | 132.9  | 113.6  | 104.9  | 102.7  | 102.2  | 44.6   | 65.3   | 63.3   |
| 294.7  | 328.9  | 174.0  | 248.7  | 167.0  | 183.9  | 169.2  | 141.2  | 165.7  |
| 289.6  | 412.8  | 325.8  | 130.5  | 137.3  | 125.4  | 64.0   | 81.1   | 104.1  |
| 2032.0 | 2036.2 | 1267.0 | 1323.0 | 1001.4 | 1102.4 | 812.5  | 653.2  | 805.1  |
| 809.1  | 1485.0 | 1129.5 | 25.2   | 16.2   | 16.1   | 11.8   | 15.0   | 14.6   |
| 207.7  | 336.1  | 211.9  | 11.6   | 4.1    | 11.6   | 6.1    | 9.6    | 12.5   |
| 83.3   | 121.3  | 53.9   | 23.0   | 19.6   | 22.9   | 7.5    | 7.4    | 14.0   |
| 3216.7 | 4161.0 | 3078.3 | 2477.7 | 1548.9 | 1595.0 | 1235.5 | 1035.3 | 1065.7 |
| 69.5   | 91.5   | 95.3   | 115.6  | 84.4   | 123.9  | 46.9   | 70.1   | 56.5   |
| 410.6  | 537.2  | 264.3  | 446.5  | 348.8  | 392.2  | 263.9  | 273.0  | 355.5  |
| 472.1  | 537.2  | 544.0  | 554.1  | 522.3  | 548.2  | 348.9  | 386.1  | 397.4  |
| 792.7  | 955.1  | 458.8  | 361.3  | 304.6  | 304.7  | 185.9  | 153.1  | 176.4  |
| 622.3  | 846.9  | 678.0  | 93.1   | 68.8   | 66.7   | 76.2   | 87.7   | 96.9   |
| 965.3  | 1301.0 | 1062.8 | 172.9  | 127.2  | 153.6  | 80.1   | 88.6   | 98.1   |
| 831.5  | 789.7  | 471.7  | 54.2   | 34.1   | 47.3   | 33.3   | 29.5   | 27.4   |
| 591.6  | 585.1  | 429.2  | 30.9   | 25.1   | 13.0   | 12.7   | 20.3   | 17.8   |
| 132.3  | 125.6  | 81.1   | 143.1  | 123.4  | 129.7  | 71.5   | 67.4   | 91.2   |

|        |        |        |        |        |        |        |        |        |
|--------|--------|--------|--------|--------|--------|--------|--------|--------|
| 618.6  | 747.4  | 504.3  | 685.2  | 405.3  | 468.5  | 316.1  | 357.2  | 395.2  |
| 128.3  | 144.7  | 142.8  | 281.5  | 228.9  | 287.4  | 91.4   | 109.5  | 111.6  |
| 141.4  | 190.2  | 110.5  | 21.9   | 19.0   | 13.2   | 39.2   | 28.7   | 35.4   |
| 1075.1 | 1202.8 | 743.6  | 253.9  | 186.8  | 203.2  | 213.0  | 183.5  | 203.6  |
| 11.2   | 8.0    | 17.5   | 15.5   | 22.3   | 11.8   | 15.8   | 11.7   | 12.4   |
| 218.4  | 370.8  | 319.6  | 3199.5 | 2655.9 | 3200.1 | 2449.2 | 1971.5 | 2642.2 |
| 916.9  | 1126.3 | 861.1  | 534.7  | 456.7  | 458.1  | 495.0  | 505.9  | 530.1  |
| 7.7    | 6.2    | 2.6    | 539.3  | 363.7  | 406.1  | 378.0  | 280.4  | 321.3  |
| 7.3    | 4.5    | 4.3    | 64.5   | 38.5   | 51.8   | 43.0   | 45.0   | 44.8   |
| 16.5   | 19.4   | 11.7   | 607.1  | 399.5  | 454.2  | 441.0  | 335.5  | 380.5  |
| 350.4  | 385.1  | 164.1  | 280.6  | 176.5  | 191.0  | 120.2  | 89.5   | 119.9  |
| 88.8   | 106.6  | 64.2   | 117.0  | 90.6   | 91.5   | 50.0   | 48.1   | 52.4   |
| 1037.2 | 1203.2 | 656.5  | 221.2  | 211.9  | 243.0  | 157.9  | 189.7  | 186.7  |
| 104.8  | 147.7  | 128.4  | 253.4  | 232.4  | 264.5  | 146.2  | 129.4  | 133.2  |
| 172.2  | 216.1  | 186.0  | 257.3  | 285.7  | 336.3  | 150.7  | 190.7  | 194.8  |
| 66.1   | 59.3   | 36.2   | 13.5   | 5.3    | 12.4   | 13.1   | 14.4   | 14.9   |
| 769.2  | 799.9  | 440.8  | 82.3   | 72.5   | 90.7   | 81.2   | 74.3   | 86.9   |
| 41.8   | 55.6   | 47.1   | 91.0   | 76.9   | 83.1   | 42.7   | 47.2   | 53.4   |
| 55.9   | 65.1   | 44.9   | 51.8   | 46.8   | 49.4   | 23.6   | 28.2   | 22.2   |
| 842.2  | 848.3  | 668.6  | 357.3  | 361.8  | 384.0  | 323.8  | 347.0  | 359.1  |
| 250.1  | 302.6  | 226.6  | 148.4  | 117.4  | 149.6  | 86.3   | 111.6  | 114.2  |
| 190.7  | 223.9  | 185.5  | 222.4  | 198.2  | 216.7  | 125.6  | 158.4  | 156.3  |
| 12.6   | 19.3   | 10.7   | 37.1   | 23.7   | 30.6   | 15.7   | 18.8   | 20.3   |
| 6.7    | 2.6    | 2.3    | 9.9    | 9.5    | 4.3    | 7.6    | 14.7   | 8.4    |
| 3.5    | 6.8    | 1.8    | 3.6    | 5.9    | 15.1   | 4.5    | 7.2    | 8.1    |
| 28.9   | 10.7   | 20.4   | 11.3   | 15.4   | 24.8   | 19.2   | 19.7   | 3.9    |
| 4.8    | 12.7   | 10.2   | 28.6   | 27.4   | 23.6   | 27.7   | 16.1   | 27.0   |
| 221.3  | 232.9  | 174.5  | 63.2   | 56.2   | 51.8   | 78.8   | 70.4   | 78.5   |
| 880.4  | 892.7  | 779.4  | 346.9  | 292.6  | 331.2  | 236.1  | 211.7  | 259.9  |
| 26.4   | 29.1   | 53.8   | 6.5    | 3.4    | 8.9    | 3.4    | 2.6    | 3.3    |
| 10.6   | 36.2   | 21.1   | 17.8   | 17.1   | 9.5    | 9.3    | 6.1    | 6.7    |
| 1269.6 | 1710.8 | 1253.8 | 797.6  | 703.6  | 740.5  | 395.6  | 374.9  | 452.3  |
| 11.4   | 11.4   | 5.7    | 11.8   | 15.3   | 12.3   | 6.5    | 6.9    | 13.1   |
| 271.3  | 320.2  | 193.2  | 100.3  | 89.1   | 78.1   | 137.9  | 137.7  | 145.3  |
| 79.6   | 111.2  | 117.1  | 12.1   | 8.1    | 7.9    | 4.6    | 10.5   | 13.0   |
| 307.8  | 468.2  | 417.9  | 252.4  | 250.2  | 287.3  | 185.8  | 227.5  | 239.6  |
| 1.0    | 9.4    | 2.9    | 2.8    | 7.0    | 6.8    | 1.1    | 0.8    | 2.6    |
| 5.7    | 5.3    | 5.7    | 2.7    | 2.3    | 3.5    | 3.6    | 2.6    | 6.3    |
| 110.3  | 151.1  | 89.9   | 140.2  | 134.2  | 150.5  | 53.9   | 71.2   | 81.5   |
| 18.6   | 37.6   | 7.1    | 12.4   | 8.8    | 12.0   | 16.1   | 20.8   | 23.6   |
| 243.3  | 297.7  | 310.3  | 316.3  | 253.4  | 262.5  | 152.6  | 156.4  | 175.8  |
| 23.6   | 48.1   | 36.9   | 70.9   | 60.2   | 65.2   | 27.7   | 25.6   | 26.7   |
| 9.9    | 15.8   | 2.5    | 16.5   | 3.8    | 12.2   | 13.0   | 7.1    | 9.0    |
| 38.6   | 49.0   | 38.1   | 36.9   | 87.8   | 82.6   | 31.0   | 72.5   | 56.4   |
| 3044.5 | 3654.8 | 2696.6 | 6488.7 | 5737.8 | 5754.2 | 4024.5 | 3612.7 | 4328.2 |
| 359.6  | 494.6  | 339.2  | 201.4  | 197.6  | 218.3  | 121.7  | 133.8  | 182.3  |
| 327.0  | 391.6  | 302.2  | 265.5  | 252.3  | 272.1  | 156.2  | 224.7  | 201.9  |
| 528.1  | 490.3  | 228.7  | 647.9  | 516.1  | 521.9  | 479.9  | 445.5  | 466.9  |
| 108.2  | 143.9  | 96.0   | 56.6   | 43.7   | 56.3   | 37.7   | 32.1   | 37.2   |
| 9.4    | 17.1   | 1.8    | 40.0   | 34.4   | 36.0   | 11.3   | 7.3    | 13.0   |
| 12.5   | 5.9    | 8.7    | 13.9   | 8.9    | 7.7    | 10.3   | 6.4    | 12.2   |
| 85.5   | 102.3  | 99.6   | 94.8   | 86.8   | 98.3   | 57.1   | 77.5   | 76.5   |
| 2043.7 | 1996.5 | 1162.5 | 386.7  | 265.3  | 287.3  | 222.1  | 179.5  | 202.5  |

|        |        |        |        |        |        |        |        |        |
|--------|--------|--------|--------|--------|--------|--------|--------|--------|
| 4.5    | 10.0   | 12.2   | 26.3   | 18.5   | 17.4   | 6.7    | 3.8    | 10.0   |
| 15.2   | 18.2   | 14.5   | 13.7   | 11.5   | 20.1   | 9.9    | 11.8   | 17.3   |
| 524.7  | 745.7  | 720.9  | 175.4  | 149.2  | 188.0  | 125.4  | 159.5  | 159.4  |
| 35.9   | 57.8   | 60.9   | 33.2   | 28.7   | 32.3   | 22.4   | 40.8   | 31.8   |
| 383.8  | 504.1  | 266.0  | 423.8  | 313.9  | 417.4  | 242.3  | 234.1  | 281.9  |
| 71.0   | 77.5   | 58.5   | 208.4  | 192.4  | 211.6  | 117.6  | 109.6  | 131.6  |
| 1333.4 | 1641.6 | 1141.6 | 598.0  | 413.6  | 413.3  | 357.5  | 270.3  | 341.5  |
| 1095.1 | 1467.7 | 948.2  | 322.9  | 229.6  | 249.6  | 292.2  | 239.4  | 286.3  |
| 8.2    | 32.6   | 33.2   | 740.4  | 624.7  | 749.6  | 297.7  | 405.0  | 367.7  |
| 9.5    | 12.8   | 2.3    | 9.3    | 15.7   | 14.8   | 8.4    | 7.9    | 13.4   |
| 6.2    | 7.0    | 4.0    | 11.5   | 12.1   | 8.5    | 1.1    | 2.8    | 6.5    |
| 466.3  | 539.8  | 460.8  | 31.3   | 23.3   | 27.2   | 19.6   | 20.8   | 19.4   |
| 482.7  | 561.2  | 429.3  | 100.2  | 123.3  | 102.7  | 97.4   | 178.9  | 155.7  |
| 606.0  | 872.3  | 833.5  | 387.7  | 303.2  | 348.5  | 189.9  | 212.7  | 198.9  |
| 72.1   | 80.7   | 70.7   | 74.4   | 62.6   | 58.7   | 43.3   | 31.3   | 32.3   |
| 521.4  | 687.7  | 503.0  | 76.1   | 65.5   | 63.5   | 37.0   | 21.6   | 27.8   |
| 696.0  | 1129.9 | 651.5  | 29.3   | 37.9   | 23.4   | 23.5   | 17.0   | 24.2   |
| 854.2  | 971.6  | 728.9  | 1101.9 | 659.6  | 740.0  | 711.1  | 589.7  | 685.7  |
| 837.8  | 1201.5 | 899.4  | 2278.3 | 1432.6 | 1707.8 | 2124.0 | 1452.2 | 1833.9 |
| 242.9  | 281.5  | 222.4  | 72.0   | 72.1   | 66.7   | 75.0   | 65.0   | 66.4   |
| 327.7  | 370.8  | 254.9  | 486.4  | 370.4  | 391.4  | 305.8  | 273.1  | 334.4  |
| 21.0   | 21.9   | 10.8   | 32.5   | 49.4   | 45.2   | 30.8   | 27.0   | 21.1   |
| 759.9  | 949.0  | 566.1  | 91.9   | 70.0   | 69.7   | 114.9  | 113.3  | 139.5  |
| 16.1   | 6.9    | 6.2    | 843.6  | 637.5  | 723.1  | 404.4  | 528.4  | 463.4  |
| 4.9    | 1.2    | 1.1    | 22.6   | 14.6   | 6.3    | 5.9    | 3.6    | 0.7    |
| 8.3    | 11.2   | 10.6   | 16.7   | 12.1   | 5.5    | 9.0    | 9.0    | 7.4    |
| 129.2  | 194.2  | 142.1  | 36.3   | 23.0   | 33.2   | 67.1   | 57.5   | 59.8   |
| 777.2  | 805.2  | 849.2  | 286.0  | 250.4  | 281.7  | 202.6  | 231.3  | 239.2  |
| 1.8    | 9.3    | 5.7    | 14.8   | 1.5    | 8.4    | 6.3    | 1.2    | 2.7    |
| 19.6   | 25.0   | 9.8    | 704.2  | 768.7  | 714.5  | 580.2  | 883.4  | 855.8  |
| 18.9   | 30.7   | 15.4   | 384.7  | 409.8  | 459.7  | 149.3  | 257.8  | 271.5  |
| 214.6  | 250.6  | 136.1  | 4280.4 | 4594.5 | 4967.9 | 2188.9 | 3043.5 | 3171.0 |
| 3232.3 | 3763.6 | 2899.4 | 1033.2 | 937.5  | 1023.8 | 458.3  | 643.3  | 642.0  |
| 9.4    | 8.9    | 7.9    | 9.7    | 3.1    | 6.6    | 4.9    | 0.6    | 2.2    |
| 484.1  | 618.4  | 594.5  | 292.7  | 260.0  | 296.3  | 198.6  | 184.4  | 210.2  |
| 963.2  | 1019.9 | 599.5  | 779.7  | 449.9  | 544.9  | 553.2  | 237.5  | 370.2  |
| 1927.1 | 1878.9 | 1299.9 | 725.9  | 580.3  | 618.3  | 507.6  | 474.9  | 514.6  |
| 967.4  | 1790.9 | 1325.6 | 813.6  | 515.8  | 632.7  | 516.5  | 359.1  | 514.2  |
| 206.2  | 373.2  | 284.0  | 79.8   | 69.7   | 91.8   | 105.7  | 50.8   | 79.8   |
| 7.2    | 2.0    | 1.1    | 12.5   | 12.9   | 12.1   | 6.7    | 6.3    | 1.9    |
| 4.8    | 2.5    | 6.3    | 14.1   | 7.8    | 6.6    | 0.4    | 3.8    | 2.6    |
| 5.6    | 2.3    | 2.6    | 4.7    | 3.8    | 8.8    | 2.3    | 2.9    | 4.0    |
| 216.6  | 272.1  | 196.6  | 32.3   | 26.4   | 18.4   | 25.0   | 23.1   | 26.0   |
| 109.6  | 128.2  | 112.8  | 5.1    | 12.7   | 3.8    | 2.6    | 7.3    | 3.6    |
| 9.5    | 12.9   | 10.5   | 246.9  | 214.6  | 221.4  | 170.5  | 177.3  | 205.2  |
| 1.9    | 1.2    | 1.9    | 103.5  | 90.4   | 92.1   | 78.7   | 70.3   | 92.9   |
| 11.5   | 7.1    | 15.6   | 9.6    | 7.5    | 12.5   | 2.9    | 12.2   | 3.5    |
| 372.7  | 498.1  | 423.6  | 216.8  | 158.3  | 181.9  | 163.5  | 161.6  | 180.1  |
| 10.5   | 15.6   | 7.6    | 360.3  | 287.3  | 303.0  | 224.9  | 239.2  | 247.2  |
| 229.9  | 283.7  | 260.8  | 158.0  | 152.5  | 194.4  | 87.2   | 103.8  | 108.6  |
| 1942.4 | 2527.9 | 2162.7 | 2173.1 | 1903.9 | 2086.5 | 963.6  | 1111.7 | 1202.3 |
| 655.4  | 846.9  | 671.6  | 374.4  | 291.1  | 327.8  | 347.1  | 336.8  | 399.8  |
| 120.7  | 142.4  | 108.0  | 113.6  | 78.7   | 97.9   | 82.0   | 81.0   | 101.7  |

|        |        |        |        |        |        |        |        |        |
|--------|--------|--------|--------|--------|--------|--------|--------|--------|
| 470.1  | 394.9  | 223.2  | 16.3   | 8.7    | 13.4   | 9.3    | 2.7    | 2.0    |
| 510.2  | 466.9  | 299.7  | 7.6    | 12.4   | 6.2    | 6.1    | 2.3    | 5.2    |
| 765.4  | 993.2  | 709.1  | 220.7  | 173.7  | 193.8  | 254.4  | 230.8  | 256.9  |
| 218.3  | 227.0  | 190.7  | 80.7   | 55.0   | 67.9   | 70.2   | 70.6   | 67.6   |
| 734.4  | 1076.8 | 900.6  | 1581.1 | 1345.4 | 1559.2 | 1030.0 | 1270.6 | 1244.1 |
| 0.7    | 1.0    | 4.6    | 27.0   | 13.3   | 18.5   | 15.6   | 16.3   | 14.3   |
| 11.5   | 21.3   | 15.9   | 114.9  | 142.7  | 149.3  | 107.1  | 183.2  | 176.0  |
| 24.5   | 29.3   | 26.5   | 247.9  | 280.6  | 317.4  | 147.9  | 213.2  | 208.9  |
| 406.6  | 531.9  | 385.9  | 278.5  | 289.9  | 240.0  | 95.4   | 137.1  | 170.6  |
| 32.6   | 32.4   | 21.3   | 15.3   | 24.9   | 23.0   | 13.7   | 20.5   | 17.6   |
| 51.5   | 49.0   | 45.5   | 42.5   | 43.9   | 42.2   | 44.1   | 37.6   | 59.6   |
| 10.2   | 10.4   | 3.6    | 12.8   | 15.6   | 6.2    | 3.7    | 2.9    | 6.8    |
| 6.0    | 10.8   | 22.8   | 29.2   | 31.5   | 41.9   | 30.2   | 27.2   | 33.0   |
| 61.2   | 104.6  | 100.4  | 26.9   | 37.3   | 35.1   | 22.2   | 23.1   | 22.2   |
| 355.6  | 402.4  | 328.5  | 307.5  | 170.6  | 198.5  | 256.9  | 151.1  | 176.8  |
| 782.4  | 915.7  | 637.9  | 292.4  | 178.0  | 186.1  | 258.3  | 186.7  | 187.2  |
| 60.7   | 79.5   | 99.1   | 157.3  | 159.1  | 151.3  | 82.7   | 105.3  | 103.8  |
| 882.2  | 1157.4 | 876.2  | 152.4  | 124.6  | 129.2  | 103.0  | 75.7   | 60.6   |
| 226.4  | 326.6  | 276.7  | 27.6   | 35.1   | 40.9   | 21.7   | 34.0   | 29.3   |
| 236.4  | 349.6  | 294.1  | 44.0   | 32.0   | 45.3   | 33.0   | 38.3   | 38.8   |
| 191.8  | 211.2  | 155.5  | 138.5  | 112.4  | 127.2  | 102.4  | 103.8  | 96.0   |
| 109.1  | 167.0  | 116.4  | 86.5   | 69.2   | 61.7   | 76.6   | 74.3   | 94.6   |
| 405.9  | 485.4  | 413.9  | 188.0  | 165.5  | 145.0  | 321.3  | 355.1  | 357.9  |
| 143.3  | 225.4  | 184.8  | 45.5   | 62.0   | 76.7   | 9.7    | 36.9   | 49.7   |
| 14.7   | 25.4   | 23.1   | 41.7   | 39.9   | 35.6   | 21.7   | 23.5   | 20.2   |
| 5.8    | 1.8    | 3.0    | 4.7    | 4.8    | 4.5    | 1.3    | 1.2    | 1.7    |
| 575.2  | 603.6  | 366.0  | 274.9  | 184.3  | 226.8  | 269.6  | 234.0  | 266.8  |
| 317.3  | 449.6  | 369.2  | 471.9  | 405.9  | 449.8  | 315.3  | 433.0  | 384.4  |
| 1.4    | 4.0    | 1.3    | 44.3   | 26.2   | 27.1   | 32.3   | 34.8   | 40.5   |
| 1.7    | 0.4    | 0.3    | 151.6  | 113.3  | 108.5  | 143.9  | 135.5  | 131.0  |
| 189.9  | 249.7  | 155.1  | 269.0  | 188.6  | 198.2  | 163.5  | 165.7  | 199.2  |
| 255.6  | 332.9  | 229.2  | 245.1  | 259.9  | 269.0  | 155.6  | 253.5  | 236.7  |
| 438.4  | 592.3  | 465.7  | 687.4  | 527.0  | 595.3  | 395.8  | 438.5  | 444.1  |
| 33.2   | 31.4   | 25.3   | 32.6   | 8.2    | 14.8   | 28.1   | 14.0   | 24.3   |
| 41.8   | 48.6   | 37.1   | 35.1   | 31.2   | 43.0   | 19.3   | 15.0   | 30.7   |
| 1923.7 | 2152.6 | 1348.8 | 324.3  | 262.2  | 292.7  | 238.6  | 260.1  | 267.3  |
| 9.4    | 6.6    | 5.8    | 4.0    | 3.9    | 3.6    | 1.8    | 2.5    | 5.0    |
| 2.4    | 1.9    | 1.0    | 4.0    | 2.7    | 3.6    | 3.3    | 2.4    | 1.3    |
| 193.9  | 210.7  | 127.1  | 194.9  | 174.9  | 190.1  | 129.4  | 156.9  | 155.8  |
| 434.5  | 406.1  | 215.6  | 179.6  | 147.5  | 121.0  | 190.8  | 165.4  | 204.6  |
| 151.5  | 233.8  | 207.7  | 342.1  | 314.8  | 349.2  | 185.5  | 248.1  | 235.3  |
| 155.4  | 226.6  | 179.6  | 434.9  | 394.5  | 477.2  | 253.7  | 323.0  | 321.4  |
| 3161.4 | 3143.9 | 1653.3 | 780.0  | 593.3  | 575.1  | 772.2  | 579.0  | 659.9  |
| 27.4   | 44.0   | 17.3   | 11.8   | 4.9    | 23.3   | 4.3    | 6.6    | 11.9   |
| 7.4    | 17.7   | 8.8    | 13.4   | 10.2   | 11.3   | 4.1    | 3.2    | 6.5    |
| 9.7    | 15.8   | 11.8   | 45.7   | 37.2   | 45.9   | 36.5   | 35.7   | 40.5   |
| 445.1  | 557.1  | 295.3  | 407.8  | 295.6  | 305.6  | 391.9  | 311.6  | 360.0  |
| 382.0  | 539.6  | 402.9  | 494.4  | 368.4  | 419.2  | 551.1  | 489.3  | 589.4  |
| 71.8   | 67.6   | 64.2   | 9.6    | 12.0   | 6.3    | 11.7   | 8.3    | 6.8    |
| 160.1  | 215.7  | 165.8  | 39.3   | 39.2   | 50.9   | 89.9   | 67.8   | 82.6   |
| 2371.9 | 2785.6 | 2246.9 | 833.3  | 821.8  | 800.4  | 606.4  | 613.1  | 728.9  |
| 956.6  | 1213.7 | 994.9  | 164.5  | 163.6  | 189.4  | 75.8   | 87.5   | 85.0   |
| 144.1  | 257.2  | 124.4  | 338.0  | 239.6  | 329.3  | 107.7  | 94.3   | 112.1  |

|        |        |        |        |        |        |       |       |       |
|--------|--------|--------|--------|--------|--------|-------|-------|-------|
| 246.9  | 310.4  | 244.3  | 536.2  | 537.4  | 522.9  | 497.8 | 639.3 | 708.1 |
| 131.4  | 226.5  | 245.8  | 107.7  | 109.2  | 107.1  | 77.5  | 117.2 | 115.4 |
| 1.1    | 4.8    | 13.5   | 4.2    | 10.9   | 3.9    | 8.0   | 7.7   | 5.7   |
| 272.4  | 529.3  | 721.5  | 233.6  | 230.3  | 248.3  | 158.8 | 214.9 | 190.8 |
| 15.7   | 10.2   | 9.0    | 18.1   | 16.6   | 20.1   | 13.9  | 20.3  | 14.1  |
| 0.9    | 1.0    | 0.8    | 5.6    | 3.4    | 1.9    | 0.7   | 0.9   | 1.1   |
| 4.4    | 10.4   | 1.3    | 55.4   | 56.7   | 57.7   | 52.6  | 47.3  | 62.1  |
| 222.7  | 307.5  | 184.1  | 158.9  | 138.4  | 134.1  | 84.2  | 109.5 | 91.1  |
| 136.9  | 155.6  | 126.1  | 80.1   | 64.8   | 66.9   | 54.6  | 66.6  | 60.1  |
| 68.4   | 79.2   | 68.7   | 48.7   | 26.4   | 33.8   | 30.7  | 45.9  | 48.3  |
| 139.9  | 220.8  | 186.2  | 75.3   | 73.5   | 75.9   | 35.2  | 58.7  | 54.8  |
| 1.8    | 6.8    | 1.4    | 11.3   | 13.2   | 6.0    | 14.9  | 23.4  | 26.5  |
| 97.2   | 139.9  | 83.0   | 97.0   | 79.2   | 99.3   | 65.3  | 66.5  | 77.1  |
| 1187.0 | 1226.2 | 651.9  | 606.7  | 454.9  | 461.8  | 379.5 | 351.5 | 402.3 |
| 26.2   | 50.2   | 33.2   | 117.4  | 129.8  | 142.8  | 58.3  | 76.3  | 72.8  |
| 131.5  | 220.3  | 172.5  | 1155.6 | 1055.8 | 1283.4 | 736.4 | 792.2 | 895.2 |
| 1.0    | 12.0   | 1.9    | 20.2   | 7.7    | 28.0   | 12.5  | 7.8   | 3.4   |
| 215.9  | 232.0  | 189.6  | 177.8  | 113.0  | 147.1  | 79.8  | 65.6  | 82.8  |
| 6854.7 | 6929.3 | 6225.8 | 11.3   | 13.1   | 12.5   | 8.5   | 8.1   | 5.2   |
| 4.1    | 3.0    | 4.7    | 9.3    | 9.6    | 8.0    | 4.1   | 2.9   | 2.3   |
| 31.9   | 39.6   | 21.8   | 16.4   | 24.2   | 14.7   | 14.0  | 12.2  | 13.7  |
| 334.3  | 459.5  | 385.6  | 450.1  | 431.9  | 443.7  | 233.3 | 280.6 | 293.1 |
| 108.7  | 228.5  | 270.9  | 149.0  | 114.0  | 127.4  | 64.6  | 93.0  | 121.8 |
| 162.8  | 177.8  | 91.4   | 105.7  | 80.7   | 74.5   | 96.7  | 85.1  | 113.6 |
| 135.4  | 140.8  | 102.0  | 254.2  | 180.5  | 217.3  | 111.0 | 89.4  | 113.2 |
| 13.4   | 20.4   | 10.8   | 55.5   | 47.0   | 59.4   | 31.5  | 44.2  | 52.0  |
| 184.6  | 229.9  | 172.8  | 222.1  | 143.6  | 149.4  | 149.5 | 127.0 | 143.8 |
| 8.6    | 11.2   | 13.9   | 22.0   | 18.9   | 14.1   | 6.5   | 4.5   | 1.4   |
| 994.3  | 1253.2 | 871.4  | 383.0  | 269.9  | 305.9  | 271.3 | 212.1 | 238.7 |
| 56.2   | 64.2   | 61.0   | 362.9  | 251.1  | 285.1  | 187.5 | 174.4 | 196.6 |
| 203.2  | 235.6  | 176.5  | 220.3  | 174.6  | 191.6  | 129.6 | 109.3 | 135.3 |
| 118.4  | 130.7  | 93.0   | 93.1   | 79.6   | 87.3   | 55.7  | 48.6  | 55.2  |
| 31.6   | 40.1   | 28.8   | 15.9   | 9.7    | 9.3    | 14.3  | 12.3  | 12.4  |
| 943.9  | 1014.0 | 542.1  | 995.6  | 621.7  | 664.7  | 539.6 | 324.0 | 403.2 |
| 175.7  | 190.9  | 118.0  | 124.4  | 62.0   | 82.5   | 125.6 | 64.1  | 103.1 |
| 11.7   | 25.1   | 12.9   | 47.5   | 36.9   | 47.5   | 23.2  | 20.8  | 21.0  |
| 109.5  | 131.9  | 79.9   | 77.9   | 94.3   | 90.0   | 52.2  | 87.0  | 73.9  |
| 63.8   | 61.5   | 52.9   | 66.4   | 35.6   | 53.0   | 17.4  | 19.3  | 28.3  |
| 14.2   | 16.9   | 4.4    | 23.1   | 20.3   | 27.7   | 12.7  | 9.3   | 18.0  |
| 3.8    | 3.0    | 0.7    | 4.9    | 9.3    | 6.6    | 3.1   | 0.3   | 0.9   |
| 9.9    | 18.9   | 9.0    | 12.3   | 10.1   | 16.0   | 9.0   | 19.1  | 24.3  |
| 16.4   | 23.1   | 19.2   | 18.1   | 9.3    | 9.0    | 17.1  | 5.0   | 12.5  |
| 30.2   | 31.0   | 23.4   | 33.1   | 18.7   | 26.7   | 22.7  | 17.1  | 16.8  |
| 85.3   | 127.3  | 108.8  | 91.4   | 75.8   | 85.0   | 70.5  | 66.9  | 51.5  |
| 128.7  | 131.7  | 70.3   | 96.1   | 95.5   | 86.8   | 92.9  | 91.1  | 110.6 |
| 34.1   | 32.7   | 30.7   | 16.9   | 6.8    | 20.0   | 19.8  | 7.4   | 11.1  |
| 60.8   | 117.3  | 128.1  | 7.2    | 13.6   | 20.6   | 13.9  | 34.2  | 54.9  |
| 1.3    | 1.4    | 1.3    | 2.2    | 2.4    | 3.1    | 1.1   | 1.7   | 1.4   |
| 68.7   | 88.3   | 87.7   | 187.4  | 136.1  | 163.5  | 106.9 | 84.3  | 101.8 |
| 14.9   | 6.0    | 8.3    | 57.8   | 40.4   | 59.6   | 30.0  | 35.8  | 34.8  |
| 244.5  | 309.4  | 235.3  | 154.0  | 110.5  | 135.1  | 84.6  | 68.1  | 79.2  |
| 8.4    | 11.9   | 8.6    | 11.9   | 6.5    | 6.5    | 3.6   | 6.8   | 5.4   |
| 12.7   | 19.4   | 18.2   | 60.5   | 66.8   | 57.8   | 55.1  | 54.0  | 57.9  |

|        |        |        |        |        |        |        |        |        |
|--------|--------|--------|--------|--------|--------|--------|--------|--------|
| 2.9    | 16.2   | 4.2    | 15.5   | 20.8   | 8.5    | 14.2   | 10.9   | 6.4    |
| 55.2   | 77.6   | 35.2   | 21.1   | 9.2    | 11.8   | 10.7   | 8.3    | 7.2    |
| 223.7  | 225.9  | 134.1  | 347.5  | 253.3  | 353.6  | 178.7  | 213.6  | 188.7  |
| 11.9   | 21.3   | 18.0   | 13.6   | 15.6   | 12.7   | 6.1    | 2.9    | 7.6    |
| 20.3   | 16.3   | 12.0   | 17.9   | 18.2   | 14.5   | 18.0   | 23.8   | 18.0   |
| 346.8  | 419.5  | 305.8  | 461.7  | 463.9  | 519.5  | 287.8  | 376.8  | 391.6  |
| 73.8   | 93.6   | 93.8   | 137.7  | 128.2  | 165.5  | 72.6   | 90.3   | 78.2   |
| 166.0  | 193.0  | 155.3  | 67.4   | 50.8   | 56.4   | 53.5   | 62.8   | 61.0   |
| 2.3    | 4.3    | 1.2    | 15.0   | 5.4    | 7.6    | 2.6    | 1.7    | 2.3    |
| 96.2   | 121.0  | 84.5   | 255.3  | 179.7  | 211.3  | 293.0  | 248.9  | 280.9  |
| 179.7  | 194.3  | 156.2  | 771.2  | 622.4  | 683.3  | 510.3  | 424.0  | 508.7  |
| 124.6  | 151.0  | 121.6  | 77.4   | 58.7   | 77.5   | 41.3   | 37.4   | 47.6   |
| 248.7  | 263.4  | 193.2  | 137.6  | 137.5  | 132.5  | 105.1  | 93.9   | 86.2   |
| 25.9   | 24.7   | 28.3   | 424.8  | 295.9  | 273.9  | 248.0  | 162.3  | 239.2  |
| 326.9  | 426.1  | 242.5  | 114.7  | 103.5  | 121.3  | 123.7  | 124.8  | 123.7  |
| 4.7    | 23.7   | 24.4   | 6.4    | 2.5    | 7.4    | 1.2    | 2.6    | 2.3    |
| 322.0  | 569.5  | 499.9  | 224.5  | 214.4  | 211.6  | 263.9  | 460.5  | 374.3  |
| 398.2  | 505.7  | 348.0  | 344.9  | 336.0  | 379.4  | 248.6  | 294.4  | 334.7  |
| 16.5   | 4.8    | 6.6    | 5.8    | 7.2    | 4.6    | 2.3    | 13.6   | 4.0    |
| 614.3  | 596.5  | 322.4  | 161.0  | 91.6   | 121.9  | 222.7  | 127.1  | 149.1  |
| 1239.3 | 1176.5 | 610.0  | 146.9  | 87.1   | 89.1   | 430.8  | 276.2  | 293.3  |
| 8.0    | 1.9    | 1.7    | 11.6   | 5.1    | 9.4    | 3.7    | 2.6    | 2.2    |
| 9.5    | 34.3   | 27.1   | 3.4    | 2.5    | 1.9    | 1.8    | 1.2    | 1.1    |
| 448.6  | 882.8  | 772.4  | 71.8   | 51.1   | 45.8   | 65.5   | 28.6   | 55.7   |
| 12.0   | 21.1   | 15.0   | 16.0   | 19.6   | 24.6   | 15.9   | 12.0   | 16.1   |
| 315.0  | 490.8  | 392.1  | 500.7  | 386.8  | 448.6  | 264.5  | 230.8  | 227.4  |
| 77.7   | 162.8  | 135.1  | 103.6  | 85.5   | 120.6  | 72.8   | 109.9  | 109.8  |
| 151.0  | 174.6  | 140.2  | 167.0  | 143.2  | 178.4  | 123.0  | 128.4  | 144.9  |
| 209.0  | 254.4  | 219.2  | 255.0  | 223.5  | 249.7  | 158.2  | 163.2  | 167.5  |
| 8.9    | 12.0   | 7.0    | 17.8   | 13.6   | 15.1   | 6.4    | 11.3   | 5.5    |
| 104.4  | 118.9  | 128.5  | 17.6   | 12.4   | 19.5   | 10.9   | 8.0    | 4.3    |
| 567.4  | 276.7  | 133.6  | 48.9   | 40.5   | 37.8   | 24.0   | 13.3   | 21.8   |
| 20.0   | 26.8   | 20.1   | 24.2   | 22.9   | 24.6   | 16.2   | 17.0   | 21.5   |
| 2.9    | 9.3    | 10.2   | 53.2   | 28.0   | 25.3   | 17.2   | 18.9   | 23.0   |
| 1.7    | 1.8    | 1.4    | 11.9   | 10.1   | 11.3   | 2.1    | 5.2    | 3.3    |
| 5.0    | 6.1    | 12.9   | 9.4    | 4.7    | 6.9    | 4.6    | 2.0    | 1.9    |
| 111.9  | 178.5  | 176.6  | 82.4   | 98.2   | 112.2  | 45.2   | 89.9   | 70.1   |
| 6852.9 | 8058.6 | 8421.2 | 8629.9 | 8180.5 | 8531.9 | 6068.1 | 6207.3 | 6487.0 |
| 1466.6 | 2091.6 | 2266.5 | 2518.7 | 2411.6 | 2575.8 | 1931.3 | 2197.9 | 2322.5 |
| 5060.2 | 4524.8 | 2081.4 | 2235.0 | 791.9  | 906.3  | 980.6  | 392.7  | 528.0  |
| 43.2   | 46.5   | 24.1   | 5.7    | 4.7    | 8.3    | 0.7    | 2.2    | 4.5    |
| 13.0   | 14.1   | 7.6    | 4.1    | 3.4    | 10.6   | 1.3    | 10.3   | 2.4    |
| 52.5   | 51.5   | 21.2   | 58.0   | 32.5   | 46.2   | 42.9   | 28.8   | 51.6   |
| 115.6  | 113.5  | 62.3   | 108.8  | 70.5   | 111.6  | 84.5   | 62.7   | 92.1   |
| 52.0   | 65.7   | 60.0   | 146.8  | 125.5  | 136.2  | 111.5  | 123.7  | 125.1  |
| 18.1   | 18.3   | 7.5    | 25.0   | 11.2   | 11.7   | 10.7   | 11.0   | 10.8   |
| 952.1  | 882.8  | 426.4  | 447.3  | 271.6  | 306.0  | 335.1  | 258.3  | 275.4  |
| 185.2  | 328.4  | 196.4  | 348.7  | 245.2  | 255.8  | 200.4  | 150.0  | 207.4  |
| 68.9   | 157.7  | 224.0  | 126.0  | 153.9  | 184.1  | 78.5   | 100.8  | 96.3   |
| 10.0   | 22.4   | 21.4   | 31.7   | 23.4   | 23.9   | 2.8    | 11.2   | 14.0   |
| 45.9   | 80.0   | 54.9   | 119.5  | 104.6  | 127.0  | 86.4   | 79.5   | 81.1   |
| 3.4    | 4.9    | 5.2    | 44.4   | 34.1   | 34.8   | 32.4   | 26.7   | 34.1   |
| 899.7  | 1240.2 | 1075.7 | 294.3  | 328.2  | 318.8  | 194.8  | 342.1  | 300.2  |

|        |        |        |        |        |        |        |        |        |
|--------|--------|--------|--------|--------|--------|--------|--------|--------|
| 1318.4 | 1782.7 | 1518.1 | 359.3  | 389.3  | 395.4  | 296.6  | 459.8  | 412.9  |
| 748.7  | 1134.7 | 800.0  | 31.4   | 16.6   | 26.8   | 14.3   | 16.8   | 20.0   |
| 4.4    | 1.4    | 7.8    | 17.0   | 11.3   | 11.8   | 16.3   | 11.1   | 14.6   |
| 642.9  | 942.0  | 789.8  | 558.2  | 533.6  | 544.1  | 463.6  | 516.7  | 601.2  |
| 22.5   | 23.0   | 8.5    | 1010.1 | 890.7  | 932.4  | 698.7  | 545.3  | 764.7  |
| 83.9   | 49.9   | 17.7   | 7.7    | 15.5   | 8.9    | 3.5    | 5.4    | 5.5    |
| 5.0    | 7.4    | 6.2    | 3.6    | 10.3   | 19.4   | 8.0    | 7.4    | 1.6    |
| 39.0   | 44.3   | 32.9   | 37.1   | 29.4   | 42.0   | 38.7   | 42.8   | 41.9   |
| 4.4    | 8.0    | 0.2    | 2.4    | 3.1    | 4.8    | 1.2    | 2.4    | 5.4    |
| 814.5  | 996.6  | 728.1  | 929.8  | 737.3  | 792.8  | 571.8  | 579.8  | 652.6  |
| 552.5  | 635.9  | 400.3  | 160.7  | 128.7  | 140.2  | 134.1  | 129.8  | 142.8  |
| 241.0  | 291.6  | 201.6  | 158.8  | 122.3  | 127.5  | 77.4   | 87.3   | 88.7   |
| 243.3  | 248.5  | 191.5  | 41.2   | 46.6   | 51.1   | 58.7   | 73.6   | 73.6   |
| 0.8    | 1.9    | 2.7    | 23.5   | 6.6    | 4.5    | 14.8   | 7.6    | 7.3    |
| 19.6   | 11.2   | 11.1   | 20.6   | 13.4   | 19.7   | 7.1    | 8.9    | 11.4   |
| 3670.1 | 2049.7 | 941.3  | 422.5  | 258.3  | 236.0  | 625.7  | 240.2  | 442.1  |
| 184.2  | 205.0  | 147.9  | 108.0  | 60.6   | 72.0   | 72.4   | 49.5   | 51.4   |
| 107.6  | 158.6  | 89.7   | 123.2  | 101.6  | 105.2  | 92.4   | 84.3   | 95.8   |
| 2210.2 | 2980.1 | 2557.8 | 2438.2 | 2859.1 | 2869.7 | 1864.6 | 2212.7 | 2354.6 |
| 15.4   | 46.7   | 27.7   | 6.9    | 2.5    | 8.0    | 6.9    | 2.5    | 4.3    |
| 245.1  | 254.9  | 137.5  | 135.9  | 95.9   | 96.6   | 61.3   | 54.9   | 56.4   |
| 1.9    | 3.1    | 6.0    | 13.1   | 11.5   | 9.2    | 2.3    | 15.0   | 7.6    |
| 94.9   | 138.4  | 75.6   | 73.6   | 71.7   | 59.3   | 72.8   | 66.6   | 98.6   |
| 48.3   | 55.4   | 45.4   | 12.9   | 11.7   | 7.5    | 36.4   | 25.5   | 25.1   |
| 11.0   | 8.9    | 4.6    | 461.2  | 464.6  | 553.8  | 220.6  | 263.8  | 328.6  |
| 819.0  | 1064.9 | 853.9  | 444.2  | 350.7  | 433.0  | 353.5  | 325.7  | 362.5  |
| 403.0  | 368.1  | 143.3  | 43.0   | 37.9   | 36.3   | 20.0   | 44.6   | 41.6   |
| 27.5   | 28.1   | 10.6   | 10.7   | 3.5    | 11.5   | 11.4   | 4.5    | 6.2    |
| 307.7  | 322.8  | 243.8  | 494.4  | 361.0  | 392.9  | 320.0  | 306.7  | 350.8  |
| 46.0   | 59.4   | 67.3   | 38.0   | 17.2   | 16.6   | 16.6   | 10.9   | 24.5   |
| 5.3    | 5.7    | 6.9    | 7.0    | 1.3    | 1.9    | 7.2    | 7.5    | 4.2    |
| 132.7  | 116.3  | 66.8   | 118.9  | 108.5  | 99.1   | 70.5   | 77.3   | 69.2   |
| 2.8    | 4.5    | 5.0    | 7.0    | 7.0    | 9.5    | 1.2    | 1.7    | 1.5    |
| 77.4   | 116.5  | 69.6   | 44.5   | 32.2   | 30.2   | 36.7   | 24.5   | 31.1   |
| 44.8   | 60.4   | 44.5   | 4.6    | 8.3    | 11.5   | 9.1    | 16.8   | 21.6   |
| 153.4  | 229.3  | 217.0  | 31.2   | 28.8   | 46.1   | 37.9   | 32.7   | 37.6   |
| 1968.1 | 1668.8 | 542.9  | 629.4  | 430.5  | 506.2  | 338.1  | 227.7  | 278.5  |
| 28.4   | 30.9   | 22.5   | 48.7   | 45.1   | 39.8   | 28.2   | 17.6   | 26.1   |
| 41.2   | 35.0   | 21.7   | 29.0   | 39.5   | 43.2   | 17.8   | 17.5   | 27.0   |
| 2.4    | 2.6    | 2.8    | 8.5    | 5.5    | 13.2   | 1.5    | 5.2    | 1.9    |
| 3.3    | 1.7    | 1.6    | 8.6    | 3.7    | 7.3    | 5.0    | 3.6    | 4.0    |
| 6.3    | 11.1   | 4.7    | 39.0   | 36.3   | 44.3   | 10.4   | 3.4    | 14.5   |
| 509.7  | 785.2  | 728.1  | 452.6  | 418.1  | 447.5  | 255.0  | 331.1  | 316.3  |
| 297.9  | 416.0  | 140.7  | 332.3  | 145.4  | 153.4  | 135.5  | 79.8   | 85.2   |
| 131.5  | 147.1  | 101.3  | 125.3  | 135.5  | 140.1  | 87.4   | 96.6   | 107.3  |
| 3.5    | 4.8    | 2.7    | 95.3   | 68.4   | 72.1   | 38.3   | 36.5   | 47.4   |
| 101.3  | 123.9  | 89.3   | 53.2   | 56.9   | 55.0   | 60.9   | 74.1   | 64.3   |
| 1526.4 | 1482.1 | 847.2  | 722.2  | 436.7  | 502.9  | 231.0  | 179.9  | 234.0  |
| 181.3  | 214.5  | 121.9  | 74.1   | 64.0   | 74.9   | 57.9   | 63.9   | 63.1   |
| 140.6  | 155.2  | 87.3   | 90.6   | 53.6   | 64.1   | 70.4   | 51.7   | 68.5   |
| 10.7   | 10.2   | 16.7   | 18.3   | 21.2   | 27.4   | 14.2   | 20.4   | 20.5   |
| 3.8    | 1.5    | 7.4    | 3.8    | 5.1    | 6.7    | 9.9    | 6.5    | 1.3    |
| 12.2   | 22.1   | 4.3    | 31.1   | 23.3   | 18.9   | 11.1   | 14.7   | 12.8   |



|        |        |        |        |        |        |       |       |        |
|--------|--------|--------|--------|--------|--------|-------|-------|--------|
| 10.1   | 11.6   | 3.9    | 8.4    | 10.4   | 11.7   | 16.3  | 4.6   | 5.5    |
| 3.9    | 14.1   | 4.8    | 6.0    | 6.8    | 10.8   | 17.5  | 4.2   | 4.9    |
| 4.6    | 28.8   | 52.0   | 126.3  | 120.2  | 149.8  | 137.5 | 190.2 | 203.8  |
| 742.8  | 1053.0 | 816.6  | 420.3  | 349.0  | 371.1  | 281.6 | 301.7 | 297.3  |
| 89.8   | 122.8  | 130.5  | 38.5   | 56.8   | 78.6   | 30.4  | 80.1  | 51.1   |
| 979.7  | 1763.3 | 2466.6 | 7.2    | 16.4   | 9.0    | 9.2   | 1.9   | 7.8    |
| 17.8   | 39.5   | 35.5   | 52.9   | 37.4   | 53.3   | 29.8  | 23.7  | 40.6   |
| 543.7  | 524.7  | 288.1  | 1400.1 | 871.1  | 889.7  | 873.7 | 579.6 | 686.1  |
| 32.1   | 83.2   | 27.5   | 231.6  | 173.1  | 184.3  | 170.6 | 130.4 | 146.9  |
| 23.3   | 32.7   | 15.3   | 28.0   | 14.9   | 19.5   | 19.1  | 5.4   | 14.5   |
| 1924.6 | 1969.9 | 1095.6 | 853.2  | 638.5  | 751.9  | 540.1 | 526.2 | 626.2  |
| 1108.5 | 1158.0 | 619.5  | 273.6  | 198.8  | 239.1  | 264.9 | 178.9 | 252.8  |
| 2.5    | 7.0    | 1.8    | 4.5    | 5.2    | 3.7    | 2.2   | 2.4   | 2.3    |
| 1.3    | 2.3    | 1.5    | 5.8    | 3.9    | 5.2    | 1.4   | 1.2   | 1.8    |
| 151.4  | 167.5  | 100.0  | 83.6   | 64.1   | 85.1   | 56.7  | 47.2  | 53.5   |
| 108.5  | 130.2  | 94.6   | 6.9    | 4.6    | 7.8    | 6.1   | 20.8  | 14.4   |
| 219.4  | 266.4  | 300.1  | 179.6  | 163.9  | 229.5  | 96.1  | 151.1 | 141.5  |
| 2.6    | 10.6   | 6.6    | 8.4    | 9.2    | 5.5    | 4.1   | 3.8   | 6.0    |
| 1816.6 | 1848.5 | 1494.0 | 1244.7 | 1069.6 | 1143.0 | 922.4 | 908.2 | 1013.1 |
| 1468.8 | 1597.2 | 1028.9 | 909.0  | 717.3  | 760.7  | 734.3 | 699.2 | 750.4  |
| 283.4  | 422.9  | 286.7  | 190.9  | 141.7  | 166.0  | 152.2 | 148.5 | 139.0  |
| 7.8    | 11.9   | 11.7   | 68.8   | 40.0   | 59.4   | 27.8  | 18.6  | 22.8   |
| 481.5  | 853.5  | 816.5  | 430.3  | 366.6  | 406.2  | 258.3 | 358.6 | 339.0  |
| 143.7  | 200.5  | 177.9  | 227.8  | 199.0  | 187.1  | 316.3 | 309.9 | 308.6  |
| 7.0    | 11.2   | 14.3   | 5.0    | 3.9    | 13.3   | 1.0   | 2.6   | 1.1    |
| 8.2    | 6.7    | 10.2   | 4.7    | 2.9    | 11.3   | 4.1   | 1.2   | 1.4    |
| 100.7  | 125.3  | 83.0   | 399.1  | 318.9  | 374.2  | 247.9 | 266.4 | 253.8  |
| 33.5   | 32.2   | 40.6   | 10.1   | 10.1   | 23.7   | 12.9  | 9.5   | 13.3   |
| 6.4    | 5.8    | 15.7   | 184.6  | 160.9  | 167.3  | 107.5 | 109.6 | 126.9  |
| 4.3    | 1.3    | 1.8    | 43.8   | 42.1   | 42.1   | 17.7  | 24.2  | 32.6   |
| 153.3  | 245.0  | 221.6  | 90.4   | 66.4   | 100.4  | 135.1 | 135.2 | 167.7  |
| 576.1  | 738.8  | 629.2  | 546.6  | 471.6  | 579.7  | 319.3 | 282.7 | 338.8  |
| 54.9   | 84.8   | 62.8   | 70.4   | 53.4   | 67.6   | 49.6  | 48.4  | 54.4   |
| 8.6    | 9.2    | 8.0    | 9.1    | 7.9    | 10.7   | 5.3   | 6.5   | 6.3    |
| 23.8   | 34.6   | 43.1   | 6.4    | 23.6   | 21.0   | 49.6  | 50.4  | 49.7   |
| 2.7    | 2.1    | 3.1    | 13.3   | 19.5   | 6.9    | 5.1   | 3.2   | 3.1    |
| 164.8  | 245.8  | 219.0  | 188.4  | 168.2  | 187.5  | 253.4 | 265.0 | 290.3  |
| 186.1  | 302.8  | 290.6  | 11.7   | 7.8    | 9.6    | 3.3   | 2.9   | 4.7    |
| 44.1   | 93.5   | 82.0   | 43.2   | 16.8   | 19.8   | 3.3   | 3.2   | 3.3    |
| 221.4  | 165.5  | 39.9   | 8.5    | 7.4    | 12.5   | 3.4   | 2.5   | 5.2    |
| 244.5  | 280.7  | 249.2  | 160.4  | 141.4  | 163.8  | 97.2  | 108.4 | 131.4  |
| 589.0  | 520.0  | 59.2   | 17.6   | 24.3   | 25.7   | 16.3  | 17.5  | 18.2   |
| 216.6  | 138.4  | 54.5   | 103.6  | 86.0   | 75.2   | 158.1 | 123.4 | 163.3  |
| 136.6  | 166.5  | 90.4   | 253.7  | 235.3  | 258.2  | 221.9 | 192.9 | 207.4  |
| 5.3    | 24.2   | 26.2   | 8.7    | 10.0   | 4.2    | 11.4  | 2.9   | 11.8   |
| 10.0   | 1.8    | 9.4    | 9.8    | 9.7    | 14.9   | 4.3   | 8.2   | 4.4    |
| 2.4    | 3.4    | 2.4    | 5.7    | 5.1    | 4.5    | 7.7   | 6.8   | 2.6    |
| 8.4    | 4.2    | 5.7    | 4.3    | 6.6    | 9.0    | 2.4   | 4.6   | 2.7    |
| 362.3  | 537.3  | 443.5  | 68.6   | 65.1   | 69.5   | 47.1  | 66.8  | 74.1   |
| 841.9  | 958.6  | 462.2  | 223.2  | 119.0  | 119.5  | 161.3 | 82.0  | 91.8   |
| 331.0  | 330.4  | 149.9  | 11.8   | 10.8   | 6.5    | 1.9   | 5.2   | 4.4    |
| 117.4  | 147.1  | 68.6   | 7.2    | 12.4   | 8.9    | 4.4   | 6.3   | 14.0   |
| 192.2  | 351.2  | 307.8  | 46.6   | 50.5   | 55.5   | 57.6  | 94.4  | 85.3   |

|        |        |        |        |        |        |        |        |        |
|--------|--------|--------|--------|--------|--------|--------|--------|--------|
| 377.9  | 478.3  | 291.3  | 218.2  | 176.7  | 228.8  | 283.3  | 212.7  | 256.6  |
| 816.4  | 904.3  | 607.9  | 611.5  | 350.3  | 486.3  | 506.7  | 385.7  | 452.2  |
| 16.0   | 17.3   | 10.1   | 80.1   | 70.2   | 84.4   | 41.7   | 63.5   | 56.9   |
| 353.7  | 375.6  | 335.7  | 167.9  | 120.1  | 138.4  | 118.8  | 134.5  | 136.6  |
| 1849.4 | 1801.6 | 1181.6 | 1580.7 | 1239.2 | 1479.4 | 1065.5 | 990.4  | 1112.0 |
| 81.6   | 93.4   | 45.2   | 8.9    | 4.9    | 5.3    | 6.6    | 6.6    | 7.9    |
| 2.3    | 2.4    | 1.9    | 7.1    | 4.0    | 10.2   | 2.3    | 2.3    | 2.8    |
| 463.6  | 558.3  | 349.8  | 88.9   | 67.7   | 79.8   | 77.6   | 74.4   | 73.3   |
| 935.3  | 1173.5 | 749.9  | 231.9  | 163.5  | 183.8  | 158.7  | 164.9  | 185.8  |
| 0.9    | 1.4    | 0.9    | 2.2    | 1.6    | 1.7    | 0.8    | 0.7    | 1.2    |
| 1134.4 | 1194.4 | 870.3  | 4.8    | 3.5    | 3.5    | 1.1    | 1.3    | 2.9    |
| 10.8   | 19.2   | 6.9    | 7.6    | 7.4    | 6.4    | 16.2   | 11.3   | 7.1    |
| 118.5  | 124.8  | 128.7  | 117.2  | 95.6   | 105.4  | 68.8   | 74.6   | 74.4   |
| 7.0    | 8.5    | 3.9    | 13.3   | 10.0   | 7.3    | 0.9    | 0.7    | 3.6    |
| 1.0    | 0.9    | 2.3    | 6.4    | 6.3    | 5.7    | 3.1    | 9.7    | 10.7   |
| 36.4   | 35.7   | 28.6   | 42.0   | 41.9   | 47.6   | 38.7   | 34.4   | 47.2   |
| 428.7  | 709.6  | 826.1  | 997.4  | 1428.5 | 1640.6 | 801.2  | 1331.5 | 1327.0 |
| 68.7   | 116.2  | 89.6   | 127.5  | 125.7  | 144.4  | 85.2   | 98.9   | 92.9   |
| 35.9   | 55.8   | 58.6   | 56.0   | 64.0   | 64.0   | 45.9   | 68.6   | 65.9   |
| 10.8   | 10.2   | 7.0    | 11.5   | 12.6   | 6.6    | 10.8   | 7.4    | 3.0    |
| 5.7    | 1.5    | 0.6    | 4.8    | 2.4    | 3.5    | 2.0    | 3.5    | 1.3    |
| 30.0   | 75.7   | 73.3   | 1089.9 | 526.8  | 688.5  | 474.3  | 356.5  | 414.4  |
| 37.6   | 46.2   | 43.0   | 138.9  | 190.1  | 179.5  | 86.5   | 144.2  | 151.7  |
| 7.5    | 4.8    | 2.6    | 4.6    | 5.2    | 6.4    | 3.6    | 4.0    | 4.2    |
| 107.8  | 156.8  | 165.6  | 192.8  | 130.1  | 173.8  | 128.5  | 71.7   | 108.4  |
| 54.7   | 54.8   | 53.7   | 46.6   | 42.7   | 44.3   | 45.1   | 51.7   | 63.7   |
| 348.4  | 324.1  | 207.5  | 41.6   | 25.6   | 22.3   | 37.5   | 18.8   | 24.8   |
| 71.7   | 112.8  | 82.3   | 51.8   | 45.0   | 54.9   | 72.7   | 67.2   | 71.1   |
| 101.9  | 127.9  | 106.3  | 119.9  | 99.9   | 108.6  | 56.6   | 50.2   | 68.4   |
| 11.2   | 8.9    | 5.2    | 10.7   | 4.0    | 4.8    | 2.9    | 3.9    | 8.4    |
| 129.8  | 210.2  | 191.9  | 101.7  | 78.1   | 74.7   | 128.9  | 124.7  | 144.3  |
| 47.4   | 60.8   | 35.8   | 27.5   | 12.5   | 30.6   | 16.9   | 13.7   | 24.0   |
| 410.6  | 436.7  | 238.1  | 126.5  | 97.5   | 121.3  | 88.9   | 68.4   | 73.6   |
| 1.3    | 1.4    | 4.1    | 15.9   | 10.4   | 14.4   | 5.1    | 8.7    | 10.9   |
| 206.1  | 242.3  | 178.2  | 139.3  | 130.6  | 138.0  | 57.6   | 75.5   | 81.4   |
| 56.6   | 118.1  | 67.0   | 9.1    | 2.0    | 1.9    | 1.1    | 5.7    | 1.1    |
| 12.7   | 13.6   | 9.8    | 10.7   | 13.8   | 7.7    | 17.5   | 4.2    | 9.3    |
| 3964.3 | 4896.9 | 3070.7 | 1924.6 | 946.1  | 1011.2 | 922.4  | 566.1  | 637.0  |
| 8.0    | 3.8    | 3.8    | 21.1   | 6.2    | 3.2    | 8.4    | 4.8    | 10.7   |
| 65.7   | 113.7  | 85.3   | 81.0   | 61.6   | 65.5   | 53.7   | 59.3   | 70.1   |
| 125.8  | 168.7  | 127.6  | 64.5   | 46.2   | 49.3   | 93.7   | 75.6   | 83.8   |
| 9.5    | 3.0    | 3.8    | 22.8   | 14.7   | 5.7    | 9.3    | 8.9    | 14.5   |
| 70.5   | 86.0   | 61.6   | 8.2    | 27.1   | 15.0   | 3.7    | 4.5    | 11.6   |
| 74.1   | 103.1  | 62.3   | 178.3  | 149.8  | 166.5  | 103.5  | 115.6  | 124.6  |
| 1122.8 | 971.6  | 616.6  | 341.0  | 275.1  | 329.5  | 243.3  | 206.7  | 230.5  |
| 35.1   | 46.1   | 52.4   | 19.9   | 24.1   | 15.3   | 4.9    | 7.4    | 12.7   |
| 148.2  | 183.5  | 158.4  | 98.0   | 86.6   | 117.6  | 86.5   | 77.7   | 108.0  |
| 8.3    | 9.5    | 5.2    | 5.6    | 7.7    | 15.0   | 5.7    | 8.5    | 7.9    |
| 105.6  | 142.8  | 88.0   | 76.0   | 69.8   | 80.3   | 93.4   | 135.8  | 119.6  |
| 902.0  | 943.2  | 569.7  | 2052.2 | 1673.9 | 1790.1 | 1314.1 | 1147.7 | 1437.2 |
| 498.8  | 558.8  | 353.5  | 374.4  | 341.1  | 347.7  | 264.0  | 202.8  | 281.0  |
| 16.5   | 7.8    | 10.1   | 64.0   | 49.7   | 61.6   | 42.4   | 41.5   | 37.1   |
| 82.4   | 107.1  | 84.9   | 173.8  | 171.6  | 163.8  | 134.5  | 179.0  | 188.5  |

|        |        |        |        |        |        |       |       |       |
|--------|--------|--------|--------|--------|--------|-------|-------|-------|
| 25.9   | 35.6   | 18.4   | 49.2   | 41.9   | 46.8   | 33.9  | 25.8  | 40.4  |
| 5.5    | 13.9   | 23.9   | 3.4    | 2.1    | 5.9    | 7.8   | 1.6   | 2.6   |
| 131.2  | 191.9  | 222.9  | 7.1    | 3.8    | 3.9    | 13.1  | 3.3   | 4.9   |
| 27.3   | 28.6   | 25.7   | 29.2   | 25.5   | 27.0   | 18.7  | 14.4  | 17.1  |
| 24.4   | 23.8   | 15.4   | 8.7    | 6.3    | 11.5   | 20.5  | 16.8  | 18.1  |
| 736.9  | 837.4  | 640.2  | 625.1  | 513.2  | 622.4  | 593.3 | 562.6 | 586.4 |
| 146.4  | 191.5  | 154.2  | 239.7  | 179.6  | 232.7  | 201.4 | 206.1 | 230.9 |
| 6.4    | 5.9    | 7.1    | 7.9    | 2.2    | 4.2    | 2.1   | 4.0   | 4.4   |
| 9.3    | 4.6    | 5.9    | 71.0   | 50.2   | 82.2   | 34.3  | 34.4  | 33.3  |
| 15.5   | 14.2   | 16.6   | 63.4   | 51.2   | 49.9   | 10.2  | 16.5  | 15.1  |
| 65.7   | 121.2  | 137.1  | 50.6   | 51.4   | 63.2   | 38.8  | 75.5  | 60.1  |
| 2.3    | 2.8    | 1.3    | 8.3    | 2.8    | 7.0    | 3.4   | 2.2   | 3.2   |
| 1.2    | 3.5    | 0.5    | 2.7    | 1.8    | 1.3    | 0.6   | 0.4   | 2.5   |
| 14.8   | 19.2   | 19.1   | 33.9   | 26.0   | 29.9   | 21.6  | 16.0  | 23.6  |
| 31.0   | 41.8   | 24.2   | 80.3   | 87.4   | 79.4   | 37.1  | 55.4  | 46.1  |
| 23.2   | 40.6   | 28.3   | 45.9   | 46.4   | 60.7   | 30.8  | 34.0  | 40.7  |
| 53.2   | 53.8   | 41.3   | 51.7   | 44.7   | 45.9   | 31.1  | 23.0  | 36.3  |
| 131.3  | 135.1  | 74.1   | 80.3   | 59.6   | 67.2   | 53.9  | 44.7  | 49.4  |
| 7.4    | 3.8    | 8.5    | 21.0   | 25.6   | 24.8   | 28.6  | 32.8  | 35.3  |
| 52.6   | 82.7   | 58.0   | 117.8  | 101.4  | 119.0  | 150.4 | 134.3 | 136.7 |
| 4.1    | 6.8    | 4.7    | 9.7    | 4.5    | 10.2   | 4.7   | 2.1   | 2.9   |
| 73.3   | 110.2  | 62.8   | 39.9   | 40.4   | 47.4   | 33.3  | 38.6  | 29.3  |
| 191.1  | 439.2  | 508.6  | 35.4   | 20.3   | 18.5   | 20.7  | 10.6  | 16.6  |
| 1483.4 | 1674.2 | 872.1  | 1585.4 | 1229.1 | 1447.4 | 853.1 | 794.9 | 938.8 |
| 67.2   | 106.0  | 74.3   | 131.5  | 108.1  | 109.0  | 41.2  | 29.6  | 49.8  |
| 73.1   | 80.6   | 72.5   | 46.4   | 69.4   | 68.3   | 18.1  | 60.9  | 55.2  |
| 2840.9 | 3326.0 | 2111.5 | 1054.9 | 777.2  | 832.5  | 819.1 | 746.3 | 805.7 |
| 11.2   | 17.6   | 14.6   | 16.1   | 11.7   | 12.8   | 6.4   | 10.7  | 13.2  |
| 1.1    | 16.0   | 4.4    | 2.8    | 2.3    | 2.5    | 1.1   | 0.9   | 3.3   |
| 2.6    | 3.5    | 3.1    | 7.3    | 3.1    | 2.4    | 1.6   | 1.9   | 1.3   |
| 1.6    | 2.9    | 2.0    | 5.5    | 1.6    | 7.0    | 1.5   | 1.7   | 1.7   |
| 1.7    | 2.6    | 2.4    | 9.7    | 8.1    | 9.5    | 1.1   | 2.4   | 1.4   |
| 113.5  | 205.2  | 119.9  | 99.9   | 55.3   | 70.5   | 162.4 | 93.8  | 105.7 |
| 23.1   | 8.4    | 11.7   | 6.7    | 9.7    | 8.2    | 4.1   | 13.0  | 5.1   |
| 5.5    | 5.8    | 1.8    | 6.6    | 4.4    | 8.4    | 6.5   | 6.3   | 5.9   |
| 1.6    | 1.4    | 0.9    | 4.7    | 2.0    | 2.3    | 2.0   | 1.2   | 1.5   |
| 149.8  | 235.7  | 164.4  | 29.9   | 33.6   | 40.4   | 17.4  | 15.0  | 21.3  |
| 7.6    | 5.8    | 5.4    | 27.1   | 21.0   | 13.8   | 6.1   | 6.4   | 5.9   |
| 0.9    | 6.8    | 5.0    | 3.9    | 4.1    | 8.5    | 5.9   | 1.5   | 4.1   |
| 1.3    | 1.7    | 1.2    | 15.4   | 20.1   | 15.7   | 6.7   | 4.2   | 9.4   |
| 1.9    | 5.7    | 2.9    | 38.5   | 32.2   | 38.0   | 18.0  | 12.1  | 22.9  |
| 50.2   | 84.1   | 69.3   | 42.7   | 38.5   | 43.5   | 48.5  | 60.5  | 61.7  |
| 6.1    | 7.1    | 2.2    | 10.9   | 15.4   | 9.0    | 10.7  | 5.9   | 11.0  |
| 7.6    | 21.4   | 12.1   | 10.6   | 17.7   | 18.3   | 2.6   | 16.9  | 11.0  |
| 77.6   | 90.7   | 78.9   | 31.0   | 29.1   | 14.2   | 13.9  | 12.5  | 15.5  |
| 43.7   | 70.3   | 33.9   | 11.3   | 8.7    | 11.2   | 7.2   | 6.3   | 2.9   |
| 21.1   | 43.4   | 18.5   | 14.5   | 13.3   | 15.5   | 11.3  | 9.6   | 7.3   |
| 23.6   | 20.9   | 5.2    | 22.9   | 17.3   | 7.1    | 9.3   | 12.3  | 13.1  |
| 27.2   | 29.9   | 9.7    | 8.3    | 4.6    | 3.4    | 11.4  | 2.7   | 3.3   |
| 74.3   | 96.8   | 67.3   | 67.4   | 44.0   | 58.7   | 64.3  | 54.9  | 63.1  |
| 322.7  | 436.7  | 314.9  | 1256.7 | 1110.1 | 1213.5 | 813.9 | 847.0 | 891.9 |
| 16.3   | 9.1    | 7.0    | 7.2    | 5.5    | 6.4    | 5.1   | 3.1   | 7.1   |
| 1.8    | 6.2    | 3.7    | 11.8   | 3.2    | 13.9   | 5.5   | 7.0   | 1.0   |

|        |        |        |        |        |        |        |        |        |
|--------|--------|--------|--------|--------|--------|--------|--------|--------|
| 84.3   | 125.3  | 89.1   | 36.1   | 39.0   | 40.6   | 33.7   | 36.3   | 42.9   |
| 513.7  | 820.2  | 902.6  | 122.3  | 110.7  | 106.5  | 184.5  | 217.0  | 227.1  |
| 7.0    | 5.8    | 5.3    | 14.2   | 13.6   | 14.6   | 5.8    | 11.8   | 7.9    |
| 265.0  | 272.0  | 94.1   | 45.0   | 41.1   | 40.8   | 45.6   | 27.5   | 34.0   |
| 156.6  | 187.1  | 175.1  | 110.2  | 99.8   | 122.7  | 53.7   | 67.9   | 71.7   |
| 117.2  | 118.0  | 69.4   | 66.4   | 47.7   | 45.9   | 71.9   | 51.2   | 75.4   |
| 315.3  | 381.4  | 184.8  | 111.5  | 70.8   | 74.4   | 64.0   | 44.4   | 49.9   |
| 180.2  | 170.4  | 97.8   | 105.4  | 66.2   | 82.3   | 50.9   | 61.7   | 54.4   |
| 548.5  | 817.6  | 571.9  | 893.1  | 680.0  | 795.9  | 586.7  | 486.6  | 683.2  |
| 524.7  | 557.9  | 375.5  | 322.9  | 274.0  | 313.1  | 239.5  | 244.0  | 262.5  |
| 24.9   | 23.2   | 11.5   | 4.1    | 3.7    | 8.7    | 13.1   | 8.6    | 14.2   |
| 9.6    | 5.7    | 4.5    | 8.7    | 12.9   | 12.2   | 22.9   | 36.9   | 40.3   |
| 1871.7 | 2248.4 | 1754.3 | 1059.8 | 877.9  | 1027.8 | 765.3  | 726.8  | 773.8  |
| 8.6    | 11.0   | 5.4    | 15.5   | 15.9   | 25.4   | 14.4   | 10.3   | 9.2    |
| 13.4   | 10.6   | 5.6    | 18.0   | 7.4    | 4.9    | 4.1    | 6.5    | 5.1    |
| 376.7  | 320.8  | 180.6  | 79.7   | 58.5   | 69.9   | 95.0   | 81.5   | 107.1  |
| 487.4  | 396.3  | 206.0  | 116.8  | 88.8   | 106.2  | 109.1  | 88.6   | 97.4   |
| 10.6   | 3.2    | 4.2    | 27.1   | 9.4    | 14.2   | 9.0    | 6.1    | 9.5    |
| 241.0  | 369.5  | 349.0  | 48.5   | 33.3   | 42.1   | 25.5   | 22.8   | 23.8   |
| 175.8  | 195.2  | 148.2  | 43.1   | 33.6   | 52.7   | 18.3   | 16.8   | 26.8   |
| 252.6  | 265.4  | 170.2  | 160.0  | 144.7  | 139.3  | 79.9   | 80.6   | 99.3   |
| 256.3  | 317.5  | 165.1  | 204.8  | 155.6  | 170.5  | 116.1  | 121.8  | 136.5  |
| 1692.8 | 1889.0 | 1310.4 | 136.9  | 122.2  | 146.4  | 121.8  | 120.6  | 144.4  |
| 10.7   | 7.4    | 8.2    | 11.1   | 8.2    | 7.6    | 4.2    | 2.3    | 3.6    |
| 650.9  | 727.9  | 499.5  | 213.0  | 117.1  | 110.0  | 130.2  | 87.9   | 102.2  |
| 1080.8 | 1462.3 | 936.0  | 2939.8 | 3054.4 | 3174.2 | 2322.5 | 2707.8 | 2635.6 |
| 297.9  | 291.0  | 191.8  | 430.0  | 311.6  | 329.2  | 313.3  | 271.6  | 254.2  |
| 12.5   | 20.9   | 16.9   | 15.7   | 6.7    | 18.8   | 19.2   | 16.8   | 24.7   |
| 2.5    | 9.0    | 2.1    | 9.0    | 8.4    | 6.8    | 2.6    | 2.9    | 1.8    |
| 2.5    | 6.3    | 12.6   | 11.7   | 13.1   | 5.4    | 9.5    | 5.3    | 12.1   |
| 8.8    | 5.5    | 1.4    | 16.9   | 11.5   | 10.5   | 3.9    | 3.8    | 2.3    |
| 3.1    | 3.7    | 0.7    | 11.9   | 7.5    | 7.3    | 5.5    | 5.4    | 4.3    |
| 8.3    | 10.4   | 10.6   | 10.2   | 12.5   | 14.7   | 6.1    | 8.5    | 5.1    |
| 10.1   | 4.3    | 3.6    | 9.9    | 7.8    | 15.0   | 3.5    | 1.4    | 1.0    |
| 520.0  | 686.3  | 517.6  | 67.8   | 32.3   | 67.8   | 34.7   | 21.9   | 24.0   |
| 29.9   | 34.0   | 37.2   | 19.3   | 14.0   | 16.6   | 5.1    | 11.3   | 4.8    |
| 118.3  | 144.2  | 116.0  | 5.0    | 23.4   | 16.9   | 20.5   | 11.4   | 9.5    |
| 72.1   | 88.7   | 68.4   | 13.2   | 14.7   | 10.9   | 9.4    | 12.4   | 2.0    |
| 4.9    | 3.7    | 10.3   | 27.9   | 19.9   | 22.2   | 11.1   | 8.0    | 11.0   |
| 237.9  | 257.8  | 177.9  | 257.5  | 223.8  | 241.2  | 233.0  | 256.6  | 290.2  |
| 155.5  | 221.3  | 217.2  | 53.8   | 60.0   | 49.6   | 36.9   | 48.9   | 49.0   |
| 23.6   | 35.8   | 22.3   | 27.0   | 32.1   | 44.8   | 39.2   | 39.6   | 32.2   |
| 19.8   | 9.3    | 14.1   | 21.4   | 7.1    | 10.2   | 13.8   | 3.6    | 7.5    |
| 71.4   | 116.1  | 103.4  | 216.4  | 182.5  | 233.2  | 106.2  | 124.9  | 128.0  |
| 946.6  | 1356.2 | 1419.1 | 2796.1 | 2067.7 | 2378.9 | 1782.2 | 1426.0 | 1763.3 |
| 72.7   | 121.9  | 90.6   | 57.3   | 44.7   | 41.9   | 18.5   | 22.5   | 26.1   |
| 360.1  | 408.5  | 231.5  | 151.5  | 120.5  | 145.4  | 134.3  | 113.7  | 119.3  |
| 3.4    | 2.0    | 5.5    | 4.8    | 2.7    | 3.3    | 1.3    | 1.1    | 1.5    |
| 77.0   | 117.3  | 62.0   | 40.1   | 54.1   | 42.8   | 27.5   | 25.6   | 30.2   |
| 4.4    | 4.1    | 10.5   | 2.7    | 2.2    | 2.4    | 1.2    | 2.1    | 2.0    |
| 1719.1 | 2145.3 | 1439.4 | 1409.1 | 870.7  | 1081.5 | 899.8  | 614.3  | 646.7  |
| 251.5  | 270.6  | 139.6  | 155.7  | 96.5   | 109.2  | 83.4   | 60.6   | 71.4   |
| 367.4  | 350.5  | 209.9  | 184.7  | 111.4  | 124.8  | 141.7  | 109.5  | 126.6  |

|        |        |        |        |       |       |       |       |       |
|--------|--------|--------|--------|-------|-------|-------|-------|-------|
| 0.9    | 2.5    | 0.6    | 6.8    | 6.2   | 3.9   | 1.1   | 0.6   | 2.7   |
| 36.3   | 21.9   | 41.1   | 18.1   | 11.8  | 28.2  | 28.1  | 40.9  | 12.0  |
| 78.9   | 113.9  | 69.9   | 21.9   | 15.3  | 20.1  | 60.7  | 47.6  | 58.6  |
| 452.6  | 591.1  | 456.8  | 626.3  | 418.8 | 489.5 | 396.2 | 250.2 | 344.0 |
| 290.4  | 401.8  | 280.1  | 325.5  | 232.7 | 237.3 | 212.5 | 133.7 | 191.9 |
| 4.8    | 5.2    | 4.4    | 13.8   | 12.0  | 16.4  | 6.8   | 4.5   | 6.3   |
| 37.9   | 43.2   | 30.1   | 15.4   | 13.2  | 23.7  | 17.6  | 24.8  | 26.3  |
| 36.2   | 59.2   | 45.5   | 23.5   | 19.7  | 35.7  | 20.0  | 23.5  | 20.5  |
| 9.6    | 6.6    | 18.4   | 15.0   | 24.3  | 23.4  | 7.2   | 12.5  | 18.1  |
| 8.4    | 22.0   | 8.2    | 29.4   | 16.2  | 19.0  | 14.9  | 5.1   | 10.6  |
| 1.9    | 6.8    | 5.8    | 18.3   | 12.3  | 17.3  | 7.8   | 6.8   | 10.3  |
| 1.4    | 1.6    | 0.4    | 2.6    | 5.1   | 4.3   | 0.9   | 0.8   | 2.4   |
| 0.6    | 1.3    | 0.6    | 0.8    | 0.7   | 3.1   | 0.4   | 0.6   | 0.3   |
| 4.1    | 17.5   | 2.9    | 4.0    | 2.3   | 4.3   | 4.1   | 1.6   | 6.0   |
| 50.8   | 75.8   | 72.5   | 63.0   | 62.5  | 61.1  | 36.3  | 48.2  | 44.2  |
| 43.3   | 70.6   | 64.7   | 64.9   | 64.1  | 59.2  | 29.3  | 60.2  | 52.2  |
| 28.0   | 25.8   | 12.6   | 20.8   | 20.6  | 21.8  | 9.6   | 15.7  | 13.4  |
| 2.5    | 1.9    | 0.4    | 2.8    | 5.9   | 3.4   | 4.0   | 1.7   | 1.0   |
| 423.4  | 592.3  | 447.4  | 139.0  | 116.0 | 119.3 | 117.4 | 145.2 | 131.0 |
| 44.4   | 75.1   | 71.9   | 192.5  | 189.2 | 200.9 | 145.4 | 145.4 | 174.0 |
| 506.8  | 512.6  | 307.5  | 234.0  | 149.4 | 196.0 | 261.5 | 198.5 | 218.6 |
| 9.4    | 15.1   | 13.8   | 6.6    | 10.5  | 13.7  | 20.7  | 15.5  | 18.1  |
| 54.4   | 65.2   | 53.8   | 19.7   | 18.4  | 15.2  | 15.9  | 8.2   | 17.7  |
| 27.8   | 9.7    | 18.0   | 11.2   | 12.6  | 6.1   | 16.5  | 17.3  | 9.0   |
| 5.6    | 12.7   | 3.7    | 11.6   | 13.0  | 14.7  | 16.4  | 6.5   | 9.0   |
| 15.6   | 19.2   | 13.9   | 21.1   | 26.2  | 34.4  | 8.6   | 12.1  | 11.9  |
| 4.7    | 4.2    | 3.7    | 34.7   | 32.3  | 47.7  | 18.5  | 16.5  | 19.3  |
| 10.5   | 16.5   | 16.7   | 38.4   | 33.4  | 30.9  | 19.6  | 22.4  | 8.1   |
| 4.2    | 9.3    | 5.5    | 8.6    | 8.9   | 8.6   | 3.2   | 2.0   | 2.1   |
| 186.0  | 461.5  | 525.9  | 85.6   | 53.9  | 64.5  | 45.7  | 40.2  | 51.6  |
| 4.6    | 3.3    | 5.0    | 20.5   | 19.4  | 16.1  | 6.1   | 16.1  | 5.3   |
| 315.7  | 380.4  | 239.5  | 285.0  | 198.7 | 242.7 | 297.2 | 215.6 | 256.1 |
| 45.6   | 61.6   | 56.6   | 54.5   | 54.2  | 62.0  | 51.1  | 51.3  | 37.3  |
| 2.5    | 1.3    | 5.4    | 9.3    | 5.0   | 8.2   | 2.0   | 4.0   | 6.9   |
| 2.1    | 3.7    | 2.2    | 9.2    | 5.6   | 3.6   | 1.3   | 2.3   | 2.6   |
| 1.0    | 0.9    | 1.0    | 52.3   | 36.9  | 46.9  | 42.1  | 53.6  | 54.1  |
| 925.5  | 1109.7 | 675.8  | 339.5  | 318.6 | 257.9 | 320.3 | 334.4 | 342.3 |
| 908.7  | 1060.8 | 631.8  | 302.4  | 252.6 | 247.7 | 332.2 | 312.1 | 344.2 |
| 146.0  | 149.4  | 97.6   | 127.1  | 109.0 | 113.8 | 119.2 | 108.5 | 85.8  |
| 127.4  | 235.9  | 57.3   | 94.0   | 147.2 | 158.8 | 43.9  | 93.0  | 80.5  |
| 0.4    | 3.9    | 5.2    | 89.7   | 100.0 | 90.9  | 100.8 | 195.0 | 147.7 |
| 1911.4 | 2029.5 | 1245.2 | 1127.9 | 830.6 | 809.1 | 862.8 | 715.6 | 824.4 |
| 66.5   | 79.8   | 43.6   | 29.8   | 25.4  | 21.2  | 22.7  | 15.5  | 25.1  |
| 1.1    | 1.9    | 0.9    | 3.0    | 1.8   | 2.7   | 1.0   | 1.3   | 0.8   |
| 25.5   | 46.3   | 33.7   | 22.0   | 26.8  | 23.1  | 6.7   | 29.4  | 23.3  |
| 332.7  | 554.1  | 505.6  | 740.8  | 641.0 | 761.8 | 511.7 | 549.7 | 556.4 |
| 87.3   | 121.3  | 130.0  | 7.0    | 13.1  | 5.8   | 9.4   | 0.7   | 4.3   |
| 465.0  | 559.7  | 379.8  | 4.5    | 2.1   | 3.8   | 8.9   | 0.9   | 1.3   |
| 448.7  | 550.1  | 371.8  | 323.6  | 303.6 | 311.9 | 278.2 | 255.3 | 316.0 |
| 860.3  | 905.0  | 548.0  | 40.1   | 33.3  | 33.5  | 19.5  | 22.0  | 23.2  |
| 4.4    | 7.5    | 7.2    | 17.1   | 16.6  | 18.1  | 4.9   | 4.3   | 4.9   |
| 5.6    | 9.1    | 6.3    | 14.5   | 18.9  | 17.3  | 2.4   | 2.1   | 1.6   |
| 27.7   | 46.4   | 71.4   | 60.8   | 38.2  | 54.3  | 35.6  | 45.8  | 40.4  |

|        |        |        |        |        |        |        |        |        |
|--------|--------|--------|--------|--------|--------|--------|--------|--------|
| 15.3   | 5.8    | 9.9    | 32.6   | 20.2   | 23.2   | 14.3   | 9.0    | 12.5   |
| 545.7  | 560.4  | 219.3  | 281.0  | 180.6  | 259.7  | 204.9  | 173.8  | 175.2  |
| 810.3  | 1161.1 | 1005.7 | 857.1  | 706.3  | 759.5  | 571.4  | 599.2  | 662.7  |
| 102.3  | 124.9  | 97.3   | 110.9  | 102.9  | 86.4   | 69.3   | 80.9   | 92.2   |
| 1.2    | 2.1    | 0.9    | 3.5    | 3.0    | 4.1    | 1.2    | 1.5    | 1.3    |
| 195.0  | 218.7  | 136.0  | 67.2   | 53.4   | 55.2   | 45.1   | 53.3   | 59.7   |
| 340.9  | 430.0  | 191.5  | 411.1  | 247.7  | 264.8  | 214.5  | 118.9  | 144.6  |
| 1.5    | 0.7    | 2.8    | 5.1    | 4.9    | 4.9    | 5.7    | 3.7    | 1.3    |
| 216.0  | 131.2  | 52.1   | 146.1  | 88.7   | 108.6  | 140.1  | 112.1  | 136.8  |
| 3.8    | 8.4    | 1.5    | 9.3    | 12.5   | 19.2   | 6.0    | 4.4    | 6.1    |
| 3.9    | 2.5    | 1.7    | 3.9    | 2.2    | 8.4    | 1.0    | 2.3    | 2.5    |
| 87.4   | 104.8  | 85.0   | 93.5   | 73.9   | 85.0   | 52.3   | 57.3   | 72.5   |
| 0.9    | 1.7    | 3.6    | 0.7    | 5.0    | 1.0    | 1.1    | 0.3    | 1.8    |
| 1.1    | 1.2    | 1.5    | 2.2    | 1.9    | 2.6    | 0.9    | 0.7    | 1.6    |
| 2.8    | 3.2    | 2.3    | 9.0    | 8.5    | 9.1    | 3.1    | 4.4    | 3.1    |
| 91.2   | 129.5  | 89.9   | 67.2   | 55.3   | 60.4   | 42.5   | 48.5   | 49.8   |
| 2263.1 | 2724.9 | 1939.0 | 3783.5 | 3394.0 | 3658.4 | 1909.4 | 1726.9 | 2194.4 |
| 4.3    | 4.0    | 1.6    | 4.8    | 4.4    | 5.3    | 2.0    | 2.0    | 2.1    |
| 13.4   | 21.9   | 13.0   | 23.6   | 15.8   | 19.9   | 8.0    | 10.9   | 12.1   |
| 15.1   | 16.1   | 18.5   | 15.2   | 22.8   | 20.8   | 18.4   | 21.5   | 10.0   |
| 11.6   | 20.7   | 13.1   | 15.7   | 11.2   | 9.2    | 2.3    | 14.1   | 9.9    |
| 139.6  | 183.4  | 133.6  | 1162.8 | 1173.5 | 1378.2 | 1056.7 | 1009.2 | 1348.4 |
| 1914.1 | 2441.3 | 1923.0 | 1944.2 | 1874.2 | 2121.3 | 987.4  | 1047.6 | 1169.6 |
| 102.1  | 214.8  | 156.0  | 222.4  | 206.6  | 259.9  | 117.6  | 115.2  | 144.5  |
| 16.9   | 8.8    | 5.3    | 5.7    | 16.3   | 13.4   | 13.3   | 9.6    | 18.3   |
| 8.8    | 11.0   | 2.7    | 32.0   | 15.7   | 19.2   | 3.9    | 3.5    | 2.6    |
| 7.3    | 7.5    | 4.1    | 4.3    | 9.2    | 6.0    | 4.6    | 2.1    | 4.8    |
| 576.2  | 652.3  | 442.0  | 41.0   | 44.1   | 54.5   | 25.5   | 40.8   | 38.0   |
| 929.3  | 1098.6 | 701.3  | 160.5  | 136.7  | 163.8  | 98.7   | 117.3  | 123.9  |
| 5.9    | 12.9   | 4.2    | 10.1   | 4.8    | 6.0    | 9.1    | 8.9    | 11.2   |
| 28.4   | 24.6   | 10.5   | 64.3   | 72.9   | 81.8   | 42.4   | 49.9   | 68.6   |
| 197.1  | 289.5  | 241.1  | 11.9   | 21.4   | 13.3   | 6.6    | 3.0    | 4.6    |
| 12.4   | 16.2   | 12.2   | 30.5   | 23.0   | 33.9   | 21.9   | 17.7   | 18.8   |
| 806.9  | 1186.6 | 1009.3 | 1198.3 | 965.2  | 1138.7 | 482.8  | 427.8  | 539.2  |
| 4.2    | 5.2    | 6.5    | 6.0    | 4.2    | 7.1    | 5.0    | 7.0    | 2.3    |
| 84.0   | 114.5  | 105.1  | 46.7   | 36.9   | 46.6   | 17.4   | 34.0   | 41.2   |
| 7.2    | 7.2    | 6.9    | 6.9    | 7.6    | 5.8    | 4.8    | 6.4    | 11.2   |
| 5.6    | 1.5    | 4.6    | 8.0    | 8.0    | 3.0    | 1.2    | 1.3    | 0.8    |
| 6.8    | 6.2    | 3.5    | 8.3    | 13.7   | 5.0    | 7.6    | 4.1    | 4.1    |
| 126.7  | 167.1  | 113.3  | 40.7   | 27.9   | 31.5   | 77.0   | 75.3   | 72.1   |
| 8196.8 | 9231.2 | 8577.9 | 5154.3 | 4242.8 | 4503.0 | 2816.9 | 2558.7 | 3043.5 |
| 6.4    | 11.7   | 11.2   | 179.7  | 144.1  | 171.5  | 134.5  | 130.4  | 139.7  |
| 54.1   | 53.7   | 27.9   | 8.8    | 4.4    | 9.7    | 15.9   | 15.3   | 16.8   |
| 15.6   | 11.6   | 7.7    | 18.0   | 15.5   | 23.8   | 14.0   | 9.0    | 8.7    |
| 700.5  | 725.3  | 440.1  | 191.5  | 150.6  | 181.9  | 189.5  | 170.5  | 206.0  |
| 427.7  | 472.1  | 265.5  | 135.6  | 104.3  | 127.1  | 128.0  | 118.4  | 133.8  |
| 25.2   | 22.7   | 18.7   | 48.7   | 43.1   | 45.4   | 25.7   | 24.5   | 32.6   |
| 1139.2 | 1093.0 | 774.8  | 739.2  | 579.4  | 599.8  | 517.0  | 458.4  | 470.3  |
| 108.6  | 115.5  | 78.0   | 34.1   | 69.3   | 53.1   | 29.3   | 31.3   | 43.4   |
| 28.1   | 40.4   | 29.5   | 53.8   | 27.7   | 46.4   | 14.4   | 8.9    | 28.5   |
| 12.4   | 26.2   | 46.7   | 11.2   | 8.1    | 18.9   | 2.6    | 3.0    | 7.5    |
| 79.0   | 90.9   | 54.6   | 48.4   | 28.5   | 56.0   | 38.1   | 36.2   | 40.3   |
| 4.0    | 8.4    | 4.8    | 13.4   | 10.7   | 15.7   | 8.7    | 6.3    | 7.2    |

|         |        |        |        |        |        |        |        |        |
|---------|--------|--------|--------|--------|--------|--------|--------|--------|
| 9.4     | 14.9   | 14.8   | 59.8   | 55.6   | 33.8   | 24.4   | 33.0   | 27.3   |
| 3.7     | 3.3    | 3.3    | 0.9    | 2.4    | 5.7    | 2.1    | 2.0    | 3.9    |
| 3.3     | 6.1    | 4.9    | 20.7   | 17.8   | 5.8    | 6.7    | 2.2    | 2.8    |
| 1.9     | 1.5    | 1.4    | 2.3    | 3.1    | 8.2    | 2.5    | 1.7    | 7.3    |
| 29.6    | 33.1   | 35.9   | 33.4   | 28.7   | 37.0   | 19.2   | 25.0   | 25.8   |
| 14.2    | 19.2   | 22.1   | 8.3    | 6.0    | 6.6    | 10.4   | 15.2   | 16.3   |
| 15.8    | 16.0   | 18.6   | 13.9   | 9.7    | 14.2   | 19.7   | 2.5    | 14.4   |
| 24.9    | 29.4   | 19.3   | 40.1   | 34.5   | 28.7   | 16.9   | 18.2   | 19.2   |
| 7.1     | 3.1    | 6.8    | 36.1   | 20.2   | 29.9   | 19.5   | 15.7   | 20.3   |
| 4.9     | 2.6    | 2.4    | 8.9    | 11.9   | 8.5    | 13.5   | 10.0   | 10.1   |
| 23.8    | 26.1   | 17.2   | 29.2   | 31.9   | 32.6   | 25.5   | 27.4   | 33.7   |
| 51.3    | 48.1   | 40.6   | 6.1    | 6.3    | 9.3    | 5.8    | 13.0   | 23.2   |
| 10.8    | 10.3   | 10.0   | 19.1   | 13.1   | 18.0   | 5.1    | 6.7    | 7.0    |
| 147.7   | 167.4  | 76.4   | 53.5   | 53.9   | 51.7   | 52.2   | 46.3   | 50.0   |
| 6.7     | 4.0    | 7.9    | 3.6    | 6.1    | 9.7    | 7.9    | 4.7    | 5.1    |
| 54.4    | 50.7   | 33.6   | 8.8    | 18.5   | 12.7   | 5.1    | 6.5    | 8.6    |
| 751.6   | 860.5  | 407.4  | 482.3  | 359.2  | 383.7  | 314.8  | 231.9  | 281.5  |
| 4.7     | 1.8    | 5.3    | 19.0   | 37.9   | 33.8   | 16.7   | 51.4   | 36.4   |
| 327.6   | 346.1  | 163.6  | 173.3  | 110.5  | 133.0  | 73.2   | 45.6   | 69.4   |
| 1.7     | 7.3    | 5.7    | 4.8    | 2.4    | 7.0    | 4.9    | 0.8    | 1.0    |
| 19.8    | 24.8   | 20.3   | 52.2   | 38.4   | 38.1   | 16.8   | 18.7   | 26.8   |
| 2932.9  | 3914.4 | 3817.5 | 4577.2 | 4403.9 | 4590.1 | 2494.8 | 2883.8 | 3155.2 |
| 3.4     | 5.6    | 3.4    | 9.7    | 4.2    | 13.1   | 2.6    | 6.0    | 3.2    |
| 27.9    | 43.5   | 22.7   | 61.4   | 56.4   | 73.2   | 23.3   | 27.0   | 34.3   |
| 1815.1  | 2122.4 | 1672.8 | 402.4  | 385.8  | 403.8  | 458.8  | 459.8  | 531.9  |
| 182.7   | 207.3  | 155.6  | 113.4  | 85.0   | 99.5   | 69.9   | 67.5   | 68.1   |
| 130.3   | 151.3  | 92.1   | 36.6   | 26.1   | 31.1   | 34.0   | 42.1   | 40.5   |
| 17.8    | 28.5   | 30.4   | 37.3   | 41.3   | 44.0   | 25.6   | 19.7   | 21.3   |
| 1.5     | 2.7    | 1.3    | 2.4    | 1.6    | 1.9    | 1.5    | 1.1    | 1.5    |
| 218.2   | 179.3  | 140.8  | 25.4   | 18.6   | 17.4   | 18.8   | 20.6   | 16.8   |
| 9.0     | 12.7   | 17.6   | 13.4   | 20.8   | 19.5   | 8.7    | 9.2    | 14.0   |
| 12.5    | 7.2    | 5.8    | 12.1   | 14.3   | 15.3   | 10.6   | 11.0   | 14.0   |
| 1.2     | 5.9    | 4.9    | 1.7    | 5.7    | 5.8    | 0.5    | 0.8    | 2.6    |
| 18.1    | 18.5   | 14.2   | 23.2   | 23.1   | 22.8   | 9.7    | 8.5    | 11.7   |
| 6.9     | 4.2    | 5.0    | 8.5    | 8.1    | 12.7   | 1.6    | 3.6    | 5.5    |
| 22.9    | 28.7   | 11.2   | 51.5   | 38.5   | 48.9   | 27.8   | 31.4   | 35.7   |
| 4.5     | 2.0    | 4.1    | 12.2   | 10.4   | 8.3    | 3.4    | 1.0    | 3.4    |
| 22.3    | 17.8   | 15.3   | 27.0   | 27.7   | 19.1   | 5.6    | 15.3   | 17.8   |
| 40.6    | 65.6   | 51.5   | 68.9   | 51.3   | 62.6   | 61.3   | 53.3   | 66.4   |
| 1028.4  | 1017.6 | 765.7  | 40.4   | 38.4   | 34.2   | 32.3   | 23.8   | 41.8   |
| 796.0   | 723.8  | 541.2  | 7.2    | 7.8    | 9.4    | 2.3    | 6.0    | 8.2    |
| 19.2    | 21.9   | 16.7   | 19.1   | 14.7   | 17.3   | 13.7   | 18.1   | 19.4   |
| 21.6    | 27.7   | 13.6   | 11.1   | 15.6   | 28.1   | 15.2   | 16.4   | 17.7   |
| 113.0   | 152.5  | 123.8  | 102.0  | 107.4  | 134.4  | 65.9   | 96.7   | 90.8   |
| 142.3   | 161.8  | 100.7  | 54.7   | 23.3   | 29.2   | 52.5   | 41.1   | 42.4   |
| 1449.0  | 1625.5 | 1320.0 | 1119.4 | 996.3  | 1191.4 | 701.1  | 780.7  | 824.0  |
| 19.4    | 15.4   | 13.0   | 30.2   | 31.4   | 36.5   | 18.8   | 30.0   | 19.7   |
| 10099.4 | 9784.6 | 8170.6 | 8080.0 | 6684.3 | 6542.8 | 6377.7 | 5563.1 | 5865.8 |
| 114.5   | 164.9  | 130.0  | 143.2  | 114.8  | 126.4  | 70.7   | 71.8   | 75.9   |
| 2198.7  | 2216.6 | 1466.1 | 4714.8 | 3884.2 | 4162.2 | 3108.7 | 2583.6 | 2897.8 |
| 46.5    | 65.0   | 65.7   | 45.2   | 40.5   | 48.9   | 49.3   | 59.3   | 52.0   |
| 87.8    | 114.5  | 96.0   | 4.3    | 6.7    | 4.1    | 1.8    | 9.1    | 2.1    |
| 890.2   | 1012.3 | 532.1  | 1124.5 | 750.0  | 810.2  | 613.8  | 479.4  | 579.1  |

|        |        |        |        |        |        |       |        |        |
|--------|--------|--------|--------|--------|--------|-------|--------|--------|
| 72.6   | 97.6   | 120.4  | 17.9   | 26.3   | 29.9   | 16.1  | 34.5   | 29.6   |
| 15.1   | 32.3   | 22.3   | 12.4   | 6.8    | 14.6   | 3.9   | 5.1    | 4.4    |
| 26.5   | 53.3   | 47.3   | 84.3   | 87.8   | 80.8   | 39.4  | 73.2   | 58.1   |
| 2.0    | 14.0   | 12.5   | 16.9   | 23.2   | 14.0   | 13.3  | 8.3    | 10.1   |
| 2.2    | 1.8    | 5.3    | 15.5   | 13.8   | 9.5    | 4.8   | 8.2    | 5.3    |
| 120.9  | 177.4  | 156.9  | 22.8   | 16.8   | 32.0   | 6.8   | 12.5   | 11.8   |
| 70.3   | 89.7   | 100.7  | 38.5   | 36.8   | 37.1   | 24.3  | 28.1   | 28.5   |
| 4.0    | 2.6    | 3.5    | 9.2    | 6.5    | 22.0   | 2.4   | 4.3    | 7.8    |
| 17.9   | 18.0   | 15.1   | 39.4   | 56.3   | 50.0   | 14.8  | 14.2   | 24.9   |
| 4.0    | 7.1    | 2.1    | 21.2   | 6.2    | 18.5   | 11.5  | 5.1    | 8.1    |
| 10.8   | 10.1   | 10.6   | 10.6   | 17.0   | 15.4   | 4.6   | 4.2    | 13.3   |
| 73.4   | 33.2   | 4.3    | 10.7   | 5.0    | 7.0    | 8.7   | 2.4    | 3.0    |
| 28.0   | 35.5   | 32.6   | 14.3   | 15.0   | 19.8   | 13.7  | 5.0    | 9.6    |
| 2428.1 | 2338.6 | 1505.9 | 1533.1 | 1604.0 | 1393.4 | 922.7 | 1132.9 | 1211.8 |
| 31.2   | 27.1   | 22.8   | 26.8   | 15.7   | 18.0   | 13.1  | 10.5   | 16.5   |
| 44.5   | 44.7   | 19.5   | 11.2   | 3.0    | 17.8   | 14.1  | 7.8    | 8.5    |
| 21.2   | 25.3   | 13.7   | 51.5   | 44.5   | 54.0   | 28.3  | 38.4   | 43.9   |
| 157.4  | 181.9  | 112.1  | 186.4  | 133.4  | 144.2  | 115.1 | 125.3  | 128.8  |
| 76.6   | 73.8   | 33.7   | 75.5   | 54.6   | 50.4   | 56.4  | 42.9   | 53.2   |
| 9.4    | 11.1   | 13.6   | 5.4    | 4.0    | 6.8    | 3.0   | 2.5    | 5.3    |
| 6.1    | 6.9    | 7.8    | 547.2  | 378.4  | 442.9  | 397.3 | 338.1  | 392.8  |
| 65.8   | 60.4   | 26.4   | 52.2   | 38.5   | 41.5   | 52.3  | 26.3   | 35.7   |
| 41.0   | 72.5   | 53.3   | 111.0  | 119.2  | 139.9  | 42.4  | 73.2   | 79.5   |
| 111.7  | 141.2  | 92.8   | 215.1  | 139.7  | 145.9  | 96.6  | 85.2   | 78.6   |
| 623.4  | 741.1  | 424.8  | 496.2  | 409.4  | 458.7  | 335.2 | 374.1  | 405.0  |
| 2.9    | 3.5    | 2.7    | 9.0    | 6.6    | 11.2   | 3.8   | 4.4    | 9.4    |
| 1.7    | 1.8    | 1.4    | 4.0    | 2.6    | 2.8    | 1.5   | 1.7    | 2.1    |
| 6.8    | 6.7    | 8.0    | 9.2    | 8.4    | 7.0    | 6.0   | 7.7    | 5.6    |
| 26.6   | 23.7   | 16.5   | 41.7   | 35.0   | 48.1   | 19.7  | 16.7   | 30.1   |
| 13.6   | 15.4   | 12.3   | 3.9    | 10.5   | 3.8    | 3.6   | 6.0    | 7.7    |
| 74.7   | 89.1   | 69.0   | 196.5  | 159.8  | 167.3  | 107.9 | 129.2  | 124.4  |
| 917.3  | 916.0  | 597.7  | 613.6  | 581.7  | 606.6  | 456.1 | 376.2  | 434.2  |
| 109.4  | 126.2  | 74.4   | 28.5   | 22.2   | 28.1   | 23.8  | 26.1   | 22.9   |
| 172.8  | 222.2  | 182.5  | 189.5  | 154.0  | 178.8  | 96.9  | 113.8  | 104.7  |
| 215.4  | 326.7  | 252.0  | 29.1   | 20.0   | 32.9   | 23.4  | 24.6   | 24.0   |
| 1.6    | 1.0    | 0.7    | 5.7    | 3.8    | 1.5    | 1.1   | 7.2    | 0.8    |
| 52.2   | 49.5   | 50.3   | 40.6   | 26.3   | 36.5   | 30.1  | 23.4   | 24.0   |
| 58.9   | 87.7   | 54.2   | 22.7   | 9.9    | 39.6   | 28.8  | 39.1   | 47.7   |
| 300.9  | 424.7  | 383.4  | 43.6   | 46.5   | 54.9   | 64.6  | 79.6   | 69.2   |
| 3.2    | 3.0    | 0.9    | 3.6    | 2.7    | 6.6    | 3.8   | 1.4    | 2.7    |
| 18.0   | 13.5   | 10.5   | 17.7   | 19.2   | 32.2   | 12.7  | 13.8   | 21.6   |
| 369.0  | 287.0  | 181.2  | 36.9   | 40.2   | 46.4   | 37.1  | 46.8   | 42.9   |
| 1.4    | 7.2    | 7.5    | 8.9    | 6.8    | 5.7    | 10.2  | 6.2    | 5.7    |
| 1.8    | 6.9    | 6.8    | 10.2   | 5.1    | 14.6   | 7.4   | 2.1    | 4.2    |
| 12.6   | 3.3    | 2.9    | 18.3   | 11.5   | 8.1    | 2.4   | 6.6    | 12.2   |
| 175.8  | 235.4  | 196.2  | 38.2   | 26.4   | 29.8   | 25.5  | 16.6   | 20.0   |
| 13.7   | 21.5   | 15.0   | 13.2   | 4.0    | 11.4   | 6.0   | 2.4    | 3.2    |
| 141.3  | 164.8  | 99.3   | 571.3  | 459.2  | 569.3  | 155.5 | 201.4  | 221.1  |
| 6.2    | 6.1    | 3.8    | 4.9    | 11.0   | 10.1   | 14.1  | 5.8    | 11.7   |
| 10.6   | 8.6    | 3.7    | 12.3   | 13.8   | 11.0   | 13.4  | 14.7   | 10.9   |
| 78.5   | 74.7   | 67.7   | 90.8   | 72.5   | 81.7   | 50.6  | 47.1   | 73.5   |
| 2.8    | 3.6    | 5.9    | 5.5    | 4.7    | 4.0    | 4.9   | 2.1    | 3.2    |
| 7.1    | 11.2   | 7.2    | 23.5   | 18.8   | 28.0   | 8.1   | 2.0    | 13.4   |



|        |        |        |        |       |        |        |        |        |
|--------|--------|--------|--------|-------|--------|--------|--------|--------|
| 21.8   | 30.4   | 17.6   | 56.2   | 33.2  | 43.8   | 22.7   | 29.2   | 38.4   |
| 11.4   | 23.7   | 5.7    | 43.0   | 40.3  | 54.4   | 14.7   | 25.9   | 27.3   |
| 10.2   | 4.8    | 5.6    | 5.4    | 4.6   | 6.2    | 5.7    | 2.8    | 2.6    |
| 2014.5 | 2022.6 | 1507.9 | 1108.6 | 933.3 | 1047.9 | 731.1  | 790.9  | 803.8  |
| 612.3  | 610.7  | 576.8  | 476.0  | 374.0 | 421.9  | 390.3  | 415.4  | 397.7  |
| 40.3   | 38.9   | 19.2   | 310.4  | 266.2 | 269.9  | 205.5  | 228.7  | 300.7  |
| 26.7   | 26.4   | 13.4   | 259.1  | 211.0 | 235.1  | 235.7  | 227.8  | 257.5  |
| 4.1    | 5.5    | 2.8    | 2.9    | 8.5   | 2.6    | 3.5    | 3.5    | 1.0    |
| 21.8   | 23.1   | 11.1   | 26.0   | 28.6  | 26.0   | 21.1   | 7.8    | 17.4   |
| 229.1  | 318.8  | 235.7  | 23.1   | 22.1  | 20.5   | 41.5   | 50.4   | 41.5   |
| 29.5   | 58.1   | 41.7   | 7.7    | 6.7   | 13.8   | 11.8   | 11.4   | 12.0   |
| 1104.1 | 1315.0 | 854.8  | 1139.6 | 917.2 | 956.6  | 1483.5 | 1287.3 | 1428.8 |
| 258.2  | 320.5  | 297.0  | 225.3  | 195.6 | 223.3  | 233.0  | 241.1  | 213.3  |
| 296.3  | 323.9  | 224.6  | 169.1  | 121.3 | 148.5  | 131.0  | 88.5   | 112.8  |
| 47.4   | 32.2   | 12.6   | 11.4   | 11.9  | 20.1   | 30.5   | 18.7   | 26.8   |
| 2.1    | 2.4    | 1.2    | 6.1    | 5.3   | 4.7    | 4.1    | 1.8    | 0.3    |
| 39.0   | 68.2   | 43.7   | 49.1   | 47.3  | 45.7   | 29.6   | 22.7   | 32.9   |
| 1.7    | 1.1    | 6.6    | 12.5   | 5.6   | 5.4    | 3.5    | 3.7    | 2.1    |
| 36.7   | 47.1   | 32.6   | 40.9   | 32.1  | 40.4   | 16.4   | 21.1   | 23.8   |
| 41.1   | 64.6   | 39.0   | 39.0   | 27.3  | 31.1   | 32.1   | 31.1   | 22.5   |
| 0.6    | 4.9    | 1.6    | 30.0   | 32.5  | 30.8   | 14.3   | 12.4   | 20.6   |
| 2457.8 | 2527.9 | 1641.2 | 826.6  | 560.5 | 593.3  | 1298.1 | 1032.6 | 1230.7 |
| 9.5    | 12.5   | 7.7    | 14.0   | 13.6  | 16.3   | 12.6   | 15.7   | 17.0   |
| 1.8    | 2.9    | 1.4    | 4.0    | 4.1   | 3.7    | 2.6    | 1.3    | 1.8    |
| 991.3  | 1282.2 | 944.2  | 534.5  | 536.0 | 574.5  | 419.3  | 535.8  | 527.8  |
| 4.4    | 5.2    | 1.0    | 14.1   | 8.9   | 6.9    | 14.6   | 14.7   | 19.7   |
| 3.9    | 13.0   | 7.4    | 4.4    | 8.9   | 3.3    | 9.7    | 5.5    | 2.7    |
| 6.3    | 6.0    | 5.1    | 8.5    | 20.2  | 10.8   | 2.3    | 5.8    | 0.5    |
| 20.7   | 15.5   | 15.1   | 30.9   | 9.4   | 25.4   | 15.1   | 12.6   | 12.0   |
| 17.2   | 26.4   | 20.5   | 78.9   | 47.9  | 66.0   | 32.8   | 27.9   | 28.6   |
| 10.7   | 3.5    | 5.3    | 9.7    | 5.0   | 10.3   | 9.8    | 6.0    | 0.8    |
| 2.6    | 2.2    | 5.0    | 3.9    | 8.3   | 11.5   | 1.3    | 1.7    | 3.6    |
| 7.3    | 10.0   | 8.1    | 9.2    | 12.9  | 25.9   | 13.6   | 7.6    | 19.4   |
| 2.1    | 4.7    | 6.3    | 8.5    | 6.9   | 1.7    | 1.0    | 2.8    | 4.9    |
| 15.3   | 16.1   | 16.5   | 10.3   | 5.2   | 5.8    | 5.1    | 2.4    | 5.3    |
| 37.1   | 48.7   | 39.8   | 68.2   | 59.5  | 44.9   | 50.9   | 28.8   | 41.7   |
| 7.3    | 3.0    | 3.5    | 3.7    | 2.8   | 4.1    | 4.3    | 2.1    | 2.3    |
| 1.8    | 5.5    | 3.1    | 3.2    | 5.3   | 3.2    | 2.1    | 0.6    | 1.0    |
| 9.0    | 11.3   | 13.8   | 23.6   | 10.6  | 19.9   | 12.4   | 15.8   | 15.4   |
| 677.8  | 951.9  | 927.2  | 264.5  | 257.8 | 311.0  | 202.3  | 281.1  | 270.3  |
| 9.2    | 1.3    | 9.5    | 24.0   | 19.2  | 12.5   | 6.6    | 9.6    | 3.1    |
| 60.4   | 117.0  | 118.3  | 70.0   | 75.3  | 88.0   | 41.9   | 64.5   | 62.6   |
| 13.9   | 15.5   | 11.3   | 13.2   | 8.7   | 7.4    | 7.1    | 5.2    | 5.9    |
| 6.0    | 7.2    | 12.1   | 25.5   | 10.3  | 20.1   | 8.4    | 9.1    | 12.9   |
| 2302.9 | 2798.9 | 2177.0 | 777.2  | 633.9 | 663.5  | 458.0  | 429.8  | 600.6  |
| 2.7    | 4.1    | 2.6    | 6.8    | 4.7   | 5.4    | 5.6    | 2.1    | 2.9    |
| 799.8  | 676.9  | 525.0  | 497.8  | 442.0 | 459.7  | 353.5  | 369.8  | 430.3  |
| 300.4  | 333.9  | 223.6  | 506.2  | 430.7 | 489.5  | 363.4  | 388.9  | 400.3  |
| 2.2    | 3.4    | 2.3    | 8.1    | 6.9   | 6.6    | 1.7    | 1.4    | 3.4    |
| 52.6   | 75.0   | 78.1   | 19.4   | 13.6  | 18.3   | 10.5   | 8.9    | 9.4    |
| 11.6   | 17.8   | 12.5   | 12.5   | 13.5  | 31.6   | 4.3    | 12.0   | 10.3   |
| 0.9    | 1.5    | 1.0    | 2.0    | 2.8   | 3.3    | 0.9    | 1.2    | 0.7    |
| 14.4   | 7.9    | 16.2   | 35.1   | 29.7  | 29.1   | 18.6   | 14.0   | 21.2   |

|         |         |        |        |        |        |        |        |        |
|---------|---------|--------|--------|--------|--------|--------|--------|--------|
| 2.6     | 2.9     | 5.9    | 5.3    | 4.0    | 4.1    | 17.8   | 7.4    | 5.9    |
| 2.2     | 4.2     | 11.2   | 27.1   | 21.1   | 38.0   | 18.3   | 25.3   | 24.2   |
| 1.0     | 1.0     | 1.4    | 47.3   | 41.1   | 47.2   | 22.6   | 41.8   | 29.4   |
| 8.3     | 17.8    | 8.6    | 15.6   | 13.5   | 23.0   | 8.5    | 5.2    | 10.3   |
| 7.7     | 1.3     | 4.8    | 15.3   | 6.8    | 8.5    | 6.9    | 7.5    | 5.8    |
| 14.3    | 21.5    | 8.7    | 35.3   | 17.4   | 19.7   | 14.7   | 16.5   | 16.2   |
| 2.5     | 7.2     | 2.5    | 22.7   | 17.7   | 12.4   | 1.8    | 1.8    | 9.5    |
| 6.7     | 2.7     | 3.0    | 3.1    | 4.6    | 8.9    | 4.3    | 1.1    | 2.3    |
| 733.9   | 881.4   | 577.3  | 129.5  | 65.7   | 82.7   | 115.1  | 77.6   | 80.2   |
| 28.8    | 33.4    | 27.6   | 12.2   | 12.0   | 22.4   | 9.2    | 5.2    | 3.5    |
| 91.3    | 125.3   | 125.0  | 78.1   | 89.0   | 102.0  | 49.8   | 75.2   | 53.2   |
| 1239.3  | 1503.7  | 970.4  | 620.5  | 439.7  | 538.4  | 647.9  | 377.0  | 580.0  |
| 11179.7 | 10245.6 | 7882.5 | 7654.1 | 6522.1 | 7092.9 | 5921.8 | 4966.8 | 5883.7 |
| 7.3     | 10.3    | 4.8    | 26.4   | 13.0   | 17.6   | 7.0    | 10.1   | 1.9    |
| 3.8     | 0.8     | 0.9    | 4.7    | 7.4    | 5.7    | 2.4    | 0.9    | 1.2    |
| 154.0   | 200.3   | 141.9  | 3.5    | 6.1    | 3.6    | 1.7    | 1.1    | 3.7    |
| 2.0     | 1.2     | 6.2    | 6.7    | 8.5    | 12.8   | 6.3    | 9.5    | 2.1    |
| 8.8     | 8.8     | 5.1    | 6.6    | 8.5    | 10.1   | 6.0    | 7.6    | 4.1    |
| 4.0     | 8.8     | 43.7   | 5.2    | 3.6    | 3.1    | 1.4    | 2.5    | 2.3    |
| 24.2    | 23.6    | 10.4   | 21.7   | 15.0   | 12.9   | 16.9   | 16.7   | 22.9   |
| 213.4   | 223.5   | 200.0  | 97.0   | 86.4   | 88.7   | 86.6   | 112.3  | 98.4   |
| 95.1    | 151.3   | 116.4  | 38.4   | 27.6   | 36.6   | 17.6   | 22.8   | 20.0   |
| 10.9    | 14.6    | 5.8    | 7.7    | 8.9    | 8.9    | 10.3   | 5.6    | 14.7   |
| 10.3    | 20.6    | 6.9    | 16.8   | 14.9   | 9.5    | 16.0   | 12.8   | 17.5   |
| 221.1   | 176.4   | 103.5  | 87.7   | 46.1   | 55.7   | 38.9   | 30.1   | 35.3   |
| 1.6     | 8.7     | 5.8    | 7.7    | 8.8    | 8.1    | 14.3   | 11.8   | 10.1   |
| 2.7     | 6.4     | 1.8    | 4.6    | 4.7    | 4.4    | 1.9    | 1.8    | 2.0    |
| 11.8    | 9.3     | 11.4   | 14.6   | 16.8   | 8.7    | 11.7   | 4.7    | 5.3    |
| 1.4     | 4.3     | 3.0    | 39.4   | 28.2   | 30.4   | 31.1   | 29.1   | 29.7   |
| 17.5    | 19.5    | 4.8    | 19.1   | 25.3   | 23.1   | 2.8    | 3.9    | 10.4   |
| 465.1   | 511.6   | 327.3  | 73.9   | 68.0   | 72.0   | 36.6   | 64.4   | 59.3   |
| 39.1    | 37.1    | 30.9   | 143.1  | 133.7  | 134.7  | 89.8   | 71.0   | 91.1   |
| 20.6    | 36.0    | 40.5   | 10.2   | 14.0   | 5.1    | 23.1   | 15.9   | 18.3   |
| 20.9    | 55.8    | 58.5   | 30.1   | 34.2   | 28.6   | 30.6   | 29.3   | 43.9   |
| 172.2   | 191.6   | 179.5  | 110.4  | 82.3   | 100.5  | 97.0   | 97.0   | 92.8   |
| 100.9   | 167.5   | 131.9  | 17.4   | 18.6   | 20.5   | 15.4   | 6.2    | 19.2   |
| 2.3     | 1.6     | 0.8    | 3.9    | 2.9    | 6.4    | 0.7    | 1.6    | 1.0    |
| 2.2     | 15.4    | 9.6    | 7.6    | 4.6    | 8.7    | 1.8    | 1.2    | 2.3    |
| 37.2    | 42.3    | 25.0   | 26.2   | 10.6   | 23.0   | 7.4    | 10.0   | 9.8    |
| 7.5     | 5.7     | 11.6   | 18.8   | 8.1    | 12.2   | 4.4    | 4.9    | 6.6    |
| 6.7     | 31.2    | 35.8   | 274.2  | 279.7  | 297.0  | 169.8  | 157.9  | 230.5  |
| 3.6     | 1.7     | 1.7    | 8.7    | 3.4    | 11.7   | 9.0    | 3.1    | 3.6    |
| 12.2    | 21.5    | 5.4    | 53.5   | 24.8   | 30.4   | 35.3   | 41.5   | 38.7   |
| 11.4    | 3.7     | 4.8    | 3.4    | 3.5    | 13.2   | 2.6    | 4.2    | 8.0    |
| 2749.5  | 3060.5  | 2065.5 | 966.8  | 764.6  | 786.7  | 977.7  | 947.0  | 1076.1 |
| 325.9   | 379.0   | 276.7  | 788.4  | 581.8  | 643.9  | 542.6  | 377.7  | 509.3  |
| 3.2     | 9.9     | 13.8   | 27.3   | 7.4    | 8.1    | 3.6    | 8.4    | 12.7   |
| 13.7    | 11.5    | 20.2   | 23.6   | 27.3   | 36.4   | 13.2   | 42.1   | 33.9   |
| 6.8     | 2.2     | 2.2    | 23.9   | 29.7   | 20.5   | 12.0   | 31.6   | 26.8   |
| 238.5   | 334.3   | 186.4  | 82.8   | 73.5   | 86.4   | 118.5  | 126.0  | 130.5  |
| 52.0    | 117.1   | 123.6  | 22.0   | 28.7   | 33.9   | 17.7   | 28.7   | 30.8   |
| 492.1   | 492.7   | 405.1  | 543.1  | 446.1  | 520.8  | 285.6  | 268.4  | 286.6  |
| 205.9   | 286.8   | 232.6  | 37.3   | 47.0   | 32.8   | 44.4   | 36.7   | 53.7   |

|        |        |        |        |        |        |        |        |        |
|--------|--------|--------|--------|--------|--------|--------|--------|--------|
| 8.0    | 5.6    | 13.6   | 29.7   | 16.6   | 25.8   | 13.3   | 3.6    | 17.3   |
| 5.5    | 17.7   | 20.0   | 21.4   | 22.8   | 26.3   | 17.3   | 11.8   | 3.7    |
| 17.5   | 5.5    | 6.8    | 4.9    | 9.3    | 6.7    | 2.8    | 1.3    | 1.4    |
| 2.4    | 1.6    | 2.6    | 1.4    | 1.5    | 10.6   | 1.6    | 0.6    | 2.2    |
| 13.2   | 14.8   | 13.2   | 6.5    | 6.2    | 7.5    | 11.8   | 6.6    | 5.6    |
| 440.1  | 690.9  | 459.9  | 35.7   | 30.5   | 40.3   | 27.8   | 30.9   | 31.9   |
| 1091.6 | 1371.0 | 922.9  | 888.3  | 746.9  | 849.0  | 502.6  | 500.5  | 535.5  |
| 119.4  | 149.7  | 158.3  | 100.8  | 147.9  | 147.2  | 117.7  | 208.6  | 189.5  |
| 6.3    | 3.7    | 3.2    | 7.8    | 10.8   | 8.2    | 3.6    | 2.3    | 4.0    |
| 240.8  | 282.0  | 184.3  | 1123.0 | 859.4  | 900.9  | 720.2  | 658.0  | 739.8  |
| 324.9  | 489.7  | 621.1  | 9.2    | 6.2    | 14.5   | 1.2    | 5.1    | 4.2    |
| 2.4    | 3.8    | 1.7    | 4.9    | 3.8    | 4.2    | 2.7    | 2.0    | 2.4    |
| 36.1   | 33.9   | 18.0   | 22.0   | 17.1   | 7.2    | 12.5   | 16.8   | 10.0   |
| 86.3   | 106.8  | 70.0   | 3.3    | 1.5    | 2.4    | 3.8    | 2.9    | 1.7    |
| 16.1   | 20.3   | 18.9   | 19.7   | 14.0   | 16.0   | 10.0   | 8.5    | 16.1   |
| 61.8   | 67.7   | 63.9   | 68.9   | 54.7   | 70.3   | 51.7   | 35.4   | 41.1   |
| 1303.9 | 1585.6 | 930.8  | 739.1  | 519.8  | 497.4  | 611.4  | 430.8  | 580.6  |
| 1.7    | 1.5    | 1.4    | 17.7   | 18.3   | 13.4   | 2.4    | 7.3    | 13.4   |
| 136.7  | 176.8  | 170.6  | 4.0    | 3.6    | 3.1    | 0.7    | 0.5    | 0.7    |
| 293.4  | 290.3  | 282.2  | 37.4   | 29.5   | 35.7   | 30.8   | 29.9   | 5.0    |
| 2.3    | 2.1    | 1.9    | 3.6    | 2.1    | 2.2    | 1.0    | 1.1    | 1.6    |
| 21.7   | 20.2   | 19.3   | 28.7   | 38.9   | 41.9   | 17.6   | 10.1   | 10.2   |
| 5.6    | 8.6    | 8.9    | 9.1    | 11.7   | 4.4    | 2.6    | 1.6    | 1.6    |
| 1.0    | 0.8    | 3.1    | 3.9    | 4.1    | 7.5    | 3.1    | 3.8    | 1.2    |
| 14.2   | 6.4    | 11.6   | 100.9  | 82.7   | 98.4   | 38.7   | 43.4   | 54.9   |
| 317.4  | 304.2  | 171.1  | 38.1   | 27.6   | 23.6   | 27.7   | 16.9   | 20.6   |
| 3425.5 | 3829.1 | 2662.4 | 3938.5 | 3616.5 | 3521.5 | 3180.4 | 3224.2 | 3427.9 |
| 17.9   | 29.7   | 18.4   | 54.2   | 45.2   | 40.8   | 37.4   | 40.3   | 50.0   |
| 3.3    | 4.5    | 5.1    | 1.9    | 2.4    | 2.2    | 1.8    | 1.9    | 2.6    |
| 3.0    | 6.2    | 5.6    | 14.2   | 13.3   | 13.1   | 9.4    | 11.7   | 14.9   |
| 115.5  | 127.3  | 70.5   | 22.6   | 21.3   | 26.6   | 23.1   | 31.2   | 21.9   |
| 2.2    | 4.7    | 6.9    | 5.5    | 4.6    | 8.6    | 4.1    | 2.4    | 3.5    |
| 18.4   | 10.7   | 12.9   | 21.9   | 6.1    | 20.9   | 9.6    | 8.7    | 10.2   |
| 20.4   | 14.5   | 15.8   | 15.8   | 13.9   | 24.9   | 12.4   | 12.4   | 19.4   |
| 19.5   | 30.8   | 5.8    | 25.1   | 27.9   | 42.2   | 4.7    | 1.9    | 6.2    |
| 65.6   | 68.4   | 46.7   | 104.7  | 60.8   | 88.7   | 102.2  | 54.9   | 81.5   |
| 237.5  | 354.4  | 196.2  | 166.6  | 101.0  | 111.8  | 123.3  | 77.9   | 84.5   |
| 258.6  | 347.9  | 330.0  | 167.2  | 163.9  | 186.0  | 162.5  | 167.8  | 209.8  |
| 1630.1 | 1951.1 | 1574.2 | 855.9  | 733.5  | 879.7  | 642.9  | 638.9  | 720.8  |
| 20.9   | 38.6   | 29.4   | 26.2   | 14.5   | 13.9   | 18.8   | 9.1    | 11.9   |
| 14.3   | 17.2   | 13.3   | 18.4   | 13.7   | 29.1   | 6.9    | 7.9    | 8.8    |
| 34.4   | 41.5   | 37.2   | 3.5    | 3.1    | 2.9    | 1.7    | 3.0    | 1.9    |
| 101.7  | 123.9  | 68.4   | 52.8   | 41.5   | 53.7   | 43.0   | 60.1   | 54.6   |
| 39.5   | 60.3   | 32.4   | 13.9   | 10.2   | 11.3   | 16.0   | 22.6   | 22.2   |
| 3.9    | 2.7    | 6.9    | 18.3   | 11.6   | 26.9   | 31.4   | 37.9   | 33.5   |
| 66.8   | 83.5   | 91.2   | 131.0  | 137.9  | 133.1  | 79.6   | 112.5  | 112.6  |
| 29.5   | 36.6   | 20.1   | 12.0   | 13.1   | 18.8   | 16.9   | 13.2   | 6.3    |
| 8612.0 | 8384.1 | 8177.6 | 3725.3 | 3577.6 | 4144.2 | 2332.3 | 2551.3 | 2743.5 |
| 1063.9 | 1098.4 | 857.3  | 552.3  | 446.9  | 529.8  | 320.9  | 314.7  | 372.7  |
| 2.7    | 2.8    | 5.0    | 1.4    | 1.2    | 4.6    | 0.8    | 0.9    | 1.8    |
| 21.7   | 21.6   | 17.4   | 7.1    | 13.6   | 15.3   | 5.3    | 24.7   | 20.7   |
| 3.8    | 8.4    | 2.9    | 15.2   | 10.9   | 12.0   | 13.6   | 1.9    | 9.2    |
| 2.8    | 3.2    | 1.3    | 5.8    | 2.4    | 3.8    | 0.3    | 0.3    | 0.4    |

|        |        |        |        |        |        |        |        |        |
|--------|--------|--------|--------|--------|--------|--------|--------|--------|
| 11.6   | 4.5    | 4.6    | 10.6   | 8.5    | 10.4   | 0.8    | 3.1    | 4.6    |
| 5353.2 | 5774.2 | 4531.0 | 5660.7 | 4491.7 | 4911.9 | 3123.7 | 2719.8 | 3154.3 |
| 9.9    | 10.3   | 14.4   | 8.2    | 12.0   | 5.0    | 16.1   | 10.1   | 10.3   |
| 14.4   | 12.6   | 10.1   | 23.0   | 20.6   | 21.7   | 14.3   | 7.6    | 7.8    |
| 4.1    | 5.1    | 4.1    | 18.5   | 14.2   | 6.9    | 6.5    | 8.7    | 13.4   |
| 741.2  | 862.9  | 601.6  | 1143.0 | 930.7  | 1040.0 | 536.3  | 594.0  | 611.7  |
| 1.5    | 1.1    | 1.1    | 7.1    | 1.0    | 1.8    | 1.2    | 0.9    | 0.6    |
| 8.6    | 16.1   | 3.3    | 9.0    | 6.3    | 10.9   | 5.1    | 6.8    | 16.7   |
| 1.5    | 3.4    | 13.2   | 8.9    | 10.1   | 5.0    | 6.1    | 6.3    | 2.0    |
| 5.3    | 16.5   | 7.8    | 11.2   | 7.6    | 9.0    | 3.2    | 2.2    | 2.8    |
| 155.2  | 169.8  | 133.1  | 152.3  | 140.3  | 150.3  | 80.3   | 91.8   | 94.6   |
| 15.7   | 17.7   | 12.0   | 20.5   | 23.7   | 23.6   | 11.2   | 9.3    | 21.2   |
| 215.2  | 317.9  | 297.6  | 3.4    | 2.9    | 1.8    | 1.2    | 0.7    | 0.8    |
| 13.5   | 27.3   | 17.0   | 16.5   | 6.7    | 11.5   | 9.9    | 9.6    | 6.8    |
| 1.4    | 3.7    | 3.4    | 26.4   | 21.8   | 25.1   | 28.9   | 26.7   | 32.2   |
| 9.7    | 6.5    | 6.3    | 7.4    | 7.9    | 8.7    | 12.4   | 14.3   | 13.2   |
| 277.1  | 327.3  | 232.8  | 139.7  | 109.7  | 153.3  | 166.4  | 151.6  | 152.8  |
| 3.7    | 4.8    | 4.1    | 8.4    | 7.7    | 5.9    | 3.4    | 2.7    | 8.6    |
| 1.2    | 2.6    | 2.1    | 2.4    | 1.6    | 1.3    | 7.1    | 0.8    | 1.0    |
| 92.5   | 84.3   | 104.0  | 11.5   | 3.0    | 4.6    | 1.8    | 3.0    | 2.2    |
| 5857.3 | 6533.9 | 5173.8 | 3677.9 | 2930.2 | 3238.8 | 2016.7 | 1816.3 | 2105.6 |
| 2.2    | 9.9    | 3.8    | 8.9    | 6.2    | 6.6    | 13.7   | 3.7    | 6.9    |
| 69.6   | 92.4   | 63.3   | 25.8   | 20.5   | 20.1   | 30.4   | 30.6   | 28.2   |
| 5.6    | 6.6    | 6.6    | 5.9    | 4.7    | 12.4   | 2.2    | 2.3    | 9.2    |
| 147.9  | 220.9  | 126.5  | 46.6   | 21.1   | 39.9   | 28.7   | 18.6   | 33.9   |
| 239.4  | 227.8  | 178.8  | 34.2   | 26.6   | 33.4   | 39.3   | 37.4   | 38.3   |
| 1.1    | 0.8    | 2.1    | 3.9    | 1.5    | 2.3    | 3.1    | 0.9    | 1.2    |
| 2160.8 | 2459.4 | 1935.9 | 1045.7 | 847.3  | 982.3  | 576.7  | 613.6  | 643.2  |
| 205.4  | 339.5  | 202.2  | 28.6   | 21.3   | 21.2   | 14.8   | 16.6   | 12.9   |
| 6.7    | 6.8    | 9.9    | 5.0    | 4.9    | 3.6    | 4.7    | 1.7    | 2.7    |
| 213.9  | 243.3  | 117.5  | 142.2  | 99.4   | 107.7  | 81.8   | 69.3   | 86.0   |
| 6.8    | 3.6    | 4.2    | 8.9    | 13.2   | 7.5    | 7.4    | 3.4    | 2.3    |
| 220.0  | 272.3  | 149.2  | 48.9   | 31.8   | 53.9   | 40.7   | 50.2   | 44.3   |
| 4433.0 | 4939.5 | 3016.9 | 2182.1 | 1409.1 | 1786.0 | 1597.4 | 1169.9 | 1532.9 |
| 7.5    | 11.9   | 3.7    | 16.5   | 12.3   | 9.6    | 12.3   | 10.7   | 8.8    |
| 12.1   | 12.5   | 10.5   | 18.0   | 15.4   | 20.2   | 11.2   | 13.3   | 16.2   |
| 2592.3 | 3128.3 | 2121.2 | 865.5  | 741.0  | 882.6  | 977.8  | 1030.3 | 1088.3 |
| 21.3   | 34.7   | 26.1   | 28.4   | 20.2   | 19.0   | 14.7   | 9.9    | 8.9    |
| 11.8   | 3.0    | 6.5    | 21.3   | 16.9   | 14.2   | 6.7    | 3.4    | 5.5    |
| 135.7  | 132.7  | 64.3   | 145.4  | 129.7  | 149.0  | 114.1  | 111.2  | 138.0  |
| 90.9   | 85.9   | 64.3   | 55.3   | 42.0   | 51.7   | 26.1   | 27.7   | 39.3   |
| 2.9    | 4.8    | 1.2    | 20.2   | 23.5   | 16.2   | 5.4    | 10.2   | 16.0   |
| 4.8    | 6.0    | 3.5    | 41.6   | 34.4   | 47.4   | 51.8   | 45.8   | 56.6   |
| 25.2   | 36.0   | 35.2   | 33.2   | 19.2   | 38.4   | 20.6   | 18.2   | 28.3   |
| 26.3   | 31.9   | 21.3   | 12.2   | 10.8   | 25.7   | 8.2    | 14.7   | 15.9   |
| 120.1  | 161.3  | 137.7  | 230.4  | 184.9  | 250.6  | 189.9  | 239.9  | 223.1  |
| 3.0    | 3.4    | 2.6    | 9.7    | 3.8    | 3.4    | 2.6    | 1.5    | 2.1    |
| 90.7   | 127.8  | 108.0  | 38.2   | 55.6   | 64.6   | 49.5   | 47.3   | 52.1   |
| 16.2   | 17.1   | 14.8   | 8.8    | 27.0   | 20.0   | 3.9    | 3.2    | 2.6    |
| 30.9   | 35.8   | 28.8   | 14.7   | 14.3   | 16.1   | 4.8    | 8.1    | 9.5    |
| 37.8   | 42.4   | 27.2   | 28.2   | 17.8   | 11.1   | 17.2   | 15.5   | 11.3   |
| 1.7    | 2.0    | 1.4    | 4.0    | 4.4    | 2.8    | 1.7    | 1.3    | 2.7    |
| 11.0   | 8.8    | 9.8    | 9.4    | 11.4   | 16.1   | 5.4    | 5.7    | 12.8   |

|        |        |        |        |        |        |        |        |        |
|--------|--------|--------|--------|--------|--------|--------|--------|--------|
| 9.3    | 15.2   | 4.2    | 6.3    | 5.7    | 1.2    | 6.6    | 4.3    | 4.9    |
| 19.9   | 31.3   | 17.5   | 6.5    | 12.4   | 13.3   | 15.2   | 11.7   | 19.2   |
| 40.5   | 35.4   | 20.6   | 8.4    | 16.4   | 15.6   | 8.4    | 2.9    | 11.0   |
| 9.1    | 3.2    | 6.1    | 16.1   | 16.8   | 11.9   | 8.1    | 9.3    | 8.5    |
| 14.9   | 23.0   | 3.0    | 5.0    | 12.9   | 6.0    | 20.7   | 3.8    | 7.3    |
| 7.1    | 5.7    | 7.0    | 17.9   | 15.9   | 13.5   | 9.7    | 7.5    | 9.0    |
| 25.8   | 28.7   | 17.2   | 31.0   | 23.2   | 23.8   | 23.1   | 22.7   | 24.2   |
| 12.6   | 7.4    | 8.5    | 5.1    | 2.2    | 7.3    | 0.9    | 2.8    | 2.8    |
| 2373.5 | 2709.6 | 2142.9 | 2590.4 | 2123.9 | 2297.6 | 1151.0 | 1139.6 | 1333.6 |
| 493.1  | 609.8  | 429.0  | 394.8  | 291.1  | 334.7  | 259.2  | 232.2  | 287.8  |
| 5.0    | 0.6    | 2.4    | 9.6    | 3.5    | 11.2   | 5.5    | 2.6    | 2.6    |
| 10.1   | 10.3   | 5.3    | 27.4   | 17.5   | 23.2   | 7.2    | 10.4   | 13.0   |
| 11.3   | 15.5   | 8.3    | 16.8   | 13.6   | 23.7   | 13.4   | 8.9    | 7.4    |
| 3.8    | 2.7    | 2.8    | 3.1    | 3.0    | 3.2    | 2.7    | 2.3    | 2.7    |
| 8.3    | 7.7    | 5.4    | 6.1    | 7.9    | 9.7    | 1.7    | 6.4    | 11.9   |
| 6.7    | 14.8   | 8.2    | 18.9   | 8.1    | 20.9   | 5.4    | 6.1    | 4.0    |
| 45.2   | 27.9   | 4.5    | 54.9   | 60.0   | 59.0   | 32.3   | 76.3   | 71.1   |
| 1.3    | 0.9    | 0.9    | 5.7    | 2.8    | 2.8    | 0.8    | 1.2    | 1.0    |
| 573.6  | 790.0  | 447.8  | 339.8  | 247.9  | 245.2  | 303.3  | 257.3  | 302.6  |
| 134.7  | 178.6  | 97.8   | 68.1   | 55.9   | 66.4   | 85.7   | 70.1   | 87.6   |
| 583.9  | 897.0  | 540.6  | 168.0  | 102.6  | 167.9  | 97.4   | 114.4  | 118.8  |
| 180.8  | 199.7  | 134.4  | 45.4   | 28.0   | 40.9   | 31.1   | 26.1   | 32.5   |
| 1.0    | 6.5    | 2.4    | 8.9    | 7.8    | 9.2    | 2.4    | 3.1    | 4.1    |
| 1.6    | 5.1    | 6.9    | 10.2   | 7.5    | 11.8   | 10.8   | 13.9   | 12.5   |
| 25.9   | 14.5   | 16.3   | 20.2   | 17.8   | 24.7   | 11.6   | 14.7   | 16.7   |
| 6215.1 | 6977.2 | 6070.2 | 2441.7 | 1967.1 | 2143.3 | 1752.1 | 1683.4 | 1799.4 |
| 2.5    | 1.2    | 1.0    | 10.0   | 2.4    | 2.2    | 1.3    | 1.3    | 2.1    |
| 1.0    | 4.5    | 2.5    | 3.2    | 2.8    | 4.0    | 2.6    | 0.9    | 0.6    |
| 1.9    | 2.2    | 2.5    | 7.1    | 8.2    | 23.0   | 8.9    | 3.5    | 4.2    |
| 210.2  | 287.9  | 359.2  | 309.7  | 250.1  | 276.7  | 179.8  | 155.6  | 169.0  |
| 19.6   | 31.2   | 28.3   | 20.8   | 16.4   | 18.8   | 14.0   | 18.2   | 16.5   |
| 254.0  | 281.2  | 167.3  | 196.1  | 140.8  | 185.3  | 155.7  | 113.3  | 136.8  |
| 4.5    | 5.7    | 10.9   | 2.1    | 5.6    | 5.7    | 1.3    | 0.9    | 3.5    |
| 152.8  | 176.8  | 138.7  | 217.0  | 181.4  | 231.7  | 143.1  | 209.9  | 213.0  |
| 36.1   | 40.6   | 30.2   | 34.0   | 29.4   | 28.1   | 14.4   | 18.0   | 25.2   |
| 41.1   | 44.7   | 31.5   | 38.3   | 28.6   | 33.0   | 26.0   | 20.7   | 18.7   |
| 3407.7 | 4136.8 | 3445.2 | 4885.0 | 3872.9 | 4441.0 | 2777.0 | 2473.1 | 2908.7 |
| 2.6    | 10.1   | 8.3    | 5.4    | 7.3    | 14.7   | 9.6    | 9.3    | 4.7    |
| 157.7  | 210.8  | 108.9  | 75.0   | 66.6   | 85.7   | 53.1   | 36.9   | 42.3   |
| 25.9   | 37.4   | 18.3   | 18.8   | 6.3    | 12.6   | 3.4    | 6.3    | 6.0    |
| 9.7    | 2.9    | 1.5    | 12.0   | 13.0   | 13.4   | 5.2    | 2.7    | 10.2   |
| 23.2   | 36.1   | 23.4   | 76.4   | 71.0   | 57.0   | 67.1   | 63.0   | 78.4   |
| 86.1   | 107.0  | 108.1  | 10.9   | 15.9   | 10.1   | 9.9    | 9.0    | 9.6    |
| 3.7    | 4.0    | 11.0   | 7.8    | 10.2   | 10.4   | 4.9    | 12.4   | 11.7   |
| 688.6  | 890.8  | 850.3  | 156.9  | 101.9  | 145.1  | 161.3  | 142.7  | 166.7  |
| 455.4  | 556.2  | 335.6  | 372.2  | 328.2  | 393.8  | 336.7  | 400.5  | 446.2  |
| 20.7   | 24.1   | 12.3   | 37.0   | 27.1   | 21.9   | 24.6   | 21.8   | 27.1   |
| 520.4  | 575.5  | 364.3  | 287.6  | 152.3  | 223.7  | 264.3  | 225.9  | 241.1  |
| 582.9  | 740.0  | 783.9  | 197.0  | 164.2  | 217.3  | 152.2  | 211.8  | 178.5  |
| 4.5    | 5.6    | 13.0   | 14.4   | 30.8   | 15.0   | 8.7    | 8.0    | 15.9   |
| 1.8    | 1.1    | 0.9    | 1.8    | 1.7    | 1.9    | 0.7    | 1.1    | 0.8    |
| 216.5  | 329.8  | 241.4  | 581.2  | 503.4  | 607.4  | 329.9  | 407.8  | 429.3  |
| 1.2    | 6.6    | 3.8    | 7.7    | 7.3    | 12.7   | 5.7    | 7.1    | 7.0    |

|        |        |        |        |        |        |        |        |        |
|--------|--------|--------|--------|--------|--------|--------|--------|--------|
| 2.5    | 5.3    | 2.4    | 8.5    | 5.1    | 10.9   | 8.4    | 1.6    | 1.8    |
| 21.0   | 47.6   | 37.5   | 3.3    | 3.5    | 4.8    | 15.1   | 9.6    | 12.1   |
| 5.4    | 9.2    | 8.1    | 9.1    | 3.9    | 9.6    | 9.6    | 1.7    | 1.5    |
| 68.5   | 108.2  | 63.8   | 90.9   | 86.2   | 85.4   | 70.5   | 78.0   | 81.1   |
| 25.0   | 34.4   | 14.5   | 4.1    | 9.7    | 3.5    | 2.3    | 1.1    | 1.7    |
| 2355.7 | 2445.6 | 1635.4 | 1113.0 | 1049.9 | 1201.0 | 681.6  | 745.9  | 853.7  |
| 134.4  | 172.1  | 110.6  | 240.9  | 182.9  | 238.5  | 152.9  | 139.4  | 161.4  |
| 14.2   | 19.8   | 21.2   | 22.3   | 18.4   | 10.0   | 12.0   | 8.0    | 10.0   |
| 4.3    | 7.8    | 6.3    | 15.7   | 14.7   | 6.5    | 1.8    | 10.6   | 6.2    |
| 204.7  | 362.7  | 385.8  | 4.1    | 6.1    | 2.4    | 5.9    | 1.6    | 2.6    |
| 1933.6 | 1971.7 | 1130.8 | 811.8  | 441.2  | 515.6  | 519.7  | 385.1  | 425.5  |
| 4.1    | 2.0    | 0.9    | 3.3    | 2.6    | 3.6    | 1.1    | 0.9    | 1.2    |
| 440.5  | 602.8  | 492.1  | 426.0  | 343.1  | 341.2  | 335.5  | 366.5  | 419.3  |
| 3.5    | 3.2    | 1.0    | 2.2    | 1.2    | 2.4    | 0.7    | 1.3    | 0.6    |
| 821.4  | 762.8  | 495.1  | 285.8  | 210.6  | 255.1  | 170.5  | 162.6  | 172.5  |
| 104.5  | 124.2  | 125.3  | 110.7  | 95.1   | 95.1   | 61.8   | 69.4   | 74.9   |
| 5.1    | 6.7    | 6.7    | 14.7   | 19.6   | 27.5   | 4.9    | 6.1    | 5.1    |
| 794.4  | 934.7  | 495.8  | 111.8  | 66.5   | 74.4   | 165.9  | 101.0  | 130.5  |
| 415.7  | 509.1  | 327.3  | 93.3   | 57.3   | 60.3   | 116.1  | 132.2  | 109.3  |
| 2.8    | 1.6    | 2.6    | 2.3    | 4.7    | 7.9    | 4.7    | 2.1    | 2.2    |
| 326.7  | 344.0  | 203.4  | 351.0  | 194.8  | 227.5  | 189.7  | 124.4  | 152.6  |
| 2.0    | 7.4    | 2.6    | 25.5   | 15.6   | 15.4   | 28.0   | 36.0   | 33.1   |
| 1.0    | 2.0    | 0.9    | 3.0    | 4.0    | 2.9    | 5.2    | 1.1    | 1.8    |
| 225.8  | 309.8  | 220.8  | 153.6  | 132.2  | 142.4  | 101.0  | 119.4  | 123.8  |
| 2128.3 | 2021.4 | 999.9  | 834.4  | 522.1  | 623.6  | 523.7  | 351.3  | 461.7  |
| 1.4    | 4.9    | 3.9    | 7.9    | 7.3    | 1.9    | 1.2    | 1.7    | 1.4    |
| 17.3   | 19.0   | 23.6   | 14.9   | 8.5    | 4.7    | 6.7    | 2.1    | 0.6    |
| 4.0    | 6.6    | 3.2    | 13.9   | 8.5    | 9.8    | 8.4    | 3.4    | 11.3   |
| 10.3   | 8.0    | 15.4   | 24.1   | 19.5   | 10.3   | 13.8   | 8.6    | 16.5   |
| 10.2   | 7.2    | 12.2   | 29.6   | 20.3   | 14.0   | 4.7    | 4.1    | 8.9    |
| 466.1  | 557.8  | 552.4  | 342.7  | 290.0  | 320.2  | 179.0  | 161.5  | 209.2  |
| 57.6   | 82.0   | 55.5   | 107.7  | 78.3   | 105.7  | 110.9  | 104.9  | 112.0  |
| 401.2  | 506.2  | 332.6  | 426.7  | 395.1  | 474.4  | 238.4  | 263.2  | 241.4  |
| 19.2   | 15.3   | 15.9   | 37.5   | 47.0   | 35.9   | 25.1   | 26.9   | 25.3   |
| 12.4   | 9.5    | 5.6    | 17.8   | 14.5   | 22.5   | 10.0   | 5.7    | 2.7    |
| 37.0   | 36.5   | 28.3   | 19.3   | 12.1   | 27.8   | 56.3   | 51.1   | 64.5   |
| 10.6   | 25.7   | 22.8   | 5.3    | 5.5    | 10.6   | 22.7   | 34.2   | 29.3   |
| 9.3    | 33.0   | 15.0   | 7.6    | 8.8    | 5.0    | 4.9    | 4.6    | 5.3    |
| 816.1  | 781.3  | 413.0  | 606.3  | 386.4  | 410.5  | 465.9  | 356.7  | 325.9  |
| 396.0  | 577.5  | 472.8  | 398.0  | 326.0  | 385.0  | 188.7  | 245.9  | 211.7  |
| 5651.6 | 5178.8 | 3581.5 | 1156.1 | 1194.4 | 1265.7 | 1113.9 | 1868.4 | 1444.4 |
| 14.4   | 10.1   | 5.1    | 5.9    | 9.7    | 5.9    | 2.6    | 10.4   | 12.3   |
| 248.7  | 321.0  | 218.6  | 279.3  | 189.8  | 233.5  | 321.9  | 211.9  | 264.4  |
| 9.1    | 14.5   | 9.7    | 15.7   | 10.5   | 10.5   | 7.3    | 10.2   | 14.6   |
| 174.1  | 243.6  | 200.6  | 307.1  | 255.2  | 251.7  | 95.9   | 78.4   | 95.3   |
| 18.0   | 31.7   | 14.0   | 37.4   | 21.2   | 42.6   | 7.7    | 21.2   | 11.6   |
| 15.1   | 15.1   | 10.3   | 26.7   | 16.0   | 28.7   | 12.4   | 8.1    | 4.2    |
| 3.8    | 8.0    | 5.4    | 10.9   | 8.5    | 22.2   | 9.2    | 3.9    | 11.5   |
| 1.5    | 0.4    | 0.6    | 6.4    | 7.7    | 7.9    | 4.1    | 5.8    | 2.7    |
| 16.1   | 18.0   | 14.4   | 19.7   | 11.6   | 23.2   | 4.1    | 4.8    | 28.4   |
| 15.5   | 6.4    | 8.1    | 15.7   | 11.1   | 18.4   | 12.4   | 5.7    | 9.0    |
| 19.6   | 21.0   | 9.5    | 26.4   | 13.6   | 6.0    | 14.4   | 14.9   | 12.2   |
| 2.9    | 6.2    | 2.4    | 2.5    | 4.1    | 3.9    | 1.7    | 4.6    | 5.4    |

|         |         |         |         |         |         |        |        |        |
|---------|---------|---------|---------|---------|---------|--------|--------|--------|
| 28.2    | 37.7    | 20.9    | 8.5     | 12.2    | 15.7    | 4.9    | 12.3   | 3.6    |
| 6.1     | 5.7     | 2.8     | 3.9     | 4.0     | 5.6     | 6.4    | 1.9    | 3.8    |
| 0.8     | 1.5     | 3.3     | 6.1     | 7.8     | 8.7     | 0.9    | 1.2    | 3.4    |
| 83.1    | 117.8   | 121.6   | 44.8    | 44.5    | 54.6    | 32.1   | 33.0   | 31.6   |
| 171.0   | 214.7   | 220.9   | 111.9   | 141.8   | 165.1   | 84.0   | 110.1  | 115.0  |
| 29.8    | 24.6    | 16.1    | 16.8    | 19.9    | 24.6    | 22.2   | 18.1   | 29.5   |
| 0.8     | 2.5     | 3.1     | 34.7    | 36.8    | 38.2    | 39.9   | 38.5   | 40.4   |
| 222.0   | 336.6   | 379.0   | 77.2    | 62.1    | 58.9    | 64.8   | 54.6   | 64.3   |
| 2.5     | 3.3     | 6.0     | 115.6   | 97.4    | 90.5    | 68.8   | 47.1   | 62.1   |
| 35.6    | 37.8    | 14.8    | 13.4    | 5.9     | 11.2    | 7.5    | 2.1    | 8.4    |
| 4.7     | 2.1     | 0.8     | 4.7     | 3.7     | 8.4     | 3.6    | 1.9    | 4.0    |
| 486.2   | 627.2   | 630.4   | 588.8   | 533.6   | 575.3   | 513.2  | 511.6  | 605.2  |
| 40.7    | 46.2    | 33.7    | 82.7    | 74.9    | 69.6    | 56.7   | 74.9   | 60.4   |
| 15.7    | 7.0     | 9.5     | 32.6    | 29.2    | 47.9    | 6.0    | 8.9    | 10.9   |
| 26.8    | 47.7    | 36.6    | 4.4     | 5.0     | 11.1    | 4.4    | 2.1    | 2.8    |
| 176.0   | 195.4   | 122.0   | 68.4    | 54.0    | 79.6    | 97.7   | 77.8   | 96.6   |
| 1562.7  | 1288.5  | 871.6   | 153.0   | 137.4   | 150.6   | 132.6  | 172.1  | 160.7  |
| 220.9   | 270.3   | 211.8   | 97.7    | 83.9    | 109.0   | 89.0   | 89.4   | 108.5  |
| 8.9     | 7.8     | 11.5    | 13.3    | 17.0    | 24.9    | 4.5    | 17.1   | 11.5   |
| 419.5   | 652.1   | 503.0   | 627.8   | 509.7   | 584.6   | 398.0  | 365.6  | 414.0  |
| 333.7   | 418.2   | 340.3   | 179.2   | 140.3   | 166.3   | 95.6   | 98.1   | 131.0  |
| 28.2    | 41.0    | 35.7    | 22.0    | 6.2     | 18.8    | 8.8    | 4.1    | 6.7    |
| 280.3   | 360.1   | 286.2   | 78.9    | 94.9    | 105.5   | 57.7   | 87.4   | 95.1   |
| 37.3    | 30.3    | 27.5    | 28.9    | 18.6    | 15.1    | 2.9    | 6.4    | 10.1   |
| 7.2     | 4.3     | 5.0     | 21.9    | 11.8    | 19.5    | 1.8    | 6.0    | 1.9    |
| 43.8    | 60.3    | 45.4    | 21.0    | 10.9    | 19.2    | 16.9   | 16.3   | 21.5   |
| 13.2    | 21.6    | 15.4    | 16.7    | 15.8    | 17.3    | 32.3   | 25.1   | 30.0   |
| 0.9     | 0.8     | 1.6     | 2.4     | 1.6     | 1.6     | 1.3    | 0.7    | 0.8    |
| 1944.0  | 2084.1  | 1459.4  | 1021.3  | 968.4   | 898.8   | 604.4  | 692.8  | 743.8  |
| 2.4     | 10.9    | 4.3     | 9.1     | 5.6     | 8.1     | 4.6    | 5.9    | 7.5    |
| 73.2    | 80.3    | 66.8    | 72.2    | 66.3    | 88.7    | 89.2   | 101.3  | 107.0  |
| 16.9    | 12.4    | 12.2    | 10.6    | 10.4    | 6.4     | 7.1    | 6.9    | 10.3   |
| 7.0     | 9.7     | 3.8     | 14.2    | 10.5    | 8.6     | 5.8    | 3.5    | 4.6    |
| 1790.2  | 2212.9  | 1525.0  | 1254.5  | 1085.9  | 1246.5  | 674.2  | 717.7  | 840.8  |
| 342.7   | 442.0   | 317.1   | 242.3   | 212.2   | 227.3   | 238.0  | 233.5  | 263.4  |
| 52.7    | 96.3    | 164.6   | 53.9    | 63.9    | 61.1    | 49.9   | 52.4   | 74.9   |
| 35.7    | 57.2    | 58.8    | 37.4    | 49.0    | 46.0    | 31.7   | 31.4   | 35.8   |
| 3.5     | 7.8     | 1.6     | 2.7     | 3.0     | 7.4     | 2.7    | 2.5    | 1.8    |
| 2.8     | 3.8     | 4.0     | 12.3    | 5.7     | 10.3    | 3.9    | 0.6    | 2.1    |
| 26.8    | 35.6    | 16.4    | 38.9    | 24.5    | 29.1    | 21.0   | 14.9   | 28.0   |
| 1701.8  | 2237.6  | 2218.4  | 1365.8  | 1223.8  | 1325.6  | 961.4  | 889.8  | 1020.8 |
| 10507.4 | 11361.3 | 10118.7 | 10628.8 | 10367.3 | 10837.5 | 6013.5 | 6598.5 | 6891.0 |
| 58.2    | 97.6    | 82.7    | 68.2    | 60.7    | 75.3    | 50.2   | 57.1   | 50.7   |
| 2480.8  | 2927.3  | 2284.3  | 3110.5  | 2560.6  | 2741.3  | 2102.9 | 1876.6 | 2197.4 |
| 291.4   | 409.5   | 317.7   | 672.4   | 476.0   | 615.7   | 405.5  | 405.1  | 475.0  |
| 6.4     | 2.5     | 4.9     | 21.4    | 21.7    | 29.4    | 22.2   | 24.5   | 25.0   |
| 426.2   | 702.3   | 485.5   | 80.8    | 58.8    | 62.1    | 29.9   | 31.0   | 47.7   |
| 1032.5  | 1566.1  | 1563.5  | 579.4   | 514.7   | 504.8   | 439.1  | 497.0  | 592.3  |
| 99.7    | 164.1   | 127.7   | 130.1   | 140.3   | 154.7   | 133.0  | 203.3  | 186.5  |
| 155.6   | 115.5   | 64.5    | 6.9     | 7.7     | 6.5     | 3.2    | 7.1    | 3.7    |
| 10.3    | 56.9    | 81.4    | 311.7   | 302.1   | 451.4   | 224.0  | 372.2  | 261.0  |
| 5.1     | 8.0     | 1.6     | 9.7     | 10.3    | 12.9    | 4.2    | 3.1    | 6.7    |
| 11.8    | 26.2    | 30.5    | 8.2     | 10.2    | 6.7     | 14.5   | 4.9    | 11.2   |

|        |        |        |        |        |        |        |        |        |
|--------|--------|--------|--------|--------|--------|--------|--------|--------|
| 245.6  | 344.0  | 255.2  | 99.7   | 90.4   | 91.9   | 78.6   | 87.7   | 99.3   |
| 3.0    | 8.4    | 4.6    | 7.6    | 11.7   | 13.2   | 10.7   | 9.2    | 13.0   |
| 4.6    | 10.8   | 0.4    | 4.3    | 8.4    | 4.7    | 6.6    | 2.1    | 4.3    |
| 6.8    | 7.9    | 4.6    | 11.8   | 8.4    | 7.8    | 4.4    | 5.6    | 4.9    |
| 25.0   | 11.9   | 11.0   | 5.3    | 4.0    | 2.7    | 2.9    | 2.2    | 1.2    |
| 366.9  | 360.1  | 284.8  | 43.9   | 21.1   | 24.2   | 26.5   | 25.6   | 25.4   |
| 133.2  | 110.4  | 112.4  | 4.5    | 9.3    | 10.1   | 10.4   | 8.4    | 10.9   |
| 24.6   | 14.9   | 9.6    | 2.7    | 1.3    | 3.7    | 1.5    | 0.6    | 0.7    |
| 5.5    | 15.3   | 4.1    | 15.4   | 8.7    | 13.8   | 1.7    | 2.3    | 4.4    |
| 148.1  | 259.0  | 213.4  | 246.6  | 210.0  | 258.4  | 177.9  | 221.0  | 225.0  |
| 11.4   | 8.9    | 6.4    | 18.1   | 14.1   | 8.0    | 3.5    | 7.1    | 2.3    |
| 8.6    | 9.3    | 4.9    | 16.3   | 16.1   | 25.7   | 12.3   | 12.8   | 14.0   |
| 26.0   | 38.7   | 28.8   | 33.8   | 41.5   | 43.8   | 18.0   | 23.3   | 33.6   |
| 148.8  | 184.9  | 117.0  | 165.3  | 121.0  | 139.1  | 120.9  | 107.6  | 114.4  |
| 5.8    | 6.9    | 6.2    | 13.0   | 7.3    | 7.7    | 1.2    | 2.2    | 3.2    |
| 21.0   | 32.6   | 41.7   | 32.4   | 30.2   | 44.0   | 25.7   | 43.8   | 43.9   |
| 4.3    | 9.0    | 6.6    | 20.2   | 11.8   | 18.4   | 8.8    | 6.6    | 0.9    |
| 183.2  | 258.9  | 264.2  | 157.6  | 112.7  | 159.2  | 130.1  | 131.7  | 131.3  |
| 2.2    | 1.4    | 1.9    | 6.3    | 7.3    | 4.8    | 2.2    | 2.3    | 4.4    |
| 347.8  | 323.4  | 295.7  | 102.5  | 78.1   | 110.5  | 73.3   | 102.2  | 85.9   |
| 81.4   | 100.1  | 71.4   | 103.4  | 85.8   | 95.7   | 75.2   | 81.1   | 75.1   |
| 17.1   | 22.7   | 13.0   | 20.2   | 30.9   | 20.2   | 20.1   | 14.6   | 28.3   |
| 366.0  | 421.8  | 277.5  | 299.1  | 232.2  | 255.9  | 234.5  | 249.9  | 262.3  |
| 4.2    | 10.7   | 1.5    | 5.9    | 10.4   | 5.0    | 5.0    | 4.9    | 2.2    |
| 1.0    | 3.7    | 1.0    | 3.5    | 1.5    | 2.8    | 1.0    | 0.8    | 0.5    |
| 2.6    | 3.6    | 3.3    | 10.9   | 9.8    | 10.2   | 2.3    | 2.6    | 2.0    |
| 296.1  | 419.9  | 349.2  | 127.1  | 116.0  | 127.5  | 171.4  | 171.3  | 183.5  |
| 190.6  | 258.6  | 223.9  | 249.3  | 288.5  | 249.8  | 143.9  | 166.6  | 164.5  |
| 16.9   | 24.7   | 15.7   | 62.8   | 41.9   | 44.9   | 43.7   | 32.8   | 43.4   |
| 93.2   | 127.4  | 74.9   | 148.2  | 109.5  | 134.8  | 81.2   | 69.2   | 86.2   |
| 13.6   | 14.4   | 9.5    | 12.1   | 9.5    | 13.4   | 6.2    | 2.6    | 14.2   |
| 3.4    | 6.1    | 2.0    | 5.8    | 6.3    | 5.1    | 3.9    | 1.3    | 1.3    |
| 3483.8 | 3359.2 | 1881.1 | 1943.6 | 1202.0 | 1316.8 | 1723.8 | 1184.8 | 1548.4 |
| 13.1   | 10.8   | 3.2    | 29.7   | 21.1   | 18.1   | 22.2   | 27.1   | 28.8   |
| 28.8   | 54.0   | 44.2   | 3.1    | 6.5    | 6.5    | 1.7    | 1.5    | 2.5    |
| 54.2   | 97.2   | 78.1   | 52.7   | 58.9   | 67.1   | 33.3   | 42.5   | 38.3   |
| 225.3  | 337.2  | 294.8  | 152.8  | 133.9  | 140.1  | 95.5   | 110.1  | 106.8  |
| 3.1    | 3.0    | 0.3    | 21.5   | 13.8   | 9.9    | 29.3   | 18.1   | 17.2   |
| 10.1   | 13.0   | 8.3    | 4.0    | 14.2   | 16.6   | 6.6    | 6.2    | 3.5    |
| 9.3    | 13.8   | 7.1    | 2.4    | 2.0    | 4.8    | 7.5    | 4.1    | 1.5    |
| 10.1   | 22.1   | 16.8   | 21.9   | 14.0   | 22.1   | 6.7    | 3.1    | 15.2   |
| 3.2    | 6.7    | 1.1    | 10.6   | 10.8   | 5.2    | 3.4    | 6.5    | 3.1    |
| 6.7    | 7.2    | 3.7    | 14.3   | 7.2    | 6.7    | 1.3    | 2.8    | 4.1    |
| 5.8    | 1.7    | 11.5   | 6.8    | 8.9    | 11.0   | 11.4   | 2.9    | 6.8    |
| 230.6  | 248.9  | 165.7  | 84.2   | 77.8   | 83.1   | 110.9  | 109.5  | 141.4  |
| 100.3  | 110.8  | 51.3   | 159.9  | 142.8  | 185.9  | 115.3  | 97.6   | 114.1  |
| 385.4  | 524.4  | 344.9  | 548.8  | 405.4  | 532.8  | 358.7  | 317.3  | 410.0  |
| 16.6   | 26.0   | 23.4   | 20.7   | 19.6   | 12.8   | 12.6   | 18.1   | 10.9   |
| 0.8    | 1.4    | 3.0    | 8.6    | 7.8    | 4.6    | 0.9    | 1.9    | 1.6    |
| 45.9   | 60.1   | 36.9   | 92.3   | 91.1   | 100.5  | 48.3   | 60.6   | 56.0   |
| 4.2    | 11.1   | 4.8    | 11.5   | 12.7   | 15.3   | 4.9    | 4.4    | 7.4    |
| 3.3    | 5.5    | 7.5    | 13.2   | 5.7    | 12.0   | 9.3    | 4.5    | 8.2    |
| 9.2    | 18.8   | 8.0    | 11.6   | 10.2   | 18.7   | 10.7   | 9.3    | 13.2   |



|        |        |        |        |        |        |        |        |        |
|--------|--------|--------|--------|--------|--------|--------|--------|--------|
| 8.2    | 8.8    | 4.8    | 4.2    | 12.1   | 14.9   | 8.7    | 7.9    | 8.7    |
| 3614.0 | 4435.0 | 3535.5 | 3095.4 | 2844.6 | 3083.8 | 2005.8 | 1896.0 | 2121.0 |
| 238.8  | 231.4  | 124.7  | 161.5  | 141.1  | 160.7  | 197.9  | 230.8  | 245.9  |
| 18.7   | 17.3   | 11.7   | 13.2   | 10.0   | 7.4    | 10.8   | 7.4    | 5.6    |
| 13.7   | 21.5   | 14.9   | 28.6   | 19.7   | 23.1   | 10.4   | 16.2   | 21.4   |
| 172.0  | 263.5  | 193.4  | 595.0  | 523.6  | 609.6  | 426.3  | 441.3  | 483.2  |
| 314.3  | 366.0  | 293.4  | 121.9  | 109.2  | 106.4  | 67.7   | 66.4   | 72.7   |
| 3.8    | 6.0    | 0.2    | 3.1    | 3.9    | 2.7    | 1.2    | 2.6    | 0.6    |
| 1.8    | 1.8    | 1.5    | 4.0    | 8.4    | 7.4    | 3.3    | 1.9    | 2.2    |
| 19.2   | 25.2   | 20.6   | 25.5   | 18.6   | 33.6   | 12.0   | 18.3   | 13.2   |
| 6.9    | 7.1    | 2.1    | 12.5   | 2.6    | 7.2    | 2.4    | 5.3    | 3.4    |
| 8.7    | 3.7    | 5.5    | 7.1    | 5.4    | 11.2   | 6.2    | 10.7   | 10.1   |
| 11.1   | 9.8    | 11.5   | 19.2   | 12.2   | 12.9   | 15.2   | 5.6    | 13.2   |
| 1.2    | 1.4    | 0.8    | 3.6    | 2.8    | 3.9    | 0.9    | 1.8    | 3.0    |
| 0.8    | 0.6    | 1.3    | 6.5    | 1.1    | 0.8    | 1.1    | 1.2    | 1.4    |
| 10.6   | 13.7   | 4.3    | 13.3   | 14.7   | 10.4   | 6.8    | 5.9    | 12.6   |
| 48.7   | 66.1   | 43.0   | 64.9   | 57.3   | 58.8   | 41.6   | 44.3   | 43.2   |
| 311.8  | 283.5  | 205.2  | 220.3  | 183.2  | 226.4  | 242.2  | 317.3  | 261.4  |
| 243.2  | 225.4  | 205.8  | 495.4  | 393.2  | 361.3  | 268.0  | 232.5  | 252.0  |
| 175.1  | 218.4  | 181.1  | 181.3  | 170.5  | 199.6  | 197.2  | 201.5  | 222.7  |
| 16.4   | 14.9   | 11.7   | 355.3  | 258.9  | 326.6  | 238.2  | 179.5  | 220.4  |
| 23.4   | 39.1   | 19.3   | 72.4   | 42.8   | 61.9   | 62.2   | 57.3   | 52.5   |
| 23.4   | 34.4   | 6.0    | 36.3   | 23.8   | 17.5   | 21.1   | 6.6    | 6.9    |
| 4.4    | 3.8    | 2.5    | 2.1    | 4.6    | 3.7    | 2.1    | 1.2    | 5.1    |
| 26.0   | 23.2   | 12.9   | 30.0   | 21.1   | 21.8   | 21.8   | 16.1   | 21.3   |
| 316.8  | 237.7  | 187.6  | 2121.1 | 2062.1 | 2287.2 | 963.8  | 1017.0 | 1191.5 |
| 1.1    | 4.3    | 7.9    | 5.1    | 3.6    | 6.7    | 6.0    | 3.6    | 1.7    |
| 6.8    | 6.9    | 5.4    | 8.6    | 7.9    | 3.8    | 7.4    | 6.7    | 6.8    |
| 7.9    | 7.9    | 5.4    | 13.1   | 8.0    | 6.6    | 10.2   | 7.8    | 12.0   |
| 1.9    | 3.3    | 0.9    | 7.1    | 4.6    | 4.0    | 1.2    | 2.2    | 1.2    |
| 13.6   | 5.0    | 10.3   | 23.5   | 26.6   | 16.1   | 8.4    | 6.5    | 8.6    |
| 2.0    | 3.1    | 3.3    | 5.0    | 7.2    | 10.6   | 4.6    | 2.1    | 4.1    |
| 1.4    | 0.8    | 3.9    | 6.7    | 8.7    | 13.5   | 1.4    | 1.1    | 1.8    |
| 6.8    | 12.7   | 8.6    | 19.0   | 8.1    | 15.3   | 5.3    | 7.7    | 3.7    |
| 1273.4 | 1196.7 | 1084.9 | 992.4  | 911.1  | 1097.5 | 607.8  | 849.1  | 854.6  |
| 3.8    | 3.2    | 2.7    | 20.8   | 23.0   | 20.7   | 15.3   | 12.0   | 27.4   |
| 8.4    | 13.9   | 16.5   | 11.3   | 7.4    | 13.7   | 1.5    | 4.6    | 8.3    |
| 64.5   | 75.6   | 41.1   | 45.7   | 39.1   | 34.3   | 35.5   | 34.4   | 36.8   |
| 5.3    | 11.5   | 6.4    | 22.0   | 16.6   | 33.0   | 19.9   | 13.9   | 16.6   |
| 663.6  | 696.1  | 492.4  | 34.9   | 30.8   | 37.9   | 21.6   | 31.2   | 29.2   |
| 3.3    | 3.5    | 2.4    | 8.2    | 11.9   | 9.1    | 4.0    | 2.4    | 5.1    |
| 131.1  | 135.6  | 118.8  | 220.8  | 171.3  | 200.5  | 185.3  | 211.8  | 234.9  |
| 460.5  | 614.8  | 887.7  | 25.3   | 20.9   | 21.5   | 5.9    | 7.8    | 13.8   |
| 94.2   | 149.3  | 60.5   | 52.4   | 32.0   | 42.6   | 24.1   | 23.5   | 18.2   |
| 2989.5 | 3043.7 | 2063.6 | 2274.6 | 2019.0 | 2082.1 | 1454.3 | 1395.3 | 1575.5 |
| 32.0   | 48.2   | 21.3   | 25.0   | 14.0   | 23.6   | 15.5   | 10.8   | 10.0   |
| 161.5  | 255.6  | 214.5  | 1765.0 | 1543.8 | 2000.0 | 1384.4 | 1721.0 | 1548.3 |
| 40.4   | 44.8   | 24.2   | 43.1   | 32.9   | 41.7   | 12.4   | 22.6   | 21.5   |
| 2.2    | 8.1    | 2.1    | 4.3    | 3.2    | 3.7    | 4.2    | 3.0    | 2.4    |
| 14.9   | 16.6   | 13.8   | 94.6   | 66.9   | 88.4   | 47.9   | 69.3   | 52.6   |
| 34.7   | 38.4   | 20.5   | 51.3   | 27.5   | 39.4   | 33.8   | 9.5    | 21.9   |
| 2524.0 | 2688.4 | 1372.2 | 3709.8 | 2517.4 | 2576.9 | 2431.2 | 1881.9 | 2181.4 |
| 23.3   | 34.4   | 19.4   | 21.7   | 15.5   | 21.8   | 13.7   | 12.1   | 10.5   |

|        |        |        |        |        |        |       |        |        |
|--------|--------|--------|--------|--------|--------|-------|--------|--------|
| 1413.7 | 1718.8 | 1274.5 | 13.5   | 14.8   | 11.3   | 17.7  | 11.9   | 8.4    |
| 14.5   | 8.8    | 19.5   | 19.6   | 20.1   | 26.1   | 6.6   | 7.0    | 4.2    |
| 3.1    | 2.1    | 8.1    | 6.2    | 5.1    | 5.9    | 4.6   | 1.6    | 3.6    |
| 19.1   | 21.9   | 12.1   | 13.6   | 12.2   | 7.2    | 4.5   | 5.5    | 5.2    |
| 13.4   | 6.9    | 6.3    | 29.1   | 10.8   | 9.3    | 7.8   | 2.9    | 6.9    |
| 14.8   | 16.5   | 11.5   | 16.2   | 8.4    | 9.3    | 13.3  | 6.1    | 13.4   |
| 2442.9 | 3042.5 | 2878.7 | 2049.7 | 1933.1 | 2110.2 | 956.6 | 1248.6 | 1227.8 |
| 137.0  | 194.6  | 195.4  | 78.2   | 71.5   | 97.4   | 59.8  | 64.8   | 71.6   |
| 260.9  | 279.7  | 151.2  | 470.4  | 284.5  | 324.6  | 377.1 | 287.3  | 354.2  |
| 24.1   | 42.6   | 47.9   | 124.8  | 171.8  | 190.7  | 69.9  | 145.4  | 143.5  |
| 134.7  | 140.1  | 91.5   | 254.5  | 183.7  | 227.8  | 146.2 | 133.8  | 145.7  |
| 14.0   | 18.4   | 12.7   | 20.1   | 17.0   | 27.3   | 10.2  | 15.9   | 21.3   |
| 3.7    | 7.0    | 3.7    | 13.6   | 9.5    | 12.4   | 4.5   | 3.1    | 4.0    |
| 10.3   | 33.6   | 22.9   | 53.0   | 42.7   | 58.5   | 20.2  | 21.5   | 13.4   |
| 624.5  | 770.6  | 455.0  | 27.8   | 33.0   | 25.6   | 9.9   | 13.6   | 3.7    |
| 4.8    | 4.6    | 2.0    | 11.1   | 9.6    | 10.5   | 3.4   | 2.1    | 3.6    |
| 5.3    | 16.0   | 15.7   | 22.4   | 28.5   | 22.8   | 14.8  | 13.8   | 14.5   |
| 6.6    | 2.7    | 7.4    | 21.4   | 12.6   | 18.1   | 7.0   | 1.3    | 2.2    |
| 68.1   | 83.4   | 60.9   | 28.0   | 23.3   | 13.4   | 73.7  | 79.0   | 87.7   |
| 269.7  | 399.1  | 403.1  | 892.4  | 924.8  | 1015.9 | 658.2 | 868.3  | 817.7  |
| 13.1   | 22.5   | 22.5   | 11.4   | 20.6   | 18.4   | 17.6  | 13.3   | 11.9   |
| 41.6   | 48.0   | 29.8   | 111.4  | 85.1   | 92.8   | 143.5 | 110.9  | 140.3  |
| 76.1   | 89.8   | 79.5   | 94.5   | 75.2   | 107.0  | 87.0  | 108.6  | 103.8  |
| 316.0  | 503.0  | 217.8  | 891.0  | 509.7  | 635.4  | 200.2 | 170.8  | 215.8  |
| 638.7  | 740.5  | 441.9  | 204.8  | 159.2  | 160.9  | 142.8 | 130.8  | 147.7  |
| 4.1    | 14.4   | 7.7    | 4.4    | 4.4    | 5.6    | 11.8  | 7.6    | 2.2    |
| 4.8    | 9.1    | 4.4    | 8.3    | 8.1    | 11.6   | 6.0   | 5.6    | 10.5   |
| 25.7   | 32.0   | 22.1   | 41.1   | 22.0   | 35.2   | 26.2  | 15.5   | 24.7   |
| 96.4   | 109.2  | 74.6   | 49.3   | 34.8   | 37.9   | 27.8  | 28.4   | 34.1   |
| 2.0    | 3.3    | 3.7    | 5.6    | 4.1    | 7.3    | 2.6   | 2.7    | 3.3    |
| 19.7   | 24.3   | 9.4    | 23.8   | 22.5   | 42.3   | 12.9  | 7.5    | 14.7   |
| 2.5    | 3.4    | 1.0    | 6.2    | 3.3    | 7.8    | 7.0   | 12.4   | 8.7    |
| 24.4   | 28.0   | 13.2   | 13.8   | 7.7    | 6.7    | 5.5   | 6.6    | 3.1    |
| 789.2  | 837.7  | 408.9  | 207.6  | 162.1  | 163.1  | 177.4 | 146.5  | 169.4  |
| 19.7   | 13.9   | 14.1   | 28.3   | 12.5   | 19.9   | 12.9  | 14.3   | 16.8   |
| 19.9   | 15.5   | 13.8   | 18.7   | 7.1    | 8.6    | 18.2  | 15.7   | 13.9   |
| 18.2   | 29.5   | 16.3   | 3.3    | 2.1    | 3.4    | 1.3   | 1.7    | 2.7    |
| 2.3    | 2.1    | 1.2    | 1.9    | 1.4    | 3.2    | 4.5   | 1.4    | 1.4    |
| 6.9    | 15.6   | 4.1    | 17.0   | 15.8   | 17.1   | 9.0   | 1.6    | 9.4    |
| 14.2   | 5.8    | 21.7   | 16.7   | 31.2   | 29.6   | 6.6   | 6.1    | 4.3    |
| 10.4   | 5.2    | 5.4    | 10.9   | 5.4    | 9.4    | 2.7   | 2.5    | 9.0    |
| 9.5    | 7.9    | 1.9    | 3.8    | 4.3    | 4.0    | 2.3   | 2.4    | 3.0    |
| 139.5  | 188.6  | 136.5  | 79.7   | 45.2   | 79.1   | 77.6  | 71.8   | 70.7   |
| 31.8   | 34.3   | 24.1   | 28.2   | 17.0   | 10.8   | 8.1   | 7.5    | 8.4    |
| 370.0  | 410.6  | 224.0  | 41.0   | 29.3   | 38.1   | 29.2  | 30.3   | 27.7   |
| 2.8    | 5.4    | 3.2    | 5.3    | 1.8    | 4.7    | 4.6   | 1.0    | 2.5    |
| 1.3    | 1.5    | 3.8    | 6.6    | 5.8    | 2.0    | 3.9   | 1.7    | 1.2    |
| 61.1   | 95.5   | 54.0   | 60.9   | 49.7   | 63.8   | 51.4  | 47.9   | 85.3   |
| 596.1  | 1041.5 | 975.5  | 1731.2 | 1423.0 | 1516.5 | 940.4 | 1066.5 | 1142.6 |
| 35.6   | 37.6   | 33.2   | 16.8   | 19.9   | 20.1   | 16.9  | 18.9   | 19.6   |
| 16.8   | 26.6   | 17.1   | 29.5   | 18.4   | 19.4   | 16.1  | 17.0   | 26.7   |
| 237.7  | 277.0  | 188.1  | 146.1  | 113.5  | 139.5  | 89.6  | 92.9   | 102.3  |
| 282.5  | 338.0  | 225.4  | 267.7  | 173.5  | 191.9  | 139.6 | 115.3  | 105.2  |

|        |        |        |        |        |        |        |        |        |
|--------|--------|--------|--------|--------|--------|--------|--------|--------|
| 96.9   | 175.8  | 186.5  | 5.8    | 8.3    | 8.6    | 2.9    | 3.9    | 3.3    |
| 2.6    | 8.2    | 9.8    | 16.9   | 20.4   | 22.9   | 20.8   | 18.1   | 17.0   |
| 6.7    | 12.8   | 2.5    | 23.6   | 5.1    | 4.1    | 19.7   | 13.7   | 11.2   |
| 2084.0 | 3488.1 | 2892.5 | 4970.6 | 4491.8 | 4334.9 | 2577.5 | 3505.4 | 3547.5 |
| 358.7  | 493.7  | 403.6  | 174.6  | 159.6  | 189.5  | 99.8   | 120.5  | 123.8  |
| 798.4  | 1500.5 | 1914.1 | 583.2  | 502.9  | 563.0  | 385.0  | 517.6  | 566.4  |
| 39.6   | 63.2   | 53.9   | 7.1    | 13.0   | 5.2    | 27.8   | 19.9   | 30.1   |
| 13.1   | 17.5   | 10.2   | 96.4   | 71.8   | 97.6   | 75.7   | 90.9   | 108.5  |
| 3275.9 | 3064.4 | 2133.2 | 340.2  | 301.3  | 341.3  | 328.4  | 373.4  | 380.9  |
| 3.0    | 5.0    | 4.2    | 16.3   | 22.7   | 17.4   | 16.8   | 37.9   | 24.6   |
| 8.7    | 12.2   | 1.5    | 20.0   | 20.0   | 28.8   | 20.4   | 31.0   | 26.9   |
| 2.3    | 3.6    | 2.0    | 12.5   | 8.8    | 10.4   | 2.2    | 4.4    | 5.6    |
| 3.5    | 0.8    | 1.0    | 10.8   | 15.3   | 10.6   | 4.5    | 4.8    | 4.3    |
| 1752.8 | 1841.0 | 1174.7 | 1537.9 | 1351.1 | 1586.8 | 594.2  | 647.8  | 688.5  |
| 44.2   | 31.0   | 21.8   | 10.2   | 6.2    | 7.6    | 12.0   | 6.4    | 6.9    |
| 35.0   | 18.3   | 11.3   | 7.3    | 8.2    | 7.7    | 5.4    | 7.0    | 5.8    |
| 4.0    | 7.2    | 1.2    | 11.8   | 2.9    | 2.8    | 13.7   | 2.0    | 19.0   |
| 13.9   | 10.2   | 11.4   | 16.0   | 12.6   | 17.9   | 11.7   | 10.2   | 12.2   |
| 573.1  | 747.0  | 595.2  | 356.0  | 275.8  | 331.4  | 455.6  | 495.5  | 465.5  |
| 75.4   | 74.8   | 41.6   | 40.5   | 30.5   | 28.0   | 23.1   | 22.1   | 25.9   |
| 21.9   | 16.1   | 8.6    | 1.3    | 1.5    | 1.6    | 0.5    | 0.5    | 0.7    |
| 10.0   | 8.0    | 11.8   | 10.5   | 7.7    | 3.0    | 14.4   | 8.6    | 3.6    |
| 3643.3 | 3727.0 | 3142.3 | 2125.7 | 1726.9 | 1918.9 | 1548.7 | 1594.5 | 1643.2 |
| 171.8  | 106.9  | 70.0   | 143.5  | 117.4  | 141.7  | 44.1   | 56.3   | 57.7   |
| 38.6   | 29.6   | 39.0   | 59.9   | 33.9   | 29.2   | 33.7   | 28.9   | 33.4   |
| 10.6   | 33.9   | 31.5   | 5.1    | 4.2    | 5.2    | 1.6    | 12.9   | 3.1    |
| 10.1   | 11.2   | 13.3   | 14.7   | 11.2   | 13.1   | 11.5   | 8.0    | 8.4    |
| 300.2  | 451.0  | 390.5  | 608.8  | 556.7  | 657.1  | 399.6  | 518.3  | 494.3  |
| 35.3   | 28.9   | 20.9   | 7.0    | 5.0    | 12.5   | 10.6   | 12.0   | 17.5   |
| 8.5    | 12.4   | 17.8   | 13.7   | 7.7    | 14.0   | 4.9    | 6.4    | 14.3   |
| 9.7    | 11.4   | 7.2    | 17.2   | 8.0    | 9.2    | 4.5    | 8.3    | 4.5    |
| 53.2   | 72.5   | 101.1  | 501.8  | 386.0  | 509.2  | 303.7  | 278.7  | 327.1  |
| 6.6    | 4.6    | 6.5    | 6.0    | 10.3   | 5.0    | 9.2    | 9.1    | 5.6    |
| 167.1  | 218.4  | 155.5  | 120.4  | 66.0   | 98.1   | 37.3   | 44.0   | 56.9   |
| 313.7  | 441.4  | 412.7  | 351.5  | 348.0  | 436.6  | 277.3  | 347.9  | 359.3  |
| 2.6    | 5.6    | 3.2    | 14.9   | 6.0    | 3.6    | 5.0    | 6.1    | 2.0    |
| 6.5    | 6.9    | 1.7    | 3.5    | 2.4    | 4.1    | 10.5   | 1.8    | 1.9    |
| 51.1   | 78.1   | 76.8   | 41.0   | 25.7   | 28.3   | 22.5   | 15.2   | 15.7   |
| 74.5   | 69.0   | 59.7   | 34.0   | 17.5   | 17.6   | 18.4   | 12.2   | 20.8   |
| 73.8   | 113.3  | 78.6   | 37.2   | 26.1   | 41.5   | 56.6   | 53.7   | 62.7   |
| 16.2   | 20.9   | 10.5   | 16.4   | 10.5   | 9.8    | 4.8    | 5.4    | 8.8    |
| 492.9  | 575.9  | 291.3  | 128.7  | 79.6   | 98.9   | 154.5  | 101.5  | 135.1  |
| 2.4    | 1.7    | 2.6    | 12.7   | 15.9   | 19.0   | 8.1    | 16.6   | 13.2   |
| 21.7   | 33.5   | 22.8   | 6.0    | 16.2   | 8.8    | 17.7   | 17.4   | 20.5   |
| 38.0   | 58.4   | 33.8   | 107.2  | 68.6   | 72.5   | 59.4   | 49.8   | 62.1   |
| 3.0    | 7.2    | 10.2   | 27.3   | 11.6   | 15.3   | 4.5    | 18.8   | 16.6   |
| 14.9   | 26.4   | 17.2   | 59.2   | 32.7   | 27.3   | 31.0   | 25.0   | 28.7   |
| 13.0   | 36.6   | 20.4   | 11.9   | 17.7   | 14.8   | 13.0   | 33.6   | 30.8   |
| 8.3    | 4.5    | 4.6    | 3.4    | 4.7    | 5.7    | 1.3    | 1.6    | 4.9    |
| 87.9   | 94.1   | 68.4   | 24.8   | 20.2   | 29.6   | 23.6   | 21.6   | 29.6   |
| 542.6  | 807.8  | 701.0  | 382.5  | 301.0  | 354.6  | 378.9  | 482.2  | 465.9  |
| 86.7   | 138.9  | 117.6  | 124.5  | 134.9  | 127.0  | 84.5   | 94.5   | 88.2   |
| 8.0    | 2.8    | 2.4    | 138.4  | 129.7  | 132.2  | 105.5  | 61.3   | 79.9   |

|        |        |        |        |        |        |        |        |        |
|--------|--------|--------|--------|--------|--------|--------|--------|--------|
| 5.2    | 2.8    | 1.2    | 6.0    | 3.8    | 4.2    | 1.8    | 1.2    | 1.6    |
| 8.9    | 4.6    | 7.5    | 1.5    | 7.9    | 10.8   | 7.7    | 2.7    | 3.7    |
| 20.6   | 21.5   | 18.5   | 38.1   | 37.3   | 27.2   | 16.7   | 22.1   | 32.2   |
| 11.0   | 13.6   | 6.3    | 14.2   | 9.2    | 13.7   | 5.1    | 11.0   | 17.8   |
| 15.0   | 27.1   | 7.3    | 8.4    | 4.9    | 5.5    | 1.5    | 1.2    | 1.8    |
| 87.2   | 115.7  | 105.1  | 203.8  | 234.5  | 236.7  | 96.2   | 138.3  | 147.4  |
| 1.5    | 2.5    | 2.0    | 25.1   | 21.1   | 26.2   | 8.7    | 6.6    | 6.3    |
| 3.3    | 3.5    | 8.2    | 7.0    | 6.0    | 5.5    | 3.1    | 2.8    | 2.8    |
| 1.0    | 3.6    | 2.2    | 12.4   | 12.7   | 13.0   | 3.1    | 1.4    | 1.4    |
| 3.6    | 4.5    | 2.8    | 5.0    | 3.3    | 11.6   | 3.0    | 2.5    | 3.5    |
| 3396.9 | 4587.6 | 3853.0 | 2722.6 | 2402.5 | 2516.4 | 2364.5 | 3148.3 | 3021.6 |
| 564.4  | 699.2  | 619.3  | 137.5  | 87.8   | 121.2  | 325.5  | 218.1  | 283.8  |
| 1.4    | 1.5    | 3.3    | 3.3    | 7.9    | 13.3   | 7.3    | 3.7    | 3.9    |
| 19.4   | 20.5   | 13.6   | 13.7   | 30.4   | 24.2   | 12.9   | 6.3    | 10.0   |
| 3.9    | 15.7   | 1.3    | 4.2    | 14.7   | 3.2    | 2.4    | 1.7    | 3.3    |
| 3411.6 | 1207.8 | 566.9  | 528.1  | 333.5  | 352.2  | 468.1  | 309.1  | 361.6  |
| 171.7  | 204.1  | 187.7  | 97.5   | 79.5   | 102.8  | 113.1  | 95.8   | 121.1  |
| 11.1   | 9.7    | 4.8    | 6.7    | 9.8    | 4.6    | 3.8    | 7.8    | 8.6    |
| 2.2    | 4.9    | 3.8    | 19.3   | 1.0    | 9.4    | 2.7    | 2.4    | 2.6    |
| 5439.5 | 5815.0 | 3907.6 | 2504.6 | 2109.6 | 2147.6 | 1264.9 | 1398.1 | 1664.3 |
| 1687.5 | 2083.8 | 1676.3 | 2200.8 | 1987.2 | 2097.6 | 972.4  | 1036.8 | 1200.7 |
| 1.4    | 3.1    | 2.2    | 7.2    | 7.4    | 3.3    | 9.8    | 7.7    | 4.2    |
| 656.7  | 857.5  | 614.0  | 65.5   | 57.6   | 74.7   | 35.0   | 54.3   | 49.4   |
| 10.2   | 7.5    | 9.6    | 10.0   | 9.1    | 11.4   | 2.1    | 8.2    | 1.7    |
| 96.1   | 141.6  | 129.8  | 74.3   | 68.7   | 81.7   | 54.6   | 67.0   | 68.7   |
| 1.4    | 1.3    | 2.1    | 7.7    | 4.2    | 4.2    | 8.4    | 5.7    | 6.0    |
| 3.9    | 1.4    | 3.1    | 7.7    | 8.3    | 7.6    | 4.5    | 1.6    | 2.0    |
| 22.3   | 19.0   | 12.3   | 20.9   | 4.6    | 18.7   | 7.6    | 6.2    | 7.9    |
| 41.8   | 74.9   | 48.5   | 20.7   | 19.2   | 21.4   | 23.6   | 27.8   | 22.5   |
| 7.6    | 13.2   | 7.9    | 16.7   | 9.3    | 9.6    | 2.8    | 5.0    | 2.6    |
| 16.6   | 16.8   | 10.7   | 25.8   | 20.6   | 21.3   | 15.0   | 15.5   | 11.6   |
| 0.3    | 0.4    | 0.7    | 0.8    | 2.0    | 6.2    | 0.3    | 1.5    | 0.5    |
| 5.0    | 11.0   | 5.4    | 17.9   | 18.0   | 18.4   | 15.9   | 8.2    | 10.3   |
| 1.1    | 2.2    | 1.0    | 8.9    | 4.6    | 5.3    | 3.4    | 0.9    | 0.8    |
| 8.8    | 11.1   | 4.7    | 17.4   | 7.7    | 8.8    | 2.7    | 4.9    | 1.2    |
| 24.2   | 19.9   | 25.5   | 45.6   | 30.8   | 27.7   | 12.9   | 17.4   | 15.9   |
| 18.0   | 17.3   | 11.1   | 19.5   | 22.6   | 13.8   | 10.0   | 6.6    | 17.8   |
| 15.8   | 20.9   | 16.5   | 43.2   | 22.7   | 30.6   | 5.6    | 9.0    | 5.9    |
| 281.1  | 319.5  | 196.0  | 216.2  | 195.0  | 188.0  | 249.8  | 221.7  | 265.9  |
| 4994.4 | 5472.1 | 4213.1 | 5337.7 | 4230.7 | 4668.6 | 3044.7 | 2724.4 | 3144.7 |
| 2.4    | 3.2    | 0.7    | 2.7    | 2.5    | 2.7    | 1.6    | 3.5    | 1.3    |
| 3.5    | 9.2    | 2.9    | 10.4   | 5.9    | 15.7   | 4.1    | 1.4    | 1.8    |
| 86.3   | 134.6  | 113.8  | 132.2  | 114.0  | 215.6  | 1457.3 | 1337.0 | 1593.4 |
| 59.1   | 70.5   | 73.4   | 14.3   | 7.7    | 6.7    | 3.6    | 4.0    | 1.2    |
| 431.4  | 555.1  | 409.5  | 29.8   | 19.1   | 25.1   | 46.1   | 35.9   | 56.2   |
| 814.6  | 754.5  | 513.2  | 70.3   | 56.1   | 69.0   | 109.6  | 78.9   | 98.5   |
| 12.5   | 4.7    | 9.3    | 14.1   | 14.9   | 13.4   | 9.5    | 8.9    | 8.4    |
| 1110.2 | 1341.5 | 1069.2 | 148.6  | 107.3  | 132.7  | 363.5  | 278.3  | 308.7  |
| 48.9   | 51.9   | 38.6   | 33.3   | 8.8    | 35.3   | 35.7   | 23.1   | 18.8   |
| 19.1   | 21.1   | 18.7   | 26.2   | 15.5   | 14.5   | 9.3    | 9.2    | 8.3    |
| 13.0   | 24.8   | 18.6   | 10.6   | 4.5    | 12.7   | 5.7    | 1.5    | 6.6    |
| 14.7   | 15.7   | 9.4    | 24.9   | 19.1   | 17.5   | 17.1   | 14.8   | 18.1   |
| 1.8    | 2.2    | 1.6    | 12.3   | 7.5    | 21.2   | 1.5    | 4.3    | 1.8    |

|        |        |        |        |        |        |        |        |        |
|--------|--------|--------|--------|--------|--------|--------|--------|--------|
| 2.9    | 4.5    | 4.6    | 8.2    | 9.1    | 2.6    | 2.2    | 3.6    | 2.9    |
| 4.4    | 7.8    | 3.2    | 5.7    | 5.5    | 7.5    | 8.6    | 4.4    | 6.8    |
| 28.4   | 41.8   | 30.5   | 45.9   | 40.4   | 46.0   | 28.5   | 27.0   | 34.8   |
| 23.6   | 20.3   | 31.2   | 25.2   | 27.8   | 18.9   | 17.6   | 16.9   | 19.6   |
| 6.7    | 6.1    | 4.7    | 11.7   | 6.8    | 8.3    | 4.1    | 6.5    | 4.4    |
| 39.3   | 48.1   | 41.0   | 160.2  | 135.0  | 138.6  | 109.8  | 117.4  | 137.9  |
| 298.7  | 465.2  | 313.2  | 153.0  | 115.1  | 137.2  | 149.5  | 139.4  | 142.8  |
| 45.3   | 45.8   | 31.4   | 10.8   | 6.2    | 10.7   | 6.3    | 3.8    | 11.4   |
| 4768.9 | 5258.2 | 3987.8 | 5269.7 | 4380.4 | 4730.9 | 3666.8 | 3335.2 | 3663.7 |
| 3874.6 | 5004.1 | 3938.5 | 1686.4 | 1496.8 | 1624.2 | 1327.0 | 976.4  | 1398.2 |
| 845.5  | 811.6  | 519.4  | 38.0   | 15.4   | 20.5   | 31.7   | 23.6   | 25.8   |
| 15.6   | 8.1    | 14.5   | 18.1   | 13.2   | 13.4   | 12.4   | 19.1   | 15.8   |
| 5.1    | 4.3    | 4.2    | 3.9    | 5.0    | 6.4    | 10.6   | 3.4    | 5.9    |
| 16.6   | 19.1   | 16.8   | 17.9   | 14.5   | 19.8   | 11.8   | 14.1   | 17.4   |
| 18.1   | 26.0   | 17.3   | 8.3    | 12.5   | 12.2   | 9.7    | 5.1    | 16.5   |
| 8.4    | 20.1   | 10.4   | 15.8   | 8.6    | 11.2   | 13.4   | 7.1    | 7.6    |
| 1.4    | 5.4    | 2.9    | 4.9    | 5.1    | 2.7    | 0.7    | 0.8    | 1.6    |
| 54.4   | 58.3   | 77.3   | 41.8   | 34.6   | 46.8   | 28.4   | 32.7   | 19.1   |
| 668.8  | 999.1  | 680.6  | 178.2  | 127.8  | 138.5  | 201.8  | 183.3  | 202.0  |
| 1.4    | 1.2    | 1.9    | 5.2    | 6.4    | 2.6    | 1.9    | 3.9    | 2.1    |
| 15.4   | 16.2   | 10.9   | 8.6    | 13.8   | 10.2   | 8.2    | 7.1    | 14.8   |
| 291.9  | 400.5  | 428.1  | 521.8  | 401.6  | 474.9  | 367.2  | 432.8  | 410.9  |
| 75.1   | 107.7  | 90.0   | 24.1   | 17.0   | 19.0   | 10.3   | 8.6    | 11.0   |
| 93.0   | 164.9  | 153.5  | 11.0   | 8.5    | 9.8    | 15.9   | 10.8   | 14.2   |
| 3.9    | 5.9    | 6.6    | 6.5    | 9.4    | 8.7    | 5.4    | 5.8    | 1.4    |
| 528.3  | 620.6  | 420.5  | 708.5  | 572.9  | 640.6  | 300.4  | 279.5  | 305.7  |
| 32.0   | 21.1   | 10.3   | 29.0   | 20.9   | 28.0   | 18.6   | 8.6    | 36.2   |
| 3732.1 | 4225.2 | 4098.2 | 3018.6 | 2554.8 | 2609.0 | 1958.8 | 2008.6 | 2226.7 |
| 7.4    | 7.6    | 7.3    | 17.0   | 15.5   | 12.7   | 4.6    | 7.5    | 11.1   |
| 564.9  | 605.2  | 629.9  | 557.7  | 527.9  | 521.3  | 783.6  | 783.8  | 901.1  |
| 173.3  | 218.5  | 183.2  | 22.2   | 18.1   | 19.3   | 32.2   | 18.6   | 27.1   |
| 12.1   | 43.6   | 20.7   | 18.5   | 7.5    | 7.1    | 6.0    | 6.5    | 6.1    |
| 18.7   | 34.8   | 13.1   | 91.4   | 78.9   | 91.4   | 72.4   | 66.5   | 89.2   |
| 95.5   | 104.2  | 70.3   | 15.8   | 10.6   | 17.2   | 65.4   | 46.3   | 63.9   |
| 157.2  | 174.5  | 126.5  | 427.9  | 319.9  | 456.7  | 182.6  | 199.1  | 187.2  |
| 522.9  | 680.2  | 460.8  | 265.3  | 252.6  | 282.4  | 173.8  | 166.9  | 223.2  |
| 7.3    | 6.7    | 6.9    | 21.2   | 16.6   | 17.1   | 7.3    | 7.8    | 8.2    |
| 2339.9 | 3065.3 | 2319.0 | 734.5  | 450.3  | 591.6  | 853.1  | 605.4  | 710.7  |
| 5.9    | 2.4    | 0.9    | 9.2    | 6.6    | 7.7    | 1.9    | 3.1    | 2.7    |
| 1041.0 | 1617.0 | 1478.0 | 1048.6 | 1050.5 | 1151.8 | 1293.3 | 1413.0 | 1545.0 |
| 201.8  | 304.7  | 187.2  | 250.0  | 206.2  | 241.3  | 151.3  | 133.6  | 162.2  |
| 1.6    | 1.9    | 1.1    | 2.7    | 2.0    | 2.5    | 1.0    | 0.9    | 0.9    |
| 2611.3 | 3000.7 | 1215.4 | 1769.7 | 811.5  | 1020.0 | 1052.9 | 538.0  | 635.8  |
| 15.8   | 8.1    | 23.5   | 6.0    | 7.2    | 5.5    | 10.0   | 7.1    | 14.4   |
| 23.3   | 21.5   | 24.3   | 16.1   | 14.7   | 12.7   | 7.4    | 13.1   | 11.3   |
| 1198.1 | 1323.8 | 848.6  | 2469.9 | 2142.0 | 1995.9 | 1913.5 | 1941.4 | 2201.5 |
| 981.8  | 955.1  | 681.3  | 2303.8 | 2008.4 | 2141.8 | 1464.9 | 1470.4 | 1548.5 |
| 295.4  | 473.2  | 395.9  | 114.6  | 93.8   | 109.9  | 102.1  | 89.8   | 109.7  |
| 6.8    | 4.8    | 7.5    | 3.6    | 2.6    | 4.5    | 7.4    | 7.4    | 5.9    |
| 10.6   | 7.7    | 8.8    | 5.2    | 3.9    | 3.5    | 4.4    | 3.1    | 3.7    |
| 72.7   | 50.7   | 36.8   | 36.0   | 23.5   | 26.3   | 24.1   | 21.0   | 20.2   |
| 5.7    | 7.6    | 4.6    | 5.2    | 3.6    | 5.2    | 4.7    | 3.6    | 2.1    |
| 195.0  | 271.6  | 219.3  | 605.0  | 512.0  | 578.5  | 295.2  | 372.2  | 350.4  |

|        |        |        |        |        |        |        |        |        |
|--------|--------|--------|--------|--------|--------|--------|--------|--------|
| 39.4   | 49.6   | 38.8   | 6.3    | 3.9    | 10.6   | 23.7   | 33.9   | 32.5   |
| 41.0   | 63.7   | 44.0   | 19.8   | 18.6   | 7.9    | 32.9   | 34.2   | 35.1   |
| 4459.6 | 5041.8 | 3885.3 | 1806.6 | 1514.6 | 1501.0 | 882.0  | 1077.8 | 1277.4 |
| 2.4    | 0.7    | 2.0    | 4.5    | 2.6    | 8.6    | 1.9    | 0.4    | 0.5    |
| 2.9    | 2.5    | 1.2    | 12.6   | 8.7    | 7.2    | 3.3    | 3.9    | 3.1    |
| 168.4  | 142.2  | 59.9   | 219.3  | 187.0  | 213.0  | 199.7  | 201.4  | 224.6  |
| 50.1   | 62.2   | 48.0   | 16.8   | 9.2    | 15.2   | 12.3   | 11.9   | 12.6   |
| 18.3   | 24.6   | 11.0   | 25.7   | 14.2   | 12.4   | 12.1   | 6.0    | 7.9    |
| 69.8   | 83.0   | 93.6   | 64.2   | 40.5   | 45.5   | 45.8   | 75.1   | 58.9   |
| 2.8    | 2.7    | 2.4    | 3.2    | 2.8    | 3.4    | 2.7    | 1.3    | 1.7    |
| 34.2   | 49.0   | 69.7   | 44.1   | 31.7   | 32.8   | 30.7   | 30.5   | 39.4   |
| 372.0  | 200.7  | 58.3   | 18.3   | 14.4   | 6.9    | 9.0    | 9.1    | 7.9    |
| 16.8   | 15.3   | 5.3    | 34.8   | 23.9   | 39.6   | 13.4   | 18.6   | 15.1   |
| 19.7   | 10.3   | 13.0   | 13.9   | 17.0   | 7.7    | 12.5   | 14.4   | 8.4    |
| 150.9  | 151.4  | 129.2  | 212.5  | 203.4  | 208.9  | 151.5  | 188.6  | 205.3  |
| 4.7    | 6.0    | 3.1    | 4.6    | 10.2   | 5.4    | 4.0    | 5.8    | 2.7    |
| 8.2    | 7.1    | 9.1    | 13.0   | 3.4    | 6.3    | 8.1    | 5.8    | 2.5    |
| 110.0  | 136.5  | 116.7  | 46.2   | 32.0   | 44.4   | 5.7    | 13.6   | 3.4    |
| 120.2  | 162.7  | 132.0  | 11.6   | 5.1    | 16.3   | 6.9    | 5.5    | 9.5    |
| 56.6   | 81.4   | 57.0   | 91.6   | 79.3   | 92.2   | 42.2   | 37.4   | 43.9   |
| 2901.4 | 2655.4 | 1470.7 | 493.1  | 367.5  | 397.8  | 646.7  | 464.0  | 555.4  |
| 980.3  | 965.1  | 501.7  | 129.6  | 94.5   | 127.7  | 217.5  | 158.8  | 187.0  |
| 44.5   | 59.9   | 32.8   | 18.2   | 12.4   | 20.2   | 24.3   | 17.3   | 14.6   |
| 13.5   | 12.7   | 12.1   | 13.5   | 14.9   | 11.7   | 7.5    | 17.0   | 14.8   |
| 76.0   | 164.4  | 158.2  | 25.1   | 26.1   | 33.5   | 77.3   | 58.7   | 109.2  |
| 7.8    | 9.1    | 16.5   | 17.8   | 10.5   | 15.3   | 12.8   | 11.6   | 7.8    |
| 69.9   | 76.1   | 51.3   | 1.5    | 4.5    | 2.3    | 1.8    | 2.0    | 3.4    |
| 42.2   | 42.8   | 37.3   | 15.8   | 7.3    | 3.8    | 10.4   | 6.1    | 7.1    |
| 1063.4 | 1379.6 | 1053.0 | 794.8  | 691.7  | 774.5  | 469.6  | 487.6  | 572.3  |
| 3.3    | 16.6   | 8.6    | 17.1   | 3.6    | 11.9   | 5.1    | 7.6    | 5.5    |
| 2437.4 | 3277.9 | 2840.9 | 2865.9 | 2382.1 | 2584.3 | 1180.9 | 1253.9 | 1396.1 |
| 86.1   | 161.1  | 119.4  | 1478.9 | 1197.6 | 1366.0 | 785.4  | 753.9  | 822.1  |
| 67.8   | 100.2  | 74.1   | 26.4   | 19.2   | 16.1   | 40.7   | 40.7   | 48.0   |
| 6.4    | 43.3   | 27.0   | 126.7  | 90.6   | 91.1   | 61.9   | 49.7   | 60.4   |
| 23.3   | 20.4   | 17.1   | 3.0    | 2.0    | 5.2    | 1.5    | 3.5    | 2.3    |
| 1.9    | 2.1    | 1.2    | 2.5    | 2.0    | 3.3    | 0.8    | 1.1    | 1.5    |
| 245.0  | 479.5  | 511.7  | 17.4   | 13.7   | 19.4   | 9.5    | 11.4   | 9.5    |
| 5.2    | 8.3    | 1.8    | 3.8    | 4.6    | 3.6    | 5.3    | 4.6    | 1.5    |
| 1138.6 | 1423.1 | 973.4  | 148.8  | 115.6  | 158.2  | 99.8   | 113.6  | 110.4  |
| 50.8   | 102.1  | 87.3   | 171.8  | 127.1  | 145.5  | 119.9  | 135.2  | 145.3  |
| 1818.0 | 2030.0 | 1478.4 | 1250.3 | 1069.1 | 1164.6 | 768.5  | 713.2  | 746.8  |
| 60.9   | 56.7   | 34.0   | 46.5   | 37.6   | 44.5   | 7.7    | 24.9   | 21.5   |
| 194.5  | 253.6  | 189.1  | 95.4   | 98.7   | 114.4  | 73.3   | 101.4  | 95.1   |
| 4.0    | 9.3    | 10.6   | 5.7    | 7.8    | 14.7   | 1.1    | 3.4    | 1.1    |
| 274.1  | 361.3  | 212.7  | 298.4  | 220.8  | 236.7  | 184.8  | 142.2  | 165.9  |
| 860.3  | 1077.3 | 798.2  | 441.9  | 327.8  | 347.4  | 193.2  | 159.6  | 223.0  |
| 709.5  | 723.1  | 498.9  | 1004.4 | 650.5  | 880.7  | 401.0  | 303.3  | 351.7  |
| 17.9   | 2.2    | 8.0    | 17.7   | 12.1   | 15.7   | 14.6   | 10.9   | 9.8    |
| 1.7    | 2.8    | 2.4    | 5.5    | 1.9    | 2.9    | 3.8    | 0.7    | 0.9    |
| 6.4    | 5.0    | 4.5    | 6.5    | 3.9    | 4.4    | 3.7    | 4.0    | 2.2    |
| 3053.2 | 3279.7 | 2791.4 | 1982.7 | 1575.2 | 1675.4 | 1255.6 | 1009.1 | 1271.5 |
| 1996.6 | 1896.1 | 1242.1 | 517.6  | 465.8  | 506.1  | 478.3  | 516.8  | 588.2  |
| 9.2    | 15.2   | 10.9   | 13.3   | 9.2    | 15.3   | 5.9    | 4.4    | 11.2   |

|         |        |        |         |        |        |        |        |        |
|---------|--------|--------|---------|--------|--------|--------|--------|--------|
| 112.0   | 139.9  | 97.0   | 36.2    | 30.5   | 42.9   | 54.3   | 60.0   | 52.7   |
| 56.7    | 67.4   | 44.2   | 18.9    | 22.9   | 15.9   | 33.2   | 26.8   | 38.1   |
| 460.0   | 667.3  | 567.8  | 388.3   | 322.9  | 366.2  | 181.8  | 185.0  | 205.1  |
| 2.6     | 2.2    | 1.1    | 5.9     | 9.0    | 7.5    | 3.2    | 1.9    | 2.8    |
| 2.4     | 0.6    | 0.6    | 6.1     | 3.5    | 8.9    | 3.1    | 2.4    | 2.6    |
| 10.1    | 6.0    | 4.2    | 14.7    | 10.4   | 6.5    | 2.4    | 4.7    | 4.2    |
| 565.6   | 836.2  | 648.9  | 347.6   | 292.6  | 354.9  | 139.2  | 162.3  | 180.5  |
| 5.5     | 9.0    | 1.2    | 2.4     | 4.5    | 2.3    | 1.8    | 1.3    | 2.1    |
| 10249.4 | 9801.6 | 7795.1 | 10827.9 | 9143.5 | 9812.6 | 6644.8 | 5392.8 | 6337.9 |
| 144.9   | 206.9  | 141.2  | 205.6   | 157.8  | 175.6  | 138.9  | 124.3  | 160.5  |
| 703.9   | 911.5  | 700.5  | 529.5   | 481.6  | 589.4  | 260.7  | 303.2  | 322.3  |
| 298.9   | 403.1  | 294.4  | 128.5   | 117.8  | 119.9  | 133.3  | 134.8  | 170.1  |
| 3.5     | 3.8    | 1.8    | 9.0     | 11.5   | 9.4    | 1.6    | 2.7    | 3.3    |
| 737.3   | 953.0  | 848.4  | 304.1   | 277.3  | 275.8  | 258.0  | 269.8  | 320.7  |
| 7.4     | 13.7   | 9.6    | 18.8    | 13.3   | 16.9   | 7.0    | 4.7    | 3.4    |
| 323.8   | 285.3  | 192.5  | 436.7   | 332.7  | 441.9  | 250.3  | 210.0  | 250.0  |
| 25.0    | 44.2   | 23.5   | 274.1   | 245.3  | 346.0  | 118.1  | 153.8  | 180.0  |
| 10.8    | 20.5   | 7.5    | 21.8    | 21.7   | 9.1    | 15.0   | 14.4   | 12.0   |
| 314.3   | 634.3  | 661.7  | 348.8   | 353.2  | 452.7  | 222.4  | 418.5  | 363.9  |
| 3058.7  | 3945.2 | 3082.6 | 1382.6  | 1223.9 | 1263.5 | 939.6  | 1150.0 | 1162.4 |
| 4557.5  | 5503.5 | 4845.7 | 4029.4  | 3534.0 | 3777.3 | 2198.4 | 1955.0 | 2346.6 |
| 394.9   | 296.7  | 164.9  | 37.9    | 43.0   | 38.8   | 21.0   | 17.0   | 15.4   |
| 8765.7  | 8701.7 | 6692.4 | 9860.4  | 8286.6 | 8821.0 | 5879.9 | 5047.6 | 5566.6 |
| 8140.1  | 9014.9 | 8169.6 | 8448.4  | 8353.1 | 9016.2 | 4598.6 | 4999.1 | 5239.0 |
| 1194.8  | 1345.0 | 1124.6 | 828.4   | 727.7  | 726.3  | 670.9  | 702.3  | 740.6  |
| 1388.7  | 1826.5 | 1504.7 | 864.9   | 836.5  | 957.2  | 414.5  | 616.0  | 583.5  |
| 10.2    | 17.7   | 11.6   | 18.7    | 21.0   | 21.3   | 19.6   | 14.5   | 23.0   |
| 147.4   | 194.0  | 137.1  | 46.8    | 24.6   | 17.5   | 39.4   | 26.3   | 32.7   |
| 103.8   | 158.2  | 135.6  | 24.2    | 26.9   | 20.2   | 75.0   | 54.6   | 59.4   |
| 14.8    | 19.3   | 16.9   | 19.5    | 7.4    | 15.8   | 15.9   | 14.0   | 13.1   |
| 832.9   | 1041.1 | 672.3  | 94.5    | 69.2   | 94.0   | 136.3  | 91.9   | 89.9   |
| 79.1    | 84.7   | 60.6   | 34.2    | 19.5   | 29.0   | 60.2   | 50.4   | 50.8   |
| 40.4    | 42.8   | 33.1   | 45.7    | 42.1   | 56.7   | 95.2   | 70.4   | 105.0  |
| 5.2     | 2.7    | 6.9    | 3.6     | 1.4    | 1.9    | 6.0    | 1.8    | 4.0    |
| 305.9   | 328.1  | 206.7  | 53.2    | 44.8   | 61.6   | 40.2   | 42.5   | 40.9   |
| 83.0    | 96.5   | 66.8   | 44.1    | 47.1   | 38.7   | 57.2   | 54.7   | 74.2   |
| 27.2    | 22.3   | 27.2   | 4.3     | 1.2    | 2.0    | 1.0    | 1.8    | 3.0    |
| 125.3   | 125.2  | 96.1   | 38.4    | 24.4   | 40.2   | 42.2   | 33.4   | 34.4   |
| 101.7   | 108.8  | 55.2   | 16.3    | 7.0    | 7.4    | 36.1   | 18.2   | 21.0   |
| 417.6   | 551.8  | 377.0  | 29.9    | 29.6   | 22.5   | 19.3   | 16.7   | 18.7   |
| 659.6   | 887.8  | 614.0  | 323.4   | 247.2  | 283.4  | 385.2  | 347.5  | 375.0  |
| 55.2    | 61.2   | 30.5   | 25.5    | 16.8   | 18.4   | 26.7   | 16.4   | 26.0   |
| 47.5    | 48.2   | 27.2   | 10.9    | 11.9   | 17.2   | 22.5   | 9.8    | 13.2   |
| 0.2     | 0.1    | 3.7    | 1.3     | 1.5    | 3.7    | 0.7    | 0.4    | 0.5    |
| 83.8    | 90.8   | 63.2   | 18.7    | 11.0   | 19.0   | 29.9   | 15.7   | 24.8   |
| 14.2    | 15.4   | 9.7    | 16.6    | 13.1   | 13.2   | 3.9    | 7.3    | 8.7    |
| 18.4    | 36.5   | 25.6   | 37.9    | 33.8   | 20.0   | 26.2   | 18.3   | 20.0   |
| 41.5    | 48.6   | 32.4   | 44.5    | 37.2   | 41.3   | 45.4   | 38.1   | 45.6   |
| 1264.7  | 1650.8 | 1167.7 | 19.1    | 13.1   | 17.2   | 7.6    | 3.3    | 6.1    |
| 1.8     | 2.2    | 2.2    | 3.9     | 5.9    | 6.3    | 4.2    | 5.5    | 5.3    |
| 9.5     | 32.0   | 22.9   | 12.7    | 11.4   | 18.2   | 8.9    | 10.0   | 8.4    |
| 18.3    | 14.2   | 19.1   | 6.3     | 8.0    | 5.4    | 4.9    | 3.7    | 15.7   |
| 1.5     | 1.1    | 0.6    | 5.7     | 4.3    | 10.1   | 1.2    | 4.2    | 0.6    |

|       |        |       |       |       |       |       |       |       |
|-------|--------|-------|-------|-------|-------|-------|-------|-------|
| 2.1   | 3.4    | 1.6   | 9.9   | 7.5   | 6.8   | 2.5   | 6.6   | 3.6   |
| 1.0   | 1.4    | 4.4   | 6.9   | 5.1   | 5.1   | 1.4   | 2.4   | 1.8   |
| 17.5  | 28.0   | 10.7  | 122.9 | 96.9  | 105.7 | 58.6  | 90.4  | 65.4  |
| 19.4  | 13.8   | 8.6   | 11.7  | 15.7  | 31.7  | 8.5   | 13.7  | 15.5  |
| 6.6   | 7.6    | 6.7   | 5.2   | 5.8   | 6.5   | 4.8   | 9.9   | 3.2   |
| 1.4   | 1.8    | 1.3   | 3.1   | 1.7   | 2.9   | 1.1   | 0.7   | 1.1   |
| 6.1   | 3.0    | 0.9   | 5.0   | 6.1   | 2.3   | 1.2   | 4.5   | 1.1   |
| 24.8  | 20.8   | 11.7  | 190.0 | 208.0 | 199.0 | 167.3 | 147.0 | 210.2 |
| 1.9   | 2.4    | 3.1   | 15.0  | 5.1   | 5.4   | 1.1   | 1.8   | 8.5   |
| 12.1  | 4.4    | 3.9   | 54.8  | 37.9  | 32.9  | 29.4  | 28.9  | 17.8  |
| 71.9  | 83.9   | 111.1 | 56.0  | 36.6  | 69.7  | 56.2  | 59.1  | 62.1  |
| 123.5 | 137.8  | 88.2  | 275.2 | 204.0 | 229.0 | 153.2 | 137.3 | 153.5 |
| 194.6 | 261.4  | 170.9 | 438.4 | 334.6 | 378.3 | 270.5 | 217.3 | 245.4 |
| 41.4  | 45.7   | 36.2  | 25.3  | 23.0  | 31.3  | 32.0  | 18.8  | 36.3  |
| 20.8  | 22.6   | 7.8   | 6.6   | 9.7   | 9.5   | 16.6  | 6.1   | 11.5  |
| 27.4  | 18.4   | 2.8   | 21.5  | 2.2   | 11.4  | 3.2   | 10.2  | 8.7   |
| 1.5   | 2.7    | 0.6   | 2.4   | 4.4   | 6.7   | 2.1   | 0.2   | 0.3   |
| 17.1  | 19.5   | 13.2  | 9.4   | 15.8  | 16.5  | 14.9  | 4.7   | 6.7   |
| 73.7  | 98.0   | 60.0  | 28.9  | 14.9  | 7.8   | 19.9  | 6.6   | 7.8   |
| 4.2   | 1.8    | 0.5   | 0.6   | 1.4   | 5.1   | 1.9   | 2.5   | 4.1   |
| 68.7  | 42.7   | 43.3  | 31.0  | 22.4  | 51.7  | 28.5  | 26.9  | 43.2  |
| 155.6 | 231.5  | 183.2 | 10.0  | 19.3  | 17.5  | 25.7  | 24.7  | 31.1  |
| 13.3  | 17.3   | 8.6   | 11.2  | 12.4  | 16.8  | 11.0  | 9.9   | 20.5  |
| 33.3  | 41.8   | 20.5  | 89.3  | 70.0  | 73.0  | 39.8  | 36.1  | 35.4  |
| 3.0   | 7.7    | 2.2   | 9.4   | 11.6  | 6.2   | 5.5   | 6.3   | 3.8   |
| 4.8   | 0.5    | 0.7   | 6.8   | 12.6  | 4.3   | 4.2   | 0.9   | 3.1   |
| 6.0   | 6.2    | 9.7   | 15.0  | 23.1  | 13.0  | 5.3   | 6.9   | 13.9  |
| 12.8  | 19.4   | 18.8  | 24.9  | 17.5  | 16.5  | 13.5  | 12.6  | 6.4   |
| 2.7   | 4.4    | 1.7   | 4.5   | 6.8   | 4.6   | 6.3   | 1.3   | 1.2   |
| 1.9   | 3.4    | 5.8   | 9.7   | 4.7   | 14.1  | 2.4   | 3.9   | 3.9   |
| 5.4   | 8.2    | 4.4   | 26.6  | 24.1  | 30.9  | 11.2  | 8.1   | 23.5  |
| 4.4   | 7.3    | 2.6   | 6.1   | 12.4  | 11.8  | 2.6   | 5.9   | 4.1   |
| 864.2 | 1061.6 | 784.0 | 329.4 | 327.4 | 393.7 | 588.8 | 572.6 | 595.8 |
| 250.4 | 278.6  | 215.4 | 131.5 | 107.3 | 111.6 | 106.9 | 101.0 | 121.8 |
| 4.8   | 7.1    | 7.0   | 236.9 | 212.3 | 207.6 | 259.1 | 188.4 | 231.8 |
| 223.5 | 171.0  | 77.8  | 37.7  | 30.5  | 36.5  | 29.3  | 25.1  | 28.3  |
| 46.1  | 92.9   | 20.3  | 10.9  | 27.4  | 20.8  | 40.8  | 40.5  | 38.6  |
| 44.1  | 58.3   | 41.8  | 27.3  | 39.2  | 46.3  | 21.3  | 29.1  | 29.8  |
| 4.1   | 4.1    | 5.4   | 8.6   | 8.3   | 6.0   | 3.3   | 2.4   | 4.0   |
| 7.2   | 10.7   | 8.5   | 47.1  | 37.2  | 55.5  | 12.4  | 22.6  | 18.0  |
| 18.9  | 13.8   | 8.7   | 430.3 | 421.3 | 505.5 | 232.3 | 273.1 | 309.3 |
| 5.2   | 2.0    | 1.5   | 1.9   | 2.9   | 2.6   | 0.9   | 2.0   | 2.0   |
| 1.5   | 0.8    | 1.0   | 2.7   | 2.4   | 2.2   | 1.0   | 1.0   | 0.8   |
| 1.7   | 2.6    | 2.8   | 5.2   | 6.7   | 3.6   | 1.6   | 2.5   | 2.3   |
| 3.0   | 0.8    | 4.2   | 9.7   | 8.6   | 6.6   | 1.2   | 1.0   | 1.0   |
| 86.5  | 165.5  | 125.7 | 6.7   | 5.1   | 1.6   | 2.4   | 5.9   | 3.1   |
| 615.1 | 853.4  | 523.5 | 198.8 | 125.3 | 157.9 | 185.8 | 121.6 | 155.7 |
| 3.1   | 1.4    | 2.1   | 6.6   | 14.6  | 9.6   | 3.2   | 3.1   | 7.4   |
| 217.7 | 272.4  | 170.4 | 217.7 | 169.1 | 228.7 | 86.6  | 131.1 | 102.6 |
| 5.7   | 1.1    | 1.7   | 4.2   | 6.9   | 3.7   | 3.9   | 0.6   | 1.5   |
| 13.8  | 5.0    | 3.1   | 8.5   | 4.7   | 12.2  | 3.2   | 4.0   | 3.2   |
| 7.8   | 4.3    | 2.9   | 5.0   | 9.1   | 6.0   | 3.1   | 3.5   | 7.5   |
| 3.9   | 1.0    | 1.7   | 11.4  | 8.6   | 6.7   | 3.4   | 2.0   | 1.6   |



|        |        |        |        |        |        |        |        |        |
|--------|--------|--------|--------|--------|--------|--------|--------|--------|
| 5.4    | 8.5    | 3.1    | 17.7   | 11.7   | 7.5    | 9.5    | 3.9    | 9.9    |
| 224.7  | 289.7  | 262.4  | 157.5  | 137.2  | 160.1  | 148.6  | 135.9  | 149.5  |
| 598.1  | 734.6  | 360.8  | 431.2  | 363.9  | 385.2  | 255.3  | 295.4  | 287.1  |
| 4.0    | 4.9    | 4.2    | 8.5    | 6.5    | 6.5    | 4.5    | 1.2    | 3.5    |
| 695.0  | 1041.8 | 771.0  | 76.7   | 31.9   | 60.3   | 256.3  | 76.8   | 172.4  |
| 44.3   | 31.3   | 20.6   | 8.9    | 9.0    | 11.8   | 8.2    | 7.6    | 6.1    |
| 1.3    | 4.1    | 4.4    | 6.1    | 15.2   | 4.5    | 2.8    | 3.0    | 4.3    |
| 521.7  | 842.6  | 563.1  | 6.4    | 3.2    | 7.0    | 2.5    | 1.6    | 1.7    |
| 13.4   | 13.6   | 17.2   | 31.1   | 34.8   | 42.5   | 4.6    | 17.0   | 5.1    |
| 3.3    | 3.1    | 8.7    | 13.1   | 6.1    | 4.7    | 2.7    | 11.1   | 2.8    |
| 266.1  | 366.5  | 233.5  | 235.1  | 207.5  | 209.3  | 136.6  | 151.9  | 166.7  |
| 0.3    | 5.4    | 4.0    | 13.5   | 14.1   | 4.7    | 3.0    | 4.8    | 2.8    |
| 8.6    | 7.0    | 6.2    | 13.7   | 4.7    | 6.1    | 6.9    | 4.3    | 7.4    |
| 23.5   | 20.7   | 27.6   | 24.1   | 23.1   | 32.5   | 13.0   | 14.7   | 13.9   |
| 29.7   | 14.7   | 39.5   | 50.9   | 37.9   | 41.4   | 29.1   | 19.9   | 18.4   |
| 2.8    | 9.7    | 2.8    | 12.0   | 6.6    | 15.5   | 5.1    | 4.5    | 5.9    |
| 13.7   | 9.9    | 8.3    | 26.5   | 14.4   | 18.7   | 5.8    | 14.7   | 9.1    |
| 7.0    | 1.9    | 6.1    | 9.6    | 8.1    | 7.0    | 3.0    | 2.3    | 5.2    |
| 13.1   | 21.1   | 12.1   | 14.4   | 12.7   | 16.4   | 11.2   | 3.8    | 17.1   |
| 139.2  | 242.2  | 211.7  | 145.3  | 164.5  | 185.1  | 106.7  | 139.2  | 134.1  |
| 12.0   | 4.8    | 3.3    | 10.6   | 23.2   | 14.3   | 11.8   | 8.2    | 12.8   |
| 0.9    | 4.3    | 2.8    | 9.1    | 6.7    | 9.8    | 0.9    | 3.8    | 0.9    |
| 68.8   | 80.8   | 51.6   | 11.7   | 22.2   | 14.7   | 20.9   | 19.3   | 16.0   |
| 27.7   | 52.4   | 23.1   | 17.5   | 12.0   | 7.6    | 8.0    | 9.5    | 3.2    |
| 37.3   | 55.0   | 37.4   | 13.6   | 15.4   | 8.2    | 4.6    | 14.1   | 8.4    |
| 362.2  | 641.7  | 621.6  | 23.2   | 14.9   | 9.7    | 8.9    | 6.3    | 8.4    |
| 3519.1 | 3902.7 | 3018.8 | 2133.9 | 1844.9 | 1955.7 | 1977.0 | 2128.1 | 2271.8 |
| 1.7    | 1.9    | 1.4    | 3.6    | 2.7    | 3.0    | 1.6    | 1.3    | 1.9    |
| 4.1    | 4.4    | 0.3    | 6.5    | 2.9    | 0.9    | 4.4    | 2.2    | 1.7    |
| 13.0   | 17.3   | 4.7    | 20.5   | 15.2   | 15.3   | 13.6   | 10.9   | 8.7    |
| 15.1   | 7.0    | 10.5   | 27.5   | 17.7   | 20.5   | 13.0   | 10.3   | 15.0   |
| 2.8    | 4.6    | 4.6    | 3.7    | 6.6    | 13.1   | 8.5    | 3.3    | 7.9    |
| 1.0    | 1.2    | 1.3    | 1.4    | 1.4    | 1.1    | 1.3    | 0.6    | 0.8    |
| 1.5    | 1.2    | 1.1    | 3.1    | 1.8    | 3.1    | 5.7    | 1.1    | 2.5    |
| 10.1   | 16.2   | 7.8    | 9.5    | 9.4    | 10.2   | 9.7    | 8.0    | 6.4    |
| 6.2    | 8.2    | 5.9    | 11.8   | 16.9   | 13.7   | 12.3   | 12.5   | 12.3   |
| 23.5   | 20.3   | 15.0   | 13.2   | 19.1   | 24.5   | 6.2    | 13.1   | 8.8    |
| 4.8    | 3.6    | 4.0    | 12.9   | 11.6   | 6.4    | 2.8    | 3.8    | 5.2    |
| 13.8   | 14.4   | 18.5   | 42.0   | 40.9   | 53.4   | 21.1   | 26.6   | 33.7   |
| 6.2    | 6.1    | 3.1    | 4.9    | 8.2    | 3.7    | 8.8    | 4.9    | 6.4    |
| 1.7    | 2.4    | 1.1    | 7.4    | 4.2    | 8.3    | 10.3   | 5.4    | 14.2   |
| 79.2   | 86.6   | 49.9   | 75.2   | 48.7   | 58.7   | 54.8   | 50.9   | 62.5   |
| 1.8    | 5.1    | 1.5    | 4.2    | 2.1    | 3.9    | 2.0    | 1.4    | 5.1    |
| 157.7  | 253.6  | 286.5  | 763.7  | 736.2  | 870.7  | 415.1  | 590.2  | 565.5  |
| 10.8   | 28.2   | 7.7    | 41.5   | 38.7   | 50.9   | 44.4   | 46.1   | 48.1   |
| 17.5   | 25.0   | 8.8    | 11.9   | 10.0   | 10.3   | 16.7   | 5.1    | 13.1   |
| 125.4  | 123.6  | 87.4   | 26.4   | 28.3   | 42.1   | 34.6   | 47.3   | 47.3   |
| 4.0    | 6.2    | 0.9    | 8.8    | 6.9    | 11.0   | 1.9    | 6.8    | 5.4    |
| 840.2  | 960.3  | 801.7  | 604.4  | 436.7  | 529.5  | 441.8  | 392.8  | 452.5  |
| 7.6    | 4.0    | 1.9    | 6.3    | 3.0    | 2.4    | 3.0    | 7.2    | 3.1    |
| 16.8   | 11.4   | 16.2   | 8.8    | 10.0   | 6.8    | 6.2    | 7.2    | 11.6   |
| 6.1    | 19.7   | 10.5   | 6.4    | 4.3    | 6.2    | 16.3   | 5.0    | 4.5    |
| 359.0  | 374.8  | 203.6  | 148.2  | 114.8  | 120.3  | 226.7  | 183.0  | 192.2  |

|        |        |        |        |        |        |        |        |        |
|--------|--------|--------|--------|--------|--------|--------|--------|--------|
| 9.2    | 7.9    | 6.0    | 3.9    | 2.0    | 9.8    | 2.9    | 4.2    | 6.9    |
| 2.9    | 4.3    | 3.1    | 4.0    | 10.9   | 5.0    | 6.8    | 11.0   | 10.3   |
| 17.9   | 10.7   | 1.3    | 11.8   | 15.3   | 23.5   | 12.7   | 14.3   | 16.2   |
| 8.4    | 30.0   | 66.2   | 20.1   | 14.4   | 20.4   | 19.9   | 15.1   | 4.2    |
| 2.0    | 2.5    | 6.4    | 5.5    | 1.1    | 4.3    | 3.4    | 0.3    | 1.4    |
| 6.3    | 2.0    | 5.3    | 21.8   | 11.7   | 11.6   | 12.0   | 4.9    | 6.4    |
| 75.1   | 84.5   | 60.2   | 44.9   | 29.8   | 34.7   | 73.9   | 54.6   | 66.5   |
| 2.3    | 10.2   | 6.0    | 6.0    | 6.7    | 14.0   | 4.7    | 3.6    | 0.9    |
| 18.2   | 26.3   | 12.3   | 10.1   | 6.7    | 12.5   | 22.3   | 18.6   | 27.6   |
| 5.1    | 10.2   | 1.5    | 5.6    | 8.1    | 9.7    | 2.8    | 0.9    | 2.1    |
| 7.5    | 2.1    | 1.6    | 3.8    | 4.5    | 11.0   | 5.1    | 5.2    | 2.1    |
| 2.8    | 7.1    | 4.7    | 16.7   | 9.6    | 17.6   | 4.6    | 2.5    | 3.6    |
| 8.9    | 8.0    | 5.6    | 8.1    | 2.8    | 3.5    | 2.4    | 6.5    | 2.3    |
| 2.5    | 2.9    | 1.9    | 22.0   | 11.8   | 13.8   | 8.6    | 13.2   | 10.0   |
| 312.0  | 451.2  | 362.9  | 149.4  | 124.1  | 158.0  | 95.2   | 114.8  | 107.2  |
| 20.0   | 18.3   | 16.6   | 31.4   | 25.1   | 41.6   | 18.4   | 17.3   | 16.2   |
| 9.3    | 5.0    | 2.2    | 24.6   | 10.7   | 18.8   | 6.4    | 5.6    | 9.6    |
| 3.9    | 2.9    | 2.1    | 11.0   | 4.6    | 5.1    | 2.9    | 2.0    | 2.8    |
| 2.7    | 1.9    | 9.3    | 19.9   | 14.4   | 24.0   | 10.9   | 6.6    | 11.0   |
| 6.9    | 9.9    | 8.6    | 15.3   | 16.5   | 14.2   | 9.5    | 18.6   | 11.5   |
| 11.3   | 3.1    | 15.5   | 21.9   | 22.3   | 31.7   | 37.7   | 23.3   | 30.3   |
| 280.2  | 389.0  | 236.7  | 123.7  | 96.0   | 142.5  | 81.2   | 65.0   | 92.5   |
| 11.9   | 7.9    | 1.1    | 15.5   | 16.8   | 24.8   | 9.9    | 5.0    | 5.8    |
| 0.5    | 3.1    | 0.4    | 14.5   | 9.5    | 1.9    | 5.1    | 0.4    | 3.5    |
| 699.1  | 930.4  | 845.4  | 987.5  | 827.3  | 1084.8 | 625.3  | 724.3  | 780.1  |
| 84.5   | 105.3  | 77.4   | 70.5   | 86.6   | 86.6   | 70.5   | 41.6   | 71.7   |
| 16.1   | 10.4   | 15.0   | 18.5   | 14.8   | 10.9   | 11.9   | 4.4    | 4.6    |
| 6.2    | 4.1    | 2.0    | 24.1   | 13.6   | 18.7   | 6.6    | 13.2   | 11.8   |
| 15.2   | 13.9   | 3.8    | 37.4   | 24.5   | 25.3   | 10.1   | 17.6   | 13.6   |
| 25.1   | 21.1   | 7.4    | 17.4   | 19.4   | 22.6   | 16.0   | 8.8    | 14.0   |
| 48.9   | 72.8   | 50.0   | 81.2   | 61.5   | 81.7   | 53.1   | 48.7   | 63.6   |
| 206.4  | 249.4  | 194.9  | 134.8  | 113.0  | 137.3  | 106.3  | 99.8   | 93.1   |
| 127.3  | 100.7  | 51.3   | 67.5   | 85.6   | 87.9   | 29.6   | 36.5   | 34.1   |
| 8.4    | 4.3    | 3.1    | 9.7    | 5.1    | 13.7   | 14.1   | 7.4    | 4.7    |
| 22.7   | 46.2   | 30.6   | 56.1   | 39.9   | 23.6   | 42.2   | 35.8   | 33.2   |
| 254.1  | 300.4  | 192.0  | 118.4  | 99.1   | 115.8  | 142.7  | 130.6  | 156.0  |
| 87.7   | 98.3   | 77.5   | 57.1   | 51.3   | 39.7   | 38.9   | 39.6   | 45.9   |
| 736.9  | 1016.9 | 841.4  | 395.4  | 392.8  | 410.3  | 256.6  | 318.2  | 334.3  |
| 95.3   | 77.5   | 40.7   | 39.5   | 19.6   | 33.9   | 22.2   | 16.3   | 16.9   |
| 340.3  | 478.4  | 387.7  | 733.5  | 396.1  | 475.3  | 752.1  | 501.9  | 602.4  |
| 53.3   | 52.6   | 38.5   | 58.5   | 52.1   | 53.4   | 42.9   | 18.2   | 31.4   |
| 52.1   | 54.8   | 38.4   | 72.3   | 47.4   | 79.0   | 20.6   | 28.9   | 22.8   |
| 24.6   | 23.8   | 17.6   | 9.7    | 9.1    | 8.9    | 11.0   | 9.9    | 12.1   |
| 19.4   | 16.0   | 8.9    | 26.3   | 21.5   | 19.5   | 15.0   | 16.2   | 13.4   |
| 5.3    | 2.5    | 1.0    | 5.5    | 5.6    | 12.6   | 0.5    | 4.1    | 0.8    |
| 3.1    | 2.5    | 0.5    | 9.5    | 3.9    | 5.5    | 0.5    | 1.0    | 4.5    |
| 8.9    | 9.7    | 6.3    | 12.1   | 11.0   | 13.2   | 1.5    | 3.8    | 2.4    |
| 20.9   | 27.0   | 26.7   | 5.7    | 6.2    | 2.6    | 2.0    | 11.7   | 12.0   |
| 13.9   | 18.8   | 12.0   | 30.5   | 33.3   | 25.9   | 33.1   | 9.5    | 29.5   |
| 2638.7 | 2868.5 | 2089.5 | 2030.1 | 1338.5 | 1629.6 | 1347.6 | 1071.6 | 1160.5 |
| 2723.1 | 2849.8 | 2076.7 | 2014.3 | 1331.5 | 1777.7 | 1233.1 | 956.0  | 1063.8 |
| 41.7   | 55.1   | 51.3   | 4.7    | 4.7    | 6.1    | 9.0    | 11.3   | 9.7    |
| 1.1    | 1.7    | 7.0    | 6.0    | 6.5    | 7.1    | 1.3    | 2.2    | 6.1    |

|         |        |        |         |         |         |        |        |        |
|---------|--------|--------|---------|---------|---------|--------|--------|--------|
| 11.8    | 20.2   | 6.7    | 8.7     | 5.0     | 8.1     | 1.3    | 1.7    | 1.3    |
| 2376.2  | 2889.8 | 2178.0 | 1237.3  | 1029.2  | 1101.2  | 831.1  | 858.7  | 940.1  |
| 6.8     | 2.9    | 7.4    | 9.8     | 11.5    | 14.0    | 6.6    | 7.7    | 9.2    |
| 139.1   | 146.8  | 118.3  | 54.8    | 44.0    | 57.2    | 55.6   | 34.5   | 40.4   |
| 29.3    | 27.5   | 11.3   | 32.3    | 32.8    | 23.1    | 17.4   | 16.7   | 22.1   |
| 32.5    | 40.8   | 28.4   | 27.4    | 16.4    | 32.7    | 28.1   | 21.4   | 18.3   |
| 27.8    | 56.5   | 46.1   | 23.2    | 21.6    | 27.4    | 25.0   | 35.3   | 23.2   |
| 428.6   | 764.1  | 812.0  | 310.4   | 415.1   | 483.0   | 260.7  | 521.7  | 466.9  |
| 898.1   | 1014.8 | 710.6  | 1246.9  | 981.3   | 1045.2  | 867.8  | 928.3  | 956.8  |
| 5.1     | 1.3    | 4.1    | 6.2     | 5.5     | 6.9     | 3.5    | 1.4    | 1.0    |
| 12.4    | 6.7    | 5.3    | 21.0    | 16.4    | 16.0    | 10.2   | 11.1   | 10.6   |
| 167.2   | 192.2  | 125.8  | 64.1    | 59.9    | 66.5    | 48.8   | 55.2   | 53.4   |
| 24.3    | 11.8   | 14.2   | 44.9    | 48.3    | 36.8    | 32.9   | 22.9   | 25.9   |
| 10168.1 | 9698.2 | 9404.4 | 10981.0 | 10858.2 | 11010.2 | 7403.6 | 7682.3 | 7910.2 |
| 952.7   | 980.2  | 623.2  | 400.7   | 375.1   | 384.9   | 262.4  | 327.5  | 314.7  |
| 5.4     | 7.4    | 3.2    | 10.9    | 8.6     | 4.2     | 4.8    | 5.2    | 3.0    |
| 198.2   | 303.0  | 274.1  | 97.9    | 89.8    | 90.4    | 164.7  | 178.6  | 189.0  |
| 144.8   | 375.9  | 289.9  | 291.8   | 203.5   | 214.6   | 366.4  | 313.0  | 391.2  |
| 10.7    | 7.4    | 1.5    | 20.1    | 13.5    | 10.3    | 9.9    | 5.2    | 11.5   |
| 7.7     | 13.5   | 12.2   | 16.9    | 7.6     | 9.7     | 14.0   | 7.9    | 14.5   |
| 4.4     | 11.5   | 5.4    | 23.7    | 11.8    | 12.4    | 21.1   | 12.1   | 14.1   |
| 24.4    | 22.8   | 22.3   | 24.2    | 25.3    | 20.7    | 15.5   | 10.5   | 21.3   |
| 23.6    | 28.4   | 21.5   | 25.0    | 18.6    | 24.2    | 13.9   | 4.5    | 5.2    |
| 0.7     | 1.6    | 0.6    | 2.6     | 1.3     | 1.1     | 0.6    | 0.7    | 0.7    |
| 0.8     | 1.2    | 1.0    | 1.1     | 1.2     | 1.8     | 2.1    | 2.4    | 3.7    |
| 0.6     | 1.5    | 3.1    | 3.4     | 3.3     | 3.0     | 3.1    | 2.9    | 4.9    |
| 3.0     | 2.9    | 2.2    | 6.8     | 4.2     | 10.8    | 2.2    | 1.7    | 3.4    |
| 15.6    | 13.7   | 1.9    | 47.4    | 35.7    | 43.9    | 15.1   | 10.4   | 8.3    |
| 1.1     | 1.4    | 1.5    | 3.2     | 3.7     | 5.0     | 0.9    | 0.9    | 1.0    |
| 4.6     | 1.4    | 4.2    | 10.0    | 5.0     | 9.8     | 1.7    | 1.6    | 2.3    |
| 130.0   | 205.8  | 153.3  | 168.7   | 134.3   | 171.3   | 89.3   | 115.5  | 122.1  |
| 103.9   | 160.2  | 129.9  | 121.2   | 94.8    | 119.4   | 61.2   | 84.5   | 93.0   |
| 1520.7  | 1677.6 | 1182.6 | 3223.6  | 2798.3  | 3089.4  | 2091.5 | 2098.9 | 2265.8 |
| 5.0     | 2.6    | 5.4    | 12.3    | 19.8    | 17.2    | 5.6    | 7.6    | 3.7    |
| 22.4    | 24.1   | 27.4   | 43.6    | 37.1    | 55.2    | 32.5   | 28.3   | 23.8   |
| 3.3     | 5.8    | 2.1    | 5.4     | 6.5     | 4.6     | 3.2    | 1.7    | 2.6    |
| 124.6   | 89.5   | 52.2   | 5.2     | 9.7     | 8.6     | 11.3   | 8.0    | 5.6    |
| 4.9     | 1.2    | 3.4    | 4.9     | 5.5     | 1.7     | 0.6    | 0.5    | 1.6    |
| 366.6   | 589.4  | 415.1  | 152.6   | 127.3   | 162.4   | 156.7  | 139.3  | 110.8  |
| 51.6    | 59.5   | 48.1   | 13.3    | 17.1    | 19.3    | 19.3   | 9.7    | 10.7   |
| 88.2    | 102.4  | 106.8  | 27.4    | 30.8    | 25.9    | 21.9   | 16.2   | 21.6   |
| 82.2    | 91.8   | 80.1   | 35.8    | 24.2    | 24.1    | 31.0   | 25.9   | 24.9   |
| 102.3   | 143.3  | 124.6  | 10.0    | 22.6    | 28.9    | 8.6    | 12.7   | 10.8   |
| 129.9   | 189.1  | 172.8  | 8.8     | 12.9    | 4.7     | 5.8    | 8.1    | 3.4    |
| 19.9    | 41.5   | 70.2   | 3.2     | 4.7     | 7.5     | 1.8    | 2.4    | 1.7    |
| 62.8    | 96.6   | 78.4   | 34.4    | 38.5    | 17.3    | 47.2   | 18.5   | 23.6   |
| 75.4    | 46.0   | 41.3   | 13.4    | 14.3    | 18.9    | 13.7   | 9.4    | 15.3   |
| 7.5     | 7.1    | 5.9    | 12.1    | 9.1     | 15.4    | 4.0    | 4.2    | 4.5    |
| 6.3     | 2.8    | 2.8    | 17.0    | 26.8    | 9.9     | 8.0    | 5.8    | 11.6   |
| 330.2   | 372.6  | 223.1  | 284.8   | 184.8   | 219.5   | 183.3  | 163.9  | 174.8  |
| 4.0     | 5.1    | 0.6    | 5.9     | 2.3     | 3.8     | 1.8    | 3.2    | 4.4    |
| 10.8    | 9.3    | 8.3    | 10.7    | 17.0    | 16.4    | 10.2   | 9.1    | 7.9    |
| 16.0    | 8.8    | 8.3    | 91.4    | 55.3    | 57.7    | 44.5   | 35.9   | 47.9   |

|         |         |         |         |         |         |        |        |        |
|---------|---------|---------|---------|---------|---------|--------|--------|--------|
| 4.8     | 2.6     | 1.0     | 4.1     | 5.4     | 9.4     | 1.0    | 1.0    | 0.4    |
| 103.0   | 117.9   | 93.0    | 121.6   | 104.5   | 114.0   | 78.1   | 81.4   | 97.0   |
| 1.6     | 3.6     | 2.0     | 4.7     | 7.2     | 16.3    | 8.4    | 3.6    | 4.7    |
| 6567.1  | 7240.4  | 6350.9  | 6933.5  | 6560.6  | 6975.2  | 4039.4 | 4157.6 | 4413.1 |
| 8.1     | 6.2     | 18.2    | 11.7    | 11.4    | 8.1     | 12.0   | 14.0   | 9.0    |
| 10.9    | 22.1    | 18.0    | 5.4     | 3.5     | 14.9    | 1.7    | 1.1    | 7.0    |
| 17.1    | 7.4     | 11.0    | 19.8    | 18.6    | 33.2    | 16.9   | 8.0    | 11.2   |
| 2.9     | 4.8     | 3.0     | 16.2    | 10.0    | 14.5    | 13.6   | 5.0    | 8.9    |
| 4.2     | 4.8     | 1.7     | 0.9     | 4.1     | 7.1     | 2.7    | 0.5    | 1.9    |
| 130.9   | 181.4   | 204.0   | 473.3   | 417.5   | 455.9   | 527.5  | 540.9  | 637.7  |
| 0.9     | 0.9     | 1.7     | 3.3     | 1.4     | 3.0     | 1.0    | 0.6    | 1.4    |
| 59.6    | 117.1   | 93.5    | 21.3    | 35.6    | 31.5    | 19.2   | 27.1   | 25.3   |
| 84.7    | 103.2   | 102.9   | 37.0    | 29.9    | 46.3    | 35.1   | 41.2   | 38.1   |
| 98.4    | 146.4   | 134.9   | 43.8    | 42.2    | 56.4    | 43.1   | 39.7   | 44.2   |
| 1.6     | 6.6     | 7.5     | 3.3     | 1.3     | 5.2     | 0.8    | 2.8    | 2.0    |
| 353.0   | 542.4   | 422.3   | 722.4   | 493.1   | 563.8   | 572.4  | 466.8  | 520.3  |
| 18.3    | 16.6    | 9.5     | 22.3    | 16.8    | 23.8    | 8.3    | 7.6    | 12.2   |
| 23.0    | 37.9    | 20.3    | 9.2     | 8.6     | 8.9     | 4.5    | 6.2    | 6.2    |
| 3.7     | 0.2     | 1.4     | 9.2     | 5.6     | 5.5     | 3.0    | 1.8    | 2.9    |
| 13.5    | 11.7    | 9.2     | 23.1    | 14.7    | 17.5    | 5.9    | 12.9   | 13.4   |
| 191.8   | 170.2   | 117.3   | 7.6     | 11.2    | 14.9    | 22.2   | 15.0   | 17.7   |
| 24.0    | 43.9    | 14.3    | 24.2    | 28.4    | 22.9    | 21.3   | 23.6   | 24.3   |
| 1.0     | 0.8     | 0.5     | 2.8     | 4.3     | 1.4     | 0.6    | 0.5    | 0.5    |
| 172.9   | 394.2   | 478.9   | 42.7    | 29.0    | 39.8    | 41.0   | 20.2   | 25.8   |
| 63.0    | 163.1   | 215.4   | 5.3     | 8.5     | 8.4     | 4.0    | 1.9    | 0.4    |
| 120.0   | 277.1   | 362.0   | 1.3     | 4.3     | 7.9     | 2.6    | 1.0    | 2.0    |
| 4.4     | 2.8     | 0.8     | 13.9    | 11.9    | 8.1     | 11.3   | 1.5    | 10.6   |
| 164.6   | 237.0   | 226.0   | 121.9   | 123.7   | 141.9   | 79.1   | 122.0  | 118.2  |
| 6.7     | 1.9     | 13.4    | 6.3     | 15.2    | 5.3     | 12.0   | 2.9    | 0.8    |
| 434.7   | 441.1   | 254.3   | 4.5     | 3.9     | 6.8     | 6.1    | 3.6    | 1.6    |
| 211.9   | 313.3   | 374.4   | 177.6   | 155.0   | 160.9   | 85.0   | 111.6  | 122.2  |
| 15.8    | 27.6    | 20.4    | 16.7    | 6.8     | 28.1    | 9.9    | 12.2   | 11.5   |
| 1412.6  | 1610.5  | 912.7   | 1463.2  | 1012.1  | 1129.1  | 993.1  | 879.1  | 988.9  |
| 556.6   | 603.5   | 355.5   | 261.3   | 201.1   | 214.2   | 217.0  | 209.8  | 224.0  |
| 1.9     | 3.4     | 8.4     | 2.8     | 1.9     | 3.1     | 1.2    | 0.7    | 0.9    |
| 11388.8 | 11311.2 | 10436.7 | 13067.1 | 12097.3 | 12749.8 | 7619.2 | 7111.0 | 7760.6 |
| 1.2     | 0.5     | 0.4     | 255.3   | 158.4   | 179.9   | 469.4  | 363.6  | 447.8  |
| 3.3     | 3.6     | 4.2     | 18.0    | 8.2     | 13.6    | 2.5    | 2.4    | 3.2    |
| 1.0     | 1.6     | 2.0     | 3.5     | 5.9     | 3.6     | 1.8    | 5.8    | 4.4    |
| 221.2   | 260.1   | 244.9   | 108.4   | 81.0    | 104.0   | 78.6   | 68.4   | 84.0   |
| 209.1   | 277.5   | 314.3   | 154.9   | 152.1   | 148.4   | 101.6  | 101.9  | 137.1  |
| 6.2     | 2.5     | 2.3     | 9.8     | 8.7     | 10.3    | 1.5    | 1.6    | 2.3    |
| 419.5   | 482.8   | 426.3   | 209.6   | 165.4   | 211.6   | 132.7  | 138.8  | 162.8  |
| 8.6     | 1.4     | 0.4     | 6.4     | 6.2     | 3.9     | 1.5    | 0.8    | 6.4    |
| 27.1    | 36.0    | 33.5    | 43.2    | 26.7    | 28.2    | 36.6   | 27.6   | 36.4   |
| 16.1    | 6.9     | 8.9     | 20.7    | 13.4    | 16.8    | 7.1    | 10.4   | 7.9    |
| 2.4     | 3.3     | 1.8     | 5.7     | 4.4     | 5.0     | 3.2    | 3.0    | 3.6    |
| 1.3     | 0.9     | 0.8     | 3.5     | 5.1     | 2.4     | 1.3    | 1.0    | 1.0    |
| 74.1    | 106.2   | 68.9    | 122.1   | 118.5   | 139.8   | 130.8  | 125.5  | 141.3  |
| 159.0   | 235.9   | 145.1   | 211.2   | 178.1   | 236.9   | 258.9  | 262.2  | 299.8  |
| 18.1    | 15.7    | 14.1    | 26.7    | 25.7    | 29.0    | 14.5   | 15.7   | 9.3    |
| 22.5    | 46.1    | 23.0    | 18.4    | 29.0    | 26.8    | 18.0   | 25.7   | 15.6   |
| 7.9     | 2.7     | 6.5     | 9.0     | 3.7     | 8.5     | 3.2    | 1.7    | 5.9    |

|        |        |        |        |        |        |        |        |        |
|--------|--------|--------|--------|--------|--------|--------|--------|--------|
| 3.2    | 6.7    | 2.7    | 4.1    | 4.7    | 4.8    | 2.2    | 2.6    | 3.4    |
| 5.9    | 18.7   | 5.1    | 14.3   | 19.1   | 22.6   | 15.3   | 10.4   | 13.3   |
| 6.7    | 4.0    | 2.9    | 8.5    | 8.8    | 7.2    | 8.4    | 5.5    | 2.4    |
| 5.3    | 5.7    | 1.6    | 4.8    | 1.9    | 9.7    | 4.9    | 1.7    | 2.0    |
| 1.6    | 1.9    | 1.3    | 2.4    | 2.7    | 3.2    | 2.0    | 1.5    | 2.6    |
| 42.2   | 41.0   | 16.5   | 20.3   | 12.6   | 15.6   | 23.2   | 7.2    | 16.9   |
| 9.7    | 16.6   | 6.2    | 14.6   | 24.3   | 20.3   | 12.2   | 7.9    | 20.5   |
| 1786.3 | 2139.0 | 1836.3 | 1094.3 | 826.9  | 925.1  | 1007.8 | 1120.7 | 1110.6 |
| 37.1   | 39.1   | 28.5   | 33.9   | 33.1   | 34.7   | 48.3   | 41.4   | 35.6   |
| 109.6  | 112.6  | 81.8   | 244.9  | 199.8  | 214.2  | 78.1   | 63.7   | 68.5   |
| 23.5   | 30.3   | 19.5   | 25.8   | 22.1   | 22.7   | 19.3   | 19.1   | 20.3   |
| 13.6   | 10.2   | 6.9    | 21.2   | 25.8   | 20.8   | 22.6   | 10.8   | 19.7   |
| 7.1    | 2.4    | 8.7    | 3.5    | 3.8    | 4.3    | 1.1    | 2.7    | 1.0    |
| 0.7    | 3.9    | 0.6    | 8.6    | 2.5    | 9.3    | 2.3    | 1.0    | 4.2    |
| 4.2    | 5.9    | 1.6    | 14.3   | 6.8    | 8.0    | 1.5    | 1.2    | 1.3    |
| 10.9   | 15.2   | 1.8    | 17.8   | 17.7   | 17.9   | 12.8   | 9.0    | 11.3   |
| 51.1   | 76.6   | 75.7   | 119.5  | 90.4   | 106.3  | 77.6   | 46.9   | 73.6   |
| 125.9  | 152.8  | 155.6  | 218.1  | 135.3  | 181.5  | 126.6  | 81.7   | 123.6  |
| 57.8   | 73.3   | 58.9   | 5.0    | 5.3    | 6.9    | 6.8    | 6.0    | 7.8    |
| 4.9    | 1.3    | 0.8    | 279.8  | 161.2  | 178.2  | 236.8  | 139.9  | 219.3  |
| 7.7    | 8.1    | 7.9    | 12.4   | 5.0    | 9.5    | 5.9    | 6.4    | 1.1    |
| 711.3  | 955.6  | 792.2  | 428.5  | 387.1  | 402.0  | 341.0  | 356.3  | 429.8  |
| 6.2    | 16.7   | 11.7   | 23.7   | 18.8   | 16.7   | 11.2   | 23.1   | 21.0   |
| 19.4   | 22.3   | 20.2   | 14.9   | 6.5    | 15.4   | 3.9    | 10.1   | 6.2    |
| 100.6  | 119.6  | 82.3   | 169.4  | 126.7  | 168.0  | 223.5  | 194.9  | 201.2  |
| 2.6    | 0.7    | 1.0    | 12.2   | 16.2   | 12.7   | 7.4    | 28.0   | 18.7   |
| 7.7    | 3.7    | 2.3    | 10.2   | 10.6   | 8.3    | 6.6    | 3.8    | 2.5    |
| 13.7   | 13.7   | 16.6   | 130.0  | 154.9  | 171.7  | 128.1  | 130.9  | 165.4  |
| 10.0   | 12.4   | 10.1   | 22.1   | 13.4   | 6.4    | 7.8    | 5.0    | 5.8    |
| 38.5   | 38.5   | 19.8   | 24.5   | 20.2   | 26.1   | 27.7   | 20.0   | 17.6   |
| 93.5   | 113.4  | 35.5   | 157.3  | 119.6  | 139.1  | 55.7   | 63.1   | 68.3   |
| 124.8  | 138.4  | 98.1   | 144.5  | 128.4  | 169.5  | 67.9   | 83.4   | 87.8   |
| 21.6   | 25.7   | 29.5   | 17.2   | 21.5   | 10.7   | 8.5    | 3.1    | 2.8    |
| 17.6   | 16.7   | 8.7    | 7.3    | 11.6   | 22.0   | 11.5   | 5.1    | 4.1    |
| 3.3    | 0.8    | 2.3    | 13.1   | 11.8   | 5.5    | 2.7    | 2.1    | 5.9    |
| 1.3    | 1.1    | 0.6    | 1.7    | 4.9    | 0.9    | 0.8    | 0.7    | 0.7    |
| 1.5    | 1.7    | 1.3    | 1.5    | 1.3    | 2.6    | 1.0    | 0.8    | 2.0    |
| 47.1   | 64.4   | 30.9   | 71.3   | 41.5   | 63.9   | 62.0   | 26.9   | 37.0   |
| 42.4   | 48.2   | 44.3   | 23.7   | 23.4   | 33.1   | 20.5   | 15.5   | 17.3   |
| 31.3   | 29.7   | 25.3   | 9.1    | 10.9   | 7.0    | 21.1   | 12.6   | 6.4    |
| 31.5   | 31.0   | 26.7   | 10.8   | 8.7    | 2.1    | 2.3    | 1.8    | 13.7   |
| 188.5  | 176.6  | 135.9  | 71.0   | 49.5   | 39.4   | 38.6   | 36.4   | 37.8   |
| 585.7  | 665.6  | 525.7  | 627.9  | 500.3  | 455.3  | 525.9  | 641.2  | 600.6  |
| 4.2    | 5.2    | 6.0    | 8.6    | 5.5    | 5.0    | 15.0   | 12.1   | 10.4   |
| 18.6   | 31.9   | 23.5   | 1.7    | 1.4    | 1.5    | 2.0    | 2.8    | 2.1    |
| 1.4    | 2.9    | 1.1    | 7.4    | 2.2    | 5.2    | 0.9    | 3.5    | 1.1    |
| 5.2    | 4.8    | 5.8    | 4.0    | 16.1   | 4.0    | 9.8    | 8.9    | 4.8    |
| 750.4  | 714.5  | 265.8  | 329.5  | 217.1  | 239.3  | 348.2  | 266.8  | 292.8  |
| 2.6    | 1.8    | 4.9    | 3.8    | 4.9    | 9.7    | 1.3    | 8.3    | 2.7    |
| 1496.8 | 1622.1 | 1303.3 | 1757.0 | 1460.1 | 1613.7 | 1243.1 | 1214.5 | 1206.1 |
| 73.7   | 108.4  | 84.7   | 11.2   | 13.7   | 39.6   | 37.5   | 30.0   | 47.7   |
| 173.4  | 201.7  | 180.1  | 301.8  | 287.2  | 285.9  | 130.8  | 130.3  | 147.4  |
| 7.5    | 10.3   | 21.7   | 5.2    | 14.7   | 11.7   | 15.6   | 17.4   | 6.6    |

|        |        |        |        |        |        |        |        |        |
|--------|--------|--------|--------|--------|--------|--------|--------|--------|
| 1433.5 | 2048.3 | 2077.2 | 936.9  | 657.5  | 754.4  | 356.4  | 516.2  | 415.3  |
| 8.3    | 14.8   | 11.0   | 15.1   | 3.5    | 11.0   | 2.7    | 12.0   | 11.7   |
| 244.3  | 398.5  | 375.5  | 127.5  | 187.5  | 194.2  | 105.9  | 242.4  | 187.4  |
| 0.4    | 0.7    | 3.6    | 14.3   | 5.3    | 11.2   | 3.4    | 2.2    | 0.6    |
| 4.5    | 11.5   | 7.8    | 22.5   | 15.5   | 24.8   | 11.1   | 11.6   | 15.8   |
| 2.8    | 3.4    | 2.0    | 12.2   | 4.8    | 6.6    | 2.7    | 1.1    | 2.2    |
| 13.0   | 7.8    | 7.9    | 1.9    | 6.3    | 5.6    | 12.0   | 7.6    | 8.8    |
| 11.2   | 4.4    | 14.4   | 23.4   | 23.9   | 13.5   | 10.5   | 11.2   | 13.8   |
| 561.2  | 812.2  | 714.1  | 332.7  | 324.0  | 283.8  | 382.7  | 393.2  | 415.9  |
| 392.5  | 432.8  | 323.7  | 168.9  | 134.4  | 144.8  | 74.9   | 74.1   | 76.2   |
| 6.5    | 3.9    | 0.7    | 10.7   | 4.5    | 19.9   | 3.6    | 2.3    | 7.9    |
| 6.4    | 9.3    | 3.0    | 51.7   | 33.9   | 49.9   | 37.6   | 25.3   | 32.1   |
| 78.7   | 77.0   | 69.0   | 5.8    | 3.8    | 2.9    | 2.5    | 2.3    | 7.1    |
| 5.9    | 10.0   | 3.0    | 27.4   | 8.2    | 16.9   | 3.6    | 2.9    | 1.5    |
| 68.2   | 141.5  | 160.3  | 12.5   | 3.9    | 4.5    | 2.9    | 3.4    | 1.2    |
| 26.4   | 23.9   | 8.1    | 24.9   | 32.3   | 18.5   | 17.1   | 19.1   | 19.0   |
| 2.7    | 2.9    | 2.4    | 5.8    | 8.3    | 5.5    | 1.5    | 2.5    | 1.2    |
| 1.3    | 1.9    | 2.4    | 10.1   | 10.8   | 7.1    | 2.8    | 1.9    | 3.1    |
| 916.3  | 1172.5 | 778.8  | 538.0  | 450.4  | 527.5  | 318.3  | 315.3  | 326.8  |
| 390.8  | 541.1  | 405.3  | 514.0  | 489.1  | 543.2  | 367.7  | 395.3  | 448.9  |
| 4.0    | 2.1    | 1.9    | 11.1   | 8.1    | 9.3    | 0.8    | 2.0    | 0.7    |
| 49.6   | 74.7   | 119.9  | 1.8    | 3.8    | 4.1    | 1.2    | 1.0    | 0.9    |
| 3.4    | 6.1    | 3.0    | 13.1   | 10.7   | 11.4   | 4.3    | 4.2    | 4.1    |
| 2.0    | 0.8    | 3.2    | 2.7    | 4.9    | 4.4    | 1.8    | 1.3    | 1.0    |
| 8.5    | 18.3   | 8.2    | 12.3   | 10.4   | 14.1   | 13.8   | 11.6   | 1.4    |
| 14.9   | 16.3   | 9.5    | 96.2   | 81.4   | 91.6   | 35.7   | 33.3   | 44.1   |
| 8.4    | 6.8    | 6.0    | 23.1   | 18.5   | 15.2   | 6.5    | 5.0    | 4.9    |
| 34.9   | 15.5   | 13.0   | 8.9    | 5.1    | 3.2    | 2.4    | 15.7   | 6.5    |
| 2.1    | 2.1    | 1.9    | 4.2    | 3.2    | 6.4    | 3.7    | 1.4    | 1.6    |
| 8304.5 | 8466.6 | 7709.8 | 8838.3 | 8175.8 | 8489.8 | 5175.0 | 4928.8 | 5116.0 |
| 15.2   | 21.0   | 8.1    | 17.5   | 17.0   | 15.8   | 8.8    | 5.9    | 12.7   |
| 8.6    | 6.3    | 8.0    | 18.9   | 6.8    | 17.3   | 1.3    | 13.3   | 16.6   |
| 2.0    | 4.5    | 4.9    | 2.6    | 2.5    | 2.5    | 4.0    | 1.8    | 0.6    |
| 7.7    | 16.4   | 2.4    | 17.0   | 11.5   | 25.4   | 6.8    | 11.4   | 8.5    |
| 1.8    | 6.3    | 6.3    | 7.1    | 10.2   | 8.2    | 6.0    | 3.4    | 1.1    |
| 40.4   | 35.7   | 21.1   | 44.4   | 40.4   | 48.2   | 47.0   | 47.4   | 57.8   |
| 7.7    | 17.3   | 12.4   | 12.8   | 7.7    | 17.8   | 2.1    | 5.1    | 8.9    |
| 68.9   | 95.5   | 100.8  | 65.3   | 53.9   | 73.6   | 77.6   | 61.3   | 74.3   |
| 4.3    | 2.9    | 4.5    | 10.6   | 11.6   | 5.5    | 3.8    | 3.9    | 6.2    |
| 35.8   | 46.0   | 28.1   | 65.6   | 48.9   | 59.4   | 21.5   | 25.9   | 35.4   |
| 2.7    | 2.4    | 2.6    | 6.0    | 5.7    | 8.1    | 3.5    | 3.2    | 3.2    |
| 36.8   | 59.3   | 31.8   | 61.2   | 55.5   | 52.8   | 21.0   | 38.3   | 42.2   |
| 7.8    | 8.9    | 5.2    | 13.2   | 10.9   | 7.6    | 4.3    | 4.4    | 4.9    |
| 1230.8 | 1372.9 | 783.7  | 1144.6 | 887.6  | 990.1  | 865.1  | 702.6  | 813.2  |
| 19.1   | 15.4   | 16.5   | 22.5   | 16.0   | 29.6   | 24.7   | 13.7   | 18.2   |
| 1608.6 | 1937.0 | 1329.5 | 1873.9 | 1726.5 | 1736.3 | 1203.1 | 1239.2 | 1351.9 |
| 276.3  | 371.5  | 265.0  | 95.9   | 57.4   | 77.1   | 66.7   | 68.2   | 99.9   |
| 1498.4 | 1738.2 | 1412.4 | 1457.8 | 1159.8 | 1153.5 | 1538.1 | 1493.5 | 1549.4 |
| 36.9   | 23.7   | 5.6    | 3.7    | 2.3    | 8.2    | 5.0    | 6.0    | 6.8    |
| 37.3   | 58.9   | 51.4   | 7.6    | 9.2    | 17.0   | 42.5   | 47.0   | 63.3   |
| 1.4    | 5.3    | 1.7    | 10.9   | 2.4    | 3.4    | 6.2    | 1.7    | 3.1    |
| 4894.5 | 5730.0 | 4708.5 | 3017.9 | 2557.5 | 2587.5 | 2512.8 | 2561.5 | 2716.4 |
| 6.7    | 1.6    | 4.3    | 13.5   | 9.2    | 4.5    | 6.5    | 6.2    | 1.8    |

|        |         |        |         |         |         |        |        |        |
|--------|---------|--------|---------|---------|---------|--------|--------|--------|
| 59.9   | 94.2    | 73.6   | 45.0    | 59.4    | 71.3    | 56.8   | 58.6   | 51.4   |
| 44.8   | 52.3    | 63.3   | 31.6    | 25.1    | 22.0    | 33.6   | 24.7   | 20.1   |
| 23.3   | 26.0    | 21.5   | 14.2    | 14.7    | 19.9    | 21.1   | 25.0   | 14.7   |
| 49.5   | 49.6    | 47.9   | 38.9    | 37.9    | 43.9    | 36.3   | 48.2   | 41.6   |
| 6.4    | 1.6     | 7.2    | 13.2    | 11.0    | 10.1    | 7.4    | 5.0    | 9.1    |
| 3.2    | 0.8     | 2.7    | 2.9     | 1.1     | 2.2     | 1.1    | 0.9    | 1.8    |
| 590.5  | 610.1   | 379.9  | 18.4    | 15.4    | 20.8    | 5.6    | 12.9   | 5.0    |
| 543.1  | 567.7   | 343.4  | 194.2   | 130.2   | 155.6   | 170.7  | 124.8  | 131.9  |
| 4.0    | 2.8     | 2.3    | 5.2     | 3.3     | 6.7     | 2.6    | 3.6    | 3.4    |
| 17.7   | 20.3    | 9.1    | 17.4    | 19.0    | 13.8    | 12.2   | 12.6   | 1.9    |
| 0.6    | 2.0     | 0.2    | 8.6     | 5.5     | 2.9     | 0.6    | 2.0    | 2.4    |
| 3.8    | 5.6     | 1.3    | 12.1    | 8.4     | 12.7    | 1.0    | 0.5    | 3.3    |
| 8.4    | 1.9     | 7.8    | 14.1    | 7.6     | 8.5     | 4.0    | 6.9    | 4.0    |
| 1.3    | 0.4     | 6.7    | 1.9     | 6.4     | 7.2     | 4.9    | 3.2    | 2.5    |
| 3.7    | 8.2     | 1.2    | 2.3     | 0.5     | 5.0     | 4.7    | 6.7    | 2.0    |
| 87.3   | 127.0   | 77.2   | 34.5    | 31.3    | 46.5    | 41.1   | 34.6   | 45.7   |
| 2774.2 | 3630.1  | 3644.3 | 300.7   | 216.3   | 286.1   | 189.2  | 264.9  | 207.9  |
| 2459.2 | 2987.2  | 2550.8 | 106.4   | 70.3    | 105.8   | 129.2  | 119.2  | 135.3  |
| 1220.8 | 1418.0  | 1111.6 | 113.1   | 91.9    | 120.9   | 137.9  | 130.1  | 148.9  |
| 11.2   | 13.7    | 16.6   | 25.2    | 18.7    | 31.6    | 13.9   | 7.4    | 18.2   |
| 2.1    | 2.5     | 1.1    | 3.4     | 3.5     | 3.9     | 1.6    | 2.1    | 1.5    |
| 3.1    | 4.3     | 2.8    | 13.9    | 3.9     | 10.6    | 1.1    | 2.5    | 2.4    |
| 140.7  | 132.9   | 97.0   | 27.5    | 21.1    | 15.5    | 34.2   | 58.8   | 48.7   |
| 20.6   | 6.0     | 14.0   | 240.6   | 194.8   | 211.1   | 113.3  | 133.6  | 140.0  |
| 174.1  | 202.6   | 163.6  | 207.9   | 162.6   | 207.0   | 194.6  | 204.8  | 207.1  |
| 205.2  | 258.0   | 181.9  | 214.3   | 164.3   | 214.1   | 217.2  | 231.6  | 211.1  |
| 89.6   | 112.2   | 54.5   | 40.4    | 36.7    | 24.0    | 22.6   | 17.3   | 20.7   |
| 413.9  | 520.2   | 300.2  | 22.3    | 19.5    | 16.7    | 43.6   | 37.5   | 36.6   |
| 14.5   | 6.1     | 20.8   | 19.2    | 28.5    | 22.3    | 16.1   | 16.1   | 24.5   |
| 9788.9 | 10298.9 | 8932.5 | 11945.0 | 10865.1 | 11157.5 | 6956.7 | 6866.3 | 7355.8 |
| 194.6  | 258.6   | 169.6  | 128.3   | 95.6    | 111.4   | 111.8  | 93.3   | 119.6  |
| 9.7    | 12.4    | 13.5   | 15.3    | 11.8    | 14.1    | 12.0   | 16.3   | 13.0   |
| 3.1    | 4.0     | 2.3    | 12.3    | 3.4     | 9.9     | 5.7    | 3.2    | 0.7    |
| 12.9   | 23.8    | 10.3   | 39.3    | 29.8    | 29.0    | 12.5   | 19.7   | 22.2   |
| 351.3  | 421.4   | 243.5  | 109.3   | 88.7    | 98.4    | 192.8  | 153.4  | 186.1  |
| 134.4  | 183.1   | 229.2  | 35.0    | 20.5    | 31.5    | 14.4   | 21.1   | 28.1   |
| 44.2   | 59.4    | 51.5   | 10.6    | 13.0    | 13.6    | 9.3    | 8.2    | 6.7    |
| 4.2    | 5.5     | 3.6    | 7.0     | 4.0     | 4.9     | 3.2    | 1.5    | 2.7    |
| 32.5   | 29.6    | 12.2   | 52.5    | 35.5    | 25.6    | 26.4   | 16.5   | 21.6   |
| 210.7  | 310.1   | 223.8  | 322.6   | 279.6   | 338.5   | 434.3  | 407.0  | 516.0  |
| 18.4   | 27.0    | 31.5   | 10.6    | 12.3    | 6.4     | 11.6   | 13.5   | 19.5   |
| 67.3   | 92.6    | 82.0   | 19.7    | 14.8    | 27.9    | 36.4   | 26.8   | 30.5   |
| 6.7    | 11.2    | 9.4    | 25.8    | 14.9    | 17.0    | 10.6   | 7.9    | 10.9   |
| 0.9    | 0.7     | 0.7    | 8.5     | 4.1     | 1.8     | 2.7    | 2.7    | 0.9    |
| 70.5   | 52.1    | 51.0   | 4.5     | 6.0     | 4.1     | 9.3    | 5.2    | 3.7    |
| 525.7  | 548.0   | 335.6  | 438.2   | 328.9   | 386.3   | 240.8  | 268.3  | 265.7  |
| 66.5   | 96.2    | 124.5  | 704.6   | 761.5   | 1001.0  | 808.0  | 1367.8 | 1109.0 |
| 1.4    | 1.7     | 1.6    | 2.8     | 2.4     | 2.9     | 1.8    | 1.3    | 1.4    |
| 287.2  | 359.2   | 228.8  | 150.9   | 128.3   | 162.1   | 166.8  | 155.7  | 163.1  |
| 4.3    | 5.8     | 11.5   | 10.7    | 12.2    | 9.0     | 1.7    | 1.5    | 1.5    |
| 510.7  | 647.8   | 415.8  | 224.0   | 166.3   | 211.8   | 348.5  | 315.8  | 373.8  |
| 1.7    | 10.2    | 1.2    | 38.6    | 27.4    | 20.9    | 17.0   | 18.5   | 21.0   |
| 3.4    | 13.4    | 7.6    | 11.1    | 11.0    | 15.4    | 11.3   | 15.3   | 14.0   |

|        |        |        |        |        |        |        |        |        |
|--------|--------|--------|--------|--------|--------|--------|--------|--------|
| 175.7  | 285.2  | 261.7  | 315.3  | 256.2  | 273.3  | 99.7   | 116.6  | 116.3  |
| 5.9    | 6.1    | 2.0    | 8.2    | 11.0   | 4.5    | 5.0    | 2.4    | 3.1    |
| 2.9    | 0.7    | 0.3    | 11.4   | 2.4    | 3.9    | 2.2    | 0.2    | 3.1    |
| 1050.5 | 1346.9 | 1088.5 | 859.5  | 613.4  | 693.0  | 740.8  | 579.7  | 696.4  |
| 10.8   | 11.5   | 2.8    | 10.9   | 6.1    | 15.3   | 4.8    | 5.9    | 5.2    |
| 0.8    | 2.7    | 0.6    | 1.4    | 3.5    | 1.0    | 5.0    | 2.7    | 1.0    |
| 52.8   | 50.2   | 33.6   | 34.2   | 13.1   | 10.4   | 11.8   | 16.5   | 21.6   |
| 4.4    | 5.1    | 5.7    | 4.3    | 1.7    | 8.8    | 4.0    | 6.2    | 1.2    |
| 1516.6 | 2057.2 | 928.9  | 274.1  | 235.4  | 272.1  | 279.6  | 194.0  | 241.5  |
| 407.3  | 460.9  | 301.0  | 500.5  | 406.2  | 417.2  | 276.5  | 231.3  | 269.3  |
| 207.4  | 226.4  | 103.9  | 356.7  | 227.5  | 249.7  | 149.5  | 123.2  | 162.7  |
| 19.2   | 16.5   | 12.0   | 21.9   | 18.3   | 14.2   | 2.7    | 13.9   | 24.7   |
| 87.0   | 107.4  | 80.5   | 357.7  | 292.4  | 334.1  | 308.3  | 359.6  | 367.7  |
| 10.9   | 9.6    | 7.6    | 12.3   | 6.0    | 18.4   | 4.2    | 4.2    | 4.9    |
| 32.8   | 43.0   | 47.7   | 67.3   | 56.8   | 96.9   | 132.8  | 124.7  | 140.1  |
| 1.9    | 3.1    | 1.2    | 8.3    | 5.9    | 7.1    | 3.7    | 2.6    | 2.7    |
| 3.4    | 3.6    | 1.6    | 9.6    | 4.6    | 9.6    | 2.8    | 3.1    | 3.3    |
| 4.0    | 4.7    | 3.9    | 3.7    | 4.0    | 4.0    | 5.0    | 2.8    | 4.6    |
| 121.8  | 128.2  | 93.1   | 50.7   | 29.8   | 37.2   | 39.2   | 37.4   | 36.2   |
| 7.6    | 2.5    | 1.0    | 6.7    | 5.5    | 8.1    | 4.6    | 3.9    | 3.7    |
| 0.8    | 1.1    | 1.0    | 9.6    | 2.4    | 4.2    | 1.5    | 0.8    | 1.0    |
| 26.5   | 13.4   | 4.3    | 8.0    | 17.8   | 12.4   | 15.5   | 17.4   | 14.4   |
| 38.0   | 72.1   | 75.9   | 5.2    | 22.2   | 4.6    | 14.6   | 22.0   | 30.0   |
| 5.9    | 3.0    | 1.4    | 17.5   | 21.6   | 34.9   | 7.5    | 7.8    | 4.3    |
| 34.1   | 39.5   | 24.5   | 30.7   | 25.3   | 22.3   | 22.5   | 22.4   | 27.3   |
| 6.2    | 3.1    | 3.5    | 4.3    | 3.3    | 4.7    | 3.9    | 0.7    | 1.6    |
| 38.3   | 52.1   | 61.1   | 1.2    | 5.6    | 9.9    | 1.6    | 5.2    | 3.7    |
| 213.4  | 237.5  | 183.6  | 225.1  | 163.8  | 196.1  | 145.1  | 134.9  | 145.7  |
| 1053.3 | 1083.7 | 672.9  | 319.4  | 247.4  | 270.3  | 241.7  | 195.0  | 205.1  |
| 565.4  | 615.2  | 413.9  | 563.3  | 420.2  | 467.3  | 232.4  | 237.4  | 262.6  |
| 180.6  | 381.5  | 267.4  | 345.9  | 266.8  | 296.4  | 255.0  | 226.9  | 244.3  |
| 2.4    | 1.9    | 4.1    | 88.2   | 97.9   | 101.7  | 82.3   | 99.4   | 97.0   |
| 11.2   | 6.7    | 8.1    | 25.7   | 26.6   | 32.1   | 5.9    | 11.5   | 11.7   |
| 508.7  | 473.6  | 413.4  | 69.7   | 52.2   | 67.2   | 108.5  | 93.6   | 103.9  |
| 1023.3 | 1444.0 | 1430.8 | 4124.7 | 4571.7 | 4378.3 | 1681.9 | 2326.6 | 3136.0 |
| 3.8    | 0.4    | 0.5    | 2.6    | 0.9    | 2.3    | 0.4    | 0.3    | 0.5    |
| 1.3    | 2.5    | 0.4    | 10.3   | 2.4    | 4.5    | 3.4    | 0.6    | 1.8    |
| 199.9  | 213.3  | 17.0   | 34.6   | 22.7   | 18.5   | 11.7   | 5.6    | 10.6   |
| 11.1   | 10.5   | 8.1    | 8.4    | 10.5   | 12.9   | 6.7    | 4.7    | 2.6    |
| 22.9   | 28.3   | 28.4   | 52.4   | 42.8   | 34.8   | 47.6   | 47.4   | 57.6   |
| 3.7    | 9.0    | 5.8    | 10.2   | 10.9   | 9.6    | 3.1    | 4.9    | 7.0    |
| 20.7   | 25.4   | 22.4   | 9.7    | 4.6    | 8.1    | 4.0    | 12.8   | 16.0   |
| 10.8   | 3.0    | 4.5    | 12.0   | 9.0    | 12.7   | 5.6    | 10.0   | 10.1   |
| 2631.8 | 2757.5 | 2360.2 | 1314.5 | 1092.0 | 1292.6 | 699.6  | 701.1  | 725.7  |
| 28.2   | 21.5   | 19.4   | 27.1   | 16.4   | 23.8   | 25.5   | 13.4   | 24.7   |
| 25.1   | 41.7   | 32.1   | 9.4    | 6.2    | 18.3   | 16.6   | 26.2   | 30.7   |
| 139.5  | 190.7  | 156.8  | 119.3  | 87.9   | 118.3  | 106.6  | 98.7   | 105.2  |
| 39.2   | 52.6   | 31.6   | 22.8   | 17.7   | 21.8   | 22.9   | 17.8   | 20.6   |
| 2.3    | 1.6    | 1.5    | 6.0    | 2.3    | 3.7    | 2.3    | 1.2    | 2.3    |
| 746.2  | 879.9  | 605.9  | 1051.4 | 712.1  | 857.4  | 629.3  | 536.2  | 601.1  |
| 4.7    | 8.4    | 5.2    | 9.7    | 8.7    | 10.1   | 4.5    | 3.6    | 5.0    |
| 3.2    | 9.6    | 5.6    | 12.0   | 6.0    | 13.0   | 1.9    | 4.3    | 1.5    |
| 1.9    | 2.4    | 1.2    | 2.6    | 1.5    | 3.2    | 0.6    | 1.0    | 1.5    |



|        |         |        |        |        |        |        |        |        |
|--------|---------|--------|--------|--------|--------|--------|--------|--------|
| 5.7    | 6.0     | 2.2    | 11.6   | 3.0    | 5.1    | 2.8    | 0.9    | 4.5    |
| 59.9   | 49.9    | 34.9   | 4.6    | 7.4    | 12.6   | 8.8    | 9.7    | 8.3    |
| 12.7   | 14.2    | 12.5   | 92.8   | 103.0  | 101.9  | 76.7   | 82.9   | 88.6   |
| 421.1  | 528.4   | 399.1  | 181.0  | 135.3  | 166.2  | 176.0  | 123.9  | 143.9  |
| 2972.4 | 3173.2  | 1916.8 | 2745.2 | 2134.2 | 2407.2 | 1369.7 | 1232.0 | 1383.1 |
| 2.4    | 8.8     | 2.2    | 8.8    | 6.6    | 11.4   | 1.5    | 2.9    | 3.1    |
| 2.0    | 0.7     | 0.7    | 2.4    | 1.3    | 3.2    | 1.8    | 0.5    | 2.8    |
| 3.7    | 2.1     | 2.2    | 10.0   | 3.8    | 11.3   | 7.3    | 2.5    | 2.1    |
| 1.1    | 9.0     | 5.2    | 13.8   | 5.1    | 17.7   | 4.0    | 3.9    | 9.1    |
| 9721.6 | 10291.5 | 9482.5 | 9846.9 | 9316.7 | 8985.6 | 7052.4 | 6928.1 | 7242.6 |
| 1282.6 | 1659.7  | 1359.1 | 2819.2 | 2664.6 | 3030.8 | 1979.2 | 1617.1 | 2106.6 |
| 61.4   | 77.8    | 63.8   | 30.5   | 24.5   | 39.3   | 55.7   | 50.9   | 49.4   |
| 1.3    | 2.9     | 2.5    | 5.7    | 8.6    | 7.5    | 2.8    | 3.6    | 5.9    |
| 4.4    | 5.8     | 13.6   | 1.9    | 1.8    | 2.0    | 2.2    | 1.8    | 1.8    |
| 3.0    | 1.9     | 2.5    | 2.5    | 4.9    | 7.4    | 1.5    | 2.7    | 2.2    |
| 6.1    | 2.6     | 1.9    | 15.6   | 12.0   | 11.4   | 10.1   | 9.4    | 6.3    |
| 5.3    | 2.6     | 0.9    | 10.0   | 3.0    | 4.3    | 1.4    | 1.1    | 1.2    |
| 17.4   | 20.0    | 6.9    | 16.9   | 7.1    | 8.3    | 8.5    | 3.0    | 3.1    |
| 3.7    | 1.1     | 1.3    | 6.8    | 2.2    | 1.4    | 1.2    | 1.3    | 1.2    |
| 1.6    | 2.2     | 1.3    | 6.7    | 2.1    | 2.9    | 1.7    | 2.4    | 1.6    |
| 1.7    | 2.3     | 3.8    | 9.3    | 3.6    | 3.9    | 2.8    | 2.1    | 2.6    |
| 19.7   | 8.0     | 8.3    | 30.6   | 22.3   | 21.8   | 10.1   | 15.1   | 14.3   |
| 0.9    | 1.1     | 0.7    | 1.8    | 1.5    | 2.3    | 0.7    | 0.7    | 0.7    |
| 10.4   | 4.9     | 6.6    | 4.0    | 4.2    | 5.8    | 11.6   | 4.6    | 5.7    |
| 3.3    | 2.7     | 3.1    | 4.0    | 5.2    | 4.9    | 2.4    | 2.7    | 1.7    |
| 2.3    | 7.4     | 2.2    | 9.1    | 5.3    | 5.0    | 9.0    | 10.1   | 3.3    |
| 7.2    | 1.7     | 0.8    | 9.7    | 9.5    | 7.5    | 1.9    | 5.6    | 3.0    |
| 10.7   | 8.8     | 13.7   | 11.1   | 10.5   | 3.7    | 5.4    | 1.6    | 4.3    |
| 1.5    | 2.8     | 2.8    | 6.0    | 1.3    | 2.8    | 0.6    | 0.7    | 1.3    |
| 9.0    | 9.8     | 9.2    | 20.2   | 10.4   | 12.9   | 2.9    | 6.9    | 10.9   |
| 3.1    | 1.5     | 1.3    | 5.4    | 2.7    | 5.3    | 1.7    | 1.8    | 3.9    |
| 378.3  | 418.1   | 315.8  | 182.8  | 177.8  | 191.3  | 182.3  | 205.7  | 204.6  |
| 9.7    | 6.5     | 3.2    | 40.5   | 26.9   | 28.3   | 27.7   | 16.0   | 17.4   |
| 6052.6 | 6035.1  | 5669.4 | 30.3   | 22.6   | 20.5   | 12.4   | 17.7   | 5.8    |
| 248.8  | 343.5   | 299.9  | 78.8   | 73.5   | 84.9   | 42.9   | 43.5   | 54.6   |
| 3.0    | 4.9     | 2.0    | 5.1    | 7.8    | 3.5    | 3.3    | 0.9    | 2.8    |
| 107.8  | 177.1   | 116.4  | 57.9   | 58.2   | 61.5   | 35.7   | 47.0   | 45.2   |
| 73.5   | 61.4    | 59.1   | 3818.8 | 3361.9 | 3323.7 | 3080.3 | 2785.2 | 3263.8 |
| 1205.0 | 1510.1  | 1226.4 | 2202.9 | 1849.0 | 1352.3 | 1309.1 | 1294.0 | 1499.9 |
| 1.6    | 1.4     | 0.9    | 4.1    | 5.9    | 5.6    | 1.6    | 1.0    | 1.4    |
| 31.7   | 18.8    | 20.1   | 46.3   | 47.3   | 24.7   | 25.5   | 16.1   | 22.1   |
| 115.7  | 139.3   | 144.0  | 49.5   | 41.4   | 34.5   | 32.1   | 35.5   | 36.5   |
| 3723.8 | 3962.0  | 2693.2 | 2521.6 | 1934.6 | 2084.9 | 1410.7 | 1205.4 | 1385.3 |
| 6.2    | 21.0    | 14.0   | 18.5   | 14.5   | 25.7   | 14.1   | 21.8   | 17.7   |
| 42.8   | 63.0    | 57.0   | 57.0   | 47.0   | 64.2   | 65.6   | 83.5   | 69.8   |
| 6077.5 | 6538.6  | 5862.5 | 5350.1 | 5297.1 | 5808.6 | 3201.0 | 3679.4 | 3689.5 |
| 4.6    | 11.0    | 6.7    | 30.5   | 17.6   | 19.5   | 18.8   | 17.0   | 15.6   |
| 26.9   | 15.5    | 28.8   | 17.7   | 6.3    | 18.5   | 9.4    | 13.3   | 19.0   |
| 8.6    | 4.3     | 3.4    | 15.3   | 5.2    | 5.8    | 6.7    | 2.1    | 9.9    |
| 2.1    | 4.4     | 4.9    | 116.8  | 102.4  | 120.6  | 132.7  | 165.2  | 138.0  |
| 584.1  | 702.1   | 522.5  | 259.3  | 216.5  | 264.6  | 372.7  | 332.9  | 428.6  |
| 11.8   | 15.0    | 18.0   | 43.0   | 41.4   | 39.0   | 19.0   | 18.3   | 25.4   |
| 1.8    | 1.0     | 1.1    | 2.7    | 1.7    | 2.5    | 0.7    | 1.1    | 1.4    |

|         |         |        |         |        |         |        |        |        |
|---------|---------|--------|---------|--------|---------|--------|--------|--------|
| 2.9     | 5.2     | 2.4    | 72.5    | 67.0   | 82.5    | 54.7   | 56.0   | 53.9   |
| 1415.3  | 1675.9  | 1333.4 | 94.5    | 94.2   | 104.5   | 176.9  | 171.5  | 208.2  |
| 7.7     | 17.8    | 4.1    | 12.1    | 9.7    | 6.3     | 13.9   | 3.5    | 5.1    |
| 1770.4  | 2204.2  | 1628.9 | 1358.1  | 1158.8 | 1216.3  | 1057.8 | 1159.6 | 1249.6 |
| 6.0     | 11.1    | 5.9    | 16.8    | 18.7   | 26.3    | 11.2   | 5.8    | 8.4    |
| 0.4     | 0.5     | 0.9    | 10.0    | 2.9    | 5.6     | 3.7    | 0.5    | 1.4    |
| 113.2   | 124.5   | 104.9  | 79.3    | 59.8   | 79.9    | 88.0   | 107.7  | 98.8   |
| 22.7    | 40.8    | 35.1   | 11.5    | 3.4    | 7.3     | 3.6    | 6.9    | 3.4    |
| 1866.5  | 2162.0  | 2041.5 | 1887.0  | 1712.3 | 1869.7  | 1116.4 | 1506.9 | 1455.8 |
| 54.7    | 87.7    | 81.7   | 61.8    | 39.6   | 61.3    | 35.9   | 33.9   | 39.8   |
| 471.4   | 456.1   | 245.2  | 284.6   | 232.3  | 255.3   | 181.2  | 177.2  | 198.7  |
| 15.3    | 6.9     | 6.1    | 8.2     | 3.7    | 10.0    | 8.7    | 2.6    | 3.1    |
| 1.6     | 2.1     | 1.7    | 11.6    | 4.1    | 5.5     | 1.4    | 0.9    | 1.4    |
| 337.9   | 489.8   | 486.9  | 41.5    | 29.8   | 27.3    | 45.8   | 39.5   | 44.2   |
| 6.4     | 3.1     | 2.7    | 4.9     | 5.1    | 7.3     | 2.7    | 4.7    | 1.8    |
| 35.2    | 48.6    | 21.6   | 47.1    | 48.1   | 43.2    | 29.3   | 16.0   | 38.9   |
| 69.0    | 94.3    | 98.3   | 185.3   | 142.5  | 201.5   | 67.4   | 84.1   | 81.5   |
| 19.1    | 27.7    | 17.9   | 34.2    | 28.6   | 32.4    | 11.0   | 9.5    | 13.7   |
| 1.8     | 1.2     | 1.9    | 2.7     | 1.8    | 3.1     | 0.7    | 0.4    | 0.6    |
| 63.9    | 111.9   | 87.3   | 93.2    | 96.6   | 111.6   | 62.9   | 58.3   | 89.6   |
| 19.7    | 27.5    | 24.4   | 28.5    | 30.4   | 32.1    | 22.9   | 12.9   | 17.7   |
| 739.9   | 665.8   | 402.2  | 284.6   | 278.8  | 312.1   | 194.3  | 185.2  | 209.7  |
| 410.8   | 518.5   | 396.4  | 389.4   | 355.8  | 353.8   | 674.2  | 712.2  | 841.9  |
| 59.9    | 71.1    | 52.7   | 10.7    | 9.5    | 6.8     | 20.6   | 10.0   | 14.9   |
| 1.9     | 3.1     | 5.2    | 10.4    | 3.1    | 3.3     | 1.3    | 3.8    | 6.5    |
| 10.0    | 1.2     | 4.1    | 13.8    | 14.6   | 5.7     | 3.3    | 5.3    | 3.4    |
| 142.3   | 189.5   | 147.3  | 323.3   | 277.9  | 293.2   | 292.3  | 255.9  | 306.9  |
| 866.5   | 977.5   | 797.0  | 171.9   | 167.7  | 177.6   | 147.8  | 175.3  | 189.4  |
| 197.3   | 172.5   | 125.7  | 117.5   | 102.4  | 98.4    | 104.1  | 117.0  | 113.3  |
| 1.7     | 2.5     | 5.1    | 9.0     | 5.0    | 3.9     | 3.7    | 1.7    | 2.3    |
| 3.9     | 2.7     | 8.5    | 3.7     | 6.0    | 4.2     | 4.2    | 3.4    | 3.8    |
| 616.5   | 741.8   | 501.5  | 145.5   | 117.4  | 135.8   | 109.1  | 106.9  | 123.1  |
| 1045.5  | 1420.9  | 1123.3 | 101.6   | 55.5   | 77.4    | 331.3  | 130.9  | 229.3  |
| 1657.3  | 1963.9  | 1109.7 | 28.5    | 28.1   | 62.3    | 15.5   | 23.9   | 17.1   |
| 7512.7  | 8068.7  | 6622.5 | 5302.9  | 5144.6 | 5576.6  | 3314.0 | 3497.9 | 3649.8 |
| 235.6   | 404.4   | 406.2  | 443.2   | 330.9  | 380.9   | 325.8  | 277.0  | 318.6  |
| 200.3   | 448.2   | 583.2  | 72.7    | 64.6   | 59.0    | 64.2   | 48.5   | 55.1   |
| 475.4   | 548.7   | 241.4  | 230.6   | 94.5   | 102.4   | 108.1  | 60.5   | 81.8   |
| 9033.6  | 8087.3  | 4794.1 | 7872.3  | 6226.0 | 7154.6  | 4648.6 | 3526.7 | 4293.0 |
| 672.7   | 951.1   | 604.7  | 754.3   | 496.1  | 691.9   | 310.5  | 280.4  | 323.4  |
| 905.1   | 918.7   | 676.1  | 1175.9  | 980.9  | 1110.2  | 628.6  | 578.0  | 685.2  |
| 223.7   | 287.5   | 149.0  | 357.8   | 241.4  | 275.5   | 230.5  | 245.2  | 242.7  |
| 6.4     | 10.3    | 3.3    | 9.4     | 13.1   | 11.4    | 11.6   | 8.7    | 11.1   |
| 23.2    | 36.2    | 19.8   | 8.3     | 2.1    | 2.9     | 5.2    | 2.6    | 3.1    |
| 10065.2 | 10341.2 | 9624.6 | 10435.7 | 9680.8 | 10004.9 | 6932.3 | 6679.9 | 7189.1 |
| 124.7   | 183.4   | 115.8  | 72.8    | 61.7   | 58.8    | 57.4   | 53.4   | 58.9   |
| 19.4    | 10.1    | 4.7    | 14.4    | 8.4    | 12.8    | 7.0    | 5.0    | 11.9   |
| 233.6   | 268.9   | 153.5  | 446.6   | 342.4  | 375.5   | 318.4  | 273.6  | 295.3  |
| 1066.5  | 1294.0  | 1005.2 | 360.7   | 278.0  | 294.8   | 215.6  | 166.1  | 255.1  |
| 12.7    | 20.3    | 10.5   | 17.3    | 24.3   | 20.3    | 12.8   | 6.5    | 15.1   |
| 3206.4  | 3466.6  | 2077.2 | 3636.0  | 3007.4 | 2913.1  | 2977.3 | 2631.7 | 3082.0 |
| 18.4    | 33.8    | 16.5   | 6.0     | 2.6    | 7.3     | 13.2   | 5.8    | 7.1    |
| 344.1   | 441.0   | 337.4  | 1315.4  | 1170.4 | 1285.9  | 775.8  | 890.2  | 958.9  |

|         |         |         |         |         |         |        |        |        |
|---------|---------|---------|---------|---------|---------|--------|--------|--------|
| 3109.1  | 3961.0  | 3236.5  | 3390.3  | 2923.6  | 3118.7  | 1469.9 | 1456.6 | 1749.0 |
| 23.1    | 21.6    | 12.1    | 24.6    | 11.6    | 32.8    | 13.3   | 11.7   | 18.9   |
| 47.1    | 62.0    | 33.4    | 62.6    | 61.2    | 66.8    | 26.2   | 58.9   | 42.9   |
| 2872.2  | 3779.2  | 3375.0  | 871.2   | 875.5   | 871.7   | 1162.8 | 1290.4 | 1438.8 |
| 10.0    | 7.8     | 2.8     | 10.1    | 18.3    | 10.2    | 8.7    | 10.4   | 6.6    |
| 3.0     | 3.3     | 2.6     | 6.0     | 3.3     | 5.0     | 2.2    | 2.2    | 1.7    |
| 3.1     | 4.8     | 4.0     | 6.0     | 7.7     | 11.6    | 3.8    | 2.2    | 2.3    |
| 12.8    | 11.5    | 6.5     | 27.9    | 10.0    | 16.3    | 10.3   | 7.5    | 6.8    |
| 27.7    | 29.3    | 23.4    | 27.3    | 28.0    | 41.7    | 31.0   | 21.8   | 24.3   |
| 1.5     | 0.9     | 0.7     | 1.3     | 1.6     | 1.5     | 0.6    | 0.9    | 0.6    |
| 103.6   | 132.6   | 101.5   | 9.9     | 19.5    | 15.4    | 9.4    | 11.3   | 9.9    |
| 0.7     | 4.9     | 0.7     | 7.3     | 11.5    | 8.7     | 9.8    | 6.8    | 4.6    |
| 2.3     | 2.9     | 4.9     | 14.1    | 17.4    | 17.7    | 5.9    | 3.3    | 6.1    |
| 5.0     | 8.8     | 2.0     | 7.1     | 5.1     | 7.0     | 3.5    | 3.0    | 6.0    |
| 724.4   | 664.9   | 521.6   | 111.4   | 87.3    | 78.9    | 80.3   | 90.0   | 91.5   |
| 80.8    | 62.0    | 66.5    | 15.9    | 10.3    | 17.4    | 30.8   | 36.0   | 29.8   |
| 3881.9  | 3943.4  | 2707.7  | 2998.9  | 2575.4  | 2729.9  | 2020.7 | 2041.2 | 2171.8 |
| 3826.3  | 4155.6  | 2648.3  | 1535.6  | 1087.5  | 1065.7  | 1300.2 | 986.5  | 1130.6 |
| 25.6    | 41.3    | 10.6    | 35.2    | 36.9    | 54.7    | 43.7   | 45.8   | 39.1   |
| 1262.9  | 1525.9  | 1224.1  | 761.7   | 675.1   | 802.2   | 738.5  | 713.5  | 759.0  |
| 7688.4  | 6953.1  | 5930.0  | 7047.2  | 6030.5  | 6327.2  | 4546.1 | 3921.0 | 4416.7 |
| 2.2     | 5.9     | 7.1     | 5.8     | 3.2     | 4.4     | 2.4    | 3.1    | 1.6    |
| 533.2   | 720.1   | 591.1   | 640.8   | 496.2   | 537.1   | 348.2  | 259.2  | 323.8  |
| 22.6    | 32.3    | 25.3    | 14.9    | 11.7    | 6.0     | 5.6    | 4.6    | 10.6   |
| 497.7   | 515.5   | 262.0   | 198.8   | 163.9   | 156.7   | 194.8  | 177.0  | 204.9  |
| 5387.0  | 5785.7  | 5295.4  | 4191.8  | 3283.6  | 3810.3  | 2979.7 | 2649.2 | 3148.0 |
| 0.4     | 3.5     | 0.2     | 36.2    | 16.5    | 8.8     | 22.7   | 9.0    | 21.0   |
| 1594.5  | 1664.6  | 1171.3  | 785.9   | 617.4   | 616.9   | 693.7  | 552.1  | 690.6  |
| 732.4   | 869.1   | 590.2   | 1276.7  | 969.2   | 1105.6  | 527.8  | 453.9  | 538.5  |
| 175.5   | 194.7   | 166.8   | 117.4   | 85.5    | 92.8    | 127.0  | 115.1  | 136.7  |
| 2323.2  | 2372.0  | 1468.6  | 2704.0  | 1935.9  | 2043.1  | 1442.0 | 1126.3 | 1434.1 |
| 4821.1  | 4108.2  | 2367.4  | 3037.7  | 2024.6  | 2748.6  | 2239.7 | 1519.4 | 1835.2 |
| 856.2   | 927.3   | 645.2   | 297.6   | 244.2   | 271.3   | 265.5  | 322.2  | 314.6  |
| 538.2   | 582.6   | 392.8   | 273.6   | 243.1   | 243.0   | 280.3  | 374.3  | 350.2  |
| 11866.3 | 11660.9 | 10775.7 | 13176.2 | 12380.2 | 12875.3 | 8004.7 | 7496.4 | 8165.7 |
| 2.8     | 0.7     | 5.0     | 8.5     | 4.3     | 13.4    | 3.7    | 2.7    | 4.5    |
| 326.1   | 376.0   | 193.5   | 111.3   | 41.6    | 50.1    | 59.6   | 26.9   | 34.3   |
| 17.2    | 23.9    | 19.3    | 35.1    | 29.7    | 27.0    | 15.0   | 16.4   | 16.4   |
| 1381.8  | 1828.7  | 1525.5  | 2600.0  | 2508.7  | 2868.7  | 1532.9 | 1922.9 | 1942.4 |
| 1.7     | 1.1     | 1.0     | 5.7     | 16.3    | 6.2     | 3.3    | 4.8    | 1.6    |
| 4.6     | 6.2     | 2.9     | 4.6     | 3.8     | 5.8     | 3.2    | 2.7    | 3.0    |
| 62.2    | 73.7    | 59.3    | 48.8    | 58.2    | 67.4    | 43.7   | 54.3   | 47.9   |
| 63.6    | 81.9    | 64.1    | 83.3    | 65.6    | 64.6    | 41.2   | 36.1   | 41.9   |
| 5.2     | 5.0     | 2.8     | 16.6    | 12.9    | 12.2    | 3.0    | 1.8    | 3.2    |
| 5.6     | 8.2     | 9.6     | 9.4     | 7.4     | 9.2     | 5.6    | 7.3    | 4.5    |
| 458.2   | 719.1   | 454.0   | 396.6   | 300.9   | 351.1   | 243.3  | 261.5  | 262.9  |
| 477.9   | 793.4   | 723.1   | 569.4   | 523.1   | 606.6   | 332.1  | 389.8  | 387.5  |
| 326.8   | 413.5   | 352.5   | 302.7   | 218.8   | 282.8   | 150.9  | 133.0  | 160.3  |
| 3.4     | 11.9    | 15.1    | 13.3    | 7.4     | 8.9     | 4.5    | 7.2    | 4.4    |
| 22.6    | 22.7    | 21.1    | 7.1     | 3.6     | 2.8     | 4.3    | 1.3    | 5.1    |
| 299.0   | 371.5   | 225.3   | 914.1   | 687.5   | 764.9   | 731.8  | 624.7  | 770.4  |
| 4407.0  | 4521.2  | 2822.9  | 2716.9  | 1949.6  | 1975.6  | 1969.8 | 1448.1 | 1878.2 |
| 3.1     | 4.9     | 5.4     | 4.3     | 4.7     | 6.5     | 5.9    | 1.8    | 2.6    |

|        |        |        |        |        |        |        |        |        |
|--------|--------|--------|--------|--------|--------|--------|--------|--------|
| 7428.2 | 6980.3 | 4674.3 | 5063.6 | 3874.1 | 4071.0 | 3553.3 | 2749.0 | 3341.3 |
| 1.0    | 1.1    | 0.9    | 1.8    | 1.2    | 2.7    | 1.0    | 0.9    | 1.7    |
| 29.3   | 50.0   | 43.9   | 1.9    | 2.5    | 1.8    | 15.3   | 17.3   | 3.9    |
| 5.7    | 14.5   | 10.3   | 4.0    | 3.5    | 6.3    | 19.0   | 9.7    | 12.3   |
| 161.5  | 148.3  | 71.1   | 12.1   | 15.8   | 12.6   | 14.4   | 21.2   | 21.5   |
| 46.7   | 76.7   | 75.3   | 97.2   | 58.6   | 51.0   | 49.1   | 32.5   | 48.0   |
| 297.4  | 321.9  | 181.2  | 159.1  | 103.5  | 140.8  | 119.6  | 114.2  | 144.2  |
| 2.0    | 2.2    | 2.8    | 8.0    | 3.8    | 8.6    | 1.6    | 3.8    | 2.1    |
| 10.6   | 13.3   | 6.6    | 5.4    | 14.5   | 9.0    | 8.7    | 5.6    | 7.0    |
| 3.8    | 3.1    | 2.0    | 4.8    | 3.6    | 2.7    | 2.9    | 1.6    | 1.8    |
| 192.5  | 234.3  | 164.5  | 84.9   | 73.9   | 80.5   | 98.3   | 83.6   | 97.2   |
| 12.2   | 19.9   | 16.5   | 28.1   | 25.3   | 25.3   | 10.8   | 17.6   | 2.5    |
| 823.2  | 1219.6 | 1078.0 | 160.3  | 126.5  | 160.7  | 197.4  | 177.0  | 221.6  |
| 147.7  | 150.3  | 110.5  | 163.5  | 147.3  | 162.9  | 110.4  | 117.9  | 116.2  |
| 224.0  | 271.8  | 200.4  | 118.1  | 91.4   | 109.7  | 120.7  | 122.1  | 150.0  |
| 16.1   | 15.0   | 11.6   | 23.1   | 20.8   | 19.9   | 7.8    | 8.5    | 10.5   |
| 2.2    | 23.5   | 10.6   | 28.2   | 13.0   | 11.9   | 2.1    | 7.2    | 4.1    |
| 340.3  | 402.7  | 200.5  | 141.3  | 91.7   | 87.4   | 210.3  | 94.9   | 147.9  |
| 10.6   | 17.8   | 10.8   | 16.9   | 18.9   | 12.4   | 16.2   | 15.0   | 6.7    |
| 35.9   | 27.7   | 27.5   | 25.0   | 26.6   | 15.9   | 37.4   | 17.4   | 24.1   |
| 42.7   | 62.8   | 51.1   | 81.5   | 58.5   | 43.8   | 32.0   | 51.5   | 48.0   |
| 14.9   | 26.3   | 21.1   | 24.9   | 13.7   | 21.6   | 13.0   | 11.0   | 10.3   |
| 12.5   | 15.6   | 17.7   | 14.4   | 20.7   | 19.3   | 13.7   | 8.5    | 17.1   |
| 14.5   | 19.7   | 12.1   | 29.1   | 39.3   | 32.3   | 35.9   | 42.2   | 41.5   |
| 7.1    | 3.7    | 7.7    | 7.2    | 9.7    | 8.5    | 3.9    | 7.0    | 2.7    |
| 0.5    | 2.8    | 4.0    | 176.0  | 122.5  | 125.4  | 224.4  | 160.6  | 170.7  |
| 18.9   | 14.9   | 11.3   | 6.5    | 17.2   | 10.8   | 11.0   | 5.4    | 7.9    |
| 418.6  | 315.5  | 70.7   | 226.6  | 107.5  | 121.8  | 227.9  | 104.6  | 128.1  |
| 62.7   | 105.0  | 67.9   | 31.0   | 27.7   | 35.9   | 50.5   | 39.8   | 44.9   |
| 7.5    | 5.9    | 3.0    | 17.2   | 9.2    | 8.9    | 3.0    | 12.5   | 4.7    |
| 6.3    | 7.7    | 5.3    | 29.6   | 28.8   | 16.3   | 11.6   | 11.7   | 6.5    |
| 22.2   | 6.8    | 22.2   | 18.6   | 9.9    | 15.0   | 2.9    | 1.6    | 5.0    |
| 157.2  | 219.3  | 173.0  | 23.2   | 25.3   | 18.6   | 15.8   | 18.8   | 17.7   |
| 0.8    | 4.3    | 0.8    | 7.9    | 3.6    | 5.3    | 3.1    | 8.6    | 3.0    |
| 2.4    | 3.7    | 1.9    | 6.7    | 2.8    | 8.0    | 1.8    | 4.2    | 1.5    |
| 4.0    | 3.4    | 2.6    | 4.5    | 4.0    | 3.6    | 6.0    | 1.8    | 2.2    |
| 173.4  | 240.2  | 171.8  | 35.8   | 21.5   | 41.0   | 87.5   | 92.5   | 102.4  |
| 1.8    | 2.9    | 0.9    | 6.6    | 4.2    | 1.8    | 5.2    | 0.8    | 1.6    |
| 23.0   | 7.5    | 7.7    | 24.0   | 17.0   | 26.3   | 20.4   | 4.6    | 12.3   |
| 35.2   | 39.9   | 31.7   | 23.3   | 18.3   | 19.9   | 16.9   | 17.2   | 20.7   |
| 14.6   | 10.1   | 4.1    | 14.3   | 11.1   | 9.9    | 2.5    | 5.3    | 8.1    |
| 273.9  | 313.3  | 247.2  | 6.0    | 1.6    | 7.1    | 4.0    | 1.7    | 5.4    |
| 17.9   | 25.1   | 54.0   | 13.7   | 11.1   | 13.3   | 16.8   | 15.9   | 22.7   |
| 7.6    | 14.5   | 5.4    | 10.1   | 7.6    | 13.1   | 3.1    | 4.0    | 7.4    |
| 3.1    | 10.4   | 6.6    | 4.5    | 5.1    | 4.1    | 8.8    | 3.5    | 2.6    |
| 5.9    | 7.1    | 4.4    | 5.1    | 2.7    | 3.7    | 3.5    | 13.4   | 3.7    |
| 187.6  | 226.6  | 153.1  | 94.7   | 84.1   | 104.3  | 25.3   | 53.0   | 66.1   |
| 2.6    | 7.0    | 2.1    | 4.2    | 3.9    | 6.2    | 6.2    | 4.6    | 4.6    |
| 2.5    | 2.5    | 1.9    | 3.9    | 3.4    | 3.3    | 1.8    | 1.7    | 1.4    |
| 2.4    | 3.6    | 3.4    | 6.6    | 8.2    | 8.9    | 3.3    | 4.9    | 4.9    |
| 9.8    | 3.9    | 5.6    | 19.6   | 14.9   | 19.8   | 1.3    | 9.2    | 2.5    |
| 22.1   | 16.0   | 10.6   | 17.1   | 9.3    | 35.7   | 14.3   | 13.8   | 14.9   |
| 8.8    | 4.5    | 3.9    | 7.1    | 4.3    | 8.7    | 3.7    | 2.8    | 4.8    |

|        |        |        |        |        |        |        |        |        |
|--------|--------|--------|--------|--------|--------|--------|--------|--------|
| 17.8   | 16.1   | 11.8   | 13.7   | 9.4    | 7.5    | 1.0    | 2.8    | 3.3    |
| 8.2    | 22.9   | 27.8   | 6.5    | 2.7    | 7.1    | 2.7    | 7.0    | 8.4    |
| 23.8   | 26.2   | 20.9   | 10.3   | 13.6   | 11.1   | 11.0   | 11.4   | 9.3    |
| 68.1   | 44.1   | 55.0   | 6.1    | 4.9    | 4.7    | 2.3    | 4.0    | 2.5    |
| 33.6   | 27.8   | 12.8   | 1.8    | 1.9    | 1.9    | 0.7    | 1.2    | 0.8    |
| 1.7    | 1.3    | 1.9    | 4.0    | 3.4    | 2.6    | 0.9    | 1.0    | 0.9    |
| 10.9   | 12.8   | 7.0    | 23.5   | 23.7   | 32.9   | 25.2   | 21.7   | 28.5   |
| 3.0    | 2.8    | 1.4    | 14.5   | 13.9   | 16.8   | 30.7   | 24.1   | 28.4   |
| 67.1   | 80.1   | 39.9   | 32.0   | 19.0   | 23.2   | 46.7   | 40.8   | 50.9   |
| 169.4  | 213.9  | 106.5  | 82.0   | 50.0   | 67.2   | 78.0   | 38.3   | 57.0   |
| 74.9   | 94.4   | 81.4   | 136.4  | 136.4  | 151.8  | 130.5  | 125.4  | 131.0  |
| 260.8  | 269.3  | 158.0  | 74.6   | 59.0   | 59.8   | 38.5   | 46.3   | 55.6   |
| 4.1    | 3.6    | 5.1    | 7.4    | 3.6    | 5.0    | 2.5    | 3.7    | 2.2    |
| 4113.7 | 4459.3 | 4162.5 | 6649.9 | 5581.4 | 6807.8 | 3350.2 | 3337.7 | 3727.0 |
| 1.6    | 0.6    | 0.7    | 2.7    | 7.8    | 2.5    | 0.5    | 2.4    | 1.1    |
| 81.7   | 143.6  | 135.6  | 123.3  | 109.7  | 168.5  | 60.4   | 64.7   | 81.1   |
| 53.2   | 83.5   | 68.8   | 33.2   | 33.1   | 22.6   | 25.1   | 11.3   | 19.9   |
| 385.7  | 290.6  | 209.9  | 399.1  | 389.1  | 510.2  | 494.9  | 637.0  | 629.4  |
| 57.6   | 75.4   | 49.0   | 33.1   | 26.8   | 28.8   | 16.4   | 16.2   | 21.8   |
| 45.3   | 66.7   | 53.4   | 17.9   | 18.0   | 15.2   | 9.9    | 8.8    | 9.1    |
| 9.9    | 7.5    | 0.8    | 4.7    | 2.2    | 3.8    | 4.1    | 1.4    | 5.5    |
| 6.0    | 6.9    | 9.0    | 15.4   | 11.5   | 14.7   | 10.3   | 5.6    | 10.2   |
| 4.6    | 4.6    | 1.2    | 2.1    | 2.2    | 2.0    | 1.4    | 0.8    | 1.1    |
| 4.6    | 3.7    | 2.1    | 9.4    | 3.6    | 2.8    | 1.8    | 5.1    | 2.4    |
| 89.4   | 92.2   | 66.8   | 32.8   | 36.8   | 23.5   | 33.7   | 32.3   | 31.4   |
| 20.4   | 4.4    | 3.2    | 14.0   | 22.3   | 29.1   | 14.6   | 22.8   | 18.7   |
| 12.6   | 2.6    | 3.5    | 4.4    | 4.2    | 7.9    | 3.1    | 2.4    | 2.4    |
| 70.9   | 113.4  | 97.5   | 70.4   | 59.5   | 68.3   | 67.0   | 71.8   | 73.2   |
| 1.1    | 2.3    | 0.9    | 2.4    | 3.3    | 4.0    | 1.1    | 0.8    | 1.5    |
| 1.5    | 3.8    | 1.9    | 7.1    | 10.4   | 11.1   | 17.5   | 12.9   | 15.4   |
| 4.6    | 2.8    | 1.0    | 5.6    | 2.4    | 1.5    | 2.3    | 2.0    | 0.8    |
| 2.4    | 7.2    | 4.6    | 6.6    | 5.7    | 10.9   | 1.0    | 3.4    | 0.9    |
| 1.7    | 5.4    | 1.9    | 6.5    | 11.7   | 4.4    | 3.9    | 1.8    | 3.3    |
| 16.8   | 16.8   | 12.2   | 29.0   | 29.4   | 23.9   | 11.9   | 6.9    | 6.1    |
| 8.3    | 28.3   | 10.6   | 32.6   | 30.2   | 25.7   | 12.6   | 2.5    | 14.2   |
| 175.3  | 234.5  | 225.1  | 4.8    | 4.9    | 3.5    | 3.7    | 2.6    | 2.7    |
| 189.0  | 156.3  | 104.4  | 49.4   | 43.4   | 45.4   | 53.7   | 40.8   | 44.3   |
| 10.9   | 14.2   | 3.6    | 12.1   | 13.4   | 14.0   | 8.9    | 6.7    | 1.8    |
| 164.5  | 208.2  | 191.3  | 6.2    | 22.0   | 8.1    | 12.9   | 11.1   | 1.6    |
| 13.5   | 10.0   | 21.3   | 29.0   | 29.6   | 28.5   | 18.3   | 23.8   | 17.3   |
| 19.6   | 11.9   | 6.6    | 7.0    | 5.8    | 12.9   | 20.9   | 17.6   | 10.1   |
| 23.5   | 6.1    | 23.2   | 9.8    | 7.0    | 11.5   | 7.6    | 4.9    | 9.7    |
| 124.5  | 110.4  | 72.0   | 22.4   | 20.3   | 22.8   | 20.5   | 15.5   | 21.6   |
| 2.9    | 4.4    | 15.7   | 8.4    | 8.1    | 13.3   | 2.6    | 5.6    | 8.9    |
| 16.7   | 11.7   | 11.1   | 30.4   | 25.7   | 14.8   | 12.5   | 11.5   | 10.4   |
| 21.3   | 22.0   | 16.2   | 16.2   | 11.8   | 18.4   | 23.0   | 15.5   | 17.9   |
| 3.9    | 4.6    | 4.7    | 10.5   | 8.0    | 9.0    | 7.6    | 11.7   | 10.2   |
| 17.2   | 17.4   | 5.8    | 36.4   | 37.1   | 42.9   | 12.2   | 3.5    | 17.1   |
| 8.6    | 6.5    | 4.4    | 8.8    | 10.8   | 6.6    | 9.8    | 2.9    | 1.8    |
| 1.5    | 7.2    | 8.1    | 7.6    | 9.1    | 2.1    | 4.9    | 8.8    | 5.3    |
| 1.5    | 3.2    | 2.2    | 4.9    | 5.9    | 2.9    | 2.4    | 1.4    | 1.8    |
| 238.7  | 294.0  | 178.8  | 104.6  | 91.5   | 109.9  | 117.7  | 90.7   | 124.5  |
| 24.8   | 32.0   | 22.0   | 46.0   | 39.9   | 43.4   | 24.3   | 5.7    | 18.6   |

|         |         |        |         |        |         |        |        |        |
|---------|---------|--------|---------|--------|---------|--------|--------|--------|
| 7.1     | 10.9    | 10.2   | 16.3    | 8.3    | 6.4     | 1.6    | 3.0    | 1.2    |
| 17.3    | 18.0    | 16.0   | 8.9     | 8.3    | 7.3     | 12.3   | 5.7    | 9.0    |
| 2.0     | 12.7    | 2.3    | 19.6    | 15.7   | 6.5     | 10.9   | 2.7    | 2.2    |
| 22.4    | 29.8    | 21.2   | 13.8    | 11.5   | 12.2    | 20.2   | 17.6   | 15.0   |
| 319.4   | 219.6   | 184.9  | 19.8    | 17.6   | 14.5    | 33.4   | 20.3   | 26.3   |
| 4.0     | 0.7     | 2.7    | 2.9     | 8.3    | 5.9     | 3.2    | 3.1    | 1.9    |
| 28.2    | 29.4    | 19.4   | 9.2     | 4.9    | 15.2    | 8.7    | 7.7    | 9.3    |
| 4.2     | 2.2     | 3.8    | 20.8    | 14.8   | 18.9    | 6.7    | 2.9    | 2.1    |
| 4.1     | 7.1     | 6.0    | 13.0    | 14.3   | 6.0     | 13.8   | 5.5    | 13.5   |
| 3.6     | 4.8     | 3.9    | 6.8     | 4.9    | 5.3     | 1.9    | 4.0    | 2.5    |
| 2349.2  | 3079.0  | 2739.6 | 319.4   | 269.0  | 330.3   | 253.9  | 241.1  | 227.3  |
| 3.5     | 11.3    | 4.3    | 6.5     | 19.4   | 26.8    | 7.3    | 7.4    | 11.7   |
| 19.0    | 19.2    | 19.8   | 65.4    | 48.3   | 84.5    | 47.4   | 62.2   | 82.5   |
| 28.0    | 32.2    | 25.4   | 7.8     | 17.3   | 10.9    | 10.1   | 11.5   | 12.6   |
| 1.0     | 4.8     | 1.1    | 4.1     | 2.5    | 3.8     | 1.3    | 1.1    | 1.3    |
| 20.9    | 34.6    | 31.0   | 31.6    | 34.1   | 28.7    | 24.5   | 21.5   | 23.6   |
| 6.8     | 3.1     | 8.1    | 61.4    | 44.1   | 45.9    | 62.4   | 55.8   | 66.0   |
| 54.2    | 89.4    | 58.0   | 66.5    | 62.5   | 61.5    | 55.9   | 62.4   | 49.8   |
| 208.0   | 373.6   | 197.4  | 84.9    | 58.1   | 80.1    | 75.5   | 74.9   | 75.8   |
| 2.3     | 2.8     | 2.2    | 6.8     | 4.9    | 9.1     | 1.3    | 2.4    | 1.1    |
| 7475.4  | 8694.2  | 5840.0 | 5196.4  | 4041.1 | 4257.8  | 2302.0 | 2284.7 | 2396.7 |
| 405.2   | 685.9   | 782.7  | 340.4   | 359.3  | 448.1   | 291.8  | 362.9  | 373.8  |
| 3.2     | 0.7     | 6.8    | 4.5     | 6.7    | 1.7     | 3.3    | 1.4    | 2.6    |
| 84.7    | 74.7    | 41.3   | 66.3    | 51.1   | 54.8    | 58.1   | 58.2   | 58.3   |
| 34.3    | 58.3    | 50.2   | 14.2    | 6.0    | 3.1     | 10.7   | 13.8   | 10.6   |
| 435.1   | 633.9   | 514.4  | 634.8   | 496.2  | 611.0   | 525.2  | 636.0  | 639.9  |
| 7972.3  | 8262.9  | 7845.3 | 8024.0  | 7639.5 | 8021.0  | 5108.9 | 4985.1 | 5445.0 |
| 203.0   | 233.3   | 230.1  | 860.0   | 665.4  | 748.7   | 707.7  | 889.4  | 723.9  |
| 961.2   | 1138.8  | 737.8  | 356.6   | 273.3  | 281.2   | 219.1  | 196.3  | 271.5  |
| 446.7   | 472.0   | 273.5  | 103.5   | 83.4   | 89.3    | 78.7   | 72.2   | 78.5   |
| 2356.7  | 2562.0  | 1629.0 | 1547.1  | 1180.9 | 1191.3  | 1575.0 | 1124.5 | 1427.3 |
| 714.1   | 821.5   | 543.4  | 459.7   | 348.2  | 349.0   | 280.8  | 222.6  | 270.3  |
| 1471.9  | 1651.3  | 1108.0 | 1318.9  | 1061.5 | 1120.5  | 874.7  | 679.0  | 853.2  |
| 1976.6  | 2595.8  | 2136.5 | 1674.2  | 1223.2 | 1512.8  | 978.3  | 804.7  | 937.1  |
| 4977.8  | 5926.7  | 5525.0 | 2600.8  | 2212.5 | 2361.1  | 2151.8 | 2272.5 | 2293.1 |
| 10665.7 | 9454.5  | 6304.7 | 2724.6  | 2739.7 | 2897.2  | 2693.0 | 3506.2 | 3598.5 |
| 2040.7  | 2821.0  | 2198.0 | 1223.8  | 1283.6 | 1445.6  | 793.1  | 1147.5 | 1179.1 |
| 1617.2  | 2164.0  | 1729.7 | 1280.7  | 1136.8 | 1393.6  | 643.7  | 963.3  | 850.6  |
| 7733.2  | 8203.4  | 6671.6 | 4687.0  | 4409.5 | 4633.7  | 3145.0 | 3457.1 | 3599.4 |
| 9409.8  | 9970.8  | 9368.9 | 10597.0 | 9855.1 | 10526.1 | 6401.6 | 6608.2 | 6973.3 |
| 1606.3  | 2344.2  | 1881.3 | 4227.9  | 4070.2 | 4561.2  | 2012.0 | 2496.5 | 2423.9 |
| 5494.8  | 6351.1  | 5584.2 | 6902.0  | 7041.7 | 6964.5  | 3504.0 | 3658.6 | 3898.9 |
| 10511.7 | 10587.9 | 9915.1 | 10216.9 | 9645.1 | 9268.8  | 5946.2 | 6128.0 | 6400.9 |
| 254.6   | 288.1   | 192.1  | 205.4   | 188.3  | 184.7   | 130.8  | 129.7  | 155.8  |
| 3938.2  | 4330.0  | 3704.8 | 2948.4  | 2379.4 | 2530.4  | 2383.8 | 2407.6 | 2411.7 |
| 2328.9  | 2637.6  | 1839.4 | 1547.1  | 1154.2 | 1262.0  | 1318.4 | 1281.1 | 1435.8 |
| 64.2    | 57.5    | 53.6   | 14.1    | 8.5    | 17.6    | 40.1   | 17.6   | 41.1   |
| 295.1   | 330.6   | 273.6  | 544.4   | 443.4  | 458.4   | 335.9  | 334.0  | 377.5  |
| 235.1   | 248.9   | 126.3  | 140.3   | 83.7   | 115.6   | 112.9  | 88.9   | 107.8  |
| 2508.0  | 2857.6  | 1849.7 | 569.0   | 398.0  | 492.2   | 326.3  | 389.0  | 351.4  |
| 2125.6  | 2245.5  | 988.1  | 1200.2  | 808.6  | 851.0   | 604.2  | 504.3  | 590.9  |
| 310.9   | 302.2   | 162.6  | 122.6   | 94.8   | 95.5    | 95.8   | 75.7   | 98.3   |
| 1460.2  | 1488.4  | 680.5  | 408.4   | 263.6  | 290.0   | 403.1  | 269.7  | 356.1  |

|         |         |         |         |         |         |        |        |        |
|---------|---------|---------|---------|---------|---------|--------|--------|--------|
| 1867.0  | 1829.7  | 1113.9  | 694.0   | 474.8   | 476.4   | 442.8  | 353.9  | 407.4  |
| 1620.1  | 1707.7  | 1076.8  | 671.4   | 484.4   | 552.1   | 434.3  | 335.3  | 387.8  |
| 9788.9  | 10081.8 | 8185.5  | 8743.3  | 7484.6  | 7784.6  | 5872.0 | 5412.2 | 5788.7 |
| 10.6    | 9.3     | 10.0    | 690.6   | 866.7   | 1036.3  | 631.4  | 1062.6 | 1132.2 |
| 5.2     | 10.2    | 5.9     | 5946.7  | 7010.4  | 7747.1  | 3653.0 | 4575.8 | 4896.3 |
| 2394.2  | 2849.1  | 2085.6  | 779.1   | 610.0   | 664.8   | 865.0  | 926.3  | 1037.6 |
| 2902.1  | 3733.2  | 3157.1  | 1093.8  | 1088.4  | 1183.9  | 799.2  | 1100.2 | 1069.5 |
| 2194.1  | 1916.6  | 1370.7  | 1444.7  | 1271.3  | 1244.9  | 1669.3 | 1623.4 | 1848.3 |
| 3377.9  | 3741.8  | 3094.6  | 875.9   | 712.6   | 920.6   | 537.5  | 713.6  | 741.2  |
| 144.6   | 151.9   | 125.0   | 59.7    | 39.8    | 49.3    | 51.9   | 30.7   | 43.9   |
| 212.0   | 193.0   | 117.3   | 280.8   | 258.7   | 262.2   | 319.5  | 264.2  | 350.2  |
| 59.4    | 81.8    | 64.9    | 18.6    | 8.2     | 13.0    | 24.3   | 14.6   | 18.7   |
| 3494.4  | 3615.2  | 2401.8  | 2003.8  | 1572.1  | 1523.9  | 2550.3 | 2401.1 | 2468.0 |
| 7356.5  | 7668.0  | 5535.2  | 5961.7  | 5068.7  | 5118.7  | 4813.7 | 4276.2 | 4694.3 |
| 9727.0  | 9461.0  | 7471.7  | 10194.0 | 8844.0  | 8577.4  | 6560.4 | 5911.7 | 6566.4 |
| 10526.0 | 9926.5  | 8488.1  | 9706.2  | 8916.0  | 9546.9  | 6317.7 | 6232.4 | 6423.1 |
| 2313.6  | 2808.0  | 2029.2  | 2164.7  | 1593.8  | 1696.3  | 1889.0 | 1739.4 | 1878.5 |
| 9557.5  | 10500.0 | 9438.3  | 9483.4  | 8890.3  | 8965.3  | 6161.9 | 6237.4 | 6682.1 |
| 93.8    | 142.7   | 88.9    | 92.1    | 77.0    | 92.5    | 87.4   | 103.9  | 108.5  |
| 508.5   | 619.9   | 468.0   | 914.8   | 680.1   | 827.0   | 480.3  | 524.9  | 495.2  |
| 551.1   | 684.2   | 501.3   | 677.2   | 545.2   | 607.0   | 334.4  | 378.0  | 409.6  |
| 323.7   | 713.0   | 332.2   | 615.4   | 551.9   | 654.7   | 309.1  | 378.5  | 410.5  |
| 195.3   | 232.0   | 133.5   | 179.2   | 122.1   | 154.0   | 116.8  | 95.3   | 109.0  |
| 11878.3 | 11807.1 | 10857.1 | 13590.5 | 12704.7 | 12992.6 | 8222.3 | 7787.9 | 7936.0 |
| 184.8   | 275.2   | 231.8   | 450.8   | 381.4   | 423.7   | 230.8  | 241.8  | 226.3  |
| 10.5    | 5.1     | 7.2     | 14.6    | 11.3    | 21.2    | 5.1    | 8.8    | 5.7    |
| 1.6     | 2.9     | 1.6     | 4.5     | 4.0     | 4.2     | 2.9    | 1.3    | 1.4    |
| 489.0   | 541.3   | 363.4   | 473.5   | 349.1   | 424.4   | 218.8  | 211.7  | 239.9  |
| 11621.6 | 10829.1 | 9335.8  | 9349.8  | 8671.8  | 9176.9  | 6990.1 | 7071.4 | 7472.8 |
| 602.6   | 618.0   | 467.8   | 3072.9  | 2588.2  | 2804.8  | 1841.7 | 1743.8 | 2153.8 |
| 758.4   | 703.0   | 460.6   | 2326.5  | 1888.3  | 2216.0  | 2042.8 | 1835.2 | 2191.0 |
| 238.5   | 301.7   | 410.8   | 765.4   | 580.5   | 737.2   | 425.2  | 749.6  | 576.2  |
| 904.9   | 1117.9  | 826.8   | 1359.5  | 1197.4  | 1237.0  | 1619.6 | 1684.9 | 1862.1 |
| 1242.8  | 1579.9  | 1270.0  | 1111.2  | 969.5   | 934.9   | 837.0  | 980.4  | 992.2  |
| 1076.8  | 1223.5  | 898.6   | 842.1   | 648.6   | 681.5   | 649.9  | 678.2  | 688.6  |
| 10.4    | 8.6     | 7.1     | 11.1    | 8.1     | 5.6     | 3.1    | 4.7    | 5.5    |
| 3.9     | 8.2     | 11.8    | 3.8     | 7.8     | 7.9     | 10.2   | 6.4    | 7.9    |
| 785.0   | 893.5   | 722.3   | 557.3   | 428.5   | 420.5   | 327.0  | 380.5  | 416.2  |
| 87.8    | 94.5    | 62.7    | 23.6    | 25.4    | 23.4    | 19.7   | 18.0   | 19.9   |
| 720.4   | 685.4   | 563.9   | 419.7   | 289.0   | 389.7   | 247.9  | 300.1  | 277.9  |
| 10231.3 | 9784.2  | 8953.6  | 10278.2 | 9598.6  | 9913.3  | 6812.0 | 6701.6 | 7140.7 |
| 151.8   | 229.5   | 217.0   | 211.8   | 200.7   | 223.7   | 108.1  | 119.0  | 131.7  |
| 8956.4  | 8920.6  | 8392.5  | 4171.8  | 3163.7  | 3696.1  | 2490.4 | 2375.0 | 2516.7 |
| 837.9   | 972.2   | 722.4   | 57.8    | 45.6    | 62.4    | 36.7   | 54.6   | 50.3   |
| 9285.7  | 8935.2  | 7620.3  | 2633.1  | 2168.1  | 2286.8  | 1905.5 | 1925.0 | 1977.3 |
| 68.2    | 94.4    | 62.2    | 55.4    | 36.1    | 56.1    | 28.5   | 28.6   | 42.8   |
| 148.1   | 224.6   | 148.1   | 117.5   | 101.1   | 119.0   | 59.4   | 63.2   | 72.9   |
| 426.2   | 513.5   | 368.6   | 151.8   | 117.6   | 173.4   | 195.3  | 165.9  | 204.6  |
| 388.6   | 448.1   | 249.0   | 114.5   | 83.5    | 108.5   | 154.9  | 95.9   | 129.9  |
| 611.9   | 696.5   | 451.3   | 402.5   | 278.8   | 342.5   | 294.1  | 205.7  | 264.8  |
| 334.1   | 411.8   | 229.5   | 331.3   | 301.9   | 291.9   | 187.0  | 168.5  | 202.6  |
| 1476.7  | 1613.9  | 1347.5  | 574.1   | 600.9   | 607.3   | 588.5  | 736.2  | 665.1  |
| 813.9   | 912.1   | 685.8   | 226.9   | 216.7   | 231.4   | 278.4  | 293.3  | 346.3  |

|         |         |         |        |        |        |        |        |        |
|---------|---------|---------|--------|--------|--------|--------|--------|--------|
| 589.0   | 729.2   | 516.7   | 404.1  | 358.9  | 381.1  | 403.5  | 457.5  | 445.8  |
| 1390.0  | 1319.8  | 702.7   | 796.3  | 557.5  | 726.3  | 1498.5 | 1034.6 | 1410.8 |
| 3403.6  | 3565.1  | 2319.5  | 1699.4 | 1131.8 | 1207.8 | 1062.2 | 938.0  | 1016.5 |
| 5.4     | 4.8     | 10.0    | 476.0  | 368.3  | 393.0  | 370.0  | 340.0  | 358.0  |
| 5.0     | 6.0     | 1.0     | 484.4  | 310.2  | 383.6  | 198.7  | 178.8  | 216.4  |
| 71.8    | 113.9   | 74.9    | 51.4   | 35.0   | 45.0   | 55.1   | 56.6   | 53.4   |
| 2247.2  | 2549.3  | 1770.3  | 1378.3 | 916.5  | 1194.8 | 1072.1 | 865.1  | 978.7  |
| 948.4   | 1098.7  | 703.4   | 293.0  | 203.8  | 265.7  | 544.1  | 389.3  | 460.8  |
| 828.2   | 976.5   | 704.1   | 544.1  | 404.1  | 510.7  | 395.0  | 312.7  | 396.8  |
| 1326.8  | 1662.5  | 793.1   | 597.4  | 491.0  | 558.1  | 586.6  | 620.9  | 746.8  |
| 37.4    | 59.7    | 33.4    | 177.5  | 190.9  | 234.4  | 86.0   | 136.1  | 113.0  |
| 208.4   | 210.4   | 147.6   | 128.9  | 82.0   | 68.5   | 86.3   | 61.8   | 62.1   |
| 638.4   | 679.8   | 457.9   | 182.0  | 104.5  | 124.2  | 130.0  | 96.2   | 97.1   |
| 669.2   | 659.5   | 421.5   | 160.9  | 81.7   | 104.8  | 109.3  | 74.2   | 89.4   |
| 194.0   | 227.4   | 173.7   | 99.6   | 58.3   | 65.9   | 65.4   | 43.4   | 52.1   |
| 390.5   | 486.4   | 334.7   | 576.1  | 503.1  | 499.7  | 418.6  | 391.4  | 443.0  |
| 330.2   | 382.0   | 242.5   | 322.9  | 252.3  | 310.8  | 282.9  | 296.9  | 269.1  |
| 140.8   | 186.0   | 163.5   | 48.1   | 53.4   | 56.6   | 79.1   | 80.7   | 72.3   |
| 502.4   | 576.7   | 330.7   | 185.3  | 151.0  | 122.4  | 137.1  | 121.6  | 165.1  |
| 416.7   | 495.7   | 315.8   | 199.2  | 135.3  | 157.7  | 155.8  | 124.8  | 159.8  |
| 3.3     | 2.5     | 6.8     | 4.1    | 5.6    | 4.9    | 2.1    | 2.3    | 1.9    |
| 321.0   | 388.1   | 238.0   | 223.6  | 200.4  | 194.8  | 212.3  | 202.2  | 222.6  |
| 384.9   | 475.8   | 302.5   | 383.4  | 295.5  | 328.5  | 297.8  | 265.4  | 350.1  |
| 210.9   | 353.1   | 331.7   | 720.2  | 689.8  | 784.2  | 309.2  | 376.8  | 381.0  |
| 670.7   | 740.6   | 442.8   | 696.0  | 649.5  | 676.1  | 555.1  | 483.2  | 561.0  |
| 539.7   | 724.8   | 754.6   | 370.8  | 372.6  | 414.6  | 284.3  | 307.5  | 329.1  |
| 209.6   | 263.1   | 268.9   | 84.0   | 77.4   | 98.3   | 108.9  | 103.9  | 129.3  |
| 720.7   | 775.4   | 430.6   | 818.0  | 572.9  | 604.9  | 571.6  | 391.4  | 523.0  |
| 544.6   | 562.5   | 223.3   | 1079.7 | 714.9  | 753.1  | 590.4  | 415.2  | 554.6  |
| 8623.0  | 9301.3  | 7858.4  | 2481.0 | 2162.0 | 2160.0 | 2590.0 | 2329.0 | 2636.4 |
| 8375.4  | 9030.9  | 8665.9  | 8920.5 | 8533.9 | 9376.9 | 5064.6 | 5199.4 | 5529.1 |
| 405.3   | 577.0   | 472.6   | 273.9  | 217.4  | 247.5  | 157.5  | 197.8  | 186.0  |
| 1361.9  | 1872.0  | 1761.3  | 1107.1 | 977.8  | 1257.3 | 785.3  | 775.3  | 935.9  |
| 11826.9 | 11705.9 | 10663.6 | 8228.7 | 7479.2 | 7213.5 | 6852.0 | 6565.0 | 7038.2 |
| 1864.1  | 2492.2  | 2209.7  | 783.6  | 631.5  | 681.4  | 587.8  | 628.6  | 654.7  |
| 191.1   | 222.6   | 177.6   | 171.7  | 158.4  | 120.7  | 75.2   | 82.2   | 74.0   |
| 74.2    | 116.8   | 88.8    | 247.2  | 178.2  | 199.9  | 114.2  | 115.4  | 121.2  |
| 141.4   | 302.2   | 273.4   | 411.8  | 319.1  | 432.3  | 313.1  | 208.2  | 177.3  |
| 608.5   | 706.7   | 625.5   | 623.7  | 477.6  | 600.8  | 326.2  | 380.0  | 405.3  |
| 2033.2  | 2310.8  | 1346.7  | 891.0  | 576.3  | 710.0  | 474.2  | 290.8  | 378.0  |
| 215.2   | 309.4   | 285.8   | 376.1  | 315.7  | 321.7  | 153.3  | 189.6  | 186.3  |
| 594.7   | 812.7   | 682.9   | 474.5  | 391.9  | 433.1  | 317.8  | 362.1  | 364.9  |
| 449.3   | 635.5   | 560.0   | 413.3  | 377.3  | 379.6  | 193.5  | 234.1  | 248.9  |
| 661.4   | 879.4   | 680.6   | 821.3  | 708.1  | 846.8  | 581.1  | 646.0  | 721.3  |
| 814.1   | 1193.9  | 1106.1  | 1016.4 | 819.3  | 789.3  | 630.9  | 540.7  | 637.4  |
| 435.7   | 512.5   | 383.4   | 290.0  | 270.6  | 287.4  | 192.4  | 250.2  | 273.4  |
| 998.7   | 1371.0  | 1057.6  | 1473.7 | 1192.1 | 1294.5 | 851.5  | 805.0  | 922.4  |
| 263.8   | 450.7   | 466.8   | 531.8  | 526.0  | 581.9  | 303.6  | 357.8  | 382.5  |
| 587.0   | 1076.5  | 889.8   | 1288.9 | 1108.5 | 1342.3 | 890.6  | 826.7  | 1031.2 |
| 3299.4  | 3641.3  | 2091.7  | 709.4  | 503.6  | 574.8  | 629.9  | 607.6  | 581.3  |
| 300.5   | 387.3   | 312.3   | 1136.3 | 1073.9 | 1134.9 | 985.7  | 1082.9 | 1177.7 |
| 1387.5  | 1356.8  | 879.6   | 196.0  | 154.6  | 139.6  | 258.9  | 215.7  | 241.5  |
| 683.7   | 721.7   | 436.5   | 207.5  | 162.9  | 193.1  | 115.9  | 161.5  | 134.6  |



|        |        |        |        |        |        |        |        |        |
|--------|--------|--------|--------|--------|--------|--------|--------|--------|
| 245.2  | 554.2  | 817.0  | 1642.2 | 1592.4 | 1736.2 | 959.7  | 1390.0 | 1313.3 |
| 121.3  | 270.6  | 162.8  | 106.3  | 117.3  | 105.9  | 116.1  | 164.6  | 150.6  |
| 469.9  | 742.7  | 460.6  | 1426.2 | 1001.0 | 1078.0 | 423.5  | 364.5  | 465.2  |
| 106.5  | 117.4  | 107.8  | 53.4   | 39.9   | 59.9   | 75.1   | 89.4   | 89.1   |
| 353.0  | 427.5  | 343.3  | 396.3  | 316.2  | 356.6  | 205.6  | 223.9  | 238.6  |
| 8.3    | 15.3   | 7.7    | 44.2   | 52.7   | 49.6   | 32.9   | 27.5   | 24.6   |
| 357.1  | 480.6  | 427.2  | 894.1  | 827.9  | 837.6  | 513.4  | 661.0  | 653.4  |
| 325.3  | 433.7  | 274.1  | 578.9  | 457.6  | 486.2  | 460.1  | 448.7  | 494.3  |
| 1958.5 | 2876.6 | 2932.5 | 1328.6 | 962.6  | 999.2  | 935.7  | 784.7  | 954.9  |
| 3865.8 | 4472.0 | 4222.3 | 1054.7 | 710.3  | 824.0  | 1084.4 | 1281.5 | 1222.1 |
| 1612.9 | 1845.8 | 1234.3 | 1608.7 | 1300.4 | 1207.6 | 969.4  | 892.1  | 1059.0 |
| 659.0  | 733.8  | 523.4  | 167.7  | 139.5  | 152.7  | 125.1  | 103.8  | 124.2  |
| 1063.4 | 1336.7 | 997.1  | 1172.9 | 984.2  | 992.3  | 1310.7 | 1440.2 | 1380.4 |
| 1012.8 | 1216.6 | 690.8  | 298.8  | 215.7  | 275.6  | 415.6  | 327.4  | 389.2  |
| 74.5   | 85.0   | 67.1   | 77.9   | 61.2   | 80.4   | 56.1   | 85.9   | 83.9   |
| 3.0    | 3.8    | 1.7    | 21.0   | 15.3   | 10.6   | 5.8    | 0.6    | 2.2    |
| 77.5   | 102.4  | 60.8   | 61.8   | 37.6   | 30.3   | 57.0   | 28.8   | 19.3   |
| 23.9   | 27.5   | 27.8   | 19.9   | 14.6   | 22.0   | 5.9    | 10.0   | 15.4   |
| 99.3   | 130.6  | 111.4  | 189.9  | 132.3  | 159.5  | 86.6   | 113.2  | 92.0   |
| 328.4  | 432.5  | 280.6  | 693.5  | 545.8  | 572.6  | 344.6  | 309.3  | 384.8  |
| 4629.2 | 5482.9 | 5138.3 | 8143.4 | 7525.2 | 7439.8 | 5159.4 | 5178.3 | 5814.5 |
| 855.9  | 1099.2 | 736.6  | 635.1  | 495.4  | 597.9  | 399.4  | 367.1  | 412.6  |
| 129.5  | 166.8  | 126.8  | 71.6   | 55.0   | 68.7   | 87.3   | 72.1   | 88.3   |
| 2781.3 | 3620.6 | 2686.1 | 3750.6 | 3521.6 | 4323.7 | 2452.8 | 2811.0 | 2814.7 |
| 1357.1 | 1450.2 | 1287.5 | 1003.0 | 968.9  | 1035.9 | 842.2  | 1088.3 | 964.9  |
| 399.7  | 567.8  | 382.2  | 587.9  | 477.7  | 496.9  | 325.3  | 315.5  | 343.1  |
| 1090.4 | 1029.9 | 798.1  | 470.7  | 434.2  | 504.2  | 415.4  | 475.8  | 477.0  |
| 503.8  | 582.0  | 494.2  | 897.4  | 685.5  | 837.6  | 366.8  | 395.0  | 385.3  |
| 283.9  | 326.0  | 211.5  | 869.7  | 790.3  | 924.0  | 327.0  | 339.1  | 405.1  |
| 1.4    | 3.6    | 3.2    | 7.2    | 17.9   | 14.6   | 18.7   | 19.6   | 13.9   |
| 9.0    | 20.5   | 4.3    | 112.5  | 67.8   | 102.7  | 107.4  | 76.6   | 92.6   |
| 165.2  | 273.1  | 297.7  | 155.5  | 127.0  | 145.1  | 146.6  | 173.0  | 162.4  |
| 4.4    | 4.3    | 4.1    | 399.1  | 260.9  | 304.2  | 391.7  | 260.2  | 349.8  |
| 115.8  | 155.6  | 189.5  | 51.9   | 39.7   | 59.0   | 61.3   | 67.6   | 78.1   |
| 569.1  | 745.9  | 972.2  | 626.5  | 584.8  | 637.5  | 401.1  | 522.9  | 491.5  |
| 50.9   | 64.3   | 67.0   | 55.7   | 48.2   | 42.8   | 23.2   | 28.4   | 32.6   |
| 2033.1 | 2945.6 | 2377.7 | 411.1  | 349.6  | 380.7  | 210.5  | 201.7  | 206.9  |
| 322.8  | 491.8  | 634.1  | 2888.8 | 2803.5 | 2761.9 | 2693.7 | 2902.6 | 3210.2 |
| 519.9  | 699.4  | 554.1  | 600.9  | 503.3  | 566.2  | 333.6  | 338.1  | 409.5  |
| 340.6  | 414.6  | 292.7  | 430.0  | 355.4  | 420.5  | 165.7  | 188.6  | 212.5  |
| 135.6  | 158.9  | 95.2   | 122.6  | 76.3   | 96.7   | 96.8   | 77.6   | 113.3  |
| 127.3  | 182.4  | 135.2  | 410.3  | 310.2  | 329.4  | 118.2  | 136.4  | 152.2  |
| 235.8  | 309.5  | 247.1  | 362.3  | 366.4  | 407.1  | 184.3  | 268.0  | 278.7  |
| 476.0  | 489.9  | 328.0  | 60.9   | 36.4   | 60.4   | 170.5  | 117.4  | 138.3  |
| 224.9  | 226.3  | 165.0  | 89.4   | 84.2   | 80.6   | 119.8  | 101.4  | 114.1  |
| 662.9  | 705.2  | 422.8  | 150.5  | 90.3   | 147.0  | 269.5  | 230.2  | 240.1  |
| 1126.6 | 1198.5 | 892.5  | 695.4  | 579.3  | 642.7  | 545.6  | 567.4  | 635.8  |
| 367.4  | 558.5  | 342.4  | 184.1  | 144.0  | 153.5  | 101.6  | 112.7  | 140.0  |
| 2011.1 | 2328.6 | 2116.8 | 232.5  | 161.9  | 169.6  | 158.5  | 121.1  | 145.1  |
| 255.5  | 304.3  | 267.8  | 207.8  | 187.3  | 170.1  | 103.0  | 109.4  | 110.1  |
| 398.0  | 458.4  | 330.7  | 238.1  | 203.5  | 227.8  | 193.3  | 195.6  | 199.5  |
| 89.8   | 95.6   | 66.7   | 68.5   | 51.8   | 84.0   | 197.5  | 122.5  | 164.4  |
| 467.3  | 553.3  | 414.2  | 1400.1 | 1343.2 | 1464.0 | 808.9  | 881.9  | 989.9  |

|        |        |        |        |        |        |        |        |        |
|--------|--------|--------|--------|--------|--------|--------|--------|--------|
| 2161.1 | 2694.4 | 1573.5 | 3091.3 | 2651.7 | 2941.9 | 1524.2 | 1622.2 | 1756.1 |
| 704.7  | 855.9  | 479.6  | 685.5  | 585.3  | 679.8  | 445.8  | 493.1  | 549.5  |
| 135.8  | 220.4  | 164.5  | 179.3  | 148.3  | 153.6  | 107.6  | 129.6  | 147.2  |
| 287.9  | 343.1  | 225.1  | 223.4  | 176.7  | 227.2  | 124.4  | 138.4  | 153.2  |
| 172.8  | 236.9  | 203.4  | 289.3  | 298.7  | 314.0  | 166.8  | 220.3  | 265.7  |
| 135.7  | 169.6  | 146.3  | 373.7  | 329.9  | 336.2  | 232.1  | 237.0  | 303.0  |
| 376.5  | 553.3  | 423.7  | 428.2  | 398.1  | 451.3  | 257.6  | 271.8  | 300.8  |
| 26.4   | 36.6   | 26.6   | 39.9   | 31.2   | 39.2   | 26.1   | 26.5   | 32.7   |
| 188.5  | 348.5  | 210.4  | 288.1  | 288.1  | 258.9  | 123.2  | 138.0  | 138.0  |
| 425.7  | 576.1  | 602.2  | 1239.3 | 993.8  | 1089.8 | 760.6  | 693.3  | 752.5  |
| 686.0  | 781.4  | 356.5  | 334.5  | 234.6  | 323.3  | 451.3  | 401.6  | 451.5  |
| 306.2  | 499.7  | 425.3  | 863.9  | 628.0  | 646.1  | 591.2  | 483.4  | 560.7  |
| 242.2  | 267.3  | 155.7  | 290.4  | 208.7  | 270.7  | 185.7  | 131.5  | 153.4  |
| 83.1   | 91.5   | 66.2   | 132.1  | 93.7   | 111.8  | 120.2  | 127.9  | 136.8  |
| 1856.2 | 1962.7 | 1213.0 | 2690.0 | 2262.6 | 2299.3 | 1531.2 | 1270.1 | 1505.5 |
| 4613.1 | 3901.4 | 2637.0 | 3113.6 | 2290.1 | 2499.3 | 1720.9 | 1377.2 | 1637.2 |
| 1127.0 | 1302.1 | 998.6  | 883.7  | 652.8  | 710.1  | 480.4  | 450.9  | 509.3  |
| 1302.5 | 1523.2 | 1025.3 | 648.0  | 499.9  | 545.0  | 683.1  | 694.1  | 654.6  |
| 293.9  | 338.5  | 207.2  | 278.1  | 256.0  | 258.6  | 172.2  | 166.4  | 199.0  |
| 75.5   | 102.9  | 94.6   | 73.5   | 77.6   | 97.9   | 33.9   | 44.1   | 32.5   |
| 32.7   | 58.0   | 62.1   | 203.1  | 157.7  | 203.6  | 114.3  | 116.2  | 123.9  |
| 29.6   | 61.4   | 62.5   | 140.3  | 123.6  | 138.4  | 129.7  | 113.8  | 122.9  |
| 3065.4 | 3568.6 | 2397.8 | 2408.4 | 1846.5 | 1985.0 | 1607.8 | 1404.4 | 1660.7 |
| 1321.1 | 1418.0 | 947.4  | 677.2  | 482.7  | 544.9  | 601.9  | 483.0  | 553.2  |
| 865.1  | 842.9  | 563.2  | 688.1  | 518.8  | 635.2  | 367.0  | 398.3  | 430.2  |
| 647.5  | 759.1  | 499.5  | 539.9  | 434.6  | 485.3  | 494.1  | 411.7  | 466.2  |
| 1205.2 | 1313.4 | 549.5  | 349.5  | 187.3  | 238.9  | 160.6  | 114.3  | 148.4  |
| 443.2  | 470.3  | 212.0  | 81.1   | 37.3   | 52.6   | 93.7   | 60.9   | 80.0   |
| 56.9   | 121.0  | 18.1   | 58.5   | 95.9   | 122.7  | 16.5   | 55.6   | 55.2   |
| 139.5  | 221.1  | 175.8  | 145.8  | 112.9  | 138.3  | 77.0   | 98.8   | 94.8   |
| 1239.4 | 1418.5 | 1139.1 | 554.8  | 430.9  | 452.4  | 411.9  | 385.2  | 444.7  |
| 77.8   | 114.6  | 78.2   | 110.5  | 76.3   | 94.8   | 76.6   | 93.1   | 99.4   |
| 128.9  | 133.2  | 110.4  | 286.2  | 227.3  | 295.2  | 108.5  | 64.1   | 131.3  |
| 9.7    | 45.4   | 85.7   | 2914.9 | 2589.3 | 2748.5 | 2309.9 | 2554.0 | 2651.4 |
| 2001.4 | 2610.0 | 2193.8 | 1356.2 | 1268.8 | 1303.3 | 1223.4 | 1462.0 | 1456.3 |
| 645.0  | 841.9  | 672.4  | 486.9  | 483.7  | 512.0  | 465.5  | 497.7  | 520.7  |
| 50.4   | 115.1  | 124.1  | 2170.9 | 2003.6 | 2223.9 | 2075.6 | 2552.9 | 2595.2 |
| 419.5  | 536.3  | 421.1  | 1074.6 | 799.9  | 948.6  | 471.5  | 483.8  | 502.8  |
| 214.8  | 268.2  | 251.8  | 218.0  | 157.6  | 193.7  | 145.8  | 155.8  | 159.0  |
| 7.8    | 8.8    | 10.6   | 177.8  | 144.9  | 150.1  | 143.4  | 141.7  | 135.7  |
| 869.2  | 1457.8 | 1063.4 | 1070.9 | 914.7  | 1105.5 | 501.5  | 528.7  | 670.3  |
| 136.7  | 203.0  | 179.0  | 147.5  | 112.4  | 168.8  | 75.8   | 74.5   | 111.8  |
| 12.1   | 11.6   | 9.2    | 74.2   | 62.8   | 60.4   | 59.7   | 70.6   | 60.9   |
| 1.5    | 1.3    | 0.9    | 252.6  | 239.9  | 215.3  | 281.7  | 269.8  | 316.6  |
| 478.1  | 761.6  | 693.1  | 676.3  | 593.0  | 697.9  | 348.8  | 433.4  | 435.7  |
| 2153.8 | 2585.3 | 1497.9 | 1649.1 | 1149.2 | 1174.6 | 1723.6 | 1183.0 | 1472.9 |
| 57.1   | 79.4   | 71.3   | 22.0   | 24.9   | 30.2   | 14.4   | 25.3   | 34.0   |
| 155.6  | 214.4  | 203.7  | 166.5  | 173.4  | 165.2  | 150.7  | 231.6  | 203.2  |
| 510.4  | 744.6  | 714.8  | 634.8  | 523.1  | 640.2  | 417.5  | 582.6  | 513.5  |
| 214.0  | 297.3  | 237.7  | 138.3  | 105.2  | 122.0  | 128.2  | 117.9  | 147.1  |
| 945.1  | 1311.4 | 974.6  | 1105.5 | 862.1  | 997.2  | 712.4  | 639.0  | 761.6  |
| 1118.8 | 1515.2 | 1039.4 | 549.5  | 406.9  | 512.3  | 410.1  | 350.5  | 375.8  |
| 470.7  | 589.6  | 417.6  | 529.4  | 467.0  | 511.8  | 317.4  | 325.3  | 346.6  |

|        |        |        |        |        |        |        |        |        |
|--------|--------|--------|--------|--------|--------|--------|--------|--------|
| 1579.4 | 1561.6 | 791.4  | 1006.6 | 877.6  | 940.6  | 766.8  | 760.4  | 840.5  |
| 634.5  | 848.0  | 706.1  | 702.5  | 695.6  | 740.0  | 358.6  | 509.3  | 483.0  |
| 142.3  | 132.6  | 61.2   | 94.0   | 75.5   | 90.3   | 58.9   | 63.3   | 75.5   |
| 203.3  | 310.6  | 180.3  | 188.9  | 150.9  | 161.6  | 124.7  | 117.9  | 142.9  |
| 23.7   | 27.5   | 15.4   | 19.3   | 19.1   | 24.2   | 9.6    | 11.0   | 15.1   |
| 31.9   | 36.4   | 16.3   | 34.6   | 31.2   | 22.8   | 20.0   | 15.4   | 27.1   |
| 392.0  | 410.9  | 267.2  | 92.3   | 56.4   | 58.5   | 58.6   | 44.8   | 58.1   |
| 1164.2 | 1477.4 | 886.2  | 712.6  | 504.9  | 551.3  | 425.8  | 329.6  | 426.4  |
| 199.9  | 261.3  | 186.6  | 203.7  | 162.9  | 162.2  | 148.9  | 194.8  | 172.7  |
| 54.9   | 65.1   | 65.4   | 47.1   | 40.9   | 49.4   | 56.4   | 74.0   | 74.8   |
| 412.6  | 493.5  | 326.1  | 534.2  | 392.7  | 514.7  | 291.4  | 326.8  | 382.3  |
| 140.3  | 218.8  | 168.0  | 95.5   | 96.9   | 101.9  | 73.2   | 82.4   | 84.9   |
| 963.8  | 1214.2 | 872.7  | 381.2  | 299.2  | 361.3  | 338.1  | 323.9  | 331.3  |
| 2080.1 | 2039.4 | 1696.0 | 967.5  | 763.7  | 808.4  | 1011.3 | 1104.6 | 1098.9 |
| 8.8    | 11.8   | 12.5   | 8.0    | 4.9    | 10.9   | 5.2    | 2.2    | 2.1    |
| 215.0  | 236.7  | 176.4  | 435.7  | 362.6  | 419.1  | 219.2  | 346.4  | 325.2  |
| 229.9  | 277.5  | 276.4  | 309.4  | 293.4  | 270.5  | 185.2  | 245.7  | 233.5  |
| 1629.8 | 2362.9 | 2591.8 | 2715.8 | 2011.9 | 2317.7 | 902.5  | 947.9  | 939.0  |
| 747.4  | 865.8  | 643.5  | 1367.1 | 1052.5 | 1170.0 | 1120.4 | 944.8  | 1171.2 |
| 20.0   | 10.2   | 17.3   | 53.2   | 19.7   | 18.0   | 20.4   | 18.3   | 35.4   |
| 1.4    | 5.8    | 7.5    | 57.1   | 33.8   | 27.5   | 25.5   | 23.1   | 25.5   |
| 411.7  | 516.5  | 436.4  | 423.9  | 370.2  | 438.8  | 251.1  | 252.5  | 277.9  |
| 29.7   | 19.3   | 18.0   | 99.6   | 80.9   | 101.5  | 59.9   | 63.7   | 72.6   |
| 7681.8 | 8500.5 | 7307.8 | 7352.1 | 7034.9 | 7583.9 | 4528.6 | 4821.5 | 5144.6 |
| 5.2    | 3.2    | 0.3    | 47.0   | 31.4   | 34.8   | 49.1   | 46.3   | 45.2   |
| 533.9  | 688.8  | 426.0  | 727.1  | 612.8  | 720.1  | 338.8  | 319.8  | 363.0  |
| 893.7  | 1168.2 | 889.1  | 219.8  | 170.6  | 230.2  | 342.2  | 357.1  | 416.3  |
| 705.4  | 840.4  | 826.1  | 324.5  | 298.6  | 293.9  | 179.2  | 226.6  | 237.4  |
| 170.3  | 214.8  | 204.5  | 63.8   | 59.8   | 74.0   | 67.0   | 79.0   | 73.0   |
| 1201.3 | 1038.2 | 811.7  | 592.7  | 510.7  | 575.7  | 305.3  | 342.8  | 367.7  |
| 298.6  | 404.7  | 406.4  | 319.3  | 252.2  | 329.3  | 212.7  | 266.5  | 253.8  |
| 765.0  | 1072.0 | 752.3  | 815.1  | 700.8  | 785.4  | 557.5  | 700.7  | 690.9  |
| 356.7  | 432.5  | 274.7  | 235.7  | 177.9  | 191.7  | 234.0  | 215.3  | 245.5  |
| 275.7  | 315.6  | 183.0  | 128.6  | 92.6   | 134.5  | 127.5  | 129.7  | 133.4  |
| 544.0  | 707.2  | 597.5  | 716.5  | 571.0  | 622.3  | 362.9  | 464.9  | 415.7  |
| 159.5  | 306.9  | 348.4  | 273.4  | 282.3  | 382.1  | 142.6  | 154.8  | 196.7  |
| 876.1  | 1131.1 | 925.3  | 1152.4 | 915.7  | 1027.0 | 602.8  | 647.4  | 698.7  |
| 977.2  | 1202.7 | 735.8  | 1671.1 | 1270.3 | 1369.0 | 1496.6 | 1205.3 | 1497.5 |
| 279.2  | 350.7  | 216.2  | 669.5  | 461.1  | 544.7  | 423.8  | 363.1  | 422.4  |
| 60.6   | 94.1   | 72.7   | 78.8   | 66.4   | 66.2   | 56.4   | 57.0   | 69.4   |
| 99.6   | 99.7   | 89.9   | 107.6  | 99.0   | 89.7   | 63.3   | 74.0   | 77.1   |
| 174.9  | 217.9  | 191.9  | 297.6  | 279.6  | 285.0  | 213.3  | 232.3  | 253.4  |
| 17.7   | 32.9   | 18.3   | 6.8    | 4.8    | 13.5   | 13.5   | 6.8    | 10.1   |
| 747.2  | 959.3  | 814.8  | 283.6  | 224.8  | 242.7  | 329.8  | 328.2  | 355.8  |
| 416.9  | 513.4  | 327.3  | 325.9  | 291.4  | 350.9  | 171.0  | 234.1  | 221.8  |
| 815.6  | 867.5  | 626.9  | 538.1  | 406.0  | 433.7  | 383.3  | 342.2  | 383.3  |
| 702.6  | 741.6  | 564.0  | 343.2  | 246.4  | 274.4  | 228.1  | 205.7  | 230.6  |
| 921.8  | 1136.7 | 925.7  | 332.9  | 275.9  | 281.0  | 292.1  | 313.1  | 341.4  |
| 503.5  | 657.5  | 602.6  | 262.0  | 230.7  | 264.2  | 222.5  | 224.9  | 239.2  |
| 540.4  | 735.7  | 610.0  | 201.3  | 168.6  | 198.7  | 231.3  | 232.7  | 216.3  |
| 641.4  | 848.0  | 514.0  | 1512.5 | 1230.8 | 1497.2 | 1109.5 | 918.4  | 1212.1 |
| 670.8  | 657.8  | 378.3  | 422.4  | 327.2  | 371.6  | 334.5  | 329.2  | 356.9  |
| 175.6  | 224.5  | 134.9  | 28.2   | 20.3   | 35.4   | 92.4   | 75.1   | 79.4   |

|        |        |        |        |        |        |        |        |        |
|--------|--------|--------|--------|--------|--------|--------|--------|--------|
| 282.7  | 323.9  | 291.9  | 156.8  | 127.9  | 125.9  | 105.6  | 134.9  | 132.0  |
| 178.2  | 185.6  | 119.4  | 141.4  | 139.7  | 160.8  | 107.1  | 121.0  | 120.0  |
| 189.3  | 235.1  | 206.2  | 78.6   | 74.8   | 88.8   | 117.6  | 116.7  | 96.3   |
| 3335.0 | 5110.6 | 6084.1 | 96.3   | 92.9   | 123.8  | 125.9  | 190.7  | 195.8  |
| 13.1   | 22.3   | 13.6   | 5.1    | 6.0    | 9.2    | 3.3    | 5.0    | 2.9    |
| 405.3  | 555.0  | 563.7  | 214.3  | 190.3  | 215.0  | 85.1   | 115.2  | 116.1  |
| 4748.5 | 4591.0 | 2864.4 | 3485.2 | 2458.8 | 2857.8 | 1925.5 | 1541.6 | 1752.9 |
| 769.4  | 991.0  | 973.5  | 1182.1 | 933.4  | 1158.3 | 625.2  | 545.2  | 652.8  |
| 1005.3 | 1237.2 | 891.4  | 1302.9 | 1041.2 | 1124.3 | 701.0  | 882.4  | 861.1  |
| 382.7  | 565.3  | 559.0  | 111.5  | 110.9  | 108.3  | 122.5  | 125.9  | 124.8  |
| 810.8  | 1028.1 | 777.8  | 920.4  | 754.4  | 823.9  | 638.5  | 783.6  | 802.9  |
| 218.7  | 314.4  | 234.9  | 297.4  | 248.1  | 277.9  | 160.8  | 189.3  | 196.0  |
| 13.3   | 18.5   | 8.9    | 49.7   | 35.8   | 28.6   | 29.4   | 27.3   | 28.2   |
| 226.0  | 305.9  | 211.8  | 185.7  | 128.2  | 180.5  | 104.3  | 131.2  | 115.8  |
| 6.8    | 4.3    | 0.8    | 37.2   | 18.9   | 17.7   | 24.7   | 14.6   | 3.8    |
| 30.4   | 28.8   | 20.8   | 56.9   | 45.1   | 47.6   | 31.0   | 38.9   | 32.1   |
| 334.3  | 448.6  | 321.5  | 234.1  | 204.0  | 237.0  | 171.5  | 222.1  | 196.5  |
| 261.9  | 333.9  | 258.0  | 102.1  | 105.6  | 126.8  | 89.4   | 123.3  | 109.4  |
| 215.4  | 375.2  | 358.9  | 146.1  | 133.7  | 139.3  | 134.8  | 110.7  | 158.3  |
| 298.4  | 482.7  | 503.8  | 246.2  | 258.5  | 262.7  | 254.7  | 198.2  | 262.2  |
| 288.1  | 341.0  | 267.9  | 104.6  | 79.5   | 102.5  | 106.3  | 126.3  | 126.6  |
| 2743.1 | 2041.0 | 840.5  | 209.9  | 138.7  | 156.3  | 169.4  | 133.2  | 153.5  |
| 600.5  | 699.1  | 533.7  | 289.0  | 192.1  | 250.9  | 194.6  | 215.0  | 212.4  |
| 866.5  | 1050.7 | 789.3  | 474.5  | 386.4  | 419.9  | 326.0  | 410.5  | 406.5  |
| 1573.0 | 1506.0 | 801.2  | 270.7  | 207.7  | 191.2  | 352.1  | 293.5  | 348.9  |
| 646.0  | 543.0  | 295.4  | 75.7   | 54.5   | 57.9   | 84.1   | 58.7   | 73.7   |
| 1223.8 | 1218.3 | 676.4  | 809.5  | 481.4  | 547.9  | 611.7  | 381.9  | 511.9  |
| 1412.9 | 1760.0 | 1301.6 | 1020.4 | 876.7  | 929.0  | 905.8  | 908.5  | 1054.0 |
| 74.3   | 146.0  | 151.0  | 49.0   | 70.2   | 61.8   | 64.0   | 43.3   | 73.3   |
| 2625.9 | 2709.3 | 1875.3 | 1460.0 | 1089.8 | 1151.8 | 1395.6 | 1181.4 | 1380.9 |
| 1190.4 | 1274.9 | 922.4  | 2172.2 | 1812.2 | 1737.9 | 806.7  | 830.6  | 894.2  |
| 145.4  | 193.7  | 112.2  | 337.3  | 279.9  | 310.7  | 169.2  | 191.7  | 198.9  |
| 33.0   | 33.6   | 33.7   | 9.3    | 13.8   | 12.2   | 14.5   | 21.0   | 9.3    |
| 185.7  | 231.5  | 297.5  | 147.7  | 123.7  | 154.0  | 128.5  | 174.5  | 146.8  |
| 493.6  | 646.8  | 483.1  | 306.2  | 245.7  | 235.6  | 258.5  | 292.8  | 271.5  |
| 259.0  | 216.3  | 163.0  | 409.3  | 315.3  | 360.9  | 258.3  | 259.3  | 266.1  |
| 135.3  | 204.5  | 193.0  | 30.8   | 29.5   | 41.4   | 30.1   | 26.6   | 36.7   |
| 27.5   | 19.9   | 22.7   | 28.1   | 20.2   | 14.7   | 17.5   | 19.1   | 12.0   |
| 150.9  | 257.9  | 330.9  | 95.0   | 118.5  | 135.5  | 108.5  | 195.8  | 165.5  |
| 180.3  | 254.5  | 225.9  | 221.4  | 194.4  | 242.1  | 139.7  | 170.2  | 168.7  |
| 256.5  | 329.9  | 262.0  | 398.2  | 316.0  | 400.7  | 183.7  | 224.9  | 221.7  |
| 3.4    | 1.5    | 1.0    | 55.6   | 42.1   | 38.8   | 44.9   | 37.0   | 33.5   |
| 2.6    | 9.6    | 5.2    | 136.5  | 101.1  | 114.0  | 54.5   | 65.5   | 58.9   |
| 557.7  | 605.3  | 420.1  | 356.5  | 251.5  | 277.2  | 279.0  | 248.2  | 262.7  |
| 0.9    | 1.5    | 0.6    | 252.7  | 191.1  | 215.0  | 217.1  | 232.3  | 236.4  |
| 908.2  | 1138.7 | 870.6  | 1152.7 | 1096.5 | 1232.4 | 740.2  | 699.5  | 861.2  |
| 530.2  | 658.0  | 506.1  | 368.5  | 330.7  | 349.5  | 285.3  | 355.5  | 358.8  |
| 2286.1 | 2965.7 | 3075.5 | 79.1   | 85.8   | 98.7   | 81.9   | 122.9  | 102.2  |
| 248.1  | 286.7  | 190.0  | 226.2  | 192.0  | 241.6  | 89.5   | 126.8  | 131.9  |
| 8903.7 | 9212.7 | 7517.3 | 8958.1 | 8247.1 | 8591.0 | 4945.5 | 5022.4 | 5274.2 |
| 751.7  | 874.8  | 640.7  | 699.2  | 598.0  | 723.4  | 581.3  | 586.4  | 610.6  |
| 46.5   | 80.0   | 66.7   | 24.3   | 29.1   | 28.9   | 29.3   | 20.3   | 31.9   |
| 5647.6 | 6581.7 | 5830.4 | 8055.4 | 7458.5 | 8194.4 | 5714.8 | 5388.8 | 6177.8 |

|         |         |         |         |         |         |        |        |        |
|---------|---------|---------|---------|---------|---------|--------|--------|--------|
| 177.0   | 380.0   | 378.4   | 156.7   | 106.6   | 164.2   | 106.5  | 79.3   | 102.1  |
| 66.1    | 108.2   | 51.0    | 86.6    | 66.3    | 70.5    | 37.3   | 46.1   | 51.9   |
| 292.7   | 609.2   | 556.4   | 221.8   | 178.8   | 183.7   | 163.5  | 132.5  | 162.5  |
| 350.2   | 438.2   | 314.1   | 564.5   | 434.3   | 481.8   | 427.0  | 474.8  | 533.7  |
| 13.7    | 10.8    | 1.4     | 3.6     | 2.9     | 5.9     | 14.0   | 8.4    | 13.2   |
| 2039.0  | 2544.1  | 1343.7  | 1073.0  | 663.6   | 684.3   | 504.2  | 310.9  | 381.8  |
| 473.3   | 539.9   | 304.0   | 224.2   | 175.9   | 242.4   | 207.3  | 193.7  | 214.8  |
| 1974.3  | 2665.3  | 1275.4  | 1041.7  | 574.8   | 633.0   | 550.7  | 280.2  | 404.4  |
| 2155.5  | 2804.4  | 1411.3  | 1229.3  | 649.9   | 741.0   | 603.4  | 295.0  | 475.9  |
| 27.4    | 26.5    | 32.2    | 41.2    | 18.4    | 44.0    | 21.0   | 17.1   | 6.7    |
| 11978.7 | 11578.1 | 11650.5 | 11573.9 | 10986.3 | 10863.2 | 7938.2 | 8313.9 | 8561.2 |
| 361.3   | 461.9   | 380.8   | 244.1   | 263.4   | 311.2   | 135.9  | 177.0  | 194.0  |
| 116.4   | 160.9   | 130.0   | 176.9   | 161.7   | 203.7   | 169.2  | 187.8  | 186.1  |
| 2389.3  | 2383.9  | 1321.8  | 1586.4  | 1129.8  | 1247.0  | 690.0  | 625.8  | 759.5  |
| 23.8    | 38.5    | 35.5    | 317.4   | 285.4   | 334.1   | 207.3  | 230.4  | 247.8  |
| 79.4    | 123.3   | 105.1   | 149.8   | 123.1   | 131.0   | 108.1  | 172.7  | 140.6  |
| 489.9   | 556.3   | 227.7   | 136.4   | 132.1   | 114.6   | 93.6   | 76.9   | 88.4   |
| 84.0    | 119.2   | 87.1    | 121.0   | 116.5   | 112.2   | 92.0   | 91.7   | 111.9  |
| 133.7   | 177.0   | 81.7    | 22.2    | 17.6    | 13.1    | 39.9   | 19.4   | 36.7   |
| 384.6   | 471.6   | 277.4   | 296.1   | 255.1   | 297.2   | 298.3  | 253.5  | 307.5  |
| 913.2   | 1035.6  | 717.2   | 276.4   | 173.8   | 177.8   | 185.4  | 153.2  | 174.7  |
| 3072.5  | 3432.5  | 1951.3  | 877.1   | 583.2   | 682.5   | 436.8  | 361.7  | 411.4  |
| 3644.0  | 3439.1  | 2152.6  | 2107.8  | 1656.5  | 1783.8  | 1258.7 | 1110.6 | 1288.9 |
| 2270.6  | 2330.7  | 1486.0  | 302.2   | 230.1   | 253.3   | 374.0  | 468.3  | 411.8  |
| 58.3    | 43.9    | 26.3    | 394.4   | 404.1   | 442.8   | 294.6  | 492.1  | 399.8  |
| 228.8   | 355.8   | 301.6   | 341.1   | 328.8   | 410.2   | 228.8  | 267.9  | 313.0  |
| 333.5   | 395.8   | 245.5   | 224.5   | 181.7   | 218.2   | 135.9  | 162.2  | 167.9  |
| 928.7   | 1208.8  | 953.8   | 557.9   | 458.2   | 489.6   | 533.2  | 625.5  | 618.4  |
| 120.3   | 178.3   | 143.1   | 211.9   | 170.3   | 197.2   | 114.1  | 128.1  | 130.8  |
| 162.5   | 171.9   | 129.9   | 474.1   | 357.2   | 401.9   | 132.0  | 139.5  | 150.4  |
| 200.0   | 226.5   | 184.2   | 175.8   | 148.6   | 201.2   | 137.0  | 143.4  | 154.1  |
| 269.2   | 277.3   | 220.2   | 169.4   | 126.7   | 149.9   | 149.3  | 156.3  | 158.7  |
| 213.8   | 320.9   | 262.9   | 219.2   | 202.4   | 219.9   | 175.2  | 230.1  | 221.5  |
| 63.1    | 77.7    | 59.0    | 33.4    | 29.0    | 32.3    | 34.8   | 28.3   | 35.3   |
| 132.7   | 148.1   | 113.9   | 90.1    | 78.9    | 81.5    | 65.4   | 74.1   | 67.3   |
| 70.6    | 77.9    | 81.2    | 35.8    | 31.4    | 48.7    | 37.2   | 44.4   | 44.7   |
| 671.8   | 899.1   | 830.3   | 41.1    | 27.4    | 38.5    | 31.8   | 24.8   | 36.6   |
| 961.6   | 1071.6  | 796.1   | 439.9   | 409.8   | 455.2   | 278.2  | 380.1  | 341.2  |
| 419.1   | 394.2   | 266.2   | 240.3   | 206.4   | 238.1   | 170.5  | 184.3  | 194.2  |
| 1507.3  | 1938.9  | 1904.7  | 63.5    | 46.2    | 63.6    | 35.5   | 38.7   | 36.8   |
| 55.6    | 79.1    | 49.1    | 65.8    | 60.1    | 53.0    | 15.3   | 13.3   | 38.2   |
| 219.2   | 287.0   | 180.8   | 214.6   | 160.2   | 193.8   | 145.0  | 122.1  | 147.6  |
| 271.6   | 324.5   | 241.2   | 270.3   | 216.4   | 256.1   | 168.8  | 133.2  | 195.8  |
| 819.9   | 960.0   | 642.6   | 874.5   | 626.6   | 701.8   | 671.8  | 610.1  | 643.8  |
| 60.8    | 77.8    | 88.6    | 121.8   | 134.9   | 162.6   | 59.8   | 77.4   | 81.0   |
| 4351.0  | 4396.4  | 2261.2  | 3965.0  | 3292.8  | 3017.6  | 2387.7 | 1868.7 | 2277.0 |
| 348.9   | 460.0   | 329.7   | 353.6   | 282.3   | 353.4   | 207.5  | 238.4  | 259.8  |
| 757.9   | 930.9   | 717.1   | 905.1   | 858.7   | 854.9   | 673.6  | 797.7  | 878.1  |
| 77.5    | 100.7   | 90.9    | 163.8   | 122.7   | 146.5   | 103.9  | 115.5  | 106.3  |
| 62.7    | 84.0    | 85.6    | 87.4    | 65.1    | 103.9   | 93.1   | 99.3   | 104.1  |
| 103.0   | 130.0   | 102.9   | 117.5   | 110.4   | 120.9   | 117.2  | 117.4  | 130.3  |
| 42.1    | 60.6    | 49.5    | 40.7    | 26.5    | 45.2    | 41.2   | 43.5   | 55.0   |
| 241.3   | 261.2   | 263.3   | 145.7   | 126.7   | 143.6   | 97.3   | 128.0  | 126.6  |

|        |        |        |        |        |        |        |        |        |
|--------|--------|--------|--------|--------|--------|--------|--------|--------|
| 152.1  | 170.6  | 149.5  | 155.7  | 137.5  | 147.0  | 107.8  | 106.6  | 116.8  |
| 380.3  | 471.3  | 351.9  | 231.9  | 201.6  | 212.3  | 136.7  | 141.2  | 144.5  |
| 1865.9 | 2064.3 | 1233.7 | 1009.9 | 708.1  | 794.0  | 547.8  | 442.8  | 523.2  |
| 986.5  | 1435.1 | 1183.9 | 333.0  | 349.2  | 297.3  | 414.7  | 725.4  | 585.2  |
| 208.5  | 313.3  | 264.6  | 53.7   | 55.5   | 70.4   | 59.3   | 115.1  | 107.0  |
| 811.1  | 935.1  | 605.9  | 425.7  | 391.3  | 379.5  | 327.3  | 274.3  | 356.0  |
| 678.9  | 1041.6 | 1009.2 | 817.8  | 828.0  | 933.5  | 720.1  | 1143.1 | 1068.5 |
| 538.5  | 848.1  | 787.2  | 317.1  | 327.9  | 395.7  | 474.2  | 745.3  | 662.3  |
| 197.5  | 290.3  | 288.8  | 54.1   | 45.4   | 60.1   | 27.4   | 34.7   | 33.7   |
| 315.2  | 498.5  | 458.7  | 549.5  | 506.5  | 638.4  | 407.1  | 500.8  | 488.6  |
| 115.0  | 265.6  | 197.5  | 239.2  | 189.8  | 202.0  | 245.9  | 220.5  | 269.6  |
| 309.0  | 399.1  | 393.2  | 56.7   | 55.1   | 64.9   | 34.1   | 45.1   | 46.8   |
| 362.1  | 363.3  | 228.3  | 189.7  | 156.5  | 169.9  | 139.2  | 128.2  | 149.6  |
| 703.1  | 711.1  | 549.1  | 781.2  | 632.5  | 670.4  | 409.0  | 417.0  | 404.7  |
| 193.5  | 196.9  | 146.5  | 139.4  | 112.0  | 135.9  | 106.7  | 91.5   | 110.3  |
| 116.9  | 148.2  | 119.0  | 114.4  | 72.4   | 103.3  | 61.6   | 66.5   | 74.4   |
| 7.3    | 4.5    | 7.5    | 12.2   | 11.2   | 11.3   | 1.5    | 1.4    | 8.8    |
| 2175.2 | 2609.5 | 2452.5 | 297.7  | 248.2  | 290.8  | 216.6  | 216.0  | 232.0  |
| 22.4   | 44.8   | 76.5   | 134.6  | 164.6  | 176.6  | 34.2   | 83.2   | 63.3   |
| 76.4   | 125.1  | 125.1  | 288.7  | 303.4  | 346.6  | 176.3  | 259.2  | 246.2  |
| 513.5  | 612.9  | 435.0  | 658.7  | 485.9  | 546.6  | 340.9  | 330.3  | 372.2  |
| 169.1  | 203.0  | 138.9  | 112.4  | 100.5  | 125.3  | 51.8   | 51.0   | 75.9   |
| 426.5  | 673.3  | 556.2  | 59.1   | 68.5   | 56.3   | 48.9   | 32.5   | 43.4   |
| 710.7  | 814.4  | 542.9  | 432.4  | 346.9  | 377.0  | 268.9  | 260.3  | 292.3  |
| 1932.0 | 2133.0 | 1649.7 | 2206.5 | 1934.7 | 2113.4 | 1240.5 | 1302.4 | 1423.7 |
| 7.0    | 0.5    | 3.3    | 14.1   | 10.2   | 14.1   | 6.2    | 6.2    | 6.0    |
| 7.9    | 9.2    | 13.8   | 5.9    | 3.7    | 14.3   | 9.3    | 1.9    | 2.6    |
| 251.0  | 277.8  | 206.3  | 349.2  | 317.8  | 355.4  | 282.4  | 336.4  | 346.6  |
| 153.0  | 259.5  | 252.0  | 207.9  | 214.7  | 254.2  | 133.4  | 240.7  | 190.4  |
| 137.9  | 189.4  | 153.2  | 472.0  | 368.6  | 483.6  | 243.0  | 278.4  | 329.9  |
| 7.9    | 19.7   | 20.4   | 6.3    | 8.9    | 14.1   | 7.8    | 14.5   | 8.1    |
| 143.9  | 182.1  | 194.9  | 238.0  | 178.9  | 209.9  | 131.8  | 144.4  | 146.9  |
| 159.6  | 179.5  | 128.9  | 13.3   | 20.6   | 17.9   | 4.8    | 3.5    | 17.6   |
| 544.9  | 621.2  | 482.9  | 215.4  | 184.7  | 192.8  | 110.2  | 157.5  | 148.9  |
| 72.5   | 65.3   | 57.4   | 35.7   | 27.7   | 22.6   | 35.7   | 33.7   | 26.4   |
| 9604.4 | 9126.2 | 7771.8 | 9433.2 | 8634.9 | 9475.1 | 5607.7 | 5733.4 | 5877.1 |
| 603.8  | 663.5  | 407.3  | 704.4  | 612.2  | 620.7  | 866.3  | 1058.5 | 924.1  |
| 481.1  | 496.9  | 332.7  | 649.2  | 467.0  | 602.5  | 439.0  | 568.9  | 520.9  |
| 192.1  | 235.3  | 216.0  | 117.7  | 96.6   | 112.3  | 118.4  | 168.1  | 136.1  |
| 217.1  | 317.9  | 274.3  | 607.1  | 449.6  | 504.2  | 409.1  | 442.7  | 435.7  |
| 363.5  | 457.2  | 441.0  | 350.9  | 342.4  | 331.0  | 201.4  | 293.5  | 276.4  |
| 305.3  | 418.2  | 254.6  | 369.1  | 299.6  | 336.1  | 199.0  | 197.5  | 227.2  |
| 564.4  | 903.8  | 943.0  | 359.0  | 400.1  | 472.7  | 266.3  | 473.0  | 454.3  |
| 1475.8 | 1729.2 | 1107.0 | 979.9  | 709.5  | 783.0  | 555.3  | 472.5  | 539.9  |
| 15.3   | 20.6   | 15.1   | 407.0  | 315.5  | 365.8  | 215.4  | 243.8  | 272.6  |
| 205.1  | 237.6  | 164.6  | 208.7  | 146.5  | 157.3  | 220.3  | 214.0  | 221.2  |
| 51.9   | 48.6   | 38.2   | 43.3   | 29.9   | 43.6   | 44.6   | 44.9   | 35.6   |
| 144.1  | 179.7  | 142.6  | 163.9  | 116.1  | 154.8  | 120.0  | 146.1  | 135.2  |
| 98.9   | 113.6  | 88.8   | 159.9  | 119.6  | 150.5  | 99.3   | 94.0   | 81.0   |
| 403.1  | 438.9  | 312.0  | 669.9  | 497.4  | 560.6  | 531.8  | 635.5  | 604.9  |
| 1414.7 | 1441.5 | 710.9  | 524.0  | 378.8  | 396.2  | 421.1  | 365.3  | 407.9  |
| 887.6  | 954.7  | 459.2  | 198.5  | 143.7  | 197.7  | 242.1  | 191.9  | 215.7  |
| 120.1  | 156.5  | 132.9  | 258.6  | 238.2  | 295.4  | 131.7  | 155.7  | 197.0  |

|         |         |         |         |         |         |        |        |        |
|---------|---------|---------|---------|---------|---------|--------|--------|--------|
| 263.2   | 264.2   | 235.5   | 138.0   | 80.5    | 110.7   | 159.7  | 129.5  | 142.0  |
| 6.4     | 10.2    | 7.3     | 12.8    | 9.2     | 11.4    | 4.1    | 8.1    | 5.9    |
| 294.1   | 493.6   | 471.8   | 317.9   | 261.8   | 325.3   | 161.5  | 175.7  | 198.0  |
| 28.8    | 22.9    | 23.5    | 9.8     | 9.8     | 7.5     | 18.9   | 17.4   | 14.3   |
| 5.1     | 1.6     | 3.8     | 14.1    | 13.2    | 5.4     | 5.7    | 6.4    | 9.1    |
| 2.1     | 7.1     | 3.2     | 18.9    | 13.8    | 7.9     | 8.9    | 16.2   | 11.6   |
| 7.9     | 5.2     | 1.5     | 5.6     | 11.6    | 8.2     | 5.1    | 5.2    | 7.1    |
| 183.8   | 254.3   | 192.7   | 99.3    | 75.7    | 83.2    | 116.2  | 114.5  | 131.2  |
| 50.3    | 64.3    | 55.1    | 4.3     | 2.8     | 4.2     | 3.0    | 4.9    | 3.8    |
| 3.8     | 12.4    | 13.1    | 36.5    | 34.1    | 37.9    | 23.2   | 37.2   | 44.3   |
| 12501.8 | 12572.3 | 11703.3 | 11842.3 | 11076.7 | 11346.0 | 7703.5 | 7897.1 | 8249.1 |
| 33.5    | 49.5    | 45.3    | 14.3    | 23.8    | 23.3    | 40.7   | 24.8   | 37.8   |
| 655.0   | 626.3   | 384.7   | 44.3    | 68.4    | 74.6    | 35.8   | 44.8   | 58.1   |
| 57.5    | 71.3    | 50.0    | 56.3    | 51.2    | 62.5    | 47.5   | 31.5   | 42.7   |
| 134.3   | 152.5   | 123.8   | 115.2   | 86.7    | 109.9   | 68.1   | 69.0   | 71.2   |
| 267.0   | 355.4   | 246.3   | 172.7   | 123.8   | 156.5   | 132.0  | 89.7   | 125.4  |
| 3.3     | 9.3     | 4.4     | 205.5   | 119.4   | 122.1   | 136.6  | 121.9  | 118.0  |
| 3.7     | 2.2     | 8.4     | 52.9    | 43.2    | 38.6    | 47.8   | 48.3   | 47.6   |
| 974.9   | 1088.4  | 774.6   | 358.5   | 373.8   | 429.7   | 286.8  | 467.8  | 417.8  |
| 703.4   | 845.7   | 699.5   | 831.2   | 736.0   | 877.7   | 418.7  | 500.7  | 531.7  |
| 518.8   | 583.0   | 399.5   | 375.5   | 325.5   | 368.1   | 209.0  | 243.1  | 236.5  |
| 1245.1  | 1510.5  | 1114.8  | 314.8   | 259.4   | 291.5   | 261.5  | 345.4  | 304.9  |
| 184.1   | 267.9   | 279.8   | 230.8   | 224.5   | 236.7   | 141.5  | 175.4  | 172.1  |
| 89.2    | 138.0   | 124.4   | 24.9    | 32.5    | 36.6    | 65.8   | 58.5   | 55.2   |
| 702.1   | 885.3   | 598.1   | 579.9   | 481.3   | 526.2   | 451.9  | 395.0  | 461.1  |
| 1838.5  | 2819.0  | 2593.6  | 282.0   | 349.2   | 364.2   | 242.8  | 513.8  | 355.2  |
| 401.6   | 517.2   | 386.7   | 416.3   | 321.9   | 356.8   | 225.0  | 238.0  | 249.8  |
| 1215.0  | 1353.8  | 1070.4  | 436.8   | 367.8   | 416.5   | 292.5  | 347.4  | 360.1  |
| 377.3   | 481.3   | 312.5   | 78.0    | 67.6    | 84.2    | 92.9   | 96.4   | 97.6   |
| 5862.8  | 6205.2  | 4963.0  | 802.0   | 650.6   | 625.6   | 1096.7 | 1004.9 | 1072.8 |
| 709.2   | 760.2   | 487.1   | 690.1   | 471.8   | 575.0   | 429.5  | 367.8  | 456.2  |
| 818.1   | 947.2   | 840.7   | 955.3   | 782.9   | 862.1   | 594.9  | 647.8  | 711.3  |
| 28.5    | 42.7    | 27.7    | 32.5    | 18.1    | 26.4    | 26.2   | 28.0   | 25.9   |
| 23.3    | 57.5    | 40.7    | 43.0    | 43.2    | 45.5    | 26.2   | 25.4   | 33.2   |
| 38.3    | 53.9    | 33.3    | 137.4   | 121.7   | 135.8   | 69.9   | 83.6   | 95.5   |
| 1093.5  | 1357.3  | 946.6   | 955.3   | 825.1   | 990.0   | 486.0  | 589.6  | 563.1  |
| 710.7   | 868.8   | 541.2   | 77.4    | 68.6    | 97.7    | 156.4  | 189.8  | 165.5  |
| 1957.9  | 2385.6  | 2318.4  | 357.7   | 395.8   | 444.3   | 369.1  | 461.4  | 492.0  |
| 147.7   | 132.0   | 103.5   | 92.8    | 70.1    | 73.7    | 46.8   | 45.4   | 57.4   |
| 1143.5  | 1275.4  | 1180.2  | 148.9   | 150.7   | 186.4   | 140.9  | 198.8  | 176.1  |
| 168.5   | 210.1   | 188.1   | 129.1   | 88.4    | 102.5   | 85.6   | 66.2   | 90.6   |
| 217.1   | 235.4   | 119.1   | 229.6   | 173.6   | 188.8   | 150.2  | 146.9  | 181.6  |
| 284.9   | 262.7   | 210.3   | 81.0    | 84.9    | 80.1    | 88.1   | 82.6   | 104.3  |
| 142.3   | 167.6   | 88.1    | 187.6   | 154.7   | 168.7   | 95.6   | 95.6   | 107.5  |
| 73.1    | 92.0    | 49.5    | 77.3    | 46.0    | 61.2    | 40.9   | 44.7   | 47.1   |
| 6544.3  | 7037.2  | 5109.1  | 4496.9  | 3724.5  | 3721.9  | 4386.8 | 3701.7 | 4405.3 |
| 33.2    | 49.2    | 37.9    | 16.1    | 23.8    | 33.0    | 31.9   | 37.1   | 37.4   |
| 588.8   | 710.0   | 524.0   | 440.2   | 377.5   | 391.0   | 318.5  | 358.8  | 352.7  |
| 826.0   | 965.1   | 689.2   | 849.1   | 661.6   | 778.9   | 441.4  | 485.1  | 468.5  |
| 152.1   | 233.7   | 163.0   | 973.4   | 755.2   | 823.9   | 400.3  | 417.2  | 451.5  |
| 154.4   | 157.1   | 134.4   | 150.8   | 110.6   | 135.3   | 74.1   | 96.9   | 103.7  |
| 827.7   | 807.4   | 424.0   | 436.3   | 332.4   | 359.1   | 225.6  | 182.9  | 223.7  |
| 10088.2 | 10042.9 | 9527.0  | 10465.7 | 9477.7  | 9590.2  | 7135.8 | 6925.9 | 7216.0 |

|        |        |        |        |        |        |        |        |        |
|--------|--------|--------|--------|--------|--------|--------|--------|--------|
| 890.4  | 817.3  | 420.1  | 339.5  | 262.2  | 272.7  | 204.0  | 202.5  | 234.4  |
| 299.1  | 401.0  | 323.6  | 259.2  | 209.8  | 235.1  | 199.1  | 243.2  | 234.5  |
| 163.4  | 203.4  | 123.9  | 161.7  | 142.6  | 128.9  | 168.1  | 163.7  | 141.7  |
| 938.3  | 1209.9 | 686.6  | 602.4  | 496.9  | 555.8  | 276.1  | 290.1  | 303.5  |
| 896.7  | 955.7  | 584.3  | 296.6  | 214.8  | 221.0  | 243.6  | 212.8  | 226.5  |
| 121.1  | 152.8  | 121.6  | 100.1  | 99.2   | 112.3  | 76.2   | 113.4  | 111.9  |
| 974.1  | 911.9  | 733.7  | 455.8  | 330.4  | 372.4  | 404.1  | 368.2  | 361.7  |
| 525.9  | 639.9  | 392.0  | 534.8  | 443.8  | 432.8  | 302.2  | 301.9  | 338.4  |
| 1277.5 | 1576.5 | 1048.4 | 1133.9 | 801.4  | 1081.6 | 673.9  | 642.1  | 782.6  |
| 279.8  | 225.5  | 137.4  | 74.0   | 72.7   | 87.8   | 69.2   | 80.8   | 92.9   |
| 549.1  | 710.9  | 653.2  | 188.4  | 126.8  | 164.0  | 119.4  | 184.9  | 148.9  |
| 484.6  | 594.0  | 493.8  | 776.0  | 684.7  | 766.2  | 536.6  | 786.2  | 619.6  |
| 878.9  | 1057.8 | 764.1  | 682.8  | 529.7  | 512.5  | 652.7  | 612.9  | 703.9  |
| 448.0  | 465.5  | 241.1  | 421.2  | 316.1  | 350.9  | 212.3  | 249.4  | 260.9  |
| 63.6   | 84.9   | 65.4   | 286.3  | 274.3  | 344.1  | 118.7  | 192.6  | 170.8  |
| 4124.2 | 4385.6 | 3030.5 | 2037.1 | 1652.9 | 1549.2 | 2466.5 | 2326.5 | 2544.0 |
| 173.3  | 231.7  | 225.7  | 154.4  | 149.3  | 167.4  | 153.7  | 212.2  | 208.5  |
| 133.5  | 121.6  | 103.9  | 93.2   | 95.9   | 83.6   | 61.0   | 67.8   | 95.6   |
| 136.1  | 178.8  | 117.8  | 94.6   | 82.5   | 110.5  | 79.0   | 89.4   | 85.8   |
| 504.9  | 654.3  | 374.8  | 613.4  | 492.0  | 549.3  | 520.5  | 520.8  | 583.9  |
| 586.9  | 671.9  | 374.4  | 549.7  | 415.7  | 400.0  | 382.6  | 357.7  | 444.5  |
| 1440.6 | 1520.7 | 995.8  | 1259.0 | 934.2  | 1184.8 | 748.2  | 746.4  | 795.7  |
| 379.8  | 420.3  | 289.6  | 500.2  | 348.7  | 514.4  | 263.8  | 213.1  | 289.7  |
| 302.4  | 374.2  | 291.7  | 322.6  | 284.7  | 250.4  | 182.4  | 183.9  | 226.8  |
| 681.0  | 709.6  | 360.6  | 282.4  | 177.8  | 197.3  | 222.8  | 174.2  | 185.6  |
| 756.4  | 1073.4 | 948.1  | 419.3  | 340.4  | 399.0  | 380.2  | 439.0  | 452.5  |
| 1633.8 | 2017.6 | 1923.9 | 1294.4 | 1120.5 | 1103.9 | 1483.1 | 1317.3 | 1621.4 |
| 1863.3 | 2049.5 | 1379.6 | 1711.3 | 1470.4 | 1594.3 | 1342.3 | 1260.1 | 1400.9 |
| 213.7  | 316.9  | 315.5  | 319.3  | 269.8  | 259.8  | 193.0  | 225.9  | 215.3  |
| 63.8   | 114.2  | 122.9  | 185.4  | 199.1  | 238.6  | 104.3  | 222.3  | 203.7  |
| 42.5   | 35.6   | 25.0   | 8.5    | 8.5    | 3.5    | 4.3    | 3.2    | 3.2    |
| 468.5  | 526.9  | 331.9  | 528.2  | 435.8  | 455.8  | 274.9  | 264.5  | 278.4  |
| 44.7   | 43.1   | 28.1   | 12.4   | 15.3   | 18.3   | 28.6   | 13.7   | 12.3   |
| 825.0  | 1128.6 | 979.2  | 415.8  | 323.9  | 370.5  | 527.8  | 493.1  | 574.8  |
| 109.1  | 124.1  | 90.3   | 70.5   | 50.5   | 51.1   | 62.8   | 61.2   | 73.7   |
| 174.1  | 232.3  | 228.5  | 174.5  | 145.6  | 176.3  | 110.6  | 176.1  | 160.5  |
| 564.1  | 733.5  | 559.5  | 291.8  | 228.2  | 251.1  | 319.0  | 269.7  | 283.2  |
| 106.8  | 145.0  | 100.8  | 80.3   | 71.3   | 79.9   | 56.6   | 59.4   | 62.5   |
| 244.8  | 302.8  | 268.9  | 99.4   | 62.9   | 77.3   | 56.3   | 39.5   | 46.2   |
| 613.4  | 840.0  | 722.5  | 150.5  | 83.1   | 106.8  | 123.7  | 53.9   | 88.9   |
| 1113.7 | 1387.3 | 1092.7 | 827.2  | 646.5  | 738.1  | 517.6  | 555.9  | 570.4  |
| 156.2  | 184.1  | 149.2  | 119.8  | 93.3   | 119.3  | 112.3  | 118.4  | 111.7  |
| 1237.6 | 1576.4 | 1338.9 | 272.6  | 215.9  | 230.6  | 336.2  | 318.8  | 351.3  |
| 6.0    | 7.8    | 13.5   | 15.5   | 12.2   | 9.1    | 4.8    | 5.0    | 5.1    |
| 33.1   | 32.7   | 30.0   | 48.0   | 36.3   | 38.8   | 26.7   | 27.7   | 36.4   |
| 260.4  | 357.1  | 210.2  | 375.8  | 397.8  | 417.7  | 312.2  | 319.8  | 412.1  |
| 180.3  | 226.0  | 136.0  | 353.4  | 272.0  | 290.7  | 184.3  | 196.1  | 202.3  |
| 666.1  | 695.5  | 438.3  | 334.1  | 229.1  | 300.5  | 249.9  | 236.9  | 227.6  |
| 369.6  | 431.1  | 308.2  | 342.2  | 333.0  | 409.3  | 173.0  | 308.7  | 320.3  |
| 181.6  | 248.1  | 204.7  | 168.9  | 130.0  | 151.5  | 137.7  | 134.3  | 125.7  |
| 206.8  | 280.1  | 189.5  | 895.0  | 848.4  | 940.4  | 501.2  | 502.4  | 613.1  |
| 380.6  | 455.2  | 285.0  | 255.9  | 192.1  | 222.1  | 169.1  | 157.7  | 195.0  |
| 73.9   | 74.1   | 54.5   | 13.3   | 13.7   | 5.2    | 5.9    | 4.8    | 8.4    |



|        |        |        |        |        |        |        |        |        |
|--------|--------|--------|--------|--------|--------|--------|--------|--------|
| 111.2  | 133.9  | 78.2   | 74.6   | 47.4   | 66.3   | 57.2   | 56.7   | 57.9   |
| 18.0   | 8.4    | 4.3    | 25.1   | 16.7   | 25.4   | 22.7   | 13.9   | 11.0   |
| 3.0    | 1.4    | 2.0    | 3.0    | 2.3    | 11.8   | 4.3    | 6.0    | 6.2    |
| 99.1   | 130.4  | 99.8   | 52.8   | 29.7   | 47.9   | 44.6   | 37.7   | 41.4   |
| 404.4  | 529.4  | 324.2  | 374.7  | 285.2  | 347.8  | 177.2  | 185.5  | 205.6  |
| 99.7   | 150.7  | 110.5  | 181.5  | 185.3  | 201.5  | 153.2  | 164.7  | 199.8  |
| 143.9  | 218.4  | 168.4  | 207.9  | 166.2  | 186.4  | 128.0  | 124.9  | 130.5  |
| 42.4   | 64.3   | 69.2   | 73.9   | 64.2   | 60.3   | 48.2   | 44.3   | 54.9   |
| 41.4   | 72.6   | 61.1   | 172.8  | 172.3  | 238.9  | 126.4  | 122.1  | 136.8  |
| 80.1   | 145.8  | 119.1  | 482.8  | 443.1  | 510.3  | 255.7  | 318.0  | 369.7  |
| 59.2   | 57.6   | 33.9   | 52.6   | 34.1   | 48.4   | 40.3   | 35.6   | 37.1   |
| 743.8  | 847.5  | 661.8  | 991.1  | 916.2  | 930.2  | 519.4  | 642.1  | 652.3  |
| 591.1  | 839.8  | 658.2  | 267.3  | 213.8  | 193.7  | 384.5  | 386.8  | 406.5  |
| 237.5  | 322.2  | 220.8  | 280.7  | 219.4  | 232.6  | 236.2  | 209.0  | 249.1  |
| 4170.1 | 4676.0 | 3336.9 | 2231.4 | 1479.9 | 1586.8 | 1479.8 | 1130.0 | 1445.1 |
| 813.5  | 968.6  | 653.2  | 544.9  | 443.4  | 502.9  | 463.3  | 448.1  | 519.8  |
| 9.8    | 15.3   | 10.0   | 167.5  | 159.6  | 175.3  | 137.8  | 155.6  | 162.2  |
| 4.5    | 6.0    | 5.2    | 295.8  | 234.0  | 291.5  | 134.7  | 160.6  | 148.8  |
| 225.3  | 233.1  | 186.7  | 214.6  | 187.7  | 234.9  | 121.3  | 128.6  | 130.6  |
| 1143.3 | 1569.5 | 1057.7 | 636.3  | 503.5  | 575.5  | 558.4  | 537.7  | 611.7  |
| 716.1  | 966.4  | 873.9  | 387.3  | 303.4  | 322.8  | 456.7  | 417.1  | 439.7  |
| 352.1  | 478.6  | 370.5  | 498.4  | 465.2  | 505.6  | 455.1  | 588.1  | 566.8  |
| 1804.8 | 2911.5 | 3269.5 | 120.2  | 88.9   | 102.3  | 88.1   | 100.1  | 98.9   |
| 205.2  | 337.4  | 264.4  | 1146.7 | 1005.8 | 1143.0 | 773.8  | 820.0  | 915.5  |
| 222.2  | 281.9  | 204.8  | 119.6  | 99.3   | 98.3   | 111.6  | 99.1   | 117.4  |
| 247.7  | 336.9  | 246.2  | 546.2  | 454.8  | 480.0  | 238.8  | 329.8  | 322.3  |
| 774.5  | 1033.6 | 814.2  | 576.0  | 433.2  | 502.4  | 442.9  | 491.0  | 497.7  |
| 820.2  | 815.6  | 445.0  | 361.0  | 296.0  | 324.1  | 460.2  | 326.8  | 431.1  |
| 1506.2 | 1396.6 | 798.6  | 695.3  | 521.8  | 556.9  | 761.2  | 591.7  | 713.4  |
| 88.5   | 136.5  | 118.5  | 82.7   | 63.8   | 85.5   | 48.6   | 71.9   | 71.6   |
| 66.4   | 86.8   | 57.7   | 189.8  | 171.4  | 195.6  | 177.5  | 233.0  | 212.7  |
| 108.4  | 152.9  | 143.8  | 250.6  | 214.6  | 269.7  | 163.7  | 193.3  | 217.9  |
| 1902.7 | 2219.8 | 1579.3 | 1400.3 | 1181.2 | 1292.0 | 860.3  | 900.1  | 989.1  |
| 341.3  | 410.7  | 298.3  | 910.7  | 669.2  | 708.9  | 405.4  | 358.6  | 389.8  |
| 120.1  | 138.8  | 89.9   | 54.8   | 38.8   | 51.7   | 53.8   | 35.7   | 42.5   |
| 184.9  | 231.2  | 180.2  | 51.2   | 34.1   | 41.5   | 63.5   | 46.5   | 56.5   |
| 156.2  | 205.8  | 137.1  | 66.1   | 47.8   | 50.9   | 52.6   | 40.6   | 52.2   |
| 8.7    | 12.8   | 6.6    | 18.7   | 2.7    | 5.6    | 3.0    | 3.1    | 5.8    |
| 392.3  | 557.9  | 255.6  | 242.4  | 156.5  | 180.9  | 188.9  | 124.4  | 178.5  |
| 3.0    | 7.8    | 1.6    | 15.8   | 13.5   | 19.2   | 19.3   | 16.2   | 18.2   |
| 537.1  | 468.4  | 283.6  | 172.4  | 134.3  | 164.7  | 147.4  | 101.8  | 132.8  |
| 234.3  | 212.3  | 125.0  | 123.8  | 106.9  | 99.3   | 84.5   | 54.0   | 76.1   |
| 355.5  | 434.2  | 230.1  | 104.4  | 91.5   | 79.5   | 106.3  | 67.3   | 101.6  |
| 1149.5 | 1215.2 | 926.4  | 685.0  | 544.5  | 578.3  | 633.8  | 668.2  | 674.4  |
| 1170.7 | 1578.2 | 1345.7 | 23.1   | 27.1   | 28.0   | 23.4   | 26.9   | 23.5   |
| 999.5  | 1205.3 | 744.2  | 495.2  | 382.6  | 405.1  | 314.3  | 255.6  | 337.9  |
| 822.4  | 1024.7 | 435.1  | 1601.0 | 1012.2 | 1075.8 | 766.2  | 629.1  | 636.8  |
| 371.9  | 444.7  | 374.6  | 906.4  | 813.1  | 894.6  | 553.8  | 641.4  | 636.3  |
| 357.7  | 317.1  | 192.7  | 195.8  | 155.4  | 181.4  | 104.0  | 132.9  | 133.4  |
| 441.4  | 487.0  | 376.2  | 176.0  | 154.7  | 150.8  | 163.9  | 195.9  | 224.7  |
| 9216.7 | 9183.5 | 7824.8 | 9104.0 | 8353.2 | 8750.0 | 5089.8 | 5205.6 | 5473.3 |
| 816.1  | 1124.4 | 877.7  | 186.7  | 152.3  | 180.0  | 153.1  | 177.2  | 167.9  |
| 608.3  | 659.9  | 480.6  | 423.5  | 324.2  | 403.2  | 179.0  | 174.9  | 226.0  |

|        |        |        |         |        |        |        |        |        |
|--------|--------|--------|---------|--------|--------|--------|--------|--------|
| 278.1  | 347.3  | 197.5  | 320.4   | 234.1  | 262.2  | 204.8  | 199.2  | 208.3  |
| 1260.1 | 1280.4 | 553.8  | 541.3   | 400.1  | 444.3  | 339.1  | 280.6  | 354.3  |
| 247.8  | 265.5  | 179.2  | 450.1   | 306.7  | 319.3  | 326.1  | 314.6  | 297.3  |
| 203.6  | 317.0  | 280.1  | 1010.1  | 733.0  | 802.1  | 500.1  | 535.9  | 554.5  |
| 1140.6 | 1429.1 | 1060.8 | 1824.1  | 1630.9 | 1668.6 | 1023.3 | 1235.7 | 1238.7 |
| 3.8    | 9.9    | 8.3    | 6.5     | 11.8   | 8.6    | 4.6    | 2.4    | 3.3    |
| 149.1  | 210.0  | 205.3  | 139.0   | 113.2  | 119.8  | 99.8   | 127.5  | 134.2  |
| 419.3  | 525.0  | 411.5  | 700.1   | 622.8  | 654.6  | 359.7  | 445.4  | 477.3  |
| 193.1  | 250.4  | 232.3  | 152.5   | 132.9  | 151.5  | 117.0  | 147.1  | 132.7  |
| 196.3  | 236.3  | 172.6  | 111.8   | 84.7   | 107.1  | 54.5   | 82.9   | 91.9   |
| 112.0  | 96.6   | 75.1   | 42.0    | 42.2   | 55.2   | 29.9   | 47.3   | 41.0   |
| 46.7   | 56.3   | 51.6   | 514.2   | 496.2  | 483.6  | 283.3  | 254.4  | 325.8  |
| 3070.9 | 1971.6 | 1254.3 | 1011.9  | 744.1  | 830.5  | 521.4  | 457.8  | 526.4  |
| 311.5  | 445.7  | 373.8  | 1497.8  | 1109.2 | 1297.4 | 614.5  | 748.8  | 751.5  |
| 74.1   | 90.2   | 64.1   | 559.6   | 509.2  | 534.4  | 389.1  | 414.3  | 479.8  |
| 137.2  | 203.8  | 107.9  | 114.9   | 113.2  | 124.3  | 148.2  | 134.6  | 144.7  |
| 448.0  | 672.8  | 472.9  | 410.2   | 381.2  | 379.0  | 260.5  | 305.5  | 324.3  |
| 340.9  | 429.6  | 278.2  | 248.8   | 169.0  | 196.0  | 157.6  | 147.1  | 148.2  |
| 282.0  | 325.4  | 138.6  | 65.0    | 64.8   | 62.5   | 63.6   | 54.9   | 57.8   |
| 113.1  | 152.9  | 95.2   | 180.7   | 173.0  | 183.2  | 98.6   | 112.5  | 121.6  |
| 874.8  | 997.9  | 1044.1 | 131.6   | 103.5  | 131.8  | 157.5  | 240.0  | 204.5  |
| 57.8   | 52.3   | 50.4   | 387.8   | 297.6  | 358.4  | 190.7  | 237.3  | 245.2  |
| 4.1    | 17.1   | 2.7    | 6.4     | 7.7    | 5.3    | 9.0    | 2.4    | 7.0    |
| 442.5  | 387.3  | 142.1  | 267.8   | 156.0  | 184.0  | 153.4  | 82.7   | 113.1  |
| 150.9  | 182.7  | 181.7  | 53.1    | 42.7   | 44.7   | 51.4   | 47.9   | 69.3   |
| 255.2  | 546.6  | 484.0  | 61.6    | 53.3   | 51.3   | 31.5   | 44.6   | 54.4   |
| 163.9  | 279.5  | 256.5  | 386.2   | 348.3  | 371.5  | 201.1  | 251.3  | 267.8  |
| 59.4   | 64.8   | 44.8   | 57.1    | 65.9   | 52.9   | 39.5   | 59.7   | 39.6   |
| 1042.9 | 1440.1 | 1078.5 | 304.6   | 223.4  | 247.2  | 318.3  | 283.3  | 315.3  |
| 419.0  | 459.4  | 239.0  | 304.6   | 187.3  | 182.1  | 285.2  | 194.3  | 241.8  |
| 80.1   | 78.9   | 67.4   | 46.6    | 43.2   | 49.6   | 38.5   | 36.6   | 55.1   |
| 183.5  | 210.0  | 149.3  | 504.7   | 406.7  | 486.2  | 398.6  | 382.4  | 423.3  |
| 797.6  | 1273.2 | 1186.2 | 315.8   | 335.5  | 364.2  | 252.4  | 339.1  | 304.7  |
| 206.9  | 230.7  | 193.3  | 173.4   | 144.6  | 176.6  | 111.2  | 116.2  | 117.6  |
| 175.8  | 211.2  | 153.9  | 77.9    | 62.0   | 83.7   | 126.8  | 107.1  | 144.9  |
| 77.8   | 112.7  | 62.6   | 10.2    | 1.9    | 2.7    | 51.5   | 24.1   | 40.9   |
| 178.2  | 248.9  | 219.7  | 475.8   | 425.8  | 496.0  | 185.3  | 204.6  | 248.5  |
| 355.3  | 406.5  | 226.2  | 215.2   | 141.8  | 185.0  | 234.3  | 181.5  | 191.4  |
| 7326.4 | 7682.9 | 6209.7 | 7388.8  | 6767.3 | 6759.3 | 4386.0 | 4185.7 | 4368.6 |
| 308.6  | 358.8  | 185.0  | 175.6   | 132.3  | 128.7  | 212.3  | 188.5  | 200.8  |
| 36.2   | 40.2   | 30.2   | 22.8    | 10.4   | 12.8   | 9.9    | 8.6    | 9.9    |
| 9462.5 | 9365.4 | 9084.6 | 10031.0 | 9510.9 | 9900.4 | 6976.2 | 6681.4 | 7275.4 |
| 1049.2 | 912.3  | 514.6  | 1603.3  | 1261.8 | 1306.6 | 771.9  | 838.4  | 861.7  |
| 44.2   | 80.9   | 67.3   | 70.8    | 74.8   | 75.3   | 50.4   | 67.7   | 68.9   |
| 425.0  | 510.7  | 415.2  | 416.5   | 321.5  | 378.7  | 302.3  | 323.2  | 340.0  |
| 1141.8 | 1068.7 | 620.8  | 552.0   | 458.5  | 456.1  | 494.9  | 529.9  | 555.4  |
| 2102.2 | 2352.4 | 2589.0 | 263.8   | 221.8  | 219.8  | 204.2  | 212.1  | 211.5  |
| 7.0    | 5.4    | 5.3    | 8.5     | 6.7    | 3.6    | 7.2    | 7.4    | 1.7    |
| 7.2    | 5.4    | 4.1    | 5.6     | 11.4   | 11.7   | 1.8    | 4.6    | 3.7    |
| 183.9  | 200.1  | 124.8  | 383.3   | 328.0  | 336.6  | 228.0  | 267.3  | 272.4  |
| 252.8  | 286.6  | 156.3  | 316.0   | 255.6  | 274.8  | 298.1  | 275.9  | 290.1  |
| 1298.7 | 1495.7 | 1043.9 | 915.8   | 695.2  | 779.7  | 589.3  | 576.9  | 624.2  |
| 2.1    | 0.9    | 0.3    | 6.3     | 3.7    | 11.3   | 0.7    | 1.1    | 0.7    |

|         |         |        |         |        |        |        |        |        |
|---------|---------|--------|---------|--------|--------|--------|--------|--------|
| 1237.6  | 2448.2  | 2480.1 | 1704.5  | 1609.0 | 1625.7 | 707.4  | 980.3  | 1038.7 |
| 563.2   | 1145.6  | 1046.8 | 263.5   | 250.0  | 260.4  | 447.3  | 450.5  | 512.4  |
| 1016.0  | 1288.8  | 1095.2 | 840.1   | 869.6  | 1006.9 | 674.7  | 797.8  | 792.7  |
| 378.1   | 407.4   | 293.7  | 535.9   | 433.8  | 447.4  | 292.4  | 303.7  | 301.2  |
| 448.0   | 537.1   | 376.7  | 462.2   | 348.3  | 361.8  | 277.2  | 285.3  | 293.6  |
| 30.7    | 47.6    | 42.9   | 29.8    | 30.0   | 29.7   | 32.2   | 40.0   | 38.5   |
| 177.1   | 174.3   | 118.4  | 1002.1  | 746.6  | 851.3  | 491.9  | 590.2  | 561.1  |
| 2054.5  | 2773.6  | 2232.6 | 1735.8  | 1363.2 | 1480.4 | 962.4  | 925.3  | 1057.5 |
| 160.4   | 195.9   | 172.7  | 152.9   | 126.9  | 151.5  | 150.2  | 131.2  | 141.9  |
| 119.8   | 144.4   | 182.1  | 219.6   | 181.6  | 214.7  | 178.4  | 177.3  | 193.9  |
| 1426.0  | 1871.9  | 1103.6 | 213.6   | 179.9  | 195.0  | 181.9  | 194.3  | 206.5  |
| 1934.4  | 2322.6  | 1457.5 | 229.0   | 190.3  | 218.6  | 204.1  | 204.5  | 201.6  |
| 236.6   | 323.1   | 231.4  | 496.7   | 407.2  | 487.6  | 345.1  | 418.4  | 403.0  |
| 41.5    | 53.1    | 47.6   | 95.9    | 73.0   | 85.8   | 61.7   | 75.7   | 72.9   |
| 37.8    | 43.6    | 21.0   | 32.2    | 32.4   | 28.7   | 13.7   | 14.1   | 10.8   |
| 182.9   | 323.1   | 207.0  | 783.6   | 471.1  | 649.8  | 406.6  | 357.6  | 340.8  |
| 35.2    | 45.6    | 25.1   | 24.1    | 22.4   | 22.4   | 34.2   | 21.0   | 25.0   |
| 2259.8  | 2582.3  | 1815.7 | 1663.1  | 1199.0 | 1206.3 | 1479.3 | 1335.6 | 1564.4 |
| 262.9   | 514.8   | 573.4  | 192.3   | 162.3  | 179.8  | 133.1  | 99.7   | 120.0  |
| 454.3   | 536.6   | 407.3  | 478.8   | 393.7  | 416.6  | 534.8  | 544.6  | 581.0  |
| 68.2    | 110.0   | 131.1  | 18.8    | 22.5   | 32.4   | 16.9   | 40.8   | 33.0   |
| 236.8   | 444.2   | 286.1  | 722.3   | 663.8  | 783.1  | 446.3  | 700.1  | 618.9  |
| 171.2   | 233.2   | 175.7  | 103.9   | 102.9  | 80.7   | 114.1  | 121.2  | 137.8  |
| 286.0   | 380.9   | 318.8  | 351.7   | 255.8  | 347.8  | 165.6  | 210.3  | 232.2  |
| 122.9   | 116.4   | 77.9   | 52.5    | 50.8   | 56.4   | 46.0   | 58.4   | 54.7   |
| 107.7   | 108.6   | 90.1   | 66.0    | 54.0   | 50.7   | 46.0   | 43.3   | 58.5   |
| 182.1   | 197.8   | 119.7  | 131.9   | 69.3   | 81.0   | 141.3  | 88.6   | 94.3   |
| 69.1    | 75.6    | 53.1   | 71.2    | 64.9   | 53.0   | 51.1   | 38.9   | 74.5   |
| 561.2   | 661.8   | 332.1  | 505.1   | 249.7  | 316.8  | 247.2  | 157.8  | 185.3  |
| 582.8   | 656.0   | 414.6  | 491.2   | 492.7  | 475.5  | 318.9  | 418.7  | 415.1  |
| 901.8   | 1072.9  | 714.4  | 681.3   | 645.4  | 691.8  | 526.4  | 614.1  | 618.4  |
| 73.3    | 94.8    | 72.7   | 228.4   | 137.2  | 153.4  | 99.9   | 65.6   | 61.7   |
| 430.2   | 621.7   | 469.1  | 192.0   | 165.0  | 188.5  | 110.3  | 107.5  | 132.5  |
| 2612.1  | 3776.4  | 2392.9 | 3479.7  | 2764.8 | 3067.0 | 2154.7 | 2250.5 | 2429.4 |
| 457.2   | 492.0   | 247.2  | 399.9   | 367.5  | 417.2  | 201.9  | 191.8  | 229.0  |
| 302.5   | 345.3   | 265.0  | 233.4   | 193.1  | 208.8  | 281.8  | 332.8  | 321.3  |
| 149.7   | 172.3   | 108.9  | 204.5   | 206.7  | 183.7  | 179.1  | 215.0  | 233.1  |
| 379.6   | 522.0   | 443.0  | 352.4   | 322.4  | 392.4  | 178.3  | 254.7  | 253.7  |
| 260.9   | 372.4   | 305.1  | 297.4   | 280.7  | 308.5  | 238.5  | 333.5  | 288.3  |
| 161.3   | 228.4   | 212.5  | 330.4   | 307.7  | 319.3  | 199.6  | 270.2  | 265.2  |
| 650.5   | 808.7   | 638.8  | 325.8   | 323.0  | 281.9  | 564.2  | 733.4  | 663.4  |
| 318.9   | 363.8   | 317.3  | 82.7    | 96.0   | 99.9   | 152.6  | 200.9  | 219.0  |
| 513.6   | 534.9   | 342.4  | 220.4   | 156.8  | 164.4  | 227.3  | 208.5  | 260.1  |
| 2.5     | 0.7     | 2.7    | 10.6    | 1.6    | 2.5    | 6.9    | 5.2    | 4.8    |
| 439.1   | 459.2   | 318.6  | 186.0   | 150.0  | 157.9  | 320.0  | 315.7  | 360.3  |
| 1405.5  | 1513.5  | 1126.1 | 745.2   | 707.3  | 666.6  | 743.9  | 808.2  | 916.4  |
| 11853.4 | 10801.7 | 8455.4 | 11275.5 | 9341.4 | 9888.6 | 6749.7 | 5648.4 | 6387.1 |
| 1705.0  | 2005.1  | 1499.8 | 1103.1  | 894.0  | 893.8  | 997.9  | 857.8  | 1035.0 |
| 45.4    | 41.8    | 33.4   | 42.5    | 36.3   | 33.1   | 27.3   | 21.5   | 15.0   |
| 78.4    | 102.6   | 64.2   | 66.8    | 57.1   | 56.2   | 42.5   | 50.0   | 53.4   |
| 1621.8  | 1694.4  | 1156.1 | 1865.1  | 1446.4 | 1598.1 | 1082.0 | 1011.4 | 1152.3 |
| 459.8   | 445.8   | 308.0  | 463.7   | 366.9  | 375.4  | 411.0  | 391.3  | 488.7  |
| 264.6   | 255.4   | 283.8  | 297.2   | 264.0  | 314.3  | 114.5  | 134.0  | 134.4  |

|         |         |         |         |         |         |        |        |        |
|---------|---------|---------|---------|---------|---------|--------|--------|--------|
| 6.8     | 11.9    | 2.1     | 58.9    | 63.8    | 71.2    | 45.8   | 58.5   | 59.9   |
| 81.4    | 140.3   | 160.3   | 91.7    | 87.6    | 108.2   | 58.1   | 97.5   | 87.5   |
| 486.4   | 615.1   | 475.6   | 409.6   | 355.0   | 381.8   | 385.8  | 422.6  | 432.5  |
| 59.3    | 69.6    | 59.2    | 67.4    | 53.1    | 51.0    | 32.5   | 33.5   | 57.4   |
| 83.9    | 84.9    | 57.2    | 21.0    | 23.9    | 8.9     | 20.1   | 18.5   | 24.0   |
| 8.8     | 5.2     | 2.8     | 188.3   | 173.3   | 185.1   | 135.0  | 153.6  | 172.8  |
| 847.5   | 1165.5  | 951.4   | 393.9   | 340.5   | 351.2   | 325.8  | 387.8  | 401.0  |
| 426.5   | 507.2   | 340.8   | 176.2   | 150.5   | 172.4   | 114.3  | 138.3  | 119.6  |
| 39.4    | 52.1    | 41.1    | 5.1     | 4.3     | 10.2    | 0.7    | 1.7    | 4.0    |
| 222.5   | 279.2   | 221.0   | 309.4   | 252.6   | 282.0   | 281.2  | 289.8  | 286.0  |
| 465.0   | 719.8   | 429.0   | 464.7   | 374.1   | 454.7   | 284.2  | 314.3  | 304.9  |
| 6.8     | 6.6     | 4.6     | 66.0    | 48.0    | 60.6    | 38.6   | 22.8   | 29.1   |
| 253.1   | 275.1   | 228.9   | 185.9   | 141.7   | 156.6   | 79.8   | 87.9   | 90.0   |
| 26.6    | 23.0    | 22.1    | 32.6    | 46.5    | 37.8    | 21.8   | 35.3   | 40.6   |
| 722.9   | 821.7   | 607.2   | 236.8   | 202.2   | 215.3   | 135.8  | 173.1  | 166.4  |
| 12162.0 | 12086.0 | 11242.0 | 13837.9 | 12988.5 | 13400.6 | 8266.4 | 8089.5 | 8308.2 |
| 145.9   | 69.5    | 55.4    | 86.2    | 54.6    | 55.9    | 39.4   | 26.0   | 29.8   |
| 315.7   | 395.3   | 346.8   | 350.9   | 274.3   | 325.1   | 191.2  | 233.8  | 240.9  |
| 28.0    | 13.8    | 12.9    | 40.5    | 31.2    | 23.1    | 26.3   | 16.5   | 20.0   |
| 1027.8  | 1125.9  | 898.9   | 262.5   | 234.5   | 248.3   | 162.5  | 214.6  | 195.6  |
| 281.9   | 309.3   | 226.0   | 107.7   | 94.8    | 89.1    | 89.4   | 103.1  | 95.4   |
| 5.1     | 6.8     | 3.7     | 3.7     | 8.4     | 10.7    | 2.9    | 4.5    | 1.0    |
| 65.2    | 64.6    | 44.0    | 9.0     | 9.4     | 17.7    | 15.4   | 16.9   | 14.6   |
| 156.6   | 241.5   | 179.8   | 226.1   | 191.5   | 222.0   | 145.1  | 167.9  | 170.3  |
| 4.9     | 7.5     | 12.9    | 4.6     | 3.9     | 3.8     | 3.9    | 2.9    | 2.6    |
| 3.4     | 1.0     | 0.4     | 2.8     | 3.0     | 4.1     | 6.4    | 2.6    | 2.9    |
| 102.5   | 150.1   | 116.8   | 55.7    | 50.9    | 52.5    | 57.3   | 63.4   | 67.8   |
| 1051.3  | 1370.9  | 1176.1  | 583.2   | 514.7   | 524.0   | 476.5  | 385.5  | 523.8  |
| 352.8   | 363.6   | 205.1   | 395.9   | 314.9   | 362.8   | 180.1  | 168.6  | 199.9  |
| 157.9   | 344.4   | 314.1   | 197.9   | 196.3   | 197.0   | 155.5  | 210.1  | 202.1  |
| 460.4   | 538.9   | 511.4   | 331.4   | 220.2   | 303.2   | 268.6  | 225.3  | 262.2  |
| 108.3   | 181.7   | 176.7   | 180.4   | 170.3   | 189.3   | 87.6   | 114.0  | 135.9  |
| 203.5   | 262.2   | 233.2   | 176.0   | 119.0   | 150.5   | 138.3  | 159.6  | 159.2  |
| 20.3    | 25.0    | 13.0    | 26.8    | 21.3    | 24.1    | 18.0   | 15.0   | 17.9   |
| 953.7   | 971.4   | 570.6   | 2720.0  | 2162.3  | 2343.2  | 1486.7 | 1205.1 | 1465.6 |
| 0.2     | 1.5     | 2.1     | 3.4     | 2.0     | 5.6     | 0.2    | 5.8    | 1.8    |
| 156.8   | 181.3   | 132.1   | 192.1   | 135.6   | 172.9   | 115.9  | 86.3   | 103.2  |
| 208.2   | 241.8   | 200.0   | 303.8   | 244.7   | 288.5   | 214.9  | 215.2  | 247.5  |
| 133.5   | 175.7   | 91.4    | 188.6   | 168.7   | 199.0   | 153.0  | 189.1  | 191.6  |
| 1269.6  | 1474.9  | 1059.3  | 945.2   | 727.1   | 767.7   | 767.2  | 669.9  | 766.2  |
| 155.1   | 308.4   | 220.8   | 136.5   | 128.5   | 126.8   | 119.0  | 112.4  | 122.9  |
| 891.4   | 1044.5  | 819.0   | 594.0   | 399.2   | 413.6   | 391.5  | 296.0  | 367.7  |
| 902.4   | 1014.4  | 818.3   | 338.7   | 274.7   | 295.4   | 252.8  | 251.8  | 287.8  |
| 301.2   | 446.5   | 452.8   | 369.6   | 377.2   | 421.1   | 265.1  | 397.2  | 341.1  |
| 259.6   | 349.8   | 299.7   | 326.4   | 275.5   | 314.4   | 156.3  | 195.2  | 194.8  |
| 411.8   | 447.2   | 259.3   | 498.8   | 379.0   | 412.7   | 299.2  | 240.0  | 291.8  |
| 566.6   | 858.7   | 828.0   | 623.6   | 568.1   | 641.9   | 499.9  | 602.2  | 603.3  |
| 58.7    | 67.9    | 40.9    | 179.4   | 134.2   | 140.9   | 112.5  | 106.6  | 123.1  |
| 1197.3  | 1567.2  | 1252.7  | 1040.2  | 879.0   | 1032.3  | 609.3  | 586.9  | 694.5  |
| 3.5     | 7.6     | 23.2    | 19.0    | 36.5    | 30.1    | 7.5    | 20.6   | 9.2    |
| 900.3   | 952.3   | 639.0   | 797.7   | 632.3   | 709.3   | 500.2  | 454.4  | 510.3  |
| 318.7   | 496.1   | 443.9   | 816.7   | 703.1   | 752.9   | 347.8  | 479.9  | 438.0  |
| 1027.8  | 1172.1  | 962.5   | 292.3   | 243.7   | 238.3   | 319.3  | 353.3  | 368.7  |

|        |        |        |        |        |        |        |        |        |
|--------|--------|--------|--------|--------|--------|--------|--------|--------|
| 142.3  | 182.2  | 115.5  | 76.2   | 82.6   | 84.4   | 59.9   | 42.7   | 60.6   |
| 86.0   | 80.8   | 69.3   | 60.2   | 50.2   | 50.8   | 75.8   | 65.3   | 82.2   |
| 16.5   | 13.0   | 18.1   | 15.9   | 14.9   | 17.3   | 14.5   | 20.2   | 20.1   |
| 173.9  | 205.5  | 171.8  | 128.7  | 102.3  | 83.9   | 73.3   | 66.7   | 73.4   |
| 6.7    | 5.0    | 3.2    | 83.0   | 82.6   | 107.8  | 40.9   | 43.8   | 53.9   |
| 118.8  | 166.2  | 132.1  | 78.8   | 76.6   | 87.1   | 66.5   | 79.8   | 68.6   |
| 47.7   | 91.7   | 67.7   | 74.1   | 79.0   | 84.5   | 39.4   | 56.8   | 52.9   |
| 42.9   | 108.2  | 126.5  | 35.5   | 44.2   | 33.6   | 27.2   | 38.9   | 41.7   |
| 23.5   | 41.9   | 31.2   | 43.9   | 36.8   | 40.8   | 20.9   | 24.0   | 18.6   |
| 872.8  | 893.7  | 532.6  | 292.9  | 266.8  | 303.3  | 183.6  | 143.7  | 192.9  |
| 662.0  | 640.6  | 367.8  | 327.7  | 199.8  | 197.4  | 390.8  | 272.4  | 326.9  |
| 200.2  | 217.1  | 118.8  | 160.8  | 112.4  | 139.1  | 107.6  | 88.3   | 114.1  |
| 186.4  | 196.1  | 113.5  | 229.3  | 171.0  | 194.5  | 126.9  | 132.7  | 138.5  |
| 163.0  | 171.1  | 104.7  | 221.4  | 145.8  | 173.8  | 151.4  | 137.7  | 147.4  |
| 2.0    | 1.5    | 1.8    | 3.3    | 1.6    | 2.8    | 1.5    | 1.4    | 1.6    |
| 1135.0 | 1077.0 | 656.5  | 625.0  | 467.0  | 521.8  | 440.4  | 426.5  | 494.4  |
| 35.4   | 46.6   | 40.8   | 67.1   | 42.4   | 55.3   | 60.6   | 49.7   | 52.6   |
| 3818.4 | 4061.0 | 3324.6 | 2649.8 | 2211.5 | 2241.1 | 2065.6 | 1834.1 | 2107.7 |
| 223.0  | 303.3  | 235.8  | 192.0  | 184.4  | 202.9  | 99.7   | 153.0  | 147.3  |
| 2256.7 | 2477.6 | 2039.8 | 2085.2 | 1585.3 | 1756.1 | 1154.8 | 992.4  | 1219.6 |
| 89.8   | 128.6  | 86.8   | 193.6  | 144.6  | 160.6  | 131.9  | 132.3  | 133.9  |
| 729.1  | 793.3  | 607.7  | 289.7  | 225.5  | 237.6  | 345.2  | 295.3  | 327.5  |
| 1017.7 | 1264.1 | 856.3  | 533.0  | 416.8  | 451.0  | 391.6  | 392.5  | 405.5  |
| 400.1  | 414.5  | 209.7  | 109.8  | 95.2   | 91.3   | 60.0   | 50.6   | 52.3   |
| 1106.6 | 1095.0 | 633.4  | 294.0  | 217.7  | 218.4  | 207.6  | 127.2  | 198.7  |
| 751.3  | 700.0  | 423.2  | 423.1  | 389.1  | 388.6  | 279.2  | 309.8  | 313.6  |
| 544.3  | 814.5  | 763.2  | 1060.9 | 954.6  | 1058.7 | 891.1  | 1127.9 | 1176.0 |
| 224.5  | 262.5  | 185.3  | 241.0  | 195.9  | 208.9  | 175.0  | 191.4  | 205.1  |
| 262.2  | 327.8  | 234.1  | 241.8  | 168.8  | 187.5  | 94.5   | 93.1   | 98.6   |
| 150.4  | 210.5  | 115.7  | 229.3  | 182.9  | 189.6  | 158.2  | 142.9  | 149.3  |
| 222.9  | 264.1  | 141.8  | 288.6  | 211.8  | 227.8  | 200.0  | 146.4  | 177.7  |
| 14.4   | 20.0   | 15.5   | 79.1   | 55.3   | 55.1   | 68.5   | 58.7   | 62.5   |
| 271.8  | 332.2  | 239.1  | 337.7  | 313.2  | 329.4  | 213.2  | 243.3  | 266.0  |
| 7.5    | 13.5   | 5.4    | 13.7   | 16.4   | 14.6   | 7.3    | 11.2   | 9.8    |
| 404.6  | 450.0  | 291.3  | 317.8  | 233.9  | 272.7  | 169.8  | 165.7  | 186.6  |
| 8984.3 | 9651.0 | 8599.4 | 9249.2 | 8848.3 | 9539.3 | 5322.5 | 5577.8 | 5915.2 |
| 74.9   | 92.6   | 64.4   | 76.2   | 80.8   | 92.4   | 55.1   | 52.1   | 69.3   |
| 25.8   | 30.3   | 10.6   | 47.5   | 37.9   | 54.1   | 18.4   | 25.8   | 22.8   |
| 162.3  | 276.5  | 323.3  | 309.7  | 317.6  | 349.0  | 160.1  | 235.2  | 228.3  |
| 235.6  | 286.3  | 200.1  | 92.3   | 75.0   | 63.4   | 70.8   | 45.8   | 49.1   |
| 20.4   | 29.6   | 32.7   | 824.5  | 657.5  | 793.8  | 324.4  | 268.5  | 339.7  |
| 630.5  | 741.0  | 530.4  | 308.9  | 269.5  | 278.2  | 208.9  | 247.7  | 239.2  |
| 61.3   | 122.0  | 129.2  | 24.6   | 19.6   | 12.8   | 9.0    | 11.2   | 19.0   |
| 460.9  | 603.3  | 457.5  | 381.6  | 363.2  | 380.3  | 304.2  | 322.2  | 346.0  |
| 39.7   | 48.5   | 32.6   | 108.2  | 104.2  | 123.7  | 105.7  | 125.9  | 108.1  |
| 165.4  | 198.4  | 180.5  | 89.7   | 87.8   | 95.8   | 59.6   | 98.3   | 97.2   |
| 119.1  | 140.1  | 131.8  | 36.5   | 39.1   | 63.1   | 44.7   | 73.3   | 69.9   |
| 119.2  | 118.5  | 83.7   | 185.8  | 149.2  | 190.1  | 164.5  | 162.3  | 185.1  |
| 214.8  | 296.9  | 253.4  | 281.1  | 220.5  | 236.5  | 211.8  | 218.5  | 233.0  |
| 137.1  | 149.0  | 136.8  | 81.3   | 80.9   | 77.7   | 59.9   | 56.4   | 59.9   |
| 707.8  | 855.7  | 654.0  | 1415.3 | 1187.6 | 1244.6 | 1107.3 | 1026.0 | 1176.7 |
| 2.9    | 3.8    | 6.4    | 5.7    | 2.5    | 5.7    | 2.6    | 1.9    | 1.6    |
| 638.7  | 694.1  | 393.3  | 283.0  | 244.0  | 255.4  | 198.2  | 216.2  | 253.3  |

|        |         |         |         |        |         |        |        |        |
|--------|---------|---------|---------|--------|---------|--------|--------|--------|
| 195.2  | 214.6   | 174.1   | 167.0   | 120.5  | 137.4   | 127.8  | 124.1  | 124.9  |
| 172.9  | 233.6   | 175.2   | 181.8   | 152.7  | 197.2   | 92.5   | 106.7  | 137.6  |
| 130.0  | 153.7   | 154.5   | 233.0   | 193.2  | 218.2   | 197.9  | 203.4  | 207.8  |
| 11.7   | 11.3    | 11.3    | 12.8    | 9.0    | 11.9    | 7.0    | 11.4   | 9.4    |
| 814.4  | 971.6   | 972.8   | 229.7   | 209.2  | 217.4   | 152.9  | 161.0  | 175.8  |
| 227.2  | 272.4   | 249.9   | 193.4   | 179.4  | 194.1   | 147.1  | 157.8  | 169.4  |
| 12.9   | 17.8    | 7.2     | 2.2     | 0.9    | 3.1     | 10.7   | 2.2    | 1.8    |
| 65.2   | 74.4    | 48.0    | 28.2    | 22.1   | 18.5    | 5.9    | 14.9   | 7.7    |
| 961.1  | 1196.8  | 1257.7  | 249.9   | 210.4  | 210.0   | 210.4  | 263.0  | 274.7  |
| 1394.5 | 1300.8  | 1013.5  | 305.4   | 251.8  | 246.6   | 174.4  | 194.8  | 190.0  |
| 299.6  | 382.8   | 226.7   | 127.2   | 100.3  | 123.1   | 94.8   | 110.3  | 120.1  |
| 96.2   | 106.8   | 65.7    | 59.9    | 55.1   | 65.7    | 44.9   | 46.4   | 41.1   |
| 4.7    | 12.9    | 11.3    | 8.0     | 7.5    | 16.8    | 4.6    | 1.4    | 4.8    |
| 352.5  | 355.6   | 218.6   | 202.0   | 166.4  | 170.2   | 110.4  | 119.6  | 134.5  |
| 411.5  | 521.2   | 297.3   | 270.1   | 198.0  | 210.3   | 146.3  | 137.6  | 154.2  |
| 202.5  | 294.1   | 181.6   | 26.9    | 34.4   | 52.3    | 18.4   | 12.2   | 18.0   |
| 30.7   | 46.9    | 52.8    | 3.4     | 7.7    | 10.3    | 3.4    | 1.0    | 2.4    |
| 209.1  | 199.3   | 152.6   | 146.1   | 122.6  | 147.4   | 97.3   | 90.0   | 94.1   |
| 391.9  | 464.0   | 325.6   | 502.0   | 372.5  | 442.1   | 269.3  | 290.0  | 314.8  |
| 55.1   | 83.8    | 52.5    | 36.4    | 46.1   | 48.4    | 32.5   | 26.3   | 23.5   |
| 81.0   | 102.5   | 83.3    | 75.4    | 80.2   | 92.8    | 45.8   | 55.9   | 52.0   |
| 2647.3 | 3560.0  | 2570.7  | 1872.9  | 1751.7 | 1726.0  | 1380.2 | 1485.1 | 1586.9 |
| 1944.8 | 2694.5  | 2097.3  | 599.2   | 551.9  | 549.6   | 417.6  | 481.8  | 511.6  |
| 188.9  | 239.0   | 196.5   | 458.8   | 485.9  | 553.2   | 248.3  | 406.6  | 382.0  |
| 93.6   | 125.6   | 123.7   | 300.8   | 312.1  | 371.6   | 120.1  | 278.0  | 243.8  |
| 60.2   | 79.5    | 72.7    | 41.7    | 43.6   | 56.8    | 53.1   | 52.9   | 40.4   |
| 137.0  | 163.5   | 127.8   | 279.2   | 220.9  | 244.0   | 156.2  | 154.5  | 171.2  |
| 141.4  | 265.8   | 280.2   | 157.5   | 149.5  | 161.9   | 108.2  | 208.1  | 176.7  |
| 124.7  | 176.5   | 182.5   | 133.6   | 110.4  | 130.6   | 95.6   | 112.5  | 119.9  |
| 465.5  | 662.0   | 456.2   | 340.9   | 270.0  | 287.4   | 357.6  | 309.2  | 362.7  |
| 2464.5 | 3059.4  | 2559.2  | 2268.8  | 1951.2 | 2092.4  | 1078.9 | 1148.3 | 1251.8 |
| 207.2  | 277.7   | 231.2   | 332.6   | 284.0  | 268.8   | 149.4  | 171.8  | 196.3  |
| 148.7  | 155.8   | 88.8    | 155.9   | 118.4  | 140.5   | 38.7   | 58.0   | 73.5   |
| 815.4  | 890.8   | 756.0   | 375.9   | 315.3  | 347.4   | 289.0  | 312.3  | 287.2  |
| 115.3  | 114.2   | 90.6    | 76.8    | 66.1   | 81.9    | 53.2   | 56.5   | 61.7   |
| 359.2  | 481.5   | 334.1   | 425.7   | 333.2  | 350.5   | 342.1  | 376.8  | 393.0  |
| 9671.6 | 10969.3 | 10039.7 | 7518.3  | 7485.8 | 7551.2  | 4470.7 | 5541.8 | 5541.9 |
| 589.5  | 623.1   | 282.9   | 202.7   | 132.1  | 159.9   | 254.9  | 134.7  | 188.4  |
| 9632.3 | 10845.6 | 9437.5  | 10147.8 | 9889.4 | 10245.8 | 5541.4 | 6156.1 | 6450.4 |
| 183.3  | 226.1   | 159.6   | 148.2   | 139.0  | 139.1   | 89.5   | 104.4  | 118.6  |
| 644.7  | 564.1   | 344.5   | 133.7   | 133.1  | 157.2   | 89.4   | 119.7  | 124.7  |
| 18.4   | 32.8    | 19.7    | 14.1    | 13.3   | 18.3    | 19.5   | 18.9   | 22.0   |
| 474.3  | 552.9   | 496.9   | 174.0   | 130.5  | 137.5   | 106.4  | 106.1  | 114.4  |
| 461.8  | 655.4   | 580.8   | 341.9   | 307.9  | 345.6   | 317.5  | 344.2  | 385.7  |
| 188.8  | 273.1   | 206.7   | 242.5   | 214.8  | 235.6   | 143.7  | 180.9  | 177.2  |
| 92.7   | 133.4   | 103.6   | 31.9    | 27.3   | 43.3    | 92.2   | 68.3   | 86.1   |
| 363.2  | 718.7   | 804.8   | 343.9   | 291.9  | 324.7   | 184.6  | 200.4  | 245.6  |
| 488.1  | 530.9   | 366.5   | 264.7   | 234.5  | 261.5   | 232.7  | 215.5  | 271.5  |
| 188.3  | 302.4   | 170.2   | 79.4    | 78.9   | 88.8    | 102.2  | 85.1   | 102.8  |
| 344.0  | 435.2   | 313.2   | 288.2   | 163.0  | 203.3   | 160.5  | 138.3  | 151.0  |
| 595.9  | 715.6   | 516.6   | 677.7   | 545.9  | 557.0   | 430.4  | 508.9  | 535.3  |
| 51.1   | 45.9    | 20.8    | 96.6    | 102.8  | 104.7   | 53.9   | 62.2   | 60.8   |
| 551.0  | 649.5   | 464.7   | 381.5   | 310.5  | 316.9   | 334.6  | 344.2  | 361.4  |

|        |        |        |        |        |        |        |        |        |
|--------|--------|--------|--------|--------|--------|--------|--------|--------|
| 9.3    | 17.1   | 12.9   | 61.8   | 52.9   | 67.3   | 70.6   | 71.2   | 69.0   |
| 5.7    | 5.9    | 11.5   | 15.5   | 19.9   | 18.2   | 22.5   | 23.0   | 29.8   |
| 173.6  | 273.5  | 252.6  | 171.3  | 128.5  | 177.1  | 137.0  | 109.7  | 135.3  |
| 106.0  | 130.3  | 83.2   | 61.4   | 44.3   | 43.3   | 64.6   | 52.5   | 68.8   |
| 239.5  | 253.6  | 159.7  | 249.9  | 183.4  | 204.6  | 165.3  | 139.8  | 130.1  |
| 521.6  | 894.7  | 658.8  | 452.1  | 277.7  | 334.0  | 238.0  | 150.3  | 192.5  |
| 836.1  | 1575.9 | 1212.5 | 763.3  | 521.2  | 597.5  | 430.3  | 326.2  | 385.0  |
| 2380.7 | 3472.3 | 3082.1 | 518.4  | 505.1  | 496.3  | 460.8  | 567.7  | 583.7  |
| 15.6   | 16.6   | 10.4   | 13.4   | 11.6   | 16.4   | 14.3   | 6.6    | 11.1   |
| 80.9   | 109.6  | 95.4   | 113.7  | 109.4  | 124.9  | 116.3  | 114.9  | 126.3  |
| 221.1  | 239.5  | 168.7  | 467.8  | 355.4  | 395.7  | 424.2  | 349.6  | 409.3  |
| 7.2    | 22.9   | 39.6   | 105.3  | 76.1   | 90.0   | 50.7   | 46.9   | 55.6   |
| 31.1   | 33.3   | 18.1   | 98.1   | 103.4  | 91.1   | 61.3   | 39.0   | 53.5   |
| 140.4  | 157.8  | 109.2  | 66.3   | 49.8   | 79.0   | 40.7   | 48.5   | 38.9   |
| 83.3   | 88.8   | 49.2   | 20.2   | 25.7   | 20.1   | 16.3   | 21.6   | 18.1   |
| 188.4  | 254.0  | 182.1  | 111.8  | 71.8   | 105.4  | 87.1   | 89.4   | 93.0   |
| 4.2    | 6.1    | 2.4    | 5.2    | 6.7    | 4.2    | 14.6   | 2.9    | 3.7    |
| 5.3    | 11.8   | 6.9    | 18.0   | 11.2   | 30.2   | 2.4    | 14.8   | 19.9   |
| 87.0   | 93.4   | 88.5   | 212.1  | 141.9  | 163.2  | 96.5   | 67.4   | 96.0   |
| 1071.6 | 1553.2 | 929.5  | 441.6  | 358.1  | 359.5  | 642.4  | 848.2  | 851.9  |
| 522.3  | 692.9  | 430.5  | 428.8  | 354.5  | 374.6  | 295.7  | 293.8  | 300.8  |
| 2059.7 | 3104.0 | 2307.1 | 4152.5 | 4254.1 | 4439.1 | 2516.0 | 3393.2 | 3449.4 |
| 16.6   | 32.1   | 21.2   | 53.3   | 24.0   | 45.0   | 27.5   | 26.4   | 10.8   |
| 397.9  | 491.5  | 555.8  | 223.0  | 182.1  | 207.2  | 125.5  | 128.0  | 114.3  |
| 302.1  | 373.6  | 340.0  | 245.6  | 224.5  | 236.7  | 132.8  | 150.5  | 169.3  |
| 313.4  | 436.9  | 310.9  | 893.6  | 846.0  | 949.5  | 624.4  | 702.1  | 793.1  |
| 53.7   | 70.4   | 47.4   | 74.8   | 57.4   | 70.8   | 82.7   | 75.5   | 88.9   |
| 319.6  | 405.9  | 322.8  | 585.5  | 398.2  | 447.0  | 321.7  | 266.1  | 289.0  |
| 1277.8 | 1446.1 | 1124.3 | 255.4  | 234.4  | 248.7  | 308.0  | 321.2  | 312.2  |
| 175.3  | 217.2  | 166.7  | 459.0  | 381.8  | 385.1  | 373.1  | 318.5  | 366.6  |
| 241.0  | 276.2  | 202.2  | 74.8   | 66.2   | 77.8   | 75.1   | 78.0   | 71.6   |
| 377.6  | 500.5  | 302.7  | 451.3  | 238.3  | 281.1  | 227.7  | 138.4  | 157.9  |
| 296.9  | 413.6  | 278.5  | 153.1  | 119.7  | 145.9  | 96.7   | 91.4   | 94.2   |
| 192.3  | 274.1  | 317.1  | 230.8  | 213.8  | 284.7  | 188.0  | 213.8  | 212.6  |
| 43.4   | 58.4   | 41.0   | 48.9   | 30.6   | 39.1   | 32.2   | 29.3   | 33.8   |
| 301.3  | 390.0  | 278.5  | 158.6  | 138.9  | 145.6  | 103.2  | 120.7  | 101.9  |
| 103.1  | 174.9  | 323.7  | 434.4  | 399.7  | 483.8  | 363.1  | 462.9  | 437.5  |
| 276.7  | 366.7  | 294.8  | 286.8  | 207.0  | 223.2  | 194.4  | 201.0  | 197.4  |
| 11.2   | 13.7   | 9.6    | 27.6   | 16.1   | 27.3   | 10.7   | 17.6   | 12.0   |
| 95.3   | 120.8  | 50.0   | 22.8   | 20.8   | 28.4   | 46.5   | 23.2   | 38.2   |
| 9.0    | 4.1    | 6.1    | 71.0   | 53.5   | 66.8   | 52.4   | 67.9   | 56.1   |
| 1530.0 | 1698.1 | 1008.0 | 761.3  | 504.7  | 543.0  | 613.6  | 487.6  | 593.5  |
| 273.5  | 296.4  | 179.2  | 122.9  | 127.4  | 101.5  | 159.9  | 128.4  | 160.3  |
| 1571.1 | 1985.9 | 1433.9 | 286.6  | 314.9  | 322.0  | 140.5  | 219.6  | 204.8  |
| 55.3   | 108.4  | 66.2   | 159.0  | 138.5  | 154.2  | 72.6   | 94.6   | 81.9   |
| 221.8  | 764.5  | 1113.0 | 13.6   | 7.1    | 11.4   | 4.6    | 4.5    | 11.2   |
| 120.6  | 145.5  | 85.8   | 87.7   | 78.1   | 79.5   | 75.1   | 68.3   | 63.9   |
| 973.3  | 1073.8 | 775.5  | 1405.0 | 1107.4 | 1248.5 | 737.7  | 853.8  | 797.0  |
| 85.5   | 90.0   | 56.8   | 49.4   | 35.8   | 64.6   | 56.6   | 42.7   | 43.0   |
| 627.6  | 1082.3 | 755.9  | 1854.7 | 1521.6 | 1770.3 | 1171.8 | 1103.4 | 1196.2 |
| 317.8  | 327.1  | 192.3  | 238.2  | 179.4  | 200.8  | 173.2  | 167.2  | 193.0  |
| 76.9   | 104.5  | 67.8   | 280.2  | 234.3  | 291.4  | 211.8  | 258.5  | 260.0  |
| 5689.2 | 5910.3 | 4375.3 | 4372.7 | 3749.6 | 3705.7 | 3623.9 | 3300.1 | 3651.0 |

|         |         |         |         |         |         |        |        |        |
|---------|---------|---------|---------|---------|---------|--------|--------|--------|
| 186.2   | 272.0   | 114.9   | 263.3   | 229.2   | 230.0   | 107.8  | 104.2  | 127.4  |
| 146.8   | 254.8   | 355.6   | 164.9   | 127.2   | 154.4   | 74.7   | 73.9   | 86.8   |
| 167.3   | 184.2   | 125.7   | 159.7   | 105.6   | 120.0   | 101.1  | 72.6   | 89.5   |
| 264.5   | 360.9   | 289.1   | 229.4   | 177.6   | 207.0   | 127.8  | 143.7  | 145.2  |
| 246.6   | 334.7   | 288.4   | 175.6   | 161.5   | 164.9   | 170.3  | 158.5  | 171.2  |
| 1843.5  | 2180.0  | 1967.3  | 1375.7  | 1111.5  | 1221.7  | 885.1  | 873.2  | 976.4  |
| 189.0   | 272.5   | 285.0   | 375.6   | 313.0   | 368.9   | 167.7  | 206.7  | 229.2  |
| 2.2     | 4.1     | 0.6     | 7.0     | 6.5     | 8.9     | 7.5    | 6.6    | 9.9    |
| 532.6   | 689.0   | 368.3   | 206.3   | 181.2   | 204.6   | 125.5  | 130.4  | 149.0  |
| 519.8   | 707.9   | 667.8   | 542.7   | 456.2   | 465.5   | 511.2  | 660.3  | 647.8  |
| 8.1     | 12.7    | 10.3    | 17.3    | 4.6     | 15.0    | 7.1    | 4.1    | 3.5    |
| 10987.6 | 10883.7 | 10375.3 | 11447.2 | 10492.8 | 11218.4 | 7638.7 | 7748.0 | 8063.5 |
| 142.8   | 275.5   | 258.7   | 364.8   | 327.2   | 343.5   | 343.8  | 450.5  | 411.2  |
| 551.1   | 624.5   | 359.3   | 323.4   | 224.2   | 251.3   | 226.9  | 188.0  | 241.5  |
| 1204.8  | 1500.5  | 1195.7  | 319.4   | 255.4   | 322.1   | 193.6  | 224.8  | 227.7  |
| 45.2    | 70.0    | 54.9    | 10.5    | 9.8     | 9.0     | 2.8    | 7.6    | 8.8    |
| 1.0     | 1.0     | 0.7     | 1.8     | 1.5     | 1.6     | 0.7    | 0.6    | 1.6    |
| 50.3    | 69.5    | 52.4    | 422.2   | 367.2   | 416.7   | 266.5  | 269.5  | 317.3  |
| 283.8   | 456.6   | 337.6   | 125.8   | 117.2   | 111.0   | 83.5   | 77.1   | 85.6   |
| 264.6   | 341.3   | 217.1   | 440.1   | 348.8   | 381.8   | 321.9  | 283.3  | 338.1  |
| 425.3   | 535.8   | 442.5   | 555.3   | 410.7   | 506.2   | 566.3  | 506.4  | 566.3  |
| 50.0    | 73.3    | 53.0    | 88.4    | 56.3    | 92.0    | 52.9   | 62.6   | 82.4   |
| 102.7   | 132.7   | 144.6   | 201.4   | 165.9   | 186.1   | 107.5  | 132.6  | 145.9  |
| 100.6   | 129.8   | 97.7    | 157.3   | 136.5   | 126.0   | 105.5  | 115.8  | 130.2  |
| 105.1   | 118.7   | 59.6    | 116.3   | 98.3    | 109.6   | 68.7   | 72.9   | 86.6   |
| 4.4     | 1.7     | 5.1     | 4.0     | 7.8     | 7.4     | 9.0    | 3.4    | 10.1   |
| 29.3    | 29.5    | 25.8    | 56.5    | 39.3    | 42.1    | 26.6   | 26.3   | 25.1   |
| 413.6   | 434.7   | 267.9   | 312.8   | 247.6   | 280.1   | 238.2  | 234.2  | 253.1  |
| 10.5    | 11.2    | 11.9    | 34.6    | 10.4    | 18.0    | 16.1   | 9.8    | 14.4   |
| 481.7   | 644.0   | 430.2   | 589.2   | 474.5   | 494.9   | 891.5  | 841.5  | 969.2  |
| 344.3   | 340.4   | 214.7   | 393.7   | 285.3   | 303.3   | 320.7  | 295.4  | 335.6  |
| 10.7    | 10.5    | 10.4    | 7.0     | 9.7     | 9.3     | 6.2    | 5.4    | 2.6    |
| 347.6   | 495.7   | 446.9   | 183.9   | 148.8   | 214.4   | 81.1   | 126.4  | 119.0  |
| 433.3   | 503.1   | 291.7   | 471.4   | 326.6   | 365.8   | 242.0  | 187.5  | 181.8  |
| 92.1    | 121.6   | 136.1   | 283.4   | 240.0   | 301.6   | 170.5  | 182.9  | 201.8  |
| 343.4   | 417.8   | 342.6   | 280.7   | 230.0   | 283.4   | 243.3  | 263.7  | 283.9  |
| 193.7   | 267.4   | 165.5   | 290.9   | 221.9   | 268.5   | 152.1  | 151.3  | 153.2  |
| 536.6   | 642.9   | 626.4   | 379.4   | 334.7   | 371.6   | 205.1  | 233.5  | 252.0  |
| 1705.5  | 1799.7  | 1290.2  | 537.2   | 410.3   | 464.2   | 487.1  | 412.5  | 455.6  |
| 87.3    | 125.7   | 136.1   | 203.9   | 183.4   | 240.5   | 96.8   | 143.1  | 119.4  |
| 901.7   | 1009.6  | 486.6   | 335.5   | 234.9   | 239.2   | 333.8  | 290.9  | 307.2  |
| 145.3   | 259.4   | 267.9   | 345.8   | 332.5   | 352.9   | 216.4  | 315.3  | 291.8  |
| 612.4   | 662.6   | 527.6   | 410.2   | 244.7   | 348.8   | 305.4  | 318.5  | 336.7  |
| 173.8   | 195.5   | 153.3   | 158.1   | 137.6   | 138.4   | 102.7  | 91.5   | 99.3   |
| 227.2   | 250.9   | 181.8   | 153.0   | 135.3   | 154.9   | 152.0  | 111.6  | 145.0  |
| 1632.8  | 2016.3  | 1566.0  | 1490.7  | 1300.6  | 1302.0  | 915.0  | 929.3  | 1047.3 |
| 335.3   | 415.7   | 314.5   | 283.9   | 241.6   | 273.1   | 213.2  | 256.4  | 248.7  |
| 196.9   | 289.0   | 261.3   | 27.3    | 33.3    | 36.8    | 27.6   | 21.8   | 18.2   |
| 1448.8  | 1399.6  | 1174.9  | 194.1   | 201.3   | 197.8   | 132.2  | 124.9  | 144.5  |
| 229.4   | 299.3   | 255.2   | 192.5   | 162.8   | 169.8   | 100.0  | 103.8  | 124.8  |
| 6.4     | 2.4     | 1.1     | 22.7    | 20.3    | 26.0    | 10.2   | 13.9   | 9.7    |
| 365.3   | 473.3   | 298.6   | 404.0   | 290.4   | 289.1   | 227.8  | 220.6  | 224.9  |
| 127.2   | 176.1   | 156.4   | 122.0   | 112.4   | 112.5   | 93.4   | 98.9   | 111.2  |



|        |        |        |        |        |        |        |        |        |
|--------|--------|--------|--------|--------|--------|--------|--------|--------|
| 37.3   | 74.1   | 114.6  | 70.1   | 85.0   | 97.2   | 47.6   | 78.9   | 74.5   |
| 59.8   | 85.3   | 60.6   | 62.5   | 38.8   | 39.5   | 39.7   | 34.5   | 35.0   |
| 103.5  | 204.3  | 174.0  | 58.6   | 56.6   | 53.4   | 21.6   | 27.7   | 24.1   |
| 6.6    | 14.5   | 28.9   | 74.8   | 73.6   | 66.7   | 41.5   | 70.6   | 58.5   |
| 145.5  | 194.2  | 129.0  | 174.2  | 133.8  | 158.0  | 134.4  | 142.2  | 128.9  |
| 1053.1 | 1256.3 | 896.9  | 192.5  | 138.1  | 130.8  | 233.6  | 240.9  | 246.5  |
| 675.1  | 847.1  | 647.4  | 298.8  | 185.6  | 182.2  | 247.9  | 257.0  | 245.9  |
| 531.8  | 633.5  | 492.5  | 396.0  | 297.2  | 334.9  | 277.6  | 235.4  | 251.0  |
| 345.7  | 465.6  | 331.0  | 287.5  | 248.7  | 251.8  | 336.7  | 390.8  | 408.0  |
| 27.0   | 38.9   | 28.3   | 19.1   | 19.1   | 27.3   | 11.6   | 21.3   | 16.2   |
| 1457.9 | 1552.3 | 947.2  | 913.1  | 724.2  | 851.7  | 526.6  | 592.3  | 515.6  |
| 11.3   | 16.4   | 11.9   | 43.1   | 51.7   | 49.7   | 40.8   | 33.4   | 34.5   |
| 6.8    | 16.2   | 19.4   | 25.8   | 5.0    | 10.2   | 4.7    | 0.9    | 11.0   |
| 1034.7 | 969.9  | 843.9  | 591.9  | 464.7  | 555.8  | 367.4  | 390.7  | 355.1  |
| 263.2  | 309.9  | 204.0  | 47.1   | 47.7   | 46.3   | 55.4   | 49.9   | 63.3   |
| 346.9  | 431.9  | 275.4  | 70.8   | 56.0   | 55.5   | 91.9   | 86.1   | 103.5  |
| 157.9  | 219.3  | 181.5  | 332.1  | 321.0  | 347.0  | 289.2  | 322.2  | 343.0  |
| 184.2  | 290.4  | 336.6  | 149.0  | 158.4  | 179.8  | 118.5  | 187.4  | 184.5  |
| 85.4   | 115.7  | 57.4   | 65.5   | 46.6   | 53.7   | 48.4   | 64.3   | 58.8   |
| 616.7  | 736.7  | 459.5  | 209.6  | 163.5  | 151.5  | 111.5  | 107.7  | 112.2  |
| 207.1  | 290.0  | 280.5  | 189.4  | 160.8  | 187.4  | 111.2  | 106.5  | 134.5  |
| 6222.8 | 7378.6 | 5905.0 | 4843.7 | 4394.5 | 5187.4 | 3362.7 | 3580.5 | 3866.2 |
| 581.3  | 645.3  | 628.0  | 345.4  | 322.4  | 311.4  | 284.1  | 337.1  | 329.7  |
| 101.7  | 178.3  | 213.9  | 567.8  | 522.8  | 604.3  | 297.5  | 345.5  | 434.5  |
| 454.7  | 669.6  | 625.8  | 107.4  | 127.5  | 115.7  | 87.4   | 119.8  | 116.2  |
| 10.5   | 2.9    | 6.0    | 5.4    | 5.2    | 7.6    | 18.7   | 15.2   | 29.6   |
| 17.4   | 22.8   | 12.0   | 38.4   | 31.4   | 33.3   | 30.6   | 29.3   | 25.0   |
| 7.8    | 3.6    | 6.3    | 9.0    | 3.3    | 2.5    | 2.3    | 5.6    | 4.1    |
| 23.4   | 9.7    | 9.6    | 9.4    | 7.9    | 14.1   | 19.5   | 13.7   | 20.5   |
| 3272.9 | 2817.9 | 749.4  | 15.4   | 9.5    | 6.3    | 6.1    | 6.3    | 11.1   |
| 452.3  | 690.6  | 658.7  | 364.5  | 334.3  | 377.3  | 234.6  | 347.7  | 297.5  |
| 223.7  | 303.1  | 223.1  | 128.1  | 101.1  | 110.0  | 98.3   | 79.8   | 87.3   |
| 24.4   | 22.3   | 18.4   | 163.1  | 135.2  | 156.3  | 71.3   | 120.5  | 116.4  |
| 446.1  | 579.3  | 649.2  | 190.6  | 180.0  | 207.8  | 149.0  | 157.3  | 172.6  |
| 235.1  | 253.4  | 186.5  | 114.7  | 122.7  | 113.7  | 86.3   | 145.1  | 119.3  |
| 130.5  | 165.9  | 104.9  | 157.0  | 158.3  | 164.9  | 90.3   | 87.3   | 97.8   |
| 616.7  | 638.2  | 282.5  | 222.5  | 119.9  | 135.4  | 134.2  | 69.3   | 86.8   |
| 7.3    | 10.8   | 8.5    | 14.9   | 11.5   | 10.4   | 7.4    | 8.1    | 5.2    |
| 13.7   | 1.8    | 1.7    | 4.8    | 3.8    | 5.1    | 2.0    | 1.3    | 1.8    |
| 974.8  | 1080.1 | 941.3  | 502.1  | 607.0  | 443.9  | 392.7  | 453.8  | 548.0  |
| 1338.8 | 1748.0 | 1109.8 | 1081.8 | 1069.3 | 1041.7 | 288.2  | 539.3  | 562.1  |
| 96.7   | 109.8  | 76.1   | 145.1  | 113.1  | 126.9  | 71.1   | 77.6   | 87.3   |
| 1123.7 | 1225.5 | 748.9  | 728.1  | 613.3  | 582.6  | 379.5  | 296.4  | 337.9  |
| 0.8    | 9.9    | 0.7    | 355.4  | 358.1  | 383.4  | 321.8  | 503.1  | 410.4  |
| 51.2   | 71.3   | 48.5   | 115.9  | 130.6  | 137.3  | 76.9   | 124.1  | 125.0  |
| 1349.9 | 1875.1 | 1862.5 | 164.3  | 145.3  | 166.5  | 120.3  | 143.8  | 148.7  |
| 362.4  | 440.3  | 399.0  | 323.9  | 323.5  | 294.7  | 235.5  | 294.4  | 324.8  |
| 7.4    | 7.6    | 7.9    | 71.1   | 59.4   | 74.8   | 56.7   | 65.3   | 66.7   |
| 612.6  | 717.7  | 521.5  | 471.5  | 327.6  | 408.8  | 300.1  | 240.2  | 297.7  |
| 1.5    | 2.2    | 1.8    | 14.9   | 10.8   | 10.1   | 2.0    | 8.2    | 3.5    |
| 47.3   | 56.3   | 46.8   | 41.8   | 37.5   | 24.2   | 13.5   | 13.4   | 14.8   |
| 137.9  | 174.0  | 122.3  | 105.6  | 80.9   | 73.2   | 74.1   | 59.2   | 84.7   |
| 22.8   | 37.8   | 28.6   | 18.4   | 21.5   | 16.2   | 17.5   | 15.4   | 20.2   |

|         |        |        |        |        |        |        |        |        |
|---------|--------|--------|--------|--------|--------|--------|--------|--------|
| 131.7   | 153.9  | 107.1  | 113.2  | 77.2   | 77.3   | 47.7   | 51.7   | 62.6   |
| 3779.8  | 4718.0 | 3709.3 | 1834.8 | 1514.8 | 1743.9 | 1330.1 | 1525.3 | 1513.7 |
| 173.3   | 253.4  | 202.1  | 189.9  | 178.7  | 209.3  | 78.8   | 110.5  | 120.1  |
| 101.5   | 131.8  | 116.4  | 35.2   | 48.5   | 45.2   | 45.3   | 41.9   | 41.9   |
| 58.9    | 80.9   | 62.8   | 99.3   | 75.9   | 97.1   | 58.8   | 69.1   | 58.2   |
| 1965.9  | 2494.5 | 1830.2 | 1060.4 | 884.5  | 1007.3 | 465.5  | 458.9  | 506.4  |
| 44.5    | 49.9   | 34.6   | 29.5   | 19.7   | 24.9   | 23.2   | 22.2   | 30.7   |
| 549.1   | 734.5  | 341.6  | 251.1  | 219.6  | 221.4  | 147.3  | 184.7  | 181.3  |
| 29.4    | 43.0   | 34.2   | 26.8   | 40.9   | 38.3   | 33.0   | 29.2   | 37.4   |
| 26.8    | 31.1   | 40.8   | 32.5   | 27.4   | 34.3   | 15.8   | 16.8   | 3.4    |
| 29.2    | 27.4   | 14.0   | 22.7   | 14.4   | 17.1   | 11.0   | 11.1   | 12.2   |
| 2.6     | 0.9    | 2.5    | 694.9  | 687.3  | 731.8  | 502.7  | 873.1  | 703.5  |
| 273.9   | 270.0  | 142.0  | 224.9  | 178.5  | 202.9  | 187.5  | 183.4  | 210.1  |
| 93.5    | 124.7  | 101.9  | 274.4  | 302.7  | 365.7  | 285.7  | 468.0  | 416.3  |
| 27.0    | 29.9   | 29.3   | 25.5   | 22.3   | 23.5   | 16.7   | 30.0   | 21.8   |
| 371.4   | 507.9  | 386.8  | 493.5  | 553.5  | 480.5  | 711.3  | 991.5  | 966.0  |
| 250.1   | 246.4  | 192.8  | 166.0  | 168.2  | 180.9  | 174.2  | 228.2  | 202.9  |
| 242.6   | 275.7  | 185.3  | 515.0  | 329.2  | 332.8  | 229.2  | 142.6  | 184.8  |
| 642.9   | 1014.7 | 879.8  | 281.9  | 234.8  | 255.3  | 345.3  | 472.1  | 434.1  |
| 83.3    | 135.2  | 87.9   | 95.5   | 92.8   | 105.4  | 77.5   | 86.4   | 86.0   |
| 217.5   | 257.9  | 201.1  | 216.7  | 158.5  | 191.1  | 173.4  | 162.9  | 162.5  |
| 2227.9  | 2697.7 | 1956.0 | 897.2  | 816.0  | 808.0  | 553.9  | 626.2  | 698.2  |
| 10445.9 | 9891.0 | 8534.5 | 9500.9 | 8696.2 | 9413.0 | 6370.3 | 6405.4 | 6550.9 |
| 160.9   | 175.7  | 120.3  | 213.1  | 222.9  | 235.4  | 290.4  | 497.9  | 414.3  |
| 138.1   | 157.0  | 114.4  | 88.6   | 57.7   | 56.5   | 68.0   | 57.5   | 64.4   |
| 39.1    | 52.8   | 44.4   | 66.2   | 40.5   | 63.6   | 21.7   | 19.1   | 32.4   |
| 41.8    | 68.3   | 116.9  | 20.3   | 15.4   | 17.0   | 16.7   | 12.0   | 15.0   |
| 521.0   | 530.1  | 386.3  | 234.1  | 185.7  | 216.0  | 148.3  | 139.9  | 172.9  |
| 281.5   | 337.9  | 223.7  | 100.7  | 79.0   | 100.2  | 77.2   | 67.1   | 77.6   |
| 1350.7  | 1744.3 | 1234.3 | 2154.4 | 1732.2 | 1889.3 | 890.2  | 822.2  | 933.1  |
| 78.3    | 145.2  | 105.0  | 57.5   | 35.7   | 43.4   | 34.6   | 39.7   | 44.0   |
| 271.5   | 377.5  | 274.9  | 211.5  | 164.4  | 165.5  | 131.6  | 147.4  | 144.8  |
| 176.5   | 278.2  | 271.1  | 11.6   | 17.3   | 22.9   | 4.8    | 27.9   | 18.9   |
| 55.9    | 84.2   | 72.7   | 10.7   | 16.3   | 10.4   | 4.6    | 17.8   | 15.3   |
| 312.6   | 343.8  | 243.9  | 116.3  | 103.2  | 84.3   | 139.3  | 165.3  | 172.7  |
| 13.1    | 27.8   | 22.7   | 17.7   | 13.9   | 8.9    | 15.7   | 15.0   | 21.1   |
| 34.4    | 42.6   | 37.9   | 388.0  | 332.9  | 328.4  | 94.6   | 135.4  | 150.2  |
| 16.9    | 21.4   | 8.7    | 6.7    | 6.4    | 6.7    | 1.6    | 0.6    | 3.2    |
| 10.8    | 18.0   | 14.1   | 24.0   | 26.3   | 25.8   | 10.9   | 13.4   | 10.7   |
| 708.1   | 1053.6 | 1007.5 | 55.0   | 42.3   | 46.4   | 37.7   | 26.3   | 41.3   |
| 12.3    | 13.4   | 6.5    | 11.5   | 6.0    | 7.6    | 2.7    | 0.4    | 2.4    |
| 734.4   | 823.0  | 485.3  | 459.9  | 212.4  | 213.0  | 249.7  | 134.2  | 189.9  |
| 515.3   | 593.6  | 324.4  | 329.4  | 137.7  | 156.8  | 168.9  | 69.8   | 103.1  |
| 535.4   | 737.4  | 452.1  | 2839.5 | 2108.9 | 2399.5 | 1614.6 | 1508.0 | 1797.0 |
| 575.5   | 490.1  | 411.8  | 20.7   | 15.6   | 10.2   | 7.6    | 4.3    | 5.4    |
| 5692.2  | 6484.7 | 5090.6 | 5193.8 | 4229.8 | 4705.4 | 2927.8 | 2411.6 | 2988.7 |
| 256.7   | 311.1  | 249.9  | 127.9  | 104.9  | 105.0  | 100.3  | 101.7  | 102.3  |
| 3.8     | 6.7    | 7.5    | 80.1   | 55.9   | 56.2   | 55.5   | 32.4   | 43.8   |
| 5.8     | 2.4    | 6.9    | 10.0   | 12.3   | 19.9   | 14.2   | 17.8   | 21.0   |
| 248.2   | 375.6  | 259.7  | 153.4  | 178.3  | 144.9  | 130.6  | 154.6  | 168.5  |
| 819.3   | 1057.6 | 968.8  | 347.8  | 282.7  | 261.8  | 210.0  | 257.6  | 247.6  |
| 1627.6  | 2008.8 | 1733.0 | 271.5  | 188.6  | 199.7  | 472.2  | 460.3  | 518.2  |
| 214.4   | 303.6  | 231.2  | 142.6  | 140.1  | 172.3  | 82.8   | 143.4  | 134.3  |

|        |        |        |        |        |        |        |        |        |
|--------|--------|--------|--------|--------|--------|--------|--------|--------|
| 291.6  | 319.4  | 219.4  | 114.5  | 85.6   | 82.8   | 79.9   | 78.8   | 96.3   |
| 416.6  | 539.3  | 426.3  | 186.5  | 142.2  | 131.1  | 181.4  | 223.8  | 248.1  |
| 747.7  | 904.6  | 687.8  | 489.4  | 402.3  | 456.6  | 395.6  | 348.8  | 377.7  |
| 65.2   | 69.0   | 78.6   | 48.4   | 36.1   | 48.6   | 42.4   | 41.3   | 40.7   |
| 30.3   | 47.8   | 37.2   | 31.0   | 20.6   | 20.7   | 22.0   | 22.0   | 21.3   |
| 281.9  | 358.9  | 309.7  | 57.4   | 50.2   | 47.3   | 86.6   | 82.1   | 84.6   |
| 311.1  | 452.4  | 331.4  | 280.2  | 229.8  | 242.3  | 261.5  | 268.5  | 287.8  |
| 835.7  | 1110.7 | 862.5  | 204.5  | 168.1  | 181.1  | 176.3  | 154.9  | 209.8  |
| 412.6  | 485.8  | 355.4  | 323.5  | 271.7  | 291.6  | 240.4  | 260.8  | 282.0  |
| 179.2  | 235.2  | 132.0  | 161.6  | 139.3  | 148.7  | 78.2   | 87.8   | 102.7  |
| 35.3   | 51.3   | 25.6   | 192.3  | 133.9  | 147.8  | 78.0   | 75.3   | 96.1   |
| 150.6  | 166.4  | 220.3  | 33.1   | 34.4   | 31.2   | 49.4   | 39.5   | 47.3   |
| 195.2  | 237.5  | 166.6  | 206.5  | 222.5  | 244.7  | 193.9  | 162.2  | 175.7  |
| 5.7    | 16.1   | 3.5    | 60.2   | 48.6   | 51.5   | 36.0   | 31.9   | 35.6   |
| 1.5    | 1.8    | 1.6    | 19.7   | 4.6    | 4.4    | 2.9    | 15.6   | 2.9    |
| 125.2  | 168.7  | 145.8  | 126.3  | 86.2   | 94.4   | 91.5   | 89.7   | 96.2   |
| 177.7  | 226.4  | 127.5  | 113.8  | 70.2   | 106.8  | 64.5   | 73.0   | 73.4   |
| 15.0   | 75.1   | 115.2  | 858.5  | 906.8  | 1218.6 | 800.6  | 917.8  | 1093.0 |
| 2018.2 | 2216.8 | 1735.7 | 3347.1 | 2714.7 | 3073.0 | 1811.9 | 1771.3 | 1907.1 |
| 188.5  | 248.5  | 209.4  | 131.1  | 101.0  | 109.0  | 95.1   | 98.5   | 115.3  |
| 491.2  | 643.3  | 570.3  | 428.3  | 354.1  | 432.1  | 237.9  | 273.3  | 307.2  |
| 1.1    | 1.2    | 1.1    | 141.0  | 103.1  | 114.2  | 62.2   | 67.3   | 79.2   |
| 695.3  | 961.6  | 723.4  | 653.3  | 586.4  | 628.3  | 350.9  | 289.3  | 351.1  |
| 2.5    | 9.1    | 9.0    | 82.7   | 81.4   | 103.5  | 98.0   | 136.1  | 118.8  |
| 366.9  | 496.6  | 394.9  | 2363.1 | 1999.5 | 2234.2 | 1677.5 | 1710.8 | 1808.1 |
| 811.3  | 853.2  | 742.4  | 1761.2 | 1456.6 | 1466.9 | 1193.1 | 1297.0 | 1417.8 |
| 62.8   | 97.9   | 99.6   | 27.3   | 18.5   | 29.8   | 9.5    | 4.5    | 15.7   |
| 58.0   | 52.5   | 42.3   | 234.4  | 213.1  | 239.9  | 123.2  | 145.6  | 153.8  |
| 4320.0 | 4618.6 | 3039.3 | 3587.9 | 3292.8 | 3355.0 | 2844.6 | 2936.2 | 3352.9 |
| 8329.3 | 8107.0 | 6079.4 | 8488.0 | 7453.3 | 7184.8 | 4428.8 | 4138.3 | 4373.2 |
| 73.4   | 90.0   | 81.8   | 486.0  | 365.6  | 376.4  | 442.7  | 476.9  | 478.6  |
| 157.6  | 200.5  | 169.4  | 552.4  | 481.1  | 551.5  | 315.8  | 404.1  | 373.1  |
| 342.5  | 418.7  | 397.9  | 500.3  | 497.0  | 462.8  | 352.4  | 336.6  | 362.5  |
| 601.0  | 695.4  | 520.1  | 715.0  | 556.0  | 637.3  | 325.5  | 281.6  | 343.2  |
| 141.4  | 181.2  | 90.0   | 127.7  | 92.6   | 88.6   | 49.8   | 38.9   | 46.8   |
| 90.7   | 126.5  | 90.2   | 55.1   | 38.8   | 46.5   | 50.5   | 34.9   | 37.6   |
| 53.1   | 71.2   | 48.8   | 42.4   | 40.3   | 47.6   | 33.9   | 43.9   | 42.4   |
| 140.0  | 304.9  | 282.6  | 88.1   | 57.8   | 75.8   | 92.1   | 72.1   | 90.3   |
| 80.7   | 134.4  | 104.9  | 77.0   | 81.7   | 70.7   | 69.8   | 78.3   | 81.9   |
| 22.9   | 26.3   | 11.5   | 23.7   | 19.0   | 26.7   | 15.6   | 21.5   | 22.4   |
| 30.8   | 54.2   | 102.7  | 394.7  | 377.8  | 385.7  | 263.1  | 284.7  | 334.2  |
| 40.3   | 56.7   | 50.1   | 23.7   | 16.6   | 33.3   | 18.9   | 16.8   | 12.3   |
| 181.2  | 301.8  | 244.4  | 383.3  | 290.0  | 311.2  | 298.3  | 319.0  | 320.8  |
| 126.9  | 150.6  | 126.5  | 232.3  | 168.6  | 202.5  | 153.3  | 174.6  | 174.7  |
| 132.8  | 156.9  | 126.0  | 487.8  | 388.9  | 419.8  | 289.5  | 320.4  | 323.9  |
| 431.8  | 537.5  | 384.5  | 662.5  | 587.6  | 533.2  | 880.6  | 968.6  | 967.4  |
| 232.7  | 306.7  | 237.4  | 209.4  | 192.1  | 230.3  | 135.8  | 156.4  | 180.2  |
| 3.9    | 4.2    | 3.6    | 11.2   | 7.4    | 8.0    | 3.4    | 3.3    | 2.5    |
| 2.0    | 2.2    | 2.2    | 4.7    | 13.3   | 9.9    | 11.1   | 15.8   | 17.1   |
| 5.9    | 7.5    | 2.0    | 14.1   | 7.3    | 12.5   | 4.3    | 3.7    | 1.3    |
| 6.8    | 6.5    | 4.1    | 5.5    | 4.0    | 5.7    | 2.6    | 8.9    | 8.7    |
| 863.1  | 1040.1 | 858.2  | 521.0  | 434.6  | 446.2  | 578.0  | 637.1  | 674.0  |
| 3.1    | 3.0    | 4.5    | 7.9    | 8.2    | 8.5    | 3.2    | 2.9    | 1.3    |

|         |         |         |         |         |         |        |        |        |
|---------|---------|---------|---------|---------|---------|--------|--------|--------|
| 70.4    | 85.3    | 74.9    | 136.0   | 99.8    | 119.6   | 77.0   | 123.9  | 79.3   |
| 54.9    | 84.4    | 72.4    | 108.9   | 111.7   | 124.1   | 86.0   | 110.3  | 104.1  |
| 363.7   | 361.4   | 257.8   | 702.4   | 501.5   | 619.2   | 396.3  | 375.7  | 421.0  |
| 7.0     | 21.6    | 10.3    | 18.0    | 2.6     | 4.4     | 2.1    | 2.8    | 2.4    |
| 54.1    | 87.2    | 58.1    | 178.3   | 182.0   | 182.4   | 108.1  | 109.3  | 126.3  |
| 337.0   | 431.7   | 327.6   | 101.7   | 104.4   | 102.8   | 91.3   | 117.0  | 129.1  |
| 110.9   | 131.4   | 108.2   | 44.8    | 31.8    | 34.0    | 15.2   | 31.5   | 32.2   |
| 587.9   | 753.8   | 537.1   | 523.9   | 406.9   | 503.1   | 279.0  | 293.3  | 308.7  |
| 10885.6 | 9956.4  | 9896.2  | 6765.0  | 6321.7  | 6023.4  | 6111.3 | 6607.9 | 7073.8 |
| 19.3    | 28.2    | 25.3    | 72.5    | 82.9    | 65.0    | 42.6   | 62.8   | 63.5   |
| 543.3   | 782.5   | 865.9   | 68.1    | 85.0    | 87.0    | 62.8   | 85.6   | 64.4   |
| 817.4   | 1293.4  | 1248.8  | 130.9   | 141.0   | 144.4   | 112.6  | 140.8  | 137.4  |
| 13499.1 | 13151.2 | 12576.4 | 14689.9 | 13976.3 | 14691.0 | 8496.0 | 8412.4 | 8603.9 |
| 457.3   | 500.9   | 319.8   | 503.3   | 347.9   | 376.3   | 278.0  | 224.6  | 273.5  |
| 2209.9  | 2482.4  | 2064.7  | 1861.2  | 1574.4  | 1711.5  | 1396.8 | 1423.9 | 1558.7 |
| 33.9    | 39.3    | 23.1    | 51.1    | 45.4    | 46.1    | 33.5   | 24.9   | 28.3   |
| 1796.3  | 1858.6  | 1033.6  | 1310.8  | 773.5   | 824.0   | 769.3  | 535.5  | 642.8  |
| 33.4    | 45.4    | 44.0    | 59.0    | 59.6    | 45.9    | 19.3   | 23.4   | 19.0   |
| 453.0   | 489.1   | 362.2   | 346.3   | 278.9   | 294.6   | 264.5  | 252.1  | 295.7  |
| 10.2    | 31.6    | 18.9    | 27.6    | 32.6    | 28.4    | 15.2   | 19.8   | 16.5   |
| 778.4   | 713.2   | 387.4   | 246.0   | 124.6   | 136.9   | 144.3  | 93.4   | 105.1  |
| 984.3   | 1362.2  | 1149.4  | 53.4    | 39.6    | 43.2    | 50.4   | 51.7   | 50.1   |
| 203.1   | 246.7   | 176.5   | 151.5   | 136.6   | 136.8   | 96.4   | 142.8  | 126.3  |
| 2.3     | 2.9     | 1.8     | 11.9    | 7.9     | 9.9     | 2.1    | 2.7    | 5.2    |
| 21.6    | 25.2    | 26.9    | 31.2    | 33.3    | 42.9    | 15.1   | 12.3   | 14.0   |
| 1083.7  | 1150.7  | 714.7   | 784.9   | 566.8   | 625.6   | 552.7  | 412.7  | 510.7  |
| 164.2   | 124.5   | 70.6    | 88.2    | 72.3    | 67.8    | 79.7   | 49.7   | 59.8   |
| 150.2   | 171.8   | 123.5   | 247.4   | 205.4   | 277.1   | 140.0  | 171.3  | 193.6  |
| 17.0    | 45.3    | 19.7    | 15.8    | 13.9    | 23.8    | 9.5    | 14.1   | 5.7    |
| 5778.3  | 5780.5  | 5024.8  | 3176.8  | 2680.8  | 2882.0  | 2173.4 | 2005.1 | 2250.8 |
| 2498.3  | 2736.7  | 2120.6  | 785.3   | 671.7   | 657.7   | 894.3  | 835.0  | 997.8  |
| 36.0    | 30.9    | 25.6    | 145.1   | 134.4   | 167.3   | 78.7   | 143.7  | 110.0  |
| 254.4   | 390.5   | 276.2   | 169.0   | 143.9   | 157.0   | 116.5  | 119.7  | 108.6  |
| 416.6   | 558.2   | 427.3   | 230.4   | 206.6   | 242.4   | 181.9  | 167.2  | 200.4  |
| 60.3    | 112.9   | 87.1    | 30.6    | 34.6    | 40.6    | 26.6   | 83.0   | 46.0   |
| 528.8   | 572.7   | 457.0   | 60.5    | 34.6    | 52.7    | 29.9   | 23.2   | 31.9   |
| 5.2     | 9.2     | 4.4     | 28.5    | 14.2    | 17.3    | 16.1   | 11.9   | 2.6    |
| 182.6   | 204.7   | 150.6   | 21.7    | 19.1    | 23.8    | 16.7   | 17.9   | 18.6   |
| 2.2     | 9.2     | 4.0     | 27.1    | 22.1    | 33.7    | 15.3   | 22.7   | 24.6   |
| 283.0   | 351.6   | 254.7   | 129.0   | 119.2   | 126.0   | 102.7  | 143.2  | 140.8  |
| 368.7   | 319.7   | 129.6   | 30.8    | 28.8    | 44.8    | 28.4   | 38.3   | 34.1   |
| 10.2    | 16.4    | 13.2    | 29.9    | 41.7    | 47.6    | 24.6   | 35.2   | 33.3   |
| 28.3    | 36.7    | 33.6    | 40.0    | 25.0    | 46.0    | 15.4   | 17.8   | 17.0   |
| 203.6   | 236.6   | 173.1   | 140.1   | 138.7   | 137.6   | 98.3   | 87.7   | 110.6  |
| 718.6   | 895.4   | 621.7   | 50.1    | 28.8    | 43.4    | 25.5   | 24.2   | 35.6   |
| 204.3   | 236.8   | 170.9   | 39.5    | 44.3    | 48.2    | 56.8   | 48.8   | 58.1   |
| 80.1    | 96.5    | 70.9    | 108.7   | 74.8    | 80.5    | 103.3  | 90.6   | 85.4   |
| 105.1   | 111.4   | 62.7    | 76.2    | 82.5    | 78.1    | 50.5   | 46.5   | 69.9   |
| 15.1    | 17.0    | 12.6    | 23.0    | 12.1    | 25.3    | 10.2   | 7.6    | 13.2   |
| 18.3    | 3.7     | 9.1     | 17.9    | 12.6    | 7.3     | 12.0   | 5.7    | 13.8   |
| 5.2     | 3.6     | 5.4     | 18.1    | 14.0    | 10.5    | 9.8    | 4.4    | 7.1    |
| 253.8   | 332.1   | 250.1   | 346.0   | 290.4   | 327.3   | 180.1  | 190.1  | 196.5  |
| 114.9   | 138.7   | 78.6    | 200.2   | 136.6   | 147.1   | 91.5   | 68.4   | 88.0   |

|        |        |        |        |        |        |        |        |        |
|--------|--------|--------|--------|--------|--------|--------|--------|--------|
| 12.9   | 14.6   | 13.1   | 17.0   | 17.4   | 11.3   | 8.5    | 11.2   | 13.7   |
| 351.3  | 359.5  | 215.2  | 39.8   | 45.5   | 60.2   | 77.0   | 67.4   | 75.1   |
| 377.8  | 357.3  | 270.5  | 150.3  | 125.3  | 129.7  | 78.1   | 68.2   | 76.9   |
| 679.5  | 757.4  | 434.5  | 423.9  | 299.5  | 327.7  | 322.8  | 295.9  | 354.4  |
| 2418.5 | 2799.3 | 1785.2 | 967.9  | 712.7  | 723.6  | 883.7  | 686.8  | 822.3  |
| 88.7   | 91.4   | 57.2   | 79.4   | 51.6   | 63.4   | 46.5   | 45.2   | 47.1   |
| 8.0    | 3.5    | 7.2    | 243.3  | 190.0  | 235.0  | 163.3  | 176.8  | 193.4  |
| 448.7  | 582.5  | 332.7  | 259.8  | 202.0  | 217.6  | 192.6  | 136.1  | 158.2  |
| 1368.0 | 1574.8 | 975.2  | 535.1  | 371.2  | 340.3  | 400.8  | 316.5  | 373.8  |
| 692.0  | 542.6  | 165.7  | 468.4  | 226.2  | 254.7  | 252.4  | 136.7  | 179.0  |
| 278.5  | 401.5  | 277.6  | 304.7  | 205.3  | 232.6  | 158.8  | 157.8  | 155.5  |
| 630.9  | 818.7  | 561.1  | 524.4  | 433.6  | 434.0  | 354.3  | 361.0  | 399.7  |
| 360.1  | 399.1  | 336.9  | 249.1  | 227.5  | 215.6  | 183.9  | 208.2  | 201.1  |
| 21.7   | 46.5   | 9.6    | 41.3   | 32.8   | 31.6   | 4.8    | 16.1   | 16.5   |
| 3.2    | 6.2    | 3.3    | 17.0   | 10.5   | 7.1    | 4.1    | 3.3    | 4.4    |
| 199.4  | 236.8  | 155.8  | 187.7  | 162.0  | 166.2  | 150.6  | 147.7  | 163.5  |
| 79.4   | 143.8  | 86.2   | 145.8  | 133.7  | 170.5  | 96.8   | 100.2  | 76.7   |
| 341.5  | 406.2  | 315.6  | 37.2   | 36.8   | 46.8   | 29.6   | 48.2   | 41.9   |
| 205.9  | 311.7  | 398.4  | 30.5   | 21.2   | 28.9   | 15.0   | 13.3   | 23.6   |
| 120.3  | 134.7  | 91.1   | 44.8   | 28.4   | 43.1   | 43.8   | 27.9   | 37.9   |
| 555.7  | 679.7  | 418.1  | 543.1  | 409.1  | 432.5  | 344.8  | 287.8  | 363.6  |
| 36.0   | 40.3   | 41.5   | 122.5  | 111.6  | 118.0  | 93.1   | 136.5  | 145.5  |
| 326.3  | 287.3  | 229.6  | 7.6    | 5.7    | 17.0   | 12.3   | 4.6    | 9.3    |
| 71.6   | 109.0  | 58.6   | 22.5   | 25.9   | 20.3   | 10.8   | 16.5   | 12.1   |
| 741.8  | 984.0  | 687.3  | 212.0  | 163.2  | 169.3  | 250.5  | 194.2  | 219.6  |
| 902.5  | 1081.1 | 803.6  | 7.7    | 14.6   | 9.6    | 8.0    | 1.0    | 4.6    |
| 2809.1 | 3207.3 | 2246.8 | 2851.4 | 2256.3 | 2406.0 | 1884.2 | 1756.5 | 1947.8 |
| 380.2  | 529.5  | 368.6  | 187.1  | 161.8  | 217.8  | 161.8  | 160.0  | 152.8  |
| 306.6  | 373.8  | 278.3  | 411.4  | 357.6  | 456.9  | 291.0  | 370.3  | 348.3  |
| 466.0  | 550.2  | 352.4  | 231.2  | 180.6  | 176.3  | 177.8  | 196.1  | 201.1  |
| 2.3    | 2.2    | 2.0    | 2.4    | 2.8    | 4.0    | 3.8    | 2.4    | 2.1    |
| 29.7   | 49.8   | 75.1   | 8.2    | 14.3   | 16.6   | 6.1    | 17.8   | 9.6    |
| 28.8   | 31.2   | 17.4   | 37.8   | 33.5   | 25.1   | 26.2   | 2.4    | 17.5   |
| 97.8   | 149.2  | 164.9  | 27.3   | 30.0   | 36.6   | 14.0   | 40.5   | 30.6   |
| 19.4   | 32.0   | 12.4   | 39.4   | 28.8   | 41.6   | 34.9   | 26.9   | 36.1   |
| 5.8    | 1.5    | 1.2    | 8.2    | 5.3    | 2.5    | 2.8    | 1.3    | 1.4    |
| 245.5  | 342.3  | 262.8  | 271.8  | 248.1  | 243.8  | 189.1  | 204.2  | 220.9  |
| 4.8    | 8.9    | 4.9    | 36.4   | 15.6   | 15.6   | 10.8   | 16.6   | 5.0    |
| 200.9  | 242.2  | 174.2  | 257.4  | 172.6  | 209.0  | 133.4  | 143.6  | 145.2  |
| 305.3  | 401.1  | 307.1  | 205.4  | 169.0  | 196.4  | 156.5  | 159.6  | 167.6  |
| 1273.0 | 1490.2 | 1131.1 | 1802.2 | 1439.6 | 1531.2 | 772.1  | 654.3  | 777.5  |
| 28.8   | 31.8   | 23.3   | 15.2   | 11.7   | 9.4    | 18.9   | 13.8   | 13.5   |
| 1387.4 | 1692.9 | 1578.0 | 979.8  | 841.1  | 821.4  | 884.1  | 906.4  | 997.7  |
| 8.1    | 16.3   | 3.2    | 148.9  | 105.9  | 120.7  | 80.4   | 71.9   | 85.5   |
| 11.7   | 4.7    | 7.7    | 17.0   | 16.0   | 9.5    | 9.3    | 4.5    | 5.6    |
| 1.9    | 3.5    | 5.5    | 10.0   | 10.6   | 9.9    | 1.4    | 5.9    | 1.3    |
| 75.0   | 59.0   | 82.4   | 120.2  | 94.7   | 87.6   | 94.2   | 108.1  | 118.5  |
| 20.2   | 32.9   | 25.5   | 25.2   | 32.3   | 25.0   | 30.7   | 32.9   | 34.9   |
| 65.1   | 68.2   | 64.4   | 79.4   | 63.0   | 80.6   | 50.7   | 45.6   | 41.9   |
| 6547.4 | 6640.8 | 4740.7 | 4001.8 | 2810.8 | 3266.4 | 2504.3 | 1863.1 | 2249.4 |
| 26.4   | 25.5   | 42.3   | 16.0   | 20.5   | 11.9   | 3.3    | 15.4   | 12.7   |
| 16.7   | 22.2   | 25.0   | 45.6   | 9.6    | 16.1   | 3.4    | 18.0   | 12.9   |
| 65.6   | 90.8   | 87.2   | 73.5   | 66.7   | 78.0   | 38.9   | 53.6   | 62.7   |

|         |         |        |        |        |        |        |        |        |
|---------|---------|--------|--------|--------|--------|--------|--------|--------|
| 325.9   | 404.6   | 210.3  | 255.3  | 228.0  | 222.9  | 88.2   | 137.6  | 148.6  |
| 166.8   | 164.3   | 99.1   | 76.5   | 50.6   | 66.6   | 63.2   | 57.3   | 64.5   |
| 2.1     | 3.5     | 1.8    | 52.1   | 40.6   | 61.9   | 24.9   | 33.1   | 27.0   |
| 77.7    | 153.3   | 579.0  | 26.8   | 38.3   | 39.1   | 14.1   | 26.6   | 21.7   |
| 69.7    | 110.9   | 206.7  | 16.0   | 25.1   | 25.7   | 13.7   | 20.4   | 22.8   |
| 493.0   | 427.1   | 321.5  | 193.4  | 173.7  | 188.1  | 119.8  | 116.6  | 147.1  |
| 169.9   | 219.3   | 171.7  | 170.7  | 149.8  | 199.2  | 114.2  | 147.8  | 133.1  |
| 257.9   | 396.4   | 441.5  | 79.0   | 82.3   | 92.3   | 77.8   | 122.6  | 110.2  |
| 8071.9  | 9328.0  | 8695.1 | 4630.1 | 4966.2 | 5315.5 | 2896.9 | 3779.9 | 3699.7 |
| 766.3   | 862.9   | 523.6  | 401.1  | 330.1  | 318.8  | 338.5  | 313.2  | 350.8  |
| 808.8   | 946.3   | 475.3  | 292.2  | 213.4  | 262.2  | 216.5  | 196.3  | 228.4  |
| 98.1    | 133.1   | 111.0  | 148.1  | 126.1  | 152.3  | 73.3   | 74.2   | 85.1   |
| 53.5    | 48.4    | 45.9   | 88.5   | 65.1   | 67.4   | 34.6   | 42.6   | 53.3   |
| 14.9    | 12.5    | 14.6   | 34.9   | 20.2   | 36.4   | 6.1    | 13.6   | 7.7    |
| 39.7    | 31.2    | 28.0   | 41.4   | 32.2   | 48.1   | 26.9   | 18.7   | 12.2   |
| 6.8     | 4.4     | 2.0    | 269.9  | 208.1  | 218.0  | 144.5  | 107.5  | 146.2  |
| 42.1    | 59.1    | 53.7   | 77.6   | 89.2   | 80.1   | 51.3   | 64.0   | 78.0   |
| 91.9    | 131.6   | 121.6  | 373.0  | 332.5  | 339.6  | 183.3  | 201.3  | 229.7  |
| 7.5     | 2.9     | 1.6    | 7.6    | 8.1    | 4.2    | 0.9    | 7.6    | 2.3    |
| 348.3   | 512.0   | 512.6  | 386.6  | 367.0  | 380.5  | 245.4  | 320.7  | 298.3  |
| 228.7   | 250.6   | 174.5  | 278.2  | 210.5  | 224.1  | 210.2  | 219.0  | 228.8  |
| 4.5     | 11.3    | 2.3    | 17.4   | 4.9    | 12.5   | 5.5    | 3.8    | 12.0   |
| 45.1    | 85.4    | 57.7   | 9.5    | 7.0    | 7.9    | 10.3   | 3.6    | 14.0   |
| 18.1    | 43.8    | 17.2   | 49.0   | 53.3   | 44.7   | 28.3   | 29.8   | 5.9    |
| 1255.7  | 1424.2  | 984.4  | 627.2  | 500.9  | 562.8  | 409.7  | 319.8  | 425.7  |
| 21.2    | 46.3    | 35.1   | 141.6  | 126.3  | 129.9  | 48.9   | 79.0   | 78.1   |
| 19.6    | 51.8    | 9.8    | 22.4   | 11.8   | 37.2   | 10.4   | 14.5   | 12.9   |
| 86.7    | 102.6   | 71.1   | 31.8   | 29.8   | 31.3   | 30.3   | 27.9   | 25.6   |
| 97.1    | 94.5    | 51.3   | 62.5   | 29.3   | 35.8   | 39.3   | 42.6   | 44.4   |
| 662.4   | 1126.3  | 923.2  | 151.5  | 133.5  | 156.1  | 109.8  | 154.0  | 141.1  |
| 86.7    | 123.3   | 78.8   | 47.9   | 25.1   | 48.1   | 42.9   | 44.0   | 45.8   |
| 53.2    | 55.7    | 44.1   | 13.4   | 7.1    | 9.9    | 22.2   | 25.3   | 22.4   |
| 82.1    | 93.4    | 55.7   | 46.0   | 23.7   | 37.3   | 48.2   | 39.2   | 50.1   |
| 111.5   | 152.2   | 115.8  | 65.0   | 59.0   | 52.1   | 94.7   | 120.8  | 114.5  |
| 93.5    | 96.9    | 78.6   | 34.6   | 36.3   | 34.7   | 36.9   | 24.6   | 37.9   |
| 11625.1 | 10876.1 | 9207.2 | 8917.3 | 8208.7 | 8659.6 | 6384.7 | 6764.1 | 6873.8 |
| 182.7   | 233.2   | 195.4  | 144.9  | 135.4  | 152.0  | 85.3   | 98.1   | 98.9   |
| 87.1    | 83.6    | 69.0   | 58.1   | 42.2   | 47.6   | 30.8   | 18.5   | 29.8   |
| 10.7    | 21.6    | 1.9    | 19.4   | 30.2   | 36.9   | 20.0   | 20.0   | 30.4   |
| 35.9    | 51.3    | 55.5   | 65.6   | 65.5   | 64.5   | 31.1   | 46.5   | 46.9   |
| 3.0     | 6.9     | 0.7    | 6.5    | 15.4   | 9.0    | 5.3    | 3.1    | 3.1    |
| 973.7   | 1067.1  | 695.0  | 32.3   | 12.4   | 23.9   | 20.2   | 16.5   | 20.4   |
| 156.8   | 187.0   | 135.7  | 133.2  | 108.9  | 123.1  | 80.1   | 85.0   | 99.4   |
| 342.1   | 559.6   | 521.5  | 184.4  | 159.7  | 191.2  | 146.4  | 133.0  | 143.6  |
| 93.5    | 157.3   | 120.2  | 151.5  | 154.6  | 166.8  | 93.3   | 89.6   | 114.8  |
| 384.6   | 526.0   | 468.3  | 364.4  | 317.3  | 306.2  | 160.4  | 167.0  | 172.8  |
| 358.0   | 445.3   | 388.1  | 216.1  | 173.8  | 174.3  | 303.2  | 340.7  | 349.8  |
| 1496.9  | 1793.0  | 1027.1 | 391.1  | 224.6  | 232.8  | 385.2  | 260.3  | 288.0  |
| 129.5   | 211.6   | 174.7  | 132.1  | 137.1  | 156.8  | 114.7  | 142.4  | 148.8  |
| 173.5   | 126.1   | 63.1   | 26.9   | 25.4   | 28.2   | 22.5   | 21.0   | 14.7   |
| 471.0   | 501.7   | 297.8  | 683.4  | 573.6  | 534.0  | 427.1  | 432.8  | 481.6  |
| 123.1   | 167.4   | 103.0  | 300.1  | 254.8  | 264.1  | 168.0  | 169.0  | 175.5  |
| 22.2    | 26.3    | 20.5   | 49.2   | 35.0   | 60.5   | 26.1   | 21.1   | 23.5   |

|        |        |        |       |       |       |       |       |       |
|--------|--------|--------|-------|-------|-------|-------|-------|-------|
| 8.2    | 16.4   | 6.1    | 18.5  | 21.2  | 14.2  | 13.5  | 8.8   | 6.8   |
| 528.2  | 604.2  | 508.0  | 200.9 | 180.7 | 164.0 | 137.1 | 150.3 | 158.6 |
| 75.2   | 100.2  | 65.9   | 191.3 | 184.5 | 196.5 | 114.9 | 123.5 | 144.3 |
| 88.1   | 83.5   | 67.6   | 78.0  | 68.8  | 68.3  | 60.9  | 45.8  | 78.7  |
| 103.7  | 126.4  | 70.6   | 182.8 | 159.5 | 176.0 | 96.3  | 129.2 | 116.1 |
| 148.2  | 217.8  | 122.6  | 348.2 | 248.5 | 274.9 | 259.9 | 253.1 | 271.4 |
| 167.2  | 270.1  | 226.4  | 15.7  | 20.8  | 17.8  | 15.6  | 28.7  | 24.8  |
| 601.5  | 733.0  | 622.5  | 70.8  | 80.2  | 77.9  | 80.2  | 114.1 | 116.1 |
| 4.4    | 3.3    | 5.5    | 23.8  | 33.2  | 22.4  | 25.3  | 41.0  | 22.2  |
| 4.7    | 10.8   | 22.0   | 11.5  | 19.0  | 11.0  | 7.6   | 9.2   | 10.4  |
| 83.7   | 112.7  | 65.9   | 329.6 | 280.5 | 387.0 | 154.3 | 174.5 | 187.1 |
| 121.1  | 180.0  | 208.1  | 113.5 | 134.1 | 113.1 | 103.9 | 151.9 | 149.4 |
| 113.1  | 154.6  | 113.4  | 207.8 | 169.8 | 212.1 | 92.3  | 79.1  | 90.6  |
| 8.7    | 11.5   | 16.4   | 53.4  | 52.7  | 65.8  | 37.7  | 40.5  | 42.4  |
| 506.3  | 643.2  | 479.0  | 785.1 | 642.0 | 697.1 | 518.6 | 530.1 | 603.5 |
| 2.8    | 2.9    | 1.8    | 8.1   | 12.8  | 6.5   | 8.8   | 1.8   | 2.2   |
| 372.5  | 496.0  | 288.6  | 125.4 | 106.6 | 99.5  | 73.4  | 60.0  | 76.4  |
| 11.6   | 16.3   | 12.1   | 67.2  | 68.4  | 62.7  | 28.4  | 33.6  | 46.7  |
| 19.0   | 28.3   | 16.2   | 26.6  | 16.0  | 23.1  | 20.7  | 6.6   | 23.0  |
| 856.6  | 916.4  | 652.9  | 363.3 | 289.8 | 303.2 | 302.8 | 309.5 | 335.7 |
| 62.6   | 79.9   | 52.4   | 36.2  | 28.3  | 40.4  | 25.7  | 15.3  | 16.3  |
| 598.0  | 622.7  | 342.4  | 165.4 | 91.4  | 94.5  | 123.4 | 75.1  | 92.6  |
| 144.8  | 215.6  | 200.7  | 80.7  | 87.9  | 94.8  | 93.5  | 93.1  | 97.4  |
| 32.2   | 42.8   | 18.2   | 29.9  | 21.3  | 19.5  | 12.7  | 8.9   | 10.5  |
| 28.2   | 55.2   | 47.7   | 18.5  | 31.5  | 44.2  | 16.5  | 23.2  | 24.6  |
| 184.4  | 198.9  | 213.1  | 4.6   | 10.3  | 17.4  | 10.2  | 8.3   | 9.1   |
| 50.9   | 54.5   | 39.9   | 31.3  | 44.8  | 49.6  | 22.3  | 25.8  | 26.8  |
| 181.9  | 160.2  | 142.9  | 27.5  | 16.8  | 28.5  | 23.3  | 21.9  | 21.5  |
| 42.9   | 92.4   | 64.5   | 18.1  | 28.9  | 26.6  | 12.3  | 28.2  | 14.4  |
| 507.1  | 512.9  | 256.3  | 56.7  | 46.0  | 39.3  | 38.9  | 46.6  | 43.3  |
| 164.9  | 182.9  | 161.2  | 171.3 | 134.1 | 144.9 | 102.0 | 104.0 | 136.2 |
| 171.3  | 176.2  | 151.2  | 131.1 | 94.9  | 107.4 | 75.1  | 70.2  | 90.5  |
| 10.9   | 22.7   | 11.8   | 38.3  | 30.8  | 38.6  | 5.1   | 5.1   | 6.0   |
| 86.4   | 107.3  | 107.1  | 99.9  | 104.1 | 89.9  | 56.5  | 72.0  | 68.8  |
| 10.4   | 16.6   | 12.5   | 11.1  | 10.9  | 11.5  | 7.3   | 10.8  | 10.0  |
| 2.6    | 11.2   | 4.4    | 51.3  | 36.2  | 48.3  | 32.1  | 33.1  | 35.4  |
| 21.1   | 25.9   | 16.9   | 42.5  | 29.7  | 30.9  | 21.6  | 16.4  | 19.5  |
| 24.4   | 36.5   | 25.6   | 19.8  | 31.2  | 28.4  | 7.3   | 14.1  | 12.5  |
| 67.4   | 73.2   | 60.7   | 205.9 | 208.1 | 223.7 | 133.6 | 148.5 | 157.3 |
| 58.9   | 100.9  | 91.3   | 109.0 | 108.5 | 83.5  | 80.2  | 97.7  | 116.1 |
| 1.4    | 7.7    | 6.9    | 11.1  | 22.6  | 10.1  | 16.3  | 8.8   | 11.1  |
| 1465.6 | 1790.4 | 1542.6 | 60.9  | 56.4  | 74.4  | 41.5  | 44.0  | 58.7  |
| 3030.0 | 3320.7 | 3232.8 | 128.4 | 140.7 | 127.7 | 75.4  | 104.8 | 103.8 |
| 1.5    | 2.3    | 1.2    | 12.2  | 13.2  | 12.9  | 6.5   | 9.6   | 17.2  |
| 1.8    | 4.1    | 7.6    | 37.4  | 23.1  | 19.8  | 11.8  | 5.5   | 13.9  |
| 97.4   | 111.4  | 68.4   | 83.0  | 77.2  | 74.7  | 42.7  | 41.9  | 42.9  |
| 223.7  | 350.1  | 371.6  | 180.3 | 239.3 | 289.5 | 201.0 | 248.1 | 225.8 |
| 110.5  | 168.0  | 91.0   | 114.2 | 98.3  | 101.8 | 58.9  | 76.8  | 81.2  |
| 40.0   | 44.6   | 58.3   | 105.5 | 89.8  | 97.9  | 37.1  | 36.1  | 46.2  |
| 449.5  | 553.8  | 463.4  | 234.7 | 219.3 | 222.1 | 235.1 | 245.8 | 264.0 |
| 23.2   | 22.8   | 18.6   | 76.9  | 77.3  | 72.2  | 30.4  | 29.3  | 44.0  |
| 6.9    | 9.6    | 10.0   | 15.6  | 10.7  | 10.5  | 10.3  | 6.0   | 1.3   |
| 566.8  | 715.2  | 575.9  | 698.9 | 586.3 | 645.1 | 414.0 | 447.7 | 445.8 |

|        |        |        |        |        |        |        |        |        |
|--------|--------|--------|--------|--------|--------|--------|--------|--------|
| 95.9   | 107.3  | 72.6   | 32.6   | 28.2   | 46.3   | 65.2   | 63.0   | 72.2   |
| 1877.7 | 2111.6 | 1549.3 | 874.2  | 734.1  | 727.0  | 734.5  | 690.4  | 835.8  |
| 443.5  | 729.8  | 939.1  | 374.5  | 357.7  | 431.4  | 202.5  | 230.5  | 255.7  |
| 285.5  | 350.1  | 282.3  | 149.5  | 111.5  | 141.1  | 124.9  | 125.8  | 142.7  |
| 9.3    | 15.7   | 13.2   | 24.5   | 19.2   | 22.2   | 11.9   | 15.6   | 10.6   |
| 646.9  | 749.6  | 491.0  | 826.1  | 689.2  | 781.4  | 424.8  | 508.0  | 477.8  |
| 289.6  | 369.9  | 291.2  | 321.7  | 277.0  | 311.3  | 242.9  | 248.8  | 272.5  |
| 5.0    | 3.5    | 5.2    | 15.1   | 6.8    | 16.4   | 7.9    | 4.4    | 5.1    |
| 492.2  | 827.7  | 608.7  | 424.2  | 334.0  | 336.6  | 343.0  | 308.6  | 360.3  |
| 90.4   | 127.6  | 115.3  | 70.7   | 78.0   | 78.2   | 33.7   | 49.3   | 49.1   |
| 193.2  | 272.5  | 232.7  | 88.6   | 67.7   | 67.9   | 68.0   | 73.7   | 80.1   |
| 69.5   | 67.5   | 45.9   | 84.4   | 77.5   | 79.0   | 36.7   | 31.3   | 41.4   |
| 29.3   | 24.4   | 16.3   | 52.1   | 34.4   | 38.5   | 19.6   | 20.3   | 19.6   |
| 22.4   | 29.2   | 19.0   | 6.6    | 19.1   | 15.5   | 18.1   | 18.8   | 25.8   |
| 157.5  | 182.1  | 136.4  | 556.5  | 482.9  | 578.4  | 269.5  | 375.8  | 357.2  |
| 635.1  | 828.1  | 908.9  | 535.3  | 451.6  | 473.2  | 508.5  | 485.2  | 590.2  |
| 174.4  | 176.7  | 112.6  | 156.3  | 108.7  | 109.9  | 72.9   | 63.3   | 84.3   |
| 25.3   | 29.8   | 30.3   | 38.5   | 29.7   | 27.3   | 20.1   | 26.3   | 31.2   |
| 63.0   | 115.5  | 109.2  | 83.8   | 85.2   | 98.4   | 76.3   | 102.8  | 109.4  |
| 1016.6 | 1083.6 | 848.3  | 425.6  | 317.5  | 341.5  | 457.5  | 406.2  | 478.6  |
| 1.2    | 2.3    | 1.2    | 49.4   | 40.6   | 36.8   | 32.1   | 41.6   | 30.2   |
| 19.6   | 48.1   | 70.0   | 238.6  | 239.8  | 267.5  | 147.5  | 198.8  | 207.1  |
| 66.4   | 134.6  | 126.4  | 759.4  | 666.1  | 718.3  | 634.6  | 747.7  | 820.7  |
| 16.3   | 32.8   | 35.9   | 5.3    | 3.0    | 1.6    | 1.4    | 1.7    | 3.2    |
| 326.5  | 307.4  | 166.2  | 342.9  | 199.6  | 212.8  | 240.3  | 163.2  | 221.3  |
| 667.5  | 902.9  | 612.9  | 198.7  | 202.6  | 196.5  | 174.9  | 186.4  | 219.1  |
| 134.6  | 172.7  | 125.9  | 111.3  | 117.5  | 116.4  | 78.3   | 102.7  | 105.2  |
| 599.6  | 979.7  | 871.8  | 1609.6 | 1394.1 | 1535.7 | 965.7  | 1076.6 | 1126.2 |
| 44.9   | 57.5   | 35.8   | 47.1   | 31.4   | 32.4   | 23.0   | 21.7   | 21.8   |
| 670.1  | 808.6  | 656.3  | 511.7  | 394.5  | 443.7  | 313.4  | 263.8  | 300.0  |
| 1.6    | 7.1    | 4.5    | 2.9    | 4.3    | 6.0    | 2.7    | 0.5    | 0.4    |
| 5.1    | 8.4    | 4.0    | 8.2    | 2.5    | 8.4    | 5.3    | 0.9    | 0.4    |
| 1357.7 | 1529.4 | 1273.9 | 1359.6 | 1186.1 | 1501.9 | 865.8  | 892.3  | 896.5  |
| 16.0   | 13.0   | 12.4   | 25.2   | 23.1   | 34.9   | 8.5    | 11.1   | 10.0   |
| 846.5  | 786.9  | 380.0  | 160.3  | 108.7  | 122.0  | 173.9  | 139.0  | 163.7  |
| 137.1  | 195.9  | 174.1  | 100.6  | 98.6   | 100.9  | 49.0   | 62.9   | 68.5   |
| 2565.5 | 3619.2 | 3329.7 | 228.7  | 188.5  | 218.2  | 131.5  | 171.6  | 158.1  |
| 116.7  | 107.9  | 53.0   | 146.0  | 116.4  | 139.1  | 84.3   | 76.6   | 98.6   |
| 404.3  | 522.8  | 325.9  | 55.1   | 36.6   | 28.0   | 6.0    | 11.3   | 32.3   |
| 30.0   | 54.9   | 41.7   | 22.4   | 18.8   | 13.2   | 28.1   | 15.8   | 26.3   |
| 39.8   | 58.5   | 43.1   | 65.4   | 68.2   | 69.7   | 47.0   | 63.3   | 68.7   |
| 452.2  | 413.5  | 290.3  | 152.5  | 114.6  | 125.3  | 121.5  | 125.5  | 129.1  |
| 67.7   | 83.8   | 79.3   | 18.5   | 15.6   | 8.2    | 25.3   | 18.5   | 15.0   |
| 84.5   | 98.7   | 81.5   | 70.1   | 36.4   | 57.4   | 49.6   | 47.1   | 47.3   |
| 1958.1 | 2014.7 | 931.2  | 3144.0 | 2442.5 | 2810.8 | 2699.0 | 1933.9 | 2492.0 |
| 130.6  | 190.4  | 168.0  | 93.4   | 72.6   | 81.8   | 55.0   | 65.7   | 62.8   |
| 27.2   | 30.5   | 18.2   | 25.5   | 30.9   | 28.8   | 16.6   | 23.3   | 22.1   |
| 275.1  | 400.6  | 287.5  | 254.6  | 235.6  | 277.3  | 160.9  | 154.0  | 194.1  |
| 153.4  | 148.4  | 82.9   | 143.7  | 97.4   | 114.1  | 89.6   | 51.4   | 74.6   |
| 2.2    | 1.2    | 2.4    | 8.6    | 3.6    | 4.8    | 1.0    | 1.7    | 0.9    |
| 45.5   | 68.1   | 31.7   | 63.5   | 45.6   | 32.4   | 32.2   | 9.0    | 36.4   |
| 19.7   | 28.8   | 10.6   | 38.2   | 20.6   | 29.4   | 9.8    | 18.2   | 25.7   |
| 33.5   | 21.0   | 6.4    | 39.1   | 48.8   | 32.8   | 39.3   | 34.2   | 35.1   |



|         |         |        |        |        |        |        |        |        |
|---------|---------|--------|--------|--------|--------|--------|--------|--------|
| 1.0     | 2.2     | 1.8    | 3.6    | 2.1    | 3.4    | 1.5    | 6.3    | 3.9    |
| 10.7    | 11.0    | 10.6   | 88.7   | 91.7   | 113.7  | 55.1   | 70.2   | 71.9   |
| 1121.2  | 1361.9  | 1175.9 | 211.9  | 159.4  | 182.1  | 164.8  | 163.2  | 172.2  |
| 813.3   | 880.5   | 542.4  | 853.2  | 698.9  | 822.1  | 606.2  | 648.6  | 738.6  |
| 74.3    | 94.3    | 72.6   | 34.8   | 21.7   | 39.7   | 21.0   | 25.3   | 26.3   |
| 80.4    | 78.4    | 49.8   | 128.7  | 102.5  | 109.6  | 27.9   | 29.1   | 32.0   |
| 4.8     | 4.0     | 8.4    | 65.0   | 35.6   | 54.3   | 32.2   | 14.3   | 25.8   |
| 1095.3  | 980.5   | 359.4  | 161.4  | 116.0  | 112.1  | 76.0   | 60.6   | 65.5   |
| 10321.2 | 10683.0 | 9622.3 | 7775.3 | 7011.1 | 6752.4 | 5064.4 | 4971.8 | 5206.8 |
| 292.3   | 542.8   | 1859.6 | 107.4  | 136.4  | 148.3  | 51.2   | 85.8   | 72.1   |
| 276.7   | 315.2   | 253.2  | 279.3  | 227.2  | 216.9  | 269.6  | 355.2  | 318.0  |
| 90.6    | 154.3   | 144.4  | 366.1  | 349.9  | 243.4  | 52.9   | 49.9   | 53.1   |
| 76.4    | 106.1   | 88.7   | 258.7  | 216.7  | 236.0  | 122.4  | 170.0  | 152.7  |
| 74.9    | 102.7   | 73.6   | 217.2  | 190.5  | 200.2  | 115.1  | 148.7  | 166.7  |
| 71.3    | 95.3    | 101.4  | 28.5   | 23.9   | 26.5   | 17.8   | 26.4   | 21.8   |
| 0.6     | 0.8     | 0.6    | 3.9    | 3.6    | 5.0    | 0.6    | 0.4    | 0.8    |
| 0.4     | 4.0     | 1.1    | 4.3    | 7.9    | 6.6    | 4.5    | 2.7    | 0.9    |
| 8351.9  | 8777.0  | 7817.4 | 7418.1 | 6511.5 | 6967.4 | 3945.1 | 3878.2 | 4264.2 |
| 965.8   | 1244.5  | 953.0  | 409.7  | 408.3  | 404.7  | 323.6  | 454.0  | 457.9  |
| 359.6   | 365.5   | 265.8  | 68.8   | 50.4   | 67.2   | 46.7   | 40.5   | 53.4   |
| 146.3   | 198.8   | 174.4  | 23.4   | 12.4   | 13.9   | 15.4   | 13.5   | 12.9   |
| 2431.0  | 2609.8  | 1658.7 | 1730.7 | 1382.9 | 1555.0 | 1387.6 | 1465.1 | 1588.7 |
| 155.7   | 267.7   | 293.4  | 78.9   | 70.6   | 94.2   | 50.8   | 67.6   | 64.6   |
| 2.9     | 1.1     | 0.9    | 11.6   | 5.9    | 18.5   | 1.2    | 2.4    | 3.1    |
| 56.6    | 53.0    | 46.0   | 42.8   | 22.5   | 51.3   | 36.8   | 22.9   | 23.3   |
| 67.6    | 105.9   | 106.4  | 78.2   | 81.6   | 67.8   | 52.5   | 79.3   | 80.8   |
| 830.5   | 994.1   | 635.5  | 563.4  | 486.4  | 505.0  | 411.5  | 456.6  | 484.2  |
| 5657.0  | 6449.5  | 5528.3 | 4764.6 | 4140.1 | 4402.1 | 2663.7 | 2533.1 | 2804.0 |
| 39.7    | 52.2    | 42.6   | 53.2   | 59.0   | 50.7   | 31.7   | 41.2   | 59.2   |
| 75.2    | 79.4    | 62.5   | 86.5   | 82.3   | 93.3   | 72.7   | 42.8   | 68.2   |
| 1.1     | 1.7     | 2.2    | 2.0    | 1.8    | 3.2    | 3.7    | 2.5    | 1.2    |
| 157.0   | 183.9   | 149.9  | 72.9   | 45.3   | 49.5   | 45.9   | 43.7   | 40.2   |
| 13.3    | 6.8     | 11.5   | 22.4   | 8.4    | 11.0   | 10.0   | 9.9    | 6.4    |
| 396.8   | 349.9   | 218.7  | 100.2  | 97.5   | 86.5   | 86.2   | 108.8  | 116.7  |
| 1001.3  | 1074.3  | 811.9  | 236.7  | 226.2  | 250.0  | 279.9  | 324.2  | 338.9  |
| 411.3   | 522.2   | 414.3  | 343.6  | 279.8  | 293.8  | 281.1  | 260.3  | 292.1  |
| 23.8    | 49.2    | 64.3   | 24.0   | 21.6   | 23.2   | 11.2   | 29.3   | 14.6   |
| 273.8   | 334.3   | 266.6  | 289.6  | 255.6  | 262.3  | 251.1  | 253.4  | 272.1  |
| 9491.0  | 10626.3 | 9334.2 | 9351.4 | 8694.8 | 8865.9 | 5480.1 | 5399.2 | 5794.5 |
| 285.8   | 310.8   | 156.3  | 196.7  | 122.1  | 144.1  | 100.4  | 76.8   | 93.3   |
| 381.4   | 502.1   | 303.4  | 162.9  | 109.8  | 111.3  | 93.7   | 74.9   | 95.8   |
| 18.7    | 22.3    | 10.7   | 24.3   | 36.4   | 31.9   | 21.0   | 24.8   | 17.3   |
| 1.1     | 3.3     | 4.7    | 11.7   | 5.6    | 6.7    | 14.1   | 1.6    | 6.0    |
| 7.1     | 4.1     | 5.6    | 12.2   | 10.7   | 11.1   | 5.7    | 4.1    | 5.1    |
| 196.8   | 224.8   | 149.0  | 52.1   | 48.9   | 52.8   | 18.4   | 36.2   | 23.1   |
| 71.5    | 77.0    | 65.0   | 218.8  | 160.1  | 164.6  | 116.0  | 122.2  | 139.5  |
| 128.3   | 178.4   | 126.3  | 12.2   | 10.1   | 5.3    | 11.5   | 18.2   | 11.3   |
| 190.2   | 221.2   | 179.9  | 29.8   | 24.0   | 26.7   | 16.4   | 19.0   | 17.6   |
| 86.9    | 78.6    | 61.8   | 152.4  | 112.2  | 124.0  | 79.6   | 75.9   | 80.3   |
| 22.0    | 35.4    | 35.2   | 84.5   | 64.5   | 64.1   | 48.9   | 47.1   | 55.6   |
| 75.9    | 69.3    | 74.3   | 117.5  | 96.9   | 99.1   | 51.8   | 51.8   | 54.6   |
| 561.1   | 733.8   | 683.1  | 796.6  | 738.8  | 815.1  | 393.7  | 513.3  | 501.9  |
| 490.1   | 568.6   | 452.6  | 367.3  | 246.6  | 259.6  | 278.7  | 267.8  | 262.5  |

|         |         |         |         |         |         |        |        |        |
|---------|---------|---------|---------|---------|---------|--------|--------|--------|
| 165.6   | 246.0   | 163.6   | 139.9   | 118.0   | 114.6   | 126.1  | 101.5  | 127.2  |
| 111.8   | 135.0   | 92.0    | 66.3    | 55.6    | 68.9    | 54.1   | 62.5   | 61.6   |
| 101.4   | 115.6   | 90.1    | 60.7    | 50.8    | 67.1    | 27.1   | 38.3   | 27.2   |
| 2.3     | 1.2     | 1.5     | 5.5     | 6.6     | 1.8     | 3.1    | 4.5    | 8.3    |
| 204.8   | 217.8   | 155.6   | 131.3   | 118.7   | 121.5   | 84.4   | 127.3  | 114.6  |
| 48.7    | 127.3   | 190.4   | 34.5    | 40.5    | 51.9    | 45.3   | 68.7   | 59.5   |
| 305.0   | 432.6   | 305.6   | 575.9   | 556.0   | 640.3   | 347.2  | 408.2  | 447.0  |
| 5409.8  | 6176.9  | 4842.9  | 1457.9  | 1122.7  | 1316.7  | 976.6  | 805.6  | 973.2  |
| 3.7     | 34.7    | 27.1    | 1177.6  | 959.5   | 1057.2  | 475.7  | 476.2  | 497.4  |
| 8.2     | 9.4     | 0.8     | 63.7    | 47.8    | 60.0    | 28.0   | 27.3   | 30.2   |
| 72.0    | 109.1   | 92.7    | 91.3    | 59.4    | 57.5    | 58.7   | 56.3   | 50.3   |
| 119.1   | 129.3   | 122.5   | 23.6    | 13.2    | 23.4    | 19.0   | 19.4   | 26.4   |
| 1877.6  | 2030.7  | 1138.4  | 1130.5  | 877.2   | 864.7   | 1521.1 | 1354.2 | 1505.3 |
| 270.5   | 408.2   | 356.9   | 1614.2  | 1427.0  | 1628.2  | 909.8  | 1114.2 | 1101.5 |
| 13.3    | 17.9    | 27.0    | 26.4    | 17.0    | 15.0    | 7.4    | 14.0   | 10.7   |
| 43.4    | 58.8    | 24.3    | 224.9   | 170.4   | 179.7   | 142.5  | 140.4  | 154.5  |
| 626.6   | 891.1   | 758.7   | 944.3   | 801.4   | 952.9   | 695.6  | 651.1  | 762.4  |
| 41.4    | 40.1    | 24.7    | 77.3    | 54.5    | 50.5    | 34.3   | 34.4   | 40.1   |
| 362.0   | 386.5   | 236.1   | 161.4   | 94.7    | 111.4   | 92.6   | 92.3   | 102.0  |
| 63.4    | 81.9    | 61.9    | 14.7    | 18.6    | 15.4    | 9.0    | 8.4    | 18.0   |
| 127.1   | 239.7   | 226.1   | 246.1   | 192.7   | 206.9   | 171.8  | 110.5  | 143.4  |
| 4.6     | 7.2     | 3.0     | 96.8    | 118.2   | 155.4   | 68.3   | 186.6  | 123.2  |
| 11247.3 | 12496.5 | 10806.5 | 11113.5 | 10155.9 | 10881.7 | 6258.4 | 6113.6 | 6706.2 |
| 5.2     | 6.5     | 15.3    | 16.0    | 2.9     | 8.4     | 7.6    | 10.3   | 9.3    |
| 1.4     | 4.8     | 3.2     | 2.3     | 3.5     | 12.5    | 1.0    | 2.7    | 1.2    |
| 4.9     | 4.4     | 3.4     | 24.5    | 53.5    | 55.9    | 33.0   | 55.9   | 50.4   |
| 29.6    | 36.2    | 15.5    | 18.4    | 14.0    | 12.2    | 21.1   | 7.6    | 15.2   |
| 51.7    | 80.3    | 66.8    | 36.6    | 16.5    | 34.4    | 33.6   | 45.4   | 34.7   |
| 71.6    | 98.7    | 64.5    | 49.8    | 45.0    | 56.0    | 52.5   | 70.0   | 54.0   |
| 2538.7  | 2679.5  | 2331.0  | 38.3    | 26.4    | 34.4    | 18.0   | 16.6   | 28.5   |
| 32.1    | 26.7    | 22.3    | 33.0    | 26.2    | 51.4    | 27.1   | 21.5   | 33.2   |
| 2.9     | 3.3     | 3.7     | 3.4     | 9.2     | 14.3    | 3.0    | 8.9    | 15.3   |
| 134.4   | 145.3   | 104.6   | 94.2    | 73.7    | 64.8    | 116.9  | 93.8   | 121.4  |
| 2.1     | 1.1     | 3.9     | 7.3     | 3.5     | 4.8     | 3.9    | 9.6    | 4.9    |
| 13.1    | 14.1    | 9.9     | 19.3    | 13.1    | 10.8    | 9.5    | 6.8    | 13.5   |
| 229.6   | 265.7   | 113.2   | 340.5   | 256.1   | 259.7   | 257.6  | 177.2  | 214.5  |
| 17.3    | 15.2    | 12.3    | 114.7   | 113.5   | 106.3   | 93.2   | 105.3  | 110.3  |
| 7.5     | 25.3    | 38.1    | 3.5     | 10.8    | 5.0     | 4.9    | 3.8    | 5.5    |
| 18.4    | 24.9    | 13.3    | 11.2    | 10.2    | 15.3    | 9.4    | 3.6    | 9.4    |
| 79.4    | 96.2    | 61.7    | 37.7    | 34.3    | 39.7    | 40.0   | 35.7   | 30.5   |
| 22.0    | 51.3    | 55.2    | 5.6     | 4.3     | 4.5     | 4.0    | 2.7    | 3.2    |
| 25.3    | 25.3    | 27.3    | 17.5    | 18.0    | 23.7    | 13.1   | 12.1   | 11.0   |
| 39.8    | 26.6    | 14.4    | 77.7    | 72.7    | 76.2    | 57.4   | 48.4   | 42.5   |
| 597.3   | 385.2   | 163.3   | 26.6    | 29.9    | 27.2    | 18.2   | 22.5   | 23.7   |
| 5.1     | 1.2     | 3.8     | 7.9     | 6.5     | 9.7     | 5.1    | 3.1    | 4.6    |
| 37.2    | 32.3    | 29.7    | 28.1    | 18.7    | 17.1    | 14.9   | 6.9    | 15.2   |
| 1.9     | 3.0     | 2.0     | 18.6    | 9.5     | 18.0    | 8.1    | 10.7   | 9.8    |
| 16.4    | 61.8    | 38.1    | 30.7    | 30.3    | 30.5    | 19.0   | 13.1   | 12.8   |
| 532.1   | 554.1   | 451.3   | 229.1   | 204.3   | 221.3   | 155.9  | 159.8  | 187.1  |
| 208.3   | 237.1   | 200.6   | 1645.5  | 1476.9  | 1634.8  | 814.2  | 763.4  | 954.7  |
| 26.1    | 19.2    | 17.7    | 68.2    | 69.5    | 62.5    | 18.6   | 30.9   | 26.8   |
| 11.2    | 2.7     | 2.3     | 6.3     | 6.0     | 12.4    | 2.1    | 1.3    | 3.1    |
| 22.2    | 28.9    | 29.8    | 122.4   | 137.3   | 155.5   | 65.5   | 98.6   | 102.1  |

|         |         |         |         |        |        |        |        |        |
|---------|---------|---------|---------|--------|--------|--------|--------|--------|
| 138.3   | 158.5   | 148.7   | 214.8   | 213.1  | 210.3  | 119.6  | 134.2  | 154.4  |
| 200.4   | 257.9   | 212.9   | 41.5    | 37.8   | 24.5   | 114.9  | 98.8   | 116.9  |
| 15.1    | 18.0    | 8.5     | 188.7   | 166.9  | 214.2  | 133.7  | 113.3  | 169.4  |
| 101.5   | 185.2   | 176.3   | 141.2   | 120.4  | 127.6  | 72.1   | 79.4   | 88.2   |
| 339.6   | 457.6   | 278.0   | 140.7   | 102.9  | 109.4  | 77.0   | 72.3   | 71.9   |
| 45.3    | 47.9    | 52.9    | 58.8    | 51.5   | 62.7   | 84.8   | 44.2   | 71.0   |
| 16.6    | 10.2    | 5.8     | 26.5    | 14.8   | 17.0   | 9.0    | 8.0    | 7.9    |
| 189.9   | 242.5   | 198.7   | 87.2    | 61.6   | 57.0   | 65.9   | 62.4   | 73.0   |
| 9923.8  | 10084.4 | 9308.0  | 9637.4  | 8834.5 | 9432.7 | 6463.5 | 6430.3 | 6619.0 |
| 809.8   | 994.8   | 643.4   | 240.3   | 130.4  | 156.8  | 169.3  | 116.1  | 128.4  |
| 111.5   | 178.5   | 175.8   | 310.9   | 231.9  | 265.7  | 199.4  | 215.7  | 212.6  |
| 1.5     | 2.4     | 2.8     | 13.2    | 3.7    | 5.4    | 1.2    | 0.5    | 4.4    |
| 641.6   | 805.1   | 547.2   | 128.8   | 79.4   | 82.1   | 80.5   | 73.2   | 89.4   |
| 4.0     | 3.5     | 4.0     | 2.3     | 4.3    | 6.6    | 1.6    | 0.6    | 1.4    |
| 50.5    | 47.4    | 26.6    | 30.0    | 35.1   | 31.3   | 19.6   | 25.1   | 25.5   |
| 259.4   | 352.1   | 223.1   | 246.9   | 231.4  | 234.4  | 153.1  | 148.0  | 192.1  |
| 603.1   | 708.7   | 448.0   | 180.4   | 122.0  | 140.3  | 238.0  | 190.6  | 196.0  |
| 162.0   | 162.2   | 123.9   | 7.6     | 14.2   | 4.2    | 2.7    | 6.3    | 4.7    |
| 121.2   | 191.7   | 194.3   | 76.9    | 63.5   | 88.7   | 57.1   | 105.6  | 89.9   |
| 63.6    | 103.0   | 95.2    | 127.8   | 139.4  | 162.5  | 54.6   | 84.3   | 72.4   |
| 1616.3  | 1893.0  | 1391.7  | 687.2   | 547.2  | 610.5  | 492.0  | 454.4  | 526.6  |
| 27.9    | 31.9    | 35.7    | 7.0     | 5.3    | 6.3    | 14.0   | 9.4    | 9.6    |
| 14.3    | 13.3    | 12.8    | 11.8    | 6.2    | 16.2   | 6.9    | 2.9    | 3.6    |
| 101.7   | 126.3   | 113.6   | 101.7   | 76.0   | 120.0  | 69.7   | 66.6   | 69.7   |
| 36.2    | 54.7    | 46.5    | 13.4    | 16.0   | 12.0   | 15.3   | 14.1   | 13.6   |
| 597.2   | 675.3   | 463.3   | 140.0   | 95.7   | 95.9   | 168.3  | 102.3  | 151.7  |
| 251.0   | 253.5   | 123.0   | 33.6    | 18.3   | 23.7   | 14.8   | 12.9   | 14.1   |
| 21.4    | 33.1    | 25.7    | 8.4     | 4.8    | 7.4    | 7.1    | 6.0    | 12.2   |
| 193.8   | 312.5   | 245.7   | 84.5    | 79.1   | 85.0   | 115.8  | 165.0  | 127.8  |
| 37.8    | 59.6    | 58.3    | 70.1    | 69.2   | 59.8   | 21.7   | 23.9   | 23.2   |
| 3.1     | 19.4    | 4.6     | 17.0    | 28.4   | 21.4   | 11.6   | 10.2   | 7.0    |
| 3618.8  | 3103.0  | 1746.9  | 3657.3  | 2946.7 | 3265.2 | 2325.8 | 1929.6 | 2253.8 |
| 11956.2 | 11243.1 | 10140.4 | 10097.2 | 9504.6 | 9652.5 | 7382.8 | 7234.5 | 7961.4 |
| 54.4    | 64.6    | 24.0    | 319.5   | 257.9  | 291.6  | 224.3  | 204.4  | 220.2  |
| 6.1     | 1.7     | 3.5     | 5.5     | 4.2    | 7.2    | 9.8    | 5.0    | 7.5    |
| 198.6   | 241.4   | 269.1   | 167.5   | 169.3  | 187.5  | 114.6  | 166.1  | 185.7  |
| 33.9    | 45.0    | 33.6    | 70.9    | 50.4   | 51.9   | 23.7   | 19.4   | 18.4   |
| 7.3     | 2.1     | 1.3     | 3.6     | 2.4    | 6.4    | 3.5    | 1.7    | 2.8    |
| 422.2   | 498.8   | 335.3   | 152.5   | 112.1  | 119.4  | 104.6  | 94.1   | 93.6   |
| 5.3     | 18.4    | 9.2     | 23.2    | 15.7   | 23.6   | 21.5   | 13.5   | 14.1   |
| 192.4   | 197.4   | 125.9   | 252.4   | 218.7  | 261.0  | 195.9  | 241.0  | 233.7  |
| 13.8    | 23.7    | 17.5    | 24.9    | 28.4   | 44.2   | 15.3   | 19.8   | 24.3   |
| 1.7     | 4.8     | 2.3     | 4.4     | 4.0    | 4.6    | 3.6    | 1.8    | 2.8    |
| 4.9     | 9.1     | 13.9    | 37.9    | 39.1   | 41.7   | 21.6   | 33.9   | 28.7   |
| 39.2    | 51.9    | 46.8    | 11.0    | 13.2   | 13.3   | 7.3    | 7.0    | 7.1    |
| 142.9   | 153.4   | 130.9   | 118.5   | 89.1   | 119.0  | 106.4  | 120.9  | 95.7   |
| 5268.5  | 5980.2  | 4880.5  | 1331.1  | 947.4  | 1199.0 | 816.1  | 678.3  | 811.3  |
| 9.4     | 12.5    | 6.5     | 30.8    | 19.8   | 21.2   | 12.9   | 20.8   | 20.8   |
| 3.7     | 3.8     | 1.1     | 5.1     | 4.4    | 11.9   | 1.4    | 5.1    | 10.7   |
| 69.5    | 82.5    | 61.2    | 94.6    | 89.6   | 81.5   | 39.1   | 49.6   | 62.3   |
| 12.2    | 23.9    | 16.5    | 12.7    | 13.8   | 20.2   | 2.4    | 3.4    | 10.0   |
| 8.9     | 6.9     | 6.0     | 10.9    | 5.7    | 4.9    | 6.0    | 7.2    | 3.8    |
| 240.4   | 268.0   | 196.3   | 168.9   | 139.0  | 159.0  | 111.1  | 116.7  | 128.0  |

|        |        |        |        |        |        |        |        |        |
|--------|--------|--------|--------|--------|--------|--------|--------|--------|
| 12.3   | 18.9   | 22.0   | 34.6   | 16.3   | 33.1   | 73.5   | 62.0   | 58.3   |
| 90.0   | 100.3  | 62.6   | 80.1   | 49.8   | 74.2   | 37.1   | 31.2   | 35.9   |
| 243.8  | 314.3  | 250.4  | 47.9   | 49.0   | 43.3   | 36.6   | 37.8   | 46.4   |
| 676.0  | 776.8  | 662.3  | 150.8  | 128.6  | 141.7  | 130.3  | 157.7  | 162.4  |
| 44.8   | 42.9   | 48.0   | 59.8   | 52.5   | 60.2   | 33.6   | 17.5   | 51.0   |
| 8547.5 | 8329.3 | 8212.4 | 3506.3 | 3378.2 | 3689.1 | 2206.2 | 2456.0 | 2672.0 |
| 605.1  | 663.7  | 452.8  | 822.8  | 602.4  | 694.1  | 512.3  | 429.9  | 543.8  |
| 147.5  | 160.5  | 124.6  | 116.6  | 76.6   | 87.9   | 79.4   | 87.2   | 83.1   |
| 590.2  | 491.2  | 376.1  | 53.8   | 38.2   | 48.4   | 41.8   | 60.4   | 52.4   |
| 3001.3 | 3099.7 | 1838.9 | 2875.9 | 2116.1 | 2382.8 | 1241.5 | 936.3  | 1092.6 |
| 282.8  | 395.0  | 446.9  | 499.9  | 495.5  | 501.8  | 423.1  | 485.3  | 545.6  |
| 159.0  | 218.9  | 155.3  | 494.7  | 436.5  | 480.4  | 267.8  | 350.1  | 357.3  |
| 251.9  | 348.1  | 280.1  | 349.9  | 320.2  | 301.1  | 764.7  | 824.3  | 960.8  |
| 603.4  | 598.0  | 425.8  | 442.1  | 332.8  | 388.7  | 248.5  | 249.9  | 281.2  |
| 31.3   | 52.2   | 46.2   | 50.1   | 38.6   | 50.9   | 34.6   | 43.2   | 29.2   |
| 3056.4 | 3422.1 | 2688.9 | 1576.1 | 1266.8 | 1323.0 | 1294.2 | 1273.4 | 1448.0 |
| 393.5  | 441.0  | 246.8  | 144.8  | 85.8   | 121.9  | 129.5  | 122.1  | 150.3  |
| 3.4    | 10.8   | 2.7    | 4.3    | 8.3    | 4.3    | 3.9    | 7.0    | 8.4    |
| 2.6    | 8.5    | 2.4    | 5.2    | 10.7   | 18.1   | 1.9    | 2.6    | 4.8    |
| 49.0   | 91.4   | 80.3   | 94.1   | 85.0   | 76.0   | 69.4   | 64.5   | 84.5   |
| 1101.9 | 1277.0 | 1008.8 | 468.3  | 376.8  | 419.0  | 310.0  | 326.4  | 322.5  |
| 7.4    | 17.8   | 9.3    | 14.7   | 2.8    | 8.9    | 13.2   | 6.6    | 11.5   |
| 136.1  | 155.9  | 104.0  | 115.5  | 63.6   | 59.8   | 67.7   | 60.0   | 48.6   |
| 235.1  | 349.9  | 242.9  | 257.3  | 201.9  | 246.1  | 124.1  | 118.1  | 152.1  |
| 14.4   | 12.3   | 5.7    | 20.1   | 25.8   | 17.2   | 7.0    | 9.5    | 7.2    |
| 183.1  | 165.3  | 47.6   | 168.3  | 90.5   | 106.5  | 73.1   | 49.6   | 57.9   |
| 75.0   | 211.6  | 291.3  | 15.4   | 12.5   | 14.1   | 15.9   | 11.3   | 12.4   |
| 0.8    | 5.7    | 15.3   | 17.5   | 35.1   | 16.7   | 14.4   | 11.5   | 11.9   |
| 145.5  | 191.8  | 164.9  | 225.4  | 215.3  | 194.2  | 157.8  | 182.1  | 170.5  |
| 63.1   | 73.0   | 61.8   | 149.6  | 150.0  | 165.1  | 74.0   | 87.2   | 84.6   |
| 504.4  | 615.7  | 514.3  | 427.1  | 345.9  | 388.3  | 474.6  | 547.5  | 557.4  |
| 22.6   | 30.6   | 29.1   | 39.2   | 64.2   | 63.4   | 39.2   | 51.9   | 41.7   |
| 237.9  | 359.6  | 240.7  | 144.6  | 131.5  | 148.8  | 174.7  | 175.6  | 208.3  |
| 1056.5 | 1200.8 | 998.9  | 871.9  | 711.8  | 749.6  | 492.5  | 529.2  | 571.1  |
| 466.0  | 556.8  | 446.4  | 310.1  | 281.8  | 300.0  | 215.3  | 283.3  | 275.9  |
| 9.0    | 6.2    | 2.0    | 30.3   | 9.9    | 17.5   | 15.9   | 9.6    | 8.0    |
| 104.9  | 104.7  | 63.2   | 97.8   | 59.4   | 69.3   | 50.9   | 34.1   | 36.9   |
| 4192.0 | 4280.5 | 2812.5 | 1824.0 | 1298.5 | 1484.5 | 1119.2 | 831.2  | 1008.4 |
| 23.6   | 15.4   | 16.7   | 27.4   | 21.1   | 17.4   | 7.4    | 8.6    | 1.3    |
| 1.2    | 4.8    | 0.3    | 1.8    | 1.2    | 3.6    | 2.3    | 1.6    | 0.8    |
| 193.2  | 199.2  | 130.4  | 177.2  | 134.3  | 153.4  | 90.2   | 89.0   | 118.6  |
| 17.7   | 8.5    | 8.9    | 14.5   | 14.3   | 34.4   | 7.3    | 17.2   | 16.3   |
| 215.6  | 339.6  | 226.7  | 420.6  | 410.2  | 468.3  | 245.8  | 270.3  | 284.2  |
| 3.8    | 9.8    | 7.4    | 11.6   | 10.4   | 7.3    | 12.3   | 8.5    | 4.5    |
| 116.5  | 155.2  | 140.4  | 171.6  | 163.7  | 150.5  | 87.1   | 84.9   | 96.4   |
| 7.4    | 6.2    | 4.1    | 17.2   | 15.6   | 13.0   | 2.7    | 11.6   | 5.9    |
| 13.6   | 15.5   | 8.0    | 30.8   | 9.6    | 18.0   | 12.0   | 2.6    | 6.5    |
| 684.7  | 860.3  | 665.2  | 751.7  | 642.6  | 685.4  | 518.9  | 489.7  | 559.5  |
| 75.8   | 101.9  | 92.0   | 362.3  | 286.7  | 314.8  | 188.0  | 208.0  | 227.2  |
| 7.4    | 22.6   | 7.3    | 7.4    | 22.3   | 7.4    | 12.6   | 16.1   | 15.3   |
| 596.5  | 707.0  | 351.0  | 119.3  | 86.5   | 105.8  | 204.9  | 157.2  | 188.8  |
| 372.8  | 448.4  | 500.8  | 42.7   | 34.6   | 34.4   | 33.2   | 45.9   | 51.4   |
| 58.4   | 70.7   | 59.2   | 88.1   | 70.3   | 81.4   | 21.0   | 33.4   | 27.6   |

|         |         |        |        |        |        |        |        |        |
|---------|---------|--------|--------|--------|--------|--------|--------|--------|
| 141.0   | 104.2   | 80.9   | 1584.5 | 1171.3 | 1291.0 | 484.6  | 475.2  | 511.3  |
| 289.5   | 600.1   | 424.1  | 61.4   | 50.4   | 63.5   | 58.8   | 79.1   | 84.5   |
| 61.2    | 62.0    | 55.0   | 31.8   | 46.5   | 32.2   | 14.4   | 24.4   | 22.4   |
| 1055.3  | 1090.6  | 631.1  | 400.6  | 268.4  | 286.8  | 231.2  | 179.4  | 208.5  |
| 49.9    | 67.6    | 66.2   | 190.7  | 230.1  | 239.3  | 116.1  | 181.8  | 188.9  |
| 2.2     | 12.1    | 7.5    | 13.1   | 12.3   | 8.6    | 3.3    | 6.3    | 4.1    |
| 50.3    | 92.4    | 81.0   | 671.1  | 681.6  | 717.6  | 454.5  | 652.0  | 671.6  |
| 7.7     | 14.0    | 9.8    | 97.9   | 74.3   | 96.7   | 59.4   | 65.3   | 69.1   |
| 7.3     | 11.8    | 3.4    | 12.5   | 2.4    | 5.7    | 2.7    | 0.7    | 1.0    |
| 10.2    | 21.6    | 6.7    | 36.5   | 15.4   | 14.2   | 16.6   | 19.7   | 22.8   |
| 32.0    | 46.7    | 30.2   | 74.1   | 59.1   | 64.3   | 28.4   | 29.6   | 35.7   |
| 524.3   | 808.4   | 397.9  | 166.4  | 121.7  | 131.7  | 288.6  | 140.7  | 231.0  |
| 7.9     | 8.0     | 8.2    | 11.5   | 19.3   | 8.1    | 4.6    | 3.7    | 9.4    |
| 2.3     | 5.3     | 1.6    | 848.1  | 514.6  | 560.4  | 526.7  | 313.1  | 446.1  |
| 10.3    | 33.6    | 19.5   | 10.9   | 6.6    | 9.9    | 1.0    | 11.2   | 5.5    |
| 0.8     | 7.0     | 1.7    | 2.6    | 1.6    | 2.0    | 2.8    | 1.0    | 1.0    |
| 326.3   | 396.2   | 324.2  | 267.8  | 192.3  | 215.5  | 138.7  | 139.2  | 148.9  |
| 133.2   | 290.9   | 369.8  | 116.7  | 110.8  | 109.5  | 78.6   | 120.1  | 95.7   |
| 14.8    | 22.3    | 17.3   | 71.3   | 72.3   | 85.2   | 23.3   | 52.1   | 58.0   |
| 49.3    | 69.5    | 46.2   | 42.9   | 28.2   | 32.0   | 23.5   | 22.4   | 31.5   |
| 563.7   | 684.5   | 452.0  | 648.1  | 558.6  | 590.5  | 289.3  | 276.1  | 326.0  |
| 1862.6  | 2447.6  | 2658.5 | 63.4   | 74.8   | 89.2   | 60.6   | 95.4   | 87.1   |
| 654.4   | 793.6   | 474.7  | 307.2  | 169.3  | 185.4  | 173.4  | 141.2  | 191.6  |
| 1055.4  | 1153.8  | 738.8  | 583.6  | 405.5  | 383.2  | 365.8  | 300.0  | 365.5  |
| 9.7     | 11.7    | 11.3   | 26.2   | 21.4   | 18.1   | 3.9    | 16.0   | 11.4   |
| 622.1   | 890.7   | 410.5  | 267.0  | 288.6  | 280.5  | 174.4  | 121.4  | 145.0  |
| 305.1   | 396.2   | 284.6  | 255.4  | 226.9  | 240.4  | 263.2  | 279.2  | 305.5  |
| 125.6   | 163.9   | 108.3  | 99.0   | 74.4   | 86.6   | 93.8   | 94.2   | 91.1   |
| 5.6     | 5.4     | 3.8    | 8.4    | 5.9    | 10.7   | 4.6    | 5.2    | 4.2    |
| 310.3   | 410.1   | 287.3  | 165.0  | 130.0  | 150.5  | 115.5  | 93.7   | 109.3  |
| 206.9   | 218.3   | 177.6  | 24.7   | 17.5   | 24.0   | 10.2   | 14.5   | 21.8   |
| 10357.4 | 10128.6 | 9575.0 | 8859.4 | 8457.8 | 8423.2 | 6378.8 | 6515.0 | 6784.7 |
| 54.5    | 64.1    | 42.4   | 43.6   | 32.1   | 39.8   | 37.2   | 43.7   | 37.7   |
| 22.7    | 25.3    | 13.5   | 28.3   | 11.7   | 13.9   | 20.3   | 8.9    | 9.6    |
| 1.6     | 2.3     | 1.1    | 7.4    | 2.4    | 3.1    | 1.5    | 1.3    | 0.9    |
| 168.0   | 214.0   | 177.3  | 1823.0 | 1643.5 | 1853.0 | 792.6  | 699.5  | 920.0  |
| 3983.9  | 4295.7  | 3721.8 | 3610.4 | 3242.4 | 3174.8 | 2006.0 | 2166.1 | 2226.5 |
| 460.5   | 465.6   | 295.8  | 15.5   | 13.1   | 17.5   | 4.5    | 4.8    | 5.2    |
| 174.8   | 180.4   | 152.9  | 217.8  | 248.8  | 262.2  | 170.3  | 197.7  | 230.1  |
| 39.5    | 57.6    | 41.2   | 61.9   | 41.6   | 47.7   | 49.1   | 37.8   | 44.8   |
| 2.0     | 15.1    | 6.3    | 8.8    | 15.7   | 8.9    | 6.4    | 3.4    | 3.1    |
| 31.6    | 47.5    | 44.3   | 64.5   | 45.9   | 46.7   | 46.0   | 52.0   | 55.4   |
| 630.0   | 642.0   | 316.2  | 583.9  | 418.8  | 456.8  | 281.1  | 226.8  | 258.1  |
| 120.8   | 122.1   | 80.1   | 37.7   | 33.3   | 48.6   | 28.0   | 28.2   | 28.7   |
| 19.2    | 23.8    | 30.0   | 18.5   | 15.0   | 23.4   | 7.6    | 6.5    | 10.1   |
| 13.1    | 10.6    | 5.5    | 7.0    | 6.7    | 11.9   | 12.3   | 12.1   | 16.8   |
| 741.6   | 821.2   | 546.6  | 168.4  | 99.2   | 126.4  | 134.3  | 92.5   | 123.3  |
| 1034.0  | 1163.4  | 759.9  | 315.1  | 158.7  | 167.1  | 224.4  | 126.2  | 148.8  |
| 77.3    | 169.9   | 181.9  | 252.0  | 191.8  | 207.7  | 139.2  | 139.0  | 149.9  |
| 23.8    | 39.1    | 24.0   | 49.2   | 43.3   | 65.4   | 39.7   | 34.2   | 48.3   |
| 3.6     | 10.9    | 9.2    | 8.4    | 8.5    | 13.6   | 1.7    | 3.3    | 7.4    |
| 692.4   | 819.4   | 868.0  | 13.4   | 23.2   | 10.7   | 17.2   | 13.4   | 8.9    |
| 292.3   | 294.6   | 208.6  | 410.1  | 323.3  | 399.8  | 257.9  | 287.6  | 360.9  |

|         |         |         |         |         |         |        |        |        |
|---------|---------|---------|---------|---------|---------|--------|--------|--------|
| 12.1    | 20.3    | 21.0    | 59.0    | 38.2    | 42.3    | 22.1   | 18.9   | 31.7   |
| 498.1   | 555.7   | 340.5   | 176.8   | 147.8   | 186.7   | 252.8  | 184.8  | 250.6  |
| 330.6   | 424.2   | 308.6   | 121.6   | 105.6   | 98.7    | 119.5  | 116.2  | 128.3  |
| 382.2   | 386.0   | 228.9   | 232.4   | 176.8   | 222.6   | 108.2  | 119.5  | 147.3  |
| 4.9     | 9.1     | 6.2     | 8.9     | 9.3     | 10.1    | 2.1    | 9.9    | 3.8    |
| 692.1   | 828.5   | 462.0   | 108.8   | 115.7   | 86.3    | 98.0   | 66.1   | 96.6   |
| 3.5     | 1.8     | 2.9     | 5.9     | 6.4     | 5.9     | 2.9    | 2.2    | 3.3    |
| 1082.7  | 1412.4  | 1003.6  | 1789.0  | 1448.2  | 1714.2  | 1304.9 | 1319.5 | 1415.9 |
| 18.1    | 20.7    | 17.6    | 30.3    | 21.6    | 27.9    | 6.6    | 11.6   | 14.9   |
| 12766.4 | 12030.8 | 11845.9 | 10921.7 | 10619.7 | 11104.2 | 8313.6 | 8394.9 | 8838.3 |
| 71.6    | 79.6    | 51.5    | 89.8    | 72.9    | 79.0    | 59.4   | 45.9   | 53.2   |
| 192.8   | 260.4   | 213.7   | 256.6   | 190.2   | 200.1   | 148.7  | 160.8  | 156.7  |
| 1036.3  | 1276.5  | 1033.0  | 779.8   | 651.2   | 722.1   | 720.0  | 655.7  | 690.1  |
| 204.8   | 157.5   | 84.8    | 58.8    | 52.4    | 55.0    | 36.2   | 55.9   | 48.4   |
| 6043.0  | 6119.6  | 4735.8  | 5953.3  | 5248.6  | 4534.7  | 5720.0 | 4789.0 | 5600.6 |
| 2.5     | 9.9     | 0.9     | 7.0     | 7.0     | 4.8     | 2.3    | 9.0    | 2.8    |
| 13.6    | 16.8    | 6.8     | 32.9    | 30.9    | 27.8    | 10.9   | 12.5   | 9.8    |
| 30.4    | 33.9    | 26.1    | 256.2   | 202.3   | 255.0   | 132.9  | 126.0  | 152.1  |
| 121.0   | 154.5   | 104.5   | 27.5    | 28.6    | 28.3    | 35.6   | 30.2   | 41.4   |
| 153.1   | 213.7   | 300.8   | 343.2   | 342.1   | 340.6   | 245.0  | 392.8  | 346.4  |
| 71.3    | 99.9    | 90.5    | 78.6    | 82.5    | 75.4    | 45.6   | 70.1   | 70.6   |
| 472.9   | 555.6   | 384.9   | 108.6   | 96.7    | 111.6   | 123.3  | 106.8  | 129.4  |
| 145.7   | 282.7   | 346.8   | 1119.4  | 1169.2  | 1240.4  | 564.1  | 873.9  | 975.2  |
| 45.0    | 45.0    | 40.9    | 236.2   | 176.4   | 182.4   | 119.6  | 112.6  | 132.9  |
| 293.8   | 377.2   | 476.7   | 483.9   | 387.6   | 434.8   | 229.0  | 182.1  | 238.9  |
| 7.1     | 3.8     | 2.0     | 12.5    | 2.3     | 3.4     | 2.9    | 3.2    | 7.3    |
| 24.0    | 32.0    | 15.3    | 50.1    | 42.2    | 32.7    | 25.3   | 23.2   | 34.9   |
| 55.5    | 89.7    | 35.1    | 66.3    | 35.8    | 54.9    | 44.9   | 38.1   | 41.1   |
| 123.0   | 134.1   | 68.7    | 62.9    | 34.5    | 38.1    | 34.5   | 14.9   | 10.1   |
| 230.1   | 261.0   | 109.9   | 96.0    | 77.8    | 93.1    | 60.2   | 49.1   | 63.9   |
| 34.3    | 34.0    | 17.1    | 30.6    | 24.6    | 30.4    | 19.4   | 16.8   | 26.4   |
| 4.5     | 16.0    | 2.7     | 19.7    | 22.6    | 20.2    | 17.2   | 9.4    | 12.1   |
| 220.5   | 271.6   | 240.6   | 549.6   | 461.2   | 475.8   | 453.7  | 447.2  | 507.5  |
| 0.9     | 12.4    | 3.4     | 17.0    | 2.1     | 8.9     | 4.0    | 1.8    | 11.5   |
| 50.2    | 50.4    | 58.8    | 118.3   | 107.3   | 114.1   | 60.7   | 73.0   | 70.0   |
| 4.0     | 3.2     | 1.7     | 4.5     | 3.7     | 6.9     | 1.8    | 3.2    | 1.8    |
| 3.0     | 13.1    | 13.1    | 20.0    | 18.3    | 14.7    | 26.3   | 18.6   | 8.5    |
| 252.5   | 285.4   | 225.9   | 283.9   | 320.7   | 242.7   | 138.9  | 184.8  | 178.8  |
| 40.4    | 53.0    | 36.7    | 5.5     | 3.3     | 4.2     | 5.9    | 4.5    | 3.2    |
| 27.8    | 53.7    | 46.2    | 15.2    | 14.5    | 14.6    | 2.7    | 6.9    | 7.9    |
| 86.9    | 115.3   | 91.0    | 123.9   | 110.0   | 116.3   | 71.4   | 78.1   | 71.7   |
| 9909.9  | 9253.1  | 6743.6  | 9586.6  | 7761.4  | 8771.2  | 6043.3 | 4916.3 | 5740.8 |
| 279.7   | 279.1   | 104.2   | 145.0   | 84.0    | 82.5    | 144.3  | 97.3   | 109.4  |
| 138.0   | 149.8   | 89.1    | 85.8    | 87.3    | 83.0    | 50.6   | 50.2   | 57.8   |
| 175.3   | 222.0   | 109.7   | 160.4   | 141.7   | 143.4   | 103.2  | 124.5  | 119.3  |
| 30.4    | 36.5    | 27.8    | 41.9    | 36.6    | 39.8    | 24.1   | 22.0   | 22.5   |
| 5.3     | 9.8     | 14.7    | 145.8   | 95.6    | 128.7   | 50.9   | 42.7   | 63.2   |
| 6.4     | 3.4     | 8.9     | 4.7     | 3.2     | 9.0     | 4.2    | 8.3    | 6.2    |
| 52.2    | 81.9    | 51.1    | 121.9   | 104.7   | 105.8   | 74.8   | 57.5   | 74.6   |
| 243.3   | 306.5   | 167.8   | 127.1   | 118.3   | 126.3   | 74.3   | 89.4   | 102.5  |
| 3107.1  | 3335.1  | 2525.7  | 4409.0  | 3834.9  | 3649.6  | 2497.7 | 2752.8 | 2883.6 |
| 209.8   | 252.0   | 259.4   | 337.8   | 345.6   | 384.4   | 214.5  | 251.0  | 275.0  |
| 63.5    | 134.6   | 142.0   | 69.7    | 104.1   | 101.9   | 39.5   | 79.2   | 79.9   |

|        |        |        |        |        |        |        |        |        |
|--------|--------|--------|--------|--------|--------|--------|--------|--------|
| 39.1   | 78.5   | 81.4   | 42.8   | 47.0   | 57.0   | 28.1   | 47.8   | 47.9   |
| 38.7   | 59.4   | 45.0   | 49.5   | 47.4   | 34.1   | 33.3   | 42.1   | 37.2   |
| 29.9   | 38.6   | 38.3   | 47.9   | 28.4   | 40.1   | 32.8   | 42.6   | 34.4   |
| 9.1    | 21.8   | 10.8   | 14.9   | 12.7   | 12.5   | 21.2   | 14.0   | 16.7   |
| 6.1    | 11.3   | 10.2   | 12.8   | 25.0   | 28.2   | 8.9    | 14.0   | 12.3   |
| 2.1    | 2.2    | 3.5    | 6.7    | 6.2    | 6.9    | 5.3    | 6.5    | 9.5    |
| 19.3   | 35.5   | 20.7   | 120.6  | 80.5   | 109.1  | 52.7   | 71.3   | 66.7   |
| 17.0   | 19.6   | 11.9   | 38.2   | 38.8   | 31.4   | 8.3    | 14.2   | 15.3   |
| 36.3   | 45.9   | 29.0   | 28.7   | 31.6   | 43.1   | 31.9   | 23.3   | 27.5   |
| 58.5   | 51.8   | 79.1   | 117.3  | 125.6  | 139.3  | 60.9   | 74.5   | 85.5   |
| 140.6  | 96.3   | 59.8   | 211.4  | 206.3  | 216.1  | 134.5  | 234.3  | 221.0  |
| 4.8    | 15.3   | 8.4    | 5.1    | 4.4    | 8.4    | 8.5    | 3.8    | 2.9    |
| 213.5  | 254.5  | 207.2  | 186.9  | 168.8  | 174.3  | 108.1  | 106.9  | 141.4  |
| 1581.4 | 1792.9 | 965.4  | 992.4  | 727.7  | 688.1  | 779.6  | 540.8  | 675.6  |
| 26.9   | 29.6   | 22.0   | 32.0   | 27.0   | 21.0   | 16.1   | 19.1   | 20.7   |
| 10.9   | 15.8   | 11.7   | 45.7   | 29.9   | 47.3   | 24.0   | 16.5   | 4.0    |
| 3.5    | 1.5    | 1.5    | 9.1    | 2.2    | 2.3    | 2.2    | 5.1    | 2.7    |
| 71.4   | 91.2   | 78.1   | 67.8   | 88.7   | 87.4   | 50.5   | 65.5   | 60.5   |
| 13.9   | 21.1   | 4.7    | 17.2   | 9.7    | 20.6   | 11.5   | 20.9   | 16.8   |
| 399.4  | 468.3  | 237.0  | 228.0  | 182.2  | 175.9  | 156.9  | 149.0  | 153.9  |
| 17.7   | 16.8   | 5.7    | 7.8    | 11.9   | 10.7   | 15.7   | 4.8    | 4.6    |
| 61.8   | 100.8  | 82.6   | 57.6   | 63.8   | 66.6   | 54.6   | 66.3   | 73.1   |
| 1123.1 | 689.0  | 552.1  | 20.9   | 9.0    | 16.7   | 15.2   | 11.2   | 15.1   |
| 75.8   | 95.7   | 72.4   | 129.3  | 120.2  | 148.5  | 68.1   | 89.7   | 82.9   |
| 1591.0 | 1678.5 | 1032.1 | 973.2  | 585.0  | 636.7  | 527.8  | 436.1  | 481.3  |
| 2.7    | 4.7    | 1.6    | 1.7    | 7.8    | 11.6   | 5.9    | 1.8    | 5.6    |
| 19.7   | 28.6   | 23.7   | 23.0   | 16.3   | 19.6   | 18.4   | 18.3   | 15.1   |
| 95.5   | 131.4  | 101.1  | 111.3  | 108.6  | 111.2  | 66.8   | 74.9   | 102.1  |
| 41.3   | 71.2   | 61.8   | 43.6   | 44.3   | 45.8   | 42.4   | 54.3   | 43.9   |
| 9235.5 | 9727.2 | 8517.8 | 5847.6 | 5288.3 | 5141.9 | 2963.6 | 3260.0 | 3285.4 |
| 59.1   | 65.0   | 44.8   | 184.1  | 146.3  | 151.7  | 207.2  | 174.3  | 246.8  |
| 191.2  | 209.6  | 167.9  | 24.9   | 22.9   | 22.0   | 12.3   | 12.8   | 19.3   |
| 3.2    | 16.7   | 2.9    | 15.9   | 24.5   | 24.3   | 12.7   | 8.8    | 3.4    |
| 13.4   | 22.6   | 10.4   | 51.7   | 32.6   | 41.0   | 22.8   | 9.7    | 27.1   |
| 17.3   | 16.7   | 14.2   | 54.3   | 40.0   | 40.0   | 15.4   | 22.2   | 18.5   |
| 420.9  | 627.6  | 568.8  | 533.7  | 567.2  | 660.8  | 360.6  | 464.5  | 522.2  |
| 155.2  | 183.5  | 149.9  | 155.4  | 162.4  | 149.6  | 113.6  | 151.3  | 134.0  |
| 570.7  | 755.9  | 557.8  | 9.6    | 16.6   | 6.4    | 12.5   | 12.0   | 10.0   |
| 435.6  | 377.3  | 244.8  | 171.5  | 90.5   | 137.2  | 124.3  | 96.5   | 103.0  |
| 8.1    | 15.1   | 9.4    | 19.7   | 19.4   | 22.3   | 10.1   | 5.8    | 8.3    |
| 459.5  | 596.2  | 459.8  | 82.7   | 69.4   | 78.4   | 37.5   | 55.7   | 54.6   |
| 6937.5 | 7095.1 | 5750.1 | 6109.1 | 5125.0 | 5738.2 | 4427.8 | 4301.0 | 4549.2 |
| 67.0   | 87.0   | 41.4   | 108.3  | 102.7  | 116.7  | 46.7   | 61.8   | 62.4   |
| 548.2  | 617.5  | 316.3  | 207.0  | 168.9  | 181.9  | 176.8  | 214.4  | 206.5  |
| 1965.6 | 2706.8 | 2612.5 | 2428.4 | 2359.8 | 2377.8 | 2299.3 | 2423.4 | 2652.2 |
| 16.3   | 24.3   | 23.7   | 20.1   | 26.4   | 32.1   | 25.2   | 16.7   | 25.0   |
| 191.4  | 200.9  | 119.0  | 149.3  | 102.3  | 109.8  | 152.4  | 144.2  | 168.0  |
| 77.0   | 87.4   | 64.9   | 77.7   | 75.9   | 56.3   | 30.9   | 43.6   | 34.0   |
| 2.1    | 4.7    | 6.9    | 4.3    | 3.4    | 5.0    | 2.9    | 2.7    | 4.3    |
| 4.6    | 9.7    | 2.2    | 23.0   | 26.1   | 20.7   | 18.1   | 13.5   | 17.7   |
| 921.7  | 1016.5 | 579.4  | 515.6  | 418.7  | 436.5  | 274.3  | 287.5  | 340.8  |
| 34.6   | 49.2   | 52.5   | 32.2   | 25.9   | 28.8   | 21.2   | 17.3   | 17.5   |
| 208.3  | 170.3  | 138.7  | 658.1  | 645.4  | 490.5  | 240.3  | 238.2  | 203.1  |

|        |        |        |        |        |        |        |        |        |
|--------|--------|--------|--------|--------|--------|--------|--------|--------|
| 3.1    | 3.0    | 4.9    | 12.1   | 7.7    | 9.5    | 7.9    | 3.9    | 2.8    |
| 2.1    | 4.9    | 2.9    | 3.9    | 3.8    | 2.1    | 1.4    | 5.4    | 3.9    |
| 401.4  | 445.9  | 376.8  | 36.7   | 40.4   | 41.8   | 19.3   | 17.0   | 21.4   |
| 0.9    | 3.9    | 5.4    | 2.4    | 3.0    | 2.6    | 3.4    | 1.3    | 4.2    |
| 3.0    | 1.9    | 3.0    | 5.3    | 5.5    | 5.7    | 3.7    | 0.9    | 9.8    |
| 35.7   | 62.3   | 74.3   | 292.9  | 255.1  | 253.0  | 142.5  | 122.3  | 140.0  |
| 1.8    | 4.4    | 2.1    | 5.0    | 4.8    | 6.3    | 9.7    | 2.6    | 2.8    |
| 68.3   | 73.8   | 52.1   | 65.8   | 62.5   | 63.6   | 33.0   | 39.6   | 39.2   |
| 5.5    | 3.5    | 5.1    | 11.5   | 10.0   | 12.9   | 0.9    | 3.8    | 1.8    |
| 552.5  | 684.7  | 475.7  | 1642.6 | 1256.1 | 1477.4 | 535.8  | 509.7  | 604.3  |
| 12.7   | 12.8   | 4.7    | 67.4   | 73.2   | 74.9   | 34.6   | 32.8   | 54.0   |
| 2.2    | 2.2    | 2.7    | 5.2    | 9.6    | 15.5   | 6.1    | 13.5   | 14.1   |
| 19.2   | 10.1   | 17.2   | 27.7   | 11.9   | 17.1   | 8.6    | 5.5    | 4.2    |
| 98.2   | 145.3  | 124.4  | 129.6  | 150.6  | 175.4  | 155.1  | 265.6  | 190.2  |
| 234.4  | 442.5  | 609.7  | 28.5   | 28.7   | 30.7   | 24.7   | 39.3   | 45.0   |
| 7689.7 | 7173.5 | 4559.9 | 4893.7 | 3999.8 | 4330.3 | 2923.3 | 2360.8 | 2745.4 |
| 264.0  | 375.4  | 327.3  | 275.1  | 221.8  | 268.4  | 164.6  | 191.2  | 169.8  |
| 116.1  | 237.5  | 128.2  | 91.7   | 85.8   | 83.0   | 50.8   | 88.3   | 75.0   |
| 1741.0 | 1987.0 | 1317.6 | 1292.1 | 1053.9 | 1062.8 | 521.0  | 545.4  | 596.3  |
| 170.1  | 211.0  | 127.8  | 459.1  | 325.4  | 385.9  | 253.3  | 217.2  | 259.5  |
| 4.1    | 2.9    | 3.0    | 5.5    | 3.8    | 5.8    | 3.1    | 3.3    | 2.2    |
| 10.0   | 14.3   | 4.9    | 22.8   | 14.7   | 20.2   | 3.2    | 6.7    | 2.1    |
| 27.6   | 30.2   | 17.4   | 46.6   | 49.0   | 45.8   | 34.9   | 38.9   | 39.9   |
| 1337.3 | 1312.4 | 972.5  | 725.9  | 542.3  | 478.6  | 347.8  | 261.9  | 405.1  |
| 4024.2 | 5354.5 | 4855.6 | 3836.6 | 3241.1 | 3359.3 | 2165.7 | 2099.4 | 2381.5 |
| 49.4   | 61.6   | 73.4   | 42.1   | 47.0   | 41.7   | 9.3    | 22.1   | 38.7   |
| 75.2   | 63.9   | 60.9   | 96.9   | 91.8   | 89.5   | 66.2   | 93.7   | 94.1   |
| 7673.5 | 8128.5 | 7300.7 | 7301.6 | 6468.0 | 6702.2 | 5412.6 | 5080.0 | 5359.5 |
| 92.5   | 116.1  | 92.1   | 14.8   | 21.7   | 25.0   | 17.7   | 11.8   | 14.0   |
| 3.7    | 2.5    | 2.6    | 4.1    | 3.9    | 9.5    | 4.6    | 3.0    | 5.6    |
| 722.3  | 887.2  | 635.7  | 246.2  | 204.0  | 220.2  | 215.9  | 217.3  | 244.3  |
| 31.6   | 57.0   | 39.3   | 50.2   | 52.7   | 48.3   | 29.8   | 35.9   | 42.5   |
| 181.9  | 203.6  | 148.4  | 183.2  | 163.2  | 167.9  | 154.9  | 159.5  | 174.3  |
| 7.1    | 10.0   | 7.3    | 27.9   | 14.7   | 29.5   | 5.5    | 9.6    | 9.7    |
| 3.2    | 2.7    | 3.0    | 6.8    | 7.1    | 5.4    | 2.6    | 3.3    | 0.4    |
| 148.2  | 142.2  | 132.7  | 498.7  | 454.4  | 553.8  | 442.1  | 613.8  | 589.7  |
| 89.7   | 102.0  | 68.1   | 235.3  | 185.2  | 187.2  | 45.9   | 46.9   | 54.2   |
| 26.6   | 32.0   | 25.6   | 44.6   | 35.0   | 23.5   | 18.3   | 18.3   | 25.2   |
| 3.2    | 2.1    | 5.4    | 5.8    | 4.2    | 16.3   | 1.8    | 2.9    | 1.8    |
| 181.0  | 293.7  | 206.5  | 434.4  | 446.1  | 488.1  | 271.1  | 406.8  | 381.7  |
| 23.6   | 25.2   | 28.1   | 29.1   | 26.4   | 20.0   | 18.1   | 21.1   | 20.7   |
| 13.8   | 6.2    | 3.0    | 6.1    | 7.7    | 14.5   | 5.6    | 4.1    | 3.4    |
| 177.0  | 211.6  | 161.7  | 113.7  | 120.5  | 113.5  | 83.9   | 93.9   | 94.1   |
| 934.6  | 1016.6 | 732.7  | 1034.5 | 821.8  | 847.4  | 1074.8 | 975.0  | 1159.8 |
| 1.3    | 5.9    | 4.2    | 9.7    | 11.9   | 9.0    | 3.8    | 10.0   | 2.1    |
| 167.9  | 222.5  | 169.1  | 68.4   | 51.7   | 72.3   | 89.7   | 71.0   | 82.2   |
| 2469.5 | 2347.5 | 1382.3 | 1901.0 | 1344.3 | 1319.3 | 709.3  | 583.8  | 586.7  |
| 44.2   | 52.4   | 28.0   | 30.3   | 9.4    | 31.8   | 7.6    | 13.5   | 6.5    |
| 5.7    | 12.1   | 3.5    | 5.3    | 2.2    | 4.1    | 1.6    | 1.3    | 1.6    |
| 328.1  | 333.0  | 214.8  | 133.6  | 125.8  | 152.4  | 97.6   | 88.3   | 112.7  |
| 203.8  | 257.4  | 156.7  | 78.9   | 53.8   | 55.2   | 60.0   | 51.4   | 56.7   |
| 2151.5 | 2380.0 | 1621.4 | 1450.5 | 1366.9 | 1388.6 | 1199.9 | 1306.6 | 1323.0 |
| 113.8  | 128.4  | 82.8   | 78.1   | 62.0   | 78.3   | 114.8  | 116.4  | 127.0  |



|        |        |        |        |        |        |        |        |        |
|--------|--------|--------|--------|--------|--------|--------|--------|--------|
| 0.3    | 1.3    | 0.4    | 7.5    | 7.2    | 3.0    | 0.3    | 0.3    | 2.2    |
| 5.9    | 4.9    | 2.2    | 5.2    | 4.9    | 8.1    | 3.8    | 3.3    | 3.4    |
| 242.9  | 358.6  | 219.6  | 367.5  | 295.1  | 359.0  | 459.6  | 521.7  | 551.1  |
| 10.3   | 8.3    | 1.9    | 15.3   | 9.7    | 13.4   | 7.9    | 6.0    | 7.2    |
| 13.6   | 8.1    | 10.7   | 19.7   | 26.1   | 27.2   | 11.4   | 3.4    | 9.8    |
| 19.4   | 13.9   | 4.3    | 12.4   | 14.1   | 21.2   | 4.2    | 5.7    | 10.1   |
| 4.1    | 11.5   | 3.1    | 12.1   | 7.7    | 12.5   | 4.7    | 12.5   | 11.2   |
| 99.4   | 104.4  | 67.5   | 130.8  | 144.8  | 151.4  | 85.5   | 79.5   | 88.2   |
| 170.9  | 250.3  | 183.6  | 105.5  | 103.6  | 98.2   | 55.7   | 57.3   | 53.9   |
| 920.4  | 880.0  | 587.7  | 898.3  | 700.2  | 781.4  | 466.1  | 441.5  | 475.7  |
| 16.7   | 19.9   | 16.8   | 4.4    | 17.0   | 6.9    | 1.7    | 1.9    | 3.5    |
| 640.7  | 853.1  | 736.8  | 509.8  | 494.3  | 586.6  | 326.6  | 413.7  | 395.7  |
| 74.5   | 77.9   | 71.6   | 52.0   | 41.4   | 58.3   | 22.1   | 23.9   | 31.7   |
| 13.8   | 17.6   | 9.0    | 16.3   | 8.5    | 7.5    | 3.7    | 9.7    | 6.0    |
| 38.4   | 28.3   | 17.5   | 32.2   | 19.6   | 34.3   | 26.5   | 21.5   | 23.4   |
| 21.6   | 29.2   | 8.3    | 33.4   | 49.6   | 56.3   | 24.7   | 36.6   | 33.1   |
| 17.0   | 21.3   | 30.9   | 10.2   | 11.8   | 12.1   | 16.3   | 14.8   | 22.9   |
| 5.0    | 24.8   | 13.1   | 24.4   | 24.8   | 23.4   | 15.8   | 15.9   | 18.2   |
| 0.5    | 2.4    | 0.5    | 2.0    | 3.8    | 1.6    | 0.6    | 0.3    | 0.7    |
| 3.9    | 11.0   | 6.8    | 8.3    | 21.5   | 13.3   | 17.3   | 1.9    | 6.4    |
| 25.2   | 27.5   | 21.4   | 43.2   | 36.3   | 36.3   | 23.7   | 24.7   | 28.9   |
| 192.5  | 247.8  | 172.9  | 177.1  | 106.3  | 111.8  | 94.2   | 81.8   | 102.6  |
| 511.5  | 678.6  | 636.3  | 250.0  | 221.2  | 221.6  | 357.9  | 430.7  | 454.6  |
| 785.4  | 1136.5 | 659.0  | 807.0  | 541.4  | 614.4  | 358.9  | 193.5  | 318.1  |
| 247.4  | 295.0  | 222.0  | 769.1  | 592.1  | 603.1  | 279.8  | 309.6  | 282.0  |
| 357.3  | 489.9  | 306.5  | 302.1  | 217.0  | 214.5  | 105.3  | 110.1  | 119.0  |
| 3.9    | 6.1    | 2.7    | 6.8    | 3.2    | 10.1   | 1.3    | 1.0    | 3.0    |
| 15.1   | 15.5   | 2.8    | 14.7   | 6.5    | 33.2   | 9.1    | 8.7    | 5.1    |
| 74.0   | 82.1   | 69.7   | 139.4  | 107.8  | 127.6  | 35.3   | 78.0   | 55.9   |
| 1306.2 | 836.7  | 390.6  | 400.7  | 284.2  | 285.2  | 320.7  | 237.5  | 271.3  |
| 419.6  | 475.5  | 276.1  | 1253.2 | 1075.6 | 1167.1 | 708.4  | 732.4  | 739.1  |
| 310.5  | 438.7  | 405.0  | 313.3  | 283.1  | 377.8  | 203.0  | 238.0  | 264.3  |
| 151.6  | 320.0  | 1054.3 | 9.0    | 5.7    | 4.4    | 6.2    | 4.9    | 3.4    |
| 8.1    | 10.0   | 3.0    | 14.0   | 14.4   | 13.2   | 5.5    | 5.0    | 9.5    |
| 2381.9 | 2764.2 | 2155.8 | 1539.7 | 1280.7 | 1469.2 | 1263.3 | 1318.4 | 1380.8 |
| 133.3  | 229.8  | 215.5  | 41.6   | 38.5   | 51.9   | 92.8   | 89.0   | 118.0  |
| 1.2    | 3.1    | 2.9    | 4.2    | 3.2    | 6.1    | 1.7    | 1.2    | 3.1    |
| 8882.4 | 9856.6 | 8720.0 | 8495.3 | 7378.6 | 7367.0 | 4986.5 | 4755.3 | 5066.1 |
| 55.6   | 72.3   | 69.7   | 4.2    | 15.2   | 9.7    | 2.8    | 1.6    | 2.8    |
| 818.4  | 794.1  | 516.1  | 252.3  | 144.0  | 169.8  | 226.3  | 166.7  | 194.7  |
| 51.2   | 53.6   | 39.1   | 48.6   | 24.5   | 32.3   | 21.8   | 9.7    | 7.7    |
| 72.1   | 64.7   | 36.8   | 110.1  | 88.7   | 91.6   | 129.4  | 119.1  | 155.6  |
| 2.9    | 3.1    | 1.9    | 24.1   | 11.0   | 12.2   | 1.4    | 1.3    | 1.6    |
| 341.9  | 351.6  | 305.9  | 55.9   | 43.8   | 57.0   | 83.8   | 80.6   | 78.4   |
| 3.8    | 2.9    | 3.1    | 4.1    | 3.2    | 7.2    | 0.8    | 0.3    | 1.0    |
| 5.7    | 7.7    | 2.6    | 6.7    | 8.4    | 8.0    | 8.2    | 7.7    | 6.7    |
| 20.5   | 24.7   | 22.9   | 146.2  | 125.8  | 113.5  | 29.4   | 22.0   | 24.5   |
| 302.7  | 333.0  | 191.0  | 499.7  | 341.1  | 378.9  | 343.1  | 268.3  | 320.5  |
| 542.7  | 662.9  | 412.6  | 365.6  | 312.9  | 324.6  | 255.6  | 279.7  | 317.8  |
| 120.4  | 146.4  | 102.8  | 136.2  | 142.8  | 134.0  | 30.3   | 39.8   | 43.0   |
| 7.6    | 9.9    | 13.0   | 19.7   | 8.9    | 18.4   | 6.6    | 9.9    | 14.2   |
| 90.6   | 95.2   | 78.4   | 88.2   | 93.6   | 103.2  | 79.1   | 78.2   | 86.4   |
| 72.7   | 69.4   | 52.3   | 10.3   | 6.5    | 3.2    | 13.6   | 2.9    | 8.3    |

|         |         |         |         |         |         |        |        |        |
|---------|---------|---------|---------|---------|---------|--------|--------|--------|
| 2.5     | 1.1     | 1.7     | 0.7     | 4.5     | 1.4     | 0.6    | 0.7    | 1.2    |
| 9.9     | 8.6     | 2.5     | 22.4    | 15.5    | 18.7    | 2.9    | 7.3    | 4.2    |
| 3.4     | 27.6    | 13.3    | 30.2    | 31.8    | 34.0    | 16.3   | 5.0    | 4.7    |
| 66.4    | 78.4    | 71.6    | 81.0    | 75.9    | 61.9    | 43.6   | 54.2   | 61.3   |
| 10.3    | 9.9     | 12.6    | 11.3    | 10.3    | 5.0     | 2.7    | 12.8   | 7.8    |
| 125.6   | 127.8   | 86.8    | 71.8    | 51.9    | 59.0    | 33.8   | 25.7   | 31.3   |
| 171.0   | 192.7   | 109.8   | 5.3     | 13.3    | 15.8    | 16.0   | 3.2    | 15.7   |
| 4.3     | 1.9     | 4.4     | 10.3    | 9.5     | 13.7    | 2.9    | 3.8    | 2.2    |
| 6.7     | 5.3     | 5.6     | 17.0    | 14.3    | 7.6     | 3.8    | 8.3    | 10.5   |
| 139.6   | 163.0   | 139.0   | 132.2   | 110.7   | 100.8   | 57.0   | 45.9   | 49.9   |
| 29.9    | 43.9    | 39.3    | 47.2    | 45.7    | 31.6    | 20.9   | 22.5   | 28.4   |
| 10194.0 | 10311.3 | 9665.1  | 11628.0 | 11096.2 | 11339.1 | 6872.7 | 7042.3 | 7559.3 |
| 75.3    | 66.5    | 32.0    | 78.7    | 64.1    | 61.4    | 50.6   | 37.0   | 55.2   |
| 14.0    | 9.2     | 14.8    | 10.5    | 11.3    | 6.5     | 4.8    | 9.7    | 9.5    |
| 8.4     | 4.8     | 5.0     | 11.1    | 8.8     | 7.4     | 3.2    | 9.3    | 3.6    |
| 8.2     | 16.8    | 7.5     | 24.7    | 14.8    | 28.8    | 16.1   | 14.5   | 15.2   |
| 22.2    | 27.2    | 25.3    | 39.1    | 35.8    | 38.3    | 19.8   | 16.2   | 11.7   |
| 3.9     | 16.5    | 11.6    | 14.3    | 9.1     | 15.6    | 15.5   | 19.9   | 7.2    |
| 401.0   | 386.4   | 211.2   | 259.8   | 228.5   | 195.0   | 149.5  | 144.5  | 169.6  |
| 308.5   | 374.6   | 254.9   | 113.8   | 90.5    | 112.3   | 99.9   | 99.1   | 113.3  |
| 20.4    | 20.6    | 15.0    | 15.6    | 22.8    | 22.1    | 12.1   | 10.3   | 22.1   |
| 339.9   | 405.2   | 283.7   | 273.8   | 209.0   | 262.0   | 163.7  | 172.8  | 167.0  |
| 50.0    | 86.1    | 91.7    | 122.7   | 102.0   | 122.3   | 82.3   | 102.9  | 106.4  |
| 40.5    | 41.4    | 29.8    | 42.2    | 29.6    | 34.7    | 14.7   | 8.4    | 15.7   |
| 14.8    | 2.9     | 11.1    | 9.2     | 5.3     | 13.6    | 10.7   | 7.4    | 5.7    |
| 794.6   | 842.1   | 576.7   | 796.1   | 636.0   | 666.7   | 354.6  | 361.3  | 393.5  |
| 40.6    | 75.3    | 85.8    | 471.2   | 285.6   | 409.9   | 331.2  | 278.2  | 349.5  |
| 126.5   | 159.3   | 170.4   | 12.6    | 16.3    | 14.1    | 5.9    | 7.3    | 6.4    |
| 1.7     | 1.8     | 2.8     | 10.1    | 27.6    | 9.7     | 2.3    | 4.5    | 4.2    |
| 1302.2  | 1685.9  | 1369.5  | 369.3   | 354.8   | 336.9   | 211.4  | 200.7  | 222.5  |
| 29.5    | 40.3    | 27.8    | 26.1    | 10.3    | 28.2    | 23.1   | 27.1   | 36.5   |
| 71.4    | 75.9    | 31.3    | 148.2   | 103.1   | 124.7   | 87.6   | 82.2   | 99.4   |
| 10.1    | 13.7    | 12.6    | 16.8    | 17.6    | 18.1    | 9.0    | 9.7    | 15.8   |
| 600.1   | 761.4   | 653.8   | 150.0   | 151.3   | 169.3   | 213.8  | 219.3  | 265.0  |
| 98.1    | 93.4    | 65.2    | 91.7    | 60.4    | 76.4    | 77.1   | 46.6   | 55.4   |
| 986.5   | 1344.4  | 1034.7  | 420.6   | 334.2   | 411.4   | 321.1  | 284.8  | 345.2  |
| 199.9   | 276.9   | 183.3   | 106.6   | 99.4    | 96.5    | 83.8   | 99.4   | 96.0   |
| 4.5     | 4.0     | 2.3     | 15.4    | 17.6    | 13.3    | 12.0   | 4.0    | 8.1    |
| 32.7    | 47.1    | 24.4    | 19.4    | 12.3    | 18.0    | 16.2   | 12.2   | 17.0   |
| 9.2     | 6.9     | 6.9     | 12.6    | 3.4     | 2.0     | 1.6    | 2.5    | 2.2    |
| 2193.5  | 2696.6  | 2327.9  | 859.7   | 831.6   | 849.1   | 612.4  | 959.4  | 863.0  |
| 41.3    | 79.8    | 65.1    | 116.7   | 88.0    | 99.3    | 103.6  | 96.8   | 109.3  |
| 333.8   | 541.8   | 322.4   | 162.7   | 113.2   | 113.1   | 178.4  | 168.9  | 198.7  |
| 3934.4  | 4287.3  | 3520.9  | 2836.7  | 2346.1  | 2594.7  | 2227.4 | 2206.1 | 2212.0 |
| 88.9    | 134.1   | 114.2   | 116.7   | 115.1   | 127.4   | 80.3   | 104.1  | 100.9  |
| 2.1     | 10.4    | 7.2     | 6.2     | 12.1    | 9.9     | 3.8    | 1.0    | 1.2    |
| 7.8     | 2.1     | 4.7     | 12.4    | 11.5    | 10.8    | 4.9    | 1.0    | 4.6    |
| 3818.7  | 4676.3  | 3687.0  | 1965.8  | 1689.4  | 1910.7  | 1568.0 | 1953.5 | 1877.2 |
| 312.1   | 183.1   | 102.2   | 7.8     | 5.8     | 11.8    | 14.1   | 10.8   | 10.3   |
| 3.5     | 2.9     | 4.4     | 18.6    | 11.7    | 9.2     | 9.0    | 12.7   | 10.1   |
| 10510.5 | 10011.1 | 10064.4 | 11814.3 | 10828.4 | 11372.7 | 7582.5 | 7411.3 | 7527.1 |
| 7.9     | 6.4     | 7.7     | 11.2    | 10.3    | 18.9    | 14.3   | 10.9   | 7.5    |
| 2.8     | 12.1    | 6.3     | 8.4     | 8.4     | 10.6    | 12.3   | 8.7    | 10.0   |

|        |        |        |        |        |        |        |        |        |
|--------|--------|--------|--------|--------|--------|--------|--------|--------|
| 18.7   | 22.4   | 12.9   | 13.3   | 9.1    | 25.3   | 13.2   | 4.1    | 13.0   |
| 18.4   | 14.5   | 16.6   | 17.0   | 10.4   | 12.0   | 16.7   | 6.4    | 10.3   |
| 4154.7 | 4183.3 | 3487.2 | 4631.1 | 4179.4 | 4061.5 | 2870.8 | 2790.6 | 2948.9 |
| 24.5   | 18.7   | 10.6   | 33.0   | 22.7   | 30.3   | 12.0   | 11.0   | 9.7    |
| 170.5  | 256.5  | 227.3  | 26.3   | 20.3   | 21.8   | 22.3   | 15.6   | 12.7   |
| 219.4  | 256.1  | 201.3  | 100.7  | 94.3   | 89.2   | 61.9   | 104.7  | 102.1  |
| 108.5  | 142.4  | 102.1  | 152.0  | 121.3  | 142.0  | 100.3  | 106.4  | 127.1  |
| 122.6  | 160.2  | 90.8   | 87.1   | 48.0   | 63.5   | 27.8   | 35.5   | 23.4   |
| 1108.3 | 1203.2 | 895.8  | 219.8  | 211.0  | 191.4  | 174.0  | 194.6  | 192.7  |
| 520.5  | 589.6  | 499.5  | 359.3  | 392.6  | 305.6  | 287.5  | 245.3  | 286.2  |
| 323.9  | 443.9  | 283.2  | 8.9    | 6.6    | 5.6    | 2.1    | 5.0    | 1.2    |
| 8665.1 | 8864.6 | 7263.0 | 5198.3 | 4557.9 | 4668.5 | 3452.5 | 3496.0 | 3824.3 |
| 26.9   | 50.7   | 38.6   | 45.3   | 35.0   | 45.4   | 38.0   | 58.7   | 50.2   |
| 1397.6 | 1667.6 | 1276.6 | 361.0  | 301.0  | 262.9  | 310.7  | 359.5  | 359.5  |
| 29.3   | 25.3   | 33.9   | 200.3  | 179.1  | 188.0  | 95.1   | 89.9   | 126.3  |
| 47.9   | 62.0   | 54.5   | 336.9  | 268.8  | 312.4  | 132.4  | 103.1  | 128.1  |
| 1069.4 | 1323.8 | 902.8  | 577.0  | 431.5  | 559.5  | 512.2  | 418.0  | 503.3  |
| 3.7    | 17.7   | 8.1    | 6.1    | 6.4    | 5.2    | 0.5    | 3.4    | 2.7    |
| 155.4  | 288.3  | 190.3  | 65.5   | 63.7   | 73.7   | 52.3   | 54.5   | 60.5   |
| 7626.2 | 8594.3 | 7192.6 | 7194.2 | 7184.3 | 7227.1 | 4089.8 | 4284.8 | 4354.3 |
| 6.4    | 11.0   | 6.7    | 22.7   | 16.8   | 21.4   | 9.1    | 12.0   | 7.9    |
| 1611.4 | 2013.3 | 1512.5 | 1183.4 | 1032.8 | 1099.7 | 587.6  | 488.1  | 633.3  |
| 492.4  | 591.9  | 488.0  | 629.1  | 524.9  | 593.8  | 325.4  | 322.1  | 378.0  |
| 3.3    | 2.1    | 4.9    | 8.9    | 8.1    | 9.2    | 5.6    | 6.8    | 3.6    |
| 5.5    | 3.5    | 0.6    | 6.2    | 10.8   | 11.9   | 1.1    | 6.9    | 5.5    |
| 104.0  | 140.6  | 119.6  | 55.6   | 46.7   | 52.1   | 36.6   | 46.2   | 47.9   |
| 1859.9 | 2351.0 | 1899.3 | 614.2  | 476.4  | 466.0  | 262.5  | 187.7  | 240.8  |
| 11.6   | 11.3   | 7.6    | 19.2   | 31.5   | 16.9   | 18.1   | 6.5    | 7.5    |
| 117.1  | 120.9  | 55.4   | 87.8   | 50.5   | 60.3   | 76.3   | 58.7   | 66.9   |
| 20.4   | 28.6   | 18.5   | 44.5   | 40.2   | 37.2   | 25.0   | 42.7   | 34.2   |
| 209.0  | 217.4  | 187.3  | 225.5  | 243.9  | 283.3  | 218.8  | 258.1  | 299.7  |
| 411.3  | 531.5  | 489.1  | 250.2  | 226.6  | 246.2  | 138.8  | 140.2  | 125.3  |
| 16.9   | 8.3    | 1.6    | 10.7   | 13.0   | 15.2   | 1.3    | 1.8    | 1.8    |
| 0.8    | 9.7    | 2.0    | 4.4    | 7.1    | 11.5   | 1.1    | 1.1    | 2.7    |
| 1.3    | 1.7    | 0.8    | 14.5   | 10.0   | 8.0    | 1.0    | 3.1    | 1.2    |
| 155.0  | 147.8  | 41.3   | 142.5  | 69.2   | 65.9   | 97.8   | 46.7   | 59.4   |
| 65.3   | 67.9   | 36.3   | 47.6   | 36.6   | 42.1   | 30.0   | 21.2   | 34.6   |
| 3.9    | 6.5    | 2.6    | 19.1   | 12.5   | 12.6   | 7.4    | 3.7    | 10.2   |
| 23.2   | 15.0   | 9.2    | 36.8   | 35.1   | 44.4   | 16.9   | 15.3   | 21.8   |
| 0.7    | 0.7    | 0.2    | 5.8    | 2.6    | 8.8    | 0.6    | 3.3    | 0.5    |
| 7000.4 | 7352.7 | 5223.1 | 4531.0 | 3382.4 | 3237.4 | 3520.1 | 2689.4 | 3142.9 |
| 115.1  | 146.4  | 58.2   | 417.5  | 320.7  | 373.6  | 332.1  | 251.7  | 346.1  |
| 138.6  | 154.7  | 51.2   | 442.1  | 288.0  | 381.2  | 250.8  | 230.3  | 270.8  |
| 25.5   | 10.9   | 3.9    | 3.1    | 3.4    | 12.0   | 7.4    | 6.5    | 2.8    |
| 1.1    | 1.7    | 0.6    | 2.6    | 1.7    | 2.4    | 1.6    | 1.0    | 1.7    |
| 93.1   | 127.4  | 107.5  | 160.5  | 139.0  | 153.8  | 109.3  | 95.8   | 101.9  |
| 15.9   | 33.7   | 30.3   | 17.7   | 11.1   | 13.1   | 11.6   | 21.8   | 22.1   |
| 748.6  | 890.6  | 619.4  | 631.3  | 506.5  | 562.4  | 661.0  | 642.6  | 712.4  |
| 28.0   | 39.6   | 28.7   | 56.4   | 48.5   | 62.9   | 49.6   | 45.8   | 46.6   |
| 1.3    | 4.6    | 4.8    | 5.8    | 12.9   | 9.4    | 4.6    | 4.5    | 5.2    |
| 8.1    | 5.1    | 12.3   | 6.5    | 4.2    | 5.9    | 8.5    | 10.3   | 1.3    |
| 24.5   | 26.7   | 17.0   | 12.3   | 16.1   | 20.0   | 2.2    | 11.5   | 13.0   |
| 1223.3 | 1528.7 | 1155.9 | 642.4  | 578.7  | 573.6  | 451.1  | 509.2  | 534.3  |

|        |        |        |        |        |        |        |        |        |
|--------|--------|--------|--------|--------|--------|--------|--------|--------|
| 113.2  | 208.5  | 401.6  | 4.7    | 7.2    | 4.4    | 3.7    | 3.5    | 2.5    |
| 16.4   | 14.1   | 8.9    | 12.4   | 22.1   | 14.2   | 5.1    | 15.3   | 15.3   |
| 140.7  | 168.2  | 82.2   | 90.2   | 62.3   | 67.3   | 123.3  | 77.9   | 105.1  |
| 124.3  | 143.5  | 111.7  | 121.6  | 96.8   | 100.2  | 82.0   | 70.3   | 83.4   |
| 9.5    | 13.3   | 20.9   | 59.6   | 41.3   | 36.7   | 12.8   | 6.3    | 9.7    |
| 379.5  | 445.8  | 448.5  | 117.9  | 104.2  | 100.4  | 138.5  | 162.3  | 144.8  |
| 135.3  | 188.6  | 167.1  | 73.8   | 49.1   | 64.5   | 57.5   | 50.2   | 64.7   |
| 3.8    | 18.9   | 12.6   | 57.1   | 48.1   | 60.8   | 27.0   | 34.2   | 38.9   |
| 6100.8 | 6803.6 | 6194.8 | 202.7  | 183.8  | 210.5  | 168.1  | 165.1  | 190.8  |
| 8.0    | 1.3    | 2.6    | 48.9   | 43.3   | 45.4   | 23.1   | 36.4   | 36.3   |
| 68.9   | 79.8   | 70.4   | 71.5   | 49.9   | 57.7   | 47.1   | 51.2   | 53.1   |
| 37.9   | 45.8   | 29.8   | 85.7   | 67.0   | 67.4   | 58.4   | 43.9   | 59.2   |
| 59.5   | 54.5   | 52.1   | 71.8   | 49.1   | 57.7   | 34.7   | 48.0   | 43.5   |
| 245.9  | 228.0  | 134.2  | 136.3  | 88.2   | 121.8  | 101.8  | 101.9  | 124.5  |
| 2.8    | 4.0    | 5.7    | 10.4   | 9.0    | 14.5   | 6.7    | 4.9    | 3.5    |
| 85.1   | 109.8  | 66.0   | 38.5   | 30.0   | 32.2   | 19.3   | 21.6   | 20.9   |
| 7.2    | 4.0    | 7.9    | 316.5  | 329.8  | 340.1  | 235.5  | 291.8  | 330.5  |
| 8560.8 | 8762.3 | 7463.5 | 7229.0 | 6592.6 | 6611.7 | 4663.0 | 4705.3 | 4927.2 |
| 5.4    | 4.6    | 37.5   | 84.5   | 73.0   | 70.5   | 38.1   | 46.7   | 53.4   |
| 4.8    | 1.6    | 2.4    | 307.5  | 300.1  | 299.0  | 178.2  | 297.0  | 310.5  |
| 154.9  | 168.5  | 133.9  | 268.8  | 219.8  | 256.9  | 189.1  | 188.0  | 185.1  |
| 50.6   | 47.7   | 32.8   | 80.8   | 74.3   | 77.4   | 27.0   | 29.2   | 25.2   |
| 1.9    | 1.4    | 2.1    | 20.0   | 18.6   | 16.4   | 7.9    | 10.8   | 10.2   |
| 190.0  | 245.2  | 184.7  | 264.0  | 187.7  | 199.2  | 144.1  | 123.8  | 117.4  |
| 18.7   | 18.1   | 18.8   | 19.9   | 12.5   | 21.1   | 12.8   | 14.3   | 6.9    |
| 11.1   | 6.6    | 4.9    | 27.2   | 13.5   | 18.3   | 6.0    | 3.8    | 4.6    |
| 3.1    | 6.0    | 9.1    | 22.9   | 12.5   | 15.3   | 6.1    | 6.7    | 3.0    |
| 309.1  | 225.7  | 86.3   | 131.9  | 67.6   | 89.2   | 72.3   | 50.5   | 58.6   |
| 17.1   | 9.6    | 11.4   | 30.7   | 16.4   | 15.5   | 13.0   | 6.0    | 14.8   |
| 12.1   | 7.5    | 3.5    | 13.5   | 11.8   | 20.0   | 6.5    | 1.9    | 5.7    |
| 574.4  | 683.0  | 294.1  | 41.2   | 34.9   | 35.3   | 56.2   | 48.7   | 58.0   |
| 5.4    | 4.8    | 4.7    | 10.7   | 4.9    | 11.7   | 2.9    | 3.0    | 4.3    |
| 75.1   | 100.2  | 84.2   | 79.7   | 64.8   | 62.2   | 39.9   | 42.2   | 53.4   |
| 70.8   | 78.8   | 68.6   | 39.5   | 29.6   | 34.9   | 29.0   | 29.1   | 37.4   |
| 10.0   | 10.7   | 16.2   | 22.3   | 13.1   | 14.8   | 10.9   | 7.4    | 15.3   |
| 71.1   | 110.5  | 77.7   | 16.8   | 19.1   | 28.8   | 15.3   | 21.4   | 17.7   |
| 6.0    | 4.1    | 0.5    | 10.2   | 9.1    | 16.4   | 10.1   | 3.1    | 5.7    |
| 2.7    | 3.1    | 2.1    | 3.2    | 3.9    | 10.3   | 1.6    | 1.7    | 2.1    |
| 4.1    | 17.0   | 17.6   | 7.8    | 5.1    | 6.0    | 4.9    | 8.7    | 8.1    |
| 19.2   | 33.4   | 20.3   | 52.1   | 34.0   | 37.7   | 14.1   | 9.9    | 27.2   |
| 7.5    | 11.8   | 14.1   | 34.6   | 24.3   | 23.2   | 14.9   | 18.2   | 17.8   |
| 5.3    | 1.9    | 3.6    | 13.6   | 13.8   | 9.7    | 11.3   | 4.9    | 15.1   |
| 4.2    | 10.6   | 1.3    | 38.9   | 22.4   | 31.7   | 8.1    | 2.8    | 5.9    |
| 1.9    | 4.6    | 2.8    | 15.0   | 11.7   | 13.9   | 7.1    | 5.9    | 12.7   |
| 8.2    | 17.2   | 11.0   | 6.1    | 18.7   | 21.8   | 23.5   | 3.3    | 4.7    |
| 5702.5 | 6316.6 | 5316.2 | 5413.9 | 5212.6 | 5302.2 | 3017.8 | 3324.3 | 3533.9 |
| 222.6  | 300.1  | 231.6  | 107.2  | 105.2  | 113.9  | 69.1   | 78.6   | 86.5   |
| 605.2  | 617.2  | 357.8  | 125.7  | 97.7   | 101.7  | 140.8  | 113.8  | 154.5  |
| 2.6    | 2.1    | 2.4    | 12.3   | 7.3    | 5.0    | 1.7    | 2.3    | 7.3    |
| 30.0   | 26.8   | 24.0   | 14.7   | 20.0   | 17.5   | 16.6   | 10.6   | 26.8   |
| 9.1    | 7.6    | 8.8    | 19.1   | 18.2   | 27.4   | 15.5   | 14.9   | 16.9   |
| 5212.8 | 5977.6 | 4911.0 | 5.6    | 7.4    | 8.6    | 4.6    | 15.2   | 16.4   |
| 25.9   | 24.8   | 15.9   | 32.0   | 34.0   | 36.7   | 22.4   | 21.6   | 25.7   |

|         |         |         |         |         |         |        |        |        |
|---------|---------|---------|---------|---------|---------|--------|--------|--------|
| 254.6   | 380.4   | 390.0   | 1121.6  | 741.8   | 875.1   | 531.9  | 496.7  | 564.5  |
| 8.1     | 26.9    | 9.7     | 31.4    | 26.3    | 21.4    | 10.6   | 7.3    | 7.8    |
| 120.1   | 175.2   | 145.5   | 157.1   | 143.3   | 123.1   | 60.5   | 64.7   | 69.9   |
| 1110.4  | 1444.9  | 1201.8  | 958.8   | 784.6   | 792.7   | 626.1  | 605.4  | 732.8  |
| 32.3    | 23.1    | 27.8    | 50.3    | 30.6    | 33.1    | 8.5    | 10.6   | 26.8   |
| 353.7   | 425.7   | 485.6   | 64.9    | 51.0    | 49.3    | 39.1   | 39.5   | 44.6   |
| 243.4   | 269.5   | 154.2   | 128.8   | 94.9    | 102.5   | 133.3  | 94.4   | 119.0  |
| 255.7   | 278.0   | 151.7   | 80.9    | 56.8    | 57.3    | 138.3  | 93.6   | 113.1  |
| 4.3     | 6.6     | 10.5    | 9.6     | 4.3     | 3.4     | 1.7    | 1.0    | 1.5    |
| 179.6   | 235.6   | 155.5   | 39.8    | 26.5    | 40.0    | 93.1   | 90.9   | 100.1  |
| 3.2     | 2.1     | 2.3     | 3.7     | 2.8     | 2.2     | 1.3    | 1.0    | 0.9    |
| 4147.5  | 3656.6  | 2410.1  | 643.5   | 673.3   | 592.4   | 586.9  | 1027.8 | 920.7  |
| 80.7    | 92.2    | 34.4    | 70.4    | 56.6    | 65.4    | 28.6   | 24.2   | 46.6   |
| 2.2     | 4.0     | 4.2     | 7.1     | 4.7     | 6.5     | 3.8    | 1.5    | 7.7    |
| 3.9     | 3.4     | 1.7     | 10.7    | 14.2    | 6.2     | 2.5    | 4.5    | 10.4   |
| 12.0    | 8.7     | 7.8     | 11.5    | 8.3     | 18.5    | 12.1   | 13.1   | 6.4    |
| 0.8     | 4.5     | 0.9     | 4.8     | 2.0     | 1.7     | 3.0    | 3.2    | 6.9    |
| 1.7     | 4.9     | 0.8     | 5.4     | 3.0     | 1.5     | 0.4    | 1.1    | 1.1    |
| 431.1   | 558.7   | 414.7   | 263.6   | 225.1   | 228.8   | 237.7  | 296.8  | 256.8  |
| 13.9    | 31.1    | 36.2    | 71.1    | 86.0    | 91.3    | 36.5   | 78.9   | 67.9   |
| 15.6    | 45.1    | 49.1    | 39.9    | 23.9    | 24.9    | 34.3   | 26.8   | 17.1   |
| 103.5   | 147.9   | 109.5   | 204.3   | 258.3   | 199.2   | 461.6  | 449.1  | 560.9  |
| 22.2    | 31.4    | 21.3    | 17.0    | 11.9    | 15.4    | 17.1   | 22.5   | 21.6   |
| 0.9     | 1.4     | 0.7     | 8.4     | 4.0     | 5.2     | 2.3    | 2.1    | 2.1    |
| 128.9   | 155.0   | 125.6   | 123.1   | 88.5    | 97.7    | 50.2   | 46.8   | 62.4   |
| 36.8    | 42.5    | 40.7    | 76.3    | 74.7    | 79.5    | 38.9   | 58.6   | 56.6   |
| 12093.7 | 11625.2 | 11638.8 | 12322.2 | 11145.1 | 11136.0 | 7602.8 | 7409.7 | 7974.9 |
| 642.4   | 755.8   | 507.1   | 397.4   | 412.0   | 369.8   | 231.5  | 325.2  | 309.0  |
| 444.4   | 474.3   | 299.1   | 226.4   | 167.9   | 172.3   | 124.1  | 94.3   | 129.9  |
| 227.9   | 307.8   | 208.3   | 157.7   | 128.6   | 131.9   | 97.2   | 88.3   | 98.0   |
| 774.7   | 781.9   | 600.1   | 250.4   | 222.3   | 283.6   | 318.3  | 293.5  | 320.8  |
| 39.4    | 37.5    | 37.8    | 18.0    | 15.7    | 19.0    | 17.0   | 16.3   | 9.9    |
| 43.8    | 50.5    | 37.6    | 88.2    | 68.8    | 81.3    | 79.4   | 67.5   | 81.9   |
| 256.1   | 336.2   | 247.4   | 15.8    | 15.5    | 16.6    | 6.9    | 8.9    | 7.0    |
| 1163.5  | 1138.1  | 646.5   | 654.2   | 597.4   | 677.0   | 347.7  | 318.3  | 370.9  |
| 300.1   | 384.5   | 300.7   | 15.4    | 11.0    | 19.4    | 16.0   | 24.7   | 30.0   |
| 9.3     | 8.4     | 3.6     | 8.1     | 5.0     | 10.7    | 3.5    | 2.0    | 7.6    |
| 5.8     | 40.1    | 12.2    | 40.6    | 37.9    | 16.9    | 62.3   | 51.9   | 55.5   |
| 27.8    | 24.3    | 21.2    | 76.1    | 51.4    | 76.9    | 59.0   | 34.4   | 51.5   |
| 183.8   | 175.2   | 203.3   | 240.6   | 207.1   | 187.5   | 168.1  | 177.0  | 200.6  |
| 95.9    | 95.4    | 67.5    | 159.6   | 105.5   | 110.4   | 73.5   | 71.3   | 81.9   |
| 1.4     | 3.4     | 1.7     | 2.3     | 2.6     | 2.5     | 1.4    | 1.3    | 1.3    |
| 27.2    | 23.2    | 8.3     | 11.7    | 10.4    | 11.2    | 16.4   | 10.0   | 10.7   |
| 122.9   | 167.5   | 133.5   | 643.0   | 488.6   | 490.1   | 117.7  | 106.4  | 105.6  |
| 49.1    | 56.9    | 49.9    | 39.9    | 36.0    | 36.6    | 13.4   | 15.1   | 22.3   |
| 26.1    | 19.6    | 17.2    | 19.9    | 17.8    | 25.5    | 18.5   | 12.5   | 23.6   |
| 26.1    | 39.1    | 53.6    | 13.1    | 4.4     | 10.4    | 8.6    | 9.2    | 8.9    |
| 8.6     | 6.9     | 4.8     | 8.7     | 10.3    | 8.6     | 5.8    | 4.9    | 4.5    |
| 16.3    | 17.4    | 2.9     | 22.1    | 32.8    | 24.9    | 9.4    | 13.3   | 4.2    |
| 2.4     | 1.0     | 0.6     | 1.8     | 2.5     | 1.7     | 1.3    | 0.4    | 0.9    |
| 7.7     | 7.2     | 6.2     | 22.8    | 13.3    | 23.8    | 3.7    | 5.5    | 5.6    |
| 108.7   | 123.1   | 109.0   | 46.2    | 42.3    | 35.3    | 46.5   | 37.3   | 26.8   |
| 3.3     | 2.3     | 4.2     | 3.4     | 7.3     | 3.6     | 4.4    | 5.8    | 2.0    |

|        |        |        |        |        |        |        |        |        |
|--------|--------|--------|--------|--------|--------|--------|--------|--------|
| 268.5  | 335.3  | 272.1  | 115.9  | 86.9   | 107.5  | 76.9   | 68.8   | 56.2   |
| 1.4    | 1.8    | 1.1    | 30.9   | 35.6   | 21.0   | 13.9   | 11.0   | 11.9   |
| 2.9    | 6.7    | 1.0    | 10.4   | 12.2   | 7.2    | 2.7    | 4.6    | 6.0    |
| 104.6  | 180.6  | 173.2  | 38.7   | 32.6   | 39.0   | 15.2   | 13.5   | 13.0   |
| 9.2    | 10.5   | 6.9    | 12.8   | 10.2   | 11.5   | 2.4    | 3.9    | 7.5    |
| 177.8  | 273.1  | 162.9  | 360.0  | 459.4  | 495.0  | 225.3  | 368.6  | 382.7  |
| 58.2   | 46.2   | 44.8   | 82.0   | 67.1   | 92.3   | 31.8   | 45.4   | 51.0   |
| 101.3  | 118.5  | 92.7   | 73.9   | 60.8   | 77.8   | 49.4   | 44.0   | 49.2   |
| 5.4    | 4.2    | 10.6   | 11.7   | 6.7    | 9.2    | 5.6    | 6.8    | 8.5    |
| 379.5  | 654.7  | 673.1  | 6988.3 | 6622.1 | 6460.3 | 5311.6 | 4914.1 | 5819.9 |
| 146.6  | 280.5  | 305.0  | 67.2   | 64.7   | 83.3   | 256.0  | 348.5  | 355.6  |
| 565.7  | 754.3  | 643.5  | 409.2  | 428.8  | 346.7  | 130.2  | 131.0  | 163.2  |
| 2849.5 | 3776.4 | 3062.7 | 1427.8 | 1240.4 | 1288.4 | 1293.1 | 1370.9 | 1490.7 |
| 12.8   | 11.0   | 1.0    | 5.0    | 3.4    | 9.9    | 1.4    | 1.5    | 3.9    |
| 9.1    | 28.8   | 13.8   | 18.4   | 14.6   | 21.2   | 3.4    | 2.7    | 6.4    |
| 248.7  | 412.2  | 294.7  | 34.5   | 21.3   | 40.5   | 49.6   | 34.7   | 48.9   |
| 0.8    | 1.4    | 1.3    | 134.0  | 134.3  | 136.5  | 60.2   | 89.8   | 88.8   |
| 980.6  | 1222.4 | 867.0  | 369.8  | 238.6  | 237.2  | 254.8  | 204.0  | 246.6  |
| 102.6  | 123.2  | 99.5   | 41.5   | 30.7   | 25.1   | 30.3   | 34.9   | 35.7   |
| 4.5    | 8.2    | 3.3    | 18.9   | 23.1   | 12.5   | 7.8    | 7.4    | 4.5    |
| 17.5   | 21.6   | 17.2   | 17.0   | 16.6   | 17.0   | 13.2   | 5.9    | 7.5    |
| 17.7   | 20.9   | 15.7   | 32.5   | 19.2   | 21.6   | 7.9    | 11.8   | 17.3   |
| 46.6   | 43.4   | 33.2   | 39.8   | 44.4   | 53.9   | 36.2   | 18.3   | 22.0   |
| 9.7    | 5.7    | 10.1   | 72.8   | 79.8   | 89.9   | 50.1   | 84.7   | 69.8   |
| 7.3    | 9.0    | 4.0    | 24.9   | 22.6   | 13.5   | 3.6    | 11.8   | 16.3   |
| 344.4  | 416.7  | 310.8  | 432.1  | 356.9  | 304.8  | 369.2  | 419.8  | 422.6  |
| 50.9   | 67.2   | 47.3   | 156.1  | 122.4  | 134.2  | 120.2  | 131.1  | 125.2  |
| 41.5   | 40.4   | 40.9   | 100.5  | 76.9   | 86.6   | 30.5   | 46.3   | 44.4   |
| 117.7  | 293.0  | 327.4  | 150.7  | 153.0  | 167.6  | 87.9   | 149.7  | 132.4  |
| 1.8    | 10.8   | 5.1    | 11.8   | 12.0   | 7.3    | 8.4    | 7.1    | 3.9    |
| 30.2   | 36.9   | 36.1   | 15.7   | 16.4   | 28.3   | 16.5   | 8.9    | 12.4   |
| 464.2  | 508.2  | 318.2  | 129.7  | 76.5   | 90.1   | 102.8  | 63.3   | 79.2   |
| 174.9  | 179.1  | 128.0  | 22.7   | 9.3    | 11.2   | 17.8   | 21.6   | 15.0   |
| 11.2   | 11.4   | 6.0    | 12.9   | 10.8   | 12.1   | 12.8   | 6.7    | 6.7    |
| 6.6    | 13.4   | 14.3   | 38.4   | 23.3   | 24.6   | 9.9    | 10.4   | 15.9   |
| 3.5    | 7.5    | 5.2    | 4.4    | 10.0   | 4.1    | 9.0    | 2.4    | 3.3    |
| 40.6   | 66.8   | 43.0   | 44.0   | 35.2   | 42.0   | 19.0   | 13.4   | 9.3    |
| 8.4    | 2.8    | 1.2    | 6.7    | 3.1    | 5.4    | 6.2    | 3.6    | 2.4    |
| 21.7   | 27.7   | 27.3   | 9.1    | 17.4   | 20.6   | 16.1   | 14.6   | 11.9   |
| 10.5   | 3.3    | 1.9    | 16.8   | 9.9    | 8.0    | 8.2    | 3.4    | 1.9    |
| 33.3   | 46.3   | 64.4   | 42.5   | 28.3   | 38.6   | 31.0   | 35.2   | 30.1   |
| 87.3   | 144.9  | 224.0  | 4.6    | 4.4    | 5.2    | 0.7    | 2.6    | 7.2    |
| 30.8   | 47.9   | 25.8   | 44.0   | 53.8   | 59.1   | 12.2   | 14.5   | 23.0   |
| 73.4   | 112.1  | 67.3   | 138.9  | 125.3  | 126.7  | 68.0   | 57.2   | 71.1   |
| 133.2  | 155.3  | 101.0  | 189.3  | 153.2  | 169.5  | 132.0  | 108.9  | 138.6  |
| 100.5  | 127.4  | 98.6   | 138.6  | 100.1  | 120.5  | 78.5   | 87.1   | 78.4   |
| 57.1   | 74.7   | 51.8   | 83.5   | 72.9   | 80.6   | 48.2   | 49.6   | 56.5   |
| 28.9   | 37.4   | 30.8   | 32.8   | 26.7   | 24.7   | 20.0   | 19.5   | 20.6   |
| 2.4    | 0.3    | 2.4    | 4.9    | 3.6    | 6.2    | 1.3    | 0.2    | 1.9    |
| 10.2   | 19.2   | 20.7   | 4583.2 | 4286.4 | 4557.8 | 3231.4 | 3297.8 | 3605.1 |
| 619.1  | 686.9  | 724.4  | 1214.6 | 1080.3 | 1141.1 | 608.2  | 591.7  | 449.0  |
| 10.8   | 13.6   | 13.7   | 32.3   | 32.6   | 39.8   | 18.6   | 17.3   | 22.1   |
| 14.6   | 22.9   | 3.1    | 93.4   | 89.0   | 106.2  | 66.8   | 91.7   | 83.8   |

|        |        |        |        |       |        |       |       |       |
|--------|--------|--------|--------|-------|--------|-------|-------|-------|
| 42.2   | 46.8   | 30.9   | 56.0   | 71.0  | 52.6   | 37.7  | 44.5  | 44.9  |
| 1.2    | 1.8    | 2.3    | 8.6    | 7.3   | 12.2   | 1.4   | 2.1   | 2.3   |
| 62.3   | 84.7   | 39.7   | 72.6   | 55.2  | 65.0   | 40.5  | 27.7  | 32.4  |
| 453.1  | 477.9  | 210.2  | 747.3  | 440.1 | 471.9  | 393.4 | 306.3 | 333.1 |
| 11.3   | 11.4   | 9.0    | 7.7    | 7.4   | 20.4   | 8.8   | 4.9   | 8.1   |
| 311.9  | 399.9  | 340.4  | 18.8   | 15.8  | 20.4   | 22.4  | 8.8   | 14.0  |
| 3.0    | 1.3    | 1.7    | 1.8    | 1.2   | 3.3    | 1.3   | 0.8   | 1.7   |
| 5.8    | 13.8   | 6.0    | 17.2   | 11.0  | 10.8   | 13.5  | 5.1   | 10.1  |
| 425.5  | 553.7  | 557.5  | 29.9   | 20.0  | 25.2   | 17.2  | 21.8  | 25.0  |
| 187.6  | 242.8  | 141.3  | 118.4  | 92.6  | 103.1  | 63.9  | 70.9  | 75.8  |
| 219.2  | 289.3  | 178.2  | 142.6  | 116.6 | 148.4  | 98.3  | 81.7  | 94.7  |
| 14.7   | 19.2   | 10.0   | 5.8    | 10.1  | 3.9    | 1.9   | 2.7   | 2.4   |
| 198.3  | 296.3  | 217.6  | 213.7  | 145.9 | 161.0  | 103.1 | 80.9  | 77.7  |
| 1603.0 | 1839.4 | 1375.0 | 1412.1 | 925.6 | 1037.3 | 573.7 | 509.5 | 548.1 |
| 769.1  | 1005.2 | 737.7  | 214.2  | 153.2 | 191.3  | 91.0  | 77.0  | 95.6  |
| 39.7   | 49.5   | 39.9   | 24.9   | 16.5  | 21.2   | 11.3  | 15.5  | 18.0  |
| 9.5    | 13.9   | 6.5    | 7.2    | 7.4   | 5.4    | 6.5   | 7.5   | 15.0  |
| 276.9  | 374.0  | 250.6  | 280.4  | 234.6 | 270.9  | 132.3 | 157.5 | 165.8 |
| 179.5  | 310.0  | 329.7  | 248.2  | 223.7 | 196.1  | 139.3 | 145.9 | 113.2 |
| 48.2   | 37.4   | 18.9   | 43.8   | 20.9  | 35.0   | 17.1  | 17.5  | 18.7  |
| 4.1    | 2.1    | 1.0    | 5.3    | 5.1   | 14.1   | 5.4   | 2.6   | 2.9   |
| 41.5   | 98.9   | 159.6  | 60.8   | 43.8  | 49.7   | 24.0  | 22.9  | 24.7  |
| 10.5   | 6.7    | 12.0   | 29.1   | 14.5  | 13.8   | 7.3   | 8.1   | 9.5   |
| 1015.0 | 1263.7 | 977.6  | 254.9  | 209.4 | 213.4  | 207.9 | 155.4 | 214.7 |
| 246.9  | 350.1  | 296.6  | 630.5  | 507.5 | 543.9  | 392.1 | 358.1 | 432.2 |
| 48.2   | 49.5   | 31.4   | 25.8   | 28.8  | 34.5   | 22.8  | 19.4  | 20.8  |
| 287.4  | 477.0  | 438.6  | 234.6  | 217.0 | 226.9  | 225.1 | 233.8 | 271.0 |
| 97.2   | 138.7  | 103.6  | 81.9   | 87.3  | 83.4   | 29.6  | 45.1  | 35.6  |
| 1.3    | 5.1    | 1.2    | 7.3    | 2.1   | 4.8    | 0.6   | 1.0   | 0.8   |
| 469.2  | 522.1  | 392.3  | 412.1  | 318.4 | 352.2  | 238.3 | 198.9 | 232.0 |
| 1173.3 | 1442.9 | 1034.5 | 763.9  | 583.5 | 654.5  | 533.0 | 438.8 | 548.1 |
| 260.4  | 371.8  | 265.2  | 562.6  | 450.7 | 448.0  | 356.0 | 438.2 | 494.7 |
| 1.1    | 1.8    | 0.9    | 4.4    | 2.5   | 3.1    | 1.5   | 2.3   | 1.7   |
| 74.8   | 99.6   | 90.0   | 29.1   | 34.6  | 25.6   | 10.2  | 21.1  | 22.7  |
| 65.6   | 113.4  | 94.7   | 37.0   | 24.8  | 33.4   | 42.8  | 49.3  | 46.9  |
| 362.4  | 436.9  | 403.3  | 277.0  | 228.3 | 257.5  | 237.8 | 211.7 | 258.4 |
| 2195.4 | 2638.6 | 1974.5 | 793.6  | 697.8 | 801.4  | 730.6 | 771.3 | 873.9 |
| 4.7    | 4.4    | 1.6    | 6.6    | 8.2   | 5.3    | 2.0   | 2.1   | 5.4   |
| 117.0  | 97.5   | 74.6   | 66.1   | 38.8  | 32.3   | 41.2  | 24.2  | 32.7  |
| 5.7    | 10.6   | 10.8   | 10.3   | 7.3   | 13.5   | 9.8   | 8.4   | 3.4   |
| 23.8   | 24.1   | 13.6   | 33.5   | 32.7  | 28.2   | 11.5  | 14.8  | 10.5  |
| 501.9  | 625.4  | 432.4  | 71.0   | 45.5  | 50.3   | 50.4  | 43.8  | 46.1  |
| 4.3    | 2.5    | 3.5    | 14.5   | 17.0  | 18.0   | 2.3   | 2.5   | 2.1   |
| 109.4  | 133.2  | 91.4   | 58.8   | 36.4  | 57.3   | 36.4  | 36.2  | 38.9  |
| 2.3    | 1.5    | 2.2    | 13.1   | 6.7   | 2.8    | 0.9   | 1.4   | 1.2   |
| 26.8   | 58.4   | 48.2   | 30.3   | 25.1  | 47.7   | 24.4  | 32.9  | 30.7  |
| 261.5  | 369.0  | 304.3  | 303.4  | 198.6 | 210.9  | 228.2 | 203.5 | 236.5 |
| 48.9   | 92.1   | 88.6   | 95.0   | 72.7  | 79.9   | 74.0  | 54.4  | 74.9  |
| 72.4   | 108.0  | 69.3   | 5.8    | 8.1   | 7.0    | 1.7   | 0.9   | 5.9   |
| 36.1   | 55.4   | 45.5   | 43.2   | 24.4  | 31.5   | 26.7  | 22.1  | 35.0  |
| 22.8   | 13.7   | 17.1   | 122.4  | 115.8 | 111.9  | 39.7  | 52.7  | 43.6  |
| 2.9    | 2.5    | 1.8    | 5.6    | 2.8   | 6.0    | 1.6   | 1.6   | 1.9   |
| 22.8   | 28.0   | 11.3   | 34.3   | 31.5  | 29.5   | 18.2  | 14.2  | 11.5  |

|         |         |         |        |        |        |        |        |        |
|---------|---------|---------|--------|--------|--------|--------|--------|--------|
| 51.7    | 67.4    | 67.4    | 21.1   | 25.7   | 25.0   | 15.7   | 25.8   | 27.4   |
| 20.8    | 21.5    | 19.8    | 34.0   | 20.6   | 35.7   | 15.0   | 6.2    | 15.4   |
| 36.3    | 47.6    | 29.6    | 101.4  | 94.7   | 99.8   | 70.0   | 72.1   | 88.6   |
| 17.6    | 16.9    | 6.0     | 16.5   | 14.3   | 17.9   | 9.4    | 14.1   | 9.7    |
| 60.0    | 74.0    | 55.8    | 91.8   | 85.5   | 73.6   | 99.1   | 105.4  | 102.9  |
| 4104.9  | 3879.7  | 1929.3  | 2260.1 | 1694.0 | 1673.9 | 1493.4 | 1001.5 | 1276.6 |
| 4.7     | 12.5    | 2.0     | 40.3   | 32.3   | 37.1   | 18.0   | 29.2   | 19.8   |
| 11048.7 | 11215.4 | 10104.4 | 5953.8 | 5360.6 | 5360.6 | 3107.6 | 3099.5 | 3312.1 |
| 103.3   | 125.9   | 63.1    | 146.2  | 102.5  | 138.2  | 76.0   | 67.3   | 83.9   |
| 4.8     | 3.0     | 1.3     | 10.6   | 7.3    | 3.8    | 2.3    | 4.6    | 3.7    |
| 2.6     | 0.5     | 1.0     | 6.9    | 3.6    | 5.3    | 1.5    | 3.0    | 0.9    |
| 10.8    | 8.3     | 3.4     | 7.3    | 7.9    | 10.8   | 2.4    | 3.1    | 2.0    |
| 18.9    | 23.1    | 31.8    | 32.0   | 46.0   | 48.6   | 22.1   | 33.9   | 35.6   |
| 162.4   | 206.0   | 193.2   | 242.8  | 221.2  | 239.5  | 43.8   | 52.7   | 72.1   |
| 2504.9  | 3267.9  | 2709.6  | 1831.3 | 1920.0 | 1962.8 | 1169.2 | 1498.6 | 1579.9 |
| 119.1   | 177.3   | 141.7   | 53.6   | 48.2   | 70.6   | 45.8   | 72.3   | 60.4   |
| 173.0   | 252.0   | 216.9   | 47.6   | 55.0   | 61.1   | 48.0   | 90.0   | 73.2   |
| 11.2    | 16.8    | 12.8    | 36.2   | 25.3   | 24.8   | 11.4   | 19.7   | 19.4   |
| 43.3    | 72.1    | 55.6    | 5.2    | 3.5    | 20.3   | 9.3    | 13.4   | 13.9   |
| 470.8   | 487.4   | 292.7   | 191.5  | 128.5  | 127.5  | 261.6  | 196.1  | 250.0  |
| 7.6     | 6.8     | 10.6    | 81.4   | 58.9   | 65.9   | 74.8   | 90.2   | 96.3   |
| 567.6   | 699.4   | 521.1   | 215.5  | 177.8  | 181.3  | 142.8  | 119.3  | 136.3  |
| 7.4     | 6.3     | 4.1     | 6.9    | 11.4   | 8.6    | 1.9    | 2.9    | 4.8    |
| 7.2     | 6.7     | 6.2     | 10.1   | 7.5    | 11.6   | 6.1    | 3.3    | 7.2    |
| 2.1     | 13.8    | 7.0     | 16.5   | 7.0    | 9.3    | 4.9    | 2.6    | 7.1    |
| 17.2    | 18.9    | 7.1     | 15.0   | 12.8   | 8.5    | 4.5    | 1.9    | 2.1    |
| 3.0     | 4.8     | 1.7     | 7.3    | 3.9    | 11.5   | 6.5    | 0.7    | 2.6    |
| 11.5    | 14.3    | 6.9     | 16.6   | 7.4    | 7.0    | 7.1    | 10.8   | 7.6    |
| 18.5    | 22.4    | 16.4    | 638.7  | 427.7  | 452.6  | 283.7  | 219.1  | 282.9  |
| 2.5     | 1.5     | 1.1     | 1.7    | 1.5    | 1.3    | 0.8    | 0.6    | 1.2    |
| 4.9     | 6.0     | 6.9     | 13.6   | 11.3   | 8.3    | 8.9    | 7.9    | 4.0    |
| 8774.5  | 9143.0  | 8695.7  | 7802.1 | 7364.3 | 7386.5 | 4916.0 | 5110.0 | 5096.3 |
| 206.4   | 197.1   | 129.0   | 167.7  | 130.0  | 155.9  | 216.7  | 219.7  | 225.7  |
| 55.8    | 79.1    | 63.5    | 50.7   | 50.7   | 52.7   | 32.7   | 42.7   | 45.9   |
| 2080.5  | 2238.2  | 1537.3  | 2045.0 | 1426.6 | 1588.1 | 1317.0 | 1096.1 | 1257.5 |
| 10.6    | 6.3     | 3.2     | 27.9   | 17.5   | 23.1   | 4.9    | 13.8   | 8.0    |
| 527.4   | 659.8   | 413.0   | 164.5  | 139.8  | 137.1  | 208.3  | 199.8  | 216.5  |
| 1051.0  | 1315.4  | 847.2   | 637.6  | 481.1  | 550.1  | 435.1  | 475.3  | 490.2  |
| 4.9     | 17.2    | 8.8     | 29.6   | 28.0   | 33.9   | 4.1    | 18.3   | 15.4   |
| 0.8     | 6.4     | 4.8     | 32.9   | 37.8   | 26.2   | 27.3   | 19.7   | 17.0   |
| 64.2    | 105.6   | 109.8   | 93.0   | 99.1   | 107.5  | 43.8   | 54.1   | 61.2   |
| 308.8   | 687.7   | 733.3   | 258.4  | 316.2  | 357.6  | 177.8  | 338.8  | 295.6  |
| 14.2    | 28.7    | 12.2    | 19.7   | 31.0   | 14.6   | 17.9   | 6.0    | 14.5   |
| 545.6   | 735.4   | 570.1   | 445.4  | 394.3  | 398.4  | 194.7  | 250.8  | 237.5  |
| 20.1    | 13.0    | 20.1    | 60.0   | 46.5   | 49.6   | 34.0   | 17.8   | 26.2   |
| 2.1     | 2.5     | 1.6     | 8.5    | 4.5    | 3.9    | 1.9    | 1.8    | 1.7    |
| 793.9   | 847.3   | 611.3   | 1024.1 | 867.7  | 712.4  | 479.3  | 476.8  | 567.7  |
| 12.8    | 34.2    | 31.9    | 5.5    | 4.2    | 7.6    | 1.8    | 1.6    | 2.5    |
| 5.0     | 7.8     | 7.1     | 8.8    | 3.7    | 18.6   | 7.6    | 2.7    | 3.3    |
| 13.3    | 24.7    | 13.8    | 46.5   | 35.2   | 42.4   | 22.0   | 33.9   | 31.2   |
| 18.3    | 19.0    | 17.9    | 16.8   | 19.6   | 6.8    | 3.7    | 2.5    | 10.7   |
| 17.2    | 15.0    | 10.4    | 27.1   | 10.3   | 21.2   | 26.8   | 10.7   | 9.6    |
| 1.7     | 8.4     | 13.8    | 10.6   | 17.9   | 7.6    | 0.9    | 4.8    | 2.1    |



|        |        |        |        |        |        |        |        |        |
|--------|--------|--------|--------|--------|--------|--------|--------|--------|
| 10.4   | 10.8   | 10.9   | 17.9   | 20.8   | 14.7   | 5.6    | 14.8   | 7.9    |
| 99.2   | 138.3  | 92.8   | 22.2   | 15.9   | 27.8   | 45.4   | 34.7   | 41.4   |
| 6.7    | 9.6    | 7.0    | 15.0   | 25.7   | 23.0   | 6.3    | 16.2   | 12.8   |
| 3.3    | 2.0    | 2.6    | 27.3   | 9.7    | 29.3   | 1.7    | 1.5    | 1.7    |
| 233.2  | 309.0  | 172.4  | 75.2   | 70.3   | 73.0   | 52.3   | 69.6   | 65.6   |
| 224.2  | 290.1  | 224.1  | 77.2   | 52.3   | 64.6   | 51.8   | 53.1   | 55.5   |
| 14.9   | 35.0   | 26.5   | 8.0    | 10.8   | 14.6   | 3.2    | 11.3   | 6.4    |
| 135.2  | 217.4  | 202.4  | 106.7  | 120.8  | 187.5  | 179.0  | 231.2  | 234.9  |
| 81.7   | 116.0  | 55.4   | 40.9   | 20.0   | 37.7   | 40.2   | 36.7   | 50.1   |
| 331.0  | 413.0  | 331.9  | 341.3  | 310.3  | 296.7  | 282.0  | 314.2  | 303.1  |
| 1.5    | 1.4    | 1.6    | 10.5   | 11.4   | 10.6   | 2.1    | 9.5    | 4.1    |
| 1.0    | 7.1    | 3.8    | 11.8   | 0.9    | 5.7    | 3.6    | 3.2    | 6.2    |
| 195.2  | 266.9  | 168.9  | 334.0  | 244.2  | 280.5  | 196.5  | 182.5  | 197.0  |
| 249.5  | 300.3  | 269.0  | 94.2   | 92.6   | 102.2  | 61.2   | 73.1   | 71.5   |
| 58.7   | 114.9  | 187.6  | 536.0  | 473.9  | 555.5  | 370.8  | 405.0  | 490.5  |
| 3.9    | 3.6    | 6.0    | 6.2    | 4.2    | 5.2    | 8.1    | 1.1    | 3.8    |
| 764.3  | 721.1  | 495.4  | 230.3  | 189.2  | 193.8  | 143.5  | 128.2  | 143.6  |
| 1.8    | 2.7    | 1.4    | 2.2    | 2.6    | 2.6    | 1.3    | 0.9    | 1.4    |
| 4.1    | 7.4    | 7.7    | 8.4    | 4.5    | 9.3    | 10.3   | 6.5    | 15.0   |
| 17.4   | 6.6    | 6.3    | 12.1   | 8.5    | 7.8    | 14.9   | 11.4   | 13.8   |
| 51.9   | 104.3  | 91.1   | 53.7   | 39.4   | 43.1   | 30.1   | 16.2   | 36.6   |
| 100.5  | 99.9   | 53.9   | 38.9   | 18.5   | 40.4   | 25.5   | 13.7   | 34.5   |
| 1658.1 | 2639.4 | 3008.5 | 1860.6 | 1480.4 | 1645.5 | 908.6  | 916.1  | 1035.4 |
| 7.7    | 9.6    | 8.1    | 22.9   | 22.7   | 23.7   | 22.8   | 17.0   | 22.3   |
| 66.7   | 89.1   | 48.3   | 181.9  | 158.2  | 170.0  | 68.7   | 52.3   | 58.0   |
| 3782.5 | 3826.5 | 2167.9 | 1609.1 | 1221.1 | 1228.2 | 1627.2 | 1277.2 | 1566.1 |
| 3.9    | 2.8    | 5.5    | 7.4    | 6.2    | 18.6   | 10.1   | 8.5    | 6.2    |
| 95.8   | 115.0  | 116.5  | 31.8   | 20.5   | 15.8   | 64.6   | 51.2   | 74.0   |
| 6.6    | 9.5    | 8.5    | 14.5   | 12.4   | 11.7   | 3.8    | 7.3    | 1.5    |
| 5.5    | 1.1    | 2.8    | 10.8   | 8.7    | 9.9    | 4.3    | 3.5    | 7.5    |
| 2.4    | 3.1    | 1.2    | 3.7    | 2.7    | 6.0    | 2.2    | 1.5    | 1.8    |
| 103.7  | 122.7  | 90.5   | 105.2  | 71.7   | 72.2   | 56.5   | 54.2   | 63.7   |
| 110.2  | 153.9  | 95.1   | 115.5  | 75.5   | 92.8   | 72.8   | 62.9   | 65.9   |
| 17.6   | 11.2   | 8.9    | 27.7   | 18.1   | 20.8   | 14.1   | 8.9    | 16.7   |
| 4.7    | 20.6   | 9.4    | 19.6   | 13.2   | 34.0   | 1.9    | 5.1    | 2.7    |
| 1095.9 | 1216.4 | 962.0  | 711.6  | 581.9  | 609.4  | 327.5  | 398.4  | 425.1  |
| 18.2   | 18.5   | 22.6   | 30.7   | 27.0   | 24.6   | 16.4   | 16.0   | 18.2   |
| 6.7    | 19.4   | 16.3   | 44.2   | 28.9   | 27.9   | 25.6   | 23.3   | 20.2   |
| 2.9    | 3.1    | 2.3    | 5.5    | 3.8    | 5.2    | 3.4    | 2.2    | 2.6    |
| 5.6    | 3.6    | 4.7    | 4.4    | 4.0    | 3.3    | 4.8    | 2.8    | 3.8    |
| 18.5   | 6.1    | 3.8    | 19.1   | 16.8   | 19.0   | 10.0   | 6.3    | 11.0   |
| 29.0   | 33.8   | 24.1   | 11.1   | 13.7   | 13.1   | 15.5   | 12.3   | 12.6   |
| 251.9  | 272.2  | 164.2  | 51.0   | 29.7   | 37.7   | 51.9   | 50.1   | 45.8   |
| 38.3   | 44.8   | 26.6   | 64.4   | 61.8   | 52.5   | 34.7   | 28.6   | 20.3   |
| 6.7    | 2.6    | 17.9   | 29.8   | 22.1   | 31.5   | 7.7    | 9.6    | 14.0   |
| 150.2  | 164.8  | 235.4  | 15.7   | 8.8    | 28.6   | 4.9    | 5.0    | 4.7    |
| 91.3   | 93.1   | 109.8  | 9.7    | 8.1    | 3.0    | 8.2    | 1.0    | 4.2    |
| 18.9   | 22.7   | 8.2    | 20.7   | 9.6    | 17.8   | 8.5    | 8.9    | 11.9   |
| 63.6   | 71.9   | 43.9   | 50.2   | 41.0   | 41.1   | 55.1   | 60.2   | 44.1   |
| 14.6   | 6.7    | 8.8    | 32.8   | 13.2   | 32.5   | 15.0   | 14.4   | 19.1   |
| 162.2  | 213.1  | 146.1  | 3520.0 | 2635.8 | 2881.3 | 1466.6 | 1373.1 | 1495.9 |
| 6.4    | 2.8    | 3.6    | 74.5   | 22.5   | 34.1   | 46.1   | 17.8   | 33.0   |
| 34.4   | 38.2   | 29.4   | 50.6   | 40.0   | 47.4   | 28.3   | 28.1   | 38.7   |

|        |        |        |        |        |        |        |        |        |
|--------|--------|--------|--------|--------|--------|--------|--------|--------|
| 8.9    | 8.6    | 7.3    | 13.0   | 6.9    | 8.7    | 5.7    | 1.6    | 6.6    |
| 4.6    | 7.9    | 2.7    | 7.3    | 16.5   | 13.2   | 4.6    | 7.7    | 7.2    |
| 44.2   | 58.5   | 43.2   | 66.7   | 53.3   | 58.6   | 22.1   | 22.8   | 22.0   |
| 22.2   | 29.7   | 13.4   | 21.4   | 20.9   | 16.7   | 22.0   | 21.3   | 25.0   |
| 602.5  | 907.0  | 726.3  | 510.2  | 442.4  | 506.4  | 164.4  | 251.5  | 231.8  |
| 7.5    | 8.4    | 27.6   | 7.6    | 10.2   | 4.9    | 2.9    | 5.8    | 0.7    |
| 33.3   | 65.3   | 44.1   | 2.2    | 1.8    | 2.5    | 2.4    | 2.5    | 1.3    |
| 11.3   | 17.0   | 8.9    | 8.8    | 9.9    | 5.1    | 7.0    | 4.5    | 3.2    |
| 14.7   | 7.4    | 9.2    | 2.0    | 2.3    | 5.7    | 2.7    | 8.2    | 6.8    |
| 91.2   | 132.1  | 117.5  | 15.6   | 15.7   | 43.0   | 91.9   | 115.6  | 121.9  |
| 483.7  | 685.6  | 560.4  | 44.2   | 48.0   | 43.9   | 50.2   | 69.5   | 69.2   |
| 3.3    | 16.7   | 11.7   | 29.2   | 14.0   | 20.9   | 7.1    | 11.1   | 6.3    |
| 3.4    | 1.2    | 4.3    | 11.3   | 1.7    | 13.1   | 4.4    | 3.5    | 1.9    |
| 3.8    | 4.5    | 8.5    | 12.5   | 10.3   | 16.7   | 28.3   | 3.3    | 3.5    |
| 13.3   | 15.5   | 23.6   | 16.6   | 21.5   | 19.7   | 12.1   | 10.0   | 10.0   |
| 1450.2 | 1898.7 | 1646.2 | 1787.6 | 1595.7 | 1445.4 | 1244.0 | 1332.7 | 1373.5 |
| 287.2  | 441.1  | 336.1  | 539.5  | 418.5  | 477.7  | 469.3  | 550.8  | 550.4  |
| 865.2  | 1342.2 | 1105.6 | 569.8  | 481.7  | 528.4  | 302.5  | 397.5  | 387.9  |
| 65.8   | 73.0   | 46.8   | 42.7   | 41.7   | 38.6   | 25.8   | 22.1   | 28.4   |
| 7.3    | 8.2    | 13.8   | 12.0   | 14.9   | 17.9   | 10.9   | 5.6    | 21.4   |
| 13.5   | 29.7   | 15.3   | 16.3   | 16.9   | 8.2    | 13.9   | 12.4   | 12.5   |
| 863.3  | 926.5  | 604.5  | 480.3  | 419.3  | 468.8  | 269.3  | 266.9  | 333.2  |
| 350.1  | 489.3  | 339.0  | 644.2  | 435.6  | 434.4  | 305.0  | 254.1  | 280.5  |
| 7.8    | 6.1    | 10.5   | 9.6    | 13.8   | 14.4   | 6.2    | 9.1    | 11.5   |
| 87.3   | 81.6   | 55.0   | 34.6   | 27.7   | 39.8   | 34.0   | 30.6   | 35.0   |
| 2.6    | 1.2    | 5.9    | 6.7    | 6.7    | 6.9    | 2.9    | 1.1    | 4.3    |
| 186.9  | 300.2  | 215.2  | 790.5  | 624.7  | 706.3  | 355.3  | 400.6  | 436.8  |
| 1.8    | 5.1    | 2.9    | 4.5    | 5.6    | 3.6    | 1.5    | 1.8    | 2.4    |
| 49.1   | 42.3   | 24.3   | 20.9   | 9.2    | 14.9   | 17.3   | 12.7   | 22.0   |
| 6974.2 | 7487.2 | 6717.8 | 8658.4 | 7927.2 | 8263.9 | 4717.1 | 4672.8 | 4904.9 |
| 30.1   | 28.6   | 28.6   | 34.4   | 28.0   | 31.6   | 23.5   | 21.3   | 11.7   |
| 139.4  | 169.7  | 126.1  | 159.4  | 174.0  | 176.6  | 105.7  | 117.6  | 126.7  |
| 471.8  | 610.0  | 612.6  | 317.0  | 261.0  | 256.5  | 164.7  | 209.7  | 212.5  |
| 8.9    | 6.7    | 8.0    | 10.4   | 20.7   | 24.4   | 12.0   | 12.0   | 11.8   |
| 35.5   | 39.0   | 31.5   | 47.1   | 28.9   | 37.9   | 11.4   | 17.5   | 25.9   |
| 146.3  | 181.5  | 88.1   | 114.1  | 90.7   | 59.0   | 163.3  | 103.1  | 147.9  |
| 9.1    | 8.6    | 7.1    | 9.6    | 8.7    | 12.4   | 2.8    | 1.4    | 3.0    |
| 97.1   | 141.5  | 158.4  | 38.8   | 30.1   | 52.2   | 49.9   | 38.6   | 34.6   |
| 1013.8 | 1295.5 | 976.4  | 734.7  | 692.0  | 821.6  | 402.4  | 550.0  | 518.9  |
| 479.8  | 610.0  | 479.4  | 1160.3 | 937.3  | 926.5  | 890.4  | 844.8  | 1028.6 |
| 5.9    | 2.3    | 0.5    | 2.9    | 3.7    | 5.4    | 2.4    | 3.8    | 1.9    |
| 244.8  | 336.7  | 152.9  | 126.6  | 90.3   | 72.3   | 79.2   | 57.1   | 53.5   |
| 6.4    | 6.7    | 11.3   | 13.4   | 5.5    | 5.3    | 9.2    | 6.1    | 4.1    |
| 12.1   | 10.5   | 9.0    | 8.9    | 11.9   | 10.4   | 7.5    | 9.6    | 9.9    |
| 3.8    | 3.4    | 1.8    | 8.0    | 9.8    | 12.5   | 6.3    | 1.3    | 2.2    |
| 18.1   | 20.0   | 13.5   | 22.9   | 22.9   | 19.4   | 10.8   | 8.0    | 9.4    |
| 4579.1 | 4656.5 | 3338.8 | 2952.4 | 2580.5 | 2714.1 | 1473.9 | 1525.9 | 1644.3 |
| 6.3    | 7.2    | 3.1    | 10.1   | 5.8    | 10.8   | 1.9    | 1.6    | 1.5    |
| 705.6  | 1095.2 | 910.3  | 1198.7 | 1502.8 | 1769.0 | 647.1  | 1192.4 | 1056.9 |
| 24.3   | 41.9   | 27.1   | 70.4   | 61.6   | 61.6   | 49.3   | 47.7   | 61.6   |
| 7.9    | 6.0    | 7.6    | 5.0    | 2.0    | 5.6    | 2.3    | 2.1    | 1.9    |
| 39.6   | 38.1   | 21.9   | 91.1   | 85.6   | 83.3   | 78.3   | 74.1   | 69.9   |
| 12.2   | 10.0   | 9.0    | 20.8   | 12.1   | 13.3   | 9.4    | 13.0   | 7.5    |

|         |         |        |         |        |        |        |        |        |
|---------|---------|--------|---------|--------|--------|--------|--------|--------|
| 7.5     | 2.9     | 3.8    | 21.2    | 13.8   | 33.5   | 9.4    | 5.5    | 9.5    |
| 2.7     | 8.6     | 3.9    | 14.0    | 11.5   | 13.6   | 5.5    | 1.3    | 7.8    |
| 8.4     | 6.8     | 3.7    | 22.2    | 7.0    | 21.5   | 8.7    | 5.1    | 7.5    |
| 12.6    | 12.4    | 11.6   | 38.0    | 37.0   | 49.1   | 16.1   | 22.2   | 18.2   |
| 73.1    | 87.7    | 57.3   | 134.3   | 85.0   | 101.1  | 63.5   | 43.4   | 53.7   |
| 43.6    | 44.1    | 22.5   | 19.0    | 10.3   | 12.1   | 43.6   | 26.8   | 41.5   |
| 10.7    | 18.7    | 2.2    | 17.1    | 6.0    | 5.8    | 5.8    | 4.4    | 3.0    |
| 3.2     | 2.6     | 2.2    | 3.8     | 3.5    | 3.7    | 3.2    | 1.8    | 1.8    |
| 1.4     | 1.4     | 1.8    | 4.3     | 2.6    | 5.7    | 1.5    | 1.4    | 1.4    |
| 1.1     | 0.6     | 0.4    | 1.2     | 0.9    | 1.5    | 0.4    | 0.6    | 0.4    |
| 531.8   | 669.0   | 471.3  | 372.7   | 310.3  | 358.4  | 303.6  | 320.4  | 378.6  |
| 276.3   | 286.5   | 202.7  | 201.8   | 157.0  | 169.8  | 112.2  | 110.7  | 126.2  |
| 198.2   | 350.2   | 267.8  | 30.1    | 22.6   | 37.7   | 22.3   | 45.2   | 45.9   |
| 779.5   | 1052.1  | 1026.8 | 68.5    | 84.1   | 71.0   | 78.4   | 86.1   | 115.8  |
| 6.4     | 14.2    | 5.0    | 5.2     | 4.9    | 5.6    | 3.3    | 13.8   | 14.8   |
| 103.5   | 139.2   | 100.9  | 102.6   | 101.4  | 108.3  | 121.2  | 109.0  | 122.9  |
| 15.5    | 33.2    | 16.5   | 11.1    | 19.1   | 25.8   | 17.0   | 15.1   | 19.9   |
| 15.3    | 21.0    | 11.9   | 27.8    | 18.9   | 29.7   | 5.3    | 6.6    | 7.7    |
| 30.9    | 38.6    | 17.1   | 21.4    | 11.2   | 16.2   | 6.3    | 6.1    | 6.7    |
| 278.1   | 288.3   | 160.7  | 160.1   | 123.1  | 110.7  | 122.1  | 116.6  | 144.0  |
| 1419.7  | 1661.1  | 1316.1 | 1255.7  | 1103.2 | 1120.0 | 331.4  | 461.7  | 476.0  |
| 183.8   | 205.9   | 152.4  | 111.9   | 120.9  | 111.7  | 94.8   | 86.7   | 103.8  |
| 3518.1  | 4051.3  | 2939.2 | 1840.5  | 1643.2 | 1708.4 | 1469.3 | 1793.0 | 1684.9 |
| 12.4    | 10.2    | 6.7    | 18.3    | 8.5    | 12.0   | 12.6   | 10.8   | 12.0   |
| 10.7    | 7.9     | 7.5    | 8.7     | 8.5    | 9.5    | 7.8    | 6.1    | 7.4    |
| 29.7    | 28.0    | 30.3   | 21.6    | 18.0   | 24.4   | 12.8   | 18.8   | 14.3   |
| 7.5     | 6.6     | 4.8    | 27.2    | 19.8   | 22.6   | 20.7   | 29.2   | 21.6   |
| 33.9    | 34.2    | 28.7   | 30.5    | 15.5   | 23.9   | 18.6   | 10.1   | 19.3   |
| 618.3   | 808.6   | 587.9  | 741.8   | 641.9  | 646.1  | 607.5  | 635.6  | 709.0  |
| 1.6     | 6.6     | 7.0    | 3.0     | 6.4    | 10.1   | 7.9    | 4.6    | 2.3    |
| 1.4     | 2.5     | 1.6    | 3.7     | 3.2    | 7.0    | 1.6    | 1.6    | 2.2    |
| 115.5   | 246.0   | 245.6  | 85.5    | 72.5   | 86.3   | 132.7  | 134.7  | 150.3  |
| 9747.5  | 9707.8  | 9013.9 | 7633.4  | 7007.4 | 6900.2 | 6641.7 | 6342.4 | 6944.3 |
| 11123.3 | 10412.0 | 9287.3 | 10204.8 | 9379.8 | 9159.2 | 7006.2 | 6121.8 | 7023.2 |
| 278.5   | 379.5   | 416.6  | 28.0    | 31.5   | 50.1   | 40.9   | 81.0   | 55.9   |
| 24.3    | 35.1    | 15.2   | 25.5    | 16.0   | 29.2   | 26.7   | 23.2   | 25.2   |
| 104.3   | 127.8   | 86.1   | 71.5    | 50.9   | 66.6   | 32.3   | 42.3   | 41.6   |
| 45.9    | 62.9    | 42.6   | 45.8    | 42.0   | 47.2   | 23.8   | 27.8   | 23.6   |
| 151.6   | 177.6   | 126.2  | 216.0   | 134.9  | 168.9  | 60.9   | 41.0   | 64.6   |
| 1312.9  | 1810.0  | 1335.2 | 823.7   | 736.9  | 798.8  | 484.8  | 599.5  | 558.6  |
| 37.5    | 37.4    | 26.8   | 28.6    | 42.8   | 40.0   | 25.1   | 23.3   | 32.8   |
| 428.4   | 574.5   | 539.1  | 100.9   | 97.2   | 129.5  | 292.4  | 210.0  | 290.0  |
| 31.6    | 41.9    | 31.6   | 23.8    | 17.4   | 12.5   | 18.7   | 12.0   | 19.2   |
| 70.3    | 65.4    | 42.9   | 34.5    | 22.8   | 27.0   | 28.9   | 25.6   | 33.2   |
| 30.4    | 44.1    | 26.7   | 35.6    | 33.8   | 42.2   | 30.2   | 29.8   | 32.5   |
| 3.9     | 2.3     | 2.5    | 14.5    | 5.9    | 16.3   | 5.2    | 5.4    | 2.8    |
| 14.4    | 10.9    | 3.5    | 10.4    | 8.3    | 12.0   | 5.1    | 9.5    | 12.0   |
| 20.1    | 27.5    | 15.4   | 13.7    | 5.1    | 14.4   | 12.0   | 10.6   | 8.7    |
| 45.8    | 32.7    | 25.0   | 3.4     | 4.0    | 8.0    | 20.4   | 16.3   | 20.4   |
| 11.4    | 7.4     | 6.4    | 17.0    | 19.7   | 8.0    | 7.9    | 9.0    | 10.4   |
| 6.5     | 6.9     | 7.7    | 30.9    | 31.9   | 22.9   | 10.6   | 15.2   | 15.5   |
| 0.8     | 0.8     | 0.5    | 1.1     | 1.9    | 1.6    | 0.8    | 0.8    | 1.6    |
| 68.9    | 118.7   | 175.8  | 2.8     | 7.2    | 5.3    | 3.4    | 2.9    | 6.0    |

|        |         |        |        |        |        |        |        |        |
|--------|---------|--------|--------|--------|--------|--------|--------|--------|
| 16.3   | 33.3    | 21.9   | 11.6   | 6.3    | 9.8    | 3.5    | 4.7    | 3.6    |
| 30.8   | 35.1    | 23.6   | 37.6   | 30.6   | 25.0   | 21.5   | 23.8   | 21.4   |
| 3.4    | 2.4     | 6.0    | 14.1   | 15.6   | 20.2   | 7.4    | 5.8    | 4.3    |
| 9736.8 | 10641.6 | 9406.3 | 8747.7 | 8556.5 | 8609.9 | 5637.5 | 5998.7 | 6313.0 |
| 952.2  | 1234.0  | 1062.1 | 527.7  | 601.4  | 502.4  | 395.5  | 477.3  | 540.2  |
| 10.9   | 19.9    | 18.8   | 23.5   | 23.5   | 25.8   | 15.5   | 12.2   | 11.3   |
| 26.3   | 20.7    | 20.7   | 31.2   | 25.0   | 41.6   | 34.7   | 31.0   | 28.9   |
| 160.1  | 208.0   | 157.9  | 305.1  | 226.0  | 267.1  | 157.4  | 174.4  | 166.7  |
| 595.4  | 741.4   | 576.6  | 404.2  | 314.2  | 345.4  | 410.8  | 389.4  | 389.1  |
| 8.6    | 15.1    | 21.1   | 22.8   | 29.2   | 14.0   | 16.5   | 20.3   | 19.6   |
| 121.8  | 154.2   | 105.1  | 198.4  | 148.8  | 160.9  | 102.7  | 78.5   | 111.8  |
| 4377.1 | 4471.6  | 3016.7 | 3311.7 | 2779.5 | 3117.7 | 3419.2 | 2972.2 | 3455.8 |
| 1.8    | 8.2     | 1.2    | 13.0   | 6.2    | 3.0    | 8.1    | 5.2    | 4.5    |
| 28.6   | 24.2    | 19.7   | 12.1   | 5.8    | 12.3   | 13.8   | 12.2   | 16.2   |
| 4.4    | 4.6     | 5.8    | 24.3   | 6.1    | 20.2   | 6.1    | 7.9    | 12.1   |
| 3936.6 | 4450.5  | 3452.5 | 3874.0 | 3393.4 | 3512.8 | 2547.1 | 2684.0 | 2926.7 |
| 92.2   | 106.9   | 70.0   | 59.3   | 59.6   | 53.2   | 39.7   | 31.7   | 37.7   |
| 21.1   | 10.5    | 13.3   | 17.8   | 7.2    | 14.2   | 6.0    | 2.5    | 10.1   |
| 1.0    | 2.6     | 2.3    | 14.2   | 8.6    | 12.5   | 1.3    | 1.0    | 1.0    |
| 16.3   | 18.5    | 11.6   | 11.6   | 7.3    | 12.3   | 7.2    | 8.1    | 5.5    |
| 4.8    | 2.0     | 2.2    | 11.0   | 19.6   | 13.4   | 3.6    | 1.8    | 7.5    |
| 10.4   | 14.3    | 7.6    | 26.2   | 16.7   | 25.3   | 13.0   | 12.3   | 11.9   |
| 0.7    | 0.7     | 0.4    | 1.8    | 1.3    | 2.0    | 1.0    | 0.7    | 0.4    |
| 18.2   | 14.4    | 8.3    | 31.1   | 14.5   | 22.9   | 13.1   | 9.2    | 15.4   |
| 267.1  | 338.5   | 295.5  | 10.5   | 16.1   | 9.5    | 20.1   | 18.3   | 15.3   |
| 39.4   | 60.7    | 50.8   | 58.2   | 55.4   | 67.6   | 37.0   | 48.8   | 52.2   |
| 77.0   | 95.9    | 72.0   | 10.6   | 15.2   | 7.6    | 13.7   | 13.2   | 9.6    |
| 16.3   | 26.4    | 18.7   | 20.3   | 14.3   | 15.8   | 8.2    | 9.9    | 9.1    |
| 12.9   | 11.6    | 8.6    | 18.8   | 15.1   | 17.2   | 10.3   | 12.4   | 12.6   |
| 16.7   | 17.0    | 11.2   | 12.0   | 20.0   | 34.9   | 11.1   | 11.4   | 23.2   |
| 19.4   | 22.8    | 13.3   | 12.8   | 9.1    | 9.8    | 0.9    | 3.8    | 9.5    |
| 10.7   | 14.3    | 12.5   | 17.6   | 22.4   | 28.9   | 14.7   | 13.0   | 13.7   |
| 1.3    | 2.2     | 4.0    | 4.6    | 5.2    | 8.5    | 1.1    | 1.7    | 1.3    |
| 33.6   | 36.1    | 23.6   | 38.6   | 27.5   | 28.3   | 13.4   | 21.6   | 10.4   |
| 75.0   | 212.3   | 220.3  | 16.8   | 6.9    | 6.6    | 4.4    | 1.3    | 4.1    |
| 331.0  | 501.0   | 392.9  | 696.2  | 598.3  | 697.3  | 489.4  | 602.7  | 533.5  |
| 8.6    | 16.9    | 17.6   | 25.1   | 16.3   | 21.2   | 3.5    | 5.1    | 2.2    |
| 6.1    | 7.4     | 2.2    | 4.7    | 4.9    | 2.3    | 1.3    | 1.3    | 3.1    |
| 5.5    | 3.9     | 4.1    | 13.4   | 9.0    | 12.6   | 3.2    | 9.8    | 5.4    |
| 2.4    | 2.2     | 1.5    | 4.4    | 4.1    | 4.9    | 1.9    | 1.7    | 1.8    |
| 13.4   | 15.2    | 18.0   | 9.1    | 15.6   | 15.5   | 6.1    | 2.1    | 8.8    |
| 4.0    | 3.2     | 0.6    | 1.3    | 4.7    | 1.2    | 0.3    | 1.1    | 0.9    |
| 2.7    | 3.7     | 2.3    | 7.8    | 4.8    | 11.3   | 4.1    | 2.4    | 3.2    |
| 5.1    | 7.3     | 5.0    | 11.4   | 8.8    | 10.5   | 6.8    | 4.2    | 4.7    |
| 9.3    | 5.7     | 6.5    | 6.4    | 12.2   | 7.7    | 2.3    | 1.2    | 2.3    |
| 1.6    | 8.6     | 7.3    | 9.2    | 6.1    | 8.4    | 5.1    | 8.7    | 3.9    |
| 5332.2 | 5982.1  | 5286.3 | 7470.6 | 6469.3 | 6782.6 | 4265.7 | 3677.8 | 4359.3 |
| 39.2   | 52.5    | 49.3   | 87.2   | 75.6   | 83.8   | 30.6   | 30.0   | 29.8   |
| 4.1    | 16.5    | 19.4   | 13.2   | 14.6   | 33.2   | 15.0   | 12.0   | 15.0   |
| 5.4    | 8.9     | 3.8    | 17.0   | 11.7   | 19.2   | 3.7    | 7.8    | 9.6    |
| 117.1  | 129.5   | 92.7   | 37.2   | 29.2   | 35.8   | 23.8   | 34.3   | 30.5   |
| 1.5    | 3.5     | 1.8    | 3.6    | 2.3    | 7.9    | 2.6    | 1.4    | 1.1    |
| 7.3    | 2.3     | 1.2    | 11.2   | 10.1   | 7.6    | 3.9    | 2.3    | 6.0    |

|        |        |        |        |        |        |       |       |       |
|--------|--------|--------|--------|--------|--------|-------|-------|-------|
| 11.6   | 15.3   | 6.4    | 42.0   | 19.5   | 25.7   | 8.8   | 19.3  | 22.3  |
| 32.4   | 52.0   | 34.7   | 14.1   | 19.4   | 7.7    | 15.0  | 10.1  | 15.9  |
| 12.1   | 12.0   | 15.8   | 74.0   | 61.5   | 67.7   | 36.9  | 35.3  | 57.8  |
| 178.7  | 208.0  | 159.7  | 1519.0 | 1349.3 | 1341.8 | 864.2 | 783.9 | 826.5 |
| 4.7    | 2.0    | 4.3    | 6.5    | 7.4    | 5.6    | 1.3   | 1.0   | 1.2   |
| 3.3    | 3.4    | 3.0    | 4.3    | 4.4    | 3.5    | 4.7   | 3.2   | 6.6   |
| 2.1    | 3.5    | 11.5   | 16.7   | 20.8   | 28.8   | 11.5  | 10.3  | 8.7   |
| 7.4    | 11.1   | 11.8   | 22.1   | 17.2   | 12.4   | 11.8  | 9.4   | 8.6   |
| 2.8    | 3.3    | 1.3    | 9.7    | 8.3    | 2.5    | 5.4   | 10.1  | 10.2  |
| 2.4    | 3.3    | 3.2    | 7.4    | 7.3    | 6.7    | 4.5   | 5.7   | 6.0   |
| 27.8   | 41.7   | 15.1   | 28.2   | 11.1   | 41.2   | 37.6  | 25.9  | 22.4  |
| 4.2    | 2.5    | 8.4    | 8.5    | 3.1    | 4.0    | 0.9   | 2.1   | 2.3   |
| 3.6    | 2.6    | 2.9    | 12.0   | 9.0    | 9.7    | 0.8   | 1.3   | 2.2   |
| 49.3   | 55.3   | 51.0   | 17.9   | 19.7   | 16.8   | 20.3  | 23.1  | 21.3  |
| 11.6   | 12.8   | 15.0   | 14.1   | 17.8   | 16.6   | 13.5  | 13.5  | 12.7  |
| 1.4    | 2.5    | 2.3    | 6.6    | 2.1    | 5.6    | 4.2   | 3.9   | 5.0   |
| 11.3   | 11.9   | 11.1   | 20.8   | 17.8   | 12.7   | 9.2   | 10.0  | 14.0  |
| 4.9    | 1.6    | 4.4    | 18.4   | 18.8   | 23.6   | 4.2   | 9.6   | 16.0  |
| 7.7    | 11.8   | 10.7   | 18.4   | 10.8   | 11.9   | 15.0  | 10.4  | 14.5  |
| 3.1    | 0.8    | 6.6    | 6.0    | 5.8    | 12.5   | 5.1   | 0.5   | 1.3   |
| 26.3   | 18.7   | 10.3   | 17.2   | 16.5   | 17.0   | 23.8  | 18.7  | 21.4  |
| 9.0    | 14.3   | 8.6    | 12.7   | 12.2   | 9.9    | 8.2   | 6.6   | 8.2   |
| 51.6   | 63.9   | 32.1   | 47.3   | 46.7   | 48.3   | 46.6  | 22.9  | 34.6  |
| 4.2    | 10.0   | 7.2    | 13.3   | 9.2    | 9.3    | 6.8   | 4.8   | 4.4   |
| 20.3   | 23.2   | 26.0   | 28.0   | 21.8   | 27.3   | 13.6  | 10.4  | 21.6  |
| 277.7  | 291.3  | 150.6  | 416.2  | 187.2  | 236.3  | 150.9 | 92.4  | 123.6 |
| 461.5  | 451.3  | 201.8  | 491.5  | 382.4  | 411.4  | 284.5 | 217.8 | 312.7 |
| 12.0   | 30.8   | 17.2   | 51.5   | 47.3   | 47.4   | 17.7  | 28.7  | 21.7  |
| 1605.4 | 1818.5 | 1331.6 | 352.4  | 306.0  | 289.1  | 327.8 | 338.2 | 362.3 |
| 775.7  | 797.3  | 500.2  | 251.9  | 197.0  | 203.3  | 132.9 | 132.0 | 150.6 |
| 2617.9 | 2555.1 | 1183.0 | 855.3  | 543.6  | 596.7  | 476.4 | 380.5 | 453.7 |
| 9.8    | 20.5   | 11.1   | 10.2   | 15.5   | 19.3   | 13.8  | 5.7   | 4.6   |
| 404.4  | 764.1  | 712.3  | 397.6  | 479.0  | 527.5  | 269.0 | 394.5 | 429.2 |
| 1218.1 | 1019.8 | 491.8  | 32.6   | 17.7   | 19.8   | 18.6  | 14.5  | 19.6  |
| 961.7  | 1051.2 | 741.7  | 894.2  | 630.0  | 606.0  | 904.0 | 687.9 | 840.0 |
| 3.1    | 12.5   | 13.7   | 27.0   | 12.9   | 16.3   | 3.6   | 11.7  | 14.7  |
| 859.8  | 1168.3 | 829.4  | 422.0  | 259.5  | 309.4  | 313.9 | 241.8 | 272.3 |
| 5.0    | 2.5    | 5.2    | 10.8   | 7.8    | 6.6    | 12.2  | 16.0  | 15.2  |
| 838.1  | 729.4  | 603.3  | 33.4   | 40.9   | 14.9   | 21.8  | 19.4  | 33.7  |
| 513.8  | 690.1  | 581.2  | 472.2  | 558.0  | 570.2  | 429.6 | 563.6 | 640.6 |
| 125.0  | 160.0  | 78.1   | 50.4   | 40.1   | 32.1   | 48.7  | 27.3  | 56.2  |
| 337.2  | 351.9  | 218.2  | 138.2  | 127.3  | 137.4  | 120.0 | 89.8  | 119.1 |
| 45.2   | 47.3   | 14.0   | 23.3   | 11.2   | 16.1   | 25.9  | 13.2  | 17.3  |
| 43.4   | 51.6   | 18.4   | 21.7   | 27.7   | 45.6   | 17.0  | 10.1  | 23.5  |
| 9.1    | 13.3   | 6.4    | 7.8    | 8.6    | 8.8    | 9.2   | 1.3   | 3.4   |
| 41.0   | 42.3   | 49.2   | 4.5    | 6.1    | 4.5    | 2.6   | 4.4   | 4.1   |
| 18.7   | 23.6   | 14.2   | 29.9   | 32.5   | 26.8   | 17.9  | 18.9  | 24.2  |
| 184.0  | 232.1  | 159.5  | 108.0  | 84.9   | 96.3   | 53.9  | 42.8  | 54.9  |
| 62.3   | 96.9   | 80.0   | 105.1  | 82.9   | 83.2   | 87.2  | 86.5  | 99.6  |
| 3.1    | 4.0    | 5.6    | 6.8    | 5.0    | 5.2    | 3.1   | 2.5   | 3.8   |
| 5.2    | 2.7    | 0.8    | 13.6   | 3.9    | 12.3   | 1.1   | 6.6   | 6.5   |
| 0.7    | 6.0    | 8.0    | 17.6   | 10.7   | 14.8   | 6.9   | 4.3   | 3.4   |
| 4.3    | 10.3   | 0.9    | 8.2    | 7.9    | 16.6   | 6.8   | 10.9  | 4.8   |

|        |        |        |        |        |        |        |        |        |
|--------|--------|--------|--------|--------|--------|--------|--------|--------|
| 8.3    | 11.5   | 5.6    | 8.3    | 5.3    | 4.8    | 9.8    | 2.2    | 2.8    |
| 58.5   | 61.6   | 58.5   | 42.5   | 55.8   | 58.2   | 75.2   | 109.8  | 104.5  |
| 2.9    | 2.5    | 3.2    | 6.6    | 3.7    | 4.9    | 2.5    | 2.0    | 3.7    |
| 19.7   | 14.9   | 13.5   | 13.9   | 10.4   | 7.1    | 5.1    | 4.6    | 4.1    |
| 22.6   | 40.5   | 33.4   | 39.1   | 17.5   | 28.7   | 26.0   | 18.1   | 19.0   |
| 3909.1 | 4913.5 | 4416.5 | 1799.8 | 1581.1 | 1751.5 | 1381.7 | 1766.2 | 1540.9 |
| 3.8    | 6.0    | 5.3    | 7.2    | 4.2    | 8.0    | 1.2    | 1.1    | 2.4    |
| 1.9    | 2.7    | 1.9    | 3.8    | 7.6    | 2.5    | 1.6    | 1.7    | 1.6    |
| 151.8  | 174.5  | 137.9  | 76.1   | 80.1   | 71.8   | 101.8  | 73.6   | 86.2   |
| 101.8  | 116.2  | 79.7   | 109.2  | 66.2   | 73.3   | 38.2   | 36.0   | 42.9   |
| 459.9  | 477.8  | 378.0  | 25.3   | 37.2   | 25.3   | 61.2   | 78.4   | 82.2   |
| 2.3    | 3.4    | 2.1    | 12.1   | 4.2    | 3.8    | 2.2    | 1.7    | 1.3    |
| 3.3    | 6.5    | 2.7    | 5.3    | 3.7    | 3.9    | 3.7    | 3.2    | 2.6    |
| 9.5    | 6.1    | 2.9    | 9.4    | 7.3    | 8.0    | 8.8    | 3.6    | 3.6    |
| 8.3    | 15.3   | 7.1    | 10.4   | 2.7    | 2.6    | 4.2    | 4.6    | 5.6    |
| 24.4   | 41.5   | 41.1   | 53.5   | 70.7   | 77.4   | 51.4   | 90.5   | 78.1   |
| 3.0    | 3.0    | 2.1    | 6.6    | 12.1   | 3.7    | 3.3    | 1.3    | 2.0    |
| 4.1    | 11.5   | 4.3    | 55.1   | 55.5   | 61.8   | 8.9    | 9.9    | 6.9    |
| 25.7   | 37.6   | 36.5   | 36.8   | 37.7   | 33.2   | 31.4   | 43.2   | 45.1   |
| 476.4  | 856.9  | 423.9  | 406.1  | 347.1  | 384.5  | 321.1  | 330.8  | 411.0  |
| 28.2   | 37.4   | 39.0   | 18.9   | 30.5   | 29.6   | 27.8   | 20.3   | 25.5   |
| 1.0    | 4.1    | 8.1    | 4.5    | 6.0    | 2.0    | 1.0    | 3.5    | 2.4    |
| 375.4  | 384.0  | 292.9  | 21.9   | 16.3   | 12.4   | 5.2    | 4.3    | 15.5   |
| 8.8    | 3.7    | 2.7    | 2.5    | 2.5    | 10.9   | 4.9    | 1.6    | 1.5    |
| 14.5   | 4.8    | 3.3    | 19.0   | 13.9   | 10.6   | 3.4    | 2.8    | 7.1    |
| 1.3    | 2.0    | 1.1    | 3.3    | 2.3    | 2.3    | 2.7    | 4.7    | 2.5    |
| 3.0    | 2.6    | 1.7    | 9.2    | 5.7    | 3.4    | 4.1    | 3.8    | 2.5    |
| 28.0   | 40.6   | 31.1   | 28.7   | 30.0   | 32.1   | 21.4   | 37.4   | 28.8   |
| 25.6   | 27.1   | 20.3   | 25.7   | 30.9   | 30.5   | 23.5   | 33.8   | 21.2   |
| 496.2  | 579.8  | 439.2  | 121.0  | 108.1  | 128.4  | 144.7  | 155.3  | 130.9  |
| 766.0  | 837.7  | 396.5  | 90.2   | 57.1   | 62.4   | 108.0  | 94.9   | 84.5   |
| 7.9    | 8.1    | 10.0   | 25.3   | 21.9   | 16.7   | 15.2   | 10.0   | 4.6    |
| 57.1   | 63.6   | 76.7   | 88.2   | 66.2   | 81.3   | 37.6   | 47.3   | 55.4   |
| 635.5  | 540.0  | 253.4  | 49.7   | 51.4   | 52.3   | 59.7   | 51.3   | 71.8   |
| 25.0   | 33.2   | 23.0   | 7.7    | 5.2    | 13.6   | 5.3    | 5.4    | 12.2   |
| 3.2    | 9.1    | 7.5    | 16.5   | 20.8   | 7.4    | 2.9    | 4.0    | 4.0    |
| 3.2    | 2.5    | 2.1    | 26.0   | 12.5   | 24.6   | 3.2    | 1.8    | 3.9    |
| 2.3    | 2.2    | 1.7    | 7.9    | 6.3    | 11.7   | 4.7    | 2.3    | 3.9    |
| 1.8    | 2.1    | 9.1    | 16.5   | 11.1   | 23.0   | 2.7    | 2.5    | 1.2    |
| 31.0   | 46.2   | 25.5   | 21.6   | 23.0   | 25.2   | 22.1   | 35.4   | 36.7   |
| 338.5  | 559.1  | 378.6  | 285.9  | 271.9  | 301.1  | 218.5  | 286.8  | 304.1  |
| 3.7    | 7.7    | 7.7    | 18.9   | 7.4    | 11.0   | 6.1    | 7.5    | 3.6    |
| 83.1   | 106.0  | 92.5   | 83.4   | 56.5   | 86.3   | 74.9   | 64.5   | 76.7   |
| 2.0    | 1.4    | 0.8    | 3.7    | 2.9    | 5.2    | 0.7    | 0.7    | 0.9    |
| 3.5    | 5.0    | 2.1    | 11.4   | 10.8   | 12.9   | 1.7    | 5.1    | 1.8    |
| 466.2  | 543.3  | 383.1  | 154.7  | 107.6  | 129.6  | 244.4  | 229.3  | 240.5  |
| 282.0  | 334.5  | 283.7  | 190.4  | 161.6  | 198.0  | 190.1  | 234.8  | 246.8  |
| 2836.5 | 3137.0 | 2399.4 | 1514.7 | 1162.2 | 1324.8 | 1048.3 | 965.7  | 1063.1 |
| 14.9   | 10.6   | 4.5    | 5.2    | 4.4    | 5.5    | 11.6   | 4.8    | 8.0    |
| 2.2    | 1.7    | 1.3    | 2.6    | 2.0    | 5.1    | 0.9    | 1.0    | 1.2    |
| 5.7    | 15.4   | 9.7    | 6.9    | 6.6    | 7.7    | 6.9    | 2.2    | 3.3    |
| 1.8    | 11.4   | 2.3    | 13.2   | 6.5    | 17.6   | 4.9    | 1.2    | 5.0    |
| 31.5   | 31.7   | 36.2   | 23.6   | 28.6   | 14.6   | 25.2   | 21.2   | 28.6   |

|        |        |        |        |        |        |        |        |        |
|--------|--------|--------|--------|--------|--------|--------|--------|--------|
| 446.3  | 429.4  | 170.6  | 326.5  | 204.5  | 244.5  | 132.7  | 144.7  | 148.4  |
| 81.5   | 101.0  | 71.8   | 130.6  | 120.0  | 112.7  | 114.8  | 109.1  | 107.1  |
| 24.9   | 30.6   | 10.0   | 13.3   | 4.4    | 8.8    | 0.6    | 1.3    | 2.1    |
| 9.6    | 2.6    | 5.4    | 8.3    | 6.8    | 5.8    | 5.4    | 3.2    | 5.3    |
| 6.4    | 5.2    | 2.5    | 4.6    | 10.0   | 4.5    | 3.6    | 6.2    | 5.8    |
| 3572.5 | 3776.8 | 2322.2 | 3320.0 | 2318.3 | 2729.7 | 1766.4 | 1597.9 | 1824.1 |
| 125.3  | 154.4  | 132.4  | 94.4   | 90.3   | 100.7  | 82.9   | 107.9  | 97.0   |
| 2.7    | 2.5    | 4.8    | 3.2    | 5.9    | 5.0    | 3.5    | 1.3    | 2.4    |
| 7.6    | 5.6    | 6.9    | 15.5   | 10.4   | 13.9   | 3.8    | 8.5    | 10.7   |
| 0.8    | 13.4   | 4.0    | 23.4   | 11.1   | 11.8   | 2.8    | 10.7   | 9.3    |
| 12.5   | 11.4   | 6.8    | 23.2   | 17.8   | 17.4   | 11.2   | 7.3    | 14.0   |
| 21.6   | 25.9   | 13.9   | 17.9   | 16.9   | 22.1   | 19.3   | 13.6   | 13.6   |
| 9.7    | 12.7   | 9.1    | 15.7   | 10.6   | 10.9   | 13.2   | 15.2   | 14.8   |
| 1.8    | 2.7    | 4.5    | 4.1    | 11.4   | 7.4    | 2.3    | 2.1    | 2.7    |
| 12.2   | 20.8   | 7.0    | 25.9   | 27.1   | 16.3   | 9.3    | 16.3   | 12.1   |
| 30.2   | 45.7   | 46.7   | 20.9   | 26.8   | 32.8   | 19.7   | 41.0   | 64.4   |
| 17.5   | 20.7   | 15.4   | 27.4   | 17.5   | 24.4   | 7.9    | 9.4    | 14.4   |
| 1.5    | 2.1    | 2.9    | 5.9    | 3.3    | 11.5   | 6.0    | 6.0    | 9.1    |
| 72.1   | 78.4   | 58.7   | 138.3  | 117.0  | 131.7  | 103.1  | 82.9   | 98.8   |
| 405.2  | 533.1  | 390.5  | 484.5  | 400.6  | 493.5  | 332.5  | 291.4  | 355.8  |
| 718.2  | 733.0  | 532.4  | 850.1  | 594.9  | 647.6  | 543.5  | 397.7  | 529.1  |
| 5.0    | 13.4   | 15.4   | 4.7    | 2.8    | 1.7    | 1.4    | 2.2    | 1.2    |
| 24.4   | 19.1   | 11.2   | 35.9   | 15.5   | 18.4   | 17.4   | 16.2   | 19.3   |
| 21.4   | 27.6   | 14.6   | 2.1    | 1.6    | 1.8    | 1.3    | 4.0    | 1.8    |
| 550.4  | 825.0  | 637.6  | 208.5  | 176.9  | 202.9  | 188.0  | 244.3  | 223.7  |
| 25.6   | 23.2   | 21.6   | 33.1   | 26.9   | 16.4   | 28.7   | 4.7    | 22.3   |
| 7.8    | 4.1    | 4.5    | 16.3   | 5.5    | 16.8   | 5.2    | 4.2    | 8.2    |
| 21.8   | 18.6   | 8.7    | 6.0    | 4.6    | 6.7    | 8.1    | 1.3    | 1.9    |
| 13.3   | 14.1   | 6.4    | 19.2   | 15.8   | 19.6   | 8.7    | 9.7    | 8.7    |
| 8.9    | 6.9    | 5.2    | 6.6    | 12.8   | 16.5   | 9.6    | 11.3   | 9.9    |
| 33.5   | 41.1   | 28.8   | 11.3   | 6.3    | 8.9    | 10.7   | 21.1   | 25.1   |
| 3.7    | 5.2    | 3.7    | 6.3    | 5.6    | 6.0    | 4.9    | 3.9    | 4.1    |
| 1.8    | 3.8    | 2.1    | 27.9   | 14.5   | 11.9   | 6.2    | 6.8    | 2.8    |
| 10.5   | 9.1    | 3.4    | 15.4   | 16.4   | 11.0   | 11.3   | 8.5    | 12.5   |
| 2.6    | 1.8    | 0.9    | 1.1    | 1.3    | 1.9    | 1.7    | 0.8    | 1.2    |
| 54.8   | 90.6   | 45.2   | 42.2   | 57.1   | 55.3   | 29.1   | 37.4   | 43.4   |
| 20.6   | 22.4   | 15.1   | 62.1   | 60.9   | 57.9   | 36.3   | 50.0   | 37.8   |
| 510.7  | 670.1  | 556.9  | 152.7  | 166.9  | 176.5  | 246.1  | 306.8  | 309.1  |
| 270.4  | 325.7  | 255.3  | 197.8  | 157.3  | 187.5  | 147.6  | 124.6  | 146.7  |
| 8.3    | 12.7   | 12.2   | 20.9   | 20.9   | 29.5   | 10.4   | 17.8   | 13.8   |
| 7.2    | 4.6    | 0.9    | 5.5    | 8.5    | 4.7    | 3.4    | 5.4    | 2.1    |
| 5550.7 | 6215.6 | 5939.5 | 6754.5 | 5846.9 | 7211.3 | 5073.9 | 4765.4 | 4907.3 |
| 92.3   | 156.2  | 251.8  | 50.7   | 58.6   | 60.5   | 47.3   | 40.9   | 49.2   |
| 750.0  | 826.2  | 575.8  | 339.2  | 257.8  | 290.2  | 281.4  | 258.3  | 237.6  |
| 1.5    | 3.0    | 1.6    | 4.6    | 8.4    | 4.9    | 3.0    | 0.7    | 2.1    |
| 105.0  | 121.9  | 86.9   | 121.1  | 120.3  | 138.3  | 134.7  | 126.5  | 142.4  |
| 428.5  | 408.0  | 248.6  | 187.8  | 184.8  | 181.9  | 133.4  | 115.6  | 122.4  |
| 16.6   | 16.9   | 10.8   | 26.5   | 20.3   | 19.3   | 10.2   | 8.5    | 9.7    |
| 1.0    | 3.5    | 3.6    | 12.6   | 9.9    | 7.0    | 2.8    | 2.1    | 0.9    |
| 2.9    | 4.6    | 6.4    | 8.8    | 5.5    | 5.9    | 2.6    | 3.8    | 11.8   |
| 5.9    | 11.1   | 2.4    | 12.3   | 16.7   | 13.3   | 5.5    | 7.9    | 9.0    |
| 16.1   | 23.9   | 9.6    | 35.5   | 21.7   | 34.4   | 26.1   | 22.9   | 17.3   |
| 1.3    | 0.9    | 0.6    | 4.2    | 3.9    | 3.3    | 1.3    | 6.5    | 3.2    |

|       |       |       |       |       |       |       |       |       |
|-------|-------|-------|-------|-------|-------|-------|-------|-------|
| 9.7   | 8.2   | 6.4   | 14.0  | 10.8  | 10.9  | 7.1   | 21.2  | 14.8  |
| 4.6   | 9.0   | 7.1   | 18.2  | 15.2  | 15.3  | 6.9   | 4.2   | 3.3   |
| 5.9   | 3.6   | 5.9   | 2.5   | 7.9   | 4.5   | 2.8   | 2.2   | 3.2   |
| 17.1  | 10.8  | 13.2  | 18.8  | 14.3  | 10.5  | 6.4   | 7.7   | 10.7  |
| 14.5  | 8.8   | 10.0  | 20.2  | 12.7  | 23.9  | 28.5  | 35.5  | 24.5  |
| 1.4   | 2.7   | 5.8   | 2.4   | 3.0   | 11.3  | 1.1   | 1.2   | 6.9   |
| 3.3   | 9.1   | 8.4   | 12.2  | 14.8  | 11.8  | 3.7   | 1.6   | 9.3   |
| 0.9   | 0.9   | 0.8   | 7.8   | 1.4   | 5.3   | 1.4   | 2.2   | 0.8   |
| 3.1   | 2.4   | 2.3   | 12.0  | 7.0   | 5.9   | 1.8   | 1.5   | 2.4   |
| 3.4   | 0.4   | 7.1   | 7.9   | 5.1   | 10.3  | 7.1   | 4.7   | 9.9   |
| 2.7   | 4.4   | 13.2  | 19.0  | 26.7  | 23.5  | 6.5   | 3.3   | 4.9   |
| 39.1  | 79.0  | 85.4  | 2.7   | 3.6   | 4.2   | 2.4   | 1.4   | 2.2   |
| 4.3   | 13.7  | 10.2  | 7.9   | 7.4   | 20.6  | 10.4  | 7.1   | 9.9   |
| 5.1   | 2.6   | 5.7   | 8.4   | 6.1   | 3.8   | 12.2  | 5.2   | 4.4   |
| 9.8   | 19.1  | 7.8   | 10.9  | 6.0   | 7.9   | 7.6   | 8.9   | 9.7   |
| 0.9   | 0.7   | 0.7   | 2.7   | 1.2   | 1.2   | 0.9   | 0.7   | 0.7   |
| 1.1   | 1.8   | 7.9   | 20.4  | 10.8  | 22.4  | 8.2   | 7.1   | 7.7   |
| 138.9 | 152.2 | 166.3 | 232.4 | 222.5 | 230.8 | 303.7 | 325.1 | 319.7 |
| 62.3  | 94.8  | 68.5  | 30.1  | 30.6  | 38.8  | 13.5  | 28.6  | 28.4  |
| 1.9   | 2.2   | 8.2   | 9.7   | 4.1   | 5.0   | 5.3   | 3.1   | 2.1   |
| 375.3 | 246.7 | 97.5  | 46.9  | 31.1  | 37.6  | 37.4  | 43.8  | 51.4  |
| 34.3  | 40.8  | 34.4  | 30.4  | 16.4  | 23.5  | 15.3  | 11.5  | 16.9  |
| 111.5 | 143.1 | 86.5  | 80.6  | 64.5  | 96.5  | 99.7  | 106.3 | 117.7 |
| 11.4  | 33.6  | 31.7  | 12.1  | 18.9  | 9.3   | 11.5  | 2.3   | 3.0   |
| 462.2 | 590.1 | 587.6 | 792.9 | 731.9 | 744.5 | 567.2 | 635.7 | 658.9 |
| 0.5   | 1.6   | 0.2   | 1.2   | 4.4   | 1.2   | 0.9   | 2.1   | 0.6   |
| 1.7   | 2.6   | 2.3   | 4.0   | 7.1   | 8.6   | 0.2   | 0.7   | 0.2   |
| 66.9  | 59.4  | 37.0  | 21.4  | 28.3  | 29.1  | 49.1  | 37.2  | 41.1  |
| 1.2   | 5.4   | 2.4   | 12.5  | 16.5  | 10.3  | 10.1  | 7.5   | 9.8   |
| 155.3 | 156.5 | 143.7 | 74.3  | 74.0  | 73.1  | 122.4 | 186.7 | 144.8 |
| 1.5   | 4.1   | 6.8   | 13.1  | 4.0   | 9.8   | 1.5   | 4.4   | 4.6   |
| 21.6  | 24.4  | 20.7  | 20.2  | 5.7   | 13.1  | 15.4  | 14.4  | 9.3   |
| 24.2  | 25.4  | 15.4  | 19.8  | 16.7  | 18.8  | 13.6  | 11.8  | 23.5  |
| 335.7 | 430.3 | 377.1 | 314.1 | 234.1 | 261.4 | 354.0 | 358.1 | 382.7 |
| 1.7   | 6.2   | 2.7   | 81.6  | 101.7 | 96.1  | 79.1  | 103.9 | 90.4  |
| 8.5   | 14.6  | 31.4  | 13.7  | 13.0  | 8.4   | 9.7   | 15.2  | 16.7  |
| 9.9   | 6.8   | 7.2   | 22.5  | 20.7  | 21.6  | 11.7  | 9.1   | 2.4   |
| 3.1   | 6.8   | 3.2   | 98.8  | 111.8 | 125.5 | 68.1  | 107.9 | 102.0 |
| 13.9  | 17.0  | 9.2   | 28.7  | 22.7  | 28.0  | 19.1  | 24.3  | 22.9  |
| 74.2  | 78.3  | 57.9  | 24.4  | 28.6  | 26.2  | 40.6  | 29.8  | 32.4  |
| 3.7   | 0.7   | 1.3   | 3.1   | 4.3   | 2.9   | 1.6   | 1.4   | 2.1   |
| 0.5   | 1.1   | 0.9   | 3.3   | 1.9   | 3.0   | 0.9   | 1.1   | 0.8   |
| 4.6   | 4.1   | 5.1   | 1.0   | 6.3   | 6.2   | 5.1   | 3.6   | 5.4   |
| 1.4   | 8.2   | 9.9   | 7.9   | 6.1   | 19.8  | 4.1   | 4.6   | 3.2   |
| 7.2   | 10.6  | 10.1  | 12.2  | 13.9  | 14.1  | 4.9   | 8.5   | 9.5   |
| 4.2   | 3.0   | 3.8   | 6.8   | 5.3   | 7.7   | 2.2   | 2.6   | 1.5   |
| 6.7   | 4.6   | 8.5   | 19.4  | 6.7   | 26.5  | 6.3   | 11.7  | 7.6   |
| 2.0   | 2.9   | 2.8   | 19.3  | 7.4   | 4.3   | 2.8   | 4.3   | 2.4   |
| 15.4  | 11.4  | 18.3  | 16.7  | 19.5  | 14.0  | 15.1  | 12.7  | 22.3  |
| 8.2   | 11.2  | 7.3   | 7.9   | 10.5  | 17.6  | 5.0   | 3.3   | 4.5   |
| 7.1   | 11.6  | 14.0  | 16.2  | 16.9  | 16.1  | 6.5   | 4.2   | 10.1  |
| 2.4   | 3.4   | 1.5   | 11.9  | 6.4   | 8.7   | 2.8   | 3.0   | 5.7   |
| 10.5  | 8.5   | 1.3   | 20.3  | 8.8   | 18.1  | 2.6   | 2.4   | 10.5  |



|        |        |        |        |        |        |        |        |        |
|--------|--------|--------|--------|--------|--------|--------|--------|--------|
| 190.2  | 204.1  | 170.8  | 691.3  | 423.0  | 489.0  | 197.1  | 197.5  | 208.9  |
| 6.3    | 3.8    | 2.2    | 6.2    | 13.1   | 12.2   | 12.0   | 3.9    | 8.9    |
| 27.8   | 36.1   | 39.6   | 43.7   | 41.0   | 58.3   | 33.2   | 43.1   | 38.9   |
| 33.3   | 23.3   | 8.6    | 32.1   | 27.2   | 27.5   | 13.3   | 17.7   | 14.3   |
| 7.8    | 5.7    | 4.3    | 15.3   | 11.5   | 9.4    | 1.6    | 8.4    | 6.2    |
| 20.4   | 19.1   | 18.4   | 22.1   | 19.5   | 26.6   | 16.6   | 18.6   | 22.6   |
| 475.8  | 1049.6 | 699.8  | 57.5   | 38.2   | 35.1   | 34.4   | 48.2   | 48.3   |
| 0.3    | 0.4    | 0.5    | 3.3    | 1.1    | 1.6    | 1.1    | 0.4    | 0.8    |
| 2.3    | 4.3    | 1.8    | 8.1    | 17.7   | 9.9    | 2.6    | 6.9    | 4.8    |
| 1.8    | 2.6    | 2.9    | 5.3    | 6.1    | 7.8    | 11.0   | 9.3    | 11.6   |
| 2.4    | 2.1    | 1.1    | 113.7  | 94.3   | 108.2  | 44.2   | 64.1   | 68.8   |
| 35.8   | 44.6   | 29.4   | 32.1   | 23.7   | 38.9   | 12.5   | 5.5    | 3.9    |
| 1023.5 | 1572.9 | 1196.5 | 751.7  | 548.8  | 606.4  | 469.0  | 445.5  | 515.7  |
| 18.0   | 14.4   | 9.1    | 33.3   | 27.3   | 32.7   | 19.6   | 11.6   | 22.7   |
| 9.3    | 3.1    | 5.8    | 12.6   | 6.7    | 14.8   | 3.3    | 2.7    | 2.9    |
| 4679.3 | 5225.0 | 4660.7 | 3439.6 | 3070.1 | 3098.4 | 2237.8 | 2343.0 | 2528.8 |
| 10.6   | 16.4   | 12.2   | 7.8    | 14.6   | 7.1    | 8.1    | 17.0   | 11.6   |
| 39.1   | 47.8   | 28.1   | 16.8   | 19.8   | 19.0   | 22.0   | 15.3   | 22.2   |
| 72.7   | 59.5   | 34.6   | 22.5   | 19.6   | 13.9   | 9.1    | 3.7    | 6.2    |
| 3.9    | 2.6    | 8.3    | 19.2   | 24.1   | 17.2   | 9.3    | 17.0   | 19.3   |
| 6.4    | 14.8   | 13.0   | 33.8   | 28.5   | 43.6   | 12.8   | 19.0   | 28.1   |
| 7.9    | 17.9   | 18.0   | 9.9    | 22.0   | 19.4   | 24.6   | 16.3   | 15.0   |
| 4.7    | 12.1   | 12.9   | 16.5   | 18.2   | 20.5   | 7.4    | 5.8    | 5.8    |
| 2.1    | 2.4    | 1.2    | 2.9    | 3.7    | 3.5    | 1.0    | 1.2    | 1.8    |
| 81.5   | 75.0   | 64.1   | 44.3   | 31.0   | 35.7   | 56.3   | 48.2   | 48.3   |
| 220.8  | 229.3  | 166.3  | 2.3    | 1.9    | 5.2    | 0.9    | 1.3    | 0.7    |
| 7.5    | 19.4   | 11.9   | 7.1    | 3.8    | 11.7   | 1.4    | 3.2    | 7.1    |
| 7.7    | 4.8    | 1.9    | 10.3   | 4.8    | 6.8    | 1.8    | 4.6    | 1.9    |
| 8.1    | 5.4    | 4.9    | 16.1   | 9.1    | 16.8   | 7.1    | 10.2   | 5.3    |
| 362.5  | 488.0  | 280.0  | 29.2   | 16.0   | 14.3   | 20.8   | 4.9    | 12.2   |
| 6.6    | 3.0    | 0.9    | 7.7    | 5.1    | 3.1    | 5.3    | 1.2    | 8.0    |
| 8.9    | 12.1   | 3.8    | 4.7    | 10.0   | 9.3    | 4.9    | 6.3    | 9.4    |
| 4.2    | 8.8    | 8.0    | 4.1    | 8.7    | 5.2    | 16.0   | 9.5    | 4.4    |
| 79.0   | 117.3  | 123.3  | 9.9    | 11.0   | 9.3    | 8.4    | 1.2    | 1.6    |
| 3.1    | 4.3    | 11.1   | 17.5   | 10.1   | 11.5   | 10.6   | 14.0   | 1.8    |
| 568.6  | 516.8  | 324.4  | 72.4   | 73.3   | 57.2   | 63.9   | 54.7   | 60.2   |
| 10.7   | 8.5    | 7.6    | 9.2    | 11.0   | 26.1   | 7.5    | 12.9   | 9.7    |
| 2003.8 | 2069.5 | 1513.9 | 8.6    | 3.6    | 7.8    | 3.8    | 4.8    | 3.0    |
| 0.8    | 1.0    | 2.1    | 2.2    | 1.8    | 1.6    | 1.1    | 0.6    | 1.0    |
| 3.0    | 12.8   | 6.8    | 14.6   | 17.5   | 5.6    | 7.4    | 9.6    | 3.4    |
| 303.4  | 214.7  | 195.7  | 440.5  | 313.9  | 350.3  | 152.2  | 177.0  | 206.2  |
| 36.3   | 42.6   | 38.0   | 46.1   | 39.4   | 54.0   | 36.5   | 44.5   | 57.6   |
| 1461.7 | 1738.4 | 1040.7 | 169.3  | 137.4  | 123.1  | 237.0  | 234.3  | 261.3  |
| 153.2  | 178.8  | 143.4  | 142.9  | 110.9  | 126.9  | 126.6  | 145.8  | 147.8  |
| 55.2   | 106.5  | 82.9   | 5.9    | 5.6    | 5.6    | 1.9    | 1.8    | 0.3    |
| 306.5  | 418.9  | 192.3  | 328.0  | 228.7  | 225.1  | 128.9  | 125.2  | 126.8  |
| 252.7  | 254.6  | 139.7  | 197.3  | 133.1  | 141.2  | 80.5   | 75.1   | 92.6   |
| 60.7   | 96.9   | 85.2   | 97.2   | 81.4   | 88.8   | 73.0   | 74.4   | 75.4   |
| 28.7   | 31.0   | 19.2   | 16.1   | 12.7   | 5.5    | 16.2   | 8.4    | 14.3   |
| 1823.7 | 2436.0 | 2080.3 | 895.0  | 793.2  | 847.6  | 548.0  | 665.9  | 844.7  |
| 280.7  | 308.0  | 217.3  | 130.3  | 115.9  | 126.5  | 226.7  | 211.1  | 221.9  |
| 3.8    | 4.2    | 4.6    | 144.6  | 134.0  | 137.7  | 97.0   | 109.0  | 103.2  |
| 81.7   | 111.0  | 59.4   | 20.8   | 20.7   | 24.5   | 19.2   | 14.6   | 18.6   |

|        |        |        |        |        |        |        |        |        |
|--------|--------|--------|--------|--------|--------|--------|--------|--------|
| 7.7    | 4.2    | 8.2    | 21.4   | 28.1   | 25.6   | 2.8    | 13.9   | 2.4    |
| 624.5  | 1087.0 | 1312.2 | 761.5  | 636.5  | 730.0  | 593.7  | 780.4  | 784.6  |
| 128.8  | 136.2  | 139.1  | 80.0   | 50.4   | 82.6   | 67.5   | 57.5   | 61.0   |
| 186.7  | 253.7  | 210.6  | 325.5  | 246.0  | 287.7  | 187.7  | 174.7  | 204.0  |
| 8.3    | 11.9   | 15.5   | 20.7   | 17.2   | 16.4   | 16.2   | 14.0   | 9.1    |
| 57.2   | 67.7   | 48.9   | 51.5   | 50.6   | 59.3   | 27.3   | 26.7   | 30.7   |
| 2.5    | 3.3    | 3.9    | 5.0    | 2.9    | 4.4    | 10.4   | 1.7    | 3.1    |
| 15.5   | 29.2   | 13.8   | 24.2   | 32.2   | 29.2   | 2.4    | 2.6    | 4.2    |
| 2.0    | 2.2    | 2.3    | 3.9    | 3.2    | 4.0    | 1.6    | 1.8    | 2.3    |
| 204.3  | 299.6  | 176.8  | 129.9  | 120.3  | 115.5  | 176.7  | 189.3  | 211.7  |
| 153.9  | 207.8  | 138.4  | 269.8  | 220.9  | 267.2  | 187.3  | 203.0  | 217.0  |
| 2.7    | 2.0    | 4.2    | 8.8    | 3.1    | 4.7    | 1.5    | 1.7    | 2.4    |
| 73.6   | 87.2   | 56.8   | 63.7   | 36.2   | 47.5   | 22.0   | 22.7   | 25.4   |
| 3.8    | 4.8    | 2.0    | 8.5    | 5.7    | 9.2    | 1.4    | 3.2    | 11.9   |
| 195.7  | 224.9  | 175.4  | 120.3  | 108.8  | 114.7  | 152.6  | 142.2  | 178.4  |
| 228.1  | 232.1  | 144.4  | 88.3   | 62.3   | 74.6   | 53.3   | 51.9   | 72.2   |
| 7.1    | 2.2    | 2.6    | 11.1   | 4.3    | 2.2    | 1.0    | 2.0    | 3.6    |
| 232.2  | 300.2  | 229.2  | 309.4  | 250.8  | 293.6  | 183.9  | 224.0  | 226.0  |
| 7910.6 | 8285.2 | 7448.0 | 6118.3 | 5128.5 | 5757.3 | 4273.8 | 3681.8 | 4283.3 |
| 14.3   | 16.1   | 16.1   | 10.7   | 9.5    | 13.9   | 3.6    | 7.3    | 4.3    |
| 8.5    | 20.3   | 3.6    | 17.0   | 9.9    | 7.7    | 8.5    | 11.5   | 8.2    |
| 70.2   | 65.5   | 59.7   | 22.7   | 20.3   | 18.3   | 30.1   | 39.1   | 30.1   |
| 92.9   | 138.7  | 105.0  | 45.2   | 19.7   | 47.9   | 42.4   | 56.4   | 48.0   |
| 64.4   | 80.4   | 69.3   | 202.4  | 189.5  | 245.8  | 73.3   | 126.8  | 111.8  |
| 295.5  | 386.4  | 274.5  | 167.7  | 164.9  | 179.9  | 213.7  | 221.5  | 228.2  |
| 37.9   | 34.2   | 25.2   | 30.3   | 34.3   | 38.6   | 25.9   | 27.3   | 19.6   |
| 71.8   | 97.3   | 89.7   | 169.3  | 149.7  | 156.5  | 141.2  | 90.1   | 121.7  |
| 181.8  | 144.4  | 119.2  | 35.8   | 52.2   | 60.6   | 46.4   | 46.9   | 66.1   |
| 1042.8 | 1102.3 | 857.3  | 183.1  | 119.5  | 153.2  | 152.3  | 131.2  | 160.4  |
| 670.3  | 717.1  | 479.1  | 86.8   | 55.2   | 74.3   | 74.1   | 65.7   | 79.5   |
| 47.5   | 70.7   | 64.7   | 80.2   | 56.2   | 75.0   | 53.4   | 69.5   | 58.8   |
| 370.3  | 348.9  | 172.9  | 144.6  | 96.9   | 95.5   | 164.2  | 134.0  | 134.7  |
| 14.8   | 17.2   | 13.9   | 26.4   | 17.9   | 25.3   | 17.5   | 17.8   | 16.9   |
| 2.5    | 2.1    | 1.2    | 9.5    | 9.3    | 10.0   | 7.2    | 0.5    | 2.9    |
| 119.7  | 181.3  | 192.4  | 205.4  | 191.6  | 193.1  | 133.0  | 173.6  | 175.1  |
| 3.4    | 2.4    | 2.1    | 4.0    | 2.7    | 8.4    | 1.5    | 1.4    | 1.9    |
| 17.1   | 28.9   | 20.5   | 17.8   | 22.8   | 21.7   | 20.3   | 37.4   | 32.9   |
| 168.7  | 251.7  | 128.1  | 86.6   | 77.3   | 69.6   | 49.7   | 47.4   | 50.0   |
| 62.9   | 98.2   | 69.9   | 74.9   | 75.2   | 95.6   | 76.5   | 58.0   | 85.2   |
| 1143.9 | 1237.6 | 672.6  | 2.1    | 3.9    | 5.2    | 3.4    | 0.7    | 4.4    |
| 1254.6 | 1440.6 | 1101.4 | 1256.8 | 987.9  | 1044.3 | 1240.0 | 1181.0 | 1286.8 |
| 3514.3 | 4089.0 | 2753.8 | 1103.8 | 734.0  | 782.6  | 747.3  | 577.0  | 637.8  |
| 515.7  | 573.0  | 374.5  | 307.2  | 202.3  | 216.7  | 114.7  | 112.9  | 140.5  |
| 0.9    | 5.0    | 4.2    | 9.4    | 4.5    | 6.5    | 2.1    | 3.2    | 1.8    |
| 30.1   | 46.7   | 23.6   | 37.0   | 54.5   | 57.7   | 52.3   | 47.1   | 38.7   |
| 214.6  | 324.4  | 319.1  | 163.8  | 156.4  | 166.4  | 111.9  | 163.7  | 153.1  |
| 332.7  | 321.2  | 246.6  | 261.2  | 204.2  | 226.2  | 183.6  | 233.4  | 229.7  |
| 20.8   | 17.1   | 19.2   | 6.8    | 9.2    | 6.1    | 8.8    | 9.5    | 10.1   |
| 21.4   | 28.7   | 30.1   | 80.5   | 66.2   | 54.3   | 39.3   | 49.9   | 54.1   |
| 372.9  | 499.8  | 400.2  | 168.5  | 168.2  | 156.2  | 162.3  | 224.8  | 233.8  |
| 262.7  | 443.0  | 425.1  | 20.3   | 9.4    | 16.1   | 1.5    | 11.8   | 9.2    |
| 232.7  | 243.6  | 191.6  | 70.5   | 61.3   | 65.5   | 80.1   | 80.0   | 79.8   |
| 1386.6 | 1830.4 | 1153.6 | 287.5  | 211.7  | 222.1  | 229.6  | 172.9  | 223.8  |

|        |        |        |        |        |        |        |        |        |
|--------|--------|--------|--------|--------|--------|--------|--------|--------|
| 146.7  | 175.8  | 134.9  | 309.4  | 285.3  | 299.0  | 268.6  | 303.7  | 305.9  |
| 10.5   | 15.0   | 13.2   | 30.2   | 12.7   | 19.3   | 22.7   | 18.1   | 26.3   |
| 156.4  | 227.7  | 153.4  | 86.6   | 84.0   | 80.8   | 63.2   | 100.6  | 77.8   |
| 4.3    | 8.2    | 0.7    | 10.6   | 3.0    | 5.3    | 2.1    | 2.6    | 2.0    |
| 187.1  | 256.4  | 244.1  | 159.7  | 140.3  | 181.8  | 215.5  | 182.9  | 219.1  |
| 413.3  | 441.0  | 202.0  | 40.2   | 18.3   | 28.1   | 29.9   | 21.0   | 26.5   |
| 888.3  | 1053.0 | 769.0  | 1717.6 | 1301.9 | 1460.6 | 883.2  | 863.0  | 908.0  |
| 57.0   | 76.3   | 48.0   | 41.3   | 26.4   | 34.1   | 35.6   | 38.1   | 37.3   |
| 976.9  | 1189.3 | 1025.4 | 518.4  | 394.2  | 473.4  | 463.4  | 468.4  | 538.0  |
| 19.0   | 27.6   | 14.0   | 27.9   | 13.9   | 20.4   | 8.7    | 19.0   | 15.4   |
| 48.0   | 62.6   | 44.9   | 27.1   | 32.3   | 33.4   | 41.5   | 38.4   | 38.9   |
| 136.3  | 218.8  | 210.1  | 387.3  | 324.0  | 354.3  | 183.8  | 213.6  | 241.7  |
| 564.6  | 575.2  | 582.3  | 332.0  | 245.7  | 285.0  | 205.1  | 265.9  | 224.0  |
| 8.4    | 7.2    | 0.6    | 10.2   | 9.1    | 12.3   | 6.1    | 7.0    | 11.6   |
| 417.2  | 504.1  | 520.7  | 456.6  | 462.9  | 516.4  | 366.5  | 416.8  | 442.0  |
| 3766.1 | 4455.6 | 3160.9 | 4362.0 | 3570.4 | 3917.3 | 2814.0 | 2542.5 | 2769.2 |
| 50.1   | 61.6   | 55.9   | 22.9   | 15.1   | 17.5   | 49.7   | 51.5   | 60.2   |
| 122.8  | 119.1  | 108.4  | 146.9  | 126.9  | 144.7  | 77.2   | 110.1  | 100.4  |
| 8.7    | 21.8   | 26.5   | 10.2   | 14.5   | 4.9    | 3.8    | 2.7    | 4.6    |
| 226.9  | 331.9  | 194.3  | 579.3  | 422.8  | 473.5  | 317.4  | 340.5  | 373.4  |
| 76.0   | 91.2   | 73.0   | 23.7   | 18.0   | 19.2   | 17.4   | 10.2   | 18.8   |
| 158.6  | 188.0  | 121.3  | 438.0  | 335.9  | 386.1  | 302.8  | 350.3  | 301.7  |
| 76.7   | 69.1   | 34.0   | 292.7  | 206.7  | 209.8  | 181.0  | 113.5  | 161.1  |
| 287.9  | 411.4  | 356.1  | 97.1   | 77.5   | 91.0   | 100.1  | 56.9   | 77.6   |
| 8.6    | 12.6   | 9.1    | 280.9  | 240.2  | 253.7  | 99.7   | 102.1  | 154.0  |
| 21.2   | 30.9   | 27.6   | 17.7   | 20.0   | 27.1   | 19.9   | 21.1   | 22.2   |
| 44.3   | 119.7  | 140.2  | 80.9   | 94.4   | 91.9   | 57.4   | 91.9   | 92.8   |
| 691.4  | 1071.4 | 794.7  | 438.0  | 421.2  | 517.3  | 228.5  | 260.9  | 306.1  |
| 6.3    | 23.0   | 3.3    | 29.0   | 29.1   | 13.9   | 9.3    | 5.1    | 9.1    |
| 298.9  | 418.1  | 314.4  | 399.0  | 307.7  | 331.3  | 255.9  | 263.9  | 300.5  |
| 167.2  | 153.7  | 134.3  | 387.9  | 401.1  | 431.0  | 254.7  | 392.3  | 367.0  |
| 119.6  | 181.9  | 133.7  | 43.2   | 54.3   | 60.4   | 36.6   | 44.1   | 41.1   |
| 37.5   | 61.6   | 54.1   | 104.6  | 77.6   | 79.7   | 79.7   | 65.4   | 78.2   |
| 32.8   | 56.5   | 40.5   | 319.2  | 306.9  | 360.8  | 252.6  | 346.4  | 389.0  |
| 468.1  | 602.8  | 489.2  | 562.5  | 495.8  | 559.6  | 316.1  | 356.8  | 374.8  |
| 64.3   | 106.2  | 81.7   | 73.7   | 63.7   | 78.5   | 73.0   | 56.3   | 65.4   |
| 13.5   | 16.6   | 2.5    | 19.9   | 24.3   | 35.9   | 17.0   | 12.6   | 23.5   |
| 41.7   | 29.9   | 30.8   | 30.1   | 25.4   | 26.9   | 20.0   | 15.0   | 19.3   |
| 70.5   | 85.9   | 75.7   | 154.2  | 142.1  | 161.8  | 73.9   | 92.3   | 96.7   |
| 5.8    | 8.0    | 5.9    | 13.4   | 12.3   | 7.1    | 7.8    | 6.6    | 5.8    |
| 15.6   | 15.3   | 9.2    | 18.4   | 12.7   | 15.6   | 12.1   | 19.7   | 15.7   |
| 87.3   | 87.0   | 80.1   | 38.2   | 16.9   | 16.7   | 15.9   | 8.4    | 19.2   |
| 139.0  | 165.4  | 85.0   | 62.1   | 69.8   | 51.0   | 92.6   | 87.8   | 99.5   |
| 66.1   | 85.4   | 56.9   | 689.2  | 512.0  | 546.0  | 434.8  | 452.0  | 466.1  |
| 426.9  | 473.1  | 231.1  | 375.5  | 259.7  | 303.7  | 555.2  | 446.9  | 546.5  |
| 17.4   | 19.4   | 10.0   | 38.4   | 16.9   | 13.2   | 16.4   | 16.7   | 8.9    |
| 5.9    | 9.4    | 10.6   | 8.4    | 14.5   | 9.0    | 3.1    | 7.0    | 4.5    |
| 28.2   | 87.3   | 73.3   | 7.5    | 9.0    | 7.9    | 8.6    | 4.5    | 4.7    |
| 3.9    | 6.7    | 1.1    | 3.0    | 5.9    | 5.1    | 2.7    | 0.4    | 1.1    |
| 1285.1 | 1134.5 | 782.5  | 538.1  | 467.6  | 507.7  | 326.4  | 364.3  | 386.8  |
| 9.8    | 9.1    | 6.0    | 19.5   | 14.9   | 16.2   | 13.7   | 7.8    | 5.4    |
| 337.5  | 493.4  | 450.3  | 283.1  | 299.9  | 303.8  | 215.5  | 242.4  | 278.7  |
| 1521.5 | 2437.6 | 2149.1 | 1508.5 | 1040.8 | 1152.1 | 1323.1 | 1055.1 | 1313.9 |

|        |        |        |        |        |        |        |        |        |
|--------|--------|--------|--------|--------|--------|--------|--------|--------|
| 13.4   | 17.8   | 12.0   | 44.6   | 34.6   | 33.6   | 25.0   | 34.6   | 33.1   |
| 8.3    | 9.4    | 4.8    | 8.1    | 8.8    | 10.8   | 11.5   | 7.8    | 4.3    |
| 2.6    | 1.9    | 8.7    | 4.2    | 4.9    | 5.9    | 3.6    | 5.5    | 2.9    |
| 21.5   | 37.1   | 45.5   | 13.6   | 14.9   | 16.8   | 11.4   | 19.4   | 13.2   |
| 305.3  | 436.7  | 336.0  | 227.4  | 203.1  | 208.7  | 219.4  | 218.4  | 280.5  |
| 106.9  | 139.0  | 102.7  | 216.1  | 181.7  | 214.8  | 123.6  | 154.7  | 167.1  |
| 1.4    | 3.9    | 1.3    | 10.3   | 4.3    | 8.8    | 1.5    | 0.9    | 2.6    |
| 9.9    | 6.1    | 7.0    | 34.3   | 14.8   | 13.4   | 8.8    | 8.0    | 10.5   |
| 112.7  | 157.3  | 135.1  | 62.9   | 61.5   | 61.0   | 38.4   | 33.3   | 30.0   |
| 502.7  | 554.7  | 343.4  | 436.0  | 289.8  | 385.6  | 227.1  | 197.8  | 222.3  |
| 77.9   | 91.3   | 56.1   | 39.6   | 35.5   | 42.9   | 61.3   | 56.0   | 62.1   |
| 74.7   | 57.6   | 49.9   | 31.6   | 23.8   | 31.3   | 45.5   | 51.0   | 47.6   |
| 114.3  | 147.0  | 147.6  | 19.2   | 23.5   | 19.6   | 38.7   | 43.4   | 35.1   |
| 3.4    | 4.9    | 4.6    | 10.4   | 9.8    | 15.7   | 3.0    | 3.4    | 3.1    |
| 1218.2 | 1665.3 | 972.7  | 668.8  | 598.1  | 643.1  | 550.3  | 563.5  | 641.9  |
| 52.3   | 45.7   | 20.8   | 56.1   | 39.7   | 51.4   | 35.2   | 33.6   | 28.9   |
| 269.8  | 356.6  | 328.4  | 4.0    | 14.7   | 24.1   | 14.9   | 14.6   | 12.4   |
| 49.0   | 75.1   | 59.3   | 125.0  | 99.4   | 109.0  | 46.7   | 44.1   | 59.2   |
| 24.4   | 21.7   | 13.3   | 29.4   | 24.0   | 20.5   | 24.3   | 16.8   | 24.1   |
| 828.9  | 877.1  | 383.4  | 523.8  | 351.0  | 370.9  | 343.3  | 227.1  | 262.4  |
| 22.1   | 25.1   | 26.6   | 71.2   | 70.7   | 60.8   | 35.9   | 32.8   | 38.7   |
| 11.0   | 15.4   | 7.9    | 7.4    | 16.4   | 8.2    | 9.5    | 3.9    | 3.3    |
| 50.0   | 88.9   | 81.0   | 4.9    | 10.3   | 6.5    | 1.5    | 2.2    | 9.3    |
| 35.0   | 41.9   | 24.9   | 114.1  | 103.3  | 96.9   | 52.9   | 76.2   | 81.0   |
| 2.7    | 5.4    | 2.3    | 3.5    | 3.2    | 6.9    | 2.5    | 1.2    | 2.0    |
| 3297.4 | 3673.8 | 2722.4 | 1608.6 | 1379.4 | 1198.0 | 1390.6 | 1550.0 | 1639.2 |
| 620.4  | 650.7  | 397.5  | 160.4  | 106.0  | 103.4  | 95.6   | 86.9   | 128.2  |
| 34.8   | 35.9   | 37.2   | 35.7   | 21.7   | 20.2   | 7.0    | 15.5   | 30.5   |
| 4.0    | 2.7    | 1.2    | 13.9   | 3.1    | 5.2    | 0.9    | 2.3    | 1.0    |
| 253.9  | 262.0  | 174.8  | 82.1   | 47.4   | 62.3   | 36.8   | 25.7   | 40.8   |
| 124.2  | 120.8  | 64.3   | 136.5  | 111.7  | 107.0  | 86.4   | 74.8   | 81.5   |
| 19.9   | 20.4   | 11.8   | 9.3    | 9.6    | 12.5   | 5.7    | 5.8    | 10.8   |
| 3.1    | 5.5    | 2.9    | 17.8   | 16.9   | 25.3   | 15.9   | 12.4   | 11.1   |
| 143.0  | 177.6  | 175.8  | 140.2  | 140.4  | 161.6  | 91.2   | 100.2  | 118.9  |
| 7.5    | 3.0    | 6.1    | 22.2   | 13.5   | 22.1   | 7.6    | 9.1    | 3.3    |
| 21.1   | 31.9   | 31.9   | 9.6    | 3.3    | 9.3    | 0.8    | 3.4    | 1.3    |
| 979.2  | 1324.4 | 1117.7 | 503.1  | 418.7  | 466.4  | 407.7  | 444.7  | 460.1  |
| 32.3   | 64.1   | 56.4   | 53.2   | 41.9   | 51.9   | 47.4   | 46.8   | 50.5   |
| 23.9   | 23.8   | 15.3   | 14.0   | 20.6   | 15.1   | 14.6   | 12.9   | 24.7   |
| 4.6    | 15.3   | 5.3    | 10.7   | 5.4    | 7.3    | 8.9    | 13.5   | 13.8   |
| 86.0   | 88.8   | 75.7   | 76.0   | 50.8   | 46.0   | 37.9   | 27.6   | 34.9   |
| 6.2    | 1.7    | 2.3    | 7.2    | 4.2    | 6.7    | 1.5    | 2.0    | 5.9    |
| 20.3   | 22.1   | 15.4   | 14.6   | 14.3   | 8.1    | 4.9    | 4.5    | 7.9    |
| 11.8   | 23.8   | 15.5   | 36.4   | 31.3   | 23.4   | 17.4   | 18.8   | 18.0   |
| 73.8   | 67.6   | 59.5   | 41.5   | 36.5   | 38.1   | 45.7   | 56.6   | 49.7   |
| 20.9   | 18.1   | 15.6   | 6.2    | 12.9   | 11.4   | 12.2   | 6.5    | 14.9   |
| 1.7    | 3.7    | 2.5    | 137.2  | 92.3   | 86.3   | 104.5  | 60.3   | 98.0   |
| 21.2   | 43.8   | 47.0   | 7.4    | 6.0    | 10.6   | 4.6    | 3.9    | 1.9    |
| 2.5    | 1.8    | 2.2    | 4.8    | 3.6    | 5.2    | 1.6    | 1.7    | 1.7    |
| 6.3    | 5.6    | 0.7    | 15.9   | 8.8    | 8.4    | 2.9    | 4.7    | 7.0    |
| 35.1   | 29.5   | 25.6   | 26.9   | 14.1   | 27.5   | 28.2   | 13.1   | 19.4   |
| 45.0   | 48.8   | 28.2   | 10.0   | 11.7   | 4.3    | 12.8   | 15.9   | 21.7   |
| 113.0  | 114.7  | 68.9   | 52.0   | 37.7   | 54.7   | 64.0   | 46.1   | 63.3   |

|        |        |        |       |       |       |       |       |       |
|--------|--------|--------|-------|-------|-------|-------|-------|-------|
| 8.1    | 15.0   | 11.9   | 9.2   | 18.4  | 12.5  | 3.4   | 11.0  | 6.4   |
| 352.0  | 408.3  | 274.1  | 96.9  | 72.3  | 79.5  | 85.4  | 76.5  | 96.3  |
| 47.6   | 50.1   | 38.7   | 23.2  | 5.7   | 15.1  | 24.8  | 23.0  | 26.9  |
| 9.6    | 20.6   | 26.0   | 2.3   | 2.5   | 2.4   | 1.0   | 0.9   | 1.3   |
| 50.3   | 51.4   | 44.4   | 53.9  | 53.2  | 58.6  | 39.9  | 41.1  | 41.7  |
| 4.0    | 6.4    | 1.0    | 16.9  | 12.1  | 16.3  | 10.6  | 7.8   | 10.9  |
| 718.4  | 937.9  | 792.6  | 300.2 | 272.5 | 299.9 | 356.4 | 376.1 | 438.3 |
| 9.9    | 13.5   | 10.0   | 64.6  | 30.0  | 20.8  | 19.6  | 17.5  | 23.0  |
| 5.7    | 12.9   | 6.5    | 11.1  | 11.9  | 15.8  | 2.8   | 5.2   | 7.3   |
| 208.0  | 206.1  | 120.6  | 89.0  | 55.2  | 65.5  | 51.8  | 49.4  | 46.1  |
| 5.0    | 7.2    | 13.3   | 18.3  | 16.6  | 14.0  | 14.8  | 5.8   | 6.1   |
| 9.8    | 13.4   | 6.9    | 13.1  | 6.7   | 12.7  | 48.4  | 35.9  | 66.8  |
| 16.3   | 5.4    | 4.9    | 52.7  | 44.9  | 47.8  | 61.6  | 54.6  | 50.7  |
| 1.6    | 1.8    | 4.2    | 3.4   | 5.0   | 8.8   | 1.7   | 6.5   | 4.1   |
| 176.2  | 213.9  | 186.8  | 133.1 | 136.4 | 138.4 | 138.2 | 113.1 | 127.5 |
| 25.3   | 23.5   | 23.5   | 383.0 | 360.6 | 392.3 | 213.7 | 252.0 | 260.8 |
| 683.5  | 764.6  | 487.2  | 394.9 | 272.0 | 328.0 | 452.3 | 336.2 | 405.9 |
| 6.2    | 10.4   | 13.0   | 12.1  | 3.2   | 6.5   | 6.0   | 1.9   | 3.1   |
| 34.9   | 40.3   | 34.5   | 50.1  | 26.4  | 33.8  | 23.3  | 8.5   | 16.0  |
| 148.5  | 158.1  | 141.7  | 75.0  | 83.3  | 82.2  | 34.7  | 29.6  | 41.8  |
| 100.2  | 110.0  | 77.7   | 108.6 | 78.5  | 114.9 | 133.0 | 119.0 | 138.8 |
| 45.3   | 59.5   | 51.4   | 50.8  | 50.1  | 57.9  | 38.2  | 41.8  | 53.8  |
| 20.3   | 24.2   | 15.6   | 17.3  | 9.4   | 12.2  | 12.3  | 7.9   | 4.5   |
| 11.0   | 11.4   | 7.7    | 11.5  | 10.4  | 26.8  | 12.5  | 15.8  | 7.5   |
| 4426.7 | 3954.2 | 2511.2 | 765.0 | 659.5 | 702.0 | 534.5 | 709.4 | 695.7 |
| 2.0    | 1.7    | 1.0    | 7.3   | 2.0   | 4.1   | 0.8   | 0.6   | 0.6   |
| 75.7   | 101.4  | 69.7   | 271.1 | 206.5 | 234.3 | 285.7 | 307.2 | 347.3 |
| 1.4    | 1.8    | 3.1    | 8.5   | 8.7   | 13.4  | 4.3   | 3.3   | 6.0   |
| 52.8   | 84.7   | 58.2   | 69.5  | 73.5  | 81.4  | 47.0  | 47.0  | 49.3  |
| 10.4   | 8.8    | 5.2    | 170.8 | 183.3 | 186.9 | 154.8 | 124.8 | 172.4 |
| 3.0    | 2.5    | 2.4    | 15.4  | 6.6   | 10.6  | 13.1  | 5.8   | 4.9   |
| 24.4   | 35.6   | 27.4   | 25.2  | 5.7   | 10.3  | 9.8   | 13.4  | 9.1   |
| 13.0   | 7.4    | 10.9   | 8.5   | 11.1  | 10.0  | 5.9   | 1.2   | 5.6   |
| 8.7    | 8.0    | 12.4   | 17.3  | 16.9  | 27.4  | 18.4  | 22.4  | 27.3  |
| 8.8    | 10.8   | 5.4    | 7.0   | 9.5   | 7.3   | 3.6   | 3.0   | 1.9   |
| 745.0  | 979.3  | 735.1  | 664.2 | 528.4 | 619.0 | 378.2 | 390.7 | 402.3 |
| 2.2    | 1.8    | 2.8    | 2.6   | 11.0  | 2.9   | 1.9   | 1.9   | 5.3   |
| 65.7   | 62.3   | 39.6   | 24.3  | 16.1  | 21.3  | 16.8  | 16.7  | 22.8  |
| 11.1   | 20.2   | 24.4   | 13.5  | 17.7  | 22.6  | 2.4   | 3.5   | 5.7   |
| 2460.5 | 2687.9 | 776.4  | 16.8  | 9.0   | 14.7  | 5.3   | 3.6   | 3.7   |
| 295.2  | 347.7  | 214.8  | 222.0 | 178.9 | 206.2 | 205.0 | 185.0 | 208.9 |
| 219.9  | 335.0  | 222.8  | 544.5 | 577.8 | 683.1 | 279.9 | 458.3 | 433.8 |
| 34.3   | 52.1   | 33.5   | 58.0  | 42.6  | 47.4  | 35.0  | 46.4  | 49.4  |
| 2.1    | 3.1    | 2.4    | 5.1   | 2.3   | 3.2   | 1.0   | 1.7   | 1.3   |
| 90.5   | 106.9  | 36.5   | 14.7  | 21.3  | 20.3  | 20.5  | 11.5  | 15.2  |
| 24.4   | 21.3   | 12.4   | 25.7  | 18.6  | 19.8  | 21.9  | 10.4  | 14.3  |
| 1485.4 | 1439.9 | 1453.6 | 891.9 | 720.9 | 956.6 | 569.1 | 657.5 | 604.7 |
| 95.9   | 101.2  | 61.5   | 206.6 | 159.7 | 188.1 | 173.6 | 133.7 | 189.0 |
| 123.3  | 125.2  | 100.6  | 57.8  | 52.2  | 56.2  | 118.0 | 107.1 | 136.7 |
| 15.8   | 16.5   | 9.2    | 11.9  | 8.6   | 10.6  | 8.2   | 6.7   | 14.8  |
| 283.7  | 453.3  | 292.5  | 235.8 | 161.2 | 171.2 | 120.0 | 118.2 | 122.4 |
| 2.7    | 5.0    | 0.5    | 11.2  | 9.2   | 4.0   | 1.7   | 0.8   | 5.4   |
| 135.4  | 145.7  | 107.4  | 84.5  | 79.4  | 92.7  | 96.9  | 93.1  | 115.1 |

|        |        |        |        |        |        |        |       |        |
|--------|--------|--------|--------|--------|--------|--------|-------|--------|
| 3813.2 | 4107.2 | 2110.2 | 1584.1 | 1126.9 | 1356.7 | 1417.7 | 967.8 | 1311.6 |
| 16.0   | 12.2   | 15.3   | 9.0    | 20.5   | 23.3   | 7.1    | 7.1   | 6.0    |
| 4.2    | 7.6    | 0.8    | 5.7    | 3.5    | 7.7    | 1.1    | 2.3   | 5.6    |
| 54.1   | 69.7   | 52.0   | 61.4   | 58.3   | 47.9   | 31.2   | 37.1  | 44.4   |
| 0.7    | 4.5    | 2.6    | 2.1    | 8.4    | 2.4    | 3.0    | 1.7   | 1.2    |
| 1.0    | 1.8    | 0.4    | 2.3    | 3.8    | 3.8    | 0.2    | 0.2   | 0.3    |
| 14.3   | 21.0   | 8.1    | 18.6   | 18.9   | 24.3   | 14.7   | 12.0  | 12.7   |
| 61.3   | 99.9   | 94.3   | 17.6   | 13.5   | 21.1   | 9.0    | 9.9   | 9.8    |
| 50.4   | 81.1   | 72.8   | 4.6    | 10.7   | 5.9    | 6.5    | 6.9   | 11.1   |
| 1.4    | 6.6    | 11.1   | 19.0   | 4.6    | 18.1   | 2.2    | 6.5   | 2.8    |
| 119.1  | 171.1  | 107.7  | 94.7   | 118.6  | 141.2  | 88.2   | 88.8  | 85.0   |
| 17.5   | 17.2   | 25.9   | 18.0   | 15.8   | 21.8   | 15.9   | 17.8  | 17.8   |
| 590.4  | 526.3  | 258.8  | 205.9  | 171.5  | 207.5  | 194.0  | 229.8 | 219.1  |
| 610.2  | 781.2  | 698.3  | 92.6   | 67.0   | 89.7   | 130.5  | 151.4 | 130.3  |
| 15.5   | 10.0   | 13.9   | 22.5   | 22.4   | 23.5   | 15.0   | 12.1  | 14.5   |
| 1.6    | 1.8    | 8.6    | 20.2   | 7.3    | 9.4    | 3.1    | 6.6   | 10.2   |
| 4.2    | 18.8   | 9.8    | 9.7    | 7.6    | 4.8    | 5.4    | 5.5   | 2.0    |
| 9.2    | 7.7    | 10.8   | 5.6    | 8.3    | 12.1   | 8.3    | 6.1   | 6.0    |
| 103.0  | 172.2  | 206.9  | 43.4   | 32.7   | 46.6   | 78.1   | 70.3  | 67.2   |
| 63.1   | 81.4   | 43.2   | 118.7  | 90.3   | 94.1   | 61.3   | 65.3  | 65.6   |
| 121.8  | 175.4  | 122.5  | 110.3  | 98.5   | 93.4   | 73.2   | 91.1  | 74.5   |
| 3.4    | 9.6    | 12.4   | 25.0   | 8.4    | 19.8   | 16.2   | 18.6  | 15.3   |
| 21.7   | 26.9   | 10.3   | 19.8   | 22.5   | 22.3   | 17.1   | 14.6  | 20.9   |
| 8.9    | 2.9    | 1.9    | 14.6   | 4.7    | 13.7   | 6.2    | 2.0   | 8.3    |
| 25.8   | 43.0   | 39.9   | 32.9   | 32.8   | 39.4   | 23.0   | 20.4  | 25.1   |
| 13.8   | 15.8   | 11.4   | 9.0    | 7.2    | 11.4   | 11.8   | 14.2  | 15.0   |
| 128.7  | 149.6  | 121.0  | 105.8  | 78.3   | 94.0   | 133.3  | 124.9 | 134.2  |
| 120.6  | 133.1  | 77.4   | 450.6  | 402.4  | 443.2  | 281.5  | 261.5 | 308.1  |
| 96.3   | 132.1  | 95.4   | 18.7   | 11.5   | 16.3   | 23.3   | 24.3  | 31.4   |
| 785.1  | 830.6  | 578.7  | 811.8  | 764.9  | 808.1  | 525.6  | 554.2 | 619.3  |
| 5.4    | 14.0   | 6.3    | 10.1   | 16.6   | 4.9    | 6.8    | 1.3   | 1.7    |
| 3.5    | 5.1    | 3.0    | 12.5   | 6.5    | 7.5    | 5.1    | 4.7   | 7.9    |
| 6.7    | 4.2    | 1.2    | 6.9    | 3.4    | 5.2    | 1.4    | 2.8   | 3.2    |
| 7.2    | 11.7   | 8.5    | 15.4   | 18.7   | 16.7   | 10.7   | 13.0  | 11.8   |
| 21.3   | 15.9   | 8.9    | 20.2   | 12.2   | 20.2   | 7.7    | 16.4  | 12.7   |
| 9.2    | 19.8   | 17.5   | 9.0    | 12.8   | 12.4   | 14.0   | 13.3  | 12.2   |
| 17.0   | 20.4   | 15.3   | 22.6   | 7.2    | 6.9    | 16.9   | 11.8  | 18.6   |
| 221.5  | 439.1  | 395.1  | 112.4  | 101.5  | 129.6  | 73.6   | 94.3  | 82.3   |
| 3.1    | 3.9    | 3.3    | 7.4    | 9.2    | 9.7    | 4.7    | 1.0   | 5.0    |
| 7.2    | 7.2    | 7.5    | 10.0   | 12.3   | 17.9   | 1.7    | 4.4   | 9.8    |
| 21.8   | 25.8   | 23.7   | 18.5   | 16.2   | 17.3   | 11.7   | 13.3  | 17.6   |
| 31.6   | 33.4   | 24.4   | 29.8   | 36.4   | 38.1   | 22.5   | 21.5  | 27.7   |
| 325.1  | 398.0  | 367.6  | 231.0  | 213.9  | 249.5  | 100.1  | 153.0 | 139.2  |
| 14.0   | 21.1   | 16.2   | 45.1   | 42.9   | 44.8   | 33.6   | 51.7  | 43.3   |
| 3.9    | 16.4   | 6.0    | 19.9   | 9.7    | 36.5   | 6.3    | 2.0   | 5.2    |
| 10.4   | 10.6   | 7.3    | 13.1   | 15.3   | 6.9    | 6.8    | 13.7  | 8.9    |
| 13.9   | 8.1    | 3.4    | 11.1   | 5.8    | 14.0   | 2.6    | 3.7   | 10.8   |
| 18.4   | 36.9   | 34.0   | 29.6   | 13.4   | 20.7   | 15.8   | 25.2  | 21.7   |
| 2.3    | 2.3    | 5.0    | 2.8    | 4.2    | 3.4    | 1.3    | 2.4   | 1.7    |
| 103.8  | 124.5  | 106.0  | 137.0  | 111.9  | 137.7  | 123.5  | 147.1 | 150.5  |
| 6.4    | 8.1    | 9.0    | 14.4   | 12.0   | 13.3   | 4.0    | 6.0   | 6.5    |
| 21.0   | 28.1   | 17.3   | 50.2   | 51.7   | 40.3   | 15.4   | 19.6  | 23.2   |
| 1127.7 | 1431.6 | 1294.2 | 83.3   | 67.2   | 82.9   | 56.9   | 117.1 | 72.6   |

|        |        |        |        |        |        |        |        |        |
|--------|--------|--------|--------|--------|--------|--------|--------|--------|
| 9.2    | 11.1   | 5.7    | 18.2   | 4.4    | 11.8   | 9.8    | 10.6   | 20.1   |
| 53.4   | 46.0   | 29.3   | 15.5   | 11.1   | 9.2    | 5.6    | 3.9    | 7.0    |
| 478.6  | 639.5  | 584.4  | 622.3  | 495.0  | 565.1  | 419.5  | 452.4  | 494.0  |
| 7826.2 | 7643.8 | 6308.6 | 6302.5 | 4909.7 | 5555.4 | 3155.7 | 3072.3 | 3256.7 |
| 14.7   | 49.6   | 29.4   | 5.5    | 4.2    | 13.2   | 20.0   | 31.1   | 6.9    |
| 25.2   | 34.5   | 45.8   | 68.1   | 53.1   | 44.8   | 24.4   | 30.4   | 24.8   |
| 955.8  | 1093.5 | 691.9  | 754.3  | 565.5  | 588.4  | 380.9  | 349.0  | 392.2  |
| 16.5   | 19.1   | 12.6   | 13.6   | 6.5    | 13.5   | 10.1   | 6.6    | 8.0    |
| 415.6  | 477.9  | 290.0  | 151.1  | 100.2  | 130.1  | 207.5  | 212.1  | 227.1  |
| 5.8    | 18.9   | 5.5    | 36.6   | 19.2   | 27.2   | 21.6   | 22.2   | 18.7   |
| 9.8    | 4.9    | 6.6    | 8.6    | 13.1   | 16.6   | 7.4    | 8.9    | 11.8   |
| 382.5  | 639.0  | 775.0  | 353.8  | 348.7  | 450.4  | 208.8  | 411.2  | 345.8  |
| 3.3    | 8.1    | 6.2    | 9.9    | 12.7   | 6.9    | 5.1    | 4.5    | 6.3    |
| 393.1  | 393.8  | 271.1  | 537.6  | 419.1  | 525.4  | 330.6  | 295.6  | 350.6  |
| 299.4  | 346.1  | 234.7  | 575.0  | 449.1  | 544.4  | 347.1  | 332.4  | 343.8  |
| 15.7   | 18.8   | 8.4    | 10.5   | 15.0   | 16.4   | 15.2   | 13.1   | 7.0    |
| 2.9    | 12.7   | 4.7    | 10.2   | 5.1    | 10.6   | 6.7    | 6.7    | 4.8    |
| 8.7    | 7.2    | 4.6    | 2.5    | 4.9    | 4.8    | 2.9    | 1.1    | 1.6    |
| 2886.8 | 3775.7 | 3297.6 | 769.7  | 711.1  | 687.2  | 465.2  | 471.6  | 576.2  |
| 2.7    | 1.9    | 1.0    | 6.6    | 6.4    | 13.8   | 2.8    | 7.1    | 9.5    |
| 25.9   | 26.3   | 31.8   | 53.5   | 44.8   | 40.7   | 18.4   | 30.2   | 27.5   |
| 0.8    | 0.8    | 1.3    | 4.7    | 6.6    | 6.5    | 1.3    | 3.1    | 1.5    |
| 5.8    | 15.9   | 5.8    | 7.0    | 8.5    | 5.8    | 3.6    | 2.4    | 3.7    |
| 689.6  | 587.9  | 532.3  | 43.6   | 48.5   | 67.0   | 42.9   | 57.7   | 51.8   |
| 334.5  | 304.9  | 278.4  | 153.6  | 136.4  | 161.7  | 229.7  | 168.0  | 202.5  |
| 134.8  | 166.2  | 93.0   | 87.6   | 72.3   | 85.5   | 68.9   | 57.9   | 67.0   |
| 8.1    | 0.7    | 2.3    | 8.5    | 16.2   | 10.2   | 2.7    | 2.4    | 1.5    |
| 129.9  | 153.6  | 73.3   | 40.9   | 21.7   | 31.2   | 64.9   | 43.0   | 55.7   |
| 55.3   | 39.8   | 19.8   | 22.7   | 5.6    | 15.4   | 12.0   | 6.9    | 7.1    |
| 17.4   | 26.1   | 19.1   | 22.6   | 20.2   | 12.3   | 14.9   | 11.5   | 13.7   |
| 165.2  | 194.6  | 144.5  | 302.4  | 216.4  | 245.4  | 183.5  | 175.3  | 230.4  |
| 1.7    | 1.5    | 1.0    | 8.3    | 3.0    | 2.4    | 2.0    | 2.3    | 2.0    |
| 0.4    | 4.1    | 5.0    | 17.1   | 7.5    | 1.8    | 1.8    | 3.1    | 3.6    |
| 40.9   | 44.7   | 26.8   | 49.8   | 35.6   | 36.8   | 52.0   | 47.0   | 70.9   |
| 53.8   | 56.8   | 41.0   | 49.4   | 30.4   | 45.3   | 46.0   | 37.7   | 57.4   |
| 16.2   | 18.5   | 18.5   | 15.4   | 15.7   | 17.1   | 5.3    | 5.1    | 9.5    |
| 83.4   | 122.3  | 119.8  | 8.1    | 8.7    | 7.4    | 32.9   | 40.9   | 35.4   |
| 24.3   | 24.6   | 14.2   | 32.5   | 25.5   | 34.2   | 20.5   | 24.7   | 22.3   |
| 4.0    | 17.7   | 17.1   | 24.3   | 21.8   | 19.8   | 13.2   | 13.1   | 9.1    |
| 3.6    | 8.2    | 5.1    | 7.2    | 10.4   | 6.8    | 0.4    | 2.8    | 4.6    |
| 166.2  | 193.1  | 122.5  | 50.2   | 30.5   | 42.1   | 98.4   | 73.8   | 90.1   |
| 25.9   | 30.2   | 20.8   | 26.1   | 22.3   | 15.5   | 19.0   | 9.0    | 12.5   |
| 1.6    | 1.2    | 1.0    | 4.1    | 3.9    | 5.6    | 1.0    | 1.4    | 1.9    |
| 2.1    | 1.2    | 3.3    | 2.4    | 1.9    | 2.3    | 1.3    | 1.1    | 1.2    |
| 17.0   | 20.9   | 16.7   | 20.0   | 22.8   | 22.9   | 19.0   | 23.2   | 19.8   |
| 3.6    | 11.8   | 8.8    | 20.6   | 12.7   | 15.1   | 8.2    | 2.2    | 8.7    |
| 3.1    | 0.8    | 1.1    | 2.5    | 5.9    | 7.0    | 2.5    | 0.7    | 2.0    |
| 7.6    | 4.1    | 4.7    | 13.8   | 11.7   | 11.1   | 1.1    | 0.9    | 7.3    |
| 8.3    | 14.0   | 3.4    | 12.8   | 10.2   | 7.5    | 8.0    | 1.6    | 10.6   |
| 14.9   | 16.7   | 11.0   | 19.3   | 6.6    | 12.3   | 13.0   | 4.0    | 7.7    |
| 13.6   | 23.0   | 23.2   | 9.4    | 7.3    | 2.2    | 7.3    | 11.4   | 9.2    |
| 94.9   | 124.3  | 99.1   | 99.9   | 87.1   | 105.6  | 61.3   | 64.0   | 52.4   |
| 6.5    | 5.2    | 3.6    | 24.6   | 19.6   | 17.9   | 21.2   | 9.2    | 16.7   |

|        |        |        |        |       |       |       |        |        |
|--------|--------|--------|--------|-------|-------|-------|--------|--------|
| 1345.9 | 1682.0 | 1191.7 | 1034.2 | 808.3 | 880.4 | 949.3 | 1041.6 | 1078.3 |
| 89.5   | 95.6   | 96.1   | 214.3  | 181.8 | 189.7 | 98.6  | 80.0   | 99.6   |
| 2.9    | 3.7    | 4.5    | 25.2   | 26.7  | 31.0  | 7.6   | 3.2    | 13.5   |
| 93.3   | 109.2  | 77.0   | 270.4  | 209.9 | 290.9 | 198.5 | 219.3  | 246.3  |
| 299.4  | 554.0  | 509.1  | 151.9  | 124.2 | 172.1 | 128.3 | 177.1  | 158.4  |
| 8.5    | 13.9   | 9.7    | 3.7    | 3.4   | 2.7   | 1.3   | 1.9    | 2.9    |
| 14.4   | 16.7   | 15.3   | 35.6   | 27.4  | 33.2  | 13.6  | 13.1   | 10.4   |
| 45.3   | 38.2   | 37.1   | 29.2   | 36.7  | 37.5  | 30.8  | 24.1   | 28.1   |
| 5.9    | 15.6   | 4.9    | 22.5   | 23.1  | 20.7  | 8.9   | 13.3   | 12.0   |
| 34.5   | 39.0   | 45.7   | 28.0   | 35.8  | 23.8  | 26.6  | 20.8   | 32.0   |
| 10.2   | 7.9    | 10.2   | 12.4   | 4.7   | 9.2   | 7.1   | 7.6    | 5.2    |
| 65.3   | 110.3  | 58.9   | 56.6   | 56.6  | 49.3  | 23.7  | 54.9   | 49.0   |
| 395.9  | 466.1  | 319.6  | 522.2  | 507.6 | 588.3 | 300.6 | 302.5  | 391.5  |
| 145.9  | 779.5  | 807.2  | 712.2  | 780.0 | 830.5 | 581.6 | 1222.3 | 896.7  |
| 2.2    | 5.1    | 2.5    | 4.4    | 6.3   | 5.9   | 3.8   | 3.0    | 0.7    |
| 3.2    | 22.6   | 13.1   | 6.7    | 12.3  | 6.1   | 4.4   | 22.8   | 13.8   |
| 184.0  | 198.7  | 102.1  | 139.9  | 97.7  | 115.1 | 70.7  | 69.4   | 85.5   |
| 34.1   | 37.4   | 16.2   | 14.2   | 32.0  | 27.1  | 19.5  | 15.9   | 14.8   |
| 36.7   | 39.5   | 29.4   | 78.5   | 43.4  | 66.6  | 47.9  | 29.8   | 33.5   |
| 3.9    | 3.4    | 2.2    | 2.3    | 2.6   | 6.7   | 1.2   | 1.3    | 1.2    |
| 498.4  | 607.6  | 361.9  | 389.5  | 275.6 | 249.1 | 502.3 | 317.2  | 472.7  |
| 1.3    | 1.4    | 8.6    | 17.5   | 14.4  | 8.3   | 1.5   | 1.0    | 5.5    |
| 26.4   | 41.7   | 22.2   | 30.3   | 25.0  | 19.6  | 17.8  | 13.3   | 17.4   |
| 65.1   | 43.9   | 45.9   | 31.3   | 42.9  | 34.2  | 22.5  | 31.8   | 29.3   |
| 11.0   | 8.3    | 10.4   | 8.0    | 9.1   | 4.5   | 2.8   | 10.6   | 7.9    |
| 2.0    | 0.6    | 1.8    | 5.7    | 1.3   | 3.7   | 5.8   | 10.4   | 9.5    |
| 64.9   | 57.8   | 57.7   | 56.1   | 47.3  | 56.3  | 59.9  | 60.5   | 64.5   |
| 212.7  | 242.1  | 288.4  | 132.2  | 136.1 | 150.0 | 115.4 | 179.7  | 142.7  |
| 612.1  | 828.2  | 742.4  | 747.1  | 633.3 | 662.9 | 755.1 | 779.9  | 823.3  |
| 9.5    | 8.3    | 2.2    | 4.6    | 4.8   | 1.7   | 0.4   | 0.3    | 1.6    |
| 45.3   | 35.9   | 27.4   | 63.6   | 79.0  | 78.4  | 48.4  | 67.8   | 61.4   |
| 1.8    | 1.5    | 1.3    | 9.1    | 5.4   | 10.7  | 8.8   | 6.2    | 12.6   |
| 4.1    | 4.3    | 3.8    | 14.3   | 13.3  | 18.6  | 8.3   | 3.2    | 13.1   |
| 70.6   | 86.2   | 74.7   | 98.2   | 90.6  | 92.2  | 69.1  | 88.3   | 78.2   |
| 225.5  | 304.0  | 238.2  | 142.1  | 132.0 | 153.9 | 118.5 | 153.0  | 139.3  |
| 20.7   | 24.8   | 19.5   | 35.1   | 27.5  | 35.1  | 25.4  | 25.6   | 21.0   |
| 2.5    | 11.7   | 0.9    | 10.2   | 7.1   | 9.6   | 4.0   | 1.7    | 8.4    |
| 31.3   | 50.6   | 34.0   | 22.7   | 12.0  | 7.1   | 20.6  | 6.8    | 22.0   |
| 6.7    | 13.1   | 5.2    | 13.4   | 9.0   | 10.1  | 15.3  | 2.8    | 5.7    |
| 2.8    | 0.7    | 1.0    | 6.2    | 5.0   | 5.5   | 1.9   | 1.9    | 2.3    |
| 33.0   | 41.6   | 26.1   | 14.6   | 12.1  | 13.7  | 10.7  | 7.5    | 8.0    |
| 257.4  | 324.6  | 190.2  | 81.2   | 68.5  | 80.2  | 51.8  | 55.9   | 51.3   |
| 176.5  | 161.3  | 94.9   | 141.4  | 105.1 | 108.4 | 88.3  | 66.5   | 84.6   |
| 31.0   | 31.2   | 23.5   | 35.9   | 41.6  | 50.8  | 19.6  | 20.3   | 21.0   |
| 20.1   | 11.7   | 14.0   | 7.4    | 11.9  | 8.1   | 4.3   | 1.2    | 1.7    |
| 3930.1 | 3237.0 | 1918.4 | 151.7  | 94.0  | 99.6  | 144.9 | 102.4  | 112.3  |
| 1.6    | 1.0    | 0.6    | 4.3    | 2.8   | 6.6   | 1.2   | 1.0    | 1.4    |
| 9.2    | 5.0    | 2.8    | 5.2    | 5.1   | 6.8   | 2.1   | 2.3    | 2.3    |
| 686.5  | 802.1  | 682.5  | 91.3   | 74.4  | 95.2  | 279.9 | 265.1  | 287.5  |
| 86.3   | 133.6  | 109.8  | 117.7  | 94.1  | 112.2 | 112.2 | 111.1  | 124.7  |
| 11.9   | 13.3   | 12.0   | 19.5   | 9.2   | 9.1   | 9.8   | 9.4    | 11.4   |
| 48.2   | 82.6   | 53.7   | 67.5   | 52.0  | 61.6  | 48.9  | 33.0   | 51.0   |
| 32.5   | 42.0   | 34.5   | 8.1    | 11.4  | 10.3  | 8.2   | 5.5    | 8.1    |



|        |        |        |        |        |        |        |        |        |
|--------|--------|--------|--------|--------|--------|--------|--------|--------|
| 5.6    | 5.6    | 6.4    | 5.1    | 3.3    | 8.6    | 8.1    | 4.6    | 3.6    |
| 89.9   | 124.4  | 84.3   | 95.4   | 76.4   | 68.2   | 54.0   | 79.3   | 73.2   |
| 136.0  | 141.5  | 133.4  | 112.2  | 99.5   | 97.3   | 85.3   | 76.8   | 79.9   |
| 12.6   | 6.0    | 5.1    | 7.4    | 8.5    | 11.2   | 3.2    | 4.1    | 4.1    |
| 19.4   | 50.4   | 78.1   | 44.0   | 57.8   | 54.8   | 31.7   | 59.9   | 57.0   |
| 1.5    | 3.2    | 3.2    | 4.7    | 0.8    | 4.8    | 2.2    | 0.4    | 0.3    |
| 18.5   | 18.0   | 4.6    | 5.4    | 6.0    | 6.4    | 5.8    | 8.7    | 2.5    |
| 1.0    | 2.2    | 5.9    | 5.4    | 11.7   | 3.9    | 10.3   | 7.5    | 3.9    |
| 65.1   | 92.6   | 53.0   | 51.1   | 48.7   | 57.1   | 66.6   | 54.7   | 63.0   |
| 2.2    | 2.2    | 2.7    | 4.5    | 7.9    | 5.9    | 2.7    | 2.2    | 1.5    |
| 6.7    | 5.7    | 2.3    | 7.9    | 4.2    | 9.8    | 1.8    | 5.1    | 2.9    |
| 21.3   | 23.8   | 16.5   | 7.6    | 3.5    | 12.6   | 5.3    | 5.7    | 9.8    |
| 63.9   | 92.2   | 51.7   | 82.6   | 62.9   | 59.7   | 47.9   | 67.8   | 73.3   |
| 35.8   | 27.8   | 21.6   | 24.1   | 14.3   | 19.8   | 12.7   | 8.5    | 13.5   |
| 14.1   | 8.1    | 11.0   | 31.5   | 14.8   | 26.6   | 3.9    | 11.8   | 6.7    |
| 18.8   | 28.6   | 25.2   | 27.8   | 20.0   | 30.0   | 8.0    | 17.7   | 16.4   |
| 4.0    | 10.0   | 6.4    | 8.3    | 12.9   | 9.2    | 5.0    | 14.6   | 9.8    |
| 5.1    | 8.6    | 6.9    | 2.1    | 4.4    | 6.3    | 2.2    | 2.2    | 2.9    |
| 9.0    | 17.5   | 7.2    | 7.1    | 1.9    | 11.0   | 12.2   | 2.8    | 8.5    |
| 1.4    | 2.5    | 2.2    | 3.5    | 2.7    | 2.3    | 1.3    | 1.9    | 1.9    |
| 14.9   | 15.7   | 17.3   | 17.6   | 12.7   | 17.5   | 6.2    | 8.0    | 1.5    |
| 52.4   | 71.3   | 47.2   | 75.2   | 56.7   | 64.7   | 34.1   | 62.1   | 57.1   |
| 29.8   | 46.0   | 48.1   | 23.5   | 11.5   | 18.0   | 15.8   | 19.7   | 17.7   |
| 10.6   | 5.6    | 4.4    | 8.9    | 11.9   | 22.9   | 9.9    | 11.4   | 12.2   |
| 23.9   | 26.2   | 22.1   | 34.4   | 53.2   | 39.0   | 27.5   | 27.7   | 32.5   |
| 21.6   | 35.0   | 17.6   | 58.5   | 54.6   | 56.0   | 35.9   | 17.0   | 38.6   |
| 87.1   | 146.4  | 130.7  | 373.7  | 340.7  | 399.2  | 196.6  | 254.9  | 253.2  |
| 11.0   | 8.1    | 5.5    | 22.2   | 11.3   | 14.9   | 11.0   | 13.3   | 14.4   |
| 11.5   | 19.9   | 7.8    | 18.4   | 21.3   | 16.6   | 17.6   | 13.2   | 20.3   |
| 333.5  | 801.1  | 1197.6 | 239.9  | 436.0  | 487.2  | 269.8  | 601.0  | 553.8  |
| 23.5   | 29.2   | 11.1   | 12.3   | 6.4    | 12.9   | 9.8    | 10.9   | 7.1    |
| 94.6   | 143.6  | 79.9   | 258.7  | 214.1  | 215.8  | 309.1  | 344.7  | 339.0  |
| 4.8    | 7.5    | 5.2    | 10.0   | 9.1    | 13.9   | 2.1    | 5.2    | 6.1    |
| 1186.6 | 1162.0 | 810.4  | 239.4  | 197.2  | 223.6  | 182.0  | 167.3  | 217.0  |
| 1.6    | 0.5    | 1.3    | 1.4    | 4.1    | 12.6   | 3.5    | 2.3    | 1.0    |
| 3.3    | 1.0    | 1.3    | 11.0   | 16.6   | 12.1   | 1.4    | 1.6    | 1.5    |
| 4.3    | 1.6    | 7.6    | 7.7    | 8.8    | 8.4    | 3.6    | 0.8    | 1.7    |
| 16.9   | 34.7   | 26.7   | 91.4   | 91.7   | 100.4  | 37.7   | 30.8   | 36.4   |
| 8.1    | 12.4   | 7.3    | 8.5    | 9.5    | 3.6    | 0.9    | 0.9    | 2.1    |
| 11.3   | 12.2   | 7.3    | 8.5    | 12.8   | 12.3   | 5.3    | 5.5    | 11.5   |
| 22.6   | 33.6   | 22.6   | 31.2   | 23.9   | 28.5   | 18.6   | 18.8   | 19.6   |
| 11.2   | 7.2    | 3.8    | 15.1   | 16.6   | 31.9   | 1.7    | 7.1    | 6.1    |
| 577.4  | 648.7  | 395.0  | 260.7  | 179.5  | 213.2  | 181.2  | 185.4  | 177.6  |
| 3.0    | 3.7    | 2.3    | 50.6   | 40.1   | 36.7   | 5.3    | 12.4   | 18.5   |
| 5.1    | 2.8    | 4.4    | 5.2    | 3.9    | 7.9    | 0.4    | 3.6    | 1.5    |
| 29.7   | 38.7   | 16.9   | 12.4   | 19.8   | 18.3   | 19.3   | 9.0    | 15.0   |
| 2234.8 | 2776.3 | 2370.6 | 1352.3 | 1261.6 | 1450.5 | 1464.3 | 1461.1 | 1691.8 |
| 593.2  | 765.9  | 580.4  | 427.5  | 358.3  | 405.7  | 263.1  | 283.3  | 296.8  |
| 220.1  | 287.7  | 269.2  | 660.4  | 548.0  | 575.8  | 387.6  | 347.7  | 430.7  |
| 8268.0 | 9083.2 | 7264.4 | 2446.8 | 1971.5 | 2079.6 | 1422.9 | 1234.2 | 1428.1 |
| 26.2   | 26.6   | 19.2   | 7.5    | 6.0    | 3.1    | 5.9    | 6.1    | 1.7    |
| 277.5  | 480.8  | 264.4  | 209.2  | 205.0  | 197.9  | 132.3  | 111.3  | 141.3  |
| 13.5   | 12.7   | 8.0    | 2.0    | 6.1    | 4.4    | 0.9    | 2.7    | 3.3    |

|         |         |         |        |        |        |        |        |        |
|---------|---------|---------|--------|--------|--------|--------|--------|--------|
| 13.2    | 26.2    | 19.6    | 9.9    | 11.8   | 8.3    | 5.4    | 5.9    | 7.3    |
| 5380.4  | 5899.9  | 4827.4  | 39.0   | 34.2   | 40.0   | 27.4   | 38.0   | 40.4   |
| 7.3     | 9.5     | 7.0     | 3.8    | 3.6    | 3.9    | 2.0    | 2.2    | 12.4   |
| 11.0    | 6.8     | 11.6    | 22.2   | 20.3   | 5.6    | 11.6   | 9.8    | 3.6    |
| 93.4    | 120.9   | 99.1    | 37.9   | 29.1   | 46.6   | 66.0   | 70.9   | 65.6   |
| 26.9    | 27.8    | 14.5    | 38.0   | 26.6   | 37.2   | 23.9   | 20.0   | 26.8   |
| 2.1     | 3.0     | 1.5     | 5.8    | 0.6    | 3.0    | 0.7    | 0.2    | 0.8    |
| 16.4    | 15.3    | 5.2     | 4.0    | 8.5    | 9.0    | 5.3    | 7.5    | 6.3    |
| 7.4     | 13.2    | 13.5    | 3.8    | 7.2    | 4.0    | 2.3    | 0.4    | 2.6    |
| 3.1     | 6.5     | 3.7     | 13.9   | 5.2    | 4.9    | 1.6    | 9.3    | 11.2   |
| 8.8     | 6.3     | 9.6     | 14.3   | 14.4   | 5.8    | 5.4    | 8.3    | 2.2    |
| 3.1     | 9.0     | 17.1    | 5.4    | 4.5    | 2.6    | 1.4    | 2.4    | 5.0    |
| 11.9    | 19.2    | 26.4    | 1.3    | 0.8    | 1.0    | 0.5    | 0.7    | 0.5    |
| 833.0   | 1465.2  | 1312.9  | 1041.2 | 667.5  | 716.2  | 1051.6 | 822.9  | 1020.6 |
| 18.4    | 26.6    | 17.8    | 25.1   | 36.7   | 27.3   | 16.5   | 13.9   | 25.2   |
| 1.4     | 2.3     | 1.3     | 9.7    | 10.4   | 15.6   | 3.4    | 2.3    | 3.6    |
| 14155.1 | 14133.3 | 12901.5 | 1538.1 | 1472.7 | 1505.3 | 1126.6 | 1459.1 | 1370.8 |
| 4.3     | 2.9     | 2.3     | 5.6    | 2.6    | 4.8    | 1.0    | 1.0    | 2.9    |
| 299.5   | 338.4   | 180.4   | 115.1  | 87.1   | 98.1   | 112.8  | 90.7   | 115.5  |
| 14.8    | 11.5    | 8.6     | 11.5   | 12.9   | 13.8   | 13.4   | 7.4    | 11.0   |
| 15.6    | 8.5     | 14.6    | 42.4   | 25.0   | 30.2   | 17.9   | 10.1   | 20.7   |
| 192.6   | 290.5   | 261.6   | 25.5   | 33.1   | 38.7   | 7.2    | 30.4   | 21.2   |
| 3.4     | 3.3     | 3.8     | 12.6   | 5.2    | 6.8    | 2.7    | 1.8    | 2.3    |
| 9.2     | 6.3     | 1.7     | 8.1    | 9.4    | 14.7   | 14.2   | 3.6    | 2.9    |
| 1.9     | 2.8     | 3.2     | 4.6    | 8.2    | 8.5    | 2.3    | 2.7    | 1.6    |
| 3.6     | 1.3     | 0.8     | 4.0    | 2.7    | 12.8   | 2.2    | 5.2    | 1.3    |
| 30.7    | 32.8    | 22.5    | 13.6   | 19.7   | 12.2   | 6.1    | 9.7    | 24.0   |
| 2.9     | 5.9     | 12.7    | 19.7   | 8.3    | 16.9   | 3.9    | 4.5    | 6.9    |
| 20.8    | 41.3    | 41.0    | 58.5   | 48.0   | 46.7   | 14.2   | 15.8   | 33.0   |
| 8.2     | 18.1    | 10.5    | 7.8    | 6.1    | 10.1   | 14.9   | 8.3    | 14.5   |
| 3834.2  | 4484.3  | 4013.4  | 35.3   | 36.6   | 38.1   | 25.9   | 43.9   | 33.1   |
| 8.6     | 5.8     | 4.2     | 32.8   | 22.7   | 21.4   | 10.9   | 6.0    | 10.2   |
| 249.8   | 238.7   | 156.1   | 478.1  | 363.1  | 376.1  | 490.8  | 471.1  | 494.9  |
| 53.4    | 69.6    | 48.5    | 67.9   | 56.6   | 55.7   | 49.8   | 33.5   | 41.2   |
| 10.4    | 5.4     | 9.1     | 21.7   | 19.2   | 19.2   | 10.5   | 10.2   | 14.5   |
| 59.8    | 63.6    | 65.6    | 58.9   | 50.3   | 40.6   | 41.1   | 37.5   | 36.0   |
| 34.0    | 52.7    | 35.2    | 34.9   | 21.6   | 33.9   | 31.5   | 24.1   | 31.7   |
| 8.3     | 6.4     | 6.7     | 27.8   | 29.2   | 37.1   | 24.1   | 32.9   | 30.5   |
| 13.8    | 12.2    | 14.5    | 7.6    | 11.2   | 10.9   | 9.9    | 7.1    | 7.5    |
| 63.3    | 91.7    | 72.8    | 10.7   | 17.6   | 20.4   | 15.2   | 17.7   | 16.8   |
| 7.8     | 16.6    | 9.6     | 22.4   | 18.7   | 31.4   | 12.9   | 15.9   | 15.5   |
| 2719.1  | 2630.0  | 1320.8  | 502.7  | 299.0  | 320.3  | 342.2  | 266.7  | 276.3  |
| 4.0     | 3.7     | 3.5     | 14.8   | 8.3    | 11.2   | 13.0   | 4.7    | 3.4    |
| 17.1    | 18.7    | 6.8     | 30.4   | 33.6   | 18.6   | 23.1   | 28.6   | 29.2   |
| 4.1     | 12.3    | 4.4     | 15.7   | 10.6   | 11.4   | 5.8    | 11.2   | 9.7    |
| 3.7     | 4.0     | 2.9     | 11.6   | 12.3   | 10.9   | 2.1    | 6.2    | 3.1    |
| 3.7     | 2.3     | 2.4     | 10.2   | 14.5   | 7.7    | 3.5    | 11.3   | 2.3    |
| 3.2     | 2.8     | 3.9     | 3.8    | 6.9    | 2.6    | 1.0    | 2.3    | 2.7    |
| 5.5     | 3.2     | 6.6     | 4.6    | 7.7    | 8.7    | 6.9    | 3.9    | 2.4    |
| 3.5     | 2.5     | 2.6     | 2.3    | 2.9    | 3.6    | 1.9    | 1.3    | 2.7    |
| 6.2     | 11.9    | 12.4    | 173.6  | 152.7  | 124.5  | 139.4  | 72.1   | 128.7  |
| 4.7     | 3.4     | 2.6     | 16.2   | 20.1   | 18.5   | 11.7   | 14.7   | 15.8   |
| 16.0    | 18.1    | 9.2     | 17.5   | 12.3   | 5.7    | 4.5    | 4.1    | 5.4    |

|        |        |        |        |        |        |        |        |        |
|--------|--------|--------|--------|--------|--------|--------|--------|--------|
| 112.9  | 135.5  | 100.8  | 119.5  | 98.4   | 114.4  | 56.3   | 58.9   | 59.9   |
| 8.8    | 8.0    | 8.6    | 10.1   | 16.4   | 7.9    | 6.8    | 3.8    | 5.8    |
| 90.4   | 75.2   | 42.1   | 14.7   | 11.0   | 19.4   | 19.2   | 11.3   | 10.9   |
| 0.8    | 1.0    | 1.9    | 6.4    | 2.2    | 3.5    | 2.0    | 0.8    | 3.3    |
| 36.1   | 62.1   | 38.7   | 14.0   | 9.1    | 11.2   | 10.0   | 5.1    | 8.8    |
| 3.4    | 2.9    | 2.3    | 6.1    | 4.3    | 7.0    | 3.2    | 3.6    | 3.6    |
| 5.2    | 6.4    | 2.6    | 20.6   | 26.5   | 21.6   | 14.0   | 27.5   | 2.9    |
| 26.9   | 17.8   | 30.3   | 7.7    | 17.9   | 14.6   | 4.5    | 16.1   | 20.6   |
| 47.6   | 40.6   | 35.3   | 35.4   | 25.6   | 50.2   | 31.6   | 33.6   | 36.4   |
| 7328.6 | 8326.3 | 7677.5 | 7236.3 | 6539.7 | 6970.4 | 4847.1 | 5172.0 | 5426.0 |
| 771.7  | 861.1  | 624.0  | 590.1  | 503.2  | 504.9  | 389.1  | 428.6  | 460.0  |
| 101.0  | 133.6  | 98.2   | 34.4   | 16.6   | 32.3   | 47.4   | 40.1   | 53.5   |
| 273.3  | 315.4  | 214.3  | 95.2   | 90.2   | 90.5   | 99.1   | 83.9   | 81.8   |
| 1.4    | 2.8    | 1.7    | 3.7    | 3.0    | 3.5    | 3.2    | 1.5    | 2.1    |
| 5.4    | 7.5    | 6.1    | 31.4   | 18.2   | 24.2   | 14.2   | 13.4   | 13.5   |
| 5.5    | 3.1    | 6.8    | 5.7    | 12.1   | 4.3    | 2.3    | 4.5    | 4.9    |
| 1.5    | 1.8    | 3.5    | 12.4   | 5.1    | 7.1    | 1.1    | 5.9    | 0.9    |
| 1537.4 | 1585.4 | 855.6  | 852.4  | 616.1  | 688.0  | 468.1  | 372.4  | 443.6  |
| 1.4    | 1.2    | 1.8    | 3.9    | 5.4    | 3.2    | 1.2    | 1.3    | 2.0    |
| 41.2   | 46.5   | 25.8   | 27.4   | 24.1   | 33.4   | 26.6   | 27.2   | 28.3   |
| 6.5    | 3.4    | 3.0    | 8.3    | 9.7    | 13.5   | 3.8    | 3.0    | 1.8    |
| 14.6   | 24.0   | 34.3   | 27.3   | 36.5   | 33.4   | 19.7   | 28.5   | 34.7   |
| 44.0   | 56.9   | 42.7   | 20.5   | 14.2   | 13.1   | 21.2   | 10.3   | 14.0   |
| 3468.1 | 3450.8 | 2273.9 | 1452.3 | 1122.8 | 1166.0 | 924.2  | 758.9  | 931.0  |
| 1.2    | 0.4    | 0.3    | 3.8    | 2.9    | 3.7    | 1.2    | 2.8    | 2.1    |
| 4.2    | 11.9   | 7.2    | 3.6    | 3.6    | 4.0    | 9.2    | 3.8    | 4.8    |
| 1.2    | 1.6    | 1.1    | 5.7    | 6.5    | 11.1   | 1.5    | 4.0    | 5.1    |
| 5.5    | 11.0   | 7.8    | 7.9    | 12.4   | 18.6   | 3.1    | 3.2    | 2.1    |
| 2.4    | 1.8    | 1.6    | 4.9    | 5.1    | 6.4    | 3.1    | 2.2    | 1.5    |
| 4168.4 | 3530.7 | 2131.0 | 57.8   | 39.7   | 66.4   | 68.2   | 62.6   | 76.5   |
| 29.0   | 39.0   | 22.5   | 125.5  | 90.4   | 111.8  | 79.4   | 65.6   | 116.1  |
| 223.6  | 252.4  | 163.7  | 241.2  | 222.6  | 222.5  | 160.4  | 203.6  | 217.3  |
| 1.6    | 5.9    | 1.8    | 14.5   | 14.1   | 14.5   | 12.3   | 5.5    | 8.3    |
| 15.0   | 20.6   | 3.1    | 10.2   | 10.2   | 12.4   | 7.6    | 1.0    | 1.9    |
| 168.0  | 160.7  | 113.6  | 41.8   | 42.6   | 46.7   | 40.4   | 55.6   | 62.3   |
| 5.9    | 17.1   | 6.1    | 12.9   | 21.9   | 19.9   | 14.9   | 7.1    | 14.9   |
| 5.2    | 2.8    | 2.1    | 12.0   | 5.9    | 12.2   | 2.9    | 4.9    | 3.6    |
| 20.5   | 30.7   | 29.4   | 50.2   | 35.4   | 58.0   | 40.1   | 30.1   | 39.0   |
| 19.6   | 23.7   | 15.2   | 30.4   | 26.1   | 30.2   | 21.5   | 31.9   | 24.4   |
| 6.9    | 6.4    | 8.2    | 13.4   | 16.1   | 12.1   | 3.1    | 2.8    | 6.7    |
| 15.4   | 24.4   | 12.9   | 2.2    | 2.5    | 3.6    | 1.7    | 5.9    | 2.7    |
| 25.9   | 32.7   | 25.4   | 34.1   | 39.4   | 30.8   | 27.5   | 21.0   | 21.5   |
| 13.2   | 13.0   | 13.7   | 35.0   | 24.0   | 24.3   | 23.5   | 24.1   | 16.2   |
| 6.8    | 11.8   | 10.4   | 19.6   | 11.7   | 16.0   | 14.0   | 15.2   | 15.0   |
| 2.8    | 0.7    | 0.5    | 12.1   | 11.3   | 7.8    | 6.1    | 9.3    | 5.5    |
| 355.7  | 485.8  | 368.5  | 55.1   | 70.3   | 71.8   | 27.7   | 47.6   | 45.3   |
| 6.6    | 5.2    | 13.5   | 6.6    | 8.3    | 12.3   | 1.3    | 1.5    | 1.7    |
| 212.8  | 246.4  | 218.5  | 19.6   | 15.5   | 38.2   | 34.1   | 21.6   | 23.3   |
| 4.6    | 24.0   | 8.6    | 11.4   | 5.1    | 6.4    | 13.7   | 6.4    | 9.5    |
| 5.3    | 15.6   | 6.5    | 11.3   | 2.9    | 13.3   | 6.0    | 3.5    | 4.5    |
| 7.0    | 6.0    | 2.1    | 17.3   | 10.5   | 15.2   | 3.8    | 3.1    | 9.3    |
| 4.2    | 1.9    | 7.3    | 9.0    | 8.9    | 10.5   | 2.4    | 3.1    | 1.5    |
| 1.9    | 11.5   | 3.0    | 12.4   | 9.7    | 17.0   | 2.6    | 4.1    | 1.3    |

|        |        |        |        |        |        |        |        |        |
|--------|--------|--------|--------|--------|--------|--------|--------|--------|
| 1.3    | 1.1    | 6.0    | 1.9    | 1.6    | 6.1    | 3.1    | 7.7    | 2.6    |
| 5.3    | 3.0    | 3.5    | 6.3    | 7.4    | 5.5    | 3.3    | 3.7    | 4.8    |
| 17.5   | 15.4   | 19.7   | 30.6   | 21.2   | 30.2   | 8.5    | 9.1    | 12.4   |
| 8.7    | 7.4    | 7.7    | 15.2   | 12.0   | 20.7   | 9.2    | 8.2    | 11.9   |
| 25.5   | 25.3   | 17.8   | 6.2    | 5.2    | 11.0   | 14.5   | 4.9    | 16.2   |
| 14.7   | 16.6   | 14.5   | 15.3   | 37.2   | 31.8   | 19.9   | 13.6   | 19.2   |
| 233.4  | 234.7  | 127.0  | 78.5   | 42.1   | 67.2   | 104.2  | 70.6   | 93.2   |
| 22.0   | 34.0   | 30.8   | 12.8   | 11.8   | 9.9    | 15.9   | 15.3   | 4.4    |
| 6.3    | 5.0    | 8.2    | 6.1    | 5.6    | 2.9    | 3.1    | 1.5    | 3.2    |
| 416.8  | 502.2  | 356.3  | 764.0  | 559.4  | 653.8  | 305.6  | 298.1  | 402.5  |
| 1.1    | 6.5    | 15.3   | 4.3    | 10.0   | 3.6    | 1.4    | 1.6    | 1.2    |
| 5.1    | 3.5    | 11.7   | 13.9   | 2.1    | 2.2    | 7.0    | 5.8    | 3.5    |
| 1.4    | 8.2    | 8.0    | 22.2   | 6.6    | 8.7    | 7.2    | 4.9    | 4.4    |
| 5.8    | 11.5   | 9.0    | 12.2   | 18.1   | 12.4   | 6.3    | 4.3    | 9.7    |
| 175.0  | 235.9  | 163.8  | 48.8   | 45.9   | 36.9   | 43.8   | 35.3   | 32.9   |
| 4.6    | 3.2    | 10.8   | 9.7    | 7.9    | 6.2    | 2.6    | 4.8    | 1.7    |
| 17.7   | 19.5   | 2.6    | 7.0    | 7.5    | 16.6   | 5.7    | 2.3    | 4.2    |
| 55.9   | 77.5   | 31.3   | 73.5   | 52.4   | 58.2   | 51.9   | 28.3   | 31.5   |
| 10.8   | 9.7    | 3.8    | 13.4   | 7.3    | 1.5    | 1.4    | 5.9    | 7.1    |
| 121.7  | 154.2  | 146.8  | 4.0    | 7.1    | 8.3    | 56.1   | 51.0   | 57.3   |
| 29.3   | 54.0   | 37.6   | 57.4   | 40.0   | 52.8   | 26.0   | 23.3   | 21.4   |
| 464.0  | 381.7  | 195.5  | 200.7  | 133.9  | 174.8  | 156.4  | 156.9  | 183.8  |
| 122.0  | 156.9  | 125.6  | 128.9  | 102.3  | 101.8  | 87.8   | 83.7   | 83.5   |
| 32.0   | 26.4   | 17.8   | 93.2   | 93.7   | 75.8   | 76.8   | 74.4   | 99.7   |
| 2.9    | 6.2    | 4.1    | 4.5    | 3.1    | 6.9    | 2.2    | 3.1    | 7.2    |
| 9.3    | 8.8    | 6.7    | 8.7    | 11.9   | 11.0   | 11.2   | 7.5    | 10.7   |
| 1220.6 | 1792.8 | 1065.9 | 1215.8 | 965.1  | 1009.6 | 640.8  | 636.5  | 650.3  |
| 7.7    | 6.3    | 6.4    | 10.1   | 13.1   | 3.7    | 9.2    | 1.9    | 6.5    |
| 0.5    | 1.1    | 0.4    | 2.3    | 1.1    | 2.0    | 1.0    | 0.4    | 0.4    |
| 3261.0 | 3781.2 | 2796.7 | 3051.2 | 2498.4 | 2384.7 | 2093.8 | 2098.0 | 2299.3 |
| 1.1    | 2.3    | 2.3    | 2.9    | 7.4    | 4.6    | 1.6    | 1.1    | 0.7    |
| 25.2   | 33.0   | 15.0   | 49.6   | 48.9   | 45.3   | 24.3   | 16.6   | 24.9   |
| 15.6   | 26.6   | 19.5   | 10.7   | 9.9    | 11.1   | 2.4    | 7.0    | 4.0    |
| 7.2    | 7.7    | 8.2    | 7.3    | 13.0   | 10.4   | 4.8    | 10.3   | 2.8    |
| 358.1  | 499.1  | 477.1  | 926.3  | 710.2  | 827.7  | 639.5  | 788.6  | 738.2  |
| 418.4  | 496.7  | 373.0  | 147.1  | 109.8  | 149.5  | 185.8  | 182.1  | 192.5  |
| 38.5   | 44.5   | 29.8   | 16.2   | 16.8   | 18.4   | 13.4   | 11.9   | 14.5   |
| 77.5   | 92.9   | 75.5   | 15.9   | 5.6    | 13.1   | 14.0   | 20.8   | 20.5   |
| 112.9  | 129.0  | 74.9   | 76.7   | 51.1   | 63.1   | 110.0  | 72.5   | 83.6   |
| 7.1    | 8.3    | 3.5    | 8.3    | 12.0   | 12.6   | 6.3    | 4.1    | 6.9    |
| 6.3    | 3.8    | 4.0    | 2.7    | 4.9    | 9.7    | 3.8    | 3.5    | 0.4    |
| 14.5   | 17.3   | 15.2   | 6.5    | 14.1   | 16.9   | 8.1    | 13.8   | 15.6   |
| 286.0  | 270.4  | 219.0  | 41.8   | 24.3   | 26.5   | 9.9    | 17.2   | 16.8   |
| 17.0   | 26.4   | 20.0   | 22.1   | 15.3   | 19.9   | 11.4   | 13.6   | 10.9   |
| 673.1  | 706.6  | 486.6  | 489.7  | 348.5  | 335.1  | 424.6  | 417.8  | 451.9  |
| 24.3   | 22.2   | 23.6   | 48.6   | 35.7   | 27.7   | 21.3   | 8.4    | 22.3   |
| 30.1   | 17.7   | 25.2   | 10.5   | 11.5   | 19.8   | 14.2   | 11.8   | 13.7   |
| 9.6    | 10.6   | 3.9    | 24.4   | 30.0   | 19.4   | 13.3   | 4.3    | 14.9   |
| 7.4    | 3.1    | 8.6    | 5.9    | 11.3   | 16.8   | 6.1    | 9.5    | 6.1    |
| 10.3   | 5.9    | 3.5    | 5.8    | 18.7   | 19.0   | 5.4    | 7.7    | 7.8    |
| 11.7   | 10.4   | 2.1    | 27.6   | 15.2   | 19.0   | 8.7    | 14.9   | 17.9   |
| 22.8   | 37.4   | 33.3   | 36.2   | 25.3   | 26.3   | 7.5    | 8.5    | 16.6   |
| 102.5  | 114.5  | 84.9   | 87.8   | 75.6   | 77.3   | 85.0   | 92.6   | 82.1   |

|       |       |       |       |       |       |       |       |       |
|-------|-------|-------|-------|-------|-------|-------|-------|-------|
| 13.7  | 7.1   | 9.3   | 8.2   | 14.9  | 8.8   | 6.7   | 6.4   | 2.1   |
| 30.7  | 23.5  | 24.2  | 16.3  | 16.4  | 21.6  | 12.2  | 5.7   | 9.1   |
| 12.7  | 18.2  | 11.2  | 32.1  | 31.8  | 46.5  | 10.9  | 23.7  | 13.9  |
| 8.3   | 7.5   | 3.4   | 2.8   | 2.6   | 6.8   | 1.9   | 1.4   | 3.4   |
| 3.8   | 8.1   | 8.9   | 19.5  | 24.5  | 16.2  | 2.8   | 7.1   | 7.5   |
| 6.5   | 6.0   | 7.1   | 17.2  | 12.0  | 17.8  | 3.3   | 5.8   | 12.4  |
| 76.0  | 90.2  | 54.3  | 122.1 | 123.1 | 99.3  | 54.9  | 54.9  | 74.6  |
| 6.3   | 6.5   | 4.1   | 34.1  | 11.5  | 11.3  | 6.6   | 6.4   | 5.6   |
| 17.2  | 23.3  | 16.4  | 12.1  | 4.5   | 10.8  | 1.2   | 5.5   | 7.4   |
| 11.7  | 23.5  | 14.4  | 30.3  | 19.6  | 29.6  | 29.5  | 33.4  | 27.0  |
| 11.3  | 6.7   | 2.0   | 6.2   | 4.7   | 5.8   | 6.3   | 2.4   | 5.5   |
| 4.7   | 5.5   | 8.5   | 15.1  | 11.2  | 10.7  | 6.8   | 9.3   | 10.0  |
| 16.8  | 15.8  | 4.9   | 14.3  | 18.6  | 14.7  | 10.3  | 12.7  | 4.4   |
| 2.9   | 2.9   | 1.5   | 5.8   | 6.9   | 8.7   | 5.2   | 2.0   | 6.2   |
| 10.6  | 2.9   | 4.6   | 3.7   | 6.9   | 2.9   | 2.9   | 0.5   | 5.4   |
| 20.2  | 25.2  | 22.5  | 23.4  | 21.7  | 17.6  | 17.6  | 18.7  | 21.5  |
| 52.7  | 72.6  | 40.9  | 39.8  | 27.2  | 35.7  | 29.1  | 36.2  | 34.0  |
| 10.9  | 18.2  | 6.7   | 26.4  | 20.2  | 26.7  | 10.7  | 7.9   | 11.1  |
| 1.5   | 17.9  | 9.9   | 15.0  | 20.0  | 16.3  | 9.3   | 6.9   | 19.1  |
| 262.4 | 428.0 | 319.0 | 718.6 | 647.7 | 796.5 | 417.5 | 379.1 | 477.6 |
| 13.7  | 19.3  | 9.8   | 6.9   | 19.7  | 22.7  | 16.1  | 8.6   | 14.8  |
| 9.1   | 15.4  | 7.3   | 16.5  | 16.6  | 20.4  | 6.2   | 4.3   | 8.4   |
| 17.6  | 8.2   | 7.2   | 19.8  | 14.9  | 26.4  | 10.3  | 9.4   | 5.7   |
| 19.7  | 17.4  | 16.8  | 15.6  | 26.1  | 27.2  | 8.6   | 15.2  | 15.1  |
| 2.5   | 3.1   | 1.9   | 18.9  | 11.7  | 7.1   | 7.1   | 2.0   | 6.9   |
| 3.5   | 20.0  | 14.8  | 10.9  | 15.0  | 10.0  | 17.5  | 18.6  | 22.6  |
| 63.3  | 94.2  | 57.2  | 91.2  | 64.4  | 70.4  | 44.2  | 40.2  | 38.9  |
| 9.5   | 15.2  | 11.1  | 29.6  | 31.9  | 29.9  | 14.6  | 7.9   | 12.4  |
| 11.0  | 13.7  | 9.6   | 1.5   | 2.8   | 3.0   | 3.9   | 0.5   | 3.9   |
| 50.9  | 47.8  | 58.8  | 27.0  | 27.3  | 34.1  | 18.8  | 17.8  | 25.1  |
| 2.8   | 8.0   | 2.1   | 13.9  | 6.9   | 6.7   | 8.3   | 6.3   | 8.4   |
| 222.6 | 205.4 | 129.6 | 17.8  | 15.3  | 22.6  | 19.4  | 9.6   | 17.7  |
| 160.4 | 146.1 | 64.0  | 32.7  | 17.1  | 26.9  | 34.8  | 31.0  | 33.9  |
| 87.5  | 121.4 | 105.7 | 73.5  | 50.9  | 58.2  | 49.5  | 48.5  | 49.0  |
| 7.4   | 3.0   | 12.4  | 2.9   | 9.8   | 6.8   | 2.3   | 2.4   | 5.3   |
| 12.2  | 10.7  | 10.6  | 6.7   | 5.6   | 8.1   | 7.8   | 6.0   | 8.3   |
| 1.3   | 0.8   | 1.0   | 4.5   | 4.5   | 2.0   | 1.7   | 4.4   | 2.1   |
| 5.8   | 8.2   | 9.2   | 19.5  | 6.1   | 5.9   | 5.5   | 1.8   | 1.7   |
| 49.7  | 55.9  | 42.7  | 15.2  | 13.4  | 24.2  | 9.5   | 13.1  | 12.0  |
| 342.7 | 445.2 | 338.2 | 242.7 | 220.4 | 250.9 | 176.8 | 202.0 | 237.1 |
| 11.1  | 26.6  | 22.4  | 3.3   | 2.0   | 5.2   | 2.5   | 3.4   | 4.8   |
| 7.5   | 5.6   | 6.0   | 10.5  | 15.8  | 17.7  | 7.2   | 5.4   | 10.6  |
| 10.3  | 11.5  | 17.3  | 15.9  | 7.3   | 3.8   | 5.2   | 3.6   | 1.9   |
| 0.6   | 2.3   | 0.5   | 1.1   | 4.5   | 1.7   | 0.9   | 0.8   | 0.6   |
| 13.5  | 14.6  | 9.5   | 23.8  | 13.3  | 27.4  | 10.8  | 10.2  | 8.5   |
| 675.6 | 859.0 | 737.3 | 395.0 | 352.5 | 407.7 | 263.8 | 278.6 | 306.5 |
| 25.6  | 50.8  | 61.7  | 3.6   | 4.3   | 2.4   | 5.8   | 3.7   | 9.0   |
| 0.6   | 8.0   | 3.1   | 12.6  | 9.4   | 7.8   | 4.3   | 5.6   | 3.9   |
| 43.4  | 79.8  | 70.3  | 9.2   | 18.2  | 15.5  | 6.9   | 6.4   | 10.3  |
| 0.7   | 4.2   | 1.6   | 25.1  | 13.4  | 21.7  | 12.2  | 14.8  | 16.3  |
| 13.7  | 9.2   | 6.5   | 37.4  | 35.2  | 24.5  | 12.2  | 21.2  | 26.1  |
| 2.0   | 3.5   | 1.9   | 7.3   | 6.8   | 5.1   | 1.5   | 1.3   | 2.0   |
| 7.1   | 2.6   | 6.6   | 32.7  | 67.2  | 67.0  | 20.7  | 64.7  | 37.2  |

|        |        |        |       |       |       |       |       |       |
|--------|--------|--------|-------|-------|-------|-------|-------|-------|
| 4.8    | 6.0    | 1.2    | 38.5  | 35.2  | 43.7  | 33.3  | 42.8  | 41.1  |
| 16.8   | 21.6   | 12.5   | 23.4  | 17.6  | 21.9  | 7.5   | 9.5   | 12.3  |
| 8.5    | 3.1    | 1.1    | 2.7   | 1.2   | 1.1   | 3.2   | 2.8   | 5.7   |
| 33.2   | 37.3   | 40.0   | 11.3  | 14.0  | 15.1  | 7.3   | 11.8  | 6.6   |
| 5.9    | 10.1   | 7.2    | 10.7  | 9.9   | 9.7   | 8.5   | 6.6   | 10.2  |
| 1.4    | 2.3    | 0.9    | 6.4   | 2.5   | 1.7   | 2.6   | 2.8   | 1.8   |
| 5703.9 | 6802.4 | 5837.5 | 195.9 | 162.5 | 196.4 | 165.9 | 169.7 | 182.0 |
| 4.4    | 2.9    | 6.4    | 33.3  | 29.4  | 24.1  | 22.6  | 19.2  | 12.7  |
| 2.9    | 2.8    | 1.4    | 16.8  | 11.3  | 7.4   | 11.6  | 21.9  | 12.5  |
| 5.1    | 3.8    | 3.5    | 10.8  | 11.9  | 4.3   | 6.4   | 4.2   | 8.5   |
| 3.2    | 10.5   | 7.4    | 7.9   | 3.4   | 5.4   | 7.7   | 6.7   | 5.0   |
| 12.5   | 20.4   | 23.1   | 13.7  | 5.3   | 18.1  | 3.0   | 9.5   | 4.9   |
| 4.8    | 4.2    | 7.2    | 9.0   | 4.9   | 4.9   | 2.4   | 9.8   | 6.7   |
| 0.6    | 2.3    | 0.9    | 3.1   | 9.1   | 9.2   | 2.6   | 0.6   | 4.6   |
| 4.3    | 3.2    | 3.5    | 70.9  | 93.5  | 92.4  | 71.1  | 107.0 | 93.8  |
| 11.8   | 13.6   | 4.4    | 13.1  | 24.0  | 16.0  | 12.0  | 15.6  | 14.5  |
| 13.0   | 18.0   | 10.8   | 39.4  | 19.3  | 30.6  | 11.2  | 15.3  | 15.8  |
| 1.3    | 1.8    | 3.2    | 1.7   | 3.2   | 1.2   | 3.0   | 0.5   | 1.1   |
| 4.9    | 6.9    | 12.4   | 14.8  | 11.1  | 10.4  | 8.6   | 4.5   | 7.2   |
| 1.5    | 8.4    | 2.9    | 19.8  | 21.7  | 7.8   | 9.2   | 17.7  | 24.4  |
| 2.3    | 3.6    | 1.5    | 4.7   | 3.6   | 8.7   | 5.6   | 1.8   | 3.2   |
| 18.5   | 16.4   | 9.7    | 15.5  | 23.9  | 29.7  | 20.7  | 3.3   | 11.5  |
| 235.1  | 253.1  | 171.6  | 62.5  | 36.2  | 51.1  | 73.0  | 71.7  | 80.6  |
| 1.6    | 10.8   | 3.3    | 3.0   | 10.8  | 2.5   | 1.7   | 1.1   | 2.4   |
| 12.6   | 16.0   | 13.4   | 25.2  | 23.5  | 13.1  | 8.3   | 5.8   | 16.3  |
| 1.0    | 8.1    | 3.1    | 14.6  | 9.5   | 8.3   | 2.6   | 5.1   | 0.7   |
| 159.4  | 206.0  | 192.6  | 169.1 | 148.3 | 189.6 | 84.9  | 111.4 | 129.5 |
| 15.8   | 20.0   | 24.9   | 21.7  | 20.3  | 24.4  | 21.2  | 11.0  | 15.7  |
| 1.1    | 1.5    | 1.1    | 17.3  | 4.7   | 9.2   | 10.0  | 5.8   | 12.6  |
| 53.0   | 74.2   | 61.6   | 25.4  | 11.2  | 22.3  | 16.4  | 12.8  | 9.5   |
| 26.3   | 12.6   | 8.6    | 36.5  | 25.8  | 25.3  | 16.4  | 3.6   | 17.4  |
| 119.9  | 155.2  | 148.4  | 109.8 | 104.2 | 107.5 | 70.6  | 75.8  | 95.6  |
| 0.7    | 5.6    | 1.5    | 4.2   | 4.5   | 7.6   | 0.4   | 1.5   | 0.4   |
| 4.9    | 8.4    | 6.1    | 4.3   | 9.0   | 19.1  | 9.8   | 11.8  | 5.5   |
| 5.7    | 10.8   | 4.9    | 12.4  | 9.4   | 14.0  | 17.4  | 11.5  | 6.7   |
| 55.4   | 92.7   | 95.2   | 24.5  | 27.8  | 36.2  | 33.6  | 40.8  | 47.8  |
| 18.6   | 27.3   | 40.2   | 63.6  | 37.2  | 32.6  | 41.2  | 27.3  | 38.1  |
| 1.2    | 3.9    | 4.9    | 4.4   | 3.6   | 10.2  | 1.4   | 4.2   | 2.6   |
| 15.4   | 12.2   | 2.2    | 17.0  | 10.3  | 12.4  | 7.8   | 6.8   | 3.9   |
| 5.3    | 2.4    | 1.8    | 5.0   | 6.0   | 9.9   | 2.6   | 1.1   | 1.1   |
| 1.4    | 1.5    | 0.8    | 3.9   | 2.9   | 2.9   | 0.9   | 0.8   | 3.2   |
| 12.9   | 16.1   | 15.7   | 22.0  | 23.3  | 22.0  | 11.9  | 17.2  | 16.1  |
| 1.5    | 0.9    | 0.8    | 1.9   | 5.1   | 2.0   | 1.5   | 0.9   | 1.6   |
| 4.0    | 11.9   | 4.6    | 3.3   | 3.6   | 3.8   | 2.1   | 3.7   | 2.1   |
| 1.2    | 6.3    | 5.9    | 4.4   | 1.8   | 5.5   | 6.4   | 5.8   | 4.8   |
| 1.4    | 1.6    | 0.7    | 2.2   | 3.6   | 7.6   | 2.5   | 0.9   | 1.3   |
| 14.4   | 18.5   | 9.2    | 14.1  | 16.7  | 19.1  | 14.0  | 2.5   | 17.3  |
| 170.8  | 193.1  | 105.5  | 200.5 | 147.7 | 165.7 | 84.6  | 87.4  | 123.0 |
| 2.4    | 7.1    | 2.8    | 4.2   | 1.0   | 6.8   | 1.7   | 0.7   | 0.6   |
| 2.3    | 2.7    | 5.1    | 7.7   | 3.8   | 3.3   | 2.2   | 2.3   | 4.5   |
| 192.0  | 231.7  | 166.6  | 98.6  | 76.0  | 101.6 | 151.9 | 115.3 | 137.9 |
| 6.8    | 7.7    | 3.1    | 7.9   | 8.5   | 9.4   | 14.3  | 8.1   | 12.0  |
| 207.8  | 256.2  | 246.7  | 167.8 | 134.1 | 156.0 | 174.0 | 132.3 | 189.0 |

|        |        |        |        |        |        |        |        |        |
|--------|--------|--------|--------|--------|--------|--------|--------|--------|
| 4.3    | 1.0    | 3.9    | 9.8    | 3.9    | 8.2    | 12.1   | 3.2    | 9.3    |
| 0.4    | 0.7    | 0.9    | 1.8    | 5.7    | 4.9    | 2.6    | 1.0    | 3.6    |
| 1.9    | 1.3    | 1.3    | 2.0    | 3.5    | 3.1    | 1.4    | 1.0    | 2.0    |
| 3.7    | 15.5   | 3.3    | 33.0   | 26.8   | 36.2   | 33.1   | 27.5   | 36.9   |
| 43.8   | 47.7   | 46.7   | 50.6   | 59.0   | 38.0   | 37.9   | 48.8   | 49.4   |
| 1.7    | 1.6    | 0.9    | 7.7    | 4.2    | 5.2    | 1.3    | 1.3    | 1.4    |
| 33.0   | 26.6   | 22.2   | 37.5   | 28.2   | 38.1   | 22.0   | 24.4   | 29.7   |
| 2.8    | 5.4    | 4.4    | 2.8    | 3.7    | 13.4   | 2.6    | 1.8    | 1.9    |
| 12.2   | 8.7    | 8.5    | 20.1   | 8.8    | 11.0   | 5.4    | 8.1    | 14.4   |
| 3.2    | 1.3    | 3.5    | 7.0    | 5.1    | 3.8    | 3.2    | 6.6    | 1.1    |
| 10.3   | 4.2    | 10.3   | 39.5   | 33.2   | 44.6   | 17.5   | 20.5   | 16.7   |
| 16.3   | 13.6   | 7.5    | 31.0   | 24.6   | 39.9   | 21.8   | 17.8   | 20.1   |
| 21.9   | 13.3   | 13.9   | 25.8   | 27.3   | 10.9   | 3.4    | 12.8   | 2.3    |
| 82.1   | 99.8   | 66.8   | 110.1  | 80.2   | 76.2   | 54.7   | 67.4   | 76.1   |
| 19.8   | 27.6   | 18.0   | 30.3   | 28.7   | 37.9   | 21.8   | 18.4   | 24.1   |
| 22.9   | 18.8   | 14.2   | 20.1   | 19.0   | 23.4   | 6.0    | 10.3   | 13.0   |
| 17.2   | 19.1   | 13.0   | 19.4   | 10.2   | 12.6   | 16.0   | 13.5   | 16.7   |
| 4.4    | 23.7   | 5.9    | 14.7   | 6.3    | 5.3    | 1.4    | 1.6    | 1.4    |
| 4.7    | 6.3    | 2.6    | 17.4   | 10.7   | 10.6   | 6.5    | 5.0    | 7.5    |
| 14.4   | 8.1    | 17.8   | 5.0    | 5.8    | 4.6    | 7.7    | 8.9    | 3.4    |
| 3584.7 | 4100.1 | 2738.7 | 6226.2 | 4640.9 | 5043.9 | 4146.5 | 3056.3 | 3886.7 |
| 3.1    | 7.4    | 5.2    | 11.4   | 4.0    | 8.0    | 1.9    | 1.2    | 1.0    |
| 11.2   | 15.0   | 12.0   | 4.3    | 9.3    | 6.3    | 2.3    | 1.0    | 1.1    |
| 111.3  | 118.8  | 102.7  | 106.0  | 99.7   | 110.7  | 98.2   | 90.4   | 94.2   |
| 10.8   | 7.0    | 4.5    | 51.1   | 35.0   | 43.6   | 18.8   | 2.1    | 12.1   |
| 14.3   | 6.4    | 6.8    | 14.1   | 4.4    | 20.9   | 5.7    | 10.6   | 11.5   |
| 6.4    | 3.0    | 2.1    | 11.7   | 14.5   | 10.0   | 2.8    | 2.9    | 5.5    |
| 11.8   | 18.2   | 7.5    | 22.6   | 18.2   | 12.8   | 10.6   | 14.0   | 15.3   |
| 0.8    | 1.0    | 0.8    | 4.9    | 5.0    | 7.9    | 0.9    | 3.5    | 2.5    |
| 3.9    | 24.6   | 20.9   | 27.4   | 21.9   | 13.3   | 4.5    | 5.7    | 13.2   |
| 15.9   | 22.2   | 12.8   | 13.2   | 8.2    | 3.8    | 11.8   | 11.0   | 10.3   |
| 4.1    | 2.4    | 3.9    | 3.0    | 7.0    | 7.7    | 5.5    | 5.7    | 1.6    |
| 7.1    | 17.3   | 16.3   | 15.7   | 7.0    | 8.4    | 8.1    | 5.8    | 7.7    |
| 17.7   | 13.0   | 8.3    | 15.9   | 18.6   | 13.7   | 16.1   | 11.5   | 11.7   |
| 17.0   | 19.1   | 20.5   | 47.0   | 32.3   | 40.0   | 10.7   | 10.4   | 19.4   |
| 3119.2 | 3307.4 | 2692.4 | 21.0   | 10.3   | 31.7   | 25.3   | 18.7   | 23.4   |
| 1.0    | 0.5    | 4.4    | 5.7    | 2.8    | 12.8   | 2.9    | 0.6    | 0.3    |
| 15.4   | 25.4   | 12.1   | 19.8   | 20.0   | 33.1   | 17.6   | 12.9   | 16.2   |
| 15.6   | 13.8   | 6.0    | 7.0    | 11.5   | 14.4   | 9.6    | 3.0    | 3.9    |
| 995.9  | 1457.8 | 1191.3 | 512.4  | 488.4  | 544.5  | 457.6  | 562.5  | 558.0  |
| 4.6    | 9.9    | 5.3    | 13.3   | 8.9    | 7.1    | 5.7    | 9.8    | 4.6    |
| 21.4   | 19.7   | 3.2    | 11.9   | 5.4    | 6.6    | 5.4    | 4.1    | 5.2    |
| 0.9    | 1.2    | 0.9    | 6.7    | 5.2    | 4.9    | 10.0   | 11.0   | 9.0    |
| 2.7    | 2.2    | 2.0    | 9.7    | 6.8    | 8.5    | 2.2    | 1.4    | 6.1    |
| 37.9   | 63.3   | 45.7   | 54.0   | 48.5   | 26.5   | 49.3   | 42.4   | 45.4   |
| 5.5    | 8.6    | 3.3    | 16.6   | 7.0    | 1.7    | 9.3    | 6.7    | 3.3    |
| 3.2    | 9.3    | 9.4    | 4.7    | 6.0    | 1.6    | 1.3    | 1.2    | 0.6    |
| 60.2   | 88.2   | 63.7   | 106.1  | 91.5   | 105.8  | 64.1   | 68.6   | 75.1   |
| 1.2    | 1.2    | 3.5    | 2.6    | 2.3    | 5.1    | 1.5    | 0.9    | 1.5    |
| 6.3    | 7.7    | 9.4    | 5.6    | 9.4    | 5.3    | 1.0    | 1.3    | 1.6    |
| 9.4    | 11.4   | 10.4   | 17.0   | 16.6   | 25.4   | 12.8   | 13.2   | 10.9   |
| 278.1  | 374.2  | 435.0  | 273.2  | 317.7  | 297.5  | 228.2  | 205.5  | 220.5  |
| 96.0   | 149.7  | 132.6  | 152.0  | 153.2  | 181.7  | 128.8  | 117.4  | 141.7  |

|        |        |        |        |        |        |        |        |        |
|--------|--------|--------|--------|--------|--------|--------|--------|--------|
| 12.4   | 8.2    | 3.2    | 16.1   | 12.7   | 17.4   | 11.7   | 5.6    | 2.3    |
| 3.0    | 4.4    | 3.0    | 23.9   | 6.3    | 16.7   | 3.9    | 1.6    | 5.7    |
| 6.8    | 5.8    | 5.8    | 8.6    | 11.2   | 13.6   | 5.9    | 6.6    | 3.6    |
| 1301.1 | 1498.7 | 1029.6 | 3662.0 | 2918.0 | 3101.2 | 2475.0 | 2166.2 | 2499.2 |
| 26.4   | 21.1   | 10.5   | 21.3   | 12.0   | 27.4   | 14.8   | 14.3   | 14.4   |
| 23.6   | 24.6   | 15.6   | 21.1   | 19.5   | 23.5   | 25.5   | 3.2    | 18.6   |
| 15.8   | 18.3   | 17.4   | 6.9    | 19.2   | 23.7   | 19.3   | 33.7   | 16.8   |
| 15.9   | 20.7   | 23.6   | 26.2   | 21.8   | 22.7   | 5.6    | 11.4   | 5.7    |
| 21.9   | 16.0   | 12.3   | 43.2   | 38.5   | 41.0   | 18.8   | 21.7   | 22.7   |
| 7.8    | 14.3   | 7.6    | 12.3   | 4.9    | 6.6    | 7.4    | 8.7    | 15.0   |
| 14.8   | 24.2   | 18.5   | 25.1   | 20.0   | 9.7    | 5.9    | 9.9    | 6.6    |
| 379.6  | 517.8  | 384.4  | 514.9  | 413.6  | 453.5  | 470.2  | 548.1  | 492.0  |
| 28.3   | 15.5   | 12.3   | 36.0   | 28.6   | 35.4   | 17.3   | 16.4   | 22.9   |
| 1.8    | 3.6    | 2.3    | 3.5    | 2.2    | 5.7    | 1.8    | 1.3    | 1.8    |
| 46.2   | 52.3   | 37.9   | 10.6   | 12.7   | 13.5   | 22.5   | 23.6   | 33.9   |
| 10.3   | 11.0   | 4.4    | 8.1    | 11.7   | 24.7   | 8.3    | 13.9   | 12.7   |
| 40.7   | 73.9   | 51.0   | 103.2  | 87.4   | 115.1  | 40.8   | 50.4   | 59.1   |
| 11.3   | 17.9   | 10.7   | 14.1   | 11.6   | 17.1   | 14.5   | 10.4   | 17.7   |
| 3.6    | 3.5    | 3.1    | 2.5    | 3.4    | 2.9    | 2.6    | 2.5    | 2.4    |
| 4.0    | 2.0    | 2.0    | 8.5    | 3.6    | 7.5    | 2.8    | 3.9    | 3.8    |
| 13.2   | 6.4    | 7.3    | 10.4   | 8.8    | 10.5   | 5.4    | 4.5    | 6.8    |
| 159.7  | 221.1  | 129.6  | 141.9  | 108.9  | 126.7  | 209.2  | 192.1  | 208.2  |
| 5.0    | 5.7    | 4.3    | 9.8    | 10.3   | 15.6   | 4.1    | 3.9    | 9.5    |
| 163.4  | 224.5  | 172.3  | 25.2   | 22.8   | 22.7   | 13.5   | 14.5   | 19.7   |
| 22.5   | 21.0   | 19.1   | 13.0   | 14.9   | 8.5    | 14.1   | 11.5   | 25.2   |
| 2400.3 | 2557.9 | 1535.9 | 2131.1 | 1609.7 | 1696.2 | 1392.8 | 1226.3 | 1382.3 |
| 14.9   | 8.7    | 13.2   | 25.0   | 13.8   | 15.9   | 8.6    | 8.7    | 16.1   |
| 4.2    | 6.0    | 0.8    | 7.5    | 8.6    | 17.3   | 9.7    | 10.5   | 13.2   |
| 3.7    | 2.7    | 2.0    | 5.5    | 10.1   | 1.4    | 2.2    | 1.8    | 2.2    |
| 1.5    | 0.4    | 0.6    | 8.3    | 5.1    | 2.3    | 2.2    | 2.2    | 2.1    |
| 0.8    | 1.4    | 2.1    | 10.2   | 2.4    | 3.7    | 4.2    | 1.3    | 1.1    |
| 19.1   | 29.2   | 66.8   | 7.2    | 2.4    | 5.1    | 5.5    | 3.3    | 3.0    |
| 13.4   | 14.6   | 10.6   | 27.6   | 16.1   | 12.6   | 12.9   | 9.5    | 14.1   |
| 2.5    | 2.6    | 4.6    | 16.2   | 5.0    | 8.7    | 8.1    | 5.6    | 5.8    |
| 8.1    | 15.3   | 6.0    | 9.8    | 7.7    | 3.9    | 5.5    | 5.6    | 4.6    |
| 2.5    | 2.0    | 2.6    | 8.4    | 7.3    | 11.4   | 4.4    | 2.5    | 1.0    |
| 77.4   | 114.4  | 133.9  | 6.9    | 5.8    | 5.7    | 4.7    | 3.4    | 4.0    |
| 478.9  | 510.6  | 411.1  | 229.3  | 203.3  | 174.1  | 202.6  | 178.6  | 213.8  |
| 24.1   | 33.7   | 24.8   | 40.1   | 28.0   | 16.5   | 11.6   | 4.2    | 11.6   |
| 1417.1 | 1597.2 | 906.1  | 437.7  | 379.0  | 339.9  | 443.4  | 396.8  | 471.3  |
| 2.9    | 5.7    | 2.9    | 16.9   | 6.7    | 10.8   | 9.5    | 4.8    | 9.5    |
| 26.0   | 25.3   | 17.0   | 10.4   | 14.9   | 10.3   | 14.3   | 7.0    | 17.4   |
| 5.9    | 11.6   | 2.8    | 15.9   | 18.6   | 14.1   | 4.5    | 8.7    | 14.2   |
| 5.0    | 8.7    | 8.1    | 3.3    | 2.6    | 5.4    | 9.8    | 4.1    | 4.1    |
| 101.5  | 146.0  | 92.3   | 69.9   | 51.8   | 62.5   | 53.5   | 40.0   | 48.9   |
| 4.8    | 13.1   | 5.2    | 20.4   | 14.8   | 13.1   | 7.6    | 8.5    | 4.3    |
| 224.2  | 292.1  | 199.4  | 192.9  | 167.1  | 201.4  | 176.5  | 207.7  | 194.3  |
| 13.1   | 9.3    | 18.5   | 17.4   | 20.9   | 28.3   | 12.7   | 9.8    | 14.0   |
| 22.8   | 23.5   | 15.1   | 28.8   | 16.6   | 19.6   | 13.8   | 27.7   | 16.6   |
| 10.9   | 7.7    | 6.1    | 19.8   | 19.5   | 15.4   | 7.9    | 10.7   | 10.7   |
| 381.9  | 431.6  | 419.1  | 690.5  | 663.3  | 698.3  | 476.2  | 532.6  | 593.0  |
| 97.1   | 156.3  | 186.7  | 49.6   | 36.4   | 41.6   | 68.9   | 61.3   | 63.3   |
| 12.6   | 11.5   | 8.7    | 5.7    | 15.7   | 7.8    | 6.4    | 2.4    | 1.7    |



|        |        |        |       |       |       |       |       |       |
|--------|--------|--------|-------|-------|-------|-------|-------|-------|
| 33.9   | 24.4   | 29.2   | 35.5  | 27.7  | 38.1  | 31.7  | 27.5  | 32.8  |
| 7.4    | 7.5    | 4.2    | 8.1   | 8.7   | 12.0  | 3.9   | 1.8   | 4.8   |
| 4.2    | 3.7    | 3.8    | 7.1   | 7.5   | 5.2   | 3.6   | 3.2   | 2.3   |
| 9.6    | 10.6   | 10.0   | 24.1  | 17.1  | 24.8  | 11.7  | 9.8   | 14.1  |
| 1411.4 | 1777.0 | 1319.9 | 128.5 | 98.0  | 123.0 | 130.7 | 148.0 | 146.0 |
| 10.5   | 9.0    | 4.4    | 26.3  | 9.9   | 21.7  | 7.5   | 2.7   | 13.6  |
| 4.5    | 5.8    | 4.2    | 8.0   | 10.5  | 16.5  | 4.0   | 7.4   | 7.7   |
| 1.8    | 1.8    | 4.3    | 2.2   | 2.3   | 2.1   | 0.9   | 1.9   | 1.1   |
| 4.6    | 3.8    | 2.7    | 8.9   | 12.5  | 8.9   | 3.4   | 5.3   | 6.3   |
| 27.6   | 27.3   | 15.8   | 29.0  | 20.9  | 27.3  | 25.3  | 18.1  | 14.9  |
| 7.8    | 9.2    | 1.7    | 10.9  | 14.5  | 20.9  | 11.4  | 9.7   | 13.4  |
| 6.7    | 9.1    | 5.8    | 12.9  | 12.7  | 5.8   | 8.3   | 6.8   | 6.6   |
| 25.8   | 30.8   | 16.9   | 75.2  | 44.5  | 72.6  | 22.2  | 22.0  | 33.9  |
| 16.2   | 3.5    | 4.3    | 19.4  | 21.6  | 22.6  | 12.0  | 7.5   | 6.2   |
| 80.8   | 90.6   | 74.7   | 34.0  | 37.8  | 33.2  | 37.5  | 39.6  | 39.0  |
| 387.1  | 474.3  | 356.2  | 664.4 | 513.3 | 581.8 | 397.6 | 316.5 | 396.4 |
| 14.9   | 24.0   | 23.1   | 27.5  | 28.1  | 16.6  | 19.8  | 25.8  | 22.5  |
| 15.5   | 21.1   | 18.2   | 31.3  | 27.8  | 32.8  | 19.3  | 17.5  | 27.0  |
| 39.3   | 21.9   | 26.0   | 33.5  | 46.9  | 58.9  | 11.1  | 20.6  | 28.6  |
| 12.5   | 17.6   | 5.6    | 4.0   | 14.3  | 12.6  | 8.5   | 7.0   | 4.8   |
| 2.1    | 2.4    | 3.4    | 9.4   | 14.0  | 5.5   | 2.6   | 4.1   | 2.5   |
| 1.3    | 1.6    | 3.0    | 7.3   | 6.6   | 7.1   | 2.4   | 1.2   | 3.9   |
| 56.2   | 91.1   | 47.9   | 146.1 | 115.7 | 150.6 | 119.0 | 111.5 | 124.9 |
| 10.8   | 9.0    | 23.3   | 74.2  | 56.1  | 74.8  | 22.6  | 24.0  | 32.8  |
| 32.0   | 63.7   | 43.4   | 6.6   | 3.3   | 12.9  | 14.3  | 4.6   | 6.4   |
| 80.6   | 75.6   | 62.7   | 94.2  | 70.0  | 82.4  | 35.3  | 35.1  | 57.9  |
| 119.8  | 132.7  | 104.5  | 101.8 | 83.9  | 108.1 | 84.3  | 76.1  | 76.5  |
| 1.4    | 1.9    | 3.3    | 8.6   | 7.1   | 8.6   | 3.9   | 1.6   | 3.7   |
| 1.7    | 1.9    | 0.6    | 3.4   | 3.9   | 3.8   | 4.3   | 1.3   | 6.2   |
| 14.0   | 13.5   | 3.4    | 10.6  | 9.4   | 20.8  | 7.9   | 4.8   | 8.1   |
| 70.2   | 110.3  | 80.1   | 107.9 | 117.9 | 121.4 | 70.9  | 101.7 | 90.0  |
| 474.7  | 420.4  | 259.8  | 129.3 | 110.2 | 133.9 | 128.0 | 118.6 | 141.4 |
| 337.9  | 271.5  | 186.9  | 216.0 | 143.1 | 150.6 | 128.3 | 111.0 | 129.7 |
| 4.9    | 2.8    | 1.7    | 5.9   | 2.2   | 6.3   | 2.3   | 1.5   | 5.5   |
| 138.2  | 198.3  | 227.0  | 102.1 | 123.0 | 153.9 | 119.1 | 172.8 | 185.8 |
| 2.5    | 2.0    | 4.7    | 12.1  | 7.8   | 6.3   | 3.1   | 1.8   | 1.4   |
| 2.0    | 1.3    | 1.2    | 5.4   | 3.5   | 5.5   | 1.8   | 1.2   | 2.9   |
| 169.1  | 167.0  | 135.9  | 224.5 | 180.1 | 181.6 | 116.9 | 102.4 | 147.8 |
| 29.3   | 33.7   | 17.5   | 32.9  | 43.0  | 33.8  | 37.2  | 32.4  | 37.0  |
| 13.6   | 22.7   | 18.2   | 11.5  | 9.7   | 10.3  | 8.8   | 7.5   | 11.2  |
| 44.2   | 44.7   | 35.7   | 202.5 | 157.0 | 158.7 | 73.2  | 89.6  | 84.1  |
| 6.8    | 4.1    | 4.4    | 7.7   | 11.1  | 5.8   | 2.7   | 0.8   | 1.0   |
| 311.3  | 351.0  | 260.9  | 85.1  | 46.9  | 64.4  | 160.8 | 75.0  | 71.3  |
| 28.0   | 39.5   | 31.3   | 37.2  | 36.2  | 34.6  | 17.1  | 14.5  | 18.6  |
| 27.6   | 29.3   | 22.7   | 46.9  | 35.6  | 42.0  | 30.3  | 20.8  | 26.6  |
| 17.7   | 17.8   | 17.6   | 6.1   | 6.5   | 12.4  | 8.7   | 24.0  | 17.5  |
| 4.6    | 1.0    | 2.9    | 14.8  | 5.9   | 1.8   | 6.3   | 1.2   | 3.8   |
| 1.9    | 0.3    | 4.7    | 5.1   | 5.7   | 3.1   | 0.9   | 2.5   | 2.3   |
| 4.2    | 2.8    | 1.8    | 4.1   | 3.6   | 4.7   | 3.3   | 1.4   | 1.8   |
| 1.5    | 3.5    | 5.0    | 14.5  | 10.2  | 7.2   | 4.4   | 3.0   | 3.0   |
| 10.1   | 10.8   | 1.2    | 14.0  | 2.3   | 15.3  | 4.0   | 1.4   | 1.8   |
| 9.8    | 7.4    | 11.1   | 13.7  | 27.7  | 24.2  | 22.4  | 12.9  | 19.7  |
| 135.1  | 231.8  | 205.7  | 88.0  | 84.7  | 107.1 | 106.3 | 117.8 | 127.6 |

|       |       |       |        |       |       |       |       |        |
|-------|-------|-------|--------|-------|-------|-------|-------|--------|
| 6.5   | 4.3   | 6.2   | 8.4    | 11.1  | 7.3   | 3.0   | 1.2   | 2.4    |
| 26.1  | 20.3  | 21.8  | 23.4   | 22.5  | 31.1  | 12.4  | 16.0  | 14.2   |
| 0.7   | 2.3   | 2.6   | 4.6    | 2.4   | 8.5   | 2.9   | 0.8   | 0.6    |
| 11.0  | 20.5  | 12.1  | 12.3   | 6.8   | 15.5  | 1.0   | 5.9   | 4.0    |
| 1.0   | 2.6   | 2.6   | 7.4    | 3.1   | 2.2   | 1.3   | 0.9   | 0.9    |
| 9.3   | 10.9  | 6.7   | 25.3   | 14.2  | 26.7  | 7.8   | 10.0  | 7.5    |
| 2.9   | 5.1   | 1.6   | 7.1    | 15.2  | 4.7   | 5.9   | 5.0   | 9.0    |
| 7.4   | 5.6   | 3.6   | 27.3   | 17.4  | 13.3  | 11.2  | 9.0   | 6.0    |
| 24.4  | 25.8  | 25.6  | 23.6   | 25.4  | 29.9  | 16.0  | 14.0  | 14.1   |
| 99.7  | 112.3 | 77.0  | 80.8   | 85.5  | 100.6 | 83.3  | 80.0  | 75.7   |
| 36.7  | 30.2  | 20.5  | 27.8   | 15.9  | 33.9  | 21.7  | 11.9  | 8.6    |
| 6.5   | 3.3   | 5.8   | 5.8    | 9.1   | 17.2  | 7.6   | 1.5   | 6.9    |
| 4.5   | 8.6   | 4.2   | 14.2   | 8.3   | 10.7  | 8.8   | 7.5   | 8.9    |
| 215.4 | 303.0 | 238.5 | 116.1  | 91.6  | 113.1 | 118.0 | 139.8 | 145.2  |
| 7.3   | 1.6   | 2.2   | 12.1   | 4.8   | 8.5   | 2.1   | 5.3   | 0.9    |
| 478.3 | 670.4 | 513.9 | 382.1  | 348.2 | 421.7 | 221.1 | 242.4 | 277.0  |
| 14.7  | 22.6  | 18.9  | 21.4   | 12.8  | 22.5  | 14.9  | 8.5   | 9.8    |
| 126.1 | 141.5 | 84.7  | 547.1  | 461.1 | 549.7 | 343.3 | 313.7 | 350.2  |
| 4.0   | 13.9  | 7.6   | 25.9   | 16.5  | 17.6  | 13.9  | 14.4  | 10.0   |
| 7.2   | 0.5   | 3.1   | 12.6   | 9.1   | 1.6   | 1.6   | 3.6   | 0.8    |
| 6.0   | 12.8  | 16.2  | 11.6   | 8.5   | 15.4  | 2.3   | 6.4   | 3.1    |
| 310.2 | 332.5 | 234.0 | 108.2  | 78.9  | 98.1  | 119.2 | 90.4  | 89.4   |
| 4.0   | 8.9   | 3.3   | 5.3    | 5.3   | 7.6   | 4.1   | 1.8   | 5.0    |
| 74.2  | 79.8  | 54.9  | 317.0  | 281.0 | 332.3 | 144.3 | 225.2 | 209.9  |
| 77.8  | 127.4 | 112.0 | 148.5  | 141.4 | 175.9 | 82.5  | 95.8  | 101.6  |
| 23.9  | 26.9  | 25.3  | 31.3   | 21.7  | 28.5  | 20.3  | 24.2  | 27.0   |
| 0.7   | 2.2   | 2.1   | 4.2    | 4.2   | 9.8   | 5.1   | 2.4   | 2.3    |
| 7.6   | 6.6   | 11.9  | 8.4    | 10.5  | 6.1   | 6.4   | 7.2   | 9.7    |
| 535.9 | 597.3 | 417.5 | 1096.1 | 950.2 | 982.8 | 940.4 | 927.6 | 1081.0 |
| 142.4 | 168.5 | 151.2 | 131.2  | 105.4 | 109.5 | 101.2 | 96.0  | 123.0  |
| 13.8  | 6.8   | 2.8   | 10.4   | 15.9  | 14.0  | 2.6   | 6.4   | 9.3    |
| 16.8  | 15.2  | 20.8  | 23.8   | 18.2  | 29.9  | 13.5  | 13.3  | 8.9    |
| 15.9  | 9.3   | 8.7   | 28.7   | 30.4  | 25.1  | 19.4  | 26.8  | 25.6   |
| 55.2  | 77.0  | 45.3  | 96.9   | 85.1  | 93.0  | 68.2  | 53.3  | 71.8   |
| 3.9   | 3.8   | 3.3   | 9.4    | 2.5   | 11.6  | 1.3   | 3.2   | 2.1    |
| 3.6   | 5.2   | 10.6  | 7.7    | 3.6   | 5.3   | 0.3   | 0.7   | 0.9    |
| 8.0   | 4.2   | 1.2   | 17.8   | 16.6  | 27.4  | 8.3   | 2.9   | 6.4    |
| 25.1  | 26.3  | 9.9   | 25.4   | 5.7   | 24.8  | 15.4  | 16.0  | 17.7   |
| 40.6  | 51.5  | 36.1  | 1.1    | 3.0   | 4.4   | 7.3   | 3.9   | 4.5    |
| 2.0   | 26.6  | 25.7  | 2.2    | 2.3   | 2.2   | 1.9   | 1.0   | 1.8    |
| 16.3  | 21.7  | 6.8   | 18.7   | 27.0  | 16.7  | 17.0  | 14.0  | 23.9   |
| 8.6   | 11.4  | 4.3   | 13.5   | 12.5  | 21.3  | 15.8  | 15.2  | 19.7   |
| 7.8   | 7.4   | 4.0   | 29.9   | 16.7  | 12.4  | 17.8  | 3.3   | 8.1    |
| 4.5   | 9.0   | 3.8   | 7.7    | 7.8   | 5.0   | 7.1   | 4.8   | 5.7    |
| 3.9   | 0.6   | 4.7   | 6.7    | 4.1   | 2.9   | 2.3   | 2.4   | 5.7    |
| 1.4   | 4.6   | 1.5   | 2.9    | 1.9   | 3.0   | 0.8   | 0.8   | 3.7    |
| 479.9 | 566.4 | 387.8 | 376.2  | 351.0 | 421.2 | 244.7 | 266.0 | 324.9  |
| 9.9   | 11.6  | 9.9   | 22.7   | 13.1  | 17.0  | 11.9  | 15.2  | 13.2   |
| 186.8 | 207.7 | 150.7 | 176.4  | 146.7 | 234.6 | 97.4  | 88.2  | 106.4  |
| 20.9  | 43.6  | 36.3  | 10.8   | 25.4  | 18.5  | 31.2  | 37.3  | 37.9   |
| 43.3  | 74.6  | 58.4  | 24.0   | 17.0  | 30.5  | 31.0  | 30.3  | 43.5   |
| 2.4   | 1.0   | 2.7   | 37.8   | 41.9  | 38.7  | 10.5  | 19.0  | 15.0   |
| 1.8   | 2.9   | 4.2   | 9.4    | 5.5   | 3.1   | 1.2   | 0.8   | 1.3    |

|       |       |       |       |       |       |       |       |       |
|-------|-------|-------|-------|-------|-------|-------|-------|-------|
| 5.1   | 4.5   | 1.5   | 9.5   | 7.7   | 3.4   | 5.0   | 6.4   | 3.9   |
| 2.2   | 2.9   | 3.5   | 8.1   | 6.2   | 24.4  | 9.8   | 3.7   | 4.6   |
| 0.5   | 0.8   | 0.4   | 4.3   | 8.4   | 4.7   | 5.1   | 0.4   | 1.3   |
| 14.8  | 23.0  | 17.0  | 17.1  | 15.8  | 19.8  | 9.4   | 13.7  | 13.0  |
| 14.8  | 15.4  | 11.9  | 24.3  | 16.9  | 29.4  | 16.7  | 24.3  | 18.4  |
| 3.2   | 8.5   | 1.9   | 3.1   | 7.1   | 11.5  | 3.5   | 1.9   | 3.3   |
| 4.2   | 6.2   | 3.3   | 19.3  | 11.5  | 14.1  | 2.7   | 19.1  | 4.6   |
| 6.0   | 2.9   | 4.6   | 3.3   | 2.2   | 10.0  | 6.8   | 1.4   | 1.6   |
| 95.5  | 103.0 | 73.6  | 22.6  | 18.4  | 13.3  | 54.7  | 43.9  | 53.7  |
| 88.3  | 113.6 | 92.7  | 84.2  | 94.6  | 87.7  | 79.1  | 73.4  | 68.9  |
| 16.8  | 26.7  | 20.6  | 39.1  | 26.4  | 23.8  | 16.5  | 10.3  | 11.9  |
| 37.1  | 43.0  | 33.2  | 50.5  | 40.2  | 52.8  | 41.9  | 30.7  | 44.6  |
| 8.2   | 6.9   | 5.0   | 17.4  | 7.5   | 18.4  | 6.6   | 9.2   | 5.8   |
| 5.7   | 2.9   | 1.6   | 11.3  | 4.9   | 9.0   | 6.5   | 5.6   | 8.0   |
| 41.1  | 47.8  | 25.8  | 31.9  | 31.1  | 29.9  | 24.9  | 24.8  | 26.3  |
| 110.0 | 112.5 | 74.7  | 145.0 | 80.4  | 120.1 | 81.8  | 72.6  | 99.5  |
| 1.6   | 7.2   | 4.4   | 6.4   | 8.5   | 5.2   | 0.4   | 2.0   | 7.0   |
| 19.6  | 28.3  | 12.7  | 29.6  | 9.6   | 19.1  | 11.6  | 21.5  | 24.7  |
| 11.3  | 9.9   | 5.6   | 9.1   | 6.6   | 2.1   | 4.3   | 3.4   | 4.9   |
| 12.7  | 5.3   | 1.3   | 5.6   | 4.9   | 3.8   | 1.9   | 5.7   | 3.9   |
| 2.8   | 2.3   | 2.4   | 3.7   | 3.4   | 3.6   | 1.3   | 1.7   | 2.1   |
| 9.6   | 10.1  | 10.1  | 8.7   | 12.9  | 6.7   | 5.6   | 14.9  | 13.2  |
| 12.8  | 27.9  | 17.4  | 23.0  | 34.7  | 26.1  | 17.7  | 25.0  | 23.9  |
| 636.9 | 763.5 | 588.0 | 384.2 | 317.3 | 370.4 | 335.3 | 350.3 | 393.3 |
| 3.3   | 3.3   | 3.1   | 13.2  | 4.9   | 15.9  | 7.8   | 2.9   | 3.5   |
| 11.7  | 18.1  | 13.3  | 20.7  | 26.8  | 22.2  | 14.7  | 12.2  | 14.9  |
| 30.3  | 31.5  | 34.5  | 23.8  | 18.9  | 18.7  | 22.5  | 27.1  | 31.6  |
| 147.2 | 188.7 | 122.8 | 131.3 | 117.4 | 96.3  | 105.9 | 113.4 | 137.2 |
| 0.8   | 0.7   | 3.6   | 9.1   | 5.3   | 6.7   | 2.0   | 2.0   | 1.3   |
| 3.0   | 8.5   | 2.2   | 7.3   | 10.3  | 6.3   | 6.8   | 2.6   | 3.1   |
| 89.1  | 142.4 | 119.0 | 155.2 | 113.2 | 125.0 | 96.1  | 68.6  | 85.6  |
| 82.6  | 80.8  | 81.7  | 97.2  | 85.8  | 83.6  | 53.6  | 55.8  | 66.2  |
| 27.2  | 42.0  | 29.1  | 55.0  | 46.4  | 47.1  | 21.8  | 29.3  | 29.3  |
| 100.6 | 148.7 | 123.7 | 74.7  | 68.8  | 65.6  | 67.8  | 76.3  | 87.0  |
| 22.1  | 23.1  | 21.0  | 15.3  | 27.4  | 12.4  | 15.3  | 22.3  | 11.7  |
| 44.9  | 48.4  | 29.0  | 105.8 | 35.0  | 48.8  | 9.1   | 18.0  | 11.0  |
| 3.7   | 2.6   | 1.9   | 4.2   | 8.9   | 11.7  | 2.8   | 2.8   | 2.2   |
| 9.5   | 18.5  | 8.9   | 47.9  | 38.5  | 30.7  | 22.2  | 10.8  | 20.0  |
| 5.3   | 2.6   | 4.0   | 11.0  | 1.8   | 8.5   | 1.9   | 5.4   | 1.2   |
| 5.6   | 4.2   | 7.9   | 17.1  | 7.1   | 2.8   | 6.6   | 4.1   | 6.2   |
| 6.6   | 2.5   | 1.7   | 16.1  | 19.4  | 14.2  | 1.8   | 5.1   | 9.6   |
| 2.7   | 3.7   | 4.8   | 10.9  | 17.0  | 11.2  | 7.5   | 2.8   | 5.6   |
| 7.3   | 6.5   | 4.7   | 19.1  | 7.6   | 11.1  | 4.6   | 3.8   | 3.9   |
| 23.6  | 37.7  | 23.9  | 44.3  | 65.4  | 63.8  | 31.3  | 47.1  | 42.2  |
| 14.0  | 18.0  | 17.0  | 10.9  | 4.5   | 13.7  | 4.4   | 2.8   | 5.2   |
| 3.0   | 2.9   | 2.8   | 8.0   | 6.7   | 12.0  | 2.5   | 5.5   | 2.1   |
| 1.9   | 4.4   | 2.0   | 4.5   | 6.9   | 5.9   | 0.5   | 0.2   | 4.0   |
| 17.6  | 21.8  | 19.4  | 22.2  | 19.2  | 26.7  | 16.6  | 13.9  | 21.6  |
| 4.7   | 3.0   | 3.3   | 13.9  | 14.4  | 14.9  | 1.9   | 2.0   | 4.5   |
| 39.6  | 44.8  | 29.4  | 43.0  | 33.4  | 34.0  | 25.3  | 24.8  | 28.3  |
| 95.1  | 81.3  | 56.8  | 33.0  | 25.6  | 23.6  | 21.6  | 13.0  | 19.0  |
| 11.2  | 3.6   | 13.9  | 6.1   | 7.0   | 2.4   | 6.0   | 12.0  | 5.1   |
| 4.9   | 20.4  | 11.2  | 17.9  | 14.6  | 17.4  | 2.5   | 1.1   | 1.8   |

|       |       |       |       |       |       |       |       |       |
|-------|-------|-------|-------|-------|-------|-------|-------|-------|
| 11.0  | 6.6   | 13.3  | 10.0  | 8.0   | 6.5   | 1.8   | 5.1   | 2.0   |
| 21.7  | 29.6  | 17.1  | 6.2   | 12.4  | 6.9   | 3.1   | 5.8   | 5.7   |
| 112.6 | 133.4 | 94.4  | 100.1 | 94.3  | 92.5  | 71.6  | 83.6  | 83.1  |
| 246.7 | 180.0 | 78.3  | 43.3  | 21.5  | 23.3  | 30.8  | 18.3  | 18.6  |
| 9.6   | 2.0   | 1.0   | 8.4   | 11.1  | 9.9   | 2.1   | 1.4   | 3.4   |
| 584.7 | 678.1 | 401.7 | 641.2 | 501.7 | 553.2 | 433.7 | 352.3 | 435.9 |
| 1.3   | 1.5   | 1.1   | 1.4   | 1.5   | 1.2   | 0.8   | 0.6   | 1.1   |
| 8.5   | 2.8   | 2.8   | 3.7   | 3.5   | 3.7   | 1.5   | 3.2   | 1.2   |
| 3.5   | 4.9   | 2.9   | 5.1   | 7.8   | 6.6   | 5.0   | 2.4   | 2.4   |
| 3.3   | 6.5   | 4.8   | 1.6   | 5.4   | 8.4   | 4.2   | 2.2   | 5.9   |
| 3.5   | 2.0   | 1.9   | 8.1   | 8.6   | 4.7   | 5.0   | 1.2   | 2.2   |
| 13.7  | 7.7   | 12.1  | 26.5  | 12.1  | 13.1  | 8.2   | 8.4   | 11.6  |
| 12.9  | 18.5  | 13.5  | 17.8  | 18.0  | 22.6  | 18.5  | 9.2   | 16.5  |
| 10.7  | 4.5   | 5.3   | 4.2   | 9.3   | 3.8   | 7.8   | 8.2   | 8.1   |
| 28.1  | 24.7  | 18.3  | 29.9  | 28.5  | 15.4  | 23.9  | 34.4  | 19.1  |
| 4.2   | 0.9   | 3.7   | 10.9  | 5.4   | 12.2  | 7.4   | 0.7   | 2.6   |
| 1.6   | 1.6   | 9.8   | 8.4   | 9.3   | 4.6   | 1.1   | 6.6   | 5.3   |
| 4.5   | 5.2   | 0.5   | 10.6  | 2.7   | 13.9  | 7.0   | 3.3   | 10.8  |
| 14.4  | 11.1  | 2.9   | 23.4  | 41.1  | 15.6  | 5.7   | 6.1   | 9.2   |
| 13.7  | 37.5  | 33.6  | 39.0  | 35.6  | 39.5  | 22.7  | 26.5  | 30.3  |
| 6.0   | 0.7   | 3.7   | 2.8   | 0.8   | 5.4   | 1.8   | 1.4   | 0.7   |
| 1.4   | 2.4   | 3.9   | 2.2   | 4.5   | 3.2   | 1.4   | 3.2   | 2.3   |
| 18.4  | 5.7   | 4.4   | 16.8  | 14.1  | 15.0  | 4.8   | 8.3   | 12.1  |
| 111.2 | 177.7 | 107.5 | 35.8  | 36.3  | 36.8  | 123.8 | 62.9  | 112.7 |
| 8.3   | 7.8   | 3.7   | 15.7  | 13.9  | 20.1  | 7.2   | 6.4   | 4.7   |
| 38.3  | 66.8  | 44.9  | 17.2  | 27.5  | 11.6  | 4.7   | 11.0  | 12.0  |
| 13.3  | 10.9  | 5.5   | 14.2  | 8.8   | 12.0  | 5.7   | 10.4  | 2.5   |
| 1.9   | 3.4   | 1.2   | 5.8   | 11.9  | 9.6   | 2.9   | 3.9   | 5.0   |
| 9.5   | 6.7   | 4.0   | 14.6  | 24.7  | 8.4   | 15.6  | 20.2  | 9.1   |
| 3.8   | 1.5   | 2.4   | 12.0  | 5.0   | 8.1   | 0.1   | 0.4   | 3.2   |
| 4.4   | 11.2  | 10.4  | 4.5   | 8.2   | 1.6   | 2.5   | 5.3   | 5.1   |
| 4.9   | 2.8   | 4.3   | 3.0   | 3.4   | 2.5   | 0.6   | 3.6   | 3.3   |
| 7.1   | 16.3  | 7.6   | 6.9   | 10.2  | 12.5  | 10.2  | 2.5   | 3.7   |
| 18.4  | 17.2  | 21.7  | 53.0  | 38.1  | 38.1  | 22.3  | 61.6  | 37.8  |
| 42.1  | 48.9  | 38.1  | 30.6  | 18.2  | 24.6  | 35.0  | 27.8  | 43.1  |
| 11.8  | 16.5  | 8.7   | 8.4   | 11.4  | 8.3   | 9.8   | 5.6   | 12.1  |
| 32.5  | 46.8  | 34.1  | 76.7  | 49.6  | 58.8  | 26.6  | 35.1  | 34.4  |
| 9.2   | 10.6  | 6.3   | 5.9   | 4.0   | 8.4   | 3.0   | 4.2   | 4.6   |
| 2.2   | 0.6   | 0.9   | 3.5   | 4.2   | 3.2   | 0.5   | 2.7   | 3.3   |
| 5.8   | 7.6   | 0.7   | 7.8   | 1.7   | 3.9   | 4.3   | 2.4   | 1.8   |
| 2.4   | 1.2   | 0.4   | 1.3   | 2.0   | 5.8   | 0.5   | 1.5   | 0.8   |
| 537.5 | 591.1 | 474.5 | 588.1 | 452.8 | 518.1 | 360.8 | 320.9 | 369.5 |
| 6.2   | 8.0   | 3.8   | 25.9  | 24.2  | 24.0  | 12.2  | 10.2  | 18.2  |
| 5.3   | 18.5  | 13.1  | 13.7  | 18.2  | 17.1  | 7.1   | 8.5   | 6.2   |
| 13.1  | 24.1  | 7.9   | 29.1  | 35.2  | 38.7  | 6.8   | 8.3   | 2.8   |
| 1.7   | 4.4   | 2.4   | 5.0   | 7.5   | 6.9   | 2.7   | 2.3   | 0.5   |
| 31.5  | 34.7  | 32.0  | 47.0  | 31.3  | 42.5  | 48.9  | 39.2  | 38.5  |
| 0.7   | 2.2   | 1.7   | 9.8   | 11.0  | 7.7   | 6.4   | 4.4   | 6.3   |
| 3.0   | 3.2   | 2.1   | 4.1   | 3.9   | 15.2  | 3.8   | 0.6   | 6.2   |
| 1.0   | 4.2   | 3.6   | 27.9  | 7.1   | 11.4  | 1.2   | 6.8   | 5.2   |
| 10.6  | 6.5   | 2.0   | 6.7   | 8.2   | 8.8   | 3.4   | 2.0   | 1.8   |
| 2.9   | 3.0   | 1.8   | 15.4  | 4.1   | 6.3   | 5.4   | 6.4   | 4.0   |
| 3.2   | 7.7   | 1.8   | 3.3   | 3.3   | 6.5   | 3.7   | 1.5   | 2.4   |

|        |        |        |        |        |        |        |        |        |
|--------|--------|--------|--------|--------|--------|--------|--------|--------|
| 4.8    | 6.5    | 10.1   | 13.1   | 6.5    | 8.0    | 3.3    | 4.2    | 1.9    |
| 8.1    | 4.5    | 1.5    | 4.9    | 2.9    | 14.9   | 2.6    | 3.4    | 4.1    |
| 11.3   | 9.2    | 9.0    | 10.6   | 28.5   | 14.7   | 7.4    | 4.2    | 5.8    |
| 7.0    | 6.9    | 2.7    | 5.9    | 23.0   | 8.9    | 6.0    | 5.5    | 4.4    |
| 21.4   | 31.9   | 25.9   | 45.9   | 24.4   | 55.1   | 25.8   | 23.8   | 31.3   |
| 259.4  | 309.8  | 246.5  | 212.8  | 171.0  | 185.4  | 150.9  | 116.9  | 145.4  |
| 17.1   | 21.6   | 10.6   | 31.5   | 38.9   | 25.8   | 13.3   | 17.5   | 19.0   |
| 0.7    | 3.5    | 3.9    | 14.1   | 14.3   | 11.2   | 3.4    | 4.8    | 3.4    |
| 38.7   | 40.1   | 40.5   | 20.3   | 33.9   | 23.9   | 32.2   | 23.6   | 32.4   |
| 25.3   | 16.4   | 11.8   | 13.2   | 17.2   | 32.2   | 13.4   | 13.3   | 11.3   |
| 18.9   | 9.6    | 7.1    | 9.5    | 5.9    | 6.7    | 4.8    | 9.0    | 7.9    |
| 774.5  | 1022.9 | 771.5  | 529.6  | 480.4  | 570.0  | 308.0  | 334.1  | 338.0  |
| 2000.8 | 2002.0 | 1369.7 | 1186.0 | 1023.3 | 1021.0 | 578.9  | 771.7  | 735.1  |
| 4.8    | 3.3    | 1.1    | 79.8   | 75.1   | 84.9   | 73.0   | 83.0   | 108.3  |
| 525.9  | 709.7  | 610.3  | 1476.0 | 1077.9 | 1234.6 | 854.8  | 873.7  | 978.9  |
| 15.7   | 13.8   | 11.3   | 12.7   | 13.1   | 20.2   | 15.8   | 8.7    | 12.1   |
| 99.2   | 158.5  | 139.8  | 19.0   | 9.9    | 8.7    | 4.8    | 4.2    | 9.6    |
| 610.6  | 759.1  | 537.7  | 1234.7 | 975.0  | 1176.6 | 1238.4 | 1296.9 | 1415.6 |
| 5.4    | 5.3    | 3.1    | 6.6    | 4.0    | 11.5   | 12.1   | 6.0    | 6.1    |
| 190.6  | 266.1  | 164.9  | 65.8   | 62.2   | 55.9   | 69.6   | 77.3   | 77.7   |
| 56.3   | 77.2   | 53.1   | 34.1   | 27.6   | 16.4   | 29.0   | 18.5   | 32.5   |
| 4.3    | 3.7    | 5.1    | 6.4    | 5.5    | 6.9    | 3.1    | 2.4    | 3.1    |
| 11.3   | 15.7   | 6.9    | 40.2   | 34.2   | 31.9   | 17.7   | 18.1   | 19.8   |
| 1.0    | 1.5    | 2.6    | 8.0    | 4.7    | 8.3    | 3.0    | 1.0    | 1.2    |
| 4.4    | 9.1    | 4.1    | 8.8    | 6.3    | 4.6    | 5.5    | 0.6    | 1.4    |
| 8.1    | 2.0    | 4.7    | 7.0    | 9.7    | 5.8    | 1.7    | 5.0    | 1.4    |
| 20.8   | 19.3   | 22.2   | 22.1   | 27.6   | 29.6   | 19.8   | 17.7   | 7.5    |
| 117.6  | 137.6  | 104.8  | 407.1  | 374.1  | 404.3  | 212.2  | 244.9  | 245.0  |
| 506.9  | 457.4  | 200.3  | 69.7   | 77.0   | 85.8   | 59.1   | 75.8   | 67.9   |
| 602.1  | 714.4  | 450.5  | 51.8   | 33.3   | 28.4   | 98.8   | 59.7   | 62.1   |
| 17.6   | 9.0    | 9.7    | 10.0   | 4.4    | 9.0    | 3.9    | 1.0    | 6.9    |
| 43.9   | 26.6   | 5.5    | 7.6    | 7.1    | 7.0    | 3.2    | 4.4    | 8.2    |
| 281.3  | 326.2  | 167.2  | 368.8  | 217.6  | 266.4  | 244.6  | 198.5  | 201.2  |
| 24.7   | 14.1   | 13.0   | 47.6   | 25.6   | 53.6   | 30.8   | 14.7   | 12.2   |
| 3.5    | 1.7    | 0.6    | 4.0    | 3.2    | 2.3    | 1.2    | 1.1    | 3.4    |
| 533.2  | 675.8  | 464.5  | 1093.9 | 743.7  | 922.5  | 655.8  | 624.7  | 709.7  |
| 4.8    | 4.1    | 3.9    | 9.4    | 7.8    | 6.4    | 3.7    | 1.6    | 2.0    |
| 277.3  | 319.5  | 180.9  | 131.3  | 107.1  | 95.7   | 134.8  | 138.1  | 145.3  |
| 4.7    | 3.5    | 5.2    | 9.6    | 7.2    | 2.0    | 4.6    | 2.9    | 1.7    |
| 289.3  | 368.5  | 315.2  | 72.9   | 73.9   | 67.7   | 62.8   | 76.8   | 77.3   |
| 48.5   | 70.7   | 44.3   | 4.9    | 13.0   | 9.3    | 3.0    | 1.4    | 1.8    |
| 159.2  | 169.2  | 114.3  | 12.9   | 10.3   | 27.3   | 35.1   | 24.5   | 27.2   |
| 4.8    | 1.6    | 1.6    | 2.4    | 8.2    | 10.2   | 2.0    | 2.3    | 3.0    |
| 559.6  | 492.5  | 203.9  | 370.5  | 274.5  | 296.8  | 256.8  | 199.3  | 239.9  |
| 93.8   | 159.4  | 162.2  | 12.7   | 3.7    | 6.9    | 12.6   | 15.2   | 13.1   |
| 14.4   | 16.1   | 12.6   | 4.8    | 7.7    | 1.6    | 0.4    | 0.6    | 1.0    |
| 36.7   | 45.1   | 27.0   | 42.8   | 32.8   | 49.8   | 43.5   | 37.2   | 32.6   |
| 1776.9 | 2159.3 | 1432.3 | 911.7  | 665.3  | 694.1  | 659.2  | 515.1  | 632.9  |
| 7.3    | 8.9    | 9.8    | 20.7   | 19.0   | 26.0   | 9.7    | 10.8   | 9.7    |
| 363.6  | 493.9  | 276.6  | 170.1  | 89.2   | 119.7  | 133.6  | 58.3   | 93.0   |
| 0.9    | 0.5    | 3.0    | 4.4    | 10.4   | 1.6    | 0.8    | 6.3    | 7.3    |
| 13.4   | 5.8    | 11.0   | 27.3   | 20.8   | 12.8   | 7.3    | 6.9    | 2.4    |
| 235.9  | 299.9  | 164.9  | 68.9   | 52.0   | 46.7   | 47.2   | 36.7   | 50.3   |

|        |        |        |        |        |        |        |        |        |
|--------|--------|--------|--------|--------|--------|--------|--------|--------|
| 223.1  | 268.6  | 214.7  | 59.6   | 62.3   | 53.6   | 54.7   | 62.8   | 66.1   |
| 3.3    | 2.6    | 1.6    | 2.5    | 2.4    | 2.5    | 2.3    | 1.0    | 1.4    |
| 20.1   | 18.6   | 24.4   | 13.6   | 17.4   | 15.1   | 18.2   | 6.5    | 16.7   |
| 143.0  | 260.4  | 246.4  | 199.4  | 170.1  | 214.4  | 136.2  | 194.7  | 193.3  |
| 5.1    | 6.9    | 6.4    | 14.0   | 15.4   | 16.2   | 9.6    | 11.1   | 10.5   |
| 262.5  | 324.4  | 261.2  | 178.7  | 172.2  | 181.8  | 121.9  | 95.8   | 120.3  |
| 14.8   | 15.7   | 15.0   | 26.3   | 21.9   | 30.9   | 16.1   | 13.3   | 13.6   |
| 550.4  | 574.8  | 327.4  | 46.0   | 29.1   | 32.0   | 77.7   | 53.5   | 53.9   |
| 5.8    | 7.2    | 1.0    | 7.6    | 9.8    | 7.9    | 5.9    | 4.3    | 4.4    |
| 18.4   | 45.8   | 18.3   | 17.5   | 7.3    | 12.3   | 21.5   | 35.7   | 28.3   |
| 2.0    | 1.7    | 4.2    | 4.3    | 3.6    | 2.8    | 5.4    | 2.9    | 0.5    |
| 4.0    | 4.3    | 5.7    | 19.9   | 16.6   | 15.4   | 8.9    | 6.9    | 11.0   |
| 33.8   | 40.3   | 27.8   | 39.2   | 31.4   | 28.4   | 29.9   | 26.2   | 27.2   |
| 10.2   | 4.4    | 10.9   | 19.6   | 23.1   | 22.2   | 9.8    | 9.9    | 13.7   |
| 3.5    | 5.2    | 5.8    | 9.6    | 9.0    | 3.9    | 4.0    | 0.9    | 5.1    |
| 216.0  | 200.2  | 92.5   | 112.8  | 91.3   | 124.4  | 114.0  | 76.9   | 93.5   |
| 15.2   | 20.9   | 21.1   | 12.4   | 7.0    | 21.7   | 24.7   | 19.3   | 26.8   |
| 146.4  | 213.2  | 139.3  | 235.5  | 193.5  | 241.7  | 142.8  | 160.3  | 179.4  |
| 11.8   | 16.3   | 5.8    | 21.6   | 14.1   | 18.0   | 5.8    | 13.5   | 6.3    |
| 6.7    | 6.7    | 1.8    | 3.4    | 3.2    | 7.3    | 0.7    | 3.7    | 0.8    |
| 4.1    | 2.0    | 4.3    | 3.0    | 3.6    | 3.9    | 1.0    | 1.0    | 0.9    |
| 4.5    | 5.1    | 3.3    | 14.9   | 20.7   | 7.6    | 3.7    | 3.1    | 5.8    |
| 22.1   | 22.4   | 15.6   | 36.5   | 46.6   | 26.7   | 18.6   | 17.8   | 19.3   |
| 18.1   | 22.2   | 10.9   | 24.1   | 20.4   | 20.9   | 11.7   | 14.4   | 16.2   |
| 37.0   | 31.6   | 17.8   | 35.6   | 33.2   | 53.5   | 25.8   | 19.4   | 15.1   |
| 13.0   | 22.5   | 9.0    | 15.8   | 13.3   | 13.5   | 7.9    | 5.6    | 9.4    |
| 119.0  | 146.4  | 101.4  | 257.5  | 190.1  | 209.2  | 261.1  | 208.5  | 241.2  |
| 1.9    | 0.7    | 1.6    | 4.8    | 5.2    | 8.3    | 1.4    | 0.9    | 1.0    |
| 47.5   | 57.2   | 40.9   | 45.0   | 50.8   | 55.3   | 49.3   | 55.9   | 59.5   |
| 18.6   | 15.8   | 6.0    | 11.9   | 13.7   | 13.0   | 5.2    | 9.9    | 16.9   |
| 3.4    | 2.5    | 6.0    | 5.5    | 2.0    | 2.7    | 3.1    | 2.3    | 3.1    |
| 3.3    | 6.7    | 1.6    | 9.3    | 10.0   | 7.3    | 5.4    | 1.6    | 4.6    |
| 150.3  | 180.4  | 184.9  | 232.9  | 167.3  | 215.9  | 108.9  | 126.9  | 132.8  |
| 24.1   | 26.2   | 6.2    | 36.8   | 20.3   | 17.8   | 19.5   | 13.4   | 10.5   |
| 34.0   | 46.8   | 39.8   | 49.7   | 46.4   | 47.9   | 31.7   | 31.5   | 37.1   |
| 6.7    | 9.9    | 1.1    | 20.9   | 26.9   | 30.8   | 13.8   | 10.9   | 18.8   |
| 6.4    | 5.9    | 1.9    | 4.5    | 6.9    | 7.0    | 1.7    | 2.4    | 5.4    |
| 12.8   | 13.5   | 7.3    | 13.5   | 10.4   | 15.6   | 9.6    | 5.0    | 14.4   |
| 8.8    | 9.6    | 8.1    | 8.5    | 9.6    | 12.4   | 5.4    | 5.4    | 6.0    |
| 21.0   | 13.4   | 15.3   | 292.6  | 189.5  | 236.5  | 128.4  | 83.8   | 123.0  |
| 806.1  | 1114.6 | 962.0  | 363.1  | 328.5  | 329.3  | 370.7  | 433.7  | 461.3  |
| 581.2  | 525.4  | 292.0  | 1086.7 | 649.8  | 766.6  | 577.0  | 436.4  | 498.5  |
| 7.0    | 7.9    | 3.6    | 6.3    | 6.1    | 6.1    | 3.7    | 7.4    | 6.8    |
| 8.5    | 12.0   | 9.0    | 27.5   | 15.7   | 30.4   | 10.9   | 11.0   | 9.3    |
| 3.0    | 2.9    | 5.4    | 7.3    | 3.4    | 11.1   | 3.4    | 11.5   | 3.5    |
| 5.1    | 1.6    | 3.4    | 4.7    | 3.9    | 3.4    | 4.2    | 3.9    | 1.8    |
| 25.9   | 20.9   | 17.2   | 70.4   | 50.3   | 46.1   | 39.6   | 41.8   | 24.5   |
| 63.4   | 106.2  | 90.2   | 67.3   | 73.7   | 93.1   | 81.2   | 137.7  | 118.8  |
| 1921.4 | 2036.9 | 1097.4 | 2586.5 | 2069.1 | 1855.4 | 2339.8 | 1858.8 | 2307.7 |
| 53.5   | 70.7   | 72.0   | 23.8   | 31.3   | 44.9   | 39.6   | 41.0   | 50.4   |
| 7.4    | 21.7   | 13.2   | 6.1    | 2.8    | 11.2   | 5.2    | 2.5    | 4.0    |
| 17.7   | 14.1   | 11.3   | 27.0   | 31.0   | 21.7   | 11.3   | 20.5   | 24.5   |
| 1.9    | 3.6    | 2.9    | 6.9    | 5.7    | 10.3   | 3.7    | 0.5    | 1.0    |

|        |        |        |        |        |        |        |        |        |
|--------|--------|--------|--------|--------|--------|--------|--------|--------|
| 76.0   | 138.6  | 171.6  | 1066.3 | 867.9  | 916.7  | 555.6  | 619.5  | 674.6  |
| 12.9   | 15.4   | 12.6   | 16.8   | 18.2   | 16.6   | 9.7    | 8.9    | 5.3    |
| 5.2    | 9.8    | 1.4    | 12.8   | 14.3   | 15.8   | 2.0    | 9.2    | 11.3   |
| 27.6   | 41.1   | 11.4   | 48.2   | 24.1   | 31.8   | 11.6   | 22.5   | 5.7    |
| 7.7    | 7.0    | 6.7    | 7.1    | 10.9   | 15.7   | 6.3    | 7.9    | 8.1    |
| 1.3    | 0.9    | 1.0    | 1.8    | 1.7    | 4.5    | 0.6    | 1.1    | 0.7    |
| 7.1    | 9.1    | 9.0    | 13.5   | 10.6   | 11.6   | 9.8    | 11.9   | 9.9    |
| 408.8  | 507.5  | 340.6  | 276.1  | 210.9  | 278.3  | 179.9  | 188.9  | 218.0  |
| 4.3    | 6.4    | 2.9    | 9.5    | 9.2    | 11.0   | 6.4    | 2.7    | 5.0    |
| 292.4  | 338.1  | 221.0  | 252.9  | 210.3  | 241.3  | 262.8  | 258.0  | 268.7  |
| 13.8   | 6.6    | 3.4    | 6.8    | 7.4    | 5.9    | 8.1    | 1.7    | 6.7    |
| 5.9    | 7.6    | 1.5    | 17.7   | 15.7   | 7.7    | 7.4    | 8.0    | 7.1    |
| 9.9    | 11.8   | 4.7    | 22.1   | 18.8   | 18.3   | 13.8   | 7.7    | 10.7   |
| 32.4   | 31.1   | 28.2   | 47.4   | 33.9   | 31.4   | 23.9   | 29.4   | 23.1   |
| 1.7    | 2.6    | 1.5    | 7.8    | 8.1    | 5.2    | 2.0    | 1.8    | 3.0    |
| 4.1    | 7.6    | 7.5    | 8.1    | 11.8   | 2.2    | 4.8    | 1.8    | 4.2    |
| 1.4    | 2.2    | 2.0    | 4.6    | 5.6    | 4.1    | 5.4    | 7.3    | 2.7    |
| 1.6    | 9.0    | 2.3    | 5.8    | 13.8   | 4.7    | 7.9    | 4.1    | 6.9    |
| 3.4    | 7.2    | 2.0    | 2.4    | 3.8    | 2.2    | 1.8    | 1.0    | 1.9    |
| 2.3    | 6.0    | 2.7    | 6.3    | 3.9    | 4.9    | 3.5    | 2.6    | 2.8    |
| 4.1    | 4.2    | 13.5   | 10.7   | 7.6    | 19.1   | 9.0    | 8.0    | 5.6    |
| 5.0    | 14.6   | 8.8    | 450.7  | 440.0  | 534.6  | 210.0  | 241.6  | 316.4  |
| 46.9   | 62.7   | 57.2   | 31.3   | 42.6   | 48.5   | 31.7   | 62.5   | 49.8   |
| 22.1   | 15.3   | 6.4    | 23.3   | 17.7   | 19.6   | 11.7   | 15.5   | 11.3   |
| 28.6   | 12.8   | 18.8   | 6.9    | 21.2   | 11.3   | 9.6    | 13.3   | 10.6   |
| 12.3   | 10.0   | 5.3    | 32.9   | 10.2   | 12.1   | 11.3   | 11.7   | 13.1   |
| 8.8    | 7.2    | 8.3    | 18.3   | 14.2   | 19.9   | 5.4    | 8.6    | 11.7   |
| 44.3   | 60.6   | 58.3   | 249.8  | 200.3  | 241.5  | 150.6  | 148.4  | 168.7  |
| 8.5    | 16.2   | 11.1   | 14.6   | 13.6   | 11.4   | 18.8   | 23.1   | 13.9   |
| 3.6    | 8.1    | 4.0    | 14.2   | 11.6   | 23.4   | 4.8    | 3.4    | 0.9    |
| 3.2    | 8.1    | 2.6    | 12.1   | 10.3   | 10.9   | 3.9    | 3.6    | 2.7    |
| 13.6   | 19.6   | 13.4   | 7.0    | 10.2   | 14.3   | 8.5    | 6.6    | 6.7    |
| 11.8   | 6.7    | 9.3    | 28.5   | 18.0   | 30.7   | 8.0    | 8.9    | 5.7    |
| 15.5   | 26.2   | 8.8    | 10.0   | 11.3   | 7.9    | 10.4   | 7.7    | 2.0    |
| 14.8   | 20.8   | 6.1    | 17.9   | 15.3   | 20.8   | 3.8    | 16.5   | 9.4    |
| 80.9   | 163.8  | 113.8  | 46.2   | 20.7   | 28.7   | 55.6   | 59.3   | 53.0   |
| 26.6   | 23.3   | 15.8   | 21.3   | 31.4   | 24.6   | 27.5   | 39.8   | 34.5   |
| 56.3   | 62.7   | 55.3   | 18.0   | 15.4   | 17.4   | 26.2   | 14.3   | 17.8   |
| 6341.7 | 7819.6 | 6369.4 | 4445.5 | 4052.9 | 3942.2 | 4133.5 | 4493.6 | 4628.8 |
| 2.8    | 5.1    | 1.6    | 3.9    | 2.3    | 3.2    | 5.3    | 1.7    | 1.1    |
| 23.5   | 24.3   | 19.2   | 33.3   | 36.7   | 32.0   | 15.6   | 27.0   | 22.5   |
| 3.9    | 5.4    | 4.2    | 2.7    | 6.1    | 3.2    | 2.8    | 2.5    | 2.2    |
| 2.5    | 4.3    | 2.4    | 5.6    | 4.2    | 3.3    | 1.5    | 2.3    | 2.6    |
| 8.2    | 10.7   | 5.9    | 26.0   | 30.9   | 7.6    | 17.1   | 15.3   | 21.8   |
| 15.3   | 13.0   | 10.3   | 7.9    | 13.6   | 11.6   | 16.6   | 10.7   | 14.7   |
| 5.3    | 3.1    | 3.5    | 4.6    | 4.2    | 7.6    | 1.3    | 1.9    | 2.6    |
| 0.5    | 4.4    | 1.9    | 3.9    | 7.0    | 8.3    | 0.7    | 3.3    | 2.0    |
| 229.8  | 251.9  | 166.6  | 151.0  | 135.1  | 149.2  | 118.3  | 107.4  | 119.3  |
| 72.8   | 93.1   | 101.1  | 56.2   | 41.4   | 46.5   | 48.1   | 58.4   | 59.7   |
| 70.4   | 93.4   | 91.1   | 20.4   | 15.9   | 22.9   | 17.9   | 10.6   | 19.9   |
| 12.8   | 4.3    | 1.9    | 18.1   | 24.4   | 15.7   | 1.8    | 1.3    | 9.8    |
| 13.6   | 25.2   | 17.4   | 248.4  | 211.2  | 329.9  | 93.6   | 131.9  | 152.0  |
| 3.7    | 5.3    | 4.3    | 5.4    | 12.5   | 3.8    | 1.5    | 3.9    | 3.4    |

|       |        |       |       |       |       |       |       |       |
|-------|--------|-------|-------|-------|-------|-------|-------|-------|
| 14.1  | 14.4   | 14.5  | 21.0  | 16.8  | 9.4   | 8.2   | 7.5   | 11.5  |
| 6.8   | 7.7    | 3.2   | 12.0  | 6.6   | 9.2   | 12.9  | 1.8   | 5.8   |
| 1.7   | 9.9    | 1.1   | 3.8   | 6.5   | 6.6   | 2.2   | 3.1   | 8.6   |
| 36.1  | 25.8   | 22.3  | 34.4  | 16.6  | 14.5  | 3.8   | 8.4   | 4.1   |
| 132.1 | 117.2  | 87.5  | 16.3  | 17.1  | 19.7  | 20.0  | 19.6  | 19.7  |
| 2.6   | 6.7    | 3.4   | 6.6   | 4.4   | 5.2   | 6.7   | 2.8   | 2.8   |
| 3.1   | 3.1    | 3.0   | 15.1  | 16.5  | 16.5  | 4.9   | 3.5   | 7.5   |
| 41.7  | 41.0   | 40.1  | 45.7  | 56.0  | 49.5  | 31.8  | 35.7  | 41.9  |
| 6.1   | 0.9    | 6.9   | 2.0   | 7.9   | 2.7   | 2.9   | 1.3   | 1.1   |
| 0.4   | 3.0    | 1.4   | 8.2   | 4.3   | 4.8   | 1.3   | 1.7   | 1.2   |
| 24.7  | 26.7   | 21.5  | 36.8  | 38.1  | 46.5  | 19.5  | 16.5  | 27.1  |
| 27.0  | 41.8   | 32.3  | 44.5  | 42.0  | 42.6  | 18.5  | 9.4   | 7.4   |
| 8.7   | 7.8    | 9.2   | 18.3  | 16.3  | 12.4  | 11.0  | 7.3   | 9.5   |
| 15.8  | 6.9    | 8.3   | 4.2   | 5.5   | 15.8  | 9.1   | 6.6   | 7.2   |
| 16.3  | 16.8   | 15.3  | 31.9  | 29.7  | 31.6  | 20.6  | 14.0  | 19.3  |
| 6.2   | 6.1    | 3.8   | 8.7   | 12.8  | 10.8  | 4.3   | 6.7   | 1.1   |
| 12.4  | 13.2   | 11.3  | 17.5  | 22.5  | 28.7  | 7.6   | 14.3  | 14.3  |
| 10.6  | 18.0   | 8.8   | 23.2  | 18.3  | 21.8  | 10.1  | 5.8   | 11.6  |
| 188.2 | 143.8  | 140.1 | 42.8  | 58.2  | 52.5  | 16.1  | 31.1  | 28.3  |
| 2.0   | 6.4    | 3.6   | 12.1  | 5.7   | 9.6   | 2.7   | 2.8   | 1.8   |
| 14.6  | 18.8   | 12.6  | 64.1  | 22.3  | 23.8  | 7.5   | 11.2  | 10.3  |
| 5.6   | 10.0   | 1.6   | 6.2   | 9.3   | 8.7   | 9.1   | 5.6   | 12.0  |
| 8.5   | 14.4   | 10.4  | 27.7  | 20.4  | 16.6  | 9.1   | 9.5   | 12.4  |
| 3.2   | 13.3   | 6.6   | 28.8  | 17.9  | 20.5  | 8.9   | 13.7  | 10.4  |
| 5.7   | 5.4    | 3.0   | 8.6   | 10.9  | 17.4  | 7.8   | 6.9   | 16.5  |
| 14.2  | 26.2   | 14.2  | 13.7  | 14.4  | 12.5  | 9.3   | 10.6  | 8.2   |
| 15.9  | 13.5   | 9.8   | 25.6  | 18.8  | 18.5  | 13.5  | 11.3  | 16.7  |
| 21.6  | 15.7   | 18.1  | 29.0  | 13.2  | 11.6  | 16.1  | 17.2  | 18.0  |
| 20.5  | 16.5   | 5.9   | 16.1  | 23.3  | 24.0  | 15.8  | 9.1   | 16.6  |
| 40.8  | 35.5   | 29.7  | 581.4 | 435.9 | 497.1 | 300.1 | 224.8 | 307.3 |
| 9.5   | 14.3   | 8.5   | 19.7  | 11.4  | 17.2  | 11.0  | 9.0   | 11.3  |
| 1.4   | 9.3    | 1.2   | 4.1   | 5.1   | 4.8   | 1.6   | 5.8   | 1.3   |
| 1.2   | 5.1    | 0.8   | 14.7  | 13.6  | 12.7  | 7.5   | 11.4  | 6.1   |
| 6.2   | 3.9    | 6.2   | 10.3  | 15.1  | 13.0  | 6.3   | 4.3   | 2.8   |
| 3.8   | 3.5    | 1.4   | 3.9   | 6.0   | 5.0   | 2.4   | 0.9   | 1.1   |
| 89.7  | 107.7  | 77.0  | 188.2 | 168.2 | 180.7 | 98.3  | 108.8 | 126.4 |
| 2.3   | 13.3   | 5.4   | 18.1  | 13.2  | 10.9  | 6.3   | 8.2   | 11.0  |
| 29.5  | 21.6   | 21.2  | 22.2  | 14.9  | 25.5  | 21.8  | 23.2  | 21.7  |
| 3.2   | 2.7    | 2.0   | 4.3   | 3.6   | 5.3   | 7.0   | 1.6   | 2.9   |
| 9.7   | 4.3    | 3.7   | 6.2   | 10.2  | 13.8  | 4.8   | 1.6   | 2.0   |
| 2.2   | 7.0    | 2.7   | 9.8   | 7.6   | 10.7  | 3.9   | 2.9   | 5.2   |
| 4.4   | 1.6    | 1.8   | 13.2  | 8.0   | 8.1   | 4.7   | 2.4   | 4.9   |
| 6.7   | 6.5    | 4.8   | 2.1   | 2.8   | 2.5   | 4.8   | 0.8   | 4.5   |
| 21.7  | 19.2   | 15.6  | 22.1  | 22.7  | 24.9  | 16.5  | 15.8  | 25.1  |
| 17.2  | 23.8   | 17.6  | 25.2  | 15.7  | 13.3  | 14.8  | 11.5  | 2.1   |
| 29.5  | 36.0   | 22.1  | 47.0  | 32.7  | 45.9  | 12.9  | 11.8  | 22.4  |
| 835.4 | 1012.2 | 858.2 | 672.9 | 608.3 | 604.2 | 525.7 | 673.8 | 681.6 |
| 8.1   | 2.9    | 4.9   | 8.7   | 7.4   | 5.0   | 4.6   | 1.7   | 2.1   |
| 93.9  | 92.3   | 66.6  | 13.3  | 8.8   | 9.8   | 14.5  | 15.1  | 16.9  |
| 31.2  | 25.9   | 20.1  | 26.3  | 37.8  | 24.4  | 29.5  | 11.5  | 25.8  |
| 47.6  | 53.0   | 31.0  | 34.9  | 32.3  | 36.6  | 23.3  | 25.2  | 17.1  |
| 13.2  | 9.7    | 6.1   | 9.5   | 12.8  | 12.3  | 1.3   | 5.9   | 0.8   |
| 9.2   | 7.5    | 13.7  | 10.8  | 18.6  | 6.9   | 13.4  | 14.4  | 12.8  |



|       |       |       |       |       |       |       |       |       |
|-------|-------|-------|-------|-------|-------|-------|-------|-------|
| 50.9  | 89.0  | 111.5 | 22.4  | 20.3  | 27.3  | 40.6  | 39.7  | 46.4  |
| 8.0   | 10.2  | 10.3  | 8.0   | 15.6  | 6.7   | 3.7   | 4.7   | 7.7   |
| 8.4   | 7.5   | 4.0   | 10.4  | 10.8  | 6.7   | 7.1   | 6.3   | 1.6   |
| 8.9   | 6.8   | 5.5   | 4.0   | 13.8  | 12.8  | 5.5   | 10.2  | 5.2   |
| 22.1  | 32.9  | 28.1  | 34.0  | 17.8  | 21.1  | 32.1  | 10.5  | 23.0  |
| 10.2  | 7.2   | 5.5   | 19.3  | 17.6  | 13.7  | 6.0   | 6.5   | 6.3   |
| 24.1  | 24.3  | 24.3  | 13.4  | 8.3   | 9.7   | 18.7  | 15.4  | 11.4  |
| 3.8   | 7.1   | 7.3   | 14.5  | 9.2   | 10.7  | 7.8   | 7.4   | 10.3  |
| 26.9  | 21.5  | 6.4   | 21.4  | 22.4  | 24.6  | 16.2  | 12.9  | 12.4  |
| 14.1  | 12.6  | 13.8  | 11.3  | 10.5  | 7.6   | 7.5   | 5.1   | 5.7   |
| 5.1   | 4.9   | 7.3   | 15.1  | 5.2   | 7.7   | 10.7  | 9.5   | 9.8   |
| 8.0   | 11.1  | 9.1   | 16.1  | 8.6   | 27.0  | 12.7  | 6.1   | 8.1   |
| 255.4 | 264.1 | 216.4 | 283.3 | 225.9 | 240.1 | 139.8 | 142.3 | 165.7 |
| 9.7   | 10.3  | 2.1   | 11.9  | 18.5  | 20.1  | 14.4  | 10.2  | 9.7   |
| 660.7 | 753.6 | 397.1 | 258.6 | 186.9 | 192.1 | 186.6 | 122.5 | 180.3 |
| 14.0  | 13.4  | 11.7  | 15.5  | 4.4   | 21.5  | 21.8  | 10.9  | 17.7  |
| 20.2  | 25.8  | 10.4  | 26.9  | 8.5   | 10.5  | 12.7  | 8.2   | 4.7   |
| 3.9   | 12.6  | 12.3  | 18.5  | 5.5   | 7.2   | 4.2   | 9.9   | 2.9   |
| 80.0  | 124.4 | 91.8  | 123.7 | 137.2 | 136.1 | 47.4  | 52.8  | 65.8  |
| 146.2 | 215.3 | 189.7 | 30.6  | 18.1  | 31.0  | 26.1  | 27.4  | 33.5  |
| 3.9   | 4.5   | 9.2   | 7.3   | 1.8   | 6.1   | 1.7   | 1.5   | 1.8   |
| 0.9   | 2.3   | 1.4   | 5.5   | 3.5   | 6.2   | 1.9   | 2.8   | 1.3   |
| 118.8 | 122.3 | 91.4  | 175.8 | 163.1 | 175.7 | 157.7 | 255.4 | 211.2 |
| 15.4  | 15.7  | 4.3   | 8.2   | 22.0  | 14.4  | 11.9  | 4.0   | 10.0  |
| 9.8   | 0.9   | 3.7   | 1.2   | 4.6   | 12.6  | 2.5   | 3.9   | 0.9   |
| 20.5  | 17.7  | 9.2   | 15.2  | 7.5   | 20.4  | 8.8   | 5.9   | 11.1  |
| 2.1   | 6.8   | 1.0   | 3.0   | 4.5   | 9.3   | 2.7   | 4.5   | 1.7   |
| 51.4  | 52.0  | 30.3  | 17.5  | 27.6  | 27.5  | 17.4  | 14.8  | 5.8   |
| 12.7  | 19.3  | 10.8  | 29.4  | 25.5  | 26.0  | 15.8  | 18.2  | 19.1  |
| 12.1  | 8.1   | 5.3   | 34.1  | 30.1  | 19.9  | 26.3  | 24.6  | 19.7  |
| 20.3  | 26.1  | 18.9  | 14.7  | 24.3  | 29.1  | 40.8  | 39.8  | 47.5  |
| 4.7   | 2.9   | 6.8   | 11.2  | 13.0  | 7.3   | 5.3   | 2.0   | 3.8   |
| 145.3 | 130.9 | 129.6 | 50.7  | 39.3  | 55.5  | 46.7  | 56.9  | 69.3  |
| 4.1   | 1.2   | 2.6   | 2.4   | 4.6   | 7.8   | 1.8   | 2.9   | 1.5   |
| 6.9   | 6.0   | 15.9  | 8.4   | 2.9   | 11.5  | 2.8   | 9.4   | 4.7   |
| 43.5  | 29.6  | 13.6  | 83.9  | 74.0  | 87.7  | 31.2  | 32.3  | 53.9  |
| 23.3  | 13.5  | 17.7  | 13.4  | 21.9  | 11.9  | 18.6  | 6.0   | 3.8   |
| 1.6   | 4.6   | 2.2   | 14.5  | 10.1  | 7.3   | 0.9   | 6.0   | 4.2   |
| 3.0   | 1.2   | 0.8   | 2.2   | 4.4   | 2.1   | 3.1   | 2.0   | 0.4   |
| 96.4  | 119.8 | 90.7  | 100.5 | 79.6  | 91.9  | 121.9 | 111.2 | 135.8 |
| 177.0 | 203.5 | 176.2 | 164.6 | 112.8 | 116.8 | 156.2 | 165.8 | 162.2 |
| 7.1   | 18.0  | 6.4   | 7.1   | 9.1   | 9.2   | 5.3   | 6.7   | 2.0   |
| 69.9  | 93.9  | 33.9  | 13.4  | 10.7  | 13.8  | 9.5   | 5.3   | 2.2   |
| 2.5   | 2.3   | 2.2   | 5.7   | 3.8   | 6.7   | 2.4   | 1.7   | 2.7   |
| 11.4  | 17.7  | 9.3   | 25.3  | 14.9  | 10.6  | 9.8   | 5.5   | 5.8   |
| 294.4 | 396.1 | 340.1 | 78.1  | 61.9  | 71.7  | 75.9  | 88.1  | 79.5  |
| 0.5   | 0.4   | 0.4   | 1.7   | 1.7   | 1.7   | 1.8   | 0.7   | 0.7   |
| 18.8  | 34.9  | 29.2  | 22.9  | 26.6  | 29.6  | 16.2  | 21.5  | 23.0  |
| 4.8   | 2.1   | 5.4   | 7.3   | 10.6  | 11.1  | 2.9   | 6.9   | 7.0   |
| 2.7   | 1.4   | 0.7   | 2.3   | 5.2   | 4.3   | 1.6   | 0.8   | 0.4   |
| 6.6   | 3.1   | 3.4   | 6.4   | 6.9   | 9.5   | 4.5   | 5.2   | 5.7   |
| 163.8 | 184.1 | 121.3 | 144.0 | 107.9 | 118.8 | 72.9  | 63.4  | 71.0  |
| 5.8   | 4.2   | 0.9   | 39.9  | 19.2  | 17.0  | 9.9   | 11.2  | 14.4  |

|        |        |        |        |        |        |        |        |        |
|--------|--------|--------|--------|--------|--------|--------|--------|--------|
| 4.2    | 5.5    | 4.1    | 15.6   | 16.8   | 5.7    | 4.4    | 5.6    | 5.1    |
| 191.9  | 330.5  | 325.5  | 54.9   | 57.9   | 63.9   | 20.4   | 44.3   | 47.4   |
| 23.6   | 35.9   | 26.7   | 35.1   | 24.3   | 36.0   | 24.3   | 30.6   | 23.0   |
| 982.2  | 1155.8 | 680.5  | 544.8  | 469.4  | 465.9  | 471.9  | 313.0  | 446.8  |
| 196.9  | 207.0  | 129.5  | 46.5   | 38.3   | 50.2   | 40.2   | 41.9   | 38.1   |
| 3.4    | 2.2    | 2.6    | 9.8    | 4.7    | 12.6   | 3.2    | 1.7    | 1.8    |
| 13.0   | 11.4   | 15.1   | 36.0   | 28.4   | 40.9   | 25.3   | 16.6   | 25.2   |
| 7983.9 | 8503.1 | 7210.6 | 4043.9 | 3559.3 | 3679.0 | 3853.8 | 3662.8 | 3892.1 |
| 16.3   | 23.3   | 13.3   | 10.7   | 13.7   | 8.8    | 5.0    | 2.0    | 1.8    |
| 101.5  | 146.2  | 105.4  | 86.6   | 95.0   | 89.6   | 90.6   | 107.2  | 113.0  |
| 99.8   | 126.2  | 99.4   | 3.9    | 4.3    | 3.0    | 8.9    | 3.1    | 11.2   |
| 3.8    | 8.5    | 8.8    | 26.5   | 28.5   | 16.8   | 10.8   | 3.4    | 11.0   |
| 3.2    | 4.2    | 5.2    | 8.0    | 14.0   | 10.7   | 2.0    | 2.1    | 3.1    |
| 1.0    | 7.7    | 4.2    | 5.9    | 5.5    | 10.4   | 1.4    | 0.9    | 2.0    |
| 9.7    | 20.8   | 15.2   | 24.7   | 24.7   | 25.7   | 19.2   | 18.0   | 23.2   |
| 5.6    | 7.7    | 3.2    | 11.2   | 4.2    | 20.1   | 6.8    | 9.4    | 2.0    |
| 7.8    | 17.5   | 9.1    | 2.3    | 1.5    | 2.7    | 1.3    | 1.0    | 1.0    |
| 2.4    | 0.1    | 0.2    | 8.9    | 7.6    | 0.9    | 1.7    | 0.4    | 2.0    |
| 7521.1 | 8282.0 | 7683.6 | 7992.4 | 7596.5 | 8669.5 | 4050.2 | 4597.0 | 4849.8 |
| 2.6    | 1.8    | 1.3    | 4.1    | 3.6    | 2.2    | 7.1    | 5.5    | 5.3    |
| 4.7    | 0.7    | 1.8    | 2.4    | 6.2    | 3.4    | 0.7    | 0.5    | 0.6    |
| 61.4   | 91.4   | 61.0   | 26.3   | 17.1   | 17.7   | 15.5   | 14.3   | 14.7   |
| 4.1    | 5.4    | 5.2    | 3.5    | 4.4    | 2.7    | 2.0    | 2.1    | 2.3    |
| 26.8   | 20.4   | 15.0   | 13.1   | 11.7   | 19.3   | 6.0    | 4.9    | 2.8    |
| 2.4    | 1.8    | 0.9    | 7.3    | 9.1    | 6.7    | 2.2    | 2.0    | 1.7    |
| 10.5   | 13.7   | 9.8    | 6.9    | 6.8    | 3.2    | 1.3    | 1.6    | 1.3    |
| 5.6    | 1.8    | 7.2    | 14.8   | 23.8   | 30.3   | 9.9    | 7.0    | 7.1    |
| 4.8    | 5.7    | 7.4    | 19.7   | 7.1    | 11.3   | 8.5    | 7.1    | 8.1    |
| 15.5   | 11.2   | 7.0    | 13.6   | 12.5   | 11.1   | 9.8    | 6.4    | 8.5    |
| 3.0    | 4.9    | 4.6    | 14.6   | 15.8   | 24.9   | 7.2    | 2.9    | 5.9    |
| 19.6   | 25.0   | 15.7   | 12.4   | 17.6   | 26.1   | 20.0   | 19.2   | 23.8   |
| 11.1   | 11.8   | 5.3    | 16.7   | 9.5    | 6.9    | 10.6   | 4.7    | 8.5    |
| 69.6   | 97.3   | 38.6   | 29.1   | 22.0   | 30.1   | 14.8   | 2.9    | 24.9   |
| 399.8  | 430.0  | 327.7  | 271.4  | 221.6  | 226.5  | 165.9  | 172.3  | 165.9  |
| 11.7   | 18.7   | 12.1   | 22.5   | 14.2   | 16.1   | 11.4   | 6.4    | 5.2    |
| 36.7   | 53.8   | 35.9   | 66.0   | 46.0   | 57.4   | 35.7   | 35.6   | 46.5   |
| 2.8    | 1.5    | 1.7    | 2.0    | 1.0    | 3.3    | 0.8    | 0.4    | 0.8    |
| 196.2  | 257.0  | 182.3  | 168.0  | 152.7  | 174.1  | 87.3   | 84.6   | 84.2   |
| 262.5  | 256.1  | 166.7  | 198.8  | 163.5  | 164.5  | 131.1  | 121.1  | 137.8  |
| 161.9  | 227.9  | 108.1  | 112.8  | 122.1  | 139.2  | 130.7  | 128.6  | 134.9  |
| 31.5   | 30.0   | 14.4   | 23.8   | 21.5   | 17.7   | 14.6   | 19.5   | 20.9   |
| 3.4    | 5.1    | 7.6    | 5.9    | 2.9    | 12.0   | 4.0    | 3.8    | 3.9    |
| 7.2    | 11.8   | 9.3    | 15.2   | 20.0   | 17.2   | 11.9   | 7.1    | 15.2   |
| 2.0    | 7.1    | 8.7    | 16.0   | 11.5   | 5.4    | 1.4    | 2.4    | 1.3    |
| 18.4   | 20.7   | 6.8    | 4.4    | 6.4    | 11.8   | 28.1   | 24.8   | 30.6   |
| 23.3   | 46.5   | 40.5   | 19.1   | 18.8   | 24.2   | 35.7   | 38.1   | 31.8   |
| 57.2   | 50.6   | 44.6   | 14.7   | 19.3   | 14.0   | 29.2   | 18.6   | 34.4   |
| 7.1    | 14.7   | 15.6   | 7.2    | 9.1    | 10.4   | 9.0    | 11.2   | 11.7   |
| 6.9    | 5.0    | 2.6    | 4.8    | 12.7   | 8.3    | 3.6    | 2.4    | 6.2    |
| 607.7  | 702.6  | 501.5  | 330.4  | 262.4  | 334.1  | 303.7  | 327.3  | 348.6  |
| 20.8   | 18.8   | 17.8   | 15.4   | 12.1   | 14.3   | 18.5   | 15.3   | 12.3   |
| 2.8    | 2.8    | 2.6    | 3.4    | 3.2    | 7.0    | 1.3    | 1.3    | 1.7    |
| 176.5  | 262.6  | 235.8  | 41.3   | 22.2   | 28.4   | 41.7   | 53.4   | 53.0   |

|        |        |        |       |       |       |       |       |       |
|--------|--------|--------|-------|-------|-------|-------|-------|-------|
| 1.5    | 1.8    | 1.4    | 12.1  | 7.3   | 5.9   | 1.3   | 2.6   | 1.3   |
| 18.1   | 13.0   | 11.2   | 26.7  | 20.4  | 19.2  | 15.9  | 7.2   | 10.8  |
| 1.7    | 1.5    | 1.9    | 1.5   | 2.4   | 3.0   | 0.8   | 1.1   | 1.5   |
| 10.5   | 12.9   | 15.3   | 11.6  | 6.6   | 3.4   | 6.1   | 10.7  | 10.0  |
| 1.9    | 8.0    | 4.2    | 8.6   | 6.8   | 8.4   | 2.8   | 2.8   | 3.8   |
| 1.2    | 2.0    | 2.8    | 8.2   | 13.2  | 2.4   | 3.3   | 1.7   | 2.3   |
| 47.2   | 49.6   | 31.2   | 15.4  | 15.8  | 22.7  | 20.5  | 19.3  | 29.0  |
| 12.2   | 6.7    | 6.8    | 21.8  | 7.9   | 14.2  | 9.0   | 13.0  | 11.3  |
| 6.7    | 16.5   | 11.6   | 13.4  | 10.4  | 5.7   | 10.1  | 8.6   | 8.2   |
| 8.6    | 4.9    | 1.1    | 6.8   | 2.8   | 6.9   | 2.0   | 2.2   | 4.1   |
| 79.0   | 121.5  | 70.8   | 96.0  | 63.7  | 75.2  | 64.0  | 59.6  | 67.9  |
| 13.4   | 17.8   | 13.8   | 22.8  | 26.4  | 39.8  | 17.3  | 16.5  | 20.1  |
| 183.6  | 272.4  | 241.2  | 13.1  | 6.3   | 16.7  | 5.1   | 4.1   | 2.3   |
| 4.6    | 3.0    | 3.9    | 10.2  | 14.2  | 10.7  | 10.8  | 1.6   | 5.4   |
| 13.1   | 16.6   | 7.5    | 20.5  | 20.8  | 19.7  | 12.9  | 14.9  | 11.3  |
| 9.1    | 17.8   | 8.4    | 24.2  | 19.5  | 18.7  | 18.8  | 9.2   | 24.5  |
| 10.7   | 3.3    | 9.7    | 4.7   | 4.6   | 4.7   | 13.9  | 18.2  | 29.3  |
| 1.2    | 2.3    | 0.9    | 2.4   | 1.8   | 2.1   | 1.0   | 0.6   | 1.0   |
| 3.2    | 1.9    | 0.4    | 4.5   | 1.6   | 1.5   | 1.7   | 0.8   | 0.5   |
| 19.7   | 13.4   | 4.0    | 19.0  | 6.9   | 18.4  | 8.5   | 28.5  | 14.5  |
| 5.2    | 10.8   | 8.3    | 41.3  | 29.5  | 27.0  | 8.0   | 8.9   | 10.4  |
| 8.8    | 18.3   | 9.8    | 19.5  | 11.5  | 22.8  | 16.9  | 26.7  | 8.5   |
| 7.8    | 6.7    | 5.1    | 3.3   | 4.7   | 3.1   | 0.6   | 1.2   | 4.7   |
| 9.7    | 12.3   | 10.6   | 27.7  | 16.3  | 11.5  | 10.7  | 11.0  | 8.6   |
| 13.0   | 12.4   | 15.3   | 16.8  | 22.6  | 14.6  | 6.3   | 11.9  | 11.9  |
| 3.0    | 7.2    | 3.0    | 6.7   | 3.4   | 9.6   | 1.9   | 4.2   | 2.6   |
| 2.4    | 7.9    | 2.9    | 31.2  | 22.6  | 20.7  | 2.2   | 3.8   | 4.7   |
| 17.7   | 17.1   | 11.3   | 35.2  | 28.6  | 37.1  | 19.3  | 27.0  | 30.4  |
| 181.2  | 175.5  | 104.8  | 290.9 | 169.6 | 197.9 | 136.9 | 84.1  | 89.6  |
| 0.6    | 5.1    | 2.2    | 4.4   | 8.0   | 2.6   | 3.3   | 1.9   | 6.6   |
| 143.3  | 178.8  | 119.9  | 455.2 | 300.7 | 317.2 | 308.5 | 185.4 | 250.1 |
| 21.8   | 21.7   | 16.6   | 18.8  | 9.1   | 15.1  | 1.9   | 8.4   | 11.4  |
| 6.2    | 3.2    | 2.4    | 6.5   | 7.7   | 8.9   | 0.4   | 3.9   | 3.9   |
| 125.0  | 179.7  | 108.9  | 65.8  | 51.8  | 46.4  | 89.0  | 68.2  | 89.5  |
| 1934.3 | 2577.2 | 2272.2 | 531.7 | 488.0 | 535.8 | 287.1 | 310.8 | 331.1 |
| 345.3  | 395.5  | 227.5  | 2.4   | 1.8   | 1.6   | 1.5   | 2.6   | 3.9   |
| 20.5   | 31.2   | 25.8   | 34.9  | 24.6  | 39.8  | 18.5  | 14.3  | 16.2  |
| 415.0  | 404.7  | 287.3  | 121.6 | 113.6 | 138.4 | 90.5  | 103.9 | 103.1 |
| 158.3  | 195.0  | 154.6  | 99.5  | 97.9  | 124.4 | 57.0  | 67.9  | 73.3  |
| 402.4  | 440.0  | 307.7  | 191.9 | 130.6 | 151.1 | 81.0  | 94.9  | 94.8  |
| 147.3  | 162.0  | 132.3  | 137.4 | 103.3 | 124.8 | 113.8 | 119.9 | 178.7 |
| 2.6    | 2.6    | 6.6    | 4.6   | 5.4   | 9.3   | 3.6   | 4.7   | 1.9   |
| 13.4   | 17.3   | 12.0   | 25.5  | 11.3  | 36.9  | 15.1  | 8.3   | 12.9  |
| 555.2  | 983.9  | 1272.1 | 449.9 | 679.4 | 835.1 | 385.3 | 833.8 | 744.4 |
| 14.5   | 47.5   | 29.9   | 56.7  | 50.0  | 49.1  | 19.9  | 31.4  | 36.0  |
| 25.8   | 24.1   | 18.5   | 22.2  | 13.5  | 15.6  | 16.1  | 16.7  | 27.6  |
| 207.5  | 224.1  | 165.5  | 41.9  | 21.8  | 22.5  | 20.8  | 20.0  | 18.3  |
| 2.1    | 3.6    | 8.2    | 11.4  | 10.5  | 9.6   | 4.6   | 3.2   | 2.9   |
| 9.1    | 5.1    | 3.2    | 17.1  | 21.6  | 19.2  | 6.6   | 5.5   | 11.5  |
| 21.2   | 10.0   | 6.8    | 29.4  | 19.7  | 25.0  | 26.6  | 5.4   | 12.5  |
| 680.2  | 892.4  | 661.7  | 63.4  | 57.3  | 69.2  | 58.9  | 57.1  | 61.9  |
| 47.7   | 38.1   | 31.9   | 18.8  | 16.0  | 10.7  | 7.1   | 4.9   | 7.8   |
| 0.3    | 1.6    | 0.3    | 4.0   | 2.7   | 5.3   | 2.3   | 1.3   | 1.8   |

|        |        |        |       |       |       |       |       |       |
|--------|--------|--------|-------|-------|-------|-------|-------|-------|
| 67.2   | 60.7   | 42.1   | 81.6  | 85.7  | 98.4  | 26.7  | 45.8  | 38.8  |
| 46.2   | 77.1   | 48.3   | 10.1  | 4.7   | 7.4   | 4.1   | 2.8   | 2.9   |
| 7.9    | 4.0    | 1.2    | 4.0   | 3.4   | 9.4   | 1.1   | 2.2   | 1.2   |
| 35.6   | 43.7   | 35.9   | 38.6  | 40.7  | 35.0  | 23.8  | 17.5  | 23.6  |
| 17.4   | 14.2   | 13.5   | 25.5  | 14.5  | 19.2  | 5.5   | 8.5   | 8.0   |
| 12.5   | 3.7    | 3.8    | 12.1  | 5.9   | 9.1   | 4.4   | 4.5   | 9.2   |
| 4.5    | 8.0    | 3.1    | 3.9   | 10.8  | 14.6  | 7.5   | 1.4   | 1.8   |
| 14.5   | 15.7   | 11.1   | 16.6  | 11.8  | 15.7  | 12.9  | 13.8  | 13.4  |
| 2.5    | 2.4    | 2.7    | 2.5   | 2.7   | 3.1   | 2.0   | 1.6   | 1.6   |
| 184.1  | 526.8  | 513.4  | 707.2 | 595.4 | 646.1 | 680.5 | 794.1 | 806.8 |
| 35.5   | 26.9   | 26.6   | 98.6  | 91.5  | 96.6  | 60.9  | 42.1  | 62.7  |
| 13.1   | 16.8   | 12.7   | 29.5  | 20.2  | 43.2  | 6.6   | 7.9   | 8.5   |
| 8.7    | 7.9    | 7.7    | 7.2   | 8.8   | 15.9  | 5.5   | 11.4  | 10.5  |
| 303.7  | 437.4  | 387.4  | 522.9 | 445.3 | 531.9 | 420.4 | 489.8 | 510.3 |
| 6.1    | 9.3    | 8.7    | 12.8  | 17.5  | 19.1  | 9.4   | 13.5  | 12.9  |
| 2.1    | 15.1   | 5.9    | 8.0   | 8.5   | 6.0   | 13.3  | 3.0   | 2.5   |
| 5.1    | 6.5    | 10.2   | 8.7   | 8.1   | 9.5   | 4.3   | 1.4   | 6.6   |
| 7.2    | 5.6    | 3.5    | 8.8   | 4.3   | 6.7   | 4.1   | 2.8   | 3.7   |
| 13.4   | 13.6   | 17.9   | 16.8  | 1.7   | 9.4   | 9.3   | 11.4  | 8.4   |
| 7.8    | 6.4    | 6.4    | 8.8   | 3.4   | 13.3  | 9.4   | 3.8   | 3.3   |
| 100.9  | 105.6  | 102.6  | 142.6 | 101.0 | 120.0 | 72.3  | 89.6  | 81.5  |
| 10.5   | 10.9   | 8.8    | 21.6  | 20.2  | 12.9  | 2.3   | 11.7  | 8.7   |
| 9.0    | 3.6    | 6.1    | 11.4  | 4.1   | 6.6   | 1.3   | 2.2   | 3.5   |
| 120.9  | 109.6  | 91.2   | 125.2 | 82.6  | 116.6 | 83.4  | 64.5  | 83.1  |
| 13.1   | 8.5    | 6.3    | 17.3  | 20.0  | 14.7  | 10.2  | 14.7  | 10.3  |
| 11.6   | 6.1    | 2.8    | 15.6  | 8.7   | 8.9   | 17.2  | 11.8  | 19.3  |
| 10.8   | 22.8   | 11.1   | 17.2  | 7.4   | 12.4  | 4.5   | 7.6   | 13.3  |
| 14.3   | 13.6   | 4.2    | 8.5   | 8.4   | 9.9   | 6.4   | 4.6   | 3.1   |
| 11.0   | 4.8    | 2.5    | 17.8  | 7.5   | 17.1  | 9.4   | 3.7   | 4.0   |
| 54.8   | 85.6   | 96.0   | 168.1 | 179.2 | 211.6 | 112.5 | 149.2 | 138.5 |
| 13.4   | 18.4   | 13.8   | 45.2  | 29.0  | 36.4  | 21.3  | 34.8  | 26.8  |
| 14.7   | 10.2   | 8.6    | 14.6  | 20.9  | 25.6  | 14.0  | 7.1   | 15.3  |
| 5.4    | 11.8   | 11.1   | 22.5  | 23.3  | 22.0  | 35.8  | 33.8  | 41.3  |
| 10.4   | 8.3    | 7.5    | 8.1   | 9.9   | 8.1   | 0.7   | 5.7   | 5.5   |
| 10.8   | 10.4   | 9.2    | 9.4   | 4.9   | 11.3  | 6.9   | 10.5  | 1.7   |
| 7.6    | 5.4    | 3.2    | 17.7  | 19.2  | 14.8  | 9.9   | 7.6   | 6.9   |
| 2.4    | 0.3    | 0.2    | 4.1   | 2.7   | 2.9   | 2.1   | 1.0   | 0.8   |
| 1461.9 | 1552.3 | 928.2  | 650.7 | 526.6 | 524.4 | 442.7 | 320.6 | 409.4 |
| 4.7    | 5.3    | 2.2    | 9.2   | 4.3   | 5.1   | 3.5   | 2.8   | 1.6   |
| 29.0   | 18.7   | 25.1   | 21.2  | 9.9   | 19.7  | 18.8  | 12.0  | 14.1  |
| 58.5   | 70.7   | 48.4   | 38.2  | 31.9  | 38.2  | 39.3  | 41.5  | 48.5  |
| 844.4  | 1520.9 | 1424.3 | 348.2 | 367.8 | 429.3 | 302.7 | 376.4 | 370.1 |
| 1.5    | 7.5    | 0.8    | 5.7   | 12.7  | 2.8   | 1.1   | 5.6   | 2.1   |
| 8.7    | 7.1    | 13.1   | 19.4  | 17.3  | 15.3  | 13.3  | 12.7  | 9.2   |
| 780.1  | 765.2  | 500.2  | 488.9 | 345.5 | 390.6 | 309.2 | 331.8 | 348.1 |
| 6.4    | 9.4    | 5.9    | 19.5  | 17.5  | 12.7  | 3.9   | 8.5   | 5.1   |
| 4.9    | 4.5    | 1.2    | 6.0   | 6.1   | 11.9  | 0.6   | 1.8   | 2.3   |
| 1.6    | 0.6    | 1.4    | 5.5   | 1.7   | 1.2   | 2.8   | 0.5   | 0.7   |
| 0.6    | 0.7    | 0.7    | 2.7   | 6.4   | 3.0   | 0.9   | 1.6   | 0.8   |
| 370.8  | 442.4  | 323.1  | 47.4  | 37.1  | 50.3  | 61.8  | 75.3  | 76.5  |
| 19.2   | 26.7   | 11.0   | 19.6  | 13.7  | 27.1  | 14.1  | 11.8  | 17.4  |
| 4.9    | 6.4    | 3.6    | 5.2   | 4.5   | 5.5   | 3.8   | 6.3   | 2.5   |
| 6.9    | 10.0   | 7.2    | 8.3   | 9.8   | 7.5   | 2.2   | 9.4   | 3.3   |

|       |       |       |        |       |        |       |       |       |
|-------|-------|-------|--------|-------|--------|-------|-------|-------|
| 2.8   | 1.5   | 5.2   | 4.5    | 6.8   | 3.0    | 2.8   | 4.0   | 2.4   |
| 320.7 | 457.0 | 369.4 | 1041.1 | 915.5 | 1105.7 | 416.9 | 406.2 | 496.4 |
| 9.5   | 9.5   | 5.0   | 25.1   | 11.8  | 7.2    | 5.7   | 1.5   | 3.2   |
| 11.7  | 12.0  | 8.8   | 19.7   | 22.0  | 35.8   | 8.6   | 15.2  | 13.1  |
| 1.7   | 8.0   | 6.0   | 7.9    | 4.5   | 9.8    | 3.0   | 7.9   | 4.6   |
| 11.5  | 14.4  | 10.3  | 16.0   | 8.7   | 11.8   | 9.6   | 12.3  | 14.3  |
| 2.8   | 6.5   | 9.4   | 15.9   | 13.8  | 18.1   | 5.1   | 7.8   | 5.3   |
| 186.7 | 189.2 | 139.4 | 137.6  | 131.8 | 127.5  | 125.2 | 108.9 | 143.4 |
| 19.1  | 23.4  | 18.8  | 23.4   | 15.6  | 25.8   | 15.1  | 26.4  | 12.3  |
| 2.8   | 0.6   | 1.4   | 3.7    | 3.7   | 7.5    | 2.8   | 2.6   | 2.4   |
| 33.4  | 10.9  | 6.8   | 28.7   | 28.0  | 32.2   | 23.4  | 19.4  | 18.2  |
| 27.4  | 35.4  | 24.8  | 29.1   | 20.4  | 25.6   | 18.3  | 11.2  | 20.5  |
| 2.2   | 1.1   | 0.8   | 4.6    | 2.4   | 2.9    | 1.5   | 0.9   | 1.3   |
| 18.8  | 15.6  | 11.9  | 40.4   | 18.0  | 25.2   | 6.1   | 14.6  | 8.1   |
| 9.7   | 8.4   | 4.7   | 15.0   | 8.5   | 26.6   | 10.9  | 5.1   | 9.1   |
| 39.7  | 34.7  | 24.4  | 53.0   | 36.1  | 35.9   | 34.3  | 19.9  | 25.9  |
| 1.7   | 5.0   | 6.9   | 11.5   | 14.8  | 10.3   | 2.9   | 1.4   | 5.3   |
| 6.9   | 9.7   | 6.0   | 8.8    | 9.3   | 11.4   | 8.0   | 5.6   | 10.0  |
| 1.7   | 2.1   | 0.9   | 3.5    | 3.7   | 3.6    | 1.1   | 1.2   | 1.5   |
| 4.4   | 7.6   | 6.2   | 19.0   | 8.5   | 9.0    | 5.2   | 9.4   | 8.2   |
| 0.5   | 0.9   | 1.1   | 2.8    | 4.8   | 4.2    | 2.0   | 3.1   | 6.5   |
| 237.8 | 249.2 | 171.1 | 212.7  | 180.4 | 229.3  | 212.9 | 190.1 | 203.4 |
| 32.3  | 35.0  | 21.5  | 23.6   | 27.6  | 36.3   | 27.7  | 36.6  | 42.7  |
| 2.3   | 1.4   | 0.5   | 3.3    | 3.7   | 2.5    | 1.2   | 1.0   | 0.9   |
| 33.4  | 20.4  | 19.3  | 44.4   | 41.7  | 24.7   | 17.8  | 17.5  | 18.1  |
| 6.5   | 8.9   | 18.0  | 43.6   | 43.7  | 41.5   | 25.8  | 29.3  | 27.8  |
| 2.0   | 8.4   | 2.5   | 8.4    | 5.2   | 17.5   | 2.1   | 1.8   | 2.4   |
| 1.9   | 6.8   | 3.5   | 12.5   | 5.5   | 2.2    | 3.7   | 3.4   | 5.9   |
| 8.7   | 12.1  | 8.5   | 11.9   | 15.7  | 9.7    | 11.8  | 5.9   | 13.0  |
| 9.3   | 11.5  | 8.6   | 18.4   | 27.9  | 28.2   | 10.2  | 9.8   | 1.6   |
| 0.9   | 1.6   | 1.9   | 9.5    | 4.2   | 9.3    | 1.3   | 1.0   | 4.6   |
| 5.7   | 9.5   | 2.3   | 5.2    | 12.0  | 9.3    | 3.9   | 5.4   | 5.3   |
| 0.4   | 2.0   | 0.8   | 1.0    | 3.6   | 1.8    | 0.5   | 0.5   | 0.5   |
| 2.2   | 1.8   | 1.6   | 4.2    | 3.5   | 6.0    | 1.3   | 1.6   | 1.8   |
| 2.4   | 2.5   | 2.3   | 7.8    | 5.2   | 10.0   | 3.0   | 1.8   | 2.0   |
| 7.6   | 10.4  | 5.4   | 10.7   | 12.6  | 4.9    | 2.1   | 3.3   | 8.1   |
| 4.7   | 6.1   | 1.2   | 12.0   | 16.5  | 10.6   | 3.4   | 1.1   | 1.3   |
| 16.7  | 9.7   | 12.5  | 43.9   | 25.8  | 27.4   | 20.6  | 22.6  | 15.8  |
| 2.7   | 3.4   | 4.1   | 22.0   | 21.0  | 13.1   | 1.2   | 5.3   | 9.9   |
| 2.6   | 4.5   | 3.0   | 5.9    | 4.6   | 5.9    | 3.3   | 2.9   | 4.1   |
| 4.9   | 2.1   | 5.5   | 13.2   | 5.1   | 13.2   | 2.2   | 5.8   | 6.3   |
| 10.3  | 9.4   | 2.5   | 13.1   | 6.2   | 10.7   | 2.7   | 2.9   | 2.9   |
| 8.1   | 8.6   | 3.4   | 12.7   | 8.6   | 10.5   | 5.6   | 4.6   | 10.1  |
| 7.8   | 4.6   | 5.8   | 19.7   | 17.8  | 19.2   | 16.0  | 17.3  | 19.6  |
| 12.8  | 9.8   | 15.9  | 15.1   | 10.6  | 20.6   | 3.3   | 12.6  | 5.4   |
| 14.0  | 10.4  | 7.1   | 18.1   | 15.7  | 12.0   | 9.8   | 11.5  | 19.3  |
| 16.6  | 14.0  | 25.5  | 28.8   | 15.5  | 17.6   | 12.9  | 15.3  | 19.3  |
| 1.1   | 9.6   | 2.0   | 1.6    | 8.2   | 7.7    | 0.8   | 0.2   | 0.3   |
| 26.2  | 33.9  | 23.4  | 34.2   | 43.3  | 42.5   | 27.3  | 18.8  | 30.9  |
| 103.7 | 180.2 | 95.4  | 177.7  | 216.1 | 192.7  | 141.9 | 227.0 | 223.3 |
| 2.5   | 6.2   | 0.6   | 14.1   | 13.6  | 14.5   | 7.3   | 5.4   | 4.9   |
| 14.2  | 9.5   | 14.8  | 14.9   | 4.6   | 5.7    | 6.0   | 2.8   | 4.6   |
| 2.7   | 2.3   | 2.3   | 3.0    | 2.4   | 12.5   | 2.8   | 2.1   | 1.5   |

|       |       |       |        |       |        |       |       |       |
|-------|-------|-------|--------|-------|--------|-------|-------|-------|
| 14.2  | 11.9  | 10.2  | 13.9   | 7.9   | 11.5   | 3.0   | 2.4   | 2.6   |
| 4.3   | 0.6   | 7.5   | 2.4    | 6.8   | 8.7    | 0.5   | 0.5   | 3.9   |
| 15.6  | 29.8  | 17.2  | 33.5   | 28.2  | 38.8   | 25.7  | 16.0  | 26.8  |
| 2.7   | 5.6   | 4.4   | 10.6   | 16.6  | 10.3   | 3.8   | 5.1   | 3.5   |
| 7.0   | 7.7   | 4.5   | 12.8   | 15.0  | 14.9   | 7.9   | 7.8   | 9.8   |
| 6.3   | 11.9  | 10.0  | 24.5   | 19.9  | 20.3   | 10.4  | 9.9   | 10.0  |
| 4.2   | 2.7   | 3.5   | 6.4    | 9.7   | 12.7   | 4.4   | 1.3   | 1.7   |
| 15.1  | 16.4  | 11.0  | 23.7   | 27.8  | 26.1   | 20.4  | 25.3  | 19.1  |
| 5.3   | 3.1   | 2.7   | 11.0   | 9.5   | 13.0   | 3.8   | 1.1   | 4.2   |
| 7.7   | 8.9   | 3.4   | 15.0   | 5.9   | 12.1   | 4.6   | 7.2   | 3.5   |
| 0.6   | 1.8   | 0.5   | 4.7    | 1.6   | 7.0    | 2.6   | 1.1   | 0.8   |
| 3.5   | 5.7   | 3.4   | 18.1   | 21.0  | 18.7   | 10.4  | 10.0  | 14.0  |
| 9.4   | 4.6   | 2.5   | 3.1    | 5.9   | 8.5    | 2.7   | 4.3   | 3.4   |
| 8.7   | 11.5  | 7.3   | 14.0   | 18.4  | 17.0   | 12.5  | 6.7   | 6.8   |
| 0.9   | 3.9   | 1.0   | 2.6    | 2.5   | 8.9    | 1.7   | 1.8   | 1.2   |
| 23.3  | 10.9  | 15.3  | 21.7   | 21.9  | 20.8   | 12.6  | 11.7  | 14.0  |
| 6.9   | 7.5   | 8.3   | 5.6    | 13.3  | 7.6    | 8.2   | 4.6   | 6.1   |
| 75.5  | 69.7  | 34.5  | 19.1   | 21.2  | 28.1   | 6.5   | 8.2   | 7.8   |
| 19.6  | 23.4  | 23.3  | 28.9   | 34.1  | 34.6   | 21.9  | 19.3  | 19.3  |
| 34.1  | 34.1  | 33.0  | 33.8   | 17.0  | 18.0   | 10.2  | 11.7  | 15.5  |
| 110.9 | 114.0 | 76.9  | 83.0   | 67.7  | 75.2   | 94.2  | 79.9  | 81.1  |
| 35.3  | 35.9  | 39.7  | 9.7    | 13.1  | 18.7   | 11.2  | 17.9  | 18.4  |
| 32.9  | 26.3  | 27.3  | 24.7   | 24.3  | 19.8   | 14.9  | 13.2  | 16.6  |
| 71.0  | 85.3  | 60.8  | 31.8   | 28.3  | 30.5   | 19.9  | 5.5   | 12.4  |
| 5.9   | 6.9   | 3.4   | 7.1    | 7.0   | 6.1    | 3.4   | 4.3   | 3.3   |
| 3.9   | 3.2   | 4.6   | 3.9    | 3.0   | 10.4   | 9.1   | 1.9   | 11.3  |
| 2.6   | 11.2  | 3.0   | 14.2   | 16.4  | 11.1   | 3.9   | 4.3   | 4.1   |
| 2.9   | 1.2   | 1.3   | 6.1    | 7.9   | 3.2    | 2.2   | 5.1   | 4.0   |
| 3.0   | 6.7   | 1.0   | 6.9    | 7.0   | 8.0    | 7.2   | 1.3   | 10.2  |
| 5.8   | 8.1   | 15.1  | 24.0   | 17.1  | 31.6   | 16.2  | 11.7  | 21.4  |
| 239.0 | 322.5 | 281.4 | 254.0  | 252.9 | 227.4  | 217.7 | 261.7 | 243.5 |
| 0.4   | 6.5   | 5.1   | 10.6   | 15.8  | 8.0    | 3.6   | 7.4   | 6.5   |
| 4.7   | 11.6  | 10.3  | 5.7    | 4.4   | 9.2    | 2.8   | 4.5   | 5.6   |
| 1.3   | 8.5   | 7.6   | 2.1    | 16.2  | 7.2    | 7.6   | 3.3   | 6.1   |
| 27.2  | 17.2  | 4.9   | 25.8   | 12.6  | 12.4   | 4.1   | 2.6   | 5.1   |
| 5.3   | 2.7   | 3.9   | 4.0    | 2.3   | 5.5    | 10.5  | 2.7   | 5.9   |
| 9.1   | 7.5   | 5.8   | 4.0    | 7.2   | 13.6   | 5.5   | 4.2   | 3.1   |
| 836.9 | 958.1 | 802.6 | 1197.7 | 939.0 | 1022.6 | 771.4 | 587.9 | 707.0 |
| 5.3   | 7.1   | 8.4   | 7.0    | 5.0   | 7.5    | 5.1   | 4.9   | 10.7  |
| 11.8  | 18.3  | 5.6   | 11.7   | 10.7  | 12.1   | 12.7  | 11.5  | 18.6  |
| 6.1   | 10.2  | 10.0  | 12.1   | 5.9   | 13.7   | 10.6  | 7.5   | 4.1   |
| 4.8   | 2.2   | 6.8   | 7.0    | 6.6   | 5.5    | 8.2   | 3.8   | 0.8   |
| 162.1 | 157.8 | 103.1 | 221.9  | 166.8 | 175.2  | 111.5 | 114.1 | 109.7 |
| 7.5   | 5.1   | 1.9   | 19.9   | 6.0   | 9.2    | 6.5   | 6.3   | 11.0  |
| 2.0   | 1.7   | 1.0   | 6.0    | 2.9   | 9.0    | 0.6   | 1.8   | 7.2   |
| 151.4 | 172.3 | 104.8 | 152.3  | 128.3 | 150.9  | 152.4 | 145.6 | 161.5 |
| 18.2  | 22.4  | 12.6  | 27.1   | 30.5  | 22.0   | 11.1  | 11.8  | 13.3  |
| 17.9  | 14.9  | 10.3  | 30.5   | 21.1  | 32.5   | 11.0  | 2.6   | 12.9  |
| 236.8 | 241.6 | 187.3 | 77.2   | 44.1  | 83.3   | 143.2 | 124.3 | 146.1 |
| 14.0  | 17.7  | 12.8  | 30.2   | 28.9  | 23.9   | 9.0   | 11.5  | 13.0  |
| 49.8  | 61.1  | 32.0  | 39.2   | 40.8  | 57.4   | 39.4  | 33.7  | 25.8  |
| 18.0  | 45.7  | 37.7  | 17.0   | 15.6  | 18.4   | 7.9   | 10.1  | 20.4  |
| 1.2   | 1.6   | 0.9   | 4.6    | 2.1   | 3.6    | 1.2   | 2.3   | 1.3   |

|        |        |        |        |        |        |        |        |        |
|--------|--------|--------|--------|--------|--------|--------|--------|--------|
| 376.4  | 379.5  | 339.6  | 444.8  | 364.8  | 393.1  | 232.8  | 232.8  | 205.1  |
| 18.5   | 18.0   | 9.4    | 15.8   | 14.5   | 16.0   | 9.3    | 10.5   | 7.5    |
| 575.4  | 685.6  | 254.1  | 164.7  | 103.9  | 107.9  | 164.0  | 119.0  | 139.0  |
| 11.5   | 12.8   | 6.4    | 18.8   | 14.8   | 20.9   | 9.1    | 9.7    | 13.4   |
| 5.5    | 3.4    | 2.6    | 7.7    | 6.6    | 7.5    | 1.2    | 5.1    | 1.4    |
| 281.6  | 310.8  | 272.4  | 334.8  | 265.1  | 360.3  | 146.4  | 243.1  | 205.2  |
| 5.2    | 4.8    | 6.5    | 5.0    | 5.3    | 11.2   | 5.7    | 1.8    | 8.1    |
| 10.0   | 10.7   | 10.0   | 15.5   | 17.1   | 15.9   | 10.6   | 15.6   | 12.8   |
| 20.0   | 28.7   | 27.7   | 21.6   | 11.1   | 6.3    | 2.7    | 2.7    | 6.7    |
| 16.0   | 13.9   | 14.6   | 13.4   | 16.2   | 19.5   | 7.6    | 13.1   | 7.9    |
| 8.2    | 9.4    | 20.4   | 33.8   | 19.0   | 19.3   | 11.4   | 16.8   | 12.9   |
| 985.5  | 1370.1 | 1014.5 | 682.7  | 638.0  | 756.2  | 430.0  | 603.4  | 579.4  |
| 130.7  | 157.3  | 123.0  | 18.7   | 15.7   | 21.6   | 25.4   | 11.6   | 7.4    |
| 1.9    | 1.5    | 5.2    | 14.2   | 7.5    | 18.2   | 5.7    | 4.6    | 4.7    |
| 20.5   | 38.5   | 31.4   | 23.3   | 18.2   | 19.1   | 7.0    | 8.8    | 13.4   |
| 4.1    | 3.4    | 1.8    | 3.2    | 1.8    | 6.7    | 1.4    | 2.0    | 1.3    |
| 43.0   | 46.0   | 35.1   | 34.8   | 28.2   | 41.9   | 22.7   | 32.8   | 34.3   |
| 6.9    | 4.5    | 5.3    | 11.5   | 8.4    | 4.5    | 10.5   | 5.1    | 9.5    |
| 188.3  | 184.2  | 84.6   | 133.7  | 68.4   | 65.3   | 134.3  | 79.9   | 80.1   |
| 50.7   | 56.3   | 43.3   | 62.9   | 41.4   | 49.8   | 39.9   | 35.1   | 35.6   |
| 9.2    | 16.0   | 22.3   | 26.5   | 38.7   | 47.4   | 65.1   | 54.8   | 62.0   |
| 9142.7 | 9839.0 | 9249.3 | 3261.5 | 2928.9 | 3095.1 | 2184.7 | 2369.8 | 2523.2 |
| 645.5  | 645.0  | 403.4  | 345.1  | 300.9  | 339.7  | 317.6  | 311.3  | 327.6  |
| 1.6    | 2.2    | 0.4    | 4.4    | 5.4    | 2.5    | 1.1    | 1.4    | 0.7    |
| 31.0   | 44.6   | 28.0   | 19.0   | 22.8   | 20.2   | 22.0   | 16.3   | 22.5   |
| 14.2   | 18.7   | 11.7   | 14.7   | 11.1   | 9.3    | 9.0    | 9.0    | 5.7    |
| 22.5   | 33.1   | 19.8   | 9.5    | 9.6    | 17.3   | 14.0   | 5.3    | 18.5   |
| 999.0  | 1127.6 | 372.5  | 778.7  | 312.5  | 342.8  | 319.1  | 120.8  | 175.6  |
| 6.7    | 5.7    | 3.1    | 5.0    | 12.7   | 4.9    | 0.7    | 0.8    | 1.7    |
| 15.3   | 7.7    | 11.6   | 18.0   | 8.3    | 11.3   | 1.9    | 3.1    | 2.9    |
| 8.4    | 12.4   | 4.0    | 13.3   | 17.1   | 27.6   | 5.5    | 10.8   | 6.9    |
| 3870.6 | 4917.1 | 3518.2 | 2572.1 | 2080.5 | 2197.2 | 1895.6 | 1797.9 | 2062.8 |
| 454.1  | 644.3  | 487.6  | 235.8  | 243.7  | 231.2  | 249.8  | 287.7  | 324.6  |
| 14.1   | 17.6   | 16.3   | 15.8   | 25.3   | 25.3   | 28.4   | 22.1   | 35.8   |
| 0.5    | 1.8    | 0.4    | 2.9    | 1.7    | 1.4    | 0.8    | 1.1    | 3.3    |
| 1.5    | 7.6    | 2.5    | 4.5    | 7.3    | 9.0    | 9.0    | 6.9    | 4.8    |
| 166.8  | 222.9  | 149.3  | 155.2  | 103.8  | 116.7  | 72.7   | 58.8   | 56.6   |
| 27.6   | 33.7   | 17.4   | 103.1  | 93.4   | 107.1  | 103.9  | 120.5  | 148.8  |
| 25.1   | 29.3   | 26.1   | 43.8   | 34.0   | 39.0   | 28.5   | 33.6   | 38.2   |
| 9.6    | 11.6   | 10.8   | 12.8   | 12.4   | 19.1   | 7.1    | 6.2    | 12.2   |
| 5058.0 | 4442.4 | 2136.9 | 106.7  | 99.7   | 105.3  | 72.0   | 103.5  | 93.8   |
| 1527.7 | 1575.6 | 905.3  | 729.2  | 514.6  | 634.9  | 346.6  | 320.7  | 379.0  |
| 41.0   | 50.1   | 28.9   | 10.7   | 10.8   | 8.6    | 5.9    | 4.0    | 6.6    |
| 51.9   | 80.4   | 50.9   | 53.4   | 43.4   | 50.6   | 27.8   | 24.3   | 33.0   |
| 8.5    | 1.6    | 7.2    | 13.0   | 4.6    | 6.7    | 2.8    | 3.7    | 1.4    |
| 94.3   | 120.1  | 71.1   | 2.4    | 5.5    | 5.7    | 1.3    | 0.8    | 1.2    |
| 81.2   | 77.5   | 39.4   | 34.2   | 14.0   | 26.5   | 2.3    | 13.9   | 17.7   |
| 2.4    | 1.0    | 1.4    | 2.4    | 2.0    | 1.6    | 0.9    | 1.2    | 0.8    |
| 5.8    | 7.5    | 1.2    | 4.1    | 3.2    | 6.3    | 1.4    | 0.8    | 8.2    |
| 12.2   | 16.4   | 11.1   | 9.7    | 18.9   | 17.8   | 6.8    | 7.3    | 8.2    |
| 12.1   | 14.3   | 9.8    | 24.2   | 15.5   | 9.5    | 10.2   | 9.4    | 10.7   |
| 10.6   | 15.1   | 10.3   | 23.6   | 13.2   | 25.1   | 15.7   | 12.4   | 17.7   |
| 40.2   | 43.8   | 34.7   | 180.9  | 161.7  | 187.0  | 99.1   | 102.4  | 113.4  |

|        |        |        |        |        |        |        |        |        |
|--------|--------|--------|--------|--------|--------|--------|--------|--------|
| 8.2    | 5.0    | 2.9    | 17.3   | 15.3   | 9.5    | 10.3   | 13.1   | 8.3    |
| 21.1   | 37.8   | 36.7   | 122.4  | 150.5  | 162.5  | 57.7   | 129.3  | 99.2   |
| 30.4   | 6.7    | 7.7    | 15.0   | 4.7    | 6.6    | 10.7   | 5.9    | 14.0   |
| 442.8  | 560.4  | 488.7  | 287.4  | 276.7  | 350.3  | 378.0  | 483.4  | 471.3  |
| 87.3   | 134.5  | 107.6  | 165.7  | 154.6  | 165.8  | 101.5  | 133.1  | 132.1  |
| 1765.9 | 738.1  | 240.1  | 42.2   | 51.6   | 57.1   | 37.4   | 89.9   | 56.8   |
| 13.2   | 24.9   | 15.3   | 11.4   | 6.6    | 14.7   | 10.4   | 12.5   | 5.7    |
| 1.3    | 2.2    | 1.3    | 2.3    | 2.4    | 1.6    | 1.3    | 0.9    | 1.3    |
| 26.8   | 29.4   | 19.5   | 31.5   | 41.0   | 36.9   | 31.5   | 22.2   | 15.9   |
| 9.9    | 15.3   | 2.4    | 45.2   | 35.8   | 43.4   | 23.2   | 25.6   | 23.4   |
| 19.7   | 18.3   | 7.0    | 20.3   | 32.7   | 12.3   | 32.7   | 11.1   | 10.5   |
| 1659.5 | 1917.6 | 1535.8 | 1291.7 | 1105.4 | 1290.7 | 709.2  | 849.4  | 813.3  |
| 17.3   | 26.5   | 12.3   | 23.9   | 12.4   | 19.7   | 19.3   | 16.3   | 17.4   |
| 4.3    | 1.5    | 5.3    | 14.3   | 4.6    | 7.2    | 4.6    | 3.4    | 0.7    |
| 10.7   | 8.8    | 1.8    | 18.3   | 11.0   | 11.8   | 3.0    | 3.2    | 5.9    |
| 5.4    | 4.0    | 0.6    | 6.1    | 7.2    | 7.3    | 4.1    | 5.4    | 4.5    |
| 19.8   | 23.2   | 15.4   | 18.1   | 17.1   | 14.7   | 16.1   | 11.8   | 9.7    |
| 6.7    | 5.3    | 4.4    | 13.0   | 8.4    | 9.0    | 12.9   | 5.1    | 4.6    |
| 1.2    | 2.6    | 3.7    | 3.4    | 5.1    | 4.6    | 0.9    | 1.5    | 2.5    |
| 94.4   | 114.4  | 79.1   | 115.2  | 97.5   | 96.7   | 58.2   | 41.2   | 37.8   |
| 70.9   | 62.0   | 29.9   | 17.3   | 17.0   | 14.9   | 17.7   | 14.2   | 8.7    |
| 5.2    | 8.0    | 3.0    | 23.4   | 8.2    | 14.6   | 8.0    | 7.3    | 2.1    |
| 9.9    | 6.0    | 3.9    | 3.6    | 8.8    | 10.2   | 4.7    | 6.4    | 2.4    |
| 19.9   | 16.0   | 7.9    | 9.1    | 4.2    | 4.9    | 5.8    | 5.6    | 3.1    |
| 7.5    | 11.4   | 5.9    | 10.5   | 11.5   | 9.0    | 5.7    | 5.9    | 5.8    |
| 9.2    | 6.2    | 5.3    | 9.0    | 18.0   | 15.1   | 7.1    | 3.8    | 8.6    |
| 12.8   | 1.7    | 6.1    | 16.4   | 10.7   | 17.8   | 3.3    | 1.9    | 3.0    |
| 11.9   | 16.2   | 11.3   | 4.4    | 8.3    | 10.3   | 4.5    | 9.2    | 4.8    |
| 1.3    | 6.0    | 3.0    | 23.0   | 10.7   | 12.3   | 5.2    | 3.8    | 7.0    |
| 19.9   | 24.5   | 4.8    | 40.0   | 49.3   | 30.3   | 26.4   | 21.1   | 23.7   |
| 10.1   | 20.9   | 22.6   | 34.5   | 18.5   | 36.7   | 23.5   | 21.7   | 22.5   |
| 34.0   | 44.6   | 43.0   | 26.9   | 18.6   | 36.4   | 45.5   | 57.3   | 43.2   |
| 2692.3 | 3172.8 | 2568.3 | 1621.9 | 1355.4 | 1554.0 | 982.2  | 1041.9 | 1114.3 |
| 18.2   | 26.9   | 16.2   | 28.2   | 19.3   | 26.8   | 8.2    | 9.5    | 17.0   |
| 1.1    | 9.0    | 9.4    | 22.8   | 13.6   | 24.3   | 12.2   | 12.7   | 8.5    |
| 2.3    | 1.4    | 0.9    | 2.9    | 2.9    | 11.2   | 0.9    | 5.3    | 6.3    |
| 68.5   | 67.0   | 26.1   | 90.5   | 43.8   | 56.6   | 41.5   | 22.7   | 30.5   |
| 37.8   | 52.7   | 41.4   | 146.2  | 113.1  | 107.3  | 40.8   | 42.5   | 88.4   |
| 38.4   | 34.8   | 23.7   | 47.1   | 44.2   | 32.8   | 28.1   | 22.1   | 17.8   |
| 51.3   | 55.1   | 24.7   | 64.9   | 60.3   | 53.9   | 32.8   | 46.6   | 46.4   |
| 12.8   | 7.3    | 4.5    | 3.7    | 10.0   | 3.4    | 6.5    | 7.3    | 3.9    |
| 1984.3 | 2381.8 | 1763.3 | 1591.3 | 1136.6 | 1359.7 | 1586.9 | 1321.6 | 1518.0 |
| 165.3  | 156.9  | 99.1   | 85.4   | 65.6   | 85.2   | 72.1   | 78.1   | 85.9   |
| 4222.6 | 4328.8 | 3096.6 | 3126.4 | 2204.1 | 2596.4 | 2286.9 | 1730.8 | 2032.9 |
| 2.4    | 12.4   | 4.0    | 5.9    | 1.9    | 5.4    | 0.5    | 1.1    | 2.0    |
| 646.1  | 779.9  | 584.2  | 529.4  | 446.5  | 512.6  | 317.2  | 290.9  | 304.6  |
| 101.7  | 106.5  | 113.8  | 307.2  | 318.1  | 372.2  | 104.9  | 225.3  | 202.4  |
| 7.3    | 2.5    | 4.3    | 18.4   | 10.2   | 27.6   | 5.0    | 5.0    | 2.7    |
| 2.1    | 1.6    | 1.9    | 4.6    | 2.6    | 5.0    | 1.4    | 1.3    | 2.4    |
| 1.4    | 1.9    | 1.1    | 4.4    | 16.2   | 12.3   | 3.4    | 8.0    | 5.4    |
| 0.5    | 1.1    | 4.8    | 3.0    | 1.6    | 3.8    | 0.6    | 2.0    | 0.7    |
| 5.3    | 4.3    | 2.7    | 3.5    | 8.8    | 10.7   | 2.0    | 1.5    | 1.1    |
| 129.6  | 132.3  | 83.2   | 76.0   | 61.5   | 75.9   | 94.3   | 99.2   | 93.1   |



|        |        |        |        |        |        |        |        |        |
|--------|--------|--------|--------|--------|--------|--------|--------|--------|
| 55.3   | 76.4   | 34.1   | 24.6   | 24.0   | 23.9   | 13.9   | 25.8   | 17.2   |
| 23.5   | 35.2   | 23.0   | 9.0    | 24.2   | 28.0   | 13.0   | 31.0   | 31.6   |
| 8.9    | 9.5    | 2.4    | 17.9   | 8.8    | 11.0   | 6.3    | 6.6    | 5.5    |
| 3.6    | 4.2    | 4.7    | 8.8    | 9.1    | 14.2   | 2.1    | 3.1    | 6.0    |
| 13.4   | 30.5   | 33.3   | 45.4   | 56.9   | 52.8   | 13.9   | 32.6   | 45.2   |
| 2.4    | 1.9    | 0.4    | 121.5  | 101.6  | 115.2  | 75.8   | 140.9  | 117.5  |
| 25.3   | 25.3   | 23.2   | 9.8    | 5.8    | 10.4   | 6.8    | 6.4    | 5.2    |
| 216.1  | 224.9  | 141.4  | 179.3  | 111.0  | 130.8  | 151.6  | 129.7  | 101.6  |
| 2.5    | 2.2    | 3.6    | 3.9    | 2.8    | 3.3    | 1.8    | 0.8    | 1.5    |
| 13.8   | 12.4   | 8.7    | 26.2   | 9.4    | 22.1   | 8.0    | 10.0   | 9.2    |
| 701.3  | 819.3  | 549.2  | 272.7  | 250.1  | 284.4  | 217.1  | 234.6  | 239.4  |
| 9.4    | 11.0   | 3.2    | 10.7   | 7.1    | 8.7    | 1.5    | 5.3    | 6.8    |
| 2.1    | 2.5    | 2.0    | 9.6    | 7.1    | 21.2   | 6.0    | 6.8    | 7.2    |
| 10.1   | 10.2   | 4.9    | 20.1   | 16.3   | 9.3    | 5.0    | 7.1    | 4.1    |
| 7.4    | 3.6    | 7.4    | 4.6    | 4.5    | 5.9    | 8.9    | 7.9    | 12.3   |
| 6.9    | 19.2   | 6.6    | 16.4   | 6.5    | 7.8    | 6.6    | 7.4    | 6.6    |
| 3.7    | 5.0    | 2.4    | 8.5    | 5.3    | 3.9    | 3.4    | 2.0    | 6.8    |
| 10.3   | 18.5   | 11.2   | 9.6    | 14.8   | 18.6   | 4.3    | 1.6    | 8.3    |
| 3.3    | 1.5    | 4.7    | 8.5    | 1.9    | 3.0    | 2.3    | 4.8    | 4.4    |
| 221.2  | 384.8  | 420.2  | 232.8  | 192.7  | 184.5  | 108.0  | 101.4  | 100.6  |
| 5.5    | 4.5    | 2.4    | 4.4    | 3.7    | 4.6    | 2.3    | 2.3    | 2.0    |
| 295.9  | 432.0  | 377.3  | 293.4  | 280.9  | 304.5  | 264.3  | 366.0  | 336.3  |
| 2.0    | 1.2    | 0.9    | 2.6    | 3.0    | 3.0    | 1.0    | 1.0    | 1.2    |
| 8.7    | 4.0    | 10.1   | 21.4   | 14.6   | 8.7    | 3.3    | 9.1    | 4.6    |
| 13.4   | 18.5   | 6.1    | 15.6   | 11.7   | 17.8   | 11.8   | 10.2   | 12.7   |
| 5408.7 | 6011.3 | 5106.8 | 3381.5 | 3058.6 | 3078.5 | 2829.1 | 2760.5 | 3045.8 |
| 2.2    | 7.2    | 2.7    | 6.6    | 5.3    | 2.7    | 1.3    | 1.6    | 2.6    |
| 15.8   | 18.7   | 16.5   | 15.9   | 17.0   | 12.8   | 20.1   | 13.9   | 25.0   |
| 3.9    | 1.0    | 1.2    | 5.6    | 4.8    | 7.4    | 2.8    | 3.9    | 2.8    |
| 0.5    | 0.6    | 0.6    | 1.3    | 1.3    | 2.7    | 1.2    | 0.3    | 0.5    |
| 53.6   | 67.4   | 60.9   | 149.2  | 127.7  | 125.6  | 99.7   | 96.4   | 115.5  |
| 682.3  | 803.5  | 607.0  | 391.4  | 324.1  | 332.2  | 449.7  | 406.3  | 447.0  |
| 41.1   | 50.1   | 46.2   | 68.7   | 41.1   | 48.4   | 59.1   | 50.8   | 65.3   |
| 29.5   | 34.7   | 34.4   | 37.4   | 37.4   | 34.2   | 21.6   | 26.6   | 31.0   |
| 23.2   | 21.0   | 10.8   | 11.6   | 7.2    | 10.9   | 4.6    | 4.9    | 4.5    |
| 7.0    | 12.1   | 7.1    | 8.3    | 13.2   | 7.0    | 10.6   | 11.5   | 16.8   |
| 2.7    | 4.0    | 2.6    | 4.8    | 4.9    | 4.6    | 1.7    | 0.8    | 2.7    |
| 51.7   | 49.2   | 39.9   | 74.6   | 48.2   | 60.3   | 34.8   | 52.7   | 48.8   |
| 24.7   | 8.9    | 14.2   | 18.7   | 9.0    | 11.5   | 10.3   | 6.6    | 14.3   |
| 3.3    | 8.8    | 3.7    | 11.7   | 8.0    | 6.3    | 4.3    | 3.1    | 4.6    |
| 1.9    | 2.7    | 1.9    | 7.6    | 2.9    | 11.7   | 2.9    | 3.4    | 2.8    |
| 26.2   | 26.7   | 15.5   | 6.6    | 7.4    | 7.0    | 18.7   | 14.6   | 16.5   |
| 2.5    | 6.1    | 2.7    | 7.9    | 5.0    | 8.5    | 1.8    | 0.6    | 6.8    |
| 77.9   | 80.7   | 46.2   | 12.6   | 8.3    | 11.9   | 62.2   | 41.8   | 39.2   |
| 28.6   | 32.8   | 25.3   | 12.2   | 1.0    | 10.0   | 18.2   | 11.1   | 17.4   |
| 1.3    | 6.0    | 5.3    | 6.5    | 7.7    | 5.6    | 1.1    | 0.9    | 1.6    |
| 25.5   | 27.1   | 13.9   | 18.6   | 12.3   | 17.8   | 15.2   | 13.7   | 15.8   |
| 4.8    | 6.0    | 1.1    | 4.8    | 4.8    | 5.2    | 1.8    | 1.3    | 1.6    |
| 2.8    | 1.6    | 0.9    | 11.8   | 2.2    | 12.1   | 1.0    | 1.3    | 2.7    |
| 61.9   | 67.1   | 51.6   | 78.4   | 57.7   | 64.5   | 44.2   | 33.0   | 34.0   |
| 9.2    | 4.8    | 1.6    | 3.7    | 12.5   | 7.5    | 9.2    | 3.9    | 5.3    |
| 13.2   | 14.3   | 6.7    | 23.6   | 9.8    | 12.3   | 14.2   | 6.1    | 9.4    |
| 8.0    | 7.0    | 7.4    | 14.6   | 12.0   | 19.3   | 5.0    | 2.6    | 7.8    |

|        |        |        |        |        |        |        |        |        |
|--------|--------|--------|--------|--------|--------|--------|--------|--------|
| 18.0   | 15.3   | 16.0   | 5.1    | 3.2    | 11.6   | 8.2    | 12.3   | 3.0    |
| 36.9   | 34.6   | 18.5   | 31.4   | 35.6   | 16.5   | 47.3   | 24.6   | 31.5   |
| 15.2   | 19.6   | 10.9   | 28.4   | 15.3   | 20.0   | 9.1    | 12.7   | 5.2    |
| 0.5    | 4.2    | 3.2    | 5.5    | 7.9    | 8.9    | 1.4    | 1.7    | 2.3    |
| 14.8   | 16.7   | 10.1   | 26.4   | 29.6   | 17.8   | 11.9   | 10.5   | 10.2   |
| 224.9  | 322.2  | 24.8   | 31.5   | 18.6   | 25.5   | 27.6   | 7.9    | 12.4   |
| 32.5   | 41.6   | 27.4   | 12.0   | 22.2   | 36.4   | 27.2   | 9.5    | 22.5   |
| 42.4   | 46.1   | 28.6   | 31.6   | 39.4   | 46.7   | 29.1   | 17.5   | 28.3   |
| 0.8    | 3.2    | 1.3    | 5.0    | 16.1   | 10.4   | 1.0    | 3.4    | 0.4    |
| 6652.8 | 8242.3 | 8663.9 | 9026.9 | 8695.6 | 9074.7 | 6096.1 | 6403.8 | 6770.3 |
| 686.9  | 892.1  | 682.5  | 397.7  | 309.1  | 351.4  | 252.1  | 303.3  | 279.5  |
| 370.4  | 421.8  | 428.5  | 124.9  | 98.1   | 116.0  | 83.6   | 99.5   | 92.1   |
| 4.0    | 4.2    | 3.2    | 11.6   | 4.1    | 3.9    | 3.4    | 1.6    | 1.7    |
| 235.5  | 251.4  | 213.2  | 89.3   | 52.6   | 87.2   | 91.5   | 80.2   | 93.6   |
| 5908.1 | 6532.6 | 4062.3 | 1518.5 | 1343.8 | 1404.9 | 1166.6 | 962.7  | 1054.9 |
| 8.1    | 11.1   | 22.0   | 10.2   | 15.8   | 18.6   | 6.1    | 7.0    | 9.4    |
| 7.8    | 5.6    | 3.6    | 5.8    | 1.7    | 2.7    | 5.3    | 1.3    | 1.2    |
| 188.1  | 224.2  | 91.6   | 136.0  | 106.7  | 116.5  | 107.8  | 122.5  | 145.2  |
| 26.3   | 33.5   | 23.9   | 26.2   | 25.3   | 29.8   | 26.9   | 22.5   | 16.3   |
| 165.3  | 255.5  | 234.7  | 230.9  | 227.3  | 255.4  | 241.5  | 282.8  | 283.3  |
| 4.1    | 2.8    | 1.7    | 5.4    | 4.3    | 4.7    | 4.9    | 2.4    | 2.2    |
| 14.5   | 12.6   | 10.6   | 14.9   | 15.8   | 5.3    | 8.9    | 5.3    | 2.2    |
| 260.6  | 412.1  | 256.3  | 70.4   | 48.9   | 76.8   | 57.6   | 78.0   | 93.9   |
| 19.6   | 8.5    | 5.7    | 4.6    | 5.8    | 19.2   | 3.2    | 3.1    | 2.2    |
| 4.6    | 2.7    | 4.8    | 4.8    | 5.8    | 4.3    | 1.6    | 7.3    | 2.4    |
| 7.4    | 24.4   | 4.2    | 12.8   | 11.6   | 4.7    | 8.4    | 7.5    | 11.8   |
| 391.4  | 534.1  | 310.5  | 552.9  | 468.9  | 561.1  | 328.7  | 322.7  | 380.7  |
| 186.9  | 189.1  | 65.6   | 131.5  | 80.5   | 109.9  | 104.2  | 58.3   | 83.8   |
| 4.1    | 21.6   | 7.2    | 25.4   | 28.6   | 24.2   | 30.9   | 32.1   | 27.8   |
| 94.3   | 121.0  | 89.0   | 52.3   | 57.0   | 63.2   | 36.6   | 40.0   | 54.6   |
| 11.0   | 21.0   | 6.1    | 15.7   | 16.5   | 13.3   | 9.1    | 10.3   | 11.5   |
| 2.1    | 8.4    | 8.9    | 6.1    | 4.1    | 4.9    | 2.0    | 2.0    | 3.8    |
| 8.1    | 7.8    | 4.0    | 7.9    | 3.5    | 15.2   | 8.8    | 8.1    | 7.2    |
| 3.6    | 13.7   | 1.8    | 8.5    | 8.3    | 6.5    | 8.4    | 8.1    | 8.0    |
| 6.3    | 2.1    | 6.3    | 10.5   | 9.2    | 25.9   | 7.9    | 11.7   | 5.9    |
| 6.8    | 1.7    | 4.9    | 5.6    | 8.7    | 6.7    | 11.1   | 1.3    | 1.0    |
| 3.5    | 1.3    | 2.2    | 9.2    | 4.8    | 10.8   | 1.4    | 1.4    | 0.7    |
| 28.6   | 39.6   | 37.4   | 20.8   | 25.5   | 34.6   | 38.1   | 27.3   | 38.8   |
| 5.6    | 8.2    | 3.9    | 15.4   | 14.3   | 13.0   | 9.7    | 4.0    | 7.6    |
| 7.7    | 10.3   | 20.2   | 12.8   | 19.5   | 27.9   | 19.1   | 10.0   | 10.7   |
| 2.9    | 8.5    | 3.0    | 4.6    | 3.3    | 2.8    | 5.5    | 2.4    | 1.3    |
| 68.4   | 88.0   | 68.9   | 48.4   | 42.5   | 45.0   | 35.9   | 43.4   | 44.5   |
| 4.0    | 3.7    | 11.9   | 7.6    | 24.0   | 7.5    | 2.9    | 10.1   | 8.4    |
| 6.5    | 3.1    | 5.8    | 3.5    | 3.9    | 7.8    | 0.9    | 0.8    | 1.4    |
| 5.6    | 1.1    | 1.5    | 9.8    | 6.3    | 2.5    | 1.5    | 4.5    | 1.1    |
| 3.5    | 7.4    | 1.3    | 4.1    | 16.2   | 8.5    | 7.6    | 5.6    | 7.4    |
| 2.2    | 10.2   | 7.9    | 6.8    | 19.6   | 13.8   | 3.6    | 6.7    | 2.6    |
| 61.9   | 66.9   | 38.7   | 35.0   | 35.3   | 29.0   | 66.5   | 46.1   | 56.0   |
| 7.5    | 7.9    | 7.0    | 10.6   | 17.9   | 10.5   | 2.0    | 5.6    | 3.1    |
| 3.5    | 9.4    | 16.5   | 20.0   | 8.4    | 16.4   | 1.8    | 2.6    | 2.3    |
| 7.9    | 7.3    | 5.1    | 10.7   | 10.2   | 2.0    | 3.1    | 6.9    | 3.5    |
| 98.7   | 149.8  | 104.1  | 68.8   | 70.7   | 62.1   | 79.1   | 72.1   | 95.3   |
| 51.1   | 53.1   | 28.3   | 33.9   | 19.4   | 23.0   | 22.6   | 15.0   | 30.5   |

|         |         |        |        |        |        |        |        |        |
|---------|---------|--------|--------|--------|--------|--------|--------|--------|
| 8.9     | 9.8     | 11.0   | 10.3   | 14.7   | 16.4   | 5.9    | 8.5    | 2.3    |
| 0.5     | 0.7     | 2.9    | 0.9    | 1.6    | 0.9    | 0.5    | 0.4    | 0.7    |
| 3.5     | 4.2     | 3.1    | 4.1    | 2.8    | 2.0    | 3.2    | 1.8    | 3.5    |
| 6.3     | 10.3    | 3.9    | 4.5    | 2.7    | 7.5    | 13.5   | 6.2    | 6.1    |
| 1.3     | 4.3     | 1.6    | 8.2    | 1.4    | 2.4    | 1.8    | 0.8    | 1.8    |
| 12.5    | 9.7     | 13.1   | 22.2   | 15.5   | 15.4   | 10.0   | 7.7    | 14.4   |
| 2.6     | 2.8     | 2.5    | 13.7   | 11.0   | 10.4   | 11.6   | 6.3    | 7.9    |
| 1.1     | 1.6     | 1.1    | 5.3    | 2.6    | 4.4    | 1.9    | 1.1    | 5.4    |
| 5.1     | 8.2     | 2.1    | 10.9   | 11.9   | 11.2   | 5.2    | 13.2   | 2.4    |
| 1.1     | 3.9     | 1.9    | 10.1   | 9.8    | 5.2    | 5.1    | 3.0    | 2.9    |
| 7.3     | 7.5     | 4.6    | 2.4    | 3.2    | 2.4    | 0.5    | 0.7    | 1.4    |
| 3.1     | 2.2     | 1.8    | 4.2    | 3.9    | 8.7    | 2.8    | 2.9    | 4.5    |
| 4.2     | 2.6     | 0.8    | 5.5    | 8.6    | 3.0    | 5.9    | 2.0    | 2.7    |
| 1.7     | 2.1     | 6.6    | 12.0   | 6.9    | 6.2    | 1.5    | 6.4    | 7.0    |
| 15.5    | 12.8    | 13.9   | 22.1   | 21.7   | 32.8   | 16.4   | 11.4   | 17.0   |
| 11747.8 | 11158.1 | 9453.5 | 9049.1 | 8695.7 | 8317.4 | 7840.0 | 8036.4 | 8013.6 |
| 3.1     | 1.9     | 10.7   | 30.9   | 20.7   | 26.2   | 16.9   | 12.2   | 4.8    |
| 10.5    | 5.4     | 7.6    | 14.3   | 15.3   | 17.4   | 5.9    | 7.6    | 3.7    |
| 4.1     | 1.6     | 1.8    | 6.1    | 4.1    | 11.3   | 2.9    | 1.6    | 2.7    |
| 26.3    | 19.7    | 12.3   | 12.7   | 6.7    | 5.8    | 7.6    | 2.4    | 2.7    |
| 3.9     | 4.5     | 2.3    | 12.4   | 7.5    | 21.2   | 6.7    | 4.5    | 7.4    |
| 2.6     | 8.5     | 4.8    | 17.5   | 15.6   | 21.9   | 4.3    | 6.2    | 1.9    |
| 7.6     | 4.8     | 4.2    | 12.9   | 8.7    | 9.5    | 2.3    | 3.1    | 3.2    |
| 17.4    | 24.7    | 5.6    | 27.1   | 21.8   | 39.3   | 23.0   | 11.9   | 4.7    |
| 6.1     | 1.2     | 0.7    | 6.5    | 3.2    | 2.6    | 2.1    | 5.5    | 0.9    |
| 3.9     | 3.2     | 4.0    | 17.1   | 8.7    | 5.8    | 3.4    | 3.3    | 6.6    |
| 3061.2  | 2821.0  | 1932.7 | 190.7  | 140.6  | 128.8  | 315.5  | 419.2  | 351.6  |
| 194.0   | 190.5   | 139.5  | 37.3   | 47.9   | 51.1   | 36.9   | 44.9   | 47.9   |
| 7.0     | 6.5     | 16.7   | 19.0   | 16.4   | 23.3   | 11.1   | 2.8    | 7.8    |
| 10.6    | 7.6     | 8.7    | 25.2   | 14.5   | 9.0    | 13.8   | 11.3   | 12.9   |
| 9.1     | 12.1    | 11.9   | 31.2   | 27.1   | 13.7   | 16.7   | 5.9    | 11.4   |
| 0.7     | 2.6     | 0.6    | 4.1    | 4.2    | 1.8    | 6.6    | 0.6    | 0.8    |
| 37.4    | 38.1    | 16.9   | 41.7   | 36.0   | 42.2   | 33.3   | 27.5   | 25.2   |
| 5.5     | 4.1     | 2.4    | 7.0    | 13.1   | 19.2   | 1.0    | 7.6    | 4.1    |
| 1062.2  | 1175.4  | 811.9  | 784.3  | 603.6  | 678.6  | 485.8  | 507.5  | 526.6  |
| 13.2    | 10.0    | 6.0    | 7.4    | 8.0    | 7.3    | 11.9   | 10.4   | 5.7    |
| 10.7    | 6.0     | 7.5    | 20.3   | 19.6   | 10.3   | 8.8    | 11.4   | 13.3   |
| 5.2     | 7.3     | 3.3    | 5.7    | 6.2    | 5.2    | 1.7    | 2.8    | 5.7    |
| 10.1    | 17.1    | 10.7   | 28.6   | 17.2   | 14.7   | 9.3    | 11.5   | 17.4   |
| 1.2     | 1.5     | 0.5    | 1.4    | 1.1    | 4.5    | 0.4    | 0.7    | 0.4    |
| 4.5     | 7.2     | 1.7    | 10.1   | 3.8    | 8.6    | 1.2    | 0.6    | 1.0    |
| 18.4    | 4.2     | 6.0    | 6.2    | 3.9    | 6.6    | 2.3    | 2.3    | 1.1    |
| 5.3     | 1.6     | 2.4    | 9.4    | 2.4    | 2.9    | 1.1    | 5.1    | 2.7    |
| 3.7     | 4.8     | 3.4    | 4.2    | 1.0    | 4.0    | 1.5    | 1.4    | 1.8    |
| 10.8    | 17.4    | 11.6   | 24.0   | 14.9   | 22.0   | 12.4   | 9.2    | 11.4   |
| 8.1     | 1.9     | 2.0    | 4.4    | 1.9    | 2.7    | 9.8    | 1.2    | 5.1    |
| 4.0     | 6.7     | 2.0    | 4.3    | 4.7    | 8.4    | 5.1    | 0.8    | 1.1    |
| 5916.1  | 5897.8  | 5044.6 | 14.0   | 6.6    | 17.5   | 7.9    | 5.6    | 9.8    |
| 18.1    | 16.5    | 9.3    | 11.5   | 8.4    | 3.6    | 4.2    | 10.3   | 5.2    |
| 3.3     | 5.0     | 1.7    | 7.5    | 3.4    | 6.3    | 1.9    | 3.4    | 7.2    |
| 19.4    | 15.5    | 12.4   | 28.6   | 31.3   | 27.7   | 5.8    | 5.3    | 5.1    |
| 29.3    | 30.0    | 21.9   | 20.1   | 13.9   | 10.0   | 11.3   | 10.4   | 15.1   |
| 58.6    | 66.3    | 43.8   | 49.6   | 42.4   | 46.8   | 34.7   | 45.4   | 45.3   |

|         |         |         |         |        |        |        |        |        |
|---------|---------|---------|---------|--------|--------|--------|--------|--------|
| 73.3    | 81.7    | 73.0    | 29.6    | 37.9   | 56.1   | 24.1   | 27.4   | 14.2   |
| 7.5     | 7.7     | 5.8     | 6.5     | 15.8   | 16.8   | 5.5    | 2.1    | 3.1    |
| 1.7     | 4.1     | 1.9     | 4.8     | 4.6    | 11.8   | 1.5    | 0.8    | 0.4    |
| 52.6    | 45.8    | 36.7    | 33.9    | 23.3   | 28.2   | 29.7   | 18.6   | 18.0   |
| 10.5    | 14.1    | 7.7     | 22.3    | 18.7   | 13.9   | 11.5   | 9.7    | 9.6    |
| 4.4     | 12.0    | 6.5     | 35.5    | 23.7   | 25.4   | 6.6    | 2.3    | 7.6    |
| 16.5    | 11.2    | 14.1    | 13.9    | 22.5   | 17.9   | 17.4   | 13.2   | 17.4   |
| 936.5   | 921.1   | 580.8   | 379.8   | 329.3  | 355.8  | 282.7  | 256.5  | 299.1  |
| 1731.7  | 2215.6  | 1503.0  | 882.8   | 575.8  | 632.6  | 507.6  | 440.6  | 522.1  |
| 1.5     | 2.4     | 2.9     | 18.2    | 7.4    | 4.0    | 2.1    | 4.3    | 2.5    |
| 58.6    | 92.6    | 60.9    | 138.2   | 130.1  | 143.1  | 111.8  | 112.5  | 142.2  |
| 1.7     | 2.6     | 1.0     | 3.8     | 12.1   | 2.9    | 1.9    | 2.2    | 3.2    |
| 222.4   | 266.3   | 157.5   | 4.9     | 3.1    | 20.0   | 14.6   | 22.0   | 16.0   |
| 26.0    | 23.8    | 11.4    | 24.7    | 12.5   | 24.0   | 10.2   | 6.2    | 10.4   |
| 44.4    | 44.8    | 35.5    | 54.8    | 44.3   | 61.3   | 38.5   | 34.2   | 34.5   |
| 2.8     | 2.0     | 1.4     | 9.4     | 4.6    | 4.8    | 1.0    | 6.2    | 8.6    |
| 13.3    | 26.6    | 12.7    | 28.1    | 27.8   | 38.5   | 12.5   | 21.0   | 29.2   |
| 51.4    | 73.8    | 65.6    | 6.6     | 3.4    | 7.2    | 1.0    | 1.7    | 1.3    |
| 4.5     | 7.4     | 4.6     | 4.3     | 5.3    | 12.8   | 1.0    | 1.6    | 4.8    |
| 5.9     | 6.1     | 3.1     | 22.8    | 15.6   | 30.3   | 5.0    | 9.0    | 4.8    |
| 2.5     | 1.9     | 1.5     | 5.3     | 4.0    | 3.4    | 0.8    | 1.2    | 1.3    |
| 76.4    | 86.9    | 44.6    | 40.5    | 34.7   | 46.2   | 54.6   | 33.7   | 67.3   |
| 6.3     | 4.5     | 1.9     | 3.7     | 11.2   | 16.5   | 5.3    | 10.3   | 1.3    |
| 21.2    | 18.3    | 13.0    | 51.5    | 27.8   | 64.6   | 23.5   | 24.8   | 12.0   |
| 11.0    | 18.6    | 14.1    | 15.7    | 11.5   | 9.8    | 10.1   | 8.1    | 7.0    |
| 0.7     | 2.5     | 0.8     | 3.1     | 1.3    | 2.5    | 1.6    | 0.7    | 4.1    |
| 4.4     | 12.5    | 6.8     | 17.9    | 15.3   | 18.0   | 3.1    | 10.2   | 12.0   |
| 87.5    | 113.3   | 63.6    | 38.9    | 41.2   | 39.2   | 35.7   | 22.4   | 32.0   |
| 30.7    | 31.4    | 12.0    | 9.4     | 12.7   | 10.6   | 17.0   | 9.6    | 9.8    |
| 1083.7  | 1384.8  | 977.0   | 849.5   | 754.0  | 725.7  | 918.6  | 811.8  | 974.0  |
| 71.4    | 99.0    | 38.6    | 52.1    | 64.4   | 48.9   | 31.0   | 21.5   | 25.4   |
| 4.7     | 10.8    | 4.2     | 23.6    | 17.4   | 23.2   | 5.9    | 9.9    | 12.7   |
| 4389.6  | 4474.2  | 2485.8  | 595.4   | 477.8  | 502.3  | 928.6  | 722.8  | 797.1  |
| 21.2    | 19.0    | 18.2    | 15.7    | 30.5   | 28.8   | 9.7    | 14.6   | 17.1   |
| 3.4     | 1.7     | 0.5     | 5.9     | 3.3    | 12.0   | 2.2    | 2.1    | 2.6    |
| 428.5   | 428.9   | 302.1   | 138.0   | 100.2  | 126.2  | 84.9   | 87.0   | 77.0   |
| 7.6     | 21.9    | 17.5    | 11.3    | 10.4   | 11.8   | 16.9   | 13.2   | 15.4   |
| 0.7     | 6.3     | 6.8     | 5.3     | 7.7    | 7.4    | 5.2    | 6.2    | 3.4    |
| 7.3     | 15.2    | 9.9     | 21.8    | 22.2   | 27.0   | 10.4   | 12.5   | 15.5   |
| 5947.5  | 5935.7  | 4463.9  | 3229.4  | 2882.2 | 2828.9 | 2470.5 | 2346.6 | 2417.5 |
| 17.1    | 20.0    | 11.9    | 11.0    | 6.8    | 10.5   | 5.9    | 4.2    | 2.1    |
| 3.8     | 3.4     | 2.1     | 4.3     | 11.0   | 6.2    | 1.9    | 3.1    | 6.6    |
| 2.5     | 4.1     | 7.0     | 3.1     | 4.3    | 6.7    | 4.5    | 1.2    | 5.6    |
| 18.9    | 27.3    | 15.4    | 21.9    | 14.0   | 21.6   | 8.6    | 10.7   | 12.0   |
| 11429.7 | 11479.0 | 10951.3 | 10272.4 | 9729.4 | 9775.2 | 6995.9 | 7480.8 | 7712.8 |
| 240.9   | 341.8   | 262.6   | 152.0   | 109.0  | 124.8  | 219.8  | 172.2  | 216.3  |
| 9.4     | 15.2    | 16.1    | 24.1    | 19.5   | 18.6   | 22.7   | 12.0   | 16.2   |
| 66.3    | 81.9    | 51.0    | 83.2    | 59.5   | 78.4   | 98.9   | 61.0   | 79.7   |
| 740.0   | 1009.0  | 616.1   | 680.9   | 501.4  | 512.4  | 498.7  | 486.2  | 522.8  |
| 6325.3  | 7230.9  | 6758.5  | 3544.2  | 3146.5 | 3414.4 | 1876.6 | 2052.5 | 2142.2 |
| 17.8    | 11.3    | 11.3    | 14.9    | 18.9   | 8.4    | 12.3   | 10.5   | 10.2   |
| 17.4    | 13.8    | 6.5     | 5.4     | 9.5    | 7.0    | 16.6   | 8.6    | 7.2    |
| 5.9     | 0.9     | 6.0     | 3.6     | 2.6    | 6.3    | 4.9    | 2.6    | 4.2    |

|        |        |       |       |       |       |       |       |       |
|--------|--------|-------|-------|-------|-------|-------|-------|-------|
| 12.7   | 16.8   | 12.7  | 36.2  | 18.2  | 14.7  | 17.8  | 9.3   | 12.8  |
| 42.2   | 49.9   | 24.5  | 50.0  | 39.0  | 40.5  | 59.5  | 48.4  | 51.4  |
| 500.8  | 432.6  | 396.6 | 129.4 | 116.4 | 103.1 | 77.6  | 32.3  | 100.1 |
| 4.7    | 4.1    | 12.5  | 12.0  | 6.7   | 4.6   | 2.1   | 1.3   | 1.8   |
| 2.5    | 2.5    | 1.5   | 3.0   | 7.3   | 2.4   | 2.5   | 1.8   | 5.7   |
| 9.8    | 17.2   | 3.1   | 24.5  | 15.5  | 29.1  | 4.9   | 9.3   | 5.6   |
| 1.6    | 1.0    | 0.7   | 5.5   | 3.5   | 4.6   | 1.0   | 1.2   | 5.6   |
| 2.8    | 3.1    | 15.8  | 26.0  | 7.6   | 19.5  | 8.6   | 4.5   | 20.6  |
| 21.0   | 24.7   | 23.2  | 25.2  | 28.6  | 31.3  | 15.7  | 16.5  | 11.0  |
| 7.0    | 6.3    | 8.9   | 14.3  | 9.4   | 15.1  | 5.5   | 9.8   | 8.4   |
| 10.0   | 16.2   | 14.7  | 37.6  | 14.1  | 25.5  | 13.3  | 4.6   | 15.9  |
| 2.7    | 2.4    | 3.8   | 12.7  | 10.2  | 12.0  | 3.1   | 7.9   | 1.3   |
| 19.1   | 3.7    | 30.0  | 39.4  | 29.4  | 36.3  | 31.3  | 16.9  | 10.5  |
| 1.1    | 2.7    | 2.3   | 2.1   | 2.8   | 2.6   | 0.9   | 1.8   | 3.1   |
| 6.9    | 11.6   | 7.2   | 16.5  | 10.8  | 5.9   | 3.9   | 7.8   | 9.0   |
| 36.3   | 55.5   | 40.1  | 38.5  | 31.6  | 44.2  | 45.3  | 44.5  | 40.1  |
| 5.2    | 8.6    | 4.1   | 20.6  | 18.9  | 22.7  | 3.1   | 13.8  | 16.8  |
| 178.3  | 223.3  | 185.0 | 214.6 | 170.9 | 187.7 | 140.2 | 121.2 | 117.6 |
| 223.1  | 232.9  | 99.9  | 89.6  | 74.9  | 90.5  | 84.1  | 74.3  | 104.1 |
| 24.9   | 28.8   | 33.8  | 9.2   | 7.1   | 13.1  | 25.3  | 23.2  | 26.8  |
| 76.8   | 114.5  | 67.5  | 53.3  | 38.3  | 47.9  | 58.4  | 72.3  | 110.7 |
| 88.4   | 85.0   | 66.1  | 102.9 | 86.5  | 89.8  | 51.4  | 34.4  | 39.8  |
| 1.8    | 1.8    | 1.8   | 8.7   | 5.7   | 4.3   | 1.9   | 2.0   | 2.2   |
| 12.1   | 15.6   | 10.5  | 14.0  | 11.6  | 6.3   | 12.8  | 11.7  | 10.9  |
| 113.2  | 124.5  | 77.3  | 121.4 | 93.1  | 89.0  | 68.8  | 61.3  | 83.0  |
| 27.4   | 38.5   | 18.0  | 18.0  | 19.2  | 19.9  | 15.4  | 13.6  | 12.4  |
| 44.3   | 56.6   | 40.5  | 41.0  | 17.9  | 31.5  | 27.1  | 18.4  | 26.8  |
| 9.6    | 15.9   | 5.3   | 14.8  | 14.5  | 14.3  | 8.9   | 5.2   | 7.0   |
| 1.8    | 0.8    | 3.6   | 3.8   | 8.8   | 6.9   | 1.2   | 1.3   | 0.8   |
| 1115.0 | 1349.1 | 818.9 | 393.6 | 378.6 | 362.1 | 471.2 | 394.4 | 436.6 |
| 2.9    | 2.3    | 2.1   | 3.0   | 2.2   | 2.1   | 1.7   | 1.3   | 1.5   |
| 5.4    | 8.8    | 6.2   | 7.8   | 13.6  | 9.6   | 7.2   | 7.5   | 10.6  |
| 7.9    | 13.3   | 6.4   | 15.3  | 21.1  | 29.0  | 11.1  | 9.4   | 7.7   |
| 27.3   | 24.3   | 18.0  | 20.7  | 11.5  | 14.3  | 9.4   | 9.8   | 17.1  |
| 36.1   | 31.4   | 35.7  | 6.9   | 8.8   | 3.7   | 8.6   | 7.7   | 1.9   |
| 11.9   | 23.5   | 23.5  | 57.5  | 65.2  | 59.4  | 39.4  | 31.7  | 36.4  |
| 5.3    | 11.9   | 7.2   | 7.9   | 8.6   | 18.4  | 7.4   | 6.9   | 7.3   |
| 1.1    | 1.4    | 2.5   | 2.6   | 2.0   | 2.1   | 1.0   | 1.4   | 1.2   |
| 488.7  | 392.4  | 192.9 | 119.8 | 81.0  | 81.8  | 161.3 | 163.6 | 146.2 |
| 7.4    | 15.2   | 11.3  | 16.0  | 19.5  | 21.4  | 18.8  | 9.3   | 11.0  |
| 1099.4 | 1444.8 | 942.6 | 938.9 | 821.7 | 815.8 | 728.7 | 805.5 | 856.3 |
| 2.3    | 3.9    | 4.9   | 10.0  | 6.1   | 11.3  | 8.5   | 4.2   | 6.5   |
| 1.0    | 1.3    | 1.7   | 2.2   | 3.5   | 4.1   | 0.8   | 0.8   | 1.0   |
| 3.2    | 2.3    | 3.9   | 7.3   | 10.7  | 13.8  | 8.0   | 0.9   | 10.5  |
| 163.4  | 208.3  | 119.6 | 78.9  | 59.8  | 70.2  | 67.7  | 60.6  | 68.6  |
| 6.8    | 7.7    | 4.3   | 4.3   | 4.0   | 15.2  | 3.6   | 1.8   | 6.6   |
| 3.5    | 3.3    | 1.9   | 4.3   | 7.2   | 4.8   | 2.4   | 2.6   | 3.2   |
| 12.5   | 27.6   | 7.5   | 33.4  | 19.5  | 22.9  | 18.9  | 14.4  | 22.1  |
| 3.0    | 3.3    | 3.9   | 7.5   | 6.3   | 4.1   | 2.1   | 3.4   | 3.5   |
| 3.6    | 3.1    | 3.0   | 5.3   | 4.9   | 6.2   | 4.3   | 3.6   | 3.7   |
| 12.4   | 20.7   | 12.6  | 14.2  | 13.1  | 18.2  | 18.7  | 9.4   | 12.9  |
| 34.8   | 20.8   | 2.2   | 37.7  | 13.2  | 27.2  | 23.8  | 11.0  | 10.3  |
| 27.6   | 26.7   | 20.4  | 36.5  | 41.1  | 31.8  | 29.4  | 28.8  | 38.8  |

|        |        |        |        |        |        |        |        |        |
|--------|--------|--------|--------|--------|--------|--------|--------|--------|
| 254.2  | 300.5  | 173.6  | 98.1   | 108.3  | 122.1  | 82.5   | 70.8   | 103.1  |
| 7.2    | 4.2    | 1.5    | 9.2    | 6.2    | 5.4    | 6.6    | 4.7    | 3.3    |
| 18.8   | 13.8   | 18.7   | 14.8   | 7.0    | 15.4   | 11.5   | 10.3   | 10.9   |
| 4.9    | 10.5   | 4.7    | 16.0   | 26.5   | 31.8   | 7.0    | 4.1    | 12.9   |
| 8.5    | 3.5    | 2.4    | 3.0    | 5.8    | 3.8    | 8.9    | 3.5    | 2.1    |
| 8.9    | 8.8    | 5.0    | 4.0    | 12.2   | 9.8    | 5.9    | 2.6    | 6.5    |
| 13.7   | 21.6   | 15.3   | 39.1   | 42.4   | 34.0   | 15.7   | 13.6   | 20.8   |
| 9.7    | 7.1    | 2.5    | 9.7    | 12.7   | 6.5    | 3.3    | 3.6    | 4.8    |
| 1276.8 | 1681.5 | 1313.4 | 1164.0 | 1095.2 | 1134.2 | 894.3  | 904.2  | 1083.7 |
| 2.4    | 1.4    | 6.3    | 23.2   | 6.2    | 10.5   | 3.0    | 5.6    | 11.0   |
| 548.7  | 782.2  | 583.2  | 272.6  | 236.1  | 279.9  | 228.0  | 288.3  | 280.3  |
| 6985.5 | 7187.7 | 6979.3 | 61.0   | 52.4   | 55.9   | 24.8   | 23.6   | 25.0   |
| 21.8   | 25.0   | 20.2   | 25.8   | 17.2   | 17.9   | 6.8    | 7.4    | 15.2   |
| 10.3   | 10.4   | 10.4   | 8.4    | 4.0    | 2.2    | 7.4    | 9.6    | 7.6    |
| 21.5   | 22.5   | 21.5   | 12.5   | 6.6    | 6.4    | 4.2    | 1.8    | 7.5    |
| 4.0    | 4.3    | 4.0    | 3.7    | 5.3    | 6.2    | 1.6    | 1.8    | 3.6    |
| 3.7    | 2.6    | 2.6    | 3.9    | 7.2    | 2.7    | 9.2    | 2.1    | 2.9    |
| 55.4   | 71.8   | 48.7   | 51.6   | 45.8   | 57.9   | 44.1   | 35.8   | 41.1   |
| 13.0   | 17.0   | 5.4    | 29.4   | 12.8   | 11.8   | 18.7   | 5.6    | 11.8   |
| 726.4  | 785.7  | 403.6  | 236.6  | 179.8  | 229.0  | 233.7  | 174.0  | 217.5  |
| 176.8  | 284.6  | 295.7  | 7.1    | 14.5   | 14.6   | 4.5    | 11.5   | 6.1    |
| 502.3  | 834.4  | 687.7  | 76.9   | 76.7   | 75.3   | 30.7   | 30.6   | 34.3   |
| 15.0   | 2.8    | 7.2    | 15.6   | 5.7    | 2.2    | 2.4    | 3.7    | 2.2    |
| 220.4  | 322.3  | 251.5  | 194.0  | 154.4  | 208.7  | 92.0   | 130.9  | 190.4  |
| 1093.5 | 1344.2 | 806.0  | 541.5  | 379.7  | 436.7  | 713.3  | 430.0  | 622.1  |
| 6.9    | 14.3   | 2.0    | 18.8   | 5.3    | 10.8   | 12.8   | 7.6    | 2.8    |
| 322.7  | 365.3  | 310.4  | 90.5   | 102.4  | 85.0   | 81.4   | 98.8   | 95.1   |
| 8.8    | 16.6   | 7.6    | 2.6    | 4.6    | 8.8    | 5.8    | 1.4    | 8.7    |
| 9.0    | 3.7    | 2.1    | 4.1    | 4.5    | 4.9    | 3.2    | 4.7    | 2.4    |
| 2.0    | 10.8   | 4.9    | 13.2   | 9.4    | 11.0   | 8.6    | 3.3    | 1.3    |
| 4.8    | 4.3    | 2.3    | 14.0   | 4.5    | 6.6    | 1.2    | 0.7    | 5.3    |
| 3.9    | 4.1    | 12.5   | 15.2   | 8.7    | 11.7   | 4.0    | 4.7    | 4.3    |
| 24.5   | 20.4   | 9.6    | 36.7   | 21.7   | 32.4   | 29.9   | 16.1   | 21.5   |
| 0.9    | 3.4    | 0.9    | 4.3    | 3.1    | 6.3    | 1.5    | 1.6    | 0.9    |
| 1.7    | 2.0    | 1.0    | 12.1   | 10.3   | 6.6    | 2.0    | 1.3    | 2.8    |
| 7.0    | 18.9   | 6.5    | 9.0    | 10.1   | 12.1   | 7.6    | 3.9    | 6.5    |
| 0.6    | 5.4    | 6.7    | 1.2    | 3.3    | 3.4    | 2.7    | 2.1    | 0.2    |
| 167.0  | 264.4  | 190.5  | 148.2  | 137.3  | 158.7  | 73.1   | 123.1  | 108.1  |
| 4.2    | 3.4    | 9.1    | 9.7    | 13.2   | 8.1    | 9.4    | 5.8    | 8.7    |
| 2.1    | 2.3    | 7.3    | 7.4    | 13.0   | 11.8   | 6.2    | 0.9    | 8.2    |
| 1518.5 | 2466.2 | 2195.8 | 1304.8 | 954.8  | 1005.1 | 1360.6 | 1078.3 | 1289.4 |
| 16.3   | 20.9   | 28.1   | 17.3   | 24.4   | 13.8   | 33.6   | 32.8   | 29.5   |
| 4.7    | 5.5    | 1.5    | 7.6    | 9.7    | 10.9   | 0.6    | 6.4    | 2.6    |
| 11.3   | 6.2    | 2.6    | 6.3    | 12.7   | 4.7    | 2.9    | 4.3    | 5.6    |
| 50.6   | 59.4   | 53.9   | 36.0   | 20.5   | 28.4   | 50.7   | 36.7   | 43.3   |
| 10.5   | 10.6   | 6.0    | 8.3    | 9.1    | 3.0    | 12.7   | 10.8   | 8.8    |
| 6.0    | 7.5    | 2.8    | 9.0    | 11.8   | 8.5    | 8.7    | 3.4    | 4.9    |
| 1.9    | 2.6    | 2.4    | 10.1   | 4.6    | 6.7    | 2.4    | 3.8    | 2.6    |
| 18.1   | 24.2   | 14.7   | 35.0   | 33.5   | 49.2   | 18.1   | 28.3   | 24.8   |
| 0.7    | 0.8    | 1.0    | 2.4    | 5.8    | 2.9    | 0.4    | 0.4    | 0.7    |
| 49.9   | 60.7   | 52.3   | 24.8   | 9.7    | 10.9   | 14.8   | 11.4   | 15.9   |
| 39.6   | 56.1   | 45.5   | 9.9    | 7.9    | 2.4    | 9.5    | 6.4    | 5.6    |
| 7.0    | 14.2   | 6.7    | 19.3   | 15.7   | 17.8   | 7.0    | 5.5    | 11.3   |

|        |        |        |       |       |       |       |       |       |
|--------|--------|--------|-------|-------|-------|-------|-------|-------|
| 4.1    | 7.2    | 4.1    | 7.3   | 4.8   | 4.1   | 5.4   | 4.4   | 4.5   |
| 2.9    | 6.3    | 3.9    | 13.4  | 6.8   | 16.4  | 3.7   | 3.5   | 2.9   |
| 2.6    | 0.8    | 2.9    | 34.1  | 42.9  | 39.8  | 37.8  | 40.1  | 42.9  |
| 5.5    | 3.9    | 1.2    | 8.8   | 13.4  | 12.7  | 2.4   | 5.5   | 5.7   |
| 4060.9 | 4466.1 | 2904.6 | 727.2 | 615.8 | 664.5 | 689.2 | 736.9 | 786.9 |
| 1322.8 | 1509.7 | 1089.2 | 176.8 | 140.0 | 165.3 | 112.8 | 82.1  | 110.3 |
| 1.9    | 9.0    | 5.8    | 12.7  | 14.4  | 16.1  | 5.6   | 2.6   | 5.8   |
| 11.3   | 3.8    | 0.4    | 8.7   | 3.5   | 19.7  | 8.2   | 10.4  | 6.2   |
| 11.7   | 7.1    | 2.0    | 23.2  | 16.3  | 22.6  | 8.1   | 11.8  | 9.8   |
| 12.1   | 22.0   | 13.4   | 50.1  | 35.7  | 23.3  | 12.9  | 20.2  | 19.1  |
| 1.8    | 2.2    | 1.4    | 3.9   | 9.8   | 3.6   | 8.8   | 3.2   | 3.1   |
| 15.5   | 15.6   | 8.2    | 24.2  | 43.0  | 46.3  | 25.7  | 11.1  | 12.9  |
| 11.6   | 13.1   | 4.0    | 5.9   | 14.6  | 24.1  | 14.8  | 8.7   | 7.5   |
| 0.8    | 7.0    | 0.6    | 4.4   | 2.3   | 2.7   | 0.5   | 1.9   | 0.9   |
| 50.6   | 54.2   | 42.0   | 37.5  | 30.5  | 26.8  | 47.5  | 50.6  | 58.3  |
| 24.4   | 21.8   | 10.0   | 14.5  | 12.9  | 12.1  | 15.7  | 10.8  | 5.3   |
| 286.8  | 344.4  | 233.5  | 185.5 | 137.7 | 158.5 | 227.7 | 174.8 | 214.3 |
| 6.0    | 3.0    | 4.6    | 2.1   | 13.3  | 5.6   | 5.0   | 4.4   | 2.9   |
| 18.0   | 3.7    | 10.4   | 23.3  | 8.7   | 19.6  | 5.2   | 1.8   | 2.6   |
| 3.4    | 15.8   | 9.6    | 11.0  | 6.1   | 3.1   | 5.4   | 11.4  | 7.0   |
| 1.9    | 2.0    | 1.8    | 5.7   | 4.5   | 5.3   | 1.8   | 1.1   | 5.9   |
| 12.2   | 11.4   | 7.2    | 13.6  | 11.5  | 14.5  | 5.8   | 6.3   | 6.1   |
| 11.1   | 14.0   | 7.0    | 34.8  | 36.3  | 44.5  | 7.2   | 12.8  | 12.6  |
| 2.9    | 1.7    | 5.3    | 1.9   | 2.7   | 5.8   | 1.8   | 3.0   | 4.3   |
| 0.8    | 1.0    | 0.6    | 1.5   | 6.2   | 8.4   | 0.8   | 1.1   | 0.6   |
| 20.4   | 34.9   | 7.9    | 10.1  | 11.4  | 12.9  | 13.4  | 14.1  | 18.9  |
| 15.5   | 13.5   | 14.0   | 32.5  | 22.8  | 31.6  | 18.0  | 19.8  | 11.9  |
| 12.1   | 26.2   | 16.8   | 4.8   | 22.7  | 11.0  | 11.8  | 11.1  | 20.8  |
| 6.7    | 3.6    | 3.0    | 3.5   | 4.9   | 5.0   | 5.4   | 9.9   | 3.0   |
| 0.4    | 7.0    | 0.4    | 3.8   | 1.2   | 1.2   | 1.8   | 0.6   | 1.1   |
| 17.2   | 16.8   | 9.5    | 23.6  | 8.5   | 16.3  | 1.7   | 4.3   | 6.3   |
| 2.4    | 2.8    | 2.7    | 10.3  | 4.8   | 9.0   | 3.5   | 2.0   | 1.7   |
| 32.3   | 31.8   | 22.3   | 31.2  | 40.4  | 33.1  | 27.8  | 22.5  | 37.7  |
| 7.6    | 8.3    | 3.2    | 13.8  | 5.7   | 4.9   | 6.5   | 4.4   | 7.0   |
| 2.0    | 1.2    | 1.3    | 2.4   | 2.8   | 3.6   | 0.9   | 1.4   | 1.1   |
| 6.4    | 5.6    | 4.6    | 8.1   | 7.5   | 10.0  | 3.4   | 2.6   | 2.9   |
| 0.6    | 1.0    | 0.5    | 2.0   | 8.0   | 8.8   | 0.9   | 2.6   | 2.9   |
| 11.7   | 17.5   | 13.0   | 31.1  | 18.7  | 32.7  | 19.8  | 10.5  | 8.5   |
| 1.4    | 12.2   | 6.0    | 14.4  | 1.7   | 8.6   | 3.9   | 4.9   | 0.9   |
| 18.8   | 28.6   | 16.1   | 24.0  | 24.8  | 24.4  | 11.5  | 13.6  | 15.9  |
| 2.8    | 2.1    | 1.9    | 5.9   | 4.7   | 4.9   | 3.5   | 4.5   | 3.7   |
| 21.1   | 27.0   | 15.1   | 14.5  | 12.2  | 12.6  | 15.7  | 17.9  | 20.3  |
| 74.8   | 90.8   | 46.9   | 56.3  | 34.7  | 50.1  | 37.9  | 40.6  | 51.8  |
| 10.9   | 11.2   | 4.2    | 30.1  | 12.5  | 24.0  | 9.4   | 13.7  | 14.0  |
| 87.3   | 139.2  | 100.6  | 127.5 | 115.2 | 161.3 | 79.9  | 79.3  | 92.5  |
| 7.1    | 5.7    | 4.7    | 9.6   | 5.0   | 19.4  | 7.4   | 4.0   | 5.6   |
| 21.6   | 34.0   | 30.0   | 35.2  | 26.3  | 18.7  | 12.6  | 20.0  | 16.7  |
| 4.3    | 11.7   | 3.5    | 10.4  | 8.4   | 7.1   | 6.8   | 2.0   | 5.2   |
| 123.6  | 145.2  | 121.6  | 151.4 | 122.4 | 142.0 | 167.6 | 162.4 | 158.5 |
| 184.5  | 221.4  | 96.6   | 38.7  | 23.6  | 24.8  | 31.1  | 27.6  | 33.2  |
| 1.5    | 3.3    | 3.0    | 5.1   | 3.5   | 4.9   | 1.6   | 3.9   | 1.3   |
| 11.5   | 23.6   | 19.0   | 6.4   | 21.5  | 22.2  | 12.0  | 28.7  | 21.2  |
| 1.7    | 7.0    | 5.9    | 6.7   | 13.0  | 18.1  | 7.4   | 7.1   | 2.7   |

|        |        |       |       |       |       |       |       |       |
|--------|--------|-------|-------|-------|-------|-------|-------|-------|
| 291.6  | 320.9  | 250.7 | 96.6  | 73.4  | 102.3 | 249.3 | 238.2 | 271.1 |
| 6.0    | 5.9    | 3.0   | 16.1  | 18.9  | 11.4  | 4.0   | 6.7   | 14.7  |
| 2.9    | 3.7    | 2.9   | 9.4   | 6.6   | 4.9   | 1.0   | 3.2   | 10.1  |
| 13.8   | 43.2   | 15.4  | 32.7  | 25.5  | 31.6  | 24.9  | 14.3  | 29.2  |
| 12.6   | 13.2   | 15.2  | 526.4 | 374.0 | 398.4 | 359.7 | 269.3 | 341.5 |
| 28.0   | 34.0   | 40.6  | 42.7  | 39.3  | 45.5  | 31.2  | 17.5  | 28.0  |
| 9.7    | 22.0   | 23.9  | 6.8   | 3.2   | 5.9   | 1.5   | 12.4  | 1.8   |
| 29.3   | 38.0   | 19.5  | 54.5  | 48.8  | 37.1  | 35.6  | 32.8  | 37.0  |
| 11.6   | 13.4   | 7.7   | 12.3  | 8.3   | 12.2  | 9.2   | 7.1   | 8.0   |
| 114.2  | 98.6   | 84.4  | 90.0  | 69.2  | 72.8  | 71.9  | 58.8  | 89.3  |
| 69.3   | 93.7   | 74.6  | 41.5  | 41.1  | 39.2  | 35.8  | 30.9  | 23.1  |
| 3.6    | 19.5   | 6.9   | 18.2  | 24.4  | 12.6  | 9.5   | 15.5  | 21.3  |
| 12.5   | 6.3    | 7.2   | 21.7  | 17.8  | 14.4  | 5.8   | 8.6   | 4.1   |
| 12.5   | 13.6   | 6.5   | 10.3  | 9.1   | 17.2  | 8.2   | 5.6   | 8.3   |
| 5.0    | 4.2    | 7.5   | 6.5   | 16.6  | 19.4  | 5.8   | 5.3   | 7.4   |
| 2.5    | 2.0    | 4.4   | 18.4  | 24.7  | 13.4  | 5.6   | 2.7   | 9.0   |
| 1054.9 | 1484.2 | 749.6 | 20.5  | 12.9  | 17.7  | 20.9  | 7.3   | 7.6   |
| 3.8    | 3.7    | 5.8   | 3.4   | 2.4   | 3.5   | 8.1   | 1.6   | 2.2   |
| 0.9    | 1.0    | 1.6   | 2.0   | 1.6   | 3.4   | 0.7   | 0.7   | 0.8   |
| 1.4    | 2.9    | 4.5   | 4.5   | 2.8   | 9.5   | 0.8   | 0.9   | 1.4   |
| 3.0    | 3.5    | 2.8   | 5.5   | 7.1   | 7.7   | 1.6   | 6.1   | 1.8   |
| 17.5   | 20.1   | 25.3  | 10.1  | 20.0  | 40.1  | 14.4  | 1.0   | 15.8  |
| 48.1   | 58.0   | 36.4  | 29.1  | 20.0  | 39.8  | 33.0  | 31.5  | 29.6  |
| 5.1    | 5.2    | 5.4   | 8.4   | 5.7   | 4.2   | 6.3   | 4.8   | 2.8   |
| 576.4  | 1015.1 | 622.7 | 137.4 | 126.9 | 128.8 | 290.4 | 349.7 | 365.2 |
| 1.3    | 1.4    | 1.1   | 6.5   | 5.4   | 3.7   | 2.0   | 1.9   | 1.6   |
| 45.5   | 39.5   | 42.5  | 67.2  | 47.5  | 58.2  | 28.2  | 41.7  | 43.3  |
| 16.3   | 10.6   | 12.2  | 19.6  | 16.6  | 16.9  | 10.4  | 9.0   | 15.0  |
| 3.7    | 2.2    | 1.1   | 2.0   | 2.8   | 3.1   | 0.8   | 1.0   | 1.7   |
| 2.2    | 1.3    | 2.2   | 2.4   | 2.4   | 4.4   | 0.8   | 2.5   | 1.1   |
| 4.3    | 3.7    | 3.9   | 7.4   | 6.7   | 17.2  | 0.9   | 1.6   | 2.9   |
| 1.0    | 0.7    | 0.4   | 8.6   | 4.5   | 11.8  | 4.0   | 0.7   | 1.6   |
| 16.8   | 25.9   | 23.1  | 35.3  | 28.1  | 32.7  | 11.8  | 17.8  | 16.8  |
| 0.3    | 3.5    | 4.5   | 14.0  | 5.5   | 5.4   | 2.3   | 7.4   | 3.4   |
| 7.8    | 7.5    | 5.5   | 19.1  | 11.1  | 11.9  | 9.8   | 9.0   | 8.2   |
| 11.2   | 12.6   | 13.5  | 15.3  | 12.7  | 15.8  | 6.9   | 10.0  | 8.2   |
| 2.4    | 2.1    | 2.0   | 7.3   | 2.7   | 6.9   | 5.6   | 2.5   | 7.8   |
| 1.5    | 1.1    | 1.1   | 3.2   | 3.4   | 2.7   | 1.2   | 1.3   | 1.8   |
| 1.9    | 2.3    | 2.1   | 5.8   | 4.2   | 4.4   | 1.7   | 2.0   | 2.0   |
| 5.9    | 1.2    | 1.7   | 7.6   | 14.5  | 5.0   | 1.9   | 6.3   | 5.0   |
| 5.2    | 3.0    | 2.5   | 7.5   | 7.6   | 16.5  | 2.2   | 6.1   | 8.2   |
| 44.6   | 55.4   | 30.0  | 31.2  | 27.0  | 32.7  | 24.6  | 29.8  | 22.7  |
| 0.9    | 2.9    | 1.9   | 8.3   | 9.0   | 2.6   | 0.9   | 0.6   | 1.3   |
| 1.5    | 1.8    | 1.9   | 2.7   | 6.8   | 4.9   | 1.2   | 0.9   | 2.4   |
| 24.5   | 35.3   | 41.9  | 14.3  | 7.0   | 6.6   | 8.9   | 11.2  | 12.2  |
| 2.8    | 2.8    | 2.4   | 6.7   | 5.1   | 5.6   | 1.6   | 1.7   | 2.4   |
| 13.5   | 9.7    | 6.0   | 43.2  | 28.8  | 29.2  | 13.4  | 10.4  | 14.6  |
| 13.7   | 16.8   | 15.4  | 9.7   | 10.7  | 22.9  | 9.4   | 15.3  | 9.9   |
| 2.6    | 3.4    | 0.2   | 6.7   | 6.3   | 2.7   | 0.3   | 0.8   | 2.0   |
| 17.7   | 15.9   | 11.8  | 36.1  | 28.0  | 31.9  | 12.7  | 6.2   | 15.3  |
| 23.2   | 33.5   | 17.4  | 36.5  | 33.3  | 42.5  | 14.2  | 25.1  | 31.8  |
| 109.4  | 119.5  | 93.3  | 39.4  | 33.9  | 36.0  | 16.3  | 21.5  | 22.4  |
| 2.3    | 1.9    | 2.5   | 9.8   | 5.6   | 8.6   | 2.8   | 1.6   | 5.8   |



|      |      |      |      |      |      |      |      |      |
|------|------|------|------|------|------|------|------|------|
| 3.8  | 5.5  | 10.0 | 3.4  | 5.6  | 4.9  | 2.4  | 1.0  | 4.4  |
| 2.9  | 10.1 | 3.3  | 12.6 | 12.5 | 20.2 | 4.3  | 2.7  | 4.6  |
| 11.1 | 4.6  | 1.6  | 6.1  | 7.8  | 4.9  | 1.7  | 4.7  | 3.2  |
| 27.1 | 22.2 | 16.4 | 43.3 | 24.3 | 25.4 | 33.7 | 22.5 | 25.9 |
| 14.1 | 13.3 | 7.1  | 9.2  | 2.9  | 9.4  | 5.1  | 2.9  | 2.2  |
| 1.4  | 3.9  | 5.0  | 17.8 | 5.1  | 19.0 | 4.8  | 1.3  | 2.5  |
| 16.4 | 20.4 | 5.9  | 25.1 | 24.0 | 27.6 | 14.2 | 16.0 | 15.4 |
| 21.1 | 24.7 | 14.8 | 8.2  | 5.7  | 8.2  | 7.2  | 3.5  | 3.2  |
| 18.8 | 24.0 | 10.4 | 9.4  | 27.0 | 23.6 | 33.8 | 18.0 | 23.3 |
| 20.7 | 28.7 | 13.7 | 41.3 | 24.7 | 38.0 | 15.9 | 18.1 | 35.3 |
| 2.7  | 0.9  | 3.3  | 10.9 | 5.7  | 5.3  | 4.5  | 3.0  | 4.5  |
| 6.0  | 12.5 | 7.2  | 28.0 | 13.0 | 28.6 | 10.3 | 17.2 | 12.9 |
| 2.8  | 3.1  | 4.0  | 14.1 | 10.7 | 4.8  | 7.8  | 3.4  | 2.8  |
| 20.8 | 13.4 | 9.2  | 22.0 | 14.2 | 7.5  | 21.7 | 16.8 | 13.6 |
| 11.7 | 13.2 | 9.6  | 15.2 | 20.4 | 10.7 | 7.3  | 5.6  | 9.4  |
| 12.6 | 15.2 | 12.4 | 35.7 | 21.5 | 23.2 | 23.3 | 11.8 | 18.9 |
| 2.3  | 4.9  | 6.0  | 5.3  | 4.7  | 5.9  | 0.9  | 0.8  | 1.5  |
| 14.5 | 15.0 | 4.0  | 22.1 | 22.3 | 25.9 | 8.7  | 9.5  | 8.3  |
| 3.0  | 2.0  | 1.5  | 5.9  | 3.4  | 6.4  | 2.8  | 1.5  | 3.4  |
| 3.0  | 2.3  | 1.4  | 3.6  | 2.4  | 3.3  | 2.2  | 1.7  | 1.8  |
| 10.2 | 6.0  | 12.3 | 20.1 | 20.5 | 20.5 | 6.2  | 6.3  | 11.5 |
| 4.4  | 5.8  | 2.5  | 7.6  | 4.3  | 13.0 | 2.1  | 3.8  | 1.8  |
| 8.4  | 8.0  | 2.0  | 8.2  | 12.0 | 13.3 | 5.1  | 3.9  | 5.0  |
| 2.8  | 4.8  | 6.3  | 5.7  | 7.4  | 11.4 | 2.3  | 5.2  | 3.0  |
| 6.9  | 8.9  | 3.6  | 5.8  | 7.2  | 3.9  | 3.9  | 1.1  | 5.7  |
| 16.2 | 15.7 | 12.9 | 8.8  | 18.7 | 5.8  | 5.0  | 7.8  | 8.3  |
| 5.2  | 10.9 | 4.1  | 27.3 | 25.8 | 50.0 | 9.3  | 8.9  | 12.2 |
| 15.0 | 11.9 | 12.1 | 15.5 | 12.2 | 22.6 | 2.7  | 4.8  | 3.2  |
| 15.0 | 27.5 | 15.2 | 27.9 | 29.7 | 25.3 | 31.1 | 30.5 | 30.9 |
| 6.0  | 9.9  | 9.2  | 17.2 | 17.1 | 17.0 | 5.4  | 7.3  | 6.6  |
| 7.6  | 4.2  | 8.9  | 4.6  | 2.5  | 5.2  | 6.5  | 1.1  | 1.1  |
| 12.1 | 11.5 | 11.1 | 19.8 | 15.0 | 25.7 | 14.5 | 11.0 | 13.1 |
| 3.4  | 14.7 | 7.5  | 16.5 | 10.5 | 14.7 | 19.5 | 12.9 | 12.7 |
| 2.2  | 6.6  | 3.6  | 7.2  | 7.6  | 12.2 | 3.2  | 5.1  | 2.5  |
| 5.2  | 19.0 | 2.0  | 10.8 | 7.4  | 16.8 | 9.5  | 4.1  | 9.3  |
| 2.9  | 1.0  | 2.1  | 9.6  | 2.2  | 2.7  | 0.5  | 2.4  | 1.8  |
| 6.7  | 1.7  | 4.0  | 7.2  | 8.5  | 7.4  | 0.3  | 1.6  | 4.9  |
| 26.0 | 25.1 | 13.7 | 26.4 | 17.7 | 17.7 | 7.8  | 11.2 | 6.7  |
| 0.7  | 1.0  | 0.7  | 2.2  | 7.4  | 2.4  | 1.1  | 2.1  | 4.4  |
| 0.9  | 1.2  | 1.0  | 3.3  | 2.3  | 2.8  | 0.8  | 0.6  | 1.5  |
| 1.6  | 1.0  | 3.9  | 8.9  | 5.4  | 2.7  | 0.9  | 0.8  | 3.9  |
| 4.1  | 9.4  | 9.3  | 17.5 | 10.1 | 7.9  | 3.8  | 8.4  | 10.7 |
| 5.6  | 3.7  | 4.1  | 19.9 | 22.8 | 20.9 | 5.6  | 4.4  | 4.7  |
| 6.9  | 10.2 | 4.6  | 12.0 | 12.7 | 18.0 | 3.9  | 2.3  | 4.2  |
| 9.2  | 12.1 | 1.7  | 4.5  | 2.6  | 9.8  | 5.1  | 3.3  | 6.3  |
| 17.6 | 8.8  | 6.0  | 8.1  | 3.8  | 3.6  | 4.3  | 5.6  | 1.9  |
| 15.5 | 19.3 | 13.0 | 24.4 | 17.5 | 26.0 | 14.4 | 12.4 | 5.5  |
| 1.5  | 1.7  | 1.9  | 3.3  | 3.5  | 4.4  | 2.3  | 2.9  | 1.7  |
| 8.1  | 2.6  | 6.1  | 16.2 | 3.3  | 6.3  | 4.5  | 2.4  | 2.0  |
| 30.2 | 33.8 | 24.2 | 70.4 | 50.6 | 57.4 | 32.5 | 17.7 | 17.9 |
| 18.0 | 16.4 | 12.1 | 16.8 | 8.4  | 13.8 | 14.4 | 8.9  | 10.7 |
| 5.3  | 3.7  | 4.4  | 15.4 | 18.4 | 5.3  | 3.3  | 3.6  | 4.5  |
| 9.0  | 10.2 | 6.2  | 14.0 | 13.4 | 22.1 | 3.1  | 6.5  | 3.5  |

|       |        |        |        |        |        |        |        |        |
|-------|--------|--------|--------|--------|--------|--------|--------|--------|
| 8.2   | 6.3    | 2.8    | 12.5   | 5.6    | 12.2   | 2.2    | 0.4    | 7.1    |
| 0.7   | 0.8    | 0.6    | 1.4    | 6.8    | 1.7    | 0.7    | 0.7    | 1.4    |
| 0.6   | 1.4    | 0.8    | 4.9    | 1.5    | 6.9    | 5.6    | 0.7    | 0.5    |
| 7.5   | 19.3   | 6.9    | 24.5   | 17.0   | 9.2    | 5.5    | 8.7    | 11.3   |
| 12.3  | 12.6   | 2.4    | 15.9   | 2.5    | 13.8   | 7.0    | 5.8    | 5.5    |
| 2.5   | 7.0    | 3.3    | 12.0   | 11.8   | 17.1   | 2.7    | 7.5    | 3.5    |
| 12.0  | 37.7   | 14.9   | 23.1   | 12.9   | 13.3   | 18.3   | 19.0   | 7.0    |
| 1.6   | 8.0    | 4.1    | 9.5    | 7.1    | 10.4   | 2.7    | 7.0    | 8.6    |
| 4.8   | 5.9    | 6.9    | 12.2   | 7.4    | 8.1    | 11.0   | 5.3    | 4.6    |
| 245.6 | 299.6  | 263.0  | 145.2  | 118.4  | 166.7  | 180.7  | 199.1  | 203.5  |
| 1.1   | 0.7    | 3.3    | 2.2    | 2.7    | 6.7    | 2.0    | 2.5    | 2.6    |
| 86.7  | 100.1  | 74.2   | 76.8   | 68.3   | 53.2   | 63.4   | 47.9   | 61.7   |
| 8.0   | 17.0   | 9.6    | 24.1   | 26.9   | 14.1   | 21.0   | 17.0   | 11.2   |
| 12.2  | 9.0    | 2.9    | 7.1    | 15.3   | 7.3    | 9.4    | 5.1    | 16.2   |
| 21.7  | 6.3    | 9.2    | 29.6   | 27.5   | 33.7   | 11.0   | 10.8   | 20.9   |
| 3.6   | 7.3    | 8.5    | 11.7   | 13.5   | 14.3   | 2.4    | 4.2    | 5.1    |
| 2.1   | 2.0    | 7.5    | 15.4   | 4.9    | 22.9   | 2.0    | 2.2    | 1.6    |
| 4.0   | 2.7    | 4.8    | 10.3   | 6.9    | 5.4    | 2.9    | 2.1    | 4.4    |
| 5.4   | 5.9    | 4.8    | 7.2    | 2.8    | 8.9    | 4.8    | 4.2    | 1.1    |
| 14.8  | 16.9   | 13.3   | 7.5    | 7.5    | 14.7   | 12.4   | 5.9    | 11.3   |
| 3.8   | 6.2    | 0.9    | 7.6    | 5.9    | 1.9    | 0.7    | 1.6    | 1.9    |
| 20.6  | 7.2    | 9.2    | 34.1   | 18.3   | 18.7   | 5.4    | 8.5    | 14.6   |
| 9.8   | 12.6   | 13.6   | 6.1    | 8.0    | 8.6    | 13.3   | 14.2   | 6.1    |
| 0.7   | 2.0    | 2.9    | 8.5    | 3.0    | 5.7    | 1.3    | 0.7    | 1.1    |
| 1.1   | 3.5    | 1.6    | 4.0    | 4.6    | 9.0    | 2.4    | 1.1    | 3.4    |
| 2.3   | 3.1    | 1.3    | 5.0    | 12.1   | 10.6   | 3.9    | 2.1    | 5.3    |
| 47.5  | 40.2   | 38.2   | 28.8   | 22.5   | 15.8   | 24.2   | 23.6   | 26.9   |
| 62.7  | 62.6   | 16.1   | 37.1   | 34.2   | 14.0   | 16.3   | 14.3   | 11.8   |
| 89.5  | 99.9   | 86.3   | 87.6   | 70.3   | 73.3   | 70.9   | 81.4   | 55.4   |
| 10.8  | 20.1   | 7.9    | 17.8   | 8.8    | 10.2   | 7.0    | 7.8    | 12.1   |
| 2.9   | 2.8    | 1.5    | 5.9    | 3.3    | 20.3   | 2.8    | 2.3    | 2.2    |
| 1.3   | 1.7    | 1.5    | 10.4   | 4.8    | 4.7    | 4.3    | 2.2    | 1.9    |
| 5.2   | 1.2    | 4.8    | 8.3    | 7.6    | 10.5   | 1.4    | 1.0    | 7.8    |
| 15.6  | 17.9   | 12.5   | 21.1   | 23.2   | 10.1   | 7.2    | 6.0    | 8.3    |
| 2.1   | 3.7    | 0.7    | 1.5    | 4.0    | 2.7    | 0.7    | 0.9    | 0.7    |
| 1.8   | 3.9    | 6.4    | 17.9   | 8.8    | 17.7   | 1.5    | 2.6    | 8.7    |
| 0.8   | 1.2    | 1.0    | 1.4    | 1.5    | 1.1    | 3.6    | 0.9    | 0.8    |
| 6.2   | 20.8   | 10.1   | 15.6   | 21.5   | 19.2   | 24.9   | 24.1   | 27.2   |
| 29.4  | 29.1   | 22.9   | 43.4   | 24.5   | 24.6   | 18.0   | 17.8   | 24.9   |
| 1.5   | 2.8    | 0.5    | 1.2    | 2.6    | 3.0    | 0.8    | 1.2    | 0.3    |
| 72.5  | 88.5   | 67.3   | 45.5   | 43.1   | 41.1   | 18.3   | 21.5   | 26.7   |
| 745.8 | 1076.1 | 1007.0 | 8596.8 | 8548.4 | 8897.2 | 5442.6 | 6178.8 | 6246.5 |
| 8.5   | 7.9    | 7.7    | 12.1   | 14.2   | 15.6   | 11.8   | 3.9    | 5.8    |
| 21.7  | 26.3   | 13.6   | 41.9   | 31.9   | 38.8   | 17.9   | 18.7   | 19.5   |
| 0.8   | 8.8    | 4.6    | 7.9    | 6.8    | 5.8    | 1.8    | 0.6    | 0.8    |
| 6.8   | 6.0    | 3.3    | 10.1   | 3.8    | 5.6    | 2.1    | 2.1    | 1.5    |
| 160.0 | 212.9  | 178.1  | 102.4  | 74.5   | 87.6   | 113.5  | 68.6   | 112.9  |
| 16.8  | 13.2   | 21.8   | 18.3   | 45.4   | 13.9   | 6.4    | 5.8    | 12.0   |
| 486.5 | 652.8  | 456.0  | 504.9  | 435.5  | 474.2  | 361.3  | 355.8  | 404.3  |
| 1.0   | 1.2    | 1.0    | 3.0    | 1.8    | 3.2    | 0.8    | 1.5    | 1.8    |
| 3.2   | 2.4    | 9.4    | 9.8    | 28.0   | 17.5   | 4.1    | 3.6    | 2.8    |
| 4.4   | 3.1    | 2.4    | 9.2    | 6.4    | 8.6    | 1.8    | 2.4    | 2.6    |
| 11.2  | 14.4   | 10.9   | 16.8   | 17.5   | 13.1   | 7.0    | 6.0    | 7.9    |

|       |       |       |       |       |       |       |       |       |
|-------|-------|-------|-------|-------|-------|-------|-------|-------|
| 7.1   | 5.1   | 3.8   | 9.4   | 8.2   | 14.4  | 13.7  | 14.0  | 10.0  |
| 41.6  | 54.3  | 32.7  | 63.7  | 57.8  | 52.5  | 36.9  | 31.1  | 39.6  |
| 5.7   | 6.0   | 3.8   | 5.1   | 10.4  | 6.6   | 11.4  | 7.2   | 6.5   |
| 9.3   | 13.4  | 5.4   | 17.4  | 11.7  | 14.5  | 2.5   | 2.1   | 1.1   |
| 3.9   | 5.6   | 3.8   | 5.3   | 3.3   | 5.2   | 1.9   | 1.9   | 2.1   |
| 8.3   | 7.2   | 1.4   | 10.6  | 8.6   | 9.1   | 2.6   | 11.3  | 10.6  |
| 2.8   | 1.9   | 4.3   | 5.0   | 4.2   | 5.9   | 1.8   | 1.8   | 2.0   |
| 158.5 | 196.8 | 109.4 | 60.1  | 56.5  | 59.5  | 75.4  | 67.9  | 87.4  |
| 12.5  | 13.6  | 9.5   | 10.9  | 9.8   | 4.6   | 15.1  | 3.5   | 5.0   |
| 9.6   | 13.9  | 9.5   | 13.1  | 17.1  | 11.9  | 2.2   | 10.8  | 11.5  |
| 66.6  | 91.8  | 77.2  | 91.2  | 79.3  | 49.8  | 47.1  | 61.3  | 49.1  |
| 31.1  | 39.6  | 45.5  | 35.9  | 33.7  | 45.4  | 34.7  | 31.6  | 31.9  |
| 33.9  | 40.0  | 26.4  | 14.4  | 12.8  | 13.4  | 20.3  | 3.8   | 8.8   |
| 0.5   | 1.0   | 0.8   | 2.4   | 3.5   | 2.6   | 1.1   | 0.6   | 0.6   |
| 160.1 | 213.1 | 146.0 | 187.7 | 141.4 | 178.0 | 98.0  | 84.5  | 101.9 |
| 249.5 | 264.0 | 155.7 | 321.6 | 237.7 | 252.2 | 235.9 | 201.0 | 258.7 |
| 11.6  | 12.5  | 12.9  | 11.3  | 1.7   | 1.4   | 4.9   | 3.4   | 8.6   |
| 9.4   | 5.0   | 0.7   | 17.9  | 16.8  | 23.0  | 8.7   | 5.0   | 5.7   |
| 1.4   | 2.4   | 10.2  | 14.7  | 4.4   | 11.4  | 2.2   | 14.4  | 14.8  |
| 40.9  | 40.6  | 40.7  | 39.7  | 36.7  | 41.7  | 32.4  | 32.3  | 30.9  |
| 1.4   | 1.4   | 0.3   | 2.6   | 3.6   | 2.9   | 0.5   | 0.2   | 0.3   |
| 13.0  | 19.9  | 18.8  | 31.5  | 11.4  | 28.1  | 19.2  | 17.8  | 16.8  |
| 184.1 | 151.6 | 67.0  | 45.3  | 19.1  | 32.1  | 44.6  | 24.3  | 26.5  |
| 8.8   | 15.8  | 11.5  | 7.3   | 15.8  | 7.0   | 7.5   | 6.2   | 2.3   |
| 4.9   | 4.3   | 1.7   | 9.7   | 8.6   | 2.8   | 6.3   | 3.1   | 3.1   |
| 17.5  | 23.0  | 19.6  | 112.7 | 73.9  | 104.2 | 50.0  | 54.9  | 51.8  |
| 4.4   | 9.8   | 3.6   | 9.4   | 10.8  | 12.3  | 8.2   | 4.7   | 3.6   |
| 20.6  | 11.3  | 3.4   | 10.3  | 5.8   | 7.8   | 4.1   | 3.5   | 3.3   |
| 1.2   | 3.4   | 0.4   | 1.7   | 1.6   | 0.8   | 0.4   | 0.4   | 0.4   |
| 9.3   | 7.8   | 5.3   | 3.4   | 18.4  | 15.4  | 9.2   | 8.7   | 10.5  |
| 36.0  | 20.5  | 24.8  | 38.3  | 28.4  | 22.3  | 14.3  | 28.8  | 21.3  |
| 3.8   | 3.2   | 9.4   | 7.9   | 8.1   | 9.4   | 8.4   | 2.6   | 3.1   |
| 35.4  | 45.8  | 14.1  | 4.3   | 4.6   | 6.4   | 5.7   | 1.8   | 4.2   |
| 5.4   | 3.3   | 8.7   | 19.9  | 12.5  | 15.8  | 5.1   | 6.0   | 5.3   |
| 38.0  | 36.5  | 27.4  | 52.7  | 50.8  | 63.1  | 41.6  | 46.7  | 39.7  |
| 268.6 | 314.9 | 231.3 | 209.2 | 117.2 | 160.9 | 116.7 | 96.7  | 120.3 |
| 10.3  | 4.3   | 3.8   | 5.1   | 9.6   | 3.1   | 1.2   | 0.4   | 0.8   |
| 83.8  | 116.8 | 94.9  | 127.3 | 122.8 | 136.8 | 63.4  | 72.7  | 79.4  |
| 9.8   | 5.6   | 10.8  | 4.9   | 3.6   | 5.5   | 5.0   | 2.0   | 2.4   |
| 16.4  | 21.6  | 12.7  | 13.8  | 10.2  | 14.8  | 11.9  | 11.5  | 14.7  |
| 11.5  | 26.4  | 4.0   | 5.5   | 8.1   | 3.7   | 7.1   | 3.4   | 2.3   |
| 28.3  | 40.5  | 27.5  | 6.9   | 14.1  | 13.2  | 5.3   | 11.6  | 13.2  |
| 4.7   | 4.3   | 3.5   | 2.9   | 5.3   | 5.4   | 2.7   | 2.0   | 3.3   |
| 7.2   | 6.1   | 3.6   | 7.2   | 6.4   | 5.7   | 15.5  | 5.6   | 12.3  |
| 3.4   | 11.8  | 7.5   | 5.3   | 3.0   | 6.0   | 5.8   | 2.3   | 2.9   |
| 3.4   | 7.3   | 8.9   | 4.2   | 6.9   | 1.3   | 6.0   | 6.9   | 8.4   |
| 100.1 | 130.1 | 511.7 | 35.7  | 30.2  | 49.0  | 11.5  | 22.8  | 22.8  |
| 12.4  | 14.5  | 10.7  | 19.7  | 22.2  | 25.3  | 8.8   | 17.0  | 13.6  |
| 1.2   | 1.1   | 1.2   | 1.3   | 1.5   | 1.3   | 0.9   | 2.9   | 1.3   |
| 43.7  | 41.2  | 23.7  | 33.1  | 21.9  | 21.2  | 13.9  | 25.8  | 23.3  |
| 7.0   | 4.2   | 8.4   | 14.7  | 11.7  | 13.9  | 10.3  | 6.4   | 2.5   |
| 406.6 | 528.5 | 470.0 | 90.6  | 70.4  | 101.0 | 70.8  | 84.0  | 80.6  |
| 0.8   | 0.9   | 0.7   | 2.6   | 1.8   | 1.4   | 1.0   | 0.7   | 0.9   |

|       |        |       |       |       |       |       |       |       |
|-------|--------|-------|-------|-------|-------|-------|-------|-------|
| 7.1   | 2.5    | 4.2   | 16.6  | 9.7   | 5.1   | 7.1   | 4.0   | 6.0   |
| 323.8 | 388.0  | 248.0 | 39.5  | 29.2  | 45.3  | 159.7 | 115.2 | 138.2 |
| 739.4 | 1019.3 | 989.3 | 412.2 | 398.0 | 460.2 | 246.6 | 354.8 | 333.6 |
| 7.4   | 9.5    | 9.7   | 8.3   | 13.3  | 14.2  | 3.6   | 6.8   | 6.4   |
| 600.0 | 858.4  | 753.3 | 216.8 | 172.1 | 198.9 | 186.9 | 187.0 | 192.8 |
| 6.0   | 5.7    | 5.3   | 2.3   | 4.8   | 3.6   | 2.2   | 1.6   | 3.3   |
| 12.6  | 6.4    | 7.5   | 10.1  | 20.3  | 4.0   | 6.9   | 1.2   | 4.2   |
| 178.0 | 201.6  | 129.5 | 66.7  | 75.4  | 93.5  | 154.5 | 115.2 | 159.4 |
| 26.7  | 6.9    | 7.2   | 24.8  | 13.9  | 19.6  | 11.8  | 4.7   | 7.5   |
| 5.3   | 9.1    | 7.2   | 20.5  | 15.1  | 16.7  | 17.8  | 14.8  | 14.6  |
| 2.4   | 3.9    | 1.2   | 5.5   | 3.1   | 5.3   | 2.3   | 1.7   | 1.1   |
| 2.0   | 8.7    | 1.8   | 15.8  | 2.7   | 3.6   | 1.7   | 1.2   | 1.6   |
| 153.2 | 161.7  | 81.6  | 79.2  | 56.2  | 49.1  | 75.0  | 56.1  | 54.9  |
| 19.3  | 4.4    | 4.7   | 19.6  | 11.5  | 13.0  | 7.4   | 7.3   | 5.4   |
| 211.1 | 182.1  | 109.3 | 46.7  | 50.0  | 48.5  | 117.4 | 106.9 | 113.8 |
| 1.9   | 3.2    | 1.9   | 9.8   | 4.5   | 3.8   | 1.3   | 1.7   | 1.7   |
| 7.1   | 0.5    | 1.4   | 4.7   | 2.8   | 5.3   | 5.8   | 3.9   | 5.3   |
| 7.6   | 8.4    | 4.3   | 14.6  | 9.7   | 9.9   | 4.4   | 5.5   | 4.6   |
| 8.5   | 13.2   | 13.1  | 22.7  | 32.9  | 11.5  | 22.4  | 14.6  | 28.9  |
| 6.8   | 9.7    | 12.5  | 513.9 | 526.3 | 628.9 | 245.2 | 277.8 | 333.0 |
| 2.0   | 4.4    | 2.8   | 10.7  | 2.0   | 12.4  | 7.0   | 8.0   | 3.7   |
| 15.8  | 16.7   | 9.5   | 6.6   | 15.0  | 26.8  | 6.8   | 1.5   | 2.2   |
| 13.0  | 10.9   | 10.0  | 21.4  | 16.8  | 8.1   | 15.6  | 13.5  | 14.0  |
| 19.2  | 17.3   | 8.7   | 13.5  | 17.2  | 15.6  | 2.6   | 2.0   | 8.1   |
| 10.2  | 11.7   | 7.6   | 15.0  | 7.8   | 14.0  | 7.1   | 9.0   | 9.5   |
| 23.3  | 24.9   | 21.5  | 4.5   | 11.5  | 1.4   | 17.2  | 18.4  | 11.4  |
| 6.0   | 7.6    | 3.5   | 23.9  | 20.6  | 25.6  | 6.1   | 6.4   | 7.8   |
| 2.4   | 2.0    | 1.6   | 5.8   | 7.8   | 4.6   | 1.7   | 2.1   | 1.3   |
| 44.6  | 43.3   | 32.8  | 33.5  | 15.8  | 28.7  | 6.4   | 7.8   | 4.9   |
| 31.4  | 36.0   | 18.2  | 7.6   | 8.6   | 16.1  | 7.4   | 6.3   | 10.0  |
| 13.5  | 11.0   | 6.6   | 18.0  | 11.0  | 14.6  | 7.2   | 11.8  | 9.9   |
| 11.1  | 7.9    | 8.4   | 16.6  | 15.5  | 14.8  | 16.6  | 7.6   | 5.6   |
| 78.7  | 101.8  | 86.7  | 27.8  | 12.1  | 17.9  | 8.3   | 7.5   | 9.3   |
| 4.9   | 10.2   | 5.7   | 27.3  | 9.3   | 9.6   | 7.4   | 10.6  | 16.5  |
| 2.4   | 1.2    | 2.5   | 11.3  | 4.0   | 6.7   | 8.5   | 5.2   | 2.6   |
| 9.5   | 22.1   | 7.8   | 39.3  | 31.6  | 20.5  | 18.5  | 11.5  | 4.1   |
| 8.3   | 19.3   | 2.1   | 33.0  | 21.5  | 21.4  | 3.1   | 4.6   | 9.1   |
| 35.0  | 27.9   | 23.4  | 23.3  | 21.1  | 24.6  | 11.6  | 14.5  | 7.2   |
| 0.9   | 7.0    | 0.7   | 3.6   | 3.3   | 4.8   | 2.4   | 9.0   | 6.4   |
| 9.4   | 5.2    | 6.9   | 30.2  | 24.3  | 30.1  | 8.6   | 7.0   | 19.3  |
| 177.8 | 182.7  | 114.2 | 85.8  | 59.8  | 63.6  | 71.0  | 56.4  | 77.8  |
| 801.8 | 717.5  | 572.0 | 84.8  | 66.8  | 65.3  | 77.9  | 72.5  | 82.2  |
| 6.6   | 3.3    | 2.9   | 8.2   | 5.4   | 7.2   | 2.2   | 0.9   | 1.9   |
| 148.2 | 138.6  | 91.2  | 17.0  | 23.8  | 27.3  | 22.4  | 21.4  | 26.8  |
| 66.1  | 95.0   | 49.5  | 87.0  | 55.5  | 51.0  | 35.2  | 28.3  | 30.7  |
| 15.0  | 10.7   | 11.9  | 20.4  | 17.4  | 9.7   | 8.4   | 6.3   | 7.7   |
| 4.5   | 2.4    | 2.4   | 15.7  | 13.8  | 12.4  | 2.7   | 5.6   | 3.6   |
| 2.9   | 0.4    | 0.9   | 1.5   | 4.7   | 3.1   | 2.0   | 1.5   | 2.0   |
| 3.5   | 5.6    | 6.8   | 4.5   | 4.5   | 4.8   | 3.8   | 3.1   | 2.1   |
| 21.7  | 22.3   | 11.7  | 24.0  | 12.7  | 11.3  | 15.0  | 13.5  | 16.7  |
| 2.9   | 9.6    | 2.2   | 1.5   | 6.0   | 4.0   | 4.0   | 1.3   | 3.7   |
| 368.2 | 451.0  | 203.8 | 307.2 | 185.0 | 224.1 | 194.1 | 112.0 | 151.0 |
| 16.8  | 58.6   | 19.0  | 4.6   | 5.2   | 4.7   | 1.3   | 1.0   | 2.2   |

|        |        |        |        |        |        |        |        |        |
|--------|--------|--------|--------|--------|--------|--------|--------|--------|
| 454.2  | 635.8  | 521.1  | 265.6  | 217.8  | 202.6  | 186.3  | 162.4  | 206.8  |
| 27.2   | 16.3   | 13.7   | 28.9   | 22.7   | 36.1   | 24.2   | 20.2   | 22.0   |
| 2.0    | 2.0    | 1.3    | 3.5    | 3.1    | 4.6    | 1.9    | 1.9    | 1.5    |
| 4.1    | 10.8   | 4.5    | 4.2    | 6.2    | 2.0    | 5.3    | 2.9    | 3.6    |
| 137.0  | 202.6  | 161.7  | 272.9  | 243.6  | 266.0  | 168.8  | 191.0  | 222.2  |
| 33.8   | 45.1   | 64.1   | 129.0  | 117.2  | 125.0  | 182.1  | 209.3  | 194.6  |
| 87.2   | 103.9  | 105.7  | 101.2  | 94.9   | 108.3  | 65.0   | 75.3   | 75.8   |
| 21.7   | 31.5   | 21.3   | 31.6   | 27.4   | 25.1   | 21.9   | 20.1   | 19.2   |
| 37.1   | 30.0   | 15.3   | 20.8   | 27.3   | 15.0   | 10.9   | 10.3   | 8.1    |
| 24.0   | 32.9   | 15.3   | 30.8   | 25.9   | 23.9   | 19.9   | 15.8   | 24.1   |
| 16.8   | 26.6   | 17.4   | 20.9   | 13.9   | 23.2   | 3.0    | 10.1   | 8.4    |
| 8.6    | 6.8    | 12.0   | 16.1   | 8.3    | 18.3   | 6.7    | 8.6    | 5.0    |
| 1.3    | 4.7    | 4.3    | 3.7    | 12.7   | 7.0    | 3.1    | 2.1    | 3.7    |
| 5.5    | 8.6    | 4.3    | 4.9    | 8.5    | 9.1    | 5.2    | 1.2    | 6.5    |
| 3.4    | 10.4   | 13.6   | 5.7    | 11.6   | 23.4   | 8.1    | 4.3    | 2.8    |
| 140.1  | 166.4  | 81.8   | 115.6  | 82.1   | 105.4  | 115.1  | 75.3   | 78.2   |
| 4.5    | 2.1    | 4.3    | 2.2    | 3.2    | 1.9    | 4.2    | 1.3    | 1.1    |
| 423.2  | 209.0  | 156.1  | 66.5   | 60.2   | 93.1   | 184.6  | 215.9  | 256.2  |
| 1.9    | 3.7    | 6.2    | 14.0   | 4.6    | 5.9    | 6.1    | 3.1    | 3.8    |
| 687.1  | 938.4  | 772.0  | 2072.4 | 1599.9 | 1764.5 | 1346.8 | 1434.7 | 1482.8 |
| 0.7    | 0.8    | 0.2    | 6.2    | 6.5    | 1.7    | 0.3    | 1.6    | 1.6    |
| 8.3    | 4.0    | 4.7    | 21.1   | 41.4   | 45.0   | 2.9    | 17.9   | 19.3   |
| 483.3  | 593.2  | 377.2  | 118.2  | 89.6   | 117.9  | 106.6  | 96.7   | 111.1  |
| 985.8  | 901.4  | 373.4  | 793.5  | 514.9  | 570.4  | 319.3  | 264.1  | 286.0  |
| 0.5    | 1.3    | 1.7    | 7.3    | 3.2    | 6.3    | 5.6    | 1.4    | 3.4    |
| 9.2    | 12.4   | 14.8   | 18.9   | 13.4   | 18.1   | 8.7    | 9.0    | 9.8    |
| 6.6    | 6.0    | 10.1   | 16.9   | 14.4   | 10.3   | 9.8    | 8.9    | 2.7    |
| 132.4  | 177.5  | 127.2  | 27.1   | 32.5   | 17.1   | 15.6   | 16.3   | 25.6   |
| 0.5    | 0.8    | 3.1    | 7.9    | 5.5    | 3.9    | 0.9    | 0.6    | 0.9    |
| 22.2   | 24.6   | 21.1   | 17.5   | 23.5   | 15.5   | 7.1    | 13.8   | 12.8   |
| 4.7    | 8.4    | 8.8    | 15.2   | 4.5    | 8.0    | 4.9    | 2.3    | 6.4    |
| 277.8  | 302.6  | 266.2  | 151.3  | 106.2  | 153.3  | 211.2  | 217.3  | 247.1  |
| 8.9    | 9.4    | 11.7   | 9.0    | 5.4    | 10.1   | 9.2    | 2.9    | 6.4    |
| 0.7    | 0.2    | 1.6    | 1.6    | 6.3    | 2.0    | 0.7    | 0.8    | 0.5    |
| 3037.9 | 3225.8 | 2165.3 | 2123.6 | 1582.6 | 1665.4 | 1779.8 | 1328.3 | 1689.2 |
| 11.1   | 9.3    | 6.2    | 21.6   | 19.1   | 15.8   | 12.3   | 6.3    | 5.9    |
| 4.8    | 4.5    | 0.8    | 8.6    | 9.7    | 4.5    | 2.6    | 0.8    | 4.5    |
| 6.9    | 12.4   | 4.4    | 19.1   | 9.2    | 7.8    | 10.0   | 3.7    | 9.2    |
| 156.0  | 227.0  | 194.9  | 4.9    | 7.7    | 11.5   | 4.1    | 11.3   | 3.3    |
| 65.3   | 60.3   | 45.0   | 98.4   | 75.7   | 95.6   | 34.4   | 43.5   | 51.4   |
| 10.2   | 10.3   | 8.7    | 33.7   | 11.0   | 32.4   | 8.5    | 9.8    | 10.5   |
| 2.8    | 2.7    | 1.8    | 2.2    | 5.8    | 7.9    | 1.7    | 1.7    | 1.8    |
| 642.1  | 626.8  | 353.7  | 367.8  | 284.7  | 333.8  | 276.9  | 202.5  | 257.1  |
| 8.5    | 9.1    | 6.5    | 1.1    | 2.5    | 7.5    | 0.7    | 3.3    | 0.8    |
| 5.8    | 21.2   | 9.7    | 29.0   | 26.0   | 18.5   | 15.0   | 4.9    | 5.3    |
| 2.3    | 4.5    | 3.4    | 8.7    | 12.3   | 5.6    | 2.8    | 4.5    | 7.0    |
| 17.6   | 23.1   | 18.7   | 17.5   | 14.7   | 8.1    | 15.8   | 10.1   | 1.3    |
| 29.0   | 13.9   | 36.4   | 20.2   | 27.5   | 44.1   | 38.8   | 42.4   | 41.4   |
| 3.1    | 4.8    | 1.0    | 5.3    | 5.4    | 9.7    | 2.4    | 1.3    | 1.3    |
| 14.2   | 13.0   | 13.3   | 16.5   | 12.0   | 7.1    | 19.9   | 9.4    | 8.6    |
| 13.1   | 17.4   | 15.0   | 21.6   | 27.7   | 19.5   | 6.2    | 11.6   | 9.7    |
| 3.3    | 6.6    | 1.6    | 16.6   | 18.4   | 16.4   | 3.0    | 2.4    | 4.4    |
| 3.4    | 17.4   | 10.4   | 16.4   | 15.9   | 10.2   | 8.5    | 2.7    | 14.8   |

|       |       |       |       |       |       |       |       |       |
|-------|-------|-------|-------|-------|-------|-------|-------|-------|
| 228.1 | 378.8 | 219.0 | 63.7  | 51.2  | 90.1  | 91.4  | 120.1 | 129.0 |
| 14.1  | 12.7  | 6.1   | 34.3  | 30.1  | 21.2  | 11.8  | 10.6  | 14.9  |
| 15.7  | 32.4  | 16.3  | 31.3  | 23.6  | 33.0  | 11.8  | 11.5  | 8.6   |
| 119.1 | 186.3 | 140.3 | 27.6  | 30.5  | 26.8  | 23.5  | 17.9  | 20.6  |
| 2.2   | 2.2   | 1.9   | 8.8   | 5.7   | 4.4   | 2.2   | 2.6   | 2.8   |
| 4.1   | 0.9   | 5.4   | 2.9   | 4.6   | 3.5   | 1.5   | 5.4   | 0.5   |
| 15.1  | 4.4   | 3.7   | 8.1   | 11.5  | 16.2  | 3.7   | 2.5   | 8.0   |
| 267.9 | 403.4 | 321.5 | 28.9  | 31.8  | 23.6  | 24.2  | 12.9  | 22.9  |
| 7.4   | 13.7  | 6.4   | 11.5  | 3.8   | 1.6   | 2.6   | 2.4   | 11.7  |
| 11.5  | 16.2  | 14.2  | 38.6  | 31.3  | 37.0  | 15.0  | 16.6  | 24.6  |
| 3.9   | 9.3   | 11.9  | 10.4  | 17.6  | 14.4  | 14.2  | 4.4   | 11.7  |
| 6.0   | 2.1   | 1.7   | 8.3   | 4.2   | 6.6   | 6.0   | 4.4   | 8.5   |
| 72.6  | 79.8  | 74.3  | 61.3  | 60.5  | 65.5  | 86.3  | 94.0  | 79.7  |
| 12.1  | 20.0  | 15.4  | 29.0  | 22.9  | 27.3  | 18.2  | 16.9  | 21.8  |
| 16.2  | 10.8  | 10.1  | 9.9   | 5.6   | 4.1   | 5.2   | 4.1   | 6.6   |
| 1.1   | 1.6   | 1.0   | 1.7   | 2.0   | 1.7   | 1.1   | 1.4   | 1.3   |
| 9.3   | 13.3  | 5.8   | 23.8  | 16.5  | 27.0  | 5.5   | 8.8   | 11.0  |
| 12.3  | 13.9  | 10.1  | 12.5  | 13.2  | 19.8  | 26.6  | 18.0  | 15.5  |
| 285.2 | 299.6 | 179.9 | 267.7 | 272.6 | 257.9 | 315.1 | 296.7 | 334.8 |
| 4.5   | 9.6   | 1.6   | 19.1  | 16.7  | 16.6  | 9.0   | 7.8   | 2.6   |
| 307.0 | 269.5 | 173.6 | 128.8 | 88.4  | 89.1  | 144.6 | 79.3  | 101.4 |
| 453.5 | 771.4 | 415.6 | 76.2  | 53.7  | 60.7  | 66.4  | 73.0  | 75.9  |
| 3.9   | 2.6   | 4.0   | 5.6   | 3.2   | 5.2   | 2.1   | 2.3   | 2.8   |
| 13.7  | 22.3  | 16.5  | 43.2  | 26.8  | 25.5  | 13.8  | 12.5  | 8.8   |
| 4.2   | 2.5   | 1.1   | 2.6   | 4.6   | 1.6   | 4.7   | 1.7   | 1.3   |
| 2.1   | 2.7   | 1.9   | 11.6  | 9.6   | 11.3  | 1.9   | 1.8   | 4.7   |
| 23.7  | 23.1  | 9.7   | 36.8  | 40.2  | 31.2  | 29.6  | 18.6  | 19.9  |
| 4.7   | 7.9   | 1.3   | 13.6  | 9.1   | 3.7   | 1.7   | 1.7   | 6.6   |
| 14.2  | 13.8  | 16.6  | 35.3  | 8.9   | 37.2  | 3.3   | 3.2   | 4.8   |
| 1.0   | 1.6   | 4.5   | 2.2   | 6.2   | 10.7  | 0.8   | 2.5   | 1.1   |
| 0.4   | 3.6   | 3.3   | 9.0   | 1.5   | 9.1   | 0.6   | 0.8   | 0.7   |
| 17.2  | 7.6   | 9.8   | 10.3  | 3.7   | 8.9   | 9.9   | 2.9   | 2.9   |
| 91.0  | 91.9  | 60.6  | 75.1  | 56.1  | 70.5  | 52.6  | 43.1  | 52.3  |
| 67.4  | 89.3  | 65.5  | 266.0 | 265.0 | 280.1 | 105.8 | 95.9  | 122.1 |
| 37.5  | 27.0  | 19.7  | 39.0  | 38.3  | 40.9  | 22.1  | 25.3  | 38.0  |
| 11.3  | 16.1  | 11.0  | 34.6  | 31.8  | 25.8  | 22.7  | 21.3  | 21.8  |
| 698.2 | 794.3 | 666.2 | 345.2 | 263.8 | 289.8 | 307.4 | 296.2 | 307.4 |
| 7.7   | 3.8   | 3.3   | 14.3  | 18.1  | 15.3  | 5.1   | 13.9  | 4.2   |
| 74.3  | 86.1  | 46.8  | 85.6  | 72.1  | 72.8  | 48.8  | 40.8  | 42.7  |
| 8.4   | 8.4   | 5.9   | 7.2   | 9.0   | 12.3  | 8.6   | 2.4   | 6.4   |
| 20.3  | 31.8  | 46.5  | 125.1 | 100.8 | 117.9 | 152.7 | 155.5 | 150.3 |
| 29.0  | 31.3  | 19.7  | 35.6  | 30.7  | 23.3  | 19.9  | 14.3  | 18.0  |
| 17.6  | 15.4  | 15.3  | 34.7  | 22.1  | 31.6  | 19.5  | 27.0  | 20.3  |
| 45.2  | 32.5  | 35.5  | 4.6   | 6.8   | 6.8   | 8.8   | 4.4   | 7.3   |
| 15.2  | 21.9  | 10.5  | 9.0   | 7.3   | 14.1  | 26.5  | 19.0  | 22.0  |
| 102.7 | 108.7 | 92.9  | 82.1  | 55.5  | 50.0  | 51.4  | 86.1  | 57.9  |
| 19.0  | 31.9  | 6.3   | 18.6  | 8.6   | 19.1  | 17.8  | 9.2   | 7.3   |
| 18.1  | 24.4  | 11.9  | 28.9  | 27.2  | 35.2  | 14.5  | 19.2  | 14.5  |
| 4.3   | 3.7   | 2.5   | 22.2  | 4.9   | 6.7   | 3.9   | 2.8   | 4.2   |
| 7.6   | 14.2  | 1.5   | 9.8   | 7.5   | 4.4   | 4.0   | 5.0   | 12.2  |
| 3.7   | 16.8  | 1.6   | 19.0  | 18.3  | 13.3  | 15.8  | 13.1  | 17.9  |
| 2.1   | 1.9   | 1.4   | 9.9   | 5.6   | 4.8   | 2.4   | 4.3   | 3.0   |
| 1.0   | 1.1   | 2.3   | 10.5  | 6.2   | 3.4   | 3.4   | 3.9   | 1.0   |

|        |        |        |        |        |        |        |        |        |
|--------|--------|--------|--------|--------|--------|--------|--------|--------|
| 1.9    | 3.8    | 7.7    | 18.1   | 18.4   | 18.4   | 8.8    | 2.7    | 6.6    |
| 25.1   | 28.4   | 2.6    | 7.6    | 8.8    | 19.9   | 8.5    | 7.9    | 3.1    |
| 1.9    | 1.6    | 1.7    | 4.2    | 2.7    | 7.4    | 2.3    | 2.7    | 3.2    |
| 9.6    | 9.3    | 2.5    | 3.7    | 5.1    | 4.6    | 14.3   | 7.3    | 9.5    |
| 9.9    | 15.0   | 6.2    | 7.4    | 4.6    | 4.4    | 13.1   | 8.0    | 9.2    |
| 6.4    | 6.2    | 4.6    | 50.3   | 23.4   | 27.1   | 30.6   | 34.9   | 48.8   |
| 0.5    | 1.6    | 0.5    | 4.2    | 8.5    | 5.9    | 1.0    | 3.5    | 1.6    |
| 7.7    | 11.1   | 3.1    | 4.6    | 13.5   | 2.6    | 6.6    | 4.8    | 4.3    |
| 3.1    | 2.7    | 4.7    | 8.6    | 6.6    | 11.6   | 3.6    | 6.0    | 3.8    |
| 6.8    | 4.5    | 7.2    | 4.9    | 8.3    | 10.0   | 2.4    | 1.4    | 1.6    |
| 5.5    | 9.8    | 3.4    | 15.5   | 13.0   | 11.1   | 5.4    | 6.4    | 10.0   |
| 20.1   | 10.1   | 6.9    | 3.7    | 5.4    | 14.9   | 5.9    | 13.5   | 5.8    |
| 8.6    | 3.2    | 5.7    | 13.2   | 11.9   | 18.0   | 2.1    | 2.3    | 1.7    |
| 27.7   | 21.1   | 5.5    | 14.3   | 12.8   | 10.3   | 2.4    | 2.6    | 3.9    |
| 2.6    | 6.9    | 3.2    | 15.0   | 6.4    | 4.2    | 5.1    | 0.8    | 4.0    |
| 4.9    | 2.3    | 2.0    | 5.5    | 4.4    | 4.9    | 1.1    | 0.5    | 0.9    |
| 7.0    | 4.6    | 5.2    | 19.0   | 10.2   | 8.8    | 1.8    | 2.3    | 3.4    |
| 0.6    | 0.8    | 0.6    | 4.3    | 1.0    | 1.4    | 0.4    | 0.8    | 1.0    |
| 6.2    | 2.0    | 1.0    | 5.0    | 4.1    | 3.8    | 5.2    | 5.1    | 1.3    |
| 33.8   | 58.7   | 61.7   | 241.6  | 179.5  | 207.3  | 128.6  | 87.8   | 117.2  |
| 6.1    | 4.6    | 6.4    | 19.0   | 19.2   | 11.2   | 6.2    | 7.5    | 14.3   |
| 1.9    | 1.9    | 1.3    | 9.4    | 5.5    | 15.8   | 0.8    | 6.8    | 7.6    |
| 0.7    | 0.7    | 0.6    | 1.4    | 1.0    | 1.6    | 1.1    | 0.7    | 0.6    |
| 1.0    | 1.6    | 4.8    | 9.2    | 1.6    | 1.8    | 2.2    | 0.8    | 0.9    |
| 5.0    | 2.1    | 1.5    | 5.6    | 4.3    | 9.1    | 1.9    | 1.8    | 4.3    |
| 5.9    | 7.9    | 1.7    | 2.0    | 3.5    | 2.2    | 2.8    | 0.5    | 1.0    |
| 2.4    | 6.6    | 10.4   | 18.6   | 18.1   | 20.0   | 12.7   | 4.1    | 4.7    |
| 2.0    | 2.3    | 1.3    | 4.2    | 4.4    | 2.9    | 2.3    | 1.1    | 1.4    |
| 4.9    | 12.5   | 8.3    | 12.7   | 16.4   | 10.8   | 7.9    | 3.1    | 5.0    |
| 0.8    | 0.7    | 3.2    | 6.6    | 7.0    | 4.6    | 1.7    | 0.5    | 1.4    |
| 4809.1 | 5037.2 | 2616.4 | 1934.4 | 1336.1 | 1783.9 | 1198.7 | 1079.0 | 1112.4 |
| 4.7    | 1.9    | 4.5    | 1.2    | 1.9    | 1.3    | 4.1    | 1.7    | 0.7    |
| 189.6  | 226.9  | 164.6  | 531.9  | 392.5  | 420.9  | 450.8  | 401.5  | 440.3  |
| 2.4    | 7.3    | 2.4    | 5.5    | 4.5    | 7.4    | 3.8    | 2.4    | 5.4    |
| 4.7    | 7.6    | 5.3    | 6.4    | 8.8    | 7.1    | 1.2    | 4.8    | 8.4    |
| 146.1  | 143.7  | 62.3   | 49.2   | 31.5   | 32.5   | 54.3   | 46.8   | 48.9   |
| 0.8    | 0.9    | 0.2    | 1.8    | 2.4    | 3.7    | 1.0    | 0.4    | 0.8    |
| 432.2  | 499.2  | 226.8  | 200.4  | 150.5  | 182.4  | 103.9  | 85.0   | 110.6  |
| 201.8  | 312.4  | 242.3  | 135.2  | 128.8  | 126.0  | 93.0   | 138.5  | 107.4  |
| 3.1    | 10.3   | 2.9    | 5.3    | 5.4    | 2.4    | 1.3    | 1.3    | 4.3    |
| 19.4   | 15.5   | 18.9   | 22.3   | 30.4   | 29.8   | 41.7   | 19.4   | 27.9   |
| 2.2    | 0.7    | 1.0    | 2.9    | 1.6    | 2.0    | 4.5    | 0.5    | 0.5    |
| 7.9    | 18.5   | 19.4   | 43.0   | 33.5   | 31.6   | 19.5   | 16.6   | 18.0   |
| 0.9    | 0.7    | 2.9    | 2.8    | 6.0    | 4.4    | 0.8    | 3.0    | 3.0    |
| 1564.3 | 1560.2 | 687.8  | 447.6  | 351.0  | 387.3  | 357.7  | 293.0  | 343.0  |
| 42.4   | 52.1   | 45.2   | 32.2   | 30.0   | 41.9   | 31.3   | 25.8   | 18.3   |
| 2.7    | 1.1    | 1.2    | 2.6    | 2.3    | 2.9    | 0.8    | 0.9    | 1.8    |
| 5.1    | 4.9    | 8.8    | 8.8    | 8.2    | 17.6   | 5.7    | 1.8    | 0.9    |
| 2.7    | 3.3    | 4.6    | 5.2    | 10.8   | 7.0    | 4.5    | 1.8    | 2.5    |
| 21.9   | 34.2   | 30.0   | 22.1   | 16.6   | 28.8   | 16.8   | 24.3   | 21.6   |
| 8.3    | 5.4    | 3.4    | 8.0    | 4.1    | 11.3   | 1.5    | 7.4    | 7.2    |
| 20.2   | 24.9   | 15.1   | 31.1   | 17.6   | 26.0   | 16.6   | 11.8   | 12.7   |
| 24.6   | 33.7   | 12.9   | 19.2   | 24.2   | 24.9   | 17.8   | 16.3   | 28.8   |

|        |        |        |        |        |        |        |        |        |
|--------|--------|--------|--------|--------|--------|--------|--------|--------|
| 1.7    | 4.5    | 2.1    | 2.9    | 2.4    | 2.6    | 0.9    | 1.1    | 1.6    |
| 56.0   | 56.7   | 55.9   | 66.2   | 56.3   | 80.0   | 31.8   | 32.8   | 41.3   |
| 606.0  | 763.2  | 684.1  | 302.4  | 273.9  | 234.7  | 198.2  | 164.1  | 216.3  |
| 187.7  | 252.0  | 155.9  | 10.3   | 21.7   | 14.6   | 12.4   | 9.7    | 13.3   |
| 21.0   | 26.5   | 22.3   | 35.5   | 37.2   | 41.6   | 18.1   | 15.9   | 19.6   |
| 10.2   | 4.4    | 6.5    | 4.8    | 18.1   | 22.0   | 6.3    | 13.1   | 9.1    |
| 313.3  | 763.9  | 880.7  | 1038.8 | 877.0  | 1003.2 | 571.9  | 736.0  | 741.8  |
| 7.2    | 6.3    | 0.8    | 9.1    | 9.7    | 6.5    | 1.9    | 4.6    | 0.5    |
| 92.7   | 91.1   | 58.1   | 21.2   | 22.8   | 26.1   | 21.9   | 15.9   | 15.7   |
| 69.8   | 67.5   | 30.7   | 38.7   | 43.4   | 51.3   | 86.2   | 91.2   | 105.0  |
| 0.5    | 1.9    | 4.5    | 1.7    | 1.9    | 1.2    | 0.7    | 1.9    | 4.4    |
| 30.4   | 39.8   | 28.1   | 48.9   | 38.0   | 43.7   | 42.6   | 60.2   | 64.5   |
| 20.0   | 25.4   | 10.0   | 17.4   | 17.7   | 27.2   | 21.1   | 17.4   | 19.3   |
| 41.4   | 32.2   | 27.3   | 45.0   | 34.6   | 31.3   | 18.0   | 13.4   | 23.4   |
| 12.6   | 8.7    | 11.5   | 16.7   | 17.8   | 12.3   | 8.4    | 15.2   | 14.7   |
| 2.4    | 3.6    | 12.3   | 14.6   | 24.1   | 12.2   | 12.0   | 4.7    | 0.9    |
| 0.4    | 0.3    | 3.1    | 3.0    | 5.8    | 8.4    | 0.7    | 1.9    | 3.6    |
| 158.2  | 237.9  | 139.3  | 30.2   | 19.2   | 20.4   | 23.5   | 16.5   | 18.4   |
| 5.4    | 3.2    | 1.5    | 17.7   | 6.7    | 12.1   | 10.2   | 7.1    | 2.8    |
| 53.7   | 66.5   | 40.1   | 57.3   | 44.9   | 56.4   | 26.5   | 40.1   | 46.4   |
| 10.8   | 14.1   | 10.5   | 25.9   | 13.8   | 19.4   | 11.4   | 6.1    | 7.0    |
| 4.8    | 11.5   | 2.9    | 18.9   | 5.1    | 15.5   | 9.6    | 18.3   | 21.7   |
| 2.0    | 9.2    | 1.9    | 2.6    | 2.6    | 3.5    | 2.2    | 1.6    | 3.3    |
| 77.6   | 87.0   | 58.6   | 32.1   | 27.3   | 19.4   | 39.6   | 24.2   | 34.1   |
| 4942.3 | 5553.1 | 4376.9 | 1338.4 | 972.7  | 1222.8 | 1101.2 | 1020.2 | 1062.2 |
| 3.0    | 6.0    | 7.1    | 10.7   | 17.5   | 12.3   | 7.9    | 4.5    | 5.9    |
| 71.4   | 88.0   | 34.5   | 26.6   | 25.1   | 23.3   | 46.3   | 42.6   | 40.2   |
| 34.6   | 26.3   | 2.3    | 14.7   | 14.2   | 12.7   | 6.3    | 6.8    | 2.6    |
| 613.8  | 721.9  | 423.8  | 575.8  | 510.7  | 514.4  | 642.4  | 609.8  | 689.5  |
| 3.6    | 9.9    | 8.1    | 12.9   | 6.4    | 20.0   | 3.6    | 0.7    | 3.3    |
| 0.9    | 7.1    | 5.1    | 2.4    | 2.8    | 4.8    | 0.9    | 0.7    | 1.2    |
| 3.7    | 3.5    | 2.9    | 5.5    | 5.9    | 8.5    | 3.0    | 2.3    | 3.0    |
| 11.8   | 40.1   | 31.7   | 87.5   | 79.2   | 70.9   | 22.1   | 27.5   | 41.6   |
| 124.6  | 170.2  | 149.6  | 356.0  | 317.5  | 364.5  | 148.0  | 179.5  | 185.3  |
| 96.5   | 96.3   | 59.5   | 117.4  | 64.6   | 82.9   | 52.9   | 38.2   | 63.0   |
| 1.8    | 1.1    | 1.4    | 0.9    | 4.6    | 3.9    | 0.8    | 0.9    | 2.7    |
| 16.0   | 26.0   | 24.1   | 22.6   | 22.3   | 17.4   | 11.3   | 14.7   | 8.9    |
| 16.9   | 18.5   | 9.4    | 34.5   | 15.2   | 24.3   | 6.3    | 12.5   | 10.4   |
| 4.6    | 14.1   | 6.0    | 6.2    | 6.9    | 11.4   | 4.6    | 3.8    | 5.2    |
| 6.1    | 1.5    | 11.0   | 10.3   | 14.9   | 6.1    | 0.8    | 5.0    | 5.7    |
| 26.3   | 34.7   | 31.9   | 23.1   | 30.5   | 34.0   | 29.5   | 15.4   | 22.6   |
| 10.0   | 19.7   | 10.8   | 15.1   | 9.3    | 21.0   | 6.0    | 9.1    | 12.4   |
| 2.9    | 2.6    | 1.9    | 4.7    | 4.8    | 3.0    | 4.6    | 2.6    | 5.3    |
| 2.7    | 2.2    | 2.8    | 6.7    | 6.6    | 8.1    | 3.5    | 3.4    | 5.1    |
| 6.8    | 3.4    | 8.0    | 9.3    | 8.7    | 4.9    | 5.9    | 2.4    | 1.8    |
| 8.6    | 21.2   | 4.2    | 16.8   | 10.2   | 12.7   | 8.8    | 2.4    | 9.7    |
| 2.2    | 3.2    | 3.4    | 11.0   | 5.4    | 6.7    | 2.8    | 3.2    | 1.7    |
| 7.1    | 3.9    | 5.0    | 14.4   | 4.0    | 11.6   | 8.9    | 9.1    | 4.3    |
| 11.8   | 18.8   | 15.7   | 33.4   | 28.5   | 32.9   | 14.2   | 20.7   | 18.5   |
| 392.1  | 727.1  | 842.6  | 456.6  | 363.7  | 396.0  | 216.2  | 183.8  | 220.2  |
| 42.5   | 62.0   | 29.7   | 29.3   | 22.5   | 30.2   | 17.2   | 16.4   | 20.7   |
| 64.5   | 68.7   | 41.9   | 25.0   | 17.0   | 39.1   | 15.2   | 11.9   | 17.3   |
| 2962.3 | 3149.2 | 1940.0 | 1675.9 | 1408.0 | 1547.2 | 1237.1 | 1377.7 | 1409.8 |



|       |       |       |       |       |       |       |       |       |
|-------|-------|-------|-------|-------|-------|-------|-------|-------|
| 7.3   | 2.7   | 3.1   | 13.3  | 11.4  | 26.3  | 8.1   | 6.5   | 1.7   |
| 2.7   | 3.1   | 1.3   | 9.5   | 11.6  | 18.2  | 12.7  | 2.3   | 4.8   |
| 10.9  | 22.0  | 11.7  | 23.6  | 17.2  | 9.9   | 6.2   | 6.2   | 16.7  |
| 1.9   | 8.5   | 3.9   | 8.3   | 3.4   | 6.5   | 1.3   | 1.8   | 2.3   |
| 115.1 | 90.9  | 49.3  | 89.2  | 48.0  | 84.6  | 113.8 | 57.5  | 86.9  |
| 2.8   | 2.5   | 1.2   | 5.8   | 4.8   | 11.0  | 1.6   | 3.6   | 2.4   |
| 2.2   | 2.1   | 3.4   | 3.8   | 1.2   | 1.6   | 4.1   | 0.7   | 0.7   |
| 45.2  | 54.2  | 41.4  | 22.4  | 16.9  | 17.6  | 23.3  | 29.3  | 31.7  |
| 6.4   | 2.0   | 6.3   | 16.6  | 10.8  | 17.4  | 4.0   | 8.2   | 7.5   |
| 5.3   | 5.8   | 2.8   | 16.9  | 6.0   | 2.2   | 4.3   | 2.5   | 4.4   |
| 4.1   | 7.6   | 2.4   | 20.6  | 9.4   | 23.9  | 3.6   | 15.5  | 13.4  |
| 8.5   | 10.8  | 2.2   | 16.0  | 7.5   | 10.9  | 3.9   | 3.8   | 3.8   |
| 1.9   | 0.8   | 0.8   | 1.7   | 1.5   | 1.6   | 1.2   | 0.7   | 1.6   |
| 14.0  | 18.7  | 5.6   | 13.1  | 18.2  | 10.1  | 16.8  | 11.3  | 14.0  |
| 3.1   | 4.6   | 2.4   | 22.1  | 12.3  | 7.4   | 3.4   | 4.2   | 4.0   |
| 3.4   | 13.0  | 7.5   | 9.9   | 7.1   | 9.4   | 2.6   | 1.9   | 5.5   |
| 286.2 | 330.9 | 187.3 | 170.8 | 126.2 | 112.1 | 113.2 | 77.7  | 106.4 |
| 13.8  | 13.1  | 9.7   | 5.3   | 2.6   | 8.5   | 3.3   | 3.9   | 4.2   |
| 20.0  | 18.3  | 18.2  | 54.9  | 33.8  | 61.5  | 22.0  | 26.3  | 27.4  |
| 320.3 | 519.7 | 367.0 | 374.4 | 312.6 | 323.1 | 317.8 | 289.2 | 377.9 |
| 110.3 | 138.4 | 91.9  | 53.0  | 49.6  | 66.0  | 54.5  | 46.4  | 54.3  |
| 5.9   | 6.2   | 6.1   | 17.7  | 12.4  | 12.7  | 10.4  | 12.5  | 17.1  |
| 96.0  | 135.3 | 96.0  | 116.3 | 77.0  | 88.2  | 80.9  | 64.0  | 97.3  |
| 16.4  | 48.6  | 32.4  | 11.8  | 15.5  | 15.3  | 4.9   | 10.7  | 6.0   |
| 20.5  | 10.8  | 8.2   | 39.7  | 35.8  | 24.5  | 14.7  | 22.3  | 16.1  |
| 1.0   | 0.6   | 3.2   | 3.0   | 5.9   | 5.2   | 0.2   | 2.7   | 1.8   |
| 13.5  | 8.0   | 8.1   | 16.2  | 15.5  | 21.9  | 7.1   | 6.1   | 10.7  |
| 346.9 | 301.8 | 195.3 | 113.0 | 92.0  | 94.0  | 112.1 | 106.4 | 103.4 |
| 26.8  | 45.8  | 30.6  | 28.8  | 31.5  | 24.3  | 20.0  | 28.1  | 25.9  |
| 2.6   | 6.1   | 5.9   | 7.1   | 10.1  | 17.6  | 5.7   | 4.4   | 6.9   |
| 4.0   | 6.6   | 14.5  | 11.2  | 5.7   | 13.7  | 10.2  | 9.5   | 12.7  |
| 467.9 | 568.2 | 445.8 | 700.7 | 596.6 | 665.1 | 220.9 | 263.8 | 368.9 |
| 3.8   | 1.3   | 1.6   | 2.9   | 3.9   | 7.1   | 1.4   | 1.2   | 3.9   |
| 50.7  | 165.8 | 160.1 | 101.5 | 104.7 | 111.4 | 156.8 | 256.7 | 177.4 |
| 7.2   | 12.3  | 7.8   | 12.5  | 9.4   | 23.7  | 13.3  | 11.2  | 16.3  |
| 7.0   | 8.4   | 6.7   | 9.4   | 5.9   | 9.5   | 6.4   | 2.9   | 5.3   |
| 28.2  | 54.5  | 34.4  | 65.0  | 54.1  | 56.0  | 44.5  | 51.5  | 47.2  |
| 7.8   | 11.5  | 11.6  | 18.3  | 14.1  | 12.1  | 6.9   | 5.9   | 8.3   |
| 45.8  | 63.1  | 34.8  | 47.7  | 51.6  | 55.1  | 44.5  | 21.2  | 31.4  |
| 206.1 | 299.4 | 190.8 | 40.5  | 27.4  | 33.8  | 65.1  | 43.4  | 54.5  |
| 13.4  | 26.5  | 18.3  | 27.5  | 9.9   | 20.5  | 28.9  | 20.7  | 29.7  |
| 41.9  | 38.2  | 13.2  | 18.4  | 20.1  | 24.1  | 28.0  | 17.5  | 20.1  |
| 264.2 | 310.6 | 263.6 | 98.5  | 95.6  | 105.4 | 196.0 | 232.1 | 144.4 |
| 24.9  | 21.8  | 20.0  | 50.4  | 33.6  | 31.0  | 21.0  | 28.2  | 27.8  |
| 0.4   | 3.5   | 0.8   | 2.0   | 2.3   | 1.4   | 4.2   | 3.0   | 0.5   |
| 3.4   | 2.7   | 7.7   | 13.2  | 5.4   | 6.5   | 8.6   | 5.4   | 8.2   |
| 2.6   | 3.1   | 2.5   | 4.9   | 5.0   | 2.9   | 2.3   | 4.4   | 3.3   |
| 66.6  | 79.7  | 53.2  | 121.8 | 105.4 | 128.1 | 106.4 | 84.9  | 120.9 |
| 5.0   | 2.3   | 8.1   | 3.2   | 5.1   | 2.5   | 4.6   | 0.8   | 2.1   |
| 6.9   | 20.1  | 7.8   | 18.6  | 4.4   | 6.7   | 8.7   | 9.9   | 6.6   |
| 2.1   | 3.2   | 3.6   | 12.5  | 9.9   | 10.5  | 6.8   | 2.6   | 17.2  |
| 6.4   | 1.8   | 3.4   | 5.9   | 10.7  | 9.4   | 1.3   | 1.7   | 5.2   |
| 445.2 | 569.1 | 423.7 | 384.8 | 292.7 | 353.1 | 222.4 | 231.6 | 243.2 |

|        |        |        |        |       |        |        |       |        |
|--------|--------|--------|--------|-------|--------|--------|-------|--------|
| 9.3    | 4.0    | 2.1    | 6.6    | 5.0   | 6.2    | 2.3    | 2.9   | 1.7    |
| 140.8  | 178.9  | 105.4  | 113.2  | 97.7  | 110.1  | 85.2   | 73.0  | 86.0   |
| 13.4   | 16.0   | 14.5   | 16.7   | 19.0  | 8.2    | 14.3   | 14.0  | 10.2   |
| 2091.9 | 2391.5 | 1767.4 | 1082.6 | 871.4 | 1033.8 | 630.5  | 599.0 | 665.7  |
| 328.6  | 378.2  | 268.7  | 68.5   | 68.5  | 83.0   | 38.2   | 84.3  | 66.4   |
| 2.1    | 2.0    | 5.3    | 16.7   | 11.0  | 6.3    | 9.0    | 7.5   | 3.2    |
| 315.3  | 391.3  | 113.2  | 7.7    | 15.4  | 7.7    | 5.6    | 3.6   | 10.0   |
| 0.4    | 0.4    | 0.4    | 1.1    | 3.5   | 1.5    | 0.3    | 0.5   | 0.2    |
| 15.8   | 19.6   | 9.6    | 22.7   | 18.0  | 12.5   | 9.5    | 7.0   | 3.8    |
| 1.9    | 2.7    | 1.3    | 2.3    | 2.1   | 4.8    | 0.9    | 1.8   | 1.6    |
| 31.6   | 39.6   | 26.5   | 48.5   | 40.3  | 48.6   | 35.4   | 37.5  | 32.4   |
| 12.6   | 3.5    | 1.5    | 9.1    | 8.6   | 9.4    | 2.4    | 1.5   | 1.0    |
| 1097.5 | 940.5  | 669.6  | 231.2  | 188.3 | 267.0  | 536.6  | 392.6 | 471.4  |
| 25.8   | 4.6    | 16.2   | 53.2   | 45.5  | 32.5   | 25.1   | 14.0  | 15.6   |
| 14.8   | 10.7   | 10.6   | 16.9   | 15.5  | 23.7   | 13.2   | 10.8  | 11.5   |
| 4.9    | 3.3    | 0.9    | 12.1   | 6.9   | 3.4    | 2.9    | 0.9   | 2.4    |
| 1.0    | 0.9    | 4.4    | 2.1    | 6.5   | 4.1    | 0.5    | 0.9   | 1.0    |
| 1.2    | 3.5    | 3.9    | 2.5    | 5.8   | 8.7    | 2.6    | 4.6   | 5.9    |
| 3.0    | 5.7    | 7.7    | 27.1   | 11.5  | 8.8    | 13.8   | 8.5   | 5.5    |
| 2.4    | 5.5    | 1.4    | 12.2   | 8.7   | 4.6    | 6.0    | 1.9   | 1.8    |
| 2.2    | 5.6    | 5.3    | 17.0   | 12.3  | 20.7   | 4.4    | 1.4   | 8.7    |
| 14.3   | 12.1   | 0.8    | 6.4    | 22.9  | 16.9   | 5.2    | 8.0   | 5.6    |
| 22.7   | 37.3   | 31.4   | 8.3    | 2.4   | 11.1   | 6.3    | 9.3   | 5.2    |
| 30.1   | 34.3   | 27.7   | 25.4   | 13.1  | 22.9   | 28.9   | 21.1  | 14.9   |
| 166.0  | 259.6  | 214.2  | 21.6   | 22.2  | 34.6   | 65.6   | 67.6  | 54.6   |
| 666.5  | 859.3  | 665.3  | 911.8  | 651.9 | 754.9  | 489.4  | 407.9 | 507.9  |
| 5.6    | 1.8    | 6.8    | 14.4   | 8.1   | 6.0    | 7.3    | 11.9  | 11.4   |
| 4.0    | 3.2    | 1.4    | 8.4    | 8.5   | 6.6    | 3.4    | 2.9   | 8.8    |
| 11.5   | 4.4    | 6.5    | 12.3   | 6.5   | 16.0   | 13.1   | 5.4   | 4.6    |
| 63.0   | 91.9   | 80.4   | 114.9  | 80.1  | 96.4   | 65.5   | 56.1  | 76.5   |
| 7.3    | 21.2   | 11.7   | 35.5   | 23.4  | 34.0   | 21.1   | 15.1  | 8.8    |
| 1.3    | 1.5    | 1.0    | 4.1    | 2.7   | 3.4    | 1.1    | 1.1   | 1.2    |
| 2425.3 | 2919.7 | 2122.9 | 1140.4 | 934.9 | 866.3  | 1071.7 | 998.6 | 1226.4 |
| 14.1   | 18.5   | 15.4   | 36.4   | 31.1  | 22.7   | 17.1   | 15.1  | 26.3   |
| 2.6    | 2.9    | 1.9    | 11.2   | 12.4  | 9.7    | 5.4    | 6.4   | 4.5    |
| 5.5    | 3.4    | 1.3    | 6.2    | 2.1   | 1.7    | 6.2    | 1.9   | 1.3    |
| 1.8    | 3.5    | 1.0    | 2.7    | 5.5   | 3.8    | 2.3    | 1.6   | 5.8    |
| 17.6   | 19.5   | 13.8   | 18.4   | 21.1  | 15.7   | 19.6   | 8.9   | 20.3   |
| 8.4    | 15.9   | 1.6    | 10.7   | 6.3   | 7.6    | 17.4   | 13.3  | 23.6   |
| 25.5   | 21.0   | 3.9    | 12.8   | 5.5   | 16.3   | 6.0    | 5.7   | 3.6    |
| 21.5   | 10.7   | 30.7   | 33.5   | 34.3  | 35.9   | 13.7   | 13.5  | 6.0    |
| 0.9    | 1.0    | 0.7    | 1.9    | 1.9   | 2.3    | 0.9    | 0.5   | 0.7    |
| 526.2  | 589.1  | 393.6  | 453.7  | 385.8 | 381.2  | 425.5  | 528.0 | 524.5  |
| 7.0    | 3.3    | 5.7    | 2.7    | 7.2   | 1.7    | 1.5    | 3.9   | 1.2    |
| 1.7    | 4.0    | 0.3    | 1.2    | 2.6   | 5.4    | 1.1    | 0.4   | 0.4    |
| 36.2   | 54.7   | 39.4   | 48.2   | 53.3  | 67.0   | 51.4   | 41.7  | 56.9   |
| 3.2    | 7.2    | 4.2    | 20.3   | 18.5  | 27.9   | 35.6   | 40.2  | 46.7   |
| 2.1    | 1.5    | 0.8    | 5.8    | 3.5   | 7.6    | 3.0    | 0.9   | 2.5    |
| 6.9    | 6.7    | 7.4    | 13.2   | 18.4  | 10.6   | 11.2   | 7.8   | 5.4    |
| 10.3   | 14.8   | 10.3   | 3.1    | 7.7   | 6.5    | 2.5    | 5.0   | 4.3    |
| 24.6   | 17.5   | 20.0   | 21.3   | 23.8  | 34.6   | 7.5    | 15.7  | 20.3   |
| 5.7    | 5.8    | 4.5    | 9.2    | 8.3   | 10.3   | 6.4    | 5.0   | 6.4    |
| 5.5    | 4.2    | 4.0    | 14.8   | 15.3  | 5.5    | 3.0    | 14.4  | 16.8   |

|        |        |        |        |        |        |        |        |        |
|--------|--------|--------|--------|--------|--------|--------|--------|--------|
| 12.9   | 8.0    | 7.0    | 5.8    | 13.4   | 9.7    | 13.2   | 5.8    | 17.9   |
| 1.0    | 0.6    | 0.7    | 1.4    | 4.9    | 3.9    | 1.1    | 5.2    | 1.1    |
| 36.4   | 11.9   | 27.7   | 8.0    | 27.6   | 10.9   | 2.4    | 2.2    | 8.5    |
| 9.0    | 10.1   | 7.7    | 14.7   | 17.8   | 26.8   | 2.3    | 6.5    | 2.5    |
| 1.3    | 1.8    | 3.0    | 2.6    | 2.2    | 2.2    | 0.8    | 1.0    | 1.2    |
| 1.9    | 3.1    | 6.6    | 5.9    | 5.8    | 6.5    | 5.3    | 5.4    | 1.9    |
| 1.5    | 1.2    | 1.8    | 2.3    | 2.2    | 2.8    | 0.9    | 0.8    | 1.2    |
| 21.7   | 10.2   | 20.3   | 28.3   | 19.4   | 23.4   | 19.8   | 10.9   | 16.1   |
| 4.5    | 10.4   | 6.8    | 4.5    | 6.5    | 5.6    | 10.4   | 9.3    | 18.6   |
| 1424.4 | 1587.8 | 1579.0 | 170.4  | 153.0  | 166.8  | 79.3   | 118.1  | 118.1  |
| 1.0    | 13.6   | 1.9    | 13.8   | 5.9    | 7.7    | 1.1    | 5.0    | 5.1    |
| 14.1   | 12.8   | 16.2   | 23.9   | 18.8   | 13.8   | 10.6   | 11.5   | 12.7   |
| 282.0  | 445.3  | 279.1  | 82.7   | 80.5   | 102.2  | 66.2   | 92.2   | 85.7   |
| 6.2    | 2.2    | 3.0    | 2.9    | 1.5    | 1.8    | 1.7    | 0.9    | 5.0    |
| 42.5   | 22.5   | 21.8   | 34.3   | 31.2   | 43.4   | 4.8    | 18.3   | 8.3    |
| 4.6    | 2.6    | 7.2    | 3.8    | 15.4   | 10.7   | 4.7    | 4.0    | 5.0    |
| 18.2   | 26.0   | 10.1   | 22.3   | 24.5   | 38.0   | 13.9   | 16.7   | 16.0   |
| 5637.1 | 6079.1 | 4329.7 | 2277.5 | 1786.8 | 2047.6 | 2221.6 | 1833.7 | 2170.9 |
| 10.7   | 3.1    | 3.0    | 9.8    | 12.7   | 14.3   | 3.5    | 5.6    | 13.6   |
| 9.0    | 12.5   | 12.9   | 13.0   | 6.7    | 11.8   | 10.9   | 10.5   | 7.7    |
| 107.3  | 152.6  | 103.7  | 94.6   | 91.1   | 121.9  | 102.8  | 118.6  | 116.3  |
| 2.9    | 7.1    | 5.0    | 1.6    | 4.3    | 2.2    | 1.2    | 6.8    | 1.8    |
| 520.4  | 568.1  | 446.6  | 103.8  | 90.0   | 103.7  | 194.0  | 164.8  | 194.7  |
| 22.0   | 20.6   | 14.0   | 16.6   | 12.4   | 20.8   | 15.9   | 9.7    | 13.7   |
| 2447.2 | 2831.6 | 1933.5 | 943.9  | 727.9  | 823.9  | 830.4  | 730.6  | 839.3  |
| 5.6    | 7.3    | 8.5    | 10.2   | 11.9   | 14.7   | 12.9   | 8.8    | 11.2   |
| 2.4    | 2.6    | 2.7    | 4.5    | 5.2    | 4.5    | 1.4    | 1.3    | 3.8    |
| 9.2    | 19.5   | 10.3   | 20.0   | 4.9    | 14.7   | 12.7   | 8.5    | 9.7    |
| 3.2    | 6.9    | 3.6    | 11.0   | 17.2   | 15.7   | 4.2    | 7.9    | 4.5    |
| 4.8    | 10.2   | 11.2   | 3.2    | 6.8    | 5.6    | 4.1    | 8.1    | 0.5    |
| 34.4   | 40.5   | 25.8   | 33.4   | 31.8   | 38.2   | 30.0   | 28.6   | 31.8   |
| 4.1    | 1.7    | 0.9    | 10.4   | 9.0    | 3.5    | 1.6    | 1.0    | 2.7    |
| 120.4  | 163.2  | 102.7  | 48.7   | 44.7   | 62.4   | 52.4   | 51.6   | 58.4   |
| 103.8  | 108.8  | 86.4   | 41.0   | 34.8   | 34.3   | 41.3   | 34.6   | 29.9   |
| 1.5    | 1.7    | 1.6    | 7.9    | 8.8    | 6.5    | 1.7    | 1.0    | 1.4    |
| 26.2   | 40.5   | 30.1   | 19.1   | 15.7   | 17.0   | 17.6   | 34.7   | 39.6   |
| 162.0  | 179.5  | 143.3  | 68.9   | 77.1   | 63.1   | 69.5   | 60.7   | 86.6   |
| 1.9    | 2.1    | 1.3    | 3.8    | 3.7    | 3.9    | 1.8    | 2.1    | 2.7    |
| 14.9   | 14.4   | 6.5    | 18.9   | 19.0   | 15.6   | 2.4    | 14.7   | 17.6   |
| 9.1    | 14.2   | 14.6   | 9.8    | 6.6    | 7.9    | 8.2    | 5.3    | 4.8    |
| 164.3  | 213.3  | 148.9  | 460.0  | 438.4  | 440.7  | 404.6  | 465.5  | 502.8  |
| 6.1    | 2.2    | 8.3    | 18.4   | 17.7   | 28.0   | 4.0    | 2.7    | 2.8    |
| 6.8    | 13.5   | 8.4    | 7.8    | 8.7    | 12.8   | 4.3    | 10.3   | 7.5    |
| 4.9    | 4.0    | 0.4    | 6.6    | 3.6    | 11.4   | 7.6    | 7.0    | 5.1    |
| 4.7    | 2.2    | 2.2    | 6.9    | 5.7    | 7.6    | 3.6    | 2.7    | 0.7    |
| 61.2   | 42.9   | 43.7   | 48.4   | 33.0   | 49.8   | 31.0   | 22.8   | 33.7   |
| 3.3    | 5.4    | 5.3    | 10.0   | 7.3    | 6.0    | 5.2    | 6.2    | 3.5    |
| 35.8   | 31.4   | 28.5   | 46.7   | 51.6   | 48.5   | 24.1   | 22.7   | 19.6   |
| 3.7    | 6.7    | 7.1    | 5.6    | 10.9   | 4.5    | 3.3    | 0.9    | 6.1    |
| 5.1    | 5.7    | 1.6    | 11.4   | 16.5   | 6.6    | 2.8    | 5.7    | 3.2    |
| 2.0    | 4.4    | 2.2    | 3.0    | 5.5    | 2.3    | 6.7    | 3.9    | 1.7    |
| 1.1    | 1.0    | 1.3    | 5.1    | 3.7    | 5.7    | 3.1    | 5.3    | 3.4    |
| 492.2  | 665.2  | 520.3  | 540.7  | 345.6  | 368.0  | 204.1  | 190.3  | 231.7  |

|        |        |        |        |        |        |        |        |        |
|--------|--------|--------|--------|--------|--------|--------|--------|--------|
| 7.6    | 17.9   | 8.1    | 8.8    | 12.7   | 21.4   | 9.7    | 11.0   | 14.4   |
| 24.5   | 33.5   | 36.2   | 26.6   | 25.0   | 41.7   | 18.3   | 17.9   | 19.4   |
| 15.4   | 15.4   | 12.1   | 19.9   | 12.8   | 11.7   | 9.1    | 10.9   | 13.6   |
| 13.6   | 15.7   | 4.4    | 8.4    | 2.9    | 4.0    | 2.4    | 1.6    | 2.7    |
| 1.2    | 1.5    | 0.9    | 14.5   | 10.7   | 6.3    | 1.5    | 1.5    | 4.6    |
| 10.2   | 17.4   | 4.4    | 14.0   | 8.2    | 23.9   | 5.0    | 7.6    | 10.3   |
| 132.3  | 113.7  | 73.3   | 121.9  | 94.0   | 105.8  | 110.7  | 101.2  | 92.3   |
| 100.2  | 90.9   | 50.6   | 32.1   | 25.2   | 42.6   | 30.5   | 34.7   | 33.6   |
| 9.6    | 16.9   | 7.7    | 4.6    | 4.7    | 12.6   | 13.0   | 7.7    | 11.8   |
| 1.4    | 3.4    | 1.4    | 4.2    | 5.3    | 5.0    | 2.8    | 2.2    | 1.8    |
| 52.7   | 62.5   | 42.5   | 19.9   | 16.4   | 18.6   | 20.7   | 15.8   | 19.9   |
| 13.9   | 7.7    | 13.5   | 15.0   | 5.1    | 11.0   | 3.8    | 12.1   | 11.2   |
| 11.3   | 15.1   | 4.9    | 33.5   | 15.1   | 22.9   | 16.6   | 14.5   | 13.5   |
| 1.9    | 5.1    | 5.6    | 10.8   | 9.8    | 9.2    | 1.8    | 5.4    | 0.7    |
| 42.2   | 51.5   | 29.9   | 10.8   | 10.5   | 11.6   | 28.1   | 11.7   | 17.6   |
| 5.8    | 0.3    | 4.2    | 4.4    | 4.7    | 4.4    | 2.5    | 2.9    | 2.7    |
| 157.2  | 191.4  | 125.1  | 108.1  | 88.0   | 94.5   | 107.3  | 82.2   | 84.3   |
| 267.8  | 293.6  | 190.9  | 214.9  | 176.8  | 157.7  | 166.6  | 181.7  | 166.8  |
| 17.3   | 30.6   | 16.4   | 61.8   | 42.9   | 45.3   | 17.6   | 19.5   | 25.0   |
| 51.3   | 84.6   | 51.6   | 54.0   | 43.8   | 48.4   | 47.4   | 45.9   | 38.3   |
| 8.3    | 20.0   | 17.3   | 18.8   | 22.2   | 13.3   | 12.4   | 10.8   | 11.2   |
| 49.7   | 33.2   | 34.3   | 28.0   | 15.4   | 4.9    | 21.2   | 19.1   | 19.8   |
| 73.1   | 77.4   | 77.5   | 40.7   | 42.6   | 34.6   | 40.4   | 19.3   | 25.5   |
| 68.9   | 98.6   | 54.8   | 32.2   | 21.5   | 32.7   | 44.6   | 31.9   | 47.6   |
| 63.3   | 78.6   | 69.9   | 33.8   | 23.6   | 36.4   | 39.1   | 44.3   | 51.0   |
| 2.5    | 5.8    | 5.9    | 11.5   | 13.2   | 12.8   | 13.4   | 9.5    | 4.9    |
| 4659.5 | 5232.8 | 4368.4 | 1735.4 | 1442.8 | 1602.8 | 1685.4 | 1477.4 | 1681.7 |
| 1.5    | 4.3    | 1.5    | 3.7    | 1.9    | 8.6    | 3.2    | 3.7    | 2.9    |
| 25.0   | 8.4    | 14.8   | 20.2   | 13.3   | 13.9   | 16.9   | 15.6   | 13.2   |
| 11.1   | 14.4   | 5.7    | 25.8   | 21.0   | 19.8   | 8.5    | 11.4   | 12.4   |
| 2.6    | 1.1    | 1.4    | 16.7   | 3.9    | 3.6    | 1.0    | 4.1    | 4.4    |
| 11.8   | 13.7   | 10.6   | 4.4    | 15.0   | 10.6   | 18.3   | 14.7   | 11.1   |
| 117.4  | 110.4  | 81.5   | 22.4   | 39.1   | 48.9   | 35.9   | 28.1   | 37.9   |
| 84.7   | 91.8   | 85.6   | 62.3   | 91.9   | 51.6   | 80.1   | 58.1   | 48.5   |
| 140.5  | 156.6  | 77.7   | 64.8   | 55.3   | 38.1   | 75.5   | 69.8   | 56.2   |
| 31.0   | 35.6   | 18.4   | 34.1   | 23.5   | 18.5   | 35.1   | 27.1   | 35.9   |
| 7.1    | 5.5    | 8.7    | 1.8    | 1.4    | 5.9    | 1.8    | 1.0    | 1.7    |
| 40.0   | 52.6   | 46.8   | 18.0   | 14.2   | 19.5   | 6.7    | 14.3   | 24.4   |
| 36.0   | 44.0   | 41.2   | 62.7   | 54.8   | 61.9   | 38.0   | 47.1   | 31.4   |
| 17.9   | 30.2   | 25.8   | 10.1   | 8.3    | 25.6   | 20.3   | 15.1   | 29.4   |
| 434.7  | 554.2  | 291.6  | 322.7  | 262.7  | 295.6  | 284.2  | 207.9  | 313.4  |
| 24.2   | 26.8   | 39.5   | 7.8    | 8.7    | 12.1   | 5.9    | 9.4    | 6.2    |
| 1.0    | 4.6    | 0.8    | 1.8    | 6.3    | 6.0    | 1.0    | 0.9    | 1.5    |
| 14.4   | 27.7   | 17.8   | 15.0   | 8.2    | 11.9   | 20.1   | 19.7   | 12.8   |
| 15.7   | 7.4    | 3.6    | 4.7    | 8.3    | 3.4    | 3.4    | 2.4    | 4.6    |
| 6.3    | 4.4    | 7.2    | 13.2   | 14.1   | 20.2   | 6.8    | 5.4    | 5.1    |
| 10.7   | 20.1   | 14.2   | 27.7   | 17.8   | 22.9   | 8.8    | 8.3    | 4.3    |
| 20.7   | 20.1   | 16.8   | 27.0   | 38.6   | 36.8   | 24.6   | 21.5   | 24.9   |
| 2.0    | 2.5    | 2.5    | 5.2    | 3.3    | 3.3    | 2.6    | 2.4    | 3.2    |
| 1277.3 | 2267.2 | 1566.3 | 865.8  | 940.8  | 872.6  | 1013.8 | 960.4  | 1127.9 |
| 6.1    | 15.0   | 11.7   | 7.7    | 8.4    | 5.9    | 0.5    | 3.4    | 2.7    |
| 3.5    | 4.2    | 5.4    | 9.2    | 22.9   | 9.9    | 5.6    | 10.9   | 6.9    |
| 5.7    | 25.2   | 14.6   | 18.7   | 15.0   | 19.7   | 5.8    | 12.5   | 15.3   |

|        |        |        |         |        |        |        |        |        |
|--------|--------|--------|---------|--------|--------|--------|--------|--------|
| 42.8   | 48.0   | 31.9   | 36.0    | 34.1   | 14.6   | 40.4   | 20.8   | 42.5   |
| 5.5    | 11.8   | 1.5    | 8.8     | 6.1    | 11.7   | 3.6    | 1.5    | 2.4    |
| 2.6    | 2.2    | 2.9    | 12.3    | 16.7   | 10.8   | 1.7    | 1.1    | 1.6    |
| 10.8   | 9.7    | 9.7    | 13.7    | 7.5    | 18.8   | 13.4   | 7.4    | 11.0   |
| 5.9    | 3.9    | 4.7    | 1.8     | 1.2    | 1.5    | 0.4    | 1.1    | 2.0    |
| 760.4  | 624.2  | 507.5  | 37.1    | 28.4   | 30.2   | 23.8   | 27.6   | 32.6   |
| 6.2    | 12.2   | 5.3    | 18.0    | 14.4   | 11.8   | 7.4    | 7.9    | 8.1    |
| 28.6   | 32.0   | 28.5   | 50.6    | 39.4   | 37.5   | 27.9   | 24.3   | 26.7   |
| 6.5    | 4.7    | 6.5    | 17.8    | 28.4   | 24.4   | 13.6   | 4.2    | 25.6   |
| 0.8    | 0.8    | 2.9    | 1.2     | 1.2    | 10.5   | 6.9    | 0.5    | 2.3    |
| 343.7  | 323.7  | 206.0  | 405.5   | 215.1  | 250.2  | 154.1  | 125.5  | 166.9  |
| 7.0    | 7.7    | 2.4    | 21.0    | 19.6   | 14.7   | 2.9    | 4.3    | 4.5    |
| 4.9    | 10.3   | 4.2    | 6.5     | 2.4    | 3.3    | 6.0    | 9.4    | 3.2    |
| 2.8    | 6.8    | 7.1    | 9.0     | 7.3    | 13.0   | 9.2    | 5.3    | 4.3    |
| 11.9   | 15.1   | 13.9   | 33.0    | 22.8   | 32.2   | 11.2   | 9.6    | 8.7    |
| 9334.0 | 9217.9 | 8863.7 | 10107.6 | 9083.1 | 9794.4 | 6689.6 | 6369.3 | 7066.3 |
| 13.9   | 15.2   | 21.3   | 26.6    | 15.9   | 57.9   | 74.0   | 86.1   | 127.5  |
| 14.5   | 12.4   | 12.4   | 13.4    | 12.0   | 5.6    | 7.7    | 7.9    | 6.9    |
| 2.0    | 1.2    | 5.3    | 19.1    | 18.6   | 21.0   | 5.9    | 4.4    | 6.3    |
| 3.8    | 0.5    | 1.5    | 2.2     | 5.3    | 2.4    | 0.7    | 0.4    | 0.4    |
| 54.0   | 100.2  | 94.2   | 77.8    | 57.3   | 73.0   | 67.9   | 63.8   | 74.9   |
| 0.7    | 0.8    | 0.8    | 4.1     | 7.5    | 4.2    | 5.0    | 4.2    | 2.6    |
| 16.8   | 7.1    | 9.0    | 20.7    | 11.7   | 12.8   | 14.7   | 16.5   | 15.3   |
| 41.0   | 55.0   | 28.5   | 70.4    | 60.8   | 68.5   | 37.1   | 28.0   | 37.6   |
| 89.5   | 150.5  | 122.3  | 160.0   | 121.7  | 158.6  | 70.6   | 54.8   | 73.2   |
| 2379.9 | 2308.3 | 1737.2 | 1036.3  | 718.0  | 715.8  | 911.1  | 818.5  | 884.9  |
| 7.8    | 0.8    | 0.8    | 1.8     | 3.8    | 3.4    | 2.3    | 1.2    | 2.4    |
| 6.0    | 6.1    | 3.9    | 21.8    | 15.7   | 34.0   | 11.0   | 4.8    | 23.8   |
| 3.9    | 10.2   | 11.2   | 10.1    | 2.8    | 11.4   | 2.6    | 6.6    | 4.5    |
| 2.7    | 3.6    | 1.5    | 8.0     | 6.2    | 6.2    | 9.9    | 3.4    | 2.3    |
| 7.5    | 21.1   | 6.1    | 11.3    | 10.7   | 17.2   | 22.5   | 7.3    | 9.3    |
| 7.0    | 15.7   | 7.8    | 4.9     | 3.5    | 5.1    | 3.1    | 4.1    | 2.6    |
| 13.7   | 10.7   | 7.7    | 17.5    | 9.9    | 9.0    | 7.1    | 4.5    | 2.8    |
| 102.3  | 89.5   | 68.3   | 77.6    | 53.6   | 55.2   | 57.4   | 48.9   | 63.8   |
| 4.1    | 5.8    | 1.9    | 12.4    | 8.5    | 10.2   | 7.1    | 0.4    | 4.6    |
| 5.7    | 8.3    | 1.7    | 19.9    | 13.5   | 15.3   | 6.8    | 5.8    | 12.8   |
| 226.8  | 318.3  | 261.9  | 171.8   | 173.1  | 239.7  | 76.3   | 120.4  | 136.3  |
| 10.3   | 15.8   | 9.8    | 8.1     | 13.5   | 7.2    | 18.3   | 8.6    | 6.5    |
| 2.0    | 2.2    | 1.3    | 6.4     | 3.0    | 2.8    | 2.7    | 1.8    | 3.1    |
| 1.3    | 1.8    | 1.7    | 3.0     | 4.4    | 5.1    | 0.5    | 1.3    | 1.3    |
| 16.2   | 21.9   | 12.0   | 18.6    | 17.4   | 24.0   | 16.0   | 13.2   | 14.9   |
| 0.8    | 0.7    | 0.8    | 3.6     | 2.0    | 4.0    | 1.2    | 2.0    | 0.7    |
| 4.2    | 2.8    | 1.5    | 2.3     | 2.0    | 2.5    | 4.6    | 0.9    | 1.1    |
| 53.3   | 62.1   | 24.1   | 20.7    | 12.9   | 3.1    | 6.8    | 1.6    | 3.3    |
| 561.9  | 760.1  | 486.5  | 416.2   | 281.5  | 348.2  | 208.1  | 203.8  | 270.2  |
| 8.3    | 5.4    | 1.0    | 17.1    | 12.3   | 11.5   | 1.1    | 0.5    | 2.5    |
| 10.8   | 10.9   | 6.9    | 5.0     | 2.8    | 6.8    | 19.5   | 3.5    | 5.5    |
| 137.2  | 132.1  | 118.0  | 67.6    | 52.3   | 63.9   | 73.8   | 65.3   | 82.5   |
| 4.8    | 4.7    | 5.2    | 1.3     | 1.2    | 6.3    | 0.6    | 3.5    | 1.2    |
| 54.0   | 59.3   | 63.4   | 24.9    | 18.0   | 19.2   | 13.7   | 16.3   | 18.2   |
| 2.1    | 1.8    | 1.3    | 5.0     | 1.3    | 7.0    | 0.7    | 1.2    | 3.5    |
| 8.7    | 1.3    | 5.0    | 6.2     | 3.6    | 8.1    | 4.6    | 1.4    | 7.1    |
| 8.7    | 19.2   | 3.5    | 35.1    | 33.2   | 30.9   | 17.4   | 10.0   | 23.8   |

|        |        |        |        |        |        |        |        |        |
|--------|--------|--------|--------|--------|--------|--------|--------|--------|
| 658.6  | 814.4  | 751.2  | 101.7  | 93.4   | 107.2  | 119.1  | 109.7  | 117.4  |
| 277.3  | 290.2  | 150.0  | 68.2   | 44.3   | 50.0   | 58.8   | 64.0   | 72.3   |
| 0.9    | 11.9   | 5.5    | 18.5   | 17.1   | 25.2   | 9.1    | 11.7   | 10.3   |
| 9.8    | 14.6   | 10.3   | 10.7   | 12.0   | 12.5   | 4.5    | 6.9    | 7.5    |
| 1.2    | 1.7    | 3.7    | 2.1    | 4.9    | 8.6    | 1.1    | 3.4    | 0.4    |
| 22.6   | 26.2   | 30.3   | 43.3   | 42.2   | 41.8   | 10.4   | 11.3   | 15.3   |
| 2.0    | 1.4    | 1.5    | 3.9    | 2.2    | 2.1    | 1.8    | 1.5    | 2.0    |
| 3.0    | 8.5    | 2.3    | 8.6    | 2.0    | 6.3    | 1.0    | 2.6    | 4.1    |
| 8.7    | 7.6    | 6.2    | 10.0   | 7.8    | 22.3   | 1.9    | 6.6    | 2.4    |
| 519.0  | 580.7  | 249.3  | 83.5   | 49.1   | 61.2   | 135.3  | 119.6  | 120.3  |
| 24.6   | 30.5   | 20.6   | 53.4   | 43.6   | 26.9   | 19.1   | 26.3   | 19.6   |
| 22.8   | 11.6   | 16.1   | 6.1    | 10.4   | 11.0   | 12.9   | 18.3   | 14.2   |
| 160.5  | 229.9  | 174.6  | 168.7  | 158.8  | 208.2  | 339.3  | 318.3  | 360.3  |
| 17.8   | 19.3   | 6.4    | 23.8   | 29.3   | 28.0   | 16.3   | 12.5   | 16.7   |
| 9.0    | 23.3   | 10.4   | 20.3   | 13.3   | 18.4   | 8.7    | 12.0   | 16.1   |
| 1.2    | 4.0    | 1.3    | 3.4    | 1.6    | 2.5    | 0.7    | 0.6    | 0.6    |
| 0.3    | 1.9    | 0.5    | 3.7    | 1.4    | 4.0    | 0.4    | 0.6    | 2.1    |
| 12.4   | 19.0   | 8.1    | 20.8   | 14.8   | 22.8   | 17.0   | 7.5    | 24.7   |
| 1.7    | 6.9    | 4.8    | 8.5    | 5.6    | 12.5   | 1.7    | 5.4    | 3.4    |
| 18.3   | 30.2   | 18.9   | 23.5   | 15.3   | 22.1   | 20.3   | 13.8   | 13.9   |
| 434.4  | 521.3  | 476.7  | 266.4  | 234.5  | 246.8  | 148.8  | 167.7  | 152.8  |
| 369.1  | 444.0  | 353.1  | 362.6  | 242.0  | 304.5  | 251.0  | 181.3  | 230.5  |
| 4.0    | 2.1    | 1.7    | 17.4   | 7.6    | 8.6    | 2.0    | 4.7    | 2.1    |
| 5.8    | 6.1    | 1.7    | 5.4    | 16.1   | 6.3    | 6.0    | 4.0    | 6.0    |
| 1.7    | 7.8    | 3.3    | 3.0    | 8.5    | 2.2    | 6.1    | 0.5    | 6.3    |
| 77.5   | 111.0  | 84.6   | 34.3   | 32.3   | 37.9   | 44.4   | 56.3   | 42.3   |
| 1.4    | 4.3    | 6.3    | 15.2   | 13.0   | 4.1    | 3.1    | 1.1    | 4.6    |
| 6.1    | 7.3    | 4.9    | 2.7    | 3.2    | 1.5    | 0.7    | 2.2    | 1.5    |
| 4.7    | 6.4    | 9.4    | 6.7    | 7.4    | 5.6    | 3.0    | 1.1    | 3.5    |
| 62.2   | 69.2   | 46.2   | 63.2   | 54.6   | 56.2   | 55.4   | 42.7   | 37.9   |
| 5603.9 | 6389.2 | 5457.9 | 5217.7 | 4459.1 | 4665.4 | 3875.5 | 3521.2 | 3053.6 |
| 40.1   | 40.5   | 25.2   | 22.5   | 13.4   | 16.9   | 19.6   | 30.5   | 19.9   |
| 13.6   | 23.0   | 22.6   | 40.0   | 25.7   | 31.9   | 5.5    | 7.6    | 9.5    |
| 1.5    | 6.2    | 3.5    | 8.8    | 5.2    | 11.6   | 12.7   | 3.2    | 12.7   |
| 2.7    | 2.9    | 2.1    | 5.5    | 4.8    | 9.5    | 1.7    | 6.9    | 4.3    |
| 4.9    | 15.6   | 11.8   | 21.6   | 21.5   | 40.3   | 19.4   | 6.1    | 10.1   |
| 24.9   | 19.2   | 14.3   | 21.4   | 5.9    | 10.1   | 19.5   | 9.2    | 14.9   |
| 44.3   | 90.9   | 55.8   | 91.0   | 84.5   | 92.3   | 61.6   | 63.4   | 55.4   |
| 10.9   | 8.8    | 2.6    | 26.9   | 13.8   | 26.0   | 9.8    | 11.4   | 16.6   |
| 127.5  | 176.1  | 110.4  | 71.0   | 63.2   | 75.5   | 95.6   | 94.4   | 113.6  |
| 4.4    | 2.0    | 2.1    | 7.5    | 4.4    | 8.9    | 1.6    | 2.1    | 1.7    |
| 27.2   | 25.1   | 29.5   | 32.2   | 23.2   | 25.6   | 14.4   | 12.4   | 19.3   |
| 52.5   | 86.8   | 88.0   | 21.1   | 19.3   | 12.0   | 13.8   | 16.7   | 14.0   |
| 6.4    | 4.6    | 2.9    | 13.6   | 8.7    | 16.5   | 9.2    | 3.1    | 9.0    |
| 68.2   | 76.6   | 46.1   | 61.8   | 48.4   | 52.5   | 41.0   | 35.5   | 56.8   |
| 11.2   | 17.1   | 9.2    | 15.8   | 17.1   | 23.5   | 9.4    | 9.7    | 9.8    |
| 23.8   | 31.1   | 21.0   | 14.9   | 21.3   | 15.5   | 18.5   | 14.4   | 12.3   |
| 9.9    | 2.7    | 6.1    | 13.2   | 7.8    | 17.0   | 7.7    | 10.0   | 10.6   |
| 15.4   | 14.8   | 15.8   | 25.7   | 18.5   | 30.0   | 15.2   | 11.9   | 15.6   |
| 506.7  | 572.7  | 532.1  | 586.2  | 488.9  | 581.1  | 377.2  | 340.6  | 402.3  |
| 24.2   | 15.5   | 17.9   | 15.5   | 10.5   | 19.4   | 11.4   | 18.0   | 7.3    |
| 24.4   | 19.0   | 11.2   | 33.3   | 30.8   | 27.3   | 38.9   | 27.6   | 36.3   |
| 1.2    | 2.6    | 1.6    | 13.0   | 11.3   | 6.2    | 1.5    | 1.4    | 2.6    |

|        |        |        |        |        |        |        |        |        |
|--------|--------|--------|--------|--------|--------|--------|--------|--------|
| 25.8   | 39.7   | 42.7   | 13.5   | 9.1    | 20.7   | 9.2    | 7.1    | 13.7   |
| 2.6    | 4.7    | 2.4    | 17.1   | 17.4   | 12.2   | 4.7    | 8.6    | 6.0    |
| 8018.9 | 9012.0 | 7832.7 | 2789.2 | 2221.1 | 2510.8 | 1871.9 | 1970.7 | 2256.3 |
| 733.3  | 1033.5 | 875.2  | 459.1  | 341.6  | 392.9  | 433.2  | 375.4  | 423.6  |
| 52.4   | 82.3   | 46.0   | 72.0   | 44.0   | 74.3   | 37.0   | 27.7   | 42.0   |
| 10.8   | 17.4   | 16.8   | 16.5   | 16.2   | 19.9   | 13.2   | 13.2   | 10.0   |
| 2.0    | 2.2    | 1.5    | 11.3   | 4.2    | 7.0    | 3.4    | 1.8    | 1.7    |
| 606.1  | 624.2  | 389.0  | 258.0  | 202.0  | 220.1  | 232.7  | 189.7  | 217.8  |
| 2.2    | 3.0    | 4.0    | 13.6   | 12.5   | 5.1    | 8.3    | 7.9    | 7.2    |
| 5.7    | 5.5    | 5.1    | 13.7   | 13.5   | 6.2    | 2.7    | 1.4    | 7.5    |
| 327.0  | 355.4  | 250.2  | 329.3  | 282.0  | 321.4  | 180.3  | 143.5  | 163.6  |
| 20.3   | 29.4   | 19.6   | 11.6   | 11.5   | 21.8   | 8.9    | 2.9    | 4.4    |
| 301.0  | 511.5  | 336.5  | 221.0  | 214.0  | 204.0  | 138.3  | 138.8  | 162.6  |
| 21.7   | 43.4   | 54.3   | 15.8   | 16.4   | 29.2   | 8.4    | 16.4   | 30.8   |
| 39.9   | 36.5   | 20.0   | 24.2   | 18.6   | 18.8   | 18.0   | 15.2   | 14.4   |
| 5.7    | 4.0    | 3.4    | 8.9    | 7.1    | 10.1   | 5.4    | 3.6    | 3.7    |
| 2.6    | 5.0    | 2.0    | 8.4    | 5.0    | 5.5    | 2.4    | 1.4    | 2.2    |
| 56.9   | 93.8   | 69.0   | 11.1   | 10.6   | 10.0   | 9.4    | 14.1   | 14.6   |
| 6.7    | 5.3    | 1.1    | 7.5    | 11.8   | 12.3   | 10.5   | 3.4    | 4.3    |
| 83.4   | 77.7   | 45.5   | 72.7   | 53.7   | 65.3   | 68.2   | 57.6   | 67.6   |
| 63.2   | 47.7   | 49.4   | 67.6   | 79.3   | 51.1   | 46.7   | 33.3   | 48.9   |
| 1.0    | 3.8    | 1.1    | 3.1    | 4.5    | 5.2    | 1.7    | 1.1    | 4.6    |
| 92.7   | 111.3  | 63.9   | 134.0  | 107.8  | 112.4  | 78.4   | 63.6   | 92.4   |
| 7.5    | 2.4    | 5.3    | 11.8   | 14.7   | 12.0   | 12.6   | 3.8    | 11.8   |
| 40.3   | 18.0   | 16.9   | 8.7    | 5.1    | 3.6    | 0.8    | 1.4    | 2.9    |
| 4.8    | 5.5    | 5.5    | 18.7   | 6.0    | 22.8   | 8.4    | 11.5   | 7.0    |
| 5.2    | 4.6    | 9.3    | 18.8   | 14.8   | 10.6   | 11.3   | 9.9    | 7.2    |
| 20.3   | 28.3   | 29.4   | 50.2   | 69.8   | 84.2   | 49.9   | 51.1   | 48.1   |
| 7.9    | 29.2   | 13.4   | 14.3   | 16.6   | 21.4   | 22.9   | 11.9   | 9.2    |
| 7.7    | 6.7    | 3.9    | 27.4   | 46.9   | 26.8   | 20.6   | 16.1   | 22.7   |
| 1.3    | 1.1    | 4.8    | 5.1    | 5.4    | 11.3   | 3.1    | 2.4    | 4.0    |
| 79.8   | 121.0  | 64.3   | 33.5   | 32.7   | 30.3   | 14.9   | 13.8   | 10.2   |
| 11.5   | 19.7   | 8.9    | 14.8   | 7.2    | 10.1   | 8.9    | 3.7    | 10.8   |
| 7.6    | 7.8    | 1.5    | 14.9   | 14.4   | 14.4   | 8.2    | 2.9    | 3.2    |
| 12.0   | 22.1   | 16.7   | 16.1   | 18.2   | 12.0   | 9.4    | 15.2   | 12.1   |
| 2.0    | 0.6    | 0.3    | 12.7   | 5.5    | 8.0    | 3.4    | 2.2    | 3.5    |
| 8.6    | 10.2   | 3.9    | 10.0   | 9.5    | 19.4   | 2.1    | 2.5    | 4.8    |
| 270.6  | 314.1  | 205.7  | 241.8  | 178.6  | 181.2  | 135.6  | 129.5  | 141.8  |
| 303.9  | 392.3  | 256.9  | 376.0  | 247.3  | 283.5  | 138.8  | 154.6  | 189.0  |
| 3.3    | 2.3    | 2.8    | 60.8   | 45.0   | 50.4   | 68.8   | 29.7   | 56.3   |
| 70.5   | 113.1  | 93.0   | 26.9   | 20.2   | 14.7   | 13.0   | 11.7   | 12.1   |
| 11.5   | 10.5   | 7.6    | 12.9   | 16.8   | 10.3   | 8.9    | 4.8    | 8.1    |
| 3.8    | 3.1    | 2.4    | 4.3    | 6.7    | 2.9    | 8.2    | 1.2    | 7.3    |
| 1.4    | 7.2    | 5.0    | 7.7    | 5.2    | 21.3   | 14.1   | 6.4    | 11.5   |
| 11.6   | 4.0    | 2.3    | 12.0   | 22.4   | 17.8   | 5.8    | 4.5    | 8.4    |
| 10.3   | 16.7   | 11.5   | 14.7   | 11.6   | 26.4   | 7.0    | 13.7   | 13.5   |
| 3.2    | 5.1    | 3.2    | 3.8    | 5.1    | 6.6    | 1.0    | 0.8    | 3.8    |
| 0.5    | 1.7    | 5.7    | 3.1    | 3.6    | 1.1    | 2.9    | 3.0    | 0.3    |
| 4.0    | 1.8    | 3.8    | 16.3   | 4.6    | 3.5    | 1.8    | 1.3    | 0.8    |
| 9.4    | 18.6   | 16.9   | 9.3    | 10.9   | 12.1   | 10.5   | 15.6   | 13.5   |
| 58.4   | 69.5   | 44.6   | 21.1   | 16.0   | 26.7   | 28.1   | 25.8   | 30.2   |
| 41.7   | 64.0   | 53.6   | 10.2   | 2.6    | 8.3    | 4.7    | 7.3    | 8.6    |
| 74.0   | 100.3  | 84.9   | 71.0   | 73.9   | 74.9   | 48.2   | 48.2   | 65.6   |

|       |       |       |       |       |       |       |       |       |
|-------|-------|-------|-------|-------|-------|-------|-------|-------|
| 27.8  | 28.5  | 13.0  | 19.4  | 17.5  | 20.7  | 23.0  | 18.8  | 16.2  |
| 284.9 | 372.6 | 296.9 | 281.6 | 254.3 | 354.3 | 238.3 | 225.2 | 290.8 |
| 20.8  | 25.0  | 13.3  | 27.3  | 21.8  | 26.1  | 21.6  | 10.1  | 18.2  |
| 8.6   | 4.1   | 6.1   | 5.9   | 2.1   | 2.3   | 7.5   | 5.0   | 5.3   |
| 1.0   | 2.3   | 0.3   | 2.2   | 2.2   | 1.7   | 0.6   | 0.9   | 0.8   |
| 57.2  | 60.7  | 57.7  | 31.0  | 16.2  | 27.5  | 56.1  | 40.5  | 43.3  |
| 17.0  | 37.6  | 26.3  | 51.0  | 36.5  | 49.5  | 21.9  | 20.8  | 24.0  |
| 16.6  | 21.7  | 6.6   | 22.2  | 14.4  | 21.5  | 10.4  | 10.0  | 6.7   |
| 129.2 | 210.6 | 152.5 | 178.1 | 168.3 | 175.6 | 75.5  | 83.5  | 99.1  |
| 148.1 | 195.5 | 131.4 | 109.7 | 82.4  | 99.4  | 86.5  | 80.4  | 85.3  |
| 3.8   | 3.4   | 0.4   | 5.0   | 6.0   | 4.7   | 2.8   | 1.2   | 0.3   |
| 10.7  | 10.2  | 9.1   | 2.3   | 5.0   | 12.3  | 5.0   | 8.5   | 4.6   |
| 28.5  | 28.8  | 22.1  | 45.8  | 32.8  | 34.5  | 19.8  | 21.2  | 19.8  |
| 48.0  | 38.2  | 31.3  | 65.4  | 51.0  | 39.6  | 34.8  | 28.3  | 32.7  |
| 32.2  | 55.9  | 45.0  | 14.9  | 3.5   | 9.4   | 10.4  | 5.9   | 12.0  |
| 6.2   | 9.8   | 7.0   | 16.7  | 15.9  | 13.0  | 4.7   | 4.8   | 1.5   |
| 9.9   | 16.4  | 7.4   | 20.5  | 20.5  | 18.0  | 16.0  | 11.9  | 16.1  |
| 36.4  | 41.3  | 41.3  | 33.1  | 14.9  | 29.5  | 36.9  | 31.1  | 34.7  |
| 34.3  | 24.7  | 23.9  | 11.9  | 18.6  | 11.2  | 18.8  | 11.7  | 28.2  |
| 12.7  | 13.8  | 6.7   | 16.3  | 12.9  | 21.7  | 7.5   | 5.3   | 15.4  |
| 6.6   | 0.5   | 1.8   | 4.1   | 4.7   | 7.5   | 6.1   | 0.5   | 2.0   |
| 14.5  | 11.3  | 8.0   | 27.5  | 3.6   | 8.8   | 15.6  | 10.4  | 7.4   |
| 4.8   | 0.9   | 4.8   | 4.6   | 14.7  | 9.8   | 6.0   | 5.7   | 6.7   |
| 2.5   | 3.8   | 1.5   | 5.0   | 18.1  | 7.0   | 1.4   | 3.2   | 0.9   |
| 7.3   | 12.5  | 9.7   | 17.8  | 8.4   | 16.5  | 6.1   | 7.6   | 5.8   |
| 8.4   | 4.6   | 5.4   | 16.6  | 7.7   | 15.7  | 7.9   | 5.9   | 10.0  |
| 3.6   | 9.0   | 4.0   | 13.2  | 13.0  | 13.8  | 4.4   | 8.9   | 9.2   |
| 19.0  | 16.6  | 18.0  | 23.6  | 20.9  | 30.5  | 16.9  | 14.6  | 13.3  |
| 8.5   | 1.6   | 2.0   | 3.7   | 4.9   | 5.9   | 3.2   | 3.4   | 5.7   |
| 2.8   | 1.2   | 2.9   | 2.0   | 2.9   | 1.6   | 4.6   | 0.3   | 3.7   |
| 3.8   | 1.1   | 1.9   | 2.8   | 4.5   | 5.2   | 1.2   | 1.3   | 2.1   |
| 23.2  | 32.3  | 30.0  | 39.2  | 22.5  | 28.1  | 27.7  | 24.6  | 21.4  |
| 3.9   | 6.7   | 9.1   | 18.2  | 12.5  | 7.5   | 6.8   | 10.4  | 6.1   |
| 0.8   | 2.5   | 6.6   | 4.3   | 15.6  | 15.4  | 5.7   | 0.6   | 0.8   |
| 30.9  | 34.9  | 27.6  | 8.6   | 16.6  | 24.2  | 37.6  | 40.1  | 36.9  |
| 12.3  | 3.9   | 1.7   | 3.4   | 8.5   | 2.7   | 0.9   | 4.3   | 3.5   |
| 7.1   | 6.8   | 5.5   | 8.1   | 2.6   | 12.0  | 3.4   | 5.9   | 0.5   |
| 41.8  | 52.3  | 28.9  | 58.6  | 46.4  | 42.6  | 31.5  | 49.2  | 38.3  |
| 61.6  | 59.4  | 47.2  | 56.2  | 40.4  | 42.5  | 39.7  | 32.4  | 36.2  |
| 6.7   | 2.7   | 5.6   | 11.2  | 7.3   | 10.6  | 2.2   | 6.5   | 3.8   |
| 4.1   | 9.9   | 1.2   | 7.2   | 8.2   | 7.9   | 2.5   | 5.2   | 4.3   |
| 3.7   | 4.8   | 3.2   | 14.0  | 9.5   | 8.8   | 1.1   | 1.4   | 3.2   |
| 14.7  | 15.3  | 14.6  | 7.1   | 11.0  | 12.6  | 4.4   | 9.2   | 7.3   |
| 12.3  | 17.3  | 13.5  | 16.5  | 15.4  | 16.3  | 7.0   | 1.2   | 7.9   |
| 38.0  | 26.7  | 43.9  | 72.6  | 46.4  | 67.8  | 35.4  | 38.3  | 16.9  |
| 6.4   | 2.0   | 1.1   | 4.8   | 2.8   | 3.8   | 2.4   | 1.5   | 1.3   |
| 21.9  | 22.7  | 26.2  | 35.5  | 29.0  | 45.7  | 18.2  | 20.8  | 29.9  |
| 6.1   | 5.4   | 6.2   | 7.7   | 4.1   | 2.9   | 1.6   | 5.0   | 6.1   |
| 9.0   | 1.8   | 1.4   | 7.1   | 1.7   | 4.3   | 5.2   | 0.9   | 1.5   |
| 145.0 | 191.7 | 144.9 | 40.3  | 29.7  | 29.8  | 16.7  | 21.2  | 25.0  |
| 36.3  | 37.1  | 35.0  | 43.1  | 29.1  | 23.7  | 24.2  | 21.2  | 21.5  |
| 4.4   | 11.6  | 5.7   | 21.7  | 40.5  | 26.3  | 37.2  | 41.9  | 38.9  |
| 11.0  | 9.9   | 10.3  | 4.5   | 9.4   | 2.0   | 5.1   | 4.2   | 4.7   |



|       |       |       |       |       |       |       |       |       |
|-------|-------|-------|-------|-------|-------|-------|-------|-------|
| 69.6  | 71.1  | 42.4  | 40.7  | 23.4  | 32.1  | 57.0  | 41.1  | 62.4  |
| 15.4  | 32.3  | 20.9  | 5.9   | 15.0  | 11.5  | 15.3  | 2.8   | 5.2   |
| 56.1  | 120.9 | 100.6 | 16.6  | 17.2  | 24.6  | 17.6  | 9.6   | 3.4   |
| 49.8  | 61.0  | 33.4  | 50.7  | 57.2  | 51.7  | 33.9  | 33.8  | 37.6  |
| 0.5   | 2.1   | 0.8   | 11.3  | 6.1   | 9.9   | 8.6   | 9.7   | 9.6   |
| 3.5   | 12.0  | 2.1   | 15.8  | 19.0  | 7.5   | 13.2  | 8.9   | 20.7  |
| 58.6  | 59.4  | 32.7  | 17.9  | 15.3  | 24.6  | 47.0  | 24.6  | 44.3  |
| 24.8  | 28.8  | 21.1  | 12.8  | 6.3   | 19.4  | 11.4  | 9.6   | 13.6  |
| 9.2   | 10.5  | 5.7   | 20.6  | 3.0   | 15.8  | 6.9   | 14.9  | 8.7   |
| 110.8 | 158.7 | 113.9 | 103.3 | 93.0  | 103.1 | 139.9 | 130.5 | 154.5 |
| 10.9  | 7.3   | 2.9   | 17.0  | 13.7  | 22.0  | 20.7  | 16.6  | 10.6  |
| 42.8  | 39.2  | 52.8  | 11.4  | 19.0  | 25.1  | 3.8   | 13.4  | 10.1  |
| 13.6  | 22.4  | 10.7  | 36.5  | 24.3  | 27.0  | 14.4  | 13.4  | 10.9  |
| 107.1 | 155.0 | 120.1 | 75.7  | 75.1  | 63.4  | 43.3  | 50.6  | 58.0  |
| 73.0  | 69.4  | 72.2  | 13.3  | 16.1  | 17.5  | 11.1  | 14.7  | 11.5  |
| 47.7  | 56.5  | 48.2  | 25.9  | 22.3  | 15.6  | 26.2  | 20.2  | 25.0  |
| 2.2   | 3.2   | 2.7   | 5.6   | 10.2  | 8.8   | 4.2   | 2.4   | 3.2   |
| 33.0  | 41.4  | 28.5  | 108.2 | 81.3  | 86.0  | 49.5  | 32.3  | 51.9  |
| 7.3   | 4.2   | 2.9   | 4.1   | 7.2   | 6.5   | 2.3   | 3.8   | 0.6   |
| 14.9  | 13.5  | 16.4  | 21.5  | 18.9  | 22.3  | 16.2  | 14.0  | 14.7  |
| 4.2   | 3.5   | 2.9   | 5.6   | 10.1  | 12.3  | 6.2   | 2.9   | 2.0   |
| 7.6   | 2.7   | 1.7   | 9.8   | 14.1  | 8.7   | 10.5  | 10.4  | 1.4   |
| 1.6   | 4.7   | 1.0   | 90.4  | 69.8  | 72.1  | 35.5  | 42.7  | 43.5  |
| 102.3 | 122.5 | 78.0  | 63.6  | 57.5  | 51.7  | 45.0  | 45.2  | 49.3  |
| 99.0  | 65.4  | 77.5  | 90.7  | 54.4  | 76.7  | 55.1  | 66.1  | 51.1  |
| 231.5 | 278.7 | 191.5 | 41.7  | 18.9  | 23.7  | 44.8  | 30.3  | 31.7  |
| 4.1   | 4.8   | 3.0   | 4.2   | 4.0   | 7.1   | 0.3   | 1.7   | 1.7   |
| 32.2  | 29.5  | 21.6  | 43.3  | 46.4  | 46.2  | 18.6  | 24.7  | 23.4  |
| 1.9   | 2.7   | 2.3   | 4.7   | 8.6   | 6.1   | 3.0   | 4.6   | 0.3   |
| 41.3  | 47.6  | 30.9  | 1.9   | 4.0   | 2.6   | 3.6   | 2.5   | 2.9   |
| 26.3  | 56.0  | 37.0  | 38.3  | 29.1  | 20.2  | 33.5  | 25.2  | 37.7  |
| 57.3  | 67.5  | 55.7  | 5.1   | 8.4   | 6.3   | 2.0   | 4.5   | 5.5   |
| 47.6  | 76.9  | 52.6  | 122.4 | 95.8  | 99.7  | 52.6  | 55.4  | 65.8  |
| 13.5  | 5.7   | 10.8  | 11.5  | 10.6  | 6.9   | 6.4   | 6.7   | 12.2  |
| 25.1  | 30.4  | 22.2  | 34.4  | 25.5  | 35.4  | 17.7  | 20.0  | 21.8  |
| 19.8  | 36.1  | 18.7  | 40.3  | 38.5  | 27.9  | 27.5  | 24.7  | 24.1  |
| 65.2  | 71.2  | 68.8  | 42.6  | 42.9  | 62.7  | 37.1  | 40.7  | 49.7  |
| 34.2  | 46.7  | 23.7  | 15.7  | 17.4  | 15.6  | 17.9  | 12.9  | 21.8  |
| 22.3  | 22.6  | 17.9  | 29.8  | 14.1  | 21.3  | 27.2  | 16.0  | 24.7  |
| 8.1   | 9.9   | 11.6  | 17.9  | 20.6  | 19.6  | 14.6  | 18.0  | 8.8   |
| 54.8  | 57.4  | 43.3  | 68.4  | 89.0  | 81.2  | 41.8  | 41.4  | 37.4  |
| 9.8   | 5.1   | 2.3   | 5.0   | 9.8   | 4.1   | 3.5   | 4.0   | 12.0  |
| 32.6  | 19.2  | 18.1  | 31.6  | 36.6  | 35.5  | 18.8  | 15.4  | 21.7  |
| 10.7  | 17.5  | 21.3  | 22.4  | 17.2  | 13.5  | 13.3  | 21.8  | 20.7  |
| 14.9  | 10.4  | 9.0   | 22.0  | 7.5   | 13.8  | 5.5   | 4.8   | 10.4  |
| 356.7 | 419.5 | 260.9 | 188.5 | 106.0 | 102.7 | 110.6 | 73.1  | 81.5  |
| 2.1   | 0.8   | 10.0  | 10.0  | 13.4  | 11.1  | 4.2   | 5.2   | 4.6   |
| 2.7   | 4.7   | 5.2   | 5.4   | 5.6   | 7.5   | 1.5   | 3.9   | 3.4   |
| 19.4  | 25.1  | 26.7  | 35.1  | 26.6  | 25.0  | 13.3  | 16.9  | 19.9  |
| 29.1  | 47.9  | 34.9  | 21.9  | 20.7  | 25.9  | 41.2  | 47.3  | 43.6  |
| 166.5 | 213.4 | 173.3 | 117.1 | 125.4 | 134.3 | 58.9  | 58.2  | 76.4  |
| 2.2   | 6.0   | 1.4   | 7.3   | 9.1   | 9.4   | 2.1   | 4.8   | 10.6  |
| 23.8  | 41.2  | 18.2  | 19.5  | 16.9  | 26.1  | 17.4  | 5.3   | 11.9  |

|       |        |        |        |        |        |        |        |        |
|-------|--------|--------|--------|--------|--------|--------|--------|--------|
| 1.6   | 3.8    | 2.1    | 3.1    | 5.8    | 3.1    | 1.6    | 2.3    | 1.2    |
| 9.9   | 8.2    | 5.2    | 12.2   | 6.1    | 13.5   | 7.0    | 3.8    | 8.8    |
| 18.2  | 37.5   | 27.5   | 39.6   | 26.5   | 29.4   | 15.0   | 23.3   | 22.3   |
| 27.2  | 36.6   | 23.5   | 29.1   | 22.5   | 21.6   | 27.6   | 22.9   | 18.5   |
| 11.7  | 8.6    | 6.1    | 10.5   | 6.8    | 15.9   | 8.5    | 3.4    | 5.5    |
| 48.3  | 83.1   | 54.3   | 58.7   | 53.0   | 45.0   | 39.9   | 40.3   | 39.0   |
| 9.1   | 4.6    | 4.2    | 12.6   | 7.1    | 14.4   | 2.0    | 8.8    | 9.6    |
| 14.9  | 21.2   | 11.9   | 10.2   | 8.9    | 6.1    | 9.1    | 2.7    | 1.9    |
| 25.7  | 28.3   | 25.9   | 19.1   | 20.5   | 14.7   | 22.9   | 20.1   | 25.5   |
| 34.2  | 34.7   | 24.9   | 18.2   | 15.1   | 14.3   | 12.1   | 13.2   | 8.9    |
| 5.3   | 5.1    | 4.0    | 5.3    | 14.2   | 11.7   | 12.7   | 4.8    | 10.8   |
| 8.5   | 15.7   | 5.8    | 15.8   | 11.1   | 11.4   | 2.3    | 6.4    | 12.7   |
| 4.7   | 9.1    | 15.3   | 4.2    | 3.1    | 3.6    | 6.2    | 1.7    | 2.6    |
| 1.8   | 1.9    | 1.8    | 7.0    | 6.1    | 3.2    | 1.9    | 2.0    | 4.5    |
| 34.1  | 35.3   | 29.1   | 34.6   | 34.8   | 25.8   | 26.2   | 17.1   | 29.2   |
| 18.0  | 21.0   | 13.7   | 8.6    | 13.2   | 21.0   | 12.9   | 12.4   | 13.2   |
| 2.4   | 1.2    | 1.7    | 8.0    | 9.1    | 6.4    | 4.2    | 6.0    | 8.3    |
| 10.0  | 11.2   | 6.6    | 113.3  | 113.6  | 107.0  | 76.1   | 64.7   | 84.8   |
| 45.1  | 66.1   | 34.9   | 7.6    | 12.7   | 9.7    | 19.5   | 13.0   | 22.6   |
| 11.4  | 7.9    | 7.4    | 3.2    | 1.5    | 7.8    | 3.8    | 1.3    | 1.3    |
| 14.0  | 6.4    | 7.5    | 24.9   | 8.0    | 21.0   | 8.4    | 12.5   | 15.7   |
| 1.5   | 1.6    | 1.3    | 6.1    | 3.3    | 5.1    | 0.9    | 1.1    | 1.3    |
| 3.6   | 14.1   | 5.8    | 30.7   | 12.6   | 8.0    | 2.5    | 4.3    | 5.1    |
| 10.4  | 20.7   | 9.4    | 18.8   | 4.5    | 10.5   | 5.7    | 0.9    | 1.2    |
| 133.3 | 123.3  | 95.6   | 106.7  | 97.1   | 94.6   | 94.4   | 69.8   | 73.9   |
| 962.9 | 1651.3 | 1392.2 | 1271.2 | 1052.5 | 1294.3 | 1497.8 | 1429.1 | 1787.5 |
| 1.8   | 1.6    | 2.0    | 7.0    | 4.8    | 3.2    | 7.6    | 5.4    | 0.6    |
| 81.5  | 131.7  | 107.1  | 8.5    | 9.1    | 4.0    | 29.4   | 22.1   | 37.4   |
| 2.6   | 8.7    | 5.7    | 19.0   | 14.3   | 13.8   | 5.5    | 2.7    | 18.8   |
| 70.7  | 99.0   | 81.9   | 12.9   | 15.1   | 21.6   | 15.7   | 15.9   | 13.0   |
| 317.3 | 299.7  | 173.0  | 34.1   | 22.9   | 37.6   | 22.4   | 15.2   | 18.7   |
| 190.9 | 172.8  | 119.1  | 142.0  | 103.1  | 104.4  | 94.8   | 104.0  | 105.9  |
| 4.6   | 3.4    | 6.0    | 17.4   | 8.5    | 27.6   | 5.8    | 14.3   | 15.4   |
| 10.2  | 8.5    | 6.6    | 62.1   | 53.6   | 51.9   | 22.6   | 32.1   | 41.6   |
| 113.5 | 120.1  | 77.5   | 71.1   | 55.5   | 67.6   | 56.4   | 37.8   | 45.3   |
| 11.1  | 4.7    | 4.2    | 19.8   | 10.3   | 12.8   | 2.8    | 12.6   | 7.9    |
| 10.7  | 18.0   | 10.3   | 30.2   | 10.3   | 14.1   | 7.2    | 13.1   | 10.8   |
| 12.7  | 17.6   | 14.1   | 31.3   | 19.0   | 28.3   | 5.4    | 7.1    | 11.4   |
| 11.7  | 3.3    | 6.9    | 3.6    | 3.2    | 2.5    | 6.9    | 2.0    | 6.2    |
| 20.5  | 29.9   | 14.6   | 24.4   | 18.8   | 26.6   | 20.5   | 18.8   | 19.1   |
| 3.0   | 8.4    | 4.4    | 9.4    | 13.7   | 7.6    | 10.5   | 10.0   | 13.0   |
| 5.1   | 5.8    | 4.6    | 17.0   | 5.9    | 7.4    | 9.0    | 7.5    | 11.0   |
| 32.9  | 36.0   | 25.7   | 90.5   | 46.2   | 55.3   | 21.8   | 18.6   | 27.6   |
| 225.2 | 290.6  | 177.3  | 106.9  | 106.1  | 79.1   | 56.9   | 54.1   | 60.6   |
| 20.2  | 29.9   | 16.9   | 24.5   | 21.5   | 14.4   | 5.8    | 18.3   | 5.6    |
| 94.2  | 108.1  | 46.7   | 63.8   | 55.5   | 63.3   | 55.4   | 61.2   | 53.2   |
| 4.6   | 1.5    | 2.8    | 6.1    | 6.5    | 7.6    | 1.3    | 2.4    | 5.7    |
| 16.7  | 20.3   | 18.1   | 33.8   | 17.8   | 37.3   | 14.4   | 13.0   | 18.2   |
| 9.5   | 5.9    | 2.6    | 22.0   | 21.0   | 38.9   | 15.2   | 14.3   | 21.5   |
| 4.8   | 7.2    | 0.5    | 7.5    | 5.8    | 6.6    | 1.6    | 4.2    | 4.0    |
| 0.9   | 3.8    | 1.1    | 5.5    | 7.3    | 11.3   | 4.2    | 1.7    | 0.3    |
| 5.1   | 7.2    | 6.5    | 13.6   | 17.6   | 19.9   | 5.9    | 9.4    | 4.4    |
| 11.5  | 5.5    | 2.3    | 5.9    | 10.5   | 6.0    | 7.6    | 8.8    | 4.2    |

|         |         |         |         |         |         |        |        |        |
|---------|---------|---------|---------|---------|---------|--------|--------|--------|
| 5.2     | 4.1     | 5.8     | 11.4    | 9.5     | 12.8    | 5.3    | 6.1    | 8.2    |
| 14.0    | 15.7    | 10.4    | 12.0    | 13.4    | 7.7     | 18.1   | 12.4   | 5.2    |
| 147.1   | 180.0   | 150.4   | 156.1   | 160.1   | 135.7   | 98.8   | 83.6   | 81.9   |
| 37.4    | 52.1    | 31.1    | 24.7    | 21.8    | 28.4    | 6.7    | 7.6    | 24.0   |
| 2.9     | 6.6     | 1.1     | 5.4     | 6.4     | 5.9     | 3.4    | 3.3    | 2.8    |
| 7.8     | 7.0     | 7.4     | 23.5    | 13.8    | 8.5     | 8.1    | 9.4    | 11.1   |
| 430.3   | 663.7   | 513.1   | 104.4   | 77.2    | 84.3    | 114.1  | 109.6  | 105.4  |
| 28.3    | 18.5    | 23.0    | 14.6    | 19.9    | 18.7    | 24.1   | 15.7   | 29.7   |
| 2.5     | 0.3     | 4.3     | 2.2     | 4.4     | 5.6     | 4.2    | 3.0    | 0.5    |
| 4.9     | 2.5     | 2.8     | 11.0    | 9.4     | 5.5     | 14.3   | 10.2   | 24.6   |
| 3.6     | 5.3     | 2.8     | 32.5    | 33.8    | 30.9    | 7.3    | 3.4    | 16.5   |
| 0.7     | 1.1     | 4.3     | 8.1     | 5.5     | 9.6     | 0.8    | 1.7    | 2.5    |
| 58.4    | 55.3    | 41.2    | 58.7    | 46.7    | 60.9    | 37.9   | 45.1   | 40.3   |
| 124.2   | 113.3   | 81.2    | 212.7   | 172.4   | 189.1   | 99.9   | 101.3  | 105.6  |
| 51.6    | 30.4    | 25.4    | 79.0    | 59.6    | 70.2    | 35.3   | 36.4   | 39.1   |
| 1914.9  | 2002.8  | 1349.0  | 829.9   | 686.3   | 770.4   | 460.9  | 446.4  | 538.0  |
| 4010.9  | 4230.7  | 3295.4  | 5200.7  | 4444.0  | 4494.4  | 3042.2 | 2769.9 | 3162.5 |
| 4967.1  | 5609.7  | 4840.3  | 9324.8  | 8735.4  | 8551.0  | 6016.3 | 5917.5 | 6470.4 |
| 4678.3  | 5330.4  | 4502.6  | 3842.2  | 3784.4  | 3949.8  | 2658.4 | 3046.0 | 3178.9 |
| 9467.5  | 10065.3 | 8746.8  | 9343.9  | 8002.9  | 8217.5  | 5845.6 | 5167.5 | 5829.0 |
| 64.6    | 70.3    | 54.4    | 50.6    | 40.0    | 47.9    | 37.4   | 39.5   | 40.6   |
| 1724.8  | 1722.9  | 1015.3  | 2245.9  | 1795.8  | 1765.6  | 1612.2 | 1328.1 | 1551.3 |
| 3.6     | 3.8     | 2.6     | 5.9     | 4.5     | 4.8     | 2.1    | 5.6    | 2.9    |
| 3674.5  | 3961.9  | 2478.6  | 2364.8  | 1770.3  | 1998.0  | 1653.4 | 1376.5 | 1667.9 |
| 3135.3  | 3419.2  | 1981.3  | 1084.5  | 789.2   | 911.3   | 1013.7 | 883.1  | 1029.3 |
| 1500.8  | 2101.0  | 1514.2  | 731.5   | 557.6   | 656.6   | 474.8  | 419.8  | 540.7  |
| 1630.2  | 2048.5  | 1649.7  | 2746.7  | 2398.2  | 2605.7  | 1559.4 | 1645.3 | 1801.1 |
| 12669.2 | 12871.9 | 12262.8 | 3968.9  | 3898.1  | 4197.3  | 1984.1 | 2131.3 | 2458.1 |
| 254.3   | 364.2   | 321.1   | 726.6   | 573.2   | 586.9   | 386.6  | 349.5  | 405.0  |
| 1055.0  | 1154.7  | 914.4   | 549.5   | 532.7   | 542.9   | 344.8  | 425.7  | 396.6  |
| 5403.4  | 6706.2  | 6360.7  | 1013.7  | 931.0   | 821.3   | 1781.3 | 2298.1 | 2024.4 |
| 5512.8  | 6757.3  | 6773.3  | 2196.6  | 2238.1  | 2284.2  | 1685.5 | 2175.6 | 2063.7 |
| 9487.8  | 9558.4  | 8039.2  | 9569.4  | 9245.2  | 8929.3  | 5223.2 | 5381.2 | 5816.2 |
| 257.7   | 393.3   | 275.6   | 242.8   | 290.5   | 294.2   | 127.0  | 219.4  | 209.4  |
| 79.5    | 113.1   | 104.5   | 87.9    | 67.2    | 98.2    | 56.9   | 74.9   | 71.4   |
| 1889.5  | 2717.3  | 2297.8  | 2730.7  | 2453.2  | 2721.6  | 1975.1 | 2390.7 | 2344.1 |
| 1306.1  | 1837.3  | 1251.2  | 1812.3  | 1575.6  | 1878.5  | 1116.1 | 1190.7 | 1289.6 |
| 484.6   | 594.9   | 315.0   | 443.6   | 387.1   | 437.1   | 397.6  | 576.5  | 534.7  |
| 603.9   | 803.0   | 432.0   | 635.1   | 514.7   | 552.4   | 572.9  | 631.5  | 614.9  |
| 10903.5 | 11038.2 | 10381.9 | 11085.9 | 10486.5 | 11240.8 | 6769.3 | 6861.1 | 7118.3 |
| 1488.7  | 1469.9  | 1159.6  | 711.4   | 596.0   | 752.5   | 588.0  | 560.4  | 586.0  |
| 705.3   | 911.7   | 685.6   | 1744.7  | 1330.1  | 1343.9  | 942.9  | 908.6  | 974.2  |
| 518.6   | 655.1   | 486.8   | 467.2   | 404.8   | 440.7   | 567.5  | 636.6  | 684.5  |
| 8013.8  | 8644.9  | 7747.5  | 894.5   | 822.1   | 926.1   | 1158.6 | 1520.1 | 1419.2 |
| 7882.6  | 8263.0  | 5057.9  | 1382.1  | 911.5   | 937.8   | 2359.2 | 1768.4 | 2142.2 |
| 1139.3  | 1478.1  | 1426.3  | 990.3   | 930.1   | 1040.6  | 874.5  | 934.8  | 943.0  |
| 6104.2  | 6942.7  | 6064.5  | 4332.9  | 4045.6  | 4094.6  | 2746.4 | 2771.2 | 3047.3 |
| 1202.7  | 1466.2  | 904.0   | 533.0   | 491.7   | 522.2   | 573.4  | 645.2  | 721.4  |
| 944.5   | 1229.5  | 1146.7  | 268.9   | 263.4   | 268.2   | 291.9  | 276.8  | 338.5  |
| 884.9   | 1068.9  | 802.4   | 4080.5  | 3717.8  | 4355.7  | 2179.8 | 2401.5 | 2524.9 |
| 1501.7  | 2159.8  | 1916.3  | 766.8   | 923.5   | 1037.2  | 413.5  | 743.9  | 681.6  |
| 1833.5  | 2677.7  | 2743.4  | 1003.8  | 827.9   | 935.1   | 621.2  | 628.7  | 703.8  |
| 7658.7  | 7904.0  | 6687.5  | 4654.6  | 3616.1  | 3813.6  | 3458.5 | 2450.0 | 3144.8 |

|        |        |        |        |        |        |        |        |        |
|--------|--------|--------|--------|--------|--------|--------|--------|--------|
| 606.0  | 658.0  | 334.5  | 691.9  | 518.5  | 589.1  | 443.9  | 362.9  | 438.4  |
| 2420.1 | 2312.4 | 1346.5 | 1378.7 | 1064.5 | 1102.0 | 848.1  | 699.4  | 866.4  |
| 3233.4 | 4226.1 | 3345.8 | 4941.2 | 4566.2 | 4877.7 | 2424.0 | 2723.3 | 3172.0 |
| 6.7    | 7.7    | 3.6    | 9.5    | 11.2   | 8.6    | 2.9    | 4.5    | 7.0    |
| 2412.5 | 2889.6 | 2349.1 | 1026.9 | 866.8  | 944.5  | 1159.4 | 1218.9 | 1299.1 |
| 977.0  | 1248.3 | 897.0  | 809.4  | 714.8  | 722.7  | 575.9  | 623.2  | 649.0  |
| 633.7  | 767.0  | 552.3  | 375.1  | 314.1  | 373.4  | 318.2  | 329.6  | 357.8  |
| 835.1  | 1174.4 | 768.3  | 409.6  | 337.0  | 337.4  | 306.5  | 388.6  | 356.1  |
| 34.9   | 35.2   | 21.5   | 32.4   | 31.8   | 36.2   | 26.8   | 29.7   | 20.1   |
| 14.2   | 17.2   | 11.2   | 24.0   | 12.0   | 18.5   | 10.9   | 8.2    | 8.7    |
| 35.0   | 34.0   | 33.3   | 51.3   | 29.3   | 32.7   | 20.8   | 27.5   | 26.1   |
| 194.9  | 261.8  | 183.9  | 210.8  | 190.3  | 228.4  | 196.6  | 177.5  | 224.4  |
| 541.8  | 668.1  | 480.5  | 336.7  | 310.3  | 330.0  | 215.8  | 272.0  | 254.6  |
| 6.2    | 21.5   | 24.8   | 15.7   | 7.6    | 10.5   | 5.5    | 8.7    | 2.6    |
| 2708.5 | 2994.0 | 2274.8 | 3474.6 | 3064.6 | 3243.0 | 2163.0 | 2108.6 | 2312.6 |
| 9432.9 | 9097.9 | 7775.2 | 3372.0 | 2889.2 | 3020.3 | 1934.3 | 1856.9 | 2114.5 |
| 1266.8 | 1796.4 | 1607.9 | 743.1  | 650.9  | 658.3  | 504.2  | 525.1  | 539.1  |
| 568.6  | 914.7  | 991.0  | 6.3    | 10.8   | 14.7   | 14.6   | 22.2   | 14.3   |
| 2884.6 | 3706.4 | 2456.6 | 2284.1 | 1603.9 | 1864.3 | 1526.9 | 1091.5 | 1400.7 |
| 5254.4 | 5842.7 | 5230.5 | 4975.1 | 4600.5 | 4434.6 | 3976.4 | 4238.6 | 4565.9 |
| 3288.9 | 3414.4 | 2417.7 | 6174.4 | 5548.8 | 5884.0 | 3519.1 | 3646.0 | 3859.6 |
| 160.2  | 184.2  | 103.1  | 667.2  | 540.4  | 570.7  | 441.9  | 338.6  | 479.8  |
| 586.9  | 693.4  | 440.4  | 977.3  | 849.9  | 722.4  | 890.9  | 604.0  | 879.4  |
| 1204.0 | 1294.9 | 779.3  | 449.8  | 399.1  | 477.4  | 505.6  | 549.9  | 564.7  |
| 380.9  | 547.6  | 507.6  | 332.8  | 247.7  | 251.8  | 290.3  | 354.8  | 371.7  |
| 1580.3 | 1787.5 | 1404.8 | 1133.8 | 1130.5 | 1150.5 | 814.8  | 845.2  | 1012.6 |
| 994.3  | 1386.2 | 1143.8 | 2290.2 | 2208.9 | 2305.9 | 1109.0 | 1324.1 | 1377.4 |
| 377.8  | 452.0  | 341.1  | 444.1  | 317.6  | 316.5  | 200.9  | 215.3  | 267.9  |
| 606.4  | 721.8  | 424.9  | 584.5  | 479.8  | 573.0  | 527.0  | 464.5  | 516.5  |
| 446.9  | 749.4  | 1013.5 | 419.5  | 490.2  | 506.8  | 263.3  | 461.3  | 400.5  |
| 372.1  | 507.6  | 333.5  | 533.3  | 434.7  | 559.1  | 275.3  | 276.3  | 315.1  |
| 261.2  | 359.8  | 238.8  | 185.9  | 118.5  | 158.9  | 182.0  | 148.8  | 198.3  |
| 642.6  | 689.7  | 375.5  | 942.3  | 652.8  | 892.8  | 607.9  | 525.2  | 558.8  |
| 256.8  | 304.7  | 295.7  | 81.1   | 62.9   | 92.5   | 90.0   | 92.4   | 102.6  |
| 541.3  | 700.8  | 596.9  | 214.0  | 202.0  | 302.8  | 114.6  | 165.0  | 170.3  |
| 214.8  | 247.0  | 223.5  | 527.7  | 442.4  | 524.9  | 221.0  | 251.0  | 270.2  |
| 661.9  | 657.1  | 392.7  | 76.1   | 73.8   | 56.2   | 45.0   | 50.3   | 91.2   |
| 747.4  | 956.9  | 740.1  | 503.7  | 439.5  | 558.7  | 485.6  | 462.4  | 496.1  |
| 930.2  | 1340.6 | 816.3  | 622.7  | 468.5  | 532.1  | 509.8  | 493.9  | 534.5  |
| 73.9   | 91.7   | 71.4   | 168.6  | 154.3  | 167.5  | 39.0   | 48.3   | 61.4   |
| 2098.2 | 2318.8 | 2012.4 | 1813.3 | 1482.7 | 1493.9 | 825.3  | 771.6  | 1050.8 |
| 151.9  | 217.5  | 175.9  | 412.8  | 388.9  | 451.5  | 262.2  | 309.7  | 305.5  |
| 844.3  | 807.9  | 491.3  | 421.5  | 362.2  | 435.7  | 231.7  | 277.8  | 277.8  |
| 2590.4 | 3077.8 | 2510.1 | 2508.3 | 2209.7 | 2381.6 | 1385.8 | 1540.5 | 1626.4 |
| 500.3  | 615.7  | 477.4  | 573.6  | 546.9  | 563.2  | 348.8  | 398.7  | 422.6  |
| 387.5  | 515.5  | 499.5  | 228.6  | 249.0  | 299.4  | 224.7  | 309.4  | 320.8  |
| 2503.8 | 3436.9 | 2828.4 | 1019.1 | 922.4  | 967.9  | 1041.8 | 1250.4 | 1175.6 |
| 6559.9 | 7704.1 | 6344.7 | 3570.1 | 3047.4 | 3156.8 | 2531.8 | 2198.6 | 2644.0 |
| 2123.4 | 2428.1 | 1905.1 | 2867.4 | 2555.4 | 2496.0 | 1431.3 | 1431.1 | 1611.4 |
| 2684.4 | 3234.0 | 2400.3 | 2460.9 | 2254.1 | 2217.3 | 2273.8 | 2399.0 | 2603.7 |
| 197.4  | 199.5  | 179.1  | 384.2  | 325.1  | 331.4  | 234.6  | 229.2  | 265.3  |
| 1017.9 | 1070.9 | 692.2  | 802.5  | 571.1  | 581.7  | 814.1  | 704.4  | 765.3  |
| 961.1  | 1084.8 | 743.9  | 850.8  | 611.9  | 732.7  | 454.8  | 461.6  | 509.6  |

|        |        |        |        |        |        |        |        |        |
|--------|--------|--------|--------|--------|--------|--------|--------|--------|
| 2163.0 | 3057.1 | 2853.2 | 2525.7 | 2883.9 | 3192.6 | 1649.4 | 2489.5 | 2189.1 |
| 764.3  | 668.4  | 463.6  | 533.0  | 404.4  | 484.7  | 364.5  | 372.0  | 387.1  |
| 2336.9 | 2402.5 | 1473.0 | 4325.1 | 3665.9 | 3810.8 | 2148.4 | 1970.0 | 2402.4 |
| 951.7  | 1254.9 | 996.5  | 428.2  | 394.3  | 407.6  | 408.5  | 422.8  | 423.0  |
| 2253.0 | 2468.9 | 1732.4 | 964.7  | 848.8  | 1000.6 | 637.2  | 572.7  | 713.7  |
| 1764.7 | 1934.4 | 1330.9 | 1328.2 | 1109.9 | 1159.4 | 925.5  | 831.3  | 1069.3 |
| 297.2  | 346.1  | 229.0  | 138.9  | 129.1  | 124.1  | 182.4  | 160.7  | 212.4  |
| 936.4  | 1236.3 | 864.8  | 436.3  | 401.5  | 399.0  | 406.1  | 385.3  | 459.5  |
| 1088.9 | 1319.6 | 740.5  | 1653.0 | 1233.3 | 1427.2 | 1180.3 | 1149.4 | 1247.0 |
| 4139.7 | 4611.8 | 3331.4 | 915.4  | 738.1  | 786.1  | 689.6  | 694.4  | 734.2  |
| 786.1  | 920.4  | 733.8  | 988.7  | 924.7  | 975.8  | 369.5  | 445.0  | 571.0  |
| 352.9  | 526.6  | 356.4  | 152.3  | 149.3  | 172.1  | 231.0  | 191.0  | 293.2  |
| 1136.5 | 1440.5 | 1227.4 | 448.9  | 408.0  | 435.3  | 351.3  | 370.5  | 359.8  |
| 120.4  | 127.4  | 72.6   | 843.0  | 612.3  | 680.5  | 780.4  | 555.8  | 705.8  |
| 611.5  | 707.5  | 442.3  | 419.9  | 316.5  | 367.6  | 346.9  | 315.3  | 342.6  |
| 1690.7 | 1888.3 | 1160.0 | 1084.5 | 752.3  | 821.1  | 786.0  | 768.7  | 802.5  |
| 318.8  | 340.7  | 218.3  | 255.8  | 224.4  | 250.5  | 238.4  | 276.3  | 286.9  |
| 201.3  | 215.3  | 119.8  | 78.6   | 70.7   | 64.4   | 66.5   | 55.2   | 89.0   |
| 270.3  | 246.2  | 164.1  | 206.8  | 179.1  | 215.6  | 128.8  | 131.3  | 148.1  |
| 402.2  | 398.8  | 251.8  | 196.8  | 174.9  | 215.5  | 264.6  | 284.8  | 302.8  |
| 2198.7 | 2630.7 | 1937.2 | 1383.2 | 1133.4 | 1367.4 | 703.3  | 716.3  | 749.7  |
| 1018.9 | 1331.3 | 1003.8 | 444.3  | 406.0  | 432.2  | 412.9  | 454.3  | 507.5  |
| 638.3  | 785.7  | 476.0  | 350.2  | 287.2  | 300.8  | 215.4  | 220.3  | 226.0  |
| 323.9  | 386.2  | 261.3  | 257.3  | 250.0  | 288.2  | 176.9  | 165.4  | 202.2  |
| 701.2  | 800.1  | 470.4  | 273.0  | 259.5  | 273.3  | 266.9  | 279.0  | 315.3  |
| 1630.4 | 1731.2 | 1004.8 | 1031.5 | 840.4  | 946.4  | 980.9  | 932.2  | 992.7  |
| 649.5  | 724.5  | 331.5  | 521.3  | 386.6  | 446.3  | 383.8  | 387.6  | 377.2  |
| 1169.0 | 1063.3 | 563.6  | 686.2  | 527.8  | 560.2  | 765.4  | 588.9  | 719.6  |
| 8493.0 | 8258.3 | 6070.1 | 1305.5 | 946.6  | 1147.9 | 634.4  | 574.6  | 708.9  |
| 988.8  | 1327.5 | 936.4  | 573.9  | 434.2  | 501.4  | 320.8  | 326.2  | 359.4  |
| 1549.8 | 2163.2 | 1929.5 | 1218.6 | 1061.2 | 1092.3 | 953.3  | 953.8  | 1096.4 |
| 132.4  | 168.9  | 137.2  | 879.5  | 797.7  | 877.2  | 386.1  | 401.2  | 479.5  |
| 3065.3 | 3620.9 | 2999.3 | 881.3  | 785.0  | 861.4  | 665.9  | 540.3  | 659.9  |
| 860.3  | 1053.8 | 759.8  | 787.3  | 677.8  | 737.1  | 424.8  | 451.7  | 509.8  |
| 331.4  | 407.7  | 252.7  | 615.7  | 511.8  | 552.8  | 302.0  | 316.1  | 342.2  |
| 676.3  | 791.2  | 484.4  | 367.8  | 263.6  | 273.3  | 370.7  | 252.7  | 330.8  |
| 1990.7 | 2699.3 | 1672.8 | 229.1  | 216.4  | 208.7  | 307.6  | 342.8  | 362.3  |
| 323.1  | 379.7  | 310.1  | 582.5  | 396.0  | 502.3  | 157.8  | 185.2  | 266.8  |
| 3518.4 | 3509.2 | 2517.6 | 2036.5 | 1615.1 | 1708.1 | 1822.5 | 1343.4 | 1840.3 |
| 1301.4 | 1916.2 | 1748.0 | 1315.6 | 1292.0 | 1454.8 | 840.8  | 1230.7 | 1341.4 |
| 13.3   | 45.3   | 21.8   | 36.2   | 22.9   | 33.0   | 12.2   | 20.5   | 23.2   |
| 6578.6 | 6900.3 | 5891.4 | 4026.4 | 3433.9 | 3580.8 | 3112.8 | 2896.2 | 3222.4 |
| 120.9  | 148.2  | 175.7  | 288.2  | 254.5  | 293.8  | 207.8  | 232.4  | 272.3  |
| 1060.4 | 1017.2 | 479.7  | 723.1  | 561.0  | 611.4  | 543.5  | 516.0  | 612.2  |
| 2254.6 | 2318.5 | 1794.3 | 175.7  | 177.0  | 135.2  | 358.0  | 313.8  | 360.6  |
| 1112.1 | 1387.6 | 1168.3 | 1195.3 | 1114.2 | 1222.3 | 759.5  | 903.5  | 976.1  |
| 330.6  | 615.4  | 786.6  | 234.0  | 166.9  | 196.0  | 155.8  | 215.7  | 171.3  |
| 1586.2 | 1972.5 | 1502.3 | 757.2  | 585.1  | 699.4  | 540.2  | 416.8  | 500.7  |
| 940.5  | 1128.6 | 763.2  | 699.7  | 645.2  | 637.1  | 415.3  | 510.8  | 457.5  |
| 252.9  | 349.3  | 315.5  | 142.6  | 135.5  | 160.5  | 92.0   | 83.2   | 88.7   |
| 324.6  | 315.2  | 308.6  | 243.1  | 149.4  | 187.6  | 94.9   | 133.1  | 157.8  |
| 522.8  | 705.7  | 704.0  | 94.6   | 86.7   | 85.6   | 48.7   | 47.7   | 64.4   |
| 169.3  | 207.4  | 149.6  | 85.3   | 78.7   | 92.0   | 87.5   | 73.8   | 90.8   |

|        |        |        |        |        |        |        |        |        |
|--------|--------|--------|--------|--------|--------|--------|--------|--------|
| 1177.2 | 1696.8 | 1389.4 | 1477.3 | 1290.5 | 1359.6 | 907.9  | 997.1  | 1077.9 |
| 637.2  | 698.2  | 436.1  | 513.5  | 424.0  | 467.2  | 280.0  | 255.6  | 325.6  |
| 206.8  | 276.5  | 212.4  | 86.1   | 90.0   | 101.4  | 64.3   | 84.2   | 84.7   |
| 301.8  | 299.8  | 232.8  | 84.9   | 78.8   | 79.3   | 100.8  | 118.4  | 113.8  |
| 298.1  | 375.5  | 274.6  | 206.3  | 186.6  | 229.8  | 110.4  | 138.5  | 138.0  |
| 536.1  | 878.8  | 612.4  | 665.3  | 592.3  | 664.5  | 318.4  | 394.5  | 379.2  |
| 681.7  | 790.9  | 474.4  | 961.0  | 766.8  | 780.6  | 585.9  | 533.2  | 597.4  |
| 588.2  | 758.5  | 662.9  | 94.2   | 50.6   | 62.0   | 61.5   | 37.9   | 50.1   |
| 2265.5 | 1832.7 | 1371.3 | 755.4  | 683.3  | 667.1  | 607.2  | 519.4  | 595.1  |
| 3030.6 | 3585.6 | 2027.7 | 1343.8 | 853.5  | 887.0  | 1023.7 | 640.8  | 844.1  |
| 2751.5 | 3039.3 | 2374.0 | 1461.1 | 1141.6 | 1298.2 | 1195.6 | 1055.5 | 1222.4 |
| 5179.1 | 6150.7 | 5025.0 | 5401.6 | 4748.8 | 4915.9 | 2775.4 | 2561.9 | 3020.6 |
| 853.5  | 924.3  | 621.0  | 1165.9 | 808.2  | 862.2  | 516.3  | 372.8  | 442.1  |
| 1749.3 | 1919.6 | 1380.2 | 691.0  | 622.1  | 677.1  | 394.4  | 522.6  | 502.1  |
| 1620.4 | 2010.3 | 1697.5 | 1567.2 | 1235.0 | 1371.9 | 853.6  | 786.0  | 917.9  |
| 99.8   | 81.8   | 43.9   | 335.1  | 282.6  | 366.0  | 251.5  | 290.6  | 331.7  |
| 250.0  | 307.1  | 223.0  | 65.1   | 56.7   | 68.1   | 105.1  | 97.4   | 105.9  |
| 525.8  | 682.3  | 504.8  | 437.2  | 459.2  | 473.9  | 284.4  | 353.9  | 372.9  |
| 225.8  | 239.0  | 147.2  | 52.3   | 46.9   | 59.7   | 74.0   | 52.3   | 63.1   |
| 544.2  | 640.9  | 415.9  | 257.3  | 184.9  | 216.8  | 236.8  | 189.7  | 216.1  |
| 686.2  | 802.9  | 487.7  | 173.2  | 122.8  | 131.5  | 212.7  | 158.3  | 182.8  |
| 351.6  | 399.0  | 259.2  | 96.4   | 81.1   | 80.7   | 137.7  | 108.2  | 114.5  |
| 820.0  | 1054.2 | 770.1  | 837.8  | 698.0  | 805.6  | 468.2  | 489.1  | 529.2  |
| 4688.4 | 4218.1 | 3542.0 | 2663.3 | 2060.9 | 2250.9 | 1878.2 | 1677.8 | 1834.5 |
| 429.0  | 582.4  | 322.0  | 595.1  | 514.3  | 571.9  | 298.3  | 307.2  | 338.3  |
| 962.3  | 1055.2 | 564.5  | 636.3  | 420.9  | 458.5  | 379.1  | 323.9  | 363.5  |
| 180.4  | 222.9  | 152.9  | 100.3  | 85.7   | 100.8  | 105.6  | 153.3  | 136.3  |
| 364.7  | 438.4  | 344.5  | 428.6  | 317.7  | 347.8  | 366.1  | 355.3  | 377.3  |
| 190.6  | 243.6  | 183.4  | 332.8  | 300.1  | 385.5  | 168.5  | 143.4  | 163.5  |
| 0.6    | 0.8    | 0.7    | 2.5    | 1.4    | 2.0    | 1.0    | 1.1    | 1.2    |
| 313.8  | 411.9  | 303.1  | 217.4  | 219.3  | 258.6  | 118.8  | 137.7  | 158.9  |
| 288.5  | 465.6  | 347.4  | 490.5  | 424.0  | 532.6  | 219.4  | 238.4  | 280.2  |
| 1191.2 | 1605.9 | 1854.0 | 882.0  | 950.4  | 1034.5 | 750.7  | 1022.5 | 898.1  |
| 415.1  | 510.1  | 300.8  | 139.6  | 100.6  | 124.4  | 87.9   | 83.4   | 104.8  |
| 965.8  | 1205.7 | 985.0  | 425.8  | 354.5  | 345.6  | 589.9  | 657.7  | 602.5  |
| 628.1  | 867.6  | 569.4  | 465.7  | 327.6  | 357.0  | 271.7  | 245.7  | 270.8  |
| 232.4  | 285.6  | 166.6  | 288.1  | 233.0  | 276.7  | 138.1  | 142.6  | 151.4  |
| 3.3    | 1.8    | 3.5    | 17.5   | 10.6   | 23.0   | 2.9    | 8.6    | 3.3    |
| 1755.2 | 2029.7 | 1437.7 | 880.9  | 675.8  | 749.7  | 792.1  | 673.5  | 831.0  |
| 646.5  | 795.5  | 531.1  | 402.2  | 350.3  | 361.4  | 251.4  | 327.2  | 285.1  |
| 2659.5 | 3256.1 | 2608.4 | 1318.8 | 1034.3 | 1140.3 | 983.1  | 1009.2 | 1084.3 |
| 2890.9 | 3066.9 | 2879.7 | 989.7  | 1138.1 | 996.0  | 523.3  | 785.4  | 733.8  |
| 127.2  | 168.7  | 138.9  | 189.4  | 157.2  | 158.5  | 119.7  | 151.7  | 142.0  |
| 144.0  | 169.1  | 119.7  | 339.2  | 256.5  | 299.8  | 170.3  | 165.8  | 185.0  |
| 11.1   | 11.9   | 17.7   | 149.2  | 142.7  | 161.3  | 77.3   | 88.1   | 103.5  |
| 138.6  | 146.5  | 70.6   | 114.0  | 70.6   | 80.7   | 60.5   | 48.3   | 61.6   |
| 337.9  | 693.1  | 709.4  | 1330.8 | 1208.4 | 1287.8 | 858.1  | 1179.3 | 1027.6 |
| 1980.5 | 1939.1 | 1185.5 | 1012.8 | 724.0  | 808.7  | 505.3  | 436.8  | 488.2  |
| 495.1  | 811.4  | 848.3  | 760.0  | 688.7  | 683.4  | 597.3  | 670.9  | 659.4  |
| 671.1  | 616.6  | 391.2  | 249.8  | 196.6  | 232.6  | 255.4  | 211.3  | 267.2  |
| 661.8  | 700.7  | 418.3  | 366.8  | 277.8  | 339.6  | 199.6  | 193.7  | 197.6  |
| 983.4  | 897.1  | 531.4  | 235.2  | 196.4  | 196.8  | 208.3  | 221.3  | 229.8  |
| 811.0  | 874.1  | 603.1  | 1523.3 | 1178.7 | 1423.9 | 395.0  | 368.1  | 441.1  |

|        |        |        |        |        |        |        |        |        |
|--------|--------|--------|--------|--------|--------|--------|--------|--------|
| 404.4  | 458.1  | 297.2  | 603.8  | 508.6  | 565.2  | 281.4  | 235.9  | 254.6  |
| 416.2  | 593.4  | 469.8  | 249.6  | 204.4  | 183.7  | 106.6  | 97.5   | 105.5  |
| 3776.1 | 4238.0 | 2894.3 | 928.5  | 874.0  | 893.0  | 892.9  | 1117.6 | 1054.5 |
| 1677.4 | 1681.0 | 1084.2 | 498.7  | 504.3  | 565.1  | 366.9  | 345.9  | 387.0  |
| 2953.2 | 3407.0 | 2960.5 | 8845.4 | 8537.4 | 8287.9 | 5302.5 | 5404.2 | 5707.3 |
| 3213.5 | 3523.6 | 3096.5 | 8408.5 | 8179.5 | 8562.3 | 4845.8 | 5213.8 | 5387.0 |
| 1905.3 | 1811.9 | 1034.3 | 1042.5 | 724.7  | 781.1  | 651.1  | 522.9  | 604.9  |
| 72.4   | 85.7   | 79.3   | 64.5   | 55.8   | 61.3   | 37.7   | 51.7   | 47.4   |
| 79.7   | 100.6  | 69.6   | 45.2   | 41.4   | 41.0   | 48.7   | 60.2   | 73.6   |
| 432.2  | 493.1  | 392.6  | 255.2  | 223.6  | 246.3  | 172.7  | 184.4  | 204.8  |
| 710.8  | 864.5  | 595.3  | 626.0  | 505.5  | 581.9  | 421.2  | 425.7  | 469.5  |
| 151.2  | 237.1  | 161.0  | 94.2   | 64.3   | 86.2   | 162.6  | 145.0  | 169.9  |
| 182.5  | 214.0  | 144.8  | 375.7  | 308.6  | 348.0  | 170.0  | 153.8  | 168.3  |
| 1419.1 | 1375.6 | 1073.9 | 2065.5 | 1700.0 | 1890.8 | 1125.9 | 975.4  | 1167.6 |
| 3364.1 | 4085.0 | 2933.9 | 2087.7 | 1797.6 | 1948.9 | 1432.9 | 1471.6 | 1633.1 |
| 283.9  | 294.5  | 205.0  | 324.8  | 264.0  | 298.0  | 150.3  | 168.0  | 166.1  |
| 111.3  | 208.7  | 218.9  | 89.5   | 106.1  | 96.9   | 146.9  | 218.0  | 204.8  |
| 222.6  | 342.6  | 255.8  | 98.4   | 98.1   | 125.2  | 116.1  | 113.2  | 132.5  |
| 110.7  | 152.8  | 114.1  | 235.3  | 217.9  | 224.2  | 83.4   | 137.6  | 104.5  |
| 1821.5 | 2132.6 | 1624.2 | 840.8  | 706.9  | 718.2  | 529.4  | 467.4  | 522.7  |
| 1824.7 | 2179.2 | 1572.2 | 655.0  | 559.3  | 565.5  | 615.7  | 579.8  | 670.3  |
| 930.4  | 1371.9 | 888.4  | 849.7  | 675.5  | 751.9  | 490.2  | 446.8  | 512.9  |
| 555.1  | 549.2  | 420.4  | 1054.9 | 979.8  | 1110.2 | 756.4  | 812.7  | 939.5  |
| 301.6  | 360.8  | 317.3  | 232.3  | 202.6  | 189.8  | 257.8  | 270.6  | 266.2  |
| 54.2   | 40.4   | 30.4   | 51.1   | 45.7   | 30.5   | 35.5   | 47.6   | 46.1   |
| 1852.4 | 1797.4 | 1211.3 | 1656.5 | 1164.1 | 1222.9 | 1089.2 | 874.4  | 1015.9 |
| 729.2  | 1049.5 | 961.5  | 902.7  | 830.9  | 914.5  | 467.1  | 579.0  | 551.8  |
| 1864.4 | 2256.9 | 1727.2 | 602.1  | 520.8  | 570.8  | 331.8  | 434.2  | 453.1  |
| 1412.3 | 1554.0 | 1261.3 | 680.2  | 631.2  | 607.1  | 479.4  | 521.0  | 560.0  |
| 2179.6 | 2423.1 | 1841.7 | 2171.1 | 1814.1 | 2037.4 | 1297.9 | 1243.6 | 1461.4 |
| 299.1  | 325.9  | 248.8  | 269.3  | 194.9  | 225.2  | 171.8  | 148.1  | 168.3  |
| 344.1  | 371.5  | 247.2  | 116.3  | 101.8  | 121.7  | 86.0   | 107.9  | 108.5  |
| 2465.0 | 2610.7 | 1993.7 | 777.0  | 605.7  | 635.4  | 643.2  | 682.1  | 753.6  |
| 1523.2 | 1813.6 | 1215.5 | 1641.9 | 1235.7 | 1270.9 | 930.6  | 805.8  | 896.3  |
| 1881.6 | 2258.0 | 1680.5 | 444.7  | 374.5  | 437.1  | 342.1  | 351.8  | 366.4  |
| 37.1   | 58.6   | 42.1   | 109.0  | 105.2  | 115.7  | 89.2   | 110.5  | 101.5  |
| 394.8  | 547.8  | 355.6  | 1048.1 | 722.8  | 780.7  | 418.9  | 365.1  | 412.0  |
| 497.4  | 647.5  | 501.7  | 628.6  | 524.4  | 557.2  | 339.3  | 315.5  | 344.0  |
| 126.5  | 162.7  | 131.5  | 18.7   | 21.7   | 22.6   | 17.3   | 26.8   | 24.2   |
| 1013.7 | 1270.1 | 1195.5 | 194.0  | 177.2  | 168.8  | 161.1  | 207.5  | 183.1  |
| 42.8   | 70.2   | 56.6   | 8.5    | 11.3   | 15.1   | 8.8    | 11.8   | 11.8   |
| 1871.1 | 2561.9 | 2197.4 | 356.5  | 312.3  | 363.0  | 294.7  | 341.7  | 334.6  |
| 486.8  | 547.3  | 450.2  | 284.6  | 241.7  | 293.0  | 248.4  | 326.3  | 312.3  |
| 3316.2 | 3473.1 | 1947.5 | 1542.8 | 1062.5 | 1132.2 | 1636.0 | 1127.8 | 1357.6 |
| 1405.5 | 1351.6 | 809.6  | 661.1  | 509.6  | 548.6  | 375.5  | 327.5  | 353.3  |
| 692.0  | 677.5  | 436.3  | 869.0  | 725.2  | 778.1  | 436.7  | 463.4  | 506.4  |
| 578.6  | 562.9  | 373.0  | 654.8  | 595.5  | 647.0  | 406.7  | 406.3  | 442.8  |
| 863.7  | 937.3  | 526.3  | 271.1  | 215.4  | 204.2  | 213.8  | 190.0  | 244.2  |
| 219.3  | 309.5  | 246.3  | 177.9  | 177.2  | 178.5  | 170.7  | 183.1  | 197.4  |
| 2411.5 | 2927.4 | 2072.6 | 1876.3 | 1762.8 | 1955.0 | 713.8  | 903.7  | 938.8  |
| 8.9    | 11.1   | 7.3    | 3521.6 | 3343.0 | 3603.4 | 1174.8 | 1338.5 | 1376.1 |
| 480.8  | 734.6  | 510.9  | 1089.6 | 929.0  | 1033.2 | 798.0  | 878.4  | 884.0  |
| 848.1  | 948.6  | 534.0  | 242.5  | 191.1  | 228.8  | 193.8  | 189.8  | 197.6  |

|        |        |        |        |        |        |        |        |        |
|--------|--------|--------|--------|--------|--------|--------|--------|--------|
| 2.0    | 7.0    | 2.6    | 26.8   | 24.1   | 25.6   | 26.7   | 10.7   | 32.5   |
| 10.7   | 9.0    | 6.5    | 77.0   | 69.6   | 65.4   | 61.4   | 55.1   | 67.7   |
| 440.3  | 546.1  | 377.6  | 237.3  | 187.6  | 209.7  | 170.1  | 142.2  | 178.6  |
| 667.1  | 889.1  | 693.0  | 1942.4 | 1955.4 | 2130.3 | 1119.8 | 1470.3 | 1447.1 |
| 800.1  | 894.1  | 577.2  | 425.3  | 308.4  | 338.5  | 283.5  | 270.6  | 290.2  |
| 1047.3 | 1524.6 | 1518.1 | 496.7  | 523.9  | 594.6  | 359.0  | 577.3  | 503.0  |
| 2737.0 | 2837.1 | 1804.7 | 1108.5 | 751.6  | 806.2  | 810.1  | 519.0  | 724.9  |
| 1128.8 | 1317.6 | 1034.2 | 4942.4 | 4087.3 | 4363.6 | 3003.3 | 2252.3 | 2814.9 |
| 81.3   | 99.8   | 85.8   | 88.8   | 79.9   | 83.7   | 53.8   | 69.3   | 65.7   |
| 86.8   | 124.7  | 101.3  | 5.5    | 9.1    | 9.4    | 4.6    | 4.0    | 3.9    |
| 213.5  | 207.8  | 122.9  | 79.8   | 58.1   | 68.4   | 86.0   | 65.7   | 82.9   |
| 1912.9 | 2464.4 | 2401.1 | 477.0  | 442.6  | 552.3  | 254.1  | 266.1  | 316.6  |
| 1154.8 | 1223.2 | 958.0  | 983.7  | 841.0  | 922.0  | 489.0  | 486.4  | 528.7  |
| 2035.4 | 2608.8 | 2198.1 | 6714.2 | 5422.3 | 5382.1 | 5107.2 | 4169.0 | 5079.5 |
| 870.9  | 1065.0 | 706.5  | 1427.6 | 1472.1 | 1776.1 | 692.9  | 966.7  | 994.2  |
| 313.2  | 412.1  | 249.6  | 247.6  | 163.5  | 234.2  | 217.8  | 163.7  | 261.1  |
| 5984.1 | 6656.5 | 5864.0 | 3475.9 | 3069.7 | 2880.7 | 2846.6 | 2623.5 | 3028.4 |
| 660.6  | 1093.9 | 1052.1 | 1162.3 | 1049.8 | 1221.6 | 732.8  | 897.1  | 941.4  |
| 243.4  | 393.7  | 390.3  | 622.8  | 522.2  | 577.9  | 372.1  | 381.6  | 463.6  |
| 411.8  | 345.1  | 200.1  | 742.5  | 592.6  | 500.3  | 711.1  | 658.6  | 762.3  |
| 399.6  | 408.3  | 202.1  | 1022.0 | 794.4  | 781.6  | 755.3  | 733.7  | 850.0  |
| 889.9  | 955.7  | 657.4  | 496.6  | 374.4  | 387.8  | 406.8  | 438.4  | 472.1  |
| 474.5  | 723.5  | 481.6  | 1406.7 | 962.2  | 1036.2 | 846.9  | 787.5  | 816.1  |
| 1832.7 | 2196.3 | 1491.4 | 24.7   | 27.9   | 32.9   | 16.7   | 53.8   | 29.8   |
| 182.8  | 315.2  | 261.1  | 660.0  | 604.2  | 694.3  | 423.0  | 601.5  | 557.0  |
| 267.0  | 387.9  | 275.4  | 173.3  | 138.8  | 185.2  | 110.6  | 112.5  | 129.3  |
| 1873.6 | 2024.9 | 1703.4 | 207.4  | 218.1  | 215.8  | 173.8  | 201.6  | 208.5  |
| 2141.3 | 2615.0 | 2083.6 | 1115.5 | 1050.9 | 1073.9 | 596.3  | 757.8  | 721.8  |
| 464.7  | 524.9  | 367.4  | 314.8  | 255.0  | 290.4  | 192.1  | 202.9  | 208.9  |
| 2072.7 | 2514.9 | 2419.7 | 875.5  | 731.0  | 792.0  | 440.3  | 465.6  | 496.4  |
| 6080.9 | 5334.0 | 3096.5 | 24.1   | 19.3   | 29.6   | 31.4   | 17.7   | 27.8   |
| 1983.0 | 1561.0 | 901.6  | 15.3   | 9.4    | 15.5   | 8.5    | 8.0    | 9.2    |
| 894.1  | 733.7  | 472.8  | 54.8   | 31.2   | 31.7   | 26.3   | 42.0   | 23.8   |
| 1775.4 | 1350.4 | 765.2  | 15.5   | 14.7   | 21.7   | 7.5    | 8.0    | 7.4    |
| 1825.0 | 1421.6 | 719.6  | 3.4    | 3.5    | 3.6    | 2.8    | 3.9    | 2.8    |
| 889.9  | 977.9  | 512.3  | 695.7  | 490.7  | 519.9  | 399.8  | 376.1  | 401.4  |
| 1.1    | 1.3    | 1.4    | 1323.1 | 889.6  | 874.2  | 360.4  | 290.3  | 345.8  |
| 2162.1 | 2603.8 | 2029.8 | 2451.0 | 1961.2 | 2070.4 | 2165.7 | 2407.2 | 2593.6 |
| 323.3  | 436.9  | 395.5  | 408.0  | 405.6  | 436.5  | 265.8  | 335.6  | 352.3  |
| 194.7  | 289.4  | 181.0  | 308.0  | 248.0  | 293.0  | 216.5  | 240.4  | 254.3  |
| 85.3   | 128.4  | 75.2   | 83.5   | 76.9   | 71.3   | 82.4   | 87.3   | 96.0   |
| 2224.0 | 2680.1 | 2245.1 | 1284.4 | 1215.7 | 1291.5 | 631.2  | 840.6  | 781.3  |
| 963.2  | 1223.1 | 848.4  | 589.6  | 482.6  | 586.7  | 445.5  | 491.3  | 545.6  |
| 1268.5 | 1461.6 | 936.8  | 1107.9 | 594.2  | 623.4  | 679.0  | 399.7  | 455.0  |
| 463.6  | 710.5  | 658.9  | 2720.1 | 2374.2 | 2785.3 | 708.1  | 659.2  | 708.9  |
| 1910.1 | 2352.2 | 1920.3 | 889.9  | 844.4  | 925.9  | 594.9  | 705.4  | 740.1  |
| 194.4  | 244.1  | 186.4  | 96.8   | 85.1   | 93.1   | 38.5   | 55.0   | 64.7   |
| 275.9  | 323.7  | 252.1  | 213.8  | 166.8  | 208.5  | 205.2  | 202.3  | 227.5  |
| 1577.4 | 1749.8 | 1040.7 | 456.2  | 313.9  | 333.0  | 251.4  | 213.2  | 226.1  |
| 9.4    | 13.2   | 11.0   | 14.9   | 5.3    | 15.0   | 7.6    | 9.1    | 3.7    |
| 675.2  | 781.8  | 429.9  | 499.1  | 402.7  | 451.2  | 370.5  | 318.9  | 398.6  |
| 125.6  | 208.7  | 201.5  | 120.0  | 121.1  | 124.8  | 85.1   | 150.1  | 117.6  |
| 472.4  | 989.7  | 557.2  | 154.5  | 118.4  | 130.6  | 162.2  | 89.7   | 120.3  |



|        |        |        |        |        |        |        |        |        |
|--------|--------|--------|--------|--------|--------|--------|--------|--------|
| 515.0  | 835.5  | 781.5  | 273.0  | 327.4  | 387.2  | 177.9  | 218.7  | 268.3  |
| 273.6  | 308.0  | 324.6  | 407.9  | 374.0  | 452.1  | 226.9  | 292.8  | 308.3  |
| 465.8  | 596.4  | 456.9  | 606.3  | 559.0  | 723.6  | 397.4  | 385.5  | 415.4  |
| 264.7  | 392.9  | 329.0  | 224.1  | 211.6  | 248.9  | 132.6  | 172.3  | 155.1  |
| 552.4  | 744.9  | 577.4  | 393.4  | 338.0  | 380.2  | 246.7  | 282.1  | 306.9  |
| 595.8  | 849.8  | 536.4  | 238.3  | 179.7  | 160.9  | 159.4  | 117.0  | 145.4  |
| 765.6  | 789.6  | 543.3  | 1871.1 | 1726.8 | 1906.0 | 1158.2 | 1232.5 | 1375.4 |
| 2441.3 | 3241.7 | 2756.7 | 1638.4 | 1514.9 | 1596.3 | 953.0  | 1055.4 | 1184.9 |
| 2148.3 | 2567.5 | 1758.4 | 1695.4 | 1374.7 | 1448.0 | 1316.5 | 1239.6 | 1410.7 |
| 632.4  | 584.8  | 374.5  | 320.4  | 291.2  | 298.5  | 215.0  | 202.3  | 270.0  |
| 34.9   | 79.1   | 78.8   | 99.5   | 94.0   | 134.0  | 45.9   | 61.4   | 69.4   |
| 113.0  | 143.6  | 84.3   | 173.2  | 116.2  | 149.7  | 76.8   | 66.8   | 79.3   |
| 65.3   | 117.8  | 111.7  | 429.6  | 377.2  | 436.8  | 285.3  | 444.3  | 364.6  |
| 261.3  | 356.7  | 322.3  | 436.2  | 366.8  | 386.0  | 253.7  | 265.9  | 300.5  |
| 35.7   | 62.9   | 29.8   | 36.9   | 22.5   | 26.4   | 27.3   | 23.6   | 32.3   |
| 1707.1 | 1975.0 | 1593.9 | 1616.7 | 1369.2 | 1506.6 | 803.8  | 756.5  | 822.4  |
| 1337.2 | 1697.2 | 1369.6 | 1040.0 | 887.4  | 955.1  | 623.1  | 657.8  | 767.2  |
| 944.6  | 998.8  | 662.3  | 348.7  | 227.7  | 285.5  | 421.0  | 358.5  | 377.9  |
| 412.9  | 736.8  | 588.1  | 452.4  | 497.4  | 536.1  | 188.9  | 366.3  | 283.1  |
| 430.5  | 497.8  | 361.5  | 363.9  | 237.3  | 289.7  | 317.0  | 290.4  | 300.2  |
| 2655.8 | 3224.4 | 2282.5 | 684.0  | 428.3  | 476.4  | 356.3  | 256.7  | 311.5  |
| 218.8  | 262.3  | 164.7  | 149.5  | 116.8  | 118.5  | 134.0  | 98.7   | 150.9  |
| 2674.1 | 3083.9 | 2344.5 | 1624.7 | 1342.2 | 1556.6 | 1078.2 | 1229.4 | 1221.5 |
| 914.4  | 1143.1 | 798.5  | 736.1  | 583.5  | 652.9  | 559.1  | 518.1  | 573.0  |
| 160.7  | 241.0  | 151.0  | 89.6   | 80.4   | 106.1  | 142.9  | 173.4  | 178.3  |
| 1.5    | 1.8    | 1.5    | 4.5    | 3.5    | 4.1    | 1.0    | 1.0    | 1.1    |
| 23.0   | 36.9   | 23.7   | 138.8  | 112.2  | 125.2  | 48.4   | 55.5   | 56.3   |
| 1101.0 | 1249.9 | 973.5  | 875.6  | 658.5  | 696.4  | 417.0  | 374.1  | 486.3  |
| 947.2  | 1308.3 | 1133.7 | 693.9  | 671.8  | 710.3  | 530.7  | 701.3  | 638.6  |
| 563.5  | 663.6  | 545.1  | 1098.4 | 1057.5 | 1132.3 | 439.8  | 610.2  | 619.8  |
| 2845.4 | 3261.4 | 2412.3 | 1491.2 | 1259.5 | 1282.4 | 949.0  | 1008.9 | 1125.0 |
| 1547.8 | 1917.0 | 1322.0 | 468.0  | 349.7  | 363.7  | 290.5  | 297.4  | 359.3  |
| 408.2  | 573.1  | 340.2  | 408.4  | 270.4  | 326.4  | 231.2  | 179.7  | 208.6  |
| 512.3  | 716.5  | 486.5  | 189.0  | 172.6  | 201.3  | 134.4  | 142.7  | 155.1  |
| 2498.3 | 2813.9 | 1950.5 | 2200.1 | 1581.8 | 1736.3 | 1379.1 | 1248.0 | 1485.4 |
| 12.7   | 9.8    | 10.6   | 13.2   | 12.3   | 10.6   | 13.6   | 16.1   | 10.7   |
| 188.2  | 250.0  | 174.0  | 114.6  | 102.6  | 90.1   | 73.3   | 73.5   | 78.3   |
| 589.5  | 829.5  | 645.2  | 311.1  | 270.9  | 317.0  | 290.0  | 329.3  | 317.7  |
| 1181.5 | 1289.3 | 718.2  | 891.3  | 658.1  | 749.9  | 576.6  | 450.2  | 539.1  |
| 166.0  | 259.5  | 192.2  | 263.1  | 234.6  | 266.8  | 157.2  | 204.5  | 210.1  |
| 4606.7 | 4567.2 | 2846.9 | 1766.2 | 1802.7 | 1967.4 | 1071.5 | 1295.1 | 1370.6 |
| 121.9  | 138.3  | 99.6   | 156.4  | 115.5  | 125.2  | 60.6   | 51.6   | 53.7   |
| 999.6  | 1110.5 | 762.9  | 1738.2 | 1339.3 | 1270.4 | 828.1  | 774.1  | 876.0  |
| 968.1  | 1340.4 | 879.3  | 462.4  | 314.1  | 365.2  | 247.9  | 230.3  | 240.7  |
| 72.2   | 93.2   | 64.0   | 8.9    | 2.3    | 2.5    | 9.5    | 9.6    | 3.6    |
| 157.1  | 234.2  | 184.8  | 201.2  | 165.3  | 208.5  | 255.4  | 241.6  | 259.5  |
| 1051.2 | 1472.9 | 1012.0 | 858.4  | 691.3  | 776.8  | 794.8  | 848.2  | 812.1  |
| 1402.7 | 1841.9 | 1799.0 | 1110.1 | 843.8  | 1043.6 | 424.5  | 427.6  | 496.6  |
| 2801.0 | 3204.8 | 2211.9 | 389.8  | 330.9  | 305.2  | 312.3  | 392.9  | 425.7  |
| 281.0  | 368.6  | 252.2  | 345.9  | 287.6  | 346.8  | 230.3  | 235.8  | 242.1  |
| 1776.8 | 2157.8 | 1189.4 | 1199.9 | 785.0  | 876.9  | 649.2  | 390.5  | 482.4  |
| 342.8  | 343.7  | 278.8  | 226.9  | 191.7  | 195.2  | 131.1  | 127.5  | 140.2  |
| 200.1  | 248.8  | 198.9  | 230.0  | 223.7  | 214.6  | 165.4  | 147.6  | 187.5  |

|        |        |        |        |        |        |        |        |        |
|--------|--------|--------|--------|--------|--------|--------|--------|--------|
| 294.4  | 425.4  | 321.7  | 312.6  | 316.7  | 350.2  | 179.0  | 210.0  | 222.5  |
| 902.7  | 1064.0 | 642.9  | 136.0  | 80.2   | 89.4   | 128.5  | 86.8   | 116.9  |
| 2206.4 | 2033.4 | 1356.7 | 1631.7 | 1333.4 | 1417.1 | 792.2  | 801.8  | 888.2  |
| 89.2   | 179.6  | 106.7  | 110.3  | 87.3   | 129.3  | 91.0   | 81.3   | 61.7   |
| 160.4  | 174.4  | 141.6  | 249.8  | 200.1  | 260.0  | 128.2  | 155.9  | 158.3  |
| 363.4  | 382.2  | 280.2  | 150.4  | 137.8  | 162.2  | 139.3  | 152.9  | 153.0  |
| 649.9  | 688.2  | 489.2  | 486.2  | 465.3  | 512.8  | 338.6  | 353.4  | 380.1  |
| 714.9  | 864.4  | 680.9  | 1232.7 | 942.8  | 1034.2 | 748.4  | 733.8  | 750.8  |
| 515.3  | 563.4  | 347.9  | 580.3  | 382.8  | 414.8  | 266.9  | 230.9  | 243.2  |
| 225.8  | 284.6  | 170.9  | 229.6  | 138.7  | 173.6  | 80.8   | 51.7   | 82.3   |
| 654.2  | 875.4  | 598.1  | 600.2  | 495.7  | 543.3  | 379.9  | 423.4  | 462.1  |
| 323.5  | 422.8  | 232.6  | 620.6  | 472.8  | 551.1  | 430.2  | 314.3  | 380.1  |
| 810.8  | 905.1  | 731.9  | 31.7   | 36.4   | 38.7   | 31.5   | 27.2   | 36.6   |
| 1551.4 | 1628.3 | 1221.1 | 501.6  | 396.6  | 399.1  | 570.6  | 637.3  | 665.9  |
| 57.3   | 66.0   | 45.1   | 540.5  | 471.8  | 499.4  | 312.9  | 366.3  | 387.6  |
| 1084.4 | 1399.0 | 1130.2 | 13.3   | 11.4   | 8.6    | 7.0    | 10.2   | 9.3    |
| 332.2  | 529.6  | 506.2  | 906.0  | 777.3  | 900.5  | 435.1  | 586.0  | 527.8  |
| 411.1  | 544.8  | 396.9  | 440.7  | 383.4  | 451.9  | 217.8  | 250.5  | 279.6  |
| 642.6  | 860.4  | 692.0  | 92.1   | 77.8   | 89.5   | 113.7  | 146.6  | 142.0  |
| 279.2  | 263.7  | 186.2  | 259.2  | 205.8  | 237.0  | 132.5  | 133.2  | 159.8  |
| 485.2  | 521.4  | 340.5  | 548.0  | 376.3  | 381.3  | 509.2  | 365.0  | 416.8  |
| 1008.8 | 1680.4 | 1464.0 | 379.1  | 367.0  | 372.8  | 395.6  | 463.8  | 452.5  |
| 896.2  | 1172.9 | 790.7  | 62.4   | 41.1   | 33.4   | 31.8   | 31.6   | 34.3   |
| 842.5  | 1006.5 | 726.7  | 344.2  | 286.2  | 283.5  | 360.2  | 367.4  | 436.8  |
| 1174.1 | 1248.8 | 556.6  | 182.1  | 126.4  | 109.6  | 164.7  | 105.3  | 150.4  |
| 472.7  | 610.5  | 454.9  | 958.3  | 932.2  | 994.9  | 381.1  | 362.3  | 419.6  |
| 1332.8 | 1602.3 | 1436.3 | 1310.9 | 1127.4 | 1270.3 | 1168.2 | 1444.6 | 1407.3 |
| 235.4  | 306.7  | 213.3  | 424.6  | 260.1  | 270.5  | 319.0  | 266.3  | 292.7  |
| 197.2  | 303.6  | 239.6  | 3.7    | 7.9    | 6.0    | 4.9    | 3.2    | 4.3    |
| 3476.4 | 4106.5 | 3046.1 | 2201.1 | 1768.0 | 1908.3 | 1329.7 | 1299.1 | 1460.7 |
| 1795.6 | 2124.0 | 1584.7 | 414.9  | 334.2  | 334.9  | 391.8  | 519.1  | 492.3  |
| 525.9  | 588.2  | 371.9  | 294.8  | 240.1  | 252.6  | 186.3  | 188.1  | 223.5  |
| 764.2  | 811.8  | 434.2  | 204.3  | 161.2  | 182.9  | 156.9  | 147.6  | 182.1  |
| 631.9  | 737.0  | 420.4  | 883.5  | 697.3  | 784.9  | 525.8  | 454.1  | 554.3  |
| 8137.7 | 7220.1 | 4992.3 | 513.7  | 383.3  | 384.1  | 405.3  | 361.7  | 435.8  |
| 941.8  | 999.9  | 773.4  | 1063.8 | 886.3  | 1015.5 | 801.9  | 790.2  | 844.2  |
| 552.5  | 665.4  | 370.5  | 836.6  | 554.1  | 584.9  | 550.4  | 468.7  | 511.1  |
| 1913.0 | 2367.2 | 2241.2 | 405.3  | 417.3  | 436.0  | 351.8  | 492.4  | 510.5  |
| 52.1   | 77.7   | 48.1   | 133.0  | 126.5  | 133.6  | 31.1   | 28.2   | 34.5   |
| 487.4  | 594.8  | 471.5  | 186.3  | 152.5  | 145.6  | 202.4  | 184.2  | 196.5  |
| 703.9  | 730.2  | 516.1  | 577.2  | 405.5  | 475.8  | 304.2  | 233.8  | 245.3  |
| 309.0  | 375.8  | 333.4  | 120.2  | 84.3   | 93.2   | 98.8   | 109.1  | 122.5  |
| 161.1  | 193.0  | 127.0  | 222.0  | 195.2  | 219.1  | 137.0  | 100.0  | 122.6  |
| 1312.2 | 1445.4 | 653.9  | 656.5  | 317.4  | 352.4  | 351.5  | 168.9  | 219.4  |
| 404.1  | 522.4  | 358.6  | 500.8  | 444.8  | 459.4  | 275.2  | 316.0  | 320.4  |
| 3156.1 | 3333.4 | 2358.7 | 1557.2 | 1168.6 | 1146.8 | 1020.4 | 858.2  | 992.1  |
| 1104.0 | 1179.9 | 640.5  | 723.9  | 577.5  | 597.9  | 339.8  | 332.0  | 341.2  |
| 878.1  | 845.4  | 463.4  | 473.7  | 384.6  | 451.8  | 290.6  | 256.4  | 308.5  |
| 596.6  | 673.6  | 366.4  | 433.3  | 383.0  | 445.8  | 310.6  | 315.3  | 353.0  |
| 78.7   | 110.7  | 65.4   | 87.4   | 65.7   | 108.9  | 49.0   | 33.3   | 62.7   |
| 419.6  | 468.5  | 360.1  | 162.3  | 126.1  | 157.2  | 146.5  | 107.6  | 153.2  |
| 924.5  | 1004.9 | 695.2  | 568.6  | 370.1  | 426.7  | 351.8  | 286.8  | 357.8  |
| 233.7  | 333.5  | 329.9  | 323.3  | 283.1  | 375.1  | 225.2  | 264.3  | 302.4  |

|        |        |        |        |        |        |        |        |        |
|--------|--------|--------|--------|--------|--------|--------|--------|--------|
| 245.3  | 221.6  | 222.4  | 112.5  | 107.2  | 111.2  | 64.7   | 105.1  | 97.7   |
| 239.5  | 280.5  | 189.3  | 286.8  | 244.7  | 259.7  | 167.8  | 159.2  | 177.5  |
| 299.0  | 324.4  | 172.5  | 211.2  | 160.8  | 156.1  | 144.6  | 163.7  | 157.0  |
| 179.3  | 239.5  | 132.7  | 158.9  | 134.5  | 128.3  | 138.0  | 154.6  | 135.7  |
| 225.6  | 279.7  | 146.9  | 202.3  | 174.9  | 150.6  | 214.3  | 211.1  | 215.4  |
| 237.5  | 306.2  | 234.3  | 302.2  | 255.4  | 260.1  | 188.0  | 205.2  | 240.3  |
| 477.6  | 537.5  | 304.6  | 365.5  | 268.2  | 286.4  | 187.3  | 145.0  | 226.1  |
| 570.1  | 844.8  | 606.5  | 1230.6 | 850.7  | 987.6  | 583.4  | 528.8  | 558.0  |
| 835.8  | 906.9  | 570.4  | 438.7  | 295.1  | 349.5  | 301.3  | 265.2  | 276.7  |
| 876.2  | 1090.9 | 781.5  | 508.1  | 370.4  | 396.3  | 419.2  | 373.0  | 443.1  |
| 558.3  | 590.9  | 383.9  | 581.7  | 416.6  | 433.0  | 280.2  | 276.5  | 330.9  |
| 53.4   | 47.7   | 36.6   | 74.4   | 50.6   | 56.7   | 36.8   | 37.3   | 41.4   |
| 559.0  | 765.9  | 602.6  | 640.0  | 492.0  | 575.6  | 435.6  | 477.2  | 506.1  |
| 960.1  | 985.8  | 685.7  | 551.5  | 427.9  | 474.2  | 309.8  | 256.8  | 302.5  |
| 1055.5 | 1342.3 | 1178.8 | 1027.2 | 928.1  | 1008.5 | 1038.1 | 1042.2 | 1150.3 |
| 1636.0 | 1619.4 | 775.2  | 758.1  | 539.1  | 590.1  | 293.2  | 304.8  | 348.7  |
| 125.7  | 162.5  | 107.2  | 98.7   | 97.9   | 85.2   | 46.4   | 60.4   | 55.7   |
| 153.7  | 246.0  | 237.5  | 270.9  | 257.7  | 271.9  | 208.9  | 304.5  | 272.1  |
| 370.2  | 431.8  | 431.7  | 278.9  | 252.7  | 339.7  | 206.0  | 237.0  | 236.9  |
| 262.5  | 291.0  | 235.9  | 366.3  | 287.8  | 330.9  | 150.7  | 160.0  | 188.1  |
| 1541.8 | 2442.8 | 1064.0 | 1722.7 | 1418.1 | 1509.6 | 1475.1 | 1016.0 | 1392.9 |
| 312.4  | 471.9  | 422.8  | 176.9  | 169.8  | 206.5  | 118.5  | 154.2  | 164.8  |
| 195.9  | 339.4  | 263.6  | 109.7  | 109.8  | 103.8  | 108.6  | 158.1  | 162.6  |
| 39.5   | 54.9   | 36.8   | 87.4   | 76.4   | 72.3   | 36.4   | 35.9   | 50.7   |
| 271.0  | 494.0  | 464.3  | 245.2  | 198.4  | 255.6  | 125.4  | 154.0  | 127.5  |
| 1420.7 | 1481.1 | 888.1  | 619.5  | 504.6  | 523.7  | 440.8  | 390.7  | 497.4  |
| 2218.3 | 2169.2 | 1112.8 | 498.2  | 409.6  | 410.8  | 350.2  | 275.2  | 265.8  |
| 466.9  | 591.6  | 457.3  | 232.2  | 213.2  | 227.2  | 191.8  | 214.9  | 233.2  |
| 507.4  | 678.3  | 481.8  | 417.1  | 305.4  | 329.9  | 252.6  | 171.8  | 212.6  |
| 165.1  | 216.2  | 180.3  | 80.1   | 96.8   | 81.8   | 50.3   | 65.9   | 80.6   |
| 209.8  | 214.2  | 122.0  | 138.0  | 88.1   | 110.7  | 78.5   | 78.8   | 78.9   |
| 793.7  | 863.2  | 406.1  | 189.0  | 137.0  | 148.6  | 131.5  | 129.7  | 157.8  |
| 654.8  | 715.5  | 468.2  | 517.3  | 446.5  | 423.7  | 163.8  | 218.8  | 262.6  |
| 214.1  | 339.5  | 251.4  | 213.0  | 168.3  | 161.5  | 209.5  | 240.1  | 220.7  |
| 747.7  | 831.7  | 544.5  | 722.8  | 481.4  | 620.4  | 389.3  | 303.5  | 309.3  |
| 1709.0 | 2176.0 | 1908.8 | 2625.7 | 2371.5 | 2468.0 | 1418.6 | 1408.0 | 1626.9 |
| 220.6  | 322.0  | 149.8  | 101.2  | 62.2   | 95.8   | 47.4   | 31.8   | 45.0   |
| 106.8  | 111.7  | 145.4  | 9.2    | 7.5    | 8.2    | 3.2    | 1.7    | 4.5    |
| 2402.4 | 2624.0 | 1788.3 | 891.6  | 706.8  | 726.6  | 517.0  | 456.9  | 533.7  |
| 160.7  | 217.0  | 217.3  | 1200.7 | 1329.5 | 1655.2 | 752.9  | 1419.5 | 1207.0 |
| 582.8  | 758.4  | 546.2  | 469.3  | 441.6  | 470.8  | 486.3  | 785.8  | 618.1  |
| 145.4  | 195.7  | 126.9  | 54.6   | 47.2   | 52.1   | 76.0   | 82.7   | 80.8   |
| 1122.0 | 1614.9 | 1299.4 | 1769.9 | 1399.0 | 1572.3 | 1110.4 | 1311.8 | 1320.5 |
| 816.6  | 1380.9 | 1234.9 | 170.5  | 174.4  | 220.0  | 106.2  | 148.6  | 117.8  |
| 224.0  | 291.5  | 323.4  | 515.9  | 437.9  | 481.7  | 224.3  | 343.2  | 347.6  |
| 2176.8 | 2457.5 | 1543.1 | 1406.4 | 996.8  | 1080.0 | 1190.6 | 1050.1 | 1138.1 |
| 1608.3 | 2065.3 | 1748.4 | 788.6  | 685.1  | 746.3  | 590.0  | 716.8  | 739.0  |
| 1322.6 | 1525.5 | 1023.1 | 492.8  | 422.3  | 430.2  | 424.3  | 411.8  | 459.1  |
| 34.5   | 49.2   | 30.8   | 36.2   | 37.8   | 43.8   | 19.1   | 22.5   | 18.5   |
| 71.6   | 139.0  | 105.7  | 87.8   | 77.2   | 79.7   | 110.9  | 130.4  | 113.1  |
| 165.8  | 261.7  | 250.9  | 422.2  | 418.5  | 454.6  | 248.2  | 304.2  | 321.0  |
| 651.0  | 856.1  | 575.8  | 301.2  | 232.1  | 232.1  | 255.0  | 292.3  | 299.9  |
| 118.9  | 157.4  | 148.0  | 196.7  | 217.4  | 221.6  | 184.7  | 264.0  | 254.0  |

|        |        |        |        |        |        |        |        |        |
|--------|--------|--------|--------|--------|--------|--------|--------|--------|
| 1038.5 | 1212.5 | 1070.4 | 779.7  | 907.0  | 1081.9 | 756.1  | 1002.1 | 940.3  |
| 310.2  | 421.3  | 364.6  | 236.5  | 199.5  | 170.7  | 299.5  | 355.6  | 303.8  |
| 170.3  | 302.6  | 325.5  | 177.0  | 172.8  | 204.2  | 94.6   | 106.9  | 108.4  |
| 475.7  | 422.2  | 288.9  | 141.2  | 113.8  | 117.4  | 103.1  | 119.0  | 121.5  |
| 8.3    | 9.2    | 1.8    | 13.1   | 2.9    | 6.0    | 5.3    | 1.5    | 2.9    |
| 15.8   | 4.0    | 3.8    | 7.5    | 2.7    | 6.8    | 3.7    | 8.0    | 8.0    |
| 100.5  | 125.0  | 99.5   | 179.8  | 142.9  | 160.5  | 166.1  | 173.8  | 180.7  |
| 1392.9 | 1534.0 | 1118.6 | 629.3  | 453.7  | 490.6  | 536.3  | 484.5  | 527.3  |
| 1735.6 | 2180.9 | 2099.7 | 1275.9 | 1195.7 | 1426.0 | 783.2  | 988.6  | 1031.9 |
| 1181.7 | 1380.0 | 940.9  | 864.3  | 650.1  | 721.7  | 639.4  | 533.6  | 637.4  |
| 596.6  | 667.6  | 384.3  | 1111.0 | 923.0  | 1004.0 | 526.1  | 523.0  | 597.7  |
| 1501.6 | 1836.2 | 1272.6 | 995.8  | 705.2  | 766.2  | 808.9  | 657.5  | 810.2  |
| 5530.7 | 6279.5 | 4944.0 | 4547.8 | 3739.4 | 4122.7 | 2323.7 | 1929.9 | 2416.5 |
| 829.8  | 1053.1 | 1019.7 | 527.0  | 562.0  | 640.1  | 435.2  | 587.6  | 558.0  |
| 159.6  | 157.3  | 149.7  | 127.4  | 123.7  | 138.2  | 63.5   | 91.6   | 90.0   |
| 627.2  | 707.1  | 434.6  | 288.2  | 203.1  | 223.8  | 294.3  | 227.7  | 255.8  |
| 1498.5 | 1769.5 | 942.7  | 867.5  | 959.5  | 1055.4 | 561.6  | 1056.9 | 850.3  |
| 658.7  | 853.2  | 627.1  | 1172.3 | 1040.9 | 1065.4 | 1320.6 | 1357.6 | 1582.4 |
| 167.2  | 176.5  | 115.4  | 96.7   | 84.3   | 75.2   | 92.6   | 80.9   | 92.1   |
| 436.6  | 459.0  | 364.3  | 209.8  | 133.6  | 146.7  | 229.3  | 200.5  | 184.0  |
| 597.6  | 795.1  | 722.3  | 300.8  | 300.4  | 313.3  | 244.5  | 233.6  | 282.8  |
| 101.1  | 120.7  | 54.8   | 205.8  | 143.2  | 197.7  | 60.1   | 59.5   | 68.7   |
| 4650.2 | 5380.9 | 4581.3 | 4797.0 | 4480.2 | 4527.3 | 2151.7 | 2096.2 | 2503.3 |
| 3149.0 | 4029.1 | 3286.7 | 1867.1 | 1556.0 | 1598.7 | 935.6  | 1155.2 | 1283.6 |
| 262.5  | 289.0  | 209.7  | 78.3   | 77.1   | 67.9   | 109.6  | 111.8  | 125.9  |
| 5145.8 | 4813.3 | 3276.9 | 731.0  | 558.3  | 591.1  | 458.7  | 417.8  | 474.9  |
| 39.0   | 78.5   | 97.7   | 229.3  | 210.1  | 240.1  | 179.3  | 237.6  | 228.8  |
| 1433.9 | 2127.0 | 2023.3 | 1350.3 | 1424.3 | 1378.7 | 1196.4 | 1502.3 | 1634.8 |
| 937.2  | 1100.1 | 846.9  | 705.1  | 868.0  | 896.4  | 462.3  | 625.2  | 666.2  |
| 6.8    | 4.5    | 6.9    | 15.2   | 20.3   | 28.5   | 25.7   | 21.3   | 31.7   |
| 197.6  | 229.5  | 162.4  | 242.5  | 227.0  | 246.2  | 122.1  | 143.3  | 146.0  |
| 684.8  | 806.9  | 507.7  | 891.4  | 704.8  | 719.8  | 897.6  | 728.1  | 886.2  |
| 795.5  | 1095.9 | 718.4  | 716.8  | 411.8  | 541.0  | 345.4  | 281.7  | 341.8  |
| 1284.2 | 2050.7 | 2274.7 | 2041.6 | 1858.2 | 1940.2 | 1146.8 | 1321.5 | 1419.5 |
| 628.6  | 727.9  | 537.1  | 130.7  | 88.3   | 100.3  | 116.2  | 117.4  | 120.6  |
| 3687.5 | 4517.8 | 3419.3 | 4323.9 | 3690.8 | 3853.3 | 2065.0 | 2421.2 | 2446.7 |
| 720.0  | 780.9  | 448.5  | 526.8  | 387.7  | 473.2  | 328.7  | 319.7  | 363.5  |
| 120.4  | 164.5  | 104.0  | 138.2  | 135.1  | 155.8  | 105.8  | 133.2  | 123.0  |
| 936.6  | 1157.1 | 893.8  | 585.0  | 505.5  | 482.2  | 328.9  | 312.3  | 339.1  |
| 389.0  | 705.1  | 741.6  | 108.6  | 117.8  | 128.1  | 117.1  | 137.4  | 143.4  |
| 117.7  | 175.9  | 146.2  | 151.5  | 140.6  | 164.2  | 140.9  | 191.7  | 170.9  |
| 407.1  | 347.0  | 250.3  | 736.0  | 621.4  | 631.9  | 494.4  | 391.7  | 448.2  |
| 438.2  | 553.7  | 362.3  | 290.9  | 261.6  | 293.9  | 188.8  | 222.4  | 232.7  |
| 126.7  | 196.6  | 166.5  | 136.1  | 106.2  | 105.4  | 70.5   | 83.6   | 84.6   |
| 65.8   | 96.6   | 85.2   | 12.7   | 22.5   | 7.8    | 25.2   | 20.1   | 15.8   |
| 4.9    | 1.9    | 1.1    | 18.2   | 3.0    | 8.3    | 1.0    | 1.3    | 3.9    |
| 444.2  | 505.9  | 364.5  | 1114.9 | 895.7  | 947.1  | 886.4  | 1007.1 | 1024.0 |
| 290.8  | 360.3  | 276.7  | 330.0  | 252.4  | 300.2  | 216.6  | 197.4  | 230.5  |
| 7648.9 | 7798.7 | 7286.0 | 4950.4 | 4744.4 | 4625.9 | 3189.7 | 3127.2 | 3483.6 |
| 245.1  | 285.4  | 188.4  | 293.7  | 190.4  | 266.5  | 156.4  | 139.3  | 149.7  |
| 614.2  | 728.4  | 553.8  | 589.1  | 473.7  | 656.9  | 407.3  | 489.3  | 506.1  |
| 512.5  | 577.6  | 353.5  | 727.9  | 548.8  | 634.8  | 548.8  | 484.5  | 576.4  |
| 1136.0 | 1458.3 | 1103.6 | 511.4  | 443.4  | 472.4  | 320.1  | 361.3  | 371.8  |

|        |        |        |        |        |        |        |        |        |
|--------|--------|--------|--------|--------|--------|--------|--------|--------|
| 416.4  | 526.1  | 350.5  | 540.7  | 489.5  | 529.6  | 313.3  | 399.4  | 375.1  |
| 10.7   | 3.5    | 9.8    | 6.5    | 7.3    | 11.3   | 12.4   | 7.8    | 1.5    |
| 8946.1 | 8645.6 | 7834.5 | 3591.6 | 3139.3 | 3197.4 | 1932.5 | 1840.3 | 2109.7 |
| 76.2   | 214.7  | 229.6  | 71.4   | 96.1   | 104.1  | 63.5   | 102.7  | 94.4   |
| 1016.8 | 956.8  | 499.0  | 619.9  | 522.5  | 513.0  | 431.9  | 358.9  | 446.7  |
| 581.9  | 598.8  | 428.7  | 154.1  | 118.2  | 116.1  | 109.4  | 97.6   | 102.1  |
| 978.7  | 986.5  | 690.0  | 2836.6 | 2395.3 | 2458.6 | 1565.7 | 1798.3 | 1759.3 |
| 1130.0 | 1153.7 | 561.0  | 413.3  | 303.0  | 310.2  | 346.7  | 253.2  | 315.6  |
| 1834.8 | 1884.8 | 935.1  | 638.6  | 490.3  | 459.5  | 645.2  | 528.2  | 616.3  |
| 222.8  | 276.6  | 201.4  | 274.1  | 224.6  | 264.8  | 130.9  | 137.5  | 145.7  |
| 483.9  | 625.2  | 523.2  | 693.7  | 586.8  | 632.1  | 631.6  | 625.4  | 688.6  |
| 373.1  | 471.6  | 452.8  | 1323.2 | 1149.4 | 1174.7 | 755.8  | 989.7  | 961.9  |
| 518.3  | 749.4  | 660.4  | 326.6  | 281.9  | 312.6  | 193.7  | 192.7  | 232.2  |
| 519.4  | 718.1  | 490.2  | 208.6  | 207.3  | 189.0  | 190.4  | 225.1  | 201.2  |
| 416.8  | 549.9  | 396.4  | 998.3  | 855.7  | 994.0  | 460.9  | 471.7  | 527.2  |
| 145.8  | 207.9  | 154.2  | 208.0  | 152.1  | 176.5  | 97.0   | 94.4   | 116.2  |
| 937.8  | 923.0  | 520.9  | 527.0  | 389.0  | 418.5  | 683.7  | 653.9  | 709.1  |
| 1036.7 | 1016.5 | 705.6  | 582.2  | 561.1  | 611.6  | 243.9  | 333.5  | 366.6  |
| 1410.5 | 1622.1 | 1162.1 | 276.7  | 204.0  | 224.3  | 198.4  | 177.2  | 217.9  |
| 1608.0 | 1856.5 | 1219.0 | 1801.3 | 1534.8 | 1600.3 | 780.3  | 749.7  | 846.2  |
| 617.5  | 827.2  | 653.7  | 317.6  | 229.8  | 247.4  | 145.7  | 121.3  | 138.7  |
| 2485.1 | 2822.6 | 1875.7 | 569.7  | 417.0  | 466.8  | 478.4  | 384.3  | 407.1  |
| 614.7  | 859.3  | 722.3  | 117.0  | 122.2  | 137.0  | 86.0   | 98.1   | 108.9  |
| 1738.6 | 1859.2 | 1339.9 | 583.5  | 487.5  | 497.7  | 656.5  | 598.1  | 655.9  |
| 42.3   | 51.9   | 55.9   | 106.9  | 95.7   | 107.7  | 65.8   | 57.3   | 50.4   |
| 1456.9 | 1493.1 | 882.6  | 886.1  | 666.8  | 723.6  | 887.5  | 758.9  | 816.0  |
| 373.0  | 433.3  | 326.8  | 65.4   | 43.3   | 57.9   | 61.1   | 48.0   | 64.0   |
| 3525.6 | 4210.0 | 3240.1 | 723.9  | 624.4  | 671.7  | 399.4  | 476.9  | 494.0  |
| 360.9  | 465.1  | 453.7  | 480.9  | 361.2  | 427.2  | 333.2  | 407.6  | 400.5  |
| 622.2  | 633.7  | 346.4  | 454.9  | 409.6  | 451.5  | 466.2  | 410.1  | 505.7  |
| 674.0  | 1026.6 | 799.8  | 1154.8 | 1109.7 | 1192.9 | 650.4  | 765.9  | 845.2  |
| 242.7  | 330.9  | 198.2  | 356.7  | 271.1  | 341.2  | 229.8  | 202.5  | 205.2  |
| 570.9  | 696.7  | 539.3  | 548.6  | 425.9  | 448.3  | 312.2  | 324.2  | 340.7  |
| 667.1  | 707.7  | 432.6  | 122.8  | 103.5  | 109.2  | 82.5   | 91.6   | 122.4  |
| 238.3  | 278.1  | 165.0  | 117.4  | 110.0  | 134.3  | 116.8  | 167.8  | 154.9  |
| 46.8   | 42.4   | 9.4    | 71.0   | 49.5   | 36.0   | 57.9   | 26.6   | 41.4   |
| 108.9  | 148.1  | 94.3   | 157.9  | 119.1  | 137.3  | 93.0   | 79.1   | 93.7   |
| 478.5  | 594.4  | 360.1  | 224.8  | 191.5  | 195.2  | 200.6  | 313.3  | 254.0  |
| 798.2  | 932.4  | 683.7  | 936.9  | 678.8  | 792.3  | 684.0  | 605.5  | 676.2  |
| 1143.2 | 1242.1 | 739.5  | 699.8  | 562.7  | 563.0  | 432.8  | 377.8  | 436.1  |
| 1283.2 | 1459.3 | 1105.4 | 911.4  | 765.8  | 882.1  | 456.9  | 434.3  | 486.3  |
| 93.2   | 180.9  | 120.6  | 139.4  | 102.2  | 93.7   | 52.9   | 58.8   | 63.0   |
| 171.9  | 209.7  | 148.0  | 68.1   | 69.8   | 66.8   | 71.3   | 91.3   | 114.9  |
| 84.3   | 107.6  | 94.6   | 108.0  | 101.4  | 108.9  | 63.2   | 68.1   | 65.5   |
| 435.3  | 599.4  | 349.4  | 294.0  | 166.5  | 207.3  | 262.6  | 124.3  | 193.4  |
| 172.3  | 222.1  | 159.0  | 277.9  | 258.0  | 258.2  | 146.0  | 229.3  | 222.2  |
| 604.0  | 1132.7 | 856.7  | 1584.7 | 1505.8 | 1559.0 | 1209.1 | 1775.6 | 1678.4 |
| 185.8  | 206.2  | 81.9   | 184.5  | 175.1  | 136.0  | 125.3  | 100.6  | 136.4  |
| 20.8   | 26.9   | 17.5   | 27.4   | 25.1   | 23.1   | 8.5    | 14.9   | 13.4   |
| 351.9  | 493.1  | 384.5  | 461.4  | 566.8  | 601.1  | 282.0  | 515.9  | 464.8  |
| 1535.2 | 1802.5 | 1357.5 | 1564.2 | 1127.9 | 1171.5 | 875.6  | 672.8  | 871.1  |
| 237.0  | 352.0  | 288.3  | 409.5  | 449.2  | 500.5  | 321.0  | 428.3  | 442.9  |
| 651.9  | 791.1  | 468.3  | 361.4  | 295.9  | 321.5  | 185.5  | 167.9  | 214.6  |

|        |        |        |        |        |        |        |        |        |
|--------|--------|--------|--------|--------|--------|--------|--------|--------|
| 130.4  | 140.3  | 146.3  | 119.7  | 81.0   | 95.2   | 47.2   | 60.7   | 54.2   |
| 231.9  | 347.0  | 337.2  | 510.8  | 600.8  | 688.7  | 322.7  | 407.8  | 502.4  |
| 1148.9 | 1377.9 | 1203.7 | 417.0  | 365.7  | 387.0  | 369.3  | 361.3  | 418.5  |
| 238.5  | 288.0  | 215.0  | 313.8  | 247.0  | 309.3  | 161.7  | 157.5  | 185.7  |
| 846.2  | 964.7  | 729.2  | 461.0  | 388.9  | 437.0  | 344.9  | 371.5  | 386.0  |
| 840.5  | 895.3  | 690.4  | 340.8  | 233.1  | 271.5  | 227.4  | 195.5  | 212.8  |
| 259.4  | 275.8  | 218.8  | 412.0  | 348.4  | 396.1  | 152.3  | 158.3  | 181.1  |
| 732.9  | 1004.1 | 792.5  | 650.8  | 614.7  | 688.2  | 301.7  | 313.6  | 373.3  |
| 96.1   | 119.5  | 91.0   | 63.9   | 51.7   | 73.3   | 53.9   | 39.4   | 66.4   |
| 8.1    | 11.1   | 1.9    | 2.1    | 2.0    | 5.9    | 0.8    | 1.1    | 1.2    |
| 459.2  | 489.7  | 242.8  | 221.5  | 121.9  | 167.1  | 138.2  | 102.4  | 131.3  |
| 398.7  | 372.7  | 194.5  | 130.3  | 92.2   | 107.1  | 129.8  | 82.2   | 106.2  |
| 218.6  | 214.7  | 124.6  | 129.0  | 78.5   | 99.7   | 98.6   | 75.4   | 84.3   |
| 106.3  | 93.7   | 55.3   | 165.1  | 160.4  | 232.5  | 188.4  | 165.1  | 184.2  |
| 37.8   | 72.4   | 65.0   | 432.6  | 392.7  | 446.3  | 282.9  | 270.7  | 320.4  |
| 255.2  | 278.1  | 169.0  | 378.6  | 236.1  | 297.6  | 200.8  | 185.2  | 184.2  |
| 334.8  | 368.1  | 167.7  | 402.3  | 267.4  | 257.4  | 169.9  | 122.0  | 157.9  |
| 110.7  | 153.2  | 116.6  | 117.0  | 111.8  | 113.8  | 60.6   | 70.1   | 70.6   |
| 563.0  | 803.2  | 580.1  | 346.4  | 303.9  | 339.3  | 166.9  | 174.0  | 214.5  |
| 1173.1 | 1917.5 | 2034.7 | 697.5  | 611.9  | 730.0  | 713.3  | 822.5  | 819.4  |
| 388.9  | 430.2  | 273.2  | 292.2  | 239.6  | 230.4  | 204.8  | 186.2  | 220.9  |
| 278.8  | 278.1  | 107.8  | 545.5  | 355.0  | 369.0  | 349.3  | 198.9  | 284.3  |
| 105.4  | 138.1  | 113.4  | 163.2  | 134.6  | 173.7  | 138.4  | 187.3  | 164.0  |
| 288.6  | 389.0  | 274.7  | 571.6  | 601.2  | 641.1  | 308.3  | 431.7  | 427.9  |
| 596.3  | 739.1  | 514.5  | 364.1  | 196.1  | 228.6  | 173.6  | 117.2  | 123.9  |
| 405.0  | 572.0  | 641.1  | 1392.2 | 1004.0 | 1167.7 | 633.1  | 548.9  | 623.3  |
| 237.0  | 323.0  | 238.9  | 302.8  | 271.0  | 285.5  | 136.2  | 175.2  | 183.4  |
| 297.3  | 333.0  | 258.8  | 235.1  | 220.7  | 200.7  | 260.8  | 321.9  | 304.2  |
| 2.7    | 4.1    | 3.4    | 518.2  | 492.8  | 541.2  | 299.3  | 367.9  | 362.0  |
| 1073.1 | 1521.4 | 1458.1 | 802.9  | 502.9  | 568.5  | 597.1  | 455.5  | 521.3  |
| 242.2  | 321.2  | 232.9  | 141.2  | 118.6  | 140.2  | 134.5  | 126.3  | 131.9  |
| 389.3  | 453.9  | 287.9  | 255.2  | 196.5  | 217.9  | 128.7  | 131.4  | 139.2  |
| 296.6  | 357.9  | 204.2  | 484.0  | 395.9  | 398.9  | 309.6  | 276.7  | 322.4  |
| 394.9  | 408.3  | 222.9  | 278.5  | 244.2  | 244.8  | 147.7  | 106.4  | 131.5  |
| 257.8  | 335.7  | 274.9  | 83.8   | 65.8   | 67.2   | 65.8   | 62.7   | 89.3   |
| 351.6  | 541.8  | 489.2  | 33.2   | 33.2   | 37.5   | 34.8   | 30.9   | 31.0   |
| 1808.9 | 2269.3 | 2067.3 | 2752.8 | 2205.2 | 2248.4 | 1595.8 | 1349.3 | 1605.3 |
| 428.3  | 545.2  | 383.5  | 762.3  | 569.6  | 748.6  | 309.4  | 319.3  | 357.5  |
| 1304.6 | 1539.9 | 1521.0 | 17.9   | 22.7   | 19.4   | 14.9   | 4.6    | 11.0   |
| 1227.9 | 1575.7 | 1354.6 | 736.7  | 575.3  | 635.3  | 638.5  | 629.2  | 650.5  |
| 180.9  | 227.8  | 160.2  | 143.4  | 131.5  | 129.0  | 150.7  | 130.0  | 147.3  |
| 285.5  | 229.3  | 144.8  | 103.6  | 76.7   | 66.1   | 64.5   | 56.2   | 56.3   |
| 286.5  | 466.5  | 567.0  | 194.1  | 162.2  | 183.0  | 279.8  | 340.4  | 308.0  |
| 342.6  | 332.9  | 237.0  | 328.8  | 248.1  | 264.0  | 152.2  | 158.0  | 155.2  |
| 241.0  | 294.0  | 209.8  | 307.9  | 311.5  | 371.6  | 184.3  | 227.4  | 242.0  |
| 198.8  | 260.7  | 205.8  | 354.3  | 325.3  | 387.9  | 173.7  | 226.7  | 220.4  |
| 1334.5 | 1358.2 | 1146.8 | 46.4   | 25.1   | 18.5   | 34.6   | 15.8   | 22.5   |
| 692.1  | 688.0  | 404.0  | 247.2  | 184.0  | 223.5  | 252.7  | 214.6  | 251.8  |
| 25.7   | 21.0   | 12.3   | 26.1   | 17.6   | 29.2   | 12.8   | 14.0   | 14.0   |
| 657.0  | 775.3  | 444.4  | 308.0  | 298.4  | 276.7  | 179.3  | 195.0  | 196.4  |
| 1353.4 | 1707.1 | 1096.6 | 452.3  | 326.9  | 356.5  | 470.3  | 382.2  | 467.1  |
| 437.7  | 547.7  | 451.0  | 339.0  | 296.6  | 325.8  | 142.6  | 159.5  | 187.1  |
| 1380.2 | 1281.9 | 676.0  | 1462.3 | 1147.1 | 1251.9 | 666.9  | 555.8  | 661.5  |

|        |        |        |        |        |        |        |        |        |
|--------|--------|--------|--------|--------|--------|--------|--------|--------|
| 99.7   | 134.8  | 121.7  | 136.3  | 135.3  | 176.3  | 75.6   | 110.0  | 120.1  |
| 17.9   | 40.9   | 37.8   | 92.9   | 89.6   | 111.2  | 78.3   | 83.8   | 107.3  |
| 1011.1 | 1130.4 | 803.2  | 823.2  | 630.7  | 680.5  | 421.3  | 431.6  | 519.1  |
| 462.5  | 460.7  | 317.4  | 123.1  | 89.1   | 103.4  | 168.9  | 143.8  | 150.8  |
| 728.1  | 986.6  | 911.6  | 526.2  | 461.6  | 510.6  | 329.3  | 377.2  | 367.6  |
| 1387.5 | 1822.7 | 1777.8 | 182.1  | 118.3  | 167.4  | 114.9  | 125.3  | 110.1  |
| 639.5  | 726.6  | 576.8  | 235.5  | 187.9  | 215.1  | 165.6  | 195.0  | 161.5  |
| 75.0   | 109.9  | 98.4   | 86.4   | 72.2   | 80.0   | 64.8   | 74.6   | 75.1   |
| 37.5   | 69.7   | 51.2   | 54.3   | 46.8   | 40.0   | 39.0   | 31.1   | 42.8   |
| 125.8  | 312.2  | 387.0  | 183.9  | 172.3  | 182.6  | 119.2  | 133.9  | 144.8  |
| 299.9  | 408.1  | 265.3  | 410.1  | 315.4  | 350.9  | 226.0  | 213.5  | 252.5  |
| 403.3  | 530.7  | 403.7  | 142.8  | 120.0  | 143.7  | 130.4  | 169.8  | 169.2  |
| 1162.1 | 1122.9 | 644.1  | 251.4  | 155.6  | 159.8  | 157.9  | 96.4   | 137.6  |
| 2392.4 | 2562.7 | 1256.3 | 951.7  | 500.6  | 497.8  | 562.8  | 301.9  | 413.9  |
| 2257.0 | 2615.2 | 2108.6 | 486.4  | 482.4  | 464.9  | 490.1  | 498.7  | 576.9  |
| 963.2  | 1281.2 | 1033.6 | 159.5  | 156.8  | 160.9  | 185.8  | 262.5  | 270.6  |
| 22.5   | 22.9   | 26.4   | 5.7    | 19.3   | 9.4    | 5.0    | 3.3    | 11.2   |
| 1037.0 | 1387.4 | 1187.0 | 935.9  | 771.2  | 836.5  | 437.8  | 458.5  | 456.7  |
| 602.1  | 649.7  | 431.2  | 421.5  | 233.2  | 282.6  | 248.3  | 160.4  | 187.6  |
| 1142.3 | 1205.3 | 676.2  | 1130.5 | 743.4  | 754.7  | 776.8  | 586.1  | 683.4  |
| 1472.0 | 1625.7 | 950.8  | 1687.8 | 1235.4 | 1698.9 | 802.9  | 671.2  | 876.1  |
| 1344.3 | 1393.7 | 861.4  | 749.9  | 652.4  | 741.3  | 487.9  | 460.3  | 571.9  |
| 318.7  | 447.8  | 294.3  | 266.4  | 250.6  | 282.6  | 161.7  | 158.1  | 207.8  |
| 813.9  | 988.9  | 721.0  | 2319.5 | 1966.3 | 2200.3 | 1648.2 | 1676.3 | 1841.9 |
| 508.0  | 951.2  | 959.3  | 109.4  | 111.4  | 98.9   | 64.7   | 103.6  | 87.3   |
| 108.8  | 150.2  | 115.7  | 35.3   | 29.7   | 33.0   | 26.1   | 35.5   | 32.6   |
| 166.4  | 224.8  | 196.0  | 445.0  | 403.7  | 505.9  | 385.4  | 461.5  | 455.4  |
| 126.4  | 176.3  | 126.5  | 215.9  | 149.7  | 195.6  | 115.1  | 116.8  | 134.9  |
| 448.5  | 517.1  | 335.8  | 450.5  | 311.8  | 381.7  | 375.1  | 294.6  | 357.7  |
| 405.9  | 500.5  | 354.9  | 558.4  | 477.8  | 574.0  | 242.0  | 264.0  | 269.7  |
| 358.3  | 508.6  | 389.5  | 390.1  | 335.3  | 429.6  | 392.6  | 465.9  | 415.0  |
| 787.4  | 291.3  | 70.1   | 565.8  | 431.2  | 441.9  | 412.8  | 302.4  | 373.5  |
| 2.8    | 1.8    | 6.8    | 9.7    | 6.1    | 1.3    | 5.5    | 0.6    | 0.7    |
| 247.2  | 338.9  | 176.1  | 192.0  | 137.6  | 154.2  | 94.6   | 101.4  | 99.1   |
| 397.0  | 449.0  | 305.9  | 161.2  | 144.9  | 152.7  | 105.6  | 126.4  | 123.7  |
| 70.2   | 84.1   | 66.6   | 106.4  | 78.7   | 107.4  | 52.8   | 50.1   | 59.5   |
| 132.8  | 200.9  | 141.5  | 550.6  | 401.0  | 504.8  | 387.3  | 374.0  | 376.9  |
| 174.5  | 191.2  | 114.4  | 94.5   | 79.5   | 98.0   | 85.6   | 78.5   | 75.0   |
| 723.9  | 879.4  | 694.6  | 228.4  | 178.5  | 207.4  | 122.8  | 164.4  | 163.0  |
| 37.1   | 59.7   | 38.0   | 36.6   | 26.5   | 36.2   | 14.6   | 11.4   | 12.8   |
| 342.4  | 476.1  | 263.8  | 218.9  | 206.3  | 215.9  | 131.9  | 142.7  | 153.5  |
| 83.4   | 144.8  | 109.6  | 255.8  | 250.0  | 262.7  | 123.1  | 118.9  | 149.7  |
| 621.3  | 772.3  | 663.0  | 311.5  | 272.8  | 317.1  | 241.7  | 286.2  | 311.3  |
| 6.7    | 14.6   | 13.1   | 15.0   | 4.6    | 11.4   | 3.4    | 2.5    | 4.2    |
| 1733.6 | 2046.2 | 1389.7 | 1163.2 | 867.8  | 868.1  | 1006.8 | 779.0  | 995.6  |
| 364.1  | 397.9  | 270.9  | 187.2  | 157.8  | 206.9  | 118.1  | 86.3   | 133.5  |
| 265.4  | 347.9  | 244.4  | 294.2  | 259.8  | 258.0  | 156.1  | 198.1  | 177.9  |
| 691.7  | 942.4  | 660.4  | 658.3  | 414.8  | 465.1  | 209.0  | 180.6  | 148.4  |
| 330.9  | 402.7  | 249.0  | 316.3  | 246.9  | 284.2  | 162.5  | 135.9  | 155.9  |
| 998.5  | 1069.3 | 855.5  | 444.0  | 321.7  | 347.0  | 357.5  | 379.1  | 441.0  |
| 473.3  | 834.0  | 657.3  | 436.8  | 378.1  | 376.0  | 259.5  | 258.7  | 284.8  |
| 711.5  | 1018.6 | 882.7  | 411.1  | 344.1  | 390.5  | 268.5  | 276.5  | 299.8  |
| 739.6  | 1209.1 | 951.1  | 547.7  | 449.2  | 496.0  | 335.9  | 348.6  | 425.5  |

|        |        |        |        |        |        |        |        |        |
|--------|--------|--------|--------|--------|--------|--------|--------|--------|
| 43.6   | 53.4   | 32.7   | 5.3    | 22.9   | 15.8   | 11.0   | 17.4   | 15.5   |
| 1046.2 | 1286.2 | 1041.8 | 4576.0 | 3868.5 | 4086.2 | 2334.6 | 2223.1 | 2448.3 |
| 760.0  | 777.0  | 480.4  | 301.0  | 190.2  | 192.3  | 205.8  | 156.8  | 199.7  |
| 276.6  | 288.9  | 260.8  | 187.8  | 124.0  | 170.5  | 155.8  | 159.4  | 145.5  |
| 142.5  | 206.9  | 179.6  | 267.7  | 247.3  | 260.1  | 159.1  | 173.0  | 189.5  |
| 958.7  | 1049.3 | 685.2  | 410.0  | 346.7  | 355.8  | 419.7  | 398.9  | 467.5  |
| 263.3  | 428.6  | 461.2  | 275.2  | 246.4  | 260.4  | 261.5  | 282.5  | 313.6  |
| 1464.0 | 1340.7 | 749.8  | 186.7  | 158.7  | 149.5  | 186.2  | 196.4  | 188.9  |
| 2495.1 | 2210.0 | 1273.7 | 853.5  | 619.0  | 650.7  | 723.3  | 655.9  | 735.3  |
| 443.5  | 370.3  | 159.0  | 438.9  | 265.3  | 308.9  | 278.8  | 167.8  | 172.8  |
| 266.5  | 359.9  | 266.4  | 76.6   | 47.1   | 36.3   | 39.1   | 30.2   | 27.6   |
| 94.0   | 107.7  | 78.0   | 106.2  | 81.5   | 93.2   | 54.7   | 58.6   | 65.8   |
| 81.0   | 121.4  | 98.2   | 61.0   | 64.1   | 91.8   | 48.5   | 69.6   | 68.2   |
| 832.7  | 999.4  | 630.8  | 1009.5 | 762.8  | 843.8  | 475.9  | 450.6  | 530.3  |
| 362.1  | 398.1  | 311.5  | 164.4  | 199.0  | 198.2  | 125.6  | 208.8  | 170.3  |
| 398.1  | 504.8  | 299.3  | 176.8  | 132.4  | 155.3  | 109.7  | 132.8  | 142.8  |
| 14.8   | 25.5   | 19.7   | 34.9   | 30.9   | 35.7   | 17.1   | 18.9   | 16.0   |
| 312.9  | 462.9  | 371.5  | 563.4  | 502.3  | 548.2  | 265.6  | 264.0  | 302.1  |
| 598.5  | 618.5  | 290.2  | 718.1  | 482.9  | 545.9  | 263.6  | 211.3  | 219.0  |
| 161.2  | 155.1  | 115.7  | 245.3  | 174.6  | 199.7  | 157.4  | 130.7  | 142.0  |
| 36.3   | 47.8   | 23.3   | 51.2   | 32.1   | 24.5   | 9.6    | 17.0   | 16.7   |
| 112.0  | 104.6  | 88.8   | 380.1  | 288.3  | 306.2  | 361.0  | 405.3  | 412.2  |
| 789.7  | 1253.2 | 919.1  | 866.0  | 707.1  | 743.9  | 437.7  | 500.7  | 494.7  |
| 16.6   | 8.4    | 20.2   | 18.7   | 25.4   | 30.1   | 10.9   | 14.4   | 17.0   |
| 146.9  | 190.3  | 142.7  | 302.2  | 238.8  | 278.9  | 123.3  | 140.0  | 138.6  |
| 97.9   | 148.3  | 126.4  | 115.0  | 100.0  | 113.4  | 75.7   | 89.2   | 91.5   |
| 88.8   | 117.1  | 71.9   | 97.9   | 59.3   | 72.1   | 52.9   | 40.9   | 60.4   |
| 152.7  | 186.5  | 129.0  | 260.5  | 197.8  | 224.1  | 150.2  | 150.3  | 151.1  |
| 173.3  | 261.8  | 173.0  | 605.2  | 385.9  | 419.8  | 235.4  | 232.4  | 260.2  |
| 233.7  | 333.7  | 293.7  | 78.3   | 76.1   | 75.5   | 59.4   | 82.8   | 79.2   |
| 675.2  | 737.1  | 503.9  | 214.2  | 156.3  | 183.6  | 135.3  | 111.1  | 112.7  |
| 429.5  | 488.3  | 409.2  | 263.8  | 224.6  | 251.2  | 173.2  | 188.5  | 180.0  |
| 694.5  | 833.0  | 534.2  | 210.9  | 181.0  | 165.4  | 213.4  | 162.0  | 212.5  |
| 514.5  | 678.9  | 531.1  | 195.7  | 164.2  | 178.5  | 168.0  | 199.7  | 198.4  |
| 190.7  | 251.4  | 283.3  | 177.9  | 138.6  | 168.6  | 115.5  | 140.7  | 135.0  |
| 87.7   | 109.7  | 90.9   | 238.1  | 187.0  | 213.0  | 116.3  | 152.8  | 134.5  |
| 92.2   | 110.4  | 82.6   | 167.4  | 125.4  | 140.3  | 117.6  | 119.3  | 125.7  |
| 433.4  | 381.1  | 291.7  | 223.5  | 165.6  | 190.6  | 191.7  | 153.9  | 226.8  |
| 268.6  | 320.0  | 239.8  | 197.5  | 159.9  | 165.0  | 154.6  | 150.4  | 152.8  |
| 87.5   | 135.3  | 111.1  | 110.7  | 121.6  | 163.2  | 74.5   | 125.4  | 114.2  |
| 85.1   | 125.1  | 101.8  | 17.9   | 26.2   | 21.7   | 23.5   | 31.0   | 29.0   |
| 153.8  | 186.9  | 168.3  | 286.7  | 236.6  | 250.9  | 169.0  | 174.9  | 191.4  |
| 379.5  | 621.2  | 540.9  | 288.2  | 280.9  | 305.6  | 339.6  | 449.4  | 437.1  |
| 186.3  | 202.6  | 110.5  | 150.6  | 142.5  | 136.6  | 142.7  | 112.6  | 126.5  |
| 1798.9 | 2557.4 | 1907.5 | 241.5  | 226.7  | 229.4  | 231.9  | 232.3  | 250.0  |
| 8358.5 | 7931.0 | 6390.1 | 1023.1 | 794.2  | 822.1  | 1019.4 | 854.4  | 1024.5 |
| 328.7  | 403.4  | 281.1  | 116.7  | 130.1  | 146.4  | 78.6   | 135.1  | 102.1  |
| 234.1  | 381.4  | 263.1  | 76.6   | 63.8   | 59.7   | 46.6   | 77.0   | 65.6   |
| 480.6  | 557.0  | 415.1  | 166.8  | 166.1  | 179.9  | 172.7  | 180.2  | 210.4  |
| 362.7  | 537.3  | 365.5  | 361.0  | 332.2  | 346.2  | 311.0  | 263.2  | 266.5  |
| 757.2  | 1154.6 | 1174.0 | 786.9  | 704.0  | 753.1  | 547.2  | 617.6  | 596.2  |
| 164.8  | 211.1  | 137.3  | 143.6  | 104.1  | 142.1  | 89.7   | 85.0   | 80.0   |
| 246.4  | 307.7  | 180.1  | 119.2  | 115.6  | 102.2  | 73.5   | 89.3   | 79.2   |



|        |        |        |        |        |        |        |        |        |
|--------|--------|--------|--------|--------|--------|--------|--------|--------|
| 617.9  | 720.3  | 486.4  | 433.8  | 301.0  | 334.9  | 310.0  | 236.8  | 320.6  |
| 97.9   | 117.0  | 88.6   | 65.2   | 66.0   | 80.4   | 52.9   | 51.4   | 57.8   |
| 128.8  | 171.9  | 150.9  | 1032.4 | 734.5  | 813.5  | 316.1  | 326.5  | 325.7  |
| 941.1  | 1106.4 | 798.1  | 263.0  | 225.1  | 221.0  | 303.0  | 316.4  | 347.7  |
| 1707.3 | 1736.1 | 908.0  | 881.4  | 578.5  | 631.5  | 442.7  | 332.2  | 390.0  |
| 846.0  | 1171.4 | 927.3  | 798.8  | 687.0  | 733.7  | 583.0  | 674.4  | 705.6  |
| 447.1  | 512.2  | 452.8  | 372.5  | 265.7  | 284.3  | 221.0  | 205.6  | 218.4  |
| 363.3  | 507.0  | 402.6  | 1098.5 | 1032.0 | 1166.7 | 705.4  | 861.5  | 905.2  |
| 503.9  | 407.4  | 244.5  | 256.5  | 196.3  | 180.5  | 121.9  | 91.7   | 121.0  |
| 198.4  | 324.7  | 221.9  | 136.7  | 163.5  | 130.9  | 109.3  | 128.4  | 148.7  |
| 36.9   | 51.3   | 42.6   | 59.3   | 54.1   | 58.7   | 31.4   | 41.4   | 39.3   |
| 12.4   | 6.6    | 3.8    | 54.4   | 27.6   | 44.9   | 35.9   | 32.9   | 37.4   |
| 544.3  | 883.3  | 702.3  | 284.8  | 272.3  | 301.8  | 232.2  | 262.1  | 289.4  |
| 59.0   | 68.7   | 55.1   | 82.8   | 69.8   | 64.1   | 61.3   | 48.3   | 49.2   |
| 24.7   | 43.6   | 47.7   | 32.2   | 22.0   | 23.9   | 14.2   | 24.7   | 22.8   |
| 373.5  | 484.8  | 295.7  | 208.5  | 174.1  | 171.2  | 158.0  | 207.5  | 190.6  |
| 534.7  | 570.2  | 297.8  | 146.6  | 111.8  | 139.2  | 108.2  | 95.7   | 105.6  |
| 874.5  | 1031.0 | 705.2  | 772.3  | 616.4  | 692.2  | 471.2  | 454.4  | 501.9  |
| 789.0  | 746.7  | 414.5  | 388.5  | 248.7  | 315.9  | 355.2  | 265.1  | 313.1  |
| 1352.2 | 1371.9 | 825.3  | 1184.9 | 1028.2 | 1123.0 | 772.8  | 797.2  | 854.7  |
| 267.2  | 308.7  | 200.5  | 326.2  | 252.5  | 274.9  | 191.5  | 171.0  | 191.5  |
| 409.9  | 386.7  | 286.3  | 306.4  | 215.4  | 305.7  | 158.2  | 159.5  | 176.0  |
| 666.9  | 700.4  | 495.0  | 278.1  | 216.1  | 248.1  | 197.5  | 199.5  | 224.3  |
| 62.6   | 116.0  | 87.7   | 119.7  | 118.5  | 126.3  | 82.0   | 106.1  | 108.7  |
| 3319.8 | 3860.9 | 2701.5 | 3332.3 | 2825.8 | 3051.7 | 2063.7 | 2258.5 | 2227.2 |
| 4.3    | 1.8    | 3.6    | 5.4    | 6.4    | 5.0    | 2.8    | 5.3    | 0.5    |
| 5.1    | 2.1    | 6.9    | 7.1    | 7.9    | 20.1   | 3.6    | 6.8    | 2.4    |
| 163.6  | 252.8  | 128.1  | 233.4  | 169.7  | 172.6  | 129.2  | 144.1  | 136.9  |
| 124.6  | 194.7  | 201.5  | 386.1  | 397.3  | 441.0  | 220.0  | 326.1  | 312.3  |
| 763.4  | 742.2  | 444.8  | 211.8  | 195.9  | 219.8  | 170.0  | 179.4  | 209.7  |
| 413.6  | 461.2  | 300.4  | 305.8  | 223.1  | 291.0  | 140.8  | 151.8  | 181.8  |
| 727.0  | 920.4  | 598.6  | 430.6  | 346.7  | 411.6  | 318.2  | 263.1  | 332.2  |
| 117.7  | 132.0  | 65.8   | 67.5   | 48.5   | 66.9   | 30.6   | 28.2   | 40.3   |
| 70.9   | 123.7  | 115.8  | 213.3  | 201.4  | 225.6  | 146.0  | 183.0  | 207.3  |
| 6343.5 | 6760.3 | 6350.1 | 1102.7 | 1099.2 | 1147.5 | 670.5  | 700.1  | 811.7  |
| 405.9  | 518.7  | 352.9  | 476.7  | 425.6  | 546.3  | 297.6  | 337.0  | 352.6  |
| 436.3  | 418.1  | 227.6  | 42.8   | 32.4   | 33.1   | 35.8   | 30.9   | 33.6   |
| 197.4  | 299.4  | 252.7  | 48.2   | 46.3   | 47.1   | 30.3   | 38.7   | 38.9   |
| 436.6  | 526.5  | 280.0  | 262.4  | 186.1  | 246.5  | 136.6  | 138.0  | 141.4  |
| 1597.2 | 1883.1 | 1320.4 | 1780.8 | 1519.6 | 1682.4 | 973.6  | 1070.5 | 1068.7 |
| 243.7  | 293.0  | 311.8  | 176.1  | 164.5  | 178.2  | 113.4  | 139.4  | 135.6  |
| 3.4    | 18.4   | 5.5    | 9.2    | 14.0   | 13.0   | 4.8    | 3.9    | 8.0    |
| 113.2  | 109.9  | 87.0   | 74.2   | 46.1   | 57.9   | 61.2   | 42.0   | 55.1   |
| 148.4  | 270.5  | 179.7  | 160.6  | 109.6  | 119.3  | 133.4  | 128.0  | 130.9  |
| 273.2  | 535.7  | 867.3  | 102.9  | 119.4  | 106.8  | 104.1  | 107.8  | 103.9  |
| 327.5  | 304.7  | 161.3  | 327.3  | 212.3  | 238.7  | 135.5  | 121.9  | 167.9  |
| 62.4   | 119.8  | 170.6  | 51.3   | 38.0   | 45.8   | 27.2   | 42.2   | 47.6   |
| 305.6  | 423.6  | 363.9  | 246.1  | 209.6  | 237.4  | 233.9  | 284.8  | 289.8  |
| 563.1  | 797.7  | 635.3  | 419.2  | 388.5  | 456.6  | 193.0  | 298.8  | 259.2  |
| 210.3  | 225.3  | 145.3  | 280.9  | 183.3  | 185.3  | 126.0  | 110.0  | 121.7  |
| 1849.0 | 2217.6 | 1498.6 | 1721.9 | 1294.1 | 1381.6 | 913.4  | 761.3  | 934.7  |
| 414.8  | 667.2  | 482.7  | 1501.8 | 1018.9 | 1152.9 | 1157.8 | 750.3  | 1049.8 |
| 2600.1 | 3045.2 | 2309.1 | 1593.5 | 1363.2 | 1454.7 | 697.0  | 708.0  | 746.2  |

|        |        |        |        |        |        |        |        |        |
|--------|--------|--------|--------|--------|--------|--------|--------|--------|
| 400.5  | 428.9  | 260.0  | 377.8  | 279.2  | 262.9  | 241.6  | 202.2  | 225.1  |
| 742.9  | 671.3  | 357.8  | 616.2  | 423.0  | 478.0  | 365.0  | 259.4  | 308.2  |
| 309.6  | 368.0  | 261.7  | 103.0  | 79.9   | 112.9  | 70.4   | 80.3   | 79.9   |
| 1206.4 | 1532.9 | 1058.3 | 366.6  | 291.1  | 270.9  | 310.7  | 263.9  | 325.2  |
| 349.7  | 495.0  | 289.1  | 678.3  | 585.1  | 706.1  | 266.4  | 298.4  | 367.9  |
| 503.4  | 717.0  | 637.7  | 410.4  | 319.1  | 346.3  | 305.9  | 309.5  | 320.1  |
| 32.0   | 42.6   | 44.7   | 705.4  | 631.0  | 608.6  | 507.2  | 534.1  | 576.6  |
| 124.9  | 166.3  | 115.5  | 127.1  | 88.6   | 111.1  | 74.8   | 68.1   | 82.1   |
| 201.6  | 270.6  | 187.4  | 223.0  | 236.1  | 276.5  | 156.5  | 194.0  | 195.2  |
| 168.7  | 261.3  | 250.6  | 212.5  | 196.1  | 225.1  | 109.5  | 152.0  | 139.7  |
| 878.2  | 1063.3 | 754.5  | 412.6  | 327.0  | 344.0  | 499.8  | 419.1  | 507.3  |
| 200.6  | 298.4  | 196.2  | 1402.1 | 1284.1 | 1424.3 | 717.9  | 1171.9 | 1030.9 |
| 141.6  | 162.5  | 114.5  | 166.4  | 127.4  | 138.2  | 77.5   | 86.9   | 91.8   |
| 50.0   | 50.2   | 38.0   | 175.4  | 145.0  | 137.8  | 90.3   | 62.7   | 89.7   |
| 2.9    | 9.4    | 1.5    | 96.7   | 77.4   | 96.7   | 54.6   | 76.9   | 68.0   |
| 875.1  | 1125.6 | 832.5  | 355.7  | 287.6  | 292.1  | 240.7  | 211.5  | 260.4  |
| 1075.0 | 1099.7 | 633.1  | 569.5  | 438.8  | 494.0  | 316.2  | 290.1  | 324.4  |
| 274.3  | 315.4  | 108.7  | 83.7   | 63.0   | 62.3   | 130.7  | 106.7  | 134.7  |
| 337.8  | 415.2  | 278.0  | 2113.3 | 1996.5 | 2228.0 | 1405.3 | 1633.9 | 1732.9 |
| 392.9  | 419.6  | 273.6  | 215.6  | 166.0  | 165.3  | 147.3  | 104.6  | 141.9  |
| 305.0  | 317.5  | 169.3  | 166.6  | 154.7  | 149.1  | 210.2  | 175.4  | 190.1  |
| 90.7   | 115.3  | 61.1   | 150.8  | 106.2  | 125.5  | 74.0   | 90.7   | 88.3   |
| 143.6  | 236.1  | 209.4  | 265.0  | 236.6  | 245.1  | 141.5  | 143.4  | 185.3  |
| 971.4  | 1227.5 | 1100.7 | 225.2  | 197.8  | 210.5  | 184.4  | 204.0  | 214.2  |
| 524.6  | 616.0  | 410.8  | 475.5  | 446.2  | 455.3  | 517.0  | 604.0  | 584.9  |
| 134.4  | 138.9  | 84.6   | 68.6   | 54.9   | 65.4   | 64.6   | 66.9   | 73.5   |
| 136.3  | 182.4  | 146.6  | 188.7  | 148.4  | 171.3  | 89.7   | 88.5   | 81.7   |
| 69.8   | 86.0   | 68.3   | 55.2   | 59.3   | 54.6   | 40.8   | 41.0   | 50.8   |
| 88.7   | 108.3  | 84.1   | 122.6  | 109.9  | 115.7  | 71.9   | 61.0   | 67.1   |
| 169.4  | 228.2  | 172.4  | 105.2  | 73.6   | 93.0   | 100.0  | 111.0  | 108.2  |
| 370.2  | 438.0  | 280.9  | 226.1  | 192.9  | 194.2  | 145.8  | 116.7  | 143.6  |
| 662.6  | 793.6  | 561.7  | 431.4  | 358.0  | 401.8  | 320.8  | 305.3  | 357.8  |
| 377.0  | 539.7  | 465.2  | 178.2  | 175.0  | 159.7  | 134.5  | 132.9  | 164.5  |
| 465.7  | 536.1  | 280.3  | 236.6  | 165.0  | 224.6  | 115.0  | 81.4   | 118.9  |
| 76.7   | 90.2   | 62.7   | 257.9  | 213.8  | 218.2  | 113.6  | 101.6  | 121.0  |
| 225.1  | 279.6  | 169.9  | 576.2  | 548.6  | 618.0  | 270.6  | 329.7  | 345.4  |
| 4.3    | 6.4    | 3.8    | 134.2  | 125.8  | 148.4  | 86.5   | 118.2  | 113.3  |
| 332.1  | 425.9  | 302.2  | 546.5  | 492.0  | 532.8  | 228.9  | 300.6  | 290.8  |
| 908.1  | 1186.8 | 963.0  | 221.8  | 207.3  | 227.6  | 214.7  | 261.1  | 251.1  |
| 319.7  | 380.4  | 282.7  | 164.0  | 149.9  | 158.2  | 129.1  | 125.8  | 155.1  |
| 348.2  | 457.8  | 362.5  | 203.6  | 180.1  | 190.9  | 154.9  | 142.6  | 141.7  |
| 73.4   | 122.0  | 109.5  | 169.5  | 191.1  | 180.6  | 53.8   | 103.9  | 83.3   |
| 366.3  | 478.2  | 334.5  | 233.4  | 204.8  | 190.4  | 287.2  | 266.6  | 282.3  |
| 444.9  | 557.6  | 422.4  | 408.2  | 331.5  | 377.1  | 299.2  | 269.1  | 291.7  |
| 162.9  | 178.9  | 143.4  | 530.3  | 539.1  | 625.6  | 309.3  | 328.9  | 428.1  |
| 1.1    | 4.6    | 0.3    | 3.4    | 0.8    | 3.7    | 5.1    | 3.4    | 2.0    |
| 1791.5 | 1742.5 | 1074.7 | 568.0  | 344.0  | 322.6  | 430.7  | 315.6  | 329.1  |
| 900.3  | 1024.0 | 957.9  | 142.5  | 108.2  | 123.2  | 89.2   | 89.0   | 97.2   |
| 206.3  | 239.5  | 120.5  | 72.3   | 58.0   | 78.3   | 38.8   | 39.1   | 43.3   |
| 312.6  | 379.0  | 275.5  | 309.1  | 271.7  | 265.2  | 268.2  | 303.3  | 316.8  |
| 4.5    | 9.2    | 7.8    | 216.1  | 214.3  | 232.5  | 128.4  | 202.1  | 222.6  |
| 299.6  | 354.8  | 273.7  | 281.9  | 249.8  | 288.1  | 121.5  | 138.2  | 164.5  |
| 143.0  | 240.9  | 205.6  | 147.2  | 129.9  | 161.5  | 65.9   | 94.4   | 97.6   |

|        |        |        |        |        |        |       |       |       |
|--------|--------|--------|--------|--------|--------|-------|-------|-------|
| 641.4  | 803.4  | 669.1  | 514.3  | 468.5  | 512.3  | 426.2 | 495.5 | 529.4 |
| 306.8  | 423.7  | 222.7  | 102.8  | 90.7   | 104.7  | 55.1  | 62.8  | 69.5  |
| 74.3   | 77.8   | 53.4   | 65.6   | 62.3   | 55.7   | 50.0  | 39.8  | 36.3  |
| 267.1  | 365.7  | 329.1  | 62.3   | 58.2   | 60.6   | 28.2  | 36.9  | 26.3  |
| 47.9   | 45.7   | 15.5   | 142.8  | 86.9   | 104.4  | 87.0  | 54.5  | 63.9  |
| 40.2   | 53.0   | 42.1   | 51.6   | 37.2   | 48.0   | 31.4  | 20.8  | 35.5  |
| 177.0  | 244.6  | 185.8  | 201.3  | 202.3  | 230.4  | 106.7 | 152.3 | 153.6 |
| 1215.8 | 1510.8 | 925.5  | 1029.7 | 908.8  | 1007.0 | 617.9 | 651.9 | 696.2 |
| 2195.6 | 2445.3 | 1743.3 | 828.7  | 827.0  | 864.8  | 477.8 | 568.7 | 582.1 |
| 1567.1 | 1536.8 | 985.4  | 472.4  | 377.1  | 373.7  | 295.3 | 280.7 | 305.7 |
| 33.5   | 61.7   | 183.1  | 624.9  | 564.0  | 661.7  | 322.5 | 380.6 | 420.6 |
| 82.4   | 110.1  | 65.8   | 132.5  | 129.3  | 125.9  | 72.0  | 72.0  | 84.3  |
| 603.5  | 663.1  | 396.1  | 520.6  | 412.8  | 449.7  | 258.0 | 210.0 | 284.1 |
| 223.1  | 244.2  | 162.1  | 130.2  | 129.5  | 141.7  | 112.9 | 132.1 | 141.6 |
| 899.2  | 1381.7 | 1172.7 | 1393.6 | 1363.6 | 1421.4 | 507.8 | 546.8 | 625.9 |
| 249.7  | 278.2  | 137.0  | 175.6  | 100.4  | 117.3  | 115.4 | 85.5  | 96.0  |
| 218.9  | 231.4  | 117.8  | 174.6  | 148.8  | 144.4  | 91.6  | 81.2  | 76.9  |
| 1987.9 | 1824.2 | 992.5  | 463.8  | 299.3  | 293.8  | 580.8 | 352.0 | 545.7 |
| 696.4  | 850.1  | 604.1  | 898.2  | 763.2  | 861.6  | 542.0 | 450.7 | 614.4 |
| 80.8   | 94.5   | 78.9   | 156.1  | 139.1  | 132.5  | 142.8 | 119.1 | 142.5 |
| 168.8  | 247.6  | 160.5  | 71.3   | 100.7  | 107.6  | 74.8  | 98.7  | 113.7 |
| 324.7  | 430.2  | 358.5  | 237.7  | 208.1  | 248.7  | 159.4 | 203.9 | 204.0 |
| 526.5  | 604.6  | 458.7  | 1608.3 | 1282.7 | 1402.0 | 854.9 | 816.9 | 903.4 |
| 543.6  | 628.8  | 433.1  | 967.1  | 799.2  | 757.8  | 642.0 | 560.6 | 639.0 |
| 2.7    | 10.9   | 5.4    | 60.2   | 66.6   | 56.9   | 50.9  | 68.4  | 41.3  |
| 231.4  | 303.7  | 223.1  | 264.7  | 194.4  | 189.4  | 199.9 | 152.2 | 189.5 |
| 417.2  | 494.4  | 272.6  | 202.9  | 143.3  | 181.1  | 157.3 | 136.2 | 170.8 |
| 538.0  | 548.0  | 257.5  | 618.9  | 457.6  | 494.4  | 365.5 | 292.6 | 344.0 |
| 609.4  | 714.2  | 483.3  | 415.6  | 291.8  | 324.0  | 402.5 | 354.2 | 391.4 |
| 788.6  | 839.1  | 548.5  | 239.5  | 187.7  | 210.0  | 286.8 | 235.7 | 264.9 |
| 103.2  | 121.6  | 92.3   | 18.6   | 22.1   | 17.9   | 23.4  | 12.4  | 17.3  |
| 1700.4 | 1866.7 | 1302.0 | 1799.3 | 1391.0 | 1514.5 | 975.5 | 792.7 | 926.9 |
| 374.7  | 473.4  | 437.5  | 335.4  | 358.8  | 415.9  | 208.7 | 264.8 | 233.0 |
| 373.9  | 449.5  | 352.7  | 488.7  | 408.9  | 494.5  | 326.2 | 357.0 | 362.8 |
| 875.5  | 1042.6 | 766.8  | 481.8  | 412.6  | 427.1  | 274.5 | 326.7 | 338.5 |
| 61.0   | 93.7   | 81.2   | 209.2  | 160.5  | 187.5  | 109.0 | 86.0  | 109.9 |
| 1366.2 | 1388.7 | 384.6  | 560.5  | 219.2  | 230.7  | 247.7 | 110.9 | 152.7 |
| 399.9  | 374.0  | 205.2  | 218.7  | 153.7  | 172.0  | 116.9 | 113.0 | 122.5 |
| 114.3  | 147.7  | 68.9   | 53.3   | 44.5   | 52.0   | 25.7  | 21.9  | 17.4  |
| 160.2  | 197.3  | 161.1  | 75.2   | 82.8   | 88.6   | 56.2  | 72.0  | 60.7  |
| 39.6   | 45.3   | 30.6   | 32.3   | 38.6   | 41.4   | 25.3  | 33.7  | 38.7  |
| 207.5  | 254.7  | 114.4  | 102.0  | 85.3   | 98.0   | 65.1  | 63.9  | 81.0  |
| 28.1   | 14.5   | 20.2   | 13.8   | 6.2    | 9.2    | 4.1   | 9.6   | 12.6  |
| 637.4  | 867.9  | 516.3  | 911.2  | 733.8  | 805.7  | 527.4 | 522.8 | 577.4 |
| 641.6  | 554.2  | 349.5  | 411.7  | 282.7  | 317.2  | 292.2 | 207.6 | 251.0 |
| 366.2  | 426.0  | 259.8  | 336.5  | 264.0  | 309.8  | 262.3 | 260.9 | 270.2 |
| 423.3  | 492.8  | 300.3  | 341.0  | 248.9  | 301.8  | 260.4 | 257.6 | 239.3 |
| 147.6  | 165.5  | 146.1  | 281.0  | 226.9  | 274.4  | 84.9  | 131.7 | 135.3 |
| 873.3  | 1018.5 | 715.8  | 345.8  | 286.9  | 273.1  | 229.5 | 225.1 | 292.5 |
| 605.2  | 677.5  | 518.1  | 278.4  | 204.3  | 206.3  | 327.5 | 337.6 | 366.8 |
| 37.3   | 35.0   | 20.3   | 53.9   | 53.7   | 53.8   | 26.0  | 37.5  | 39.1  |
| 7.6    | 14.0   | 16.1   | 14.4   | 12.2   | 6.3    | 14.2  | 7.6   | 3.9   |
| 343.3  | 365.6  | 245.9  | 406.8  | 389.3  | 394.1  | 257.5 | 240.7 | 289.1 |

|        |        |        |        |        |        |        |        |        |
|--------|--------|--------|--------|--------|--------|--------|--------|--------|
| 369.4  | 353.7  | 164.4  | 19.9   | 12.1   | 19.4   | 41.4   | 24.6   | 22.2   |
| 129.7  | 170.5  | 156.7  | 162.9  | 150.7  | 160.7  | 95.1   | 214.6  | 136.8  |
| 620.0  | 645.7  | 431.2  | 565.1  | 486.3  | 532.9  | 353.2  | 432.7  | 409.5  |
| 1492.8 | 1744.2 | 987.5  | 1169.6 | 1124.3 | 1194.8 | 1068.4 | 1176.5 | 1210.8 |
| 610.2  | 847.8  | 781.2  | 873.4  | 752.7  | 847.4  | 465.3  | 587.5  | 524.3  |
| 471.8  | 638.9  | 434.8  | 1043.9 | 896.9  | 986.5  | 532.0  | 556.1  | 576.1  |
| 84.9   | 105.4  | 85.4   | 42.7   | 63.1   | 64.1   | 29.3   | 56.1   | 38.1   |
| 185.0  | 246.8  | 182.9  | 180.9  | 155.1  | 170.7  | 115.1  | 130.6  | 117.8  |
| 106.6  | 138.6  | 152.8  | 30.0   | 31.0   | 33.0   | 21.0   | 32.4   | 31.7   |
| 1233.4 | 1163.6 | 533.4  | 206.5  | 110.8  | 124.1  | 178.0  | 144.8  | 160.0  |
| 120.6  | 136.9  | 97.8   | 128.8  | 110.1  | 104.3  | 68.1   | 69.4   | 75.5   |
| 222.3  | 154.5  | 101.9  | 150.8  | 116.9  | 162.4  | 106.0  | 135.6  | 138.1  |
| 117.2  | 163.0  | 94.2   | 253.9  | 278.5  | 270.0  | 247.6  | 343.8  | 369.8  |
| 180.8  | 225.0  | 157.5  | 117.6  | 98.6   | 113.3  | 82.3   | 77.4   | 76.5   |
| 195.0  | 234.8  | 164.6  | 284.5  | 256.3  | 301.8  | 160.8  | 212.2  | 197.8  |
| 400.9  | 545.8  | 361.2  | 255.5  | 202.4  | 208.8  | 150.5  | 148.5  | 165.0  |
| 623.1  | 554.5  | 364.8  | 300.1  | 232.9  | 274.4  | 204.3  | 214.5  | 218.7  |
| 272.1  | 279.7  | 150.7  | 295.0  | 162.2  | 172.8  | 116.4  | 99.6   | 105.1  |
| 159.1  | 227.3  | 183.7  | 65.3   | 56.4   | 62.0   | 33.9   | 48.7   | 47.1   |
| 11.6   | 15.5   | 13.7   | 11.3   | 14.2   | 20.5   | 12.4   | 12.4   | 17.5   |
| 1571.6 | 1764.9 | 1172.3 | 516.3  | 419.6  | 434.9  | 354.5  | 331.4  | 330.1  |
| 3.0    | 4.9    | 1.9    | 11.7   | 6.4    | 9.0    | 1.7    | 2.4    | 8.1    |
| 141.9  | 205.7  | 141.8  | 144.8  | 101.6  | 118.5  | 72.0   | 69.6   | 73.6   |
| 36.9   | 59.3   | 67.9   | 26.5   | 13.6   | 17.0   | 14.7   | 12.7   | 9.8    |
| 222.1  | 302.1  | 207.5  | 389.4  | 301.3  | 343.2  | 255.2  | 238.3  | 247.9  |
| 34.8   | 51.6   | 58.7   | 101.8  | 117.9  | 118.2  | 63.8   | 78.9   | 90.5   |
| 637.7  | 851.1  | 713.3  | 321.9  | 347.9  | 318.2  | 192.6  | 256.7  | 247.6  |
| 14.2   | 20.1   | 11.7   | 78.2   | 99.9   | 100.0  | 39.1   | 50.5   | 54.8   |
| 40.1   | 68.3   | 57.7   | 89.8   | 94.4   | 113.2  | 66.4   | 75.2   | 68.4   |
| 228.0  | 232.9  | 202.7  | 218.1  | 149.5  | 203.9  | 100.1  | 82.6   | 98.1   |
| 186.3  | 281.7  | 258.8  | 187.9  | 197.8  | 205.3  | 106.7  | 147.1  | 166.0  |
| 842.7  | 1073.6 | 868.4  | 405.5  | 317.5  | 372.5  | 207.8  | 211.6  | 221.0  |
| 158.5  | 176.3  | 169.8  | 176.6  | 152.3  | 167.7  | 125.7  | 125.6  | 144.4  |
| 223.1  | 250.9  | 230.6  | 188.9  | 184.0  | 242.3  | 118.0  | 156.9  | 151.2  |
| 268.9  | 389.0  | 281.4  | 122.9  | 139.0  | 139.8  | 173.2  | 233.5  | 217.0  |
| 129.7  | 263.1  | 1098.5 | 58.7   | 47.2   | 53.7   | 46.5   | 44.3   | 48.5   |
| 322.2  | 524.5  | 339.3  | 154.1  | 150.1  | 172.5  | 99.8   | 112.3  | 113.1  |
| 451.9  | 646.5  | 574.6  | 1584.2 | 1323.9 | 1361.5 | 1598.3 | 1568.5 | 1693.8 |
| 44.2   | 59.3   | 54.0   | 293.4  | 251.4  | 254.1  | 227.9  | 195.5  | 233.7  |
| 414.4  | 620.5  | 476.6  | 156.4  | 134.9  | 154.2  | 107.4  | 127.2  | 124.6  |
| 303.2  | 321.3  | 231.7  | 159.3  | 155.2  | 143.6  | 99.3   | 119.3  | 105.6  |
| 959.9  | 883.5  | 499.1  | 112.4  | 96.3   | 83.8   | 109.3  | 82.5   | 111.0  |
| 351.2  | 516.0  | 562.6  | 170.6  | 179.7  | 190.7  | 237.9  | 333.9  | 300.0  |
| 787.3  | 1023.0 | 674.7  | 413.2  | 318.0  | 345.0  | 218.4  | 223.0  | 248.3  |
| 607.7  | 453.0  | 161.0  | 203.4  | 168.4  | 189.8  | 176.2  | 108.0  | 146.3  |
| 225.4  | 265.3  | 209.3  | 451.9  | 362.5  | 410.6  | 242.8  | 261.3  | 260.6  |
| 353.1  | 492.9  | 330.3  | 379.9  | 325.1  | 305.3  | 341.0  | 362.6  | 415.7  |
| 150.5  | 165.6  | 86.5   | 187.1  | 144.2  | 164.0  | 87.0   | 85.2   | 87.2   |
| 8.2    | 20.4   | 8.2    | 70.6   | 53.6   | 64.4   | 25.8   | 36.3   | 36.8   |
| 552.6  | 810.2  | 651.9  | 317.1  | 255.8  | 299.4  | 208.1  | 299.7  | 289.4  |
| 777.5  | 864.2  | 358.5  | 364.8  | 269.4  | 303.7  | 158.6  | 129.7  | 173.9  |
| 2607.9 | 3087.7 | 2180.5 | 1372.6 | 1173.8 | 1260.8 | 676.3  | 702.4  | 780.3  |
| 131.2  | 160.4  | 106.1  | 689.8  | 570.2  | 672.7  | 386.8  | 430.7  | 466.3  |

|        |        |        |        |        |        |        |       |        |
|--------|--------|--------|--------|--------|--------|--------|-------|--------|
| 9.7    | 1.5    | 1.7    | 5.4    | 8.8    | 10.6   | 2.0    | 6.6   | 4.5    |
| 74.7   | 94.1   | 104.3  | 65.4   | 46.0   | 47.4   | 39.1   | 35.3  | 54.9   |
| 48.8   | 69.0   | 62.0   | 66.0   | 67.2   | 64.3   | 63.1   | 63.9  | 64.4   |
| 1012.5 | 1241.3 | 988.0  | 719.3  | 555.9  | 670.2  | 443.7  | 516.7 | 449.9  |
| 22.4   | 23.7   | 18.6   | 72.8   | 54.8   | 73.9   | 64.5   | 57.2  | 59.4   |
| 164.5  | 264.8  | 221.1  | 311.3  | 233.2  | 262.0  | 88.8   | 124.0 | 152.8  |
| 846.5  | 808.0  | 434.5  | 361.7  | 173.8  | 173.4  | 266.8  | 139.7 | 166.9  |
| 1163.3 | 999.2  | 596.4  | 359.2  | 196.1  | 169.6  | 335.5  | 203.7 | 208.8  |
| 208.9  | 313.6  | 231.3  | 137.8  | 105.3  | 123.4  | 66.4   | 70.6  | 74.0   |
| 12.1   | 19.6   | 18.7   | 134.7  | 113.4  | 131.9  | 51.7   | 65.5  | 59.4   |
| 185.8  | 198.2  | 140.2  | 133.9  | 104.9  | 108.1  | 134.3  | 116.0 | 133.5  |
| 494.1  | 574.6  | 443.8  | 313.1  | 299.2  | 354.6  | 171.7  | 235.5 | 212.3  |
| 494.7  | 560.6  | 421.3  | 197.8  | 139.3  | 154.4  | 254.7  | 190.0 | 236.7  |
| 507.1  | 465.5  | 443.8  | 193.9  | 162.4  | 175.1  | 162.9  | 143.2 | 169.8  |
| 353.8  | 407.7  | 183.2  | 281.3  | 219.6  | 226.5  | 158.6  | 120.3 | 164.3  |
| 1326.3 | 1694.6 | 1309.8 | 1277.2 | 1046.9 | 1072.8 | 765.4  | 693.9 | 827.8  |
| 446.8  | 531.5  | 367.2  | 414.5  | 337.2  | 338.7  | 239.6  | 208.8 | 249.3  |
| 159.7  | 190.0  | 123.0  | 154.9  | 118.1  | 149.7  | 115.0  | 132.0 | 140.2  |
| 247.0  | 283.9  | 228.3  | 65.5   | 59.6   | 62.3   | 107.0  | 129.3 | 130.0  |
| 1.7    | 2.3    | 1.8    | 47.6   | 41.9   | 35.0   | 13.1   | 6.8   | 16.0   |
| 662.9  | 933.0  | 906.3  | 760.9  | 857.6  | 886.4  | 495.3  | 845.9 | 733.3  |
| 396.3  | 542.7  | 520.6  | 1357.0 | 1138.3 | 1249.0 | 1073.1 | 818.4 | 1028.2 |
| 90.6   | 104.1  | 34.9   | 13.7   | 6.6    | 8.3    | 7.7    | 2.5   | 4.7    |
| 920.3  | 1212.5 | 1056.5 | 844.0  | 939.3  | 1100.2 | 535.4  | 756.7 | 742.8  |
| 907.4  | 832.2  | 525.5  | 947.6  | 649.7  | 751.1  | 486.7  | 382.7 | 475.2  |
| 835.5  | 704.4  | 262.0  | 252.0  | 163.6  | 230.9  | 99.7   | 78.0  | 120.6  |
| 323.2  | 423.2  | 343.0  | 243.6  | 213.1  | 233.7  | 199.1  | 214.5 | 218.0  |
| 142.6  | 171.7  | 116.0  | 126.6  | 85.4   | 102.6  | 105.6  | 94.1  | 133.2  |
| 559.2  | 670.1  | 402.2  | 503.4  | 443.3  | 495.1  | 384.4  | 307.8 | 408.6  |
| 112.6  | 148.0  | 118.5  | 173.8  | 123.2  | 136.7  | 96.4   | 95.7  | 128.4  |
| 170.7  | 178.5  | 139.0  | 213.4  | 227.6  | 255.2  | 181.0  | 216.6 | 223.5  |
| 1510.8 | 2186.8 | 2185.9 | 18.4   | 11.0   | 25.5   | 7.6    | 11.2  | 9.1    |
| 163.8  | 249.7  | 222.7  | 185.0  | 229.2  | 248.6  | 184.9  | 249.4 | 256.5  |
| 369.4  | 477.4  | 353.3  | 421.8  | 389.6  | 447.9  | 260.2  | 251.8 | 275.3  |
| 28.8   | 12.3   | 15.1   | 8.7    | 11.5   | 6.3    | 8.5    | 8.2   | 16.6   |
| 9.1    | 1.2    | 1.7    | 5.5    | 5.2    | 4.2    | 1.3    | 1.1   | 4.3    |
| 156.5  | 432.2  | 787.9  | 638.7  | 616.6  | 670.1  | 512.3  | 658.2 | 643.3  |
| 155.4  | 278.7  | 233.3  | 220.9  | 210.9  | 217.1  | 201.9  | 195.1 | 216.0  |
| 8.2    | 11.8   | 3.3    | 11.6   | 15.1   | 14.6   | 12.9   | 25.6  | 24.7   |
| 360.0  | 340.6  | 186.4  | 460.1  | 354.0  | 387.2  | 212.8  | 174.0 | 211.2  |
| 418.7  | 525.0  | 358.0  | 203.6  | 167.2  | 200.7  | 288.2  | 304.3 | 302.3  |
| 197.6  | 219.9  | 154.9  | 187.8  | 137.1  | 148.3  | 102.5  | 91.3  | 103.6  |
| 693.3  | 814.1  | 518.6  | 584.5  | 458.6  | 430.4  | 446.2  | 389.9 | 444.2  |
| 681.3  | 1090.7 | 829.2  | 244.7  | 277.1  | 305.1  | 146.0  | 196.5 | 168.0  |
| 539.2  | 860.7  | 672.1  | 190.1  | 179.3  | 206.8  | 122.7  | 227.2 | 216.1  |
| 1374.3 | 1578.5 | 911.8  | 325.9  | 265.6  | 274.3  | 359.8  | 359.1 | 404.5  |
| 242.0  | 262.3  | 176.2  | 170.3  | 146.1  | 139.6  | 80.9   | 72.7  | 87.8   |
| 231.4  | 269.8  | 241.7  | 137.3  | 93.4   | 115.9  | 109.2  | 110.2 | 113.3  |
| 650.2  | 794.8  | 659.2  | 412.6  | 364.9  | 407.7  | 229.6  | 234.3 | 283.9  |
| 100.2  | 144.5  | 117.3  | 132.8  | 107.9  | 113.8  | 86.9   | 53.1  | 80.2   |
| 394.6  | 591.4  | 483.2  | 173.9  | 145.9  | 158.6  | 130.0  | 104.6 | 142.7  |
| 68.3   | 82.6   | 54.7   | 219.5  | 148.2  | 164.8  | 78.6   | 72.1  | 98.5   |
| 1217.3 | 1242.0 | 421.8  | 618.6  | 421.4  | 443.0  | 322.8  | 231.4 | 267.8  |

|        |        |       |        |        |        |       |       |       |
|--------|--------|-------|--------|--------|--------|-------|-------|-------|
| 347.0  | 497.3  | 414.4 | 102.6  | 79.1   | 102.7  | 52.9  | 64.3  | 55.2  |
| 276.8  | 284.0  | 192.5 | 230.6  | 227.3  | 239.7  | 135.5 | 165.8 | 181.8 |
| 36.9   | 72.2   | 52.2  | 26.7   | 8.6    | 25.0   | 9.1   | 5.0   | 10.2  |
| 262.5  | 328.6  | 183.5 | 118.7  | 92.6   | 97.7   | 180.2 | 176.9 | 182.3 |
| 493.6  | 681.5  | 508.9 | 228.4  | 175.4  | 172.7  | 197.1 | 224.3 | 248.0 |
| 153.3  | 193.4  | 144.4 | 316.1  | 248.5  | 256.8  | 202.1 | 190.5 | 187.9 |
| 1249.4 | 1375.9 | 808.0 | 428.3  | 356.9  | 407.7  | 309.1 | 299.1 | 306.9 |
| 403.8  | 496.5  | 295.1 | 272.1  | 193.3  | 228.4  | 285.5 | 236.8 | 305.0 |
| 1.1    | 1.0    | 0.7   | 4.3    | 2.9    | 3.4    | 2.5   | 2.3   | 2.6   |
| 6.5    | 2.9    | 1.8   | 148.0  | 105.6  | 112.8  | 81.6  | 72.5  | 88.9  |
| 133.0  | 131.1  | 74.5  | 173.8  | 108.7  | 98.2   | 85.7  | 49.2  | 52.5  |
| 27.0   | 45.2   | 40.0  | 37.2   | 39.9   | 50.3   | 30.5  | 54.6  | 43.2  |
| 665.8  | 840.0  | 627.5 | 116.4  | 106.1  | 116.3  | 120.3 | 105.4 | 134.3 |
| 533.2  | 603.1  | 378.1 | 397.9  | 307.7  | 302.3  | 196.5 | 188.2 | 218.3 |
| 653.7  | 324.3  | 136.0 | 4.2    | 3.4    | 7.8    | 1.1   | 3.2   | 1.1   |
| 29.3   | 27.4   | 13.7  | 87.7   | 66.6   | 76.3   | 47.8  | 45.7  | 62.2  |
| 173.6  | 155.1  | 83.6  | 168.1  | 102.7  | 141.3  | 61.3  | 50.4  | 86.5  |
| 843.6  | 847.1  | 476.2 | 316.5  | 165.6  | 203.6  | 183.0 | 131.6 | 143.8 |
| 51.4   | 81.6   | 66.6  | 111.1  | 110.8  | 106.7  | 60.0  | 106.7 | 100.1 |
| 1301.9 | 1437.9 | 931.1 | 724.3  | 542.3  | 508.0  | 593.3 | 514.6 | 603.4 |
| 316.9  | 549.8  | 744.2 | 275.5  | 280.8  | 303.8  | 138.6 | 233.9 | 213.2 |
| 3.5    | 5.7    | 4.7   | 1.9    | 4.8    | 1.7    | 0.5   | 0.9   | 4.3   |
| 159.3  | 174.0  | 127.5 | 70.9   | 67.4   | 70.1   | 52.8  | 49.5  | 52.6  |
| 627.2  | 663.4  | 279.9 | 1366.1 | 1145.1 | 1225.5 | 834.7 | 846.0 | 952.4 |
| 379.6  | 526.3  | 362.1 | 158.7  | 124.0  | 151.9  | 101.0 | 118.2 | 113.5 |
| 198.2  | 238.5  | 146.6 | 292.1  | 257.6  | 303.8  | 198.2 | 217.7 | 252.2 |
| 284.8  | 352.5  | 203.9 | 300.0  | 244.5  | 265.1  | 216.7 | 212.9 | 239.8 |
| 0.9    | 1.8    | 3.0   | 79.5   | 51.2   | 64.5   | 64.4  | 70.1  | 66.6  |
| 251.4  | 276.9  | 179.4 | 156.2  | 120.3  | 125.5  | 130.1 | 116.1 | 153.6 |
| 1171.7 | 1272.0 | 657.6 | 883.5  | 619.2  | 670.7  | 849.1 | 680.6 | 782.6 |
| 136.4  | 120.9  | 72.3  | 182.3  | 131.2  | 137.0  | 134.0 | 113.0 | 114.0 |
| 670.6  | 751.0  | 543.4 | 297.3  | 311.9  | 320.1  | 209.6 | 266.2 | 288.2 |
| 477.9  | 652.5  | 341.8 | 277.1  | 123.8  | 149.8  | 83.3  | 53.5  | 62.8  |
| 147.0  | 183.1  | 135.7 | 133.8  | 125.5  | 116.7  | 73.2  | 77.7  | 97.1  |
| 120.6  | 136.5  | 81.7  | 85.7   | 98.8   | 91.8   | 41.4  | 46.1  | 56.6  |
| 54.0   | 80.7   | 26.1  | 199.3  | 124.0  | 141.2  | 96.8  | 95.1  | 95.1  |
| 293.3  | 300.0  | 256.7 | 88.1   | 76.9   | 70.6   | 43.0  | 59.2  | 62.2  |
| 52.7   | 90.3   | 98.0  | 68.0   | 93.6   | 85.0   | 66.5  | 81.5  | 85.0  |
| 65.4   | 126.0  | 164.4 | 97.7   | 102.3  | 107.4  | 52.7  | 90.3  | 92.1  |
| 274.7  | 258.9  | 189.0 | 197.8  | 151.3  | 193.8  | 260.3 | 242.1 | 234.7 |
| 72.3   | 81.7   | 67.6  | 77.1   | 62.7   | 58.8   | 54.0  | 46.5  | 52.4  |
| 83.0   | 107.5  | 71.1  | 71.8   | 60.3   | 64.1   | 39.9  | 47.7  | 56.8  |
| 46.7   | 70.8   | 43.7  | 87.5   | 66.5   | 81.8   | 44.3  | 39.4  | 40.0  |
| 198.7  | 267.8  | 254.9 | 162.3  | 144.3  | 183.7  | 117.2 | 103.6 | 119.8 |
| 173.0  | 235.5  | 162.3 | 227.4  | 207.8  | 198.8  | 155.6 | 137.1 | 150.4 |
| 360.4  | 435.0  | 297.6 | 441.2  | 338.4  | 395.1  | 202.9 | 192.4 | 204.5 |
| 420.4  | 566.6  | 476.7 | 534.5  | 384.2  | 402.5  | 292.6 | 257.4 | 302.8 |
| 255.8  | 331.2  | 217.4 | 171.7  | 128.6  | 167.6  | 108.9 | 129.3 | 139.8 |
| 469.1  | 587.6  | 438.9 | 207.2  | 149.2  | 154.4  | 130.9 | 146.2 | 164.4 |
| 138.4  | 155.2  | 78.4  | 77.5   | 85.4   | 78.7   | 56.2  | 56.1  | 70.1  |
| 90.3   | 177.8  | 154.4 | 39.9   | 32.8   | 45.6   | 19.8  | 57.0  | 21.9  |
| 83.1   | 73.4   | 51.3  | 147.8  | 111.3  | 145.2  | 68.4  | 84.5  | 84.7  |
| 501.9  | 609.3  | 478.3 | 262.0  | 214.2  | 255.5  | 194.9 | 209.7 | 238.8 |

|        |        |        |        |        |        |       |        |        |
|--------|--------|--------|--------|--------|--------|-------|--------|--------|
| 88.6   | 139.8  | 106.3  | 218.6  | 193.3  | 199.9  | 109.5 | 110.9  | 114.8  |
| 399.1  | 422.2  | 284.3  | 206.9  | 166.0  | 191.6  | 128.2 | 144.9  | 147.7  |
| 86.9   | 118.4  | 84.2   | 283.0  | 270.4  | 296.9  | 193.5 | 184.1  | 237.2  |
| 54.5   | 95.6   | 88.9   | 196.5  | 224.6  | 225.4  | 84.3  | 110.3  | 111.4  |
| 100.3  | 123.7  | 124.7  | 119.6  | 101.6  | 122.9  | 94.6  | 97.6   | 102.3  |
| 345.3  | 455.4  | 280.5  | 368.6  | 309.9  | 316.4  | 203.3 | 232.9  | 232.3  |
| 867.5  | 1012.6 | 595.4  | 663.2  | 443.7  | 478.2  | 356.5 | 318.9  | 327.6  |
| 382.5  | 644.2  | 555.1  | 125.3  | 103.8  | 116.1  | 131.0 | 169.2  | 192.7  |
| 176.9  | 246.1  | 125.8  | 82.0   | 57.6   | 76.2   | 51.7  | 49.2   | 57.2   |
| 196.6  | 234.4  | 134.8  | 177.5  | 132.8  | 158.9  | 109.1 | 109.7  | 122.3  |
| 624.8  | 684.2  | 425.4  | 201.9  | 125.4  | 114.2  | 322.5 | 202.8  | 271.5  |
| 677.7  | 872.3  | 811.1  | 1294.8 | 1247.8 | 1398.8 | 558.8 | 658.2  | 671.6  |
| 589.0  | 539.9  | 345.9  | 236.8  | 165.2  | 163.7  | 146.4 | 96.0   | 132.5  |
| 142.2  | 142.0  | 95.6   | 81.6   | 82.7   | 62.6   | 79.9  | 82.9   | 78.0   |
| 629.5  | 682.7  | 315.0  | 300.1  | 239.3  | 291.7  | 139.1 | 130.9  | 160.2  |
| 392.7  | 486.1  | 298.2  | 286.4  | 208.6  | 254.7  | 171.6 | 135.7  | 155.0  |
| 52.6   | 60.6   | 50.0   | 53.1   | 28.6   | 40.0   | 44.7  | 49.9   | 55.9   |
| 110.3  | 120.9  | 93.9   | 208.4  | 215.1  | 239.1  | 130.7 | 125.9  | 126.9  |
| 300.5  | 398.4  | 400.3  | 305.6  | 298.4  | 336.4  | 211.2 | 203.0  | 279.1  |
| 269.6  | 331.4  | 238.0  | 225.1  | 152.2  | 156.4  | 154.2 | 128.5  | 139.9  |
| 2088.0 | 1794.6 | 765.1  | 559.3  | 229.4  | 265.7  | 434.9 | 200.1  | 246.9  |
| 119.4  | 156.0  | 119.0  | 46.2   | 29.1   | 37.9   | 36.7  | 26.1   | 35.8   |
| 343.6  | 484.0  | 407.7  | 153.1  | 160.1  | 169.2  | 77.9  | 89.8   | 101.0  |
| 20.2   | 39.9   | 29.3   | 82.8   | 58.2   | 67.5   | 78.5  | 57.0   | 66.6   |
| 73.4   | 85.5   | 72.3   | 77.2   | 65.4   | 72.5   | 41.1  | 40.9   | 39.8   |
| 162.8  | 227.5  | 145.4  | 130.7  | 107.7  | 115.1  | 114.8 | 91.1   | 108.9  |
| 1038.8 | 1634.1 | 1702.5 | 265.7  | 203.9  | 249.9  | 133.4 | 149.3  | 158.8  |
| 93.5   | 125.7  | 116.0  | 103.9  | 128.8  | 137.2  | 87.7  | 126.2  | 114.5  |
| 11.2   | 40.2   | 30.9   | 17.0   | 8.6    | 15.1   | 14.2  | 24.1   | 22.0   |
| 80.6   | 94.8   | 56.0   | 119.3  | 116.3  | 111.4  | 66.7  | 69.7   | 74.7   |
| 344.2  | 751.1  | 661.9  | 198.2  | 146.7  | 177.6  | 126.3 | 111.4  | 116.6  |
| 686.2  | 667.4  | 351.1  | 210.6  | 158.3  | 150.6  | 142.9 | 89.3   | 116.8  |
| 128.1  | 181.0  | 132.6  | 137.0  | 113.2  | 104.6  | 95.6  | 85.0   | 89.4   |
| 535.8  | 662.9  | 614.6  | 326.9  | 300.9  | 358.7  | 194.9 | 244.5  | 260.5  |
| 2822.4 | 2024.8 | 853.3  | 41.7   | 35.0   | 31.1   | 17.0  | 18.3   | 14.9   |
| 513.9  | 525.5  | 463.5  | 510.7  | 478.0  | 505.5  | 232.2 | 264.0  | 265.0  |
| 88.8   | 94.1   | 53.5   | 183.2  | 148.8  | 141.8  | 62.9  | 85.9   | 67.6   |
| 496.3  | 532.9  | 366.9  | 237.6  | 190.1  | 227.2  | 154.9 | 159.5  | 168.7  |
| 29.4   | 43.3   | 37.7   | 24.4   | 22.6   | 17.3   | 27.5  | 25.5   | 37.4   |
| 286.8  | 286.8  | 174.4  | 81.3   | 65.1   | 58.6   | 47.8  | 51.3   | 56.9   |
| 157.2  | 212.9  | 168.8  | 753.1  | 458.9  | 531.5  | 540.7 | 409.0  | 425.3  |
| 7.9    | 10.5   | 20.1   | 375.9  | 297.2  | 297.5  | 280.0 | 270.0  | 304.6  |
| 1491.1 | 1024.8 | 919.2  | 634.1  | 469.4  | 490.0  | 518.4 | 496.5  | 568.1  |
| 16.8   | 16.4   | 11.3   | 23.2   | 15.4   | 21.0   | 21.2  | 10.5   | 14.4   |
| 3.0    | 2.3    | 5.0    | 462.7  | 395.5  | 418.2  | 456.3 | 578.1  | 528.0  |
| 13.3   | 23.1   | 16.3   | 1165.6 | 992.9  | 1088.6 | 896.6 | 1159.3 | 1094.5 |
| 23.4   | 33.2   | 29.0   | 71.6   | 55.6   | 65.2   | 19.3  | 28.4   | 38.4   |
| 861.4  | 953.4  | 598.3  | 655.0  | 490.9  | 535.1  | 306.5 | 300.0  | 321.5  |
| 337.6  | 373.1  | 257.2  | 64.8   | 70.7   | 82.4   | 40.2  | 56.7   | 55.4   |
| 108.2  | 94.5   | 93.6   | 12.7   | 9.5    | 8.9    | 21.5  | 12.2   | 20.4   |
| 182.9  | 251.6  | 185.9  | 47.6   | 27.3   | 33.1   | 15.3  | 19.3   | 21.8   |
| 139.5  | 235.5  | 178.0  | 255.4  | 260.3  | 313.4  | 236.8 | 299.0  | 316.9  |
| 11.7   | 22.0   | 18.0   | 36.7   | 37.3   | 26.1   | 14.7  | 12.2   | 3.9    |

|        |        |        |       |       |       |       |       |       |
|--------|--------|--------|-------|-------|-------|-------|-------|-------|
| 178.3  | 174.9  | 176.5  | 161.1 | 111.0 | 118.0 | 65.6  | 50.7  | 77.5  |
| 876.3  | 1081.6 | 884.1  | 656.0 | 482.6 | 553.4 | 389.6 | 417.2 | 430.2 |
| 338.0  | 321.5  | 189.1  | 71.7  | 75.1  | 72.8  | 76.3  | 55.1  | 83.2  |
| 119.5  | 100.1  | 59.6   | 21.6  | 15.6  | 9.4   | 18.0  | 30.8  | 10.7  |
| 937.7  | 1067.7 | 626.9  | 172.7 | 130.8 | 136.0 | 150.6 | 120.6 | 149.5 |
| 11.4   | 10.8   | 6.9    | 480.4 | 537.6 | 572.3 | 541.6 | 616.5 | 652.8 |
| 72.9   | 114.6  | 100.1  | 252.7 | 288.1 | 337.9 | 154.0 | 231.4 | 227.5 |
| 40.0   | 63.8   | 54.2   | 159.4 | 164.8 | 197.4 | 127.0 | 184.5 | 167.1 |
| 722.1  | 679.6  | 443.8  | 174.1 | 132.8 | 136.8 | 189.0 | 178.8 | 205.0 |
| 3.6    | 6.5    | 8.0    | 12.0  | 8.4   | 7.5   | 1.9   | 5.7   | 5.0   |
| 42.1   | 53.3   | 27.9   | 96.6  | 81.6  | 84.8  | 45.0  | 56.2  | 57.7  |
| 258.9  | 218.3  | 129.8  | 211.6 | 173.2 | 176.8 | 142.5 | 119.6 | 138.3 |
| 124.6  | 177.1  | 126.0  | 136.3 | 106.9 | 139.7 | 113.5 | 115.4 | 116.8 |
| 50.9   | 50.1   | 115.8  | 276.8 | 249.6 | 305.8 | 123.6 | 129.9 | 167.8 |
| 226.7  | 289.0  | 161.5  | 250.8 | 187.1 | 182.2 | 126.9 | 114.0 | 122.3 |
| 1581.5 | 1814.8 | 1374.1 | 744.0 | 717.6 | 703.9 | 526.1 | 535.9 | 548.9 |
| 412.5  | 700.8  | 579.3  | 9.2   | 16.2  | 7.0   | 3.8   | 2.9   | 4.8   |
| 40.4   | 70.4   | 60.5   | 54.0  | 41.0  | 50.2  | 78.7  | 60.4  | 59.1  |
| 83.6   | 89.0   | 64.1   | 55.2  | 35.6  | 29.7  | 21.0  | 31.8  | 29.2  |
| 19.7   | 21.5   | 5.6    | 816.0 | 740.7 | 879.3 | 357.2 | 471.4 | 463.6 |
| 339.6  | 667.7  | 977.3  | 18.9  | 48.2  | 56.7  | 23.2  | 76.1  | 59.8  |
| 461.7  | 501.1  | 296.3  | 770.5 | 601.4 | 643.0 | 341.3 | 314.0 | 347.7 |
| 279.6  | 301.2  | 214.5  | 434.1 | 396.3 | 366.3 | 311.1 | 291.9 | 366.8 |
| 143.1  | 167.8  | 127.7  | 171.8 | 156.9 | 171.1 | 110.3 | 127.9 | 147.2 |
| 112.4  | 129.4  | 61.4   | 8.4   | 6.1   | 6.4   | 4.0   | 2.2   | 3.7   |
| 142.8  | 191.9  | 147.1  | 111.5 | 87.5  | 118.0 | 65.7  | 75.0  | 69.6  |
| 74.4   | 108.4  | 106.6  | 151.1 | 145.7 | 142.3 | 90.8  | 107.0 | 135.4 |
| 1179.4 | 1431.4 | 1046.4 | 353.6 | 275.9 | 275.2 | 500.3 | 483.3 | 530.7 |
| 4.7    | 5.8    | 3.6    | 9.6   | 9.7   | 13.8  | 4.1   | 3.4   | 5.6   |
| 33.9   | 65.3   | 56.0   | 834.5 | 563.0 | 606.8 | 386.3 | 331.4 | 357.3 |
| 1606.5 | 2485.5 | 2442.0 | 190.5 | 188.7 | 210.3 | 106.9 | 153.0 | 136.1 |
| 193.6  | 260.3  | 256.0  | 247.5 | 258.8 | 249.9 | 321.9 | 455.8 | 401.1 |
| 459.8  | 651.0  | 516.9  | 13.8  | 14.0  | 17.0  | 11.8  | 8.0   | 3.7   |
| 122.3  | 188.0  | 101.0  | 193.8 | 153.0 | 149.9 | 136.3 | 101.7 | 121.3 |
| 148.8  | 236.5  | 197.1  | 249.6 | 241.0 | 236.8 | 221.4 | 228.9 | 231.7 |
| 88.9   | 144.4  | 98.1   | 81.7  | 62.1  | 76.0  | 77.6  | 70.6  | 74.2  |
| 20.8   | 24.2   | 19.5   | 40.3  | 29.5  | 21.5  | 26.3  | 20.7  | 24.0  |
| 530.6  | 574.0  | 368.1  | 276.8 | 190.6 | 192.9 | 274.5 | 165.3 | 203.5 |
| 204.1  | 295.1  | 236.3  | 184.5 | 162.0 | 174.2 | 180.8 | 193.4 | 216.8 |
| 83.4   | 133.1  | 102.1  | 57.3  | 56.2  | 57.6  | 22.5  | 51.8  | 37.8  |
| 188.1  | 269.5  | 187.7  | 153.5 | 106.9 | 134.2 | 98.2  | 100.8 | 98.6  |
| 699.6  | 382.4  | 141.2  | 110.5 | 75.3  | 100.1 | 63.7  | 66.1  | 84.7  |
| 176.2  | 210.7  | 156.3  | 84.3  | 37.3  | 53.1  | 17.9  | 12.7  | 10.7  |
| 218.7  | 583.3  | 546.8  | 370.2 | 472.4 | 536.1 | 503.6 | 739.4 | 702.8 |
| 815.2  | 816.4  | 469.6  | 159.7 | 141.2 | 138.4 | 144.3 | 154.7 | 168.6 |
| 417.7  | 448.0  | 240.5  | 232.6 | 163.8 | 169.0 | 142.1 | 121.4 | 128.3 |
| 92.4   | 125.2  | 78.6   | 69.0  | 49.7  | 71.9  | 53.7  | 39.5  | 38.3  |
| 790.0  | 881.0  | 631.9  | 133.5 | 120.4 | 149.0 | 96.7  | 146.1 | 120.2 |
| 1.5    | 0.8    | 3.5    | 2.2   | 2.4   | 3.4   | 1.3   | 2.4   | 1.6   |
| 11.7   | 4.5    | 4.2    | 18.5  | 15.8  | 10.6  | 9.9   | 15.7  | 9.5   |
| 5.7    | 5.3    | 1.8    | 82.0  | 75.2  | 65.4  | 59.7  | 64.6  | 74.3  |
| 1022.6 | 997.6  | 431.4  | 696.2 | 432.7 | 485.5 | 324.3 | 224.5 | 266.5 |
| 247.3  | 322.8  | 238.6  | 240.0 | 207.7 | 226.8 | 152.2 | 141.4 | 185.3 |



|        |        |        |        |        |        |        |       |        |
|--------|--------|--------|--------|--------|--------|--------|-------|--------|
| 168.1  | 180.5  | 91.6   | 124.2  | 116.2  | 91.3   | 146.3  | 152.5 | 166.5  |
| 165.6  | 199.1  | 178.4  | 141.0  | 163.4  | 189.5  | 86.0   | 100.7 | 104.7  |
| 1.7    | 2.1    | 1.6    | 10.2   | 11.5   | 6.5    | 2.2    | 4.3   | 1.1    |
| 343.0  | 296.8  | 134.3  | 139.7  | 107.4  | 85.6   | 216.1  | 182.5 | 208.7  |
| 2018.8 | 1958.7 | 1171.6 | 9.8    | 3.9    | 8.4    | 6.0    | 3.0   | 3.7    |
| 198.7  | 221.5  | 199.0  | 128.0  | 105.4  | 116.8  | 49.7   | 63.0  | 64.1   |
| 47.7   | 86.2   | 60.3   | 59.7   | 43.8   | 72.4   | 40.6   | 39.7  | 32.5   |
| 603.2  | 605.1  | 252.2  | 188.4  | 94.9   | 87.2   | 236.8  | 126.4 | 157.6  |
| 8.7    | 29.1   | 51.6   | 5.3    | 2.6    | 3.5    | 1.1    | 6.3   | 1.3    |
| 431.7  | 462.3  | 242.4  | 240.1  | 168.6  | 182.8  | 192.7  | 178.1 | 198.0  |
| 224.5  | 286.5  | 174.0  | 327.9  | 295.3  | 307.4  | 284.3  | 350.1 | 346.0  |
| 63.0   | 85.0   | 73.6   | 61.0   | 55.3   | 64.7   | 45.0   | 69.0  | 70.7   |
| 112.0  | 153.6  | 164.3  | 144.1  | 175.0  | 216.4  | 100.2  | 152.9 | 171.0  |
| 32.0   | 55.5   | 82.8   | 37.2   | 52.8   | 58.8   | 65.2   | 80.4  | 67.5   |
| 337.8  | 400.3  | 182.4  | 429.3  | 385.3  | 361.9  | 281.2  | 255.0 | 288.2  |
| 3018.0 | 3165.4 | 1831.5 | 3161.9 | 1590.0 | 1657.1 | 1618.0 | 765.2 | 1000.4 |
| 276.1  | 332.3  | 233.0  | 61.1   | 55.7   | 65.7   | 106.1  | 100.5 | 106.0  |
| 296.0  | 487.9  | 424.1  | 154.1  | 115.9  | 117.1  | 132.9  | 117.7 | 116.7  |
| 320.7  | 326.4  | 154.6  | 126.1  | 112.2  | 122.9  | 144.0  | 130.2 | 135.8  |
| 179.3  | 204.2  | 143.1  | 397.9  | 313.1  | 354.3  | 138.2  | 125.3 | 156.8  |
| 707.7  | 523.6  | 159.7  | 453.6  | 263.5  | 304.1  | 245.6  | 128.6 | 205.5  |
| 692.5  | 657.3  | 309.2  | 384.9  | 298.1  | 286.6  | 251.9  | 232.5 | 251.9  |
| 782.8  | 889.0  | 632.0  | 394.5  | 322.7  | 364.0  | 227.1  | 183.2 | 224.8  |
| 188.2  | 274.7  | 197.8  | 273.8  | 255.1  | 291.5  | 92.1   | 91.5  | 97.8   |
| 8.6    | 2.5    | 5.1    | 9.7    | 12.8   | 10.3   | 11.5   | 3.3   | 19.9   |
| 495.8  | 662.2  | 423.5  | 283.6  | 264.1  | 273.4  | 155.4  | 108.7 | 147.1  |
| 408.7  | 428.3  | 193.8  | 190.1  | 138.1  | 121.4  | 177.5  | 119.4 | 170.4  |
| 115.9  | 170.9  | 127.2  | 79.8   | 76.9   | 86.5   | 69.2   | 71.7  | 78.8   |
| 180.1  | 192.8  | 157.5  | 153.4  | 121.7  | 130.0  | 100.0  | 110.1 | 129.4  |
| 234.1  | 278.2  | 165.6  | 225.3  | 190.0  | 207.6  | 159.0  | 122.4 | 173.0  |
| 149.5  | 160.4  | 69.5   | 75.3   | 52.9   | 48.6   | 37.4   | 32.5  | 33.9   |
| 1.3    | 6.1    | 0.4    | 9.8    | 3.0    | 6.6    | 2.7    | 4.9   | 6.6    |
| 64.0   | 98.4   | 104.3  | 122.2  | 106.3  | 116.9  | 50.6   | 64.4  | 65.3   |
| 103.2  | 150.8  | 170.5  | 17.1   | 13.0   | 10.3   | 3.8    | 7.5   | 6.9    |
| 187.9  | 330.1  | 304.2  | 125.6  | 76.3   | 85.3   | 82.5   | 53.3  | 80.8   |
| 436.7  | 609.8  | 357.4  | 333.1  | 218.3  | 218.8  | 161.6  | 124.1 | 159.8  |
| 64.2   | 90.1   | 47.7   | 21.7   | 20.6   | 19.6   | 22.5   | 13.8  | 18.3   |
| 807.1  | 1000.3 | 890.2  | 837.5  | 645.0  | 769.1  | 556.7  | 482.0 | 591.7  |
| 129.6  | 112.6  | 45.2   | 205.8  | 158.0  | 192.5  | 169.5  | 129.6 | 144.2  |
| 109.0  | 163.2  | 128.8  | 167.9  | 146.9  | 145.4  | 56.3   | 80.5  | 82.5   |
| 145.5  | 196.6  | 161.1  | 443.7  | 345.3  | 399.9  | 234.4  | 238.4 | 259.7  |
| 315.7  | 334.3  | 295.3  | 218.2  | 195.3  | 211.2  | 157.4  | 172.8 | 166.4  |
| 68.0   | 102.3  | 80.8   | 194.8  | 167.9  | 183.3  | 127.1  | 105.2 | 159.8  |
| 428.4  | 528.0  | 287.1  | 218.4  | 156.5  | 145.3  | 220.4  | 189.6 | 223.1  |
| 267.4  | 382.9  | 330.1  | 213.0  | 192.6  | 243.5  | 179.8  | 175.0 | 168.4  |
| 257.0  | 259.1  | 243.3  | 66.5   | 64.0   | 82.3   | 47.2   | 48.9  | 68.7   |
| 76.6   | 180.6  | 133.2  | 88.2   | 98.6   | 108.2  | 44.6   | 58.7  | 67.0   |
| 275.6  | 317.1  | 213.5  | 201.3  | 141.7  | 159.5  | 78.6   | 57.8  | 76.8   |
| 90.5   | 156.5  | 116.1  | 191.2  | 115.0  | 140.3  | 81.1   | 67.2  | 74.8   |
| 469.6  | 579.7  | 488.9  | 753.8  | 563.9  | 617.3  | 407.3  | 377.7 | 431.7  |
| 4.6    | 1.5    | 1.6    | 46.5   | 28.6   | 23.0   | 45.3   | 18.5  | 32.5   |
| 766.9  | 850.3  | 533.1  | 384.6  | 317.2  | 360.9  | 362.0  | 362.7 | 369.2  |
| 133.3  | 217.4  | 143.9  | 212.3  | 187.9  | 216.9  | 157.3  | 151.0 | 164.1  |

|       |        |        |        |        |        |        |        |        |
|-------|--------|--------|--------|--------|--------|--------|--------|--------|
| 271.5 | 350.6  | 210.9  | 99.4   | 65.4   | 105.9  | 51.5   | 55.3   | 62.1   |
| 3.4   | 2.0    | 2.3    | 138.2  | 161.2  | 160.9  | 112.2  | 169.3  | 174.5  |
| 117.6 | 133.0  | 121.8  | 34.0   | 28.9   | 34.6   | 47.4   | 44.9   | 50.0   |
| 181.5 | 213.3  | 193.8  | 51.3   | 47.4   | 64.0   | 55.5   | 87.9   | 87.1   |
| 9.0   | 11.4   | 8.0    | 12.7   | 10.5   | 5.5    | 3.3    | 5.8    | 3.6    |
| 360.7 | 456.6  | 331.6  | 216.5  | 181.4  | 193.3  | 139.5  | 148.0  | 168.7  |
| 91.8  | 160.8  | 131.9  | 98.3   | 94.2   | 117.3  | 106.9  | 88.6   | 121.3  |
| 179.9 | 194.8  | 200.1  | 191.0  | 147.2  | 171.8  | 123.4  | 111.4  | 130.0  |
| 279.5 | 316.1  | 215.5  | 272.5  | 229.5  | 231.2  | 318.6  | 338.3  | 335.2  |
| 920.2 | 1266.9 | 1042.7 | 514.4  | 532.5  | 553.6  | 600.3  | 821.4  | 863.3  |
| 145.0 | 170.4  | 189.3  | 171.2  | 209.7  | 213.0  | 115.4  | 158.1  | 137.7  |
| 321.9 | 395.3  | 219.1  | 256.9  | 200.1  | 211.1  | 172.6  | 195.9  | 211.1  |
| 182.3 | 226.8  | 141.5  | 82.7   | 50.6   | 65.6   | 48.8   | 49.4   | 61.3   |
| 10.4  | 16.1   | 4.3    | 13.8   | 14.2   | 11.9   | 10.3   | 8.2    | 9.8    |
| 3.4   | 2.5    | 2.6    | 40.2   | 18.2   | 27.0   | 22.3   | 14.1   | 22.1   |
| 802.0 | 830.6  | 454.4  | 506.8  | 408.3  | 409.2  | 450.5  | 438.6  | 510.8  |
| 231.8 | 276.2  | 212.1  | 174.6  | 152.1  | 158.2  | 109.1  | 138.3  | 142.7  |
| 150.0 | 211.0  | 165.2  | 90.1   | 64.4   | 75.6   | 61.2   | 64.6   | 82.4   |
| 90.0  | 92.3   | 47.7   | 62.6   | 41.2   | 42.6   | 44.6   | 31.0   | 52.8   |
| 86.1  | 111.0  | 66.8   | 137.3  | 104.0  | 98.9   | 108.1  | 89.6   | 99.4   |
| 240.1 | 273.6  | 199.0  | 333.7  | 250.6  | 281.1  | 214.6  | 173.0  | 205.6  |
| 460.4 | 513.5  | 365.0  | 846.4  | 639.4  | 772.7  | 401.3  | 428.1  | 535.3  |
| 43.4  | 61.0   | 55.6   | 7.2    | 16.0   | 19.8   | 15.5   | 19.0   | 19.6   |
| 143.3 | 145.6  | 65.4   | 115.2  | 88.7   | 103.2  | 75.9   | 45.6   | 60.4   |
| 117.4 | 150.7  | 90.4   | 172.7  | 143.0  | 181.5  | 116.1  | 107.7  | 128.2  |
| 648.1 | 860.9  | 687.0  | 598.3  | 502.5  | 524.6  | 381.8  | 422.6  | 440.0  |
| 235.9 | 260.7  | 159.9  | 178.7  | 143.6  | 162.0  | 148.5  | 161.5  | 187.5  |
| 44.9  | 67.6   | 42.3   | 179.2  | 129.9  | 156.1  | 150.1  | 146.9  | 157.1  |
| 289.8 | 355.9  | 273.4  | 390.9  | 284.5  | 324.7  | 261.5  | 271.9  | 297.6  |
| 269.1 | 313.2  | 184.6  | 18.8   | 13.2   | 18.2   | 12.3   | 9.4    | 16.8   |
| 256.4 | 194.6  | 103.9  | 210.0  | 140.9  | 185.5  | 121.2  | 107.6  | 140.3  |
| 28.0  | 38.1   | 15.5   | 199.1  | 204.3  | 247.0  | 103.4  | 140.1  | 128.4  |
| 84.8  | 162.5  | 124.8  | 186.3  | 164.1  | 163.5  | 71.0   | 82.5   | 82.0   |
| 170.9 | 188.7  | 120.5  | 60.1   | 62.3   | 60.4   | 64.8   | 66.4   | 63.7   |
| 321.2 | 323.3  | 216.6  | 248.6  | 209.2  | 263.0  | 142.7  | 168.7  | 164.5  |
| 220.9 | 264.1  | 225.4  | 307.8  | 273.4  | 263.1  | 150.8  | 144.1  | 168.6  |
| 571.0 | 814.3  | 613.5  | 1600.5 | 1335.9 | 1508.1 | 1014.3 | 1016.2 | 1083.7 |
| 147.8 | 189.9  | 108.9  | 134.7  | 138.8  | 156.0  | 63.1   | 82.7   | 87.4   |
| 17.7  | 20.1   | 16.6   | 1005.0 | 727.5  | 835.9  | 463.9  | 403.8  | 466.3  |
| 828.1 | 709.4  | 408.7  | 16.2   | 13.8   | 22.2   | 22.1   | 14.3   | 6.1    |
| 253.7 | 292.7  | 173.2  | 216.5  | 157.9  | 183.2  | 126.8  | 116.8  | 122.8  |
| 362.5 | 454.1  | 328.9  | 186.1  | 158.4  | 159.4  | 150.7  | 152.1  | 196.7  |
| 736.5 | 954.0  | 753.0  | 10.7   | 16.5   | 18.1   | 7.6    | 1.8    | 5.9    |
| 105.9 | 115.6  | 60.1   | 17.7   | 24.3   | 14.8   | 24.0   | 9.7    | 32.6   |
| 35.3  | 41.8   | 40.5   | 54.1   | 37.0   | 45.9   | 23.5   | 27.0   | 32.9   |
| 916.1 | 1179.9 | 950.7  | 1004.6 | 791.1  | 879.2  | 551.4  | 561.6  | 618.2  |
| 517.8 | 706.1  | 509.8  | 274.6  | 226.1  | 227.2  | 249.6  | 277.8  | 300.0  |
| 647.5 | 838.7  | 833.4  | 742.0  | 634.3  | 654.4  | 620.6  | 587.2  | 664.8  |
| 364.9 | 358.7  | 163.1  | 181.3  | 140.5  | 135.7  | 96.5   | 70.8   | 70.2   |
| 293.5 | 280.0  | 170.4  | 227.6  | 178.8  | 194.2  | 126.7  | 145.5  | 155.8  |
| 36.0  | 52.8   | 28.7   | 60.4   | 37.7   | 40.1   | 42.1   | 29.5   | 49.8   |
| 245.9 | 220.3  | 152.4  | 145.8  | 117.6  | 140.2  | 115.9  | 137.2  | 138.4  |
| 180.7 | 265.1  | 218.2  | 388.2  | 342.9  | 402.0  | 188.4  | 230.0  | 235.0  |

|        |        |        |        |       |       |       |       |       |
|--------|--------|--------|--------|-------|-------|-------|-------|-------|
| 13.3   | 9.4    | 12.7   | 24.8   | 20.8  | 19.2  | 12.7  | 14.9  | 17.8  |
| 2.7    | 2.3    | 2.3    | 5.7    | 4.7   | 4.0   | 2.1   | 1.4   | 1.8   |
| 34.8   | 71.4   | 41.4   | 201.5  | 235.4 | 252.4 | 152.0 | 185.3 | 217.2 |
| 137.0  | 178.3  | 136.5  | 135.1  | 98.4  | 119.7 | 55.2  | 71.7  | 71.8  |
| 8.0    | 3.5    | 2.0    | 5.4    | 3.8   | 5.6   | 15.1  | 2.7   | 6.8   |
| 970.9  | 1009.4 | 519.9  | 627.4  | 358.3 | 401.4 | 298.5 | 227.1 | 258.8 |
| 3.5    | 6.1    | 6.8    | 13.2   | 12.9  | 11.9  | 5.1   | 2.7   | 4.6   |
| 406.1  | 477.9  | 267.4  | 2.5    | 3.3   | 5.0   | 3.6   | 0.1   | 0.3   |
| 1275.6 | 1370.1 | 735.7  | 1102.0 | 926.9 | 999.7 | 592.5 | 560.2 | 656.6 |
| 132.4  | 196.3  | 213.0  | 63.2   | 88.4  | 84.3  | 70.2  | 106.7 | 113.5 |
| 935.4  | 874.3  | 319.5  | 741.1  | 521.0 | 591.9 | 407.5 | 339.8 | 425.6 |
| 52.7   | 64.2   | 57.5   | 244.3  | 193.4 | 211.0 | 134.0 | 82.2  | 161.1 |
| 90.1   | 123.1  | 114.0  | 33.0   | 47.6  | 36.5  | 33.4  | 48.4  | 41.2  |
| 158.8  | 201.1  | 192.2  | 263.3  | 222.0 | 232.9 | 170.1 | 171.2 | 194.2 |
| 157.6  | 312.5  | 291.9  | 157.2  | 202.6 | 176.5 | 92.5  | 146.1 | 118.9 |
| 1050.4 | 1153.6 | 835.5  | 278.5  | 229.6 | 255.2 | 316.1 | 286.0 | 312.6 |
| 112.6  | 106.1  | 162.5  | 18.7   | 33.0  | 32.8  | 20.1  | 23.8  | 23.4  |
| 39.8   | 39.3   | 51.3   | 290.4  | 268.5 | 281.0 | 201.5 | 265.9 | 257.1 |
| 552.5  | 681.0  | 409.7  | 199.5  | 205.7 | 216.3 | 129.0 | 197.2 | 168.0 |
| 382.0  | 426.9  | 263.0  | 370.7  | 299.4 | 318.3 | 218.0 | 219.3 | 246.0 |
| 45.0   | 45.3   | 29.9   | 62.7   | 59.1  | 61.8  | 72.1  | 77.5  | 89.5  |
| 5.4    | 9.4    | 9.1    | 46.6   | 46.2  | 55.2  | 25.1  | 47.3  | 44.6  |
| 54.8   | 55.2   | 43.8   | 381.9  | 287.5 | 320.2 | 246.5 | 216.6 | 279.2 |
| 248.4  | 275.5  | 124.8  | 92.8   | 58.5  | 72.2  | 61.5  | 50.3  | 54.7  |
| 510.4  | 676.0  | 491.3  | 152.3  | 122.7 | 143.6 | 129.1 | 117.6 | 134.8 |
| 7.6    | 12.8   | 21.1   | 21.6   | 26.7  | 35.5  | 16.4  | 18.7  | 7.2   |
| 1376.3 | 1067.1 | 397.3  | 428.8  | 167.9 | 164.8 | 209.2 | 83.6  | 111.8 |
| 158.8  | 223.1  | 181.7  | 143.1  | 123.0 | 135.6 | 87.7  | 102.3 | 98.0  |
| 1093.7 | 1225.7 | 1032.6 | 304.1  | 265.8 | 269.8 | 230.9 | 241.6 | 271.5 |
| 217.7  | 225.3  | 147.9  | 45.7   | 51.5  | 45.0  | 64.6  | 68.5  | 68.8  |
| 336.3  | 493.9  | 265.7  | 507.0  | 281.0 | 323.4 | 225.7 | 162.2 | 162.7 |
| 4.8    | 3.8    | 2.9    | 11.4   | 4.8   | 5.7   | 9.4   | 5.2   | 4.3   |
| 779.3  | 685.2  | 281.1  | 686.5  | 583.0 | 560.8 | 577.6 | 431.6 | 603.6 |
| 791.2  | 871.1  | 569.6  | 565.2  | 340.8 | 398.2 | 278.7 | 270.5 | 286.7 |
| 240.0  | 329.8  | 263.7  | 121.6  | 89.9  | 106.5 | 92.5  | 133.2 | 110.1 |
| 44.9   | 70.0   | 69.3   | 46.2   | 68.3  | 59.5  | 34.8  | 46.7  | 55.7  |
| 1061.0 | 1283.1 | 1329.2 | 84.7   | 76.1  | 75.5  | 78.4  | 74.0  | 73.4  |
| 2.8    | 3.9    | 3.7    | 3.6    | 3.1   | 3.2   | 0.9   | 0.7   | 0.9   |
| 41.6   | 37.2   | 21.4   | 114.1  | 75.6  | 73.8  | 71.6  | 84.1  | 128.0 |
| 197.4  | 330.2  | 216.1  | 424.2  | 439.7 | 502.0 | 245.0 | 405.4 | 364.5 |
| 155.0  | 310.0  | 267.5  | 6.1    | 11.3  | 9.8   | 5.0   | 5.4   | 3.7   |
| 331.8  | 354.9  | 217.1  | 88.8   | 73.5  | 88.6  | 80.6  | 70.1  | 85.5  |
| 512.3  | 583.8  | 412.4  | 236.7  | 190.8 | 203.5 | 194.5 | 195.5 | 212.5 |
| 575.3  | 609.4  | 426.6  | 249.6  | 196.9 | 207.8 | 224.7 | 210.2 | 216.0 |
| 41.0   | 53.2   | 50.0   | 76.4   | 77.2  | 68.1  | 46.8  | 44.9  | 44.3  |
| 65.0   | 88.9   | 42.6   | 15.7   | 14.5  | 22.6  | 3.5   | 3.0   | 5.1   |
| 164.3  | 382.7  | 413.6  | 412.8  | 489.8 | 553.0 | 225.8 | 364.7 | 365.8 |
| 102.2  | 111.2  | 100.1  | 60.7   | 47.4  | 48.1  | 23.8  | 14.6  | 29.2  |
| 236.4  | 278.2  | 181.4  | 290.1  | 157.1 | 234.1 | 162.8 | 164.5 | 188.4 |
| 546.5  | 666.7  | 430.9  | 186.0  | 174.1 | 156.5 | 210.7 | 199.7 | 228.0 |
| 195.7  | 206.9  | 155.5  | 50.6   | 49.5  | 46.8  | 16.6  | 24.7  | 19.7  |
| 24.5   | 28.7   | 26.3   | 50.4   | 45.0  | 53.2  | 29.4  | 29.6  | 23.3  |
| 30.2   | 42.6   | 31.4   | 4.5    | 6.4   | 2.8   | 7.5   | 4.6   | 2.0   |

|        |        |        |        |        |        |        |        |        |
|--------|--------|--------|--------|--------|--------|--------|--------|--------|
| 40.2   | 59.6   | 48.1   | 63.4   | 53.5   | 68.6   | 41.5   | 50.6   | 46.6   |
| 49.1   | 52.9   | 47.3   | 109.6  | 92.3   | 107.6  | 73.0   | 80.1   | 84.2   |
| 416.5  | 456.5  | 348.3  | 275.5  | 262.4  | 244.2  | 223.1  | 290.3  | 312.0  |
| 1885.9 | 2036.5 | 1375.1 | 966.4  | 674.9  | 659.3  | 742.6  | 491.0  | 637.8  |
| 1041.5 | 1058.2 | 459.2  | 248.4  | 180.1  | 191.9  | 302.7  | 242.2  | 284.9  |
| 294.4  | 382.9  | 272.8  | 798.5  | 744.6  | 762.6  | 459.0  | 555.1  | 558.3  |
| 132.5  | 152.2  | 115.5  | 59.0   | 69.5   | 65.1   | 43.3   | 62.0   | 59.6   |
| 161.6  | 220.0  | 158.9  | 63.0   | 60.6   | 46.8   | 54.8   | 50.3   | 49.4   |
| 829.1  | 899.6  | 656.1  | 746.2  | 569.4  | 714.6  | 428.1  | 404.7  | 454.1  |
| 176.7  | 311.9  | 290.6  | 157.1  | 122.7  | 145.8  | 117.4  | 116.4  | 131.5  |
| 705.0  | 743.7  | 314.9  | 292.0  | 226.5  | 236.7  | 230.7  | 195.2  | 249.8  |
| 898.9  | 556.0  | 295.4  | 349.9  | 228.5  | 260.3  | 200.7  | 163.5  | 209.6  |
| 14.2   | 8.9    | 3.2    | 108.6  | 101.0  | 125.8  | 56.4   | 77.6   | 73.8   |
| 26.0   | 46.5   | 24.8   | 35.9   | 45.4   | 29.8   | 9.1    | 14.3   | 13.9   |
| 1641.0 | 2627.8 | 2441.6 | 2016.3 | 1946.5 | 1983.6 | 1238.6 | 1331.2 | 1466.9 |
| 2.2    | 1.3    | 0.8    | 9.5    | 6.6    | 5.5    | 1.6    | 3.1    | 1.6    |
| 680.0  | 717.3  | 484.2  | 531.3  | 511.9  | 561.3  | 525.6  | 485.3  | 550.3  |
| 89.5   | 163.6  | 164.5  | 117.7  | 136.7  | 161.1  | 65.0   | 120.5  | 110.6  |
| 74.9   | 80.7   | 82.7   | 51.9   | 32.4   | 25.6   | 16.3   | 12.4   | 16.7   |
| 9.9    | 3.2    | 5.0    | 18.3   | 26.9   | 9.7    | 32.4   | 11.4   | 4.3    |
| 46.2   | 57.8   | 39.7   | 77.5   | 42.8   | 72.2   | 45.8   | 36.9   | 36.4   |
| 158.6  | 232.7  | 165.7  | 392.7  | 349.4  | 399.1  | 185.1  | 223.8  | 210.6  |
| 551.2  | 783.3  | 650.4  | 9.9    | 18.8   | 18.7   | 19.1   | 11.6   | 13.9   |
| 98.4   | 109.1  | 78.0   | 209.4  | 185.1  | 191.4  | 97.1   | 121.0  | 121.1  |
| 130.0  | 227.7  | 137.9  | 225.1  | 195.0  | 213.3  | 152.9  | 167.9  | 157.4  |
| 194.7  | 268.5  | 163.5  | 245.7  | 181.1  | 221.3  | 120.1  | 139.2  | 140.9  |
| 309.2  | 389.7  | 316.2  | 1504.8 | 1288.5 | 1350.9 | 661.9  | 791.1  | 748.9  |
| 6.9    | 4.8    | 3.1    | 840.4  | 503.1  | 569.8  | 433.7  | 257.3  | 359.8  |
| 227.2  | 266.8  | 207.7  | 119.5  | 104.3  | 92.4   | 83.6   | 93.6   | 91.1   |
| 307.9  | 373.4  | 205.8  | 40.2   | 28.2   | 28.7   | 21.1   | 15.7   | 16.4   |
| 41.2   | 33.2   | 33.9   | 79.6   | 50.0   | 59.4   | 29.8   | 31.0   | 41.0   |
| 489.9  | 385.4  | 210.3  | 18.0   | 17.0   | 17.1   | 18.6   | 9.8    | 17.8   |
| 13.5   | 6.6    | 8.4    | 13.5   | 13.7   | 13.6   | 18.6   | 9.0    | 12.8   |
| 511.5  | 517.9  | 266.4  | 366.7  | 246.6  | 263.9  | 211.0  | 155.8  | 175.7  |
| 1243.3 | 1410.2 | 957.8  | 420.8  | 329.1  | 338.1  | 228.7  | 192.2  | 239.0  |
| 106.6  | 153.3  | 105.0  | 374.1  | 296.0  | 266.1  | 261.6  | 257.9  | 301.7  |
| 144.3  | 219.6  | 145.0  | 271.8  | 210.0  | 240.8  | 127.9  | 130.6  | 143.2  |
| 3.3    | 5.5    | 1.4    | 4.7    | 7.9    | 12.8   | 8.3    | 3.6    | 4.1    |
| 1195.2 | 1281.2 | 757.9  | 717.1  | 514.6  | 561.1  | 624.3  | 394.8  | 592.3  |
| 264.2  | 279.8  | 199.3  | 133.5  | 112.8  | 122.8  | 70.8   | 85.5   | 84.7   |
| 715.1  | 851.8  | 550.5  | 228.3  | 153.3  | 154.0  | 163.3  | 156.2  | 140.7  |
| 214.9  | 308.6  | 149.6  | 206.6  | 147.7  | 180.4  | 87.3   | 60.1   | 69.3   |
| 292.6  | 406.5  | 311.9  | 311.5  | 270.7  | 280.1  | 167.5  | 197.2  | 203.4  |
| 135.4  | 188.5  | 181.7  | 238.8  | 232.4  | 323.9  | 116.0  | 163.3  | 147.6  |
| 403.5  | 407.1  | 187.5  | 1077.2 | 779.0  | 926.8  | 464.2  | 367.6  | 464.3  |
| 256.9  | 228.4  | 257.8  | 407.1  | 392.1  | 412.4  | 142.0  | 129.0  | 177.0  |
| 1480.9 | 2005.1 | 1445.7 | 426.1  | 309.9  | 307.6  | 376.1  | 292.6  | 358.8  |
| 301.2  | 393.3  | 361.4  | 272.6  | 188.8  | 215.4  | 210.3  | 258.4  | 251.6  |
| 56.6   | 104.0  | 64.2   | 48.2   | 32.4   | 44.6   | 25.4   | 40.0   | 45.2   |
| 428.8  | 624.7  | 429.7  | 422.7  | 308.1  | 360.6  | 179.0  | 166.4  | 194.4  |
| 226.4  | 392.9  | 387.1  | 150.5  | 127.3  | 142.9  | 106.1  | 108.2  | 130.8  |
| 82.2   | 116.5  | 101.5  | 168.3  | 165.7  | 176.9  | 123.0  | 90.1   | 120.2  |
| 316.5  | 328.7  | 256.7  | 206.4  | 194.3  | 195.9  | 142.9  | 162.2  | 162.0  |

|        |        |        |        |       |        |        |       |        |
|--------|--------|--------|--------|-------|--------|--------|-------|--------|
| 172.9  | 221.7  | 168.9  | 460.3  | 334.7 | 393.8  | 326.1  | 334.2 | 342.5  |
| 303.5  | 321.6  | 220.5  | 128.0  | 88.3  | 120.9  | 102.4  | 101.4 | 105.6  |
| 102.3  | 141.7  | 76.3   | 50.6   | 36.2  | 52.5   | 22.0   | 47.9  | 37.3   |
| 393.6  | 469.8  | 340.9  | 198.2  | 164.9 | 190.0  | 108.7  | 79.8  | 105.2  |
| 61.9   | 71.7   | 50.3   | 81.7   | 71.6  | 75.9   | 63.3   | 48.8  | 51.7   |
| 5.2    | 4.9    | 7.8    | 30.5   | 20.5  | 17.0   | 16.2   | 19.8  | 13.2   |
| 23.8   | 38.0   | 18.7   | 90.3   | 76.6  | 91.4   | 57.4   | 76.1  | 59.6   |
| 2.8    | 2.1    | 1.0    | 3.2    | 7.0   | 6.1    | 0.5    | 4.9   | 8.3    |
| 134.0  | 154.2  | 105.9  | 60.2   | 52.4  | 58.4   | 40.6   | 34.8  | 50.8   |
| 163.8  | 175.2  | 124.5  | 87.7   | 76.7  | 86.7   | 116.3  | 108.6 | 121.8  |
| 13.5   | 35.2   | 48.2   | 466.5  | 532.7 | 672.5  | 239.3  | 362.9 | 343.2  |
| 10.0   | 14.6   | 9.7    | 26.9   | 27.5  | 21.2   | 20.0   | 17.6  | 17.2   |
| 104.5  | 110.6  | 58.5   | 90.2   | 64.1  | 79.9   | 55.4   | 54.0  | 43.2   |
| 11.2   | 5.1    | 3.9    | 14.9   | 10.4  | 10.6   | 6.1    | 5.5   | 6.0    |
| 80.9   | 72.6   | 43.8   | 42.0   | 34.8  | 36.5   | 30.5   | 21.6  | 23.4   |
| 49.6   | 53.4   | 45.5   | 34.7   | 32.0  | 35.1   | 24.0   | 22.7  | 29.8   |
| 257.8  | 260.5  | 299.3  | 141.1  | 113.3 | 143.7  | 84.0   | 77.5  | 75.1   |
| 825.4  | 1016.7 | 774.6  | 462.6  | 357.8 | 409.9  | 289.4  | 282.5 | 327.9  |
| 197.8  | 231.4  | 132.2  | 258.7  | 214.3 | 230.9  | 150.9  | 150.7 | 158.0  |
| 609.3  | 538.8  | 259.8  | 189.9  | 136.5 | 147.7  | 128.0  | 104.1 | 138.4  |
| 625.0  | 474.1  | 363.1  | 215.4  | 180.4 | 199.1  | 150.7  | 131.5 | 166.8  |
| 42.9   | 45.5   | 33.8   | 32.7   | 20.3  | 25.0   | 3.6    | 12.9  | 16.1   |
| 12.2   | 11.8   | 4.6    | 15.4   | 4.3   | 9.8    | 5.9    | 1.9   | 11.7   |
| 3.5    | 2.8    | 3.1    | 51.5   | 51.0  | 66.9   | 36.0   | 38.3  | 41.9   |
| 545.8  | 602.0  | 321.7  | 145.3  | 125.1 | 131.6  | 110.6  | 95.6  | 95.3   |
| 613.1  | 584.7  | 283.1  | 574.2  | 337.3 | 340.4  | 603.8  | 264.5 | 409.5  |
| 0.5    | 3.4    | 0.6    | 6.7    | 8.7   | 5.1    | 5.5    | 6.8   | 3.2    |
| 4.7    | 5.8    | 4.3    | 11.0   | 6.4   | 8.3    | 4.0    | 7.0   | 5.1    |
| 584.6  | 703.7  | 523.0  | 1196.0 | 936.8 | 1055.5 | 652.2  | 750.2 | 745.7  |
| 254.2  | 459.4  | 349.8  | 53.8   | 48.6  | 48.5   | 52.2   | 52.6  | 54.4   |
| 682.6  | 791.1  | 455.5  | 578.0  | 388.8 | 473.6  | 293.1  | 265.0 | 332.4  |
| 193.7  | 230.8  | 128.7  | 171.3  | 127.2 | 144.9  | 123.1  | 87.9  | 114.1  |
| 43.4   | 64.3   | 46.0   | 31.0   | 5.4   | 18.1   | 18.8   | 19.8  | 11.4   |
| 11.8   | 13.5   | 7.8    | 16.4   | 18.3  | 37.8   | 16.9   | 18.8  | 21.4   |
| 11.4   | 25.6   | 16.3   | 8.7    | 12.8  | 13.3   | 5.8    | 5.4   | 4.7    |
| 467.4  | 408.4  | 171.3  | 6.2    | 10.6  | 9.5    | 2.6    | 0.6   | 5.1    |
| 44.4   | 61.0   | 39.6   | 113.2  | 85.3  | 106.8  | 73.3   | 72.2  | 68.5   |
| 575.4  | 684.0  | 489.4  | 109.6  | 96.0  | 141.1  | 78.4   | 75.1  | 85.2   |
| 258.2  | 287.6  | 197.2  | 45.3   | 50.9  | 48.5   | 45.8   | 38.4  | 49.6   |
| 1613.3 | 1768.2 | 1083.0 | 646.3  | 463.4 | 503.1  | 484.0  | 388.5 | 471.9  |
| 117.0  | 125.9  | 88.0   | 67.0   | 46.0  | 71.1   | 38.4   | 31.0  | 34.3   |
| 2474.0 | 3669.1 | 2697.0 | 968.9  | 778.7 | 878.3  | 1213.5 | 985.1 | 1141.8 |
| 240.0  | 253.3  | 192.0  | 115.1  | 108.5 | 121.8  | 107.0  | 100.2 | 107.4  |
| 541.1  | 604.3  | 353.2  | 306.1  | 231.1 | 241.6  | 165.5  | 141.0 | 163.9  |
| 214.6  | 221.0  | 148.6  | 187.8  | 144.7 | 180.2  | 106.4  | 115.6 | 111.9  |
| 699.0  | 958.8  | 725.1  | 456.3  | 425.4 | 466.6  | 302.7  | 397.4 | 466.5  |
| 243.9  | 308.7  | 217.7  | 282.5  | 209.8 | 279.7  | 146.0  | 147.4 | 163.6  |
| 521.3  | 1049.4 | 1440.6 | 719.1  | 529.7 | 575.1  | 462.1  | 344.8 | 441.1  |
| 84.1   | 115.4  | 95.8   | 82.4   | 81.0  | 95.2   | 49.4   | 60.7  | 67.3   |
| 199.0  | 254.7  | 171.1  | 199.0  | 168.4 | 177.3  | 129.6  | 132.6 | 147.3  |
| 175.4  | 168.3  | 116.6  | 131.8  | 105.8 | 95.5   | 119.0  | 107.0 | 133.4  |
| 111.0  | 103.3  | 49.2   | 81.9   | 61.2  | 65.8   | 41.4   | 37.6  | 53.3   |
| 70.1   | 91.4   | 65.7   | 5.1    | 10.1  | 7.6    | 3.4    | 8.7   | 12.9   |

|        |        |        |        |       |       |       |       |       |
|--------|--------|--------|--------|-------|-------|-------|-------|-------|
| 360.9  | 435.9  | 327.0  | 338.3  | 315.3 | 354.8 | 255.4 | 268.9 | 303.9 |
| 4.1    | 0.9    | 0.4    | 12.1   | 2.2   | 2.1   | 2.9   | 2.8   | 0.2   |
| 129.7  | 216.1  | 185.4  | 56.8   | 56.0  | 62.7  | 46.6  | 47.8  | 49.0  |
| 49.7   | 70.2   | 70.0   | 49.5   | 36.3  | 47.2  | 13.8  | 16.1  | 18.8  |
| 437.4  | 552.7  | 461.5  | 389.3  | 332.9 | 330.9 | 306.2 | 311.4 | 368.0 |
| 72.5   | 102.3  | 67.4   | 14.1   | 9.0   | 32.4  | 16.3  | 10.2  | 7.8   |
| 2.6    | 7.8    | 8.2    | 25.3   | 23.2  | 9.5   | 8.7   | 6.6   | 8.3   |
| 25.8   | 17.6   | 20.0   | 13.2   | 7.4   | 4.5   | 1.7   | 1.5   | 2.3   |
| 137.0  | 184.5  | 144.4  | 142.3  | 124.5 | 155.7 | 107.9 | 103.6 | 121.9 |
| 29.1   | 25.0   | 15.2   | 161.7  | 127.0 | 129.7 | 111.4 | 114.5 | 129.3 |
| 967.3  | 915.3  | 502.3  | 187.3  | 147.6 | 158.5 | 154.5 | 128.3 | 141.6 |
| 3.6    | 2.3    | 4.4    | 15.7   | 9.8   | 20.5  | 2.7   | 6.1   | 4.3   |
| 125.3  | 167.2  | 78.9   | 111.9  | 104.5 | 150.1 | 138.3 | 100.3 | 149.6 |
| 512.2  | 554.1  | 397.9  | 273.0  | 251.7 | 283.2 | 281.5 | 272.7 | 304.8 |
| 350.5  | 419.6  | 401.1  | 213.0  | 191.8 | 205.1 | 189.1 | 213.4 | 217.7 |
| 2326.9 | 2416.9 | 1310.5 | 953.7  | 546.1 | 536.3 | 616.2 | 325.3 | 421.2 |
| 619.6  | 676.0  | 554.3  | 157.9  | 145.5 | 140.1 | 183.0 | 142.9 | 201.7 |
| 1390.0 | 1123.4 | 577.4  | 124.1  | 119.6 | 129.8 | 69.3  | 82.9  | 81.3  |
| 234.7  | 405.4  | 274.4  | 55.4   | 64.2  | 71.1  | 49.6  | 62.1  | 69.6  |
| 92.6   | 161.9  | 75.4   | 63.3   | 73.2  | 46.6  | 33.8  | 49.5  | 45.0  |
| 11.3   | 26.9   | 20.2   | 18.9   | 10.5  | 4.6   | 21.5  | 16.6  | 27.3  |
| 60.1   | 103.8  | 71.4   | 44.9   | 36.2  | 41.8  | 23.5  | 14.1  | 25.5  |
| 68.3   | 70.5   | 39.5   | 457.6  | 377.9 | 401.0 | 254.9 | 225.5 | 261.1 |
| 465.8  | 695.9  | 725.8  | 409.8  | 433.7 | 365.8 | 388.0 | 358.0 | 454.6 |
| 591.4  | 561.4  | 354.2  | 84.5   | 84.1  | 82.8  | 80.0  | 111.6 | 119.4 |
| 626.6  | 605.3  | 286.2  | 227.7  | 165.3 | 153.4 | 197.0 | 150.8 | 202.1 |
| 31.4   | 42.5   | 23.6   | 5.9    | 9.3   | 14.9  | 4.3   | 4.2   | 11.9  |
| 25.6   | 30.0   | 27.9   | 11.2   | 11.7  | 23.6  | 12.3  | 10.2  | 16.3  |
| 4309.3 | 2679.0 | 1440.7 | 630.9  | 392.2 | 401.0 | 384.2 | 292.5 | 340.5 |
| 778.0  | 991.7  | 700.1  | 1154.2 | 857.4 | 931.0 | 474.5 | 408.9 | 451.6 |
| 153.6  | 186.5  | 124.0  | 112.1  | 94.7  | 124.3 | 128.0 | 113.3 | 127.6 |
| 38.0   | 49.4   | 55.0   | 74.0   | 84.2  | 67.4  | 115.7 | 149.9 | 121.0 |
| 72.9   | 76.3   | 83.4   | 46.0   | 44.8  | 37.9  | 22.3  | 30.0  | 37.0  |
| 427.3  | 494.2  | 280.6  | 216.3  | 155.9 | 159.5 | 280.5 | 245.5 | 287.3 |
| 7.8    | 6.8    | 7.8    | 22.4   | 21.4  | 3.0   | 9.9   | 2.8   | 3.5   |
| 188.3  | 269.5  | 249.1  | 88.5   | 71.7  | 80.5  | 65.4  | 69.9  | 76.7  |
| 247.7  | 318.7  | 195.0  | 117.7  | 97.6  | 108.7 | 82.9  | 67.7  | 92.5  |
| 5.4    | 3.2    | 14.1   | 6.4    | 8.1   | 12.3  | 10.0  | 4.5   | 8.8   |
| 41.8   | 42.2   | 34.1   | 29.7   | 30.3  | 32.7  | 33.8  | 39.7  | 30.3  |
| 60.6   | 72.7   | 54.6   | 49.1   | 41.7  | 49.5  | 23.1  | 18.1  | 31.6  |
| 280.2  | 493.2  | 539.7  | 17.4   | 13.4  | 11.8  | 22.9  | 15.5  | 23.3  |
| 100.5  | 137.5  | 101.3  | 12.6   | 11.7  | 11.5  | 16.6  | 13.8  | 16.3  |
| 333.1  | 449.3  | 382.0  | 158.2  | 125.6 | 161.4 | 99.6  | 140.8 | 117.3 |
| 917.3  | 1034.0 | 765.0  | 593.9  | 532.6 | 571.3 | 366.7 | 369.8 | 417.7 |
| 447.0  | 488.4  | 183.6  | 233.6  | 186.9 | 153.3 | 301.0 | 253.4 | 258.7 |
| 591.5  | 703.4  | 399.1  | 133.6  | 111.3 | 119.3 | 125.5 | 138.5 | 153.9 |
| 8.1    | 5.3    | 8.4    | 7.9    | 10.4  | 5.9   | 3.7   | 4.4   | 3.9   |
| 160.9  | 162.8  | 120.0  | 217.3  | 164.7 | 172.4 | 75.7  | 71.5  | 88.6  |
| 142.3  | 271.5  | 155.0  | 9.1    | 14.9  | 14.7  | 13.8  | 9.1   | 5.3   |
| 61.7   | 78.3   | 38.8   | 33.8   | 27.2  | 22.7  | 30.8  | 18.5  | 22.6  |
| 36.6   | 41.3   | 30.7   | 39.0   | 28.5  | 31.9  | 28.7  | 17.0  | 25.7  |
| 82.7   | 130.9  | 71.4   | 110.9  | 81.9  | 99.8  | 46.3  | 64.7  | 61.2  |
| 182.1  | 257.1  | 212.6  | 148.5  | 139.4 | 127.5 | 102.1 | 134.1 | 124.6 |

|        |        |        |       |       |        |       |       |       |
|--------|--------|--------|-------|-------|--------|-------|-------|-------|
| 108.9  | 111.3  | 113.8  | 139.8 | 130.4 | 128.3  | 86.5  | 81.9  | 85.2  |
| 102.8  | 122.8  | 95.6   | 115.2 | 101.5 | 95.3   | 68.0  | 60.6  | 71.5  |
| 218.1  | 353.1  | 301.0  | 717.5 | 848.8 | 1059.5 | 428.5 | 736.7 | 664.5 |
| 395.7  | 421.5  | 312.3  | 124.8 | 112.0 | 119.3  | 83.5  | 75.2  | 90.9  |
| 38.6   | 52.6   | 56.3   | 30.2  | 30.8  | 36.8   | 29.5  | 43.8  | 42.2  |
| 1.6    | 3.0    | 2.5    | 3.9   | 2.7   | 4.0    | 3.0   | 2.9   | 1.6   |
| 695.5  | 919.7  | 629.6  | 446.1 | 393.9 | 421.7  | 323.6 | 334.1 | 347.4 |
| 252.0  | 383.6  | 339.8  | 287.5 | 272.1 | 334.2  | 211.7 | 311.9 | 307.5 |
| 158.2  | 217.1  | 220.8  | 38.0  | 37.6  | 47.4   | 23.3  | 17.6  | 26.2  |
| 430.5  | 670.0  | 601.3  | 14.7  | 13.8  | 20.6   | 16.9  | 26.9  | 19.0  |
| 1.6    | 1.9    | 0.9    | 2.8   | 4.2   | 7.5    | 4.3   | 1.9   | 0.7   |
| 1.0    | 8.3    | 6.7    | 50.2  | 61.4  | 66.1   | 37.6  | 63.8  | 60.4  |
| 207.3  | 267.0  | 160.9  | 289.1 | 249.1 | 271.3  | 262.4 | 244.9 | 267.1 |
| 50.1   | 78.1   | 43.8   | 35.7  | 31.1  | 29.8   | 28.8  | 20.1  | 36.9  |
| 759.5  | 804.5  | 542.1  | 462.4 | 374.9 | 419.9  | 289.5 | 306.5 | 350.6 |
| 46.2   | 48.1   | 30.3   | 122.8 | 85.2  | 102.1  | 92.0  | 115.4 | 114.7 |
| 291.2  | 289.0  | 254.6  | 77.1  | 52.9  | 57.2   | 24.9  | 17.7  | 17.3  |
| 232.7  | 277.0  | 173.0  | 649.0 | 477.2 | 574.5  | 390.1 | 290.1 | 374.0 |
| 82.8   | 113.7  | 103.3  | 62.9  | 52.8  | 56.9   | 36.8  | 37.7  | 47.5  |
| 73.7   | 86.4   | 85.3   | 93.3  | 82.8  | 92.4   | 47.9  | 54.1  | 57.7  |
| 1085.5 | 1194.6 | 988.1  | 622.6 | 599.3 | 591.2  | 701.3 | 875.5 | 916.6 |
| 170.9  | 207.3  | 176.6  | 98.5  | 84.1  | 107.2  | 98.1  | 116.4 | 121.6 |
| 54.0   | 68.0   | 21.0   | 48.3  | 33.1  | 27.8   | 44.7  | 27.8  | 40.9  |
| 82.4   | 136.7  | 173.3  | 71.8  | 63.6  | 90.4   | 51.9  | 67.8  | 83.0  |
| 52.5   | 67.0   | 51.5   | 48.7  | 23.3  | 38.2   | 27.8  | 26.8  | 20.5  |
| 122.6  | 166.9  | 134.4  | 323.1 | 223.3 | 219.9  | 266.8 | 175.8 | 255.0 |
| 853.4  | 842.4  | 462.8  | 543.6 | 339.4 | 386.3  | 410.7 | 293.6 | 364.4 |
| 7.8    | 3.1    | 6.4    | 13.8  | 16.0  | 15.0   | 8.6   | 5.9   | 3.1   |
| 423.5  | 449.7  | 305.0  | 88.6  | 71.3  | 78.8   | 43.0  | 53.4  | 54.5  |
| 629.1  | 803.8  | 510.6  | 165.5 | 140.3 | 139.3  | 63.0  | 54.6  | 70.1  |
| 108.5  | 160.7  | 93.3   | 39.1  | 24.2  | 27.4   | 19.6  | 27.1  | 22.8  |
| 518.3  | 663.3  | 436.5  | 240.6 | 217.0 | 242.7  | 186.0 | 182.3 | 198.5 |
| 31.2   | 62.1   | 38.5   | 39.6  | 16.5  | 41.4   | 13.3  | 14.9  | 22.7  |
| 272.0  | 373.8  | 237.7  | 351.3 | 303.6 | 298.1  | 218.2 | 158.1 | 193.9 |
| 2437.3 | 2546.6 | 1807.2 | 842.2 | 745.0 | 737.0  | 489.8 | 529.0 | 569.9 |
| 411.2  | 511.9  | 524.8  | 137.7 | 166.4 | 161.6  | 116.2 | 166.3 | 147.8 |
| 60.6   | 89.1   | 128.0  | 53.7  | 40.5  | 62.2   | 41.1  | 35.6  | 33.1  |
| 70.1   | 111.9  | 133.9  | 221.2 | 234.5 | 241.0  | 109.8 | 145.5 | 157.9 |
| 93.9   | 154.6  | 81.9   | 169.2 | 158.0 | 152.5  | 98.4  | 81.2  | 129.1 |
| 2.1    | 6.5    | 1.2    | 70.1  | 47.9  | 59.3   | 41.4  | 46.5  | 48.8  |
| 319.1  | 344.1  | 201.1  | 211.1 | 133.2 | 129.4  | 236.0 | 165.8 | 210.8 |
| 17.6   | 27.4   | 21.3   | 49.2  | 33.5  | 52.7   | 24.6  | 36.0  | 29.5  |
| 15.9   | 23.6   | 12.0   | 223.8 | 197.0 | 204.3  | 100.1 | 125.3 | 150.2 |
| 1.6    | 1.7    | 1.2    | 33.7  | 22.7  | 26.3   | 17.4  | 15.8  | 8.9   |
| 1.0    | 9.2    | 4.3    | 12.0  | 9.5   | 12.7   | 5.3   | 4.6   | 3.3   |
| 451.8  | 599.5  | 306.1  | 95.1  | 97.4  | 92.5   | 102.1 | 102.6 | 96.7  |
| 30.1   | 36.3   | 15.6   | 62.3  | 53.4  | 50.1   | 55.7  | 37.2  | 48.9  |
| 225.6  | 356.2  | 385.6  | 197.6 | 188.9 | 196.9  | 102.7 | 167.9 | 137.3 |
| 63.7   | 82.0   | 69.2   | 31.3  | 28.3  | 37.7   | 39.3  | 36.2  | 40.2  |
| 101.2  | 162.6  | 135.9  | 315.2 | 263.6 | 325.9  | 126.4 | 173.3 | 166.5 |
| 16.1   | 50.4   | 39.7   | 65.5  | 56.6  | 77.7   | 8.5   | 38.7  | 50.3  |
| 482.8  | 556.1  | 449.7  | 169.5 | 156.9 | 148.4  | 217.2 | 206.9 | 226.1 |
| 251.8  | 386.1  | 335.0  | 215.9 | 211.8 | 206.0  | 163.5 | 165.1 | 176.5 |

|        |        |        |        |        |        |       |       |       |
|--------|--------|--------|--------|--------|--------|-------|-------|-------|
| 26.7   | 30.0   | 31.7   | 33.3   | 36.6   | 35.0   | 32.6  | 35.3  | 41.2  |
| 126.9  | 132.8  | 95.2   | 43.7   | 41.0   | 28.6   | 29.1  | 33.3  | 43.6  |
| 148.3  | 187.9  | 146.5  | 574.4  | 596.0  | 692.8  | 187.9 | 294.0 | 299.5 |
| 346.5  | 408.4  | 329.8  | 162.1  | 120.6  | 154.6  | 93.8  | 110.4 | 103.0 |
| 2.4    | 1.7    | 0.7    | 4.3    | 3.2    | 3.3    | 3.9   | 2.5   | 6.4   |
| 387.6  | 489.1  | 297.6  | 312.4  | 251.3  | 260.0  | 211.7 | 192.5 | 202.0 |
| 249.5  | 270.1  | 214.6  | 138.4  | 122.3  | 141.6  | 85.2  | 100.3 | 96.8  |
| 90.8   | 162.5  | 140.6  | 33.1   | 43.5   | 51.9   | 40.9  | 29.3  | 38.2  |
| 4.0    | 6.9    | 4.0    | 71.8   | 73.5   | 48.2   | 18.8  | 16.6  | 15.2  |
| 209.5  | 287.9  | 159.0  | 113.3  | 100.1  | 107.1  | 84.5  | 65.0  | 95.5  |
| 2.3    | 2.0    | 2.0    | 3.1    | 3.4    | 3.2    | 1.3   | 1.0   | 2.4   |
| 29.3   | 40.1   | 49.2   | 32.7   | 33.6   | 31.7   | 41.5  | 30.4  | 42.3  |
| 54.9   | 101.9  | 69.8   | 37.6   | 22.2   | 33.1   | 32.1  | 41.7  | 43.9  |
| 57.1   | 80.2   | 63.6   | 43.9   | 41.3   | 40.9   | 34.0  | 35.4  | 33.2  |
| 536.9  | 636.8  | 339.8  | 109.5  | 94.3   | 113.2  | 81.7  | 101.1 | 104.3 |
| 111.0  | 146.0  | 99.1   | 67.7   | 53.0   | 54.7   | 52.1  | 42.9  | 56.9  |
| 225.6  | 324.0  | 165.6  | 171.6  | 90.8   | 104.3  | 90.9  | 61.1  | 65.1  |
| 74.6   | 131.3  | 105.4  | 51.0   | 45.4   | 42.5   | 27.0  | 31.2  | 33.2  |
| 44.2   | 50.5   | 18.1   | 33.0   | 29.3   | 26.3   | 27.2  | 25.7  | 31.3  |
| 1057.4 | 988.9  | 353.9  | 220.9  | 120.1  | 115.7  | 143.3 | 83.5  | 110.0 |
| 80.7   | 71.6   | 67.1   | 99.6   | 62.4   | 90.6   | 38.5  | 36.9  | 43.9  |
| 280.5  | 336.8  | 226.1  | 97.4   | 93.9   | 97.0   | 98.8  | 77.1  | 89.1  |
| 214.3  | 253.5  | 139.3  | 353.6  | 313.7  | 376.8  | 202.2 | 229.0 | 245.5 |
| 48.0   | 62.6   | 17.6   | 31.2   | 17.1   | 14.8   | 26.7  | 8.8   | 24.3  |
| 1841.6 | 2271.5 | 2206.7 | 102.6  | 87.7   | 103.4  | 66.3  | 86.9  | 82.6  |
| 45.2   | 40.6   | 24.1   | 86.4   | 74.1   | 62.8   | 50.2  | 50.5  | 51.8  |
| 28.7   | 24.2   | 26.2   | 33.9   | 35.9   | 40.8   | 31.5  | 18.8  | 26.8  |
| 20.7   | 27.3   | 26.7   | 119.5  | 107.2  | 81.9   | 89.8  | 111.7 | 133.5 |
| 123.6  | 132.5  | 105.8  | 174.0  | 125.4  | 120.3  | 84.2  | 69.0  | 101.8 |
| 11.3   | 17.4   | 7.8    | 400.6  | 323.5  | 357.4  | 241.7 | 194.8 | 262.5 |
| 74.2   | 87.9   | 97.1   | 202.9  | 164.5  | 186.3  | 103.0 | 117.4 | 119.7 |
| 190.4  | 192.5  | 104.9  | 72.3   | 45.8   | 58.7   | 37.8  | 26.9  | 26.6  |
| 5.9    | 17.0   | 2.6    | 23.6   | 20.2   | 18.1   | 16.6  | 22.6  | 27.6  |
| 46.1   | 49.7   | 42.4   | 62.6   | 55.3   | 76.3   | 70.3  | 38.5  | 61.2  |
| 10.8   | 22.1   | 13.9   | 11.6   | 8.6    | 10.9   | 3.4   | 1.7   | 2.2   |
| 129.0  | 227.6  | 247.1  | 130.1  | 126.2  | 128.7  | 166.4 | 310.1 | 236.4 |
| 294.9  | 331.5  | 136.7  | 402.9  | 313.8  | 295.1  | 181.8 | 159.2 | 183.8 |
| 973.1  | 1197.5 | 836.8  | 84.1   | 70.6   | 81.8   | 77.2  | 71.9  | 79.8  |
| 1.4    | 3.4    | 1.5    | 7.5    | 8.9    | 5.8    | 4.3   | 13.4  | 11.8  |
| 41.6   | 50.3   | 39.6   | 190.4  | 129.0  | 137.4  | 60.3  | 66.5  | 77.4  |
| 0.8    | 0.7    | 0.3    | 2.1    | 1.6    | 5.6    | 1.4   | 1.3   | 1.8   |
| 71.4   | 83.7   | 64.0   | 29.8   | 20.3   | 30.4   | 34.4  | 43.7  | 30.3  |
| 363.7  | 470.6  | 375.8  | 18.5   | 22.5   | 33.3   | 24.3  | 13.0  | 19.0  |
| 33.4   | 24.0   | 11.9   | 17.2   | 15.8   | 18.2   | 6.7   | 9.1   | 2.6   |
| 1261.6 | 1522.9 | 1401.5 | 138.6  | 137.6  | 164.8  | 117.6 | 166.7 | 166.4 |
| 222.9  | 268.9  | 195.3  | 38.7   | 63.0   | 57.4   | 29.7  | 59.4  | 41.7  |
| 9.0    | 10.4   | 7.5    | 18.7   | 9.9    | 9.7    | 1.7   | 5.6   | 8.9   |
| 672.7  | 726.5  | 502.9  | 582.0  | 412.5  | 447.4  | 337.6 | 286.6 | 319.6 |
| 31.5   | 39.1   | 21.8   | 56.9   | 42.4   | 56.3   | 43.6  | 29.5  | 41.8  |
| 7.7    | 1.1    | 4.8    | 1315.5 | 1059.9 | 1013.6 | 817.0 | 765.9 | 861.9 |
| 387.9  | 542.3  | 382.1  | 292.3  | 208.0  | 237.0  | 205.8 | 164.6 | 208.7 |
| 22.4   | 50.9   | 38.2   | 70.1   | 57.9   | 78.2   | 41.9  | 39.3  | 44.8  |
| 197.7  | 275.0  | 173.6  | 76.8   | 72.2   | 66.5   | 106.5 | 112.5 | 116.5 |



|        |        |        |        |        |        |        |        |        |
|--------|--------|--------|--------|--------|--------|--------|--------|--------|
| 168.0  | 210.5  | 163.2  | 125.9  | 111.3  | 115.6  | 106.0  | 102.3  | 117.5  |
| 3411.9 | 3434.2 | 2229.8 | 2721.4 | 1992.9 | 2084.8 | 2111.6 | 1522.8 | 1954.1 |
| 185.7  | 192.2  | 95.5   | 90.8   | 44.4   | 54.9   | 92.7   | 64.9   | 61.5   |
| 7.8    | 3.2    | 3.0    | 7.3    | 9.5    | 6.2    | 3.4    | 2.6    | 1.8    |
| 403.1  | 401.2  | 291.7  | 194.5  | 129.8  | 146.6  | 144.9  | 161.4  | 154.3  |
| 230.6  | 310.1  | 244.6  | 103.3  | 82.9   | 103.6  | 78.3   | 107.3  | 100.5  |
| 2.3    | 3.5    | 6.3    | 44.6   | 43.9   | 46.7   | 23.0   | 35.1   | 16.8   |
| 389.3  | 454.9  | 282.0  | 449.9  | 366.5  | 474.1  | 224.6  | 203.7  | 237.9  |
| 32.1   | 37.9   | 26.5   | 211.3  | 166.9  | 145.7  | 148.7  | 120.7  | 165.6  |
| 41.5   | 54.8   | 38.0   | 215.0  | 134.2  | 133.2  | 187.0  | 104.2  | 137.7  |
| 20.5   | 23.1   | 15.4   | 74.3   | 41.7   | 36.4   | 81.2   | 36.7   | 61.0   |
| 1509.4 | 1706.8 | 987.4  | 286.0  | 212.4  | 202.2  | 195.4  | 159.8  | 176.0  |
| 13.8   | 10.4   | 12.3   | 97.8   | 111.6  | 113.8  | 56.8   | 74.9   | 89.0   |
| 24.4   | 25.0   | 27.7   | 47.4   | 50.8   | 43.7   | 26.1   | 30.4   | 35.8   |
| 189.7  | 253.5  | 143.2  | 199.5  | 116.8  | 129.8  | 99.3   | 58.7   | 68.6   |
| 225.1  | 336.7  | 260.1  | 232.1  | 177.4  | 197.0  | 119.5  | 112.6  | 127.8  |
| 9.5    | 6.5    | 4.3    | 15.4   | 1.9    | 9.4    | 8.3    | 5.6    | 10.2   |
| 23.8   | 49.2   | 41.6   | 49.2   | 36.6   | 35.2   | 22.2   | 22.6   | 22.9   |
| 15.6   | 16.4   | 12.8   | 46.6   | 42.9   | 42.9   | 16.4   | 23.4   | 18.7   |
| 278.0  | 322.4  | 150.1  | 365.4  | 248.2  | 285.5  | 186.7  | 154.5  | 163.5  |
| 104.0  | 162.4  | 128.0  | 196.7  | 198.3  | 209.1  | 244.9  | 326.7  | 312.0  |
| 268.7  | 443.3  | 526.6  | 51.3   | 51.6   | 54.1   | 65.7   | 97.0   | 81.4   |
| 62.7   | 74.1   | 73.3   | 85.9   | 89.3   | 113.2  | 36.9   | 45.4   | 59.2   |
| 17.4   | 15.0   | 11.9   | 11.6   | 9.7    | 11.1   | 14.2   | 9.5    | 8.3    |
| 36.8   | 53.8   | 47.7   | 61.1   | 43.2   | 58.6   | 48.5   | 57.3   | 47.8   |
| 69.7   | 110.0  | 89.8   | 144.5  | 151.9  | 136.4  | 183.2  | 183.7  | 185.9  |
| 37.0   | 55.7   | 35.3   | 40.6   | 28.0   | 44.9   | 27.2   | 27.5   | 28.0   |
| 19.3   | 10.3   | 5.5    | 4.4    | 7.7    | 11.4   | 3.1    | 3.4    | 6.6    |
| 86.9   | 102.6  | 57.4   | 179.9  | 98.0   | 99.4   | 68.9   | 60.9   | 62.2   |
| 197.6  | 269.0  | 239.3  | 196.3  | 158.6  | 188.7  | 201.0  | 213.5  | 233.9  |
| 265.0  | 293.4  | 199.0  | 147.3  | 126.6  | 131.0  | 83.3   | 90.1   | 98.5   |
| 21.8   | 10.3   | 13.8   | 11.3   | 9.7    | 16.4   | 21.2   | 5.6    | 14.2   |
| 268.1  | 284.6  | 183.6  | 163.3  | 139.9  | 139.4  | 68.8   | 64.2   | 82.1   |
| 21.4   | 29.3   | 22.0   | 8.5    | 7.0    | 13.3   | 7.6    | 8.5    | 8.1    |
| 525.1  | 503.4  | 272.8  | 132.3  | 118.7  | 131.1  | 183.4  | 159.7  | 182.0  |
| 506.0  | 508.7  | 517.2  | 239.6  | 218.0  | 230.6  | 140.9  | 133.2  | 176.3  |
| 137.2  | 155.4  | 83.1   | 185.7  | 139.7  | 170.0  | 96.6   | 92.2   | 100.2  |
| 2054.4 | 2635.8 | 2118.7 | 1263.3 | 1168.2 | 1244.6 | 809.9  | 925.4  | 1000.3 |
| 318.6  | 404.3  | 322.6  | 208.1  | 144.8  | 160.9  | 151.8  | 118.8  | 137.5  |
| 9.6    | 12.0   | 4.4    | 4.5    | 2.2    | 10.8   | 3.9    | 4.3    | 4.9    |
| 134.8  | 167.7  | 98.5   | 170.3  | 149.1  | 187.8  | 113.2  | 96.9   | 123.2  |
| 58.7   | 92.7   | 73.6   | 19.2   | 35.5   | 25.3   | 6.6    | 8.0    | 22.1   |
| 17.4   | 21.6   | 13.3   | 8.8    | 5.9    | 10.7   | 2.2    | 5.7    | 3.1    |
| 240.2  | 262.7  | 190.4  | 130.1  | 120.3  | 144.9  | 117.4  | 132.9  | 134.4  |
| 381.8  | 568.7  | 406.2  | 193.6  | 176.4  | 184.6  | 163.3  | 169.4  | 189.7  |
| 71.4   | 80.6   | 39.8   | 80.4   | 35.3   | 49.8   | 41.3   | 33.9   | 44.6   |
| 66.7   | 68.1   | 53.0   | 28.4   | 25.1   | 24.4   | 22.7   | 14.3   | 18.7   |
| 43.9   | 47.6   | 35.8   | 45.8   | 35.3   | 43.4   | 50.2   | 54.9   | 63.4   |
| 123.9  | 98.8   | 73.1   | 88.4   | 65.9   | 75.2   | 61.6   | 54.6   | 74.3   |
| 22.2   | 23.1   | 30.0   | 39.9   | 34.1   | 49.9   | 19.0   | 26.6   | 33.0   |
| 158.8  | 197.7  | 144.0  | 204.1  | 194.3  | 199.9  | 176.6  | 194.6  | 220.3  |
| 180.6  | 213.5  | 148.3  | 32.1   | 41.6   | 40.7   | 45.6   | 45.9   | 54.3   |
| 109.7  | 207.3  | 186.8  | 94.6   | 103.5  | 102.1  | 37.8   | 61.3   | 54.3   |

|        |        |        |        |        |        |       |       |       |
|--------|--------|--------|--------|--------|--------|-------|-------|-------|
| 149.8  | 195.7  | 135.7  | 84.3   | 70.8   | 78.8   | 37.6  | 51.4  | 53.5  |
| 47.4   | 62.7   | 44.4   | 66.8   | 56.3   | 66.9   | 46.9  | 63.1  | 54.6  |
| 1706.9 | 1708.6 | 976.8  | 239.1  | 156.2  | 153.8  | 197.5 | 174.9 | 179.8 |
| 149.1  | 145.8  | 122.3  | 241.6  | 172.5  | 207.9  | 122.8 | 128.5 | 138.5 |
| 216.4  | 273.8  | 206.4  | 126.6  | 115.2  | 135.4  | 113.9 | 126.5 | 121.1 |
| 1885.3 | 2195.7 | 1461.0 | 1253.6 | 1082.6 | 1154.6 | 717.8 | 790.4 | 774.0 |
| 327.2  | 432.4  | 365.2  | 300.9  | 285.0  | 269.8  | 288.3 | 303.7 | 324.2 |
| 37.1   | 63.4   | 76.3   | 87.9   | 94.7   | 108.6  | 57.6  | 90.8  | 93.8  |
| 185.2  | 224.2  | 182.5  | 70.0   | 40.6   | 46.1   | 59.4  | 44.2  | 55.9  |
| 43.6   | 89.5   | 71.3   | 79.4   | 55.8   | 77.6   | 41.1  | 42.9  | 52.9  |
| 161.0  | 166.9  | 101.7  | 21.3   | 15.4   | 6.2    | 6.6   | 4.5   | 3.4   |
| 1770.3 | 2010.4 | 1643.8 | 894.1  | 875.6  | 862.8  | 656.1 | 832.4 | 826.3 |
| 247.4  | 316.1  | 220.5  | 392.6  | 240.8  | 290.1  | 192.9 | 163.7 | 167.5 |
| 18.1   | 19.9   | 17.6   | 23.0   | 24.7   | 29.7   | 22.2  | 24.1  | 29.1  |
| 130.1  | 184.9  | 172.3  | 18.6   | 13.5   | 8.2    | 8.0   | 7.6   | 11.0  |
| 53.6   | 97.4   | 84.7   | 139.5  | 135.6  | 146.5  | 87.9  | 99.5  | 149.9 |
| 157.5  | 123.0  | 13.7   | 48.5   | 31.7   | 69.8   | 45.1  | 19.5  | 31.3  |
| 258.3  | 290.2  | 224.0  | 143.2  | 110.6  | 94.6   | 106.7 | 107.1 | 122.2 |
| 1068.6 | 1034.3 | 499.1  | 464.6  | 388.2  | 413.4  | 504.1 | 456.4 | 509.3 |
| 2.1    | 2.2    | 2.0    | 11.1   | 21.7   | 5.9    | 3.6   | 2.6   | 3.7   |
| 9.4    | 14.5   | 15.7   | 40.4   | 49.4   | 29.7   | 8.5   | 23.6  | 5.4   |
| 761.7  | 770.8  | 461.4  | 233.9  | 182.7  | 215.1  | 139.7 | 160.0 | 164.8 |
| 68.6   | 58.9   | 28.1   | 11.6   | 7.7    | 9.8    | 7.5   | 4.4   | 3.4   |
| 2.5    | 1.7    | 1.5    | 54.0   | 59.4   | 67.5   | 43.8  | 75.6  | 70.4  |
| 519.3  | 307.3  | 162.3  | 43.9   | 31.7   | 53.5   | 28.8  | 32.0  | 39.1  |
| 4.7    | 17.5   | 12.9   | 32.7   | 14.7   | 27.7   | 15.3  | 7.0   | 13.7  |
| 441.7  | 481.9  | 140.5  | 333.5  | 232.9  | 243.5  | 221.1 | 156.7 | 238.9 |
| 328.7  | 550.0  | 380.7  | 36.1   | 30.7   | 35.7   | 23.6  | 35.2  | 33.3  |
| 427.3  | 647.4  | 593.7  | 249.2  | 229.4  | 248.3  | 97.5  | 155.2 | 162.6 |
| 314.9  | 341.7  | 284.8  | 152.6  | 113.7  | 126.6  | 96.5  | 77.7  | 86.7  |
| 312.9  | 436.7  | 309.5  | 147.7  | 105.5  | 121.1  | 111.7 | 98.0  | 121.8 |
| 171.0  | 225.1  | 214.9  | 132.8  | 114.1  | 130.9  | 118.0 | 130.9 | 149.5 |
| 307.9  | 307.1  | 229.4  | 188.3  | 187.9  | 198.4  | 184.0 | 255.1 | 190.0 |
| 547.1  | 695.5  | 420.0  | 187.9  | 167.9  | 181.9  | 184.2 | 164.4 | 177.2 |
| 10.0   | 21.7   | 31.9   | 153.2  | 135.4  | 131.1  | 44.8  | 62.2  | 57.4  |
| 36.6   | 61.9   | 48.7   | 64.8   | 45.5   | 45.9   | 50.6  | 69.0  | 61.8  |
| 1.1    | 0.9    | 0.8    | 54.3   | 38.2   | 41.8   | 47.5  | 46.0  | 40.3  |
| 64.6   | 88.3   | 79.0   | 164.2  | 140.5  | 149.5  | 157.9 | 133.7 | 172.4 |
| 92.4   | 131.8  | 135.8  | 3.5    | 6.7    | 8.1    | 2.8   | 3.7   | 0.4   |
| 249.8  | 297.1  | 168.0  | 182.6  | 138.1  | 161.9  | 132.3 | 136.9 | 157.6 |
| 13.1   | 24.0   | 12.9   | 7.0    | 8.5    | 13.6   | 9.7   | 6.0   | 12.8  |
| 1.4    | 1.2    | 0.7    | 10.5   | 7.4    | 12.4   | 3.3   | 0.8   | 0.9   |
| 34.9   | 34.4   | 21.8   | 11.3   | 5.4    | 9.4    | 3.6   | 5.1   | 3.6   |
| 553.0  | 719.7  | 583.2  | 390.3  | 345.0  | 362.0  | 347.1 | 379.9 | 425.0 |
| 3.5    | 5.3    | 6.0    | 20.5   | 28.9   | 31.9   | 13.1  | 20.1  | 22.5  |
| 73.5   | 94.1   | 43.3   | 186.2  | 126.9  | 140.5  | 115.3 | 76.8  | 119.3 |
| 3.2    | 2.2    | 2.0    | 2.9    | 10.5   | 13.9   | 1.7   | 3.6   | 2.9   |
| 434.4  | 582.3  | 379.9  | 1594.0 | 1020.7 | 1103.7 | 704.7 | 691.0 | 753.4 |
| 15.7   | 14.1   | 14.9   | 30.9   | 26.4   | 22.7   | 14.3  | 13.1  | 12.9  |
| 326.7  | 410.2  | 288.0  | 86.9   | 93.1   | 95.3   | 50.0  | 78.0  | 69.4  |
| 215.9  | 331.2  | 218.8  | 620.9  | 523.8  | 607.8  | 531.0 | 542.0 | 638.9 |
| 16.6   | 30.1   | 28.6   | 42.8   | 41.6   | 62.4   | 21.2  | 29.3  | 32.2  |
| 657.2  | 637.3  | 398.7  | 391.4  | 315.5  | 339.0  | 217.3 | 215.9 | 255.3 |

|        |        |        |        |        |        |       |       |        |
|--------|--------|--------|--------|--------|--------|-------|-------|--------|
| 32.7   | 28.2   | 29.4   | 89.1   | 58.2   | 67.5   | 45.6  | 33.9  | 54.7   |
| 751.7  | 770.0  | 575.1  | 236.4  | 186.3  | 204.2  | 312.6 | 297.5 | 346.9  |
| 10.3   | 11.0   | 12.6   | 30.6   | 8.2    | 17.3   | 15.3  | 8.2   | 10.2   |
| 34.2   | 63.4   | 49.0   | 167.3  | 129.2  | 153.4  | 69.1  | 83.3  | 100.0  |
| 1817.4 | 2039.2 | 1422.2 | 527.6  | 425.2  | 498.8  | 460.6 | 409.3 | 441.7  |
| 228.3  | 253.4  | 136.9  | 2.7    | 2.9    | 5.9    | 2.0   | 7.5   | 2.3    |
| 320.4  | 467.8  | 391.8  | 11.4   | 21.6   | 14.4   | 23.5  | 9.0   | 12.7   |
| 147.8  | 190.5  | 180.5  | 126.0  | 112.6  | 126.0  | 69.5  | 85.8  | 90.4   |
| 82.6   | 100.6  | 60.7   | 88.7   | 80.0   | 82.7   | 45.7  | 47.6  | 58.7   |
| 17.1   | 13.2   | 7.6    | 25.4   | 20.0   | 12.7   | 13.2  | 15.0  | 7.1    |
| 157.6  | 199.9  | 150.5  | 166.6  | 172.5  | 209.9  | 100.9 | 112.6 | 110.6  |
| 122.5  | 153.6  | 109.5  | 87.7   | 74.5   | 89.7   | 64.2  | 88.9  | 85.4   |
| 16.7   | 20.5   | 15.4   | 8.3    | 16.2   | 9.4    | 12.0  | 4.1   | 4.7    |
| 274.9  | 386.4  | 313.1  | 204.2  | 192.8  | 228.3  | 113.8 | 139.5 | 130.3  |
| 8.4    | 9.8    | 2.5    | 81.4   | 70.1   | 85.4   | 63.6  | 51.4  | 59.6   |
| 68.8   | 80.7   | 61.2   | 38.0   | 56.6   | 48.0   | 21.7  | 46.5  | 34.7   |
| 5.7    | 6.2    | 7.8    | 45.2   | 20.4   | 34.4   | 41.1  | 15.3  | 23.7   |
| 2.3    | 1.3    | 1.0    | 2.1    | 2.5    | 3.4    | 2.2   | 1.2   | 2.4    |
| 10.1   | 31.2   | 10.4   | 60.2   | 45.9   | 54.8   | 31.4  | 32.8  | 41.1   |
| 32.1   | 63.8   | 43.8   | 27.1   | 14.5   | 25.7   | 13.1  | 27.8  | 18.8   |
| 89.9   | 115.4  | 107.4  | 66.2   | 35.9   | 60.9   | 39.2  | 24.4  | 42.3   |
| 129.8  | 211.3  | 146.7  | 209.7  | 148.2  | 177.0  | 113.0 | 106.3 | 98.6   |
| 151.8  | 242.8  | 107.8  | 124.3  | 110.6  | 100.2  | 98.0  | 98.0  | 94.8   |
| 195.5  | 241.0  | 197.6  | 65.5   | 81.1   | 76.2   | 62.7  | 120.5 | 88.2   |
| 16.1   | 12.7   | 5.3    | 17.5   | 9.1    | 4.6    | 11.9  | 7.5   | 4.1    |
| 35.6   | 49.2   | 53.6   | 16.0   | 13.1   | 25.9   | 9.5   | 9.5   | 18.5   |
| 0.9    | 1.1    | 0.5    | 3.2    | 1.5    | 2.3    | 0.9   | 1.4   | 0.9    |
| 3.2    | 3.4    | 5.2    | 16.4   | 11.7   | 14.5   | 7.1   | 9.7   | 11.7   |
| 103.9  | 111.9  | 90.5   | 79.2   | 56.0   | 73.8   | 60.8  | 51.3  | 66.1   |
| 10.2   | 9.8    | 6.8    | 13.3   | 13.9   | 18.7   | 5.5   | 9.4   | 3.0    |
| 315.1  | 430.9  | 353.9  | 113.0  | 74.9   | 105.3  | 54.8  | 49.1  | 63.3   |
| 427.1  | 392.1  | 388.9  | 393.3  | 320.3  | 347.2  | 210.7 | 211.0 | 242.8  |
| 12.3   | 25.9   | 17.6   | 62.7   | 45.7   | 71.8   | 65.2  | 55.1  | 55.2   |
| 34.5   | 41.3   | 29.9   | 166.2  | 171.6  | 130.9  | 89.0  | 110.5 | 108.3  |
| 0.8    | 0.9    | 0.6    | 30.5   | 44.1   | 50.0   | 8.8   | 51.3  | 47.4   |
| 124.4  | 140.9  | 94.1   | 171.4  | 154.5  | 155.5  | 174.6 | 171.3 | 187.1  |
| 6.2    | 12.7   | 9.4    | 12.6   | 11.6   | 11.9   | 4.4   | 8.1   | 10.4   |
| 74.1   | 116.3  | 73.3   | 34.7   | 32.3   | 39.3   | 30.8  | 38.5  | 38.9   |
| 1.3    | 4.0    | 2.6    | 9.3    | 5.0    | 12.6   | 1.3   | 3.0   | 1.5    |
| 111.0  | 136.2  | 72.5   | 41.4   | 54.1   | 44.5   | 29.2  | 23.7  | 38.4   |
| 13.2   | 27.3   | 8.6    | 110.3  | 69.8   | 82.0   | 43.0  | 32.2  | 42.4   |
| 917.7  | 930.1  | 608.3  | 127.0  | 93.0   | 95.6   | 144.0 | 110.9 | 143.3  |
| 3.6    | 2.5    | 2.8    | 209.8  | 223.3  | 241.4  | 123.1 | 228.7 | 197.5  |
| 24.6   | 30.5   | 13.2   | 20.4   | 20.7   | 13.7   | 9.5   | 13.5  | 12.3   |
| 25.5   | 35.5   | 36.9   | 88.4   | 77.7   | 91.3   | 41.8  | 58.3  | 60.8   |
| 396.8  | 463.4  | 305.4  | 82.9   | 67.3   | 82.8   | 58.2  | 66.4  | 64.4   |
| 95.2   | 145.7  | 79.4   | 68.0   | 61.2   | 57.2   | 41.4  | 47.3  | 63.7   |
| 59.9   | 58.8   | 61.1   | 66.2   | 58.2   | 61.2   | 71.9  | 61.8  | 58.5   |
| 109.5  | 140.9  | 95.0   | 98.5   | 68.9   | 79.7   | 58.1  | 54.8  | 65.3   |
| 344.0  | 371.3  | 258.9  | 145.3  | 139.3  | 193.2  | 124.7 | 127.6 | 136.5  |
| 61.3   | 95.6   | 71.3   | 62.2   | 48.7   | 45.1   | 33.8  | 25.5  | 51.6   |
| 2722.1 | 2747.7 | 1897.1 | 1451.4 | 1152.6 | 1171.8 | 940.0 | 859.3 | 1003.6 |
| 160.2  | 260.4  | 188.4  | 104.5  | 89.4   | 105.7  | 72.3  | 100.5 | 86.0   |

|        |        |        |       |       |       |       |       |       |
|--------|--------|--------|-------|-------|-------|-------|-------|-------|
| 21.1   | 23.0   | 21.7   | 52.1  | 66.5  | 45.3  | 31.3  | 46.8  | 36.9  |
| 1.9    | 2.0    | 1.5    | 2.4   | 1.7   | 1.7   | 1.0   | 1.8   | 1.8   |
| 48.0   | 64.0   | 67.7   | 64.2  | 61.6  | 88.8  | 33.0  | 47.6  | 42.5  |
| 15.0   | 8.0    | 5.7    | 8.4   | 12.0  | 27.6  | 8.9   | 4.8   | 4.6   |
| 14.4   | 36.3   | 39.2   | 7.3   | 10.4  | 10.6  | 5.9   | 15.6  | 6.3   |
| 28.7   | 34.9   | 30.8   | 5.7   | 1.6   | 6.8   | 3.5   | 2.2   | 2.1   |
| 74.4   | 92.8   | 63.0   | 2.9   | 3.0   | 2.6   | 2.1   | 3.1   | 2.6   |
| 483.0  | 515.1  | 352.4  | 116.8 | 101.3 | 111.1 | 44.2  | 56.8  | 64.5  |
| 223.5  | 298.9  | 200.5  | 205.5 | 150.3 | 158.2 | 118.8 | 101.5 | 122.5 |
| 260.6  | 317.0  | 261.4  | 397.3 | 336.1 | 355.7 | 173.0 | 186.5 | 203.9 |
| 120.4  | 151.6  | 106.8  | 254.0 | 188.9 | 209.2 | 147.5 | 126.6 | 166.7 |
| 121.4  | 190.7  | 129.4  | 51.9  | 33.4  | 66.3  | 42.4  | 29.9  | 43.1  |
| 12.6   | 35.8   | 29.4   | 12.9  | 3.7   | 8.3   | 4.5   | 4.3   | 3.0   |
| 26.6   | 6.9    | 7.2    | 25.1  | 18.8  | 31.4  | 13.0  | 9.8   | 5.1   |
| 10.1   | 18.5   | 10.1   | 8.2   | 11.4  | 12.7  | 8.9   | 7.1   | 1.7   |
| 1.5    | 9.7    | 1.7    | 11.4  | 10.2  | 6.8   | 1.8   | 2.6   | 3.5   |
| 282.6  | 296.0  | 185.3  | 130.2 | 112.3 | 126.5 | 89.5  | 99.8  | 98.5  |
| 66.2   | 113.8  | 105.9  | 237.2 | 198.6 | 189.4 | 123.7 | 116.0 | 135.9 |
| 5.8    | 15.2   | 6.1    | 4.2   | 19.9  | 8.5   | 7.6   | 10.9  | 7.0   |
| 108.2  | 86.1   | 39.8   | 125.1 | 115.2 | 108.0 | 101.3 | 99.6  | 120.1 |
| 36.3   | 47.8   | 21.2   | 4.7   | 4.9   | 11.6  | 1.2   | 2.0   | 6.5   |
| 75.4   | 70.8   | 49.4   | 34.6  | 26.4  | 31.4  | 34.1  | 21.0  | 27.6  |
| 28.9   | 42.0   | 26.9   | 58.4  | 44.9  | 48.9  | 34.0  | 31.2  | 38.3  |
| 257.2  | 280.4  | 180.7  | 139.7 | 119.8 | 124.7 | 93.5  | 77.4  | 102.6 |
| 40.7   | 52.3   | 32.0   | 32.3  | 31.2  | 27.2  | 45.4  | 44.3  | 48.0  |
| 284.8  | 382.4  | 429.1  | 104.7 | 104.4 | 113.2 | 72.1  | 82.1  | 81.7  |
| 273.0  | 396.0  | 243.3  | 33.6  | 54.5  | 53.7  | 27.7  | 65.3  | 56.6  |
| 3.6    | 2.4    | 1.0    | 9.0   | 3.4   | 3.0   | 2.4   | 7.4   | 2.4   |
| 122.1  | 176.8  | 114.2  | 34.9  | 22.1  | 35.2  | 28.7  | 30.6  | 28.3  |
| 37.3   | 69.0   | 34.9   | 8.0   | 6.0   | 8.7   | 2.0   | 7.9   | 7.8   |
| 417.4  | 382.7  | 221.6  | 226.9 | 120.9 | 117.7 | 143.9 | 80.6  | 108.9 |
| 36.9   | 55.1   | 38.3   | 27.1  | 30.9  | 21.0  | 32.2  | 28.8  | 25.9  |
| 46.0   | 78.0   | 62.2   | 92.3  | 89.2  | 101.1 | 56.1  | 58.3  | 56.5  |
| 48.6   | 67.9   | 62.7   | 55.3  | 40.2  | 43.8  | 51.0  | 36.7  | 40.1  |
| 1539.8 | 1779.6 | 1394.2 | 977.3 | 849.9 | 977.1 | 676.0 | 664.5 | 736.0 |
| 218.9  | 319.0  | 207.8  | 222.7 | 148.1 | 181.6 | 123.1 | 134.0 | 123.8 |
| 133.3  | 211.0  | 152.4  | 77.7  | 82.2  | 97.2  | 115.3 | 187.1 | 193.8 |
| 11.3   | 12.0   | 3.0    | 9.2   | 14.6  | 16.2  | 3.5   | 5.6   | 5.2   |
| 471.3  | 543.2  | 420.2  | 31.1  | 19.7  | 26.6  | 18.0  | 16.5  | 19.9  |
| 87.2   | 92.1   | 43.7   | 84.5  | 66.9  | 54.1  | 56.4  | 34.7  | 39.3  |
| 73.7   | 104.1  | 71.5   | 231.7 | 218.2 | 249.6 | 184.3 | 170.3 | 189.7 |
| 264.9  | 317.0  | 273.9  | 158.4 | 160.0 | 161.8 | 137.1 | 165.7 | 163.6 |
| 758.2  | 679.7  | 302.7  | 147.4 | 72.9  | 65.2  | 183.9 | 88.9  | 105.7 |
| 387.6  | 410.7  | 170.8  | 250.9 | 123.9 | 135.2 | 179.8 | 99.1  | 119.2 |
| 90.0   | 102.4  | 71.1   | 82.9  | 64.5  | 79.6  | 80.8  | 61.3  | 78.4  |
| 125.7  | 108.4  | 56.7   | 325.4 | 223.1 | 295.2 | 181.3 | 207.7 | 212.7 |
| 108.1  | 228.0  | 146.0  | 2.5   | 1.6   | 10.1  | 3.6   | 2.8   | 4.9   |
| 73.2   | 153.0  | 82.8   | 14.7  | 12.1  | 12.0  | 5.7   | 3.1   | 1.9   |
| 50.0   | 48.0   | 33.1   | 102.8 | 87.3  | 113.1 | 77.5  | 73.3  | 82.5  |
| 58.5   | 36.2   | 27.2   | 62.3  | 56.4  | 65.1  | 32.5  | 57.5  | 42.2  |
| 28.5   | 53.8   | 46.2   | 40.4  | 33.4  | 42.4  | 32.7  | 36.9  | 30.5  |
| 273.5  | 327.8  | 124.9  | 115.8 | 67.4  | 50.7  | 58.6  | 39.6  | 56.1  |
| 12.0   | 20.9   | 12.4   | 25.5  | 18.9  | 26.2  | 17.5  | 20.8  | 19.0  |

|        |        |        |        |        |        |        |        |        |
|--------|--------|--------|--------|--------|--------|--------|--------|--------|
| 52.4   | 62.7   | 38.6   | 46.3   | 55.4   | 50.8   | 33.9   | 44.1   | 45.8   |
| 2.1    | 1.8    | 1.5    | 4.1    | 9.6    | 9.3    | 1.8    | 4.6    | 1.3    |
| 21.5   | 23.8   | 27.1   | 21.4   | 17.0   | 17.8   | 7.8    | 11.7   | 12.0   |
| 493.1  | 567.2  | 374.4  | 97.1   | 61.9   | 66.6   | 81.2   | 58.7   | 64.3   |
| 1203.0 | 1498.4 | 1073.4 | 11.7   | 7.2    | 5.1    | 6.0    | 13.3   | 8.3    |
| 22.1   | 15.7   | 13.1   | 35.9   | 41.4   | 50.0   | 13.5   | 15.4   | 6.1    |
| 422.4  | 520.6  | 317.4  | 168.5  | 98.5   | 122.6  | 105.6  | 62.3   | 76.6   |
| 3.3    | 2.9    | 1.6    | 3.5    | 6.4    | 4.1    | 1.1    | 2.1    | 2.3    |
| 636.9  | 751.8  | 395.3  | 78.5   | 37.3   | 53.6   | 80.1   | 66.6   | 69.3   |
| 91.4   | 99.9   | 62.2   | 39.2   | 44.5   | 55.4   | 35.4   | 45.2   | 46.2   |
| 6.4    | 6.0    | 2.1    | 2.6    | 10.0   | 17.5   | 11.5   | 7.1    | 4.7    |
| 103.0  | 116.0  | 94.7   | 150.7  | 151.3  | 164.4  | 132.8  | 138.7  | 150.5  |
| 8.9    | 5.2    | 7.7    | 12.5   | 10.3   | 10.2   | 6.2    | 8.7    | 6.8    |
| 168.5  | 375.0  | 319.0  | 232.3  | 166.4  | 165.5  | 227.7  | 197.9  | 273.4  |
| 95.0   | 187.6  | 155.5  | 132.1  | 143.2  | 140.7  | 117.5  | 122.8  | 140.8  |
| 1.3    | 2.9    | 4.1    | 3.0    | 3.3    | 3.1    | 2.1    | 2.0    | 2.0    |
| 72.4   | 123.5  | 88.9   | 1032.8 | 859.5  | 1022.4 | 400.4  | 546.5  | 499.3  |
| 4.1    | 3.3    | 8.7    | 4.1    | 3.7    | 4.7    | 2.3    | 3.5    | 2.9    |
| 44.6   | 52.0   | 17.6   | 20.2   | 15.7   | 14.9   | 23.6   | 18.4   | 13.8   |
| 5.6    | 6.3    | 6.2    | 60.6   | 81.0   | 82.6   | 31.3   | 60.5   | 57.4   |
| 5.0    | 12.8   | 4.6    | 5.1    | 12.9   | 13.7   | 8.5    | 11.6   | 5.8    |
| 1.6    | 0.9    | 1.3    | 5.1    | 6.7    | 5.5    | 8.9    | 7.6    | 10.2   |
| 383.9  | 395.3  | 197.6  | 576.4  | 440.9  | 429.7  | 315.7  | 269.2  | 330.5  |
| 14.1   | 19.6   | 12.6   | 109.3  | 99.9   | 106.6  | 91.8   | 90.5   | 93.3   |
| 148.7  | 276.6  | 244.4  | 23.6   | 15.4   | 16.0   | 8.4    | 11.2   | 7.9    |
| 71.5   | 180.7  | 317.1  | 21.9   | 30.3   | 31.4   | 34.9   | 43.6   | 43.2   |
| 346.3  | 369.0  | 202.6  | 179.4  | 115.8  | 153.0  | 81.1   | 63.7   | 86.3   |
| 315.2  | 287.8  | 151.0  | 119.1  | 52.4   | 61.8   | 58.9   | 35.0   | 42.7   |
| 0.7    | 0.5    | 1.8    | 4.0    | 3.0    | 3.8    | 0.9    | 1.3    | 8.9    |
| 0.8    | 1.0    | 0.6    | 2.9    | 3.9    | 8.1    | 0.6    | 0.9    | 1.8    |
| 113.0  | 201.9  | 748.1  | 22.9   | 40.7   | 60.0   | 24.4   | 39.2   | 18.8   |
| 20.4   | 20.2   | 11.8   | 14.0   | 10.6   | 15.4   | 8.2    | 13.2   | 17.1   |
| 42.0   | 55.8   | 49.1   | 60.4   | 51.6   | 44.9   | 32.7   | 29.9   | 36.7   |
| 13.1   | 14.7   | 10.2   | 14.5   | 11.4   | 9.1    | 18.2   | 14.6   | 11.5   |
| 155.5  | 203.5  | 184.0  | 151.2  | 178.3  | 173.7  | 103.2  | 154.2  | 151.7  |
| 408.9  | 458.8  | 241.6  | 245.4  | 201.4  | 187.5  | 114.5  | 129.3  | 155.5  |
| 198.0  | 273.3  | 167.0  | 131.6  | 90.9   | 100.1  | 117.7  | 98.0   | 131.9  |
| 141.1  | 210.5  | 257.3  | 42.5   | 45.1   | 31.3   | 31.6   | 28.6   | 34.6   |
| 50.6   | 85.5   | 84.8   | 67.3   | 47.0   | 53.2   | 36.7   | 34.1   | 43.5   |
| 64.6   | 112.7  | 125.6  | 98.3   | 96.7   | 125.0  | 81.6   | 116.4  | 103.1  |
| 1079.7 | 1211.1 | 791.9  | 190.6  | 138.0  | 157.4  | 145.2  | 91.8   | 112.2  |
| 138.1  | 194.5  | 154.8  | 4.6    | 5.8    | 7.3    | 3.9    | 2.1    | 2.8    |
| 123.6  | 125.9  | 71.5   | 25.4   | 14.9   | 30.5   | 33.4   | 28.7   | 35.0   |
| 414.7  | 594.2  | 541.7  | 305.4  | 267.4  | 280.2  | 194.9  | 224.8  | 213.9  |
| 68.5   | 90.5   | 85.6   | 170.4  | 141.0  | 140.8  | 90.6   | 100.3  | 91.5   |
| 1520.9 | 2041.1 | 1854.3 | 1354.9 | 1108.4 | 1254.1 | 1172.1 | 1267.6 | 1225.0 |
| 5.5    | 2.9    | 3.5    | 4.0    | 4.1    | 6.6    | 1.7    | 2.2    | 2.4    |
| 334.5  | 408.4  | 371.1  | 197.8  | 206.3  | 208.0  | 126.2  | 128.5  | 162.4  |
| 1.6    | 4.5    | 3.4    | 8.0    | 1.1    | 4.2    | 2.9    | 3.6    | 2.8    |
| 519.7  | 756.3  | 716.4  | 177.9  | 190.5  | 202.0  | 96.4   | 136.9  | 132.0  |
| 13.1   | 3.1    | 14.1   | 11.3   | 3.9    | 5.9    | 6.5    | 3.3    | 6.8    |
| 1135.1 | 1198.1 | 695.1  | 557.8  | 268.8  | 283.5  | 282.5  | 138.7  | 155.0  |
| 118.9  | 104.9  | 36.8   | 106.2  | 53.3   | 44.2   | 15.5   | 5.1    | 3.0    |

|       |       |       |       |       |       |       |       |       |
|-------|-------|-------|-------|-------|-------|-------|-------|-------|
| 66.7  | 71.5  | 45.2  | 74.2  | 57.3  | 57.0  | 40.3  | 39.8  | 47.4  |
| 583.0 | 655.9 | 344.1 | 62.3  | 41.6  | 69.8  | 63.0  | 74.4  | 64.8  |
| 144.7 | 246.0 | 82.4  | 20.2  | 7.3   | 10.1  | 21.8  | 18.8  | 20.8  |
| 78.7  | 103.1 | 38.5  | 111.6 | 86.3  | 101.5 | 89.7  | 60.5  | 69.8  |
| 11.3  | 38.3  | 20.0  | 6.6   | 8.7   | 7.3   | 4.1   | 9.1   | 8.0   |
| 96.5  | 304.0 | 505.9 | 59.6  | 65.5  | 69.4  | 40.7  | 27.4  | 34.5  |
| 265.3 | 345.0 | 182.1 | 19.8  | 27.9  | 30.2  | 13.5  | 12.1  | 13.5  |
| 4.9   | 5.6   | 7.2   | 11.3  | 8.7   | 8.9   | 9.0   | 0.8   | 6.4   |
| 153.5 | 221.6 | 128.6 | 78.5  | 68.6  | 88.2  | 51.1  | 64.3  | 72.5  |
| 78.3  | 80.7  | 52.9  | 111.7 | 85.8  | 117.0 | 79.6  | 95.2  | 87.9  |
| 5.1   | 5.7   | 3.5   | 24.5  | 22.1  | 21.1  | 10.6  | 12.3  | 9.1   |
| 5.4   | 5.3   | 4.3   | 16.7  | 19.4  | 16.9  | 11.3  | 7.3   | 13.8  |
| 14.8  | 6.7   | 9.2   | 22.5  | 6.4   | 18.9  | 11.4  | 13.3  | 3.4   |
| 224.7 | 311.7 | 273.8 | 428.9 | 357.6 | 393.9 | 419.5 | 450.2 | 492.1 |
| 299.4 | 488.3 | 381.8 | 688.8 | 591.4 | 633.8 | 488.4 | 557.6 | 599.1 |
| 281.0 | 450.7 | 292.6 | 275.8 | 153.3 | 148.6 | 211.7 | 135.3 | 184.0 |
| 220.3 | 311.9 | 216.3 | 136.9 | 132.2 | 135.1 | 60.7  | 69.0  | 67.8  |
| 2.3   | 7.1   | 4.0   | 11.9  | 5.3   | 4.6   | 3.7   | 3.8   | 1.3   |
| 546.8 | 643.8 | 339.4 | 330.4 | 300.7 | 328.0 | 243.1 | 209.1 | 257.1 |
| 5.7   | 14.5  | 8.7   | 14.0  | 18.7  | 10.5  | 11.2  | 4.1   | 4.0   |
| 47.3  | 64.0  | 46.0  | 38.7  | 44.4  | 47.8  | 21.5  | 33.5  | 27.3  |
| 2.2   | 4.7   | 1.5   | 3.5   | 2.1   | 3.2   | 2.2   | 2.2   | 2.9   |
| 51.9  | 57.9  | 45.7  | 137.3 | 126.4 | 164.5 | 57.2  | 56.0  | 63.2  |
| 297.8 | 423.8 | 405.3 | 120.7 | 112.1 | 122.7 | 87.7  | 123.2 | 109.6 |
| 237.7 | 192.7 | 87.7  | 103.2 | 72.1  | 72.4  | 55.7  | 43.7  | 64.4  |
| 6.8   | 1.9   | 4.2   | 59.0  | 47.5  | 51.5  | 38.6  | 67.2  | 80.0  |
| 34.7  | 63.6  | 60.1  | 100.5 | 119.0 | 107.2 | 95.9  | 145.0 | 131.6 |
| 82.6  | 271.2 | 595.6 | 7.5   | 3.8   | 5.8   | 4.2   | 1.3   | 2.4   |
| 0.8   | 0.7   | 2.0   | 6.2   | 10.5  | 3.6   | 5.7   | 4.5   | 1.7   |
| 23.6  | 30.9  | 33.1  | 15.7  | 10.5  | 17.8  | 13.3  | 11.0  | 16.7  |
| 58.6  | 86.4  | 53.2  | 75.3  | 63.3  | 89.4  | 17.8  | 36.0  | 40.3  |
| 583.4 | 731.0 | 409.1 | 546.1 | 277.0 | 308.8 | 389.8 | 201.1 | 256.0 |
| 12.2  | 14.4  | 3.0   | 18.2  | 6.0   | 12.6  | 2.2   | 6.6   | 7.9   |
| 399.3 | 430.7 | 294.6 | 508.7 | 539.9 | 575.3 | 291.3 | 378.8 | 388.5 |
| 26.5  | 50.8  | 25.6  | 10.0  | 6.2   | 5.9   | 13.7  | 18.2  | 12.4  |
| 56.0  | 81.1  | 69.6  | 24.2  | 21.9  | 32.4  | 10.0  | 28.4  | 28.0  |
| 2.3   | 2.4   | 1.8   | 22.9  | 8.1   | 6.7   | 2.5   | 7.3   | 3.0   |
| 338.9 | 481.2 | 371.6 | 11.5  | 1.2   | 2.9   | 10.2  | 11.6  | 9.6   |
| 93.9  | 132.3 | 78.8  | 192.8 | 168.7 | 185.0 | 109.0 | 99.6  | 109.4 |
| 247.3 | 284.1 | 173.8 | 173.8 | 102.8 | 111.9 | 92.9  | 91.5  | 73.1  |
| 4.0   | 13.7  | 9.6   | 11.2  | 6.5   | 7.7   | 2.9   | 6.9   | 2.1   |
| 611.6 | 788.5 | 456.3 | 804.5 | 643.5 | 640.0 | 582.4 | 542.5 | 655.4 |
| 182.7 | 282.5 | 189.8 | 314.5 | 293.6 | 272.8 | 163.5 | 240.7 | 196.6 |
| 638.2 | 744.6 | 516.0 | 422.4 | 400.0 | 488.5 | 370.5 | 453.1 | 457.8 |
| 28.6  | 13.2  | 17.6  | 7.5   | 3.3   | 2.7   | 8.9   | 6.8   | 13.0  |
| 9.6   | 15.4  | 23.1  | 31.0  | 30.7  | 32.6  | 16.2  | 13.7  | 8.5   |
| 94.5  | 123.5 | 106.4 | 165.1 | 161.1 | 173.8 | 144.1 | 163.4 | 213.3 |
| 9.4   | 12.8  | 5.3   | 32.6  | 38.5  | 24.9  | 15.9  | 17.8  | 24.1  |
| 4.4   | 7.7   | 3.5   | 19.7  | 24.2  | 28.2  | 9.7   | 8.8   | 15.3  |
| 4.6   | 7.7   | 7.2   | 12.1  | 12.9  | 11.2  | 9.5   | 11.6  | 11.0  |
| 0.7   | 5.3   | 3.0   | 4.2   | 6.0   | 7.2   | 0.6   | 3.8   | 1.2   |
| 52.9  | 72.0  | 59.4  | 2.2   | 8.1   | 3.2   | 1.1   | 1.3   | 5.7   |
| 3.4   | 8.6   | 10.5  | 10.0  | 16.2  | 29.0  | 9.2   | 14.1  | 14.7  |

|        |        |        |       |       |       |       |       |       |
|--------|--------|--------|-------|-------|-------|-------|-------|-------|
| 32.6   | 68.6   | 92.2   | 19.3  | 15.9  | 16.9  | 24.1  | 32.4  | 17.2  |
| 216.6  | 205.7  | 145.0  | 123.9 | 71.0  | 104.8 | 95.4  | 75.2  | 94.5  |
| 1.4    | 5.9    | 1.6    | 15.6  | 15.1  | 8.0   | 7.2   | 6.5   | 9.4   |
| 88.9   | 119.4  | 108.0  | 109.1 | 81.7  | 102.2 | 87.9  | 83.5  | 99.9  |
| 1.2    | 5.5    | 0.5    | 10.3  | 3.2   | 3.1   | 7.0   | 0.9   | 2.0   |
| 426.4  | 702.9  | 595.5  | 67.3  | 62.0  | 64.6  | 56.3  | 59.1  | 71.1  |
| 27.7   | 22.5   | 21.9   | 26.7  | 19.1  | 34.1  | 33.8  | 16.7  | 24.2  |
| 112.0  | 140.5  | 96.7   | 44.8  | 43.0  | 49.1  | 52.7  | 54.7  | 54.0  |
| 202.2  | 224.7  | 172.5  | 60.4  | 52.4  | 58.2  | 38.3  | 41.0  | 44.0  |
| 0.8    | 4.9    | 0.5    | 12.7  | 13.9  | 14.8  | 3.2   | 18.8  | 15.0  |
| 331.7  | 332.5  | 213.2  | 26.5  | 38.5  | 41.1  | 26.6  | 27.8  | 27.1  |
| 24.7   | 17.4   | 2.4    | 25.2  | 16.0  | 18.9  | 10.2  | 1.9   | 7.2   |
| 1052.2 | 1349.8 | 1059.7 | 314.6 | 273.7 | 253.9 | 225.3 | 232.8 | 220.6 |
| 291.0  | 382.6  | 394.4  | 81.7  | 61.3  | 52.6  | 45.0  | 32.9  | 40.0  |
| 61.6   | 72.1   | 45.8   | 32.0  | 24.3  | 29.0  | 34.6  | 31.1  | 39.9  |
| 491.7  | 657.4  | 581.3  | 368.7 | 295.7 | 292.9 | 250.5 | 253.3 | 227.7 |
| 24.6   | 38.1   | 16.2   | 27.8  | 22.4  | 16.8  | 17.2  | 21.2  | 25.2  |
| 31.5   | 47.4   | 35.5   | 123.6 | 101.7 | 100.6 | 55.2  | 56.2  | 64.2  |
| 345.1  | 474.0  | 356.4  | 103.5 | 95.3  | 118.5 | 81.0  | 88.6  | 70.0  |
| 106.3  | 135.4  | 86.4   | 40.7  | 26.8  | 42.2  | 40.4  | 36.6  | 43.9  |
| 8.6    | 23.9   | 15.9   | 3.3   | 3.3   | 7.0   | 1.0   | 1.7   | 3.5   |
| 29.5   | 32.6   | 14.4   | 28.5  | 24.6  | 19.0  | 26.2  | 20.7  | 19.9  |
| 19.9   | 18.1   | 23.4   | 60.7  | 48.4  | 68.2  | 29.0  | 36.5  | 30.5  |
| 206.5  | 276.5  | 214.0  | 499.6 | 402.8 | 504.1 | 307.2 | 321.7 | 372.7 |
| 3762.2 | 2842.8 | 441.8  | 32.0  | 23.4  | 25.9  | 21.8  | 30.1  | 25.8  |
| 21.2   | 16.6   | 11.3   | 134.5 | 119.4 | 163.6 | 82.1  | 107.1 | 101.3 |
| 50.1   | 62.9   | 41.4   | 36.2  | 22.8  | 20.8  | 24.7  | 29.3  | 26.2  |
| 79.1   | 91.9   | 78.1   | 47.5  | 40.6  | 54.6  | 49.7  | 53.0  | 47.6  |
| 30.6   | 40.9   | 20.2   | 33.7  | 18.2  | 15.6  | 12.5  | 16.1  | 19.2  |
| 159.3  | 238.6  | 183.4  | 521.2 | 401.1 | 429.4 | 278.2 | 237.1 | 303.5 |
| 97.9   | 110.8  | 120.9  | 99.8  | 96.2  | 111.8 | 66.4  | 95.3  | 99.0  |
| 127.9  | 173.3  | 131.3  | 141.2 | 115.5 | 137.2 | 83.0  | 76.3  | 98.9  |
| 4.7    | 4.4    | 7.1    | 7.3   | 8.0   | 10.8  | 8.4   | 3.6   | 6.9   |
| 0.7    | 2.1    | 0.2    | 8.4   | 3.0   | 16.8  | 3.2   | 3.8   | 0.3   |
| 163.1  | 208.4  | 149.3  | 59.1  | 64.2  | 71.0  | 71.9  | 63.6  | 75.6  |
| 5.6    | 16.1   | 4.5    | 10.8  | 12.4  | 14.0  | 5.0   | 10.8  | 9.4   |
| 243.7  | 268.7  | 210.3  | 160.3 | 127.1 | 126.2 | 106.4 | 84.2  | 91.5  |
| 1.4    | 2.4    | 2.3    | 12.7  | 9.2   | 15.8  | 11.0  | 3.4   | 1.3   |
| 560.6  | 574.8  | 482.0  | 504.4 | 439.9 | 504.0 | 409.6 | 432.7 | 465.7 |
| 730.9  | 963.1  | 551.5  | 395.2 | 305.2 | 315.4 | 262.1 | 231.2 | 291.3 |
| 259.1  | 268.3  | 106.4  | 119.0 | 72.5  | 63.9  | 83.9  | 45.6  | 53.9  |
| 3.3    | 4.7    | 2.2    | 6.9   | 2.8   | 9.4   | 2.6   | 0.7   | 0.4   |
| 1.0    | 1.1    | 1.3    | 4.5   | 2.9   | 7.2   | 1.2   | 1.8   | 1.6   |
| 99.9   | 167.5  | 102.7  | 83.7  | 72.2  | 71.3  | 45.0  | 28.9  | 34.7  |
| 37.2   | 50.9   | 25.7   | 93.1  | 74.1  | 77.8  | 58.8  | 53.9  | 62.4  |
| 9.5    | 20.0   | 10.0   | 19.1  | 6.9   | 10.1  | 0.9   | 6.9   | 2.1   |
| 49.9   | 49.5   | 23.3   | 10.9  | 8.2   | 12.6  | 23.0  | 11.8  | 23.2  |
| 152.1  | 196.8  | 135.2  | 78.0  | 59.0  | 56.4  | 73.6  | 65.9  | 64.6  |
| 59.7   | 63.5   | 40.7   | 32.2  | 38.6  | 30.9  | 17.0  | 5.5   | 17.3  |
| 5.7    | 3.8    | 2.9    | 85.7  | 60.8  | 83.2  | 43.6  | 54.9  | 51.7  |
| 6.4    | 2.6    | 1.1    | 36.5  | 32.5  | 30.0  | 20.7  | 19.8  | 15.0  |
| 74.7   | 105.8  | 75.8   | 48.1  | 47.9  | 54.2  | 47.1  | 38.6  | 40.9  |
| 187.6  | 244.7  | 174.2  | 133.4 | 104.3 | 114.4 | 79.1  | 92.1  | 103.3 |

|       |        |        |       |       |       |       |       |       |
|-------|--------|--------|-------|-------|-------|-------|-------|-------|
| 1.0   | 1.1    | 2.1    | 9.7   | 2.8   | 4.3   | 5.3   | 5.4   | 2.3   |
| 162.5 | 233.9  | 204.2  | 256.1 | 233.5 | 227.1 | 117.4 | 134.9 | 158.0 |
| 42.9  | 46.5   | 35.8   | 70.0  | 49.9  | 62.9  | 37.1  | 48.8  | 50.0  |
| 5.8   | 3.3    | 9.0    | 11.3  | 12.2  | 7.9   | 16.9  | 3.4   | 12.6  |
| 9.5   | 31.2   | 20.3   | 14.9  | 9.6   | 11.0  | 21.2  | 11.2  | 10.8  |
| 10.5  | 12.8   | 6.2    | 34.6  | 10.4  | 20.7  | 12.8  | 11.1  | 14.1  |
| 5.9   | 3.9    | 3.5    | 25.0  | 17.5  | 36.5  | 6.8   | 9.7   | 15.1  |
| 1.8   | 1.8    | 6.0    | 21.8  | 17.1  | 18.3  | 9.1   | 14.0  | 16.6  |
| 11.3  | 14.8   | 6.6    | 13.4  | 16.3  | 13.1  | 7.0   | 9.2   | 7.9   |
| 27.8  | 33.2   | 24.9   | 43.8  | 27.5  | 26.6  | 13.3  | 11.3  | 19.4  |
| 145.4 | 190.0  | 112.1  | 225.5 | 191.0 | 213.3 | 185.1 | 182.2 | 204.0 |
| 16.9  | 16.9   | 16.6   | 44.8  | 28.0  | 32.5  | 11.0  | 11.7  | 16.9  |
| 806.2 | 731.8  | 434.2  | 193.0 | 156.5 | 160.5 | 135.3 | 142.2 | 138.8 |
| 88.5  | 128.7  | 105.6  | 148.6 | 165.3 | 161.9 | 97.9  | 130.5 | 140.0 |
| 206.5 | 256.3  | 165.3  | 37.7  | 31.2  | 38.8  | 30.8  | 37.9  | 42.8  |
| 131.1 | 166.4  | 87.1   | 200.2 | 132.1 | 172.8 | 183.4 | 135.5 | 160.2 |
| 262.1 | 332.6  | 244.6  | 532.7 | 423.1 | 495.5 | 315.3 | 326.2 | 335.7 |
| 73.2  | 115.4  | 96.6   | 213.2 | 183.2 | 176.9 | 112.8 | 145.9 | 147.0 |
| 873.7 | 1303.9 | 1113.6 | 553.0 | 445.4 | 461.0 | 364.0 | 433.2 | 433.7 |
| 145.6 | 240.5  | 244.3  | 816.1 | 618.4 | 632.1 | 628.9 | 507.2 | 639.6 |
| 38.4  | 63.2   | 46.3   | 143.0 | 104.3 | 106.8 | 120.5 | 123.9 | 104.7 |
| 16.3  | 51.0   | 44.4   | 14.4  | 7.0   | 16.9  | 2.4   | 2.0   | 3.4   |
| 12.4  | 6.9    | 5.3    | 15.1  | 8.2   | 13.5  | 6.9   | 6.6   | 8.3   |
| 1.4   | 1.6    | 1.9    | 3.6   | 8.8   | 4.7   | 4.8   | 3.8   | 2.0   |
| 24.4  | 57.3   | 59.4   | 54.9  | 60.0  | 72.5  | 36.0  | 33.7  | 41.5  |
| 75.8  | 97.5   | 68.2   | 28.9  | 40.0  | 32.0  | 47.2  | 55.8  | 52.2  |
| 8.6   | 6.4    | 7.2    | 25.8  | 13.9  | 16.6  | 13.1  | 14.0  | 13.4  |
| 148.4 | 197.0  | 129.6  | 179.8 | 92.6  | 110.7 | 48.5  | 39.5  | 43.2  |
| 49.0  | 71.5   | 72.6   | 8.7   | 4.5   | 14.3  | 3.2   | 8.0   | 3.8   |
| 6.1   | 22.3   | 5.0    | 33.7  | 23.0  | 22.5  | 23.1  | 8.7   | 17.1  |
| 1.6   | 2.0    | 1.2    | 4.3   | 2.2   | 4.2   | 1.5   | 1.5   | 2.0   |
| 12.1  | 14.9   | 11.6   | 12.3  | 12.3  | 17.5  | 4.8   | 11.2  | 3.2   |
| 22.0  | 39.8   | 49.9   | 23.5  | 16.4  | 14.5  | 6.9   | 12.7  | 18.1  |
| 125.3 | 123.2  | 93.9   | 656.7 | 598.7 | 618.3 | 544.4 | 622.5 | 640.4 |
| 31.6  | 30.7   | 35.9   | 20.0  | 26.6  | 31.7  | 16.6  | 15.5  | 17.8  |
| 249.8 | 283.4  | 166.1  | 160.9 | 113.5 | 112.8 | 125.5 | 122.0 | 122.3 |
| 2.6   | 2.5    | 1.6    | 3.8   | 3.8   | 4.6   | 2.6   | 2.7   | 2.0   |
| 2.9   | 9.8    | 19.2   | 23.9  | 17.1  | 15.7  | 8.5   | 8.9   | 5.8   |
| 2.7   | 6.3    | 0.3    | 9.6   | 2.9   | 4.3   | 2.3   | 1.8   | 2.5   |
| 28.2  | 34.2   | 21.2   | 23.8  | 16.3  | 11.6  | 14.4  | 4.7   | 20.8  |
| 227.9 | 275.1  | 136.3  | 36.4  | 28.4  | 19.3  | 19.0  | 6.5   | 9.3   |
| 545.9 | 702.8  | 597.4  | 145.0 | 127.9 | 160.0 | 51.0  | 54.3  | 90.3  |
| 48.1  | 43.3   | 33.4   | 33.8  | 19.3  | 16.0  | 18.1  | 14.0  | 25.1  |
| 235.8 | 263.9  | 186.8  | 229.4 | 163.0 | 218.0 | 139.7 | 104.9 | 158.4 |
| 73.0  | 97.9   | 80.4   | 62.9  | 51.9  | 50.2  | 37.2  | 36.5  | 37.1  |
| 18.7  | 29.8   | 4.4    | 18.2  | 18.3  | 17.3  | 13.4  | 3.0   | 10.2  |
| 411.9 | 454.5  | 249.5  | 214.6 | 193.0 | 216.2 | 127.3 | 152.4 | 166.7 |
| 175.5 | 153.3  | 91.5   | 9.5   | 11.8  | 8.5   | 7.7   | 11.1  | 6.5   |
| 88.0  | 108.0  | 65.6   | 80.8  | 77.9  | 82.1  | 50.4  | 73.0  | 75.2  |
| 15.2  | 5.6    | 2.6    | 5.6   | 4.4   | 5.4   | 9.2   | 3.3   | 3.3   |
| 91.4  | 96.2   | 38.1   | 51.7  | 26.8  | 38.2  | 42.2  | 37.9  | 36.5  |
| 5.2   | 2.1    | 0.8    | 1.5   | 7.5   | 10.9  | 3.7   | 3.3   | 7.4   |
| 246.4 | 342.2  | 200.7  | 518.4 | 397.0 | 468.7 | 325.1 | 264.4 | 343.5 |



|        |        |        |        |        |        |        |        |        |
|--------|--------|--------|--------|--------|--------|--------|--------|--------|
| 145.1  | 195.1  | 149.0  | 15.0   | 4.3    | 17.5   | 11.8   | 16.7   | 16.4   |
| 68.9   | 73.9   | 44.9   | 30.4   | 41.6   | 33.4   | 25.2   | 19.2   | 26.7   |
| 192.5  | 245.6  | 218.0  | 130.8  | 121.9  | 130.4  | 80.8   | 82.7   | 91.6   |
| 10.8   | 5.5    | 6.8    | 4.2    | 4.1    | 5.4    | 2.3    | 2.4    | 3.1    |
| 26.4   | 25.3   | 24.5   | 20.5   | 21.2   | 27.9   | 18.2   | 22.7   | 15.4   |
| 2.7    | 5.9    | 1.7    | 2.9    | 4.3    | 3.7    | 2.7    | 1.2    | 5.3    |
| 115.9  | 131.5  | 104.8  | 201.7  | 168.7  | 174.2  | 151.5  | 101.1  | 132.8  |
| 36.6   | 49.6   | 48.0   | 35.9   | 24.2   | 30.9   | 57.5   | 39.2   | 42.8   |
| 12.2   | 10.4   | 12.6   | 13.7   | 19.6   | 16.2   | 8.7    | 9.6    | 14.8   |
| 6.9    | 22.0   | 9.1    | 5.1    | 6.2    | 4.7    | 6.6    | 3.3    | 17.2   |
| 2.0    | 10.3   | 1.9    | 16.9   | 19.0   | 10.2   | 6.8    | 14.8   | 7.6    |
| 3.9    | 4.7    | 5.2    | 9.8    | 4.3    | 9.7    | 11.5   | 1.5    | 1.5    |
| 5.1    | 2.5    | 4.2    | 6.0    | 6.6    | 2.5    | 3.8    | 6.4    | 3.1    |
| 4.3    | 5.1    | 3.9    | 24.1   | 21.2   | 22.7   | 10.2   | 5.2    | 3.8    |
| 45.3   | 68.5   | 52.1   | 18.8   | 14.8   | 15.3   | 3.1    | 5.1    | 4.4    |
| 115.8  | 100.8  | 64.5   | 256.1  | 197.8  | 227.1  | 128.9  | 121.0  | 137.5  |
| 101.6  | 249.3  | 305.0  | 25.7   | 25.1   | 30.6   | 16.9   | 15.4   | 17.1   |
| 171.6  | 240.4  | 141.1  | 6.8    | 2.3    | 3.6    | 6.6    | 8.3    | 9.4    |
| 8.3    | 10.8   | 8.3    | 380.2  | 276.6  | 297.2  | 431.8  | 303.1  | 357.8  |
| 149.2  | 205.7  | 171.6  | 25.5   | 18.6   | 19.3   | 18.0   | 18.1   | 13.7   |
| 12.1   | 15.4   | 12.7   | 97.9   | 106.5  | 99.3   | 120.6  | 126.6  | 140.9  |
| 6.5    | 10.5   | 10.0   | 28.2   | 30.7   | 25.3   | 18.4   | 15.2   | 26.6   |
| 1.0    | 6.3    | 2.1    | 10.7   | 2.0    | 7.4    | 3.8    | 2.4    | 6.6    |
| 18.1   | 20.6   | 32.1   | 19.4   | 17.7   | 26.3   | 5.8    | 15.0   | 6.5    |
| 5.7    | 0.8    | 4.0    | 34.1   | 14.3   | 7.9    | 16.6   | 12.1   | 14.2   |
| 99.3   | 143.8  | 103.2  | 222.9  | 228.3  | 235.5  | 177.9  | 240.9  | 257.8  |
| 129.2  | 127.8  | 45.5   | 72.9   | 72.1   | 63.0   | 42.0   | 37.3   | 54.1   |
| 7.6    | 4.5    | 7.9    | 144.8  | 130.9  | 143.2  | 107.1  | 97.5   | 86.0   |
| 1.6    | 4.0    | 3.1    | 9.0    | 30.0   | 30.8   | 3.2    | 4.6    | 11.5   |
| 117.8  | 203.1  | 94.1   | 21.3   | 10.0   | 25.2   | 9.0    | 5.8    | 8.1    |
| 35.0   | 41.4   | 17.0   | 43.7   | 31.5   | 40.9   | 27.3   | 30.3   | 18.4   |
| 32.5   | 29.4   | 26.1   | 26.1   | 24.5   | 29.8   | 19.5   | 18.7   | 12.7   |
| 19.6   | 9.2    | 15.4   | 7.7    | 6.4    | 4.2    | 13.6   | 12.9   | 9.2    |
| 280.1  | 367.3  | 283.8  | 138.8  | 115.1  | 133.6  | 98.1   | 110.7  | 102.5  |
| 41.7   | 53.6   | 50.8   | 12.0   | 13.5   | 8.1    | 11.5   | 11.2   | 17.5   |
| 143.2  | 161.8  | 92.6   | 120.2  | 102.4  | 96.7   | 105.6  | 106.7  | 138.3  |
| 72.6   | 110.4  | 83.8   | 18.7   | 18.2   | 27.0   | 16.2   | 28.7   | 19.1   |
| 8.1    | 23.4   | 5.1    | 29.3   | 22.7   | 17.2   | 14.2   | 4.8    | 11.2   |
| 95.9   | 108.9  | 72.6   | 62.1   | 53.3   | 65.4   | 45.5   | 53.1   | 60.6   |
| 75.1   | 80.7   | 65.7   | 26.3   | 20.5   | 30.4   | 35.3   | 33.1   | 38.1   |
| 262.4  | 400.7  | 566.2  | 112.8  | 94.9   | 94.7   | 134.2  | 146.4  | 149.3  |
| 186.4  | 275.9  | 268.6  | 208.9  | 224.1  | 245.9  | 128.2  | 176.0  | 173.2  |
| 152.4  | 194.7  | 120.8  | 40.6   | 21.9   | 36.0   | 20.6   | 25.9   | 27.6   |
| 356.2  | 537.8  | 640.7  | 7.6    | 4.4    | 12.6   | 5.0    | 12.0   | 7.7    |
| 8.1    | 14.5   | 2.4    | 22.6   | 32.6   | 38.3   | 14.7   | 24.8   | 15.0   |
| 5.6    | 10.6   | 5.5    | 19.3   | 19.0   | 9.5    | 8.2    | 7.4    | 7.7    |
| 3011.2 | 4094.3 | 2952.5 | 3345.6 | 2895.6 | 3032.8 | 1777.3 | 1820.0 | 1882.0 |
| 153.7  | 156.5  | 87.1   | 117.4  | 72.7   | 65.2   | 76.8   | 61.0   | 75.0   |
| 62.9   | 71.2   | 53.0   | 5.7    | 7.9    | 10.8   | 3.2    | 3.9    | 5.2    |
| 53.9   | 88.6   | 76.5   | 176.9  | 146.3  | 156.8  | 132.9  | 132.7  | 158.7  |
| 33.1   | 57.8   | 32.5   | 12.1   | 9.9    | 7.5    | 2.1    | 8.5    | 5.1    |
| 171.0  | 231.0  | 199.4  | 163.9  | 134.9  | 167.1  | 114.3  | 129.9  | 131.9  |
| 7.6    | 36.9   | 65.5   | 145.0  | 134.6  | 152.3  | 85.3   | 144.2  | 133.7  |

|        |        |        |        |       |        |        |       |       |
|--------|--------|--------|--------|-------|--------|--------|-------|-------|
| 87.8   | 118.7  | 73.3   | 55.2   | 46.5  | 52.1   | 34.8   | 35.8  | 42.6  |
| 108.9  | 152.4  | 132.1  | 129.8  | 99.7  | 116.5  | 69.2   | 46.9  | 70.3  |
| 133.8  | 203.4  | 194.0  | 45.2   | 43.8  | 52.5   | 38.4   | 43.6  | 44.1  |
| 2.1    | 11.2   | 9.7    | 8.7    | 1.6   | 2.4    | 1.7    | 1.0   | 0.7   |
| 3.6    | 5.9    | 9.9    | 6.5    | 3.2   | 6.4    | 4.4    | 7.3   | 1.0   |
| 127.2  | 139.2  | 123.5  | 67.9   | 44.0  | 55.3   | 41.4   | 38.0  | 49.0  |
| 1.7    | 3.3    | 4.6    | 14.9   | 11.4  | 11.7   | 6.7    | 6.2   | 2.9   |
| 9.8    | 10.9   | 5.1    | 19.5   | 5.9   | 5.5    | 2.4    | 5.1   | 3.8   |
| 1.8    | 1.8    | 0.4    | 5.6    | 6.1   | 1.7    | 1.0    | 1.7   | 0.5   |
| 3.9    | 10.3   | 3.7    | 7.5    | 4.5   | 9.8    | 4.1    | 8.0   | 9.0   |
| 21.6   | 24.3   | 19.4   | 49.1   | 39.1  | 44.1   | 21.5   | 30.7  | 35.1  |
| 1.2    | 2.7    | 1.9    | 3.7    | 5.5   | 10.6   | 0.9    | 0.8   | 2.7   |
| 39.7   | 27.5   | 28.0   | 50.6   | 59.3  | 25.2   | 30.5   | 45.4  | 29.2  |
| 3.3    | 7.4    | 0.6    | 1.0    | 1.0   | 1.5    | 0.5    | 0.7   | 0.6   |
| 74.6   | 96.3   | 65.7   | 82.6   | 84.2  | 80.9   | 66.9   | 74.4  | 82.7  |
| 12.9   | 50.3   | 21.3   | 15.6   | 25.3  | 40.5   | 10.3   | 25.8  | 17.0  |
| 84.3   | 118.9  | 66.0   | 33.4   | 22.9  | 31.3   | 25.0   | 22.9  | 22.6  |
| 92.6   | 141.1  | 125.7  | 87.4   | 100.0 | 93.5   | 67.4   | 90.2  | 93.9  |
| 3887.0 | 3698.6 | 1310.6 | 917.8  | 544.8 | 565.9  | 1211.1 | 792.3 | 980.2 |
| 7.6    | 7.5    | 7.0    | 17.2   | 14.0  | 21.8   | 6.8    | 11.7  | 7.8   |
| 5.2    | 4.6    | 2.6    | 389.9  | 248.9 | 265.1  | 207.5  | 127.3 | 192.2 |
| 1.1    | 1.7    | 2.2    | 125.3  | 82.8  | 72.6   | 80.1   | 34.4  | 71.3  |
| 0.9    | 0.5    | 1.4    | 1.0    | 1.2   | 1.0    | 0.4    | 0.4   | 0.4   |
| 26.8   | 32.8   | 20.2   | 48.5   | 38.0  | 51.5   | 27.3   | 22.8  | 20.5  |
| 134.3  | 160.9  | 108.2  | 37.4   | 30.9  | 26.9   | 57.9   | 57.9  | 66.3  |
| 4.5    | 4.3    | 2.2    | 5.1    | 2.5   | 4.9    | 7.5    | 4.6   | 11.9  |
| 4.8    | 4.6    | 4.4    | 530.8  | 409.0 | 457.0  | 398.7  | 489.3 | 445.7 |
| 1.9    | 2.5    | 3.1    | 5.3    | 6.7   | 2.8    | 1.1    | 1.4   | 1.1   |
| 35.3   | 46.4   | 42.5   | 76.0   | 60.6  | 72.3   | 56.9   | 65.4  | 64.2  |
| 881.1  | 1222.6 | 743.9  | 560.4  | 430.8 | 448.6  | 352.6  | 376.5 | 386.7 |
| 26.3   | 21.4   | 13.4   | 29.1   | 27.1  | 26.7   | 15.5   | 13.4  | 21.9  |
| 19.9   | 46.5   | 32.6   | 40.1   | 38.0  | 45.0   | 27.1   | 46.1  | 47.4  |
| 25.5   | 32.8   | 24.3   | 77.0   | 70.8  | 82.5   | 34.8   | 50.6  | 52.1  |
| 588.7  | 658.8  | 471.8  | 189.5  | 163.3 | 178.3  | 97.5   | 120.5 | 126.6 |
| 15.4   | 22.1   | 23.0   | 8.1    | 6.3   | 16.2   | 7.5    | 3.9   | 3.5   |
| 1.9    | 10.5   | 2.1    | 17.1   | 16.0  | 24.4   | 15.7   | 18.5  | 23.5  |
| 98.3   | 110.1  | 84.7   | 66.3   | 48.7  | 59.1   | 46.2   | 61.3  | 59.3  |
| 841.1  | 1053.7 | 975.6  | 89.9   | 46.4  | 54.8   | 38.7   | 28.0  | 29.8  |
| 176.3  | 193.2  | 177.9  | 107.3  | 114.6 | 129.9  | 67.2   | 74.0  | 93.3  |
| 10.5   | 12.8   | 2.9    | 5.4    | 14.6  | 7.9    | 3.3    | 2.8   | 4.7   |
| 304.4  | 409.1  | 276.8  | 370.5  | 279.6 | 336.6  | 283.8  | 254.1 | 322.8 |
| 51.1   | 72.8   | 58.0   | 27.7   | 24.5  | 19.7   | 24.5   | 22.7  | 36.5  |
| 31.7   | 32.2   | 12.1   | 29.4   | 21.7  | 20.1   | 33.2   | 16.0  | 23.9  |
| 25.9   | 23.9   | 20.4   | 13.2   | 13.5  | 13.3   | 15.7   | 12.3  | 15.1  |
| 20.4   | 18.5   | 15.4   | 33.4   | 27.4  | 29.8   | 13.9   | 16.0  | 14.4  |
| 39.8   | 46.1   | 34.3   | 8.5    | 9.4   | 18.1   | 5.4    | 6.6   | 4.5   |
| 26.6   | 28.1   | 21.9   | 33.8   | 26.2  | 19.8   | 9.1    | 8.2   | 12.8  |
| 694.7  | 873.1  | 596.9  | 1151.6 | 891.6 | 1030.7 | 633.4  | 649.7 | 711.7 |
| 210.0  | 243.5  | 213.4  | 186.2  | 159.8 | 158.2  | 140.0  | 155.9 | 173.9 |
| 209.8  | 241.6  | 176.5  | 191.9  | 180.7 | 170.7  | 147.4  | 140.1 | 164.2 |
| 1328.3 | 1475.0 | 955.1  | 970.5  | 857.8 | 914.8  | 700.8  | 763.8 | 855.6 |
| 8.1    | 6.5    | 1.6    | 27.3   | 28.9  | 36.1   | 23.9   | 24.4  | 35.4  |
| 60.5   | 52.3   | 36.8   | 121.1  | 99.5  | 92.4   | 71.9   | 83.3  | 79.3  |

|       |        |       |       |       |       |       |       |       |
|-------|--------|-------|-------|-------|-------|-------|-------|-------|
| 524.0 | 665.2  | 573.8 | 63.5  | 63.0  | 71.5  | 65.8  | 66.6  | 80.5  |
| 8.7   | 6.9    | 7.8   | 24.4  | 17.6  | 7.7   | 2.6   | 4.8   | 8.6   |
| 23.7  | 13.8   | 16.3  | 38.7  | 26.2  | 24.0  | 14.5  | 13.3  | 11.3  |
| 3.1   | 2.5    | 1.5   | 6.9   | 6.6   | 2.9   | 5.3   | 1.2   | 4.6   |
| 37.6  | 46.6   | 48.0  | 103.9 | 108.2 | 122.3 | 66.1  | 79.8  | 84.5  |
| 11.7  | 24.4   | 2.9   | 31.2  | 14.6  | 16.3  | 3.7   | 17.8  | 6.9   |
| 43.2  | 72.6   | 46.4  | 70.8  | 58.5  | 68.1  | 27.3  | 37.3  | 34.8  |
| 4.0   | 9.4    | 8.5   | 4.6   | 6.2   | 2.3   | 7.6   | 2.4   | 3.2   |
| 7.2   | 5.6    | 5.0   | 3.9   | 6.0   | 12.8  | 9.0   | 4.3   | 5.5   |
| 61.9  | 99.5   | 85.5  | 26.6  | 34.2  | 41.0  | 21.7  | 33.3  | 27.7  |
| 2.6   | 5.7    | 4.3   | 60.0  | 36.3  | 27.0  | 50.6  | 34.0  | 43.9  |
| 319.3 | 454.7  | 404.1 | 19.1  | 15.4  | 23.3  | 14.7  | 19.9  | 17.3  |
| 43.4  | 75.8   | 86.0  | 22.0  | 11.9  | 13.8  | 9.7   | 20.6  | 21.3  |
| 1.5   | 1.3    | 0.9   | 2.6   | 1.9   | 2.2   | 2.0   | 1.0   | 1.0   |
| 8.5   | 1.5    | 6.7   | 5.8   | 12.9  | 9.6   | 4.4   | 9.1   | 9.6   |
| 2.0   | 2.1    | 1.1   | 3.0   | 2.6   | 2.0   | 1.7   | 1.8   | 3.3   |
| 95.1  | 125.8  | 108.9 | 33.2  | 26.8  | 36.3  | 32.2  | 38.1  | 37.9  |
| 1.7   | 1.9    | 1.0   | 5.1   | 4.1   | 2.5   | 2.0   | 1.8   | 2.4   |
| 2.3   | 9.0    | 2.6   | 8.6   | 15.9  | 18.6  | 0.7   | 2.7   | 3.9   |
| 10.3  | 8.0    | 3.1   | 8.9   | 10.9  | 3.9   | 2.5   | 1.1   | 4.6   |
| 59.6  | 58.8   | 47.4  | 25.0  | 32.5  | 34.1  | 20.7  | 30.0  | 25.6  |
| 162.2 | 213.4  | 202.7 | 171.1 | 140.1 | 162.3 | 132.6 | 149.7 | 147.1 |
| 43.9  | 53.0   | 50.2  | 17.6  | 11.5  | 9.5   | 19.7  | 18.8  | 23.7  |
| 8.5   | 7.1    | 4.8   | 17.2  | 11.1  | 11.2  | 8.3   | 7.5   | 6.8   |
| 25.5  | 36.1   | 33.3  | 18.6  | 15.4  | 15.7  | 10.7  | 15.1  | 16.5  |
| 12.1  | 8.5    | 9.8   | 23.6  | 17.4  | 29.4  | 27.1  | 7.3   | 16.0  |
| 66.4  | 96.8   | 82.5  | 83.8  | 86.1  | 86.5  | 70.7  | 74.6  | 94.9  |
| 5.7   | 7.4    | 3.0   | 22.4  | 12.3  | 16.1  | 6.9   | 6.1   | 14.5  |
| 680.4 | 722.2  | 617.5 | 83.1  | 76.9  | 104.7 | 130.8 | 156.1 | 147.7 |
| 17.7  | 15.8   | 15.8  | 14.9  | 8.6   | 23.6  | 20.2  | 17.9  | 14.4  |
| 21.1  | 15.4   | 20.3  | 30.5  | 15.2  | 33.0  | 4.8   | 9.3   | 12.4  |
| 15.6  | 16.7   | 5.1   | 12.9  | 10.0  | 10.6  | 12.9  | 7.5   | 1.9   |
| 34.8  | 63.7   | 47.8  | 106.1 | 77.6  | 97.7  | 56.6  | 60.4  | 60.3  |
| 3.0   | 3.1    | 3.0   | 6.9   | 11.6  | 11.5  | 3.6   | 3.4   | 5.9   |
| 342.7 | 280.2  | 274.8 | 31.0  | 32.9  | 35.6  | 34.8  | 41.7  | 60.6  |
| 8.4   | 21.5   | 29.1  | 11.6  | 8.2   | 17.3  | 7.4   | 6.9   | 6.5   |
| 199.5 | 218.5  | 183.8 | 32.4  | 27.5  | 35.5  | 56.0  | 71.5  | 72.8  |
| 4.1   | 8.6    | 5.7   | 19.5  | 17.1  | 19.4  | 10.1  | 8.5   | 9.4   |
| 44.7  | 61.6   | 48.5  | 93.4  | 97.5  | 111.9 | 48.0  | 50.4  | 61.8  |
| 49.0  | 69.3   | 47.4  | 123.1 | 87.6  | 104.1 | 93.3  | 75.4  | 103.8 |
| 751.8 | 1128.0 | 966.2 | 573.6 | 433.5 | 449.9 | 317.5 | 286.1 | 335.5 |
| 4.9   | 7.7    | 6.6   | 15.9  | 17.3  | 12.2  | 3.9   | 10.0  | 15.8  |
| 27.7  | 41.0   | 33.0  | 21.7  | 21.3  | 26.2  | 41.7  | 34.5  | 41.3  |
| 28.0  | 51.2   | 37.4  | 92.0  | 71.1  | 78.1  | 65.9  | 52.1  | 67.8  |
| 18.1  | 13.6   | 9.6   | 24.5  | 25.4  | 26.1  | 22.5  | 17.1  | 18.2  |
| 4.7   | 11.5   | 1.8   | 14.6  | 11.0  | 6.5   | 9.4   | 9.1   | 8.2   |
| 127.4 | 152.9  | 141.1 | 109.2 | 79.6  | 93.1  | 97.1  | 80.0  | 97.6  |
| 386.9 | 301.5  | 91.6  | 50.7  | 33.3  | 39.6  | 67.5  | 31.3  | 44.0  |
| 40.1  | 47.9   | 36.6  | 20.7  | 12.7  | 19.4  | 12.7  | 16.3  | 8.4   |
| 1.4   | 5.2    | 7.3   | 8.6   | 15.9  | 10.2  | 4.1   | 18.9  | 12.0  |
| 11.2  | 13.1   | 0.8   | 24.3  | 15.5  | 16.0  | 32.3  | 23.5  | 26.0  |
| 8.6   | 12.5   | 3.9   | 13.3  | 6.1   | 17.5  | 4.1   | 3.0   | 5.7   |
| 160.1 | 204.3  | 93.2  | 118.3 | 75.6  | 95.0  | 51.6  | 41.6  | 53.4  |

|        |        |       |        |       |       |       |       |       |
|--------|--------|-------|--------|-------|-------|-------|-------|-------|
| 149.8  | 189.0  | 118.1 | 52.3   | 38.5  | 36.9  | 109.8 | 70.2  | 71.6  |
| 16.7   | 26.8   | 12.8  | 20.5   | 18.3  | 15.9  | 7.9   | 10.7  | 8.3   |
| 3.0    | 4.8    | 2.6   | 9.5    | 5.7   | 5.8   | 17.2  | 17.6  | 14.1  |
| 99.5   | 89.1   | 90.0  | 4.7    | 4.6   | 3.5   | 7.9   | 7.2   | 6.7   |
| 47.2   | 53.7   | 13.5  | 34.0   | 21.3  | 22.8  | 30.2  | 3.9   | 17.3  |
| 153.9  | 243.0  | 187.9 | 104.5  | 100.4 | 90.6  | 56.5  | 76.1  | 90.6  |
| 60.5   | 54.5   | 42.5  | 39.1   | 29.1  | 27.8  | 32.2  | 31.3  | 51.5  |
| 2.2    | 1.6    | 1.2   | 44.7   | 40.4  | 34.9  | 24.6  | 4.6   | 35.6  |
| 46.4   | 48.6   | 41.3  | 51.2   | 35.3  | 25.4  | 30.2  | 31.1  | 31.7  |
| 22.5   | 44.0   | 24.1  | 64.8   | 42.5  | 59.6  | 34.9  | 37.0  | 22.7  |
| 3.8    | 0.6    | 0.3   | 3.9    | 2.1   | 9.8   | 2.5   | 1.3   | 2.0   |
| 86.5   | 79.9   | 59.8  | 31.0   | 5.8   | 10.7  | 17.7  | 10.9  | 15.3  |
| 2.1    | 3.5    | 6.3   | 7.6    | 9.9   | 17.2  | 4.5   | 8.1   | 4.0   |
| 73.6   | 93.0   | 71.6  | 7.9    | 2.3   | 3.3   | 7.0   | 2.2   | 2.4   |
| 75.6   | 98.5   | 136.0 | 112.6  | 133.1 | 131.1 | 51.5  | 95.7  | 76.6  |
| 1.5    | 2.6    | 1.8   | 3.4    | 6.5   | 7.1   | 2.0   | 1.4   | 3.2   |
| 109.8  | 152.6  | 124.5 | 44.1   | 37.4  | 37.2  | 28.8  | 26.0  | 27.9  |
| 4.2    | 13.7   | 6.8   | 9.4    | 11.9  | 17.1  | 9.4   | 9.3   | 11.1  |
| 15.9   | 23.6   | 17.3  | 46.5   | 46.3  | 61.3  | 26.5  | 36.9  | 22.5  |
| 1.4    | 1.4    | 1.3   | 1.5    | 2.5   | 2.7   | 1.0   | 2.5   | 0.6   |
| 2.0    | 5.7    | 3.3   | 4.9    | 2.6   | 3.2   | 2.1   | 0.3   | 2.4   |
| 1.9    | 12.8   | 11.0  | 3.5    | 8.8   | 8.0   | 2.5   | 8.4   | 1.2   |
| 22.9   | 21.6   | 14.6  | 44.6   | 33.7  | 45.1  | 24.5  | 16.0  | 30.8  |
| 9.0    | 7.4    | 3.3   | 15.6   | 2.0   | 13.9  | 3.1   | 3.7   | 4.5   |
| 40.1   | 38.8   | 31.0  | 46.8   | 22.1  | 37.0  | 16.8  | 20.8  | 16.8  |
| 10.5   | 41.0   | 47.3  | 19.1   | 35.9  | 33.9  | 26.5  | 21.0  | 16.1  |
| 52.8   | 46.4   | 30.4  | 38.1   | 31.2  | 34.5  | 39.5  | 43.4  | 41.3  |
| 9.2    | 8.3    | 6.8   | 3.4    | 6.7   | 12.5  | 4.5   | 7.6   | 1.8   |
| 1.2    | 7.1    | 4.5   | 20.4   | 3.7   | 6.0   | 3.8   | 0.7   | 2.0   |
| 87.5   | 113.0  | 89.7  | 26.1   | 29.7  | 28.1  | 14.3  | 17.3  | 20.8  |
| 43.6   | 70.5   | 43.5  | 66.5   | 35.8  | 64.8  | 39.1  | 40.9  | 49.8  |
| 2.2    | 1.7    | 4.6   | 7.8    | 15.2  | 5.7   | 7.5   | 1.3   | 2.0   |
| 84.5   | 90.2   | 70.2  | 47.6   | 43.8  | 51.6  | 27.0  | 32.7  | 26.6  |
| 0.6    | 2.3    | 0.7   | 11.7   | 6.4   | 9.1   | 4.5   | 2.0   | 3.6   |
| 1.4    | 4.2    | 0.8   | 2.4    | 3.4   | 7.1   | 1.1   | 1.3   | 1.1   |
| 112.3  | 132.3  | 67.7  | 130.7  | 95.4  | 95.5  | 63.9  | 63.9  | 80.8  |
| 2286.3 | 1497.1 | 710.3 | 152.1  | 88.8  | 107.3 | 78.4  | 38.7  | 76.6  |
| 8.7    | 15.3   | 5.8   | 18.7   | 13.4  | 13.5  | 12.2  | 7.1   | 10.4  |
| 613.5  | 667.8  | 548.9 | 573.7  | 467.1 | 516.4 | 425.1 | 412.5 | 448.9 |
| 4.1    | 5.9    | 3.4   | 5.1    | 5.8   | 5.0   | 2.5   | 2.9   | 2.0   |
| 21.5   | 27.7   | 18.8  | 10.5   | 5.6   | 7.7   | 10.5  | 4.8   | 6.6   |
| 23.8   | 35.1   | 16.6  | 91.9   | 63.0  | 99.2  | 74.6  | 124.3 | 91.7  |
| 60.5   | 83.5   | 70.4  | 51.8   | 34.0  | 42.9  | 33.4  | 38.2  | 33.8  |
| 769.0  | 990.1  | 815.1 | 1070.6 | 765.1 | 794.3 | 834.7 | 750.7 | 709.2 |
| 119.9  | 154.8  | 112.0 | 403.6  | 383.8 | 420.7 | 190.0 | 237.6 | 293.2 |
| 136.1  | 222.4  | 112.9 | 180.7  | 107.7 | 138.0 | 87.4  | 60.9  | 99.0  |
| 28.9   | 30.2   | 18.6  | 23.8   | 17.3  | 30.7  | 27.9  | 25.4  | 27.3  |
| 220.6  | 367.5  | 160.7 | 334.9  | 363.8 | 429.2 | 370.9 | 497.2 | 438.8 |
| 31.2   | 48.9   | 32.9  | 95.5   | 74.1  | 95.1  | 56.1  | 62.9  | 69.6  |
| 410.9  | 512.9  | 354.0 | 62.8   | 47.3  | 58.2  | 25.4  | 52.1  | 43.5  |
| 51.1   | 70.3   | 71.5  | 24.9   | 20.4  | 31.6  | 24.3  | 26.7  | 38.9  |
| 4.7    | 1.7    | 2.6   | 9.8    | 8.8   | 10.0  | 3.4   | 6.1   | 6.8   |
| 159.4  | 207.6  | 131.4 | 24.5   | 27.3  | 25.9  | 70.0  | 51.1  | 69.8  |

|        |        |        |        |        |        |        |        |        |
|--------|--------|--------|--------|--------|--------|--------|--------|--------|
| 13.3   | 11.4   | 9.9    | 65.9   | 46.3   | 60.9   | 36.4   | 43.9   | 42.7   |
| 154.7  | 217.6  | 169.0  | 397.0  | 369.6  | 401.9  | 337.3  | 357.8  | 377.2  |
| 1.0    | 1.3    | 2.6    | 33.4   | 33.1   | 24.4   | 23.5   | 37.7   | 45.9   |
| 156.2  | 233.9  | 249.9  | 101.0  | 84.4   | 113.2  | 89.4   | 97.7   | 98.8   |
| 3.9    | 1.7    | 1.1    | 9.3    | 9.4    | 3.7    | 6.8    | 6.8    | 9.0    |
| 1803.5 | 1702.0 | 954.9  | 433.5  | 338.9  | 334.1  | 300.9  | 230.4  | 270.7  |
| 10.0   | 6.1    | 4.8    | 9.0    | 16.2   | 15.9   | 8.8    | 3.4    | 4.8    |
| 6.3    | 8.3    | 6.8    | 15.2   | 5.7    | 13.2   | 8.3    | 5.3    | 3.5    |
| 5.2    | 1.7    | 5.4    | 6.8    | 5.5    | 3.1    | 6.5    | 5.9    | 5.8    |
| 3.2    | 2.3    | 1.5    | 2.1    | 2.5    | 2.2    | 4.6    | 0.9    | 4.3    |
| 9.2    | 9.1    | 10.6   | 128.0  | 91.9   | 117.9  | 76.6   | 91.5   | 103.0  |
| 1348.6 | 1729.5 | 1424.9 | 2092.8 | 1701.5 | 1771.0 | 2405.7 | 2160.4 | 2394.8 |
| 502.8  | 549.8  | 304.8  | 440.8  | 389.0  | 430.9  | 295.3  | 335.2  | 362.0  |
| 16.1   | 13.9   | 17.7   | 21.9   | 10.8   | 16.0   | 6.2    | 5.1    | 7.5    |
| 2.4    | 3.3    | 9.1    | 6.6    | 3.4    | 4.7    | 4.8    | 2.8    | 3.2    |
| 2.0    | 2.0    | 12.8   | 11.3   | 8.7    | 6.4    | 4.8    | 2.3    | 3.3    |
| 16.8   | 9.5    | 11.8   | 10.2   | 10.4   | 12.0   | 4.1    | 4.0    | 5.9    |
| 5.0    | 4.4    | 5.2    | 16.0   | 14.8   | 17.6   | 3.4    | 8.3    | 5.7    |
| 149.5  | 298.8  | 330.3  | 332.8  | 322.5  | 385.6  | 112.5  | 182.0  | 171.7  |
| 5.5    | 7.0    | 2.4    | 4.0    | 10.6   | 5.9    | 2.7    | 1.5    | 5.0    |
| 35.2   | 71.1   | 107.9  | 0.9    | 9.6    | 9.2    | 0.3    | 1.8    | 4.1    |
| 56.6   | 74.8   | 33.2   | 3.5    | 6.3    | 5.8    | 1.2    | 0.9    | 1.4    |
| 7.6    | 8.9    | 12.8   | 22.6   | 3.4    | 8.4    | 8.5    | 4.6    | 1.8    |
| 35.5   | 47.6   | 48.2   | 17.5   | 7.6    | 14.1   | 4.1    | 10.7   | 7.2    |
| 163.6  | 180.1  | 115.0  | 75.3   | 53.0   | 59.8   | 48.4   | 36.8   | 38.9   |
| 342.2  | 519.0  | 398.2  | 279.7  | 249.7  | 245.2  | 190.9  | 164.2  | 163.5  |
| 8.9    | 6.7    | 6.3    | 12.3   | 12.0   | 9.2    | 4.9    | 5.8    | 6.6    |
| 10.1   | 18.4   | 5.3    | 13.1   | 30.4   | 27.1   | 9.0    | 9.6    | 17.8   |
| 308.6  | 443.5  | 377.0  | 592.3  | 357.9  | 414.5  | 240.1  | 171.1  | 238.6  |
| 8.3    | 14.0   | 10.2   | 33.4   | 32.2   | 25.5   | 19.6   | 20.2   | 17.8   |
| 52.2   | 61.9   | 37.2   | 38.1   | 27.4   | 30.3   | 22.0   | 27.8   | 21.5   |
| 811.7  | 979.1  | 718.7  | 170.6  | 118.3  | 135.9  | 98.0   | 87.5   | 113.3  |
| 1276.7 | 1207.7 | 661.0  | 374.9  | 249.6  | 260.9  | 342.5  | 231.9  | 289.3  |
| 1140.4 | 1016.1 | 708.0  | 71.4   | 72.2   | 70.7   | 46.6   | 71.2   | 52.1   |
| 4.3    | 6.7    | 2.5    | 11.7   | 8.0    | 10.0   | 9.0    | 10.8   | 7.6    |
| 15.2   | 30.0   | 16.8   | 34.3   | 26.7   | 35.8   | 20.0   | 11.3   | 23.7   |
| 13.1   | 16.9   | 7.6    | 23.6   | 18.3   | 23.0   | 19.6   | 19.1   | 12.7   |
| 5.9    | 7.1    | 6.5    | 21.4   | 8.4    | 4.3    | 7.5    | 8.4    | 8.8    |
| 162.9  | 265.6  | 161.9  | 343.6  | 301.2  | 345.3  | 185.0  | 205.7  | 194.9  |
| 96.7   | 103.6  | 54.7   | 101.7  | 74.6   | 101.3  | 33.6   | 34.6   | 36.9   |
| 53.6   | 70.5   | 56.9   | 44.8   | 42.2   | 53.0   | 33.8   | 30.5   | 30.6   |
| 78.6   | 84.0   | 43.6   | 69.3   | 50.2   | 60.5   | 74.2   | 48.7   | 69.2   |
| 402.9  | 560.7  | 424.5  | 5.2    | 10.8   | 12.4   | 4.1    | 4.3    | 7.5    |
| 4.1    | 6.7    | 1.6    | 9.1    | 4.2    | 2.3    | 1.4    | 3.2    | 1.6    |
| 86.3   | 121.4  | 76.8   | 69.0   | 64.7   | 69.6   | 115.3  | 91.6   | 125.6  |
| 93.0   | 118.4  | 81.1   | 44.4   | 32.3   | 33.5   | 86.1   | 69.9   | 85.1   |
| 568.4  | 668.0  | 467.4  | 9.5    | 6.8    | 6.9    | 1.9    | 0.7    | 1.2    |
| 6.1    | 5.6    | 1.8    | 4.5    | 10.7   | 11.6   | 3.3    | 4.3    | 4.7    |
| 140.6  | 205.4  | 144.0  | 58.1   | 65.2   | 53.6   | 52.4   | 62.4   | 62.8   |
| 18.1   | 13.3   | 14.7   | 15.6   | 21.5   | 16.5   | 14.7   | 13.7   | 17.9   |
| 1195.7 | 1387.8 | 948.5  | 131.1  | 88.7   | 103.3  | 144.3  | 75.8   | 106.6  |
| 698.8  | 748.4  | 602.9  | 182.5  | 153.2  | 142.5  | 243.9  | 217.5  | 240.5  |
| 55.9   | 60.7   | 45.5   | 47.1   | 35.7   | 51.5   | 30.9   | 33.1   | 31.2   |

|       |       |       |       |       |       |       |       |       |
|-------|-------|-------|-------|-------|-------|-------|-------|-------|
| 295.4 | 418.3 | 342.9 | 365.0 | 317.6 | 343.2 | 244.8 | 251.8 | 288.7 |
| 87.9  | 112.8 | 69.1  | 100.3 | 91.9  | 89.7  | 46.9  | 57.5  | 59.0  |
| 153.1 | 169.9 | 88.5  | 33.8  | 29.3  | 32.0  | 25.3  | 16.2  | 23.7  |
| 63.5  | 87.7  | 43.4  | 16.5  | 19.4  | 23.0  | 13.3  | 11.9  | 11.5  |
| 4.2   | 0.8   | 1.1   | 13.4  | 6.0   | 16.1  | 6.9   | 10.9  | 12.5  |
| 58.9  | 84.1  | 78.8  | 72.3  | 70.4  | 84.5  | 46.8  | 68.3  | 62.6  |
| 145.8 | 129.0 | 48.7  | 56.6  | 49.1  | 53.3  | 32.7  | 26.6  | 39.9  |
| 496.5 | 622.0 | 382.7 | 263.0 | 244.5 | 268.9 | 140.9 | 135.8 | 151.4 |
| 4.1   | 6.3   | 3.7   | 5.4   | 9.0   | 15.2  | 5.3   | 4.0   | 3.4   |
| 717.4 | 619.0 | 284.4 | 125.0 | 63.5  | 73.9  | 101.8 | 63.4  | 58.9  |
| 49.5  | 46.2  | 34.0  | 48.4  | 40.8  | 41.1  | 25.9  | 30.2  | 32.7  |
| 49.9  | 58.4  | 49.0  | 70.1  | 59.2  | 75.6  | 48.1  | 40.8  | 71.4  |
| 9.1   | 7.6   | 7.0   | 15.2  | 11.7  | 18.6  | 2.4   | 1.2   | 1.3   |
| 15.0  | 4.6   | 7.9   | 14.1  | 8.1   | 6.0   | 4.4   | 4.0   | 3.5   |
| 145.6 | 185.4 | 247.4 | 37.5  | 42.1  | 45.1  | 60.8  | 86.1  | 70.6  |
| 47.8  | 56.4  | 34.2  | 39.0  | 37.3  | 37.5  | 21.6  | 24.1  | 30.2  |
| 215.2 | 259.3 | 160.4 | 103.7 | 89.9  | 109.7 | 92.8  | 84.5  | 95.5  |
| 235.8 | 201.2 | 171.4 | 23.6  | 16.8  | 28.1  | 18.2  | 9.5   | 17.5  |
| 21.8  | 28.8  | 31.5  | 16.5  | 17.4  | 15.7  | 11.7  | 15.8  | 13.6  |
| 4.1   | 10.3  | 6.4   | 16.0  | 14.6  | 12.7  | 7.5   | 4.9   | 5.5   |
| 3.8   | 5.3   | 3.8   | 5.7   | 2.1   | 1.8   | 3.1   | 0.9   | 6.0   |
| 7.1   | 7.7   | 6.3   | 10.7  | 11.8  | 12.2  | 9.9   | 5.5   | 1.8   |
| 105.3 | 134.0 | 116.1 | 26.6  | 7.5   | 24.3  | 12.1  | 5.7   | 9.5   |
| 4.1   | 1.9   | 3.4   | 7.5   | 8.9   | 4.9   | 0.9   | 0.6   | 0.3   |
| 2.9   | 0.8   | 0.4   | 6.6   | 4.0   | 2.0   | 1.0   | 1.6   | 1.0   |
| 1.2   | 1.6   | 1.3   | 2.5   | 1.8   | 3.0   | 1.2   | 1.1   | 0.9   |
| 60.8  | 97.9  | 65.0  | 128.1 | 98.6  | 99.5  | 82.6  | 85.6  | 82.1  |
| 12.4  | 16.1  | 16.9  | 14.1  | 12.2  | 14.1  | 7.5   | 3.8   | 7.7   |
| 124.0 | 112.1 | 58.3  | 48.8  | 50.5  | 58.7  | 37.0  | 34.8  | 40.9  |
| 9.5   | 6.3   | 6.8   | 5.1   | 8.0   | 2.7   | 0.7   | 3.8   | 6.6   |
| 194.7 | 202.0 | 79.5  | 244.2 | 164.7 | 164.9 | 139.6 | 74.7  | 108.6 |
| 28.7  | 23.3  | 14.5  | 2.4   | 13.6  | 7.7   | 6.1   | 9.6   | 7.4   |
| 13.2  | 22.4  | 10.7  | 4.4   | 7.2   | 3.4   | 7.8   | 5.3   | 7.0   |
| 1.1   | 0.5   | 3.4   | 7.7   | 7.6   | 14.6  | 4.1   | 7.8   | 7.0   |
| 99.7  | 115.7 | 71.7  | 93.3  | 101.3 | 87.9  | 37.5  | 40.3  | 53.6  |
| 36.9  | 59.4  | 54.1  | 91.8  | 63.6  | 60.6  | 54.9  | 49.6  | 43.7  |
| 10.9  | 3.0   | 9.2   | 13.6  | 19.0  | 3.5   | 19.6  | 16.8  | 12.0  |
| 275.8 | 332.4 | 199.0 | 112.9 | 79.2  | 81.5  | 192.4 | 162.2 | 178.3 |
| 44.8  | 62.9  | 67.9  | 49.5  | 42.8  | 51.5  | 36.2  | 41.8  | 40.3  |
| 156.5 | 232.1 | 186.6 | 101.3 | 94.5  | 91.7  | 88.6  | 75.9  | 106.0 |
| 85.7  | 69.3  | 37.1  | 51.3  | 43.8  | 28.4  | 26.3  | 29.2  | 30.3  |
| 0.9   | 1.1   | 2.3   | 1.7   | 4.1   | 3.3   | 0.9   | 0.7   | 1.7   |
| 2.3   | 4.1   | 2.0   | 23.4  | 36.2  | 26.5  | 12.8  | 22.2  | 25.9  |
| 1.7   | 1.8   | 3.8   | 16.5  | 26.9  | 19.4  | 2.7   | 3.3   | 4.4   |
| 6.4   | 8.6   | 6.0   | 9.7   | 5.1   | 3.9   | 3.1   | 9.3   | 10.6  |
| 1.1   | 7.7   | 1.8   | 10.0  | 6.7   | 4.9   | 2.5   | 1.9   | 6.1   |
| 22.0  | 11.2  | 18.4  | 26.8  | 22.1  | 28.0  | 12.2  | 8.9   | 16.5  |
| 68.1  | 63.6  | 42.7  | 63.5  | 51.9  | 65.4  | 37.4  | 40.2  | 43.2  |
| 12.9  | 22.4  | 12.3  | 20.4  | 10.8  | 25.5  | 15.6  | 15.5  | 18.6  |
| 181.8 | 93.0  | 52.4  | 19.0  | 32.1  | 36.7  | 20.7  | 23.0  | 27.4  |
| 1.4   | 2.4   | 2.8   | 2.6   | 2.8   | 1.7   | 1.3   | 1.2   | 2.1   |
| 25.9  | 22.3  | 17.5  | 25.6  | 26.4  | 39.8  | 21.1  | 16.5  | 19.6  |
| 116.5 | 167.5 | 124.2 | 143.6 | 108.5 | 121.5 | 77.3  | 68.4  | 73.2  |

|        |        |        |        |        |        |        |        |        |
|--------|--------|--------|--------|--------|--------|--------|--------|--------|
| 6.3    | 2.5    | 5.8    | 25.7   | 7.3    | 13.4   | 1.1    | 3.7    | 2.3    |
| 31.6   | 33.0   | 26.8   | 102.5  | 88.9   | 83.6   | 64.3   | 51.4   | 57.2   |
| 99.4   | 129.5  | 97.3   | 74.1   | 77.0   | 85.9   | 53.0   | 48.5   | 62.0   |
| 1.2    | 1.0    | 0.7    | 10.0   | 2.3    | 11.0   | 1.5    | 1.0    | 3.2    |
| 395.4  | 453.3  | 283.4  | 216.4  | 183.3  | 199.6  | 206.8  | 258.7  | 280.5  |
| 63.9   | 85.3   | 56.0   | 25.0   | 14.3   | 13.8   | 43.6   | 42.4   | 53.7   |
| 70.0   | 91.7   | 66.4   | 8.1    | 5.2    | 5.9    | 3.4    | 3.1    | 4.4    |
| 32.1   | 50.0   | 58.5   | 71.2   | 70.2   | 61.5   | 51.9   | 54.9   | 49.6   |
| 40.1   | 63.7   | 31.4   | 82.8   | 46.7   | 80.7   | 5.7    | 22.5   | 6.4    |
| 78.6   | 120.1  | 74.8   | 8.2    | 9.0    | 13.3   | 16.6   | 15.8   | 13.8   |
| 1959.5 | 2286.6 | 1496.9 | 1585.9 | 1252.6 | 1331.1 | 1375.5 | 1366.9 | 1392.8 |
| 8.5    | 6.2    | 4.6    | 14.1   | 14.2   | 18.5   | 7.4    | 12.4   | 15.2   |
| 365.8  | 475.5  | 326.2  | 255.8  | 231.0  | 264.7  | 127.6  | 154.5  | 167.3  |
| 11.1   | 15.1   | 21.1   | 35.1   | 45.7   | 38.7   | 24.7   | 31.5   | 33.2   |
| 660.4  | 521.9  | 382.5  | 56.1   | 58.9   | 62.5   | 42.2   | 40.0   | 43.8   |
| 1.8    | 1.7    | 1.7    | 1.9    | 2.3    | 2.3    | 1.4    | 1.0    | 1.8    |
| 81.4   | 130.7  | 127.1  | 43.2   | 40.0   | 55.3   | 24.3   | 30.8   | 35.3   |
| 17.3   | 16.5   | 27.0   | 17.7   | 14.6   | 21.0   | 6.1    | 3.4    | 8.3    |
| 156.6  | 200.3  | 130.7  | 427.1  | 480.0  | 497.2  | 238.0  | 265.1  | 315.5  |
| 25.8   | 19.8   | 17.9   | 56.4   | 31.6   | 29.4   | 13.2   | 24.8   | 30.6   |
| 257.2  | 135.8  | 51.2   | 24.1   | 27.1   | 22.2   | 12.2   | 14.7   | 11.4   |
| 6.3    | 5.7    | 2.7    | 13.6   | 14.5   | 9.5    | 14.6   | 15.6   | 15.0   |
| 36.3   | 45.4   | 38.1   | 31.9   | 36.6   | 26.7   | 18.9   | 17.9   | 20.8   |
| 1.3    | 2.5    | 2.7    | 11.1   | 2.7    | 13.3   | 9.0    | 2.8    | 3.6    |
| 39.7   | 51.3   | 42.3   | 16.5   | 7.7    | 20.2   | 14.2   | 20.2   | 22.6   |
| 0.7    | 2.6    | 0.9    | 5.6    | 4.7    | 6.2    | 4.2    | 1.3    | 3.9    |
| 323.0  | 333.3  | 233.3  | 99.8   | 65.6   | 76.3   | 88.8   | 54.9   | 69.6   |
| 2.8    | 3.1    | 5.8    | 8.9    | 18.9   | 19.6   | 5.4    | 5.4    | 3.0    |
| 18.4   | 9.3    | 5.5    | 13.2   | 6.8    | 18.0   | 10.3   | 5.7    | 6.3    |
| 33.1   | 35.5   | 29.0   | 24.8   | 19.0   | 34.5   | 24.0   | 23.4   | 17.1   |
| 3.4    | 3.7    | 1.7    | 4.3    | 7.0    | 5.0    | 1.5    | 7.1    | 6.7    |
| 0.6    | 1.8    | 0.6    | 6.1    | 2.3    | 1.6    | 1.1    | 0.9    | 0.5    |
| 96.9   | 129.1  | 117.7  | 22.3   | 23.0   | 28.9   | 34.9   | 28.2   | 28.1   |
| 17.2   | 34.0   | 29.8   | 21.5   | 33.3   | 28.8   | 18.5   | 20.2   | 34.3   |
| 17.4   | 20.2   | 20.1   | 16.7   | 22.7   | 17.8   | 8.4    | 5.8    | 14.5   |
| 5.8    | 19.7   | 9.9    | 8.4    | 7.8    | 10.8   | 2.4    | 9.6    | 5.1    |
| 9.7    | 32.0   | 15.0   | 25.0   | 20.9   | 44.2   | 10.3   | 20.6   | 13.9   |
| 301.7  | 291.2  | 171.6  | 202.6  | 162.4  | 182.3  | 129.9  | 142.0  | 124.9  |
| 108.7  | 126.7  | 82.2   | 23.2   | 17.5   | 38.2   | 23.6   | 38.7   | 35.7   |
| 91.3   | 115.6  | 88.9   | 185.8  | 132.6  | 175.0  | 124.0  | 111.6  | 114.9  |
| 2.1    | 1.7    | 1.8    | 3.7    | 2.1    | 2.6    | 1.1    | 1.6    | 1.1    |
| 0.7    | 2.5    | 4.1    | 3.1    | 1.6    | 1.9    | 0.4    | 0.7    | 0.7    |
| 52.8   | 52.4   | 49.0   | 3.0    | 2.7    | 2.2    | 7.4    | 2.7    | 2.6    |
| 10.3   | 19.4   | 15.3   | 17.8   | 18.4   | 15.3   | 3.2    | 5.6    | 7.7    |
| 37.5   | 37.0   | 31.6   | 30.0   | 27.5   | 25.8   | 22.3   | 22.5   | 21.7   |
| 393.5  | 600.1  | 562.1  | 518.8  | 404.8  | 439.9  | 240.1  | 254.0  | 266.8  |
| 2.5    | 19.7   | 8.3    | 15.6   | 9.3    | 8.1    | 2.1    | 5.9    | 6.1    |
| 923.9  | 1080.7 | 622.2  | 404.3  | 312.3  | 320.7  | 338.3  | 304.2  | 325.4  |
| 34.5   | 48.0   | 54.9   | 42.1   | 42.4   | 41.3   | 28.5   | 24.2   | 29.2   |
| 433.5  | 410.4  | 195.8  | 100.8  | 57.8   | 67.4   | 118.4  | 67.9   | 69.9   |
| 19.8   | 16.2   | 16.6   | 2.3    | 1.6    | 9.1    | 1.4    | 2.1    | 3.8    |
| 281.5  | 307.2  | 149.8  | 153.6  | 77.9   | 64.4   | 61.7   | 19.3   | 38.8   |
| 119.3  | 142.7  | 107.7  | 41.6   | 40.4   | 57.5   | 43.9   | 56.9   | 61.8   |

|        |        |        |       |       |       |       |       |       |
|--------|--------|--------|-------|-------|-------|-------|-------|-------|
| 5.3    | 17.7   | 66.5   | 20.9  | 11.5  | 14.7  | 16.7  | 14.2  | 23.0  |
| 3.3    | 12.0   | 7.7    | 9.6   | 5.7   | 13.7  | 15.9  | 16.3  | 15.8  |
| 76.9   | 87.0   | 53.6   | 146.5 | 86.9  | 86.9  | 106.3 | 77.5  | 102.6 |
| 13.5   | 22.6   | 9.0    | 21.8  | 10.2  | 8.4   | 5.1   | 5.1   | 6.0   |
| 27.4   | 47.1   | 42.7   | 20.1  | 4.5   | 20.7  | 4.7   | 2.1   | 5.6   |
| 1.6    | 2.5    | 0.6    | 18.4  | 11.2  | 4.3   | 11.9  | 7.9   | 12.6  |
| 6.8    | 6.0    | 2.8    | 6.7   | 4.6   | 7.5   | 3.1   | 1.6   | 2.3   |
| 1169.2 | 1225.8 | 618.6  | 831.8 | 648.9 | 632.1 | 463.8 | 465.1 | 504.2 |
| 9.3    | 8.1    | 2.9    | 10.8  | 4.6   | 7.3   | 1.2   | 1.9   | 3.6   |
| 12.2   | 14.7   | 14.5   | 39.5  | 21.0  | 27.1  | 11.8  | 17.9  | 13.9  |
| 102.9  | 142.5  | 77.8   | 70.1  | 47.7  | 60.6  | 27.3  | 25.8  | 21.9  |
| 7.4    | 8.8    | 6.2    | 8.1   | 12.8  | 9.5   | 5.3   | 10.6  | 11.6  |
| 1898.2 | 2419.5 | 1536.0 | 972.0 | 725.1 | 758.0 | 841.3 | 752.2 | 895.7 |
| 1.7    | 1.9    | 2.0    | 16.1  | 4.1   | 7.1   | 1.7   | 1.6   | 3.3   |
| 9.9    | 4.0    | 16.9   | 16.1  | 18.9  | 24.9  | 4.6   | 8.9   | 8.4   |
| 1.2    | 0.9    | 6.4    | 12.2  | 9.8   | 10.5  | 4.8   | 9.2   | 3.1   |
| 15.3   | 32.1   | 18.4   | 15.8  | 15.3  | 15.1  | 10.0  | 6.1   | 10.8  |
| 90.3   | 94.8   | 69.3   | 71.3  | 48.6  | 57.9  | 39.3  | 44.1  | 37.4  |
| 0.8    | 2.0    | 0.8    | 6.4   | 1.9   | 2.9   | 0.9   | 1.3   | 2.5   |
| 11.5   | 5.7    | 11.3   | 14.7  | 11.2  | 15.9  | 5.2   | 4.4   | 3.3   |
| 27.8   | 37.1   | 32.5   | 12.4  | 8.5   | 14.7  | 10.8  | 5.8   | 8.9   |
| 13.7   | 14.5   | 19.1   | 14.2  | 18.8  | 20.6  | 15.4  | 30.9  | 30.1  |
| 1.2    | 0.5    | 2.5    | 3.7   | 2.6   | 4.0   | 1.4   | 1.9   | 1.1   |
| 1.9    | 2.0    | 2.4    | 3.2   | 6.6   | 9.1   | 2.7   | 1.2   | 2.6   |
| 4.7    | 2.4    | 2.2    | 36.9  | 45.4  | 39.6  | 20.5  | 41.6  | 33.8  |
| 14.3   | 20.0   | 9.1    | 29.6  | 23.5  | 17.4  | 14.9  | 9.0   | 10.3  |
| 81.2   | 88.1   | 73.1   | 95.7  | 84.1  | 91.2  | 74.8  | 91.0  | 98.7  |
| 12.6   | 2.2    | 3.6    | 15.3  | 24.9  | 17.7  | 14.0  | 11.4  | 5.5   |
| 13.4   | 13.8   | 5.8    | 32.9  | 28.2  | 28.8  | 8.0   | 10.6  | 12.6  |
| 3.6    | 4.3    | 4.6    | 7.9   | 10.2  | 8.4   | 8.0   | 19.5  | 11.3  |
| 1.1    | 1.4    | 1.3    | 10.3  | 9.7   | 6.6   | 4.2   | 1.3   | 4.6   |
| 3.9    | 2.4    | 5.2    | 7.7   | 3.8   | 3.4   | 2.0   | 6.6   | 7.9   |
| 14.4   | 15.2   | 18.4   | 27.8  | 17.0  | 22.6  | 30.3  | 33.3  | 34.3  |
| 8.9    | 9.1    | 9.1    | 11.3  | 11.2  | 14.4  | 20.4  | 26.6  | 23.1  |
| 29.0   | 26.1   | 18.5   | 15.1  | 5.5   | 7.9   | 7.8   | 5.5   | 8.5   |
| 419.9  | 381.5  | 325.8  | 22.4  | 14.6  | 12.4  | 9.6   | 11.8  | 10.5  |
| 27.8   | 34.6   | 14.4   | 13.4  | 8.0   | 9.9   | 9.3   | 8.2   | 11.4  |
| 35.8   | 32.3   | 26.9   | 54.5  | 29.2  | 35.8  | 31.2  | 33.1  | 28.1  |
| 2.1    | 4.4    | 8.9    | 6.0   | 8.2   | 10.2  | 13.7  | 14.9  | 12.8  |
| 1.6    | 5.7    | 6.9    | 33.1  | 25.0  | 28.5  | 6.3   | 7.1   | 10.9  |
| 361.9  | 502.9  | 384.8  | 341.5 | 287.4 | 332.2 | 186.5 | 211.5 | 214.9 |
| 146.4  | 184.9  | 123.2  | 21.0  | 44.5  | 39.0  | 25.3  | 44.4  | 41.1  |
| 7.8    | 20.5   | 16.0   | 8.7   | 14.9  | 7.5   | 10.6  | 4.9   | 8.1   |
| 2.1    | 3.2    | 1.7    | 6.2   | 4.7   | 7.3   | 7.3   | 2.4   | 2.8   |
| 6.8    | 7.0    | 15.2   | 12.8  | 7.1   | 17.7  | 1.4   | 3.9   | 6.8   |
| 10.3   | 18.0   | 9.1    | 22.8  | 12.5  | 13.7  | 13.4  | 15.4  | 13.5  |
| 6.3    | 8.9    | 5.0    | 49.4  | 54.2  | 54.0  | 34.1  | 36.7  | 40.8  |
| 15.6   | 17.2   | 20.0   | 48.2  | 36.7  | 41.4  | 26.1  | 30.7  | 27.6  |
| 6.4    | 11.4   | 14.1   | 43.5  | 35.6  | 43.6  | 27.4  | 20.0  | 24.3  |
| 1.1    | 0.8    | 1.0    | 1.9   | 2.2   | 1.6   | 0.8   | 1.0   | 1.3   |
| 126.7  | 175.0  | 113.7  | 102.5 | 67.8  | 76.0  | 64.8  | 54.2  | 59.7  |
| 29.1   | 44.7   | 36.4   | 20.6  | 23.5  | 25.7  | 23.9  | 19.2  | 26.3  |
| 11.5   | 7.9    | 11.4   | 12.1  | 6.1   | 7.9   | 5.2   | 4.1   | 10.5  |



|        |        |        |        |        |        |        |       |        |
|--------|--------|--------|--------|--------|--------|--------|-------|--------|
| 236.7  | 262.2  | 179.4  | 113.0  | 109.0  | 119.8  | 70.5   | 66.3  | 82.1   |
| 10.7   | 28.6   | 21.3   | 8.7    | 3.8    | 3.4    | 3.6    | 1.9   | 1.4    |
| 4.0    | 11.0   | 5.5    | 11.8   | 3.3    | 14.5   | 15.0   | 6.5   | 2.7    |
| 52.6   | 77.4   | 46.6   | 167.4  | 129.7  | 144.6  | 71.5   | 56.9  | 81.4   |
| 503.2  | 478.3  | 384.3  | 86.4   | 76.6   | 96.0   | 73.3   | 72.2  | 85.5   |
| 0.6    | 0.7    | 4.3    | 3.2    | 0.9    | 1.0    | 3.2    | 5.2   | 0.4    |
| 3.2    | 2.3    | 0.5    | 2.9    | 0.8    | 4.8    | 0.5    | 1.2   | 2.2    |
| 1578.2 | 1716.9 | 1068.7 | 1077.7 | 866.0  | 913.9  | 631.3  | 555.8 | 611.7  |
| 23.0   | 50.7   | 58.4   | 15.2   | 23.9   | 18.0   | 14.8   | 20.8  | 21.3   |
| 39.4   | 55.1   | 169.3  | 70.3   | 67.1   | 77.5   | 30.0   | 39.9  | 43.4   |
| 16.2   | 19.3   | 11.9   | 56.7   | 36.0   | 39.4   | 30.1   | 31.8  | 32.9   |
| 7.2    | 10.5   | 22.3   | 35.6   | 20.8   | 21.6   | 4.5    | 9.2   | 16.1   |
| 5.8    | 7.2    | 6.8    | 41.2   | 39.3   | 48.0   | 3.0    | 5.5   | 3.8    |
| 76.8   | 97.0   | 62.3   | 35.3   | 24.4   | 31.1   | 40.6   | 28.6  | 32.4   |
| 9.1    | 14.2   | 12.1   | 4.4    | 5.3    | 7.8    | 8.3    | 5.3   | 2.2    |
| 171.9  | 195.6  | 108.4  | 307.0  | 247.2  | 289.0  | 136.6  | 123.5 | 157.5  |
| 3.7    | 9.8    | 3.8    | 11.6   | 7.0    | 8.3    | 17.0   | 8.1   | 6.5    |
| 94.4   | 162.4  | 123.5  | 53.4   | 44.0   | 36.5   | 40.3   | 44.9  | 44.5   |
| 18.9   | 21.5   | 14.9   | 39.9   | 32.4   | 33.3   | 24.4   | 22.7  | 18.7   |
| 37.5   | 55.4   | 40.5   | 99.8   | 89.5   | 99.3   | 94.3   | 90.7  | 104.0  |
| 77.6   | 80.2   | 76.2   | 323.7  | 238.8  | 238.6  | 94.5   | 83.4  | 100.6  |
| 3141.4 | 4035.4 | 3856.0 | 444.4  | 331.0  | 343.8  | 368.9  | 289.7 | 347.7  |
| 6.8    | 4.6    | 10.7   | 7.8    | 6.2    | 5.1    | 11.3   | 6.0   | 13.3   |
| 24.0   | 22.9   | 18.7   | 28.7   | 22.8   | 26.6   | 25.4   | 23.4  | 20.8   |
| 2.4    | 1.5    | 1.5    | 3.8    | 3.6    | 5.4    | 2.0    | 2.1   | 2.8    |
| 42.1   | 31.0   | 24.1   | 44.2   | 48.4   | 49.7   | 19.9   | 29.8  | 17.3   |
| 20.7   | 13.7   | 14.4   | 50.5   | 42.7   | 47.3   | 25.4   | 39.5  | 46.0   |
| 34.8   | 18.2   | 22.1   | 37.6   | 41.0   | 36.0   | 28.4   | 36.7  | 55.7   |
| 6.2    | 5.1    | 6.6    | 5.2    | 3.3    | 11.6   | 4.8    | 3.8   | 7.6    |
| 3.5    | 7.9    | 3.7    | 8.8    | 9.6    | 7.9    | 2.6    | 2.1   | 4.1    |
| 5.1    | 6.8    | 1.4    | 5.9    | 2.6    | 4.4    | 0.8    | 1.6   | 2.1    |
| 526.9  | 657.1  | 446.5  | 76.8   | 50.4   | 60.4   | 54.8   | 66.0  | 63.3   |
| 45.5   | 64.8   | 45.3   | 30.6   | 33.1   | 36.5   | 35.9   | 32.7  | 38.9   |
| 28.8   | 57.2   | 52.5   | 71.3   | 67.2   | 75.6   | 50.8   | 64.9  | 64.4   |
| 85.4   | 118.5  | 61.0   | 154.8  | 111.6  | 139.2  | 107.1  | 98.9  | 112.6  |
| 890.5  | 1135.6 | 680.9  | 168.5  | 145.4  | 135.8  | 164.5  | 180.3 | 218.8  |
| 279.4  | 416.9  | 308.1  | 192.8  | 161.6  | 175.4  | 188.7  | 245.4 | 219.4  |
| 87.6   | 117.7  | 82.5   | 117.5  | 118.3  | 118.0  | 86.1   | 118.2 | 123.0  |
| 54.4   | 68.8   | 39.7   | 91.5   | 75.0   | 82.9   | 39.3   | 29.3  | 31.8   |
| 12.7   | 8.9    | 5.2    | 11.8   | 11.2   | 5.5    | 9.7    | 3.6   | 2.9    |
| 81.6   | 79.6   | 57.1   | 12.3   | 4.7    | 9.2    | 4.5    | 3.8   | 1.1    |
| 192.1  | 191.6  | 105.8  | 73.7   | 69.7   | 64.1   | 65.0   | 64.3  | 70.3   |
| 60.1   | 92.8   | 87.3   | 45.3   | 45.6   | 53.6   | 17.7   | 23.5  | 19.8   |
| 53.9   | 105.5  | 97.0   | 13.5   | 14.3   | 12.7   | 6.7    | 13.9  | 18.9   |
| 4.5    | 4.3    | 1.3    | 3.7    | 2.5    | 1.9    | 2.1    | 2.3   | 0.7    |
| 15.1   | 28.1   | 14.0   | 13.0   | 13.8   | 16.9   | 5.6    | 3.8   | 7.5    |
| 79.8   | 84.7   | 122.2  | 57.0   | 39.7   | 51.9   | 14.9   | 14.4  | 34.8   |
| 6.1    | 7.4    | 5.2    | 11.7   | 10.8   | 10.3   | 1.8    | 3.7   | 4.1    |
| 10.8   | 4.9    | 6.4    | 11.4   | 15.8   | 18.2   | 7.3    | 7.3   | 2.1    |
| 1348.4 | 1662.7 | 1458.1 | 371.1  | 379.5  | 467.8  | 359.1  | 502.0 | 481.1  |
| 1.4    | 4.7    | 1.1    | 3.8    | 7.2    | 5.1    | 5.5    | 10.5  | 5.6    |
| 4.8    | 5.7    | 0.5    | 7.9    | 6.2    | 14.0   | 5.3    | 1.5   | 1.2    |
| 211.4  | 249.3  | 197.5  | 2181.4 | 1882.0 | 2141.0 | 1107.2 | 975.6 | 1203.4 |

|        |        |        |       |       |       |       |       |       |
|--------|--------|--------|-------|-------|-------|-------|-------|-------|
| 37.8   | 32.9   | 36.9   | 28.1  | 25.5  | 38.3  | 16.8  | 23.9  | 9.5   |
| 15.1   | 11.2   | 17.2   | 15.3  | 6.0   | 13.5  | 16.0  | 10.5  | 12.5  |
| 200.7  | 181.8  | 97.9   | 34.3  | 37.1  | 42.5  | 35.4  | 30.1  | 47.9  |
| 1.5    | 1.2    | 1.2    | 2.3   | 2.2   | 1.9   | 0.9   | 0.9   | 1.1   |
| 158.6  | 203.9  | 138.3  | 689.7 | 524.7 | 592.2 | 470.5 | 424.2 | 484.9 |
| 410.1  | 291.0  | 127.2  | 13.8  | 4.6   | 2.9   | 9.8   | 3.1   | 5.8   |
| 1127.7 | 1390.6 | 1062.4 | 343.8 | 233.5 | 282.3 | 463.1 | 405.3 | 432.1 |
| 142.0  | 160.8  | 91.6   | 189.3 | 128.6 | 142.5 | 108.6 | 80.8  | 112.0 |
| 181.6  | 209.4  | 157.9  | 300.4 | 235.4 | 269.1 | 196.1 | 213.3 | 217.0 |
| 449.8  | 506.6  | 350.4  | 571.9 | 447.7 | 517.2 | 426.9 | 464.6 | 514.7 |
| 5.7    | 3.4    | 4.2    | 14.7  | 11.5  | 12.7  | 3.5   | 4.1   | 11.5  |
| 3.5    | 3.8    | 2.6    | 12.7  | 10.3  | 13.5  | 11.9  | 2.9   | 3.3   |
| 2.2    | 4.3    | 4.9    | 7.2   | 11.3  | 6.5   | 2.2   | 1.9   | 2.1   |
| 118.0  | 130.0  | 87.6   | 80.1  | 63.1  | 77.4  | 83.4  | 61.4  | 70.3  |
| 39.4   | 34.6   | 33.4   | 47.0  | 60.1  | 43.9  | 32.1  | 40.3  | 49.2  |
| 40.1   | 25.2   | 25.3   | 13.5  | 10.7  | 15.0  | 16.5  | 12.4  | 19.2  |
| 5.1    | 3.4    | 2.0    | 11.7  | 10.6  | 12.1  | 2.5   | 1.5   | 3.2   |
| 16.8   | 12.7   | 5.4    | 22.4  | 16.1  | 17.7  | 16.4  | 13.3  | 2.3   |
| 1.7    | 2.2    | 3.5    | 3.1   | 3.1   | 3.9   | 1.1   | 2.3   | 2.0   |
| 155.0  | 166.0  | 144.3  | 66.2  | 57.0  | 75.8  | 70.2  | 88.7  | 68.8  |
| 8.5    | 6.8    | 4.0    | 8.2   | 10.7  | 14.4  | 17.3  | 11.5  | 15.8  |
| 2.2    | 4.2    | 5.5    | 6.1   | 4.5   | 3.1   | 1.6   | 1.6   | 0.9   |
| 57.4   | 78.7   | 53.9   | 88.6  | 76.9  | 91.9  | 75.2  | 68.6  | 86.4  |
| 16.2   | 29.7   | 21.8   | 24.0  | 22.8  | 28.0  | 19.3  | 27.3  | 26.1  |
| 24.1   | 26.1   | 17.5   | 30.9  | 22.6  | 27.8  | 19.4  | 15.0  | 17.9  |
| 5.3    | 12.0   | 9.2    | 7.8   | 7.3   | 7.0   | 2.3   | 4.2   | 2.5   |
| 45.9   | 57.1   | 46.9   | 47.3  | 40.8  | 40.9  | 43.6  | 54.3  | 46.0  |
| 50.8   | 74.7   | 60.2   | 15.1  | 18.7  | 13.8  | 41.4  | 41.6  | 43.6  |
| 5.5    | 9.6    | 5.7    | 14.7  | 10.3  | 26.1  | 4.8   | 6.5   | 7.0   |
| 0.7    | 1.5    | 1.0    | 4.0   | 2.7   | 3.0   | 0.7   | 0.8   | 0.8   |
| 154.3  | 163.6  | 99.1   | 60.9  | 38.2  | 43.9  | 36.1  | 28.4  | 32.8  |
| 6.9    | 5.9    | 1.3    | 5.2   | 9.4   | 8.2   | 5.6   | 1.2   | 1.5   |
| 1.6    | 3.7    | 9.6    | 452.7 | 351.6 | 370.4 | 316.2 | 245.1 | 289.3 |
| 12.7   | 12.2   | 12.3   | 22.3  | 15.8  | 17.0  | 15.5  | 21.3  | 21.5  |
| 8.1    | 19.5   | 6.5    | 31.1  | 35.8  | 26.4  | 14.8  | 12.8  | 17.6  |
| 2.2    | 8.0    | 4.6    | 8.5   | 3.5   | 3.3   | 0.9   | 1.0   | 1.4   |
| 25.8   | 17.6   | 14.1   | 11.4  | 2.4   | 10.4  | 3.9   | 3.4   | 10.8  |
| 8.1    | 17.7   | 10.7   | 23.1  | 19.4  | 30.6  | 20.9  | 17.1  | 18.6  |
| 22.6   | 13.4   | 9.0    | 20.7  | 16.5  | 20.0  | 15.1  | 11.9  | 14.9  |
| 35.3   | 39.9   | 27.2   | 65.7  | 68.8  | 64.4  | 30.3  | 59.2  | 46.0  |
| 2.0    | 2.1    | 2.6    | 2.9   | 1.9   | 1.8   | 1.4   | 1.0   | 1.7   |
| 154.9  | 190.5  | 62.2   | 105.0 | 77.5  | 86.8  | 91.3  | 70.8  | 68.6  |
| 510.2  | 634.2  | 382.3  | 323.9 | 260.4 | 278.2 | 425.9 | 361.3 | 454.0 |
| 30.0   | 46.4   | 35.7   | 22.3  | 13.6  | 31.3  | 23.4  | 14.9  | 18.5  |
| 106.5  | 91.5   | 63.8   | 30.8  | 20.3  | 20.9  | 19.2  | 18.0  | 23.7  |
| 247.5  | 290.9  | 209.1  | 70.3  | 48.8  | 49.9  | 109.6 | 89.6  | 105.5 |
| 328.2  | 331.3  | 201.5  | 126.5 | 76.3  | 86.0  | 60.9  | 48.4  | 64.5  |
| 212.0  | 308.7  | 297.7  | 153.2 | 117.1 | 158.5 | 178.0 | 230.6 | 193.2 |
| 39.1   | 42.9   | 30.1   | 27.2  | 14.3  | 17.8  | 30.2  | 34.6  | 36.3  |
| 31.7   | 40.6   | 25.6   | 67.4  | 60.3  | 63.5  | 65.5  | 79.0  | 74.6  |
| 7.5    | 2.2    | 0.9    | 14.8  | 9.0   | 9.6   | 3.7   | 6.7   | 5.7   |
| 29.8   | 36.1   | 22.3   | 34.4  | 37.5  | 36.3  | 30.6  | 28.9  | 35.4  |
| 17.8   | 27.5   | 16.2   | 20.2  | 5.9   | 17.3  | 18.9  | 11.1  | 18.5  |

|        |        |        |       |       |       |       |       |       |
|--------|--------|--------|-------|-------|-------|-------|-------|-------|
| 1.1    | 6.7    | 1.6    | 9.1   | 15.6  | 7.9   | 4.2   | 6.6   | 7.7   |
| 5.9    | 1.9    | 2.4    | 11.3  | 11.2  | 8.3   | 4.4   | 5.5   | 1.9   |
| 1441.7 | 1463.3 | 1013.3 | 723.0 | 650.1 | 744.9 | 543.3 | 642.6 | 590.7 |
| 1.6    | 3.4    | 1.2    | 4.9   | 2.7   | 5.8   | 1.1   | 3.2   | 1.2   |
| 51.9   | 72.8   | 38.3   | 21.3  | 15.5  | 31.2  | 19.1  | 13.4  | 19.6  |
| 59.7   | 89.6   | 57.4   | 93.2  | 71.9  | 91.4  | 68.6  | 72.3  | 90.7  |
| 15.6   | 15.6   | 16.4   | 26.3  | 24.7  | 16.1  | 14.1  | 15.0  | 15.8  |
| 17.1   | 19.5   | 8.3    | 19.1  | 6.6   | 2.1   | 16.2  | 9.1   | 16.3  |
| 11.7   | 6.9    | 4.6    | 4.5   | 3.4   | 1.4   | 9.3   | 8.9   | 3.1   |
| 81.6   | 74.5   | 30.3   | 121.9 | 86.9  | 78.8  | 73.5  | 48.7  | 65.8  |
| 12.7   | 12.6   | 4.8    | 33.3  | 29.6  | 34.8  | 17.7  | 11.5  | 9.3   |
| 30.4   | 27.5   | 19.7   | 20.4  | 23.5  | 22.6  | 19.6  | 18.6  | 17.8  |
| 149.8  | 178.7  | 107.1  | 41.3  | 42.5  | 44.1  | 44.8  | 31.3  | 33.2  |
| 1.5    | 1.5    | 1.0    | 18.9  | 7.2   | 11.9  | 4.6   | 6.4   | 10.2  |
| 8.2    | 15.8   | 12.5   | 11.9  | 3.9   | 9.8   | 2.9   | 4.1   | 4.3   |
| 469.5  | 647.5  | 539.5  | 495.8 | 445.5 | 518.0 | 345.2 | 399.4 | 398.2 |
| 33.1   | 15.6   | 33.9   | 31.7  | 14.2  | 24.2  | 14.9  | 5.6   | 18.4  |
| 9.4    | 18.9   | 19.4   | 9.0   | 20.4  | 14.9  | 14.2  | 6.9   | 10.6  |
| 53.3   | 50.1   | 29.9   | 8.8   | 16.7  | 5.5   | 7.1   | 14.5  | 8.3   |
| 38.3   | 39.1   | 29.5   | 5.5   | 10.0  | 8.7   | 7.2   | 5.8   | 9.2   |
| 39.1   | 63.4   | 85.5   | 95.5  | 85.2  | 82.2  | 74.9  | 82.6  | 90.8  |
| 9.5    | 6.7    | 4.3    | 20.3  | 10.5  | 9.0   | 8.1   | 4.5   | 5.0   |
| 8.2    | 11.0   | 5.3    | 17.2  | 13.6  | 8.1   | 3.9   | 4.2   | 4.4   |
| 1.3    | 0.5    | 0.3    | 2.8   | 2.8   | 3.2   | 0.4   | 0.6   | 1.6   |
| 3.6    | 10.6   | 7.1    | 12.4  | 11.6  | 19.2  | 1.6   | 1.7   | 3.6   |
| 2.7    | 4.8    | 3.6    | 4.2   | 3.0   | 3.2   | 1.8   | 1.8   | 1.7   |
| 5.4    | 2.7    | 9.6    | 14.6  | 9.4   | 10.0  | 18.8  | 11.9  | 10.0  |
| 8.9    | 4.4    | 1.8    | 3.7   | 4.4   | 2.1   | 2.2   | 3.1   | 1.4   |
| 2.3    | 11.1   | 5.3    | 19.2  | 20.6  | 19.5  | 9.2   | 8.8   | 9.0   |
| 11.4   | 21.4   | 13.1   | 35.0  | 23.6  | 37.7  | 18.4  | 8.9   | 21.4  |
| 3.4    | 1.8    | 1.3    | 2.5   | 1.9   | 1.5   | 1.5   | 2.3   | 1.2   |
| 29.9   | 32.7   | 55.6   | 18.3  | 36.3  | 23.8  | 14.7  | 4.9   | 7.4   |
| 29.7   | 33.1   | 16.2   | 11.3  | 9.0   | 8.6   | 11.4  | 9.1   | 7.1   |
| 4.9    | 5.6    | 4.3    | 17.6  | 10.5  | 8.7   | 2.1   | 3.7   | 4.6   |
| 15.0   | 28.0   | 35.2   | 20.8  | 23.3  | 31.6  | 13.6  | 19.4  | 27.3  |
| 3.9    | 4.4    | 3.5    | 14.5  | 7.8   | 5.8   | 5.5   | 1.9   | 1.0   |
| 24.9   | 17.4   | 13.0   | 19.9  | 11.9  | 4.9   | 9.4   | 13.0  | 11.6  |
| 16.5   | 29.7   | 13.2   | 37.3  | 26.1  | 22.7  | 24.7  | 18.7  | 22.5  |
| 14.6   | 17.8   | 8.2    | 12.5  | 11.0  | 11.5  | 11.3  | 12.0  | 19.8  |
| 153.3  | 170.0  | 105.3  | 52.7  | 56.1  | 58.0  | 51.7  | 73.1  | 79.8  |
| 3.2    | 4.3    | 2.9    | 12.4  | 10.6  | 6.3   | 10.6  | 1.9   | 3.2   |
| 33.6   | 24.3   | 19.7   | 26.8  | 24.8  | 40.7  | 24.2  | 25.7  | 26.8  |
| 20.0   | 18.5   | 14.3   | 33.4  | 18.7  | 17.8  | 9.9   | 8.8   | 9.9   |
| 85.3   | 100.7  | 92.1   | 16.8  | 6.3   | 18.6  | 21.5  | 14.5  | 21.7  |
| 36.3   | 31.3   | 26.7   | 32.5  | 32.4  | 27.3  | 29.7  | 22.3  | 16.8  |
| 8.7    | 15.5   | 7.1    | 14.2  | 7.1   | 11.2  | 6.4   | 6.6   | 8.8   |
| 45.3   | 54.7   | 38.6   | 28.5  | 17.1  | 21.4  | 40.0  | 35.1  | 32.5  |
| 16.1   | 19.8   | 19.1   | 73.2  | 65.6  | 75.4  | 58.4  | 66.2  | 83.7  |
| 55.7   | 90.4   | 69.9   | 3.0   | 7.3   | 7.9   | 11.0  | 6.5   | 11.6  |
| 319.1  | 387.9  | 209.3  | 85.2  | 51.4  | 61.6  | 98.6  | 66.0  | 82.9  |
| 7.0    | 3.9    | 5.7    | 42.8  | 35.4  | 35.0  | 30.6  | 29.0  | 33.7  |
| 22.7   | 26.4   | 18.0   | 22.8  | 30.4  | 36.4  | 25.1  | 32.8  | 27.3  |
| 14.1   | 18.2   | 20.7   | 7.7   | 6.7   | 9.9   | 9.9   | 9.1   | 10.6  |

|       |       |       |       |       |       |       |       |       |
|-------|-------|-------|-------|-------|-------|-------|-------|-------|
| 16.5  | 26.0  | 16.9  | 19.2  | 16.5  | 27.2  | 17.7  | 11.0  | 15.5  |
| 35.0  | 45.3  | 29.7  | 13.8  | 7.9   | 8.9   | 12.3  | 11.0  | 11.9  |
| 1.8   | 5.6   | 21.6  | 4.4   | 1.1   | 1.5   | 4.4   | 1.7   | 6.1   |
| 1.6   | 3.5   | 1.3   | 7.4   | 9.8   | 1.8   | 5.8   | 1.8   | 0.9   |
| 3.3   | 3.8   | 3.5   | 6.6   | 4.7   | 4.4   | 3.1   | 2.6   | 3.6   |
| 3.5   | 8.3   | 12.4  | 21.7  | 36.7  | 32.9  | 13.5  | 8.3   | 3.6   |
| 578.8 | 794.4 | 701.9 | 285.9 | 223.4 | 283.3 | 318.8 | 299.6 | 398.4 |
| 60.7  | 64.7  | 57.7  | 75.4  | 47.8  | 58.1  | 47.2  | 26.2  | 47.7  |
| 122.3 | 177.5 | 136.1 | 15.5  | 7.6   | 14.5  | 11.8  | 7.8   | 7.3   |
| 9.4   | 12.1  | 5.5   | 32.2  | 19.3  | 13.5  | 7.8   | 4.5   | 14.8  |
| 22.6  | 30.0  | 11.6  | 8.1   | 4.4   | 5.6   | 3.0   | 1.3   | 2.9   |
| 155.7 | 187.1 | 118.7 | 30.2  | 21.0  | 19.3  | 12.6  | 18.8  | 25.8  |
| 139.6 | 127.7 | 69.6  | 64.6  | 54.5  | 46.1  | 39.3  | 30.7  | 39.7  |
| 3.4   | 4.7   | 13.2  | 43.6  | 55.5  | 84.7  | 19.5  | 25.8  | 33.9  |
| 5.1   | 10.3  | 5.2   | 10.7  | 11.8  | 18.5  | 6.1   | 3.3   | 6.4   |
| 10.5  | 7.9   | 19.6  | 20.9  | 21.2  | 25.8  | 18.0  | 17.1  | 15.4  |
| 18.4  | 24.6  | 19.5  | 17.1  | 22.9  | 22.8  | 17.2  | 7.6   | 13.8  |
| 12.8  | 2.2   | 4.7   | 57.5  | 47.2  | 70.2  | 27.9  | 52.6  | 51.6  |
| 5.8   | 12.7  | 2.8   | 12.9  | 5.2   | 7.5   | 11.0  | 9.9   | 9.6   |
| 101.0 | 107.0 | 115.5 | 535.5 | 360.9 | 447.9 | 373.7 | 228.6 | 400.7 |
| 109.4 | 281.6 | 278.0 | 455.7 | 390.0 | 444.8 | 250.3 | 375.5 | 324.9 |
| 18.3  | 17.8  | 15.9  | 19.9  | 15.3  | 18.7  | 12.7  | 8.4   | 8.0   |
| 9.6   | 20.5  | 18.4  | 37.9  | 37.6  | 26.9  | 25.9  | 40.2  | 40.8  |
| 6.6   | 21.5  | 11.5  | 10.6  | 9.0   | 18.1  | 5.5   | 4.1   | 16.0  |
| 64.7  | 41.2  | 28.4  | 46.3  | 36.2  | 47.8  | 33.6  | 11.9  | 18.8  |
| 0.3   | 2.8   | 2.7   | 11.4  | 3.1   | 15.8  | 2.9   | 2.2   | 0.9   |
| 18.8  | 11.5  | 6.8   | 19.8  | 21.7  | 14.4  | 15.1  | 16.7  | 10.6  |
| 72.9  | 108.3 | 76.6  | 48.7  | 36.2  | 53.2  | 34.4  | 42.0  | 37.3  |
| 1.6   | 5.3   | 3.0   | 10.2  | 8.9   | 3.3   | 4.1   | 2.9   | 4.3   |
| 7.1   | 7.1   | 5.4   | 7.8   | 6.1   | 6.2   | 4.1   | 5.4   | 3.1   |
| 193.5 | 289.1 | 229.6 | 359.6 | 345.5 | 354.4 | 265.5 | 386.9 | 371.6 |
| 3.8   | 5.6   | 1.6   | 3.2   | 7.8   | 5.7   | 0.3   | 3.1   | 1.2   |
| 5.9   | 6.5   | 4.3   | 10.0  | 3.5   | 4.9   | 10.1  | 1.9   | 8.5   |
| 14.9  | 16.8  | 17.7  | 6.5   | 5.1   | 2.9   | 9.6   | 5.7   | 11.0  |
| 2.2   | 21.3  | 10.7  | 3.5   | 2.8   | 3.0   | 6.6   | 8.5   | 2.4   |
| 5.3   | 12.4  | 7.1   | 14.3  | 21.8  | 16.1  | 10.5  | 0.9   | 6.5   |
| 23.7  | 47.8  | 39.4  | 25.4  | 29.1  | 32.5  | 29.9  | 31.7  | 29.8  |
| 11.4  | 11.6  | 10.2  | 29.1  | 34.1  | 33.1  | 28.6  | 22.8  | 22.2  |
| 10.9  | 7.6   | 4.9   | 8.6   | 3.8   | 10.1  | 4.4   | 1.3   | 1.8   |
| 12.3  | 13.5  | 12.3  | 13.8  | 11.3  | 11.3  | 6.4   | 7.5   | 6.5   |
| 68.2  | 71.2  | 48.9  | 20.6  | 18.0  | 14.5  | 13.5  | 22.6  | 10.4  |
| 4.0   | 3.8   | 3.1   | 42.7  | 10.7  | 32.9  | 40.3  | 26.9  | 38.4  |
| 18.8  | 42.3  | 48.8  | 35.1  | 35.1  | 48.8  | 12.0  | 43.2  | 35.7  |
| 428.7 | 459.7 | 273.3 | 103.0 | 86.9  | 85.4  | 79.2  | 86.3  | 99.7  |
| 18.5  | 17.0  | 12.0  | 32.5  | 32.9  | 31.3  | 13.7  | 15.9  | 10.7  |
| 5.0   | 7.7   | 18.2  | 22.4  | 12.5  | 13.0  | 6.1   | 6.6   | 4.6   |
| 4.7   | 6.3   | 5.1   | 9.1   | 7.9   | 7.2   | 4.1   | 4.4   | 4.2   |
| 146.4 | 138.4 | 69.7  | 66.0  | 58.2  | 59.6  | 66.6  | 62.1  | 69.2  |
| 14.4  | 13.4  | 4.6   | 16.9  | 22.3  | 17.2  | 14.7  | 10.6  | 7.7   |
| 5.8   | 2.1   | 2.7   | 10.0  | 9.7   | 23.8  | 2.6   | 9.6   | 9.8   |
| 206.9 | 258.5 | 155.3 | 40.8  | 48.5  | 49.0  | 37.5  | 48.3  | 44.4  |
| 25.6  | 31.5  | 21.1  | 18.3  | 10.0  | 24.4  | 5.1   | 29.4  | 14.7  |
| 20.5  | 36.5  | 41.7  | 5.1   | 5.1   | 11.5  | 2.9   | 3.0   | 4.2   |

|       |       |       |       |       |       |       |       |       |
|-------|-------|-------|-------|-------|-------|-------|-------|-------|
| 62.0  | 73.8  | 62.3  | 143.1 | 88.4  | 114.7 | 62.5  | 60.7  | 77.6  |
| 91.7  | 89.8  | 48.8  | 80.3  | 65.9  | 64.6  | 45.3  | 57.5  | 68.9  |
| 24.0  | 54.1  | 64.4  | 88.7  | 81.1  | 79.8  | 55.2  | 40.2  | 50.9  |
| 309.0 | 320.5 | 220.1 | 246.8 | 208.4 | 234.4 | 163.2 | 186.2 | 183.7 |
| 16.4  | 21.9  | 13.3  | 3.9   | 5.3   | 2.3   | 0.3   | 1.9   | 2.3   |
| 410.8 | 468.3 | 331.9 | 26.7  | 29.6  | 36.0  | 16.8  | 19.7  | 29.4  |
| 44.6  | 38.1  | 14.9  | 27.8  | 13.1  | 17.1  | 19.5  | 4.6   | 9.3   |
| 6.0   | 1.2   | 2.1   | 4.5   | 9.1   | 5.0   | 2.9   | 0.7   | 5.8   |
| 22.8  | 34.4  | 23.4  | 11.4  | 4.9   | 10.6  | 14.6  | 15.4  | 14.9  |
| 12.1  | 24.4  | 14.2  | 6.1   | 4.8   | 8.5   | 2.9   | 2.2   | 4.8   |
| 3.5   | 4.4   | 10.6  | 8.7   | 7.8   | 11.8  | 2.6   | 7.9   | 7.0   |
| 68.0  | 91.7  | 80.0  | 103.4 | 77.2  | 104.0 | 106.9 | 74.6  | 101.7 |
| 1.4   | 4.6   | 1.2   | 13.5  | 18.0  | 9.9   | 7.6   | 10.8  | 14.8  |
| 20.1  | 9.2   | 5.5   | 9.0   | 12.8  | 19.7  | 6.4   | 5.9   | 14.7  |
| 15.6  | 19.7  | 17.2  | 30.1  | 20.0  | 22.6  | 15.2  | 14.1  | 10.8  |
| 331.4 | 433.3 | 268.8 | 400.0 | 292.2 | 331.2 | 222.3 | 200.3 | 236.2 |
| 219.8 | 258.8 | 200.8 | 236.1 | 186.4 | 199.5 | 359.2 | 310.8 | 350.3 |
| 2.2   | 2.3   | 5.4   | 3.1   | 2.6   | 1.8   | 6.1   | 6.6   | 10.2  |
| 42.5  | 56.9  | 27.1  | 24.2  | 11.2  | 16.8  | 13.8  | 20.9  | 19.7  |
| 121.8 | 158.8 | 123.9 | 139.4 | 115.9 | 141.9 | 49.7  | 67.7  | 70.4  |
| 17.1  | 21.8  | 32.8  | 20.8  | 19.2  | 20.6  | 17.4  | 22.5  | 13.5  |
| 1.9   | 1.6   | 2.4   | 6.6   | 12.4  | 4.6   | 1.2   | 2.2   | 1.0   |
| 11.2  | 9.7   | 10.9  | 20.5  | 8.2   | 28.4  | 15.2  | 6.3   | 21.7  |
| 56.7  | 77.6  | 80.2  | 62.6  | 57.4  | 67.1  | 45.9  | 37.9  | 38.1  |
| 5.4   | 4.3   | 6.2   | 11.9  | 7.4   | 6.9   | 2.2   | 4.9   | 7.2   |
| 2.4   | 2.5   | 2.2   | 3.2   | 2.8   | 2.7   | 1.1   | 1.0   | 1.2   |
| 13.7  | 10.1  | 5.7   | 14.6  | 5.3   | 12.8  | 1.4   | 7.5   | 13.5  |
| 15.9  | 14.8  | 15.4  | 33.5  | 19.9  | 33.3  | 29.6  | 27.4  | 36.7  |
| 7.2   | 4.5   | 0.9   | 16.3  | 4.4   | 15.9  | 11.8  | 16.3  | 9.5   |
| 8.4   | 6.0   | 2.2   | 10.8  | 2.6   | 15.7  | 3.7   | 1.6   | 4.0   |
| 6.7   | 1.3   | 4.9   | 2.9   | 13.3  | 13.1  | 2.0   | 17.2  | 10.5  |
| 2.0   | 1.7   | 0.8   | 7.1   | 12.2  | 6.7   | 0.7   | 2.6   | 1.2   |
| 0.5   | 0.8   | 0.7   | 4.1   | 0.9   | 1.4   | 1.3   | 0.5   | 0.8   |
| 1.1   | 1.1   | 0.9   | 2.1   | 1.5   | 1.9   | 1.1   | 1.2   | 1.2   |
| 527.2 | 651.9 | 545.6 | 99.8  | 81.8  | 83.4  | 87.6  | 85.0  | 85.1  |
| 43.7  | 90.9  | 82.6  | 49.4  | 49.9  | 47.8  | 43.9  | 72.7  | 47.3  |
| 1.9   | 3.9   | 3.7   | 9.0   | 4.3   | 1.9   | 1.0   | 1.5   | 0.9   |
| 4.6   | 16.3  | 9.8   | 13.5  | 8.1   | 12.1  | 6.8   | 5.8   | 8.6   |
| 10.1  | 20.0  | 25.3  | 9.2   | 2.9   | 9.9   | 1.1   | 3.1   | 5.9   |
| 49.2  | 90.0  | 71.4  | 29.8  | 28.6  | 26.7  | 27.3  | 40.3  | 29.9  |
| 3.7   | 1.4   | 5.5   | 13.2  | 7.0   | 10.8  | 11.1  | 4.2   | 11.4  |
| 5.0   | 3.2   | 4.4   | 4.5   | 2.1   | 6.7   | 4.1   | 1.5   | 2.7   |
| 12.2  | 8.3   | 18.3  | 8.2   | 9.9   | 10.8  | 6.9   | 2.7   | 1.5   |
| 88.7  | 69.9  | 76.5  | 86.9  | 63.0  | 74.4  | 77.1  | 58.6  | 72.4  |
| 4.6   | 5.7   | 4.4   | 18.1  | 5.5   | 12.9  | 5.9   | 4.3   | 3.0   |
| 87.4  | 100.8 | 49.6  | 29.0  | 16.6  | 20.5  | 30.8  | 16.8  | 14.7  |
| 19.0  | 29.8  | 14.8  | 32.7  | 40.1  | 35.4  | 25.6  | 22.7  | 22.0  |
| 16.7  | 15.4  | 13.7  | 15.1  | 17.8  | 11.7  | 8.8   | 5.2   | 11.1  |
| 20.9  | 18.6  | 6.8   | 10.9  | 13.0  | 10.4  | 10.0  | 8.7   | 11.0  |
| 3.1   | 10.3  | 2.8   | 12.6  | 11.0  | 10.3  | 4.7   | 3.4   | 7.8   |
| 6.3   | 7.2   | 4.6   | 7.0   | 5.8   | 4.9   | 6.3   | 7.8   | 7.9   |
| 1.4   | 1.7   | 1.4   | 6.0   | 8.3   | 6.8   | 4.5   | 6.8   | 4.6   |
| 13.4  | 18.2  | 21.6  | 24.3  | 22.6  | 25.2  | 14.0  | 22.1  | 20.1  |

|       |       |       |       |       |       |       |       |       |
|-------|-------|-------|-------|-------|-------|-------|-------|-------|
| 5.1   | 2.5   | 0.5   | 18.9  | 15.3  | 11.2  | 5.1   | 4.1   | 8.3   |
| 20.1  | 11.7  | 7.2   | 16.0  | 18.2  | 14.0  | 10.2  | 12.9  | 7.6   |
| 11.5  | 2.9   | 2.5   | 12.5  | 17.2  | 17.0  | 8.8   | 8.6   | 9.1   |
| 341.8 | 392.4 | 313.8 | 184.1 | 158.8 | 172.5 | 107.3 | 105.3 | 122.2 |
| 13.0  | 8.3   | 6.8   | 1.3   | 1.3   | 3.3   | 11.8  | 4.7   | 5.5   |
| 14.2  | 11.7  | 2.3   | 4.7   | 3.6   | 7.7   | 4.7   | 7.8   | 9.8   |
| 21.2  | 25.3  | 10.8  | 16.0  | 19.6  | 11.7  | 3.1   | 13.8  | 13.3  |
| 4.6   | 3.8   | 3.4   | 8.7   | 3.6   | 7.9   | 3.0   | 3.4   | 3.9   |
| 17.5  | 35.9  | 31.6  | 4.3   | 2.9   | 4.8   | 15.2  | 9.8   | 5.6   |
| 17.8  | 26.1  | 17.4  | 404.0 | 309.3 | 327.9 | 286.4 | 286.5 | 318.8 |
| 3.6   | 6.0   | 16.4  | 9.4   | 2.6   | 14.8  | 4.8   | 6.1   | 8.9   |
| 9.4   | 4.2   | 6.1   | 11.1  | 9.0   | 7.8   | 9.1   | 6.1   | 10.7  |
| 425.5 | 513.4 | 351.9 | 421.9 | 286.9 | 342.1 | 240.3 | 213.7 | 241.7 |
| 4.8   | 3.1   | 2.8   | 1.3   | 2.0   | 2.4   | 1.6   | 1.0   | 0.5   |
| 381.4 | 459.2 | 425.7 | 142.7 | 140.5 | 180.1 | 109.2 | 145.4 | 139.5 |
| 3.5   | 2.5   | 1.5   | 5.5   | 10.1  | 3.2   | 2.9   | 4.0   | 1.9   |
| 5.8   | 2.8   | 1.3   | 48.6  | 42.5  | 24.8  | 2.8   | 3.8   | 3.6   |
| 5.8   | 8.4   | 5.5   | 7.5   | 15.6  | 21.1  | 3.9   | 4.7   | 7.1   |
| 1.8   | 2.7   | 1.5   | 5.2   | 3.8   | 3.8   | 2.1   | 1.3   | 2.1   |
| 6.8   | 2.3   | 1.7   | 8.0   | 3.0   | 6.9   | 3.9   | 2.5   | 2.4   |
| 32.8  | 55.8  | 47.5  | 7.9   | 11.2  | 8.7   | 18.6  | 11.2  | 14.2  |
| 15.6  | 22.0  | 12.6  | 14.3  | 30.6  | 31.1  | 14.9  | 23.9  | 18.7  |
| 5.0   | 4.4   | 11.7  | 4.9   | 4.9   | 5.8   | 3.2   | 1.9   | 2.7   |
| 5.7   | 11.4  | 10.4  | 27.0  | 20.0  | 16.5  | 6.6   | 11.7  | 10.2  |
| 8.8   | 18.0  | 6.7   | 17.3  | 23.7  | 10.0  | 4.4   | 6.6   | 5.2   |
| 2.5   | 9.4   | 3.1   | 18.5  | 14.9  | 21.5  | 12.7  | 2.5   | 5.8   |
| 340.3 | 385.4 | 315.5 | 8.0   | 8.0   | 16.2  | 7.9   | 10.1  | 4.8   |
| 62.4  | 86.0  | 93.5  | 4.4   | 8.0   | 6.9   | 3.8   | 6.9   | 5.8   |
| 2.9   | 6.0   | 4.0   | 14.7  | 4.6   | 6.2   | 3.1   | 5.1   | 3.9   |
| 3.6   | 9.9   | 2.5   | 6.7   | 9.5   | 14.6  | 7.1   | 10.3  | 8.9   |
| 2.4   | 2.3   | 1.3   | 5.4   | 4.2   | 3.9   | 0.5   | 3.6   | 2.4   |
| 10.4  | 4.6   | 6.0   | 11.3  | 11.0  | 8.8   | 10.1  | 8.1   | 7.7   |
| 1.1   | 6.3   | 1.1   | 7.5   | 2.3   | 4.2   | 0.8   | 3.3   | 1.0   |
| 10.9  | 25.3  | 9.2   | 6.0   | 3.1   | 5.3   | 3.2   | 9.2   | 2.7   |
| 18.2  | 17.5  | 21.4  | 11.9  | 12.9  | 28.9  | 16.3  | 14.3  | 13.7  |
| 6.4   | 15.1  | 10.3  | 6.1   | 14.6  | 10.7  | 6.7   | 8.8   | 5.1   |
| 174.3 | 220.6 | 184.7 | 54.3  | 43.6  | 51.7  | 40.2  | 31.7  | 38.0  |
| 52.2  | 47.6  | 43.1  | 12.3  | 15.6  | 24.6  | 20.5  | 19.8  | 25.2  |
| 12.6  | 3.2   | 13.7  | 83.2  | 65.2  | 77.0  | 44.3  | 37.6  | 53.5  |
| 77.0  | 69.0  | 48.8  | 66.2  | 52.8  | 69.4  | 53.9  | 52.3  | 59.8  |
| 1.0   | 1.5   | 0.9   | 3.8   | 3.8   | 3.0   | 1.9   | 0.9   | 0.9   |
| 13.1  | 26.7  | 20.6  | 42.5  | 33.4  | 44.6  | 27.3  | 18.2  | 23.3  |
| 1.9   | 2.8   | 1.9   | 3.2   | 5.5   | 3.4   | 1.3   | 1.2   | 1.6   |
| 0.8   | 3.9   | 1.7   | 6.0   | 6.4   | 2.5   | 4.7   | 0.6   | 2.7   |
| 59.3  | 105.7 | 69.8  | 15.4  | 21.1  | 29.5  | 23.5  | 13.7  | 3.9   |
| 6.9   | 5.9   | 2.7   | 6.8   | 9.7   | 15.5  | 6.8   | 6.7   | 7.5   |
| 19.8  | 23.8  | 8.5   | 28.0  | 21.9  | 31.6  | 14.3  | 15.5  | 15.8  |
| 105.1 | 142.9 | 80.2  | 94.8  | 111.1 | 91.2  | 94.1  | 76.6  | 101.2 |
| 11.4  | 29.1  | 16.1  | 38.6  | 46.8  | 41.2  | 19.9  | 21.7  | 35.0  |
| 2.9   | 7.2   | 5.1   | 27.0  | 17.0  | 22.8  | 18.8  | 20.7  | 17.3  |
| 4.1   | 6.1   | 3.0   | 5.0   | 4.8   | 4.7   | 3.7   | 2.6   | 4.5   |
| 4.5   | 3.7   | 4.4   | 12.4  | 6.4   | 11.5  | 6.2   | 6.4   | 2.7   |
| 5.1   | 10.3  | 4.1   | 29.4  | 9.5   | 19.9  | 7.5   | 4.4   | 5.3   |

|        |        |        |       |       |       |       |       |       |
|--------|--------|--------|-------|-------|-------|-------|-------|-------|
| 25.2   | 20.4   | 13.0   | 24.5  | 22.2  | 26.2  | 17.6  | 13.6  | 15.2  |
| 51.6   | 99.3   | 71.6   | 72.3  | 68.6  | 72.3  | 46.4  | 45.8  | 52.4  |
| 10.9   | 3.3    | 4.3    | 7.7   | 5.6   | 12.1  | 3.6   | 4.0   | 1.3   |
| 1.4    | 4.3    | 1.5    | 5.6   | 3.3   | 5.8   | 0.9   | 1.5   | 1.9   |
| 13.5   | 27.5   | 31.6   | 9.4   | 7.0   | 10.9  | 2.2   | 11.0  | 10.7  |
| 24.7   | 24.6   | 13.8   | 22.0  | 21.9  | 22.9  | 18.1  | 12.7  | 18.1  |
| 14.4   | 14.6   | 25.9   | 61.5  | 69.7  | 67.6  | 48.8  | 47.8  | 54.8  |
| 24.1   | 68.7   | 38.3   | 103.6 | 90.5  | 104.0 | 45.0  | 48.8  | 41.8  |
| 83.8   | 126.3  | 71.8   | 19.1  | 15.4  | 13.7  | 25.4  | 14.7  | 17.5  |
| 14.1   | 17.7   | 18.2   | 27.5  | 26.0  | 23.8  | 14.1  | 16.0  | 17.7  |
| 141.5  | 112.8  | 105.5  | 4.2   | 4.3   | 6.0   | 0.7   | 5.6   | 6.1   |
| 6.6    | 17.5   | 4.3    | 7.7   | 6.3   | 10.5  | 2.5   | 4.6   | 4.8   |
| 68.4   | 96.2   | 72.5   | 23.1  | 16.1  | 22.0  | 29.1  | 28.3  | 33.6  |
| 7.5    | 4.5    | 3.2    | 12.1  | 5.3   | 11.9  | 6.1   | 15.5  | 9.3   |
| 25.0   | 27.1   | 30.0   | 5.6   | 16.9  | 5.8   | 2.5   | 17.8  | 6.9   |
| 68.4   | 91.3   | 64.5   | 11.2  | 12.2  | 20.1  | 15.1  | 14.9  | 17.4  |
| 7.6    | 5.4    | 2.7    | 34.6  | 24.2  | 25.3  | 36.3  | 33.2  | 39.2  |
| 16.7   | 15.4   | 11.6   | 32.7  | 20.2  | 21.1  | 22.1  | 16.1  | 26.2  |
| 7.1    | 13.2   | 3.3    | 26.5  | 13.8  | 30.2  | 8.7   | 5.8   | 2.9   |
| 1209.5 | 1590.2 | 1275.3 | 406.4 | 430.8 | 500.3 | 352.9 | 465.7 | 468.1 |
| 1.7    | 2.5    | 1.4    | 2.9   | 2.9   | 2.9   | 1.8   | 1.7   | 1.3   |
| 3.4    | 1.7    | 0.8    | 10.9  | 4.2   | 8.4   | 3.3   | 3.4   | 2.0   |
| 0.9    | 1.0    | 1.0    | 4.0   | 3.4   | 6.3   | 1.1   | 4.5   | 1.0   |
| 13.2   | 1.4    | 10.4   | 14.0  | 13.6  | 5.6   | 10.1  | 7.2   | 6.7   |
| 70.5   | 106.8  | 80.2   | 50.9  | 48.9  | 37.0  | 25.6  | 34.1  | 22.3  |
| 14.9   | 18.7   | 22.8   | 14.6  | 10.6  | 28.2  | 50.9  | 37.5  | 36.6  |
| 2.4    | 9.0    | 5.7    | 16.8  | 4.2   | 12.2  | 12.3  | 7.5   | 9.0   |
| 5.9    | 1.6    | 1.5    | 11.9  | 2.2   | 4.8   | 13.0  | 6.9   | 4.5   |
| 194.8  | 298.0  | 241.9  | 381.6 | 364.0 | 424.5 | 198.9 | 233.7 | 244.5 |
| 0.7    | 0.9    | 0.7    | 1.7   | 1.3   | 2.0   | 0.8   | 0.6   | 0.8   |
| 41.2   | 56.4   | 54.1   | 298.4 | 285.4 | 301.2 | 162.4 | 240.7 | 207.8 |
| 3.6    | 6.9    | 5.3    | 28.9  | 20.4  | 22.2  | 5.6   | 3.9   | 11.5  |
| 14.3   | 9.1    | 9.1    | 19.7  | 18.5  | 17.7  | 11.3  | 7.6   | 9.8   |
| 26.4   | 25.0   | 19.4   | 40.6  | 33.2  | 49.8  | 20.7  | 19.9  | 26.2  |
| 2.1    | 2.1    | 2.3    | 4.5   | 2.9   | 3.9   | 2.1   | 5.1   | 1.5   |
| 7.2    | 3.0    | 2.4    | 2.2   | 3.8   | 4.8   | 2.2   | 2.9   | 3.6   |
| 189.9  | 196.2  | 141.5  | 718.6 | 547.5 | 604.7 | 246.6 | 280.1 | 268.3 |
| 678.7  | 906.8  | 704.5  | 222.2 | 206.4 | 201.7 | 131.9 | 178.8 | 172.1 |
| 4.1    | 8.6    | 8.1    | 22.3  | 14.3  | 9.1   | 7.5   | 4.5   | 17.7  |
| 12.7   | 20.0   | 16.1   | 10.5  | 8.3   | 6.5   | 0.8   | 2.9   | 0.7   |
| 3.3    | 3.4    | 1.1    | 4.9   | 5.9   | 4.1   | 1.8   | 3.5   | 3.0   |
| 2.2    | 2.9    | 0.8    | 7.8   | 7.1   | 9.0   | 3.1   | 5.2   | 2.8   |
| 203.1  | 325.3  | 208.7  | 68.3  | 52.7  | 88.1  | 52.5  | 57.1  | 73.7  |
| 5.7    | 2.8    | 2.5    | 7.1   | 8.9   | 8.6   | 4.1   | 4.1   | 3.0   |
| 4.0    | 1.8    | 2.4    | 0.6   | 8.7   | 4.2   | 3.2   | 2.4   | 3.1   |
| 0.3    | 0.9    | 0.6    | 4.4   | 2.6   | 0.9   | 0.5   | 0.4   | 0.4   |
| 4.7    | 3.4    | 2.2    | 6.5   | 9.6   | 11.2  | 3.6   | 0.8   | 1.3   |
| 2.1    | 1.5    | 0.8    | 8.6   | 6.1   | 5.4   | 1.8   | 1.0   | 1.5   |
| 1.2    | 10.7   | 4.2    | 7.7   | 4.9   | 8.9   | 2.3   | 1.5   | 4.4   |
| 1.9    | 2.9    | 1.6    | 5.5   | 5.4   | 4.8   | 1.8   | 0.8   | 1.7   |
| 1.9    | 2.9    | 5.0    | 15.3  | 6.4   | 18.1  | 4.6   | 6.9   | 8.9   |
| 1.9    | 9.9    | 3.0    | 11.4  | 7.5   | 9.2   | 2.9   | 0.4   | 4.0   |
| 3.0    | 3.2    | 3.5    | 31.0  | 36.0  | 17.1  | 7.7   | 4.4   | 6.4   |

|        |        |        |        |       |       |       |       |        |
|--------|--------|--------|--------|-------|-------|-------|-------|--------|
| 11.9   | 13.7   | 11.2   | 19.4   | 9.2   | 15.2  | 8.9   | 11.0  | 15.1   |
| 20.6   | 12.9   | 9.8    | 15.7   | 13.9  | 20.4  | 5.0   | 9.7   | 9.9    |
| 5.3    | 4.1    | 1.4    | 7.4    | 7.4   | 5.8   | 3.2   | 0.6   | 1.8    |
| 2.2    | 3.2    | 3.1    | 4.0    | 4.0   | 4.2   | 2.0   | 1.9   | 3.2    |
| 4.2    | 3.7    | 1.2    | 5.2    | 2.6   | 3.8   | 0.9   | 1.0   | 0.9    |
| 7.2    | 15.2   | 6.4    | 25.2   | 9.4   | 7.9   | 8.5   | 5.2   | 13.4   |
| 14.4   | 10.6   | 9.4    | 15.6   | 12.7  | 17.1  | 9.1   | 7.3   | 15.1   |
| 1.8    | 4.0    | 5.5    | 5.6    | 7.6   | 2.6   | 4.7   | 4.4   | 0.8    |
| 11.1   | 16.8   | 13.3   | 21.9   | 12.2  | 20.6  | 15.3  | 16.7  | 12.9   |
| 566.0  | 530.8  | 297.4  | 5.1    | 6.3   | 3.9   | 4.6   | 6.1   | 4.4    |
| 17.1   | 24.9   | 11.3   | 21.5   | 17.5  | 21.5  | 12.1  | 12.0  | 15.5   |
| 5.7    | 12.0   | 10.9   | 6.3    | 17.8  | 7.5   | 5.1   | 5.1   | 9.4    |
| 5.2    | 0.6    | 0.9    | 17.7   | 13.5  | 23.7  | 3.6   | 4.0   | 2.9    |
| 24.9   | 13.6   | 18.5   | 18.7   | 9.4   | 16.4  | 12.8  | 12.7  | 8.5    |
| 1006.9 | 1086.7 | 694.0  | 653.7  | 450.1 | 475.1 | 505.6 | 415.4 | 498.4  |
| 2701.4 | 2448.1 | 1418.7 | 1147.1 | 950.4 | 903.0 | 897.4 | 845.6 | 1057.7 |
| 12.4   | 1.8    | 6.8    | 6.3    | 5.4   | 3.6   | 3.4   | 1.1   | 0.9    |
| 1.1    | 1.9    | 1.4    | 3.4    | 6.2   | 4.0   | 1.8   | 1.8   | 1.6    |
| 23.6   | 27.6   | 22.4   | 34.6   | 22.1  | 18.3  | 10.8  | 15.6  | 23.1   |
| 7.1    | 2.7    | 3.1    | 8.7    | 11.5  | 7.0   | 4.1   | 3.1   | 0.8    |
| 1.2    | 1.7    | 0.6    | 2.7    | 2.8   | 2.6   | 0.7   | 0.8   | 0.7    |
| 58.9   | 104.5  | 130.9  | 18.7   | 10.7  | 8.3   | 12.1  | 5.8   | 10.0   |
| 6.6    | 20.4   | 9.5    | 31.4   | 31.5  | 27.2  | 23.3  | 19.5  | 17.6   |
| 10.6   | 9.9    | 10.7   | 37.0   | 22.2  | 24.9  | 16.3  | 15.6  | 12.2   |
| 1.7    | 1.9    | 1.9    | 3.1    | 2.5   | 3.9   | 1.8   | 2.3   | 2.0    |
| 9.5    | 2.4    | 6.8    | 18.5   | 11.5  | 4.9   | 2.0   | 3.9   | 12.0   |
| 4.9    | 10.6   | 6.6    | 7.3    | 4.5   | 12.4  | 2.9   | 6.5   | 10.2   |
| 44.1   | 54.5   | 47.5   | 29.8   | 50.9  | 40.5  | 5.7   | 4.8   | 15.7   |
| 1.7    | 1.6    | 1.2    | 9.7    | 9.3   | 8.6   | 1.3   | 0.5   | 4.4    |
| 2.2    | 2.2    | 0.4    | 31.9   | 17.1  | 12.7  | 8.4   | 12.2  | 8.6    |
| 14.6   | 13.9   | 15.3   | 27.2   | 17.3  | 24.3  | 12.8  | 10.2  | 11.9   |
| 19.5   | 22.4   | 21.3   | 24.3   | 17.8  | 36.2  | 20.8  | 14.0  | 31.0   |
| 16.4   | 13.7   | 15.6   | 33.4   | 23.9  | 28.7  | 25.1  | 15.4  | 18.3   |
| 3.0    | 5.6    | 1.6    | 10.4   | 10.1  | 16.5  | 4.6   | 3.9   | 1.1    |
| 15.0   | 9.7    | 7.2    | 14.4   | 13.6  | 9.5   | 9.2   | 11.5  | 9.4    |
| 5.0    | 4.0    | 1.4    | 8.9    | 2.6   | 2.8   | 2.6   | 1.9   | 4.8    |
| 1078.6 | 1239.7 | 650.7  | 1054.4 | 799.3 | 847.3 | 826.5 | 721.0 | 836.2  |
| 2.7    | 6.1    | 2.2    | 6.7    | 6.0   | 3.2   | 1.8   | 3.1   | 1.8    |
| 52.6   | 49.4   | 27.4   | 16.0   | 11.1  | 7.8   | 11.2  | 4.8   | 11.0   |
| 10.6   | 9.8    | 6.7    | 4.2    | 2.9   | 6.4   | 7.5   | 3.1   | 6.6    |
| 6.0    | 7.7    | 6.1    | 9.8    | 7.2   | 7.0   | 6.7   | 3.7   | 2.1    |
| 8.3    | 13.6   | 3.6    | 8.1    | 3.7   | 9.5   | 4.4   | 1.0   | 4.3    |
| 170.3  | 216.7  | 157.2  | 107.0  | 80.4  | 104.8 | 103.2 | 125.3 | 123.1  |
| 2.4    | 9.7    | 5.8    | 17.6   | 8.0   | 5.1   | 6.8   | 5.8   | 7.9    |
| 15.2   | 9.7    | 26.1   | 6.6    | 17.4  | 13.6  | 14.6  | 8.8   | 15.0   |
| 6.0    | 4.7    | 1.5    | 14.5   | 4.5   | 9.0   | 5.6   | 1.3   | 4.8    |
| 34.6   | 33.6   | 20.3   | 55.4   | 39.3  | 64.0  | 35.6  | 29.2  | 31.0   |
| 57.2   | 88.3   | 82.1   | 52.9   | 57.3  | 49.7  | 33.5  | 25.5  | 23.3   |
| 4.3    | 7.3    | 4.7    | 40.5   | 19.8  | 26.0  | 12.4  | 13.8  | 16.4   |
| 122.5  | 166.0  | 152.2  | 21.4   | 15.2  | 22.2  | 18.9  | 12.0  | 19.8   |
| 4.0    | 8.2    | 12.9   | 9.4    | 4.8   | 14.8  | 4.1   | 3.5   | 7.4    |
| 20.4   | 18.3   | 14.3   | 27.2   | 20.2  | 11.7  | 10.1  | 6.7   | 8.7    |
| 11.0   | 4.8    | 5.3    | 15.7   | 12.6  | 10.7  | 2.9   | 3.5   | 8.9    |



|        |        |        |       |       |       |       |       |       |
|--------|--------|--------|-------|-------|-------|-------|-------|-------|
| 3.7    | 9.4    | 3.8    | 12.8  | 13.8  | 12.3  | 4.8   | 2.3   | 5.6   |
| 4.2    | 1.8    | 4.8    | 12.4  | 8.0   | 18.1  | 5.0   | 1.4   | 2.8   |
| 67.5   | 67.6   | 53.9   | 51.0  | 42.7  | 45.7  | 26.1  | 29.0  | 42.6  |
| 8.2    | 2.5    | 1.6    | 7.4   | 7.0   | 4.9   | 9.0   | 4.1   | 2.6   |
| 0.8    | 1.1    | 0.6    | 4.3   | 4.0   | 3.8   | 3.3   | 1.5   | 1.2   |
| 5.0    | 7.3    | 3.3    | 3.3   | 6.3   | 5.1   | 2.5   | 3.9   | 7.4   |
| 10.4   | 15.0   | 9.4    | 10.1  | 7.3   | 9.9   | 11.4  | 3.5   | 4.1   |
| 17.8   | 23.9   | 21.0   | 36.6  | 19.6  | 9.3   | 6.5   | 12.9  | 13.0  |
| 16.9   | 18.9   | 10.4   | 11.3  | 14.0  | 7.5   | 9.9   | 9.1   | 9.8   |
| 2.8    | 2.4    | 2.5    | 11.0  | 5.7   | 9.9   | 1.9   | 3.0   | 4.6   |
| 8.1    | 10.7   | 8.8    | 23.2  | 7.9   | 15.7  | 11.1  | 9.0   | 15.3  |
| 9.1    | 9.7    | 12.8   | 20.4  | 27.4  | 20.3  | 7.5   | 10.5  | 14.6  |
| 6.3    | 9.7    | 10.3   | 11.2  | 7.3   | 17.7  | 6.2   | 5.6   | 1.5   |
| 9.6    | 17.3   | 11.3   | 29.7  | 19.0  | 31.7  | 12.9  | 8.9   | 9.7   |
| 17.0   | 22.6   | 21.3   | 13.8  | 20.2  | 19.5  | 6.5   | 7.9   | 11.4  |
| 1.3    | 1.2    | 0.9    | 2.4   | 2.9   | 2.6   | 1.4   | 1.6   | 1.1   |
| 18.2   | 25.8   | 23.9   | 23.9  | 21.0  | 27.4  | 17.6  | 20.5  | 19.2  |
| 3.7    | 7.2    | 1.9    | 72.5  | 67.7  | 95.2  | 74.2  | 128.3 | 118.7 |
| 11.4   | 1.2    | 2.6    | 1.8   | 1.2   | 3.8   | 0.7   | 0.8   | 0.7   |
| 14.7   | 29.1   | 6.5    | 17.3  | 6.1   | 12.1  | 8.2   | 8.2   | 15.9  |
| 6.4    | 5.7    | 5.3    | 13.0  | 7.9   | 9.6   | 5.0   | 2.6   | 3.4   |
| 238.8  | 372.2  | 427.3  | 2.7   | 3.0   | 3.9   | 9.7   | 5.3   | 1.8   |
| 2.4    | 6.2    | 3.0    | 6.5   | 6.3   | 8.5   | 3.7   | 3.8   | 3.1   |
| 315.3  | 405.8  | 285.8  | 249.5 | 213.7 | 215.7 | 137.9 | 159.7 | 163.4 |
| 19.7   | 23.5   | 28.1   | 137.9 | 97.3  | 117.0 | 81.3  | 89.4  | 98.9  |
| 37.0   | 29.8   | 23.7   | 29.5  | 13.9  | 14.8  | 12.4  | 17.6  | 21.4  |
| 14.0   | 20.7   | 13.4   | 29.2  | 23.3  | 23.3  | 13.2  | 16.9  | 13.0  |
| 8.7    | 8.4    | 3.7    | 16.9  | 12.8  | 18.8  | 8.3   | 6.0   | 14.0  |
| 20.0   | 27.7   | 14.6   | 31.8  | 24.6  | 30.6  | 16.8  | 14.5  | 15.9  |
| 20.0   | 19.9   | 13.2   | 22.9  | 17.8  | 25.3  | 8.6   | 14.5  | 9.8   |
| 16.3   | 15.0   | 18.6   | 5.6   | 9.7   | 9.7   | 4.5   | 13.7  | 5.4   |
| 5.5    | 10.1   | 5.2    | 10.4  | 6.1   | 9.0   | 3.5   | 1.9   | 3.0   |
| 21.7   | 25.5   | 16.8   | 33.3  | 36.3  | 39.7  | 16.6  | 15.6  | 29.7  |
| 507.5  | 623.2  | 451.4  | 290.6 | 279.7 | 298.6 | 172.0 | 174.6 | 188.9 |
| 1.3    | 2.1    | 0.9    | 4.0   | 3.8   | 2.9   | 2.0   | 2.2   | 6.6   |
| 25.7   | 46.2   | 21.1   | 26.5  | 19.3  | 31.7  | 27.3  | 20.6  | 27.8  |
| 17.3   | 17.0   | 12.4   | 22.7  | 19.2  | 36.3  | 13.0  | 13.2  | 9.2   |
| 2.0    | 1.6    | 1.9    | 10.4  | 2.6   | 8.2   | 6.5   | 2.4   | 2.9   |
| 52.3   | 77.6   | 44.1   | 93.0  | 82.5  | 85.9  | 65.3  | 73.0  | 73.9  |
| 83.5   | 113.2  | 78.2   | 44.9  | 30.1  | 37.0  | 41.3  | 36.9  | 49.5  |
| 5.8    | 5.0    | 3.8    | 13.0  | 7.6   | 5.5   | 6.1   | 6.8   | 5.0   |
| 157.3  | 244.8  | 186.3  | 303.4 | 245.3 | 276.7 | 166.4 | 162.2 | 191.0 |
| 84.0   | 101.6  | 74.8   | 45.4  | 51.7  | 55.3  | 32.6  | 44.9  | 36.7  |
| 2015.0 | 2246.1 | 1564.4 | 949.8 | 787.0 | 960.6 | 559.9 | 582.1 | 629.6 |
| 34.0   | 32.3   | 24.1   | 46.2  | 35.8  | 34.7  | 21.9  | 22.0  | 21.4  |
| 17.5   | 22.5   | 17.0   | 26.7  | 17.5  | 12.3  | 12.1  | 6.5   | 9.7   |
| 63.1   | 90.0   | 58.2   | 74.3  | 62.6  | 61.2  | 40.7  | 53.6  | 60.3  |
| 2.2    | 1.8    | 1.1    | 6.1   | 3.1   | 4.3   | 1.9   | 1.4   | 1.3   |
| 3.4    | 2.8    | 2.1    | 11.5  | 10.4  | 8.8   | 8.6   | 5.1   | 2.2   |
| 15.3   | 24.9   | 20.0   | 41.4  | 34.1  | 43.4  | 34.9  | 26.0  | 32.0  |
| 4.5    | 4.9    | 1.9    | 13.9  | 11.0  | 10.9  | 1.1   | 1.6   | 3.9   |
| 65.1   | 82.2   | 59.5   | 251.6 | 178.7 | 194.7 | 175.4 | 169.4 | 184.4 |
| 5.3    | 10.1   | 8.7    | 6.7   | 7.4   | 17.3  | 7.2   | 7.4   | 2.6   |

|       |       |       |        |        |        |       |       |       |
|-------|-------|-------|--------|--------|--------|-------|-------|-------|
| 143.4 | 149.3 | 121.1 | 55.7   | 41.6   | 54.9   | 38.4  | 49.8  | 49.2  |
| 25.7  | 30.3  | 34.8  | 20.9   | 39.5   | 57.3   | 18.5  | 30.1  | 13.3  |
| 13.1  | 2.6   | 5.5   | 9.3    | 5.2    | 4.3    | 1.7   | 2.0   | 0.4   |
| 1.3   | 1.0   | 0.8   | 16.0   | 6.1    | 4.3    | 6.2   | 6.2   | 1.7   |
| 2.5   | 2.2   | 2.5   | 3.7    | 10.3   | 8.0    | 7.7   | 2.0   | 2.2   |
| 49.9  | 73.8  | 52.5  | 6.0    | 8.8    | 5.8    | 1.9   | 7.0   | 0.9   |
| 21.0  | 31.6  | 38.8  | 26.3   | 36.4   | 41.3   | 21.2  | 26.3  | 27.3  |
| 1.7   | 2.3   | 10.4  | 58.4   | 56.5   | 62.1   | 69.0  | 93.1  | 97.2  |
| 17.9  | 19.2  | 24.1  | 372.3  | 361.9  | 389.1  | 265.4 | 357.0 | 388.6 |
| 3.5   | 5.6   | 11.0  | 4.4    | 4.5    | 3.6    | 3.8   | 3.4   | 2.0   |
| 13.9  | 12.7  | 2.0   | 27.4   | 26.8   | 50.2   | 12.8  | 9.4   | 13.2  |
| 8.1   | 1.6   | 6.3   | 4.4    | 11.0   | 9.2    | 3.1   | 7.4   | 3.2   |
| 3.8   | 8.7   | 1.4   | 6.6    | 5.8    | 5.7    | 1.7   | 1.6   | 1.8   |
| 13.1  | 24.1  | 12.0  | 15.6   | 9.9    | 10.1   | 6.7   | 6.9   | 7.0   |
| 158.6 | 188.5 | 135.9 | 65.2   | 81.9   | 72.0   | 78.4  | 115.7 | 103.9 |
| 46.3  | 32.4  | 32.6  | 54.3   | 45.2   | 49.2   | 28.6  | 22.9  | 35.5  |
| 230.5 | 301.2 | 280.1 | 122.6  | 71.1   | 99.3   | 114.4 | 133.2 | 157.9 |
| 2.5   | 4.4   | 4.9   | 5.2    | 5.4    | 6.4    | 2.2   | 2.9   | 3.2   |
| 5.6   | 6.2   | 6.6   | 11.6   | 9.6    | 6.5    | 3.7   | 4.2   | 7.9   |
| 8.5   | 2.1   | 1.8   | 15.5   | 7.3    | 10.2   | 5.7   | 5.8   | 3.0   |
| 4.1   | 2.9   | 8.5   | 7.3    | 3.7    | 4.7    | 9.5   | 1.5   | 1.5   |
| 100.3 | 134.6 | 101.3 | 2.9    | 3.1    | 3.8    | 1.4   | 1.6   | 1.6   |
| 5.9   | 4.4   | 3.6   | 12.3   | 12.2   | 19.5   | 4.0   | 3.1   | 3.2   |
| 12.7  | 6.2   | 2.3   | 16.2   | 12.2   | 4.5    | 2.3   | 3.4   | 2.4   |
| 28.5  | 28.1  | 16.2  | 26.1   | 18.2   | 24.4   | 7.0   | 5.8   | 5.0   |
| 708.3 | 813.6 | 507.4 | 324.1  | 253.3  | 318.1  | 206.7 | 200.6 | 182.4 |
| 532.7 | 643.9 | 395.2 | 397.1  | 332.7  | 336.7  | 422.9 | 454.1 | 454.5 |
| 2.5   | 3.5   | 1.6   | 11.4   | 8.7    | 12.5   | 3.6   | 3.1   | 5.0   |
| 3.2   | 3.2   | 1.0   | 7.2    | 4.2    | 8.8    | 7.7   | 1.3   | 2.5   |
| 0.4   | 5.4   | 0.5   | 9.7    | 12.5   | 11.3   | 7.1   | 5.2   | 7.8   |
| 799.1 | 758.3 | 485.7 | 1124.2 | 1017.9 | 1068.6 | 619.0 | 589.4 | 722.0 |
| 1.7   | 2.9   | 5.3   | 14.3   | 8.9    | 5.8    | 2.5   | 1.9   | 6.5   |
| 2.2   | 1.8   | 5.1   | 12.0   | 2.9    | 9.2    | 4.3   | 3.0   | 6.1   |
| 18.8  | 19.1  | 8.4   | 9.0    | 18.2   | 9.7    | 12.2  | 16.4  | 15.2  |
| 535.6 | 445.0 | 126.2 | 379.0  | 132.9  | 150.3  | 208.7 | 87.3  | 111.4 |
| 9.9   | 6.1   | 4.6   | 16.6   | 7.3    | 8.4    | 5.5   | 3.5   | 2.7   |
| 24.6  | 22.9  | 8.0   | 50.0   | 18.2   | 26.0   | 26.6  | 27.3  | 33.3  |
| 2.1   | 1.1   | 1.3   | 8.6    | 1.3    | 10.2   | 1.6   | 4.5   | 2.1   |
| 8.6   | 1.1   | 3.1   | 1.6    | 2.2    | 5.5    | 1.3   | 1.3   | 3.2   |
| 7.8   | 6.2   | 3.8   | 5.1    | 4.3    | 7.0    | 0.3   | 1.3   | 4.0   |
| 12.0  | 12.7  | 13.8  | 11.6   | 11.1   | 13.1   | 3.1   | 6.8   | 4.5   |
| 187.0 | 218.6 | 97.8  | 5.5    | 6.5    | 13.6   | 8.1   | 3.8   | 13.8  |
| 91.9  | 67.2  | 61.3  | 78.5   | 76.5   | 92.3   | 49.6  | 51.3  | 51.2  |
| 4.6   | 6.2   | 1.5   | 11.3   | 11.6   | 7.9    | 2.2   | 2.3   | 9.5   |
| 143.7 | 162.4 | 129.7 | 155.4  | 146.9  | 162.9  | 97.4  | 116.6 | 129.9 |
| 3.2   | 4.3   | 2.6   | 14.3   | 6.7    | 9.3    | 3.7   | 3.7   | 4.6   |
| 1.3   | 8.2   | 10.3  | 4.1    | 15.0   | 21.8   | 8.0   | 10.7  | 6.8   |
| 3.2   | 2.2   | 1.1   | 5.2    | 16.0   | 2.7    | 4.6   | 2.1   | 2.3   |
| 9.1   | 2.7   | 1.8   | 15.7   | 9.7    | 19.6   | 12.4  | 2.7   | 12.7  |
| 1.0   | 0.4   | 0.7   | 6.5    | 14.5   | 5.1    | 8.1   | 2.7   | 8.6   |
| 7.5   | 3.1   | 6.8   | 7.8    | 4.3    | 4.2    | 8.0   | 5.3   | 4.9   |
| 12.5  | 32.9  | 19.4  | 263.5  | 203.8  | 212.8  | 177.5 | 160.5 | 166.0 |
| 57.9  | 73.5  | 46.3  | 7.3    | 12.9   | 8.4    | 7.0   | 5.5   | 11.6  |

|       |       |       |       |       |       |       |       |       |
|-------|-------|-------|-------|-------|-------|-------|-------|-------|
| 0.9   | 1.3   | 2.6   | 6.3   | 1.5   | 5.7   | 1.2   | 1.6   | 5.1   |
| 31.1  | 37.5  | 25.0  | 62.3  | 51.2  | 59.1  | 42.1  | 26.6  | 44.4  |
| 9.6   | 11.5  | 3.5   | 15.5  | 6.6   | 9.2   | 4.7   | 3.4   | 10.9  |
| 0.8   | 0.9   | 0.5   | 2.1   | 3.8   | 1.2   | 1.0   | 0.3   | 1.2   |
| 4.1   | 12.5  | 2.2   | 18.9  | 12.7  | 17.9  | 2.8   | 6.3   | 3.2   |
| 59.0  | 80.8  | 62.5  | 19.6  | 17.1  | 13.9  | 9.9   | 1.8   | 5.2   |
| 6.3   | 6.1   | 6.1   | 8.3   | 9.2   | 5.8   | 3.5   | 3.4   | 7.0   |
| 7.6   | 3.4   | 5.9   | 11.7  | 9.8   | 17.5  | 11.0  | 8.4   | 8.9   |
| 6.8   | 5.3   | 5.8   | 4.9   | 5.1   | 2.8   | 6.5   | 2.1   | 1.5   |
| 2.1   | 4.8   | 1.3   | 5.0   | 2.3   | 5.8   | 3.3   | 2.2   | 2.7   |
| 2.0   | 3.9   | 1.0   | 2.7   | 2.8   | 3.4   | 2.4   | 2.1   | 5.1   |
| 15.8  | 13.4  | 6.9   | 9.6   | 9.5   | 25.3  | 15.4  | 20.2  | 3.7   |
| 67.2  | 78.9  | 48.7  | 13.5  | 16.8  | 22.4  | 16.4  | 15.5  | 16.5  |
| 23.8  | 21.1  | 8.9   | 16.0  | 23.1  | 21.7  | 17.6  | 10.2  | 15.2  |
| 19.1  | 20.4  | 14.1  | 24.5  | 14.5  | 16.5  | 16.6  | 19.4  | 8.9   |
| 31.7  | 46.3  | 21.0  | 15.9  | 7.1   | 10.2  | 2.3   | 2.8   | 2.3   |
| 20.3  | 25.9  | 46.4  | 11.6  | 10.0  | 19.2  | 5.3   | 8.3   | 8.9   |
| 3.9   | 10.7  | 4.7   | 10.1  | 5.1   | 25.4  | 6.1   | 6.6   | 3.2   |
| 667.5 | 606.4 | 210.0 | 352.0 | 255.4 | 254.2 | 177.9 | 138.8 | 124.8 |
| 12.2  | 9.4   | 8.4   | 41.9  | 31.1  | 34.8  | 26.6  | 18.3  | 20.4  |
| 437.5 | 491.6 | 317.7 | 193.9 | 167.2 | 196.5 | 147.0 | 126.3 | 148.5 |
| 18.5  | 29.4  | 20.0  | 34.3  | 35.8  | 23.9  | 17.0  | 12.4  | 6.6   |
| 22.7  | 26.4  | 17.9  | 16.0  | 10.0  | 21.0  | 9.7   | 7.1   | 10.8  |
| 24.3  | 20.3  | 13.9  | 10.3  | 7.5   | 7.8   | 13.5  | 6.8   | 4.1   |
| 8.6   | 3.8   | 7.5   | 19.1  | 20.6  | 16.6  | 14.9  | 14.8  | 14.7  |
| 5.0   | 9.5   | 4.4   | 7.1   | 13.4  | 6.1   | 1.6   | 2.8   | 4.0   |
| 8.7   | 7.9   | 8.4   | 14.1  | 9.7   | 12.4  | 13.0  | 6.4   | 8.9   |
| 5.8   | 1.0   | 5.1   | 4.1   | 6.1   | 8.9   | 1.0   | 1.3   | 2.1   |
| 4.6   | 2.7   | 7.8   | 10.0  | 12.6  | 7.8   | 4.6   | 4.0   | 3.2   |
| 1.8   | 4.4   | 6.0   | 15.5  | 9.2   | 9.4   | 8.1   | 1.1   | 1.2   |
| 1.6   | 5.2   | 1.4   | 5.6   | 12.8  | 6.6   | 3.4   | 0.3   | 5.5   |
| 12.9  | 12.8  | 17.7  | 22.6  | 13.2  | 29.4  | 20.3  | 18.3  | 15.2  |
| 10.0  | 8.3   | 9.3   | 17.3  | 19.6  | 13.3  | 7.0   | 9.8   | 6.2   |
| 62.8  | 84.4  | 29.3  | 32.1  | 21.4  | 18.7  | 21.8  | 17.2  | 15.6  |
| 2.6   | 6.6   | 1.8   | 5.7   | 7.1   | 1.6   | 1.1   | 3.3   | 0.3   |
| 23.0  | 20.1  | 8.6   | 24.7  | 25.7  | 32.6  | 21.1  | 23.6  | 24.0  |
| 3.5   | 8.1   | 3.4   | 11.3  | 8.6   | 14.2  | 2.7   | 7.2   | 4.6   |
| 87.9  | 132.7 | 84.9  | 147.2 | 85.8  | 126.9 | 73.4  | 70.3  | 88.5  |
| 28.7  | 24.2  | 21.6  | 38.9  | 27.9  | 36.9  | 14.2  | 21.4  | 34.1  |
| 7.7   | 2.3   | 1.9   | 4.3   | 4.6   | 5.8   | 2.5   | 1.5   | 5.1   |
| 4.5   | 11.1  | 10.6  | 3.2   | 4.5   | 3.2   | 4.4   | 2.7   | 1.2   |
| 4.7   | 2.6   | 3.8   | 16.3  | 9.4   | 12.4  | 8.0   | 14.6  | 3.9   |
| 39.2  | 32.6  | 28.5  | 41.8  | 34.1  | 33.6  | 35.4  | 23.6  | 31.3  |
| 20.1  | 23.7  | 2.7   | 35.0  | 15.0  | 34.8  | 16.8  | 16.0  | 23.8  |
| 17.5  | 12.4  | 11.7  | 34.7  | 29.0  | 26.5  | 5.1   | 10.1  | 5.8   |
| 19.8  | 23.6  | 23.5  | 43.6  | 37.3  | 32.3  | 26.7  | 28.4  | 24.4  |
| 40.1  | 51.6  | 24.9  | 23.7  | 28.2  | 33.0  | 9.9   | 22.8  | 6.1   |
| 6.2   | 7.3   | 4.1   | 9.5   | 11.6  | 20.6  | 5.4   | 6.6   | 7.2   |
| 1.2   | 11.4  | 7.9   | 11.0  | 1.7   | 8.3   | 2.4   | 6.4   | 3.6   |
| 7.8   | 9.6   | 10.1  | 14.4  | 18.7  | 17.7  | 6.8   | 4.3   | 7.9   |
| 61.6  | 75.2  | 49.5  | 102.0 | 61.9  | 64.8  | 37.7  | 42.0  | 45.9  |
| 48.2  | 60.5  | 42.8  | 49.7  | 26.5  | 41.1  | 39.5  | 42.8  | 42.6  |
| 4.2   | 6.6   | 7.0   | 11.4  | 9.5   | 8.3   | 11.1  | 7.0   | 8.1   |

|        |        |        |        |        |        |        |        |        |
|--------|--------|--------|--------|--------|--------|--------|--------|--------|
| 2.4    | 3.5    | 1.3    | 26.6   | 8.3    | 8.6    | 8.3    | 4.6    | 6.5    |
| 0.6    | 0.8    | 0.8    | 1.5    | 5.2    | 2.6    | 0.3    | 1.7    | 0.2    |
| 191.6  | 221.8  | 169.5  | 195.1  | 236.0  | 181.9  | 127.4  | 133.7  | 167.8  |
| 3.4    | 1.6    | 3.2    | 4.1    | 5.8    | 8.9    | 3.4    | 3.6    | 2.1    |
| 20.3   | 22.2   | 28.4   | 25.4   | 15.3   | 21.2   | 19.0   | 9.1    | 9.6    |
| 1.2    | 8.5    | 4.7    | 9.8    | 11.4   | 14.2   | 5.8    | 5.9    | 4.4    |
| 13.9   | 12.1   | 7.2    | 19.5   | 12.0   | 10.4   | 14.3   | 6.3    | 8.2    |
| 39.3   | 49.2   | 27.9   | 67.5   | 49.7   | 76.9   | 41.3   | 44.7   | 51.4   |
| 261.2  | 345.6  | 273.6  | 234.6  | 191.6  | 215.8  | 113.7  | 162.3  | 140.3  |
| 14.1   | 6.6    | 6.2    | 21.2   | 11.4   | 22.8   | 2.8    | 6.0    | 15.8   |
| 5.3    | 2.7    | 2.7    | 4.0    | 2.6    | 5.6    | 3.4    | 3.3    | 2.9    |
| 119.6  | 116.3  | 103.9  | 266.2  | 197.6  | 221.3  | 144.7  | 142.9  | 118.3  |
| 50.0   | 70.4   | 70.0   | 24.6   | 22.3   | 23.4   | 33.4   | 35.3   | 33.4   |
| 7.9    | 0.9    | 3.6    | 7.6    | 7.8    | 5.8    | 3.2    | 6.5    | 5.1    |
| 13.0   | 12.5   | 4.8    | 20.2   | 12.0   | 19.1   | 14.0   | 10.3   | 12.1   |
| 2.1    | 1.3    | 4.9    | 9.9    | 6.3    | 10.1   | 16.4   | 15.0   | 19.1   |
| 181.4  | 273.2  | 202.5  | 105.8  | 104.3  | 125.7  | 75.6   | 99.0   | 91.5   |
| 48.6   | 58.1   | 57.1   | 26.7   | 31.7   | 32.5   | 14.9   | 19.5   | 20.7   |
| 2156.7 | 2676.2 | 2061.5 | 2117.4 | 1762.0 | 1888.8 | 1394.8 | 1255.4 | 1491.6 |
| 399.1  | 481.5  | 411.9  | 591.0  | 500.6  | 533.2  | 399.9  | 460.7  | 472.0  |
| 31.3   | 9.5    | 12.9   | 35.5   | 17.5   | 40.4   | 11.4   | 13.5   | 15.0   |
| 127.9  | 262.4  | 258.0  | 223.7  | 177.8  | 187.8  | 121.1  | 95.2   | 131.2  |
| 31.3   | 8.8    | 10.3   | 13.6   | 31.1   | 11.8   | 21.1   | 17.7   | 8.1    |
| 338.4  | 454.8  | 247.5  | 274.9  | 212.5  | 252.2  | 126.3  | 149.1  | 146.4  |
| 6.4    | 9.1    | 9.9    | 10.1   | 17.4   | 15.7   | 7.9    | 8.4    | 15.8   |
| 71.9   | 142.1  | 163.1  | 170.7  | 195.0  | 221.4  | 58.0   | 126.2  | 97.8   |
| 12.5   | 16.7   | 13.3   | 15.8   | 17.2   | 18.6   | 13.9   | 9.0    | 13.0   |
| 67.6   | 95.0   | 86.3   | 79.1   | 88.3   | 82.0   | 46.0   | 47.9   | 62.7   |
| 143.2  | 152.8  | 159.0  | 4.4    | 3.0    | 3.7    | 1.9    | 1.1    | 2.7    |
| 1.7    | 10.5   | 4.7    | 13.8   | 5.4    | 14.6   | 5.8    | 5.8    | 11.0   |
| 418.6  | 730.8  | 644.0  | 123.6  | 139.3  | 141.6  | 63.8   | 92.8   | 97.8   |
| 1.7    | 1.6    | 4.0    | 1.3    | 7.8    | 1.7    | 0.6    | 1.0    | 2.4    |
| 749.1  | 1121.3 | 772.9  | 1294.6 | 1236.9 | 1379.5 | 707.9  | 883.1  | 853.3  |
| 14.7   | 15.2   | 3.4    | 9.1    | 13.0   | 4.2    | 3.7    | 5.3    | 5.6    |
| 120.2  | 189.7  | 164.9  | 96.6   | 97.3   | 137.9  | 72.3   | 107.5  | 102.9  |
| 13.6   | 21.7   | 15.0   | 49.4   | 36.2   | 51.9   | 23.9   | 20.7   | 23.7   |
| 1.9    | 1.4    | 1.0    | 2.0    | 1.8    | 1.5    | 1.1    | 0.3    | 0.4    |
| 149.3  | 168.4  | 170.6  | 216.9  | 184.7  | 227.0  | 169.5  | 207.0  | 220.9  |
| 501.7  | 583.5  | 674.7  | 371.4  | 387.9  | 449.4  | 289.3  | 419.0  | 380.2  |
| 78.3   | 107.3  | 52.6   | 48.9   | 37.3   | 58.3   | 26.7   | 28.8   | 22.9   |
| 4.6    | 6.8    | 2.0    | 3.0    | 4.1    | 3.7    | 1.6    | 2.4    | 1.8    |
| 44.2   | 47.6   | 25.6   | 7.2    | 12.3   | 13.5   | 20.5   | 19.7   | 13.4   |
| 22.4   | 29.0   | 18.5   | 25.7   | 26.6   | 34.3   | 22.3   | 16.8   | 19.7   |
| 2.0    | 2.1    | 2.1    | 6.6    | 7.9    | 6.4    | 1.1    | 1.2    | 1.4    |
| 3.9    | 9.4    | 4.9    | 9.5    | 17.5   | 8.4    | 9.8    | 9.2    | 7.8    |
| 788.2  | 939.1  | 730.4  | 171.9  | 128.8  | 156.1  | 138.7  | 161.4  | 162.8  |
| 12.1   | 30.8   | 40.0   | 20.5   | 9.1    | 13.8   | 8.0    | 14.2   | 13.4   |
| 84.1   | 137.6  | 107.3  | 43.8   | 44.1   | 53.2   | 33.5   | 49.9   | 47.2   |
| 15.1   | 21.9   | 17.0   | 9.8    | 3.3    | 5.5    | 1.6    | 5.2    | 2.6    |
| 0.7    | 0.7    | 2.8    | 2.8    | 1.2    | 4.1    | 2.0    | 0.4    | 0.9    |
| 81.4   | 76.8   | 51.6   | 69.3   | 67.2   | 76.1   | 70.7   | 54.7   | 77.2   |
| 6.0    | 7.4    | 3.1    | 16.1   | 10.8   | 11.0   | 6.2    | 7.4    | 8.7    |
| 259.8  | 304.2  | 261.1  | 239.5  | 195.1  | 238.3  | 226.1  | 239.3  | 246.2  |

|       |       |       |       |       |       |       |       |       |
|-------|-------|-------|-------|-------|-------|-------|-------|-------|
| 22.8  | 35.5  | 17.6  | 29.2  | 29.1  | 29.5  | 21.3  | 22.6  | 13.1  |
| 3.3   | 0.9   | 3.1   | 16.3  | 4.5   | 12.7  | 9.2   | 3.4   | 5.9   |
| 14.9  | 20.6  | 16.2  | 25.4  | 14.8  | 17.9  | 10.2  | 10.7  | 10.9  |
| 4.8   | 25.9  | 8.4   | 11.9  | 3.9   | 6.4   | 4.2   | 8.6   | 7.6   |
| 10.8  | 17.7  | 5.8   | 28.0  | 10.1  | 7.9   | 1.5   | 5.8   | 1.8   |
| 10.3  | 8.8   | 4.7   | 5.4   | 9.4   | 10.7  | 4.2   | 6.1   | 4.6   |
| 34.2  | 55.5  | 32.7  | 98.8  | 124.6 | 156.1 | 58.1  | 96.1  | 80.7  |
| 14.7  | 9.9   | 12.4  | 20.8  | 30.0  | 16.4  | 18.0  | 10.6  | 17.6  |
| 3.4   | 5.2   | 0.6   | 1.9   | 4.0   | 10.2  | 0.4   | 4.5   | 0.9   |
| 2.4   | 3.1   | 4.0   | 11.9  | 7.3   | 13.8  | 3.3   | 4.6   | 2.5   |
| 2.2   | 7.7   | 5.1   | 6.8   | 12.0  | 7.0   | 3.8   | 0.3   | 0.2   |
| 5.4   | 1.0   | 2.5   | 3.7   | 3.8   | 3.1   | 0.5   | 1.5   | 1.7   |
| 64.9  | 85.6  | 65.3  | 116.8 | 111.6 | 133.6 | 104.5 | 119.0 | 124.0 |
| 535.0 | 630.1 | 381.1 | 548.2 | 401.3 | 470.7 | 385.3 | 385.5 | 383.3 |
| 5.9   | 7.3   | 2.7   | 8.4   | 11.6  | 5.5   | 4.6   | 4.2   | 5.0   |
| 12.3  | 14.8  | 18.3  | 28.3  | 21.3  | 16.2  | 9.4   | 7.1   | 4.0   |
| 8.1   | 10.1  | 11.9  | 26.4  | 14.3  | 12.8  | 19.2  | 12.8  | 12.4  |
| 2.0   | 1.5   | 0.6   | 3.0   | 3.7   | 5.2   | 0.8   | 0.4   | 1.3   |
| 3.0   | 6.9   | 2.7   | 7.2   | 3.4   | 10.1  | 4.3   | 5.3   | 3.4   |
| 17.0  | 14.5  | 13.0  | 15.5  | 13.0  | 20.4  | 15.6  | 14.4  | 20.1  |
| 298.5 | 380.6 | 256.9 | 298.4 | 261.7 | 294.0 | 223.8 | 219.3 | 240.7 |
| 56.3  | 79.1  | 57.7  | 43.8  | 38.8  | 29.7  | 30.4  | 26.3  | 38.1  |
| 3.9   | 11.0  | 14.2  | 7.2   | 12.1  | 5.1   | 12.0  | 2.9   | 5.2   |
| 0.7   | 2.3   | 5.6   | 10.7  | 9.1   | 13.4  | 0.7   | 2.0   | 1.3   |
| 332.2 | 425.1 | 311.5 | 64.6  | 54.1  | 43.1  | 141.4 | 135.7 | 143.7 |
| 11.8  | 16.3  | 9.6   | 6.0   | 12.6  | 6.7   | 8.5   | 10.4  | 12.0  |
| 21.1  | 15.9  | 9.2   | 16.8  | 15.1  | 11.3  | 7.5   | 12.0  | 10.1  |
| 7.5   | 9.8   | 2.6   | 4.2   | 2.4   | 8.3   | 2.2   | 4.6   | 4.9   |
| 1.2   | 5.6   | 1.8   | 2.3   | 2.3   | 3.6   | 1.4   | 0.8   | 2.4   |
| 25.4  | 8.4   | 18.7  | 20.1  | 9.4   | 22.6  | 12.2  | 15.9  | 15.6  |
| 5.2   | 10.7  | 12.3  | 16.7  | 18.6  | 21.8  | 9.1   | 8.5   | 7.5   |
| 1.9   | 3.6   | 0.9   | 3.1   | 2.3   | 2.5   | 1.5   | 0.9   | 1.0   |
| 7.1   | 8.6   | 5.6   | 13.5  | 8.4   | 9.2   | 3.8   | 6.1   | 7.2   |
| 4.5   | 4.6   | 0.9   | 8.0   | 11.0  | 2.4   | 1.4   | 3.8   | 1.6   |
| 1.8   | 4.1   | 1.4   | 3.5   | 3.7   | 10.4  | 1.7   | 1.7   | 2.5   |
| 11.2  | 13.0  | 10.2  | 15.7  | 12.5  | 21.8  | 6.8   | 8.6   | 9.4   |
| 5.1   | 3.2   | 4.3   | 9.0   | 2.5   | 12.7  | 5.4   | 4.2   | 4.5   |
| 7.1   | 9.6   | 10.6  | 19.0  | 11.7  | 16.2  | 11.2  | 5.7   | 16.2  |
| 1.3   | 2.2   | 6.5   | 4.0   | 2.6   | 2.2   | 0.8   | 1.6   | 7.6   |
| 11.5  | 3.4   | 4.9   | 8.5   | 13.7  | 7.4   | 12.7  | 18.2  | 3.0   |
| 12.3  | 17.6  | 5.5   | 21.3  | 20.9  | 16.1  | 14.5  | 7.4   | 15.2  |
| 3.7   | 7.0   | 2.1   | 3.2   | 2.4   | 3.0   | 2.3   | 1.7   | 0.8   |
| 1.6   | 1.5   | 1.6   | 3.0   | 4.8   | 6.4   | 0.9   | 1.0   | 0.9   |
| 20.3  | 9.3   | 5.1   | 4.8   | 5.0   | 5.0   | 6.0   | 6.7   | 7.1   |
| 4.2   | 10.6  | 5.2   | 6.3   | 17.8  | 13.8  | 9.5   | 3.9   | 6.0   |
| 2.8   | 1.3   | 0.8   | 5.6   | 9.0   | 4.5   | 2.9   | 1.6   | 3.6   |
| 8.0   | 13.6  | 3.9   | 7.8   | 15.5  | 16.8  | 7.0   | 4.5   | 10.3  |
| 24.6  | 19.8  | 13.4  | 24.4  | 30.5  | 39.0  | 16.5  | 24.1  | 16.3  |
| 4.9   | 15.4  | 5.9   | 9.3   | 18.0  | 8.3   | 2.7   | 3.4   | 2.7   |
| 1.5   | 2.0   | 1.1   | 12.2  | 7.9   | 14.0  | 1.5   | 2.7   | 6.4   |
| 22.1  | 17.1  | 12.8  | 17.7  | 37.2  | 30.9  | 9.2   | 11.7  | 13.9  |
| 6.4   | 12.3  | 2.6   | 3.8   | 3.8   | 3.7   | 2.1   | 1.4   | 2.4   |
| 13.7  | 11.5  | 3.2   | 16.7  | 4.4   | 7.5   | 3.8   | 6.4   | 4.1   |

|        |        |        |        |        |        |        |        |        |
|--------|--------|--------|--------|--------|--------|--------|--------|--------|
| 2.5    | 2.1    | 0.9    | 6.5    | 9.7    | 2.3    | 1.4    | 0.7    | 0.7    |
| 4.8    | 4.9    | 5.1    | 1.9    | 6.9    | 16.0   | 3.9    | 8.4    | 3.7    |
| 5.4    | 9.6    | 1.8    | 24.7   | 21.9   | 17.7   | 1.6    | 1.6    | 1.1    |
| 7.5    | 8.8    | 6.6    | 3.3    | 1.4    | 3.4    | 3.1    | 2.9    | 4.6    |
| 7.2    | 9.3    | 3.0    | 13.7   | 16.2   | 25.3   | 6.9    | 7.8    | 8.8    |
| 4.9    | 11.5   | 6.7    | 6.2    | 4.2    | 13.1   | 2.2    | 6.0    | 2.3    |
| 15.8   | 20.0   | 17.6   | 6.6    | 7.5    | 10.3   | 19.9   | 16.6   | 21.0   |
| 5.0    | 6.9    | 0.7    | 6.5    | 0.9    | 6.4    | 3.4    | 4.6    | 5.9    |
| 4.5    | 1.7    | 0.3    | 0.9    | 3.4    | 3.5    | 3.1    | 3.2    | 0.4    |
| 51.5   | 52.9   | 33.9   | 54.0   | 50.6   | 60.9   | 40.0   | 37.3   | 32.1   |
| 25.0   | 35.7   | 19.3   | 55.2   | 27.4   | 19.3   | 27.8   | 16.9   | 14.9   |
| 459.4  | 448.1  | 239.6  | 234.1  | 116.9  | 114.4  | 142.6  | 84.8   | 96.6   |
| 214.9  | 299.1  | 209.0  | 26.5   | 22.7   | 35.4   | 22.3   | 31.2   | 25.2   |
| 31.2   | 28.6   | 23.9   | 18.9   | 10.4   | 14.1   | 5.9    | 3.2    | 4.8    |
| 12.3   | 6.6    | 12.4   | 20.0   | 16.7   | 11.1   | 3.3    | 10.2   | 5.7    |
| 4.2    | 10.4   | 2.1    | 8.3    | 12.7   | 16.8   | 6.9    | 8.2    | 8.5    |
| 0.7    | 1.4    | 4.0    | 6.9    | 6.2    | 5.3    | 0.6    | 3.4    | 0.9    |
| 3.1    | 3.0    | 1.5    | 6.0    | 2.9    | 5.6    | 5.0    | 2.9    | 5.1    |
| 2.3    | 2.8    | 3.4    | 3.8    | 2.8    | 4.2    | 1.6    | 2.2    | 4.7    |
| 3.2    | 1.8    | 1.5    | 4.3    | 3.5    | 6.4    | 1.8    | 2.0    | 2.2    |
| 7.1    | 7.6    | 7.6    | 15.1   | 4.3    | 15.6   | 5.1    | 6.3    | 4.1    |
| 0.4    | 0.5    | 0.5    | 5.5    | 4.0    | 9.1    | 0.5    | 0.5    | 4.5    |
| 9.1    | 7.6    | 7.1    | 17.3   | 15.7   | 9.4    | 6.5    | 10.3   | 8.6    |
| 1.8    | 7.5    | 2.6    | 7.8    | 4.0    | 5.1    | 2.8    | 5.9    | 8.0    |
| 15.3   | 22.5   | 15.7   | 22.1   | 11.8   | 27.5   | 13.0   | 14.4   | 19.7   |
| 9.9    | 8.2    | 3.5    | 16.4   | 7.8    | 19.2   | 3.0    | 5.6    | 5.1    |
| 11.2   | 14.3   | 8.2    | 21.5   | 17.9   | 22.2   | 18.2   | 27.3   | 15.5   |
| 630.8  | 832.8  | 687.8  | 480.3  | 459.2  | 482.4  | 357.9  | 454.0  | 419.1  |
| 13.3   | 12.6   | 6.5    | 32.1   | 28.2   | 17.1   | 10.0   | 13.1   | 19.1   |
| 13.6   | 13.8   | 11.5   | 3.2    | 15.1   | 4.8    | 1.0    | 4.0    | 1.5    |
| 2.3    | 4.4    | 3.1    | 13.4   | 17.8   | 18.1   | 12.0   | 4.8    | 8.6    |
| 2.4    | 2.7    | 8.7    | 10.6   | 8.6    | 8.1    | 4.8    | 5.8    | 5.3    |
| 9.8    | 2.9    | 2.5    | 7.5    | 6.0    | 6.3    | 4.1    | 10.9   | 2.2    |
| 4.2    | 3.5    | 2.9    | 4.7    | 2.8    | 3.1    | 8.9    | 1.3    | 4.0    |
| 17.2   | 21.6   | 17.4   | 20.1   | 20.4   | 14.3   | 8.5    | 11.0   | 5.8    |
| 3006.8 | 3719.2 | 3246.8 | 3367.3 | 2658.4 | 2789.0 | 1416.8 | 1151.4 | 1444.5 |
| 361.3  | 301.4  | 136.7  | 235.4  | 146.2  | 159.4  | 202.7  | 97.6   | 142.1  |
| 5.4    | 6.0    | 3.6    | 7.1    | 10.0   | 16.3   | 6.6    | 9.5    | 13.6   |
| 7.3    | 18.2   | 12.1   | 18.3   | 8.9    | 11.1   | 12.0   | 10.1   | 9.8    |
| 4.0    | 2.0    | 1.3    | 7.3    | 4.3    | 2.8    | 5.1    | 4.3    | 2.2    |
| 14.7   | 9.4    | 10.3   | 8.8    | 4.8    | 21.2   | 6.6    | 7.5    | 13.3   |
| 11.6   | 6.8    | 13.3   | 20.0   | 25.5   | 23.3   | 11.3   | 9.0    | 4.9    |
| 4.5    | 5.7    | 2.2    | 16.4   | 9.5    | 11.6   | 12.3   | 11.0   | 6.3    |
| 6.6    | 7.0    | 4.0    | 14.7   | 8.3    | 13.2   | 3.6    | 7.3    | 3.3    |
| 15.0   | 15.0   | 11.6   | 12.6   | 16.9   | 13.4   | 10.2   | 5.4    | 4.1    |
| 3.7    | 9.6    | 6.9    | 15.3   | 19.5   | 26.1   | 14.6   | 15.7   | 13.4   |
| 4.7    | 3.1    | 7.1    | 17.4   | 5.1    | 17.7   | 2.7    | 5.1    | 2.3    |
| 4.1    | 1.8    | 0.9    | 3.9    | 2.5    | 2.4    | 1.0    | 1.2    | 0.7    |
| 13.0   | 4.2    | 4.0    | 16.3   | 7.7    | 11.2   | 6.4    | 6.3    | 6.6    |
| 0.5    | 1.3    | 0.5    | 4.7    | 2.1    | 1.4    | 2.1    | 1.0    | 0.7    |
| 2.5    | 4.5    | 3.9    | 12.8   | 7.3    | 7.4    | 3.7    | 4.8    | 8.8    |
| 4.3    | 5.8    | 3.2    | 1.6    | 4.2    | 12.8   | 8.8    | 7.1    | 6.4    |
| 5.0    | 14.5   | 13.1   | 22.3   | 21.0   | 10.2   | 14.2   | 8.2    | 15.2   |

|        |        |        |        |        |        |       |        |        |
|--------|--------|--------|--------|--------|--------|-------|--------|--------|
| 2.2    | 3.9    | 2.8    | 4.9    | 4.3    | 3.1    | 1.3   | 1.7    | 1.6    |
| 7.0    | 9.3    | 5.0    | 8.1    | 8.1    | 4.3    | 6.6   | 2.8    | 5.8    |
| 3.8    | 1.6    | 0.7    | 4.1    | 4.5    | 7.6    | 6.3   | 2.1    | 2.5    |
| 225.7  | 200.4  | 114.7  | 48.5   | 21.6   | 32.4   | 39.7  | 24.0   | 33.2   |
| 13.5   | 20.1   | 10.9   | 25.3   | 23.9   | 25.9   | 21.0  | 10.3   | 17.2   |
| 9.8    | 25.5   | 12.3   | 35.2   | 26.4   | 26.7   | 26.4  | 23.3   | 22.2   |
| 10.0   | 6.6    | 10.6   | 15.0   | 13.7   | 18.0   | 6.1   | 8.7    | 13.9   |
| 1.4    | 1.1    | 3.2    | 3.5    | 1.3    | 5.2    | 1.7   | 6.9    | 0.8    |
| 1263.2 | 1287.2 | 772.2  | 988.5  | 798.4  | 914.5  | 512.6 | 491.8  | 539.9  |
| 3.3    | 9.7    | 6.6    | 21.8   | 10.6   | 5.2    | 11.9  | 9.1    | 10.4   |
| 1538.2 | 1919.4 | 888.3  | 392.1  | 223.1  | 277.8  | 322.7 | 165.3  | 213.7  |
| 1.5    | 5.0    | 4.2    | 9.8    | 9.1    | 8.6    | 1.7   | 2.7    | 2.6    |
| 2.9    | 5.2    | 3.4    | 3.4    | 4.4    | 3.1    | 2.6   | 2.5    | 3.2    |
| 1.0    | 9.2    | 4.7    | 7.8    | 8.1    | 7.2    | 2.0   | 5.6    | 10.2   |
| 41.5   | 37.0   | 12.7   | 36.7   | 24.1   | 59.5   | 12.6  | 41.9   | 29.7   |
| 2.5    | 10.6   | 7.6    | 19.0   | 14.6   | 14.5   | 11.2  | 5.3    | 9.0    |
| 12.7   | 11.8   | 11.7   | 18.8   | 9.4    | 5.9    | 12.1  | 10.3   | 13.1   |
| 3.6    | 11.2   | 4.7    | 14.0   | 12.0   | 20.3   | 3.7   | 3.5    | 2.4    |
| 4.3    | 2.4    | 0.4    | 3.7    | 6.4    | 4.8    | 1.2   | 0.9    | 0.2    |
| 15.7   | 24.4   | 7.1    | 12.2   | 6.8    | 17.8   | 16.3  | 18.7   | 15.0   |
| 1.6    | 11.4   | 1.3    | 5.5    | 2.7    | 8.0    | 0.7   | 3.0    | 6.5    |
| 1.4    | 2.9    | 1.5    | 3.0    | 4.8    | 2.5    | 4.2   | 1.2    | 2.2    |
| 5.3    | 5.1    | 3.4    | 21.2   | 11.6   | 13.9   | 4.2   | 28.1   | 29.5   |
| 20.6   | 40.4   | 19.3   | 41.7   | 27.6   | 38.8   | 17.7  | 19.9   | 19.5   |
| 6.0    | 6.2    | 5.3    | 18.4   | 19.5   | 23.1   | 13.7  | 11.0   | 8.8    |
| 0.9    | 3.5    | 2.0    | 13.1   | 11.6   | 3.1    | 1.8   | 8.0    | 5.1    |
| 19.8   | 13.1   | 12.5   | 26.2   | 20.9   | 29.4   | 18.4  | 10.6   | 9.1    |
| 1.9    | 11.6   | 8.3    | 6.9    | 1.9    | 10.0   | 1.5   | 4.9    | 2.4    |
| 11.6   | 17.8   | 15.1   | 15.4   | 12.4   | 16.5   | 13.5  | 12.3   | 8.5    |
| 5.1    | 9.5    | 8.0    | 8.0    | 19.1   | 4.3    | 1.6   | 5.4    | 11.2   |
| 19.0   | 8.1    | 12.0   | 24.7   | 12.5   | 34.6   | 16.2  | 11.3   | 4.9    |
| 1.8    | 8.6    | 5.3    | 5.1    | 2.5    | 5.4    | 4.7   | 3.0    | 1.8    |
| 16.7   | 21.9   | 18.7   | 14.7   | 8.5    | 6.1    | 4.4   | 6.5    | 1.4    |
| 23.7   | 34.8   | 31.9   | 17.9   | 18.5   | 27.5   | 20.7  | 11.3   | 14.2   |
| 4.3    | 2.9    | 3.6    | 6.2    | 3.5    | 12.5   | 4.6   | 2.7    | 3.6    |
| 75.2   | 111.0  | 128.0  | 30.7   | 33.1   | 49.6   | 31.6  | 45.5   | 33.5   |
| 18.9   | 24.9   | 19.4   | 7.8    | 8.2    | 14.4   | 5.4   | 4.2    | 7.9    |
| 1.8    | 7.6    | 5.7    | 1.7    | 0.9    | 0.8    | 0.2   | 0.5    | 0.4    |
| 7.3    | 2.8    | 3.1    | 9.7    | 12.7   | 28.5   | 1.8   | 14.6   | 15.0   |
| 7.4    | 9.3    | 3.5    | 10.6   | 17.5   | 11.9   | 2.9   | 7.4    | 2.1    |
| 2.9    | 3.6    | 1.6    | 7.0    | 12.6   | 3.2    | 2.8   | 1.3    | 3.5    |
| 16.8   | 27.7   | 18.5   | 18.0   | 6.1    | 20.7   | 5.5   | 5.2    | 10.3   |
| 2375.6 | 2836.8 | 2075.6 | 1606.6 | 1350.0 | 1502.5 | 964.9 | 1118.7 | 1098.0 |
| 510.6  | 662.5  | 471.8  | 294.7  | 209.8  | 234.9  | 174.7 | 180.5  | 214.4  |
| 472.7  | 591.9  | 339.3  | 84.0   | 67.8   | 64.2   | 100.4 | 120.2  | 123.8  |
| 1.3    | 2.5    | 3.3    | 2.1    | 2.2    | 2.7    | 1.0   | 0.9    | 1.2    |
| 6.9    | 2.0    | 1.1    | 12.2   | 5.4    | 31.8   | 9.6   | 5.1    | 5.0    |
| 17.7   | 26.4   | 15.6   | 25.7   | 19.9   | 21.8   | 15.5  | 13.1   | 16.5   |
| 15.7   | 16.3   | 14.8   | 12.7   | 6.9    | 11.0   | 7.6   | 1.4    | 4.0    |
| 8.3    | 15.8   | 11.8   | 19.1   | 13.3   | 11.0   | 5.8   | 6.4    | 6.1    |
| 1.0    | 1.1    | 0.6    | 1.4    | 1.1    | 1.6    | 0.5   | 0.6    | 0.7    |
| 277.3  | 356.1  | 320.2  | 112.6  | 120.1  | 129.0  | 81.0  | 98.5   | 104.3  |
| 264.4  | 374.7  | 218.9  | 176.3  | 138.7  | 157.2  | 98.1  | 78.8   | 91.2   |

|        |        |        |        |        |        |        |        |        |
|--------|--------|--------|--------|--------|--------|--------|--------|--------|
| 210.7  | 295.2  | 237.8  | 254.6  | 188.5  | 223.3  | 206.1  | 168.5  | 183.3  |
| 13.8   | 22.1   | 25.1   | 40.0   | 32.8   | 30.4   | 30.1   | 33.2   | 36.3   |
| 341.6  | 393.4  | 236.2  | 18.3   | 10.1   | 20.5   | 10.5   | 9.2    | 11.5   |
| 90.7   | 115.5  | 59.8   | 62.3   | 50.4   | 50.8   | 35.1   | 36.2   | 36.9   |
| 721.8  | 896.6  | 684.3  | 522.9  | 423.6  | 484.0  | 299.7  | 374.4  | 397.3  |
| 21.3   | 58.2   | 46.8   | 37.9   | 46.3   | 38.6   | 38.7   | 65.4   | 55.1   |
| 33.1   | 27.5   | 15.9   | 10.9   | 11.0   | 12.2   | 6.4    | 1.3    | 10.1   |
| 3432.4 | 4108.2 | 3829.3 | 1132.5 | 984.8  | 1095.4 | 453.2  | 432.6  | 566.9  |
| 192.9  | 313.0  | 220.7  | 15.9   | 15.2   | 11.6   | 27.9   | 28.5   | 26.8   |
| 19.0   | 24.0   | 16.9   | 30.0   | 21.0   | 50.3   | 19.8   | 19.6   | 24.6   |
| 1945.7 | 2629.6 | 1895.7 | 212.9  | 183.9  | 186.6  | 240.2  | 270.6  | 293.1  |
| 29.5   | 43.5   | 37.5   | 19.1   | 21.9   | 17.8   | 25.7   | 21.3   | 31.8   |
| 394.0  | 496.5  | 328.8  | 445.6  | 310.9  | 365.8  | 246.6  | 233.2  | 256.3  |
| 3732.9 | 3915.3 | 2518.2 | 707.0  | 503.9  | 570.3  | 518.1  | 408.4  | 464.8  |
| 489.8  | 472.5  | 261.2  | 451.8  | 370.7  | 376.3  | 222.8  | 192.1  | 210.3  |
| 7.7    | 18.4   | 25.6   | 6.0    | 6.6    | 6.6    | 13.0   | 6.4    | 4.0    |
| 200.4  | 246.4  | 231.3  | 51.5   | 47.1   | 60.5   | 28.9   | 31.6   | 22.8   |
| 416.2  | 571.5  | 519.1  | 166.1  | 143.2  | 153.3  | 140.3  | 187.4  | 194.9  |
| 89.2   | 114.5  | 74.9   | 119.4  | 84.7   | 105.8  | 108.5  | 88.8   | 100.7  |
| 97.4   | 149.6  | 127.5  | 122.7  | 93.8   | 113.3  | 60.6   | 73.4   | 77.5   |
| 213.1  | 221.4  | 139.5  | 46.3   | 37.5   | 38.3   | 46.4   | 23.5   | 31.3   |
| 353.7  | 392.8  | 252.5  | 520.8  | 518.5  | 633.2  | 237.4  | 341.3  | 333.2  |
| 12.1   | 12.0   | 9.7    | 26.7   | 19.5   | 18.9   | 13.0   | 9.6    | 9.0    |
| 11.5   | 18.3   | 11.7   | 7.2    | 7.8    | 8.5    | 7.0    | 6.0    | 8.3    |
| 4.2    | 12.0   | 5.8    | 3.7    | 15.0   | 11.2   | 9.5    | 5.0    | 5.4    |
| 7643.7 | 8076.8 | 7351.1 | 6331.0 | 5667.2 | 5827.5 | 4016.1 | 3876.2 | 4250.0 |
| 29.2   | 36.2   | 28.4   | 44.6   | 36.9   | 51.4   | 28.6   | 41.4   | 41.8   |
| 202.9  | 223.4  | 177.7  | 184.4  | 140.7  | 163.5  | 46.0   | 43.1   | 38.2   |
| 30.1   | 31.5   | 24.3   | 30.9   | 22.7   | 25.3   | 17.0   | 12.8   | 14.9   |
| 831.9  | 1051.4 | 803.9  | 2020.8 | 1737.5 | 1965.2 | 1059.1 | 1095.9 | 1279.2 |
| 11.2   | 6.8    | 13.9   | 49.8   | 32.3   | 33.5   | 32.1   | 22.4   | 35.5   |
| 2196.5 | 2135.2 | 1368.2 | 2152.3 | 1523.5 | 1673.0 | 1211.0 | 901.4  | 1151.2 |
| 55.9   | 72.8   | 43.4   | 64.8   | 47.1   | 67.4   | 46.9   | 57.2   | 52.3   |
| 25.1   | 48.3   | 37.6   | 171.9  | 134.0  | 155.2  | 97.5   | 92.0   | 109.0  |
| 18.8   | 23.3   | 21.0   | 44.5   | 21.9   | 34.1   | 33.1   | 20.6   | 23.5   |
| 2.1    | 5.2    | 8.4    | 11.7   | 5.4    | 2.4    | 1.6    | 0.9    | 2.0    |
| 5.3    | 4.4    | 3.9    | 6.1    | 5.1    | 11.5   | 1.9    | 2.6    | 5.6    |
| 1.8    | 4.1    | 0.7    | 1.9    | 2.4    | 1.6    | 0.9    | 0.6    | 2.2    |
| 156.2  | 197.4  | 150.1  | 271.2  | 183.3  | 218.8  | 197.3  | 194.0  | 207.2  |
| 436.0  | 417.5  | 382.0  | 76.9   | 90.9   | 84.0   | 36.9   | 73.0   | 75.3   |
| 55.9   | 89.9   | 68.2   | 47.6   | 24.8   | 16.6   | 13.8   | 13.2   | 16.1   |
| 13.4   | 7.9    | 6.6    | 22.9   | 8.8    | 20.0   | 8.2    | 10.8   | 8.7    |
| 26.3   | 13.5   | 7.4    | 23.0   | 25.3   | 14.4   | 12.1   | 8.0    | 12.5   |
| 3.4    | 1.9    | 1.1    | 4.9    | 4.6    | 4.0    | 0.9    | 0.5    | 0.5    |
| 13.5   | 19.4   | 19.2   | 12.1   | 8.3    | 8.2    | 3.7    | 7.9    | 7.9    |
| 674.7  | 690.9  | 437.0  | 439.5  | 381.4  | 389.3  | 262.2  | 256.1  | 273.0  |
| 30.3   | 23.9   | 22.2   | 17.9   | 22.5   | 22.6   | 22.2   | 26.0   | 22.5   |
| 5.4    | 3.2    | 1.7    | 5.9    | 7.5    | 11.5   | 1.4    | 1.6    | 8.3    |
| 2.2    | 1.3    | 1.2    | 7.6    | 3.9    | 11.8   | 3.1    | 6.0    | 10.4   |
| 3.8    | 2.7    | 2.4    | 12.5   | 10.0   | 9.1    | 4.8    | 2.5    | 6.5    |
| 259.4  | 396.2  | 376.6  | 38.5   | 38.9   | 41.7   | 48.3   | 46.6   | 42.4   |
| 12.4   | 19.6   | 16.7   | 26.9   | 21.3   | 28.7   | 14.0   | 27.1   | 25.9   |
| 127.1  | 139.3  | 196.0  | 158.0  | 98.3   | 123.5  | 93.6   | 61.3   | 71.2   |



|        |        |        |        |        |        |        |        |        |
|--------|--------|--------|--------|--------|--------|--------|--------|--------|
| 37.8   | 49.1   | 39.0   | 40.7   | 39.3   | 41.1   | 38.9   | 57.4   | 46.9   |
| 30.5   | 38.2   | 26.0   | 78.6   | 52.5   | 62.5   | 27.4   | 28.4   | 22.6   |
| 1998.7 | 2155.5 | 1530.8 | 2793.5 | 2337.7 | 2462.4 | 2958.9 | 2652.1 | 3038.8 |
| 49.4   | 108.8  | 132.3  | 20.0   | 13.3   | 22.4   | 12.7   | 18.1   | 25.9   |
| 181.1  | 272.3  | 327.9  | 82.7   | 82.1   | 91.7   | 62.9   | 105.3  | 86.5   |
| 11.1   | 20.7   | 10.4   | 18.1   | 14.0   | 16.3   | 11.7   | 15.3   | 13.0   |
| 48.5   | 66.7   | 54.9   | 15.3   | 10.9   | 8.4    | 8.6    | 6.7    | 10.0   |
| 16.7   | 14.1   | 5.6    | 12.7   | 18.4   | 16.5   | 15.0   | 10.3   | 9.5    |
| 3.2    | 11.4   | 5.3    | 16.5   | 9.2    | 16.2   | 12.0   | 2.9    | 1.8    |
| 16.1   | 21.1   | 6.6    | 1.4    | 5.8    | 4.4    | 5.5    | 3.9    | 0.9    |
| 151.3  | 172.6  | 135.7  | 62.4   | 72.2   | 91.6   | 34.4   | 52.1   | 55.8   |
| 15.8   | 40.3   | 35.8   | 250.8  | 217.0  | 219.3  | 175.0  | 253.8  | 239.7  |
| 76.5   | 76.4   | 53.2   | 49.9   | 43.9   | 63.3   | 33.4   | 36.4   | 47.3   |
| 7.4    | 6.4    | 3.5    | 8.8    | 5.1    | 6.2    | 10.3   | 4.5    | 19.1   |
| 533.7  | 537.9  | 404.7  | 364.7  | 292.9  | 350.0  | 249.3  | 209.0  | 263.3  |
| 50.2   | 68.9   | 78.9   | 19.1   | 23.0   | 33.3   | 35.5   | 31.7   | 35.5   |
| 594.4  | 830.5  | 819.5  | 106.7  | 85.8   | 108.2  | 61.4   | 59.5   | 66.3   |
| 67.9   | 80.0   | 63.9   | 37.3   | 56.5   | 61.4   | 23.0   | 32.0   | 40.5   |
| 242.8  | 298.8  | 253.9  | 292.6  | 260.8  | 261.2  | 129.1  | 137.6  | 162.8  |
| 372.3  | 423.8  | 275.2  | 161.6  | 130.3  | 142.0  | 186.8  | 158.2  | 169.3  |
| 4.1    | 2.2    | 2.1    | 8.2    | 7.8    | 4.8    | 5.0    | 1.0    | 6.9    |
| 4.5    | 6.4    | 6.8    | 13.6   | 11.6   | 4.8    | 9.2    | 3.4    | 4.4    |
| 29.2   | 38.4   | 31.4   | 39.0   | 28.0   | 43.4   | 22.2   | 34.5   | 19.6   |
| 5.8    | 7.6    | 7.2    | 29.6   | 23.8   | 34.0   | 36.8   | 40.6   | 47.6   |
| 260.8  | 390.0  | 426.9  | 182.8  | 161.5  | 189.3  | 156.8  | 211.9  | 196.3  |
| 20.6   | 13.9   | 26.3   | 33.6   | 32.2   | 28.5   | 8.6    | 8.6    | 19.5   |
| 84.1   | 116.2  | 105.7  | 119.3  | 81.9   | 78.4   | 79.6   | 87.2   | 92.9   |
| 33.5   | 48.0   | 50.7   | 7.5    | 8.5    | 19.6   | 9.1    | 20.6   | 24.6   |
| 20.8   | 23.2   | 18.2   | 164.1  | 138.1  | 154.3  | 97.8   | 116.2  | 102.7  |
| 1.6    | 2.6    | 1.2    | 3.8    | 3.4    | 2.4    | 1.4    | 1.9    | 3.2    |
| 8.8    | 9.1    | 6.0    | 8.1    | 3.8    | 7.0    | 4.0    | 3.1    | 1.8    |
| 11.2   | 7.7    | 14.1   | 683.3  | 716.6  | 836.2  | 714.4  | 1206.4 | 1131.1 |
| 1606.1 | 1485.0 | 640.3  | 325.3  | 241.7  | 250.1  | 391.0  | 272.8  | 322.6  |
| 375.2  | 552.8  | 291.6  | 235.4  | 227.5  | 236.2  | 113.3  | 123.2  | 141.8  |
| 4.3    | 11.8   | 3.8    | 3.4    | 8.1    | 2.2    | 3.7    | 7.1    | 5.0    |
| 6.5    | 4.9    | 12.2   | 14.7   | 11.1   | 7.8    | 14.8   | 13.0   | 8.4    |
| 0.8    | 1.5    | 0.7    | 1362.1 | 1504.8 | 1762.5 | 1090.5 | 1718.3 | 1539.2 |
| 108.8  | 129.9  | 88.6   | 109.1  | 93.0   | 107.8  | 82.7   | 71.1   | 82.9   |
| 2.3    | 1.4    | 1.4    | 2.1    | 3.0    | 6.8    | 2.3    | 0.8    | 1.8    |
| 441.6  | 606.3  | 398.9  | 209.1  | 185.0  | 146.9  | 267.3  | 235.8  | 282.7  |
| 52.2   | 56.2   | 33.3   | 72.6   | 58.7   | 62.1   | 30.0   | 34.9   | 41.5   |
| 1.4    | 5.2    | 2.6    | 3.8    | 5.2    | 8.0    | 0.8    | 2.2    | 1.6    |
| 7.8    | 13.4   | 7.8    | 24.6   | 16.2   | 21.1   | 15.8   | 13.0   | 14.0   |
| 44.8   | 99.9   | 84.5   | 114.2  | 87.7   | 83.7   | 69.3   | 62.0   | 62.5   |
| 52.6   | 64.5   | 15.7   | 11.9   | 16.0   | 29.8   | 6.2    | 7.0    | 10.0   |
| 4.8    | 13.3   | 1.9    | 16.0   | 5.3    | 18.0   | 12.6   | 4.8    | 9.9    |
| 4.1    | 8.7    | 1.9    | 9.0    | 4.6    | 9.3    | 9.0    | 7.9    | 3.8    |
| 2.5    | 7.4    | 7.7    | 35.0   | 31.7   | 37.4   | 26.5   | 17.1   | 40.3   |
| 22.2   | 35.1   | 14.3   | 25.9   | 10.0   | 34.7   | 19.6   | 27.9   | 26.3   |
| 0.4    | 5.6    | 1.2    | 6.8    | 1.3    | 6.0    | 2.9    | 2.1    | 2.8    |
| 38.1   | 42.6   | 22.7   | 23.2   | 18.2   | 14.5   | 14.5   | 12.3   | 16.8   |
| 74.7   | 70.2   | 43.3   | 218.4  | 186.5  | 215.0  | 149.4  | 175.7  | 180.8  |
| 106.5  | 106.9  | 65.3   | 8.2    | 7.8    | 3.4    | 3.7    | 3.4    | 2.9    |

|        |        |        |       |       |       |       |       |       |
|--------|--------|--------|-------|-------|-------|-------|-------|-------|
| 62.8   | 84.9   | 94.2   | 229.1 | 213.1 | 250.7 | 160.5 | 181.6 | 171.5 |
| 50.3   | 58.5   | 56.8   | 142.2 | 112.6 | 120.0 | 90.7  | 83.4  | 95.2  |
| 15.8   | 14.4   | 9.0    | 23.7  | 13.5  | 21.0  | 7.3   | 7.7   | 3.8   |
| 170.7  | 304.7  | 204.5  | 303.4 | 246.9 | 263.8 | 173.7 | 189.8 | 199.2 |
| 273.2  | 415.9  | 369.0  | 103.5 | 71.0  | 98.5  | 86.6  | 100.2 | 94.0  |
| 810.7  | 816.2  | 571.8  | 229.5 | 181.3 | 215.6 | 157.0 | 167.1 | 201.8 |
| 11.7   | 9.4    | 6.9    | 73.8  | 46.9  | 51.7  | 44.7  | 32.0  | 31.2  |
| 78.6   | 90.6   | 76.9   | 17.9  | 8.7   | 21.3  | 18.0  | 20.0  | 29.8  |
| 13.0   | 20.1   | 36.7   | 38.8  | 22.1  | 40.6  | 13.0  | 27.1  | 23.5  |
| 134.7  | 136.5  | 104.9  | 160.0 | 126.6 | 146.3 | 115.6 | 115.1 | 126.5 |
| 28.3   | 31.0   | 19.1   | 34.1  | 25.3  | 24.9  | 17.5  | 23.3  | 26.5  |
| 38.4   | 41.6   | 41.2   | 26.6  | 27.3  | 29.2  | 21.8  | 18.3  | 20.9  |
| 43.5   | 74.2   | 56.1   | 27.9  | 17.4  | 15.9  | 12.4  | 18.3  | 16.4  |
| 0.9    | 0.7    | 1.0    | 6.2   | 2.2   | 10.3  | 0.8   | 1.2   | 4.4   |
| 70.0   | 73.0   | 39.2   | 72.2  | 51.8  | 68.7  | 50.4  | 43.8  | 42.4  |
| 6.9    | 4.3    | 2.4    | 5.8   | 8.0   | 10.6  | 2.3   | 1.8   | 6.1   |
| 1119.1 | 754.9  | 348.6  | 315.4 | 193.9 | 204.2 | 124.3 | 109.9 | 107.1 |
| 1620.0 | 1803.2 | 1300.1 | 188.6 | 144.3 | 167.8 | 103.7 | 105.5 | 102.2 |
| 59.6   | 34.0   | 13.0   | 17.6  | 25.4  | 17.4  | 15.3  | 10.2  | 11.1  |
| 13.9   | 20.5   | 23.3   | 24.3  | 14.3  | 18.2  | 21.8  | 18.7  | 13.0  |
| 12.8   | 13.4   | 3.1    | 24.7  | 19.2  | 22.6  | 12.5  | 13.0  | 11.7  |
| 109.3  | 150.1  | 131.8  | 113.7 | 114.2 | 129.9 | 87.3  | 84.3  | 86.2  |
| 126.3  | 120.1  | 71.1   | 131.9 | 102.7 | 105.0 | 76.9  | 90.3  | 80.3  |
| 17.3   | 19.9   | 17.9   | 73.6  | 82.5  | 47.1  | 29.7  | 36.6  | 36.1  |
| 1.0    | 1.4    | 0.7    | 2.7   | 2.6   | 2.4   | 1.3   | 0.8   | 1.0   |
| 20.5   | 24.0   | 19.6   | 70.0  | 35.9  | 49.5  | 31.4  | 27.9  | 33.9  |
| 3.8    | 4.5    | 7.9    | 13.6  | 5.8   | 5.3   | 5.2   | 3.1   | 2.8   |
| 365.4  | 485.4  | 311.6  | 305.4 | 229.6 | 275.3 | 188.5 | 162.6 | 196.0 |
| 1.6    | 2.2    | 2.2    | 6.9   | 7.3   | 9.1   | 0.5   | 1.5   | 4.2   |
| 13.4   | 8.0    | 8.1    | 16.7  | 22.3  | 21.3  | 7.1   | 7.1   | 7.7   |
| 2.5    | 3.8    | 3.4    | 24.4  | 7.7   | 13.7  | 6.1   | 5.5   | 4.7   |
| 36.3   | 74.9   | 47.7   | 117.1 | 105.5 | 95.0  | 78.9  | 70.1  | 87.6  |
| 2.6    | 2.9    | 5.3    | 4.6   | 3.3   | 14.8  | 6.3   | 1.8   | 2.4   |
| 1.9    | 5.4    | 1.9    | 4.7   | 3.3   | 4.7   | 1.7   | 3.9   | 2.3   |
| 3.6    | 4.6    | 0.9    | 2.2   | 2.5   | 9.9   | 2.5   | 2.9   | 1.0   |
| 26.7   | 21.6   | 17.4   | 22.2  | 11.0  | 13.5  | 25.3  | 17.9  | 10.0  |
| 53.2   | 44.0   | 37.4   | 9.3   | 6.9   | 4.4   | 1.3   | 1.0   | 5.0   |
| 441.8  | 486.2  | 286.8  | 114.6 | 82.2  | 105.3 | 164.5 | 118.2 | 176.1 |
| 19.7   | 21.5   | 14.0   | 49.3  | 39.0  | 54.5  | 15.1  | 20.8  | 19.8  |
| 272.8  | 254.4  | 153.1  | 162.4 | 138.6 | 150.0 | 89.8  | 81.4  | 85.8  |
| 468.7  | 553.0  | 456.8  | 79.3  | 60.6  | 71.1  | 52.9  | 66.8  | 65.7  |
| 2.8    | 4.1    | 3.1    | 13.3  | 6.7   | 5.4   | 9.2   | 12.3  | 4.7   |
| 11.9   | 6.8    | 4.5    | 10.1  | 15.0  | 10.9  | 2.6   | 8.2   | 9.6   |
| 72.6   | 108.4  | 104.0  | 37.9  | 22.4  | 41.2  | 21.7  | 74.3  | 47.4  |
| 3.3    | 4.5    | 4.5    | 9.1   | 5.9   | 12.3  | 1.7   | 2.8   | 4.4   |
| 1.2    | 8.7    | 13.3   | 13.5  | 8.1   | 6.5   | 3.7   | 11.2  | 2.9   |
| 39.8   | 46.1   | 36.0   | 31.3  | 34.4  | 39.1  | 36.7  | 41.5  | 49.2  |
| 1.2    | 1.0    | 0.8    | 3.8   | 3.7   | 1.9   | 0.5   | 1.3   | 1.8   |
| 313.8  | 352.4  | 202.6  | 410.2 | 322.0 | 319.1 | 237.9 | 192.0 | 242.2 |
| 1.1    | 3.4    | 6.8    | 6.7   | 6.6   | 12.6  | 1.6   | 4.5   | 10.2  |
| 24.8   | 20.8   | 12.6   | 33.5  | 17.2  | 26.8  | 48.2  | 35.6  | 41.0  |
| 1.3    | 1.3    | 1.2    | 7.4   | 4.1   | 5.7   | 2.1   | 2.1   | 3.4   |
| 324.1  | 391.8  | 312.7  | 175.2 | 174.2 | 184.3 | 140.9 | 166.5 | 166.8 |

|       |       |       |       |       |       |      |       |       |
|-------|-------|-------|-------|-------|-------|------|-------|-------|
| 5.1   | 15.6  | 11.3  | 6.5   | 7.9   | 11.2  | 3.5  | 3.7   | 3.0   |
| 170.1 | 182.6 | 117.5 | 47.4  | 54.9  | 55.6  | 49.7 | 77.9  | 67.8  |
| 7.9   | 17.1  | 12.7  | 44.9  | 29.3  | 23.8  | 12.1 | 11.9  | 10.7  |
| 51.3  | 72.5  | 44.3  | 21.1  | 13.7  | 14.3  | 15.0 | 14.0  | 18.9  |
| 7.5   | 9.2   | 10.6  | 10.3  | 27.2  | 10.6  | 3.6  | 13.3  | 5.3   |
| 21.9  | 27.9  | 21.0  | 11.2  | 11.8  | 10.4  | 8.7  | 13.3  | 7.0   |
| 1.3   | 5.2   | 4.1   | 4.5   | 2.8   | 4.3   | 1.9  | 2.3   | 1.7   |
| 13.0  | 13.4  | 6.3   | 7.7   | 7.9   | 20.9  | 2.0  | 3.5   | 5.0   |
| 37.0  | 62.6  | 43.8  | 21.4  | 20.0  | 15.1  | 19.1 | 21.8  | 18.0  |
| 5.4   | 12.2  | 8.4   | 10.9  | 7.4   | 7.8   | 8.9  | 9.8   | 5.8   |
| 1.5   | 4.0   | 0.9   | 3.4   | 5.5   | 7.1   | 0.9  | 6.6   | 2.5   |
| 13.6  | 22.5  | 4.7   | 16.9  | 14.9  | 9.5   | 7.3  | 4.8   | 15.4  |
| 15.3  | 14.5  | 11.3  | 12.7  | 11.9  | 17.1  | 17.2 | 6.1   | 7.5   |
| 4.9   | 5.5   | 3.6   | 5.1   | 4.0   | 11.0  | 1.9  | 3.6   | 2.9   |
| 5.7   | 5.8   | 9.0   | 5.5   | 6.3   | 4.6   | 2.7  | 2.3   | 2.7   |
| 22.1  | 17.2  | 11.9  | 28.6  | 21.9  | 33.4  | 14.0 | 13.3  | 17.6  |
| 8.2   | 5.4   | 0.5   | 5.8   | 4.8   | 3.7   | 0.7  | 1.3   | 0.3   |
| 26.4  | 19.6  | 25.2  | 30.3  | 39.4  | 34.6  | 22.3 | 23.8  | 19.4  |
| 31.9  | 22.4  | 20.6  | 34.2  | 25.1  | 31.9  | 28.2 | 27.7  | 25.1  |
| 5.0   | 6.2   | 5.5   | 8.7   | 7.7   | 10.5  | 9.8  | 9.3   | 16.9  |
| 20.9  | 20.7  | 9.1   | 27.0  | 36.0  | 42.9  | 35.7 | 28.6  | 39.9  |
| 4.6   | 4.1   | 6.4   | 4.2   | 11.8  | 11.4  | 2.5  | 4.8   | 6.9   |
| 2.3   | 3.3   | 0.8   | 2.1   | 3.0   | 2.9   | 1.6  | 0.9   | 1.4   |
| 10.3  | 11.2  | 7.5   | 18.5  | 12.1  | 7.2   | 6.3  | 3.9   | 7.0   |
| 7.6   | 20.0  | 11.2  | 37.6  | 27.2  | 21.0  | 13.8 | 12.0  | 7.4   |
| 16.0  | 18.9  | 16.3  | 29.3  | 24.3  | 32.6  | 16.8 | 12.4  | 15.4  |
| 2.8   | 8.7   | 4.0   | 3.8   | 3.1   | 4.2   | 4.9  | 4.4   | 5.7   |
| 17.7  | 35.3  | 32.6  | 171.3 | 133.8 | 184.3 | 74.1 | 90.3  | 88.8  |
| 150.4 | 253.3 | 211.7 | 165.8 | 129.9 | 148.5 | 83.2 | 91.9  | 89.1  |
| 1.5   | 2.5   | 1.5   | 2.9   | 3.3   | 2.9   | 0.9  | 2.7   | 2.0   |
| 27.7  | 43.6  | 43.2  | 16.8  | 28.7  | 31.6  | 15.9 | 18.5  | 23.1  |
| 4.4   | 1.6   | 4.8   | 9.1   | 8.3   | 14.9  | 4.3  | 5.7   | 7.6   |
| 4.3   | 3.4   | 5.9   | 4.4   | 5.8   | 6.6   | 2.0  | 4.4   | 3.8   |
| 21.4  | 22.5  | 8.8   | 16.6  | 22.5  | 23.6  | 12.1 | 10.7  | 11.7  |
| 10.2  | 4.4   | 8.1   | 6.7   | 9.7   | 8.4   | 4.9  | 3.4   | 5.2   |
| 1.6   | 1.6   | 1.3   | 6.2   | 5.1   | 8.5   | 2.6  | 3.7   | 2.7   |
| 21.8  | 20.7  | 13.3  | 33.3  | 36.0  | 27.8  | 11.5 | 14.5  | 17.8  |
| 1.3   | 1.1   | 1.0   | 2.1   | 1.9   | 1.8   | 0.9  | 1.1   | 1.2   |
| 1.2   | 2.2   | 12.9  | 5.7   | 4.6   | 6.7   | 1.2  | 2.9   | 1.5   |
| 21.4  | 27.2  | 14.1  | 17.5  | 9.6   | 20.7  | 7.1  | 15.4  | 3.1   |
| 116.1 | 169.5 | 112.1 | 97.2  | 89.9  | 92.8  | 46.4 | 56.4  | 58.3  |
| 14.9  | 34.5  | 8.8   | 6.4   | 9.9   | 16.4  | 16.0 | 9.6   | 9.0   |
| 18.1  | 7.7   | 9.6   | 14.3  | 14.8  | 11.4  | 12.4 | 7.2   | 2.1   |
| 3.1   | 11.0  | 3.8   | 5.3   | 12.5  | 13.5  | 5.1  | 1.0   | 5.2   |
| 23.3  | 41.5  | 34.6  | 87.1  | 87.0  | 86.4  | 81.8 | 129.5 | 126.8 |
| 3.8   | 10.2  | 9.6   | 1.9   | 2.2   | 2.2   | 1.1  | 8.7   | 1.4   |
| 16.9  | 48.3  | 40.8  | 62.8  | 51.2  | 42.2  | 23.8 | 23.7  | 28.0  |
| 112.1 | 164.7 | 158.0 | 39.6  | 17.3  | 21.3  | 27.7 | 20.6  | 26.9  |
| 8.2   | 6.2   | 6.3   | 6.2   | 2.1   | 7.2   | 0.8  | 1.5   | 2.6   |
| 4.0   | 7.8   | 4.0   | 14.8  | 6.1   | 12.7  | 3.4  | 2.6   | 5.3   |
| 1.7   | 2.5   | 0.7   | 6.1   | 3.3   | 10.1  | 0.8  | 1.1   | 2.4   |
| 2.1   | 2.2   | 4.3   | 4.5   | 5.1   | 6.0   | 1.2  | 2.3   | 1.9   |
| 72.4  | 105.9 | 97.6  | 42.7  | 17.7  | 31.0  | 38.1 | 43.1  | 45.5  |

|       |        |       |       |       |       |       |       |       |
|-------|--------|-------|-------|-------|-------|-------|-------|-------|
| 6.4   | 13.9   | 11.1  | 7.0   | 9.7   | 19.2  | 3.9   | 5.6   | 12.0  |
| 3.8   | 1.1    | 1.8   | 14.2  | 10.2  | 16.0  | 10.0  | 11.1  | 15.7  |
| 4.5   | 31.0   | 6.9   | 5.4   | 4.8   | 5.5   | 3.6   | 4.1   | 3.2   |
| 2.3   | 6.2    | 7.3   | 4.8   | 3.6   | 5.4   | 6.0   | 3.9   | 2.2   |
| 4.1   | 3.2    | 4.8   | 5.8   | 11.0  | 9.6   | 3.5   | 4.1   | 5.7   |
| 3.2   | 7.3    | 5.4   | 12.8  | 12.4  | 13.3  | 5.0   | 2.9   | 4.9   |
| 1.7   | 6.8    | 1.0   | 9.0   | 9.4   | 12.8  | 5.1   | 5.0   | 4.5   |
| 21.1  | 15.6   | 12.7  | 41.6  | 37.6  | 50.5  | 14.0  | 26.3  | 26.8  |
| 196.7 | 251.8  | 181.7 | 37.4  | 32.1  | 32.1  | 38.8  | 54.9  | 52.7  |
| 4.8   | 8.2    | 4.2   | 5.1   | 5.3   | 18.1  | 9.4   | 10.8  | 6.9   |
| 233.6 | 248.2  | 162.8 | 75.2  | 69.0  | 69.3  | 83.3  | 67.6  | 79.7  |
| 12.6  | 11.0   | 5.1   | 26.2  | 25.3  | 21.1  | 11.7  | 6.9   | 12.4  |
| 2.3   | 3.6    | 2.1   | 10.6  | 5.2   | 10.7  | 3.6   | 1.5   | 2.0   |
| 1.6   | 3.6    | 2.4   | 16.7  | 17.1  | 15.2  | 6.5   | 1.7   | 8.4   |
| 32.2  | 35.9   | 4.3   | 17.8  | 11.0  | 13.7  | 18.2  | 7.4   | 36.7  |
| 77.6  | 153.9  | 106.3 | 23.1  | 33.5  | 32.8  | 11.9  | 16.6  | 7.1   |
| 27.4  | 39.0   | 16.6  | 36.2  | 44.3  | 32.9  | 20.8  | 22.8  | 15.8  |
| 21.7  | 21.6   | 16.4  | 28.5  | 16.5  | 21.0  | 17.3  | 10.5  | 14.2  |
| 3.8   | 7.5    | 2.5   | 4.4   | 5.1   | 9.5   | 3.3   | 3.6   | 1.3   |
| 15.3  | 14.9   | 9.7   | 10.7  | 20.2  | 12.3  | 4.6   | 4.1   | 8.0   |
| 4.8   | 9.0    | 3.6   | 10.3  | 6.1   | 10.3  | 2.7   | 1.0   | 2.3   |
| 8.5   | 7.8    | 1.4   | 11.7  | 10.2  | 13.4  | 6.1   | 9.1   | 9.9   |
| 3.7   | 5.7    | 4.4   | 8.8   | 4.2   | 10.0  | 4.3   | 3.4   | 5.2   |
| 6.8   | 11.2   | 10.2  | 23.5  | 14.0  | 14.3  | 14.8  | 11.0  | 15.7  |
| 4.1   | 14.7   | 4.9   | 15.5  | 13.6  | 16.1  | 2.3   | 2.5   | 2.1   |
| 38.8  | 50.4   | 40.9  | 8.6   | 5.5   | 5.5   | 6.2   | 1.3   | 5.7   |
| 7.9   | 7.5    | 5.0   | 9.8   | 4.8   | 6.7   | 0.4   | 3.9   | 4.1   |
| 0.6   | 7.3    | 3.6   | 2.6   | 10.2  | 4.8   | 2.1   | 5.1   | 1.8   |
| 41.3  | 19.6   | 17.7  | 73.5  | 52.1  | 63.5  | 34.9  | 20.9  | 31.1  |
| 21.2  | 32.2   | 42.5  | 12.7  | 11.2  | 6.2   | 6.6   | 3.8   | 4.0   |
| 195.9 | 187.6  | 87.0  | 5.9   | 8.7   | 7.6   | 1.0   | 1.5   | 1.8   |
| 1.6   | 3.9    | 1.3   | 12.4  | 5.9   | 12.6  | 2.2   | 3.4   | 2.4   |
| 15.5  | 6.0    | 4.6   | 10.6  | 6.1   | 9.3   | 3.7   | 6.6   | 5.0   |
| 4.2   | 8.6    | 8.5   | 3.9   | 3.6   | 11.2  | 7.4   | 2.7   | 8.3   |
| 0.7   | 0.9    | 6.1   | 9.8   | 2.5   | 5.0   | 5.7   | 2.4   | 1.1   |
| 2.9   | 2.6    | 1.2   | 4.8   | 3.2   | 3.7   | 3.3   | 1.6   | 3.1   |
| 6.5   | 15.5   | 10.9  | 18.0  | 14.5  | 7.7   | 14.0  | 12.3  | 10.3  |
| 156.8 | 302.7  | 216.9 | 95.0  | 83.8  | 97.1  | 47.7  | 48.2  | 54.8  |
| 6.1   | 11.2   | 2.9   | 23.9  | 23.9  | 10.2  | 1.5   | 2.1   | 6.6   |
| 25.1  | 16.6   | 27.8  | 51.7  | 46.8  | 38.8  | 25.9  | 38.3  | 33.9  |
| 12.7  | 9.6    | 33.0  | 77.3  | 49.2  | 34.9  | 31.4  | 23.9  | 26.4  |
| 304.3 | 361.2  | 336.7 | 211.2 | 179.2 | 208.5 | 198.9 | 201.9 | 193.4 |
| 337.6 | 337.3  | 191.2 | 242.7 | 191.5 | 191.3 | 170.7 | 172.0 | 185.6 |
| 9.7   | 17.1   | 15.8  | 55.8  | 55.8  | 67.6  | 28.9  | 29.5  | 24.1  |
| 77.5  | 105.9  | 123.5 | 58.9  | 42.5  | 53.3  | 30.0  | 32.2  | 33.2  |
| 477.6 | 617.1  | 511.2 | 154.5 | 122.0 | 106.6 | 137.8 | 104.3 | 140.6 |
| 333.4 | 401.8  | 313.8 | 262.8 | 253.0 | 301.4 | 298.2 | 347.0 | 384.9 |
| 17.6  | 32.1   | 28.3  | 27.8  | 29.0  | 36.0  | 24.0  | 30.4  | 33.9  |
| 826.6 | 1132.6 | 882.7 | 509.7 | 337.0 | 358.8 | 598.8 | 491.3 | 537.8 |
| 19.7  | 33.4   | 9.7   | 20.5  | 12.0  | 10.6  | 4.8   | 1.0   | 0.8   |
| 2.2   | 1.3    | 0.9   | 2.1   | 2.1   | 2.1   | 0.8   | 0.9   | 1.0   |
| 6.5   | 4.3    | 2.4   | 6.1   | 5.7   | 5.5   | 3.0   | 3.4   | 3.4   |
| 1.3   | 1.5    | 1.6   | 11.5  | 11.0  | 14.4  | 2.5   | 3.5   | 5.4   |

|        |        |        |        |        |        |        |        |        |
|--------|--------|--------|--------|--------|--------|--------|--------|--------|
| 3.9    | 15.2   | 13.1   | 31.1   | 23.4   | 29.2   | 30.1   | 32.8   | 40.3   |
| 1.1    | 2.1    | 2.4    | 14.5   | 8.4    | 12.6   | 5.4    | 4.3    | 3.7    |
| 231.8  | 305.6  | 210.8  | 174.2  | 133.6  | 151.5  | 94.1   | 88.4   | 122.2  |
| 15.8   | 22.1   | 10.8   | 39.1   | 24.5   | 10.8   | 17.4   | 15.7   | 11.0   |
| 7.3    | 6.2    | 7.8    | 18.5   | 13.3   | 18.4   | 14.1   | 8.6    | 5.0    |
| 112.9  | 154.3  | 145.2  | 444.2  | 345.4  | 373.5  | 209.1  | 193.9  | 239.8  |
| 6.1    | 5.1    | 8.7    | 109.3  | 122.3  | 130.9  | 90.7   | 123.5  | 106.7  |
| 50.0   | 57.9   | 43.3   | 56.1   | 59.9   | 45.4   | 83.9   | 71.6   | 95.2   |
| 8.0    | 4.8    | 4.0    | 16.4   | 22.8   | 19.4   | 8.7    | 14.3   | 10.3   |
| 146.2  | 169.5  | 127.3  | 10.0   | 5.2    | 6.9    | 3.6    | 4.2    | 4.8    |
| 4.3    | 4.5    | 2.8    | 31.6   | 22.1   | 40.7   | 32.6   | 31.5   | 30.6   |
| 5.2    | 11.1   | 2.4    | 9.7    | 7.0    | 4.7    | 4.4    | 3.9    | 0.9    |
| 76.5   | 115.3  | 109.1  | 28.5   | 34.8   | 34.5   | 37.4   | 43.2   | 47.9   |
| 2102.8 | 2208.6 | 1069.0 | 517.2  | 430.8  | 474.3  | 312.3  | 352.4  | 360.1  |
| 586.4  | 665.8  | 816.4  | 227.5  | 209.8  | 226.3  | 133.6  | 152.3  | 155.8  |
| 130.7  | 185.4  | 129.9  | 188.2  | 144.4  | 155.9  | 96.4   | 102.7  | 107.6  |
| 7.5    | 8.2    | 4.7    | 17.4   | 19.4   | 18.2   | 8.6    | 2.0    | 5.0    |
| 153.3  | 138.1  | 88.6   | 90.8   | 87.2   | 87.7   | 71.0   | 79.4   | 89.6   |
| 180.4  | 241.6  | 127.3  | 185.1  | 174.6  | 177.5  | 76.6   | 77.0   | 112.1  |
| 309.9  | 342.6  | 249.1  | 100.5  | 69.6   | 94.4   | 159.5  | 113.7  | 127.5  |
| 228.6  | 195.7  | 115.8  | 9.0    | 11.3   | 6.8    | 12.2   | 9.5    | 15.6   |
| 119.4  | 137.0  | 110.5  | 162.2  | 132.7  | 143.7  | 90.5   | 99.2   | 110.0  |
| 70.0   | 112.3  | 86.0   | 326.2  | 281.6  | 309.6  | 164.5  | 186.5  | 173.0  |
| 32.4   | 51.2   | 25.8   | 29.2   | 18.0   | 26.3   | 26.7   | 25.8   | 34.2   |
| 2.1    | 1.5    | 1.3    | 7.0    | 7.6    | 2.7    | 2.6    | 4.0    | 1.0    |
| 3.2    | 4.5    | 7.1    | 13.5   | 12.5   | 21.2   | 5.6    | 10.6   | 5.3    |
| 244.4  | 280.2  | 204.0  | 204.5  | 150.4  | 175.9  | 132.9  | 94.2   | 126.1  |
| 6.0    | 3.5    | 0.8    | 10.0   | 7.5    | 8.6    | 1.5    | 1.6    | 5.9    |
| 535.0  | 684.4  | 462.8  | 276.4  | 232.6  | 231.4  | 165.8  | 191.9  | 209.4  |
| 515.3  | 607.9  | 463.9  | 701.5  | 587.2  | 630.0  | 537.4  | 610.8  | 660.7  |
| 1.3    | 1.6    | 1.5    | 4.7    | 2.2    | 2.9    | 1.6    | 2.4    | 1.4    |
| 5.6    | 5.0    | 5.5    | 25.4   | 9.0    | 16.2   | 1.6    | 2.7    | 7.1    |
| 2.4    | 3.7    | 0.7    | 2.9    | 11.5   | 3.9    | 3.9    | 0.3    | 4.4    |
| 4.3    | 10.0   | 2.4    | 13.1   | 9.9    | 10.9   | 9.7    | 17.3   | 10.7   |
| 258.3  | 275.8  | 184.3  | 239.2  | 199.7  | 239.0  | 115.2  | 153.8  | 155.6  |
| 12.3   | 17.2   | 13.7   | 19.6   | 21.3   | 6.5    | 12.5   | 15.4   | 11.6   |
| 6.1    | 5.8    | 5.0    | 7.4    | 8.7    | 5.5    | 12.6   | 5.1    | 5.1    |
| 17.4   | 28.7   | 19.4   | 27.7   | 29.9   | 35.2   | 11.0   | 21.9   | 20.1   |
| 7.6    | 3.8    | 8.4    | 4.7    | 6.7    | 3.7    | 3.3    | 7.7    | 7.3    |
| 39.4   | 46.6   | 31.2   | 65.0   | 70.1   | 66.0   | 38.7   | 45.8   | 43.8   |
| 19.3   | 70.1   | 67.2   | 8.5    | 16.8   | 10.3   | 8.4    | 16.1   | 8.9    |
| 20.4   | 15.9   | 5.5    | 44.4   | 15.1   | 21.6   | 13.3   | 5.2    | 4.3    |
| 11.0   | 3.3    | 5.1    | 6.3    | 2.6    | 9.6    | 2.2    | 1.8    | 4.5    |
| 14.9   | 14.6   | 16.6   | 27.3   | 21.8   | 22.9   | 11.2   | 16.0   | 10.9   |
| 520.0  | 752.2  | 782.4  | 67.5   | 53.6   | 64.5   | 55.9   | 70.3   | 66.5   |
| 8.9    | 3.2    | 1.8    | 106.4  | 70.5   | 90.6   | 36.5   | 46.8   | 65.0   |
| 409.1  | 476.0  | 337.4  | 682.5  | 520.5  | 625.0  | 374.4  | 314.0  | 359.0  |
| 23.5   | 26.9   | 15.8   | 17.1   | 13.0   | 7.9    | 18.9   | 6.1    | 5.5    |
| 110.9  | 196.9  | 229.4  | 374.3  | 474.3  | 543.3  | 314.0  | 407.2  | 496.3  |
| 33.5   | 93.6   | 76.6   | 95.9   | 49.4   | 51.9   | 49.0   | 51.1   | 45.5   |
| 29.1   | 38.6   | 47.7   | 21.1   | 19.0   | 34.0   | 16.6   | 23.7   | 16.3   |
| 3.2    | 2.2    | 3.5    | 11.7   | 8.9    | 3.0    | 2.6    | 2.8    | 3.3    |
| 2580.9 | 2864.3 | 1999.0 | 1981.2 | 1539.9 | 1713.9 | 1157.8 | 1039.8 | 1202.7 |

|        |        |        |       |       |       |       |       |       |
|--------|--------|--------|-------|-------|-------|-------|-------|-------|
| 0.9    | 1.0    | 0.7    | 1.5   | 1.6   | 1.7   | 1.7   | 0.8   | 1.0   |
| 1135.9 | 1161.4 | 621.9  | 652.1 | 501.5 | 527.3 | 359.3 | 318.6 | 389.8 |
| 285.3  | 419.3  | 413.0  | 148.4 | 132.5 | 150.9 | 108.9 | 129.6 | 124.0 |
| 280.8  | 366.5  | 290.0  | 15.1  | 9.0   | 9.2   | 8.3   | 5.1   | 9.6   |
| 215.3  | 241.4  | 166.4  | 119.5 | 89.4  | 96.8  | 132.6 | 100.4 | 116.6 |
| 1.8    | 0.9    | 0.8    | 9.8   | 3.6   | 5.5   | 2.0   | 1.7   | 1.3   |
| 100.3  | 94.2   | 82.0   | 286.7 | 233.2 | 266.2 | 184.0 | 212.0 | 233.5 |
| 5.5    | 4.4    | 3.2    | 73.6  | 84.8  | 89.2  | 19.0  | 39.2  | 35.6  |
| 24.7   | 27.8   | 24.3   | 33.8  | 43.1  | 40.4  | 20.1  | 32.9  | 31.8  |
| 1709.7 | 1883.6 | 1341.8 | 855.2 | 741.2 | 843.4 | 458.2 | 530.4 | 570.7 |
| 191.9  | 188.5  | 97.8   | 92.7  | 75.6  | 74.7  | 55.6  | 52.5  | 67.8  |
| 601.3  | 791.9  | 576.3  | 273.0 | 254.1 | 338.1 | 173.5 | 204.9 | 223.4 |
| 10.5   | 9.1    | 10.5   | 24.6  | 24.4  | 24.9  | 17.8  | 9.8   | 10.7  |
| 433.4  | 552.4  | 445.5  | 609.7 | 537.3 | 582.5 | 464.4 | 471.8 | 551.8 |
| 153.8  | 160.1  | 77.1   | 99.3  | 79.1  | 92.0  | 123.9 | 122.0 | 139.9 |
| 1802.1 | 2032.0 | 1731.1 | 451.5 | 406.0 | 404.7 | 247.5 | 215.8 | 256.2 |
| 73.3   | 91.4   | 50.9   | 137.1 | 116.1 | 154.9 | 34.9  | 36.6  | 67.8  |
| 6.9    | 6.5    | 4.3    | 12.7  | 11.6  | 14.7  | 15.2  | 5.5   | 8.8   |
| 8.4    | 16.4   | 9.4    | 21.8  | 8.3   | 20.2  | 19.1  | 13.4  | 15.3  |
| 48.7   | 70.8   | 53.8   | 132.3 | 121.9 | 134.5 | 60.8  | 68.0  | 75.7  |
| 178.6  | 337.3  | 282.9  | 342.7 | 247.4 | 292.5 | 189.7 | 176.0 | 196.8 |
| 6.2    | 5.4    | 9.9    | 4.0   | 1.4   | 2.9   | 2.1   | 2.1   | 8.6   |
| 33.9   | 44.5   | 30.0   | 77.0  | 60.0  | 61.8  | 55.6  | 52.3  | 61.3  |
| 262.9  | 347.9  | 204.8  | 141.0 | 114.0 | 136.2 | 94.6  | 110.7 | 108.7 |
| 11.5   | 7.0    | 4.2    | 3.3   | 3.8   | 4.8   | 3.8   | 1.8   | 2.3   |
| 39.3   | 39.5   | 25.2   | 30.8  | 26.4  | 22.2  | 30.6  | 32.9  | 36.6  |
| 6.9    | 4.7    | 4.8    | 55.8  | 54.1  | 40.5  | 40.6  | 40.9  | 27.7  |
| 11.0   | 2.6    | 5.1    | 23.4  | 20.1  | 14.4  | 1.9   | 10.0  | 4.2   |
| 3.6    | 6.7    | 5.6    | 15.6  | 12.7  | 15.7  | 5.5   | 2.6   | 10.5  |
| 2.2    | 6.1    | 6.3    | 15.8  | 6.4   | 7.4   | 3.8   | 4.2   | 3.3   |
| 51.1   | 76.5   | 64.5   | 5.3   | 3.1   | 5.4   | 2.6   | 1.4   | 1.6   |
| 0.8    | 1.6    | 1.6    | 2.3   | 2.5   | 1.6   | 1.3   | 1.3   | 1.1   |
| 5.2    | 3.4    | 1.7    | 7.6   | 7.0   | 13.5  | 2.1   | 2.3   | 4.4   |
| 45.6   | 54.2   | 55.1   | 19.4  | 14.1  | 22.4  | 16.1  | 24.2  | 23.1  |
| 1.3    | 0.8    | 1.6    | 6.7   | 3.9   | 2.2   | 0.5   | 0.9   | 1.1   |
| 2.3    | 2.7    | 2.3    | 6.7   | 7.5   | 7.3   | 6.5   | 2.3   | 1.7   |
| 86.8   | 104.4  | 74.9   | 123.4 | 99.3  | 100.3 | 69.0  | 78.3  | 75.9  |
| 38.5   | 40.8   | 32.8   | 4.0   | 1.5   | 4.6   | 3.0   | 3.5   | 1.9   |
| 3.2    | 3.9    | 1.9    | 13.2  | 9.1   | 12.3  | 6.1   | 3.1   | 6.8   |
| 49.8   | 47.7   | 41.5   | 14.8  | 8.9   | 32.2  | 11.5  | 8.0   | 23.5  |
| 41.0   | 39.9   | 14.1   | 21.1  | 23.0  | 33.6  | 26.8  | 17.4  | 31.6  |
| 18.9   | 15.5   | 19.2   | 17.4  | 8.1   | 8.0   | 8.2   | 9.6   | 23.9  |
| 9.0    | 6.1    | 6.4    | 13.4  | 20.0  | 13.9  | 7.6   | 12.2  | 9.8   |
| 26.5   | 19.4   | 24.9   | 50.9  | 34.3  | 47.3  | 29.0  | 25.6  | 27.7  |
| 2.8    | 4.7    | 1.7    | 3.8   | 6.7   | 3.2   | 2.6   | 3.0   | 4.1   |
| 17.2   | 16.3   | 4.8    | 20.7  | 11.0  | 16.5  | 7.6   | 14.2  | 11.8  |
| 18.3   | 30.2   | 20.2   | 36.5  | 32.5  | 40.0  | 32.1  | 30.5  | 35.4  |
| 5.0    | 12.3   | 14.6   | 8.5   | 5.3   | 5.2   | 3.0   | 2.1   | 2.1   |
| 11.9   | 20.7   | 15.4   | 24.7  | 49.7  | 37.5  | 8.6   | 39.1  | 33.6  |
| 19.0   | 13.8   | 7.4    | 19.4  | 20.1  | 10.4  | 5.0   | 2.9   | 17.8  |
| 16.8   | 21.9   | 14.2   | 9.7   | 6.2   | 10.3  | 9.0   | 4.3   | 6.5   |
| 278.4  | 270.2  | 252.2  | 7.0   | 7.6   | 2.9   | 1.6   | 3.3   | 3.2   |
| 32.6   | 34.6   | 32.3   | 114.6 | 83.4  | 90.3  | 30.6  | 25.5  | 31.9  |

|       |       |       |       |       |       |       |       |       |
|-------|-------|-------|-------|-------|-------|-------|-------|-------|
| 15.6  | 12.6  | 12.9  | 19.9  | 16.3  | 17.7  | 4.8   | 6.9   | 4.1   |
| 25.6  | 28.5  | 18.0  | 44.7  | 27.0  | 34.1  | 33.3  | 27.6  | 35.8  |
| 18.9  | 11.4  | 10.8  | 27.4  | 18.0  | 19.7  | 7.6   | 14.8  | 17.7  |
| 2.1   | 4.7   | 1.0   | 12.9  | 2.6   | 5.9   | 4.4   | 1.3   | 1.1   |
| 303.0 | 334.4 | 234.3 | 432.9 | 406.1 | 438.6 | 290.1 | 305.1 | 347.8 |
| 4.3   | 1.8   | 3.6   | 3.7   | 1.5   | 4.0   | 4.1   | 5.8   | 1.6   |
| 1.3   | 3.2   | 1.1   | 6.2   | 3.8   | 3.6   | 1.9   | 1.6   | 1.8   |
| 21.0  | 29.3  | 12.9  | 24.4  | 35.0  | 24.2  | 32.3  | 18.3  | 11.3  |
| 8.1   | 16.4  | 16.1  | 5.8   | 2.0   | 9.6   | 14.0  | 13.5  | 18.8  |
| 2.2   | 14.5  | 2.7   | 5.0   | 3.8   | 13.6  | 2.4   | 0.9   | 7.3   |
| 3.8   | 3.2   | 1.8   | 9.5   | 8.4   | 11.0  | 5.2   | 10.8  | 5.6   |
| 31.2  | 29.5  | 15.1  | 27.7  | 29.6  | 24.4  | 11.6  | 12.5  | 21.6  |
| 4.2   | 2.9   | 3.4   | 11.0  | 7.0   | 8.9   | 3.1   | 6.3   | 3.4   |
| 9.4   | 3.0   | 1.3   | 5.6   | 18.3  | 11.3  | 1.2   | 2.1   | 1.9   |
| 9.0   | 7.7   | 5.2   | 20.8  | 15.5  | 15.1  | 4.3   | 2.2   | 3.4   |
| 1.5   | 3.8   | 1.1   | 17.2  | 6.9   | 2.1   | 5.7   | 4.1   | 4.5   |
| 12.2  | 18.0  | 14.2  | 16.4  | 29.1  | 8.6   | 8.8   | 8.6   | 17.4  |
| 11.8  | 23.2  | 15.4  | 21.1  | 25.4  | 15.3  | 18.5  | 11.9  | 14.1  |
| 5.7   | 6.3   | 5.9   | 6.7   | 5.1   | 9.2   | 3.7   | 3.6   | 5.5   |
| 124.4 | 129.2 | 104.0 | 435.8 | 257.5 | 316.6 | 368.6 | 305.7 | 375.9 |
| 6.2   | 1.4   | 2.0   | 11.3  | 2.9   | 3.2   | 1.7   | 1.8   | 3.1   |
| 3.4   | 3.3   | 1.3   | 13.0  | 25.0  | 18.1  | 4.9   | 10.9  | 16.3  |
| 20.0  | 22.5  | 9.0   | 27.3  | 24.9  | 18.9  | 5.1   | 12.8  | 1.7   |
| 1.9   | 2.3   | 0.7   | 2.3   | 3.4   | 2.3   | 1.0   | 1.3   | 0.8   |
| 2.7   | 5.0   | 2.5   | 6.9   | 7.2   | 9.1   | 9.8   | 1.9   | 3.4   |
| 18.2  | 21.8  | 16.8  | 29.7  | 30.6  | 31.7  | 25.3  | 17.0  | 13.5  |
| 4.1   | 1.9   | 3.2   | 3.2   | 2.2   | 6.7   | 8.3   | 1.1   | 0.8   |
| 23.3  | 8.4   | 13.8  | 29.5  | 33.8  | 25.4  | 8.9   | 10.0  | 17.6  |
| 161.1 | 182.2 | 118.7 | 108.0 | 79.4  | 96.2  | 88.4  | 70.2  | 77.9  |
| 8.8   | 15.1  | 4.3   | 10.8  | 11.4  | 15.4  | 15.1  | 3.1   | 12.0  |
| 12.4  | 7.4   | 4.1   | 14.8  | 5.2   | 14.1  | 7.2   | 2.5   | 4.2   |
| 4.9   | 2.0   | 2.4   | 2.8   | 4.5   | 8.5   | 1.6   | 6.6   | 7.4   |
| 13.3  | 15.5  | 9.5   | 42.0  | 29.5  | 20.8  | 15.8  | 9.8   | 11.6  |
| 2.9   | 2.2   | 5.1   | 3.8   | 6.7   | 3.0   | 3.8   | 8.5   | 5.4   |
| 2.9   | 4.1   | 4.0   | 6.2   | 5.2   | 7.3   | 4.0   | 4.2   | 1.5   |
| 9.3   | 7.4   | 7.0   | 12.3  | 14.1  | 13.7  | 8.8   | 2.7   | 1.8   |
| 3.8   | 1.5   | 1.6   | 3.4   | 2.2   | 8.8   | 1.0   | 0.5   | 3.5   |
| 21.7  | 22.4  | 19.8  | 35.4  | 24.4  | 37.0  | 9.3   | 11.1  | 17.1  |
| 15.0  | 6.5   | 5.8   | 41.8  | 33.9  | 41.7  | 28.3  | 19.9  | 32.9  |
| 41.7  | 19.0  | 15.9  | 52.2  | 36.2  | 33.4  | 42.3  | 53.2  | 45.9  |
| 2.4   | 6.1   | 7.7   | 18.1  | 8.2   | 16.3  | 5.9   | 6.9   | 2.9   |
| 1.6   | 1.6   | 0.9   | 4.6   | 2.5   | 2.4   | 1.7   | 1.3   | 0.7   |
| 4.5   | 7.8   | 7.5   | 15.4  | 12.7  | 10.4  | 3.7   | 4.6   | 3.9   |
| 21.9  | 6.5   | 9.6   | 23.7  | 19.1  | 15.4  | 5.1   | 5.2   | 6.8   |
| 1.9   | 9.5   | 5.1   | 8.0   | 5.6   | 15.7  | 1.6   | 1.7   | 1.4   |
| 10.3  | 6.2   | 8.8   | 23.1  | 10.8  | 17.9  | 9.9   | 4.4   | 6.8   |
| 0.7   | 4.3   | 3.8   | 3.5   | 2.6   | 3.7   | 1.1   | 1.0   | 1.4   |
| 2.3   | 3.4   | 5.3   | 17.9  | 16.3  | 17.0  | 2.9   | 3.0   | 6.9   |
| 30.8  | 25.1  | 26.6  | 27.1  | 23.4  | 24.5  | 15.2  | 19.2  | 19.6  |
| 28.8  | 22.7  | 7.7   | 25.7  | 24.9  | 27.4  | 5.4   | 8.3   | 17.1  |
| 5.9   | 5.4   | 13.1  | 7.5   | 24.0  | 13.6  | 18.3  | 19.0  | 14.7  |
| 7.4   | 9.4   | 5.4   | 15.9  | 16.6  | 12.3  | 5.4   | 6.3   | 10.2  |
| 5.5   | 13.3  | 5.3   | 14.2  | 6.1   | 5.4   | 6.3   | 12.0  | 5.2   |

|        |        |        |       |       |       |        |       |        |
|--------|--------|--------|-------|-------|-------|--------|-------|--------|
| 1.0    | 1.5    | 0.6    | 3.6   | 2.3   | 2.5   | 1.8    | 1.0   | 1.3    |
| 1.6    | 1.5    | 0.8    | 1.9   | 2.8   | 3.5   | 2.3    | 1.3   | 1.3    |
| 1.9    | 4.1    | 2.2    | 3.7   | 3.2   | 3.1   | 5.8    | 1.1   | 1.3    |
| 7.9    | 3.3    | 3.3    | 6.6   | 5.6   | 8.8   | 5.8    | 8.7   | 3.2    |
| 6.4    | 6.7    | 1.5    | 10.0  | 15.1  | 7.3   | 2.6    | 8.3   | 3.5    |
| 7.5    | 1.6    | 2.9    | 12.5  | 9.1   | 8.8   | 2.3    | 1.8   | 6.2    |
| 2.3    | 1.8    | 4.9    | 4.4   | 3.2   | 9.2   | 2.0    | 1.4   | 1.2    |
| 31.5   | 30.7   | 19.6   | 31.8  | 27.3  | 31.9  | 13.4   | 8.0   | 19.0   |
| 3.4    | 5.6    | 6.2    | 4.4   | 3.2   | 5.9   | 1.2    | 3.9   | 1.4    |
| 13.1   | 7.5    | 10.2   | 7.0   | 7.2   | 10.0  | 3.1    | 2.4   | 6.3    |
| 12.2   | 10.6   | 3.7    | 9.8   | 9.9   | 4.9   | 7.2    | 12.8  | 9.7    |
| 16.4   | 9.8    | 9.3    | 20.9  | 14.4  | 22.6  | 19.1   | 17.4  | 7.0    |
| 9.5    | 14.9   | 3.9    | 30.8  | 18.4  | 29.4  | 16.2   | 16.1  | 15.4   |
| 19.3   | 20.9   | 21.2   | 11.8  | 6.5   | 10.7  | 5.2    | 9.2   | 10.4   |
| 3.3    | 14.0   | 8.1    | 8.3   | 17.6  | 22.5  | 7.8    | 9.7   | 6.7    |
| 15.6   | 5.7    | 4.2    | 16.3  | 11.9  | 5.8   | 3.7    | 1.8   | 2.2    |
| 10.2   | 11.6   | 5.6    | 18.5  | 23.3  | 13.5  | 11.5   | 12.6  | 3.8    |
| 1.9    | 4.9    | 5.2    | 6.7   | 17.2  | 6.3   | 7.4    | 4.2   | 6.5    |
| 17.2   | 21.5   | 17.3   | 32.0  | 32.2  | 27.8  | 21.6   | 21.7  | 21.3   |
| 32.9   | 16.1   | 18.2   | 26.7  | 21.8  | 40.9  | 15.3   | 10.0  | 13.7   |
| 2.9    | 6.3    | 4.6    | 13.0  | 11.5  | 12.0  | 5.0    | 1.8   | 8.0    |
| 2639.9 | 3141.4 | 2374.7 | 653.7 | 582.3 | 533.7 | 1097.7 | 863.1 | 1052.5 |
| 4.5    | 10.8   | 4.4    | 28.0  | 31.2  | 26.2  | 10.5   | 11.1  | 19.8   |
| 2.1    | 2.6    | 2.2    | 4.8   | 4.5   | 4.9   | 2.9    | 3.0   | 3.4    |
| 2.0    | 3.3    | 2.3    | 4.5   | 3.0   | 12.5  | 9.5    | 5.4   | 13.7   |
| 4.5    | 5.1    | 1.7    | 8.7   | 5.4   | 7.9   | 3.6    | 4.8   | 8.8    |
| 6.1    | 9.9    | 3.1    | 19.3  | 19.2  | 8.6   | 9.6    | 8.3   | 6.0    |
| 30.2   | 30.9   | 13.4   | 33.9  | 22.4  | 30.4  | 32.7   | 32.8  | 22.1   |
| 2.3    | 2.4    | 2.6    | 9.8   | 7.8   | 5.6   | 1.5    | 5.7   | 2.3    |
| 3.2    | 13.2   | 4.0    | 3.7   | 7.4   | 6.8   | 8.0    | 6.5   | 11.8   |
| 10.2   | 8.2    | 9.4    | 25.3  | 25.6  | 34.4  | 3.6    | 9.7   | 3.4    |
| 11.5   | 5.9    | 8.5    | 24.7  | 15.8  | 21.3  | 7.6    | 7.0   | 7.9    |
| 5.3    | 4.6    | 7.6    | 10.5  | 12.9  | 10.1  | 6.8    | 5.0   | 2.4    |
| 1.8    | 6.2    | 1.6    | 2.4   | 6.0   | 4.2   | 5.3    | 6.6   | 3.1    |
| 11.5   | 10.0   | 10.2   | 19.8  | 10.7  | 5.5   | 3.5    | 5.6   | 12.0   |
| 2.0    | 2.1    | 7.2    | 3.6   | 3.4   | 4.6   | 7.0    | 5.8   | 0.8    |
| 7.4    | 4.9    | 2.1    | 4.5   | 2.6   | 5.7   | 1.0    | 1.8   | 1.7    |
| 10.5   | 11.5   | 11.2   | 11.7  | 10.7  | 11.9  | 5.4    | 6.8   | 12.5   |
| 2.0    | 0.8    | 2.7    | 3.0   | 3.3   | 4.5   | 1.2    | 1.6   | 1.3    |
| 6.4    | 20.8   | 3.5    | 19.1  | 10.0  | 15.9  | 20.7   | 8.0   | 8.9    |
| 0.8    | 0.8    | 1.4    | 4.2   | 2.7   | 3.4   | 1.7    | 2.1   | 7.6    |
| 3.2    | 3.3    | 1.3    | 11.2  | 7.2   | 7.0   | 2.9    | 5.2   | 3.4    |
| 8.6    | 14.0   | 8.3    | 25.1  | 22.8  | 29.5  | 17.9   | 5.6   | 10.4   |
| 10.4   | 5.7    | 6.8    | 5.8   | 3.1   | 8.5   | 0.8    | 4.6   | 1.0    |
| 13.6   | 15.5   | 8.9    | 28.5  | 28.1  | 29.9  | 14.1   | 8.2   | 18.8   |
| 15.1   | 25.4   | 18.0   | 29.7  | 32.8  | 29.4  | 19.6   | 7.0   | 15.1   |
| 1.7    | 1.7    | 1.5    | 4.4   | 2.5   | 2.1   | 0.9    | 1.4   | 1.5    |
| 36.1   | 44.4   | 25.9   | 47.6  | 29.5  | 45.1  | 31.3   | 28.7  | 22.4   |
| 11.3   | 10.1   | 9.0    | 10.8  | 6.4   | 14.9  | 4.8    | 6.2   | 4.3    |
| 20.4   | 23.7   | 16.1   | 31.3  | 16.1  | 31.7  | 19.1   | 22.8  | 20.9   |
| 2.3    | 2.3    | 4.1    | 9.3   | 7.3   | 16.6  | 3.0    | 0.9   | 2.2    |
| 1.2    | 0.6    | 0.6    | 1.3   | 1.2   | 1.2   | 0.6    | 1.0   | 0.8    |
| 6.4    | 2.6    | 11.5   | 23.3  | 21.7  | 27.3  | 17.3   | 12.4  | 12.4   |



|        |        |        |        |        |        |        |        |        |
|--------|--------|--------|--------|--------|--------|--------|--------|--------|
| 4.9    | 7.7    | 5.4    | 12.0   | 3.3    | 15.0   | 6.1    | 3.3    | 3.5    |
| 9.5    | 3.9    | 9.1    | 6.8    | 12.5   | 7.0    | 3.9    | 6.7    | 15.2   |
| 22.5   | 29.3   | 15.5   | 15.9   | 22.3   | 20.4   | 9.8    | 13.6   | 11.9   |
| 37.2   | 48.2   | 40.9   | 7.5    | 15.6   | 11.7   | 5.6    | 6.0    | 3.2    |
| 1.2    | 1.5    | 1.1    | 1.9    | 1.4    | 1.9    | 0.6    | 0.7    | 0.6    |
| 63.2   | 74.3   | 53.7   | 63.0   | 59.1   | 88.0   | 65.6   | 89.4   | 89.8   |
| 747.0  | 946.2  | 688.5  | 436.9  | 420.1  | 400.2  | 516.0  | 499.9  | 570.1  |
| 0.6    | 1.4    | 3.4    | 4.4    | 4.8    | 2.8    | 5.3    | 1.7    | 2.4    |
| 36.3   | 36.5   | 19.3   | 24.2   | 37.0   | 17.9   | 33.7   | 25.0   | 41.1   |
| 14.0   | 24.6   | 9.1    | 16.0   | 24.4   | 12.2   | 17.6   | 17.5   | 18.0   |
| 360.5  | 462.7  | 388.4  | 241.9  | 225.0  | 245.7  | 218.4  | 234.4  | 240.2  |
| 2.2    | 2.5    | 2.7    | 6.1    | 3.6    | 5.7    | 2.4    | 1.8    | 2.6    |
| 339.6  | 312.0  | 214.9  | 121.5  | 112.7  | 99.5   | 123.8  | 151.7  | 125.6  |
| 23.4   | 24.7   | 11.5   | 42.1   | 24.2   | 26.4   | 17.7   | 17.2   | 17.4   |
| 97.5   | 110.3  | 96.8   | 80.2   | 110.0  | 90.7   | 47.1   | 81.1   | 69.5   |
| 1435.7 | 1843.8 | 1410.1 | 323.7  | 243.2  | 240.3  | 511.3  | 521.5  | 520.3  |
| 3.8    | 13.4   | 5.3    | 23.8   | 16.6   | 23.0   | 3.9    | 4.3    | 9.6    |
| 72.6   | 101.3  | 95.0   | 174.5  | 162.9  | 186.0  | 130.8  | 167.6  | 167.8  |
| 1.4    | 1.6    | 2.9    | 4.9    | 11.0   | 3.5    | 1.7    | 1.7    | 1.9    |
| 105.1  | 106.2  | 76.0   | 144.0  | 109.4  | 120.8  | 108.1  | 84.8   | 123.9  |
| 12.9   | 16.1   | 7.5    | 13.2   | 30.4   | 26.9   | 23.2   | 2.7    | 9.8    |
| 3553.0 | 3336.9 | 2181.3 | 3940.6 | 3225.2 | 3161.4 | 1640.3 | 1359.1 | 1652.9 |
| 140.3  | 173.9  | 141.4  | 74.1   | 77.3   | 91.2   | 61.6   | 56.4   | 59.7   |
| 364.2  | 443.3  | 241.9  | 206.2  | 131.5  | 174.2  | 123.5  | 105.2  | 103.1  |
| 1059.4 | 1182.6 | 776.1  | 719.6  | 493.3  | 542.9  | 396.2  | 299.8  | 361.8  |
| 5.4    | 8.3    | 7.5    | 6.3    | 2.1    | 2.1    | 1.2    | 0.7    | 3.0    |
| 4.8    | 7.3    | 7.0    | 5.4    | 5.2    | 18.5   | 6.6    | 3.7    | 9.2    |
| 47.9   | 53.2   | 33.2   | 31.1   | 25.0   | 38.5   | 19.6   | 20.0   | 17.3   |
| 0.7    | 0.6    | 0.4    | 3.4    | 4.7    | 6.0    | 7.4    | 0.6    | 0.3    |
| 3.5    | 9.4    | 5.2    | 19.2   | 4.8    | 15.1   | 3.2    | 1.7    | 9.0    |
| 23.8   | 29.2   | 12.0   | 37.6   | 35.7   | 49.7   | 25.9   | 4.2    | 6.6    |
| 2.8    | 8.1    | 9.3    | 13.7   | 7.0    | 10.3   | 8.1    | 8.1    | 6.6    |
| 2.1    | 6.5    | 3.0    | 20.7   | 13.9   | 13.2   | 2.6    | 2.5    | 4.8    |
| 15.7   | 21.1   | 7.0    | 26.3   | 21.7   | 17.2   | 13.3   | 9.1    | 7.8    |
| 8.3    | 15.7   | 8.7    | 26.0   | 9.4    | 8.4    | 16.9   | 3.9    | 14.7   |
| 6.0    | 17.4   | 9.5    | 24.9   | 14.7   | 15.7   | 17.0   | 10.8   | 4.5    |
| 558.2  | 856.0  | 794.6  | 397.3  | 385.9  | 434.5  | 310.1  | 421.5  | 403.2  |
| 4.9    | 3.3    | 2.5    | 5.5    | 10.8   | 8.9    | 1.5    | 1.4    | 1.1    |
| 7.2    | 6.5    | 9.6    | 2.6    | 7.9    | 21.3   | 1.6    | 5.9    | 1.9    |
| 3355.7 | 4061.4 | 2969.9 | 1318.8 | 1044.3 | 1160.5 | 1153.7 | 1135.8 | 1112.6 |
| 25.4   | 15.0   | 15.3   | 25.6   | 25.1   | 28.0   | 17.7   | 13.0   | 13.5   |
| 2.1    | 2.7    | 1.9    | 2.6    | 3.1    | 4.0    | 1.0    | 1.8    | 2.3    |
| 18.8   | 19.1   | 9.8    | 6.0    | 5.0    | 8.5    | 6.0    | 2.7    | 4.6    |
| 0.9    | 1.8    | 1.0    | 2.1    | 1.5    | 1.6    | 1.7    | 1.0    | 1.3    |
| 4.0    | 6.0    | 1.9    | 4.5    | 3.1    | 3.6    | 2.8    | 6.3    | 2.9    |
| 15.1   | 7.7    | 10.0   | 10.7   | 14.8   | 8.6    | 9.3    | 9.1    | 3.9    |
| 3.4    | 9.6    | 6.9    | 5.5    | 3.3    | 5.1    | 3.2    | 2.1    | 3.5    |
| 17.0   | 21.4   | 8.8    | 34.9   | 12.9   | 29.0   | 19.7   | 14.3   | 17.3   |
| 8.1    | 8.7    | 5.1    | 7.7    | 13.9   | 10.2   | 4.6    | 2.8    | 1.4    |
| 2.4    | 12.9   | 2.2    | 8.0    | 6.7    | 6.8    | 1.3    | 1.6    | 6.9    |
| 24.7   | 36.9   | 23.7   | 12.7   | 16.8   | 23.0   | 10.4   | 4.2    | 3.1    |
| 41.1   | 20.5   | 16.8   | 27.7   | 34.8   | 38.8   | 22.6   | 28.7   | 29.2   |
| 14.8   | 28.4   | 8.1    | 12.3   | 22.2   | 22.3   | 14.5   | 16.7   | 14.8   |

|        |        |        |        |        |        |        |        |        |
|--------|--------|--------|--------|--------|--------|--------|--------|--------|
| 21.4   | 19.3   | 12.2   | 27.5   | 25.5   | 28.5   | 22.1   | 15.0   | 24.1   |
| 14.0   | 11.2   | 8.4    | 18.7   | 8.6    | 15.5   | 4.4    | 12.4   | 12.8   |
| 10.2   | 10.2   | 2.3    | 7.8    | 18.3   | 21.6   | 6.4    | 1.2    | 4.0    |
| 4.8    | 13.3   | 2.3    | 6.9    | 6.3    | 7.0    | 4.3    | 2.3    | 1.4    |
| 1.2    | 0.9    | 2.7    | 5.3    | 5.4    | 9.7    | 1.2    | 3.7    | 0.9    |
| 2241.8 | 2764.7 | 2381.3 | 2683.2 | 2393.5 | 2544.4 | 1921.2 | 2180.1 | 2269.2 |
| 926.7  | 1327.2 | 1114.0 | 2137.3 | 1872.6 | 2092.6 | 1198.4 | 1447.2 | 1450.6 |
| 1323.6 | 1679.1 | 1503.3 | 2462.3 | 2328.1 | 2634.6 | 1368.9 | 1683.3 | 1784.8 |
| 5696.1 | 6375.4 | 4904.7 | 5953.7 | 6176.4 | 5198.6 | 4788.1 | 5627.7 | 5663.6 |
| 5219.8 | 5829.0 | 4925.8 | 6922.8 | 6543.2 | 6678.3 | 3874.3 | 4401.4 | 4486.8 |
| 2877.0 | 3478.3 | 3268.9 | 2950.2 | 3116.7 | 3280.9 | 1975.4 | 2534.0 | 2578.3 |
| 161.0  | 258.2  | 235.7  | 136.4  | 100.6  | 99.2   | 111.2  | 90.1   | 140.3  |
| 917.5  | 1284.4 | 1045.2 | 589.9  | 523.9  | 489.2  | 544.1  | 635.0  | 673.4  |
| 433.5  | 651.6  | 427.5  | 284.4  | 297.4  | 312.8  | 236.9  | 267.6  | 282.7  |
| 521.7  | 546.8  | 292.5  | 237.1  | 154.0  | 157.5  | 189.0  | 155.4  | 172.9  |
| 2428.2 | 2374.5 | 1423.4 | 2863.2 | 2033.9 | 2360.6 | 1570.7 | 1315.1 | 1531.3 |
| 1482.0 | 1450.5 | 885.2  | 372.1  | 284.2  | 281.4  | 408.5  | 360.9  | 417.5  |
| 1780.0 | 1855.4 | 1395.5 | 1162.6 | 1000.2 | 1081.9 | 750.3  | 738.1  | 801.4  |
| 1489.2 | 1791.4 | 1048.4 | 519.6  | 402.2  | 483.3  | 273.1  | 335.5  | 357.7  |
| 2589.4 | 2442.0 | 1550.1 | 689.6  | 552.0  | 589.9  | 489.3  | 535.4  | 563.5  |
| 494.8  | 611.6  | 404.5  | 226.7  | 224.0  | 224.2  | 118.3  | 144.6  | 148.9  |
| 273.1  | 324.2  | 208.0  | 79.0   | 52.2   | 65.1   | 60.4   | 56.0   | 60.1   |
| 1404.2 | 2111.4 | 1598.4 | 1225.0 | 1179.1 | 1373.6 | 607.8  | 822.8  | 853.1  |
| 425.8  | 295.2  | 32.6   | 58.9   | 33.1   | 33.9   | 30.8   | 24.8   | 20.8   |
| 226.2  | 286.4  | 260.0  | 319.2  | 227.6  | 299.5  | 190.7  | 214.0  | 235.8  |
| 6.5    | 4.4    | 8.2    | 7.1    | 8.7    | 10.8   | 5.8    | 1.7    | 3.6    |
| 4635.4 | 4675.6 | 3357.8 | 1319.8 | 1013.2 | 1032.5 | 1267.1 | 1079.2 | 1262.1 |
| 1690.8 | 2435.9 | 1897.1 | 1240.0 | 1234.7 | 1178.3 | 1472.9 | 1530.7 | 1779.9 |
| 2771.3 | 3096.3 | 2465.1 | 2829.4 | 2198.9 | 2678.2 | 1216.1 | 1222.3 | 1422.1 |
| 843.1  | 1244.2 | 952.4  | 702.4  | 606.5  | 647.4  | 343.4  | 337.2  | 378.5  |
| 115.8  | 185.7  | 182.5  | 294.6  | 285.1  | 336.9  | 124.8  | 157.1  | 157.8  |
| 216.6  | 300.4  | 249.4  | 51.2   | 41.3   | 31.8   | 43.6   | 46.6   | 50.7   |
| 320.3  | 403.5  | 338.9  | 367.6  | 258.9  | 303.0  | 221.0  | 247.5  | 258.4  |
| 456.0  | 556.0  | 402.1  | 924.0  | 722.4  | 710.1  | 725.7  | 676.1  | 881.4  |
| 412.6  | 535.7  | 386.7  | 1757.0 | 1578.2 | 1649.8 | 983.7  | 1080.1 | 1178.3 |
| 294.8  | 423.5  | 357.6  | 696.9  | 809.1  | 920.3  | 286.2  | 603.7  | 554.0  |
| 2035.0 | 2172.9 | 1337.0 | 739.0  | 614.3  | 645.8  | 526.4  | 438.2  | 549.9  |
| 595.7  | 651.3  | 407.9  | 366.9  | 296.5  | 298.7  | 187.3  | 180.9  | 195.0  |
| 627.3  | 858.9  | 702.4  | 567.3  | 545.7  | 583.1  | 375.8  | 465.8  | 483.2  |
| 2589.6 | 2768.2 | 1893.7 | 321.1  | 195.3  | 239.1  | 180.9  | 122.9  | 145.8  |
| 335.4  | 372.3  | 192.4  | 1300.6 | 913.9  | 1008.9 | 533.7  | 512.7  | 659.7  |
| 222.0  | 230.1  | 136.4  | 491.1  | 358.4  | 398.9  | 364.6  | 317.5  | 356.4  |
| 50.0   | 83.8   | 70.2   | 79.7   | 82.4   | 92.7   | 46.0   | 63.6   | 56.6   |
| 2098.5 | 2327.1 | 1513.7 | 1859.0 | 1362.6 | 1496.2 | 1165.1 | 910.8  | 1182.1 |
| 452.8  | 295.2  | 95.3   | 94.8   | 74.6   | 84.3   | 136.0  | 114.1  | 111.6  |
| 168.1  | 219.5  | 166.0  | 82.1   | 74.3   | 81.7   | 64.2   | 112.7  | 79.9   |
| 452.1  | 615.0  | 315.3  | 276.7  | 238.5  | 272.5  | 159.8  | 178.3  | 187.2  |
| 427.0  | 532.8  | 300.3  | 203.5  | 144.5  | 178.3  | 135.6  | 167.8  | 155.2  |
| 487.6  | 567.8  | 328.4  | 179.3  | 137.5  | 162.0  | 115.3  | 94.0   | 128.5  |
| 400.9  | 480.5  | 409.9  | 611.2  | 451.4  | 490.8  | 252.7  | 285.4  | 275.9  |
| 474.4  | 572.5  | 357.0  | 644.3  | 502.4  | 541.5  | 278.0  | 274.4  | 310.4  |
| 613.3  | 681.5  | 443.0  | 363.0  | 292.7  | 340.7  | 261.2  | 277.2  | 318.3  |
| 366.4  | 465.4  | 374.7  | 612.6  | 504.7  | 566.6  | 474.7  | 474.3  | 532.8  |

|        |        |        |        |        |        |        |        |        |
|--------|--------|--------|--------|--------|--------|--------|--------|--------|
| 186.2  | 293.6  | 244.0  | 228.1  | 186.3  | 192.0  | 140.4  | 148.5  | 148.7  |
| 596.8  | 748.5  | 391.0  | 407.1  | 261.2  | 308.7  | 224.9  | 163.6  | 162.6  |
| 1261.2 | 1307.9 | 564.7  | 573.5  | 263.4  | 275.0  | 265.1  | 125.4  | 159.1  |
| 1188.2 | 1564.1 | 982.4  | 767.3  | 664.1  | 692.3  | 519.8  | 565.6  | 612.9  |
| 2.6    | 3.9    | 6.7    | 40.4   | 33.6   | 32.8   | 18.4   | 31.6   | 33.0   |
| 4.4    | 2.3    | 1.8    | 31.3   | 30.2   | 32.2   | 13.8   | 41.8   | 44.8   |
| 100.9  | 92.2   | 73.0   | 242.2  | 133.3  | 190.4  | 87.1   | 62.4   | 88.0   |
| 186.9  | 176.0  | 110.8  | 167.3  | 114.1  | 118.6  | 133.6  | 140.9  | 127.2  |
| 28.3   | 28.3   | 13.2   | 102.2  | 79.3   | 101.7  | 57.7   | 59.0   | 63.6   |
| 147.8  | 226.6  | 207.7  | 264.6  | 179.1  | 232.5  | 199.8  | 162.8  | 204.6  |
| 16.3   | 13.9   | 14.3   | 19.3   | 28.7   | 26.8   | 6.6    | 5.1    | 8.2    |
| 103.1  | 184.7  | 220.7  | 69.7   | 65.7   | 73.7   | 72.0   | 58.6   | 63.6   |
| 1103.7 | 1289.0 | 1010.7 | 504.2  | 420.1  | 414.9  | 485.6  | 446.5  | 505.9  |
| 1995.2 | 2487.0 | 1795.6 | 1267.0 | 1097.9 | 1163.2 | 960.9  | 992.8  | 1143.4 |
| 36.2   | 37.3   | 26.6   | 55.8   | 64.4   | 45.5   | 26.2   | 26.7   | 22.1   |
| 189.9  | 292.0  | 170.9  | 330.9  | 344.2  | 370.9  | 194.5  | 271.0  | 199.8  |
| 644.5  | 744.7  | 472.0  | 368.4  | 334.2  | 338.5  | 210.7  | 214.9  | 269.1  |
| 842.3  | 964.7  | 605.7  | 405.4  | 306.3  | 345.9  | 261.9  | 234.3  | 291.3  |
| 117.5  | 113.6  | 75.6   | 77.9   | 72.8   | 79.1   | 47.4   | 40.7   | 37.7   |
| 468.9  | 385.4  | 293.0  | 85.5   | 86.7   | 110.3  | 35.2   | 90.0   | 70.9   |
| 1992.0 | 2238.8 | 1203.9 | 484.7  | 373.4  | 379.0  | 246.5  | 208.3  | 220.3  |
| 409.9  | 524.6  | 274.9  | 230.1  | 190.3  | 153.9  | 226.8  | 257.5  | 258.5  |
| 113.1  | 139.3  | 153.5  | 243.8  | 217.8  | 227.2  | 111.6  | 139.4  | 144.7  |
| 259.7  | 349.8  | 322.1  | 160.9  | 159.9  | 176.0  | 109.1  | 130.2  | 149.3  |
| 689.2  | 895.9  | 781.0  | 246.7  | 244.8  | 263.1  | 218.3  | 316.2  | 319.0  |
| 46.5   | 54.5   | 48.3   | 29.7   | 32.5   | 41.1   | 64.3   | 70.1   | 82.1   |
| 96.0   | 118.2  | 73.3   | 232.2  | 221.0  | 200.4  | 138.3  | 145.3  | 163.2  |
| 4.8    | 11.8   | 11.7   | 7.0    | 7.3    | 20.9   | 16.2   | 12.0   | 11.5   |
| 320.4  | 378.8  | 295.6  | 184.6  | 153.4  | 172.4  | 166.6  | 203.0  | 184.0  |
| 348.4  | 398.0  | 217.0  | 232.6  | 166.6  | 176.4  | 125.0  | 116.6  | 131.3  |
| 235.5  | 299.1  | 113.6  | 146.4  | 131.2  | 125.7  | 118.4  | 82.7   | 97.4   |
| 255.1  | 350.6  | 309.0  | 180.1  | 155.7  | 173.6  | 138.5  | 158.9  | 161.9  |
| 261.0  | 288.5  | 200.2  | 19.0   | 11.1   | 12.5   | 14.9   | 2.2    | 9.5    |
| 23.2   | 36.9   | 36.7   | 37.5   | 40.7   | 54.3   | 19.4   | 30.2   | 21.7   |
| 947.9  | 1239.3 | 913.1  | 461.0  | 354.2  | 325.0  | 375.9  | 386.8  | 479.3  |
| 157.0  | 183.2  | 150.8  | 111.9  | 116.0  | 137.9  | 88.0   | 100.1  | 116.8  |
| 159.8  | 241.7  | 230.9  | 36.9   | 40.0   | 45.9   | 23.4   | 31.3   | 26.7   |
| 470.0  | 801.9  | 837.0  | 62.7   | 51.6   | 35.6   | 53.6   | 66.0   | 43.8   |
| 17.9   | 17.5   | 5.0    | 10.8   | 14.1   | 10.6   | 6.6    | 8.5    | 10.9   |
| 293.0  | 393.9  | 196.4  | 53.1   | 68.7   | 76.6   | 41.5   | 37.7   | 71.2   |
| 623.8  | 658.7  | 276.6  | 327.5  | 214.3  | 215.9  | 232.5  | 183.5  | 197.7  |
| 17.2   | 53.3   | 38.1   | 68.3   | 38.9   | 76.7   | 12.8   | 18.3   | 12.1   |
| 26.8   | 21.2   | 11.4   | 51.4   | 47.6   | 44.8   | 94.8   | 87.4   | 91.3   |
| 64.8   | 94.1   | 83.3   | 84.7   | 76.6   | 88.2   | 51.0   | 80.9   | 65.1   |
| 180.6  | 262.7  | 247.6  | 163.3  | 200.0  | 200.0  | 148.2  | 241.0  | 210.7  |
| 243.5  | 302.1  | 231.9  | 130.4  | 125.8  | 153.1  | 130.9  | 181.4  | 164.6  |
| 160.0  | 153.2  | 106.4  | 105.2  | 78.2   | 85.3   | 64.5   | 117.6  | 80.7   |
| 122.8  | 139.5  | 112.9  | 364.0  | 293.3  | 341.9  | 257.0  | 238.4  | 285.6  |
| 118.5  | 120.1  | 108.6  | 367.0  | 323.6  | 362.9  | 227.7  | 240.6  | 277.5  |
| 1114.7 | 1182.7 | 949.4  | 455.3  | 399.4  | 394.5  | 456.0  | 525.4  | 582.8  |
| 420.3  | 537.2  | 361.6  | 88.1   | 62.8   | 80.0   | 48.2   | 52.7   | 47.8   |
| 3018.0 | 3431.1 | 2420.7 | 1899.8 | 1541.4 | 1590.9 | 1154.8 | 1083.9 | 1224.9 |
| 127.5  | 137.7  | 73.1   | 43.6   | 43.7   | 50.6   | 25.7   | 27.2   | 33.1   |

|         |         |        |         |        |         |        |        |        |
|---------|---------|--------|---------|--------|---------|--------|--------|--------|
| 52.3    | 49.9    | 45.4   | 84.3    | 70.3   | 70.2    | 65.7   | 53.8   | 63.9   |
| 150.0   | 163.2   | 135.9  | 165.7   | 125.7  | 145.4   | 120.0  | 131.4  | 128.0  |
| 250.9   | 307.7   | 187.6  | 128.9   | 113.5  | 119.7   | 81.6   | 76.4   | 81.3   |
| 3.1     | 1.1     | 1.4    | 2.0     | 1.8    | 1.6     | 0.7    | 0.6    | 0.8    |
| 1287.6  | 1362.8  | 352.3  | 42.1    | 24.8   | 34.0    | 36.4   | 45.0   | 34.7   |
| 10.3    | 6.8     | 16.1   | 28.3    | 16.8   | 20.9    | 27.7   | 15.1   | 16.2   |
| 355.2   | 431.0   | 238.2  | 482.7   | 565.6  | 675.6   | 244.1  | 271.4  | 319.1  |
| 1080.9  | 1375.9  | 943.3  | 389.5   | 353.3  | 352.5   | 257.8  | 309.3  | 297.0  |
| 225.8   | 214.8   | 133.2  | 9.9     | 11.6   | 6.5     | 8.7    | 7.8    | 8.5    |
| 202.2   | 310.4   | 225.9  | 216.7   | 189.7  | 247.7   | 141.2  | 242.7  | 174.7  |
| 4.5     | 4.4     | 3.5    | 16.3    | 3.1    | 11.1    | 17.9   | 9.6    | 10.5   |
| 9.7     | 10.2    | 3.1    | 180.2   | 90.7   | 133.3   | 180.5  | 83.8   | 131.4  |
| 2.7     | 2.0     | 2.0    | 318.9   | 290.8  | 327.0   | 205.3  | 283.6  | 216.5  |
| 112.7   | 113.0   | 53.8   | 65.5    | 64.3   | 50.9    | 63.9   | 46.2   | 69.6   |
| 244.3   | 238.6   | 134.8  | 200.5   | 195.1  | 178.7   | 110.9  | 70.4   | 111.9  |
| 105.8   | 215.9   | 251.7  | 651.2   | 665.7  | 721.6   | 444.9  | 665.3  | 650.2  |
| 157.4   | 348.1   | 387.7  | 410.5   | 407.3  | 432.9   | 409.0  | 624.3  | 580.0  |
| 49.5    | 99.9    | 109.7  | 122.2   | 121.4  | 110.6   | 94.8   | 140.9  | 152.9  |
| 353.1   | 421.8   | 248.2  | 327.8   | 213.7  | 287.1   | 165.3  | 119.6  | 136.0  |
| 3.9     | 6.0     | 9.4    | 8.0     | 9.2    | 3.8     | 1.9    | 1.8    | 6.0    |
| 250.1   | 360.0   | 254.6  | 170.5   | 133.8  | 160.3   | 90.6   | 107.9  | 125.0  |
| 20.3    | 19.9    | 18.0   | 26.1    | 38.8   | 39.0    | 9.8    | 17.0   | 15.7   |
| 83.2    | 111.7   | 100.9  | 86.1    | 72.6   | 67.6    | 46.3   | 61.1   | 81.9   |
| 248.6   | 354.3   | 277.8  | 172.5   | 149.1  | 183.9   | 226.3  | 266.0  | 277.4  |
| 1170.7  | 1355.2  | 950.9  | 596.1   | 491.3  | 530.8   | 335.3  | 316.3  | 360.1  |
| 210.6   | 263.1   | 150.0  | 289.4   | 263.5  | 301.4   | 154.0  | 142.0  | 186.4  |
| 133.5   | 196.7   | 180.6  | 176.3   | 178.1  | 188.8   | 104.8  | 136.3  | 142.1  |
| 81.3    | 140.0   | 147.2  | 125.6   | 133.8  | 138.3   | 68.5   | 80.6   | 89.0   |
| 56.1    | 47.3    | 14.0   | 30.9    | 24.5   | 34.8    | 15.0   | 19.0   | 26.8   |
| 12.9    | 8.4     | 3.3    | 8.7     | 5.6    | 7.7     | 3.8    | 12.3   | 8.7    |
| 38.8    | 44.4    | 34.3   | 35.1    | 37.7   | 35.7    | 16.9   | 21.3   | 23.6   |
| 202.0   | 277.3   | 235.1  | 116.9   | 110.8  | 134.5   | 75.1   | 93.3   | 88.6   |
| 10.7    | 12.8    | 23.0   | 27.8    | 22.7   | 22.4    | 19.2   | 17.3   | 21.9   |
| 191.6   | 362.2   | 220.3  | 133.0   | 88.6   | 90.6    | 144.3  | 106.1  | 143.0  |
| 11846.2 | 11086.7 | 9752.1 | 10221.6 | 9546.3 | 10100.6 | 7235.0 | 7382.8 | 7498.3 |
| 1.3     | 3.2     | 0.8    | 2.7     | 4.5    | 2.1     | 0.7    | 0.5    | 1.0    |
| 2.1     | 1.4     | 2.3    | 9.3     | 5.2    | 12.3    | 2.8    | 3.0    | 1.6    |
| 328.5   | 418.3   | 347.9  | 343.2   | 343.8  | 375.4   | 206.1  | 257.0  | 277.7  |
| 16.4    | 18.7    | 17.4   | 15.8    | 24.4   | 20.1    | 3.3    | 4.1    | 7.3    |
| 20.0    | 27.3    | 13.5   | 34.3    | 29.4   | 33.1    | 11.4   | 8.0    | 13.4   |
| 2127.4  | 2776.9  | 2053.7 | 1115.8  | 927.8  | 982.4   | 1012.0 | 1085.5 | 1181.9 |
| 186.2   | 227.7   | 190.1  | 97.7    | 76.3   | 90.0    | 93.1   | 96.2   | 99.6   |
| 29.5    | 34.9    | 28.9   | 27.5    | 16.8   | 22.3    | 24.5   | 13.5   | 18.3   |
| 22.4    | 25.7    | 20.1   | 28.0    | 27.0   | 27.9    | 18.6   | 17.7   | 24.5   |
| 23.5    | 42.1    | 29.7   | 31.0    | 32.6   | 30.8    | 14.8   | 18.8   | 21.4   |
| 258.9   | 313.2   | 225.7  | 145.6   | 102.7  | 111.5   | 180.7  | 167.5  | 177.1  |
| 2610.3  | 3350.4  | 2385.9 | 4052.9  | 3401.5 | 3890.3  | 2211.2 | 2143.9 | 2383.6 |
| 1023.5  | 946.7   | 650.6  | 606.5   | 496.0  | 548.9   | 313.0  | 259.1  | 368.5  |
| 62.2    | 63.8    | 47.7   | 41.5    | 34.7   | 32.2    | 40.5   | 34.8   | 47.4   |
| 2463.8  | 2514.1  | 1744.2 | 871.1   | 737.9  | 800.0   | 581.8  | 604.3  | 670.2  |
| 2.8     | 7.1     | 1.3    | 6.7     | 2.7    | 2.3     | 1.4    | 4.0    | 11.9   |
| 3.7     | 5.6     | 2.3    | 3.7     | 2.8    | 3.8     | 6.9    | 1.4    | 4.7    |
| 3.3     | 6.3     | 5.7    | 8.0     | 6.6    | 8.3     | 2.9    | 4.1    | 4.7    |

|        |        |        |       |       |       |       |       |       |
|--------|--------|--------|-------|-------|-------|-------|-------|-------|
| 24.3   | 47.8   | 48.8   | 53.2  | 55.5  | 62.6  | 37.6  | 37.7  | 64.2  |
| 25.2   | 26.4   | 21.9   | 35.3  | 28.1  | 35.2  | 23.2  | 19.6  | 27.9  |
| 138.8  | 136.8  | 122.6  | 36.4  | 23.6  | 31.2  | 95.6  | 69.8  | 91.0  |
| 192.4  | 196.6  | 94.3   | 403.4 | 228.9 | 339.8 | 247.9 | 162.2 | 210.9 |
| 1.1    | 1.8    | 0.5    | 1.5   | 4.1   | 4.6   | 1.2   | 0.5   | 0.9   |
| 34.8   | 36.8   | 21.7   | 39.2  | 27.0  | 46.1  | 30.3  | 29.0  | 29.8  |
| 80.2   | 64.0   | 35.3   | 41.2  | 28.2  | 30.3  | 35.0  | 36.8  | 35.9  |
| 38.7   | 30.7   | 16.3   | 29.3  | 21.6  | 27.2  | 21.4  | 8.8   | 21.1  |
| 143.3  | 243.8  | 112.8  | 69.1  | 43.3  | 63.7  | 109.8 | 103.0 | 124.1 |
| 30.1   | 27.5   | 16.9   | 226.2 | 193.9 | 209.9 | 165.5 | 188.4 | 192.8 |
| 991.8  | 965.3  | 538.5  | 633.2 | 485.7 | 489.6 | 321.4 | 301.2 | 333.1 |
| 167.5  | 178.1  | 151.5  | 150.0 | 106.0 | 140.6 | 283.7 | 205.9 | 268.3 |
| 5.4    | 3.4    | 4.7    | 23.4  | 24.3  | 16.9  | 2.6   | 5.8   | 1.8   |
| 28.0   | 44.6   | 41.6   | 43.4  | 28.6  | 44.9  | 11.2  | 5.2   | 15.6  |
| 444.9  | 450.8  | 318.8  | 497.9 | 348.0 | 456.6 | 357.5 | 280.6 | 350.2 |
| 24.7   | 16.5   | 20.0   | 26.3  | 27.6  | 27.9  | 23.2  | 25.8  | 28.1  |
| 43.1   | 55.4   | 59.9   | 59.7  | 48.5  | 59.8  | 68.5  | 70.3  | 75.7  |
| 6.7    | 10.0   | 7.2    | 10.4  | 5.6   | 7.0   | 5.5   | 3.4   | 3.2   |
| 1.8    | 2.3    | 3.2    | 125.0 | 111.6 | 110.7 | 134.2 | 173.3 | 180.7 |
| 94.0   | 148.2  | 154.4  | 319.9 | 285.7 | 286.1 | 265.3 | 345.7 | 330.3 |
| 590.5  | 727.7  | 558.6  | 316.5 | 204.4 | 277.7 | 128.2 | 159.9 | 160.2 |
| 651.2  | 831.9  | 427.7  | 4.1   | 6.7   | 6.1   | 8.8   | 10.1  | 3.9   |
| 283.6  | 253.8  | 97.5   | 294.8 | 221.0 | 233.1 | 174.9 | 129.9 | 177.4 |
| 102.1  | 110.6  | 94.7   | 52.7  | 47.3  | 61.9  | 41.0  | 37.3  | 36.9  |
| 28.6   | 14.4   | 42.7   | 36.3  | 34.0  | 24.5  | 16.3  | 20.2  | 11.8  |
| 1105.5 | 1139.2 | 923.8  | 553.9 | 398.9 | 462.6 | 490.8 | 459.5 | 505.8 |
| 74.2   | 85.1   | 63.0   | 75.5  | 79.2  | 80.4  | 37.1  | 48.0  | 47.5  |
| 713.8  | 967.8  | 797.9  | 535.3 | 400.8 | 458.8 | 371.6 | 341.6 | 396.5 |
| 92.3   | 99.0   | 78.3   | 190.8 | 205.3 | 203.7 | 110.9 | 108.5 | 142.9 |
| 212.2  | 380.8  | 383.3  | 137.0 | 106.3 | 121.8 | 84.0  | 110.4 | 86.0  |
| 138.8  | 139.2  | 84.4   | 173.6 | 148.4 | 194.2 | 102.2 | 92.8  | 116.1 |
| 3.1    | 3.7    | 2.4    | 3.0   | 2.8   | 6.2   | 2.0   | 2.1   | 2.9   |
| 18.0   | 12.1   | 7.5    | 23.4  | 14.4  | 27.9  | 16.8  | 19.0  | 20.9  |
| 41.5   | 60.0   | 39.8   | 81.5  | 85.1  | 87.6  | 22.0  | 21.1  | 40.3  |
| 7.8    | 2.7    | 2.5    | 10.3  | 6.2   | 4.9   | 3.4   | 2.7   | 0.7   |
| 37.9   | 35.8   | 27.7   | 39.9  | 15.0  | 18.1  | 36.2  | 33.3  | 19.9  |
| 19.2   | 22.3   | 22.2   | 15.0  | 10.1  | 8.0   | 19.3  | 17.1  | 6.1   |
| 982.5  | 1399.8 | 977.4  | 890.5 | 748.8 | 842.2 | 503.0 | 487.5 | 551.2 |
| 87.5   | 103.8  | 69.1   | 124.1 | 140.2 | 148.0 | 96.3  | 92.6  | 107.0 |
| 566.7  | 1028.4 | 1055.1 | 162.0 | 171.7 | 166.1 | 100.5 | 111.5 | 132.5 |
| 1.5    | 2.0    | 10.1   | 409.5 | 472.9 | 481.0 | 452.2 | 664.6 | 660.0 |
| 14.8   | 12.2   | 12.3   | 26.9  | 5.5   | 8.0   | 8.5   | 2.7   | 7.0   |
| 188.7  | 298.9  | 267.1  | 197.9 | 189.0 | 218.1 | 166.9 | 212.7 | 219.3 |
| 22.3   | 42.4   | 21.7   | 40.0  | 36.4  | 29.7  | 27.5  | 35.0  | 30.5  |
| 12.9   | 15.6   | 15.5   | 33.3  | 25.1  | 40.6  | 7.7   | 6.0   | 6.5   |
| 15.4   | 25.0   | 9.0    | 32.6  | 42.4  | 44.6  | 33.3  | 36.0  | 41.8  |
| 61.4   | 72.3   | 47.9   | 24.6  | 15.2  | 24.8  | 23.6  | 16.1  | 24.6  |
| 18.0   | 9.8    | 3.1    | 3.5   | 4.6   | 4.3   | 7.5   | 2.7   | 3.4   |
| 259.4  | 355.3  | 203.0  | 466.4 | 314.8 | 318.0 | 268.2 | 183.7 | 242.7 |
| 1848.9 | 1960.7 | 1278.7 | 481.7 | 348.8 | 432.1 | 381.6 | 271.1 | 337.4 |
| 1151.5 | 1153.1 | 553.4  | 517.4 | 259.2 | 258.0 | 310.3 | 151.6 | 218.4 |
| 1.6    | 1.8    | 1.7    | 14.8  | 13.3  | 20.2  | 4.2   | 4.3   | 1.8   |
| 49.0   | 56.0   | 52.6   | 27.0  | 24.5  | 32.5  | 33.4  | 28.6  | 34.9  |

|        |        |        |        |        |        |        |        |        |
|--------|--------|--------|--------|--------|--------|--------|--------|--------|
| 18.9   | 31.4   | 19.1   | 23.9   | 20.9   | 17.6   | 27.5   | 20.0   | 13.1   |
| 19.5   | 23.3   | 13.4   | 45.6   | 27.5   | 35.2   | 12.5   | 13.7   | 14.3   |
| 0.3    | 3.2    | 0.8    | 2.1    | 10.5   | 3.2    | 2.8    | 3.4    | 5.8    |
| 32.9   | 32.5   | 31.9   | 10.5   | 5.2    | 5.1    | 1.7    | 3.3    | 3.7    |
| 8.8    | 4.5    | 2.5    | 4.8    | 1.9    | 8.2    | 7.4    | 11.6   | 3.1    |
| 938.5  | 905.1  | 440.5  | 299.3  | 147.9  | 173.4  | 224.8  | 139.6  | 155.2  |
| 186.8  | 245.3  | 210.8  | 90.6   | 82.1   | 107.8  | 43.8   | 58.6   | 47.7   |
| 120.5  | 176.4  | 123.1  | 98.4   | 65.5   | 85.8   | 55.9   | 71.6   | 85.8   |
| 872.2  | 1114.0 | 761.2  | 675.4  | 642.4  | 615.3  | 437.9  | 456.9  | 474.6  |
| 1246.2 | 1552.1 | 1210.2 | 707.1  | 703.8  | 758.1  | 322.8  | 377.0  | 425.0  |
| 7.6    | 4.1    | 3.0    | 862.8  | 862.1  | 926.5  | 503.6  | 579.2  | 654.6  |
| 7249.2 | 7471.1 | 5835.1 | 3550.4 | 2913.6 | 3173.5 | 2510.3 | 2313.8 | 2428.2 |
| 764.1  | 1081.3 | 710.0  | 957.3  | 879.4  | 967.3  | 484.8  | 552.0  | 582.0  |
| 527.1  | 457.1  | 343.6  | 353.1  | 270.5  | 328.8  | 203.9  | 248.3  | 231.1  |
| 146.9  | 180.3  | 162.3  | 80.2   | 73.9   | 83.5   | 87.1   | 97.4   | 103.0  |
| 201.4  | 114.9  | 52.4   | 27.7   | 33.0   | 22.9   | 21.1   | 22.2   | 24.8   |
| 12.4   | 9.2    | 6.5    | 9.9    | 8.8    | 6.2    | 4.6    | 7.3    | 5.6    |
| 12.5   | 6.7    | 6.1    | 41.7   | 24.5   | 31.6   | 21.6   | 6.4    | 22.3   |
| 815.4  | 943.3  | 612.2  | 836.1  | 610.1  | 710.7  | 529.6  | 482.8  | 542.8  |
| 5420.9 | 6065.7 | 5266.4 | 2889.4 | 2467.0 | 2522.1 | 2013.5 | 1929.6 | 2174.0 |
| 40.2   | 53.8   | 33.2   | 36.9   | 28.9   | 46.5   | 28.2   | 27.7   | 24.0   |
| 629.6  | 868.9  | 705.3  | 423.7  | 389.8  | 437.6  | 285.1  | 357.2  | 345.7  |
| 137.3  | 176.5  | 80.0   | 59.3   | 31.1   | 42.0   | 68.4   | 34.9   | 36.0   |
| 1022.4 | 1146.8 | 920.4  | 1112.4 | 965.0  | 1113.0 | 434.1  | 500.4  | 565.4  |
| 66.0   | 83.7   | 50.2   | 40.8   | 29.4   | 30.3   | 36.9   | 28.7   | 35.6   |
| 163.1  | 204.2  | 167.3  | 235.7  | 196.5  | 228.2  | 130.4  | 130.9  | 140.6  |
| 23.7   | 31.4   | 23.6   | 23.9   | 20.9   | 17.5   | 14.4   | 15.0   | 23.8   |
| 183.1  | 236.3  | 232.0  | 217.4  | 185.3  | 200.4  | 108.3  | 120.4  | 147.8  |
| 2.1    | 7.7    | 21.9   | 64.7   | 51.3   | 64.3   | 27.1   | 35.5   | 38.7   |
| 5.1    | 16.0   | 20.4   | 32.0   | 21.0   | 39.6   | 14.2   | 24.8   | 17.0   |
| 705.7  | 902.6  | 722.4  | 1052.0 | 893.2  | 978.7  | 622.6  | 707.6  | 742.8  |
| 443.6  | 408.7  | 163.3  | 404.9  | 277.1  | 314.8  | 253.8  | 231.3  | 255.0  |
| 32.3   | 32.2   | 18.7   | 86.5   | 87.5   | 103.3  | 59.9   | 61.6   | 64.3   |
| 4.0    | 4.1    | 4.8    | 8.4    | 7.4    | 4.2    | 1.5    | 5.2    | 2.0    |
| 16.7   | 12.7   | 10.1   | 41.4   | 34.3   | 28.6   | 4.7    | 11.0   | 10.9   |
| 16.6   | 14.5   | 13.4   | 20.4   | 20.1   | 17.1   | 10.4   | 5.7    | 11.7   |
| 19.4   | 17.9   | 25.7   | 55.3   | 39.8   | 33.8   | 17.6   | 19.7   | 17.0   |
| 75.4   | 87.6   | 109.0  | 134.0  | 113.7  | 136.4  | 82.0   | 82.8   | 85.1   |
| 2.4    | 4.7    | 1.6    | 7.5    | 7.2    | 17.0   | 2.8    | 2.3    | 2.5    |
| 1.2    | 1.6    | 1.2    | 8.1    | 4.7    | 2.7    | 1.6    | 1.3    | 0.9    |
| 0.5    | 0.6    | 0.4    | 1.6    | 1.1    | 1.1    | 0.6    | 0.5    | 0.5    |
| 1.1    | 0.8    | 1.0    | 2.1    | 1.7    | 1.6    | 1.2    | 0.6    | 0.8    |
| 18.6   | 12.7   | 12.1   | 27.5   | 31.1   | 22.1   | 8.1    | 21.4   | 16.8   |
| 0.8    | 2.2    | 0.9    | 5.4    | 6.1    | 3.3    | 1.3    | 1.2    | 1.3    |
| 470.7  | 710.8  | 521.4  | 579.2  | 509.7  | 606.0  | 269.9  | 308.3  | 318.8  |
| 1899.2 | 2493.1 | 1952.5 | 1765.4 | 1750.2 | 1980.4 | 1159.3 | 1309.6 | 1332.7 |
| 625.3  | 746.0  | 416.1  | 510.2  | 436.0  | 467.6  | 423.8  | 404.5  | 443.6  |
| 5.9    | 20.3   | 12.2   | 10.2   | 11.0   | 20.6   | 7.4    | 10.1   | 6.1    |
| 15.1   | 18.5   | 17.9   | 157.9  | 145.2  | 153.2  | 211.3  | 239.3  | 235.7  |
| 4.5    | 6.7    | 15.4   | 65.2   | 67.7   | 60.5   | 46.9   | 62.2   | 74.6   |
| 13.2   | 10.1   | 10.6   | 15.3   | 13.2   | 11.6   | 7.7    | 10.0   | 12.6   |
| 3162.3 | 3169.6 | 1969.8 | 1491.7 | 1378.4 | 1498.3 | 630.6  | 618.8  | 738.6  |
| 20.5   | 25.2   | 17.6   | 19.7   | 16.2   | 15.8   | 8.7    | 11.1   | 11.7   |

|        |        |        |        |        |        |        |        |        |
|--------|--------|--------|--------|--------|--------|--------|--------|--------|
| 381.1  | 375.1  | 322.0  | 156.0  | 139.0  | 159.7  | 139.5  | 143.3  | 155.4  |
| 126.1  | 192.1  | 187.1  | 128.1  | 134.6  | 165.7  | 92.6   | 149.8  | 140.5  |
| 352.6  | 445.5  | 345.4  | 170.1  | 139.7  | 139.6  | 128.8  | 128.3  | 132.9  |
| 118.7  | 140.2  | 72.1   | 163.8  | 135.4  | 140.8  | 114.1  | 75.1   | 99.8   |
| 161.6  | 178.4  | 136.7  | 44.1   | 39.0   | 48.4   | 41.5   | 39.4   | 41.7   |
| 960.9  | 1019.7 | 644.4  | 594.3  | 485.1  | 548.9  | 275.7  | 275.6  | 286.9  |
| 80.1   | 110.0  | 103.1  | 66.2   | 54.4   | 62.5   | 36.9   | 42.7   | 48.8   |
| 1183.3 | 1343.2 | 860.9  | 2339.8 | 1801.9 | 1893.4 | 1082.7 | 1063.9 | 1175.9 |
| 283.6  | 377.1  | 234.4  | 475.6  | 336.3  | 368.1  | 163.4  | 174.7  | 193.3  |
| 1499.4 | 1720.0 | 1262.6 | 1158.2 | 1011.7 | 1037.1 | 700.9  | 766.1  | 831.2  |
| 326.4  | 420.4  | 366.8  | 289.8  | 243.4  | 261.2  | 183.7  | 240.8  | 234.5  |
| 281.0  | 367.8  | 311.1  | 149.6  | 100.2  | 147.4  | 153.2  | 134.9  | 155.7  |
| 485.0  | 500.1  | 285.8  | 295.8  | 249.6  | 293.8  | 181.6  | 138.9  | 163.4  |
| 17.1   | 13.7   | 11.0   | 104.9  | 76.9   | 67.9   | 36.6   | 47.9   | 30.8   |
| 4.2    | 2.3    | 5.2    | 148.2  | 107.2  | 133.0  | 75.2   | 89.4   | 82.8   |
| 1604.0 | 1875.1 | 1537.3 | 906.6  | 760.6  | 822.9  | 842.2  | 909.9  | 985.8  |
| 812.4  | 1162.9 | 653.5  | 742.8  | 581.2  | 584.1  | 837.6  | 428.8  | 750.1  |
| 2118.4 | 2096.0 | 1193.7 | 1037.6 | 865.7  | 882.8  | 700.4  | 648.8  | 713.1  |
| 94.9   | 134.5  | 83.5   | 108.9  | 83.4   | 102.8  | 73.3   | 83.2   | 68.4   |
| 117.5  | 170.8  | 98.1   | 128.3  | 105.4  | 101.8  | 61.1   | 65.4   | 91.6   |
| 194.3  | 296.7  | 267.7  | 394.2  | 375.8  | 423.4  | 340.1  | 437.0  | 457.5  |
| 115.6  | 117.0  | 84.2   | 2.3    | 1.7    | 1.8    | 1.5    | 2.1    | 1.4    |
| 19.9   | 35.7   | 52.8   | 136.9  | 206.9  | 252.1  | 69.7   | 234.3  | 154.3  |
| 54.8   | 84.3   | 115.6  | 94.7   | 129.4  | 169.8  | 95.9   | 266.3  | 184.4  |
| 115.6  | 142.2  | 71.6   | 93.7   | 72.4   | 88.3   | 49.4   | 35.2   | 58.0   |
| 271.7  | 487.5  | 259.6  | 282.4  | 238.8  | 287.9  | 227.7  | 196.6  | 265.3  |
| 1469.5 | 2209.7 | 1931.5 | 584.0  | 752.0  | 805.0  | 517.2  | 1013.9 | 989.5  |
| 1128.2 | 1133.3 | 575.3  | 538.1  | 457.1  | 468.2  | 755.1  | 753.2  | 766.4  |
| 196.5  | 301.2  | 263.2  | 171.6  | 175.1  | 188.8  | 87.3   | 121.4  | 120.5  |
| 260.6  | 320.8  | 313.8  | 166.3  | 138.8  | 140.5  | 223.2  | 292.6  | 259.5  |
| 439.1  | 465.7  | 345.6  | 267.3  | 240.6  | 236.6  | 338.7  | 320.5  | 429.5  |
| 264.6  | 268.4  | 180.5  | 44.0   | 44.7   | 55.2   | 90.6   | 87.2   | 103.0  |
| 130.6  | 199.4  | 166.9  | 262.7  | 251.6  | 274.5  | 168.7  | 196.4  | 177.1  |
| 895.4  | 1331.7 | 1248.5 | 1881.5 | 1301.4 | 1571.7 | 835.2  | 833.4  | 1070.0 |
| 67.4   | 78.4   | 65.3   | 100.8  | 87.3   | 92.8   | 78.8   | 71.1   | 84.3   |
| 41.1   | 64.3   | 63.6   | 74.1   | 60.5   | 72.6   | 48.7   | 64.3   | 51.2   |
| 305.8  | 405.0  | 238.4  | 187.4  | 162.0  | 155.9  | 196.7  | 161.8  | 179.5  |
| 654.5  | 906.2  | 701.5  | 211.9  | 200.6  | 234.6  | 162.6  | 204.7  | 224.9  |
| 203.4  | 241.1  | 197.4  | 56.7   | 55.8   | 50.1   | 33.1   | 30.2   | 41.6   |
| 348.4  | 399.6  | 408.4  | 20.4   | 14.1   | 22.5   | 19.8   | 23.5   | 18.9   |
| 395.2  | 481.7  | 414.9  | 190.3  | 162.8  | 201.7  | 105.8  | 88.6   | 115.7  |
| 7369.9 | 7933.5 | 7274.1 | 6646.8 | 5799.1 | 6244.0 | 3830.1 | 3863.1 | 4168.5 |
| 790.8  | 1027.6 | 718.9  | 792.6  | 633.5  | 684.1  | 415.3  | 429.1  | 437.5  |
| 550.4  | 687.7  | 481.4  | 603.0  | 494.0  | 563.2  | 313.9  | 345.3  | 411.7  |
| 256.8  | 231.1  | 222.4  | 217.3  | 205.7  | 222.1  | 123.6  | 226.6  | 206.2  |
| 166.1  | 179.0  | 107.3  | 47.7   | 89.9   | 65.1   | 18.2   | 51.0   | 81.3   |
| 446.8  | 536.7  | 401.8  | 680.4  | 530.4  | 588.2  | 398.8  | 450.4  | 466.8  |
| 361.9  | 454.8  | 284.3  | 192.0  | 114.5  | 157.2  | 205.0  | 157.1  | 164.6  |
| 451.2  | 551.0  | 351.9  | 178.2  | 119.4  | 116.8  | 254.3  | 203.6  | 238.3  |
| 100.5  | 101.5  | 74.6   | 315.7  | 296.0  | 302.6  | 171.4  | 139.9  | 184.7  |
| 5.5    | 2.7    | 2.1    | 15.6   | 14.3   | 19.2   | 7.1    | 16.3   | 5.9    |
| 50.3   | 55.9   | 38.1   | 63.5   | 39.9   | 65.1   | 133.4  | 111.5  | 137.8  |
| 192.2  | 244.9  | 188.9  | 155.1  | 150.1  | 154.9  | 166.1  | 185.6  | 190.7  |

|         |         |         |         |         |         |        |        |        |
|---------|---------|---------|---------|---------|---------|--------|--------|--------|
| 111.8   | 169.6   | 144.4   | 121.0   | 123.7   | 120.2   | 130.3  | 158.7  | 164.0  |
| 71.6    | 112.5   | 98.3    | 221.0   | 218.5   | 243.2   | 139.0  | 179.8  | 183.7  |
| 194.2   | 262.8   | 146.7   | 150.1   | 128.7   | 119.0   | 92.4   | 83.8   | 77.1   |
| 119.1   | 227.1   | 170.6   | 164.1   | 127.9   | 145.8   | 123.9  | 104.5  | 117.5  |
| 6960.0  | 6952.3  | 5857.7  | 4666.7  | 4318.3  | 3992.0  | 3258.3 | 2913.4 | 3608.1 |
| 22.3    | 20.6    | 9.6     | 37.7    | 59.4    | 64.3    | 7.9    | 16.4   | 35.8   |
| 8.0     | 2.4     | 7.7     | 8.4     | 9.1     | 7.7     | 2.7    | 3.7    | 2.5    |
| 137.0   | 136.4   | 105.4   | 204.2   | 172.7   | 195.0   | 140.5  | 166.2  | 157.5  |
| 8.2     | 10.7    | 12.6    | 20.9    | 13.8    | 10.3    | 10.7   | 1.0    | 9.3    |
| 9.7     | 6.9     | 5.4     | 3.6     | 6.0     | 6.0     | 3.6    | 4.0    | 0.8    |
| 298.4   | 441.9   | 285.3   | 103.4   | 106.5   | 105.4   | 65.5   | 91.7   | 111.3  |
| 11564.8 | 11373.6 | 11263.8 | 13298.4 | 12661.0 | 12924.0 | 8640.1 | 8433.8 | 8939.9 |
| 109.7   | 133.2   | 83.0    | 89.6    | 94.4    | 123.5   | 61.1   | 97.8   | 80.2   |
| 187.3   | 171.4   | 103.9   | 148.4   | 136.2   | 143.7   | 96.8   | 74.4   | 95.3   |
| 2.6     | 2.5     | 0.8     | 11.9    | 6.9     | 6.7     | 4.4    | 1.9    | 1.5    |
| 433.8   | 674.7   | 611.3   | 460.6   | 415.6   | 443.9   | 301.9  | 353.6  | 402.2  |
| 345.2   | 473.6   | 364.0   | 183.1   | 148.9   | 155.5   | 209.5  | 220.7  | 226.2  |
| 265.1   | 418.7   | 346.7   | 739.4   | 660.1   | 676.1   | 420.1  | 448.7  | 514.7  |
| 7.9     | 3.2     | 2.7     | 7.0     | 3.0     | 2.4     | 0.6    | 1.2    | 1.7    |
| 253.9   | 291.6   | 197.6   | 1053.3  | 815.7   | 902.8   | 524.4  | 646.7  | 574.6  |
| 272.4   | 268.4   | 183.4   | 40.2    | 26.0    | 55.9    | 32.2   | 20.6   | 39.6   |
| 633.4   | 802.2   | 757.4   | 957.2   | 939.8   | 948.4   | 761.4  | 928.1  | 896.8  |
| 74.3    | 90.6    | 89.7    | 130.7   | 123.8   | 100.1   | 97.4   | 105.7  | 134.5  |
| 282.7   | 386.9   | 252.0   | 268.3   | 197.0   | 219.0   | 120.1  | 103.0  | 129.3  |
| 159.0   | 291.7   | 249.9   | 1347.0  | 1464.0  | 1922.9  | 707.7  | 1318.6 | 1132.1 |
| 49.7    | 73.3    | 56.1    | 88.7    | 74.3    | 85.6    | 43.6   | 49.0   | 54.2   |
| 169.2   | 187.1   | 141.3   | 213.6   | 195.3   | 218.6   | 157.8  | 146.1  | 146.8  |
| 3.8     | 10.4    | 2.3     | 6.3     | 10.8    | 7.7     | 9.1    | 2.4    | 5.6    |
| 1483.9  | 1928.7  | 1579.1  | 92.6    | 55.7    | 61.0    | 37.7   | 49.2   | 55.6   |
| 730.7   | 1036.7  | 930.8   | 139.2   | 139.1   | 166.8   | 82.2   | 120.5  | 118.4  |
| 487.7   | 539.1   | 320.3   | 861.9   | 658.7   | 775.8   | 484.6  | 410.1  | 504.1  |
| 191.6   | 226.0   | 157.4   | 125.0   | 106.9   | 152.1   | 119.3  | 99.6   | 125.1  |
| 410.8   | 483.4   | 341.8   | 336.7   | 297.6   | 338.4   | 199.4  | 229.6  | 240.0  |
| 301.4   | 405.1   | 370.9   | 282.5   | 235.9   | 243.7   | 254.5  | 247.1  | 278.8  |
| 823.1   | 823.4   | 515.6   | 434.6   | 297.4   | 363.6   | 383.9  | 342.3  | 390.7  |
| 108.6   | 163.4   | 93.2    | 152.7   | 109.0   | 133.8   | 94.4   | 77.5   | 100.0  |
| 262.4   | 276.4   | 133.3   | 552.1   | 491.4   | 537.9   | 477.6  | 502.1  | 545.0  |
| 102.8   | 187.6   | 196.8   | 99.9    | 110.1   | 134.9   | 71.9   | 174.5  | 121.1  |
| 323.0   | 409.3   | 340.2   | 255.6   | 231.6   | 249.4   | 214.1  | 262.5  | 253.8  |
| 141.3   | 202.9   | 164.0   | 106.2   | 87.5    | 105.3   | 91.8   | 108.3  | 110.1  |
| 3467.9  | 4089.8  | 3113.2  | 1022.6  | 843.0   | 877.5   | 569.2  | 517.0  | 604.6  |
| 112.1   | 126.7   | 126.0   | 81.1    | 78.6    | 84.2    | 17.4   | 42.9   | 33.8   |
| 1974.6  | 2007.1  | 1320.7  | 2246.2  | 1822.9  | 1878.4  | 984.3  | 995.8  | 1149.4 |
| 3150.1  | 2464.7  | 1267.3  | 431.4   | 391.5   | 386.1   | 231.8  | 243.8  | 288.2  |
| 54.9    | 66.9    | 49.5    | 72.3    | 50.8    | 70.4    | 40.2   | 46.4   | 67.6   |
| 54.8    | 62.3    | 65.9    | 88.4    | 84.1    | 95.2    | 43.9   | 51.4   | 54.1   |
| 24.3    | 42.9    | 46.7    | 59.9    | 53.7    | 48.1    | 28.9   | 31.3   | 31.8   |
| 79.0    | 131.3   | 119.1   | 121.5   | 107.1   | 121.9   | 86.2   | 102.1  | 96.8   |
| 13.3    | 18.6    | 7.9     | 15.2    | 8.9     | 14.2    | 7.6    | 18.0   | 24.4   |
| 96.3    | 134.7   | 81.0    | 179.2   | 133.1   | 181.4   | 111.4  | 108.1  | 111.8  |
| 24.0    | 36.2    | 19.1    | 34.2    | 28.4    | 41.1    | 54.8   | 56.5   | 59.2   |
| 52.3    | 65.7    | 44.7    | 216.0   | 145.8   | 173.7   | 117.2  | 112.1  | 134.3  |
| 577.2   | 734.8   | 540.8   | 422.5   | 366.3   | 410.4   | 256.1  | 277.4  | 278.7  |



|         |         |        |        |        |        |        |        |        |
|---------|---------|--------|--------|--------|--------|--------|--------|--------|
| 135.8   | 126.6   | 98.2   | 17.2   | 13.7   | 17.7   | 11.3   | 10.5   | 10.4   |
| 289.1   | 464.2   | 478.3  | 419.4  | 343.9  | 358.7  | 437.2  | 517.9  | 551.5  |
| 341.0   | 420.9   | 263.7  | 912.6  | 713.8  | 701.3  | 432.3  | 397.8  | 466.1  |
| 82.0    | 117.4   | 131.1  | 69.7   | 70.6   | 95.7   | 25.5   | 41.9   | 33.9   |
| 2059.5  | 2070.6  | 1390.8 | 781.7  | 716.5  | 717.4  | 411.2  | 434.6  | 488.1  |
| 201.5   | 222.1   | 147.0  | 107.9  | 98.3   | 103.8  | 124.8  | 79.1   | 88.2   |
| 121.9   | 166.3   | 119.6  | 149.2  | 103.7  | 117.8  | 55.8   | 61.2   | 87.7   |
| 1304.5  | 1502.6  | 1110.2 | 938.3  | 858.7  | 861.4  | 671.6  | 703.7  | 824.9  |
| 197.0   | 209.0   | 176.4  | 176.4  | 146.8  | 151.8  | 81.8   | 101.3  | 116.1  |
| 157.9   | 218.0   | 118.1  | 227.0  | 141.5  | 160.3  | 111.3  | 80.0   | 89.4   |
| 167.2   | 176.4   | 138.8  | 166.1  | 126.8  | 147.0  | 94.6   | 89.0   | 85.0   |
| 170.5   | 233.9   | 139.5  | 117.1  | 86.0   | 95.6   | 124.1  | 78.0   | 78.4   |
| 1.2     | 2.2     | 1.4    | 8.6    | 4.0    | 9.8    | 1.7    | 1.4    | 2.3    |
| 1287.4  | 1459.1  | 1069.2 | 435.5  | 386.3  | 426.1  | 328.8  | 302.2  | 334.1  |
| 294.6   | 484.5   | 461.9  | 35.4   | 30.9   | 24.4   | 22.5   | 6.2    | 7.1    |
| 279.7   | 356.0   | 229.0  | 249.8  | 220.3  | 251.7  | 214.0  | 176.1  | 212.3  |
| 228.3   | 282.3   | 295.9  | 79.3   | 87.7   | 99.8   | 70.4   | 79.5   | 89.1   |
| 37.6    | 29.8    | 18.3   | 70.3   | 56.2   | 51.7   | 35.2   | 37.0   | 36.8   |
| 91.6    | 159.3   | 114.8  | 110.9  | 104.7  | 111.9  | 89.0   | 111.3  | 101.1  |
| 41.1    | 47.8    | 28.3   | 35.1   | 29.8   | 23.2   | 15.6   | 19.0   | 17.5   |
| 40.5    | 51.5    | 40.3   | 99.8   | 82.0   | 101.4  | 52.9   | 55.5   | 68.7   |
| 21.0    | 76.5    | 89.4   | 644.1  | 559.4  | 578.1  | 332.3  | 607.7  | 491.6  |
| 20.2    | 33.6    | 11.0   | 11.7   | 8.2    | 7.5    | 19.7   | 6.5    | 6.6    |
| 7.4     | 5.3     | 4.5    | 64.7   | 29.2   | 27.0   | 5.0    | 7.0    | 10.1   |
| 180.4   | 361.3   | 401.6  | 107.4  | 143.1  | 128.9  | 61.4   | 124.3  | 94.9   |
| 80.9    | 87.5    | 47.4   | 148.3  | 109.1  | 130.1  | 80.4   | 70.7   | 95.3   |
| 129.7   | 194.1   | 181.7  | 22.1   | 32.0   | 18.4   | 7.7    | 10.7   | 8.5    |
| 48.1    | 64.3    | 64.5   | 85.8   | 67.5   | 76.6   | 37.7   | 50.8   | 38.9   |
| 57.1    | 104.0   | 132.8  | 39.5   | 42.5   | 55.3   | 33.3   | 49.1   | 40.3   |
| 5.3     | 9.9     | 9.5    | 187.3  | 218.4  | 234.6  | 161.8  | 172.3  | 205.0  |
| 2.9     | 5.9     | 4.2    | 8.4    | 6.0    | 6.0    | 1.8    | 2.4    | 2.3    |
| 117.0   | 166.5   | 130.6  | 118.5  | 79.6   | 82.2   | 33.4   | 32.5   | 39.4   |
| 76.8    | 142.8   | 118.5  | 37.9   | 33.9   | 27.7   | 39.0   | 33.4   | 41.7   |
| 321.7   | 356.1   | 207.4  | 189.7  | 152.2  | 175.6  | 118.5  | 117.9  | 125.1  |
| 8.6     | 10.4    | 10.3   | 268.7  | 255.7  | 246.9  | 224.4  | 270.3  | 292.0  |
| 1427.5  | 1871.5  | 1611.5 | 244.5  | 206.3  | 228.6  | 151.9  | 168.3  | 189.3  |
| 62.8    | 96.1    | 45.3   | 84.7   | 69.1   | 81.8   | 51.0   | 46.2   | 55.1   |
| 205.9   | 269.8   | 208.1  | 430.3  | 362.0  | 432.7  | 264.5  | 275.8  | 318.8  |
| 65.6    | 94.1    | 69.8   | 37.1   | 34.3   | 34.5   | 8.4    | 34.6   | 21.2   |
| 235.2   | 340.9   | 464.5  | 38.9   | 20.7   | 23.6   | 33.2   | 26.8   | 22.6   |
| 147.8   | 136.5   | 118.7  | 313.2  | 238.3  | 252.9  | 114.7  | 112.3  | 127.2  |
| 88.2    | 106.9   | 64.8   | 81.9   | 70.8   | 78.2   | 134.6  | 111.9  | 123.8  |
| 787.2   | 1058.6  | 809.9  | 124.0  | 100.6  | 128.4  | 146.9  | 159.7  | 183.9  |
| 193.9   | 239.4   | 130.5  | 95.5   | 85.9   | 102.1  | 73.6   | 78.4   | 89.0   |
| 267.8   | 471.5   | 444.8  | 8.6    | 7.3    | 8.7    | 1.4    | 1.5    | 1.3    |
| 5.7     | 6.7     | 5.5    | 4.5    | 8.1    | 4.2    | 1.7    | 7.6    | 1.2    |
| 0.8     | 5.2     | 2.0    | 8.3    | 12.5   | 6.5    | 6.0    | 3.9    | 8.9    |
| 4.5     | 4.5     | 2.6    | 156.9  | 204.8  | 161.8  | 80.0   | 133.0  | 131.9  |
| 167.2   | 198.9   | 160.7  | 142.0  | 137.2  | 147.9  | 91.6   | 78.2   | 86.6   |
| 50.7    | 75.1    | 57.9   | 138.4  | 129.9  | 143.5  | 59.9   | 81.0   | 71.9   |
| 81.8    | 119.5   | 59.0   | 118.0  | 117.8  | 140.3  | 71.3   | 70.1   | 104.6  |
| 12551.4 | 12109.9 | 8479.4 | 9258.2 | 8019.2 | 7853.5 | 7649.7 | 6864.3 | 7791.9 |
| 122.9   | 191.3   | 108.6  | 65.4   | 60.9   | 86.5   | 37.9   | 84.1   | 92.8   |

|        |        |        |        |        |        |        |        |        |
|--------|--------|--------|--------|--------|--------|--------|--------|--------|
| 361.0  | 563.0  | 332.1  | 253.0  | 208.9  | 272.7  | 176.3  | 198.8  | 204.7  |
| 203.0  | 265.1  | 159.1  | 115.4  | 90.3   | 104.4  | 94.2   | 79.6   | 88.2   |
| 119.2  | 148.9  | 89.4   | 170.0  | 131.3  | 155.6  | 93.6   | 107.1  | 85.1   |
| 1943.2 | 2013.4 | 1389.8 | 1516.7 | 1224.4 | 1357.7 | 923.3  | 686.4  | 919.2  |
| 63.1   | 129.5  | 105.3  | 43.6   | 51.0   | 50.6   | 25.1   | 55.9   | 48.4   |
| 3.6    | 2.0    | 7.0    | 8.2    | 3.6    | 4.2    | 1.2    | 0.9    | 1.9    |
| 97.2   | 165.1  | 151.8  | 56.5   | 48.2   | 46.8   | 35.2   | 47.0   | 42.9   |
| 10.4   | 9.9    | 1.2    | 9.7    | 5.9    | 4.0    | 4.7    | 1.6    | 2.0    |
| 2.4    | 4.7    | 1.9    | 7.2    | 9.2    | 6.8    | 7.6    | 9.1    | 4.1    |
| 67.3   | 62.6   | 40.6   | 43.4   | 23.5   | 29.8   | 18.9   | 16.6   | 21.5   |
| 81.2   | 129.1  | 120.5  | 39.7   | 52.7   | 60.7   | 36.6   | 43.7   | 40.6   |
| 163.9  | 252.3  | 201.4  | 226.7  | 157.1  | 245.5  | 119.9  | 130.9  | 141.2  |
| 63.1   | 90.9   | 81.2   | 19.7   | 38.2   | 23.5   | 31.9   | 48.2   | 48.0   |
| 74.1   | 109.4  | 65.5   | 78.8   | 58.5   | 87.5   | 28.5   | 39.3   | 47.3   |
| 105.5  | 121.0  | 80.1   | 267.0  | 226.0  | 252.0  | 141.9  | 110.5  | 144.6  |
| 85.2   | 124.1  | 104.8  | 93.6   | 64.6   | 75.2   | 50.6   | 45.2   | 52.4   |
| 143.7  | 220.6  | 193.3  | 169.7  | 133.6  | 141.4  | 95.7   | 67.9   | 113.0  |
| 4.9    | 9.0    | 1.1    | 10.7   | 5.0    | 11.2   | 3.6    | 6.0    | 3.3    |
| 51.1   | 47.0   | 3.3    | 3.9    | 3.9    | 4.3    | 1.1    | 2.4    | 0.4    |
| 21.7   | 18.8   | 14.3   | 31.3   | 24.6   | 19.0   | 9.9    | 10.2   | 12.4   |
| 28.3   | 32.5   | 35.4   | 35.0   | 48.1   | 44.3   | 23.8   | 41.3   | 36.3   |
| 3.7    | 36.1   | 9.8    | 11.5   | 9.1    | 16.5   | 17.1   | 5.3    | 9.0    |
| 40.7   | 37.2   | 34.1   | 41.4   | 48.5   | 36.3   | 24.8   | 22.8   | 19.1   |
| 3.4    | 9.9    | 10.2   | 15.7   | 11.8   | 20.3   | 7.9    | 4.8    | 5.1    |
| 30.1   | 52.9   | 40.8   | 46.6   | 30.8   | 45.7   | 21.3   | 13.4   | 20.5   |
| 422.8  | 371.0  | 203.4  | 205.5  | 170.4  | 244.8  | 138.0  | 146.8  | 174.8  |
| 72.6   | 66.6   | 38.9   | 49.6   | 47.9   | 53.1   | 42.3   | 35.5   | 45.9   |
| 42.1   | 50.8   | 32.3   | 41.2   | 26.9   | 33.7   | 49.7   | 38.9   | 38.7   |
| 1.9    | 2.4    | 1.2    | 3.9    | 2.8    | 5.6    | 2.7    | 0.9    | 1.0    |
| 392.5  | 597.8  | 420.2  | 254.5  | 155.6  | 150.7  | 193.0  | 148.4  | 140.7  |
| 4724.4 | 5049.9 | 3586.0 | 2419.4 | 1858.4 | 1897.4 | 1262.2 | 1039.4 | 1255.0 |
| 89.5   | 106.0  | 92.4   | 115.1  | 72.6   | 102.2  | 55.4   | 71.9   | 59.1   |
| 103.1  | 145.5  | 79.2   | 70.4   | 53.6   | 64.8   | 61.0   | 68.4   | 61.7   |
| 45.6   | 83.7   | 68.7   | 19.1   | 18.8   | 30.8   | 42.5   | 93.7   | 98.2   |
| 685.6  | 731.4  | 453.3  | 1402.0 | 1056.9 | 1150.8 | 751.4  | 640.0  | 780.7  |
| 42.4   | 56.9   | 71.7   | 7.9    | 5.8    | 7.0    | 4.2    | 4.3    | 4.4    |
| 29.4   | 24.9   | 15.2   | 25.2   | 39.1   | 29.4   | 16.9   | 19.2   | 28.4   |
| 8.1    | 6.5    | 6.9    | 7.5    | 7.4    | 11.1   | 1.4    | 2.7    | 6.2    |
| 2053.3 | 2066.0 | 1023.6 | 1796.3 | 1154.1 | 1203.7 | 931.8  | 732.8  | 904.9  |
| 697.4  | 988.3  | 725.4  | 1220.7 | 925.5  | 1159.7 | 603.2  | 598.6  | 640.4  |
| 1.6    | 1.5    | 0.4    | 47.8   | 75.6   | 67.9   | 10.4   | 29.0   | 32.7   |
| 273.8  | 403.5  | 367.7  | 614.3  | 575.3  | 550.5  | 259.1  | 233.9  | 305.3  |
| 197.1  | 245.8  | 175.3  | 19.9   | 10.8   | 5.6    | 9.1    | 5.2    | 8.5    |
| 6.4    | 13.8   | 7.7    | 16.0   | 11.9   | 20.2   | 3.2    | 2.9    | 7.3    |
| 334.7  | 378.5  | 412.5  | 2651.4 | 2291.2 | 2570.6 | 1791.7 | 2031.5 | 2260.0 |
| 103.3  | 92.9   | 71.2   | 213.6  | 188.6  | 217.2  | 147.8  | 120.0  | 125.3  |
| 259.5  | 328.7  | 284.8  | 193.1  | 180.3  | 167.8  | 74.4   | 106.1  | 107.5  |
| 141.0  | 204.9  | 132.1  | 112.8  | 95.7   | 101.1  | 67.5   | 84.3   | 79.0   |
| 4.9    | 20.6   | 14.9   | 45.7   | 20.5   | 44.6   | 17.7   | 14.0   | 15.3   |
| 4.5    | 3.8    | 5.2    | 267.7  | 259.7  | 256.2  | 229.2  | 234.0  | 285.5  |
| 528.5  | 585.5  | 423.7  | 603.3  | 522.5  | 455.0  | 210.0  | 196.9  | 233.1  |
| 4.8    | 34.5   | 31.3   | 44.5   | 33.9   | 23.6   | 15.5   | 19.0   | 4.9    |
| 24.0   | 38.8   | 17.1   | 22.0   | 20.3   | 24.9   | 25.3   | 23.6   | 26.3   |

|        |        |        |        |        |        |        |        |        |
|--------|--------|--------|--------|--------|--------|--------|--------|--------|
| 23.8   | 32.7   | 26.1   | 7.7    | 6.0    | 15.6   | 5.0    | 7.7    | 9.6    |
| 31.2   | 23.4   | 11.1   | 42.2   | 36.4   | 37.8   | 9.6    | 15.8   | 17.7   |
| 2.7    | 3.5    | 2.8    | 8.4    | 7.0    | 14.6   | 6.5    | 3.3    | 5.8    |
| 79.0   | 69.3   | 66.4   | 114.8  | 82.4   | 93.6   | 63.4   | 64.3   | 60.2   |
| 0.7    | 1.1    | 0.8    | 1.3    | 2.3    | 4.4    | 0.6    | 0.5    | 1.4    |
| 150.5  | 268.8  | 212.0  | 108.3  | 131.8  | 101.6  | 68.5   | 78.6   | 74.9   |
| 5649.6 | 6354.7 | 4987.0 | 6176.4 | 4817.9 | 5040.2 | 3643.7 | 3429.4 | 3733.9 |
| 176.8  | 193.4  | 219.4  | 185.4  | 183.0  | 204.1  | 74.3   | 120.1  | 124.6  |
| 141.4  | 212.7  | 153.9  | 112.9  | 105.4  | 116.1  | 55.4   | 95.8   | 87.9   |
| 9.4    | 4.5    | 1.0    | 5.5    | 3.1    | 4.5    | 4.9    | 1.0    | 1.8    |
| 50.6   | 63.1   | 33.6   | 37.0   | 41.2   | 58.3   | 15.9   | 24.2   | 28.2   |
| 390.3  | 656.7  | 349.5  | 319.5  | 249.9  | 273.6  | 191.6  | 161.2  | 197.0  |
| 170.0  | 317.1  | 265.8  | 471.0  | 408.5  | 439.5  | 398.9  | 446.8  | 479.7  |
| 1.2    | 1.0    | 5.5    | 187.1  | 169.7  | 179.9  | 120.1  | 134.3  | 135.6  |
| 105.5  | 125.2  | 98.2   | 217.8  | 200.2  | 195.1  | 52.0   | 45.4   | 49.9   |
| 19.3   | 31.4   | 27.1   | 12.9   | 25.8   | 23.6   | 10.7   | 25.1   | 10.4   |
| 311.3  | 434.7  | 434.1  | 212.2  | 197.5  | 261.4  | 233.2  | 264.9  | 273.5  |
| 150.0  | 176.0  | 128.4  | 132.9  | 123.2  | 106.7  | 98.7   | 116.8  | 112.8  |
| 109.8  | 136.7  | 85.7   | 144.3  | 112.8  | 129.4  | 63.9   | 72.6   | 71.1   |
| 463.5  | 525.0  | 327.5  | 158.5  | 107.3  | 113.0  | 93.6   | 81.9   | 85.5   |
| 17.6   | 21.1   | 14.1   | 161.8  | 140.6  | 157.0  | 78.2   | 52.8   | 86.3   |
| 26.6   | 31.1   | 23.8   | 56.1   | 41.7   | 57.5   | 30.3   | 30.6   | 38.9   |
| 3.4    | 1.6    | 1.7    | 3.9    | 2.6    | 5.7    | 1.4    | 2.1    | 2.6    |
| 34.0   | 42.7   | 33.9   | 15.0   | 14.0   | 19.7   | 12.0   | 7.4    | 7.1    |
| 1150.4 | 1174.1 | 651.7  | 1458.9 | 1104.8 | 1185.0 | 973.1  | 855.4  | 976.5  |
| 102.9  | 117.7  | 117.9  | 215.3  | 163.6  | 195.6  | 82.3   | 88.1   | 97.7   |
| 751.1  | 1059.3 | 767.2  | 281.0  | 219.9  | 251.1  | 266.7  | 271.3  | 326.3  |
| 29.2   | 49.8   | 40.8   | 74.0   | 65.0   | 69.8   | 50.3   | 64.3   | 69.9   |
| 2.0    | 0.7    | 0.4    | 118.5  | 118.8  | 110.0  | 171.5  | 157.4  | 200.2  |
| 16.1   | 12.7   | 5.5    | 16.5   | 19.8   | 24.1   | 20.0   | 12.7   | 22.5   |
| 3.6    | 5.4    | 7.3    | 15.8   | 16.1   | 15.0   | 7.4    | 0.9    | 6.0    |
| 1.1    | 0.9    | 1.9    | 3.4    | 2.6    | 4.1    | 2.4    | 1.8    | 2.3    |
| 24.0   | 29.8   | 24.7   | 7.1    | 8.5    | 14.0   | 15.3   | 14.4   | 5.9    |
| 61.1   | 120.6  | 99.6   | 19.7   | 15.1   | 17.2   | 7.4    | 7.7    | 9.7    |
| 16.8   | 6.7    | 16.9   | 10.4   | 11.2   | 11.6   | 1.8    | 7.8    | 12.5   |
| 27.4   | 69.9   | 60.8   | 15.0   | 17.2   | 25.8   | 16.6   | 38.7   | 39.8   |
| 9.3    | 5.3    | 4.1    | 22.0   | 21.6   | 27.2   | 5.2    | 6.0    | 9.4    |
| 264.3  | 474.0  | 395.9  | 195.3  | 192.6  | 222.4  | 113.0  | 220.9  | 159.6  |
| 1100.3 | 1805.8 | 1618.9 | 790.3  | 772.8  | 910.8  | 420.8  | 625.2  | 565.8  |
| 110.2  | 250.7  | 280.0  | 97.4   | 107.4  | 118.2  | 83.2   | 177.4  | 128.6  |
| 92.7   | 235.2  | 281.2  | 44.7   | 46.5   | 48.0   | 61.2   | 130.5  | 96.0   |
| 373.2  | 395.7  | 177.9  | 116.1  | 81.7   | 94.7   | 76.3   | 73.6   | 70.4   |
| 48.6   | 66.0   | 46.2   | 83.9   | 53.8   | 59.7   | 67.2   | 53.5   | 57.6   |
| 85.8   | 108.8  | 64.3   | 92.0   | 67.0   | 68.6   | 53.5   | 43.3   | 50.4   |
| 7.2    | 25.2   | 30.9   | 25.6   | 16.6   | 24.9   | 13.4   | 6.7    | 9.4    |
| 35.4   | 42.2   | 22.0   | 55.5   | 55.9   | 50.8   | 26.9   | 18.3   | 37.8   |
| 16.7   | 9.8    | 9.8    | 62.2   | 60.5   | 57.1   | 36.3   | 43.3   | 46.8   |
| 1.0    | 0.8    | 1.3    | 2.9    | 10.7   | 2.1    | 1.3    | 1.7    | 0.7    |
| 24.1   | 28.9   | 9.5    | 11.0   | 14.5   | 16.2   | 12.3   | 12.1   | 12.2   |
| 155.0  | 168.2  | 135.4  | 110.7  | 87.3   | 83.8   | 29.2   | 32.9   | 56.5   |
| 5.4    | 7.5    | 16.8   | 23.9   | 19.0   | 15.5   | 12.7   | 6.4    | 11.2   |
| 41.5   | 45.6   | 33.7   | 76.1   | 58.7   | 61.9   | 24.1   | 26.1   | 30.4   |
| 301.6  | 422.0  | 342.1  | 213.8  | 201.0  | 203.9  | 146.7  | 160.7  | 169.0  |

|        |        |        |        |        |        |        |        |        |
|--------|--------|--------|--------|--------|--------|--------|--------|--------|
| 125.7  | 149.2  | 110.6  | 125.9  | 94.7   | 114.2  | 77.5   | 65.3   | 70.7   |
| 1047.3 | 1124.8 | 580.6  | 301.8  | 229.7  | 215.3  | 253.6  | 239.5  | 236.2  |
| 1188.2 | 1164.9 | 901.7  | 178.1  | 185.2  | 199.7  | 63.7   | 81.6   | 79.7   |
| 6.0    | 1.5    | 1.9    | 3.9    | 15.7   | 7.1    | 2.5    | 1.8    | 3.1    |
| 81.7   | 73.3   | 73.6   | 75.7   | 59.5   | 79.3   | 136.3  | 93.6   | 112.8  |
| 6.1    | 2.0    | 6.4    | 12.7   | 8.1    | 3.4    | 3.3    | 2.8    | 3.6    |
| 21.7   | 46.0   | 30.6   | 47.3   | 32.6   | 52.3   | 26.4   | 24.4   | 37.5   |
| 192.5  | 234.0  | 151.2  | 254.8  | 235.8  | 247.8  | 122.4  | 156.1  | 134.4  |
| 1.4    | 1.5    | 0.9    | 3.1    | 5.9    | 5.6    | 2.0    | 2.7    | 2.7    |
| 2.3    | 2.6    | 1.8    | 3.1    | 2.2    | 2.5    | 1.9    | 1.2    | 1.5    |
| 2.2    | 3.1    | 1.5    | 11.6   | 8.0    | 8.9    | 1.1    | 3.6    | 1.1    |
| 418.9  | 439.2  | 246.1  | 410.6  | 334.0  | 350.1  | 181.3  | 201.1  | 223.6  |
| 642.7  | 636.9  | 358.5  | 316.6  | 267.3  | 270.1  | 358.1  | 284.7  | 349.3  |
| 3.9    | 5.6    | 5.0    | 5.6    | 9.5    | 12.8   | 3.8    | 2.1    | 5.1    |
| 102.0  | 37.6   | 42.5   | 50.9   | 90.9   | 33.6   | 14.9   | 34.2   | 22.8   |
| 358.7  | 432.8  | 294.2  | 200.4  | 129.0  | 169.0  | 231.4  | 223.1  | 240.8  |
| 59.7   | 75.9   | 47.4   | 63.2   | 59.5   | 78.2   | 33.8   | 33.9   | 16.8   |
| 87.4   | 155.7  | 182.2  | 55.7   | 56.4   | 76.6   | 38.3   | 52.9   | 48.3   |
| 54.0   | 55.5   | 39.4   | 39.3   | 26.5   | 21.7   | 5.7    | 13.6   | 16.5   |
| 25.6   | 28.6   | 23.2   | 43.1   | 43.2   | 28.9   | 24.5   | 26.6   | 31.3   |
| 29.9   | 46.6   | 32.5   | 55.8   | 46.9   | 50.5   | 25.3   | 22.2   | 33.0   |
| 1.2    | 2.0    | 1.7    | 8.2    | 8.6    | 5.7    | 1.3    | 1.7    | 1.8    |
| 1877.8 | 2790.0 | 2626.9 | 2096.8 | 1664.4 | 1774.7 | 1524.7 | 1453.6 | 1560.9 |
| 9.2    | 33.9   | 18.9   | 67.3   | 49.8   | 58.3   | 28.4   | 29.1   | 14.5   |
| 5.7    | 9.4    | 5.4    | 19.7   | 18.8   | 12.1   | 5.3    | 9.2    | 7.2    |
| 55.1   | 60.7   | 63.3   | 96.2   | 71.0   | 93.3   | 56.3   | 47.1   | 48.1   |
| 99.3   | 129.2  | 131.0  | 24.5   | 13.8   | 24.2   | 2.0    | 9.8    | 16.4   |
| 26.2   | 46.1   | 31.6   | 97.4   | 70.2   | 74.3   | 52.4   | 58.3   | 62.1   |
| 65.7   | 79.5   | 44.9   | 104.2  | 77.2   | 82.8   | 46.9   | 33.7   | 40.8   |
| 47.3   | 80.0   | 98.7   | 176.4  | 140.0  | 166.2  | 122.1  | 139.1  | 148.2  |
| 285.2  | 352.8  | 216.9  | 382.3  | 329.2  | 336.2  | 154.7  | 168.9  | 232.6  |
| 72.2   | 74.4   | 50.2   | 80.3   | 74.2   | 80.2   | 34.9   | 36.2   | 48.5   |
| 14.7   | 14.1   | 8.7    | 30.8   | 33.2   | 26.6   | 15.8   | 15.6   | 21.0   |
| 74.8   | 73.4   | 48.8   | 23.6   | 37.6   | 30.8   | 16.2   | 21.4   | 23.2   |
| 11.8   | 6.9    | 5.2    | 20.1   | 12.0   | 11.7   | 11.1   | 11.6   | 12.3   |
| 56.6   | 63.7   | 44.8   | 47.3   | 36.4   | 51.8   | 44.8   | 42.0   | 39.6   |
| 1213.7 | 1544.9 | 1076.1 | 1468.4 | 1125.2 | 1248.5 | 1193.8 | 1074.6 | 1202.3 |
| 2321.3 | 2572.5 | 1235.1 | 565.1  | 298.9  | 306.3  | 571.1  | 346.3  | 430.9  |
| 846.5  | 1015.6 | 502.7  | 400.4  | 198.2  | 209.9  | 134.4  | 97.9   | 132.0  |
| 21.8   | 18.1   | 11.2   | 20.4   | 9.5    | 17.7   | 21.1   | 5.5    | 11.4   |
| 470.2  | 538.8  | 293.2  | 295.8  | 135.8  | 165.7  | 172.0  | 107.4  | 132.0  |
| 39.1   | 38.5   | 28.0   | 52.4   | 52.4   | 37.5   | 35.9   | 26.9   | 31.8   |
| 41.8   | 47.2   | 33.0   | 65.2   | 46.1   | 62.1   | 27.3   | 39.6   | 37.9   |
| 8.1    | 4.2    | 2.4    | 22.0   | 24.4   | 19.1   | 10.5   | 4.7    | 6.6    |
| 10.0   | 12.2   | 10.3   | 33.3   | 18.5   | 32.7   | 16.9   | 15.7   | 14.8   |
| 130.5  | 106.5  | 64.9   | 79.3   | 63.2   | 72.8   | 51.0   | 42.8   | 49.8   |
| 93.5   | 145.5  | 104.3  | 74.5   | 47.6   | 40.7   | 69.7   | 62.8   | 68.8   |
| 24.0   | 29.1   | 19.7   | 20.1   | 24.8   | 27.2   | 14.8   | 18.8   | 17.5   |
| 2160.2 | 2185.3 | 1426.9 | 1467.5 | 952.5  | 1130.9 | 833.7  | 652.9  | 816.7  |
| 90.8   | 103.7  | 48.7   | 6.7    | 20.8   | 19.0   | 7.8    | 2.6    | 2.8    |
| 1.6    | 2.3    | 1.3    | 2.3    | 1.4    | 4.4    | 2.1    | 0.8    | 1.1    |
| 11.9   | 6.4    | 11.1   | 21.7   | 7.3    | 19.8   | 4.1    | 9.3    | 10.1   |
| 13.8   | 10.0   | 9.8    | 28.4   | 17.2   | 17.4   | 7.3    | 8.9    | 8.9    |

|        |        |        |       |        |        |       |        |        |
|--------|--------|--------|-------|--------|--------|-------|--------|--------|
| 214.9  | 309.6  | 247.3  | 154.9 | 140.2  | 176.9  | 98.0  | 148.9  | 146.4  |
| 8.6    | 7.3    | 2.4    | 19.9  | 11.0   | 15.7   | 6.8   | 11.9   | 6.3    |
| 1.3    | 1.7    | 7.0    | 3.7   | 2.6    | 5.0    | 3.1   | 5.0    | 4.0    |
| 1.1    | 7.6    | 11.6   | 3.5   | 2.9    | 3.4    | 3.4   | 5.5    | 7.1    |
| 289.1  | 410.1  | 229.5  | 223.9 | 207.1  | 249.6  | 183.0 | 219.8  | 233.1  |
| 20.7   | 23.4   | 18.4   | 17.5  | 13.0   | 24.3   | 3.4   | 11.0   | 5.8    |
| 15.8   | 18.4   | 19.3   | 27.4  | 17.3   | 24.7   | 23.5  | 14.2   | 14.9   |
| 2.0    | 2.6    | 3.9    | 12.1  | 3.6    | 3.2    | 4.2   | 2.1    | 1.9    |
| 180.5  | 155.3  | 72.4   | 114.7 | 91.4   | 105.7  | 65.3  | 54.9   | 56.9   |
| 7.3    | 12.8   | 11.7   | 3.5   | 5.4    | 8.4    | 2.7   | 2.9    | 6.5    |
| 63.5   | 87.1   | 57.6   | 7.5   | 6.6    | 1.7    | 1.8   | 0.9    | 1.2    |
| 8.2    | 8.2    | 13.8   | 6.3   | 8.8    | 15.9   | 10.0  | 7.9    | 8.9    |
| 247.7  | 260.2  | 164.4  | 212.0 | 158.8  | 175.2  | 127.6 | 95.0   | 133.9  |
| 508.0  | 645.8  | 461.4  | 655.1 | 498.0  | 574.7  | 415.5 | 435.2  | 452.1  |
| 28.7   | 23.7   | 9.3    | 16.3  | 18.2   | 21.9   | 9.7   | 8.9    | 13.9   |
| 331.6  | 454.8  | 982.1  | 956.7 | 1373.0 | 1229.9 | 667.7 | 1341.9 | 1262.3 |
| 5.2    | 4.9    | 2.3    | 14.0  | 4.8    | 12.2   | 8.8   | 2.7    | 12.0   |
| 2.5    | 1.7    | 2.3    | 6.6   | 2.6    | 6.6    | 1.3   | 2.3    | 2.0    |
| 63.6   | 71.2   | 48.9   | 138.7 | 133.0  | 130.8  | 40.2  | 39.1   | 46.3   |
| 5.7    | 7.9    | 6.0    | 23.3  | 14.6   | 7.3    | 10.9  | 15.8   | 17.9   |
| 8.8    | 11.1   | 16.2   | 19.1  | 13.4   | 15.6   | 6.8   | 10.3   | 11.2   |
| 6.4    | 9.1    | 3.7    | 16.7  | 13.7   | 10.5   | 8.1   | 5.1    | 12.9   |
| 17.4   | 17.6   | 10.2   | 6.6   | 13.7   | 7.8    | 2.7   | 6.6    | 7.3    |
| 47.9   | 67.7   | 28.1   | 23.5  | 21.8   | 27.9   | 26.6  | 17.7   | 19.1   |
| 3.7    | 3.5    | 2.2    | 3.4   | 2.9    | 2.7    | 1.4   | 2.6    | 0.9    |
| 2004.6 | 2240.6 | 1447.9 | 949.3 | 566.3  | 593.0  | 820.9 | 512.7  | 603.8  |
| 4.3    | 2.4    | 1.9    | 3.9   | 5.8    | 7.4    | 6.5   | 1.0    | 9.9    |
| 10.9   | 8.6    | 2.2    | 23.2  | 9.4    | 17.1   | 4.9   | 4.4    | 6.6    |
| 1.4    | 4.8    | 12.2   | 11.1  | 6.9    | 11.7   | 5.8   | 3.4    | 12.9   |
| 12.1   | 9.5    | 7.6    | 15.2  | 7.0    | 9.6    | 5.8   | 13.3   | 11.9   |
| 7.4    | 7.0    | 4.8    | 16.0  | 17.9   | 19.3   | 7.8   | 7.3    | 6.8    |
| 1.7    | 1.8    | 1.8    | 2.0   | 1.6    | 3.0    | 1.2   | 1.1    | 0.9    |
| 12.3   | 4.1    | 1.6    | 7.0   | 7.4    | 3.5    | 1.8   | 7.4    | 4.0    |
| 12.9   | 16.0   | 8.5    | 33.2  | 29.0   | 15.8   | 21.4  | 18.2   | 11.5   |
| 1.1    | 1.6    | 1.8    | 2.6   | 2.9    | 2.1    | 1.5   | 1.1    | 1.2    |
| 3.4    | 3.2    | 18.2   | 17.7  | 9.7    | 12.1   | 6.9   | 3.1    | 6.5    |
| 12.3   | 13.3   | 8.6    | 10.9  | 8.4    | 15.3   | 5.9   | 5.6    | 9.3    |
| 8.3    | 3.4    | 4.5    | 19.8  | 4.1    | 15.2   | 5.5   | 2.0    | 1.0    |
| 44.8   | 49.9   | 45.6   | 29.9  | 30.4   | 31.0   | 15.1  | 15.3   | 23.7   |
| 6.5    | 5.6    | 7.5    | 14.5  | 7.2    | 6.6    | 9.6   | 8.6    | 15.8   |
| 16.1   | 4.7    | 9.0    | 26.6  | 15.3   | 12.0   | 3.3   | 11.2   | 9.7    |
| 91.4   | 193.3  | 112.5  | 54.3  | 55.1   | 55.8   | 53.1  | 77.5   | 67.0   |
| 34.2   | 22.0   | 20.7   | 37.9  | 17.0   | 14.3   | 12.7  | 27.5   | 12.0   |
| 6.7    | 12.3   | 7.2    | 8.9   | 4.3    | 4.2    | 2.1   | 2.3    | 2.3    |
| 22.6   | 38.7   | 26.0   | 40.1  | 31.8   | 30.1   | 15.0  | 21.1   | 28.4   |
| 12.1   | 21.2   | 5.5    | 11.8  | 14.4   | 13.1   | 9.0   | 8.8    | 17.8   |
| 1.9    | 2.8    | 1.5    | 2.2   | 2.3    | 11.9   | 1.8   | 1.8    | 2.1    |
| 255.7  | 391.1  | 296.6  | 253.1 | 200.5  | 215.3  | 222.3 | 200.4  | 228.1  |
| 1.6    | 2.2    | 3.0    | 3.0   | 3.3    | 4.1    | 1.5   | 1.8    | 1.6    |
| 10.0   | 3.0    | 3.4    | 21.4  | 26.9   | 10.0   | 3.2   | 6.1    | 17.4   |
| 1.4    | 1.9    | 6.9    | 13.9  | 5.2    | 10.5   | 4.3   | 5.0    | 1.7    |
| 698.2  | 856.6  | 601.0  | 220.7 | 186.8  | 184.4  | 201.0 | 196.9  | 207.9  |
| 426.8  | 532.9  | 358.5  | 243.5 | 208.1  | 218.6  | 144.9 | 132.0  | 110.9  |

|        |        |        |       |       |       |       |       |       |
|--------|--------|--------|-------|-------|-------|-------|-------|-------|
| 196.6  | 177.3  | 143.4  | 179.4 | 155.1 | 143.9 | 95.6  | 116.9 | 141.3 |
| 8.3    | 12.6   | 5.2    | 18.2  | 15.7  | 25.7  | 9.5   | 6.0   | 9.7   |
| 26.2   | 10.5   | 6.7    | 43.4  | 26.0  | 42.8  | 9.0   | 18.7  | 12.1  |
| 4133.8 | 4406.6 | 4412.3 | 192.6 | 176.3 | 181.1 | 195.7 | 355.5 | 226.0 |
| 60.4   | 80.0   | 56.3   | 51.2  | 56.2  | 56.9  | 30.0  | 24.6  | 33.2  |
| 25.9   | 34.9   | 20.0   | 34.2  | 39.0  | 35.5  | 23.3  | 23.4  | 30.2  |
| 99.3   | 124.5  | 110.1  | 99.4  | 89.2  | 98.2  | 74.5  | 103.3 | 93.5  |
| 7.3    | 2.0    | 2.2    | 2.3   | 3.8   | 7.4   | 1.2   | 0.8   | 0.8   |
| 66.6   | 79.4   | 48.1   | 59.3  | 44.3  | 61.8  | 47.8  | 34.7  | 34.9  |
| 27.8   | 41.2   | 22.4   | 25.0  | 15.4  | 17.0  | 8.5   | 9.0   | 17.6  |
| 57.6   | 83.2   | 71.2   | 62.7  | 52.2  | 58.6  | 48.6  | 55.6  | 61.7  |
| 256.5  | 379.2  | 320.7  | 314.9 | 337.2 | 377.5 | 156.4 | 185.5 | 189.4 |
| 19.7   | 26.1   | 15.5   | 27.4  | 7.2   | 13.3  | 2.2   | 3.8   | 5.4   |
| 284.2  | 281.7  | 131.9  | 96.4  | 44.0  | 54.3  | 95.6  | 41.1  | 47.9  |
| 353.8  | 450.5  | 367.2  | 310.5 | 237.9 | 268.5 | 278.3 | 314.7 | 316.2 |
| 47.6   | 50.3   | 37.1   | 69.3  | 47.1  | 71.6  | 36.5  | 29.1  | 40.1  |
| 11.9   | 13.8   | 12.7   | 53.0  | 57.1  | 60.1  | 36.0  | 29.9  | 40.4  |
| 306.0  | 370.4  | 227.7  | 251.9 | 161.4 | 183.6 | 143.6 | 153.7 | 167.2 |
| 12.8   | 10.4   | 9.2    | 28.8  | 24.1  | 19.8  | 15.9  | 6.5   | 17.0  |
| 9.9    | 5.0    | 5.2    | 33.6  | 21.8  | 14.6  | 9.7   | 2.1   | 6.0   |
| 295.0  | 455.5  | 346.1  | 346.8 | 308.0 | 362.8 | 257.1 | 273.3 | 313.5 |
| 168.8  | 353.6  | 320.5  | 48.7  | 37.2  | 37.1  | 60.9  | 39.6  | 42.6  |
| 1230.8 | 1630.1 | 1592.6 | 182.8 | 193.3 | 207.9 | 153.8 | 211.6 | 213.3 |
| 6.3    | 15.3   | 10.1   | 11.6  | 10.8  | 18.6  | 4.6   | 16.9  | 14.9  |
| 62.2   | 101.8  | 91.7   | 60.9  | 55.6  | 60.6  | 31.2  | 48.8  | 46.5  |
| 428.1  | 495.4  | 233.5  | 464.9 | 329.1 | 331.9 | 336.2 | 280.5 | 328.6 |
| 150.1  | 233.5  | 137.6  | 101.7 | 61.1  | 71.4  | 87.9  | 49.5  | 123.5 |
| 102.4  | 109.0  | 90.9   | 356.5 | 293.7 | 336.0 | 264.3 | 244.2 | 276.5 |
| 30.8   | 33.3   | 29.1   | 91.1  | 67.4  | 89.7  | 35.0  | 50.3  | 47.8  |
| 7.1    | 7.0    | 5.8    | 9.3   | 13.0  | 13.1  | 4.4   | 4.2   | 5.2   |
| 4.1    | 6.2    | 1.4    | 17.3  | 9.2   | 11.8  | 0.8   | 5.7   | 1.3   |
| 22.0   | 35.4   | 20.7   | 208.1 | 195.4 | 180.6 | 225.8 | 158.1 | 209.2 |
| 17.1   | 20.2   | 11.6   | 15.9  | 23.1  | 27.9  | 8.0   | 12.5  | 23.9  |
| 186.3  | 235.5  | 225.9  | 173.1 | 179.2 | 184.6 | 97.2  | 143.5 | 159.8 |
| 4.6    | 11.0   | 8.4    | 9.0   | 12.5  | 5.4   | 3.6   | 1.9   | 2.9   |
| 618.3  | 729.9  | 459.9  | 188.6 | 153.0 | 168.8 | 146.4 | 152.0 | 156.4 |
| 8.1    | 11.5   | 9.1    | 17.2  | 12.7  | 8.7   | 7.2   | 10.2  | 10.4  |
| 12.9   | 15.0   | 13.3   | 10.6  | 12.4  | 3.7   | 4.5   | 7.2   | 1.1   |
| 179.2  | 258.7  | 214.9  | 353.2 | 333.4 | 358.2 | 199.0 | 281.0 | 275.9 |
| 1.1    | 1.6    | 1.8    | 4.6   | 3.4   | 4.5   | 1.4   | 1.3   | 1.4   |
| 14.9   | 38.9   | 33.4   | 29.4  | 28.5  | 31.8  | 13.6  | 16.3  | 25.1  |
| 1.9    | 6.8    | 0.9    | 8.0   | 5.6   | 9.5   | 7.0   | 10.0  | 8.7   |
| 304.2  | 388.9  | 449.2  | 50.2  | 38.6  | 40.0  | 46.2  | 35.7  | 41.5  |
| 831.5  | 1045.2 | 970.5  | 761.2 | 627.3 | 689.2 | 705.9 | 727.6 | 767.2 |
| 68.4   | 61.6   | 54.4   | 39.0  | 41.3  | 32.0  | 43.8  | 40.9  | 50.8  |
| 311.4  | 367.9  | 284.2  | 37.6  | 32.0  | 46.1  | 30.8  | 39.6  | 43.2  |
| 261.8  | 407.2  | 299.9  | 91.0  | 72.8  | 92.4  | 81.5  | 94.8  | 91.1  |
| 4.3    | 11.3   | 4.1    | 34.6  | 33.3  | 31.9  | 10.5  | 20.7  | 13.4  |
| 2.0    | 6.3    | 3.7    | 14.1  | 9.1   | 11.4  | 3.4   | 4.0   | 6.9   |
| 2793.7 | 3360.9 | 3590.3 | 508.4 | 392.6 | 460.9 | 378.8 | 347.6 | 359.6 |
| 2493.2 | 2669.0 | 1421.0 | 541.1 | 424.7 | 517.9 | 367.0 | 342.3 | 434.9 |
| 119.6  | 154.3  | 109.8  | 43.1  | 37.5  | 35.3  | 37.2  | 72.3  | 55.0  |
| 91.8   | 108.2  | 98.9   | 82.7  | 55.3  | 81.4  | 75.9  | 88.1  | 95.8  |

|       |        |        |       |       |       |       |       |       |
|-------|--------|--------|-------|-------|-------|-------|-------|-------|
| 915.1 | 1069.7 | 630.7  | 238.0 | 229.9 | 210.7 | 201.8 | 200.3 | 240.2 |
| 38.8  | 43.1   | 23.4   | 34.6  | 35.1  | 37.2  | 29.0  | 19.8  | 28.9  |
| 19.5  | 27.2   | 3.0    | 15.3  | 14.3  | 19.0  | 15.6  | 12.0  | 24.6  |
| 7.4   | 1.1    | 0.9    | 9.3   | 2.6   | 11.0  | 4.0   | 2.2   | 0.8   |
| 1.4   | 1.0    | 0.7    | 79.1  | 78.4  | 84.5  | 51.9  | 43.1  | 54.8  |
| 860.6 | 1007.9 | 584.7  | 189.1 | 134.0 | 153.1 | 153.0 | 125.1 | 152.1 |
| 80.0  | 84.6   | 63.3   | 81.5  | 54.6  | 83.7  | 77.1  | 78.6  | 75.0  |
| 484.1 | 739.9  | 635.8  | 447.0 | 508.6 | 543.3 | 234.2 | 326.5 | 289.0 |
| 3.3   | 11.2   | 6.5    | 17.3  | 10.2  | 5.2   | 10.0  | 6.4   | 11.0  |
| 13.4  | 27.0   | 17.7   | 14.8  | 22.6  | 23.8  | 20.3  | 18.0  | 14.0  |
| 4.7   | 7.9    | 4.9    | 7.9   | 7.4   | 5.9   | 4.0   | 0.7   | 3.1   |
| 68.1  | 81.9   | 52.8   | 47.1  | 55.2  | 45.3  | 41.4  | 48.2  | 51.3  |
| 23.9  | 16.8   | 14.7   | 38.5  | 22.7  | 24.5  | 16.1  | 22.4  | 36.4  |
| 11.7  | 7.8    | 5.6    | 9.1   | 4.1   | 15.0  | 3.6   | 2.8   | 7.0   |
| 2.8   | 2.2    | 7.5    | 10.0  | 17.7  | 19.1  | 10.2  | 7.4   | 6.3   |
| 22.2  | 41.4   | 38.4   | 26.3  | 43.5  | 39.6  | 24.8  | 36.0  | 29.6  |
| 1.0   | 2.2    | 1.2    | 5.5   | 3.4   | 1.8   | 9.3   | 6.9   | 8.0   |
| 283.5 | 306.2  | 276.7  | 166.9 | 131.4 | 182.2 | 97.2  | 116.7 | 107.4 |
| 6.1   | 4.7    | 6.6    | 1.2   | 5.1   | 1.5   | 1.3   | 1.3   | 1.5   |
| 6.3   | 6.3    | 5.2    | 9.0   | 11.5  | 15.1  | 0.6   | 3.5   | 5.0   |
| 1.5   | 1.1    | 1.3    | 7.2   | 4.0   | 6.7   | 5.6   | 3.7   | 4.8   |
| 17.6  | 12.7   | 11.7   | 10.1  | 10.8  | 30.0  | 10.3  | 12.9  | 7.4   |
| 15.8  | 11.9   | 14.6   | 23.2  | 25.4  | 18.3  | 17.3  | 17.8  | 14.4  |
| 15.2  | 20.6   | 12.7   | 11.6  | 14.5  | 3.7   | 11.5  | 9.4   | 11.8  |
| 608.0 | 715.9  | 532.3  | 869.9 | 751.4 | 795.5 | 434.6 | 536.9 | 540.0 |
| 35.6  | 22.1   | 34.7   | 60.0  | 59.8  | 86.7  | 33.8  | 47.8  | 29.9  |
| 2.9   | 23.6   | 10.4   | 4.7   | 9.3   | 11.8  | 9.8   | 13.7  | 4.4   |
| 20.6  | 17.2   | 14.1   | 15.7  | 9.9   | 6.3   | 15.2  | 18.1  | 17.9  |
| 16.9  | 28.3   | 18.6   | 23.7  | 29.9  | 34.7  | 19.0  | 24.0  | 18.6  |
| 65.9  | 90.2   | 57.1   | 28.0  | 50.5  | 48.9  | 52.4  | 38.8  | 38.3  |
| 10.0  | 4.9    | 5.1    | 12.7  | 11.4  | 12.5  | 1.1   | 1.2   | 7.1   |
| 8.1   | 11.4   | 8.6    | 6.1   | 14.4  | 12.8  | 6.0   | 5.0   | 5.3   |
| 161.2 | 208.0  | 167.8  | 138.5 | 134.7 | 155.0 | 118.3 | 134.4 | 143.8 |
| 153.9 | 172.1  | 107.1  | 65.8  | 76.2  | 111.0 | 47.3  | 61.4  | 64.2  |
| 215.7 | 350.3  | 265.3  | 95.6  | 101.1 | 111.6 | 116.7 | 119.6 | 128.5 |
| 79.8  | 110.4  | 64.0   | 49.3  | 45.9  | 50.5  | 43.7  | 40.9  | 46.1  |
| 3.0   | 2.7    | 2.0    | 9.1   | 3.8   | 4.8   | 5.7   | 2.1   | 1.2   |
| 212.7 | 249.8  | 163.8  | 32.4  | 42.7  | 34.6  | 21.6  | 35.1  | 32.1  |
| 1.9   | 1.1    | 3.8    | 8.7   | 4.4   | 7.8   | 3.1   | 0.7   | 0.8   |
| 1.5   | 9.1    | 7.8    | 6.9   | 5.3   | 6.4   | 2.9   | 9.6   | 5.5   |
| 2.1   | 2.6    | 1.6    | 3.5   | 3.0   | 3.2   | 1.7   | 1.5   | 0.9   |
| 576.3 | 509.0  | 311.4  | 102.9 | 81.9  | 101.1 | 76.2  | 74.3  | 83.6  |
| 359.5 | 471.2  | 426.5  | 287.3 | 294.3 | 315.7 | 236.3 | 361.4 | 374.8 |
| 224.5 | 225.8  | 113.2  | 331.0 | 218.4 | 207.7 | 209.5 | 174.0 | 185.1 |
| 0.7   | 1.0    | 1.8    | 2.3   | 3.2   | 6.4   | 1.7   | 0.6   | 0.9   |
| 638.2 | 781.6  | 644.9  | 419.5 | 314.5 | 337.4 | 449.2 | 465.4 | 500.4 |
| 669.6 | 1092.6 | 552.9  | 409.7 | 305.2 | 331.9 | 349.0 | 308.1 | 338.0 |
| 4.9   | 5.9    | 6.1    | 23.3  | 15.0  | 27.0  | 7.9   | 6.8   | 7.3   |
| 159.9 | 186.4  | 88.2   | 108.9 | 74.8  | 83.6  | 63.3  | 71.0  | 79.9  |
| 72.8  | 117.9  | 107.3  | 107.3 | 80.9  | 83.1  | 71.8  | 97.2  | 89.6  |
| 32.6  | 38.1   | 27.2   | 28.1  | 28.5  | 22.4  | 24.2  | 25.3  | 22.1  |
| 729.6 | 1009.5 | 1013.5 | 189.8 | 185.7 | 206.0 | 292.1 | 286.6 | 345.7 |
| 13.4  | 14.9   | 12.9   | 16.1  | 31.0  | 21.6  | 7.0   | 4.0   | 10.0  |

|        |        |        |        |        |        |        |        |        |
|--------|--------|--------|--------|--------|--------|--------|--------|--------|
| 9.4    | 19.6   | 18.2   | 23.1   | 30.4   | 29.7   | 11.1   | 12.7   | 10.7   |
| 1440.5 | 1754.0 | 1303.1 | 1085.6 | 836.1  | 1006.8 | 577.9  | 604.9  | 671.9  |
| 10.4   | 14.4   | 11.6   | 18.0   | 13.3   | 18.0   | 8.2    | 3.9    | 11.2   |
| 21.3   | 37.3   | 14.0   | 22.0   | 11.7   | 11.5   | 6.5    | 7.8    | 13.8   |
| 12.0   | 24.6   | 18.7   | 5.8    | 15.2   | 15.7   | 23.5   | 14.0   | 21.5   |
| 1001.8 | 833.5  | 447.3  | 954.0  | 702.3  | 715.8  | 433.7  | 362.2  | 402.1  |
| 150.4  | 235.6  | 163.0  | 320.5  | 268.9  | 305.9  | 214.9  | 246.5  | 279.0  |
| 26.6   | 25.7   | 17.3   | 35.5   | 30.1   | 23.9   | 25.9   | 26.5   | 19.9   |
| 13.9   | 17.3   | 11.3   | 16.0   | 12.2   | 21.0   | 9.1    | 7.5    | 17.4   |
| 20.0   | 24.6   | 18.1   | 56.3   | 32.9   | 36.2   | 27.6   | 20.8   | 22.2   |
| 112.2  | 118.4  | 88.2   | 234.8  | 202.4  | 243.6  | 160.8  | 176.2  | 184.9  |
| 4.6    | 4.0    | 2.7    | 23.5   | 16.4   | 31.4   | 17.3   | 23.2   | 5.2    |
| 14.4   | 15.8   | 7.8    | 9.3    | 12.2   | 16.4   | 8.5    | 5.5    | 15.7   |
| 21.5   | 22.3   | 18.8   | 15.6   | 16.0   | 11.6   | 19.1   | 19.3   | 12.2   |
| 1.9    | 12.6   | 4.9    | 7.7    | 7.7    | 19.7   | 8.1    | 8.0    | 9.0    |
| 2.3    | 2.8    | 5.1    | 5.1    | 6.3    | 4.7    | 1.4    | 1.7    | 3.0    |
| 6.9    | 2.2    | 4.3    | 9.8    | 5.7    | 2.7    | 3.9    | 4.3    | 2.6    |
| 86.2   | 135.4  | 104.9  | 115.0  | 100.8  | 108.0  | 85.3   | 103.0  | 115.4  |
| 5333.8 | 5904.0 | 4981.0 | 1895.7 | 1931.8 | 1605.9 | 1617.2 | 1819.0 | 2080.4 |
| 522.1  | 714.0  | 668.4  | 1267.5 | 1118.3 | 1192.3 | 839.7  | 1011.4 | 1010.8 |
| 3670.7 | 3551.4 | 2092.8 | 6631.5 | 4875.8 | 5567.2 | 4854.1 | 3523.0 | 4520.1 |
| 92.7   | 90.8   | 57.4   | 169.2  | 122.9  | 97.0   | 92.9   | 74.6   | 82.9   |
| 114.6  | 105.0  | 76.9   | 228.9  | 160.5  | 174.5  | 125.2  | 125.0  | 139.2  |
| 376.9  | 303.0  | 150.1  | 123.9  | 89.5   | 84.8   | 130.5  | 106.9  | 109.3  |
| 8.1    | 4.1    | 10.2   | 78.5   | 70.3   | 83.3   | 77.3   | 43.5   | 68.0   |
| 42.3   | 60.0   | 61.3   | 56.4   | 62.1   | 61.9   | 54.3   | 65.3   | 61.6   |
| 33.5   | 44.0   | 53.5   | 58.3   | 45.2   | 70.7   | 30.4   | 35.7   | 27.8   |
| 776.2  | 879.8  | 575.5  | 110.3  | 78.6   | 88.0   | 116.0  | 100.8  | 118.0  |
| 23.7   | 35.8   | 35.4   | 75.5   | 75.0   | 86.4   | 67.9   | 69.8   | 64.9   |
| 18.8   | 22.1   | 21.0   | 41.8   | 30.3   | 32.9   | 25.7   | 19.0   | 23.9   |
| 24.0   | 28.0   | 24.0   | 47.7   | 32.3   | 43.0   | 25.0   | 20.5   | 22.8   |
| 404.1  | 621.5  | 517.4  | 476.2  | 405.1  | 397.9  | 436.6  | 530.3  | 518.4  |
| 677.8  | 962.9  | 858.5  | 2070.7 | 1960.1 | 2247.8 | 1349.6 | 1815.1 | 1706.5 |
| 67.0   | 87.5   | 74.6   | 22.6   | 46.3   | 32.7   | 27.8   | 13.3   | 20.2   |
| 2.1    | 7.1    | 0.6    | 4.3    | 6.9    | 15.2   | 4.5    | 2.0    | 2.2    |
| 9.8    | 8.1    | 9.3    | 11.0   | 21.8   | 8.0    | 5.9    | 5.7    | 9.6    |
| 10.1   | 14.0   | 16.0   | 42.2   | 39.5   | 48.9   | 20.4   | 28.3   | 27.3   |
| 7.4    | 5.7    | 5.8    | 9.8    | 11.7   | 11.6   | 5.3    | 6.0    | 6.0    |
| 553.0  | 653.8  | 536.3  | 186.1  | 121.4  | 132.9  | 141.8  | 130.1  | 151.4  |
| 267.0  | 274.4  | 181.0  | 238.0  | 210.3  | 216.8  | 150.7  | 139.2  | 176.7  |
| 34.4   | 34.0   | 24.7   | 59.3   | 41.7   | 53.4   | 29.6   | 34.6   | 33.6   |
| 3.7    | 7.6    | 1.9    | 5.0    | 2.2    | 3.8    | 4.9    | 0.5    | 4.7    |
| 5.3    | 2.3    | 5.6    | 7.6    | 6.3    | 10.6   | 6.6    | 5.5    | 5.9    |
| 0.7    | 3.1    | 0.5    | 1.4    | 1.3    | 1.4    | 1.0    | 0.4    | 1.3    |
| 272.6  | 243.2  | 161.0  | 182.6  | 156.3  | 182.5  | 72.7   | 86.8   | 98.7   |
| 2.3    | 6.9    | 6.6    | 24.3   | 15.5   | 18.6   | 8.2    | 12.0   | 13.4   |
| 1256.6 | 1609.1 | 1247.5 | 732.6  | 675.8  | 798.8  | 378.5  | 462.4  | 461.6  |
| 4.7    | 9.0    | 5.9    | 22.9   | 19.8   | 10.8   | 6.4    | 4.4    | 5.2    |
| 1.6    | 5.4    | 3.4    | 8.4    | 6.8    | 7.0    | 2.1    | 3.0    | 2.2    |
| 3.4    | 2.4    | 2.4    | 3.7    | 3.6    | 2.2    | 2.8    | 2.2    | 2.7    |
| 313.4  | 377.7  | 229.8  | 98.7   | 83.8   | 80.0   | 115.2  | 102.3  | 103.7  |
| 105.0  | 116.4  | 74.1   | 131.9  | 108.0  | 118.8  | 102.6  | 101.0  | 130.9  |
| 99.7   | 147.1  | 102.5  | 97.1   | 67.5   | 73.7   | 55.9   | 55.1   | 64.1   |



|       |       |       |       |       |       |       |       |       |
|-------|-------|-------|-------|-------|-------|-------|-------|-------|
| 381.0 | 249.5 | 28.4  | 20.6  | 12.0  | 19.6  | 12.9  | 11.5  | 10.8  |
| 163.5 | 214.6 | 145.8 | 104.4 | 104.3 | 86.8  | 58.9  | 88.5  | 85.0  |
| 118.0 | 145.9 | 87.3  | 27.6  | 27.6  | 18.1  | 42.3  | 41.7  | 48.8  |
| 6.4   | 15.9  | 9.1   | 9.6   | 12.9  | 3.8   | 10.1  | 13.6  | 7.2   |
| 102.1 | 114.9 | 79.0  | 79.7  | 63.4  | 72.6  | 51.7  | 52.6  | 56.8  |
| 53.5  | 67.0  | 20.9  | 18.1  | 21.3  | 27.2  | 16.8  | 9.4   | 14.0  |
| 9.8   | 19.2  | 10.4  | 11.6  | 19.0  | 15.4  | 9.1   | 8.2   | 7.9   |
| 16.8  | 14.6  | 15.8  | 20.9  | 18.8  | 28.6  | 17.1  | 20.6  | 26.5  |
| 128.4 | 197.7 | 185.0 | 42.5  | 40.8  | 47.1  | 23.8  | 45.6  | 40.5  |
| 12.6  | 7.3   | 5.1   | 41.9  | 28.7  | 32.4  | 6.7   | 18.0  | 21.3  |
| 328.5 | 371.5 | 285.8 | 423.4 | 345.5 | 374.9 | 331.7 | 274.4 | 341.8 |
| 60.9  | 59.5  | 35.8  | 84.8  | 55.9  | 71.4  | 39.5  | 39.5  | 56.1  |
| 94.4  | 130.2 | 97.7  | 108.2 | 111.0 | 110.9 | 89.4  | 98.3  | 94.4  |
| 53.3  | 108.5 | 147.8 | 7.6   | 4.7   | 6.5   | 8.9   | 3.7   | 4.4   |
| 268.0 | 370.5 | 175.5 | 179.9 | 155.9 | 154.7 | 130.2 | 116.6 | 150.0 |
| 169.0 | 237.6 | 120.2 | 120.3 | 131.1 | 141.1 | 78.0  | 96.2  | 103.0 |
| 10.5  | 8.6   | 4.7   | 8.4   | 9.8   | 5.1   | 7.7   | 3.6   | 2.3   |
| 26.1  | 36.3  | 32.1  | 30.4  | 28.4  | 26.4  | 11.6  | 21.7  | 13.7  |
| 57.5  | 82.0  | 56.1  | 36.3  | 30.0  | 38.7  | 45.5  | 49.7  | 48.1  |
| 19.3  | 19.9  | 16.4  | 48.7  | 28.8  | 22.4  | 17.9  | 18.1  | 17.8  |
| 4.9   | 1.8   | 5.9   | 9.6   | 11.9  | 4.6   | 4.8   | 4.5   | 5.6   |
| 23.0  | 29.7  | 21.4  | 15.4  | 16.6  | 15.9  | 13.8  | 13.3  | 14.1  |
| 2.6   | 1.7   | 5.0   | 3.0   | 2.0   | 1.6   | 0.1   | 0.7   | 0.9   |
| 6.6   | 3.2   | 3.3   | 5.5   | 7.2   | 2.2   | 6.0   | 1.4   | 1.2   |
| 6.8   | 8.4   | 1.6   | 9.3   | 7.3   | 10.4  | 1.3   | 3.6   | 7.7   |
| 15.1  | 22.5  | 22.1  | 29.8  | 29.3  | 30.4  | 22.1  | 36.1  | 35.4  |
| 17.0  | 24.9  | 18.1  | 17.9  | 19.0  | 10.9  | 10.5  | 9.0   | 10.5  |
| 5.7   | 1.5   | 3.8   | 11.3  | 7.9   | 3.6   | 4.1   | 5.1   | 6.6   |
| 11.3  | 4.8   | 3.2   | 12.7  | 14.1  | 13.0  | 3.2   | 9.0   | 3.8   |
| 210.3 | 247.2 | 167.8 | 23.7  | 11.5  | 26.2  | 8.6   | 11.4  | 9.4   |
| 10.7  | 12.0  | 9.6   | 22.8  | 10.0  | 5.2   | 2.1   | 5.1   | 4.7   |
| 6.3   | 4.7   | 2.4   | 6.3   | 5.6   | 2.9   | 2.4   | 2.0   | 3.1   |
| 198.4 | 265.7 | 219.4 | 224.2 | 202.9 | 181.0 | 216.3 | 182.0 | 216.1 |
| 5.2   | 3.8   | 4.3   | 9.8   | 2.5   | 10.8  | 1.2   | 6.7   | 2.6   |
| 0.3   | 0.6   | 3.2   | 4.9   | 4.0   | 4.6   | 3.5   | 0.7   | 0.9   |
| 7.3   | 9.8   | 4.0   | 13.7  | 13.6  | 17.4  | 7.4   | 4.4   | 3.3   |
| 28.1  | 30.1  | 17.4  | 41.7  | 26.9  | 42.7  | 25.2  | 26.3  | 22.3  |
| 59.5  | 71.9  | 33.7  | 48.9  | 35.7  | 44.6  | 25.7  | 6.3   | 21.3  |
| 33.0  | 37.3  | 29.7  | 11.2  | 8.5   | 9.6   | 1.8   | 1.1   | 0.6   |
| 65.1  | 76.9  | 38.8  | 41.5  | 49.6  | 45.0  | 26.9  | 22.3  | 33.7  |
| 46.0  | 52.4  | 22.1  | 11.0  | 24.5  | 18.2  | 18.9  | 12.1  | 16.7  |
| 14.1  | 10.1  | 14.1  | 11.9  | 19.0  | 12.1  | 7.2   | 6.1   | 10.4  |
| 20.4  | 33.8  | 30.1  | 28.5  | 12.9  | 11.8  | 14.5  | 13.1  | 17.3  |
| 0.7   | 2.3   | 2.5   | 5.0   | 6.0   | 6.7   | 5.8   | 5.5   | 6.5   |
| 191.7 | 168.6 | 82.0  | 29.6  | 21.6  | 20.3  | 54.7  | 36.2  | 53.6  |
| 13.7  | 18.8  | 13.7  | 10.0  | 10.6  | 10.6  | 12.5  | 11.5  | 10.6  |
| 58.8  | 49.4  | 42.0  | 41.7  | 21.6  | 32.5  | 32.9  | 23.9  | 35.0  |
| 27.8  | 35.7  | 56.6  | 105.4 | 87.3  | 80.3  | 67.5  | 63.2  | 61.0  |
| 6.7   | 6.2   | 10.2  | 6.9   | 19.8  | 19.2  | 5.2   | 2.5   | 16.5  |
| 5.5   | 5.0   | 1.9   | 11.2  | 3.0   | 8.3   | 3.0   | 2.7   | 3.5   |
| 24.4  | 64.8  | 90.1  | 20.8  | 36.0  | 35.3  | 12.4  | 37.4  | 25.2  |
| 13.0  | 16.3  | 15.8  | 85.7  | 63.6  | 51.3  | 55.9  | 62.4  | 63.3  |
| 14.2  | 21.3  | 12.9  | 12.9  | 8.6   | 6.1   | 4.9   | 4.9   | 5.0   |

|       |       |       |       |       |       |       |       |       |
|-------|-------|-------|-------|-------|-------|-------|-------|-------|
| 27.7  | 47.6  | 31.7  | 52.9  | 37.6  | 52.1  | 33.9  | 34.7  | 38.3  |
| 14.6  | 21.8  | 2.5   | 8.2   | 20.1  | 14.3  | 12.3  | 4.8   | 6.6   |
| 3.7   | 9.4   | 5.2   | 8.9   | 4.6   | 8.2   | 6.6   | 5.2   | 9.2   |
| 7.9   | 13.9  | 18.8  | 28.5  | 14.2  | 17.3  | 6.6   | 3.7   | 3.8   |
| 0.7   | 4.0   | 0.8   | 4.7   | 4.6   | 8.4   | 3.2   | 2.3   | 1.2   |
| 6.7   | 8.6   | 8.4   | 6.0   | 13.9  | 9.8   | 1.7   | 6.9   | 7.5   |
| 9.7   | 8.1   | 8.4   | 24.3  | 16.7  | 28.0  | 7.8   | 13.4  | 2.3   |
| 0.9   | 1.0   | 0.5   | 10.4  | 3.0   | 3.9   | 0.8   | 3.2   | 1.0   |
| 6.0   | 6.4   | 6.9   | 12.9  | 7.9   | 7.2   | 5.6   | 4.1   | 4.3   |
| 96.0  | 126.1 | 85.2  | 63.7  | 48.1  | 50.1  | 46.4  | 48.2  | 47.6  |
| 12.1  | 17.4  | 7.9   | 15.2  | 11.2  | 13.0  | 8.9   | 5.9   | 10.2  |
| 78.7  | 95.5  | 62.0  | 44.0  | 31.6  | 55.0  | 21.0  | 28.6  | 35.0  |
| 0.7   | 4.3   | 2.0   | 8.0   | 1.8   | 2.7   | 0.2   | 0.1   | 1.7   |
| 9.7   | 2.0   | 1.5   | 6.6   | 3.3   | 4.3   | 1.5   | 1.8   | 2.3   |
| 1.9   | 0.8   | 0.5   | 7.8   | 4.2   | 5.6   | 3.0   | 0.9   | 1.8   |
| 57.4  | 57.2  | 55.1  | 84.1  | 83.9  | 89.3  | 57.8  | 61.4  | 62.6  |
| 9.0   | 27.8  | 7.2   | 24.1  | 16.0  | 24.1  | 20.5  | 23.7  | 6.2   |
| 65.9  | 62.7  | 31.6  | 43.7  | 31.0  | 34.7  | 20.0  | 27.0  | 25.5  |
| 6.5   | 8.2   | 10.0  | 11.8  | 17.0  | 15.3  | 9.2   | 10.5  | 9.9   |
| 2.0   | 6.1   | 6.3   | 10.6  | 8.0   | 12.9  | 1.3   | 1.6   | 9.4   |
| 205.2 | 200.4 | 153.8 | 194.0 | 186.8 | 176.7 | 127.8 | 108.5 | 140.3 |
| 31.1  | 22.1  | 23.0  | 11.6  | 3.4   | 3.3   | 9.7   | 14.4  | 3.0   |
| 6.8   | 7.0   | 4.2   | 9.7   | 8.0   | 13.5  | 5.4   | 7.6   | 13.3  |
| 11.5  | 16.4  | 11.9  | 11.4  | 9.2   | 5.2   | 5.1   | 7.2   | 5.8   |
| 1.7   | 0.6   | 0.7   | 7.3   | 5.2   | 11.3  | 1.1   | 2.5   | 0.7   |
| 74.5  | 106.9 | 105.9 | 31.7  | 35.1  | 33.6  | 35.4  | 27.0  | 28.8  |
| 4.8   | 8.6   | 7.4   | 9.6   | 13.0  | 6.0   | 7.5   | 4.2   | 3.1   |
| 2.4   | 2.5   | 2.1   | 6.4   | 13.5  | 6.7   | 7.1   | 3.9   | 6.5   |
| 4.7   | 6.4   | 4.0   | 10.5  | 8.2   | 7.9   | 6.6   | 2.1   | 2.9   |
| 12.4  | 22.6  | 12.3  | 6.1   | 7.2   | 12.7  | 4.8   | 17.8  | 11.5  |
| 1.5   | 1.6   | 2.7   | 4.8   | 1.4   | 3.6   | 1.1   | 1.2   | 1.2   |
| 75.0  | 48.4  | 30.4  | 59.5  | 47.6  | 60.3  | 29.3  | 36.2  | 34.1  |
| 37.6  | 50.4  | 21.4  | 10.3  | 10.5  | 21.1  | 7.0   | 12.4  | 10.3  |
| 43.7  | 51.9  | 41.1  | 15.4  | 13.7  | 14.1  | 6.3   | 3.9   | 0.8   |
| 31.9  | 39.9  | 44.3  | 54.4  | 51.9  | 42.0  | 15.2  | 19.8  | 22.0  |
| 1.5   | 5.8   | 1.2   | 10.3  | 5.3   | 9.1   | 2.6   | 5.0   | 1.6   |
| 99.5  | 122.3 | 73.9  | 68.9  | 77.6  | 87.4  | 81.4  | 71.8  | 71.5  |
| 8.1   | 4.0   | 8.3   | 12.2  | 2.7   | 14.3  | 1.8   | 14.2  | 10.0  |
| 12.4  | 3.7   | 4.6   | 33.4  | 21.3  | 26.0  | 5.3   | 3.9   | 8.4   |
| 15.1  | 19.3  | 16.5  | 4.2   | 13.9  | 8.3   | 1.7   | 2.2   | 2.1   |
| 14.8  | 8.3   | 11.0  | 35.1  | 21.2  | 24.6  | 9.2   | 13.1  | 10.9  |
| 6.1   | 4.8   | 8.6   | 7.7   | 10.7  | 19.3  | 8.5   | 6.8   | 5.5   |
| 33.4  | 46.2  | 42.1  | 38.9  | 24.5  | 33.3  | 36.9  | 40.8  | 41.8  |
| 45.6  | 77.0  | 38.0  | 115.1 | 92.6  | 132.6 | 50.5  | 63.9  | 65.0  |
| 30.7  | 61.7  | 83.3  | 34.5  | 30.0  | 18.9  | 24.2  | 10.8  | 27.3  |
| 9.5   | 9.4   | 4.0   | 16.4  | 14.5  | 18.5  | 6.2   | 3.0   | 7.3   |
| 40.8  | 51.8  | 56.4  | 10.2  | 17.3  | 13.6  | 4.2   | 4.1   | 9.4   |
| 8.3   | 11.1  | 9.2   | 8.2   | 5.7   | 7.3   | 2.3   | 3.1   | 2.8   |
| 34.2  | 38.2  | 30.8  | 61.1  | 47.8  | 50.3  | 34.8  | 30.7  | 32.1  |
| 5.4   | 13.7  | 9.4   | 10.3  | 13.6  | 17.0  | 8.6   | 2.4   | 6.2   |
| 38.1  | 47.0  | 36.7  | 41.8  | 46.3  | 48.4  | 46.6  | 43.2  | 52.2  |
| 303.1 | 372.5 | 224.3 | 379.0 | 344.5 | 328.5 | 559.1 | 494.1 | 537.1 |
| 20.2  | 23.6  | 15.3  | 33.1  | 26.3  | 27.6  | 22.0  | 15.7  | 16.3  |

|        |        |        |        |        |        |        |        |        |
|--------|--------|--------|--------|--------|--------|--------|--------|--------|
| 12.3   | 20.2   | 11.3   | 20.7   | 12.9   | 18.1   | 10.4   | 11.0   | 13.8   |
| 5.1    | 8.6    | 2.0    | 10.6   | 6.8    | 5.8    | 5.2    | 1.8    | 1.8    |
| 3.4    | 3.6    | 3.3    | 13.5   | 2.7    | 3.5    | 3.3    | 1.3    | 0.9    |
| 4.3    | 8.0    | 3.2    | 18.9   | 3.3    | 5.7    | 9.2    | 1.8    | 7.5    |
| 9.4    | 8.8    | 7.5    | 14.9   | 14.2   | 11.1   | 6.9    | 12.5   | 7.4    |
| 25.9   | 30.1   | 14.8   | 18.5   | 21.4   | 18.2   | 14.9   | 18.1   | 21.6   |
| 16.3   | 15.7   | 7.9    | 34.0   | 26.1   | 27.0   | 15.7   | 12.4   | 18.6   |
| 5.2    | 5.1    | 5.0    | 9.5    | 4.6    | 2.4    | 3.1    | 5.0    | 3.5    |
| 4.0    | 8.2    | 3.6    | 27.5   | 6.8    | 6.0    | 2.6    | 2.8    | 5.6    |
| 38.3   | 48.2   | 43.7   | 69.7   | 80.2   | 80.2   | 33.2   | 50.7   | 42.1   |
| 10.5   | 17.7   | 6.5    | 25.8   | 18.4   | 13.6   | 13.8   | 12.1   | 15.9   |
| 96.4   | 107.1  | 68.5   | 88.5   | 54.9   | 71.5   | 67.4   | 42.4   | 60.4   |
| 1.1    | 1.4    | 0.9    | 2.3    | 5.0    | 1.7    | 0.6    | 0.8    | 0.6    |
| 3.8    | 12.0   | 10.3   | 7.4    | 11.5   | 9.1    | 7.3    | 4.6    | 9.8    |
| 347.3  | 525.1  | 418.5  | 425.4  | 405.9  | 440.6  | 356.9  | 409.1  | 447.8  |
| 3935.2 | 5348.3 | 5210.2 | 3491.0 | 3213.8 | 2991.4 | 4278.6 | 4433.8 | 4750.0 |
| 293.6  | 350.9  | 162.4  | 58.9   | 48.8   | 60.6   | 33.6   | 56.9   | 53.9   |
| 174.8  | 239.4  | 228.1  | 37.8   | 28.2   | 33.5   | 28.2   | 31.0   | 31.3   |
| 367.2  | 427.6  | 335.3  | 306.8  | 272.8  | 316.0  | 197.8  | 184.2  | 207.0  |
| 271.5  | 343.3  | 282.5  | 281.2  | 258.0  | 280.0  | 165.2  | 170.5  | 190.1  |
| 6.3    | 9.0    | 10.8   | 12.0   | 17.8   | 20.0   | 9.9    | 11.1   | 11.6   |
| 218.8  | 278.9  | 214.9  | 363.9  | 297.2  | 265.2  | 188.2  | 170.4  | 196.6  |
| 436.6  | 472.2  | 358.7  | 55.8   | 41.1   | 47.5   | 32.9   | 26.3   | 33.1   |
| 656.1  | 709.6  | 487.8  | 823.5  | 703.4  | 771.5  | 427.9  | 432.0  | 487.4  |
| 138.5  | 132.4  | 102.8  | 161.1  | 120.7  | 135.1  | 118.9  | 118.4  | 118.9  |
| 139.8  | 211.7  | 221.1  | 523.6  | 398.6  | 398.2  | 297.6  | 249.4  | 309.2  |
| 31.5   | 37.1   | 31.6   | 130.5  | 140.9  | 142.6  | 91.6   | 110.2  | 112.7  |
| 100.0  | 134.8  | 85.4   | 119.9  | 79.7   | 110.6  | 50.2   | 73.0   | 72.6   |
| 179.9  | 252.2  | 162.2  | 203.8  | 157.9  | 181.1  | 99.1   | 97.6   | 118.8  |
| 165.5  | 210.9  | 156.8  | 57.8   | 41.9   | 64.0   | 46.4   | 44.0   | 47.4   |
| 29.7   | 50.9   | 39.6   | 79.6   | 74.1   | 80.4   | 25.3   | 58.4   | 72.0   |
| 202.5  | 276.8  | 203.4  | 327.9  | 254.1  | 250.9  | 264.4  | 281.3  | 310.6  |
| 146.4  | 158.8  | 118.9  | 64.7   | 61.2   | 54.7   | 93.9   | 109.0  | 117.8  |
| 462.0  | 578.2  | 418.4  | 731.4  | 586.8  | 650.5  | 519.5  | 525.7  | 554.4  |
| 2.8    | 4.7    | 2.5    | 81.2   | 53.5   | 63.1   | 45.9   | 34.2   | 42.8   |
| 408.0  | 480.3  | 350.6  | 451.7  | 376.2  | 378.5  | 312.5  | 310.0  | 349.6  |
| 6.8    | 7.3    | 3.1    | 3.5    | 11.2   | 10.2   | 2.4    | 3.4    | 1.8    |
| 71.6   | 135.6  | 118.5  | 195.7  | 187.3  | 197.5  | 113.2  | 130.2  | 147.4  |
| 235.1  | 305.9  | 213.6  | 1388.6 | 1250.8 | 1387.5 | 853.1  | 921.1  | 1011.4 |
| 92.5   | 147.1  | 128.1  | 110.0  | 89.8   | 114.4  | 71.4   | 92.7   | 77.6   |
| 118.3  | 191.5  | 132.3  | 104.6  | 89.0   | 116.5  | 63.7   | 63.4   | 79.3   |
| 116.1  | 130.5  | 87.9   | 76.1   | 70.9   | 72.9   | 58.8   | 55.9   | 58.2   |
| 14.6   | 20.0   | 12.0   | 27.0   | 21.7   | 25.5   | 12.3   | 14.9   | 13.3   |
| 52.3   | 55.7   | 41.4   | 46.4   | 34.6   | 40.7   | 38.9   | 38.7   | 40.8   |
| 5.2    | 9.7    | 22.8   | 23.1   | 13.3   | 11.8   | 3.4    | 3.9    | 7.6    |
| 105.2  | 116.5  | 54.7   | 41.0   | 35.5   | 63.6   | 67.9   | 49.1   | 61.6   |
| 582.3  | 697.4  | 472.8  | 694.9  | 602.1  | 552.2  | 782.3  | 846.7  | 924.3  |
| 181.2  | 268.6  | 204.0  | 413.4  | 341.5  | 402.4  | 184.3  | 214.7  | 259.6  |
| 579.1  | 699.7  | 573.0  | 565.5  | 535.9  | 589.8  | 321.8  | 320.7  | 367.7  |
| 905.7  | 998.2  | 915.0  | 466.5  | 422.3  | 435.1  | 317.0  | 376.6  | 389.5  |
| 384.3  | 456.6  | 375.2  | 673.7  | 569.9  | 716.2  | 310.2  | 392.7  | 436.2  |
| 96.6   | 103.3  | 71.0   | 37.6   | 31.5   | 35.6   | 69.1   | 55.5   | 69.9   |
| 16.2   | 21.1   | 19.5   | 18.0   | 22.6   | 25.8   | 19.8   | 15.7   | 18.6   |

|        |        |        |        |       |        |       |       |       |
|--------|--------|--------|--------|-------|--------|-------|-------|-------|
| 298.8  | 269.1  | 261.0  | 89.7   | 76.1  | 83.2   | 72.2  | 56.6  | 72.5  |
| 414.0  | 408.0  | 192.8  | 123.6  | 97.2  | 131.1  | 63.3  | 57.8  | 62.0  |
| 3726.6 | 3136.4 | 1656.5 | 1510.1 | 966.7 | 1104.7 | 674.5 | 429.8 | 573.6 |
| 3039.5 | 2439.3 | 1204.0 | 1276.0 | 866.2 | 864.1  | 532.8 | 307.1 | 460.1 |
| 425.9  | 593.7  | 493.5  | 70.7   | 61.8  | 71.5   | 74.8  | 92.4  | 100.9 |
| 39.8   | 17.4   | 11.5   | 36.7   | 8.8   | 9.0    | 15.4  | 18.7  | 48.8  |
| 5.1    | 8.3    | 8.6    | 15.7   | 13.4  | 8.6    | 12.9  | 11.3  | 9.0   |
| 70.3   | 102.6  | 128.5  | 33.2   | 40.1  | 34.8   | 52.1  | 54.0  | 66.2  |
| 117.8  | 181.9  | 148.8  | 79.5   | 63.3  | 71.6   | 46.2  | 52.4  | 56.8  |
| 508.8  | 655.7  | 401.7  | 214.0  | 190.3 | 187.2  | 188.3 | 185.8 | 217.3 |
| 3.5    | 5.1    | 4.2    | 8.3    | 6.2   | 5.3    | 0.6   | 2.8   | 1.0   |
| 100.2  | 126.8  | 87.9   | 157.7  | 130.5 | 117.6  | 85.5  | 88.0  | 98.4  |
| 541.9  | 728.7  | 589.5  | 181.1  | 159.3 | 169.3  | 159.8 | 188.1 | 167.4 |
| 710.2  | 911.6  | 645.9  | 850.4  | 578.5 | 779.8  | 553.3 | 421.4 | 562.0 |
| 62.4   | 76.6   | 87.3   | 122.7  | 98.5  | 117.2  | 48.8  | 53.7  | 58.8  |
| 950.0  | 1317.2 | 1093.3 | 186.4  | 164.2 | 176.8  | 234.5 | 323.9 | 300.5 |
| 95.2   | 127.1  | 106.3  | 17.5   | 16.2  | 16.3   | 37.2  | 30.9  | 22.0  |
| 3.2    | 6.0    | 4.9    | 25.6   | 15.5  | 20.2   | 19.7  | 21.1  | 20.9  |
| 151.4  | 210.5  | 178.8  | 139.8  | 152.7 | 163.0  | 83.0  | 135.1 | 112.9 |
| 1.3    | 1.7    | 1.1    | 2.5    | 1.7   | 2.3    | 1.7   | 0.6   | 1.3   |
| 152.5  | 211.1  | 161.2  | 128.1  | 103.6 | 125.4  | 80.0  | 104.7 | 104.6 |
| 418.2  | 558.5  | 428.4  | 235.6  | 184.2 | 219.0  | 146.1 | 174.4 | 182.7 |
| 93.9   | 107.9  | 51.8   | 144.7  | 97.0  | 98.9   | 58.8  | 64.4  | 59.5  |
| 131.2  | 157.0  | 118.5  | 290.2  | 209.8 | 265.2  | 161.4 | 158.3 | 159.2 |
| 50.8   | 56.1   | 55.4   | 42.4   | 52.5  | 61.0   | 34.8  | 48.7  | 42.6  |
| 73.1   | 107.6  | 61.6   | 58.6   | 47.2  | 42.9   | 61.5  | 49.6  | 59.8  |
| 12.0   | 7.2    | 9.4    | 14.9   | 12.7  | 16.1   | 5.2   | 7.6   | 9.7   |
| 88.9   | 121.8  | 106.3  | 98.6   | 96.4  | 124.5  | 39.5  | 44.9  | 50.3  |
| 181.4  | 228.5  | 185.2  | 205.9  | 227.9 | 250.7  | 143.0 | 191.5 | 200.1 |
| 118.7  | 146.7  | 112.1  | 53.0   | 41.8  | 39.7   | 65.3  | 60.9  | 70.0  |
| 162.9  | 216.8  | 177.1  | 393.4  | 342.9 | 382.8  | 182.3 | 174.0 | 193.2 |
| 257.8  | 344.4  | 241.8  | 310.7  | 240.9 | 256.1  | 194.0 | 181.6 | 213.7 |
| 64.4   | 68.9   | 47.3   | 78.4   | 70.4  | 72.7   | 42.6  | 40.9  | 46.2  |
| 312.0  | 406.9  | 263.6  | 167.9  | 139.5 | 161.7  | 112.5 | 115.3 | 110.5 |
| 359.2  | 393.5  | 235.9  | 819.4  | 630.3 | 753.4  | 354.3 | 341.6 | 360.9 |
| 193.2  | 320.8  | 287.9  | 547.9  | 488.6 | 526.0  | 424.0 | 501.3 | 562.9 |
| 168.2  | 334.4  | 316.5  | 308.5  | 228.1 | 246.9  | 215.0 | 150.5 | 215.0 |
| 77.4   | 84.8   | 48.0   | 72.0   | 63.9  | 58.8   | 46.7  | 42.4  | 36.6  |
| 926.5  | 1096.8 | 639.5  | 312.6  | 279.7 | 295.8  | 199.5 | 198.7 | 200.2 |
| 92.7   | 107.7  | 93.1   | 204.7  | 169.8 | 157.6  | 107.4 | 124.3 | 114.0 |
| 129.5  | 138.1  | 97.7   | 76.9   | 64.7  | 70.4   | 48.3  | 42.3  | 59.3  |
| 920.5  | 1277.1 | 920.2  | 361.5  | 274.2 | 302.0  | 274.6 | 227.6 | 317.9 |
| 140.5  | 210.7  | 185.4  | 391.7  | 326.7 | 376.9  | 216.9 | 247.9 | 289.3 |
| 257.9  | 305.6  | 170.9  | 297.7  | 222.6 | 243.5  | 170.9 | 145.4 | 171.0 |
| 452.5  | 588.8  | 488.2  | 458.2  | 405.0 | 427.4  | 363.1 | 327.4 | 422.0 |
| 75.3   | 95.8   | 82.4   | 120.4  | 76.2  | 76.1   | 52.6  | 51.9  | 53.8  |
| 15.0   | 18.3   | 19.4   | 152.7  | 133.0 | 150.7  | 90.5  | 89.2  | 110.1 |
| 78.4   | 92.6   | 74.7   | 540.0  | 436.8 | 449.9  | 378.0 | 305.7 | 391.2 |
| 215.8  | 294.7  | 160.5  | 339.9  | 309.5 | 358.0  | 256.9 | 309.7 | 330.5 |
| 218.3  | 271.7  | 221.0  | 458.4  | 410.6 | 397.3  | 225.6 | 236.5 | 299.3 |
| 84.2   | 105.9  | 94.3   | 150.3  | 117.5 | 133.0  | 74.4  | 81.9  | 83.6  |
| 81.6   | 149.3  | 172.0  | 167.1  | 161.7 | 187.8  | 75.8  | 124.7 | 116.6 |
| 47.6   | 80.2   | 71.3   | 105.4  | 98.8  | 100.7  | 37.4  | 50.8  | 54.2  |

|        |        |        |        |        |        |       |       |       |
|--------|--------|--------|--------|--------|--------|-------|-------|-------|
| 7.2    | 5.0    | 6.1    | 10.6   | 6.7    | 4.3    | 3.2   | 2.9   | 4.6   |
| 180.2  | 195.8  | 151.2  | 200.0  | 166.1  | 189.5  | 97.2  | 104.8 | 110.3 |
| 135.6  | 204.5  | 155.1  | 269.0  | 232.3  | 257.9  | 134.3 | 159.1 | 158.0 |
| 25.1   | 35.0   | 25.7   | 25.3   | 12.6   | 14.7   | 8.9   | 17.8  | 16.6  |
| 86.6   | 92.8   | 89.6   | 149.7  | 181.7  | 210.7  | 121.3 | 152.9 | 174.7 |
| 251.8  | 307.2  | 250.5  | 283.6  | 317.6  | 349.9  | 154.5 | 186.9 | 208.2 |
| 117.2  | 147.9  | 104.4  | 412.6  | 315.6  | 357.9  | 206.3 | 207.9 | 224.0 |
| 59.4   | 115.8  | 78.2   | 140.6  | 139.0  | 148.0  | 114.6 | 143.9 | 145.3 |
| 82.2   | 119.6  | 83.3   | 84.7   | 48.1   | 45.6   | 29.1  | 27.2  | 27.3  |
| 176.0  | 198.5  | 125.6  | 259.8  | 201.1  | 210.3  | 171.7 | 182.9 | 168.2 |
| 172.2  | 199.8  | 123.1  | 265.1  | 238.9  | 254.3  | 199.0 | 201.6 | 191.2 |
| 93.1   | 149.5  | 76.2   | 151.2  | 131.8  | 162.3  | 102.5 | 130.2 | 110.1 |
| 220.2  | 255.7  | 215.8  | 109.4  | 98.6   | 97.3   | 97.5  | 112.9 | 125.6 |
| 83.3   | 123.7  | 73.2   | 98.5   | 85.3   | 104.7  | 69.4  | 73.4  | 96.6  |
| 122.9  | 139.5  | 155.4  | 254.1  | 212.4  | 227.6  | 285.6 | 303.8 | 329.4 |
| 344.8  | 282.2  | 15.4   | 30.3   | 21.5   | 27.9   | 25.3  | 34.5  | 23.1  |
| 51.2   | 58.5   | 48.5   | 18.3   | 10.9   | 27.3   | 6.3   | 3.2   | 5.1   |
| 64.1   | 89.3   | 63.4   | 102.3  | 70.1   | 75.6   | 68.8  | 64.5  | 77.6  |
| 882.9  | 1198.5 | 986.9  | 664.4  | 727.9  | 710.8  | 557.4 | 800.1 | 787.1 |
| 90.4   | 137.8  | 77.2   | 153.1  | 137.4  | 160.3  | 120.9 | 141.5 | 141.9 |
| 149.9  | 213.4  | 150.9  | 219.7  | 159.3  | 167.2  | 96.4  | 89.7  | 100.0 |
| 292.2  | 394.1  | 254.3  | 299.6  | 254.0  | 304.5  | 230.5 | 183.6 | 264.5 |
| 179.9  | 259.5  | 238.4  | 33.3   | 29.0   | 31.2   | 49.6  | 47.1  | 45.3  |
| 1029.1 | 1176.5 | 880.7  | 1246.1 | 930.2  | 1007.6 | 868.1 | 597.2 | 786.1 |
| 1928.3 | 2298.4 | 1846.6 | 1411.2 | 1289.9 | 1448.4 | 929.5 | 943.3 | 977.1 |
| 14.9   | 11.2   | 10.2   | 18.0   | 19.7   | 31.6   | 8.0   | 8.6   | 8.1   |
| 1010.1 | 1471.6 | 1374.7 | 136.5  | 114.7  | 131.2  | 76.8  | 64.3  | 73.0  |
| 2479.7 | 3415.1 | 2893.4 | 1168.3 | 928.9  | 1049.8 | 906.5 | 829.4 | 975.6 |
| 1.2    | 1.2    | 1.2    | 2.9    | 3.1    | 2.3    | 1.2   | 1.8   | 0.8   |
| 24.4   | 26.4   | 9.0    | 53.5   | 49.5   | 56.4   | 26.4  | 29.7  | 13.0  |
| 130.3  | 191.3  | 117.5  | 148.2  | 168.3  | 163.2  | 80.9  | 127.1 | 113.5 |
| 143.1  | 149.7  | 86.1   | 38.1   | 26.4   | 34.6   | 67.2  | 57.4  | 60.8  |
| 349.1  | 387.1  | 245.2  | 630.7  | 551.5  | 617.7  | 453.8 | 487.1 | 575.6 |
| 2.8    | 4.5    | 8.1    | 6.9    | 7.1    | 5.0    | 2.2   | 2.0   | 3.2   |
| 218.5  | 261.9  | 243.4  | 409.3  | 355.4  | 341.1  | 368.7 | 367.1 | 407.0 |
| 32.4   | 40.1   | 25.0   | 20.3   | 18.3   | 10.0   | 12.0  | 10.7  | 19.5  |
| 6.5    | 16.6   | 9.5    | 19.1   | 22.4   | 18.2   | 11.9  | 12.5  | 11.2  |
| 130.9  | 150.9  | 112.4  | 76.8   | 50.0   | 67.4   | 65.0  | 42.6  | 65.6  |
| 49.4   | 62.1   | 48.0   | 72.1   | 59.8   | 79.9   | 48.8  | 45.6  | 59.4  |
| 78.6   | 110.6  | 113.5  | 113.4  | 105.8  | 108.9  | 72.6  | 77.9  | 77.5  |
| 115.3  | 135.3  | 88.8   | 81.0   | 67.8   | 76.8   | 40.1  | 38.9  | 52.5  |
| 107.8  | 117.5  | 69.9   | 60.5   | 68.6   | 64.5   | 29.9  | 30.3  | 43.2  |
| 47.1   | 41.1   | 45.7   | 46.6   | 63.6   | 35.7   | 39.7  | 32.6  | 31.2  |
| 162.4  | 194.0  | 159.7  | 116.3  | 79.5   | 104.5  | 72.3  | 72.4  | 83.3  |
| 110.0  | 171.6  | 108.5  | 122.8  | 82.1   | 94.6   | 46.8  | 54.3  | 61.1  |
| 93.9   | 119.7  | 75.0   | 53.1   | 44.9   | 42.2   | 61.1  | 61.2  | 68.9  |
| 243.8  | 279.9  | 192.9  | 325.6  | 269.8  | 264.4  | 187.6 | 184.5 | 193.4 |
| 9.5    | 17.8   | 8.7    | 18.2   | 12.9   | 5.4    | 12.2  | 6.6   | 6.7   |
| 13.8   | 39.7   | 43.4   | 7.9    | 10.1   | 12.1   | 6.9   | 10.5  | 11.4  |
| 51.9   | 113.8  | 82.3   | 53.5   | 65.3   | 51.7   | 38.9  | 57.2  | 57.9  |
| 6.8    | 6.2    | 8.1    | 13.5   | 9.5    | 14.9   | 5.6   | 6.1   | 4.9   |
| 195.4  | 240.2  | 182.1  | 67.4   | 42.1   | 45.5   | 49.4  | 29.0  | 34.7  |
| 71.1   | 93.0   | 54.2   | 84.7   | 63.7   | 62.9   | 56.4  | 53.9  | 54.0  |

|        |        |        |        |        |        |        |        |        |
|--------|--------|--------|--------|--------|--------|--------|--------|--------|
| 63.4   | 111.6  | 104.8  | 44.0   | 55.7   | 78.4   | 29.4   | 64.4   | 59.9   |
| 151.7  | 225.1  | 172.3  | 231.8  | 183.1  | 206.7  | 146.1  | 161.3  | 190.3  |
| 80.7   | 84.3   | 42.3   | 29.8   | 29.5   | 32.5   | 34.4   | 26.2   | 38.0   |
| 53.1   | 45.5   | 29.1   | 60.8   | 58.3   | 47.1   | 22.3   | 19.6   | 29.9   |
| 27.3   | 33.1   | 31.4   | 20.5   | 19.7   | 23.1   | 16.0   | 24.9   | 26.3   |
| 131.1  | 192.5  | 154.9  | 212.9  | 178.9  | 184.6  | 162.9  | 128.1  | 178.0  |
| 63.0   | 91.6   | 76.6   | 125.1  | 113.7  | 110.0  | 67.6   | 89.5   | 89.6   |
| 88.8   | 96.5   | 72.5   | 199.5  | 198.9  | 210.0  | 80.1   | 129.7  | 120.9  |
| 1.5    | 5.5    | 1.7    | 2.6    | 1.6    | 7.8    | 0.7    | 0.8    | 0.6    |
| 50.8   | 86.9   | 95.4   | 94.9   | 88.6   | 103.6  | 89.1   | 120.2  | 100.8  |
| 127.5  | 148.4  | 102.9  | 180.3  | 148.0  | 164.5  | 136.2  | 140.4  | 146.5  |
| 59.4   | 49.6   | 37.3   | 14.4   | 17.1   | 17.2   | 9.8    | 9.6    | 11.5   |
| 189.0  | 226.1  | 170.0  | 205.1  | 145.1  | 178.7  | 136.3  | 133.8  | 134.3  |
| 87.3   | 108.5  | 76.4   | 113.0  | 99.8   | 91.0   | 45.7   | 57.7   | 64.4   |
| 43.3   | 72.4   | 47.4   | 85.9   | 72.6   | 74.8   | 73.3   | 74.1   | 79.2   |
| 47.2   | 77.1   | 61.0   | 187.3  | 152.0  | 178.3  | 150.5  | 136.4  | 186.4  |
| 31.1   | 40.5   | 14.3   | 18.5   | 6.9    | 6.3    | 5.6    | 4.9    | 3.4    |
| 197.4  | 245.2  | 208.0  | 173.3  | 168.3  | 176.1  | 109.1  | 91.6   | 108.9  |
| 221.7  | 374.3  | 252.1  | 247.7  | 292.6  | 330.4  | 162.8  | 232.5  | 240.7  |
| 11.4   | 13.4   | 8.3    | 16.6   | 14.5   | 21.7   | 17.6   | 10.0   | 8.1    |
| 114.1  | 162.7  | 117.9  | 116.3  | 98.4   | 118.3  | 64.9   | 87.9   | 87.9   |
| 241.9  | 312.7  | 210.5  | 314.5  | 206.1  | 221.6  | 185.5  | 117.7  | 158.2  |
| 67.2   | 91.1   | 102.1  | 5.4    | 14.8   | 5.3    | 8.0    | 20.7   | 18.0   |
| 346.8  | 449.0  | 366.6  | 290.4  | 242.4  | 248.1  | 183.5  | 166.8  | 190.4  |
| 321.5  | 332.9  | 191.1  | 36.4   | 38.0   | 32.6   | 27.0   | 32.4   | 35.9   |
| 329.0  | 447.3  | 377.6  | 545.6  | 477.3  | 513.0  | 232.5  | 217.4  | 277.5  |
| 149.6  | 137.4  | 125.3  | 177.0  | 159.3  | 150.0  | 97.7   | 103.2  | 121.8  |
| 152.1  | 153.9  | 112.0  | 197.8  | 138.8  | 168.5  | 129.4  | 140.8  | 156.6  |
| 28.9   | 35.3   | 26.0   | 50.7   | 37.4   | 34.1   | 34.4   | 32.7   | 29.9   |
| 10.5   | 16.5   | 14.1   | 56.2   | 46.9   | 42.8   | 20.1   | 27.2   | 24.6   |
| 83.7   | 52.8   | 22.6   | 158.7  | 90.4   | 106.7  | 101.2  | 61.8   | 112.0  |
| 34.4   | 41.4   | 21.8   | 54.3   | 38.9   | 51.2   | 36.3   | 42.7   | 25.7   |
| 757.2  | 914.5  | 646.4  | 737.1  | 631.8  | 649.4  | 407.2  | 417.3  | 473.7  |
| 462.0  | 480.0  | 370.9  | 415.7  | 361.8  | 393.4  | 325.6  | 283.9  | 310.1  |
| 364.1  | 461.8  | 387.4  | 2021.0 | 1693.9 | 2033.3 | 812.0  | 810.4  | 953.1  |
| 76.0   | 126.0  | 143.2  | 196.1  | 197.9  | 213.0  | 73.4   | 88.4   | 112.0  |
| 657.8  | 1028.6 | 893.8  | 115.8  | 80.6   | 96.4   | 101.0  | 171.8  | 155.3  |
| 227.5  | 273.0  | 209.6  | 397.0  | 334.3  | 403.8  | 234.9  | 254.4  | 268.6  |
| 28.6   | 39.0   | 31.2   | 85.3   | 61.1   | 64.3   | 45.0   | 34.8   | 42.8   |
| 188.7  | 171.1  | 132.0  | 30.0   | 26.5   | 26.3   | 19.8   | 9.4    | 16.3   |
| 27.1   | 27.2   | 29.7   | 40.4   | 28.7   | 18.1   | 31.6   | 27.2   | 30.7   |
| 14.8   | 14.0   | 11.9   | 15.5   | 9.3    | 9.2    | 6.6    | 5.2    | 5.5    |
| 15.5   | 9.9    | 3.0    | 22.9   | 12.7   | 20.0   | 12.5   | 10.9   | 10.0   |
| 20.0   | 26.9   | 17.1   | 32.8   | 23.1   | 31.6   | 28.9   | 13.3   | 15.9   |
| 86.4   | 93.3   | 52.5   | 16.6   | 12.3   | 18.3   | 7.3    | 8.8    | 7.0    |
| 162.3  | 188.0  | 124.8  | 3.3    | 8.8    | 1.4    | 6.9    | 6.6    | 8.1    |
| 65.3   | 74.7   | 68.3   | 31.5   | 30.8   | 26.9   | 18.8   | 25.9   | 21.5   |
| 210.2  | 316.5  | 202.8  | 340.0  | 333.9  | 309.8  | 186.7  | 178.7  | 187.0  |
| 31.9   | 48.1   | 42.0   | 38.0   | 44.3   | 53.0   | 22.3   | 32.5   | 33.8   |
| 70.8   | 88.7   | 52.9   | 65.8   | 62.5   | 61.6   | 46.3   | 55.3   | 58.9   |
| 3793.1 | 4699.4 | 4139.3 | 5965.5 | 5286.4 | 5258.9 | 4010.0 | 3717.5 | 4297.2 |
| 63.8   | 103.9  | 64.3   | 87.3   | 84.5   | 84.3   | 70.5   | 72.6   | 85.2   |
| 312.3  | 407.6  | 280.2  | 487.1  | 499.6  | 552.9  | 208.4  | 225.9  | 246.7  |

|        |        |        |        |        |        |        |        |        |
|--------|--------|--------|--------|--------|--------|--------|--------|--------|
| 1052.7 | 988.0  | 611.6  | 110.2  | 147.0  | 172.2  | 96.6   | 128.8  | 133.5  |
| 360.7  | 600.3  | 456.2  | 533.6  | 523.0  | 579.3  | 411.4  | 450.3  | 472.2  |
| 156.6  | 200.7  | 159.6  | 127.9  | 85.3   | 107.0  | 103.5  | 91.0   | 101.4  |
| 26.2   | 35.2   | 10.6   | 36.4   | 19.0   | 26.9   | 21.7   | 13.9   | 20.7   |
| 65.9   | 95.8   | 104.4  | 76.4   | 66.9   | 66.9   | 27.6   | 39.8   | 24.5   |
| 38.2   | 49.6   | 47.3   | 128.4  | 148.9  | 164.9  | 54.1   | 94.6   | 97.5   |
| 12.9   | 21.3   | 4.6    | 638.1  | 602.5  | 690.3  | 171.2  | 221.4  | 240.0  |
| 39.6   | 77.7   | 55.5   | 35.8   | 27.4   | 30.2   | 21.6   | 26.9   | 30.3   |
| 130.8  | 155.9  | 137.2  | 55.2   | 64.5   | 67.6   | 44.3   | 58.0   | 60.3   |
| 3372.3 | 3746.3 | 2558.9 | 3659.7 | 3118.7 | 3181.4 | 2802.5 | 2761.7 | 3153.1 |
| 880.7  | 1097.6 | 895.3  | 545.7  | 513.8  | 518.7  | 374.6  | 454.2  | 471.2  |
| 262.5  | 334.0  | 164.1  | 254.4  | 203.7  | 229.2  | 210.8  | 240.0  | 244.0  |
| 339.3  | 451.5  | 303.7  | 96.8   | 86.5   | 92.2   | 61.3   | 54.1   | 63.1   |
| 706.4  | 811.0  | 563.9  | 4.0    | 5.2    | 3.2    | 1.3    | 0.9    | 1.1    |
| 520.8  | 505.8  | 353.6  | 334.2  | 261.7  | 309.4  | 200.5  | 199.5  | 213.9  |
| 228.2  | 243.8  | 193.2  | 53.6   | 40.7   | 48.9   | 28.0   | 31.3   | 34.2   |
| 449.0  | 486.3  | 270.4  | 433.2  | 336.0  | 337.1  | 228.1  | 211.0  | 231.4  |
| 363.3  | 484.4  | 313.7  | 301.7  | 203.1  | 227.9  | 209.5  | 211.7  | 236.7  |
| 148.7  | 206.5  | 162.6  | 36.3   | 25.2   | 39.3   | 16.9   | 26.8   | 27.3   |
| 122.9  | 130.7  | 101.8  | 343.6  | 277.2  | 326.8  | 100.1  | 94.1   | 97.1   |
| 2.6    | 7.7    | 8.2    | 13.1   | 12.9   | 12.1   | 3.7    | 21.0   | 11.4   |
| 8.4    | 8.3    | 7.0    | 92.1   | 117.3  | 122.5  | 76.5   | 114.0  | 113.1  |
| 96.1   | 168.9  | 127.8  | 337.3  | 258.5  | 272.0  | 215.4  | 239.6  | 261.9  |
| 124.0  | 157.5  | 119.6  | 107.3  | 113.5  | 120.7  | 59.9   | 80.8   | 69.1   |
| 35.2   | 38.6   | 24.7   | 71.3   | 66.1   | 66.0   | 65.9   | 72.4   | 81.1   |
| 53.4   | 58.9   | 47.9   | 65.1   | 52.8   | 50.5   | 38.5   | 37.7   | 44.8   |
| 2.0    | 2.4    | 1.1    | 4.7    | 4.8    | 5.2    | 2.8    | 2.1    | 1.2    |
| 11.9   | 9.5    | 3.0    | 18.3   | 13.3   | 5.2    | 6.4    | 5.7    | 3.9    |
| 290.2  | 404.7  | 310.9  | 329.2  | 329.7  | 367.8  | 173.2  | 210.5  | 229.7  |
| 12.1   | 39.0   | 9.7    | 250.0  | 199.7  | 232.9  | 130.7  | 135.1  | 166.7  |
| 130.2  | 220.4  | 187.6  | 146.1  | 128.0  | 127.9  | 63.1   | 68.5   | 89.0   |
| 315.0  | 356.9  | 152.1  | 350.9  | 200.1  | 211.9  | 192.2  | 126.4  | 131.2  |
| 956.8  | 1377.1 | 1120.2 | 1498.8 | 1379.8 | 1507.2 | 695.3  | 730.0  | 844.6  |
| 35.8   | 63.9   | 48.1   | 76.9   | 74.9   | 75.0   | 38.4   | 44.4   | 47.2   |
| 361.6  | 458.0  | 306.1  | 475.2  | 415.3  | 448.3  | 243.6  | 260.1  | 279.2  |
| 4380.3 | 4404.4 | 3869.3 | 2489.2 | 2026.9 | 2219.4 | 1149.0 | 1139.8 | 1306.9 |
| 237.0  | 332.2  | 290.6  | 370.7  | 295.1  | 345.1  | 309.6  | 363.3  | 322.8  |
| 87.2   | 104.6  | 60.8   | 281.6  | 240.4  | 314.7  | 130.9  | 164.7  | 191.9  |
| 166.2  | 199.6  | 138.5  | 198.7  | 203.3  | 203.6  | 206.9  | 213.7  | 264.1  |
| 17.2   | 10.7   | 22.5   | 74.1   | 67.1   | 76.4   | 26.8   | 39.4   | 47.7   |
| 20.8   | 11.7   | 8.3    | 44.6   | 37.7   | 38.6   | 37.6   | 26.5   | 26.2   |
| 124.5  | 154.3  | 142.3  | 70.3   | 67.2   | 69.0   | 72.5   | 95.3   | 84.3   |
| 33.8   | 28.2   | 20.5   | 47.6   | 35.2   | 50.3   | 21.1   | 17.8   | 17.2   |
| 1.6    | 2.0    | 3.9    | 2.4    | 3.2    | 3.8    | 0.9    | 1.4    | 1.2    |
| 104.7  | 117.7  | 77.0   | 198.0  | 149.8  | 198.5  | 72.8   | 96.1   | 95.9   |
| 110.6  | 142.8  | 118.9  | 187.8  | 152.7  | 189.7  | 91.1   | 112.2  | 90.7   |
| 10.5   | 12.1   | 5.6    | 208.0  | 220.4  | 251.3  | 171.9  | 240.1  | 245.8  |
| 85.5   | 108.4  | 49.4   | 58.4   | 48.8   | 51.2   | 35.5   | 32.4   | 41.8   |
| 334.2  | 469.6  | 338.1  | 237.7  | 218.2  | 229.6  | 183.4  | 185.6  | 201.8  |
| 134.8  | 175.9  | 147.6  | 68.5   | 51.3   | 55.5   | 54.0   | 53.4   | 58.5   |
| 50.8   | 90.2   | 118.5  | 19.9   | 20.8   | 11.0   | 7.2    | 4.8    | 15.7   |
| 49.2   | 83.9   | 106.4  | 691.0  | 690.3  | 780.8  | 451.3  | 706.7  | 656.6  |
| 170.3  | 216.9  | 175.5  | 374.2  | 343.7  | 369.1  | 186.7  | 230.4  | 220.1  |

|        |        |        |        |        |        |       |       |       |
|--------|--------|--------|--------|--------|--------|-------|-------|-------|
| 54.5   | 57.7   | 62.1   | 161.1  | 119.8  | 177.6  | 135.4 | 119.8 | 157.3 |
| 404.3  | 479.7  | 290.7  | 209.0  | 208.9  | 245.5  | 121.0 | 125.9 | 139.7 |
| 76.9   | 89.6   | 51.8   | 58.7   | 60.3   | 80.2   | 43.1  | 43.9  | 46.1  |
| 154.9  | 195.7  | 126.2  | 193.1  | 153.3  | 148.8  | 111.8 | 100.4 | 119.9 |
| 245.9  | 397.5  | 275.2  | 182.9  | 177.3  | 183.1  | 141.2 | 160.3 | 195.6 |
| 428.1  | 560.5  | 369.3  | 247.2  | 211.9  | 231.8  | 206.9 | 205.8 | 203.5 |
| 366.8  | 396.0  | 306.0  | 398.6  | 364.4  | 377.1  | 187.9 | 207.2 | 196.5 |
| 343.8  | 402.0  | 225.9  | 176.1  | 120.5  | 128.1  | 106.1 | 82.9  | 86.3  |
| 312.4  | 395.1  | 302.0  | 204.3  | 174.8  | 216.2  | 127.3 | 134.5 | 134.6 |
| 844.0  | 1054.0 | 686.3  | 727.1  | 614.5  | 687.2  | 422.0 | 377.6 | 499.6 |
| 183.0  | 255.1  | 171.8  | 195.0  | 159.1  | 158.0  | 137.1 | 120.1 | 137.5 |
| 32.8   | 34.6   | 30.4   | 35.8   | 33.3   | 39.6   | 26.5  | 27.4  | 27.5  |
| 236.5  | 323.9  | 239.0  | 346.9  | 307.0  | 342.8  | 193.5 | 223.2 | 233.9 |
| 41.8   | 48.6   | 32.3   | 138.4  | 144.4  | 125.2  | 58.8  | 80.5  | 65.9  |
| 181.3  | 194.0  | 93.0   | 44.3   | 39.0   | 32.4   | 30.3  | 19.9  | 31.0  |
| 34.3   | 70.8   | 28.8   | 4.0    | 1.8    | 5.0    | 2.8   | 2.3   | 2.0   |
| 87.5   | 73.9   | 43.7   | 94.6   | 75.0   | 80.6   | 65.4  | 48.1  | 70.0  |
| 29.1   | 43.1   | 29.9   | 65.9   | 48.7   | 49.2   | 33.8  | 31.7  | 43.1  |
| 16.9   | 13.7   | 5.4    | 10.4   | 10.6   | 11.3   | 8.7   | 11.7  | 6.8   |
| 670.9  | 878.5  | 706.7  | 1193.7 | 959.5  | 1040.3 | 565.4 | 565.6 | 616.3 |
| 830.2  | 930.0  | 551.1  | 785.3  | 570.2  | 740.5  | 331.7 | 329.3 | 347.1 |
| 246.0  | 275.7  | 123.1  | 161.9  | 80.0   | 78.4   | 111.5 | 65.3  | 81.9  |
| 36.0   | 55.7   | 41.0   | 153.4  | 144.8  | 156.8  | 80.5  | 90.4  | 92.2  |
| 220.3  | 243.5  | 208.4  | 451.2  | 341.1  | 364.0  | 251.0 | 216.2 | 233.6 |
| 152.8  | 258.9  | 210.9  | 354.9  | 339.5  | 339.5  | 140.2 | 187.5 | 185.4 |
| 193.1  | 272.6  | 192.1  | 353.7  | 294.7  | 344.3  | 226.8 | 224.4 | 232.0 |
| 809.5  | 953.2  | 672.3  | 704.8  | 551.4  | 662.2  | 577.2 | 482.0 | 539.4 |
| 112.3  | 181.6  | 160.1  | 69.3   | 53.2   | 67.5   | 54.3  | 49.2  | 58.4  |
| 331.0  | 425.3  | 246.0  | 227.6  | 188.0  | 192.5  | 136.5 | 139.3 | 153.9 |
| 228.0  | 367.3  | 336.8  | 426.9  | 392.9  | 433.0  | 206.3 | 346.9 | 311.7 |
| 276.1  | 385.6  | 314.7  | 325.3  | 289.5  | 310.4  | 200.1 | 224.4 | 243.8 |
| 3076.1 | 3231.9 | 2000.8 | 1281.2 | 1146.3 | 1308.6 | 731.7 | 804.2 | 911.2 |
| 17.8   | 11.5   | 17.7   | 528.8  | 487.2  | 471.4  | 421.3 | 398.0 | 486.7 |
| 150.0  | 153.3  | 94.1   | 76.4   | 50.7   | 53.9   | 32.9  | 28.5  | 35.8  |
| 250.5  | 457.4  | 478.0  | 241.8  | 188.6  | 214.1  | 116.4 | 127.0 | 139.6 |
| 258.4  | 331.2  | 220.3  | 452.0  | 371.8  | 412.9  | 290.8 | 314.7 | 345.0 |
| 197.0  | 243.0  | 158.1  | 154.9  | 112.6  | 111.7  | 105.8 | 98.1  | 111.4 |
| 196.9  | 251.3  | 207.3  | 123.1  | 84.4   | 94.3   | 66.0  | 68.1  | 74.6  |
| 9.3    | 5.5    | 9.8    | 29.3   | 9.2    | 17.1   | 10.7  | 7.6   | 12.4  |
| 2.1    | 1.8    | 2.4    | 158.3  | 170.8  | 173.6  | 78.0  | 137.9 | 123.1 |
| 200.1  | 230.7  | 134.0  | 233.1  | 180.0  | 208.0  | 163.3 | 174.2 | 206.7 |
| 121.9  | 125.6  | 104.0  | 174.9  | 133.2  | 127.9  | 110.0 | 112.1 | 110.8 |
| 245.6  | 322.7  | 209.6  | 205.6  | 183.5  | 192.0  | 176.4 | 184.3 | 209.5 |
| 99.6   | 109.8  | 91.8   | 97.8   | 69.7   | 83.6   | 65.5  | 64.6  | 70.7  |
| 468.7  | 440.5  | 416.3  | 194.3  | 125.1  | 162.4  | 32.7  | 56.9  | 73.5  |
| 306.4  | 266.3  | 277.5  | 20.4   | 16.1   | 20.0   | 10.5  | 5.6   | 8.3   |
| 166.8  | 202.0  | 148.7  | 245.8  | 213.7  | 204.4  | 167.9 | 147.9 | 194.6 |
| 125.1  | 148.4  | 123.9  | 185.5  | 132.0  | 161.8  | 105.4 | 81.7  | 87.3  |
| 463.4  | 611.0  | 495.5  | 326.1  | 271.6  | 281.6  | 139.8 | 147.9 | 174.4 |
| 369.1  | 566.0  | 451.3  | 551.2  | 455.6  | 563.8  | 342.6 | 402.9 | 409.7 |
| 350.3  | 340.2  | 216.0  | 383.9  | 312.5  | 367.7  | 260.2 | 238.4 | 252.3 |
| 289.7  | 346.9  | 194.2  | 252.6  | 218.4  | 244.0  | 197.9 | 174.2 | 208.7 |
| 2137.7 | 2910.3 | 1907.0 | 875.1  | 400.0  | 398.6  | 413.9 | 229.7 | 310.2 |



|       |        |       |        |        |        |       |       |       |
|-------|--------|-------|--------|--------|--------|-------|-------|-------|
| 85.7  | 162.5  | 144.2 | 102.1  | 99.6   | 111.5  | 64.9  | 116.7 | 99.5  |
| 10.8  | 12.5   | 8.3   | 49.6   | 44.4   | 62.0   | 39.3  | 52.2  | 47.6  |
| 2.5   | 7.6    | 5.8   | 16.6   | 23.2   | 25.1   | 22.1  | 28.0  | 29.6  |
| 437.8 | 512.2  | 343.6 | 657.9  | 566.6  | 611.9  | 399.9 | 448.5 | 462.6 |
| 26.5  | 65.8   | 78.2  | 468.6  | 476.6  | 602.9  | 299.2 | 454.8 | 417.0 |
| 5.8   | 12.3   | 1.5   | 9.0    | 11.1   | 4.9    | 1.2   | 1.3   | 2.7   |
| 98.5  | 136.6  | 117.8 | 139.0  | 124.2  | 149.7  | 81.3  | 69.2  | 81.8  |
| 65.5  | 92.4   | 62.0  | 273.9  | 223.6  | 238.4  | 146.0 | 134.5 | 155.4 |
| 53.7  | 97.6   | 126.7 | 25.9   | 9.1    | 16.6   | 9.0   | 10.7  | 6.4   |
| 115.0 | 167.3  | 143.2 | 183.5  | 159.3  | 179.1  | 128.6 | 151.0 | 164.1 |
| 131.6 | 196.1  | 199.3 | 149.7  | 132.1  | 158.7  | 88.2  | 122.9 | 117.3 |
| 534.9 | 722.2  | 533.3 | 408.4  | 359.7  | 417.3  | 264.8 | 278.8 | 295.8 |
| 283.4 | 430.7  | 352.9 | 24.2   | 16.4   | 19.7   | 16.4  | 13.8  | 18.5  |
| 826.8 | 943.9  | 541.7 | 782.1  | 560.2  | 755.4  | 340.1 | 323.6 | 357.7 |
| 397.0 | 493.3  | 290.7 | 236.7  | 158.5  | 218.9  | 198.8 | 146.1 | 157.7 |
| 562.4 | 735.3  | 456.3 | 376.4  | 379.9  | 409.0  | 231.3 | 279.3 | 266.1 |
| 96.5  | 130.7  | 109.2 | 341.9  | 282.9  | 310.2  | 161.8 | 139.3 | 164.5 |
| 17.9  | 25.7   | 21.4  | 52.1   | 35.7   | 42.4   | 28.2  | 32.2  | 30.3  |
| 105.7 | 376.4  | 490.2 | 64.8   | 54.0   | 68.6   | 42.5  | 34.4  | 46.5  |
| 192.2 | 341.3  | 302.5 | 153.7  | 143.5  | 165.4  | 114.1 | 149.8 | 144.5 |
| 134.6 | 207.7  | 183.3 | 450.2  | 388.4  | 377.7  | 290.5 | 277.6 | 312.2 |
| 479.1 | 528.7  | 308.6 | 757.4  | 542.0  | 651.9  | 386.6 | 356.5 | 391.2 |
| 168.1 | 208.5  | 151.8 | 741.3  | 677.1  | 699.5  | 291.3 | 366.1 | 386.6 |
| 414.6 | 508.3  | 334.1 | 501.2  | 525.6  | 509.4  | 205.7 | 260.3 | 229.2 |
| 4.6   | 8.0    | 3.8   | 11.2   | 17.5   | 17.6   | 9.5   | 3.2   | 10.6  |
| 182.1 | 242.6  | 169.1 | 69.8   | 72.6   | 78.4   | 83.7  | 110.7 | 112.1 |
| 218.5 | 291.2  | 200.6 | 300.8  | 248.1  | 273.1  | 189.3 | 204.7 | 212.1 |
| 154.2 | 182.2  | 124.0 | 476.7  | 388.5  | 409.5  | 297.8 | 286.3 | 303.1 |
| 366.4 | 459.7  | 293.7 | 382.9  | 310.5  | 323.7  | 220.4 | 215.0 | 214.4 |
| 225.6 | 299.9  | 241.1 | 85.7   | 94.4   | 94.4   | 57.8  | 75.4  | 64.7  |
| 624.8 | 582.0  | 295.3 | 643.6  | 450.9  | 467.5  | 448.0 | 340.7 | 392.5 |
| 214.5 | 286.4  | 220.0 | 222.1  | 176.8  | 216.2  | 136.8 | 137.2 | 154.8 |
| 6.6   | 7.2    | 7.0   | 13.0   | 21.0   | 15.1   | 12.7  | 4.8   | 18.2  |
| 389.2 | 426.1  | 231.3 | 341.8  | 230.4  | 246.8  | 278.1 | 212.8 | 261.4 |
| 15.9  | 21.0   | 13.2  | 32.8   | 17.7   | 34.9   | 20.8  | 22.4  | 20.8  |
| 198.2 | 286.2  | 212.1 | 114.2  | 104.3  | 102.1  | 164.7 | 153.7 | 175.4 |
| 61.3  | 84.5   | 45.4  | 140.3  | 113.5  | 137.5  | 75.9  | 71.3  | 93.6  |
| 9.6   | 10.9   | 10.3  | 29.1   | 16.4   | 12.8   | 7.9   | 4.0   | 2.7   |
| 701.6 | 826.6  | 613.5 | 366.3  | 298.0  | 352.9  | 174.4 | 174.5 | 210.5 |
| 256.0 | 384.0  | 313.1 | 235.5  | 258.6  | 237.0  | 168.5 | 207.4 | 200.1 |
| 780.7 | 1053.6 | 741.6 | 355.4  | 256.9  | 278.3  | 326.7 | 279.4 | 318.7 |
| 164.1 | 206.7  | 138.1 | 110.8  | 109.5  | 110.8  | 69.6  | 80.3  | 92.2  |
| 88.8  | 120.5  | 78.2  | 77.2   | 61.5   | 67.6   | 101.3 | 111.4 | 124.0 |
| 83.0  | 141.9  | 109.1 | 84.7   | 85.8   | 95.3   | 48.1  | 77.9  | 74.4  |
| 198.7 | 260.3  | 170.9 | 233.3  | 163.0  | 254.3  | 160.6 | 155.2 | 207.4 |
| 404.9 | 545.1  | 383.2 | 203.9  | 202.6  | 214.0  | 161.2 | 243.5 | 232.2 |
| 98.5  | 108.3  | 99.4  | 144.4  | 119.0  | 135.8  | 116.3 | 109.3 | 122.1 |
| 2.6   | 3.9    | 8.3   | 7.2    | 8.0    | 12.0   | 1.5   | 2.4   | 2.4   |
| 85.0  | 112.0  | 96.4  | 68.5   | 53.8   | 55.1   | 60.9  | 60.3  | 62.1  |
| 72.6  | 89.5   | 51.9  | 50.8   | 46.1   | 48.7   | 37.3  | 51.8  | 47.8  |
| 160.5 | 217.0  | 167.1 | 93.7   | 73.0   | 102.7  | 67.9  | 92.8  | 74.2  |
| 692.9 | 936.4  | 655.3 | 1726.7 | 1337.8 | 1474.7 | 793.2 | 670.3 | 787.2 |
| 98.5  | 185.1  | 226.3 | 283.2  | 241.0  | 254.8  | 117.8 | 132.2 | 139.1 |

|        |        |        |        |        |        |        |        |        |
|--------|--------|--------|--------|--------|--------|--------|--------|--------|
| 225.2  | 266.5  | 157.4  | 92.4   | 88.9   | 111.0  | 74.6   | 76.2   | 90.2   |
| 179.5  | 203.7  | 161.3  | 195.8  | 185.9  | 207.5  | 114.6  | 134.5  | 145.8  |
| 143.0  | 180.5  | 142.6  | 239.9  | 200.6  | 234.0  | 158.0  | 174.6  | 189.9  |
| 293.3  | 395.1  | 338.0  | 1836.4 | 1970.4 | 2043.1 | 1116.5 | 1661.7 | 1587.7 |
| 134.9  | 181.0  | 156.2  | 130.2  | 103.9  | 114.6  | 83.5   | 85.6   | 80.7   |
| 163.5  | 263.1  | 210.8  | 346.9  | 270.3  | 291.4  | 271.1  | 254.6  | 279.2  |
| 754.9  | 766.7  | 536.1  | 879.5  | 722.1  | 876.9  | 508.0  | 451.9  | 563.0  |
| 10.7   | 11.7   | 5.7    | 683.5  | 665.8  | 732.1  | 430.4  | 530.1  | 553.8  |
| 358.8  | 415.6  | 301.5  | 493.4  | 458.4  | 498.4  | 279.9  | 277.5  | 325.7  |
| 107.9  | 215.8  | 220.0  | 633.7  | 611.4  | 725.1  | 268.5  | 418.2  | 429.3  |
| 97.3   | 153.0  | 118.0  | 466.6  | 366.7  | 360.8  | 288.3  | 328.1  | 330.6  |
| 8.6    | 3.0    | 7.0    | 11.2   | 9.7    | 7.4    | 8.0    | 2.9    | 3.7    |
| 71.6   | 123.7  | 106.1  | 153.1  | 144.8  | 172.5  | 71.8   | 133.7  | 125.7  |
| 195.6  | 257.9  | 177.7  | 322.6  | 264.2  | 293.1  | 199.9  | 194.8  | 209.3  |
| 167.6  | 229.8  | 184.3  | 151.7  | 143.2  | 126.2  | 131.5  | 184.2  | 154.2  |
| 232.5  | 323.7  | 284.6  | 301.9  | 193.1  | 228.4  | 131.2  | 134.3  | 127.3  |
| 788.9  | 735.1  | 485.6  | 425.5  | 329.3  | 373.2  | 304.4  | 276.0  | 340.1  |
| 64.0   | 76.3   | 52.7   | 72.7   | 53.8   | 58.4   | 48.3   | 38.3   | 47.7   |
| 257.2  | 421.4  | 328.1  | 244.1  | 201.0  | 197.7  | 136.0  | 149.8  | 171.7  |
| 211.7  | 227.4  | 166.5  | 161.0  | 148.5  | 174.0  | 100.4  | 90.9   | 110.7  |
| 55.4   | 91.0   | 119.1  | 40.4   | 28.3   | 32.6   | 27.5   | 22.6   | 24.3   |
| 26.5   | 34.8   | 61.9   | 312.7  | 402.7  | 441.1  | 194.2  | 320.7  | 338.2  |
| 119.2  | 113.4  | 66.7   | 79.0   | 60.4   | 63.5   | 74.2   | 55.3   | 61.0   |
| 130.9  | 156.5  | 77.3   | 110.3  | 82.4   | 108.2  | 66.8   | 113.1  | 88.7   |
| 157.7  | 210.1  | 134.6  | 221.9  | 206.3  | 213.0  | 88.8   | 87.3   | 108.6  |
| 50.8   | 62.2   | 42.5   | 119.1  | 105.1  | 109.1  | 83.8   | 61.6   | 79.3   |
| 83.3   | 103.0  | 82.8   | 166.0  | 143.1  | 159.0  | 104.2  | 115.2  | 119.5  |
| 534.0  | 528.1  | 299.3  | 557.8  | 452.3  | 535.6  | 309.3  | 292.1  | 365.8  |
| 156.6  | 220.9  | 193.8  | 104.3  | 85.0   | 83.4   | 70.0   | 83.4   | 79.6   |
| 186.2  | 201.6  | 158.2  | 224.4  | 177.0  | 223.3  | 162.8  | 163.7  | 166.3  |
| 119.9  | 189.2  | 155.0  | 11.7   | 9.5    | 7.9    | 5.4    | 7.3    | 5.9    |
| 294.1  | 377.2  | 271.5  | 238.8  | 191.2  | 197.9  | 160.3  | 142.9  | 159.3  |
| 384.4  | 540.5  | 575.6  | 66.0   | 55.8   | 58.8   | 33.1   | 32.7   | 42.4   |
| 27.8   | 32.7   | 25.2   | 42.9   | 30.4   | 45.6   | 29.5   | 30.5   | 26.2   |
| 74.4   | 100.7  | 61.6   | 57.0   | 38.6   | 52.0   | 35.0   | 27.7   | 39.4   |
| 133.8  | 161.2  | 121.7  | 405.5  | 364.2  | 375.7  | 295.6  | 273.2  | 373.2  |
| 81.3   | 120.4  | 68.5   | 75.4   | 66.1   | 81.2   | 43.6   | 44.8   | 49.2   |
| 133.4  | 146.8  | 101.0  | 38.1   | 35.5   | 36.9   | 47.2   | 34.7   | 40.4   |
| 422.8  | 590.5  | 466.5  | 443.2  | 294.1  | 351.4  | 180.7  | 161.8  | 196.9  |
| 31.8   | 27.9   | 12.0   | 22.3   | 19.8   | 16.4   | 14.6   | 7.1    | 11.1   |
| 199.6  | 276.9  | 190.0  | 183.7  | 138.0  | 170.5  | 120.4  | 115.5  | 127.9  |
| 11.2   | 17.5   | 10.1   | 7.8    | 5.5    | 5.4    | 3.8    | 5.1    | 4.7    |
| 130.7  | 187.9  | 151.3  | 8.5    | 16.1   | 9.3    | 9.9    | 13.8   | 26.9   |
| 3610.6 | 2634.8 | 1063.0 | 31.1   | 35.9   | 38.5   | 18.1   | 25.4   | 25.9   |
| 169.1  | 190.0  | 128.1  | 137.5  | 127.9  | 130.7  | 96.7   | 108.0  | 112.9  |
| 111.7  | 156.6  | 144.1  | 117.1  | 96.9   | 100.4  | 70.2   | 57.3   | 66.3   |
| 55.6   | 65.3   | 52.9   | 14.9   | 14.9   | 24.0   | 19.9   | 26.0   | 23.9   |
| 125.4  | 148.1  | 111.4  | 139.8  | 115.1  | 123.8  | 60.8   | 52.1   | 77.1   |
| 26.9   | 33.1   | 31.2   | 4.7    | 3.7    | 9.4    | 7.6    | 8.9    | 13.7   |
| 5.4    | 39.6   | 28.0   | 9.6    | 14.2   | 13.2   | 9.4    | 11.2   | 16.0   |
| 178.6  | 230.7  | 175.4  | 343.2  | 334.0  | 366.0  | 184.4  | 205.5  | 210.7  |
| 99.2   | 146.8  | 105.5  | 113.8  | 102.7  | 94.4   | 98.5   | 77.6   | 86.4   |
| 150.7  | 128.5  | 70.1   | 1190.4 | 905.8  | 1035.3 | 415.0  | 406.0  | 420.3  |

|        |        |        |        |        |        |        |        |        |
|--------|--------|--------|--------|--------|--------|--------|--------|--------|
| 199.6  | 245.4  | 175.5  | 163.6  | 108.4  | 129.8  | 67.8   | 66.8   | 71.6   |
| 161.1  | 188.6  | 135.9  | 345.0  | 270.2  | 296.5  | 137.8  | 122.3  | 143.5  |
| 29.2   | 29.0   | 19.2   | 49.2   | 44.6   | 47.8   | 24.6   | 18.9   | 23.5   |
| 39.3   | 51.9   | 44.2   | 113.5  | 111.8  | 112.3  | 84.0   | 75.7   | 89.2   |
| 1613.0 | 2505.1 | 2165.8 | 126.1  | 99.8   | 126.6  | 136.4  | 149.5  | 160.5  |
| 32.7   | 56.0   | 15.2   | 41.1   | 19.6   | 24.3   | 14.0   | 16.8   | 23.2   |
| 93.6   | 103.3  | 62.7   | 66.8   | 39.8   | 55.7   | 24.8   | 25.7   | 38.3   |
| 99.1   | 158.0  | 195.0  | 33.7   | 18.5   | 14.3   | 18.5   | 16.3   | 14.8   |
| 252.4  | 412.2  | 413.8  | 1894.8 | 1768.5 | 1835.1 | 1422.9 | 1688.5 | 1777.4 |
| 189.8  | 328.0  | 236.2  | 130.7  | 129.8  | 135.4  | 106.8  | 145.2  | 129.9  |
| 145.1  | 195.7  | 135.3  | 140.8  | 145.3  | 173.4  | 120.5  | 119.4  | 138.9  |
| 157.4  | 213.8  | 157.5  | 184.8  | 179.3  | 196.1  | 165.0  | 176.5  | 181.2  |
| 267.8  | 265.3  | 143.4  | 219.3  | 196.5  | 186.7  | 156.6  | 144.8  | 141.8  |
| 717.1  | 1173.8 | 1001.1 | 2257.4 | 2185.3 | 2429.1 | 1121.0 | 1292.3 | 1504.0 |
| 157.6  | 217.5  | 162.9  | 320.5  | 270.5  | 307.0  | 250.3  | 234.5  | 262.8  |
| 131.6  | 173.0  | 146.0  | 99.1   | 106.9  | 105.5  | 90.0   | 127.6  | 124.1  |
| 77.6   | 108.9  | 59.8   | 253.0  | 235.3  | 255.5  | 139.0  | 117.0  | 142.4  |
| 67.1   | 116.4  | 47.6   | 15.0   | 15.3   | 6.3    | 13.4   | 17.9   | 15.4   |
| 162.9  | 173.3  | 121.1  | 107.0  | 83.0   | 93.7   | 91.8   | 88.9   | 77.5   |
| 198.1  | 248.1  | 186.8  | 143.1  | 124.6  | 159.3  | 102.0  | 118.6  | 127.9  |
| 84.0   | 103.1  | 78.2   | 57.6   | 52.9   | 53.6   | 38.4   | 62.1   | 58.0   |
| 51.0   | 69.8   | 65.3   | 35.6   | 30.6   | 37.0   | 24.7   | 35.3   | 35.1   |
| 48.8   | 64.4   | 64.9   | 13.0   | 16.5   | 16.0   | 8.6    | 16.7   | 16.8   |
| 49.0   | 49.8   | 37.4   | 235.7  | 218.8  | 255.5  | 159.4  | 219.8  | 213.0  |
| 466.0  | 668.7  | 582.5  | 810.1  | 782.7  | 841.9  | 508.5  | 538.7  | 638.1  |
| 218.9  | 242.5  | 180.6  | 319.3  | 221.2  | 257.1  | 144.0  | 149.8  | 156.1  |
| 179.5  | 205.9  | 87.7   | 156.7  | 151.5  | 159.3  | 97.7   | 103.9  | 108.4  |
| 300.9  | 367.3  | 139.6  | 114.5  | 73.2   | 93.2   | 83.1   | 58.3   | 67.3   |
| 183.5  | 260.2  | 192.1  | 122.8  | 110.2  | 110.9  | 129.3  | 150.5  | 145.2  |
| 218.7  | 373.1  | 272.2  | 64.0   | 73.3   | 72.1   | 66.2   | 64.9   | 84.0   |
| 348.0  | 401.9  | 297.8  | 167.6  | 167.5  | 171.4  | 106.4  | 118.4  | 113.9  |
| 13.3   | 18.8   | 25.0   | 19.2   | 13.2   | 24.2   | 17.8   | 13.0   | 9.5    |
| 245.4  | 295.2  | 236.1  | 247.2  | 232.2  | 236.7  | 143.4  | 156.0  | 169.8  |
| 296.1  | 478.3  | 424.7  | 270.1  | 277.7  | 321.7  | 198.5  | 275.3  | 261.9  |
| 87.6   | 104.9  | 74.0   | 22.2   | 14.6   | 22.6   | 25.5   | 22.5   | 25.4   |
| 49.3   | 55.4   | 36.3   | 109.4  | 80.6   | 98.7   | 54.7   | 47.2   | 48.8   |
| 180.8  | 194.1  | 170.8  | 359.1  | 264.6  | 288.1  | 225.9  | 187.5  | 224.2  |
| 70.1   | 98.9   | 80.7   | 10.6   | 7.8    | 11.2   | 27.5   | 26.6   | 29.5   |
| 109.1  | 121.3  | 97.5   | 236.7  | 190.3  | 217.6  | 118.7  | 104.8  | 97.0   |
| 312.1  | 434.2  | 373.2  | 568.7  | 597.9  | 569.4  | 271.6  | 322.9  | 367.5  |
| 18.9   | 19.4   | 19.7   | 40.6   | 27.6   | 38.9   | 23.1   | 10.5   | 15.8   |
| 71.9   | 78.8   | 67.6   | 51.0   | 47.9   | 53.8   | 39.2   | 23.5   | 36.5   |
| 142.7  | 160.1  | 83.9   | 109.6  | 99.0   | 108.6  | 75.4   | 82.4   | 93.9   |
| 158.8  | 187.3  | 124.6  | 193.1  | 150.8  | 168.9  | 123.3  | 113.1  | 140.6  |
| 18.6   | 33.2   | 30.5   | 24.3   | 16.2   | 32.7   | 17.6   | 13.2   | 17.0   |
| 49.9   | 77.3   | 48.3   | 77.6   | 56.8   | 62.1   | 45.5   | 48.1   | 47.7   |
| 11.9   | 16.8   | 10.5   | 136.6  | 122.7  | 124.3  | 94.5   | 120.7  | 119.4  |
| 717.3  | 1124.7 | 931.4  | 29.1   | 28.4   | 25.7   | 44.4   | 39.5   | 51.8   |
| 39.0   | 37.4   | 48.7   | 185.8  | 169.9  | 209.4  | 117.6  | 143.5  | 133.3  |
| 122.6  | 123.3  | 70.0   | 73.9   | 69.8   | 62.0   | 55.9   | 59.8   | 59.6   |
| 14.5   | 17.4   | 10.6   | 16.0   | 13.8   | 12.7   | 10.3   | 11.3   | 15.4   |
| 2753.5 | 2509.1 | 1313.1 | 425.4  | 411.8  | 426.1  | 258.6  | 232.0  | 266.2  |
| 221.7  | 293.5  | 246.6  | 118.1  | 98.8   | 111.7  | 93.7   | 69.2   | 100.1  |

|       |       |       |       |       |       |       |       |       |
|-------|-------|-------|-------|-------|-------|-------|-------|-------|
| 6.1   | 6.9   | 0.6   | 3.9   | 2.3   | 5.1   | 1.5   | 3.7   | 2.2   |
| 139.7 | 146.9 | 70.0  | 112.6 | 76.0  | 76.1  | 76.9  | 62.8  | 84.0  |
| 59.1  | 62.9  | 44.5  | 93.8  | 85.6  | 79.5  | 66.5  | 45.7  | 56.6  |
| 209.7 | 233.2 | 96.3  | 250.3 | 203.7 | 225.9 | 143.4 | 120.3 | 168.5 |
| 186.0 | 179.9 | 132.9 | 16.8  | 6.7   | 12.1  | 3.5   | 14.5  | 7.4   |
| 125.7 | 167.1 | 76.7  | 561.7 | 436.3 | 449.0 | 198.5 | 208.2 | 289.3 |
| 132.7 | 157.5 | 110.1 | 218.8 | 218.9 | 217.0 | 148.8 | 141.2 | 183.0 |
| 55.7  | 54.0  | 11.9  | 49.9  | 57.6  | 64.5  | 51.7  | 55.8  | 63.5  |
| 200.7 | 242.7 | 137.6 | 246.8 | 176.8 | 217.1 | 99.1  | 89.8  | 101.3 |

---

Batch.10 (Batch.10 ↑Batch.10 \Batch.10 ↑Batch.11 \Batch.11 ↓Batch.11 (Batch.11 ↑Batch.12 \)

|        |        |        |        |        |        |        |        |         |
|--------|--------|--------|--------|--------|--------|--------|--------|---------|
| 914.9  | 980.2  | 839.8  | 881.2  | 389.3  | 306.6  | 413.1  | 387.3  | 465.6   |
| 230.6  | 210.9  | 615.0  | 190.8  | 253.8  | 157.5  | 178.4  | 227.5  | 534.0   |
| 13.6   | 17.3   | 20.3   | 12.0   | 28.0   | 21.8   | 26.3   | 33.7   | 25.5    |
| 97.9   | 97.2   | 114.6  | 90.1   | 167.0  | 213.0  | 164.8  | 188.0  | 158.7   |
| 5.6    | 6.8    | 8.5    | 7.3    | 3.9    | 5.8    | 0.7    | 3.0    | 10.4    |
| 27.3   | 29.0   | 29.4   | 27.9   | 30.2   | 23.6   | 17.3   | 22.9   | 40.7    |
| 18.2   | 12.9   | 27.2   | 17.8   | 15.2   | 16.0   | 19.3   | 19.5   | 26.6    |
| 23.8   | 27.5   | 25.8   | 36.1   | 55.5   | 71.7   | 46.8   | 56.9   | 22.0    |
| 5.0    | 2.6    | 1.0    | 1.4    | 13.3   | 8.4    | 12.5   | 13.6   | 3.5     |
| 3.4    | 9.5    | 4.1    | 7.6    | 3.0    | 6.2    | 3.4    | 0.4    | 7.5     |
| 141.2  | 138.4  | 217.9  | 148.8  | 25.1   | 16.9   | 24.5   | 23.4   | 38.2    |
| 362.8  | 331.0  | 493.6  | 402.0  | 192.2  | 197.1  | 171.9  | 222.9  | 405.8   |
| 32.3   | 23.7   | 32.3   | 23.3   | 26.1   | 28.0   | 24.1   | 37.2   | 18.4    |
| 100.9  | 98.1   | 126.9  | 82.1   | 572.6  | 499.8  | 621.5  | 570.7  | 148.4   |
| 48.1   | 47.8   | 67.7   | 40.9   | 337.6  | 320.9  | 386.8  | 369.2  | 281.9   |
| 157.0  | 182.3  | 91.1   | 111.1  | 334.7  | 277.0  | 351.1  | 422.7  | 103.1   |
| 20.7   | 27.5   | 16.3   | 13.5   | 41.9   | 38.6   | 45.0   | 47.4   | 31.0    |
| 122.5  | 107.9  | 166.3  | 100.5  | 99.1   | 86.9   | 92.1   | 114.8  | 145.5   |
| 108.2  | 94.3   | 110.9  | 97.6   | 141.2  | 118.8  | 128.5  | 147.8  | 131.5   |
| 220.1  | 199.5  | 321.0  | 162.4  | 103.7  | 101.6  | 117.4  | 112.3  | 145.7   |
| 757.7  | 765.6  | 1246.5 | 1018.4 | 1248.2 | 1112.3 | 1087.3 | 1263.3 | 1361.1  |
| 2155.8 | 2016.3 | 2796.5 | 2267.2 | 1657.2 | 2087.0 | 1733.7 | 1927.3 | 1979.2  |
| 6142.1 | 5463.1 | 6886.1 | 5778.8 | 5433.5 | 5479.2 | 5591.0 | 5897.5 | 8414.7  |
| 6920.9 | 6195.8 | 8230.3 | 6616.8 | 7903.9 | 8235.7 | 8035.6 | 8794.8 | 12395.3 |
| 5317.4 | 4897.8 | 7563.0 | 4510.7 | 4819.4 | 4106.6 | 5049.3 | 5415.9 | 5188.1  |
| 1482.1 | 1511.9 | 1684.2 | 1615.7 | 2505.3 | 2283.8 | 2750.6 | 2616.8 | 2404.7  |
| 2625.8 | 2355.4 | 3612.1 | 2574.6 | 3458.5 | 3326.9 | 3791.3 | 3809.9 | 6531.7  |
| 3136.0 | 3054.5 | 3712.4 | 3062.7 | 3286.6 | 3721.9 | 3977.4 | 3845.0 | 4448.8  |
| 1232.8 | 1104.1 | 1774.3 | 1215.8 | 1200.8 | 1041.7 | 1158.1 | 1336.5 | 1648.3  |
| 2153.8 | 2066.6 | 2929.3 | 2172.8 | 2173.2 | 1991.8 | 2221.0 | 2413.8 | 2773.0  |
| 4741.5 | 4188.1 | 5007.9 | 4451.0 | 5546.5 | 5843.3 | 5690.2 | 5957.1 | 8683.9  |
| 1162.1 | 1100.9 | 1435.0 | 1104.4 | 996.3  | 922.6  | 1135.8 | 1269.3 | 1051.1  |
| 4184.2 | 3708.4 | 5024.0 | 4169.7 | 5535.5 | 5773.5 | 5680.5 | 5924.0 | 7779.1  |
| 3886.8 | 3992.6 | 4668.6 | 3865.4 | 7066.1 | 6956.6 | 7491.3 | 7232.5 | 10345.7 |
| 1690.6 | 1672.1 | 2639.6 | 1671.9 | 1989.8 | 1858.9 | 1991.7 | 2276.6 | 2354.5  |
| 1953.5 | 1847.1 | 2238.5 | 1773.4 | 2421.5 | 2346.3 | 2533.0 | 2817.0 | 1791.0  |
| 5330.7 | 4808.9 | 6614.9 | 5587.3 | 6307.7 | 5556.3 | 6047.2 | 6442.0 | 9931.9  |
| 6479.4 | 6136.8 | 7660.1 | 6284.0 | 7929.7 | 8097.8 | 7921.2 | 8454.9 | 10894.0 |
| 6480.8 | 6048.0 | 7081.8 | 6465.3 | 7584.5 | 7094.2 | 7906.2 | 8711.2 | 11154.0 |
| 5930.3 | 5642.1 | 6725.8 | 5239.0 | 3904.8 | 4103.5 | 4213.1 | 4298.2 | 7955.4  |
| 872.9  | 744.6  | 1411.3 | 757.6  | 1530.6 | 1170.0 | 1607.0 | 1745.5 | 2021.7  |
| 7385.9 | 6856.4 | 7711.3 | 6778.4 | 7354.5 | 7222.5 | 7422.0 | 7681.9 | 9185.6  |
| 5634.8 | 5348.0 | 6323.0 | 5630.4 | 6017.1 | 6296.0 | 6277.4 | 6140.3 | 8647.8  |
| 2805.4 | 2848.5 | 2500.0 | 2717.2 | 2621.9 | 2787.4 | 2829.3 | 2904.2 | 3698.2  |
| 4826.3 | 4455.5 | 5673.3 | 4611.5 | 5864.4 | 6058.0 | 6008.8 | 6222.5 | 7806.8  |
| 5290.5 | 5125.6 | 5356.8 | 4170.9 | 6812.2 | 6978.3 | 7549.2 | 7961.9 | 11236.6 |
| 4327.8 | 4268.9 | 3767.4 | 4279.4 | 4396.1 | 5144.4 | 4736.2 | 4851.8 | 7742.7  |
| 2633.1 | 2491.0 | 3219.8 | 2871.6 | 3032.2 | 3982.8 | 3302.2 | 3364.5 | 3126.2  |
| 1082.9 | 1022.9 | 1374.4 | 1027.8 | 1154.4 | 1042.8 | 1163.4 | 1383.8 | 915.9   |
| 8561.2 | 8360.2 | 9050.9 | 8531.9 | 6256.5 | 6515.6 | 6427.2 | 6643.4 | 8110.8  |
| 1534.8 | 1479.2 | 2054.7 | 1619.3 | 3963.7 | 3763.5 | 4188.5 | 4209.1 | 5911.0  |
| 6114.2 | 6074.3 | 7527.0 | 6247.0 | 8023.0 | 8517.2 | 8253.4 | 8635.5 | 11846.5 |

|        |        |        |        |        |        |        |        |         |
|--------|--------|--------|--------|--------|--------|--------|--------|---------|
| 6232.4 | 6018.6 | 6721.1 | 5977.8 | 7395.1 | 7729.6 | 7750.2 | 7938.1 | 10267.7 |
| 3347.8 | 3028.4 | 3282.3 | 2948.6 | 3313.0 | 2575.2 | 3287.9 | 3796.5 | 5674.1  |
| 6306.5 | 5879.4 | 7380.8 | 6089.0 | 5807.2 | 5278.9 | 5612.7 | 6263.6 | 10178.1 |
| 180.4  | 176.8  | 473.9  | 304.8  | 462.3  | 465.6  | 440.3  | 496.6  | 387.4   |
| 3370.0 | 3286.4 | 3649.8 | 3410.3 | 3739.5 | 3858.6 | 3816.7 | 4138.4 | 5383.8  |
| 3397.4 | 3196.4 | 4608.4 | 3056.2 | 3940.4 | 2869.1 | 3570.3 | 4284.7 | 4510.1  |
| 6764.7 | 6352.2 | 7989.0 | 6808.0 | 7486.1 | 7500.1 | 7967.1 | 8392.4 | 10514.6 |
| 1419.0 | 1321.9 | 1954.9 | 1360.7 | 2189.3 | 1914.9 | 2308.8 | 2548.0 | 3702.1  |
| 1829.7 | 1802.7 | 2115.1 | 1715.9 | 1924.6 | 1641.9 | 2013.2 | 2257.3 | 2548.2  |
| 1432.0 | 1338.1 | 2340.3 | 1291.2 | 2499.0 | 2846.2 | 2406.4 | 2663.8 | 2327.1  |
| 500.8  | 488.9  | 612.3  | 489.2  | 989.7  | 963.6  | 1015.9 | 1039.1 | 694.7   |
| 3167.5 | 2535.4 | 4228.0 | 2606.8 | 3827.3 | 3351.7 | 3523.0 | 3926.3 | 5178.4  |
| 1978.9 | 1794.8 | 2846.1 | 2130.3 | 1687.4 | 1227.5 | 1642.4 | 1896.9 | 2454.3  |
| 540.1  | 512.5  | 757.2  | 575.9  | 905.2  | 820.9  | 882.5  | 1075.2 | 741.0   |
| 1671.5 | 1556.1 | 1899.2 | 1472.9 | 1910.9 | 2211.4 | 2373.9 | 2266.8 | 1933.6  |
| 2500.5 | 2467.3 | 2521.7 | 1855.5 | 1920.4 | 1480.8 | 1830.6 | 2208.3 | 1947.6  |
| 2847.7 | 2783.4 | 4158.8 | 2888.8 | 2244.9 | 2414.7 | 2610.2 | 2694.3 | 3955.5  |
| 1271.0 | 1334.8 | 1380.7 | 1258.7 | 337.5  | 295.7  | 302.4  | 401.4  | 302.9   |
| 1287.4 | 1114.0 | 1998.1 | 1211.0 | 1666.1 | 1482.1 | 1750.1 | 2114.0 | 2055.9  |
| 213.4  | 198.4  | 287.8  | 172.2  | 535.2  | 489.4  | 490.7  | 595.9  | 499.7   |
| 2058.6 | 1866.6 | 3003.0 | 1860.2 | 2138.2 | 1682.3 | 1960.3 | 2233.1 | 2934.0  |
| 378.9  | 379.2  | 597.4  | 524.6  | 539.8  | 589.0  | 495.6  | 650.5  | 562.4   |
| 124.2  | 105.8  | 176.5  | 123.3  | 839.4  | 1021.0 | 928.9  | 985.0  | 677.6   |
| 1407.4 | 1364.9 | 1583.6 | 1399.1 | 1035.3 | 1179.1 | 1279.4 | 1180.5 | 1226.1  |
| 326.9  | 335.1  | 361.7  | 312.2  | 769.3  | 581.9  | 745.2  | 869.0  | 827.6   |
| 2599.8 | 2665.9 | 3109.0 | 2662.0 | 3515.1 | 3236.8 | 3638.0 | 3897.6 | 4369.9  |
| 1310.5 | 1243.0 | 1630.0 | 1376.2 | 1646.1 | 1529.9 | 1556.4 | 1845.8 | 1739.0  |
| 2995.9 | 2788.1 | 4068.3 | 2825.0 | 3555.7 | 3811.5 | 3701.8 | 4068.8 | 4468.2  |
| 990.3  | 927.2  | 1971.3 | 1119.4 | 1523.1 | 1326.4 | 1429.4 | 1744.9 | 2497.1  |
| 5706.8 | 5415.1 | 6377.1 | 5722.2 | 6459.7 | 6484.3 | 6812.0 | 6834.7 | 9279.3  |
| 7815.9 | 7494.7 | 8442.2 | 7566.0 | 7594.2 | 8026.4 | 7857.8 | 7865.2 | 9545.3  |
| 5462.6 | 5292.1 | 5974.9 | 5461.5 | 6665.4 | 6376.1 | 6593.4 | 7004.6 | 8524.4  |
| 4124.8 | 3705.8 | 5780.4 | 4127.9 | 5901.9 | 5057.0 | 5912.9 | 6190.2 | 7166.5  |
| 3195.3 | 2882.7 | 4648.9 | 3486.0 | 2859.0 | 2174.9 | 2839.2 | 3182.5 | 4081.0  |
| 471.3  | 459.6  | 369.1  | 430.6  | 932.8  | 928.7  | 980.2  | 1065.7 | 1063.1  |
| 1109.3 | 1074.0 | 1676.9 | 1077.5 | 1633.0 | 1591.3 | 1874.7 | 1893.0 | 1067.4  |
| 2860.3 | 2758.4 | 3609.6 | 2991.0 | 3235.1 | 3377.4 | 3511.0 | 3803.9 | 2745.6  |
| 101.9  | 95.6   | 139.1  | 100.1  | 203.3  | 174.8  | 177.6  | 239.2  | 344.6   |
| 467.3  | 456.6  | 362.2  | 334.4  | 261.7  | 319.1  | 303.0  | 300.1  | 151.2   |
| 369.8  | 354.9  | 418.2  | 293.2  | 880.2  | 752.3  | 782.1  | 871.9  | 1374.4  |
| 1667.4 | 1359.1 | 2486.4 | 1481.7 | 2140.1 | 1353.6 | 2185.4 | 2327.3 | 3516.4  |
| 1759.0 | 1511.5 | 2727.0 | 1577.8 | 2546.3 | 1618.5 | 2254.6 | 2646.4 | 2900.1  |
| 2256.0 | 2159.4 | 2933.2 | 2244.6 | 3498.1 | 3746.6 | 3535.4 | 3980.2 | 5688.5  |
| 1064.9 | 895.5  | 2062.9 | 1095.8 | 727.0  | 776.0  | 821.3  | 802.4  | 1007.9  |
| 204.6  | 185.8  | 277.6  | 221.5  | 505.4  | 669.8  | 522.0  | 608.6  | 811.8   |
| 4030.9 | 3765.5 | 4994.7 | 3776.9 | 4575.0 | 4151.3 | 4772.1 | 5145.0 | 5663.3  |
| 479.3  | 437.5  | 633.6  | 425.5  | 1003.2 | 796.3  | 1005.2 | 1057.9 | 2845.1  |
| 1300.4 | 1280.7 | 1705.4 | 1177.3 | 3142.6 | 2792.9 | 3205.9 | 3524.1 | 3569.5  |
| 7352.3 | 7119.1 | 8051.4 | 6729.9 | 4310.3 | 4039.4 | 4609.4 | 4961.4 | 6032.6  |
| 3990.6 | 3696.7 | 4837.1 | 3788.2 | 6101.6 | 6716.9 | 6649.1 | 6879.7 | 10321.9 |
| 5492.7 | 4980.6 | 6857.1 | 5493.2 | 5812.4 | 6030.8 | 6195.7 | 6735.9 | 9145.5  |
| 1083.5 | 1001.5 | 1387.5 | 997.0  | 1563.5 | 1535.6 | 1497.4 | 1966.8 | 1223.8  |
| 2044.0 | 1896.2 | 2805.4 | 1917.5 | 1789.0 | 1573.2 | 1799.2 | 2083.1 | 1439.7  |

|        |        |        |        |        |        |        |        |         |
|--------|--------|--------|--------|--------|--------|--------|--------|---------|
| 1309.0 | 1155.8 | 2001.8 | 1397.8 | 2210.0 | 2243.2 | 2215.9 | 2317.2 | 2683.2  |
| 2836.9 | 2632.1 | 3143.7 | 2357.4 | 2917.0 | 3000.9 | 3095.4 | 3300.2 | 3893.9  |
| 4189.4 | 3929.4 | 5762.5 | 4124.3 | 2766.1 | 2639.8 | 3035.9 | 3307.8 | 3900.0  |
| 6166.8 | 5947.2 | 6895.4 | 5909.8 | 6326.9 | 7056.4 | 6905.6 | 6764.7 | 9460.0  |
| 4249.3 | 3933.5 | 5078.6 | 4200.0 | 5213.3 | 4439.2 | 5217.5 | 5660.4 | 8187.6  |
| 694.3  | 752.7  | 766.6  | 631.7  | 744.5  | 929.5  | 747.4  | 755.4  | 831.5   |
| 3968.0 | 3758.8 | 4296.8 | 3863.7 | 5786.5 | 5404.3 | 5825.5 | 6068.3 | 8436.4  |
| 7486.1 | 7193.0 | 7470.8 | 7062.0 | 8560.3 | 8787.9 | 9216.9 | 9192.8 | 10151.6 |
| 1796.2 | 1674.0 | 2791.3 | 1847.6 | 2253.1 | 2488.5 | 2347.4 | 2486.2 | 3956.0  |
| 3522.5 | 3670.2 | 3335.4 | 3425.0 | 3892.2 | 4860.6 | 4880.9 | 4929.5 | 6227.0  |
| 6507.8 | 6340.4 | 7701.6 | 6384.8 | 8424.4 | 8759.6 | 8798.0 | 8732.2 | 10767.1 |
| 1575.7 | 1388.7 | 1761.8 | 1701.4 | 2195.9 | 2420.2 | 2812.0 | 2576.1 | 1804.4  |
| 1657.3 | 1578.4 | 2202.2 | 1575.4 | 2432.2 | 1800.8 | 2473.1 | 2902.0 | 2600.2  |
| 1051.1 | 1019.9 | 1579.1 | 1176.7 | 1301.0 | 1132.0 | 1360.0 | 1431.4 | 1879.8  |
| 7159.9 | 6828.5 | 8285.0 | 7383.3 | 7375.4 | 7262.0 | 7419.8 | 7778.7 | 11173.5 |
| 1044.9 | 973.8  | 1512.5 | 1020.0 | 1657.1 | 1117.3 | 1665.9 | 1914.5 | 2256.5  |
| 2807.1 | 2764.2 | 3506.5 | 2679.3 | 3000.1 | 2240.4 | 2940.9 | 3341.6 | 3193.7  |
| 634.9  | 593.8  | 858.6  | 612.2  | 2579.0 | 2124.7 | 2397.8 | 2778.4 | 2945.2  |
| 206.6  | 204.0  | 264.1  | 225.2  | 970.6  | 925.0  | 1014.1 | 1024.9 | 1082.9  |
| 79.0   | 82.2   | 107.3  | 83.0   | 230.6  | 171.4  | 212.9  | 267.2  | 237.0   |
| 497.6  | 509.1  | 476.0  | 488.6  | 1380.5 | 1388.8 | 1651.0 | 1663.1 | 960.6   |
| 1808.9 | 1760.8 | 1978.9 | 1961.7 | 3322.3 | 3178.2 | 3599.9 | 3772.7 | 3000.0  |
| 10.5   | 6.1    | 3.3    | 4.4    | 2206.4 | 2503.8 | 2309.3 | 2341.4 | 1597.8  |
| 776.6  | 1225.1 | 727.8  | 752.4  | 1693.6 | 1444.5 | 2351.5 | 1834.1 | 1227.3  |
| 847.5  | 785.8  | 1066.4 | 750.9  | 741.6  | 805.1  | 717.2  | 851.8  | 511.8   |
| 2037.0 | 1787.8 | 2226.3 | 1527.1 | 2060.1 | 1827.0 | 2313.5 | 2533.5 | 4118.3  |
| 505.8  | 464.4  | 523.5  | 342.4  | 725.6  | 684.6  | 763.1  | 1034.3 | 1810.2  |
| 1506.2 | 1345.0 | 1564.4 | 1128.3 | 1583.5 | 1559.3 | 1754.6 | 1924.1 | 2901.0  |
| 2847.2 | 2716.0 | 2855.6 | 2875.5 | 1297.6 | 1340.4 | 1273.2 | 1423.5 | 175.6   |
| 742.4  | 725.1  | 1050.0 | 713.4  | 694.2  | 528.9  | 616.9  | 804.9  | 1065.2  |
| 2764.8 | 2879.9 | 3898.0 | 2656.6 | 1951.8 | 1357.5 | 1717.8 | 2186.1 | 2469.1  |
| 945.9  | 908.5  | 1447.4 | 1017.3 | 1158.3 | 1123.4 | 1513.4 | 1329.3 | 1685.8  |
| 2409.9 | 2098.2 | 3504.6 | 2167.5 | 3918.4 | 2659.7 | 3924.8 | 4227.2 | 4928.8  |
| 1003.1 | 969.4  | 1600.1 | 1042.5 | 1270.7 | 1392.9 | 1656.2 | 1490.5 | 2081.8  |
| 549.6  | 523.5  | 1370.6 | 1171.8 | 812.9  | 779.4  | 886.1  | 1032.6 | 541.4   |
| 1447.3 | 1352.6 | 1495.5 | 1155.5 | 1964.6 | 1861.6 | 2068.6 | 2312.4 | 1586.8  |
| 7604.1 | 6941.9 | 8269.9 | 7158.5 | 2575.3 | 2325.1 | 2650.8 | 2950.6 | 4597.2  |
| 538.8  | 542.1  | 1217.8 | 922.8  | 715.9  | 1042.1 | 760.5  | 869.3  | 415.7   |
| 254.2  | 208.1  | 401.4  | 209.1  | 253.8  | 223.9  | 386.1  | 356.9  | 598.3   |
| 456.4  | 414.5  | 500.3  | 458.6  | 456.2  | 368.0  | 434.6  | 537.9  | 486.3   |
| 7862.0 | 7597.4 | 9614.0 | 7483.5 | 3033.0 | 2657.1 | 2907.2 | 3435.1 | 1287.6  |
| 656.9  | 639.0  | 1062.0 | 682.8  | 1418.0 | 1385.4 | 1284.4 | 1475.8 | 1057.7  |
| 1280.9 | 1404.6 | 1382.3 | 1475.4 | 1350.7 | 1425.2 | 1465.1 | 1663.4 | 1955.2  |
| 558.6  | 625.4  | 845.1  | 519.1  | 1470.2 | 2141.4 | 2335.8 | 1663.5 | 1117.9  |
| 370.2  | 323.2  | 529.1  | 334.3  | 454.7  | 523.0  | 475.9  | 497.1  | 341.5   |
| 294.8  | 239.9  | 471.8  | 323.5  | 620.2  | 615.3  | 626.4  | 710.7  | 320.3   |
| 1759.9 | 1703.5 | 1994.9 | 1545.5 | 2079.0 | 1987.7 | 1936.9 | 2387.4 | 2053.5  |
| 1620.1 | 1514.4 | 2065.1 | 1557.9 | 2528.0 | 2603.0 | 2989.3 | 2653.7 | 2202.4  |
| 2236.3 | 2113.0 | 2589.0 | 1941.0 | 2722.0 | 2590.1 | 2839.4 | 3198.9 | 2888.7  |
| 3522.9 | 3105.2 | 5405.8 | 3586.5 | 5472.5 | 4761.6 | 5311.6 | 6044.5 | 7832.3  |
| 92.6   | 105.0  | 148.3  | 100.5  | 340.1  | 658.9  | 377.3  | 389.8  | 720.1   |
| 130.5  | 117.0  | 201.1  | 128.2  | 502.2  | 971.6  | 592.1  | 577.6  | 747.0   |
| 1065.4 | 953.4  | 1469.6 | 1028.7 | 1123.6 | 1090.1 | 1207.2 | 1417.1 | 946.0   |

|        |        |        |        |        |        |        |        |         |
|--------|--------|--------|--------|--------|--------|--------|--------|---------|
| 2815.5 | 2590.0 | 4113.1 | 2889.4 | 2160.1 | 1877.6 | 2010.1 | 2338.0 | 2391.4  |
| 622.6  | 837.4  | 638.0  | 745.2  | 576.9  | 912.0  | 622.5  | 672.0  | 519.4   |
| 7984.6 | 7529.6 | 7998.5 | 8036.7 | 6588.1 | 6322.5 | 6894.8 | 7354.7 | 8361.2  |
| 2953.1 | 2434.8 | 5372.7 | 3485.9 | 5845.1 | 6192.1 | 5894.4 | 6448.8 | 6604.8  |
| 436.8  | 418.1  | 368.0  | 411.8  | 210.0  | 298.2  | 201.6  | 207.1  | 48.1    |
| 1784.8 | 1666.4 | 1192.2 | 1748.0 | 655.9  | 893.0  | 589.9  | 687.4  | 229.9   |
| 331.4  | 304.2  | 317.8  | 339.9  | 179.7  | 266.3  | 138.9  | 187.7  | 48.6    |
| 3687.3 | 3285.7 | 5163.4 | 3293.8 | 4989.0 | 4551.0 | 5051.3 | 5658.4 | 5586.0  |
| 3206.0 | 3022.9 | 4490.8 | 3300.7 | 4621.0 | 4715.6 | 4749.0 | 4419.0 | 3553.2  |
| 3257.5 | 3027.6 | 4572.6 | 3126.9 | 4349.2 | 4176.7 | 4489.6 | 5106.9 | 4010.8  |
| 2268.2 | 2010.8 | 3193.4 | 2030.8 | 4006.3 | 3532.9 | 3921.4 | 4314.3 | 4209.0  |
| 4310.8 | 4154.3 | 4408.8 | 3824.1 | 3713.2 | 3397.2 | 3944.0 | 4150.1 | 4640.9  |
| 574.1  | 559.5  | 856.2  | 592.1  | 460.6  | 597.4  | 556.6  | 547.0  | 305.2   |
| 2832.4 | 2491.5 | 3369.0 | 2560.0 | 669.8  | 348.6  | 748.8  | 793.3  | 1952.6  |
| 2572.5 | 2715.5 | 3352.6 | 3439.1 | 2424.1 | 3020.6 | 2846.3 | 2965.2 | 2249.5  |
| 4.6    | 9.4    | 13.9   | 10.6   | 337.8  | 449.9  | 339.3  | 381.3  | 328.0   |
| 3054.3 | 2976.6 | 4545.8 | 3422.4 | 1183.7 | 1434.7 | 1286.9 | 1284.6 | 5685.5  |
| 308.1  | 415.8  | 182.3  | 299.2  | 88.1   | 48.0   | 90.7   | 103.0  | 61.7    |
| 15.1   | 2.7    | 4.1    | 14.1   | 505.8  | 702.0  | 555.2  | 618.0  | 476.0   |
| 3273.0 | 2870.6 | 5820.1 | 2921.4 | 5967.5 | 5121.3 | 5901.6 | 6502.2 | 9247.5  |
| 6440.2 | 6003.4 | 6714.2 | 6243.9 | 7603.2 | 8247.3 | 7891.2 | 7786.2 | 10887.3 |
| 777.4  | 761.4  | 899.7  | 814.0  | 2212.6 | 2206.9 | 2363.3 | 2606.8 | 4283.6  |
| 4095.1 | 3535.5 | 4892.3 | 3185.2 | 1794.8 | 1363.4 | 1886.2 | 1944.7 | 2819.4  |
| 3398.6 | 3251.4 | 3903.0 | 3132.3 | 3935.4 | 4650.3 | 4010.2 | 4323.8 | 2743.7  |
| 2967.0 | 2682.7 | 3553.3 | 2156.0 | 2143.0 | 1612.8 | 2272.6 | 2495.0 | 1939.7  |
| 2320.1 | 2089.4 | 2957.7 | 2046.1 | 2314.7 | 2651.3 | 2195.2 | 2477.8 | 1577.4  |
| 2442.2 | 2178.9 | 3840.7 | 2453.0 | 4134.6 | 3704.3 | 3928.0 | 4460.9 | 6572.6  |
| 3672.8 | 3029.6 | 5233.3 | 3381.0 | 1753.4 | 1690.1 | 1894.6 | 1928.3 | 2463.5  |
| 1250.0 | 1129.5 | 2077.2 | 1381.2 | 603.9  | 451.6  | 648.2  | 711.4  | 721.3   |
| 2549.5 | 2410.3 | 2776.9 | 2216.9 | 3453.1 | 3890.7 | 3865.3 | 4118.5 | 4197.8  |
| 640.5  | 702.1  | 583.8  | 804.0  | 1330.9 | 1644.9 | 1490.1 | 1558.3 | 937.1   |
| 2827.7 | 2737.0 | 3813.2 | 2890.9 | 2463.4 | 2014.5 | 2274.9 | 2676.8 | 4523.0  |
| 2518.6 | 2127.3 | 2794.9 | 2103.9 | 2909.3 | 3388.2 | 3044.4 | 3253.2 | 4259.5  |
| 643.8  | 514.4  | 965.9  | 539.5  | 566.6  | 540.7  | 508.9  | 575.6  | 949.1   |
| 0.6    | 0.7    | 3.2    | 2.0    | 3961.2 | 3350.3 | 4376.6 | 4683.3 | 3902.7  |
| 1121.7 | 1000.9 | 1719.0 | 1045.8 | 949.2  | 889.3  | 879.3  | 996.4  | 1431.6  |
| 611.5  | 548.7  | 777.7  | 569.0  | 657.4  | 709.5  | 657.7  | 707.4  | 839.7   |
| 2006.0 | 1870.9 | 2669.9 | 1807.6 | 2347.3 | 2486.9 | 2245.8 | 2677.0 | 3466.3  |
| 1095.5 | 1000.0 | 1457.3 | 951.9  | 1261.4 | 1404.8 | 1242.2 | 1502.7 | 1993.1  |
| 2670.5 | 2280.8 | 3661.0 | 3003.7 | 402.8  | 564.9  | 509.6  | 509.0  | 340.9   |
| 71.3   | 68.8   | 108.9  | 66.1   | 255.8  | 303.8  | 231.2  | 285.0  | 198.9   |
| 104.3  | 116.3  | 164.8  | 118.5  | 480.9  | 512.9  | 482.0  | 623.2  | 389.4   |
| 2759.5 | 2964.5 | 2786.8 | 2565.6 | 2032.7 | 1701.2 | 2328.0 | 2659.2 | 2671.4  |
| 4624.6 | 4661.7 | 5442.1 | 4884.4 | 5069.9 | 5287.5 | 5181.9 | 5291.7 | 7607.1  |
| 1737.1 | 1629.0 | 2359.1 | 1784.8 | 883.7  | 819.7  | 1001.5 | 1028.8 | 1306.0  |
| 95.1   | 97.2   | 130.5  | 109.6  | 156.4  | 114.3  | 118.0  | 158.4  | 144.7   |
| 1553.6 | 1535.4 | 1901.9 | 1515.3 | 3433.5 | 3113.0 | 3568.9 | 3638.4 | 1715.6  |
| 1022.9 | 1052.5 | 442.4  | 789.9  | 941.4  | 1371.1 | 1100.4 | 1168.7 | 762.4   |
| 1640.5 | 1521.6 | 2488.8 | 1524.7 | 2997.6 | 2047.4 | 2913.8 | 3176.0 | 4315.1  |
| 3597.8 | 3477.8 | 4680.4 | 3458.1 | 5150.6 | 4320.3 | 5234.2 | 5389.1 | 7280.7  |
| 3035.0 | 3158.6 | 3401.4 | 2646.0 | 2365.9 | 1794.0 | 2516.7 | 2553.0 | 1587.6  |
| 1581.5 | 1435.4 | 2141.4 | 1504.1 | 1526.1 | 1241.7 | 1532.6 | 1662.9 | 2045.6  |
| 502.6  | 448.5  | 690.3  | 518.1  | 575.4  | 447.6  | 495.3  | 620.3  | 565.9   |



|        |        |        |        |        |        |        |        |         |
|--------|--------|--------|--------|--------|--------|--------|--------|---------|
| 265.5  | 252.0  | 382.4  | 280.1  | 305.7  | 233.7  | 269.0  | 321.2  | 337.7   |
| 82.2   | 99.1   | 91.0   | 119.2  | 151.3  | 62.4   | 122.3  | 153.7  | 238.7   |
| 1999.1 | 1855.1 | 2050.0 | 1839.7 | 1631.5 | 1079.7 | 1590.4 | 1747.1 | 2705.0  |
| 480.9  | 398.0  | 679.6  | 351.8  | 812.2  | 793.1  | 767.7  | 861.0  | 1135.7  |
| 164.2  | 161.0  | 190.8  | 152.9  | 85.9   | 84.2   | 85.4   | 115.8  | 112.6   |
| 4390.9 | 4209.3 | 4833.6 | 4270.5 | 4807.0 | 5333.9 | 4989.0 | 5297.4 | 7223.0  |
| 208.7  | 177.6  | 319.0  | 209.4  | 327.5  | 378.9  | 304.5  | 450.2  | 323.3   |
| 1713.1 | 1567.0 | 2525.3 | 1666.7 | 2740.7 | 3234.3 | 2753.2 | 2932.6 | 2691.7  |
| 1074.3 | 904.5  | 1576.9 | 935.7  | 1839.7 | 1811.3 | 1726.8 | 2073.5 | 1720.3  |
| 4456.8 | 4126.8 | 5854.9 | 4407.6 | 4583.6 | 4466.4 | 4755.8 | 5342.3 | 4214.0  |
| 752.0  | 733.9  | 893.8  | 639.2  | 543.4  | 381.5  | 589.0  | 700.6  | 617.7   |
| 515.2  | 411.9  | 687.3  | 475.0  | 500.4  | 511.7  | 561.2  | 548.9  | 528.1   |
| 1571.0 | 1759.4 | 1166.7 | 1356.3 | 291.0  | 290.4  | 296.4  | 373.0  | 1138.8  |
| 1000.7 | 821.1  | 1574.0 | 1001.0 | 929.3  | 942.2  | 915.7  | 844.9  | 768.4   |
| 1893.0 | 1545.1 | 3267.3 | 1776.3 | 2694.8 | 2399.5 | 2951.6 | 3468.7 | 1849.6  |
| 384.7  | 367.0  | 835.4  | 516.9  | 1533.1 | 1182.9 | 1522.5 | 1635.7 | 738.8   |
| 1848.2 | 1559.5 | 2792.0 | 1637.4 | 2062.6 | 2227.2 | 2475.3 | 2474.9 | 1328.5  |
| 1179.8 | 1137.4 | 995.4  | 937.5  | 1280.1 | 1737.5 | 1579.1 | 1455.6 | 1185.7  |
| 138.2  | 107.2  | 137.1  | 82.8   | 126.0  | 81.6   | 142.0  | 143.5  | 240.2   |
| 2617.9 | 2407.0 | 3825.1 | 2742.6 | 4316.6 | 3727.1 | 3938.3 | 4600.9 | 5467.9  |
| 1238.1 | 1169.4 | 1392.9 | 1350.1 | 499.1  | 666.1  | 874.4  | 648.2  | 665.8   |
| 2505.3 | 2248.8 | 3578.7 | 2404.4 | 4079.5 | 4361.9 | 4394.0 | 4529.7 | 7231.8  |
| 1109.1 | 1170.0 | 1217.1 | 1221.1 | 322.8  | 469.6  | 476.2  | 379.4  | 391.9   |
| 725.6  | 760.2  | 881.6  | 650.8  | 508.7  | 641.8  | 524.3  | 583.7  | 1897.4  |
| 1131.2 | 1072.8 | 1365.1 | 993.3  | 1079.5 | 846.2  | 1101.8 | 1145.1 | 1047.7  |
| 1084.1 | 1168.0 | 1331.4 | 1118.4 | 2488.3 | 2400.2 | 2454.6 | 2427.3 | 3033.8  |
| 791.2  | 856.1  | 1317.2 | 1229.4 | 777.2  | 867.9  | 666.8  | 926.9  | 1295.6  |
| 1224.3 | 1220.1 | 1257.8 | 1028.2 | 944.6  | 826.2  | 944.6  | 1138.6 | 1115.9  |
| 534.8  | 452.8  | 956.9  | 516.6  | 1263.3 | 1053.3 | 1319.2 | 1489.6 | 988.0   |
| 1117.6 | 971.0  | 1895.4 | 1203.8 | 2200.8 | 1918.9 | 2433.2 | 2524.9 | 1801.3  |
| 976.1  | 922.8  | 971.5  | 989.7  | 799.0  | 1097.7 | 905.3  | 1042.7 | 754.2   |
| 3106.8 | 3064.2 | 1875.2 | 3160.0 | 3436.8 | 3727.6 | 3578.6 | 3859.1 | 7265.3  |
| 6264.4 | 5811.3 | 6297.0 | 6186.9 | 7279.8 | 7906.8 | 7813.8 | 8046.7 | 10045.7 |
| 7705.1 | 7410.8 | 8747.5 | 7764.6 | 8265.3 | 8342.2 | 8599.8 | 8797.0 | 11541.3 |
| 5574.2 | 5114.1 | 5769.6 | 4577.2 | 4815.2 | 5381.8 | 5245.7 | 5850.5 | 6455.7  |
| 165.0  | 165.7  | 229.0  | 183.5  | 140.5  | 112.4  | 156.2  | 196.0  | 204.5   |
| 302.0  | 270.8  | 454.1  | 290.2  | 407.9  | 433.9  | 413.4  | 476.8  | 556.1   |
| 335.5  | 311.2  | 476.5  | 342.1  | 419.5  | 354.3  | 392.8  | 448.8  | 463.7   |
| 747.2  | 686.6  | 852.1  | 716.6  | 912.4  | 702.6  | 816.9  | 1063.4 | 1138.1  |
| 2090.7 | 2043.8 | 2790.9 | 2052.6 | 2694.0 | 1891.2 | 2488.2 | 3135.6 | 3704.3  |
| 8.8    | 7.3    | 10.9   | 8.8    | 3.9    | 4.7    | 2.5    | 10.3   | 24.1    |
| 3596.6 | 3384.6 | 4091.2 | 3568.6 | 3921.3 | 4326.4 | 4004.6 | 4447.2 | 6582.7  |
| 1823.1 | 1634.9 | 2762.8 | 1816.4 | 2639.0 | 2039.1 | 2289.8 | 2782.2 | 3440.5  |
| 215.5  | 199.2  | 336.6  | 192.9  | 404.1  | 486.6  | 683.9  | 664.0  | 864.1   |
| 1357.1 | 1190.8 | 1735.0 | 1349.8 | 1830.4 | 1874.6 | 2184.3 | 2045.8 | 2115.0  |
| 1312.8 | 1127.1 | 1736.7 | 1246.3 | 2398.8 | 2153.1 | 2603.0 | 2784.8 | 1794.2  |
| 379.5  | 297.6  | 700.8  | 345.5  | 329.4  | 342.6  | 343.1  | 394.5  | 1242.2  |
| 352.6  | 270.3  | 560.6  | 339.4  | 201.4  | 173.5  | 140.9  | 162.0  | 721.1   |
| 581.9  | 486.4  | 708.6  | 614.8  | 264.3  | 291.3  | 239.7  | 276.6  | 1081.1  |
| 1110.2 | 819.8  | 2058.0 | 860.9  | 428.5  | 384.8  | 478.7  | 692.3  | 3014.0  |
| 422.0  | 342.4  | 681.7  | 380.9  | 705.4  | 712.5  | 787.4  | 908.6  | 1487.9  |
| 4377.8 | 4169.0 | 5553.0 | 4840.8 | 6312.8 | 6493.3 | 6688.5 | 7001.5 | 8946.3  |
| 1763.7 | 1470.9 | 2904.8 | 1613.8 | 1984.6 | 2211.0 | 2054.0 | 2200.3 | 4242.9  |

|        |        |        |        |        |        |        |        |         |
|--------|--------|--------|--------|--------|--------|--------|--------|---------|
| 776.9  | 663.8  | 1223.6 | 748.8  | 1045.4 | 896.7  | 1134.7 | 1186.3 | 1924.1  |
| 3334.5 | 2960.4 | 4547.3 | 3192.5 | 3670.8 | 3357.4 | 3955.0 | 4160.8 | 6042.2  |
| 308.5  | 269.5  | 455.2  | 307.7  | 400.3  | 364.5  | 352.0  | 474.3  | 350.3   |
| 1209.1 | 1078.6 | 1993.5 | 1210.4 | 1582.7 | 1350.0 | 1471.6 | 1775.8 | 1212.8  |
| 8109.0 | 7606.4 | 8433.3 | 7833.8 | 7295.2 | 7942.1 | 7655.5 | 7682.5 | 10583.1 |
| 650.3  | 699.3  | 418.5  | 625.2  | 279.7  | 517.1  | 292.9  | 315.4  | 341.3   |
| 494.4  | 537.7  | 328.9  | 597.9  | 466.1  | 792.3  | 581.4  | 611.2  | 507.8   |
| 807.0  | 727.8  | 1541.5 | 664.5  | 1029.8 | 1185.8 | 1078.6 | 1172.5 | 1532.0  |
| 973.8  | 924.3  | 1527.4 | 886.2  | 1243.9 | 1343.3 | 1417.5 | 1426.9 | 1690.6  |
| 1094.3 | 1038.0 | 1762.3 | 1008.5 | 1336.4 | 1560.6 | 1471.4 | 1592.7 | 1605.9  |
| 250.5  | 269.5  | 239.1  | 267.1  | 304.4  | 286.4  | 252.8  | 328.3  | 335.1   |
| 9248.4 | 8754.9 | 9706.2 | 8687.0 | 9185.6 | 9381.5 | 9636.6 | 9795.7 | 10028.5 |
| 943.2  | 841.2  | 1728.0 | 997.2  | 686.3  | 607.9  | 612.9  | 819.1  | 1267.3  |
| 3046.3 | 2751.4 | 4712.3 | 3168.5 | 4724.9 | 4060.0 | 4605.8 | 4903.6 | 6984.6  |
| 2158.3 | 1860.0 | 2910.3 | 1871.2 | 1953.8 | 1919.9 | 1873.3 | 2340.7 | 3052.8  |
| 689.7  | 635.2  | 738.8  | 631.6  | 137.1  | 107.2  | 117.5  | 122.8  | 93.6    |
| 648.8  | 466.7  | 1163.4 | 516.2  | 1507.4 | 598.0  | 1339.3 | 1578.8 | 2312.4  |
| 1245.3 | 949.6  | 2087.4 | 1042.4 | 2905.6 | 1351.7 | 2843.7 | 3113.5 | 3672.8  |
| 415.7  | 342.3  | 751.4  | 379.0  | 1851.4 | 2121.8 | 1882.1 | 2021.7 | 817.6   |
| 334.9  | 222.1  | 464.8  | 300.9  | 1582.1 | 1887.1 | 1535.1 | 1881.7 | 757.2   |
| 555.3  | 500.9  | 944.5  | 534.0  | 2251.1 | 2780.9 | 2436.2 | 2457.8 | 786.2   |
| 294.7  | 358.3  | 270.5  | 252.5  | 902.3  | 1301.2 | 932.6  | 1045.8 | 731.4   |
| 402.6  | 474.4  | 347.5  | 369.8  | 1026.4 | 1624.7 | 1159.8 | 1276.2 | 716.6   |
| 403.2  | 347.7  | 589.4  | 380.0  | 739.7  | 512.6  | 783.7  | 1003.2 | 998.1   |
| 790.3  | 773.9  | 947.3  | 773.0  | 825.4  | 614.1  | 894.8  | 1116.6 | 1175.4  |
| 62.6   | 60.6   | 125.7  | 85.5   | 628.5  | 570.1  | 581.8  | 696.8  | 1360.8  |
| 6645.3 | 6169.6 | 6970.2 | 6018.8 | 7282.9 | 7511.4 | 7371.0 | 7827.5 | 11190.2 |
| 1026.1 | 991.4  | 1289.8 | 940.9  | 1530.0 | 1873.9 | 1397.5 | 1738.3 | 1932.9  |
| 1666.6 | 1563.6 | 2001.4 | 1526.9 | 2105.1 | 2529.0 | 2034.1 | 2321.6 | 2810.0  |
| 252.0  | 237.0  | 382.8  | 289.1  | 333.6  | 415.5  | 421.8  | 412.4  | 185.4   |
| 108.3  | 102.3  | 113.7  | 103.5  | 119.4  | 149.5  | 135.2  | 147.5  | 98.7    |
| 569.8  | 565.3  | 688.4  | 569.3  | 1458.9 | 1198.7 | 1320.6 | 1563.2 | 1697.2  |
| 160.6  | 155.3  | 239.1  | 157.0  | 484.5  | 402.3  | 460.2  | 540.0  | 675.9   |
| 128.5  | 121.4  | 86.6   | 94.6   | 401.6  | 524.8  | 413.3  | 396.1  | 718.4   |
| 172.3  | 173.9  | 189.4  | 147.8  | 1045.7 | 1049.9 | 1138.6 | 1181.1 | 1705.7  |
| 2607.7 | 2368.9 | 3322.7 | 2289.3 | 2308.9 | 1532.4 | 2499.5 | 2644.9 | 3200.4  |
| 3789.7 | 3479.4 | 4496.5 | 3561.4 | 2749.5 | 2181.4 | 2905.5 | 3380.3 | 4595.3  |
| 1760.6 | 1692.8 | 2063.2 | 1762.7 | 2334.9 | 2431.7 | 2528.9 | 2761.5 | 2551.3  |
| 3110.6 | 3056.5 | 3661.4 | 2978.0 | 3303.6 | 2764.2 | 3438.4 | 3838.7 | 5008.5  |
| 1538.4 | 1139.3 | 2259.7 | 1025.0 | 2038.0 | 1583.3 | 1841.0 | 2171.0 | 2038.1  |
| 1688.7 | 1483.6 | 2339.3 | 1326.6 | 2071.3 | 1819.2 | 1988.4 | 2303.0 | 1973.6  |
| 933.8  | 811.8  | 1203.3 | 740.4  | 1821.1 | 2009.2 | 1952.8 | 2208.0 | 1014.4  |
| 1762.0 | 1792.2 | 2456.2 | 2061.5 | 1802.9 | 3170.1 | 2102.1 | 2015.3 | 2629.0  |
| 6137.2 | 5449.7 | 6829.3 | 5812.0 | 5639.0 | 5931.9 | 6060.5 | 6409.4 | 5833.1  |
| 4535.9 | 4201.2 | 5428.0 | 5029.4 | 5193.4 | 5593.2 | 5480.0 | 5777.6 | 7827.5  |
| 1174.1 | 1089.0 | 1780.5 | 1189.5 | 2968.4 | 3214.0 | 3269.0 | 3485.8 | 2239.8  |
| 223.9  | 210.1  | 333.7  | 163.6  | 739.4  | 492.3  | 628.9  | 745.6  | 784.0   |
| 2.6    | 4.1    | 4.1    | 4.8    | 13.4   | 33.8   | 33.3   | 17.7   | 5.6     |
| 11.0   | 7.9    | 15.5   | 6.7    | 71.1   | 72.1   | 70.5   | 70.1   | 16.0    |
| 2469.2 | 2554.9 | 3117.0 | 2763.9 | 2685.2 | 3016.5 | 2580.0 | 2786.4 | 5327.7  |
| 351.9  | 307.7  | 517.4  | 312.2  | 1357.9 | 2179.7 | 1440.4 | 1344.0 | 1085.5  |
| 477.6  | 443.2  | 637.9  | 466.9  | 2842.0 | 4130.9 | 2963.5 | 3082.9 | 1815.1  |
| 793.1  | 717.8  | 1229.1 | 887.9  | 424.2  | 510.5  | 560.3  | 674.4  | 631.2   |

|        |        |         |        |         |        |         |         |         |
|--------|--------|---------|--------|---------|--------|---------|---------|---------|
| 304.4  | 213.4  | 1091.3  | 177.8  | 2613.9  | 2927.2 | 2356.9  | 2729.4  | 710.9   |
| 550.5  | 576.0  | 636.6   | 525.1  | 908.7   | 968.7  | 924.9   | 1024.1  | 626.3   |
| 1982.3 | 1906.5 | 2891.3  | 1977.9 | 2747.8  | 2127.2 | 2722.6  | 3065.7  | 2974.7  |
| 731.8  | 653.4  | 942.2   | 724.0  | 665.3   | 677.4  | 725.6   | 774.9   | 483.5   |
| 2454.3 | 2493.3 | 2690.1  | 2691.4 | 1666.8  | 1629.1 | 1734.6  | 1911.7  | 2373.1  |
| 6.7    | 10.0   | 9.5     | 10.6   | 3.9     | 4.3    | 6.2     | 10.9    | 8.9     |
| 249.3  | 203.5  | 209.2   | 148.0  | 157.1   | 144.4  | 126.0   | 169.3   | 568.2   |
| 1802.9 | 1838.6 | 1617.6  | 1492.2 | 1200.7  | 1349.1 | 1167.7  | 1277.1  | 2421.8  |
| 1706.7 | 1585.5 | 1568.8  | 1212.4 | 1121.9  | 1145.1 | 1100.6  | 1152.8  | 3093.1  |
| 3985.6 | 3741.7 | 4568.5  | 3886.8 | 3178.2  | 2790.7 | 3273.2  | 3452.0  | 1591.5  |
| 1908.1 | 1675.8 | 2455.7  | 1926.4 | 2370.2  | 1934.6 | 2568.3  | 2996.8  | 1062.9  |
| 9191.7 | 8890.0 | 10691.4 | 8853.8 | 10369.8 | 9773.5 | 10302.6 | 10689.6 | 11052.3 |
| 624.3  | 596.1  | 985.5   | 666.9  | 1495.4  | 3381.1 | 1570.2  | 1676.7  | 1010.4  |
| 2408.7 | 2206.7 | 3018.7  | 2613.7 | 1798.8  | 2606.6 | 2160.5  | 2066.9  | 3056.2  |
| 2541.8 | 2669.5 | 2972.9  | 2724.7 | 1340.1  | 1702.3 | 1426.8  | 1509.9  | 1766.5  |
| 376.8  | 334.0  | 477.6   | 375.5  | 567.3   | 565.1  | 652.0   | 621.2   | 564.3   |
| 2275.8 | 1775.1 | 3663.2  | 2177.8 | 4742.8  | 4097.7 | 4634.7  | 5149.3  | 5391.0  |
| 4853.3 | 4252.8 | 6737.2  | 4654.7 | 6781.3  | 6061.5 | 6955.6  | 7660.2  | 9190.7  |
| 321.1  | 343.9  | 319.8   | 247.0  | 1016.2  | 1153.8 | 1459.1  | 1231.2  | 302.4   |
| 5440.7 | 4959.1 | 5976.4  | 5125.7 | 5571.2  | 6483.5 | 6023.9  | 6186.0  | 8400.0  |
| 1299.0 | 1246.3 | 1366.8  | 1088.9 | 407.5   | 428.0  | 381.9   | 472.6   | 839.0   |
| 769.5  | 843.4  | 821.4   | 675.8  | 255.9   | 248.9  | 233.8   | 288.9   | 469.2   |
| 873.1  | 745.8  | 1508.5  | 859.6  | 2664.2  | 2591.2 | 2719.0  | 2895.8  | 3574.8  |
| 240.7  | 221.8  | 388.9   | 266.9  | 429.3   | 380.4  | 371.2   | 483.5   | 219.8   |
| 1435.0 | 1278.3 | 1218.6  | 1278.9 | 716.6   | 841.7  | 718.1   | 778.2   | 623.8   |
| 224.3  | 215.0  | 454.3   | 250.2  | 919.2   | 1019.5 | 951.6   | 989.9   | 700.9   |
| 341.8  | 339.2  | 526.5   | 395.2  | 868.5   | 770.9  | 761.6   | 1005.3  | 504.3   |
| 6993.6 | 6647.2 | 8098.7  | 6877.4 | 8693.9  | 8892.3 | 8902.8  | 9424.3  | 11418.6 |
| 1482.4 | 1333.1 | 2210.4  | 1460.0 | 2840.0  | 2881.0 | 2843.0  | 3182.3  | 2338.3  |
| 5297.0 | 4871.4 | 6761.7  | 5391.2 | 5784.9  | 5604.9 | 5931.4  | 5551.1  | 8353.2  |
| 1046.1 | 900.2  | 1600.2  | 987.8  | 1883.8  | 2013.4 | 1892.5  | 2113.4  | 2681.9  |
| 741.1  | 636.1  | 875.4   | 665.0  | 1043.5  | 1082.3 | 1143.8  | 1289.4  | 889.3   |
| 2130.9 | 1853.3 | 3300.1  | 2024.3 | 2966.5  | 2956.3 | 3187.7  | 3318.3  | 4105.8  |
| 2818.4 | 2643.8 | 3278.3  | 2778.3 | 4111.3  | 3888.7 | 4071.1  | 4243.1  | 7483.4  |
| 27.7   | 23.9   | 39.3    | 21.0   | 1762.8  | 1825.1 | 1572.6  | 2188.0  | 2726.3  |
| 484.2  | 493.8  | 813.4   | 472.9  | 1218.3  | 1593.8 | 1343.8  | 1428.6  | 997.9   |
| 2715.5 | 2392.5 | 3677.1  | 2577.0 | 4759.1  | 4631.4 | 5075.8  | 4872.2  | 7129.1  |
| 128.3  | 114.3  | 186.5   | 97.0   | 446.0   | 470.3  | 512.8   | 515.8   | 473.6   |
| 1216.3 | 925.3  | 2012.4  | 1168.6 | 1847.2  | 898.9  | 1828.3  | 2210.8  | 2927.3  |
| 821.7  | 710.6  | 1325.6  | 801.8  | 1386.0  | 692.9  | 1335.0  | 1595.3  | 1818.3  |
| 1116.9 | 974.4  | 1679.6  | 1017.3 | 2496.4  | 2126.3 | 2072.3  | 2468.7  | 1408.0  |
| 359.0  | 153.1  | 1643.1  | 350.8  | 570.1   | 556.2  | 1052.1  | 688.5   | 232.3   |
| 1640.1 | 1067.1 | 4574.9  | 1731.5 | 1797.5  | 1579.8 | 3100.7  | 2144.5  | 377.5   |
| 1114.2 | 1079.6 | 1493.1  | 1086.7 | 2175.3  | 2391.0 | 2345.0  | 2348.3  | 2121.3  |
| 4366.1 | 4581.4 | 4571.0  | 3837.3 | 7210.7  | 7550.4 | 7334.7  | 7699.9  | 12281.6 |
| 4.3    | 4.2    | 7.6     | 7.1    | 54.5    | 65.0   | 71.7    | 84.5    | 41.7    |
| 107.4  | 111.0  | 131.0   | 107.0  | 177.2   | 191.9  | 217.3   | 245.7   | 113.4   |
| 710.2  | 641.1  | 1073.0  | 731.2  | 1068.0  | 1043.3 | 1213.7  | 1197.3  | 2180.3  |
| 323.7  | 372.3  | 352.1   | 378.3  | 1278.4  | 1633.5 | 1383.1  | 1518.3  | 775.0   |
| 492.9  | 559.7  | 468.1   | 482.0  | 1761.0  | 2201.7 | 2023.4  | 2122.3  | 957.7   |
| 2400.5 | 2284.9 | 3091.0  | 2088.3 | 5084.7  | 4819.1 | 5470.5  | 5686.9  | 6464.9  |
| 70.9   | 54.3   | 119.7   | 59.4   | 324.3   | 524.8  | 459.3   | 425.3   | 400.7   |
| 320.0  | 283.3  | 467.0   | 309.6  | 1044.4  | 1567.7 | 1487.8  | 1221.3  | 1144.1  |

|        |        |        |        |        |        |        |        |         |
|--------|--------|--------|--------|--------|--------|--------|--------|---------|
| 436.3  | 469.3  | 623.0  | 512.9  | 953.3  | 1294.6 | 1076.4 | 1084.6 | 992.4   |
| 1879.7 | 1729.9 | 1945.5 | 1541.6 | 1763.2 | 1344.4 | 1956.3 | 2001.3 | 3252.4  |
| 2413.8 | 2387.2 | 2193.1 | 1868.2 | 1631.8 | 936.3  | 1755.4 | 1905.7 | 3083.4  |
| 2182.3 | 2010.4 | 3250.3 | 2068.7 | 2140.5 | 2201.2 | 2088.3 | 2239.8 | 1944.9  |
| 1547.6 | 1467.6 | 1611.5 | 1314.8 | 1533.5 | 1297.1 | 1747.3 | 1869.2 | 1314.2  |
| 295.0  | 295.0  | 448.0  | 304.6  | 624.0  | 685.2  | 815.1  | 847.8  | 365.6   |
| 530.5  | 514.5  | 763.8  | 538.0  | 715.1  | 734.2  | 817.0  | 839.6  | 416.4   |
| 1437.1 | 1457.4 | 1786.7 | 1500.0 | 1410.6 | 1343.4 | 1468.9 | 1588.1 | 968.8   |
| 902.1  | 954.4  | 943.1  | 819.6  | 833.2  | 881.7  | 812.1  | 940.4  | 851.6   |
| 1197.6 | 904.0  | 1778.1 | 1022.2 | 1590.6 | 1600.9 | 1668.1 | 1751.6 | 1013.3  |
| 2699.3 | 2357.9 | 4822.3 | 2539.5 | 4728.9 | 4057.3 | 4494.6 | 5021.0 | 6298.3  |
| 282.3  | 284.1  | 311.2  | 339.6  | 307.0  | 312.4  | 293.6  | 340.7  | 188.7   |
| 64.5   | 45.7   | 75.9   | 69.7   | 110.0  | 85.5   | 107.8  | 119.8  | 60.3    |
| 80.9   | 76.7   | 115.2  | 95.2   | 114.2  | 99.6   | 106.6  | 117.2  | 67.2    |
| 211.8  | 234.4  | 224.4  | 296.4  | 244.3  | 231.6  | 199.5  | 254.8  | 152.8   |
| 4653.5 | 4292.7 | 5448.4 | 4353.0 | 4663.8 | 4393.2 | 4753.3 | 5395.2 | 7891.6  |
| 700.7  | 755.8  | 604.7  | 548.2  | 2423.7 | 3260.3 | 2870.0 | 2873.4 | 1464.4  |
| 853.6  | 799.2  | 1019.2 | 701.0  | 1065.4 | 1004.0 | 1061.2 | 1301.9 | 796.4   |
| 345.5  | 288.4  | 331.8  | 259.4  | 251.8  | 223.1  | 215.2  | 245.2  | 257.5   |
| 1121.6 | 966.5  | 2313.9 | 873.2  | 1373.3 | 786.4  | 1556.8 | 1498.5 | 765.7   |
| 1653.4 | 1488.4 | 1894.5 | 1518.5 | 1363.6 | 1320.2 | 1534.6 | 1483.5 | 2280.5  |
| 954.5  | 915.8  | 1073.7 | 848.6  | 313.3  | 180.6  | 306.5  | 386.9  | 353.6   |
| 0.7    | 0.5    | 0.9    | 0.9    | 2.4    | 1.2    | 1.0    | 0.5    | 7.1     |
| 1669.7 | 1725.0 | 1554.2 | 1696.5 | 1346.6 | 2038.0 | 1408.0 | 1692.3 | 1539.4  |
| 742.0  | 682.1  | 803.3  | 552.7  | 469.8  | 372.5  | 378.7  | 508.3  | 592.5   |
| 798.1  | 826.1  | 866.3  | 634.9  | 528.8  | 515.8  | 442.5  | 594.0  | 859.7   |
| 3439.2 | 3078.2 | 4527.5 | 3419.6 | 6696.5 | 7274.9 | 7187.0 | 7611.2 | 12109.9 |
| 2131.1 | 1869.9 | 3160.6 | 1957.7 | 3363.7 | 3256.0 | 3553.6 | 3992.0 | 4755.4  |
| 3112.5 | 3105.0 | 2834.9 | 3144.3 | 2410.9 | 3430.4 | 2486.0 | 2536.4 | 2235.9  |
| 1931.0 | 2021.0 | 1062.0 | 1332.5 | 4339.3 | 4022.7 | 4550.7 | 4843.9 | 5907.8  |
| 2212.7 | 1998.8 | 3596.1 | 2251.2 | 3204.9 | 2659.2 | 3346.8 | 3447.2 | 4055.5  |
| 159.3  | 147.2  | 203.5  | 132.5  | 219.0  | 207.0  | 210.3  | 252.0  | 345.1   |
| 839.7  | 768.0  | 1636.6 | 887.8  | 1650.2 | 1281.6 | 1427.0 | 1609.9 | 2025.3  |
| 1745.8 | 1558.0 | 2140.4 | 1707.4 | 2858.1 | 2790.1 | 2827.8 | 3222.4 | 3504.9  |
| 1630.4 | 1529.1 | 2559.4 | 1679.7 | 4003.5 | 3270.0 | 4090.9 | 4291.7 | 4150.8  |
| 157.5  | 161.2  | 191.9  | 154.9  | 577.7  | 1378.1 | 1003.4 | 713.2  | 35.8    |
| 18.7   | 19.8   | 25.9   | 15.7   | 44.4   | 91.6   | 62.0   | 51.3   | 15.5    |
| 976.5  | 809.9  | 1551.5 | 928.6  | 1602.4 | 1202.5 | 1464.1 | 1733.5 | 1767.0  |
| 1896.5 | 1534.5 | 2924.1 | 1733.2 | 3420.3 | 2756.2 | 3469.4 | 3755.9 | 3872.1  |
| 762.4  | 766.5  | 1004.1 | 763.9  | 1701.8 | 1453.2 | 1691.5 | 1907.4 | 3337.8  |
| 748.9  | 596.9  | 1349.6 | 1011.3 | 1189.0 | 1060.7 | 1280.6 | 1303.5 | 1047.5  |
| 17.6   | 14.7   | 32.9   | 20.0   | 91.5   | 80.1   | 102.1  | 124.3  | 168.4   |
| 859.2  | 819.6  | 950.8  | 582.5  | 1308.6 | 1606.4 | 1170.6 | 1402.3 | 2037.0  |
| 1150.4 | 930.9  | 1992.1 | 1092.0 | 3002.4 | 2333.5 | 3079.4 | 3578.9 | 4591.3  |
| 508.7  | 454.4  | 643.1  | 439.6  | 1076.5 | 861.7  | 1064.5 | 1301.7 | 580.1   |
| 8446.9 | 7836.9 | 9755.2 | 8498.7 | 5049.4 | 5056.9 | 5195.9 | 5487.8 | 6516.5  |
| 464.9  | 363.8  | 806.1  | 432.9  | 1233.1 | 1007.5 | 1364.2 | 1560.2 | 828.0   |
| 300.0  | 238.7  | 510.5  | 291.7  | 666.4  | 563.9  | 743.2  | 819.1  | 326.5   |
| 2015.4 | 1696.1 | 3018.0 | 1773.0 | 3021.5 | 2480.6 | 3194.4 | 3752.5 | 1685.8  |
| 850.7  | 720.7  | 1463.2 | 604.0  | 1381.9 | 906.7  | 1387.0 | 1634.9 | 2878.5  |
| 1591.6 | 1344.3 | 2813.6 | 1495.3 | 2514.3 | 1585.2 | 2239.3 | 2656.6 | 4027.2  |
| 572.8  | 482.3  | 992.2  | 574.1  | 765.8  | 561.3  | 687.5  | 790.9  | 396.0   |
| 1221.5 | 1070.4 | 1971.1 | 1480.3 | 1398.6 | 1002.6 | 1266.3 | 1607.5 | 846.2   |

|        |        |        |        |        |        |        |        |         |
|--------|--------|--------|--------|--------|--------|--------|--------|---------|
| 1032.1 | 861.6  | 1567.1 | 888.5  | 2618.8 | 2452.1 | 2786.5 | 3013.1 | 3019.2  |
| 818.2  | 1079.0 | 545.7  | 741.3  | 3433.1 | 3149.1 | 5120.2 | 4727.6 | 126.5   |
| 305.9  | 315.3  | 335.0  | 248.0  | 334.0  | 302.0  | 342.9  | 450.6  | 383.8   |
| 511.8  | 537.1  | 537.2  | 520.2  | 495.7  | 554.3  | 607.2  | 649.2  | 668.6   |
| 375.5  | 318.4  | 500.5  | 354.3  | 661.7  | 748.4  | 779.2  | 794.8  | 1508.1  |
| 591.6  | 583.9  | 867.7  | 632.1  | 931.3  | 980.7  | 1061.5 | 1100.0 | 1399.1  |
| 996.4  | 944.7  | 1223.8 | 839.7  | 2705.9 | 2186.1 | 2709.8 | 3201.5 | 1729.9  |
| 266.6  | 219.3  | 448.6  | 258.5  | 1263.0 | 1283.4 | 1254.3 | 1427.8 | 1066.2  |
| 105.2  | 141.1  | 88.5   | 125.9  | 298.7  | 391.5  | 332.7  | 338.9  | 179.7   |
| 390.8  | 479.3  | 399.7  | 379.3  | 746.0  | 938.0  | 876.3  | 804.3  | 890.4   |
| 89.1   | 104.9  | 58.9   | 76.5   | 699.0  | 586.6  | 1353.8 | 1126.6 | 26.9    |
| 652.2  | 885.9  | 383.8  | 539.2  | 3473.1 | 3081.5 | 5774.5 | 4778.9 | 96.1    |
| 15.0   | 21.5   | 33.9   | 19.1   | 29.8   | 26.9   | 30.8   | 46.4   | 58.3    |
| 4060.4 | 3801.0 | 4764.4 | 3882.2 | 6275.5 | 6707.9 | 6401.3 | 6704.9 | 8924.8  |
| 2719.5 | 2455.1 | 4363.8 | 2804.3 | 3128.9 | 2824.0 | 3369.4 | 3424.8 | 4169.0  |
| 290.8  | 295.0  | 257.5  | 255.9  | 697.9  | 764.2  | 582.1  | 796.6  | 578.2   |
| 3786.4 | 4054.9 | 3167.3 | 3405.7 | 1678.6 | 2587.3 | 1832.4 | 1946.4 | 2476.3  |
| 145.5  | 160.4  | 315.7  | 127.7  | 530.2  | 549.1  | 483.6  | 575.0  | 519.0   |
| 827.5  | 823.5  | 1062.7 | 651.3  | 460.2  | 364.5  | 474.2  | 548.1  | 335.4   |
| 1509.8 | 1452.6 | 1532.6 | 1260.4 | 1849.0 | 1758.5 | 2059.5 | 2208.3 | 1390.1  |
| 888.1  | 907.7  | 1797.5 | 744.7  | 4323.5 | 4061.0 | 4493.2 | 4843.0 | 3632.9  |
| 99.0   | 69.3   | 119.4  | 73.6   | 339.8  | 414.7  | 378.9  | 454.1  | 579.6   |
| 592.0  | 594.9  | 807.8  | 603.7  | 1320.6 | 1324.7 | 1470.6 | 1558.4 | 2305.9  |
| 460.1  | 452.8  | 533.9  | 442.7  | 603.0  | 717.8  | 423.1  | 538.7  | 1444.0  |
| 643.8  | 894.8  | 504.2  | 614.7  | 375.7  | 647.6  | 433.5  | 383.7  | 2940.1  |
| 1065.0 | 1375.9 | 858.8  | 944.3  | 417.3  | 825.9  | 508.0  | 435.8  | 2456.9  |
| 534.2  | 499.0  | 702.1  | 470.5  | 647.8  | 686.0  | 760.4  | 814.2  | 376.1   |
| 120.3  | 121.2  | 208.8  | 174.4  | 561.0  | 774.9  | 592.1  | 705.9  | 2593.1  |
| 398.5  | 418.0  | 777.2  | 527.6  | 1585.8 | 2487.1 | 1733.9 | 1795.9 | 1593.4  |
| 4441.6 | 4088.1 | 5250.8 | 4285.0 | 3282.3 | 3686.0 | 3554.9 | 3803.3 | 6792.4  |
| 4611.7 | 4308.9 | 5435.0 | 4447.4 | 9150.8 | 9457.4 | 9024.0 | 9260.4 | 13222.1 |
| 1129.6 | 1023.0 | 1453.8 | 1050.4 | 524.7  | 614.0  | 479.0  | 574.5  | 787.1   |
| 22.5   | 25.0   | 37.8   | 22.5   | 8.6    | 8.5    | 8.9    | 18.4   | 19.0    |
| 1206.9 | 1012.9 | 1584.5 | 904.4  | 1672.4 | 1966.7 | 1905.9 | 1845.1 | 1212.8  |
| 4.1    | 7.1    | 10.2   | 4.1    | 13.0   | 6.2    | 12.4   | 8.8    | 11.4    |
| 420.7  | 454.9  | 416.0  | 307.1  | 1788.4 | 1471.5 | 2660.5 | 2013.5 | 349.4   |
| 650.3  | 628.4  | 664.6  | 630.0  | 1003.0 | 1286.8 | 1078.5 | 1181.4 | 725.2   |
| 6386.8 | 5933.6 | 6961.0 | 5917.2 | 7158.9 | 7316.8 | 7311.8 | 7411.6 | 10855.6 |
| 1081.5 | 1077.2 | 2018.0 | 891.0  | 2958.8 | 1998.3 | 2446.8 | 3426.7 | 1780.3  |
| 163.1  | 154.0  | 206.6  | 162.2  | 211.5  | 227.3  | 272.3  | 261.5  | 531.9   |
| 6763.0 | 6712.0 | 8634.1 | 6680.1 | 7244.8 | 6903.9 | 7047.3 | 7376.1 | 10360.2 |
| 4094.0 | 3885.9 | 4720.3 | 3694.3 | 5960.4 | 5862.8 | 6281.3 | 7027.8 | 6377.4  |
| 4.6    | 1.2    | 6.0    | 6.2    | 5.1    | 0.7    | 2.4    | 4.0    | 3.8     |
| 38.4   | 34.9   | 58.5   | 21.5   | 18.0   | 13.0   | 12.3   | 22.1   | 15.0    |
| 276.2  | 277.4  | 288.6  | 293.2  | 161.1  | 146.2  | 149.9  | 169.3  | 128.4   |
| 459.2  | 424.4  | 552.3  | 393.0  | 988.4  | 852.6  | 1094.5 | 1115.0 | 1329.2  |
| 1654.9 | 1381.5 | 1877.4 | 1339.5 | 3110.0 | 3070.3 | 3552.4 | 3397.4 | 3760.3  |
| 3194.1 | 2836.4 | 4547.9 | 2890.8 | 1672.8 | 1485.6 | 1656.9 | 1973.8 | 3242.9  |
| 2404.8 | 2172.7 | 3570.9 | 2262.9 | 2926.2 | 2848.8 | 3041.1 | 3278.0 | 2596.7  |
| 1412.4 | 1321.8 | 1705.7 | 1381.0 | 1182.6 | 1138.7 | 1354.8 | 1431.5 | 897.6   |
| 503.0  | 539.3  | 626.3  | 544.2  | 498.0  | 523.8  | 535.6  | 605.0  | 622.9   |
| 518.3  | 575.5  | 703.8  | 602.1  | 485.9  | 544.9  | 545.8  | 578.2  | 610.3   |
| 1626.1 | 1504.0 | 2185.8 | 1500.3 | 1342.6 | 1202.0 | 1529.8 | 1681.1 | 1668.3  |

|        |        |        |        |        |        |        |        |         |
|--------|--------|--------|--------|--------|--------|--------|--------|---------|
| 4336.5 | 4082.7 | 5067.5 | 4395.2 | 5827.7 | 6138.2 | 5921.1 | 6340.3 | 7707.8  |
| 877.8  | 782.5  | 1577.5 | 852.7  | 2825.2 | 2699.4 | 3091.4 | 3226.0 | 2076.5  |
| 3.9    | 2.4    | 1.6    | 1.7    | 39.4   | 72.4   | 45.2   | 44.3   | 1.3     |
| 1.2    | 1.9    | 2.9    | 4.3    | 18.2   | 19.2   | 16.6   | 25.2   | 1.0     |
| 4.4    | 8.1    | 8.7    | 7.0    | 184.4  | 227.8  | 210.4  | 227.4  | 12.5    |
| 391.2  | 334.2  | 677.9  | 425.7  | 555.6  | 523.8  | 499.8  | 602.9  | 897.1   |
| 582.5  | 558.3  | 876.0  | 630.5  | 1220.0 | 1137.6 | 1205.1 | 1312.2 | 1491.8  |
| 425.7  | 386.8  | 842.6  | 439.3  | 981.9  | 920.3  | 870.6  | 925.9  | 1597.8  |
| 474.8  | 479.8  | 940.5  | 500.3  | 959.7  | 978.4  | 875.7  | 1064.6 | 1435.8  |
| 2279.5 | 2290.6 | 2557.0 | 2205.9 | 2139.4 | 2406.9 | 2521.4 | 2609.3 | 1873.2  |
| 925.6  | 742.8  | 1095.0 | 658.1  | 1383.8 | 635.4  | 1296.0 | 1307.1 | 2256.6  |
| 1226.1 | 1157.4 | 1525.8 | 1213.0 | 1995.8 | 2204.4 | 2255.8 | 2215.0 | 4048.8  |
| 1013.5 | 1000.9 | 1568.2 | 1133.2 | 458.9  | 539.0  | 484.7  | 529.7  | 1200.8  |
| 110.8  | 107.8  | 44.4   | 89.3   | 174.2  | 204.4  | 233.5  | 199.6  | 50.3    |
| 5880.3 | 5590.6 | 6022.0 | 5711.3 | 7763.4 | 7602.5 | 7643.1 | 8189.2 | 10077.4 |
| 2141.8 | 1949.6 | 2647.1 | 2117.1 | 1892.8 | 2088.6 | 1884.2 | 2140.9 | 2615.1  |
| 59.1   | 59.2   | 141.3  | 56.5   | 1047.2 | 912.6  | 1438.6 | 1368.7 | 127.6   |
| 3851.9 | 3452.0 | 5921.8 | 3976.5 | 3914.6 | 3824.2 | 4018.6 | 4287.4 | 6907.5  |
| 1722.4 | 1539.6 | 1908.6 | 1674.8 | 3786.4 | 3971.2 | 4302.9 | 4324.6 | 5502.7  |
| 656.1  | 667.1  | 759.3  | 694.4  | 2284.2 | 2335.0 | 2593.5 | 2563.1 | 3473.6  |
| 1010.2 | 865.7  | 1492.9 | 973.9  | 522.9  | 561.8  | 565.3  | 604.5  | 609.3   |
| 1335.3 | 1120.3 | 1907.0 | 1236.8 | 615.9  | 659.2  | 637.2  | 755.3  | 708.8   |
| 1687.9 | 1393.4 | 2423.0 | 1538.3 | 2043.0 | 2372.9 | 2391.5 | 2334.9 | 2934.3  |
| 183.2  | 172.6  | 408.5  | 155.8  | 1501.1 | 1101.9 | 1531.0 | 1713.7 | 1832.4  |
| 67.9   | 50.0   | 138.9  | 49.6   | 781.7  | 583.1  | 791.1  | 911.5  | 1075.0  |
| 29.2   | 19.5   | 43.6   | 24.3   | 73.2   | 57.0   | 470.4  | 151.5  | 162.7   |
| 1815.1 | 1898.9 | 2418.9 | 2425.6 | 1793.0 | 1931.4 | 2049.5 | 1967.4 | 2500.4  |
| 1488.1 | 1610.0 | 1558.1 | 1617.8 | 990.7  | 1115.8 | 1015.4 | 1220.5 | 783.5   |
| 1564.1 | 1638.6 | 1692.1 | 1647.2 | 1207.7 | 1300.6 | 1430.4 | 1547.8 | 1495.3  |
| 1541.9 | 1489.0 | 1775.6 | 1410.8 | 2422.3 | 2256.3 | 2703.1 | 2811.5 | 2961.7  |
| 483.5  | 425.8  | 534.9  | 411.6  | 220.3  | 179.0  | 265.8  | 327.8  | 165.1   |
| 1204.2 | 1105.1 | 1523.8 | 977.6  | 1281.0 | 1287.7 | 1370.1 | 1418.8 | 1284.5  |
| 5966.8 | 5318.3 | 6799.5 | 5402.7 | 5737.2 | 5983.0 | 5970.5 | 6266.1 | 5577.1  |
| 722.9  | 729.6  | 694.9  | 551.4  | 446.7  | 414.8  | 600.4  | 542.3  | 142.7   |
| 528.7  | 509.7  | 534.7  | 564.4  | 1445.6 | 1339.4 | 1423.9 | 1548.0 | 3397.3  |
| 508.5  | 531.0  | 542.6  | 521.4  | 1446.7 | 1211.1 | 1466.5 | 1575.5 | 2909.6  |
| 679.8  | 778.8  | 703.7  | 711.2  | 1510.5 | 1361.4 | 1628.4 | 1692.5 | 2736.6  |
| 1.7    | 3.2    | 5.7    | 4.4    | 14.8   | 10.6   | 6.1    | 17.3   | 2.6     |
| 396.8  | 352.0  | 528.4  | 307.0  | 826.2  | 559.2  | 812.5  | 880.4  | 1367.1  |
| 56.7   | 44.7   | 75.6   | 51.8   | 271.3  | 146.0  | 254.0  | 309.2  | 254.8   |
| 2326.9 | 2076.4 | 2954.6 | 2045.6 | 3940.2 | 3562.7 | 4616.9 | 4616.9 | 3516.2  |
| 1146.6 | 1077.0 | 1599.9 | 1119.3 | 2080.5 | 1866.9 | 1954.0 | 2227.2 | 2269.3  |
| 561.2  | 483.2  | 686.9  | 469.2  | 832.0  | 863.0  | 914.6  | 961.1  | 751.8   |
| 1418.0 | 1344.1 | 1996.6 | 1396.4 | 1540.1 | 1236.7 | 1458.8 | 1692.1 | 1988.8  |
| 1207.7 | 1181.8 | 1765.5 | 1199.3 | 1545.6 | 1205.0 | 1496.7 | 1676.1 | 2060.0  |
| 1361.7 | 1295.3 | 1946.4 | 1435.1 | 1295.8 | 880.2  | 1171.9 | 1340.5 | 1752.4  |
| 253.5  | 237.3  | 379.6  | 286.2  | 656.2  | 472.4  | 596.2  | 668.4  | 605.8   |
| 1721.0 | 1495.8 | 2267.9 | 1524.5 | 3398.9 | 3077.2 | 4132.2 | 3974.5 | 2197.3  |
| 783.8  | 685.4  | 953.2  | 671.4  | 800.2  | 712.0  | 857.5  | 974.2  | 907.0   |
| 138.7  | 138.6  | 219.5  | 165.1  | 1091.2 | 1114.4 | 1567.9 | 1334.3 | 618.6   |
| 266.9  | 239.5  | 441.5  | 298.8  | 1281.0 | 1340.0 | 1562.6 | 1509.8 | 555.3   |
| 784.4  | 767.8  | 1129.5 | 801.5  | 1061.7 | 2088.5 | 1349.0 | 1318.2 | 1170.0  |
| 1254.3 | 1093.1 | 1572.1 | 1009.7 | 990.6  | 900.2  | 1008.2 | 1096.5 | 1378.1  |

|        |        |        |        |        |        |        |        |        |
|--------|--------|--------|--------|--------|--------|--------|--------|--------|
| 1603.2 | 1470.7 | 2156.1 | 1530.7 | 1255.1 | 1037.5 | 1207.9 | 1497.2 | 1337.3 |
| 790.9  | 760.5  | 1204.8 | 941.5  | 664.3  | 684.8  | 737.6  | 805.3  | 893.1  |
| 1154.3 | 976.0  | 1760.0 | 1180.3 | 1093.4 | 1309.4 | 1160.3 | 1289.0 | 1742.8 |
| 3713.8 | 3331.0 | 4560.8 | 3448.5 | 1039.7 | 728.6  | 1184.9 | 1253.3 | 2294.3 |
| 56.6   | 58.8   | 84.9   | 50.7   | 20.4   | 17.2   | 19.6   | 28.8   | 19.7   |
| 1830.4 | 1687.4 | 1739.3 | 1691.8 | 1410.9 | 1229.0 | 1380.9 | 1667.5 | 1225.9 |
| 691.2  | 780.2  | 639.9  | 438.2  | 150.9  | 308.2  | 121.3  | 210.5  | 103.9  |
| 742.1  | 932.5  | 623.1  | 625.7  | 155.0  | 327.8  | 137.2  | 205.6  | 120.4  |
| 1339.4 | 1577.5 | 1189.7 | 1181.3 | 204.3  | 605.4  | 208.9  | 278.9  | 120.0  |
| 861.6  | 711.2  | 1481.2 | 840.1  | 1168.0 | 1153.2 | 1320.5 | 1480.0 | 1130.4 |
| 712.6  | 953.1  | 297.3  | 288.4  | 3943.9 | 4322.3 | 3933.2 | 4573.7 | 5189.6 |
| 1350.6 | 1155.3 | 2123.3 | 1257.4 | 1796.6 | 1155.5 | 1821.1 | 2127.5 | 2548.3 |
| 796.2  | 663.1  | 1458.5 | 785.3  | 1758.4 | 1136.1 | 1752.9 | 1881.1 | 2764.2 |
| 1331.4 | 1273.7 | 1351.3 | 991.1  | 90.3   | 98.4   | 120.9  | 152.5  | 15.1   |
| 1147.0 | 1016.7 | 1664.6 | 833.9  | 1053.9 | 777.8  | 966.9  | 1178.6 | 1583.3 |
| 658.1  | 628.1  | 771.9  | 558.3  | 526.5  | 439.3  | 524.3  | 585.4  | 591.6  |
| 556.9  | 511.3  | 762.0  | 569.3  | 350.1  | 225.9  | 284.5  | 391.8  | 534.7  |
| 2062.3 | 1870.8 | 2425.1 | 1569.4 | 1564.3 | 1348.4 | 1517.9 | 1660.5 | 2445.0 |
| 464.7  | 498.4  | 691.7  | 495.5  | 677.5  | 608.8  | 593.0  | 692.0  | 397.2  |
| 5823.2 | 5502.1 | 6497.4 | 5141.5 | 3685.5 | 3119.6 | 4578.8 | 4518.9 | 3674.5 |
| 5588.7 | 5710.4 | 6009.5 | 5515.0 | 3948.7 | 3971.2 | 5421.7 | 4599.2 | 3406.9 |
| 947.1  | 943.4  | 825.4  | 804.7  | 1569.3 | 1667.9 | 1588.2 | 1791.8 | 1385.1 |
| 258.5  | 237.5  | 328.2  | 240.2  | 642.0  | 641.0  | 935.2  | 750.1  | 589.1  |
| 158.2  | 110.8  | 244.1  | 143.8  | 264.2  | 199.5  | 231.2  | 301.5  | 202.8  |
| 26.5   | 23.7   | 38.7   | 27.8   | 96.1   | 73.4   | 108.6  | 103.9  | 65.5   |
| 288.5  | 289.7  | 440.5  | 305.0  | 398.1  | 333.5  | 352.7  | 397.2  | 262.8  |
| 1622.3 | 1518.6 | 1737.0 | 1459.3 | 551.9  | 712.5  | 594.5  | 611.7  | 133.1  |
| 2560.4 | 2600.4 | 2686.5 | 2481.5 | 1025.3 | 1279.2 | 1155.8 | 1247.4 | 229.9  |
| 287.3  | 220.1  | 728.9  | 279.2  | 6053.8 | 5586.8 | 6390.6 | 6478.3 | 6935.9 |
| 1589.9 | 1433.8 | 2463.5 | 1438.3 | 1899.4 | 1353.5 | 1872.9 | 2157.9 | 4339.2 |
| 191.8  | 182.9  | 175.7  | 164.3  | 661.7  | 717.0  | 740.2  | 833.7  | 556.9  |
| 6674.4 | 6512.3 | 7098.2 | 6647.7 | 6262.5 | 6733.1 | 6473.3 | 6494.1 | 9219.2 |
| 462.8  | 457.0  | 426.4  | 648.9  | 1258.4 | 891.8  | 1149.6 | 1483.6 | 1669.5 |
| 238.2  | 207.1  | 448.1  | 282.4  | 159.9  | 155.8  | 148.6  | 180.2  | 244.5  |
| 855.0  | 909.2  | 1549.3 | 986.9  | 260.6  | 274.2  | 266.0  | 367.1  | 384.9  |
| 797.8  | 856.6  | 1220.5 | 806.8  | 2175.1 | 2088.3 | 2442.8 | 2271.1 | 1426.0 |
| 196.0  | 168.2  | 324.5  | 183.2  | 410.2  | 172.7  | 316.6  | 556.8  | 447.5  |
| 318.8  | 274.4  | 499.8  | 309.2  | 479.5  | 524.6  | 368.6  | 462.8  | 894.1  |
| 105.5  | 107.1  | 165.1  | 119.9  | 206.0  | 209.9  | 210.5  | 225.3  | 249.8  |
| 522.0  | 564.6  | 461.0  | 432.1  | 397.8  | 692.4  | 765.7  | 555.7  | 235.7  |
| 2.1    | 4.4    | 3.2    | 12.4   | 777.6  | 486.9  | 492.8  | 542.2  | 170.7  |
| 201.3  | 180.0  | 328.1  | 135.8  | 752.7  | 559.0  | 773.9  | 929.1  | 1251.9 |
| 24.3   | 26.3   | 28.2   | 18.2   | 27.8   | 44.9   | 35.2   | 25.2   | 16.9   |
| 63.6   | 53.2   | 71.0   | 50.8   | 23.5   | 30.9   | 18.2   | 18.7   | 24.9   |
| 508.5  | 468.4  | 673.3  | 476.0  | 615.9  | 771.1  | 544.3  | 693.9  | 986.6  |
| 2905.5 | 2703.7 | 3520.0 | 2545.2 | 859.8  | 1081.6 | 926.9  | 1007.1 | 893.9  |
| 449.8  | 406.1  | 614.9  | 385.3  | 121.4  | 154.9  | 124.1  | 143.4  | 118.1  |
| 7381.6 | 7226.8 | 7801.8 | 7530.1 | 7621.3 | 7819.6 | 7756.3 | 7683.6 | 9309.6 |
| 293.1  | 303.7  | 166.9  | 280.7  | 298.5  | 520.3  | 266.6  | 263.1  | 209.5  |
| 553.8  | 509.4  | 929.9  | 558.4  | 1558.4 | 1194.2 | 1588.9 | 1674.7 | 1496.9 |
| 696.6  | 630.6  | 843.2  | 613.9  | 962.2  | 1246.4 | 1066.5 | 1164.0 | 705.4  |
| 499.3  | 469.9  | 574.3  | 476.6  | 753.2  | 852.7  | 799.5  | 851.2  | 542.8  |
| 1031.8 | 958.1  | 1266.5 | 886.5  | 1555.8 | 1233.3 | 1379.5 | 1596.4 | 1461.5 |

|        |        |        |        |        |        |        |        |        |
|--------|--------|--------|--------|--------|--------|--------|--------|--------|
| 184.0  | 220.9  | 203.3  | 136.7  | 279.2  | 241.2  | 259.4  | 312.3  | 544.3  |
| 162.2  | 148.2  | 173.4  | 181.8  | 124.4  | 103.7  | 106.7  | 133.6  | 128.5  |
| 453.0  | 416.5  | 458.6  | 433.1  | 274.9  | 313.9  | 326.7  | 331.2  | 282.3  |
| 0.6    | 1.2    | 1.0    | 0.4    | 557.1  | 665.9  | 1675.8 | 742.6  | 9.1    |
| 656.7  | 654.6  | 977.0  | 739.9  | 684.8  | 623.4  | 698.4  | 735.4  | 501.5  |
| 1017.7 | 1559.5 | 1127.6 | 1265.3 | 287.0  | 231.0  | 305.0  | 347.9  | 1595.4 |
| 1292.0 | 1647.2 | 1462.0 | 1568.1 | 251.9  | 160.6  | 281.0  | 316.3  | 1683.3 |
| 1.3    | 3.7    | 1.3    | 5.6    | 0.9    | 0.4    | 0.7    | 0.7    | 10.8   |
| 442.6  | 449.1  | 607.8  | 429.0  | 1694.3 | 1618.8 | 1629.4 | 1853.0 | 1372.6 |
| 1158.2 | 1149.3 | 1246.4 | 1220.2 | 1252.6 | 1260.0 | 1110.4 | 1415.3 | 2767.1 |
| 1663.2 | 1815.3 | 1697.1 | 1733.5 | 459.4  | 355.4  | 503.9  | 605.6  | 1012.0 |
| 1700.6 | 1403.6 | 2890.8 | 1665.7 | 2538.2 | 2527.3 | 2662.3 | 2841.5 | 2890.5 |
| 338.3  | 343.6  | 399.0  | 401.4  | 291.1  | 208.6  | 277.4  | 348.1  | 194.9  |
| 1776.8 | 1507.0 | 2350.6 | 1657.4 | 2792.0 | 2283.5 | 2863.4 | 3250.5 | 3366.1 |
| 14.2   | 16.8   | 19.2   | 13.3   | 1830.9 | 1897.1 | 2136.4 | 2212.9 | 803.1  |
| 296.3  | 268.0  | 312.7  | 232.9  | 224.5  | 175.5  | 251.3  | 264.9  | 360.8  |
| 1762.4 | 1622.0 | 2025.4 | 1703.7 | 1706.5 | 1351.0 | 1729.1 | 1932.8 | 2118.4 |
| 111.6  | 98.9   | 169.9  | 88.3   | 99.6   | 100.2  | 119.3  | 111.5  | 290.7  |
| 198.5  | 196.0  | 333.5  | 204.0  | 161.5  | 145.5  | 162.2  | 188.8  | 294.5  |
| 1003.2 | 959.6  | 1227.3 | 1075.9 | 610.7  | 475.9  | 619.6  | 691.6  | 1011.8 |
| 479.0  | 425.9  | 732.9  | 508.2  | 313.7  | 308.8  | 299.3  | 363.6  | 575.4  |
| 401.5  | 312.4  | 472.1  | 394.7  | 305.8  | 266.4  | 299.5  | 360.5  | 511.4  |
| 1118.1 | 1057.3 | 1497.9 | 1043.0 | 2323.0 | 2479.9 | 2411.0 | 2485.3 | 3102.7 |
| 1839.0 | 1704.3 | 2521.1 | 2021.1 | 1743.9 | 1868.0 | 1911.6 | 2219.4 | 1905.6 |
| 710.4  | 598.3  | 846.4  | 596.2  | 343.2  | 342.8  | 380.3  | 422.8  | 349.9  |
| 1593.8 | 1589.4 | 2292.7 | 2058.5 | 195.6  | 202.0  | 193.6  | 196.7  | 142.5  |
| 668.6  | 618.4  | 1262.4 | 950.3  | 91.7   | 77.1   | 91.6   | 98.2   | 104.1  |
| 129.5  | 136.7  | 245.7  | 169.9  | 371.2  | 468.2  | 416.5  | 446.9  | 222.5  |
| 279.1  | 256.0  | 318.1  | 235.5  | 328.6  | 291.8  | 315.7  | 406.7  | 437.4  |
| 1690.4 | 1692.2 | 1973.6 | 1664.1 | 1697.4 | 1591.3 | 1575.1 | 1985.5 | 1935.5 |
| 137.6  | 136.3  | 185.2  | 119.3  | 193.6  | 147.7  | 193.9  | 221.3  | 175.2  |
| 739.3  | 604.7  | 773.0  | 641.7  | 845.9  | 722.6  | 834.9  | 969.2  | 638.2  |
| 218.2  | 218.2  | 248.3  | 124.6  | 501.9  | 454.2  | 377.5  | 480.4  | 430.8  |
| 2141.2 | 1805.5 | 3169.9 | 1614.7 | 3368.0 | 2286.7 | 3049.4 | 3880.2 | 4119.7 |
| 473.5  | 485.0  | 536.7  | 385.6  | 492.9  | 518.7  | 474.5  | 555.8  | 492.2  |
| 5071.1 | 4762.2 | 6767.3 | 4788.3 | 6475.1 | 6448.2 | 6470.6 | 6705.4 | 8276.7 |
| 1569.3 | 1374.1 | 2286.6 | 1312.6 | 2286.2 | 1511.0 | 2096.0 | 2751.8 | 2853.3 |
| 2265.0 | 2188.5 | 2532.4 | 1881.7 | 2171.1 | 1670.9 | 2207.7 | 2551.1 | 2329.3 |
| 1355.5 | 1311.3 | 1633.5 | 1418.9 | 1132.3 | 1024.8 | 1114.4 | 1216.9 | 535.9  |
| 6067.3 | 5666.0 | 5769.0 | 5123.6 | 6401.6 | 6478.4 | 6474.5 | 6926.7 | 9314.6 |
| 438.1  | 472.5  | 686.9  | 411.7  | 1366.6 | 1730.7 | 1419.2 | 1581.8 | 422.6  |
| 985.9  | 870.9  | 1579.3 | 990.9  | 1951.9 | 1938.9 | 2232.9 | 2312.6 | 2801.9 |
| 1600.7 | 1436.0 | 2384.7 | 1777.8 | 2937.9 | 2629.2 | 3066.9 | 3268.2 | 3453.7 |
| 1520.8 | 1431.3 | 1989.6 | 1482.3 | 1468.1 | 1186.5 | 1761.0 | 1816.4 | 1250.5 |
| 411.5  | 367.1  | 531.0  | 380.3  | 509.5  | 408.5  | 585.3  | 604.2  | 272.3  |
| 963.6  | 1005.5 | 1072.8 | 939.2  | 731.8  | 633.0  | 765.2  | 823.7  | 459.8  |
| 299.8  | 259.4  | 364.2  | 227.7  | 463.8  | 487.7  | 447.4  | 540.4  | 708.3  |
| 260.0  | 240.0  | 372.0  | 237.6  | 164.7  | 164.4  | 185.3  | 225.0  | 188.1  |
| 1439.8 | 1425.0 | 1552.1 | 1244.1 | 1487.0 | 2144.2 | 1413.4 | 1610.1 | 1618.0 |
| 570.5  | 561.9  | 636.5  | 488.6  | 670.2  | 1014.2 | 565.8  | 717.4  | 643.7  |
| 1.3    | 1.9    | 1.6    | 1.1    | 5843.0 | 5717.0 | 5621.9 | 6015.6 | 5163.0 |
| 1441.6 | 1173.1 | 2445.7 | 1364.0 | 1691.9 | 1667.5 | 1654.6 | 1753.2 | 1708.5 |
| 10.6   | 1.6    | 2.9    | 3.3    | 273.9  | 241.4  | 357.2  | 287.4  | 644.2  |



|        |        |        |        |        |        |        |        |        |
|--------|--------|--------|--------|--------|--------|--------|--------|--------|
| 70.5   | 70.8   | 57.8   | 45.4   | 1913.4 | 1473.1 | 2320.3 | 1789.5 | 3439.0 |
| 114.3  | 134.5  | 68.6   | 70.0   | 2823.9 | 2177.1 | 3454.4 | 2835.5 | 3720.0 |
| 227.2  | 254.7  | 127.3  | 133.6  | 2882.0 | 1972.1 | 3345.0 | 3202.0 | 5078.0 |
| 1274.8 | 1072.7 | 2367.5 | 1198.5 | 1368.9 | 870.9  | 1361.6 | 1547.4 | 1785.8 |
| 3825.1 | 3560.2 | 6273.1 | 3671.5 | 3704.1 | 3023.8 | 3620.8 | 4025.1 | 4150.8 |
| 1486.8 | 1433.7 | 2316.2 | 1908.5 | 1922.4 | 2203.2 | 2107.3 | 2188.3 | 3033.7 |
| 928.5  | 800.9  | 1348.8 | 813.4  | 2148.3 | 1970.0 | 2150.7 | 2504.3 | 3654.5 |
| 540.6  | 523.1  | 1085.4 | 435.8  | 776.7  | 703.7  | 759.6  | 853.7  | 799.7  |
| 97.7   | 70.2   | 183.3  | 116.9  | 119.1  | 176.9  | 172.1  | 203.8  | 55.6   |
| 101.1  | 87.0   | 232.3  | 112.5  | 122.1  | 172.1  | 193.4  | 221.2  | 50.9   |
| 925.6  | 807.2  | 1358.6 | 895.1  | 1517.5 | 1167.6 | 1507.3 | 1781.0 | 843.2  |
| 3720.5 | 3232.6 | 4717.6 | 3634.7 | 2415.3 | 2773.8 | 2558.8 | 2849.9 | 4137.3 |
| 857.1  | 730.7  | 1095.8 | 835.2  | 1401.0 | 1175.0 | 1496.5 | 1502.4 | 740.4  |
| 1987.6 | 1763.2 | 2349.3 | 1749.1 | 2148.6 | 1704.9 | 2124.3 | 2450.8 | 1019.1 |
| 147.0  | 123.3  | 198.7  | 130.0  | 159.3  | 166.7  | 243.7  | 243.6  | 2269.3 |
| 270.6  | 195.5  | 723.3  | 298.2  | 743.3  | 587.3  | 1385.5 | 1193.9 | 7500.6 |
| 34.9   | 35.5   | 38.6   | 40.6   | 54.0   | 51.2   | 42.4   | 55.7   | 48.3   |
| 313.5  | 317.5  | 404.8  | 291.1  | 424.7  | 521.8  | 394.4  | 422.1  | 608.0  |
| 167.9  | 171.9  | 211.4  | 181.4  | 459.5  | 414.0  | 390.1  | 515.5  | 197.2  |
| 263.4  | 203.0  | 450.8  | 198.5  | 454.2  | 366.5  | 557.3  | 540.2  | 340.1  |
| 1131.3 | 874.6  | 1791.6 | 787.4  | 1916.9 | 1485.7 | 2346.2 | 2336.6 | 1690.4 |
| 230.0  | 180.1  | 345.1  | 229.1  | 652.6  | 493.3  | 708.1  | 733.9  | 801.1  |
| 589.4  | 502.2  | 616.3  | 417.3  | 11.6   | 11.6   | 10.8   | 9.5    | 7.9    |
| 3786.6 | 3541.5 | 3718.5 | 2957.8 | 63.9   | 43.4   | 103.9  | 103.8  | 2.5    |
| 824.9  | 759.1  | 732.1  | 759.8  | 788.7  | 642.7  | 931.6  | 1073.7 | 730.9  |
| 292.7  | 276.7  | 286.8  | 218.5  | 582.9  | 604.0  | 619.4  | 717.6  | 297.0  |
| 1887.2 | 1778.6 | 2150.6 | 1912.0 | 3803.8 | 4233.6 | 4182.1 | 4355.7 | 4478.7 |
| 638.5  | 571.9  | 870.4  | 612.2  | 1316.4 | 1351.5 | 1475.6 | 1498.7 | 1601.6 |
| 1081.7 | 1086.1 | 2036.1 | 1154.7 | 2143.0 | 2487.6 | 2059.5 | 2110.7 | 2075.8 |
| 6.0    | 8.8    | 10.1   | 2.3    | 24.3   | 26.3   | 20.1   | 4.9    | 375.7  |
| 537.4  | 464.9  | 544.8  | 456.4  | 901.1  | 732.9  | 1126.4 | 1099.3 | 572.7  |
| 718.1  | 690.2  | 894.5  | 634.2  | 860.8  | 625.3  | 885.3  | 1017.4 | 461.7  |
| 399.3  | 394.8  | 401.5  | 253.3  | 978.0  | 951.1  | 933.1  | 1058.8 | 1104.0 |
| 2681.6 | 2745.5 | 2983.5 | 3899.6 | 370.6  | 605.8  | 500.5  | 473.3  | 1189.0 |
| 548.9  | 503.0  | 667.7  | 440.1  | 576.4  | 470.9  | 578.1  | 671.8  | 651.8  |
| 408.7  | 392.1  | 505.2  | 306.0  | 360.9  | 289.2  | 343.4  | 378.8  | 470.0  |
| 903.6  | 799.1  | 1260.9 | 700.0  | 1511.6 | 1539.7 | 1733.5 | 1892.4 | 1668.1 |
| 1042.3 | 959.4  | 1630.6 | 1073.0 | 1139.0 | 1617.3 | 1184.9 | 1335.2 | 2138.8 |
| 793.6  | 776.1  | 938.6  | 765.7  | 1493.8 | 1902.4 | 1455.8 | 1721.0 | 1564.0 |
| 3.9    | 5.8    | 2.5    | 2.7    | 58.1   | 43.3   | 84.1   | 60.8   | 2772.8 |
| 11.4   | 6.4    | 6.8    | 6.5    | 41.8   | 31.1   | 52.2   | 41.3   | 1196.9 |
| 21.5   | 15.1   | 31.4   | 20.0   | 61.3   | 56.2   | 111.8  | 64.0   | 3271.8 |
| 0.7    | 1.0    | 4.1    | 1.7    | 43.0   | 46.9   | 100.9  | 56.4   | 3273.7 |
| 172.3  | 155.1  | 259.9  | 128.5  | 465.5  | 373.6  | 476.5  | 539.1  | 513.0  |
| 392.7  | 403.6  | 586.9  | 358.8  | 1024.5 | 885.4  | 996.7  | 1075.1 | 1250.3 |
| 392.8  | 348.6  | 611.4  | 356.5  | 1042.5 | 833.4  | 957.3  | 1106.5 | 1466.4 |
| 3824.9 | 3731.0 | 3923.2 | 3857.9 | 5029.0 | 4745.7 | 5134.9 | 5288.8 | 6916.4 |
| 239.2  | 233.3  | 373.2  | 262.6  | 581.1  | 481.4  | 542.0  | 665.7  | 485.4  |
| 345.8  | 334.8  | 419.1  | 258.9  | 935.5  | 940.2  | 914.6  | 963.6  | 1296.0 |
| 378.1  | 286.2  | 464.9  | 272.2  | 828.6  | 819.4  | 835.2  | 923.7  | 1026.2 |
| 166.0  | 146.5  | 176.9  | 132.9  | 327.4  | 341.9  | 298.6  | 378.0  | 203.4  |
| 53.5   | 33.6   | 60.5   | 53.9   | 113.6  | 116.6  | 105.3  | 135.2  | 54.4   |
| 1459.7 | 1350.1 | 1916.0 | 1276.4 | 3199.3 | 2870.0 | 3352.4 | 3768.5 | 4031.5 |

|        |        |        |        |        |        |        |        |        |
|--------|--------|--------|--------|--------|--------|--------|--------|--------|
| 536.4  | 532.9  | 810.4  | 502.8  | 1414.9 | 1434.8 | 1562.2 | 1458.1 | 1714.5 |
| 2.3    | 1.6    | 3.9    | 2.1    | 103.8  | 111.5  | 149.0  | 110.1  | 230.0  |
| 4.7    | 4.8    | 9.5    | 8.8    | 129.2  | 147.6  | 202.5  | 161.8  | 375.0  |
| 575.5  | 578.7  | 587.9  | 558.0  | 437.1  | 458.0  | 476.5  | 567.1  | 456.3  |
| 581.5  | 591.4  | 618.6  | 533.3  | 557.8  | 717.4  | 532.3  | 644.2  | 443.3  |
| 875.7  | 887.1  | 966.4  | 825.9  | 843.1  | 788.7  | 906.9  | 1021.7 | 1193.7 |
| 161.6  | 165.9  | 240.3  | 143.0  | 199.5  | 203.4  | 189.4  | 251.2  | 366.8  |
| 533.0  | 459.6  | 940.7  | 475.0  | 762.8  | 787.7  | 742.3  | 864.3  | 870.6  |
| 8.9    | 10.3   | 29.0   | 16.8   | 98.9   | 156.8  | 117.6  | 127.2  | 71.0   |
| 30.0   | 21.4   | 117.0  | 72.3   | 305.0  | 491.0  | 332.7  | 336.0  | 214.1  |
| 36.4   | 31.8   | 35.6   | 39.3   | 61.3   | 51.6   | 80.0   | 76.7   | 37.1   |
| 1413.3 | 1310.9 | 1599.8 | 1475.0 | 1714.3 | 1930.3 | 2229.4 | 2158.8 | 1654.3 |
| 382.5  | 306.2  | 775.6  | 341.5  | 1359.9 | 1098.1 | 1303.1 | 1399.8 | 2067.5 |
| 380.5  | 353.0  | 415.4  | 313.8  | 390.8  | 483.8  | 397.1  | 497.5  | 775.9  |
| 730.1  | 598.1  | 1220.8 | 766.8  | 992.1  | 893.6  | 1038.9 | 1023.9 | 2147.5 |
| 642.0  | 558.6  | 939.0  | 647.4  | 1295.5 | 1371.0 | 1395.8 | 1521.0 | 1140.0 |
| 1208.7 | 1119.7 | 1951.7 | 1074.1 | 2320.6 | 1780.6 | 2215.0 | 2637.5 | 3101.7 |
| 593.9  | 647.9  | 653.9  | 561.6  | 708.7  | 739.2  | 743.8  | 848.4  | 767.7  |
| 292.4  | 299.1  | 392.3  | 261.7  | 767.0  | 757.0  | 714.4  | 815.3  | 601.8  |
| 935.4  | 886.8  | 1206.0 | 791.7  | 2155.5 | 1934.6 | 2078.8 | 2444.6 | 1695.6 |
| 112.4  | 102.1  | 135.7  | 92.6   | 196.6  | 195.0  | 224.5  | 243.0  | 209.7  |
| 86.3   | 63.6   | 99.5   | 65.6   | 108.1  | 71.6   | 126.3  | 115.9  | 189.4  |
| 198.1  | 177.3  | 299.2  | 168.2  | 391.7  | 288.7  | 460.2  | 464.3  | 461.5  |
| 321.6  | 275.0  | 443.0  | 248.5  | 440.2  | 316.5  | 450.2  | 541.7  | 581.8  |
| 50.8   | 51.5   | 38.8   | 28.9   | 273.3  | 381.0  | 375.6  | 416.8  | 215.5  |
| 218.2  | 202.7  | 225.7  | 222.0  | 139.0  | 172.4  | 153.8  | 151.4  | 458.6  |
| 21.0   | 12.2   | 40.2   | 15.2   | 13.7   | 10.8   | 10.0   | 1.9    | 27.9   |
| 167.4  | 161.5  | 329.9  | 176.6  | 223.5  | 212.3  | 240.7  | 231.6  | 297.9  |
| 347.0  | 349.4  | 590.2  | 419.3  | 407.2  | 576.4  | 394.7  | 459.0  | 507.3  |
| 244.0  | 192.9  | 334.4  | 260.2  | 353.4  | 373.7  | 327.1  | 410.6  | 582.6  |
| 197.6  | 174.4  | 283.7  | 198.5  | 283.0  | 266.4  | 242.2  | 300.2  | 308.1  |
| 223.0  | 200.5  | 404.9  | 237.4  | 461.5  | 537.3  | 468.7  | 589.5  | 569.1  |
| 1689.3 | 1393.0 | 2483.2 | 1701.2 | 1700.7 | 2129.2 | 2374.5 | 2372.0 | 912.9  |
| 908.9  | 866.5  | 1018.8 | 880.7  | 689.1  | 715.4  | 825.5  | 845.9  | 528.4  |
| 633.6  | 592.2  | 1388.3 | 965.5  | 3993.7 | 5201.5 | 4680.6 | 4332.5 | 3408.4 |
| 371.8  | 359.7  | 653.7  | 323.5  | 764.1  | 641.9  | 717.8  | 807.4  | 1330.7 |
| 526.8  | 463.2  | 1009.4 | 501.4  | 951.6  | 765.7  | 947.6  | 1078.9 | 1370.2 |
| 514.7  | 477.6  | 754.5  | 499.0  | 1129.9 | 688.5  | 1174.4 | 1210.8 | 1109.1 |
| 827.9  | 779.1  | 1068.9 | 803.3  | 1236.5 | 773.2  | 1305.4 | 1371.4 | 1003.8 |
| 1649.2 | 1820.1 | 1532.8 | 1709.5 | 1223.4 | 1078.9 | 1258.0 | 1484.8 | 1319.8 |
| 1647.0 | 1644.5 | 1553.5 | 1572.9 | 2255.0 | 2567.4 | 2696.8 | 2576.8 | 1943.7 |
| 1519.7 | 1408.0 | 2976.7 | 1154.6 | 2687.1 | 1747.3 | 2543.7 | 2884.5 | 3369.6 |
| 80.3   | 45.5   | 107.1  | 75.3   | 130.8  | 132.5  | 153.4  | 160.7  | 97.6   |
| 605.2  | 524.8  | 985.6  | 618.9  | 935.8  | 928.0  | 1129.1 | 1141.3 | 446.6  |
| 20.3   | 17.2   | 31.7   | 18.8   | 18.3   | 20.3   | 27.7   | 35.1   | 31.3   |
| 124.7  | 101.0  | 228.3  | 124.7  | 281.8  | 285.7  | 340.4  | 281.2  | 149.3  |
| 364.2  | 423.5  | 350.1  | 369.8  | 436.8  | 492.6  | 378.4  | 434.8  | 385.8  |
| 111.5  | 108.4  | 102.0  | 82.9   | 155.2  | 179.2  | 180.3  | 169.1  | 269.0  |
| 859.0  | 781.2  | 1215.5 | 833.3  | 1131.3 | 967.4  | 1052.2 | 1240.1 | 1712.8 |
| 1857.2 | 1588.6 | 3140.4 | 1736.4 | 2402.3 | 1800.2 | 2176.6 | 2698.3 | 3521.4 |
| 186.4  | 157.1  | 347.1  | 132.5  | 277.8  | 218.1  | 286.6  | 351.9  | 609.2  |
| 219.1  | 166.4  | 194.5  | 149.2  | 339.2  | 341.7  | 382.3  | 372.8  | 177.6  |
| 89.4   | 106.3  | 138.5  | 82.7   | 72.6   | 61.0   | 68.1   | 78.1   | 64.1   |

|        |        |        |        |        |        |        |        |         |
|--------|--------|--------|--------|--------|--------|--------|--------|---------|
| 384.7  | 369.5  | 516.3  | 402.7  | 427.5  | 369.8  | 429.8  | 496.6  | 340.4   |
| 540.6  | 616.9  | 537.3  | 423.5  | 2818.5 | 2450.9 | 3428.6 | 3189.2 | 1089.7  |
| 1438.1 | 1388.3 | 1683.2 | 1505.5 | 1221.4 | 1666.4 | 1354.5 | 1285.9 | 1321.4  |
| 6038.7 | 5901.7 | 5998.7 | 6554.1 | 6649.2 | 7628.6 | 7248.6 | 7294.1 | 10032.2 |
| 854.1  | 818.0  | 965.8  | 753.3  | 1139.9 | 1084.1 | 1196.7 | 1309.8 | 1418.4  |
| 110.5  | 115.3  | 124.6  | 102.9  | 174.3  | 185.5  | 180.4  | 199.1  | 220.9   |
| 660.3  | 696.0  | 729.7  | 643.8  | 1054.0 | 1139.6 | 1124.5 | 1291.5 | 1249.6  |
| 402.6  | 397.6  | 650.6  | 507.3  | 873.7  | 528.5  | 974.4  | 949.8  | 949.6   |
| 2377.5 | 2205.3 | 2932.0 | 2216.9 | 2187.6 | 1558.5 | 2208.5 | 2570.1 | 3014.8  |
| 1301.4 | 1147.6 | 1642.5 | 1218.5 | 789.4  | 545.8  | 776.2  | 988.8  | 1756.1  |
| 186.4  | 177.8  | 246.2  | 176.9  | 207.8  | 125.7  | 182.2  | 243.0  | 304.3   |
| 679.4  | 555.7  | 1067.8 | 586.4  | 943.3  | 711.1  | 911.0  | 1063.4 | 1132.9  |
| 892.2  | 623.8  | 1194.5 | 934.0  | 955.7  | 960.8  | 997.2  | 1048.4 | 2750.9  |
| 961.9  | 829.8  | 1406.4 | 903.6  | 1169.9 | 1164.3 | 1280.7 | 1304.2 | 2913.8  |
| 50.5   | 46.2   | 81.2   | 47.9   | 95.4   | 84.9   | 77.2   | 85.7   | 106.2   |
| 182.3  | 163.9  | 276.8  | 194.0  | 301.8  | 287.4  | 252.5  | 296.4  | 332.8   |
| 104.9  | 85.6   | 136.2  | 104.4  | 218.7  | 180.9  | 219.0  | 250.8  | 247.1   |
| 2638.9 | 2305.0 | 4085.9 | 2478.3 | 5931.7 | 5062.9 | 5791.3 | 6359.8 | 9460.4  |
| 299.5  | 265.4  | 489.5  | 290.7  | 753.2  | 629.5  | 777.9  | 777.6  | 1518.1  |
| 135.3  | 109.2  | 200.1  | 113.1  | 306.4  | 240.6  | 275.7  | 348.6  | 719.1   |
| 614.2  | 667.2  | 638.4  | 595.6  | 622.3  | 628.0  | 759.8  | 654.6  | 591.0   |
| 94.5   | 67.4   | 49.7   | 56.5   | 14.7   | 11.8   | 20.6   | 18.9   | 62.4    |
| 232.8  | 209.5  | 130.4  | 166.5  | 36.9   | 33.5   | 31.1   | 48.5   | 104.5   |
| 574.3  | 527.7  | 910.8  | 558.2  | 1310.8 | 1074.1 | 1399.5 | 1583.4 | 751.3   |
| 1769.0 | 1635.6 | 2197.7 | 1621.1 | 2454.2 | 2320.7 | 2661.1 | 3117.8 | 1839.1  |
| 1671.3 | 1759.5 | 2113.2 | 1725.1 | 1390.1 | 1366.9 | 1440.6 | 1562.9 | 1418.3  |
| 2578.8 | 2469.9 | 3311.2 | 2629.6 | 2049.5 | 1945.4 | 2225.1 | 2409.8 | 1921.9  |
| 952.7  | 908.2  | 1241.7 | 971.9  | 1526.5 | 1253.6 | 1574.6 | 1677.2 | 2230.9  |
| 2791.7 | 2309.8 | 3295.1 | 1945.1 | 2063.2 | 1493.1 | 2931.5 | 2859.5 | 1483.0  |
| 946.3  | 782.9  | 1265.3 | 733.0  | 1154.2 | 922.7  | 1335.6 | 1402.3 | 627.3   |
| 437.7  | 398.9  | 652.1  | 433.7  | 374.1  | 365.1  | 355.7  | 453.1  | 523.5   |
| 958.3  | 857.6  | 1597.6 | 902.1  | 603.9  | 559.6  | 617.7  | 729.2  | 1165.4  |
| 421.6  | 365.4  | 673.2  | 391.5  | 106.2  | 107.2  | 102.9  | 122.8  | 232.8   |
| 191.3  | 169.0  | 357.1  | 188.9  | 159.7  | 107.1  | 196.7  | 197.6  | 84.8    |
| 124.4  | 110.5  | 165.2  | 98.6   | 115.2  | 115.2  | 138.3  | 147.5  | 58.4    |
| 8.7    | 13.4   | 5.2    | 7.6    | 33.2   | 32.9   | 33.7   | 41.8   | 38.9    |
| 155.2  | 139.6  | 174.4  | 147.2  | 345.6  | 448.5  | 420.6  | 428.7  | 567.7   |
| 2511.8 | 2106.6 | 4027.4 | 2458.8 | 4638.3 | 4153.3 | 4403.4 | 4726.0 | 4868.3  |
| 383.6  | 354.0  | 660.5  | 345.8  | 1195.1 | 1418.9 | 1524.5 | 1286.9 | 2345.6  |
| 1467.4 | 1472.1 | 1552.7 | 1567.9 | 1409.6 | 1344.5 | 1492.2 | 1645.7 | 2747.2  |
| 4857.5 | 4596.5 | 5724.3 | 4724.7 | 7212.4 | 7749.5 | 7675.8 | 7921.9 | 12457.8 |
| 623.0  | 611.1  | 794.9  | 660.8  | 955.2  | 1071.5 | 945.2  | 1078.8 | 799.6   |
| 500.3  | 528.8  | 584.0  | 563.8  | 1073.7 | 1290.7 | 1251.0 | 1263.4 | 1272.6  |
| 7815.1 | 7597.3 | 8531.0 | 7684.7 | 7693.7 | 8138.1 | 8186.8 | 8250.4 | 11094.2 |
| 3954.7 | 3646.0 | 4978.8 | 4078.6 | 5710.1 | 5945.7 | 6018.9 | 6303.1 | 9729.6  |
| 1098.0 | 1019.9 | 1469.6 | 982.4  | 1339.8 | 1112.3 | 1254.4 | 1442.6 | 1366.9  |
| 1331.7 | 1193.6 | 1843.0 | 1120.2 | 1115.1 | 820.1  | 1023.1 | 1299.9 | 877.7   |
| 5.2    | 11.3   | 5.1    | 6.3    | 5.6    | 3.8    | 9.4    | 4.7    | 6.6     |
| 3.3    | 1.0    | 4.6    | 2.7    | 0.8    | 1.9    | 4.8    | 1.5    | 5.4     |
| 1501.6 | 1310.3 | 2329.2 | 1679.1 | 3451.6 | 4642.1 | 3681.0 | 3933.2 | 2118.8  |
| 742.9  | 691.8  | 1139.0 | 727.9  | 1057.5 | 1314.5 | 1163.1 | 1223.6 | 2364.5  |
| 17.0   | 16.4   | 10.0   | 12.9   | 10.7   | 12.3   | 7.2    | 21.1   | 6.5     |
| 899.9  | 1018.1 | 1101.6 | 940.5  | 5867.0 | 5622.8 | 6480.8 | 6698.2 | 3550.0  |

|        |        |        |        |        |        |        |        |         |
|--------|--------|--------|--------|--------|--------|--------|--------|---------|
| 624.1  | 526.5  | 1260.6 | 560.3  | 2628.7 | 2457.9 | 2503.8 | 2783.0 | 2696.3  |
| 2272.7 | 2099.2 | 2903.2 | 2110.8 | 3239.3 | 3301.5 | 3450.8 | 3443.5 | 4373.3  |
| 16.4   | 30.0   | 35.0   | 24.2   | 15.2   | 23.5   | 18.1   | 11.4   | 17.5    |
| 563.5  | 561.2  | 685.9  | 581.9  | 356.5  | 443.0  | 389.3  | 416.4  | 275.9   |
| 199.3  | 174.4  | 264.9  | 194.9  | 432.5  | 476.3  | 414.9  | 499.0  | 462.5   |
| 21.5   | 12.6   | 59.1   | 17.1   | 3085.4 | 2755.0 | 3391.6 | 3553.8 | 2922.7  |
| 4408.2 | 4078.7 | 5738.8 | 4309.1 | 3376.4 | 3285.7 | 3548.1 | 4200.4 | 4803.3  |
| 588.9  | 553.6  | 863.6  | 568.4  | 1867.6 | 1622.6 | 2034.6 | 2053.0 | 1952.9  |
| 752.5  | 681.2  | 1444.0 | 624.2  | 1613.7 | 1134.4 | 2095.0 | 1794.7 | 1575.6  |
| 625.8  | 624.4  | 587.6  | 613.4  | 192.7  | 192.0  | 193.9  | 240.0  | 304.8   |
| 2181.9 | 1889.6 | 3900.3 | 2303.6 | 3766.5 | 2900.4 | 3718.4 | 4050.6 | 5086.6  |
| 13.8   | 14.2   | 13.1   | 18.7   | 380.4  | 358.3  | 382.3  | 428.3  | 132.3   |
| 12.3   | 26.2   | 17.5   | 27.8   | 343.1  | 377.6  | 425.9  | 365.0  | 138.9   |
| 1.1    | 1.5    | 1.1    | 3.9    | 296.2  | 302.3  | 375.3  | 364.6  | 156.0   |
| 454.1  | 394.4  | 615.5  | 419.4  | 1231.8 | 1078.4 | 1133.4 | 1394.4 | 2543.2  |
| 430.4  | 377.6  | 507.9  | 368.6  | 313.8  | 322.3  | 245.2  | 290.7  | 222.8   |
| 32.0   | 33.8   | 38.0   | 32.4   | 11.5   | 19.0   | 14.8   | 23.0   | 6.7     |
| 445.2  | 358.3  | 652.7  | 430.0  | 310.3  | 312.3  | 321.3  | 308.2  | 552.3   |
| 1070.0 | 1153.9 | 1007.1 | 1134.5 | 583.8  | 567.7  | 643.4  | 726.3  | 672.6   |
| 195.2  | 194.5  | 353.6  | 194.3  | 577.7  | 486.3  | 609.9  | 602.0  | 145.6   |
| 651.6  | 698.2  | 1065.3 | 730.4  | 1166.6 | 1016.6 | 1225.3 | 1302.2 | 377.1   |
| 397.8  | 357.7  | 295.5  | 239.8  | 268.1  | 190.9  | 264.2  | 246.7  | 15.3    |
| 101.4  | 152.8  | 118.6  | 76.4   | 3720.8 | 4052.6 | 4213.6 | 4436.5 | 651.0   |
| 1191.3 | 1106.0 | 1327.8 | 1185.0 | 1964.6 | 2112.8 | 2215.3 | 2097.7 | 2732.6  |
| 290.7  | 295.8  | 380.2  | 186.0  | 2053.9 | 1204.8 | 1920.6 | 2180.2 | 1931.8  |
| 626.3  | 622.1  | 746.4  | 368.0  | 2379.7 | 1354.7 | 1845.8 | 2371.9 | 1296.8  |
| 7599.0 | 7311.4 | 9263.5 | 7587.8 | 7908.7 | 7111.2 | 7868.7 | 8490.3 | 10713.6 |
| 30.2   | 40.3   | 24.3   | 26.5   | 25.5   | 31.7   | 21.6   | 21.8   | 27.7    |
| 10.9   | 22.2   | 8.8    | 10.3   | 13.2   | 14.4   | 9.9    | 11.5   | 7.3     |
| 311.1  | 291.6  | 361.5  | 284.4  | 538.0  | 574.2  | 509.4  | 589.9  | 390.3   |
| 210.2  | 222.2  | 341.8  | 185.1  | 411.1  | 314.1  | 426.5  | 531.5  | 285.5   |
| 428.8  | 378.8  | 572.8  | 352.9  | 887.8  | 910.2  | 985.5  | 1052.7 | 1058.6  |
| 153.7  | 137.7  | 234.1  | 132.9  | 306.9  | 245.2  | 292.8  | 389.0  | 289.6   |
| 355.8  | 333.7  | 382.2  | 301.3  | 2457.3 | 2277.9 | 2176.0 | 2551.3 | 3872.4  |
| 820.5  | 848.9  | 804.5  | 877.5  | 602.2  | 776.7  | 834.7  | 806.0  | 460.7   |
| 840.1  | 850.3  | 867.1  | 931.8  | 398.4  | 464.0  | 541.2  | 526.3  | 301.4   |
| 1021.4 | 1018.4 | 1106.1 | 775.1  | 1818.9 | 1553.4 | 1645.9 | 1911.3 | 1819.4  |
| 1534.6 | 1409.2 | 1889.4 | 1587.1 | 1382.8 | 1206.0 | 1403.8 | 1695.2 | 1216.0  |
| 795.2  | 841.1  | 1171.6 | 743.0  | 1920.1 | 1612.4 | 2098.1 | 2067.8 | 2793.5  |
| 1267.4 | 1286.9 | 1734.3 | 1243.5 | 2853.8 | 2589.8 | 2717.3 | 2975.2 | 3628.0  |
| 1076.7 | 967.5  | 1529.9 | 862.2  | 486.1  | 416.5  | 483.1  | 530.1  | 528.9   |
| 281.0  | 232.4  | 502.9  | 234.9  | 127.3  | 107.7  | 133.0  | 161.8  | 224.0   |
| 35.8   | 25.3   | 40.3   | 18.4   | 321.3  | 278.8  | 860.5  | 619.9  | 184.7   |
| 68.6   | 58.4   | 105.9  | 47.7   | 831.7  | 765.2  | 2008.5 | 1654.1 | 338.2   |
| 293.4  | 324.1  | 253.3  | 300.2  | 319.8  | 376.9  | 393.5  | 454.7  | 173.1   |
| 1084.3 | 1072.3 | 990.4  | 906.2  | 872.4  | 942.6  | 1076.9 | 1155.1 | 320.6   |
| 53.4   | 45.4   | 43.7   | 20.5   | 245.8  | 317.0  | 189.5  | 266.5  | 229.7   |
| 160.1  | 152.1  | 170.9  | 137.0  | 192.1  | 271.2  | 233.9  | 235.3  | 128.2   |
| 92.4   | 59.8   | 93.6   | 76.6   | 738.0  | 699.8  | 784.7  | 875.7  | 683.8   |
| 224.1  | 210.3  | 255.0  | 239.7  | 363.6  | 206.9  | 339.6  | 410.4  | 410.3   |
| 2617.4 | 2400.3 | 3695.0 | 2507.3 | 2824.3 | 2291.3 | 2733.6 | 3198.9 | 3273.2  |
| 4870.2 | 5225.4 | 5408.5 | 4614.7 | 3711.5 | 3339.0 | 4208.1 | 3915.5 | 2614.5  |
| 1980.8 | 2316.4 | 2227.2 | 1833.0 | 1159.4 | 1074.9 | 1473.6 | 1675.4 | 782.6   |

|        |        |        |        |        |        |        |        |        |
|--------|--------|--------|--------|--------|--------|--------|--------|--------|
| 141.6  | 136.0  | 157.3  | 128.6  | 107.8  | 145.0  | 144.1  | 180.1  | 140.3  |
| 643.3  | 661.4  | 619.8  | 568.7  | 420.3  | 463.8  | 412.4  | 630.3  | 265.2  |
| 3574.2 | 3059.7 | 4992.9 | 3532.6 | 4088.0 | 4149.6 | 4317.6 | 4659.9 | 4874.1 |
| 121.8  | 131.7  | 230.9  | 136.0  | 1167.0 | 1013.1 | 1153.9 | 1181.5 | 1582.0 |
| 125.1  | 149.3  | 47.7   | 69.2   | 495.3  | 299.6  | 295.5  | 407.2  | 2877.5 |
| 59.9   | 77.0   | 16.9   | 15.7   | 233.2  | 126.2  | 112.8  | 167.0  | 1062.8 |
| 1076.5 | 924.4  | 2143.4 | 1154.4 | 1915.8 | 1747.0 | 1801.1 | 1863.2 | 1848.5 |
| 1986.6 | 1712.5 | 3408.9 | 1946.2 | 3819.2 | 3040.7 | 3801.7 | 3832.0 | 3776.9 |
| 12.0   | 21.9   | 33.1   | 21.5   | 358.5  | 326.1  | 445.4  | 401.6  | 64.2   |
| 26.5   | 22.8   | 37.3   | 19.6   | 226.5  | 243.8  | 295.5  | 266.5  | 87.9   |
| 651.0  | 596.2  | 1293.0 | 929.7  | 2944.1 | 2282.4 | 3349.2 | 3352.2 | 4099.8 |
| 33.5   | 41.2   | 32.1   | 30.1   | 452.0  | 504.9  | 518.3  | 529.2  | 356.6  |
| 4.4    | 4.0    | 2.3    | 7.5    | 72.4   | 97.6   | 81.9   | 110.4  | 72.0   |
| 62.9   | 68.1   | 58.5   | 50.7   | 60.3   | 74.2   | 70.5   | 90.8   | 126.0  |
| 1060.6 | 1076.4 | 869.5  | 948.0  | 611.5  | 691.3  | 542.6  | 871.8  | 732.1  |
| 22.4   | 17.5   | 20.3   | 23.1   | 29.1   | 26.5   | 23.6   | 26.8   | 25.3   |
| 733.6  | 730.8  | 802.1  | 652.9  | 1552.8 | 1647.8 | 1555.4 | 1745.5 | 1484.6 |
| 455.0  | 395.1  | 482.9  | 360.9  | 1003.4 | 1037.7 | 926.9  | 1038.7 | 829.1  |
| 1089.5 | 1040.8 | 1713.9 | 1300.4 | 1569.9 | 1883.4 | 1737.3 | 1799.3 | 2094.3 |
| 996.8  | 913.6  | 1049.5 | 1005.1 | 977.8  | 990.5  | 1021.6 | 1193.0 | 708.9  |
| 46.6   | 34.0   | 70.4   | 21.6   | 330.3  | 239.3  | 646.8  | 401.1  | 563.3  |
| 151.9  | 117.2  | 298.0  | 111.0  | 1236.0 | 817.8  | 1287.1 | 1244.7 | 589.1  |
| 433.4  | 422.6  | 791.4  | 437.1  | 1232.3 | 1254.0 | 1296.5 | 1315.8 | 956.0  |
| 821.8  | 747.3  | 1091.6 | 638.0  | 863.4  | 918.6  | 792.7  | 905.1  | 710.1  |
| 84.7   | 84.4   | 110.5  | 65.9   | 80.3   | 86.9   | 75.6   | 81.1   | 70.4   |
| 640.8  | 564.6  | 936.0  | 458.6  | 867.1  | 1035.6 | 880.4  | 968.2  | 901.1  |
| 426.6  | 515.2  | 708.2  | 520.8  | 674.1  | 618.9  | 682.3  | 753.6  | 519.3  |
| 378.4  | 326.1  | 431.3  | 334.6  | 410.7  | 515.6  | 404.1  | 446.5  | 633.7  |
| 5.5    | 9.1    | 7.2    | 6.8    | 6.5    | 10.4   | 1.7    | 3.5    | 123.5  |
| 1869.9 | 1443.2 | 1853.0 | 1787.5 | 307.5  | 299.5  | 368.7  | 410.4  | 120.8  |
| 424.6  | 414.7  | 501.3  | 405.4  | 338.2  | 390.8  | 328.4  | 417.2  | 194.1  |
| 1276.6 | 1150.4 | 1899.4 | 1180.1 | 1657.7 | 1620.4 | 1682.1 | 1989.2 | 1695.1 |
| 1276.0 | 1267.4 | 1651.0 | 1220.1 | 1303.5 | 1425.8 | 1298.6 | 1563.5 | 1547.1 |
| 150.0  | 138.9  | 201.8  | 130.6  | 160.1  | 173.6  | 160.4  | 187.6  | 129.3  |
| 67.7   | 68.7   | 81.4   | 47.5   | 69.4   | 48.4   | 50.4   | 70.7   | 29.0   |
| 30.9   | 32.2   | 25.2   | 10.1   | 22.7   | 21.2   | 26.3   | 23.1   | 48.8   |
| 313.7  | 294.7  | 428.6  | 304.8  | 792.2  | 617.9  | 826.4  | 904.8  | 827.6  |
| 122.2  | 135.6  | 182.0  | 125.5  | 220.4  | 212.2  | 207.7  | 238.5  | 180.9  |
| 2884.7 | 2844.7 | 3533.3 | 2775.8 | 2549.5 | 2358.0 | 2942.3 | 3154.4 | 2440.0 |
| 1841.9 | 1798.2 | 2302.0 | 1785.0 | 1837.1 | 1522.5 | 2011.5 | 2150.5 | 1341.7 |
| 1941.5 | 1856.1 | 2145.5 | 2366.6 | 692.8  | 1001.6 | 768.9  | 810.3  | 840.0  |
| 310.2  | 285.0  | 563.2  | 324.6  | 361.4  | 346.5  | 347.7  | 388.7  | 604.0  |
| 135.8  | 128.8  | 138.9  | 133.9  | 393.9  | 275.3  | 509.0  | 487.1  | 132.4  |
| 131.9  | 136.0  | 137.7  | 152.3  | 334.3  | 233.4  | 418.6  | 394.2  | 132.0  |
| 314.1  | 288.1  | 386.3  | 269.8  | 319.6  | 249.6  | 374.9  | 455.4  | 561.6  |
| 222.4  | 219.7  | 258.5  | 218.1  | 244.2  | 177.8  | 257.5  | 311.4  | 276.2  |
| 863.4  | 802.9  | 1150.5 | 824.1  | 1055.9 | 1036.2 | 1090.2 | 1359.5 | 901.3  |
| 388.1  | 544.2  | 424.1  | 424.3  | 127.2  | 133.6  | 78.3   | 163.8  | 225.5  |
| 1016.6 | 1380.9 | 1170.7 | 1054.8 | 496.0  | 413.6  | 342.3  | 507.9  | 937.5  |
| 193.6  | 249.5  | 241.5  | 165.0  | 88.7   | 71.7   | 58.0   | 82.8   | 138.6  |
| 184.4  | 155.5  | 241.0  | 163.6  | 145.9  | 113.1  | 129.6  | 159.4  | 88.3   |
| 1252.3 | 1288.8 | 1674.8 | 1301.3 | 1497.2 | 1347.6 | 1487.6 | 1684.5 | 1288.0 |
| 6.9    | 2.1    | 5.1    | 14.2   | 8.4    | 3.3    | 8.4    | 4.5    | 6.6    |

|        |        |         |        |        |        |        |        |        |
|--------|--------|---------|--------|--------|--------|--------|--------|--------|
| 165.7  | 174.5  | 145.3   | 189.6  | 229.5  | 295.0  | 224.2  | 294.3  | 355.2  |
| 4.6    | 2.6    | 5.8     | 5.0    | 14.9   | 17.4   | 18.0   | 21.9   | 8.8    |
| 1502.0 | 1517.7 | 1922.9  | 1461.0 | 2351.3 | 2426.1 | 2427.5 | 2678.5 | 1552.5 |
| 854.8  | 827.2  | 1119.3  | 928.9  | 878.2  | 677.6  | 789.9  | 863.6  | 961.8  |
| 551.8  | 483.6  | 785.7   | 663.4  | 617.9  | 454.2  | 673.4  | 683.3  | 1376.3 |
| 681.0  | 610.3  | 998.8   | 718.0  | 657.9  | 525.8  | 660.7  | 733.3  | 1218.8 |
| 454.2  | 458.5  | 672.1   | 432.4  | 942.5  | 1005.9 | 974.2  | 954.5  | 864.1  |
| 63.9   | 54.8   | 70.6    | 42.5   | 276.7  | 298.3  | 294.3  | 330.8  | 525.4  |
| 1745.5 | 1482.6 | 3505.0  | 1789.0 | 2009.2 | 1474.4 | 1951.9 | 2043.9 | 3686.5 |
| 42.6   | 37.1   | 73.5    | 44.7   | 34.2   | 16.7   | 24.8   | 26.5   | 38.3   |
| 293.0  | 290.2  | 153.1   | 205.2  | 264.0  | 301.5  | 231.0  | 332.7  | 383.8  |
| 704.4  | 802.1  | 429.5   | 582.8  | 679.2  | 701.1  | 644.8  | 850.5  | 736.5  |
| 1899.3 | 1820.5 | 2921.1  | 1936.2 | 3479.2 | 2950.7 | 3463.5 | 3929.7 | 5489.6 |
| 1006.5 | 989.1  | 1519.6  | 1100.9 | 1804.2 | 1474.3 | 1690.0 | 1897.7 | 2718.4 |
| 33.6   | 34.8   | 47.4    | 36.9   | 94.9   | 92.1   | 106.8  | 106.0  | 19.7   |
| 5368.4 | 5062.1 | 6933.7  | 5811.2 | 1113.7 | 891.3  | 1011.0 | 1247.2 | 1029.6 |
| 12.9   | 26.6   | 7.5     | 3.8    | 289.1  | 307.8  | 419.6  | 316.3  | 459.9  |
| 1361.5 | 1301.0 | 2017.3  | 1221.9 | 2431.1 | 2752.3 | 2573.3 | 2715.8 | 1854.3 |
| 427.8  | 342.7  | 927.5   | 474.5  | 571.8  | 543.6  | 582.5  | 602.1  | 911.0  |
| 135.0  | 137.4  | 178.0   | 149.2  | 320.9  | 518.5  | 422.1  | 389.5  | 174.7  |
| 382.1  | 343.5  | 476.3   | 400.3  | 915.8  | 1293.7 | 984.3  | 1162.4 | 374.0  |
| 198.2  | 224.5  | 172.6   | 172.7  | 133.4  | 102.9  | 109.5  | 135.3  | 190.8  |
| 278.9  | 310.4  | 232.5   | 223.5  | 266.1  | 298.5  | 267.4  | 350.0  | 435.4  |
| 98.5   | 76.9   | 160.5   | 96.4   | 170.1  | 170.2  | 167.7  | 190.7  | 215.3  |
| 402.7  | 364.3  | 804.3   | 550.3  | 9.0    | 7.6    | 9.4    | 20.9   | 760.9  |
| 2249.8 | 2292.3 | 2507.4  | 2136.6 | 2206.5 | 1813.7 | 2335.4 | 2458.1 | 1568.1 |
| 1008.8 | 982.6  | 1220.5  | 878.2  | 1404.2 | 1230.1 | 1545.7 | 1518.3 | 1108.5 |
| 8900.0 | 8318.9 | 11243.6 | 9313.8 | 3517.2 | 3433.7 | 3572.0 | 3933.1 | 5135.0 |
| 133.1  | 116.0  | 200.0   | 114.6  | 79.2   | 83.3   | 84.5   | 94.4   | 121.8  |
| 5.5    | 2.7    | 3.1     | 10.1   | 1.6    | 10.7   | 3.7    | 8.9    | 3.8    |
| 2188.8 | 2190.5 | 1859.8  | 1670.1 | 1202.8 | 1449.1 | 1331.0 | 1399.7 | 735.0  |
| 102.7  | 82.3   | 158.8   | 96.1   | 302.1  | 223.3  | 382.5  | 457.7  | 536.2  |
| 663.0  | 613.3  | 962.6   | 596.7  | 1539.5 | 1512.8 | 1552.4 | 1810.7 | 1420.3 |
| 4619.4 | 4239.2 | 5258.2  | 4588.8 | 6115.7 | 6758.7 | 6377.9 | 6708.3 | 9733.1 |
| 633.7  | 589.4  | 988.3   | 559.4  | 576.6  | 443.8  | 629.4  | 723.5  | 722.4  |
| 174.6  | 159.0  | 238.8   | 164.9  | 183.2  | 147.0  | 209.5  | 239.1  | 155.4  |
| 358.4  | 350.8  | 573.3   | 386.8  | 563.9  | 487.3  | 654.8  | 756.4  | 538.9  |
| 522.3  | 543.8  | 771.5   | 507.1  | 723.2  | 707.8  | 662.8  | 749.9  | 893.9  |
| 306.5  | 315.2  | 392.8   | 319.6  | 351.8  | 364.9  | 425.8  | 427.1  | 644.1  |
| 981.2  | 1079.8 | 618.1   | 894.9  | 620.1  | 816.7  | 819.4  | 835.6  | 443.6  |
| 741.9  | 742.6  | 669.5   | 732.0  | 633.2  | 487.4  | 623.6  | 691.5  | 712.9  |
| 234.1  | 233.4  | 353.3   | 242.0  | 301.6  | 242.2  | 312.1  | 353.6  | 326.1  |
| 1848.7 | 1449.9 | 2593.2  | 1540.6 | 698.2  | 798.8  | 746.4  | 759.3  | 974.9  |
| 614.4  | 691.9  | 554.7   | 587.3  | 95.6   | 77.9   | 153.8  | 110.4  | 27.8   |
| 1671.6 | 1698.1 | 1643.1  | 1590.0 | 713.3  | 651.3  | 1078.4 | 1021.0 | 190.2  |
| 353.2  | 362.3  | 290.7   | 307.8  | 134.9  | 124.1  | 153.4  | 204.8  | 24.2   |
| 143.4  | 110.0  | 159.3   | 104.5  | 213.1  | 233.0  | 207.3  | 269.8  | 229.0  |
| 207.5  | 156.2  | 348.2   | 193.5  | 1047.2 | 976.1  | 1081.3 | 1107.6 | 861.4  |
| 112.7  | 109.1  | 214.0   | 111.6  | 495.3  | 435.0  | 485.4  | 597.5  | 477.6  |
| 893.8  | 591.2  | 1194.7  | 908.9  | 722.2  | 903.6  | 881.5  | 945.6  | 981.2  |
| 447.0  | 414.5  | 621.3   | 442.2  | 329.9  | 357.5  | 326.6  | 367.7  | 601.9  |
| 798.8  | 733.9  | 1161.2  | 823.4  | 454.8  | 407.8  | 471.0  | 612.8  | 933.1  |
| 2246.8 | 2068.3 | 3422.3  | 2868.4 | 234.8  | 301.4  | 233.4  | 309.4  | 148.6  |

|        |        |        |        |        |        |        |        |         |
|--------|--------|--------|--------|--------|--------|--------|--------|---------|
| 397.4  | 583.7  | 185.0  | 190.3  | 7355.7 | 7490.0 | 7334.8 | 7363.3 | 8322.8  |
| 2670.7 | 3405.7 | 1517.6 | 2959.7 | 97.8   | 64.6   | 141.7  | 139.5  | 0.8     |
| 439.4  | 406.2  | 583.4  | 456.1  | 67.9   | 59.6   | 47.9   | 80.8   | 23.0    |
| 7829.3 | 7697.9 | 8417.6 | 7758.2 | 8807.8 | 9352.9 | 9272.6 | 9507.5 | 11717.0 |
| 11.9   | 7.9    | 16.8   | 8.5    | 495.3  | 343.5  | 554.6  | 559.9  | 93.2    |
| 27.6   | 17.5   | 19.6   | 8.7    | 772.3  | 477.4  | 824.1  | 835.0  | 130.7   |
| 1260.2 | 1245.5 | 1205.5 | 1438.5 | 621.0  | 409.4  | 735.1  | 841.7  | 1003.4  |
| 699.1  | 648.8  | 1118.8 | 724.2  | 1564.5 | 965.4  | 1566.3 | 1637.3 | 1929.5  |
| 310.7  | 294.0  | 276.6  | 234.5  | 734.3  | 904.5  | 797.8  | 859.2  | 732.3   |
| 621.2  | 520.9  | 1218.0 | 556.9  | 768.0  | 604.6  | 714.3  | 876.3  | 1074.3  |
| 125.8  | 87.4   | 218.1  | 119.3  | 164.5  | 101.2  | 120.0  | 150.1  | 154.5   |
| 534.7  | 418.4  | 1097.2 | 527.3  | 499.8  | 316.9  | 463.6  | 643.4  | 741.3   |
| 9.1    | 5.2    | 8.7    | 10.8   | 833.6  | 1055.5 | 809.8  | 704.3  | 99.9    |
| 119.6  | 107.2  | 159.3  | 110.4  | 155.4  | 153.4  | 115.0  | 161.0  | 135.1   |
| 290.0  | 274.1  | 414.8  | 255.3  | 371.4  | 270.6  | 343.7  | 434.3  | 435.8   |
| 1881.0 | 1620.8 | 2675.0 | 1833.5 | 2193.2 | 2353.2 | 2412.5 | 2528.4 | 3105.5  |
| 13.1   | 14.2   | 8.1    | 6.7    | 3.2    | 8.3    | 10.0   | 15.4   | 8.4     |
| 2556.8 | 2497.3 | 3008.5 | 2465.8 | 2105.6 | 2369.0 | 2301.1 | 2674.2 | 2324.0  |
| 1107.5 | 972.7  | 1184.5 | 974.7  | 971.4  | 1174.8 | 1065.9 | 1238.0 | 987.8   |
| 181.4  | 205.0  | 329.3  | 180.1  | 2631.9 | 2445.9 | 3029.0 | 2693.7 | 683.9   |
| 354.3  | 362.1  | 437.0  | 262.4  | 279.0  | 263.9  | 275.8  | 328.1  | 243.1   |
| 206.6  | 177.8  | 240.5  | 183.6  | 131.2  | 101.9  | 113.4  | 141.3  | 96.4    |
| 549.0  | 525.8  | 656.1  | 516.8  | 249.0  | 167.8  | 233.5  | 299.5  | 280.6   |
| 87.9   | 86.1   | 127.8  | 88.9   | 48.8   | 24.6   | 37.1   | 68.7   | 54.1    |
| 361.6  | 317.0  | 395.7  | 272.4  | 222.1  | 210.1  | 274.0  | 315.6  | 263.8   |
| 5.1    | 6.6    | 5.8    | 9.3    | 5.9    | 5.3    | 6.2    | 3.6    | 8.5     |
| 28.8   | 27.4   | 35.8   | 35.9   | 27.0   | 25.7   | 26.9   | 39.2   | 55.4    |
| 2195.8 | 2033.9 | 2888.5 | 2148.5 | 3586.6 | 3387.3 | 3530.9 | 3631.4 | 2972.3  |
| 244.2  | 224.5  | 264.2  | 174.1  | 346.3  | 282.4  | 439.4  | 440.3  | 366.5   |
| 333.1  | 314.4  | 345.2  | 251.2  | 437.1  | 339.1  | 433.3  | 453.5  | 211.0   |
| 224.0  | 220.5  | 281.3  | 186.1  | 735.4  | 699.4  | 712.1  | 769.6  | 1050.3  |
| 664.6  | 663.2  | 1094.6 | 622.5  | 2214.9 | 1657.4 | 2008.9 | 2368.9 | 3471.0  |
| 438.7  | 469.2  | 535.0  | 390.5  | 1227.5 | 1169.5 | 1140.6 | 1350.1 | 1317.5  |
| 318.5  | 287.4  | 568.4  | 316.8  | 2197.3 | 2213.0 | 2202.3 | 2326.9 | 2265.2  |
| 174.6  | 154.2  | 212.2  | 128.7  | 434.9  | 514.5  | 480.7  | 489.0  | 314.5   |
| 93.2   | 103.7  | 146.8  | 84.3   | 222.0  | 232.5  | 201.6  | 243.6  | 195.6   |
| 878.1  | 931.4  | 1081.9 | 860.7  | 1231.3 | 1378.1 | 1123.3 | 1361.1 | 1031.9  |
| 1917.1 | 1703.9 | 2204.1 | 1974.0 | 2196.7 | 2282.8 | 2490.5 | 2482.8 | 2174.2  |
| 585.1  | 703.0  | 401.8  | 381.4  | 1066.6 | 1432.1 | 1010.9 | 1244.9 | 318.5   |
| 59.0   | 78.6   | 46.7   | 43.9   | 127.4  | 192.5  | 147.0  | 164.7  | 70.8    |
| 154.3  | 175.8  | 117.6  | 104.9  | 392.3  | 518.5  | 315.2  | 452.0  | 44.6    |
| 737.3  | 682.6  | 725.3  | 561.9  | 3255.7 | 3206.6 | 2609.8 | 3718.1 | 2612.9  |
| 1205.5 | 1106.8 | 1145.3 | 993.3  | 5148.2 | 4248.3 | 4172.8 | 6137.2 | 5198.2  |
| 148.9  | 128.5  | 205.6  | 138.2  | 216.9  | 226.7  | 198.2  | 241.0  | 438.8   |
| 547.1  | 550.8  | 563.1  | 480.4  | 1807.0 | 1734.8 | 1702.6 | 1933.3 | 3361.7  |
| 1294.0 | 1348.0 | 1283.0 | 1245.2 | 2655.7 | 3852.2 | 2138.4 | 3317.9 | 3559.2  |
| 831.3  | 759.0  | 1369.0 | 792.4  | 1561.1 | 1390.3 | 1584.6 | 1719.8 | 1909.6  |
| 170.3  | 200.2  | 249.3  | 200.7  | 168.7  | 152.5  | 275.4  | 282.4  | 311.4   |
| 156.4  | 183.9  | 164.1  | 133.9  | 569.8  | 729.8  | 515.0  | 546.3  | 233.7   |
| 493.2  | 421.6  | 932.2  | 590.8  | 1361.2 | 2313.9 | 1426.5 | 1528.4 | 1423.6  |
| 242.0  | 219.2  | 562.9  | 210.8  | 616.1  | 365.2  | 477.3  | 662.0  | 726.3   |
| 514.9  | 510.6  | 1343.6 | 493.0  | 1284.5 | 643.9  | 1001.2 | 1332.0 | 1872.9  |
| 395.1  | 345.3  | 798.5  | 441.0  | 1052.9 | 953.3  | 1019.0 | 1113.1 | 2002.4  |

|        |        |        |        |        |        |        |        |         |
|--------|--------|--------|--------|--------|--------|--------|--------|---------|
| 716.5  | 621.1  | 1386.5 | 747.4  | 1492.8 | 1335.4 | 1482.7 | 1662.9 | 2906.1  |
| 251.3  | 223.7  | 287.0  | 220.6  | 330.1  | 330.6  | 308.3  | 351.5  | 287.7   |
| 624.4  | 571.9  | 709.5  | 529.4  | 365.9  | 537.0  | 409.7  | 451.9  | 2271.9  |
| 99.4   | 94.4   | 182.4  | 91.2   | 587.4  | 610.0  | 503.7  | 591.7  | 256.4   |
| 976.4  | 952.3  | 953.4  | 838.4  | 794.6  | 730.1  | 861.1  | 1017.9 | 1294.6  |
| 601.2  | 645.4  | 500.0  | 556.0  | 440.2  | 414.9  | 422.5  | 492.0  | 442.9   |
| 508.8  | 517.3  | 629.1  | 449.3  | 1186.8 | 1099.5 | 1353.9 | 1305.0 | 1248.7  |
| 1209.7 | 1161.3 | 1542.6 | 1022.0 | 1745.1 | 1677.7 | 1990.4 | 2175.4 | 2161.2  |
| 180.4  | 160.9  | 278.3  | 218.3  | 701.7  | 561.1  | 714.6  | 875.5  | 1884.6  |
| 669.5  | 673.4  | 821.4  | 637.8  | 826.3  | 685.1  | 964.4  | 966.6  | 1149.9  |
| 415.6  | 393.8  | 977.2  | 494.3  | 2022.7 | 2081.0 | 1774.6 | 2250.4 | 1707.9  |
| 370.0  | 287.7  | 732.1  | 363.8  | 1931.9 | 1816.1 | 1562.6 | 2117.1 | 1833.1  |
| 856.3  | 761.4  | 1155.4 | 744.1  | 1522.2 | 1404.6 | 1726.7 | 1705.4 | 1869.8  |
| 7996.4 | 7624.2 | 8794.6 | 7753.8 | 7830.0 | 8091.5 | 8032.4 | 8132.6 | 10785.8 |
| 844.6  | 891.5  | 970.4  | 882.1  | 744.5  | 720.8  | 652.2  | 891.8  | 876.1   |
| 252.0  | 275.6  | 196.3  | 177.1  | 492.0  | 537.7  | 580.5  | 564.3  | 427.9   |
| 1.3    | 0.9    | 1.0    | 1.4    | 0.8    | 0.7    | 1.0    | 1.3    | 2.1     |
| 1.8    | 7.1    | 15.2   | 4.1    | 8.3    | 2.6    | 3.3    | 2.1    | 6.8     |
| 15.5   | 3.4    | 26.2   | 7.3    | 3.9    | 10.0   | 13.9   | 4.8    | 5.0     |
| 459.5  | 421.1  | 847.6  | 574.4  | 431.3  | 314.4  | 483.3  | 516.8  | 620.6   |
| 861.9  | 922.0  | 1456.5 | 1010.7 | 708.9  | 581.0  | 606.2  | 772.3  | 600.0   |
| 861.6  | 787.2  | 1034.6 | 859.1  | 1524.6 | 2198.9 | 1705.3 | 1863.5 | 989.8   |
| 504.2  | 467.3  | 696.0  | 509.3  | 515.7  | 363.4  | 483.7  | 585.2  | 482.0   |
| 644.2  | 645.6  | 503.7  | 476.1  | 270.4  | 266.8  | 287.9  | 361.3  | 892.6   |
| 931.7  | 901.7  | 975.9  | 829.4  | 2044.2 | 1751.4 | 1858.2 | 2223.7 | 3493.6  |
| 283.8  | 283.9  | 347.8  | 262.1  | 576.3  | 621.6  | 579.5  | 694.1  | 368.5   |
| 292.1  | 364.0  | 274.7  | 223.3  | 787.3  | 766.5  | 691.3  | 755.3  | 1361.9  |
| 104.3  | 183.2  | 96.6   | 88.7   | 8078.6 | 7990.9 | 8306.0 | 8242.6 | 1998.7  |
| 181.7  | 181.3  | 270.9  | 157.4  | 753.8  | 753.4  | 730.8  | 843.4  | 406.6   |
| 1118.4 | 1178.4 | 823.7  | 1040.5 | 1501.6 | 1709.3 | 1362.8 | 1378.8 | 518.0   |
| 308.7  | 255.9  | 437.3  | 339.7  | 430.9  | 335.8  | 466.7  | 501.0  | 531.6   |
| 97.5   | 103.6  | 155.8  | 127.7  | 2.6    | 0.7    | 1.9    | 4.1    | 12.5    |
| 391.5  | 384.8  | 417.5  | 366.7  | 535.3  | 436.4  | 552.3  | 438.1  | 747.1   |
| 261.2  | 222.3  | 333.5  | 243.1  | 606.4  | 679.5  | 613.8  | 670.8  | 721.7   |
| 117.1  | 123.7  | 147.1  | 111.5  | 155.7  | 148.7  | 149.5  | 178.7  | 133.5   |
| 318.2  | 260.2  | 358.9  | 254.9  | 727.3  | 745.3  | 772.9  | 865.3  | 1478.1  |
| 846.0  | 861.9  | 1027.4 | 782.4  | 1347.3 | 1325.8 | 1311.5 | 1528.1 | 819.0   |
| 321.4  | 258.8  | 665.1  | 349.1  | 850.4  | 820.7  | 931.1  | 937.4  | 1275.6  |
| 421.9  | 420.1  | 522.2  | 474.9  | 616.3  | 736.1  | 595.8  | 695.7  | 903.8   |
| 874.0  | 811.0  | 972.9  | 629.4  | 1634.7 | 1526.4 | 1539.3 | 1797.5 | 1110.5  |
| 641.8  | 642.1  | 837.6  | 723.2  | 1058.1 | 1076.3 | 950.0  | 1143.5 | 1229.4  |
| 692.7  | 676.9  | 1000.6 | 722.7  | 919.4  | 753.1  | 943.1  | 1037.3 | 871.2   |
| 152.5  | 182.6  | 202.3  | 183.1  | 388.4  | 552.8  | 418.2  | 409.2  | 597.8   |
| 577.4  | 508.8  | 713.1  | 495.8  | 844.1  | 982.4  | 921.1  | 1038.3 | 1286.3  |
| 423.5  | 434.5  | 691.2  | 435.5  | 670.4  | 584.0  | 663.6  | 722.5  | 1717.4  |
| 978.3  | 879.8  | 1451.1 | 956.3  | 1603.2 | 1444.0 | 1706.1 | 1890.1 | 3634.2  |
| 21.5   | 16.4   | 32.8   | 23.8   | 7.1    | 6.5    | 21.3   | 17.0   | 58.0    |
| 713.4  | 692.8  | 824.0  | 645.7  | 417.2  | 491.1  | 514.4  | 505.2  | 254.1   |
| 1354.6 | 1328.1 | 1537.2 | 1318.4 | 948.2  | 1257.3 | 1162.5 | 1155.7 | 1825.2  |
| 621.1  | 576.2  | 1272.3 | 707.3  | 1329.8 | 986.2  | 1358.3 | 1568.3 | 1097.8  |
| 386.3  | 359.8  | 934.9  | 441.1  | 1208.6 | 803.4  | 1116.4 | 1330.8 | 838.0   |
| 3278.2 | 2843.1 | 6231.2 | 4240.0 | 5951.5 | 5844.3 | 5914.9 | 6287.8 | 8630.5  |
| 243.9  | 282.4  | 195.6  | 228.2  | 83.0   | 91.9   | 90.5   | 97.4   | 124.3   |



|        |        |        |        |        |        |        |        |        |
|--------|--------|--------|--------|--------|--------|--------|--------|--------|
| 1823.1 | 1621.3 | 2280.2 | 1459.1 | 2324.3 | 2123.6 | 2329.2 | 2700.3 | 2621.5 |
| 579.4  | 534.3  | 764.6  | 589.9  | 2215.2 | 1362.4 | 2061.7 | 2443.7 | 989.2  |
| 872.2  | 1074.1 | 933.8  | 1254.5 | 1250.2 | 955.0  | 1169.8 | 1141.8 | 384.4  |
| 508.5  | 543.1  | 698.2  | 659.4  | 545.8  | 501.5  | 591.8  | 664.6  | 200.9  |
| 199.7  | 223.7  | 169.2  | 154.6  | 477.8  | 647.3  | 416.1  | 505.2  | 186.1  |
| 120.0  | 106.5  | 106.3  | 62.6   | 339.0  | 477.8  | 305.7  | 352.7  | 188.8  |
| 76.4   | 77.6   | 61.2   | 47.0   | 180.0  | 271.6  | 183.0  | 222.8  | 149.7  |
| 11.7   | 12.5   | 22.2   | 11.1   | 17.2   | 14.1   | 20.1   | 27.6   | 61.9   |
| 9.7    | 4.9    | 11.2   | 6.7    | 26.8   | 17.3   | 45.4   | 28.5   | 188.2  |
| 446.6  | 358.1  | 410.0  | 384.9  | 1049.0 | 877.8  | 1126.5 | 1025.9 | 1228.6 |
| 670.7  | 594.1  | 910.4  | 595.7  | 590.4  | 526.5  | 667.9  | 637.8  | 311.9  |
| 372.7  | 305.8  | 569.1  | 336.6  | 423.9  | 389.0  | 432.6  | 438.8  | 583.2  |
| 1340.2 | 1248.3 | 1553.2 | 1206.6 | 909.1  | 814.0  | 905.3  | 1015.8 | 984.3  |
| 217.0  | 195.7  | 296.0  | 196.2  | 176.6  | 141.1  | 193.3  | 234.7  | 264.7  |
| 585.3  | 578.9  | 721.0  | 538.5  | 1257.7 | 1175.7 | 1248.5 | 1502.5 | 881.4  |
| 1.0    | 2.7    | 5.2    | 1.0    | 0.8    | 0.7    | 0.9    | 1.0    | 11.3   |
| 517.8  | 474.6  | 479.3  | 464.3  | 286.0  | 293.6  | 314.4  | 378.7  | 288.5  |
| 620.0  | 609.1  | 522.4  | 565.8  | 273.9  | 289.6  | 312.8  | 422.8  | 407.2  |
| 6712.4 | 6784.6 | 7356.2 | 6224.1 | 7092.7 | 7163.7 | 7314.5 | 7760.0 | 8799.6 |
| 514.4  | 421.8  | 558.7  | 558.8  | 481.0  | 627.1  | 484.7  | 559.0  | 623.4  |
| 1398.1 | 1256.2 | 1572.0 | 1548.7 | 1606.6 | 1930.3 | 1782.1 | 1932.3 | 1492.5 |
| 2411.2 | 2228.3 | 2970.1 | 2679.6 | 2939.9 | 3711.5 | 3312.9 | 3252.5 | 3391.7 |
| 684.7  | 589.5  | 943.7  | 677.9  | 520.5  | 516.1  | 538.5  | 563.6  | 956.4  |
| 471.2  | 434.8  | 1235.3 | 379.0  | 1388.6 | 848.4  | 1152.7 | 1553.5 | 974.5  |
| 61.5   | 51.6   | 84.5   | 101.1  | 54.7   | 113.4  | 49.9   | 63.0   | 77.2   |
| 77.4   | 67.9   | 124.2  | 93.3   | 54.6   | 68.2   | 37.8   | 56.8   | 58.9   |
| 2716.7 | 2622.7 | 3190.2 | 2509.1 | 1063.4 | 810.2  | 1012.9 | 1083.8 | 1642.6 |
| 290.3  | 275.5  | 392.8  | 265.0  | 731.7  | 778.4  | 856.6  | 835.8  | 644.1  |
| 1066.9 | 1017.6 | 1349.1 | 1123.1 | 1555.2 | 1501.5 | 1747.1 | 1726.0 | 1409.1 |
| 501.7  | 520.7  | 658.3  | 483.6  | 564.9  | 631.1  | 618.1  | 634.2  | 439.8  |
| 189.1  | 158.0  | 270.9  | 141.3  | 142.9  | 90.4   | 154.7  | 166.9  | 159.0  |
| 511.6  | 425.2  | 825.9  | 519.7  | 496.1  | 383.4  | 500.4  | 573.7  | 643.6  |
| 48.2   | 49.9   | 65.0   | 32.2   | 1012.4 | 691.9  | 1280.1 | 1234.4 | 706.4  |
| 1005.6 | 841.7  | 1697.3 | 1120.5 | 237.5  | 130.2  | 446.0  | 374.2  | 51.8   |
| 363.0  | 274.8  | 654.5  | 472.1  | 47.7   | 22.4   | 106.6  | 58.0   | 14.6   |
| 429.0  | 400.5  | 638.1  | 420.8  | 339.9  | 329.8  | 372.7  | 422.2  | 758.8  |
| 1305.1 | 1016.3 | 2007.9 | 1223.2 | 2131.8 | 2554.3 | 2365.5 | 2557.8 | 4117.2 |
| 303.6  | 311.5  | 479.7  | 311.6  | 461.5  | 414.3  | 520.7  | 557.0  | 711.4  |
| 455.3  | 408.7  | 593.0  | 478.1  | 633.6  | 581.8  | 695.4  | 896.7  | 878.0  |
| 70.2   | 73.2   | 55.8   | 57.2   | 336.0  | 381.9  | 315.9  | 326.5  | 491.8  |
| 114.4  | 113.0  | 89.0   | 84.6   | 483.0  | 560.3  | 494.9  | 541.2  | 647.8  |
| 414.5  | 367.1  | 534.0  | 341.5  | 980.0  | 881.4  | 1082.9 | 1150.8 | 1419.0 |
| 776.5  | 757.8  | 874.0  | 601.4  | 2120.7 | 2132.5 | 2045.1 | 2323.7 | 2441.0 |
| 1055.1 | 1040.1 | 1009.5 | 820.9  | 1067.9 | 1008.7 | 1039.2 | 1147.0 | 839.2  |
| 181.2  | 208.4  | 204.1  | 189.7  | 302.2  | 362.4  | 344.1  | 371.4  | 432.1  |
| 1194.2 | 894.8  | 2588.7 | 1035.1 | 3059.3 | 2902.6 | 3421.8 | 3306.9 | 5325.5 |
| 221.3  | 248.4  | 422.7  | 294.2  | 562.7  | 600.8  | 482.7  | 510.2  | 64.0   |
| 212.5  | 203.3  | 230.2  | 177.1  | 651.3  | 648.6  | 661.8  | 726.7  | 658.7  |
| 40.2   | 36.6   | 72.3   | 43.9   | 140.6  | 151.2  | 169.6  | 172.3  | 1024.0 |
| 69.8   | 61.3   | 100.2  | 63.9   | 249.2  | 224.4  | 239.0  | 301.2  | 1605.9 |
| 174.8  | 165.1  | 283.8  | 195.2  | 144.5  | 112.5  | 142.2  | 152.8  | 167.7  |
| 620.5  | 513.4  | 1035.0 | 592.5  | 605.3  | 645.4  | 616.4  | 673.9  | 740.4  |
| 830.8  | 751.5  | 1655.9 | 770.2  | 1517.6 | 1546.5 | 1430.5 | 1635.8 | 4065.8 |

|        |        |        |        |        |        |        |        |        |
|--------|--------|--------|--------|--------|--------|--------|--------|--------|
| 632.5  | 530.2  | 802.9  | 562.1  | 1090.0 | 463.8  | 868.2  | 904.5  | 1961.0 |
| 1710.7 | 1433.4 | 1941.1 | 1681.7 | 2102.3 | 1107.0 | 1948.2 | 2259.7 | 2801.0 |
| 552.2  | 461.8  | 645.9  | 444.0  | 1726.9 | 2087.8 | 1654.8 | 1883.8 | 1869.2 |
| 2032.3 | 1871.9 | 2540.4 | 1876.4 | 2295.0 | 1859.2 | 2403.2 | 2721.9 | 2123.8 |
| 625.4  | 572.8  | 1305.6 | 599.1  | 1717.0 | 1301.8 | 1462.4 | 1765.0 | 1740.8 |
| 2641.3 | 2726.2 | 2236.7 | 1981.2 | 6308.4 | 6280.5 | 6518.8 | 6523.6 | 4772.6 |
| 183.9  | 172.4  | 156.7  | 167.6  | 139.9  | 181.3  | 149.3  | 173.9  | 199.2  |
| 2282.8 | 2387.7 | 2511.7 | 2449.8 | 2245.0 | 2442.2 | 2671.5 | 2665.8 | 3103.3 |
| 626.3  | 547.7  | 898.0  | 617.1  | 1425.9 | 1138.2 | 1558.1 | 1597.2 | 1319.1 |
| 698.1  | 767.9  | 1164.7 | 769.3  | 1082.0 | 909.3  | 1124.5 | 1222.7 | 362.5  |
| 691.7  | 655.6  | 1020.2 | 717.4  | 1334.1 | 1053.3 | 1293.1 | 1487.5 | 1044.2 |
| 6268.1 | 5723.8 | 7850.3 | 6292.1 | 2458.2 | 1430.0 | 2946.0 | 2156.6 | 2487.5 |
| 2630.3 | 2350.4 | 3839.0 | 2753.9 | 3001.3 | 2696.3 | 3149.0 | 3356.7 | 3644.2 |
| 294.9  | 244.3  | 400.9  | 266.1  | 137.7  | 124.6  | 142.7  | 186.0  | 140.0  |
| 154.8  | 158.2  | 73.0   | 54.1   | 1819.8 | 1204.7 | 1926.4 | 2023.4 | 2812.3 |
| 2290.5 | 2185.3 | 2744.9 | 2245.7 | 4041.3 | 3971.6 | 4129.9 | 4185.1 | 6852.2 |
| 12.4   | 4.8    | 11.4   | 14.1   | 40.6   | 23.4   | 58.3   | 35.5   | 40.9   |
| 137.2  | 151.3  | 172.0  | 137.0  | 206.2  | 171.5  | 303.8  | 235.3  | 300.3  |
| 679.0  | 671.1  | 762.6  | 620.8  | 788.5  | 729.3  | 907.1  | 907.2  | 745.2  |
| 254.0  | 257.7  | 379.2  | 277.9  | 333.2  | 386.2  | 370.4  | 371.7  | 239.1  |
| 82.9   | 64.5   | 177.6  | 116.1  | 810.0  | 630.2  | 1285.9 | 930.7  | 259.7  |
| 379.5  | 395.4  | 539.2  | 439.0  | 893.3  | 747.2  | 1126.6 | 1099.3 | 1622.9 |
| 110.9  | 124.0  | 137.7  | 122.3  | 161.4  | 143.0  | 167.9  | 194.3  | 216.4  |
| 247.8  | 260.5  | 377.2  | 293.1  | 605.6  | 515.7  | 713.0  | 789.1  | 904.5  |
| 292.1  | 248.5  | 518.9  | 283.0  | 825.1  | 788.2  | 841.7  | 973.5  | 782.6  |
| 2.8    | 3.1    | 4.4    | 3.0    | 4.9    | 7.3    | 5.4    | 5.3    | 12.6   |
| 190.0  | 171.3  | 306.8  | 167.9  | 344.5  | 350.4  | 317.8  | 363.9  | 317.7  |
| 1817.5 | 1687.2 | 1475.1 | 1443.1 | 1022.6 | 1188.4 | 1116.8 | 1239.7 | 986.1  |
| 826.8  | 906.4  | 688.4  | 714.2  | 141.7  | 164.9  | 120.2  | 168.8  | 50.4   |
| 246.7  | 194.1  | 348.6  | 229.9  | 878.1  | 835.8  | 896.0  | 983.1  | 987.7  |
| 6.4    | 2.5    | 6.9    | 2.5    | 130.6  | 147.6  | 236.5  | 184.3  | 114.7  |
| 3.1    | 5.8    | 1.5    | 3.5    | 493.5  | 490.3  | 767.4  | 550.7  | 301.3  |
| 1.4    | 1.7    | 4.5    | 2.4    | 905.7  | 793.2  | 1314.7 | 1146.1 | 384.1  |
| 330.3  | 331.0  | 467.1  | 338.0  | 511.6  | 652.7  | 575.1  | 634.6  | 768.7  |
| 905.3  | 852.4  | 1178.3 | 990.4  | 2207.6 | 1744.9 | 2276.9 | 2444.2 | 2392.5 |
| 413.6  | 442.7  | 322.7  | 360.3  | 536.6  | 651.2  | 625.6  | 690.1  | 304.4  |
| 6.0    | 8.4    | 105.6  | 68.4   | 156.0  | 166.6  | 206.1  | 187.1  | 156.2  |
| 289.0  | 282.5  | 436.2  | 359.5  | 585.3  | 658.4  | 598.4  | 692.2  | 460.6  |
| 575.8  | 569.9  | 738.8  | 579.5  | 812.9  | 738.4  | 800.3  | 920.5  | 567.6  |
| 567.4  | 549.5  | 783.0  | 566.1  | 664.7  | 594.7  | 684.2  | 766.6  | 507.8  |
| 101.8  | 52.1   | 288.5  | 66.6   | 390.7  | 351.6  | 872.7  | 555.9  | 66.8   |
| 382.1  | 202.2  | 984.9  | 236.3  | 1101.8 | 734.4  | 1828.5 | 1414.8 | 165.2  |
| 259.6  | 146.8  | 696.3  | 188.4  | 832.7  | 685.3  | 1362.0 | 1052.5 | 80.8   |
| 378.3  | 371.0  | 344.2  | 339.3  | 877.8  | 749.1  | 1065.8 | 1265.2 | 1772.8 |
| 213.8  | 169.9  | 422.9  | 200.4  | 599.3  | 548.2  | 608.1  | 655.4  | 900.8  |
| 525.9  | 507.2  | 700.7  | 545.3  | 632.8  | 607.8  | 615.3  | 768.0  | 800.5  |
| 316.0  | 262.3  | 479.3  | 249.8  | 1744.0 | 1993.0 | 2010.9 | 1560.9 | 3773.5 |
| 578.7  | 607.9  | 657.9  | 516.9  | 861.4  | 753.1  | 777.1  | 849.9  | 1632.2 |
| 226.4  | 188.0  | 420.7  | 149.8  | 624.5  | 566.7  | 700.6  | 785.0  | 670.4  |
| 213.1  | 179.4  | 397.0  | 139.7  | 572.9  | 453.6  | 626.4  | 676.8  | 585.3  |
| 449.4  | 428.5  | 508.5  | 384.7  | 651.0  | 546.7  | 716.2  | 768.0  | 663.3  |
| 314.5  | 324.6  | 458.3  | 354.3  | 518.0  | 391.3  | 476.4  | 548.0  | 426.1  |
| 823.2  | 824.8  | 755.6  | 751.3  | 990.3  | 853.4  | 1058.2 | 1166.1 | 901.2  |

|        |        |        |        |        |        |        |        |         |
|--------|--------|--------|--------|--------|--------|--------|--------|---------|
| 52.3   | 44.4   | 43.4   | 44.1   | 49.4   | 31.9   | 38.9   | 43.4   | 30.8    |
| 497.2  | 410.0  | 437.1  | 460.6  | 467.5  | 504.6  | 501.8  | 532.7  | 195.2   |
| 214.0  | 235.4  | 360.8  | 230.8  | 350.2  | 327.0  | 358.8  | 371.6  | 346.8   |
| 1.1    | 1.4    | 1.8    | 1.4    | 1.7    | 0.9    | 0.9    | 0.9    | 1.6     |
| 521.2  | 481.0  | 638.8  | 528.8  | 511.7  | 396.6  | 422.1  | 538.7  | 1258.6  |
| 473.8  | 508.5  | 491.7  | 438.6  | 453.7  | 333.9  | 429.5  | 605.8  | 311.5   |
| 540.1  | 409.2  | 875.1  | 441.4  | 347.7  | 373.5  | 369.7  | 373.4  | 464.3   |
| 205.8  | 198.1  | 217.5  | 113.1  | 520.6  | 814.0  | 873.0  | 728.8  | 1790.8  |
| 1271.1 | 1228.7 | 1432.9 | 1174.9 | 388.4  | 449.8  | 386.5  | 503.9  | 323.8   |
| 369.7  | 359.8  | 444.5  | 338.1  | 171.4  | 221.9  | 233.5  | 249.3  | 147.9   |
| 677.9  | 739.8  | 634.7  | 666.7  | 1269.1 | 1330.2 | 1555.6 | 1649.9 | 440.3   |
| 23.3   | 20.0   | 19.5   | 18.2   | 172.2  | 215.2  | 193.0  | 216.1  | 534.1   |
| 5827.7 | 5582.9 | 6329.0 | 5281.2 | 344.9  | 254.0  | 721.1  | 486.0  | 0.6     |
| 730.5  | 671.7  | 1022.1 | 730.1  | 757.7  | 777.4  | 849.4  | 869.3  | 589.2   |
| 1747.4 | 1673.6 | 1865.5 | 1816.4 | 1657.8 | 1661.2 | 1740.5 | 1934.1 | 2299.2  |
| 1275.0 | 1120.8 | 1733.6 | 941.6  | 1862.5 | 1859.2 | 1949.2 | 2313.2 | 2192.8  |
| 4.4    | 6.2    | 3.0    | 2.4    | 18.3   | 25.6   | 15.2   | 23.8   | 14.5    |
| 33.7   | 17.8   | 32.9   | 23.1   | 148.4  | 156.0  | 168.4  | 171.7  | 88.1    |
| 114.3  | 101.5  | 197.9  | 72.5   | 671.5  | 639.5  | 557.0  | 645.5  | 1182.9  |
| 224.2  | 214.5  | 254.7  | 226.4  | 303.9  | 338.9  | 305.7  | 369.5  | 280.3   |
| 207.6  | 206.4  | 235.8  | 196.1  | 294.1  | 273.2  | 306.8  | 372.0  | 240.0   |
| 443.5  | 388.3  | 525.1  | 448.8  | 585.7  | 659.9  | 673.8  | 719.7  | 675.8   |
| 270.9  | 212.2  | 599.6  | 298.7  | 604.4  | 567.6  | 694.4  | 703.6  | 210.4   |
| 303.9  | 282.0  | 643.0  | 387.4  | 602.9  | 527.7  | 616.2  | 609.6  | 170.4   |
| 993.9  | 839.2  | 1835.1 | 901.1  | 1282.8 | 1004.6 | 1368.1 | 1431.2 | 1114.6  |
| 463.8  | 414.5  | 1000.5 | 404.0  | 961.9  | 492.2  | 687.3  | 955.4  | 904.7   |
| 814.6  | 821.3  | 1733.8 | 717.7  | 1425.3 | 794.5  | 1101.3 | 1522.1 | 1940.0  |
| 5418.4 | 4942.1 | 6521.0 | 5501.7 | 5880.2 | 6216.5 | 6033.7 | 6250.4 | 8534.8  |
| 41.3   | 43.9   | 39.5   | 27.9   | 1335.6 | 1934.7 | 1070.5 | 1207.8 | 10055.6 |
| 2.1    | 1.2    | 3.6    | 5.3    | 617.9  | 265.4  | 1241.3 | 929.8  | 1.1     |
| 236.1  | 230.9  | 379.6  | 194.8  | 203.5  | 177.5  | 286.7  | 301.9  | 9.1     |
| 2923.1 | 2686.8 | 4029.3 | 2546.2 | 2601.8 | 1863.9 | 2577.6 | 3169.7 | 172.2   |
| 812.9  | 775.2  | 1483.2 | 760.9  | 816.9  | 576.7  | 894.0  | 1070.6 | 51.8    |
| 604.7  | 557.3  | 755.9  | 652.4  | 762.6  | 681.0  | 762.1  | 857.1  | 281.5   |
| 1760.6 | 1672.1 | 2518.1 | 1736.7 | 1883.2 | 1648.1 | 1955.2 | 2157.5 | 1405.2  |
| 252.9  | 187.6  | 269.3  | 221.9  | 224.8  | 190.2  | 281.7  | 296.4  | 305.1   |
| 198.8  | 172.8  | 252.3  | 197.9  | 272.1  | 234.2  | 255.0  | 304.2  | 365.9   |
| 370.6  | 315.0  | 485.0  | 381.5  | 409.8  | 356.6  | 377.2  | 439.8  | 543.9   |
| 1718.3 | 1567.4 | 2122.0 | 1639.9 | 1715.9 | 1480.3 | 1714.0 | 1926.4 | 2196.7  |
| 85.4   | 78.7   | 124.9  | 87.7   | 52.3   | 56.1   | 52.0   | 74.5   | 123.9   |
| 271.8  | 261.1  | 429.6  | 198.7  | 249.9  | 224.5  | 242.9  | 286.9  | 616.7   |
| 82.2   | 64.8   | 174.2  | 76.8   | 107.1  | 57.7   | 107.8  | 143.9  | 217.7   |
| 417.9  | 373.8  | 737.4  | 402.2  | 605.9  | 284.2  | 571.6  | 642.6  | 862.5   |
| 419.7  | 380.1  | 584.0  | 415.8  | 487.9  | 415.5  | 451.8  | 579.6  | 292.5   |
| 853.9  | 869.6  | 937.4  | 923.0  | 1503.4 | 1494.7 | 1542.0 | 1622.9 | 2101.5  |
| 379.8  | 366.6  | 412.7  | 322.2  | 201.0  | 205.6  | 223.9  | 231.2  | 218.4   |
| 590.9  | 534.7  | 709.2  | 542.6  | 371.2  | 446.7  | 415.1  | 513.8  | 367.7   |
| 475.7  | 426.0  | 382.3  | 369.9  | 121.3  | 141.9  | 121.6  | 164.6  | 84.2    |
| 171.3  | 142.5  | 236.8  | 146.2  | 172.9  | 138.6  | 164.1  | 193.9  | 248.5   |
| 950.7  | 897.2  | 1264.6 | 900.1  | 758.2  | 728.8  | 734.8  | 923.5  | 974.8   |
| 975.2  | 807.5  | 1941.1 | 1229.8 | 877.6  | 956.5  | 1027.6 | 961.7  | 522.2   |
| 2015.0 | 1664.2 | 3859.1 | 2365.1 | 1204.5 | 1141.9 | 1372.4 | 1249.8 | 760.9   |
| 2278.5 | 1896.3 | 4174.3 | 2689.3 | 1909.1 | 1913.3 | 2304.9 | 2070.4 | 1401.9  |

|        |        |        |        |        |        |        |        |        |
|--------|--------|--------|--------|--------|--------|--------|--------|--------|
| 82.7   | 70.4   | 162.0  | 109.0  | 65.5   | 66.9   | 76.9   | 76.3   | 48.9   |
| 51.7   | 54.9   | 107.3  | 57.1   | 612.2  | 545.4  | 660.9  | 637.3  | 887.4  |
| 15.5   | 18.3   | 19.5   | 12.0   | 8.9    | 8.7    | 11.5   | 11.5   | 20.2   |
| 20.0   | 33.8   | 33.2   | 19.2   | 31.5   | 28.2   | 17.2   | 31.7   | 110.6  |
| 191.9  | 169.2  | 457.6  | 196.3  | 313.0  | 291.2  | 310.3  | 312.5  | 677.4  |
| 403.3  | 342.3  | 563.9  | 337.8  | 570.0  | 519.2  | 530.1  | 567.0  | 710.2  |
| 702.9  | 600.7  | 1342.3 | 610.7  | 1146.1 | 876.0  | 945.1  | 1151.3 | 1423.2 |
| 1639.4 | 1495.3 | 2496.9 | 1563.0 | 1389.9 | 946.7  | 1379.6 | 1573.3 | 2134.3 |
| 1373.7 | 1200.4 | 1806.8 | 1057.3 | 1886.9 | 1291.6 | 1745.6 | 2138.3 | 1926.3 |
| 146.3  | 124.9  | 312.8  | 114.8  | 796.4  | 567.2  | 703.9  | 844.7  | 705.6  |
| 203.5  | 224.3  | 259.8  | 195.8  | 437.9  | 314.0  | 553.2  | 508.3  | 190.4  |
| 63.3   | 48.8   | 54.3   | 42.4   | 50.0   | 30.4   | 51.5   | 57.2   | 89.3   |
| 303.7  | 265.0  | 356.1  | 256.8  | 226.5  | 201.4  | 194.8  | 264.9  | 194.3  |
| 250.8  | 257.3  | 333.7  | 241.0  | 293.4  | 414.4  | 323.9  | 354.1  | 382.1  |
| 1040.8 | 974.3  | 1052.7 | 862.2  | 1470.1 | 1523.3 | 1528.2 | 1736.1 | 1402.7 |
| 379.0  | 373.7  | 518.5  | 366.8  | 318.5  | 343.8  | 314.4  | 351.3  | 425.9  |
| 203.5  | 202.5  | 298.2  | 193.9  | 221.7  | 232.8  | 239.9  | 259.8  | 244.4  |
| 333.7  | 297.0  | 496.6  | 310.9  | 250.8  | 206.7  | 290.4  | 285.3  | 114.5  |
| 640.9  | 592.8  | 989.6  | 674.7  | 441.5  | 387.4  | 477.2  | 491.1  | 262.0  |
| 66.1   | 43.1   | 159.6  | 44.5   | 584.8  | 369.9  | 468.4  | 615.4  | 341.1  |
| 320.0  | 289.3  | 385.5  | 287.3  | 372.1  | 343.3  | 357.0  | 440.5  | 308.1  |
| 117.1  | 110.1  | 141.9  | 112.3  | 126.1  | 127.7  | 127.4  | 145.4  | 102.0  |
| 458.8  | 440.2  | 550.5  | 402.6  | 606.9  | 564.5  | 630.7  | 642.6  | 502.1  |
| 325.0  | 233.3  | 653.4  | 209.2  | 1240.4 | 1291.9 | 1313.6 | 1457.5 | 1531.6 |
| 212.6  | 206.0  | 320.1  | 192.5  | 172.1  | 148.7  | 160.8  | 219.9  | 253.4  |
| 332.7  | 350.4  | 341.8  | 317.7  | 390.6  | 393.3  | 421.4  | 459.0  | 593.2  |
| 2256.9 | 1947.9 | 3089.4 | 2276.2 | 661.9  | 633.3  | 661.7  | 758.8  | 1271.6 |
| 17.7   | 18.1   | 35.5   | 11.9   | 255.4  | 277.3  | 201.2  | 270.6  | 192.1  |
| 26.4   | 21.3   | 65.7   | 27.2   | 434.0  | 392.8  | 372.8  | 445.4  | 288.0  |
| 6.3    | 10.7   | 1.9    | 14.5   | 29.3   | 27.2   | 24.0   | 28.6   | 40.6   |
| 7.5    | 19.5   | 15.2   | 20.1   | 76.5   | 71.7   | 56.4   | 82.2   | 86.0   |
| 972.7  | 911.4  | 1147.5 | 1035.4 | 1129.8 | 1002.7 | 1226.4 | 1312.1 | 413.1  |
| 522.5  | 524.3  | 650.2  | 568.2  | 742.9  | 726.7  | 870.6  | 854.1  | 281.3  |
| 360.1  | 353.6  | 409.9  | 383.6  | 407.6  | 364.1  | 421.3  | 458.6  | 226.8  |
| 631.0  | 622.0  | 949.1  | 650.4  | 1151.1 | 952.1  | 1238.4 | 1289.6 | 2406.5 |
| 1185.0 | 1169.1 | 1859.4 | 1152.5 | 1693.7 | 1423.5 | 1685.6 | 1949.3 | 1948.8 |
| 235.1  | 160.3  | 413.5  | 191.9  | 336.6  | 272.3  | 336.3  | 364.9  | 477.4  |
| 80.8   | 67.5   | 113.2  | 70.4   | 75.4   | 72.3   | 101.8  | 106.5  | 123.1  |
| 622.6  | 563.1  | 1138.3 | 652.9  | 656.8  | 634.0  | 625.4  | 696.7  | 470.6  |
| 253.4  | 262.7  | 202.7  | 195.9  | 285.9  | 288.1  | 380.6  | 326.1  | 659.8  |
| 459.3  | 489.8  | 440.1  | 443.4  | 587.0  | 496.6  | 534.1  | 581.4  | 672.3  |
| 149.0  | 138.6  | 144.2  | 122.2  | 122.9  | 201.2  | 154.6  | 163.2  | 136.2  |
| 123.5  | 97.5   | 154.6  | 120.8  | 54.4   | 84.0   | 61.4   | 94.8   | 90.0   |
| 430.0  | 420.9  | 553.8  | 461.2  | 314.4  | 458.5  | 341.7  | 457.3  | 298.7  |
| 470.8  | 444.5  | 486.0  | 507.8  | 386.3  | 612.1  | 437.5  | 480.9  | 321.2  |
| 603.7  | 595.9  | 575.5  | 517.6  | 753.4  | 690.3  | 727.3  | 851.0  | 656.5  |
| 1332.6 | 1252.6 | 1120.6 | 1214.0 | 1024.0 | 733.9  | 1062.3 | 1300.1 | 671.3  |
| 540.4  | 547.1  | 479.1  | 418.5  | 798.0  | 799.8  | 792.2  | 953.7  | 2134.9 |
| 34.6   | 29.7   | 47.2   | 29.1   | 330.1  | 627.3  | 870.9  | 333.3  | 1332.6 |
| 860.7  | 756.2  | 1373.9 | 990.4  | 1837.0 | 1631.1 | 1908.8 | 2098.0 | 1681.5 |
| 31.8   | 20.7   | 54.3   | 22.2   | 77.9   | 32.0   | 43.2   | 78.5   | 29.6   |
| 1057.2 | 764.5  | 1979.9 | 969.7  | 1799.8 | 1299.8 | 1660.2 | 2004.9 | 2436.5 |
| 1.6    | 0.7    | 0.7    | 1.3    | 10.9   | 8.2    | 3.6    | 8.7    | 1.7    |

|        |        |        |        |        |        |        |        |        |
|--------|--------|--------|--------|--------|--------|--------|--------|--------|
| 4.4    | 2.8    | 2.5    | 0.2    | 456.5  | 376.6  | 567.5  | 593.7  | 42.8   |
| 1260.4 | 1108.2 | 1536.0 | 1230.6 | 1280.0 | 1007.2 | 1236.9 | 1521.2 | 2069.8 |
| 727.4  | 706.7  | 1370.1 | 856.1  | 11.1   | 14.9   | 13.2   | 10.3   | 351.6  |
| 120.8  | 113.0  | 158.8  | 117.5  | 162.2  | 138.2  | 131.4  | 195.8  | 188.5  |
| 221.6  | 204.2  | 258.6  | 211.5  | 285.3  | 256.2  | 264.8  | 309.0  | 315.0  |
| 61.8   | 92.9   | 80.1   | 52.6   | 117.1  | 123.5  | 99.6   | 133.5  | 110.8  |
| 52.0   | 39.2   | 63.5   | 59.6   | 32.4   | 49.0   | 38.9   | 40.6   | 36.6   |
| 461.7  | 475.4  | 376.3  | 407.1  | 486.0  | 583.9  | 441.4  | 533.8  | 372.8  |
| 276.8  | 286.1  | 204.4  | 343.6  | 613.7  | 522.9  | 642.9  | 711.1  | 756.0  |
| 507.9  | 497.6  | 396.6  | 632.4  | 775.8  | 614.1  | 762.6  | 934.2  | 1231.1 |
| 5287.7 | 4680.3 | 5620.3 | 5137.2 | 3998.2 | 3769.3 | 3978.3 | 4503.7 | 3609.4 |
| 59.0   | 64.0   | 172.4  | 27.2   | 479.3  | 181.2  | 389.2  | 485.2  | 193.8  |
| 344.8  | 322.2  | 538.0  | 310.0  | 456.7  | 519.8  | 471.1  | 565.3  | 939.9  |
| 1307.1 | 1107.1 | 2063.7 | 1242.0 | 1539.2 | 1519.5 | 1694.0 | 1827.0 | 3434.9 |
| 933.6  | 949.9  | 980.6  | 1048.6 | 773.8  | 1183.8 | 873.4  | 866.4  | 991.8  |
| 39.1   | 43.0   | 61.9   | 39.4   | 48.7   | 40.7   | 53.3   | 66.1   | 61.5   |
| 1151.0 | 911.4  | 1982.9 | 1065.4 | 1167.3 | 1196.4 | 1213.9 | 1362.7 | 1099.0 |
| 1172.0 | 1083.5 | 2511.4 | 1333.8 | 2574.8 | 3304.5 | 2737.3 | 3184.3 | 3111.2 |
| 1258.0 | 923.9  | 1771.4 | 1064.8 | 1205.4 | 1294.5 | 1223.0 | 1497.6 | 1347.1 |
| 186.1  | 169.9  | 221.9  | 165.6  | 291.3  | 290.2  | 298.1  | 319.8  | 314.9  |
| 1845.9 | 1663.6 | 1723.2 | 1289.2 | 715.0  | 679.2  | 649.4  | 733.2  | 1021.6 |
| 760.1  | 717.4  | 649.7  | 768.9  | 563.1  | 839.8  | 631.2  | 682.3  | 403.4  |
| 19.5   | 14.8   | 12.7   | 15.0   | 18.0   | 7.4    | 17.7   | 19.2   | 23.3   |
| 198.8  | 180.6  | 271.9  | 229.7  | 569.2  | 401.4  | 530.2  | 611.1  | 491.6  |
| 242.9  | 238.5  | 295.6  | 214.5  | 506.3  | 527.4  | 523.8  | 654.1  | 484.7  |
| 690.1  | 658.7  | 725.6  | 599.4  | 1203.1 | 1159.6 | 1268.4 | 1382.8 | 1028.4 |
| 398.5  | 301.3  | 740.2  | 406.2  | 887.7  | 946.6  | 864.9  | 956.0  | 1123.5 |
| 416.1  | 357.5  | 602.5  | 410.4  | 752.7  | 868.9  | 850.3  | 955.0  | 1576.0 |
| 1443.6 | 1223.9 | 1709.3 | 1242.5 | 1486.0 | 1392.6 | 1372.7 | 1510.6 | 1606.1 |
| 1512.5 | 1355.9 | 1987.2 | 1454.8 | 975.2  | 953.4  | 1022.0 | 1272.3 | 1215.0 |
| 219.2  | 208.9  | 384.7  | 232.9  | 792.5  | 546.2  | 614.3  | 819.5  | 554.2  |
| 156.9  | 179.5  | 218.4  | 187.1  | 185.9  | 176.2  | 157.1  | 182.9  | 152.5  |
| 393.7  | 393.9  | 398.5  | 381.4  | 350.2  | 353.6  | 373.4  | 423.3  | 261.4  |
| 123.4  | 112.5  | 151.5  | 99.1   | 148.0  | 163.8  | 158.1  | 196.5  | 158.3  |
| 614.0  | 642.3  | 531.1  | 603.0  | 447.8  | 436.7  | 493.3  | 582.1  | 339.4  |
| 507.6  | 601.7  | 519.5  | 557.6  | 433.3  | 522.9  | 570.6  | 532.5  | 685.5  |
| 417.8  | 451.4  | 462.5  | 455.3  | 394.3  | 487.0  | 509.6  | 490.8  | 477.7  |
| 261.6  | 248.3  | 310.3  | 216.2  | 285.3  | 252.0  | 263.8  | 302.5  | 595.6  |
| 420.0  | 413.0  | 472.9  | 352.9  | 422.5  | 389.7  | 427.9  | 434.4  | 765.7  |
| 705.3  | 639.2  | 731.8  | 627.3  | 822.8  | 824.0  | 704.3  | 891.7  | 439.7  |
| 1975.4 | 1625.5 | 2889.8 | 1688.2 | 2187.3 | 2003.6 | 2360.2 | 2576.0 | 1640.5 |
| 21.9   | 26.4   | 20.2   | 22.4   | 56.1   | 34.1   | 51.9   | 84.3   | 29.4   |
| 1202.6 | 1202.7 | 1359.0 | 1135.1 | 1361.0 | 1290.6 | 1270.2 | 1631.9 | 1405.4 |
| 59.6   | 34.1   | 43.3   | 55.1   | 192.5  | 220.3  | 221.6  | 184.1  | 6.0    |
| 414.0  | 402.0  | 420.3  | 329.5  | 585.0  | 529.8  | 562.8  | 648.2  | 457.4  |
| 3.5    | 6.5    | 6.0    | 4.7    | 3.4    | 4.6    | 2.1    | 0.3    | 4.6    |
| 406.5  | 236.7  | 886.7  | 290.2  | 522.4  | 442.8  | 707.0  | 648.9  | 123.1  |
| 317.8  | 160.2  | 610.3  | 205.0  | 601.8  | 439.3  | 866.8  | 652.5  | 84.0   |
| 3.5    | 4.6    | 4.8    | 3.4    | 3.4    | 2.5    | 2.7    | 3.5    | 29.9   |
| 14.4   | 20.6   | 30.0   | 22.4   | 45.8   | 46.6   | 41.7   | 39.7   | 50.9   |
| 252.1  | 216.0  | 308.6  | 248.1  | 374.2  | 488.1  | 371.5  | 442.3  | 255.4  |
| 508.7  | 534.5  | 1018.4 | 567.1  | 1907.2 | 1321.1 | 1533.9 | 1985.3 | 695.6  |
| 51.6   | 44.3   | 109.4  | 61.9   | 150.2  | 155.8  | 124.9  | 153.2  | 138.5  |

|        |        |        |        |        |        |        |        |        |
|--------|--------|--------|--------|--------|--------|--------|--------|--------|
| 162.8  | 120.1  | 342.6  | 191.1  | 779.1  | 817.1  | 798.4  | 827.9  | 436.1  |
| 1046.4 | 1145.0 | 714.2  | 983.4  | 2457.2 | 2902.0 | 2940.5 | 2750.8 | 2053.0 |
| 529.3  | 426.1  | 571.9  | 432.7  | 235.8  | 198.0  | 170.1  | 260.9  | 281.8  |
| 726.7  | 691.4  | 793.7  | 730.2  | 289.5  | 290.9  | 284.6  | 355.1  | 274.6  |
| 238.7  | 255.2  | 374.5  | 244.0  | 405.3  | 341.8  | 377.2  | 449.8  | 211.7  |
| 114.8  | 126.5  | 167.5  | 117.2  | 156.1  | 142.3  | 162.3  | 173.6  | 113.6  |
| 861.0  | 819.3  | 1195.4 | 917.7  | 871.2  | 795.4  | 934.3  | 996.2  | 1957.9 |
| 529.9  | 484.7  | 871.4  | 541.4  | 1137.0 | 1230.4 | 1130.3 | 1238.4 | 1147.7 |
| 507.3  | 535.1  | 519.7  | 555.9  | 284.0  | 380.9  | 274.2  | 328.3  | 1220.1 |
| 46.2   | 60.9   | 78.1   | 50.8   | 49.1   | 64.1   | 36.3   | 47.2   | 57.0   |
| 1457.5 | 1405.3 | 1842.4 | 1492.4 | 1403.8 | 1545.3 | 1445.8 | 1517.8 | 1129.4 |
| 5.1    | 14.7   | 10.3   | 9.9    | 43.3   | 44.5   | 33.0   | 48.6   | 75.3   |
| 2.1    | 3.9    | 3.4    | 1.6    | 106.5  | 105.9  | 125.0  | 116.9  | 152.2  |
| 189.3  | 157.1  | 234.3  | 141.2  | 163.7  | 201.0  | 193.0  | 217.7  | 229.3  |
| 400.1  | 352.6  | 392.3  | 294.3  | 459.5  | 540.4  | 494.2  | 536.2  | 361.2  |
| 1816.2 | 1797.8 | 1744.7 | 1780.6 | 3806.8 | 3692.1 | 4026.9 | 3911.4 | 4028.7 |
| 394.7  | 372.6  | 364.6  | 372.4  | 192.5  | 223.7  | 181.5  | 198.1  | 266.8  |
| 334.0  | 346.5  | 364.4  | 340.6  | 201.9  | 245.0  | 211.7  | 234.3  | 256.5  |
| 117.0  | 113.0  | 131.9  | 119.0  | 66.7   | 91.0   | 64.2   | 58.3   | 78.8   |
| 3375.4 | 3310.5 | 3728.3 | 3291.9 | 1326.5 | 1162.2 | 1364.4 | 1602.4 | 1023.5 |
| 417.5  | 410.5  | 732.7  | 481.2  | 703.5  | 593.5  | 661.4  | 708.1  | 587.6  |
| 1282.2 | 1109.2 | 2562.5 | 1570.1 | 949.5  | 716.9  | 994.4  | 992.2  | 332.3  |
| 115.0  | 79.1   | 219.2  | 136.0  | 154.4  | 150.2  | 162.3  | 202.3  | 282.0  |
| 1.1    | 3.8    | 2.3    | 1.1    | 67.9   | 38.6   | 281.1  | 166.4  | 2.2    |
| 507.6  | 370.7  | 856.3  | 479.0  | 1418.9 | 997.6  | 1447.7 | 1448.2 | 1802.4 |
| 20.4   | 17.8   | 33.3   | 21.2   | 28.7   | 21.7   | 41.4   | 35.6   | 68.1   |
| 501.1  | 464.0  | 538.7  | 422.6  | 575.5  | 665.3  | 692.8  | 716.7  | 644.7  |
| 584.1  | 545.3  | 645.7  | 525.7  | 426.9  | 423.9  | 454.8  | 519.3  | 364.2  |
| 372.6  | 334.2  | 324.9  | 215.4  | 397.5  | 415.2  | 434.6  | 432.7  | 554.5  |
| 105.2  | 113.9  | 83.2   | 71.7   | 80.3   | 90.0   | 92.3   | 95.4   | 107.1  |
| 234.4  | 185.7  | 365.3  | 181.8  | 187.2  | 178.3  | 214.7  | 277.4  | 207.1  |
| 476.3  | 474.1  | 450.8  | 448.1  | 838.0  | 699.2  | 1066.9 | 1037.0 | 883.1  |
| 857.7  | 855.4  | 733.7  | 696.7  | 474.4  | 319.0  | 380.8  | 501.7  | 583.5  |
| 1158.7 | 1210.8 | 1134.3 | 974.9  | 503.7  | 424.2  | 445.7  | 561.9  | 731.5  |
| 630.1  | 573.9  | 668.8  | 555.4  | 289.1  | 289.2  | 366.2  | 358.1  | 263.7  |
| 1715.8 | 1650.8 | 1891.9 | 1696.9 | 700.2  | 774.3  | 859.2  | 880.5  | 565.9  |
| 1258.6 | 1218.5 | 1935.6 | 1312.7 | 1262.2 | 887.6  | 1278.1 | 1387.1 | 1114.9 |
| 160.2  | 163.8  | 160.5  | 150.7  | 90.8   | 163.0  | 91.5   | 105.2  | 157.5  |
| 105.5  | 102.0  | 122.0  | 88.1   | 72.6   | 97.1   | 63.3   | 60.5   | 186.9  |
| 64.6   | 60.6   | 61.4   | 66.0   | 134.9  | 136.9  | 139.0  | 149.8  | 92.1   |
| 275.6  | 273.7  | 257.6  | 251.0  | 465.8  | 537.2  | 478.7  | 582.9  | 466.6  |
| 36.5   | 31.6   | 32.4   | 32.4   | 55.6   | 53.3   | 58.4   | 78.1   | 68.3   |
| 2657.0 | 2446.5 | 3448.8 | 2254.5 | 366.5  | 368.3  | 366.3  | 447.8  | 4.1    |
| 2491.0 | 2390.7 | 2742.9 | 2196.3 | 2174.0 | 2113.4 | 2341.5 | 2432.9 | 2810.9 |
| 4802.9 | 4816.2 | 4292.3 | 4065.0 | 1948.9 | 1466.2 | 2754.5 | 2573.9 | 1432.1 |
| 77.3   | 79.4   | 85.3   | 37.6   | 250.5  | 188.4  | 376.8  | 282.0  | 25.3   |
| 16.2   | 18.4   | 25.7   | 17.8   | 74.1   | 31.5   | 107.5  | 83.4   | 3.4    |
| 145.9  | 174.6  | 219.6  | 151.5  | 142.9  | 141.0  | 154.4  | 167.4  | 199.7  |
| 395.4  | 355.5  | 523.1  | 389.2  | 287.9  | 271.7  | 319.2  | 367.9  | 403.3  |
| 291.0  | 283.2  | 377.2  | 309.0  | 193.9  | 213.6  | 256.3  | 250.8  | 342.5  |
| 367.8  | 309.2  | 338.9  | 275.9  | 859.0  | 887.5  | 1214.8 | 1103.1 | 715.2  |
| 183.4  | 207.6  | 247.2  | 202.2  | 0.4    | 0.7    | 3.9    | 5.4    | 445.8  |
| 518.5  | 540.6  | 718.2  | 549.6  | 6.3    | 0.5    | 2.5    | 2.1    | 1037.9 |

|        |        |        |        |        |        |        |        |        |
|--------|--------|--------|--------|--------|--------|--------|--------|--------|
| 23.0   | 23.8   | 27.8   | 25.5   | 1598.5 | 1927.1 | 1689.4 | 1782.6 | 1159.7 |
| 189.6  | 174.4  | 239.5  | 161.9  | 362.7  | 358.3  | 352.9  | 420.0  | 533.3  |
| 11.9   | 17.3   | 6.6    | 2.1    | 9.2    | 8.8    | 27.0   | 14.4   | 6.5    |
| 437.6  | 444.7  | 869.8  | 424.4  | 1037.0 | 898.9  | 1012.6 | 1107.1 | 828.8  |
| 269.0  | 264.7  | 318.4  | 211.3  | 499.1  | 514.9  | 534.5  | 542.3  | 292.0  |
| 706.0  | 697.2  | 658.6  | 558.8  | 335.2  | 292.8  | 340.5  | 402.0  | 383.4  |
| 179.1  | 181.6  | 233.8  | 168.2  | 635.9  | 551.4  | 530.5  | 707.3  | 298.1  |
| 1058.9 | 1126.9 | 1568.9 | 970.1  | 2068.2 | 1899.4 | 2165.1 | 2340.3 | 1613.5 |
| 0.6    | 0.8    | 1.0    | 1.5    | 347.6  | 267.2  | 378.0  | 384.4  | 28.3   |
| 1.0    | 0.2    | 4.8    | 2.1    | 932.2  | 603.6  | 929.6  | 1058.0 | 92.3   |
| 30.3   | 31.2   | 45.7   | 36.4   | 74.0   | 42.8   | 44.6   | 59.0   | 1012.8 |
| 295.2  | 294.8  | 313.2  | 283.8  | 285.8  | 325.8  | 356.2  | 323.9  | 221.3  |
| 1455.5 | 1432.8 | 1624.5 | 1487.1 | 1054.6 | 1071.7 | 890.2  | 1099.2 | 490.5  |
| 284.9  | 283.3  | 275.5  | 288.6  | 511.7  | 489.0  | 537.3  | 566.9  | 1440.0 |
| 226.9  | 241.8  | 428.2  | 246.0  | 405.8  | 463.2  | 445.3  | 522.6  | 1006.1 |
| 239.6  | 290.4  | 176.6  | 217.0  | 1343.5 | 1333.0 | 1326.7 | 1539.6 | 703.8  |
| 45.4   | 58.9   | 62.0   | 42.8   | 349.3  | 296.4  | 400.0  | 498.3  | 141.6  |
| 130.4  | 159.6  | 174.2  | 102.7  | 135.6  | 136.2  | 220.6  | 141.9  | 560.6  |
| 122.1  | 121.1  | 131.7  | 89.5   | 29.2   | 28.5   | 40.2   | 41.1   | 129.3  |
| 147.9  | 147.1  | 180.9  | 138.9  | 56.2   | 51.2   | 41.0   | 36.9   | 99.3   |
| 701.6  | 658.8  | 997.4  | 679.7  | 634.0  | 621.3  | 666.9  | 737.6  | 1199.4 |
| 287.9  | 333.3  | 283.5  | 268.4  | 422.0  | 677.1  | 526.8  | 532.4  | 958.0  |
| 610.9  | 577.4  | 1139.3 | 668.6  | 1528.5 | 1348.1 | 1400.0 | 1628.3 | 1523.2 |
| 458.4  | 413.0  | 845.5  | 466.0  | 929.6  | 770.8  | 893.7  | 1114.2 | 783.0  |
| 573.8  | 521.0  | 686.1  | 423.8  | 494.0  | 494.6  | 504.3  | 596.0  | 371.9  |
| 348.0  | 311.1  | 348.1  | 251.8  | 307.7  | 314.0  | 339.1  | 370.0  | 163.0  |
| 474.2  | 456.3  | 563.4  | 404.3  | 1049.8 | 965.9  | 1170.2 | 1184.9 | 888.1  |
| 545.2  | 549.1  | 544.3  | 440.8  | 491.3  | 507.1  | 546.1  | 668.7  | 214.7  |
| 233.5  | 210.3  | 305.8  | 197.0  | 173.4  | 185.3  | 172.3  | 217.7  | 221.0  |
| 318.5  | 298.5  | 399.7  | 295.0  | 261.0  | 201.7  | 245.6  | 282.4  | 255.9  |
| 571.3  | 613.5  | 621.1  | 610.4  | 355.5  | 317.1  | 335.0  | 411.4  | 345.7  |
| 275.7  | 262.8  | 363.3  | 226.7  | 267.1  | 265.1  | 274.8  | 306.6  | 350.7  |
| 10.8   | 13.9   | 13.5   | 6.8    | 10.3   | 2.2    | 10.9   | 3.7    | 10.2   |
| 48.1   | 53.8   | 88.9   | 50.6   | 40.9   | 53.3   | 50.5   | 44.8   | 73.2   |
| 64.6   | 56.4   | 189.2  | 158.4  | 7.8    | 3.1    | 3.7    | 5.0    | 8.8    |
| 664.8  | 688.3  | 965.4  | 791.7  | 1570.9 | 1741.5 | 1678.7 | 1756.3 | 867.5  |
| 452.7  | 488.2  | 411.9  | 440.4  | 150.3  | 188.4  | 161.1  | 188.0  | 125.3  |
| 216.8  | 204.6  | 279.1  | 254.6  | 488.6  | 501.8  | 521.2  | 630.4  | 144.1  |
| 77.1   | 64.0   | 110.1  | 73.2   | 226.8  | 213.1  | 260.5  | 289.0  | 77.5   |
| 483.7  | 448.8  | 638.3  | 445.1  | 1112.3 | 780.6  | 1170.0 | 1293.3 | 1802.0 |
| 444.9  | 326.7  | 1602.5 | 245.8  | 2443.5 | 1113.0 | 1636.9 | 2448.4 | 4592.6 |
| 2859.1 | 2592.5 | 3270.3 | 2608.8 | 5853.6 | 6405.0 | 6446.7 | 6854.1 | 7244.3 |
| 1214.0 | 1322.9 | 1459.9 | 1360.2 | 2037.0 | 2085.8 | 1962.1 | 2280.0 | 4049.9 |
| 22.1   | 16.4   | 32.8   | 19.5   | 26.4   | 18.2   | 23.7   | 35.4   | 40.6   |
| 549.5  | 435.9  | 846.2  | 541.3  | 868.6  | 798.9  | 952.4  | 1167.8 | 460.5  |
| 263.5  | 256.5  | 345.3  | 245.2  | 316.7  | 273.1  | 260.9  | 319.4  | 523.7  |
| 80.6   | 74.6   | 153.5  | 67.7   | 493.8  | 264.3  | 390.4  | 499.2  | 282.1  |
| 742.0  | 682.4  | 2062.9 | 673.4  | 2253.8 | 1837.4 | 2114.6 | 2202.2 | 2885.0 |
| 529.4  | 493.4  | 733.3  | 420.9  | 844.3  | 831.0  | 838.6  | 950.0  | 1208.5 |
| 979.2  | 950.1  | 1153.1 | 792.4  | 1134.8 | 1014.5 | 1037.3 | 1377.8 | 1203.6 |
| 724.9  | 620.7  | 956.1  | 741.1  | 491.1  | 772.7  | 588.0  | 650.9  | 424.5  |
| 1116.5 | 1172.4 | 1165.5 | 845.1  | 1102.1 | 980.2  | 1217.1 | 1199.5 | 785.8  |
| 10.0   | 15.9   | 18.4   | 6.7    | 32.2   | 21.2   | 27.9   | 40.6   | 19.9   |

|        |        |        |        |        |        |        |        |        |
|--------|--------|--------|--------|--------|--------|--------|--------|--------|
| 1037.5 | 922.1  | 1640.1 | 1062.2 | 1718.9 | 1993.3 | 1791.2 | 1858.4 | 2214.0 |
| 162.1  | 146.4  | 213.0  | 138.0  | 79.6   | 59.6   | 79.0   | 89.6   | 69.5   |
| 64.0   | 64.1   | 97.9   | 72.5   | 61.0   | 56.2   | 55.5   | 80.0   | 56.1   |
| 111.9  | 133.0  | 162.0  | 125.7  | 93.6   | 64.1   | 69.0   | 93.4   | 125.5  |
| 48.8   | 41.4   | 37.5   | 31.3   | 16.3   | 20.0   | 28.2   | 30.5   | 4.8    |
| 304.6  | 316.5  | 280.4  | 275.5  | 231.5  | 301.7  | 245.9  | 277.5  | 154.7  |
| 22.2   | 26.9   | 35.3   | 6.3    | 9.6    | 7.3    | 9.7    | 14.2   | 31.4   |
| 165.5  | 160.2  | 183.1  | 234.2  | 189.3  | 166.3  | 144.6  | 175.8  | 150.5  |
| 375.2  | 400.8  | 601.3  | 611.1  | 181.2  | 242.7  | 174.2  | 163.1  | 157.2  |
| 1194.5 | 1034.6 | 2099.2 | 1289.9 | 1230.9 | 1052.1 | 1183.2 | 1434.2 | 1795.1 |
| 153.3  | 134.2  | 237.7  | 152.4  | 688.7  | 703.4  | 706.7  | 758.1  | 870.9  |
| 257.1  | 240.8  | 372.0  | 257.0  | 265.0  | 339.3  | 332.1  | 312.2  | 209.0  |
| 86.3   | 81.0   | 109.0  | 95.8   | 46.0   | 32.3   | 39.2   | 32.3   | 39.5   |
| 603.5  | 583.3  | 868.3  | 629.4  | 549.2  | 583.7  | 610.8  | 657.0  | 441.3  |
| 458.8  | 463.2  | 548.6  | 416.9  | 180.2  | 234.9  | 254.8  | 237.5  | 475.9  |
| 350.4  | 355.6  | 425.4  | 327.0  | 192.3  | 217.6  | 239.5  | 262.2  | 345.5  |
| 708.1  | 745.2  | 754.4  | 734.3  | 357.4  | 349.7  | 377.8  | 442.1  | 595.1  |
| 492.6  | 464.0  | 711.6  | 377.2  | 1434.5 | 1366.3 | 1192.3 | 1296.0 | 3249.2 |
| 495.0  | 498.2  | 505.7  | 412.3  | 1506.5 | 1415.1 | 1651.1 | 1966.9 | 1368.0 |
| 1219.3 | 1207.8 | 1209.6 | 992.8  | 2255.9 | 2256.5 | 2414.5 | 2554.3 | 3966.3 |
| 1650.1 | 1477.8 | 2735.1 | 1545.6 | 2435.5 | 2814.7 | 2829.8 | 2787.9 | 2580.6 |
| 477.1  | 434.9  | 550.2  | 506.7  | 476.9  | 439.7  | 487.5  | 566.1  | 208.7  |
| 181.0  | 263.3  | 93.7   | 206.9  | 557.3  | 601.7  | 520.2  | 613.2  | 1048.1 |
| 170.2  | 231.8  | 99.3   | 218.0  | 321.1  | 439.4  | 343.3  | 376.9  | 633.8  |
| 134.1  | 130.9  | 179.4  | 132.8  | 168.4  | 196.4  | 199.4  | 207.3  | 77.3   |
| 308.2  | 320.7  | 387.7  | 291.1  | 460.8  | 397.4  | 486.0  | 553.2  | 197.6  |
| 203.6  | 212.4  | 284.0  | 210.9  | 267.6  | 310.5  | 244.6  | 266.0  | 87.1   |
| 453.1  | 450.3  | 1319.6 | 339.0  | 1859.1 | 1053.7 | 1691.0 | 1980.7 | 1104.6 |
| 2993.3 | 2738.4 | 4027.0 | 3133.5 | 1111.3 | 1033.9 | 1179.9 | 1276.5 | 1813.3 |
| 444.6  | 438.1  | 390.5  | 344.3  | 154.0  | 197.3  | 197.9  | 198.4  | 412.7  |
| 458.0  | 466.7  | 510.2  | 353.8  | 448.5  | 449.4  | 481.0  | 512.3  | 368.1  |
| 848.9  | 819.9  | 1024.5 | 851.8  | 872.2  | 715.0  | 819.1  | 854.3  | 2056.0 |
| 133.0  | 114.1  | 175.4  | 136.7  | 215.6  | 245.6  | 218.2  | 261.3  | 260.7  |
| 114.8  | 98.4   | 145.6  | 120.8  | 123.4  | 102.9  | 145.2  | 214.3  | 265.3  |
| 301.3  | 292.6  | 416.2  | 312.6  | 323.3  | 330.8  | 346.0  | 353.4  | 253.8  |
| 2167.1 | 1732.4 | 3109.2 | 1707.4 | 2119.9 | 2025.4 | 2449.4 | 2500.9 | 4919.7 |
| 297.0  | 337.0  | 482.2  | 138.4  | 1446.6 | 1544.4 | 2376.3 | 1772.2 | 855.7  |
| 342.3  | 335.2  | 364.9  | 404.8  | 401.3  | 515.6  | 417.4  | 526.2  | 215.1  |
| 526.8  | 533.7  | 521.2  | 639.1  | 553.7  | 614.6  | 549.4  | 659.8  | 228.9  |
| 128.6  | 117.7  | 141.6  | 123.0  | 262.1  | 316.7  | 219.5  | 295.3  | 142.2  |
| 255.2  | 253.0  | 303.3  | 265.9  | 448.8  | 496.9  | 405.4  | 517.5  | 238.1  |
| 680.7  | 678.5  | 664.1  | 617.5  | 1981.1 | 2431.5 | 2155.7 | 2211.5 | 1543.4 |
| 19.4   | 22.1   | 26.8   | 14.4   | 71.3   | 87.6   | 69.5   | 69.7   | 108.9  |
| 1214.7 | 1015.4 | 2118.4 | 1339.6 | 3122.3 | 2763.0 | 3085.0 | 3340.5 | 3962.5 |
| 2269.5 | 1963.9 | 3551.8 | 2407.4 | 4360.6 | 4085.8 | 4632.2 | 4754.5 | 5992.6 |
| 282.5  | 256.2  | 358.2  | 274.1  | 533.0  | 445.7  | 521.1  | 612.0  | 809.9  |
| 662.3  | 588.9  | 1186.6 | 754.8  | 1069.6 | 1073.6 | 1200.0 | 1235.4 | 927.7  |
| 786.1  | 689.8  | 1321.7 | 831.4  | 1218.0 | 1413.7 | 1364.0 | 1349.8 | 1337.6 |
| 587.2  | 673.1  | 318.1  | 445.2  | 1212.8 | 1189.3 | 1458.5 | 1358.8 | 116.5  |
| 1246.0 | 1329.6 | 646.6  | 1032.5 | 1541.6 | 1650.6 | 1907.5 | 1757.3 | 200.1  |
| 240.5  | 209.5  | 413.6  | 225.2  | 654.9  | 684.0  | 703.1  | 778.3  | 899.3  |
| 393.2  | 353.6  | 391.7  | 317.5  | 2375.1 | 2259.1 | 2560.1 | 2526.3 | 1926.8 |
| 1031.9 | 983.1  | 1461.4 | 1114.6 | 1285.6 | 951.0  | 1129.5 | 1468.4 | 1412.2 |



|        |        |        |        |        |        |        |        |        |
|--------|--------|--------|--------|--------|--------|--------|--------|--------|
| 363.1  | 352.6  | 355.2  | 351.7  | 538.7  | 601.0  | 580.7  | 630.7  | 473.5  |
| 45.8   | 38.1   | 43.6   | 46.5   | 36.2   | 32.2   | 44.8   | 50.4   | 86.5   |
| 1.3    | 1.6    | 1.3    | 1.8    | 1.3    | 1.3    | 1.2    | 1.2    | 3.4    |
| 140.8  | 122.3  | 148.5  | 128.4  | 191.4  | 190.2  | 187.4  | 222.9  | 176.3  |
| 216.9  | 163.9  | 224.6  | 196.8  | 406.8  | 359.3  | 404.4  | 497.8  | 414.1  |
| 113.4  | 122.3  | 109.9  | 103.3  | 98.7   | 129.4  | 107.7  | 98.6   | 248.7  |
| 81.4   | 75.0   | 121.1  | 83.5   | 54.6   | 82.9   | 59.1   | 64.3   | 141.3  |
| 1600.4 | 1358.6 | 2430.1 | 1345.4 | 254.9  | 181.4  | 283.8  | 352.8  | 666.4  |
| 436.5  | 392.1  | 437.5  | 406.0  | 173.6  | 117.6  | 158.8  | 198.8  | 52.3   |
| 154.4  | 172.8  | 179.1  | 149.7  | 70.6   | 56.5   | 74.6   | 101.3  | 51.4   |
| 1447.3 | 1358.1 | 1697.5 | 1493.5 | 1087.3 | 954.2  | 1242.2 | 1397.8 | 2055.6 |
| 151.0  | 152.8  | 166.5  | 142.0  | 198.4  | 195.9  | 183.8  | 180.3  | 241.6  |
| 150.2  | 139.2  | 179.3  | 99.1   | 784.9  | 750.7  | 962.9  | 1125.7 | 778.9  |
| 82.1   | 74.8   | 180.3  | 71.5   | 111.2  | 42.4   | 93.5   | 108.4  | 172.1  |
| 562.4  | 471.4  | 913.7  | 414.7  | 1073.2 | 694.3  | 986.7  | 1184.2 | 1476.0 |
| 368.2  | 335.5  | 426.3  | 337.8  | 355.4  | 307.7  | 352.2  | 427.5  | 763.6  |
| 1085.5 | 886.8  | 1105.8 | 853.6  | 654.1  | 569.9  | 675.6  | 808.8  | 1216.8 |
| 2613.7 | 2609.1 | 3361.3 | 2691.2 | 4059.5 | 3888.1 | 4496.6 | 4304.9 | 3344.5 |
| 18.6   | 15.6   | 32.1   | 30.6   | 14.4   | 17.7   | 18.8   | 22.3   | 26.3   |
| 448.9  | 568.4  | 420.0  | 482.5  | 357.2  | 470.7  | 332.2  | 388.1  | 330.6  |
| 470.6  | 427.6  | 696.5  | 519.0  | 1129.9 | 944.7  | 813.9  | 1033.8 | 44.6   |
| 59.6   | 63.8   | 59.0   | 48.0   | 89.6   | 81.4   | 107.7  | 105.5  | 128.3  |
| 158.5  | 166.2  | 123.0  | 116.7  | 155.2  | 168.5  | 142.3  | 165.8  | 304.7  |
| 115.5  | 99.5   | 224.2  | 120.8  | 254.6  | 188.2  | 216.4  | 263.9  | 365.0  |
| 476.3  | 447.4  | 538.8  | 501.4  | 822.1  | 946.1  | 1300.7 | 1112.0 | 763.5  |
| 4.7    | 4.4    | 2.3    | 1.9    | 38.8   | 64.1   | 51.9   | 39.1   | 11.6   |
| 9.7    | 13.2   | 20.8   | 14.4   | 38.2   | 40.4   | 38.6   | 41.7   | 23.4   |
| 219.7  | 246.8  | 272.4  | 325.1  | 786.2  | 1344.6 | 591.7  | 713.7  | 115.5  |
| 64.6   | 85.5   | 124.4  | 91.7   | 301.5  | 583.2  | 232.4  | 308.0  | 63.2   |
| 588.7  | 585.9  | 555.4  | 638.2  | 412.4  | 383.7  | 436.0  | 525.7  | 296.4  |
| 526.1  | 480.3  | 461.7  | 413.0  | 343.3  | 307.3  | 280.8  | 390.4  | 337.6  |
| 705.4  | 710.4  | 597.9  | 581.9  | 636.9  | 731.2  | 650.9  | 655.5  | 503.0  |
| 162.3  | 143.3  | 124.2  | 150.9  | 247.9  | 256.8  | 204.8  | 271.8  | 304.8  |
| 380.5  | 363.5  | 356.3  | 347.3  | 429.1  | 505.2  | 428.4  | 517.9  | 640.1  |
| 172.9  | 180.0  | 171.9  | 185.5  | 204.5  | 232.9  | 175.0  | 249.6  | 302.7  |
| 1841.6 | 1626.8 | 2657.3 | 1845.9 | 2190.6 | 1888.0 | 2343.5 | 2513.1 | 2484.9 |
| 176.7  | 165.3  | 334.3  | 182.5  | 349.9  | 294.7  | 343.0  | 386.7  | 410.0  |
| 970.5  | 734.1  | 1352.1 | 706.1  | 1394.5 | 1239.9 | 1262.0 | 1768.5 | 3220.3 |
| 2673.7 | 2378.4 | 3930.4 | 2550.7 | 3513.7 | 3213.5 | 3749.5 | 3925.3 | 5168.5 |
| 168.5  | 176.1  | 165.8  | 127.7  | 1286.3 | 1279.3 | 1790.5 | 1368.6 | 295.5  |
| 62.9   | 66.2   | 72.6   | 48.8   | 70.4   | 60.1   | 113.7  | 81.4   | 219.3  |
| 240.6  | 216.7  | 249.7  | 197.8  | 301.6  | 279.1  | 309.8  | 333.0  | 359.6  |
| 160.1  | 182.8  | 128.4  | 145.0  | 22.5   | 9.3    | 23.7   | 23.9   | 367.6  |
| 1246.5 | 1130.5 | 1845.7 | 1348.8 | 1741.0 | 1792.8 | 1816.9 | 2137.4 | 1982.7 |
| 242.0  | 190.0  | 346.5  | 220.4  | 198.7  | 176.5  | 167.5  | 220.1  | 205.8  |
| 1459.6 | 1269.7 | 2352.8 | 1369.5 | 1237.9 | 1239.5 | 1252.6 | 1418.5 | 1235.6 |
| 48.4   | 45.1   | 51.0   | 27.6   | 30.5   | 31.0   | 41.7   | 41.2   | 24.3   |
| 244.8  | 311.3  | 247.0  | 242.2  | 345.3  | 315.7  | 415.3  | 370.3  | 178.2  |
| 886.4  | 826.6  | 1063.5 | 828.4  | 841.6  | 890.7  | 969.2  | 1023.3 | 1377.6 |
| 344.3  | 343.1  | 427.1  | 266.6  | 6.9    | 14.7   | 21.9   | 29.4   | 3.5    |
| 643.8  | 668.7  | 751.6  | 604.4  | 370.1  | 334.1  | 299.5  | 374.3  | 1534.1 |
| 0.2    | 0.4    | 0.5    | 1.1    | 1.7    | 1.5    | 1.6    | 0.9    | 470.0  |
| 2.4    | 9.4    | 14.9   | 2.5    | 4.2    | 4.8    | 5.2    | 4.3    | 141.6  |

|        |        |        |        |        |        |        |        |        |
|--------|--------|--------|--------|--------|--------|--------|--------|--------|
| 88.7   | 75.4   | 92.5   | 71.7   | 160.5  | 184.9  | 157.3  | 179.8  | 358.4  |
| 445.6  | 383.8  | 570.3  | 324.3  | 333.2  | 361.6  | 342.3  | 404.2  | 256.5  |
| 1588.4 | 1570.4 | 1927.6 | 1598.6 | 1502.6 | 1346.5 | 1337.0 | 1762.9 | 808.5  |
| 347.9  | 323.8  | 344.1  | 276.4  | 1341.2 | 1543.3 | 1279.5 | 1476.0 | 723.8  |
| 88.5   | 89.4   | 98.4   | 72.6   | 602.6  | 684.2  | 615.0  | 687.1  | 302.3  |
| 75.2   | 81.0   | 45.3   | 60.6   | 296.1  | 861.2  | 270.3  | 178.4  | 528.1  |
| 7.2    | 4.1    | 9.2    | 3.7    | 6.0    | 4.4    | 5.7    | 9.3    | 7.4    |
| 1392.0 | 1343.3 | 1727.2 | 1351.3 | 1056.6 | 1195.3 | 1140.5 | 1227.6 | 168.4  |
| 549.6  | 564.4  | 577.9  | 424.2  | 782.9  | 942.5  | 1109.4 | 1198.7 | 191.4  |
| 2.2    | 1.8    | 1.7    | 1.4    | 1.2    | 3.5    | 0.9    | 1.0    | 1.9    |
| 89.2   | 99.0   | 84.4   | 73.6   | 189.3  | 203.4  | 204.9  | 249.3  | 146.7  |
| 440.4  | 479.0  | 341.3  | 430.1  | 559.9  | 543.9  | 605.4  | 671.8  | 259.1  |
| 1408.6 | 1395.8 | 2118.2 | 1154.3 | 3847.6 | 4405.1 | 3772.7 | 3936.9 | 5719.0 |
| 28.8   | 17.3   | 30.2   | 22.9   | 73.3   | 68.7   | 105.1  | 92.2   | 213.5  |
| 557.5  | 605.3  | 287.7  | 456.5  | 84.8   | 115.4  | 134.1  | 125.3  | 107.1  |
| 615.9  | 578.1  | 647.9  | 573.3  | 548.7  | 583.6  | 570.3  | 594.9  | 1054.3 |
| 113.8  | 115.5  | 130.5  | 99.7   | 120.0  | 116.4  | 123.3  | 77.3   | 231.3  |
| 1087.2 | 961.7  | 1129.3 | 951.1  | 1626.9 | 1441.9 | 1644.6 | 1864.9 | 1284.0 |
| 344.7  | 337.6  | 479.6  | 377.0  | 358.0  | 364.6  | 361.7  | 429.6  | 206.1  |
| 132.1  | 137.2  | 233.0  | 132.3  | 274.0  | 295.5  | 321.8  | 418.2  | 410.5  |
| 3516.4 | 3441.6 | 3374.1 | 3000.1 | 5587.6 | 5721.5 | 5692.1 | 6159.4 | 8822.9 |
| 207.9  | 195.7  | 279.6  | 197.1  | 201.2  | 228.1  | 227.7  | 227.1  | 248.5  |
| 800.8  | 857.2  | 659.4  | 777.9  | 641.1  | 591.6  | 734.2  | 685.0  | 688.6  |
| 125.8  | 115.6  | 92.6   | 95.6   | 105.1  | 135.0  | 106.1  | 85.9   | 128.7  |
| 657.9  | 749.7  | 792.6  | 836.7  | 851.0  | 893.3  | 924.6  | 1052.5 | 640.2  |
| 258.9  | 281.7  | 287.1  | 323.1  | 509.7  | 431.0  | 532.5  | 675.6  | 481.6  |
| 2.9    | 3.2    | 3.6    | 3.4    | 1.6    | 1.3    | 5.7    | 4.9    | 393.9  |
| 2.0    | 2.4    | 2.3    | 3.5    | 6.9    | 3.5    | 3.2    | 8.4    | 940.5  |
| 16.6   | 15.4   | 15.0   | 8.4    | 9.3    | 11.4   | 12.9   | 17.7   | 1495.2 |
| 662.0  | 670.8  | 755.2  | 647.1  | 1091.0 | 1067.6 | 1133.9 | 1260.2 | 1121.6 |
| 239.3  | 177.6  | 309.5  | 243.0  | 195.0  | 154.9  | 223.4  | 237.2  | 176.1  |
| 138.0  | 146.3  | 150.5  | 138.4  | 239.8  | 269.7  | 301.6  | 255.7  | 362.3  |
| 869.7  | 800.5  | 1045.2 | 722.7  | 1321.8 | 1777.9 | 1465.8 | 1542.5 | 2237.4 |
| 279.1  | 225.8  | 399.9  | 236.2  | 928.2  | 927.6  | 888.2  | 1044.0 | 1663.5 |
| 1912.2 | 1711.5 | 2352.9 | 1724.3 | 2009.2 | 1799.6 | 1997.6 | 2112.1 | 2748.1 |
| 59.5   | 46.7   | 52.2   | 45.0   | 48.5   | 57.2   | 43.7   | 31.4   | 44.2   |
| 76.4   | 81.1   | 69.5   | 74.5   | 54.0   | 82.4   | 68.6   | 90.5   | 63.4   |
| 56.8   | 53.4   | 66.9   | 49.7   | 43.3   | 62.9   | 44.7   | 61.6   | 49.2   |
| 330.2  | 387.9  | 175.3  | 297.0  | 447.3  | 453.0  | 534.6  | 554.6  | 509.3  |
| 144.6  | 161.3  | 122.4  | 124.9  | 186.8  | 212.0  | 197.8  | 232.8  | 194.5  |
| 146.7  | 128.6  | 191.5  | 116.4  | 238.5  | 282.8  | 245.1  | 301.9  | 169.5  |
| 183.7  | 155.5  | 263.5  | 198.3  | 261.8  | 269.9  | 238.2  | 297.7  | 165.9  |
| 181.0  | 178.9  | 248.0  | 198.4  | 283.5  | 265.2  | 230.3  | 314.9  | 241.2  |
| 158.8  | 136.7  | 166.1  | 144.4  | 1377.3 | 1318.8 | 1392.5 | 1422.5 | 339.5  |
| 621.3  | 760.9  | 667.3  | 779.6  | 539.7  | 458.5  | 519.3  | 664.7  | 687.0  |
| 486.3  | 627.5  | 503.7  | 718.0  | 390.5  | 287.8  | 348.2  | 478.7  | 340.2  |
| 217.5  | 210.5  | 311.3  | 190.5  | 310.3  | 249.6  | 340.5  | 349.5  | 305.9  |
| 157.2  | 137.5  | 271.2  | 152.8  | 274.1  | 210.5  | 293.8  | 374.5  | 259.9  |
| 53.4   | 50.8   | 59.1   | 56.7   | 45.3   | 42.7   | 39.9   | 48.6   | 40.2   |
| 198.7  | 185.1  | 309.9  | 206.2  | 230.8  | 186.0  | 207.9  | 261.8  | 284.4  |
| 464.4  | 447.0  | 568.3  | 509.2  | 350.8  | 318.3  | 363.5  | 436.7  | 312.1  |
| 935.5  | 1078.1 | 913.0  | 1114.5 | 879.8  | 805.8  | 895.0  | 1047.2 | 868.2  |
| 1155.8 | 1127.4 | 935.5  | 987.1  | 499.4  | 617.8  | 534.0  | 603.2  | 269.2  |

|        |        |        |        |        |        |        |        |        |
|--------|--------|--------|--------|--------|--------|--------|--------|--------|
| 276.1  | 255.3  | 226.0  | 217.0  | 138.9  | 165.9  | 156.1  | 172.8  | 158.3  |
| 48.5   | 50.1   | 33.1   | 43.0   | 10.9   | 20.1   | 17.5   | 17.3   | 9.0    |
| 205.4  | 176.1  | 183.7  | 176.8  | 116.1  | 132.9  | 115.4  | 139.4  | 119.6  |
| 114.6  | 107.6  | 147.3  | 105.3  | 151.1  | 192.3  | 140.9  | 171.1  | 139.2  |
| 529.5  | 523.0  | 682.4  | 511.0  | 590.9  | 672.1  | 586.9  | 717.7  | 595.8  |
| 87.7   | 59.0   | 184.2  | 73.1   | 61.3   | 45.6   | 59.8   | 71.4   | 76.6   |
| 622.0  | 406.8  | 1068.5 | 458.9  | 830.1  | 487.5  | 790.2  | 859.5  | 644.6  |
| 355.0  | 270.9  | 759.2  | 328.4  | 505.8  | 391.5  | 457.9  | 564.9  | 1068.9 |
| 124.8  | 94.6   | 275.7  | 137.3  | 199.2  | 132.2  | 171.4  | 208.6  | 377.0  |
| 847.1  | 820.9  | 920.7  | 864.6  | 710.3  | 617.8  | 630.9  | 872.4  | 1714.1 |
| 129.3  | 96.1   | 145.5  | 92.3   | 344.3  | 271.8  | 508.6  | 432.2  | 563.9  |
| 62.3   | 99.5   | 13.2   | 45.8   | 206.9  | 327.2  | 259.6  | 271.5  | 109.1  |
| 129.4  | 167.3  | 47.3   | 89.7   | 382.6  | 540.6  | 461.0  | 490.3  | 333.2  |
| 1.1    | 5.4    | 2.0    | 1.7    | 8.4    | 10.3   | 7.8    | 2.4    | 274.9  |
| 876.7  | 871.5  | 1000.6 | 874.6  | 1450.1 | 1337.1 | 1785.6 | 1640.7 | 2542.5 |
| 1920.8 | 1687.1 | 3090.0 | 2278.3 | 2999.3 | 2744.0 | 3149.7 | 3274.8 | 5414.2 |
| 404.9  | 327.3  | 829.6  | 386.7  | 1175.6 | 951.0  | 1044.7 | 1290.9 | 1078.0 |
| 68.3   | 61.9   | 69.3   | 72.5   | 53.4   | 54.8   | 52.3   | 56.0   | 35.1   |
| 100.3  | 96.3   | 99.8   | 134.8  | 119.7  | 121.9  | 108.2  | 135.4  | 98.5   |
| 788.2  | 624.8  | 1034.2 | 726.3  | 777.4  | 752.6  | 672.1  | 779.1  | 1952.3 |
| 24.5   | 29.9   | 32.5   | 11.9   | 158.0  | 176.8  | 226.7  | 165.7  | 149.7  |
| 14.2   | 18.6   | 15.7   | 9.8    | 136.1  | 181.9  | 191.2  | 148.3  | 80.9   |
| 86.0   | 98.6   | 74.1   | 75.7   | 612.9  | 537.9  | 695.3  | 701.1  | 296.8  |
| 668.7  | 661.3  | 861.3  | 681.3  | 382.9  | 303.7  | 295.6  | 337.4  | 690.3  |
| 18.4   | 17.1   | 20.9   | 17.2   | 45.4   | 46.9   | 32.2   | 52.6   | 41.6   |
| 416.4  | 598.4  | 361.4  | 626.0  | 1214.4 | 1543.6 | 1660.0 | 1441.3 | 1005.2 |
| 2363.9 | 2114.2 | 3110.8 | 2432.0 | 2153.0 | 2284.6 | 2495.6 | 2494.1 | 2302.0 |
| 1128.9 | 990.9  | 1736.4 | 1151.1 | 1118.9 | 1173.1 | 1278.5 | 1351.5 | 1029.8 |
| 1973.0 | 1604.3 | 2362.5 | 1770.7 | 1132.8 | 1350.6 | 1237.8 | 1370.1 | 1620.2 |
| 17.1   | 13.6   | 19.8   | 15.6   | 21.7   | 21.5   | 16.2   | 34.1   | 24.3   |
| 400.9  | 361.2  | 377.8  | 273.1  | 474.5  | 637.8  | 488.1  | 586.2  | 489.1  |
| 121.1  | 106.0  | 163.8  | 103.0  | 263.3  | 237.5  | 260.3  | 278.3  | 261.8  |
| 109.2  | 92.2   | 207.6  | 76.0   | 758.0  | 366.3  | 597.3  | 767.1  | 327.8  |
| 187.3  | 204.5  | 332.4  | 143.6  | 1906.1 | 1377.5 | 1690.5 | 1975.9 | 818.8  |
| 899.8  | 872.2  | 1014.9 | 858.0  | 829.4  | 963.5  | 951.3  | 929.6  | 1047.4 |
| 652.6  | 611.1  | 959.3  | 591.0  | 1529.3 | 1030.4 | 1399.4 | 1670.1 | 846.4  |
| 157.9  | 149.6  | 132.9  | 162.7  | 172.7  | 277.1  | 180.9  | 212.9  | 150.8  |
| 56.2   | 50.4   | 77.2   | 48.4   | 35.3   | 50.7   | 36.3   | 28.1   | 12.2   |
| 509.0  | 401.1  | 598.0  | 385.6  | 678.4  | 608.6  | 512.3  | 668.9  | 370.6  |
| 202.5  | 174.9  | 260.2  | 160.4  | 334.8  | 336.2  | 263.7  | 360.1  | 180.9  |
| 442.7  | 419.6  | 609.1  | 417.0  | 322.2  | 330.8  | 304.9  | 374.4  | 364.6  |
| 210.5  | 174.2  | 309.9  | 173.3  | 92.9   | 110.8  | 91.6   | 103.1  | 179.4  |
| 231.9  | 229.7  | 177.6  | 217.3  | 266.9  | 242.2  | 236.0  | 290.9  | 174.3  |
| 317.8  | 407.7  | 187.6  | 323.8  | 253.8  | 377.9  | 312.8  | 298.6  | 345.8  |
| 293.9  | 298.8  | 321.6  | 280.5  | 201.9  | 255.2  | 216.1  | 255.7  | 192.4  |
| 400.8  | 360.2  | 987.4  | 271.8  | 1551.7 | 1004.6 | 1323.8 | 1684.0 | 1922.9 |
| 572.0  | 484.9  | 702.3  | 659.7  | 452.2  | 582.6  | 490.1  | 581.5  | 459.6  |
| 756.9  | 672.1  | 1122.8 | 851.1  | 336.8  | 368.1  | 372.9  | 417.5  | 431.6  |
| 1813.0 | 1517.0 | 2501.9 | 1745.7 | 2484.1 | 1894.3 | 2560.4 | 2865.8 | 4202.1 |
| 204.0  | 176.8  | 407.1  | 217.2  | 769.8  | 790.6  | 958.2  | 952.8  | 463.5  |
| 100.3  | 73.1   | 163.3  | 105.6  | 13.3   | 17.8   | 19.9   | 2.6    | 4.6    |
| 573.9  | 559.4  | 617.6  | 580.9  | 936.6  | 1124.1 | 1047.5 | 1082.1 | 1005.0 |
| 272.1  | 307.0  | 257.2  | 248.1  | 507.7  | 546.7  | 441.2  | 585.4  | 361.8  |

|        |        |        |        |        |        |        |        |        |
|--------|--------|--------|--------|--------|--------|--------|--------|--------|
| 160.6  | 116.7  | 211.9  | 121.5  | 313.3  | 278.2  | 361.6  | 431.6  | 590.8  |
| 666.2  | 691.9  | 781.7  | 614.5  | 240.4  | 222.7  | 238.3  | 269.4  | 377.6  |
| 1141.2 | 1157.3 | 1356.4 | 1213.1 | 1783.6 | 1826.4 | 2064.0 | 2091.1 | 1303.5 |
| 1244.1 | 1262.7 | 1437.6 | 1193.1 | 508.4  | 464.4  | 500.6  | 610.9  | 802.5  |
| 1670.3 | 1728.3 | 1833.1 | 1695.6 | 806.7  | 855.4  | 807.7  | 947.7  | 955.8  |
| 340.0  | 309.5  | 591.5  | 323.9  | 797.1  | 725.6  | 793.4  | 1001.5 | 1437.5 |
| 1109.4 | 939.4  | 1282.9 | 1181.9 | 838.2  | 1090.6 | 1015.8 | 1004.9 | 1540.8 |
| 291.8  | 245.3  | 369.3  | 241.4  | 681.5  | 523.8  | 561.0  | 789.1  | 262.4  |
| 625.5  | 598.5  | 751.7  | 505.2  | 341.5  | 296.5  | 307.6  | 345.6  | 293.3  |
| 469.2  | 464.0  | 349.8  | 367.8  | 202.5  | 193.9  | 310.7  | 291.0  | 201.6  |
| 549.6  | 615.5  | 473.7  | 600.4  | 260.7  | 230.5  | 305.8  | 317.6  | 126.7  |
| 576.4  | 492.0  | 836.3  | 544.9  | 492.3  | 369.6  | 427.6  | 545.9  | 537.3  |
| 103.2  | 98.9   | 123.1  | 92.3   | 99.8   | 79.7   | 80.6   | 105.0  | 89.9   |
| 275.4  | 261.4  | 291.1  | 232.3  | 252.7  | 269.7  | 234.3  | 266.2  | 229.4  |
| 258.0  | 260.9  | 346.0  | 288.8  | 444.7  | 542.5  | 456.6  | 523.0  | 324.1  |
| 760.1  | 807.6  | 1015.1 | 905.9  | 1050.0 | 1365.0 | 1198.1 | 1254.1 | 746.3  |
| 470.4  | 453.3  | 742.3  | 587.3  | 561.1  | 623.3  | 639.3  | 592.8  | 392.5  |
| 40.7   | 56.6   | 45.3   | 44.8   | 101.6  | 74.8   | 91.4   | 94.4   | 866.3  |
| 199.2  | 236.2  | 168.8  | 200.0  | 447.8  | 335.1  | 413.8  | 482.4  | 3450.4 |
| 61.3   | 57.4   | 57.4   | 31.6   | 94.8   | 65.2   | 99.6   | 105.0  | 891.5  |
| 236.1  | 275.9  | 260.0  | 246.8  | 254.7  | 411.0  | 258.8  | 330.3  | 339.4  |
| 841.5  | 784.9  | 1113.0 | 828.9  | 843.8  | 891.4  | 924.7  | 971.2  | 577.7  |
| 191.3  | 204.0  | 242.8  | 207.3  | 229.3  | 256.5  | 205.3  | 269.8  | 116.0  |
| 691.0  | 582.1  | 1130.6 | 799.5  | 1490.8 | 1737.2 | 1688.1 | 1682.2 | 1346.1 |
| 440.6  | 466.0  | 615.6  | 520.9  | 678.4  | 671.5  | 673.6  | 740.9  | 916.8  |
| 186.7  | 173.3  | 184.4  | 158.4  | 231.8  | 245.1  | 239.0  | 213.1  | 230.2  |
| 574.1  | 502.8  | 685.3  | 517.2  | 1538.3 | 1479.6 | 1685.6 | 1723.5 | 1072.1 |
| 378.4  | 371.6  | 477.1  | 393.2  | 875.9  | 842.7  | 917.2  | 1005.1 | 501.8  |
| 412.2  | 339.6  | 446.2  | 328.6  | 855.7  | 869.2  | 815.8  | 908.0  | 682.4  |
| 535.6  | 508.2  | 825.0  | 498.7  | 1678.9 | 1529.0 | 1775.8 | 1862.2 | 1674.2 |
| 1080.6 | 814.5  | 2186.9 | 1055.5 | 292.1  | 328.0  | 293.7  | 421.0  | 1007.1 |
| 664.4  | 622.5  | 1646.8 | 446.8  | 561.3  | 896.8  | 477.5  | 588.9  | 526.9  |
| 253.6  | 214.1  | 595.6  | 154.6  | 264.8  | 476.8  | 217.7  | 260.7  | 193.8  |
| 587.2  | 453.8  | 1080.1 | 683.0  | 701.2  | 1162.9 | 918.5  | 781.4  | 279.1  |
| 278.1  | 379.0  | 155.2  | 222.6  | 86.5   | 80.3   | 147.1  | 120.2  | 152.8  |
| 89.5   | 119.0  | 62.7   | 78.3   | 51.7   | 41.3   | 50.8   | 47.9   | 78.0   |
| 205.3  | 186.2  | 305.2  | 204.4  | 351.1  | 327.5  | 360.3  | 380.2  | 405.4  |
| 199.7  | 146.8  | 294.7  | 193.7  | 299.2  | 334.6  | 321.5  | 348.7  | 326.7  |
| 269.0  | 248.2  | 411.4  | 263.5  | 752.3  | 605.6  | 704.2  | 838.8  | 401.1  |
| 1692.1 | 1439.0 | 2128.4 | 1215.0 | 3145.5 | 2190.6 | 2478.5 | 3072.2 | 3500.6 |
| 198.8  | 230.7  | 254.0  | 207.8  | 167.3  | 149.7  | 151.9  | 175.7  | 192.5  |
| 4.6    | 3.8    | 2.9    | 5.1    | 55.4   | 43.1   | 54.6   | 69.4   | 0.9    |
| 34.7   | 35.8   | 37.1   | 29.8   | 310.3  | 263.0  | 328.6  | 350.3  | 13.5   |
| 17.3   | 14.4   | 15.4   | 8.7    | 125.1  | 104.2  | 142.0  | 165.7  | 5.0    |
| 129.0  | 96.4   | 245.6  | 123.3  | 389.9  | 351.8  | 397.6  | 410.6  | 1459.4 |
| 449.5  | 425.0  | 569.6  | 419.5  | 419.9  | 453.2  | 449.9  | 561.8  | 452.2  |
| 228.9  | 229.9  | 281.9  | 221.7  | 125.9  | 237.2  | 128.3  | 132.9  | 176.0  |
| 276.1  | 290.4  | 237.1  | 187.5  | 267.7  | 242.7  | 274.8  | 320.7  | 450.6  |
| 211.1  | 219.6  | 213.6  | 168.5  | 174.9  | 151.8  | 177.3  | 245.1  | 296.6  |
| 372.1  | 363.9  | 336.3  | 306.8  | 342.0  | 369.2  | 362.5  | 447.3  | 387.8  |
| 169.9  | 164.8  | 209.7  | 185.4  | 220.3  | 246.9  | 232.6  | 263.0  | 148.2  |
| 517.5  | 458.9  | 697.6  | 474.1  | 594.3  | 609.7  | 597.6  | 684.8  | 403.1  |
| 260.7  | 290.1  | 294.6  | 247.5  | 390.2  | 456.0  | 399.4  | 451.6  | 338.8  |

|        |        |        |        |        |        |        |        |        |
|--------|--------|--------|--------|--------|--------|--------|--------|--------|
| 305.6  | 304.7  | 342.9  | 209.2  | 1369.1 | 1508.1 | 1468.3 | 1605.8 | 1325.2 |
| 780.8  | 779.6  | 986.4  | 754.6  | 1406.3 | 1030.0 | 1354.2 | 1684.7 | 1472.5 |
| 248.1  | 240.1  | 334.5  | 235.5  | 701.4  | 493.1  | 761.0  | 814.6  | 814.6  |
| 606.1  | 654.5  | 642.4  | 523.7  | 673.4  | 574.8  | 631.1  | 758.1  | 774.4  |
| 504.3  | 525.8  | 504.7  | 469.0  | 404.6  | 359.4  | 356.0  | 463.2  | 381.0  |
| 698.8  | 748.9  | 706.3  | 599.1  | 515.5  | 467.3  | 503.7  | 626.3  | 453.8  |
| 628.2  | 635.6  | 557.9  | 492.8  | 529.6  | 516.2  | 496.2  | 516.1  | 409.3  |
| 71.5   | 56.9   | 91.7   | 70.1   | 140.6  | 245.6  | 173.0  | 173.2  | 232.4  |
| 177.9  | 136.5  | 165.3  | 150.1  | 235.6  | 187.5  | 227.7  | 210.7  | 372.6  |
| 8.9    | 15.0   | 2.8    | 15.8   | 322.8  | 241.9  | 303.2  | 308.0  | 46.1   |
| 307.3  | 300.0  | 230.8  | 291.0  | 45.0   | 64.9   | 46.1   | 7.1    | 152.8  |
| 207.4  | 173.1  | 291.1  | 233.4  | 1.3    | 0.8    | 1.3    | 0.9    | 387.1  |
| 262.8  | 257.4  | 197.5  | 281.3  | 403.5  | 418.2  | 496.8  | 537.9  | 319.2  |
| 494.9  | 568.0  | 477.2  | 489.7  | 64.9   | 76.7   | 71.4   | 78.1   | 131.5  |
| 73.8   | 112.9  | 73.9   | 86.3   | 174.8  | 181.2  | 177.1  | 204.5  | 153.0  |
| 189.0  | 199.5  | 468.9  | 216.2  | 313.4  | 215.1  | 248.4  | 315.4  | 453.3  |
| 297.3  | 315.0  | 346.9  | 300.4  | 510.8  | 388.4  | 523.1  | 625.5  | 540.6  |
| 235.3  | 216.0  | 347.0  | 244.4  | 1268.6 | 1478.9 | 1571.3 | 1490.3 | 2622.9 |
| 5.5    | 5.5    | 9.9    | 7.6    | 2.9    | 2.2    | 1.3    | 5.7    | 0.9    |
| 273.8  | 250.0  | 313.2  | 257.0  | 229.4  | 246.6  | 245.4  | 301.4  | 174.4  |
| 232.8  | 227.2  | 341.3  | 189.2  | 651.9  | 502.0  | 558.1  | 662.7  | 448.9  |
| 974.2  | 787.1  | 1644.6 | 804.1  | 1879.2 | 1608.3 | 1551.5 | 1985.7 | 2349.8 |
| 575.7  | 545.8  | 771.1  | 516.4  | 211.3  | 173.4  | 225.1  | 264.5  | 271.6  |
| 9.4    | 5.2    | 21.1   | 19.9   | 10.9   | 9.0    | 11.0   | 11.3   | 826.4  |
| 39.7   | 41.2   | 55.6   | 41.2   | 30.9   | 17.7   | 34.6   | 25.4   | 437.3  |
| 380.0  | 412.1  | 506.7  | 386.2  | 55.8   | 57.4   | 45.6   | 53.1   | 81.1   |
| 634.5  | 555.1  | 1064.7 | 691.9  | 1640.6 | 1430.7 | 1725.6 | 2081.5 | 970.6  |
| 120.6  | 98.2   | 170.0  | 92.9   | 405.8  | 351.3  | 396.8  | 464.2  | 188.0  |
| 1.3    | 1.3    | 0.5    | 0.5    | 172.1  | 255.4  | 241.0  | 204.7  | 9.6    |
| 188.0  | 168.9  | 199.0  | 184.5  | 95.1   | 97.0   | 79.5   | 137.7  | 93.6   |
| 45.9   | 48.4   | 59.3   | 55.4   | 16.7   | 19.9   | 18.2   | 23.5   | 27.5   |
| 127.6  | 119.1  | 237.6  | 117.6  | 270.6  | 202.6  | 206.0  | 289.1  | 234.4  |
| 361.4  | 310.6  | 665.9  | 349.0  | 1034.5 | 773.6  | 913.6  | 1167.5 | 648.1  |
| 1340.1 | 1134.0 | 2156.6 | 1444.8 | 977.7  | 1477.0 | 1075.1 | 1251.6 | 291.6  |
| 2.4    | 0.5    | 1.4    | 3.0    | 7.9    | 4.5    | 1.9    | 9.6    | 634.6  |
| 49.0   | 42.9   | 42.5   | 37.9   | 32.1   | 37.0   | 49.5   | 52.4   | 72.0   |
| 129.8  | 153.9  | 97.7   | 102.9  | 136.8  | 112.6  | 120.4  | 103.6  | 71.8   |
| 154.7  | 215.5  | 187.9  | 137.7  | 358.5  | 444.0  | 644.2  | 447.0  | 264.3  |
| 116.5  | 123.5  | 239.7  | 102.3  | 593.6  | 570.6  | 565.5  | 638.6  | 281.6  |
| 138.0  | 134.1  | 279.7  | 122.2  | 728.7  | 688.9  | 683.9  | 730.9  | 584.1  |
| 64.5   | 53.0   | 89.4   | 60.3   | 248.8  | 240.4  | 245.3  | 236.2  | 165.7  |
| 836.9  | 754.0  | 1442.6 | 740.1  | 1196.9 | 818.1  | 1185.4 | 1315.4 | 1802.2 |
| 38.2   | 31.6   | 29.4   | 35.7   | 39.3   | 40.0   | 28.6   | 27.9   | 57.6   |
| 329.0  | 280.3  | 359.5  | 216.1  | 658.3  | 572.8  | 596.1  | 687.3  | 325.3  |
| 170.9  | 152.9  | 298.2  | 158.5  | 471.5  | 489.3  | 482.8  | 491.7  | 711.6  |
| 157.7  | 165.5  | 186.5  | 153.0  | 771.9  | 673.4  | 995.4  | 1103.7 | 210.3  |
| 203.1  | 218.5  | 201.2  | 252.4  | 637.3  | 543.3  | 860.5  | 736.0  | 230.9  |
| 132.7  | 116.5  | 147.1  | 117.9  | 181.2  | 155.1  | 191.9  | 213.0  | 245.2  |
| 101.1  | 105.6  | 136.0  | 94.9   | 174.5  | 142.5  | 165.4  | 187.8  | 293.6  |
| 692.0  | 608.3  | 653.3  | 641.9  | 440.4  | 482.4  | 439.5  | 455.1  | 445.5  |
| 261.8  | 197.4  | 683.9  | 283.3  | 16.0   | 14.4   | 17.6   | 26.7   | 39.6   |
| 325.5  | 264.0  | 328.9  | 236.6  | 183.5  | 240.8  | 200.6  | 213.5  | 332.7  |
| 230.1  | 245.1  | 269.7  | 226.6  | 393.4  | 470.5  | 378.3  | 424.4  | 843.7  |

|        |        |        |        |        |        |        |        |        |
|--------|--------|--------|--------|--------|--------|--------|--------|--------|
| 247.8  | 212.9  | 250.5  | 223.6  | 153.0  | 154.2  | 141.4  | 216.0  | 123.1  |
| 4.6    | 11.0   | 14.7   | 4.8    | 17.1   | 23.3   | 28.9   | 24.7   | 16.9   |
| 119.6  | 139.6  | 219.7  | 151.9  | 1193.5 | 1182.4 | 1473.5 | 1357.9 | 1037.6 |
| 411.2  | 383.1  | 570.7  | 443.2  | 485.6  | 481.5  | 443.8  | 499.4  | 393.5  |
| 482.5  | 455.1  | 697.0  | 496.1  | 744.9  | 787.2  | 775.3  | 846.9  | 623.8  |
| 458.1  | 418.9  | 555.8  | 453.1  | 470.4  | 527.6  | 442.3  | 494.5  | 292.6  |
| 409.1  | 470.8  | 329.8  | 361.6  | 899.3  | 703.2  | 841.4  | 1024.6 | 710.8  |
| 2532.7 | 2451.9 | 2853.6 | 2412.9 | 3262.6 | 2573.4 | 3503.6 | 3604.2 | 3054.9 |
| 18.2   | 11.7   | 33.4   | 20.6   | 29.5   | 23.3   | 26.7   | 18.3   | 35.1   |
| 430.9  | 431.8  | 603.1  | 395.7  | 676.4  | 592.7  | 685.8  | 893.6  | 1161.1 |
| 1903.6 | 1856.6 | 2331.5 | 1911.2 | 2963.1 | 2493.4 | 3162.0 | 3688.6 | 6103.8 |
| 1696.5 | 1680.1 | 2018.6 | 1507.8 | 2050.4 | 1644.8 | 2160.7 | 2467.7 | 4133.8 |
| 1951.4 | 1630.1 | 3086.0 | 1895.7 | 2598.4 | 2602.4 | 2722.7 | 2737.4 | 6545.7 |
| 5.4    | 2.3    | 7.3    | 8.2    | 173.5  | 219.8  | 179.8  | 216.6  | 172.9  |
| 1.3    | 2.8    | 2.0    | 0.7    | 85.2   | 95.7   | 82.1   | 97.7   | 121.6  |
| 15.0   | 12.2   | 26.0   | 11.7   | 928.6  | 1097.3 | 865.7  | 1041.4 | 1138.0 |
| 5.1    | 2.6    | 4.1    | 2.8    | 2526.0 | 2773.9 | 3713.7 | 3270.8 | 568.7  |
| 2.4    | 12.3   | 8.7    | 2.1    | 1576.7 | 1768.2 | 2496.5 | 2104.6 | 239.0  |
| 256.6  | 318.3  | 247.9  | 286.7  | 513.1  | 424.8  | 437.2  | 515.8  | 956.5  |
| 105.1  | 86.1   | 349.8  | 134.5  | 492.9  | 264.1  | 369.3  | 469.5  | 854.3  |
| 1125.7 | 1267.1 | 729.8  | 820.1  | 212.3  | 166.0  | 192.4  | 224.9  | 528.3  |
| 25.3   | 14.8   | 23.7   | 19.1   | 54.2   | 62.7   | 58.6   | 61.5   | 3.9    |
| 1065.0 | 1068.8 | 1318.6 | 1091.8 | 1612.7 | 1869.8 | 1829.1 | 1948.0 | 5498.5 |
| 1906.3 | 1927.6 | 2217.9 | 1959.1 | 2840.5 | 3073.7 | 3263.0 | 3194.9 | 5956.6 |
| 808.2  | 747.1  | 754.2  | 659.4  | 565.8  | 420.7  | 906.3  | 798.9  | 256.0  |
| 1195.3 | 1094.2 | 1707.0 | 1128.4 | 2334.9 | 2498.0 | 2436.5 | 2515.6 | 3403.5 |
| 66.5   | 68.9   | 85.2   | 62.8   | 79.2   | 112.3  | 59.4   | 86.0   | 50.4   |
| 39.1   | 41.7   | 46.1   | 25.9   | 174.3  | 227.8  | 177.8  | 192.6  | 236.5  |
| 144.4  | 179.1  | 140.7  | 170.1  | 111.0  | 105.3  | 118.9  | 129.1  | 131.6  |
| 182.9  | 185.1  | 150.4  | 192.1  | 107.7  | 80.5   | 102.1  | 114.9  | 112.3  |
| 198.3  | 170.7  | 276.2  | 152.1  | 246.0  | 171.4  | 250.6  | 293.8  | 322.3  |
| 1049.4 | 1064.7 | 1035.6 | 887.9  | 965.2  | 932.7  | 1106.0 | 1228.1 | 1880.6 |
| 281.4  | 241.1  | 378.6  | 236.9  | 104.8  | 109.0  | 118.1  | 132.2  | 234.3  |
| 39.7   | 41.4   | 46.6   | 30.3   | 32.7   | 26.3   | 39.8   | 42.6   | 6.5    |
| 68.3   | 72.5   | 87.3   | 55.8   | 71.2   | 65.0   | 78.6   | 80.7   | 43.3   |
| 133.3  | 105.0  | 283.0  | 172.9  | 194.1  | 181.5  | 156.4  | 224.1  | 405.2  |
| 227.5  | 206.0  | 288.9  | 224.0  | 174.5  | 226.5  | 195.6  | 171.9  | 364.4  |
| 137.3  | 119.0  | 212.9  | 122.3  | 418.1  | 392.9  | 399.4  | 458.1  | 721.3  |
| 54.0   | 44.1   | 84.7   | 49.3   | 71.8   | 63.8   | 68.1   | 92.4   | 216.0  |
| 293.2  | 308.1  | 398.1  | 330.0  | 336.8  | 386.8  | 335.9  | 355.7  | 404.4  |
| 299.2  | 287.8  | 330.5  | 290.1  | 413.6  | 509.2  | 459.0  | 498.3  | 545.4  |
| 334.7  | 300.2  | 364.8  | 246.9  | 92.7   | 120.8  | 131.9  | 147.8  | 39.5   |
| 560.8  | 574.6  | 527.1  | 625.8  | 295.2  | 318.7  | 370.7  | 359.7  | 419.1  |
| 285.2  | 232.7  | 549.1  | 267.8  | 646.6  | 567.2  | 653.7  | 635.7  | 634.7  |
| 569.3  | 567.2  | 978.7  | 714.9  | 1141.4 | 1055.5 | 1119.4 | 1356.7 | 833.8  |
| 745.4  | 816.4  | 721.9  | 755.1  | 1609.8 | 1640.9 | 1777.9 | 1925.9 | 598.5  |
| 9.9    | 17.5   | 14.8   | 16.9   | 660.5  | 800.9  | 561.7  | 576.8  | 45.4   |
| 1556.3 | 1498.2 | 2032.2 | 1334.7 | 2344.0 | 2255.7 | 2438.4 | 2593.8 | 2130.8 |
| 14.4   | 11.0   | 8.1    | 5.9    | 48.9   | 54.9   | 148.0  | 76.4   | 92.7   |
| 1.3    | 3.3    | 0.9    | 0.5    | 42.7   | 47.8   | 103.3  | 55.7   | 80.7   |
| 189.8  | 182.2  | 304.9  | 192.3  | 309.6  | 287.5  | 329.2  | 366.6  | 427.6  |
| 332.8  | 286.8  | 539.1  | 293.7  | 554.5  | 501.5  | 609.5  | 700.2  | 793.3  |
| 2.2    | 2.7    | 9.3    | 5.9    | 7.7    | 2.2    | 12.5   | 2.1    | 14.8   |

|        |        |        |        |        |        |        |        |        |
|--------|--------|--------|--------|--------|--------|--------|--------|--------|
| 26.0   | 10.2   | 19.9   | 21.7   | 56.1   | 53.6   | 356.0  | 108.7  | 26.9   |
| 329.3  | 248.2  | 701.3  | 310.5  | 1801.1 | 1820.5 | 2005.2 | 2283.7 | 592.4  |
| 783.8  | 639.8  | 918.3  | 835.1  | 1484.2 | 1465.3 | 1586.5 | 1592.2 | 2446.3 |
| 782.0  | 825.5  | 1041.3 | 798.8  | 1164.3 | 1305.3 | 1322.7 | 1411.8 | 1416.9 |
| 142.2  | 141.5  | 159.4  | 135.7  | 264.8  | 242.5  | 280.0  | 284.3  | 346.9  |
| 349.5  | 314.1  | 422.2  | 289.0  | 514.4  | 483.3  | 550.6  | 590.8  | 1091.9 |
| 1.6    | 0.9    | 1.4    | 0.6    | 1.2    | 0.8    | 1.6    | 0.5    | 1.9    |
| 165.5  | 170.9  | 190.2  | 213.9  | 164.3  | 119.7  | 146.8  | 167.9  | 261.6  |
| 859.3  | 692.8  | 1229.5 | 759.5  | 726.5  | 784.5  | 834.4  | 843.9  | 1537.5 |
| 9.1    | 21.7   | 15.2   | 19.0   | 7.7    | 2.9    | 10.7   | 19.1   | 12.3   |
| 79.9   | 75.2   | 130.3  | 52.1   | 280.9  | 360.4  | 215.5  | 324.9  | 1676.9 |
| 3.7    | 12.7   | 13.8   | 8.3    | 10.3   | 7.4    | 8.1    | 14.4   | 16.3   |
| 1195.6 | 1179.1 | 304.6  | 452.5  | 776.0  | 668.2  | 1705.0 | 1126.8 | 1.8    |
| 5.5    | 7.1    | 5.4    | 3.2    | 2.2    | 4.2    | 14.1   | 2.9    | 9.2    |
| 65.9   | 58.2   | 83.7   | 54.7   | 117.3  | 110.4  | 95.3   | 118.4  | 86.1   |
| 142.2  | 132.1  | 161.4  | 131.4  | 234.5  | 260.0  | 218.4  | 259.3  | 261.8  |
| 418.5  | 389.3  | 677.1  | 331.0  | 1357.3 | 1298.1 | 1231.1 | 1393.6 | 1542.4 |
| 1087.5 | 959.7  | 416.7  | 371.3  | 6.4    | 7.9    | 7.9    | 8.6    | 11.0   |
| 349.4  | 287.8  | 378.9  | 297.9  | 227.4  | 171.1  | 174.3  | 176.5  | 491.0  |
| 139.9  | 128.9  | 229.0  | 139.9  | 212.8  | 149.1  | 175.2  | 216.9  | 298.7  |
| 120.1  | 115.1  | 236.8  | 138.9  | 178.9  | 127.8  | 157.6  | 183.0  | 275.6  |
| 215.1  | 190.4  | 235.7  | 133.4  | 232.7  | 266.9  | 335.5  | 280.5  | 172.7  |
| 377.7  | 370.2  | 573.9  | 376.2  | 865.1  | 1078.3 | 925.6  | 1017.3 | 1732.1 |
| 369.1  | 300.8  | 416.4  | 293.5  | 874.0  | 885.9  | 898.4  | 1083.8 | 1719.4 |
| 2055.4 | 1715.3 | 2252.7 | 2006.0 | 2373.9 | 2626.2 | 2472.0 | 2795.9 | 2541.2 |
| 1153.6 | 1114.9 | 1121.6 | 1034.9 | 1845.4 | 1934.9 | 1993.0 | 2101.8 | 2460.7 |
| 980.2  | 1140.3 | 1081.0 | 974.9  | 1542.5 | 1781.3 | 1666.7 | 1963.3 | 2251.5 |
| 266.2  | 226.7  | 305.0  | 215.5  | 229.2  | 170.8  | 215.3  | 244.5  | 390.5  |
| 663.6  | 661.1  | 776.8  | 592.0  | 598.9  | 415.7  | 509.5  | 687.0  | 946.4  |
| 442.8  | 400.9  | 593.9  | 413.7  | 448.5  | 373.2  | 499.0  | 591.4  | 401.2  |
| 187.9  | 174.0  | 223.0  | 171.2  | 435.5  | 470.2  | 396.8  | 444.9  | 311.3  |
| 186.9  | 193.0  | 228.5  | 204.9  | 438.1  | 365.7  | 341.8  | 476.3  | 312.5  |
| 794.9  | 677.1  | 1182.3 | 721.2  | 1209.2 | 1559.1 | 1328.8 | 1384.7 | 2075.5 |
| 117.1  | 88.0   | 79.9   | 97.7   | 295.9  | 340.4  | 394.3  | 350.5  | 265.6  |
| 223.2  | 160.2  | 450.3  | 243.3  | 156.4  | 151.3  | 171.0  | 192.2  | 102.8  |
| 916.9  | 770.1  | 1485.7 | 716.7  | 1418.7 | 1086.6 | 1364.9 | 1486.6 | 1835.8 |
| 109.1  | 114.7  | 116.9  | 107.5  | 4328.5 | 4051.1 | 6172.3 | 5935.2 | 2.9    |
| 12.8   | 14.7   | 24.7   | 8.2    | 474.7  | 256.0  | 914.9  | 821.7  | 7.2    |
| 8.1    | 3.9    | 2.4    | 12.2   | 7.6    | 3.7    | 5.6    | 2.0    | 3.9    |
| 621.0  | 530.5  | 704.5  | 403.0  | 785.7  | 816.9  | 803.9  | 991.0  | 719.0  |
| 640.2  | 503.4  | 1249.8 | 453.0  | 763.8  | 614.6  | 950.6  | 974.1  | 284.3  |
| 189.3  | 177.3  | 304.3  | 189.3  | 95.7   | 93.0   | 102.6  | 109.6  | 112.9  |
| 156.1  | 165.6  | 185.2  | 187.6  | 132.9  | 118.0  | 132.7  | 189.3  | 161.5  |
| 202.8  | 183.0  | 231.5  | 245.6  | 267.6  | 242.5  | 304.2  | 303.2  | 256.9  |
| 460.8  | 496.6  | 558.7  | 452.6  | 350.3  | 354.1  | 345.9  | 406.3  | 325.4  |
| 66.3   | 62.7   | 78.0   | 64.5   | 75.3   | 75.1   | 75.0   | 102.8  | 58.2   |
| 207.2  | 183.9  | 236.8  | 242.2  | 198.5  | 158.0  | 170.2  | 218.5  | 226.9  |
| 270.5  | 240.7  | 372.5  | 280.8  | 87.2   | 111.8  | 84.1   | 111.2  | 81.6   |
| 1014.2 | 927.4  | 1386.4 | 1046.8 | 381.0  | 528.0  | 433.4  | 446.7  | 399.8  |
| 197.9  | 177.8  | 180.2  | 142.5  | 224.3  | 279.0  | 306.4  | 275.5  | 331.7  |
| 459.6  | 465.6  | 570.8  | 445.7  | 700.9  | 836.0  | 825.6  | 763.9  | 783.2  |
| 2296.8 | 1990.0 | 3250.3 | 2347.3 | 2287.0 | 2061.3 | 2361.1 | 2673.1 | 4066.0 |
| 219.8  | 240.8  | 268.9  | 220.5  | 329.8  | 280.6  | 352.4  | 382.2  | 114.7  |

|        |        |        |        |        |        |        |        |        |
|--------|--------|--------|--------|--------|--------|--------|--------|--------|
| 7.1    | 15.5   | 13.5   | 18.0   | 8.0    | 16.1   | 3.4    | 8.0    | 17.7   |
| 34.3   | 38.0   | 48.4   | 44.3   | 36.6   | 54.6   | 39.6   | 36.5   | 53.2   |
| 462.1  | 377.1  | 589.2  | 417.6  | 254.7  | 293.6  | 284.3  | 328.6  | 690.2  |
| 399.6  | 340.0  | 698.5  | 320.3  | 940.3  | 585.3  | 869.5  | 1062.2 | 842.2  |
| 292.8  | 270.7  | 241.3  | 292.7  | 224.4  | 302.8  | 247.2  | 262.0  | 233.4  |
| 100.1  | 102.4  | 149.7  | 109.3  | 101.5  | 124.9  | 95.0   | 93.5   | 114.1  |
| 750.5  | 812.9  | 714.7  | 630.1  | 798.9  | 788.2  | 766.7  | 884.4  | 915.8  |
| 213.3  | 223.5  | 205.0  | 208.1  | 254.9  | 371.0  | 287.6  | 321.0  | 284.2  |
| 15.7   | 14.2   | 13.2   | 14.6   | 12.4   | 9.0    | 12.5   | 18.4   | 26.4   |
| 139.4  | 166.8  | 190.0  | 193.9  | 1167.3 | 1502.3 | 1273.6 | 1436.7 | 863.1  |
| 498.1  | 491.8  | 858.1  | 556.3  | 282.8  | 255.4  | 279.4  | 347.5  | 494.5  |
| 196.4  | 183.6  | 400.9  | 96.9   | 951.9  | 670.4  | 827.5  | 927.3  | 476.4  |
| 65.1   | 58.5   | 44.5   | 43.5   | 72.7   | 73.5   | 71.3   | 69.2   | 88.2   |
| 55.0   | 44.3   | 126.6  | 76.5   | 19.3   | 19.8   | 12.5   | 7.2    | 523.4  |
| 34.9   | 38.7   | 39.8   | 38.4   | 29.0   | 26.4   | 25.3   | 30.6   | 81.0   |
| 134.2  | 169.9  | 136.8  | 164.4  | 119.2  | 123.3  | 172.2  | 189.1  | 510.1  |
| 1550.2 | 1416.0 | 1930.9 | 1492.8 | 1826.1 | 1884.0 | 2009.9 | 2101.7 | 2207.7 |
| 205.4  | 205.7  | 257.5  | 174.7  | 304.9  | 386.4  | 362.0  | 364.9  | 249.4  |
| 49.0   | 30.7   | 69.1   | 28.5   | 3500.9 | 2757.4 | 3879.9 | 3807.9 | 2662.8 |
| 577.2  | 529.6  | 805.1  | 515.3  | 765.1  | 633.4  | 797.2  | 922.7  | 718.4  |
| 517.2  | 499.8  | 668.7  | 476.1  | 982.7  | 949.7  | 1233.3 | 1240.5 | 1197.4 |
| 408.6  | 423.2  | 664.8  | 351.4  | 281.8  | 267.9  | 283.5  | 285.0  | 778.7  |
| 386.7  | 380.9  | 462.5  | 352.3  | 254.6  | 248.8  | 254.8  | 263.0  | 304.7  |
| 251.8  | 273.3  | 78.2   | 149.2  | 221.4  | 241.8  | 272.3  | 291.0  | 3.3    |
| 597.6  | 590.3  | 573.5  | 588.7  | 1406.3 | 1380.9 | 1597.5 | 1688.0 | 730.4  |
| 1123.9 | 944.4  | 1547.6 | 873.9  | 1605.3 | 1226.0 | 1582.6 | 1826.5 | 2039.1 |
| 722.3  | 626.4  | 826.5  | 592.9  | 594.2  | 373.6  | 454.2  | 600.2  | 640.7  |
| 77.4   | 67.7   | 109.7  | 68.0   | 163.0  | 175.2  | 177.4  | 192.8  | 424.8  |
| 171.4  | 149.7  | 237.7  | 133.8  | 295.2  | 295.7  | 318.9  | 330.0  | 578.2  |
| 116.5  | 111.3  | 171.6  | 116.0  | 234.7  | 265.5  | 266.1  | 289.7  | 396.8  |
| 9.7    | 5.6    | 5.2    | 4.1    | 81.1   | 120.0  | 89.8   | 93.5   | 14.3   |
| 141.6  | 149.0  | 165.7  | 139.0  | 335.3  | 417.0  | 320.2  | 376.7  | 144.3  |
| 136.9  | 119.8  | 130.0  | 123.8  | 294.3  | 279.5  | 298.7  | 349.7  | 101.5  |
| 564.4  | 591.1  | 637.6  | 521.6  | 368.5  | 324.9  | 346.5  | 417.0  | 363.3  |
| 337.3  | 318.7  | 400.1  | 341.3  | 607.9  | 543.8  | 510.5  | 675.1  | 395.3  |
| 820.1  | 676.8  | 1168.1 | 712.6  | 1070.3 | 850.2  | 1084.8 | 1329.7 | 929.5  |
| 22.6   | 17.8   | 28.0   | 18.2   | 59.7   | 59.4   | 45.1   | 61.1   | 553.1  |
| 199.3  | 311.3  | 99.3   | 270.3  | 340.9  | 400.8  | 348.4  | 442.0  | 504.5  |
| 411.5  | 401.6  | 419.7  | 329.5  | 302.8  | 354.0  | 296.9  | 353.8  | 402.3  |
| 19.2   | 8.9    | 21.3   | 20.7   | 26.5   | 24.7   | 18.2   | 22.3   | 39.9   |
| 281.9  | 274.6  | 263.1  | 208.4  | 181.4  | 205.1  | 181.4  | 293.9  | 125.6  |
| 85.1   | 58.9   | 114.2  | 70.8   | 165.9  | 155.4  | 184.2  | 169.0  | 166.2  |
| 329.1  | 298.9  | 433.9  | 291.3  | 1595.7 | 1489.2 | 1640.3 | 1631.4 | 625.3  |
| 454.6  | 421.5  | 686.8  | 393.2  | 1018.3 | 815.9  | 869.7  | 1034.3 | 1261.8 |
| 1281.9 | 1189.6 | 920.3  | 1079.8 | 818.4  | 879.3  | 891.9  | 955.7  | 682.8  |
| 218.4  | 210.9  | 189.4  | 180.9  | 273.1  | 336.7  | 266.9  | 308.6  | 248.8  |
| 228.4  | 234.7  | 240.0  | 226.0  | 290.3  | 338.7  | 277.2  | 337.4  | 385.3  |
| 97.1   | 82.3   | 110.9  | 90.0   | 151.3  | 206.7  | 152.5  | 208.5  | 167.8  |
| 167.2  | 114.0  | 361.5  | 136.7  | 284.2  | 204.1  | 310.5  | 361.3  | 129.9  |
| 39.4   | 43.2   | 55.4   | 54.7   | 2.0    | 11.5   | 4.4    | 4.5    | 703.2  |
| 690.4  | 794.4  | 615.5  | 608.6  | 1229.5 | 1469.2 | 1294.4 | 1415.5 | 607.2  |
| 359.2  | 409.7  | 328.4  | 294.9  | 813.0  | 833.8  | 830.4  | 904.7  | 477.7  |
| 189.2  | 156.7  | 157.2  | 137.3  | 129.0  | 141.9  | 199.2  | 173.0  | 293.9  |



|        |        |        |        |        |        |        |        |        |
|--------|--------|--------|--------|--------|--------|--------|--------|--------|
| 60.1   | 73.2   | 87.0   | 60.6   | 80.2   | 65.8   | 68.6   | 77.8   | 87.1   |
| 846.0  | 901.3  | 980.9  | 886.6  | 1942.4 | 1900.9 | 1991.7 | 2304.8 | 859.9  |
| 347.1  | 324.7  | 242.5  | 320.9  | 551.7  | 970.8  | 689.4  | 717.6  | 928.1  |
| 119.5  | 124.7  | 170.2  | 142.7  | 117.9  | 125.6  | 114.2  | 144.9  | 138.1  |
| 46.2   | 47.7   | 64.7   | 41.1   | 177.1  | 158.7  | 168.8  | 175.5  | 158.9  |
| 85.1   | 82.5   | 138.7  | 66.8   | 199.7  | 194.0  | 223.5  | 186.2  | 245.0  |
| 188.3  | 219.7  | 158.6  | 221.0  | 113.7  | 170.9  | 134.5  | 164.8  | 234.6  |
| 376.3  | 286.8  | 332.7  | 287.5  | 117.3  | 135.7  | 117.8  | 111.7  | 395.6  |
| 20.3   | 20.3   | 27.0   | 12.9   | 97.3   | 83.6   | 86.5   | 110.9  | 479.3  |
| 83.0   | 63.8   | 96.0   | 62.2   | 50.3   | 53.2   | 45.1   | 67.2   | 86.6   |
| 29.1   | 36.3   | 44.6   | 31.1   | 17.8   | 11.9   | 18.3   | 21.7   | 32.3   |
| 2755.2 | 2760.4 | 1395.9 | 1381.4 | 21.4   | 12.2   | 24.4   | 13.4   | 3.4    |
| 100.9  | 98.9   | 121.7  | 124.9  | 73.8   | 85.6   | 64.2   | 94.5   | 142.7  |
| 422.3  | 430.5  | 602.1  | 374.8  | 592.3  | 742.9  | 548.5  | 666.2  | 627.4  |
| 146.3  | 147.5  | 193.9  | 120.7  | 131.5  | 135.6  | 116.1  | 157.5  | 141.8  |
| 631.8  | 571.3  | 698.8  | 525.7  | 710.1  | 660.8  | 709.3  | 831.0  | 506.1  |
| 369.7  | 318.3  | 644.4  | 311.6  | 926.7  | 641.8  | 851.6  | 989.0  | 977.7  |
| 539.6  | 435.7  | 779.3  | 402.1  | 1186.5 | 1162.0 | 1559.4 | 1608.2 | 1490.7 |
| 36.7   | 37.5   | 44.7   | 45.2   | 26.0   | 30.1   | 30.2   | 38.2   | 56.4   |
| 433.5  | 390.7  | 524.7  | 394.8  | 365.9  | 417.7  | 402.1  | 403.9  | 497.3  |
| 38.3   | 34.7   | 41.9   | 32.5   | 50.1   | 69.1   | 86.3   | 78.7   | 43.9   |
| 53.7   | 54.0   | 59.8   | 54.3   | 119.0  | 88.3   | 241.5  | 154.2  | 102.5  |
| 84.4   | 97.3   | 168.6  | 124.2  | 279.1  | 585.7  | 289.9  | 334.7  | 225.8  |
| 5.5    | 11.7   | 18.2   | 8.9    | 7.6    | 12.7   | 52.4   | 26.7   | 8.5    |
| 0.9    | 3.9    | 1.3    | 4.7    | 11.7   | 9.6    | 36.0   | 21.8   | 5.7    |
| 44.7   | 43.4   | 59.3   | 37.4   | 116.8  | 88.6   | 92.8   | 129.0  | 238.0  |
| 248.3  | 283.2  | 357.5  | 223.8  | 1054.3 | 864.6  | 1019.7 | 1167.0 | 929.3  |
| 149.3  | 123.0  | 191.6  | 130.7  | 318.1  | 312.7  | 329.5  | 356.0  | 403.8  |
| 388.8  | 359.3  | 487.2  | 360.0  | 866.9  | 741.5  | 866.2  | 1007.4 | 948.2  |
| 11.9   | 6.4    | 17.8   | 10.9   | 10.9   | 11.1   | 10.4   | 12.9   | 14.2   |
| 1.6    | 1.0    | 1.3    | 1.1    | 1.8    | 1.2    | 1.2    | 1.7    | 2.1    |
| 6.0    | 2.6    | 6.5    | 4.9    | 8.4    | 5.1    | 10.3   | 19.7   | 5.4    |
| 208.1  | 183.0  | 317.0  | 158.9  | 745.8  | 616.7  | 737.1  | 739.9  | 866.1  |
| 646.5  | 652.9  | 1140.2 | 542.4  | 1711.9 | 1358.6 | 1421.1 | 1766.0 | 1615.7 |
| 145.1  | 154.0  | 139.3  | 149.5  | 105.7  | 84.9   | 110.6  | 111.2  | 177.6  |
| 137.0  | 110.5  | 193.9  | 117.7  | 443.6  | 522.4  | 463.1  | 519.2  | 617.9  |
| 206.3  | 227.7  | 290.1  | 148.3  | 695.5  | 531.4  | 628.8  | 800.2  | 998.6  |
| 401.6  | 386.8  | 450.9  | 414.0  | 526.7  | 443.9  | 441.3  | 573.7  | 468.9  |
| 607.1  | 595.4  | 916.0  | 589.6  | 1094.8 | 1512.3 | 1448.6 | 1261.2 | 702.2  |
| 260.0  | 287.6  | 282.0  | 258.9  | 243.7  | 301.0  | 250.7  | 280.9  | 444.7  |
| 479.9  | 398.1  | 764.1  | 433.3  | 819.6  | 412.3  | 704.0  | 856.2  | 1360.6 |
| 394.8  | 422.3  | 434.8  | 359.8  | 450.1  | 464.7  | 535.4  | 579.6  | 489.1  |
| 1.8    | 1.1    | 4.9    | 3.9    | 294.0  | 192.0  | 289.8  | 379.6  | 106.1  |
| 367.1  | 362.8  | 504.6  | 400.6  | 216.7  | 227.1  | 187.0  | 296.1  | 226.9  |
| 413.8  | 371.4  | 830.8  | 585.8  | 650.9  | 893.9  | 726.5  | 908.0  | 717.5  |
| 310.5  | 279.7  | 376.8  | 226.3  | 199.7  | 172.9  | 242.6  | 250.5  | 132.5  |
| 64.3   | 60.7   | 58.9   | 49.9   | 34.1   | 45.1   | 38.4   | 39.6   | 40.9   |
| 1264.6 | 1103.4 | 1540.7 | 871.3  | 765.0  | 779.5  | 783.6  | 924.1  | 781.8  |
| 3010.9 | 2495.0 | 3522.8 | 2470.0 | 2565.8 | 2424.0 | 3328.5 | 3003.5 | 2604.9 |
| 1249.2 | 1134.0 | 1390.2 | 1027.3 | 936.9  | 634.5  | 975.4  | 1057.0 | 367.6  |
| 92.9   | 107.4  | 125.6  | 103.7  | 280.1  | 264.2  | 242.3  | 240.7  | 193.6  |
| 596.1  | 694.2  | 517.5  | 838.6  | 788.9  | 1015.1 | 962.5  | 849.2  | 256.4  |
| 299.8  | 288.1  | 465.0  | 306.1  | 588.3  | 553.2  | 612.3  | 630.0  | 266.0  |

|        |        |        |       |        |        |        |        |        |
|--------|--------|--------|-------|--------|--------|--------|--------|--------|
| 1041.6 | 887.4  | 1224.2 | 901.1 | 687.1  | 754.4  | 760.1  | 811.3  | 595.7  |
| 3.9    | 8.7    | 3.2    | 1.0   | 111.1  | 115.1  | 136.1  | 148.3  | 1.2    |
| 43.7   | 51.8   | 69.9   | 49.6  | 858.9  | 791.1  | 1274.6 | 1412.9 | 41.1   |
| 73.3   | 79.4   | 98.5   | 96.0  | 1901.7 | 1673.5 | 2758.7 | 2845.7 | 70.7   |
| 122.0  | 133.0  | 158.4  | 144.4 | 2107.2 | 1551.5 | 2488.7 | 3226.7 | 62.9   |
| 11.0   | 13.9   | 32.5   | 17.7  | 83.0   | 90.2   | 75.2   | 92.2   | 52.3   |
| 48.7   | 53.6   | 57.8   | 43.5  | 123.2  | 165.7  | 140.8  | 162.6  | 133.5  |
| 61.0   | 58.6   | 94.0   | 47.6  | 107.1  | 132.2  | 142.0  | 153.8  | 71.3   |
| 260.2  | 262.3  | 414.3  | 245.9 | 1339.1 | 1113.7 | 1301.1 | 1499.2 | 750.8  |
| 677.5  | 684.4  | 793.8  | 624.8 | 2052.4 | 1889.3 | 2244.8 | 2298.0 | 2996.5 |
| 743.1  | 748.5  | 690.6  | 631.1 | 1422.3 | 1239.5 | 1268.9 | 1594.7 | 986.0  |
| 84.9   | 79.6   | 137.8  | 81.1  | 544.4  | 502.0  | 502.6  | 627.4  | 330.9  |
| 26.0   | 27.7   | 32.5   | 27.6  | 58.4   | 45.8   | 53.7   | 48.6   | 44.9   |
| 178.7  | 188.8  | 237.2  | 142.8 | 675.5  | 602.4  | 607.0  | 743.3  | 522.4  |
| 768.8  | 762.0  | 701.4  | 755.6 | 349.7  | 404.6  | 386.2  | 463.2  | 278.5  |
| 133.5  | 135.6  | 117.3  | 107.6 | 22.4   | 31.4   | 22.6   | 36.8   | 59.7   |
| 646.9  | 569.4  | 396.6  | 551.0 | 224.1  | 186.7  | 227.8  | 293.7  | 170.1  |
| 29.7   | 33.4   | 23.2   | 24.0  | 27.0   | 17.8   | 20.8   | 27.4   | 213.0  |
| 324.9  | 323.3  | 324.2  | 325.3 | 409.4  | 541.7  | 438.4  | 460.2  | 528.5  |
| 136.4  | 167.2  | 125.5  | 134.9 | 42.7   | 37.5   | 36.6   | 36.9   | 65.4   |
| 159.1  | 162.2  | 190.6  | 154.3 | 266.2  | 337.6  | 254.1  | 267.6  | 316.4  |
| 831.5  | 1117.1 | 628.8  | 972.2 | 11.9   | 18.4   | 12.0   | 20.5   | 668.5  |
| 73.3   | 105.5  | 20.8   | 68.4  | 82.5   | 99.2   | 147.1  | 165.3  | 93.1   |
| 150.3  | 148.0  | 100.6  | 122.1 | 27.8   | 36.2   | 30.3   | 13.6   | 37.5   |
| 946.4  | 860.2  | 1030.1 | 698.7 | 857.0  | 623.1  | 877.4  | 947.4  | 275.1  |
| 354.6  | 315.2  | 708.6  | 357.0 | 4238.8 | 3566.9 | 5450.3 | 5117.6 | 1948.4 |
| 191.0  | 159.2  | 265.8  | 231.6 | 130.5  | 213.4  | 138.6  | 142.6  | 87.7   |
| 238.7  | 219.5  | 252.8  | 251.8 | 131.5  | 164.9  | 134.9  | 138.6  | 147.5  |
| 253.4  | 244.7  | 283.6  | 196.3 | 579.6  | 695.9  | 563.9  | 587.8  | 786.8  |
| 690.2  | 677.2  | 903.1  | 667.8 | 891.0  | 581.8  | 844.1  | 941.5  | 1694.1 |
| 79.8   | 78.4   | 112.7  | 95.8  | 123.1  | 144.2  | 91.7   | 120.7  | 139.2  |
| 69.8   | 69.9   | 97.7   | 60.8  | 161.8  | 152.8  | 208.6  | 221.1  | 311.6  |
| 4.1    | 8.7    | 6.6    | 2.2   | 34.3   | 66.9   | 42.2   | 44.3   | 265.3  |
| 336.4  | 361.1  | 452.9  | 303.4 | 764.9  | 607.8  | 627.7  | 693.8  | 408.4  |
| 785.3  | 735.3  | 1057.8 | 753.8 | 1054.4 | 785.8  | 1033.3 | 1222.6 | 1995.3 |
| 177.5  | 187.6  | 378.3  | 185.1 | 1795.9 | 1026.5 | 1223.4 | 1555.9 | 668.2  |
| 775.1  | 702.5  | 1075.7 | 757.1 | 1027.0 | 739.8  | 967.8  | 1115.1 | 1257.7 |
| 74.7   | 80.7   | 111.6  | 97.4  | 72.2   | 63.4   | 69.5   | 96.3   | 84.0   |
| 574.5  | 492.6  | 722.8  | 501.1 | 640.3  | 402.5  | 615.9  | 719.9  | 829.0  |
| 132.5  | 160.7  | 107.1  | 118.9 | 56.1   | 86.5   | 68.0   | 73.3   | 136.2  |
| 18.6   | 8.9    | 26.3   | 5.1   | 9.9    | 3.7    | 3.3    | 2.8    | 13.2   |
| 123.5  | 109.7  | 200.8  | 118.1 | 243.5  | 183.5  | 164.6  | 213.2  | 212.5  |
| 764.6  | 629.7  | 1196.3 | 806.9 | 1439.8 | 1742.5 | 1533.4 | 1643.9 | 1364.3 |
| 38.3   | 52.1   | 73.1   | 44.5  | 68.7   | 69.9   | 53.8   | 66.4   | 152.2  |
| 154.0  | 140.2  | 236.4  | 151.6 | 352.0  | 409.5  | 364.5  | 408.7  | 359.5  |
| 22.7   | 8.2    | 71.6   | 21.4  | 131.8  | 72.1   | 141.9  | 158.3  | 405.6  |
| 19.0   | 19.2   | 49.2   | 16.8  | 51.9   | 37.4   | 56.0   | 56.8   | 148.2  |
| 107.7  | 101.1  | 164.9  | 115.4 | 100.4  | 73.3   | 98.1   | 118.8  | 179.1  |
| 23.6   | 40.2   | 34.3   | 41.4  | 20.1   | 23.7   | 34.1   | 35.2   | 160.6  |
| 14.7   | 9.2    | 27.3   | 9.6   | 22.9   | 27.2   | 46.4   | 53.6   | 46.3   |
| 760.7  | 584.9  | 1898.7 | 660.4 | 2487.1 | 1787.4 | 2154.8 | 2516.4 | 3878.6 |
| 964.3  | 819.9  | 1440.3 | 938.1 | 1178.0 | 1001.4 | 1176.8 | 1354.1 | 694.5  |
| 19.3   | 22.9   | 22.9   | 18.8  | 14.9   | 14.1   | 12.7   | 26.4   | 22.3   |

|        |        |        |        |        |        |        |        |        |
|--------|--------|--------|--------|--------|--------|--------|--------|--------|
| 402.8  | 386.3  | 586.4  | 458.8  | 339.4  | 339.3  | 327.0  | 359.3  | 295.4  |
| 1421.4 | 1375.7 | 1772.6 | 1311.6 | 1725.4 | 1578.1 | 1706.4 | 2043.5 | 1634.4 |
| 346.1  | 386.9  | 322.8  | 392.7  | 65.7   | 37.2   | 51.9   | 71.5   | 223.5  |
| 2154.9 | 2470.2 | 1807.9 | 2118.6 | 1.2    | 2.5    | 3.9    | 3.3    | 329.8  |
| 5.5    | 3.3    | 8.9    | 5.8    | 14.9   | 18.6   | 19.0   | 17.3   | 19.4   |
| 359.3  | 337.0  | 444.0  | 338.0  | 582.3  | 607.2  | 575.2  | 637.6  | 589.6  |
| 192.2  | 260.1  | 162.8  | 217.7  | 289.3  | 399.5  | 403.6  | 404.3  | 225.4  |
| 0.8    | 0.6    | 0.8    | 0.4    | 0.4    | 0.6    | 0.6    | 0.7    | 0.6    |
| 136.9  | 134.2  | 176.8  | 121.1  | 206.6  | 279.8  | 221.9  | 237.9  | 321.2  |
| 458.4  | 372.1  | 409.5  | 331.7  | 457.7  | 558.2  | 456.3  | 598.4  | 333.7  |
| 166.4  | 157.3  | 121.3  | 109.6  | 187.1  | 177.0  | 194.0  | 223.9  | 151.4  |
| 15.0   | 2.9    | 12.7   | 5.9    | 192.2  | 235.9  | 189.9  | 224.7  | 304.8  |
| 3.4    | 3.0    | 3.7    | 4.7    | 72.2   | 81.6   | 75.0   | 94.5   | 82.8   |
| 3.3    | 2.0    | 2.8    | 0.6    | 84.5   | 134.4  | 100.9  | 88.9   | 82.0   |
| 105.3  | 118.4  | 135.8  | 118.8  | 217.2  | 444.7  | 209.0  | 267.9  | 82.3   |
| 130.7  | 117.2  | 163.8  | 100.1  | 328.0  | 297.3  | 299.7  | 356.2  | 425.1  |
| 654.3  | 714.4  | 613.4  | 598.3  | 905.6  | 712.9  | 870.7  | 1106.0 | 808.1  |
| 701.3  | 631.7  | 1908.2 | 535.2  | 2481.2 | 1163.3 | 1971.2 | 2578.5 | 4820.8 |
| 268.1  | 405.2  | 147.3  | 141.6  | 64.6   | 44.9   | 76.0   | 113.0  | 18.2   |
| 1508.3 | 1477.1 | 1943.7 | 1480.3 | 2073.7 | 1829.8 | 2172.8 | 2349.4 | 6972.6 |
| 238.5  | 212.0  | 223.4  | 161.4  | 382.8  | 413.2  | 332.7  | 449.3  | 547.9  |
| 18.7   | 23.9   | 33.9   | 14.7   | 32.6   | 29.6   | 35.7   | 39.3   | 36.9   |
| 3.0    | 1.1    | 5.8    | 1.4    | 24.7   | 19.2   | 31.7   | 30.4   | 13.8   |
| 2.7    | 3.4    | 1.9    | 2.7    | 2.5    | 1.6    | 2.1    | 1.7    | 23.4   |
| 44.2   | 35.3   | 35.5   | 31.5   | 42.9   | 44.4   | 25.7   | 34.2   | 85.9   |
| 569.8  | 543.7  | 702.4  | 581.4  | 815.7  | 934.1  | 851.4  | 896.0  | 514.9  |
| 71.7   | 87.1   | 108.8  | 112.7  | 98.2   | 85.7   | 85.6   | 92.5   | 46.5   |
| 212.6  | 187.8  | 309.6  | 172.8  | 336.7  | 291.7  | 333.4  | 362.4  | 174.9  |
| 329.9  | 297.2  | 428.5  | 325.2  | 609.5  | 598.4  | 731.0  | 830.9  | 170.2  |
| 401.7  | 398.5  | 573.3  | 451.0  | 636.2  | 546.8  | 760.0  | 802.9  | 180.1  |
| 138.2  | 118.6  | 199.1  | 124.6  | 239.2  | 222.7  | 262.3  | 316.6  | 88.7   |
| 29.8   | 24.2   | 35.6   | 34.1   | 28.8   | 26.7   | 34.2   | 29.1   | 35.6   |
| 175.4  | 152.0  | 256.5  | 160.9  | 128.2  | 156.6  | 141.4  | 126.0  | 303.4  |
| 199.1  | 271.5  | 176.9  | 184.0  | 119.8  | 132.7  | 135.5  | 171.8  | 77.0   |
| 305.8  | 275.2  | 458.1  | 262.5  | 700.2  | 533.0  | 667.3  | 767.6  | 918.1  |
| 469.4  | 478.9  | 542.9  | 412.9  | 597.1  | 470.4  | 542.9  | 661.7  | 630.9  |
| 549.9  | 554.8  | 768.3  | 578.8  | 993.0  | 798.9  | 1030.4 | 1111.1 | 1100.7 |
| 17.9   | 20.1   | 25.4   | 24.8   | 18.9   | 14.9   | 23.2   | 30.7   | 30.8   |
| 24.0   | 29.2   | 21.7   | 26.9   | 20.8   | 13.6   | 10.9   | 23.1   | 25.3   |
| 522.5  | 549.1  | 677.6  | 633.9  | 5.8    | 8.0    | 8.4    | 4.8    | 8.1    |
| 59.2   | 57.7   | 65.6   | 47.1   | 21.6   | 15.2   | 19.7   | 25.3   | 35.4   |
| 655.0  | 670.2  | 754.6  | 609.5  | 490.4  | 382.1  | 450.1  | 547.1  | 390.9  |
| 229.3  | 181.0  | 389.3  | 204.1  | 322.8  | 418.1  | 265.1  | 294.3  | 777.5  |
| 366.9  | 399.3  | 299.5  | 257.8  | 556.3  | 468.5  | 565.5  | 642.8  | 408.6  |
| 253.0  | 236.5  | 260.2  | 224.9  | 266.3  | 262.8  | 295.8  | 336.2  | 191.7  |
| 73.9   | 80.4   | 70.2   | 66.8   | 185.8  | 214.5  | 141.6  | 214.2  | 153.6  |
| 228.8  | 203.7  | 432.0  | 158.4  | 269.1  | 111.4  | 180.7  | 270.9  | 244.0  |
| 144.7  | 135.0  | 269.3  | 103.7  | 385.9  | 215.4  | 340.4  | 423.3  | 293.1  |
| 455.2  | 395.1  | 839.0  | 291.2  | 1122.0 | 512.8  | 915.3  | 1154.5 | 949.5  |
| 309.7  | 291.7  | 468.8  | 300.7  | 673.7  | 783.9  | 649.5  | 645.2  | 714.4  |
| 586.0  | 545.5  | 830.8  | 638.2  | 214.4  | 165.4  | 189.5  | 204.6  | 710.4  |
| 704.0  | 633.7  | 853.3  | 713.6  | 136.5  | 126.2  | 137.3  | 158.0  | 426.6  |
| 598.7  | 515.3  | 814.4  | 600.5  | 152.9  | 179.2  | 171.0  | 179.7  | 465.3  |

|        |        |        |        |        |        |        |        |        |
|--------|--------|--------|--------|--------|--------|--------|--------|--------|
| 418.1  | 321.7  | 608.9  | 224.3  | 663.6  | 411.8  | 860.1  | 852.1  | 419.3  |
| 282.9  | 209.9  | 393.3  | 168.5  | 448.1  | 258.4  | 611.0  | 577.0  | 349.1  |
| 370.3  | 347.9  | 621.3  | 401.0  | 510.2  | 470.3  | 555.1  | 581.6  | 635.5  |
| 581.0  | 526.6  | 836.8  | 624.9  | 1000.9 | 983.3  | 1025.8 | 1061.2 | 1356.8 |
| 586.4  | 557.4  | 576.6  | 419.8  | 537.2  | 502.2  | 546.1  | 606.8  | 504.5  |
| 798.1  | 780.8  | 777.7  | 609.9  | 844.1  | 718.2  | 837.4  | 937.4  | 836.1  |
| 130.3  | 145.3  | 107.7  | 119.8  | 70.0   | 53.9   | 73.4   | 75.3   | 291.8  |
| 1157.5 | 1230.8 | 1228.0 | 1244.9 | 288.8  | 296.7  | 336.3  | 385.1  | 525.2  |
| 80.7   | 83.6   | 118.5  | 98.3   | 91.4   | 98.4   | 79.0   | 99.2   | 213.9  |
| 294.3  | 305.1  | 304.9  | 295.6  | 286.2  | 339.8  | 314.1  | 339.1  | 627.8  |
| 26.3   | 19.5   | 26.8   | 21.0   | 22.1   | 18.0   | 25.5   | 28.6   | 35.4   |
| 1973.2 | 1893.3 | 2833.1 | 2057.1 | 714.6  | 893.5  | 667.9  | 800.4  | 371.5  |
| 87.2   | 140.2  | 94.4   | 99.7   | 664.6  | 524.9  | 660.2  | 654.6  | 603.4  |
| 83.2   | 116.4  | 79.5   | 66.0   | 341.2  | 254.4  | 348.6  | 389.9  | 264.7  |
| 450.8  | 504.6  | 359.3  | 437.5  | 391.5  | 308.2  | 374.4  | 399.8  | 721.0  |
| 540.6  | 608.0  | 713.1  | 828.9  | 1582.2 | 1634.1 | 1740.2 | 2089.9 | 322.4  |
| 8.0    | 6.7    | 9.8    | 8.4    | 302.6  | 181.4  | 379.3  | 364.7  | 66.6   |
| 246.2  | 253.4  | 317.5  | 214.8  | 268.2  | 295.2  | 267.3  | 292.0  | 482.2  |
| 160.4  | 178.0  | 226.9  | 158.8  | 1.9    | 2.9    | 0.4    | 0.7    | 443.5  |
| 81.1   | 78.7   | 131.9  | 72.0   | 2.6    | 3.7    | 0.8    | 0.1    | 326.2  |
| 270.3  | 233.2  | 397.5  | 257.1  | 433.7  | 428.8  | 410.8  | 432.6  | 638.6  |
| 650.4  | 628.1  | 900.9  | 627.1  | 535.2  | 600.7  | 464.1  | 620.3  | 868.0  |
| 90.6   | 94.5   | 91.0   | 68.2   | 155.6  | 143.0  | 150.1  | 179.8  | 130.2  |
| 598.2  | 492.8  | 639.6  | 350.8  | 472.0  | 372.3  | 670.3  | 569.0  | 153.7  |
| 6.0    | 7.6    | 11.1   | 8.0    | 6.6    | 1.7    | 6.7    | 6.4    | 8.6    |
| 612.6  | 548.1  | 806.6  | 599.5  | 363.5  | 459.3  | 466.2  | 530.1  | 823.3  |
| 215.6  | 238.9  | 249.0  | 210.4  | 202.5  | 228.7  | 244.1  | 292.1  | 572.2  |
| 82.0   | 69.3   | 109.5  | 86.3   | 107.9  | 93.1   | 88.6   | 116.2  | 224.3  |
| 972.9  | 835.9  | 1770.9 | 984.4  | 1959.1 | 1674.4 | 1981.1 | 2171.7 | 2493.9 |
| 305.9  | 309.3  | 357.9  | 235.9  | 232.7  | 281.6  | 230.9  | 247.5  | 301.3  |
| 268.2  | 248.8  | 334.2  | 225.3  | 172.4  | 155.4  | 163.1  | 181.6  | 197.4  |
| 64.1   | 60.6   | 79.9   | 54.2   | 186.5  | 223.3  | 177.3  | 195.5  | 133.5  |
| 53.2   | 33.6   | 49.2   | 38.2   | 45.3   | 45.7   | 42.3   | 67.3   | 57.2   |
| 90.1   | 98.1   | 115.5  | 97.3   | 103.0  | 153.3  | 113.4  | 116.5  | 144.3  |
| 198.0  | 231.0  | 293.9  | 181.0  | 216.3  | 198.1  | 208.6  | 208.1  | 160.2  |
| 108.9  | 94.6   | 123.9  | 97.2   | 101.8  | 123.9  | 109.2  | 107.8  | 104.8  |
| 117.6  | 107.4  | 183.3  | 59.1   | 331.7  | 238.9  | 398.1  | 358.8  | 61.2   |
| 334.7  | 341.0  | 363.5  | 290.0  | 379.1  | 439.8  | 379.7  | 441.7  | 445.0  |
| 272.4  | 240.1  | 343.8  | 217.4  | 446.0  | 368.6  | 430.7  | 499.4  | 541.4  |
| 193.3  | 171.8  | 285.3  | 187.5  | 373.5  | 359.8  | 342.1  | 432.5  | 522.6  |
| 618.4  | 673.6  | 397.4  | 581.8  | 1338.6 | 1694.0 | 1515.4 | 1645.9 | 891.2  |
| 197.8  | 161.0  | 406.0  | 145.6  | 735.6  | 602.6  | 713.4  | 731.9  | 545.0  |
| 587.1  | 493.5  | 770.4  | 474.0  | 957.9  | 809.2  | 1057.6 | 1364.2 | 580.6  |
| 1184.2 | 1150.8 | 1753.2 | 1311.6 | 996.2  | 829.2  | 926.9  | 1082.6 | 738.6  |
| 429.0  | 383.8  | 625.7  | 463.8  | 417.6  | 369.5  | 332.0  | 446.2  | 185.9  |
| 136.9  | 139.3  | 189.5  | 138.6  | 78.9   | 83.4   | 71.3   | 105.1  | 207.3  |
| 62.7   | 60.5   | 85.9   | 58.4   | 46.9   | 63.6   | 50.8   | 59.6   | 91.5   |
| 38.6   | 32.0   | 43.3   | 39.4   | 107.8  | 93.1   | 106.0  | 115.1  | 166.1  |
| 623.5  | 536.7  | 952.6  | 547.3  | 433.7  | 436.0  | 445.5  | 533.3  | 776.0  |
| 49.8   | 29.6   | 64.4   | 40.9   | 44.7   | 38.8   | 43.9   | 45.4   | 41.8   |
| 919.7  | 823.1  | 2569.2 | 673.9  | 4433.7 | 2701.2 | 3826.8 | 4167.8 | 4496.1 |
| 341.9  | 440.0  | 172.5  | 258.0  | 67.3   | 57.1   | 56.5   | 85.1   | 101.8  |
| 2162.7 | 1881.5 | 2872.4 | 2158.3 | 3533.3 | 3703.0 | 3847.7 | 4002.9 | 4747.2 |

|        |        |        |        |        |        |        |        |        |
|--------|--------|--------|--------|--------|--------|--------|--------|--------|
| 236.4  | 227.2  | 345.7  | 215.0  | 421.0  | 407.3  | 416.1  | 492.3  | 617.2  |
| 462.7  | 390.3  | 871.4  | 556.0  | 638.8  | 628.1  | 609.3  | 648.2  | 644.3  |
| 257.8  | 215.8  | 411.8  | 271.9  | 516.1  | 580.2  | 513.4  | 601.2  | 378.8  |
| 247.5  | 209.8  | 399.7  | 238.7  | 475.3  | 546.5  | 534.1  | 588.4  | 507.7  |
| 1371.6 | 1200.0 | 1540.4 | 1191.3 | 1515.8 | 1566.3 | 1519.1 | 1696.9 | 2080.1 |
| 406.6  | 488.6  | 328.2  | 444.6  | 19.7   | 26.4   | 29.1   | 21.0   | 12.7   |
| 889.8  | 1066.1 | 729.1  | 890.7  | 518.9  | 563.2  | 503.7  | 605.1  | 2335.8 |
| 616.3  | 615.4  | 656.7  | 671.8  | 4.0    | 0.2    | 3.4    | 5.9    | 573.1  |
| 673.4  | 709.5  | 741.7  | 653.9  | 0.2    | 0.6    | 2.3    | 0.6    | 846.4  |
| 58.9   | 55.7   | 70.3   | 58.9   | 131.7  | 107.7  | 139.5  | 172.8  | 121.4  |
| 501.6  | 477.2  | 743.8  | 467.8  | 1088.4 | 816.5  | 1116.4 | 1322.4 | 875.1  |
| 1108.5 | 1089.9 | 1086.3 | 1019.4 | 1274.9 | 1156.0 | 1460.3 | 1439.5 | 1579.0 |
| 166.9  | 148.1  | 150.2  | 130.5  | 257.2  | 228.4  | 293.7  | 300.6  | 299.8  |
| 611.2  | 745.9  | 660.3  | 869.7  | 190.1  | 278.0  | 164.5  | 198.7  | 618.7  |
| 452.4  | 404.6  | 537.3  | 430.3  | 627.9  | 556.7  | 585.1  | 761.0  | 154.9  |
| 148.0  | 160.0  | 114.9  | 124.1  | 387.3  | 401.0  | 498.6  | 472.1  | 107.2  |
| 61.0   | 54.4   | 58.4   | 44.1   | 76.0   | 83.4   | 98.1   | 94.7   | 34.3   |
| 499.0  | 449.5  | 644.7  | 398.8  | 1259.4 | 922.7  | 1176.5 | 1373.0 | 889.0  |
| 210.9  | 221.0  | 259.7  | 242.3  | 479.6  | 344.0  | 458.6  | 478.6  | 280.6  |
| 124.1  | 123.0  | 146.2  | 125.1  | 264.6  | 154.7  | 288.2  | 340.0  | 150.1  |
| 3.3    | 5.0    | 1.8    | 3.9    | 0.5    | 1.8    | 2.9    | 0.8    | 3.4    |
| 103.0  | 71.6   | 227.7  | 95.2   | 585.2  | 347.9  | 598.5  | 579.0  | 1193.1 |
| 672.0  | 582.8  | 783.6  | 646.0  | 620.2  | 664.7  | 711.4  | 874.2  | 631.9  |
| 657.2  | 572.4  | 880.4  | 687.4  | 393.9  | 361.3  | 343.2  | 432.3  | 256.7  |
| 39.1   | 34.2   | 29.6   | 38.1   | 30.3   | 39.6   | 40.4   | 25.3   | 47.8   |
| 41.1   | 30.7   | 53.4   | 42.0   | 53.3   | 76.1   | 45.4   | 66.5   | 70.0   |
| 45.5   | 44.1   | 72.5   | 50.6   | 50.9   | 54.1   | 53.1   | 57.9   | 120.1  |
| 42.4   | 53.8   | 93.0   | 44.2   | 1190.1 | 1078.5 | 1413.1 | 1258.4 | 226.8  |
| 127.4  | 123.4  | 238.4  | 115.7  | 1971.4 | 1701.6 | 2073.0 | 2260.3 | 434.0  |
| 202.5  | 205.7  | 314.6  | 207.2  | 448.7  | 439.5  | 489.0  | 482.7  | 393.2  |
| 275.2  | 266.3  | 321.7  | 266.0  | 190.9  | 189.5  | 187.6  | 218.0  | 168.8  |
| 948.6  | 996.1  | 848.3  | 895.4  | 350.9  | 331.6  | 382.9  | 455.7  | 452.3  |
| 119.2  | 110.4  | 149.0  | 113.8  | 82.0   | 87.6   | 88.2   | 93.5   | 62.6   |
| 23.9   | 23.1   | 23.5   | 28.1   | 251.5  | 215.7  | 209.4  | 254.8  | 64.9   |
| 23.4   | 21.6   | 19.9   | 18.4   | 199.0  | 187.3  | 227.0  | 208.9  | 72.6   |
| 8.1    | 12.0   | 15.2   | 12.4   | 5144.8 | 5807.6 | 5928.3 | 5600.9 | 23.2   |
| 2.0    | 5.7    | 3.0    | 2.4    | 4447.4 | 4930.8 | 3905.7 | 4934.4 | 6.5    |
| 1317.4 | 1261.3 | 1510.8 | 1286.8 | 310.1  | 292.9  | 318.2  | 368.2  | 188.3  |
| 907.0  | 974.9  | 866.5  | 928.1  | 143.5  | 136.1  | 132.1  | 167.4  | 67.3   |
| 731.8  | 687.9  | 820.8  | 576.6  | 165.4  | 176.8  | 193.8  | 206.5  | 148.8  |
| 252.8  | 257.5  | 362.1  | 288.3  | 359.7  | 440.5  | 366.9  | 410.1  | 459.2  |
| 273.3  | 274.1  | 515.2  | 268.0  | 554.5  | 426.6  | 487.9  | 627.6  | 641.1  |
| 487.2  | 386.8  | 718.5  | 451.1  | 996.0  | 785.5  | 933.9  | 1040.3 | 833.0  |
| 850.4  | 781.1  | 1482.1 | 869.4  | 1944.9 | 1850.2 | 2001.1 | 2205.3 | 2548.4 |
| 337.1  | 317.3  | 406.1  | 380.6  | 278.9  | 372.5  | 304.7  | 371.3  | 228.0  |
| 20.3   | 28.8   | 23.3   | 16.6   | 182.4  | 272.8  | 198.4  | 221.7  | 657.8  |
| 13.0   | 17.0   | 17.0   | 11.6   | 179.6  | 248.5  | 189.3  | 202.1  | 578.9  |
| 62.2   | 57.4   | 98.8   | 64.9   | 133.2  | 117.6  | 102.3  | 132.7  | 251.0  |
| 70.4   | 69.7   | 96.0   | 60.4   | 106.7  | 63.5   | 89.2   | 110.8  | 114.2  |
| 97.3   | 94.4   | 141.8  | 75.1   | 630.5  | 659.2  | 669.2  | 714.9  | 651.1  |
| 306.8  | 273.8  | 308.0  | 254.6  | 507.7  | 439.5  | 435.5  | 579.1  | 246.2  |
| 12.1   | 3.5    | 2.9    | 2.1    | 38.9   | 43.0   | 40.7   | 43.7   | 273.4  |
| 14.2   | 25.4   | 19.5   | 22.7   | 62.4   | 55.9   | 68.9   | 70.0   | 484.8  |

|        |        |        |        |        |        |        |        |         |
|--------|--------|--------|--------|--------|--------|--------|--------|---------|
| 795.4  | 776.7  | 686.6  | 681.8  | 257.7  | 365.5  | 278.0  | 294.1  | 418.8   |
| 907.7  | 780.6  | 1308.4 | 876.0  | 1181.0 | 1024.9 | 1223.4 | 1383.7 | 941.4   |
| 243.8  | 217.3  | 355.8  | 202.6  | 988.1  | 1010.2 | 1183.6 | 1162.7 | 521.9   |
| 10.0   | 24.1   | 14.4   | 9.5    | 26.2   | 31.8   | 31.8   | 38.9   | 51.2    |
| 5689.0 | 5340.1 | 6701.3 | 5387.1 | 7494.2 | 7532.7 | 7468.2 | 8030.6 | 10612.7 |
| 175.8  | 186.3  | 116.4  | 156.8  | 82.9   | 86.5   | 85.2   | 75.0   | 60.6    |
| 256.5  | 235.7  | 338.0  | 271.8  | 712.7  | 690.7  | 707.1  | 846.6  | 708.0   |
| 24.8   | 16.1   | 13.8   | 22.7   | 19.3   | 19.6   | 24.0   | 14.6   | 23.0    |
| 921.3  | 907.3  | 1180.4 | 818.3  | 686.2  | 569.6  | 660.2  | 924.4  | 485.2   |
| 566.6  | 505.0  | 617.8  | 462.5  | 584.7  | 430.6  | 497.8  | 672.4  | 264.5   |
| 260.8  | 244.6  | 361.7  | 246.0  | 831.1  | 706.2  | 1111.8 | 1012.9 | 1271.1  |
| 131.7  | 126.9  | 208.9  | 142.5  | 721.9  | 665.1  | 703.3  | 799.9  | 693.9   |
| 167.5  | 168.9  | 269.4  | 192.9  | 778.3  | 889.7  | 879.4  | 965.7  | 725.3   |
| 276.2  | 274.1  | 208.3  | 227.7  | 151.7  | 207.4  | 177.9  | 211.8  | 274.4   |
| 98.5   | 89.0   | 49.5   | 87.9   | 244.0  | 318.3  | 268.0  | 258.7  | 328.9   |
| 109.1  | 98.6   | 114.1  | 113.4  | 83.8   | 55.5   | 102.2  | 92.7   | 60.1    |
| 21.3   | 20.6   | 15.5   | 20.8   | 15.2   | 11.5   | 15.2   | 19.4   | 15.3    |
| 58.2   | 56.2   | 75.0   | 55.8   | 43.2   | 36.5   | 68.2   | 55.8   | 39.3    |
| 2.4    | 2.8    | 5.2    | 1.3    | 8.4    | 9.2    | 6.1    | 11.8   | 168.8   |
| 5.3    | 4.1    | 2.8    | 2.2    | 13.8   | 12.6   | 13.5   | 13.3   | 408.8   |
| 14.8   | 8.2    | 17.2   | 15.2   | 16.8   | 13.5   | 17.8   | 30.3   | 166.5   |
| 816.8  | 756.6  | 1421.6 | 747.9  | 885.1  | 556.3  | 842.5  | 1059.1 | 808.4   |
| 133.2  | 107.0  | 155.5  | 98.6   | 384.1  | 342.7  | 450.4  | 418.9  | 247.9   |
| 347.8  | 356.6  | 327.3  | 302.0  | 654.8  | 528.4  | 855.6  | 758.0  | 254.7   |
| 98.2   | 108.6  | 112.0  | 78.3   | 157.3  | 151.9  | 331.2  | 221.6  | 112.2   |
| 233.3  | 226.8  | 350.9  | 243.7  | 472.0  | 409.3  | 437.7  | 496.0  | 619.8   |
| 267.1  | 250.2  | 446.7  | 237.0  | 575.1  | 524.9  | 860.4  | 715.9  | 345.6   |
| 74.0   | 107.1  | 72.6   | 75.1   | 138.8  | 377.7  | 162.3  | 177.2  | 184.4   |
| 2313.4 | 1986.1 | 3076.5 | 2078.0 | 2418.5 | 1987.5 | 2623.0 | 3074.0 | 4967.3  |
| 11.6   | 2.7    | 9.3    | 9.0    | 18.5   | 3.0    | 9.9    | 16.7   | 7.0     |
| 418.6  | 422.3  | 671.3  | 432.5  | 757.5  | 860.9  | 845.9  | 889.4  | 1348.3  |
| 192.2  | 183.0  | 194.1  | 171.9  | 200.5  | 240.7  | 232.8  | 267.3  | 184.1   |
| 292.0  | 286.4  | 327.2  | 281.6  | 1020.0 | 1037.5 | 929.5  | 1100.1 | 825.8   |
| 560.1  | 477.0  | 892.9  | 525.1  | 1149.3 | 870.4  | 1111.0 | 1276.6 | 2236.1  |
| 191.5  | 207.2  | 255.3  | 183.5  | 876.2  | 1161.6 | 959.7  | 891.9  | 402.3   |
| 200.9  | 169.4  | 329.3  | 182.6  | 357.9  | 397.1  | 432.1  | 426.8  | 327.2   |
| 81.7   | 83.4   | 116.4  | 76.0   | 88.1   | 83.1   | 86.1   | 124.3  | 355.3   |
| 140.1  | 130.8  | 150.6  | 127.3  | 113.2  | 104.0  | 121.5  | 125.6  | 388.5   |
| 425.8  | 464.0  | 500.6  | 500.3  | 343.7  | 359.8  | 341.0  | 399.1  | 321.2   |
| 86.6   | 86.1   | 71.4   | 69.0   | 105.4  | 158.0  | 165.1  | 145.1  | 122.2   |
| 6.4    | 9.7    | 7.0    | 3.2    | 222.4  | 293.0  | 238.7  | 257.6  | 163.2   |
| 2.8    | 14.6   | 4.8    | 8.3    | 1110.6 | 1231.2 | 1097.1 | 1264.8 | 836.1   |
| 115.3  | 178.5  | 49.2   | 139.4  | 70.1   | 52.7   | 126.5  | 114.9  | 3.7     |
| 201.0  | 301.3  | 68.1   | 233.0  | 160.5  | 106.0  | 242.0  | 232.4  | 2.4     |
| 217.9  | 195.7  | 269.2  | 232.9  | 186.6  | 156.6  | 194.8  | 217.0  | 196.5   |
| 1110.1 | 966.7  | 2012.6 | 1059.8 | 2367.6 | 1872.8 | 2275.4 | 2508.6 | 3116.3  |
| 235.1  | 192.5  | 468.2  | 251.3  | 510.2  | 425.8  | 537.5  | 583.9  | 520.7   |
| 111.1  | 103.6  | 122.7  | 99.7   | 213.7  | 144.7  | 172.7  | 221.2  | 191.3   |
| 296.1  | 286.7  | 315.2  | 236.5  | 1544.1 | 1253.1 | 1954.1 | 1871.9 | 1746.6  |
| 9.0    | 13.8   | 12.0   | 10.9   | 33.2   | 25.0   | 47.1   | 46.2   | 21.4    |
| 59.3   | 58.6   | 71.0   | 55.0   | 179.1  | 133.4  | 257.8  | 209.7  | 156.0   |
| 185.1  | 179.7  | 251.3  | 181.1  | 514.2  | 409.2  | 471.5  | 527.5  | 910.2   |
| 497.6  | 448.4  | 525.6  | 342.7  | 1071.0 | 1289.8 | 1164.6 | 1154.3 | 1777.6  |

|        |        |        |        |        |        |        |        |        |
|--------|--------|--------|--------|--------|--------|--------|--------|--------|
| 3667.2 | 3446.1 | 4199.7 | 3071.5 | 3830.5 | 4012.2 | 4031.5 | 4178.2 | 5333.4 |
| 58.3   | 42.7   | 100.9  | 41.0   | 36.8   | 33.9   | 25.8   | 45.1   | 104.1  |
| 42.6   | 36.8   | 54.7   | 33.5   | 20.6   | 24.1   | 24.1   | 23.7   | 54.5   |
| 22.2   | 32.0   | 18.3   | 10.3   | 90.3   | 127.9  | 111.1  | 147.8  | 55.6   |
| 313.3  | 276.3  | 368.9  | 304.4  | 236.5  | 228.9  | 229.4  | 277.6  | 129.8  |
| 258.6  | 300.0  | 321.0  | 264.5  | 486.2  | 530.4  | 590.8  | 567.5  | 499.8  |
| 3433.0 | 3184.6 | 3778.7 | 3258.3 | 474.9  | 281.2  | 531.2  | 611.8  | 597.6  |
| 670.6  | 668.5  | 1076.5 | 629.2  | 1121.1 | 879.7  | 957.4  | 1170.8 | 1386.6 |
| 326.6  | 285.2  | 526.4  | 297.2  | 534.8  | 389.1  | 546.5  | 573.1  | 666.3  |
| 21.2   | 19.3   | 34.5   | 22.6   | 25.8   | 21.1   | 21.0   | 32.4   | 46.3   |
| 176.6  | 182.9  | 109.5  | 149.2  | 130.1  | 166.8  | 75.9   | 152.6  | 49.6   |
| 133.0  | 115.9  | 147.9  | 94.7   | 20.2   | 19.6   | 32.5   | 32.1   | 43.5   |
| 224.2  | 255.4  | 241.4  | 237.6  | 466.1  | 572.3  | 514.4  | 568.5  | 291.7  |
| 5.9    | 4.1    | 17.2   | 6.9    | 21.8   | 17.2   | 18.8   | 18.7   | 11.5   |
| 435.4  | 319.1  | 811.7  | 701.6  | 55.7   | 54.3   | 75.2   | 66.5   | 12.3   |
| 529.4  | 519.1  | 651.2  | 470.2  | 272.3  | 228.1  | 272.0  | 281.0  | 222.9  |
| 44.4   | 46.7   | 48.6   | 43.0   | 26.3   | 15.2   | 27.5   | 34.6   | 32.4   |
| 311.3  | 257.0  | 285.9  | 264.2  | 763.1  | 732.4  | 646.3  | 780.4  | 493.1  |
| 141.0  | 114.3  | 163.2  | 106.0  | 157.1  | 153.3  | 156.8  | 141.1  | 252.7  |
| 394.3  | 368.6  | 515.6  | 412.2  | 605.0  | 791.0  | 668.1  | 681.2  | 799.5  |
| 633.1  | 635.8  | 704.3  | 582.4  | 188.5  | 203.9  | 222.0  | 213.8  | 120.1  |
| 252.9  | 264.9  | 336.8  | 236.7  | 744.4  | 1150.8 | 783.8  | 903.1  | 197.3  |
| 1168.4 | 1114.6 | 1468.0 | 1084.0 | 1967.6 | 2675.6 | 2148.0 | 2536.6 | 867.1  |
| 213.5  | 154.1  | 360.3  | 212.2  | 469.0  | 599.4  | 517.7  | 529.0  | 308.6  |
| 438.3  | 362.6  | 821.0  | 437.1  | 815.2  | 1011.5 | 892.8  | 936.0  | 490.1  |
| 12.3   | 21.1   | 3.0    | 10.5   | 6.1    | 6.0    | 20.2   | 12.5   | 22.7   |
| 38.2   | 37.1   | 17.2   | 33.2   | 64.6   | 48.1   | 83.8   | 100.8  | 119.5  |
| 231.4  | 255.8  | 309.1  | 273.4  | 276.5  | 213.9  | 252.1  | 302.6  | 168.1  |
| 82.6   | 71.5   | 223.6  | 86.6   | 297.2  | 150.2  | 220.4  | 293.3  | 184.9  |
| 381.6  | 354.7  | 434.2  | 353.5  | 423.9  | 463.9  | 533.5  | 544.5  | 218.1  |
| 18.3   | 24.4   | 15.3   | 19.0   | 28.0   | 39.8   | 35.3   | 24.2   | 2.1    |
| 148.4  | 174.4  | 176.6  | 135.4  | 162.0  | 206.0  | 180.0  | 188.8  | 20.6   |
| 308.7  | 252.9  | 357.9  | 327.8  | 103.4  | 115.2  | 139.5  | 151.8  | 186.1  |
| 600.5  | 539.2  | 666.4  | 592.9  | 146.2  | 190.9  | 187.8  | 220.6  | 331.8  |
| 327.5  | 346.7  | 305.0  | 264.4  | 346.4  | 427.1  | 385.5  | 387.5  | 413.7  |
| 226.9  | 218.2  | 288.8  | 184.7  | 1410.1 | 1645.8 | 1902.5 | 1805.6 | 417.2  |
| 24.0   | 33.6   | 56.9   | 25.7   | 279.7  | 268.3  | 285.9  | 321.3  | 187.8  |
| 158.4  | 124.9  | 413.1  | 105.5  | 380.1  | 248.1  | 472.7  | 418.2  | 522.9  |
| 512.3  | 405.9  | 890.9  | 481.5  | 1085.0 | 1286.7 | 1098.6 | 1138.5 | 2259.9 |
| 553.0  | 476.7  | 940.1  | 526.6  | 1156.8 | 1356.8 | 1247.8 | 1393.4 | 1715.4 |
| 478.3  | 444.3  | 532.2  | 457.5  | 327.9  | 325.5  | 343.1  | 390.9  | 117.7  |
| 265.4  | 280.8  | 302.3  | 246.3  | 140.1  | 124.5  | 113.5  | 148.1  | 71.2   |
| 283.3  | 266.7  | 308.2  | 268.5  | 170.2  | 196.1  | 175.8  | 186.5  | 929.4  |
| 451.0  | 468.6  | 290.5  | 383.0  | 765.7  | 904.6  | 813.6  | 965.6  | 317.6  |
| 181.2  | 171.5  | 124.4  | 148.6  | 375.0  | 439.0  | 338.9  | 438.0  | 140.5  |
| 1124.5 | 894.4  | 1135.1 | 879.9  | 78.0   | 57.4   | 87.9   | 141.4  | 78.0   |
| 124.2  | 116.9  | 155.6  | 125.5  | 58.9   | 61.8   | 78.1   | 63.5   | 66.0   |
| 329.5  | 326.2  | 424.8  | 340.1  | 354.8  | 393.1  | 360.7  | 447.0  | 385.2  |
| 5.0    | 6.3    | 6.1    | 3.3    | 76.5   | 79.5   | 79.3   | 107.1  | 2.6    |
| 18.2   | 7.2    | 6.8    | 10.3   | 75.3   | 71.4   | 71.3   | 83.4   | 5.1    |
| 191.4  | 161.6  | 116.5  | 152.5  | 28.9   | 19.7   | 50.6   | 39.4   | 83.4   |
| 466.3  | 421.4  | 631.4  | 372.8  | 738.6  | 744.4  | 760.6  | 760.6  | 380.8  |
| 111.9  | 145.9  | 143.0  | 100.8  | 248.1  | 303.0  | 275.8  | 253.3  | 234.6  |

|        |        |        |        |        |        |        |        |        |
|--------|--------|--------|--------|--------|--------|--------|--------|--------|
| 21.8   | 17.7   | 15.5   | 23.4   | 32.3   | 23.8   | 28.5   | 29.2   | 27.8   |
| 308.6  | 343.7  | 268.2  | 282.3  | 45.2   | 48.2   | 39.1   | 55.9   | 40.9   |
| 608.3  | 534.3  | 737.4  | 539.9  | 1595.2 | 1263.2 | 1600.5 | 1778.7 | 3392.0 |
| 302.9  | 225.5  | 614.4  | 250.0  | 493.3  | 449.8  | 478.8  | 558.7  | 351.2  |
| 5.6    | 2.7    | 11.2   | 4.7    | 160.3  | 195.9  | 207.7  | 183.1  | 14.3   |
| 111.5  | 95.6   | 110.2  | 76.4   | 782.6  | 781.7  | 982.6  | 953.6  | 130.3  |
| 404.3  | 411.3  | 570.4  | 398.9  | 369.8  | 294.9  | 341.1  | 411.7  | 412.0  |
| 145.1  | 144.8  | 184.0  | 147.4  | 157.4  | 204.7  | 187.3  | 183.1  | 519.7  |
| 15.1   | 15.3   | 9.7    | 18.7   | 1101.3 | 1205.6 | 924.3  | 1051.3 | 303.4  |
| 11.5   | 10.8   | 14.5   | 14.1   | 767.5  | 803.9  | 768.9  | 771.1  | 344.9  |
| 304.5  | 341.1  | 343.3  | 277.9  | 136.4  | 108.1  | 104.8  | 139.6  | 41.8   |
| 120.7  | 129.3  | 149.5  | 126.8  | 378.1  | 313.2  | 395.4  | 407.0  | 575.1  |
| 457.7  | 449.9  | 579.0  | 405.3  | 222.7  | 187.8  | 209.4  | 267.1  | 677.2  |
| 27.8   | 43.8   | 37.0   | 36.9   | 47.3   | 57.1   | 44.4   | 62.0   | 45.9   |
| 1.8    | 1.2    | 2.8    | 1.4    | 39.2   | 42.4   | 40.7   | 43.3   | 59.2   |
| 12.9   | 15.3   | 14.8   | 10.8   | 115.3  | 127.5  | 117.5  | 135.2  | 158.3  |
| 217.3  | 235.3  | 236.9  | 182.9  | 733.4  | 778.5  | 717.3  | 840.0  | 257.5  |
| 2.5    | 5.6    | 2.9    | 1.9    | 2.8    | 4.5    | 2.7    | 4.4    | 58.3   |
| 3452.7 | 3573.6 | 2243.6 | 2992.3 | 162.2  | 197.3  | 252.1  | 286.0  | 199.4  |
| 2181.1 | 2344.4 | 1322.3 | 1800.8 | 126.5  | 141.6  | 163.0  | 186.8  | 91.6   |
| 299.6  | 332.2  | 219.1  | 247.8  | 732.2  | 799.5  | 606.9  | 735.5  | 331.7  |
| 389.6  | 416.6  | 259.3  | 452.0  | 147.7  | 304.4  | 214.1  | 222.9  | 172.8  |
| 68.6   | 79.8   | 77.5   | 54.6   | 47.3   | 52.2   | 51.2   | 65.9   | 139.0  |
| 216.6  | 192.6  | 199.4  | 191.7  | 105.9  | 129.4  | 107.1  | 143.3  | 231.7  |
| 128.7  | 109.1  | 134.1  | 108.8  | 81.8   | 90.6   | 76.9   | 93.5   | 132.2  |
| 645.3  | 644.7  | 763.4  | 595.2  | 1842.0 | 1726.2 | 1805.8 | 1976.6 | 1260.3 |
| 300.8  | 271.9  | 396.1  | 303.0  | 539.1  | 504.2  | 567.3  | 640.4  | 752.3  |
| 458.4  | 420.9  | 540.7  | 446.2  | 178.5  | 148.4  | 176.9  | 228.5  | 353.7  |
| 760.0  | 620.1  | 1810.3 | 635.7  | 3963.3 | 3052.7 | 3391.4 | 3893.4 | 4655.6 |
| 745.6  | 668.7  | 800.7  | 498.4  | 93.9   | 90.1   | 97.7   | 134.3  | 416.7  |
| 169.0  | 191.9  | 200.3  | 182.3  | 153.6  | 196.5  | 173.7  | 186.4  | 186.2  |
| 130.3  | 143.4  | 151.7  | 167.9  | 215.2  | 262.9  | 201.7  | 278.0  | 185.8  |
| 271.0  | 253.8  | 195.4  | 226.6  | 366.8  | 359.2  | 332.9  | 452.3  | 427.6  |
| 148.6  | 134.4  | 104.2  | 114.5  | 208.5  | 235.5  | 197.8  | 269.8  | 203.9  |
| 163.7  | 151.3  | 201.1  | 185.8  | 185.5  | 202.0  | 211.0  | 193.9  | 495.1  |
| 122.0  | 134.3  | 196.5  | 117.6  | 346.0  | 264.3  | 355.8  | 336.9  | 89.4   |
| 75.9   | 66.6   | 95.8   | 72.7   | 190.4  | 197.8  | 175.9  | 232.1  | 234.2  |
| 166.3  | 179.6  | 231.4  | 177.0  | 439.5  | 439.5  | 462.8  | 485.3  | 350.9  |
| 73.3   | 64.7   | 74.9   | 49.2   | 214.5  | 201.5  | 221.6  | 194.8  | 184.0  |
| 678.7  | 482.2  | 1495.3 | 826.9  | 33.4   | 52.7   | 63.0   | 65.5   | 1.6    |
| 94.6   | 92.5   | 94.5   | 86.6   | 65.7   | 80.0   | 55.7   | 63.4   | 60.3   |
| 32.0   | 29.5   | 36.8   | 34.8   | 40.7   | 45.3   | 39.6   | 37.1   | 32.1   |
| 92.5   | 78.6   | 148.2  | 100.2  | 111.7  | 126.0  | 144.6  | 150.7  | 113.7  |
| 22.5   | 21.4   | 23.7   | 26.4   | 250.6  | 325.5  | 230.2  | 268.2  | 354.6  |
| 300.0  | 281.6  | 285.2  | 282.5  | 217.2  | 218.4  | 157.4  | 301.5  | 407.2  |
| 18.4   | 26.0   | 7.8    | 2.9    | 89.0   | 70.0   | 128.4  | 153.2  | 35.1   |
| 324.1  | 349.9  | 391.0  | 328.7  | 587.5  | 483.0  | 564.0  | 661.1  | 882.1  |
| 454.5  | 474.8  | 536.6  | 438.8  | 446.3  | 394.7  | 445.8  | 585.8  | 522.6  |
| 207.3  | 202.8  | 326.7  | 227.4  | 371.5  | 377.4  | 365.3  | 370.8  | 624.9  |
| 37.8   | 30.8   | 75.5   | 21.3   | 149.9  | 110.2  | 128.1  | 155.8  | 102.8  |
| 5.2    | 6.9    | 4.4    | 11.0   | 244.2  | 103.3  | 485.3  | 296.8  | 28.7   |
| 166.7  | 136.0  | 241.3  | 149.3  | 159.2  | 132.8  | 116.4  | 157.7  | 112.6  |
| 201.2  | 209.2  | 346.2  | 264.3  | 161.1  | 140.7  | 151.8  | 181.8  | 487.4  |



|        |        |        |        |        |        |        |        |        |
|--------|--------|--------|--------|--------|--------|--------|--------|--------|
| 13.2   | 14.1   | 28.1   | 15.2   | 30.4   | 37.9   | 25.1   | 29.6   | 10.2   |
| 137.5  | 142.8  | 224.5  | 176.2  | 419.2  | 414.1  | 475.3  | 543.7  | 224.5  |
| 70.0   | 61.5   | 108.0  | 80.6   | 145.8  | 175.7  | 133.2  | 213.1  | 128.6  |
| 511.4  | 458.4  | 726.8  | 447.3  | 847.7  | 814.7  | 1000.2 | 1103.1 | 192.7  |
| 87.4   | 84.3   | 69.1   | 81.6   | 56.1   | 78.1   | 59.2   | 69.2   | 48.4   |
| 192.3  | 193.3  | 228.4  | 193.8  | 271.0  | 329.2  | 291.5  | 326.4  | 250.3  |
| 208.6  | 188.0  | 269.8  | 237.1  | 261.8  | 288.3  | 268.4  | 304.6  | 363.5  |
| 635.6  | 569.0  | 1045.3 | 658.1  | 904.4  | 711.6  | 940.8  | 970.4  | 1045.4 |
| 274.7  | 278.8  | 341.1  | 263.8  | 579.2  | 663.7  | 603.0  | 712.8  | 629.6  |
| 197.0  | 210.1  | 168.5  | 170.3  | 217.6  | 347.3  | 239.6  | 255.9  | 107.1  |
| 59.7   | 62.7   | 59.6   | 66.3   | 131.3  | 110.3  | 128.2  | 148.6  | 166.1  |
| 400.8  | 323.9  | 343.8  | 240.9  | 417.9  | 259.3  | 398.1  | 462.0  | 796.7  |
| 40.6   | 52.6   | 63.4   | 42.8   | 55.5   | 30.1   | 49.8   | 64.1   | 139.6  |
| 610.6  | 590.3  | 647.1  | 487.7  | 641.2  | 655.4  | 663.4  | 718.6  | 678.1  |
| 407.1  | 296.3  | 631.5  | 376.3  | 340.0  | 240.2  | 277.8  | 385.2  | 356.4  |
| 97.6   | 99.0   | 134.7  | 75.8   | 206.2  | 167.1  | 212.4  | 226.8  | 699.3  |
| 157.8  | 143.1  | 172.5  | 117.6  | 299.1  | 282.3  | 283.9  | 353.0  | 600.2  |
| 221.2  | 280.0  | 219.0  | 176.9  | 477.6  | 363.7  | 586.0  | 661.3  | 405.7  |
| 29.2   | 16.0   | 28.9   | 15.8   | 56.5   | 93.1   | 90.2   | 81.3   | 48.0   |
| 255.5  | 230.2  | 256.1  | 202.6  | 260.0  | 297.2  | 346.0  | 291.2  | 103.4  |
| 275.5  | 241.7  | 426.4  | 258.3  | 471.5  | 299.0  | 475.2  | 573.9  | 624.7  |
| 1194.6 | 1070.6 | 1971.4 | 1136.4 | 2739.6 | 2502.0 | 2839.9 | 3165.8 | 3727.0 |
| 936.3  | 818.0  | 998.7  | 852.4  | 213.1  | 213.5  | 279.0  | 251.6  | 1040.5 |
| 795.6  | 866.2  | 846.9  | 796.5  | 11.2   | 23.9   | 13.1   | 32.4   | 3.2    |
| 3.9    | 2.5    | 4.0    | 7.0    | 200.8  | 205.3  | 219.5  | 234.1  | 109.5  |
| 1.7    | 3.0    | 1.6    | 2.0    | 110.0  | 111.9  | 163.7  | 124.5  | 99.7   |
| 468.5  | 481.3  | 593.2  | 508.0  | 922.8  | 928.7  | 993.8  | 1187.3 | 1019.6 |
| 133.4  | 153.6  | 186.0  | 153.0  | 145.9  | 120.0  | 133.8  | 171.8  | 287.6  |
| 61.2   | 47.7   | 71.2   | 52.8   | 13.0   | 1.1    | 16.3   | 22.2   | 4.4    |
| 172.5  | 212.8  | 149.0  | 207.9  | 208.1  | 197.9  | 235.0  | 261.4  | 188.0  |
| 94.7   | 69.7   | 76.6   | 59.9   | 85.3   | 102.5  | 79.9   | 87.2   | 58.2   |
| 15.3   | 10.9   | 15.5   | 14.6   | 86.6   | 149.4  | 116.4  | 111.2  | 22.7   |
| 20.9   | 16.9   | 48.9   | 31.5   | 21.3   | 15.0   | 29.2   | 28.6   | 34.7   |
| 673.3  | 601.8  | 1260.5 | 681.7  | 1427.9 | 1285.2 | 1474.5 | 1563.1 | 1551.0 |
| 89.8   | 80.8   | 80.1   | 63.0   | 40.8   | 33.8   | 55.5   | 79.2   | 54.3   |
| 197.9  | 202.8  | 177.9  | 172.3  | 180.2  | 215.9  | 188.0  | 204.6  | 444.3  |
| 488.8  | 389.3  | 658.0  | 451.4  | 533.2  | 508.8  | 601.2  | 714.0  | 1570.0 |
| 51.3   | 69.9   | 118.4  | 62.3   | 172.7  | 95.5   | 163.1  | 145.1  | 257.6  |
| 116.8  | 115.4  | 114.6  | 90.6   | 217.0  | 200.3  | 187.0  | 203.3  | 238.2  |
| 276.6  | 277.4  | 294.6  | 272.2  | 242.2  | 420.8  | 282.6  | 277.8  | 243.2  |
| 50.1   | 54.2   | 66.2   | 53.9   | 67.1   | 101.8  | 73.2   | 78.9   | 76.4   |
| 304.5  | 328.7  | 273.0  | 309.5  | 232.9  | 242.5  | 328.9  | 277.8  | 139.1  |
| 659.2  | 796.2  | 744.6  | 850.5  | 581.6  | 561.4  | 506.8  | 610.4  | 202.4  |
| 472.1  | 490.2  | 490.9  | 424.9  | 532.8  | 547.1  | 558.4  | 603.8  | 641.6  |
| 281.4  | 290.1  | 358.7  | 282.9  | 98.3   | 298.3  | 108.8  | 107.4  | 174.5  |
| 81.5   | 71.2   | 117.3  | 80.4   | 100.7  | 110.1  | 136.9  | 102.6  | 62.9   |
| 68.5   | 86.3   | 104.2  | 132.2  | 176.3  | 129.7  | 223.8  | 103.4  | 61.1   |
| 539.2  | 506.7  | 878.9  | 682.7  | 1060.4 | 713.1  | 1073.7 | 1230.0 | 474.4  |
| 5.0    | 3.7    | 28.0   | 10.0   | 25.2   | 29.3   | 32.7   | 7.9    | 26.5   |
| 311.3  | 238.2  | 423.8  | 324.2  | 367.0  | 470.7  | 452.6  | 455.5  | 417.0  |
| 432.7  | 434.7  | 550.0  | 401.5  | 496.9  | 454.8  | 563.8  | 607.1  | 1155.3 |
| 375.0  | 306.5  | 603.4  | 385.8  | 1774.3 | 1315.7 | 1867.4 | 1888.0 | 1282.7 |
| 62.4   | 52.5   | 90.3   | 46.1   | 452.7  | 384.6  | 442.1  | 521.3  | 29.1   |

|        |       |        |        |        |        |        |        |        |
|--------|-------|--------|--------|--------|--------|--------|--------|--------|
| 114.1  | 100.4 | 206.3  | 129.6  | 953.2  | 662.6  | 802.7  | 906.1  | 68.3   |
| 1005.1 | 937.6 | 1135.8 | 945.7  | 735.5  | 834.7  | 910.5  | 863.2  | 2294.3 |
| 701.4  | 702.1 | 1114.9 | 674.1  | 1484.8 | 1254.8 | 1666.4 | 1525.0 | 1338.5 |
| 10.1   | 5.6   | 17.5   | 7.3    | 15.3   | 24.1   | 14.1   | 18.5   | 7762.6 |
| 265.3  | 263.5 | 256.1  | 237.6  | 205.9  | 280.2  | 201.3  | 278.5  | 299.1  |
| 30.7   | 29.8  | 12.6   | 23.9   | 47.9   | 45.8   | 49.4   | 47.5   | 33.1   |
| 49.7   | 33.2  | 120.6  | 62.1   | 341.0  | 338.5  | 357.3  | 320.4  | 190.9  |
| 101.4  | 121.4 | 71.8   | 89.8   | 363.7  | 393.3  | 363.7  | 465.5  | 181.7  |
| 92.5   | 125.4 | 59.4   | 91.6   | 394.4  | 413.0  | 398.2  | 454.3  | 233.8  |
| 62.9   | 59.4  | 69.9   | 52.7   | 59.8   | 48.4   | 52.5   | 68.1   | 94.1   |
| 181.9  | 185.1 | 233.3  | 246.2  | 271.3  | 219.7  | 256.3  | 331.4  | 210.7  |
| 160.2  | 172.6 | 218.5  | 177.6  | 149.2  | 138.5  | 162.3  | 178.6  | 192.3  |
| 448.8  | 411.4 | 548.9  | 428.6  | 1142.5 | 1152.1 | 1217.8 | 1318.6 | 1206.6 |
| 13.7   | 12.5  | 10.3   | 8.6    | 7.9    | 6.1    | 6.5    | 4.3    | 126.9  |
| 389.9  | 344.5 | 901.0  | 358.4  | 1710.4 | 965.6  | 1430.4 | 1728.7 | 1775.0 |
| 155.0  | 119.1 | 242.3  | 136.9  | 225.7  | 155.6  | 234.2  | 281.2  | 246.7  |
| 384.8  | 377.8 | 355.8  | 374.3  | 597.1  | 523.4  | 657.9  | 743.1  | 423.2  |
| 72.8   | 69.6  | 112.3  | 82.6   | 115.1  | 88.9   | 92.2   | 131.2  | 125.7  |
| 667.8  | 707.2 | 652.5  | 732.3  | 873.0  | 935.6  | 978.0  | 1087.6 | 930.1  |
| 51.9   | 39.5  | 36.6   | 43.7   | 67.8   | 88.2   | 66.2   | 68.0   | 108.0  |
| 47.8   | 41.1  | 41.6   | 44.6   | 85.7   | 95.3   | 100.6  | 73.3   | 57.5   |
| 4.7    | 3.3   | 8.6    | 2.5    | 2.3    | 1.8    | 4.5    | 1.6    | 25.1   |
| 13.1   | 5.4   | 9.9    | 3.9    | 5.6    | 4.7    | 6.3    | 4.6    | 24.0   |
| 12.7   | 32.3  | 9.1    | 19.0   | 11.9   | 9.9    | 11.3   | 22.7   | 46.7   |
| 57.4   | 71.0  | 52.3   | 42.9   | 122.6  | 113.5  | 110.6  | 174.7  | 117.6  |
| 6.0    | 5.3   | 13.8   | 5.6    | 1.8    | 6.6    | 9.4    | 1.4    | 6.5    |
| 870.8  | 724.1 | 1269.3 | 797.3  | 1969.7 | 1816.1 | 2203.8 | 2347.0 | 1855.9 |
| 227.5  | 175.1 | 502.1  | 216.0  | 398.2  | 300.5  | 423.6  | 486.4  | 252.9  |
| 73.3   | 78.6  | 129.6  | 87.6   | 246.5  | 194.7  | 263.0  | 302.3  | 224.1  |
| 12.2   | 5.7   | 11.6   | 5.4    | 13.3   | 8.6    | 12.9   | 23.2   | 15.3   |
| 141.0  | 111.5 | 273.6  | 115.6  | 310.2  | 197.8  | 282.7  | 350.1  | 342.0  |
| 271.3  | 236.5 | 251.4  | 264.0  | 715.6  | 1654.3 | 1225.6 | 968.1  | 1502.2 |
| 0.6    | 8.2   | 6.1    | 3.6    | 32.5   | 18.5   | 24.2   | 25.8   | 854.0  |
| 137.9  | 146.0 | 190.3  | 159.1  | 19.2   | 18.3   | 24.2   | 11.8   | 3.8    |
| 402.7  | 371.0 | 533.6  | 371.9  | 37.4   | 57.9   | 64.3   | 69.3   | 11.4   |
| 355.6  | 360.4 | 264.2  | 264.6  | 286.8  | 395.5  | 308.1  | 329.6  | 378.2  |
| 324.4  | 345.5 | 368.7  | 248.1  | 618.3  | 461.0  | 608.6  | 746.3  | 471.9  |
| 725.4  | 634.6 | 781.1  | 752.8  | 182.7  | 171.0  | 176.0  | 227.2  | 128.7  |
| 359.2  | 329.2 | 463.4  | 297.2  | 431.7  | 367.7  | 432.6  | 503.3  | 172.1  |
| 17.0   | 11.4  | 32.3   | 15.3   | 48.9   | 45.3   | 49.2   | 68.3   | 24.2   |
| 22.8   | 25.6  | 53.5   | 27.9   | 178.0  | 143.3  | 178.5  | 207.3  | 109.8  |
| 22.2   | 17.0  | 32.5   | 22.9   | 169.4  | 163.6  | 178.0  | 196.6  | 62.3   |
| 65.3   | 68.3  | 45.5   | 57.6   | 177.0  | 158.9  | 236.0  | 231.4  | 83.0   |
| 1157.8 | 766.3 | 2287.7 | 1031.5 | 2730.7 | 1796.0 | 2518.9 | 2958.5 | 4541.0 |
| 338.9  | 357.5 | 1177.6 | 541.3  | 1012.2 | 1012.6 | 1000.3 | 1238.7 | 1224.6 |
| 6.3    | 4.6   | 3.4    | 2.0    | 14.0   | 7.9    | 15.0   | 14.1   | 72.9   |
| 1.3    | 2.8   | 1.3    | 1.7    | 49.6   | 54.0   | 52.8   | 59.7   | 227.0  |
| 139.5  | 115.1 | 264.1  | 112.1  | 198.4  | 159.1  | 177.2  | 267.9  | 192.2  |
| 189.9  | 159.4 | 361.1  | 160.8  | 323.5  | 273.7  | 316.1  | 366.4  | 302.9  |
| 178.7  | 148.7 | 199.9  | 145.7  | 339.2  | 251.5  | 363.9  | 333.0  | 412.3  |
| 307.3  | 280.4 | 389.5  | 296.7  | 613.9  | 474.3  | 573.9  | 715.5  | 697.0  |
| 829.0  | 778.9 | 1123.9 | 805.5  | 1029.0 | 773.0  | 969.5  | 1266.1 | 919.8  |
| 175.9  | 169.0 | 267.9  | 144.1  | 286.3  | 200.1  | 291.7  | 333.3  | 97.5   |

|        |        |        |        |        |        |        |        |        |
|--------|--------|--------|--------|--------|--------|--------|--------|--------|
| 328.9  | 304.3  | 279.1  | 262.4  | 191.5  | 126.3  | 219.7  | 215.6  | 242.5  |
| 8.7    | 8.9    | 6.0    | 1.9    | 197.3  | 111.1  | 137.7  | 163.1  | 490.1  |
| 506.9  | 472.0  | 818.8  | 439.6  | 2000.1 | 1325.4 | 1934.4 | 2559.4 | 1439.9 |
| 155.9  | 218.7  | 104.5  | 103.0  | 777.2  | 641.5  | 954.7  | 808.4  | 410.2  |
| 81.2   | 80.0   | 72.1   | 58.9   | 117.5  | 122.7  | 93.9   | 116.4  | 194.0  |
| 36.0   | 34.1   | 58.8   | 35.6   | 60.5   | 74.7   | 49.8   | 78.4   | 124.8  |
| 125.1  | 113.5  | 201.8  | 127.4  | 357.2  | 256.1  | 362.5  | 446.3  | 556.4  |
| 83.6   | 77.4   | 132.3  | 84.2   | 344.5  | 238.8  | 352.8  | 416.0  | 384.6  |
| 57.7   | 33.0   | 170.2  | 32.5   | 332.3  | 258.3  | 400.4  | 505.7  | 9.6    |
| 1032.7 | 932.8  | 1517.3 | 984.4  | 959.2  | 837.2  | 972.5  | 1126.5 | 1349.4 |
| 345.3  | 307.5  | 470.1  | 399.7  | 260.6  | 203.1  | 251.8  | 297.8  | 321.0  |
| 4.9    | 4.6    | 4.4    | 4.6    | 66.6   | 197.8  | 75.6   | 78.7   | 36.9   |
| 13.5   | 8.7    | 7.8    | 14.4   | 18.8   | 39.3   | 23.1   | 18.5   | 25.0   |
| 215.5  | 217.6  | 229.3  | 241.6  | 717.4  | 861.3  | 699.8  | 964.0  | 147.1  |
| 516.0  | 538.8  | 566.7  | 547.5  | 1468.0 | 1531.6 | 1344.3 | 2006.9 | 399.3  |
| 63.3   | 59.7   | 86.5   | 55.8   | 41.4   | 51.5   | 45.4   | 47.6   | 72.0   |
| 114.8  | 99.3   | 179.1  | 103.6  | 132.0  | 134.2  | 106.6  | 134.0  | 116.1  |
| 177.7  | 208.1  | 159.7  | 176.8  | 179.8  | 175.5  | 152.8  | 139.5  | 110.1  |
| 183.3  | 180.8  | 256.0  | 182.2  | 308.1  | 285.8  | 296.5  | 319.2  | 471.4  |
| 13.3   | 22.8   | 18.5   | 15.5   | 46.6   | 61.0   | 37.6   | 46.1   | 17.9   |
| 323.6  | 297.8  | 394.8  | 291.6  | 666.5  | 648.9  | 734.5  | 816.2  | 829.8  |
| 576.9  | 488.1  | 961.4  | 508.9  | 648.2  | 432.2  | 610.9  | 728.6  | 630.3  |
| 19.9   | 5.4    | 9.1    | 3.4    | 111.1  | 75.3   | 104.0  | 114.8  | 60.4   |
| 978.8  | 845.3  | 1470.0 | 971.4  | 715.4  | 730.8  | 730.0  | 861.8  | 323.0  |
| 1353.6 | 1276.3 | 2229.6 | 1405.3 | 1013.7 | 846.4  | 1039.8 | 1329.3 | 607.3  |
| 225.3  | 207.1  | 396.9  | 291.0  | 275.7  | 298.2  | 343.1  | 311.1  | 659.8  |
| 223.3  | 199.1  | 137.1  | 104.4  | 296.6  | 289.1  | 289.9  | 291.9  | 9.6    |
| 200.2  | 159.5  | 184.3  | 123.2  | 473.5  | 433.4  | 443.9  | 485.7  | 18.6   |
| 78.1   | 83.4   | 111.9  | 60.7   | 200.2  | 189.2  | 202.3  | 188.5  | 233.7  |
| 41.9   | 38.6   | 55.4   | 44.4   | 56.5   | 53.0   | 51.6   | 55.5   | 74.7   |
| 1114.8 | 993.0  | 1407.1 | 927.9  | 1101.5 | 1013.3 | 1153.6 | 1242.6 | 1824.1 |
| 17.5   | 17.3   | 11.5   | 14.4   | 25.5   | 20.0   | 21.8   | 23.9   | 27.9   |
| 1907.4 | 1694.2 | 2607.5 | 2118.5 | 1334.3 | 1050.4 | 1410.7 | 1499.6 | 1421.5 |
| 463.6  | 378.9  | 678.9  | 463.2  | 589.7  | 550.5  | 628.4  | 733.9  | 1213.0 |
| 141.2  | 134.3  | 213.2  | 137.4  | 110.8  | 110.0  | 108.4  | 130.0  | 134.7  |
| 91.0   | 77.0   | 147.9  | 72.9   | 83.3   | 94.8   | 85.7   | 96.7   | 47.8   |
| 101.8  | 109.4  | 181.3  | 96.3   | 144.3  | 120.9  | 169.0  | 151.6  | 140.0  |
| 271.0  | 269.3  | 483.0  | 309.6  | 398.3  | 339.6  | 423.2  | 514.4  | 672.4  |
| 4.3    | 7.1    | 14.5   | 2.9    | 38.5   | 67.5   | 33.0   | 17.0   | 361.3  |
| 273.4  | 267.9  | 164.9  | 249.6  | 159.1  | 149.7  | 180.3  | 198.6  | 5.5    |
| 43.5   | 41.0   | 143.9  | 59.2   | 1474.0 | 1520.5 | 1709.5 | 1408.8 | 1047.3 |
| 469.1  | 464.1  | 419.4  | 388.6  | 827.8  | 605.8  | 1036.0 | 1001.8 | 800.3  |
| 523.5  | 482.6  | 564.3  | 433.6  | 678.6  | 791.8  | 841.3  | 823.3  | 229.4  |
| 1.9    | 6.9    | 5.9    | 3.0    | 449.8  | 518.9  | 668.9  | 624.0  | 16.5   |
| 10.6   | 12.9   | 17.6   | 9.7    | 11.2   | 12.7   | 16.0   | 17.7   | 16.4   |
| 765.8  | 698.7  | 1520.6 | 687.4  | 2304.2 | 1600.9 | 2079.3 | 2306.8 | 2498.2 |
| 357.8  | 404.0  | 350.8  | 388.2  | 227.2  | 221.8  | 206.2  | 234.5  | 140.0  |
| 865.2  | 859.4  | 697.7  | 919.8  | 497.1  | 493.5  | 466.0  | 518.9  | 236.7  |
| 21.8   | 22.3   | 20.1   | 22.6   | 3.4    | 5.8    | 8.3    | 3.4    | 12.0   |
| 117.5  | 122.0  | 126.0  | 104.6  | 152.8  | 139.6  | 129.5  | 156.7  | 143.6  |
| 211.9  | 252.8  | 193.7  | 235.3  | 167.8  | 140.4  | 158.8  | 211.0  | 92.1   |
| 684.2  | 752.1  | 669.4  | 683.2  | 410.2  | 394.1  | 446.5  | 486.9  | 241.2  |
| 2615.3 | 2006.5 | 3501.9 | 2264.4 | 3488.7 | 3334.5 | 3791.7 | 3907.2 | 3740.8 |

|        |        |        |        |        |        |        |        |        |
|--------|--------|--------|--------|--------|--------|--------|--------|--------|
| 173.7  | 187.7  | 224.3  | 182.0  | 56.9   | 61.9   | 43.5   | 66.0   | 78.8   |
| 214.7  | 189.0  | 150.3  | 245.7  | 378.5  | 310.1  | 407.5  | 509.2  | 1072.1 |
| 159.5  | 176.6  | 152.3  | 203.8  | 146.3  | 130.2  | 129.0  | 173.0  | 450.1  |
| 0.9    | 3.3    | 1.5    | 3.2    | 2.8    | 3.9    | 1.3    | 1.8    | 1.1    |
| 2.8    | 6.6    | 6.9    | 9.7    | 5.8    | 0.7    | 8.0    | 2.5    | 6.8    |
| 474.5  | 429.9  | 289.3  | 536.7  | 40.2   | 23.0   | 64.3   | 61.5   | 138.8  |
| 123.4  | 113.3  | 203.7  | 120.5  | 170.8  | 180.3  | 244.3  | 184.0  | 196.9  |
| 120.7  | 90.0   | 180.1  | 123.4  | 174.6  | 169.5  | 194.2  | 183.9  | 180.9  |
| 58.5   | 53.3   | 76.9   | 72.4   | 47.3   | 54.5   | 56.9   | 47.8   | 29.7   |
| 140.8  | 99.4   | 162.9  | 109.7  | 109.0  | 128.0  | 144.1  | 139.8  | 176.8  |
| 63.1   | 72.7   | 107.3  | 78.3   | 47.1   | 38.2   | 37.2   | 70.9   | 36.2   |
| 263.1  | 283.9  | 529.6  | 296.1  | 143.8  | 125.5  | 138.5  | 189.0  | 124.7  |
| 9.9    | 11.7   | 21.1   | 12.9   | 182.3  | 192.8  | 182.2  | 238.4  | 135.0  |
| 204.1  | 233.5  | 211.6  | 191.2  | 942.2  | 655.4  | 1791.1 | 1199.7 | 191.3  |
| 285.0  | 364.8  | 270.5  | 317.8  | 961.6  | 694.7  | 1290.3 | 1366.3 | 130.8  |
| 4.9    | 6.2    | 2.7    | 3.1    | 21.6   | 9.4    | 13.4   | 22.7   | 30.4   |
| 93.5   | 74.1   | 138.2  | 104.8  | 157.3  | 111.6  | 117.8  | 157.2  | 104.8  |
| 126.2  | 91.7   | 192.4  | 109.0  | 188.4  | 150.7  | 166.8  | 241.3  | 89.7   |
| 139.8  | 122.8  | 148.3  | 112.6  | 156.5  | 148.8  | 168.8  | 194.8  | 87.8   |
| 604.1  | 677.2  | 600.5  | 534.1  | 615.1  | 702.6  | 654.0  | 740.1  | 272.0  |
| 628.5  | 596.3  | 516.4  | 473.7  | 249.4  | 218.7  | 288.3  | 300.9  | 158.4  |
| 489.6  | 416.2  | 956.1  | 559.7  | 925.3  | 814.4  | 770.7  | 1039.4 | 387.8  |
| 255.8  | 235.3  | 314.7  | 166.7  | 146.8  | 118.0  | 147.1  | 185.6  | 165.1  |
| 749.7  | 696.3  | 902.1  | 585.1  | 476.1  | 444.2  | 454.9  | 507.0  | 558.6  |
| 8.6    | 14.2   | 31.3   | 23.6   | 82.9   | 88.6   | 89.1   | 87.6   | 263.3  |
| 15.0   | 16.2   | 20.9   | 16.2   | 11.6   | 8.1    | 9.6    | 14.6   | 15.0   |
| 0.5    | 3.7    | 1.0    | 4.1    | 0.5    | 1.5    | 0.4    | 0.3    | 1.1    |
| 4.4    | 0.5    | 0.5    | 1.5    | 0.5    | 0.3    | 1.5    | 0.2    | 0.4    |
| 15.3   | 9.9    | 13.2   | 17.1   | 226.2  | 211.5  | 288.1  | 241.9  | 343.5  |
| 1005.5 | 1016.8 | 1430.9 | 1129.8 | 137.0  | 120.6  | 136.9  | 164.3  | 135.4  |
| 1.0    | 1.0    | 1.2    | 2.9    | 1.0    | 0.8    | 0.9    | 0.6    | 6.1    |
| 323.7  | 277.0  | 466.5  | 291.7  | 180.2  | 166.4  | 185.2  | 205.5  | 400.2  |
| 11.5   | 8.5    | 5.8    | 5.5    | 194.1  | 205.0  | 232.8  | 203.3  | 2.8    |
| 16.3   | 20.1   | 28.2   | 11.9   | 301.2  | 346.0  | 337.4  | 351.5  | 5.8    |
| 313.7  | 319.6  | 155.8  | 247.6  | 139.5  | 160.3  | 172.5  | 183.4  | 223.9  |
| 1.0    | 1.5    | 1.2    | 2.8    | 114.1  | 187.5  | 119.3  | 131.7  | 17.2   |
| 22.3   | 13.8   | 20.7   | 14.8   | 1343.6 | 1824.5 | 1640.1 | 1412.8 | 234.1  |
| 1.5    | 8.0    | 6.5    | 3.9    | 3.9    | 2.0    | 1.7    | 2.0    | 3.7    |
| 0.9    | 0.8    | 1.1    | 0.9    | 2.2    | 0.7    | 5.5    | 0.6    | 4.7    |
| 6.5    | 6.6    | 10.4   | 7.0    | 7.6    | 8.9    | 9.1    | 12.8   | 2.8    |
| 266.8  | 365.5  | 252.7  | 229.8  | 727.5  | 692.4  | 817.0  | 900.6  | 679.9  |
| 35.8   | 42.4   | 33.2   | 32.4   | 22.5   | 24.9   | 17.5   | 13.8   | 37.3   |
| 29.4   | 19.8   | 32.9   | 28.6   | 19.0   | 18.6   | 29.4   | 37.4   | 29.4   |
| 170.2  | 161.8  | 230.6  | 183.4  | 501.0  | 487.4  | 554.1  | 592.6  | 409.0  |
| 108.2  | 103.8  | 178.9  | 117.8  | 476.3  | 535.4  | 482.6  | 552.7  | 481.1  |
| 1227.3 | 1233.7 | 1764.9 | 1218.8 | 845.9  | 875.2  | 866.7  | 963.8  | 1077.8 |
| 590.9  | 532.0  | 907.1  | 546.1  | 1084.0 | 912.3  | 1137.8 | 1367.8 | 952.5  |
| 58.5   | 61.4   | 60.7   | 60.5   | 10.0   | 12.1   | 5.8    | 2.2    | 1.8    |
| 22.0   | 20.8   | 11.0   | 9.7    | 33.2   | 35.4   | 36.8   | 39.0   | 124.0  |
| 257.6  | 220.3  | 247.1  | 204.1  | 874.2  | 728.4  | 859.7  | 949.2  | 1550.1 |
| 6637.8 | 6334.6 | 7439.9 | 6508.2 | 7234.5 | 7165.0 | 7321.1 | 7448.7 | 9563.7 |
| 161.3  | 171.0  | 194.4  | 162.0  | 217.4  | 180.7  | 234.7  | 244.9  | 373.7  |
| 139.1  | 118.6  | 172.6  | 124.6  | 57.0   | 55.3   | 65.3   | 45.6   | 44.1   |

|        |        |        |        |        |        |        |        |         |
|--------|--------|--------|--------|--------|--------|--------|--------|---------|
| 70.6   | 65.7   | 139.8  | 54.8   | 218.2  | 163.9  | 215.8  | 251.6  | 96.1    |
| 162.9  | 134.1  | 330.4  | 144.7  | 391.7  | 254.7  | 326.8  | 417.3  | 189.9   |
| 122.3  | 106.0  | 221.3  | 113.5  | 282.3  | 202.9  | 251.6  | 303.4  | 81.7    |
| 91.0   | 80.9   | 176.0  | 89.1   | 156.4  | 130.3  | 143.0  | 202.5  | 68.2    |
| 49.6   | 39.8   | 72.3   | 47.9   | 103.9  | 76.2   | 82.5   | 117.2  | 40.2    |
| 215.9  | 201.2  | 212.3  | 211.1  | 49.5   | 44.6   | 49.9   | 54.1   | 53.2    |
| 149.7  | 127.9  | 300.5  | 196.9  | 182.1  | 231.9  | 199.0  | 231.7  | 32.2    |
| 400.8  | 394.4  | 1067.8 | 313.5  | 892.6  | 946.3  | 804.7  | 867.3  | 1354.5  |
| 229.1  | 169.4  | 392.6  | 211.5  | 816.3  | 756.0  | 850.2  | 919.5  | 1059.9  |
| 644.9  | 655.2  | 496.7  | 490.0  | 1448.5 | 1246.1 | 1526.8 | 1778.8 | 1343.1  |
| 181.4  | 143.9  | 269.2  | 131.4  | 461.6  | 523.0  | 469.2  | 517.0  | 767.1   |
| 173.3  | 180.3  | 148.9  | 181.0  | 160.3  | 170.8  | 158.0  | 189.2  | 183.4   |
| 79.4   | 55.4   | 140.7  | 29.8   | 101.1  | 91.3   | 157.8  | 140.3  | 18.0    |
| 346.4  | 232.0  | 324.0  | 165.4  | 732.7  | 701.1  | 741.6  | 804.5  | 754.6   |
| 130.3  | 150.3  | 121.8  | 104.1  | 5.3    | 7.9    | 1.1    | 1.3    | 1.3     |
| 27.4   | 34.2   | 22.0   | 55.8   | 1.1    | 1.9    | 1.1    | 0.6    | 0.8     |
| 114.0  | 96.9   | 168.0  | 104.2  | 202.0  | 276.8  | 263.3  | 254.9  | 164.7   |
| 410.1  | 322.8  | 619.4  | 371.0  | 344.3  | 225.8  | 313.9  | 425.5  | 663.1   |
| 1146.7 | 964.6  | 1772.6 | 1160.0 | 1075.6 | 873.6  | 1093.9 | 1263.3 | 2099.1  |
| 8294.9 | 7847.8 | 8568.2 | 7913.1 | 8382.4 | 8149.0 | 8083.2 | 8634.4 | 11275.3 |
| 105.4  | 84.1   | 160.1  | 88.8   | 215.5  | 209.4  | 222.2  | 262.3  | 115.4   |
| 22.8   | 17.5   | 31.7   | 19.0   | 9.6    | 5.5    | 16.2   | 14.6   | 6.1     |
| 379.4  | 390.0  | 562.6  | 462.6  | 205.6  | 159.0  | 208.7  | 209.5  | 56.3    |
| 1192.9 | 1353.5 | 1096.2 | 1195.5 | 564.0  | 622.8  | 626.2  | 570.8  | 285.0   |
| 365.9  | 311.4  | 658.6  | 396.7  | 847.4  | 657.3  | 870.1  | 1051.5 | 646.1   |
| 168.1  | 152.7  | 323.9  | 184.7  | 423.7  | 396.7  | 438.9  | 514.2  | 650.3   |
| 767.0  | 789.5  | 809.5  | 829.5  | 594.7  | 900.9  | 808.2  | 726.3  | 534.3   |
| 464.7  | 422.3  | 447.8  | 442.5  | 397.7  | 551.3  | 505.5  | 528.6  | 224.3   |
| 342.2  | 322.7  | 268.0  | 298.2  | 152.2  | 121.4  | 158.3  | 193.7  | 129.0   |
| 282.6  | 260.8  | 408.6  | 247.5  | 448.9  | 333.4  | 552.8  | 510.9  | 1448.4  |
| 469.8  | 507.5  | 415.2  | 490.5  | 157.6  | 147.7  | 172.3  | 176.9  | 123.5   |
| 259.0  | 206.4  | 567.2  | 199.5  | 299.0  | 282.2  | 325.0  | 410.9  | 397.5   |
| 10.9   | 3.6    | 4.5    | 10.5   | 193.7  | 218.8  | 198.3  | 179.3  | 331.1   |
| 197.6  | 194.8  | 228.3  | 200.3  | 465.0  | 544.5  | 472.4  | 521.9  | 345.5   |
| 397.7  | 365.8  | 476.3  | 373.7  | 768.0  | 807.8  | 827.5  | 905.2  | 813.7   |
| 157.2  | 130.3  | 143.0  | 115.1  | 199.0  | 221.2  | 216.0  | 251.9  | 216.7   |
| 66.6   | 49.9   | 94.5   | 60.5   | 114.7  | 118.2  | 110.8  | 135.3  | 77.4    |
| 24.1   | 16.8   | 21.4   | 10.5   | 8.5    | 12.4   | 3.4    | 19.5   | 23.9    |
| 534.8  | 523.8  | 728.4  | 459.4  | 1313.6 | 1171.7 | 1372.1 | 1497.5 | 1139.5  |
| 201.1  | 197.8  | 175.2  | 201.8  | 187.3  | 267.9  | 226.9  | 234.6  | 311.1   |
| 71.8   | 73.3   | 76.5   | 57.7   | 120.7  | 143.3  | 118.3  | 108.8  | 292.5   |
| 59.4   | 47.9   | 74.2   | 50.8   | 37.3   | 31.3   | 39.3   | 49.2   | 69.4    |
| 248.2  | 266.6  | 257.8  | 232.1  | 172.6  | 144.1  | 179.5  | 194.9  | 223.4   |
| 15.5   | 14.4   | 23.6   | 13.0   | 524.8  | 360.1  | 623.3  | 555.0  | 154.0   |
| 17.7   | 17.5   | 16.2   | 17.7   | 218.5  | 196.8  | 282.6  | 278.7  | 78.9    |
| 22.4   | 26.1   | 36.3   | 20.7   | 1218.3 | 830.5  | 1401.0 | 1213.8 | 318.6   |
| 48.6   | 48.4   | 127.3  | 51.8   | 123.3  | 110.0  | 106.5  | 121.0  | 41.9    |
| 148.2  | 134.4  | 319.9  | 150.2  | 369.3  | 300.7  | 306.6  | 371.0  | 140.7   |
| 18.3   | 21.8   | 6.3    | 14.9   | 203.2  | 199.5  | 150.4  | 213.4  | 257.1   |
| 282.2  | 237.7  | 402.7  | 211.9  | 237.0  | 356.0  | 228.7  | 286.7  | 152.2   |
| 11.1   | 18.6   | 4.4    | 12.3   | 2266.3 | 1912.5 | 3126.8 | 2501.8 | 249.8   |
| 261.9  | 266.7  | 268.2  | 310.2  | 623.9  | 636.3  | 691.4  | 655.5  | 6.5     |
| 572.9  | 566.1  | 829.1  | 596.7  | 442.3  | 386.6  | 396.4  | 565.7  | 885.9   |

|        |        |        |        |        |        |        |        |         |
|--------|--------|--------|--------|--------|--------|--------|--------|---------|
| 116.4  | 153.5  | 73.0   | 137.8  | 429.1  | 537.6  | 388.0  | 444.4  | 1074.8  |
| 1.4    | 4.6    | 1.8    | 1.0    | 18.1   | 26.5   | 40.0   | 29.3   | 136.7   |
| 2.6    | 2.5    | 9.3    | 1.8    | 1.6    | 5.1    | 6.7    | 0.8    | 5.2     |
| 9.1    | 9.7    | 3.6    | 5.0    | 15.5   | 29.0   | 12.5   | 14.2   | 269.5   |
| 44.7   | 51.2   | 65.4   | 47.4   | 106.2  | 85.1   | 138.1  | 129.8  | 543.0   |
| 232.0  | 218.5  | 305.4  | 231.0  | 307.9  | 328.8  | 306.3  | 363.8  | 320.0   |
| 24.3   | 22.4   | 33.0   | 28.7   | 552.9  | 376.6  | 623.6  | 586.9  | 50.4    |
| 733.5  | 741.3  | 1002.6 | 740.1  | 569.1  | 557.3  | 607.1  | 645.5  | 390.5   |
| 588.2  | 532.4  | 872.2  | 575.5  | 668.0  | 798.9  | 709.1  | 781.2  | 519.6   |
| 381.6  | 365.6  | 588.8  | 365.2  | 377.8  | 419.7  | 397.5  | 469.2  | 317.9   |
| 72.8   | 67.6   | 150.9  | 57.8   | 85.8   | 60.9   | 69.9   | 101.2  | 99.2    |
| 272.1  | 264.1  | 399.5  | 286.1  | 371.3  | 330.7  | 363.9  | 442.3  | 358.1   |
| 212.4  | 250.7  | 190.4  | 223.8  | 107.7  | 118.2  | 114.4  | 155.2  | 71.0    |
| 104.6  | 118.3  | 124.1  | 162.1  | 85.9   | 82.2   | 55.4   | 71.9   | 152.8   |
| 195.0  | 200.7  | 251.8  | 170.1  | 476.3  | 397.6  | 511.6  | 605.2  | 460.7   |
| 4.8    | 5.5    | 6.2    | 6.6    | 38.9   | 36.3   | 52.2   | 44.7   | 25.9    |
| 3.4    | 12.8   | 9.5    | 3.0    | 15.3   | 11.8   | 16.6   | 19.9   | 11.1    |
| 12.5   | 15.7   | 13.9   | 16.0   | 820.5  | 735.9  | 761.0  | 932.0  | 423.5   |
| 71.7   | 57.7   | 83.4   | 51.1   | 134.3  | 95.4   | 111.3  | 146.9  | 92.1    |
| 227.7  | 188.9  | 328.8  | 148.3  | 695.0  | 508.8  | 667.7  | 784.3  | 621.8   |
| 20.6   | 26.6   | 31.0   | 27.3   | 3.0    | 1.0    | 1.2    | 0.5    | 21.9    |
| 190.0  | 181.2  | 212.3  | 198.4  | 338.5  | 496.4  | 386.4  | 402.7  | 206.1   |
| 182.9  | 188.5  | 226.8  | 175.5  | 328.0  | 311.5  | 321.3  | 354.5  | 268.5   |
| 232.6  | 214.0  | 335.8  | 220.0  | 491.7  | 294.8  | 433.5  | 608.0  | 692.2   |
| 118.8  | 87.7   | 198.2  | 114.9  | 148.7  | 195.8  | 166.2  | 172.8  | 264.7   |
| 130.0  | 124.3  | 220.5  | 128.9  | 189.7  | 260.3  | 208.9  | 199.1  | 288.1   |
| 271.1  | 262.7  | 312.2  | 254.2  | 312.4  | 385.6  | 313.8  | 343.1  | 351.7   |
| 372.5  | 391.8  | 438.7  | 416.7  | 853.6  | 1043.3 | 971.3  | 988.9  | 979.6   |
| 68.5   | 83.1   | 64.9   | 76.7   | 103.8  | 134.5  | 142.2  | 171.6  | 57.2    |
| 296.8  | 321.2  | 237.9  | 276.2  | 501.4  | 588.4  | 658.4  | 685.2  | 422.0   |
| 136.7  | 125.1  | 207.0  | 134.7  | 490.3  | 621.0  | 566.4  | 593.6  | 136.5   |
| 68.7   | 59.6   | 135.6  | 72.2   | 279.3  | 317.6  | 295.6  | 303.5  | 72.7    |
| 226.3  | 190.3  | 298.5  | 209.0  | 503.3  | 568.1  | 496.4  | 576.7  | 110.5   |
| 4.7    | 7.5    | 8.7    | 7.3    | 30.7   | 27.9   | 35.4   | 29.4   | 39.3    |
| 368.5  | 365.0  | 336.8  | 267.8  | 1117.8 | 850.0  | 1153.6 | 1267.7 | 882.0   |
| 789.6  | 710.9  | 1273.0 | 797.0  | 787.4  | 842.9  | 899.0  | 877.0  | 1831.6  |
| 11.5   | 10.7   | 13.8   | 18.3   | 35.8   | 42.6   | 68.8   | 46.3   | 21.5    |
| 226.4  | 203.2  | 377.4  | 224.3  | 511.1  | 494.2  | 523.0  | 564.7  | 551.0   |
| 92.2   | 93.2   | 84.7   | 88.4   | 41.6   | 47.7   | 55.7   | 61.0   | 35.5    |
| 7599.3 | 7120.5 | 8775.6 | 7493.1 | 7581.8 | 7923.3 | 7741.2 | 7898.9 | 10079.4 |
| 231.4  | 243.8  | 198.2  | 144.4  | 594.7  | 398.2  | 926.6  | 696.5  | 2622.5  |
| 510.9  | 384.8  | 1192.3 | 487.5  | 1218.1 | 1290.2 | 1150.5 | 1324.1 | 2460.8  |
| 34.8   | 28.2   | 18.1   | 26.0   | 6.3    | 8.3    | 2.5    | 3.2    | 6.1     |
| 11.7   | 2.7    | 23.6   | 3.7    | 2.9    | 2.1    | 2.8    | 4.2    | 2.2     |
| 181.4  | 188.4  | 256.7  | 178.2  | 144.9  | 140.4  | 129.1  | 158.1  | 175.6   |
| 3722.6 | 3384.2 | 4844.3 | 3591.0 | 3665.1 | 4411.5 | 3873.2 | 3910.9 | 3726.3  |
| 328.8  | 287.0  | 402.7  | 268.2  | 445.9  | 510.3  | 504.0  | 458.2  | 642.2   |
| 240.4  | 192.2  | 230.0  | 216.6  | 123.4  | 113.9  | 125.1  | 197.5  | 65.3    |
| 366.9  | 331.1  | 397.5  | 337.2  | 297.7  | 304.0  | 305.4  | 410.0  | 172.4   |
| 96.9   | 109.0  | 79.3   | 108.6  | 50.6   | 78.5   | 56.0   | 61.8   | 129.2   |
| 76.5   | 75.0   | 95.6   | 87.6   | 227.9  | 281.8  | 253.2  | 210.8  | 238.5   |
| 299.2  | 241.1  | 682.6  | 340.7  | 490.5  | 407.7  | 551.1  | 702.3  | 814.6   |
| 111.4  | 90.4   | 156.7  | 99.0   | 299.8  | 262.4  | 342.4  | 350.3  | 340.8   |

|        |       |        |        |        |        |        |        |        |
|--------|-------|--------|--------|--------|--------|--------|--------|--------|
| 124.1  | 104.8 | 110.5  | 106.2  | 59.0   | 114.9  | 75.3   | 80.2   | 98.6   |
| 128.4  | 135.5 | 232.4  | 146.6  | 135.5  | 130.6  | 135.8  | 143.7  | 156.8  |
| 164.8  | 180.7 | 274.2  | 195.7  | 165.5  | 157.7  | 164.5  | 191.2  | 195.9  |
| 100.5  | 89.8  | 156.8  | 115.9  | 98.5   | 93.7   | 94.2   | 93.7   | 103.6  |
| 422.6  | 440.7 | 698.8  | 392.5  | 367.1  | 336.6  | 423.5  | 560.0  | 163.4  |
| 231.8  | 220.8 | 197.4  | 167.4  | 172.2  | 196.8  | 200.3  | 191.4  | 205.4  |
| 201.9  | 203.6 | 162.4  | 172.5  | 57.1   | 57.1   | 67.2   | 65.1   | 67.7   |
| 2.9    | 2.3   | 2.7    | 2.1    | 2.0    | 2.3    | 1.5    | 1.0    | 33.6   |
| 18.2   | 20.9  | 21.1   | 14.7   | 19.7   | 22.9   | 16.1   | 20.7   | 97.9   |
| 2.5    | 3.4   | 3.4    | 1.4    | 5.9    | 5.3    | 5.9    | 1.5    | 16.2   |
| 346.2  | 365.8 | 459.2  | 351.3  | 681.3  | 483.4  | 550.8  | 707.0  | 877.5  |
| 1047.9 | 791.1 | 1385.3 | 1024.2 | 2621.4 | 2532.1 | 2908.3 | 3006.7 | 2799.8 |
| 89.4   | 81.5  | 69.6   | 110.9  | 58.5   | 43.1   | 38.7   | 75.1   | 73.2   |
| 87.6   | 91.0  | 112.1  | 90.7   | 196.7  | 207.6  | 193.3  | 210.8  | 227.9  |
| 946.9  | 957.9 | 1172.9 | 926.2  | 1019.4 | 1203.0 | 1255.3 | 1282.7 | 491.9  |
| 318.8  | 281.7 | 552.8  | 269.5  | 792.1  | 650.2  | 730.8  | 851.8  | 862.3  |
| 555.8  | 494.4 | 985.7  | 454.0  | 1538.3 | 1267.6 | 1464.4 | 1778.6 | 1202.5 |
| 36.9   | 48.2  | 71.5   | 57.0   | 270.0  | 211.6  | 331.7  | 325.6  | 96.4   |
| 100.9  | 111.5 | 88.0   | 72.1   | 78.1   | 98.0   | 142.6  | 115.2  | 259.2  |
| 73.2   | 51.5  | 72.7   | 61.4   | 121.1  | 95.6   | 118.4  | 119.9  | 67.7   |
| 308.8  | 315.4 | 348.2  | 270.5  | 529.4  | 525.3  | 545.2  | 647.0  | 289.2  |
| 180.4  | 178.5 | 261.6  | 190.2  | 30.4   | 25.1   | 29.5   | 20.0   | 177.8  |
| 86.4   | 82.7  | 118.8  | 113.5  | 8.8    | 3.3    | 7.5    | 26.2   | 83.9   |
| 260.6  | 219.0 | 542.2  | 233.0  | 916.7  | 529.5  | 783.6  | 957.6  | 673.8  |
| 44.0   | 47.8  | 45.9   | 40.2   | 23.8   | 34.5   | 26.7   | 37.7   | 31.1   |
| 49.7   | 33.9  | 58.6   | 41.5   | 56.6   | 57.8   | 56.3   | 54.5   | 78.6   |
| 74.6   | 62.3  | 100.0  | 60.4   | 226.1  | 226.2  | 205.9  | 240.0  | 255.2  |
| 190.3  | 191.8 | 249.0  | 200.2  | 247.2  | 245.0  | 290.0  | 252.3  | 91.9   |
| 215.7  | 149.8 | 480.8  | 225.3  | 321.8  | 448.0  | 367.1  | 370.6  | 444.3  |
| 29.0   | 28.7  | 29.6   | 24.7   | 39.8   | 38.7   | 46.4   | 61.8   | 62.6   |
| 288.7  | 277.3 | 346.8  | 308.7  | 654.3  | 851.1  | 709.1  | 703.9  | 733.0  |
| 6.7    | 8.1   | 3.5    | 6.5    | 121.9  | 65.3   | 104.4  | 151.4  | 58.6   |
| 303.0  | 231.7 | 487.5  | 313.8  | 304.5  | 296.0  | 275.4  | 328.0  | 290.6  |
| 137.9  | 129.4 | 103.0  | 125.4  | 141.7  | 204.3  | 160.9  | 183.6  | 174.0  |
| 250.4  | 253.2 | 290.5  | 258.4  | 543.9  | 537.0  | 522.1  | 626.8  | 553.2  |
| 123.9  | 109.7 | 118.5  | 107.8  | 63.5   | 62.1   | 52.2   | 78.9   | 33.8   |
| 71.9   | 65.8  | 77.3   | 58.3   | 55.9   | 48.6   | 46.8   | 62.1   | 35.4   |
| 227.8  | 203.1 | 205.8  | 202.9  | 109.6  | 108.3  | 111.8  | 106.9  | 83.6   |
| 120.3  | 129.9 | 136.8  | 107.5  | 267.3  | 251.8  | 299.0  | 308.3  | 260.7  |
| 3.2    | 3.7   | 4.5    | 1.0    | 7.1    | 1.1    | 4.8    | 1.1    | 2.5    |
| 101.8  | 107.0 | 109.8  | 76.6   | 350.8  | 256.7  | 325.6  | 335.0  | 528.7  |
| 38.6   | 36.9  | 40.1   | 19.5   | 123.3  | 95.5   | 104.3  | 133.2  | 212.7  |
| 125.3  | 114.9 | 137.0  | 132.3  | 247.8  | 298.1  | 256.6  | 275.7  | 250.1  |
| 128.9  | 131.5 | 109.0  | 133.9  | 167.9  | 214.9  | 180.8  | 195.0  | 135.3  |
| 466.6  | 457.3 | 419.1  | 366.2  | 291.5  | 374.5  | 330.7  | 357.3  | 241.9  |
| 4.3    | 10.1  | 3.9    | 4.8    | 368.1  | 408.6  | 421.6  | 381.8  | 254.1  |
| 35.8   | 54.4  | 31.3   | 40.2   | 39.3   | 40.3   | 38.0   | 40.6   | 33.8   |
| 81.0   | 86.5  | 82.7   | 81.5   | 87.7   | 125.7  | 68.4   | 103.2  | 131.8  |
| 20.5   | 21.4  | 27.5   | 21.2   | 12.6   | 8.3    | 12.2   | 15.9   | 12.2   |
| 152.1  | 150.8 | 152.2  | 137.0  | 134.6  | 151.9  | 159.2  | 148.3  | 209.7  |
| 70.3   | 72.6  | 130.6  | 80.6   | 168.3  | 131.8  | 91.7   | 129.0  | 142.8  |
| 26.2   | 24.7  | 33.9   | 43.1   | 153.7  | 167.5  | 179.5  | 162.4  | 193.0  |
| 56.5   | 59.8  | 81.0   | 65.8   | 37.3   | 45.4   | 40.2   | 54.4   | 73.7   |

|        |        |        |        |        |        |        |        |        |
|--------|--------|--------|--------|--------|--------|--------|--------|--------|
| 184.3  | 185.4  | 210.1  | 186.8  | 465.2  | 584.3  | 479.6  | 488.9  | 399.2  |
| 195.2  | 166.0  | 296.6  | 167.4  | 342.1  | 281.2  | 412.2  | 472.9  | 538.1  |
| 342.4  | 330.8  | 557.1  | 298.1  | 407.6  | 266.3  | 370.2  | 446.3  | 668.7  |
| 4.5    | 4.9    | 5.1    | 6.3    | 92.9   | 60.2   | 103.3  | 116.0  | 4.6    |
| 178.8  | 169.3  | 193.4  | 182.6  | 66.0   | 69.7   | 70.7   | 81.6   | 148.3  |
| 39.2   | 50.3   | 60.1   | 26.5   | 200.5  | 173.6  | 204.4  | 196.2  | 4369.3 |
| 125.2  | 138.6  | 146.9  | 129.8  | 209.3  | 178.0  | 192.8  | 199.4  | 127.2  |
| 656.3  | 677.7  | 700.3  | 622.3  | 576.9  | 534.4  | 626.9  | 745.7  | 459.0  |
| 71.7   | 67.6   | 80.5   | 56.9   | 69.4   | 51.4   | 63.2   | 76.9   | 121.9  |
| 14.3   | 15.4   | 11.5   | 15.5   | 19.1   | 13.9   | 13.4   | 23.6   | 3.2    |
| 133.8  | 145.5  | 173.2  | 142.4  | 28.3   | 25.2   | 23.4   | 24.4   | 11.9   |
| 131.7  | 90.2   | 441.5  | 199.1  | 138.0  | 115.3  | 146.1  | 172.1  | 4867.1 |
| 36.9   | 40.5   | 34.5   | 41.9   | 121.3  | 152.2  | 122.6  | 137.5  | 78.9   |
| 125.8  | 97.6   | 114.5  | 104.4  | 401.0  | 336.9  | 415.6  | 500.1  | 254.5  |
| 1028.9 | 755.0  | 1706.2 | 822.2  | 757.9  | 694.7  | 731.6  | 989.2  | 965.2  |
| 2063.5 | 1845.8 | 3107.5 | 1952.4 | 1391.3 | 1673.6 | 1563.8 | 1597.8 | 1234.1 |
| 1.5    | 1.1    | 7.2    | 1.2    | 5.3    | 1.5    | 7.1    | 20.8   | 3.3    |
| 86.9   | 96.0   | 134.3  | 121.2  | 70.4   | 44.8   | 73.3   | 60.9   | 164.5  |
| 57.8   | 67.5   | 82.4   | 55.0   | 26.3   | 41.7   | 31.7   | 45.5   | 90.6   |
| 165.4  | 152.8  | 246.7  | 154.5  | 334.5  | 362.4  | 292.1  | 380.8  | 241.9  |
| 71.0   | 57.1   | 115.6  | 74.6   | 238.6  | 232.2  | 183.0  | 253.9  | 95.1   |
| 25.4   | 21.9   | 87.1   | 31.7   | 227.6  | 151.6  | 298.1  | 275.9  | 404.3  |
| 103.1  | 94.4   | 121.4  | 89.5   | 357.6  | 462.9  | 380.0  | 419.9  | 428.9  |
| 142.5  | 153.0  | 242.5  | 162.9  | 281.6  | 264.1  | 332.3  | 329.3  | 367.8  |
| 101.3  | 109.8  | 120.1  | 81.7   | 289.5  | 249.5  | 311.6  | 279.1  | 121.5  |
| 271.4  | 261.3  | 348.3  | 245.6  | 747.2  | 716.1  | 752.3  | 847.9  | 411.2  |
| 142.2  | 106.5  | 363.5  | 196.4  | 255.6  | 224.3  | 282.7  | 260.5  | 339.0  |
| 230.8  | 221.0  | 256.5  | 205.9  | 427.8  | 395.0  | 350.9  | 444.6  | 687.5  |
| 391.8  | 312.2  | 443.3  | 301.6  | 387.2  | 286.8  | 320.4  | 453.5  | 686.7  |
| 104.3  | 102.5  | 103.0  | 111.9  | 83.6   | 105.7  | 90.7   | 96.1   | 95.4   |
| 137.6  | 126.1  | 131.9  | 129.9  | 91.3   | 121.5  | 109.6  | 106.8  | 106.1  |
| 68.3   | 81.1   | 74.2   | 79.6   | 94.6   | 91.2   | 80.6   | 113.8  | 62.3   |
| 545.4  | 483.2  | 881.4  | 601.1  | 472.8  | 505.0  | 486.9  | 521.7  | 397.9  |
| 791.3  | 727.8  | 1148.7 | 865.0  | 583.8  | 604.8  | 554.5  | 607.0  | 567.7  |
| 182.6  | 175.2  | 458.6  | 132.9  | 434.2  | 226.4  | 388.3  | 440.5  | 553.9  |
| 86.9   | 87.1   | 265.1  | 77.3   | 258.2  | 131.2  | 197.4  | 264.9  | 415.5  |
| 203.3  | 177.2  | 280.8  | 183.1  | 831.9  | 645.0  | 852.6  | 973.0  | 790.4  |
| 56.4   | 49.7   | 73.0   | 57.7   | 182.6  | 152.5  | 200.2  | 217.9  | 166.6  |
| 835.1  | 896.5  | 1450.4 | 700.7  | 2052.3 | 1305.2 | 1668.3 | 1548.3 | 1923.7 |
| 303.3  | 274.0  | 687.4  | 227.8  | 1087.1 | 612.9  | 851.3  | 1040.2 | 902.1  |
| 133.7  | 132.2  | 152.4  | 123.1  | 72.6   | 83.3   | 89.9   | 77.0   | 35.8   |
| 743.6  | 732.9  | 818.5  | 716.8  | 240.3  | 267.3  | 224.5  | 253.8  | 108.8  |
| 45.7   | 38.3   | 123.2  | 75.6   | 143.7  | 81.5   | 155.6  | 193.5  | 188.9  |
| 343.9  | 289.8  | 666.8  | 270.0  | 750.9  | 715.4  | 691.4  | 793.3  | 366.4  |
| 340.6  | 288.5  | 405.3  | 266.4  | 719.2  | 800.1  | 810.5  | 843.4  | 486.1  |
| 92.4   | 110.6  | 132.7  | 80.7   | 69.6   | 65.3   | 76.9   | 84.1   | 85.3   |
| 504.9  | 647.3  | 457.5  | 385.4  | 437.9  | 345.9  | 459.6  | 442.3  | 531.0  |
| 203.8  | 245.9  | 203.9  | 139.8  | 179.3  | 159.3  | 213.7  | 208.7  | 124.7  |
| 128.2  | 94.5   | 219.5  | 192.4  | 92.6   | 100.8  | 84.1   | 108.4  | 109.2  |
| 288.0  | 314.1  | 453.0  | 330.1  | 520.5  | 400.5  | 559.9  | 684.2  | 550.1  |
| 201.5  | 203.0  | 303.7  | 242.7  | 482.0  | 335.8  | 499.4  | 537.5  | 786.0  |
| 224.2  | 218.5  | 175.3  | 207.4  | 207.8  | 232.1  | 225.8  | 240.5  | 286.1  |
| 335.7  | 347.3  | 233.6  | 298.2  | 279.7  | 367.5  | 378.6  | 423.6  | 369.7  |



|       |       |       |       |       |        |        |        |        |
|-------|-------|-------|-------|-------|--------|--------|--------|--------|
| 304.7 | 248.9 | 661.1 | 303.2 | 601.1 | 612.6  | 609.7  | 650.9  | 358.5  |
| 225.7 | 216.0 | 156.1 | 201.9 | 140.8 | 155.0  | 144.2  | 179.6  | 239.6  |
| 118.7 | 113.9 | 155.5 | 123.4 | 252.9 | 246.5  | 201.4  | 338.5  | 260.8  |
| 107.1 | 124.8 | 110.6 | 154.6 | 60.4  | 65.0   | 83.2   | 79.8   | 19.3   |
| 221.9 | 220.1 | 203.2 | 281.5 | 221.7 | 184.9  | 273.2  | 277.6  | 80.7   |
| 70.3  | 72.3  | 71.0  | 84.6  | 77.6  | 82.0   | 63.6   | 90.6   | 80.7   |
| 23.2  | 22.7  | 37.7  | 25.4  | 418.3 | 1458.0 | 400.2  | 370.1  | 294.8  |
| 60.9  | 46.4  | 151.9 | 57.2  | 228.4 | 202.8  | 235.7  | 289.8  | 217.9  |
| 10.9  | 4.7   | 5.4   | 4.5   | 4.5   | 5.3    | 3.7    | 4.8    | 4.9    |
| 15.3  | 11.9  | 16.4  | 16.0  | 5.7   | 10.0   | 5.9    | 15.0   | 8.0    |
| 309.6 | 264.0 | 282.7 | 302.9 | 19.6  | 15.2   | 14.2   | 25.7   | 25.7   |
| 152.5 | 152.2 | 195.5 | 145.2 | 282.8 | 235.3  | 284.7  | 297.8  | 223.6  |
| 7.3   | 9.9   | 9.9   | 14.3  | 5.5   | 4.0    | 4.1    | 9.8    | 7.1    |
| 111.5 | 94.0  | 178.4 | 106.9 | 128.1 | 158.3  | 136.8  | 134.8  | 220.0  |
| 156.7 | 160.3 | 170.0 | 153.6 | 152.4 | 135.0  | 384.0  | 205.8  | 124.3  |
| 505.7 | 529.9 | 608.5 | 461.8 | 475.7 | 398.9  | 1100.6 | 554.8  | 400.6  |
| 173.4 | 173.6 | 223.6 | 184.9 | 251.0 | 299.0  | 260.9  | 356.0  | 192.8  |
| 198.6 | 189.8 | 223.6 | 191.8 | 184.4 | 228.2  | 233.7  | 243.6  | 197.2  |
| 191.9 | 201.7 | 158.9 | 160.2 | 218.6 | 293.4  | 246.9  | 289.2  | 558.0  |
| 934.0 | 868.2 | 933.9 | 858.8 | 261.7 | 219.8  | 277.7  | 272.9  | 333.0  |
| 283.7 | 262.8 | 329.2 | 284.7 | 153.8 | 137.9  | 111.8  | 171.8  | 122.7  |
| 58.4  | 77.0  | 18.9  | 48.1  | 65.8  | 76.5   | 65.8   | 94.2   | 78.5   |
| 387.3 | 380.9 | 456.3 | 396.5 | 530.1 | 481.8  | 506.9  | 618.2  | 564.5  |
| 439.2 | 416.8 | 536.9 | 416.2 | 396.7 | 404.2  | 417.3  | 416.9  | 312.1  |
| 284.2 | 273.6 | 332.7 | 314.4 | 595.3 | 386.8  | 667.5  | 683.6  | 456.2  |
| 76.5  | 83.6  | 91.3  | 70.9  | 272.7 | 403.1  | 290.6  | 262.4  | 125.1  |
| 107.9 | 125.9 | 134.2 | 101.0 | 265.1 | 174.5  | 255.7  | 290.6  | 251.1  |
| 247.2 | 286.2 | 389.7 | 317.2 | 1.1   | 3.5    | 7.9    | 8.4    | 2.1    |
| 124.6 | 138.3 | 141.1 | 130.4 | 504.2 | 720.1  | 549.4  | 628.9  | 213.8  |
| 337.9 | 274.5 | 390.0 | 240.5 | 758.7 | 822.3  | 763.4  | 863.2  | 1328.5 |
| 715.0 | 575.3 | 887.0 | 739.8 | 814.3 | 904.6  | 942.5  | 1033.3 | 838.4  |
| 44.9  | 49.4  | 74.6  | 54.1  | 54.6  | 54.3   | 59.3   | 68.8   | 84.0   |
| 375.1 | 369.1 | 603.5 | 420.2 | 609.9 | 561.6  | 603.5  | 760.9  | 759.9  |
| 277.1 | 276.6 | 443.8 | 286.8 | 504.0 | 768.2  | 553.9  | 549.8  | 488.5  |
| 99.0  | 80.1  | 111.6 | 84.4  | 8.9   | 16.7   | 15.3   | 13.3   | 101.9  |
| 59.4  | 57.5  | 79.2  | 50.9  | 15.0  | 7.8    | 12.9   | 17.1   | 63.8   |
| 116.2 | 111.9 | 243.4 | 156.4 | 153.8 | 155.5  | 150.5  | 194.2  | 94.5   |
| 208.7 | 176.3 | 414.9 | 281.3 | 314.9 | 293.8  | 291.5  | 400.0  | 152.4  |
| 129.7 | 120.8 | 150.3 | 120.1 | 273.8 | 296.8  | 260.1  | 254.3  | 369.5  |
| 113.5 | 124.4 | 143.4 | 117.0 | 207.0 | 180.5  | 162.6  | 251.1  | 185.9  |
| 451.4 | 454.1 | 465.6 | 419.2 | 663.7 | 653.1  | 655.0  | 807.7  | 734.7  |
| 100.8 | 71.1  | 256.5 | 97.2  | 500.6 | 422.0  | 445.3  | 475.8  | 419.1  |
| 67.9  | 42.9  | 64.4  | 60.4  | 74.1  | 83.3   | 80.5   | 83.2   | 18.4   |
| 100.6 | 65.0  | 168.9 | 82.0  | 257.5 | 263.0  | 288.2  | 282.4  | 558.1  |
| 85.0  | 83.4  | 111.1 | 77.0  | 130.5 | 127.8  | 98.1   | 128.1  | 230.6  |
| 504.8 | 491.8 | 500.0 | 448.8 | 506.3 | 662.3  | 510.8  | 540.7  | 417.7  |
| 225.2 | 241.6 | 179.9 | 218.9 | 122.1 | 96.1   | 117.2  | 155.8  | 148.1  |
| 218.0 | 154.5 | 554.3 | 186.3 | 490.5 | 191.7  | 382.2  | 572.3  | 744.1  |
| 198.3 | 190.5 | 192.8 | 176.7 | 331.5 | 363.5  | 359.4  | 375.6  | 348.7  |
| 89.6  | 83.6  | 114.6 | 92.3  | 418.9 | 474.6  | 520.3  | 374.7  | 86.9   |
| 82.9  | 79.5  | 87.5  | 94.8  | 164.8 | 187.9  | 161.4  | 217.7  | 374.9  |
| 70.4  | 61.2  | 78.7  | 52.3  | 60.6  | 70.8   | 67.8   | 77.0   | 132.6  |
| 8.7   | 10.6  | 5.6   | 4.5   | 23.1  | 9.0    | 15.5   | 20.5   | 26.5   |

|        |        |        |        |        |        |        |        |        |
|--------|--------|--------|--------|--------|--------|--------|--------|--------|
| 108.0  | 87.7   | 180.5  | 117.8  | 495.3  | 557.9  | 615.3  | 632.8  | 767.9  |
| 44.3   | 36.4   | 69.1   | 36.3   | 445.9  | 287.6  | 435.3  | 572.8  | 124.3  |
| 91.3   | 85.0   | 180.8  | 89.9   | 659.2  | 533.0  | 684.6  | 811.3  | 161.7  |
| 31.7   | 25.7   | 50.9   | 38.8   | 294.7  | 178.8  | 295.5  | 288.2  | 84.6   |
| 424.1  | 458.0  | 499.3  | 494.3  | 389.4  | 439.8  | 402.2  | 458.6  | 195.4  |
| 148.5  | 124.0  | 341.2  | 150.5  | 24.8   | 25.0   | 26.4   | 34.5   | 60.9   |
| 108.5  | 134.7  | 95.7   | 112.3  | 131.1  | 162.5  | 148.1  | 142.1  | 102.1  |
| 63.7   | 82.0   | 155.2  | 101.7  | 41.2   | 39.8   | 47.4   | 58.1   | 72.0   |
| 2.1    | 3.8    | 2.5    | 2.3    | 4.5    | 1.5    | 1.3    | 1.5    | 2.3    |
| 218.5  | 185.9  | 271.3  | 205.2  | 225.5  | 178.9  | 207.4  | 268.0  | 221.2  |
| 105.2  | 116.5  | 122.3  | 120.0  | 140.1  | 181.6  | 138.0  | 169.8  | 156.4  |
| 196.5  | 139.5  | 306.8  | 159.2  | 342.6  | 378.3  | 346.8  | 390.1  | 107.7  |
| 152.4  | 108.7  | 200.0  | 136.5  | 239.0  | 197.9  | 193.1  | 231.4  | 68.6   |
| 2.0    | 7.6    | 8.2    | 7.7    | 6.6    | 7.6    | 9.7    | 16.3   | 4.0    |
| 5.1    | 6.1    | 5.1    | 6.8    | 12.4   | 13.9   | 25.8   | 17.5   | 1.2    |
| 317.4  | 324.3  | 505.4  | 367.7  | 307.3  | 352.5  | 435.2  | 418.1  | 258.4  |
| 148.4  | 138.1  | 202.4  | 134.7  | 304.5  | 374.1  | 466.0  | 328.2  | 219.9  |
| 9.9    | 9.1    | 16.3   | 11.7   | 76.4   | 67.0   | 58.9   | 77.8   | 440.3  |
| 62.7   | 63.1   | 78.7   | 55.2   | 379.7  | 386.3  | 356.8  | 364.9  | 1226.9 |
| 171.6  | 206.1  | 163.8  | 157.0  | 215.0  | 206.7  | 203.8  | 257.1  | 185.5  |
| 243.5  | 224.8  | 565.4  | 248.7  | 463.5  | 358.5  | 391.9  | 425.3  | 629.6  |
| 80.9   | 87.7   | 89.6   | 56.6   | 1058.3 | 1032.5 | 1128.7 | 1282.2 | 2011.8 |
| 1924.4 | 1822.9 | 1823.5 | 2271.6 | 393.0  | 560.1  | 602.3  | 541.1  | 1264.4 |
| 9.2    | 8.0    | 10.4   | 6.8    | 7.4    | 3.3    | 4.7    | 4.5    | 14.1   |
| 1264.8 | 1330.7 | 1163.5 | 1251.3 | 393.7  | 467.1  | 430.6  | 517.5  | 365.0  |
| 37.8   | 40.0   | 61.4   | 33.8   | 83.6   | 88.2   | 92.0   | 115.2  | 96.0   |
| 98.1   | 114.0  | 79.8   | 86.6   | 81.7   | 121.4  | 88.3   | 92.9   | 56.9   |
| 59.2   | 72.4   | 37.3   | 57.3   | 25.7   | 37.9   | 27.9   | 33.4   | 41.3   |
| 545.0  | 602.8  | 565.6  | 540.1  | 407.4  | 341.7  | 416.7  | 516.3  | 478.8  |
| 437.4  | 386.1  | 562.0  | 331.1  | 370.6  | 267.9  | 379.0  | 446.0  | 502.1  |
| 640.3  | 568.9  | 833.4  | 527.7  | 550.1  | 499.3  | 635.5  | 782.9  | 651.1  |
| 625.4  | 712.5  | 653.6  | 610.3  | 660.2  | 876.1  | 768.4  | 771.4  | 466.1  |
| 222.2  | 208.9  | 283.7  | 211.7  | 186.4  | 225.0  | 199.3  | 225.7  | 231.7  |
| 423.4  | 449.2  | 464.5  | 349.6  | 523.2  | 883.2  | 486.1  | 604.7  | 310.8  |
| 3679.1 | 3229.5 | 5288.3 | 3790.2 | 3518.4 | 3292.7 | 3561.9 | 3880.1 | 5973.3 |
| 68.9   | 64.5   | 72.4   | 76.0   | 21.5   | 29.7   | 23.3   | 16.7   | 34.7   |
| 270.2  | 247.7  | 261.4  | 237.6  | 256.3  | 241.6  | 297.2  | 301.8  | 303.7  |
| 255.9  | 276.1  | 311.7  | 241.2  | 256.1  | 261.8  | 324.1  | 325.3  | 354.4  |
| 24.9   | 18.4   | 26.7   | 22.9   | 162.5  | 139.9  | 84.5   | 124.9  | 1306.5 |
| 302.9  | 280.6  | 408.3  | 269.8  | 320.1  | 317.9  | 367.9  | 401.7  | 348.4  |
| 248.9  | 247.0  | 388.8  | 256.3  | 257.3  | 279.8  | 252.8  | 272.0  | 163.6  |
| 9.3    | 15.4   | 10.3   | 14.6   | 1173.4 | 913.0  | 1550.1 | 1527.9 | 121.7  |
| 13.4   | 21.7   | 9.8    | 18.8   | 3491.6 | 3429.8 | 4487.7 | 4317.7 | 329.3  |
| 8.5    | 21.0   | 6.0    | 4.3    | 149.4  | 221.0  | 154.4  | 185.0  | 42.9   |
| 3.5    | 9.0    | 4.6    | 3.6    | 3.2    | 3.1    | 2.5    | 4.1    | 4.7    |
| 324.6  | 273.2  | 485.1  | 341.1  | 372.8  | 289.3  | 361.6  | 395.9  | 376.4  |
| 207.4  | 206.9  | 322.3  | 197.9  | 253.6  | 212.5  | 255.4  | 269.8  | 262.5  |
| 5.3    | 9.6    | 9.4    | 5.3    | 98.2   | 147.4  | 118.1  | 135.3  | 56.2   |
| 154.9  | 174.8  | 212.4  | 164.2  | 113.1  | 115.8  | 105.5  | 124.4  | 136.4  |
| 1.3    | 2.4    | 4.8    | 4.7    | 1.0    | 4.9    | 3.9    | 0.6    | 1.0    |
| 35.6   | 42.9   | 58.6   | 57.5   | 13.2   | 14.7   | 17.8   | 23.9   | 21.8   |
| 959.5  | 1051.5 | 585.7  | 682.7  | 346.3  | 497.5  | 451.5  | 613.8  | 651.9  |
| 103.8  | 108.3  | 84.8   | 84.4   | 167.7  | 169.2  | 161.5  | 176.0  | 298.5  |

|        |        |        |        |        |        |        |        |        |
|--------|--------|--------|--------|--------|--------|--------|--------|--------|
| 663.4  | 665.7  | 354.5  | 397.9  | 197.8  | 251.8  | 250.5  | 285.0  | 368.8  |
| 262.2  | 241.6  | 421.0  | 211.5  | 671.0  | 730.5  | 721.8  | 753.1  | 796.4  |
| 290.4  | 219.1  | 232.8  | 233.1  | 132.6  | 127.6  | 119.3  | 143.4  | 94.6   |
| 693.4  | 615.0  | 964.4  | 516.4  | 707.4  | 731.5  | 773.0  | 853.8  | 486.2  |
| 26.6   | 25.5   | 32.7   | 30.3   | 76.8   | 65.0   | 82.2   | 117.9  | 134.2  |
| 80.3   | 77.0   | 68.1   | 61.4   | 174.5  | 160.5  | 160.4  | 203.2  | 187.1  |
| 277.6  | 281.3  | 362.0  | 282.6  | 973.2  | 761.2  | 968.8  | 1072.3 | 1170.3 |
| 272.6  | 231.0  | 516.7  | 300.2  | 315.6  | 300.7  | 327.1  | 393.4  | 398.9  |
| 496.9  | 553.8  | 411.8  | 347.5  | 936.0  | 613.3  | 923.3  | 1314.5 | 342.4  |
| 488.7  | 461.1  | 776.6  | 451.8  | 844.4  | 940.0  | 859.9  | 960.2  | 560.0  |
| 252.3  | 246.2  | 336.7  | 225.5  | 415.0  | 357.2  | 482.5  | 472.6  | 430.7  |
| 166.9  | 169.9  | 249.6  | 161.4  | 209.0  | 193.7  | 216.2  | 239.6  | 162.1  |
| 121.4  | 105.6  | 184.9  | 105.7  | 209.9  | 119.2  | 185.5  | 242.7  | 158.1  |
| 8.3    | 11.5   | 44.5   | 14.0   | 154.9  | 191.5  | 77.0   | 102.9  | 349.3  |
| 28.1   | 14.4   | 71.7   | 19.9   | 186.2  | 277.7  | 102.3  | 122.1  | 370.3  |
| 765.4  | 662.3  | 860.2  | 623.4  | 451.0  | 436.9  | 471.2  | 535.1  | 415.8  |
| 477.3  | 486.6  | 602.4  | 460.8  | 437.9  | 410.4  | 454.7  | 517.8  | 493.6  |
| 80.8   | 80.5   | 102.5  | 74.6   | 94.3   | 85.4   | 79.9   | 95.0   | 86.9   |
| 317.1  | 363.2  | 369.0  | 279.7  | 487.7  | 605.2  | 489.4  | 519.6  | 309.8  |
| 67.5   | 64.9   | 38.9   | 37.4   | 42.6   | 40.8   | 57.9   | 36.5   | 26.1   |
| 103.8  | 109.4  | 56.5   | 50.3   | 72.8   | 82.2   | 75.9   | 84.8   | 22.5   |
| 574.9  | 561.9  | 598.2  | 513.8  | 290.3  | 416.1  | 313.3  | 378.5  | 554.8  |
| 301.9  | 310.9  | 347.6  | 277.6  | 240.1  | 319.8  | 194.0  | 309.1  | 479.9  |
| 347.2  | 287.9  | 562.3  | 210.6  | 487.7  | 247.5  | 374.5  | 470.8  | 395.0  |
| 324.6  | 284.2  | 549.8  | 341.5  | 425.2  | 268.6  | 365.7  | 466.4  | 651.9  |
| 273.3  | 211.1  | 321.2  | 243.8  | 442.6  | 337.1  | 420.1  | 507.9  | 682.3  |
| 63.5   | 55.5   | 105.4  | 66.2   | 95.2   | 70.1   | 81.9   | 118.9  | 136.8  |
| 574.2  | 531.5  | 1477.8 | 489.7  | 1915.5 | 1082.0 | 1720.1 | 2063.9 | 2536.9 |
| 233.0  | 238.6  | 331.0  | 261.0  | 525.6  | 581.0  | 558.4  | 636.0  | 388.6  |
| 218.2  | 268.3  | 211.4  | 240.6  | 493.6  | 525.5  | 509.7  | 597.1  | 365.4  |
| 88.5   | 79.5   | 118.5  | 43.1   | 31.5   | 41.7   | 42.8   | 41.3   | 10.4   |
| 138.5  | 117.8  | 213.3  | 116.3  | 143.3  | 100.0  | 157.5  | 174.7  | 140.6  |
| 1572.8 | 1655.7 | 1931.0 | 1821.8 | 636.9  | 592.7  | 587.1  | 648.0  | 771.0  |
| 34.8   | 47.1   | 41.1   | 39.3   | 64.3   | 101.8  | 76.3   | 60.7   | 65.5   |
| 20.5   | 9.8    | 15.1   | 20.1   | 95.5   | 96.5   | 93.7   | 116.5  | 64.8   |
| 75.5   | 72.3   | 109.1  | 46.9   | 580.2  | 592.8  | 797.4  | 807.9  | 306.0  |
| 452.3  | 433.5  | 551.4  | 457.3  | 1052.5 | 1133.0 | 1110.0 | 1287.2 | 857.7  |
| 173.3  | 180.8  | 97.1   | 231.5  | 103.3  | 115.0  | 93.3   | 127.0  | 140.0  |
| 391.7  | 463.9  | 256.7  | 549.7  | 204.4  | 274.8  | 208.5  | 276.7  | 340.2  |
| 142.3  | 149.8  | 162.7  | 131.6  | 211.6  | 174.3  | 192.1  | 220.3  | 279.5  |
| 117.1  | 129.2  | 132.3  | 121.3  | 182.5  | 118.2  | 173.2  | 202.0  | 338.8  |
| 291.9  | 301.8  | 318.0  | 330.1  | 280.5  | 300.3  | 301.6  | 373.2  | 333.8  |
| 100.5  | 98.7   | 119.7  | 114.5  | 107.1  | 99.0   | 101.6  | 137.1  | 132.3  |
| 181.4  | 162.9  | 132.7  | 151.8  | 99.5   | 92.7   | 96.3   | 118.0  | 81.6   |
| 126.3  | 129.9  | 153.2  | 102.0  | 118.8  | 91.8   | 151.7  | 120.6  | 211.3  |
| 558.1  | 520.6  | 619.8  | 423.7  | 494.2  | 369.5  | 532.7  | 622.8  | 578.6  |
| 5.5    | 8.2    | 10.2   | 8.1    | 82.5   | 105.5  | 91.5   | 97.1   | 2.8    |
| 1.7    | 3.3    | 2.2    | 1.6    | 63.9   | 89.8   | 73.6   | 73.6   | 10.8   |
| 236.1  | 241.5  | 266.5  | 265.4  | 99.9   | 160.7  | 107.8  | 126.0  | 192.0  |
| 176.9  | 180.7  | 204.8  | 213.7  | 50.7   | 62.7   | 48.2   | 57.1   | 61.9   |
| 33.7   | 32.4   | 45.4   | 39.0   | 67.0   | 74.6   | 65.1   | 80.4   | 158.8  |
| 196.2  | 222.7  | 371.0  | 229.3  | 279.0  | 190.3  | 363.5  | 349.5  | 482.8  |
| 213.3  | 206.4  | 337.0  | 250.3  | 318.5  | 219.8  | 426.3  | 353.3  | 504.6  |

|        |        |        |        |        |        |        |        |        |
|--------|--------|--------|--------|--------|--------|--------|--------|--------|
| 44.7   | 49.3   | 81.1   | 62.4   | 62.1   | 58.2   | 81.7   | 85.0   | 49.9   |
| 39.5   | 45.5   | 38.3   | 29.4   | 136.5  | 125.5  | 139.6  | 121.9  | 66.0   |
| 85.6   | 112.1  | 90.3   | 79.7   | 423.0  | 401.8  | 473.3  | 492.5  | 295.1  |
| 312.3  | 357.9  | 361.5  | 335.6  | 208.5  | 200.9  | 270.3  | 181.6  | 321.1  |
| 1076.9 | 1004.4 | 1532.9 | 989.4  | 1025.3 | 1115.6 | 933.2  | 1188.3 | 1088.7 |
| 2.5    | 2.4    | 2.6    | 0.7    | 1.7    | 2.4    | 3.6    | 1.2    | 1.8    |
| 361.2  | 377.3  | 391.6  | 426.5  | 66.5   | 55.1   | 75.0   | 67.8   | 162.8  |
| 332.2  | 333.0  | 395.5  | 306.6  | 81.4   | 72.7   | 114.1  | 87.5   | 208.1  |
| 2424.2 | 2125.2 | 2932.8 | 2214.6 | 2746.4 | 2207.5 | 2825.1 | 3035.6 | 3830.4 |
| 1516.1 | 1474.3 | 1825.4 | 1444.5 | 300.0  | 377.4  | 404.8  | 319.6  | 1.6    |
| 14.9   | 6.0    | 12.1   | 5.5    | 6.6    | 12.7   | 9.7    | 12.1   | 12.2   |
| 3.0    | 5.4    | 11.5   | 4.0    | 2.3    | 8.5    | 10.8   | 6.7    | 11.0   |
| 2.1    | 2.5    | 2.1    | 1.0    | 0.9    | 7.1    | 5.0    | 4.8    | 8.3    |
| 572.1  | 594.7  | 833.5  | 481.5  | 649.2  | 463.1  | 684.1  | 687.6  | 917.2  |
| 24.0   | 15.0   | 3.0    | 15.1   | 101.7  | 122.0  | 89.6   | 138.9  | 53.9   |
| 760.6  | 703.1  | 1113.3 | 792.4  | 1349.6 | 1310.0 | 1328.2 | 1513.4 | 1458.4 |
| 3.2    | 3.9    | 1.9    | 1.1    | 134.4  | 103.6  | 155.2  | 163.8  | 1.3    |
| 596.0  | 540.1  | 1012.5 | 566.2  | 983.0  | 830.9  | 1028.9 | 1141.6 | 1197.5 |
| 376.8  | 355.2  | 452.8  | 340.2  | 635.1  | 603.7  | 621.0  | 717.7  | 936.7  |
| 372.1  | 412.0  | 268.3  | 320.8  | 32.6   | 18.7   | 42.4   | 51.8   | 2.4    |
| 302.2  | 405.5  | 177.8  | 268.0  | 160.9  | 112.6  | 149.4  | 188.0  | 55.8   |
| 63.9   | 75.2   | 141.2  | 48.0   | 512.2  | 401.4  | 302.9  | 517.0  | 791.2  |
| 114.5  | 102.5  | 188.1  | 94.6   | 113.4  | 149.4  | 97.4   | 99.8   | 109.0  |
| 1515.4 | 1439.3 | 1597.1 | 1242.0 | 1921.4 | 1538.2 | 1957.5 | 2307.9 | 4621.8 |
| 140.5  | 130.7  | 129.7  | 130.3  | 105.7  | 144.0  | 109.3  | 117.2  | 95.6   |
| 17.2   | 12.7   | 27.0   | 10.9   | 112.4  | 102.0  | 128.7  | 86.7   | 44.5   |
| 170.0  | 177.3  | 434.7  | 237.5  | 797.2  | 462.7  | 695.4  | 755.3  | 253.0  |
| 2537.3 | 2191.4 | 4302.0 | 3066.4 | 1631.0 | 1722.1 | 1678.1 | 1820.4 | 1604.1 |
| 20.2   | 28.7   | 32.0   | 25.3   | 35.9   | 18.3   | 32.3   | 43.5   | 41.2   |
| 14.6   | 15.3   | 23.9   | 5.7    | 95.2   | 89.3   | 87.1   | 108.5  | 971.6  |
| 150.2  | 143.8  | 322.5  | 128.4  | 916.8  | 501.6  | 742.0  | 941.9  | 622.9  |
| 90.4   | 86.6   | 97.5   | 83.6   | 98.7   | 121.1  | 90.8   | 100.3  | 91.3   |
| 208.2  | 197.0  | 230.2  | 212.8  | 125.5  | 104.5  | 116.6  | 138.2  | 172.0  |
| 45.5   | 60.4   | 106.5  | 82.8   | 19.4   | 14.5   | 22.0   | 19.3   | 2.4    |
| 91.8   | 80.4   | 181.6  | 76.9   | 479.1  | 361.0  | 414.9  | 530.1  | 319.1  |
| 67.5   | 65.3   | 123.1  | 73.8   | 438.1  | 642.0  | 512.8  | 584.9  | 3.1    |
| 127.7  | 94.2   | 70.1   | 79.7   | 2.2    | 4.0    | 20.0   | 13.6   | 2.2    |
| 290.6  | 269.3  | 205.2  | 218.5  | 25.5   | 13.0   | 79.4   | 31.1   | 17.9   |
| 286.5  | 239.6  | 191.2  | 222.5  | 7.7    | 1.8    | 35.9   | 14.6   | 8.1    |
| 446.7  | 413.5  | 607.4  | 393.2  | 571.7  | 332.3  | 474.8  | 701.9  | 330.1  |
| 397.7  | 355.1  | 499.6  | 318.3  | 731.0  | 541.5  | 694.4  | 854.2  | 533.1  |
| 534.9  | 482.2  | 770.4  | 431.9  | 590.0  | 576.2  | 478.1  | 672.1  | 754.4  |
| 598.2  | 577.3  | 931.2  | 671.7  | 617.6  | 764.1  | 711.6  | 742.5  | 263.4  |
| 123.8  | 138.8  | 154.0  | 144.1  | 49.4   | 63.2   | 51.8   | 72.8   | 34.4   |
| 431.9  | 425.1  | 1048.1 | 443.8  | 943.6  | 514.8  | 728.5  | 1010.9 | 1099.5 |
| 181.6  | 158.8  | 228.5  | 166.5  | 133.9  | 160.4  | 131.8  | 180.5  | 211.4  |
| 10.9   | 4.5    | 15.9   | 11.0   | 291.1  | 408.4  | 305.5  | 315.5  | 3.1    |
| 3.1    | 3.6    | 4.8    | 4.3    | 204.2  | 215.9  | 210.6  | 226.1  | 2.9    |
| 242.1  | 244.2  | 415.3  | 234.4  | 609.1  | 596.7  | 633.0  | 675.2  | 836.6  |
| 162.5  | 132.4  | 255.0  | 135.5  | 353.2  | 292.6  | 350.8  | 389.8  | 506.0  |
| 261.3  | 316.8  | 145.1  | 378.5  | 497.3  | 1454.5 | 422.3  | 457.6  | 85.4   |
| 122.6  | 132.1  | 121.5  | 137.9  | 412.2  | 1203.2 | 544.2  | 457.6  | 68.4   |
| 106.2  | 84.8   | 56.7   | 51.7   | 1.8    | 6.5    | 10.7   | 7.8    | 613.0  |

|        |        |        |        |        |        |        |        |        |
|--------|--------|--------|--------|--------|--------|--------|--------|--------|
| 27.1   | 21.7   | 18.8   | 17.3   | 5.8    | 5.1    | 10.3   | 12.9   | 173.7  |
| 55.2   | 54.8   | 59.1   | 56.4   | 81.6   | 72.5   | 83.4   | 91.1   | 168.2  |
| 2.9    | 2.2    | 2.7    | 12.5   | 1.3    | 1.1    | 4.0    | 2.1    | 9.5    |
| 5.8    | 1.6    | 23.5   | 4.9    | 21.3   | 14.3   | 22.9   | 20.9   | 44.7   |
| 699.7  | 789.8  | 493.8  | 686.8  | 451.8  | 496.5  | 450.1  | 569.0  | 401.5  |
| 159.0  | 140.6  | 200.0  | 148.9  | 243.9  | 257.5  | 222.4  | 291.8  | 163.2  |
| 788.3  | 722.9  | 1183.4 | 784.8  | 590.3  | 499.4  | 582.4  | 685.5  | 481.0  |
| 273.2  | 281.0  | 429.6  | 235.3  | 263.1  | 237.0  | 253.2  | 342.5  | 236.0  |
| 305.8  | 285.0  | 427.3  | 282.8  | 358.6  | 342.7  | 353.3  | 467.2  | 229.4  |
| 137.0  | 124.0  | 150.6  | 143.7  | 111.7  | 158.6  | 143.9  | 128.9  | 40.2   |
| 120.4  | 90.9   | 130.5  | 76.4   | 87.1   | 94.2   | 132.6  | 148.1  | 108.7  |
| 39.7   | 19.7   | 59.9   | 43.4   | 81.9   | 89.3   | 81.3   | 105.2  | 168.2  |
| 645.7  | 597.1  | 1147.7 | 760.2  | 6.1    | 2.2    | 4.7    | 1.2    | 1.1    |
| 282.9  | 256.3  | 386.8  | 250.5  | 1346.5 | 1618.7 | 1475.5 | 1406.3 | 2739.0 |
| 1926.8 | 2472.0 | 1534.0 | 2158.6 | 163.8  | 256.8  | 131.0  | 190.8  | 286.0  |
| 127.1  | 115.8  | 143.0  | 139.1  | 175.1  | 262.8  | 229.8  | 236.5  | 456.3  |
| 103.4  | 115.3  | 93.1   | 94.3   | 52.0   | 51.1   | 55.3   | 69.1   | 28.5   |
| 279.8  | 247.4  | 303.2  | 251.9  | 448.9  | 433.2  | 500.3  | 535.3  | 391.5  |
| 209.0  | 218.3  | 208.5  | 210.3  | 270.1  | 263.4  | 272.5  | 294.8  | 255.5  |
| 632.3  | 661.9  | 560.1  | 508.7  | 252.4  | 331.7  | 269.9  | 311.9  | 270.5  |
| 13.6   | 12.3   | 18.3   | 10.3   | 6.4    | 7.4    | 8.6    | 6.6    | 11.9   |
| 1478.5 | 1390.5 | 2239.3 | 1612.9 | 2284.4 | 2039.5 | 2281.2 | 2432.8 | 1861.5 |
| 67.6   | 67.6   | 105.0  | 59.6   | 53.9   | 61.4   | 45.1   | 51.7   | 46.5   |
| 97.6   | 89.5   | 137.1  | 94.9   | 102.6  | 115.1  | 81.5   | 101.6  | 87.3   |
| 461.5  | 387.3  | 781.5  | 435.6  | 914.4  | 582.6  | 882.3  | 1095.8 | 454.2  |
| 118.5  | 108.5  | 102.6  | 119.1  | 287.0  | 382.0  | 345.5  | 363.4  | 511.5  |
| 95.9   | 89.6   | 126.9  | 75.1   | 165.8  | 202.7  | 158.3  | 183.3  | 122.2  |
| 61.5   | 74.1   | 44.6   | 50.4   | 98.0   | 75.4   | 79.0   | 91.0   | 95.5   |
| 18.4   | 39.5   | 4.1    | 22.7   | 82.4   | 75.6   | 72.7   | 72.2   | 35.2   |
| 15.3   | 7.4    | 4.1    | 5.8    | 15.3   | 13.3   | 9.7    | 25.8   | 5.2    |
| 14.5   | 5.5    | 15.7   | 13.1   | 7.5    | 9.1    | 10.0   | 8.3    | 13.5   |
| 1.8    | 1.2    | 2.4    | 1.5    | 51.4   | 56.3   | 36.0   | 68.9   | 7.1    |
| 16.0   | 24.6   | 30.0   | 21.9   | 168.0  | 181.9  | 147.8  | 239.9  | 32.1   |
| 36.2   | 51.3   | 31.5   | 63.4   | 42.4   | 24.3   | 51.5   | 55.9   | 31.4   |
| 7.6    | 7.5    | 2.3    | 9.4    | 1.5    | 1.8    | 5.2    | 5.6    | 6.3    |
| 1182.0 | 1134.6 | 1315.9 | 1370.4 | 579.9  | 770.4  | 631.4  | 668.4  | 524.7  |
| 2.9    | 9.5    | 11.0   | 9.7    | 7.9    | 3.3    | 11.3   | 7.1    | 6.0    |
| 1355.5 | 1055.4 | 1620.9 | 1105.8 | 1212.6 | 1292.8 | 1349.3 | 1455.3 | 2131.0 |
| 21.1   | 13.0   | 20.2   | 9.5    | 14.3   | 17.1   | 18.7   | 39.0   | 60.8   |
| 211.5  | 191.9  | 289.3  | 234.0  | 315.5  | 256.0  | 263.3  | 365.9  | 479.9  |
| 108.5  | 107.6  | 128.4  | 94.4   | 178.2  | 180.9  | 168.6  | 209.2  | 144.3  |
| 124.5  | 111.2  | 162.2  | 112.1  | 200.2  | 162.2  | 148.6  | 219.3  | 142.7  |
| 3.3    | 2.6    | 9.7    | 3.4    | 3.4    | 2.7    | 2.1    | 4.3    | 5.1    |
| 1638.9 | 1408.8 | 2414.5 | 1541.8 | 2543.5 | 2597.6 | 2620.6 | 2932.4 | 2062.5 |
| 10.5   | 11.5   | 8.0    | 1.3    | 74.1   | 44.8   | 66.8   | 90.3   | 1.1    |
| 210.7  | 186.3  | 245.3  | 173.7  | 203.4  | 186.7  | 209.5  | 243.5  | 196.2  |
| 97.6   | 82.4   | 86.2   | 73.4   | 70.7   | 73.4   | 71.9   | 82.7   | 86.9   |
| 70.4   | 76.5   | 107.6  | 78.2   | 32.0   | 22.0   | 21.7   | 32.5   | 37.2   |
| 253.0  | 238.2  | 396.0  | 174.9  | 386.9  | 337.4  | 386.2  | 440.0  | 469.9  |
| 7.2    | 12.6   | 13.5   | 4.2    | 126.0  | 135.7  | 164.4  | 193.2  | 23.5   |
| 101.2  | 98.2   | 121.0  | 89.9   | 236.6  | 216.9  | 253.9  | 271.9  | 168.1  |
| 209.1  | 212.5  | 267.2  | 203.5  | 425.5  | 466.4  | 399.1  | 487.9  | 242.9  |
| 282.8  | 267.1  | 351.0  | 228.4  | 555.5  | 513.9  | 516.8  | 683.5  | 209.8  |

|        |        |        |        |        |        |        |        |        |
|--------|--------|--------|--------|--------|--------|--------|--------|--------|
| 279.3  | 308.1  | 308.4  | 262.4  | 449.0  | 499.2  | 443.9  | 505.5  | 218.1  |
| 41.0   | 48.9   | 37.6   | 35.3   | 43.8   | 68.7   | 51.0   | 65.7   | 43.6   |
| 744.1  | 704.9  | 1097.3 | 808.0  | 61.3   | 56.9   | 99.1   | 86.0   | 185.6  |
| 4252.4 | 3913.2 | 5387.8 | 4345.7 | 702.7  | 630.1  | 704.0  | 846.7  | 1004.5 |
| 11.7   | 12.1   | 9.8    | 6.3    | 32.8   | 30.7   | 31.9   | 31.2   | 8.8    |
| 41.9   | 41.0   | 56.0   | 24.5   | 316.5  | 253.9  | 207.4  | 282.7  | 752.9  |
| 147.4  | 122.9  | 219.1  | 157.0  | 116.0  | 90.0   | 127.8  | 117.3  | 194.6  |
| 32.0   | 29.8   | 9.0    | 16.1   | 42.0   | 63.2   | 49.1   | 54.8   | 16.6   |
| 100.4  | 101.0  | 159.8  | 102.8  | 130.0  | 101.0  | 141.2  | 141.7  | 129.5  |
| 78.8   | 112.9  | 106.5  | 95.6   | 93.3   | 86.5   | 95.1   | 111.6  | 146.6  |
| 23.9   | 34.8   | 14.3   | 24.4   | 222.2  | 400.5  | 349.8  | 263.2  | 63.0   |
| 17.6   | 37.7   | 13.5   | 28.9   | 271.7  | 354.2  | 324.9  | 348.9  | 81.3   |
| 65.5   | 57.7   | 72.4   | 70.9   | 103.5  | 92.1   | 68.6   | 98.2   | 117.9  |
| 2.1    | 5.2    | 2.8    | 2.6    | 23.0   | 25.1   | 31.7   | 38.5   | 40.6   |
| 4.7    | 1.2    | 1.5    | 2.9    | 6.5    | 1.5    | 5.1    | 2.0    | 27.3   |
| 233.0  | 282.4  | 154.8  | 220.6  | 266.0  | 265.6  | 257.3  | 283.0  | 30.8   |
| 363.3  | 447.6  | 531.0  | 544.4  | 3343.6 | 3127.5 | 3159.5 | 3423.6 | 1135.5 |
| 462.2  | 402.2  | 501.0  | 413.2  | 598.6  | 604.1  | 612.3  | 734.7  | 898.8  |
| 254.6  | 245.3  | 287.9  | 251.6  | 327.3  | 341.7  | 326.1  | 371.5  | 412.8  |
| 85.3   | 86.5   | 64.5   | 81.0   | 319.2  | 534.3  | 351.7  | 402.6  | 241.9  |
| 45.6   | 55.9   | 33.7   | 39.7   | 49.5   | 60.5   | 53.1   | 73.8   | 55.4   |
| 396.2  | 359.3  | 512.1  | 402.8  | 277.1  | 299.4  | 304.7  | 319.3  | 529.4  |
| 94.9   | 92.5   | 135.3  | 94.9   | 89.8   | 91.3   | 96.7   | 114.3  | 60.6   |
| 356.2  | 318.3  | 472.6  | 340.5  | 705.6  | 726.7  | 728.7  | 767.5  | 482.8  |
| 35.1   | 35.0   | 32.4   | 26.9   | 83.1   | 120.4  | 108.0  | 119.9  | 98.1   |
| 247.4  | 259.1  | 231.4  | 257.0  | 288.7  | 302.0  | 291.6  | 329.6  | 205.0  |
| 63.5   | 63.9   | 84.3   | 72.8   | 107.6  | 100.5  | 85.1   | 99.1   | 65.6   |
| 114.5  | 91.7   | 138.4  | 124.6  | 183.9  | 156.2  | 147.7  | 209.9  | 77.7   |
| 166.2  | 148.9  | 117.5  | 116.2  | 170.3  | 187.5  | 173.4  | 194.2  | 147.0  |
| 1.2    | 1.6    | 1.5    | 0.9    | 1.8    | 1.1    | 3.1    | 2.9    | 1.9    |
| 152.5  | 175.6  | 180.2  | 180.2  | 200.8  | 235.1  | 238.2  | 223.4  | 170.2  |
| 117.0  | 107.8  | 139.5  | 108.1  | 170.5  | 144.3  | 177.4  | 225.6  | 418.9  |
| 47.6   | 39.5   | 44.4   | 32.0   | 59.5   | 48.9   | 63.8   | 71.1   | 103.6  |
| 11.9   | 22.8   | 21.8   | 12.0   | 23.8   | 32.2   | 31.2   | 39.2   | 40.1   |
| 57.6   | 59.7   | 55.0   | 55.0   | 66.0   | 48.7   | 46.9   | 69.6   | 39.3   |
| 1249.9 | 1258.6 | 1639.1 | 1168.9 | 658.6  | 609.4  | 624.3  | 793.8  | 1258.9 |
| 246.4  | 242.3  | 281.4  | 263.1  | 216.0  | 296.6  | 246.1  | 265.4  | 357.2  |
| 465.0  | 447.6  | 583.3  | 474.7  | 483.8  | 418.6  | 461.0  | 558.8  | 447.6  |
| 78.9   | 68.4   | 107.6  | 72.2   | 81.2   | 62.9   | 81.6   | 89.0   | 67.3   |
| 175.9  | 164.2  | 217.7  | 161.6  | 125.2  | 94.5   | 124.6  | 168.8  | 89.7   |
| 518.6  | 479.1  | 867.0  | 512.2  | 692.7  | 696.9  | 722.3  | 809.4  | 779.1  |
| 14.7   | 12.0   | 12.7   | 5.9    | 93.6   | 98.4   | 113.5  | 121.5  | 2.9    |
| 103.5  | 92.6   | 145.8  | 82.1   | 506.3  | 505.8  | 512.3  | 518.8  | 386.6  |
| 246.0  | 230.4  | 307.8  | 217.3  | 386.6  | 374.3  | 486.6  | 517.4  | 209.9  |
| 432.8  | 488.0  | 328.0  | 323.1  | 476.2  | 698.7  | 576.4  | 571.8  | 622.1  |
| 1.7    | 1.6    | 1.9    | 1.8    | 1.5    | 2.1    | 5.9    | 2.0    | 4.6    |
| 2.3    | 6.5    | 4.6    | 1.7    | 6.7    | 12.0   | 2.7    | 5.4    | 1.6    |
| 17.1   | 9.6    | 10.2   | 14.5   | 8.9    | 2.6    | 9.3    | 4.6    | 5.3    |
| 131.5  | 127.8  | 162.5  | 139.9  | 52.4   | 52.2   | 76.1   | 74.2   | 377.6  |
| 226.2  | 199.3  | 238.4  | 256.3  | 91.5   | 74.0   | 111.0  | 141.2  | 588.9  |
| 304.0  | 267.8  | 476.9  | 279.9  | 640.3  | 586.4  | 689.1  | 772.7  | 366.3  |
| 282.3  | 234.2  | 500.4  | 331.6  | 1027.1 | 840.4  | 1142.5 | 1128.1 | 923.4  |
| 107.4  | 97.6   | 116.5  | 100.9  | 156.7  | 176.8  | 143.3  | 148.2  | 204.8  |

|        |        |        |        |        |        |        |        |        |
|--------|--------|--------|--------|--------|--------|--------|--------|--------|
| 4.1    | 6.3    | 5.3    | 6.7    | 9.4    | 2.6    | 4.1    | 7.9    | 12.2   |
| 2.5    | 0.7    | 2.8    | 0.8    | 4.0    | 0.6    | 6.6    | 5.5    | 77.7   |
| 9.6    | 10.9   | 16.3   | 12.4   | 11.5   | 6.7    | 7.7    | 11.9   | 126.5  |
| 196.6  | 188.0  | 307.1  | 226.2  | 465.6  | 466.3  | 536.2  | 586.7  | 648.9  |
| 274.0  | 282.2  | 260.0  | 235.5  | 136.3  | 136.7  | 109.2  | 121.0  | 92.1   |
| 214.8  | 191.7  | 224.1  | 168.7  | 269.0  | 238.7  | 281.1  | 345.5  | 216.9  |
| 176.7  | 172.8  | 212.2  | 138.4  | 309.7  | 282.0  | 286.1  | 360.5  | 203.6  |
| 689.4  | 611.9  | 1342.1 | 658.9  | 3348.5 | 2302.0 | 2801.4 | 3353.3 | 4240.0 |
| 117.3  | 106.4  | 137.8  | 107.4  | 80.3   | 92.6   | 75.3   | 85.4   | 141.5  |
| 705.3  | 658.3  | 686.0  | 653.9  | 193.5  | 241.4  | 245.4  | 254.5  | 65.0   |
| 455.3  | 403.0  | 593.2  | 395.6  | 292.5  | 317.4  | 290.3  | 341.8  | 238.7  |
| 61.4   | 67.3   | 37.3   | 69.8   | 33.5   | 97.6   | 68.7   | 67.7   | 16.2   |
| 4.9    | 5.6    | 10.6   | 7.1    | 14.3   | 11.8   | 9.8    | 21.1   | 14.3   |
| 332.1  | 295.8  | 991.4  | 325.6  | 61.0   | 46.7   | 59.7   | 65.2   | 974.7  |
| 4.4    | 5.6    | 6.0    | 5.3    | 3.1    | 3.2    | 4.8    | 4.0    | 45.6   |
| 14.4   | 19.2   | 15.3   | 12.1   | 13.0   | 24.3   | 20.2   | 14.4   | 523.1  |
| 51.1   | 50.7   | 72.3   | 48.6   | 35.5   | 26.6   | 36.3   | 35.2   | 51.3   |
| 546.3  | 585.6  | 1181.8 | 422.9  | 291.1  | 273.3  | 272.6  | 314.6  | 390.9  |
| 141.8  | 130.6  | 139.0  | 105.9  | 184.8  | 190.5  | 193.9  | 178.3  | 129.1  |
| 317.7  | 276.1  | 412.4  | 335.9  | 654.2  | 658.9  | 706.1  | 814.3  | 388.6  |
| 56.8   | 63.9   | 58.8   | 46.5   | 79.2   | 84.8   | 74.9   | 71.9   | 92.9   |
| 69.1   | 65.3   | 62.6   | 60.8   | 39.3   | 52.9   | 40.0   | 52.1   | 104.3  |
| 505.2  | 485.3  | 365.0  | 378.0  | 251.7  | 303.8  | 256.9  | 309.6  | 298.5  |
| 23.0   | 18.0   | 42.1   | 18.2   | 860.0  | 630.4  | 812.4  | 965.0  | 2.7    |
| 1364.4 | 1404.1 | 1172.0 | 1145.7 | 0.9    | 0.5    | 0.8    | 0.8    | 1.5    |
| 269.6  | 250.6  | 397.8  | 278.2  | 434.6  | 555.0  | 476.1  | 519.7  | 477.2  |
| 165.5  | 179.1  | 207.8  | 163.3  | 124.1  | 104.6  | 123.3  | 170.0  | 240.0  |
| 208.5  | 194.9  | 287.4  | 183.3  | 412.8  | 790.5  | 472.9  | 512.7  | 109.4  |
| 227.3  | 290.7  | 174.7  | 190.9  | 279.0  | 452.1  | 277.7  | 299.7  | 346.5  |
| 868.6  | 763.4  | 948.0  | 930.4  | 292.3  | 317.6  | 347.8  | 352.9  | 343.8  |
| 120.8  | 111.5  | 118.9  | 95.6   | 138.4  | 161.7  | 177.2  | 178.3  | 129.6  |
| 84.7   | 80.3   | 80.5   | 46.4   | 170.1  | 121.1  | 166.0  | 189.1  | 159.5  |
| 87.8   | 86.5   | 93.3   | 60.1   | 216.5  | 147.1  | 195.3  | 231.6  | 181.7  |
| 206.9  | 210.4  | 206.7  | 162.2  | 296.9  | 188.0  | 239.7  | 251.4  | 311.7  |
| 306.2  | 301.8  | 336.5  | 285.3  | 299.2  | 305.8  | 347.1  | 298.5  | 344.1  |
| 248.6  | 234.8  | 279.8  | 212.9  | 365.7  | 356.4  | 372.6  | 394.7  | 298.3  |
| 396.7  | 353.8  | 379.8  | 350.6  | 400.3  | 480.6  | 451.8  | 477.6  | 502.3  |
| 691.1  | 707.5  | 886.0  | 761.6  | 687.7  | 646.9  | 724.5  | 813.9  | 334.5  |
| 278.6  | 339.6  | 284.2  | 252.8  | 413.9  | 526.9  | 321.0  | 392.2  | 37.1   |
| 33.6   | 31.3   | 23.6   | 13.7   | 192.5  | 209.7  | 221.2  | 218.7  | 120.6  |
| 6.7    | 0.9    | 3.9    | 3.8    | 10.3   | 9.9    | 7.9    | 16.8   | 5.8    |
| 157.3  | 172.5  | 175.0  | 156.8  | 100.4  | 99.8   | 118.2  | 155.6  | 229.4  |
| 46.9   | 59.7   | 61.5   | 37.8   | 62.2   | 58.3   | 65.7   | 99.4   | 95.5   |
| 522.6  | 499.6  | 457.5  | 411.8  | 571.9  | 587.3  | 722.1  | 727.0  | 513.4  |
| 10.7   | 10.6   | 6.2    | 13.8   | 1.3    | 2.9    | 12.1   | 3.4    | 9.0    |
| 44.7   | 56.4   | 59.8   | 45.6   | 484.0  | 392.1  | 491.6  | 539.3  | 93.0   |
| 841.0  | 784.1  | 1112.3 | 905.9  | 938.9  | 699.8  | 884.5  | 1113.7 | 309.8  |
| 390.2  | 376.0  | 544.7  | 369.2  | 1340.3 | 1415.3 | 1561.8 | 1566.2 | 1180.3 |
| 15.3   | 20.5   | 12.2   | 14.4   | 278.3  | 219.1  | 248.2  | 279.5  | 416.7  |
| 4.7    | 6.2    | 9.1    | 2.5    | 85.5   | 96.3   | 86.7   | 81.3   | 144.8  |
| 67.1   | 67.1   | 71.4   | 71.9   | 118.4  | 109.0  | 126.9  | 130.9  | 148.6  |
| 78.1   | 88.8   | 107.8  | 91.6   | 190.3  | 164.6  | 187.7  | 236.9  | 231.4  |
| 98.0   | 98.7   | 108.0  | 100.4  | 134.1  | 131.8  | 119.6  | 155.4  | 159.8  |

|        |        |        |        |        |        |        |        |        |
|--------|--------|--------|--------|--------|--------|--------|--------|--------|
| 152.2  | 149.9  | 194.5  | 158.5  | 149.0  | 162.8  | 150.2  | 179.3  | 128.8  |
| 33.6   | 29.6   | 25.5   | 20.6   | 19.9   | 44.4   | 34.4   | 35.4   | 31.6   |
| 117.1  | 126.8  | 125.0  | 113.0  | 152.3  | 165.3  | 154.7  | 163.7  | 162.3  |
| 1.5    | 1.4    | 3.9    | 2.2    | 14.4   | 13.4   | 15.7   | 16.0   | 97.4   |
| 10.0   | 5.8    | 10.3   | 9.5    | 105.6  | 87.6   | 90.4   | 104.2  | 39.1   |
| 732.2  | 698.7  | 803.1  | 728.1  | 694.9  | 736.4  | 706.9  | 724.9  | 594.9  |
| 2181.7 | 1721.9 | 3415.0 | 2064.6 | 3502.2 | 3638.0 | 3815.4 | 3996.6 | 2781.5 |
| 26.4   | 34.2   | 50.9   | 39.5   | 165.0  | 131.0  | 139.7  | 183.1  | 842.4  |
| 268.1  | 280.6  | 135.6  | 147.9  | 155.5  | 151.6  | 153.0  | 201.8  | 79.0   |
| 8.1    | 3.6    | 7.9    | 4.7    | 8.0    | 19.6   | 14.8   | 22.2   | 8.7    |
| 60.1   | 49.1   | 67.0   | 43.8   | 52.4   | 68.1   | 65.6   | 66.2   | 80.1   |
| 276.3  | 282.5  | 256.3  | 233.5  | 228.5  | 370.6  | 248.7  | 278.5  | 214.7  |
| 192.2  | 154.4  | 359.0  | 215.5  | 617.6  | 620.8  | 612.9  | 670.7  | 536.1  |
| 324.0  | 256.9  | 405.8  | 266.1  | 1323.4 | 1223.9 | 1274.1 | 1526.7 | 2307.6 |
| 371.0  | 347.5  | 462.3  | 393.4  | 349.1  | 363.7  | 397.1  | 450.2  | 270.4  |
| 281.0  | 261.4  | 367.6  | 312.0  | 95.9   | 90.6   | 108.8  | 127.3  | 98.1   |
| 430.6  | 366.0  | 572.4  | 361.6  | 442.5  | 554.5  | 471.3  | 506.8  | 389.5  |
| 120.3  | 120.0  | 227.9  | 136.0  | 213.7  | 186.7  | 167.0  | 213.0  | 486.8  |
| 18.5   | 16.6   | 24.8   | 16.0   | 10.1   | 12.9   | 15.3   | 22.2   | 15.0   |
| 10.5   | 2.7    | 42.3   | 13.5   | 2.8    | 1.2    | 3.4    | 5.2    | 17.6   |
| 112.6  | 89.6   | 125.1  | 77.0   | 155.1  | 179.4  | 152.5  | 181.3  | 116.2  |
| 1490.8 | 1378.5 | 1652.1 | 1476.3 | 1636.1 | 1779.0 | 1864.6 | 1966.8 | 1449.1 |
| 283.2  | 250.1  | 527.7  | 287.5  | 1252.7 | 1249.7 | 1299.4 | 1426.8 | 1189.6 |
| 91.6   | 99.5   | 105.0  | 101.3  | 31.9   | 50.0   | 32.0   | 39.6   | 27.1   |
| 235.4  | 236.4  | 252.0  | 172.6  | 231.3  | 216.4  | 242.4  | 288.5  | 458.2  |
| 261.7  | 239.7  | 333.3  | 176.9  | 1146.0 | 668.0  | 1069.5 | 1152.1 | 792.6  |
| 76.1   | 59.0   | 98.9   | 58.9   | 337.0  | 188.4  | 284.4  | 372.6  | 273.0  |
| 325.9  | 348.2  | 312.8  | 348.0  | 198.2  | 162.3  | 299.5  | 278.9  | 781.2  |
| 425.1  | 515.6  | 337.9  | 589.3  | 89.7   | 87.3   | 122.1  | 89.7   | 450.2  |
| 189.7  | 229.9  | 250.2  | 221.4  | 178.7  | 239.0  | 206.5  | 225.5  | 78.9   |
| 309.1  | 330.8  | 369.8  | 348.3  | 384.9  | 528.2  | 420.0  | 456.1  | 168.0  |
| 17.1   | 20.5   | 14.6   | 11.4   | 13.5   | 11.1   | 9.6    | 17.7   | 6.9    |
| 50.4   | 51.4   | 79.5   | 55.3   | 75.3   | 55.3   | 74.3   | 72.0   | 71.5   |
| 699.4  | 604.4  | 1068.6 | 748.6  | 266.0  | 249.9  | 252.3  | 288.1  | 156.0  |
| 68.1   | 64.8   | 112.4  | 64.9   | 38.5   | 36.9   | 43.6   | 50.4   | 32.4   |
| 155.5  | 131.2  | 180.8  | 132.5  | 165.6  | 263.3  | 168.6  | 201.4  | 173.7  |
| 201.7  | 193.4  | 137.2  | 164.5  | 474.9  | 370.5  | 684.2  | 658.6  | 383.9  |
| 291.5  | 301.1  | 211.9  | 193.6  | 471.8  | 415.1  | 650.7  | 659.3  | 451.0  |
| 8.4    | 12.2   | 3.3    | 6.9    | 14.4   | 6.7    | 35.5   | 21.7   | 3.7    |
| 1.1    | 1.1    | 1.7    | 1.7    | 1.7    | 1.9    | 15.8   | 8.1    | 1.0    |
| 567.4  | 663.1  | 526.0  | 538.9  | 427.3  | 386.3  | 621.8  | 616.9  | 870.6  |
| 52.9   | 53.4   | 56.5   | 48.3   | 55.1   | 52.8   | 44.9   | 49.9   | 27.3   |
| 133.0  | 122.9  | 158.4  | 115.8  | 133.2  | 114.1  | 121.6  | 144.3  | 73.5   |
| 123.2  | 133.9  | 176.3  | 109.9  | 316.6  | 269.5  | 347.3  | 426.4  | 296.0  |
| 70.7   | 75.1   | 70.4   | 62.2   | 139.2  | 126.5  | 143.0  | 151.7  | 110.1  |
| 3.1    | 1.6    | 2.1    | 5.4    | 2.1    | 5.3    | 6.7    | 1.4    | 2.3    |
| 133.2  | 128.4  | 253.7  | 160.5  | 614.4  | 571.5  | 698.8  | 768.8  | 265.8  |
| 253.7  | 218.4  | 376.9  | 238.7  | 757.5  | 705.7  | 813.0  | 867.9  | 512.2  |
| 252.4  | 222.7  | 385.0  | 241.8  | 247.5  | 186.1  | 249.7  | 281.1  | 396.5  |
| 271.3  | 191.9  | 459.7  | 181.2  | 2.2    | 2.3    | 2.6    | 2.9    | 3.8    |
| 7.5    | 2.5    | 3.5    | 3.4    | 381.2  | 317.4  | 451.4  | 453.7  | 366.7  |
| 146.7  | 146.7  | 124.0  | 117.2  | 133.7  | 134.5  | 129.0  | 163.0  | 156.1  |
| 296.1  | 257.2  | 303.7  | 242.3  | 278.0  | 289.7  | 271.6  | 325.7  | 266.7  |



|        |        |        |        |        |        |        |        |        |
|--------|--------|--------|--------|--------|--------|--------|--------|--------|
| 56.2   | 62.9   | 74.0   | 41.4   | 169.1  | 124.9  | 188.8  | 198.8  | 126.0  |
| 282.5  | 262.1  | 343.9  | 251.4  | 469.5  | 372.5  | 494.3  | 579.2  | 388.3  |
| 60.0   | 69.8   | 89.2   | 55.2   | 147.1  | 135.7  | 104.7  | 151.5  | 147.3  |
| 125.5  | 128.8  | 116.9  | 145.1  | 125.9  | 141.5  | 154.5  | 216.9  | 110.3  |
| 75.9   | 85.5   | 21.4   | 96.4   | 59.1   | 84.2   | 73.2   | 83.2   | 123.4  |
| 76.1   | 66.7   | 104.4  | 86.6   | 115.2  | 111.3  | 114.8  | 130.8  | 309.5  |
| 137.7  | 136.2  | 136.4  | 151.0  | 161.7  | 206.5  | 194.3  | 203.4  | 275.2  |
| 97.6   | 108.5  | 190.0  | 110.3  | 191.1  | 194.4  | 155.2  | 190.6  | 187.0  |
| 22.4   | 24.8   | 41.3   | 13.2   | 73.4   | 55.4   | 63.0   | 80.3   | 39.6   |
| 4.3    | 6.8    | 8.3    | 1.1    | 32.4   | 12.3   | 29.2   | 34.4   | 10.2   |
| 2590.1 | 2244.9 | 3556.0 | 2377.8 | 2325.7 | 2323.8 | 2508.2 | 2694.7 | 3964.7 |
| 145.8  | 137.8  | 266.8  | 150.2  | 366.8  | 341.6  | 334.0  | 366.8  | 444.2  |
| 67.3   | 70.8   | 52.5   | 52.0   | 919.4  | 1699.2 | 1156.2 | 1465.3 | 145.4  |
| 38.2   | 43.3   | 73.9   | 59.8   | 5.5    | 14.9   | 26.0   | 22.4   | 23.2   |
| 1660.7 | 1671.5 | 1636.9 | 1297.0 | 2581.9 | 2527.6 | 2421.3 | 2960.4 | 3903.8 |
| 104.3  | 113.0  | 110.8  | 114.5  | 61.4   | 92.1   | 70.8   | 80.5   | 79.6   |
| 93.4   | 79.5   | 111.4  | 87.6   | 137.8  | 212.3  | 182.9  | 143.3  | 158.4  |
| 1.6    | 5.1    | 1.2    | 7.3    | 1.7    | 1.0    | 3.3    | 3.1    | 3.3    |
| 55.6   | 41.1   | 56.8   | 50.1   | 74.2   | 52.9   | 56.5   | 67.3   | 35.2   |
| 184.8  | 156.0  | 316.8  | 186.4  | 386.0  | 423.7  | 371.9  | 470.7  | 203.6  |
| 26.3   | 17.0   | 13.9   | 13.3   | 17.6   | 10.5   | 18.7   | 3.1    | 15.5   |
| 277.3  | 286.8  | 285.4  | 226.9  | 199.0  | 168.9  | 187.1  | 220.8  | 181.9  |
| 362.8  | 321.4  | 494.6  | 402.5  | 269.7  | 281.1  | 301.5  | 347.0  | 132.9  |
| 214.7  | 229.6  | 191.3  | 248.0  | 304.0  | 406.2  | 294.8  | 362.6  | 126.0  |
| 148.9  | 129.7  | 217.4  | 158.3  | 214.7  | 203.1  | 245.0  | 276.2  | 416.3  |
| 108.1  | 105.4  | 108.8  | 107.9  | 148.2  | 151.2  | 154.3  | 166.7  | 144.7  |
| 166.4  | 164.9  | 180.1  | 144.6  | 203.0  | 205.6  | 240.3  | 279.0  | 339.8  |
| 30.3   | 23.7   | 46.9   | 21.5   | 0.7    | 0.4    | 0.6    | 0.3    | 327.9  |
| 1.7    | 0.7    | 0.9    | 0.9    | 0.8    | 2.3    | 1.1    | 5.3    | 1.8    |
| 145.8  | 109.4  | 136.1  | 123.2  | 40.1   | 43.7   | 43.4   | 63.8   | 182.0  |
| 130.4  | 130.0  | 136.5  | 100.9  | 118.4  | 180.8  | 166.9  | 156.4  | 118.9  |
| 13.8   | 2.7    | 21.3   | 18.5   | 3.1    | 10.6   | 13.5   | 5.2    | 14.1   |
| 105.1  | 85.4   | 148.7  | 102.9  | 27.6   | 66.8   | 35.7   | 52.9   | 61.7   |
| 240.4  | 229.4  | 350.5  | 329.5  | 191.8  | 262.1  | 180.0  | 216.3  | 609.5  |
| 60.4   | 76.7   | 83.5   | 71.3   | 2.4    | 5.2    | 2.3    | 2.7    | 4.5    |
| 90.9   | 94.3   | 73.4   | 79.6   | 127.9  | 148.4  | 142.3  | 155.2  | 160.5  |
| 305.8  | 294.2  | 393.4  | 304.0  | 407.6  | 302.3  | 394.1  | 445.2  | 339.0  |
| 232.2  | 219.4  | 428.3  | 226.7  | 376.6  | 339.8  | 330.6  | 424.2  | 773.7  |
| 12.6   | 5.5    | 10.8   | 1.1    | 4.2    | 3.6    | 10.4   | 2.8    | 2.7    |
| 96.4   | 101.5  | 164.1  | 71.0   | 153.8  | 123.4  | 118.7  | 184.5  | 109.1  |
| 108.2  | 78.5   | 230.1  | 85.9   | 399.2  | 311.6  | 349.8  | 393.8  | 269.7  |
| 328.3  | 321.3  | 412.3  | 294.2  | 599.9  | 609.6  | 608.9  | 728.0  | 610.3  |
| 14.6   | 10.2   | 13.9   | 11.0   | 251.6  | 298.9  | 321.7  | 337.3  | 204.5  |
| 373.0  | 327.3  | 1063.6 | 297.5  | 360.7  | 237.9  | 261.3  | 360.2  | 1011.7 |
| 1.9    | 4.6    | 8.3    | 5.3    | 3.9    | 1.5    | 2.5    | 1.0    | 4.7    |
| 2.5    | 1.2    | 4.7    | 2.9    | 0.9    | 2.9    | 0.7    | 6.4    | 5.8    |
| 6.6    | 1.1    | 6.0    | 2.4    | 40.4   | 12.2   | 50.5   | 40.7   | 2.7    |
| 10.8   | 11.3   | 21.4   | 14.0   | 33.7   | 15.7   | 37.6   | 39.9   | 22.5   |
| 84.6   | 81.2   | 90.5   | 83.5   | 230.0  | 239.2  | 245.5  | 251.9  | 439.6  |
| 33.0   | 22.0   | 71.7   | 23.2   | 204.6  | 161.8  | 195.2  | 245.8  | 156.0  |
| 14.4   | 8.7    | 29.3   | 18.1   | 34.5   | 33.6   | 30.2   | 34.9   | 40.1   |
| 498.2  | 433.7  | 647.6  | 410.8  | 424.3  | 409.7  | 472.8  | 517.8  | 201.7  |
| 36.9   | 39.2   | 38.7   | 32.7   | 349.2  | 309.7  | 365.6  | 406.6  | 194.4  |

|        |        |        |        |        |        |        |        |        |
|--------|--------|--------|--------|--------|--------|--------|--------|--------|
| 55.4   | 61.0   | 29.7   | 35.1   | 434.2  | 360.3  | 407.8  | 542.3  | 234.3  |
| 180.7  | 185.1  | 269.9  | 226.5  | 160.6  | 189.5  | 182.9  | 171.0  | 196.7  |
| 2.5    | 1.5    | 1.9    | 1.0    | 37.4   | 27.5   | 48.5   | 41.1   | 140.4  |
| 61.5   | 63.4   | 128.8  | 77.6   | 64.8   | 56.9   | 51.4   | 48.4   | 88.6   |
| 27.4   | 21.7   | 32.1   | 51.8   | 43.7   | 33.9   | 51.1   | 37.5   | 68.5   |
| 221.1  | 194.3  | 231.3  | 210.5  | 182.6  | 133.7  | 206.7  | 247.7  | 151.8  |
| 60.7   | 47.9   | 126.2  | 54.0   | 513.3  | 419.0  | 529.9  | 547.5  | 1239.2 |
| 192.4  | 183.4  | 203.8  | 151.3  | 17.6   | 22.6   | 20.8   | 25.2   | 13.3   |
| 458.0  | 466.1  | 604.5  | 473.5  | 556.6  | 669.4  | 651.6  | 676.7  | 766.8  |
| 234.7  | 208.5  | 281.2  | 215.0  | 206.3  | 216.2  | 213.8  | 230.5  | 276.6  |
| 0.7    | 0.9    | 1.2    | 0.6    | 125.6  | 193.8  | 153.5  | 185.0  | 1.5    |
| 6.4    | 4.7    | 3.7    | 3.4    | 317.3  | 424.8  | 352.6  | 356.1  | 9.2    |
| 73.7   | 96.9   | 82.8   | 86.5   | 224.9  | 296.3  | 252.6  | 224.0  | 252.7  |
| 212.9  | 207.8  | 219.7  | 219.6  | 337.7  | 503.7  | 391.4  | 434.7  | 716.7  |
| 308.7  | 277.5  | 262.9  | 338.6  | 525.6  | 782.1  | 549.8  | 635.1  | 1173.1 |
| 595.6  | 517.2  | 1058.0 | 652.2  | 1093.7 | 883.9  | 1066.1 | 1167.2 | 1322.6 |
| 666.4  | 607.8  | 778.1  | 673.4  | 99.0   | 126.4  | 159.7  | 138.3  | 33.8   |
| 195.3  | 167.5  | 205.9  | 166.3  | 42.2   | 44.3   | 33.7   | 42.2   | 119.3  |
| 8.8    | 9.2    | 17.0   | 11.3   | 15.0   | 15.9   | 17.3   | 18.8   | 12.1   |
| 190.2  | 128.4  | 367.8  | 282.0  | 1011.7 | 2151.8 | 1571.4 | 1163.6 | 811.0  |
| 6.5    | 12.6   | 15.5   | 12.4   | 61.2   | 55.4   | 50.1   | 71.4   | 5.8    |
| 170.5  | 170.7  | 210.5  | 178.2  | 389.8  | 489.8  | 409.4  | 507.3  | 185.0  |
| 107.5  | 72.6   | 157.7  | 84.0   | 180.0  | 175.3  | 205.5  | 226.2  | 184.4  |
| 7.0    | 3.6    | 3.2    | 4.1    | 1369.7 | 1339.4 | 1318.2 | 1585.2 | 2108.8 |
| 54.1   | 54.5   | 79.6   | 48.3   | 243.4  | 293.5  | 248.9  | 293.4  | 112.5  |
| 39.8   | 39.3   | 40.0   | 22.9   | 135.5  | 156.4  | 131.1  | 144.5  | 89.7   |
| 241.3  | 238.3  | 266.3  | 211.5  | 348.8  | 432.2  | 356.6  | 427.0  | 344.2  |
| 119.2  | 102.2  | 133.7  | 105.4  | 197.7  | 165.4  | 193.0  | 192.6  | 103.5  |
| 133.5  | 124.8  | 136.3  | 108.3  | 146.4  | 134.5  | 156.3  | 187.4  | 130.4  |
| 219.1  | 222.1  | 275.8  | 208.3  | 370.0  | 323.1  | 326.3  | 405.4  | 650.3  |
| 59.2   | 58.0   | 61.8   | 46.6   | 102.5  | 112.6  | 90.0   | 109.4  | 287.0  |
| 128.9  | 83.5   | 179.1  | 95.4   | 325.0  | 310.2  | 349.6  | 373.7  | 235.3  |
| 648.6  | 626.0  | 828.8  | 528.6  | 1118.4 | 1195.0 | 1172.0 | 1313.9 | 859.1  |
| 1755.6 | 1845.1 | 1827.1 | 1687.5 | 447.2  | 362.2  | 412.9  | 518.1  | 696.7  |
| 494.5  | 340.9  | 620.4  | 426.2  | 761.8  | 795.4  | 830.4  | 750.9  | 495.1  |
| 13.2   | 7.5    | 10.8   | 8.8    | 366.2  | 402.6  | 352.7  | 487.7  | 75.7   |
| 66.6   | 73.6   | 91.2   | 78.3   | 85.7   | 55.4   | 82.5   | 91.9   | 108.7  |
| 493.9  | 414.1  | 848.0  | 472.1  | 430.6  | 272.2  | 477.3  | 521.5  | 898.7  |
| 382.8  | 337.8  | 792.0  | 279.1  | 1073.4 | 661.8  | 1448.4 | 1042.9 | 619.2  |
| 488.3  | 441.4  | 541.5  | 411.8  | 391.0  | 320.7  | 360.5  | 443.2  | 602.7  |
| 538.4  | 431.0  | 679.8  | 403.5  | 675.8  | 624.4  | 666.6  | 778.5  | 1101.3 |
| 18.3   | 16.6   | 4.5    | 15.8   | 4.5    | 9.8    | 10.4   | 13.0   | 31.1   |
| 234.0  | 252.3  | 251.8  | 160.0  | 536.4  | 508.7  | 541.9  | 567.8  | 246.6  |
| 313.8  | 297.9  | 220.0  | 227.2  | 75.3   | 111.1  | 71.1   | 94.0   | 118.3  |
| 23.6   | 26.2   | 33.2   | 22.8   | 23.3   | 20.3   | 28.7   | 19.2   | 25.3   |
| 179.6  | 167.8  | 186.6  | 146.9  | 63.5   | 102.6  | 50.6   | 88.0   | 109.8  |
| 1730.4 | 1831.8 | 1948.3 | 1549.9 | 814.0  | 1219.1 | 693.8  | 1098.1 | 992.0  |
| 13.9   | 11.2   | 10.1   | 9.2    | 59.4   | 28.8   | 59.7   | 70.6   | 65.8   |
| 116.8  | 116.0  | 98.6   | 61.2   | 35.1   | 37.2   | 22.8   | 36.8   | 16.6   |
| 261.8  | 250.2  | 789.3  | 246.4  | 1122.9 | 628.2  | 1044.4 | 1247.1 | 839.3  |
| 182.3  | 186.7  | 176.3  | 160.8  | 73.8   | 65.7   | 76.4   | 114.9  | 4.9    |
| 1787.5 | 1571.0 | 3966.1 | 2504.2 | 12.4   | 12.0   | 12.7   | 2.9    | 2.3    |
| 133.2  | 158.5  | 88.3   | 143.9  | 61.5   | 61.8   | 65.3   | 67.5   | 40.3   |

|        |        |        |        |        |        |        |        |        |
|--------|--------|--------|--------|--------|--------|--------|--------|--------|
| 44.6   | 39.2   | 82.1   | 42.4   | 97.6   | 60.0   | 114.7  | 127.2  | 493.2  |
| 1.6    | 1.7    | 2.5    | 2.9    | 8.2    | 4.4    | 11.8   | 3.5    | 3.2    |
| 5.1    | 2.3    | 15.0   | 8.8    | 15.7   | 15.1   | 30.4   | 21.1   | 15.8   |
| 69.2   | 84.9   | 48.7   | 55.2   | 106.1  | 172.5  | 126.9  | 148.6  | 110.3  |
| 102.1  | 104.6  | 85.4   | 94.2   | 123.5  | 182.7  | 162.5  | 194.7  | 80.1   |
| 214.6  | 204.2  | 460.7  | 198.0  | 1079.4 | 595.2  | 902.0  | 1130.8 | 578.1  |
| 317.2  | 295.7  | 330.8  | 308.3  | 173.3  | 143.4  | 157.8  | 228.3  | 51.1   |
| 2.7    | 5.1    | 3.8    | 5.1    | 1.9    | 0.9    | 0.8    | 4.9    | 1.9    |
| 353.8  | 238.6  | 497.2  | 384.3  | 91.6   | 89.5   | 85.4   | 104.9  | 1.9    |
| 108.7  | 79.9   | 169.5  | 120.3  | 28.9   | 40.9   | 28.8   | 35.8   | 7.4    |
| 66.5   | 48.9   | 82.3   | 89.2   | 23.8   | 21.5   | 30.6   | 34.8   | 2.4    |
| 47.9   | 20.7   | 60.9   | 41.9   | 11.2   | 7.5    | 10.7   | 7.0    | 1.5    |
| 228.4  | 234.1  | 261.2  | 262.7  | 211.3  | 181.3  | 281.4  | 262.9  | 175.4  |
| 9.0    | 1.3    | 7.7    | 3.8    | 8.5    | 6.5    | 3.1    | 1.1    | 3.7    |
| 977.0  | 1007.8 | 980.2  | 1083.2 | 799.9  | 727.9  | 1039.0 | 914.0  | 475.1  |
| 216.2  | 214.0  | 296.1  | 209.9  | 441.6  | 371.5  | 471.6  | 551.8  | 527.4  |
| 461.3  | 402.2  | 710.3  | 460.1  | 390.9  | 352.3  | 416.3  | 485.8  | 471.2  |
| 192.5  | 173.7  | 249.0  | 198.7  | 321.7  | 399.6  | 323.6  | 331.2  | 386.1  |
| 131.9  | 119.8  | 257.3  | 121.6  | 116.1  | 121.2  | 125.1  | 135.2  | 142.1  |
| 113.5  | 132.5  | 128.9  | 122.8  | 72.6   | 98.5   | 103.9  | 121.9  | 75.9   |
| 28.1   | 22.6   | 28.6   | 12.6   | 2.7    | 0.5    | 4.0    | 1.7    | 1.3    |
| 122.1  | 103.7  | 118.9  | 78.6   | 15.0   | 8.7    | 14.6   | 18.0   | 5.2    |
| 904.4  | 784.3  | 739.3  | 835.6  | 2495.5 | 2272.4 | 3042.2 | 3062.6 | 2581.6 |
| 172.5  | 173.5  | 220.9  | 173.2  | 349.3  | 317.8  | 350.3  | 359.1  | 271.6  |
| 23.0   | 20.5   | 21.6   | 17.6   | 33.2   | 35.8   | 37.0   | 38.3   | 39.4   |
| 38.6   | 23.7   | 25.8   | 6.6    | 21.1   | 21.4   | 23.3   | 27.7   | 46.0   |
| 163.1  | 162.5  | 166.5  | 121.6  | 120.8  | 127.8  | 133.3  | 134.8  | 132.3  |
| 932.8  | 771.1  | 1530.8 | 946.2  | 619.9  | 701.6  | 935.3  | 935.0  | 607.9  |
| 119.0  | 117.5  | 173.3  | 132.5  | 116.4  | 88.2   | 146.1  | 175.2  | 124.5  |
| 103.4  | 89.3   | 125.6  | 90.2   | 104.8  | 73.7   | 91.1   | 94.8   | 95.6   |
| 709.0  | 660.2  | 845.3  | 642.4  | 362.5  | 263.5  | 348.2  | 363.1  | 493.4  |
| 368.3  | 369.3  | 286.6  | 304.7  | 367.4  | 352.1  | 429.8  | 448.8  | 318.2  |
| 187.5  | 202.0  | 123.3  | 142.6  | 200.0  | 162.5  | 177.3  | 217.7  | 186.3  |
| 630.4  | 501.1  | 863.3  | 581.4  | 88.2   | 109.3  | 104.0  | 110.8  | 77.0   |
| 371.8  | 330.8  | 667.6  | 387.6  | 73.1   | 69.7   | 53.6   | 92.2   | 111.9  |
| 227.7  | 233.7  | 196.7  | 184.6  | 232.7  | 236.2  | 252.1  | 316.3  | 120.9  |
| 256.9  | 233.8  | 410.2  | 220.8  | 72.2   | 79.7   | 59.7   | 80.4   | 31.1   |
| 154.0  | 152.7  | 194.6  | 147.3  | 34.1   | 51.7   | 44.1   | 56.4   | 36.7   |
| 15.7   | 28.6   | 51.6   | 28.7   | 85.2   | 60.1   | 106.6  | 113.5  | 100.5  |
| 7.8    | 5.6    | 8.9    | 5.7    | 42.0   | 32.0   | 54.8   | 50.7   | 29.2   |
| 2.8    | 1.5    | 12.5   | 6.7    | 1.3    | 1.9    | 0.5    | 3.0    | 120.2  |
| 685.5  | 699.1  | 724.2  | 750.6  | 529.3  | 486.5  | 541.1  | 566.3  | 717.6  |
| 104.1  | 93.7   | 107.3  | 116.7  | 58.9   | 39.5   | 52.8   | 71.0   | 53.5   |
| 357.8  | 304.8  | 455.6  | 295.4  | 94.1   | 167.2  | 123.1  | 119.6  | 497.6  |
| 271.8  | 279.0  | 295.8  | 243.9  | 318.3  | 260.7  | 419.1  | 400.9  | 117.8  |
| 1112.3 | 1152.0 | 1279.6 | 961.0  | 738.6  | 437.7  | 725.4  | 928.8  | 1176.8 |
| 59.7   | 47.6   | 114.8  | 38.7   | 93.9   | 98.2   | 85.1   | 102.8  | 60.5   |
| 25.0   | 11.0   | 37.6   | 16.0   | 60.9   | 38.3   | 47.0   | 45.6   | 42.4   |
| 1.5    | 0.6    | 0.9    | 0.8    | 1.9    | 0.5    | 0.8    | 0.5    | 0.8    |
| 5.6    | 13.1   | 4.2    | 9.8    | 5.6    | 6.0    | 5.0    | 8.0    | 5.7    |
| 50.2   | 42.7   | 67.0   | 37.8   | 37.0   | 33.1   | 42.8   | 31.7   | 89.2   |
| 85.6   | 87.6   | 75.2   | 71.1   | 703.8  | 489.8  | 575.2  | 876.9  | 110.3  |
| 57.6   | 59.4   | 50.3   | 50.9   | 509.4  | 373.0  | 387.8  | 593.9  | 68.2   |

|       |       |        |       |        |        |        |        |        |
|-------|-------|--------|-------|--------|--------|--------|--------|--------|
| 20.0  | 11.9  | 33.6   | 18.6  | 15.5   | 15.6   | 16.7   | 28.1   | 23.5   |
| 0.7   | 3.1   | 2.7    | 1.5   | 10.8   | 18.7   | 19.3   | 22.0   | 3.6    |
| 198.8 | 177.2 | 367.3  | 214.2 | 366.2  | 458.0  | 352.2  | 477.2  | 304.4  |
| 329.0 | 351.6 | 215.6  | 333.7 | 3.2    | 2.8    | 3.3    | 0.9    | 93.0   |
| 197.8 | 190.0 | 231.2  | 185.3 | 475.2  | 533.4  | 544.8  | 512.4  | 480.0  |
| 2.7   | 4.2   | 3.5    | 3.8   | 205.4  | 143.6  | 174.4  | 240.0  | 1.3    |
| 148.4 | 148.2 | 194.2  | 153.9 | 436.1  | 378.3  | 407.5  | 421.2  | 693.2  |
| 1.6   | 2.1   | 3.3    | 0.9   | 860.6  | 756.6  | 962.4  | 1096.8 | 805.4  |
| 8.8   | 4.0   | 7.4    | 7.9   | 1222.6 | 1049.7 | 1188.5 | 1389.6 | 1041.5 |
| 9.7   | 9.5   | 9.5    | 2.6   | 335.7  | 415.0  | 339.6  | 364.9  | 281.6  |
| 107.5 | 138.8 | 109.5  | 111.0 | 176.4  | 162.0  | 191.4  | 228.3  | 170.7  |
| 117.4 | 103.0 | 161.0  | 113.0 | 136.6  | 95.7   | 192.4  | 118.0  | 113.4  |
| 28.3  | 23.7  | 47.1   | 37.6  | 8.5    | 6.1    | 9.6    | 12.4   | 6.5    |
| 851.1 | 771.9 | 990.4  | 955.9 | 273.0  | 313.6  | 279.6  | 360.5  | 248.0  |
| 80.5  | 55.7  | 77.6   | 59.0  | 125.2  | 103.5  | 126.6  | 147.6  | 76.7   |
| 114.8 | 124.5 | 147.8  | 122.8 | 241.0  | 340.8  | 390.6  | 298.5  | 324.2  |
| 0.8   | 0.8   | 1.3    | 0.9   | 477.3  | 649.4  | 525.1  | 572.9  | 2.2    |
| 177.6 | 155.8 | 198.7  | 162.1 | 193.1  | 188.1  | 194.4  | 194.5  | 138.5  |
| 77.6  | 76.3  | 83.9   | 56.0  | 185.4  | 237.4  | 217.1  | 207.2  | 285.9  |
| 255.1 | 260.8 | 274.4  | 281.2 | 145.5  | 224.8  | 169.6  | 151.7  | 183.8  |
| 851.6 | 538.9 | 1206.4 | 715.4 | 1458.8 | 1120.3 | 1420.9 | 1724.4 | 2820.4 |
| 108.6 | 119.5 | 146.5  | 111.5 | 354.5  | 404.2  | 437.3  | 443.3  | 341.7  |
| 99.0  | 93.1  | 129.0  | 88.3  | 281.1  | 278.3  | 270.3  | 296.5  | 251.7  |
| 4.6   | 8.8   | 2.6    | 23.1  | 10.5   | 6.8    | 6.6    | 1.4    | 2.2    |
| 17.5  | 25.0  | 35.6   | 13.0  | 84.3   | 51.4   | 56.1   | 69.6   | 63.4   |
| 29.1  | 24.4  | 55.2   | 28.6  | 76.6   | 68.4   | 78.8   | 82.8   | 97.3   |
| 13.0  | 9.9   | 16.3   | 6.5   | 20.0   | 13.4   | 7.0    | 3.7    | 3.8    |
| 37.2  | 43.0  | 67.0   | 42.5  | 59.5   | 62.9   | 52.9   | 74.9   | 22.7   |
| 322.0 | 267.1 | 265.5  | 225.9 | 263.7  | 202.7  | 252.9  | 356.8  | 368.3  |
| 6.1   | 5.5   | 6.1    | 12.6  | 42.4   | 27.3   | 34.8   | 58.7   | 60.4   |
| 3.3   | 3.9   | 6.9    | 2.0   | 16.5   | 16.2   | 3.6    | 5.2    | 12.6   |
| 212.5 | 197.7 | 232.5  | 165.9 | 402.5  | 331.0  | 432.8  | 514.0  | 926.3  |
| 2.9   | 8.9   | 9.2    | 6.5   | 1.2    | 3.0    | 6.7    | 1.5    | 3.6    |
| 31.6  | 27.1  | 23.0   | 18.6  | 121.1  | 94.8   | 111.3  | 142.7  | 265.3  |
| 181.5 | 183.2 | 200.8  | 183.5 | 329.0  | 344.6  | 310.7  | 373.1  | 341.6  |
| 191.7 | 151.2 | 295.2  | 160.3 | 194.1  | 136.9  | 177.4  | 215.9  | 369.4  |
| 181.0 | 172.3 | 310.7  | 191.3 | 159.0  | 110.6  | 146.6  | 161.6  | 226.9  |
| 39.6  | 33.8  | 51.4   | 32.8  | 7.0    | 4.1    | 1.3    | 8.0    | 10.7   |
| 4.6   | 5.9   | 4.2    | 2.4   | 1.8    | 2.9    | 4.5    | 0.5    | 11.3   |
| 9.5   | 4.6   | 17.7   | 9.0   | 256.6  | 226.0  | 320.7  | 330.7  | 330.4  |
| 242.5 | 232.6 | 352.7  | 182.8 | 459.2  | 342.2  | 448.2  | 550.5  | 760.3  |
| 57.6  | 60.4  | 60.1   | 55.8  | 76.6   | 79.6   | 78.6   | 79.4   | 122.6  |
| 3.7   | 7.2   | 7.2    | 3.8   | 10.2   | 6.9    | 8.9    | 12.7   | 47.9   |
| 112.5 | 85.4  | 100.1  | 74.8  | 174.7  | 164.9  | 178.1  | 188.4  | 156.0  |
| 146.4 | 121.5 | 292.7  | 104.1 | 637.9  | 414.8  | 542.7  | 645.1  | 553.5  |
| 207.9 | 211.5 | 308.8  | 271.5 | 321.1  | 304.4  | 361.3  | 376.5  | 118.6  |
| 222.5 | 202.1 | 255.8  | 195.5 | 251.9  | 255.8  | 261.8  | 316.7  | 286.9  |
| 67.6  | 78.4  | 91.0   | 83.9  | 20.7   | 22.5   | 12.9   | 17.9   | 18.0   |
| 297.4 | 249.6 | 411.4  | 362.3 | 109.3  | 103.9  | 106.5  | 142.9  | 76.0   |
| 3.6   | 2.1   | 4.0    | 1.3   | 68.6   | 65.5   | 75.8   | 98.8   | 5.3    |
| 0.8   | 2.4   | 1.0    | 2.8   | 21.4   | 13.0   | 23.1   | 26.3   | 10.5   |
| 1.0   | 0.8   | 1.7    | 1.8   | 7.3    | 3.0    | 4.8    | 8.3    | 2.6    |
| 21.1  | 10.7  | 26.9   | 16.2  | 23.9   | 16.9   | 20.2   | 27.6   | 29.8   |

|       |       |       |       |        |        |        |        |        |
|-------|-------|-------|-------|--------|--------|--------|--------|--------|
| 66.7  | 52.6  | 66.8  | 68.9  | 36.4   | 47.4   | 38.3   | 41.7   | 58.3   |
| 50.8  | 46.2  | 117.5 | 65.6  | 58.0   | 59.6   | 60.4   | 57.1   | 82.6   |
| 115.1 | 96.8  | 327.2 | 156.9 | 308.3  | 311.9  | 308.3  | 312.2  | 239.5  |
| 3.6   | 10.9  | 6.5   | 3.6   | 2.1    | 1.3    | 5.9    | 7.0    | 8.6    |
| 131.3 | 103.8 | 231.6 | 133.1 | 183.0  | 164.0  | 182.0  | 207.3  | 161.6  |
| 152.2 | 131.4 | 268.6 | 149.6 | 186.2  | 149.3  | 155.8  | 213.2  | 121.6  |
| 144.2 | 116.5 | 337.8 | 163.6 | 503.1  | 479.5  | 472.2  | 516.8  | 453.6  |
| 9.7   | 12.0  | 14.9  | 7.0   | 3.5    | 2.2    | 22.3   | 1.6    | 13.3   |
| 11.0  | 5.2   | 7.1   | 7.1   | 13.8   | 7.0    | 9.2    | 12.9   | 7.9    |
| 11.5  | 12.7  | 11.1  | 8.2   | 197.9  | 172.8  | 197.0  | 281.6  | 173.3  |
| 9.0   | 10.0  | 4.7   | 2.9   | 242.5  | 182.0  | 227.3  | 284.1  | 176.2  |
| 3.1   | 1.4   | 6.2   | 5.4   | 0.7    | 0.7    | 5.7    | 2.2    | 2.0    |
| 2.9   | 1.0   | 1.3   | 1.8   | 1.8    | 1.3    | 2.3    | 1.5    | 4.5    |
| 21.6  | 20.3  | 36.0  | 40.9  | 24.8   | 23.7   | 30.8   | 30.1   | 27.9   |
| 11.1  | 14.6  | 13.9  | 5.5   | 163.3  | 146.1  | 149.3  | 197.0  | 284.3  |
| 516.9 | 482.2 | 935.1 | 547.3 | 953.1  | 1016.7 | 1012.0 | 1161.7 | 1818.0 |
| 46.0  | 39.9  | 119.4 | 54.2  | 357.1  | 291.0  | 444.0  | 461.4  | 17.5   |
| 63.6  | 80.1  | 66.4  | 59.9  | 64.0   | 83.9   | 87.6   | 89.6   | 65.3   |
| 39.3  | 47.8  | 48.1  | 38.9  | 299.2  | 313.9  | 270.6  | 340.1  | 358.1  |
| 28.5  | 25.3  | 35.2  | 27.9  | 279.2  | 268.0  | 220.2  | 282.3  | 262.0  |
| 508.5 | 454.0 | 628.1 | 456.5 | 582.8  | 666.0  | 538.9  | 639.1  | 534.9  |
| 0.9   | 1.1   | 1.6   | 1.4   | 0.7    | 0.6    | 1.0    | 11.1   | 2.4    |
| 26.6  | 16.3  | 14.2  | 10.2  | 244.8  | 520.5  | 508.5  | 280.7  | 6.4    |
| 13.6  | 14.9  | 11.0  | 3.8   | 155.4  | 361.3  | 351.1  | 205.2  | 6.6    |
| 8.9   | 9.8   | 15.1  | 15.7  | 1972.3 | 2041.1 | 2413.7 | 2044.6 | 65.8   |
| 158.3 | 171.2 | 157.3 | 132.3 | 131.6  | 146.3  | 220.3  | 186.7  | 275.7  |
| 52.6  | 68.5  | 58.4  | 52.9  | 75.4   | 56.8   | 68.5   | 48.3   | 84.3   |
| 15.1  | 15.0  | 21.7  | 21.1  | 46.6   | 51.2   | 35.2   | 52.5   | 26.7   |
| 486.1 | 419.9 | 462.3 | 395.5 | 720.4  | 631.8  | 657.3  | 822.2  | 915.3  |
| 43.6  | 32.5  | 41.6  | 23.6  | 77.1   | 89.5   | 70.8   | 96.8   | 68.4   |
| 589.2 | 556.6 | 732.1 | 537.1 | 379.5  | 391.9  | 439.3  | 457.3  | 82.8   |
| 306.5 | 265.7 | 391.7 | 290.4 | 180.9  | 169.4  | 198.7  | 204.5  | 24.4   |
| 322.4 | 323.5 | 427.7 | 445.4 | 140.5  | 254.7  | 189.5  | 204.7  | 333.5  |
| 300.7 | 367.8 | 466.0 | 267.7 | 88.7   | 79.9   | 102.4  | 116.9  | 173.9  |
| 105.5 | 84.2  | 167.6 | 95.4  | 30.0   | 36.6   | 44.4   | 35.5   | 130.4  |
| 38.0  | 38.5  | 35.0  | 34.1  | 22.6   | 20.0   | 24.7   | 29.4   | 29.4   |
| 65.7  | 74.5  | 74.2  | 66.3  | 27.3   | 29.3   | 34.4   | 28.6   | 41.8   |
| 6.2   | 5.4   | 4.1   | 8.3   | 3.0    | 4.7    | 5.0    | 3.7    | 3.8    |
| 2.2   | 7.8   | 7.6   | 7.1   | 1.7    | 1.7    | 3.4    | 3.9    | 6.5    |
| 193.8 | 247.3 | 319.7 | 212.0 | 236.8  | 184.3  | 152.8  | 198.4  | 74.0   |
| 282.0 | 300.3 | 450.4 | 356.2 | 372.8  | 336.9  | 356.1  | 409.2  | 557.9  |
| 141.3 | 152.5 | 180.4 | 157.1 | 86.1   | 93.1   | 74.2   | 84.2   | 64.8   |
| 170.9 | 155.4 | 164.4 | 147.6 | 124.6  | 91.0   | 101.7  | 110.6  | 67.8   |
| 7.7   | 4.5   | 7.0   | 6.6   | 112.3  | 96.6   | 80.1   | 128.5  | 23.1   |
| 52.8  | 53.0  | 86.3  | 54.9  | 442.8  | 344.7  | 474.3  | 554.8  | 202.0  |
| 364.4 | 445.6 | 382.6 | 348.1 | 2067.0 | 2136.8 | 1874.8 | 1919.3 | 195.0  |
| 217.5 | 180.9 | 361.2 | 209.7 | 149.0  | 161.2  | 172.5  | 188.7  | 64.1   |
| 109.9 | 85.0  | 57.6  | 100.1 | 1.8    | 5.9    | 8.0    | 17.4   | 156.5  |
| 29.3  | 30.6  | 43.9  | 41.7  | 21.3   | 10.6   | 37.9   | 43.9   | 22.7   |
| 22.5  | 25.1  | 32.7  | 32.2  | 15.7   | 5.0    | 31.1   | 23.5   | 14.9   |
| 4.6   | 15.0  | 16.4  | 5.2   | 7.0    | 7.4    | 13.0   | 10.1   | 13.9   |
| 109.0 | 105.5 | 73.4  | 94.2  | 85.1   | 63.5   | 69.3   | 83.6   | 104.4  |
| 593.7 | 591.7 | 913.5 | 564.4 | 17.6   | 8.4    | 25.0   | 27.5   | 70.7   |

|       |       |        |       |        |        |        |        |        |
|-------|-------|--------|-------|--------|--------|--------|--------|--------|
| 31.3  | 21.7  | 26.5   | 26.3  | 54.7   | 87.2   | 43.3   | 63.5   | 123.3  |
| 146.6 | 170.1 | 62.5   | 119.2 | 43.2   | 115.0  | 23.4   | 33.4   | 138.0  |
| 67.3  | 61.2  | 57.9   | 53.8  | 134.0  | 246.8  | 147.1  | 164.4  | 75.0   |
| 10.6  | 11.5  | 8.8    | 8.2   | 6.9    | 4.1    | 7.7    | 5.2    | 162.5  |
| 13.2  | 10.0  | 24.8   | 11.3  | 4.1    | 6.2    | 7.5    | 14.4   | 17.3   |
| 9.1   | 10.0  | 8.2    | 8.6   | 10.5   | 7.9    | 7.1    | 13.8   | 3.4    |
| 1.7   | 2.4   | 7.6    | 1.9   | 30.8   | 29.9   | 112.5  | 45.8   | 5.3    |
| 270.8 | 235.5 | 466.4  | 268.0 | 3890.8 | 3328.1 | 3480.8 | 4342.9 | 1013.6 |
| 78.5  | 77.0  | 140.6  | 58.7  | 299.3  | 259.7  | 299.9  | 292.0  | 206.9  |
| 47.8  | 48.7  | 72.0   | 49.6  | 139.0  | 126.9  | 114.2  | 164.4  | 101.7  |
| 110.0 | 97.0  | 62.9   | 57.4  | 70.1   | 72.2   | 99.6   | 78.7   | 21.8   |
| 121.1 | 132.7 | 83.8   | 83.4  | 32.5   | 37.0   | 39.9   | 53.3   | 11.8   |
| 20.5  | 29.3  | 18.6   | 14.7  | 2.1    | 2.8    | 0.9    | 6.7    | 6.3    |
| 396.9 | 299.4 | 641.6  | 342.0 | 861.6  | 780.7  | 872.9  | 918.9  | 950.7  |
| 27.2  | 25.3  | 37.5   | 27.3  | 36.6   | 30.2   | 43.3   | 56.6   | 317.5  |
| 158.5 | 139.4 | 255.5  | 163.9 | 164.4  | 149.9  | 135.0  | 149.2  | 94.4   |
| 3.8   | 6.6   | 3.2    | 4.7   | 16.5   | 12.1   | 12.6   | 8.3    | 114.5  |
| 172.8 | 174.8 | 166.0  | 151.1 | 433.2  | 422.2  | 451.9  | 549.1  | 206.8  |
| 27.5  | 36.3  | 37.4   | 20.3  | 81.7   | 63.2   | 62.3   | 82.6   | 117.4  |
| 42.5  | 41.2  | 14.0   | 20.5  | 25.8   | 31.8   | 24.2   | 38.1   | 38.7   |
| 88.4  | 107.6 | 52.8   | 66.8  | 116.0  | 110.3  | 105.6  | 111.5  | 104.9  |
| 7.8   | 10.0  | 5.8    | 8.0   | 1088.6 | 959.6  | 586.3  | 767.8  | 430.7  |
| 44.7  | 43.3  | 27.3   | 31.8  | 16.9   | 11.6   | 17.0   | 22.8   | 39.9   |
| 122.8 | 94.8  | 145.1  | 98.6  | 146.5  | 159.5  | 157.8  | 183.9  | 174.1  |
| 246.8 | 254.9 | 354.2  | 280.9 | 21.1   | 12.5   | 20.9   | 21.4   | 22.0   |
| 189.8 | 203.2 | 210.5  | 191.9 | 265.3  | 258.2  | 260.5  | 296.8  | 181.8  |
| 91.7  | 101.1 | 121.5  | 91.1  | 143.4  | 156.2  | 139.6  | 175.4  | 175.9  |
| 38.1  | 36.8  | 54.7   | 30.7  | 49.2   | 47.1   | 46.1   | 65.9   | 52.5   |
| 199.9 | 204.0 | 117.1  | 81.5  | 120.2  | 181.7  | 143.8  | 175.5  | 167.6  |
| 444.9 | 394.1 | 470.3  | 418.3 | 386.0  | 363.0  | 391.6  | 405.6  | 465.4  |
| 1.5   | 2.6   | 2.4    | 9.5   | 5.5    | 2.0    | 6.9    | 7.0    | 3.2    |
| 13.2  | 8.9   | 18.1   | 10.7  | 9.7    | 6.7    | 10.8   | 15.6   | 11.8   |
| 36.7  | 42.4  | 30.2   | 40.7  | 37.4   | 50.1   | 40.2   | 38.7   | 24.7   |
| 3.6   | 6.9   | 1.1    | 3.9   | 377.2  | 276.8  | 1049.9 | 687.8  | 8.5    |
| 300.4 | 258.2 | 191.3  | 385.5 | 160.4  | 222.1  | 148.0  | 114.2  | 192.2  |
| 441.4 | 431.3 | 389.6  | 404.0 | 8.8    | 4.4    | 5.0    | 1.0    | 2.4    |
| 326.0 | 336.0 | 283.8  | 278.3 | 16.2   | 7.1    | 8.1    | 18.6   | 4.0    |
| 168.9 | 177.0 | 185.3  | 152.8 | 141.4  | 144.8  | 115.8  | 148.8  | 108.4  |
| 557.4 | 537.8 | 715.4  | 512.5 | 607.4  | 572.6  | 665.4  | 672.1  | 494.6  |
| 172.2 | 173.5 | 224.1  | 168.9 | 243.0  | 261.0  | 242.0  | 291.2  | 394.0  |
| 32.0  | 28.0  | 35.9   | 22.5  | 39.2   | 57.3   | 55.4   | 48.0   | 49.2   |
| 90.8  | 91.5  | 93.9   | 100.0 | 117.4  | 139.0  | 109.4  | 146.9  | 113.8  |
| 213.4 | 249.1 | 157.6  | 164.4 | 570.3  | 350.3  | 561.2  | 498.1  | 474.3  |
| 577.5 | 634.5 | 544.3  | 611.8 | 45.7   | 109.3  | 58.2   | 77.8   | 25.0   |
| 854.4 | 855.1 | 858.6  | 809.1 | 70.0   | 142.1  | 73.6   | 101.2  | 35.2   |
| 483.8 | 423.3 | 828.7  | 606.3 | 152.6  | 118.9  | 215.1  | 196.2  | 11.2   |
| 374.5 | 416.7 | 239.4  | 341.8 | 467.5  | 394.4  | 438.4  | 502.3  | 342.6  |
| 77.3  | 87.1  | 79.0   | 89.2  | 17.8   | 40.6   | 26.3   | 31.0   | 71.4   |
| 657.2 | 685.4 | 706.8  | 575.1 | 301.9  | 304.0  | 344.2  | 377.4  | 281.1  |
| 112.1 | 99.7  | 1613.7 | 265.0 | 731.4  | 470.8  | 617.3  | 780.6  | 726.9  |
| 84.1  | 63.1  | 1072.7 | 155.6 | 851.0  | 527.1  | 706.6  | 957.9  | 617.4  |
| 16.3  | 16.9  | 15.5   | 13.0  | 6.1    | 4.3    | 13.3   | 9.6    | 11.1   |
| 130.1 | 133.8 | 160.9  | 134.2 | 271.5  | 190.9  | 262.3  | 316.2  | 228.3  |

|        |        |        |        |        |        |        |        |        |
|--------|--------|--------|--------|--------|--------|--------|--------|--------|
| 125.5  | 97.5   | 242.1  | 104.8  | 254.2  | 309.2  | 330.5  | 286.9  | 260.1  |
| 173.8  | 166.9  | 217.5  | 185.5  | 365.6  | 328.6  | 404.7  | 421.0  | 294.3  |
| 32.6   | 26.3   | 19.8   | 18.2   | 188.2  | 196.2  | 246.1  | 225.2  | 217.6  |
| 344.2  | 321.1  | 416.0  | 293.1  | 246.8  | 255.5  | 277.0  | 309.4  | 17.1   |
| 41.0   | 43.8   | 92.8   | 43.2   | 147.8  | 98.1   | 114.0  | 117.9  | 261.0  |
| 43.2   | 31.7   | 119.9  | 24.5   | 201.0  | 120.6  | 148.6  | 171.7  | 190.9  |
| 3.1    | 2.1    | 3.1    | 4.3    | 5.4    | 19.8   | 2.3    | 4.2    | 7.4    |
| 152.5  | 122.0  | 250.0  | 157.6  | 217.4  | 188.4  | 203.5  | 223.4  | 507.3  |
| 13.9   | 18.0   | 27.5   | 31.5   | 4.8    | 5.0    | 2.5    | 29.4   | 56.0   |
| 3.6    | 2.0    | 2.6    | 3.8    | 3.7    | 4.5    | 8.2    | 7.2    | 1.8    |
| 128.5  | 124.1  | 80.8   | 77.9   | 84.4   | 99.5   | 78.4   | 89.7   | 112.8  |
| 11.5   | 15.6   | 16.4   | 6.1    | 13.5   | 11.5   | 5.6    | 14.5   | 14.2   |
| 369.2  | 344.0  | 455.7  | 320.2  | 673.4  | 556.3  | 658.8  | 850.0  | 1246.0 |
| 88.1   | 78.7   | 64.4   | 70.6   | 112.9  | 123.8  | 113.0  | 163.6  | 142.1  |
| 182.2  | 189.3  | 164.9  | 160.0  | 174.8  | 169.7  | 183.0  | 198.4  | 103.2  |
| 171.0  | 175.2  | 142.9  | 146.1  | 40.1   | 54.3   | 48.0   | 55.8   | 62.9   |
| 83.0   | 85.6   | 105.5  | 91.8   | 37.2   | 38.6   | 55.1   | 49.1   | 516.5  |
| 230.2  | 227.3  | 229.8  | 202.8  | 378.9  | 305.1  | 408.4  | 437.0  | 158.6  |
| 22.5   | 27.3   | 29.4   | 20.2   | 796.9  | 336.6  | 848.9  | 1071.3 | 277.3  |
| 69.5   | 70.1   | 81.1   | 58.9   | 44.3   | 42.6   | 37.4   | 40.3   | 55.7   |
| 76.8   | 75.7   | 76.1   | 72.7   | 50.5   | 45.8   | 57.4   | 57.9   | 67.6   |
| 167.5  | 189.3  | 169.4  | 163.8  | 126.2  | 100.7  | 107.6  | 156.1  | 129.8  |
| 1.7    | 1.7    | 1.9    | 2.9    | 1.1    | 1.1    | 1.6    | 1.3    | 3.0    |
| 2.4    | 2.1    | 4.9    | 1.8    | 30.3   | 40.3   | 18.8   | 50.4   | 24.3   |
| 24.2   | 26.8   | 21.0   | 15.6   | 4.6    | 9.3    | 17.8   | 6.5    | 15.1   |
| 32.0   | 44.5   | 27.5   | 27.1   | 20.0   | 17.2   | 16.4   | 34.2   | 36.2   |
| 120.4  | 105.1  | 148.2  | 128.1  | 150.1  | 155.5  | 144.4  | 153.2  | 233.1  |
| 16.1   | 13.4   | 30.4   | 18.1   | 17.5   | 41.1   | 29.8   | 36.6   | 10.0   |
| 74.6   | 52.6   | 109.1  | 65.4   | 79.0   | 139.5  | 87.9   | 102.0  | 60.6   |
| 50.2   | 47.8   | 48.6   | 46.9   | 168.5  | 203.4  | 143.1  | 183.3  | 152.0  |
| 52.0   | 35.1   | 82.4   | 57.1   | 209.3  | 225.3  | 231.0  | 237.6  | 278.1  |
| 97.9   | 73.6   | 88.1   | 92.1   | 14.3   | 17.5   | 16.4   | 14.4   | 38.6   |
| 115.5  | 108.2  | 97.8   | 91.1   | 224.9  | 196.6  | 199.1  | 218.5  | 168.1  |
| 1114.8 | 1321.5 | 1059.5 | 1159.3 | 1101.1 | 1014.6 | 1417.4 | 1201.9 | 310.3  |
| 533.4  | 632.5  | 579.6  | 450.0  | 801.6  | 908.3  | 1224.0 | 993.3  | 384.8  |
| 1.7    | 0.6    | 1.0    | 0.7    | 4.5    | 2.8    | 1.3    | 1.1    | 6.4    |
| 5.1    | 4.4    | 3.8    | 3.5    | 4.7    | 1.7    | 3.7    | 5.3    | 11.8   |
| 55.5   | 54.9   | 51.3   | 51.8   | 49.1   | 98.5   | 74.5   | 69.0   | 41.2   |
| 955.6  | 910.4  | 1222.6 | 1024.6 | 1004.2 | 957.7  | 1060.7 | 1240.3 | 745.3  |
| 17.5   | 19.4   | 19.4   | 15.4   | 5.9    | 8.7    | 10.8   | 20.6   | 12.3   |
| 40.9   | 40.9   | 37.9   | 27.1   | 130.4  | 169.7  | 134.6  | 149.1  | 1853.3 |
| 232.3  | 219.0  | 278.8  | 217.7  | 253.3  | 265.6  | 275.1  | 277.1  | 641.0  |
| 5.4    | 0.5    | 4.1    | 5.4    | 1.1    | 1.4    | 1.2    | 8.1    | 3.2    |
| 460.1  | 346.1  | 1217.4 | 360.1  | 97.1   | 107.4  | 90.8   | 87.0   | 879.9  |
| 340.3  | 251.6  | 999.8  | 279.5  | 209.3  | 171.6  | 207.3  | 200.7  | 1027.3 |
| 113.9  | 106.6  | 138.5  | 106.2  | 178.5  | 151.7  | 182.8  | 210.3  | 208.6  |
| 337.5  | 271.5  | 621.7  | 320.7  | 747.1  | 836.8  | 951.6  | 860.7  | 233.4  |
| 16.5   | 17.1   | 25.0   | 37.9   | 7.6    | 14.7   | 7.3    | 17.0   | 40.6   |
| 1658.9 | 1916.9 | 1474.5 | 1984.1 | 36.6   | 106.6  | 51.4   | 54.3   | 20.5   |
| 390.0  | 348.8  | 374.9  | 333.7  | 575.1  | 523.2  | 490.2  | 577.6  | 573.6  |
| 88.4   | 88.9   | 82.5   | 71.4   | 189.5  | 180.8  | 182.4  | 185.3  | 167.6  |
| 160.4  | 148.2  | 159.9  | 131.4  | 209.6  | 190.2  | 185.3  | 254.0  | 192.1  |
| 348.8  | 329.6  | 823.7  | 249.7  | 714.2  | 653.9  | 718.6  | 781.1  | 713.9  |

|        |        |        |        |        |        |        |        |        |
|--------|--------|--------|--------|--------|--------|--------|--------|--------|
| 52.6   | 43.2   | 75.4   | 55.7   | 102.5  | 104.0  | 112.3  | 131.9  | 41.4   |
| 236.6  | 209.5  | 237.5  | 194.0  | 293.3  | 347.8  | 360.6  | 383.2  | 230.9  |
| 927.6  | 822.5  | 2320.1 | 659.7  | 1709.8 | 1089.0 | 1425.6 | 1829.1 | 2147.7 |
| 128.2  | 92.2   | 198.5  | 116.1  | 274.2  | 252.1  | 259.2  | 271.7  | 222.6  |
| 882.2  | 932.3  | 1152.4 | 1026.3 | 222.8  | 277.5  | 224.7  | 212.6  | 206.8  |
| 90.7   | 78.9   | 92.6   | 82.5   | 45.0   | 45.3   | 46.2   | 55.1   | 56.4   |
| 12.5   | 11.4   | 19.7   | 9.2    | 784.6  | 664.0  | 919.2  | 868.7  | 853.3  |
| 2772.3 | 2687.9 | 3889.4 | 2605.6 | 2883.9 | 3040.8 | 3080.9 | 3326.5 | 3792.3 |
| 194.0  | 206.4  | 156.3  | 183.2  | 693.9  | 732.4  | 841.8  | 780.5  | 542.3  |
| 350.8  | 326.0  | 891.8  | 279.8  | 2280.3 | 1503.2 | 2165.8 | 2254.2 | 1291.3 |
| 328.2  | 334.1  | 506.1  | 357.0  | 529.9  | 707.1  | 477.0  | 501.0  | 1222.1 |
| 7.7    | 9.8    | 4.4    | 7.9    | 29.3   | 34.5   | 44.8   | 41.4   | 48.4   |
| 5.0    | 5.8    | 9.3    | 4.0    | 109.9  | 88.7   | 106.3  | 120.9  | 7.4    |
| 8.4    | 9.0    | 16.7   | 10.5   | 52.2   | 47.8   | 48.1   | 74.5   | 13.3   |
| 31.1   | 32.2   | 56.7   | 22.5   | 70.9   | 62.4   | 67.6   | 97.9   | 40.3   |
| 190.2  | 204.4  | 305.3  | 202.8  | 53.2   | 63.1   | 46.0   | 57.8   | 11.7   |
| 105.7  | 109.4  | 115.3  | 81.6   | 22.0   | 13.3   | 17.4   | 29.3   | 182.9  |
| 4.8    | 6.9    | 4.3    | 1.8    | 4.4    | 3.8    | 8.1    | 3.6    | 32.2   |
| 113.4  | 104.2  | 198.2  | 138.8  | 45.4   | 35.0   | 54.8   | 51.8   | 206.5  |
| 13.6   | 16.0   | 24.8   | 27.0   | 37.5   | 46.2   | 30.2   | 68.7   | 31.6   |
| 182.4  | 124.6  | 465.2  | 189.0  | 307.1  | 246.0  | 463.8  | 402.8  | 8.1    |
| 362.8  | 357.8  | 310.7  | 309.3  | 263.5  | 215.0  | 238.7  | 328.7  | 251.8  |
| 12.7   | 6.9    | 8.1    | 5.6    | 16.8   | 5.4    | 9.2    | 4.1    | 11.0   |
| 15.6   | 11.7   | 15.9   | 23.3   | 47.2   | 42.9   | 43.6   | 46.7   | 23.5   |
| 81.9   | 81.7   | 103.8  | 95.0   | 217.3  | 169.3  | 223.1  | 243.2  | 100.7  |
| 95.9   | 94.1   | 124.4  | 104.7  | 273.3  | 176.9  | 212.5  | 291.3  | 123.3  |
| 774.2  | 723.2  | 959.4  | 768.8  | 1349.1 | 1322.3 | 1579.0 | 1480.3 | 2517.0 |
| 10.7   | 10.9   | 17.4   | 11.8   | 11.1   | 9.1    | 14.1   | 18.4   | 13.3   |
| 5.2    | 5.9    | 1.0    | 1.5    | 2.0    | 4.6    | 2.2    | 5.1    | 6.3    |
| 334.7  | 296.8  | 482.3  | 286.0  | 48.7   | 57.7   | 41.8   | 53.7   | 638.1  |
| 126.6  | 103.9  | 182.7  | 123.7  | 15.5   | 17.3   | 9.6    | 18.0   | 159.5  |
| 6.4    | 10.6   | 7.8    | 5.7    | 5.5    | 9.2    | 5.2    | 0.9    | 4.1    |
| 63.0   | 63.4   | 126.9  | 67.5   | 68.3   | 60.3   | 68.9   | 97.7   | 45.0   |
| 32.1   | 33.4   | 38.2   | 37.2   | 48.8   | 45.6   | 50.2   | 48.5   | 35.0   |
| 250.3  | 230.3  | 443.8  | 220.7  | 868.8  | 632.8  | 954.9  | 1305.7 | 399.2  |
| 477.9  | 427.8  | 681.8  | 388.9  | 1602.2 | 1549.1 | 1902.5 | 2083.5 | 631.8  |
| 102.1  | 87.0   | 170.2  | 114.0  | 62.6   | 59.6   | 61.3   | 70.0   | 73.2   |
| 103.9  | 106.4  | 159.7  | 141.5  | 35.7   | 40.1   | 41.6   | 50.1   | 48.0   |
| 82.9   | 92.6   | 80.4   | 84.8   | 78.1   | 122.5  | 87.2   | 108.5  | 25.7   |
| 36.7   | 51.7   | 38.9   | 41.1   | 31.9   | 53.1   | 25.8   | 47.1   | 17.0   |
| 349.0  | 364.5  | 472.6  | 352.2  | 584.2  | 567.8  | 572.7  | 600.4  | 291.1  |
| 43.4   | 41.2   | 55.1   | 43.7   | 23.5   | 21.0   | 12.0   | 35.6   | 208.2  |
| 259.4  | 248.5  | 352.6  | 268.2  | 253.3  | 314.1  | 267.7  | 290.1  | 107.0  |
| 181.7  | 166.9  | 188.9  | 194.5  | 98.0   | 74.2   | 91.6   | 110.2  | 99.3   |
| 475.7  | 515.3  | 526.2  | 502.5  | 335.8  | 262.4  | 310.7  | 391.4  | 386.3  |
| 29.5   | 34.5   | 39.1   | 31.7   | 52.7   | 35.7   | 46.9   | 76.3   | 54.3   |
| 64.6   | 59.7   | 43.1   | 50.6   | 7.5    | 9.2    | 7.4    | 9.8    | 29.4   |
| 63.0   | 58.9   | 70.6   | 64.7   | 291.1  | 206.8  | 249.4  | 393.0  | 459.5  |
| 8.7    | 14.2   | 2.5    | 13.0   | 18.1   | 23.5   | 21.9   | 16.8   | 8.9    |
| 2.7    | 1.1    | 8.9    | 12.5   | 115.4  | 132.1  | 127.4  | 124.0  | 26.8   |
| 81.4   | 57.6   | 106.5  | 50.2   | 84.2   | 133.0  | 118.8  | 106.2  | 142.4  |
| 104.1  | 77.1   | 124.1  | 92.3   | 49.3   | 61.6   | 45.4   | 72.8   | 87.8   |
| 173.0  | 179.8  | 160.0  | 167.5  | 330.0  | 339.4  | 290.0  | 358.8  | 440.2  |



|        |        |        |        |        |        |        |        |        |
|--------|--------|--------|--------|--------|--------|--------|--------|--------|
| 25.0   | 28.8   | 26.4   | 13.4   | 32.8   | 35.9   | 38.1   | 44.0   | 34.8   |
| 28.2   | 20.7   | 33.0   | 32.4   | 238.8  | 323.4  | 249.2  | 257.1  | 221.1  |
| 51.4   | 40.9   | 85.5   | 60.0   | 368.4  | 359.7  | 526.0  | 500.4  | 138.7  |
| 47.6   | 41.6   | 85.9   | 41.3   | 142.9  | 93.2   | 124.3  | 142.7  | 368.9  |
| 21.1   | 14.2   | 42.9   | 6.3    | 110.1  | 89.6   | 104.5  | 129.7  | 122.7  |
| 260.6  | 267.8  | 315.2  | 167.1  | 201.7  | 190.1  | 159.0  | 199.5  | 137.9  |
| 1.3    | 1.4    | 0.8    | 0.6    | 1189.6 | 1174.2 | 2338.3 | 1654.7 | 727.3  |
| 100.3  | 103.7  | 111.4  | 100.1  | 551.5  | 457.7  | 705.2  | 606.1  | 250.4  |
| 38.7   | 44.5   | 43.1   | 45.0   | 200.8  | 218.6  | 276.7  | 216.7  | 76.4   |
| 6.3    | 9.8    | 9.9    | 6.0    | 47.1   | 43.3   | 63.2   | 58.1   | 609.1  |
| 441.9  | 417.8  | 571.8  | 469.8  | 256.9  | 278.0  | 274.9  | 339.8  | 464.4  |
| 285.8  | 252.2  | 319.6  | 282.3  | 136.8  | 197.9  | 146.9  | 194.0  | 50.1   |
| 114.3  | 100.3  | 131.7  | 120.1  | 162.1  | 139.9  | 151.8  | 163.9  | 158.9  |
| 111.8  | 144.8  | 151.0  | 110.4  | 147.9  | 249.3  | 176.1  | 177.4  | 104.9  |
| 205.2  | 177.4  | 280.9  | 213.1  | 290.9  | 361.1  | 272.3  | 346.2  | 243.6  |
| 1369.5 | 1238.5 | 2253.7 | 1350.9 | 1557.7 | 856.6  | 1315.3 | 1798.4 | 1314.8 |
| 146.8  | 160.2  | 234.3  | 172.3  | 763.5  | 801.7  | 807.5  | 927.5  | 1223.3 |
| 288.1  | 265.3  | 346.0  | 243.0  | 724.0  | 505.2  | 858.0  | 914.9  | 278.7  |
| 22.7   | 19.4   | 18.1   | 13.0   | 17.6   | 28.4   | 24.6   | 26.7   | 72.4   |
| 19.8   | 26.6   | 35.4   | 25.1   | 30.7   | 18.1   | 14.3   | 34.3   | 59.4   |
| 98.1   | 102.3  | 88.1   | 93.4   | 125.6  | 149.8  | 145.4  | 151.2  | 212.2  |
| 74.6   | 66.1   | 91.6   | 79.4   | 107.3  | 142.0  | 119.6  | 158.0  | 170.9  |
| 48.2   | 26.6   | 27.1   | 15.4   | 84.3   | 109.6  | 109.5  | 94.4   | 51.9   |
| 16.6   | 9.3    | 57.2   | 59.5   | 6.0    | 12.9   | 9.4    | 2.6    | 1.4    |
| 41.6   | 38.0   | 51.9   | 38.0   | 29.3   | 30.1   | 37.8   | 35.9   | 57.0   |
| 5174.0 | 5250.1 | 4998.5 | 4948.2 | 4557.9 | 4887.6 | 4808.9 | 5248.5 | 7254.7 |
| 2.5    | 1.1    | 3.5    | 1.6    | 5.1    | 1.1    | 1.7    | 2.0    | 2.8    |
| 41.6   | 34.9   | 70.1   | 43.7   | 43.8   | 39.2   | 46.0   | 37.2   | 71.6   |
| 1412.4 | 1552.4 | 1097.5 | 1355.2 | 335.6  | 406.8  | 431.2  | 473.4  | 50.3   |
| 90.4   | 75.3   | 132.5  | 88.3   | 95.1   | 130.5  | 118.5  | 107.8  | 103.6  |
| 90.5   | 94.5   | 136.7  | 101.6  | 153.6  | 134.2  | 126.3  | 168.7  | 122.1  |
| 200.1  | 180.4  | 276.2  | 187.3  | 270.9  | 226.7  | 253.2  | 340.9  | 184.8  |
| 104.2  | 78.3   | 143.5  | 94.4   | 137.9  | 109.1  | 121.9  | 178.8  | 137.2  |
| 15.1   | 14.7   | 16.6   | 17.6   | 9.8    | 3.1    | 5.7    | 9.3    | 6.0    |
| 12.3   | 13.3   | 9.7    | 16.8   | 8.4    | 3.2    | 5.9    | 6.4    | 6.1    |
| 808.4  | 960.8  | 494.8  | 776.4  | 105.3  | 42.0   | 207.5  | 182.5  | 58.6   |
| 93.7   | 103.9  | 152.9  | 86.7   | 98.1   | 88.4   | 128.4  | 113.1  | 154.2  |
| 7.7    | 4.3    | 12.3   | 3.0    | 1.2    | 5.2    | 0.5    | 0.3    | 9.8    |
| 1.8    | 3.6    | 1.9    | 2.0    | 938.5  | 837.8  | 811.0  | 951.7  | 1184.1 |
| 3.9    | 17.0   | 15.0   | 11.0   | 23.4   | 30.3   | 25.3   | 31.0   | 11.9   |
| 206.1  | 200.0  | 288.3  | 174.3  | 203.6  | 175.4  | 207.1  | 277.0  | 232.4  |
| 11.6   | 9.0    | 32.4   | 10.3   | 15.2   | 17.2   | 20.8   | 27.2   | 13.7   |
| 491.0  | 491.6  | 679.7  | 386.6  | 653.3  | 649.7  | 592.4  | 714.2  | 750.3  |
| 179.6  | 152.4  | 323.1  | 121.8  | 117.6  | 74.2   | 87.7   | 111.3  | 113.9  |
| 42.9   | 39.0   | 60.6   | 35.6   | 12.1   | 10.8   | 13.2   | 20.3   | 16.1   |
| 7.0    | 2.0    | 9.8    | 6.3    | 6.6    | 2.8    | 2.3    | 8.8    | 6.7    |
| 126.7  | 115.9  | 374.4  | 240.6  | 144.2  | 126.9  | 160.7  | 159.5  | 139.9  |
| 2.5    | 2.0    | 6.5    | 3.4    | 6.2    | 2.5    | 4.0    | 7.6    | 1.4    |
| 391.0  | 393.9  | 395.7  | 444.4  | 251.8  | 271.6  | 313.2  | 317.5  | 609.1  |
| 69.7   | 69.3   | 243.0  | 36.0   | 287.2  | 189.9  | 235.2  | 297.7  | 237.4  |
| 250.9  | 256.9  | 765.1  | 234.7  | 752.0  | 532.8  | 706.2  | 847.0  | 1341.4 |
| 148.2  | 154.4  | 430.9  | 124.1  | 525.8  | 298.8  | 438.4  | 596.9  | 688.9  |
| 69.2   | 57.2   | 61.2   | 66.2   | 73.0   | 59.7   | 75.9   | 85.8   | 54.8   |

|        |        |        |        |        |        |        |        |        |
|--------|--------|--------|--------|--------|--------|--------|--------|--------|
| 37.5   | 35.2   | 40.6   | 29.1   | 1.8    | 2.5    | 6.3    | 0.9    | 5.1    |
| 1186.0 | 1350.1 | 728.4  | 1230.1 | 304.3  | 297.4  | 334.3  | 354.9  | 136.5  |
| 780.5  | 781.5  | 546.1  | 766.1  | 197.3  | 198.8  | 216.0  | 267.0  | 115.9  |
| 50.4   | 38.7   | 101.9  | 47.4   | 183.0  | 167.8  | 218.1  | 197.4  | 308.4  |
| 8.9    | 14.3   | 8.0    | 12.0   | 61.5   | 75.1   | 66.1   | 78.1   | 11.8   |
| 20.6   | 27.5   | 22.4   | 34.6   | 181.6  | 128.5  | 430.4  | 386.0  | 7.8    |
| 38.2   | 50.4   | 36.5   | 44.7   | 69.1   | 97.3   | 58.2   | 69.6   | 53.3   |
| 263.7  | 317.8  | 325.3  | 428.1  | 87.1   | 112.6  | 105.1  | 100.8  | 289.5  |
| 7.9    | 5.5    | 9.7    | 9.7    | 9.0    | 9.8    | 11.4   | 5.9    | 29.8   |
| 52.4   | 48.7   | 44.5   | 65.4   | 69.7   | 64.0   | 56.1   | 85.4   | 54.7   |
| 40.2   | 35.4   | 37.8   | 31.8   | 122.4  | 102.4  | 126.4  | 128.5  | 521.5  |
| 1475.5 | 1206.5 | 2056.7 | 1228.6 | 3043.0 | 2924.1 | 3255.3 | 3569.5 | 1057.7 |
| 93.2   | 90.4   | 160.8  | 122.5  | 262.1  | 282.1  | 244.9  | 287.9  | 183.7  |
| 135.1  | 137.9  | 214.5  | 144.6  | 212.8  | 266.9  | 226.4  | 245.1  | 176.7  |
| 56.8   | 46.9   | 55.2   | 52.6   | 62.1   | 68.0   | 59.0   | 57.1   | 40.6   |
| 226.1  | 228.6  | 258.8  | 206.2  | 436.5  | 377.2  | 412.1  | 383.5  | 930.1  |
| 215.2  | 196.9  | 504.9  | 148.3  | 1334.1 | 883.4  | 1042.0 | 1394.2 | 801.8  |
| 69.3   | 63.2   | 126.1  | 61.3   | 244.0  | 185.8  | 205.2  | 275.5  | 391.8  |
| 43.4   | 57.7   | 40.1   | 56.2   | 59.9   | 114.4  | 63.3   | 72.1   | 295.3  |
| 124.8  | 142.2  | 142.2  | 152.4  | 284.3  | 237.1  | 313.9  | 355.4  | 151.5  |
| 13.8   | 22.7   | 4.9    | 2.4    | 13.7   | 11.0   | 6.7    | 4.1    | 9.9    |
| 23.6   | 17.2   | 24.5   | 22.2   | 3626.7 | 2889.6 | 4366.4 | 4715.4 | 503.3  |
| 3.7    | 7.5    | 9.0    | 4.5    | 2.2    | 7.8    | 7.3    | 26.6   | 19.1   |
| 11.6   | 11.1   | 16.4   | 13.5   | 11.2   | 16.9   | 11.7   | 18.5   | 34.0   |
| 10.2   | 6.3    | 8.8    | 15.3   | 4.6    | 3.2    | 3.4    | 3.1    | 64.6   |
| 39.9   | 32.8   | 58.6   | 47.1   | 76.0   | 86.9   | 54.0   | 79.5   | 51.2   |
| 51.0   | 48.4   | 80.6   | 47.9   | 126.4  | 148.4  | 134.3  | 190.1  | 55.7   |
| 50.5   | 52.3   | 82.0   | 54.3   | 116.1  | 166.1  | 135.0  | 129.7  | 112.4  |
| 81.9   | 84.5   | 135.4  | 84.5   | 25.7   | 26.2   | 31.8   | 39.4   | 78.3   |
| 133.0  | 101.8  | 230.0  | 93.5   | 1082.6 | 299.3  | 900.9  | 1305.3 | 601.9  |
| 87.1   | 84.3   | 74.3   | 58.7   | 263.3  | 297.8  | 260.7  | 306.5  | 55.4   |
| 51.1   | 42.3   | 40.2   | 28.6   | 106.6  | 105.8  | 87.7   | 140.1  | 22.0   |
| 331.1  | 347.0  | 701.6  | 291.8  | 1180.6 | 568.4  | 873.3  | 1136.0 | 394.8  |
| 3.1    | 1.4    | 2.6    | 1.7    | 3.9    | 3.2    | 1.4    | 0.8    | 171.3  |
| 1.2    | 1.2    | 1.5    | 5.5    | 73.5   | 47.7   | 70.9   | 84.8   | 45.3   |
| 114.6  | 116.1  | 164.1  | 125.1  | 222.0  | 220.7  | 226.0  | 308.9  | 326.6  |
| 122.2  | 142.3  | 148.8  | 114.3  | 123.4  | 101.4  | 94.1   | 101.4  | 151.3  |
| 73.6   | 68.3   | 75.6   | 55.3   | 42.0   | 38.3   | 39.2   | 47.0   | 121.2  |
| 182.9  | 178.4  | 222.8  | 201.4  | 154.5  | 153.8  | 214.8  | 231.2  | 279.0  |
| 282.2  | 273.4  | 308.8  | 263.5  | 89.7   | 71.9   | 110.8  | 145.5  | 208.2  |
| 988.0  | 868.5  | 1982.6 | 1043.8 | 2519.8 | 1758.1 | 2273.4 | 2850.1 | 4293.3 |
| 1143.3 | 1165.5 | 1495.9 | 1150.9 | 201.0  | 168.8  | 230.4  | 264.2  | 297.2  |
| 200.9  | 183.5  | 198.1  | 171.6  | 758.2  | 609.8  | 809.6  | 942.3  | 806.3  |
| 190.9  | 165.8  | 308.9  | 165.9  | 630.1  | 886.6  | 789.7  | 732.8  | 1760.4 |
| 4.3    | 14.6   | 25.3   | 15.2   | 90.4   | 190.9  | 85.4   | 91.7   | 21.6   |
| 171.8  | 146.3  | 231.0  | 155.3  | 455.5  | 618.9  | 512.0  | 502.1  | 748.1  |
| 264.7  | 247.5  | 225.3  | 204.5  | 130.9  | 138.7  | 109.4  | 181.0  | 279.2  |
| 176.2  | 166.8  | 132.7  | 132.3  | 138.9  | 174.5  | 143.3  | 145.6  | 236.8  |
| 337.4  | 341.6  | 644.1  | 331.1  | 637.7  | 184.5  | 544.8  | 690.9  | 642.2  |
| 686.6  | 662.9  | 663.5  | 747.2  | 127.6  | 119.9  | 150.7  | 189.6  | 12.9   |
| 75.9   | 74.8   | 90.5   | 72.6   | 47.9   | 56.3   | 57.2   | 39.7   | 122.0  |
| 110.0  | 109.4  | 142.4  | 101.8  | 85.7   | 99.0   | 108.4  | 92.5   | 148.3  |
| 197.9  | 146.0  | 202.4  | 140.6  | 67.4   | 92.7   | 82.3   | 61.4   | 87.3   |

|        |        |        |        |        |        |        |        |        |
|--------|--------|--------|--------|--------|--------|--------|--------|--------|
| 29.4   | 14.0   | 27.3   | 25.7   | 72.4   | 68.0   | 76.4   | 96.6   | 8.0    |
| 8.0    | 8.2    | 14.0   | 6.3    | 62.6   | 63.6   | 64.1   | 73.0   | 14.3   |
| 654.6  | 562.6  | 928.5  | 625.4  | 690.5  | 629.4  | 705.4  | 946.7  | 1235.6 |
| 381.2  | 318.5  | 587.1  | 358.8  | 574.8  | 613.3  | 673.6  | 700.6  | 746.7  |
| 21.1   | 31.7   | 42.2   | 42.0   | 12.4   | 14.5   | 14.6   | 29.4   | 8.4    |
| 107.3  | 100.6  | 114.0  | 93.3   | 50.1   | 35.5   | 66.1   | 65.9   | 248.6  |
| 56.3   | 58.1   | 68.2   | 41.3   | 17.3   | 28.1   | 40.8   | 19.7   | 153.4  |
| 100.1  | 119.0  | 140.6  | 105.6  | 147.8  | 119.9  | 166.4  | 166.2  | 131.7  |
| 20.0   | 20.0   | 25.1   | 22.4   | 40.0   | 32.3   | 51.5   | 63.3   | 59.1   |
| 1.2    | 1.1    | 1.4    | 1.5    | 1.9    | 1.3    | 3.0    | 6.1    | 3.6    |
| 95.3   | 94.5   | 83.5   | 48.9   | 109.0  | 129.6  | 101.0  | 125.2  | 89.0   |
| 255.2  | 306.8  | 213.9  | 254.2  | 338.2  | 350.1  | 371.2  | 425.3  | 166.0  |
| 33.6   | 37.4   | 38.9   | 37.2   | 75.6   | 43.4   | 53.2   | 69.8   | 86.1   |
| 12.0   | 15.4   | 37.2   | 11.4   | 15.6   | 22.4   | 10.5   | 11.5   | 26.5   |
| 11.7   | 11.7   | 19.1   | 11.5   | 10.0   | 12.8   | 15.9   | 23.5   | 383.6  |
| 1.0    | 1.5    | 4.3    | 3.2    | 1.4    | 1.8    | 6.9    | 10.7   | 277.3  |
| 198.9  | 205.8  | 165.5  | 217.9  | 3.9    | 16.0   | 15.6   | 14.4   | 4.7    |
| 52.3   | 45.5   | 66.5   | 54.0   | 23.8   | 40.0   | 56.6   | 42.8   | 5.5    |
| 149.8  | 148.0  | 190.3  | 167.8  | 70.3   | 79.5   | 95.7   | 107.5  | 46.9   |
| 172.7  | 165.9  | 248.3  | 187.5  | 151.6  | 212.9  | 172.6  | 196.3  | 84.7   |
| 125.2  | 121.7  | 243.5  | 130.7  | 255.7  | 534.4  | 283.0  | 288.5  | 169.5  |
| 41.6   | 41.1   | 37.0   | 42.3   | 140.1  | 141.7  | 123.4  | 138.9  | 86.3   |
| 3.0    | 1.1    | 7.4    | 1.8    | 25.1   | 17.2   | 26.4   | 33.9   | 508.9  |
| 295.0  | 281.0  | 233.2  | 283.5  | 153.6  | 164.6  | 192.8  | 197.7  | 151.1  |
| 137.7  | 119.1  | 226.9  | 123.5  | 224.8  | 197.4  | 217.5  | 256.2  | 207.0  |
| 103.1  | 75.7   | 214.7  | 107.8  | 260.2  | 196.4  | 208.5  | 303.9  | 142.1  |
| 84.1   | 72.9   | 103.0  | 75.2   | 84.8   | 96.0   | 86.1   | 96.8   | 123.3  |
| 33.4   | 27.7   | 46.9   | 33.2   | 50.5   | 50.7   | 47.8   | 53.2   | 85.1   |
| 229.9  | 261.5  | 324.5  | 243.5  | 461.9  | 560.0  | 510.5  | 584.4  | 575.2  |
| 145.1  | 169.3  | 181.4  | 165.6  | 195.5  | 221.5  | 202.3  | 238.7  | 195.0  |
| 44.9   | 37.0   | 41.2   | 33.3   | 40.2   | 22.9   | 25.4   | 36.8   | 51.1   |
| 159.2  | 224.9  | 139.1  | 107.1  | 819.8  | 1130.9 | 1096.7 | 1081.4 | 300.7  |
| 272.5  | 309.5  | 246.9  | 231.0  | 422.6  | 437.1  | 503.6  | 490.3  | 548.4  |
| 573.1  | 585.8  | 619.8  | 511.0  | 504.1  | 488.0  | 511.2  | 586.4  | 392.8  |
| 24.9   | 28.9   | 35.3   | 47.1   | 41.7   | 85.3   | 74.7   | 51.5   | 63.8   |
| 323.5  | 279.2  | 514.9  | 332.9  | 283.2  | 229.3  | 321.5  | 273.8  | 463.1  |
| 2214.6 | 1972.3 | 2483.6 | 1778.8 | 1440.3 | 1245.5 | 1467.0 | 1625.3 | 1936.0 |
| 0.9    | 4.1    | 1.3    | 1.4    | 4.2    | 0.9    | 1.1    | 1.1    | 5.0    |
| 12.0   | 1.4    | 20.1   | 10.5   | 626.1  | 515.0  | 896.1  | 810.9  | 62.3   |
| 3.4    | 4.5    | 5.8    | 1.8    | 709.5  | 783.8  | 1296.8 | 917.0  | 135.5  |
| 3.8    | 4.6    | 3.4    | 8.5    | 7.4    | 2.2    | 2.3    | 2.4    | 14.8   |
| 343.6  | 321.4  | 479.8  | 250.4  | 134.1  | 192.6  | 153.2  | 149.4  | 219.0  |
| 64.4   | 66.9   | 121.5  | 62.6   | 111.3  | 88.1   | 100.4  | 108.6  | 116.8  |
| 156.0  | 164.6  | 261.6  | 224.2  | 83.5   | 59.2   | 74.4   | 102.7  | 65.7   |
| 71.1   | 65.2   | 67.1   | 49.0   | 49.1   | 61.5   | 51.6   | 46.0   | 57.8   |
| 182.4  | 175.7  | 358.0  | 189.9  | 478.0  | 499.1  | 504.4  | 590.9  | 1155.6 |
| 12.5   | 19.0   | 24.2   | 4.4    | 24.0   | 16.9   | 7.6    | 21.2   | 11.4   |
| 17.2   | 24.0   | 31.7   | 20.5   | 25.5   | 19.7   | 23.3   | 23.9   | 17.1   |
| 69.2   | 78.3   | 93.9   | 78.0   | 19.9   | 23.6   | 14.3   | 28.4   | 15.9   |
| 14.8   | 16.3   | 26.8   | 17.9   | 18.6   | 8.8    | 15.7   | 19.7   | 36.7   |
| 232.0  | 196.2  | 309.3  | 218.5  | 198.2  | 217.7  | 182.6  | 166.1  | 107.1  |
| 105.5  | 97.7   | 139.5  | 89.2   | 113.6  | 112.6  | 108.8  | 109.3  | 94.4   |
| 637.2  | 842.3  | 587.5  | 694.7  | 287.7  | 398.4  | 246.9  | 302.3  | 741.1  |

|        |        |        |        |       |        |       |        |        |
|--------|--------|--------|--------|-------|--------|-------|--------|--------|
| 3.7    | 1.4    | 4.2    | 0.2    | 121.1 | 123.4  | 122.2 | 92.0   | 64.0   |
| 690.1  | 899.2  | 679.3  | 688.1  | 581.9 | 729.3  | 604.3 | 649.4  | 1485.4 |
| 232.5  | 186.2  | 208.2  | 227.9  | 285.6 | 407.9  | 336.5 | 298.6  | 336.7  |
| 11.9   | 3.6    | 9.8    | 8.9    | 8.2   | 2.8    | 1.9   | 1.5    | 15.0   |
| 148.0  | 129.1  | 376.4  | 124.9  | 431.2 | 251.6  | 392.8 | 500.9  | 510.1  |
| 40.6   | 29.7   | 120.5  | 46.3   | 47.8  | 34.8   | 54.3  | 59.1   | 113.0  |
| 15.4   | 9.3    | 49.9   | 20.0   | 32.7  | 31.8   | 48.6  | 55.2   | 60.5   |
| 130.7  | 137.6  | 125.6  | 104.3  | 113.5 | 110.0  | 126.2 | 133.7  | 106.1  |
| 509.1  | 465.4  | 1126.1 | 526.1  | 844.9 | 520.1  | 747.9 | 923.0  | 925.6  |
| 106.5  | 88.9   | 127.7  | 83.6   | 155.5 | 181.5  | 167.1 | 204.8  | 351.4  |
| 1853.6 | 1775.4 | 2233.7 | 1703.2 | 965.4 | 1060.4 | 984.1 | 1254.4 | 1583.6 |
| 274.2  | 294.0  | 364.5  | 340.0  | 465.3 | 330.6  | 520.2 | 569.9  | 670.7  |
| 231.0  | 236.4  | 336.8  | 269.7  | 199.0 | 184.0  | 134.6 | 176.9  | 230.6  |
| 64.2   | 60.1   | 45.5   | 67.6   | 31.2  | 27.6   | 25.4  | 23.9   | 78.3   |
| 20.0   | 20.6   | 23.8   | 21.6   | 37.1  | 39.6   | 42.2  | 49.2   | 37.7   |
| 33.8   | 39.2   | 49.0   | 48.8   | 119.8 | 105.6  | 111.1 | 119.6  | 113.0  |
| 244.3  | 195.2  | 596.4  | 200.8  | 490.8 | 317.1  | 441.1 | 553.9  | 1715.8 |
| 40.7   | 37.3   | 63.4   | 39.3   | 13.9  | 4.4    | 6.7   | 12.9   | 12.0   |
| 350.1  | 275.8  | 404.7  | 329.5  | 158.2 | 140.2  | 126.3 | 168.6  | 198.0  |
| 181.4  | 172.5  | 235.3  | 179.7  | 47.2  | 32.7   | 30.0  | 56.1   | 72.5   |
| 180.5  | 139.9  | 244.5  | 128.7  | 287.6 | 234.8  | 287.1 | 266.8  | 288.5  |
| 138.2  | 151.2  | 116.6  | 102.2  | 258.1 | 431.6  | 294.2 | 327.0  | 180.8  |
| 177.2  | 181.1  | 266.0  | 183.3  | 497.1 | 386.7  | 395.9 | 465.5  | 486.9  |
| 11.0   | 5.6    | 16.2   | 12.6   | 57.4  | 46.7   | 68.6  | 62.7   | 11.0   |
| 7.5    | 9.4    | 2.5    | 4.1    | 3.6   | 1.0    | 6.6   | 0.9    | 29.9   |
| 68.1   | 58.4   | 72.1   | 60.6   | 37.7  | 34.2   | 38.4  | 58.9   | 73.6   |
| 146.0  | 125.8  | 170.0  | 118.0  | 118.9 | 105.9  | 102.4 | 124.9  | 168.6  |
| 141.0  | 124.7  | 87.1   | 111.1  | 43.3  | 38.4   | 66.7  | 41.6   | 79.5   |
| 257.7  | 239.8  | 234.2  | 211.1  | 85.6  | 67.2   | 109.4 | 122.6  | 251.2  |
| 11.8   | 16.0   | 38.1   | 27.5   | 45.6  | 53.1   | 41.1  | 31.6   | 43.8   |
| 246.8  | 203.3  | 330.3  | 231.5  | 210.9 | 257.3  | 206.9 | 226.6  | 106.7  |
| 124.5  | 112.2  | 366.7  | 99.5   | 288.6 | 195.9  | 268.0 | 323.3  | 277.6  |
| 6.3    | 18.4   | 17.5   | 5.8    | 396.3 | 432.7  | 344.2 | 474.2  | 1643.7 |
| 30.7   | 36.6   | 55.7   | 37.6   | 33.5  | 26.3   | 44.4  | 43.5   | 97.8   |
| 34.3   | 23.0   | 24.7   | 24.2   | 26.5  | 24.7   | 20.0  | 32.9   | 74.3   |
| 8.0    | 5.6    | 8.5    | 9.7    | 26.1  | 15.9   | 23.9  | 23.2   | 540.1  |
| 11.6   | 15.3   | 9.0    | 14.3   | 12.5  | 4.5    | 8.6   | 17.0   | 13.7   |
| 0.7    | 1.5    | 2.3    | 0.8    | 1.7   | 5.0    | 9.9   | 7.1    | 140.3  |
| 689.7  | 679.2  | 709.9  | 623.1  | 420.5 | 432.3  | 430.3 | 454.5  | 578.1  |
| 57.9   | 52.8   | 77.9   | 59.9   | 105.0 | 105.4  | 83.1  | 105.9  | 161.5  |
| 84.9   | 89.2   | 65.0   | 58.3   | 72.1  | 118.0  | 78.2  | 84.1   | 93.7   |
| 20.3   | 19.4   | 22.3   | 15.6   | 20.6  | 27.7   | 20.5  | 26.4   | 29.6   |
| 209.0  | 213.5  | 204.6  | 193.4  | 186.5 | 207.6  | 204.6 | 228.2  | 142.7  |
| 15.7   | 10.6   | 13.5   | 8.8    | 456.3 | 573.5  | 470.6 | 599.2  | 337.3  |
| 41.4   | 34.9   | 40.0   | 22.5   | 41.2  | 45.7   | 43.2  | 50.4   | 17.3   |
| 147.4  | 162.0  | 253.3  | 138.9  | 459.6 | 448.1  | 415.1 | 488.1  | 232.5  |
| 92.6   | 95.9   | 110.6  | 99.4   | 135.5 | 132.1  | 155.3 | 156.4  | 58.4   |
| 198.6  | 211.9  | 275.8  | 199.5  | 357.6 | 318.8  | 327.6 | 365.8  | 137.9  |
| 83.9   | 73.5   | 51.1   | 63.1   | 100.1 | 197.6  | 162.4 | 141.0  | 9.2    |
| 147.2  | 124.5  | 241.1  | 153.5  | 712.1 | 993.1  | 857.2 | 710.8  | 687.6  |
| 90.5   | 90.9   | 180.8  | 110.8  | 446.3 | 630.8  | 464.7 | 459.0  | 337.5  |
| 88.0   | 97.1   | 58.9   | 72.2   | 26.8  | 31.0   | 21.9  | 26.6   | 3.8    |
| 196.9  | 243.7  | 120.0  | 277.0  | 7.6   | 12.3   | 12.0  | 11.5   | 692.1  |

|        |        |        |        |        |        |        |        |        |
|--------|--------|--------|--------|--------|--------|--------|--------|--------|
| 14.8   | 7.7    | 6.8    | 9.0    | 0.9    | 0.7    | 2.2    | 0.6    | 5.6    |
| 653.1  | 741.5  | 333.1  | 453.5  | 63.8   | 94.6   | 97.8   | 88.5   | 45.6   |
| 136.4  | 131.2  | 176.0  | 148.6  | 125.3  | 123.2  | 134.6  | 158.2  | 122.9  |
| 4.6    | 6.7    | 5.2    | 5.8    | 21.4   | 18.8   | 22.5   | 14.1   | 8.7    |
| 9.0    | 5.3    | 5.8    | 4.7    | 9.9    | 4.8    | 7.1    | 9.2    | 8.6    |
| 21.5   | 40.9   | 25.7   | 27.7   | 25.5   | 28.6   | 22.7   | 37.3   | 29.1   |
| 1402.9 | 1253.2 | 1782.1 | 1368.2 | 757.6  | 952.5  | 874.8  | 719.8  | 750.5  |
| 13.3   | 5.6    | 8.0    | 14.4   | 10.7   | 9.2    | 8.1    | 10.6   | 23.6   |
| 430.5  | 459.6  | 345.1  | 447.2  | 338.1  | 276.8  | 328.7  | 391.7  | 543.3  |
| 9.2    | 5.0    | 4.8    | 5.5    | 4.9    | 2.5    | 5.5    | 1.3    | 7.1    |
| 272.1  | 228.0  | 431.6  | 228.0  | 276.8  | 202.0  | 243.3  | 381.8  | 291.6  |
| 164.5  | 144.8  | 175.4  | 194.7  | 141.3  | 137.5  | 166.2  | 178.1  | 143.6  |
| 15.2   | 13.9   | 13.8   | 12.8   | 90.3   | 93.8   | 64.2   | 89.1   | 1.2    |
| 27.0   | 42.1   | 39.0   | 41.9   | 31.5   | 59.6   | 44.9   | 62.8   | 15.0   |
| 47.1   | 42.6   | 56.7   | 47.0   | 67.7   | 55.1   | 73.0   | 85.2   | 40.7   |
| 12.9   | 19.2   | 10.5   | 15.9   | 2.0    | 1.6    | 6.4    | 5.5    | 22.0   |
| 772.2  | 789.6  | 626.0  | 682.5  | 192.1  | 144.5  | 188.0  | 234.6  | 243.3  |
| 338.3  | 322.0  | 460.2  | 374.8  | 631.9  | 759.1  | 679.8  | 737.8  | 500.6  |
| 21.8   | 23.0   | 17.9   | 20.1   | 17.9   | 24.6   | 26.7   | 21.3   | 32.4   |
| 118.8  | 117.5  | 75.1   | 97.9   | 58.4   | 86.1   | 70.4   | 83.3   | 62.7   |
| 8.0    | 13.6   | 14.3   | 9.5    | 5.8    | 7.3    | 9.5    | 7.7    | 7.8    |
| 1.2    | 2.8    | 1.6    | 4.6    | 8.9    | 10.7   | 6.9    | 10.0   | 23.3   |
| 7.2    | 9.1    | 9.9    | 10.9   | 3.2    | 6.5    | 3.9    | 9.4    | 5.6    |
| 159.7  | 149.7  | 157.7  | 143.1  | 204.1  | 186.1  | 193.3  | 242.9  | 154.2  |
| 406.2  | 412.1  | 444.0  | 366.7  | 364.8  | 304.1  | 370.2  | 420.0  | 215.6  |
| 383.2  | 338.9  | 357.0  | 324.4  | 333.4  | 241.4  | 371.3  | 420.1  | 161.5  |
| 55.5   | 51.9   | 65.6   | 42.3   | 145.0  | 91.9   | 134.0  | 149.7  | 121.9  |
| 28.1   | 22.9   | 43.1   | 24.0   | 43.5   | 37.0   | 41.4   | 52.0   | 38.0   |
| 28.5   | 26.7   | 60.9   | 32.4   | 266.8  | 116.3  | 192.7  | 251.0  | 98.1   |
| 112.3  | 110.1  | 178.4  | 113.3  | 420.6  | 242.2  | 305.8  | 381.5  | 201.0  |
| 107.6  | 100.3  | 86.8   | 101.9  | 438.6  | 536.8  | 424.8  | 439.8  | 164.6  |
| 0.6    | 0.7    | 5.7    | 4.4    | 45.4   | 53.2   | 117.0  | 54.8   | 0.4    |
| 122.9  | 121.9  | 134.0  | 121.7  | 170.9  | 177.5  | 182.3  | 242.0  | 59.0   |
| 1.5    | 1.1    | 1.7    | 1.2    | 2.5    | 3.8    | 2.5    | 3.3    | 2.8    |
| 21.8   | 21.3   | 22.0   | 21.0   | 31.3   | 28.9   | 25.6   | 31.0   | 29.9   |
| 20.3   | 15.3   | 18.8   | 12.5   | 34.4   | 26.1   | 71.6   | 50.8   | 73.3   |
| 21.8   | 17.2   | 25.4   | 17.8   | 43.8   | 48.1   | 49.4   | 64.4   | 33.4   |
| 398.6  | 345.8  | 764.3  | 473.5  | 1353.5 | 1419.9 | 1021.7 | 1142.4 | 1574.5 |
| 53.2   | 56.7   | 72.6   | 54.0   | 154.5  | 201.2  | 150.4  | 184.3  | 135.0  |
| 114.8  | 103.1  | 82.5   | 77.6   | 26.7   | 30.0   | 28.3   | 32.4   | 29.6   |
| 26.9   | 13.7   | 26.6   | 21.5   | 47.7   | 54.2   | 53.2   | 30.7   | 34.6   |
| 26.2   | 23.2   | 48.5   | 29.2   | 50.1   | 50.2   | 51.6   | 60.5   | 120.0  |
| 599.9  | 484.5  | 1021.3 | 629.6  | 1191.3 | 1103.6 | 1365.5 | 1328.9 | 1588.5 |
| 852.0  | 814.9  | 704.2  | 622.3  | 392.5  | 578.5  | 443.1  | 485.6  | 605.5  |
| 740.8  | 698.5  | 623.9  | 520.8  | 171.9  | 242.8  | 168.2  | 243.9  | 256.9  |
| 70.5   | 93.2   | 76.4   | 80.5   | 83.6   | 120.5  | 145.0  | 92.6   | 55.7   |
| 80.5   | 97.7   | 89.1   | 84.1   | 88.5   | 57.4   | 74.8   | 85.6   | 195.5  |
| 199.4  | 166.9  | 233.4  | 157.6  | 262.2  | 287.8  | 268.2  | 301.6  | 293.0  |
| 7.2    | 1.8    | 6.7    | 5.9    | 30.6   | 26.6   | 38.3   | 21.4   | 2.7    |
| 0.9    | 0.9    | 1.3    | 0.4    | 12.5   | 4.5    | 9.5    | 2.0    | 1.2    |
| 2.9    | 3.0    | 4.4    | 3.6    | 11.2   | 5.5    | 17.6   | 4.3    | 3.4    |
| 81.4   | 114.6  | 74.2   | 71.1   | 20.7   | 22.6   | 18.7   | 40.8   | 18.8   |
| 231.9  | 221.0  | 326.0  | 191.5  | 2665.8 | 2475.7 | 2585.1 | 3274.0 | 296.9  |

|        |        |        |        |        |        |        |        |        |
|--------|--------|--------|--------|--------|--------|--------|--------|--------|
| 1251.1 | 1297.2 | 1669.8 | 1426.6 | 1862.3 | 2150.1 | 2055.7 | 2250.3 | 938.5  |
| 58.8   | 62.3   | 58.4   | 72.8   | 43.1   | 73.6   | 58.7   | 59.8   | 4.2    |
| 144.0  | 134.5  | 166.8  | 114.5  | 295.1  | 316.6  | 355.9  | 310.6  | 109.1  |
| 24.6   | 20.9   | 14.7   | 10.0   | 41.5   | 43.3   | 38.2   | 58.5   | 71.5   |
| 62.4   | 77.7   | 75.8   | 42.8   | 101.9  | 140.8  | 105.4  | 130.8  | 126.0  |
| 71.5   | 52.3   | 77.6   | 52.5   | 188.2  | 233.7  | 229.5  | 218.6  | 91.2   |
| 156.7  | 112.7  | 202.0  | 115.3  | 641.4  | 597.3  | 856.8  | 774.2  | 353.7  |
| 197.6  | 202.3  | 192.5  | 152.7  | 361.8  | 377.5  | 303.4  | 377.8  | 224.9  |
| 195.0  | 182.8  | 191.8  | 160.5  | 357.0  | 436.0  | 413.0  | 448.8  | 287.9  |
| 250.6  | 274.2  | 559.7  | 503.3  | 17.7   | 58.2   | 27.3   | 14.1   | 37.8   |
| 147.8  | 136.3  | 166.3  | 117.8  | 112.1  | 127.8  | 117.5  | 112.0  | 121.0  |
| 176.2  | 186.5  | 155.4  | 135.1  | 283.1  | 361.8  | 315.7  | 354.5  | 213.7  |
| 234.2  | 246.7  | 213.7  | 196.1  | 433.7  | 504.2  | 439.3  | 533.4  | 259.4  |
| 182.9  | 184.3  | 269.4  | 188.2  | 297.6  | 253.1  | 249.5  | 285.6  | 510.2  |
| 1.6    | 2.0    | 2.4    | 2.2    | 3.7    | 0.8    | 2.6    | 2.6    | 2.9    |
| 21.4   | 20.6   | 40.7   | 18.1   | 35.4   | 35.8   | 28.9   | 25.6   | 36.4   |
| 9.6    | 17.2   | 25.7   | 6.5    | 35.2   | 43.9   | 32.3   | 43.1   | 87.4   |
| 5.4    | 8.7    | 5.4    | 0.8    | 158.0  | 192.0  | 161.2  | 166.4  | 223.3  |
| 73.4   | 69.3   | 57.5   | 73.5   | 97.6   | 137.9  | 117.8  | 115.8  | 110.6  |
| 81.6   | 83.7   | 107.5  | 79.5   | 162.3  | 136.6  | 166.8  | 213.7  | 85.7   |
| 189.9  | 173.2  | 241.2  | 177.1  | 395.7  | 360.5  | 437.7  | 491.2  | 219.0  |
| 11.4   | 18.6   | 12.2   | 13.2   | 1483.1 | 1342.2 | 1822.8 | 1669.7 | 93.5   |
| 416.7  | 402.1  | 346.8  | 466.2  | 145.1  | 81.7   | 277.7  | 206.5  | 73.1   |
| 234.8  | 198.5  | 196.8  | 259.6  | 94.7   | 48.6   | 126.0  | 97.5   | 22.8   |
| 483.4  | 492.7  | 640.5  | 488.1  | 766.2  | 728.8  | 758.6  | 898.5  | 727.7  |
| 295.0  | 268.7  | 351.3  | 284.5  | 501.5  | 377.1  | 465.8  | 516.8  | 436.5  |
| 14.6   | 18.2   | 27.2   | 8.8    | 191.3  | 150.4  | 228.2  | 197.8  | 26.7   |
| 195.0  | 224.2  | 156.7  | 185.5  | 158.4  | 153.5  | 178.0  | 201.3  | 134.8  |
| 319.9  | 311.0  | 375.9  | 323.6  | 334.5  | 361.8  | 352.8  | 383.7  | 621.0  |
| 34.0   | 38.1   | 71.7   | 37.6   | 43.8   | 45.0   | 36.2   | 53.2   | 111.1  |
| 567.6  | 481.7  | 896.1  | 480.2  | 868.7  | 789.1  | 801.3  | 978.7  | 924.2  |
| 179.1  | 187.6  | 216.3  | 163.3  | 219.3  | 188.4  | 202.5  | 250.1  | 284.5  |
| 28.3   | 25.9   | 41.8   | 21.4   | 66.6   | 75.4   | 86.5   | 76.5   | 67.5   |
| 32.2   | 38.6   | 43.5   | 24.8   | 30.9   | 50.3   | 50.5   | 56.3   | 12.9   |
| 3.4    | 0.8    | 6.6    | 5.3    | 8.2    | 8.0    | 6.0    | 15.7   | 15.8   |
| 15.7   | 10.4   | 12.6   | 10.2   | 25.3   | 13.4   | 11.3   | 22.2   | 27.9   |
| 1068.7 | 1319.9 | 819.2  | 1121.6 | 4.5    | 12.0   | 4.3    | 10.7   | 8.9    |
| 70.1   | 72.7   | 159.5  | 78.5   | 57.0   | 35.7   | 80.0   | 82.4   | 13.5   |
| 16.4   | 10.6   | 19.8   | 18.1   | 8.2    | 6.4    | 7.8    | 5.9    | 3.3    |
| 101.7  | 113.6  | 129.7  | 111.2  | 3.5    | 1.6    | 2.2    | 16.4   | 28.2   |
| 116.0  | 99.1   | 89.4   | 85.6   | 207.1  | 311.2  | 248.5  | 257.0  | 181.4  |
| 76.2   | 79.6   | 84.3   | 56.7   | 93.3   | 103.0  | 83.6   | 106.7  | 83.4   |
| 164.2  | 129.4  | 246.0  | 149.1  | 84.4   | 103.3  | 113.7  | 121.3  | 108.0  |
| 28.3   | 28.8   | 46.1   | 23.9   | 685.4  | 502.0  | 876.3  | 928.6  | 856.7  |
| 1072.1 | 1021.6 | 1181.2 | 999.6  | 645.3  | 705.4  | 754.8  | 690.8  | 1651.9 |
| 96.5   | 110.1  | 92.5   | 108.6  | 85.5   | 93.3   | 92.1   | 80.2   | 173.0  |
| 0.7    | 5.8    | 8.2    | 1.2    | 103.2  | 109.8  | 74.3   | 120.5  | 27.7   |
| 4.0    | 2.7    | 3.6    | 5.7    | 70.8   | 71.2   | 56.9   | 74.8   | 11.2   |
| 1.0    | 0.7    | 1.1    | 0.6    | 1.4    | 0.6    | 0.6    | 0.5    | 1.0    |
| 490.0  | 452.6  | 439.1  | 366.5  | 189.0  | 140.0  | 203.3  | 230.6  | 303.9  |
| 6.3    | 7.9    | 3.9    | 1.5    | 23.7   | 19.0   | 23.7   | 28.7   | 34.5   |
| 16.9   | 18.2   | 38.8   | 20.6   | 5.9    | 2.6    | 6.8    | 2.9    | 112.3  |
| 38.4   | 33.5   | 63.2   | 57.8   | 50.3   | 44.4   | 58.8   | 62.2   | 85.2   |

|        |        |        |        |        |       |        |        |        |
|--------|--------|--------|--------|--------|-------|--------|--------|--------|
| 18.3   | 10.4   | 22.2   | 17.7   | 31.0   | 46.0  | 34.1   | 47.9   | 125.7  |
| 6.6    | 8.7    | 9.8    | 4.3    | 107.9  | 81.8  | 104.3  | 97.3   | 346.1  |
| 17.2   | 20.0   | 29.1   | 15.3   | 19.7   | 16.0  | 24.7   | 10.9   | 38.3   |
| 70.1   | 82.7   | 66.4   | 60.3   | 70.6   | 93.4  | 83.9   | 100.1  | 110.3  |
| 21.3   | 30.1   | 29.7   | 19.5   | 26.8   | 35.6  | 28.1   | 31.3   | 56.9   |
| 156.6  | 144.2  | 302.1  | 184.6  | 2.7    | 5.6   | 2.0    | 1.2    | 1.7    |
| 85.5   | 62.7   | 206.3  | 106.4  | 205.1  | 223.9 | 209.2  | 191.5  | 632.4  |
| 78.4   | 78.2   | 108.3  | 78.6   | 66.6   | 100.8 | 89.9   | 86.6   | 64.3   |
| 320.0  | 320.1  | 263.8  | 260.6  | 191.7  | 174.8 | 221.4  | 266.3  | 106.4  |
| 318.9  | 261.7  | 446.6  | 230.4  | 146.1  | 143.2 | 151.0  | 166.8  | 344.5  |
| 302.5  | 287.2  | 454.3  | 246.7  | 923.0  | 743.0 | 905.8  | 1048.9 | 1316.1 |
| 9.8    | 1.1    | 2.6    | 8.1    | 1.4    | 10.2  | 1.8    | 9.2    | 1.7    |
| 112.6  | 90.7   | 243.7  | 84.6   | 379.3  | 194.3 | 402.3  | 502.4  | 339.8  |
| 142.8  | 131.7  | 169.3  | 141.5  | 173.9  | 209.8 | 205.4  | 213.8  | 295.3  |
| 5.2    | 2.6    | 5.3    | 4.1    | 3.2    | 0.8   | 1.4    | 4.5    | 6.8    |
| 4.5    | 2.2    | 5.9    | 4.1    | 1.1    | 0.6   | 1.3    | 0.2    | 0.2    |
| 2.1    | 1.8    | 6.4    | 3.1    | 12.7   | 31.2  | 7.5    | 3.3    | 41.7   |
| 3.6    | 2.7    | 4.8    | 1.7    | 1.4    | 1.4   | 2.9    | 5.8    | 2.3    |
| 36.8   | 38.5   | 49.2   | 44.7   | 65.1   | 44.3  | 66.3   | 62.5   | 50.4   |
| 8.5    | 3.0    | 9.0    | 9.4    | 0.6    | 2.1   | 1.6    | 0.7    | 1.1    |
| 35.9   | 32.9   | 29.0   | 13.1   | 85.5   | 103.1 | 124.4  | 118.9  | 102.2  |
| 2.5    | 7.8    | 3.2    | 3.4    | 61.4   | 65.5  | 74.3   | 73.2   | 38.0   |
| 195.7  | 219.8  | 103.1  | 167.9  | 268.1  | 293.7 | 319.1  | 339.7  | 110.4  |
| 146.3  | 132.8  | 167.9  | 140.1  | 196.8  | 144.9 | 218.3  | 284.9  | 328.7  |
| 24.6   | 8.7    | 14.7   | 15.8   | 7.5    | 10.3  | 6.1    | 5.8    | 26.8   |
| 3.0    | 2.9    | 8.7    | 4.1    | 898.3  | 871.3 | 609.3  | 619.9  | 1426.4 |
| 1.7    | 2.1    | 2.3    | 1.8    | 5.6    | 3.2   | 4.3    | 3.0    | 79.4   |
| 2.4    | 2.8    | 0.8    | 2.4    | 7.2    | 1.4   | 0.1    | 3.0    | 58.4   |
| 82.9   | 81.9   | 111.8  | 75.9   | 225.3  | 186.4 | 253.0  | 293.0  | 195.9  |
| 127.1  | 109.9  | 154.5  | 142.4  | 6.3    | 7.6   | 13.7   | 2.6    | 6.2    |
| 17.7   | 13.8   | 2.4    | 10.9   | 2.1    | 4.5   | 4.2    | 2.5    | 45.2   |
| 1412.4 | 1156.8 | 1934.6 | 1266.5 | 854.6  | 729.5 | 855.8  | 1024.9 | 1401.1 |
| 1382.1 | 1142.2 | 1689.5 | 1266.2 | 1074.1 | 948.8 | 1130.1 | 1183.9 | 1466.2 |
| 1.7    | 7.4    | 1.2    | 1.8    | 5.9    | 7.8   | 7.9    | 5.0    | 14.1   |
| 17.6   | 22.0   | 23.2   | 20.3   | 38.1   | 31.6  | 28.6   | 41.3   | 56.4   |
| 5.8    | 4.0    | 2.5    | 2.0    | 2.3    | 2.4   | 6.3    | 0.8    | 1.1    |
| 57.6   | 45.8   | 56.2   | 41.7   | 11.5   | 14.8  | 15.6   | 25.0   | 14.8   |
| 126.3  | 93.6   | 138.1  | 120.2  | 115.9  | 82.0  | 122.3  | 146.4  | 40.3   |
| 166.5  | 110.7  | 155.4  | 114.8  | 114.8  | 124.7 | 112.9  | 113.9  | 156.4  |
| 94.6   | 83.8   | 119.2  | 82.5   | 71.1   | 85.0  | 76.5   | 89.2   | 89.7   |
| 63.9   | 70.7   | 183.0  | 73.3   | 108.5  | 86.1  | 101.0  | 119.8  | 161.7  |
| 21.6   | 40.3   | 49.8   | 31.0   | 140.2  | 159.4 | 153.0  | 179.1  | 219.1  |
| 12.9   | 17.8   | 27.7   | 15.4   | 92.5   | 79.1  | 140.1  | 141.7  | 29.0   |
| 0.8    | 7.1    | 3.6    | 4.3    | 4.4    | 3.4   | 6.2    | 7.5    | 5.3    |
| 3.4    | 0.7    | 2.6    | 2.8    | 20.9   | 16.3  | 20.1   | 27.7   | 0.6    |
| 31.2   | 16.4   | 40.5   | 20.1   | 103.8  | 93.8  | 108.8  | 96.6   | 153.2  |
| 173.2  | 172.0  | 567.2  | 115.0  | 310.8  | 240.1 | 240.7  | 358.8  | 454.6  |
| 1.8    | 3.4    | 4.2    | 2.6    | 57.0   | 80.6  | 54.0   | 71.2   | 87.4   |
| 30.3   | 35.5   | 14.0   | 29.4   | 58.5   | 69.7  | 64.2   | 71.6   | 9.5    |
| 224.7  | 199.7  | 449.9  | 192.1  | 742.3  | 343.4 | 498.6  | 797.0  | 849.3  |
| 11.8   | 6.6    | 12.5   | 2.6    | 4.9    | 13.2  | 16.7   | 17.8   | 3.5    |
| 5.2    | 1.8    | 2.6    | 3.6    | 57.0   | 62.4  | 54.7   | 65.5   | 5.1    |
| 39.3   | 53.5   | 29.5   | 54.6   | 126.5  | 155.6 | 104.0  | 125.9  | 45.9   |

|        |        |        |        |        |       |        |        |        |
|--------|--------|--------|--------|--------|-------|--------|--------|--------|
| 186.0  | 190.0  | 176.5  | 179.9  | 150.5  | 122.0 | 147.0  | 170.0  | 177.0  |
| 190.8  | 209.2  | 230.8  | 179.8  | 123.6  | 94.4  | 115.8  | 123.5  | 209.0  |
| 11.2   | 1.6    | 3.4    | 12.3   | 2.2    | 3.4   | 4.7    | 13.9   | 7.7    |
| 153.4  | 152.2  | 163.3  | 134.7  | 82.8   | 86.1  | 81.9   | 88.0   | 262.0  |
| 38.7   | 46.3   | 61.1   | 35.2   | 32.8   | 32.7  | 19.8   | 40.9   | 74.6   |
| 234.0  | 267.4  | 246.0  | 263.4  | 121.6  | 198.9 | 138.3  | 139.9  | 148.5  |
| 308.0  | 320.4  | 279.7  | 278.1  | 18.7   | 15.4  | 22.1   | 21.5   | 250.8  |
| 10.8   | 9.3    | 15.2   | 2.9    | 23.2   | 18.9  | 19.2   | 29.6   | 6.4    |
| 1.3    | 1.2    | 1.1    | 0.8    | 0.7    | 1.0   | 2.0    | 1.7    | 5.0    |
| 0.8    | 0.7    | 2.5    | 1.0    | 33.6   | 18.0  | 39.5   | 29.0   | 185.9  |
| 90.2   | 93.1   | 78.1   | 67.3   | 163.7  | 141.3 | 177.0  | 208.0  | 93.1   |
| 135.0  | 134.2  | 219.9  | 125.1  | 403.4  | 366.0 | 418.6  | 422.1  | 572.0  |
| 323.3  | 342.2  | 477.0  | 266.4  | 861.7  | 860.6 | 887.1  | 894.7  | 411.6  |
| 601.8  | 570.3  | 933.5  | 500.8  | 1063.1 | 952.3 | 1138.8 | 1358.0 | 887.1  |
| 120.9  | 113.1  | 123.7  | 125.7  | 435.4  | 332.5 | 421.8  | 436.5  | 6.4    |
| 0.4    | 0.3    | 0.3    | 2.9    | 3.6    | 0.4   | 0.4    | 8.6    | 25.2   |
| 5.0    | 8.5    | 9.9    | 9.7    | 8.6    | 5.4   | 5.3    | 5.0    | 79.8   |
| 12.3   | 11.6   | 20.3   | 16.7   | 4.9    | 4.2   | 16.9   | 11.9   | 15.9   |
| 13.1   | 8.8    | 11.0   | 9.6    | 2.5    | 2.4   | 6.7    | 6.9    | 226.5  |
| 6.4    | 6.1    | 6.7    | 4.2    | 3.6    | 7.4   | 3.3    | 8.7    | 66.0   |
| 3.5    | 3.6    | 1.3    | 1.1    | 2.6    | 6.6   | 1.8    | 3.3    | 8.2    |
| 2.7    | 4.8    | 0.9    | 2.5    | 19.6   | 28.1  | 29.2   | 31.2   | 34.9   |
| 4.5    | 5.9    | 1.8    | 2.7    | 24.1   | 39.5  | 51.3   | 50.4   | 3040.8 |
| 0.5    | 1.8    | 0.5    | 1.9    | 93.1   | 77.8  | 102.2  | 115.2  | 48.9   |
| 10.6   | 9.6    | 12.3   | 12.3   | 355.2  | 361.3 | 329.7  | 406.8  | 164.7  |
| 64.1   | 61.2   | 122.2  | 76.3   | 62.0   | 88.9  | 75.7   | 78.7   | 100.7  |
| 107.0  | 92.1   | 147.9  | 88.9   | 133.6  | 117.4 | 126.8  | 147.1  | 120.5  |
| 2.7    | 0.7    | 3.7    | 4.4    | 126.3  | 195.8 | 138.6  | 122.3  | 25.6   |
| 64.4   | 49.1   | 116.2  | 54.0   | 63.5   | 77.4  | 58.1   | 87.2   | 134.1  |
| 98.9   | 95.5   | 114.6  | 102.9  | 104.3  | 89.4  | 86.5   | 121.2  | 69.3   |
| 227.9  | 163.3  | 296.9  | 169.5  | 263.4  | 234.1 | 242.8  | 323.2  | 316.6  |
| 78.6   | 94.6   | 133.0  | 82.0   | 89.7   | 78.9  | 100.0  | 83.4   | 168.2  |
| 786.5  | 701.4  | 979.9  | 776.4  | 313.6  | 436.6 | 340.5  | 367.9  | 735.5  |
| 113.8  | 124.2  | 147.8  | 107.1  | 61.8   | 47.1  | 73.0   | 60.9   | 117.4  |
| 2.6    | 7.3    | 4.4    | 3.4    | 1.2    | 2.8   | 1.8    | 0.9    | 5.3    |
| 19.9   | 19.3   | 28.8   | 25.5   | 30.4   | 20.2  | 24.8   | 38.3   | 42.2   |
| 223.8  | 195.1  | 263.9  | 168.0  | 107.8  | 128.7 | 158.0  | 172.7  | 80.9   |
| 2623.5 | 2648.8 | 3399.7 | 2838.7 | 389.9  | 396.9 | 426.8  | 430.0  | 184.1  |
| 3.3    | 1.8    | 3.0    | 4.2    | 0.5    | 1.0   | 0.5    | 1.5    | 1.1    |
| 3.4    | 3.5    | 6.7    | 5.3    | 1.0    | 1.1   | 1.3    | 1.8    | 2.4    |
| 393.9  | 355.7  | 425.7  | 365.1  | 177.1  | 162.2 | 181.4  | 169.9  | 194.8  |
| 87.5   | 122.0  | 145.3  | 132.0  | 924.3  | 760.2 | 606.4  | 853.3  | 1542.6 |
| 45.8   | 44.8   | 66.7   | 68.0   | 647.3  | 522.6 | 473.1  | 607.1  | 1209.9 |
| 22.2   | 13.8   | 37.0   | 16.5   | 69.6   | 59.6  | 74.4   | 82.9   | 164.6  |
| 15.9   | 8.7    | 27.7   | 11.5   | 93.1   | 32.7  | 73.6   | 79.3   | 89.3   |
| 81.4   | 76.1   | 155.5  | 85.1   | 109.3  | 71.0  | 105.1  | 138.3  | 152.4  |
| 88.0   | 74.3   | 128.1  | 88.6   | 111.6  | 96.9  | 85.5   | 117.8  | 113.1  |
| 122.6  | 91.7   | 184.7  | 112.2  | 165.1  | 81.1  | 116.4  | 169.5  | 194.5  |
| 400.0  | 329.3  | 599.7  | 355.1  | 267.4  | 211.9 | 242.2  | 334.8  | 240.0  |
| 85.1   | 72.7   | 106.6  | 114.9  | 119.5  | 99.0  | 131.4  | 164.6  | 105.5  |
| 36.6   | 28.2   | 58.1   | 56.4   | 35.8   | 35.7  | 30.7   | 31.2   | 37.5   |
| 5.1    | 6.9    | 8.2    | 10.3   | 19.6   | 21.7  | 19.1   | 17.4   | 8.7    |
| 79.9   | 99.0   | 122.5  | 90.7   | 384.4  | 407.9 | 407.8  | 489.3  | 105.6  |



|        |        |        |        |        |        |        |        |        |
|--------|--------|--------|--------|--------|--------|--------|--------|--------|
| 28.6   | 42.7   | 29.2   | 21.6   | 122.6  | 112.8  | 128.5  | 127.8  | 110.6  |
| 7.9    | 9.2    | 10.7   | 7.0    | 64.9   | 78.5   | 72.9   | 94.9   | 74.0   |
| 101.0  | 100.5  | 70.2   | 49.7   | 1.6    | 4.5    | 4.8    | 4.2    | 4.4    |
| 229.6  | 219.9  | 388.2  | 239.8  | 167.0  | 152.2  | 164.8  | 189.8  | 270.6  |
| 38.0   | 37.5   | 23.8   | 18.8   | 30.3   | 16.6   | 24.0   | 32.1   | 26.5   |
| 25.7   | 28.7   | 43.9   | 30.0   | 51.4   | 67.3   | 94.2   | 105.9  | 70.5   |
| 36.0   | 35.9   | 69.3   | 37.1   | 137.0  | 111.3  | 180.9  | 174.7  | 129.9  |
| 93.2   | 70.9   | 178.3  | 86.7   | 50.6   | 36.8   | 59.1   | 65.4   | 1.4    |
| 46.2   | 50.9   | 57.2   | 40.9   | 9.1    | 3.1    | 11.2   | 7.6    | 14.7   |
| 137.4  | 113.8  | 223.0  | 90.8   | 425.0  | 277.3  | 334.1  | 482.7  | 192.5  |
| 73.2   | 75.7   | 64.1   | 76.6   | 16.0   | 20.6   | 12.0   | 19.8   | 11.0   |
| 129.4  | 127.6  | 157.3  | 129.7  | 132.7  | 152.6  | 161.2  | 175.2  | 125.8  |
| 11.3   | 7.5    | 14.4   | 6.5    | 178.3  | 129.6  | 164.6  | 250.8  | 216.0  |
| 34.9   | 42.4   | 81.6   | 49.9   | 193.9  | 166.2  | 215.7  | 224.5  | 296.0  |
| 3.1    | 2.8    | 5.3    | 0.5    | 4.2    | 3.5    | 1.6    | 4.5    | 3.2    |
| 156.4  | 163.4  | 163.0  | 136.0  | 283.1  | 231.5  | 272.8  | 375.8  | 310.9  |
| 1119.5 | 883.1  | 1514.3 | 946.4  | 1677.1 | 1725.6 | 2024.6 | 2107.5 | 709.3  |
| 236.5  | 172.5  | 296.9  | 221.7  | 597.4  | 694.0  | 720.4  | 750.8  | 261.3  |
| 18.9   | 28.3   | 26.8   | 22.7   | 17.3   | 14.3   | 14.5   | 18.6   | 24.2   |
| 208.2  | 189.2  | 243.7  | 174.0  | 81.5   | 79.9   | 72.3   | 108.8  | 97.5   |
| 20.2   | 23.7   | 33.6   | 16.8   | 319.3  | 275.9  | 260.8  | 269.4  | 923.2  |
| 43.6   | 52.2   | 43.4   | 53.0   | 96.8   | 114.0  | 100.7  | 115.0  | 64.6   |
| 205.0  | 209.4  | 200.5  | 189.1  | 132.2  | 191.7  | 134.4  | 162.1  | 149.3  |
| 74.4   | 81.8   | 112.3  | 102.6  | 48.3   | 50.7   | 52.3   | 65.2   | 72.7   |
| 26.0   | 22.6   | 57.5   | 32.8   | 38.0   | 34.7   | 28.5   | 51.5   | 26.7   |
| 175.4  | 216.2  | 229.5  | 183.8  | 134.2  | 107.2  | 124.8  | 139.7  | 179.8  |
| 73.2   | 76.1   | 113.6  | 78.0   | 212.4  | 242.1  | 236.0  | 243.9  | 279.7  |
| 781.6  | 832.5  | 812.5  | 810.0  | 2005.2 | 1719.0 | 1955.1 | 2172.8 | 2723.6 |
| 4.2    | 6.4    | 6.1    | 5.0    | 190.9  | 135.0  | 214.9  | 217.2  | 8.9    |
| 5.4    | 6.0    | 7.7    | 4.6    | 9.5    | 11.1   | 10.4   | 12.1   | 4.8    |
| 86.1   | 89.1   | 147.2  | 45.8   | 391.4  | 275.3  | 335.5  | 401.2  | 303.2  |
| 76.2   | 84.0   | 33.8   | 31.0   | 466.3  | 357.2  | 747.4  | 693.8  | 29.1   |
| 5.8    | 14.5   | 20.4   | 19.5   | 2.7    | 8.8    | 7.4    | 6.0    | 42.9   |
| 7.3    | 5.6    | 19.3   | 10.7   | 0.9    | 7.5    | 4.0    | 3.6    | 1.4    |
| 23.2   | 17.6   | 21.6   | 15.3   | 7.9    | 10.2   | 15.0   | 2.8    | 24.5   |
| 7.0    | 4.9    | 4.3    | 3.0    | 12.6   | 15.6   | 10.1   | 21.4   | 6.5    |
| 10.8   | 9.3    | 7.9    | 2.9    | 22.7   | 11.2   | 18.5   | 28.5   | 3.4    |
| 481.7  | 604.5  | 463.3  | 724.9  | 216.9  | 387.9  | 165.8  | 201.3  | 377.5  |
| 3.7    | 1.8    | 1.3    | 1.4    | 1.0    | 1.9    | 7.5    | 1.5    | 2.4    |
| 2992.1 | 2749.3 | 3223.5 | 1949.9 | 269.5  | 302.7  | 258.0  | 362.9  | 394.8  |
| 15.5   | 13.8   | 20.7   | 16.8   | 30.4   | 25.6   | 39.6   | 42.2   | 91.3   |
| 357.1  | 339.8  | 344.3  | 251.6  | 14.4   | 7.2    | 13.0   | 1.6    | 27.7   |
| 26.4   | 32.6   | 54.2   | 40.7   | 28.6   | 34.6   | 12.8   | 31.6   | 13.7   |
| 131.9  | 133.2  | 162.8  | 134.8  | 348.6  | 380.7  | 389.7  | 432.5  | 547.7  |
| 109.1  | 118.8  | 77.4   | 98.7   | 66.9   | 108.5  | 75.1   | 64.5   | 52.9   |
| 55.1   | 63.4   | 36.8   | 70.9   | 21.8   | 41.7   | 15.5   | 31.7   | 20.8   |
| 280.3  | 264.6  | 172.5  | 247.7  | 39.4   | 30.8   | 42.2   | 56.6   | 70.1   |
| 1.9    | 1.1    | 1.9    | 1.8    | 1.3    | 1.4    | 6.0    | 1.2    | 4.3    |
| 36.9   | 43.6   | 39.7   | 43.6   | 90.6   | 68.7   | 82.1   | 91.2   | 111.9  |
| 95.3   | 98.1   | 96.1   | 100.5  | 212.0  | 164.2  | 242.1  | 222.2  | 232.8  |
| 6.3    | 6.1    | 1.6    | 3.9    | 2.5    | 0.9    | 2.2    | 1.6    | 5.6    |
| 58.4   | 53.9   | 48.2   | 46.2   | 59.0   | 63.3   | 49.5   | 65.8   | 42.2   |
| 24.7   | 19.7   | 38.8   | 36.1   | 45.5   | 42.5   | 40.6   | 54.0   | 42.7   |

|       |       |        |       |        |        |        |        |        |
|-------|-------|--------|-------|--------|--------|--------|--------|--------|
| 144.0 | 129.7 | 202.8  | 175.3 | 96.4   | 108.3  | 125.8  | 113.9  | 101.7  |
| 9.3   | 27.8  | 21.1   | 22.5  | 23.3   | 24.7   | 22.1   | 26.1   | 39.4   |
| 6.0   | 11.3  | 7.4    | 5.9   | 5.5    | 5.5    | 1.3    | 2.9    | 256.6  |
| 1.1   | 1.8   | 2.8    | 0.6   | 0.6    | 0.5    | 0.2    | 2.5    | 192.9  |
| 12.6  | 26.7  | 71.4   | 12.0  | 168.0  | 78.4   | 144.3  | 112.8  | 142.5  |
| 889.7 | 905.7 | 1018.0 | 844.8 | 1098.8 | 1042.6 | 1223.0 | 1156.2 | 1307.5 |
| 0.7   | 0.6   | 1.0    | 0.7   | 114.8  | 63.2   | 93.4   | 114.8  | 34.4   |
| 3.2   | 3.2   | 3.4    | 3.4   | 2.7    | 2.3    | 2.6    | 3.2    | 8.4    |
| 16.9  | 7.9   | 18.3   | 10.4  | 6.5    | 9.5    | 7.0    | 14.6   | 16.8   |
| 6.3   | 8.7   | 7.2    | 8.1   | 6.1    | 8.5    | 9.0    | 10.5   | 12.7   |
| 48.7  | 47.8  | 79.5   | 48.6  | 47.1   | 46.6   | 61.2   | 63.7   | 95.7   |
| 431.6 | 359.8 | 440.0  | 350.1 | 713.6  | 1021.6 | 956.0  | 872.2  | 168.4  |
| 722.7 | 762.9 | 893.7  | 646.2 | 206.7  | 171.3  | 200.5  | 254.0  | 555.1  |
| 218.6 | 218.1 | 216.3  | 281.6 | 24.8   | 50.9   | 35.7   | 24.8   | 11.4   |
| 200.8 | 226.7 | 137.4  | 180.3 | 127.5  | 133.9  | 118.9  | 150.5  | 92.7   |
| 235.8 | 203.4 | 338.5  | 218.8 | 167.4  | 61.6   | 127.3  | 160.3  | 75.9   |
| 3.9   | 5.3   | 3.9    | 1.3   | 1.2    | 1.7    | 1.3    | 1.2    | 1.6    |
| 497.6 | 449.8 | 546.0  | 468.6 | 461.6  | 558.7  | 560.2  | 570.3  | 868.7  |
| 46.2  | 56.2  | 42.3   | 52.3  | 24.8   | 23.8   | 34.1   | 33.8   | 63.7   |
| 230.4 | 235.3 | 132.9  | 184.1 | 124.9  | 85.2   | 108.3  | 168.5  | 98.5   |
| 12.4  | 16.2  | 8.6    | 10.8  | 10.4   | 12.9   | 19.2   | 23.2   | 27.8   |
| 1.0   | 1.1   | 1.7    | 1.3   | 15.9   | 9.6    | 12.2   | 8.4    | 13.2   |
| 88.2  | 79.8  | 116.1  | 98.8  | 132.7  | 147.5  | 162.0  | 164.1  | 98.3   |
| 33.0  | 29.2  | 41.8   | 26.4  | 22.8   | 26.1   | 25.7   | 33.5   | 46.3   |
| 38.6  | 50.1  | 53.4   | 39.6  | 67.5   | 58.6   | 58.4   | 56.5   | 57.9   |
| 149.8 | 71.0  | 460.4  | 254.2 | 102.2  | 81.6   | 89.5   | 134.1  | 32.7   |
| 6.9   | 6.4   | 7.0    | 10.9  | 5.3    | 0.7    | 4.5    | 12.8   | 9.5    |
| 1.5   | 2.1   | 4.4    | 3.9   | 14.7   | 15.4   | 8.8    | 11.5   | 8.4    |
| 3.9   | 1.9   | 9.0    | 6.3   | 1.5    | 1.7    | 6.8    | 2.4    | 4.7    |
| 4.3   | 3.8   | 23.3   | 9.1   | 7.9    | 5.3    | 5.5    | 19.9   | 27.1   |
| 38.9  | 58.9  | 34.0   | 26.2  | 722.9  | 1006.3 | 1002.2 | 1050.2 | 200.4  |
| 2.0   | 2.6   | 2.3    | 2.3   | 37.7   | 51.8   | 41.8   | 46.3   | 5.3    |
| 8.6   | 3.1   | 9.7    | 6.4   | 4.8    | 2.7    | 1.7    | 2.4    | 7.1    |
| 87.4  | 85.3  | 115.1  | 96.2  | 167.9  | 186.9  | 172.7  | 218.8  | 375.8  |
| 16.2  | 11.9  | 7.8    | 1.9   | 103.8  | 113.9  | 260.7  | 185.1  | 13.7   |
| 15.8  | 16.7  | 24.5   | 22.7  | 274.1  | 256.7  | 341.7  | 311.2  | 59.8   |
| 71.7  | 67.9  | 88.2   | 46.4  | 78.9   | 89.1   | 88.0   | 100.0  | 113.7  |
| 2.0   | 2.6   | 4.8    | 5.4   | 2.0    | 2.0    | 3.4    | 8.2    | 4.4    |
| 7.0   | 3.1   | 6.4    | 1.5   | 9.4    | 7.9    | 8.3    | 26.9   | 20.9   |
| 173.6 | 156.2 | 241.6  | 172.6 | 323.8  | 316.7  | 311.8  | 358.2  | 316.7  |
| 152.5 | 131.3 | 196.2  | 142.6 | 200.0  | 214.9  | 174.5  | 217.0  | 261.1  |
| 11.3  | 17.2  | 26.2   | 12.6  | 34.3   | 10.5   | 26.5   | 21.1   | 60.9   |
| 6.5   | 9.4   | 19.1   | 14.6  | 20.8   | 12.6   | 18.7   | 23.4   | 29.7   |
| 2.6   | 2.1   | 17.9   | 5.9   | 22.5   | 11.4   | 20.9   | 23.5   | 43.7   |
| 62.5  | 69.6  | 81.9   | 56.7  | 36.6   | 60.8   | 40.6   | 49.3   | 54.3   |
| 153.6 | 118.5 | 294.5  | 189.0 | 347.1  | 403.0  | 386.0  | 367.9  | 548.9  |
| 186.5 | 190.8 | 272.2  | 146.9 | 11.7   | 8.3    | 33.4   | 42.3   | 43.1   |
| 98.7  | 121.8 | 113.4  | 68.8  | 137.2  | 128.9  | 162.9  | 174.4  | 63.4   |
| 439.8 | 778.9 | 357.5  | 462.6 | 553.9  | 878.9  | 667.0  | 628.6  | 1885.1 |
| 98.6  | 76.7  | 311.9  | 62.8  | 435.2  | 258.7  | 363.3  | 451.0  | 527.2  |
| 157.2 | 195.2 | 224.0  | 196.2 | 193.7  | 167.3  | 201.0  | 252.7  | 125.7  |
| 134.7 | 123.5 | 132.3  | 90.3  | 111.1  | 122.1  | 113.3  | 117.4  | 103.2  |
| 11.2  | 11.4  | 17.7   | 10.8  | 6.3    | 2.9    | 4.5    | 11.6   | 18.5   |

|        |        |        |        |        |        |        |        |       |
|--------|--------|--------|--------|--------|--------|--------|--------|-------|
| 224.2  | 294.1  | 90.1   | 529.6  | 4.8    | 1.1    | 3.5    | 1.8    | 2.0   |
| 260.0  | 227.4  | 285.6  | 261.2  | 167.0  | 219.7  | 204.9  | 173.7  | 292.3 |
| 1.5    | 2.2    | 0.4    | 0.4    | 2.1    | 2.4    | 0.5    | 0.9    | 15.8  |
| 201.4  | 153.4  | 326.3  | 162.4  | 729.2  | 1036.8 | 1124.0 | 1218.4 | 620.8 |
| 55.4   | 67.0   | 73.6   | 51.1   | 41.9   | 45.2   | 32.1   | 43.0   | 74.7  |
| 803.9  | 641.4  | 698.8  | 664.4  | 168.1  | 125.9  | 125.3  | 182.6  | 101.1 |
| 24.9   | 27.2   | 38.7   | 26.5   | 73.1   | 118.8  | 95.5   | 115.0  | 27.8  |
| 9.0    | 8.0    | 2.5    | 5.0    | 415.0  | 385.1  | 184.1  | 258.3  | 226.9 |
| 659.7  | 461.0  | 1310.1 | 534.9  | 968.6  | 532.4  | 1050.1 | 1214.0 | 387.3 |
| 392.1  | 323.5  | 681.9  | 395.6  | 1005.6 | 1103.5 | 1081.6 | 1086.3 | 748.9 |
| 192.4  | 191.2  | 214.3  | 125.4  | 621.9  | 637.0  | 651.8  | 620.0  | 648.2 |
| 172.2  | 162.9  | 311.7  | 158.9  | 297.3  | 226.3  | 282.0  | 335.4  | 177.8 |
| 5.3    | 3.6    | 3.5    | 1.3    | 7.8    | 5.1    | 11.4   | 11.2   | 23.0  |
| 9.0    | 15.5   | 22.4   | 8.8    | 18.5   | 17.1   | 38.9   | 24.3   | 52.2  |
| 29.2   | 26.8   | 34.0   | 30.6   | 7.8    | 7.9    | 15.0   | 5.5    | 53.9  |
| 45.3   | 37.1   | 35.0   | 28.0   | 8.6    | 9.7    | 12.5   | 9.7    | 71.6  |
| 2682.0 | 2507.7 | 2913.1 | 2956.9 | 18.2   | 9.3    | 8.5    | 24.3   | 52.9  |
| 292.3  | 300.5  | 480.5  | 443.3  | 73.4   | 71.7   | 94.3   | 98.7   | 20.1  |
| 1.5    | 1.8    | 1.3    | 2.3    | 30.5   | 45.6   | 40.6   | 30.0   | 174.9 |
| 27.1   | 21.9   | 33.5   | 26.0   | 34.4   | 42.7   | 52.5   | 41.8   | 118.3 |
| 1.9    | 5.3    | 5.6    | 9.8    | 152.3  | 218.6  | 256.5  | 173.7  | 497.2 |
| 20.0   | 18.4   | 23.2   | 11.0   | 57.1   | 69.0   | 91.0   | 71.6   | 189.0 |
| 96.3   | 78.4   | 127.2  | 78.8   | 73.9   | 110.1  | 86.2   | 75.8   | 128.0 |
| 879.6  | 787.8  | 1169.9 | 901.4  | 536.0  | 563.8  | 573.1  | 652.4  | 983.0 |
| 7.5    | 9.0    | 10.9   | 5.9    | 7.3    | 12.9   | 12.8   | 15.3   | 10.8  |
| 206.1  | 148.7  | 215.3  | 162.6  | 180.0  | 175.1  | 139.2  | 203.0  | 161.4 |
| 209.1  | 228.9  | 195.9  | 186.9  | 53.9   | 31.8   | 39.1   | 46.7   | 135.7 |
| 141.3  | 125.9  | 192.9  | 123.7  | 271.6  | 294.1  | 264.4  | 318.5  | 355.4 |
| 149.8  | 174.8  | 142.3  | 131.0  | 31.1   | 26.0   | 29.6   | 40.0   | 78.9  |
| 2.3    | 9.4    | 7.6    | 1.7    | 12.3   | 6.9    | 6.1    | 7.6    | 5.7   |
| 1.9    | 1.6    | 5.5    | 1.9    | 3.8    | 1.1    | 2.3    | 3.0    | 1.6   |
| 9.4    | 10.0   | 10.2   | 9.4    | 5.8    | 8.6    | 2.9    | 13.3   | 140.5 |
| 8.0    | 9.2    | 32.0   | 9.4    | 257.2  | 240.8  | 319.0  | 363.2  | 125.1 |
| 1377.6 | 1369.5 | 1307.5 | 1548.8 | 367.9  | 390.5  | 363.0  | 484.3  | 365.8 |
| 261.0  | 240.8  | 595.0  | 277.2  | 993.4  | 736.4  | 883.3  | 1127.4 | 783.4 |
| 7.0    | 2.6    | 1.0    | 3.1    | 17.0   | 19.1   | 24.8   | 22.7   | 7.4   |
| 55.3   | 69.5   | 76.5   | 61.3   | 148.2  | 150.9  | 166.3  | 186.8  | 115.0 |
| 9.0    | 15.6   | 15.5   | 8.7    | 23.0   | 18.0   | 16.6   | 21.8   | 12.2  |
| 169.5  | 143.2  | 221.7  | 140.3  | 123.1  | 88.4   | 122.0  | 177.9  | 89.3  |
| 15.4   | 15.5   | 2.7    | 2.2    | 176.1  | 124.8  | 116.5  | 165.3  | 236.7 |
| 150.3  | 138.4  | 206.1  | 112.1  | 223.4  | 232.7  | 183.5  | 244.6  | 383.2 |
| 6.1    | 6.3    | 5.2    | 2.1    | 15.0   | 14.9   | 19.5   | 11.7   | 5.0   |
| 121.6  | 136.0  | 191.6  | 122.1  | 263.6  | 170.3  | 206.6  | 291.1  | 240.3 |
| 18.3   | 54.4   | 39.4   | 26.8   | 25.5   | 46.4   | 30.7   | 32.6   | 44.9  |
| 91.3   | 94.6   | 119.8  | 94.0   | 91.0   | 83.6   | 78.0   | 88.8   | 105.0 |
| 54.7   | 65.0   | 83.4   | 62.6   | 73.9   | 55.6   | 50.2   | 68.3   | 86.2  |
| 515.5  | 417.8  | 920.1  | 530.8  | 498.4  | 337.9  | 572.2  | 610.3  | 102.9 |
| 190.4  | 154.5  | 348.8  | 202.8  | 102.8  | 72.7   | 110.9  | 119.6  | 19.5  |
| 12.5   | 13.2   | 10.4   | 5.4    | 23.1   | 23.0   | 24.1   | 18.7   | 7.6   |
| 57.1   | 66.6   | 104.0  | 64.8   | 73.3   | 66.3   | 104.2  | 66.3   | 91.8  |
| 69.4   | 75.8   | 85.0   | 60.9   | 86.2   | 87.5   | 111.9  | 85.6   | 98.5  |
| 480.2  | 392.8  | 839.2  | 472.8  | 570.4  | 370.2  | 586.0  | 629.2  | 854.7 |
| 49.9   | 63.1   | 74.9   | 54.5   | 114.3  | 89.5   | 93.3   | 138.4  | 111.4 |

|        |        |        |       |       |       |       |       |        |
|--------|--------|--------|-------|-------|-------|-------|-------|--------|
| 6.8    | 5.6    | 6.2    | 12.5  | 9.8   | 10.5  | 8.4   | 13.9  | 23.9   |
| 1.6    | 1.3    | 1.9    | 1.4   | 1.2   | 1.1   | 1.3   | 1.4   | 4.6    |
| 49.3   | 60.0   | 88.3   | 47.7  | 200.3 | 150.5 | 165.2 | 201.0 | 381.1  |
| 2.5    | 2.4    | 13.2   | 4.8   | 256.7 | 279.8 | 299.0 | 270.7 | 74.7   |
| 0.7    | 0.8    | 0.8    | 0.6   | 43.4  | 20.5  | 64.5  | 49.3  | 1.0    |
| 6.1    | 4.7    | 8.3    | 4.7   | 10.7  | 17.3  | 16.4  | 21.6  | 21.1   |
| 49.4   | 40.0   | 43.1   | 31.6  | 93.8  | 108.9 | 94.7  | 136.0 | 50.4   |
| 1008.9 | 900.2  | 1097.9 | 947.9 | 35.4  | 31.8  | 28.1  | 26.3  | 16.0   |
| 62.1   | 53.0   | 81.3   | 52.7  | 68.9  | 85.0  | 48.4  | 72.5  | 62.4   |
| 79.6   | 96.7   | 83.6   | 72.5  | 56.2  | 70.2  | 47.7  | 54.9  | 27.5   |
| 54.3   | 58.2   | 79.4   | 68.7  | 98.8  | 86.1  | 119.4 | 120.8 | 1667.0 |
| 17.1   | 19.4   | 25.1   | 20.4  | 52.5  | 71.2  | 69.8  | 73.5  | 34.4   |
| 11.5   | 12.8   | 13.5   | 12.2  | 20.3  | 35.0  | 29.9  | 25.3  | 14.3   |
| 11.7   | 15.2   | 13.9   | 13.8  | 25.6  | 14.5  | 14.9  | 18.9  | 18.6   |
| 3.6    | 5.1    | 1.6    | 3.5   | 2.4   | 2.2   | 21.2  | 2.4   | 2.2    |
| 620.8  | 658.1  | 882.3  | 684.9 | 399.9 | 389.6 | 471.4 | 494.3 | 237.8  |
| 171.4  | 160.4  | 211.2  | 195.6 | 146.4 | 210.8 | 165.7 | 185.5 | 338.5  |
| 1.8    | 3.7    | 7.1    | 4.1   | 0.9   | 2.8   | 0.7   | 1.7   | 1.2    |
| 161.7  | 157.4  | 196.4  | 148.0 | 165.5 | 133.7 | 220.6 | 183.5 | 33.0   |
| 869.7  | 836.9  | 972.2  | 831.8 | 659.7 | 436.2 | 718.4 | 681.7 | 121.4  |
| 14.6   | 29.0   | 32.5   | 22.3  | 16.7  | 17.3  | 18.5  | 26.3  | 24.5   |
| 35.5   | 26.3   | 87.3   | 44.5  | 31.1  | 19.8  | 23.2  | 42.4  | 30.8   |
| 16.9   | 20.3   | 15.4   | 13.1  | 65.4  | 58.8  | 55.2  | 67.0  | 27.5   |
| 15.9   | 13.3   | 37.2   | 20.8  | 32.5  | 45.2  | 28.8  | 26.6  | 30.7   |
| 7.0    | 3.4    | 7.9    | 13.3  | 14.3  | 10.8  | 9.9   | 13.3  | 15.5   |
| 3.1    | 8.1    | 9.0    | 2.6   | 7.8   | 6.6   | 8.1   | 6.8   | 7.8    |
| 172.8  | 191.0  | 204.5  | 221.5 | 526.6 | 415.8 | 570.0 | 718.6 | 145.2  |
| 29.1   | 20.5   | 32.4   | 12.8  | 26.6  | 26.5  | 30.2  | 30.7  | 43.5   |
| 25.4   | 24.5   | 54.8   | 44.1  | 549.2 | 519.7 | 611.7 | 623.5 | 200.6  |
| 8.3    | 8.4    | 2.9    | 10.0  | 116.4 | 105.2 | 95.0  | 128.0 | 190.9  |
| 328.1  | 294.4  | 519.2  | 479.4 | 540.4 | 796.9 | 590.7 | 666.9 | 359.8  |
| 55.9   | 57.2   | 53.6   | 52.5  | 48.9  | 35.3  | 53.1  | 61.3  | 78.9   |
| 25.6   | 29.4   | 35.9   | 27.1  | 36.6  | 37.4  | 40.0  | 51.7  | 44.8   |
| 130.2  | 125.2  | 191.0  | 95.4  | 280.0 | 492.4 | 259.2 | 280.3 | 10.9   |
| 8.5    | 5.3    | 12.2   | 11.0  | 141.8 | 161.0 | 109.5 | 153.6 | 23.9   |
| 20.1   | 18.1   | 81.8   | 9.1   | 144.8 | 70.5  | 87.4  | 145.2 | 363.5  |
| 26.8   | 22.7   | 59.7   | 20.6  | 48.7  | 37.2  | 36.7  | 68.5  | 219.5  |
| 15.0   | 12.1   | 16.8   | 17.5  | 6.6   | 8.2   | 7.4   | 9.2   | 5.2    |
| 26.8   | 44.9   | 55.1   | 14.8  | 1.5   | 7.8   | 2.2   | 1.9   | 436.2  |
| 65.9   | 82.0   | 80.6   | 69.3  | 255.3 | 255.2 | 282.5 | 308.3 | 593.2  |
| 103.8  | 100.8  | 115.1  | 106.1 | 290.2 | 256.1 | 296.8 | 349.5 | 658.3  |
| 37.5   | 40.1   | 30.4   | 25.6  | 31.0  | 53.4  | 35.3  | 42.0  | 48.2   |
| 13.6   | 8.7    | 25.3   | 24.2  | 767.5 | 563.3 | 780.8 | 875.0 | 364.8  |
| 57.7   | 56.4   | 72.4   | 69.7  | 60.7  | 61.6  | 76.1  | 78.1  | 87.3   |
| 0.4    | 1.8    | 2.6    | 0.8   | 0.3   | 1.3   | 1.6   | 0.5   | 1.1    |
| 1.6    | 1.8    | 1.4    | 1.3   | 1.1   | 1.0   | 1.0   | 2.2   | 1.7    |
| 144.4  | 142.7  | 159.0  | 122.5 | 137.9 | 175.7 | 138.7 | 167.2 | 177.7  |
| 11.5   | 5.4    | 5.8    | 2.5   | 5.5   | 5.6   | 5.9   | 1.3   | 10.8   |
| 5.0    | 1.0    | 5.1    | 0.7   | 1.3   | 0.8   | 0.6   | 1.3   | 2.4    |
| 110.5  | 110.3  | 237.3  | 104.9 | 620.8 | 312.6 | 546.3 | 632.6 | 670.2  |
| 906.2  | 1063.8 | 698.7  | 956.1 | 685.2 | 775.9 | 901.5 | 873.8 | 1125.0 |
| 122.6  | 148.2  | 181.4  | 116.4 | 237.4 | 272.6 | 241.9 | 286.9 | 140.3  |
| 3.2    | 2.4    | 1.3    | 2.9   | 6.6   | 5.6   | 5.3   | 10.3  | 0.5    |

|        |       |        |        |        |        |        |        |        |
|--------|-------|--------|--------|--------|--------|--------|--------|--------|
| 1.6    | 5.0   | 3.7    | 2.5    | 2.3    | 0.8    | 2.9    | 1.8    | 7.4    |
| 5.2    | 8.3   | 7.3    | 14.0   | 8.7    | 3.3    | 11.1   | 4.8    | 16.0   |
| 109.1  | 91.6  | 143.2  | 89.0   | 319.0  | 279.5  | 396.7  | 402.9  | 173.7  |
| 396.2  | 359.1 | 567.3  | 361.7  | 193.1  | 254.3  | 191.8  | 202.4  | 112.9  |
| 305.9  | 219.7 | 477.2  | 218.6  | 63.0   | 54.9   | 85.1   | 73.5   | 38.0   |
| 45.7   | 44.5  | 48.4   | 34.8   | 33.2   | 23.5   | 34.3   | 37.8   | 32.5   |
| 0.6    | 4.1   | 3.2    | 0.6    | 4.6    | 4.4    | 7.1    | 7.5    | 6.1    |
| 103.9  | 164.1 | 91.0   | 122.2  | 130.9  | 115.8  | 121.4  | 157.9  | 377.8  |
| 6.1    | 6.3   | 8.4    | 4.7    | 2.4    | 5.7    | 9.5    | 3.8    | 8.4    |
| 0.4    | 0.5   | 0.7    | 1.3    | 18.5   | 42.1   | 23.5   | 12.9   | 2.4    |
| 2.4    | 1.5   | 5.1    | 0.6    | 21.5   | 47.5   | 31.5   | 33.3   | 5.5    |
| 3.2    | 8.2   | 2.3    | 1.7    | 1.8    | 6.7    | 3.0    | 0.9    | 436.7  |
| 168.0  | 163.3 | 174.9  | 145.2  | 220.4  | 208.5  | 201.8  | 257.9  | 151.7  |
| 0.6    | 0.5   | 1.2    | 0.4    | 50.7   | 68.2   | 50.2   | 61.5   | 187.3  |
| 34.6   | 33.2  | 66.4   | 19.3   | 68.2   | 27.0   | 44.6   | 76.0   | 36.9   |
| 61.0   | 54.0  | 115.1  | 36.3   | 132.5  | 82.4   | 111.3  | 140.2  | 55.2   |
| 47.3   | 54.2  | 67.1   | 60.6   | 34.9   | 40.3   | 24.1   | 43.8   | 123.6  |
| 37.9   | 39.4  | 29.8   | 47.7   | 41.6   | 28.1   | 31.0   | 69.2   | 9.6    |
| 8.6    | 14.4  | 8.5    | 9.5    | 25.0   | 26.1   | 18.4   | 38.8   | 13.3   |
| 71.8   | 75.9  | 65.8   | 39.7   | 135.9  | 168.9  | 156.8  | 177.0  | 161.0  |
| 4.3    | 10.5  | 6.6    | 9.0    | 50.0   | 38.4   | 44.5   | 43.2   | 17.3   |
| 467.9  | 600.9 | 252.2  | 257.5  | 20.9   | 17.8   | 13.3   | 18.8   | 41.1   |
| 9.2    | 2.2   | 9.3    | 7.6    | 128.7  | 126.7  | 125.2  | 173.7  | 197.3  |
| 0.5    | 1.5   | 0.7    | 1.0    | 1.4    | 0.5    | 7.7    | 3.3    | 214.3  |
| 0.5    | 0.4   | 0.8    | 0.4    | 2.1    | 0.6    | 0.5    | 0.3    | 1.0    |
| 65.9   | 76.6  | 79.8   | 70.0   | 66.0   | 63.0   | 69.1   | 82.5   | 72.6   |
| 95.0   | 91.1  | 75.6   | 83.5   | 58.0   | 38.2   | 54.1   | 70.2   | 90.8   |
| 4.1    | 14.1  | 22.5   | 11.8   | 59.3   | 68.6   | 65.6   | 65.4   | 15.4   |
| 24.5   | 4.7   | 18.1   | 19.6   | 42.9   | 37.5   | 36.1   | 28.9   | 29.9   |
| 82.6   | 85.1  | 102.4  | 96.3   | 42.7   | 47.6   | 49.3   | 62.6   | 48.1   |
| 20.8   | 17.4  | 22.5   | 10.0   | 4.6    | 7.0    | 6.6    | 19.4   | 162.6  |
| 1044.6 | 922.2 | 2406.4 | 1315.6 | 2467.4 | 3439.8 | 2580.4 | 2787.5 | 2454.5 |
| 191.0  | 247.9 | 262.1  | 172.5  | 488.4  | 470.3  | 308.8  | 360.3  | 899.2  |
| 48.9   | 35.2  | 46.0   | 39.2   | 29.8   | 18.2   | 26.0   | 36.8   | 38.2   |
| 21.8   | 12.1  | 13.8   | 9.6    | 37.1   | 43.6   | 43.1   | 42.9   | 120.8  |
| 2.1    | 0.6   | 0.6    | 0.8    | 28.1   | 36.6   | 30.3   | 24.3   | 495.7  |
| 15.5   | 11.9  | 6.0    | 5.1    | 212.2  | 165.1  | 182.0  | 267.0  | 64.9   |
| 90.1   | 76.9  | 123.9  | 54.4   | 40.1   | 39.8   | 57.5   | 63.0   | 1.5    |
| 166.2  | 173.0 | 194.9  | 142.8  | 79.2   | 85.5   | 95.9   | 108.4  | 10.4   |
| 459.4  | 460.4 | 676.3  | 325.5  | 576.4  | 465.9  | 496.0  | 620.0  | 410.2  |
| 19.0   | 19.5  | 43.0   | 37.3   | 24.4   | 20.8   | 22.9   | 30.5   | 6.8    |
| 10.8   | 12.8  | 19.9   | 18.5   | 1.3    | 8.7    | 7.5    | 1.3    | 6.2    |
| 11.5   | 15.9  | 27.0   | 24.7   | 9.0    | 17.5   | 14.4   | 10.8   | 8.7    |
| 50.3   | 65.2  | 46.4   | 51.9   | 54.5   | 83.4   | 46.4   | 81.6   | 80.0   |
| 77.3   | 62.1  | 116.3  | 59.1   | 16.9   | 22.7   | 34.8   | 73.8   | 151.2  |
| 6.9    | 3.6   | 9.4    | 9.9    | 3.7    | 2.9    | 1.8    | 2.1    | 27.8   |
| 47.7   | 48.6  | 32.6   | 31.2   | 52.6   | 41.1   | 53.0   | 56.1   | 47.4   |
| 12.9   | 7.2   | 20.5   | 18.8   | 15.7   | 21.9   | 13.6   | 24.0   | 21.8   |
| 104.4  | 110.6 | 157.9  | 111.3  | 88.6   | 77.9   | 82.5   | 111.9  | 118.4  |
| 13.5   | 19.6  | 21.5   | 16.4   | 17.5   | 4.8    | 12.1   | 12.3   | 17.3   |
| 13.2   | 4.1   | 15.2   | 6.6    | 7.5    | 1.6    | 3.3    | 4.4    | 4.4    |
| 105.6  | 87.6  | 141.4  | 94.6   | 101.9  | 89.3   | 95.9   | 115.6  | 123.1  |
| 253.6  | 243.6 | 206.8  | 220.0  | 157.9  | 149.4  | 162.5  | 227.7  | 28.8   |

|        |        |        |        |        |        |        |        |        |
|--------|--------|--------|--------|--------|--------|--------|--------|--------|
| 72.8   | 57.1   | 201.9  | 65.1   | 301.4  | 307.8  | 345.8  | 316.5  | 136.0  |
| 257.2  | 274.1  | 745.5  | 191.5  | 1258.1 | 904.2  | 1134.9 | 1264.7 | 1890.3 |
| 274.7  | 240.2  | 744.6  | 188.8  | 886.9  | 681.8  | 733.3  | 971.7  | 1671.3 |
| 31.4   | 36.4   | 43.8   | 36.2   | 76.5   | 62.6   | 67.3   | 51.8   | 220.5  |
| 10.5   | 8.3    | 16.7   | 12.2   | 140.8  | 163.0  | 111.3  | 145.0  | 20.8   |
| 372.2  | 420.8  | 490.4  | 419.9  | 177.6  | 125.9  | 173.2  | 171.1  | 399.3  |
| 270.6  | 301.9  | 478.9  | 342.8  | 204.5  | 183.9  | 159.5  | 231.3  | 287.6  |
| 30.3   | 29.8   | 22.7   | 33.7   | 27.1   | 33.1   | 24.2   | 25.8   | 38.4   |
| 4.4    | 2.6    | 2.1    | 5.6    | 79.4   | 85.5   | 147.2  | 109.6  | 55.0   |
| 31.0   | 35.3   | 101.2  | 33.2   | 175.2  | 122.8  | 147.9  | 165.5  | 106.2  |
| 23.5   | 28.2   | 27.4   | 18.4   | 7.7    | 13.1   | 20.5   | 17.0   | 23.5   |
| 23.4   | 13.6   | 51.8   | 14.1   | 9.9    | 8.8    | 17.0   | 8.4    | 17.2   |
| 455.1  | 435.2  | 471.8  | 417.7  | 210.9  | 222.4  | 205.2  | 208.2  | 231.7  |
| 1706.7 | 1725.6 | 2019.6 | 1626.8 | 740.6  | 699.8  | 734.9  | 814.9  | 630.9  |
| 3.4    | 4.2    | 2.3    | 5.5    | 104.1  | 92.5   | 112.1  | 137.6  | 606.4  |
| 7.2    | 7.3    | 7.2    | 7.2    | 56.4   | 41.2   | 45.6   | 55.4   | 405.2  |
| 6.1    | 9.4    | 10.5   | 12.0   | 22.4   | 9.9    | 19.7   | 16.7   | 9.9    |
| 112.8  | 105.2  | 167.2  | 122.6  | 233.5  | 224.4  | 274.5  | 309.5  | 105.2  |
| 202.3  | 197.7  | 325.9  | 250.8  | 530.4  | 468.1  | 589.7  | 583.8  | 254.8  |
| 50.6   | 50.7   | 64.8   | 52.9   | 133.5  | 122.2  | 168.5  | 137.2  | 158.1  |
| 26.8   | 27.9   | 38.1   | 30.5   | 22.3   | 25.1   | 39.5   | 36.5   | 76.1   |
| 1.6    | 1.6    | 2.5    | 1.8    | 3.7    | 2.1    | 3.9    | 10.5   | 2.7    |
| 225.7  | 276.2  | 134.3  | 195.0  | 108.9  | 158.3  | 121.7  | 137.2  | 165.9  |
| 9.4    | 1.8    | 7.7    | 5.0    | 186.1  | 193.3  | 160.2  | 247.3  | 10.9   |
| 141.4  | 166.2  | 105.9  | 145.5  | 181.9  | 190.0  | 167.4  | 198.6  | 57.7   |
| 125.7  | 139.2  | 107.7  | 117.9  | 188.5  | 181.7  | 206.2  | 212.7  | 134.0  |
| 82.7   | 69.0   | 79.4   | 112.2  | 19.6   | 33.0   | 22.3   | 14.6   | 20.6   |
| 18.2   | 16.0   | 19.2   | 12.0   | 5.2    | 9.6    | 4.3    | 12.1   | 11.9   |
| 3.6    | 2.7    | 10.2   | 1.7    | 33.2   | 19.0   | 41.2   | 31.3   | 69.9   |
| 59.1   | 51.2   | 77.9   | 34.8   | 134.2  | 131.3  | 136.8  | 158.8  | 175.1  |
| 18.1   | 15.3   | 14.1   | 7.4    | 40.9   | 45.7   | 50.0   | 65.7   | 37.9   |
| 37.0   | 41.7   | 49.7   | 28.5   | 149.6  | 111.1  | 145.9  | 182.7  | 69.5   |
| 239.3  | 218.1  | 376.9  | 378.3  | 31.8   | 17.2   | 21.7   | 30.9   | 19.2   |
| 101.4  | 97.3   | 207.9  | 116.8  | 136.3  | 154.1  | 136.9  | 179.7  | 90.5   |
| 104.3  | 112.8  | 57.6   | 100.1  | 32.4   | 36.8   | 29.4   | 49.6   | 34.5   |
| 13.2   | 20.7   | 20.2   | 23.8   | 6.2    | 9.7    | 7.2    | 15.4   | 12.3   |
| 3.3    | 0.7    | 2.8    | 2.9    | 257.3  | 234.5  | 232.6  | 331.3  | 7.1    |
| 7.4    | 2.4    | 9.3    | 6.0    | 277.9  | 210.0  | 229.5  | 372.5  | 11.2   |
| 57.0   | 64.5   | 35.1   | 53.8   | 90.5   | 98.5   | 117.7  | 128.4  | 78.5   |
| 778.9  | 848.7  | 1216.1 | 981.2  | 598.4  | 628.4  | 462.3  | 748.8  | 870.9  |
| 228.9  | 213.8  | 183.2  | 129.1  | 1042.7 | 1273.6 | 1013.7 | 1266.6 | 586.9  |
| 104.6  | 100.0  | 104.8  | 103.4  | 195.9  | 164.5  | 193.2  | 202.7  | 330.3  |
| 164.2  | 169.6  | 168.3  | 145.9  | 738.4  | 707.1  | 880.8  | 859.6  | 1144.0 |
| 362.5  | 378.6  | 408.9  | 354.5  | 294.4  | 244.4  | 286.3  | 368.1  | 588.3  |
| 2.0    | 1.8    | 8.5    | 1.9    | 1.2    | 1.1    | 1.2    | 2.2    | 3.3    |
| 27.8   | 19.9   | 32.4   | 13.5   | 6.2    | 9.9    | 15.1   | 21.6   | 20.3   |
| 173.7  | 172.0  | 257.1  | 171.0  | 385.4  | 258.9  | 375.4  | 401.7  | 315.5  |
| 132.6  | 114.6  | 165.0  | 123.2  | 40.7   | 38.5   | 40.1   | 65.6   | 28.3   |
| 6.8    | 1.3    | 4.3    | 1.3    | 2.4    | 1.3    | 3.9    | 9.2    | 7.2    |
| 45.2   | 44.4   | 83.6   | 35.8   | 70.3   | 97.4   | 61.7   | 93.9   | 136.4  |
| 25.0   | 32.8   | 17.5   | 17.0   | 7.3    | 5.9    | 6.0    | 7.6    | 4.0    |
| 121.1  | 112.1  | 226.6  | 103.6  | 381.6  | 332.0  | 279.5  | 420.7  | 391.3  |
| 4.5    | 4.0    | 2.7    | 3.4    | 9.7    | 2.9    | 4.0    | 5.1    | 5.1    |

|       |       |       |       |        |        |        |        |        |
|-------|-------|-------|-------|--------|--------|--------|--------|--------|
| 162.0 | 155.9 | 206.2 | 138.0 | 125.7  | 105.8  | 112.9  | 160.3  | 58.3   |
| 93.6  | 122.9 | 33.9  | 83.9  | 361.5  | 376.8  | 406.3  | 491.0  | 226.3  |
| 17.5  | 21.1  | 8.6   | 8.9   | 50.8   | 55.4   | 54.8   | 83.1   | 38.3   |
| 270.9 | 274.5 | 579.8 | 259.4 | 737.4  | 348.2  | 688.7  | 818.6  | 523.1  |
| 8.3   | 7.4   | 2.9   | 1.9   | 169.1  | 173.8  | 147.2  | 143.9  | 27.8   |
| 333.0 | 289.2 | 348.5 | 320.0 | 70.9   | 55.4   | 85.0   | 87.6   | 188.8  |
| 157.8 | 179.5 | 585.8 | 162.0 | 1376.6 | 1018.6 | 1196.7 | 1407.1 | 1439.8 |
| 74.3  | 76.4  | 176.1 | 82.3  | 274.1  | 148.0  | 178.6  | 221.6  | 207.0  |
| 42.1  | 23.5  | 103.5 | 33.6  | 95.4   | 50.7   | 66.3   | 90.4   | 125.1  |
| 249.5 | 254.2 | 290.5 | 213.0 | 197.0  | 192.3  | 194.8  | 198.1  | 141.5  |
| 7.6   | 2.6   | 7.8   | 6.7   | 5.3    | 11.2   | 2.7    | 9.3    | 7.5    |
| 8.1   | 19.7  | 6.6   | 15.9  | 10.0   | 10.1   | 6.0    | 9.9    | 2.8    |
| 191.5 | 169.5 | 370.3 | 207.6 | 406.7  | 392.2  | 459.2  | 460.4  | 337.7  |
| 192.6 | 171.1 | 243.5 | 155.0 | 165.3  | 147.7  | 194.5  | 221.1  | 216.5  |
| 81.5  | 59.5  | 115.1 | 52.2  | 285.4  | 305.6  | 311.3  | 287.1  | 352.2  |
| 6.3   | 5.1   | 9.7   | 6.1   | 7.0    | 3.0    | 4.2    | 2.7    | 1.6    |
| 233.0 | 223.8 | 426.6 | 196.7 | 255.5  | 167.9  | 226.7  | 272.9  | 194.0  |
| 3.9   | 8.9   | 14.0  | 8.9   | 16.3   | 12.1   | 15.9   | 25.9   | 164.3  |
| 50.6  | 39.0  | 56.8  | 43.9  | 90.6   | 84.2   | 100.3  | 93.7   | 133.0  |
| 145.2 | 132.4 | 104.1 | 89.1  | 101.6  | 107.5  | 119.1  | 111.0  | 16.5   |
| 611.7 | 516.3 | 877.4 | 572.0 | 821.3  | 878.9  | 852.5  | 824.7  | 1402.6 |
| 10.7  | 8.2   | 11.7  | 8.3   | 13.6   | 11.7   | 25.5   | 20.7   | 34.4   |
| 46.8  | 42.3  | 46.7  | 38.5  | 68.3   | 63.8   | 65.5   | 100.2  | 82.1   |
| 330.8 | 280.6 | 531.4 | 302.8 | 544.3  | 496.7  | 652.0  | 753.4  | 1038.3 |
| 4.9   | 3.4   | 15.1  | 9.7   | 58.1   | 60.0   | 67.1   | 72.7   | 116.5  |
| 3.8   | 3.4   | 3.9   | 3.9   | 25.8   | 33.4   | 32.4   | 38.4   | 23.1   |
| 0.4   | 2.8   | 1.4   | 4.8   | 17.3   | 17.9   | 18.8   | 18.3   | 11.0   |
| 1.4   | 5.0   | 1.5   | 4.4   | 1.2    | 1.4    | 5.9    | 0.9    | 3.8    |
| 268.3 | 249.2 | 304.8 | 224.1 | 364.6  | 349.2  | 337.0  | 451.3  | 474.5  |
| 2.3   | 3.7   | 6.1   | 7.8   | 1.7    | 1.5    | 9.9    | 6.0    | 5.8    |
| 260.7 | 260.0 | 261.2 | 267.2 | 315.3  | 455.7  | 334.6  | 397.3  | 240.0  |
| 6.6   | 12.5  | 9.2   | 19.5  | 3.7    | 1.4    | 5.3    | 1.0    | 5.8    |
| 7.3   | 0.7   | 8.9   | 12.0  | 1.4    | 2.7    | 0.4    | 1.2    | 1.0    |
| 3.1   | 2.5   | 5.5   | 8.7   | 6.3    | 1.9    | 10.2   | 2.4    | 9.5    |
| 134.4 | 135.8 | 217.8 | 123.3 | 281.2  | 184.4  | 228.3  | 381.7  | 204.6  |
| 6.8   | 10.0  | 10.4  | 2.0   | 5.2    | 12.7   | 9.5    | 9.2    | 46.5   |
| 4.1   | 3.1   | 2.2   | 0.8   | 325.1  | 230.2  | 454.1  | 452.0  | 5.9    |
| 3.1   | 19.6  | 8.9   | 15.4  | 33.5   | 30.3   | 24.1   | 14.8   | 12.8   |
| 133.2 | 121.3 | 203.1 | 147.5 | 268.7  | 391.8  | 252.0  | 237.9  | 193.8  |
| 25.7  | 19.1  | 37.6  | 21.6  | 27.7   | 34.2   | 36.9   | 19.1   | 29.9   |
| 63.6  | 79.1  | 95.4  | 81.7  | 64.0   | 40.4   | 58.2   | 73.2   | 82.3   |
| 26.2  | 27.2  | 21.1  | 23.9  | 15.3   | 10.8   | 12.7   | 13.5   | 14.4   |
| 25.1  | 30.6  | 25.8  | 22.5  | 12.2   | 16.7   | 14.3   | 14.7   | 22.1   |
| 318.0 | 272.0 | 343.0 | 375.5 | 111.4  | 122.4  | 171.6  | 160.5  | 142.9  |
| 14.5  | 13.3  | 18.4  | 6.8   | 253.2  | 260.8  | 231.8  | 252.7  | 195.9  |
| 18.9  | 12.2  | 15.8  | 12.0  | 200.8  | 215.0  | 153.9  | 242.4  | 81.1   |
| 1.4   | 3.0   | 2.0   | 1.5   | 16.0   | 7.1    | 12.3   | 14.7   | 3.3    |
| 436.7 | 445.1 | 416.6 | 455.0 | 307.5  | 324.3  | 322.0  | 346.8  | 120.8  |
| 133.0 | 119.5 | 178.7 | 89.6  | 27.1   | 25.4   | 33.1   | 36.0   | 134.7  |
| 365.2 | 320.7 | 472.2 | 236.6 | 466.3  | 541.4  | 499.0  | 542.2  | 464.8  |
| 3.2   | 1.9   | 4.7   | 1.4   | 0.9    | 2.1    | 3.6    | 8.8    | 4.7    |
| 1.2   | 1.1   | 0.8   | 0.6   | 2.8    | 3.1    | 4.3    | 0.9    | 1.2    |
| 82.7  | 105.1 | 112.8 | 96.1  | 147.1  | 140.6  | 138.7  | 127.9  | 213.2  |

|        |        |        |        |        |        |        |        |         |
|--------|--------|--------|--------|--------|--------|--------|--------|---------|
| 11.6   | 12.3   | 11.9   | 18.0   | 101.2  | 54.6   | 131.9  | 129.3  | 579.3   |
| 202.2  | 209.5  | 220.5  | 200.0  | 49.4   | 58.9   | 49.3   | 70.4   | 88.2    |
| 1.9    | 1.8    | 2.9    | 1.5    | 1.9    | 0.9    | 1.1    | 1.7    | 3.1     |
| 332.5  | 224.9  | 634.0  | 346.3  | 184.2  | 283.6  | 173.5  | 188.6  | 145.4   |
| 27.7   | 27.0   | 38.1   | 31.0   | 23.0   | 25.7   | 19.7   | 23.3   | 28.1    |
| 35.7   | 31.9   | 61.2   | 49.2   | 39.8   | 34.8   | 33.9   | 61.4   | 74.3    |
| 45.7   | 35.8   | 53.9   | 26.0   | 25.6   | 21.5   | 23.9   | 22.6   | 36.0    |
| 1.4    | 1.1    | 1.4    | 5.6    | 249.1  | 181.0  | 275.7  | 212.8  | 1.2     |
| 88.5   | 105.1  | 99.7   | 85.5   | 14.9   | 15.8   | 24.3   | 30.7   | 127.9   |
| 415.3  | 450.0  | 472.3  | 476.5  | 875.1  | 751.3  | 1516.1 | 1224.3 | 1544.3  |
| 1.5    | 1.9    | 4.5    | 1.9    | 6.8    | 10.7   | 2.3    | 16.8   | 7.2     |
| 78.1   | 78.9   | 122.9  | 62.0   | 225.8  | 174.0  | 210.0  | 265.6  | 267.6   |
| 18.3   | 16.1   | 22.4   | 12.7   | 50.7   | 59.6   | 67.2   | 66.7   | 46.1    |
| 1.4    | 2.5    | 2.1    | 0.8    | 80.8   | 90.4   | 70.2   | 88.4   | 2.5     |
| 44.3   | 40.2   | 101.0  | 24.3   | 153.9  | 59.6   | 111.8  | 143.9  | 180.7   |
| 68.2   | 62.3   | 173.9  | 57.3   | 305.4  | 172.2  | 233.5  | 336.8  | 226.5   |
| 14.5   | 6.5    | 17.0   | 8.5    | 13.2   | 16.0   | 14.8   | 21.7   | 16.4    |
| 18.6   | 15.3   | 25.0   | 22.0   | 19.0   | 24.0   | 17.6   | 25.9   | 33.8    |
| 1.5    | 4.2    | 2.7    | 2.1    | 11.0   | 6.3    | 7.7    | 0.6    | 2.8     |
| 2.3    | 2.5    | 2.3    | 3.2    | 16.4   | 10.2   | 11.0   | 11.9   | 1.4     |
| 7207.8 | 7058.6 | 8040.9 | 7165.6 | 7358.8 | 7872.4 | 7734.8 | 8254.7 | 10410.1 |
| 54.8   | 50.3   | 46.4   | 53.1   | 66.7   | 92.7   | 75.9   | 87.6   | 72.8    |
| 13.8   | 11.7   | 5.2    | 10.3   | 8.8    | 12.3   | 10.7   | 10.3   | 9.7     |
| 1.8    | 8.0    | 8.2    | 5.3    | 1.2    | 1.9    | 8.6    | 6.0    | 1.6     |
| 14.3   | 23.6   | 19.2   | 23.7   | 65.3   | 57.5   | 111.5  | 91.5   | 4.6     |
| 109.3  | 150.3  | 76.6   | 106.0  | 512.5  | 425.8  | 931.1  | 636.7  | 25.8    |
| 8.6    | 7.4    | 9.9    | 5.1    | 11.4   | 7.7    | 9.2    | 26.2   | 8.6     |
| 57.7   | 62.3   | 114.5  | 79.0   | 69.2   | 41.5   | 54.2   | 88.3   | 91.9    |
| 431.8  | 469.0  | 827.8  | 497.1  | 401.2  | 254.0  | 387.1  | 453.9  | 394.6   |
| 16.4   | 17.8   | 32.7   | 10.9   | 38.8   | 51.9   | 46.4   | 47.3   | 69.1    |
| 59.0   | 61.9   | 81.9   | 61.3   | 35.4   | 56.1   | 34.4   | 57.0   | 40.6    |
| 232.8  | 225.5  | 308.9  | 200.5  | 191.1  | 277.8  | 183.1  | 217.6  | 264.5   |
| 7.3    | 3.9    | 5.9    | 12.6   | 4.2    | 2.2    | 3.7    | 1.6    | 2.3     |
| 337.4  | 288.2  | 649.2  | 353.8  | 1030.2 | 845.7  | 938.0  | 1107.6 | 860.4   |
| 64.0   | 59.4   | 57.4   | 78.7   | 68.0   | 97.4   | 66.0   | 72.8   | 38.7    |
| 73.7   | 61.9   | 111.2  | 88.4   | 59.1   | 58.1   | 81.5   | 87.0   | 72.7    |
| 204.0  | 132.8  | 332.3  | 204.0  | 191.3  | 141.5  | 222.1  | 245.6  | 145.5   |
| 17.8   | 18.0   | 22.3   | 12.5   | 17.7   | 20.0   | 26.6   | 26.4   | 45.1    |
| 32.1   | 23.3   | 57.7   | 36.9   | 2.7    | 2.7    | 3.0    | 1.7    | 1.8     |
| 134.5  | 124.7  | 197.8  | 164.0  | 47.9   | 44.2   | 50.7   | 60.0   | 71.6    |
| 14.4   | 13.9   | 27.8   | 16.5   | 13.8   | 5.8    | 13.0   | 16.5   | 23.5    |
| 150.7  | 157.1  | 351.1  | 196.3  | 2.3    | 5.6    | 2.9    | 10.1   | 242.4   |
| 117.5  | 115.1  | 249.1  | 149.9  | 5.0    | 4.0    | 3.6    | 8.0    | 303.3   |
| 73.6   | 71.1   | 164.6  | 87.6   | 3.6    | 6.0    | 3.6    | 1.8    | 105.4   |
| 33.7   | 17.9   | 38.6   | 36.7   | 121.1  | 83.6   | 111.7  | 133.9  | 241.6   |
| 20.2   | 22.5   | 14.9   | 20.5   | 42.5   | 30.0   | 50.2   | 76.0   | 89.7    |
| 17.5   | 13.9   | 26.4   | 18.9   | 26.1   | 21.6   | 25.4   | 29.0   | 49.4    |
| 35.1   | 29.0   | 47.7   | 35.8   | 20.8   | 24.9   | 14.8   | 31.0   | 105.0   |
| 9.2    | 8.5    | 14.7   | 15.8   | 34.7   | 24.9   | 31.5   | 43.2   | 66.0    |
| 55.3   | 48.1   | 57.3   | 43.5   | 67.1   | 70.0   | 54.7   | 62.4   | 54.2    |
| 170.5  | 139.8  | 219.8  | 150.7  | 53.7   | 53.7   | 57.1   | 70.7   | 53.6    |
| 21.0   | 15.5   | 22.3   | 17.7   | 10.6   | 14.4   | 10.9   | 21.2   | 26.9    |
| 5.9    | 5.3    | 10.6   | 4.6    | 3.2    | 9.0    | 13.4   | 7.8    | 29.8    |



|        |        |        |        |        |        |        |        |        |
|--------|--------|--------|--------|--------|--------|--------|--------|--------|
| 76.7   | 49.2   | 87.6   | 65.7   | 165.4  | 254.6  | 184.5  | 198.5  | 166.0  |
| 2.5    | 6.6    | 4.4    | 5.2    | 44.5   | 64.3   | 93.9   | 38.3   | 104.6  |
| 82.6   | 72.0   | 127.9  | 74.6   | 143.7  | 134.7  | 138.0  | 169.3  | 96.5   |
| 77.5   | 81.1   | 107.5  | 47.1   | 180.2  | 196.1  | 204.5  | 181.8  | 265.9  |
| 29.4   | 28.3   | 30.3   | 30.8   | 16.4   | 5.3    | 11.9   | 15.6   | 212.0  |
| 47.5   | 34.2   | 88.6   | 47.0   | 95.6   | 127.6  | 111.1  | 110.6  | 143.9  |
| 5.0    | 2.6    | 5.8    | 4.1    | 3.3    | 1.1    | 8.2    | 0.5    | 4.0    |
| 26.0   | 26.8   | 14.6   | 9.9    | 77.8   | 54.7   | 99.9   | 109.6  | 47.7   |
| 16.3   | 17.9   | 9.5    | 5.5    | 74.4   | 55.1   | 104.0  | 70.2   | 22.4   |
| 11.5   | 20.5   | 27.4   | 19.9   | 13.2   | 18.5   | 18.4   | 29.6   | 23.7   |
| 30.2   | 23.2   | 61.7   | 23.1   | 39.8   | 17.6   | 36.7   | 55.7   | 37.3   |
| 90.1   | 74.2   | 107.3  | 64.7   | 38.5   | 44.6   | 49.2   | 33.5   | 42.0   |
| 197.4  | 199.2  | 228.5  | 182.2  | 253.5  | 369.5  | 265.8  | 300.5  | 291.2  |
| 0.4    | 1.0    | 3.2    | 0.3    | 0.7    | 0.3    | 4.8    | 0.5    | 1.0    |
| 0.6    | 1.2    | 0.7    | 3.5    | 4.2    | 1.0    | 0.8    | 7.3    | 5.1    |
| 0.5    | 2.6    | 2.8    | 4.4    | 1.4    | 2.3    | 1.9    | 0.6    | 0.4    |
| 841.9  | 712.9  | 1033.5 | 679.6  | 0.6    | 2.2    | 1.2    | 0.3    | 0.8    |
| 3194.3 | 2710.6 | 3306.5 | 2490.2 | 5.3    | 3.6    | 1.4    | 2.3    | 8.9    |
| 13.0   | 12.5   | 10.6   | 3.4    | 16.5   | 10.1   | 20.1   | 3.9    | 15.5   |
| 101.0  | 102.6  | 92.8   | 99.4   | 78.4   | 93.1   | 107.3  | 115.5  | 124.4  |
| 11.2   | 17.1   | 18.8   | 12.5   | 6.4    | 14.4   | 8.0    | 10.7   | 22.3   |
| 80.5   | 64.3   | 93.0   | 73.9   | 127.8  | 115.7  | 129.4  | 152.5  | 134.5  |
| 21.6   | 12.9   | 50.0   | 9.9    | 175.0  | 101.4  | 162.2  | 198.2  | 151.2  |
| 17.2   | 14.4   | 13.9   | 26.7   | 82.5   | 82.5   | 82.6   | 66.0   | 2232.8 |
| 301.6  | 238.4  | 481.9  | 250.9  | 92.7   | 94.1   | 127.6  | 80.2   | 311.9  |
| 43.3   | 40.1   | 44.1   | 37.3   | 42.6   | 29.7   | 36.7   | 59.2   | 51.8   |
| 39.3   | 31.4   | 57.2   | 34.5   | 2.7    | 3.4    | 12.0   | 9.6    | 6.0    |
| 403.7  | 358.2  | 403.5  | 448.8  | 78.5   | 50.6   | 61.6   | 64.6   | 82.0   |
| 1.2    | 4.3    | 6.5    | 4.6    | 0.8    | 0.9    | 1.9    | 0.4    | 1.4    |
| 25.4   | 26.3   | 3.4    | 24.7   | 4.8    | 24.4   | 20.3   | 28.5   | 14.3   |
| 28.9   | 24.7   | 28.6   | 21.4   | 1464.9 | 1622.6 | 1517.1 | 1631.0 | 1115.1 |
| 18.4   | 18.2   | 32.1   | 19.1   | 108.2  | 43.9   | 103.1  | 121.1  | 594.2  |
| 358.6  | 344.8  | 493.7  | 344.9  | 412.4  | 454.5  | 437.2  | 430.2  | 443.2  |
| 6.4    | 2.2    | 10.4   | 6.9    | 34.0   | 27.6   | 21.1   | 24.6   | 62.9   |
| 2.8    | 0.6    | 1.4    | 1.5    | 4.2    | 2.0    | 1.5    | 8.0    | 5.8    |
| 2.7    | 7.7    | 4.1    | 12.7   | 1.2    | 5.3    | 6.2    | 3.7    | 13.3   |
| 2.3    | 1.3    | 1.4    | 1.7    | 1.1    | 2.5    | 1.3    | 3.6    | 1.3    |
| 257.4  | 243.6  | 532.2  | 255.1  | 1105.9 | 604.1  | 868.3  | 1106.9 | 923.1  |
| 45.8   | 52.7   | 30.5   | 40.9   | 33.9   | 42.2   | 60.6   | 47.5   | 8.5    |
| 5.3    | 15.9   | 13.0   | 9.3    | 32.4   | 39.0   | 63.1   | 60.0   | 1.5    |
| 5.6    | 0.7    | 4.6    | 0.6    | 0.5    | 1.5    | 0.6    | 0.4    | 0.6    |
| 12.7   | 13.1   | 32.3   | 16.2   | 123.1  | 126.1  | 107.5  | 150.4  | 22.8   |
| 170.4  | 160.5  | 189.4  | 155.3  | 13.3   | 11.2   | 7.7    | 20.7   | 646.9  |
| 56.2   | 59.2   | 60.6   | 70.7   | 75.5   | 80.3   | 52.4   | 83.0   | 52.3   |
| 15.0   | 13.2   | 33.6   | 17.7   | 205.6  | 169.6  | 205.6  | 255.2  | 135.4  |
| 87.3   | 90.9   | 93.0   | 66.2   | 125.1  | 131.6  | 144.2  | 155.5  | 70.3   |
| 11.6   | 7.9    | 10.0   | 8.9    | 68.1   | 215.7  | 80.0   | 81.1   | 9.6    |
| 7.8    | 13.2   | 14.7   | 8.9    | 5.9    | 0.5    | 10.0   | 10.2   | 45.0   |
| 18.5   | 23.7   | 19.7   | 6.6    | 9.6    | 22.3   | 17.4   | 14.0   | 134.4  |
| 39.0   | 15.7   | 30.5   | 30.9   | 12.4   | 8.2    | 13.7   | 26.3   | 43.3   |
| 752.3  | 880.0  | 1110.9 | 916.5  | 244.1  | 143.8  | 232.9  | 264.6  | 624.2  |
| 371.0  | 316.6  | 481.5  | 318.3  | 195.5  | 200.6  | 198.5  | 235.5  | 227.4  |
| 155.7  | 142.4  | 246.5  | 161.1  | 591.9  | 767.7  | 592.0  | 643.1  | 338.4  |

|        |        |        |        |        |        |        |        |        |
|--------|--------|--------|--------|--------|--------|--------|--------|--------|
| 132.2  | 115.7  | 181.3  | 109.5  | 169.9  | 190.9  | 164.5  | 191.4  | 200.4  |
| 51.2   | 68.8   | 37.7   | 72.1   | 18.8   | 46.0   | 32.9   | 44.6   | 5.6    |
| 183.8  | 190.8  | 291.1  | 229.3  | 132.5  | 97.9   | 73.7   | 124.6  | 182.0  |
| 95.0   | 70.8   | 86.2   | 83.3   | 83.7   | 159.7  | 94.3   | 135.8  | 91.5   |
| 4.0    | 14.9   | 2.2    | 9.5    | 27.7   | 30.2   | 32.0   | 34.1   | 31.4   |
| 24.4   | 20.9   | 36.2   | 11.0   | 53.6   | 51.2   | 47.6   | 43.6   | 23.1   |
| 28.9   | 24.6   | 50.0   | 20.1   | 54.1   | 33.8   | 59.4   | 72.1   | 29.5   |
| 539.8  | 486.5  | 340.4  | 548.6  | 117.3  | 173.8  | 164.5  | 136.9  | 52.3   |
| 95.0   | 81.3   | 135.8  | 98.0   | 64.1   | 69.5   | 54.8   | 88.1   | 94.6   |
| 15.5   | 15.1   | 16.8   | 10.1   | 4.3    | 7.6    | 16.5   | 14.6   | 16.2   |
| 4.6    | 0.9    | 1.4    | 2.7    | 5.2    | 0.8    | 1.7    | 1.8    | 2.3    |
| 68.0   | 92.6   | 73.4   | 53.2   | 85.5   | 82.0   | 147.0  | 209.8  | 5.1    |
| 124.4  | 149.5  | 118.9  | 69.1   | 225.0  | 207.2  | 415.3  | 321.8  | 9.3    |
| 11.5   | 10.5   | 24.7   | 9.2    | 30.5   | 35.4   | 30.0   | 34.8   | 60.4   |
| 938.2  | 895.2  | 935.3  | 677.7  | 2631.5 | 2967.3 | 2763.4 | 3009.7 | 2962.5 |
| 19.8   | 22.1   | 49.8   | 10.4   | 21.6   | 18.6   | 23.5   | 22.2   | 13.8   |
| 207.7  | 204.5  | 225.4  | 216.6  | 40.1   | 51.6   | 47.9   | 44.0   | 360.2  |
| 49.2   | 45.3   | 78.5   | 43.1   | 121.6  | 172.3  | 130.5  | 143.2  | 54.9   |
| 2.6    | 1.9    | 1.8    | 0.9    | 5.6    | 1.7    | 1.8    | 2.5    | 2.1    |
| 1.3    | 1.4    | 1.9    | 0.9    | 1.5    | 0.9    | 0.7    | 0.9    | 2.1    |
| 115.2  | 101.4  | 185.5  | 110.4  | 106.3  | 83.2   | 64.7   | 93.7   | 82.8   |
| 52.3   | 42.7   | 63.1   | 34.1   | 24.6   | 33.3   | 31.9   | 37.7   | 45.2   |
| 3.9    | 3.9    | 4.6    | 4.2    | 3.7    | 4.7    | 6.6    | 0.3    | 2.1    |
| 2.1    | 0.8    | 3.9    | 7.0    | 5.4    | 0.9    | 3.0    | 1.3    | 3.0    |
| 53.2   | 57.9   | 88.9   | 48.3   | 47.1   | 62.6   | 61.1   | 72.0   | 57.7   |
| 35.6   | 38.8   | 64.8   | 43.4   | 153.0  | 145.3  | 133.7  | 152.3  | 167.7  |
| 72.8   | 84.7   | 89.8   | 89.4   | 174.7  | 152.5  | 225.4  | 229.7  | 272.1  |
| 84.2   | 98.6   | 77.8   | 64.0   | 268.8  | 220.7  | 255.4  | 319.7  | 76.3   |
| 47.4   | 44.7   | 46.1   | 25.3   | 197.7  | 139.5  | 198.0  | 208.6  | 83.2   |
| 2.9    | 5.0    | 6.8    | 13.5   | 72.5   | 73.8   | 83.6   | 89.2   | 22.8   |
| 11.9   | 20.8   | 28.3   | 10.0   | 194.4  | 168.6  | 167.5  | 273.2  | 36.1   |
| 3029.7 | 2618.8 | 3049.1 | 2855.5 | 7.0    | 15.3   | 12.8   | 25.2   | 17.6   |
| 91.6   | 87.1   | 139.2  | 102.1  | 262.2  | 227.5  | 332.9  | 340.1  | 307.9  |
| 21.7   | 27.1   | 23.3   | 19.1   | 30.3   | 33.3   | 40.6   | 53.1   | 31.2   |
| 167.5  | 155.0  | 263.2  | 207.1  | 111.2  | 161.5  | 111.8  | 117.1  | 275.7  |
| 24.6   | 30.2   | 73.2   | 35.2   | 56.6   | 38.1   | 59.2   | 52.8   | 16.6   |
| 13.8   | 16.0   | 18.7   | 3.7    | 58.8   | 18.8   | 75.1   | 68.6   | 23.3   |
| 5.1    | 2.9    | 2.2    | 7.7    | 23.6   | 21.9   | 27.6   | 19.9   | 504.9  |
| 80.7   | 90.6   | 128.0  | 72.7   | 208.8  | 238.5  | 168.2  | 188.3  | 3214.7 |
| 66.1   | 67.3   | 68.2   | 44.8   | 82.4   | 68.6   | 101.1  | 107.1  | 111.9  |
| 152.0  | 158.7  | 151.4  | 134.8  | 202.8  | 164.0  | 250.6  | 250.6  | 195.7  |
| 140.6  | 145.2  | 150.4  | 153.7  | 159.8  | 153.6  | 177.1  | 184.0  | 43.8   |
| 385.4  | 437.9  | 484.5  | 341.3  | 679.7  | 583.2  | 1286.2 | 869.5  | 324.6  |
| 78.2   | 74.3   | 97.0   | 55.8   | 33.8   | 34.3   | 27.5   | 56.9   | 53.7   |
| 460.8  | 497.2  | 353.0  | 502.2  | 130.9  | 120.4  | 138.7  | 205.6  | 92.3   |
| 2.9    | 1.5    | 21.6   | 4.6    | 27.1   | 22.7   | 23.1   | 38.1   | 18.8   |
| 149.8  | 144.1  | 433.5  | 125.1  | 263.9  | 235.7  | 262.4  | 295.9  | 395.1  |
| 42.9   | 52.8   | 38.9   | 39.4   | 63.5   | 89.4   | 66.9   | 67.4   | 55.8   |
| 30.8   | 27.7   | 29.0   | 23.0   | 45.4   | 54.0   | 55.9   | 61.7   | 42.4   |
| 33.4   | 33.3   | 41.5   | 39.2   | 12.8   | 9.2    | 10.0   | 7.0    | 4.6    |
| 3.2    | 4.1    | 0.6    | 0.8    | 3.2    | 1.5    | 1.3    | 0.8    | 4.9    |
| 3.9    | 0.8    | 4.1    | 0.8    | 2.7    | 1.4    | 0.3    | 0.4    | 28.0   |
| 17.4   | 12.7   | 20.5   | 2.9    | 7.8    | 7.9    | 7.6    | 15.2   | 62.9   |

|        |        |        |        |        |        |        |        |        |
|--------|--------|--------|--------|--------|--------|--------|--------|--------|
| 9.5    | 13.2   | 15.7   | 28.4   | 7.6    | 3.1    | 5.2    | 7.5    | 25.6   |
| 32.4   | 46.2   | 39.6   | 34.9   | 101.2  | 147.5  | 123.5  | 148.9  | 185.2  |
| 6.4    | 8.0    | 9.8    | 6.0    | 7.6    | 10.1   | 18.4   | 12.6   | 20.0   |
| 347.9  | 331.0  | 1049.0 | 248.8  | 275.0  | 125.3  | 185.3  | 277.0  | 407.4  |
| 90.4   | 98.7   | 99.2   | 103.0  | 73.0   | 63.8   | 81.7   | 99.2   | 88.9   |
| 312.2  | 282.3  | 400.0  | 268.1  | 433.6  | 375.5  | 377.7  | 487.8  | 750.9  |
| 195.2  | 166.4  | 248.2  | 203.6  | 183.3  | 226.5  | 202.6  | 229.7  | 76.7   |
| 10.2   | 9.0    | 6.4    | 7.0    | 7.3    | 1.4    | 3.9    | 10.5   | 1.7    |
| 42.5   | 7.9    | 40.8   | 39.7   | 22.4   | 20.2   | 31.9   | 15.9   | 33.3   |
| 1.6    | 4.5    | 2.1    | 3.7    | 2.6    | 0.6    | 2.0    | 3.9    | 2.9    |
| 0.8    | 1.7    | 1.7    | 1.5    | 1.3    | 0.4    | 3.5    | 4.1    | 4.2    |
| 51.7   | 50.4   | 43.9   | 44.0   | 121.2  | 138.1  | 146.6  | 153.0  | 1007.7 |
| 2.2    | 1.9    | 2.5    | 1.4    | 1.3    | 2.3    | 4.9    | 11.1   | 1.3    |
| 4.2    | 3.2    | 5.0    | 3.1    | 0.5    | 3.4    | 0.7    | 2.0    | 0.5    |
| 55.3   | 45.2   | 57.2   | 49.2   | 51.2   | 48.7   | 61.7   | 68.2   | 75.8   |
| 77.9   | 82.6   | 188.8  | 83.0   | 263.7  | 136.4  | 196.0  | 252.9  | 256.8  |
| 237.6  | 241.0  | 619.8  | 503.9  | 1031.9 | 3201.8 | 991.3  | 1259.6 | 1044.9 |
| 1519.3 | 1417.3 | 2074.9 | 1361.7 | 947.0  | 1252.1 | 1102.3 | 1216.2 | 329.7  |
| 7.2    | 10.0   | 12.8   | 5.4    | 12.3   | 7.4    | 3.8    | 7.3    | 5.0    |
| 86.6   | 82.6   | 102.0  | 88.4   | 50.7   | 54.2   | 60.6   | 48.3   | 17.7   |
| 3.7    | 5.8    | 10.3   | 12.7   | 8.5    | 4.6    | 22.4   | 20.7   | 2.4    |
| 222.9  | 229.4  | 207.4  | 254.6  | 153.3  | 111.0  | 162.3  | 169.1  | 142.7  |
| 181.6  | 171.1  | 450.7  | 125.0  | 860.1  | 674.3  | 784.4  | 892.5  | 637.7  |
| 13.9   | 14.7   | 13.7   | 5.4    | 7.8    | 6.9    | 7.1    | 16.0   | 11.8   |
| 405.1  | 314.2  | 945.3  | 454.3  | 913.5  | 872.2  | 1004.1 | 1057.5 | 1044.0 |
| 3.0    | 1.7    | 3.2    | 2.3    | 3.2    | 2.1    | 1.8    | 1.8    | 4.3    |
| 1.0    | 2.1    | 1.9    | 1.9    | 1.4    | 2.8    | 1.8    | 1.2    | 8.3    |
| 14.4   | 13.6   | 13.3   | 15.4   | 5.4    | 6.8    | 5.8    | 4.7    | 9.6    |
| 40.9   | 47.2   | 25.6   | 36.1   | 36.3   | 56.0   | 32.4   | 41.0   | 77.1   |
| 184.1  | 180.8  | 228.5  | 183.0  | 178.9  | 142.0  | 196.3  | 210.7  | 279.1  |
| 129.6  | 122.5  | 211.0  | 126.9  | 700.1  | 393.1  | 600.6  | 708.6  | 433.4  |
| 88.4   | 129.7  | 92.5   | 86.1   | 49.2   | 49.7   | 62.7   | 73.4   | 45.3   |
| 246.3  | 242.3  | 369.3  | 181.4  | 212.4  | 171.6  | 222.8  | 227.8  | 174.5  |
| 15.1   | 13.7   | 10.0   | 9.6    | 6.8    | 5.4    | 6.2    | 3.5    | 10.5   |
| 13.3   | 17.6   | 26.6   | 9.5    | 5.6    | 9.0    | 13.3   | 1.0    | 7.3    |
| 170.8  | 162.7  | 178.9  | 99.7   | 79.1   | 68.4   | 128.9  | 101.2  | 40.2   |
| 20.9   | 12.1   | 8.0    | 21.8   | 25.3   | 27.4   | 25.9   | 4.8    | 25.9   |
| 39.9   | 20.5   | 37.7   | 23.3   | 51.8   | 52.3   | 50.6   | 50.8   | 34.2   |
| 2.6    | 3.5    | 11.3   | 2.7    | 5.2    | 2.9    | 8.7    | 8.4    | 6.3    |
| 144.7  | 153.1  | 206.6  | 154.0  | 256.6  | 193.2  | 254.2  | 262.9  | 297.4  |
| 23.3   | 19.2   | 32.2   | 28.0   | 172.1  | 164.3  | 189.8  | 194.5  | 123.5  |
| 33.2   | 25.8   | 54.1   | 24.0   | 137.9  | 77.5   | 121.3  | 165.1  | 99.7   |
| 130.2  | 122.3  | 163.1  | 142.3  | 35.8   | 36.0   | 45.6   | 35.2   | 54.6   |
| 126.2  | 108.7  | 150.2  | 132.5  | 193.8  | 269.0  | 191.5  | 249.3  | 68.5   |
| 12.0   | 16.4   | 13.4   | 13.7   | 9.7    | 9.8    | 12.5   | 22.3   | 19.5   |
| 25.0   | 33.1   | 34.3   | 13.6   | 25.0   | 36.1   | 21.7   | 23.0   | 25.7   |
| 181.2  | 182.2  | 197.5  | 176.7  | 249.2  | 221.1  | 288.4  | 269.2  | 475.2  |
| 146.1  | 137.1  | 172.0  | 165.7  | 176.1  | 172.7  | 225.7  | 197.8  | 433.3  |
| 30.5   | 30.5   | 41.6   | 28.5   | 8.2    | 10.4   | 5.1    | 6.7    | 81.6   |
| 29.2   | 25.3   | 57.4   | 20.8   | 68.6   | 29.6   | 109.2  | 102.0  | 19.0   |
| 1887.4 | 1549.4 | 1817.9 | 1034.7 | 147.6  | 147.9  | 194.6  | 180.2  | 7.0    |
| 13.3   | 6.3    | 16.6   | 5.9    | 111.7  | 130.2  | 87.2   | 113.9  | 10.0   |
| 8.7    | 7.8    | 16.0   | 15.6   | 231.8  | 270.5  | 164.8  | 241.9  | 15.5   |

|        |        |        |        |        |        |        |        |        |
|--------|--------|--------|--------|--------|--------|--------|--------|--------|
| 207.2  | 165.5  | 242.6  | 154.1  | 253.4  | 221.1  | 237.7  | 251.9  | 253.4  |
| 24.4   | 30.0   | 81.0   | 20.2   | 229.7  | 118.2  | 184.2  | 298.4  | 304.3  |
| 46.2   | 40.5   | 91.8   | 23.2   | 121.8  | 137.1  | 112.6  | 139.1  | 118.6  |
| 198.1  | 182.6  | 160.2  | 140.0  | 293.8  | 287.8  | 325.7  | 370.7  | 202.0  |
| 33.1   | 32.2   | 47.1   | 30.6   | 93.9   | 88.1   | 114.9  | 121.5  | 46.7   |
| 222.9  | 229.1  | 234.1  | 229.2  | 160.3  | 221.5  | 161.9  | 172.2  | 209.4  |
| 55.0   | 62.5   | 56.9   | 77.3   | 156.1  | 169.0  | 162.0  | 194.9  | 113.0  |
| 155.2  | 183.3  | 181.8  | 150.6  | 839.5  | 764.9  | 940.9  | 1160.5 | 476.3  |
| 47.5   | 42.4   | 29.1   | 28.1   | 9.0    | 8.4    | 10.6   | 11.1   | 11.6   |
| 49.2   | 48.3   | 66.8   | 41.9   | 5.5    | 14.2   | 12.5   | 12.6   | 2.7    |
| 112.4  | 122.2  | 170.1  | 205.5  | 193.8  | 225.5  | 205.1  | 222.4  | 208.4  |
| 86.8   | 71.9   | 94.0   | 79.6   | 74.6   | 77.2   | 72.3   | 74.5   | 72.8   |
| 31.4   | 30.0   | 33.9   | 21.8   | 19.1   | 17.0   | 15.2   | 16.9   | 26.0   |
| 66.5   | 73.5   | 43.1   | 55.1   | 647.4  | 482.3  | 850.7  | 835.9  | 3621.9 |
| 24.2   | 24.4   | 23.3   | 15.9   | 14.0   | 9.4    | 34.5   | 15.9   | 11.3   |
| 3.5    | 9.3    | 5.7    | 2.4    | 6.0    | 6.1    | 15.7   | 9.7    | 2.4    |
| 17.0   | 17.0   | 18.1   | 14.1   | 194.8  | 167.9  | 82.3   | 122.9  | 248.7  |
| 2.9    | 4.6    | 1.5    | 2.9    | 1.2    | 3.7    | 1.4    | 1.0    | 76.4   |
| 51.7   | 45.7   | 68.2   | 43.8   | 5.0    | 3.9    | 4.1    | 5.6    | 6.7    |
| 44.5   | 43.8   | 54.7   | 30.7   | 24.1   | 18.4   | 38.1   | 26.4   | 37.0   |
| 44.0   | 50.6   | 6.7    | 32.5   | 26.8   | 48.3   | 34.6   | 31.7   | 19.6   |
| 109.9  | 148.3  | 113.6  | 79.2   | 445.2  | 676.6  | 566.0  | 542.9  | 122.3  |
| 7.6    | 11.0   | 13.4   | 11.1   | 25.3   | 22.6   | 26.8   | 29.4   | 21.3   |
| 219.3  | 195.3  | 255.3  | 177.6  | 86.2   | 79.5   | 77.2   | 97.8   | 98.9   |
| 6.4    | 9.9    | 12.4   | 11.7   | 5.7    | 5.3    | 3.3    | 1.6    | 13.3   |
| 35.6   | 27.7   | 25.9   | 26.5   | 6.9    | 8.7    | 8.7    | 5.7    | 72.0   |
| 213.8  | 187.0  | 223.4  | 190.2  | 468.1  | 326.4  | 575.6  | 608.3  | 642.0  |
| 43.4   | 55.9   | 25.2   | 21.3   | 64.6   | 42.8   | 66.7   | 64.1   | 31.8   |
| 41.7   | 48.8   | 12.8   | 23.7   | 73.0   | 45.2   | 83.6   | 91.7   | 31.7   |
| 6.9    | 0.7    | 2.9    | 0.8    | 1.8    | 1.7    | 2.2    | 2.4    | 11.6   |
| 2.2    | 5.8    | 6.1    | 11.7   | 1.0    | 1.6    | 3.3    | 1.4    | 4.9    |
| 156.8  | 161.7  | 186.3  | 188.3  | 107.4  | 127.4  | 123.2  | 135.9  | 131.3  |
| 10.6   | 8.9    | 11.9   | 8.5    | 14.0   | 17.9   | 14.6   | 29.5   | 18.3   |
| 3.8    | 3.0    | 5.3    | 3.9    | 23.2   | 27.8   | 37.8   | 21.9   | 17.8   |
| 4.5    | 0.6    | 1.3    | 3.9    | 0.9    | 3.2    | 5.4    | 3.2    | 1.6    |
| 5.5    | 8.0    | 6.6    | 5.6    | 21.1   | 17.5   | 52.4   | 54.8   | 11.0   |
| 26.3   | 22.7   | 23.1   | 8.0    | 408.8  | 382.7  | 468.2  | 495.1  | 585.1  |
| 9.7    | 7.1    | 3.5    | 3.5    | 74.6   | 66.1   | 69.3   | 90.7   | 42.2   |
| 37.8   | 35.0   | 54.6   | 36.8   | 213.1  | 153.9  | 193.8  | 250.4  | 66.1   |
| 16.7   | 16.3   | 21.6   | 17.6   | 113.1  | 107.6  | 115.2  | 117.9  | 30.6   |
| 5.9    | 3.6    | 4.3    | 5.0    | 6.9    | 12.4   | 2.3    | 15.4   | 4.0    |
| 35.5   | 33.7   | 60.3   | 44.4   | 36.1   | 34.2   | 40.0   | 24.7   | 69.5   |
| 257.3  | 238.7  | 332.0  | 248.0  | 441.7  | 471.0  | 452.9  | 514.9  | 263.6  |
| 1.3    | 1.1    | 4.6    | 2.1    | 8.5    | 6.2    | 2.1    | 2.8    | 2.0    |
| 13.5   | 13.8   | 24.2   | 14.5   | 19.9   | 16.3   | 22.8   | 26.2   | 23.0   |
| 101.8  | 91.5   | 134.8  | 76.1   | 441.0  | 453.6  | 508.8  | 526.1  | 462.8  |
| 16.9   | 13.4   | 23.8   | 34.9   | 296.3  | 191.7  | 181.2  | 204.6  | 1975.7 |
| 13.3   | 14.4   | 7.5    | 26.1   | 93.3   | 73.1   | 82.6   | 114.9  | 36.2   |
| 43.1   | 38.3   | 46.6   | 29.8   | 52.1   | 53.9   | 156.7  | 72.4   | 41.7   |
| 1851.1 | 1393.0 | 2767.4 | 1777.0 | 3603.7 | 2352.8 | 3640.2 | 3878.1 | 4421.8 |
| 60.2   | 62.2   | 84.0   | 69.0   | 153.9  | 139.0  | 161.5  | 157.9  | 157.2  |
| 93.1   | 94.6   | 124.6  | 97.3   | 250.9  | 223.8  | 275.7  | 303.7  | 210.6  |
| 68.6   | 56.6   | 91.2   | 73.9   | 68.5   | 66.3   | 69.3   | 78.6   | 78.7   |

|       |       |       |       |        |        |        |        |        |
|-------|-------|-------|-------|--------|--------|--------|--------|--------|
| 3.9   | 2.7   | 4.7   | 2.1   | 8.9    | 2.1    | 11.3   | 4.8    | 10.6   |
| 30.0  | 30.7  | 26.9  | 34.7  | 3.2    | 13.5   | 7.3    | 2.4    | 11.8   |
| 144.4 | 138.8 | 137.8 | 177.0 | 67.2   | 82.3   | 83.7   | 75.4   | 54.3   |
| 197.2 | 217.2 | 226.3 | 229.8 | 238.5  | 221.2  | 263.8  | 330.7  | 183.1  |
| 21.2  | 26.1  | 17.0  | 14.6  | 19.8   | 21.1   | 25.5   | 22.3   | 27.2   |
| 79.5  | 55.9  | 109.3 | 67.8  | 58.0   | 55.7   | 53.5   | 81.6   | 86.8   |
| 8.9   | 10.1  | 6.4   | 8.5   | 1.3    | 2.0    | 7.4    | 12.3   | 8.0    |
| 22.6  | 20.6  | 24.8  | 20.6  | 21.5   | 10.0   | 17.6   | 28.3   | 33.9   |
| 51.2  | 62.0  | 21.7  | 41.7  | 11.2   | 23.5   | 10.6   | 17.3   | 68.2   |
| 17.2  | 13.1  | 38.0  | 15.4  | 27.1   | 42.4   | 40.0   | 40.8   | 35.5   |
| 9.2   | 6.8   | 14.8  | 14.7  | 9.0    | 11.7   | 14.3   | 14.1   | 8.6    |
| 2.4   | 2.7   | 3.4   | 2.0   | 72.6   | 56.3   | 73.1   | 75.6   | 38.2   |
| 2.5   | 3.9   | 4.9   | 4.6   | 45.9   | 42.1   | 48.3   | 40.6   | 16.5   |
| 241.8 | 253.8 | 391.9 | 239.0 | 12.2   | 6.3    | 9.2    | 10.5   | 19.1   |
| 108.6 | 114.0 | 206.1 | 129.4 | 5.0    | 6.6    | 11.9   | 1.3    | 22.2   |
| 0.9   | 2.8   | 6.8   | 0.8   | 0.4    | 0.8    | 0.8    | 1.6    | 4.3    |
| 2.8   | 2.1   | 3.5   | 2.2   | 34.4   | 29.5   | 20.1   | 49.0   | 39.0   |
| 36.8  | 27.4  | 20.3  | 12.6  | 17.2   | 13.8   | 18.4   | 38.2   | 3.1    |
| 56.5  | 47.4  | 98.4  | 66.7  | 49.6   | 60.4   | 57.7   | 41.6   | 67.8   |
| 7.6   | 17.4  | 7.1   | 11.5  | 61.7   | 43.1   | 73.8   | 59.9   | 28.3   |
| 4.9   | 3.6   | 3.2   | 5.1   | 1282.4 | 2636.0 | 4078.9 | 2243.0 | 17.6   |
| 50.7  | 79.0  | 30.6  | 45.7  | 45.6   | 67.8   | 51.9   | 54.0   | 8.8    |
| 15.0  | 8.0   | 14.1  | 12.2  | 5.0    | 2.8    | 3.3    | 4.7    | 2.5    |
| 177.2 | 128.3 | 143.0 | 187.1 | 67.2   | 69.7   | 53.3   | 94.2   | 72.4   |
| 61.6  | 42.8  | 56.9  | 52.9  | 34.4   | 35.9   | 39.4   | 19.5   | 37.7   |
| 73.4  | 68.5  | 67.5  | 61.3  | 129.7  | 113.0  | 129.9  | 154.6  | 74.8   |
| 2.5   | 6.1   | 5.5   | 9.4   | 4.7    | 2.2    | 3.3    | 1.8    | 6.5    |
| 179.8 | 136.2 | 224.8 | 125.2 | 281.9  | 235.6  | 290.1  | 263.8  | 38.3   |
| 25.5  | 38.9  | 29.7  | 36.1  | 31.1   | 29.7   | 29.4   | 22.1   | 20.3   |
| 29.8  | 15.3  | 36.7  | 17.5  | 51.3   | 72.3   | 40.2   | 55.1   | 113.4  |
| 81.4  | 100.0 | 140.9 | 57.4  | 311.2  | 261.7  | 298.2  | 344.3  | 111.2  |
| 2.8   | 7.9   | 5.5   | 3.9   | 12.0   | 13.4   | 9.7    | 15.5   | 122.6  |
| 53.7  | 50.6  | 63.1  | 47.8  | 160.2  | 148.7  | 170.3  | 173.2  | 208.2  |
| 48.3  | 57.9  | 47.1  | 49.7  | 31.6   | 40.5   | 44.9   | 60.1   | 85.7   |
| 59.3  | 59.2  | 79.0  | 54.0  | 76.2   | 94.6   | 86.3   | 115.6  | 83.7   |
| 171.0 | 157.0 | 288.0 | 176.1 | 219.9  | 160.9  | 181.6  | 154.4  | 261.9  |
| 134.5 | 124.0 | 186.7 | 139.3 | 671.0  | 669.3  | 747.9  | 804.8  | 1211.3 |
| 2.5   | 0.7   | 1.9   | 0.9   | 724.0  | 911.3  | 981.0  | 944.1  | 188.6  |
| 4.7   | 3.4   | 6.4   | 6.8   | 1.9    | 2.8    | 1.5    | 5.5    | 10.3   |
| 172.4 | 206.2 | 257.2 | 182.1 | 689.5  | 567.1  | 556.8  | 757.6  | 675.9  |
| 0.9   | 0.8   | 2.3   | 1.2   | 1.3    | 1.1    | 1.3    | 0.8    | 1.6    |
| 188.3 | 186.9 | 255.5 | 224.4 | 90.3   | 77.6   | 90.9   | 82.9   | 157.7  |
| 6.5   | 10.2  | 12.0  | 5.4   | 13.2   | 9.2    | 3.3    | 10.4   | 11.9   |
| 8.1   | 14.0  | 16.0  | 10.4  | 15.4   | 18.7   | 6.7    | 1.6    | 31.0   |
| 66.8  | 70.0  | 60.1  | 57.8  | 63.6   | 87.4   | 65.5   | 61.0   | 31.4   |
| 62.9  | 75.1  | 50.9  | 41.7  | 12.2   | 50.0   | 20.7   | 9.5    | 32.5   |
| 5.3   | 4.6   | 3.9   | 0.8   | 1.8    | 1.2    | 1.3    | 0.8    | 3.6    |
| 28.5  | 28.8  | 47.4  | 36.2  | 80.1   | 74.9   | 78.6   | 84.9   | 437.8  |
| 1.9   | 5.6   | 3.7   | 0.8   | 1.6    | 4.1    | 7.2    | 1.0    | 3.6    |
| 1.4   | 2.1   | 4.6   | 1.1   | 1.6    | 0.9    | 1.5    | 3.9    | 1.8    |
| 172.2 | 149.4 | 228.0 | 119.1 | 212.0  | 190.6  | 303.0  | 279.3  | 303.0  |
| 71.0  | 75.6  | 75.1  | 44.2  | 142.0  | 113.8  | 186.6  | 158.4  | 166.0  |
| 39.7  | 42.3  | 98.6  | 49.4  | 95.6   | 62.6   | 82.4   | 124.2  | 87.1   |

|       |       |        |       |        |       |        |        |        |
|-------|-------|--------|-------|--------|-------|--------|--------|--------|
| 318.6 | 356.9 | 452.2  | 319.1 | 457.9  | 431.8 | 399.9  | 536.3  | 280.5  |
| 80.0  | 78.1  | 99.2   | 67.3  | 177.9  | 119.1 | 166.1  | 225.7  | 127.0  |
| 30.6  | 22.6  | 27.5   | 27.6  | 356.5  | 195.3 | 362.0  | 401.8  | 122.4  |
| 30.6  | 37.5  | 51.3   | 35.8  | 77.5   | 118.0 | 47.1   | 59.1   | 367.1  |
| 527.3 | 486.5 | 795.8  | 428.3 | 343.9  | 584.3 | 394.1  | 425.5  | 563.1  |
| 81.3  | 87.2  | 118.6  | 82.6  | 363.0  | 385.1 | 545.9  | 598.2  | 506.0  |
| 111.2 | 108.3 | 152.9  | 128.7 | 432.2  | 477.5 | 633.6  | 566.3  | 589.3  |
| 117.5 | 143.7 | 106.7  | 123.1 | 37.0   | 40.8  | 45.0   | 54.0   | 82.8   |
| 60.2  | 58.7  | 43.2   | 53.6  | 74.6   | 77.4  | 66.2   | 76.4   | 41.4   |
| 24.3  | 24.5  | 21.2   | 22.5  | 24.0   | 28.0  | 31.3   | 31.3   | 31.7   |
| 1.8   | 8.7   | 3.1    | 4.1   | 6.1    | 6.2   | 2.6    | 1.6    | 2.0    |
| 78.0  | 97.5  | 85.2   | 99.1  | 89.4   | 72.8  | 88.1   | 95.7   | 53.1   |
| 645.1 | 615.3 | 1030.9 | 721.6 | 1074.3 | 888.8 | 1035.8 | 1161.1 | 1084.4 |
| 37.1  | 30.7  | 37.5   | 30.2  | 72.6   | 76.0  | 62.3   | 83.5   | 45.5   |
| 71.5  | 52.0  | 95.4   | 51.7  | 133.1  | 139.3 | 130.8  | 123.9  | 486.1  |
| 15.8  | 13.3  | 22.5   | 17.2  | 80.1   | 96.2  | 80.6   | 82.1   | 151.2  |
| 153.1 | 145.2 | 120.5  | 134.7 | 9.8    | 3.4   | 1.8    | 1.1    | 12.9   |
| 8.1   | 4.4   | 4.7    | 4.0   | 244.3  | 329.5 | 304.8  | 225.4  | 28.5   |
| 24.8  | 14.4  | 18.4   | 25.2  | 11.0   | 16.6  | 20.5   | 8.0    | 19.5   |
| 56.7  | 57.6  | 63.2   | 49.5  | 47.4   | 48.7  | 62.2   | 67.4   | 82.5   |
| 66.5  | 57.9  | 77.9   | 53.8  | 64.2   | 76.0  | 74.3   | 81.3   | 98.4   |
| 60.5  | 40.3  | 79.0   | 55.8  | 74.4   | 73.6  | 76.6   | 111.4  | 129.9  |
| 14.0  | 13.5  | 17.6   | 9.2   | 3.4    | 5.5   | 9.4    | 9.1    | 14.0   |
| 1.9   | 1.5   | 1.6    | 1.6   | 1.3    | 1.0   | 1.4    | 1.1    | 1.7    |
| 26.0  | 20.4  | 36.7   | 18.1  | 88.4   | 76.2  | 119.4  | 93.0   | 36.3   |
| 24.3  | 22.9  | 23.0   | 24.5  | 31.5   | 25.2  | 27.8   | 41.6   | 37.8   |
| 4.4   | 9.2   | 19.3   | 8.8   | 3.6    | 4.0   | 2.0    | 2.4    | 6.0    |
| 44.7  | 36.3  | 67.0   | 44.9  | 161.9  | 157.0 | 157.9  | 190.9  | 189.7  |
| 177.4 | 140.5 | 203.2  | 120.1 | 188.6  | 176.2 | 193.7  | 239.7  | 328.6  |
| 231.6 | 234.1 | 310.9  | 294.6 | 74.7   | 74.5  | 90.9   | 107.1  | 262.4  |
| 69.6  | 88.6  | 28.8   | 67.2  | 7.1    | 2.5   | 2.4    | 1.8    | 11.0   |
| 138.0 | 132.3 | 129.9  | 110.0 | 13.3   | 10.5  | 5.0    | 20.5   | 1.8    |
| 24.8  | 24.0  | 15.5   | 15.2  | 64.3   | 50.3  | 64.9   | 85.7   | 27.8   |
| 30.1  | 30.3  | 34.4   | 31.9  | 18.6   | 25.1  | 17.4   | 12.6   | 8.1    |
| 78.1  | 47.1  | 145.6  | 44.0  | 169.8  | 214.5 | 154.4  | 142.5  | 332.1  |
| 333.0 | 292.3 | 332.8  | 385.9 | 10.3   | 9.8   | 7.8    | 7.7    | 5.9    |
| 27.1  | 33.1  | 29.8   | 24.6  | 42.5   | 32.5  | 49.2   | 44.3   | 22.1   |
| 33.3  | 25.0  | 47.0   | 36.5  | 29.5   | 28.3  | 24.2   | 30.4   | 98.4   |
| 25.7  | 28.2  | 7.3    | 10.0  | 69.6   | 73.3  | 75.3   | 82.1   | 66.4   |
| 80.0  | 63.1  | 192.5  | 96.6  | 84.7   | 58.1  | 81.2   | 79.1   | 86.6   |
| 10.1  | 18.7  | 21.9   | 17.1  | 17.5   | 14.0  | 12.2   | 15.3   | 22.2   |
| 30.2  | 29.3  | 48.9   | 43.7  | 16.7   | 18.7  | 15.1   | 20.2   | 84.9   |
| 123.2 | 108.8 | 146.2  | 132.8 | 62.3   | 72.5  | 53.7   | 60.9   | 99.1   |
| 66.3  | 64.2  | 65.1   | 69.8  | 34.8   | 39.3  | 29.5   | 34.2   | 57.1   |
| 18.8  | 19.3  | 16.0   | 12.3  | 0.2    | 5.9   | 0.6    | 2.0    | 141.0  |
| 100.4 | 84.5  | 198.6  | 102.6 | 488.7  | 285.8 | 326.2  | 434.4  | 363.7  |
| 36.9  | 39.8  | 34.5   | 31.4  | 15.0   | 7.5   | 11.0   | 18.4   | 37.3   |
| 11.5  | 10.7  | 14.7   | 8.9   | 9.5    | 11.1  | 6.4    | 12.6   | 5.0    |
| 58.0  | 61.4  | 95.9   | 55.0  | 112.1  | 111.1 | 125.7  | 126.7  | 99.6   |
| 211.2 | 235.8 | 160.6  | 136.8 | 84.1   | 177.9 | 93.4   | 83.7   | 199.6  |
| 94.5  | 86.3  | 268.5  | 100.0 | 383.7  | 275.7 | 350.4  | 407.6  | 174.5  |
| 258.0 | 209.4 | 343.1  | 238.0 | 298.7  | 358.6 | 374.3  | 353.5  | 367.6  |
| 1.2   | 1.0   | 0.4    | 1.5   | 2.4    | 0.9   | 1.6    | 0.5    | 1.7    |

|        |        |        |        |        |        |        |        |        |
|--------|--------|--------|--------|--------|--------|--------|--------|--------|
| 15.0   | 20.2   | 4.6    | 17.9   | 2.4    | 2.1    | 2.6    | 2.4    | 4.8    |
| 18.3   | 22.7   | 8.6    | 30.8   | 2.1    | 0.7    | 0.8    | 3.7    | 4.5    |
| 50.3   | 47.8   | 44.8   | 26.9   | 12.3   | 11.5   | 7.8    | 19.6   | 39.1   |
| 152.4  | 120.9  | 253.5  | 152.5  | 131.5  | 153.5  | 125.2  | 159.6  | 107.4  |
| 17.1   | 13.3   | 26.4   | 17.6   | 35.9   | 35.2   | 31.3   | 34.3   | 40.2   |
| 203.4  | 178.0  | 280.7  | 234.9  | 37.1   | 52.4   | 57.2   | 34.9   | 16.8   |
| 10.7   | 6.2    | 6.0    | 1.9    | 7.4    | 7.4    | 6.1    | 9.8    | 35.6   |
| 50.7   | 60.0   | 46.5   | 48.6   | 89.6   | 98.5   | 111.4  | 134.5  | 116.6  |
| 131.5  | 138.9  | 175.4  | 128.8  | 54.6   | 61.1   | 69.4   | 68.6   | 65.5   |
| 69.6   | 68.1   | 85.9   | 68.1   | 73.8   | 66.4   | 60.3   | 72.7   | 101.5  |
| 373.4  | 379.9  | 394.9  | 312.7  | 6.0    | 3.1    | 14.5   | 3.6    | 9.0    |
| 4.4    | 7.7    | 3.2    | 2.9    | 32.1   | 29.9   | 29.6   | 33.8   | 12.5   |
| 64.6   | 82.6   | 66.0   | 66.8   | 215.7  | 187.4  | 224.8  | 252.6  | 76.8   |
| 62.8   | 52.9   | 58.3   | 56.9   | 60.0   | 81.7   | 68.9   | 67.0   | 62.4   |
| 8.1    | 10.9   | 10.7   | 9.3    | 292.9  | 201.3  | 322.9  | 340.7  | 17.2   |
| 1106.6 | 1298.1 | 689.7  | 1009.4 | 249.7  | 187.7  | 200.9  | 290.7  | 14.5   |
| 42.2   | 47.9   | 29.0   | 39.1   | 87.2   | 85.4   | 111.5  | 89.3   | 10.5   |
| 50.8   | 51.8   | 51.9   | 42.8   | 144.8  | 107.2  | 112.4  | 136.9  | 227.3  |
| 30.4   | 14.6   | 47.6   | 23.6   | 16.9   | 17.2   | 28.8   | 24.4   | 38.9   |
| 3.8    | 9.4    | 10.1   | 8.9    | 12.1   | 7.2    | 13.0   | 15.6   | 2.8    |
| 444.4  | 470.2  | 422.4  | 401.4  | 1076.7 | 1018.6 | 1081.8 | 1287.4 | 391.9  |
| 146.4  | 140.2  | 240.5  | 159.1  | 590.0  | 480.8  | 600.3  | 579.5  | 333.7  |
| 8.6    | 7.5    | 10.5   | 12.9   | 60.0   | 72.4   | 79.9   | 70.2   | 11.2   |
| 8.4    | 4.8    | 5.4    | 5.3    | 78.6   | 104.2  | 67.9   | 71.9   | 733.8  |
| 3.5    | 4.7    | 3.2    | 7.2    | 5.3    | 3.6    | 6.6    | 9.5    | 6.3    |
| 1.9    | 11.7   | 5.9    | 9.5    | 1.5    | 1.6    | 2.6    | 2.4    | 122.4  |
| 2.5    | 0.9    | 2.3    | 2.7    | 7.6    | 10.0   | 9.2    | 10.8   | 12.2   |
| 7.2    | 1.0    | 7.5    | 4.3    | 12.0   | 9.3    | 7.4    | 5.4    | 10.6   |
| 36.9   | 33.1   | 49.1   | 35.8   | 48.8   | 57.4   | 51.3   | 57.4   | 75.9   |
| 1.3    | 1.6    | 2.0    | 2.2    | 1.2    | 2.0    | 1.4    | 3.2    | 2.6    |
| 633.8  | 587.1  | 838.9  | 609.7  | 618.2  | 652.2  | 654.3  | 679.3  | 445.7  |
| 6.6    | 1.9    | 3.2    | 3.1    | 2.0    | 1.8    | 2.3    | 2.5    | 2.4    |
| 4.5    | 5.1    | 8.0    | 5.8    | 7.3    | 6.7    | 9.7    | 20.6   | 19.5   |
| 5.6    | 5.6    | 16.1   | 7.1    | 3.1    | 6.0    | 9.9    | 19.9   | 15.1   |
| 35.0   | 40.0   | 38.9   | 44.2   | 29.7   | 18.8   | 18.0   | 22.1   | 44.0   |
| 4.9    | 1.6    | 5.3    | 3.9    | 5.3    | 2.4    | 8.9    | 8.7    | 6.3    |
| 46.3   | 55.9   | 65.2   | 58.6   | 14.7   | 7.6    | 8.5    | 15.9   | 40.6   |
| 62.4   | 78.0   | 63.9   | 74.1   | 0.2    | 2.7    | 0.4    | 4.2    | 43.0   |
| 149.0  | 134.9  | 220.3  | 111.3  | 248.6  | 203.2  | 246.4  | 270.4  | 312.3  |
| 72.1   | 48.1   | 197.5  | 68.3   | 358.7  | 249.8  | 297.7  | 400.2  | 620.3  |
| 69.4   | 88.9   | 84.1   | 62.4   | 153.9  | 133.4  | 132.2  | 133.6  | 115.3  |
| 55.9   | 51.9   | 122.8  | 67.2   | 202.4  | 180.7  | 219.3  | 209.6  | 262.9  |
| 8.9    | 9.3    | 6.1    | 6.0    | 14.2   | 8.9    | 12.3   | 33.1   | 8.9    |
| 1431.1 | 1460.0 | 1738.1 | 1474.2 | 83.4   | 41.2   | 68.1   | 114.3  | 1682.2 |
| 326.0  | 357.7  | 365.1  | 346.7  | 3.6    | 2.4    | 12.3   | 11.6   | 425.6  |
| 13.3   | 16.3   | 17.2   | 8.3    | 14.5   | 13.0   | 11.1   | 13.6   | 37.2   |
| 1.0    | 3.5    | 3.1    | 2.4    | 87.0   | 118.7  | 100.0  | 93.8   | 383.5  |
| 6.2    | 1.4    | 3.7    | 3.6    | 36.2   | 59.1   | 45.6   | 54.1   | 149.9  |
| 45.6   | 53.2   | 40.3   | 51.4   | 34.1   | 30.8   | 37.7   | 35.3   | 35.9   |
| 4478.7 | 3598.8 | 6697.1 | 4073.5 | 4772.3 | 2879.3 | 4492.8 | 5182.1 | 7441.5 |
| 27.2   | 33.2   | 26.7   | 25.1   | 57.6   | 44.6   | 55.0   | 53.3   | 4.4    |
| 28.0   | 33.9   | 45.8   | 24.6   | 78.5   | 47.2   | 79.3   | 91.1   | 51.1   |
| 7.0    | 5.6    | 23.8   | 8.1    | 3.3    | 3.7    | 8.7    | 8.5    | 4.3    |

|       |       |       |       |       |        |        |        |        |
|-------|-------|-------|-------|-------|--------|--------|--------|--------|
| 7.5   | 9.1   | 18.3  | 7.2   | 162.9 | 109.7  | 123.6  | 164.7  | 141.4  |
| 1.6   | 6.2   | 6.5   | 1.8   | 14.0  | 1.7    | 2.3    | 12.7   | 3.3    |
| 40.9  | 38.7  | 71.0  | 38.7  | 69.1  | 81.3   | 65.0   | 61.6   | 112.9  |
| 5.1   | 2.9   | 2.1   | 2.5   | 14.5  | 16.2   | 10.9   | 22.9   | 18.7   |
| 162.8 | 153.1 | 139.3 | 149.9 | 101.8 | 74.4   | 91.4   | 120.3  | 205.8  |
| 57.0  | 49.1  | 91.4  | 53.1  | 71.5  | 84.1   | 70.8   | 77.1   | 102.9  |
| 7.2   | 3.0   | 5.9   | 3.2   | 32.0  | 7.7    | 20.0   | 18.1   | 4.0    |
| 4.0   | 7.5   | 3.8   | 7.9   | 21.1  | 13.6   | 11.4   | 7.2    | 10.2   |
| 2.3   | 1.5   | 1.9   | 1.5   | 9.2   | 5.1    | 8.0    | 11.1   | 8.5    |
| 9.4   | 9.9   | 17.2  | 14.0  | 19.1  | 15.8   | 26.0   | 26.2   | 11.0   |
| 206.8 | 161.5 | 362.1 | 193.5 | 14.7  | 7.2    | 12.3   | 24.0   | 10.9   |
| 38.2  | 34.9  | 63.0  | 40.9  | 11.0  | 0.7    | 1.2    | 11.5   | 4.7    |
| 150.0 | 186.5 | 124.3 | 137.0 | 102.5 | 96.0   | 124.2  | 136.3  | 111.3  |
| 64.7  | 54.2  | 93.1  | 95.0  | 5.5   | 7.1    | 11.3   | 9.9    | 1.0    |
| 139.6 | 157.5 | 157.2 | 162.9 | 99.2  | 107.3  | 125.7  | 118.7  | 165.8  |
| 10.9  | 10.1  | 19.8  | 12.0  | 15.5  | 12.3   | 13.6   | 10.1   | 7.5    |
| 1.9   | 2.4   | 3.2   | 1.8   | 1.1   | 2.1    | 1.9    | 11.7   | 5.8    |
| 29.9  | 22.4  | 33.7  | 10.8  | 44.4  | 20.8   | 33.6   | 24.6   | 12.6   |
| 2.9   | 0.4   | 2.6   | 0.6   | 0.8   | 0.4    | 0.5    | 2.5    | 0.7    |
| 150.0 | 139.6 | 167.9 | 126.4 | 195.9 | 144.9  | 234.9  | 246.8  | 447.1  |
| 34.9  | 26.9  | 26.6  | 32.7  | 34.2  | 26.5   | 27.7   | 40.1   | 2.8    |
| 13.7  | 14.4  | 21.1  | 12.3  | 14.0  | 23.6   | 24.0   | 25.8   | 10.3   |
| 14.5  | 11.5  | 19.9  | 16.8  | 8.6   | 3.9    | 7.7    | 9.5    | 21.3   |
| 210.6 | 244.6 | 66.2  | 131.9 | 5.5   | 3.1    | 9.2    | 12.6   | 16.2   |
| 13.0  | 15.9  | 12.2  | 10.5  | 7.8   | 12.7   | 8.0    | 14.2   | 26.3   |
| 396.3 | 338.8 | 528.7 | 377.7 | 561.8 | 495.7  | 667.0  | 753.7  | 1372.5 |
| 43.6  | 48.7  | 69.8  | 52.7  | 66.3  | 64.0   | 70.2   | 62.9   | 85.1   |
| 84.9  | 86.1  | 111.7 | 81.5  | 62.7  | 67.5   | 49.8   | 66.1   | 82.6   |
| 395.3 | 391.0 | 601.2 | 410.0 | 989.8 | 1004.9 | 994.7  | 970.0  | 1417.9 |
| 2.2   | 2.4   | 2.0   | 2.8   | 3.8   | 0.9    | 9.2    | 1.0    | 19.8   |
| 15.0  | 17.4  | 24.5  | 20.6  | 14.4  | 12.0   | 11.3   | 13.0   | 20.2   |
| 78.8  | 88.1  | 88.3  | 86.2  | 66.4  | 54.6   | 64.8   | 79.0   | 74.3   |
| 10.3  | 12.5  | 16.2  | 13.9  | 99.0  | 59.4   | 104.7  | 112.4  | 16.6   |
| 159.0 | 158.6 | 174.5 | 145.5 | 198.8 | 183.1  | 211.0  | 244.8  | 223.0  |
| 9.3   | 5.3   | 4.5   | 3.3   | 311.4 | 346.5  | 417.0  | 412.3  | 9.7    |
| 6.7   | 3.0   | 7.4   | 7.5   | 3.2   | 3.5    | 5.6    | 6.6    | 36.3   |
| 10.6  | 3.0   | 4.3   | 4.6   | 3.3   | 3.0    | 8.4    | 2.6    | 2.5    |
| 77.5  | 68.8  | 173.7 | 71.2  | 107.6 | 111.9  | 104.2  | 158.1  | 81.4   |
| 3.9   | 9.5   | 9.8   | 3.7   | 3.4   | 5.6    | 17.5   | 13.9   | 582.7  |
| 356.9 | 335.1 | 521.7 | 306.3 | 855.1 | 989.1  | 1032.8 | 1091.0 | 1529.3 |
| 8.5   | 11.0  | 151.7 | 97.3  | 7.1   | 6.1    | 15.8   | 10.9   | 2.4    |
| 2.2   | 2.7   | 3.1   | 2.2   | 1.5   | 5.0    | 0.5    | 7.4    | 3.4    |
| 10.3  | 12.0  | 19.3  | 11.4  | 9.0   | 13.9   | 9.9    | 18.8   | 17.2   |
| 162.8 | 130.5 | 420.7 | 125.5 | 479.3 | 280.1  | 433.8  | 568.3  | 598.0  |
| 170.8 | 160.6 | 185.9 | 178.5 | 168.1 | 152.4  | 185.5  | 168.2  | 124.1  |
| 14.4  | 19.4  | 35.8  | 19.9  | 110.3 | 158.2  | 128.4  | 112.3  | 51.7   |
| 5.8   | 8.2   | 8.9   | 4.5   | 6.0   | 9.6    | 8.0    | 7.5    | 6.5    |
| 7.0   | 6.6   | 6.9   | 7.4   | 3.4   | 5.4    | 4.9    | 2.0    | 6.8    |
| 2.4   | 1.8   | 3.4   | 2.2   | 2.7   | 4.3    | 3.2    | 6.2    | 1.9    |
| 205.5 | 175.8 | 403.7 | 173.3 | 312.0 | 168.6  | 283.2  | 306.5  | 150.9  |
| 4.9   | 4.4   | 7.1   | 6.1   | 32.8  | 46.3   | 45.4   | 61.6   | 41.9   |
| 36.2  | 17.3  | 115.1 | 41.4  | 197.5 | 139.0  | 234.0  | 246.3  | 41.7   |
| 15.1  | 11.7  | 13.6  | 20.2  | 61.0  | 43.5   | 67.3   | 65.8   | 78.3   |



|        |        |        |        |        |        |        |        |        |
|--------|--------|--------|--------|--------|--------|--------|--------|--------|
| 10.8   | 3.6    | 11.1   | 8.2    | 40.4   | 38.3   | 30.8   | 39.4   | 6.9    |
| 15.1   | 8.3    | 18.2   | 14.4   | 7.6    | 8.8    | 8.4    | 1.2    | 19.3   |
| 71.8   | 74.8   | 111.2  | 81.9   | 343.1  | 335.2  | 364.9  | 395.2  | 173.6  |
| 86.0   | 58.6   | 46.1   | 52.9   | 42.5   | 59.0   | 60.9   | 84.5   | 32.1   |
| 1925.1 | 1830.6 | 2407.0 | 2171.1 | 432.5  | 404.4  | 526.9  | 507.6  | 509.5  |
| 76.2   | 61.8   | 163.4  | 75.9   | 56.9   | 50.1   | 56.9   | 68.9   | 147.6  |
| 162.7  | 171.4  | 136.4  | 162.8  | 30.1   | 18.5   | 29.8   | 34.2   | 118.0  |
| 287.3  | 237.6  | 382.1  | 274.8  | 372.0  | 277.1  | 314.5  | 382.3  | 231.8  |
| 11.7   | 4.7    | 9.2    | 8.9    | 45.4   | 31.9   | 72.3   | 65.5   | 37.0   |
| 0.6    | 0.6    | 0.7    | 0.4    | 0.7    | 2.2    | 0.7    | 0.9    | 3.9    |
| 13.4   | 22.1   | 19.5   | 15.1   | 12.2   | 7.5    | 10.2   | 15.4   | 12.7   |
| 64.6   | 64.6   | 49.1   | 54.8   | 10.8   | 13.4   | 14.3   | 25.5   | 18.7   |
| 4571.8 | 4674.6 | 5823.5 | 4534.1 | 1946.2 | 1447.9 | 2021.2 | 2596.9 | 2383.3 |
| 450.8  | 404.4  | 712.8  | 478.9  | 112.6  | 80.5   | 107.7  | 143.8  | 211.7  |
| 17.5   | 21.6   | 13.8   | 12.1   | 0.9    | 4.6    | 0.6    | 0.6    | 2.5    |
| 13.0   | 3.7    | 32.7   | 6.6    | 37.9   | 26.2   | 21.7   | 30.8   | 337.9  |
| 7.3    | 8.0    | 10.9   | 5.5    | 4.7    | 5.4    | 6.8    | 10.2   | 18.4   |
| 67.6   | 71.4   | 43.6   | 40.6   | 39.5   | 13.2   | 30.8   | 42.0   | 76.4   |
| 97.3   | 90.2   | 131.4  | 79.6   | 104.2  | 129.5  | 114.1  | 129.4  | 93.0   |
| 3.6    | 8.4    | 2.1    | 7.5    | 3.5    | 4.5    | 6.0    | 10.5   | 7.4    |
| 180.5  | 139.5  | 185.8  | 147.8  | 119.2  | 101.6  | 114.2  | 143.4  | 108.6  |
| 679.5  | 633.9  | 653.3  | 642.8  | 417.8  | 435.8  | 492.8  | 513.1  | 503.8  |
| 175.9  | 153.8  | 184.1  | 163.7  | 88.3   | 76.2   | 87.6   | 101.1  | 66.9   |
| 9.0    | 2.9    | 3.4    | 1.9    | 43.5   | 43.7   | 37.0   | 49.0   | 39.4   |
| 0.8    | 1.3    | 2.2    | 1.5    | 0.5    | 3.1    | 6.6    | 2.0    | 1.5    |
| 11.0   | 16.6   | 14.2   | 13.8   | 5.8    | 9.3    | 15.4   | 1.0    | 16.9   |
| 10.1   | 3.4    | 12.3   | 6.7    | 39.0   | 40.7   | 34.5   | 32.1   | 14.0   |
| 420.3  | 399.8  | 303.5  | 308.7  | 29.2   | 23.6   | 40.6   | 41.6   | 484.0  |
| 8.0    | 2.7    | 12.2   | 8.1    | 3.2    | 9.8    | 7.1    | 6.5    | 6.6    |
| 0.8    | 1.0    | 1.2    | 0.7    | 0.6    | 1.1    | 0.7    | 1.3    | 1.3    |
| 218.3  | 253.0  | 268.5  | 209.1  | 193.8  | 139.4  | 212.0  | 211.1  | 305.2  |
| 4.6    | 7.6    | 6.3    | 3.8    | 17.6   | 12.2   | 31.0   | 34.3   | 5.5    |
| 15.4   | 12.1   | 9.8    | 5.5    | 3.8    | 2.1    | 2.7    | 7.4    | 16.1   |
| 9.4    | 9.6    | 13.8   | 17.0   | 27.7   | 17.4   | 24.0   | 12.1   | 10.7   |
| 66.5   | 68.3   | 43.8   | 76.5   | 224.8  | 237.7  | 229.1  | 260.5  | 110.3  |
| 8.3    | 10.9   | 6.8    | 2.3    | 2.8    | 4.9    | 2.1    | 2.6    | 15.0   |
| 2.2    | 6.7    | 9.9    | 9.2    | 3.3    | 4.0    | 6.1    | 4.1    | 10.7   |
| 22.2   | 18.0   | 37.7   | 13.7   | 11.9   | 12.2   | 11.3   | 16.3   | 51.3   |
| 1.6    | 4.7    | 2.2    | 1.9    | 469.9  | 421.2  | 490.1  | 596.7  | 13.0   |
| 9.2    | 6.2    | 6.2    | 5.9    | 11.4   | 13.6   | 14.1   | 29.4   | 15.4   |
| 1.1    | 1.2    | 10.2   | 6.5    | 13.0   | 7.3    | 14.8   | 13.0   | 5.6    |
| 2.1    | 2.0    | 2.7    | 4.2    | 17.9   | 12.2   | 8.3    | 16.3   | 3.4    |
| 3.1    | 1.1    | 1.7    | 5.0    | 5.1    | 1.1    | 17.3   | 17.5   | 6.0    |
| 7.9    | 1.6    | 2.5    | 11.0   | 3.6    | 8.5    | 1.4    | 16.7   | 6.1    |
| 142.6  | 132.5  | 334.3  | 83.0   | 440.7  | 297.4  | 386.4  | 508.9  | 493.9  |
| 164.4  | 165.1  | 322.5  | 114.4  | 458.8  | 286.6  | 391.4  | 516.1  | 558.4  |
| 105.6  | 119.6  | 188.6  | 116.4  | 458.2  | 310.1  | 428.0  | 511.1  | 289.6  |
| 22.5   | 19.7   | 19.7   | 17.1   | 92.3   | 77.0   | 90.6   | 108.8  | 135.8  |
| 5.9    | 9.6    | 5.4    | 6.9    | 94.2   | 7.5    | 84.1   | 105.2  | 114.5  |
| 34.6   | 47.3   | 48.5   | 49.7   | 169.3  | 138.3  | 233.8  | 216.0  | 196.0  |
| 166.5  | 139.4  | 300.1  | 236.5  | 143.0  | 150.0  | 159.5  | 195.4  | 13.1   |
| 7.5    | 10.9   | 12.0   | 2.8    | 6.3    | 2.7    | 6.8    | 3.2    | 1.5    |
| 169.0  | 153.2  | 131.3  | 124.2  | 764.9  | 743.3  | 843.2  | 981.3  | 587.6  |

|        |        |        |       |        |        |        |        |        |
|--------|--------|--------|-------|--------|--------|--------|--------|--------|
| 10.8   | 11.8   | 8.2    | 17.4  | 12.2   | 15.1   | 8.8    | 17.5   | 17.9   |
| 9.0    | 6.5    | 6.6    | 5.3   | 16.4   | 7.9    | 21.4   | 10.6   | 8.5    |
| 3.7    | 3.8    | 10.8   | 7.0   | 21.1   | 4.4    | 14.3   | 16.7   | 6.0    |
| 111.2  | 93.6   | 66.7   | 61.3  | 18.2   | 17.2   | 23.1   | 17.1   | 5.3    |
| 81.1   | 86.9   | 66.3   | 73.1  | 351.1  | 355.1  | 429.5  | 420.2  | 146.1  |
| 4.4    | 1.5    | 0.7    | 0.2   | 77.2   | 74.7   | 74.3   | 96.9   | 35.8   |
| 117.8  | 121.0  | 110.7  | 110.9 | 105.0  | 101.9  | 92.8   | 122.9  | 84.8   |
| 62.1   | 65.8   | 69.4   | 57.9  | 73.8   | 72.1   | 103.2  | 104.2  | 33.2   |
| 15.1   | 25.0   | 26.4   | 23.1  | 17.3   | 17.0   | 10.8   | 22.8   | 56.6   |
| 36.4   | 31.9   | 50.0   | 34.4  | 31.3   | 32.6   | 29.8   | 42.2   | 66.4   |
| 773.8  | 737.1  | 910.2  | 791.5 | 1061.8 | 981.2  | 1142.9 | 1236.1 | 828.3  |
| 382.3  | 405.0  | 267.6  | 444.0 | 3.8    | 1.6    | 6.7    | 0.5    | 15.5   |
| 23.0   | 23.8   | 26.2   | 23.3  | 76.7   | 63.2   | 74.6   | 111.5  | 6.9    |
| 102.3  | 114.8  | 134.6  | 109.4 | 125.2  | 154.0  | 156.3  | 155.0  | 134.6  |
| 109.4  | 93.9   | 104.7  | 99.1  | 69.6   | 80.4   | 89.4   | 91.2   | 65.0   |
| 760.4  | 739.9  | 1003.6 | 749.8 | 826.5  | 782.2  | 984.6  | 1030.1 | 1554.8 |
| 1.2    | 1.3    | 0.9    | 1.0   | 9.3    | 14.7   | 1.5    | 3.3    | 8.0    |
| 3.7    | 2.6    | 7.3    | 7.1   | 5.8    | 5.8    | 3.7    | 4.5    | 6.8    |
| 95.3   | 96.9   | 145.2  | 116.6 | 60.9   | 53.3   | 71.8   | 60.7   | 66.8   |
| 0.2    | 1.4    | 0.3    | 2.2   | 30.1   | 38.0   | 32.2   | 46.2   | 0.4    |
| 0.8    | 0.8    | 1.8    | 1.9   | 107.2  | 141.1  | 137.7  | 139.9  | 1.2    |
| 249.5  | 162.7  | 339.4  | 180.7 | 145.1  | 156.7  | 137.7  | 154.5  | 163.3  |
| 20.3   | 18.8   | 27.0   | 11.0  | 27.8   | 40.3   | 25.8   | 48.7   | 11.7   |
| 113.0  | 100.1  | 187.7  | 82.3  | 36.5   | 35.3   | 36.9   | 50.0   | 161.4  |
| 41.3   | 48.4   | 65.9   | 41.2  | 17.0   | 16.2   | 20.9   | 19.6   | 58.3   |
| 192.7  | 137.5  | 282.2  | 186.6 | 209.5  | 235.7  | 212.2  | 229.9  | 166.0  |
| 17.8   | 16.6   | 29.9   | 4.9   | 192.4  | 265.5  | 268.4  | 291.5  | 172.7  |
| 1.3    | 0.8    | 7.8    | 4.5   | 326.3  | 259.5  | 310.1  | 376.7  | 267.9  |
| 3.2    | 4.5    | 0.9    | 2.4   | 1.4    | 0.8    | 0.2    | 0.5    | 4.1    |
| 8.0    | 9.1    | 18.6   | 17.1  | 5.7    | 7.9    | 10.5   | 12.1   | 6.2    |
| 17.7   | 33.9   | 18.1   | 39.6  | 32.3   | 38.3   | 32.7   | 32.6   | 29.9   |
| 2.5    | 4.0    | 8.6    | 3.4   | 37.4   | 46.2   | 40.7   | 52.1   | 51.5   |
| 75.0   | 77.2   | 96.6   | 72.1  | 157.9  | 204.3  | 158.9  | 167.6  | 91.8   |
| 34.0   | 18.2   | 29.2   | 19.4  | 10.2   | 20.0   | 5.4    | 3.0    | 20.9   |
| 894.4  | 765.9  | 1622.5 | 678.0 | 2805.6 | 1526.4 | 1982.9 | 2722.8 | 2714.6 |
| 117.1  | 125.0  | 103.8  | 98.1  | 101.5  | 112.5  | 99.1   | 122.0  | 48.9   |
| 14.4   | 23.8   | 17.2   | 36.2  | 43.3   | 76.6   | 40.9   | 52.4   | 9.9    |
| 1.9    | 1.1    | 1.6    | 1.0   | 6.6    | 4.5    | 9.4    | 7.9    | 13.1   |
| 1024.4 | 1160.9 | 366.0  | 664.6 | 6.1    | 12.5   | 8.9    | 18.2   | 8.5    |
| 253.8  | 229.4  | 215.6  | 297.9 | 53.5   | 50.7   | 59.4   | 51.2   | 117.1  |
| 44.1   | 36.1   | 99.1   | 62.5  | 19.4   | 29.2   | 31.6   | 43.6   | 33.1   |
| 82.6   | 78.5   | 62.9   | 58.1  | 786.0  | 865.9  | 1125.1 | 1044.6 | 1057.6 |
| 11.2   | 7.6    | 14.8   | 6.4   | 9.7    | 13.7   | 5.6    | 7.7    | 9.6    |
| 11.6   | 9.9    | 17.5   | 14.0  | 7.2    | 5.9    | 6.4    | 24.8   | 13.8   |
| 126.3  | 108.0  | 122.6  | 101.2 | 145.7  | 147.1  | 172.4  | 188.0  | 117.5  |
| 2.4    | 2.9    | 3.8    | 1.4   | 14.3   | 14.5   | 19.1   | 12.2   | 66.2   |
| 39.7   | 44.5   | 50.5   | 52.1  | 41.6   | 45.4   | 32.0   | 47.5   | 85.5   |
| 765.1  | 690.2  | 1128.5 | 666.0 | 706.6  | 538.6  | 701.5  | 692.1  | 601.6  |
| 124.0  | 109.5  | 182.9  | 151.7 | 82.9   | 99.6   | 103.4  | 108.9  | 170.1  |
| 29.9   | 30.3   | 32.9   | 41.2  | 18.7   | 18.1   | 18.5   | 19.2   | 36.6   |
| 47.9   | 48.6   | 55.6   | 42.9  | 176.3  | 150.6  | 202.9  | 198.9  | 205.6  |
| 10.3   | 17.3   | 4.6    | 11.1  | 233.0  | 208.0  | 205.9  | 212.9  | 835.9  |
| 3.4    | 2.7    | 3.6    | 5.8   | 13.4   | 9.0    | 1.6    | 8.3    | 15.5   |

|       |       |        |       |        |        |        |        |        |
|-------|-------|--------|-------|--------|--------|--------|--------|--------|
| 33.7  | 34.9  | 38.9   | 26.1  | 20.7   | 12.7   | 17.1   | 13.2   | 22.4   |
| 19.6  | 6.6   | 17.8   | 18.3  | 7.3    | 6.1    | 7.3    | 9.4    | 17.2   |
| 55.6  | 48.0  | 73.6   | 49.2  | 79.4   | 67.9   | 77.1   | 92.0   | 78.5   |
| 36.3  | 48.0  | 30.5   | 40.9  | 25.0   | 29.4   | 21.8   | 36.3   | 46.9   |
| 9.2   | 13.3  | 19.0   | 8.3   | 42.4   | 54.8   | 37.9   | 63.3   | 194.9  |
| 0.8   | 1.0   | 2.4    | 2.3   | 33.0   | 46.8   | 30.9   | 33.9   | 186.4  |
| 94.6  | 91.8  | 126.7  | 65.8  | 101.3  | 84.4   | 91.8   | 127.2  | 207.1  |
| 194.9 | 180.7 | 341.3  | 181.9 | 266.9  | 250.8  | 199.7  | 259.8  | 1020.9 |
| 152.2 | 148.3 | 166.8  | 136.7 | 181.5  | 187.7  | 206.4  | 203.6  | 63.8   |
| 10.5  | 22.6  | 2.8    | 11.7  | 3.1    | 3.5    | 3.8    | 13.7   | 10.3   |
| 1.9   | 1.9   | 1.3    | 0.6   | 0.6    | 2.9    | 1.2    | 3.3    | 2.3    |
| 3.8   | 6.4   | 5.9    | 2.6   | 13.6   | 15.5   | 8.1    | 7.9    | 38.3   |
| 3.5   | 4.3   | 10.0   | 10.8  | 17.6   | 26.1   | 17.6   | 29.2   | 18.8   |
| 4.9   | 3.3   | 1.6    | 2.7   | 3.4    | 2.2    | 1.7    | 1.9    | 8.1    |
| 40.3  | 37.2  | 36.3   | 43.3  | 23.1   | 20.9   | 24.8   | 32.4   | 32.3   |
| 108.7 | 103.6 | 32.1   | 118.2 | 7.4    | 3.2    | 5.8    | 8.5    | 16.0   |
| 16.5  | 18.9  | 39.0   | 39.6  | 28.8   | 18.2   | 42.4   | 45.0   | 0.5    |
| 3.5   | 4.3   | 13.1   | 6.7   | 19.5   | 3.7    | 18.7   | 22.9   | 6.5    |
| 60.4  | 57.3  | 57.9   | 55.1  | 9.1    | 1.4    | 2.8    | 5.0    | 6.0    |
| 153.4 | 176.2 | 203.1  | 153.1 | 474.2  | 470.5  | 521.6  | 564.9  | 890.8  |
| 16.2  | 17.6  | 22.5   | 21.3  | 11.3   | 8.5    | 11.4   | 19.5   | 24.3   |
| 0.8   | 1.2   | 0.7    | 1.3   | 0.7    | 0.8    | 1.0    | 1.2    | 70.9   |
| 1.9   | 1.3   | 2.3    | 2.5   | 7.0    | 11.7   | 6.4    | 2.7    | 2.8    |
| 1.5   | 3.6   | 30.6   | 2.0   | 0.7    | 0.6    | 0.8    | 0.6    | 1.6    |
| 13.4  | 15.8  | 6.3    | 15.3  | 21.3   | 19.3   | 23.8   | 36.4   | 10.5   |
| 935.7 | 927.8 | 1215.0 | 923.4 | 1872.1 | 1600.4 | 1885.6 | 2128.3 | 1098.1 |
| 14.8  | 19.3  | 55.6   | 11.5  | 25.1   | 17.5   | 22.4   | 26.2   | 41.9   |
| 235.1 | 268.3 | 304.5  | 223.1 | 204.4  | 253.3  | 178.6  | 203.8  | 170.5  |
| 33.5  | 28.1  | 37.7   | 18.2  | 381.6  | 355.3  | 423.0  | 448.7  | 155.2  |
| 3.0   | 3.1   | 6.1    | 4.4   | 5.0    | 2.3    | 3.8    | 7.2    | 3.9    |
| 2.4   | 9.7   | 6.2    | 9.9   | 1.7    | 6.5    | 3.8    | 3.2    | 22.5   |
| 94.9  | 85.0  | 61.0   | 83.6  | 36.1   | 23.9   | 31.8   | 35.8   | 71.3   |
| 8.6   | 6.7   | 1.7    | 8.4   | 3.4    | 1.0    | 3.6    | 6.6    | 5.4    |
| 4.7   | 8.3   | 15.3   | 2.8   | 5.2    | 2.2    | 5.9    | 7.5    | 11.3   |
| 77.0  | 130.5 | 51.5   | 172.2 | 10.6   | 7.6    | 19.1   | 20.8   | 15.7   |
| 5.8   | 14.0  | 11.9   | 9.5   | 65.5   | 57.2   | 54.7   | 50.2   | 358.3  |
| 8.5   | 9.7   | 5.3    | 4.8   | 7.8    | 8.7    | 17.7   | 8.2    | 5.3    |
| 6.9   | 5.5   | 8.2    | 1.6   | 12.6   | 5.1    | 7.4    | 4.0    | 9.1    |
| 8.1   | 1.3   | 10.0   | 5.6   | 9.2    | 7.7    | 2.8    | 9.1    | 8.7    |
| 42.1  | 46.9  | 52.9   | 45.6  | 17.3   | 22.6   | 34.5   | 47.7   | 22.6   |
| 8.3   | 5.6   | 9.5    | 13.3  | 3.1    | 2.8    | 5.9    | 6.2    | 4.1    |
| 0.5   | 1.3   | 1.5    | 1.6   | 0.6    | 0.4    | 1.4    | 0.5    | 0.8    |
| 210.5 | 210.2 | 190.0  | 249.1 | 105.1  | 103.4  | 97.8   | 88.9   | 108.8  |
| 261.0 | 207.2 | 231.1  | 111.0 | 77.0   | 40.5   | 55.2   | 94.5   | 42.9   |
| 7.2   | 4.6   | 9.2    | 7.2   | 150.7  | 156.4  | 132.8  | 198.5  | 37.0   |
| 36.2  | 37.1  | 22.9   | 35.8  | 17.6   | 19.3   | 14.2   | 17.1   | 12.6   |
| 1.2   | 2.8   | 1.9    | 0.8   | 95.1   | 69.8   | 103.7  | 110.3  | 14.4   |
| 15.9  | 12.2  | 20.8   | 15.2  | 13.0   | 11.1   | 22.0   | 21.3   | 15.0   |
| 36.4  | 34.2  | 33.3   | 26.5  | 96.6   | 86.9   | 82.3   | 117.0  | 85.4   |
| 1.7   | 2.1   | 3.4    | 1.9   | 1.7    | 1.7    | 2.1    | 1.2    | 6.1    |
| 107.1 | 97.2  | 141.8  | 77.6  | 48.6   | 40.5   | 61.6   | 42.5   | 36.8   |
| 0.9   | 2.7   | 3.8    | 2.6   | 1.8    | 4.3    | 5.3    | 4.3    | 3.3    |
| 25.4  | 24.8  | 26.2   | 20.2  | 16.9   | 17.8   | 15.7   | 17.0   | 31.0   |

|        |        |        |        |        |        |        |        |       |
|--------|--------|--------|--------|--------|--------|--------|--------|-------|
| 1.1    | 15.6   | 10.6   | 15.5   | 41.6   | 35.7   | 39.7   | 67.4   | 39.8  |
| 3.1    | 6.6    | 12.0   | 1.6    | 6.8    | 8.2    | 7.0    | 10.1   | 4.4   |
| 46.0   | 55.4   | 44.6   | 63.1   | 15.2   | 15.8   | 22.7   | 37.9   | 50.0  |
| 4.6    | 8.7    | 6.3    | 7.2    | 3.7    | 4.7    | 3.6    | 5.1    | 18.7  |
| 377.1  | 309.1  | 568.7  | 377.4  | 412.1  | 410.1  | 525.8  | 475.6  | 525.3 |
| 3308.8 | 3595.1 | 1496.6 | 3538.6 | 6.2    | 6.4    | 12.6   | 13.4   | 56.4  |
| 89.6   | 81.0   | 77.6   | 66.3   | 83.7   | 80.6   | 86.9   | 119.1  | 4.2   |
| 4.6    | 4.1    | 4.8    | 4.8    | 15.4   | 28.6   | 19.1   | 16.3   | 16.9  |
| 629.9  | 598.8  | 807.2  | 487.2  | 480.2  | 648.6  | 502.6  | 528.1  | 359.6 |
| 128.0  | 120.6  | 143.4  | 116.1  | 0.8    | 2.7    | 1.3    | 1.4    | 62.0  |
| 85.7   | 116.5  | 65.3   | 65.3   | 4.3    | 0.7    | 3.8    | 6.5    | 10.7  |
| 22.9   | 26.1   | 93.1   | 19.7   | 89.5   | 62.6   | 83.6   | 102.1  | 100.2 |
| 22.8   | 17.6   | 30.8   | 17.8   | 73.1   | 65.7   | 59.1   | 88.5   | 40.7  |
| 17.6   | 11.6   | 21.0   | 5.8    | 56.4   | 59.0   | 61.6   | 69.9   | 119.3 |
| 2.5    | 2.9    | 3.6    | 2.4    | 29.7   | 16.2   | 28.8   | 41.9   | 16.1  |
| 1.1    | 0.6    | 5.8    | 1.2    | 60.4   | 27.6   | 139.0  | 79.0   | 241.6 |
| 14.5   | 7.9    | 5.6    | 14.1   | 37.0   | 36.8   | 63.4   | 71.5   | 133.4 |
| 4.7    | 6.1    | 6.5    | 4.1    | 9.4    | 10.5   | 15.0   | 0.6    | 10.6  |
| 97.0   | 90.4   | 129.0  | 91.6   | 211.0  | 216.2  | 213.9  | 219.1  | 175.0 |
| 79.7   | 71.8   | 175.8  | 113.0  | 471.1  | 312.3  | 398.0  | 428.5  | 314.2 |
| 10.4   | 6.1    | 3.1    | 2.9    | 9.6    | 7.1    | 5.4    | 10.9   | 15.9  |
| 4.1    | 6.0    | 10.5   | 7.4    | 17.7   | 11.4   | 21.8   | 27.9   | 42.9  |
| 103.2  | 108.5  | 127.8  | 136.4  | 40.7   | 31.6   | 49.2   | 63.8   | 75.6  |
| 54.0   | 70.2   | 42.6   | 41.6   | 10.3   | 20.2   | 14.5   | 4.2    | 2.9   |
| 7.8    | 5.3    | 5.1    | 4.3    | 9.1    | 5.3    | 6.0    | 7.4    | 0.6   |
| 1.3    | 0.4    | 1.0    | 0.8    | 0.6    | 1.7    | 5.3    | 0.3    | 4.1   |
| 10.6   | 12.3   | 13.1   | 9.1    | 177.2  | 83.9   | 450.8  | 264.3  | 26.2  |
| 6.9    | 5.9    | 8.2    | 5.9    | 58.3   | 25.8   | 192.4  | 102.9  | 13.6  |
| 92.7   | 75.4   | 136.7  | 100.5  | 55.0   | 57.0   | 48.3   | 39.5   | 34.2  |
| 18.1   | 27.3   | 67.7   | 38.3   | 4.6    | 12.3   | 4.7    | 5.9    | 4.7   |
| 67.0   | 52.9   | 86.2   | 68.3   | 83.2   | 78.0   | 85.9   | 98.1   | 27.2  |
| 40.0   | 40.1   | 8.9    | 35.4   | 11.6   | 11.0   | 6.7    | 14.3   | 15.4  |
| 67.0   | 67.2   | 52.4   | 54.5   | 20.8   | 21.3   | 23.4   | 28.4   | 36.7  |
| 6.2    | 3.5    | 8.4    | 7.1    | 8.2    | 7.2    | 9.3    | 1.3    | 355.3 |
| 3.2    | 2.5    | 8.9    | 5.5    | 610.6  | 604.4  | 597.9  | 656.9  | 309.0 |
| 12.2   | 8.5    | 39.2   | 12.2   | 186.9  | 114.4  | 158.8  | 170.7  | 73.1  |
| 3.1    | 4.2    | 1.3    | 1.7    | 7.2    | 11.3   | 11.4   | 13.5   | 4.3   |
| 369.8  | 354.7  | 429.8  | 339.8  | 708.7  | 641.9  | 673.6  | 822.1  | 787.8 |
| 166.6  | 199.3  | 164.3  | 177.9  | 195.6  | 201.3  | 198.8  | 210.9  | 323.2 |
| 25.8   | 25.2   | 28.5   | 18.3   | 2194.3 | 3101.5 | 3608.1 | 2614.5 | 9.2   |
| 58.4   | 68.2   | 183.1  | 54.3   | 3.2    | 0.7    | 2.9    | 5.8    | 369.8 |
| 4.8    | 8.9    | 19.1   | 3.7    | 7.5    | 6.2    | 18.4   | 15.7   | 7.8   |
| 311.1  | 287.1  | 359.4  | 318.9  | 399.6  | 476.5  | 516.5  | 500.4  | 350.3 |
| 1.2    | 2.1    | 1.8    | 5.1    | 2.1    | 3.4    | 2.0    | 4.4    | 4.5   |
| 8.3    | 10.1   | 4.4    | 8.9    | 8.5    | 3.9    | 10.0   | 7.3    | 126.9 |
| 0.4    | 0.8    | 0.6    | 0.5    | 38.5   | 15.2   | 35.1   | 54.3   | 1.8   |
| 8.9    | 9.8    | 20.5   | 15.3   | 13.2   | 10.7   | 6.3    | 14.3   | 25.9  |
| 221.2  | 204.3  | 176.2  | 160.6  | 61.3   | 54.7   | 66.0   | 80.9   | 80.8  |
| 6.8    | 3.5    | 7.0    | 6.5    | 5.2    | 5.8    | 6.1    | 7.7    | 7.7   |
| 7.0    | 5.7    | 7.5    | 5.6    | 7.0    | 3.9    | 3.4    | 2.2    | 11.9  |
| 92.3   | 91.6   | 106.0  | 96.7   | 101.9  | 113.6  | 115.3  | 130.9  | 107.1 |
| 2.8    | 3.3    | 1.6    | 0.5    | 34.5   | 25.7   | 39.2   | 44.8   | 8.7   |
| 1.6    | 8.6    | 9.5    | 5.2    | 21.7   | 20.4   | 23.5   | 28.4   | 8.8   |

|       |       |       |       |        |        |        |        |        |
|-------|-------|-------|-------|--------|--------|--------|--------|--------|
| 2.0   | 8.8   | 15.7  | 5.4   | 41.5   | 34.1   | 19.1   | 34.9   | 35.7   |
| 208.6 | 220.8 | 256.2 | 235.7 | 201.8  | 242.3  | 230.9  | 225.3  | 162.5  |
| 1.9   | 6.5   | 3.7   | 2.8   | 17.3   | 22.0   | 14.5   | 33.3   | 3.4    |
| 3.0   | 7.7   | 1.2   | 4.8   | 146.0  | 141.6  | 171.4  | 195.1  | 7.1    |
| 74.9  | 60.9  | 108.1 | 72.1  | 206.9  | 189.1  | 214.3  | 211.2  | 266.4  |
| 48.8  | 47.7  | 72.3  | 41.1  | 88.1   | 93.5   | 91.5   | 79.1   | 194.0  |
| 33.5  | 32.4  | 26.7  | 22.8  | 32.1   | 24.7   | 20.9   | 33.3   | 212.5  |
| 2.4   | 1.2   | 2.5   | 2.6   | 1.1    | 1.5    | 1.3    | 1.4    | 5.4    |
| 5.7   | 11.7  | 15.5  | 5.5   | 9.8    | 52.0   | 15.5   | 16.2   | 18.0   |
| 27.4  | 26.2  | 63.6  | 36.2  | 47.5   | 51.0   | 65.2   | 59.5   | 24.5   |
| 112.3 | 111.1 | 87.6  | 120.4 | 151.1  | 161.9  | 158.3  | 156.1  | 76.0   |
| 0.7   | 0.4   | 2.7   | 4.0   | 1.0    | 0.8    | 0.9    | 2.2    | 5.6    |
| 347.7 | 357.1 | 248.7 | 201.3 | 1204.9 | 1211.2 | 1284.6 | 1359.7 | 655.0  |
| 28.5  | 24.8  | 15.8  | 12.8  | 154.2  | 206.7  | 180.0  | 208.0  | 53.7   |
| 21.1  | 15.1  | 22.8  | 21.9  | 28.7   | 18.3   | 29.6   | 30.6   | 38.3   |
| 0.8   | 2.6   | 4.7   | 2.5   | 1.0    | 1.9    | 0.9    | 1.9    | 147.2  |
| 16.4  | 7.4   | 6.1   | 11.8  | 4.9    | 6.0    | 8.9    | 16.2   | 24.1   |
| 3.3   | 2.3   | 3.5   | 1.9   | 14.8   | 19.3   | 31.9   | 27.1   | 1.5    |
| 18.8  | 15.5  | 19.2  | 13.1  | 90.2   | 87.9   | 66.4   | 79.2   | 69.9   |
| 4.6   | 6.3   | 13.5  | 3.4   | 43.3   | 51.5   | 41.7   | 49.7   | 53.1   |
| 5.2   | 4.4   | 1.8   | 7.1   | 18.6   | 20.3   | 25.8   | 25.8   | 2.4    |
| 1.6   | 1.8   | 1.8   | 2.3   | 1.0    | 0.6    | 1.3    | 1.5    | 1.3    |
| 62.2  | 46.2  | 63.1  | 75.4  | 113.5  | 156.4  | 128.3  | 153.5  | 55.6   |
| 48.1  | 46.1  | 46.4  | 37.6  | 60.7   | 86.9   | 78.1   | 77.6   | 33.7   |
| 28.3  | 21.0  | 40.1  | 19.0  | 35.2   | 45.0   | 45.4   | 35.4   | 41.3   |
| 16.5  | 13.0  | 24.1  | 9.6   | 52.1   | 73.8   | 46.8   | 54.1   | 72.4   |
| 0.5   | 0.9   | 1.0   | 0.7   | 1.2    | 0.7    | 2.8    | 1.2    | 1.2    |
| 59.6  | 63.7  | 93.4  | 58.0  | 255.0  | 292.4  | 254.3  | 267.8  | 208.9  |
| 9.3   | 9.4   | 5.3   | 3.6   | 28.9   | 17.3   | 22.9   | 10.5   | 23.5   |
| 27.7  | 51.4  | 7.2   | 17.9  | 9.8    | 12.2   | 14.7   | 10.4   | 18.8   |
| 166.5 | 155.6 | 158.9 | 134.7 | 1.9    | 1.1    | 1.1    | 1.7    | 1.6    |
| 18.1  | 8.4   | 11.5  | 17.7  | 5.9    | 2.2    | 3.5    | 3.5    | 18.3   |
| 2.6   | 1.9   | 12.0  | 5.4   | 0.8    | 1.1    | 1.0    | 2.8    | 40.9   |
| 823.6 | 734.7 | 784.2 | 721.7 | 87.3   | 99.2   | 121.4  | 164.3  | 93.3   |
| 2.4   | 10.5  | 10.4  | 4.8   | 2.7    | 8.0    | 6.5    | 14.6   | 9.5    |
| 375.2 | 384.8 | 350.8 | 294.7 | 572.1  | 457.2  | 456.5  | 486.4  | 1129.5 |
| 10.4  | 8.8   | 7.1   | 9.2   | 8.0    | 5.2    | 8.3    | 4.5    | 16.2   |
| 20.1  | 22.5  | 39.8  | 20.7  | 67.1   | 56.4   | 68.7   | 82.9   | 95.8   |
| 16.0  | 13.2  | 11.9  | 5.7   | 25.8   | 21.7   | 25.8   | 20.3   | 74.6   |
| 37.0  | 28.9  | 38.2  | 27.7  | 32.5   | 31.1   | 28.3   | 43.6   | 62.1   |
| 20.8  | 15.5  | 20.9  | 20.6  | 37.0   | 35.7   | 37.6   | 41.4   | 61.9   |
| 45.9  | 68.3  | 42.5  | 28.9  | 14.0   | 8.3    | 15.9   | 15.5   | 2.9    |
| 25.1  | 30.1  | 30.9  | 31.5  | 50.9   | 41.8   | 52.0   | 66.2   | 256.0  |
| 24.5  | 27.7  | 33.0  | 13.2  | 18.6   | 9.6    | 10.0   | 14.4   | 72.0   |
| 0.9   | 1.3   | 3.1   | 2.3   | 3.4    | 3.9    | 1.7    | 2.4    | 2.3    |
| 33.7  | 55.6  | 72.0  | 34.9  | 72.2   | 71.0   | 90.7   | 92.6   | 128.5  |
| 277.5 | 282.7 | 207.7 | 198.0 | 30.7   | 46.5   | 39.9   | 49.8   | 98.8   |
| 15.6  | 11.3  | 13.2  | 10.5  | 237.2  | 258.1  | 295.5  | 279.3  | 122.0  |
| 2.9   | 4.5   | 5.3   | 1.1   | 292.2  | 238.4  | 304.6  | 321.1  | 133.7  |
| 9.0   | 6.5   | 10.9  | 6.3   | 18.4   | 21.7   | 24.7   | 23.3   | 14.5   |
| 1.3   | 2.1   | 1.7   | 1.4   | 15.3   | 20.3   | 15.2   | 20.6   | 2.6    |
| 3.6   | 3.2   | 4.6   | 3.2   | 5.5    | 1.2    | 3.8    | 6.0    | 1.4    |
| 158.4 | 144.8 | 218.8 | 214.4 | 84.2   | 81.5   | 73.6   | 106.7  | 2.2    |

|        |        |        |        |        |        |        |        |        |
|--------|--------|--------|--------|--------|--------|--------|--------|--------|
| 23.9   | 17.9   | 23.4   | 24.6   | 12.8   | 5.9    | 5.1    | 6.0    | 23.4   |
| 3.1    | 2.2    | 3.8    | 4.3    | 1.3    | 1.1    | 1.9    | 0.4    | 1.1    |
| 7.0    | 13.0   | 22.5   | 9.2    | 8.7    | 13.4   | 8.9    | 10.5   | 15.3   |
| 58.2   | 60.6   | 49.5   | 58.4   | 13.0   | 15.2   | 14.3   | 18.8   | 16.5   |
| 120.2  | 103.5  | 69.5   | 81.3   | 151.1  | 142.6  | 176.5  | 194.2  | 154.0  |
| 5.5    | 2.2    | 7.3    | 0.9    | 3.6    | 5.7    | 1.1    | 2.0    | 14.2   |
| 3.9    | 3.4    | 0.9    | 1.6    | 2.8    | 1.3    | 1.1    | 1.6    | 1.8    |
| 200.7  | 219.6  | 255.7  | 156.5  | 279.9  | 327.2  | 300.8  | 357.6  | 257.2  |
| 55.6   | 25.8   | 80.3   | 40.2   | 49.4   | 52.2   | 65.1   | 58.4   | 37.4   |
| 1.9    | 2.0    | 1.3    | 1.5    | 17.4   | 19.7   | 10.9   | 19.7   | 2.1    |
| 1.5    | 2.4    | 2.6    | 5.2    | 3.1    | 6.6    | 1.0    | 2.1    | 10.2   |
| 1.0    | 0.7    | 1.8    | 2.3    | 258.0  | 280.9  | 302.7  | 237.6  | 9.6    |
| 3.5    | 6.0    | 8.0    | 9.1    | 207.4  | 185.6  | 236.3  | 192.9  | 13.8   |
| 0.6    | 0.8    | 2.5    | 0.9    | 274.1  | 258.0  | 376.3  | 313.1  | 2.6    |
| 94.6   | 87.0   | 179.4  | 86.9   | 369.2  | 233.1  | 348.6  | 379.1  | 149.1  |
| 3.3    | 1.6    | 7.8    | 1.5    | 1.3    | 2.6    | 5.9    | 1.2    | 10.0   |
| 1.8    | 5.8    | 2.0    | 6.9    | 4.3    | 7.2    | 8.2    | 5.3    | 8.4    |
| 82.4   | 68.9   | 73.4   | 59.8   | 80.4   | 66.8   | 84.3   | 81.9   | 91.0   |
| 77.5   | 66.8   | 135.8  | 85.5   | 24.9   | 29.4   | 28.9   | 36.1   | 4.3    |
| 380.3  | 304.1  | 537.3  | 361.3  | 603.4  | 515.7  | 568.2  | 669.6  | 910.1  |
| 133.8  | 137.0  | 155.3  | 137.4  | 121.8  | 147.3  | 165.9  | 174.9  | 166.1  |
| 11.3   | 16.2   | 32.7   | 17.1   | 19.1   | 10.6   | 19.1   | 18.0   | 6.1    |
| 19.8   | 11.5   | 30.4   | 14.4   | 15.5   | 10.9   | 6.4    | 15.9   | 10.6   |
| 17.0   | 4.2    | 16.9   | 20.1   | 111.0  | 74.4   | 108.4  | 119.1  | 27.3   |
| 5.4    | 1.3    | 7.5    | 6.3    | 5.9    | 6.6    | 8.0    | 9.3    | 5.9    |
| 3.6    | 6.9    | 3.2    | 2.0    | 1.9    | 3.0    | 1.1    | 1.0    | 3.4    |
| 20.8   | 17.2   | 10.8   | 12.6   | 128.1  | 133.3  | 93.4   | 179.5  | 52.7   |
| 162.0  | 189.5  | 99.8   | 132.8  | 237.5  | 210.3  | 229.5  | 259.3  | 128.8  |
| 54.6   | 61.8   | 57.8   | 59.4   | 45.0   | 35.1   | 37.2   | 53.5   | 67.7   |
| 23.7   | 8.7    | 17.7   | 6.4    | 9.1    | 4.0    | 7.5    | 8.1    | 16.8   |
| 1656.1 | 1467.9 | 2486.7 | 1670.0 | 4154.5 | 3650.2 | 4067.0 | 4287.2 | 6348.5 |
| 49.0   | 39.8   | 30.4   | 28.5   | 29.4   | 53.7   | 38.0   | 53.3   | 7.4    |
| 10.1   | 10.0   | 24.9   | 17.4   | 7.9    | 4.9    | 8.8    | 1.8    | 7.1    |
| 25.2   | 32.5   | 23.9   | 29.8   | 22.7   | 41.1   | 22.4   | 28.1   | 30.5   |
| 10.9   | 11.7   | 8.8    | 4.6    | 6.5    | 7.2    | 3.2    | 10.8   | 2.3    |
| 0.6    | 1.3    | 0.7    | 0.4    | 0.6    | 3.5    | 3.8    | 3.1    | 10.8   |
| 11.0   | 2.4    | 14.4   | 11.9   | 11.0   | 11.4   | 2.4    | 11.3   | 8.0    |
| 3.9    | 6.9    | 8.3    | 8.3    | 1.8    | 1.4    | 3.1    | 0.9    | 8.0    |
| 82.8   | 86.8   | 85.1   | 89.4   | 38.0   | 66.8   | 46.3   | 52.0   | 45.5   |
| 4.1    | 6.4    | 12.8   | 9.0    | 10.9   | 10.6   | 11.7   | 14.5   | 21.9   |
| 22.7   | 22.6   | 13.3   | 25.4   | 9.8    | 6.1    | 11.4   | 25.1   | 32.7   |
| 27.1   | 25.4   | 47.2   | 26.7   | 13.4   | 21.6   | 10.7   | 23.5   | 54.9   |
| 17.1   | 15.7   | 22.3   | 20.3   | 76.5   | 70.4   | 81.6   | 95.0   | 58.2   |
| 17.0   | 17.1   | 13.1   | 7.2    | 16.2   | 7.6    | 17.6   | 12.9   | 25.5   |
| 71.2   | 62.2   | 89.7   | 70.3   | 84.6   | 73.9   | 68.4   | 99.3   | 109.6  |
| 1.8    | 4.5    | 9.8    | 9.5    | 214.8  | 345.0  | 178.6  | 254.9  | 315.3  |
| 27.0   | 24.9   | 32.8   | 21.4   | 20.2   | 13.7   | 20.4   | 19.8   | 20.2   |
| 254.6  | 252.6  | 419.8  | 312.2  | 235.0  | 257.6  | 247.0  | 282.0  | 387.0  |
| 11.7   | 16.6   | 22.8   | 11.9   | 103.1  | 108.6  | 118.4  | 132.6  | 104.6  |
| 7.1    | 16.9   | 3.2    | 9.4    | 6.3    | 6.7    | 4.5    | 2.4    | 4.3    |
| 169.0  | 143.6  | 208.5  | 146.8  | 231.8  | 243.9  | 244.5  | 268.9  | 208.3  |
| 74.3   | 62.8   | 70.4   | 45.4   | 44.8   | 27.0   | 43.4   | 37.8   | 13.8   |
| 19.2   | 19.0   | 30.2   | 21.6   | 3.1    | 4.4    | 10.4   | 8.6    | 13.1   |

|        |        |        |        |        |        |        |        |        |
|--------|--------|--------|--------|--------|--------|--------|--------|--------|
| 88.3   | 91.7   | 115.4  | 98.8   | 207.9  | 189.5  | 194.3  | 220.1  | 82.0   |
| 3.5    | 1.9    | 4.8    | 1.6    | 36.6   | 46.7   | 35.1   | 44.7   | 1.8    |
| 77.3   | 76.3   | 22.0   | 25.7   | 17.4   | 29.5   | 25.1   | 26.5   | 12.1   |
| 1.1    | 6.2    | 2.3    | 0.9    | 1.1    | 2.2    | 1.3    | 1.0    | 6.1    |
| 4.8    | 1.8    | 3.4    | 1.9    | 9.5    | 8.4    | 7.7    | 2.2    | 7.5    |
| 104.0  | 100.5  | 100.6  | 104.2  | 118.7  | 89.7   | 97.1   | 122.2  | 140.8  |
| 52.2   | 36.8   | 74.3   | 31.0   | 124.4  | 58.3   | 104.7  | 144.0  | 294.7  |
| 15.4   | 12.6   | 13.6   | 14.7   | 6.7    | 8.1    | 9.2    | 11.8   | 16.9   |
| 1.4    | 4.3    | 6.5    | 6.3    | 3.3    | 0.6    | 4.1    | 0.7    | 2.0    |
| 5.6    | 9.4    | 11.8   | 12.5   | 53.1   | 81.6   | 66.1   | 80.5   | 250.3  |
| 66.4   | 47.2   | 182.1  | 56.4   | 367.3  | 318.5  | 387.5  | 368.8  | 524.8  |
| 8.9    | 3.1    | 14.1   | 4.1    | 1.6    | 7.2    | 4.8    | 7.1    | 18.7   |
| 7.1    | 2.4    | 10.9   | 16.3   | 10.0   | 8.5    | 24.3   | 6.8    | 44.5   |
| 1.1    | 3.4    | 6.2    | 1.5    | 13.9   | 15.9   | 12.9   | 10.4   | 15.5   |
| 1.7    | 3.1    | 4.3    | 3.6    | 7.9    | 6.4    | 0.4    | 6.7    | 393.5  |
| 33.9   | 38.4   | 50.0   | 36.1   | 26.1   | 31.5   | 29.5   | 30.2   | 53.3   |
| 8.6    | 2.6    | 12.3   | 8.3    | 6.5    | 3.9    | 7.7    | 1.2    | 5.1    |
| 93.7   | 90.2   | 114.0  | 116.6  | 88.5   | 88.6   | 96.0   | 138.7  | 133.3  |
| 2.7    | 7.9    | 10.0   | 6.5    | 1.7    | 8.3    | 7.3    | 11.6   | 7.6    |
| 8.3    | 4.4    | 17.5   | 1.8    | 1.3    | 4.6    | 2.7    | 1.7    | 2.4    |
| 206.1  | 191.9  | 267.1  | 197.6  | 215.3  | 239.4  | 256.4  | 267.6  | 424.6  |
| 22.8   | 32.2   | 43.3   | 33.5   | 20.0   | 18.6   | 34.8   | 49.9   | 52.5   |
| 6.1    | 5.4    | 3.6    | 3.4    | 9.5    | 25.2   | 2.6    | 2.6    | 4.2    |
| 568.4  | 535.4  | 775.4  | 534.5  | 1832.0 | 2578.8 | 1925.7 | 2046.1 | 1431.1 |
| 8.3    | 6.4    | 6.5    | 8.0    | 25.5   | 59.9   | 22.0   | 35.9   | 10.1   |
| 1.7    | 1.8    | 4.5    | 1.9    | 8.7    | 3.2    | 7.4    | 11.7   | 4.2    |
| 4.3    | 1.1    | 3.6    | 2.6    | 13.8   | 1.7    | 6.8    | 16.0   | 10.3   |
| 4.9    | 4.1    | 8.9    | 4.4    | 23.2   | 16.1   | 26.5   | 28.4   | 7.1    |
| 15.0   | 8.7    | 20.4   | 16.1   | 14.1   | 5.2    | 11.6   | 9.1    | 20.2   |
| 32.8   | 25.5   | 8.3    | 13.1   | 10.9   | 9.6    | 15.2   | 24.0   | 10.4   |
| 101.3  | 91.0   | 51.6   | 92.8   | 6.5    | 3.9    | 9.0    | 7.0    | 16.0   |
| 54.7   | 38.9   | 42.5   | 29.7   | 49.2   | 30.4   | 66.6   | 90.9   | 142.2  |
| 7.1    | 10.2   | 7.3    | 10.5   | 3.6    | 0.5    | 7.6    | 4.3    | 13.3   |
| 2.2    | 3.5    | 10.4   | 4.1    | 38.2   | 41.8   | 146.6  | 55.8   | 11.7   |
| 40.1   | 42.7   | 62.4   | 45.8   | 126.9  | 124.0  | 97.4   | 144.5  | 74.2   |
| 18.9   | 16.3   | 25.3   | 17.5   | 170.0  | 133.0  | 151.4  | 189.9  | 74.0   |
| 5.6    | 1.8    | 2.2    | 0.7    | 1.0    | 1.9    | 2.7    | 2.9    | 2.0    |
| 124.6  | 122.8  | 164.9  | 110.5  | 133.7  | 174.8  | 153.3  | 141.6  | 121.6  |
| 18.8   | 20.4   | 23.0   | 19.3   | 26.0   | 22.1   | 26.0   | 37.6   | 15.3   |
| 40.1   | 33.5   | 39.7   | 29.7   | 39.3   | 46.6   | 43.7   | 58.7   | 21.5   |
| 122.5  | 129.0  | 111.4  | 117.4  | 149.7  | 168.6  | 189.8  | 176.6  | 78.7   |
| 121.6  | 103.6  | 262.5  | 162.6  | 74.0   | 67.8   | 67.0   | 81.0   | 153.0  |
| 239.7  | 235.8  | 340.3  | 238.5  | 51.3   | 57.4   | 52.8   | 102.3  | 72.0   |
| 30.7   | 17.8   | 93.4   | 37.5   | 11.1   | 14.3   | 6.1    | 7.3    | 13.8   |
| 2012.0 | 1939.2 | 2863.0 | 2248.8 | 2141.3 | 1877.1 | 2256.2 | 2515.4 | 2168.0 |
| 5.3    | 8.3    | 7.1    | 9.1    | 34.7   | 41.7   | 50.4   | 55.9   | 8.8    |
| 1.5    | 2.9    | 6.7    | 1.6    | 1.8    | 1.3    | 4.9    | 6.6    | 1.3    |
| 5.5    | 15.0   | 9.0    | 9.1    | 9.2    | 8.0    | 6.2    | 8.6    | 18.3   |
| 10.7   | 9.6    | 5.6    | 8.5    | 1.0    | 1.0    | 2.8    | 5.7    | 92.6   |
| 85.9   | 94.4   | 95.5   | 74.5   | 172.9  | 128.1  | 138.6  | 128.9  | 64.5   |
| 107.6  | 111.9  | 115.7  | 98.1   | 125.6  | 191.5  | 146.3  | 184.3  | 323.9  |
| 2.8    | 2.8    | 1.6    | 3.1    | 1.4    | 5.9    | 15.5   | 19.1   | 12.2   |
| 1.3    | 1.5    | 5.2    | 4.7    | 2.8    | 2.3    | 5.9    | 4.0    | 3.3    |

|       |        |       |       |       |       |       |       |       |
|-------|--------|-------|-------|-------|-------|-------|-------|-------|
| 1.3   | 0.9    | 3.2   | 1.9   | 1.0   | 0.9   | 1.1   | 1.5   | 3.7   |
| 1.9   | 2.9    | 3.1   | 3.0   | 1.9   | 5.4   | 3.5   | 2.7   | 2.2   |
| 1.8   | 1.9    | 2.5   | 2.0   | 1.1   | 1.3   | 1.4   | 3.8   | 1.7   |
| 11.8  | 9.4    | 14.8  | 20.9  | 13.5  | 4.4   | 11.3  | 10.1  | 22.4  |
| 9.9   | 10.1   | 13.4  | 15.4  | 8.4   | 11.3  | 4.5   | 7.0   | 15.5  |
| 6.2   | 8.0    | 7.2   | 2.6   | 1.9   | 6.0   | 7.8   | 3.4   | 6.8   |
| 52.7  | 50.6   | 36.7  | 45.9  | 57.8  | 59.1  | 56.8  | 66.6  | 223.9 |
| 14.6  | 20.8   | 14.2  | 9.8   | 8.5   | 12.8  | 11.8  | 4.1   | 9.1   |
| 1.2   | 2.5    | 3.0   | 2.1   | 15.2  | 10.4  | 12.3  | 14.8  | 22.6  |
| 21.3  | 10.7   | 14.1  | 13.5  | 425.2 | 483.9 | 352.6 | 482.6 | 71.3  |
| 10.2  | 2.8    | 14.1  | 7.8   | 369.9 | 552.2 | 458.2 | 348.4 | 31.3  |
| 63.5  | 50.0   | 49.1  | 55.6  | 33.0  | 24.0  | 35.6  | 35.4  | 25.7  |
| 119.3 | 102.9  | 101.6 | 100.3 | 80.4  | 73.2  | 75.7  | 99.8  | 31.4  |
| 77.4  | 67.7   | 153.5 | 76.9  | 204.2 | 155.7 | 166.3 | 216.1 | 272.1 |
| 0.6   | 0.7    | 1.0   | 0.9   | 1.1   | 0.9   | 3.1   | 0.7   | 1.2   |
| 6.1   | 1.6    | 2.1   | 5.6   | 4.3   | 3.2   | 3.6   | 5.2   | 1.3   |
| 1.2   | 1.2    | 1.4   | 1.5   | 6.1   | 2.6   | 1.7   | 2.3   | 6.6   |
| 7.0   | 7.9    | 4.7   | 4.0   | 10.2  | 3.6   | 6.0   | 2.4   | 9.8   |
| 8.6   | 6.6    | 11.3  | 7.8   | 10.5  | 5.7   | 5.0   | 8.6   | 10.7  |
| 103.6 | 80.5   | 199.7 | 89.4  | 38.5  | 31.1  | 30.8  | 49.8  | 72.5  |
| 412.5 | 421.2  | 532.2 | 351.6 | 743.8 | 691.3 | 753.7 | 917.8 | 556.6 |
| 90.4  | 82.3   | 171.8 | 92.7  | 117.6 | 97.8  | 107.2 | 129.2 | 34.5  |
| 8.7   | 16.2   | 9.4   | 12.2  | 16.1  | 16.9  | 22.2  | 27.2  | 25.4  |
| 17.4  | 18.6   | 25.6  | 12.0  | 151.3 | 161.6 | 174.5 | 170.7 | 70.3  |
| 10.8  | 7.5    | 24.8  | 19.1  | 14.5  | 13.6  | 7.3   | 16.1  | 23.8  |
| 165.0 | 150.3  | 167.8 | 133.1 | 346.1 | 380.7 | 412.8 | 389.8 | 205.0 |
| 55.3  | 49.9   | 71.7  | 60.8  | 85.2  | 99.4  | 108.1 | 121.0 | 103.4 |
| 10.9  | 7.4    | 18.0  | 9.2   | 93.1  | 56.9  | 125.3 | 113.6 | 15.8  |
| 117.4 | 129.6  | 235.1 | 139.8 | 276.2 | 245.8 | 242.0 | 321.5 | 597.6 |
| 586.8 | 1068.1 | 136.1 | 461.3 | 17.1  | 24.8  | 19.7  | 28.4  | 115.3 |
| 190.5 | 194.4  | 157.9 | 195.6 | 88.3  | 102.9 | 103.9 | 94.0  | 33.7  |
| 3.8   | 4.2    | 2.1   | 3.9   | 30.6  | 36.2  | 49.0  | 41.2  | 6.1   |
| 36.4  | 26.3   | 38.7  | 31.8  | 23.5  | 11.6  | 17.1  | 23.5  | 33.2  |
| 1.8   | 3.0    | 5.0   | 1.4   | 1.5   | 0.7   | 1.5   | 0.7   | 2.2   |
| 3.6   | 3.4    | 1.7   | 2.3   | 5.9   | 7.8   | 5.8   | 8.1   | 5.5   |
| 6.1   | 2.7    | 6.8   | 1.3   | 6.0   | 5.6   | 2.6   | 11.9  | 8.2   |
| 45.5  | 49.1   | 27.1  | 31.2  | 69.9  | 101.3 | 76.4  | 88.3  | 63.9  |
| 79.7  | 81.3   | 68.9  | 54.3  | 22.0  | 26.8  | 21.0  | 29.2  | 35.3  |
| 7.6   | 10.9   | 6.2   | 2.2   | 25.4  | 61.2  | 34.9  | 19.3  | 2.5   |
| 212.8 | 146.5  | 371.6 | 181.5 | 12.9  | 10.1  | 13.5  | 13.9  | 20.9  |
| 53.3  | 64.5   | 48.4  | 47.8  | 186.7 | 295.7 | 233.1 | 271.1 | 86.3  |
| 204.4 | 217.4  | 253.4 | 208.5 | 192.2 | 222.1 | 149.5 | 175.1 | 132.9 |
| 58.9  | 52.3   | 81.3  | 40.7  | 45.2  | 65.9  | 49.1  | 60.9  | 51.2  |
| 185.9 | 173.3  | 266.8 | 178.9 | 355.0 | 349.6 | 333.7 | 405.9 | 485.4 |
| 6.0   | 7.9    | 1.6   | 4.0   | 1.0   | 6.9   | 0.9   | 4.7   | 4.9   |
| 1.7   | 4.1    | 2.8   | 3.4   | 2.8   | 0.6   | 0.8   | 0.9   | 1.3   |
| 42.6  | 53.4   | 49.7  | 63.2  | 5.4   | 12.5  | 5.3   | 18.8  | 8.3   |
| 11.4  | 10.0   | 7.0   | 5.4   | 2.1   | 2.9   | 1.7   | 1.9   | 10.8  |
| 140.4 | 112.4  | 267.5 | 143.7 | 48.7  | 34.3  | 65.5  | 49.4  | 2.8   |
| 143.8 | 117.4  | 251.1 | 135.7 | 46.3  | 34.9  | 56.9  | 54.7  | 13.2  |
| 408.8 | 325.3  | 698.5 | 418.8 | 654.9 | 582.4 | 693.5 | 874.0 | 262.6 |
| 38.5  | 33.7   | 38.3  | 39.1  | 76.8  | 67.8  | 73.9  | 72.5  | 94.5  |
| 4.4   | 5.1    | 7.9   | 4.1   | 3.5   | 1.8   | 3.9   | 4.2   | 1.3   |



|        |        |        |        |        |        |        |        |        |
|--------|--------|--------|--------|--------|--------|--------|--------|--------|
| 29.5   | 28.2   | 26.6   | 21.8   | 19.0   | 21.0   | 14.5   | 17.6   | 11.4   |
| 17.8   | 15.4   | 25.3   | 22.7   | 251.5  | 294.4  | 313.6  | 244.0  | 111.1  |
| 49.0   | 57.6   | 49.4   | 42.5   | 207.1  | 258.8  | 310.6  | 298.0  | 115.0  |
| 40.1   | 41.8   | 27.5   | 60.2   | 7.9    | 12.4   | 6.8    | 14.2   | 20.7   |
| 11.8   | 8.4    | 14.4   | 5.8    | 15.5   | 8.8    | 11.4   | 15.4   | 46.8   |
| 13.1   | 8.4    | 20.5   | 9.4    | 14.6   | 12.4   | 9.8    | 12.8   | 19.1   |
| 2.1    | 1.4    | 2.9    | 1.8    | 1.2    | 1.4    | 1.5    | 8.5    | 2.6    |
| 487.0  | 447.1  | 484.1  | 475.7  | 79.9   | 35.4   | 86.6   | 71.1   | 71.9   |
| 58.6   | 62.6   | 51.1   | 35.1   | 49.1   | 62.5   | 43.2   | 46.6   | 42.1   |
| 3.4    | 5.1    | 6.1    | 11.2   | 3.4    | 3.4    | 2.8    | 1.2    | 0.7    |
| 13.4   | 13.3   | 22.2   | 13.9   | 6.4    | 13.3   | 17.7   | 16.9   | 22.3   |
| 7.9    | 11.3   | 9.1    | 8.0    | 4.3    | 7.5    | 5.1    | 10.4   | 7.9    |
| 12.1   | 13.4   | 16.3   | 15.8   | 11.9   | 15.7   | 11.2   | 12.7   | 23.1   |
| 6.1    | 4.1    | 3.9    | 6.2    | 7.5    | 9.1    | 5.2    | 10.3   | 8.0    |
| 231.5  | 231.1  | 292.9  | 199.4  | 162.3  | 150.8  | 164.3  | 215.3  | 225.8  |
| 1680.1 | 1639.2 | 1968.2 | 1731.5 | 1021.2 | 948.1  | 937.3  | 1169.8 | 1331.5 |
| 5.8    | 3.8    | 4.1    | 7.0    | 10.6   | 19.7   | 19.7   | 19.0   | 20.2   |
| 7.6    | 17.7   | 13.5   | 3.3    | 17.5   | 17.5   | 18.2   | 24.1   | 16.1   |
| 38.1   | 39.8   | 40.1   | 29.8   | 72.8   | 81.1   | 67.3   | 76.6   | 53.5   |
| 6.8    | 8.1    | 8.7    | 5.9    | 12.3   | 6.2    | 21.7   | 31.3   | 3.4    |
| 92.3   | 93.4   | 115.0  | 100.5  | 27.9   | 37.3   | 37.4   | 38.0   | 5.4    |
| 32.8   | 39.9   | 18.3   | 16.0   | 18.7   | 8.0    | 12.1   | 28.5   | 15.0   |
| 30.3   | 28.3   | 32.7   | 26.1   | 5.5    | 6.0    | 18.7   | 2.7    | 14.2   |
| 19.4   | 22.9   | 28.4   | 17.4   | 64.4   | 83.5   | 81.3   | 90.3   | 146.8  |
| 6.1    | 15.4   | 4.1    | 11.8   | 45.9   | 44.1   | 40.3   | 62.3   | 88.6   |
| 3.8    | 6.1    | 7.7    | 10.3   | 433.2  | 187.9  | 801.1  | 508.7  | 120.6  |
| 17.2   | 25.3   | 15.5   | 23.4   | 22.7   | 21.8   | 22.1   | 26.5   | 16.3   |
| 0.7    | 1.1    | 1.5    | 0.8    | 0.3    | 0.7    | 0.4    | 1.1    | 0.7    |
| 0.8    | 0.9    | 2.1    | 1.0    | 24.6   | 26.3   | 24.2   | 17.8   | 5.1    |
| 2.6    | 7.1    | 3.4    | 1.5    | 130.3  | 148.8  | 129.8  | 142.6  | 30.8   |
| 7.2    | 6.9    | 3.2    | 6.4    | 110.6  | 123.9  | 122.8  | 116.9  | 38.3   |
| 1.2    | 1.7    | 2.4    | 1.2    | 4.5    | 2.0    | 4.4    | 4.4    | 12.0   |
| 6.0    | 4.8    | 4.6    | 4.9    | 117.1  | 102.0  | 158.5  | 139.4  | 22.7   |
| 13.7   | 3.2    | 14.7   | 14.8   | 7.3    | 10.8   | 13.0   | 11.2   | 20.8   |
| 492.2  | 502.3  | 452.8  | 413.9  | 577.1  | 673.6  | 854.6  | 779.9  | 281.2  |
| 38.2   | 32.2   | 65.5   | 42.5   | 253.1  | 296.3  | 252.5  | 240.9  | 41.4   |
| 152.8  | 138.3  | 210.2  | 159.2  | 126.5  | 158.5  | 207.3  | 202.1  | 270.6  |
| 66.4   | 51.9   | 71.4   | 69.3   | 70.9   | 45.9   | 35.7   | 56.0   | 16.4   |
| 149.4  | 163.1  | 121.5  | 133.4  | 151.8  | 156.5  | 149.6  | 161.2  | 141.7  |
| 1264.7 | 1197.9 | 1992.5 | 1306.3 | 2856.0 | 2934.0 | 3434.5 | 3483.9 | 1757.2 |
| 2.0    | 3.7    | 3.7    | 1.3    | 46.9   | 32.7   | 74.2   | 44.0   | 3.2    |
| 1.7    | 0.5    | 2.1    | 1.1    | 1.2    | 1.1    | 0.6    | 3.9    | 4.8    |
| 3.2    | 7.5    | 6.1    | 9.6    | 8.0    | 6.0    | 4.6    | 11.4   | 7.3    |
| 3.0    | 2.8    | 4.9    | 4.8    | 15.8   | 13.5   | 18.5   | 19.4   | 157.0  |
| 44.3   | 40.3   | 50.1   | 39.4   | 2.0    | 2.5    | 3.1    | 3.6    | 53.4   |
| 27.1   | 11.3   | 46.3   | 18.7   | 7.2    | 8.6    | 8.0    | 8.4    | 8.4    |
| 3.2    | 2.4    | 2.5    | 5.1    | 21.3   | 26.7   | 17.9   | 23.7   | 2.4    |
| 5.5    | 9.4    | 3.7    | 3.1    | 2.7    | 2.3    | 6.3    | 4.8    | 3.9    |
| 6.1    | 3.4    | 6.8    | 8.3    | 1.7    | 2.4    | 9.3    | 2.8    | 12.1   |
| 88.2   | 68.1   | 242.8  | 36.9   | 392.4  | 245.5  | 520.9  | 527.0  | 73.2   |
| 48.7   | 47.3   | 57.4   | 46.8   | 21.0   | 20.4   | 15.0   | 39.3   | 38.0   |
| 0.8    | 1.1    | 1.2    | 1.7    | 1.8    | 2.8    | 1.2    | 1.4    | 1.5    |
| 0.9    | 2.4    | 2.3    | 2.4    | 5.8    | 14.3   | 6.2    | 5.6    | 24.7   |

|        |        |        |        |        |        |        |        |        |
|--------|--------|--------|--------|--------|--------|--------|--------|--------|
| 8.9    | 11.4   | 4.4    | 16.7   | 19.1   | 30.0   | 26.8   | 22.9   | 11.4   |
| 10.8   | 15.0   | 21.9   | 2.7    | 15.8   | 14.5   | 10.3   | 11.3   | 22.0   |
| 4.5    | 1.1    | 8.8    | 5.9    | 11.7   | 10.6   | 20.1   | 20.4   | 14.4   |
| 22.8   | 19.8   | 10.5   | 20.0   | 4.5    | 5.1    | 6.8    | 15.9   | 54.0   |
| 6.0    | 8.3    | 10.5   | 7.7    | 509.0  | 699.7  | 453.6  | 552.5  | 34.5   |
| 14.4   | 13.5   | 13.8   | 12.7   | 14.3   | 9.4    | 18.6   | 21.7   | 18.8   |
| 24.1   | 24.9   | 35.2   | 28.1   | 147.8  | 86.4   | 97.3   | 186.0  | 62.2   |
| 20.8   | 23.6   | 22.0   | 23.0   | 16.9   | 4.8    | 8.1    | 21.7   | 155.8  |
| 15.8   | 15.9   | 25.1   | 5.8    | 12.8   | 12.8   | 9.4    | 7.4    | 28.3   |
| 28.5   | 23.5   | 36.5   | 25.8   | 100.4  | 108.5  | 117.7  | 117.7  | 45.8   |
| 54.5   | 46.3   | 74.4   | 48.9   | 145.6  | 145.6  | 131.9  | 175.8  | 76.5   |
| 2.1    | 3.8    | 4.3    | 2.3    | 0.9    | 1.8    | 2.4    | 4.7    | 3.2    |
| 3.6    | 1.3    | 6.1    | 0.6    | 6.0    | 2.6    | 8.1    | 5.1    | 8.7    |
| 37.2   | 54.2   | 20.8   | 29.3   | 6.5    | 4.9    | 5.1    | 0.9    | 4.6    |
| 12.4   | 10.9   | 8.1    | 13.8   | 5.2    | 3.5    | 10.0   | 2.6    | 16.8   |
| 0.7    | 0.4    | 0.8    | 0.5    | 10.9   | 21.8   | 15.7   | 20.6   | 21.5   |
| 5.5    | 3.6    | 7.6    | 5.5    | 41.5   | 52.4   | 42.7   | 48.2   | 67.6   |
| 403.8  | 263.9  | 611.3  | 296.2  | 26.6   | 30.0   | 23.3   | 16.6   | 23.9   |
| 4.7    | 1.2    | 1.0    | 1.2    | 9.1    | 3.4    | 6.6    | 8.0    | 4.2    |
| 18.0   | 20.9   | 32.2   | 30.8   | 5.3    | 7.9    | 3.1    | 4.8    | 3.3    |
| 1.7    | 3.2    | 6.9    | 10.1   | 33.6   | 32.6   | 30.6   | 21.8   | 21.8   |
| 105.2  | 95.2   | 104.3  | 106.6  | 24.9   | 27.3   | 28.7   | 26.6   | 49.8   |
| 22.1   | 18.6   | 3.8    | 12.1   | 4.3    | 5.9    | 4.2    | 9.7    | 12.3   |
| 3457.5 | 3008.6 | 4118.5 | 3222.6 | 3620.0 | 3523.7 | 3816.2 | 4022.7 | 4032.2 |
| 47.1   | 39.7   | 41.0   | 50.2   | 57.9   | 48.3   | 71.1   | 76.1   | 28.4   |
| 143.6  | 138.0  | 169.0  | 142.8  | 148.4  | 186.4  | 149.0  | 174.4  | 130.6  |
| 1.0    | 3.1    | 4.8    | 0.8    | 42.6   | 35.7   | 32.1   | 53.4   | 14.1   |
| 6.8    | 7.4    | 18.1   | 4.6    | 4.7    | 1.7    | 3.3    | 2.2    | 7.3    |
| 163.7  | 168.5  | 175.8  | 117.4  | 278.0  | 355.1  | 308.8  | 320.3  | 207.4  |
| 17.6   | 20.6   | 26.8   | 21.4   | 39.9   | 41.7   | 43.4   | 58.2   | 44.8   |
| 0.4    | 2.4    | 4.7    | 2.2    | 3.7    | 3.9    | 2.0    | 0.1    | 42.3   |
| 0.5    | 1.5    | 5.6    | 1.0    | 5.0    | 3.1    | 9.0    | 1.0    | 2.3    |
| 1.1    | 0.8    | 1.5    | 1.1    | 4.1    | 21.3   | 16.3   | 1.1    | 46.7   |
| 30.2   | 29.0   | 42.4   | 30.3   | 20.3   | 15.0   | 23.8   | 28.9   | 26.8   |
| 19.3   | 22.7   | 26.5   | 16.8   | 8.9    | 5.6    | 6.4    | 13.6   | 9.6    |
| 8.7    | 7.1    | 3.1    | 11.0   | 2.9    | 9.7    | 4.8    | 5.7    | 9.8    |
| 808.4  | 756.0  | 676.4  | 891.3  | 40.7   | 57.6   | 35.3   | 47.4   | 14.0   |
| 4.5    | 11.4   | 10.0   | 9.0    | 6.6    | 8.7    | 1.7    | 15.4   | 11.5   |
| 17.1   | 11.0   | 19.3   | 16.0   | 20.5   | 12.5   | 14.3   | 18.2   | 25.3   |
| 44.7   | 54.9   | 67.7   | 48.3   | 29.8   | 26.1   | 23.3   | 29.2   | 28.6   |
| 2.2    | 7.9    | 2.9    | 2.0    | 3.6    | 2.0    | 6.6    | 1.3    | 8.5    |
| 38.9   | 30.6   | 66.4   | 43.8   | 43.4   | 45.9   | 39.6   | 59.5   | 69.5   |
| 42.2   | 43.9   | 89.8   | 35.1   | 99.4   | 103.5  | 81.9   | 115.8  | 161.1  |
| 1.7    | 4.7    | 6.7    | 3.1    | 0.6    | 0.9    | 0.9    | 1.1    | 4.3    |
| 133.6  | 157.5  | 57.2   | 101.5  | 12.1   | 19.5   | 13.0   | 21.9   | 3.1    |
| 40.2   | 45.3   | 23.4   | 36.1   | 14.5   | 10.4   | 11.7   | 19.6   | 15.9   |
| 6.8    | 7.6    | 6.8    | 4.1    | 47.2   | 79.2   | 63.9   | 67.8   | 43.3   |
| 21.7   | 21.5   | 42.8   | 25.7   | 51.0   | 44.9   | 48.7   | 53.7   | 52.6   |
| 1.2    | 1.1    | 2.1    | 1.2    | 3.1    | 35.1   | 1.8    | 2.1    | 1.8    |
| 25.4   | 44.4   | 17.0   | 69.9   | 21.0   | 4.0    | 4.3    | 13.2   | 103.8  |
| 17.6   | 17.8   | 26.7   | 19.6   | 116.3  | 77.6   | 107.8  | 160.5  | 14.0   |
| 68.8   | 58.4   | 36.9   | 58.8   | 63.3   | 48.0   | 38.1   | 77.3   | 44.2   |
| 2.2    | 2.5    | 7.6    | 2.7    | 4.0    | 15.3   | 7.8    | 15.1   | 3.3    |

|       |       |       |       |       |        |       |       |        |
|-------|-------|-------|-------|-------|--------|-------|-------|--------|
| 148.9 | 122.6 | 382.0 | 134.5 | 15.3  | 12.8   | 11.9  | 24.9  | 26.5   |
| 48.3  | 42.2  | 42.2  | 24.6  | 120.5 | 110.9  | 100.7 | 137.3 | 70.5   |
| 56.7  | 51.0  | 59.5  | 45.6  | 25.1  | 36.6   | 39.3  | 43.2  | 38.3   |
| 350.4 | 350.2 | 260.1 | 432.1 | 655.5 | 448.8  | 566.4 | 770.0 | 653.7  |
| 14.3  | 7.2   | 9.5   | 2.9   | 10.6  | 3.5    | 1.7   | 11.0  | 14.9   |
| 0.7   | 1.2   | 5.9   | 1.5   | 14.6  | 14.7   | 16.0  | 17.1  | 32.8   |
| 0.5   | 0.8   | 2.8   | 0.3   | 22.4  | 16.6   | 21.8  | 26.8  | 36.1   |
| 8.4   | 7.5   | 7.8   | 5.0   | 9.6   | 2.7    | 2.3   | 12.0  | 16.4   |
| 135.4 | 142.4 | 185.9 | 104.2 | 137.0 | 80.8   | 113.5 | 178.7 | 249.5  |
| 5.1   | 6.6   | 16.8  | 8.8   | 9.5   | 4.4    | 6.6   | 4.2   | 37.4   |
| 6.2   | 5.2   | 4.8   | 4.7   | 1.6   | 2.4    | 3.9   | 0.7   | 3.2    |
| 1.2   | 3.0   | 3.0   | 0.7   | 30.8  | 16.5   | 43.2  | 35.1  | 3.4    |
| 6.1   | 13.4  | 17.2  | 9.2   | 959.3 | 1041.9 | 692.4 | 886.7 | 462.1  |
| 0.9   | 0.8   | 0.9   | 1.4   | 0.8   | 0.5    | 0.8   | 0.4   | 0.8    |
| 0.7   | 2.9   | 2.9   | 1.9   | 3.1   | 2.4    | 3.3   | 0.3   | 45.7   |
| 11.2  | 5.6   | 7.7   | 4.4   | 21.4  | 15.3   | 25.7  | 31.6  | 45.1   |
| 254.3 | 227.0 | 481.3 | 259.2 | 713.8 | 556.3  | 682.4 | 778.5 | 1297.1 |
| 14.4  | 12.3  | 15.8  | 20.0  | 145.3 | 229.5  | 144.8 | 202.3 | 100.8  |
| 12.0  | 14.1  | 25.2  | 9.8   | 3.2   | 2.4    | 8.2   | 2.5   | 20.0   |
| 6.3   | 1.3   | 5.6   | 9.3   | 0.4   | 0.4    | 5.5   | 6.3   | 2.9    |
| 5.0   | 1.5   | 8.2   | 5.7   | 10.0  | 2.1    | 5.9   | 11.7  | 127.9  |
| 16.9  | 8.9   | 17.9  | 14.2  | 6.7   | 8.0    | 5.8   | 2.7   | 17.5   |
| 7.9   | 6.8   | 6.8   | 4.2   | 1.2   | 4.6    | 6.6   | 1.5   | 7.5    |
| 0.7   | 0.9   | 1.3   | 0.7   | 1.2   | 1.2    | 0.9   | 2.0   | 2.2    |
| 1.5   | 0.8   | 1.4   | 0.6   | 31.7  | 19.3   | 16.0  | 22.5  | 1.8    |
| 34.1  | 30.8  | 50.6  | 24.1  | 469.4 | 317.6  | 509.0 | 441.2 | 308.0  |
| 48.5  | 39.6  | 58.3  | 44.2  | 513.3 | 412.3  | 597.8 | 537.1 | 196.2  |
| 10.1  | 6.0   | 2.7   | 4.0   | 1.8   | 2.4    | 1.4   | 1.9   | 2.8    |
| 2.1   | 2.0   | 0.7   | 3.7   | 0.3   | 2.4    | 1.5   | 2.3   | 5.9    |
| 4.1   | 4.2   | 0.6   | 0.9   | 2.1   | 1.3    | 0.5   | 1.0   | 2.1    |
| 99.5  | 92.3  | 282.9 | 87.9  | 299.2 | 167.8  | 271.7 | 349.7 | 236.5  |
| 9.0   | 25.8  | 78.4  | 69.8  | 5.5   | 3.4    | 5.5   | 0.7   | 2.2    |
| 14.9  | 7.4   | 23.7  | 20.7  | 6.3   | 14.5   | 13.9  | 19.2  | 15.8   |
| 4.4   | 3.4   | 2.3   | 5.8   | 1.0   | 3.3    | 6.0   | 6.3   | 2.0    |
| 11.6  | 12.7  | 4.1   | 6.5   | 1.2   | 1.5    | 1.7   | 1.7   | 3.1    |
| 1.3   | 1.8   | 1.7   | 1.3   | 1.2   | 1.2    | 1.7   | 2.8   | 1.6    |
| 3.1   | 3.9   | 5.6   | 4.5   | 6.0   | 3.4    | 3.2   | 3.0   | 19.2   |
| 5.4   | 1.8   | 3.0   | 2.0   | 1.4   | 3.3    | 1.1   | 1.0   | 2.0    |
| 142.0 | 122.6 | 133.4 | 129.2 | 56.3  | 106.6  | 81.9  | 83.3  | 108.7  |
| 1.3   | 1.2   | 1.5   | 1.5   | 1.2   | 1.2    | 1.6   | 1.3   | 1.9    |
| 6.0   | 2.9   | 4.8   | 13.5  | 19.3  | 21.6   | 17.6  | 17.1  | 221.5  |
| 1.8   | 3.9   | 7.9   | 1.3   | 85.6  | 58.4   | 63.8  | 80.9  | 51.7   |
| 1.8   | 5.2   | 8.8   | 7.2   | 56.9  | 35.6   | 51.4  | 64.9  | 49.6   |
| 1.2   | 1.0   | 2.7   | 0.6   | 0.5   | 0.6    | 0.6   | 0.9   | 0.9    |
| 10.0  | 4.4   | 7.8   | 7.5   | 81.2  | 65.6   | 75.3  | 106.9 | 6.4    |
| 4.1   | 9.5   | 12.9  | 9.2   | 26.5  | 24.0   | 24.5  | 29.8  | 1.8    |
| 6.4   | 5.2   | 22.5  | 19.3  | 22.0  | 20.3   | 18.7  | 29.0  | 9.1    |
| 8.2   | 4.7   | 30.6  | 8.0   | 115.7 | 107.4  | 147.4 | 131.2 | 189.1  |
| 19.5  | 15.6  | 17.5  | 10.5  | 19.8  | 9.0    | 16.5  | 17.5  | 18.5   |
| 292.4 | 271.7 | 462.9 | 266.2 | 71.8  | 67.3   | 77.2  | 94.9  | 128.3  |
| 2.6   | 3.8   | 5.6   | 3.0   | 13.6  | 9.7    | 18.9  | 9.5   | 12.9   |
| 353.4 | 344.0 | 304.1 | 334.1 | 323.4 | 355.8  | 385.0 | 338.9 | 246.7  |
| 44.4  | 56.4  | 34.7  | 38.0  | 32.5  | 45.8   | 24.1  | 35.7  | 7.5    |

|       |       |        |       |       |       |       |       |       |
|-------|-------|--------|-------|-------|-------|-------|-------|-------|
| 48.8  | 33.2  | 57.0   | 32.3  | 116.1 | 88.7  | 90.8  | 134.1 | 163.1 |
| 61.5  | 55.7  | 63.3   | 48.3  | 58.0  | 50.1  | 38.4  | 54.9  | 18.9  |
| 21.0  | 24.3  | 8.9    | 24.4  | 8.0   | 5.6   | 14.0  | 9.9   | 11.8  |
| 7.3   | 2.3   | 9.9    | 9.2   | 85.8  | 52.3  | 81.9  | 87.0  | 71.1  |
| 1.9   | 1.9   | 2.4    | 2.4   | 2.5   | 1.5   | 1.7   | 2.4   | 2.6   |
| 38.5  | 40.5  | 60.5   | 47.5  | 10.2  | 8.8   | 16.9  | 6.4   | 37.1  |
| 1.2   | 6.3   | 13.3   | 8.9   | 0.7   | 1.5   | 3.2   | 3.0   | 15.0  |
| 3.2   | 5.5   | 3.8    | 10.5  | 5.2   | 6.2   | 4.4   | 6.5   | 6.1   |
| 2.4   | 4.4   | 13.4   | 5.3   | 7.3   | 4.6   | 5.7   | 8.7   | 8.6   |
| 2.8   | 13.0  | 18.6   | 7.3   | 9.5   | 6.4   | 8.5   | 11.2  | 6.2   |
| 16.9  | 15.1  | 22.0   | 30.0  | 1.2   | 6.9   | 0.5   | 1.1   | 2.2   |
| 3.4   | 4.4   | 3.3    | 2.3   | 26.0  | 24.1  | 29.7  | 36.8  | 16.8  |
| 7.4   | 5.8   | 17.3   | 10.0  | 80.8  | 124.4 | 95.4  | 78.9  | 51.1  |
| 56.6  | 48.4  | 48.8   | 53.0  | 51.5  | 65.0  | 46.9  | 57.9  | 18.6  |
| 8.3   | 25.1  | 8.8    | 19.5  | 3.3   | 1.3   | 2.1   | 2.6   | 6.4   |
| 14.3  | 25.2  | 10.5   | 10.6  | 0.8   | 0.8   | 0.8   | 0.6   | 3.9   |
| 16.1  | 5.3   | 31.4   | 25.8  | 11.2  | 13.7  | 7.0   | 4.3   | 2.1   |
| 3.4   | 6.7   | 7.5    | 3.6   | 3.5   | 6.4   | 5.5   | 6.3   | 6.6   |
| 23.8  | 24.7  | 31.0   | 26.3  | 10.8  | 6.8   | 4.5   | 14.5  | 17.6  |
| 1.9   | 2.1   | 2.1    | 2.8   | 22.7  | 22.2  | 25.0  | 28.5  | 3.9   |
| 11.1  | 10.0  | 21.0   | 19.1  | 7.7   | 2.6   | 6.7   | 19.1  | 4.8   |
| 48.4  | 50.4  | 58.9   | 50.0  | 52.8  | 60.6  | 52.9  | 54.5  | 80.6  |
| 2.3   | 9.5   | 9.8    | 11.1  | 10.0  | 7.8   | 4.8   | 10.0  | 212.3 |
| 20.3  | 19.7  | 11.5   | 17.7  | 10.7  | 10.1  | 16.8  | 23.6  | 23.8  |
| 64.9  | 57.3  | 79.0   | 40.6  | 208.5 | 183.4 | 199.6 | 240.1 | 224.1 |
| 12.2  | 15.2  | 13.2   | 22.6  | 15.7  | 10.5  | 9.8   | 11.1  | 74.7  |
| 4.7   | 4.6   | 3.1    | 2.8   | 1.1   | 2.0   | 3.5   | 1.7   | 1.9   |
| 4.6   | 13.3  | 1.3    | 2.7   | 20.0  | 10.7  | 64.1  | 37.5  | 1.2   |
| 5.7   | 1.7   | 4.2    | 5.5   | 3.8   | 1.0   | 5.1   | 0.9   | 28.8  |
| 67.2  | 66.2  | 119.4  | 69.6  | 642.4 | 467.3 | 589.3 | 713.5 | 592.9 |
| 7.9   | 8.8   | 6.1    | 8.3   | 3.4   | 4.5   | 9.1   | 4.8   | 4.2   |
| 283.7 | 263.8 | 585.8  | 359.6 | 497.7 | 505.8 | 388.6 | 466.2 | 652.1 |
| 149.4 | 169.0 | 136.8  | 140.3 | 114.6 | 120.0 | 136.5 | 121.3 | 103.0 |
| 264.7 | 248.4 | 253.5  | 219.9 | 14.6  | 27.7  | 19.0  | 10.3  | 6.7   |
| 4.4   | 6.4   | 12.4   | 5.2   | 26.1  | 28.3  | 30.8  | 33.4  | 60.2  |
| 264.5 | 257.1 | 1049.3 | 176.7 | 517.3 | 178.4 | 425.3 | 493.4 | 523.7 |
| 81.3  | 82.4  | 136.5  | 108.5 | 116.6 | 84.3  | 126.9 | 131.2 | 394.5 |
| 1.3   | 1.3   | 3.2    | 2.3   | 22.6  | 20.1  | 19.7  | 24.6  | 1.3   |
| 30.5  | 33.5  | 37.3   | 18.4  | 27.0  | 10.2  | 25.1  | 20.8  | 23.3  |
| 6.9   | 3.2   | 2.8    | 7.5   | 1.2   | 2.0   | 2.2   | 0.8   | 3.2   |
| 13.2  | 26.2  | 20.1   | 10.9  | 5.4   | 3.9   | 5.5   | 3.2   | 7.7   |
| 12.5  | 13.7  | 11.9   | 13.4  | 6.5   | 4.0   | 5.3   | 1.8   | 74.1  |
| 0.6   | 2.1   | 1.8    | 3.5   | 2.1   | 2.2   | 0.5   | 2.6   | 3.9   |
| 29.9  | 33.9  | 33.2   | 22.3  | 13.2  | 7.1   | 11.5  | 22.2  | 25.1  |
| 6.4   | 9.3   | 6.8    | 7.6   | 9.0   | 5.9   | 8.9   | 16.7  | 5.6   |
| 122.6 | 111.3 | 145.6  | 103.3 | 15.1  | 14.5  | 11.1  | 15.9  | 19.2  |
| 4.8   | 1.9   | 3.6    | 3.5   | 3.0   | 1.1   | 5.1   | 0.1   | 2.3   |
| 50.0  | 60.0  | 22.8   | 35.4  | 3.9   | 0.2   | 2.5   | 0.3   | 1.7   |
| 294.2 | 272.8 | 342.7  | 337.9 | 36.8  | 50.2  | 24.3  | 38.5  | 1.8   |
| 262.6 | 228.0 | 338.8  | 196.7 | 215.0 | 215.7 | 232.6 | 224.8 | 226.6 |
| 1.6   | 1.5   | 2.0    | 1.4   | 1.2   | 1.5   | 1.4   | 1.9   | 2.5   |
| 9.0   | 21.9  | 11.1   | 9.4   | 15.2  | 11.4  | 12.4  | 14.2  | 11.9  |
| 0.9   | 1.0   | 1.3    | 1.3   | 0.9   | 2.6   | 2.1   | 0.7   | 2.0   |

|       |       |       |       |       |       |       |       |        |
|-------|-------|-------|-------|-------|-------|-------|-------|--------|
| 3.4   | 1.6   | 2.9   | 4.4   | 1.4   | 0.8   | 3.5   | 1.2   | 3.9    |
| 16.7  | 30.7  | 27.3  | 15.3  | 28.3  | 25.0  | 33.1  | 45.9  | 20.8   |
| 2.8   | 2.6   | 2.8   | 2.9   | 2.0   | 3.4   | 2.6   | 5.3   | 2.7    |
| 10.0  | 10.9  | 17.3  | 10.0  | 5.7   | 10.5  | 12.8  | 11.2  | 21.3   |
| 1.7   | 7.6   | 7.4   | 5.7   | 0.6   | 0.5   | 3.6   | 0.5   | 2.3    |
| 8.8   | 5.6   | 11.1  | 5.2   | 421.2 | 303.4 | 675.1 | 525.7 | 1469.1 |
| 16.3  | 13.1  | 22.4  | 18.2  | 35.3  | 36.0  | 27.0  | 41.2  | 247.5  |
| 16.1  | 25.7  | 14.3  | 11.4  | 160.9 | 138.5 | 121.5 | 155.3 | 25.2   |
| 56.1  | 58.0  | 48.0  | 38.7  | 24.9  | 16.3  | 16.5  | 7.4   | 99.3   |
| 3.1   | 4.4   | 10.4  | 8.1   | 11.6  | 21.4  | 19.1  | 15.3  | 43.6   |
| 123.2 | 126.3 | 157.3 | 122.0 | 201.4 | 297.4 | 217.9 | 232.5 | 168.5  |
| 45.2  | 32.3  | 104.8 | 41.5  | 313.8 | 311.0 | 292.1 | 351.0 | 878.5  |
| 0.7   | 0.5   | 0.8   | 0.6   | 41.2  | 49.8  | 55.6  | 53.4  | 1.0    |
| 35.9  | 20.1  | 5.4   | 48.0  | 31.7  | 25.7  | 24.0  | 55.9  | 34.3   |
| 8.0   | 15.8  | 11.5  | 14.9  | 11.4  | 16.4  | 4.2   | 5.7   | 23.5   |
| 1.5   | 3.8   | 4.1   | 9.7   | 1.4   | 1.3   | 1.3   | 2.9   | 3.0    |
| 18.6  | 17.6  | 14.2  | 15.9  | 1.3   | 7.5   | 8.5   | 14.9  | 7.0    |
| 11.1  | 10.9  | 15.1  | 7.4   | 26.8  | 23.6  | 25.9  | 27.7  | 11.0   |
| 30.7  | 34.8  | 69.1  | 40.9  | 133.7 | 142.2 | 127.2 | 157.4 | 98.6   |
| 24.4  | 24.2  | 25.2  | 15.2  | 22.5  | 14.5  | 15.1  | 21.2  | 12.2   |
| 8.1   | 13.8  | 13.4  | 14.8  | 74.2  | 54.6  | 72.7  | 71.5  | 21.6   |
| 16.0  | 17.5  | 19.8  | 18.1  | 51.3  | 29.7  | 35.3  | 46.9  | 14.1   |
| 0.3   | 3.8   | 0.7   | 6.8   | 2.4   | 3.1   | 2.3   | 1.5   | 0.4    |
| 2.2   | 2.2   | 2.3   | 4.7   | 2.5   | 2.2   | 2.9   | 2.6   | 3.3    |
| 14.6  | 16.0  | 26.3  | 21.1  | 8.0   | 2.5   | 2.7   | 14.9  | 31.1   |
| 16.1  | 13.2  | 32.2  | 15.1  | 14.8  | 10.0  | 13.3  | 15.8  | 29.3   |
| 2.4   | 0.9   | 8.2   | 5.1   | 1.5   | 5.0   | 9.4   | 13.0  | 10.5   |
| 9.2   | 6.1   | 23.5  | 12.3  | 2.2   | 3.5   | 3.5   | 11.2  | 8.0    |
| 0.6   | 1.1   | 0.7   | 0.7   | 0.6   | 1.2   | 2.7   | 1.1   | 0.7    |
| 1.3   | 0.7   | 1.4   | 0.8   | 1.4   | 1.2   | 1.3   | 1.5   | 1.6    |
| 381.7 | 343.6 | 461.8 | 371.9 | 412.6 | 415.0 | 423.1 | 492.0 | 658.7  |
| 152.1 | 137.4 | 219.2 | 123.7 | 283.3 | 298.3 | 282.0 | 375.1 | 190.3  |
| 1.0   | 4.3   | 3.1   | 3.6   | 22.1  | 23.8  | 20.0  | 28.9  | 4.3    |
| 3.7   | 2.2   | 1.2   | 0.6   | 0.4   | 0.7   | 0.9   | 0.9   | 4.1    |
| 25.0  | 26.3  | 9.8   | 34.3  | 22.4  | 22.2  | 29.4  | 23.7  | 22.7   |
| 177.1 | 153.5 | 230.3 | 154.9 | 127.2 | 94.6  | 140.2 | 162.9 | 162.7  |
| 5.4   | 4.8   | 9.9   | 3.2   | 7.8   | 6.8   | 4.6   | 5.8   | 7.6    |
| 4.1   | 7.7   | 5.0   | 3.2   | 1.6   | 2.7   | 2.6   | 4.2   | 3.5    |
| 39.2  | 28.5  | 106.5 | 48.4  | 490.0 | 273.4 | 590.8 | 568.7 | 201.8  |
| 2.4   | 1.8   | 2.8   | 2.7   | 17.3  | 12.4  | 17.5  | 18.1  | 2.0    |
| 6.1   | 4.7   | 6.2   | 4.1   | 3.9   | 9.6   | 3.6   | 6.5   | 21.6   |
| 3.4   | 5.5   | 8.2   | 4.3   | 4.2   | 2.0   | 5.9   | 3.3   | 15.8   |
| 12.8  | 2.1   | 3.8   | 5.6   | 53.0  | 40.8  | 52.9  | 74.7  | 194.8  |
| 140.2 | 140.9 | 89.7  | 197.9 | 23.9  | 26.6  | 26.4  | 32.3  | 15.3   |
| 7.3   | 5.6   | 6.4   | 6.7   | 8.1   | 7.0   | 15.1  | 9.4   | 18.1   |
| 3.2   | 2.0   | 1.1   | 5.2   | 5.7   | 1.4   | 4.7   | 11.0  | 5.7    |
| 132.1 | 99.8  | 201.4 | 132.2 | 203.4 | 171.7 | 207.2 | 267.2 | 182.4  |
| 11.0  | 13.2  | 15.9  | 12.6  | 10.2  | 8.5   | 4.6   | 0.7   | 40.2   |
| 8.5   | 2.3   | 14.1  | 10.2  | 5.9   | 2.1   | 5.5   | 12.1  | 37.3   |
| 38.2  | 35.6  | 40.2  | 21.3  | 144.1 | 156.2 | 104.0 | 127.3 | 369.9  |
| 12.4  | 10.4  | 8.7   | 6.0   | 7.1   | 4.1   | 5.9   | 8.8   | 15.1   |
| 47.8  | 51.1  | 66.4  | 51.9  | 56.2  | 47.7  | 65.0  | 86.0  | 48.4   |
| 23.2  | 29.6  | 30.5  | 35.8  | 57.4  | 74.0  | 75.5  | 74.9  | 76.6   |

|       |       |        |       |        |        |        |        |        |
|-------|-------|--------|-------|--------|--------|--------|--------|--------|
| 23.1  | 25.3  | 30.8   | 18.6  | 44.4   | 45.1   | 63.9   | 62.5   | 69.7   |
| 8.2   | 10.4  | 6.2    | 4.4   | 11.4   | 8.3    | 8.0    | 9.6    | 6.9    |
| 1.8   | 1.5   | 2.2    | 1.1   | 3.5    | 1.2    | 2.2    | 1.7    | 2.1    |
| 289.3 | 238.2 | 336.3  | 243.0 | 464.1  | 593.4  | 471.1  | 590.7  | 817.9  |
| 209.2 | 208.9 | 240.9  | 228.6 | 4.3    | 3.3    | 3.9    | 3.0    | 5.2    |
| 62.1  | 50.4  | 58.6   | 69.7  | 40.3   | 57.6   | 48.0   | 42.4   | 53.7   |
| 3.9   | 6.4   | 6.6    | 7.0   | 3.9    | 3.7    | 0.9    | 0.3    | 0.9    |
| 23.5  | 18.5  | 17.2   | 32.4  | 18.0   | 19.6   | 19.7   | 27.2   | 143.5  |
| 17.8  | 23.9  | 14.4   | 12.9  | 25.9   | 23.9   | 26.8   | 23.1   | 39.7   |
| 41.9  | 51.2  | 40.0   | 35.2  | 7.1    | 4.1    | 3.4    | 0.4    | 6.6    |
| 19.6  | 32.1  | 50.6   | 16.6  | 9.3    | 9.0    | 13.2   | 18.2   | 25.6   |
| 429.2 | 373.3 | 558.1  | 447.5 | 909.6  | 1124.4 | 960.4  | 1067.3 | 943.3  |
| 4.8   | 1.3   | 2.5    | 5.7   | 6.4    | 4.0    | 3.6    | 4.2    | 5.1    |
| 677.7 | 639.2 | 1113.3 | 598.2 | 1053.4 | 817.8  | 949.4  | 1116.0 | 1524.2 |
| 57.6  | 66.6  | 72.1   | 67.1  | 42.5   | 41.7   | 35.1   | 42.9   | 47.8   |
| 1.1   | 1.0   | 0.8    | 0.5   | 2.8    | 1.1    | 0.8    | 0.9    | 1.5    |
| 995.5 | 806.4 | 1246.8 | 615.8 | 1237.7 | 844.3  | 1255.4 | 1381.1 | 1973.0 |
| 47.2  | 53.2  | 65.6   | 31.6  | 41.9   | 30.9   | 54.8   | 76.7   | 69.3   |
| 23.7  | 19.3  | 17.1   | 15.2  | 15.0   | 16.7   | 14.6   | 21.9   | 46.1   |
| 9.5   | 4.9   | 21.3   | 10.5  | 9.2    | 8.5    | 10.0   | 8.2    | 8.1    |
| 705.8 | 606.0 | 655.7  | 445.5 | 70.0   | 68.6   | 69.5   | 65.5   | 148.0  |
| 1.2   | 0.8   | 7.3    | 3.3   | 22.7   | 17.0   | 17.8   | 28.2   | 41.2   |
| 190.9 | 170.6 | 213.2  | 135.9 | 172.7  | 163.0  | 210.6  | 199.0  | 146.1  |
| 5.2   | 10.8  | 23.2   | 10.4  | 3.4    | 5.0    | 5.6    | 8.1    | 19.3   |
| 43.7  | 46.2  | 70.8   | 53.6  | 56.2   | 42.3   | 45.0   | 56.2   | 61.4   |
| 54.2  | 45.6  | 86.1   | 57.6  | 39.6   | 35.4   | 24.9   | 47.1   | 48.0   |
| 4.1   | 5.8   | 3.9    | 6.4   | 7.9    | 6.5    | 3.5    | 5.6    | 9.1    |
| 279.3 | 270.4 | 529.8  | 205.9 | 219.0  | 159.3  | 176.2  | 229.2  | 336.2  |
| 1.4   | 5.3   | 3.9    | 4.1   | 72.4   | 28.8   | 47.5   | 50.8   | 264.6  |
| 6.5   | 5.6   | 13.0   | 7.0   | 24.3   | 39.6   | 22.6   | 44.0   | 25.4   |
| 4.3   | 1.1   | 0.5    | 1.3   | 9.3    | 15.4   | 16.6   | 14.0   | 14.8   |
| 9.3   | 4.8   | 4.1    | 18.6  | 3.2    | 2.3    | 0.3    | 0.6    | 469.0  |
| 0.7   | 7.0   | 0.9    | 1.4   | 0.8    | 4.1    | 0.6    | 4.2    | 122.9  |
| 6.9   | 2.8   | 3.9    | 4.1   | 23.3   | 28.0   | 25.4   | 30.4   | 14.3   |
| 3.6   | 13.4  | 3.8    | 8.0   | 2.4    | 4.4    | 6.2    | 7.3    | 3.1    |
| 398.5 | 287.1 | 587.0  | 353.2 | 2093.4 | 2285.8 | 1534.8 | 1875.4 | 1742.6 |
| 327.7 | 302.7 | 626.2  | 351.6 | 389.4  | 521.8  | 392.5  | 467.7  | 474.2  |
| 26.2  | 24.1  | 27.3   | 25.1  | 67.1   | 113.6  | 91.5   | 100.3  | 56.9   |
| 9.5   | 3.3   | 6.9    | 5.5   | 2.6    | 5.7    | 5.3    | 8.8    | 6.2    |
| 15.6  | 23.8  | 23.2   | 16.3  | 7.3    | 6.7    | 10.4   | 5.7    | 17.0   |
| 19.9  | 22.2  | 49.8   | 14.4  | 197.1  | 146.1  | 167.5  | 213.3  | 105.5  |
| 16.5  | 8.1   | 16.7   | 11.0  | 14.0   | 7.3    | 3.1    | 7.8    | 12.2   |
| 53.7  | 46.5  | 37.0   | 49.9  | 25.2   | 44.6   | 33.7   | 50.1   | 70.6   |
| 1.0   | 0.8   | 2.7    | 0.8   | 70.6   | 92.0   | 62.7   | 89.9   | 36.3   |
| 4.3   | 2.4   | 5.8    | 5.3   | 1.4    | 6.0    | 0.9    | 4.9    | 8.0    |
| 2.7   | 3.1   | 2.4    | 2.1   | 80.5   | 59.3   | 74.1   | 74.0   | 40.3   |
| 31.0  | 30.1  | 30.5   | 26.3  | 132.4  | 272.1  | 239.2  | 228.6  | 60.3   |
| 14.6  | 17.0  | 25.9   | 16.6  | 46.6   | 41.9   | 58.4   | 75.7   | 53.5   |
| 10.1  | 5.4   | 15.7   | 12.5  | 119.1  | 117.6  | 177.3  | 165.7  | 98.8   |
| 8.5   | 15.1  | 13.6   | 12.5  | 5.5    | 9.0    | 4.1    | 15.9   | 15.3   |
| 1.8   | 2.3   | 3.2    | 1.9   | 3.4    | 1.3    | 2.5    | 1.4    | 2.9    |
| 11.3  | 9.5   | 9.2    | 9.7   | 50.4   | 37.1   | 67.1   | 37.7   | 16.7   |
| 2.8   | 3.7   | 2.4    | 5.0   | 23.6   | 23.4   | 37.1   | 27.8   | 12.4   |

|       |       |       |       |        |        |        |        |        |
|-------|-------|-------|-------|--------|--------|--------|--------|--------|
| 34.6  | 38.8  | 50.1  | 32.0  | 49.3   | 36.7   | 44.1   | 37.6   | 59.6   |
| 5.4   | 3.6   | 7.2   | 10.5  | 31.4   | 30.8   | 18.3   | 28.1   | 21.0   |
| 65.9  | 62.9  | 23.4  | 14.9  | 413.3  | 245.2  | 495.3  | 554.2  | 14.0   |
| 526.2 | 413.3 | 973.8 | 479.3 | 991.1  | 649.6  | 982.5  | 1046.5 | 1633.8 |
| 52.4  | 47.2  | 71.8  | 42.4  | 67.7   | 69.5   | 75.2   | 81.6   | 83.3   |
| 22.1  | 22.3  | 41.4  | 20.5  | 29.0   | 29.0   | 16.9   | 23.9   | 78.9   |
| 223.1 | 187.0 | 276.4 | 200.5 | 49.5   | 56.6   | 56.9   | 71.0   | 102.7  |
| 139.5 | 108.6 | 126.0 | 81.2  | 95.0   | 72.8   | 116.4  | 120.3  | 65.8   |
| 1.8   | 6.2   | 2.8   | 6.3   | 77.2   | 43.4   | 82.5   | 67.5   | 10.8   |
| 1.8   | 4.1   | 2.7   | 3.0   | 24.7   | 58.9   | 61.6   | 38.6   | 20.4   |
| 347.1 | 321.0 | 842.2 | 240.7 | 1048.8 | 727.3  | 922.7  | 1213.8 | 845.2  |
| 118.8 | 98.1  | 168.0 | 122.5 | 81.4   | 72.9   | 93.9   | 86.7   | 16.5   |
| 4.9   | 1.5   | 5.2   | 4.0   | 2.1    | 1.6    | 2.5    | 1.6    | 88.9   |
| 16.5  | 9.2   | 19.6  | 20.7  | 19.9   | 14.5   | 15.8   | 3.1    | 17.2   |
| 47.6  | 49.4  | 58.5  | 36.8  | 113.5  | 135.1  | 105.9  | 138.3  | 62.1   |
| 18.1  | 36.2  | 24.4  | 22.1  | 1.8    | 1.3    | 1.5    | 1.3    | 11.2   |
| 188.2 | 136.9 | 231.3 | 112.9 | 43.4   | 29.5   | 67.7   | 53.3   | 675.9  |
| 51.9  | 45.0  | 74.0  | 43.4  | 10.6   | 36.4   | 17.2   | 17.1   | 33.5   |
| 143.4 | 178.9 | 60.7  | 107.9 | 132.5  | 78.6   | 77.5   | 164.6  | 13.5   |
| 6.8   | 6.1   | 13.4  | 8.3   | 8.1    | 1.8    | 6.4    | 10.6   | 10.3   |
| 1.9   | 3.0   | 4.5   | 5.1   | 14.6   | 17.6   | 22.3   | 19.5   | 3.9    |
| 433.5 | 409.9 | 450.2 | 374.0 | 319.6  | 280.8  | 313.9  | 360.9  | 426.1  |
| 40.7  | 49.8  | 36.4  | 31.2  | 18.1   | 13.2   | 15.0   | 16.9   | 48.3   |
| 14.7  | 10.9  | 37.0  | 14.0  | 10.5   | 6.0    | 6.5    | 6.7    | 222.2  |
| 729.2 | 761.6 | 895.5 | 652.3 | 2607.5 | 2581.8 | 3307.4 | 3043.9 | 610.9  |
| 42.9  | 40.8  | 50.9  | 35.0  | 249.3  | 298.8  | 418.6  | 321.5  | 17.6   |
| 7.4   | 9.0   | 20.6  | 12.9  | 11.1   | 7.1    | 11.9   | 11.3   | 15.3   |
| 15.1  | 4.9   | 14.8  | 13.5  | 3.9    | 1.9    | 3.8    | 7.7    | 7.7    |
| 1.9   | 1.9   | 1.5   | 2.2   | 3.1    | 8.4    | 4.2    | 3.1    | 10.0   |
| 8.6   | 9.7   | 14.3  | 11.2  | 1.1    | 3.0    | 6.2    | 11.1   | 16.2   |
| 197.5 | 182.0 | 287.1 | 227.0 | 2.1    | 2.4    | 3.2    | 2.5    | 5.0    |
| 6.7   | 16.6  | 13.9  | 6.0   | 21.3   | 22.7   | 16.7   | 44.0   | 22.8   |
| 18.8  | 17.4  | 25.5  | 15.8  | 50.4   | 38.4   | 48.6   | 48.7   | 28.9   |
| 9.9   | 3.9   | 14.8  | 19.8  | 12.1   | 10.6   | 12.0   | 14.8   | 10.1   |
| 5.4   | 8.9   | 12.5  | 8.8   | 6.8    | 4.1    | 7.4    | 7.4    | 9.2    |
| 4.3   | 4.8   | 9.9   | 6.3   | 57.9   | 44.6   | 41.9   | 50.1   | 78.5   |
| 41.2  | 47.8  | 39.7  | 32.5  | 11.0   | 15.1   | 22.3   | 33.6   | 5.4    |
| 9.5   | 6.9   | 18.0  | 9.5   | 26.4   | 34.6   | 35.4   | 38.0   | 72.6   |
| 2.7   | 3.0   | 5.2   | 2.2   | 3.4    | 2.9    | 2.6    | 4.6    | 7.1    |
| 6.6   | 16.4  | 26.4  | 22.8  | 4.6    | 13.8   | 12.2   | 16.6   | 22.4   |
| 43.4  | 34.7  | 53.7  | 39.5  | 95.0   | 91.6   | 90.0   | 136.0  | 129.3  |
| 5.5   | 7.6   | 13.8  | 6.0   | 3.6    | 6.2    | 6.3    | 10.0   | 11.2   |
| 6.1   | 2.6   | 4.9   | 6.3   | 5.2    | 6.1    | 6.0    | 9.0    | 6.8    |
| 1.9   | 1.9   | 0.7   | 0.4   | 3.0    | 0.2    | 2.8    | 0.2    | 1.8    |
| 5.3   | 3.2   | 6.3   | 5.7   | 2.6    | 1.9    | 7.7    | 2.7    | 9.3    |
| 60.7  | 54.4  | 39.6  | 26.2  | 161.9  | 110.9  | 119.0  | 153.2  | 33.5   |
| 352.3 | 320.3 | 360.7 | 268.5 | 655.8  | 609.6  | 492.1  | 813.7  | 734.1  |
| 54.7  | 48.3  | 67.2  | 54.6  | 84.6   | 76.9   | 74.1   | 95.6   | 119.3  |
| 7.8   | 2.9   | 15.8  | 1.5   | 14.5   | 13.6   | 12.9   | 14.1   | 3.3    |
| 195.2 | 192.0 | 221.0 | 188.1 | 103.5  | 133.2  | 120.8  | 133.1  | 271.1  |
| 18.2  | 31.4  | 20.5  | 23.6  | 2.4    | 0.3    | 0.6    | 0.2    | 1.7    |
| 0.5   | 0.6   | 0.4   | 1.8   | 0.7    | 1.4    | 0.5    | 0.6    | 0.8    |
| 12.2  | 10.7  | 15.3  | 9.0   | 4.7    | 1.7    | 3.7    | 3.5    | 15.4   |

|        |        |        |        |        |        |        |        |        |
|--------|--------|--------|--------|--------|--------|--------|--------|--------|
| 5.5    | 0.7    | 4.0    | 4.5    | 0.6    | 0.4    | 1.3    | 0.3    | 7.9    |
| 6.7    | 1.6    | 1.4    | 3.3    | 0.9    | 2.7    | 7.0    | 1.1    | 2.2    |
| 144.4  | 126.8  | 206.1  | 117.5  | 211.8  | 122.4  | 171.2  | 180.0  | 275.7  |
| 2.0    | 1.7    | 1.7    | 1.5    | 1.5    | 1.0    | 0.9    | 0.9    | 1.6    |
| 1.8    | 1.5    | 2.2    | 1.7    | 0.9    | 1.0    | 2.2    | 2.2    | 1.9    |
| 6.9    | 11.0   | 12.6   | 9.2    | 9.1    | 6.1    | 11.1   | 6.2    | 17.5   |
| 4.3    | 8.8    | 3.0    | 7.3    | 3.4    | 2.0    | 2.3    | 2.2    | 3.4    |
| 27.2   | 25.0   | 26.2   | 19.3   | 17.2   | 20.5   | 19.6   | 17.9   | 35.9   |
| 0.5    | 0.9    | 0.5    | 0.6    | 78.1   | 86.9   | 71.1   | 102.5  | 0.7    |
| 17.5   | 24.0   | 16.7   | 17.1   | 2.2    | 6.2    | 2.5    | 5.1    | 54.9   |
| 141.0  | 112.9  | 132.1  | 172.6  | 12.0   | 7.8    | 12.9   | 10.8   | 117.1  |
| 5.0    | 1.9    | 3.6    | 1.2    | 2.2    | 1.6    | 5.0    | 2.0    | 5.5    |
| 3.2    | 4.0    | 3.7    | 1.7    | 15.2   | 14.5   | 8.3    | 18.8   | 1530.3 |
| 1807.0 | 1695.0 | 2276.1 | 1556.5 | 2996.8 | 3427.4 | 3072.3 | 3062.7 | 4136.9 |
| 6.1    | 9.6    | 5.7    | 9.5    | 5.3    | 1.2    | 1.8    | 6.7    | 4.1    |
| 6.3    | 11.9   | 19.4   | 16.8   | 13.0   | 11.0   | 9.6    | 11.5   | 25.7   |
| 12.1   | 12.8   | 13.8   | 9.8    | 10.4   | 4.8    | 5.5    | 11.3   | 25.0   |
| 3.5    | 7.4    | 8.4    | 3.4    | 4.4    | 3.9    | 5.3    | 6.8    | 18.7   |
| 1.9    | 8.6    | 2.4    | 6.2    | 4.4    | 3.3    | 5.3    | 1.4    | 183.2  |
| 27.2   | 22.7   | 28.6   | 20.5   | 1.0    | 0.9    | 1.7    | 0.4    | 3.6    |
| 70.1   | 51.0   | 83.1   | 47.0   | 4.3    | 5.1    | 2.4    | 5.6    | 0.9    |
| 34.5   | 21.9   | 40.3   | 21.7   | 4.0    | 3.0    | 7.0    | 0.5    | 5.0    |
| 29.4   | 26.3   | 11.4   | 14.5   | 42.3   | 33.9   | 50.3   | 74.3   | 4.5    |
| 10.0   | 7.6    | 16.0   | 5.3    | 10.5   | 10.0   | 8.0    | 27.3   | 21.1   |
| 28.9   | 28.2   | 31.2   | 34.4   | 11.2   | 14.8   | 27.3   | 17.5   | 36.9   |
| 13.4   | 18.2   | 10.1   | 11.8   | 78.1   | 45.6   | 55.6   | 92.0   | 48.3   |
| 12.2   | 2.4    | 7.8    | 6.8    | 9.3    | 4.5    | 10.6   | 8.6    | 14.4   |
| 0.9    | 0.5    | 1.3    | 0.6    | 45.1   | 66.9   | 51.6   | 53.5   | 8008.7 |
| 64.5   | 57.4   | 132.3  | 55.1   | 171.2  | 126.9  | 158.4  | 263.8  | 188.9  |
| 856.0  | 799.5  | 961.8  | 702.7  | 522.3  | 478.5  | 481.9  | 568.9  | 778.1  |
| 47.9   | 50.4   | 36.8   | 37.1   | 85.3   | 117.8  | 90.4   | 91.4   | 41.8   |
| 13.4   | 21.2   | 27.6   | 19.2   | 25.5   | 17.7   | 22.7   | 30.8   | 67.6   |
| 8.9    | 13.1   | 8.1    | 7.7    | 4.5    | 3.0    | 4.0    | 8.5    | 5.9    |
| 19.5   | 11.0   | 26.0   | 15.9   | 9.2    | 7.5    | 1.0    | 1.3    | 15.5   |
| 44.8   | 56.9   | 36.5   | 49.4   | 6.9    | 8.2    | 6.1    | 12.5   | 4.1    |
| 100.8  | 87.3   | 146.4  | 105.5  | 71.4   | 94.8   | 81.9   | 89.9   | 55.5   |
| 12.4   | 14.9   | 18.1   | 14.1   | 9.6    | 9.0    | 5.6    | 17.8   | 8.5    |
| 77.7   | 71.1   | 67.1   | 62.5   | 99.8   | 120.4  | 111.3  | 113.1  | 92.1   |
| 28.6   | 38.7   | 21.6   | 25.3   | 18.4   | 20.0   | 12.7   | 18.6   | 16.5   |
| 64.4   | 53.6   | 89.2   | 59.7   | 95.6   | 72.4   | 75.9   | 105.4  | 93.6   |
| 1.1    | 2.0    | 1.2    | 1.0    | 0.8    | 0.7    | 0.8    | 1.1    | 2.0    |
| 21.4   | 28.5   | 31.1   | 34.8   | 35.1   | 39.5   | 26.8   | 30.5   | 32.8   |
| 13.1   | 13.7   | 23.9   | 20.3   | 11.8   | 13.0   | 9.5    | 5.1    | 13.1   |
| 208.3  | 179.0  | 222.2  | 172.7  | 113.4  | 128.0  | 99.8   | 126.8  | 102.9  |
| 1.2    | 2.1    | 1.8    | 4.9    | 2.4    | 3.0    | 1.1    | 0.6    | 6.3    |
| 0.5    | 0.7    | 0.6    | 0.4    | 2.9    | 0.7    | 7.0    | 1.9    | 1.5    |
| 26.5   | 30.2   | 15.6   | 20.2   | 5.8    | 1.8    | 3.5    | 12.8   | 6.9    |
| 4.3    | 3.9    | 10.0   | 4.0    | 3.7    | 1.0    | 3.0    | 3.1    | 4.9    |
| 3.2    | 2.7    | 3.3    | 2.3    | 1.3    | 1.1    | 1.2    | 2.0    | 4.1    |
| 70.9   | 64.4   | 104.1  | 73.8   | 15.7   | 13.5   | 11.7   | 14.6   | 269.2  |
| 1.6    | 7.3    | 2.4    | 1.9    | 1.7    | 1.3    | 1.3    | 1.4    | 0.9    |
| 7.2    | 5.3    | 15.0   | 7.2    | 15.4   | 19.4   | 18.4   | 20.8   | 21.1   |
| 11.7   | 11.5   | 13.9   | 5.5    | 7.0    | 2.9    | 2.9    | 10.7   | 5.1    |



|       |       |       |       |        |        |        |        |        |
|-------|-------|-------|-------|--------|--------|--------|--------|--------|
| 33.2  | 26.0  | 85.6  | 37.7  | 1.5    | 0.5    | 0.9    | 3.3    | 6.9    |
| 162.9 | 116.1 | 368.9 | 165.5 | 6.0    | 3.7    | 4.8    | 13.5   | 18.9   |
| 656.0 | 706.9 | 926.9 | 716.5 | 1407.7 | 1300.3 | 1456.4 | 1659.6 | 1181.2 |
| 0.4   | 0.1   | 0.3   | 0.8   | 36.0   | 13.5   | 41.2   | 52.6   | 662.7  |
| 0.7   | 2.9   | 0.3   | 1.1   | 1.2    | 0.2    | 1.4    | 2.6    | 0.3    |
| 7.9   | 2.3   | 2.8   | 4.6   | 2.5    | 1.5    | 3.2    | 9.9    | 7.5    |
| 20.9  | 18.2  | 2.1   | 9.8   | 43.1   | 37.0   | 47.4   | 37.0   | 2.7    |
| 100.9 | 102.0 | 172.2 | 107.9 | 127.4  | 78.8   | 125.1  | 161.0  | 118.5  |
| 2.7   | 2.4   | 2.8   | 4.6   | 2.3    | 1.6    | 1.1    | 1.7    | 3.6    |
| 6.3   | 12.8  | 13.8  | 7.7   | 4.6    | 9.2    | 3.5    | 9.7    | 13.9   |
| 1.2   | 2.3   | 1.3   | 1.0   | 1.1    | 0.6    | 1.0    | 0.6    | 1.6    |
| 14.9  | 9.9   | 18.0  | 12.2  | 6.2    | 6.6    | 5.4    | 7.4    | 11.9   |
| 0.8   | 1.1   | 0.9   | 1.1   | 1.3    | 0.7    | 0.6    | 5.4    | 2.0    |
| 5.6   | 0.6   | 4.4   | 2.6   | 2.6    | 0.2    | 2.0    | 2.9    | 1.4    |
| 21.8  | 31.6  | 36.0  | 24.6  | 26.5   | 21.6   | 19.8   | 27.3   | 32.3   |
| 5.3   | 23.3  | 12.7  | 9.0   | 10.0   | 3.4    | 9.4    | 6.1    | 24.9   |
| 3.1   | 2.1   | 5.2   | 2.6   | 1.7    | 5.3    | 2.9    | 9.3    | 117.6  |
| 19.1  | 21.9  | 17.1  | 17.4  | 14.4   | 11.5   | 18.5   | 21.0   | 2.9    |
| 17.4  | 12.5  | 14.5  | 20.1  | 18.9   | 13.6   | 9.2    | 33.1   | 17.2   |
| 12.3  | 11.9  | 11.0  | 9.5   | 2.1    | 8.0    | 4.3    | 8.5    | 10.5   |
| 9.0   | 10.5  | 14.0  | 14.4  | 238.2  | 271.5  | 248.6  | 287.3  | 56.9   |
| 12.1  | 6.5   | 13.7  | 9.1   | 9.3    | 10.8   | 12.2   | 23.7   | 15.1   |
| 17.9  | 33.5  | 39.6  | 31.7  | 26.8   | 20.7   | 30.2   | 36.7   | 156.0  |
| 0.9   | 0.6   | 1.0   | 1.1   | 1.0    | 1.2    | 1.0    | 0.8    | 45.6   |
| 8.9   | 4.4   | 14.7  | 6.3   | 3.4    | 4.0    | 7.5    | 0.8    | 2.0    |
| 29.7  | 24.1  | 34.4  | 24.5  | 24.7   | 20.2   | 17.6   | 26.2   | 27.4   |
| 106.3 | 174.9 | 115.9 | 309.2 | 1.4    | 0.8    | 0.9    | 9.7    | 6.4    |
| 18.9  | 17.6  | 10.6  | 8.1   | 4.4    | 7.5    | 10.0   | 9.8    | 16.0   |
| 5.6   | 2.9   | 9.9   | 6.0   | 5.3    | 7.2    | 2.7    | 3.7    | 2.1    |
| 19.4  | 16.9  | 21.0  | 7.1   | 12.2   | 10.4   | 9.7    | 7.0    | 16.8   |
| 45.8  | 40.6  | 36.2  | 33.4  | 12.5   | 9.2    | 11.1   | 14.1   | 11.9   |
| 22.5  | 21.6  | 28.3  | 16.3  | 17.0   | 11.4   | 11.5   | 25.9   | 4.3    |
| 3.8   | 1.2   | 9.3   | 3.0   | 18.8   | 19.3   | 14.4   | 16.7   | 25.6   |
| 36.6  | 42.7  | 56.9  | 31.6  | 25.9   | 20.8   | 23.8   | 25.1   | 30.7   |
| 1.3   | 1.2   | 2.8   | 2.9   | 70.4   | 75.1   | 54.0   | 75.6   | 67.9   |
| 10.6  | 12.8  | 10.1  | 13.9  | 179.9  | 173.4  | 150.5  | 197.0  | 327.2  |
| 41.1  | 49.4  | 49.8  | 38.3  | 12.0   | 13.9   | 15.0   | 18.4   | 48.3   |
| 28.5  | 24.4  | 50.0  | 32.6  | 122.5  | 97.5   | 119.3  | 144.9  | 146.5  |
| 3.3   | 10.8  | 12.5  | 4.6   | 5.6    | 10.4   | 7.4    | 2.9    | 6.7    |
| 2.6   | 3.5   | 2.0   | 1.9   | 63.6   | 100.3  | 94.2   | 55.6   | 2.3    |
| 84.1  | 88.1  | 148.3 | 82.7  | 108.0  | 82.5   | 93.3   | 116.7  | 136.7  |
| 4.3   | 4.4   | 9.8   | 4.0   | 20.8   | 71.6   | 31.0   | 31.1   | 8.8    |
| 113.0 | 113.6 | 124.4 | 110.9 | 51.6   | 54.6   | 54.0   | 68.6   | 136.1  |
| 23.7  | 23.8  | 25.8  | 22.1  | 42.6   | 46.5   | 33.9   | 42.5   | 16.0   |
| 7.9   | 5.0   | 7.4   | 19.4  | 6.2    | 12.7   | 6.0    | 9.9    | 14.2   |
| 1.2   | 1.3   | 2.6   | 4.2   | 97.9   | 129.3  | 110.2  | 121.3  | 7.6    |
| 4.0   | 1.3   | 7.8   | 4.4   | 3.2    | 3.0    | 0.9    | 1.1    | 2.3    |
| 309.1 | 291.3 | 349.2 | 306.7 | 931.5  | 598.9  | 1202.9 | 1109.7 | 670.7  |
| 8.2   | 4.8   | 4.0   | 3.8   | 14.3   | 6.8    | 7.6    | 5.0    | 53.5   |
| 19.9  | 22.6  | 40.8  | 17.0  | 481.9  | 433.9  | 546.5  | 554.9  | 364.5  |
| 8.7   | 21.0  | 16.3  | 7.4   | 18.6   | 21.9   | 23.0   | 38.2   | 37.2   |
| 27.3  | 24.5  | 41.2  | 25.6  | 2.7    | 10.0   | 10.3   | 1.4    | 7.8    |
| 12.2  | 3.5   | 3.5   | 2.1   | 2.9    | 2.7    | 3.9    | 2.6    | 3.6    |

|       |       |       |       |       |       |       |       |        |
|-------|-------|-------|-------|-------|-------|-------|-------|--------|
| 5.1   | 1.5   | 4.5   | 3.4   | 6.2   | 3.5   | 2.4   | 4.6   | 9.4    |
| 0.9   | 3.1   | 3.7   | 4.1   | 1.2   | 0.9   | 6.1   | 5.4   | 4.8    |
| 17.7  | 14.2  | 12.8  | 11.9  | 8.3   | 8.6   | 8.8   | 7.1   | 6.0    |
| 37.3  | 28.5  | 39.2  | 36.4  | 36.8  | 60.1  | 53.3  | 42.2  | 5.9    |
| 11.0  | 4.6   | 4.5   | 2.0   | 6.3   | 5.9   | 1.8   | 2.2   | 6.7    |
| 13.7  | 19.0  | 31.4  | 10.8  | 14.6  | 11.2  | 14.9  | 17.3  | 169.8  |
| 59.0  | 53.0  | 84.8  | 53.9  | 53.9  | 39.1  | 45.9  | 74.6  | 54.4   |
| 2.8   | 7.2   | 3.2   | 2.0   | 0.7   | 1.0   | 0.9   | 2.1   | 1.9    |
| 1.3   | 2.2   | 2.9   | 1.3   | 6.1   | 8.4   | 26.8  | 14.1  | 1.1    |
| 10.4  | 17.6  | 9.1   | 7.2   | 8.8   | 10.3  | 7.8   | 14.8  | 9.5    |
| 22.9  | 17.7  | 32.1  | 22.8  | 46.4  | 58.6  | 47.2  | 40.8  | 41.2   |
| 3.6   | 2.5   | 3.1   | 2.4   | 1.2   | 3.3   | 5.8   | 0.8   | 3.0    |
| 91.9  | 108.6 | 53.9  | 70.4  | 26.5  | 27.8  | 32.2  | 32.3  | 37.3   |
| 11.3  | 12.7  | 12.1  | 12.8  | 7.3   | 10.3  | 6.2   | 12.9  | 8.1    |
| 4.3   | 3.9   | 5.6   | 4.5   | 3.0   | 2.5   | 2.1   | 0.9   | 1.3    |
| 0.8   | 0.8   | 1.0   | 1.0   | 1.5   | 1.2   | 0.7   | 1.6   | 2.4    |
| 26.0  | 22.9  | 47.0  | 35.4  | 1.9   | 7.2   | 3.1   | 13.8  | 3.7    |
| 7.4   | 9.7   | 15.9  | 4.3   | 17.7  | 11.7  | 24.3  | 29.3  | 11.9   |
| 1.0   | 1.3   | 4.7   | 2.7   | 0.9   | 0.8   | 5.5   | 13.8  | 3.8    |
| 1.8   | 2.0   | 2.9   | 1.7   | 1.3   | 0.8   | 1.6   | 2.9   | 3.3    |
| 15.8  | 20.3  | 9.2   | 13.6  | 9.2   | 9.1   | 9.6   | 13.6  | 92.2   |
| 77.0  | 73.1  | 81.3  | 73.0  | 113.0 | 129.3 | 130.1 | 143.1 | 75.4   |
| 31.2  | 31.5  | 53.2  | 28.9  | 29.0  | 46.7  | 31.7  | 20.9  | 8.0    |
| 25.3  | 38.8  | 17.6  | 22.8  | 20.5  | 20.8  | 25.7  | 18.0  | 23.8   |
| 14.0  | 8.1   | 30.9  | 14.9  | 39.1  | 56.4  | 47.8  | 39.5  | 12.7   |
| 3.1   | 3.8   | 18.3  | 8.4   | 3.3   | 2.1   | 1.3   | 3.0   | 15.4   |
| 124.4 | 74.6  | 331.7 | 125.6 | 55.3  | 40.0  | 49.6  | 56.9  | 2.6    |
| 15.0  | 5.8   | 7.5   | 12.2  | 4.6   | 2.5   | 4.9   | 8.3   | 2.0    |
| 18.3  | 22.6  | 34.2  | 15.8  | 9.2   | 10.4  | 11.0  | 15.0  | 7.3    |
| 1.7   | 5.7   | 3.0   | 9.5   | 340.6 | 278.1 | 329.4 | 354.0 | 9.8    |
| 7.8   | 4.1   | 4.9   | 7.3   | 8.5   | 5.5   | 15.9  | 3.4   | 5.9    |
| 2.4   | 1.5   | 3.3   | 3.9   | 4.4   | 7.5   | 8.9   | 11.0  | 2.4    |
| 7.6   | 6.4   | 4.6   | 5.8   | 6.9   | 5.9   | 9.0   | 8.7   | 7.0    |
| 277.5 | 243.3 | 469.2 | 225.8 | 402.6 | 441.4 | 330.2 | 374.1 | 406.6  |
| 6.4   | 6.9   | 5.9   | 4.9   | 3.9   | 1.6   | 4.6   | 3.0   | 12.3   |
| 7.7   | 2.6   | 2.9   | 5.8   | 1.5   | 1.6   | 3.9   | 1.3   | 6.9    |
| 1.6   | 1.9   | 1.9   | 1.5   | 1.2   | 1.1   | 1.1   | 1.8   | 1.8    |
| 51.6  | 50.3  | 77.8  | 43.5  | 124.3 | 106.1 | 109.3 | 126.2 | 53.7   |
| 3.9   | 5.7   | 2.8   | 9.4   | 3.3   | 6.8   | 9.9   | 15.4  | 90.8   |
| 66.1  | 64.8  | 78.3  | 97.8  | 31.7  | 27.3  | 35.0  | 42.8  | 19.6   |
| 2.8   | 5.3   | 1.3   | 4.8   | 0.5   | 2.1   | 3.1   | 1.2   | 6.1    |
| 12.2  | 10.4  | 8.4   | 3.9   | 4.8   | 1.1   | 5.2   | 8.5   | 9.8    |
| 2.4   | 0.5   | 0.9   | 0.5   | 0.9   | 1.2   | 0.5   | 0.1   | 0.7    |
| 1.0   | 1.5   | 7.7   | 2.6   | 6.1   | 3.7   | 0.7   | 1.8   | 5.7    |
| 29.0  | 33.0  | 10.7  | 28.7  | 133.6 | 57.4  | 127.3 | 109.5 | 1.3    |
| 1.6   | 1.8   | 6.7   | 5.4   | 2.3   | 0.9   | 2.9   | 4.6   | 3.1    |
| 15.4  | 13.8  | 24.1  | 19.0  | 5.3   | 13.9  | 14.7  | 11.9  | 15.8   |
| 5.6   | 5.5   | 27.2  | 5.7   | 16.8  | 10.7  | 10.3  | 33.5  | 4.0    |
| 34.9  | 27.5  | 39.7  | 33.9  | 19.0  | 18.3  | 15.9  | 10.2  | 6.3    |
| 9.7   | 3.4   | 11.4  | 5.4   | 297.9 | 198.8 | 391.8 | 350.3 | 58.1   |
| 2.0   | 2.7   | 7.0   | 1.6   | 3.3   | 2.1   | 2.1   | 7.2   | 2.3    |
| 847.9 | 885.2 | 867.4 | 659.4 | 403.5 | 407.4 | 372.1 | 358.1 | 1034.8 |
| 218.7 | 237.4 | 240.0 | 169.3 | 176.6 | 116.1 | 177.8 | 150.9 | 357.3  |

|       |       |       |       |        |        |        |        |       |
|-------|-------|-------|-------|--------|--------|--------|--------|-------|
| 3.2   | 7.1   | 8.6   | 2.1   | 2.6    | 2.9    | 4.4    | 3.3    | 7.8   |
| 2.8   | 4.9   | 12.9  | 4.9   | 4.3    | 1.3    | 1.8    | 3.2    | 5.0   |
| 85.2  | 92.6  | 60.3  | 92.3  | 14.1   | 10.4   | 12.3   | 18.2   | 9.2   |
| 76.6  | 67.6  | 94.4  | 82.6  | 1566.6 | 1530.4 | 1695.7 | 1476.1 | 356.3 |
| 22.8  | 27.6  | 27.0  | 23.2  | 85.3   | 66.1   | 74.6   | 107.2  | 56.4  |
| 10.5  | 12.7  | 14.5  | 9.8   | 12.0   | 10.4   | 10.3   | 7.4    | 13.4  |
| 4.8   | 8.1   | 5.1   | 3.5   | 5.8    | 12.1   | 14.5   | 16.9   | 3.3   |
| 6.4   | 6.6   | 3.0   | 4.4   | 4.4    | 2.3    | 7.6    | 8.2    | 9.2   |
| 1.9   | 4.1   | 6.8   | 7.0   | 5.3    | 2.1    | 1.6    | 3.5    | 2.7   |
| 2.0   | 10.0  | 12.1  | 12.2  | 5.1    | 9.8    | 7.2    | 9.4    | 14.8  |
| 12.7  | 10.4  | 12.8  | 10.1  | 24.8   | 33.5   | 27.4   | 36.6   | 3.2   |
| 1.6   | 1.0   | 29.8  | 18.3  | 1.7    | 4.7    | 8.6    | 12.8   | 10.7  |
| 125.1 | 142.6 | 294.3 | 97.7  | 170.3  | 139.6  | 134.2  | 171.3  | 172.2 |
| 53.7  | 25.4  | 69.4  | 38.4  | 54.7   | 54.8   | 69.8   | 52.0   | 37.6  |
| 5.0   | 11.4  | 8.3   | 9.3   | 6.7    | 5.5    | 1.1    | 6.8    | 7.0   |
| 6.8   | 9.6   | 14.8  | 4.6   | 1.2    | 3.5    | 8.7    | 9.2    | 7.5   |
| 2.1   | 1.4   | 3.0   | 1.4   | 1.2    | 1.2    | 3.5    | 1.7    | 3.1   |
| 14.2  | 12.1  | 18.8  | 3.6   | 1.7    | 3.3    | 1.9    | 3.2    | 1.9   |
| 2.5   | 1.7   | 7.9   | 2.3   | 2.2    | 1.1    | 1.6    | 8.5    | 7.3   |
| 429.8 | 600.9 | 432.1 | 611.7 | 476.3  | 472.0  | 443.0  | 505.1  | 530.4 |
| 6.1   | 10.3  | 11.0  | 8.9   | 11.6   | 8.8    | 7.8    | 23.5   | 13.4  |
| 5.1   | 11.4  | 6.1   | 3.4   | 11.4   | 1.9    | 7.4    | 2.2    | 35.6  |
| 1.5   | 1.9   | 1.3   | 2.2   | 0.7    | 0.9    | 1.2    | 1.4    | 0.8   |
| 21.5  | 24.5  | 59.9  | 35.5  | 12.2   | 8.1    | 13.2   | 16.2   | 25.5  |
| 0.9   | 0.8   | 1.1   | 0.9   | 2.3    | 0.6    | 0.9    | 0.9    | 1.7   |
| 1.0   | 8.7   | 4.3   | 1.3   | 0.7    | 2.6    | 2.8    | 8.7    | 44.9  |
| 3.3   | 6.7   | 1.9   | 2.1   | 1.3    | 2.0    | 1.5    | 2.0    | 2.0   |
| 4.1   | 6.9   | 1.7   | 2.4   | 0.7    | 5.2    | 11.1   | 2.0    | 12.1  |
| 4.4   | 3.4   | 4.2   | 3.3   | 538.7  | 690.9  | 548.0  | 703.7  | 845.1 |
| 8.7   | 7.6   | 6.6   | 2.9   | 0.9    | 0.6    | 1.0    | 2.6    | 1.0   |
| 5.8   | 3.5   | 5.4   | 4.7   | 7.6    | 4.8    | 3.7    | 9.7    | 10.0  |
| 93.0  | 78.1  | 89.1  | 68.9  | 256.4  | 353.1  | 279.8  | 340.0  | 107.6 |
| 4.9   | 2.7   | 5.7   | 3.4   | 2.5    | 2.6    | 3.5    | 4.9    | 3.9   |
| 8.1   | 7.0   | 6.7   | 1.8   | 6.7    | 3.6    | 6.7    | 4.8    | 7.6   |
| 3.5   | 4.4   | 4.7   | 8.4   | 1.6    | 1.0    | 2.6    | 3.3    | 3.1   |
| 7.6   | 11.9  | 18.2  | 14.3  | 12.3   | 10.1   | 9.8    | 19.2   | 24.8  |
| 6.1   | 1.2   | 1.8   | 1.3   | 6.2    | 4.4    | 3.2    | 10.1   | 4.4   |
| 0.7   | 4.4   | 2.7   | 1.2   | 4.3    | 3.4    | 14.8   | 11.8   | 9.9   |
| 40.1  | 41.6  | 62.8  | 53.0  | 175.0  | 206.8  | 170.1  | 205.4  | 204.0 |
| 1.8   | 1.6   | 1.1   | 0.6   | 434.8  | 436.8  | 519.9  | 374.6  | 7.9   |
| 4.2   | 5.4   | 4.4   | 6.5   | 2.9    | 4.9    | 0.6    | 3.2    | 10.0  |
| 13.5  | 7.3   | 14.9  | 11.8  | 11.5   | 11.1   | 17.1   | 11.3   | 24.2  |
| 92.6  | 90.2  | 113.4 | 93.6  | 14.2   | 6.5    | 17.3   | 14.1   | 8.1   |
| 35.0  | 32.0  | 55.6  | 34.4  | 34.1   | 16.3   | 25.9   | 33.6   | 37.3  |
| 124.3 | 109.8 | 177.3 | 95.8  | 72.6   | 42.9   | 83.3   | 66.7   | 77.9  |
| 0.3   | 0.4   | 0.6   | 0.4   | 0.5    | 0.5    | 0.7    | 0.4    | 0.4   |
| 10.4  | 6.2   | 5.5   | 6.9   | 18.2   | 6.6    | 17.7   | 4.0    | 15.1  |
| 76.7  | 76.2  | 82.0  | 69.7  | 55.4   | 76.1   | 61.0   | 65.2   | 97.7  |
| 163.0 | 156.9 | 115.5 | 125.1 | 113.5  | 153.3  | 131.6  | 127.7  | 111.8 |
| 20.9  | 17.4  | 18.5  | 15.9  | 13.2   | 11.6   | 11.8   | 15.2   | 23.8  |
| 3.8   | 4.6   | 5.3   | 6.6   | 482.2  | 336.6  | 378.0  | 449.8  | 9.5   |
| 3.8   | 2.8   | 6.9   | 3.1   | 44.5   | 51.7   | 38.4   | 62.7   | 9.5   |
| 6.0   | 2.6   | 1.6   | 1.1   | 32.7   | 28.3   | 33.8   | 48.1   | 12.5  |

|        |        |        |        |        |       |       |        |       |
|--------|--------|--------|--------|--------|-------|-------|--------|-------|
| 42.4   | 35.0   | 56.7   | 34.5   | 42.1   | 38.4  | 49.8  | 57.4   | 108.2 |
| 2.1    | 4.3    | 6.0    | 1.6    | 2.0    | 8.0   | 4.6   | 3.2    | 2.3   |
| 3.2    | 3.3    | 1.4    | 1.7    | 13.0   | 18.3  | 16.3  | 27.6   | 5.8   |
| 20.2   | 29.3   | 27.6   | 28.5   | 26.2   | 30.3  | 16.3  | 39.4   | 33.5  |
| 12.8   | 5.9    | 22.5   | 16.2   | 10.2   | 3.7   | 16.2  | 21.0   | 16.6  |
| 5.1    | 6.3    | 8.3    | 5.4    | 4.4    | 5.1   | 9.9   | 8.1    | 6.9   |
| 1.9    | 12.9   | 3.6    | 2.3    | 86.5   | 62.3  | 138.7 | 148.5  | 725.8 |
| 107.0  | 91.4   | 229.6  | 106.0  | 1129.8 | 744.8 | 918.9 | 1298.4 | 739.8 |
| 2.7    | 5.5    | 7.8    | 6.6    | 5.2    | 1.1   | 2.4   | 3.3    | 2.0   |
| 0.9    | 5.2    | 1.0    | 6.5    | 2.1    | 3.0   | 4.5   | 0.9    | 7.7   |
| 9.4    | 13.3   | 16.2   | 8.6    | 7.8    | 11.0  | 8.1   | 2.6    | 5.5   |
| 4.4    | 3.8    | 1.9    | 2.4    | 4.2    | 0.9   | 7.1   | 7.7    | 4.3   |
| 1.1    | 1.0    | 2.4    | 0.7    | 0.7    | 2.1   | 1.1   | 2.1    | 2.4   |
| 2.5    | 2.1    | 0.2    | 3.2    | 3.9    | 3.1   | 0.6   | 2.1    | 3.3   |
| 9.5    | 2.5    | 10.2   | 12.8   | 6.4    | 10.4  | 14.9  | 12.2   | 21.2  |
| 1.9    | 11.6   | 10.1   | 15.7   | 2.1    | 1.7   | 11.0  | 5.3    | 2.1   |
| 0.5    | 0.9    | 0.6    | 1.2    | 0.7    | 0.4   | 0.7   | 0.8    | 143.6 |
| 58.2   | 63.2   | 59.7   | 50.1   | 33.2   | 59.9  | 38.8  | 49.4   | 8.3   |
| 4.6    | 3.1    | 10.2   | 8.1    | 103.2  | 38.4  | 209.4 | 166.7  | 6.0   |
| 2.5    | 2.1    | 1.3    | 0.6    | 159.0  | 278.8 | 184.7 | 147.4  | 440.5 |
| 9.5    | 15.9   | 16.3   | 4.3    | 5.4    | 3.6   | 5.1   | 5.8    | 98.8  |
| 750.0  | 747.6  | 1929.0 | 1967.6 | 14.4   | 12.0  | 20.2  | 29.1   | 5.7   |
| 11.7   | 2.4    | 7.9    | 4.3    | 6.0    | 8.9   | 9.0   | 15.3   | 43.6  |
| 0.7    | 0.6    | 0.6    | 0.6    | 0.5    | 0.7   | 0.7   | 2.0    | 1.2   |
| 5.0    | 6.4    | 4.6    | 9.0    | 1.8    | 0.8   | 1.5   | 1.4    | 11.4  |
| 4.2    | 2.7    | 3.8    | 0.6    | 237.2  | 215.7 | 570.1 | 302.5  | 61.9  |
| 258.9  | 205.6  | 451.1  | 254.4  | 195.0  | 156.4 | 175.9 | 251.7  | 245.8 |
| 1.5    | 1.2    | 1.9    | 1.9    | 0.9    | 0.9   | 0.9   | 1.8    | 1.7   |
| 1706.1 | 1826.4 | 1610.6 | 1462.0 | 19.4   | 14.8  | 22.2  | 23.6   | 234.8 |
| 10.1   | 8.3    | 10.5   | 12.1   | 4.6    | 0.7   | 4.0   | 3.1    | 6.1   |
| 1.5    | 2.0    | 2.2    | 4.0    | 18.6   | 13.1  | 16.7  | 11.3   | 3.4   |
| 9.5    | 6.1    | 10.8   | 4.4    | 10.7   | 3.6   | 6.8   | 12.4   | 11.4  |
| 0.9    | 1.0    | 6.0    | 3.2    | 0.8    | 0.9   | 4.3   | 1.8    | 15.0  |
| 17.5   | 26.7   | 28.0   | 14.7   | 15.9   | 7.8   | 9.8   | 24.9   | 13.1  |
| 1.5    | 5.7    | 5.5    | 2.5    | 12.4   | 18.4  | 23.1  | 28.5   | 6.7   |
| 28.3   | 28.6   | 59.3   | 53.9   | 24.0   | 33.3  | 51.3  | 34.6   | 0.8   |
| 1.5    | 1.2    | 1.9    | 1.0    | 1.1    | 0.6   | 1.4   | 1.4    | 1.5   |
| 1.3    | 1.1    | 2.2    | 3.9    | 2.2    | 2.9   | 2.1   | 11.1   | 5.9   |
| 3.6    | 2.8    | 4.9    | 1.8    | 24.3   | 32.1  | 15.3  | 35.4   | 69.4  |
| 16.9   | 20.0   | 35.1   | 22.0   | 16.9   | 23.1  | 9.5   | 19.5   | 70.4  |
| 69.1   | 62.1   | 57.6   | 44.2   | 18.6   | 22.6  | 18.1  | 29.8   | 55.1  |
| 10.2   | 16.5   | 13.8   | 10.9   | 0.8    | 1.6   | 8.4   | 10.2   | 7.4   |
| 1.5    | 1.5    | 2.7    | 2.1    | 1.8    | 1.6   | 1.7   | 1.9    | 3.5   |
| 1.2    | 1.3    | 3.3    | 1.7    | 1.4    | 0.7   | 1.0   | 1.5    | 3.2   |
| 98.7   | 74.6   | 52.4   | 33.9   | 61.4   | 65.2  | 69.9  | 86.4   | 18.0  |
| 2.6    | 2.9    | 2.2    | 3.0    | 2.9    | 3.1   | 1.9   | 2.2    | 2.4   |
| 10.1   | 11.8   | 5.4    | 14.7   | 14.0   | 7.5   | 12.0  | 13.6   | 63.4  |
| 6.6    | 5.3    | 14.6   | 7.8    | 21.1   | 16.0  | 21.9  | 21.1   | 11.7  |
| 132.3  | 131.4  | 205.1  | 137.0  | 84.0   | 82.0  | 77.9  | 106.2  | 91.9  |
| 1.8    | 1.6    | 2.4    | 2.8    | 1.9    | 1.1   | 4.3   | 1.5    | 2.8   |
| 8.2    | 1.7    | 2.6    | 1.3    | 3.1    | 1.3   | 5.8   | 2.3    | 9.9   |
| 5.4    | 1.4    | 3.4    | 3.3    | 2.5    | 3.0   | 3.1   | 0.5    | 10.4  |
| 25.4   | 24.6   | 50.3   | 26.5   | 6.2    | 9.6   | 3.8   | 18.8   | 45.4  |

|        |       |        |       |        |        |        |        |        |
|--------|-------|--------|-------|--------|--------|--------|--------|--------|
| 3.1    | 2.5   | 5.5    | 2.8   | 3.2    | 2.3    | 9.2    | 12.2   | 6.2    |
| 17.9   | 16.2  | 11.4   | 16.1  | 59.9   | 55.9   | 34.8   | 47.2   | 75.5   |
| 20.6   | 13.8  | 28.4   | 24.8  | 78.8   | 78.5   | 65.2   | 102.2  | 127.6  |
| 2.9    | 6.7   | 15.0   | 4.0   | 2.2    | 1.8    | 5.5    | 2.9    | 3.5    |
| 501.0  | 491.0 | 738.0  | 479.6 | 523.2  | 484.3  | 519.4  | 572.1  | 405.5  |
| 0.6    | 1.8   | 4.6    | 0.7   | 1.1    | 3.4    | 1.3    | 0.2    | 2.8    |
| 15.7   | 15.7  | 12.5   | 14.2  | 14.8   | 23.3   | 18.6   | 25.8   | 26.4   |
| 17.1   | 19.2  | 10.8   | 15.8  | 13.3   | 5.4    | 11.0   | 13.2   | 17.0   |
| 5.2    | 2.2   | 5.0    | 4.3   | 3.1    | 0.4    | 3.7    | 0.2    | 2.5    |
| 61.7   | 60.4  | 42.9   | 48.2  | 10.5   | 15.3   | 16.5   | 6.9    | 33.8   |
| 1.7    | 2.7   | 12.9   | 6.2   | 6.1    | 10.8   | 11.1   | 4.2    | 15.1   |
| 3.1    | 1.3   | 2.8    | 1.3   | 181.0  | 125.2  | 125.0  | 166.7  | 54.5   |
| 2.2    | 0.7   | 4.1    | 3.8   | 4.7    | 8.2    | 1.4    | 11.9   | 1.7    |
| 3.7    | 8.6   | 7.6    | 1.3   | 4.7    | 0.8    | 2.2    | 4.4    | 7.9    |
| 48.0   | 79.3  | 3.5    | 22.9  | 3.1    | 4.1    | 4.6    | 15.2   | 5.0    |
| 4.8    | 2.7   | 14.3   | 6.9   | 5.8    | 3.5    | 5.0    | 6.0    | 11.3   |
| 1.6    | 3.7   | 1.8    | 6.6   | 3.9    | 2.3    | 4.1    | 5.9    | 7.4    |
| 1.7    | 13.4  | 7.2    | 3.4   | 7.4    | 5.0    | 6.8    | 9.3    | 1.7    |
| 0.8    | 0.6   | 1.2    | 0.6   | 1.2    | 1.1    | 1.2    | 0.9    | 1.1    |
| 31.7   | 32.1  | 29.4   | 22.3  | 278.7  | 243.3  | 341.6  | 246.2  | 22.1   |
| 2.1    | 5.1   | 2.8    | 2.3   | 3.5    | 3.3    | 9.0    | 3.6    | 8.3    |
| 224.9  | 244.1 | 236.6  | 230.9 | 262.3  | 329.8  | 258.4  | 280.0  | 192.4  |
| 3.6    | 4.3   | 3.8    | 4.3   | 22.7   | 19.6   | 32.8   | 20.4   | 27.3   |
| 2.4    | 7.2   | 1.0    | 4.5   | 9.8    | 2.6    | 1.8    | 9.2    | 3.8    |
| 3.6    | 1.6   | 3.3    | 3.1   | 3.5    | 2.5    | 4.1    | 3.4    | 4.5    |
| 12.4   | 15.6  | 16.0   | 12.8  | 242.6  | 205.0  | 314.8  | 271.9  | 186.0  |
| 14.1   | 16.1  | 12.4   | 10.9  | 13.7   | 8.3    | 12.5   | 12.4   | 26.9   |
| 3.7    | 7.1   | 14.3   | 16.3  | 3.2    | 8.4    | 4.0    | 5.3    | 15.4   |
| 77.6   | 79.6  | 83.0   | 71.4  | 171.8  | 164.1  | 184.3  | 186.4  | 178.0  |
| 3.0    | 4.4   | 3.3    | 3.9   | 1.9    | 5.6    | 0.3    | 6.3    | 1.9    |
| 116.7  | 109.3 | 140.2  | 141.2 | 19.9   | 22.7   | 26.5   | 25.3   | 8.4    |
| 317.0  | 271.2 | 357.1  | 283.4 | 569.1  | 594.5  | 560.5  | 642.9  | 1094.3 |
| 6.8    | 0.7   | 1.5    | 0.5   | 2.3    | 3.1    | 4.4    | 0.4    | 0.8    |
| 1.2    | 1.0   | 2.3    | 1.6   | 4.1    | 1.7    | 4.8    | 2.9    | 37.0   |
| 2.1    | 2.9   | 2.9    | 2.5   | 2.8    | 1.7    | 1.4    | 1.4    | 4.0    |
| 1067.8 | 908.9 | 1626.4 | 948.6 | 2359.1 | 1902.4 | 2475.5 | 2767.3 | 2830.6 |
| 5.3    | 5.0   | 5.4    | 1.3   | 2.6    | 7.4    | 5.3    | 1.7    | 7.6    |
| 0.8    | 5.7   | 3.0    | 3.0   | 1.3    | 3.3    | 1.3    | 2.8    | 4.5    |
| 12.3   | 7.0   | 17.4   | 4.8   | 37.2   | 31.4   | 37.2   | 27.5   | 138.5  |
| 2.9    | 1.5   | 10.0   | 4.6   | 4.1    | 5.1    | 6.5    | 10.5   | 10.9   |
| 3.7    | 1.4   | 2.3    | 1.4   | 2.6    | 5.8    | 2.3    | 2.1    | 3.0    |
| 199.8  | 200.7 | 204.6  | 151.0 | 122.3  | 126.9  | 144.8  | 150.9  | 175.9  |
| 430.7  | 428.1 | 754.6  | 512.3 | 179.5  | 152.9  | 155.8  | 156.0  | 237.0  |
| 34.8   | 42.3  | 90.5   | 66.6  | 25.1   | 10.1   | 18.4   | 32.0   | 56.6   |
| 0.9    | 6.3   | 3.7    | 6.0   | 3.6    | 3.9    | 1.2    | 1.6    | 8.5    |
| 11.1   | 16.6  | 8.6    | 9.0   | 12.5   | 15.5   | 14.0   | 24.7   | 19.3   |
| 2.0    | 1.9   | 8.1    | 6.1   | 102.0  | 78.7   | 131.1  | 114.4  | 1.1    |
| 8.2    | 11.0  | 7.8    | 10.4  | 0.6    | 3.9    | 2.1    | 2.2    | 7.0    |
| 2.9    | 5.4   | 7.0    | 1.0   | 5.9    | 13.8   | 8.1    | 14.3   | 8.5    |
| 8.3    | 1.8   | 13.0   | 16.6  | 8.6    | 7.9    | 10.2   | 9.3    | 21.8   |
| 5.7    | 7.5   | 4.3    | 6.1   | 8.6    | 6.2    | 3.4    | 8.0    | 117.3  |
| 252.3  | 244.5 | 520.7  | 312.4 | 992.7  | 847.3  | 421.1  | 704.2  | 1898.0 |
| 8.7    | 11.1  | 13.1   | 7.2   | 8.9    | 3.5    | 12.0   | 5.8    | 2.4    |

|        |        |        |        |       |       |       |       |       |
|--------|--------|--------|--------|-------|-------|-------|-------|-------|
| 1516.2 | 1378.1 | 2298.0 | 2450.4 | 49.8  | 49.4  | 33.0  | 40.1  | 98.0  |
| 2.2    | 2.8    | 3.3    | 11.6   | 2.2   | 1.1   | 4.1   | 1.4   | 6.1   |
| 2.0    | 0.9    | 4.7    | 2.7    | 1.5   | 1.2   | 1.1   | 2.0   | 5.4   |
| 2.6    | 4.4    | 6.8    | 5.6    | 1.2   | 7.2   | 4.8   | 5.2   | 3.5   |
| 30.8   | 45.6   | 63.3   | 36.4   | 33.3  | 33.5  | 44.2  | 50.9  | 48.9  |
| 222.4  | 182.7  | 380.1  | 230.6  | 272.1 | 281.1 | 265.0 | 300.2 | 581.5 |
| 80.8   | 90.8   | 108.2  | 93.0   | 91.6  | 95.1  | 90.6  | 142.8 | 135.1 |
| 1.0    | 1.3    | 1.3    | 0.8    | 1.8   | 1.2   | 8.7   | 2.7   | 1.1   |
| 5.2    | 7.0    | 10.0   | 7.2    | 6.6   | 7.8   | 5.3   | 2.0   | 6.8   |
| 183.7  | 136.4  | 275.5  | 168.9  | 109.3 | 79.2  | 109.4 | 138.5 | 86.9  |
| 113.7  | 112.7  | 137.7  | 89.9   | 99.6  | 119.0 | 110.6 | 157.0 | 208.4 |
| 28.0   | 14.2   | 33.0   | 29.1   | 64.9  | 59.0  | 36.8  | 56.9  | 63.9  |
| 1.5    | 2.5    | 2.2    | 1.5    | 4.4   | 2.0   | 2.0   | 2.5   | 2.8   |
| 1.4    | 1.0    | 3.3    | 0.6    | 0.8   | 0.5   | 0.5   | 0.5   | 0.7   |
| 13.3   | 19.7   | 21.7   | 19.7   | 35.4  | 26.2  | 7.2   | 26.7  | 20.5  |
| 11.2   | 9.1    | 13.6   | 9.8    | 13.4  | 5.1   | 9.4   | 10.6  | 10.0  |
| 3.6    | 1.0    | 1.1    | 7.4    | 5.1   | 1.8   | 3.3   | 3.8   | 5.3   |
| 4.1    | 3.3    | 2.1    | 1.2    | 1.7   | 1.3   | 1.4   | 2.0   | 1.3   |
| 0.7    | 0.7    | 1.0    | 2.2    | 18.2  | 21.5  | 23.3  | 20.8  | 20.6  |
| 157.1  | 132.2  | 178.4  | 101.5  | 1.1   | 2.6   | 2.8   | 1.5   | 0.9   |
| 21.1   | 23.0   | 16.8   | 15.0   | 42.9  | 47.4  | 45.9  | 49.6  | 26.3  |
| 7.6    | 1.7    | 7.5    | 9.8    | 2.4   | 2.1   | 12.9  | 3.5   | 15.3  |
| 18.5   | 8.7    | 21.0   | 21.4   | 7.7   | 7.8   | 22.0  | 42.9  | 12.1  |
| 4.1    | 6.1    | 2.6    | 1.3    | 0.9   | 5.0   | 7.5   | 6.2   | 6.8   |
| 15.1   | 22.0   | 11.5   | 22.1   | 1.1   | 11.8  | 1.7   | 11.0  | 8.7   |
| 1.2    | 4.1    | 12.3   | 1.6    | 0.5   | 2.9   | 6.0   | 1.0   | 1.0   |
| 1.0    | 4.8    | 6.1    | 0.9    | 4.6   | 5.8   | 4.6   | 5.5   | 7.2   |
| 6.5    | 3.4    | 3.1    | 6.8    | 3.3   | 1.4   | 2.8   | 1.3   | 4.3   |
| 530.4  | 482.1  | 695.9  | 598.0  | 606.7 | 748.9 | 636.4 | 771.1 | 589.8 |
| 14.7   | 12.9   | 17.9   | 19.0   | 7.1   | 13.9  | 8.5   | 2.9   | 16.1  |
| 15.3   | 16.1   | 33.3   | 15.2   | 11.2  | 10.9  | 9.4   | 11.6  | 27.7  |
| 2.7    | 1.8    | 1.8    | 0.7    | 1.9   | 1.4   | 1.5   | 0.7   | 2.8   |
| 111.1  | 106.3  | 99.3   | 88.1   | 101.1 | 117.7 | 109.1 | 141.2 | 95.9  |
| 1.3    | 5.1    | 3.9    | 4.5    | 12.2  | 2.4   | 20.4  | 15.8  | 3.3   |
| 60.2   | 46.3   | 76.3   | 55.8   | 30.3  | 30.9  | 33.9  | 40.1  | 69.5  |
| 3.4    | 13.0   | 14.2   | 14.6   | 10.6  | 12.7  | 19.1  | 9.3   | 110.8 |
| 326.1  | 302.2  | 501.7  | 293.9  | 645.7 | 561.5 | 644.5 | 790.3 | 749.4 |
| 46.3   | 45.7   | 47.3   | 29.3   | 67.8  | 37.3  | 47.7  | 72.2  | 74.9  |
| 18.8   | 19.4   | 20.5   | 13.2   | 33.1  | 19.0  | 27.9  | 43.1  | 123.7 |
| 6.5    | 16.9   | 38.4   | 19.5   | 2.9   | 3.5   | 0.9   | 8.8   | 5.8   |
| 9.8    | 3.8    | 2.8    | 2.7    | 36.1  | 47.2  | 40.5  | 58.3  | 63.4  |
| 2.1    | 7.4    | 3.7    | 5.9    | 146.3 | 55.9  | 415.6 | 124.8 | 1.0   |
| 0.7    | 2.7    | 1.2    | 1.4    | 1.2   | 1.7   | 0.6   | 2.2   | 0.3   |
| 46.4   | 55.4   | 29.4   | 32.4   | 189.8 | 246.2 | 207.1 | 200.5 | 47.7  |
| 68.7   | 67.4   | 137.1  | 57.3   | 112.1 | 118.0 | 103.7 | 117.0 | 27.4  |
| 13.9   | 10.3   | 22.0   | 13.9   | 52.4  | 40.1  | 115.7 | 60.6  | 886.9 |
| 418.0  | 502.8  | 89.3   | 277.7  | 19.3  | 2.0   | 14.2  | 8.1   | 9.8   |
| 34.4   | 32.6   | 70.6   | 31.1   | 10.3  | 8.1   | 5.3   | 1.9   | 18.9  |
| 19.7   | 19.2   | 31.6   | 19.4   | 10.5  | 5.4   | 9.5   | 2.8   | 5.6   |
| 11.0   | 5.8    | 14.2   | 16.3   | 2.2   | 1.5   | 1.0   | 1.5   | 5.4   |
| 9.6    | 3.2    | 6.4    | 4.5    | 68.6  | 42.1  | 67.0  | 94.3  | 199.4 |
| 10.0   | 1.4    | 3.9    | 2.3    | 1.5   | 4.1   | 10.2  | 21.8  | 7.6   |
| 7.9    | 7.9    | 5.0    | 8.4    | 17.7  | 15.0  | 25.2  | 35.2  | 3.2   |

|        |        |        |        |        |        |        |        |        |
|--------|--------|--------|--------|--------|--------|--------|--------|--------|
| 2.5    | 1.3    | 2.2    | 1.8    | 11.0   | 2.0    | 5.9    | 1.6    | 22.7   |
| 4.1    | 0.8    | 7.1    | 2.1    | 15.5   | 1.1    | 4.8    | 5.0    | 13.4   |
| 8.0    | 2.5    | 2.6    | 4.6    | 10.1   | 15.0   | 12.3   | 10.1   | 1.6    |
| 1.0    | 4.1    | 2.7    | 0.4    | 0.5    | 1.3    | 0.9    | 0.4    | 1.9    |
| 27.1   | 20.3   | 17.1   | 24.5   | 16.9   | 14.2   | 17.7   | 18.7   | 38.6   |
| 16.4   | 17.8   | 27.7   | 8.8    | 17.8   | 15.2   | 23.6   | 14.0   | 34.6   |
| 1.2    | 2.4    | 1.2    | 1.4    | 3.0    | 2.7    | 8.6    | 1.0    | 1.5    |
| 10.0   | 6.7    | 7.6    | 1.9    | 53.2   | 63.9   | 43.2   | 48.8   | 40.0   |
| 24.7   | 32.6   | 25.6   | 16.3   | 20.9   | 9.5    | 11.7   | 18.9   | 9.2    |
| 9.5    | 7.3    | 14.0   | 8.1    | 9.6    | 0.4    | 5.3    | 6.8    | 6.1    |
| 4.0    | 1.4    | 39.0   | 1.4    | 77.1   | 63.3   | 55.7   | 76.3   | 1.7    |
| 53.9   | 43.2   | 63.3   | 54.9   | 17.3   | 7.2    | 15.3   | 22.9   | 59.4   |
| 6.4    | 0.6    | 1.1    | 0.4    | 1.1    | 0.9    | 0.3    | 0.8    | 1.6    |
| 4.4    | 5.8    | 8.9    | 7.9    | 5.0    | 4.9    | 3.4    | 4.4    | 10.6   |
| 27.3   | 22.8   | 22.2   | 18.4   | 18.6   | 19.8   | 22.0   | 28.1   | 44.8   |
| 12.2   | 4.6    | 13.2   | 6.4    | 10.7   | 16.1   | 5.2    | 6.7    | 22.1   |
| 10.6   | 9.8    | 11.2   | 6.7    | 20.8   | 8.2    | 11.8   | 18.8   | 25.8   |
| 13.0   | 10.8   | 36.5   | 10.9   | 119.9  | 65.1   | 115.7  | 141.3  | 70.2   |
| 7.5    | 11.5   | 14.5   | 3.7    | 9.0    | 19.8   | 16.3   | 20.4   | 3.2    |
| 0.8    | 1.2    | 1.2    | 0.7    | 1.2    | 0.5    | 1.3    | 0.5    | 4.4    |
| 24.8   | 22.7   | 28.0   | 20.3   | 43.5   | 47.9   | 58.1   | 57.7   | 78.2   |
| 18.6   | 18.7   | 19.3   | 13.0   | 18.3   | 25.7   | 18.8   | 18.9   | 43.5   |
| 4.3    | 1.8    | 7.2    | 7.0    | 26.6   | 34.3   | 31.3   | 33.2   | 22.9   |
| 6.4    | 9.3    | 6.6    | 3.8    | 3.6    | 6.0    | 15.5   | 6.1    | 13.6   |
| 19.1   | 21.3   | 12.0   | 18.6   | 50.4   | 54.2   | 47.4   | 54.7   | 29.7   |
| 2.6    | 7.8    | 2.5    | 2.5    | 2.1    | 4.9    | 3.6    | 1.6    | 8.0    |
| 152.8  | 123.0  | 171.6  | 126.0  | 289.7  | 165.2  | 228.2  | 341.3  | 357.3  |
| 4.7    | 7.7    | 10.0   | 6.6    | 22.7   | 12.9   | 24.8   | 13.3   | 23.1   |
| 52.2   | 48.5   | 66.6   | 46.6   | 130.5  | 96.0   | 131.1  | 155.9  | 220.3  |
| 3.5    | 7.1    | 12.7   | 6.5    | 5.0    | 1.1    | 2.7    | 8.7    | 6.7    |
| 51.8   | 53.0   | 55.0   | 60.1   | 38.1   | 36.6   | 29.9   | 61.2   | 4.9    |
| 15.2   | 6.8    | 17.7   | 8.4    | 0.7    | 5.0    | 8.8    | 7.3    | 54.6   |
| 2.1    | 3.7    | 0.8    | 0.7    | 4.0    | 0.8    | 0.5    | 2.8    | 3.5    |
| 6.1    | 1.8    | 6.6    | 8.9    | 16.7   | 20.7   | 24.7   | 26.1   | 23.4   |
| 120.8  | 122.0  | 227.9  | 100.3  | 904.8  | 781.5  | 886.8  | 970.3  | 473.3  |
| 90.0   | 95.1   | 78.2   | 78.8   | 39.0   | 59.9   | 52.4   | 57.7   | 84.8   |
| 3.1    | 1.7    | 3.8    | 3.3    | 40.3   | 152.0  | 42.4   | 60.8   | 1181.3 |
| 14.4   | 11.0   | 7.1    | 7.3    | 8.3    | 11.1   | 8.9    | 2.1    | 28.6   |
| 90.9   | 74.1   | 141.1  | 95.9   | 51.8   | 28.3   | 44.1   | 62.1   | 97.6   |
| 344.7  | 304.3  | 443.3  | 398.8  | 286.3  | 240.6  | 317.1  | 326.0  | 399.6  |
| 30.1   | 37.3   | 15.0   | 31.0   | 6.0    | 1.0    | 5.5    | 7.8    | 5.9    |
| 29.7   | 27.1   | 38.3   | 34.0   | 91.5   | 92.4   | 89.9   | 118.8  | 19.4   |
| 125.0  | 129.4  | 114.3  | 113.8  | 39.7   | 46.1   | 46.0   | 45.2   | 16.3   |
| 8783.1 | 8340.7 | 9421.4 | 8372.5 | 7678.9 | 7938.2 | 8050.7 | 8157.7 | 9769.6 |
| 5.8    | 10.9   | 27.8   | 18.0   | 8.8    | 3.8    | 10.8   | 20.1   | 2098.9 |
| 36.0   | 28.0   | 115.3  | 14.2   | 920.2  | 299.3  | 947.7  | 1293.5 | 20.5   |
| 1007.6 | 946.8  | 1083.1 | 842.2  | 784.2  | 936.3  | 904.1  | 915.9  | 1395.9 |
| 13.5   | 18.3   | 16.9   | 2.6    | 7.6    | 12.6   | 15.3   | 12.0   | 19.5   |
| 11.1   | 17.8   | 19.1   | 10.3   | 10.0   | 10.7   | 14.9   | 2.6    | 16.2   |
| 83.6   | 83.7   | 80.2   | 68.2   | 35.1   | 36.3   | 34.9   | 68.0   | 43.5   |
| 17.2   | 10.9   | 40.1   | 18.5   | 38.7   | 87.4   | 51.8   | 55.6   | 83.2   |
| 89.9   | 82.6   | 114.9  | 87.9   | 64.5   | 77.3   | 67.5   | 80.5   | 58.9   |
| 10.2   | 10.0   | 10.3   | 4.5    | 5.9    | 9.2    | 10.2   | 3.0    | 7.6    |

|        |        |        |        |        |        |        |        |        |
|--------|--------|--------|--------|--------|--------|--------|--------|--------|
| 6.3    | 2.0    | 2.5    | 2.1    | 96.1   | 106.1  | 132.4  | 60.9   | 4387.7 |
| 14.5   | 15.5   | 11.7   | 15.1   | 5.9    | 6.8    | 15.5   | 9.6    | 19.4   |
| 134.5  | 134.2  | 179.1  | 103.9  | 373.0  | 345.9  | 342.8  | 413.2  | 256.8  |
| 85.5   | 94.4   | 167.1  | 79.7   | 60.2   | 48.1   | 51.2   | 66.4   | 158.2  |
| 12.0   | 13.9   | 23.5   | 15.6   | 14.3   | 11.9   | 15.0   | 5.4    | 20.8   |
| 103.9  | 89.1   | 94.5   | 103.0  | 8.8    | 11.7   | 6.8    | 22.4   | 14.8   |
| 2.6    | 2.2    | 2.7    | 6.0    | 4.4    | 1.8    | 7.6    | 0.9    | 3.4    |
| 18.7   | 23.2   | 30.1   | 16.6   | 3.9    | 10.2   | 6.9    | 2.1    | 13.5   |
| 2.8    | 3.0    | 1.1    | 4.7    | 1.2    | 20.9   | 3.8    | 1.9    | 4.7    |
| 5.3    | 2.1    | 11.4   | 20.0   | 6.1    | 2.4    | 16.1   | 0.6    | 209.0  |
| 15.1   | 13.0   | 15.4   | 16.4   | 8.8    | 14.5   | 8.5    | 15.8   | 16.7   |
| 13.2   | 22.7   | 23.1   | 10.9   | 17.6   | 19.1   | 16.2   | 16.9   | 32.8   |
| 2.7    | 6.6    | 1.6    | 4.1    | 2.9    | 4.8    | 5.6    | 2.3    | 22.1   |
| 190.9  | 170.5  | 312.1  | 158.3  | 28.1   | 16.8   | 25.6   | 34.2   | 151.9  |
| 27.2   | 35.9   | 25.8   | 33.3   | 86.4   | 142.6  | 83.1   | 99.3   | 185.8  |
| 5.0    | 3.9    | 4.8    | 8.0    | 73.5   | 161.9  | 86.2   | 79.2   | 53.4   |
| 6.6    | 7.1    | 9.8    | 4.5    | 6.9    | 4.0    | 6.8    | 10.7   | 8.7    |
| 24.7   | 25.7   | 30.0   | 25.7   | 22.9   | 16.0   | 25.2   | 23.5   | 44.5   |
| 132.8  | 141.0  | 133.7  | 208.0  | 22.7   | 37.5   | 26.3   | 39.2   | 60.9   |
| 3.9    | 1.8    | 6.9    | 5.0    | 1.0    | 3.8    | 4.1    | 6.2    | 9.5    |
| 2.7    | 1.3    | 3.2    | 1.6    | 1.4    | 1.0    | 0.9    | 3.0    | 3.4    |
| 29.3   | 24.1   | 32.4   | 19.2   | 35.0   | 21.8   | 25.2   | 51.8   | 52.6   |
| 6.1    | 10.0   | 1.3    | 4.9    | 14.6   | 11.7   | 17.5   | 11.2   | 1.4    |
| 544.1  | 516.9  | 863.1  | 578.8  | 814.5  | 917.1  | 862.3  | 992.8  | 663.2  |
| 143.3  | 131.9  | 191.0  | 121.2  | 143.9  | 117.6  | 134.6  | 192.9  | 122.4  |
| 9.6    | 8.7    | 20.8   | 14.6   | 16.3   | 8.1    | 24.5   | 19.0   | 24.1   |
| 11.5   | 9.2    | 18.3   | 5.7    | 44.9   | 41.6   | 51.0   | 41.4   | 5.7    |
| 27.8   | 17.0   | 30.6   | 3.4    | 7.4    | 0.9    | 5.5    | 1.4    | 2.2    |
| 10.3   | 5.0    | 24.1   | 14.2   | 4.5    | 1.7    | 1.3    | 11.3   | 7.5    |
| 1.2    | 1.1    | 1.4    | 1.1    | 4.0    | 0.7    | 0.7    | 0.5    | 2.3    |
| 72.1   | 77.2   | 66.1   | 63.8   | 8.0    | 14.4   | 16.2   | 2.8    | 69.0   |
| 184.7  | 211.7  | 159.3  | 172.8  | 43.2   | 55.7   | 43.0   | 43.6   | 115.0  |
| 5.6    | 6.0    | 4.6    | 5.3    | 4.1    | 7.7    | 5.0    | 19.9   | 7.5    |
| 1.0    | 8.8    | 5.0    | 0.8    | 1.7    | 2.8    | 2.1    | 1.1    | 4.6    |
| 1.3    | 2.8    | 2.1    | 2.8    | 3.0    | 0.4    | 2.1    | 4.9    | 1.7    |
| 29.8   | 24.9   | 51.6   | 27.7   | 9.9    | 9.2    | 23.5   | 20.4   | 14.9   |
| 9.7    | 6.7    | 6.6    | 9.3    | 2.4    | 3.4    | 3.6    | 0.9    | 4.9    |
| 1.0    | 0.8    | 1.3    | 0.7    | 0.6    | 0.5    | 0.7    | 0.7    | 1.5    |
| 9.2    | 6.7    | 27.7   | 12.9   | 19.3   | 22.2   | 7.5    | 6.7    | 32.2   |
| 23.8   | 30.6   | 31.9   | 25.4   | 9.5    | 10.1   | 11.2   | 7.6    | 14.9   |
| 6.2    | 9.0    | 9.7    | 9.3    | 16.2   | 29.0   | 25.2   | 27.7   | 22.2   |
| 11.5   | 9.4    | 17.5   | 8.4    | 6.5    | 5.8    | 10.9   | 7.2    | 19.0   |
| 39.0   | 38.7   | 23.6   | 36.3   | 46.8   | 45.0   | 37.0   | 47.0   | 35.4   |
| 24.8   | 32.0   | 14.4   | 31.6   | 13.0   | 4.8    | 7.9    | 25.3   | 5.9    |
| 29.1   | 30.4   | 40.3   | 25.1   | 176.7  | 187.4  | 183.2  | 202.5  | 301.5  |
| 26.8   | 32.4   | 20.8   | 17.6   | 5.3    | 4.4    | 11.5   | 7.7    | 12.2   |
| 10.3   | 6.2    | 5.7    | 4.0    | 6.5    | 0.3    | 1.5    | 4.6    | 17.5   |
| 8.2    | 4.8    | 2.6    | 5.4    | 5.1    | 4.1    | 1.2    | 4.6    | 4.4    |
| 0.9    | 1.1    | 2.8    | 2.8    | 3.4    | 1.7    | 1.8    | 0.7    | 4.3    |
| 4.1    | 0.8    | 2.2    | 3.8    | 31.3   | 40.8   | 25.9   | 35.6   | 21.6   |
| 1.6    | 2.7    | 1.8    | 2.7    | 3.2    | 4.7    | 1.7    | 0.8    | 2.3    |
| 10.2   | 5.5    | 12.2   | 1.8    | 6.0    | 6.2    | 8.1    | 4.7    | 5.4    |
| 1735.5 | 1750.0 | 2516.0 | 1645.6 | 1122.3 | 1003.2 | 1068.1 | 1266.6 | 2483.7 |



|        |        |        |        |        |        |        |        |        |
|--------|--------|--------|--------|--------|--------|--------|--------|--------|
| 23.2   | 21.8   | 30.2   | 13.3   | 1.3    | 5.3    | 1.5    | 0.7    | 14.3   |
| 11.0   | 14.4   | 15.8   | 10.5   | 16.0   | 16.3   | 22.5   | 20.4   | 9.2    |
| 0.5    | 0.7    | 0.9    | 2.4    | 1.1    | 2.8    | 0.7    | 1.3    | 2.3    |
| 8.1    | 13.3   | 18.0   | 9.8    | 18.6   | 9.0    | 4.6    | 13.3   | 24.8   |
| 13.8   | 15.5   | 15.3   | 11.9   | 1492.6 | 1186.4 | 1394.4 | 1591.1 | 291.7  |
| 1.0    | 0.7    | 8.8    | 0.6    | 497.1  | 292.6  | 394.3  | 523.3  | 7.4    |
| 5.8    | 7.9    | 11.3   | 11.4   | 8.8    | 5.8    | 6.5    | 4.8    | 18.2   |
| 1.2    | 0.9    | 2.7    | 1.0    | 0.6    | 0.8    | 0.6    | 1.0    | 2.0    |
| 8.3    | 17.2   | 17.1   | 16.3   | 4.4    | 11.3   | 7.1    | 27.6   | 25.4   |
| 1.9    | 5.3    | 1.0    | 2.6    | 0.9    | 1.7    | 0.6    | 0.6    | 7.4    |
| 552.8  | 543.8  | 1037.9 | 471.6  | 5.9    | 4.3    | 5.6    | 3.5    | 1062.1 |
| 9.0    | 14.0   | 12.9   | 13.8   | 14.8   | 9.6    | 13.9   | 14.6   | 13.1   |
| 13.1   | 10.3   | 16.7   | 3.7    | 6.2    | 6.5    | 5.0    | 1.7    | 8.5    |
| 12.7   | 14.2   | 37.4   | 29.9   | 23.3   | 20.1   | 20.3   | 19.1   | 35.9   |
| 36.8   | 38.5   | 33.2   | 37.1   | 29.7   | 27.7   | 37.2   | 35.5   | 59.9   |
| 2.1    | 4.4    | 2.8    | 7.1    | 4.8    | 6.4    | 4.3    | 9.2    | 1.3    |
| 0.4    | 0.6    | 2.3    | 3.0    | 3.4    | 2.3    | 1.6    | 1.3    | 3.2    |
| 5.9    | 6.3    | 6.6    | 2.4    | 12.5   | 11.2   | 10.4   | 6.6    | 10.8   |
| 8.0    | 6.3    | 8.4    | 7.7    | 2742.2 | 2775.4 | 2954.1 | 3129.2 | 471.6  |
| 3.9    | 0.8    | 7.9    | 0.3    | 1.2    | 3.7    | 1.1    | 1.0    | 1.8    |
| 1.3    | 1.9    | 2.2    | 3.8    | 3.0    | 1.1    | 2.0    | 1.6    | 3.5    |
| 9.3    | 6.0    | 3.0    | 4.8    | 1.4    | 0.9    | 3.2    | 10.2   | 10.3   |
| 3.1    | 5.6    | 9.3    | 5.2    | 89.5   | 115.8  | 102.0  | 115.0  | 11.2   |
| 1.1    | 1.7    | 1.3    | 5.9    | 456.7  | 728.6  | 601.0  | 690.3  | 8.4    |
| 14.7   | 6.6    | 4.1    | 14.5   | 23.5   | 37.3   | 37.1   | 48.6   | 8.4    |
| 0.6    | 0.8    | 0.8    | 0.7    | 0.7    | 0.5    | 0.6    | 1.2    | 0.8    |
| 39.2   | 43.4   | 27.2   | 39.0   | 36.1   | 57.3   | 31.5   | 53.9   | 26.1   |
| 106.5  | 104.2  | 114.2  | 81.7   | 215.6  | 250.9  | 150.4  | 197.7  | 175.1  |
| 19.2   | 22.5   | 25.9   | 17.0   | 28.9   | 31.3   | 23.0   | 25.7   | 29.1   |
| 2.1    | 2.8    | 11.7   | 2.1    | 4.0    | 1.8    | 2.6    | 7.7    | 15.0   |
| 35.2   | 36.1   | 36.8   | 30.2   | 15.3   | 13.9   | 10.2   | 16.8   | 47.9   |
| 12.0   | 13.6   | 26.8   | 14.1   | 222.1  | 140.9  | 184.9  | 198.6  | 350.3  |
| 12.1   | 8.7    | 12.4   | 11.2   | 76.2   | 53.5   | 72.8   | 100.9  | 147.1  |
| 2.3    | 1.6    | 11.0   | 1.2    | 4.8    | 7.2    | 4.1    | 7.8    | 13.8   |
| 1315.5 | 1344.7 | 1407.2 | 1290.5 | 1072.3 | 1306.4 | 1209.7 | 1273.7 | 956.3  |
| 2.5    | 2.5    | 6.5    | 2.7    | 3.1    | 3.9    | 4.2    | 4.0    | 9.9    |
| 3.2    | 5.7    | 6.6    | 5.5    | 12.1   | 16.1   | 12.1   | 19.6   | 8.2    |
| 29.7   | 26.2   | 22.6   | 29.6   | 76.8   | 74.5   | 72.1   | 81.7   | 36.8   |
| 6.2    | 3.4    | 11.5   | 3.1    | 3.4    | 2.0    | 9.6    | 10.2   | 6.3    |
| 9.7    | 10.8   | 5.5    | 7.1    | 17.4   | 17.4   | 15.5   | 25.4   | 19.4   |
| 34.3   | 23.8   | 56.8   | 36.3   | 404.2  | 513.0  | 320.3  | 375.7  | 914.6  |
| 13.9   | 9.4    | 8.1    | 9.0    | 17.4   | 20.4   | 28.8   | 34.1   | 21.6   |
| 1.9    | 1.0    | 3.0    | 2.2    | 3.7    | 0.4    | 0.2    | 0.4    | 1.6    |
| 194.4  | 210.0  | 245.7  | 172.4  | 98.0   | 74.0   | 57.3   | 92.6   | 154.4  |
| 4.0    | 5.3    | 6.3    | 1.7    | 13.2   | 2.3    | 4.1    | 9.4    | 23.7   |
| 113.4  | 101.0  | 93.1   | 77.7   | 194.9  | 210.5  | 248.0  | 264.4  | 145.9  |
| 135.5  | 121.0  | 116.6  | 113.3  | 177.4  | 169.5  | 229.4  | 252.8  | 129.0  |
| 7.1    | 8.9    | 15.7   | 6.7    | 21.2   | 27.5   | 19.4   | 28.1   | 70.3   |
| 13.8   | 5.3    | 6.3    | 2.8    | 30.4   | 35.8   | 38.8   | 41.2   | 64.4   |
| 13.2   | 7.5    | 15.4   | 5.6    | 7.5    | 3.1    | 8.1    | 2.9    | 11.8   |
| 29.4   | 26.5   | 47.7   | 30.8   | 21.8   | 22.1   | 8.6    | 22.5   | 22.8   |
| 10.6   | 10.9   | 12.5   | 9.5    | 90.0   | 104.1  | 81.4   | 70.8   | 89.0   |
| 12.4   | 10.2   | 20.6   | 14.6   | 23.0   | 15.6   | 17.5   | 20.4   | 2.9    |

|       |       |       |       |       |       |       |       |       |
|-------|-------|-------|-------|-------|-------|-------|-------|-------|
| 15.7  | 15.6  | 20.6  | 9.4   | 27.5  | 28.6  | 35.8  | 35.5  | 27.3  |
| 8.5   | 5.3   | 7.3   | 1.9   | 1.3   | 1.0   | 2.0   | 0.5   | 0.9   |
| 16.7  | 8.9   | 13.6  | 6.0   | 9.0   | 5.0   | 11.0  | 8.2   | 8.7   |
| 1.3   | 1.7   | 2.4   | 2.8   | 4.1   | 2.4   | 1.9   | 4.6   | 2.4   |
| 6.1   | 7.5   | 16.2  | 4.7   | 11.7  | 11.3  | 11.4  | 13.0  | 15.3  |
| 1.7   | 4.8   | 2.8   | 5.6   | 4.4   | 2.1   | 5.0   | 0.9   | 9.4   |
| 7.1   | 2.4   | 9.5   | 7.3   | 4.6   | 7.7   | 1.5   | 8.2   | 2.3   |
| 6.7   | 12.5  | 1.7   | 7.1   | 2.1   | 0.9   | 5.9   | 2.0   | 1.5   |
| 44.4  | 51.0  | 53.7  | 53.9  | 83.8  | 109.1 | 71.0  | 88.2  | 14.5  |
| 23.4  | 22.0  | 29.3  | 17.3  | 13.9  | 12.2  | 15.6  | 13.9  | 21.9  |
| 0.7   | 0.6   | 1.1   | 0.9   | 64.8  | 73.9  | 67.8  | 81.3  | 23.5  |
| 13.5  | 9.7   | 46.9  | 16.9  | 41.8  | 69.4  | 39.7  | 55.4  | 80.4  |
| 153.7 | 163.4 | 128.8 | 161.4 | 58.2  | 58.9  | 60.3  | 66.5  | 33.9  |
| 227.5 | 197.4 | 287.9 | 153.3 | 581.7 | 706.7 | 579.7 | 608.1 | 446.3 |
| 318.0 | 303.6 | 363.5 | 317.6 | 239.5 | 203.7 | 195.0 | 209.1 | 235.0 |
| 2.3   | 6.0   | 2.9   | 5.9   | 2.5   | 6.8   | 8.7   | 1.0   | 4.3   |
| 16.5  | 21.5  | 21.3  | 18.5  | 4.6   | 3.1   | 4.7   | 10.5  | 12.4  |
| 2.0   | 7.7   | 2.7   | 7.0   | 3.1   | 1.2   | 0.7   | 2.6   | 7.2   |
| 13.4  | 9.2   | 6.1   | 6.6   | 73.1  | 54.6  | 67.1  | 62.5  | 140.6 |
| 6.1   | 8.2   | 7.3   | 4.2   | 2.1   | 1.7   | 4.1   | 0.9   | 3.6   |
| 151.9 | 135.2 | 237.4 | 111.3 | 28.5  | 19.2  | 29.9  | 32.7  | 145.6 |
| 118.9 | 109.2 | 82.5  | 82.1  | 1.8   | 6.4   | 2.6   | 2.3   | 1.3   |
| 6.4   | 8.0   | 5.0   | 4.5   | 12.7  | 6.3   | 1.0   | 10.2  | 12.7  |
| 13.8  | 17.0  | 21.0  | 10.3  | 161.3 | 156.8 | 165.0 | 190.0 | 25.5  |
| 14.3  | 29.6  | 4.2   | 18.1  | 7.4   | 13.7  | 8.7   | 1.2   | 16.9  |
| 2.5   | 6.0   | 5.7   | 1.8   | 3.9   | 7.8   | 6.5   | 11.1  | 14.8  |
| 1.0   | 0.8   | 10.6  | 1.1   | 8.8   | 5.9   | 20.2  | 17.1  | 180.3 |
| 3.9   | 1.5   | 4.0   | 4.1   | 5.3   | 4.2   | 5.9   | 10.4  | 14.9  |
| 29.5  | 28.5  | 38.1  | 40.5  | 73.8  | 70.6  | 60.3  | 56.6  | 72.9  |
| 15.2  | 10.0  | 33.5  | 17.7  | 25.7  | 39.3  | 43.4  | 36.5  | 43.3  |
| 9.7   | 4.8   | 11.4  | 2.8   | 12.0  | 3.1   | 2.3   | 12.4  | 4.4   |
| 10.5  | 3.2   | 4.6   | 3.2   | 46.0  | 33.4  | 38.4  | 40.1  | 15.3  |
| 14.2  | 13.7  | 10.7  | 17.8  | 5.5   | 5.3   | 8.5   | 10.9  | 17.0  |
| 13.0  | 12.3  | 8.5   | 8.8   | 29.2  | 28.8  | 24.3  | 41.2  | 37.9  |
| 22.0  | 14.9  | 20.8  | 11.8  | 11.3  | 8.1   | 10.5  | 16.9  | 22.7  |
| 0.7   | 0.4   | 3.5   | 2.6   | 246.5 | 164.3 | 244.5 | 310.6 | 0.9   |
| 1.6   | 2.6   | 1.5   | 0.6   | 6.3   | 0.9   | 1.7   | 1.2   | 2.4   |
| 8.7   | 7.5   | 27.2  | 16.1  | 14.4  | 7.8   | 6.9   | 0.6   | 3.2   |
| 12.8  | 10.3  | 11.9  | 7.1   | 37.3  | 42.2  | 31.2  | 41.8  | 12.7  |
| 170.9 | 146.0 | 555.1 | 734.9 | 6.1   | 4.8   | 9.7   | 20.5  | 11.4  |
| 0.4   | 3.9   | 4.0   | 5.1   | 28.6  | 21.9  | 30.2  | 31.1  | 1.7   |
| 1.2   | 3.9   | 2.4   | 1.9   | 3.1   | 1.9   | 6.0   | 1.8   | 2.1   |
| 4.3   | 0.6   | 1.4   | 0.8   | 20.0  | 10.3  | 53.6  | 41.4  | 4.3   |
| 8.7   | 4.5   | 7.1   | 12.3  | 17.0  | 19.5  | 23.3  | 27.8  | 15.9  |
| 15.3  | 13.3  | 16.9  | 3.5   | 19.1  | 15.5  | 17.9  | 22.3  | 20.3  |
| 2.2   | 5.6   | 2.7   | 4.8   | 10.1  | 6.0   | 7.3   | 1.0   | 13.2  |
| 11.5  | 4.3   | 11.2  | 3.9   | 1.1   | 3.5   | 3.3   | 2.5   | 57.1  |
| 95.1  | 76.9  | 124.8 | 81.6  | 77.8  | 70.1  | 70.3  | 65.9  | 13.4  |
| 91.4  | 88.5  | 167.0 | 97.2  | 61.6  | 76.7  | 78.0  | 94.2  | 25.3  |
| 107.5 | 101.6 | 130.6 | 90.2  | 160.0 | 181.7 | 159.0 | 186.2 | 98.1  |
| 4.0   | 2.0   | 2.0   | 2.3   | 18.7  | 9.0   | 22.1  | 25.4  | 10.6  |
| 0.8   | 3.9   | 4.3   | 3.8   | 4.6   | 3.3   | 2.5   | 7.4   | 7.3   |
| 3.8   | 0.8   | 2.9   | 1.1   | 2.9   | 0.6   | 2.6   | 0.4   | 2.8   |

|       |       |       |       |       |       |       |       |       |
|-------|-------|-------|-------|-------|-------|-------|-------|-------|
| 5.0   | 2.9   | 4.5   | 3.2   | 4.0   | 1.6   | 1.4   | 2.3   | 2.7   |
| 15.5  | 11.3  | 16.9  | 7.4   | 10.4  | 5.7   | 15.3  | 20.2  | 28.7  |
| 0.6   | 0.4   | 0.7   | 1.8   | 1.0   | 1.5   | 1.6   | 1.0   | 2.5   |
| 4.1   | 3.3   | 11.2  | 4.3   | 4.4   | 4.4   | 4.4   | 13.8  | 7.7   |
| 1.6   | 4.7   | 9.6   | 6.0   | 5.0   | 0.9   | 4.9   | 6.8   | 10.3  |
| 10.5  | 7.1   | 5.5   | 9.2   | 13.9  | 5.3   | 6.8   | 1.0   | 19.0  |
| 54.6  | 51.6  | 60.9  | 49.8  | 151.3 | 160.5 | 163.7 | 176.0 | 202.0 |
| 10.0  | 9.4   | 15.4  | 9.9   | 17.0  | 9.5   | 13.2  | 9.1   | 10.7  |
| 8.6   | 7.9   | 16.0  | 8.4   | 12.0  | 7.3   | 3.9   | 1.5   | 3.2   |
| 5.6   | 5.9   | 6.5   | 16.9  | 1.9   | 1.9   | 2.1   | 1.1   | 2.1   |
| 21.9  | 29.7  | 39.4  | 20.4  | 17.5  | 7.7   | 12.1  | 22.9  | 26.5  |
| 27.4  | 18.3  | 59.2  | 23.6  | 25.4  | 29.4  | 29.3  | 35.1  | 96.1  |
| 9.1   | 7.6   | 10.9  | 9.1   | 8.9   | 6.8   | 3.8   | 1.8   | 13.5  |
| 6.9   | 2.9   | 9.6   | 5.3   | 4.9   | 2.8   | 1.6   | 4.3   | 97.4  |
| 4.3   | 9.1   | 6.6   | 7.8   | 3.6   | 8.6   | 6.0   | 2.9   | 16.2  |
| 0.9   | 1.1   | 1.1   | 3.8   | 12.9  | 20.9  | 8.2   | 11.1  | 7.5   |
| 21.8  | 23.5  | 29.6  | 18.3  | 8.9   | 9.6   | 9.9   | 14.8  | 24.3  |
| 86.6  | 83.3  | 157.1 | 87.5  | 25.1  | 18.4  | 17.9  | 23.5  | 85.0  |
| 69.3  | 90.2  | 29.9  | 52.2  | 24.0  | 32.0  | 31.8  | 28.7  | 23.7  |
| 28.6  | 30.4  | 40.8  | 33.0  | 22.3  | 23.9  | 16.5  | 30.7  | 35.0  |
| 126.5 | 86.7  | 125.4 | 81.5  | 259.3 | 359.6 | 295.5 | 380.2 | 264.2 |
| 2.0   | 3.2   | 2.6   | 1.7   | 4.7   | 1.6   | 2.3   | 5.4   | 3.5   |
| 21.7  | 17.7  | 25.9  | 16.9  | 27.9  | 31.5  | 36.1  | 45.9  | 40.6  |
| 5.0   | 1.7   | 2.9   | 2.9   | 3.4   | 1.0   | 2.7   | 0.3   | 21.2  |
| 45.2  | 44.5  | 47.9  | 47.1  | 19.2  | 26.0  | 30.2  | 32.1  | 63.2  |
| 3.2   | 4.6   | 6.1   | 3.4   | 4.2   | 3.1   | 4.6   | 2.4   | 2.7   |
| 50.1  | 58.6  | 100.0 | 109.4 | 10.1  | 1.2   | 3.3   | 9.8   | 15.9  |
| 6.5   | 3.7   | 20.5  | 1.5   | 13.9  | 4.5   | 7.9   | 23.5  | 2.4   |
| 9.8   | 9.6   | 19.8  | 5.8   | 84.1  | 81.7  | 90.7  | 111.1 | 79.9  |
| 14.5  | 8.9   | 7.3   | 7.8   | 69.1  | 32.6  | 177.2 | 90.4  | 3.4   |
| 20.6  | 13.4  | 18.2  | 10.7  | 21.3  | 1.7   | 28.8  | 55.5  | 12.0  |
| 5.6   | 0.7   | 1.9   | 1.3   | 1.7   | 2.5   | 4.8   | 1.5   | 1.4   |
| 0.8   | 0.8   | 1.0   | 0.9   | 1.1   | 0.8   | 1.0   | 0.7   | 1.2   |
| 1.8   | 1.0   | 4.4   | 4.8   | 5.0   | 0.7   | 2.4   | 0.5   | 256.8 |
| 1.3   | 0.8   | 1.1   | 2.2   | 0.6   | 0.9   | 0.9   | 0.5   | 3.4   |
| 13.4  | 8.8   | 8.5   | 12.8  | 8.4   | 9.8   | 12.2  | 24.0  | 9.9   |
| 77.6  | 82.6  | 59.2  | 69.6  | 19.4  | 45.2  | 25.8  | 47.6  | 16.7  |
| 1.3   | 1.7   | 4.8   | 3.3   | 20.8  | 18.2  | 25.8  | 33.4  | 27.2  |
| 19.0  | 14.9  | 30.3  | 21.8  | 17.6  | 15.3  | 15.5  | 22.8  | 29.5  |
| 19.1  | 23.7  | 19.2  | 15.3  | 54.5  | 43.6  | 67.5  | 85.5  | 47.9  |
| 6.1   | 12.2  | 15.0  | 9.9   | 2.4   | 2.0   | 0.9   | 3.8   | 10.0  |
| 5.0   | 2.6   | 10.5  | 7.1   | 3.6   | 1.7   | 6.9   | 2.1   | 6.1   |
| 597.0 | 510.7 | 886.3 | 557.7 | 485.3 | 546.4 | 570.2 | 650.1 | 361.1 |
| 1.6   | 1.0   | 1.9   | 1.6   | 0.8   | 4.0   | 1.7   | 1.9   | 1.7   |
| 91.5  | 75.6  | 120.6 | 89.6  | 7.7   | 4.1   | 3.6   | 1.0   | 1.2   |
| 6.0   | 12.2  | 10.5  | 6.6   | 4.3   | 3.4   | 4.1   | 8.0   | 10.2  |
| 5.7   | 3.4   | 3.0   | 3.6   | 3.0   | 1.8   | 7.0   | 12.7  | 4.6   |
| 5.8   | 6.6   | 4.8   | 10.4  | 3.3   | 8.6   | 2.8   | 8.8   | 12.0  |
| 11.3  | 11.1  | 11.0  | 14.0  | 15.2  | 12.9  | 17.8  | 13.9  | 13.3  |
| 118.7 | 102.8 | 158.4 | 118.5 | 47.5  | 65.1  | 52.0  | 55.1  | 38.2  |
| 22.5  | 31.1  | 28.8  | 4.4   | 2.1   | 5.5   | 1.9   | 3.3   | 5.0   |
| 2.1   | 1.0   | 7.6   | 0.8   | 5.4   | 0.6   | 7.0   | 1.9   | 1.2   |
| 3.9   | 4.9   | 13.2  | 2.8   | 6.3   | 8.9   | 7.3   | 5.9   | 12.6  |

|        |        |        |        |        |        |        |        |        |
|--------|--------|--------|--------|--------|--------|--------|--------|--------|
| 11.2   | 4.6    | 5.7    | 11.6   | 3.8    | 10.7   | 8.2    | 18.2   | 7.8    |
| 179.0  | 181.9  | 147.7  | 155.6  | 49.0   | 67.1   | 54.1   | 73.5   | 81.3   |
| 28.5   | 15.2   | 16.7   | 21.1   | 2.4    | 9.3    | 4.9    | 7.7    | 18.8   |
| 2.9    | 3.8    | 5.3    | 7.0    | 3.9    | 2.7    | 2.0    | 4.0    | 2.4    |
| 6.3    | 8.9    | 2.6    | 6.4    | 58.2   | 36.7   | 37.9   | 86.3   | 9.0    |
| 0.5    | 0.2    | 2.1    | 1.3    | 8.0    | 27.4   | 7.8    | 11.0   | 0.5    |
| 1.2    | 3.3    | 2.3    | 3.7    | 3.4    | 5.5    | 3.2    | 0.8    | 3.8    |
| 134.2  | 115.8  | 225.2  | 95.2   | 329.1  | 293.2  | 301.2  | 364.6  | 657.7  |
| 98.6   | 96.1   | 137.6  | 84.3   | 102.3  | 88.4   | 105.3  | 106.0  | 106.9  |
| 2031.6 | 1968.3 | 1912.8 | 1827.6 | 1694.1 | 1727.6 | 1964.6 | 2128.4 | 2569.3 |
| 35.4   | 40.9   | 40.7   | 22.6   | 25.7   | 24.5   | 28.3   | 36.4   | 46.6   |
| 270.1  | 277.6  | 258.0  | 282.3  | 183.0  | 183.4  | 183.4  | 218.3  | 317.8  |
| 90.6   | 89.1   | 269.4  | 90.0   | 28.8   | 17.3   | 29.4   | 17.4   | 19.3   |
| 14.1   | 11.0   | 11.8   | 10.7   | 3.7    | 1.9    | 4.1    | 8.0    | 8.4    |
| 1.2    | 0.9    | 1.1    | 1.3    | 79.1   | 52.4   | 82.1   | 116.8  | 9.3    |
| 6.1    | 4.9    | 12.1   | 2.7    | 13.2   | 12.7   | 49.3   | 46.8   | 2.4    |
| 52.8   | 61.9   | 7.6    | 31.8   | 1.5    | 1.5    | 3.8    | 2.3    | 2.4    |
| 8.9    | 9.4    | 9.6    | 8.8    | 14.0   | 8.6    | 4.3    | 21.4   | 17.5   |
| 496.0  | 505.5  | 715.0  | 1242.4 | 5.6    | 1.3    | 1.6    | 0.6    | 3.7    |
| 13.9   | 12.9   | 15.9   | 8.9    | 9.8    | 6.3    | 11.9   | 5.6    | 16.0   |
| 5.5    | 8.7    | 16.5   | 7.6    | 45.9   | 57.6   | 104.0  | 42.6   | 10.5   |
| 2.7    | 3.9    | 3.4    | 7.0    | 3.7    | 8.1    | 10.0   | 13.5   | 4.9    |
| 7.2    | 3.7    | 3.3    | 2.8    | 0.5    | 2.9    | 2.9    | 0.8    | 6.7    |
| 1.9    | 2.2    | 2.4    | 1.6    | 1.8    | 5.7    | 2.1    | 4.7    | 2.8    |
| 11.3   | 9.1    | 6.5    | 6.1    | 34.3   | 22.6   | 29.6   | 37.2   | 91.4   |
| 5.8    | 6.8    | 8.9    | 5.6    | 20.9   | 17.1   | 19.7   | 18.7   | 9.8    |
| 32.7   | 27.0   | 30.3   | 19.3   | 19.0   | 12.5   | 16.8   | 12.1   | 16.5   |
| 6.3    | 3.9    | 10.0   | 6.1    | 14.6   | 10.9   | 15.7   | 20.5   | 35.4   |
| 121.9  | 79.5   | 192.9  | 117.3  | 384.7  | 259.7  | 327.4  | 341.8  | 662.6  |
| 10.7   | 4.4    | 9.8    | 6.7    | 1.1    | 1.4    | 5.1    | 7.0    | 6.0    |
| 7.5    | 3.4    | 5.2    | 2.4    | 5.0    | 0.5    | 6.5    | 0.9    | 5.0    |
| 1.5    | 1.9    | 4.6    | 3.6    | 2.1    | 2.3    | 1.0    | 1.7    | 5.6    |
| 2.4    | 2.6    | 3.2    | 4.4    | 1.7    | 2.8    | 2.0    | 3.2    | 13.0   |
| 12.8   | 6.7    | 5.3    | 6.8    | 143.5  | 307.3  | 176.4  | 148.6  | 3.3    |
| 4.4    | 3.3    | 8.8    | 2.4    | 1.0    | 1.0    | 0.8    | 0.6    | 1.3    |
| 4.0    | 6.8    | 5.1    | 4.4    | 10.3   | 5.5    | 6.8    | 8.7    | 12.2   |
| 6.3    | 3.8    | 7.1    | 2.5    | 2.9    | 3.3    | 7.1    | 7.8    | 3.2    |
| 34.5   | 46.2   | 38.8   | 36.3   | 65.5   | 59.2   | 54.9   | 68.2   | 41.7   |
| 3.3    | 4.6    | 6.7    | 7.9    | 4.3    | 3.1    | 8.0    | 5.5    | 11.3   |
| 2.2    | 1.9    | 2.0    | 2.3    | 1.3    | 1.3    | 2.0    | 2.7    | 2.7    |
| 23.3   | 29.2   | 27.3   | 14.4   | 32.0   | 40.1   | 42.9   | 39.6   | 18.2   |
| 2.4    | 1.2    | 7.2    | 3.4    | 3.8    | 17.6   | 8.4    | 9.0    | 2.2    |
| 2.9    | 3.9    | 3.7    | 2.1    | 4.0    | 3.1    | 3.7    | 4.2    | 4.6    |
| 5.8    | 7.0    | 9.2    | 9.8    | 0.7    | 4.5    | 1.6    | 12.1   | 1.0    |
| 20.3   | 22.0   | 29.7   | 18.3   | 68.9   | 47.9   | 96.5   | 103.8  | 25.8   |
| 6.1    | 6.1    | 9.4    | 5.1    | 1.8    | 3.9    | 1.4    | 0.5    | 7.1    |
| 54.0   | 51.3   | 58.5   | 55.2   | 2.0    | 1.4    | 4.0    | 4.8    | 5.7    |
| 5.8    | 9.5    | 2.9    | 3.4    | 7.1    | 2.5    | 1.0    | 7.2    | 42.3   |
| 122.9  | 121.5  | 157.5  | 87.7   | 65.3   | 58.7   | 65.8   | 79.4   | 181.2  |
| 2.5    | 3.3    | 5.7    | 1.7    | 2.9    | 3.5    | 2.2    | 1.0    | 1.4    |
| 167.7  | 170.8  | 96.1   | 118.3  | 12.1   | 30.0   | 18.2   | 26.0   | 13.4   |
| 49.4   | 32.8   | 91.0   | 37.1   | 6.5    | 3.8    | 13.3   | 3.0    | 1.6    |
| 133.0  | 118.2  | 119.9  | 104.6  | 84.5   | 118.5  | 85.4   | 86.7   | 126.7  |

|       |       |       |       |       |       |       |       |       |
|-------|-------|-------|-------|-------|-------|-------|-------|-------|
| 6.9   | 1.4   | 12.4  | 2.0   | 3.8   | 4.5   | 6.9   | 14.4  | 13.1  |
| 3.5   | 1.1   | 9.7   | 4.5   | 3.2   | 1.2   | 2.9   | 9.6   | 6.9   |
| 65.0  | 66.5  | 95.3  | 84.8  | 28.8  | 17.8  | 19.9  | 17.7  | 24.6  |
| 2.7   | 10.0  | 3.6   | 1.5   | 71.6  | 62.6  | 76.7  | 88.6  | 222.1 |
| 26.6  | 35.3  | 42.5  | 28.5  | 25.8  | 15.6  | 16.3  | 7.8   | 13.2  |
| 4.6   | 9.1   | 1.6   | 7.5   | 6.4   | 0.7   | 10.1  | 27.1  | 15.3  |
| 4.8   | 6.0   | 12.5  | 1.2   | 5.5   | 2.7   | 2.9   | 12.6  | 9.7   |
| 1.0   | 0.4   | 0.6   | 0.9   | 2.0   | 0.4   | 1.7   | 0.9   | 2.3   |
| 1.3   | 2.1   | 2.7   | 1.4   | 33.3  | 27.2  | 54.2  | 56.7  | 2.1   |
| 0.7   | 1.0   | 1.1   | 0.8   | 0.7   | 0.7   | 1.3   | 0.9   | 1.2   |
| 1.1   | 0.8   | 1.2   | 0.8   | 0.7   | 2.1   | 0.9   | 0.6   | 1.5   |
| 225.9 | 218.7 | 341.5 | 274.7 | 288.7 | 302.8 | 261.7 | 313.7 | 360.5 |
| 222.5 | 179.1 | 253.4 | 198.4 | 144.5 | 211.8 | 159.8 | 202.9 | 116.2 |
| 17.3  | 10.7  | 18.5  | 5.5   | 11.7  | 2.9   | 12.0  | 16.5  | 14.9  |
| 60.1  | 67.3  | 38.5  | 45.0  | 26.5  | 38.0  | 30.4  | 34.8  | 67.1  |
| 12.7  | 14.0  | 2.0   | 3.9   | 77.6  | 86.9  | 83.5  | 93.1  | 10.7  |
| 20.1  | 5.7   | 17.7  | 5.1   | 11.4  | 10.5  | 10.3  | 12.6  | 22.7  |
| 6.7   | 4.6   | 3.9   | 3.9   | 2.1   | 1.8   | 1.2   | 1.8   | 4.6   |
| 12.9  | 9.9   | 16.4  | 12.4  | 4.0   | 0.7   | 0.5   | 0.9   | 8.2   |
| 79.9  | 72.7  | 119.9 | 105.8 | 151.7 | 103.8 | 132.2 | 169.4 | 138.8 |
| 314.7 | 315.2 | 393.2 | 303.5 | 380.6 | 386.8 | 370.4 | 446.8 | 313.5 |
| 116.6 | 131.4 | 173.0 | 109.3 | 254.1 | 184.9 | 267.1 | 294.8 | 218.3 |
| 5.5   | 2.1   | 4.4   | 7.8   | 4.3   | 3.7   | 1.7   | 4.0   | 7.1   |
| 9.8   | 7.2   | 4.0   | 5.8   | 39.3  | 47.7  | 58.1  | 49.3  | 68.5  |
| 406.6 | 369.8 | 346.2 | 303.4 | 124.9 | 103.6 | 109.8 | 148.6 | 497.1 |
| 6.8   | 1.5   | 1.5   | 4.6   | 21.3  | 25.6  | 16.5  | 6.6   | 7.1   |
| 323.9 | 286.5 | 371.8 | 251.6 | 327.8 | 337.1 | 308.7 | 358.3 | 172.2 |
| 171.2 | 194.7 | 226.6 | 142.7 | 185.7 | 175.9 | 166.2 | 185.6 | 502.6 |
| 30.5  | 23.1  | 35.6  | 20.9  | 15.9  | 15.5  | 14.1  | 21.6  | 11.4  |
| 16.0  | 7.0   | 3.2   | 6.4   | 5.0   | 9.0   | 6.8   | 3.9   | 10.0  |
| 6.3   | 11.2  | 13.9  | 5.1   | 13.4  | 49.2  | 29.7  | 34.3  | 13.8  |
| 2.8   | 6.6   | 2.7   | 10.7  | 2.2   | 13.4  | 9.2   | 5.7   | 5.8   |
| 1.3   | 5.0   | 3.1   | 1.6   | 2.5   | 21.6  | 3.8   | 7.7   | 2.3   |
| 9.6   | 3.1   | 12.2  | 14.0  | 14.5  | 19.7  | 9.5   | 19.5  | 3.9   |
| 16.0  | 18.6  | 29.5  | 19.4  | 39.6  | 27.4  | 33.8  | 39.6  | 12.5  |
| 1.5   | 2.5   | 2.2   | 2.0   | 1.2   | 2.1   | 1.1   | 4.3   | 2.9   |
| 10.3  | 7.2   | 8.5   | 13.1  | 23.8  | 40.6  | 32.1  | 25.9  | 23.8  |
| 1.3   | 2.0   | 3.7   | 2.7   | 4.6   | 0.8   | 1.7   | 2.0   | 6.8   |
| 3.7   | 3.9   | 20.5  | 7.5   | 5.8   | 9.5   | 10.9  | 8.7   | 9.8   |
| 6.6   | 19.4  | 9.9   | 8.7   | 10.9  | 6.0   | 11.8  | 8.7   | 15.0  |
| 101.6 | 109.9 | 154.9 | 124.7 | 171.5 | 110.9 | 134.1 | 162.1 | 313.0 |
| 442.5 | 401.9 | 577.1 | 386.8 | 379.8 | 306.7 | 325.4 | 421.4 | 524.6 |
| 1.9   | 2.2   | 12.0  | 4.1   | 1.6   | 4.1   | 7.3   | 0.4   | 9.6   |
| 9.2   | 4.1   | 8.6   | 1.1   | 4.5   | 2.4   | 9.1   | 3.8   | 39.5  |
| 23.2  | 29.5  | 38.4  | 22.7  | 22.6  | 18.3  | 20.3  | 14.6  | 25.3  |
| 8.5   | 4.3   | 4.5   | 2.2   | 34.0  | 29.2  | 20.0  | 32.4  | 49.9  |
| 26.3  | 21.6  | 21.7  | 15.1  | 8.5   | 7.8   | 20.7  | 15.5  | 25.7  |
| 1.4   | 2.0   | 1.9   | 1.8   | 2.1   | 0.6   | 2.4   | 2.4   | 4.8   |
| 2.9   | 2.6   | 3.4   | 5.8   | 2.4   | 2.1   | 2.0   | 2.9   | 14.6  |
| 4.9   | 13.9  | 9.4   | 6.7   | 7.4   | 10.3  | 2.5   | 17.6  | 16.1  |
| 1.8   | 1.6   | 3.3   | 2.5   | 28.7  | 29.3  | 41.9  | 53.2  | 1.0   |
| 12.1  | 3.3   | 9.6   | 2.6   | 5.6   | 5.6   | 2.4   | 3.8   | 2.5   |
| 4.6   | 1.8   | 12.0  | 7.6   | 2.3   | 6.2   | 1.4   | 14.2  | 5.8   |

|       |       |       |       |       |       |       |       |       |
|-------|-------|-------|-------|-------|-------|-------|-------|-------|
| 12.8  | 16.0  | 18.5  | 17.6  | 27.5  | 20.7  | 25.7  | 14.4  | 23.8  |
| 36.2  | 32.1  | 105.4 | 35.8  | 21.0  | 16.7  | 16.3  | 23.5  | 40.6  |
| 6.8   | 3.6   | 2.4   | 7.2   | 10.4  | 3.5   | 2.6   | 18.7  | 10.0  |
| 9.8   | 18.6  | 13.0  | 4.3   | 12.3  | 5.4   | 6.0   | 27.4  | 29.6  |
| 7.4   | 19.1  | 21.1  | 16.3  | 13.9  | 14.3  | 28.2  | 18.7  | 14.5  |
| 1.7   | 1.9   | 3.7   | 1.7   | 2.8   | 2.8   | 2.4   | 5.4   | 3.6   |
| 0.3   | 4.1   | 3.3   | 1.3   | 2.0   | 1.9   | 5.3   | 2.2   | 120.2 |
| 4.9   | 16.9  | 9.7   | 14.7  | 6.8   | 1.5   | 4.4   | 5.8   | 6.3   |
| 0.6   | 3.8   | 0.6   | 0.6   | 0.6   | 1.7   | 1.9   | 0.5   | 0.8   |
| 15.9  | 23.7  | 18.1  | 29.0  | 12.0  | 20.8  | 8.7   | 15.6  | 17.8  |
| 9.9   | 7.1   | 5.0   | 7.0   | 178.7 | 181.5 | 205.1 | 245.7 | 46.2  |
| 4.2   | 2.7   | 2.4   | 3.5   | 39.6  | 58.7  | 41.2  | 64.0  | 600.9 |
| 0.6   | 0.5   | 0.8   | 0.6   | 0.5   | 0.5   | 1.1   | 0.6   | 0.8   |
| 77.3  | 70.9  | 106.3 | 64.3  | 52.8  | 41.4  | 46.5  | 57.2  | 70.5  |
| 2.9   | 12.0  | 11.1  | 5.0   | 3.6   | 8.2   | 6.6   | 3.2   | 5.1   |
| 5.0   | 5.4   | 13.0  | 9.2   | 26.3  | 19.8  | 24.5  | 39.3  | 64.9  |
| 3.2   | 5.3   | 9.1   | 7.7   | 2.0   | 2.5   | 2.4   | 2.6   | 7.6   |
| 7.7   | 5.8   | 7.8   | 7.9   | 8.7   | 5.7   | 7.6   | 20.5  | 12.9  |
| 7.0   | 2.3   | 6.3   | 1.2   | 2.6   | 4.5   | 10.6  | 11.3  | 13.2  |
| 5.5   | 5.1   | 1.5   | 4.2   | 12.6  | 19.2  | 18.2  | 18.0  | 32.9  |
| 10.7  | 5.1   | 6.1   | 8.0   | 147.7 | 88.5  | 221.6 | 158.3 | 222.8 |
| 17.4  | 15.9  | 20.2  | 22.3  | 4.7   | 11.0  | 16.0  | 7.3   | 30.2  |
| 4.6   | 4.4   | 2.3   | 3.5   | 6.0   | 4.8   | 3.5   | 3.1   | 7.1   |
| 10.0  | 14.4  | 24.8  | 10.0  | 15.5  | 15.0  | 14.0  | 13.4  | 20.3  |
| 37.8  | 28.7  | 35.5  | 10.1  | 54.5  | 86.3  | 57.0  | 70.3  | 106.1 |
| 3.7   | 3.1   | 3.7   | 0.7   | 0.7   | 2.3   | 1.8   | 1.1   | 2.9   |
| 2.9   | 3.5   | 1.8   | 11.9  | 1.8   | 1.2   | 4.7   | 1.3   | 7.5   |
| 2.0   | 1.8   | 1.8   | 1.8   | 2.9   | 1.0   | 6.8   | 10.6  | 5.9   |
| 4.5   | 4.8   | 2.6   | 0.8   | 25.9  | 11.7  | 44.2  | 37.4  | 15.0  |
| 6.8   | 14.2  | 23.3  | 14.5  | 23.3  | 13.0  | 12.7  | 12.4  | 22.7  |
| 176.3 | 168.8 | 206.0 | 135.7 | 166.5 | 161.8 | 155.5 | 184.7 | 79.6  |
| 311.2 | 280.4 | 383.0 | 264.9 | 618.6 | 862.9 | 573.9 | 744.9 | 285.2 |
| 9.9   | 5.0   | 9.0   | 9.3   | 18.4  | 12.7  | 20.7  | 24.7  | 40.8  |
| 398.6 | 343.3 | 520.0 | 348.1 | 168.0 | 185.0 | 169.9 | 190.1 | 361.2 |
| 19.1  | 20.5  | 25.3  | 18.8  | 30.9  | 18.4  | 33.8  | 42.1  | 37.4  |
| 17.7  | 16.4  | 27.1  | 9.0   | 13.9  | 30.8  | 27.7  | 34.1  | 25.4  |
| 3.7   | 7.3   | 4.8   | 3.0   | 34.8  | 45.8  | 44.9  | 50.6  | 22.6  |
| 4.7   | 0.8   | 8.4   | 1.4   | 238.4 | 233.5 | 110.1 | 255.1 | 70.4  |
| 2.2   | 3.3   | 2.7   | 3.9   | 30.8  | 32.4  | 15.7  | 28.4  | 24.6  |
| 12.7  | 12.8  | 5.6   | 9.1   | 36.4  | 49.3  | 30.5  | 62.2  | 21.0  |
| 17.1  | 9.9   | 23.7  | 18.5  | 7.8   | 3.4   | 10.5  | 8.3   | 11.8  |
| 300.8 | 235.1 | 471.1 | 272.2 | 80.3  | 67.9  | 113.9 | 78.8  | 185.6 |
| 48.9  | 40.6  | 73.8  | 48.6  | 55.4  | 48.2  | 59.0  | 64.3  | 60.0  |
| 10.6  | 8.7   | 7.8   | 14.2  | 11.4  | 7.4   | 9.0   | 7.4   | 11.5  |
| 17.9  | 13.0  | 29.6  | 17.4  | 4.3   | 2.7   | 3.4   | 0.9   | 26.8  |
| 1.8   | 4.8   | 5.2   | 4.3   | 2.9   | 3.3   | 2.7   | 1.6   | 11.4  |
| 2.2   | 3.4   | 6.0   | 9.2   | 10.1  | 3.3   | 9.5   | 3.4   | 12.6  |
| 2.1   | 5.0   | 6.6   | 4.7   | 4.0   | 7.6   | 2.8   | 8.4   | 22.5  |
| 2.6   | 3.2   | 0.7   | 2.0   | 0.1   | 1.3   | 2.6   | 2.3   | 4.1   |
| 104.3 | 98.2  | 124.0 | 109.4 | 119.3 | 108.5 | 118.8 | 105.4 | 112.0 |
| 9.0   | 5.7   | 8.1   | 11.5  | 4.5   | 2.0   | 3.6   | 16.2  | 16.3  |
| 3.6   | 3.7   | 9.8   | 7.2   | 11.1  | 10.2  | 12.9  | 5.6   | 4.7   |
| 3.0   | 2.9   | 10.7  | 1.8   | 4.2   | 4.9   | 6.0   | 1.6   | 9.5   |

|        |        |        |        |        |        |        |        |        |
|--------|--------|--------|--------|--------|--------|--------|--------|--------|
| 1.1    | 9.6    | 6.6    | 7.5    | 6.1    | 0.9    | 3.4    | 9.8    | 20.5   |
| 86.0   | 79.4   | 44.9   | 90.1   | 14.2   | 11.6   | 16.2   | 25.4   | 2.2    |
| 5.8    | 3.8    | 3.3    | 6.0    | 16.1   | 11.1   | 12.3   | 20.4   | 23.7   |
| 62.4   | 48.8   | 101.6  | 69.9   | 83.4   | 83.9   | 74.2   | 98.7   | 67.9   |
| 11.6   | 9.9    | 29.6   | 9.5    | 6.2    | 6.6    | 3.8    | 13.6   | 11.7   |
| 15.8   | 9.8    | 20.1   | 9.5    | 10.2   | 8.0    | 7.1    | 10.7   | 16.7   |
| 2.7    | 2.9    | 7.3    | 2.1    | 6.1    | 8.6    | 3.8    | 12.4   | 6.0    |
| 5.0    | 6.1    | 11.5   | 2.0    | 6.1    | 14.2   | 2.7    | 10.1   | 13.5   |
| 18.0   | 21.2   | 27.8   | 17.0   | 26.6   | 24.9   | 29.0   | 30.6   | 26.7   |
| 727.7  | 643.2  | 1034.0 | 648.1  | 300.0  | 298.3  | 330.7  | 367.5  | 429.2  |
| 0.8    | 3.9    | 2.8    | 0.3    | 18.2   | 32.7   | 13.5   | 13.8   | 5.2    |
| 26.8   | 25.8   | 17.4   | 24.2   | 31.2   | 28.2   | 25.6   | 41.9   | 36.2   |
| 0.8    | 2.2    | 0.3    | 1.1    | 2.7    | 1.0    | 3.9    | 1.9    | 0.6    |
| 75.8   | 84.6   | 81.5   | 90.5   | 690.0  | 410.6  | 783.5  | 874.8  | 83.4   |
| 12.1   | 12.6   | 17.6   | 19.3   | 20.4   | 6.6    | 10.8   | 15.6   | 24.6   |
| 9.0    | 6.2    | 16.5   | 8.2    | 9.8    | 4.9    | 4.5    | 2.2    | 16.4   |
| 84.0   | 83.3   | 105.9  | 58.8   | 27.8   | 24.7   | 34.3   | 32.0   | 68.6   |
| 7.1    | 13.5   | 17.7   | 11.7   | 1.2    | 2.4    | 7.1    | 12.3   | 9.6    |
| 419.6  | 386.9  | 528.1  | 433.0  | 365.5  | 395.2  | 341.7  | 418.6  | 365.8  |
| 73.5   | 76.2   | 81.9   | 89.4   | 48.0   | 67.0   | 47.2   | 54.1   | 68.6   |
| 3.6    | 1.3    | 2.9    | 1.5    | 2.6    | 4.6    | 7.7    | 5.1    | 8.5    |
| 57.5   | 58.2   | 59.2   | 43.2   | 148.0  | 133.2  | 153.8  | 160.6  | 103.7  |
| 7.8    | 9.6    | 6.5    | 4.4    | 3.0    | 5.9    | 10.3   | 19.8   | 0.6    |
| 2.4    | 2.0    | 2.6    | 2.0    | 1.7    | 4.5    | 1.3    | 1.5    | 3.6    |
| 2.3    | 3.7    | 2.7    | 0.7    | 1.2    | 2.1    | 5.5    | 1.8    | 2.3    |
| 3.0    | 2.3    | 2.6    | 3.5    | 1.5    | 2.3    | 2.8    | 4.3    | 7.4    |
| 23.2   | 20.9   | 30.6   | 30.3   | 29.7   | 27.2   | 26.6   | 29.3   | 34.1   |
| 37.4   | 40.2   | 50.4   | 23.1   | 23.1   | 13.0   | 49.2   | 34.1   | 125.5  |
| 97.5   | 104.6  | 126.9  | 111.1  | 190.8  | 166.1  | 148.3  | 200.5  | 149.1  |
| 1.2    | 0.7    | 1.0    | 0.8    | 44.3   | 164.8  | 148.5  | 45.1   | 1.4    |
| 3.8    | 1.9    | 4.7    | 3.4    | 3.4    | 2.2    | 7.1    | 2.5    | 5.7    |
| 21.0   | 24.2   | 16.4   | 18.6   | 29.9   | 26.2   | 24.9   | 22.4   | 31.4   |
| 16.4   | 20.2   | 10.2   | 10.0   | 36.7   | 43.8   | 46.1   | 45.4   | 48.9   |
| 2.5    | 1.3    | 1.6    | 1.9    | 3.3    | 1.5    | 7.3    | 13.1   | 2.4    |
| 11.8   | 15.2   | 13.8   | 2.1    | 2.9    | 4.8    | 2.2    | 7.9    | 8.7    |
| 1.6    | 1.5    | 2.3    | 2.1    | 1.7    | 1.9    | 2.7    | 2.9    | 2.4    |
| 1240.2 | 978.5  | 2008.6 | 1266.3 | 2042.8 | 1355.3 | 1864.4 | 2174.9 | 2882.1 |
| 0.3    | 4.4    | 3.6    | 3.8    | 2.6    | 0.7    | 1.9    | 0.2    | 6.9    |
| 11.5   | 16.8   | 18.0   | 14.3   | 7.7    | 6.9    | 12.8   | 11.9   | 5.4    |
| 5.0    | 9.7    | 8.2    | 7.8    | 14.5   | 2.7    | 8.2    | 15.2   | 8.5    |
| 2.4    | 2.1    | 1.6    | 2.1    | 6.7    | 7.6    | 2.7    | 15.7   | 5.8    |
| 1.3    | 1.8    | 2.2    | 2.5    | 2.8    | 12.9   | 2.2    | 1.5    | 2.3    |
| 1.8    | 1.9    | 3.4    | 1.8    | 4.8    | 5.5    | 2.1    | 0.3    | 2.9    |
| 3.1    | 4.2    | 6.0    | 5.9    | 6.1    | 1.2    | 3.6    | 1.7    | 1.1    |
| 4.7    | 6.0    | 3.0    | 3.0    | 2.2    | 1.7    | 5.9    | 7.3    | 4.4    |
| 7.1    | 18.4   | 6.6    | 16.3   | 5.5    | 8.7    | 5.6    | 15.4   | 32.7   |
| 1.2    | 7.6    | 8.5    | 2.5    | 3.9    | 3.8    | 2.0    | 5.1    | 4.4    |
| 2.9    | 7.0    | 7.5    | 1.2    | 1.9    | 4.7    | 1.5    | 6.1    | 2.7    |
| 4.1    | 10.5   | 12.2   | 11.0   | 3.9    | 1.1    | 3.9    | 3.6    | 6.4    |
| 1171.8 | 1115.9 | 988.5  | 1074.0 | 584.1  | 465.7  | 568.1  | 690.9  | 654.7  |
| 12.3   | 7.3    | 7.1    | 3.1    | 6.0    | 11.8   | 9.3    | 10.8   | 6.3    |
| 18.8   | 23.0   | 4.9    | 26.4   | 12.9   | 13.8   | 27.3   | 29.4   | 5.6    |
| 124.3  | 130.8  | 118.3  | 119.2  | 132.1  | 164.7  | 151.4  | 155.2  | 160.4  |

|        |        |        |        |        |        |        |        |        |
|--------|--------|--------|--------|--------|--------|--------|--------|--------|
| 54.0   | 41.0   | 51.1   | 31.5   | 39.8   | 30.1   | 40.3   | 40.8   | 70.2   |
| 279.3  | 317.5  | 353.8  | 490.4  | 11.9   | 15.4   | 8.6    | 15.3   | 16.1   |
| 8.9    | 6.4    | 5.0    | 6.0    | 9.5    | 7.3    | 5.0    | 7.1    | 6.9    |
| 9.5    | 14.4   | 14.2   | 19.6   | 13.3   | 26.8   | 20.9   | 6.3    | 26.3   |
| 40.7   | 35.8   | 44.9   | 34.3   | 36.5   | 18.5   | 17.0   | 36.6   | 21.8   |
| 11.2   | 11.4   | 29.7   | 9.4    | 37.6   | 15.6   | 32.7   | 36.3   | 17.9   |
| 1.9    | 3.8    | 7.9    | 3.4    | 5.7    | 3.7    | 4.5    | 0.2    | 8.6    |
| 37.7   | 38.8   | 40.2   | 32.4   | 54.6   | 46.6   | 45.0   | 66.2   | 78.9   |
| 66.6   | 44.9   | 80.9   | 61.1   | 19.8   | 37.3   | 25.9   | 28.2   | 10.8   |
| 1.1    | 1.3    | 0.3    | 2.2    | 1.8    | 0.6    | 2.5    | 0.5    | 16.2   |
| 12.9   | 14.2   | 18.2   | 10.7   | 3.4    | 5.9    | 8.0    | 12.8   | 9.6    |
| 11.4   | 10.3   | 8.7    | 11.8   | 13.5   | 8.4    | 9.9    | 19.0   | 22.2   |
| 7.7    | 7.6    | 13.8   | 12.8   | 9.9    | 10.1   | 2.3    | 2.3    | 12.4   |
| 1.3    | 1.2    | 1.9    | 1.0    | 0.8    | 1.1    | 1.8    | 0.4    | 56.7   |
| 2.2    | 8.5    | 14.5   | 10.4   | 3.3    | 7.7    | 11.7   | 13.2   | 10.7   |
| 3.1    | 1.3    | 4.3    | 5.6    | 2.3    | 3.2    | 0.9    | 0.3    | 9.0    |
| 6.6    | 9.0    | 5.0    | 1.8    | 2.8    | 4.0    | 0.9    | 0.5    | 3.4    |
| 1.6    | 1.5    | 1.4    | 3.9    | 7.5    | 8.5    | 15.6   | 8.6    | 2.3    |
| 142.4  | 157.1  | 204.4  | 155.7  | 11.8   | 5.7    | 9.6    | 10.8   | 47.4   |
| 12.7   | 10.1   | 17.6   | 3.7    | 47.0   | 32.1   | 58.3   | 58.6   | 226.8  |
| 5.2    | 9.9    | 12.6   | 11.9   | 11.3   | 16.3   | 30.6   | 26.9   | 105.1  |
| 5.5    | 5.5    | 4.3    | 7.9    | 3.4    | 3.3    | 2.4    | 5.0    | 14.3   |
| 5.6    | 3.6    | 3.3    | 2.2    | 10.8   | 4.5    | 3.9    | 6.0    | 9.1    |
| 7.2    | 1.8    | 11.7   | 5.9    | 3.7    | 8.7    | 6.7    | 2.9    | 3.6    |
| 117.4  | 151.9  | 90.8   | 96.2   | 29.5   | 36.4   | 56.7   | 56.7   | 57.9   |
| 200.9  | 220.5  | 196.1  | 166.1  | 54.9   | 44.9   | 72.2   | 76.8   | 99.6   |
| 2.7    | 3.2    | 3.5    | 8.0    | 1.0    | 4.0    | 4.8    | 1.4    | 5.1    |
| 14.9   | 17.5   | 19.9   | 17.5   | 88.9   | 70.8   | 96.9   | 94.6   | 11.9   |
| 5.8    | 1.2    | 10.2   | 8.9    | 7.3    | 6.1    | 5.3    | 6.4    | 11.2   |
| 37.3   | 30.1   | 49.6   | 33.9   | 25.4   | 11.1   | 18.6   | 25.1   | 87.5   |
| 455.8  | 389.4  | 510.0  | 375.0  | 1105.6 | 1404.7 | 1299.6 | 1189.8 | 1568.7 |
| 3.6    | 3.3    | 1.9    | 12.5   | 3.2    | 2.5    | 3.2    | 1.6    | 1.2    |
| 5.0    | 4.7    | 9.3    | 4.2    | 13.2   | 4.5    | 16.6   | 4.2    | 9.9    |
| 8.7    | 3.1    | 4.5    | 2.1    | 6.5    | 2.7    | 1.8    | 1.8    | 5.6    |
| 6.8    | 3.3    | 3.4    | 1.3    | 3.1    | 1.8    | 5.1    | 3.1    | 2.9    |
| 3.4    | 2.3    | 3.4    | 2.2    | 1.3    | 2.8    | 1.8    | 4.7    | 2.6    |
| 35.2   | 30.9   | 28.2   | 33.3   | 86.1   | 106.0  | 119.4  | 141.9  | 13.8   |
| 40.6   | 35.9   | 118.7  | 40.5   | 630.4  | 528.3  | 724.4  | 718.0  | 1180.1 |
| 8.7    | 6.5    | 12.4   | 7.7    | 8.1    | 11.9   | 2.3    | 5.5    | 14.6   |
| 2.1    | 6.7    | 5.1    | 1.6    | 5.2    | 0.7    | 3.4    | 0.6    | 6.1    |
| 3.9    | 4.1    | 9.8    | 1.6    | 2.0    | 2.1    | 1.3    | 3.7    | 1.7    |
| 6.2    | 5.5    | 8.4    | 4.5    | 42.7   | 38.2   | 41.0   | 27.2   | 51.9   |
| 3.1    | 4.1    | 13.4   | 3.8    | 3.6    | 10.2   | 6.3    | 7.2    | 8.0    |
| 1.2    | 1.3    | 0.9    | 0.6    | 3.9    | 1.7    | 3.3    | 6.6    | 2.2    |
| 13.1   | 6.0    | 17.6   | 7.6    | 51.0   | 48.3   | 45.6   | 47.7   | 2.6    |
| 29.8   | 38.3   | 64.8   | 24.0   | 1.4    | 1.5    | 3.2    | 6.0    | 69.4   |
| 18.8   | 18.1   | 7.1    | 11.2   | 310.9  | 295.5  | 405.5  | 386.3  | 11.6   |
| 1604.0 | 1523.7 | 1871.8 | 1602.4 | 2090.8 | 2172.3 | 2345.8 | 2464.1 | 2291.7 |
| 13.1   | 12.7   | 18.5   | 12.4   | 19.3   | 14.4   | 9.6    | 8.6    | 14.8   |
| 16.2   | 10.8   | 37.4   | 14.4   | 13.9   | 4.3    | 12.8   | 19.0   | 15.6   |
| 27.4   | 24.2   | 48.9   | 38.9   | 24.5   | 63.3   | 28.9   | 34.4   | 48.9   |
| 24.0   | 26.3   | 40.8   | 17.4   | 21.9   | 16.0   | 18.6   | 14.2   | 23.8   |
| 35.7   | 45.6   | 38.8   | 36.2   | 16.7   | 19.2   | 17.3   | 20.2   | 27.6   |



|       |       |       |       |        |        |        |        |       |
|-------|-------|-------|-------|--------|--------|--------|--------|-------|
| 24.3  | 24.3  | 22.5  | 16.3  | 43.7   | 27.8   | 22.4   | 47.4   | 16.5  |
| 8.5   | 12.8  | 10.3  | 8.1   | 7.4    | 8.4    | 5.7    | 11.0   | 7.0   |
| 22.2  | 23.6  | 37.4  | 32.7  | 6.0    | 7.1    | 8.3    | 14.7   | 17.4  |
| 1.1   | 1.0   | 1.9   | 1.1   | 14.2   | 18.3   | 13.4   | 14.3   | 1.7   |
| 17.4  | 8.7   | 15.2  | 12.6  | 17.4   | 11.9   | 6.7    | 3.2    | 12.3  |
| 13.0  | 11.9  | 18.4  | 7.3   | 8.2    | 12.8   | 7.0    | 14.6   | 15.9  |
| 6.9   | 7.4   | 6.6   | 3.1   | 25.6   | 15.9   | 41.3   | 42.9   | 4.1   |
| 0.7   | 0.5   | 1.3   | 0.8   | 23.8   | 17.3   | 25.7   | 22.5   | 1.3   |
| 1.7   | 2.0   | 1.8   | 1.7   | 0.8    | 1.2    | 1.5    | 0.3    | 0.5   |
| 3.3   | 3.1   | 8.6   | 3.4   | 1.8    | 1.4    | 2.2    | 2.6    | 10.5  |
| 6.4   | 3.7   | 6.0   | 11.3  | 11.2   | 6.0    | 12.5   | 12.9   | 21.5  |
| 2.9   | 3.6   | 6.3   | 2.0   | 126.3  | 91.1   | 198.1  | 190.3  | 604.8 |
| 10.3  | 4.9   | 5.5   | 10.4  | 7.1    | 2.7    | 5.5    | 11.6   | 4.7   |
| 78.0  | 75.3  | 83.0  | 64.0  | 15.4   | 10.4   | 14.5   | 18.8   | 71.6  |
| 27.6  | 26.9  | 29.5  | 33.9  | 3.8    | 8.5    | 5.5    | 7.3    | 121.6 |
| 38.9  | 20.4  | 41.8  | 24.5  | 21.3   | 25.2   | 29.7   | 34.0   | 41.5  |
| 3.4   | 2.2   | 2.9   | 4.6   | 0.5    | 4.3    | 4.3    | 0.6    | 2.0   |
| 2.9   | 0.9   | 1.0   | 1.2   | 0.5    | 0.4    | 0.8    | 0.7    | 0.9   |
| 21.5  | 19.1  | 9.7   | 14.3  | 18.6   | 28.6   | 19.3   | 29.3   | 23.0  |
| 18.8  | 22.1  | 29.1  | 22.4  | 17.5   | 5.4    | 53.1   | 31.5   | 29.3  |
| 7.0   | 3.4   | 6.1   | 5.0   | 1.0    | 1.9    | 0.9    | 1.5    | 3.3   |
| 12.4  | 10.5  | 8.8   | 14.3  | 11.3   | 3.3    | 9.5    | 14.9   | 13.4  |
| 8.8   | 6.2   | 5.0   | 4.4   | 37.4   | 40.1   | 35.3   | 54.0   | 42.6  |
| 43.9  | 45.7  | 65.3  | 38.2  | 56.7   | 24.8   | 71.5   | 72.2   | 81.6  |
| 6.2   | 13.9  | 21.5  | 7.5   | 12.9   | 5.5    | 7.5    | 4.8    | 6.5   |
| 86.1  | 76.6  | 127.6 | 84.9  | 311.6  | 254.2  | 327.9  | 377.5  | 290.6 |
| 6.1   | 2.6   | 6.4   | 6.4   | 5.6    | 9.5    | 7.0    | 3.9    | 2.8   |
| 2.4   | 6.7   | 1.9   | 1.4   | 9.0    | 7.5    | 7.8    | 9.3    | 7.4   |
| 1.7   | 8.4   | 3.0   | 2.3   | 3.8    | 2.0    | 1.1    | 0.6    | 9.8   |
| 6.9   | 2.4   | 12.9  | 5.2   | 16.3   | 24.8   | 3.1    | 12.7   | 31.1  |
| 119.6 | 84.1  | 566.8 | 233.9 | 284.0  | 613.2  | 430.1  | 398.0  | 23.7  |
| 3.6   | 3.6   | 2.9   | 4.0   | 1.7    | 1.0    | 2.4    | 2.1    | 1.3   |
| 7.3   | 5.7   | 7.4   | 6.6   | 4.3    | 3.3    | 5.1    | 1.7    | 8.2   |
| 337.7 | 314.9 | 350.1 | 251.6 | 477.2  | 438.5  | 496.6  | 574.0  | 571.5 |
| 1.1   | 1.6   | 5.5   | 1.6   | 5.2    | 3.2    | 5.9    | 1.0    | 8.5   |
| 336.0 | 293.0 | 414.5 | 345.1 | 125.1  | 145.4  | 130.3  | 145.4  | 122.1 |
| 2.3   | 1.2   | 1.8   | 2.5   | 24.9   | 25.9   | 23.0   | 16.7   | 3.4   |
| 41.9  | 26.7  | 54.9  | 34.4  | 7.2    | 9.4    | 4.9    | 4.9    | 29.6  |
| 1.4   | 1.2   | 1.0   | 0.9   | 5.3    | 4.1    | 15.7   | 15.5   | 64.7  |
| 2.7   | 2.8   | 2.3   | 2.3   | 9.1    | 18.9   | 4.8    | 11.5   | 3.6   |
| 7.3   | 10.3  | 9.3   | 8.5   | 2914.4 | 2963.7 | 3090.5 | 3239.4 | 517.4 |
| 2.8   | 1.6   | 6.7   | 10.6  | 22.1   | 6.9    | 23.2   | 24.5   | 10.5  |
| 346.3 | 288.7 | 861.3 | 469.4 | 369.7  | 417.5  | 366.7  | 402.5  | 803.9 |
| 0.7   | 3.4   | 3.3   | 3.4   | 2.7    | 4.6    | 2.3    | 11.4   | 8.5   |
| 112.3 | 113.7 | 135.5 | 104.2 | 94.8   | 100.7  | 85.8   | 93.4   | 50.0  |
| 4.6   | 3.0   | 10.9  | 3.0   | 6.5    | 2.2    | 9.3    | 1.0    | 4.9   |
| 1.0   | 1.0   | 0.7   | 1.0   | 1.4    | 0.8    | 1.2    | 1.3    | 1.9   |
| 18.2  | 5.0   | 21.2  | 14.2  | 7.8    | 12.6   | 11.0   | 16.9   | 12.0  |
| 6.3   | 11.2  | 4.2   | 4.5   | 2.5    | 1.7    | 5.1    | 3.9    | 8.1   |
| 6.5   | 6.7   | 9.6   | 13.3  | 10.4   | 6.1    | 8.1    | 2.8    | 22.3  |
| 18.7  | 22.4  | 30.1  | 19.8  | 18.2   | 14.0   | 20.8   | 18.2   | 33.6  |
| 0.8   | 3.4   | 4.8   | 4.6   | 1.0    | 3.8    | 8.6    | 6.3    | 1.6   |
| 300.5 | 286.5 | 398.2 | 292.9 | 392.3  | 355.6  | 432.0  | 513.0  | 367.1 |

|        |        |        |        |        |        |        |        |        |
|--------|--------|--------|--------|--------|--------|--------|--------|--------|
| 2.1    | 12.7   | 7.4    | 17.1   | 44.2   | 45.3   | 45.0   | 34.7   | 39.0   |
| 8.1    | 22.6   | 11.0   | 12.8   | 7.3    | 4.8    | 11.1   | 2.9    | 8.4    |
| 17.5   | 10.0   | 18.2   | 13.8   | 24.1   | 8.2    | 21.0   | 18.3   | 31.8   |
| 4.3    | 1.7    | 2.5    | 3.0    | 1.8    | 3.4    | 4.1    | 1.4    | 6.6    |
| 22.5   | 19.0   | 57.0   | 36.4   | 12.0   | 10.5   | 19.1   | 27.3   | 2.7    |
| 1.2    | 1.1    | 3.1    | 1.5    | 2.1    | 17.6   | 11.2   | 2.8    | 1.8    |
| 97.1   | 67.3   | 101.4  | 73.9   | 45.8   | 55.6   | 41.3   | 79.6   | 68.7   |
| 4.4    | 7.5    | 9.7    | 7.1    | 1.9    | 2.4    | 0.6    | 1.5    | 8.8    |
| 0.3    | 0.8    | 3.1    | 0.2    | 0.3    | 0.6    | 5.1    | 3.7    | 1.5    |
| 336.7  | 337.1  | 311.7  | 275.1  | 350.8  | 314.0  | 286.4  | 401.8  | 86.1   |
| 36.8   | 40.2   | 10.8   | 17.8   | 4.5    | 2.4    | 4.5    | 8.2    | 5.3    |
| 8.5    | 1.0    | 7.0    | 7.4    | 14.2   | 19.0   | 24.2   | 20.9   | 26.1   |
| 10.4   | 10.4   | 15.2   | 9.5    | 180.1  | 145.9  | 203.9  | 193.4  | 425.8  |
| 31.6   | 33.6   | 30.7   | 22.8   | 22.0   | 24.6   | 21.2   | 34.4   | 17.1   |
| 8.6    | 12.5   | 16.6   | 12.3   | 6.4    | 6.4    | 10.3   | 2.1    | 7.5    |
| 33.5   | 33.4   | 36.1   | 28.0   | 13.8   | 5.3    | 8.7    | 3.5    | 13.8   |
| 23.2   | 18.4   | 15.0   | 17.9   | 18.2   | 15.7   | 20.8   | 20.1   | 22.8   |
| 1.8    | 2.1    | 2.4    | 4.0    | 9.4    | 4.5    | 6.0    | 18.0   | 15.3   |
| 8.7    | 7.6    | 8.3    | 6.4    | 3.5    | 4.1    | 6.7    | 5.6    | 7.6    |
| 1.3    | 0.9    | 1.1    | 4.1    | 0.9    | 1.1    | 0.9    | 1.0    | 1.1    |
| 4.9    | 1.5    | 2.2    | 2.0    | 3.0    | 0.3    | 5.0    | 9.1    | 0.7    |
| 0.4    | 3.5    | 1.9    | 1.7    | 2.5    | 0.5    | 0.4    | 4.3    | 1.1    |
| 505.7  | 416.8  | 921.3  | 507.7  | 1198.2 | 989.2  | 1143.7 | 1325.7 | 1377.1 |
| 161.5  | 151.4  | 238.4  | 172.7  | 84.6   | 85.5   | 103.2  | 128.3  | 103.5  |
| 7.3    | 11.7   | 15.5   | 19.5   | 12.9   | 9.8    | 9.8    | 14.9   | 17.6   |
| 49.2   | 48.6   | 47.5   | 43.4   | 278.4  | 435.1  | 269.6  | 306.0  | 193.8  |
| 18.8   | 26.1   | 12.6   | 16.8   | 43.8   | 43.7   | 40.9   | 55.3   | 35.0   |
| 58.2   | 79.8   | 18.0   | 18.9   | 464.8  | 355.4  | 770.9  | 803.5  | 25.2   |
| 372.8  | 324.2  | 650.1  | 322.2  | 589.9  | 458.9  | 579.7  | 724.6  | 794.7  |
| 1.3    | 2.8    | 2.3    | 5.0    | 43.9   | 36.1   | 44.9   | 45.7   | 43.9   |
| 100.5  | 110.7  | 88.9   | 103.8  | 1.3    | 3.2    | 2.3    | 3.1    | 20.3   |
| 42.8   | 44.5   | 69.4   | 69.1   | 5.0    | 3.3    | 1.2    | 8.2    | 13.5   |
| 80.0   | 63.0   | 165.4  | 80.5   | 73.5   | 81.6   | 60.2   | 77.7   | 66.9   |
| 1283.8 | 1178.1 | 1355.6 | 1127.7 | 1351.3 | 1481.1 | 1435.6 | 1589.9 | 2487.2 |
| 27.1   | 53.6   | 32.1   | 47.3   | 21.6   | 34.4   | 11.0   | 40.0   | 56.7   |
| 6.9    | 12.9   | 12.7   | 15.0   | 7.3    | 7.6    | 4.9    | 10.0   | 5.4    |
| 16.7   | 14.3   | 21.2   | 15.1   | 10.8   | 7.3    | 15.9   | 18.8   | 15.5   |
| 21.9   | 17.1   | 16.4   | 11.8   | 9.6    | 10.5   | 15.3   | 42.7   | 28.9   |
| 11.1   | 15.5   | 28.0   | 2.8    | 14.6   | 7.4    | 9.3    | 3.4    | 16.6   |
| 1.3    | 8.6    | 2.9    | 1.3    | 0.8    | 1.0    | 2.1    | 1.7    | 4.9    |
| 5.4    | 2.9    | 1.3    | 1.2    | 4.5    | 8.8    | 7.1    | 4.4    | 8.0    |
| 0.7    | 1.0    | 0.9    | 0.8    | 0.7    | 0.6    | 0.5    | 0.7    | 1.1    |
| 7.6    | 11.0   | 12.0   | 8.5    | 9.4    | 4.1    | 5.1    | 17.6   | 11.5   |
| 2.8    | 5.8    | 0.9    | 1.3    | 0.7    | 0.5    | 0.6    | 0.5    | 5.4    |
| 11.3   | 11.4   | 21.8   | 10.4   | 45.7   | 43.4   | 70.4   | 49.9   | 95.1   |
| 1.4    | 2.3    | 4.1    | 3.6    | 34.6   | 27.9   | 34.9   | 23.7   | 29.9   |
| 5.1    | 1.1    | 0.1    | 2.3    | 1.3    | 1.1    | 1.5    | 0.2    | 1.9    |
| 4.4    | 18.9   | 13.0   | 4.1    | 2.8    | 6.8    | 12.3   | 3.6    | 26.1   |
| 0.8    | 1.0    | 8.7    | 1.0    | 25.6   | 32.5   | 23.4   | 29.7   | 521.8  |
| 0.8    | 1.5    | 1.0    | 1.0    | 0.5    | 1.1    | 0.9    | 0.4    | 1.5    |
| 1.5    | 1.2    | 0.7    | 3.7    | 256.0  | 299.7  | 289.2  | 304.5  | 44.8   |
| 6.3    | 4.7    | 8.0    | 5.5    | 9.6    | 6.2    | 2.5    | 10.1   | 11.7   |
| 4.5    | 8.9    | 13.7   | 6.5    | 2.7    | 5.2    | 8.5    | 9.2    | 8.9    |

|        |        |        |        |        |        |        |        |        |
|--------|--------|--------|--------|--------|--------|--------|--------|--------|
| 14.9   | 16.8   | 16.6   | 15.8   | 18.2   | 16.7   | 17.2   | 30.0   | 19.2   |
| 177.5  | 152.9  | 223.8  | 135.5  | 284.8  | 226.0  | 324.0  | 334.2  | 144.0  |
| 53.1   | 69.6   | 31.3   | 38.2   | 4.4    | 5.7    | 8.9    | 9.7    | 9.0    |
| 5.6    | 3.9    | 8.3    | 8.7    | 9.4    | 16.5   | 15.2   | 13.7   | 7.9    |
| 124.1  | 118.0  | 98.4   | 86.9   | 173.0  | 116.6  | 150.2  | 206.3  | 22.8   |
| 1573.9 | 1398.8 | 1826.6 | 1415.1 | 2099.4 | 2204.4 | 2199.8 | 2523.6 | 2119.0 |
| 11.2   | 4.4    | 19.7   | 12.9   | 7.6    | 3.5    | 6.4    | 8.5    | 18.2   |
| 42.7   | 46.7   | 51.9   | 44.2   | 51.0   | 53.5   | 48.5   | 73.4   | 74.7   |
| 8.0    | 9.6    | 6.2    | 8.0    | 10.7   | 12.6   | 15.3   | 10.2   | 47.2   |
| 3.5    | 4.8    | 4.1    | 1.8    | 5.0    | 0.6    | 3.0    | 1.0    | 1.9    |
| 1.0    | 1.1    | 1.6    | 0.7    | 0.8    | 0.6    | 0.8    | 0.8    | 1.3    |
| 642.6  | 563.7  | 973.1  | 519.3  | 262.2  | 279.3  | 233.2  | 293.9  | 219.5  |
| 42.6   | 49.5   | 36.9   | 34.9   | 37.7   | 35.0   | 29.3   | 33.0   | 23.5   |
| 298.4  | 310.6  | 506.2  | 234.9  | 1925.6 | 995.8  | 2051.5 | 2333.4 | 1089.9 |
| 2.1    | 2.0    | 0.9    | 0.4    | 4.8    | 1.9    | 2.3    | 1.0    | 2.7    |
| 3.9    | 6.0    | 21.6   | 5.9    | 7.0    | 9.1    | 9.1    | 14.8   | 3.5    |
| 2936.0 | 2661.5 | 3732.3 | 2459.3 | 2384.9 | 2009.4 | 2530.0 | 2615.8 | 3727.0 |
| 872.2  | 1006.1 | 712.1  | 928.9  | 196.8  | 161.0  | 292.3  | 224.5  | 282.9  |
| 259.1  | 303.7  | 224.9  | 249.8  | 199.5  | 307.0  | 202.9  | 214.3  | 331.0  |
| 13.3   | 12.3   | 18.8   | 10.1   | 116.9  | 79.4   | 131.5  | 126.2  | 9.8    |
| 17.2   | 19.3   | 15.9   | 8.8    | 432.2  | 262.0  | 498.9  | 511.2  | 7.7    |
| 28.1   | 37.1   | 11.2   | 35.8   | 4.3    | 0.8    | 0.3    | 4.4    | 3.4    |
| 7.4    | 8.3    | 9.9    | 6.6    | 9.2    | 0.7    | 3.3    | 5.7    | 10.7   |
| 23.9   | 24.8   | 25.9   | 14.8   | 19.2   | 17.9   | 21.8   | 20.3   | 20.0   |
| 3.9    | 2.1    | 1.2    | 0.7    | 3.4    | 1.3    | 2.1    | 1.2    | 2.6    |
| 30.0   | 21.1   | 26.7   | 23.1   | 21.3   | 14.1   | 27.4   | 33.6   | 1.5    |
| 1.3    | 2.2    | 2.5    | 0.9    | 2.1    | 0.9    | 1.3    | 1.3    | 3.1    |
| 110.8  | 122.0  | 143.8  | 114.8  | 784.1  | 867.3  | 860.1  | 983.7  | 341.8  |
| 119.1  | 105.9  | 130.3  | 95.4   | 264.7  | 268.9  | 236.5  | 307.9  | 293.0  |
| 1.6    | 0.9    | 3.1    | 0.5    | 0.5    | 0.7    | 0.7    | 0.3    | 1.7    |
| 20.3   | 40.6   | 40.8   | 20.5   | 126.2  | 107.1  | 116.3  | 137.9  | 33.1   |
| 27.8   | 23.6   | 22.4   | 23.2   | 14.5   | 7.8    | 20.7   | 9.5    | 21.7   |
| 19.6   | 27.5   | 24.2   | 14.3   | 8.8    | 4.6    | 5.6    | 11.1   | 11.4   |
| 253.1  | 276.5  | 243.5  | 219.9  | 125.3  | 148.5  | 175.1  | 164.2  | 166.2  |
| 42.2   | 41.4   | 56.1   | 40.6   | 23.8   | 21.4   | 28.6   | 32.5   | 44.3   |
| 15.8   | 6.1    | 5.3    | 3.9    | 9.1    | 4.3    | 4.2    | 10.9   | 13.2   |
| 14.9   | 23.1   | 33.9   | 11.5   | 34.1   | 20.3   | 18.3   | 21.3   | 45.5   |
| 1.0    | 1.2    | 1.3    | 0.9    | 1.6    | 1.2    | 1.8    | 0.8    | 1.9    |
| 7.0    | 5.4    | 10.2   | 5.3    | 7.1    | 6.1    | 6.5    | 2.0    | 12.5   |
| 17.3   | 18.0   | 25.6   | 16.8   | 14.9   | 10.7   | 7.5    | 12.1   | 19.6   |
| 25.3   | 11.1   | 22.2   | 12.2   | 20.2   | 7.5    | 18.9   | 12.2   | 16.9   |
| 6.2    | 4.7    | 6.0    | 5.0    | 22.4   | 16.3   | 22.8   | 26.9   | 28.6   |
| 2.9    | 2.6    | 4.9    | 5.8    | 2.0    | 1.0    | 3.4    | 12.4   | 3.7    |
| 225.5  | 234.9  | 189.3  | 201.0  | 643.3  | 554.6  | 617.1  | 673.5  | 326.7  |
| 4.9    | 4.2    | 2.2    | 0.9    | 3.9    | 3.9    | 8.6    | 8.2    | 4.5    |
| 173.3  | 147.6  | 233.5  | 146.6  | 843.0  | 835.8  | 1182.5 | 1022.1 | 401.4  |
| 3.6    | 4.5    | 5.5    | 2.7    | 62.2   | 70.9   | 49.3   | 68.7   | 13.5   |
| 1.2    | 1.5    | 1.9    | 1.3    | 1.0    | 3.5    | 3.4    | 0.7    | 1.7    |
| 5.9    | 15.5   | 6.6    | 7.7    | 11.1   | 20.5   | 12.7   | 18.6   | 7.0    |
| 4.8    | 5.1    | 9.5    | 2.2    | 4.1    | 3.4    | 1.8    | 0.9    | 9.1    |
| 8.1    | 3.7    | 7.0    | 3.4    | 3.5    | 3.1    | 10.2   | 14.5   | 3.2    |
| 6.5    | 1.2    | 3.9    | 3.4    | 1.0    | 0.5    | 0.8    | 2.7    | 1.4    |
| 8.9    | 10.5   | 17.6   | 8.0    | 18.9   | 17.4   | 15.7   | 13.9   | 25.6   |

|        |        |        |        |        |        |        |        |        |
|--------|--------|--------|--------|--------|--------|--------|--------|--------|
| 12.4   | 4.5    | 14.2   | 11.7   | 7.9    | 2.8    | 1.0    | 2.8    | 10.1   |
| 7.6    | 7.2    | 4.1    | 6.9    | 4.4    | 3.6    | 6.9    | 0.9    | 8.4    |
| 2.4    | 0.8    | 0.9    | 2.2    | 3.0    | 0.8    | 2.6    | 0.6    | 1.5    |
| 10.4   | 3.9    | 26.8   | 13.0   | 4.0    | 9.5    | 5.5    | 19.5   | 9.5    |
| 1.3    | 1.1    | 1.5    | 1.0    | 2.7    | 3.2    | 5.4    | 1.9    | 4.4    |
| 7.8    | 2.0    | 3.0    | 2.0    | 1.0    | 2.6    | 8.3    | 0.6    | 4.3    |
| 2.4    | 1.2    | 3.2    | 1.7    | 1.5    | 1.5    | 1.4    | 3.6    | 2.5    |
| 1.4    | 2.0    | 2.6    | 1.1    | 14.3   | 16.8   | 23.8   | 24.8   | 1.7    |
| 8.4    | 9.0    | 20.3   | 8.4    | 11.1   | 4.6    | 14.2   | 17.6   | 26.0   |
| 2.4    | 2.2    | 4.4    | 2.5    | 10.2   | 2.6    | 7.0    | 4.5    | 2.2    |
| 16.0   | 12.3   | 11.0   | 8.6    | 14.9   | 9.7    | 17.5   | 22.1   | 15.6   |
| 9.0    | 10.7   | 12.2   | 13.8   | 2.2    | 5.7    | 4.5    | 11.9   | 11.1   |
| 6.1    | 3.1    | 8.4    | 5.1    | 4.1    | 2.2    | 2.0    | 4.6    | 6.1    |
| 16.6   | 13.5   | 28.6   | 13.4   | 4.2    | 1.0    | 3.0    | 1.0    | 67.1   |
| 3.6    | 8.1    | 6.3    | 11.0   | 7.8    | 1.4    | 4.9    | 1.3    | 7.5    |
| 3.3    | 1.9    | 2.6    | 2.3    | 1.5    | 0.8    | 5.6    | 0.6    | 3.7    |
| 23.7   | 20.6   | 15.1   | 21.6   | 7.8    | 7.5    | 7.4    | 20.4   | 17.3   |
| 64.2   | 56.9   | 90.1   | 53.8   | 106.8  | 114.5  | 130.2  | 153.3  | 120.4  |
| 2.0    | 10.8   | 8.3    | 2.4    | 2.1    | 3.3    | 4.1    | 10.1   | 16.7   |
| 2.2    | 4.2    | 2.6    | 1.8    | 1.1    | 1.6    | 1.3    | 2.0    | 9.4    |
| 6.8    | 7.9    | 2.8    | 3.2    | 5.6    | 8.6    | 8.1    | 18.5   | 4.4    |
| 12.6   | 7.1    | 7.6    | 5.6    | 18.1   | 14.2   | 21.0   | 14.6   | 16.3   |
| 4.0    | 11.0   | 2.1    | 1.0    | 3.9    | 1.6    | 3.5    | 1.1    | 9.4    |
| 4.7    | 1.9    | 8.8    | 10.5   | 9.3    | 6.8    | 9.3    | 9.7    | 3.1    |
| 7.8    | 3.6    | 10.5   | 8.1    | 17.8   | 15.0   | 20.8   | 21.7   | 25.1   |
| 23.8   | 22.8   | 14.3   | 21.6   | 38.2   | 38.3   | 44.4   | 58.4   | 19.0   |
| 35.3   | 63.4   | 17.8   | 33.1   | 100.2  | 109.0  | 96.6   | 94.2   | 41.7   |
| 33.0   | 39.2   | 47.6   | 34.9   | 187.4  | 122.1  | 206.6  | 245.2  | 146.9  |
| 8.8    | 9.0    | 10.6   | 10.3   | 6.4    | 7.0    | 10.7   | 12.3   | 15.9   |
| 0.9    | 1.3    | 2.0    | 1.4    | 0.9    | 1.1    | 1.2    | 3.9    | 1.0    |
| 16.1   | 20.8   | 17.5   | 13.4   | 12.4   | 16.3   | 9.0    | 22.4   | 13.0   |
| 1.2    | 4.4    | 4.8    | 5.5    | 2.5    | 1.1    | 0.8    | 0.9    | 2.9    |
| 0.7    | 4.3    | 1.4    | 2.1    | 0.7    | 0.8    | 0.7    | 0.6    | 1.1    |
| 299.2  | 261.8  | 383.3  | 234.9  | 193.2  | 283.3  | 188.0  | 231.0  | 251.9  |
| 2.1    | 2.4    | 1.8    | 0.6    | 1.7    | 0.8    | 1.0    | 7.6    | 8.0    |
| 0.8    | 0.5    | 0.7    | 1.1    | 1.1    | 1.1    | 1.7    | 5.1    | 1.1    |
| 5.1    | 2.8    | 3.5    | 4.7    | 5.8    | 7.0    | 3.4    | 4.3    | 5.5    |
| 4573.7 | 4448.8 | 6000.1 | 4380.1 | 7563.6 | 6862.0 | 7498.4 | 7950.5 | 9174.2 |
| 6.1    | 8.7    | 7.9    | 6.9    | 8.1    | 3.6    | 4.9    | 5.9    | 7.6    |
| 4.2    | 6.8    | 0.9    | 3.0    | 0.1    | 0.6    | 0.2    | 0.4    | 1.2    |
| 4.5    | 8.6    | 6.1    | 5.4    | 2.1    | 5.5    | 0.7    | 1.2    | 8.2    |
| 31.1   | 29.5   | 37.1   | 22.7   | 46.1   | 43.1   | 50.7   | 59.0   | 61.9   |
| 4.5    | 3.6    | 8.5    | 3.1    | 2.6    | 4.9    | 3.6    | 5.8    | 12.5   |
| 0.9    | 0.7    | 2.1    | 1.2    | 1.0    | 1.4    | 1.1    | 1.2    | 0.8    |
| 7.3    | 3.3    | 4.6    | 3.1    | 1.0    | 1.0    | 1.4    | 2.6    | 4.0    |
| 15.0   | 8.2    | 9.7    | 13.1   | 2.6    | 1.4    | 1.9    | 3.1    | 8.5    |
| 9.4    | 10.0   | 15.7   | 2.9    | 15.2   | 13.7   | 15.4   | 13.9   | 18.1   |
| 108.5  | 114.7  | 196.9  | 142.3  | 177.3  | 143.2  | 159.3  | 192.9  | 240.5  |
| 4.5    | 4.7    | 1.3    | 3.5    | 4.1    | 3.3    | 2.1    | 1.1    | 2.4    |
| 11.9   | 10.0   | 16.6   | 11.8   | 5.8    | 4.6    | 8.9    | 8.3    | 14.5   |
| 0.7    | 1.8    | 3.8    | 2.6    | 2.5    | 0.6    | 0.8    | 0.3    | 5.1    |
| 9.0    | 1.1    | 5.1    | 2.0    | 1.9    | 1.9    | 0.8    | 7.4    | 0.9    |
| 2.5    | 2.0    | 2.4    | 1.9    | 25.1   | 19.8   | 17.0   | 27.5   | 2.6    |

|       |       |        |       |       |       |       |       |       |
|-------|-------|--------|-------|-------|-------|-------|-------|-------|
| 0.5   | 0.5   | 0.7    | 0.6   | 0.9   | 0.4   | 0.9   | 0.3   | 0.8   |
| 1.4   | 8.6   | 5.5    | 2.3   | 1.8   | 1.4   | 1.1   | 3.2   | 2.2   |
| 0.7   | 0.5   | 0.5    | 0.6   | 0.5   | 0.9   | 0.4   | 0.5   | 0.7   |
| 5.8   | 2.9   | 5.7    | 3.4   | 2.9   | 3.1   | 2.7   | 6.3   | 4.2   |
| 14.4  | 9.3   | 9.2    | 11.4  | 3.3   | 7.9   | 7.6   | 10.6  | 14.4  |
| 3.7   | 3.2   | 7.7    | 3.3   | 79.9  | 73.0  | 98.6  | 96.3  | 19.6  |
| 125.4 | 113.6 | 226.3  | 134.9 | 373.5 | 501.1 | 542.4 | 480.4 | 139.2 |
| 192.7 | 234.8 | 235.5  | 141.6 | 551.3 | 573.9 | 558.4 | 592.9 | 259.8 |
| 5.3   | 5.3   | 10.4   | 3.9   | 7.6   | 7.7   | 2.7   | 9.2   | 9.8   |
| 74.1  | 89.1  | 99.8   | 71.7  | 234.0 | 235.5 | 249.7 | 279.3 | 179.5 |
| 7.2   | 7.1   | 13.9   | 9.9   | 2.7   | 4.8   | 10.6  | 9.8   | 13.2  |
| 11.9  | 16.8  | 23.3   | 8.2   | 21.6  | 14.5  | 11.2  | 22.0  | 11.9  |
| 0.8   | 0.8   | 1.2    | 1.6   | 0.5   | 0.6   | 3.0   | 0.6   | 1.3   |
| 1.1   | 0.3   | 1.5    | 1.5   | 0.4   | 0.4   | 5.1   | 5.3   | 2.9   |
| 6.5   | 2.1   | 6.3    | 2.9   | 6.5   | 0.6   | 2.1   | 3.5   | 9.9   |
| 10.4  | 6.6   | 15.4   | 8.2   | 5.9   | 5.1   | 9.7   | 17.0  | 5.5   |
| 858.0 | 731.1 | 1290.4 | 716.3 | 139.1 | 121.9 | 167.4 | 155.0 | 247.1 |
| 0.6   | 0.7   | 0.6    | 0.4   | 1.1   | 3.9   | 7.3   | 4.1   | 2.1   |
| 14.0  | 29.6  | 33.9   | 14.3  | 25.2  | 12.0  | 18.6  | 26.3  | 29.5  |
| 10.9  | 3.1   | 5.7    | 3.6   | 4.4   | 3.9   | 7.9   | 13.8  | 3.6   |
| 115.6 | 97.0  | 136.9  | 98.5  | 24.7  | 47.4  | 19.0  | 30.8  | 28.4  |
| 1.3   | 1.1   | 6.8    | 2.0   | 1.5   | 1.1   | 1.6   | 3.4   | 4.7   |
| 4.8   | 2.5   | 5.0    | 8.2   | 271.5 | 274.0 | 333.4 | 306.8 | 278.9 |
| 2.2   | 4.9   | 4.6    | 3.8   | 1.5   | 3.5   | 1.8   | 12.8  | 2.8   |
| 59.6  | 58.6  | 91.8   | 70.5  | 41.5  | 30.4  | 47.9  | 43.7  | 103.8 |
| 1.0   | 0.7   | 2.0    | 7.9   | 8.7   | 5.4   | 9.8   | 9.2   | 1.3   |
| 2.4   | 3.9   | 2.2    | 7.6   | 1.8   | 1.2   | 1.4   | 8.6   | 1.6   |
| 3.6   | 2.6   | 0.7    | 6.4   | 3.6   | 6.4   | 4.2   | 5.1   | 7.0   |
| 7.9   | 5.2   | 15.8   | 8.5   | 11.5  | 9.6   | 9.5   | 16.7  | 17.0  |
| 1.0   | 0.9   | 1.8    | 1.1   | 1.1   | 0.7   | 1.8   | 1.1   | 1.0   |
| 15.5  | 20.8  | 15.5   | 7.5   | 16.1  | 10.9  | 12.8  | 10.5  | 9.8   |
| 5.3   | 10.3  | 7.9    | 9.6   | 11.0  | 6.7   | 8.9   | 11.9  | 8.4   |
| 87.2  | 78.1  | 126.9  | 76.8  | 5.9   | 11.9  | 12.8  | 21.3  | 66.3  |
| 18.9  | 28.9  | 45.2   | 17.3  | 103.5 | 116.9 | 111.9 | 119.5 | 24.5  |
| 1.2   | 1.2   | 2.2    | 1.3   | 1.3   | 1.0   | 2.2   | 2.7   | 5.5   |
| 5.5   | 0.8   | 4.6    | 2.3   | 3.9   | 0.3   | 5.3   | 0.3   | 0.7   |
| 3.8   | 5.1   | 12.3   | 5.2   | 9.5   | 5.4   | 8.8   | 10.4  | 18.6  |
| 14.3  | 4.0   | 13.9   | 16.9  | 21.6  | 17.5  | 19.1  | 12.8  | 32.0  |
| 6.2   | 8.2   | 5.4    | 2.9   | 1.6   | 7.9   | 10.2  | 7.9   | 6.5   |
| 5.8   | 0.6   | 1.5    | 0.5   | 0.8   | 3.5   | 0.9   | 8.1   | 0.5   |
| 102.4 | 109.1 | 198.0  | 155.7 | 18.5  | 16.2  | 14.5  | 19.2  | 26.8  |
| 5.5   | 9.3   | 2.5    | 2.7   | 2.8   | 4.5   | 4.5   | 0.8   | 2.5   |
| 1.2   | 0.9   | 1.7    | 1.1   | 10.5  | 29.8  | 19.5  | 5.6   | 5.3   |
| 11.6  | 7.6   | 5.3    | 11.2  | 54.7  | 69.7  | 95.5  | 58.9  | 147.1 |
| 52.1  | 49.0  | 43.7   | 41.1  | 183.3 | 219.6 | 158.2 | 179.2 | 160.2 |
| 538.5 | 587.9 | 627.2  | 646.7 | 619.3 | 703.0 | 660.8 | 782.2 | 363.4 |
| 7.4   | 5.6   | 10.9   | 2.9   | 5.3   | 10.8  | 8.4   | 3.8   | 14.2  |
| 2.4   | 2.1   | 3.2    | 1.5   | 29.0  | 37.3  | 35.4  | 35.4  | 1.1   |
| 2.7   | 5.4   | 1.3    | 2.9   | 6.3   | 5.5   | 9.7   | 6.0   | 5.9   |
| 19.3  | 19.5  | 19.7   | 16.5  | 11.3  | 14.7  | 13.3  | 21.4  | 17.9  |
| 2.3   | 2.8   | 3.9    | 2.7   | 2.3   | 3.2   | 4.9   | 11.1  | 4.1   |
| 1.7   | 1.6   | 4.1    | 7.4   | 7.8   | 3.8   | 5.2   | 2.6   | 9.0   |
| 20.1  | 14.3  | 18.3   | 24.0  | 16.9  | 10.2  | 7.0   | 1.8   | 17.5  |

|        |        |        |        |        |        |        |        |        |
|--------|--------|--------|--------|--------|--------|--------|--------|--------|
| 14.0   | 15.1   | 25.2   | 12.8   | 8.9    | 3.6    | 3.8    | 8.1    | 6.0    |
| 2.9    | 6.8    | 7.0    | 5.8    | 8.1    | 4.8    | 11.9   | 4.3    | 2.6    |
| 6.2    | 5.3    | 3.7    | 3.8    | 6.6    | 1.6    | 4.2    | 0.8    | 5.3    |
| 1.5    | 2.2    | 3.0    | 0.9    | 1.6    | 1.5    | 1.2    | 3.4    | 7.2    |
| 6.8    | 5.5    | 6.2    | 6.2    | 1.1    | 1.7    | 1.4    | 3.0    | 5.1    |
| 441.5  | 419.5  | 499.4  | 401.9  | 296.0  | 315.1  | 341.3  | 387.7  | 325.8  |
| 121.8  | 105.9  | 158.9  | 106.4  | 97.8   | 111.2  | 101.3  | 126.2  | 110.8  |
| 1706.9 | 1603.2 | 2351.1 | 1696.9 | 1063.1 | 1120.0 | 1053.7 | 1228.9 | 1647.6 |
| 20.7   | 7.0    | 32.8   | 5.3    | 27.6   | 27.6   | 20.3   | 23.9   | 127.5  |
| 5.6    | 3.4    | 10.4   | 5.7    | 3.4    | 0.9    | 3.8    | 0.1    | 4.6    |
| 14.0   | 19.1   | 12.0   | 9.9    | 10.7   | 14.7   | 12.8   | 4.6    | 14.0   |
| 10.4   | 8.0    | 3.4    | 1.7    | 2.4    | 2.3    | 0.9    | 0.3    | 1.1    |
| 2.1    | 5.9    | 3.8    | 9.9    | 119.2  | 117.5  | 121.5  | 145.5  | 319.9  |
| 18.1   | 24.5   | 19.9   | 14.5   | 12.1   | 17.3   | 20.0   | 14.8   | 18.3   |
| 8.9    | 9.9    | 5.0    | 3.3    | 4.5    | 2.9    | 2.8    | 7.1    | 74.8   |
| 3.4    | 7.9    | 8.1    | 4.3    | 4.3    | 1.9    | 1.1    | 0.5    | 1.5    |
| 3.3    | 4.6    | 1.9    | 9.5    | 3.9    | 1.8    | 3.6    | 6.4    | 56.8   |
| 3.8    | 3.6    | 14.1   | 3.5    | 12.0   | 12.0   | 16.1   | 3.3    | 20.2   |
| 6.7    | 7.8    | 10.0   | 7.1    | 14.6   | 8.4    | 19.5   | 14.4   | 37.7   |
| 2054.9 | 1501.5 | 3513.7 | 2189.7 | 2093.2 | 1865.0 | 2268.7 | 2330.4 | 3170.9 |
| 1.8    | 5.6    | 2.0    | 1.2    | 3.4    | 1.5    | 1.7    | 6.6    | 7.0    |
| 16.8   | 13.2   | 11.4   | 14.5   | 17.2   | 29.4   | 20.3   | 36.9   | 22.0   |
| 827.6  | 710.1  | 1151.0 | 697.3  | 673.4  | 555.7  | 659.9  | 797.7  | 2212.9 |
| 0.4    | 0.7    | 0.6    | 0.8    | 13.3   | 11.5   | 22.2   | 15.5   | 425.8  |
| 6.5    | 2.3    | 3.7    | 1.5    | 3.3    | 2.8    | 5.4    | 7.3    | 3.8    |
| 112.7  | 121.9  | 157.0  | 112.1  | 294.3  | 280.1  | 296.2  | 302.1  | 320.5  |
| 14.0   | 10.1   | 1.7    | 17.9   | 7.8    | 5.0    | 13.2   | 6.3    | 14.2   |
| 1.6    | 4.5    | 6.6    | 2.8    | 1.0    | 1.1    | 1.9    | 1.1    | 1.7    |
| 4.4    | 7.9    | 12.8   | 9.7    | 1.1    | 2.0    | 4.2    | 1.9    | 14.0   |
| 30.3   | 21.4   | 29.1   | 21.6   | 20.6   | 15.2   | 18.0   | 20.9   | 17.3   |
| 35.9   | 49.2   | 7.7    | 15.0   | 2.1    | 2.2    | 0.9    | 3.1    | 2.9    |
| 5.9    | 9.6    | 14.1   | 6.4    | 15.1   | 17.5   | 19.9   | 16.9   | 322.4  |
| 5.0    | 8.2    | 12.5   | 9.6    | 18.0   | 11.0   | 21.1   | 13.8   | 19.6   |
| 43.4   | 44.4   | 39.0   | 46.3   | 59.3   | 50.8   | 51.2   | 59.4   | 56.6   |
| 125.8  | 107.3  | 330.6  | 199.7  | 148.9  | 145.7  | 148.3  | 174.4  | 123.1  |
| 10.9   | 0.9    | 8.2    | 1.5    | 3.3    | 3.2    | 7.7    | 1.0    | 7.4    |
| 74.3   | 66.8   | 89.8   | 57.4   | 63.9   | 73.0   | 63.2   | 73.7   | 101.1  |
| 16.9   | 13.2   | 19.1   | 20.5   | 39.1   | 27.6   | 22.0   | 26.4   | 31.7   |
| 15.5   | 8.8    | 13.3   | 5.0    | 5.8    | 7.8    | 2.5    | 2.9    | 7.4    |
| 36.1   | 25.2   | 47.5   | 20.4   | 10.1   | 6.6    | 5.2    | 5.6    | 5.6    |
| 0.7    | 1.5    | 4.2    | 3.6    | 2.4    | 3.5    | 1.6    | 0.8    | 2.4    |
| 1.3    | 3.0    | 1.5    | 11.3   | 5.0    | 4.2    | 2.4    | 8.4    | 9.8    |
| 4.4    | 3.8    | 6.4    | 3.9    | 8.5    | 4.0    | 7.0    | 5.1    | 3.1    |
| 131.5  | 130.9  | 134.2  | 108.4  | 178.1  | 131.2  | 190.2  | 181.2  | 41.4   |
| 239.2  | 238.1  | 283.6  | 238.8  | 467.0  | 326.0  | 373.7  | 432.2  | 339.6  |
| 4.5    | 1.1    | 7.0    | 8.7    | 1.5    | 8.1    | 1.7    | 10.4   | 4.2    |
| 11.4   | 8.9    | 27.7   | 4.8    | 2.4    | 1.8    | 1.9    | 2.2    | 13.9   |
| 22.9   | 20.8   | 27.0   | 25.9   | 16.0   | 14.6   | 11.8   | 6.6    | 7.3    |
| 1.7    | 4.3    | 3.8    | 5.2    | 9.9    | 11.4   | 11.7   | 11.5   | 7.5    |
| 6.0    | 6.0    | 4.9    | 0.8    | 5.9    | 1.5    | 4.3    | 1.8    | 4.2    |
| 1.6    | 1.7    | 2.1    | 2.1    | 1.3    | 1.3    | 1.4    | 1.1    | 2.7    |
| 130.5  | 120.2  | 142.4  | 126.8  | 100.8  | 104.5  | 112.1  | 114.9  | 156.7  |
| 31.7   | 11.7   | 32.5   | 24.1   | 37.4   | 37.7   | 34.2   | 45.2   | 18.7   |

|       |       |       |       |       |       |       |       |       |
|-------|-------|-------|-------|-------|-------|-------|-------|-------|
| 6.4   | 7.4   | 14.1  | 7.8   | 2.5   | 3.0   | 5.3   | 10.7  | 6.0   |
| 2.9   | 1.2   | 2.1   | 0.8   | 26.5  | 27.6  | 38.1  | 18.1  | 8.7   |
| 5.2   | 2.4   | 8.9   | 5.5   | 3.6   | 1.3   | 8.7   | 6.3   | 7.9   |
| 11.0  | 8.6   | 8.5   | 2.1   | 1.2   | 7.1   | 2.9   | 9.4   | 2.7   |
| 2.0   | 0.8   | 1.3   | 0.3   | 0.7   | 0.4   | 0.7   | 0.4   | 1.2   |
| 2.6   | 2.6   | 10.4  | 2.9   | 2.8   | 1.6   | 1.5   | 5.6   | 2.1   |
| 1.2   | 0.9   | 1.1   | 0.7   | 3.9   | 4.2   | 3.5   | 13.8  | 0.7   |
| 3.6   | 7.2   | 10.4  | 5.8   | 13.4  | 9.5   | 9.5   | 11.3  | 18.8  |
| 12.9  | 7.7   | 11.2  | 7.7   | 109.2 | 131.3 | 86.4  | 133.4 | 76.5  |
| 7.7   | 7.1   | 9.6   | 2.9   | 1.8   | 1.9   | 4.5   | 1.2   | 3.8   |
| 1.1   | 1.3   | 1.0   | 0.8   | 2.1   | 0.7   | 0.6   | 0.8   | 2.1   |
| 0.7   | 0.9   | 1.0   | 0.8   | 0.7   | 0.4   | 1.1   | 0.7   | 1.1   |
| 6.2   | 15.9  | 15.4  | 7.1   | 213.9 | 257.9 | 333.2 | 308.8 | 12.6  |
| 10.5  | 5.3   | 18.6  | 9.2   | 9.0   | 2.0   | 4.3   | 3.1   | 17.6  |
| 1.5   | 2.2   | 10.3  | 3.9   | 7.9   | 23.2  | 4.1   | 1.1   | 17.8  |
| 15.0  | 14.3  | 13.9  | 9.6   | 4.9   | 7.1   | 7.7   | 0.9   | 10.7  |
| 1.0   | 2.1   | 1.9   | 0.9   | 0.8   | 1.3   | 0.9   | 1.4   | 2.5   |
| 3.3   | 1.5   | 2.4   | 5.2   | 1.9   | 1.0   | 1.6   | 1.3   | 4.1   |
| 1.0   | 1.4   | 1.0   | 3.7   | 0.8   | 0.9   | 6.3   | 0.9   | 2.9   |
| 3.1   | 5.4   | 4.0   | 0.8   | 22.5  | 18.2  | 23.8  | 20.6  | 5.4   |
| 26.2  | 21.1  | 38.2  | 14.7  | 58.3  | 73.0  | 49.2  | 59.6  | 10.0  |
| 86.2  | 70.5  | 195.4 | 163.1 | 22.9  | 21.4  | 28.1  | 42.0  | 23.8  |
| 28.0  | 22.7  | 31.1  | 24.8  | 19.0  | 17.2  | 25.8  | 28.9  | 45.4  |
| 49.0  | 47.8  | 77.9  | 35.9  | 194.7 | 134.9 | 153.9 | 211.5 | 259.7 |
| 107.4 | 124.1 | 147.4 | 124.6 | 420.3 | 313.8 | 437.0 | 582.1 | 500.3 |
| 64.9  | 66.8  | 33.4  | 46.8  | 13.9  | 8.1   | 5.1   | 7.8   | 9.4   |
| 10.2  | 7.1   | 4.5   | 1.4   | 6.9   | 3.8   | 3.8   | 1.7   | 4.6   |
| 55.9  | 56.7  | 49.5  | 66.1  | 17.0  | 19.6  | 18.8  | 24.2  | 14.8  |
| 5.9   | 1.6   | 7.3   | 9.2   | 8.3   | 4.1   | 2.4   | 3.6   | 2.3   |
| 245.0 | 185.8 | 422.3 | 296.6 | 461.8 | 498.6 | 559.9 | 526.3 | 582.4 |
| 0.2   | 0.3   | 0.8   | 0.4   | 0.3   | 0.5   | 0.2   | 0.4   | 89.6  |
| 4.6   | 6.0   | 1.8   | 3.2   | 2.2   | 6.4   | 2.2   | 1.6   | 61.3  |
| 12.0  | 11.1  | 19.4  | 6.9   | 1.9   | 1.0   | 8.9   | 2.0   | 8.9   |
| 11.4  | 10.5  | 12.1  | 12.5  | 8.9   | 5.6   | 4.1   | 11.1  | 2.5   |
| 3.5   | 6.8   | 4.6   | 6.4   | 10.5  | 9.2   | 12.7  | 13.7  | 25.5  |
| 1.2   | 4.0   | 6.1   | 1.7   | 5.6   | 3.6   | 2.9   | 9.7   | 6.7   |
| 12.5  | 13.3  | 21.1  | 11.3  | 14.6  | 14.0  | 12.1  | 23.3  | 25.0  |
| 6.0   | 6.0   | 12.5  | 9.6   | 9.2   | 2.9   | 6.7   | 17.7  | 11.6  |
| 203.9 | 232.3 | 224.8 | 155.8 | 376.8 | 512.5 | 427.5 | 473.5 | 295.8 |
| 0.4   | 2.8   | 2.4   | 3.4   | 1.6   | 0.1   | 2.4   | 4.3   | 0.6   |
| 6.2   | 4.8   | 11.9  | 10.8  | 3.8   | 9.1   | 6.5   | 1.7   | 6.0   |
| 36.7  | 53.0  | 59.1  | 40.3  | 23.6  | 21.3  | 26.4  | 42.1  | 55.7  |
| 0.9   | 3.7   | 1.3   | 1.6   | 1.9   | 0.5   | 2.3   | 1.1   | 4.2   |
| 1.0   | 1.1   | 2.0   | 0.7   | 0.4   | 0.4   | 0.5   | 1.5   | 1.4   |
| 6.4   | 5.7   | 24.8  | 11.3  | 1.7   | 1.1   | 4.6   | 1.7   | 2.4   |
| 6.9   | 15.1  | 5.5   | 10.5  | 15.9  | 13.7  | 14.4  | 2.3   | 12.5  |
| 27.6  | 31.7  | 39.6  | 39.2  | 63.4  | 67.1  | 62.1  | 84.3  | 7.0   |
| 4.2   | 3.5   | 3.0   | 10.3  | 4.9   | 5.0   | 3.5   | 8.1   | 7.1   |
| 156.6 | 147.6 | 125.6 | 112.1 | 72.0  | 89.1  | 88.5  | 82.6  | 57.2  |
| 49.5  | 54.4  | 30.6  | 43.4  | 20.7  | 37.1  | 28.7  | 30.0  | 17.3  |
| 1.0   | 0.8   | 1.4   | 0.9   | 0.8   | 0.7   | 1.0   | 0.8   | 24.5  |
| 1.3   | 2.0   | 1.8   | 1.8   | 196.5 | 185.5 | 128.9 | 149.8 | 2.7   |
| 3.1   | 4.2   | 10.7  | 5.4   | 3.4   | 6.1   | 3.6   | 1.0   | 10.0  |

|       |       |       |       |        |        |        |        |       |
|-------|-------|-------|-------|--------|--------|--------|--------|-------|
| 6.4   | 4.3   | 3.7   | 3.0   | 1.5    | 7.2    | 0.9    | 1.4    | 3.1   |
| 11.8  | 3.8   | 2.9   | 1.2   | 2.1    | 1.6    | 2.0    | 3.1    | 2.5   |
| 14.6  | 17.3  | 15.8  | 12.2  | 6.3    | 9.5    | 3.6    | 12.7   | 9.7   |
| 7.3   | 1.3   | 8.7   | 3.3   | 5.4    | 0.9    | 1.0    | 0.5    | 1.8   |
| 30.2  | 29.6  | 40.5  | 27.6  | 37.5   | 60.1   | 39.3   | 66.0   | 72.5  |
| 14.2  | 17.5  | 7.7   | 12.3  | 7.1    | 12.2   | 6.2    | 3.9    | 16.2  |
| 4.0   | 4.4   | 7.2   | 3.0   | 4.5    | 1.3    | 1.8    | 1.4    | 8.0   |
| 104.7 | 93.1  | 159.1 | 100.7 | 157.0  | 154.6  | 158.6  | 158.5  | 176.0 |
| 1.2   | 4.8   | 2.9   | 1.1   | 5.5    | 3.9    | 1.4    | 1.3    | 3.8   |
| 14.5  | 10.7  | 14.7  | 16.0  | 2.9    | 0.3    | 1.0    | 5.5    | 0.5   |
| 241.0 | 187.4 | 471.7 | 187.5 | 769.0  | 636.8  | 707.3  | 797.8  | 840.9 |
| 11.7  | 11.0  | 11.8  | 8.5   | 11.8   | 8.0    | 18.8   | 3.7    | 21.8  |
| 6.9   | 5.1   | 4.9   | 5.1   | 7.9    | 2.0    | 4.5    | 8.1    | 28.1  |
| 9.4   | 12.5  | 10.3  | 9.3   | 7.8    | 7.6    | 5.1    | 20.0   | 5.3   |
| 260.2 | 237.6 | 384.6 | 258.2 | 336.4  | 332.3  | 325.4  | 430.3  | 200.7 |
| 121.5 | 109.0 | 146.1 | 116.7 | 113.8  | 83.1   | 76.0   | 124.5  | 130.2 |
| 12.8  | 13.4  | 8.5   | 8.0   | 3.1    | 1.5    | 3.3    | 3.0    | 0.7   |
| 39.5  | 47.3  | 50.8  | 42.5  | 367.0  | 303.8  | 294.3  | 355.5  | 475.0 |
| 129.5 | 115.8 | 195.0 | 131.1 | 117.3  | 145.8  | 152.9  | 134.7  | 232.7 |
| 5.9   | 11.5  | 13.7  | 12.2  | 40.8   | 60.3   | 49.2   | 52.3   | 68.6  |
| 2.8   | 1.3   | 6.3   | 1.3   | 1.3    | 1.1    | 1.1    | 2.7    | 2.3   |
| 1.7   | 1.9   | 2.4   | 3.0   | 2.8    | 3.6    | 7.0    | 6.5    | 5.2   |
| 4.4   | 2.0   | 0.6   | 1.4   | 0.9    | 0.4    | 0.6    | 1.3    | 8.2   |
| 1.3   | 1.6   | 2.4   | 1.3   | 1.1    | 1.0    | 0.9    | 8.6    | 1.9   |
| 4.2   | 7.9   | 11.2  | 4.7   | 6.4    | 0.8    | 3.6    | 4.9    | 12.5  |
| 1.0   | 3.9   | 8.8   | 4.6   | 25.2   | 24.0   | 18.4   | 29.1   | 18.7  |
| 4.2   | 3.8   | 2.7   | 3.6   | 4.2    | 0.2    | 2.7    | 1.1    | 5.1   |
| 1.0   | 1.6   | 1.5   | 2.9   | 3.2    | 1.3    | 1.0    | 2.7    | 3.7   |
| 27.8  | 27.2  | 40.0  | 40.2  | 28.9   | 24.7   | 25.8   | 35.3   | 19.9  |
| 0.8   | 1.2   | 0.9   | 0.6   | 1.1    | 3.1    | 1.3    | 0.4    | 1.0   |
| 6.2   | 3.2   | 3.1   | 2.4   | 3.0    | 2.6    | 4.8    | 2.8    | 7.8   |
| 2.2   | 3.3   | 5.4   | 6.6   | 11.2   | 11.7   | 12.4   | 7.5    | 8.1   |
| 1.7   | 1.0   | 1.3   | 1.0   | 8.0    | 6.6    | 6.0    | 1.3    | 1.3   |
| 4.9   | 2.6   | 13.3  | 2.5   | 6.8    | 0.9    | 1.4    | 0.3    | 2.8   |
| 7.4   | 7.5   | 12.3  | 8.2   | 10.6   | 9.9    | 12.8   | 13.1   | 20.8  |
| 2.5   | 1.2   | 2.0   | 1.3   | 5.1    | 6.8    | 3.4    | 10.9   | 6.2   |
| 1.8   | 6.6   | 5.3   | 5.4   | 2.2    | 5.3    | 8.2    | 7.4    | 9.3   |
| 67.0  | 63.5  | 71.8  | 65.3  | 34.0   | 16.9   | 26.9   | 43.1   | 48.1  |
| 10.8  | 7.0   | 13.2  | 5.3   | 15.1   | 14.5   | 7.5    | 22.1   | 3.4   |
| 6.2   | 3.0   | 3.2   | 5.5   | 6.8    | 4.6    | 3.8    | 7.4    | 3.6   |
| 0.9   | 2.7   | 1.3   | 4.0   | 2.8    | 2.4    | 1.7    | 4.8    | 5.8   |
| 10.7  | 19.6  | 5.6   | 7.1   | 13.3   | 9.9    | 0.8    | 8.6    | 10.2  |
| 11.9  | 10.5  | 7.4   | 12.3  | 26.8   | 30.2   | 22.2   | 34.1   | 27.3  |
| 7.6   | 7.4   | 7.7   | 6.7   | 2.6    | 6.1    | 4.5    | 9.2    | 8.8   |
| 0.5   | 0.8   | 0.5   | 1.1   | 0.4    | 1.8    | 0.2    | 0.2    | 0.3   |
| 12.9  | 9.4   | 13.4  | 8.3   | 7.6    | 7.6    | 9.7    | 10.0   | 18.1  |
| 485.6 | 525.7 | 635.1 | 413.1 | 1150.4 | 1470.1 | 1428.9 | 1543.5 | 937.8 |
| 8.4   | 1.6   | 3.4   | 2.0   | 2.3    | 1.4    | 3.0    | 1.5    | 3.9   |
| 540.0 | 447.5 | 510.7 | 405.3 | 643.1  | 616.5  | 682.8  | 840.0  | 783.8 |
| 2.1   | 5.0   | 7.7   | 3.7   | 4.1    | 4.3    | 3.0    | 1.1    | 1.7   |
| 3.6   | 2.9   | 3.8   | 4.3   | 1.1    | 1.6    | 3.3    | 5.2    | 6.0   |
| 0.5   | 6.4   | 2.9   | 1.9   | 1.1    | 0.9    | 0.3    | 0.6    | 2.4   |
| 14.7  | 20.5  | 19.1  | 9.3   | 17.5   | 16.0   | 17.3   | 18.8   | 18.4  |



|        |        |        |        |        |        |        |        |        |
|--------|--------|--------|--------|--------|--------|--------|--------|--------|
| 5.9    | 7.8    | 7.6    | 5.9    | 1.7    | 5.4    | 3.3    | 9.8    | 1.5    |
| 8.2    | 2.6    | 12.1   | 2.5    | 8.0    | 5.4    | 9.5    | 9.5    | 9.5    |
| 1.6    | 7.3    | 1.5    | 0.6    | 1.0    | 1.2    | 3.0    | 4.1    | 1.5    |
| 4.4    | 4.6    | 5.6    | 1.3    | 5.0    | 2.4    | 3.2    | 8.0    | 7.2    |
| 4.6    | 6.4    | 10.1   | 5.1    | 4.1    | 1.0    | 4.1    | 5.2    | 6.4    |
| 2.0    | 3.8    | 4.3    | 2.4    | 2.8    | 2.7    | 1.2    | 0.5    | 5.9    |
| 101.9  | 103.2  | 165.9  | 80.8   | 259.2  | 177.0  | 265.2  | 292.8  | 289.0  |
| 1.3    | 1.6    | 8.5    | 2.6    | 1.7    | 2.2    | 3.8    | 1.0    | 6.6    |
| 17.3   | 12.8   | 18.1   | 14.0   | 7.6    | 6.4    | 12.6   | 2.4    | 7.5    |
| 595.2  | 587.9  | 878.4  | 650.9  | 874.9  | 569.5  | 732.8  | 971.7  | 922.2  |
| 34.4   | 48.8   | 50.4   | 26.3   | 26.5   | 22.8   | 42.4   | 31.3   | 15.0   |
| 24.2   | 14.0   | 15.5   | 14.8   | 48.3   | 53.1   | 37.8   | 48.5   | 31.1   |
| 23.6   | 23.9   | 30.7   | 17.1   | 25.3   | 23.7   | 21.7   | 38.1   | 26.3   |
| 2.9    | 3.9    | 1.3    | 1.5    | 1.8    | 5.1    | 3.2    | 4.8    | 4.4    |
| 1.6    | 1.7    | 1.3    | 2.1    | 1.1    | 2.2    | 1.8    | 1.0    | 2.3    |
| 3.8    | 2.1    | 6.5    | 6.2    | 7.5    | 1.7    | 2.3    | 9.0    | 1.5    |
| 12.0   | 16.0   | 36.2   | 21.5   | 90.2   | 56.3   | 94.7   | 93.8   | 22.0   |
| 8.5    | 15.8   | 14.3   | 8.0    | 8.8    | 5.0    | 6.3    | 17.7   | 8.5    |
| 12.6   | 16.7   | 18.7   | 21.3   | 7.2    | 10.2   | 8.5    | 11.2   | 18.9   |
| 2.2    | 5.4    | 4.7    | 10.8   | 776.6  | 539.4  | 670.5  | 841.5  | 391.0  |
| 31.8   | 23.3   | 30.3   | 25.8   | 32.6   | 54.1   | 29.5   | 27.4   | 15.8   |
| 31.1   | 27.2   | 51.2   | 34.1   | 27.6   | 33.6   | 29.2   | 40.3   | 68.4   |
| 4.1    | 5.2    | 4.8    | 3.4    | 0.8    | 3.6    | 0.7    | 0.8    | 4.8    |
| 11.9   | 7.4    | 3.6    | 3.7    | 5.4    | 8.5    | 9.3    | 7.8    | 10.9   |
| 10.7   | 16.5   | 12.5   | 12.5   | 10.4   | 11.5   | 8.2    | 10.3   | 5.1    |
| 123.7  | 114.8  | 121.8  | 113.7  | 91.8   | 94.1   | 92.1   | 110.9  | 162.0  |
| 6.5    | 10.2   | 8.0    | 7.9    | 6.5    | 7.5    | 4.8    | 10.6   | 4.9    |
| 26.7   | 16.6   | 30.5   | 13.1   | 27.2   | 21.3   | 29.1   | 32.0   | 20.3   |
| 1.0    | 2.0    | 4.5    | 1.9    | 1.3    | 2.4    | 1.5    | 2.1    | 3.1    |
| 3.9    | 7.6    | 18.8   | 7.5    | 10.2   | 16.0   | 6.5    | 9.9    | 13.1   |
| 12.5   | 3.5    | 16.3   | 18.1   | 5.7    | 3.5    | 3.1    | 4.6    | 16.2   |
| 21.6   | 12.5   | 7.9    | 8.2    | 18.2   | 25.0   | 7.9    | 37.0   | 9.8    |
| 3.7    | 4.9    | 11.0   | 7.8    | 8.9    | 12.9   | 10.5   | 14.9   | 25.3   |
| 2158.7 | 1717.5 | 3246.4 | 1844.6 | 2589.0 | 2064.5 | 2719.3 | 2988.8 | 3294.2 |
| 2612.1 | 2116.0 | 3548.8 | 2145.9 | 2372.5 | 1788.6 | 2528.9 | 2757.4 | 3468.6 |
| 2.2    | 7.5    | 10.7   | 11.0   | 8.0    | 10.1   | 9.0    | 8.6    | 17.7   |
| 19.6   | 17.0   | 9.4    | 10.3   | 20.1   | 6.1    | 15.3   | 9.3    | 10.2   |
| 217.7  | 218.4  | 188.9  | 197.2  | 117.7  | 154.2  | 139.3  | 103.0  | 56.2   |
| 131.7  | 131.4  | 135.6  | 117.0  | 125.0  | 126.2  | 130.7  | 163.8  | 168.8  |
| 0.5    | 0.9    | 3.8    | 1.3    | 0.9    | 0.9    | 0.8    | 0.8    | 1.4    |
| 172.5  | 163.2  | 239.8  | 183.0  | 396.4  | 371.8  | 391.3  | 424.6  | 412.3  |
| 1.0    | 2.0    | 6.7    | 5.6    | 6.4    | 10.2   | 8.0    | 7.4    | 2.4    |
| 2.4    | 3.0    | 6.3    | 1.0    | 69.0   | 53.2   | 52.4   | 49.8   | 11.2   |
| 1.9    | 6.4    | 3.2    | 3.5    | 19.1   | 21.0   | 20.8   | 24.6   | 6.7    |
| 12.6   | 12.2   | 12.0   | 15.4   | 1.9    | 2.4    | 14.1   | 8.2    | 11.6   |
| 14.1   | 14.8   | 13.7   | 11.0   | 16.6   | 18.8   | 15.8   | 18.8   | 25.5   |
| 245.6  | 190.9  | 387.7  | 285.0  | 1.8    | 3.1    | 1.0    | 4.4    | 1.7    |
| 1022.3 | 826.1  | 1349.5 | 1297.1 | 1.2    | 1.4    | 0.8    | 2.0    | 1.8    |
| 3.8    | 3.4    | 1.8    | 1.1    | 2.5    | 3.2    | 1.2    | 3.1    | 8.5    |
| 50.9   | 55.8   | 73.4   | 39.1   | 95.9   | 133.5  | 115.6  | 124.2  | 63.2   |
| 427.3  | 393.7  | 602.5  | 381.8  | 332.8  | 329.2  | 327.3  | 324.0  | 627.2  |
| 10.9   | 12.0   | 9.1    | 3.7    | 6.0    | 3.2    | 4.8    | 8.4    | 27.4   |
| 8.0    | 6.3    | 16.2   | 7.3    | 14.0   | 5.7    | 3.5    | 9.2    | 12.5   |

|        |        |        |        |        |        |        |        |        |
|--------|--------|--------|--------|--------|--------|--------|--------|--------|
| 16.5   | 16.5   | 23.8   | 7.4    | 298.1  | 332.5  | 319.8  | 359.0  | 101.1  |
| 16.8   | 10.1   | 15.5   | 9.7    | 11.3   | 7.8    | 3.8    | 18.0   | 10.9   |
| 1.1    | 4.4    | 1.3    | 1.0    | 60.5   | 67.5   | 126.8  | 91.7   | 2.1    |
| 1.8    | 0.8    | 2.5    | 4.6    | 4.6    | 1.1    | 1.4    | 7.9    | 7.6    |
| 15.4   | 7.1    | 23.7   | 25.4   | 8.5    | 3.3    | 1.6    | 4.5    | 2.7    |
| 1.3    | 1.2    | 1.5    | 1.5    | 1.7    | 1.4    | 2.1    | 1.6    | 1.9    |
| 4.0    | 1.7    | 2.3    | 4.0    | 9.9    | 7.9    | 5.0    | 11.9   | 4.8    |
| 36.8   | 45.9   | 38.3   | 38.1   | 149.0  | 150.1  | 127.5  | 200.6  | 527.1  |
| 10.5   | 9.0    | 5.9    | 7.3    | 71.1   | 94.4   | 74.0   | 123.6  | 39.4   |
| 12.5   | 7.3    | 12.2   | 4.1    | 17.1   | 18.7   | 18.1   | 25.4   | 18.7   |
| 4.4    | 0.4    | 4.8    | 8.4    | 2.5    | 2.6    | 5.0    | 8.1    | 6.0    |
| 2.4    | 0.7    | 7.7    | 2.6    | 0.9    | 1.1    | 4.5    | 7.8    | 1.3    |
| 48.5   | 43.2   | 58.7   | 20.9   | 20.9   | 15.9   | 33.4   | 27.9   | 2.7    |
| 313.1  | 257.3  | 427.1  | 276.2  | 354.6  | 254.8  | 345.5  | 334.9  | 388.1  |
| 15.2   | 14.2   | 19.8   | 13.0   | 33.2   | 16.4   | 26.1   | 39.4   | 22.2   |
| 191.4  | 157.5  | 329.7  | 182.9  | 285.1  | 318.4  | 382.7  | 368.5  | 342.6  |
| 7.4    | 1.1    | 6.8    | 9.3    | 2.5    | 0.7    | 4.3    | 0.3    | 2.6    |
| 139.4  | 143.6  | 129.0  | 85.7   | 66.5   | 59.6   | 62.6   | 81.9   | 63.6   |
| 5.7    | 8.2    | 5.0    | 7.3    | 4.0    | 2.3    | 2.6    | 8.0    | 9.0    |
| 16.7   | 9.5    | 14.6   | 11.7   | 11.3   | 4.7    | 15.4   | 13.3   | 17.7   |
| 2.5    | 0.8    | 1.0    | 0.9    | 0.6    | 1.8    | 0.4    | 1.3    | 4.9    |
| 320.5  | 285.0  | 441.7  | 277.5  | 293.5  | 288.2  | 291.7  | 340.2  | 405.5  |
| 3.7    | 6.6    | 1.7    | 2.9    | 1.0    | 4.4    | 3.9    | 2.5    | 7.2    |
| 286.3  | 265.0  | 359.9  | 203.0  | 232.9  | 242.7  | 214.6  | 250.8  | 255.2  |
| 8.4    | 4.9    | 5.5    | 9.9    | 1.8    | 6.8    | 2.5    | 13.9   | 5.0    |
| 10.8   | 15.1   | 13.1   | 6.3    | 4.8    | 8.6    | 11.6   | 13.1   | 13.4   |
| 29.2   | 25.9   | 44.2   | 30.8   | 61.3   | 51.2   | 53.9   | 83.7   | 64.7   |
| 2.9    | 13.8   | 14.7   | 16.1   | 20.7   | 16.6   | 22.7   | 22.6   | 23.0   |
| 457.3  | 354.6  | 629.2  | 456.7  | 1095.4 | 1257.8 | 1238.4 | 1217.8 | 221.6  |
| 4.3    | 1.1    | 6.0    | 1.7    | 21.5   | 14.8   | 34.7   | 22.4   | 25.8   |
| 17.5   | 9.0    | 15.3   | 13.6   | 6.1    | 4.0    | 5.3    | 6.4    | 42.1   |
| 144.3  | 121.0  | 147.3  | 104.8  | 169.5  | 136.0  | 166.7  | 186.8  | 158.5  |
| 16.1   | 15.2   | 10.8   | 10.3   | 4.4    | 3.8    | 2.7    | 19.8   | 5.2    |
| 29.3   | 31.1   | 25.3   | 30.1   | 8.6    | 10.3   | 6.8    | 8.4    | 11.8   |
| 12.2   | 5.1    | 3.2    | 15.9   | 2.5    | 4.9    | 1.3    | 3.7    | 4.5    |
| 192.8  | 218.2  | 166.9  | 161.3  | 130.4  | 225.0  | 123.4  | 155.6  | 258.0  |
| 243.5  | 238.2  | 237.2  | 218.6  | 193.0  | 330.3  | 200.5  | 273.6  | 277.2  |
| 19.0   | 18.8   | 7.7    | 12.1   | 18.5   | 25.7   | 23.4   | 25.3   | 34.9   |
| 4.3    | 2.6    | 3.7    | 4.4    | 9.4    | 9.8    | 7.1    | 2.9    | 8.7    |
| 3.4    | 3.9    | 2.4    | 1.8    | 1.2    | 1.0    | 6.3    | 3.2    | 6.4    |
| 18.8   | 20.5   | 28.8   | 19.6   | 19.2   | 12.7   | 13.5   | 22.8   | 32.1   |
| 12.9   | 11.1   | 10.1   | 7.0    | 96.5   | 109.3  | 108.6  | 120.2  | 10.4   |
| 1.7    | 1.3    | 1.3    | 1.1    | 1.3    | 1.6    | 1.4    | 0.6    | 2.4    |
| 10.6   | 5.5    | 10.0   | 6.4    | 2.7    | 3.6    | 11.6   | 1.5    | 34.7   |
| 15.0   | 9.1    | 6.8    | 8.9    | 2.9    | 4.7    | 4.3    | 6.0    | 4.2    |
| 1575.9 | 1162.8 | 2162.3 | 1359.5 | 3160.3 | 3123.7 | 3294.8 | 3725.7 | 4234.4 |
| 117.1  | 171.0  | 172.5  | 157.3  | 525.8  | 475.3  | 765.9  | 522.4  | 136.7  |
| 6.6    | 2.5    | 9.0    | 11.1   | 6.4    | 7.0    | 7.4    | 7.5    | 0.9    |
| 5.3    | 7.0    | 15.6   | 13.0   | 17.0   | 3.6    | 10.8   | 6.1    | 6.7    |
| 6.4    | 9.0    | 8.3    | 8.1    | 2.8    | 5.0    | 1.7    | 2.5    | 5.1    |
| 47.5   | 38.9   | 73.0   | 37.3   | 34.4   | 40.3   | 33.8   | 79.9   | 88.4   |
| 0.9    | 3.6    | 4.5    | 2.0    | 2.6    | 0.8    | 1.8    | 1.0    | 6.8    |
| 0.8    | 0.7    | 0.7    | 0.4    | 0.3    | 2.6    | 0.5    | 2.3    | 2.7    |

|        |        |        |        |        |        |        |        |        |
|--------|--------|--------|--------|--------|--------|--------|--------|--------|
| 0.7    | 0.6    | 2.7    | 0.7    | 4.0    | 0.8    | 6.4    | 2.5    | 2.1    |
| 21.4   | 20.3   | 29.9   | 12.7   | 20.9   | 18.5   | 26.4   | 26.6   | 30.8   |
| 3.2    | 1.2    | 3.2    | 2.5    | 2.4    | 4.5    | 1.7    | 0.9    | 3.5    |
| 3.2    | 3.6    | 5.0    | 1.3    | 1.5    | 4.6    | 3.2    | 1.1    | 5.4    |
| 1814.9 | 1562.4 | 1532.2 | 1420.4 | 2430.7 | 2071.1 | 2625.6 | 2777.7 | 2031.8 |
| 2.3    | 2.4    | 3.3    | 2.0    | 12.0   | 3.9    | 1.8    | 1.8    | 2.5    |
| 5.2    | 1.7    | 6.5    | 0.9    | 3.3    | 2.0    | 5.5    | 9.7    | 8.4    |
| 4.7    | 1.8    | 5.1    | 0.6    | 3.6    | 1.9    | 0.4    | 0.6    | 3.8    |
| 4.1    | 0.9    | 1.9    | 3.8    | 13.8   | 11.9   | 14.4   | 9.7    | 11.9   |
| 27.9   | 23.6   | 49.3   | 16.2   | 150.9  | 78.3   | 148.5  | 198.9  | 49.5   |
| 13.9   | 19.4   | 28.2   | 25.7   | 20.6   | 14.5   | 14.8   | 9.8    | 22.6   |
| 2.1    | 4.9    | 13.2   | 7.8    | 31.8   | 35.6   | 38.2   | 41.1   | 10.5   |
| 14.9   | 8.2    | 6.0    | 9.4    | 8.7    | 9.7    | 12.0   | 10.3   | 12.7   |
| 16.3   | 13.7   | 29.2   | 20.7   | 32.2   | 32.4   | 25.7   | 30.4   | 51.9   |
| 29.1   | 23.3   | 26.6   | 20.2   | 107.2  | 127.9  | 144.7  | 154.1  | 76.2   |
| 6.5    | 3.3    | 9.3    | 4.1    | 2.6    | 6.6    | 6.2    | 11.4   | 11.4   |
| 7.4    | 6.5    | 16.6   | 8.3    | 5.6    | 8.4    | 8.3    | 1.1    | 10.2   |
| 48.0   | 67.5   | 50.5   | 48.9   | 66.4   | 53.9   | 79.8   | 79.8   | 92.2   |
| 0.6    | 2.1    | 3.0    | 0.4    | 0.5    | 0.5    | 2.2    | 6.6    | 1.0    |
| 7.5    | 6.2    | 18.3   | 14.0   | 7.0    | 11.0   | 11.1   | 2.8    | 23.0   |
| 33.4   | 29.0   | 34.4   | 15.3   | 13.5   | 15.4   | 15.9   | 25.7   | 88.6   |
| 18.5   | 21.4   | 28.4   | 25.0   | 13.7   | 12.9   | 10.4   | 26.5   | 31.0   |
| 6.6    | 0.6    | 2.9    | 2.5    | 9.2    | 5.6    | 13.6   | 10.5   | 23.7   |
| 29.1   | 21.8   | 37.8   | 18.2   | 52.2   | 49.6   | 53.1   | 41.4   | 113.5  |
| 39.4   | 41.0   | 59.8   | 32.1   | 24.1   | 22.2   | 22.2   | 32.3   | 42.7   |
| 304.1  | 313.0  | 301.7  | 331.6  | 198.4  | 211.6  | 186.1  | 282.8  | 418.3  |
| 25.2   | 17.4   | 33.5   | 18.1   | 0.2    | 0.3    | 0.3    | 0.1    | 0.3    |
| 57.9   | 81.8   | 49.9   | 78.7   | 30.8   | 31.2   | 28.5   | 47.0   | 54.0   |
| 4.9    | 10.4   | 4.6    | 5.2    | 6.6    | 4.2    | 10.4   | 13.6   | 4.8    |
| 9.9    | 1.3    | 11.5   | 6.3    | 20.3   | 13.2   | 17.8   | 30.4   | 59.7   |
| 2.8    | 1.4    | 2.7    | 1.4    | 3.4    | 1.6    | 1.9    | 1.2    | 2.2    |
| 1.3    | 1.4    | 1.4    | 1.6    | 1.1    | 0.8    | 1.4    | 3.4    | 1.3    |
| 1.0    | 1.7    | 1.7    | 1.0    | 0.7    | 1.2    | 1.0    | 0.9    | 9.0    |
| 402.6  | 382.2  | 572.2  | 417.4  | 618.4  | 557.0  | 665.9  | 762.1  | 536.8  |
| 3.1    | 0.8    | 5.1    | 0.9    | 1.2    | 2.0    | 2.3    | 1.8    | 5.9    |
| 266.5  | 280.6  | 324.7  | 255.2  | 243.5  | 210.5  | 229.4  | 306.2  | 155.2  |
| 4.5    | 1.2    | 2.0    | 6.0    | 4.6    | 5.4    | 5.1    | 2.8    | 2.2    |
| 187.6  | 168.6  | 249.0  | 168.8  | 451.3  | 486.2  | 466.9  | 480.2  | 332.7  |
| 5.3    | 3.1    | 2.1    | 0.7    | 1.3    | 1.7    | 0.3    | 0.7    | 3.4    |
| 124.8  | 107.6  | 205.3  | 122.3  | 110.0  | 119.1  | 113.4  | 119.0  | 57.5   |
| 117.3  | 119.8  | 166.2  | 123.2  | 296.7  | 362.5  | 321.9  | 329.0  | 392.7  |
| 337.0  | 303.1  | 570.3  | 344.3  | 829.7  | 908.2  | 803.9  | 962.9  | 772.2  |
| 2.8    | 6.1    | 4.8    | 6.4    | 8.8    | 14.7   | 5.7    | 10.6   | 6.3    |
| 55.2   | 58.1   | 81.1   | 48.3   | 72.6   | 79.3   | 71.5   | 98.0   | 154.1  |
| 98.7   | 99.6   | 112.9  | 91.0   | 88.4   | 90.1   | 87.7   | 96.3   | 73.3   |
| 21.6   | 19.7   | 22.4   | 16.3   | 1.7    | 2.8    | 1.5    | 5.1    | 4.1    |
| 161.9  | 163.6  | 198.5  | 168.8  | 184.0  | 211.4  | 189.3  | 219.4  | 203.1  |
| 963.5  | 907.2  | 1471.2 | 949.1  | 482.8  | 558.6  | 504.6  | 553.6  | 919.4  |
| 46.4   | 51.2   | 59.8   | 41.3   | 49.9   | 118.0  | 50.7   | 63.1   | 285.0  |
| 167.1  | 139.9  | 203.5  | 144.2  | 97.8   | 110.3  | 82.8   | 125.5  | 414.0  |
| 7.5    | 3.3    | 2.1    | 5.8    | 21.1   | 14.1   | 16.6   | 19.0   | 7.6    |
| 0.8    | 2.7    | 1.0    | 5.5    | 3.1    | 3.7    | 5.8    | 1.1    | 1.1    |
| 1.8    | 5.0    | 5.6    | 5.1    | 5.5    | 2.8    | 2.7    | 0.8    | 7.5    |

|       |       |        |       |        |        |        |        |        |
|-------|-------|--------|-------|--------|--------|--------|--------|--------|
| 12.6  | 12.4  | 3.4    | 11.0  | 7.8    | 15.6   | 13.8   | 10.6   | 13.3   |
| 7.0   | 1.2   | 1.6    | 2.7   | 6.2    | 8.5    | 5.8    | 3.1    | 1.5    |
| 3.7   | 1.1   | 5.6    | 5.1   | 6.2    | 5.6    | 2.7    | 10.2   | 7.0    |
| 2.8   | 2.6   | 2.5    | 1.6   | 3.4    | 2.0    | 1.7    | 1.3    | 10.0   |
| 2.6   | 6.4   | 4.6    | 3.9   | 4.9    | 2.6    | 2.3    | 3.9    | 8.0    |
| 1.8   | 2.6   | 2.1    | 2.9   | 1.8    | 0.9    | 4.3    | 1.5    | 14.5   |
| 1.2   | 1.6   | 2.4    | 0.9   | 1.9    | 0.4    | 2.6    | 3.6    | 1.8    |
| 24.5  | 20.7  | 24.7   | 18.2  | 18.5   | 15.7   | 14.1   | 25.6   | 23.2   |
| 5.5   | 11.5  | 7.3    | 8.2   | 7.6    | 10.6   | 9.2    | 13.3   | 16.9   |
| 273.5 | 241.5 | 317.3  | 239.1 | 554.0  | 483.9  | 566.2  | 586.7  | 895.7  |
| 2.7   | 8.1   | 2.7    | 4.4   | 1.3    | 3.1    | 5.4    | 2.8    | 2.6    |
| 35.5  | 28.2  | 52.1   | 32.0  | 112.9  | 110.5  | 101.8  | 114.8  | 91.8   |
| 7.6   | 11.0  | 6.8    | 8.5   | 7.1    | 9.0    | 6.5    | 2.5    | 8.9    |
| 3.6   | 1.7   | 4.9    | 3.9   | 5.7    | 3.5    | 2.9    | 6.4    | 6.8    |
| 5.5   | 6.5   | 12.5   | 18.4  | 5.2    | 3.4    | 9.5    | 5.1    | 24.2   |
| 16.5  | 11.2  | 11.6   | 13.8  | 12.9   | 1.8    | 8.7    | 8.0    | 18.3   |
| 4.5   | 5.5   | 5.0    | 2.8   | 8.8    | 2.5    | 6.3    | 4.1    | 3.6    |
| 0.9   | 1.9   | 2.2    | 4.8   | 3.5    | 3.3    | 2.0    | 1.2    | 1.1    |
| 8.8   | 6.9   | 10.3   | 2.2   | 7.7    | 4.5    | 1.7    | 18.9   | 16.7   |
| 16.9  | 13.2  | 17.4   | 14.7  | 8.9    | 7.3    | 4.6    | 11.2   | 31.1   |
| 255.2 | 217.9 | 360.3  | 208.7 | 772.1  | 802.6  | 798.3  | 878.3  | 535.9  |
| 602.3 | 652.2 | 366.0  | 562.1 | 0.7    | 3.0    | 4.4    | 7.3    | 2.3    |
| 2.0   | 4.7   | 4.8    | 3.7   | 1.8    | 2.2    | 0.7    | 2.9    | 3.4    |
| 638.2 | 649.5 | 688.6  | 469.8 | 1272.0 | 1432.3 | 1702.8 | 1546.3 | 2026.4 |
| 5.5   | 11.8  | 16.8   | 10.4  | 2.8    | 6.9    | 2.0    | 5.1    | 5.2    |
| 7.3   | 9.0   | 7.1    | 6.2   | 10.2   | 1.3    | 3.9    | 2.7    | 6.6    |
| 5.7   | 1.5   | 11.0   | 10.6  | 10.2   | 3.6    | 3.1    | 4.4    | 6.2    |
| 7.5   | 8.8   | 13.9   | 5.1   | 6.5    | 9.0    | 10.7   | 8.3    | 71.2   |
| 3.7   | 6.3   | 7.0    | 7.6   | 3.1    | 5.2    | 5.4    | 7.6    | 13.9   |
| 4.7   | 2.9   | 12.3   | 6.6   | 1621.4 | 1645.5 | 1728.0 | 1952.5 | 246.0  |
| 3.6   | 1.0   | 1.8    | 6.0   | 3.9    | 2.2    | 2.1    | 3.4    | 2.7    |
| 10.3  | 9.4   | 18.5   | 8.3   | 16.3   | 8.4    | 8.7    | 8.9    | 15.7   |
| 1.1   | 0.9   | 3.7    | 5.0   | 613.9  | 360.9  | 584.6  | 757.5  | 336.2  |
| 137.8 | 125.1 | 209.6  | 136.6 | 256.2  | 230.5  | 209.0  | 233.4  | 502.4  |
| 901.9 | 873.9 | 1087.9 | 995.6 | 1867.7 | 2015.2 | 2321.2 | 2281.0 | 2032.6 |
| 5.2   | 9.9   | 4.3    | 3.5   | 5.0    | 4.0    | 7.2    | 1.0    | 11.7   |
| 11.5  | 16.5  | 17.7   | 12.5  | 12.0   | 16.9   | 7.0    | 3.2    | 13.0   |
| 17.1  | 5.4   | 16.8   | 18.2  | 11.8   | 13.9   | 9.3    | 9.4    | 20.3   |
| 1.0   | 4.6   | 3.7    | 1.4   | 1.1    | 0.6    | 0.8    | 0.7    | 5.9    |
| 4.2   | 2.2   | 1.9    | 2.8   | 0.6    | 2.3    | 1.3    | 16.2   | 7.1    |
| 2.7   | 1.8   | 2.8    | 2.2   | 3.1    | 5.5    | 6.3    | 10.6   | 0.7    |
| 13.3  | 5.1   | 22.1   | 7.6   | 42.2   | 17.0   | 56.8   | 44.3   | 17.3   |
| 16.9  | 17.3  | 17.2   | 16.0  | 19.8   | 18.6   | 38.3   | 43.5   | 5.0    |
| 1.3   | 1.5   | 0.9    | 4.0   | 0.6    | 0.7    | 2.9    | 1.2    | 0.9    |
| 8.2   | 8.6   | 8.6    | 6.2   | 3.4    | 2.6    | 5.4    | 0.7    | 1.7    |
| 3.9   | 10.2  | 3.8    | 3.7   | 5.6    | 4.9    | 2.9    | 7.9    | 12.2   |
| 8.2   | 10.3  | 14.4   | 10.4  | 9.3    | 3.5    | 12.9   | 12.8   | 44.3   |
| 16.5  | 5.1   | 11.7   | 3.6   | 8.2    | 2.6    | 4.1    | 12.3   | 2.9    |
| 2.6   | 4.2   | 1.6    | 2.1   | 0.8    | 1.0    | 3.9    | 5.7    | 9.1    |
| 1.7   | 7.4   | 2.2    | 1.4   | 3.7    | 1.4    | 1.1    | 1.4    | 7.1    |
| 17.1  | 15.7  | 19.1   | 20.1  | 14.3   | 7.5    | 6.7    | 15.7   | 13.1   |
| 1.4   | 1.7   | 1.9    | 1.3   | 1.3    | 1.0    | 1.0    | 1.3    | 2.0    |
| 84.3  | 91.3  | 86.4   | 92.3  | 108.9  | 95.7   | 95.5   | 129.2  | 90.5   |

|        |        |        |        |        |        |        |        |        |
|--------|--------|--------|--------|--------|--------|--------|--------|--------|
| 25.3   | 24.0   | 26.3   | 24.5   | 22.9   | 13.5   | 12.7   | 23.7   | 23.1   |
| 94.8   | 71.4   | 140.2  | 64.7   | 172.5  | 110.6  | 159.6  | 184.4  | 112.5  |
| 22.7   | 22.0   | 26.3   | 22.0   | 11.7   | 12.7   | 10.1   | 13.9   | 17.6   |
| 7.1    | 5.3    | 20.4   | 8.7    | 1.4    | 1.5    | 10.5   | 2.2    | 2.0    |
| 26.5   | 24.7   | 24.0   | 26.8   | 12.6   | 10.8   | 12.7   | 11.2   | 17.7   |
| 16.4   | 12.6   | 19.2   | 25.0   | 15.6   | 21.8   | 7.0    | 15.4   | 45.6   |
| 1.6    | 4.0    | 2.8    | 1.2    | 1.6    | 0.7    | 4.2    | 1.8    | 7.6    |
| 9.1    | 5.4    | 8.0    | 5.4    | 5.3    | 4.4    | 6.3    | 10.0   | 8.7    |
| 2.1    | 1.8    | 9.8    | 4.4    | 12.0   | 5.8    | 8.9    | 2.4    | 8.1    |
| 3.2    | 2.4    | 1.3    | 3.5    | 0.2    | 0.4    | 1.3    | 0.4    | 0.2    |
| 2.9    | 1.8    | 3.4    | 1.6    | 11.2   | 5.7    | 10.8   | 20.6   | 5.9    |
| 7.1    | 14.9   | 16.5   | 15.5   | 3.7    | 6.3    | 7.7    | 6.5    | 11.3   |
| 8.0    | 11.5   | 22.0   | 23.6   | 11.5   | 3.7    | 18.1   | 14.6   | 10.0   |
| 1259.1 | 1167.6 | 1642.9 | 1297.8 | 178.0  | 213.5  | 222.2  | 228.1  | 152.5  |
| 16.2   | 20.6   | 33.6   | 26.1   | 23.3   | 17.0   | 17.9   | 22.2   | 23.7   |
| 1.1    | 0.7    | 0.8    | 0.7    | 0.4    | 0.9    | 0.9    | 0.8    | 2.1    |
| 0.7    | 0.7    | 3.9    | 2.0    | 1.5    | 1.0    | 3.0    | 0.2    | 4.0    |
| 6.6    | 1.5    | 17.8   | 4.8    | 9.2    | 22.1   | 6.6    | 15.3   | 383.7  |
| 58.0   | 56.1   | 63.4   | 63.0   | 97.9   | 118.4  | 110.2  | 147.8  | 24.3   |
| 1.6    | 4.1    | 2.0    | 2.1    | 0.3    | 0.4    | 5.7    | 1.1    | 4.3    |
| 599.9  | 437.4  | 919.4  | 556.3  | 1070.6 | 1130.5 | 1199.8 | 1229.7 | 1098.7 |
| 11.0   | 20.3   | 34.6   | 20.3   | 23.6   | 34.3   | 23.1   | 34.0   | 21.9   |
| 13.1   | 21.5   | 19.2   | 12.3   | 65.2   | 79.6   | 63.4   | 67.2   | 36.2   |
| 3.2    | 1.6    | 8.3    | 6.0    | 5.5    | 4.6    | 6.7    | 4.8    | 13.2   |
| 3.7    | 6.1    | 3.5    | 4.4    | 16.5   | 12.4   | 19.0   | 19.2   | 28.2   |
| 3.9    | 5.7    | 9.7    | 3.5    | 35.8   | 28.7   | 33.4   | 33.3   | 404.7  |
| 94.7   | 87.6   | 74.7   | 69.0   | 161.1  | 467.1  | 196.8  | 188.5  | 80.7   |
| 567.4  | 448.9  | 705.4  | 470.2  | 1289.6 | 1662.6 | 1587.0 | 1619.9 | 468.4  |
| 8.9    | 9.3    | 9.6    | 3.9    | 2.4    | 3.1    | 7.9    | 9.2    | 12.7   |
| 7.9    | 9.4    | 12.6   | 9.6    | 12.9   | 11.0   | 9.3    | 10.4   | 22.3   |
| 208.0  | 220.8  | 177.0  | 193.1  | 27.9   | 21.6   | 26.0   | 26.3   | 2.1    |
| 19.3   | 8.6    | 19.4   | 15.3   | 17.6   | 10.6   | 16.0   | 36.5   | 23.7   |
| 592.7  | 605.0  | 480.5  | 423.2  | 676.1  | 514.8  | 649.5  | 806.2  | 907.2  |
| 2.3    | 1.7    | 2.0    | 2.9    | 0.8    | 3.4    | 1.8    | 0.9    | 2.0    |
| 1774.4 | 1562.7 | 2683.9 | 1879.4 | 2743.7 | 3151.7 | 2775.0 | 2824.2 | 4323.1 |
| 160.0  | 134.3  | 166.9  | 127.9  | 80.9   | 104.0  | 82.6   | 107.5  | 39.5   |
| 1.3    | 6.6    | 1.9    | 1.7    | 11.0   | 12.5   | 9.5    | 22.3   | 13.2   |
| 79.1   | 82.4   | 99.2   | 92.7   | 175.9  | 156.1  | 159.0  | 204.8  | 152.0  |
| 0.9    | 7.3    | 12.6   | 3.6    | 3.1    | 5.5    | 2.3    | 9.5    | 7.1    |
| 1.1    | 1.9    | 1.3    | 0.9    | 2.8    | 0.8    | 1.8    | 1.7    | 2.2    |
| 81.0   | 96.4   | 107.2  | 69.7   | 74.2   | 91.3   | 66.9   | 80.9   | 201.1  |
| 8.1    | 11.8   | 8.3    | 9.4    | 5.0    | 4.2    | 8.3    | 9.2    | 9.5    |
| 6.1    | 6.4    | 1.8    | 3.2    | 2.0    | 0.3    | 3.1    | 3.4    | 5.3    |
| 158.0  | 167.9  | 156.7  | 159.8  | 118.8  | 102.1  | 102.1  | 129.6  | 168.2  |
| 4.5    | 1.8    | 3.7    | 1.0    | 0.3    | 2.3    | 3.4    | 0.5    | 3.8    |
| 112.0  | 94.2   | 203.0  | 114.0  | 50.6   | 66.7   | 41.0   | 47.0   | 50.4   |
| 10.7   | 33.4   | 18.4   | 6.7    | 12.6   | 2.1    | 7.0    | 2.7    | 7.6    |
| 13.3   | 19.9   | 20.3   | 15.5   | 10.0   | 10.2   | 17.5   | 13.3   | 20.9   |
| 28.4   | 50.7   | 34.0   | 28.7   | 8.8    | 16.2   | 15.4   | 16.1   | 59.4   |
| 0.9    | 1.6    | 1.0    | 3.6    | 0.7    | 0.7    | 0.8    | 2.0    | 1.9    |
| 2.9    | 5.8    | 3.8    | 1.3    | 2.6    | 1.9    | 0.6    | 0.6    | 3.2    |
| 2213.8 | 2041.6 | 3132.6 | 2196.2 | 2061.0 | 1531.0 | 1834.2 | 2270.6 | 1935.0 |
| 3.3    | 6.0    | 4.3    | 7.3    | 3195.3 | 3164.0 | 3407.9 | 3463.7 | 501.3  |

|        |        |        |        |        |        |        |        |        |
|--------|--------|--------|--------|--------|--------|--------|--------|--------|
| 111.6  | 117.1  | 184.6  | 111.5  | 294.3  | 201.7  | 239.7  | 298.9  | 115.4  |
| 14.7   | 5.6    | 8.4    | 12.7   | 8.9    | 11.6   | 3.3    | 6.0    | 22.7   |
| 7.1    | 10.6   | 14.4   | 2.8    | 5.9    | 5.4    | 5.4    | 8.3    | 4.3    |
| 3.2    | 4.0    | 3.3    | 7.2    | 1.4    | 2.2    | 2.2    | 1.4    | 16.7   |
| 1.7    | 4.5    | 8.7    | 7.8    | 7.4    | 3.9    | 4.1    | 0.7    | 1.8    |
| 1.1    | 6.7    | 4.2    | 4.6    | 1.2    | 1.0    | 3.5    | 1.7    | 2.3    |
| 6.1    | 9.2    | 20.8   | 12.3   | 14.4   | 7.8    | 15.5   | 18.5   | 38.1   |
| 46.4   | 52.5   | 49.6   | 34.0   | 25.6   | 27.0   | 30.4   | 32.6   | 69.4   |
| 15.1   | 25.7   | 29.3   | 16.7   | 13.8   | 13.7   | 8.7    | 3.7    | 33.7   |
| 132.0  | 116.0  | 117.1  | 111.6  | 188.3  | 167.7  | 163.4  | 186.4  | 158.4  |
| 2.0    | 1.9    | 1.2    | 0.3    | 1.0    | 1.6    | 0.7    | 2.3    | 3.0    |
| 11.5   | 4.9    | 8.2    | 1.6    | 5.9    | 3.7    | 5.5    | 5.6    | 1.7    |
| 30.2   | 8.0    | 9.9    | 20.8   | 12.4   | 10.8   | 15.3   | 5.8    | 10.4   |
| 145.0  | 141.5  | 139.2  | 140.7  | 115.9  | 131.4  | 125.5  | 163.4  | 81.1   |
| 13.0   | 11.4   | 16.8   | 10.9   | 23.8   | 25.8   | 19.2   | 35.4   | 63.7   |
| 2.3    | 10.4   | 10.2   | 8.3    | 7.5    | 7.4    | 2.9    | 0.5    | 11.7   |
| 1.1    | 4.8    | 1.0    | 0.7    | 0.5    | 6.1    | 1.1    | 1.1    | 1.2    |
| 20.6   | 27.4   | 12.9   | 22.3   | 4.0    | 3.9    | 4.0    | 10.8   | 9.9    |
| 6.6    | 7.2    | 4.1    | 1.7    | 3.8    | 1.4    | 3.5    | 1.1    | 7.4    |
| 4.9    | 5.8    | 5.6    | 5.4    | 4.1    | 2.0    | 2.3    | 7.6    | 6.7    |
| 515.7  | 447.8  | 845.4  | 534.1  | 720.6  | 750.6  | 690.9  | 764.9  | 245.8  |
| 747.3  | 840.3  | 776.8  | 873.5  | 0.8    | 1.1    | 4.0    | 5.1    | 26.0   |
| 3.0    | 0.8    | 2.9    | 2.0    | 1.2    | 3.9    | 1.3    | 2.8    | 3.2    |
| 0.8    | 0.6    | 1.0    | 1.2    | 7.6    | 5.3    | 5.1    | 1.7    | 10.1   |
| 33.9   | 30.1   | 54.8   | 35.4   | 31.4   | 34.7   | 32.6   | 40.3   | 55.0   |
| 64.6   | 65.4   | 61.4   | 60.8   | 45.0   | 55.2   | 39.2   | 51.0   | 101.0  |
| 2.1    | 1.2    | 1.3    | 0.9    | 16.1   | 11.3   | 18.1   | 18.4   | 10.6   |
| 18.1   | 17.8   | 15.8   | 12.6   | 15.7   | 16.1   | 22.8   | 13.1   | 31.9   |
| 2.2    | 0.9    | 4.1    | 2.4    | 4.6    | 6.9    | 3.7    | 7.0    | 0.7    |
| 277.5  | 259.3  | 487.2  | 236.3  | 433.2  | 367.9  | 387.5  | 453.3  | 1052.3 |
| 13.8   | 5.7    | 20.2   | 9.0    | 15.9   | 11.8   | 14.5   | 18.2   | 10.7   |
| 27.6   | 25.6   | 49.7   | 21.3   | 27.2   | 20.5   | 23.6   | 23.2   | 17.0   |
| 8.1    | 5.3    | 5.6    | 3.0    | 2.2    | 3.5    | 2.9    | 1.1    | 6.0    |
| 4.5    | 5.4    | 7.9    | 6.0    | 1.4    | 4.7    | 2.9    | 12.6   | 6.6    |
| 4.3    | 8.2    | 10.8   | 9.4    | 9.5    | 10.1   | 13.3   | 7.4    | 15.5   |
| 2.2    | 2.3    | 0.7    | 4.5    | 4.1    | 8.1    | 8.8    | 14.9   | 9.6    |
| 6.2    | 11.2   | 16.2   | 6.1    | 13.9   | 9.4    | 16.6   | 21.5   | 10.4   |
| 7.1    | 7.4    | 6.9    | 5.6    | 27.2   | 31.9   | 23.2   | 32.6   | 9.8    |
| 5.3    | 2.0    | 16.8   | 4.6    | 6.0    | 2.2    | 3.8    | 1.2    | 7.5    |
| 3.2    | 1.8    | 9.0    | 8.1    | 7.2    | 8.0    | 8.1    | 9.4    | 10.4   |
| 6.2    | 5.8    | 9.8    | 9.7    | 9.2    | 3.5    | 7.5    | 5.0    | 8.7    |
| 12.9   | 12.1   | 11.9   | 12.1   | 3.9    | 3.8    | 4.9    | 6.4    | 1.7    |
| 411.8  | 423.4  | 425.8  | 310.7  | 169.7  | 253.1  | 183.9  | 196.6  | 212.2  |
| 4726.6 | 5182.1 | 3822.9 | 4728.7 | 5068.8 | 6242.2 | 5298.5 | 5649.4 | 8462.1 |
| 2.3    | 10.4   | 2.5    | 3.2    | 2.3    | 2.0    | 4.8    | 1.1    | 8.1    |
| 393.9  | 389.0  | 549.1  | 408.0  | 924.4  | 789.4  | 860.1  | 1042.0 | 860.8  |
| 39.2   | 48.5   | 52.5   | 41.3   | 24.0   | 23.0   | 19.8   | 33.7   | 29.5   |
| 4.0    | 1.7    | 2.7    | 1.1    | 5.8    | 13.5   | 5.0    | 2.2    | 7.5    |
| 57.4   | 58.6   | 45.3   | 27.3   | 110.6  | 140.4  | 92.8   | 122.7  | 85.4   |
| 10.1   | 4.5    | 6.6    | 6.2    | 6.4    | 6.8    | 10.9   | 10.1   | 22.6   |
| 14.5   | 21.4   | 13.4   | 20.3   | 10.2   | 6.4    | 13.5   | 23.0   | 13.3   |
| 683.5  | 632.1  | 979.4  | 676.6  | 1358.4 | 1057.2 | 1318.9 | 1583.6 | 966.7  |
| 2.3    | 2.7    | 6.5    | 3.3    | 2.3    | 0.9    | 1.0    | 3.7    | 18.6   |

|       |       |        |        |        |        |       |        |        |
|-------|-------|--------|--------|--------|--------|-------|--------|--------|
| 31.2  | 23.7  | 49.1   | 27.9   | 13.5   | 16.1   | 8.5   | 22.4   | 28.1   |
| 4.8   | 9.1   | 8.5    | 8.0    | 1.2    | 6.1    | 4.1   | 7.0    | 3.0    |
| 3.7   | 5.4   | 1.6    | 2.8    | 5.7    | 1.0    | 5.6   | 4.7    | 5.7    |
| 13.1  | 9.0   | 7.6    | 7.2    | 8.1    | 9.8    | 7.3   | 12.7   | 10.1   |
| 5.7   | 3.6   | 14.5   | 9.8    | 1.3    | 3.4    | 5.1   | 2.9    | 6.1    |
| 37.5  | 40.6  | 69.4   | 35.2   | 30.8   | 53.4   | 30.2  | 47.1   | 42.0   |
| 6.7   | 3.0   | 4.7    | 2.3    | 3.0    | 5.1    | 6.4   | 1.4    | 1.8    |
| 7.5   | 4.7   | 6.8    | 1.0    | 1.1    | 1.1    | 4.9   | 2.0    | 1.5    |
| 865.2 | 863.4 | 1043.1 | 922.1  | 384.4  | 481.7  | 431.0 | 485.1  | 285.7  |
| 23.2  | 22.9  | 9.9    | 27.0   | 1.5    | 0.5    | 0.7   | 0.6    | 1.7    |
| 6.7   | 5.7   | 3.0    | 2.6    | 7.3    | 3.9    | 9.6   | 6.0    | 3.1    |
| 2.8   | 2.4   | 1.9    | 1.8    | 6.8    | 2.4    | 7.2   | 1.2    | 2.7    |
| 584.4 | 600.4 | 714.4  | 575.7  | 584.1  | 609.0  | 604.4 | 682.8  | 941.2  |
| 2.6   | 3.9   | 2.7    | 4.3    | 172.1  | 229.9  | 203.0 | 255.9  | 108.5  |
| 849.2 | 793.2 | 1071.0 | 867.1  | 806.0  | 1013.1 | 892.8 | 965.7  | 794.5  |
| 1.2   | 4.2   | 2.1    | 1.5    | 3.4    | 3.0    | 0.7   | 0.5    | 5.0    |
| 2.1   | 0.9   | 1.3    | 2.4    | 3.2    | 6.2    | 3.5   | 7.8    | 25.6   |
| 771.1 | 694.9 | 990.7  | 682.5  | 891.6  | 833.9  | 962.4 | 1038.1 | 292.3  |
| 36.6  | 39.3  | 30.2   | 29.0   | 62.3   | 85.5   | 80.0  | 78.6   | 192.6  |
| 0.9   | 2.2   | 2.6    | 1.4    | 1.1    | 1.1    | 2.1   | 1.3    | 5.6    |
| 3.9   | 1.8   | 2.3    | 1.5    | 3.1    | 4.1    | 4.3   | 5.1    | 7.5    |
| 4.2   | 4.7   | 10.7   | 7.6    | 3.4    | 1.0    | 1.4   | 1.8    | 3.8    |
| 2.0   | 4.6   | 1.9    | 2.9    | 2.6    | 0.9    | 3.9   | 1.3    | 2.7    |
| 7.7   | 1.1   | 1.8    | 5.6    | 1.0    | 7.4    | 2.0   | 0.7    | 58.4   |
| 6.3   | 11.9  | 20.2   | 12.3   | 4.0    | 3.8    | 6.8   | 2.2    | 14.2   |
| 3.4   | 7.1   | 6.0    | 5.5    | 4.6    | 0.6    | 0.5   | 4.0    | 11.5   |
| 489.6 | 456.3 | 578.8  | 461.7  | 359.9  | 378.5  | 328.1 | 415.6  | 215.4  |
| 12.2  | 12.0  | 10.5   | 14.7   | 3.5    | 9.5    | 12.0  | 10.3   | 12.8   |
| 5.8   | 9.4   | 8.0    | 7.2    | 6.9    | 4.8    | 2.5   | 8.4    | 11.9   |
| 164.8 | 137.3 | 264.4  | 157.5  | 88.6   | 132.4  | 87.1  | 127.4  | 533.1  |
| 5.8   | 6.7   | 13.8   | 5.4    | 6.4    | 3.5    | 3.3   | 14.5   | 7.6    |
| 49.6  | 60.9  | 50.4   | 13.0   | 365.8  | 110.1  | 894.6 | 549.0  | 287.1  |
| 10.2  | 13.9  | 11.6   | 10.8   | 8.0    | 10.1   | 13.4  | 15.7   | 133.0  |
| 355.1 | 325.5 | 517.8  | 333.6  | 1084.3 | 663.8  | 859.8 | 1117.7 | 1108.4 |
| 66.1  | 48.2  | 97.4   | 57.4   | 112.4  | 122.6  | 86.7  | 103.7  | 139.2  |
| 375.2 | 375.7 | 463.9  | 362.9  | 435.5  | 443.4  | 426.2 | 491.4  | 799.9  |
| 370.1 | 345.0 | 435.5  | 416.4  | 333.4  | 306.6  | 287.5 | 358.5  | 792.4  |
| 1.0   | 1.8   | 1.8    | 1.1    | 5.6    | 3.5    | 1.4   | 2.3    | 8.0    |
| 21.1  | 17.1  | 23.3   | 14.8   | 26.0   | 62.2   | 34.0  | 47.5   | 26.0   |
| 3.7   | 16.2  | 11.5   | 11.6   | 16.9   | 23.5   | 21.8  | 25.4   | 2.5    |
| 17.2  | 20.0  | 23.3   | 18.5   | 21.8   | 19.3   | 21.7  | 16.3   | 14.3   |
| 56.5  | 50.8  | 67.1   | 59.7   | 185.5  | 188.5  | 194.9 | 224.0  | 51.0   |
| 7.5   | 0.9   | 2.5    | 3.4    | 4.4    | 4.6    | 2.6   | 10.5   | 1.2    |
| 71.4  | 89.5  | 46.0   | 80.7   | 16.8   | 24.6   | 27.8  | 29.2   | 22.1   |
| 21.9  | 21.6  | 21.6   | 18.9   | 29.4   | 38.1   | 34.7  | 42.5   | 23.6   |
| 4.0   | 16.1  | 10.4   | 8.2    | 5.2    | 7.1    | 5.3   | 10.1   | 12.8   |
| 2.2   | 6.8   | 3.0    | 11.6   | 4.8    | 4.3    | 6.0   | 8.5    | 9.4    |
| 421.2 | 412.0 | 2297.5 | 1661.9 | 564.8  | 668.1  | 543.3 | 650.4  | 555.7  |
| 543.9 | 484.6 | 946.2  | 555.1  | 383.3  | 315.2  | 449.5 | 553.4  | 298.5  |
| 9.0   | 17.8  | 11.2   | 11.5   | 11.5   | 2.3    | 2.2   | 10.2   | 20.0   |
| 163.0 | 148.8 | 180.7  | 120.5  | 203.5  | 188.8  | 166.0 | 208.7  | 241.2  |
| 1.8   | 3.1   | 0.5    | 0.4    | 2.5    | 3.0    | 1.5   | 8.4    | 5.1    |
| 294.5 | 253.6 | 608.4  | 540.5  | 37.4   | 26.0   | 42.8  | 64.8   | 31.6   |

|       |       |       |       |       |       |       |       |       |
|-------|-------|-------|-------|-------|-------|-------|-------|-------|
| 2.8   | 4.9   | 7.5   | 14.5  | 1.9   | 2.1   | 1.6   | 1.5   | 2.0   |
| 4.4   | 3.1   | 4.5   | 3.2   | 0.4   | 2.2   | 1.9   | 0.3   | 4.2   |
| 1.2   | 3.9   | 9.3   | 1.3   | 15.5  | 27.2  | 11.2  | 1.3   | 745.1 |
| 10.9  | 7.7   | 16.0  | 10.4  | 6.5   | 8.2   | 8.4   | 1.2   | 5.0   |
| 1.9   | 4.5   | 2.1   | 2.0   | 2.3   | 1.6   | 0.3   | 1.4   | 5.6   |
| 6.3   | 4.1   | 5.1   | 9.3   | 9.3   | 6.7   | 3.8   | 3.8   | 3.7   |
| 0.4   | 0.9   | 5.5   | 1.6   | 5.4   | 1.5   | 8.7   | 3.7   | 1.0   |
| 157.9 | 133.4 | 211.3 | 126.3 | 230.2 | 234.9 | 241.0 | 287.8 | 134.5 |
| 208.1 | 196.2 | 351.7 | 169.9 | 301.0 | 251.4 | 285.8 | 314.1 | 192.1 |
| 6.6   | 8.4   | 9.3   | 4.8   | 4.2   | 3.1   | 6.0   | 6.6   | 3.4   |
| 0.9   | 1.1   | 1.4   | 1.6   | 1.0   | 1.1   | 2.4   | 1.3   | 1.1   |
| 12.1  | 11.3  | 16.8  | 10.8  | 11.8  | 10.5  | 4.0   | 14.3  | 5.7   |
| 4.8   | 2.3   | 4.5   | 1.8   | 6.4   | 1.8   | 10.0  | 10.0  | 2.3   |
| 3.3   | 1.5   | 4.0   | 1.7   | 2.9   | 2.1   | 2.4   | 2.4   | 1.9   |
| 8.8   | 15.6  | 17.8  | 9.1   | 11.8  | 5.3   | 6.1   | 9.4   | 11.4  |
| 2.9   | 4.8   | 3.4   | 2.6   | 9.9   | 9.6   | 7.5   | 4.8   | 33.8  |
| 0.5   | 2.1   | 1.0   | 2.3   | 2.4   | 0.7   | 1.7   | 0.5   | 2.0   |
| 3.3   | 3.7   | 11.5  | 5.6   | 4.1   | 4.2   | 7.4   | 4.7   | 41.0  |
| 5.3   | 7.8   | 8.4   | 2.4   | 1.0   | 4.0   | 2.2   | 7.9   | 8.3   |
| 6.0   | 2.1   | 5.3   | 7.6   | 3.9   | 0.6   | 3.6   | 2.9   | 6.8   |
| 35.8  | 20.1  | 42.2  | 33.7  | 20.7  | 12.8  | 21.7  | 36.4  | 24.3  |
| 1.8   | 2.8   | 2.7   | 1.1   | 3.6   | 6.7   | 3.3   | 0.8   | 7.3   |
| 0.9   | 5.2   | 5.1   | 10.2  | 2.8   | 2.3   | 3.4   | 0.7   | 0.7   |
| 308.7 | 267.4 | 298.2 | 176.3 | 146.8 | 146.7 | 162.3 | 153.4 | 79.3  |
| 4.0   | 4.3   | 6.8   | 9.1   | 3.0   | 4.0   | 2.4   | 6.4   | 15.4  |
| 3.4   | 3.3   | 6.3   | 6.1   | 7.4   | 6.7   | 5.1   | 2.9   | 7.9   |
| 9.5   | 16.4  | 10.6  | 4.3   | 6.0   | 6.8   | 14.3  | 6.9   | 14.1  |
| 1.3   | 2.3   | 2.7   | 0.3   | 0.5   | 0.3   | 0.4   | 0.7   | 0.4   |
| 11.2  | 24.4  | 45.4  | 21.3  | 724.1 | 993.5 | 526.7 | 753.3 | 23.0  |
| 79.4  | 76.6  | 157.2 | 89.1  | 103.5 | 126.5 | 113.4 | 126.7 | 146.7 |
| 2.5   | 3.7   | 1.3   | 3.0   | 3.0   | 1.2   | 2.9   | 1.3   | 1.3   |
| 1.4   | 0.7   | 1.3   | 2.4   | 2.3   | 1.2   | 0.4   | 0.2   | 3.9   |
| 4.6   | 5.6   | 5.8   | 3.6   | 2.9   | 2.7   | 3.0   | 3.4   | 6.2   |
| 4.6   | 5.5   | 3.0   | 3.7   | 3.7   | 4.8   | 1.4   | 4.5   | 4.0   |
| 8.5   | 5.5   | 7.8   | 6.1   | 11.1  | 6.8   | 5.3   | 18.0  | 21.0  |
| 19.8  | 14.0  | 33.6  | 16.5  | 39.2  | 39.3  | 42.8  | 57.6  | 16.3  |
| 24.9  | 20.1  | 32.7  | 26.8  | 4.0   | 10.2  | 7.6   | 13.0  | 24.3  |
| 4.5   | 1.4   | 2.5   | 1.5   | 1.8   | 5.1   | 1.2   | 2.1   | 5.0   |
| 19.3  | 30.5  | 2.4   | 11.7  | 3.1   | 2.0   | 7.0   | 7.0   | 3.1   |
| 9.0   | 1.3   | 3.4   | 2.7   | 6.1   | 3.1   | 4.4   | 8.0   | 9.0   |
| 2.4   | 1.8   | 1.1   | 0.4   | 1.2   | 0.5   | 2.1   | 0.4   | 0.5   |
| 0.8   | 2.8   | 0.7   | 1.2   | 1.2   | 1.5   | 0.6   | 0.8   | 1.3   |
| 31.3  | 19.7  | 31.4  | 36.3  | 12.7  | 14.7  | 10.0  | 25.1  | 27.3  |
| 30.2  | 35.3  | 58.7  | 30.3  | 201.2 | 183.9 | 198.7 | 205.7 | 116.4 |
| 2.9   | 1.8   | 3.9   | 2.9   | 4.8   | 1.6   | 3.9   | 1.7   | 3.9   |
| 1.0   | 6.2   | 2.3   | 2.2   | 0.7   | 0.5   | 4.5   | 0.6   | 0.9   |
| 10.2  | 8.4   | 11.0  | 7.0   | 5.2   | 2.1   | 6.1   | 5.0   | 10.7  |
| 1.9   | 1.6   | 2.7   | 1.5   | 1.2   | 1.8   | 1.8   | 1.9   | 4.1   |
| 1.3   | 1.6   | 1.8   | 2.0   | 1.6   | 0.9   | 0.9   | 1.0   | 2.2   |
| 12.9  | 7.0   | 17.0  | 10.1  | 6.9   | 13.3  | 4.7   | 21.8  | 5.3   |
| 2.9   | 2.5   | 3.7   | 2.2   | 4.2   | 6.3   | 8.3   | 17.8  | 13.6  |
| 17.9  | 21.5  | 28.7  | 14.1  | 11.6  | 5.5   | 3.4   | 5.1   | 7.9   |
| 5.2   | 4.4   | 4.2   | 5.1   | 4.4   | 4.1   | 1.3   | 4.9   | 6.3   |



|        |        |        |        |        |       |        |        |        |
|--------|--------|--------|--------|--------|-------|--------|--------|--------|
| 3.1    | 6.6    | 3.7    | 3.5    | 10.6   | 3.1   | 3.1    | 4.3    | 10.4   |
| 26.6   | 22.4   | 18.2   | 15.0   | 62.9   | 42.5  | 48.9   | 56.2   | 79.8   |
| 0.7    | 1.3    | 1.5    | 1.2    | 3.3    | 0.6   | 0.4    | 0.7    | 0.9    |
| 0.7    | 0.9    | 1.2    | 1.5    | 2.0    | 0.9   | 1.2    | 1.0    | 1.0    |
| 11.9   | 9.1    | 14.7   | 11.3   | 1.5    | 6.0   | 14.7   | 15.0   | 11.4   |
| 0.7    | 0.8    | 1.7    | 1.4    | 2.2    | 1.4   | 0.5    | 1.1    | 3.0    |
| 8.1    | 4.8    | 7.4    | 4.9    | 5.3    | 0.5   | 3.2    | 1.5    | 1.7    |
| 27.0   | 16.9   | 30.4   | 22.1   | 4.2    | 3.4   | 4.3    | 4.9    | 14.8   |
| 0.4    | 3.1    | 1.8    | 1.5    | 2.0    | 0.9   | 2.1    | 0.7    | 0.2    |
| 2.5    | 2.2    | 3.2    | 3.7    | 1.2    | 2.1   | 2.3    | 12.8   | 4.9    |
| 6.4    | 4.5    | 6.2    | 5.9    | 3.9    | 3.4   | 2.4    | 4.3    | 6.3    |
| 7.6    | 10.3   | 10.9   | 4.0    | 8.8    | 4.5   | 2.4    | 13.9   | 13.1   |
| 3.0    | 5.0    | 16.0   | 3.2    | 8.3    | 4.0   | 6.6    | 10.0   | 13.0   |
| 10.5   | 9.4    | 16.8   | 9.7    | 58.6   | 45.8  | 52.9   | 74.1   | 49.9   |
| 0.9    | 0.8    | 1.6    | 1.5    | 1.3    | 0.7   | 0.6    | 0.6    | 1.2    |
| 15.3   | 23.4   | 19.7   | 14.8   | 15.5   | 15.9  | 23.7   | 25.6   | 23.3   |
| 45.9   | 68.0   | 50.8   | 37.8   | 86.0   | 71.8  | 74.7   | 93.8   | 106.0  |
| 13.3   | 12.0   | 19.2   | 8.8    | 20.6   | 30.7  | 25.1   | 8.2    | 12.0   |
| 562.6  | 519.4  | 820.7  | 557.5  | 1059.9 | 930.2 | 1058.8 | 1188.2 | 772.5  |
| 9.0    | 2.7    | 13.1   | 10.2   | 14.0   | 32.9  | 18.1   | 13.5   | 13.1   |
| 2.2    | 5.7    | 2.9    | 2.8    | 8.4    | 3.9   | 2.6    | 3.1    | 5.0    |
| 26.7   | 21.8   | 32.8   | 17.1   | 18.5   | 9.4   | 16.4   | 0.7    | 14.5   |
| 4.7    | 10.1   | 1.4    | 12.9   | 1.9    | 4.5   | 7.3    | 3.6    | 6.5    |
| 0.8    | 1.1    | 1.4    | 1.0    | 1.6    | 2.4   | 1.0    | 1.7    | 21.1   |
| 0.2    | 1.1    | 1.1    | 0.5    | 0.1    | 1.3   | 1.3    | 2.0    | 0.4    |
| 28.5   | 32.2   | 36.2   | 28.4   | 22.7   | 22.2  | 30.7   | 57.3   | 27.0   |
| 12.4   | 13.6   | 23.3   | 16.2   | 13.6   | 10.6  | 10.2   | 14.7   | 17.0   |
| 21.8   | 4.9    | 23.7   | 2.3    | 6.9    | 14.1  | 17.0   | 7.5    | 13.8   |
| 0.4    | 0.5    | 2.1    | 0.4    | 0.4    | 0.2   | 0.7    | 3.7    | 2.9    |
| 1.7    | 1.0    | 1.3    | 2.1    | 2.1    | 2.5   | 2.3    | 0.9    | 1.4    |
| 1.3    | 3.3    | 0.4    | 2.1    | 1.4    | 0.5   | 5.9    | 4.0    | 2.4    |
| 6.4    | 4.9    | 0.8    | 1.3    | 0.8    | 1.3   | 1.9    | 1.8    | 1.3    |
| 34.2   | 12.9   | 29.9   | 25.0   | 23.9   | 20.1  | 19.5   | 22.1   | 31.8   |
| 59.6   | 57.7   | 90.7   | 60.5   | 117.9  | 101.1 | 115.5  | 120.3  | 78.2   |
| 11.5   | 12.3   | 17.0   | 16.6   | 7.4    | 10.8  | 12.2   | 20.7   | 36.2   |
| 323.1  | 332.2  | 808.9  | 436.3  | 253.9  | 185.7 | 157.0  | 162.8  | 486.6  |
| 4.5    | 10.8   | 6.8    | 1.3    | 1.8    | 7.6   | 2.0    | 2.4    | 11.8   |
| 1528.4 | 1503.3 | 1671.3 | 1476.4 | 967.6  | 775.2 | 896.6  | 1084.6 | 1374.6 |
| 7.1    | 8.2    | 8.3    | 5.6    | 6.5    | 2.3   | 4.7    | 5.9    | 20.5   |
| 2.8    | 10.5   | 8.7    | 2.2    | 1.8    | 8.8   | 3.1    | 1.6    | 5.3    |
| 448.2  | 449.0  | 509.6  | 380.3  | 564.9  | 675.4 | 610.9  | 678.8  | 454.0  |
| 4.3    | 5.0    | 10.0   | 10.8   | 7.0    | 8.0   | 3.2    | 9.8    | 16.0   |
| 327.3  | 358.8  | 430.2  | 356.8  | 33.7   | 59.4  | 47.4   | 44.2   | 53.7   |
| 124.6  | 120.1  | 130.8  | 94.6   | 7.1    | 4.6   | 1.2    | 4.3    | 23.4   |
| 8.5    | 10.9   | 7.1    | 15.4   | 6.8    | 4.4   | 7.5    | 12.3   | 16.6   |
| 4.9    | 3.8    | 2.0    | 1.6    | 1.0    | 0.4   | 1.5    | 1.0    | 1.1    |
| 19.3   | 14.6   | 21.6   | 16.5   | 11.4   | 9.2   | 13.7   | 7.5    | 4.2    |
| 34.5   | 41.0   | 49.6   | 48.9   | 39.4   | 32.4  | 33.4   | 35.0   | 40.2   |
| 3.3    | 2.4    | 10.6   | 8.8    | 1.6    | 2.6   | 4.2    | 5.8    | 1.2    |
| 495.8  | 589.2  | 509.4  | 507.2  | 269.1  | 275.4 | 274.0  | 350.0  | 378.3  |
| 1.7    | 2.9    | 1.0    | 4.2    | 1.7    | 1.0   | 9.0    | 5.7    | 8.8    |
| 6.6    | 6.4    | 8.1    | 2.2    | 3.4    | 1.8   | 7.4    | 0.3    | 10.4   |
| 1.0    | 0.9    | 1.0    | 0.7    | 0.8    | 2.0   | 3.7    | 0.6    | 19.3   |

|        |        |        |        |        |        |        |        |        |
|--------|--------|--------|--------|--------|--------|--------|--------|--------|
| 23.0   | 19.9   | 24.9   | 18.0   | 22.8   | 13.0   | 22.7   | 19.9   | 25.1   |
| 6.5    | 1.6    | 3.1    | 2.4    | 2.7    | 2.5    | 3.2    | 4.1    | 3.7    |
| 5.9    | 4.6    | 13.6   | 11.3   | 1.7    | 2.2    | 6.2    | 8.8    | 16.7   |
| 4.3    | 3.7    | 8.5    | 6.2    | 14.1   | 3.4    | 17.2   | 18.0   | 4.3    |
| 6.3    | 7.4    | 15.1   | 7.3    | 3.2    | 1.2    | 3.4    | 3.0    | 10.5   |
| 3.9    | 1.1    | 2.1    | 9.4    | 3.7    | 3.3    | 8.6    | 6.6    | 2.1    |
| 293.8  | 310.7  | 234.9  | 200.5  | 363.1  | 351.0  | 489.7  | 456.3  | 218.6  |
| 4.4    | 6.9    | 17.2   | 16.1   | 12.0   | 5.9    | 8.8    | 12.5   | 10.9   |
| 15.6   | 1.9    | 5.3    | 5.8    | 19.7   | 12.5   | 17.3   | 33.1   | 23.8   |
| 19.9   | 14.2   | 21.1   | 15.3   | 21.2   | 16.7   | 15.2   | 24.4   | 13.9   |
| 43.0   | 58.5   | 38.9   | 42.0   | 68.8   | 84.3   | 74.3   | 79.5   | 63.0   |
| 6.7    | 8.6    | 8.6    | 8.2    | 10.4   | 8.3    | 9.6    | 7.3    | 9.5    |
| 10.2   | 13.6   | 22.0   | 11.5   | 16.7   | 13.5   | 11.0   | 19.5   | 19.9   |
| 2916.6 | 2697.0 | 3242.8 | 2369.9 | 2489.2 | 2356.3 | 2547.6 | 2971.3 | 2921.3 |
| 12.0   | 10.4   | 11.0   | 10.4   | 11.8   | 13.7   | 4.4    | 3.7    | 10.6   |
| 4.5    | 2.5    | 1.1    | 1.2    | 1.1    | 1.6    | 5.3    | 1.5    | 6.0    |
| 5.3    | 1.8    | 7.5    | 5.8    | 19.1   | 19.9   | 18.1   | 15.1   | 21.3   |
| 5.4    | 7.2    | 9.2    | 2.4    | 3.1    | 3.0    | 2.2    | 2.8    | 5.9    |
| 213.9  | 249.4  | 159.6  | 185.0  | 312.3  | 338.1  | 436.8  | 500.0  | 92.5   |
| 101.3  | 100.3  | 36.3   | 71.7   | 17.1   | 9.1    | 19.3   | 17.4   | 12.2   |
| 2.9    | 2.2    | 6.5    | 4.7    | 2.3    | 3.2    | 2.1    | 1.7    | 1.8    |
| 452.8  | 502.3  | 442.0  | 452.3  | 395.6  | 309.7  | 374.3  | 451.0  | 283.3  |
| 19.2   | 17.1   | 22.2   | 12.0   | 113.3  | 86.0   | 95.4   | 133.3  | 83.5   |
| 3.7    | 9.4    | 6.9    | 7.9    | 3.7    | 2.6    | 1.5    | 4.0    | 6.6    |
| 231.9  | 163.7  | 521.0  | 277.2  | 323.0  | 387.2  | 463.6  | 426.9  | 336.4  |
| 4.7    | 3.1    | 1.8    | 4.7    | 4.4    | 4.6    | 4.0    | 4.1    | 2.6    |
| 864.0  | 773.1  | 1174.4 | 774.1  | 1630.0 | 1638.6 | 1863.8 | 1739.8 | 1284.8 |
| 6.9    | 2.9    | 6.1    | 2.7    | 5.8    | 0.8    | 6.9    | 4.3    | 7.9    |
| 13.4   | 15.7   | 21.8   | 15.8   | 10.8   | 14.0   | 11.9   | 21.1   | 9.8    |
| 16.5   | 9.6    | 18.4   | 9.2    | 17.5   | 13.1   | 9.9    | 16.2   | 15.5   |
| 78.3   | 81.6   | 68.4   | 68.8   | 79.5   | 85.8   | 85.0   | 88.8   | 37.4   |
| 71.0   | 63.6   | 86.6   | 60.8   | 60.5   | 82.6   | 114.5  | 98.6   | 186.8  |
| 0.7    | 2.5    | 0.4    | 0.7    | 0.9    | 1.1    | 0.7    | 5.8    | 1.1    |
| 10.3   | 11.6   | 18.4   | 9.2    | 5.0    | 3.2    | 7.7    | 12.3   | 10.9   |
| 25.4   | 32.4   | 23.7   | 41.3   | 9.7    | 15.1   | 14.5   | 24.2   | 2.7    |
| 26.5   | 38.1   | 45.2   | 39.3   | 10.4   | 14.0   | 10.1   | 12.1   | 16.0   |
| 15.7   | 13.3   | 22.2   | 18.7   | 23.8   | 15.3   | 26.2   | 23.0   | 42.7   |
| 9.8    | 8.5    | 9.2    | 13.7   | 11.9   | 1.3    | 8.5    | 11.3   | 4.9    |
| 211.4  | 144.8  | 790.0  | 167.7  | 959.6  | 749.4  | 892.2  | 966.4  | 2240.0 |
| 39.3   | 39.9   | 30.7   | 20.5   | 38.9   | 53.6   | 75.9   | 62.5   | 259.7  |
| 12.3   | 9.5    | 16.9   | 13.6   | 10.1   | 5.1    | 10.8   | 7.3    | 19.8   |
| 9.8    | 11.3   | 24.5   | 11.3   | 9.9    | 5.8    | 12.9   | 14.6   | 11.9   |
| 9.7    | 5.3    | 18.9   | 4.2    | 9.9    | 1.4    | 4.0    | 8.8    | 10.3   |
| 4.8    | 4.6    | 5.0    | 3.7    | 6.6    | 2.6    | 1.7    | 4.7    | 5.0    |
| 16.1   | 14.6   | 11.9   | 11.4   | 6.8    | 4.9    | 8.2    | 11.9   | 21.0   |
| 102.0  | 93.1   | 162.0  | 104.8  | 28.0   | 20.3   | 28.5   | 41.4   | 26.7   |
| 0.4    | 3.3    | 1.4    | 2.4    | 7.2    | 4.1    | 5.7    | 11.3   | 15.0   |
| 2.9    | 3.6    | 6.0    | 3.7    | 2.0    | 3.4    | 1.7    | 0.5    | 2.6    |
| 202.9  | 211.9  | 192.5  | 191.3  | 261.1  | 252.8  | 312.4  | 335.3  | 220.5  |
| 1.5    | 6.0    | 9.8    | 14.4   | 20.0   | 13.8   | 19.2   | 17.3   | 5.1    |
| 21.0   | 18.1   | 18.3   | 15.7   | 15.2   | 14.3   | 16.4   | 27.2   | 24.6   |
| 8.3    | 6.5    | 4.4    | 10.2   | 0.6    | 3.9    | 5.9    | 1.8    | 2.9    |
| 3.1    | 3.8    | 6.5    | 6.0    | 28.0   | 22.6   | 35.4   | 42.1   | 19.9   |

|        |        |        |        |        |        |        |        |        |
|--------|--------|--------|--------|--------|--------|--------|--------|--------|
| 3.6    | 1.5    | 8.0    | 5.5    | 3.0    | 3.3    | 5.4    | 7.2    | 27.0   |
| 6.9    | 4.7    | 13.3   | 9.9    | 11.6   | 6.9    | 10.5   | 5.5    | 10.8   |
| 1.1    | 2.7    | 0.3    | 4.4    | 0.8    | 0.8    | 3.5    | 0.2    | 2.5    |
| 3.8    | 10.6   | 4.4    | 2.2    | 3.4    | 4.4    | 3.7    | 5.3    | 12.7   |
| 139.8  | 133.7  | 193.3  | 119.5  | 464.6  | 364.8  | 434.3  | 535.9  | 281.7  |
| 22.0   | 41.2   | 27.1   | 27.8   | 92.8   | 78.6   | 100.0  | 107.0  | 54.7   |
| 14.0   | 11.2   | 8.6    | 16.2   | 10.1   | 9.2    | 5.1    | 9.9    | 5.8    |
| 349.9  | 301.3  | 439.8  | 292.1  | 393.9  | 475.0  | 393.7  | 425.8  | 363.7  |
| 10.7   | 8.9    | 8.8    | 4.5    | 527.1  | 502.3  | 393.3  | 421.0  | 1952.1 |
| 7.2    | 10.4   | 5.4    | 9.6    | 4.3    | 7.4    | 8.4    | 10.3   | 14.0   |
| 0.9    | 7.7    | 4.3    | 0.5    | 7.7    | 4.0    | 6.7    | 0.7    | 10.1   |
| 4.6    | 6.3    | 6.3    | 11.2   | 2.1    | 2.6    | 2.9    | 4.6    | 17.7   |
| 2990.1 | 2606.5 | 3655.7 | 2840.0 | 2779.9 | 2479.5 | 2907.2 | 3115.4 | 1845.9 |
| 411.3  | 455.6  | 514.1  | 483.5  | 434.8  | 415.2  | 483.3  | 616.9  | 304.8  |
| 11.5   | 12.2   | 22.4   | 13.2   | 19.9   | 26.2   | 24.9   | 33.0   | 14.4   |
| 2.6    | 8.0    | 1.4    | 3.5    | 5.1    | 6.2    | 1.1    | 1.4    | 1.7    |
| 108.9  | 105.1  | 91.6   | 85.4   | 72.7   | 87.7   | 65.1   | 80.8   | 20.8   |
| 12.1   | 5.3    | 13.4   | 14.3   | 7.9    | 4.7    | 11.8   | 4.3    | 4.3    |
| 17.5   | 15.1   | 23.7   | 14.3   | 14.3   | 6.2    | 15.9   | 19.4   | 18.1   |
| 8.0    | 11.5   | 12.1   | 11.3   | 6.9    | 5.7    | 1.5    | 2.9    | 5.6    |
| 26.7   | 23.2   | 28.5   | 19.6   | 11.8   | 19.5   | 21.9   | 31.1   | 28.8   |
| 1.7    | 3.3    | 2.3    | 1.3    | 8.0    | 10.9   | 7.9    | 5.6    | 4.7    |
| 17.2   | 16.3   | 22.4   | 16.1   | 11.9   | 12.7   | 11.4   | 18.6   | 34.4   |
| 7.0    | 7.2    | 6.0    | 6.3    | 4.7    | 9.0    | 5.0    | 5.5    | 9.9    |
| 12.2   | 11.0   | 11.5   | 16.2   | 7.5    | 7.6    | 9.3    | 13.6   | 9.0    |
| 42.4   | 60.0   | 34.5   | 33.5   | 238.3  | 271.7  | 314.7  | 349.0  | 283.2  |
| 1.4    | 5.4    | 3.6    | 2.5    | 3.4    | 0.8    | 0.7    | 0.6    | 4.1    |
| 42.4   | 36.1   | 54.2   | 42.7   | 36.9   | 37.3   | 32.4   | 40.0   | 21.4   |
| 6.2    | 6.2    | 9.3    | 6.5    | 1.4    | 3.5    | 3.8    | 9.3    | 8.7    |
| 7.8    | 1.4    | 12.8   | 1.0    | 3.2    | 8.5    | 7.9    | 10.5   | 3.1    |
| 18.7   | 11.8   | 26.6   | 13.4   | 95.9   | 63.1   | 71.5   | 105.2  | 105.9  |
| 4.1    | 4.0    | 10.7   | 6.0    | 6.8    | 5.4    | 1.8    | 12.1   | 14.1   |
| 2.3    | 1.8    | 1.6    | 2.3    | 10.2   | 11.0   | 6.6    | 10.6   | 1.4    |
| 70.8   | 72.7   | 101.4  | 55.7   | 56.3   | 52.7   | 75.4   | 85.9   | 101.1  |
| 1396.9 | 1402.1 | 1579.0 | 1481.0 | 647.6  | 560.3  | 673.5  | 863.0  | 438.8  |
| 31.5   | 26.3   | 42.3   | 34.8   | 25.5   | 20.0   | 33.1   | 33.7   | 27.1   |
| 2.6    | 1.8    | 2.8    | 1.3    | 1.2    | 0.9    | 1.1    | 1.9    | 2.5    |
| 0.5    | 6.3    | 4.9    | 3.3    | 3.2    | 4.4    | 3.8    | 3.5    | 7.6    |
| 130.9  | 141.7  | 137.0  | 132.4  | 117.2  | 85.5   | 132.3  | 136.7  | 63.3   |
| 98.6   | 69.6   | 94.5   | 62.9   | 5.0    | 5.6    | 2.9    | 2.7    | 5.9    |
| 2.6    | 6.7    | 4.9    | 6.8    | 11.1   | 5.6    | 4.0    | 11.3   | 4.5    |
| 2.3    | 10.1   | 5.3    | 10.1   | 8.8    | 5.6    | 3.4    | 11.5   | 6.4    |
| 1.6    | 4.1    | 4.7    | 2.8    | 4.1    | 1.7    | 1.3    | 1.6    | 1.9    |
| 13.3   | 5.5    | 12.6   | 5.1    | 6.6    | 5.7    | 7.8    | 13.1   | 6.6    |
| 3.0    | 3.3    | 4.6    | 5.8    | 4.3    | 0.7    | 3.7    | 1.1    | 3.2    |
| 0.8    | 0.6    | 1.2    | 1.2    | 19.0   | 10.7   | 11.5   | 24.2   | 29.2   |
| 49.7   | 60.4   | 37.4   | 41.9   | 4.1    | 2.4    | 3.9    | 4.2    | 3.5    |
| 5.5    | 7.8    | 13.9   | 8.2    | 14.4   | 6.4    | 4.6    | 3.4    | 13.2   |
| 3.9    | 5.1    | 2.9    | 1.5    | 0.9    | 3.5    | 2.9    | 0.7    | 3.3    |
| 369.6  | 387.2  | 339.5  | 328.8  | 526.6  | 525.6  | 540.8  | 626.8  | 517.5  |
| 19.6   | 29.1   | 41.7   | 33.8   | 32.9   | 19.0   | 20.8   | 32.0   | 40.6   |
| 10.0   | 18.4   | 14.3   | 22.5   | 10.3   | 12.4   | 9.0    | 18.3   | 2.2    |
| 1.8    | 1.8    | 1.3    | 3.1    | 2.0    | 0.9    | 4.1    | 2.7    | 1.3    |

|        |        |        |        |        |        |        |        |        |
|--------|--------|--------|--------|--------|--------|--------|--------|--------|
| 251.6  | 271.2  | 268.6  | 244.9  | 158.5  | 180.6  | 153.8  | 177.9  | 272.8  |
| 2.0    | 2.0    | 3.1    | 2.1    | 2.9    | 7.8    | 2.4    | 2.8    | 3.2    |
| 172.2  | 186.2  | 218.8  | 142.2  | 252.3  | 285.6  | 254.2  | 272.4  | 94.1   |
| 932.9  | 797.3  | 1326.9 | 953.4  | 1091.1 | 1188.8 | 1270.5 | 1352.6 | 312.2  |
| 966.4  | 853.8  | 1705.1 | 914.8  | 2444.6 | 2171.6 | 2445.0 | 2584.6 | 3770.3 |
| 6.6    | 3.7    | 5.8    | 4.3    | 6.7    | 7.0    | 13.0   | 4.5    | 11.3   |
| 13.3   | 7.5    | 15.5   | 8.9    | 10.4   | 10.3   | 11.6   | 10.8   | 15.7   |
| 5.2    | 0.9    | 3.9    | 1.7    | 1.2    | 1.5    | 2.3    | 0.9    | 14.1   |
| 29.2   | 33.2   | 58.8   | 45.4   | 180.8  | 315.0  | 244.7  | 225.5  | 78.3   |
| 1338.0 | 1165.7 | 2780.3 | 1212.4 | 1938.6 | 877.9  | 1470.4 | 1849.2 | 1549.3 |
| 28.8   | 29.9   | 51.2   | 25.7   | 27.5   | 12.8   | 23.8   | 36.1   | 37.8   |
| 31.4   | 27.2   | 33.8   | 19.5   | 2.3    | 4.0    | 1.8    | 7.1    | 4.9    |
| 271.8  | 224.2  | 219.8  | 224.2  | 136.5  | 126.0  | 138.7  | 185.7  | 188.8  |
| 26.4   | 25.3   | 40.8   | 9.3    | 0.7    | 0.2    | 3.1    | 5.9    | 3.5    |
| 23.4   | 12.1   | 21.9   | 6.2    | 1.6    | 1.5    | 1.7    | 0.7    | 3.1    |
| 1.2    | 5.1    | 3.0    | 4.3    | 2.0    | 1.7    | 1.8    | 10.8   | 10.7   |
| 3.9    | 4.8    | 8.5    | 8.6    | 53.6   | 54.1   | 64.7   | 56.8   | 7.1    |
| 0.8    | 6.6    | 1.3    | 1.8    | 2.7    | 1.0    | 1.0    | 2.1    | 8.0    |
| 0.3    | 1.0    | 0.7    | 0.9    | 0.4    | 1.8    | 0.8    | 1.1    | 0.6    |
| 74.0   | 69.9   | 94.1   | 65.4   | 81.5   | 70.3   | 82.8   | 103.5  | 97.9   |
| 1.6    | 6.1    | 3.0    | 2.7    | 3.3    | 9.1    | 12.0   | 12.8   | 22.6   |
| 530.0  | 465.3  | 869.3  | 536.6  | 1671.3 | 1461.6 | 1623.6 | 1822.3 | 219.9  |
| 16.9   | 16.3   | 22.3   | 14.5   | 33.2   | 42.1   | 60.3   | 52.6   | 1.8    |
| 197.3  | 214.5  | 442.4  | 346.4  | 367.5  | 372.3  | 410.8  | 438.0  | 370.6  |
| 110.0  | 90.6   | 106.9  | 108.6  | 53.9   | 85.7   | 72.2   | 77.8   | 103.8  |
| 832.8  | 725.9  | 1293.3 | 871.7  | 867.9  | 744.1  | 874.3  | 968.0  | 1143.9 |
| 0.8    | 0.7    | 3.1    | 2.7    | 1.1    | 10.7   | 4.8    | 11.9   | 9.3    |
| 294.0  | 275.2  | 294.4  | 226.0  | 931.3  | 737.6  | 889.7  | 958.6  | 761.8  |
| 2.4    | 1.4    | 4.7    | 1.3    | 0.9    | 0.4    | 1.1    | 0.6    | 2.9    |
| 11.7   | 16.0   | 23.6   | 10.9   | 9.0    | 15.2   | 18.3   | 9.7    | 13.2   |
| 2.5    | 17.3   | 3.2    | 1.6    | 2.4    | 2.5    | 2.6    | 4.6    | 2.3    |
| 605.2  | 500.7  | 861.0  | 626.9  | 334.0  | 363.2  | 365.8  | 384.0  | 837.7  |
| 7.2    | 3.8    | 6.1    | 3.8    | 7.2    | 4.3    | 3.7    | 2.4    | 5.5    |
| 47.2   | 36.5   | 130.4  | 42.3   | 653.0  | 346.6  | 657.1  | 756.8  | 1042.3 |
| 41.0   | 55.5   | 36.8   | 40.9   | 43.4   | 32.3   | 54.2   | 53.0   | 57.9   |
| 5.5    | 7.4    | 5.7    | 6.1    | 2.2    | 5.1    | 2.7    | 4.2    | 1.3    |
| 20.5   | 39.5   | 23.6   | 26.7   | 25.6   | 23.9   | 33.9   | 23.8   | 33.0   |
| 41.8   | 41.9   | 83.8   | 48.4   | 56.4   | 43.6   | 47.2   | 50.3   | 108.0  |
| 2.2    | 2.9    | 2.4    | 1.7    | 2.9    | 2.7    | 3.1    | 3.1    | 3.7    |
| 1.3    | 2.7    | 6.1    | 7.8    | 1.4    | 2.0    | 4.9    | 5.6    | 2.3    |
| 3.4    | 6.3    | 4.3    | 2.5    | 3.6    | 3.7    | 4.4    | 3.8    | 4.6    |
| 4.0    | 2.0    | 3.2    | 11.0   | 2.5    | 2.8    | 2.6    | 1.6    | 8.6    |
| 181.6  | 163.8  | 221.8  | 173.0  | 107.3  | 80.0   | 111.1  | 68.7   | 190.7  |
| 4722.5 | 4589.1 | 4933.5 | 4446.3 | 4641.2 | 4328.9 | 4664.3 | 4892.3 | 5156.0 |
| 194.5  | 178.9  | 273.5  | 174.2  | 383.1  | 368.1  | 443.0  | 474.9  | 1290.1 |
| 8.2    | 14.7   | 12.5   | 7.0    | 24.4   | 14.6   | 20.6   | 24.8   | 48.4   |
| 298.8  | 310.1  | 241.6  | 392.8  | 151.9  | 96.4   | 141.5  | 199.4  | 15.2   |
| 261.8  | 244.0  | 372.5  | 260.8  | 287.0  | 269.7  | 310.1  | 313.8  | 362.3  |
| 73.9   | 62.7   | 87.6   | 58.2   | 98.7   | 126.9  | 119.9  | 101.8  | 137.7  |
| 108.2  | 114.0  | 186.0  | 90.4   | 60.7   | 66.0   | 102.6  | 84.6   | 121.6  |
| 125.2  | 153.7  | 135.4  | 122.8  | 148.3  | 149.9  | 156.8  | 176.0  | 226.0  |
| 8.6    | 4.1    | 1.8    | 5.4    | 1.9    | 4.5    | 4.8    | 7.3    | 2.3    |
| 2.2    | 2.1    | 3.2    | 2.4    | 2.3    | 1.3    | 1.9    | 2.0    | 3.9    |

|       |       |       |       |        |        |        |        |        |
|-------|-------|-------|-------|--------|--------|--------|--------|--------|
| 2.3   | 2.2   | 4.1   | 3.2   | 6.2    | 3.9    | 1.3    | 10.7   | 3.1    |
| 30.2  | 33.8  | 33.7  | 29.5  | 59.6   | 69.3   | 64.8   | 104.6  | 31.5   |
| 6.8   | 5.6   | 14.1  | 6.6   | 2.9    | 4.7    | 3.9    | 9.5    | 2.8    |
| 80.1  | 81.5  | 113.1 | 78.2  | 243.9  | 239.0  | 261.8  | 317.5  | 233.0  |
| 6.3   | 15.9  | 7.4   | 4.2   | 10.1   | 9.8    | 15.0   | 3.9    | 29.6   |
| 13.5  | 17.9  | 23.7  | 12.6  | 18.7   | 14.4   | 19.6   | 22.2   | 52.5   |
| 16.2  | 14.6  | 12.6  | 10.9  | 4.4    | 4.1    | 9.6    | 19.3   | 26.6   |
| 5.1   | 3.4   | 5.6   | 5.4   | 4.5    | 2.3    | 1.8    | 1.2    | 6.6    |
| 327.3 | 300.2 | 406.8 | 256.8 | 449.8  | 465.9  | 416.0  | 481.0  | 130.5  |
| 1.3   | 1.4   | 1.7   | 3.1   | 3.7    | 5.9    | 3.3    | 0.7    | 4.4    |
| 5.8   | 10.0  | 6.3   | 4.5   | 6.1    | 6.3    | 10.1   | 2.7    | 4.0    |
| 2.1   | 5.6   | 4.3   | 9.5   | 5.6    | 7.5    | 9.1    | 3.4    | 6.8    |
| 10.2  | 20.8  | 6.4   | 16.5  | 8.1    | 6.2    | 4.0    | 7.6    | 17.5   |
| 143.8 | 158.0 | 186.2 | 151.9 | 130.4  | 122.4  | 132.0  | 184.8  | 124.2  |
| 26.5  | 22.1  | 33.1  | 27.9  | 14.0   | 12.1   | 24.8   | 23.9   | 40.0   |
| 6.5   | 1.0   | 5.9   | 2.2   | 5.7    | 4.3    | 6.5    | 0.4    | 4.5    |
| 31.7  | 22.2  | 37.4  | 22.8  | 51.3   | 44.6   | 43.9   | 52.8   | 49.1   |
| 59.1  | 42.8  | 101.2 | 65.3  | 99.2   | 93.5   | 94.8   | 129.9  | 165.7  |
| 6.3   | 1.2   | 1.8   | 4.5   | 1.2    | 1.8    | 1.2    | 1.4    | 0.8    |
| 1.3   | 0.9   | 3.1   | 2.3   | 1.8    | 0.7    | 1.8    | 1.7    | 3.7    |
| 16.9  | 10.8  | 16.0  | 21.8  | 8.1    | 14.0   | 16.3   | 7.5    | 17.6   |
| 1.5   | 8.8   | 9.4   | 4.2   | 4.2    | 1.1    | 2.8    | 5.8    | 1.5    |
| 60.8  | 40.6  | 72.4  | 51.8  | 137.7  | 174.9  | 156.8  | 171.3  | 96.2   |
| 2.2   | 3.7   | 6.0   | 3.6   | 2.3    | 0.8    | 5.4    | 4.8    | 9.4    |
| 1.2   | 6.2   | 4.2   | 5.0   | 1.5    | 1.2    | 7.5    | 10.2   | 1.0    |
| 137.0 | 140.6 | 187.0 | 142.1 | 241.0  | 196.1  | 227.6  | 305.0  | 244.4  |
| 816.6 | 824.7 | 829.3 | 696.9 | 64.0   | 72.0   | 72.9   | 64.8   | 578.7  |
| 495.3 | 473.4 | 869.8 | 555.9 | 1303.5 | 1128.2 | 1230.0 | 1392.3 | 1417.3 |
| 20.6  | 16.0  | 18.9  | 7.8   | 5.4    | 5.9    | 5.7    | 18.1   | 22.4   |
| 4.8   | 9.5   | 4.8   | 8.3   | 11.8   | 10.9   | 5.9    | 15.4   | 12.4   |
| 6.3   | 14.1  | 10.9  | 9.6   | 2772.0 | 2854.1 | 3104.1 | 3141.6 | 487.9  |
| 93.3  | 86.4  | 83.6  | 86.3  | 22.3   | 23.7   | 49.0   | 33.2   | 30.1   |
| 5.0   | 1.0   | 4.5   | 3.8   | 2.4    | 2.0    | 2.9    | 5.7    | 1.9    |
| 216.3 | 211.1 | 289.9 | 299.7 | 240.8  | 245.2  | 275.1  | 297.4  | 171.0  |
| 116.3 | 126.4 | 200.1 | 97.3  | 202.4  | 175.2  | 153.0  | 213.0  | 291.4  |
| 2.3   | 2.1   | 3.2   | 1.6   | 1.7    | 2.0    | 2.1    | 1.7    | 2.4    |
| 426.9 | 326.8 | 559.4 | 313.7 | 123.1  | 200.7  | 148.2  | 183.3  | 17.4   |
| 2.8   | 1.9   | 1.5   | 2.7   | 9.3    | 3.1    | 3.1    | 3.2    | 1.6    |
| 18.8  | 27.2  | 19.0  | 16.9  | 20.3   | 24.1   | 19.5   | 36.8   | 26.7   |
| 3.5   | 10.8  | 8.2   | 15.2  | 10.5   | 10.3   | 1.3    | 3.7    | 5.7    |
| 1.2   | 0.7   | 5.1   | 0.6   | 21.8   | 28.9   | 32.7   | 39.3   | 4.1    |
| 1.0   | 5.0   | 4.5   | 7.4   | 5.4    | 5.1    | 3.6    | 7.2    | 23.6   |
| 5.9   | 8.8   | 14.5  | 10.9  | 26.1   | 21.8   | 30.8   | 42.3   | 167.2  |
| 4.3   | 1.4   | 6.0   | 3.0   | 3.0    | 1.5    | 1.8    | 5.5    | 4.6    |
| 23.6  | 18.6  | 7.0   | 13.8  | 5.7    | 1.1    | 5.7    | 9.4    | 10.1   |
| 1.7   | 2.6   | 7.0   | 4.3   | 6.5    | 2.9    | 4.1    | 3.0    | 7.7    |
| 9.0   | 15.3  | 19.0  | 18.0  | 13.4   | 8.4    | 12.3   | 13.5   | 19.0   |
| 0.6   | 0.8   | 1.5   | 1.2   | 0.8    | 1.2    | 0.9    | 1.2    | 0.7    |
| 102.0 | 105.3 | 115.9 | 96.1  | 74.7   | 72.1   | 76.7   | 91.9   | 124.8  |
| 0.7   | 0.4   | 0.6   | 0.3   | 1.5    | 0.1    | 0.3    | 0.4    | 0.7    |
| 6.5   | 2.0   | 4.0   | 8.6   | 1.2    | 7.8    | 5.2    | 15.8   | 6.1    |
| 8.4   | 3.6   | 24.5  | 3.0   | 2.5    | 5.8    | 6.5    | 20.6   | 4.7    |
| 184.3 | 163.2 | 173.6 | 124.1 | 465.5  | 520.0  | 492.3  | 541.3  | 193.1  |

|       |       |        |       |       |       |       |       |       |
|-------|-------|--------|-------|-------|-------|-------|-------|-------|
| 6.7   | 6.2   | 20.0   | 4.6   | 21.1  | 16.2  | 12.2  | 20.1  | 9.0   |
| 220.8 | 207.6 | 113.6  | 154.8 | 177.3 | 316.8 | 152.4 | 250.7 | 14.2  |
| 11.5  | 12.0  | 12.0   | 11.7  | 14.7  | 7.2   | 6.3   | 12.2  | 4.2   |
| 9.5   | 7.2   | 6.2    | 9.7   | 8.5   | 2.9   | 3.7   | 12.0  | 10.3  |
| 4.7   | 1.0   | 2.3    | 7.1   | 1.8   | 2.1   | 1.0   | 0.4   | 3.1   |
| 83.6  | 78.9  | 124.3  | 72.6  | 71.3  | 80.3  | 62.7  | 93.5  | 68.4  |
| 38.7  | 31.4  | 41.8   | 43.6  | 40.2  | 25.6  | 37.5  | 66.4  | 63.6  |
| 8.4   | 11.1  | 10.9   | 8.7   | 22.2  | 23.3  | 10.7  | 27.3  | 15.8  |
| 7.3   | 7.2   | 7.1    | 8.1   | 2.9   | 2.0   | 6.0   | 2.6   | 8.9   |
| 22.8  | 12.0  | 26.2   | 13.8  | 22.3  | 12.5  | 17.6  | 30.9  | 49.8  |
| 11.3  | 4.3   | 5.0    | 3.0   | 2.0   | 4.7   | 2.3   | 2.8   | 6.0   |
| 828.7 | 854.8 | 1219.6 | 890.1 | 77.9  | 105.5 | 77.6  | 94.5  | 172.2 |
| 47.4  | 104.4 | 32.2   | 25.0  | 21.1  | 22.2  | 13.4  | 14.6  | 16.5  |
| 1.3   | 0.6   | 1.0    | 0.5   | 0.2   | 0.8   | 0.2   | 0.5   | 0.7   |
| 4.9   | 0.9   | 3.4    | 3.6   | 1.4   | 6.3   | 4.8   | 0.4   | 2.7   |
| 39.1  | 35.6  | 43.4   | 31.2  | 55.8  | 53.0  | 58.3  | 74.2  | 44.0  |
| 17.0  | 10.0  | 24.2   | 14.8  | 17.1  | 9.5   | 6.6   | 11.6  | 24.1  |
| 9.4   | 15.6  | 17.2   | 12.0  | 2.4   | 3.3   | 1.3   | 4.6   | 4.0   |
| 4.4   | 4.8   | 17.9   | 4.4   | 3.1   | 2.8   | 5.0   | 2.7   | 4.6   |
| 35.6  | 21.3  | 40.6   | 19.7  | 34.2  | 39.0  | 30.4  | 28.4  | 27.9  |
| 12.9  | 9.1   | 11.0   | 10.4  | 9.3   | 8.2   | 9.8   | 18.7  | 30.4  |
| 9.2   | 2.2   | 2.7    | 2.0   | 1.8   | 2.9   | 1.7   | 8.0   | 7.3   |
| 12.4  | 14.3  | 10.6   | 9.6   | 40.2  | 36.6  | 38.2  | 37.4  | 55.4  |
| 2.8   | 4.6   | 10.0   | 3.4   | 3.5   | 1.6   | 7.1   | 7.6   | 9.9   |
| 4.7   | 6.9   | 9.9    | 4.5   | 14.4  | 5.3   | 10.6  | 27.3  | 6.1   |
| 18.1  | 18.2  | 18.2   | 9.4   | 13.2  | 9.5   | 12.2  | 1.6   | 28.2  |
| 10.7  | 9.6   | 12.9   | 8.6   | 2.7   | 3.7   | 7.0   | 11.3  | 3.1   |
| 3.0   | 0.7   | 2.6    | 3.9   | 1.5   | 2.5   | 1.2   | 0.9   | 2.1   |
| 1.9   | 8.3   | 7.9    | 7.2   | 8.5   | 5.3   | 8.5   | 12.2  | 7.8   |
| 1.9   | 2.8   | 3.6    | 1.2   | 220.4 | 149.4 | 289.8 | 188.4 | 6.8   |
| 23.0  | 21.0  | 30.1   | 24.2  | 19.6  | 12.5  | 12.9  | 17.0  | 19.0  |
| 3.5   | 6.0   | 5.6    | 9.5   | 7.4   | 7.5   | 8.4   | 9.0   | 24.6  |
| 5.9   | 2.3   | 8.9    | 6.9   | 5.7   | 3.0   | 6.5   | 1.6   | 18.0  |
| 9.8   | 6.3   | 14.3   | 10.5  | 9.7   | 7.0   | 11.4  | 8.7   | 4.5   |
| 0.8   | 2.7   | 1.9    | 0.6   | 0.8   | 0.7   | 0.6   | 6.9   | 2.2   |
| 1.0   | 6.2   | 6.4    | 1.8   | 10.3  | 2.3   | 1.4   | 2.7   | 4.1   |
| 36.2  | 37.2  | 51.6   | 39.3  | 24.2  | 20.5  | 19.0  | 33.2  | 28.0  |
| 18.3  | 15.5  | 20.0   | 11.1  | 19.8  | 5.3   | 16.7  | 18.1  | 26.5  |
| 17.6  | 21.3  | 29.6   | 13.8  | 11.5  | 13.5  | 9.4   | 12.3  | 35.1  |
| 1.9   | 4.4   | 4.7    | 1.8   | 7.2   | 10.5  | 3.4   | 8.2   | 15.3  |
| 2.4   | 5.1   | 6.3    | 11.8  | 4.8   | 4.5   | 9.2   | 7.8   | 10.3  |
| 8.1   | 8.7   | 2.4    | 1.5   | 8.4   | 5.6   | 7.5   | 10.6  | 13.2  |
| 6.7   | 12.3  | 13.1   | 12.3  | 12.5  | 1.2   | 10.2  | 17.1  | 14.7  |
| 14.3  | 20.3  | 20.7   | 10.2  | 13.6  | 13.1  | 12.1  | 12.3  | 50.4  |
| 26.1  | 14.4  | 15.7   | 10.2  | 1.5   | 2.5   | 3.1   | 4.6   | 10.6  |
| 1.1   | 1.2   | 2.2    | 0.5   | 1.8   | 1.3   | 1.4   | 1.4   | 4.9   |
| 2.3   | 8.8   | 3.1    | 6.5   | 4.3   | 2.8   | 3.9   | 1.0   | 31.5  |
| 14.6  | 14.2  | 10.6   | 15.4  | 4.1   | 5.7   | 6.6   | 0.8   | 19.6  |
| 18.1  | 17.9  | 21.7   | 18.1  | 19.2  | 17.8  | 49.5  | 42.6  | 20.8  |
| 21.1  | 16.5  | 20.8   | 19.7  | 23.1  | 20.8  | 22.1  | 24.3  | 35.7  |
| 7.6   | 6.7   | 8.5    | 8.6   | 44.9  | 59.5  | 49.8  | 54.9  | 15.6  |
| 5.2   | 3.8   | 5.6    | 7.9   | 26.7  | 42.7  | 33.1  | 38.2  | 7.8   |
| 11.4  | 8.3   | 17.5   | 12.3  | 13.3  | 5.6   | 5.5   | 0.9   | 10.1  |

|        |        |        |        |        |        |        |        |        |
|--------|--------|--------|--------|--------|--------|--------|--------|--------|
| 1.5    | 0.6    | 3.8    | 7.3    | 8.6    | 6.8    | 5.5    | 10.5   | 10.0   |
| 2.9    | 2.9    | 5.3    | 2.3    | 2.6    | 2.3    | 1.9    | 1.7    | 4.0    |
| 6.2    | 4.9    | 5.5    | 7.9    | 2485.5 | 2507.0 | 2604.4 | 2735.5 | 422.5  |
| 13.0   | 14.7   | 11.8   | 11.8   | 0.9    | 4.5    | 2.7    | 3.0    | 29.5   |
| 131.2  | 121.8  | 152.9  | 129.6  | 93.3   | 86.7   | 103.0  | 95.5   | 151.6  |
| 1.3    | 3.7    | 1.0    | 0.5    | 1.0    | 0.4    | 0.9    | 0.8    | 3.8    |
| 1.8    | 11.4   | 2.6    | 3.1    | 30.8   | 34.6   | 36.4   | 21.4   | 5.7    |
| 9.0    | 13.2   | 19.8   | 9.0    | 18.3   | 13.5   | 16.8   | 21.5   | 11.5   |
| 2.4    | 5.9    | 4.6    | 2.1    | 2.9    | 3.9    | 1.7    | 2.6    | 2.3    |
| 1.3    | 1.9    | 2.5    | 1.1    | 1.2    | 1.2    | 1.3    | 3.6    | 2.4    |
| 1.6    | 2.4    | 1.9    | 9.0    | 1.2    | 4.3    | 1.8    | 5.5    | 2.4    |
| 2.0    | 2.7    | 3.7    | 3.9    | 3.2    | 2.3    | 0.7    | 5.0    | 2.3    |
| 167.8  | 172.7  | 187.8  | 165.4  | 157.6  | 102.7  | 138.9  | 142.8  | 240.6  |
| 3.7    | 1.3    | 7.8    | 1.7    | 7.2    | 2.7    | 8.7    | 9.1    | 8.6    |
| 1947.4 | 1963.6 | 2385.7 | 1970.5 | 1573.7 | 1729.4 | 1533.3 | 1793.4 | 646.9  |
| 125.3  | 116.4  | 135.3  | 116.2  | 166.4  | 190.8  | 201.7  | 195.3  | 465.8  |
| 41.9   | 35.5   | 56.9   | 37.1   | 36.2   | 25.0   | 29.0   | 28.0   | 65.0   |
| 10.1   | 11.2   | 9.9    | 7.3    | 15.0   | 14.0   | 17.3   | 7.2    | 15.4   |
| 2.3    | 1.7    | 6.7    | 4.7    | 9.5    | 14.0   | 14.3   | 23.9   | 12.5   |
| 0.6    | 4.1    | 11.6   | 1.6    | 2.9    | 4.0    | 1.5    | 4.1    | 3.6    |
| 2.4    | 2.6    | 1.7    | 1.6    | 2.9    | 3.4    | 2.2    | 0.7    | 7.2    |
| 51.4   | 56.2   | 65.7   | 60.9   | 56.4   | 96.6   | 84.9   | 81.5   | 106.5  |
| 4.0    | 11.0   | 12.2   | 5.7    | 10.5   | 7.0    | 4.3    | 14.6   | 10.0   |
| 18.2   | 44.0   | 14.1   | 12.4   | 2.9    | 16.8   | 11.3   | 3.2    | 2.2    |
| 17.8   | 39.1   | 49.2   | 32.3   | 44.9   | 38.5   | 36.8   | 43.7   | 13.3   |
| 7.0    | 10.1   | 4.6    | 7.0    | 5.1    | 2.3    | 6.8    | 13.1   | 4.7    |
| 25.6   | 9.3    | 24.1   | 26.8   | 22.9   | 7.6    | 26.7   | 56.3   | 39.5   |
| 5.9    | 13.4   | 9.6    | 6.1    | 7.2    | 4.8    | 7.9    | 6.5    | 4.7    |
| 10.1   | 8.7    | 18.9   | 6.6    | 30.5   | 21.0   | 31.6   | 19.1   | 41.0   |
| 5.6    | 4.3    | 4.5    | 2.9    | 9.2    | 3.2    | 2.4    | 4.0    | 9.4    |
| 204.6  | 172.0  | 353.1  | 210.2  | 344.8  | 346.5  | 312.8  | 382.7  | 389.6  |
| 1.8    | 4.8    | 7.8    | 4.3    | 1.1    | 3.6    | 2.4    | 1.2    | 7.4    |
| 6.3    | 7.8    | 1.6    | 7.3    | 9.1    | 6.1    | 7.7    | 11.0   | 7.4    |
| 11.5   | 20.7   | 17.8   | 13.4   | 10.8   | 11.6   | 13.2   | 14.5   | 9.5    |
| 4.9    | 5.0    | 5.3    | 2.3    | 4.1    | 1.5    | 4.0    | 5.1    | 8.8    |
| 2.7    | 3.4    | 2.0    | 4.8    | 14.2   | 23.1   | 23.8   | 4.5    | 3.7    |
| 1130.4 | 1069.3 | 1534.6 | 1138.3 | 906.9  | 870.9  | 1008.6 | 1026.2 | 1248.5 |
| 1.4    | 4.1    | 6.1    | 1.7    | 1.1    | 3.1    | 8.9    | 1.5    | 1.0    |
| 11.5   | 11.3   | 21.9   | 7.6    | 4.6    | 5.7    | 7.1    | 9.9    | 16.7   |
| 12.0   | 13.0   | 37.5   | 9.5    | 0.8    | 6.5    | 1.3    | 0.7    | 33.4   |
| 13.9   | 9.4    | 18.7   | 18.6   | 14.5   | 7.0    | 12.0   | 17.1   | 13.7   |
| 5.1    | 10.3   | 9.1    | 8.1    | 3.2    | 1.5    | 1.6    | 5.7    | 10.1   |
| 5.6    | 14.2   | 15.1   | 10.9   | 11.3   | 6.7    | 11.5   | 10.1   | 12.7   |
| 4.2    | 2.7    | 3.3    | 2.8    | 2.0    | 3.3    | 2.8    | 3.2    | 4.8    |
| 1.1    | 1.8    | 2.6    | 5.1    | 2.1    | 0.8    | 2.6    | 2.2    | 1.7    |
| 17.2   | 15.3   | 5.6    | 9.5    | 12.6   | 12.7   | 13.2   | 11.1   | 9.7    |
| 8.1    | 5.6    | 7.9    | 6.7    | 3.7    | 7.2    | 9.6    | 13.8   | 6.4    |
| 4.4    | 6.3    | 12.1   | 7.5    | 8.3    | 9.4    | 7.3    | 9.2    | 17.6   |
| 1.3    | 4.3    | 2.6    | 2.9    | 0.2    | 0.5    | 0.2    | 7.5    | 6.1    |
| 2.4    | 4.6    | 0.7    | 2.1    | 28.8   | 24.8   | 29.7   | 26.0   | 8.4    |
| 79.9   | 56.3   | 161.3  | 79.1   | 72.1   | 77.6   | 74.8   | 78.0   | 77.5   |
| 2.6    | 2.4    | 1.9    | 1.0    | 3.6    | 4.2    | 2.6    | 2.5    | 3.4    |
| 16.6   | 11.0   | 2.9    | 9.3    | 7.1    | 3.6    | 10.8   | 4.9    | 37.9   |

|        |        |        |        |        |        |        |        |        |
|--------|--------|--------|--------|--------|--------|--------|--------|--------|
| 18.3   | 2.9    | 8.9    | 22.5   | 15.4   | 6.3    | 14.1   | 13.5   | 2.7    |
| 2.9    | 0.4    | 1.9    | 3.7    | 3.4    | 3.5    | 3.6    | 0.5    | 1.0    |
| 416.3  | 349.3  | 513.4  | 352.1  | 658.7  | 500.6  | 657.9  | 674.0  | 938.2  |
| 900.3  | 857.3  | 1279.6 | 560.7  | 816.9  | 458.7  | 720.5  | 799.8  | 698.6  |
| 4.7    | 6.0    | 29.0   | 11.7   | 38.8   | 42.7   | 166.5  | 89.1   | 2.3    |
| 5.2    | 1.6    | 5.4    | 4.6    | 9.3    | 4.4    | 5.0    | 11.5   | 7.1    |
| 4.5    | 3.3    | 10.3   | 2.5    | 2.0    | 4.7    | 8.2    | 2.1    | 1.8    |
| 2.6    | 8.5    | 2.9    | 7.3    | 1.8    | 3.6    | 1.1    | 5.5    | 1.8    |
| 5.8    | 5.8    | 3.6    | 3.4    | 2.2    | 1.3    | 3.4    | 2.0    | 2.7    |
| 57.8   | 73.0   | 63.4   | 69.3   | 200.0  | 160.1  | 167.5  | 246.3  | 84.4   |
| 11.9   | 11.1   | 23.2   | 12.4   | 25.2   | 19.8   | 21.5   | 14.2   | 37.9   |
| 2.8    | 1.8    | 1.2    | 1.0    | 4.5    | 3.9    | 4.6    | 0.3    | 6.7    |
| 19.4   | 20.0   | 10.7   | 13.7   | 20.7   | 12.4   | 13.0   | 22.2   | 22.0   |
| 7.8    | 8.3    | 6.5    | 10.6   | 17.5   | 35.6   | 19.5   | 27.2   | 18.7   |
| 3.5    | 13.9   | 8.1    | 9.7    | 18.8   | 7.3    | 11.5   | 1.9    | 20.0   |
| 6.0    | 5.4    | 6.6    | 9.8    | 4.5    | 4.3    | 5.2    | 11.5   | 9.2    |
| 1.8    | 4.6    | 9.1    | 1.9    | 1.5    | 1.0    | 1.8    | 0.9    | 4.0    |
| 9.6    | 8.8    | 5.0    | 5.9    | 3.6    | 0.9    | 2.5    | 12.7   | 7.6    |
| 252.0  | 291.3  | 118.8  | 190.9  | 7.2    | 6.5    | 6.3    | 11.2   | 2.3    |
| 58.1   | 46.9   | 51.8   | 96.1   | 139.7  | 145.5  | 140.7  | 162.7  | 2649.9 |
| 1.2    | 1.8    | 2.6    | 3.6    | 1.4    | 1.0    | 3.3    | 2.1    | 1.8    |
| 1890.5 | 1612.5 | 2673.5 | 1713.6 | 1622.3 | 1605.7 | 1728.6 | 1903.1 | 2466.3 |
| 94.9   | 85.1   | 125.4  | 81.2   | 232.4  | 210.3  | 228.5  | 239.6  | 265.2  |
| 1088.2 | 1005.6 | 1657.9 | 1084.7 | 1461.3 | 1514.0 | 1594.3 | 1770.4 | 1175.6 |
| 1.6    | 4.8    | 9.1    | 2.7    | 2.3    | 3.7    | 1.8    | 1.9    | 2.3    |
| 2.9    | 1.2    | 4.9    | 1.9    | 2.9    | 2.2    | 1.5    | 5.3    | 2.4    |
| 694.3  | 573.3  | 1257.4 | 654.8  | 771.4  | 640.4  | 683.1  | 814.5  | 717.2  |
| 12.7   | 12.8   | 15.0   | 13.1   | 8.2    | 7.3    | 9.5    | 9.1    | 12.9   |
| 36.6   | 39.5   | 50.2   | 32.0   | 41.4   | 49.7   | 40.4   | 54.7   | 62.6   |
| 130.0  | 132.7  | 148.5  | 117.7  | 139.0  | 137.0  | 147.5  | 202.0  | 121.3  |
| 0.9    | 2.8    | 1.1    | 1.7    | 0.5    | 0.9    | 0.8    | 2.1    | 8.8    |
| 3.4    | 2.3    | 2.6    | 1.1    | 1.2    | 7.2    | 1.7    | 2.2    | 87.9   |
| 929.2  | 719.8  | 1845.6 | 855.1  | 1198.6 | 1032.8 | 1324.6 | 1665.4 | 2516.1 |
| 0.8    | 1.0    | 1.4    | 3.4    | 1.3    | 1.1    | 0.9    | 1.0    | 2.6    |
| 1.9    | 1.0    | 2.3    | 3.6    | 1.0    | 4.0    | 1.6    | 1.1    | 2.2    |
| 42.9   | 43.0   | 74.9   | 29.2   | 0.8    | 11.3   | 6.5    | 2.0    | 17.4   |
| 9.5    | 1.1    | 6.7    | 4.8    | 2.6    | 8.1    | 1.0    | 1.5    | 1.7    |
| 8.9    | 7.2    | 9.3    | 7.1    | 8.4    | 4.6    | 7.1    | 1.7    | 6.2    |
| 31.0   | 34.8   | 38.0   | 29.4   | 19.8   | 26.7   | 27.4   | 26.7   | 21.6   |
| 11.6   | 8.0    | 1.8    | 2.0    | 8.0    | 1.4    | 1.6    | 2.3    | 11.8   |
| 26.2   | 24.0   | 34.0   | 19.3   | 33.1   | 36.1   | 39.3   | 45.1   | 59.0   |
| 1.0    | 4.8    | 2.0    | 1.6    | 4.6    | 1.6    | 1.0    | 5.2    | 5.2    |
| 8.4    | 8.6    | 2.5    | 3.2    | 5.6    | 6.7    | 4.2    | 1.2    | 5.7    |
| 0.8    | 1.1    | 9.1    | 1.0    | 2.4    | 0.5    | 0.8    | 2.8    | 6.0    |
| 9.9    | 20.5   | 22.9   | 25.6   | 11.4   | 13.5   | 17.0   | 13.3   | 27.3   |
| 2.1    | 2.2    | 2.6    | 2.3    | 1.6    | 1.7    | 1.7    | 1.7    | 3.6    |
| 55.7   | 50.9   | 38.1   | 43.8   | 3.8    | 2.8    | 3.9    | 2.1    | 7.3    |
| 2.3    | 3.0    | 3.3    | 2.1    | 1.3    | 0.9    | 2.1    | 1.3    | 7.0    |
| 661.2  | 620.8  | 995.9  | 789.3  | 688.9  | 692.1  | 811.8  | 763.5  | 1057.6 |
| 6.1    | 8.0    | 3.0    | 9.5    | 17.0   | 11.3   | 27.6   | 24.2   | 7.7    |
| 2.0    | 1.5    | 1.2    | 0.7    | 1.3    | 0.5    | 0.8    | 1.2    | 0.9    |
| 1.2    | 4.6    | 5.3    | 3.0    | 5.0    | 4.7    | 6.1    | 5.1    | 1.2    |
| 3.2    | 3.8    | 1.4    | 0.5    | 1.0    | 0.8    | 1.4    | 8.1    | 3.8    |



|        |        |        |        |        |        |        |        |        |
|--------|--------|--------|--------|--------|--------|--------|--------|--------|
| 2.9    | 2.0    | 4.6    | 2.3    | 1.9    | 1.1    | 2.3    | 10.2   | 2.2    |
| 2.7    | 1.9    | 3.6    | 2.3    | 2.0    | 2.4    | 2.8    | 3.0    | 2.6    |
| 1.0    | 0.6    | 0.7    | 2.1    | 10.9   | 6.1    | 19.1   | 9.5    | 3.5    |
| 12.4   | 3.8    | 12.7   | 11.4   | 1.9    | 3.5    | 6.0    | 3.3    | 1.9    |
| 12.2   | 11.6   | 15.5   | 14.6   | 5.1    | 2.6    | 7.5    | 7.5    | 16.2   |
| 4.8    | 1.7    | 3.4    | 3.4    | 1.1    | 0.8    | 3.1    | 3.9    | 0.7    |
| 31.8   | 32.3   | 41.3   | 26.3   | 16.3   | 16.0   | 19.9   | 29.5   | 40.3   |
| 4.3    | 2.0    | 1.4    | 1.0    | 4.0    | 5.1    | 5.5    | 5.5    | 1.7    |
| 15.3   | 11.1   | 15.5   | 7.2    | 11.0   | 6.3    | 13.9   | 10.7   | 16.8   |
| 1.0    | 1.6    | 1.5    | 1.4    | 1.3    | 2.3    | 1.9    | 2.5    | 1.8    |
| 217.7  | 195.3  | 284.8  | 196.8  | 205.9  | 238.5  | 219.2  | 287.4  | 298.0  |
| 4.8    | 4.8    | 4.8    | 6.4    | 16.3   | 10.2   | 17.3   | 20.7   | 7.1    |
| 7.6    | 14.3   | 7.2    | 11.2   | 23.1   | 20.0   | 23.5   | 21.2   | 22.6   |
| 1.8    | 1.7    | 1.9    | 2.3    | 1.3    | 1.1    | 1.2    | 1.2    | 3.0    |
| 1.6    | 0.9    | 1.9    | 2.1    | 2.0    | 2.2    | 4.4    | 4.0    | 1.5    |
| 1.9    | 1.6    | 2.2    | 1.6    | 1.7    | 1.7    | 2.9    | 1.9    | 1.8    |
| 2.3    | 3.5    | 2.6    | 4.6    | 142.8  | 103.4  | 140.6  | 155.2  | 89.8   |
| 1.2    | 0.8    | 3.3    | 3.0    | 1.4    | 1.2    | 4.4    | 3.0    | 7.3    |
| 16.7   | 15.0   | 17.1   | 12.8   | 15.8   | 10.1   | 11.8   | 13.7   | 14.1   |
| 59.4   | 42.3   | 63.2   | 40.7   | 134.8  | 170.7  | 130.1  | 139.9  | 248.8  |
| 29.8   | 26.3   | 37.3   | 30.1   | 48.3   | 45.9   | 50.8   | 49.7   | 44.7   |
| 6.4    | 9.2    | 9.7    | 8.7    | 14.0   | 9.2    | 9.7    | 20.6   | 12.1   |
| 33.2   | 32.0   | 23.7   | 23.0   | 3.6    | 10.5   | 1.2    | 17.7   | 4.5    |
| 5.3    | 4.7    | 11.3   | 4.1    | 5.3    | 4.6    | 4.7    | 2.9    | 7.4    |
| 1.2    | 1.5    | 1.6    | 1.6    | 2.0    | 1.5    | 2.9    | 1.3    | 10.6   |
| 25.9   | 25.8   | 42.1   | 14.1   | 177.9  | 147.0  | 131.9  | 159.2  | 90.5   |
| 142.0  | 140.5  | 173.8  | 123.6  | 75.1   | 59.5   | 87.9   | 92.8   | 153.5  |
| 293.8  | 337.7  | 289.5  | 264.4  | 319.8  | 621.7  | 390.6  | 378.0  | 1263.9 |
| 214.5  | 229.7  | 203.7  | 157.7  | 269.6  | 220.6  | 300.4  | 257.0  | 241.8  |
| 22.3   | 15.5   | 30.2   | 10.2   | 21.2   | 22.5   | 18.2   | 32.4   | 38.6   |
| 39.9   | 29.4   | 155.5  | 63.5   | 34.9   | 10.5   | 33.3   | 34.5   | 10.1   |
| 1898.0 | 1696.6 | 2524.6 | 1676.3 | 2317.7 | 1802.7 | 2195.5 | 2675.2 | 2541.3 |
| 0.9    | 1.0    | 3.3    | 5.4    | 5.0    | 3.4    | 3.8    | 0.9    | 8.2    |
| 3.2    | 9.1    | 5.8    | 5.1    | 2.2    | 1.0    | 2.6    | 13.2   | 12.9   |
| 1.5    | 1.4    | 1.8    | 2.2    | 1.3    | 3.0    | 2.0    | 1.2    | 2.8    |
| 1.6    | 1.1    | 1.6    | 2.1    | 30.7   | 29.7   | 12.2   | 13.2   | 4.8    |
| 7.2    | 3.6    | 11.8   | 5.9    | 2.1    | 1.0    | 5.6    | 6.1    | 11.6   |
| 0.6    | 1.1    | 1.4    | 0.7    | 1.4    | 1.3    | 1.4    | 1.8    | 1.0    |
| 29.2   | 29.9   | 42.4   | 20.2   | 23.6   | 21.7   | 16.2   | 27.0   | 25.3   |
| 27.4   | 24.7   | 30.1   | 15.2   | 5.1    | 8.1    | 3.6    | 14.0   | 4.7    |
| 1.1    | 0.8    | 1.6    | 0.5    | 2.7    | 0.5    | 0.6    | 0.9    | 0.7    |
| 92.5   | 102.6  | 105.9  | 93.8   | 73.4   | 89.2   | 72.7   | 84.5   | 61.0   |
| 1.6    | 1.7    | 0.9    | 0.7    | 0.9    | 2.1    | 5.9    | 4.9    | 6.0    |
| 20.4   | 24.4   | 20.1   | 10.5   | 7.3    | 9.0    | 8.9    | 13.3   | 13.5   |
| 4.8    | 3.7    | 4.1    | 3.3    | 15.3   | 18.3   | 33.9   | 23.1   | 7.0    |
| 5.4    | 2.9    | 12.9   | 3.5    | 2.8    | 8.8    | 9.9    | 9.9    | 8.4    |
| 12.5   | 19.4   | 25.3   | 22.3   | 6.6    | 8.2    | 7.6    | 12.3   | 6.5    |
| 41.7   | 37.9   | 52.1   | 39.0   | 16.6   | 23.8   | 20.9   | 30.3   | 39.3   |
| 1.3    | 1.8    | 1.8    | 1.4    | 1.3    | 1.0    | 1.1    | 0.9    | 1.8    |
| 30.7   | 42.4   | 8.3    | 27.3   | 65.4   | 54.7   | 41.8   | 98.1   | 49.9   |
| 149.6  | 142.4  | 199.2  | 161.5  | 343.0  | 397.6  | 366.7  | 356.4  | 201.7  |
| 3.1    | 4.3    | 3.8    | 5.4    | 7.5    | 3.2    | 3.1    | 2.4    | 67.3   |
| 13.3   | 10.0   | 11.5   | 9.1    | 5.8    | 2.3    | 11.8   | 3.8    | 2.9    |

|        |        |        |        |        |        |        |        |        |
|--------|--------|--------|--------|--------|--------|--------|--------|--------|
| 3.7    | 4.6    | 1.4    | 7.0    | 1.2    | 0.5    | 0.8    | 6.3    | 1.0    |
| 3.0    | 2.6    | 2.1    | 1.7    | 3.1    | 2.1    | 1.8    | 3.5    | 4.0    |
| 209.9  | 217.4  | 228.1  | 192.3  | 565.9  | 418.7  | 667.4  | 635.2  | 564.3  |
| 2.5    | 8.2    | 6.3    | 3.8    | 5.4    | 3.6    | 1.1    | 1.5    | 6.9    |
| 7.0    | 1.9    | 5.8    | 4.9    | 8.9    | 5.5    | 2.6    | 6.9    | 1.8    |
| 9.5    | 5.9    | 9.5    | 5.3    | 3.1    | 2.4    | 3.4    | 3.0    | 9.5    |
| 3.6    | 2.0    | 1.8    | 1.3    | 2.8    | 4.3    | 1.0    | 6.0    | 2.0    |
| 86.2   | 88.5   | 99.0   | 65.8   | 46.2   | 45.9   | 55.9   | 70.2   | 136.0  |
| 10.8   | 13.1   | 15.8   | 15.0   | 9.3    | 11.5   | 5.5    | 14.8   | 10.5   |
| 4360.7 | 4497.7 | 4315.2 | 4180.7 | 1314.5 | 1061.0 | 1273.2 | 1546.8 | 1341.2 |
| 1.0    | 1.3    | 1.6    | 1.4    | 0.9    | 0.9    | 0.8    | 1.0    | 1.5    |
| 544.9  | 527.0  | 505.5  | 478.1  | 379.1  | 304.3  | 479.7  | 477.1  | 187.9  |
| 9.6    | 5.2    | 4.8    | 8.3    | 12.4   | 6.7    | 2.9    | 2.7    | 3.3    |
| 8.3    | 2.3    | 8.6    | 10.6   | 1.8    | 3.5    | 9.4    | 2.2    | 12.4   |
| 8.5    | 12.1   | 8.1    | 7.9    | 25.9   | 25.3   | 35.2   | 39.7   | 8.8    |
| 4.1    | 4.7    | 5.5    | 8.0    | 0.5    | 3.2    | 1.6    | 0.8    | 1.6    |
| 3.1    | 2.7    | 8.0    | 4.1    | 3.0    | 3.9    | 5.6    | 1.6    | 6.8    |
| 0.6    | 0.3    | 1.4    | 1.2    | 0.5    | 1.0    | 0.4    | 0.8    | 1.7    |
| 8.1    | 6.7    | 3.4    | 5.6    | 5.7    | 13.5   | 13.0   | 12.3   | 32.6   |
| 208.6  | 145.4  | 259.6  | 143.5  | 145.4  | 112.2  | 159.0  | 128.9  | 326.7  |
| 23.2   | 24.8   | 19.3   | 18.8   | 24.8   | 22.3   | 23.6   | 34.6   | 6.5    |
| 17.5   | 17.0   | 14.7   | 13.5   | 25.3   | 24.6   | 22.2   | 34.1   | 16.0   |
| 250.2  | 236.7  | 322.6  | 246.7  | 307.9  | 297.4  | 252.1  | 327.9  | 237.3  |
| 7.5    | 2.1    | 10.1   | 4.6    | 3.7    | 2.9    | 4.2    | 6.9    | 15.3   |
| 1.0    | 2.5    | 3.4    | 1.9    | 3.2    | 4.9    | 1.8    | 1.0    | 3.0    |
| 6.4    | 14.1   | 19.0   | 1.2    | 6.0    | 8.3    | 9.4    | 3.6    | 7.6    |
| 325.5  | 272.6  | 326.3  | 233.8  | 394.2  | 382.9  | 393.0  | 385.3  | 678.7  |
| 25.0   | 27.3   | 27.2   | 12.8   | 57.6   | 64.1   | 65.6   | 84.0   | 45.8   |
| 11.3   | 19.1   | 12.9   | 7.1    | 7.3    | 5.7    | 11.5   | 19.5   | 8.6    |
| 8.8    | 6.2    | 20.7   | 9.2    | 35.0   | 13.1   | 61.0   | 53.5   | 16.7   |
| 2.9    | 1.2    | 3.5    | 3.7    | 15.0   | 10.6   | 10.3   | 9.7    | 9.0    |
| 18.7   | 26.1   | 31.2   | 25.3   | 13.8   | 13.6   | 12.8   | 21.6   | 32.0   |
| 80.1   | 59.2   | 64.1   | 61.5   | 28.1   | 21.8   | 24.7   | 31.4   | 19.1   |
| 9.8    | 14.4   | 18.3   | 10.1   | 11.0   | 15.5   | 4.1    | 23.6   | 19.8   |
| 2.4    | 5.4    | 1.1    | 1.5    | 1.8    | 0.8    | 1.2    | 2.3    | 2.3    |
| 67.6   | 39.8   | 122.5  | 45.4   | 291.5  | 214.5  | 267.7  | 310.9  | 357.2  |
| 0.7    | 0.5    | 0.8    | 0.8    | 1.2    | 1.0    | 0.7    | 0.6    | 1.3    |
| 1.9    | 0.9    | 3.2    | 5.0    | 2.3    | 5.7    | 5.9    | 8.5    | 2.0    |
| 66.6   | 62.6   | 68.6   | 47.6   | 48.6   | 67.1   | 43.4   | 53.0   | 81.4   |
| 9.8    | 12.3   | 5.6    | 8.6    | 7.8    | 8.9    | 13.9   | 10.1   | 14.4   |
| 14.2   | 11.6   | 14.0   | 13.0   | 10.3   | 6.9    | 12.0   | 15.7   | 16.8   |
| 23.2   | 16.8   | 16.9   | 16.9   | 1.5    | 3.6    | 4.7    | 9.1    | 7.2    |
| 1.4    | 1.6    | 2.6    | 1.2    | 1.7    | 0.7    | 1.8    | 1.5    | 3.1    |
| 8.6    | 6.1    | 15.8   | 12.4   | 10.3   | 2.1    | 4.3    | 8.4    | 9.5    |
| 32.4   | 28.6   | 39.7   | 32.8   | 88.7   | 119.3  | 99.5   | 105.6  | 64.7   |
| 11.1   | 5.0    | 7.0    | 7.5    | 17.2   | 9.8    | 20.7   | 35.0   | 34.9   |
| 359.6  | 355.3  | 664.0  | 364.2  | 199.9  | 157.9  | 157.5  | 199.3  | 358.6  |
| 18.4   | 17.3   | 26.8   | 19.2   | 24.4   | 31.7   | 23.7   | 29.3   | 31.6   |
| 182.3  | 174.5  | 203.1  | 132.0  | 749.7  | 438.8  | 779.8  | 845.7  | 555.8  |
| 2.5    | 5.4    | 9.3    | 6.1    | 3.1    | 2.4    | 7.3    | 9.5    | 7.0    |
| 0.9    | 0.6    | 2.0    | 0.7    | 0.9    | 0.5    | 0.7    | 0.5    | 1.0    |
| 1.4    | 1.5    | 7.4    | 2.1    | 5.9    | 5.1    | 3.7    | 7.8    | 3.3    |
| 34.6   | 31.1   | 36.8   | 24.0   | 26.0   | 25.4   | 23.7   | 18.4   | 16.1   |

|       |       |       |       |       |       |       |       |       |
|-------|-------|-------|-------|-------|-------|-------|-------|-------|
| 48.6  | 48.9  | 66.7  | 37.9  | 40.9  | 32.3  | 28.6  | 42.7  | 63.6  |
| 79.3  | 80.8  | 107.9 | 83.1  | 344.6 | 295.4 | 327.1 | 352.0 | 438.8 |
| 17.8  | 19.5  | 4.9   | 6.9   | 57.4  | 79.7  | 63.2  | 64.1  | 11.3  |
| 6.6   | 6.7   | 9.8   | 3.3   | 4.8   | 7.0   | 2.8   | 3.3   | 5.3   |
| 176.2 | 163.7 | 215.7 | 126.6 | 425.4 | 616.7 | 498.8 | 537.3 | 106.0 |
| 7.1   | 22.2  | 18.8  | 7.5   | 2.7   | 2.3   | 1.3   | 10.9  | 3.7   |
| 11.0  | 8.1   | 2.5   | 4.7   | 3.4   | 9.3   | 5.6   | 1.2   | 10.5  |
| 135.7 | 138.9 | 181.7 | 100.2 | 148.5 | 138.9 | 161.2 | 223.2 | 259.5 |
| 11.4  | 6.4   | 12.5  | 8.4   | 6.9   | 4.3   | 7.2   | 5.7   | 160.4 |
| 0.5   | 0.4   | 0.6   | 0.6   | 0.4   | 0.7   | 1.2   | 0.8   | 0.6   |
| 6.6   | 7.7   | 4.5   | 6.9   | 4.2   | 5.5   | 8.3   | 4.3   | 16.3  |
| 18.8  | 10.5  | 21.8  | 15.8  | 14.4  | 12.3  | 6.7   | 2.5   | 21.4  |
| 6.9   | 1.6   | 4.3   | 11.5  | 6.1   | 3.6   | 6.7   | 15.2  | 6.3   |
| 11.5  | 5.9   | 5.7   | 2.5   | 3.9   | 5.5   | 8.6   | 3.8   | 9.8   |
| 183.0 | 126.3 | 229.6 | 142.1 | 9.0   | 23.3  | 23.9  | 15.2  | 27.3  |
| 1.7   | 1.2   | 2.3   | 1.6   | 26.6  | 21.8  | 19.8  | 24.3  | 16.9  |
| 1.8   | 2.4   | 7.2   | 1.4   | 2.2   | 1.7   | 7.0   | 8.9   | 10.1  |
| 12.2  | 12.8  | 16.7  | 19.3  | 18.1  | 14.5  | 16.4  | 14.5  | 24.2  |
| 2.6   | 1.8   | 1.9   | 2.7   | 1.6   | 1.0   | 1.4   | 1.9   | 8.8   |
| 3.3   | 4.8   | 6.8   | 2.0   | 6.5   | 1.3   | 0.4   | 6.1   | 12.3  |
| 18.3  | 17.1  | 19.8  | 15.7  | 14.4  | 15.0  | 13.3  | 18.3  | 26.9  |
| 6.2   | 13.6  | 11.5  | 2.7   | 3.2   | 7.6   | 5.5   | 3.1   | 8.6   |
| 8.5   | 11.5  | 18.9  | 10.0  | 16.4  | 12.3  | 12.3  | 7.4   | 22.6  |
| 3.7   | 1.9   | 8.5   | 6.4   | 0.8   | 1.0   | 0.7   | 0.6   | 8.9   |
| 24.8  | 17.5  | 29.1  | 20.6  | 25.6  | 21.5  | 53.8  | 32.5  | 92.6  |
| 8.2   | 5.8   | 7.2   | 5.0   | 6.1   | 3.2   | 5.3   | 10.8  | 4.2   |
| 62.7  | 52.3  | 56.0  | 43.1  | 178.2 | 227.7 | 194.0 | 233.4 | 778.8 |
| 4.0   | 8.3   | 12.1  | 6.7   | 16.4  | 14.4  | 18.8  | 12.8  | 10.0  |
| 2.1   | 2.0   | 2.3   | 2.3   | 2.1   | 1.4   | 2.2   | 2.1   | 2.4   |
| 6.9   | 3.9   | 7.0   | 6.6   | 2.8   | 1.1   | 2.1   | 3.0   | 2.9   |
| 1.7   | 0.7   | 3.6   | 1.9   | 10.1  | 6.0   | 2.5   | 2.1   | 6.4   |
| 2.4   | 2.1   | 1.6   | 1.6   | 1.4   | 14.0  | 4.9   | 3.9   | 1.8   |
| 1.5   | 1.1   | 1.4   | 0.6   | 1.1   | 1.0   | 2.5   | 1.9   | 5.6   |
| 71.8  | 73.2  | 50.3  | 70.5  | 29.2  | 32.8  | 25.6  | 43.6  | 28.5  |
| 9.8   | 16.2  | 18.3  | 18.8  | 16.8  | 32.1  | 18.0  | 2.0   | 20.5  |
| 25.2  | 14.8  | 17.0  | 10.4  | 6.2   | 4.2   | 4.5   | 2.6   | 5.7   |
| 16.1  | 13.6  | 8.5   | 10.2  | 8.9   | 6.6   | 6.7   | 23.2  | 16.3  |
| 4.4   | 9.0   | 12.5  | 14.4  | 3.1   | 2.5   | 6.8   | 3.2   | 4.8   |
| 345.8 | 340.8 | 240.6 | 300.1 | 685.2 | 691.4 | 614.1 | 903.5 | 167.4 |
| 6.9   | 5.4   | 1.8   | 2.9   | 3.6   | 1.8   | 1.6   | 1.1   | 1.7   |
| 13.7  | 8.1   | 4.3   | 7.7   | 27.3  | 27.8  | 20.1  | 33.8  | 27.9  |
| 1.4   | 2.3   | 1.3   | 1.3   | 0.9   | 1.3   | 3.3   | 1.0   | 6.4   |
| 1.4   | 1.2   | 1.7   | 1.4   | 1.2   | 1.6   | 1.1   | 1.5   | 2.2   |
| 3.8   | 2.3   | 6.8   | 2.4   | 3.7   | 4.8   | 0.8   | 0.7   | 4.7   |
| 62.4  | 66.4  | 82.3  | 71.0  | 70.8  | 63.9  | 54.8  | 85.5  | 30.2  |
| 6.9   | 4.2   | 4.4   | 9.3   | 7.8   | 13.9  | 13.7  | 11.3  | 18.3  |
| 46.4  | 48.4  | 14.9  | 46.7  | 2.5   | 3.9   | 3.7   | 4.0   | 0.5   |
| 33.6  | 26.2  | 26.7  | 21.5  | 70.5  | 50.6  | 105.9 | 75.6  | 182.8 |
| 0.8   | 0.9   | 1.3   | 0.7   | 0.9   | 0.3   | 2.9   | 0.4   | 6.3   |
| 5.8   | 9.3   | 10.9  | 6.5   | 3.7   | 5.8   | 5.1   | 2.4   | 9.9   |
| 75.1  | 79.0  | 161.0 | 78.8  | 98.6  | 94.3  | 94.4  | 82.4  | 2.1   |
| 255.1 | 302.5 | 168.4 | 204.0 | 222.6 | 383.2 | 299.2 | 294.3 | 257.1 |
| 2.3   | 2.4   | 1.9   | 1.4   | 19.9  | 3.6   | 30.1  | 35.6  | 12.7  |

|        |        |        |        |        |        |        |        |        |
|--------|--------|--------|--------|--------|--------|--------|--------|--------|
| 25.9   | 29.0   | 41.2   | 35.7   | 3.4    | 15.0   | 20.4   | 18.5   | 28.7   |
| 10.2   | 13.9   | 15.9   | 7.9    | 14.5   | 7.8    | 6.4    | 26.6   | 27.2   |
| 1.5    | 1.6    | 3.1    | 1.9    | 2.0    | 1.3    | 1.5    | 3.7    | 2.5    |
| 5.0    | 3.4    | 0.9    | 0.3    | 3.4    | 0.4    | 0.9    | 4.0    | 6.8    |
| 14.9   | 8.0    | 11.6   | 3.4    | 12.6   | 9.2    | 11.7   | 16.5   | 9.6    |
| 1.9    | 1.1    | 1.9    | 1.0    | 161.4  | 190.7  | 182.1  | 148.3  | 394.5  |
| 75.9   | 44.8   | 130.0  | 43.0   | 186.8  | 125.2  | 163.3  | 203.8  | 197.8  |
| 5.7    | 7.0    | 9.7    | 3.2    | 10.5   | 16.3   | 5.9    | 8.7    | 1.5    |
| 0.6    | 2.5    | 2.1    | 1.2    | 1.7    | 3.0    | 4.7    | 3.2    | 8.3    |
| 5.9    | 9.9    | 15.5   | 10.0   | 9.3    | 6.4    | 2.7    | 9.6    | 9.4    |
| 18.4   | 20.1   | 26.9   | 19.3   | 17.0   | 15.9   | 16.8   | 24.0   | 13.8   |
| 5.4    | 1.2    | 3.8    | 3.6    | 0.9    | 2.4    | 1.5    | 2.6    | 1.8    |
| 3284.4 | 3271.7 | 2996.8 | 2811.1 | 4770.8 | 4475.3 | 4810.7 | 4939.5 | 7118.1 |
| 2.5    | 7.9    | 8.7    | 4.2    | 4.5    | 8.5    | 2.1    | 12.2   | 3.9    |
| 3.0    | 7.6    | 8.3    | 7.7    | 11.0   | 14.2   | 4.1    | 3.7    | 9.9    |
| 13.9   | 11.7   | 17.0   | 10.5   | 5.2    | 8.3    | 6.7    | 10.1   | 9.8    |
| 11.2   | 10.1   | 11.7   | 9.9    | 2.2    | 5.1    | 3.8    | 0.6    | 7.4    |
| 2.0    | 4.3    | 2.5    | 1.7    | 9.0    | 8.5    | 3.6    | 2.1    | 7.9    |
| 174.5  | 180.3  | 124.7  | 148.3  | 218.0  | 235.3  | 178.8  | 320.7  | 28.0   |
| 8.1    | 13.9   | 4.9    | 3.9    | 14.8   | 6.3    | 10.8   | 13.6   | 11.7   |
| 1.3    | 3.0    | 2.1    | 0.7    | 0.5    | 1.8    | 1.6    | 6.3    | 2.1    |
| 7.2    | 10.0   | 6.7    | 17.7   | 4.9    | 1.4    | 4.5    | 8.9    | 8.9    |
| 382.1  | 386.4  | 349.4  | 345.7  | 872.1  | 840.3  | 813.6  | 1034.0 | 191.9  |
| 2.0    | 1.7    | 2.0    | 1.5    | 40.3   | 36.1   | 23.9   | 58.7   | 7.2    |
| 2.6    | 2.1    | 5.0    | 1.7    | 0.7    | 3.3    | 4.0    | 0.9    | 3.6    |
| 13.6   | 17.1   | 23.3   | 3.0    | 32.4   | 14.4   | 50.1   | 31.2   | 4.5    |
| 2.5    | 5.0    | 2.9    | 2.8    | 1.9    | 3.7    | 1.5    | 5.0    | 9.6    |
| 2.3    | 2.2    | 3.7    | 2.6    | 2.5    | 3.1    | 3.1    | 3.7    | 3.5    |
| 1.0    | 1.0    | 4.3    | 1.2    | 1.3    | 0.9    | 0.8    | 1.9    | 1.7    |
| 15.6   | 18.8   | 9.3    | 11.2   | 5.8    | 38.5   | 13.0   | 21.8   | 2.8    |
| 2.0    | 4.1    | 7.8    | 3.8    | 17.9   | 11.4   | 12.7   | 17.9   | 13.1   |
| 19.3   | 12.5   | 24.2   | 12.8   | 10.5   | 7.5    | 12.0   | 13.6   | 1.1    |
| 1.2    | 1.3    | 1.5    | 1.5    | 0.7    | 0.8    | 1.0    | 0.7    | 1.3    |
| 0.9    | 1.1    | 2.4    | 1.5    | 5.7    | 1.1    | 1.1    | 2.1    | 1.9    |
| 6.0    | 8.1    | 9.7    | 7.0    | 13.3   | 19.5   | 12.3   | 16.2   | 686.9  |
| 2547.7 | 2330.3 | 1817.9 | 2142.0 | 1499.3 | 1657.9 | 1746.2 | 1759.9 | 1819.2 |
| 70.1   | 47.8   | 100.9  | 53.7   | 139.1  | 97.1   | 139.4  | 136.7  | 251.5  |
| 6.5    | 7.3    | 5.2    | 3.6    | 8.2    | 8.9    | 7.3    | 1.7    | 11.8   |
| 2.8    | 1.9    | 2.4    | 6.4    | 1.2    | 3.9    | 3.5    | 5.9    | 6.3    |
| 8.9    | 8.2    | 2.6    | 7.5    | 9.0    | 9.3    | 4.8    | 9.6    | 15.8   |
| 1.1    | 1.6    | 1.7    | 4.8    | 5.6    | 7.5    | 1.2    | 4.3    | 3.6    |
| 528.9  | 573.3  | 299.2  | 394.3  | 716.2  | 696.7  | 561.6  | 824.6  | 80.6   |
| 8.5    | 9.1    | 8.3    | 14.4   | 24.8   | 27.4   | 31.5   | 22.6   | 3.0    |
| 2.3    | 6.6    | 5.1    | 3.6    | 4.3    | 1.7    | 5.6    | 2.3    | 4.5    |
| 938.3  | 818.4  | 1471.0 | 625.2  | 1226.6 | 663.9  | 1085.1 | 1517.8 | 1795.2 |
| 1.2    | 1.1    | 1.9    | 0.8    | 0.9    | 0.8    | 6.4    | 1.9    | 4.1    |
| 6.7    | 7.2    | 9.8    | 8.3    | 9.6    | 5.7    | 9.5    | 11.3   | 19.1   |
| 2.2    | 2.8    | 3.3    | 8.9    | 6.0    | 8.0    | 4.3    | 1.7    | 2.5    |
| 5.3    | 7.1    | 5.4    | 5.1    | 13.6   | 8.0    | 16.1   | 14.4   | 15.2   |
| 0.9    | 4.4    | 3.9    | 1.7    | 0.5    | 0.4    | 0.5    | 0.7    | 2.8    |
| 109.5  | 94.5   | 90.7   | 195.7  | 3.9    | 11.0   | 5.1    | 10.8   | 3.3    |
| 3.9    | 2.8    | 3.5    | 1.7    | 1.8    | 2.4    | 1.8    | 3.3    | 3.4    |
| 8.2    | 3.6    | 10.0   | 11.5   | 3.4    | 4.4    | 5.6    | 5.8    | 14.8   |

|        |        |        |       |        |        |        |        |        |
|--------|--------|--------|-------|--------|--------|--------|--------|--------|
| 9.5    | 2.7    | 4.3    | 11.4  | 11.0   | 10.6   | 8.1    | 7.4    | 17.9   |
| 2.9    | 1.4    | 1.9    | 1.8   | 1.1    | 1.7    | 1.0    | 0.8    | 3.0    |
| 4.4    | 7.9    | 2.6    | 1.3   | 7.8    | 2.2    | 6.1    | 4.3    | 5.0    |
| 2.9    | 2.1    | 4.2    | 1.3   | 15.5   | 20.9   | 7.5    | 17.6   | 3.1    |
| 1.9    | 2.7    | 6.4    | 3.6   | 11.0   | 12.9   | 4.3    | 14.3   | 1.0    |
| 1.1    | 2.6    | 7.5    | 8.7   | 4.9    | 8.9    | 5.3    | 1.5    | 21.0   |
| 1.0    | 6.3    | 1.8    | 7.1   | 3.8    | 5.0    | 6.2    | 0.9    | 7.7    |
| 6.4    | 3.1    | 6.6    | 7.6   | 7.8    | 10.6   | 7.0    | 19.2   | 21.6   |
| 1.3    | 0.6    | 0.6    | 0.5   | 0.8    | 0.6    | 1.5    | 4.6    | 1.1    |
| 0.7    | 0.5    | 2.9    | 2.1   | 13.5   | 11.7   | 11.2   | 4.5    | 19.8   |
| 22.0   | 17.2   | 35.0   | 11.8  | 4.8    | 11.7   | 8.8    | 15.4   | 21.0   |
| 6.3    | 11.0   | 9.3    | 7.8   | 14.8   | 1.9    | 6.3    | 9.1    | 15.7   |
| 9.2    | 5.5    | 9.9    | 6.3   | 8.8    | 2.7    | 8.5    | 3.8    | 11.8   |
| 2.6    | 1.2    | 6.5    | 2.4   | 1.5    | 0.7    | 0.6    | 1.4    | 1.1    |
| 6.1    | 4.6    | 1.4    | 3.4   | 2.0    | 0.8    | 9.9    | 11.5   | 6.4    |
| 19.5   | 14.9   | 16.7   | 9.7   | 16.5   | 11.0   | 12.8   | 15.1   | 14.0   |
| 1.3    | 0.8    | 1.8    | 0.7   | 3.3    | 0.6    | 0.7    | 1.8    | 0.9    |
| 10.4   | 10.9   | 9.1    | 5.3   | 7.8    | 5.4    | 5.8    | 4.4    | 9.1    |
| 13.5   | 8.0    | 17.0   | 10.6  | 16.2   | 16.1   | 12.7   | 19.5   | 15.1   |
| 4.8    | 10.8   | 15.5   | 3.3   | 9.8    | 1.9    | 10.4   | 11.5   | 27.1   |
| 13.3   | 13.4   | 20.4   | 14.4  | 17.4   | 7.4    | 16.5   | 26.0   | 36.2   |
| 1037.7 | 1023.5 | 934.5  | 990.1 | 2703.2 | 2495.2 | 2420.9 | 2971.7 | 416.5  |
| 44.8   | 38.3   | 35.8   | 32.8  | 39.8   | 40.3   | 29.5   | 39.6   | 45.6   |
| 527.7  | 464.0  | 1037.5 | 653.9 | 2120.6 | 2012.2 | 1305.1 | 1671.1 | 3243.8 |
| 0.9    | 2.9    | 1.1    | 0.5   | 0.6    | 0.6    | 0.4    | 1.8    | 1.6    |
| 82.3   | 94.6   | 84.8   | 78.7  | 111.0  | 107.3  | 79.2   | 129.4  | 103.8  |
| 2.3    | 2.4    | 6.3    | 8.4   | 3.0    | 8.5    | 2.6    | 19.2   | 7.6    |
| 10.0   | 9.0    | 16.1   | 11.6  | 12.1   | 12.4   | 10.4   | 19.1   | 16.6   |
| 3.6    | 1.8    | 5.1    | 2.4   | 3.0    | 2.7    | 4.6    | 9.2    | 18.0   |
| 16.2   | 8.0    | 21.2   | 18.0  | 10.1   | 12.1   | 16.5   | 14.4   | 12.5   |
| 7.9    | 13.7   | 14.2   | 14.2  | 11.1   | 7.4    | 6.2    | 8.3    | 11.8   |
| 1.3    | 1.3    | 1.1    | 2.4   | 0.4    | 0.5    | 0.5    | 0.5    | 0.6    |
| 2.3    | 1.8    | 4.3    | 1.6   | 1.0    | 1.9    | 2.3    | 2.1    | 3.1    |
| 14.3   | 17.1   | 19.9   | 18.7  | 7.9    | 7.2    | 9.4    | 6.7    | 23.2   |
| 6.0    | 8.2    | 7.5    | 6.6   | 5.6    | 5.5    | 7.1    | 3.9    | 4.1    |
| 14.0   | 8.5    | 14.3   | 11.4  | 1.6    | 3.9    | 12.2   | 15.3   | 14.2   |
| 6.7    | 2.9    | 9.4    | 6.6   | 10.7   | 4.2    | 3.9    | 14.2   | 4.1    |
| 100.1  | 91.5   | 112.5  | 94.7  | 134.2  | 205.5  | 113.9  | 160.7  | 108.4  |
| 51.4   | 53.9   | 10.6   | 14.6  | 398.8  | 325.6  | 639.6  | 693.9  | 11.4   |
| 16.8   | 6.1    | 9.2    | 9.1   | 5.7    | 2.5    | 6.4    | 13.3   | 15.9   |
| 887.0  | 698.3  | 1147.2 | 860.5 | 727.9  | 758.8  | 616.3  | 771.9  | 616.8  |
| 4.8    | 6.1    | 5.2    | 6.4   | 5.0    | 2.1    | 1.6    | 2.3    | 3.0    |
| 34.1   | 26.2   | 56.2   | 41.3  | 51.1   | 32.9   | 40.2   | 75.7   | 19.3   |
| 11.3   | 5.8    | 7.2    | 11.5  | 2.2    | 7.7    | 9.9    | 7.3    | 7.5    |
| 1.8    | 1.8    | 2.3    | 1.7   | 2.3    | 1.4    | 1.6    | 2.9    | 2.0    |
| 59.2   | 49.9   | 83.2   | 60.0  | 34.8   | 47.0   | 35.2   | 47.0   | 5.0    |
| 2.2    | 2.0    | 8.3    | 1.4   | 17.6   | 13.8   | 19.6   | 18.1   | 19.7   |
| 1.6    | 2.1    | 1.7    | 0.4   | 2.8    | 1.7    | 0.6    | 0.4    | 6.3    |
| 4.0    | 5.2    | 3.5    | 1.8   | 4.6    | 1.1    | 1.0    | 0.9    | 3.6    |
| 1.7    | 9.3    | 2.6    | 5.1   | 12.8   | 10.1   | 8.2    | 9.1    | 4.7    |
| 1.5    | 1.7    | 1.5    | 1.5   | 0.8    | 12.0   | 3.3    | 1.5    | 85.2   |
| 4.4    | 5.1    | 10.2   | 8.1   | 13.7   | 21.6   | 12.1   | 17.8   | 17.3   |
| 121.9  | 129.7  | 168.1  | 107.0 | 161.5  | 129.6  | 182.3  | 149.8  | 208.5  |

|        |        |        |        |        |        |        |        |         |
|--------|--------|--------|--------|--------|--------|--------|--------|---------|
| 1001.4 | 1066.1 | 908.5  | 865.8  | 667.8  | 654.1  | 652.4  | 742.6  | 514.1   |
| 1719.2 | 1736.4 | 1947.1 | 1835.9 | 2447.6 | 2493.0 | 2764.5 | 2914.4 | 2172.9  |
| 102.4  | 138.4  | 144.3  | 124.9  | 676.3  | 1089.2 | 881.4  | 671.7  | 106.5   |
| 146.0  | 162.4  | 164.0  | 170.7  | 828.6  | 1066.8 | 912.7  | 838.5  | 142.9   |
| 397.9  | 353.1  | 818.8  | 410.6  | 623.3  | 511.7  | 733.2  | 645.0  | 976.9   |
| 2032.9 | 1734.6 | 3427.8 | 1896.6 | 2942.3 | 3387.3 | 3231.5 | 3349.7 | 3105.3  |
| 678.5  | 554.5  | 1104.4 | 744.1  | 1135.6 | 898.3  | 1043.1 | 1188.1 | 1568.8  |
| 2149.8 | 2183.3 | 2666.0 | 2253.9 | 886.1  | 956.2  | 1074.9 | 1161.0 | 1576.8  |
| 1079.5 | 1058.2 | 1586.5 | 1006.7 | 2658.7 | 2686.0 | 2647.1 | 2927.9 | 2198.6  |
| 301.3  | 194.7  | 403.7  | 237.2  | 980.6  | 827.4  | 1025.4 | 1115.8 | 541.1   |
| 442.2  | 381.5  | 628.8  | 412.5  | 1427.0 | 1198.6 | 1432.6 | 1454.2 | 594.9   |
| 1015.8 | 936.8  | 1279.8 | 984.6  | 2101.9 | 1728.1 | 2109.2 | 2259.5 | 945.3   |
| 283.4  | 224.3  | 396.4  | 226.3  | 335.1  | 292.1  | 339.1  | 414.7  | 451.3   |
| 775.0  | 654.7  | 1266.3 | 777.6  | 1353.7 | 938.1  | 1249.1 | 1567.9 | 867.2   |
| 137.9  | 148.9  | 78.0   | 97.0   | 871.7  | 1322.8 | 1086.4 | 985.0  | 561.7   |
| 2207.6 | 1824.6 | 3323.9 | 2021.6 | 3707.0 | 3838.5 | 3768.7 | 4049.1 | 6705.1  |
| 3318.6 | 2857.8 | 4795.9 | 3004.9 | 4816.8 | 4872.2 | 4848.8 | 4929.9 | 7534.6  |
| 390.4  | 320.5  | 509.1  | 314.2  | 671.4  | 695.9  | 778.4  | 830.0  | 698.2   |
| 360.0  | 366.4  | 452.3  | 351.7  | 848.7  | 710.7  | 664.8  | 629.6  | 632.7   |
| 725.3  | 639.8  | 884.5  | 692.9  | 1047.2 | 1018.3 | 1049.3 | 1333.6 | 821.1   |
| 68.6   | 63.1   | 102.3  | 82.3   | 87.0   | 84.0   | 85.5   | 111.0  | 78.1    |
| 104.8  | 102.3  | 134.0  | 121.1  | 186.9  | 154.3  | 167.2  | 180.7  | 192.8   |
| 331.8  | 373.2  | 376.9  | 339.7  | 734.6  | 565.0  | 640.2  | 653.2  | 580.1   |
| 5058.7 | 4621.1 | 5943.4 | 5376.2 | 6910.3 | 7278.4 | 7267.6 | 7440.1 | 9428.0  |
| 1511.4 | 1446.6 | 1342.8 | 1046.3 | 2659.0 | 2812.7 | 3595.6 | 2839.1 | 2694.1  |
| 614.2  | 632.0  | 569.8  | 441.6  | 1487.9 | 1641.2 | 2186.6 | 1537.5 | 974.3   |
| 734.5  | 708.5  | 983.9  | 798.5  | 1668.1 | 1707.2 | 1908.8 | 1962.2 | 1833.4  |
| 864.7  | 823.4  | 960.9  | 873.9  | 2045.9 | 1830.1 | 2320.1 | 2463.4 | 2177.0  |
| 3377.9 | 3323.4 | 4265.2 | 3472.3 | 3210.1 | 3290.7 | 3238.5 | 3454.4 | 3313.0  |
| 3027.7 | 3167.6 | 3643.9 | 2907.4 | 2556.5 | 2881.8 | 2646.3 | 2815.2 | 2676.3  |
| 1231.1 | 1095.0 | 1906.1 | 1176.4 | 3177.1 | 2457.7 | 3012.0 | 3358.2 | 2934.2  |
| 1124.0 | 1046.5 | 1793.0 | 1187.1 | 1307.2 | 1049.3 | 1269.6 | 1485.8 | 1281.7  |
| 1359.7 | 1314.0 | 1661.3 | 1084.3 | 1031.7 | 707.7  | 951.2  | 1115.4 | 1274.9  |
| 7182.3 | 6921.1 | 7288.0 | 6690.1 | 8129.1 | 7912.1 | 7973.0 | 8113.7 | 10498.6 |
| 3697.0 | 3455.6 | 3570.9 | 3157.0 | 4493.8 | 4689.9 | 4697.1 | 4807.2 | 6571.1  |
| 1265.3 | 1029.3 | 1967.1 | 966.0  | 1904.3 | 1157.6 | 2107.1 | 2229.4 | 1026.6  |
| 1340.9 | 1213.6 | 1800.5 | 1303.8 | 623.9  | 424.5  | 556.5  | 712.9  | 752.6   |
| 3918.4 | 3444.7 | 4781.5 | 3770.1 | 1467.4 | 1125.0 | 1369.7 | 1653.5 | 1906.0  |
| 4796.4 | 4511.1 | 6172.8 | 4814.5 | 2273.5 | 1429.5 | 4012.7 | 4043.3 | 6.6     |
| 4639.3 | 4450.8 | 5601.1 | 4402.0 | 1737.3 | 931.5  | 2714.1 | 2950.1 | 10.8    |
| 1803.1 | 1766.1 | 1922.3 | 1447.8 | 2220.1 | 2063.4 | 2245.1 | 2463.7 | 2081.9  |
| 2022.7 | 1854.9 | 1824.0 | 1540.9 | 700.6  | 644.5  | 732.9  | 774.7  | 619.1   |
| 3120.3 | 3145.9 | 2929.3 | 2724.6 | 1190.2 | 1049.2 | 1182.1 | 1528.8 | 896.4   |
| 4703.2 | 4513.0 | 5232.6 | 4069.5 | 1530.3 | 1619.2 | 1557.4 | 1768.0 | 991.9   |
| 5308.8 | 5161.1 | 5332.7 | 4675.8 | 1494.7 | 1917.7 | 1442.6 | 1559.8 | 781.9   |
| 106.0  | 108.5  | 123.1  | 92.9   | 239.8  | 264.5  | 215.5  | 269.7  | 187.3   |
| 201.4  | 199.6  | 426.7  | 242.3  | 445.4  | 404.1  | 428.5  | 460.0  | 194.3   |
| 2020.3 | 1816.3 | 2272.5 | 1855.3 | 3393.5 | 3539.9 | 3375.5 | 3517.5 | 2324.0  |
| 1551.2 | 1300.9 | 2380.5 | 1578.4 | 1263.5 | 1031.8 | 1227.4 | 1610.0 | 1672.8  |
| 663.3  | 592.8  | 880.8  | 683.1  | 391.0  | 429.1  | 524.9  | 541.8  | 177.6   |
| 1162.4 | 1047.1 | 1517.8 | 1170.9 | 806.8  | 867.7  | 1002.7 | 1015.7 | 307.7   |
| 196.9  | 166.1  | 266.5  | 174.6  | 203.2  | 266.4  | 327.5  | 263.8  | 84.1    |
| 129.2  | 99.3   | 194.9  | 137.3  | 104.7  | 157.5  | 126.8  | 162.2  | 44.1    |

|        |        |        |        |        |        |        |        |         |
|--------|--------|--------|--------|--------|--------|--------|--------|---------|
| 624.6  | 578.4  | 721.2  | 634.2  | 409.3  | 443.2  | 468.5  | 553.7  | 327.5   |
| 1112.0 | 1127.0 | 1361.2 | 1299.8 | 859.3  | 874.2  | 943.8  | 1078.2 | 787.7   |
| 4924.8 | 4498.1 | 5981.8 | 4678.3 | 4913.4 | 4708.9 | 4569.5 | 5029.5 | 7318.8  |
| 1084.8 | 1001.2 | 1104.5 | 957.9  | 1328.9 | 975.2  | 1189.1 | 1589.9 | 1794.4  |
| 226.9  | 168.4  | 243.7  | 211.8  | 465.2  | 326.6  | 480.3  | 560.5  | 535.9   |
| 1786.0 | 1842.6 | 1731.9 | 1732.8 | 1487.3 | 1359.5 | 1553.4 | 1776.1 | 915.3   |
| 1835.5 | 1345.1 | 3360.2 | 1758.2 | 3280.1 | 2286.1 | 3157.8 | 3622.6 | 4700.5  |
| 396.1  | 283.6  | 957.1  | 426.5  | 982.3  | 583.2  | 745.2  | 1043.1 | 1375.6  |
| 860.6  | 836.3  | 1044.6 | 930.9  | 1451.1 | 1535.5 | 1495.4 | 1610.9 | 1811.6  |
| 1378.3 | 1306.0 | 1520.2 | 1319.6 | 2308.6 | 2716.4 | 2363.3 | 2520.6 | 3452.8  |
| 435.4  | 357.2  | 648.4  | 389.8  | 1045.4 | 998.1  | 1042.5 | 1110.6 | 1616.2  |
| 697.3  | 634.9  | 1315.7 | 680.2  | 750.3  | 900.3  | 789.2  | 918.0  | 1766.1  |
| 454.5  | 468.5  | 652.4  | 550.6  | 927.2  | 923.5  | 1108.7 | 1049.8 | 1122.5  |
| 2215.3 | 1924.7 | 2900.1 | 1969.4 | 3559.2 | 3427.2 | 3980.4 | 3775.9 | 3393.9  |
| 4162.3 | 3648.3 | 5188.0 | 3541.8 | 5176.0 | 4366.9 | 4763.1 | 5941.2 | 8121.1  |
| 1244.5 | 1329.1 | 1308.4 | 1722.9 | 549.2  | 668.5  | 659.7  | 639.9  | 160.4   |
| 1349.7 | 1502.4 | 1247.0 | 1003.3 | 3669.6 | 3218.0 | 3990.6 | 3860.4 | 3648.1  |
| 1081.5 | 1040.5 | 1402.5 | 1081.4 | 1095.4 | 1445.6 | 1357.2 | 1340.6 | 1096.2  |
| 561.1  | 555.3  | 662.1  | 507.6  | 495.6  | 453.2  | 497.5  | 599.0  | 386.3   |
| 545.2  | 513.2  | 582.7  | 499.8  | 478.9  | 452.3  | 442.3  | 539.1  | 266.4   |
| 6318.0 | 5087.4 | 9450.2 | 6572.8 | 8133.6 | 6192.3 | 7978.9 | 8784.2 | 11136.6 |
| 1517.4 | 1535.1 | 2401.8 | 1664.5 | 2538.2 | 2410.6 | 2547.4 | 2808.9 | 1876.0  |
| 806.9  | 742.1  | 1458.9 | 839.4  | 1888.2 | 2229.8 | 2080.5 | 2224.6 | 2463.9  |
| 1363.4 | 1652.0 | 1090.7 | 1294.5 | 2020.8 | 1854.9 | 2584.5 | 2398.6 | 300.2   |
| 3190.5 | 2378.3 | 5229.9 | 3298.8 | 2703.0 | 2245.2 | 2990.9 | 3247.9 | 5193.0  |
| 7960.9 | 7405.1 | 8879.2 | 7502.6 | 6625.3 | 6900.6 | 6656.5 | 7219.5 | 10061.6 |
| 982.7  | 892.7  | 1921.4 | 1319.5 | 1973.5 | 3250.6 | 2237.7 | 2167.1 | 1643.6  |
| 546.1  | 438.0  | 940.4  | 470.4  | 1602.4 | 1580.1 | 1495.1 | 1708.6 | 1039.2  |
| 7645.9 | 7653.1 | 8091.3 | 7774.7 | 7735.5 | 8007.6 | 8387.6 | 8256.7 | 11980.3 |
| 2101.1 | 1717.6 | 3656.1 | 2021.6 | 5171.6 | 4391.8 | 5010.2 | 5127.2 | 5085.8  |
| 1988.1 | 1968.6 | 2529.1 | 2149.7 | 3955.8 | 3830.4 | 4193.4 | 4238.3 | 4316.0  |
| 957.5  | 879.4  | 1196.8 | 948.8  | 1522.1 | 1309.6 | 1528.5 | 1868.9 | 2646.2  |
| 925.5  | 895.6  | 1614.7 | 926.7  | 2407.5 | 1855.3 | 2617.8 | 2903.7 | 2886.5  |
| 1611.2 | 1548.8 | 2471.8 | 1570.1 | 4025.5 | 2958.9 | 4511.1 | 4732.2 | 5161.7  |
| 42.2   | 34.7   | 51.1   | 33.6   | 51.2   | 39.9   | 51.5   | 50.3   | 27.7    |
| 1440.2 | 1474.9 | 1682.7 | 1415.6 | 1204.3 | 1383.9 | 1129.7 | 1288.2 | 592.2   |
| 1224.3 | 1204.8 | 1569.3 | 1211.9 | 952.6  | 1072.9 | 872.1  | 1093.7 | 356.0   |
| 1835.6 | 1915.0 | 2283.2 | 2003.6 | 1567.1 | 1783.3 | 1560.4 | 1832.7 | 611.5   |
| 1744.4 | 1511.5 | 1990.6 | 1297.2 | 1490.3 | 797.4  | 1511.1 | 1414.7 | 1338.3  |
| 931.8  | 822.7  | 1197.9 | 664.7  | 1023.4 | 626.8  | 976.9  | 1094.5 | 797.5   |
| 26.8   | 35.1   | 42.8   | 35.6   | 27.7   | 11.8   | 17.5   | 29.6   | 65.2    |
| 1107.2 | 966.5  | 1570.7 | 744.9  | 1047.4 | 635.6  | 990.3  | 1102.0 | 1131.2  |
| 649.6  | 605.7  | 852.1  | 629.6  | 1079.2 | 1092.8 | 1163.9 | 1260.9 | 624.0   |
| 57.3   | 66.9   | 104.3  | 58.4   | 116.6  | 177.0  | 181.5  | 114.7  | 122.6   |
| 202.7  | 171.6  | 342.8  | 141.5  | 429.1  | 414.1  | 409.0  | 411.5  | 2113.0  |
| 445.5  | 358.5  | 770.7  | 341.6  | 912.6  | 728.0  | 512.7  | 735.8  | 3414.6  |
| 1418.3 | 1342.5 | 1842.8 | 1399.5 | 1118.3 | 710.5  | 913.0  | 1222.8 | 1196.1  |
| 1712.3 | 1631.7 | 1897.8 | 1535.8 | 1583.8 | 1982.3 | 1640.4 | 1798.4 | 1996.6  |
| 4.9    | 9.3    | 1.7    | 6.6    | 290.8  | 260.5  | 291.1  | 377.1  | 469.2   |
| 1.3    | 2.4    | 2.5    | 1.1    | 1643.8 | 1522.2 | 1855.7 | 1993.5 | 2882.4  |
| 1193.1 | 1153.5 | 1287.0 | 1128.9 | 498.9  | 534.6  | 535.9  | 613.3  | 815.5   |
| 1986.9 | 2056.3 | 2161.3 | 2124.9 | 1538.5 | 2026.8 | 1664.4 | 1767.5 | 1531.4  |
| 632.2  | 580.2  | 648.2  | 471.9  | 32.3   | 38.9   | 37.3   | 35.9   | 573.6   |

|        |        |        |        |        |        |        |        |        |
|--------|--------|--------|--------|--------|--------|--------|--------|--------|
| 869.6  | 831.7  | 1101.3 | 850.1  | 879.3  | 645.3  | 804.7  | 898.8  | 1346.6 |
| 285.9  | 253.0  | 499.6  | 308.8  | 333.5  | 301.6  | 352.3  | 369.1  | 757.4  |
| 501.0  | 496.7  | 791.4  | 562.7  | 536.1  | 531.0  | 579.0  | 635.6  | 641.3  |
| 534.9  | 523.6  | 486.3  | 367.0  | 388.7  | 355.6  | 380.3  | 472.7  | 1045.6 |
| 3066.0 | 2787.3 | 4139.2 | 2811.3 | 4479.3 | 4039.6 | 4727.2 | 5024.3 | 4525.6 |
| 1.5    | 3.6    | 7.1    | 13.9   | 74.5   | 82.0   | 74.4   | 85.0   | 107.6  |
| 606.7  | 546.9  | 1044.9 | 671.1  | 2909.4 | 4021.0 | 3083.3 | 3215.0 | 3401.6 |
| 390.6  | 402.9  | 450.2  | 269.6  | 1673.5 | 1564.8 | 2597.0 | 2520.5 | 832.9  |
| 393.8  | 373.9  | 455.9  | 356.9  | 383.3  | 362.9  | 469.0  | 477.1  | 355.3  |
| 233.7  | 219.3  | 265.6  | 203.9  | 2301.7 | 2825.6 | 2288.8 | 2460.4 | 2008.6 |
| 59.4   | 61.4   | 106.1  | 57.2   | 69.4   | 62.3   | 70.0   | 85.5   | 81.1   |
| 1754.0 | 1545.3 | 2475.0 | 1989.3 | 1250.4 | 1219.4 | 1335.1 | 1433.2 | 949.7  |
| 451.1  | 429.1  | 573.8  | 527.1  | 248.1  | 208.3  | 272.3  | 269.3  | 181.6  |
| 35.3   | 44.8   | 44.8   | 49.3   | 25.6   | 19.7   | 16.5   | 18.7   | 18.3   |
| 906.6  | 824.4  | 1344.3 | 949.7  | 1008.5 | 1043.5 | 1307.5 | 1227.6 | 897.0  |
| 130.7  | 115.6  | 129.7  | 118.5  | 144.1  | 109.3  | 130.0  | 182.2  | 228.2  |
| 2669.6 | 2507.7 | 3045.2 | 2444.1 | 1980.0 | 2210.8 | 2227.7 | 2414.3 | 3004.6 |
| 2067.6 | 1984.0 | 2419.5 | 1983.7 | 1087.5 | 1256.8 | 1207.4 | 1287.0 | 1541.7 |
| 2141.5 | 2100.5 | 2553.3 | 1607.6 | 2436.8 | 1777.5 | 2366.4 | 2719.6 | 3066.8 |
| 1611.0 | 1547.3 | 1749.4 | 1207.9 | 2795.0 | 2255.0 | 2669.7 | 3118.9 | 3263.0 |
| 303.4  | 311.2  | 299.4  | 359.4  | 58.7   | 46.3   | 54.4   | 64.4   | 297.3  |
| 148.8  | 145.9  | 97.9   | 150.5  | 30.9   | 30.2   | 32.6   | 37.2   | 79.3   |
| 1758.7 | 1705.3 | 2271.9 | 1811.1 | 933.7  | 975.6  | 975.4  | 1008.2 | 3323.0 |
| 4992.3 | 4666.3 | 5470.6 | 5033.1 | 1639.8 | 1600.9 | 1962.6 | 1678.6 | 2357.7 |
| 509.4  | 390.4  | 856.4  | 536.3  | 888.7  | 639.8  | 898.9  | 1010.8 | 1324.1 |
| 279.8  | 247.2  | 332.5  | 270.2  | 321.8  | 234.5  | 275.3  | 372.0  | 451.9  |
| 2079.1 | 1662.0 | 2701.9 | 1865.1 | 3963.7 | 3867.9 | 3998.4 | 4352.4 | 5465.6 |
| 3.7    | 6.9    | 1.5    | 8.6    | 500.1  | 651.7  | 617.4  | 695.2  | 1.9    |
| 108.9  | 94.3   | 181.0  | 97.4   | 102.7  | 187.5  | 169.5  | 114.1  | 74.1   |
| 552.1  | 537.2  | 904.9  | 559.0  | 880.2  | 1041.8 | 924.3  | 898.2  | 482.2  |
| 1270.3 | 1156.1 | 2098.0 | 1411.7 | 1402.2 | 994.4  | 1322.0 | 1579.6 | 2044.6 |
| 302.4  | 276.8  | 433.0  | 317.9  | 366.3  | 373.0  | 365.8  | 386.2  | 319.0  |
| 1798.8 | 1878.1 | 1745.1 | 1771.5 | 3960.5 | 4341.7 | 4127.9 | 4303.2 | 4840.5 |
| 577.6  | 561.4  | 734.6  | 590.4  | 1032.8 | 739.1  | 969.0  | 1145.8 | 959.3  |
| 658.8  | 624.2  | 952.2  | 677.0  | 1478.9 | 1038.9 | 1368.5 | 1741.1 | 1631.0 |
| 7573.3 | 7328.7 | 7519.1 | 7325.5 | 4600.8 | 4352.8 | 4927.7 | 5121.0 | 7223.8 |
| 827.0  | 729.1  | 1235.4 | 770.2  | 1933.2 | 2289.8 | 1969.3 | 2050.6 | 4609.2 |
| 377.2  | 367.8  | 612.7  | 362.6  | 1152.2 | 1209.3 | 1136.5 | 1164.5 | 499.1  |
| 863.4  | 789.8  | 1128.6 | 802.1  | 1833.1 | 1594.6 | 1990.5 | 2017.7 | 1480.0 |
| 370.4  | 370.8  | 317.8  | 382.9  | 402.5  | 468.4  | 421.7  | 525.8  | 319.8  |
| 91.7   | 102.6  | 138.3  | 162.4  | 56.8   | 94.3   | 63.2   | 89.5   | 99.9   |
| 1040.2 | 989.4  | 1130.2 | 995.9  | 1315.5 | 1285.3 | 1398.1 | 1589.2 | 1395.0 |
| 122.1  | 125.1  | 176.0  | 126.4  | 127.5  | 104.2  | 117.9  | 172.0  | 135.0  |
| 510.6  | 434.7  | 581.8  | 479.8  | 129.4  | 324.9  | 180.8  | 176.5  | 41.1   |
| 1733.1 | 1612.9 | 2221.8 | 1786.3 | 1693.1 | 1673.0 | 1902.8 | 2053.2 | 3690.7 |
| 350.8  | 328.8  | 439.2  | 345.8  | 731.1  | 524.6  | 736.7  | 723.1  | 979.1  |
| 2163.6 | 1925.7 | 2892.1 | 1945.4 | 2829.2 | 2619.7 | 2971.8 | 3330.2 | 4239.9 |
| 3456.3 | 2674.6 | 3918.9 | 2896.3 | 3203.8 | 2861.8 | 3139.7 | 3462.3 | 2337.3 |
| 4155.2 | 3903.9 | 4722.2 | 3982.8 | 4829.7 | 4763.0 | 5197.8 | 5407.9 | 6721.5 |
| 54.9   | 45.1   | 99.9   | 43.9   | 48.8   | 36.6   | 37.4   | 64.2   | 48.3   |
| 256.2  | 226.6  | 490.6  | 195.9  | 191.0  | 240.8  | 201.8  | 287.3  | 230.5  |
| 558.9  | 567.0  | 442.6  | 584.5  | 680.2  | 692.9  | 766.4  | 766.7  | 943.7  |
| 216.1  | 170.9  | 176.1  | 167.4  | 166.3  | 162.4  | 179.5  | 196.9  | 125.8  |



|        |        |        |        |        |        |        |        |         |
|--------|--------|--------|--------|--------|--------|--------|--------|---------|
| 658.0  | 604.2  | 592.2  | 531.2  | 394.0  | 436.0  | 405.0  | 405.3  | 388.3   |
| 686.5  | 728.0  | 687.8  | 696.2  | 387.8  | 450.2  | 410.0  | 516.0  | 391.3   |
| 1653.0 | 1484.2 | 2652.9 | 1520.2 | 3325.7 | 2401.7 | 3149.5 | 3864.7 | 3304.8  |
| 22.5   | 26.8   | 49.3   | 33.1   | 106.1  | 51.9   | 79.6   | 137.4  | 119.0   |
| 1457.2 | 1285.1 | 2228.3 | 1554.1 | 2185.2 | 1711.0 | 2079.7 | 2336.7 | 2542.1  |
| 1017.8 | 870.2  | 1948.9 | 1060.4 | 2650.7 | 2254.0 | 2725.5 | 2842.8 | 2804.5  |
| 965.8  | 1068.7 | 845.3  | 968.9  | 184.3  | 177.4  | 256.7  | 217.9  | 262.8   |
| 2814.6 | 2722.6 | 4457.2 | 3074.3 | 2936.2 | 2633.1 | 2920.5 | 3412.8 | 2190.9  |
| 1076.3 | 911.4  | 1496.1 | 855.7  | 1658.7 | 1492.1 | 1660.5 | 1790.0 | 1383.1  |
| 260.2  | 320.0  | 48.4   | 77.5   | 1748.1 | 1602.4 | 1999.4 | 1896.1 | 23.3    |
| 968.8  | 895.6  | 1414.0 | 901.6  | 859.3  | 835.1  | 996.7  | 1038.6 | 1044.4  |
| 308.5  | 339.5  | 310.4  | 278.6  | 461.7  | 385.1  | 534.7  | 561.4  | 506.9   |
| 571.3  | 591.6  | 470.9  | 442.0  | 1331.4 | 2501.4 | 1392.2 | 1519.2 | 830.4   |
| 659.3  | 595.0  | 502.1  | 511.2  | 1365.2 | 2632.9 | 1277.0 | 1459.0 | 931.0   |
| 2215.9 | 1948.1 | 3919.5 | 2351.0 | 3353.0 | 3220.9 | 3660.5 | 3759.7 | 4277.3  |
| 2359.8 | 2302.5 | 2804.1 | 2247.4 | 2106.2 | 1759.3 | 2422.6 | 2524.6 | 1556.0  |
| 2.0    | 1.8    | 2.5    | 2.4    | 1828.1 | 1717.8 | 2048.8 | 2187.0 | 981.0   |
| 3.7    | 10.2   | 10.0   | 3.3    | 341.1  | 327.2  | 401.7  | 372.8  | 213.6   |
| 1390.8 | 1539.2 | 1653.5 | 1749.0 | 377.2  | 387.4  | 329.5  | 465.9  | 71.3    |
| 1578.1 | 1710.6 | 1713.3 | 1991.2 | 384.8  | 389.0  | 325.5  | 441.1  | 78.5    |
| 244.7  | 211.8  | 426.2  | 250.3  | 182.0  | 163.3  | 141.4  | 172.6  | 238.2   |
| 1164.1 | 982.2  | 1825.6 | 1148.3 | 791.4  | 670.7  | 788.5  | 871.5  | 1279.9  |
| 343.8  | 372.0  | 939.7  | 306.4  | 1534.7 | 1047.5 | 1355.2 | 1597.2 | 1224.6  |
| 774.0  | 772.2  | 847.6  | 653.1  | 1635.8 | 1414.5 | 1843.8 | 1932.2 | 1737.5  |
| 17.9   | 23.3   | 13.2   | 17.7   | 2.9    | 12.5   | 7.4    | 7.2    | 26.5    |
| 222.5  | 260.0  | 153.4  | 222.4  | 33.2   | 43.8   | 25.9   | 27.4   | 222.1   |
| 1971.2 | 1787.3 | 2514.9 | 1760.1 | 1564.6 | 1360.4 | 1734.2 | 1733.3 | 2157.2  |
| 512.5  | 468.5  | 905.6  | 559.1  | 762.9  | 771.9  | 712.2  | 825.9  | 635.5   |
| 984.8  | 868.0  | 1691.7 | 1074.3 | 1554.8 | 1334.9 | 1490.0 | 1731.0 | 2286.5  |
| 303.6  | 285.3  | 406.7  | 336.0  | 496.1  | 456.0  | 482.5  | 548.5  | 394.1   |
| 252.7  | 231.4  | 458.4  | 288.7  | 317.6  | 274.3  | 272.3  | 386.0  | 327.8   |
| 379.8  | 342.2  | 585.0  | 460.5  | 659.2  | 368.6  | 551.0  | 646.5  | 1187.9  |
| 3741.6 | 3329.1 | 4675.9 | 3476.5 | 2767.4 | 3159.5 | 3293.8 | 3355.3 | 4558.6  |
| 85.0   | 74.8   | 186.3  | 148.6  | 90.5   | 77.9   | 84.1   | 88.2   | 13.0    |
| 329.5  | 284.5  | 511.7  | 518.6  | 297.3  | 298.7  | 292.2  | 355.5  | 98.7    |
| 1590.3 | 1769.7 | 2784.8 | 1472.3 | 2728.8 | 1862.6 | 2296.6 | 2990.4 | 2958.8  |
| 1147.7 | 1101.7 | 1469.1 | 1021.9 | 1155.5 | 1285.5 | 1162.9 | 1402.0 | 626.4   |
| 556.5  | 558.6  | 938.8  | 574.3  | 474.8  | 348.9  | 429.1  | 477.2  | 1007.8  |
| 439.8  | 396.3  | 760.6  | 501.4  | 663.1  | 721.8  | 607.7  | 593.9  | 1108.0  |
| 1857.6 | 1465.9 | 1773.7 | 1384.3 | 4250.0 | 5240.3 | 4661.9 | 4773.9 | 3835.3  |
| 351.0  | 301.6  | 487.4  | 329.8  | 562.9  | 719.9  | 495.2  | 628.2  | 485.1   |
| 73.4   | 74.7   | 147.0  | 79.7   | 127.9  | 82.6   | 205.6  | 182.9  | 146.0   |
| 439.4  | 375.8  | 663.4  | 426.9  | 1377.4 | 1045.4 | 1547.8 | 1400.0 | 1547.1  |
| 478.0  | 550.8  | 771.1  | 476.7  | 3734.2 | 2715.3 | 3920.0 | 4477.2 | 2207.8  |
| 613.5  | 499.9  | 1074.3 | 685.2  | 354.9  | 568.0  | 381.6  | 440.3  | 371.3   |
| 1247.0 | 969.9  | 2007.6 | 1308.6 | 742.9  | 1036.7 | 841.4  | 889.6  | 645.6   |
| 386.8  | 337.2  | 611.1  | 430.4  | 601.4  | 500.6  | 586.7  | 651.3  | 1071.3  |
| 904.0  | 954.4  | 993.5  | 943.6  | 664.9  | 617.7  | 610.8  | 761.0  | 383.7   |
| 1545.2 | 1351.0 | 2568.5 | 1444.0 | 2192.0 | 2214.5 | 2107.8 | 2182.3 | 3918.9  |
| 814.7  | 766.1  | 989.2  | 848.0  | 1141.3 | 1324.3 | 1214.7 | 1310.1 | 1831.3  |
| 151.3  | 141.5  | 228.5  | 133.7  | 188.4  | 149.8  | 163.3  | 213.4  | 247.0   |
| 392.7  | 363.5  | 551.1  | 367.5  | 311.3  | 446.8  | 275.9  | 309.9  | 301.8   |
| 8816.5 | 8471.2 | 9755.6 | 8889.7 | 9040.7 | 9102.8 | 9290.5 | 9497.8 | 12648.0 |

|        |        |        |        |        |        |        |        |         |
|--------|--------|--------|--------|--------|--------|--------|--------|---------|
| 1906.8 | 1786.0 | 2940.4 | 2035.5 | 2490.8 | 2937.7 | 2651.2 | 2823.1 | 4119.6  |
| 1201.8 | 1044.1 | 2123.0 | 1391.9 | 2153.0 | 2083.7 | 2177.9 | 2356.4 | 2216.1  |
| 362.6  | 330.4  | 699.3  | 303.1  | 953.9  | 863.7  | 888.5  | 1058.1 | 1767.3  |
| 646.8  | 624.1  | 552.6  | 634.5  | 843.3  | 1125.9 | 849.7  | 1015.5 | 307.3   |
| 149.1  | 143.8  | 187.4  | 138.2  | 191.5  | 210.0  | 175.4  | 236.9  | 224.3   |
| 177.0  | 175.3  | 226.7  | 177.5  | 274.6  | 282.2  | 254.7  | 276.6  | 223.8   |
| 69.0   | 74.1   | 96.8   | 76.1   | 150.9  | 115.4  | 154.2  | 183.4  | 76.1    |
| 1467.5 | 1496.0 | 1705.6 | 1418.1 | 1596.8 | 1185.6 | 1702.8 | 1941.6 | 1150.3  |
| 8954.9 | 8532.3 | 9623.8 | 8889.6 | 9048.4 | 9052.5 | 9279.1 | 9858.0 | 12652.2 |
| 531.0  | 498.2  | 659.7  | 483.8  | 473.0  | 338.3  | 498.1  | 545.3  | 714.0   |
| 910.9  | 787.9  | 1309.3 | 679.0  | 1495.3 | 1438.4 | 1492.5 | 1522.5 | 3350.8  |
| 559.1  | 518.4  | 800.6  | 608.2  | 801.7  | 843.2  | 928.4  | 921.2  | 572.1   |
| 375.1  | 345.9  | 631.6  | 394.3  | 436.6  | 335.7  | 402.4  | 491.6  | 446.7   |
| 422.0  | 402.7  | 618.6  | 487.6  | 526.6  | 396.5  | 504.1  | 635.4  | 373.4   |
| 756.6  | 583.7  | 1330.8 | 701.4  | 524.3  | 421.1  | 525.7  | 655.6  | 608.7   |
| 2014.4 | 1677.6 | 2861.0 | 1822.0 | 992.5  | 869.5  | 963.0  | 1167.0 | 936.7   |
| 630.2  | 592.1  | 896.7  | 602.9  | 820.4  | 821.1  | 839.9  | 880.7  | 322.0   |
| 764.9  | 646.6  | 936.9  | 670.7  | 521.3  | 471.1  | 556.9  | 606.8  | 229.5   |
| 24.1   | 20.9   | 30.3   | 25.6   | 33.7   | 25.5   | 33.8   | 40.4   | 36.9    |
| 1468.1 | 1350.8 | 1997.7 | 1404.8 | 2132.8 | 1537.1 | 2296.2 | 2577.1 | 2711.7  |
| 647.8  | 596.8  | 872.8  | 624.2  | 1161.4 | 879.5  | 1098.3 | 1200.8 | 1177.0  |
| 795.3  | 785.7  | 836.7  | 693.6  | 1080.9 | 989.0  | 1188.9 | 1196.0 | 1141.1  |
| 525.0  | 484.7  | 568.7  | 517.5  | 367.5  | 315.5  | 384.3  | 404.3  | 280.1   |
| 7.9    | 8.5    | 12.6   | 9.0    | 10.3   | 8.0    | 9.0    | 5.4    | 16.1    |
| 18.3   | 22.6   | 32.2   | 18.5   | 465.7  | 386.1  | 518.2  | 527.8  | 17.1    |
| 16.2   | 20.1   | 27.0   | 23.5   | 394.9  | 326.4  | 408.9  | 402.7  | 33.5    |
| 2089.4 | 1903.3 | 2831.8 | 2105.2 | 2456.1 | 2450.0 | 2571.2 | 2902.7 | 1574.8  |
| 1019.8 | 911.3  | 1311.1 | 958.4  | 1563.7 | 1477.1 | 1547.2 | 1786.8 | 1032.4  |
| 416.1  | 437.8  | 635.6  | 429.0  | 675.5  | 917.1  | 614.2  | 682.0  | 934.5   |
| 1074.6 | 1092.8 | 1740.5 | 1106.6 | 1936.2 | 2220.1 | 1904.1 | 2101.1 | 2706.5  |
| 6728.5 | 6517.9 | 7283.4 | 6779.9 | 6312.6 | 6762.4 | 6372.7 | 6540.5 | 9582.0  |
| 648.6  | 578.4  | 1014.7 | 671.2  | 863.3  | 772.7  | 865.8  | 1095.2 | 825.0   |
| 432.9  | 454.6  | 419.0  | 388.5  | 343.3  | 477.2  | 351.9  | 396.4  | 611.7   |
| 52.3   | 47.8   | 64.5   | 43.6   | 76.0   | 64.6   | 132.1  | 97.2   | 140.9   |
| 240.6  | 235.8  | 234.4  | 226.4  | 135.4  | 147.7  | 167.4  | 225.5  | 142.6   |
| 428.0  | 420.8  | 425.6  | 359.2  | 303.7  | 227.2  | 308.6  | 380.8  | 267.0   |
| 803.3  | 792.1  | 890.2  | 853.9  | 281.7  | 284.5  | 366.4  | 395.3  | 375.7   |
| 528.9  | 389.8  | 1074.4 | 547.6  | 1165.1 | 854.5  | 1138.4 | 1214.0 | 1373.0  |
| 2362.0 | 2127.8 | 2932.7 | 2313.5 | 4696.6 | 4518.2 | 4625.5 | 5551.4 | 5941.5  |
| 1375.0 | 1253.4 | 1532.5 | 1110.4 | 1188.8 | 1281.1 | 1328.0 | 1507.3 | 1122.2  |
| 164.2  | 148.7  | 170.8  | 121.0  | 152.8  | 173.4  | 172.0  | 175.8  | 124.6   |
| 410.3  | 375.3  | 436.3  | 280.8  | 427.8  | 389.2  | 438.4  | 521.3  | 341.2   |
| 101.9  | 126.0  | 65.8   | 105.5  | 143.7  | 201.4  | 200.4  | 235.8  | 88.6    |
| 125.2  | 186.0  | 94.0   | 178.1  | 195.5  | 186.9  | 219.6  | 244.4  | 118.1   |
| 2363.7 | 2061.5 | 3235.0 | 2391.9 | 2408.8 | 2143.8 | 2472.7 | 2715.2 | 2661.6  |
| 54.6   | 55.7   | 66.6   | 38.9   | 59.6   | 81.1   | 53.5   | 54.1   | 36.4    |
| 1127.4 | 1149.0 | 1226.1 | 1089.3 | 1063.3 | 1089.9 | 1186.1 | 1188.0 | 1506.2  |
| 1035.6 | 1047.5 | 1120.9 | 1173.5 | 485.3  | 367.3  | 492.2  | 602.5  | 494.8   |
| 697.7  | 633.6  | 1124.7 | 719.9  | 296.0  | 255.5  | 304.8  | 294.3  | 360.7   |
| 508.3  | 465.9  | 710.4  | 505.6  | 257.3  | 314.3  | 267.8  | 350.3  | 219.3   |
| 169.7  | 168.4  | 263.8  | 157.8  | 153.5  | 170.2  | 160.0  | 182.3  | 93.5    |
| 327.3  | 334.2  | 506.0  | 311.2  | 617.5  | 556.6  | 589.9  | 645.1  | 297.7   |
| 331.8  | 302.3  | 421.0  | 298.8  | 336.8  | 339.8  | 353.1  | 393.3  | 189.8   |

|        |        |        |        |        |        |        |        |        |
|--------|--------|--------|--------|--------|--------|--------|--------|--------|
| 211.1  | 182.8  | 232.5  | 205.5  | 126.7  | 100.6  | 90.6   | 137.4  | 386.0  |
| 591.6  | 609.4  | 651.7  | 586.2  | 298.8  | 277.2  | 299.8  | 352.1  | 660.6  |
| 625.9  | 447.4  | 1301.2 | 493.8  | 1086.8 | 584.5  | 1186.6 | 1454.6 | 411.8  |
| 360.0  | 353.3  | 296.1  | 331.0  | 283.1  | 224.7  | 266.2  | 325.5  | 156.9  |
| 115.8  | 144.1  | 107.5  | 131.5  | 128.8  | 100.9  | 127.9  | 176.3  | 70.2   |
| 688.7  | 679.2  | 626.8  | 657.7  | 372.8  | 362.3  | 405.1  | 489.3  | 334.5  |
| 81.5   | 76.0   | 131.0  | 92.0   | 303.6  | 512.7  | 590.2  | 323.5  | 43.2   |
| 813.3  | 833.4  | 1329.5 | 935.9  | 508.6  | 904.8  | 330.6  | 555.7  | 1586.3 |
| 1035.3 | 986.9  | 1262.1 | 916.4  | 1231.5 | 1371.3 | 1341.2 | 1372.4 | 2741.2 |
| 2.1    | 1.7    | 8.0    | 3.3    | 4.0    | 0.6    | 1.0    | 0.9    | 3.2    |
| 23.3   | 20.6   | 28.1   | 24.2   | 16.9   | 14.2   | 20.1   | 14.7   | 12.6   |
| 686.9  | 739.9  | 746.0  | 714.9  | 487.8  | 433.5  | 477.3  | 554.7  | 372.2  |
| 54.8   | 41.7   | 156.8  | 15.9   | 98.0   | 133.1  | 68.6   | 58.7   | 1367.1 |
| 60.1   | 48.7   | 147.5  | 19.9   | 81.6   | 104.8  | 54.1   | 63.2   | 1087.9 |
| 2.9    | 3.1    | 25.0   | 2.5    | 26.3   | 33.4   | 5.4    | 2.9    | 603.1  |
| 1.3    | 1.2    | 2.6    | 0.8    | 11.7   | 18.8   | 18.8   | 24.1   | 3419.4 |
| 548.6  | 486.0  | 722.3  | 500.0  | 791.8  | 706.7  | 825.6  | 898.0  | 1368.1 |
| 334.4  | 296.8  | 447.0  | 311.9  | 464.3  | 429.8  | 477.9  | 582.5  | 559.8  |
| 285.7  | 268.2  | 415.3  | 260.4  | 748.1  | 637.9  | 733.9  | 763.8  | 911.2  |
| 618.8  | 612.7  | 612.6  | 493.2  | 751.9  | 713.1  | 828.2  | 895.2  | 813.3  |
| 530.4  | 506.7  | 546.4  | 422.3  | 794.4  | 717.2  | 825.5  | 891.1  | 942.5  |
| 60.6   | 57.5   | 93.0   | 52.7   | 146.7  | 125.7  | 151.7  | 140.3  | 445.0  |
| 407.1  | 347.3  | 623.3  | 328.4  | 974.4  | 846.7  | 893.9  | 1058.1 | 1987.3 |
| 21.4   | 13.1   | 22.9   | 20.5   | 10.7   | 13.2   | 7.6    | 9.9    | 33.5   |
| 32.2   | 20.7   | 40.4   | 28.2   | 34.7   | 28.3   | 19.0   | 27.3   | 80.5   |
| 4378.2 | 4014.2 | 4919.5 | 4361.6 | 4370.8 | 4600.6 | 4385.5 | 4781.8 | 6803.9 |
| 3683.1 | 2967.8 | 5580.7 | 3783.3 | 6032.3 | 5211.8 | 6071.2 | 6579.4 | 5166.6 |
| 309.6  | 299.8  | 425.8  | 260.0  | 165.1  | 144.4  | 189.2  | 193.7  | 474.7  |
| 427.5  | 465.4  | 654.2  | 528.0  | 626.7  | 603.6  | 629.3  | 651.5  | 648.4  |
| 258.5  | 255.4  | 269.6  | 190.5  | 525.0  | 651.8  | 532.2  | 584.9  | 576.6  |
| 2043.1 | 1775.6 | 2779.9 | 2159.8 | 2872.9 | 2693.8 | 2912.3 | 3184.1 | 3042.6 |
| 1588.4 | 1383.1 | 4381.0 | 2414.2 | 4391.2 | 3776.3 | 4261.0 | 4772.3 | 5425.0 |
| 296.7  | 281.8  | 375.9  | 270.8  | 595.3  | 438.3  | 753.0  | 697.4  | 1089.3 |
| 147.7  | 126.7  | 142.7  | 87.1   | 326.1  | 312.8  | 322.9  | 321.7  | 660.6  |
| 94.1   | 96.0   | 170.1  | 115.9  | 164.4  | 94.1   | 156.9  | 260.2  | 114.2  |
| 56.8   | 62.9   | 75.0   | 76.3   | 78.7   | 51.9   | 67.0   | 94.9   | 75.6   |
| 73.7   | 54.3   | 146.7  | 71.8   | 107.9  | 89.1   | 99.8   | 114.2  | 127.1  |
| 289.1  | 251.4  | 730.7  | 365.7  | 664.8  | 886.4  | 593.0  | 730.8  | 632.3  |
| 69.1   | 69.8   | 80.9   | 71.1   | 53.0   | 65.7   | 59.8   | 75.9   | 107.6  |
| 450.4  | 449.7  | 631.9  | 432.2  | 391.8  | 354.7  | 403.3  | 485.2  | 684.8  |
| 372.2  | 341.1  | 404.4  | 347.0  | 316.1  | 380.7  | 328.8  | 412.2  | 309.1  |
| 118.6  | 155.4  | 129.5  | 172.8  | 143.7  | 88.1   | 138.3  | 157.2  | 238.1  |
| 965.4  | 1033.1 | 604.8  | 869.3  | 1387.0 | 1477.2 | 1738.2 | 1619.4 | 1949.1 |
| 262.9  | 227.9  | 319.3  | 202.9  | 249.7  | 248.2  | 245.7  | 322.0  | 492.4  |
| 3315.5 | 3142.2 | 4021.6 | 3334.2 | 1013.7 | 1030.0 | 1064.1 | 1202.4 | 1333.3 |
| 1193.6 | 1077.6 | 1517.1 | 1035.9 | 1402.3 | 1115.4 | 1386.5 | 1562.2 | 868.6  |
| 262.8  | 264.9  | 266.8  | 237.9  | 653.1  | 630.1  | 673.3  | 799.0  | 845.6  |
| 461.3  | 406.6  | 426.3  | 388.8  | 602.1  | 785.1  | 676.7  | 749.2  | 250.0  |
| 904.4  | 885.4  | 1007.4 | 1027.7 | 359.5  | 409.3  | 352.1  | 412.0  | 191.0  |
| 267.1  | 253.2  | 293.7  | 218.3  | 92.9   | 107.5  | 100.3  | 116.0  | 116.0  |
| 5061.2 | 4825.0 | 4917.1 | 4423.0 | 5308.0 | 5649.9 | 5509.2 | 5937.7 | 7631.3 |
| 206.3  | 141.1  | 314.3  | 145.4  | 224.4  | 187.6  | 234.7  | 267.9  | 622.8  |
| 223.5  | 219.6  | 452.4  | 265.7  | 413.7  | 267.1  | 344.0  | 461.4  | 883.9  |

|        |        |        |        |        |        |        |        |        |
|--------|--------|--------|--------|--------|--------|--------|--------|--------|
| 634.1  | 624.9  | 1015.4 | 786.0  | 717.7  | 812.7  | 760.7  | 773.7  | 1192.0 |
| 549.9  | 573.6  | 567.7  | 751.6  | 76.2   | 67.2   | 54.4   | 76.5   | 201.4  |
| 560.8  | 611.5  | 710.2  | 695.2  | 155.4  | 167.0  | 156.1  | 174.2  | 658.2  |
| 267.2  | 293.0  | 316.2  | 433.1  | 33.8   | 38.0   | 33.1   | 29.4   | 138.4  |
| 518.5  | 566.8  | 569.5  | 687.9  | 86.7   | 103.6  | 87.5   | 95.6   | 341.8  |
| 98.1   | 91.9   | 172.6  | 59.9   | 640.6  | 137.2  | 1221.0 | 983.1  | 974.9  |
| 220.0  | 198.9  | 275.2  | 197.2  | 346.9  | 282.5  | 301.9  | 354.2  | 494.5  |
| 381.0  | 413.3  | 537.2  | 387.3  | 595.5  | 552.6  | 560.6  | 658.1  | 372.4  |
| 184.8  | 198.9  | 258.7  | 194.9  | 220.5  | 143.0  | 173.2  | 212.6  | 101.4  |
| 252.7  | 219.5  | 417.3  | 207.0  | 538.9  | 492.2  | 548.7  | 566.5  | 347.2  |
| 845.7  | 774.4  | 1042.7 | 757.3  | 713.7  | 677.7  | 783.6  | 980.4  | 520.2  |
| 806.6  | 751.4  | 964.3  | 790.9  | 692.2  | 728.1  | 725.2  | 821.1  | 519.8  |
| 193.6  | 206.6  | 141.5  | 146.4  | 367.0  | 346.5  | 290.9  | 306.6  | 208.1  |
| 329.8  | 309.9  | 283.0  | 238.5  | 426.8  | 470.0  | 457.7  | 486.1  | 510.2  |
| 531.8  | 491.6  | 473.8  | 397.3  | 659.9  | 631.7  | 700.5  | 847.4  | 838.6  |
| 105.2  | 94.0   | 98.3   | 93.1   | 93.7   | 93.4   | 95.6   | 109.2  | 206.0  |
| 2185.4 | 2101.4 | 2949.5 | 2188.3 | 1304.9 | 1269.0 | 1208.9 | 1440.6 | 1650.0 |
| 2682.4 | 2650.8 | 2073.5 | 1951.8 | 1275.1 | 1845.7 | 1465.6 | 1525.2 | 2013.1 |
| 647.9  | 566.2  | 666.2  | 585.2  | 751.9  | 720.9  | 915.9  | 900.0  | 493.1  |
| 499.3  | 404.7  | 483.1  | 453.0  | 504.2  | 452.1  | 567.3  | 597.0  | 341.9  |
| 284.5  | 287.2  | 437.7  | 287.9  | 203.5  | 202.1  | 198.0  | 219.3  | 209.0  |
| 267.9  | 274.2  | 421.3  | 289.0  | 234.8  | 239.6  | 249.1  | 281.3  | 241.4  |
| 137.0  | 144.4  | 219.4  | 128.7  | 158.6  | 134.4  | 146.6  | 162.6  | 129.2  |
| 64.4   | 67.1   | 242.7  | 74.8   | 210.4  | 153.6  | 201.1  | 268.3  | 311.5  |
| 833.3  | 803.0  | 2092.5 | 757.7  | 2119.5 | 1577.5 | 2156.0 | 2448.8 | 2935.0 |
| 47.9   | 39.8   | 62.8   | 47.4   | 56.0   | 42.4   | 47.2   | 61.2   | 35.5   |
| 11.0   | 10.3   | 12.9   | 15.4   | 21.7   | 10.7   | 12.8   | 13.2   | 26.5   |
| 389.7  | 401.6  | 421.8  | 395.7  | 551.1  | 651.3  | 630.3  | 649.0  | 714.2  |
| 150.8  | 196.6  | 125.4  | 143.7  | 87.8   | 119.0  | 102.6  | 100.7  | 46.6   |
| 291.5  | 328.4  | 256.6  | 251.9  | 260.2  | 294.6  | 255.7  | 219.2  | 70.8   |
| 383.4  | 252.4  | 767.7  | 237.0  | 212.1  | 239.5  | 168.5  | 207.3  | 250.3  |
| 142.4  | 120.4  | 387.8  | 85.9   | 128.8  | 189.4  | 148.4  | 137.1  | 321.8  |
| 379.4  | 288.6  | 702.0  | 257.0  | 249.0  | 291.2  | 238.9  | 266.9  | 473.2  |
| 0.9    | 0.7    | 4.5    | 0.5    | 203.0  | 283.9  | 205.6  | 256.3  | 286.1  |
| 0.9    | 2.3    | 3.8    | 1.5    | 493.9  | 624.6  | 460.8  | 653.0  | 743.5  |
| 577.4  | 488.4  | 851.0  | 508.4  | 760.7  | 911.0  | 804.5  | 882.3  | 1780.0 |
| 588.8  | 527.5  | 726.0  | 465.4  | 862.6  | 847.1  | 897.4  | 904.3  | 1393.3 |
| 754.7  | 620.7  | 1086.3 | 829.5  | 1045.8 | 1002.3 | 1119.8 | 1215.0 | 764.4  |
| 260.5  | 266.2  | 262.4  | 210.0  | 733.8  | 750.4  | 741.5  | 855.4  | 1562.4 |
| 99.3   | 101.4  | 116.6  | 112.6  | 376.9  | 441.3  | 383.9  | 370.0  | 719.0  |
| 1405.4 | 1100.1 | 2270.2 | 1401.2 | 877.9  | 696.5  | 974.7  | 949.7  | 886.8  |
| 167.0  | 142.4  | 232.5  | 162.3  | 246.5  | 266.6  | 272.8  | 289.2  | 376.3  |
| 813.5  | 852.7  | 1328.6 | 738.4  | 3603.0 | 3424.2 | 4156.9 | 4069.2 | 2782.4 |
| 454.3  | 358.2  | 781.1  | 354.7  | 1363.2 | 1100.8 | 1275.3 | 1577.3 | 1204.8 |
| 2524.4 | 2222.2 | 3497.3 | 2197.0 | 4510.4 | 3755.9 | 4085.8 | 4757.9 | 6281.3 |
| 1075.2 | 921.8  | 1465.9 | 741.9  | 80.1   | 75.9   | 110.1  | 118.1  | 196.5  |
| 1702.6 | 1523.7 | 2237.4 | 1654.8 | 387.6  | 393.8  | 380.8  | 416.1  | 285.9  |
| 8073.9 | 7728.1 | 8735.1 | 7962.5 | 6167.0 | 5690.0 | 6056.7 | 6581.3 | 7922.6 |
| 6.6    | 2.5    | 12.3   | 4.9    | 36.9   | 15.9   | 28.3   | 33.8   | 10.1   |
| 13.0   | 10.5   | 12.3   | 9.8    | 67.5   | 24.6   | 45.6   | 58.1   | 23.0   |
| 1.7    | 0.6    | 1.3    | 1.3    | 29.6   | 8.0    | 18.2   | 23.6   | 6.4    |
| 269.8  | 267.5  | 331.0  | 279.5  | 405.0  | 412.0  | 333.1  | 501.8  | 384.3  |
| 690.9  | 616.7  | 1117.2 | 654.7  | 1239.2 | 1118.9 | 1177.6 | 1380.1 | 1752.8 |

|        |        |        |        |        |        |        |        |        |
|--------|--------|--------|--------|--------|--------|--------|--------|--------|
| 379.0  | 368.6  | 510.5  | 355.2  | 537.6  | 564.3  | 528.1  | 700.0  | 728.4  |
| 331.5  | 317.0  | 354.8  | 301.9  | 113.1  | 106.4  | 142.9  | 127.8  | 126.6  |
| 987.3  | 913.6  | 1056.9 | 890.5  | 331.6  | 261.3  | 356.6  | 434.9  | 302.4  |
| 327.3  | 305.3  | 417.4  | 292.6  | 122.5  | 120.1  | 117.9  | 167.6  | 74.6   |
| 1364.0 | 1222.3 | 1665.8 | 1216.1 | 1160.0 | 1167.9 | 1161.9 | 1235.8 | 670.6  |
| 542.8  | 584.9  | 488.7  | 417.6  | 776.7  | 682.4  | 706.9  | 914.5  | 449.3  |
| 268.0  | 243.7  | 218.5  | 186.9  | 501.1  | 407.8  | 396.1  | 481.7  | 322.4  |
| 299.7  | 274.9  | 352.0  | 228.3  | 342.6  | 270.1  | 415.0  | 388.1  | 199.7  |
| 171.1  | 165.2  | 218.8  | 130.7  | 216.1  | 149.7  | 233.9  | 227.5  | 123.1  |
| 163.4  | 149.0  | 166.9  | 129.0  | 134.0  | 111.9  | 172.5  | 159.4  | 77.7   |
| 308.8  | 307.2  | 326.9  | 253.7  | 784.5  | 770.8  | 818.4  | 933.1  | 963.9  |
| 2387.5 | 2319.0 | 2719.9 | 2514.2 | 172.7  | 158.0  | 218.7  | 210.4  | 46.1   |
| 5298.3 | 5058.2 | 5549.6 | 5202.2 | 378.1  | 390.7  | 652.9  | 450.3  | 33.0   |
| 216.9  | 194.8  | 278.3  | 155.2  | 263.3  | 236.3  | 270.0  | 319.7  | 223.5  |
| 68.9   | 50.6   | 89.8   | 48.7   | 132.6  | 111.1  | 145.6  | 139.0  | 136.7  |
| 1005.4 | 927.2  | 1209.2 | 1007.8 | 1370.4 | 1566.6 | 1351.5 | 1508.8 | 1949.3 |
| 154.5  | 258.5  | 68.2   | 190.4  | 83.1   | 126.0  | 97.4   | 155.4  | 138.3  |
| 226.9  | 193.7  | 720.6  | 337.3  | 289.8  | 320.1  | 296.0  | 355.5  | 450.2  |
| 517.1  | 529.9  | 511.3  | 435.3  | 192.7  | 201.3  | 227.5  | 233.2  | 579.3  |
| 62.9   | 72.8   | 83.1   | 53.1   | 45.0   | 32.2   | 53.7   | 52.0   | 106.4  |
| 123.1  | 132.1  | 47.9   | 81.7   | 69.5   | 76.2   | 70.5   | 78.8   | 123.3  |
| 170.0  | 182.5  | 130.3  | 141.5  | 128.3  | 143.3  | 110.1  | 129.5  | 420.2  |
| 4313.6 | 3894.3 | 5013.9 | 4250.0 | 1605.1 | 1072.5 | 2829.8 | 1961.8 | 83.9   |
| 73.9   | 70.1   | 54.6   | 52.2   | 1393.0 | 1266.9 | 1464.3 | 1612.0 | 1622.4 |
| 12.4   | 13.5   | 16.4   | 6.9    | 74.5   | 84.1   | 107.4  | 97.6   | 12.9   |
| 221.6  | 229.8  | 222.2  | 172.0  | 786.5  | 995.0  | 803.4  | 890.7  | 232.7  |
| 152.5  | 122.0  | 114.7  | 110.4  | 567.7  | 625.7  | 616.7  | 640.0  | 148.1  |
| 137.2  | 156.6  | 156.4  | 139.5  | 438.3  | 406.8  | 427.5  | 560.7  | 178.3  |
| 1386.4 | 1180.6 | 2007.9 | 1411.1 | 1319.6 | 1068.0 | 1574.3 | 1687.6 | 652.4  |
| 373.4  | 362.0  | 479.2  | 414.3  | 587.4  | 825.1  | 635.3  | 665.9  | 498.7  |
| 2653.5 | 2527.2 | 4294.9 | 2899.7 | 801.5  | 767.4  | 1161.7 | 876.6  | 54.9   |
| 311.0  | 279.0  | 472.3  | 299.1  | 404.7  | 801.2  | 459.4  | 483.2  | 823.8  |
| 320.3  | 358.5  | 210.2  | 316.2  | 547.1  | 617.5  | 770.6  | 649.5  | 202.2  |
| 335.7  | 411.7  | 210.3  | 368.8  | 475.8  | 380.1  | 557.9  | 497.5  | 156.9  |
| 212.8  | 261.9  | 195.5  | 213.3  | 439.0  | 535.2  | 427.6  | 484.7  | 465.8  |
| 188.5  | 200.9  | 282.2  | 263.4  | 494.4  | 433.1  | 468.1  | 569.7  | 342.9  |
| 961.7  | 1032.2 | 1005.7 | 908.6  | 906.7  | 750.1  | 922.9  | 1107.0 | 591.7  |
| 706.6  | 776.0  | 764.2  | 614.9  | 547.6  | 368.4  | 537.3  | 738.4  | 463.3  |
| 862.0  | 718.7  | 1380.9 | 759.4  | 1250.5 | 877.1  | 1412.1 | 1451.2 | 1727.1 |
| 888.3  | 754.7  | 1581.7 | 902.9  | 779.0  | 447.3  | 833.9  | 867.0  | 733.6  |
| 2857.8 | 2537.9 | 4555.0 | 2481.9 | 5561.3 | 5023.3 | 5458.3 | 6683.4 | 6822.9 |
| 888.5  | 898.6  | 1044.9 | 907.4  | 571.4  | 458.9  | 571.5  | 746.0  | 408.9  |
| 438.6  | 474.6  | 415.0  | 450.6  | 237.8  | 183.7  | 238.7  | 312.4  | 187.0  |
| 311.1  | 315.3  | 365.5  | 322.5  | 457.5  | 463.5  | 448.7  | 513.4  | 794.3  |
| 237.3  | 214.6  | 329.3  | 178.3  | 254.6  | 206.1  | 467.3  | 379.3  | 518.5  |
| 318.6  | 285.2  | 427.6  | 243.3  | 367.5  | 273.5  | 537.2  | 496.6  | 378.0  |
| 80.0   | 91.1   | 113.9  | 54.0   | 79.6   | 47.1   | 115.4  | 110.7  | 109.1  |
| 452.0  | 396.9  | 616.9  | 416.8  | 611.1  | 505.2  | 572.9  | 654.9  | 556.2  |
| 988.1  | 1315.7 | 419.6  | 874.9  | 94.6   | 108.8  | 161.3  | 190.3  | 113.8  |
| 1960.2 | 1394.5 | 3507.5 | 1948.1 | 883.3  | 1158.8 | 919.9  | 1102.7 | 112.4  |
| 3474.8 | 3147.9 | 4875.9 | 3543.0 | 1838.6 | 1886.9 | 1927.5 | 1995.4 | 4483.0 |
| 293.9  | 257.9  | 342.5  | 241.4  | 94.5   | 107.8  | 89.7   | 106.5  | 323.8  |
| 52.1   | 68.5   | 69.8   | 57.8   | 21.7   | 23.5   | 25.3   | 34.9   | 75.1   |

|        |        |        |        |        |        |        |        |        |
|--------|--------|--------|--------|--------|--------|--------|--------|--------|
| 291.9  | 269.9  | 334.6  | 251.8  | 158.1  | 183.2  | 153.1  | 187.0  | 379.9  |
| 1.1    | 1.4    | 1.1    | 0.9    | 434.0  | 534.4  | 464.4  | 514.7  | 418.9  |
| 59.0   | 56.0   | 80.5   | 55.9   | 214.1  | 261.5  | 276.3  | 281.3  | 557.7  |
| 76.8   | 86.7   | 76.5   | 83.5   | 350.0  | 402.1  | 319.2  | 373.3  | 360.0  |
| 617.6  | 649.8  | 574.3  | 614.3  | 676.7  | 645.1  | 715.4  | 804.8  | 829.5  |
| 553.2  | 502.9  | 662.8  | 445.8  | 1354.1 | 1071.2 | 1368.5 | 1553.5 | 1592.4 |
| 193.1  | 182.4  | 239.7  | 178.3  | 476.9  | 402.6  | 493.0  | 566.4  | 693.8  |
| 956.6  | 1079.5 | 876.2  | 861.8  | 1428.4 | 1371.4 | 1440.9 | 1663.9 | 1429.8 |
| 7.9    | 12.1   | 13.5   | 13.5   | 25.8   | 19.6   | 28.0   | 42.6   | 15.0   |
| 374.1  | 434.3  | 499.1  | 505.0  | 85.4   | 69.4   | 74.0   | 89.6   | 443.0  |
| 643.8  | 599.5  | 892.9  | 736.6  | 180.5  | 155.2  | 223.0  | 251.3  | 873.7  |
| 432.3  | 489.6  | 388.0  | 449.2  | 65.6   | 87.6   | 78.9   | 86.2   | 177.7  |
| 273.7  | 268.1  | 265.8  | 264.6  | 40.6   | 47.3   | 33.1   | 47.3   | 96.6   |
| 103.7  | 80.3   | 179.5  | 87.0   | 184.2  | 163.2  | 143.7  | 164.7  | 189.3  |
| 174.1  | 149.4  | 315.0  | 144.8  | 416.8  | 463.2  | 338.2  | 405.0  | 344.0  |
| 114.1  | 109.2  | 186.7  | 93.1   | 350.5  | 353.3  | 283.0  | 357.9  | 345.4  |
| 312.8  | 266.6  | 395.4  | 304.7  | 621.2  | 567.5  | 527.1  | 695.5  | 314.3  |
| 519.4  | 561.4  | 696.6  | 502.3  | 912.4  | 761.9  | 816.5  | 969.2  | 622.8  |
| 167.1  | 166.4  | 230.3  | 190.4  | 276.7  | 193.2  | 231.7  | 326.6  | 228.0  |
| 1040.8 | 928.1  | 1413.8 | 958.8  | 1039.0 | 1208.9 | 1154.1 | 1183.7 | 1398.4 |
| 957.8  | 835.9  | 1342.4 | 874.8  | 1124.1 | 1238.5 | 1199.6 | 1251.6 | 1459.4 |
| 718.3  | 678.4  | 842.2  | 642.0  | 122.2  | 138.7  | 162.9  | 144.1  | 91.8   |
| 1202.4 | 1061.3 | 1592.8 | 1220.0 | 163.0  | 158.9  | 183.8  | 212.0  | 125.2  |
| 325.5  | 304.6  | 460.1  | 290.9  | 109.1  | 110.9  | 136.3  | 115.2  | 122.7  |
| 1490.7 | 1341.0 | 1980.2 | 1305.7 | 1475.8 | 1519.0 | 1554.4 | 1758.7 | 894.9  |
| 1574.1 | 1541.7 | 1802.0 | 1638.4 | 734.7  | 645.3  | 749.3  | 860.3  | 523.2  |
| 278.8  | 241.8  | 288.0  | 246.3  | 179.7  | 185.8  | 235.0  | 231.8  | 253.5  |
| 3339.5 | 2720.9 | 4022.7 | 2949.9 | 3546.9 | 3504.8 | 3587.5 | 3893.5 | 3540.1 |
| 1122.6 | 909.1  | 1669.0 | 916.3  | 1680.1 | 1337.3 | 1514.4 | 1720.0 | 2303.4 |
| 222.9  | 179.0  | 291.9  | 232.8  | 146.9  | 101.3  | 120.8  | 145.9  | 185.5  |
| 1755.7 | 1612.2 | 2063.2 | 1273.3 | 3621.7 | 3219.0 | 3364.4 | 3854.3 | 5299.5 |
| 12.3   | 15.1   | 13.1   | 7.6    | 24.8   | 25.3   | 26.6   | 36.8   | 2.9    |
| 20.4   | 28.5   | 15.6   | 17.8   | 30.3   | 26.5   | 22.3   | 36.3   | 10.9   |
| 10.4   | 1.8    | 3.4    | 6.3    | 2.9    | 9.9    | 4.4    | 7.9    | 15.8   |
| 232.2  | 222.2  | 217.2  | 161.9  | 118.9  | 141.8  | 128.7  | 151.0  | 113.6  |
| 1.1    | 1.6    | 1.6    | 1.7    | 1.1    | 0.5    | 2.9    | 1.8    | 1.9    |
| 867.7  | 841.7  | 945.0  | 773.4  | 1298.2 | 1481.5 | 1435.4 | 1543.2 | 2102.1 |
| 727.1  | 663.3  | 900.4  | 693.3  | 745.6  | 875.6  | 839.1  | 975.8  | 816.9  |
| 337.3  | 324.8  | 395.5  | 327.2  | 344.6  | 343.0  | 389.6  | 431.5  | 519.6  |
| 289.6  | 264.0  | 360.3  | 268.9  | 258.9  | 261.0  | 279.0  | 314.1  | 430.8  |
| 134.0  | 105.4  | 105.1  | 90.0   | 151.0  | 228.6  | 151.5  | 160.1  | 374.3  |
| 305.5  | 288.8  | 581.0  | 311.6  | 1483.7 | 1400.7 | 1498.1 | 1572.4 | 2405.5 |
| 29.1   | 23.8   | 49.9   | 35.6   | 96.1   | 124.1  | 140.4  | 97.3   | 42.5   |
| 19.1   | 32.1   | 40.1   | 31.8   | 84.6   | 96.4   | 151.3  | 123.2  | 57.6   |
| 23.0   | 13.1   | 114.6  | 18.0   | 22.8   | 34.9   | 33.4   | 30.8   | 40.6   |
| 62.6   | 59.9   | 99.5   | 62.4   | 42.1   | 65.5   | 41.9   | 53.3   | 135.4  |
| 184.4  | 187.8  | 251.9  | 157.0  | 553.7  | 456.1  | 494.9  | 654.0  | 390.6  |
| 29.1   | 26.8   | 36.5   | 20.5   | 921.4  | 1053.0 | 896.2  | 949.1  | 316.6  |
| 21.6   | 22.8   | 21.1   | 4.5    | 1930.1 | 2016.8 | 1810.6 | 2035.9 | 725.7  |
| 100.2  | 94.1   | 151.8  | 94.2   | 130.2  | 139.2  | 214.6  | 160.6  | 281.1  |
| 1252.6 | 1349.7 | 1550.0 | 1337.3 | 865.3  | 866.9  | 905.3  | 947.0  | 1131.9 |
| 260.6  | 298.8  | 251.3  | 265.1  | 325.0  | 235.4  | 294.3  | 414.8  | 194.1  |
| 615.5  | 625.0  | 685.6  | 584.7  | 1369.9 | 1502.5 | 1537.3 | 1604.9 | 704.4  |

|        |        |        |        |        |        |        |        |         |
|--------|--------|--------|--------|--------|--------|--------|--------|---------|
| 567.7  | 526.6  | 847.2  | 661.7  | 674.3  | 727.3  | 715.1  | 745.1  | 571.0   |
| 294.5  | 325.5  | 198.0  | 233.0  | 270.6  | 349.9  | 329.1  | 359.3  | 374.8   |
| 500.1  | 502.1  | 559.2  | 490.6  | 1725.5 | 1782.0 | 2069.4 | 1892.1 | 223.4   |
| 1981.4 | 1838.6 | 2563.8 | 1872.4 | 1594.1 | 1261.4 | 1606.1 | 1877.4 | 2094.5  |
| 703.8  | 583.8  | 1191.6 | 652.6  | 1847.0 | 1711.0 | 1856.5 | 2294.7 | 1378.8  |
| 4.9    | 3.6    | 6.3    | 7.9    | 1.6    | 7.7    | 7.7    | 15.9   | 14.2    |
| 22.9   | 31.1   | 16.3   | 29.0   | 104.9  | 91.2   | 168.5  | 96.0   | 103.2   |
| 106.0  | 164.3  | 67.3   | 137.1  | 692.5  | 614.2  | 1038.9 | 756.3  | 714.2   |
| 192.7  | 188.2  | 347.3  | 214.4  | 647.5  | 664.2  | 658.1  | 584.3  | 1189.5  |
| 6.5    | 15.1   | 2.8    | 7.5    | 787.8  | 564.9  | 1106.6 | 590.1  | 768.3   |
| 639.3  | 847.9  | 436.4  | 767.7  | 173.3  | 203.0  | 207.6  | 239.3  | 232.1   |
| 714.4  | 624.4  | 1065.8 | 625.8  | 1273.0 | 1068.3 | 1308.0 | 1416.5 | 1555.9  |
| 1054.8 | 978.0  | 1458.2 | 1274.6 | 2696.5 | 2486.4 | 3064.7 | 2944.4 | 4530.8  |
| 65.9   | 59.2   | 79.1   | 68.5   | 85.0   | 102.5  | 88.5   | 120.3  | 49.3    |
| 115.4  | 92.6   | 99.3   | 87.1   | 170.3  | 174.1  | 168.7  | 195.2  | 59.3    |
| 157.3  | 175.0  | 192.3  | 174.6  | 161.5  | 165.6  | 139.4  | 175.2  | 86.7    |
| 106.7  | 123.3  | 118.6  | 115.1  | 391.0  | 438.0  | 460.8  | 486.3  | 252.0   |
| 153.6  | 143.3  | 150.0  | 130.7  | 553.0  | 577.5  | 607.3  | 715.2  | 357.1   |
| 509.1  | 444.9  | 593.3  | 470.1  | 181.5  | 221.6  | 156.0  | 188.8  | 105.5   |
| 437.4  | 403.3  | 557.8  | 419.9  | 530.1  | 607.9  | 587.3  | 688.7  | 622.1   |
| 1650.7 | 1683.8 | 1685.0 | 1401.2 | 911.6  | 632.7  | 963.0  | 1075.8 | 741.7   |
| 243.4  | 239.4  | 359.0  | 284.2  | 193.4  | 213.8  | 233.7  | 212.1  | 548.7   |
| 1431.8 | 1417.0 | 735.7  | 733.1  | 11.0   | 16.3   | 6.1    | 1.9    | 24.5    |
| 453.1  | 435.5  | 556.6  | 484.2  | 742.9  | 561.6  | 773.4  | 934.4  | 1012.0  |
| 2.2    | 2.6    | 3.9    | 1.5    | 3.6    | 2.2    | 2.4    | 7.2    | 11.1    |
| 254.7  | 272.7  | 245.5  | 176.8  | 284.6  | 322.7  | 309.4  | 308.1  | 233.4   |
| 1236.0 | 2024.6 | 465.0  | 987.2  | 4.5    | 3.6    | 5.9    | 6.9    | 976.5   |
| 38.7   | 33.4   | 39.8   | 32.8   | 15.9   | 13.0   | 21.7   | 16.5   | 31.2    |
| 775.7  | 673.2  | 1021.8 | 698.0  | 475.6  | 301.7  | 409.9  | 470.4  | 857.4   |
| 298.7  | 322.2  | 344.8  | 267.4  | 192.2  | 179.7  | 217.3  | 204.3  | 354.5   |
| 105.0  | 115.1  | 176.2  | 110.8  | 168.0  | 240.4  | 223.3  | 206.2  | 3705.7  |
| 589.1  | 499.0  | 833.3  | 556.5  | 1139.5 | 1221.0 | 1316.1 | 1346.5 | 1894.4  |
| 177.4  | 179.9  | 212.2  | 166.5  | 309.8  | 304.3  | 277.2  | 405.9  | 655.5   |
| 3.4    | 3.9    | 7.2    | 3.8    | 103.6  | 77.4   | 462.6  | 191.0  | 39.6    |
| 9.9    | 15.0   | 15.4   | 4.1    | 100.9  | 104.7  | 298.8  | 165.7  | 318.2   |
| 117.7  | 95.3   | 162.5  | 91.4   | 224.3  | 185.0  | 228.7  | 216.3  | 495.7   |
| 248.7  | 242.0  | 328.0  | 240.7  | 451.7  | 342.0  | 382.6  | 528.3  | 656.9   |
| 257.1  | 261.2  | 199.3  | 144.9  | 1975.1 | 2236.6 | 2024.0 | 2265.6 | 1024.6  |
| 1168.3 | 1284.7 | 1222.5 | 1339.4 | 1043.5 | 852.6  | 1090.7 | 1149.4 | 1024.2  |
| 185.0  | 208.1  | 191.2  | 208.9  | 237.3  | 211.7  | 242.8  | 227.8  | 202.4   |
| 378.0  | 334.9  | 467.1  | 349.0  | 655.8  | 627.9  | 614.9  | 709.9  | 1018.6  |
| 36.3   | 30.0   | 38.0   | 31.9   | 26.3   | 22.3   | 22.5   | 47.9   | 49.3    |
| 5039.2 | 4702.0 | 6035.8 | 4868.2 | 7019.7 | 7418.9 | 7072.3 | 7346.1 | 11153.7 |
| 550.0  | 577.9  | 1395.5 | 721.1  | 3681.2 | 2636.9 | 3424.8 | 4215.5 | 1007.1  |
| 204.1  | 186.2  | 224.6  | 131.9  | 399.6  | 331.8  | 341.6  | 420.5  | 384.9   |
| 305.9  | 291.7  | 359.7  | 247.3  | 606.4  | 577.1  | 596.4  | 682.3  | 403.1   |
| 8.4    | 6.9    | 15.4   | 6.7    | 14.2   | 7.4    | 10.5   | 11.4   | 26.6    |
| 477.3  | 427.8  | 582.3  | 440.8  | 495.8  | 407.6  | 501.7  | 564.8  | 281.5   |
| 1237.9 | 1125.1 | 1237.0 | 964.7  | 4535.4 | 5185.8 | 5084.8 | 5258.9 | 3111.6  |
| 726.2  | 673.1  | 1050.0 | 815.3  | 940.7  | 773.7  | 1010.8 | 1132.4 | 750.3   |
| 749.6  | 723.3  | 1176.1 | 859.0  | 878.7  | 690.7  | 920.8  | 1012.4 | 852.3   |
| 371.8  | 376.2  | 422.8  | 368.8  | 1573.2 | 1674.5 | 1848.0 | 1812.9 | 2297.4  |
| 35.4   | 28.9   | 40.6   | 28.6   | 19.5   | 26.6   | 21.7   | 30.5   | 19.6    |

|        |        |        |        |        |        |        |        |        |
|--------|--------|--------|--------|--------|--------|--------|--------|--------|
| 18.8   | 12.5   | 21.2   | 6.6    | 19.6   | 27.0   | 23.3   | 25.5   | 16.7   |
| 671.9  | 483.1  | 1789.6 | 490.3  | 1307.6 | 1003.4 | 1782.8 | 1769.8 | 270.9  |
| 89.6   | 92.1   | 92.7   | 65.4   | 161.5  | 194.3  | 216.9  | 221.9  | 262.0  |
| 264.9  | 257.9  | 236.1  | 235.6  | 236.6  | 270.4  | 278.8  | 312.9  | 144.4  |
| 445.1  | 438.1  | 446.0  | 371.2  | 316.3  | 406.7  | 331.3  | 402.7  | 313.7  |
| 762.1  | 751.3  | 625.8  | 600.2  | 563.6  | 680.1  | 665.7  | 680.8  | 435.7  |
| 64.2   | 54.1   | 119.4  | 54.2   | 59.8   | 58.9   | 50.6   | 67.6   | 40.6   |
| 113.5  | 107.6  | 269.8  | 98.0   | 96.9   | 87.1   | 105.4  | 130.9  | 42.8   |
| 235.6  | 249.5  | 476.3  | 307.1  | 316.6  | 273.3  | 290.3  | 346.7  | 157.8  |
| 1808.1 | 1698.1 | 2704.1 | 1815.2 | 2580.3 | 2355.0 | 2995.0 | 2888.0 | 2095.0 |
| 673.2  | 642.0  | 753.3  | 602.6  | 523.3  | 604.5  | 529.0  | 638.4  | 424.2  |
| 6.0    | 5.8    | 10.5   | 7.7    | 116.2  | 182.7  | 111.7  | 123.2  | 57.4   |
| 865.7  | 738.7  | 955.4  | 718.8  | 1206.5 | 1013.5 | 1204.3 | 1447.9 | 1311.2 |
| 189.5  | 186.5  | 282.8  | 169.8  | 204.3  | 139.0  | 206.0  | 247.5  | 256.3  |
| 30.5   | 39.7   | 23.5   | 30.2   | 36.6   | 28.7   | 46.3   | 29.4   | 59.1   |
| 0.6    | 4.2    | 1.3    | 2.8    | 4953.4 | 3980.0 | 5558.9 | 6137.5 | 204.5  |
| 218.0  | 224.0  | 339.3  | 195.2  | 684.4  | 624.1  | 653.8  | 697.7  | 977.6  |
| 171.4  | 157.8  | 302.0  | 191.7  | 645.1  | 618.7  | 733.3  | 676.9  | 1453.1 |
| 449.8  | 384.3  | 671.8  | 452.2  | 377.7  | 385.7  | 413.0  | 432.8  | 313.9  |
| 214.8  | 167.6  | 353.2  | 228.7  | 250.4  | 297.4  | 369.6  | 324.9  | 240.4  |
| 626.3  | 608.8  | 1588.4 | 1085.5 | 1358.5 | 1379.8 | 1382.3 | 1370.4 | 1045.9 |
| 231.9  | 234.6  | 201.8  | 255.3  | 165.4  | 152.7  | 153.5  | 171.5  | 357.9  |
| 7.0    | 11.0   | 7.7    | 1.2    | 1.0    | 3.5    | 3.8    | 2.2    | 9.3    |
| 13.2   | 20.5   | 23.9   | 13.1   | 7.5    | 5.8    | 8.1    | 10.6   | 10.6   |
| 9.9    | 16.7   | 8.1    | 7.0    | 2.6    | 5.3    | 6.3    | 0.6    | 7.2    |
| 16.2   | 16.1   | 7.4    | 2.0    | 7.5    | 2.5    | 7.9    | 1.5    | 2.4    |
| 605.2  | 508.7  | 709.1  | 515.9  | 858.6  | 884.1  | 935.9  | 846.2  | 1119.7 |
| 121.9  | 102.4  | 194.3  | 108.5  | 187.2  | 99.7   | 147.8  | 246.6  | 241.8  |
| 2631.8 | 2287.7 | 4240.4 | 2229.9 | 6.9    | 1.2    | 9.2    | 2.8    | 1.7    |
| 226.2  | 216.8  | 276.9  | 195.5  | 302.9  | 266.1  | 270.8  | 340.8  | 399.3  |
| 167.5  | 134.8  | 184.3  | 146.4  | 599.3  | 458.0  | 577.0  | 672.8  | 532.4  |
| 33.5   | 32.3   | 34.3   | 27.9   | 108.0  | 80.4   | 99.0   | 128.8  | 90.5   |
| 270.7  | 226.6  | 363.9  | 269.6  | 525.1  | 540.0  | 574.8  | 571.7  | 747.6  |
| 86.8   | 96.5   | 81.4   | 60.4   | 250.9  | 236.7  | 209.0  | 258.6  | 265.5  |
| 464.5  | 394.8  | 618.9  | 442.6  | 520.2  | 453.3  | 565.7  | 619.0  | 206.8  |
| 317.6  | 227.1  | 530.1  | 317.1  | 703.7  | 749.6  | 744.5  | 890.0  | 1407.8 |
| 734.3  | 655.0  | 1154.5 | 695.4  | 2410.3 | 1983.9 | 2348.5 | 2743.6 | 3358.2 |
| 35.0   | 69.0   | 17.2   | 68.4   | 28.4   | 20.9   | 29.3   | 44.0   | 3.6    |
| 74.8   | 132.8  | 17.2   | 117.1  | 39.9   | 18.2   | 93.1   | 59.1   | 3.4    |
| 79.3   | 103.2  | 43.1   | 100.2  | 108.7  | 213.7  | 134.4  | 103.3  | 521.7  |
| 186.9  | 297.6  | 46.1   | 264.7  | 420.2  | 762.4  | 627.8  | 384.1  | 3356.0 |
| 1422.5 | 1183.6 | 1938.8 | 1310.6 | 2045.0 | 1701.4 | 2132.1 | 2344.1 | 2817.4 |
| 618.6  | 616.3  | 802.0  | 680.6  | 1138.5 | 1005.5 | 1108.0 | 1213.6 | 1302.0 |
| 268.8  | 230.8  | 353.3  | 219.0  | 775.3  | 793.1  | 846.6  | 914.7  | 529.4  |
| 11.0   | 8.5    | 4.2    | 1.4    | 8.8    | 1.5    | 2.2    | 1.9    | 29.3   |
| 586.9  | 546.0  | 658.2  | 464.3  | 999.6  | 847.0  | 869.9  | 1023.7 | 930.0  |
| 207.5  | 220.3  | 376.0  | 197.1  | 2021.4 | 1486.6 | 1956.6 | 1945.9 | 1551.5 |
| 318.7  | 316.2  | 428.3  | 303.3  | 219.7  | 205.0  | 173.1  | 202.2  | 222.4  |
| 35.9   | 30.4   | 39.0   | 25.3   | 74.6   | 91.4   | 79.2   | 83.7   | 71.4   |
| 576.8  | 549.3  | 639.4  | 484.1  | 621.7  | 709.7  | 865.9  | 752.8  | 455.8  |
| 163.9  | 165.4  | 182.3  | 201.4  | 41.9   | 67.4   | 30.5   | 64.9   | 107.6  |
| 77.9   | 78.1   | 103.5  | 85.9   | 525.2  | 497.3  | 522.3  | 556.1  | 353.2  |
| 9.1    | 6.7    | 11.0   | 10.1   | 19.0   | 19.8   | 22.4   | 21.9   | 118.5  |



|        |        |        |        |        |        |        |        |        |
|--------|--------|--------|--------|--------|--------|--------|--------|--------|
| 5.5    | 6.9    | 8.7    | 11.4   | 30.3   | 32.0   | 36.0   | 34.4   | 184.7  |
| 1.8    | 8.7    | 13.5   | 7.8    | 53.5   | 47.2   | 68.9   | 82.2   | 74.1   |
| 0.9    | 0.8    | 2.2    | 1.5    | 28.9   | 27.8   | 42.4   | 16.5   | 24.4   |
| 57.9   | 55.4   | 119.2  | 86.5   | 82.0   | 24.2   | 65.4   | 142.6  | 2.2    |
| 41.0   | 24.5   | 36.7   | 40.1   | 86.9   | 70.1   | 83.3   | 84.0   | 60.5   |
| 47.2   | 45.9   | 68.4   | 47.0   | 121.5  | 145.4  | 148.9  | 132.8  | 241.5  |
| 71.5   | 63.4   | 96.7   | 68.5   | 23.6   | 26.8   | 35.4   | 37.0   | 29.4   |
| 975.9  | 1035.6 | 1440.9 | 967.9  | 306.5  | 312.4  | 278.0  | 335.3  | 182.4  |
| 335.3  | 292.5  | 333.8  | 284.2  | 391.3  | 435.0  | 426.3  | 453.7  | 160.5  |
| 107.3  | 104.9  | 156.2  | 87.8   | 316.6  | 278.4  | 376.7  | 399.3  | 295.8  |
| 500.4  | 404.9  | 1261.7 | 713.7  | 854.2  | 765.7  | 863.4  | 959.7  | 1468.3 |
| 58.5   | 60.6   | 35.8   | 38.3   | 373.2  | 397.3  | 512.8  | 459.3  | 143.4  |
| 151.9  | 152.9  | 116.2  | 93.4   | 806.9  | 740.2  | 1138.3 | 1054.3 | 428.4  |
| 236.8  | 224.5  | 282.0  | 218.8  | 217.0  | 110.2  | 199.5  | 289.0  | 514.8  |
| 112.1  | 115.2  | 129.5  | 124.6  | 123.1  | 114.8  | 177.4  | 142.7  | 200.9  |
| 1.6    | 3.8    | 2.9    | 1.6    | 512.2  | 481.8  | 455.5  | 693.0  | 634.1  |
| 834.2  | 772.8  | 1356.6 | 802.4  | 1391.4 | 848.3  | 1307.3 | 1634.0 | 1605.8 |
| 99.3   | 98.1   | 130.3  | 114.5  | 120.5  | 159.8  | 120.2  | 128.9  | 163.2  |
| 435.6  | 610.4  | 226.6  | 512.5  | 366.6  | 635.7  | 398.0  | 410.9  | 656.9  |
| 226.6  | 274.4  | 150.3  | 252.1  | 189.0  | 321.1  | 185.5  | 204.7  | 398.3  |
| 729.2  | 492.5  | 1812.7 | 491.8  | 1429.8 | 960.9  | 1797.7 | 1858.3 | 337.6  |
| 303.2  | 329.2  | 412.3  | 313.3  | 1390.6 | 1733.8 | 1620.7 | 1611.4 | 761.4  |
| 14.7   | 22.5   | 45.0   | 27.5   | 13.8   | 9.7    | 18.1   | 18.9   | 10.1   |
| 97.4   | 74.8   | 124.8  | 81.8   | 104.5  | 89.1   | 109.3  | 149.7  | 84.6   |
| 201.3  | 204.0  | 257.3  | 216.8  | 197.2  | 181.8  | 180.3  | 196.1  | 190.8  |
| 6.8    | 17.7   | 14.4   | 14.8   | 30.2   | 26.0   | 26.0   | 34.7   | 20.9   |
| 1200.0 | 1039.8 | 1193.4 | 992.1  | 1305.5 | 1277.9 | 1398.7 | 1513.9 | 1813.4 |
| 489.7  | 464.6  | 526.0  | 383.0  | 947.1  | 891.8  | 1015.9 | 1106.0 | 1710.5 |
| 664.2  | 664.8  | 816.0  | 483.6  | 1284.6 | 1401.6 | 1715.7 | 1510.8 | 1872.5 |
| 3.7    | 4.8    | 4.7    | 4.8    | 157.3  | 130.8  | 127.8  | 169.2  | 56.4   |
| 5.1    | 15.3   | 15.3   | 3.4    | 784.0  | 945.1  | 917.7  | 963.2  | 484.7  |
| 271.0  | 209.7  | 376.0  | 223.5  | 357.2  | 332.0  | 326.2  | 381.6  | 391.7  |
| 906.3  | 1063.7 | 551.7  | 1134.2 | 154.8  | 748.9  | 374.7  | 248.7  | 25.1   |
| 136.8  | 100.1  | 246.8  | 142.1  | 155.3  | 190.0  | 170.0  | 176.1  | 337.9  |
| 157.9  | 140.8  | 285.8  | 160.0  | 188.4  | 200.4  | 186.3  | 196.1  | 246.8  |
| 253.6  | 239.6  | 569.8  | 233.0  | 1521.1 | 1406.4 | 1583.5 | 1638.0 | 2398.3 |
| 314.8  | 292.2  | 342.9  | 275.7  | 102.2  | 104.7  | 96.2   | 141.1  | 102.6  |
| 78.9   | 77.1   | 84.9   | 86.2   | 59.3   | 91.0   | 87.8   | 67.0   | 76.9   |
| 72.2   | 56.0   | 66.3   | 54.6   | 164.5  | 173.9  | 135.5  | 183.8  | 209.6  |
| 18.8   | 13.3   | 20.9   | 17.3   | 30.2   | 28.0   | 32.1   | 25.9   | 75.0   |
| 790.2  | 837.6  | 837.3  | 806.4  | 259.9  | 298.3  | 239.2  | 264.0  | 374.2  |
| 196.4  | 208.6  | 206.8  | 158.3  | 243.8  | 227.7  | 255.3  | 293.6  | 661.1  |
| 532.2  | 533.4  | 571.0  | 540.2  | 593.9  | 783.7  | 587.1  | 617.2  | 575.9  |
| 48.9   | 45.8   | 57.8   | 54.6   | 35.2   | 29.7   | 32.8   | 35.2   | 35.4   |
| 10.6   | 13.1   | 23.2   | 8.6    | 2.3    | 4.8    | 5.3    | 6.2    | 14.5   |
| 3.6    | 2.5    | 8.0    | 1.4    | 2.4    | 1.7    | 0.3    | 0.9    | 5.0    |
| 51.8   | 47.7   | 134.1  | 71.8   | 113.4  | 145.4  | 158.6  | 102.3  | 77.6   |
| 8.1    | 10.9   | 2.4    | 11.1   | 1.4    | 3.2    | 5.7    | 2.7    | 3.5    |
| 39.8   | 32.3   | 65.9   | 42.8   | 200.3  | 162.1  | 196.5  | 228.4  | 174.9  |
| 424.6  | 373.4  | 644.3  | 410.8  | 955.5  | 997.4  | 1020.1 | 1119.8 | 813.1  |
| 1675.1 | 1531.6 | 2185.0 | 1708.2 | 1682.8 | 1835.2 | 1616.8 | 1729.2 | 3335.8 |
| 1884.4 | 1644.3 | 2208.6 | 1771.1 | 2078.7 | 2457.3 | 2140.1 | 2370.8 | 3648.0 |
| 418.4  | 347.5  | 723.5  | 347.7  | 913.1  | 732.2  | 849.8  | 875.6  | 1138.3 |

|        |        |        |        |        |        |        |        |        |
|--------|--------|--------|--------|--------|--------|--------|--------|--------|
| 4079.0 | 3794.9 | 5581.5 | 3849.3 | 6183.4 | 5863.4 | 6032.1 | 6501.2 | 7527.1 |
| 360.8  | 327.7  | 405.6  | 266.4  | 480.9  | 496.5  | 511.8  | 528.9  | 503.8  |
| 86.9   | 75.1   | 61.5   | 63.1   | 89.8   | 115.8  | 86.6   | 128.3  | 111.1  |
| 80.2   | 85.0   | 112.3  | 64.5   | 123.4  | 174.2  | 175.3  | 159.1  | 159.3  |
| 173.2  | 166.4  | 212.6  | 156.1  | 117.7  | 134.9  | 122.0  | 154.4  | 109.2  |
| 177.3  | 193.6  | 181.0  | 185.2  | 156.2  | 147.8  | 159.4  | 176.1  | 99.9   |
| 57.7   | 48.3   | 88.3   | 45.3   | 425.1  | 356.1  | 525.6  | 489.3  | 777.6  |
| 40.4   | 45.9   | 80.1   | 41.2   | 238.0  | 178.1  | 277.7  | 266.3  | 311.3  |
| 247.7  | 249.8  | 368.6  | 233.1  | 974.7  | 704.3  | 829.2  | 1075.3 | 903.9  |
| 86.3   | 62.2   | 114.4  | 39.8   | 1254.8 | 1067.4 | 1092.3 | 1252.7 | 4.3    |
| 186.6  | 167.3  | 311.2  | 190.0  | 38.7   | 51.4   | 45.4   | 63.5   | 160.7  |
| 721.8  | 629.6  | 1342.1 | 733.1  | 308.3  | 270.8  | 314.8  | 310.4  | 565.9  |
| 128.3  | 140.8  | 151.1  | 110.7  | 465.8  | 526.3  | 426.6  | 528.5  | 498.7  |
| 91.7   | 97.3   | 142.7  | 76.7   | 408.7  | 448.0  | 350.0  | 446.8  | 402.8  |
| 454.8  | 436.1  | 460.3  | 424.3  | 539.9  | 521.6  | 549.9  | 564.4  | 614.4  |
| 2.4    | 3.0    | 2.4    | 8.1    | 4.3    | 7.1    | 2.1    | 5.4    | 2.4    |
| 87.4   | 64.5   | 154.7  | 26.9   | 466.8  | 438.7  | 581.2  | 540.0  | 422.4  |
| 304.6  | 257.3  | 319.7  | 258.4  | 279.3  | 249.5  | 248.2  | 282.4  | 378.8  |
| 26.2   | 24.8   | 40.0   | 25.8   | 11.0   | 7.8    | 8.2    | 5.6    | 0.7    |
| 14.8   | 17.1   | 15.2   | 18.1   | 423.0  | 540.6  | 425.1  | 450.5  | 126.8  |
| 423.4  | 413.0  | 435.2  | 419.3  | 340.1  | 335.2  | 387.0  | 434.6  | 182.2  |
| 47.7   | 53.2   | 71.5   | 54.8   | 240.6  | 206.7  | 229.2  | 281.9  | 335.7  |
| 260.6  | 289.8  | 279.3  | 257.6  | 419.2  | 339.9  | 384.8  | 397.6  | 852.1  |
| 473.1  | 487.5  | 492.2  | 510.2  | 586.7  | 489.3  | 644.9  | 778.4  | 853.9  |
| 293.4  | 279.2  | 411.1  | 432.4  | 160.0  | 237.4  | 228.0  | 222.4  | 213.4  |
| 39.3   | 36.7   | 50.8   | 35.3   | 139.4  | 172.3  | 106.4  | 149.1  | 394.5  |
| 7.9    | 3.9    | 5.6    | 3.7    | 671.1  | 556.0  | 625.4  | 629.4  | 985.2  |
| 5.9    | 7.1    | 1.0    | 0.9    | 2326.8 | 2748.1 | 2444.5 | 2344.4 | 1572.6 |
| 148.1  | 129.4  | 246.0  | 121.8  | 277.4  | 218.0  | 318.3  | 279.7  | 159.1  |
| 5.7    | 15.0   | 9.1    | 2.0    | 9.3    | 12.2   | 8.2    | 2.9    | 4.2    |
| 96.4   | 94.8   | 106.0  | 86.0   | 497.4  | 775.1  | 490.3  | 476.6  | 277.9  |
| 132.2  | 120.9  | 199.3  | 106.7  | 214.4  | 251.0  | 179.7  | 281.4  | 168.6  |
| 13.0   | 8.4    | 13.5   | 16.2   | 53.3   | 43.3   | 82.8   | 67.9   | 15.0   |
| 331.3  | 303.4  | 427.9  | 342.7  | 495.1  | 351.1  | 459.6  | 633.7  | 486.1  |
| 49.8   | 42.7   | 45.1   | 47.5   | 169.6  | 103.8  | 132.9  | 186.5  | 213.9  |
| 73.4   | 84.5   | 70.1   | 42.6   | 551.0  | 455.1  | 547.5  | 556.8  | 264.6  |
| 51.8   | 74.0   | 57.0   | 41.1   | 449.5  | 491.4  | 478.9  | 482.8  | 270.5  |
| 211.0  | 208.9  | 163.6  | 120.6  | 1217.7 | 1260.6 | 1433.6 | 1345.8 | 822.7  |
| 151.4  | 119.8  | 216.0  | 123.7  | 484.9  | 342.7  | 481.1  | 557.9  | 556.4  |
| 119.8  | 100.0  | 170.3  | 93.1   | 390.5  | 270.6  | 352.8  | 457.9  | 353.1  |
| 48.3   | 96.4   | 37.1   | 48.2   | 3.4    | 0.5    | 4.1    | 4.9    | 29.8   |
| 12.8   | 16.6   | 2.7    | 9.0    | 3.6    | 0.3    | 2.5    | 4.8    | 2.3    |
| 41.1   | 54.6   | 43.4   | 28.8   | 15.8   | 3.9    | 14.2   | 4.6    | 28.4   |
| 25.4   | 28.4   | 49.5   | 20.3   | 65.0   | 117.5  | 58.2   | 116.5  | 320.3  |
| 91.9   | 80.6   | 148.5  | 89.5   | 315.0  | 453.2  | 238.3  | 364.5  | 1467.6 |
| 389.4  | 387.4  | 484.7  | 426.1  | 635.6  | 543.8  | 540.4  | 716.4  | 467.4  |
| 79.0   | 72.4   | 141.0  | 101.2  | 268.9  | 185.4  | 220.2  | 266.4  | 74.4   |
| 89.7   | 103.0  | 160.1  | 115.8  | 168.3  | 135.6  | 154.5  | 224.4  | 62.4   |
| 44.1   | 44.5   | 66.3   | 60.4   | 76.5   | 76.7   | 82.2   | 69.3   | 29.6   |
| 212.0  | 228.7  | 329.5  | 241.9  | 320.6  | 392.3  | 320.1  | 405.7  | 406.3  |
| 47.7   | 53.0   | 65.4   | 59.5   | 106.2  | 41.9   | 154.3  | 144.7  | 2.7    |
| 545.4  | 547.7  | 754.8  | 641.1  | 765.0  | 753.5  | 750.0  | 803.1  | 1271.3 |
| 375.6  | 343.2  | 444.7  | 300.3  | 902.8  | 1024.9 | 896.1  | 987.6  | 955.1  |

|        |        |        |        |        |        |        |        |        |
|--------|--------|--------|--------|--------|--------|--------|--------|--------|
| 67.2   | 67.2   | 108.1  | 76.9   | 229.2  | 220.8  | 303.5  | 237.3  | 98.6   |
| 71.2   | 69.4   | 99.3   | 85.9   | 324.0  | 307.0  | 423.4  | 333.9  | 118.2  |
| 507.8  | 551.6  | 579.6  | 518.7  | 362.5  | 295.0  | 359.1  | 412.2  | 299.3  |
| 317.7  | 330.8  | 317.0  | 311.2  | 297.5  | 288.6  | 340.5  | 339.5  | 199.8  |
| 89.4   | 97.4   | 163.4  | 94.9   | 480.4  | 347.0  | 513.7  | 563.0  | 647.3  |
| 10.5   | 8.0    | 10.6   | 6.3    | 8.0    | 7.2    | 6.8    | 7.0    | 57.9   |
| 93.5   | 97.0   | 66.2   | 83.7   | 153.7  | 167.3  | 114.4  | 168.0  | 168.5  |
| 238.2  | 238.2  | 237.0  | 220.3  | 137.8  | 195.6  | 133.2  | 186.0  | 339.7  |
| 49.0   | 54.6   | 64.3   | 89.2   | 127.1  | 120.1  | 139.8  | 159.5  | 2744.8 |
| 215.2  | 257.1  | 318.2  | 258.8  | 741.4  | 707.0  | 811.9  | 822.8  | 428.6  |
| 204.9  | 176.6  | 497.3  | 238.3  | 283.7  | 254.7  | 295.4  | 375.7  | 112.1  |
| 16.3   | 13.8   | 7.1    | 18.0   | 0.9    | 7.8    | 2.3    | 1.7    | 11.0   |
| 441.3  | 407.4  | 886.8  | 483.5  | 786.6  | 726.6  | 772.8  | 922.3  | 329.9  |
| 140.8  | 123.4  | 210.3  | 152.2  | 341.5  | 332.2  | 356.2  | 363.2  | 372.2  |
| 5.0    | 3.8    | 1.8    | 4.8    | 9.0    | 5.2    | 5.7    | 1.1    | 31.3   |
| 21.7   | 26.7   | 20.7   | 17.1   | 83.5   | 77.8   | 78.5   | 88.6   | 91.0   |
| 7.4    | 8.4    | 13.0   | 14.3   | 224.1  | 218.4  | 210.9  | 239.9  | 213.1  |
| 21.6   | 17.3   | 22.8   | 28.5   | 35.9   | 26.8   | 33.9   | 45.3   | 50.5   |
| 2149.5 | 1913.9 | 2953.7 | 2215.3 | 971.6  | 1063.3 | 914.5  | 1095.5 | 777.9  |
| 8.1    | 5.7    | 16.2   | 9.6    | 5.8    | 9.4    | 10.6   | 7.5    | 60.4   |
| 17.2   | 18.9   | 21.7   | 15.7   | 19.6   | 19.5   | 21.3   | 10.5   | 87.2   |
| 415.6  | 385.9  | 586.5  | 487.9  | 462.1  | 443.1  | 519.6  | 559.4  | 636.3  |
| 10.1   | 6.5    | 7.3    | 8.8    | 16.7   | 7.6    | 8.2    | 6.3    | 12.2   |
| 50.4   | 55.6   | 68.0   | 54.5   | 66.4   | 62.9   | 67.0   | 74.2   | 81.5   |
| 1105.1 | 1015.9 | 1269.2 | 1170.4 | 1240.8 | 1114.8 | 1300.9 | 1545.8 | 1240.4 |
| 960.1  | 846.5  | 1640.7 | 863.9  | 1685.4 | 1018.4 | 1540.2 | 1826.7 | 2116.1 |
| 412.3  | 358.6  | 394.1  | 293.6  | 152.0  | 154.8  | 178.2  | 203.3  | 329.2  |
| 769.4  | 698.9  | 690.4  | 612.4  | 583.4  | 625.3  | 674.1  | 692.6  | 909.1  |
| 167.9  | 148.7  | 208.6  | 181.6  | 69.3   | 68.2   | 72.5   | 89.7   | 47.4   |
| 26.5   | 20.6   | 46.3   | 27.9   | 23.5   | 25.1   | 30.6   | 23.7   | 53.6   |
| 6.3    | 5.2    | 5.4    | 3.1    | 4.6    | 4.8    | 8.2    | 7.6    | 9.1    |
| 143.2  | 107.4  | 178.7  | 143.7  | 189.3  | 139.4  | 180.4  | 173.3  | 330.6  |
| 89.2   | 83.4   | 152.5  | 96.1   | 905.9  | 668.9  | 928.5  | 1074.8 | 1209.0 |
| 196.0  | 175.5  | 246.3  | 182.8  | 228.2  | 244.1  | 247.8  | 240.3  | 218.9  |
| 849.9  | 806.4  | 950.7  | 809.2  | 188.8  | 322.4  | 245.5  | 227.7  | 164.3  |
| 754.9  | 711.0  | 985.7  | 726.6  | 1760.1 | 2206.2 | 1447.6 | 1615.6 | 2238.9 |
| 120.2  | 122.0  | 138.6  | 135.5  | 131.0  | 128.9  | 110.7  | 136.7  | 120.5  |
| 60.6   | 65.9   | 82.0   | 66.9   | 42.1   | 58.5   | 36.4   | 50.6   | 58.9   |
| 1549.1 | 1552.6 | 1980.0 | 1433.8 | 31.2   | 11.3   | 24.6   | 27.3   | 6.8    |
| 204.9  | 245.7  | 317.2  | 271.4  | 303.1  | 466.8  | 653.2  | 396.5  | 501.3  |
| 103.0  | 103.7  | 125.5  | 98.4   | 283.6  | 297.4  | 246.5  | 292.4  | 515.4  |
| 23.8   | 21.7   | 29.5   | 18.7   | 43.4   | 53.3   | 39.9   | 54.1   | 146.5  |
| 1.1    | 1.5    | 1.4    | 0.9    | 6.1    | 12.8   | 25.7   | 16.6   | 82.8   |
| 31.1   | 37.3   | 18.6   | 21.0   | 170.3  | 108.8  | 255.6  | 268.4  | 492.3  |
| 72.8   | 62.7   | 82.5   | 70.2   | 94.9   | 115.7  | 97.2   | 94.8   | 56.3   |
| 425.0  | 385.3  | 791.6  | 516.7  | 729.3  | 841.3  | 786.9  | 742.7  | 978.6  |
| 5.0    | 0.8    | 4.9    | 5.1    | 7.1    | 9.1    | 65.7   | 13.5   | 241.4  |
| 63.2   | 78.3   | 55.8   | 63.8   | 46.6   | 73.0   | 44.5   | 75.1   | 65.7   |
| 1.3    | 1.6    | 2.1    | 1.4    | 6.2    | 6.4    | 1.4    | 1.9    | 2.4    |
| 17.1   | 12.6   | 16.3   | 9.3    | 18.4   | 14.9   | 11.1   | 20.8   | 31.6   |
| 51.8   | 66.4   | 74.2   | 44.6   | 193.7  | 140.4  | 373.2  | 269.1  | 333.5  |
| 10.1   | 10.5   | 8.5    | 2.9    | 8.8    | 6.8    | 11.0   | 1.1    | 3.5    |
| 322.4  | 450.3  | 213.0  | 288.5  | 414.0  | 397.8  | 582.2  | 615.8  | 113.4  |

|        |        |        |        |        |        |        |        |        |
|--------|--------|--------|--------|--------|--------|--------|--------|--------|
| 439.1  | 449.8  | 619.8  | 430.3  | 683.4  | 615.6  | 726.6  | 782.0  | 499.7  |
| 19.3   | 23.5   | 18.2   | 15.7   | 21.8   | 25.3   | 9.7    | 13.2   | 47.5   |
| 100.8  | 98.7   | 131.8  | 106.8  | 110.1  | 100.9  | 102.3  | 149.1  | 347.6  |
| 88.8   | 95.6   | 127.5  | 76.0   | 104.5  | 111.0  | 109.1  | 149.2  | 527.9  |
| 187.6  | 165.3  | 344.3  | 164.2  | 631.2  | 532.1  | 643.7  | 711.0  | 280.1  |
| 116.5  | 106.1  | 216.6  | 103.5  | 392.8  | 294.1  | 397.0  | 434.2  | 283.4  |
| 322.6  | 254.2  | 431.8  | 267.5  | 176.2  | 143.4  | 154.5  | 196.4  | 207.4  |
| 223.0  | 183.6  | 594.8  | 278.2  | 222.9  | 242.0  | 217.7  | 245.6  | 178.3  |
| 571.9  | 474.2  | 952.8  | 565.4  | 465.7  | 376.3  | 517.0  | 540.7  | 314.9  |
| 2.1    | 1.1    | 3.4    | 2.3    | 61.9   | 67.3   | 85.9   | 70.1   | 11.5   |
| 5.8    | 3.8    | 2.5    | 4.6    | 17.5   | 18.3   | 11.4   | 37.4   | 2.0    |
| 1163.6 | 1638.4 | 748.4  | 1140.4 | 1164.1 | 1391.4 | 1569.8 | 1218.9 | 5.6    |
| 85.5   | 71.2   | 100.8  | 69.6   | 62.8   | 83.3   | 64.9   | 75.1   | 139.6  |
| 37.2   | 35.1   | 38.4   | 30.9   | 25.1   | 18.5   | 8.9    | 35.1   | 34.7   |
| 280.5  | 195.0  | 488.5  | 194.0  | 809.7  | 697.9  | 715.1  | 914.0  | 752.1  |
| 6.6    | 4.0    | 8.6    | 3.0    | 821.6  | 675.9  | 711.3  | 938.4  | 4.6    |
| 19.8   | 24.2   | 29.6   | 20.3   | 2.6    | 2.8    | 7.8    | 2.3    | 7.6    |
| 207.9  | 252.3  | 197.1  | 211.8  | 89.4   | 126.6  | 103.7  | 89.6   | 221.0  |
| 136.5  | 182.3  | 164.1  | 145.8  | 195.7  | 176.1  | 198.5  | 198.6  | 266.8  |
| 2223.6 | 2033.7 | 2953.8 | 2260.4 | 1629.2 | 1446.7 | 1973.8 | 2026.8 | 1548.1 |
| 89.7   | 79.7   | 92.7   | 73.8   | 113.9  | 184.2  | 134.4  | 150.3  | 125.2  |
| 131.2  | 105.1  | 171.3  | 124.0  | 171.1  | 217.7  | 164.1  | 188.9  | 173.1  |
| 312.8  | 299.3  | 290.5  | 332.5  | 180.8  | 200.8  | 197.8  | 229.1  | 190.4  |
| 117.3  | 125.8  | 125.1  | 103.7  | 115.9  | 101.3  | 130.7  | 124.7  | 142.8  |
| 166.3  | 171.5  | 203.6  | 177.4  | 474.6  | 634.6  | 470.1  | 491.8  | 601.6  |
| 166.5  | 153.6  | 222.5  | 161.8  | 76.5   | 675.1  | 98.6   | 93.9   | 164.3  |
| 358.1  | 335.5  | 339.3  | 278.2  | 380.9  | 474.3  | 458.9  | 470.9  | 247.2  |
| 376.3  | 403.2  | 405.8  | 306.8  | 361.1  | 445.1  | 383.0  | 433.6  | 202.4  |
| 334.0  | 410.3  | 520.2  | 276.7  | 801.4  | 386.1  | 1129.1 | 940.2  | 2303.1 |
| 158.8  | 175.6  | 291.8  | 123.0  | 435.4  | 175.9  | 542.6  | 541.7  | 1346.7 |
| 739.4  | 734.4  | 743.1  | 564.2  | 468.8  | 419.7  | 524.7  | 520.4  | 512.0  |
| 1464.2 | 1133.2 | 1802.6 | 1120.8 | 1506.8 | 1346.5 | 1984.9 | 1738.4 | 1454.6 |
| 275.9  | 344.5  | 269.2  | 325.3  | 158.2  | 177.5  | 171.8  | 196.7  | 140.5  |
| 312.2  | 275.5  | 516.7  | 315.7  | 372.0  | 510.3  | 430.3  | 429.4  | 747.3  |
| 2.8    | 4.6    | 12.2   | 5.5    | 156.0  | 160.5  | 149.1  | 192.4  | 32.1   |
| 287.5  | 276.3  | 408.1  | 265.8  | 514.9  | 480.0  | 586.2  | 600.0  | 611.1  |
| 107.9  | 115.4  | 135.7  | 108.8  | 14.9   | 3.2    | 4.5    | 10.1   | 17.7   |
| 0.6    | 1.1    | 2.1    | 0.4    | 126.9  | 166.3  | 156.9  | 151.8  | 1.5    |
| 4.4    | 1.5    | 2.7    | 1.6    | 71.4   | 113.9  | 109.1  | 91.3   | 2.1    |
| 289.2  | 263.2  | 293.8  | 207.6  | 634.7  | 610.7  | 611.4  | 727.9  | 852.9  |
| 189.4  | 255.4  | 175.5  | 194.4  | 1667.4 | 2100.4 | 1463.6 | 2022.5 | 96.1   |
| 42.3   | 27.0   | 42.2   | 35.7   | 57.5   | 59.8   | 55.2   | 63.4   | 62.8   |
| 4.5    | 11.2   | 14.5   | 4.2    | 5.1    | 4.4    | 6.9    | 3.7    | 11.9   |
| 31.7   | 25.4   | 21.2   | 14.4   | 40.5   | 45.0   | 28.8   | 48.5   | 64.4   |
| 49.4   | 51.5   | 20.2   | 14.9   | 67.5   | 102.1  | 70.0   | 82.8   | 99.5   |
| 686.5  | 761.0  | 778.6  | 835.0  | 34.0   | 46.8   | 36.0   | 33.6   | 37.9   |
| 137.1  | 116.3  | 240.2  | 150.0  | 935.7  | 856.9  | 963.0  | 1134.7 | 955.7  |
| 61.0   | 58.6   | 68.5   | 53.5   | 43.9   | 70.6   | 52.0   | 71.7   | 114.2  |
| 22.2   | 22.2   | 18.5   | 23.5   | 2.8    | 5.4    | 6.3    | 6.7    | 488.6  |
| 93.2   | 106.7  | 122.1  | 108.9  | 54.6   | 71.1   | 66.5   | 58.0   | 109.9  |
| 256.3  | 244.3  | 481.3  | 253.7  | 1018.6 | 670.6  | 835.9  | 1027.9 | 1176.5 |
| 577.6  | 594.8  | 675.2  | 680.9  | 603.7  | 894.8  | 728.2  | 766.8  | 169.2  |
| 150.8  | 144.8  | 205.4  | 142.2  | 269.3  | 363.3  | 290.2  | 326.6  | 127.4  |

|       |       |       |       |        |        |        |        |       |
|-------|-------|-------|-------|--------|--------|--------|--------|-------|
| 94.1  | 83.1  | 78.1  | 71.0  | 121.9  | 174.0  | 155.9  | 158.0  | 144.6 |
| 83.8  | 96.1  | 117.1 | 108.6 | 112.0  | 96.2   | 108.5  | 127.0  | 57.4  |
| 75.8  | 70.9  | 95.5  | 77.8  | 130.0  | 113.6  | 132.6  | 178.0  | 127.4 |
| 14.5  | 17.2  | 35.1  | 11.2  | 59.2   | 42.6   | 51.8   | 58.4   | 39.8  |
| 31.1  | 33.2  | 48.9  | 37.5  | 57.6   | 50.8   | 44.5   | 54.2   | 48.6  |
| 28.9  | 35.2  | 80.7  | 34.8  | 106.8  | 116.2  | 89.2   | 163.7  | 133.2 |
| 75.6  | 72.0  | 42.9  | 55.6  | 129.0  | 169.0  | 128.5  | 180.8  | 282.0 |
| 137.8 | 152.0 | 235.2 | 157.4 | 239.2  | 207.7  | 227.0  | 260.0  | 719.9 |
| 9.0   | 3.9   | 6.6   | 6.1   | 6.6    | 1.8    | 12.3   | 9.5    | 36.9  |
| 168.6 | 185.8 | 148.0 | 151.5 | 125.8  | 136.9  | 102.1  | 141.2  | 111.6 |
| 296.0 | 303.1 | 525.8 | 259.2 | 839.6  | 594.6  | 754.4  | 900.8  | 671.6 |
| 441.0 | 409.9 | 636.6 | 510.1 | 370.4  | 472.6  | 418.3  | 462.9  | 396.9 |
| 39.7  | 35.9  | 49.3  | 36.8  | 36.9   | 40.8   | 18.6   | 34.5   | 39.4  |
| 292.4 | 269.5 | 232.0 | 236.4 | 90.2   | 87.2   | 121.8  | 128.9  | 259.4 |
| 133.8 | 151.7 | 110.6 | 145.9 | 47.8   | 55.1   | 57.8   | 61.2   | 151.4 |
| 235.7 | 239.1 | 207.7 | 186.5 | 61.0   | 62.7   | 81.1   | 93.3   | 187.3 |
| 85.7  | 86.5  | 121.5 | 70.4  | 178.0  | 113.1  | 159.0  | 131.8  | 234.3 |
| 289.1 | 287.4 | 401.4 | 250.1 | 228.1  | 259.7  | 220.3  | 249.7  | 286.5 |
| 395.3 | 365.6 | 525.1 | 399.4 | 349.2  | 389.8  | 410.0  | 416.1  | 506.5 |
| 158.5 | 156.4 | 196.0 | 144.5 | 218.2  | 189.2  | 205.8  | 252.1  | 277.5 |
| 273.8 | 234.0 | 373.1 | 244.9 | 107.1  | 151.6  | 125.0  | 156.6  | 128.9 |
| 157.3 | 146.0 | 202.2 | 140.6 | 305.6  | 300.6  | 401.1  | 337.9  | 449.5 |
| 73.4  | 67.8  | 181.3 | 81.6  | 183.0  | 166.9  | 188.5  | 215.8  | 448.8 |
| 134.1 | 105.7 | 270.0 | 143.3 | 228.2  | 190.4  | 226.9  | 218.3  | 204.6 |
| 90.4  | 92.8  | 101.8 | 84.2  | 204.6  | 522.4  | 210.1  | 267.3  | 864.1 |
| 18.4  | 11.4  | 16.8  | 12.3  | 19.6   | 10.7   | 21.2   | 19.5   | 34.4  |
| 14.6  | 5.0   | 9.2   | 5.5   | 12.6   | 7.5    | 2.9    | 10.1   | 7.3   |
| 54.1  | 60.9  | 46.4  | 45.9  | 27.5   | 27.5   | 30.5   | 27.8   | 17.8  |
| 172.7 | 181.4 | 142.6 | 153.6 | 98.3   | 92.5   | 94.6   | 121.6  | 54.4  |
| 322.6 | 357.2 | 394.9 | 282.1 | 1052.0 | 694.3  | 1114.7 | 1132.0 | 737.8 |
| 23.2  | 12.0  | 8.8   | 2.7   | 12.2   | 27.0   | 21.3   | 14.6   | 8.5   |
| 296.0 | 305.3 | 244.5 | 268.0 | 16.2   | 12.9   | 18.7   | 13.0   | 43.7  |
| 10.9  | 12.5  | 10.9  | 8.8   | 4.9    | 1.1    | 2.2    | 3.3    | 59.8  |
| 339.6 | 311.1 | 570.9 | 358.7 | 341.9  | 414.3  | 361.3  | 453.4  | 381.2 |
| 242.0 | 220.5 | 427.3 | 248.5 | 396.1  | 397.2  | 396.5  | 451.0  | 336.6 |
| 76.9  | 71.6  | 59.7  | 51.4  | 20.8   | 14.7   | 16.1   | 18.9   | 29.6  |
| 70.6  | 56.8  | 47.7  | 56.7  | 18.5   | 55.8   | 14.9   | 16.6   | 57.8  |
| 425.5 | 447.2 | 409.6 | 454.9 | 1547.7 | 1539.0 | 1515.8 | 1856.0 | 871.9 |
| 211.4 | 179.4 | 365.4 | 185.2 | 588.4  | 640.6  | 605.4  | 695.1  | 332.4 |
| 152.0 | 136.2 | 185.3 | 119.9 | 164.9  | 166.9  | 184.5  | 178.8  | 87.6  |
| 259.7 | 250.9 | 303.1 | 271.8 | 246.1  | 177.7  | 214.7  | 308.2  | 136.0 |
| 879.8 | 822.4 | 924.8 | 682.0 | 767.0  | 840.4  | 886.3  | 927.4  | 846.0 |
| 120.7 | 133.3 | 248.7 | 138.4 | 93.0   | 97.2   | 69.1   | 85.1   | 69.9  |
| 101.7 | 111.9 | 136.2 | 88.7  | 108.8  | 104.3  | 110.7  | 134.4  | 48.0  |
| 347.4 | 333.9 | 418.8 | 295.5 | 553.7  | 581.8  | 577.2  | 658.6  | 647.1 |
| 98.5  | 96.6  | 125.8 | 82.9  | 154.9  | 168.9  | 139.0  | 207.2  | 200.2 |
| 79.2  | 79.1  | 179.6 | 98.9  | 224.1  | 329.2  | 232.5  | 194.5  | 284.3 |
| 22.0  | 15.1  | 34.9  | 33.4  | 12.0   | 13.5   | 23.9   | 20.9   | 41.0  |
| 341.7 | 286.1 | 285.4 | 406.7 | 34.7   | 25.5   | 47.2   | 62.7   | 189.4 |
| 153.6 | 149.0 | 105.1 | 184.0 | 20.6   | 8.9    | 19.6   | 5.0    | 63.3  |
| 166.3 | 156.3 | 289.8 | 156.4 | 402.1  | 471.8  | 447.7  | 430.1  | 644.7 |
| 27.7  | 16.2  | 63.3  | 13.1  | 55.9   | 61.1   | 56.4   | 66.3   | 23.5  |
| 152.7 | 135.1 | 147.7 | 127.2 | 216.8  | 331.5  | 199.2  | 247.2  | 158.3 |

|        |        |        |        |        |        |        |        |        |
|--------|--------|--------|--------|--------|--------|--------|--------|--------|
| 130.5  | 112.6  | 409.7  | 133.6  | 1067.7 | 601.7  | 793.1  | 1084.1 | 649.1  |
| 4.5    | 4.4    | 1.2    | 4.3    | 31.6   | 23.3   | 31.8   | 45.3   | 31.4   |
| 29.4   | 34.6   | 34.9   | 34.7   | 45.3   | 34.4   | 50.3   | 47.3   | 54.6   |
| 412.0  | 416.7  | 419.4  | 392.9  | 239.5  | 251.8  | 236.7  | 310.8  | 334.8  |
| 98.5   | 133.1  | 97.3   | 81.5   | 107.1  | 113.6  | 133.3  | 145.7  | 43.5   |
| 3.3    | 6.6    | 5.1    | 10.7   | 11.0   | 14.1   | 13.5   | 14.2   | 4.7    |
| 10.2   | 7.2    | 7.5    | 12.5   | 11.4   | 15.5   | 13.4   | 21.9   | 3.4    |
| 341.9  | 362.8  | 365.2  | 313.8  | 313.8  | 408.3  | 332.6  | 382.8  | 284.1  |
| 567.3  | 553.4  | 552.1  | 486.9  | 242.0  | 187.7  | 244.3  | 294.1  | 130.7  |
| 35.4   | 32.3   | 41.6   | 34.3   | 14.5   | 15.9   | 15.6   | 20.8   | 23.6   |
| 19.8   | 23.5   | 17.5   | 18.0   | 3.5    | 3.1    | 2.9    | 1.9    | 8.1    |
| 71.7   | 69.2   | 88.4   | 77.1   | 78.6   | 91.8   | 77.8   | 119.5  | 130.8  |
| 969.0  | 956.9  | 1004.9 | 777.9  | 1683.8 | 1353.9 | 1734.2 | 1945.3 | 1609.1 |
| 109.8  | 97.6   | 133.8  | 85.4   | 161.2  | 215.6  | 200.0  | 176.8  | 195.4  |
| 1258.4 | 1066.1 | 1629.4 | 1086.0 | 801.8  | 760.8  | 930.2  | 1012.3 | 870.8  |
| 120.2  | 172.8  | 72.7   | 137.9  | 179.7  | 215.4  | 213.5  | 242.6  | 233.5  |
| 8.7    | 9.0    | 14.8   | 25.0   | 1.8    | 1.6    | 1.4    | 3.1    | 2.1    |
| 351.0  | 341.7  | 443.3  | 345.2  | 190.3  | 194.9  | 192.0  | 225.5  | 271.7  |
| 458.5  | 410.5  | 710.4  | 417.4  | 1238.8 | 1176.3 | 1230.2 | 1259.8 | 855.4  |
| 4.5    | 1.3    | 5.6    | 5.7    | 10.0   | 8.9    | 9.9    | 10.5   | 14.3   |
| 453.3  | 447.1  | 425.5  | 302.8  | 683.7  | 690.5  | 773.1  | 912.1  | 700.2  |
| 99.2   | 85.7   | 141.2  | 128.8  | 162.2  | 180.5  | 252.0  | 211.6  | 99.4   |
| 176.0  | 167.8  | 187.0  | 166.9  | 437.5  | 390.0  | 440.6  | 484.1  | 666.8  |
| 366.8  | 384.3  | 666.9  | 520.0  | 534.9  | 529.7  | 605.4  | 680.9  | 252.8  |
| 341.2  | 337.7  | 473.5  | 460.4  | 478.2  | 474.3  | 505.0  | 484.2  | 180.3  |
| 339.2  | 334.3  | 334.4  | 299.4  | 517.5  | 507.1  | 527.3  | 582.6  | 255.7  |
| 55.7   | 54.8   | 63.7   | 82.7   | 115.8  | 138.1  | 127.5  | 150.0  | 209.0  |
| 11.2   | 12.6   | 20.1   | 14.6   | 14.2   | 10.2   | 10.7   | 4.5    | 3.1    |
| 1761.8 | 1416.0 | 1924.2 | 1643.6 | 1431.9 | 1520.6 | 1454.4 | 1668.3 | 3935.3 |
| 135.2  | 147.9  | 185.0  | 174.0  | 140.9  | 149.8  | 145.7  | 174.6  | 51.1   |
| 431.0  | 424.2  | 531.0  | 392.8  | 125.6  | 172.2  | 118.6  | 137.4  | 170.4  |
| 240.4  | 245.4  | 292.3  | 326.5  | 142.7  | 149.6  | 136.4  | 155.9  | 126.5  |
| 2.4    | 4.3    | 1.4    | 1.8    | 147.9  | 164.3  | 148.8  | 155.8  | 3.4    |
| 104.4  | 147.5  | 146.5  | 102.5  | 139.4  | 160.0  | 160.9  | 170.2  | 126.6  |
| 24.4   | 22.3   | 39.8   | 23.7   | 1.3    | 2.7    | 7.4    | 6.3    | 14.5   |
| 85.7   | 90.6   | 108.3  | 104.5  | 28.8   | 34.4   | 37.6   | 52.2   | 17.3   |
| 54.0   | 65.4   | 75.8   | 93.1   | 28.4   | 40.5   | 37.2   | 44.1   | 25.5   |
| 152.6  | 146.5  | 323.1  | 198.0  | 396.0  | 395.1  | 454.1  | 427.5  | 316.3  |
| 106.5  | 87.0   | 87.9   | 54.9   | 171.5  | 139.9  | 170.9  | 179.8  | 63.3   |
| 729.7  | 606.6  | 885.2  | 521.2  | 2146.4 | 2137.0 | 2085.8 | 2288.7 | 3011.5 |
| 16.9   | 13.5   | 19.5   | 15.4   | 10.9   | 5.8    | 7.0    | 17.9   | 101.2  |
| 9.7    | 3.2    | 13.2   | 11.5   | 119.1  | 91.4   | 133.0  | 107.4  | 26.6   |
| 11.2   | 9.9    | 7.6    | 3.4    | 38.2   | 53.7   | 56.7   | 64.6   | 13.7   |
| 996.1  | 1057.7 | 1707.9 | 957.3  | 2749.7 | 2431.2 | 2708.0 | 2913.4 | 2113.0 |
| 71.5   | 70.0   | 58.9   | 62.8   | 36.7   | 34.9   | 35.2   | 37.4   | 20.3   |
| 299.1  | 266.7  | 413.6  | 282.5  | 575.3  | 617.5  | 625.4  | 633.1  | 574.3  |
| 417.6  | 405.1  | 400.5  | 382.8  | 355.8  | 441.7  | 358.1  | 389.9  | 336.8  |
| 166.4  | 160.9  | 317.2  | 180.0  | 725.0  | 684.7  | 787.2  | 807.5  | 2328.7 |
| 83.4   | 72.3   | 134.9  | 108.1  | 216.0  | 168.5  | 199.0  | 252.1  | 226.6  |
| 86.0   | 76.5   | 134.8  | 112.9  | 318.9  | 241.7  | 318.7  | 388.5  | 455.7  |
| 28.5   | 27.0   | 35.8   | 23.9   | 293.3  | 248.8  | 299.7  | 358.5  | 191.8  |
| 14.9   | 14.5   | 17.6   | 16.3   | 153.2  | 122.2  | 136.4  | 183.5  | 67.7   |
| 77.3   | 75.9   | 133.9  | 89.7   | 324.8  | 376.5  | 320.1  | 375.9  | 150.2  |

|        |        |        |        |        |        |        |        |        |
|--------|--------|--------|--------|--------|--------|--------|--------|--------|
| 347.8  | 383.3  | 506.4  | 331.7  | 410.8  | 458.1  | 407.7  | 489.6  | 645.6  |
| 88.8   | 106.0  | 165.2  | 78.4   | 132.0  | 92.9   | 108.9  | 139.1  | 250.3  |
| 35.4   | 48.2   | 66.3   | 26.0   | 65.9   | 58.1   | 73.4   | 94.3   | 62.2   |
| 199.2  | 180.5  | 355.4  | 208.5  | 420.5  | 340.7  | 410.3  | 498.5  | 512.6  |
| 4.4    | 11.9   | 12.0   | 10.1   | 10.7   | 0.6    | 1.9    | 4.1    | 8.8    |
| 1850.7 | 1200.0 | 2723.8 | 1437.5 | 78.0   | 131.3  | 104.8  | 130.2  | 101.9  |
| 501.9  | 479.9  | 697.5  | 509.0  | 654.3  | 474.9  | 594.0  | 742.5  | 584.6  |
| 286.7  | 256.2  | 523.4  | 280.3  | 731.8  | 598.3  | 685.7  | 849.1  | 434.3  |
| 50.4   | 42.8   | 88.3   | 50.1   | 75.8   | 50.5   | 66.3   | 113.5  | 43.7   |
| 355.5  | 310.3  | 563.9  | 335.4  | 793.6  | 763.2  | 774.1  | 927.1  | 395.6  |
| 90.2   | 80.1   | 202.5  | 95.8   | 223.4  | 161.9  | 240.5  | 261.3  | 454.6  |
| 39.6   | 44.4   | 76.1   | 55.4   | 53.0   | 47.4   | 51.6   | 65.9   | 55.1   |
| 223.7  | 233.2  | 234.6  | 236.2  | 197.3  | 145.0  | 207.4  | 237.8  | 523.2  |
| 131.3  | 109.3  | 167.0  | 120.0  | 43.5   | 22.9   | 50.5   | 41.4   | 62.5   |
| 219.5  | 210.7  | 184.3  | 206.2  | 122.5  | 167.9  | 118.4  | 135.8  | 100.1  |
| 17.4   | 17.0   | 19.8   | 17.7   | 64.6   | 44.3   | 50.7   | 53.5   | 102.8  |
| 88.5   | 85.7   | 135.1  | 86.0   | 421.9  | 344.0  | 452.4  | 494.6  | 882.8  |
| 41.0   | 51.1   | 47.9   | 48.4   | 42.4   | 51.3   | 62.9   | 49.4   | 40.9   |
| 25.6   | 31.1   | 21.9   | 20.3   | 34.6   | 28.9   | 32.4   | 36.2   | 45.8   |
| 351.3  | 318.8  | 388.2  | 345.8  | 371.2  | 395.9  | 343.2  | 360.6  | 1151.5 |
| 117.5  | 119.0  | 118.5  | 108.4  | 371.4  | 334.1  | 360.6  | 441.9  | 257.9  |
| 164.7  | 146.3  | 151.4  | 146.5  | 182.6  | 229.8  | 207.3  | 209.1  | 156.1  |
| 14.6   | 28.5   | 20.8   | 37.0   | 65.6   | 60.7   | 83.9   | 106.1  | 79.7   |
| 11.5   | 13.7   | 6.3    | 11.4   | 7.0    | 0.9    | 3.1    | 10.6   | 6.1    |
| 12.2   | 16.9   | 4.8    | 7.0    | 2.2    | 0.6    | 1.3    | 2.0    | 5.6    |
| 23.2   | 10.5   | 19.1   | 5.3    | 14.0   | 8.6    | 10.8   | 10.3   | 17.4   |
| 25.3   | 14.8   | 33.0   | 24.4   | 14.8   | 13.9   | 11.0   | 16.2   | 21.3   |
| 86.7   | 76.5   | 95.7   | 61.9   | 68.7   | 49.0   | 62.6   | 86.6   | 71.6   |
| 239.5  | 244.6  | 304.9  | 207.4  | 366.8  | 355.8  | 378.1  | 418.5  | 271.4  |
| 4.6    | 4.2    | 6.5    | 6.1    | 63.4   | 65.1   | 50.4   | 91.6   | 13.6   |
| 17.8   | 15.6   | 8.6    | 9.4    | 13.6   | 41.7   | 45.6   | 83.8   | 22.7   |
| 379.8  | 387.7  | 490.6  | 364.4  | 1273.8 | 1243.4 | 1399.8 | 1463.2 | 1384.4 |
| 13.9   | 14.4   | 2.6    | 11.3   | 342.0  | 244.9  | 344.2  | 387.6  | 216.4  |
| 154.6  | 160.0  | 212.3  | 139.7  | 170.9  | 174.8  | 160.0  | 187.2  | 312.6  |
| 17.3   | 18.1   | 22.5   | 11.0   | 39.0   | 58.5   | 42.1   | 47.0   | 28.1   |
| 243.9  | 226.7  | 253.5  | 261.2  | 145.0  | 208.7  | 175.4  | 171.3  | 54.5   |
| 5.0    | 1.3    | 2.3    | 1.5    | 4.5    | 2.9    | 0.9    | 7.2    | 0.6    |
| 3.9    | 6.6    | 10.4   | 3.7    | 3.5    | 4.5    | 5.6    | 0.6    | 7.0    |
| 79.9   | 75.4   | 84.6   | 97.1   | 105.6  | 121.6  | 104.7  | 106.1  | 140.5  |
| 12.9   | 25.5   | 11.0   | 16.1   | 19.2   | 29.1   | 6.8    | 6.2    | 57.4   |
| 200.8  | 193.7  | 217.6  | 183.9  | 150.1  | 184.9  | 166.0  | 220.0  | 82.8   |
| 33.7   | 32.9   | 35.4   | 21.8   | 18.9   | 27.2   | 16.9   | 19.3   | 6.6    |
| 4.6    | 12.2   | 14.3   | 8.1    | 7.2    | 4.3    | 8.7    | 8.2    | 16.6   |
| 68.4   | 88.9   | 27.3   | 64.4   | 27.9   | 47.4   | 41.1   | 27.2   | 44.9   |
| 3915.9 | 3530.7 | 4665.4 | 3089.4 | 2246.7 | 2034.2 | 2718.4 | 2615.7 | 2428.7 |
| 161.4  | 149.5  | 173.4  | 168.3  | 218.5  | 299.6  | 276.0  | 222.3  | 320.5  |
| 236.6  | 277.3  | 159.8  | 224.5  | 137.7  | 128.3  | 159.3  | 170.7  | 83.9   |
| 382.2  | 276.4  | 526.1  | 469.4  | 209.3  | 257.3  | 207.5  | 337.7  | 1323.5 |
| 39.8   | 41.9   | 37.5   | 23.6   | 95.2   | 92.5   | 126.3  | 128.6  | 102.6  |
| 18.4   | 18.0   | 15.7   | 8.2    | 4.6    | 4.0    | 3.0    | 1.0    | 10.4   |
| 13.9   | 12.4   | 14.9   | 14.4   | 8.8    | 3.2    | 7.4    | 14.4   | 7.7    |
| 76.2   | 93.5   | 59.8   | 73.0   | 56.2   | 51.6   | 58.9   | 62.8   | 61.3   |
| 191.3  | 188.7  | 315.9  | 170.4  | 879.3  | 676.2  | 859.4  | 1022.4 | 1349.9 |

|        |        |        |        |        |        |        |        |        |
|--------|--------|--------|--------|--------|--------|--------|--------|--------|
| 7.5    | 8.8    | 8.6    | 13.9   | 5.2    | 8.8    | 10.6   | 1.4    | 4.7    |
| 9.1    | 11.5   | 26.5   | 13.4   | 27.1   | 21.5   | 25.4   | 32.3   | 13.0   |
| 159.0  | 240.1  | 132.4  | 157.6  | 173.1  | 174.7  | 251.8  | 218.7  | 111.5  |
| 41.0   | 39.8   | 31.0   | 27.7   | 194.1  | 147.4  | 217.1  | 233.1  | 132.5  |
| 252.2  | 215.4  | 356.8  | 203.4  | 144.4  | 130.2  | 199.9  | 186.4  | 80.8   |
| 131.0  | 117.3  | 175.9  | 139.8  | 233.5  | 328.5  | 284.8  | 281.4  | 61.3   |
| 299.2  | 298.0  | 398.7  | 242.3  | 426.2  | 395.3  | 421.0  | 503.3  | 529.4  |
| 259.5  | 256.7  | 376.5  | 214.1  | 390.6  | 358.7  | 371.0  | 461.8  | 389.1  |
| 419.7  | 433.0  | 280.7  | 323.1  | 109.1  | 120.1  | 106.5  | 121.7  | 316.1  |
| 7.3    | 11.4   | 12.6   | 10.8   | 1.7    | 3.4    | 8.2    | 11.1   | 10.8   |
| 9.3    | 4.6    | 3.9    | 8.1    | 2.9    | 1.3    | 6.9    | 3.8    | 18.8   |
| 17.1   | 26.5   | 23.1   | 19.2   | 167.8  | 133.7  | 158.8  | 197.0  | 344.3  |
| 180.5  | 212.5  | 112.2  | 173.3  | 432.5  | 416.2  | 479.8  | 539.4  | 965.6  |
| 227.6  | 208.5  | 233.2  | 216.3  | 309.8  | 332.9  | 300.1  | 337.7  | 265.2  |
| 26.2   | 26.4   | 80.3   | 19.2   | 33.2   | 27.6   | 31.7   | 51.5   | 6.5    |
| 19.4   | 23.5   | 43.7   | 14.6   | 250.6  | 255.3  | 294.3  | 261.1  | 44.8   |
| 20.0   | 14.4   | 48.0   | 14.9   | 310.8  | 286.6  | 433.7  | 375.4  | 69.6   |
| 592.5  | 587.5  | 1160.0 | 519.2  | 13.5   | 8.9    | 13.9   | 13.5   | 30.5   |
| 1588.5 | 1520.2 | 2832.5 | 1115.9 | 13.8   | 15.6   | 13.4   | 21.5   | 27.0   |
| 76.8   | 79.8   | 74.3   | 45.9   | 100.8  | 106.1  | 110.1  | 128.6  | 206.8  |
| 308.3  | 313.2  | 432.8  | 311.2  | 421.2  | 492.2  | 463.2  | 474.1  | 369.8  |
| 19.7   | 37.2   | 30.0   | 21.1   | 22.8   | 28.5   | 22.4   | 16.9   | 22.2   |
| 116.9  | 126.5  | 179.3  | 135.7  | 380.5  | 222.2  | 337.7  | 419.2  | 304.9  |
| 526.3  | 483.8  | 423.2  | 468.3  | 39.4   | 33.3   | 54.2   | 44.4   | 11.2   |
| 6.1    | 7.3    | 3.1    | 5.6    | 4.3    | 5.6    | 6.9    | 8.6    | 6.6    |
| 2.9    | 8.1    | 8.6    | 6.9    | 13.4   | 14.2   | 12.3   | 11.0   | 12.4   |
| 54.2   | 68.0   | 70.8   | 55.9   | 52.3   | 63.9   | 61.6   | 50.8   | 53.4   |
| 227.9  | 213.0  | 211.2  | 161.5  | 154.0  | 155.8  | 175.8  | 185.2  | 184.7  |
| 2.6    | 2.0    | 1.3    | 1.7    | 2.5    | 2.3    | 4.1    | 1.9    | 1.8    |
| 970.3  | 852.3  | 544.4  | 726.5  | 27.8   | 31.0   | 32.9   | 28.0   | 0.4    |
| 264.8  | 256.1  | 178.0  | 230.4  | 11.7   | 20.2   | 8.5    | 29.8   | 3.2    |
| 3188.5 | 3145.5 | 2216.2 | 2758.8 | 177.0  | 188.9  | 193.6  | 218.9  | 48.9   |
| 625.4  | 762.0  | 588.1  | 730.5  | 142.7  | 130.3  | 158.2  | 172.9  | 202.3  |
| 1.5    | 3.2    | 1.5    | 4.0    | 3.5    | 2.4    | 7.3    | 5.2    | 5.4    |
| 209.4  | 170.5  | 339.3  | 221.0  | 107.4  | 100.1  | 114.3  | 117.1  | 161.1  |
| 264.0  | 169.0  | 793.6  | 138.2  | 1441.9 | 1037.0 | 1862.3 | 1612.7 | 407.3  |
| 492.0  | 471.7  | 693.7  | 450.3  | 926.7  | 797.4  | 931.7  | 986.9  | 1477.2 |
| 393.1  | 357.9  | 801.0  | 510.0  | 224.1  | 647.3  | 282.7  | 274.0  | 814.0  |
| 72.9   | 68.3   | 164.8  | 83.0   | 63.0   | 151.2  | 76.5   | 59.3   | 254.3  |
| 2.5    | 2.0    | 8.0    | 2.0    | 0.5    | 1.5    | 3.5    | 2.4    | 7.0    |
| 3.1    | 3.8    | 3.5    | 0.3    | 2.4    | 2.2    | 1.0    | 3.6    | 6.1    |
| 6.7    | 3.1    | 2.6    | 1.5    | 1.1    | 5.2    | 5.8    | 6.9    | 7.3    |
| 21.1   | 20.7   | 26.0   | 16.9   | 95.4   | 121.7  | 96.9   | 93.1   | 83.9   |
| 9.1    | 10.0   | 3.2    | 3.2    | 232.0  | 260.9  | 366.9  | 335.3  | 7.7    |
| 175.6  | 155.7  | 219.4  | 153.8  | 87.9   | 83.8   | 87.4   | 105.2  | 16.7   |
| 92.5   | 77.0   | 98.2   | 77.0   | 34.1   | 31.0   | 36.7   | 42.6   | 2.7    |
| 4.5    | 12.5   | 4.3    | 9.3    | 48.8   | 57.5   | 40.2   | 35.5   | 4513.2 |
| 167.1  | 170.1  | 198.4  | 151.6  | 187.4  | 172.3  | 217.3  | 234.4  | 178.1  |
| 246.6  | 273.6  | 199.3  | 199.7  | 7.2    | 7.5    | 7.3    | 2.4    | 95.8   |
| 104.3  | 123.6  | 106.5  | 93.5   | 151.5  | 144.8  | 149.6  | 144.1  | 141.0  |
| 1190.2 | 1110.0 | 1135.6 | 1134.3 | 564.3  | 510.5  | 616.0  | 661.9  | 942.2  |
| 436.4  | 381.6  | 441.2  | 352.5  | 191.4  | 205.7  | 224.2  | 249.4  | 367.5  |
| 84.0   | 83.0   | 110.7  | 83.9   | 93.2   | 132.6  | 114.1  | 114.0  | 142.4  |



|        |        |        |        |        |        |        |        |        |
|--------|--------|--------|--------|--------|--------|--------|--------|--------|
| 0.9    | 5.3    | 15.9   | 5.7    | 238.0  | 303.8  | 241.0  | 254.2  | 397.2  |
| 8.0    | 2.0    | 8.0    | 3.6    | 213.3  | 154.6  | 162.2  | 185.6  | 198.7  |
| 241.2  | 222.1  | 374.5  | 225.8  | 366.0  | 285.4  | 375.8  | 458.2  | 356.1  |
| 85.7   | 69.8   | 96.7   | 70.4   | 145.4  | 137.2  | 148.5  | 146.4  | 132.6  |
| 1298.6 | 1285.9 | 1235.8 | 1290.2 | 400.3  | 450.4  | 369.7  | 440.4  | 375.7  |
| 12.8   | 14.4   | 28.0   | 13.5   | 26.3   | 31.2   | 23.8   | 29.6   | 22.1   |
| 182.0  | 179.4  | 132.2  | 188.2  | 155.0  | 102.9  | 134.6  | 165.0  | 210.5  |
| 230.5  | 216.4  | 157.8  | 251.3  | 236.1  | 188.2  | 215.8  | 226.5  | 273.5  |
| 141.7  | 142.2  | 149.8  | 152.0  | 389.3  | 400.8  | 533.4  | 665.2  | 462.3  |
| 18.6   | 18.9   | 14.5   | 14.8   | 77.2   | 89.0   | 77.4   | 95.1   | 128.9  |
| 33.0   | 40.7   | 59.8   | 43.0   | 22.7   | 17.4   | 18.3   | 22.9   | 39.5   |
| 5.8    | 10.6   | 7.5    | 3.5    | 3.5    | 3.1    | 6.0    | 3.4    | 11.4   |
| 28.1   | 34.2   | 35.7   | 29.2   | 5.8    | 12.1   | 7.0    | 6.0    | 12.8   |
| 26.2   | 26.0   | 21.9   | 18.9   | 48.1   | 33.2   | 34.8   | 48.2   | 52.0   |
| 173.7  | 170.0  | 288.0  | 126.0  | 49.9   | 96.0   | 76.1   | 91.3   | 6.8    |
| 187.4  | 166.3  | 366.7  | 177.1  | 869.4  | 488.1  | 725.2  | 926.5  | 416.2  |
| 97.4   | 124.5  | 117.1  | 135.4  | 82.1   | 68.9   | 84.1   | 79.8   | 72.1   |
| 86.1   | 72.4   | 72.0   | 48.6   | 1046.3 | 1218.6 | 1547.7 | 1432.8 | 68.5   |
| 28.6   | 28.2   | 35.8   | 20.2   | 142.4  | 140.3  | 280.2  | 182.1  | 146.0  |
| 32.6   | 24.6   | 51.4   | 29.3   | 181.5  | 152.1  | 292.9  | 228.8  | 138.3  |
| 110.5  | 108.7  | 136.1  | 106.7  | 275.9  | 258.5  | 287.6  | 329.6  | 427.3  |
| 77.1   | 66.2   | 91.4   | 64.4   | 210.6  | 178.9  | 230.7  | 244.8  | 219.7  |
| 364.9  | 343.3  | 390.6  | 303.2  | 399.0  | 383.9  | 384.2  | 464.9  | 229.8  |
| 28.6   | 54.4   | 74.3   | 41.8   | 21.6   | 60.5   | 40.6   | 30.9   | 73.6   |
| 24.9   | 17.3   | 35.3   | 26.9   | 296.7  | 489.4  | 728.2  | 366.2  | 249.7  |
| 1.3    | 1.6    | 5.3    | 1.6    | 1.9    | 6.4    | 2.7    | 0.8    | 15.1   |
| 268.2  | 261.2  | 443.6  | 245.0  | 356.8  | 431.2  | 313.7  | 390.9  | 496.7  |
| 424.8  | 424.6  | 369.7  | 364.5  | 910.0  | 837.7  | 1014.0 | 1146.8 | 391.3  |
| 37.3   | 27.7   | 38.9   | 26.2   | 57.3   | 63.9   | 51.8   | 67.3   | 29.4   |
| 126.9  | 102.0  | 166.0  | 75.9   | 184.5  | 242.1  | 182.9  | 220.7  | 67.8   |
| 180.8  | 157.9  | 225.1  | 172.3  | 187.4  | 184.8  | 172.0  | 233.0  | 126.7  |
| 271.4  | 261.8  | 201.8  | 216.9  | 424.9  | 478.8  | 409.8  | 428.6  | 523.8  |
| 452.4  | 438.3  | 565.2  | 503.5  | 690.6  | 891.9  | 743.4  | 791.8  | 960.0  |
| 7.6    | 10.5   | 20.5   | 13.1   | 17.8   | 16.1   | 20.7   | 14.6   | 22.3   |
| 30.5   | 16.5   | 20.3   | 20.2   | 72.4   | 112.4  | 60.5   | 54.7   | 65.3   |
| 277.6  | 238.3  | 304.8  | 268.2  | 900.8  | 612.3  | 929.9  | 1018.9 | 1276.4 |
| 7.1    | 2.4    | 10.4   | 4.8    | 3.2    | 8.2    | 2.7    | 11.5   | 11.4   |
| 2.1    | 1.9    | 1.2    | 2.3    | 1.5    | 0.6    | 2.1    | 5.1    | 5.7    |
| 165.0  | 122.8  | 188.2  | 139.6  | 265.1  | 195.2  | 186.4  | 305.8  | 289.3  |
| 166.8  | 158.6  | 321.8  | 163.6  | 336.2  | 298.4  | 306.1  | 431.5  | 449.6  |
| 258.9  | 234.8  | 169.4  | 166.5  | 191.7  | 257.0  | 205.8  | 239.8  | 139.5  |
| 337.2  | 334.4  | 265.5  | 277.0  | 185.3  | 236.7  | 168.9  | 217.9  | 138.0  |
| 631.7  | 535.9  | 1082.6 | 579.4  | 2955.3 | 2376.2 | 3083.3 | 3345.4 | 3651.9 |
| 11.1   | 8.0    | 12.2   | 7.9    | 6.4    | 3.7    | 13.6   | 11.0   | 20.7   |
| 0.9    | 2.4    | 2.4    | 2.6    | 2.2    | 1.4    | 3.1    | 4.2    | 7.1    |
| 46.9   | 52.2   | 53.2   | 42.4   | 48.6   | 29.1   | 39.9   | 47.6   | 26.8   |
| 327.7  | 302.8  | 504.3  | 325.3  | 330.8  | 331.8  | 310.0  | 347.8  | 407.0  |
| 519.3  | 536.1  | 800.6  | 544.0  | 395.1  | 292.6  | 285.0  | 378.7  | 352.8  |
| 4.5    | 6.4    | 12.2   | 12.4   | 160.8  | 162.5  | 143.8  | 218.9  | 3.7    |
| 80.8   | 73.0   | 99.7   | 66.7   | 74.6   | 73.4   | 57.8   | 81.6   | 31.7   |
| 622.3  | 636.8  | 782.1  | 543.3  | 872.4  | 823.7  | 923.4  | 953.5  | 730.3  |
| 94.1   | 100.3  | 78.1   | 76.4   | 208.2  | 248.4  | 138.0  | 149.7  | 959.1  |
| 87.5   | 86.4   | 173.1  | 95.8   | 415.8  | 356.3  | 315.6  | 428.1  | 348.7  |

|       |       |        |        |        |        |        |        |        |
|-------|-------|--------|--------|--------|--------|--------|--------|--------|
| 670.1 | 671.4 | 431.3  | 547.8  | 201.2  | 225.8  | 220.9  | 224.9  | 327.0  |
| 110.0 | 109.4 | 98.4   | 125.5  | 186.6  | 238.7  | 536.1  | 319.7  | 141.9  |
| 8.6   | 10.8  | 11.9   | 11.9   | 17.4   | 19.3   | 30.6   | 28.7   | 0.6    |
| 220.8 | 249.4 | 206.1  | 213.5  | 619.8  | 371.8  | 619.4  | 653.0  | 170.3  |
| 12.1  | 14.4  | 15.9   | 14.5   | 11.4   | 5.8    | 9.8    | 6.1    | 13.0   |
| 1.2   | 0.7   | 1.2    | 0.5    | 0.4    | 0.7    | 0.8    | 0.4    | 214.6  |
| 54.3  | 37.8  | 57.3   | 66.6   | 2.5    | 1.6    | 10.2   | 3.7    | 1.0    |
| 112.5 | 124.0 | 86.6   | 102.5  | 140.5  | 137.1  | 143.1  | 173.4  | 97.2   |
| 71.1  | 68.4  | 57.9   | 69.4   | 78.3   | 64.2   | 73.4   | 92.9   | 56.6   |
| 36.4  | 37.9  | 42.3   | 34.5   | 18.3   | 27.0   | 17.4   | 21.2   | 97.8   |
| 69.0  | 55.3  | 37.4   | 33.4   | 27.4   | 31.7   | 32.7   | 39.5   | 77.1   |
| 18.2  | 15.5  | 19.9   | 13.0   | 52.2   | 49.0   | 69.2   | 79.6   | 1.9    |
| 72.9  | 70.0  | 104.4  | 73.2   | 30.1   | 34.0   | 38.6   | 44.1   | 50.2   |
| 395.0 | 363.3 | 551.9  | 360.4  | 946.4  | 731.9  | 839.1  | 972.3  | 1548.6 |
| 77.8  | 70.9  | 79.8   | 68.9   | 9.5    | 11.7   | 14.3   | 26.5   | 32.8   |
| 918.7 | 826.8 | 1093.2 | 1113.9 | 13.8   | 12.8   | 16.0   | 15.0   | 17.0   |
| 11.5  | 1.3   | 14.3   | 5.3    | 7.8    | 0.7    | 3.7    | 2.6    | 1.4    |
| 70.0  | 89.1  | 79.5   | 60.0   | 143.8  | 118.1  | 132.0  | 169.0  | 50.0   |
| 4.3   | 3.7   | 2.6    | 3.1    | 3206.6 | 2244.1 | 3727.5 | 4359.4 | 389.7  |
| 3.3   | 2.9   | 3.3    | 3.4    | 7.7    | 9.7    | 8.8    | 10.5   | 10.3   |
| 10.6  | 16.0  | 16.7   | 12.6   | 12.5   | 11.8   | 14.6   | 21.3   | 33.9   |
| 284.8 | 300.6 | 224.0  | 236.8  | 464.2  | 473.9  | 468.0  | 592.7  | 317.5  |
| 134.3 | 144.9 | 104.3  | 82.8   | 22.7   | 9.2    | 13.6   | 22.1   | 28.4   |
| 109.1 | 90.1  | 150.3  | 83.6   | 147.5  | 122.0  | 147.4  | 151.2  | 119.4  |
| 105.5 | 100.0 | 147.2  | 99.9   | 87.6   | 87.5   | 94.5   | 123.1  | 76.4   |
| 48.8  | 40.9  | 40.6   | 28.8   | 142.9  | 168.6  | 156.0  | 166.8  | 124.6  |
| 145.6 | 125.1 | 204.0  | 116.2  | 482.3  | 584.9  | 524.7  | 577.7  | 315.4  |
| 9.0   | 7.7   | 7.7    | 5.0    | 18.5   | 18.0   | 18.0   | 11.3   | 10.6   |
| 233.3 | 202.8 | 366.6  | 197.4  | 1024.9 | 464.5  | 897.5  | 1125.2 | 495.8  |
| 168.6 | 159.7 | 237.8  | 153.0  | 68.2   | 56.7   | 60.8   | 66.7   | 116.7  |
| 116.8 | 111.6 | 170.2  | 107.1  | 198.5  | 188.3  | 242.4  | 251.9  | 392.0  |
| 50.7  | 43.7  | 78.1   | 47.6   | 113.0  | 103.7  | 120.9  | 84.0   | 116.0  |
| 19.1  | 13.4  | 19.7   | 12.7   | 48.3   | 51.7   | 55.9   | 53.1   | 84.2   |
| 353.1 | 282.8 | 783.3  | 306.0  | 1060.5 | 895.9  | 938.9  | 1282.5 | 460.3  |
| 73.6  | 55.6  | 178.4  | 46.9   | 155.4  | 155.4  | 206.2  | 191.7  | 280.9  |
| 19.7  | 20.1  | 33.7   | 32.1   | 353.1  | 330.0  | 534.2  | 351.4  | 52.7   |
| 78.4  | 79.1  | 75.7   | 65.0   | 179.7  | 145.4  | 169.7  | 203.8  | 164.4  |
| 29.4  | 18.2  | 35.7   | 24.9   | 35.8   | 42.3   | 43.3   | 37.4   | 49.8   |
| 21.2  | 14.7  | 16.6   | 9.4    | 18.8   | 12.1   | 15.5   | 18.3   | 17.8   |
| 1.3   | 2.6   | 0.4    | 0.5    | 3.9    | 0.4    | 9.6    | 0.2    | 2.8    |
| 9.5   | 16.3  | 22.1   | 14.6   | 17.5   | 16.6   | 16.2   | 18.8   | 155.9  |
| 4.6   | 6.4   | 18.5   | 4.4    | 33.6   | 13.6   | 24.2   | 33.4   | 2.1    |
| 16.0  | 15.0  | 12.5   | 9.0    | 224.7  | 115.1  | 185.9  | 273.7  | 8.8    |
| 67.1  | 65.5  | 75.6   | 53.8   | 80.4   | 81.2   | 82.0   | 80.3   | 62.4   |
| 118.1 | 77.8  | 184.9  | 89.5   | 223.8  | 171.2  | 214.2  | 209.5  | 296.6  |
| 15.0  | 12.9  | 3.4    | 13.3   | 24.8   | 26.5   | 32.5   | 26.7   | 47.1   |
| 60.4  | 40.9  | 47.7   | 41.8   | 78.8   | 98.1   | 97.1   | 122.3  | 129.9  |
| 1.1   | 1.5   | 1.1    | 1.9    | 56.3   | 71.0   | 64.6   | 71.0   | 1141.0 |
| 87.3  | 80.3  | 129.7  | 113.4  | 151.3  | 120.8  | 90.1   | 124.0  | 66.4   |
| 37.9  | 23.2  | 52.5   | 28.3   | 12.0   | 7.6    | 20.2   | 14.4   | 6.7    |
| 76.6  | 76.1  | 140.4  | 86.9   | 209.3  | 173.0  | 238.0  | 201.1  | 263.0  |
| 8.0   | 3.2   | 2.5    | 4.2    | 96.4   | 77.8   | 83.8   | 118.7  | 495.4  |
| 65.2  | 60.9  | 74.6   | 75.5   | 57.3   | 37.5   | 59.7   | 74.7   | 19.5   |

|        |        |        |        |        |        |        |        |        |
|--------|--------|--------|--------|--------|--------|--------|--------|--------|
| 7.5    | 4.7    | 12.4   | 17.4   | 5.3    | 2.4    | 6.1    | 2.8    | 12.9   |
| 9.0    | 7.5    | 18.4   | 10.2   | 81.2   | 87.6   | 87.2   | 107.9  | 65.3   |
| 185.0  | 150.8  | 225.3  | 183.9  | 34.0   | 38.5   | 48.8   | 48.0   | 73.4   |
| 5.4    | 7.1    | 8.5    | 6.1    | 0.7    | 5.3    | 9.4    | 9.2    | 27.6   |
| 18.3   | 32.8   | 19.7   | 11.5   | 13.2   | 16.1   | 16.5   | 17.2   | 14.7   |
| 322.2  | 357.6  | 319.9  | 326.1  | 117.4  | 157.1  | 131.4  | 143.8  | 1.6    |
| 106.3  | 91.0   | 78.6   | 89.9   | 28.1   | 21.3   | 38.7   | 53.0   | 1.9    |
| 58.2   | 69.3   | 64.0   | 56.2   | 55.9   | 58.4   | 60.3   | 67.0   | 25.9   |
| 2.0    | 2.7    | 2.1    | 2.8    | 8.5    | 3.9    | 2.0    | 12.8   | 1.8    |
| 266.9  | 239.8  | 355.9  | 208.2  | 80.7   | 93.8   | 99.9   | 117.7  | 208.1  |
| 485.0  | 460.9  | 628.2  | 401.0  | 168.8  | 210.7  | 219.6  | 194.0  | 326.5  |
| 60.4   | 53.5   | 84.3   | 69.3   | 69.1   | 31.1   | 44.5   | 76.8   | 91.2   |
| 92.0   | 83.1   | 178.5  | 109.7  | 137.5  | 120.3  | 137.9  | 170.3  | 384.0  |
| 174.5  | 146.2  | 374.9  | 162.8  | 40.5   | 27.5   | 45.7   | 51.4   | 51.9   |
| 155.6  | 148.5  | 160.9  | 146.2  | 345.1  | 280.6  | 350.5  | 437.6  | 247.3  |
| 0.8    | 3.5    | 3.1    | 1.3    | 3.1    | 2.6    | 4.4    | 7.8    | 9.3    |
| 468.3  | 532.3  | 327.7  | 463.1  | 310.7  | 308.6  | 315.7  | 409.4  | 246.6  |
| 330.8  | 312.6  | 355.7  | 311.2  | 316.6  | 527.9  | 378.1  | 404.3  | 446.5  |
| 8.2    | 2.8    | 2.6    | 2.2    | 2.9    | 8.0    | 14.1   | 1.3    | 7.1    |
| 140.5  | 143.6  | 315.5  | 121.5  | 265.4  | 144.7  | 225.6  | 276.1  | 311.4  |
| 276.3  | 243.2  | 628.3  | 220.2  | 375.8  | 190.7  | 268.2  | 404.1  | 500.6  |
| 2.4    | 8.4    | 2.9    | 3.5    | 59.4   | 64.3   | 61.8   | 79.0   | 41.5   |
| 4.1    | 1.2    | 2.9    | 1.0    | 5.8    | 4.5    | 2.2    | 10.5   | 4.3    |
| 40.7   | 30.5   | 78.8   | 27.5   | 3.2    | 4.2    | 1.6    | 2.4    | 14.3   |
| 8.3    | 4.6    | 14.0   | 11.2   | 330.1  | 333.0  | 592.3  | 373.7  | 13.4   |
| 251.8  | 222.1  | 488.9  | 323.9  | 310.7  | 484.6  | 335.9  | 406.5  | 250.8  |
| 96.0   | 109.2  | 100.3  | 84.3   | 111.6  | 97.6   | 137.2  | 105.5  | 90.4   |
| 135.6  | 135.8  | 153.6  | 122.1  | 196.5  | 186.7  | 189.8  | 265.0  | 156.4  |
| 174.8  | 176.4  | 191.6  | 143.0  | 249.5  | 217.8  | 236.4  | 237.7  | 155.6  |
| 9.0    | 11.5   | 4.6    | 7.8    | 49.0   | 32.2   | 49.1   | 69.8   | 67.8   |
| 4.8    | 3.0    | 8.3    | 10.5   | 8.1    | 8.0    | 6.7    | 9.1    | 17.7   |
| 11.7   | 15.6   | 23.9   | 16.4   | 308.5  | 238.5  | 344.2  | 307.5  | 202.8  |
| 14.5   | 16.1   | 19.2   | 15.9   | 14.8   | 20.9   | 14.4   | 16.3   | 29.9   |
| 21.2   | 28.4   | 31.5   | 11.7   | 25.3   | 19.6   | 33.3   | 19.0   | 24.2   |
| 2.2    | 6.0    | 1.9    | 2.6    | 0.9    | 2.3    | 0.8    | 3.3    | 3.7    |
| 2.2    | 2.3    | 2.3    | 6.2    | 4.5    | 5.9    | 2.3    | 4.0    | 3.7    |
| 69.6   | 94.4   | 55.2   | 82.9   | 125.0  | 141.2  | 153.6  | 172.6  | 61.2   |
| 6363.0 | 6347.7 | 7153.2 | 6837.2 | 3826.5 | 2753.4 | 5606.2 | 5630.6 | 17.5   |
| 2481.9 | 2271.5 | 2873.2 | 2601.9 | 966.4  | 623.1  | 1807.9 | 1837.1 | 1.3    |
| 432.5  | 352.0  | 1422.7 | 269.8  | 2496.0 | 1169.8 | 1678.0 | 2352.0 | 4171.9 |
| 0.6    | 2.4    | 1.8    | 1.7    | 20.4   | 60.6   | 23.4   | 23.0   | 1277.5 |
| 3.7    | 4.9    | 13.5   | 2.3    | 7.9    | 12.8   | 9.9    | 16.7   | 17.5   |
| 41.3   | 33.2   | 82.7   | 40.9   | 56.9   | 42.3   | 51.7   | 56.1   | 53.9   |
| 75.4   | 83.3   | 144.8  | 68.4   | 116.1  | 93.6   | 121.2  | 112.1  | 101.0  |
| 136.8  | 130.8  | 130.1  | 122.6  | 69.7   | 84.4   | 72.8   | 86.9   | 61.2   |
| 5.3    | 6.5    | 13.8   | 10.4   | 9.5    | 15.0   | 9.2    | 10.4   | 12.8   |
| 252.3  | 245.3  | 597.8  | 288.5  | 202.7  | 112.4  | 195.3  | 252.5  | 480.9  |
| 165.9  | 177.8  | 208.7  | 114.2  | 54.7   | 50.1   | 68.3   | 57.3   | 135.3  |
| 100.0  | 115.7  | 99.5   | 119.8  | 41.9   | 36.4   | 38.0   | 51.9   | 48.8   |
| 7.4    | 10.6   | 6.8    | 8.7    | 19.8   | 3.3    | 8.9    | 29.8   | 20.1   |
| 87.0   | 82.1   | 101.4  | 83.0   | 48.8   | 32.0   | 63.8   | 65.1   | 6.6    |
| 24.7   | 36.2   | 41.2   | 23.9   | 34.2   | 73.4   | 39.2   | 59.2   | 4.3    |
| 347.2  | 403.0  | 226.4  | 329.8  | 828.9  | 1042.7 | 912.5  | 1023.1 | 411.1  |

|        |        |        |        |        |        |        |        |        |
|--------|--------|--------|--------|--------|--------|--------|--------|--------|
| 432.2  | 621.2  | 292.7  | 408.3  | 907.8  | 1137.7 | 984.0  | 1089.7 | 529.7  |
| 21.5   | 19.5   | 16.5   | 15.3   | 241.3  | 269.8  | 231.9  | 292.0  | 455.0  |
| 7.4    | 9.9    | 7.2    | 3.9    | 6.4    | 12.8   | 7.9    | 9.5    | 49.8   |
| 555.9  | 569.3  | 686.7  | 568.9  | 164.8  | 137.3  | 177.4  | 202.9  | 100.0  |
| 617.0  | 462.6  | 1285.0 | 714.1  | 21.2   | 20.0   | 12.2   | 16.3   | 21.2   |
| 13.4   | 33.4   | 3.2    | 3.0    | 2.8    | 9.3    | 9.9    | 4.9    | 1.7    |
| 3.4    | 11.2   | 1.9    | 5.3    | 2.1    | 3.1    | 2.4    | 0.5    | 2.0    |
| 44.6   | 44.3   | 39.5   | 41.5   | 27.9   | 13.7   | 29.5   | 43.8   | 30.6   |
| 1.9    | 3.9    | 5.0    | 0.5    | 0.4    | 0.2    | 0.3    | 0.4    | 3.4    |
| 664.8  | 572.7  | 761.2  | 603.6  | 539.8  | 567.8  | 627.4  | 589.8  | 1703.4 |
| 144.8  | 109.9  | 196.7  | 124.7  | 157.9  | 113.3  | 168.2  | 169.1  | 450.3  |
| 89.3   | 104.4  | 100.6  | 85.3   | 187.2  | 134.5  | 144.2  | 177.6  | 201.4  |
| 80.0   | 93.3   | 63.4   | 69.6   | 418.4  | 347.6  | 386.4  | 445.2  | 170.8  |
| 4.1    | 8.8    | 17.7   | 3.1    | 42.3   | 52.9   | 115.7  | 76.6   | 3.0    |
| 6.0    | 6.0    | 11.9   | 7.3    | 10.0   | 7.2    | 10.0   | 13.6   | 17.4   |
| 285.6  | 189.3  | 884.7  | 147.8  | 1028.9 | 942.8  | 943.9  | 1189.2 | 2504.0 |
| 57.4   | 47.1   | 70.1   | 32.1   | 111.6  | 103.3  | 107.5  | 120.2  | 156.1  |
| 90.5   | 82.8   | 104.0  | 95.9   | 81.9   | 79.1   | 97.2   | 77.3   | 84.2   |
| 2374.3 | 2151.6 | 2355.1 | 2066.6 | 4482.5 | 4402.2 | 4416.8 | 5035.1 | 787.1  |
| 3.8    | 2.7    | 4.7    | 10.4   | 15.5   | 14.2   | 14.0   | 18.5   | 23.9   |
| 70.4   | 49.5   | 99.6   | 48.3   | 78.4   | 54.5   | 79.3   | 65.3   | 177.3  |
| 7.0    | 5.5    | 5.7    | 1.8    | 3.9    | 2.1    | 1.4    | 7.6    | 2.1    |
| 73.5   | 65.9   | 110.9  | 59.9   | 32.0   | 30.3   | 54.8   | 58.3   | 78.2   |
| 12.0   | 27.8   | 48.9   | 23.1   | 23.0   | 12.2   | 16.9   | 42.2   | 68.7   |
| 277.4  | 194.3  | 230.5  | 378.5  | 7.3    | 2.1    | 1.2    | 12.3   | 6.4    |
| 342.4  | 321.4  | 373.2  | 317.1  | 366.5  | 374.1  | 399.4  | 427.2  | 633.8  |
| 43.0   | 55.8   | 44.1   | 43.6   | 162.5  | 93.7   | 160.0  | 197.1  | 185.5  |
| 7.7    | 7.9    | 5.1    | 0.8    | 8.6    | 10.2   | 5.6    | 4.2    | 7.0    |
| 342.0  | 341.0  | 464.8  | 353.7  | 156.2  | 143.3  | 175.2  | 179.3  | 167.8  |
| 15.5   | 14.3   | 23.4   | 15.8   | 40.0   | 59.5   | 65.9   | 73.6   | 21.0   |
| 3.5    | 2.8    | 3.5    | 6.2    | 2.7    | 0.5    | 0.8    | 2.9    | 7.8    |
| 71.2   | 82.2   | 139.7  | 94.4   | 164.7  | 211.4  | 182.7  | 213.0  | 162.6  |
| 3.9    | 3.7    | 3.5    | 1.2    | 1.6    | 1.4    | 0.1    | 3.0    | 2.3    |
| 29.7   | 25.0   | 36.5   | 24.6   | 155.9  | 205.2  | 235.0  | 218.3  | 52.2   |
| 22.0   | 25.5   | 23.0   | 39.9   | 45.0   | 46.4   | 50.8   | 47.0   | 375.6  |
| 27.8   | 30.3   | 51.4   | 22.8   | 141.7  | 147.2  | 146.8  | 172.2  | 116.8  |
| 241.3  | 224.3  | 482.3  | 234.2  | 738.8  | 669.0  | 690.6  | 798.8  | 896.8  |
| 25.2   | 28.8   | 29.0   | 22.1   | 25.1   | 29.1   | 26.5   | 36.5   | 26.7   |
| 19.7   | 16.1   | 26.6   | 12.4   | 27.5   | 14.4   | 16.5   | 20.6   | 32.9   |
| 1.3    | 5.3    | 4.2    | 4.0    | 2.6    | 1.2    | 5.1    | 2.5    | 5.8    |
| 7.2    | 9.6    | 6.1    | 7.5    | 2.0    | 1.1    | 1.3    | 0.3    | 23.1   |
| 12.8   | 11.3   | 15.0   | 15.3   | 19.5   | 21.9   | 15.5   | 11.7   | 43.2   |
| 340.0  | 377.3  | 359.1  | 383.3  | 314.8  | 429.6  | 382.2  | 401.0  | 393.0  |
| 75.1   | 95.9   | 173.0  | 49.1   | 188.0  | 121.1  | 147.5  | 197.6  | 148.5  |
| 92.5   | 120.6  | 116.3  | 112.1  | 98.6   | 102.9  | 110.4  | 129.7  | 185.7  |
| 30.7   | 46.9   | 25.3   | 16.0   | 303.1  | 334.1  | 314.3  | 282.3  | 78.4   |
| 72.5   | 77.6   | 84.2   | 114.7  | 850.0  | 751.5  | 615.2  | 713.1  | 1176.6 |
| 200.4  | 154.6  | 517.2  | 262.7  | 1465.0 | 1568.3 | 1556.3 | 1654.2 | 2757.2 |
| 72.6   | 82.0   | 110.0  | 70.3   | 126.3  | 137.3  | 160.2  | 166.2  | 94.5   |
| 56.1   | 56.1   | 144.3  | 74.2   | 85.5   | 54.4   | 65.1   | 88.5   | 140.5  |
| 18.8   | 17.5   | 10.5   | 16.0   | 10.7   | 7.9    | 12.4   | 8.0    | 20.6   |
| 4.2    | 7.2    | 2.0    | 1.8    | 3.5    | 1.2    | 0.9    | 1.9    | 5.6    |
| 7.1    | 7.3    | 18.1   | 9.2    | 3.0    | 8.9    | 3.5    | 5.2    | 13.9   |

|       |       |        |       |        |        |        |        |        |
|-------|-------|--------|-------|--------|--------|--------|--------|--------|
| 4.4   | 2.7   | 4.6    | 2.5   | 6.3    | 2.3    | 13.0   | 21.1   | 1362.2 |
| 4.6   | 3.6   | 8.2    | 5.0   | 9.6    | 4.6    | 2.4    | 3.2    | 126.9  |
| 193.7 | 195.5 | 158.8  | 164.3 | 1.5    | 1.1    | 1.2    | 0.9    | 51.4   |
| 306.6 | 304.9 | 439.2  | 325.3 | 136.8  | 113.4  | 130.9  | 140.6  | 246.0  |
| 68.1  | 90.8  | 27.2   | 81.8  | 187.0  | 201.3  | 209.3  | 212.7  | 69.8   |
| 7.5   | 7.8   | 6.4    | 9.5   | 7.6    | 3.1    | 7.5    | 7.8    | 5.4    |
| 25.4  | 31.8  | 34.4   | 32.4  | 4.1    | 6.6    | 7.2    | 11.9   | 26.3   |
| 652.6 | 607.8 | 1086.9 | 463.4 | 339.2  | 340.4  | 324.8  | 386.1  | 432.8  |
| 173.5 | 118.5 | 209.3  | 103.6 | 77.5   | 124.0  | 74.2   | 64.9   | 182.7  |
| 16.8  | 15.3  | 19.9   | 10.5  | 5.1    | 7.6    | 8.8    | 6.2    | 11.0   |
| 546.8 | 470.3 | 659.3  | 411.9 | 1199.2 | 844.2  | 1194.5 | 1364.3 | 1606.6 |
| 241.5 | 227.2 | 316.7  | 211.8 | 703.2  | 452.1  | 713.9  | 735.9  | 1204.0 |
| 3.0   | 2.4   | 3.4    | 2.1   | 3.5    | 17.8   | 7.3    | 4.2    | 3.7    |
| 1.5   | 1.8   | 1.6    | 1.2   | 1.9    | 1.6    | 1.4    | 1.8    | 3.6    |
| 50.9  | 48.9  | 71.4   | 40.6  | 139.0  | 138.8  | 150.1  | 158.9  | 123.7  |
| 13.3  | 6.7   | 6.2    | 11.7  | 37.7   | 49.6   | 34.7   | 52.1   | 34.4   |
| 155.4 | 164.7 | 141.8  | 166.1 | 97.4   | 131.0  | 101.1  | 106.5  | 23.4   |
| 6.6   | 4.7   | 4.6    | 1.8   | 43.4   | 41.4   | 49.0   | 65.1   | 30.2   |
| 975.0 | 985.0 | 1328.8 | 947.7 | 1165.4 | 1339.8 | 1363.9 | 1425.8 | 952.3  |
| 688.8 | 724.0 | 1236.2 | 679.3 | 1207.3 | 977.4  | 1050.1 | 1339.1 | 2021.2 |
| 165.5 | 166.8 | 187.7  | 137.2 | 321.0  | 324.7  | 279.5  | 360.0  | 164.7  |
| 20.7  | 26.5  | 30.3   | 12.0  | 5.9    | 5.8    | 8.8    | 8.2    | 11.5   |
| 376.1 | 372.2 | 384.0  | 398.2 | 100.3  | 75.6   | 104.3  | 115.9  | 289.0  |
| 318.9 | 276.3 | 410.0  | 305.1 | 215.0  | 202.9  | 221.5  | 230.2  | 121.6  |
| 0.4   | 2.5   | 2.4    | 3.1   | 11.4   | 8.6    | 6.8    | 14.5   | 15.6   |
| 2.1   | 2.6   | 3.9    | 4.6   | 12.1   | 7.5    | 7.4    | 4.9    | 17.4   |
| 263.1 | 303.1 | 262.5  | 186.1 | 538.6  | 558.2  | 565.4  | 560.6  | 251.7  |
| 11.1  | 11.4  | 8.1    | 6.6   | 2.7    | 3.6    | 1.1    | 1.8    | 5.1    |
| 103.3 | 103.4 | 134.6  | 96.8  | 85.4   | 51.5   | 90.4   | 102.8  | 142.7  |
| 20.4  | 12.6  | 47.7   | 29.4  | 55.8   | 10.2   | 36.1   | 34.8   | 87.1   |
| 132.5 | 122.9 | 201.0  | 125.7 | 51.7   | 28.9   | 38.1   | 74.1   | 47.7   |
| 314.4 | 291.3 | 440.9  | 311.1 | 141.2  | 119.5  | 114.8  | 195.7  | 113.8  |
| 54.3  | 40.9  | 48.3   | 52.4  | 67.4   | 59.4   | 86.4   | 96.1   | 50.2   |
| 6.7   | 5.3   | 7.4    | 4.7   | 3039.8 | 3125.4 | 2939.5 | 3424.2 | 95.2   |
| 56.2  | 48.4  | 40.4   | 17.9  | 63.1   | 103.8  | 81.2   | 86.6   | 252.5  |
| 2.0   | 2.9   | 4.8    | 2.9   | 6.1    | 6.6    | 5.5    | 20.4   | 6.2    |
| 264.9 | 267.9 | 322.0  | 275.9 | 266.1  | 352.2  | 281.3  | 310.0  | 264.0  |
| 3.5   | 6.4   | 8.6    | 2.7   | 45.7   | 25.2   | 32.3   | 58.0   | 18.1   |
| 3.5   | 2.8   | 4.8    | 16.8  | 7.6    | 8.3    | 15.0   | 8.1    | 7.0    |
| 2.8   | 10.2  | 5.5    | 6.7   | 26.2   | 49.6   | 20.4   | 23.5   | 6.0    |
| 124.0 | 114.5 | 117.9  | 98.6  | 416.6  | 494.7  | 446.2  | 528.8  | 245.8  |
| 17.0  | 14.7  | 21.2   | 13.3  | 17.0   | 16.8   | 17.1   | 16.4   | 26.5   |
| 130.8 | 109.0 | 222.8  | 122.1 | 179.3  | 136.7  | 167.9  | 195.6  | 550.0  |
| 207.9 | 194.1 | 276.8  | 170.3 | 109.2  | 195.4  | 120.6  | 131.3  | 2.6    |
| 2.7   | 8.5   | 2.6    | 1.5   | 0.8    | 1.6    | 1.7    | 6.3    | 6.8    |
| 3.7   | 2.0   | 2.2    | 3.6   | 6.3    | 4.1    | 5.8    | 3.1    | 11.4   |
| 3.5   | 6.4   | 1.6    | 9.2   | 4.1    | 2.0    | 2.2    | 1.2    | 10.2   |
| 2.1   | 2.9   | 2.3    | 2.4   | 1.8    | 1.8    | 1.4    | 2.9    | 3.2    |
| 69.6  | 60.7  | 61.0   | 55.9  | 220.2  | 176.0  | 216.6  | 207.8  | 40.2   |
| 82.7  | 64.7  | 212.7  | 57.7  | 619.9  | 299.7  | 476.0  | 638.8  | 217.3  |
| 4.8   | 1.6   | 2.1    | 1.2   | 58.8   | 63.9   | 60.8   | 73.3   | 3.7    |
| 5.5   | 5.8   | 8.9    | 6.7   | 70.6   | 71.5   | 78.6   | 64.4   | 11.7   |
| 99.4  | 107.0 | 55.3   | 80.3  | 172.4  | 186.2  | 165.4  | 209.0  | 24.2   |

|        |        |        |        |        |        |        |        |        |
|--------|--------|--------|--------|--------|--------|--------|--------|--------|
| 258.6  | 221.9  | 431.7  | 241.7  | 273.6  | 248.0  | 252.6  | 304.1  | 413.3  |
| 440.1  | 374.1  | 733.9  | 382.3  | 768.5  | 867.8  | 738.3  | 824.6  | 925.9  |
| 58.9   | 74.4   | 36.9   | 54.7   | 37.1   | 21.9   | 25.5   | 31.1   | 74.7   |
| 144.2  | 138.2  | 131.2  | 140.5  | 335.5  | 364.8  | 357.2  | 397.8  | 423.1  |
| 1031.0 | 1000.6 | 1549.8 | 972.1  | 1288.1 | 1087.8 | 1233.7 | 1301.0 | 1996.0 |
| 4.3    | 5.8    | 12.8   | 9.3    | 334.3  | 363.3  | 259.1  | 338.9  | 410.2  |
| 1.3    | 2.0    | 2.6    | 1.9    | 1.5    | 1.1    | 1.1    | 2.4    | 2.4    |
| 63.5   | 70.0   | 100.2  | 76.0   | 219.6  | 187.5  | 229.4  | 244.4  | 193.3  |
| 160.9  | 144.0  | 228.4  | 168.8  | 419.3  | 331.6  | 414.3  | 445.4  | 424.6  |
| 0.8    | 0.8    | 0.9    | 0.5    | 1.0    | 0.7    | 0.7    | 1.0    | 1.0    |
| 1.2    | 1.5    | 1.2    | 3.7    | 6.5    | 3.5    | 5.2    | 1.3    | 2.6    |
| 6.1    | 3.3    | 9.7    | 11.0   | 25.2   | 17.5   | 17.3   | 28.2   | 32.4   |
| 76.3   | 96.1   | 89.3   | 80.0   | 140.3  | 188.9  | 133.2  | 152.8  | 126.2  |
| 1.8    | 2.4    | 3.3    | 2.7    | 271.0  | 276.6  | 557.5  | 349.8  | 2.9    |
| 5.6    | 13.0   | 6.5    | 6.1    | 1185.5 | 992.0  | 1860.8 | 1466.6 | 23.6   |
| 35.7   | 36.8   | 48.5   | 34.9   | 19.5   | 17.9   | 15.0   | 30.6   | 21.6   |
| 1409.6 | 1472.2 | 879.0  | 1297.3 | 1421.3 | 1895.8 | 1205.3 | 1710.7 | 149.0  |
| 114.0  | 130.8  | 93.0   | 89.8   | 79.7   | 148.0  | 125.9  | 111.3  | 39.4   |
| 65.1   | 63.4   | 56.4   | 65.2   | 44.4   | 79.3   | 43.8   | 42.7   | 74.3   |
| 10.6   | 8.8    | 2.7    | 3.8    | 30.3   | 23.3   | 28.9   | 38.0   | 7.5    |
| 6.1    | 0.8    | 1.9    | 4.9    | 21.2   | 17.0   | 18.4   | 15.0   | 1.3    |
| 376.3  | 395.4  | 773.9  | 382.2  | 48.6   | 47.5   | 48.7   | 48.1   | 50.4   |
| 162.8  | 140.8  | 106.1  | 130.3  | 48.8   | 73.3   | 70.6   | 81.3   | 60.3   |
| 3.0    | 2.1    | 2.5    | 2.3    | 2.5    | 1.3    | 2.2    | 1.7    | 5.2    |
| 77.5   | 54.5   | 188.9  | 79.5   | 83.0   | 89.0   | 69.0   | 98.5   | 89.6   |
| 60.3   | 48.8   | 48.0   | 39.2   | 83.2   | 83.4   | 83.3   | 95.2   | 40.1   |
| 20.2   | 22.7   | 46.7   | 40.9   | 2066.2 | 2244.2 | 1785.3 | 2383.8 | 875.9  |
| 78.3   | 76.2   | 81.8   | 58.4   | 87.0   | 99.5   | 85.4   | 96.5   | 124.3  |
| 67.3   | 68.9   | 60.7   | 63.2   | 79.9   | 100.4  | 96.3   | 112.7  | 125.0  |
| 13.9   | 10.3   | 16.6   | 2.3    | 8.2    | 9.8    | 6.2    | 2.6    | 22.3   |
| 128.0  | 141.9  | 142.6  | 93.5   | 132.8  | 166.6  | 148.4  | 196.1  | 3.0    |
| 12.7   | 8.4    | 31.8   | 7.9    | 36.2   | 32.7   | 26.1   | 32.0   | 42.3   |
| 78.9   | 54.5   | 128.0  | 64.4   | 256.7  | 219.7  | 227.9  | 322.9  | 428.8  |
| 1.0    | 3.2    | 6.9    | 2.4    | 425.5  | 474.2  | 495.3  | 544.4  | 170.0  |
| 75.0   | 74.8   | 91.6   | 70.1   | 232.5  | 247.4  | 211.9  | 252.9  | 267.3  |
| 1.1    | 5.6    | 2.2    | 1.8    | 1.9    | 1.7    | 5.5    | 11.7   | 7.5    |
| 19.0   | 9.6    | 17.4   | 16.1   | 16.3   | 17.7   | 14.0   | 24.6   | 30.7   |
| 584.2  | 558.5  | 1433.4 | 530.2  | 1976.5 | 1482.1 | 1943.0 | 2167.4 | 2670.3 |
| 8.9    | 11.6   | 5.8    | 6.5    | 2.3    | 6.0    | 3.2    | 11.3   | 8.3    |
| 62.6   | 61.1   | 76.9   | 60.4   | 250.7  | 309.0  | 280.4  | 316.6  | 91.2   |
| 73.8   | 77.3   | 118.2  | 74.2   | 268.1  | 317.9  | 339.3  | 376.3  | 157.8  |
| 8.5    | 11.4   | 14.9   | 11.0   | 0.5    | 2.8    | 3.4    | 1.9    | 16.4   |
| 4.9    | 6.3    | 11.8   | 2.4    | 1.4    | 1.2    | 2.0    | 1.9    | 4.3    |
| 150.3  | 123.1  | 220.8  | 157.5  | 35.0   | 32.9   | 37.3   | 57.8   | 58.6   |
| 234.9  | 229.2  | 327.2  | 205.7  | 285.2  | 195.9  | 315.9  | 291.0  | 131.0  |
| 12.8   | 5.8    | 8.0    | 10.0   | 35.8   | 39.8   | 34.7   | 37.2   | 65.2   |
| 97.9   | 87.5   | 124.4  | 107.8  | 132.3  | 137.9  | 118.5  | 170.7  | 91.0   |
| 5.7    | 1.8    | 10.8   | 11.6   | 3092.1 | 3056.5 | 3293.9 | 3578.7 | 5071.9 |
| 136.5  | 171.5  | 124.8  | 143.5  | 125.1  | 143.7  | 139.6  | 152.4  | 66.1   |
| 1265.3 | 1134.8 | 1551.2 | 964.3  | 766.4  | 798.4  | 807.9  | 764.4  | 692.4  |
| 225.3  | 208.0  | 311.4  | 172.8  | 186.6  | 202.2  | 221.2  | 209.4  | 380.5  |
| 40.3   | 52.4   | 48.3   | 41.2   | 269.6  | 249.9  | 295.1  | 270.2  | 54.4   |
| 215.3  | 208.4  | 177.1  | 164.7  | 122.0  | 113.5  | 127.4  | 139.1  | 61.3   |

|       |       |        |       |        |        |        |        |        |
|-------|-------|--------|-------|--------|--------|--------|--------|--------|
| 24.8  | 29.6  | 45.5   | 25.8  | 26.9   | 21.7   | 82.5   | 40.4   | 23.5   |
| 2.8   | 2.0   | 1.8    | 3.3   | 1410.3 | 2072.4 | 1170.8 | 1418.2 | 9.0    |
| 2.5   | 3.6   | 4.5    | 3.0   | 7.2    | 4.9    | 7.4    | 11.8   | 11.4   |
| 22.1  | 12.8  | 22.0   | 14.6  | 12.0   | 12.4   | 17.4   | 21.2   | 24.4   |
| 20.6  | 20.1  | 31.0   | 17.6  | 13.5   | 9.7    | 13.2   | 8.2    | 7.8    |
| 540.7 | 494.5 | 752.6  | 475.6 | 891.3  | 910.2  | 920.5  | 952.4  | 1729.0 |
| 217.1 | 243.8 | 240.5  | 197.5 | 158.7  | 224.8  | 183.9  | 218.9  | 197.1  |
| 1.8   | 1.9   | 1.5    | 1.5   | 5.4    | 7.1    | 2.5    | 5.0    | 13.0   |
| 42.4  | 37.6  | 39.0   | 22.5  | 2.9    | 2.4    | 2.7    | 7.3    | 7.4    |
| 14.9  | 14.2  | 23.3   | 12.9  | 6.1    | 11.2   | 11.9   | 6.8    | 26.4   |
| 72.1  | 95.5  | 25.6   | 54.4  | 97.5   | 116.1  | 104.9  | 120.6  | 66.3   |
| 2.0   | 1.7   | 2.3    | 2.3   | 3.8    | 9.2    | 4.2    | 4.5    | 10.0   |
| 0.4   | 0.6   | 1.0    | 0.9   | 1.8    | 2.6    | 1.2    | 0.3    | 0.6    |
| 20.3  | 16.4  | 27.8   | 18.2  | 11.6   | 6.7    | 16.5   | 12.1   | 23.8   |
| 50.7  | 65.2  | 40.3   | 48.1  | 35.5   | 45.7   | 26.3   | 36.6   | 56.4   |
| 51.0  | 43.4  | 38.9   | 35.6  | 27.1   | 35.3   | 29.8   | 31.2   | 48.8   |
| 27.7  | 19.2  | 31.4   | 21.4  | 49.7   | 41.8   | 41.1   | 57.2   | 76.9   |
| 54.5  | 51.7  | 110.8  | 64.0  | 100.0  | 126.8  | 96.9   | 133.3  | 97.4   |
| 37.4  | 36.7  | 22.1   | 22.5  | 6.4    | 8.0    | 17.7   | 13.1   | 6.9    |
| 159.8 | 134.5 | 184.4  | 117.4 | 84.5   | 99.0   | 68.6   | 99.1   | 413.6  |
| 6.0   | 2.1   | 8.0    | 4.1   | 59.1   | 86.2   | 63.9   | 65.9   | 13.3   |
| 37.9  | 34.9  | 41.0   | 32.9  | 92.8   | 50.2   | 87.5   | 107.0  | 56.1   |
| 8.2   | 10.0  | 19.3   | 12.6  | 38.8   | 30.8   | 38.3   | 57.4   | 32.0   |
| 835.3 | 714.8 | 1264.3 | 976.0 | 1645.6 | 1864.3 | 1851.2 | 1939.1 | 1470.9 |
| 45.0  | 42.9  | 56.9   | 43.1  | 57.0   | 53.5   | 61.6   | 43.6   | 63.3   |
| 61.2  | 60.4  | 40.3   | 57.9  | 48.8   | 68.1   | 39.3   | 45.0   | 109.9  |
| 795.3 | 773.4 | 1091.1 | 745.6 | 1733.3 | 1320.4 | 1584.8 | 1885.3 | 2689.9 |
| 3.6   | 14.5  | 11.3   | 17.1  | 4.0    | 2.2    | 4.2    | 1.4    | 20.2   |
| 1.0   | 1.0   | 1.2    | 1.6   | 4.2    | 0.9    | 3.1    | 1.2    | 2.7    |
| 2.9   | 1.8   | 2.1    | 1.9   | 5.2    | 7.8    | 1.9    | 5.3    | 11.4   |
| 1.0   | 3.8   | 1.5    | 4.2   | 1.3    | 5.3    | 3.0    | 0.8    | 4.8    |
| 1.4   | 1.1   | 1.8    | 2.4   | 1.1    | 1.0    | 1.1    | 0.8    | 3.4    |
| 111.0 | 101.6 | 204.2  | 75.1  | 239.0  | 213.5  | 221.7  | 256.3  | 339.4  |
| 2.9   | 6.5   | 11.0   | 5.0   | 12.9   | 3.2    | 23.1   | 10.2   | 16.5   |
| 2.9   | 4.7   | 5.3    | 3.2   | 9.0    | 6.8    | 10.3   | 9.5    | 8.9    |
| 0.9   | 0.9   | 2.1    | 1.1   | 0.6    | 0.9    | 1.0    | 0.6    | 1.2    |
| 17.1  | 23.4  | 23.9   | 26.6  | 52.3   | 61.1   | 50.9   | 66.9   | 169.3  |
| 5.7   | 2.4   | 13.0   | 4.9   | 2.0    | 1.3    | 2.2    | 2.9    | 6.5    |
| 3.3   | 5.0   | 6.1    | 1.5   | 3.4    | 6.9    | 10.2   | 4.2    | 7.3    |
| 6.5   | 3.3   | 6.8    | 4.3   | 1.3    | 1.3    | 4.8    | 8.9    | 1.4    |
| 11.4  | 6.8   | 17.2   | 14.2  | 6.0    | 5.4    | 2.9    | 3.7    | 6.1    |
| 58.9  | 64.2  | 49.8   | 54.5  | 72.9   | 88.6   | 78.4   | 107.6  | 79.3   |
| 10.5  | 9.6   | 18.6   | 8.0   | 11.5   | 10.8   | 2.8    | 10.1   | 8.6    |
| 5.3   | 17.3  | 8.4    | 8.1   | 11.6   | 14.8   | 9.8    | 12.6   | 20.5   |
| 17.7  | 15.5  | 18.8   | 16.7  | 29.0   | 30.7   | 34.0   | 38.6   | 12.5   |
| 1.9   | 4.6   | 4.4    | 7.5   | 35.7   | 48.9   | 45.9   | 66.2   | 63.1   |
| 1.7   | 6.1   | 9.2    | 6.3   | 30.1   | 37.4   | 33.0   | 33.3   | 54.4   |
| 16.1  | 17.4  | 11.5   | 23.6  | 30.3   | 33.7   | 28.8   | 27.7   | 5.4    |
| 16.1  | 5.0   | 9.4    | 1.8   | 10.5   | 15.5   | 15.7   | 24.0   | 15.9   |
| 59.6  | 57.8  | 51.5   | 42.8  | 47.9   | 47.8   | 52.0   | 67.2   | 63.7   |
| 885.0 | 802.0 | 1218.1 | 961.4 | 166.5  | 246.5  | 176.3  | 176.7  | 371.2  |
| 3.8   | 9.7   | 8.6    | 6.8   | 11.4   | 12.5   | 2.4    | 5.6    | 5.8    |
| 3.8   | 4.0   | 6.5    | 3.6   | 3.9    | 1.0    | 2.2    | 0.8    | 6.6    |

|        |        |        |        |        |        |        |        |        |
|--------|--------|--------|--------|--------|--------|--------|--------|--------|
| 46.1   | 38.2   | 47.9   | 26.0   | 39.1   | 32.0   | 29.8   | 37.3   | 3.8    |
| 212.6  | 239.3  | 243.4  | 209.9  | 217.2  | 280.9  | 249.3  | 247.1  | 36.9   |
| 7.7    | 12.6   | 5.5    | 7.5    | 7.6    | 6.1    | 16.8   | 13.3   | 1.1    |
| 25.6   | 23.2   | 79.0   | 38.1   | 207.4  | 155.4  | 208.9  | 229.3  | 372.4  |
| 71.8   | 62.8   | 77.6   | 50.6   | 163.9  | 170.9  | 183.1  | 205.4  | 210.9  |
| 70.9   | 55.9   | 96.0   | 52.4   | 125.5  | 91.4   | 128.0  | 136.8  | 97.5   |
| 48.7   | 30.5   | 97.8   | 31.9   | 149.9  | 125.5  | 167.3  | 172.4  | 267.8  |
| 46.1   | 43.4   | 76.3   | 48.6   | 193.3  | 200.5  | 208.8  | 223.3  | 221.1  |
| 546.5  | 449.6  | 886.2  | 452.4  | 340.4  | 228.4  | 387.2  | 427.1  | 189.9  |
| 247.5  | 234.1  | 362.0  | 241.2  | 402.7  | 282.5  | 398.6  | 422.2  | 479.2  |
| 10.2   | 13.2   | 23.2   | 10.4   | 8.5    | 7.8    | 4.1    | 11.7   | 35.5   |
| 42.7   | 43.1   | 18.8   | 43.6   | 11.5   | 3.1    | 3.8    | 2.7    | 5.3    |
| 773.7  | 707.4  | 1088.4 | 800.9  | 924.0  | 835.8  | 941.9  | 1069.3 | 1499.4 |
| 10.3   | 10.8   | 12.1   | 11.8   | 89.3   | 178.0  | 127.4  | 119.3  | 2.6    |
| 8.8    | 3.5    | 8.8    | 4.5    | 24.0   | 12.5   | 25.1   | 25.0   | 6.0    |
| 80.6   | 71.4   | 101.9  | 88.7   | 140.6  | 104.2  | 124.6  | 142.1  | 141.2  |
| 103.0  | 92.5   | 136.1  | 88.5   | 246.2  | 211.8  | 208.4  | 194.5  | 255.4  |
| 2.0    | 4.5    | 7.7    | 9.5    | 6.1    | 3.3    | 10.2   | 7.2    | 7.0    |
| 25.6   | 20.0   | 35.0   | 19.1   | 26.8   | 9.9    | 19.1   | 19.4   | 27.1   |
| 30.8   | 16.6   | 33.5   | 35.2   | 45.3   | 55.2   | 53.4   | 52.4   | 123.0  |
| 100.6  | 95.6   | 121.5  | 85.2   | 185.2  | 157.0  | 185.5  | 200.4  | 267.8  |
| 130.8  | 127.5  | 165.1  | 127.6  | 215.0  | 169.7  | 259.7  | 310.3  | 265.7  |
| 149.6  | 125.4  | 278.6  | 142.5  | 1619.4 | 1316.3 | 1427.2 | 2015.8 | 1285.3 |
| 3.4    | 3.6    | 4.2    | 2.5    | 13.1   | 19.1   | 7.0    | 8.6    | 6.7    |
| 95.1   | 82.3   | 201.0  | 70.5   | 431.5  | 270.4  | 414.2  | 457.0  | 461.8  |
| 2796.9 | 2743.5 | 2535.2 | 2602.8 | 1567.7 | 1568.9 | 1549.2 | 1658.4 | 1244.2 |
| 276.8  | 344.6  | 371.3  | 310.5  | 515.5  | 498.4  | 537.2  | 584.2  | 167.4  |
| 12.0   | 14.8   | 22.7   | 20.7   | 18.6   | 9.5    | 9.8    | 3.6    | 6.5    |
| 1.9    | 5.9    | 6.0    | 5.5    | 1.1    | 2.9    | 1.1    | 7.8    | 1.6    |
| 9.0    | 6.6    | 7.1    | 5.9    | 35.9   | 41.7   | 49.6   | 40.6   | 13.2   |
| 8.5    | 3.4    | 2.5    | 7.8    | 3.2    | 1.4    | 3.0    | 2.2    | 4.6    |
| 4.5    | 2.1    | 5.0    | 6.2    | 2.9    | 2.8    | 3.9    | 4.6    | 7.3    |
| 9.2    | 9.3    | 8.3    | 3.5    | 13.3   | 10.0   | 14.8   | 21.1   | 13.5   |
| 1.9    | 3.5    | 1.0    | 2.5    | 2.9    | 5.4    | 7.7    | 6.7    | 10.5   |
| 23.7   | 26.5   | 29.2   | 23.0   | 33.5   | 24.7   | 54.3   | 61.4   | 12.0   |
| 3.4    | 4.4    | 7.0    | 13.0   | 11.7   | 4.4    | 3.0    | 6.2    | 17.1   |
| 9.5    | 7.8    | 19.3   | 14.2   | 126.2  | 96.8   | 116.0  | 155.0  | 89.6   |
| 4.6    | 13.8   | 13.9   | 6.1    | 79.5   | 61.6   | 73.4   | 112.4  | 62.1   |
| 7.8    | 12.0   | 12.3   | 8.8    | 11.1   | 3.2    | 9.5    | 5.7    | 7.8    |
| 286.8  | 277.6  | 363.8  | 263.8  | 317.8  | 348.2  | 388.7  | 392.4  | 202.1  |
| 49.5   | 43.2   | 50.1   | 32.5   | 44.7   | 46.2   | 69.7   | 55.6   | 121.5  |
| 42.1   | 38.4   | 49.6   | 43.5   | 22.5   | 15.2   | 24.8   | 22.0   | 58.0   |
| 3.7    | 4.6    | 7.1    | 3.9    | 16.5   | 17.7   | 3.0    | 3.5    | 13.4   |
| 131.7  | 97.1   | 160.6  | 102.1  | 34.3   | 26.9   | 52.8   | 50.4   | 25.0   |
| 1530.3 | 1271.9 | 2349.3 | 1470.2 | 344.6  | 340.4  | 587.0  | 467.7  | 159.2  |
| 16.3   | 18.3   | 29.6   | 38.4   | 12.0   | 9.8    | 13.4   | 13.7   | 11.5   |
| 128.4  | 127.3  | 199.0  | 130.3  | 193.2  | 201.8  | 203.6  | 233.7  | 123.2  |
| 0.9    | 1.3    | 1.9    | 3.7    | 1.8    | 0.5    | 0.8    | 1.2    | 1.2    |
| 33.2   | 35.6   | 41.1   | 22.0   | 39.7   | 34.6   | 42.6   | 80.0   | 64.9   |
| 2.0    | 1.7    | 2.4    | 1.5    | 1.8    | 5.0    | 2.1    | 3.1    | 3.3    |
| 645.9  | 639.3  | 1451.3 | 586.3  | 2039.1 | 1667.0 | 1700.2 | 2141.2 | 1157.4 |
| 62.9   | 61.9   | 99.8   | 63.4   | 119.0  | 109.7  | 100.6  | 145.1  | 283.8  |
| 119.2  | 120.9  | 187.7  | 102.6  | 231.1  | 213.0  | 201.1  | 268.1  | 154.0  |



|       |       |        |       |        |        |        |        |        |
|-------|-------|--------|-------|--------|--------|--------|--------|--------|
| 2.5   | 0.8   | 3.6    | 2.8   | 4.0    | 0.5    | 2.2    | 1.5    | 1.0    |
| 26.9  | 23.4  | 32.1   | 19.8  | 20.7   | 15.5   | 23.0   | 23.5   | 10.3   |
| 56.1  | 34.0  | 92.0   | 48.0  | 63.8   | 86.4   | 76.5   | 96.6   | 72.9   |
| 262.8 | 218.0 | 667.4  | 331.8 | 102.1  | 113.8  | 97.2   | 110.4  | 27.1   |
| 171.3 | 127.6 | 413.4  | 167.5 | 63.1   | 69.3   | 63.9   | 100.4  | 5.3    |
| 5.3   | 5.5   | 7.3    | 4.6   | 5.8    | 4.9    | 3.6    | 7.0    | 7.2    |
| 23.7  | 11.9  | 25.1   | 22.3  | 25.2   | 23.1   | 25.5   | 22.9   | 74.3   |
| 32.3  | 29.0  | 26.0   | 26.1  | 24.8   | 20.9   | 21.6   | 22.9   | 84.8   |
| 8.3   | 18.1  | 14.5   | 10.4  | 34.5   | 39.2   | 42.9   | 42.1   | 10.0   |
| 10.1  | 12.8  | 18.0   | 14.0  | 21.0   | 15.9   | 14.9   | 15.3   | 6.3    |
| 3.6   | 2.5   | 8.1    | 11.4  | 9.0    | 12.1   | 9.6    | 15.7   | 10.2   |
| 2.3   | 0.4   | 5.3    | 5.3   | 2.2    | 2.2    | 2.6    | 1.6    | 0.8    |
| 0.8   | 0.5   | 3.1    | 0.4   | 0.4    | 2.3    | 0.8    | 0.2    | 0.9    |
| 1.3   | 2.7   | 8.5    | 3.8   | 7.9    | 6.4    | 9.7    | 2.1    | 4.7    |
| 47.3  | 55.6  | 35.3   | 44.9  | 7.3    | 15.4   | 14.0   | 6.6    | 53.5   |
| 56.4  | 61.9  | 46.7   | 62.8  | 10.5   | 17.0   | 9.4    | 7.0    | 44.0   |
| 12.5  | 7.8   | 15.6   | 9.2   | 6.8    | 7.8    | 9.8    | 11.0   | 4.1    |
| 3.2   | 1.5   | 3.6    | 2.7   | 7.6    | 2.3    | 9.4    | 9.9    | 7.5    |
| 137.5 | 154.1 | 226.7  | 154.5 | 329.5  | 233.4  | 293.6  | 328.8  | 58.3   |
| 149.2 | 146.2 | 181.4  | 147.4 | 62.8   | 73.3   | 71.6   | 62.8   | 38.6   |
| 213.0 | 178.0 | 365.5  | 187.4 | 607.4  | 444.8  | 596.7  | 838.6  | 468.7  |
| 15.4  | 15.8  | 12.8   | 13.6  | 8.8    | 13.0   | 8.9    | 11.1   | 24.1   |
| 17.7  | 16.8  | 32.1   | 17.2  | 24.0   | 27.3   | 23.5   | 19.4   | 23.9   |
| 6.5   | 12.0  | 14.1   | 22.9  | 10.9   | 21.4   | 13.0   | 28.3   | 7.6    |
| 7.3   | 5.7   | 9.4    | 10.3  | 7.2    | 2.9    | 6.4    | 3.3    | 17.1   |
| 11.2  | 13.2  | 13.7   | 11.6  | 7.9    | 8.7    | 8.1    | 0.6    | 12.8   |
| 15.0  | 20.2  | 4.6    | 8.7   | 2.8    | 2.8    | 2.8    | 2.1    | 4.4    |
| 12.3  | 24.5  | 16.7   | 21.4  | 22.7   | 19.3   | 19.7   | 26.5   | 17.5   |
| 3.7   | 1.2   | 2.7    | 3.0   | 1.8    | 0.8    | 3.1    | 1.0    | 1.5    |
| 45.1  | 37.1  | 94.9   | 50.9  | 3.2    | 2.4    | 0.7    | 1.0    | 19.1   |
| 3.9   | 8.0   | 2.3    | 7.0   | 4.6    | 9.5    | 7.1    | 2.4    | 85.5   |
| 270.2 | 221.7 | 285.6  | 148.5 | 350.8  | 380.6  | 405.1  | 410.0  | 194.5  |
| 33.2  | 23.5  | 57.6   | 34.9  | 51.5   | 52.3   | 63.4   | 61.4   | 85.6   |
| 2.4   | 1.4   | 4.3    | 0.7   | 1.0    | 1.3    | 1.6    | 0.7    | 150.4  |
| 1.8   | 2.6   | 3.1    | 2.4   | 3.1    | 9.3    | 2.8    | 2.4    | 2.5    |
| 47.8  | 54.9  | 60.4   | 53.0  | 25.5   | 27.7   | 26.7   | 26.0   | 2.3    |
| 351.8 | 310.4 | 396.7  | 265.3 | 970.8  | 943.4  | 948.3  | 1086.5 | 1494.9 |
| 336.5 | 354.2 | 411.4  | 267.4 | 727.6  | 714.9  | 716.5  | 890.1  | 1311.2 |
| 130.5 | 121.9 | 180.3  | 104.2 | 249.2  | 214.7  | 210.2  | 214.2  | 153.6  |
| 89.4  | 107.5 | 36.3   | 81.0  | 1687.1 | 1524.1 | 3679.5 | 2629.8 | 1368.0 |
| 181.7 | 241.3 | 80.2   | 122.8 | 0.4    | 4.4    | 0.6    | 0.3    | 4.5    |
| 711.8 | 710.1 | 1242.8 | 769.7 | 1884.1 | 1547.8 | 1969.2 | 2118.3 | 1606.9 |
| 16.2  | 13.8  | 28.1   | 19.3  | 43.7   | 32.2   | 41.6   | 59.3   | 38.4   |
| 0.7   | 0.8   | 0.8    | 1.0   | 2.4    | 1.9    | 1.1    | 11.1   | 1.2    |
| 34.2  | 29.3  | 21.1   | 26.2  | 15.0   | 26.6   | 20.1   | 10.5   | 27.7   |
| 574.2 | 575.8 | 635.2  | 503.0 | 1160.5 | 1302.0 | 1320.3 | 1428.1 | 526.4  |
| 0.9   | 3.5   | 1.6    | 0.5   | 147.2  | 81.7   | 132.4  | 191.2  | 218.1  |
| 1.5   | 1.6   | 3.0    | 1.6   | 53.9   | 47.6   | 50.0   | 57.4   | 2.0    |
| 306.6 | 261.4 | 306.8  | 256.0 | 387.6  | 380.6  | 399.9  | 425.8  | 426.2  |
| 19.5  | 18.1  | 28.4   | 13.2  | 21.7   | 40.1   | 20.8   | 23.9   | 480.9  |
| 6.1   | 3.3   | 5.6    | 5.1   | 8.2    | 4.6    | 14.8   | 8.8    | 10.5   |
| 8.1   | 4.9   | 6.7    | 9.0   | 9.9    | 3.5    | 6.8    | 18.7   | 11.6   |
| 45.8  | 53.4  | 65.9   | 59.3  | 0.6    | 0.9    | 0.5    | 2.0    | 16.3   |

|        |        |        |        |        |        |        |        |        |
|--------|--------|--------|--------|--------|--------|--------|--------|--------|
| 3.6    | 5.5    | 9.8    | 4.7    | 2.4    | 15.0   | 5.6    | 1.4    | 10.3   |
| 176.0  | 139.7  | 290.3  | 132.8  | 473.8  | 416.5  | 387.6  | 479.3  | 434.0  |
| 641.4  | 601.6  | 701.7  | 593.3  | 497.1  | 472.3  | 495.8  | 583.0  | 463.0  |
| 82.8   | 71.4   | 93.8   | 61.2   | 94.7   | 101.6  | 129.0  | 123.4  | 116.1  |
| 1.1    | 1.1    | 1.2    | 1.1    | 12.1   | 28.0   | 16.6   | 5.0    | 1.2    |
| 51.0   | 58.9   | 66.0   | 47.2   | 101.7  | 126.9  | 119.1  | 150.1  | 96.3   |
| 138.0  | 129.9  | 343.3  | 106.1  | 88.6   | 127.0  | 82.6   | 76.4   | 218.0  |
| 3.1    | 0.8    | 6.6    | 2.6    | 3.6    | 2.1    | 2.0    | 0.3    | 6.9    |
| 114.5  | 93.1   | 202.5  | 91.0   | 263.9  | 342.3  | 190.0  | 245.2  | 293.8  |
| 2.8    | 2.0    | 3.6    | 2.9    | 20.3   | 101.9  | 20.8   | 27.5   | 122.5  |
| 4.7    | 2.4    | 3.1    | 3.4    | 12.2   | 9.8    | 8.7    | 3.5    | 1.3    |
| 52.9   | 39.9   | 77.4   | 59.3   | 68.7   | 49.9   | 54.5   | 64.1   | 81.5   |
| 0.9    | 1.7    | 0.4    | 0.3    | 1.2    | 1.0    | 4.1    | 0.1    | 6.3    |
| 0.6    | 0.6    | 1.6    | 0.9    | 1.0    | 0.5    | 0.5    | 1.4    | 1.6    |
| 2.5    | 4.7    | 3.2    | 3.3    | 30.5   | 16.3   | 31.5   | 48.3   | 5.0    |
| 51.4   | 51.4   | 56.8   | 51.9   | 129.6  | 159.5  | 167.2  | 178.6  | 83.7   |
| 1928.6 | 1717.7 | 2808.2 | 1819.4 | 2458.6 | 2848.6 | 2679.7 | 3039.6 | 2967.3 |
| 2.3    | 1.8    | 3.1    | 1.9    | 1.0    | 1.6    | 2.0    | 1.1    | 2.7    |
| 13.0   | 13.5   | 18.5   | 11.4   | 75.1   | 76.6   | 73.3   | 99.9   | 38.4   |
| 23.1   | 24.8   | 17.6   | 23.2   | 7.0    | 11.2   | 10.0   | 6.2    | 14.5   |
| 9.3    | 15.7   | 8.7    | 13.9   | 6.3    | 3.4    | 3.0    | 15.9   | 12.5   |
| 1205.6 | 1087.3 | 946.2  | 738.2  | 19.6   | 19.6   | 14.6   | 31.1   | 18.2   |
| 1076.3 | 997.0  | 1233.0 | 963.5  | 851.9  | 869.2  | 956.1  | 1040.9 | 1328.7 |
| 104.7  | 95.5   | 147.5  | 118.1  | 42.3   | 37.1   | 35.9   | 49.4   | 16.0   |
| 11.8   | 1.7    | 14.7   | 5.1    | 1.8    | 3.6    | 5.3    | 11.5   | 15.0   |
| 9.5    | 4.8    | 3.8    | 1.3    | 6.2    | 1.7    | 4.1    | 6.6    | 14.7   |
| 3.7    | 2.1    | 7.1    | 1.9    | 38.4   | 32.6   | 36.8   | 34.4   | 76.4   |
| 43.8   | 50.4   | 41.5   | 31.2   | 276.7  | 348.2  | 272.7  | 266.3  | 2.2    |
| 127.1  | 105.1  | 99.8   | 86.4   | 552.0  | 662.3  | 540.9  | 607.1  | 750.0  |
| 8.7    | 9.7    | 7.7    | 7.9    | 152.5  | 130.1  | 135.6  | 195.2  | 51.0   |
| 62.5   | 64.1   | 61.0   | 60.0   | 611.7  | 480.0  | 749.8  | 680.2  | 3665.4 |
| 6.7    | 3.6    | 5.8    | 4.1    | 85.8   | 141.5  | 88.6   | 116.0  | 9.5    |
| 24.8   | 19.8   | 17.4   | 23.9   | 13.2   | 14.4   | 16.6   | 10.1   | 18.2   |
| 465.8  | 437.9  | 747.5  | 481.5  | 836.2  | 979.8  | 819.0  | 810.7  | 387.3  |
| 2.2    | 6.6    | 8.3    | 6.5    | 256.0  | 190.2  | 259.7  | 317.7  | 9.3    |
| 38.0   | 35.3   | 41.6   | 40.8   | 48.9   | 45.7   | 48.6   | 50.4   | 44.9   |
| 9.1    | 6.5    | 4.9    | 3.9    | 113.3  | 60.6   | 107.0  | 132.2  | 218.6  |
| 3.5    | 0.8    | 2.9    | 2.9    | 6.8    | 3.8    | 3.6    | 6.4    | 1.3    |
| 3.5    | 0.4    | 3.5    | 4.7    | 3.3    | 2.5    | 1.7    | 4.6    | 127.9  |
| 80.6   | 55.4   | 134.3  | 77.8   | 63.8   | 70.1   | 77.3   | 89.5   | 97.8   |
| 2861.0 | 2307.9 | 2691.5 | 1985.8 | 3643.8 | 3791.4 | 4073.5 | 4030.3 | 3583.7 |
| 133.4  | 129.6  | 150.2  | 119.5  | 190.7  | 191.7  | 194.8  | 288.3  | 71.7   |
| 10.4   | 11.5   | 13.4   | 5.6    | 92.4   | 165.3  | 120.0  | 107.7  | 186.9  |
| 12.0   | 10.4   | 18.6   | 9.1    | 26.4   | 36.0   | 33.0   | 42.3   | 15.8   |
| 204.7  | 181.8  | 157.5  | 131.4  | 495.5  | 553.1  | 485.4  | 567.9  | 587.1  |
| 123.9  | 116.5  | 124.4  | 87.5   | 388.6  | 447.8  | 382.8  | 496.1  | 365.6  |
| 19.4   | 20.7   | 37.9   | 15.4   | 18.4   | 7.4    | 2.9    | 15.1   | 22.2   |
| 455.8  | 437.6  | 855.9  | 495.1  | 970.8  | 858.1  | 993.9  | 1089.9 | 1466.7 |
| 38.4   | 32.9   | 46.7   | 44.3   | 31.0   | 39.0   | 28.1   | 16.2   | 40.6   |
| 29.3   | 27.5   | 27.6   | 17.8   | 12.2   | 23.2   | 21.6   | 37.6   | 42.6   |
| 13.1   | 4.2    | 3.6    | 6.7    | 6.2    | 3.4    | 6.7    | 0.4    | 1.6    |
| 38.2   | 32.4   | 54.8   | 33.6   | 78.3   | 65.1   | 105.1  | 105.4  | 137.8  |
| 5.6    | 3.4    | 3.3    | 4.8    | 1.6    | 5.1    | 4.8    | 2.6    | 17.4   |

|        |        |        |        |        |        |        |        |        |
|--------|--------|--------|--------|--------|--------|--------|--------|--------|
| 29.2   | 33.9   | 42.4   | 20.7   | 19.0   | 8.6    | 20.1   | 13.0   | 32.0   |
| 3.0    | 1.8    | 0.6    | 1.2    | 1.0    | 2.3    | 2.3    | 1.0    | 11.4   |
| 6.5    | 6.3    | 4.7    | 2.0    | 14.1   | 20.3   | 13.2   | 7.8    | 8.8    |
| 2.3    | 4.7    | 10.1   | 13.5   | 2.0    | 4.6    | 2.1    | 1.9    | 1.5    |
| 22.3   | 28.7   | 26.1   | 30.5   | 28.9   | 25.4   | 29.0   | 41.8   | 18.4   |
| 19.0   | 13.0   | 14.3   | 13.0   | 1.7    | 1.3    | 4.3    | 4.1    | 6.6    |
| 10.4   | 16.7   | 11.5   | 3.5    | 11.1   | 5.3    | 9.6    | 14.7   | 17.2   |
| 18.5   | 20.0   | 19.6   | 21.5   | 18.8   | 17.2   | 16.2   | 27.2   | 30.6   |
| 24.9   | 26.6   | 19.3   | 16.5   | 1.8    | 3.6    | 2.0    | 5.1    | 22.7   |
| 12.6   | 16.9   | 13.4   | 11.9   | 9.2    | 12.5   | 8.9    | 9.0    | 6.8    |
| 28.6   | 32.8   | 28.9   | 22.2   | 14.4   | 23.1   | 20.7   | 18.7   | 33.7   |
| 14.6   | 14.9   | 24.8   | 11.5   | 19.5   | 12.9   | 19.7   | 24.2   | 50.5   |
| 7.3    | 12.2   | 12.1   | 5.4    | 33.3   | 21.4   | 40.3   | 32.5   | 19.5   |
| 47.8   | 28.7   | 65.4   | 31.3   | 141.7  | 86.7   | 125.3  | 123.2  | 229.9  |
| 4.4    | 4.4    | 8.1    | 8.5    | 13.3   | 13.3   | 22.9   | 21.5   | 7.8    |
| 10.0   | 3.2    | 11.7   | 6.3    | 26.6   | 7.2    | 26.0   | 30.4   | 16.3   |
| 291.9  | 242.4  | 475.4  | 257.6  | 616.8  | 521.3  | 615.5  | 743.3  | 796.2  |
| 48.6   | 72.7   | 9.8    | 36.6   | 0.9    | 1.0    | 1.5    | 1.4    | 7.8    |
| 52.1   | 50.0   | 118.9  | 31.5   | 135.4  | 85.3   | 161.9  | 159.3  | 406.7  |
| 1.0    | 1.3    | 5.0    | 0.4    | 6.6    | 8.9    | 4.4    | 1.4    | 2.1    |
| 25.4   | 11.9   | 30.1   | 18.8   | 20.5   | 24.2   | 24.2   | 33.8   | 21.0   |
| 3173.7 | 2830.7 | 3814.5 | 3173.3 | 1715.3 | 2151.1 | 2024.3 | 1971.4 | 1682.3 |
| 3.1    | 4.8    | 6.4    | 1.9    | 12.0   | 16.4   | 13.2   | 3.7    | 8.1    |
| 45.9   | 34.1   | 30.2   | 23.5   | 31.0   | 31.3   | 25.4   | 36.6   | 33.9   |
| 480.8  | 414.9  | 722.3  | 477.6  | 1138.7 | 1243.6 | 1114.8 | 1265.3 | 1717.0 |
| 58.4   | 52.8   | 85.5   | 60.8   | 67.9   | 44.6   | 79.4   | 77.1   | 113.2  |
| 51.9   | 49.8   | 67.1   | 46.3   | 82.4   | 77.9   | 81.8   | 99.6   | 100.1  |
| 21.6   | 33.8   | 40.6   | 24.2   | 17.8   | 28.1   | 24.8   | 20.0   | 12.8   |
| 1.4    | 0.5    | 1.3    | 0.6    | 11.3   | 17.0   | 6.7    | 1.8    | 5.9    |
| 17.6   | 10.2   | 29.6   | 13.8   | 190.4  | 149.7  | 205.5  | 266.6  | 105.6  |
| 12.5   | 22.8   | 13.8   | 10.6   | 1.8    | 9.0    | 2.3    | 9.9    | 2.3    |
| 9.4    | 11.7   | 17.0   | 13.5   | 9.2    | 2.8    | 5.7    | 6.6    | 10.9   |
| 1.2    | 1.2    | 0.6    | 0.6    | 4.2    | 5.5    | 0.8    | 1.0    | 0.9    |
| 12.9   | 12.2   | 13.8   | 17.5   | 12.9   | 11.2   | 22.6   | 11.0   | 12.5   |
| 1.8    | 1.2    | 3.4    | 4.6    | 5.0    | 3.7    | 9.5    | 7.1    | 3.5    |
| 34.5   | 24.7   | 38.5   | 28.6   | 26.5   | 37.2   | 32.5   | 31.9   | 21.1   |
| 6.2    | 2.6    | 9.6    | 4.9    | 9.5    | 5.0    | 7.0    | 2.8    | 307.8  |
| 16.5   | 14.7   | 10.2   | 17.6   | 9.3    | 19.6   | 18.2   | 16.6   | 21.9   |
| 54.9   | 55.8   | 59.3   | 50.3   | 41.7   | 47.3   | 32.6   | 36.0   | 61.6   |
| 35.5   | 16.6   | 47.1   | 17.4   | 138.6  | 134.9  | 140.9  | 142.9  | 71.1   |
| 2.7    | 3.4    | 4.2    | 1.4    | 80.8   | 58.4   | 62.1   | 91.5   | 19.2   |
| 16.6   | 20.3   | 19.8   | 15.4   | 11.5   | 14.0   | 10.5   | 7.5    | 13.0   |
| 18.1   | 16.1   | 17.9   | 19.0   | 21.1   | 18.3   | 21.0   | 26.7   | 23.2   |
| 102.3  | 101.6  | 88.6   | 78.6   | 15.3   | 22.2   | 30.2   | 28.1   | 17.2   |
| 51.4   | 41.2   | 93.6   | 38.8   | 103.6  | 87.7   | 80.0   | 106.0  | 156.0  |
| 818.9  | 767.5  | 1028.3 | 848.9  | 1397.8 | 1517.9 | 1319.9 | 1595.7 | 1098.9 |
| 24.4   | 18.6   | 27.3   | 14.9   | 13.8   | 10.4   | 10.8   | 20.9   | 20.3   |
| 5853.3 | 5262.6 | 7279.1 | 5087.8 | 5436.9 | 4309.7 | 4849.8 | 6023.1 | 6697.5 |
| 82.6   | 81.0   | 87.2   | 65.3   | 169.8  | 196.5  | 157.2  | 174.3  | 195.1  |
| 2632.4 | 2486.7 | 4223.7 | 2407.5 | 2129.2 | 2120.4 | 2181.0 | 2171.5 | 4029.0 |
| 58.4   | 72.8   | 60.3   | 46.9   | 76.4   | 86.1   | 81.2   | 103.4  | 42.3   |
| 3.6    | 5.2    | 2.7    | 2.0    | 91.1   | 81.3   | 99.3   | 104.9  | 1.2    |
| 514.1  | 499.2  | 817.2  | 432.9  | 1013.6 | 1024.6 | 1081.1 | 1193.9 | 573.9  |

|        |        |        |        |        |        |        |        |        |
|--------|--------|--------|--------|--------|--------|--------|--------|--------|
| 29.0   | 49.2   | 19.3   | 42.9   | 109.6  | 127.9  | 125.0  | 131.1  | 96.9   |
| 8.7    | 12.3   | 7.5    | 10.1   | 22.8   | 24.0   | 21.4   | 44.8   | 17.3   |
| 69.6   | 70.4   | 62.2   | 64.4   | 989.7  | 768.9  | 1018.3 | 1094.6 | 127.8  |
| 4.6    | 3.6    | 12.0   | 9.4    | 5.4    | 7.2    | 6.2    | 1.2    | 2.1    |
| 13.3   | 9.2    | 8.8    | 6.0    | 37.9   | 46.7   | 48.5   | 57.9   | 1.9    |
| 16.1   | 12.4   | 5.0    | 14.1   | 31.5   | 48.1   | 35.0   | 41.5   | 57.1   |
| 39.9   | 31.8   | 25.4   | 33.6   | 32.9   | 44.4   | 45.5   | 46.5   | 45.0   |
| 3.1    | 4.0    | 2.9    | 3.4    | 2.4    | 3.2    | 11.5   | 4.2    | 2.6    |
| 22.7   | 20.1   | 18.7   | 10.7   | 8.4    | 9.2    | 3.6    | 10.9   | 19.5   |
| 3.3    | 4.1    | 8.9    | 5.2    | 0.8    | 4.4    | 5.4    | 5.6    | 2.1    |
| 3.7    | 5.2    | 12.3   | 14.1   | 11.0   | 2.5    | 8.5    | 9.7    | 10.9   |
| 1.8    | 1.8    | 3.1    | 2.9    | 2.7    | 11.0   | 5.5    | 4.3    | 622.6  |
| 7.0    | 12.4   | 15.6   | 8.3    | 14.8   | 10.8   | 14.8   | 16.0   | 27.0   |
| 1182.7 | 1124.2 | 1506.2 | 1064.4 | 1171.8 | 1023.3 | 1295.5 | 1462.8 | 1244.8 |
| 15.0   | 10.1   | 24.4   | 15.6   | 8.4    | 12.3   | 12.2   | 5.4    | 34.0   |
| 8.6    | 4.5    | 26.6   | 9.6    | 38.4   | 51.6   | 48.6   | 33.3   | 42.4   |
| 47.9   | 45.9   | 46.9   | 50.1   | 12.8   | 8.7    | 23.1   | 33.3   | 17.0   |
| 133.3  | 137.1  | 171.5  | 128.4  | 176.7  | 241.0  | 177.5  | 205.4  | 144.8  |
| 39.8   | 40.6   | 73.5   | 45.6   | 60.6   | 59.1   | 53.4   | 62.3   | 104.9  |
| 2.7    | 2.9    | 3.8    | 2.3    | 20.6   | 3.5    | 22.0   | 5.7    | 2.2    |
| 367.6  | 342.8  | 489.1  | 277.0  | 45.7   | 43.7   | 47.9   | 61.2   | 47.5   |
| 28.7   | 25.6   | 56.9   | 30.3   | 29.3   | 16.1   | 22.8   | 30.5   | 136.5  |
| 78.6   | 76.9   | 51.4   | 55.1   | 41.5   | 54.1   | 42.6   | 44.2   | 60.2   |
| 101.4  | 76.8   | 110.1  | 68.0   | 85.8   | 92.3   | 75.3   | 100.3  | 128.0  |
| 356.2  | 357.4  | 396.5  | 305.8  | 449.3  | 368.3  | 450.2  | 534.0  | 475.0  |
| 2.8    | 8.6    | 7.8    | 3.1    | 3.7    | 6.6    | 4.6    | 2.3    | 28.1   |
| 0.9    | 1.2    | 2.8    | 2.2    | 1.3    | 0.9    | 0.8    | 1.0    | 4.1    |
| 4.2    | 5.1    | 8.4    | 5.5    | 4.7    | 4.3    | 2.4    | 3.0    | 8.6    |
| 23.5   | 16.8   | 31.5   | 14.5   | 20.5   | 20.0   | 15.2   | 21.5   | 26.0   |
| 9.0    | 3.8    | 5.5    | 8.0    | 26.7   | 19.3   | 24.6   | 21.5   | 13.5   |
| 124.6  | 134.3  | 123.6  | 108.7  | 120.5  | 117.0  | 97.3   | 152.4  | 59.9   |
| 389.0  | 348.1  | 695.2  | 421.4  | 998.5  | 1073.2 | 1086.8 | 1034.0 | 943.1  |
| 25.5   | 23.4   | 35.7   | 24.6   | 41.8   | 60.7   | 52.2   | 44.4   | 36.9   |
| 131.0  | 112.1  | 125.0  | 115.4  | 234.0  | 197.3  | 203.7  | 267.1  | 191.0  |
| 21.4   | 26.4   | 27.9   | 29.5   | 59.3   | 50.7   | 57.4   | 72.0   | 68.9   |
| 4.4    | 2.4    | 2.8    | 2.7    | 4.7    | 1.3    | 4.2    | 10.6   | 6.7    |
| 30.7   | 27.0   | 38.5   | 26.9   | 20.2   | 15.3   | 16.4   | 27.8   | 20.1   |
| 37.8   | 37.9   | 53.0   | 45.6   | 65.8   | 67.6   | 50.2   | 73.7   | 96.5   |
| 97.0   | 98.5   | 98.1   | 98.1   | 457.1  | 377.7  | 554.2  | 545.3  | 152.3  |
| 2.4    | 0.7    | 1.4    | 0.2    | 0.6    | 0.3    | 0.2    | 0.3    | 5.1    |
| 14.2   | 16.6   | 17.9   | 7.7    | 8.9    | 12.5   | 12.7   | 8.8    | 17.7   |
| 52.9   | 56.3   | 53.3   | 64.8   | 242.0  | 224.1  | 230.4  | 256.9  | 123.7  |
| 6.4    | 8.2    | 2.0    | 3.9    | 17.8   | 9.9    | 16.1   | 10.6   | 1.7    |
| 4.0    | 2.4    | 2.9    | 3.1    | 2.8    | 1.5    | 5.2    | 5.1    | 14.2   |
| 4.5    | 3.3    | 9.9    | 8.9    | 4.1    | 3.6    | 2.4    | 3.5    | 3.3    |
| 23.7   | 27.3   | 28.8   | 23.1   | 12.6   | 13.0   | 13.9   | 10.9   | 23.0   |
| 2.1    | 1.5    | 4.4    | 2.0    | 1.5    | 1.8    | 1.2    | 3.7    | 13.0   |
| 192.5  | 227.5  | 216.0  | 221.6  | 159.4  | 176.4  | 167.0  | 183.5  | 104.3  |
| 1.9    | 4.1    | 6.9    | 9.9    | 3.8    | 7.5    | 4.1    | 6.5    | 15.6   |
| 12.2   | 15.0   | 13.0   | 15.2   | 4.8    | 9.5    | 3.5    | 0.8    | 19.0   |
| 64.0   | 52.8   | 58.9   | 43.4   | 55.7   | 63.5   | 59.2   | 74.7   | 79.8   |
| 3.8    | 2.9    | 6.2    | 2.6    | 1.5    | 1.0    | 1.8    | 1.0    | 2.9    |
| 9.8    | 14.7   | 13.0   | 4.2    | 8.8    | 5.9    | 5.6    | 0.9    | 1.1    |

|        |        |        |        |        |        |        |        |        |
|--------|--------|--------|--------|--------|--------|--------|--------|--------|
| 23.9   | 33.1   | 62.8   | 55.9   | 10.2   | 10.1   | 10.6   | 12.1   | 15.9   |
| 20.3   | 27.0   | 22.1   | 14.9   | 20.9   | 25.3   | 28.7   | 31.7   | 29.4   |
| 6.0    | 3.5    | 0.9    | 4.5    | 5.6    | 4.2    | 5.9    | 1.6    | 10.5   |
| 818.1  | 802.5  | 969.6  | 717.8  | 1652.6 | 1426.1 | 1613.9 | 2008.5 | 1616.4 |
| 412.1  | 440.9  | 424.2  | 378.0  | 357.1  | 386.6  | 282.9  | 385.6  | 590.6  |
| 256.1  | 234.4  | 227.0  | 186.0  | 39.1   | 51.5   | 65.8   | 86.1   | 51.7   |
| 236.5  | 224.0  | 219.9  | 170.4  | 65.4   | 66.2   | 70.5   | 99.2   | 39.4   |
| 4.7    | 4.9    | 6.5    | 3.6    | 1.0    | 0.5    | 2.6    | 2.7    | 2.2    |
| 16.2   | 14.7   | 9.8    | 7.3    | 6.8    | 15.3   | 6.9    | 10.8   | 20.8   |
| 63.0   | 51.8   | 60.4   | 43.8   | 22.9   | 27.4   | 29.5   | 34.4   | 83.7   |
| 13.9   | 13.3   | 13.8   | 10.0   | 2.9    | 5.9    | 4.3    | 0.2    | 17.1   |
| 1327.6 | 1166.0 | 1806.1 | 1112.7 | 1378.2 | 1303.1 | 1429.1 | 1651.9 | 685.8  |
| 251.8  | 249.2  | 289.7  | 268.2  | 388.6  | 308.9  | 353.2  | 486.1  | 286.4  |
| 104.5  | 84.9   | 178.2  | 78.3   | 278.2  | 231.5  | 260.0  | 269.2  | 360.7  |
| 25.2   | 24.6   | 46.4   | 17.2   | 44.5   | 36.7   | 44.0   | 58.9   | 100.6  |
| 0.9    | 1.4    | 2.6    | 1.7    | 1.1    | 0.9    | 0.6    | 0.1    | 19.4   |
| 28.1   | 26.7   | 30.8   | 26.7   | 15.2   | 19.8   | 20.8   | 21.6   | 54.2   |
| 5.6    | 4.1    | 5.9    | 5.2    | 2.9    | 1.3    | 1.2    | 1.5    | 3.0    |
| 22.9   | 28.2   | 34.6   | 27.9   | 21.3   | 23.0   | 29.0   | 32.0   | 63.8   |
| 32.3   | 29.1   | 34.6   | 26.2   | 39.4   | 43.4   | 41.1   | 59.6   | 87.4   |
| 17.7   | 13.7   | 17.5   | 17.5   | 17.5   | 15.2   | 17.9   | 19.0   | 4.5    |
| 1053.5 | 936.1  | 1948.4 | 1019.3 | 807.9  | 585.8  | 796.6  | 955.7  | 1079.3 |
| 19.3   | 15.0   | 21.5   | 13.8   | 20.2   | 28.8   | 29.0   | 23.5   | 18.7   |
| 1.3    | 1.9    | 2.9    | 1.4    | 461.2  | 448.2  | 465.3  | 512.1  | 220.6  |
| 567.9  | 565.6  | 580.2  | 583.1  | 516.8  | 467.2  | 499.9  | 577.1  | 379.3  |
| 14.3   | 8.6    | 16.6   | 15.4   | 4.9    | 5.2    | 0.7    | 6.6    | 6.9    |
| 1.9    | 4.5    | 9.1    | 5.7    | 8.9    | 9.3    | 12.2   | 3.1    | 69.1   |
| 5.1    | 2.6    | 1.1    | 2.9    | 4.6    | 9.3    | 14.1   | 15.3   | 64.3   |
| 7.3    | 6.8    | 12.3   | 9.5    | 9.4    | 9.0    | 7.6    | 3.6    | 12.9   |
| 31.4   | 32.1   | 40.6   | 32.7   | 33.6   | 34.2   | 29.8   | 32.3   | 47.4   |
| 6.9    | 7.8    | 4.9    | 7.6    | 12.3   | 2.5    | 7.2    | 8.7    | 9.9    |
| 3.8    | 1.3    | 1.0    | 4.1    | 0.7    | 1.3    | 3.5    | 1.9    | 4.4    |
| 4.7    | 6.4    | 19.4   | 8.2    | 2.4    | 6.0    | 9.1    | 11.8   | 4.9    |
| 6.4    | 3.4    | 2.8    | 2.7    | 10.5   | 17.1   | 12.3   | 5.7    | 3.0    |
| 5.6    | 0.4    | 2.6    | 3.1    | 7.6    | 12.7   | 4.6    | 7.2    | 4.9    |
| 49.7   | 28.1   | 75.9   | 47.6   | 51.5   | 34.7   | 29.7   | 41.2   | 16.7   |
| 2.4    | 5.1    | 2.2    | 3.8    | 2.1    | 2.9    | 1.5    | 8.8    | 1.8    |
| 2.6    | 1.3    | 1.7    | 1.0    | 30.2   | 41.9   | 19.6   | 19.8   | 3.0    |
| 9.8    | 13.9   | 24.2   | 10.1   | 16.2   | 20.1   | 12.1   | 15.5   | 11.8   |
| 305.5  | 297.9  | 206.3  | 260.5  | 396.8  | 522.8  | 505.4  | 487.8  | 606.9  |
| 5.3    | 2.3    | 5.8    | 1.3    | 4.5    | 4.8    | 1.5    | 0.8    | 4.4    |
| 70.3   | 65.1   | 88.9   | 102.6  | 31.1   | 36.7   | 35.1   | 22.8   | 15.6   |
| 5.6    | 4.8    | 9.7    | 8.8    | 10.6   | 3.7    | 4.8    | 4.4    | 14.4   |
| 8.6    | 10.5   | 8.4    | 3.6    | 10.3   | 13.5   | 10.7   | 5.3    | 4.9    |
| 543.9  | 509.8  | 895.0  | 493.8  | 1415.4 | 1473.4 | 1408.4 | 1579.5 | 2489.0 |
| 1.4    | 1.8    | 2.3    | 9.9    | 1.7    | 4.6    | 1.7    | 7.4    | 2.9    |
| 396.3  | 343.3  | 359.1  | 320.7  | 73.8   | 45.7   | 91.4   | 87.4   | 113.9  |
| 415.1  | 390.5  | 770.2  | 533.3  | 206.3  | 193.5  | 220.6  | 278.6  | 136.1  |
| 2.9    | 2.3    | 4.0    | 2.1    | 1.8    | 4.6    | 1.4    | 3.0    | 2.4    |
| 11.9   | 13.0   | 14.8   | 9.3    | 8.8    | 11.2   | 7.6    | 9.7    | 13.6   |
| 9.7    | 12.7   | 20.5   | 16.1   | 9.5    | 8.2    | 10.0   | 21.0   | 14.0   |
| 0.7    | 1.7    | 1.0    | 0.9    | 1.2    | 0.7    | 0.6    | 2.1    | 0.9    |
| 15.7   | 10.5   | 26.3   | 8.5    | 5.3    | 7.3    | 4.7    | 6.9    | 11.3   |

|        |        |        |        |        |        |        |        |        |
|--------|--------|--------|--------|--------|--------|--------|--------|--------|
| 14.4   | 33.4   | 6.6    | 16.4   | 2.1    | 2.1    | 5.5    | 1.8    | 3.2    |
| 36.1   | 39.3   | 20.9   | 22.4   | 9.6    | 4.8    | 1.7    | 1.9    | 6.4    |
| 37.2   | 48.7   | 17.6   | 28.3   | 0.7    | 1.2    | 0.9    | 2.5    | 4.1    |
| 1.1    | 11.0   | 11.8   | 7.4    | 6.5    | 2.4    | 10.1   | 2.3    | 24.1   |
| 3.9    | 8.5    | 5.6    | 6.4    | 4.1    | 1.2    | 7.8    | 8.7    | 12.5   |
| 18.3   | 14.5   | 15.3   | 11.8   | 12.2   | 12.0   | 7.6    | 16.7   | 10.0   |
| 2.2    | 4.7    | 6.5    | 8.1    | 0.8    | 1.4    | 2.6    | 1.9    | 3.4    |
| 1.6    | 1.8    | 3.1    | 3.8    | 1.1    | 0.8    | 2.3    | 1.6    | 2.5    |
| 69.9   | 64.1   | 168.2  | 61.3   | 688.8  | 481.7  | 581.3  | 716.1  | 455.5  |
| 6.1    | 4.0    | 7.1    | 8.6    | 9.2    | 9.5    | 16.2   | 19.7   | 6.8    |
| 90.3   | 69.1   | 50.0   | 71.4   | 81.8   | 98.1   | 82.9   | 86.9   | 72.3   |
| 443.5  | 343.2  | 685.3  | 296.0  | 950.5  | 792.4  | 1176.3 | 1247.6 | 782.9  |
| 5393.1 | 4468.2 | 7558.7 | 5412.4 | 7436.3 | 6226.4 | 7345.1 | 7718.7 | 9374.2 |
| 2.2    | 6.1    | 14.3   | 6.9    | 4.4    | 18.1   | 4.8    | 14.1   | 16.3   |
| 2.8    | 0.9    | 1.2    | 1.0    | 9.2    | 7.0    | 5.4    | 7.4    | 4.7    |
| 3.3    | 1.5    | 2.1    | 5.6    | 0.9    | 4.1    | 5.4    | 2.1    | 7.0    |
| 9.5    | 6.8    | 17.5   | 4.8    | 2.4    | 1.3    | 1.5    | 0.7    | 6.4    |
| 9.6    | 2.4    | 9.0    | 4.9    | 4.1    | 5.0    | 4.5    | 5.2    | 2.2    |
| 2.0    | 2.9    | 1.6    | 1.9    | 9.2    | 3.3    | 2.5    | 3.8    | 3.9    |
| 11.0   | 16.6   | 25.5   | 10.3   | 5.6    | 6.5    | 2.2    | 4.4    | 26.9   |
| 117.0  | 133.4  | 94.7   | 99.3   | 124.3  | 132.9  | 146.0  | 150.4  | 136.0  |
| 18.1   | 19.8   | 36.9   | 17.8   | 90.7   | 78.6   | 84.6   | 101.1  | 26.4   |
| 10.2   | 3.4    | 5.4    | 7.9    | 1.8    | 0.9    | 8.2    | 4.9    | 15.0   |
| 11.7   | 10.2   | 18.7   | 13.0   | 55.8   | 49.7   | 56.7   | 67.3   | 140.5  |
| 35.9   | 23.8   | 88.3   | 31.9   | 58.1   | 40.0   | 51.6   | 44.3   | 152.4  |
| 6.4    | 15.2   | 8.7    | 10.6   | 6.0    | 3.8    | 6.5    | 1.1    | 2.9    |
| 1.2    | 2.8    | 5.4    | 2.3    | 1.0    | 1.6    | 4.8    | 2.7    | 2.1    |
| 7.9    | 8.4    | 10.7   | 10.4   | 6.8    | 6.1    | 5.9    | 4.1    | 12.7   |
| 28.3   | 26.9   | 15.6   | 10.4   | 219.7  | 155.5  | 219.5  | 214.6  | 62.0   |
| 12.5   | 6.9    | 5.1    | 11.8   | 3.4    | 1.3    | 7.7    | 1.7    | 14.4   |
| 57.9   | 44.7   | 51.7   | 52.8   | 59.8   | 133.6  | 53.4   | 71.8   | 129.3  |
| 81.7   | 77.2   | 101.1  | 79.9   | 40.5   | 36.9   | 37.5   | 54.9   | 55.7   |
| 18.5   | 15.7   | 33.2   | 17.8   | 10.5   | 14.1   | 18.7   | 24.3   | 14.4   |
| 38.3   | 29.7   | 56.2   | 35.4   | 18.8   | 20.8   | 20.5   | 23.2   | 15.2   |
| 127.5  | 123.9  | 103.5  | 121.6  | 131.3  | 146.0  | 164.0  | 179.9  | 97.0   |
| 17.0   | 12.3   | 4.3    | 6.0    | 66.7   | 52.0   | 72.1   | 82.0   | 192.8  |
| 0.8    | 0.7    | 1.3    | 0.6    | 1.2    | 0.4    | 0.6    | 0.9    | 1.7    |
| 1.3    | 2.6    | 2.8    | 2.0    | 3.8    | 0.9    | 3.3    | 0.9    | 18.7   |
| 11.5   | 5.0    | 7.9    | 8.0    | 18.7   | 20.1   | 16.6   | 25.6   | 24.5   |
| 7.9    | 9.3    | 9.9    | 6.2    | 17.2   | 20.7   | 10.2   | 17.9   | 18.6   |
| 186.2  | 169.9  | 434.3  | 424.2  | 28.3   | 17.5   | 45.8   | 42.7   | 47.1   |
| 2.6    | 3.3    | 1.0    | 3.5    | 2.4    | 3.9    | 2.3    | 3.0    | 9.1    |
| 45.3   | 40.6   | 61.9   | 49.2   | 4.3    | 6.0    | 10.3   | 9.9    | 3.2    |
| 6.2    | 1.3    | 8.4    | 7.3    | 3.6    | 5.6    | 8.2    | 1.9    | 10.0   |
| 1000.1 | 907.0  | 1404.4 | 902.4  | 892.5  | 554.8  | 914.8  | 1054.0 | 1353.1 |
| 444.7  | 354.0  | 720.6  | 490.5  | 223.7  | 277.3  | 395.7  | 322.0  | 222.7  |
| 3.9    | 6.6    | 9.1    | 7.5    | 7.0    | 10.0   | 13.0   | 7.5    | 13.4   |
| 28.3   | 45.7   | 21.7   | 19.5   | 6.3    | 14.9   | 12.5   | 11.1   | 8.9    |
| 34.5   | 40.7   | 11.6   | 20.4   | 4.3    | 3.4    | 4.7    | 0.9    | 2.4    |
| 129.4  | 129.4  | 195.5  | 130.9  | 143.3  | 158.8  | 114.1  | 146.9  | 285.3  |
| 28.0   | 27.5   | 29.0   | 39.9   | 7.5    | 8.4    | 6.4    | 0.9    | 9.4    |
| 267.8  | 260.6  | 535.2  | 290.1  | 224.4  | 199.2  | 183.8  | 280.5  | 489.7  |
| 37.2   | 35.3   | 56.8   | 42.9   | 44.2   | 36.0   | 58.8   | 75.5   | 51.0   |

|        |        |        |        |        |        |        |        |        |
|--------|--------|--------|--------|--------|--------|--------|--------|--------|
| 9.5    | 15.1   | 21.0   | 13.0   | 5.6    | 11.4   | 11.5   | 23.6   | 7.6    |
| 4.5    | 6.0    | 15.3   | 8.0    | 24.1   | 23.2   | 34.2   | 26.8   | 7.3    |
| 2.1    | 3.8    | 3.2    | 1.5    | 2.3    | 1.2    | 1.2    | 1.4    | 2.3    |
| 0.4    | 1.4    | 1.3    | 1.1    | 0.3    | 1.4    | 1.0    | 4.9    | 2.0    |
| 2.3    | 3.7    | 9.4    | 6.5    | 7.9    | 9.5    | 7.4    | 11.9   | 9.7    |
| 43.7   | 37.1   | 23.5   | 31.0   | 82.5   | 105.9  | 92.8   | 104.3  | 176.6  |
| 525.2  | 493.8  | 729.8  | 515.7  | 648.3  | 652.9  | 738.8  | 760.9  | 1158.3 |
| 225.4  | 252.3  | 81.3   | 145.4  | 1.1    | 0.8    | 4.7    | 3.7    | 30.3   |
| 2.4    | 3.1    | 2.4    | 1.2    | 1.5    | 1.3    | 1.4    | 2.2    | 2.9    |
| 720.1  | 689.3  | 1005.8 | 613.6  | 170.1  | 149.2  | 179.0  | 201.8  | 147.9  |
| 1.6    | 5.4    | 1.6    | 6.2    | 3.6    | 1.4    | 2.6    | 3.6    | 2.4    |
| 1.9    | 3.3    | 3.3    | 2.9    | 1.9    | 1.6    | 2.3    | 2.9    | 2.4    |
| 13.3   | 23.3   | 20.9   | 16.2   | 21.2   | 18.2   | 23.1   | 12.6   | 16.5   |
| 3.5    | 3.0    | 1.9    | 3.2    | 1.2    | 7.0    | 6.2    | 2.6    | 3.4    |
| 4.3    | 3.8    | 16.4   | 5.8    | 958.0  | 738.1  | 792.3  | 1069.4 | 175.0  |
| 42.4   | 23.0   | 53.6   | 36.3   | 47.6   | 50.9   | 40.3   | 58.6   | 78.8   |
| 467.3  | 430.1  | 1111.7 | 521.5  | 1316.3 | 1340.3 | 1552.5 | 1587.5 | 1388.5 |
| 6.5    | 7.8    | 3.7    | 2.9    | 10.0   | 6.7    | 8.5    | 13.6   | 8.3    |
| 0.7    | 0.9    | 0.9    | 1.1    | 1.6    | 2.1    | 2.6    | 1.2    | 1.0    |
| 14.2   | 22.1   | 19.9   | 10.1   | 14.8   | 11.1   | 13.7   | 40.2   | 54.3   |
| 1.5    | 1.5    | 1.8    | 1.0    | 1.1    | 1.2    | 0.8    | 2.1    | 1.3    |
| 15.3   | 11.3   | 26.6   | 12.4   | 16.4   | 8.3    | 22.9   | 14.0   | 11.4   |
| 1.4    | 0.8    | 3.6    | 3.8    | 2.5    | 7.4    | 3.0    | 1.6    | 4.0    |
| 3.2    | 2.0    | 10.6   | 0.9    | 1.5    | 3.4    | 2.4    | 2.7    | 2.2    |
| 49.8   | 39.5   | 48.1   | 32.7   | 2.8    | 10.4   | 8.2    | 15.3   | 12.8   |
| 25.7   | 21.5   | 42.4   | 26.9   | 82.7   | 105.7  | 76.3   | 102.6  | 359.3  |
| 3259.2 | 3087.9 | 3950.5 | 3013.7 | 990.7  | 1222.7 | 1037.8 | 1032.2 | 1127.3 |
| 43.4   | 54.2   | 38.9   | 31.0   | 23.0   | 31.9   | 31.4   | 34.3   | 31.3   |
| 1.8    | 2.4    | 2.6    | 1.7    | 1.9    | 4.8    | 1.1    | 2.3    | 8.2    |
| 10.4   | 9.6    | 13.2   | 8.6    | 9.6    | 4.3    | 7.3    | 7.1    | 5.3    |
| 30.7   | 29.8   | 26.0   | 30.6   | 33.9   | 62.9   | 28.0   | 32.3   | 46.6   |
| 3.2    | 1.9    | 5.4    | 1.5    | 8.1    | 5.2    | 10.0   | 12.3   | 17.2   |
| 11.5   | 7.3    | 11.3   | 13.8   | 4.6    | 5.1    | 5.7    | 0.4    | 9.8    |
| 15.0   | 14.3   | 16.8   | 12.5   | 9.8    | 11.9   | 18.0   | 21.0   | 16.3   |
| 5.9    | 5.6    | 8.9    | 9.4    | 16.3   | 14.3   | 13.5   | 22.0   | 20.3   |
| 69.5   | 50.1   | 147.4  | 76.7   | 55.3   | 77.2   | 68.6   | 71.1   | 84.3   |
| 81.6   | 78.3   | 172.4  | 85.6   | 126.0  | 134.0  | 131.5  | 142.8  | 101.5  |
| 189.8  | 191.5  | 218.9  | 178.0  | 246.3  | 236.3  | 208.5  | 244.6  | 279.3  |
| 681.0  | 614.6  | 936.0  | 729.9  | 835.9  | 695.1  | 840.6  | 909.9  | 1212.1 |
| 10.7   | 11.6   | 12.2   | 3.9    | 2.5    | 3.6    | 6.8    | 9.3    | 13.2   |
| 11.0   | 12.3   | 13.3   | 8.8    | 12.8   | 9.2    | 7.3    | 3.0    | 10.1   |
| 4.5    | 3.9    | 1.7    | 6.5    | 3.2    | 16.2   | 10.1   | 20.6   | 21.0   |
| 54.6   | 59.7   | 85.6   | 34.0   | 41.3   | 23.0   | 41.6   | 9.6    | 83.0   |
| 11.3   | 9.0    | 13.8   | 6.8    | 14.4   | 11.4   | 19.8   | 26.3   | 13.2   |
| 46.3   | 52.9   | 30.4   | 35.0   | 15.7   | 23.2   | 18.1   | 19.8   | 29.6   |
| 131.5  | 166.8  | 84.0   | 125.3  | 67.2   | 111.4  | 58.1   | 63.4   | 70.1   |
| 13.4   | 16.9   | 10.0   | 12.2   | 21.5   | 25.1   | 25.1   | 40.3   | 34.6   |
| 2715.7 | 2672.5 | 2170.5 | 1891.2 | 6039.1 | 6139.2 | 6339.1 | 6420.9 | 4773.6 |
| 331.3  | 333.0  | 369.3  | 297.2  | 851.4  | 960.3  | 834.7  | 913.9  | 843.8  |
| 0.7    | 0.4    | 2.1    | 0.7    | 2.1    | 0.6    | 2.5    | 1.0    | 2.0    |
| 20.0   | 21.2   | 8.5    | 11.9   | 2.8    | 4.7    | 6.0    | 11.6   | 13.6   |
| 1.9    | 2.3    | 3.4    | 1.7    | 2.1    | 2.0    | 1.2    | 6.0    | 3.7    |
| 0.4    | 1.7    | 1.6    | 1.6    | 0.9    | 2.9    | 2.4    | 0.7    | 3.0    |

|        |        |        |        |        |        |        |        |        |
|--------|--------|--------|--------|--------|--------|--------|--------|--------|
| 1.3    | 2.9    | 1.1    | 1.4    | 1.0    | 2.1    | 4.1    | 1.6    | 6.3    |
| 2970.8 | 2753.5 | 4101.1 | 2957.2 | 2427.1 | 2697.6 | 2995.3 | 2904.4 | 4049.1 |
| 12.2   | 10.5   | 9.4    | 11.8   | 5.5    | 11.0   | 7.5    | 16.9   | 7.6    |
| 8.8    | 6.1    | 17.9   | 10.2   | 7.9    | 10.8   | 6.9    | 10.5   | 16.6   |
| 11.1   | 8.3    | 9.5    | 9.3    | 518.5  | 662.4  | 565.7  | 648.2  | 16.0   |
| 601.9  | 588.2  | 711.8  | 602.7  | 579.4  | 602.8  | 648.6  | 705.4  | 951.1  |
| 0.7    | 0.8    | 1.3    | 0.9    | 0.7    | 0.6    | 0.7    | 0.6    | 0.9    |
| 5.8    | 2.7    | 10.6   | 14.0   | 13.3   | 15.0   | 6.8    | 23.5   | 18.3   |
| 4.1    | 1.5    | 2.2    | 8.2    | 2.1    | 3.6    | 0.8    | 0.9    | 11.6   |
| 9.9    | 3.2    | 4.0    | 3.2    | 6.6    | 4.0    | 5.3    | 2.3    | 5.3    |
| 79.6   | 104.2  | 107.4  | 76.4   | 154.7  | 152.5  | 119.1  | 153.4  | 211.1  |
| 10.8   | 7.5    | 14.4   | 6.5    | 11.6   | 2.6    | 8.0    | 17.7   | 25.4   |
| 0.7    | 1.6    | 1.0    | 0.7    | 23.2   | 6.9    | 17.3   | 25.0   | 67.6   |
| 15.2   | 8.5    | 15.4   | 4.2    | 9.2    | 4.6    | 4.3    | 10.9   | 9.0    |
| 36.7   | 22.7   | 50.4   | 30.3   | 16.7   | 9.3    | 13.8   | 24.9   | 27.3   |
| 13.7   | 3.4    | 21.4   | 14.2   | 102.5  | 103.5  | 128.7  | 115.2  | 199.8  |
| 163.2  | 158.8  | 221.9  | 156.7  | 195.1  | 236.5  | 188.5  | 233.6  | 141.0  |
| 0.7    | 5.5    | 4.1    | 4.0    | 4.7    | 4.9    | 0.8    | 0.6    | 1.0    |
| 1.8    | 0.9    | 5.8    | 1.5    | 2.5    | 1.1    | 0.9    | 2.2    | 2.9    |
| 2.7    | 2.1    | 3.1    | 1.9    | 4.9    | 2.1    | 2.6    | 2.7    | 3.3    |
| 1995.5 | 1778.1 | 2799.0 | 1849.3 | 3985.2 | 3860.4 | 4016.7 | 4436.0 | 5372.4 |
| 3.5    | 4.0    | 33.7   | 15.7   | 4.2    | 7.2    | 5.0    | 8.0    | 3.5    |
| 31.8   | 37.7   | 32.3   | 32.2   | 44.4   | 59.7   | 55.6   | 60.4   | 108.7  |
| 9.7    | 6.5    | 11.3   | 8.8    | 7.2    | 6.2    | 5.5    | 2.9    | 11.0   |
| 35.8   | 24.3   | 58.3   | 32.1   | 167.4  | 299.9  | 137.4  | 188.3  | 220.5  |
| 46.8   | 41.9   | 49.3   | 41.3   | 64.6   | 48.6   | 62.1   | 73.5   | 61.0   |
| 0.6    | 1.1    | 0.7    | 0.6    | 1.5    | 1.1    | 1.4    | 0.6    | 1.8    |
| 758.4  | 661.7  | 814.3  | 654.5  | 1512.6 | 1409.1 | 1661.0 | 1718.1 | 2544.2 |
| 10.7   | 17.2   | 28.7   | 9.8    | 90.2   | 104.7  | 234.6  | 167.0  | 29.5   |
| 7.5    | 9.4    | 3.1    | 3.8    | 5.1    | 7.6    | 7.1    | 9.3    | 12.0   |
| 79.3   | 77.4   | 78.9   | 84.3   | 246.1  | 239.3  | 270.0  | 246.4  | 409.6  |
| 4.3    | 7.0    | 5.8    | 5.1    | 1.0    | 5.2    | 0.9    | 7.3    | 3.5    |
| 44.4   | 47.5   | 64.6   | 42.2   | 176.6  | 190.3  | 180.9  | 213.1  | 286.9  |
| 1334.8 | 1039.7 | 2245.7 | 1083.8 | 4553.8 | 4053.7 | 4933.0 | 4933.8 | 6154.6 |
| 6.1    | 7.6    | 8.7    | 4.7    | 1895.1 | 1803.5 | 2110.4 | 2214.1 | 3511.3 |
| 18.3   | 12.4   | 14.8   | 12.9   | 7.0    | 3.7    | 3.0    | 1.2    | 9.7    |
| 1150.6 | 1058.8 | 1510.9 | 1223.8 | 1904.6 | 1712.5 | 1868.3 | 2120.9 | 2987.6 |
| 15.0   | 9.7    | 16.6   | 20.4   | 22.6   | 32.5   | 14.0   | 14.6   | 9.9    |
| 3.3    | 6.8    | 2.5    | 10.9   | 2.9    | 4.0    | 3.6    | 1.0    | 7.0    |
| 131.4  | 121.9  | 183.7  | 152.6  | 373.6  | 309.6  | 360.7  | 393.0  | 300.1  |
| 39.0   | 43.7   | 32.1   | 32.6   | 60.0   | 67.6   | 57.8   | 65.6   | 69.7   |
| 6.4    | 2.2    | 14.0   | 8.1    | 1.3    | 0.9    | 2.4    | 1.4    | 3.3    |
| 48.4   | 45.8   | 66.9   | 47.0   | 8.2    | 8.4    | 12.9   | 17.7   | 3.2    |
| 23.0   | 23.9   | 26.7   | 15.1   | 37.9   | 28.3   | 35.8   | 50.7   | 18.3   |
| 7.1    | 13.0   | 12.4   | 3.2    | 22.6   | 19.0   | 31.1   | 29.8   | 23.4   |
| 251.2  | 240.4  | 245.5  | 237.6  | 84.1   | 103.0  | 76.4   | 96.3   | 38.0   |
| 1.8    | 2.5    | 1.7    | 4.1    | 2.0    | 1.8    | 0.8    | 3.9    | 6.3    |
| 65.4   | 52.3   | 41.8   | 73.5   | 44.4   | 95.3   | 67.6   | 72.3   | 55.6   |
| 5.0    | 2.0    | 1.9    | 3.5    | 20.5   | 35.6   | 19.7   | 25.7   | 29.7   |
| 8.5    | 14.3   | 5.8    | 2.6    | 18.7   | 14.2   | 12.7   | 19.4   | 21.7   |
| 10.8   | 9.0    | 19.2   | 14.1   | 10.9   | 12.8   | 8.1    | 11.0   | 13.6   |
| 1.3    | 1.2    | 2.1    | 1.1    | 2.5    | 1.8    | 3.2    | 6.6    | 1.7    |
| 8.4    | 6.1    | 11.5   | 8.8    | 8.7    | 6.0    | 3.5    | 0.4    | 11.6   |



|        |        |        |        |        |        |        |        |        |
|--------|--------|--------|--------|--------|--------|--------|--------|--------|
| 5.6    | 2.5    | 11.9   | 3.7    | 11.8   | 14.6   | 5.4    | 14.7   | 12.2   |
| 10.3   | 8.2    | 20.8   | 15.2   | 18.6   | 26.3   | 25.4   | 23.8   | 15.5   |
| 7.1    | 7.9    | 16.2   | 8.2    | 2587.4 | 3088.2 | 3454.1 | 2800.0 | 154.7  |
| 11.2   | 11.6   | 13.2   | 8.7    | 6.7    | 3.5    | 7.0    | 8.2    | 13.7   |
| 2.9    | 3.0    | 8.9    | 2.3    | 1155.8 | 791.2  | 1041.5 | 1228.2 | 558.6  |
| 10.1   | 10.0   | 10.7   | 12.8   | 5.0    | 3.9    | 4.8    | 7.3    | 4.8    |
| 18.6   | 25.5   | 25.9   | 25.6   | 12.1   | 15.0   | 12.4   | 14.8   | 9.9    |
| 0.4    | 6.0    | 6.7    | 0.6    | 2.2    | 3.9    | 1.7    | 6.4    | 0.9    |
| 1221.5 | 1065.6 | 1675.3 | 1244.2 | 2109.8 | 2528.4 | 2240.4 | 2270.1 | 3084.4 |
| 236.2  | 235.7  | 316.8  | 242.0  | 395.2  | 515.3  | 356.2  | 447.1  | 547.1  |
| 3.8    | 0.6    | 4.1    | 0.8    | 122.3  | 111.7  | 168.8  | 178.1  | 366.1  |
| 5.8    | 10.0   | 14.1   | 6.6    | 5.3    | 6.6    | 5.5    | 8.8    | 16.5   |
| 11.6   | 4.5    | 14.9   | 11.4   | 8.5    | 12.9   | 10.8   | 5.0    | 19.1   |
| 4.6    | 2.3    | 2.1    | 1.7    | 6.7    | 1.5    | 1.3    | 3.4    | 1.4    |
| 3.4    | 14.9   | 5.3    | 3.3    | 6.8    | 1.8    | 1.5    | 1.3    | 4.4    |
| 6.0    | 4.2    | 12.8   | 7.3    | 1.9    | 1.6    | 5.4    | 11.9   | 7.5    |
| 87.8   | 89.9   | 72.1   | 65.9   | 156.0  | 151.1  | 190.9  | 211.4  | 113.0  |
| 0.6    | 0.7    | 0.7    | 0.8    | 252.1  | 354.9  | 477.5  | 244.2  | 995.0  |
| 280.7  | 318.5  | 509.3  | 292.0  | 616.9  | 1003.1 | 462.1  | 523.4  | 567.0  |
| 81.9   | 78.0   | 170.4  | 89.6   | 156.0  | 197.2  | 113.5  | 159.3  | 152.5  |
| 141.7  | 110.1  | 103.2  | 132.9  | 688.1  | 608.2  | 636.7  | 718.2  | 347.3  |
| 25.1   | 21.6   | 33.7   | 19.3   | 22.8   | 25.6   | 26.0   | 17.8   | 35.6   |
| 3.6    | 1.6    | 2.7    | 4.5    | 3.2    | 3.7    | 5.3    | 0.8    | 9.8    |
| 11.9   | 16.2   | 14.0   | 13.7   | 1232.3 | 1374.6 | 1270.3 | 993.6  | 1906.9 |
| 16.8   | 16.3   | 20.9   | 9.8    | 21.5   | 15.0   | 25.5   | 21.1   | 30.8   |
| 1855.6 | 1742.7 | 1933.1 | 1454.9 | 5568.6 | 5840.9 | 5025.8 | 6397.5 | 5779.0 |
| 1.2    | 0.9    | 1.6    | 1.2    | 1.7    | 2.6    | 1.3    | 2.0    | 2.7    |
| 2.5    | 1.1    | 0.6    | 0.6    | 2.6    | 2.6    | 1.1    | 0.4    | 4.4    |
| 8.2    | 1.5    | 5.3    | 1.8    | 15.0   | 16.0   | 11.9   | 14.0   | 11.7   |
| 180.1  | 150.8  | 386.9  | 228.0  | 168.4  | 199.8  | 151.8  | 184.3  | 75.7   |
| 17.5   | 12.1   | 19.9   | 11.0   | 7.0    | 9.5    | 4.1    | 4.3    | 13.8   |
| 121.3  | 127.5  | 205.2  | 79.9   | 410.4  | 363.4  | 442.5  | 421.9  | 254.7  |
| 1.0    | 1.2    | 2.9    | 1.5    | 2.6    | 3.7    | 2.4    | 11.9   | 1.4    |
| 235.9  | 241.4  | 185.7  | 222.8  | 161.6  | 182.9  | 153.6  | 205.9  | 117.2  |
| 18.9   | 19.0   | 28.1   | 22.0   | 38.6   | 38.3   | 57.9   | 47.9   | 65.2   |
| 16.9   | 21.0   | 23.1   | 14.0   | 33.8   | 24.9   | 33.3   | 52.5   | 35.3   |
| 2339.4 | 2274.1 | 3140.5 | 2223.2 | 1941.8 | 1823.3 | 2010.8 | 2237.5 | 2925.9 |
| 5.4    | 7.0    | 9.1    | 7.0    | 7.1    | 6.3    | 6.7    | 14.0   | 5.4    |
| 41.4   | 40.1   | 41.8   | 40.0   | 201.2  | 260.4  | 230.6  | 279.4  | 190.9  |
| 7.7    | 5.9    | 3.6    | 5.9    | 22.7   | 17.8   | 17.8   | 18.1   | 9.4    |
| 11.1   | 10.9   | 17.1   | 10.7   | 1.0    | 8.3    | 2.7    | 10.5   | 8.8    |
| 78.8   | 91.5   | 140.8  | 107.8  | 15.8   | 18.2   | 26.4   | 34.0   | 37.1   |
| 13.1   | 6.0    | 8.3    | 3.8    | 53.6   | 26.3   | 60.4   | 73.7   | 886.0  |
| 2.2    | 10.9   | 2.9    | 2.0    | 9.4    | 3.9    | 11.2   | 12.4   | 1.5    |
| 140.5  | 149.5  | 215.8  | 124.6  | 199.2  | 181.9  | 236.0  | 281.1  | 197.5  |
| 453.8  | 407.1  | 512.4  | 407.7  | 530.5  | 572.5  | 525.4  | 603.6  | 344.6  |
| 24.3   | 21.2   | 25.2   | 27.1   | 31.0   | 32.1   | 25.5   | 34.9   | 33.8   |
| 235.1  | 174.8  | 431.1  | 209.0  | 860.6  | 961.6  | 809.6  | 887.6  | 529.7  |
| 221.8  | 262.8  | 233.6  | 267.8  | 216.1  | 186.6  | 196.5  | 270.5  | 153.5  |
| 5.1    | 2.5    | 5.8    | 4.9    | 4.1    | 5.6    | 7.4    | 7.9    | 19.3   |
| 0.5    | 0.8    | 1.0    | 0.7    | 2.1    | 2.7    | 1.3    | 1.0    | 1135.8 |
| 439.9  | 464.4  | 420.8  | 462.5  | 38.0   | 68.2   | 40.6   | 42.8   | 67.3   |
| 5.1    | 1.2    | 4.1    | 0.8    | 4.7    | 3.5    | 1.8    | 4.6    | 3.5    |

|        |        |        |        |        |       |        |        |        |
|--------|--------|--------|--------|--------|-------|--------|--------|--------|
| 4.8    | 1.5    | 1.7    | 9.4    | 1.2    | 1.4   | 3.3    | 1.2    | 6.9    |
| 8.6    | 6.3    | 21.9   | 12.5   | 24.1   | 48.1  | 19.6   | 27.6   | 3.9    |
| 2.1    | 3.6    | 6.9    | 1.6    | 3.9    | 3.8   | 5.1    | 9.8    | 9.5    |
| 86.8   | 84.4   | 77.6   | 59.6   | 15.9   | 16.3  | 17.4   | 13.0   | 13.7   |
| 1.2    | 2.0    | 2.7    | 1.8    | 29.2   | 23.9  | 34.4   | 31.3   | 2.0    |
| 819.9  | 807.4  | 888.7  | 769.8  | 915.1  | 906.2 | 965.7  | 998.0  | 1214.3 |
| 167.0  | 153.3  | 188.7  | 132.3  | 136.4  | 112.8 | 138.5  | 138.5  | 140.1  |
| 7.9    | 8.8    | 16.0   | 10.7   | 9.8    | 4.7   | 8.6    | 8.0    | 16.5   |
| 10.9   | 14.6   | 11.2   | 15.4   | 35.4   | 45.1  | 43.1   | 51.7   | 6.7    |
| 0.8    | 5.4    | 4.0    | 3.9    | 10.1   | 9.5   | 8.9    | 15.6   | 7.3    |
| 398.9  | 358.8  | 893.2  | 312.6  | 1407.0 | 710.7 | 1028.7 | 1379.6 | 1223.1 |
| 4.6    | 0.7    | 0.9    | 0.9    | 1.3    | 0.3   | 1.1    | 3.2    | 4.3    |
| 348.3  | 363.1  | 402.6  | 311.3  | 357.4  | 379.9 | 389.4  | 415.2  | 293.9  |
| 0.7    | 0.9    | 1.1    | 0.8    | 0.6    | 0.5   | 2.1    | 2.6    | 0.7    |
| 178.6  | 179.6  | 243.7  | 161.8  | 250.0  | 178.7 | 274.8  | 236.2  | 103.4  |
| 79.9   | 79.6   | 68.7   | 68.5   | 46.4   | 43.2  | 38.3   | 59.6   | 33.4   |
| 2.9    | 1.8    | 10.1   | 12.7   | 3.4    | 1.6   | 3.6    | 1.2    | 7.0    |
| 116.4  | 92.1   | 198.8  | 75.8   | 415.9  | 213.9 | 388.8  | 505.5  | 431.2  |
| 124.9  | 138.3  | 156.2  | 95.3   | 835.7  | 746.3 | 872.2  | 932.0  | 566.4  |
| 1.2    | 1.2    | 2.8    | 1.1    | 6.2    | 4.2   | 1.0    | 1.7    | 1.6    |
| 147.7  | 132.5  | 271.8  | 130.3  | 390.7  | 386.3 | 321.0  | 356.0  | 169.3  |
| 31.7   | 46.5   | 22.2   | 19.8   | 3.1    | 2.2   | 0.7    | 1.7    | 5.4    |
| 2.9    | 0.8    | 1.7    | 0.6    | 7.4    | 7.2   | 7.7    | 5.2    | 23.0   |
| 117.0  | 129.2  | 157.0  | 122.6  | 414.7  | 641.4 | 410.6  | 484.9  | 602.0  |
| 407.0  | 334.1  | 764.4  | 342.1  | 1109.3 | 936.4 | 1117.4 | 1231.3 | 1745.9 |
| 1.3    | 2.3    | 2.1    | 6.8    | 7.6    | 1.2   | 2.9    | 1.3    | 2.3    |
| 0.9    | 1.2    | 1.7    | 5.8    | 3.2    | 3.6   | 3.6    | 4.8    | 4.0    |
| 9.0    | 3.2    | 7.8    | 9.3    | 8.3    | 5.8   | 10.5   | 17.0   | 3.6    |
| 13.5   | 11.5   | 15.5   | 9.0    | 7.7    | 4.4   | 7.0    | 7.1    | 8.0    |
| 15.4   | 1.6    | 8.4    | 6.8    | 4.7    | 3.9   | 5.6    | 4.1    | 12.6   |
| 220.0  | 172.3  | 247.9  | 234.5  | 124.9  | 117.8 | 138.3  | 144.1  | 178.0  |
| 117.6  | 91.8   | 133.3  | 99.9   | 51.2   | 54.2  | 45.1   | 62.8   | 58.6   |
| 291.7  | 292.9  | 310.6  | 280.7  | 47.8   | 38.2  | 34.8   | 39.6   | 94.3   |
| 9.1    | 20.3   | 28.8   | 20.0   | 6.5    | 4.1   | 5.9    | 0.9    | 13.6   |
| 4.4    | 7.3    | 7.0    | 7.9    | 3.0    | 5.6   | 3.1    | 4.1    | 2.9    |
| 59.2   | 50.5   | 93.7   | 49.2   | 24.8   | 23.3  | 19.5   | 17.0   | 93.4   |
| 16.7   | 12.7   | 5.6    | 13.1   | 7.6    | 5.1   | 4.7    | 1.5    | 14.7   |
| 5.5    | 3.7    | 5.6    | 4.6    | 29.6   | 248.2 | 68.2   | 58.2   | 6.2    |
| 308.8  | 279.0  | 634.3  | 266.1  | 602.0  | 671.3 | 592.2  | 642.1  | 493.8  |
| 267.5  | 290.7  | 168.2  | 182.8  | 360.3  | 408.2 | 430.6  | 377.2  | 422.2  |
| 1842.4 | 2598.3 | 1455.6 | 2096.9 | 176.2  | 282.8 | 143.6  | 189.9  | 235.7  |
| 8.0    | 4.2    | 10.1   | 2.7    | 7.9    | 1.1   | 10.0   | 9.6    | 14.5   |
| 280.6  | 207.4  | 318.1  | 160.0  | 394.4  | 431.2 | 465.7  | 431.6  | 239.8  |
| 10.6   | 10.7   | 14.1   | 10.4   | 4.1    | 5.2   | 5.3    | 7.7    | 4.7    |
| 91.5   | 90.5   | 132.4  | 70.7   | 126.5  | 114.5 | 109.7  | 139.9  | 99.4   |
| 10.2   | 17.2   | 20.9   | 20.2   | 8.0    | 11.8  | 3.6    | 24.4   | 6.9    |
| 13.5   | 14.9   | 16.1   | 12.1   | 11.6   | 6.8   | 6.6    | 16.7   | 19.5   |
| 7.0    | 10.2   | 11.8   | 5.9    | 11.5   | 7.3   | 11.7   | 10.4   | 11.9   |
| 2.4    | 5.8    | 2.6    | 4.2    | 1.6    | 2.6   | 0.3    | 4.2    | 1.8    |
| 4.8    | 3.2    | 11.0   | 6.7    | 10.0   | 13.3  | 11.3   | 9.7    | 4.3    |
| 2.6    | 5.2    | 13.8   | 5.6    | 10.6   | 5.9   | 9.9    | 14.5   | 21.9   |
| 8.5    | 9.7    | 6.2    | 8.9    | 257.9  | 314.4 | 281.3  | 302.0  | 302.2  |
| 1.7    | 3.1    | 3.1    | 11.6   | 3.9    | 1.8   | 4.3    | 1.2    | 1.1    |

|        |        |        |        |        |        |        |        |         |
|--------|--------|--------|--------|--------|--------|--------|--------|---------|
| 14.4   | 24.5   | 17.6   | 9.3    | 182.5  | 192.6  | 178.3  | 183.0  | 86.5    |
| 4.3    | 4.6    | 3.3    | 2.4    | 3.1    | 1.7    | 10.8   | 2.2    | 2.8     |
| 8.3    | 1.9    | 4.9    | 2.5    | 11.5   | 15.1   | 5.9    | 11.4   | 26.5    |
| 33.3   | 29.2   | 54.1   | 39.9   | 22.2   | 15.3   | 15.5   | 36.0   | 19.7    |
| 118.7  | 107.9  | 57.7   | 51.8   | 995.1  | 1155.8 | 1329.6 | 1038.4 | 604.2   |
| 15.2   | 15.2   | 12.6   | 12.9   | 2.4    | 1.7    | 14.0   | 19.2   | 17.1    |
| 42.9   | 54.8   | 55.4   | 38.6   | 16.2   | 20.3   | 13.9   | 26.7   | 6.7     |
| 65.8   | 51.8   | 100.3  | 61.0   | 215.0  | 207.4  | 261.0  | 271.0  | 165.0   |
| 50.4   | 41.3   | 125.0  | 53.7   | 138.7  | 124.6  | 153.8  | 137.8  | 62.2    |
| 8.1    | 7.8    | 14.9   | 14.0   | 19.3   | 9.4    | 12.6   | 21.1   | 6.7     |
| 6.2    | 7.4    | 3.2    | 5.3    | 1.9    | 1.0    | 3.7    | 5.1    | 5.7     |
| 524.6  | 513.3  | 702.4  | 575.6  | 442.0  | 442.0  | 492.3  | 530.4  | 364.6   |
| 75.0   | 73.6   | 63.7   | 50.4   | 32.6   | 42.2   | 29.5   | 47.0   | 50.9    |
| 8.3    | 14.4   | 15.9   | 11.1   | 7.7    | 2.1    | 3.1    | 3.3    | 3.7     |
| 3.0    | 1.7    | 6.7    | 2.2    | 2.9    | 1.9    | 5.4    | 5.1    | 11.6    |
| 102.5  | 79.0   | 149.3  | 93.6   | 203.0  | 192.5  | 204.5  | 226.0  | 273.1   |
| 169.7  | 183.0  | 184.0  | 174.5  | 646.9  | 650.0  | 575.1  | 653.8  | 440.4   |
| 119.0  | 125.7  | 98.4   | 92.7   | 152.7  | 139.9  | 132.3  | 185.3  | 182.4   |
| 12.7   | 8.3    | 7.8    | 6.8    | 9.7    | 12.5   | 20.4   | 18.7   | 19.3    |
| 391.7  | 380.8  | 512.9  | 360.0  | 191.8  | 211.0  | 193.3  | 210.1  | 412.0   |
| 117.3  | 100.4  | 139.9  | 101.3  | 116.0  | 91.9   | 105.3  | 130.9  | 166.2   |
| 7.2    | 10.9   | 6.6    | 7.2    | 8.6    | 8.3    | 8.1    | 18.1   | 20.2    |
| 75.5   | 115.0  | 72.5   | 90.0   | 213.9  | 264.0  | 252.0  | 258.7  | 368.8   |
| 5.9    | 10.7   | 3.9    | 8.3    | 26.2   | 31.1   | 25.9   | 48.2   | 52.9    |
| 2.9    | 3.0    | 12.6   | 7.0    | 4.0    | 4.0    | 6.2    | 7.0    | 8.4     |
| 20.6   | 20.7   | 22.7   | 19.8   | 19.4   | 32.0   | 17.2   | 17.3   | 39.1    |
| 21.6   | 18.8   | 32.4   | 22.6   | 13.7   | 14.2   | 11.3   | 19.4   | 20.5    |
| 0.6    | 0.8    | 1.3    | 0.6    | 1.4    | 0.9    | 4.0    | 5.9    | 1.0     |
| 653.2  | 686.6  | 641.6  | 533.4  | 1446.5 | 1758.6 | 1646.5 | 1597.8 | 2403.5  |
| 3.8    | 1.0    | 7.7    | 3.6    | 3.7    | 9.7    | 9.2    | 1.8    | 22.3    |
| 117.6  | 126.3  | 89.3   | 92.3   | 87.2   | 102.2  | 78.4   | 114.0  | 174.0   |
| 6.1    | 1.3    | 7.6    | 3.7    | 5.1    | 8.9    | 5.0    | 6.7    | 13.8    |
| 5.8    | 8.3    | 11.7   | 2.8    | 7.9    | 11.1   | 2.8    | 2.8    | 9.3     |
| 803.1  | 771.5  | 678.7  | 608.6  | 795.8  | 854.7  | 796.4  | 929.7  | 469.2   |
| 268.0  | 256.2  | 369.3  | 272.0  | 413.3  | 469.5  | 405.3  | 439.7  | 252.3   |
| 66.3   | 45.9   | 98.6   | 55.2   | 29.7   | 12.9   | 26.5   | 25.6   | 5.6     |
| 29.3   | 37.5   | 32.8   | 27.8   | 7.8    | 8.1    | 5.7    | 7.3    | 19.2    |
| 1.6    | 3.4    | 2.9    | 1.4    | 21.3   | 12.0   | 14.5   | 13.3   | 4.6     |
| 1.3    | 4.5    | 1.8    | 2.9    | 3.1    | 0.3    | 1.8    | 3.1    | 6.2     |
| 9.1    | 18.1   | 20.2   | 19.2   | 17.4   | 18.2   | 18.3   | 14.7   | 22.4    |
| 965.6  | 809.4  | 1328.1 | 967.8  | 813.0  | 810.0  | 943.2  | 990.6  | 350.8   |
| 6924.6 | 6538.9 | 7123.8 | 6907.8 | 8253.8 | 8528.4 | 8587.0 | 8752.4 | 12469.9 |
| 55.9   | 60.3   | 57.2   | 50.8   | 41.4   | 40.5   | 39.5   | 46.9   | 67.9    |
| 2024.3 | 2016.9 | 2809.2 | 1986.7 | 2496.8 | 2412.9 | 2747.4 | 2808.2 | 2002.6  |
| 438.8  | 417.5  | 553.1  | 413.1  | 234.9  | 287.7  | 182.3  | 245.8  | 207.7   |
| 26.3   | 25.4   | 23.6   | 25.8   | 52.7   | 87.4   | 65.9   | 50.5   | 25.4    |
| 36.3   | 36.1   | 49.3   | 32.4   | 235.9  | 223.4  | 265.3  | 259.8  | 100.0   |
| 585.0  | 509.6  | 672.9  | 735.2  | 29.7   | 71.3   | 38.1   | 60.8   | 5.7     |
| 198.8  | 212.0  | 188.3  | 218.7  | 59.2   | 51.0   | 79.6   | 84.3   | 57.7    |
| 3.4    | 5.5    | 3.3    | 4.2    | 23.5   | 42.3   | 23.4   | 25.3   | 4.3     |
| 368.1  | 426.2  | 255.7  | 386.6  | 117.8  | 118.1  | 131.0  | 116.0  | 40.7    |
| 5.4    | 3.3    | 11.0   | 3.2    | 15.2   | 18.6   | 12.0   | 18.0   | 5.3     |
| 7.0    | 10.5   | 6.5    | 9.2    | 2.6    | 3.9    | 7.2    | 5.8    | 4.3     |

|        |        |        |        |        |        |        |        |        |
|--------|--------|--------|--------|--------|--------|--------|--------|--------|
| 103.4  | 80.3   | 170.1  | 108.5  | 146.0  | 106.3  | 140.2  | 156.8  | 130.0  |
| 6.2    | 1.8    | 9.0    | 9.7    | 7.2    | 9.0    | 10.7   | 4.1    | 9.6    |
| 4.5    | 3.1    | 9.0    | 3.6    | 4.1    | 1.5    | 4.5    | 1.0    | 5.0    |
| 1.1    | 2.1    | 6.1    | 3.0    | 3.4    | 3.1    | 2.0    | 0.1    | 6.4    |
| 1.1    | 1.7    | 0.1    | 1.3    | 24.1   | 19.8   | 28.7   | 46.6   | 78.3   |
| 31.0   | 28.6   | 26.2   | 17.8   | 1044.3 | 814.3  | 1279.1 | 1350.0 | 1842.9 |
| 3.1    | 7.1    | 14.2   | 9.8    | 185.9  | 185.0  | 200.4  | 265.3  | 12.0   |
| 1.6    | 2.7    | 6.1    | 2.8    | 26.8   | 39.7   | 35.3   | 35.5   | 6.2    |
| 2.5    | 7.6    | 6.0    | 13.2   | 10.3   | 8.7    | 3.3    | 4.6    | 10.7   |
| 238.8  | 206.6  | 206.3  | 260.9  | 152.9  | 171.3  | 174.6  | 197.3  | 222.5  |
| 8.4    | 10.0   | 12.9   | 7.5    | 9.8    | 1.2    | 10.1   | 9.9    | 2.9    |
| 9.0    | 3.4    | 17.5   | 13.5   | 10.2   | 4.3    | 9.5    | 11.7   | 20.2   |
| 35.1   | 32.0   | 32.0   | 23.9   | 42.6   | 41.3   | 31.6   | 43.1   | 28.3   |
| 109.7  | 72.7   | 180.9  | 115.0  | 84.6   | 60.2   | 103.3  | 108.8  | 153.9  |
| 1.4    | 1.8    | 3.7    | 1.0    | 6.9    | 3.1    | 0.9    | 2.9    | 3.8    |
| 39.4   | 43.7   | 27.1   | 40.8   | 75.7   | 101.5  | 103.9  | 117.6  | 56.7   |
| 3.2    | 7.3    | 11.0   | 9.2    | 85.4   | 66.9   | 77.1   | 77.3   | 35.9   |
| 160.0  | 145.2  | 185.5  | 134.1  | 246.2  | 236.9  | 260.9  | 296.1  | 154.3  |
| 6.6    | 3.6    | 15.8   | 9.8    | 25.9   | 3.3    | 16.2   | 28.6   | 2.2    |
| 106.3  | 119.1  | 108.6  | 104.2  | 62.4   | 48.1   | 57.3   | 85.4   | 128.3  |
| 83.0   | 92.6   | 83.3   | 70.1   | 49.8   | 45.7   | 54.7   | 55.5   | 65.9   |
| 28.5   | 17.2   | 23.4   | 24.4   | 11.9   | 16.7   | 12.0   | 26.1   | 18.1   |
| 221.2  | 180.5  | 355.3  | 236.0  | 367.8  | 322.3  | 391.3  | 472.8  | 432.6  |
| 3.1    | 8.7    | 2.3    | 10.2   | 3.8    | 5.4    | 3.5    | 9.3    | 4.5    |
| 0.6    | 0.9    | 1.3    | 1.1    | 3.2    | 0.4    | 4.1    | 8.4    | 5.9    |
| 3.3    | 2.0    | 2.4    | 14.0   | 1.6    | 2.8    | 8.1    | 3.9    | 8.3    |
| 185.7  | 186.0  | 208.5  | 204.8  | 161.2  | 130.7  | 175.7  | 229.4  | 256.2  |
| 168.5  | 187.2  | 149.8  | 156.8  | 126.1  | 133.5  | 128.0  | 136.5  | 256.1  |
| 33.3   | 33.2   | 46.1   | 38.8   | 14.6   | 8.2    | 14.0   | 14.0   | 11.8   |
| 74.9   | 75.1   | 121.0  | 64.6   | 36.6   | 53.1   | 39.1   | 45.3   | 42.2   |
| 10.0   | 11.8   | 12.9   | 11.0   | 31.3   | 32.5   | 24.8   | 30.8   | 9.4    |
| 2.2    | 0.6    | 2.9    | 2.0    | 3.1    | 2.9    | 1.7    | 0.4    | 2.8    |
| 1334.8 | 1034.8 | 2623.8 | 1255.4 | 1585.4 | 1052.6 | 1540.9 | 1707.9 | 3072.9 |
| 28.6   | 34.4   | 19.1   | 23.3   | 155.6  | 165.5  | 82.8   | 122.1  | 1062.9 |
| 1.7    | 1.9    | 1.7    | 2.6    | 6.7    | 2.7    | 5.6    | 6.2    | 11.6   |
| 37.1   | 41.6   | 23.7   | 29.3   | 21.3   | 17.0   | 21.7   | 31.3   | 21.9   |
| 122.4  | 115.0  | 118.9  | 103.7  | 95.1   | 101.9  | 115.5  | 113.6  | 117.4  |
| 18.3   | 10.6   | 34.4   | 8.4    | 0.2    | 3.9    | 3.4    | 0.4    | 72.2   |
| 7.1    | 1.1    | 2.5    | 5.4    | 3.4    | 2.3    | 3.1    | 2.2    | 7.8    |
| 6.1    | 7.3    | 4.6    | 4.8    | 7.1    | 5.4    | 4.2    | 4.4    | 10.9   |
| 7.9    | 6.6    | 5.9    | 6.2    | 18.4   | 20.3   | 21.5   | 18.8   | 8.0    |
| 5.4    | 0.7    | 2.7    | 3.1    | 2.8    | 1.5    | 3.6    | 1.8    | 1.7    |
| 3.7    | 4.4    | 6.0    | 1.7    | 4.6    | 2.5    | 3.0    | 2.6    | 5.4    |
| 3.7    | 1.6    | 2.4    | 3.2    | 7.9    | 7.7    | 6.3    | 6.7    | 14.7   |
| 136.1  | 116.3  | 152.0  | 106.7  | 232.8  | 170.1  | 182.3  | 250.6  | 116.5  |
| 104.3  | 109.0  | 119.3  | 98.6   | 93.1   | 79.3   | 77.5   | 109.1  | 107.0  |
| 333.1  | 295.7  | 494.4  | 313.1  | 169.4  | 182.8  | 171.5  | 186.0  | 244.5  |
| 9.8    | 16.4   | 11.1   | 8.6    | 10.7   | 13.5   | 21.4   | 16.6   | 17.3   |
| 2.8    | 5.2    | 3.5    | 1.0    | 4.4    | 0.6    | 3.9    | 0.5    | 3.3    |
| 64.6   | 46.0   | 48.5   | 47.8   | 49.9   | 37.9   | 54.3   | 52.5   | 48.2   |
| 6.5    | 10.3   | 8.8    | 5.3    | 5.3    | 5.3    | 4.2    | 5.4    | 1.8    |
| 3.5    | 5.1    | 6.4    | 6.1    | 3.9    | 7.1    | 4.6    | 0.8    | 5.6    |
| 9.0    | 6.7    | 12.5   | 7.4    | 11.0   | 12.2   | 10.8   | 14.2   | 14.2   |

|        |        |        |        |        |        |        |        |        |
|--------|--------|--------|--------|--------|--------|--------|--------|--------|
| 7.5    | 6.0    | 6.2    | 3.5    | 8.7    | 4.9    | 6.7    | 0.6    | 12.2   |
| 2036.0 | 1830.1 | 2911.4 | 1906.9 | 1234.5 | 1270.6 | 1304.0 | 1558.5 | 7.1    |
| 276.3  | 285.5  | 264.2  | 273.8  | 206.0  | 282.5  | 161.8  | 275.5  | 137.4  |
| 6.6    | 6.4    | 8.3    | 7.6    | 6.9    | 4.8    | 7.6    | 9.8    | 18.2   |
| 13.5   | 9.8    | 8.7    | 13.3   | 9.8    | 4.8    | 9.6    | 10.6   | 15.4   |
| 487.2  | 494.1  | 646.5  | 490.1  | 277.8  | 371.3  | 350.2  | 366.0  | 790.2  |
| 81.1   | 69.7   | 77.1   | 72.7   | 141.5  | 124.4  | 135.9  | 193.4  | 127.8  |
| 2.1    | 0.5    | 4.1    | 0.3    | 4.1    | 0.3    | 0.8    | 0.4    | 1.2    |
| 5.6    | 4.2    | 3.7    | 2.4    | 2.1    | 3.5    | 1.5    | 2.2    | 2.1    |
| 14.4   | 17.1   | 18.7   | 16.0   | 19.0   | 6.8    | 14.5   | 18.0   | 11.3   |
| 1.1    | 0.9    | 5.4    | 2.6    | 6.6    | 4.7    | 7.0    | 5.9    | 13.1   |
| 7.7    | 7.8    | 16.1   | 2.0    | 3.3    | 6.1    | 6.7    | 10.6   | 2.2    |
| 5.1    | 6.0    | 15.3   | 6.7    | 3.1    | 9.5    | 7.0    | 13.1   | 8.3    |
| 1.1    | 1.0    | 1.3    | 1.2    | 3.9    | 1.9    | 1.9    | 0.9    | 2.0    |
| 0.4    | 1.6    | 2.1    | 0.3    | 0.9    | 0.3    | 2.9    | 3.0    | 4.1    |
| 14.5   | 5.1    | 13.4   | 13.0   | 13.7   | 6.4    | 9.7    | 16.0   | 19.0   |
| 33.8   | 44.3   | 61.8   | 70.5   | 10.2   | 10.2   | 7.9    | 12.8   | 24.6   |
| 336.5  | 345.8  | 331.8  | 323.0  | 84.3   | 92.8   | 76.1   | 94.8   | 360.6  |
| 243.9  | 271.0  | 243.3  | 229.3  | 181.5  | 96.4   | 173.3  | 228.7  | 167.1  |
| 234.7  | 215.5  | 235.9  | 158.5  | 86.6   | 85.8   | 107.7  | 121.6  | 254.7  |
| 225.1  | 168.3  | 330.9  | 224.6  | 92.0   | 62.0   | 105.6  | 104.9  | 25.4   |
| 59.4   | 62.4   | 54.4   | 52.7   | 36.1   | 33.6   | 31.4   | 60.5   | 27.3   |
| 4.8    | 4.3    | 19.1   | 5.7    | 13.9   | 4.8    | 13.7   | 19.3   | 30.5   |
| 2.9    | 3.6    | 3.6    | 2.2    | 20.6   | 14.0   | 12.4   | 17.2   | 1.1    |
| 19.1   | 19.3   | 30.8   | 17.4   | 30.9   | 34.7   | 23.3   | 30.2   | 19.4   |
| 1087.3 | 1034.8 | 1267.2 | 1138.8 | 324.3  | 338.7  | 314.4  | 380.4  | 299.3  |
| 0.6    | 0.8    | 2.6    | 3.0    | 0.3    | 2.5    | 4.1    | 4.3    | 8.0    |
| 5.8    | 3.4    | 6.3    | 4.5    | 5.8    | 2.6    | 3.5    | 3.8    | 9.0    |
| 7.2    | 8.1    | 11.9   | 7.1    | 14.3   | 9.3    | 6.6    | 8.2    | 25.1   |
| 3.0    | 1.0    | 2.2    | 1.2    | 3.4    | 2.3    | 2.6    | 2.2    | 3.8    |
| 7.0    | 8.9    | 10.8   | 6.7    | 5.7    | 11.9   | 10.4   | 16.6   | 8.0    |
| 3.1    | 5.5    | 4.5    | 4.8    | 2.1    | 1.4    | 3.0    | 2.8    | 4.9    |
| 5.0    | 1.5    | 4.3    | 2.7    | 7.1    | 3.7    | 9.4    | 1.1    | 24.8   |
| 10.7   | 5.9    | 6.5    | 5.2    | 7.6    | 7.6    | 7.9    | 10.1   | 12.0   |
| 913.3  | 986.1  | 788.1  | 927.2  | 363.5  | 332.2  | 486.0  | 427.4  | 363.0  |
| 17.6   | 21.0   | 5.3    | 19.9   | 5.9    | 11.8   | 2.8    | 13.1   | 4.1    |
| 9.3    | 1.2    | 14.6   | 6.1    | 5.4    | 8.0    | 7.7    | 13.7   | 13.1   |
| 32.3   | 28.0   | 41.1   | 25.6   | 36.9   | 35.4   | 36.7   | 40.4   | 62.4   |
| 19.9   | 9.7    | 21.6   | 18.1   | 36.7   | 28.9   | 31.7   | 34.5   | 43.8   |
| 30.2   | 31.3   | 32.1   | 32.4   | 293.2  | 251.2  | 278.6  | 314.7  | 136.5  |
| 2.1    | 1.0    | 4.9    | 7.0    | 0.6    | 4.7    | 0.3    | 6.8    | 2.6    |
| 220.4  | 208.8  | 300.4  | 172.7  | 412.6  | 428.6  | 386.6  | 426.8  | 286.8  |
| 14.3   | 23.3   | 16.5   | 14.6   | 422.6  | 415.8  | 539.1  | 453.5  | 199.2  |
| 18.8   | 19.1   | 28.6   | 19.8   | 56.3   | 34.4   | 76.7   | 85.1   | 135.0  |
| 1516.1 | 1435.9 | 1980.1 | 1510.6 | 1388.7 | 1236.1 | 1437.8 | 1672.0 | 1973.3 |
| 5.3    | 8.3    | 20.2   | 9.3    | 23.1   | 20.0   | 20.7   | 14.5   | 25.7   |
| 1823.5 | 2275.7 | 2123.1 | 2278.2 | 28.1   | 26.8   | 29.8   | 19.4   | 27.0   |
| 19.0   | 27.4   | 11.8   | 18.8   | 244.4  | 248.8  | 235.3  | 194.3  | 360.6  |
| 2.7    | 4.7    | 3.2    | 7.3    | 6.5    | 1.4    | 4.8    | 1.4    | 6.4    |
| 67.9   | 72.6   | 65.4   | 48.9   | 2546.9 | 2998.2 | 2902.9 | 2895.6 | 334.6  |
| 18.6   | 20.0   | 51.9   | 25.5   | 18.9   | 11.5   | 12.2   | 3.6    | 30.5   |
| 1955.1 | 1876.6 | 3590.2 | 1997.0 | 1993.3 | 1411.5 | 1768.3 | 2068.9 | 2350.6 |
| 11.4   | 5.5    | 15.1   | 10.5   | 8.0    | 6.3    | 8.3    | 9.4    | 12.3   |

|        |        |        |        |        |        |        |        |        |
|--------|--------|--------|--------|--------|--------|--------|--------|--------|
| 9.8    | 12.5   | 17.5   | 10.6   | 648.1  | 615.9  | 742.9  | 807.8  | 933.9  |
| 13.0   | 5.9    | 12.4   | 4.3    | 10.5   | 7.1    | 8.8    | 3.4    | 21.3   |
| 3.7    | 7.7    | 5.5    | 1.4    | 9.9    | 6.5    | 6.0    | 3.9    | 11.7   |
| 4.6    | 2.3    | 2.7    | 3.9    | 14.1   | 9.3    | 22.1   | 22.0   | 9.6    |
| 3.6    | 5.5    | 7.9    | 8.4    | 4.1    | 2.0    | 7.8    | 7.1    | 5.9    |
| 6.9    | 2.3    | 7.3    | 6.4    | 9.5    | 9.3    | 16.9   | 12.1   | 7.6    |
| 1274.5 | 1416.0 | 1177.5 | 1161.7 | 1928.2 | 1834.1 | 2064.2 | 2150.9 | 1849.8 |
| 63.0   | 64.5   | 76.6   | 60.2   | 78.9   | 109.8  | 100.5  | 90.5   | 144.5  |
| 295.4  | 252.1  | 511.3  | 240.5  | 241.2  | 214.2  | 251.8  | 271.2  | 104.0  |
| 151.4  | 202.2  | 77.0   | 171.2  | 25.6   | 21.4   | 39.4   | 49.6   | 30.6   |
| 136.2  | 130.1  | 178.0  | 99.9   | 174.0  | 161.5  | 177.4  | 209.4  | 128.5  |
| 17.0   | 16.0   | 10.3   | 10.3   | 10.9   | 8.8    | 13.5   | 20.4   | 10.3   |
| 3.8    | 2.9    | 8.0    | 2.7    | 3.7    | 3.6    | 4.6    | 4.0    | 5.8    |
| 20.6   | 7.7    | 22.7   | 13.9   | 5.0    | 4.6    | 4.4    | 7.2    | 12.6   |
| 13.1   | 12.1   | 11.3   | 10.1   | 65.7   | 55.8   | 76.8   | 95.4   | 36.7   |
| 2.4    | 5.8    | 7.3    | 5.0    | 3.0    | 8.4    | 2.9    | 2.7    | 4.2    |
| 7.0    | 4.3    | 11.2   | 5.3    | 7.6    | 5.6    | 6.1    | 14.0   | 35.5   |
| 2.3    | 4.1    | 9.8    | 8.8    | 102.3  | 94.2   | 77.7   | 87.6   | 57.8   |
| 78.5   | 71.0   | 99.8   | 72.1   | 32.2   | 45.9   | 29.7   | 50.3   | 43.1   |
| 877.6  | 855.3  | 714.4  | 758.3  | 611.6  | 708.3  | 748.3  | 734.7  | 357.1  |
| 14.5   | 4.8    | 10.6   | 10.1   | 25.7   | 12.9   | 23.9   | 9.3    | 23.1   |
| 142.7  | 110.0  | 232.5  | 123.5  | 98.0   | 120.2  | 133.8  | 155.3  | 88.1   |
| 101.2  | 129.3  | 126.9  | 97.8   | 42.6   | 43.2   | 45.7   | 34.0   | 26.7   |
| 166.7  | 168.5  | 277.3  | 112.5  | 383.1  | 282.0  | 356.4  | 480.3  | 330.6  |
| 141.4  | 110.2  | 295.9  | 156.4  | 195.3  | 139.4  | 204.4  | 243.5  | 308.3  |
| 11.6   | 17.1   | 16.2   | 5.1    | 3.8    | 4.4    | 1.9    | 1.8    | 2.4    |
| 5.2    | 11.7   | 7.0    | 16.5   | 5.4    | 3.4    | 9.7    | 3.0    | 5.8    |
| 19.8   | 23.7   | 25.9   | 21.3   | 17.6   | 17.8   | 13.9   | 27.7   | 28.5   |
| 29.6   | 26.0   | 40.3   | 26.9   | 18.9   | 11.1   | 18.7   | 18.4   | 38.8   |
| 2.3    | 1.6    | 1.4    | 2.5    | 0.8    | 1.3    | 2.2    | 2.5    | 3.5    |
| 8.6    | 2.7    | 24.5   | 10.4   | 9.8    | 5.3    | 15.2   | 11.4   | 16.0   |
| 9.4    | 14.2   | 5.6    | 9.2    | 1.8    | 2.2    | 3.3    | 0.2    | 5.2    |
| 6.1    | 6.8    | 4.9    | 5.0    | 16.6   | 8.0    | 20.2   | 18.8   | 43.7   |
| 162.5  | 143.7  | 171.7  | 138.0  | 526.2  | 431.2  | 503.9  | 610.7  | 653.2  |
| 10.3   | 12.6   | 15.5   | 13.4   | 8.9    | 11.0   | 11.9   | 4.4    | 18.2   |
| 21.1   | 4.2    | 24.6   | 1.8    | 23.4   | 27.2   | 16.8   | 34.5   | 10.7   |
| 1.5    | 1.3    | 2.0    | 1.4    | 3.6    | 6.9    | 2.9    | 0.8    | 29.8   |
| 0.9    | 4.1    | 2.9    | 0.9    | 1.7    | 11.3   | 6.1    | 16.9   | 0.7    |
| 6.9    | 5.8    | 5.6    | 1.4    | 65.6   | 50.7   | 89.8   | 99.9   | 208.7  |
| 2.4    | 17.9   | 10.2   | 3.9    | 3.1    | 8.4    | 7.0    | 3.1    | 7.6    |
| 5.5    | 4.4    | 7.6    | 4.5    | 86.8   | 102.9  | 236.8  | 106.3  | 5.3    |
| 4.5    | 2.2    | 1.9    | 1.7    | 1.8    | 1.2    | 0.9    | 1.7    | 6.5    |
| 77.1   | 65.2   | 97.0   | 70.2   | 143.1  | 190.5  | 172.6  | 184.8  | 446.0  |
| 11.7   | 5.1    | 15.2   | 2.2    | 20.3   | 25.1   | 18.5   | 15.9   | 29.8   |
| 33.3   | 32.4   | 37.6   | 28.4   | 162.1  | 115.2  | 119.8  | 135.4  | 125.6  |
| 5.2    | 2.6    | 0.6    | 2.0    | 1.3    | 0.7    | 0.8    | 0.8    | 4.7    |
| 1.7    | 1.8    | 1.6    | 1.2    | 1.6    | 3.8    | 2.4    | 8.0    | 2.3    |
| 73.4   | 65.9   | 106.0  | 68.1   | 58.5   | 52.1   | 62.8   | 61.5   | 64.6   |
| 1094.1 | 1060.8 | 1235.0 | 1074.2 | 497.7  | 545.3  | 432.3  | 529.2  | 470.1  |
| 25.4   | 26.6   | 25.8   | 20.5   | 42.2   | 41.0   | 42.6   | 55.5   | 38.5   |
| 17.8   | 13.9   | 16.1   | 15.1   | 13.2   | 15.1   | 31.3   | 7.6    | 20.1   |
| 89.2   | 79.6   | 165.0  | 111.5  | 137.5  | 129.0  | 136.0  | 183.4  | 371.8  |
| 137.1  | 116.0  | 220.9  | 136.8  | 450.2  | 318.5  | 336.0  | 439.3  | 343.8  |

|        |        |        |        |        |        |        |        |        |
|--------|--------|--------|--------|--------|--------|--------|--------|--------|
| 5.0    | 2.9    | 4.2    | 10.0   | 59.3   | 58.8   | 66.0   | 71.8   | 53.4   |
| 19.8   | 20.8   | 18.7   | 12.4   | 12.0   | 5.1    | 4.3    | 12.7   | 23.6   |
| 17.1   | 18.9   | 23.2   | 17.0   | 13.1   | 7.4    | 6.5    | 15.5   | 27.4   |
| 3923.2 | 3596.5 | 4275.0 | 4766.9 | 1076.2 | 903.3  | 1252.1 | 1056.3 | 1362.1 |
| 134.1  | 140.4  | 117.9  | 100.8  | 224.0  | 306.8  | 228.5  | 263.5  | 208.9  |
| 488.0  | 571.7  | 444.7  | 591.6  | 16.6   | 13.3   | 16.6   | 17.2   | 18.6   |
| 25.9   | 23.6   | 28.5   | 19.1   | 47.0   | 36.6   | 45.6   | 46.8   | 40.6   |
| 83.3   | 104.7  | 123.2  | 102.7  | 93.3   | 66.3   | 118.0  | 132.4  | 75.7   |
| 396.5  | 351.1  | 419.1  | 342.6  | 909.3  | 805.1  | 1028.3 | 1161.0 | 796.7  |
| 28.6   | 31.4   | 10.0   | 16.7   | 4.6    | 1.7    | 3.4    | 8.1    | 12.0   |
| 28.6   | 39.5   | 20.6   | 29.3   | 8.1    | 4.9    | 7.3    | 2.3    | 2.1    |
| 5.2    | 9.2    | 4.0    | 8.2    | 2.3    | 2.6    | 0.8    | 1.4    | 1.1    |
| 7.9    | 11.5   | 9.8    | 3.9    | 0.4    | 0.7    | 2.1    | 5.5    | 5.4    |
| 679.6  | 720.2  | 670.7  | 690.8  | 942.8  | 1017.2 | 1029.0 | 1002.7 | 1008.7 |
| 6.8    | 3.1    | 7.6    | 6.7    | 17.5   | 16.6   | 15.5   | 15.3   | 46.2   |
| 7.0    | 4.3    | 7.0    | 5.4    | 19.9   | 7.8    | 19.5   | 12.4   | 32.4   |
| 3.1    | 2.9    | 3.0    | 13.3   | 8.7    | 8.0    | 5.7    | 15.1   | 19.5   |
| 10.8   | 13.2   | 13.7   | 12.5   | 91.8   | 80.1   | 72.6   | 101.6  | 18.2   |
| 476.8  | 448.3  | 590.8  | 400.5  | 834.7  | 966.4  | 897.1  | 902.7  | 573.5  |
| 22.1   | 13.0   | 28.8   | 18.5   | 46.5   | 39.6   | 42.6   | 43.0   | 127.4  |
| 2.6    | 0.3    | 0.6    | 0.8    | 9.9    | 0.6    | 5.6    | 5.5    | 33.6   |
| 7.7    | 7.0    | 9.6    | 12.7   | 5.0    | 5.7    | 12.7   | 17.1   | 5.5    |
| 1663.4 | 1598.7 | 2051.5 | 1613.0 | 2489.4 | 2921.9 | 2443.9 | 2718.5 | 3118.5 |
| 56.6   | 37.1   | 70.4   | 56.5   | 529.4  | 566.3  | 424.9  | 417.5  | 678.6  |
| 26.8   | 23.2   | 34.9   | 26.2   | 32.5   | 27.4   | 23.5   | 31.9   | 66.7   |
| 5.6    | 7.3    | 6.1    | 8.3    | 4.5    | 19.7   | 8.4    | 11.5   | 46.4   |
| 12.1   | 6.2    | 9.8    | 9.6    | 5.4    | 8.7    | 7.6    | 7.4    | 5.7    |
| 538.1  | 577.6  | 530.4  | 539.1  | 279.0  | 334.2  | 345.1  | 350.3  | 226.7  |
| 15.9   | 14.7   | 11.9   | 5.2    | 18.3   | 24.3   | 11.1   | 16.0   | 53.8   |
| 10.0   | 5.9    | 4.0    | 9.7    | 25.2   | 23.4   | 29.0   | 35.9   | 25.9   |
| 5.4    | 2.7    | 5.8    | 0.5    | 1.4    | 1.7    | 4.5    | 7.7    | 4.4    |
| 286.4  | 257.5  | 360.1  | 221.2  | 155.7  | 211.4  | 170.0  | 184.2  | 676.6  |
| 12.0   | 5.0    | 10.3   | 10.6   | 1.8    | 3.0    | 1.3    | 2.3    | 2.2    |
| 52.9   | 57.5   | 53.1   | 56.3   | 202.6  | 180.7  | 193.0  | 211.5  | 105.6  |
| 401.0  | 285.4  | 492.1  | 489.3  | 170.2  | 270.3  | 232.4  | 261.4  | 205.2  |
| 1.8    | 0.8    | 1.2    | 0.6    | 6.5    | 14.5   | 7.8    | 3.3    | 53.8   |
| 1.1    | 1.2    | 1.8    | 5.3    | 22.2   | 17.4   | 26.7   | 33.0   | 2.0    |
| 27.3   | 15.1   | 20.8   | 15.2   | 46.4   | 34.7   | 47.7   | 64.0   | 42.9   |
| 19.5   | 10.7   | 14.1   | 8.1    | 11.0   | 6.2    | 13.3   | 6.8    | 5.8    |
| 60.9   | 51.6   | 73.0   | 53.1   | 64.4   | 49.1   | 56.2   | 65.2   | 63.1   |
| 9.0    | 11.3   | 15.9   | 6.8    | 7.0    | 6.1    | 5.7    | 7.6    | 12.8   |
| 106.6  | 85.5   | 133.7  | 64.2   | 138.1  | 118.2  | 143.6  | 150.7  | 168.7  |
| 12.5   | 14.8   | 1.6    | 0.8    | 2194.0 | 2424.5 | 2198.8 | 2561.1 | 740.5  |
| 26.5   | 14.8   | 31.4   | 20.0   | 17.4   | 15.8   | 16.0   | 18.0   | 57.1   |
| 56.5   | 44.1   | 79.1   | 40.3   | 107.2  | 89.1   | 99.1   | 104.1  | 61.2   |
| 7.1    | 13.3   | 21.4   | 14.3   | 9.2    | 11.8   | 15.3   | 12.2   | 236.5  |
| 26.9   | 19.6   | 41.1   | 22.0   | 7.3    | 0.8    | 1.8    | 9.4    | 29.3   |
| 36.8   | 24.5   | 9.5    | 33.0   | 35.4   | 43.4   | 32.0   | 41.2   | 72.8   |
| 2.9    | 0.8    | 5.0    | 3.7    | 150.5  | 120.8  | 115.8  | 151.6  | 110.6  |
| 30.8   | 20.8   | 26.7   | 14.3   | 60.0   | 45.5   | 71.4   | 72.9   | 35.3   |
| 461.1  | 492.9  | 468.2  | 459.3  | 486.5  | 424.5  | 451.7  | 581.6  | 284.2  |
| 89.5   | 98.8   | 113.2  | 86.4   | 278.1  | 326.9  | 270.9  | 284.0  | 99.4   |
| 77.3   | 76.7   | 140.9  | 67.9   | 1.9    | 3.6    | 2.2    | 9.8    | 17.6   |

|        |        |        |        |        |        |        |        |        |
|--------|--------|--------|--------|--------|--------|--------|--------|--------|
| 2.4    | 1.7    | 1.7    | 4.0    | 1.1    | 1.3    | 0.9    | 1.7    | 1.6    |
| 8.0    | 4.0    | 8.5    | 7.5    | 4.0    | 6.4    | 8.8    | 9.8    | 7.8    |
| 25.2   | 20.6   | 29.3   | 19.9   | 6.5    | 10.6   | 22.3   | 11.9   | 24.1   |
| 7.6    | 11.9   | 7.4    | 3.3    | 1.6    | 5.7    | 2.7    | 7.9    | 6.0    |
| 1.6    | 2.1    | 2.4    | 5.8    | 9.0    | 1.9    | 2.5    | 2.8    | 3.0    |
| 154.9  | 146.8  | 103.3  | 128.0  | 91.0   | 91.3   | 107.0  | 111.3  | 105.3  |
| 5.6    | 9.5    | 15.8   | 12.9   | 13.2   | 31.8   | 20.2   | 24.9   | 30.2   |
| 2.2    | 4.9    | 3.9    | 3.4    | 5.5    | 4.3    | 9.0    | 1.0    | 11.9   |
| 2.1    | 4.6    | 1.8    | 5.0    | 0.6    | 3.3    | 2.4    | 5.5    | 5.9    |
| 4.9    | 2.4    | 4.9    | 2.2    | 2.0    | 9.0    | 1.8    | 3.2    | 3.6    |
| 3192.8 | 3449.2 | 3381.9 | 3348.2 | 771.8  | 508.8  | 788.9  | 997.8  | 1875.9 |
| 334.7  | 249.5  | 446.6  | 284.2  | 137.4  | 106.7  | 128.9  | 174.3  | 391.3  |
| 1.5    | 1.1    | 3.6    | 2.4    | 0.9    | 2.6    | 6.9    | 6.5    | 2.0    |
| 10.8   | 4.2    | 14.5   | 5.1    | 16.5   | 17.9   | 14.2   | 21.1   | 26.1   |
| 3.2    | 3.9    | 2.1    | 3.5    | 3.1    | 0.8    | 4.9    | 8.2    | 7.6    |
| 308.9  | 270.1  | 913.2  | 420.6  | 3240.0 | 2844.5 | 3096.5 | 3755.2 | 623.1  |
| 119.8  | 114.0  | 169.9  | 116.0  | 292.1  | 328.6  | 296.5  | 327.5  | 106.2  |
| 7.6    | 1.1    | 4.2    | 6.3    | 2.3    | 1.3    | 1.4    | 1.2    | 3.1    |
| 0.4    | 1.3    | 3.3    | 4.8    | 5.1    | 0.6    | 7.1    | 1.9    | 1.8    |
| 1420.4 | 1360.7 | 1766.3 | 1496.2 | 1221.6 | 1121.2 | 1296.8 | 1465.3 | 1701.8 |
| 1214.2 | 1159.6 | 1365.4 | 1094.1 | 1371.2 | 1504.5 | 1473.6 | 1644.0 | 2399.3 |
| 3.5    | 1.0    | 2.3    | 3.7    | 0.8    | 3.5    | 0.9    | 7.5    | 1.7    |
| 54.5   | 64.7   | 57.0   | 60.3   | 51.4   | 84.0   | 44.1   | 47.8   | 290.3  |
| 2.8    | 12.1   | 9.2    | 5.3    | 1.9    | 3.2    | 0.6    | 3.3    | 1.0    |
| 63.6   | 60.8   | 72.6   | 58.1   | 95.9   | 66.8   | 106.1  | 125.2  | 66.8   |
| 2.8    | 5.0    | 1.8    | 1.8    | 1.2    | 0.7    | 0.6    | 1.9    | 1.0    |
| 3.4    | 1.0    | 2.1    | 1.1    | 0.4    | 0.7    | 2.7    | 1.9    | 2.1    |
| 13.2   | 7.6    | 26.5   | 15.0   | 64.7   | 42.2   | 38.8   | 44.6   | 33.1   |
| 27.8   | 31.8   | 32.5   | 38.0   | 557.4  | 484.3  | 386.9  | 537.2  | 854.3  |
| 1.2    | 3.3    | 5.3    | 2.3    | 4.5    | 0.8    | 5.8    | 2.6    | 5.6    |
| 11.9   | 13.8   | 22.1   | 16.7   | 11.2   | 9.0    | 7.0    | 10.7   | 16.4   |
| 0.3    | 1.1    | 0.7    | 0.5    | 0.2    | 0.2    | 0.3    | 1.7    | 0.4    |
| 2.7    | 8.8    | 12.7   | 8.5    | 5.3    | 0.9    | 5.0    | 7.5    | 7.1    |
| 0.7    | 3.6    | 0.7    | 2.2    | 5.1    | 1.8    | 0.9    | 0.5    | 0.7    |
| 2.1    | 2.2    | 3.9    | 6.0    | 7.4    | 1.6    | 1.0    | 9.9    | 3.9    |
| 11.7   | 18.4   | 20.1   | 20.7   | 13.0   | 10.7   | 15.6   | 16.2   | 16.5   |
| 5.3    | 21.3   | 32.6   | 9.8    | 4.4    | 8.7    | 10.1   | 4.9    | 7.4    |
| 13.5   | 11.4   | 8.6    | 17.2   | 14.4   | 14.8   | 10.7   | 13.8   | 32.9   |
| 251.9  | 211.0  | 369.6  | 220.0  | 288.6  | 298.0  | 329.5  | 336.1  | 237.0  |
| 2902.8 | 2705.6 | 4017.6 | 2882.1 | 2205.8 | 2518.2 | 2631.0 | 2641.2 | 3809.5 |
| 2.3    | 1.1    | 1.3    | 1.5    | 3.0    | 4.2    | 6.3    | 5.2    | 2.8    |
| 0.6    | 1.1    | 4.8    | 0.4    | 4.6    | 2.0    | 2.6    | 9.2    | 7.1    |
| 1744.7 | 1450.2 | 2072.9 | 1779.5 | 19.2   | 24.8   | 19.5   | 20.3   | 27.0   |
| 3.9    | 0.4    | 5.2    | 6.3    | 1.8    | 2.6    | 3.1    | 0.3    | 4.7    |
| 46.2   | 44.9   | 79.9   | 50.6   | 94.3   | 111.7  | 96.1   | 116.5  | 110.3  |
| 74.3   | 57.2   | 134.8  | 35.5   | 1381.9 | 895.9  | 1640.9 | 1600.2 | 1271.5 |
| 6.2    | 1.5    | 18.8   | 9.2    | 6.1    | 10.0   | 15.1   | 1.3    | 12.1   |
| 325.9  | 281.9  | 550.9  | 317.5  | 357.5  | 348.3  | 460.7  | 397.9  | 1021.4 |
| 28.1   | 22.8   | 30.6   | 23.3   | 24.4   | 16.4   | 18.7   | 17.4   | 18.6   |
| 6.2    | 10.7   | 17.9   | 9.2    | 9.8    | 4.9    | 5.4    | 1.7    | 1.4    |
| 3.7    | 4.5    | 2.1    | 1.3    | 2.4    | 5.6    | 12.3   | 12.5   | 2.1    |
| 7.4    | 10.3   | 14.5   | 5.7    | 9.0    | 6.6    | 12.1   | 11.1   | 15.0   |
| 3.6    | 1.5    | 1.2    | 1.7    | 7.7    | 1.9    | 2.1    | 16.8   | 2.3    |



|        |        |        |        |        |        |        |        |        |
|--------|--------|--------|--------|--------|--------|--------|--------|--------|
| 2.7    | 2.7    | 4.4    | 3.3    | 17.7   | 11.9   | 37.7   | 26.9   | 4.2    |
| 4.0    | 5.3    | 7.4    | 3.0    | 15.6   | 14.7   | 16.3   | 24.0   | 39.5   |
| 26.8   | 29.9   | 29.6   | 24.0   | 39.3   | 44.3   | 48.8   | 59.4   | 94.1   |
| 22.1   | 31.9   | 23.0   | 16.1   | 11.7   | 6.6    | 9.9    | 9.3    | 21.2   |
| 5.0    | 5.5    | 9.6    | 5.6    | 5.5    | 11.1   | 5.0    | 4.7    | 3.0    |
| 132.9  | 135.8  | 132.5  | 98.7   | 175.3  | 185.0  | 225.5  | 238.1  | 352.1  |
| 151.9  | 127.9  | 177.7  | 123.9  | 211.4  | 161.5  | 148.6  | 206.2  | 230.9  |
| 12.5   | 6.7    | 6.6    | 20.2   | 19.4   | 7.1    | 20.0   | 28.0   | 58.3   |
| 3515.8 | 3348.0 | 5186.1 | 3802.8 | 1443.8 | 1675.3 | 1513.1 | 1542.2 | 6473.0 |
| 1107.9 | 872.9  | 1645.0 | 806.3  | 1246.3 | 793.1  | 1365.6 | 1405.7 | 740.0  |
| 26.0   | 20.4   | 32.6   | 21.0   | 318.9  | 244.0  | 313.4  | 373.0  | 222.2  |
| 17.6   | 16.4   | 9.7    | 14.9   | 2.4    | 12.2   | 12.9   | 14.7   | 5.0    |
| 5.0    | 3.1    | 6.1    | 5.5    | 11.0   | 9.2    | 10.9   | 11.8   | 4.4    |
| 15.8   | 14.8   | 26.8   | 15.4   | 24.5   | 16.2   | 30.1   | 33.9   | 5.8    |
| 10.6   | 7.9    | 21.1   | 3.4    | 2.9    | 8.3    | 6.8    | 19.2   | 3.7    |
| 1.8    | 12.1   | 6.3    | 6.6    | 16.0   | 14.5   | 16.2   | 30.8   | 10.2   |
| 1.2    | 1.0    | 1.1    | 1.1    | 1.1    | 0.6    | 1.5    | 2.2    | 2.4    |
| 19.2   | 29.0   | 28.8   | 28.7   | 26.3   | 31.3   | 19.3   | 8.1    | 21.6   |
| 217.4  | 220.8  | 327.2  | 218.0  | 275.8  | 319.2  | 337.8  | 334.2  | 91.1   |
| 0.8    | 1.3    | 1.6    | 1.8    | 1.2    | 0.8    | 1.8    | 0.8    | 3.3    |
| 3.2    | 5.5    | 6.2    | 3.8    | 2.8    | 2.1    | 4.4    | 6.4    | 7.9    |
| 448.1  | 502.4  | 448.4  | 485.0  | 316.7  | 269.0  | 299.9  | 372.4  | 331.0  |
| 11.2   | 17.4   | 20.8   | 18.7   | 5.9    | 14.0   | 14.5   | 11.7   | 18.0   |
| 10.1   | 6.2    | 32.5   | 9.4    | 14.0   | 5.1    | 16.7   | 28.3   | 3.0    |
| 8.2    | 4.1    | 7.5    | 6.3    | 3.9    | 3.5    | 5.3    | 11.2   | 5.1    |
| 277.5  | 272.1  | 361.2  | 269.3  | 345.3  | 381.7  | 331.6  | 395.0  | 252.1  |
| 5.3    | 10.8   | 46.5   | 8.1    | 12.4   | 9.7    | 14.4   | 21.4   | 14.4   |
| 2026.5 | 2124.7 | 2388.0 | 1879.4 | 5056.9 | 5638.1 | 4627.7 | 5350.3 | 4332.5 |
| 8.8    | 7.3    | 10.3   | 11.4   | 5.6    | 6.8    | 7.0    | 8.5    | 10.0   |
| 798.9  | 715.2  | 975.3  | 838.4  | 399.0  | 456.7  | 473.8  | 541.1  | 540.8  |
| 26.8   | 19.2   | 31.8   | 18.6   | 123.3  | 134.3  | 123.1  | 160.8  | 128.5  |
| 4.3    | 4.4    | 2.6    | 9.8    | 14.3   | 5.0    | 10.6   | 2.6    | 7.5    |
| 93.7   | 70.4   | 105.8  | 112.2  | 255.0  | 322.2  | 231.8  | 267.9  | 131.2  |
| 55.4   | 44.7   | 85.5   | 49.5   | 73.9   | 85.1   | 68.6   | 87.7   | 85.2   |
| 187.3  | 199.8  | 189.8  | 201.0  | 207.2  | 257.5  | 275.8  | 288.9  | 238.5  |
| 200.2  | 198.2  | 284.1  | 277.6  | 360.5  | 211.5  | 364.7  | 449.0  | 940.7  |
| 4.9    | 5.9    | 6.8    | 5.6    | 7.1    | 12.7   | 6.3    | 10.9   | 6.5    |
| 646.5  | 690.0  | 863.9  | 551.0  | 2806.5 | 2870.6 | 3043.7 | 3339.2 | 1842.4 |
| 2.1    | 10.2   | 2.1    | 6.9    | 1.0    | 3.8    | 0.8    | 2.2    | 4.3    |
| 1634.8 | 1560.8 | 1308.6 | 1388.6 | 822.4  | 886.6  | 863.5  | 1035.6 | 296.3  |
| 161.6  | 121.9  | 222.2  | 126.8  | 229.2  | 216.2  | 241.0  | 281.4  | 110.5  |
| 1.0    | 1.1    | 1.2    | 0.7    | 4.7    | 4.3    | 2.4    | 5.6    | 2191.9 |
| 575.6  | 582.4  | 1787.4 | 450.6  | 2542.3 | 1669.5 | 2184.7 | 2599.9 | 1857.8 |
| 21.7   | 10.5   | 18.0   | 13.3   | 81.4   | 163.0  | 66.7   | 99.7   | 6.9    |
| 8.5    | 12.4   | 9.5    | 14.8   | 30.0   | 26.1   | 21.3   | 27.5   | 29.8   |
| 2095.8 | 2116.2 | 2296.4 | 1838.0 | 4526.2 | 4273.7 | 5341.5 | 5349.3 | 1272.3 |
| 1543.9 | 1511.1 | 1721.2 | 1327.5 | 3621.5 | 3930.5 | 4374.7 | 4343.4 | 768.1  |
| 105.2  | 110.8  | 127.5  | 113.5  | 157.3  | 179.6  | 141.3  | 177.0  | 141.6  |
| 6.8    | 5.3    | 9.0    | 3.3    | 4.4    | 2.6    | 5.0    | 11.1   | 14.4   |
| 4.0    | 2.7    | 11.6   | 4.0    | 4.2    | 2.9    | 6.9    | 6.5    | 218.5  |
| 22.5   | 16.1   | 33.7   | 21.1   | 28.2   | 32.1   | 24.5   | 30.1   | 29.3   |
| 4.5    | 3.4    | 5.6    | 2.8    | 23.9   | 20.1   | 9.1    | 17.3   | 10.2   |
| 379.3  | 369.2  | 415.4  | 346.9  | 240.9  | 217.3  | 179.2  | 247.3  | 69.3   |

|        |        |        |        |        |        |        |        |        |
|--------|--------|--------|--------|--------|--------|--------|--------|--------|
| 35.5   | 37.8   | 7.3    | 18.9   | 65.8   | 89.0   | 66.3   | 94.6   | 94.8   |
| 44.9   | 46.3   | 34.7   | 32.7   | 80.5   | 104.1  | 73.6   | 103.2  | 103.8  |
| 1243.5 | 1096.4 | 1743.5 | 1317.1 | 2431.9 | 2377.6 | 2428.0 | 2804.2 | 3212.4 |
| 1.8    | 1.6    | 2.0    | 0.6    | 0.5    | 2.1    | 0.3    | 0.4    | 1.2    |
| 1.4    | 5.0    | 2.1    | 2.6    | 4.1    | 1.6    | 4.6    | 1.5    | 0.9    |
| 204.6  | 187.0  | 293.3  | 220.5  | 365.9  | 542.1  | 418.2  | 464.6  | 167.8  |
| 11.7   | 11.0   | 15.6   | 7.8    | 198.9  | 227.9  | 218.0  | 210.5  | 171.1  |
| 4.7    | 5.5    | 10.2   | 9.5    | 10.1   | 5.3    | 14.0   | 5.1    | 9.8    |
| 70.4   | 97.0   | 47.7   | 39.3   | 15.2   | 12.5   | 20.9   | 27.0   | 6.8    |
| 0.8    | 1.3    | 1.4    | 1.1    | 153.9  | 107.2  | 126.4  | 155.0  | 87.2   |
| 36.8   | 34.1   | 46.2   | 26.9   | 60.5   | 78.0   | 55.1   | 87.2   | 53.3   |
| 11.9   | 10.9   | 12.1   | 13.7   | 59.4   | 74.7   | 34.7   | 53.6   | 15.0   |
| 18.5   | 18.0   | 14.0   | 6.3    | 18.9   | 21.0   | 13.2   | 13.9   | 9.8    |
| 18.6   | 7.8    | 39.5   | 29.6   | 4.1    | 10.4   | 8.1    | 5.4    | 19.1   |
| 184.0  | 200.4  | 144.6  | 159.0  | 125.6  | 148.0  | 124.0  | 168.5  | 87.4   |
| 2.6    | 2.0    | 8.6    | 4.8    | 1.1    | 4.3    | 7.0    | 0.6    | 6.7    |
| 3.6    | 1.3    | 5.2    | 4.9    | 2.3    | 3.9    | 13.2   | 4.3    | 18.0   |
| 2.9    | 21.7   | 23.6   | 8.4    | 95.2   | 70.2   | 84.9   | 112.5  | 109.7  |
| 24.7   | 20.6   | 6.1    | 7.3    | 60.2   | 49.8   | 54.6   | 55.0   | 96.7   |
| 44.2   | 37.8   | 51.4   | 41.4   | 54.7   | 45.2   | 59.9   | 49.8   | 90.4   |
| 495.5  | 394.8  | 851.0  | 464.1  | 1908.6 | 1241.5 | 2076.7 | 2241.5 | 2179.6 |
| 187.5  | 153.8  | 310.3  | 169.5  | 766.9  | 594.9  | 846.2  | 865.8  | 781.6  |
| 15.2   | 12.8   | 42.7   | 15.4   | 43.9   | 45.6   | 50.3   | 49.0   | 108.9  |
| 7.7    | 8.7    | 13.0   | 8.9    | 12.9   | 13.5   | 23.0   | 21.4   | 16.6   |
| 93.9   | 94.1   | 99.4   | 78.1   | 63.0   | 49.1   | 71.6   | 69.9   | 40.1   |
| 7.8    | 10.7   | 21.3   | 14.2   | 42.6   | 28.8   | 29.7   | 43.8   | 34.0   |
| 1.2    | 1.6    | 1.4    | 1.5    | 7.2    | 7.6    | 3.0    | 4.7    | 1.7    |
| 14.0   | 10.3   | 15.1   | 11.2   | 28.3   | 23.4   | 38.8   | 42.3   | 47.4   |
| 535.2  | 561.7  | 660.3  | 549.2  | 1338.4 | 1021.3 | 1669.0 | 1690.3 | 1866.8 |
| 3.6    | 3.5    | 5.5    | 5.6    | 2.7    | 1.3    | 8.8    | 6.8    | 3.6    |
| 1369.3 | 1175.7 | 1612.6 | 1344.1 | 1528.7 | 1598.8 | 1698.3 | 1833.6 | 1888.1 |
| 773.8  | 811.6  | 1389.3 | 1069.5 | 436.2  | 561.4  | 357.4  | 400.3  | 353.5  |
| 43.7   | 47.1   | 61.1   | 49.2   | 30.9   | 34.7   | 22.1   | 31.4   | 62.1   |
| 55.3   | 41.7   | 73.1   | 31.3   | 20.5   | 21.3   | 25.8   | 20.4   | 48.4   |
| 2.0    | 1.5    | 1.7    | 3.4    | 2.3    | 1.2    | 6.0    | 1.3    | 2.9    |
| 0.7    | 1.2    | 1.9    | 1.3    | 12.8   | 1.7    | 15.8   | 3.3    | 20.1   |
| 7.4    | 12.5   | 21.6   | 12.1   | 21.5   | 41.3   | 27.6   | 23.5   | 47.8   |
| 0.3    | 3.4    | 2.6    | 6.3    | 2.9    | 2.7    | 0.8    | 0.3    | 3.7    |
| 124.6  | 112.2  | 179.7  | 130.2  | 84.7   | 94.3   | 93.5   | 103.4  | 88.6   |
| 129.5  | 126.0  | 148.0  | 139.7  | 70.3   | 66.1   | 57.1   | 99.3   | 60.5   |
| 775.2  | 722.5  | 1196.6 | 849.7  | 929.1  | 807.2  | 996.2  | 1021.1 | 1419.5 |
| 18.2   | 12.0   | 44.5   | 19.9   | 53.4   | 45.8   | 59.1   | 71.4   | 39.0   |
| 104.6  | 119.4  | 95.9   | 132.7  | 95.5   | 114.5  | 80.6   | 100.2  | 314.3  |
| 1.0    | 1.7    | 1.7    | 1.3    | 6.3    | 3.5    | 0.8    | 0.8    | 4.3    |
| 150.0  | 167.0  | 248.5  | 143.8  | 312.9  | 179.5  | 216.9  | 296.8  | 307.9  |
| 182.0  | 172.2  | 214.9  | 137.9  | 908.6  | 619.1  | 945.8  | 1070.1 | 621.4  |
| 355.1  | 311.0  | 589.1  | 263.5  | 683.2  | 708.3  | 567.0  | 687.1  | 599.4  |
| 3.8    | 12.6   | 21.5   | 11.5   | 11.8   | 3.6    | 8.3    | 11.4   | 9.6    |
| 3.7    | 1.1    | 7.6    | 1.1    | 0.5    | 3.0    | 0.5    | 1.0    | 4.4    |
| 0.8    | 4.1    | 8.2    | 1.2    | 2.8    | 4.8    | 2.7    | 7.6    | 1.5    |
| 1079.3 | 984.6  | 1827.3 | 1057.1 | 2850.8 | 2398.7 | 2734.6 | 2788.2 | 3946.8 |
| 545.1  | 541.2  | 730.4  | 588.2  | 1271.1 | 1283.9 | 1396.9 | 1422.9 | 600.2  |
| 7.0    | 7.8    | 5.9    | 2.5    | 3.5    | 4.3    | 5.2    | 6.5    | 10.5   |

|        |        |        |        |        |        |        |        |        |
|--------|--------|--------|--------|--------|--------|--------|--------|--------|
| 52.2   | 57.0   | 65.1   | 53.0   | 51.6   | 47.1   | 68.5   | 59.5   | 83.4   |
| 41.7   | 28.6   | 43.9   | 32.2   | 83.4   | 68.1   | 82.4   | 110.0  | 83.7   |
| 215.7  | 187.5  | 257.6  | 185.6  | 179.2  | 156.3  | 173.2  | 195.2  | 118.3  |
| 1.8    | 1.4    | 4.9    | 2.2    | 4.1    | 17.4   | 3.4    | 14.9   | 27.0   |
| 0.6    | 0.3    | 4.5    | 0.8    | 3.6    | 2.8    | 1.8    | 0.3    | 6.1    |
| 2.4    | 1.9    | 7.4    | 1.0    | 3.3    | 6.0    | 3.4    | 7.8    | 14.8   |
| 166.7  | 164.1  | 239.8  | 187.4  | 186.8  | 214.7  | 230.3  | 185.4  | 96.1   |
| 0.7    | 1.7    | 3.7    | 0.9    | 52.7   | 42.7   | 55.7   | 58.9   | 14.3   |
| 5696.2 | 5331.6 | 8164.8 | 5180.3 | 7013.7 | 6840.8 | 7266.6 | 7422.4 | 9283.1 |
| 140.9  | 131.8  | 200.0  | 132.2  | 90.4   | 86.9   | 100.4  | 86.9   | 108.1  |
| 329.7  | 323.7  | 477.5  | 368.5  | 572.0  | 721.3  | 615.3  | 658.7  | 833.2  |
| 158.3  | 143.0  | 172.5  | 112.7  | 549.3  | 424.1  | 534.7  | 679.9  | 379.0  |
| 5.4    | 4.5    | 5.0    | 4.4    | 2.2    | 2.0    | 1.6    | 1.6    | 2.8    |
| 296.7  | 277.2  | 341.4  | 254.8  | 323.8  | 333.9  | 331.4  | 371.1  | 251.0  |
| 6.1    | 5.6    | 9.2    | 6.3    | 7.1    | 6.4    | 5.7    | 5.9    | 22.4   |
| 235.4  | 249.6  | 312.6  | 246.7  | 170.9  | 156.2  | 167.4  | 144.9  | 196.2  |
| 151.8  | 131.1  | 125.1  | 115.3  | 159.6  | 268.9  | 202.5  | 244.5  | 461.1  |
| 8.7    | 17.6   | 28.7   | 18.4   | 17.3   | 22.3   | 26.9   | 34.7   | 497.2  |
| 436.7  | 469.1  | 262.3  | 478.4  | 538.8  | 820.7  | 591.0  | 610.3  | 270.9  |
| 1148.7 | 1165.1 | 1286.0 | 1159.8 | 1735.8 | 1538.9 | 1746.8 | 1965.9 | 1608.0 |
| 2094.3 | 1658.6 | 2491.9 | 1756.2 | 2040.0 | 1923.4 | 2545.8 | 2375.6 | 1956.2 |
| 20.3   | 14.0   | 32.0   | 21.6   | 1940.5 | 2024.1 | 1951.3 | 2454.4 | 2892.4 |
| 5421.2 | 4827.5 | 7616.6 | 4997.8 | 6561.0 | 6471.2 | 6907.4 | 6892.8 | 8884.1 |
| 5337.5 | 4930.4 | 5160.2 | 5074.7 | 5899.2 | 7064.4 | 6449.0 | 6901.3 | 9202.3 |
| 731.4  | 735.2  | 882.5  | 632.5  | 493.8  | 554.6  | 727.3  | 699.6  | 989.2  |
| 654.4  | 751.0  | 492.2  | 559.3  | 1132.4 | 940.2  | 1497.5 | 1438.6 | 1418.1 |
| 14.5   | 20.1   | 24.3   | 21.7   | 13.5   | 10.5   | 4.5    | 21.3   | 4.1    |
| 36.9   | 18.3   | 56.6   | 21.8   | 41.5   | 40.2   | 50.1   | 60.3   | 34.5   |
| 73.9   | 64.6   | 90.6   | 53.8   | 34.5   | 19.3   | 35.6   | 41.9   | 22.7   |
| 8.3    | 9.0    | 7.1    | 11.2   | 12.9   | 8.2    | 14.7   | 17.6   | 18.9   |
| 90.8   | 97.5   | 225.4  | 97.7   | 503.3  | 331.3  | 400.4  | 532.1  | 424.1  |
| 53.5   | 45.3   | 57.2   | 33.9   | 78.0   | 64.7   | 80.4   | 92.6   | 71.5   |
| 84.6   | 90.2   | 117.8  | 83.1   | 14.1   | 14.3   | 18.7   | 17.2   | 24.9   |
| 5.3    | 3.5    | 2.9    | 0.8    | 0.5    | 2.7    | 0.9    | 0.7    | 0.7    |
| 48.0   | 42.6   | 80.5   | 45.4   | 18.2   | 13.1   | 15.1   | 16.2   | 236.4  |
| 71.6   | 63.9   | 82.1   | 54.3   | 27.8   | 29.5   | 44.2   | 37.6   | 129.7  |
| 1.6    | 1.3    | 1.3    | 1.3    | 21.2   | 19.5   | 36.4   | 22.6   | 24.3   |
| 57.8   | 40.9   | 88.8   | 45.3   | 70.8   | 42.2   | 61.1   | 53.9   | 56.1   |
| 24.1   | 14.7   | 43.2   | 16.1   | 79.2   | 48.0   | 59.7   | 82.2   | 63.9   |
| 23.0   | 14.9   | 27.2   | 27.1   | 78.6   | 88.8   | 74.0   | 98.0   | 4.8    |
| 394.4  | 322.9  | 586.2  | 356.4  | 518.9  | 411.8  | 432.5  | 566.1  | 434.5  |
| 19.6   | 14.1   | 36.9   | 13.1   | 38.9   | 45.2   | 37.3   | 52.4   | 84.7   |
| 15.6   | 4.4    | 30.7   | 9.5    | 40.6   | 37.0   | 43.9   | 41.9   | 134.3  |
| 1.5    | 0.2    | 0.3    | 3.1    | 0.8    | 0.2    | 0.4    | 0.5    | 3.7    |
| 26.4   | 16.4   | 35.4   | 14.1   | 55.4   | 70.7   | 69.5   | 65.9   | 39.1   |
| 16.6   | 9.0    | 8.9    | 6.1    | 7.5    | 9.3    | 6.6    | 17.4   | 9.1    |
| 22.7   | 23.1   | 28.0   | 24.5   | 16.6   | 13.0   | 14.3   | 19.9   | 38.0   |
| 40.9   | 51.7   | 55.7   | 31.4   | 36.2   | 42.5   | 38.6   | 46.8   | 66.5   |
| 3.2    | 8.7    | 6.6    | 4.7    | 728.6  | 703.4  | 773.7  | 662.9  | 1185.1 |
| 1.8    | 2.2    | 1.2    | 2.6    | 1.0    | 4.6    | 0.4    | 3.3    | 3.4    |
| 12.9   | 7.2    | 4.8    | 4.5    | 4.5    | 11.9   | 12.9   | 22.3   | 11.7   |
| 3.8    | 3.8    | 7.6    | 4.0    | 7.9    | 4.6    | 3.9    | 4.9    | 4.9    |
| 0.5    | 1.3    | 1.1    | 1.7    | 0.4    | 1.3    | 1.2    | 0.5    | 0.7    |

|       |       |       |       |       |       |       |       |       |
|-------|-------|-------|-------|-------|-------|-------|-------|-------|
| 4.1   | 1.4   | 3.1   | 1.7   | 7.2   | 1.0   | 0.9   | 3.5   | 2.5   |
| 0.7   | 1.3   | 1.5   | 4.1   | 1.3   | 2.0   | 6.7   | 9.2   | 5.3   |
| 87.7  | 112.3 | 79.4  | 80.5  | 9.7   | 10.3  | 5.5   | 27.4  | 50.3  |
| 13.8  | 18.4  | 11.3  | 12.4  | 42.9  | 60.8  | 44.9  | 36.2  | 17.7  |
| 5.1   | 3.7   | 2.7   | 3.6   | 2.7   | 17.3  | 9.4   | 3.8   | 2.9   |
| 0.5   | 0.4   | 1.2   | 0.8   | 0.5   | 0.7   | 2.7   | 1.8   | 1.5   |
| 3.9   | 1.3   | 2.2   | 1.1   | 1.8   | 2.0   | 1.2   | 0.7   | 3.4   |
| 174.6 | 134.8 | 164.4 | 115.1 | 21.3  | 19.2  | 25.0  | 34.9  | 23.6  |
| 3.3   | 4.1   | 8.2   | 1.1   | 0.9   | 3.0   | 2.3   | 0.6   | 2.6   |
| 31.2  | 6.5   | 21.1  | 15.1  | 18.8  | 7.2   | 17.2  | 6.0   | 16.0  |
| 71.2  | 78.1  | 76.2  | 93.4  | 7.4   | 27.7  | 20.3  | 14.2  | 18.2  |
| 145.3 | 123.5 | 196.6 | 111.9 | 187.4 | 188.9 | 199.7 | 241.0 | 123.8 |
| 250.7 | 225.0 | 324.7 | 193.0 | 306.8 | 324.0 | 364.5 | 411.5 | 216.9 |
| 33.4  | 25.8  | 58.3  | 31.6  | 10.0  | 13.1  | 11.8  | 13.2  | 1.7   |
| 6.6   | 7.1   | 16.1  | 7.6   | 5.4   | 7.4   | 9.1   | 12.0  | 10.9  |
| 4.7   | 2.3   | 14.0  | 3.9   | 13.7  | 3.2   | 2.5   | 13.8  | 11.5  |
| 3.6   | 1.2   | 0.8   | 0.9   | 0.6   | 1.4   | 0.7   | 0.5   | 0.5   |
| 8.1   | 7.9   | 11.1  | 6.7   | 4.5   | 6.8   | 6.4   | 6.3   | 15.0  |
| 5.4   | 12.2  | 28.8  | 9.2   | 33.0  | 28.8  | 27.1  | 45.8  | 84.0  |
| 0.5   | 3.2   | 1.8   | 1.3   | 1.9   | 3.2   | 4.2   | 0.4   | 13.9  |
| 15.9  | 41.0  | 54.4  | 36.0  | 22.4  | 10.5  | 23.9  | 35.6  | 26.5  |
| 34.7  | 14.6  | 25.7  | 17.8  | 79.1  | 91.2  | 110.9 | 144.7 | 6.0   |
| 2.8   | 1.5   | 11.5  | 14.5  | 2.9   | 2.4   | 7.6   | 13.1  | 12.1  |
| 34.5  | 31.4  | 60.5  | 31.7  | 236.3 | 223.9 | 263.4 | 254.0 | 407.8 |
| 4.5   | 1.5   | 11.3  | 4.0   | 5.6   | 5.6   | 6.1   | 1.1   | 10.4  |
| 1.0   | 2.4   | 1.0   | 1.0   | 4.0   | 1.6   | 1.3   | 1.2   | 1.9   |
| 13.9  | 9.4   | 15.0  | 11.3  | 4.1   | 2.8   | 8.6   | 5.2   | 7.6   |
| 10.6  | 4.8   | 13.1  | 14.0  | 15.0  | 9.4   | 5.7   | 8.0   | 17.2  |
| 3.1   | 4.5   | 3.9   | 3.4   | 0.6   | 0.8   | 0.8   | 0.7   | 4.1   |
| 10.2  | 1.8   | 3.2   | 8.7   | 1.6   | 1.8   | 3.3   | 8.9   | 2.2   |
| 7.5   | 24.1  | 16.2  | 7.5   | 6.4   | 4.0   | 10.5  | 3.6   | 4.5   |
| 4.2   | 2.0   | 3.4   | 4.5   | 2.0   | 3.8   | 5.0   | 3.1   | 4.3   |
| 603.4 | 563.0 | 938.6 | 558.8 | 797.7 | 827.8 | 829.2 | 929.4 | 953.9 |
| 104.3 | 103.7 | 149.4 | 114.4 | 315.8 | 257.2 | 371.2 | 406.1 | 144.9 |
| 218.4 | 171.9 | 371.6 | 185.1 | 11.1  | 9.8   | 10.5  | 15.6  | 5.7   |
| 25.2  | 27.9  | 48.6  | 25.7  | 157.8 | 113.3 | 120.2 | 167.9 | 145.0 |
| 34.8  | 29.6  | 58.8  | 15.0  | 12.7  | 21.6  | 30.1  | 35.4  | 47.6  |
| 29.4  | 27.0  | 38.3  | 22.3  | 55.9  | 48.5  | 50.6  | 57.8  | 32.5  |
| 3.3   | 5.1   | 4.4   | 4.1   | 2.6   | 11.0  | 4.5   | 15.1  | 3.2   |
| 24.7  | 17.6  | 18.5  | 23.2  | 11.1  | 3.8   | 5.0   | 3.7   | 85.9  |
| 287.7 | 228.5 | 255.7 | 385.6 | 9.4   | 3.0   | 7.1   | 10.9  | 12.4  |
| 1.8   | 1.0   | 1.1   | 2.4   | 0.8   | 2.1   | 1.2   | 1.1   | 2.6   |
| 0.8   | 0.6   | 0.9   | 1.2   | 1.0   | 1.1   | 0.5   | 0.5   | 1.2   |
| 1.4   | 1.6   | 1.7   | 1.8   | 1.8   | 1.7   | 4.0   | 3.3   | 1.8   |
| 0.9   | 1.0   | 1.0   | 0.9   | 5.3   | 0.4   | 0.4   | 0.6   | 6.2   |
| 0.4   | 3.1   | 5.0   | 4.5   | 6.0   | 5.7   | 1.5   | 8.5   | 0.4   |
| 153.5 | 115.8 | 291.6 | 147.5 | 508.9 | 430.5 | 474.5 | 535.2 | 390.5 |
| 4.7   | 2.9   | 8.0   | 4.2   | 2.3   | 1.6   | 7.1   | 2.3   | 1.7   |
| 96.4  | 120.9 | 127.1 | 90.0  | 267.1 | 418.7 | 323.8 | 267.6 | 208.0 |
| 1.3   | 1.9   | 2.1   | 5.6   | 1.2   | 2.0   | 1.6   | 9.8   | 1.3   |
| 4.1   | 9.2   | 4.0   | 4.0   | 4.7   | 3.4   | 5.2   | 5.8   | 3.8   |
| 4.1   | 1.0   | 5.0   | 1.8   | 2.5   | 3.5   | 2.8   | 2.2   | 4.6   |
| 2.6   | 1.8   | 2.4   | 2.1   | 2.2   | 1.5   | 1.2   | 1.8   | 4.7   |

|        |        |        |        |        |        |        |        |        |
|--------|--------|--------|--------|--------|--------|--------|--------|--------|
| 11.2   | 4.4    | 9.6    | 9.3    | 4.2    | 11.9   | 11.4   | 3.8    | 10.2   |
| 147.0  | 142.1  | 210.2  | 134.8  | 253.3  | 228.8  | 244.8  | 289.4  | 172.0  |
| 314.0  | 289.0  | 282.1  | 240.3  | 1655.4 | 1835.1 | 2370.1 | 1582.0 | 379.6  |
| 1.6    | 0.5    | 4.4    | 4.7    | 5.3    | 3.0    | 8.6    | 6.3    | 1.6    |
| 124.9  | 48.1   | 514.9  | 94.6   | 216.6  | 196.9  | 385.6  | 298.8  | 103.1  |
| 6.9    | 7.8    | 13.3   | 6.2    | 3.3    | 4.0    | 1.9    | 0.7    | 2.3    |
| 5.0    | 2.9    | 0.6    | 1.7    | 1.7    | 0.2    | 1.0    | 0.3    | 1.9    |
| 1.5    | 1.9    | 4.1    | 1.4    | 202.8  | 246.9  | 328.5  | 306.4  | 28.1   |
| 23.2   | 3.7    | 21.2   | 16.4   | 21.8   | 2.7    | 7.6    | 11.3   | 23.7   |
| 6.3    | 2.5    | 12.1   | 3.1    | 1.3    | 1.7    | 2.7    | 1.8    | 5.0    |
| 179.7  | 159.5  | 183.7  | 166.2  | 191.0  | 198.5  | 160.8  | 222.7  | 308.5  |
| 3.4    | 0.6    | 3.3    | 3.5    | 4.5    | 2.2    | 1.3    | 0.3    | 1.6    |
| 5.1    | 4.1    | 8.0    | 2.5    | 15.3   | 18.7   | 19.5   | 25.0   | 4.7    |
| 13.9   | 14.5   | 21.8   | 11.4   | 40.3   | 40.9   | 43.0   | 53.7   | 14.3   |
| 29.3   | 24.4   | 20.2   | 18.6   | 25.1   | 16.2   | 9.5    | 29.7   | 27.1   |
| 5.1    | 10.0   | 3.4    | 7.1    | 2.4    | 5.8    | 1.7    | 5.0    | 3.1    |
| 17.6   | 16.2   | 12.1   | 5.8    | 14.4   | 5.1    | 15.0   | 11.2   | 15.8   |
| 1.8    | 2.3    | 2.3    | 1.4    | 2.5    | 12.3   | 1.6    | 4.3    | 5.1    |
| 19.8   | 17.6   | 16.9   | 13.6   | 2.8    | 8.2    | 16.6   | 3.3    | 18.0   |
| 135.1  | 133.0  | 129.9  | 135.0  | 169.2  | 230.7  | 154.7  | 139.1  | 253.3  |
| 10.4   | 4.3    | 7.1    | 5.1    | 2.7    | 2.4    | 10.9   | 3.7    | 3.1    |
| 0.5    | 1.7    | 2.5    | 1.1    | 0.5    | 0.5    | 0.4    | 1.4    | 0.9    |
| 16.1   | 18.1   | 23.4   | 14.5   | 23.7   | 15.1   | 22.1   | 27.9   | 53.3   |
| 11.6   | 6.3    | 10.2   | 3.4    | 12.1   | 15.7   | 8.4    | 4.6    | 32.6   |
| 11.0   | 8.3    | 9.6    | 8.3    | 11.8   | 8.6    | 17.7   | 23.4   | 25.1   |
| 6.4    | 9.5    | 9.1    | 6.7    | 11.7   | 4.6    | 5.7    | 7.0    | 3.7    |
| 2220.0 | 2089.2 | 2457.6 | 2085.4 | 1501.2 | 1207.0 | 1529.4 | 1892.3 | 2422.2 |
| 1.5    | 1.5    | 1.8    | 1.3    | 1.4    | 2.4    | 1.8    | 2.3    | 1.8    |
| 3.0    | 0.4    | 0.8    | 0.5    | 4.8    | 1.1    | 2.2    | 4.3    | 3.0    |
| 11.6   | 12.1   | 13.7   | 9.5    | 12.7   | 6.6    | 9.4    | 11.3   | 4.4    |
| 11.5   | 5.7    | 14.8   | 14.9   | 17.0   | 14.4   | 8.6    | 14.9   | 15.4   |
| 7.1    | 7.6    | 3.4    | 5.0    | 5.7    | 5.3    | 2.8    | 17.3   | 1.9    |
| 0.6    | 0.9    | 0.7    | 0.7    | 0.6    | 0.4    | 0.5    | 0.6    | 1.1    |
| 0.8    | 1.7    | 1.6    | 0.6    | 3.2    | 0.9    | 1.3    | 7.8    | 2.1    |
| 8.0    | 3.2    | 15.7   | 6.6    | 2.6    | 4.3    | 7.7    | 10.1   | 4.9    |
| 15.1   | 11.1   | 15.9   | 8.0    | 1.6    | 3.9    | 1.1    | 6.5    | 3.4    |
| 14.3   | 13.6   | 16.3   | 3.5    | 11.0   | 2.3    | 5.9    | 4.9    | 5.5    |
| 3.1    | 3.6    | 2.9    | 3.7    | 6.7    | 5.1    | 5.3    | 0.7    | 4.5    |
| 23.5   | 26.6   | 63.7   | 32.3   | 5.2    | 7.6    | 7.8    | 20.9   | 29.5   |
| 4.1    | 2.4    | 18.9   | 5.7    | 5.6    | 1.1    | 1.3    | 4.1    | 4.8    |
| 11.6   | 5.0    | 31.8   | 6.9    | 4.5    | 7.0    | 0.9    | 11.5   | 2.4    |
| 59.2   | 52.3   | 95.1   | 58.7   | 41.4   | 33.7   | 39.4   | 41.8   | 47.0   |
| 1.0    | 2.1    | 2.2    | 1.1    | 1.2    | 0.8    | 1.9    | 1.6    | 1.0    |
| 640.0  | 583.7  | 508.0  | 580.9  | 302.0  | 311.6  | 349.1  | 431.4  | 380.0  |
| 39.9   | 38.4   | 51.9   | 41.3   | 49.9   | 40.8   | 37.5   | 43.4   | 21.7   |
| 7.9    | 6.0    | 9.0    | 12.3   | 5.8    | 8.9    | 17.0   | 11.3   | 5.0    |
| 44.2   | 38.1   | 61.5   | 43.9   | 98.5   | 86.8   | 101.5  | 152.8  | 167.2  |
| 2.0    | 5.7    | 5.6    | 0.9    | 3.0    | 1.8    | 5.2    | 6.7    | 5.0    |
| 454.4  | 408.8  | 678.4  | 403.8  | 360.6  | 339.5  | 349.3  | 428.4  | 205.1  |
| 7.0    | 8.1    | 10.5   | 4.7    | 3.8    | 1.9    | 5.8    | 3.7    | 5.3    |
| 17.2   | 14.8   | 26.4   | 19.9   | 17.3   | 10.7   | 9.2    | 16.3   | 23.6   |
| 14.9   | 2.4    | 11.3   | 5.5    | 12.3   | 6.9    | 5.8    | 8.4    | 11.3   |
| 217.4  | 185.5  | 309.9  | 193.1  | 248.2  | 230.2  | 241.9  | 280.1  | 235.3  |

|        |       |        |       |        |        |        |        |        |
|--------|-------|--------|-------|--------|--------|--------|--------|--------|
| 4.1    | 4.1   | 6.8    | 3.2   | 10.4   | 4.7    | 10.9   | 14.8   | 13.6   |
| 7.0    | 5.6   | 11.3   | 2.7   | 37.9   | 24.5   | 39.9   | 47.8   | 7.3    |
| 11.1   | 18.7  | 29.3   | 4.3   | 18.8   | 9.5    | 15.5   | 43.3   | 6.1    |
| 4.6    | 4.4   | 6.9    | 5.4   | 14.6   | 20.6   | 18.6   | 37.5   | 17.6   |
| 0.6    | 4.5   | 6.4    | 2.9   | 5.6    | 1.1    | 0.6    | 7.5    | 6.5    |
| 2.8    | 2.9   | 13.3   | 11.8  | 1.6    | 4.1    | 6.1    | 7.3    | 7.1    |
| 62.6   | 72.8  | 87.8   | 65.6  | 61.8   | 39.9   | 46.9   | 68.8   | 66.1   |
| 1.9    | 2.6   | 1.3    | 6.8   | 1.0    | 5.3    | 4.2    | 12.7   | 12.6   |
| 17.2   | 30.4  | 24.8   | 6.7   | 18.2   | 15.9   | 19.9   | 26.3   | 27.0   |
| 2.9    | 2.4   | 4.7    | 2.9   | 5.4    | 6.4    | 10.0   | 11.9   | 1.7    |
| 3.3    | 1.6   | 3.3    | 1.7   | 8.6    | 1.7    | 5.5    | 17.0   | 14.4   |
| 2.3    | 4.6   | 11.3   | 5.8   | 1.8    | 2.4    | 5.1    | 5.2    | 5.0    |
| 1.2    | 2.9   | 3.4    | 2.4   | 1.3    | 0.9    | 2.1    | 7.3    | 14.3   |
| 7.8    | 6.9   | 9.2    | 9.5   | 4.3    | 1.5    | 4.2    | 0.6    | 3.0    |
| 119.0  | 133.4 | 107.8  | 100.7 | 183.4  | 265.7  | 189.7  | 199.5  | 175.5  |
| 24.3   | 25.4  | 27.2   | 23.0  | 27.9   | 29.2   | 21.7   | 36.1   | 65.8   |
| 2.9    | 2.3   | 3.2    | 7.0   | 5.2    | 3.8    | 3.4    | 6.2    | 12.0   |
| 3.2    | 1.6   | 3.6    | 1.6   | 4.5    | 2.3    | 1.6    | 3.7    | 3.6    |
| 11.0   | 8.4   | 7.7    | 9.0   | 9.0    | 5.4    | 3.6    | 15.0   | 11.6   |
| 7.4    | 12.2  | 5.2    | 15.8  | 6.3    | 2.8    | 4.0    | 1.7    | 7.0    |
| 23.5   | 24.0  | 22.2   | 17.1  | 12.6   | 3.2    | 8.0    | 10.3   | 20.6   |
| 63.1   | 40.6  | 229.7  | 137.9 | 44.9   | 45.8   | 35.9   | 57.7   | 4.4    |
| 3.5    | 3.7   | 2.0    | 6.2   | 6.6    | 5.9    | 11.9   | 7.3    | 9.3    |
| 0.8    | 1.9   | 2.4    | 1.0   | 1.5    | 0.2    | 1.5    | 0.3    | 1.9    |
| 799.3  | 780.4 | 862.8  | 803.1 | 267.1  | 230.7  | 322.5  | 334.0  | 341.0  |
| 32.9   | 46.6  | 47.6   | 38.7  | 53.1   | 46.2   | 56.1   | 46.9   | 43.3   |
| 10.7   | 2.2   | 7.5    | 12.7  | 10.7   | 7.6    | 6.2    | 25.9   | 14.5   |
| 13.7   | 5.7   | 12.7   | 4.4   | 3.7    | 7.5    | 9.2    | 16.5   | 12.3   |
| 11.9   | 14.0  | 17.3   | 15.4  | 7.9    | 7.8    | 9.9    | 9.9    | 8.3    |
| 13.1   | 14.5  | 12.7   | 14.7  | 7.1    | 6.9    | 8.9    | 16.2   | 23.0   |
| 62.6   | 48.2  | 77.3   | 43.0  | 26.0   | 44.4   | 29.5   | 27.2   | 72.5   |
| 102.6  | 92.2  | 133.9  | 90.7  | 190.1  | 146.7  | 189.7  | 191.8  | 317.6  |
| 26.5   | 40.3  | 51.3   | 14.8  | 45.9   | 49.2   | 57.6   | 58.0   | 105.2  |
| 2.2    | 2.7   | 11.1   | 3.7   | 8.0    | 7.2    | 7.7    | 27.8   | 3.6    |
| 31.4   | 31.1  | 28.7   | 28.7  | 29.0   | 22.6   | 31.5   | 23.7   | 25.9   |
| 148.7  | 146.9 | 189.4  | 144.9 | 117.3  | 98.1   | 115.0  | 139.4  | 208.7  |
| 43.4   | 45.7  | 45.7   | 27.9  | 88.5   | 76.7   | 80.6   | 105.6  | 100.6  |
| 314.1  | 335.6 | 297.4  | 360.3 | 551.8  | 539.1  | 572.9  | 697.9  | 386.9  |
| 21.4   | 16.8  | 33.1   | 21.5  | 50.3   | 61.1   | 29.7   | 27.5   | 422.0  |
| 557.2  | 526.0 | 1033.5 | 361.4 | 8.3    | 11.5   | 7.7    | 10.7   | 10.6   |
| 33.6   | 24.7  | 36.6   | 26.1  | 12.3   | 11.3   | 8.0    | 5.2    | 12.6   |
| 33.5   | 32.2  | 38.0   | 28.7  | 27.4   | 24.8   | 31.0   | 40.8   | 51.5   |
| 8.6    | 2.6   | 10.0   | 4.1   | 10.5   | 12.0   | 13.8   | 26.7   | 9.5    |
| 15.8   | 16.0  | 18.3   | 13.0  | 17.2   | 18.0   | 16.3   | 10.0   | 17.4   |
| 1.7    | 3.3   | 1.1    | 1.8   | 0.7    | 0.8    | 0.3    | 0.5    | 2.9    |
| 4.3    | 2.1   | 2.2    | 2.2   | 0.7    | 1.6    | 0.2    | 0.5    | 2.8    |
| 4.6    | 2.8   | 1.8    | 3.6   | 3.9    | 1.6    | 2.4    | 6.6    | 10.9   |
| 3.4    | 7.6   | 7.3    | 8.1   | 4.9    | 2.0    | 9.4    | 8.0    | 9.2    |
| 17.3   | 13.4  | 24.8   | 12.9  | 10.4   | 1.6    | 19.7   | 8.9    | 2.3    |
| 1064.4 | 965.1 | 1657.6 | 933.2 | 1764.4 | 1392.9 | 1492.4 | 2056.4 | 2312.4 |
| 974.1  | 895.4 | 1727.3 | 966.4 | 1940.0 | 1533.0 | 1617.9 | 1940.6 | 2134.6 |
| 10.3   | 13.8  | 8.2    | 4.3   | 29.2   | 30.1   | 31.5   | 48.8   | 89.0   |
| 4.6    | 2.5   | 8.9    | 1.2   | 0.6    | 0.6    | 0.5    | 0.3    | 1.8    |

|        |        |        |        |        |        |        |        |        |
|--------|--------|--------|--------|--------|--------|--------|--------|--------|
| 5.4    | 0.9    | 5.6    | 0.8    | 5.4    | 4.6    | 5.1    | 18.6   | 4.5    |
| 832.8  | 787.9  | 1191.5 | 872.4  | 615.3  | 674.3  | 699.0  | 788.6  | 1226.1 |
| 5.0    | 2.9    | 7.0    | 1.5    | 74.4   | 71.3   | 86.8   | 101.2  | 4.2    |
| 36.9   | 38.3   | 44.6   | 36.2   | 63.6   | 71.8   | 56.8   | 62.3   | 105.1  |
| 15.9   | 15.9   | 22.3   | 20.9   | 11.7   | 12.7   | 12.8   | 14.3   | 28.5   |
| 23.1   | 23.1   | 32.1   | 23.8   | 23.3   | 23.5   | 21.8   | 27.8   | 25.8   |
| 35.9   | 28.5   | 24.0   | 26.7   | 28.2   | 24.3   | 27.2   | 33.4   | 73.5   |
| 589.6  | 640.7  | 254.9  | 461.5  | 551.1  | 821.7  | 748.6  | 692.6  | 405.7  |
| 929.3  | 893.6  | 1183.1 | 1000.2 | 645.2  | 547.2  | 578.7  | 642.8  | 697.6  |
| 7.8    | 3.7    | 3.7    | 3.9    | 1.9    | 12.0   | 7.9    | 5.2    | 4.3    |
| 11.9   | 11.1   | 13.2   | 7.1    | 14.3   | 13.8   | 14.8   | 17.8   | 13.0   |
| 50.8   | 54.0   | 66.1   | 55.3   | 71.3   | 81.2   | 111.3  | 106.9  | 107.1  |
| 29.4   | 20.1   | 29.2   | 11.4   | 23.6   | 14.9   | 15.3   | 31.2   | 20.3   |
| 8280.0 | 7803.4 | 8333.3 | 7903.3 | 6962.6 | 6980.8 | 7204.4 | 7339.0 | 8291.7 |
| 345.6  | 384.5  | 266.3  | 283.0  | 742.2  | 856.3  | 858.8  | 864.2  | 1120.5 |
| 6.4    | 4.2    | 6.9    | 3.5    | 2.6    | 3.3    | 2.6    | 5.3    | 1.6    |
| 192.7  | 162.5  | 233.4  | 164.4  | 124.7  | 136.1  | 117.1  | 182.3  | 118.6  |
| 326.9  | 314.7  | 698.0  | 418.5  | 6.1    | 16.2   | 15.3   | 6.6    | 259.7  |
| 5.8    | 7.7    | 13.6   | 4.4    | 6.1    | 4.2    | 6.6    | 11.8   | 8.5    |
| 8.9    | 11.9   | 12.3   | 9.4    | 29.9   | 21.9   | 40.0   | 37.5   | 126.1  |
| 16.9   | 21.1   | 14.7   | 12.9   | 13.3   | 7.5    | 6.2    | 10.4   | 12.4   |
| 10.9   | 11.4   | 17.2   | 14.8   | 12.9   | 12.3   | 10.6   | 13.3   | 27.5   |
| 7.6    | 3.2    | 12.6   | 9.5    | 12.5   | 16.2   | 11.7   | 10.6   | 10.4   |
| 0.5    | 0.6    | 4.6    | 0.9    | 0.7    | 0.8    | 0.8    | 0.4    | 0.9    |
| 0.8    | 1.3    | 1.2    | 0.5    | 2.6    | 6.9    | 3.8    | 0.8    | 1.1    |
| 2.6    | 4.3    | 0.9    | 4.6    | 3.0    | 0.5    | 0.6    | 0.4    | 2.3    |
| 1.3    | 1.7    | 2.8    | 3.2    | 2.0    | 1.1    | 20.5   | 14.1   | 2.0    |
| 12.4   | 4.8    | 16.3   | 7.6    | 0.9    | 5.3    | 6.1    | 3.8    | 14.4   |
| 0.8    | 1.0    | 1.1    | 1.0    | 0.8    | 0.6    | 0.9    | 0.8    | 1.8    |
| 1.8    | 4.4    | 4.0    | 0.7    | 0.9    | 3.5    | 1.1    | 0.6    | 1.1    |
| 124.4  | 127.9  | 112.8  | 123.0  | 44.1   | 47.4   | 57.7   | 58.0   | 48.0   |
| 101.4  | 96.6   | 95.4   | 92.4   | 37.4   | 30.7   | 37.8   | 35.8   | 35.6   |
| 2247.3 | 2162.2 | 2773.2 | 2080.5 | 646.8  | 558.6  | 624.6  | 694.3  | 972.4  |
| 6.2    | 7.7    | 4.3    | 5.6    | 1.3    | 1.4    | 3.1    | 7.1    | 10.2   |
| 20.3   | 24.3   | 29.5   | 20.7   | 55.7   | 45.9   | 49.3   | 64.7   | 60.4   |
| 1.5    | 1.8    | 2.6    | 2.7    | 1.8    | 6.0    | 5.7    | 4.1    | 4.4    |
| 3.4    | 5.8    | 5.6    | 17.8   | 13.2   | 26.6   | 23.4   | 10.9   | 30.3   |
| 0.4    | 0.3    | 0.5    | 0.7    | 0.3    | 0.3    | 1.5    | 5.0    | 2.6    |
| 138.0  | 118.2  | 198.2  | 95.7   | 192.9  | 174.5  | 257.7  | 276.5  | 238.8  |
| 15.7   | 5.0    | 15.2   | 12.5   | 36.9   | 26.6   | 48.4   | 45.7   | 42.0   |
| 15.6   | 12.2   | 24.3   | 14.0   | 51.0   | 40.4   | 55.2   | 66.2   | 55.6   |
| 27.6   | 26.0   | 21.0   | 21.8   | 53.7   | 51.0   | 54.1   | 67.8   | 57.8   |
| 13.0   | 9.9    | 10.9   | 10.7   | 68.6   | 53.2   | 72.9   | 82.4   | 50.7   |
| 7.3    | 4.9    | 6.6    | 4.7    | 64.4   | 71.3   | 84.0   | 108.4  | 34.3   |
| 1.7    | 1.6    | 2.2    | 2.0    | 37.7   | 29.4   | 38.4   | 41.7   | 6.0    |
| 12.4   | 8.8    | 34.5   | 16.4   | 39.3   | 46.2   | 51.0   | 64.8   | 35.7   |
| 10.5   | 12.5   | 9.7    | 13.9   | 6.8    | 2.2    | 10.1   | 12.8   | 5.2    |
| 3.1    | 5.7    | 2.6    | 4.4    | 6.5    | 6.7    | 4.4    | 2.8    | 9.3    |
| 3.0    | 15.1   | 4.3    | 3.1    | 20.8   | 29.3   | 22.6   | 5.4    | 9.6    |
| 170.9  | 146.1  | 243.0  | 137.9  | 230.0  | 153.7  | 211.0  | 247.1  | 247.4  |
| 2.4    | 3.0    | 2.2    | 1.7    | 2.4    | 1.9    | 0.5    | 0.5    | 3.6    |
| 4.8    | 5.5    | 5.6    | 11.4   | 10.0   | 8.8    | 10.0   | 9.0    | 9.7    |
| 33.6   | 46.4   | 37.6   | 19.4   | 2021.0 | 1862.1 | 1838.7 | 2255.1 | 912.3  |

|        |        |        |        |        |        |        |        |         |
|--------|--------|--------|--------|--------|--------|--------|--------|---------|
| 0.8    | 1.2    | 0.7    | 0.8    | 0.6    | 3.2    | 2.0    | 4.3    | 11.2    |
| 83.8   | 74.2   | 95.1   | 85.0   | 116.1  | 119.9  | 98.8   | 119.9  | 114.6   |
| 6.7    | 2.6    | 5.5    | 1.7    | 84.9   | 72.2   | 54.8   | 45.9   | 58.4    |
| 4391.3 | 4174.9 | 4873.4 | 4125.6 | 4708.4 | 5261.3 | 5024.0 | 5254.7 | 7185.3  |
| 4.1    | 5.7    | 7.9    | 7.9    | 8.1    | 7.4    | 14.8   | 18.9   | 19.5    |
| 1.7    | 2.3    | 2.8    | 1.7    | 20.8   | 12.3   | 21.1   | 19.1   | 10.8    |
| 13.7   | 11.4   | 18.7   | 16.0   | 17.6   | 6.9    | 11.7   | 6.5    | 18.5    |
| 5.3    | 14.5   | 6.9    | 4.0    | 2.8    | 3.4    | 10.7   | 7.2    | 6.7     |
| 0.7    | 0.6    | 1.0    | 0.5    | 0.8    | 0.6    | 5.1    | 4.1    | 3.4     |
| 611.0  | 558.1  | 746.0  | 549.2  | 84.7   | 97.6   | 109.5  | 109.8  | 62.2    |
| 0.8    | 1.9    | 1.0    | 0.7    | 3.4    | 0.5    | 1.8    | 4.9    | 5.7     |
| 28.7   | 37.1   | 18.0   | 17.1   | 45.8   | 64.4   | 35.6   | 47.9   | 14.9    |
| 37.4   | 52.7   | 30.5   | 36.8   | 55.4   | 68.1   | 51.2   | 55.2   | 19.2    |
| 54.0   | 46.8   | 39.8   | 39.7   | 53.6   | 84.2   | 62.9   | 82.3   | 23.1    |
| 3.2    | 1.4    | 0.7    | 1.1    | 1.8    | 1.3    | 1.0    | 1.3    | 1.9     |
| 458.1  | 416.5  | 674.9  | 341.7  | 364.5  | 443.3  | 359.3  | 406.7  | 379.1   |
| 8.1    | 10.2   | 8.4    | 12.5   | 6.1    | 12.6   | 4.6    | 11.5   | 11.9    |
| 14.6   | 8.5    | 4.2    | 4.3    | 3.8    | 8.9    | 10.3   | 3.0    | 5.4     |
| 4.4    | 3.6    | 2.5    | 3.8    | 1.5    | 0.6    | 1.8    | 0.8    | 1.8     |
| 6.8    | 12.3   | 8.8    | 4.5    | 10.0   | 9.8    | 6.3    | 0.9    | 9.5     |
| 21.6   | 15.5   | 28.6   | 14.8   | 83.2   | 76.9   | 105.3  | 84.8   | 438.8   |
| 17.2   | 15.7   | 25.7   | 18.0   | 23.5   | 19.5   | 23.2   | 32.8   | 31.0    |
| 0.9    | 0.5    | 2.0    | 1.0    | 2.5    | 1.2    | 1.5    | 0.5    | 3.3     |
| 25.4   | 23.6   | 20.9   | 27.5   | 58.1   | 46.6   | 50.4   | 47.3   | 50.0    |
| 2.9    | 3.4    | 2.5    | 1.4    | 9.5    | 9.0    | 15.0   | 24.6   | 2.6     |
| 0.8    | 0.6    | 3.0    | 1.1    | 17.5   | 15.9   | 13.3   | 27.5   | 7.3     |
| 6.1    | 6.0    | 3.6    | 2.8    | 6.8    | 3.1    | 2.0    | 3.6    | 2.4     |
| 113.4  | 119.1  | 120.4  | 131.4  | 105.2  | 139.4  | 103.9  | 89.7   | 112.6   |
| 5.1    | 7.9    | 4.6    | 1.1    | 0.8    | 3.1    | 1.5    | 0.3    | 11.6    |
| 3.4    | 3.9    | 3.2    | 3.8    | 1.2    | 1.6    | 11.8   | 17.6   | 1.3     |
| 101.2  | 94.2   | 132.4  | 101.4  | 104.0  | 102.6  | 118.7  | 92.9   | 144.6   |
| 6.5    | 12.7   | 7.6    | 7.6    | 4.4    | 6.6    | 5.8    | 14.2   | 15.4    |
| 891.9  | 823.8  | 1345.7 | 814.5  | 1051.2 | 891.2  | 905.0  | 1134.3 | 1005.1  |
| 229.4  | 212.2  | 289.8  | 232.2  | 314.1  | 319.2  | 353.3  | 333.6  | 666.5   |
| 0.9    | 0.9    | 1.5    | 1.4    | 1.2    | 0.5    | 1.2    | 0.8    | 1.1     |
| 7491.7 | 6984.1 | 9159.9 | 7420.2 | 7783.5 | 6787.9 | 7638.3 | 8237.4 | 10449.7 |
| 358.8  | 374.9  | 567.7  | 221.5  | 430.8  | 362.3  | 382.5  | 511.5  | 1.6     |
| 2.4    | 2.2    | 3.2    | 2.4    | 3.0    | 9.5    | 2.4    | 1.7    | 12.8    |
| 3.2    | 1.9    | 2.7    | 0.7    | 1.2    | 1.0    | 0.8    | 0.8    | 1.3     |
| 83.5   | 80.3   | 103.0  | 76.4   | 161.3  | 200.7  | 157.6  | 149.8  | 143.8   |
| 129.5  | 158.4  | 106.9  | 120.8  | 100.6  | 96.2   | 89.7   | 102.1  | 136.9   |
| 3.6    | 1.4    | 1.7    | 1.7    | 1.5    | 1.7    | 1.2    | 0.8    | 2.4     |
| 136.3  | 143.8  | 233.0  | 144.6  | 92.6   | 66.1   | 96.6   | 96.1   | 96.9    |
| 3.3    | 2.2    | 3.1    | 3.3    | 0.4    | 3.8    | 2.4    | 0.4    | 3.6     |
| 41.9   | 36.9   | 44.2   | 29.0   | 39.4   | 29.2   | 34.0   | 51.0   | 62.7    |
| 9.5    | 1.3    | 10.5   | 12.3   | 9.2    | 4.9    | 6.0    | 12.9   | 11.0    |
| 3.4    | 1.7    | 4.5    | 3.2    | 0.9    | 1.8    | 1.6    | 2.1    | 1.7     |
| 0.7    | 5.4    | 1.0    | 1.1    | 3.0    | 0.3    | 0.5    | 3.6    | 1.3     |
| 124.6  | 110.0  | 156.8  | 119.1  | 56.5   | 71.4   | 51.4   | 77.0   | 79.0    |
| 259.6  | 249.7  | 419.3  | 233.9  | 127.6  | 132.9  | 123.2  | 143.2  | 167.1   |
| 16.5   | 14.8   | 13.0   | 20.3   | 12.9   | 6.9    | 6.4    | 12.3   | 22.7    |
| 8.7    | 12.4   | 23.7   | 9.3    | 19.3   | 14.7   | 18.1   | 26.0   | 31.8    |
| 2.3    | 1.6    | 2.0    | 1.4    | 4.3    | 6.4    | 4.5    | 9.4    | 7.5     |



|        |        |        |        |        |        |        |        |        |
|--------|--------|--------|--------|--------|--------|--------|--------|--------|
| 3.0    | 2.0    | 4.4    | 2.5    | 3.1    | 2.0    | 1.8    | 3.6    | 2.1    |
| 15.9   | 12.7   | 9.8    | 14.9   | 7.0    | 4.4    | 8.0    | 5.5    | 10.5   |
| 6.7    | 6.1    | 15.2   | 1.5    | 2.1    | 3.2    | 5.0    | 10.7   | 3.1    |
| 0.8    | 2.4    | 1.3    | 7.1    | 1.6    | 1.1    | 5.5    | 1.4    | 1.8    |
| 1.6    | 1.0    | 5.3    | 1.5    | 6.4    | 1.5    | 13.3   | 3.1    | 8.0    |
| 16.8   | 3.6    | 14.2   | 6.0    | 18.8   | 18.9   | 23.8   | 26.6   | 19.5   |
| 7.9    | 13.6   | 6.5    | 3.9    | 245.5  | 252.7  | 281.0  | 301.7  | 225.8  |
| 1253.0 | 1210.9 | 1221.7 | 1057.4 | 991.7  | 1141.8 | 956.6  | 1153.2 | 457.4  |
| 15.5   | 24.9   | 21.5   | 11.3   | 20.8   | 21.2   | 31.3   | 36.4   | 21.5   |
| 66.2   | 59.6   | 93.5   | 58.8   | 94.9   | 75.5   | 101.6  | 98.5   | 93.2   |
| 7.6    | 14.7   | 21.7   | 14.3   | 13.7   | 9.0    | 12.9   | 14.4   | 19.2   |
| 11.7   | 4.2    | 10.8   | 17.5   | 11.6   | 7.9    | 12.7   | 11.9   | 13.5   |
| 4.7    | 5.4    | 7.2    | 4.7    | 4.3    | 6.3    | 4.6    | 0.6    | 1.5    |
| 1.0    | 2.4    | 1.4    | 2.7    | 0.8    | 1.1    | 0.4    | 0.8    | 0.7    |
| 1.3    | 1.3    | 2.0    | 2.1    | 0.9    | 2.7    | 1.1    | 1.5    | 2.2    |
| 3.8    | 7.3    | 7.5    | 3.3    | 14.7   | 11.5   | 21.1   | 20.3   | 19.3   |
| 54.3   | 53.8   | 92.2   | 57.4   | 32.6   | 29.3   | 29.8   | 32.6   | 40.3   |
| 94.6   | 62.4   | 195.4  | 76.5   | 84.4   | 100.3  | 93.2   | 122.9  | 135.8  |
| 6.3    | 4.2    | 8.2    | 2.3    | 14.5   | 12.8   | 13.4   | 22.7   | 8.0    |
| 142.2  | 96.4   | 458.0  | 141.6  | 4.0    | 4.7    | 2.2    | 0.4    | 2.1    |
| 5.0    | 5.8    | 7.0    | 1.0    | 6.4    | 6.9    | 1.1    | 11.1   | 9.1    |
| 399.7  | 373.4  | 441.3  | 330.5  | 1190.8 | 1045.5 | 1560.9 | 1539.4 | 380.3  |
| 21.1   | 31.3   | 15.6   | 26.1   | 1.6    | 0.8    | 1.6    | 0.5    | 6.1    |
| 10.9   | 9.7    | 15.0   | 2.9    | 712.8  | 541.3  | 680.2  | 799.1  | 165.0  |
| 231.8  | 211.4  | 269.5  | 194.4  | 164.3  | 151.5  | 134.3  | 182.0  | 135.9  |
| 31.5   | 47.6   | 2.7    | 21.1   | 0.2    | 2.1    | 0.5    | 3.5    | 0.9    |
| 6.9    | 0.9    | 3.3    | 3.2    | 3.1    | 4.3    | 2.9    | 0.6    | 5.6    |
| 140.4  | 109.1  | 92.3   | 87.2   | 136.5  | 161.2  | 135.3  | 155.5  | 90.5   |
| 2.5    | 2.0    | 13.0   | 6.6    | 1.5    | 6.9    | 10.5   | 2.8    | 7.3    |
| 22.9   | 29.0   | 24.5   | 20.4   | 74.0   | 63.1   | 60.8   | 69.2   | 64.8   |
| 79.5   | 83.4   | 75.8   | 68.6   | 228.5  | 214.7  | 210.4  | 241.1  | 165.0  |
| 85.3   | 77.3   | 82.2   | 78.8   | 59.4   | 66.8   | 47.1   | 65.9   | 135.3  |
| 1.5    | 1.2    | 7.2    | 3.2    | 8.6    | 17.3   | 5.3    | 12.6   | 5.6    |
| 13.2   | 8.5    | 7.1    | 12.8   | 3.4    | 2.0    | 3.2    | 5.9    | 13.7   |
| 0.5    | 2.2    | 6.8    | 5.8    | 4.6    | 3.6    | 5.5    | 1.7    | 4.7    |
| 0.7    | 0.8    | 0.6    | 3.3    | 0.8    | 1.0    | 0.6    | 2.1    | 1.9    |
| 1.3    | 1.1    | 1.4    | 1.6    | 0.6    | 1.0    | 0.7    | 0.7    | 2.1    |
| 32.9   | 40.7   | 50.6   | 36.3   | 36.8   | 28.8   | 38.9   | 57.4   | 50.4   |
| 15.6   | 11.7   | 21.8   | 16.0   | 14.3   | 10.0   | 11.2   | 20.9   | 14.0   |
| 7.1    | 4.2    | 21.4   | 10.5   | 6.2    | 7.8    | 2.7    | 11.8   | 21.0   |
| 0.8    | 3.6    | 6.7    | 5.5    | 1.2    | 4.4    | 5.4    | 1.2    | 16.3   |
| 36.3   | 34.9   | 45.6   | 23.6   | 51.3   | 19.7   | 48.8   | 62.8   | 67.7   |
| 726.3  | 956.0  | 764.3  | 732.7  | 647.1  | 470.5  | 509.8  | 542.5  | 1399.3 |
| 16.3   | 8.1    | 16.0   | 10.3   | 9.7    | 5.5    | 12.9   | 21.3   | 19.1   |
| 2.0    | 2.9    | 2.6    | 1.6    | 21.5   | 31.2   | 22.4   | 29.2   | 31.9   |
| 0.8    | 1.6    | 1.2    | 2.3    | 0.6    | 0.6    | 0.7    | 0.8    | 1.5    |
| 3.0    | 2.2    | 8.5    | 3.8    | 5.5    | 5.0    | 5.3    | 2.5    | 5.0    |
| 275.6  | 256.2  | 518.8  | 272.8  | 952.0  | 705.1  | 927.9  | 1179.1 | 725.6  |
| 2.6    | 1.0    | 3.6    | 1.5    | 6.5    | 9.3    | 2.1    | 2.3    | 2.4    |
| 1321.6 | 1211.6 | 1410.4 | 1241.1 | 1022.0 | 1000.4 | 1052.3 | 1263.7 | 1063.1 |
| 40.0   | 44.8   | 49.6   | 25.3   | 37.9   | 49.8   | 51.4   | 47.5   | 86.4   |
| 148.8  | 150.9  | 151.0  | 128.4  | 128.6  | 110.9  | 119.5  | 154.3  | 209.2  |
| 14.4   | 20.3   | 7.9    | 12.5   | 10.4   | 11.0   | 13.0   | 3.4    | 17.8   |

|        |        |        |        |        |        |        |        |        |
|--------|--------|--------|--------|--------|--------|--------|--------|--------|
| 361.8  | 388.5  | 760.2  | 532.2  | 1829.9 | 1705.8 | 976.8  | 1601.3 | 1997.4 |
| 8.8    | 5.4    | 2.5    | 3.8    | 4.1    | 7.3    | 5.5    | 8.2    | 6.4    |
| 248.2  | 329.9  | 118.8  | 311.6  | 355.8  | 328.8  | 416.6  | 448.8  | 167.3  |
| 1.6    | 1.5    | 3.0    | 1.4    | 3.6    | 2.6    | 4.3    | 5.3    | 3.6    |
| 11.4   | 12.4   | 18.7   | 10.1   | 9.6    | 10.9   | 10.8   | 8.2    | 15.7   |
| 1.8    | 1.7    | 2.8    | 4.6    | 1.2    | 1.4    | 3.5    | 3.0    | 3.0    |
| 6.7    | 5.3    | 6.5    | 2.3    | 10.8   | 5.9    | 10.6   | 4.8    | 18.5   |
| 8.4    | 13.8   | 5.0    | 1.5    | 9.1    | 8.7    | 7.0    | 12.3   | 8.1    |
| 368.5  | 389.3  | 506.7  | 412.0  | 94.6   | 67.5   | 87.7   | 115.7  | 97.8   |
| 68.3   | 58.2   | 79.9   | 64.0   | 53.2   | 46.7   | 62.9   | 65.8   | 100.0  |
| 4.8    | 6.9    | 8.5    | 3.2    | 4.9    | 2.9    | 4.0    | 6.7    | 5.6    |
| 28.2   | 30.7   | 39.3   | 18.1   | 95.5   | 80.5   | 105.8  | 108.5  | 101.7  |
| 1.9    | 0.9    | 2.9    | 2.3    | 9.3    | 8.7    | 17.6   | 12.0   | 21.4   |
| 1.7    | 3.7    | 7.8    | 2.2    | 1.8    | 4.0    | 3.5    | 5.1    | 4.3    |
| 2.7    | 1.3    | 1.5    | 5.4    | 7.1    | 10.2   | 9.6    | 0.5    | 2.6    |
| 23.4   | 5.4    | 46.5   | 15.2   | 27.2   | 16.5   | 20.1   | 26.3   | 96.0   |
| 1.2    | 1.4    | 2.1    | 1.4    | 1.2    | 1.5    | 1.9    | 3.1    | 7.0    |
| 3.1    | 1.8    | 3.9    | 1.2    | 1.5    | 8.4    | 7.1    | 6.0    | 1.1    |
| 350.7  | 328.5  | 446.5  | 364.8  | 603.9  | 797.3  | 662.0  | 685.6  | 552.7  |
| 441.8  | 427.0  | 451.9  | 415.6  | 130.0  | 178.5  | 133.6  | 147.7  | 450.3  |
| 1.6    | 0.7    | 1.4    | 2.4    | 0.8    | 0.3    | 2.0    | 0.2    | 4.3    |
| 1.2    | 0.5    | 3.0    | 2.9    | 151.1  | 172.5  | 160.9  | 155.6  | 1.8    |
| 6.4    | 3.6    | 4.1    | 4.4    | 11.1   | 16.7   | 17.4   | 14.9   | 2.9    |
| 2.0    | 3.3    | 5.0    | 0.5    | 8.1    | 4.9    | 10.4   | 8.6    | 3.1    |
| 4.6    | 9.6    | 7.5    | 4.3    | 4.5    | 2.3    | 5.1    | 9.8    | 5.1    |
| 35.8   | 36.7   | 37.9   | 31.7   | 21.1   | 3.0    | 12.7   | 26.4   | 20.8   |
| 4.5    | 4.5    | 9.0    | 4.1    | 4.0    | 4.8    | 6.4    | 5.6    | 9.5    |
| 5.8    | 2.9    | 5.7    | 4.2    | 6.4    | 1.8    | 2.5    | 1.9    | 22.3   |
| 1.1    | 1.1    | 1.3    | 1.6    | 1.0    | 1.3    | 1.2    | 1.3    | 2.1    |
| 5203.3 | 4757.6 | 6191.0 | 5117.8 | 5424.2 | 5668.7 | 5535.8 | 5832.2 | 8340.7 |
| 11.2   | 10.5   | 6.0    | 6.6    | 11.2   | 9.2    | 17.3   | 16.0   | 80.5   |
| 7.6    | 7.8    | 11.2   | 7.4    | 3.7    | 5.9    | 2.4    | 6.1    | 12.3   |
| 1.4    | 1.2    | 1.0    | 0.6    | 0.7    | 1.1    | 1.7    | 1.3    | 6.1    |
| 4.1    | 4.2    | 6.1    | 1.1    | 5.9    | 3.3    | 1.7    | 8.9    | 2.4    |
| 1.0    | 1.6    | 1.0    | 1.5    | 3.3    | 5.6    | 0.7    | 7.5    | 1.8    |
| 67.5   | 57.3   | 71.0   | 55.1   | 29.8   | 28.3   | 33.7   | 42.1   | 14.9   |
| 2.2    | 9.2    | 4.6    | 5.1    | 28.2   | 18.7   | 14.9   | 24.8   | 7.8    |
| 86.6   | 79.4   | 103.4  | 93.7   | 35.6   | 33.1   | 19.1   | 36.0   | 20.2   |
| 5.2    | 3.5    | 6.3    | 5.3    | 0.5    | 1.4    | 4.7    | 8.0    | 8.0    |
| 31.3   | 22.2   | 42.3   | 26.2   | 24.0   | 18.7   | 31.3   | 22.1   | 41.5   |
| 2.8    | 3.0    | 2.5    | 2.3    | 1.7    | 1.6    | 2.1    | 2.7    | 7.7    |
| 34.4   | 40.2   | 42.8   | 35.6   | 64.9   | 69.2   | 82.5   | 90.8   | 54.6   |
| 4.7    | 5.8    | 4.4    | 2.8    | 31.4   | 37.0   | 32.4   | 34.8   | 6.0    |
| 812.2  | 741.7  | 1282.1 | 805.7  | 1350.3 | 1130.2 | 1254.0 | 1498.8 | 1100.6 |
| 19.8   | 21.8   | 43.4   | 24.1   | 33.2   | 25.5   | 26.3   | 41.5   | 38.4   |
| 1291.6 | 1157.3 | 1636.7 | 1111.6 | 464.9  | 443.3  | 468.7  | 520.9  | 1342.7 |
| 78.6   | 78.5   | 97.1   | 86.9   | 150.4  | 142.5  | 146.2  | 173.9  | 234.7  |
| 1573.8 | 1513.3 | 2344.4 | 1553.4 | 834.9  | 776.7  | 696.8  | 906.7  | 1006.5 |
| 3.4    | 2.6    | 7.0    | 2.8    | 6.5    | 6.1    | 0.9    | 2.5    | 4823.4 |
| 53.8   | 50.8   | 64.0   | 51.0   | 12.1   | 28.8   | 23.5   | 5.2    | 19.0   |
| 4.9    | 0.8    | 4.6    | 1.2    | 2.6    | 2.4    | 4.2    | 1.1    | 3.3    |
| 2617.5 | 2567.6 | 3419.4 | 2405.3 | 5139.6 | 5585.0 | 5436.8 | 5953.5 | 5096.3 |
| 1.5    | 4.9    | 2.6    | 4.8    | 6.0    | 0.9    | 4.5    | 1.9    | 3.4    |

|        |        |        |        |        |        |        |        |         |
|--------|--------|--------|--------|--------|--------|--------|--------|---------|
| 74.1   | 67.5   | 59.3   | 49.2   | 69.4   | 62.1   | 62.9   | 58.8   | 99.7    |
| 36.8   | 20.8   | 37.2   | 28.2   | 89.4   | 76.9   | 60.8   | 58.1   | 123.4   |
| 10.5   | 23.1   | 19.6   | 24.3   | 24.6   | 23.3   | 22.2   | 51.7   | 40.0    |
| 55.1   | 45.9   | 44.3   | 43.2   | 54.0   | 51.6   | 56.7   | 74.5   | 74.1    |
| 2.6    | 6.8    | 12.1   | 4.3    | 6.4    | 5.0    | 2.9    | 8.3    | 8.1     |
| 0.6    | 0.8    | 1.5    | 1.8    | 2.8    | 3.1    | 4.0    | 0.6    | 7.4     |
| 15.1   | 20.4   | 7.5    | 15.0   | 12.6   | 5.6    | 3.0    | 3.9    | 3.9     |
| 126.2  | 116.6  | 269.8  | 118.4  | 528.4  | 342.5  | 391.7  | 521.0  | 568.7   |
| 3.9    | 1.7    | 4.4    | 4.6    | 2.3    | 0.7    | 0.4    | 0.5    | 5.4     |
| 7.9    | 14.3   | 16.6   | 11.1   | 5.8    | 10.4   | 1.8    | 8.4    | 14.6    |
| 3.3    | 1.6    | 0.6    | 2.0    | 1.3    | 2.6    | 2.9    | 0.2    | 0.2     |
| 3.4    | 2.6    | 3.3    | 1.4    | 2.5    | 5.4    | 5.0    | 0.6    | 0.9     |
| 4.5    | 5.8    | 4.8    | 5.5    | 3.9    | 5.9    | 4.9    | 8.6    | 8.0     |
| 1.0    | 0.5    | 0.9    | 0.4    | 1.3    | 2.4    | 0.9    | 1.2    | 5.1     |
| 2.9    | 3.8    | 11.5   | 1.6    | 9.4    | 12.2   | 5.2    | 9.4    | 23.4    |
| 41.4   | 53.2   | 75.4   | 41.0   | 92.2   | 181.6  | 59.9   | 73.7   | 95.9    |
| 201.5  | 217.4  | 222.0  | 191.0  | 2627.3 | 3599.1 | 2454.4 | 2783.3 | 1822.5  |
| 169.5  | 139.1  | 151.2  | 120.3  | 2441.8 | 3310.6 | 2323.1 | 3007.4 | 1347.3  |
| 146.7  | 113.2  | 160.3  | 71.6   | 1349.3 | 1941.1 | 1195.0 | 1710.1 | 787.1   |
| 18.8   | 15.1   | 8.2    | 14.5   | 20.4   | 2.6    | 7.3    | 8.1    | 6.8     |
| 1.4    | 1.6    | 1.7    | 1.2    | 1.8    | 1.1    | 1.3    | 1.2    | 2.0     |
| 1.0    | 0.8    | 6.3    | 1.0    | 3.5    | 3.2    | 3.0    | 2.1    | 0.7     |
| 41.3   | 48.6   | 32.5   | 57.5   | 7.9    | 12.9   | 10.4   | 3.8    | 17.3    |
| 142.9  | 127.5  | 151.1  | 141.7  | 325.7  | 413.3  | 397.0  | 459.4  | 87.9    |
| 199.8  | 222.1  | 272.5  | 212.7  | 272.0  | 242.4  | 237.6  | 260.5  | 219.2   |
| 228.6  | 220.1  | 283.9  | 218.1  | 327.8  | 335.0  | 313.4  | 391.0  | 302.1   |
| 19.3   | 12.1   | 31.9   | 13.9   | 171.7  | 97.7   | 240.1  | 207.4  | 98.8    |
| 39.1   | 40.7   | 54.8   | 38.2   | 113.8  | 97.8   | 122.4  | 127.9  | 116.4   |
| 15.3   | 18.3   | 25.0   | 14.1   | 12.9   | 13.2   | 14.9   | 15.6   | 33.1    |
| 7303.6 | 6931.7 | 8400.2 | 7211.7 | 8845.1 | 9118.6 | 9084.8 | 9263.8 | 11403.0 |
| 110.9  | 114.1  | 170.0  | 105.4  | 150.2  | 169.5  | 172.6  | 179.7  | 88.6    |
| 15.6   | 12.2   | 12.4   | 18.8   | 7.1    | 10.2   | 3.7    | 15.0   | 21.2    |
| 3.9    | 3.3    | 4.4    | 2.1    | 6.3    | 2.9    | 1.7    | 6.6    | 2.5     |
| 21.8   | 22.3   | 18.5   | 12.9   | 16.4   | 4.5    | 11.4   | 13.2   | 118.2   |
| 184.8  | 157.8  | 332.9  | 194.0  | 306.1  | 310.0  | 283.1  | 348.5  | 227.4   |
| 17.2   | 21.6   | 34.2   | 33.4   | 17.1   | 5.6    | 22.2   | 38.6   | 18.1    |
| 9.8    | 14.3   | 13.1   | 9.8    | 11.4   | 5.8    | 13.7   | 5.7    | 2.2     |
| 2.3    | 1.9    | 3.3    | 2.7    | 3.9    | 2.8    | 2.4    | 6.5    | 2.2     |
| 23.8   | 18.6   | 27.3   | 21.1   | 23.3   | 23.6   | 22.3   | 32.2   | 44.2    |
| 482.0  | 405.0  | 566.8  | 465.2  | 35.7   | 71.8   | 71.7   | 50.2   | 46.6    |
| 15.3   | 13.8   | 14.0   | 10.5   | 11.4   | 5.7    | 10.8   | 9.5    | 16.2    |
| 36.4   | 28.5   | 43.6   | 35.3   | 30.4   | 27.7   | 29.0   | 30.4   | 38.3    |
| 6.4    | 7.0    | 11.0   | 9.8    | 79.0   | 51.9   | 58.8   | 74.1   | 1.1     |
| 1.5    | 3.2    | 4.0    | 2.1    | 1.7    | 2.3    | 2.1    | 0.3    | 3.0     |
| 2.5    | 1.8    | 6.0    | 19.3   | 55.8   | 49.5   | 37.6   | 76.5   | 11.0    |
| 290.4  | 283.2  | 442.3  | 319.6  | 220.2  | 218.2  | 237.6  | 254.7  | 633.4   |
| 1484.0 | 1617.9 | 794.7  | 1196.0 | 98.1   | 103.1  | 108.5  | 133.0  | 73.1    |
| 1.5    | 1.3    | 1.9    | 1.5    | 1.5    | 1.2    | 1.3    | 1.3    | 1.9     |
| 188.6  | 164.3  | 251.4  | 174.9  | 201.4  | 222.5  | 187.8  | 250.3  | 164.3   |
| 1.3    | 1.6    | 10.8   | 2.6    | 3.6    | 3.6    | 6.0    | 5.3    | 5.5     |
| 373.2  | 362.3  | 468.1  | 334.9  | 458.5  | 402.4  | 465.1  | 527.8  | 246.5   |
| 22.6   | 16.6   | 22.1   | 12.3   | 1.3    | 10.5   | 9.9    | 17.6   | 594.9   |
| 13.5   | 15.1   | 19.2   | 13.3   | 5.1    | 5.0    | 7.1    | 10.1   | 14.2    |

|        |        |        |        |        |        |        |        |        |
|--------|--------|--------|--------|--------|--------|--------|--------|--------|
| 119.5  | 121.4  | 135.2  | 134.0  | 192.3  | 201.7  | 236.3  | 233.7  | 126.7  |
| 2.4    | 2.0    | 1.2    | 2.8    | 3.8    | 4.0    | 3.1    | 4.9    | 4.6    |
| 1.8    | 3.1    | 2.4    | 0.9    | 0.4    | 0.7    | 1.0    | 2.0    | 3.4    |
| 690.8  | 627.2  | 1144.5 | 767.1  | 210.3  | 211.0  | 215.8  | 241.8  | 222.6  |
| 5.3    | 4.7    | 7.2    | 6.4    | 5.6    | 4.0    | 5.1    | 1.6    | 7.0    |
| 0.9    | 0.4    | 1.8    | 2.1    | 2.5    | 3.1    | 8.5    | 0.9    | 10.5   |
| 16.0   | 20.4   | 25.2   | 16.2   | 39.7   | 40.8   | 44.1   | 49.0   | 119.0  |
| 1.5    | 4.4    | 1.7    | 0.6    | 107.2  | 60.8   | 81.6   | 87.3   | 73.5   |
| 230.8  | 195.1  | 357.4  | 172.4  | 215.8  | 212.0  | 230.5  | 230.7  | 264.1  |
| 267.7  | 212.7  | 397.9  | 241.7  | 229.0  | 165.6  | 206.2  | 259.0  | 314.1  |
| 115.1  | 112.7  | 282.7  | 158.4  | 236.9  | 164.5  | 238.2  | 313.3  | 176.8  |
| 23.3   | 14.1   | 25.5   | 18.2   | 13.1   | 11.8   | 9.8    | 7.5    | 27.2   |
| 359.2  | 366.0  | 430.3  | 313.2  | 100.6  | 82.3   | 123.3  | 126.1  | 109.3  |
| 4.4    | 5.9    | 8.7    | 2.4    | 4.8    | 5.6    | 6.8    | 5.8    | 13.6   |
| 129.1  | 89.1   | 181.1  | 111.7  | 14.9   | 9.5    | 20.0   | 29.9   | 24.0   |
| 3.2    | 2.9    | 3.6    | 2.8    | 4.6    | 7.3    | 1.4    | 5.9    | 10.0   |
| 2.7    | 2.3    | 4.2    | 3.7    | 3.7    | 8.3    | 3.8    | 2.0    | 3.9    |
| 3.3    | 3.2    | 2.6    | 7.3    | 5.3    | 3.9    | 10.8   | 4.4    | 3.9    |
| 51.7   | 56.1   | 54.5   | 40.5   | 74.2   | 56.1   | 52.5   | 76.6   | 59.3   |
| 4.6    | 4.9    | 8.6    | 7.5    | 1.1    | 1.7    | 2.4    | 11.9   | 1.0    |
| 0.9    | 0.8    | 1.3    | 1.1    | 0.9    | 0.9    | 0.5    | 1.9    | 0.7    |
| 7.9    | 19.1   | 9.9    | 19.1   | 5.6    | 7.3    | 20.6   | 11.0   | 13.2   |
| 34.1   | 21.7   | 12.3   | 31.3   | 24.1   | 10.0   | 16.5   | 32.7   | 15.0   |
| 2.3    | 8.6    | 3.6    | 3.4    | 9.4    | 1.2    | 8.5    | 3.2    | 7.1    |
| 20.6   | 24.1   | 25.2   | 23.3   | 41.2   | 31.4   | 33.4   | 47.2   | 49.1   |
| 0.9    | 1.1    | 1.8    | 1.8    | 5.6    | 6.0    | 0.8    | 9.3    | 2.6    |
| 7.2    | 7.0    | 0.8    | 3.4    | 2.6    | 3.9    | 5.1    | 3.4    | 2.0    |
| 108.8  | 158.4  | 210.7  | 138.0  | 158.5  | 186.3  | 178.7  | 198.5  | 113.1  |
| 198.8  | 171.3  | 328.7  | 192.0  | 504.7  | 443.4  | 526.3  | 583.1  | 832.8  |
| 222.6  | 216.9  | 404.9  | 242.8  | 496.0  | 367.9  | 488.4  | 535.1  | 829.3  |
| 226.7  | 252.3  | 320.6  | 270.8  | 346.3  | 253.0  | 455.6  | 327.2  | 43.7   |
| 107.9  | 107.8  | 70.3   | 78.3   | 5.3    | 1.1    | 1.1    | 6.3    | 3.7    |
| 22.8   | 43.4   | 7.6    | 23.5   | 4.1    | 6.2    | 1.1    | 1.1    | 9.5    |
| 108.9  | 101.2  | 175.3  | 138.9  | 870.6  | 904.5  | 762.8  | 954.2  | 309.1  |
| 2944.9 | 3336.7 | 2560.8 | 3060.0 | 167.0  | 300.9  | 180.7  | 196.6  | 525.4  |
| 0.5    | 1.6    | 0.4    | 0.3    | 0.3    | 0.1    | 3.3    | 0.4    | 0.4    |
| 0.8    | 7.3    | 5.0    | 1.7    | 47.4   | 52.7   | 49.4   | 61.1   | 16.1   |
| 4.1    | 9.1    | 20.3   | 9.3    | 47.2   | 74.3   | 20.0   | 35.4   | 420.5  |
| 11.7   | 3.2    | 6.5    | 4.2    | 2.1    | 1.6    | 2.1    | 1.9    | 9.0    |
| 49.0   | 46.2   | 42.2   | 38.5   | 15.9   | 25.8   | 18.5   | 19.2   | 20.8   |
| 2.4    | 5.0    | 8.7    | 4.5    | 1.2    | 2.6    | 2.1    | 1.4    | 9.7    |
| 16.4   | 13.4   | 20.8   | 18.4   | 76.7   | 164.5  | 52.8   | 77.2   | 13.3   |
| 7.6    | 5.9    | 17.0   | 4.9    | 1.3    | 4.5    | 2.6    | 1.7    | 7.3    |
| 719.4  | 702.0  | 915.5  | 730.9  | 1592.4 | 1479.9 | 1670.5 | 1785.0 | 3051.5 |
| 20.0   | 16.0   | 25.4   | 11.4   | 16.5   | 16.4   | 11.1   | 21.8   | 7.6    |
| 29.1   | 24.5   | 29.5   | 31.2   | 14.3   | 21.5   | 16.9   | 14.7   | 15.7   |
| 111.1  | 104.1  | 150.9  | 111.8  | 247.0  | 245.6  | 247.5  | 312.6  | 99.4   |
| 28.8   | 15.7   | 42.1   | 17.3   | 44.0   | 30.6   | 41.5   | 45.1   | 42.1   |
| 1.6    | 1.4    | 6.4    | 1.8    | 1.0    | 1.2    | 1.4    | 0.8    | 1.1    |
| 554.7  | 461.2  | 995.3  | 608.3  | 573.3  | 465.5  | 550.0  | 620.0  | 451.1  |
| 3.2    | 5.6    | 10.2   | 3.9    | 6.4    | 1.0    | 8.0    | 1.8    | 5.1    |
| 3.4    | 6.8    | 1.0    | 1.1    | 1.0    | 4.4    | 1.3    | 7.5    | 5.4    |
| 0.5    | 0.5    | 0.9    | 0.6    | 6.6    | 0.7    | 2.4    | 3.6    | 4.4    |

|        |        |        |        |        |        |        |        |        |
|--------|--------|--------|--------|--------|--------|--------|--------|--------|
| 2.1    | 5.1    | 1.1    | 1.2    | 21.3   | 14.5   | 36.7   | 46.9   | 3.3    |
| 10.8   | 2.3    | 12.4   | 13.9   | 13.8   | 8.5    | 8.9    | 25.0   | 43.9   |
| 88.7   | 62.7   | 87.2   | 60.9   | 10.8   | 10.4   | 14.9   | 17.8   | 22.5   |
| 122.4  | 113.7  | 228.6  | 113.0  | 252.1  | 258.7  | 250.5  | 322.8  | 456.8  |
| 1294.4 | 1086.7 | 1951.9 | 1295.0 | 2468.5 | 2120.3 | 2433.0 | 2656.6 | 2902.0 |
| 2.4    | 1.3    | 10.9   | 3.4    | 5.3    | 1.1    | 1.8    | 12.1   | 7.5    |
| 0.6    | 0.7    | 1.4    | 1.2    | 0.9    | 1.6    | 0.9    | 1.4    | 1.4    |
| 2.9    | 1.5    | 1.2    | 7.9    | 1.1    | 3.9    | 1.3    | 1.7    | 5.1    |
| 2.1    | 5.9    | 5.5    | 0.7    | 3.4    | 4.3    | 4.2    | 9.5    | 1.5    |
| 7403.5 | 7189.2 | 8151.7 | 6903.7 | 6762.8 | 7421.0 | 7186.9 | 7127.7 | 8690.7 |
| 1798.7 | 1501.2 | 2788.6 | 1527.8 | 629.4  | 794.1  | 619.3  | 758.7  | 991.1  |
| 43.1   | 42.7   | 70.8   | 36.2   | 27.6   | 21.6   | 35.6   | 31.0   | 57.6   |
| 2.4    | 3.9    | 1.5    | 6.3    | 0.9    | 1.1    | 2.1    | 4.9    | 3.7    |
| 1.3    | 2.1    | 8.6    | 0.9    | 1.8    | 2.0    | 2.4    | 0.8    | 8.0    |
| 3.4    | 2.0    | 7.9    | 3.0    | 2.8    | 0.9    | 4.4    | 1.4    | 1.8    |
| 4.4    | 5.4    | 3.4    | 2.1    | 3.1    | 4.9    | 3.9    | 8.3    | 3.1    |
| 0.5    | 0.9    | 1.8    | 0.9    | 1.1    | 1.7    | 1.0    | 2.6    | 2.8    |
| 5.8    | 2.6    | 13.4   | 3.0    | 7.3    | 4.7    | 11.2   | 11.7   | 13.4   |
| 0.8    | 2.7    | 1.3    | 1.3    | 1.3    | 2.5    | 0.9    | 0.6    | 1.2    |
| 2.3    | 1.3    | 3.2    | 2.3    | 2.3    | 4.7    | 6.1    | 3.1    | 2.0    |
| 2.8    | 5.0    | 5.9    | 3.3    | 2.0    | 0.7    | 1.0    | 1.5    | 1.8    |
| 8.4    | 14.2   | 20.7   | 2.2    | 11.5   | 10.1   | 16.0   | 8.1    | 17.9   |
| 0.6    | 0.5    | 0.6    | 0.8    | 0.4    | 0.7    | 0.7    | 0.3    | 1.1    |
| 3.6    | 6.0    | 8.2    | 6.0    | 14.0   | 3.1    | 12.1   | 5.3    | 8.9    |
| 3.1    | 2.9    | 4.4    | 2.7    | 1.8    | 1.9    | 3.6    | 3.6    | 3.4    |
| 2.1    | 5.4    | 3.1    | 6.2    | 1.2    | 4.2    | 5.5    | 1.0    | 9.0    |
| 1.7    | 4.3    | 7.1    | 2.2    | 2.6    | 1.2    | 4.6    | 0.7    | 1.0    |
| 10.6   | 4.6    | 11.7   | 2.0    | 5.4    | 5.1    | 9.4    | 8.0    | 2.3    |
| 0.9    | 2.1    | 3.1    | 2.9    | 0.7    | 0.5    | 0.5    | 0.6    | 2.0    |
| 8.7    | 3.4    | 14.3   | 3.3    | 6.7    | 6.7    | 5.9    | 9.2    | 2.7    |
| 1.4    | 1.4    | 0.9    | 1.3    | 1.0    | 1.6    | 1.3    | 0.9    | 1.8    |
| 208.2  | 221.3  | 194.2  | 148.2  | 494.7  | 537.1  | 443.6  | 496.3  | 918.9  |
| 22.2   | 11.4   | 30.9   | 9.2    | 9.3    | 10.0   | 17.8   | 23.1   | 22.0   |
| 15.9   | 6.7    | 12.3   | 10.4   | 3460.3 | 2472.7 | 3823.3 | 4188.2 | 342.9  |
| 56.8   | 55.9   | 61.8   | 91.7   | 45.6   | 56.9   | 47.7   | 52.3   | 198.1  |
| 4.6    | 3.9    | 2.2    | 1.8    | 1.8    | 0.4    | 1.4    | 4.9    | 1.4    |
| 48.4   | 48.7   | 57.9   | 77.0   | 94.7   | 89.1   | 85.8   | 89.9   | 420.3  |
| 2879.0 | 2477.9 | 5349.6 | 3554.4 | 25.0   | 20.5   | 31.4   | 35.5   | 28.4   |
| 1499.0 | 1121.8 | 2012.0 | 1154.7 | 60.6   | 55.7   | 45.3   | 56.9   | 969.4  |
| 1.2    | 1.3    | 1.7    | 1.2    | 1.0    | 0.9    | 1.0    | 2.6    | 1.4    |
| 11.4   | 15.7   | 20.3   | 12.8   | 15.8   | 18.6   | 19.7   | 18.3   | 17.1   |
| 28.7   | 16.7   | 44.6   | 34.4   | 26.2   | 25.2   | 26.1   | 27.6   | 33.5   |
| 1303.4 | 1202.1 | 1972.1 | 1241.0 | 2387.6 | 2237.6 | 2564.5 | 2740.8 | 2029.1 |
| 12.6   | 18.9   | 36.5   | 21.2   | 83.8   | 123.8  | 91.7   | 100.8  | 45.5   |
| 86.9   | 96.0   | 72.1   | 67.3   | 54.8   | 55.6   | 49.8   | 57.2   | 50.3   |
| 4026.0 | 3695.0 | 3958.0 | 3810.6 | 4249.6 | 4647.3 | 4346.4 | 4603.1 | 6598.4 |
| 12.1   | 11.9   | 11.6   | 9.5    | 5.4    | 9.1    | 4.1    | 9.4    | 8.3    |
| 13.7   | 11.0   | 12.9   | 4.9    | 22.4   | 14.3   | 24.9   | 29.2   | 14.6   |
| 6.5    | 2.3    | 4.8    | 3.6    | 180.9  | 102.9  | 163.9  | 208.4  | 100.1  |
| 156.8  | 221.0  | 130.5  | 144.8  | 1134.6 | 1148.7 | 1067.6 | 1359.4 | 469.8  |
| 370.5  | 320.7  | 608.9  | 361.6  | 346.7  | 347.1  | 505.0  | 458.8  | 864.3  |
| 20.0   | 22.7   | 28.0   | 15.5   | 8.0    | 2.7    | 12.9   | 8.4    | 29.4   |
| 0.8    | 0.8    | 0.8    | 0.7    | 0.8    | 1.9    | 1.6    | 1.8    | 1272.5 |

|        |        |        |        |        |        |        |        |        |
|--------|--------|--------|--------|--------|--------|--------|--------|--------|
| 61.3   | 88.0   | 59.5   | 59.4   | 898.7  | 861.7  | 811.8  | 946.9  | 397.8  |
| 198.8  | 177.8  | 221.8  | 175.4  | 215.7  | 231.2  | 228.7  | 260.9  | 97.8   |
| 7.1    | 4.3    | 10.0   | 4.3    | 21.0   | 20.0   | 27.9   | 7.1    | 12.3   |
| 1218.4 | 1239.7 | 1277.7 | 983.9  | 723.4  | 590.2  | 623.8  | 773.8  | 912.1  |
| 11.9   | 10.6   | 7.6    | 13.2   | 4.9    | 9.1    | 1.0    | 2.7    | 2.4    |
| 1.5    | 2.5    | 4.4    | 2.4    | 2.1    | 2.7    | 2.3    | 0.5    | 3.0    |
| 107.4  | 98.1   | 118.6  | 103.9  | 115.5  | 103.7  | 207.5  | 146.5  | 117.4  |
| 6.8    | 2.7    | 5.9    | 3.9    | 1.1    | 1.6    | 2.3    | 1.5    | 31.7   |
| 1493.1 | 1583.2 | 1401.9 | 1498.7 | 1797.1 | 1733.4 | 2044.1 | 2268.7 | 617.2  |
| 39.7   | 33.4   | 44.4   | 46.4   | 28.3   | 17.8   | 34.9   | 25.2   | 32.6   |
| 184.9  | 163.6  | 295.4  | 187.5  | 471.4  | 527.4  | 486.6  | 536.5  | 605.1  |
| 9.6    | 15.1   | 7.1    | 1.6    | 3.4    | 7.4    | 14.0   | 3.0    | 11.3   |
| 1.6    | 1.0    | 1.8    | 2.1    | 1.5    | 1.2    | 2.0    | 1.1    | 1.5    |
| 43.2   | 41.0   | 53.8   | 13.6   | 1.0    | 0.9    | 1.7    | 1.2    | 0.8    |
| 1.7    | 2.2    | 5.8    | 1.5    | 4.2    | 0.8    | 2.1    | 0.9    | 7.9    |
| 32.3   | 25.6   | 38.4   | 18.4   | 20.5   | 14.1   | 15.1   | 10.9   | 48.7   |
| 66.6   | 86.5   | 91.2   | 103.9  | 42.3   | 58.2   | 41.8   | 32.0   | 100.6  |
| 9.8    | 12.8   | 12.1   | 5.7    | 7.5    | 6.8    | 13.3   | 14.9   | 26.0   |
| 0.6    | 0.6    | 0.6    | 0.8    | 1.3    | 0.5    | 2.0    | 1.7    | 2.3    |
| 71.4   | 49.4   | 137.3  | 114.1  | 28.3   | 15.4   | 20.7   | 22.8   | 7.3    |
| 17.4   | 23.3   | 20.4   | 20.3   | 13.1   | 10.3   | 24.4   | 26.3   | 38.4   |
| 211.5  | 223.3  | 341.2  | 246.7  | 723.2  | 716.4  | 788.5  | 803.8  | 548.3  |
| 792.2  | 723.1  | 846.4  | 707.6  | 969.9  | 531.2  | 801.9  | 1192.2 | 1362.8 |
| 12.0   | 17.8   | 50.5   | 37.4   | 14.0   | 21.6   | 12.3   | 21.9   | 43.7   |
| 6.1    | 0.9    | 1.7    | 6.6    | 3.3    | 1.0    | 4.4    | 1.3    | 11.9   |
| 1.3    | 1.0    | 9.5    | 3.4    | 0.7    | 0.5    | 1.0    | 6.1    | 5.8    |
| 262.3  | 268.8  | 393.1  | 270.2  | 131.6  | 147.1  | 144.7  | 155.4  | 129.9  |
| 186.1  | 188.5  | 211.8  | 189.0  | 381.1  | 404.8  | 425.8  | 461.7  | 462.5  |
| 131.0  | 122.2  | 136.9  | 122.9  | 73.7   | 47.6   | 68.0   | 100.4  | 106.7  |
| 3.2    | 1.3    | 1.8    | 1.2    | 1.0    | 2.9    | 1.3    | 1.5    | 2.7    |
| 5.5    | 7.0    | 6.0    | 5.3    | 16.0   | 21.3   | 21.3   | 13.3   | 2.9    |
| 114.8  | 129.2  | 139.8  | 131.2  | 195.9  | 248.7  | 199.5  | 206.3  | 161.3  |
| 140.5  | 91.1   | 668.3  | 124.1  | 261.7  | 260.8  | 503.8  | 389.0  | 142.7  |
| 26.5   | 27.8   | 23.7   | 30.3   | 172.6  | 142.2  | 192.5  | 214.6  | 53.1   |
| 3785.9 | 3712.5 | 3942.9 | 3876.8 | 5048.8 | 4505.5 | 5013.0 | 5252.9 | 6818.2 |
| 288.8  | 240.7  | 428.8  | 207.2  | 38.9   | 41.1   | 26.4   | 48.1   | 486.1  |
| 55.3   | 50.4   | 94.7   | 55.6   | 5.7    | 1.1    | 4.8    | 1.6    | 24.9   |
| 57.7   | 63.7   | 141.8  | 42.2   | 322.0  | 127.0  | 179.0  | 329.7  | 552.9  |
| 3823.7 | 3282.4 | 6275.6 | 3349.3 | 7298.5 | 6639.3 | 7280.1 | 7669.2 | 8558.9 |
| 317.4  | 249.0  | 390.1  | 305.3  | 62.6   | 40.3   | 51.9   | 56.5   | 87.4   |
| 647.4  | 571.4  | 864.8  | 546.8  | 712.4  | 702.1  | 667.2  | 713.9  | 935.8  |
| 237.4  | 223.6  | 337.3  | 225.6  | 192.7  | 160.6  | 193.6  | 210.6  | 244.3  |
| 14.2   | 7.0    | 17.0   | 6.7    | 14.4   | 7.2    | 9.5    | 11.1   | 3.6    |
| 1.9    | 2.3    | 6.6    | 2.5    | 2651.0 | 2825.7 | 3565.3 | 2978.4 | 140.2  |
| 7266.3 | 6997.3 | 7779.2 | 7062.8 | 6874.3 | 7138.5 | 6862.0 | 6992.1 | 9658.8 |
| 69.6   | 70.9   | 58.3   | 65.4   | 191.2  | 166.0  | 163.9  | 191.0  | 202.5  |
| 6.3    | 1.7    | 11.0   | 5.1    | 12.0   | 10.8   | 12.6   | 12.5   | 16.7   |
| 276.5  | 276.6  | 383.4  | 267.6  | 276.3  | 270.2  | 298.8  | 360.5  | 186.5  |
| 217.1  | 196.7  | 383.6  | 208.6  | 296.4  | 177.0  | 300.1  | 323.3  | 389.1  |
| 10.9   | 12.3   | 15.1   | 7.9    | 13.7   | 6.9    | 11.5   | 3.0    | 12.3   |
| 2810.3 | 2581.1 | 3797.3 | 2697.3 | 1001.9 | 925.8  | 1095.6 | 1154.5 | 1044.8 |
| 12.6   | 11.8   | 4.1    | 6.4    | 21.5   | 45.9   | 23.2   | 32.4   | 44.5   |
| 963.1  | 1008.3 | 956.6  | 1013.0 | 680.6  | 697.8  | 982.6  | 886.3  | 471.7  |

|        |        |        |        |        |        |        |        |         |
|--------|--------|--------|--------|--------|--------|--------|--------|---------|
| 1516.3 | 1339.1 | 1941.1 | 1258.3 | 2771.9 | 2603.1 | 2881.0 | 3110.5 | 3487.6  |
| 10.3   | 9.2    | 22.8   | 9.0    | 102.3  | 61.6   | 95.0   | 109.1  | 107.6   |
| 56.2   | 72.0   | 37.6   | 54.0   | 24.8   | 29.6   | 36.1   | 29.6   | 41.7    |
| 1404.4 | 1269.0 | 1564.0 | 1391.8 | 1204.5 | 1115.5 | 1227.0 | 1376.9 | 1013.8  |
| 5.4    | 0.6    | 6.7    | 3.0    | 7.3    | 5.6    | 6.6    | 4.3    | 6.5     |
| 2.5    | 2.0    | 3.1    | 2.1    | 1.4    | 1.6    | 1.6    | 2.1    | 2.0     |
| 3.0    | 2.3    | 10.6   | 3.4    | 4.3    | 2.6    | 2.2    | 3.4    | 8.6     |
| 8.2    | 6.5    | 1.7    | 7.9    | 48.0   | 37.3   | 51.2   | 58.6   | 37.8    |
| 16.0   | 10.2   | 26.7   | 22.8   | 15.8   | 19.1   | 18.9   | 28.6   | 42.9    |
| 1.1    | 0.6    | 1.1    | 0.6    | 1.7    | 1.2    | 0.7    | 1.4    | 1.7     |
| 13.4   | 11.9   | 11.1   | 9.5    | 3.2    | 4.7    | 5.8    | 8.3    | 0.7     |
| 5.8    | 11.8   | 1.5    | 6.0    | 10.0   | 9.9    | 12.7   | 4.8    | 6.1     |
| 3.8    | 8.4    | 3.1    | 6.6    | 37.3   | 22.7   | 33.6   | 24.8   | 12.7    |
| 9.9    | 3.0    | 6.3    | 3.3    | 3.2    | 4.5    | 4.1    | 3.9    | 7.5     |
| 83.6   | 78.6   | 107.4  | 72.0   | 443.4  | 375.9  | 456.1  | 501.7  | 685.4   |
| 23.3   | 33.9   | 50.3   | 53.9   | 23.6   | 27.0   | 25.4   | 35.4   | 64.7    |
| 2032.2 | 1901.5 | 2595.7 | 2033.9 | 1907.5 | 1589.0 | 1888.5 | 2182.2 | 2544.6  |
| 1089.5 | 968.9  | 1697.4 | 912.8  | 2272.0 | 2124.6 | 2310.0 | 2595.4 | 3085.4  |
| 28.8   | 20.6   | 58.9   | 17.5   | 246.5  | 417.8  | 311.2  | 297.2  | 61.6    |
| 770.1  | 770.4  | 917.8  | 710.0  | 1508.3 | 1682.8 | 1551.4 | 1669.0 | 1440.9  |
| 4188.3 | 3656.9 | 5629.7 | 3824.8 | 6097.8 | 5586.3 | 5932.7 | 6385.9 | 7573.8  |
| 4.3    | 5.1    | 5.4    | 4.9    | 9.4    | 4.9    | 5.0    | 8.9    | 3.5     |
| 304.3  | 218.1  | 447.0  | 256.8  | 400.8  | 444.0  | 419.1  | 466.1  | 570.9   |
| 9.2    | 4.9    | 6.2    | 7.3    | 6.2    | 5.8    | 10.7   | 9.0    | 10.3    |
| 194.5  | 183.0  | 259.4  | 185.6  | 280.4  | 209.0  | 249.0  | 297.7  | 340.0   |
| 2842.9 | 2558.2 | 4080.2 | 2878.8 | 4811.9 | 4399.9 | 4976.4 | 5186.2 | 5223.2  |
| 11.0   | 12.5   | 13.5   | 4.1    | 397.7  | 261.7  | 553.7  | 480.8  | 84.9    |
| 618.3  | 533.8  | 951.2  | 564.3  | 1141.8 | 960.6  | 1209.5 | 1360.2 | 1051.2  |
| 523.6  | 473.6  | 855.6  | 473.3  | 1068.1 | 1201.0 | 1200.4 | 1145.8 | 1071.3  |
| 115.1  | 116.5  | 147.7  | 114.3  | 67.7   | 63.9   | 70.9   | 73.7   | 93.4    |
| 1226.7 | 1034.6 | 2174.6 | 1088.0 | 1092.8 | 875.5  | 1072.6 | 1213.4 | 1765.4  |
| 1758.8 | 1495.7 | 2782.0 | 1343.7 | 4520.8 | 3182.3 | 4457.7 | 5327.6 | 4834.6  |
| 317.4  | 329.5  | 356.2  | 302.2  | 403.1  | 425.6  | 381.5  | 495.5  | 442.1   |
| 372.1  | 392.5  | 392.1  | 358.4  | 334.6  | 339.7  | 391.6  | 528.9  | 337.6   |
| 7531.2 | 7202.2 | 9241.2 | 7844.0 | 7949.6 | 7170.2 | 8041.3 | 8476.1 | 10706.8 |
| 4.4    | 1.8    | 1.3    | 3.9    | 1.0    | 0.7    | 2.0    | 0.4    | 3.9     |
| 33.5   | 23.8   | 72.9   | 30.3   | 178.2  | 129.8  | 207.6  | 201.9  | 147.1   |
| 14.5   | 11.0   | 24.7   | 5.8    | 5.1    | 7.1    | 8.8    | 19.2   | 17.4    |
| 1938.1 | 2034.5 | 1894.2 | 1853.8 | 822.4  | 994.0  | 1043.3 | 1016.1 | 1126.8  |
| 4.5    | 1.1    | 2.3    | 3.0    | 0.8    | 1.3    | 0.7    | 0.9    | 3.3     |
| 3.9    | 1.7    | 3.6    | 1.9    | 2.0    | 2.3    | 1.6    | 3.7    | 3.1     |
| 43.1   | 49.9   | 51.7   | 61.2   | 72.6   | 95.5   | 95.4   | 99.5   | 46.1    |
| 36.4   | 35.1   | 41.9   | 31.7   | 90.0   | 78.0   | 91.1   | 110.9  | 144.0   |
| 4.3    | 2.4    | 6.6    | 2.4    | 1.6    | 3.9    | 0.8    | 3.6    | 2.2     |
| 5.0    | 1.6    | 11.1   | 5.6    | 213.9  | 129.1  | 208.1  | 260.0  | 7.1     |
| 271.0  | 291.2  | 328.7  | 242.5  | 33.4   | 35.7   | 57.0   | 56.5   | 23.3    |
| 409.1  | 410.7  | 465.3  | 436.1  | 307.8  | 320.6  | 318.6  | 373.7  | 208.0   |
| 133.6  | 133.0  | 250.0  | 158.3  | 431.6  | 466.3  | 490.9  | 556.2  | 298.3   |
| 4.5    | 2.3    | 5.5    | 4.4    | 108.9  | 118.1  | 139.0  | 161.9  | 44.4    |
| 3.2    | 2.9    | 6.4    | 4.6    | 10.8   | 14.8   | 13.6   | 22.2   | 15.9    |
| 669.7  | 609.3  | 804.9  | 523.1  | 469.0  | 591.7  | 419.1  | 542.6  | 225.5   |
| 1553.1 | 1168.6 | 2807.7 | 1489.5 | 2815.0 | 2152.3 | 2983.1 | 3337.3 | 4359.5  |
| 1.3    | 4.6    | 2.6    | 4.8    | 15.4   | 17.6   | 29.4   | 38.8   | 18.6    |

|        |        |        |        |        |        |        |        |        |
|--------|--------|--------|--------|--------|--------|--------|--------|--------|
| 2951.0 | 2495.5 | 5611.1 | 3919.4 | 6125.8 | 6079.4 | 6331.8 | 6338.9 | 8604.7 |
| 0.7    | 1.4    | 1.6    | 1.1    | 1.4    | 0.6    | 0.7    | 0.9    | 1.1    |
| 11.9   | 13.1   | 21.0   | 10.4   | 5.9    | 5.8    | 2.8    | 0.7    | 3.1    |
| 11.9   | 7.5    | 12.2   | 8.7    | 7.5    | 3.3    | 9.5    | 6.3    | 3.9    |
| 14.3   | 13.0   | 18.3   | 11.0   | 41.0   | 44.4   | 18.9   | 39.7   | 20.0   |
| 50.1   | 39.7   | 53.7   | 50.7   | 271.3  | 105.4  | 272.7  | 396.4  | 234.0  |
| 120.7  | 113.4  | 134.3  | 77.8   | 265.5  | 309.0  | 312.3  | 332.3  | 230.9  |
| 3.0    | 0.8    | 1.9    | 1.9    | 10.9   | 1.9    | 12.8   | 13.4   | 3.4    |
| 6.7    | 6.4    | 10.7   | 7.9    | 16.6   | 9.1    | 32.6   | 22.2   | 10.4   |
| 2.1    | 1.7    | 2.8    | 3.9    | 57.5   | 42.3   | 30.7   | 29.2   | 27.0   |
| 94.9   | 88.6   | 144.9  | 91.7   | 181.9  | 137.6  | 158.8  | 194.9  | 332.6  |
| 10.2   | 12.3   | 17.2   | 2.3    | 14.9   | 6.3    | 10.0   | 16.3   | 19.8   |
| 201.2  | 232.8  | 214.3  | 164.8  | 1179.1 | 1590.5 | 1248.6 | 1493.4 | 761.8  |
| 119.1  | 111.5  | 150.5  | 120.8  | 106.9  | 88.9   | 88.4   | 116.7  | 357.1  |
| 132.0  | 113.7  | 179.7  | 131.7  | 211.7  | 171.3  | 213.9  | 288.3  | 154.4  |
| 9.2    | 9.0    | 14.5   | 5.4    | 6.0    | 4.7    | 4.4    | 6.9    | 13.2   |
| 8.1    | 13.4   | 3.2    | 6.6    | 11.7   | 9.2    | 8.9    | 2.2    | 20.6   |
| 109.1  | 87.5   | 287.8  | 58.3   | 252.6  | 138.6  | 207.7  | 262.2  | 1340.7 |
| 14.6   | 5.5    | 14.2   | 7.7    | 18.2   | 13.2   | 9.8    | 19.2   | 9.9    |
| 22.1   | 21.8   | 33.7   | 25.1   | 21.5   | 17.9   | 16.8   | 16.2   | 27.2   |
| 42.4   | 64.5   | 33.8   | 30.0   | 42.4   | 24.3   | 29.8   | 48.8   | 42.1   |
| 8.9    | 12.3   | 23.6   | 15.4   | 11.8   | 23.0   | 10.8   | 9.0    | 12.3   |
| 15.2   | 23.4   | 26.0   | 14.3   | 28.5   | 24.6   | 25.0   | 27.6   | 31.8   |
| 42.3   | 52.8   | 35.1   | 40.3   | 82.6   | 95.1   | 82.8   | 103.1  | 53.7   |
| 5.4    | 2.5    | 4.2    | 4.4    | 4.3    | 4.7    | 5.2    | 4.9    | 42.9   |
| 188.3  | 188.1  | 261.8  | 129.5  | 274.3  | 294.8  | 250.7  | 296.1  | 1.9    |
| 3.9    | 4.3    | 5.6    | 5.6    | 12.3   | 19.2   | 8.9    | 16.4   | 6.9    |
| 116.4  | 100.3  | 321.0  | 85.5   | 109.2  | 39.8   | 67.5   | 108.3  | 154.5  |
| 57.6   | 47.8   | 62.3   | 38.2   | 56.6   | 42.9   | 41.6   | 48.8   | 57.9   |
| 6.7    | 2.5    | 3.2    | 13.8   | 9.1    | 9.3    | 4.2    | 4.5    | 20.1   |
| 7.0    | 8.1    | 19.5   | 9.3    | 13.6   | 7.1    | 8.2    | 8.1    | 15.3   |
| 9.3    | 8.8    | 2.0    | 4.7    | 7.6    | 4.5    | 5.9    | 16.4   | 19.6   |
| 16.7   | 14.8   | 19.8   | 19.5   | 20.7   | 20.4   | 16.8   | 24.8   | 40.7   |
| 2.8    | 3.9    | 1.3    | 3.5    | 5.3    | 1.1    | 0.5    | 0.8    | 1.2    |
| 1.1    | 1.5    | 4.3    | 1.0    | 1.1    | 2.9    | 0.9    | 1.2    | 1.6    |
| 2.6    | 2.3    | 5.7    | 2.0    | 44.1   | 54.3   | 30.7   | 48.6   | 14.4   |
| 98.9   | 97.2   | 112.9  | 77.7   | 195.4  | 234.6  | 158.7  | 214.7  | 210.5  |
| 1.0    | 1.1    | 1.3    | 1.0    | 21.6   | 24.8   | 16.7   | 42.5   | 2.5    |
| 18.2   | 16.5   | 18.5   | 10.6   | 57.4   | 49.7   | 50.2   | 41.3   | 58.2   |
| 13.5   | 19.8   | 25.6   | 20.8   | 11.4   | 12.4   | 27.0   | 23.0   | 13.5   |
| 8.9    | 13.8   | 8.6    | 13.7   | 1.2    | 3.7    | 2.9    | 3.5    | 11.3   |
| 4.4    | 4.8    | 4.5    | 1.6    | 86.6   | 84.6   | 126.1  | 105.8  | 32.4   |
| 19.2   | 14.8   | 25.2   | 16.8   | 6.5    | 4.1    | 11.8   | 15.1   | 0.7    |
| 2.8    | 5.3    | 5.6    | 2.9    | 2.6    | 5.1    | 4.5    | 2.1    | 2.9    |
| 1.4    | 7.5    | 6.4    | 4.8    | 1.1    | 6.9    | 2.2    | 3.0    | 2.4    |
| 2.5    | 6.8    | 14.4   | 1.6    | 5.0    | 1.3    | 6.8    | 2.3    | 42.1   |
| 55.8   | 57.2   | 52.8   | 43.6   | 184.6  | 233.1  | 208.9  | 210.6  | 584.4  |
| 3.9    | 3.8    | 2.0    | 1.5    | 1.6    | 6.9    | 3.4    | 1.6    | 1.8    |
| 1.5    | 0.9    | 2.1    | 1.4    | 1.3    | 1.0    | 1.6    | 1.5    | 1.7    |
| 4.9    | 4.5    | 8.1    | 4.5    | 0.6    | 1.3    | 4.4    | 3.7    | 2.4    |
| 2.7    | 2.4    | 7.4    | 3.2    | 1.9    | 6.3    | 1.8    | 2.9    | 8.6    |
| 23.1   | 7.0    | 22.8   | 12.8   | 17.1   | 20.8   | 19.3   | 14.2   | 34.5   |
| 3.5    | 4.7    | 3.0    | 2.7    | 31.1   | 34.4   | 38.6   | 53.9   | 14.2   |



|        |        |        |        |        |        |        |        |        |
|--------|--------|--------|--------|--------|--------|--------|--------|--------|
| 3.4    | 0.6    | 4.9    | 0.8    | 7.1    | 1.0    | 6.3    | 5.2    | 21.2   |
| 12.7   | 13.0   | 7.4    | 6.4    | 3.0    | 3.1    | 4.8    | 2.7    | 40.8   |
| 13.4   | 12.1   | 14.3   | 11.1   | 5.0    | 4.7    | 4.5    | 8.3    | 13.3   |
| 1.5    | 2.3    | 2.3    | 1.4    | 3.0    | 4.3    | 2.1    | 9.7    | 4.6    |
| 0.5    | 0.5    | 1.3    | 1.3    | 25.3   | 4.2    | 39.9   | 35.6   | 86.0   |
| 0.7    | 0.6    | 0.9    | 0.7    | 1.3    | 1.1    | 0.8    | 3.0    | 2.1    |
| 24.1   | 23.1   | 30.6   | 24.2   | 18.0   | 14.1   | 19.5   | 19.0   | 17.0   |
| 37.9   | 20.8   | 49.7   | 29.6   | 1.3    | 1.3    | 1.3    | 1.5    | 6.3    |
| 47.9   | 39.3   | 76.3   | 36.7   | 82.2   | 77.9   | 69.2   | 103.1  | 52.9   |
| 40.2   | 48.8   | 88.6   | 35.5   | 119.5  | 92.1   | 102.5  | 96.5   | 118.9  |
| 153.4  | 172.6  | 170.0  | 169.0  | 85.8   | 97.2   | 81.1   | 88.9   | 130.2  |
| 51.1   | 47.2   | 67.9   | 45.2   | 110.1  | 121.8  | 120.8  | 148.3  | 307.1  |
| 7.4    | 2.9    | 4.8    | 9.2    | 4.1    | 7.7    | 1.2    | 2.9    | 9.9    |
| 3619.9 | 3208.3 | 4418.4 | 3469.5 | 3992.0 | 4641.8 | 4223.0 | 4364.3 | 3504.4 |
| 2.1    | 4.9    | 3.9    | 2.3    | 2.1    | 1.2    | 6.2    | 0.7    | 6.5    |
| 89.0   | 90.1   | 74.0   | 85.2   | 40.4   | 36.3   | 38.3   | 56.6   | 25.9   |
| 16.8   | 10.7   | 28.7   | 10.9   | 43.3   | 37.3   | 41.8   | 59.6   | 38.7   |
| 687.7  | 690.1  | 470.2  | 629.2  | 1795.4 | 2002.0 | 1983.5 | 2061.2 | 1286.6 |
| 15.6   | 18.2   | 35.0   | 19.8   | 54.5   | 52.4   | 43.9   | 58.7   | 61.9   |
| 13.3   | 9.8    | 14.1   | 12.9   | 43.2   | 36.6   | 37.8   | 56.7   | 43.3   |
| 0.8    | 1.3    | 4.0    | 1.5    | 5.3    | 5.6    | 13.0   | 5.6    | 15.8   |
| 9.4    | 6.7    | 5.8    | 11.5   | 5.7    | 11.2   | 2.6    | 4.6    | 11.9   |
| 0.9    | 0.9    | 1.4    | 1.5    | 1.0    | 1.1    | 1.6    | 1.9    | 2.8    |
| 4.9    | 1.4    | 1.7    | 2.2    | 2.3    | 3.6    | 2.2    | 1.8    | 27.9   |
| 37.7   | 40.7   | 34.5   | 28.2   | 164.6  | 229.0  | 176.7  | 174.4  | 144.8  |
| 14.3   | 18.6   | 22.2   | 28.7   | 7.4    | 1.6    | 6.1    | 7.8    | 21.6   |
| 4.2    | 3.1    | 4.1    | 1.1    | 4.7    | 2.6    | 1.6    | 4.2    | 4.0    |
| 85.7   | 77.4   | 95.4   | 76.5   | 43.2   | 36.3   | 43.0   | 59.3   | 62.3   |
| 1.3    | 0.9    | 1.2    | 1.9    | 1.1    | 0.9    | 0.9    | 1.9    | 2.9    |
| 8.9    | 14.7   | 5.1    | 16.0   | 4.2    | 12.6   | 1.5    | 6.0    | 64.2   |
| 2.6    | 0.7    | 2.4    | 1.7    | 0.7    | 1.3    | 0.4    | 0.5    | 1.2    |
| 1.6    | 0.9    | 1.6    | 1.7    | 4.6    | 3.2    | 0.6    | 0.9    | 6.9    |
| 6.4    | 5.6    | 3.4    | 2.9    | 2.9    | 5.8    | 7.6    | 14.5   | 17.7   |
| 7.0    | 11.8   | 19.5   | 6.3    | 17.1   | 11.5   | 13.0   | 20.0   | 33.6   |
| 19.1   | 6.7    | 22.7   | 18.6   | 15.5   | 7.7    | 13.5   | 28.6   | 19.0   |
| 2.5    | 3.0    | 4.2    | 2.3    | 2.1    | 1.6    | 3.4    | 2.4    | 3.5    |
| 32.4   | 54.7   | 60.8   | 27.0   | 11.5   | 6.4    | 9.4    | 6.3    | 3.1    |
| 8.8    | 3.8    | 3.6    | 11.2   | 6.1    | 5.3    | 11.0   | 17.3   | 38.4   |
| 8.6    | 5.8    | 17.4   | 2.7    | 1.8    | 3.1    | 1.2    | 0.7    | 4.1    |
| 12.4   | 20.2   | 10.9   | 14.4   | 14.1   | 17.2   | 22.3   | 21.0   | 24.0   |
| 14.7   | 6.3    | 16.9   | 5.6    | 11.5   | 4.5    | 8.7    | 4.3    | 16.6   |
| 3.9    | 5.6    | 6.1    | 5.9    | 5.7    | 8.8    | 4.8    | 22.3   | 6.1    |
| 22.5   | 23.9   | 20.5   | 19.9   | 4.0    | 3.8    | 7.3    | 8.6    | 13.5   |
| 8.7    | 8.0    | 2.7    | 4.8    | 1.1    | 0.6    | 3.9    | 1.9    | 3.5    |
| 10.1   | 14.7   | 8.2    | 6.3    | 5.4    | 4.1    | 6.9    | 13.8   | 30.8   |
| 12.8   | 14.5   | 28.7   | 15.3   | 11.7   | 8.6    | 15.9   | 17.2   | 27.5   |
| 8.4    | 3.4    | 4.9    | 13.1   | 4.3    | 6.8    | 5.6    | 4.7    | 3.1    |
| 11.0   | 10.1   | 28.3   | 25.9   | 15.5   | 11.5   | 21.0   | 23.2   | 22.1   |
| 3.3    | 5.4    | 3.6    | 2.6    | 12.5   | 11.8   | 13.6   | 15.5   | 13.0   |
| 6.9    | 3.2    | 6.9    | 4.0    | 2.6    | 5.9    | 2.9    | 2.1    | 5.8    |
| 2.5    | 2.0    | 2.1    | 3.1    | 4.7    | 5.3    | 6.3    | 4.5    | 3.8    |
| 101.6  | 102.6  | 199.1  | 96.8   | 153.6  | 105.4  | 144.4  | 184.2  | 207.0  |
| 11.3   | 3.8    | 16.9   | 9.0    | 21.2   | 10.3   | 10.9   | 26.5   | 18.0   |

|        |        |        |        |        |        |        |        |        |
|--------|--------|--------|--------|--------|--------|--------|--------|--------|
| 1.6    | 2.4    | 2.3    | 5.3    | 7.4    | 10.9   | 11.3   | 7.3    | 13.2   |
| 10.9   | 2.7    | 4.9    | 2.9    | 4.3    | 1.7    | 4.4    | 13.3   | 10.2   |
| 4.2    | 4.4    | 15.4   | 12.2   | 2.2    | 6.8    | 2.6    | 7.0    | 2.3    |
| 8.4    | 7.7    | 14.0   | 7.0    | 12.4   | 10.9   | 13.2   | 17.0   | 28.7   |
| 24.1   | 26.7   | 26.3   | 22.3   | 25.4   | 24.1   | 47.6   | 35.3   | 23.8   |
| 0.4    | 1.4    | 2.4    | 3.1    | 6.3    | 4.0    | 8.5    | 3.7    | 5.2    |
| 8.0    | 8.9    | 8.5    | 11.2   | 1.9    | 1.3    | 2.9    | 0.7    | 4.8    |
| 1.6    | 4.6    | 2.6    | 3.0    | 1.7    | 1.2    | 2.5    | 4.0    | 5.6    |
| 8.2    | 10.4   | 12.4   | 8.8    | 4.5    | 3.6    | 4.8    | 1.6    | 3.0    |
| 2.1    | 1.9    | 2.6    | 1.6    | 2.3    | 2.6    | 1.5    | 2.6    | 2.9    |
| 249.7  | 252.2  | 249.4  | 219.3  | 3102.9 | 4025.8 | 3140.9 | 3546.3 | 2772.2 |
| 6.3    | 4.1    | 16.1   | 8.3    | 0.7    | 1.1    | 2.1    | 4.2    | 5.9    |
| 67.6   | 73.2   | 63.6   | 88.5   | 32.5   | 27.4   | 23.5   | 33.6   | 16.8   |
| 13.4   | 13.2   | 9.9    | 11.6   | 20.6   | 24.3   | 26.4   | 26.0   | 19.3   |
| 6.1    | 1.9    | 1.8    | 1.8    | 2.4    | 0.6    | 1.5    | 1.0    | 3.4    |
| 16.7   | 23.1   | 17.8   | 15.1   | 13.9   | 5.4    | 15.2   | 10.8   | 10.1   |
| 62.9   | 65.9   | 78.5   | 56.6   | 12.1   | 8.1    | 8.0    | 22.7   | 8.5    |
| 56.9   | 61.6   | 60.4   | 49.8   | 48.1   | 40.7   | 41.4   | 54.7   | 46.7   |
| 75.4   | 62.4   | 151.8  | 102.4  | 118.3  | 38.2   | 104.4  | 153.3  | 36.1   |
| 2.1    | 4.2    | 7.3    | 1.2    | 1.2    | 4.7    | 2.8    | 2.2    | 2.6    |
| 2328.1 | 2196.8 | 2816.5 | 2214.9 | 2721.3 | 1693.8 | 2984.8 | 3110.6 | 3877.8 |
| 449.6  | 429.7  | 393.0  | 470.2  | 165.4  | 132.6  | 193.3  | 215.4  | 322.7  |
| 3.3    | 1.5    | 3.0    | 2.5    | 1.1    | 1.4    | 1.2    | 0.9    | 1.3    |
| 54.1   | 50.4   | 56.7   | 40.1   | 419.5  | 500.0  | 316.4  | 288.9  | 512.9  |
| 11.0   | 9.9    | 24.3   | 14.5   | 24.7   | 37.0   | 32.1   | 41.9   | 13.5   |
| 621.0  | 696.2  | 655.5  | 554.3  | 1121.4 | 1481.2 | 1367.4 | 1313.3 | 289.9  |
| 5491.0 | 5076.8 | 5942.9 | 4997.0 | 5664.5 | 6025.8 | 5854.4 | 5876.6 | 7731.3 |
| 834.8  | 826.5  | 442.6  | 491.6  | 657.4  | 734.4  | 612.7  | 715.6  | 339.7  |
| 215.6  | 219.1  | 307.6  | 236.1  | 475.3  | 275.1  | 370.3  | 440.8  | 442.8  |
| 101.5  | 80.2   | 96.3   | 84.5   | 186.8  | 141.9  | 185.5  | 158.2  | 241.6  |
| 1243.6 | 899.6  | 1965.7 | 902.0  | 2178.3 | 1524.4 | 2226.3 | 2464.7 | 1784.8 |
| 226.4  | 199.9  | 430.5  | 206.7  | 572.4  | 404.9  | 556.9  | 659.4  | 1540.7 |
| 703.0  | 576.0  | 1184.2 | 646.9  | 1452.9 | 972.4  | 1385.0 | 1571.3 | 688.8  |
| 869.9  | 813.9  | 1350.6 | 853.8  | 1057.3 | 1276.3 | 983.2  | 1154.1 | 1772.1 |
| 2271.3 | 2158.4 | 3296.0 | 2345.4 | 2602.8 | 1723.7 | 2096.5 | 2952.4 | 2697.3 |
| 3566.0 | 3553.2 | 3401.8 | 3580.1 | 3737.8 | 4375.2 | 4171.8 | 4131.5 | 4595.3 |
| 1229.4 | 1172.2 | 1092.4 | 1254.1 | 1356.8 | 1586.5 | 1647.4 | 1717.9 | 2485.8 |
| 991.6  | 1097.3 | 1055.9 | 1279.6 | 1160.0 | 1134.2 | 1111.0 | 1281.1 | 1902.9 |
| 3535.3 | 3654.8 | 3362.1 | 3096.2 | 5041.5 | 4729.3 | 5150.4 | 5359.5 | 7880.5 |
| 6900.4 | 6972.9 | 6735.6 | 6886.4 | 4269.5 | 4103.5 | 4653.5 | 4880.2 | 6172.3 |
| 2468.0 | 2391.1 | 3011.8 | 2769.1 | 747.3  | 686.2  | 819.3  | 864.9  | 1244.7 |
| 4052.8 | 4019.7 | 4207.3 | 4020.7 | 5400.4 | 5895.1 | 5521.4 | 5544.8 | 7164.4 |
| 6320.8 | 6194.3 | 7111.9 | 6204.3 | 6242.9 | 6323.8 | 6090.8 | 6528.2 | 9054.0 |
| 135.8  | 117.5  | 147.7  | 98.8   | 136.0  | 124.6  | 187.3  | 160.5  | 395.7  |
| 2391.3 | 2389.3 | 2916.8 | 2319.4 | 5017.9 | 5133.1 | 5428.7 | 5436.9 | 3098.9 |
| 1387.3 | 1214.9 | 1568.2 | 1245.6 | 1744.0 | 1424.9 | 1664.2 | 2124.0 | 2630.3 |
| 35.6   | 16.3   | 52.0   | 31.1   | 35.1   | 42.9   | 47.2   | 45.9   | 114.0  |
| 343.1  | 319.3  | 346.0  | 249.9  | 206.2  | 171.2  | 229.5  | 265.0  | 372.5  |
| 89.8   | 89.5   | 158.7  | 79.7   | 194.1  | 166.8  | 186.1  | 194.5  | 419.6  |
| 380.0  | 348.7  | 423.8  | 359.6  | 645.4  | 823.4  | 676.2  | 628.6  | 465.0  |
| 529.0  | 474.6  | 938.7  | 556.3  | 1235.2 | 1012.1 | 1285.8 | 1421.4 | 2339.3 |
| 94.5   | 76.5   | 141.0  | 101.3  | 223.3  | 204.2  | 186.6  | 252.1  | 144.2  |
| 298.8  | 243.7  | 659.1  | 324.9  | 1163.7 | 808.0  | 1075.9 | 1373.0 | 811.4  |

|        |        |        |        |        |        |        |        |         |
|--------|--------|--------|--------|--------|--------|--------|--------|---------|
| 380.1  | 336.4  | 688.6  | 415.8  | 1353.4 | 1053.5 | 1276.8 | 1423.0 | 1179.5  |
| 371.9  | 365.1  | 589.8  | 423.9  | 993.8  | 871.6  | 966.2  | 1062.4 | 996.7   |
| 5748.6 | 5642.8 | 6206.3 | 5061.2 | 6922.3 | 7918.8 | 7083.1 | 7469.9 | 9898.4  |
| 1073.3 | 1018.0 | 654.1  | 968.3  | 27.0   | 17.0   | 77.9   | 46.1   | 18.5    |
| 4610.2 | 4557.8 | 3330.7 | 4369.0 | 52.6   | 42.6   | 329.2  | 115.5  | 26.9    |
| 1001.3 | 915.2  | 1272.0 | 933.0  | 726.4  | 706.3  | 815.9  | 1003.1 | 1502.2  |
| 1140.3 | 1208.8 | 1141.1 | 1196.9 | 879.9  | 939.0  | 942.4  | 1022.7 | 1233.1  |
| 1739.2 | 1634.2 | 1422.9 | 1089.1 | 1226.6 | 1511.7 | 1633.6 | 1567.0 | 481.0   |
| 738.9  | 711.8  | 824.8  | 757.4  | 1713.1 | 1751.1 | 2190.6 | 1957.8 | 2176.9  |
| 39.2   | 25.8   | 41.1   | 29.9   | 54.3   | 17.6   | 33.5   | 38.8   | 1444.4  |
| 332.8  | 300.7  | 287.5  | 176.0  | 140.0  | 236.4  | 185.3  | 178.9  | 37.4    |
| 19.2   | 9.2    | 26.4   | 14.2   | 29.6   | 10.5   | 23.4   | 29.6   | 419.1   |
| 2352.4 | 2525.5 | 3317.3 | 2448.8 | 2360.5 | 2083.1 | 2784.9 | 2819.6 | 1981.9  |
| 4565.1 | 3776.6 | 6144.2 | 4001.1 | 4632.0 | 2962.2 | 3596.3 | 4691.1 | 4518.0  |
| 6129.5 | 5320.3 | 7304.6 | 5332.5 | 5839.3 | 4165.6 | 5210.6 | 6279.7 | 8314.0  |
| 6585.7 | 6581.0 | 7362.5 | 6089.1 | 6874.0 | 6465.8 | 6779.2 | 7727.7 | 8907.4  |
| 1830.7 | 1776.3 | 2445.8 | 1864.4 | 1457.9 | 1205.2 | 1438.6 | 1613.4 | 1203.4  |
| 6834.3 | 6514.1 | 7096.9 | 6530.3 | 5764.3 | 6328.7 | 5969.2 | 5990.4 | 9301.6  |
| 94.0   | 108.1  | 134.7  | 90.7   | 56.8   | 61.4   | 59.8   | 68.0   | 71.7    |
| 518.6  | 540.7  | 597.8  | 530.0  | 684.4  | 552.8  | 603.4  | 667.3  | 909.6   |
| 365.3  | 322.9  | 442.8  | 335.6  | 579.1  | 548.4  | 518.6  | 650.4  | 426.7   |
| 438.5  | 312.4  | 565.4  | 445.0  | 254.8  | 271.9  | 236.6  | 376.7  | 144.0   |
| 102.4  | 83.0   | 193.8  | 104.7  | 172.9  | 171.3  | 197.2  | 212.6  | 88.6    |
| 7931.7 | 7242.9 | 9661.4 | 7704.5 | 7918.3 | 7259.2 | 8070.3 | 8508.2 | 10907.6 |
| 246.5  | 223.5  | 370.4  | 302.3  | 111.5  | 127.9  | 113.9  | 130.4  | 98.7    |
| 9.9    | 7.2    | 4.0    | 5.9    | 12.0   | 6.2    | 19.5   | 16.9   | 927.5   |
| 1.8    | 1.7    | 2.0    | 1.2    | 1.8    | 1.1    | 2.9    | 7.0    | 244.7   |
| 212.1  | 198.2  | 416.9  | 253.1  | 417.7  | 350.4  | 385.7  | 452.9  | 657.7   |
| 7490.5 | 7316.3 | 8285.7 | 7012.3 | 7450.5 | 7239.2 | 7567.1 | 8212.5 | 9693.7  |
| 1837.9 | 1620.9 | 2374.8 | 1603.2 | 359.5  | 273.5  | 329.1  | 375.8  | 577.6   |
| 2003.8 | 1669.2 | 2700.5 | 1618.8 | 377.8  | 301.1  | 333.0  | 393.6  | 597.7   |
| 726.7  | 794.5  | 428.8  | 663.7  | 752.1  | 656.9  | 826.5  | 789.2  | 405.1   |
| 1865.5 | 1732.8 | 1990.5 | 1738.0 | 710.6  | 415.0  | 639.8  | 823.8  | 920.9   |
| 997.7  | 974.4  | 878.2  | 776.8  | 865.2  | 589.3  | 867.1  | 1039.7 | 837.7   |
| 709.3  | 650.2  | 647.7  | 496.3  | 811.3  | 608.7  | 788.4  | 904.4  | 915.6   |
| 1.5    | 5.6    | 5.0    | 1.2    | 75.1   | 90.1   | 83.1   | 105.7  | 3620.3  |
| 3.2    | 1.5    | 18.3   | 6.2    | 30.9   | 33.4   | 33.0   | 36.3   | 1249.4  |
| 401.8  | 390.4  | 446.7  | 356.8  | 573.3  | 596.9  | 668.3  | 688.8  | 529.7   |
| 19.8   | 21.9   | 28.5   | 17.6   | 47.1   | 58.7   | 100.3  | 64.1   | 62.1    |
| 348.3  | 328.8  | 348.8  | 337.6  | 625.2  | 629.6  | 600.8  | 673.4  | 356.0   |
| 7107.4 | 6960.6 | 7652.8 | 6759.1 | 6551.0 | 6581.5 | 6947.7 | 7086.1 | 9085.6  |
| 137.3  | 150.1  | 171.6  | 184.7  | 96.4   | 128.7  | 94.8   | 93.6   | 127.6   |
| 2482.2 | 2405.3 | 2861.6 | 1902.9 | 4575.4 | 4077.4 | 4240.1 | 4718.1 | 7269.6  |
| 53.9   | 56.7   | 55.8   | 44.6   | 135.2  | 91.6   | 92.4   | 130.4  | 260.8   |
| 2008.1 | 1940.5 | 2350.6 | 1578.8 | 3497.1 | 3216.6 | 3312.5 | 3692.4 | 4876.8  |
| 31.6   | 40.8   | 38.0   | 28.1   | 57.6   | 37.4   | 53.9   | 67.0   | 57.3    |
| 77.2   | 63.1   | 89.3   | 68.4   | 163.2  | 131.0  | 150.7  | 196.5  | 85.4    |
| 162.4  | 148.4  | 260.9  | 142.9  | 215.0  | 187.3  | 222.9  | 236.5  | 387.9   |
| 116.1  | 90.0   | 241.9  | 94.2   | 222.0  | 202.4  | 202.3  | 239.2  | 561.3   |
| 235.6  | 167.7  | 374.5  | 189.3  | 314.7  | 286.1  | 272.0  | 366.6  | 502.1   |
| 156.5  | 188.2  | 243.0  | 142.4  | 230.4  | 227.0  | 201.9  | 215.1  | 343.8   |
| 746.0  | 708.9  | 703.9  | 687.9  | 237.8  | 231.4  | 240.5  | 281.8  | 403.9   |
| 343.9  | 319.3  | 332.7  | 279.1  | 133.9  | 155.0  | 150.5  | 159.3  | 277.2   |

|        |        |        |        |        |        |        |        |        |
|--------|--------|--------|--------|--------|--------|--------|--------|--------|
| 517.7  | 513.6  | 472.9  | 463.8  | 169.2  | 191.2  | 148.2  | 201.0  | 186.5  |
| 1168.1 | 916.2  | 2280.8 | 1132.9 | 960.2  | 697.1  | 973.8  | 1017.4 | 1731.9 |
| 992.9  | 901.7  | 1532.4 | 954.8  | 2073.6 | 2214.6 | 2104.9 | 2144.8 | 2496.3 |
| 335.5  | 301.2  | 444.5  | 280.3  | 42.5   | 25.0   | 45.0   | 46.3   | 22.9   |
| 188.1  | 175.7  | 258.0  | 170.8  | 14.3   | 8.1    | 11.2   | 15.0   | 9.6    |
| 57.0   | 77.8   | 72.0   | 98.5   | 669.7  | 602.1  | 511.9  | 738.7  | 856.2  |
| 885.7  | 736.3  | 1596.0 | 828.9  | 1710.5 | 1304.5 | 1410.6 | 1895.4 | 1875.1 |
| 432.3  | 345.7  | 835.9  | 411.6  | 737.3  | 548.7  | 579.4  | 785.6  | 1387.8 |
| 356.8  | 330.4  | 550.4  | 349.0  | 574.7  | 696.4  | 526.5  | 587.7  | 540.4  |
| 689.7  | 668.8  | 1069.0 | 829.4  | 1243.6 | 1302.6 | 1323.3 | 1432.9 | 2121.0 |
| 131.3  | 125.5  | 133.0  | 194.2  | 24.8   | 22.2   | 19.0   | 9.4    | 25.6   |
| 64.4   | 56.4   | 127.0  | 53.3   | 269.5  | 115.1  | 175.2  | 247.3  | 280.7  |
| 95.9   | 81.1   | 208.3  | 80.3   | 582.7  | 313.1  | 372.7  | 609.0  | 564.9  |
| 80.0   | 74.3   | 189.6  | 76.0   | 548.5  | 366.6  | 354.4  | 576.1  | 602.8  |
| 48.2   | 41.9   | 103.1  | 51.5   | 372.3  | 153.4  | 213.7  | 336.0  | 195.6  |
| 420.6  | 444.4  | 432.9  | 361.8  | 801.7  | 842.1  | 691.2  | 750.5  | 391.3  |
| 312.7  | 276.1  | 349.7  | 214.0  | 540.4  | 608.9  | 463.9  | 498.2  | 294.6  |
| 87.8   | 71.7   | 64.9   | 42.6   | 88.3   | 88.7   | 104.5  | 109.7  | 106.7  |
| 126.4  | 82.3   | 183.9  | 91.9   | 370.6  | 253.1  | 503.5  | 420.5  | 565.3  |
| 152.2  | 119.5  | 225.2  | 124.9  | 277.5  | 209.2  | 334.5  | 324.8  | 523.4  |
| 1.1    | 8.5    | 1.8    | 3.2    | 0.6    | 5.2    | 3.0    | 6.5    | 1.4    |
| 215.0  | 167.7  | 328.7  | 204.7  | 261.7  | 200.0  | 258.7  | 332.4  | 274.1  |
| 310.2  | 229.4  | 446.3  | 247.8  | 436.5  | 329.8  | 378.8  | 483.1  | 348.8  |
| 377.8  | 393.7  | 478.1  | 419.3  | 467.1  | 420.9  | 525.3  | 531.9  | 195.0  |
| 551.6  | 465.6  | 800.9  | 510.6  | 584.2  | 457.2  | 509.0  | 619.0  | 701.5  |
| 316.1  | 312.2  | 203.8  | 211.3  | 468.9  | 554.5  | 473.8  | 553.8  | 479.1  |
| 121.1  | 122.4  | 89.6   | 90.6   | 155.3  | 190.2  | 152.7  | 184.5  | 209.4  |
| 475.7  | 421.8  | 591.7  | 371.3  | 685.4  | 523.5  | 629.9  | 767.8  | 675.4  |
| 443.1  | 369.6  | 769.9  | 364.0  | 516.1  | 388.4  | 442.6  | 590.9  | 459.1  |
| 2494.7 | 2174.4 | 2982.2 | 2047.6 | 2802.2 | 2192.9 | 2824.7 | 3242.2 | 3378.6 |
| 5691.3 | 5015.3 | 5427.7 | 5495.8 | 6307.0 | 6967.3 | 6948.9 | 6984.2 | 9351.2 |
| 195.5  | 213.5  | 201.4  | 217.9  | 590.6  | 578.4  | 591.9  | 671.1  | 291.0  |
| 821.5  | 738.6  | 888.6  | 657.8  | 1254.3 | 1202.8 | 1316.1 | 1546.5 | 1304.4 |
| 7091.4 | 6825.9 | 8209.2 | 6804.2 | 7330.2 | 7130.4 | 7657.5 | 7697.3 | 9963.5 |
| 660.6  | 630.6  | 827.2  | 645.7  | 2283.8 | 2159.4 | 2432.7 | 2699.6 | 2044.2 |
| 78.6   | 66.2   | 84.4   | 56.6   | 124.5  | 106.4  | 123.1  | 154.6  | 223.4  |
| 146.8  | 138.2  | 120.1  | 97.2   | 160.3  | 160.1  | 139.5  | 195.3  | 51.2   |
| 211.3  | 181.5  | 377.4  | 221.7  | 94.9   | 100.2  | 137.2  | 218.1  | 158.0  |
| 364.7  | 391.4  | 848.4  | 597.9  | 335.6  | 461.6  | 422.5  | 454.6  | 620.7  |
| 312.0  | 262.5  | 833.7  | 443.7  | 1154.8 | 1876.4 | 1133.2 | 1182.4 | 1540.5 |
| 170.8  | 172.0  | 444.8  | 414.7  | 168.1  | 161.0  | 160.4  | 188.6  | 103.0  |
| 372.5  | 345.7  | 1538.3 | 1240.9 | 578.6  | 616.9  | 595.0  | 651.1  | 293.7  |
| 246.2  | 225.3  | 974.5  | 792.8  | 359.2  | 377.0  | 350.3  | 434.5  | 210.1  |
| 635.8  | 603.9  | 632.2  | 635.1  | 408.9  | 502.5  | 454.2  | 419.6  | 292.2  |
| 569.0  | 485.1  | 1187.3 | 663.4  | 467.4  | 475.5  | 467.0  | 543.0  | 418.8  |
| 249.4  | 237.2  | 296.0  | 292.4  | 289.2  | 357.1  | 301.9  | 337.8  | 158.0  |
| 867.8  | 818.2  | 1212.1 | 844.7  | 615.8  | 676.7  | 714.6  | 698.1  | 367.3  |
| 375.3  | 329.1  | 498.8  | 412.6  | 171.5  | 141.3  | 154.7  | 211.3  | 51.8   |
| 904.6  | 792.5  | 1238.0 | 815.2  | 320.1  | 297.8  | 331.0  | 515.0  | 118.0  |
| 594.5  | 634.9  | 802.5  | 552.3  | 1345.0 | 1159.2 | 1238.3 | 1641.6 | 1904.2 |
| 1182.0 | 1263.2 | 1302.1 | 1172.5 | 260.0  | 243.6  | 235.5  | 268.5  | 279.9  |
| 242.1  | 227.9  | 309.8  | 221.6  | 425.3  | 318.6  | 373.5  | 483.9  | 629.2  |
| 143.5  | 142.1  | 136.3  | 145.9  | 168.0  | 113.7  | 138.0  | 188.9  | 175.2  |

|        |        |        |        |        |        |        |        |        |
|--------|--------|--------|--------|--------|--------|--------|--------|--------|
| 1421.1 | 1524.0 | 1027.9 | 1378.9 | 151.9  | 152.2  | 188.0  | 175.8  | 164.1  |
| 168.7  | 198.0  | 151.9  | 299.5  | 2785.3 | 2189.9 | 1877.0 | 2597.7 | 3664.5 |
| 384.4  | 387.5  | 1046.8 | 620.5  | 421.5  | 481.5  | 349.5  | 622.2  | 833.5  |
| 90.0   | 92.9   | 117.8  | 82.9   | 110.8  | 124.0  | 94.2   | 137.1  | 110.1  |
| 218.0  | 208.9  | 248.2  | 194.8  | 389.3  | 387.5  | 394.5  | 475.3  | 442.7  |
| 25.8   | 37.3   | 27.7   | 23.2   | 152.7  | 191.3  | 177.7  | 214.6  | 44.0   |
| 694.4  | 720.5  | 675.6  | 626.0  | 311.2  | 316.5  | 243.7  | 311.9  | 130.2  |
| 510.3  | 493.5  | 692.3  | 475.7  | 127.9  | 198.0  | 209.8  | 267.3  | 145.7  |
| 855.9  | 771.4  | 1229.7 | 697.7  | 71.8   | 102.5  | 108.7  | 110.2  | 561.7  |
| 1247.3 | 1197.2 | 1441.8 | 1244.3 | 3472.8 | 3275.7 | 3043.2 | 3516.4 | 2243.9 |
| 910.4  | 920.8  | 1395.9 | 952.4  | 850.4  | 901.3  | 827.7  | 976.6  | 1234.4 |
| 136.3  | 89.7   | 220.5  | 113.4  | 238.2  | 212.9  | 258.0  | 267.6  | 242.8  |
| 1491.0 | 1526.7 | 1494.9 | 1401.6 | 1077.6 | 748.7  | 939.7  | 1204.9 | 628.5  |
| 376.4  | 327.4  | 712.0  | 374.8  | 574.9  | 796.9  | 616.4  | 672.3  | 815.9  |
| 69.2   | 97.1   | 79.5   | 70.6   | 137.6  | 109.6  | 117.9  | 134.9  | 148.8  |
| 2.3    | 6.3    | 6.2    | 9.9    | 2491.5 | 2243.0 | 3573.5 | 2918.3 | 1442.8 |
| 58.8   | 53.9   | 62.7   | 49.4   | 81.4   | 66.1   | 97.1   | 102.7  | 91.0   |
| 10.0   | 11.8   | 14.8   | 7.7    | 23.4   | 24.3   | 25.5   | 22.3   | 26.0   |
| 112.0  | 100.3  | 97.9   | 115.3  | 188.0  | 160.8  | 155.4  | 156.8  | 125.5  |
| 387.2  | 356.1  | 486.5  | 316.1  | 510.6  | 545.9  | 448.5  | 544.1  | 189.2  |
| 5175.0 | 5060.8 | 6154.9 | 4495.4 | 3535.9 | 3570.8 | 4304.5 | 4297.4 | 5457.9 |
| 405.7  | 382.3  | 514.8  | 374.4  | 816.2  | 907.5  | 858.0  | 968.5  | 727.7  |
| 78.5   | 70.6   | 122.9  | 73.8   | 128.6  | 149.2  | 126.6  | 149.2  | 165.0  |
| 2998.4 | 2554.0 | 3128.1 | 2334.3 | 2478.2 | 2729.5 | 2478.7 | 2673.5 | 4352.7 |
| 1094.2 | 1277.8 | 976.7  | 998.2  | 944.1  | 1161.7 | 902.9  | 1039.7 | 3721.7 |
| 350.8  | 313.1  | 451.3  | 330.8  | 343.7  | 359.1  | 341.8  | 370.7  | 339.6  |
| 503.8  | 455.3  | 486.8  | 444.0  | 453.9  | 309.3  | 425.9  | 447.3  | 840.9  |
| 450.7  | 415.9  | 440.7  | 320.8  | 452.1  | 471.7  | 420.3  | 404.6  | 722.3  |
| 411.0  | 373.7  | 417.9  | 361.6  | 234.9  | 260.3  | 258.5  | 307.3  | 208.1  |
| 23.8   | 31.9   | 16.7   | 16.8   | 300.5  | 294.2  | 307.0  | 269.3  | 107.1  |
| 88.6   | 84.8   | 180.6  | 99.3   | 391.1  | 365.3  | 471.0  | 511.0  | 19.2   |
| 183.6  | 191.9  | 163.5  | 156.7  | 235.6  | 238.4  | 283.8  | 332.8  | 81.7   |
| 269.0  | 264.6  | 708.6  | 356.4  | 1083.3 | 841.2  | 1187.1 | 1428.0 | 15.6   |
| 79.1   | 86.8   | 76.3   | 61.7   | 109.9  | 97.1   | 182.7  | 165.0  | 75.7   |
| 505.7  | 559.2  | 443.8  | 417.5  | 702.4  | 606.6  | 942.9  | 947.1  | 252.4  |
| 31.5   | 54.7   | 20.1   | 31.9   | 6173.6 | 5074.7 | 7147.1 | 7046.7 | 1044.4 |
| 192.4  | 171.1  | 233.4  | 165.4  | 664.3  | 510.7  | 620.9  | 784.6  | 443.7  |
| 3004.8 | 2912.6 | 4067.3 | 3425.7 | 811.1  | 1071.7 | 738.7  | 1014.1 | 842.1  |
| 412.2  | 380.6  | 499.8  | 389.2  | 368.4  | 320.5  | 313.0  | 415.1  | 336.2  |
| 197.2  | 209.9  | 210.4  | 169.5  | 197.8  | 197.4  | 232.8  | 231.0  | 213.6  |
| 78.9   | 70.1   | 131.7  | 83.6   | 102.1  | 92.6   | 108.4  | 139.4  | 169.7  |
| 144.0  | 135.3  | 153.4  | 133.8  | 121.2  | 102.6  | 114.2  | 132.5  | 85.1   |
| 267.5  | 302.5  | 257.4  | 221.3  | 378.0  | 425.5  | 617.6  | 514.8  | 179.0  |
| 165.3  | 118.4  | 256.6  | 114.5  | 326.3  | 162.9  | 285.9  | 405.3  | 723.5  |
| 108.8  | 95.8   | 147.6  | 84.7   | 116.1  | 121.7  | 152.9  | 165.3  | 218.4  |
| 258.1  | 184.6  | 466.2  | 221.2  | 540.7  | 346.8  | 517.6  | 635.1  | 1291.9 |
| 563.6  | 512.4  | 785.1  | 561.1  | 639.8  | 638.9  | 591.6  | 724.4  | 620.0  |
| 101.4  | 88.4   | 164.7  | 145.3  | 147.6  | 100.0  | 144.0  | 196.5  | 167.0  |
| 118.5  | 116.2  | 182.4  | 104.1  | 1514.9 | 1950.6 | 1598.8 | 1795.1 | 1267.4 |
| 98.5   | 107.2  | 113.7  | 93.9   | 115.8  | 112.9  | 113.1  | 108.3  | 188.0  |
| 219.9  | 206.3  | 216.9  | 179.1  | 198.3  | 258.1  | 263.1  | 320.9  | 425.4  |
| 167.8  | 115.6  | 228.4  | 133.8  | 100.7  | 89.9   | 95.5   | 149.3  | 242.7  |
| 954.0  | 861.4  | 1072.6 | 877.9  | 438.0  | 465.2  | 461.6  | 632.2  | 794.7  |

|        |        |        |        |        |        |        |        |        |
|--------|--------|--------|--------|--------|--------|--------|--------|--------|
| 1558.8 | 1475.0 | 2512.6 | 2003.3 | 1421.2 | 1262.4 | 1413.1 | 1528.5 | 1382.1 |
| 541.5  | 493.6  | 621.7  | 545.2  | 769.5  | 790.3  | 719.5  | 880.8  | 553.1  |
| 142.3  | 131.0  | 156.3  | 124.9  | 467.3  | 586.1  | 666.6  | 592.7  | 278.4  |
| 147.1  | 172.1  | 178.3  | 184.8  | 320.2  | 362.1  | 305.0  | 357.7  | 252.3  |
| 233.5  | 227.3  | 289.4  | 241.8  | 642.3  | 778.4  | 965.4  | 894.9  | 345.8  |
| 272.0  | 251.9  | 291.2  | 299.3  | 751.3  | 946.2  | 915.7  | 1057.4 | 321.6  |
| 294.2  | 284.0  | 350.5  | 271.9  | 504.6  | 568.1  | 634.0  | 633.1  | 355.4  |
| 30.4   | 31.0   | 41.8   | 39.9   | 145.7  | 167.2  | 172.4  | 188.8  | 71.9   |
| 135.1  | 120.0  | 157.6  | 138.7  | 287.3  | 309.5  | 296.3  | 296.6  | 228.6  |
| 684.2  | 669.8  | 986.5  | 764.3  | 633.7  | 536.8  | 736.3  | 901.0  | 548.5  |
| 409.1  | 386.0  | 742.7  | 440.6  | 656.6  | 550.8  | 513.8  | 687.1  | 923.4  |
| 503.3  | 387.4  | 830.5  | 440.6  | 317.7  | 344.9  | 269.7  | 384.4  | 180.5  |
| 165.1  | 119.4  | 281.7  | 155.8  | 319.7  | 282.3  | 226.9  | 349.9  | 233.9  |
| 124.1  | 122.6  | 172.4  | 134.8  | 111.7  | 113.8  | 108.2  | 120.5  | 217.2  |
| 1333.0 | 1331.6 | 2039.6 | 1355.5 | 891.6  | 777.0  | 919.6  | 965.4  | 1626.8 |
| 1506.8 | 1342.9 | 2138.3 | 1215.5 | 3900.9 | 4383.3 | 3843.0 | 4099.6 | 5668.7 |
| 455.3  | 433.6  | 698.0  | 488.1  | 798.3  | 649.2  | 793.6  | 911.1  | 925.4  |
| 700.8  | 568.1  | 1076.9 | 596.4  | 1118.5 | 1204.6 | 1164.0 | 1368.8 | 874.3  |
| 186.0  | 180.2  | 248.2  | 176.4  | 183.2  | 195.7  | 206.6  | 185.4  | 419.5  |
| 40.2   | 48.0   | 52.4   | 37.6   | 165.8  | 154.5  | 211.3  | 215.7  | 142.9  |
| 117.5  | 116.3  | 176.9  | 137.5  | 176.3  | 125.7  | 200.0  | 223.1  | 233.3  |
| 127.8  | 112.3  | 213.4  | 161.8  | 185.8  | 131.4  | 257.5  | 335.4  | 255.5  |
| 1496.8 | 1270.6 | 1863.0 | 1293.0 | 2782.0 | 2655.5 | 2987.2 | 3264.7 | 2658.4 |
| 540.6  | 493.0  | 879.2  | 495.7  | 1022.6 | 977.2  | 982.4  | 1195.5 | 931.6  |
| 410.4  | 385.2  | 479.9  | 430.7  | 454.3  | 480.2  | 461.1  | 507.4  | 636.9  |
| 447.1  | 413.8  | 581.7  | 423.1  | 614.3  | 657.9  | 601.5  | 674.1  | 452.6  |
| 130.5  | 130.4  | 256.2  | 125.4  | 1024.4 | 551.8  | 939.7  | 1152.9 | 693.1  |
| 68.1   | 52.9   | 151.1  | 60.1   | 375.3  | 195.5  | 334.6  | 415.4  | 294.4  |
| 58.3   | 64.8   | 22.0   | 48.2   | 692.6  | 660.7  | 1535.1 | 1096.3 | 550.9  |
| 111.4  | 129.9  | 107.7  | 114.9  | 128.8  | 127.7  | 125.3  | 135.3  | 104.8  |
| 435.0  | 383.2  | 494.8  | 341.1  | 795.9  | 726.4  | 851.8  | 888.4  | 985.6  |
| 94.3   | 116.3  | 91.0   | 96.0   | 157.6  | 191.8  | 141.0  | 136.8  | 127.1  |
| 125.3  | 113.6  | 157.1  | 107.3  | 144.3  | 132.4  | 145.0  | 191.6  | 110.6  |
| 2812.4 | 2807.9 | 2696.9 | 2401.9 | 26.2   | 14.5   | 33.1   | 39.2   | 16.9   |
| 1541.3 | 1424.5 | 1679.9 | 1566.3 | 1152.3 | 1138.6 | 1244.2 | 1480.8 | 585.4  |
| 532.1  | 513.9  | 606.4  | 565.5  | 525.2  | 482.0  | 519.6  | 620.8  | 206.0  |
| 2604.5 | 2680.1 | 2342.8 | 2420.7 | 70.5   | 42.8   | 93.1   | 99.1   | 65.0   |
| 523.6  | 481.0  | 626.9  | 493.6  | 343.9  | 320.5  | 270.3  | 378.3  | 344.8  |
| 164.6  | 134.9  | 211.0  | 184.4  | 238.1  | 198.9  | 194.5  | 248.6  | 247.7  |
| 147.7  | 192.6  | 129.4  | 77.5   | 621.6  | 482.3  | 823.2  | 675.1  | 138.3  |
| 596.0  | 562.2  | 671.3  | 511.9  | 553.9  | 1173.9 | 676.2  | 676.7  | 663.5  |
| 112.2  | 110.9  | 86.9   | 101.0  | 154.6  | 156.6  | 144.8  | 160.8  | 82.1   |
| 45.2   | 67.4   | 51.7   | 34.3   | 170.8  | 139.1  | 243.0  | 223.9  | 68.3   |
| 275.0  | 337.2  | 236.7  | 140.3  | 774.4  | 496.1  | 1023.3 | 890.9  | 133.7  |
| 441.3  | 438.0  | 452.4  | 446.8  | 318.2  | 289.0  | 314.3  | 403.8  | 216.4  |
| 1292.7 | 1168.4 | 2677.8 | 1546.1 | 1878.8 | 2639.2 | 1887.9 | 2107.5 | 2214.2 |
| 31.9   | 25.5   | 40.7   | 34.6   | 69.6   | 38.7   | 51.0   | 58.2   | 51.9   |
| 198.8  | 234.3  | 171.5  | 233.1  | 178.5  | 172.5  | 149.4  | 191.8  | 126.5  |
| 537.8  | 563.1  | 604.9  | 557.5  | 364.7  | 391.0  | 429.0  | 500.4  | 270.5  |
| 132.5  | 127.6  | 178.8  | 152.8  | 83.0   | 59.6   | 91.2   | 111.4  | 70.3   |
| 623.4  | 589.4  | 1085.3 | 646.3  | 646.3  | 650.2  | 681.7  | 741.8  | 830.0  |
| 366.4  | 324.8  | 501.0  | 297.4  | 679.9  | 591.3  | 567.8  | 705.9  | 587.4  |
| 341.1  | 294.6  | 486.5  | 319.9  | 386.6  | 357.7  | 397.1  | 455.9  | 408.7  |

|        |        |        |        |        |        |        |        |         |
|--------|--------|--------|--------|--------|--------|--------|--------|---------|
| 773.4  | 716.6  | 1059.4 | 720.2  | 1171.1 | 734.0  | 1095.6 | 1396.4 | 1347.0  |
| 534.2  | 567.9  | 486.3  | 510.7  | 515.8  | 615.6  | 558.7  | 638.7  | 249.5   |
| 57.7   | 59.4   | 83.7   | 68.5   | 131.0  | 78.5   | 109.8  | 142.5  | 78.6    |
| 140.5  | 139.6  | 214.4  | 128.4  | 276.8  | 519.6  | 227.7  | 267.8  | 233.3   |
| 12.1   | 13.5   | 16.5   | 14.1   | 12.0   | 12.5   | 11.1   | 12.4   | 20.3    |
| 26.7   | 22.5   | 48.1   | 24.3   | 118.8  | 103.0  | 87.5   | 109.3  | 157.4   |
| 51.7   | 41.6   | 119.4  | 67.1   | 391.5  | 348.6  | 386.5  | 411.6  | 872.0   |
| 364.9  | 299.5  | 652.4  | 360.3  | 551.3  | 570.8  | 546.4  | 650.3  | 1284.1  |
| 215.6  | 223.6  | 170.7  | 168.5  | 181.7  | 179.8  | 181.2  | 190.8  | 151.6   |
| 68.1   | 71.9   | 58.0   | 62.1   | 34.8   | 43.0   | 48.8   | 62.9   | 79.6    |
| 367.6  | 298.0  | 469.7  | 311.8  | 133.5  | 187.1  | 114.9  | 130.7  | 247.7   |
| 89.9   | 99.8   | 110.6  | 127.5  | 71.1   | 77.2   | 51.8   | 77.7   | 105.2   |
| 302.4  | 313.0  | 470.3  | 325.7  | 524.2  | 476.8  | 515.3  | 632.7  | 335.9   |
| 1094.1 | 1131.6 | 1367.5 | 924.8  | 364.0  | 385.3  | 413.6  | 432.2  | 822.4   |
| 3.3    | 4.0    | 3.7    | 6.2    | 9.2    | 3.9    | 5.6    | 3.5    | 9.5     |
| 359.5  | 404.9  | 257.5  | 290.8  | 31.6   | 43.0   | 43.0   | 44.6   | 123.3   |
| 252.0  | 271.0  | 261.0  | 293.3  | 482.0  | 398.5  | 478.6  | 572.0  | 209.0   |
| 1041.6 | 976.5  | 1813.2 | 1132.8 | 3900.6 | 3806.5 | 2157.3 | 2939.1 | 5209.7  |
| 1051.7 | 859.9  | 2040.6 | 1288.1 | 319.5  | 287.8  | 330.7  | 414.4  | 163.6   |
| 7.3    | 22.3   | 55.8   | 18.3   | 259.7  | 382.9  | 329.8  | 326.8  | 25.8    |
| 23.5   | 25.9   | 40.9   | 24.1   | 196.0  | 169.5  | 374.3  | 250.1  | 47.4    |
| 272.6  | 318.2  | 285.2  | 225.8  | 397.4  | 336.1  | 400.9  | 466.3  | 248.5   |
| 78.1   | 76.7   | 69.2   | 56.9   | 1624.5 | 2390.8 | 1779.7 | 1854.5 | 10059.5 |
| 5060.6 | 4861.4 | 4903.1 | 4281.3 | 5062.6 | 5626.2 | 5277.3 | 5507.5 | 8366.4  |
| 52.4   | 53.3   | 82.9   | 33.2   | 399.2  | 317.3  | 691.9  | 413.2  | 50.2    |
| 318.6  | 296.2  | 390.1  | 290.7  | 422.8  | 438.8  | 353.5  | 386.4  | 267.3   |
| 395.4  | 387.1  | 474.4  | 409.4  | 315.5  | 332.9  | 326.2  | 385.9  | 412.6   |
| 226.6  | 227.2  | 206.9  | 212.1  | 2374.0 | 2283.2 | 2229.7 | 2853.0 | 1523.2  |
| 81.4   | 78.2   | 72.9   | 74.4   | 947.8  | 1026.2 | 765.9  | 1021.8 | 422.1   |
| 358.7  | 350.2  | 420.5  | 336.3  | 908.2  | 866.5  | 881.4  | 914.5  | 848.5   |
| 303.1  | 307.3  | 305.8  | 297.3  | 220.5  | 203.7  | 207.2  | 275.2  | 142.2   |
| 745.2  | 669.4  | 726.2  | 687.6  | 566.9  | 657.8  | 560.6  | 648.5  | 866.9   |
| 251.1  | 197.7  | 281.6  | 206.5  | 216.5  | 209.6  | 215.0  | 263.6  | 156.7   |
| 132.8  | 124.6  | 176.3  | 142.3  | 217.9  | 229.3  | 195.1  | 224.8  | 184.9   |
| 434.4  | 449.9  | 523.7  | 517.2  | 211.1  | 240.7  | 233.0  | 234.1  | 289.1   |
| 197.2  | 198.2  | 124.3  | 175.3  | 1557.4 | 1167.7 | 1568.0 | 1306.5 | 1688.0  |
| 660.9  | 666.4  | 868.2  | 704.8  | 358.3  | 400.4  | 373.8  | 420.4  | 477.3   |
| 1366.3 | 1180.3 | 2324.2 | 1415.9 | 1432.6 | 957.7  | 1102.2 | 1531.7 | 875.0   |
| 404.3  | 336.4  | 770.9  | 437.9  | 423.9  | 320.6  | 331.5  | 493.9  | 193.7   |
| 57.0   | 57.8   | 80.1   | 49.0   | 55.7   | 66.3   | 54.1   | 85.1   | 48.3    |
| 72.4   | 77.6   | 90.6   | 71.8   | 84.6   | 85.9   | 86.6   | 85.8   | 103.1   |
| 240.9  | 246.8  | 298.2  | 274.5  | 179.5  | 220.6  | 163.7  | 224.3  | 141.4   |
| 20.5   | 5.5    | 21.9   | 7.3    | 22.6   | 20.5   | 22.1   | 26.2   | 12.7    |
| 360.4  | 328.1  | 450.0  | 344.8  | 300.8  | 273.2  | 299.2  | 359.6  | 280.0   |
| 241.0  | 219.7  | 292.8  | 256.2  | 400.4  | 401.0  | 399.0  | 413.2  | 351.0   |
| 347.8  | 314.6  | 479.6  | 339.5  | 244.3  | 179.1  | 220.9  | 296.9  | 208.6   |
| 218.4  | 233.7  | 291.3  | 222.7  | 178.6  | 136.4  | 177.0  | 218.8  | 161.5   |
| 328.5  | 276.7  | 458.1  | 299.9  | 566.8  | 521.7  | 538.9  | 791.0  | 580.3   |
| 238.5  | 239.2  | 289.5  | 255.5  | 289.7  | 467.3  | 308.8  | 373.1  | 291.9   |
| 246.0  | 218.0  | 295.3  | 230.6  | 366.9  | 463.5  | 368.0  | 449.7  | 268.5   |
| 917.3  | 736.1  | 1900.9 | 1028.6 | 354.4  | 265.1  | 380.0  | 387.9  | 280.0   |
| 352.9  | 338.8  | 538.6  | 326.0  | 636.0  | 569.2  | 685.6  | 803.5  | 568.9   |
| 84.6   | 67.8   | 147.7  | 64.7   | 221.1  | 182.2  | 201.0  | 281.1  | 209.1   |

|        |        |        |        |        |        |        |        |        |
|--------|--------|--------|--------|--------|--------|--------|--------|--------|
| 143.3  | 146.7  | 164.4  | 149.0  | 382.2  | 383.3  | 416.3  | 478.5  | 348.6  |
| 120.9  | 131.9  | 148.9  | 134.7  | 176.5  | 124.4  | 169.2  | 221.6  | 191.2  |
| 132.2  | 134.3  | 184.3  | 127.1  | 352.1  | 284.5  | 315.8  | 443.9  | 230.5  |
| 197.0  | 204.7  | 141.7  | 114.9  | 0.9    | 2.1    | 10.5   | 10.8   | 3.1    |
| 3.4    | 6.5    | 4.5    | 3.5    | 6.0    | 18.5   | 13.8   | 11.1   | 27.1   |
| 103.9  | 129.8  | 106.7  | 92.9   | 280.2  | 189.0  | 466.8  | 320.6  | 465.9  |
| 1726.6 | 1631.0 | 2524.2 | 1456.3 | 4485.6 | 4685.0 | 4371.9 | 4418.3 | 6744.4 |
| 614.6  | 557.8  | 659.9  | 540.2  | 512.9  | 571.9  | 562.5  | 648.5  | 629.8  |
| 860.8  | 947.5  | 1069.8 | 924.5  | 337.7  | 296.8  | 372.3  | 379.0  | 477.2  |
| 122.8  | 150.9  | 123.0  | 111.0  | 219.0  | 174.5  | 293.0  | 315.7  | 280.7  |
| 788.5  | 832.9  | 1037.6 | 849.7  | 383.7  | 313.6  | 335.8  | 383.2  | 328.1  |
| 206.0  | 214.1  | 253.0  | 227.4  | 288.7  | 332.2  | 272.2  | 299.7  | 273.0  |
| 26.0   | 29.6   | 32.0   | 23.2   | 1233.3 | 1504.5 | 1305.3 | 1317.4 | 513.6  |
| 127.4  | 136.0  | 145.4  | 126.8  | 265.8  | 250.0  | 236.3  | 277.7  | 134.1  |
| 19.3   | 19.8   | 32.0   | 15.7   | 78.4   | 78.7   | 88.6   | 100.4  | 72.9   |
| 39.2   | 31.2   | 47.7   | 31.4   | 1396.2 | 2879.5 | 4046.9 | 2287.0 | 58.0   |
| 213.8  | 263.7  | 244.9  | 231.3  | 444.7  | 416.2  | 393.2  | 449.1  | 238.1  |
| 131.2  | 152.6  | 145.4  | 136.6  | 245.8  | 218.4  | 218.9  | 252.8  | 192.4  |
| 121.6  | 101.0  | 110.3  | 82.3   | 116.6  | 87.4   | 129.5  | 147.5  | 170.7  |
| 230.8  | 206.3  | 198.9  | 138.6  | 126.5  | 116.6  | 177.2  | 180.7  | 233.9  |
| 130.9  | 106.3  | 162.8  | 108.5  | 164.7  | 177.5  | 166.3  | 191.9  | 163.0  |
| 149.4  | 135.5  | 316.0  | 151.6  | 4417.2 | 3292.1 | 5127.0 | 5353.4 | 121.0  |
| 237.3  | 221.7  | 249.6  | 197.4  | 330.6  | 333.9  | 326.1  | 408.8  | 243.5  |
| 386.7  | 392.0  | 483.4  | 377.3  | 392.7  | 428.4  | 395.0  | 472.7  | 264.0  |
| 301.1  | 297.9  | 526.5  | 300.2  | 1594.4 | 1462.8 | 1323.1 | 1774.9 | 1724.9 |
| 68.9   | 63.0   | 123.8  | 63.3   | 707.8  | 761.1  | 669.4  | 696.9  | 700.6  |
| 418.2  | 356.3  | 967.6  | 371.4  | 525.6  | 403.7  | 504.0  | 617.5  | 643.0  |
| 931.7  | 938.7  | 1065.9 | 881.1  | 487.0  | 365.4  | 379.6  | 445.3  | 981.1  |
| 66.8   | 58.2   | 50.4   | 35.4   | 28.6   | 32.4   | 40.3   | 43.7   | 61.0   |
| 1262.8 | 1112.0 | 1737.1 | 1050.6 | 1202.9 | 1084.6 | 1203.7 | 1329.1 | 1132.1 |
| 852.6  | 791.1  | 984.4  | 741.6  | 539.7  | 496.3  | 564.3  | 616.6  | 486.5  |
| 213.0  | 210.6  | 228.0  | 242.4  | 101.7  | 135.5  | 117.6  | 128.7  | 124.8  |
| 12.5   | 25.1   | 4.9    | 17.3   | 245.6  | 226.9  | 202.5  | 241.5  | 9.5    |
| 184.9  | 195.5  | 142.3  | 178.5  | 926.2  | 847.9  | 837.8  | 1066.7 | 141.5  |
| 281.0  | 293.1  | 314.7  | 237.8  | 352.2  | 277.8  | 410.5  | 482.5  | 225.0  |
| 271.4  | 256.6  | 313.1  | 205.8  | 383.1  | 253.3  | 376.0  | 414.9  | 30.2   |
| 40.8   | 36.6   | 43.1   | 36.7   | 70.6   | 54.3   | 74.6   | 94.7   | 107.1  |
| 13.1   | 16.1   | 14.9   | 11.5   | 8.6    | 11.9   | 3.0    | 20.5   | 14.0   |
| 168.9  | 195.9  | 127.4  | 170.7  | 67.0   | 105.1  | 99.6   | 95.0   | 94.7   |
| 179.2  | 162.2  | 186.8  | 179.4  | 128.9  | 117.4  | 120.4  | 131.4  | 146.2  |
| 227.4  | 222.6  | 237.1  | 211.0  | 152.3  | 131.7  | 131.0  | 189.8  | 211.9  |
| 34.4   | 42.0   | 60.6   | 40.8   | 308.0  | 397.7  | 322.3  | 366.0  | 210.8  |
| 69.7   | 69.4   | 110.4  | 87.4   | 493.0  | 588.3  | 580.9  | 566.2  | 488.0  |
| 272.6  | 237.6  | 381.2  | 236.4  | 505.7  | 453.8  | 503.9  | 564.6  | 595.3  |
| 223.5  | 244.0  | 424.0  | 265.9  | 1478.2 | 1580.2 | 1546.5 | 1763.1 | 2245.2 |
| 852.1  | 724.7  | 841.9  | 638.3  | 740.1  | 530.9  | 752.2  | 807.9  | 806.4  |
| 360.5  | 356.2  | 386.4  | 361.8  | 382.1  | 292.2  | 323.8  | 428.6  | 428.7  |
| 104.4  | 130.0  | 115.2  | 112.6  | 293.8  | 212.7  | 273.0  | 376.7  | 183.3  |
| 149.3  | 148.0  | 171.5  | 170.7  | 332.4  | 325.2  | 276.8  | 298.3  | 209.2  |
| 5160.9 | 4927.6 | 6248.6 | 5446.5 | 6045.0 | 6167.8 | 6273.4 | 6419.5 | 8191.7 |
| 619.4  | 602.4  | 804.5  | 587.7  | 649.8  | 640.5  | 630.0  | 715.3  | 803.6  |
| 23.5   | 19.6   | 45.5   | 20.0   | 23.9   | 22.0   | 31.7   | 38.0   | 17.3   |
| 5886.2 | 5288.6 | 6638.3 | 5192.5 | 5575.5 | 5905.3 | 5873.4 | 6185.7 | 5652.7 |



|        |        |        |        |        |        |        |        |         |
|--------|--------|--------|--------|--------|--------|--------|--------|---------|
| 82.4   | 89.0   | 150.8  | 84.9   | 106.0  | 101.3  | 130.7  | 138.9  | 65.1    |
| 42.1   | 26.1   | 69.1   | 57.3   | 48.4   | 44.8   | 41.2   | 66.1   | 61.0    |
| 135.6  | 115.6  | 223.1  | 133.7  | 180.0  | 186.3  | 242.4  | 249.8  | 143.2   |
| 523.4  | 535.8  | 533.7  | 454.7  | 583.6  | 513.0  | 746.9  | 734.1  | 217.2   |
| 20.1   | 11.3   | 17.5   | 12.6   | 7.3    | 10.8   | 7.5    | 10.6   | 20.0    |
| 324.9  | 258.9  | 728.9  | 221.3  | 992.1  | 759.1  | 1247.2 | 1135.2 | 888.1   |
| 221.1  | 159.0  | 231.3  | 176.2  | 150.5  | 198.1  | 150.2  | 171.2  | 244.0   |
| 296.3  | 251.4  | 813.0  | 219.8  | 914.7  | 647.1  | 1028.6 | 914.3  | 662.7   |
| 321.3  | 283.1  | 937.9  | 255.1  | 897.2  | 650.5  | 1057.6 | 975.1  | 687.1   |
| 9.9    | 18.8   | 9.4    | 28.8   | 14.5   | 27.3   | 34.4   | 28.6   | 15.9    |
| 8492.1 | 8065.5 | 8826.9 | 8409.8 | 8182.6 | 8333.4 | 8399.4 | 8623.9 | 11453.3 |
| 190.9  | 208.1  | 198.7  | 214.9  | 522.5  | 665.6  | 420.2  | 576.3  | 138.9   |
| 210.4  | 225.7  | 193.5  | 211.8  | 106.1  | 128.5  | 114.9  | 152.1  | 81.6    |
| 643.9  | 655.4  | 951.3  | 644.0  | 929.1  | 701.4  | 861.7  | 866.9  | 1091.9  |
| 235.8  | 229.3  | 271.8  | 246.5  | 409.3  | 338.5  | 419.4  | 504.8  | 82.1    |
| 167.5  | 193.7  | 142.4  | 189.1  | 73.7   | 86.7   | 65.1   | 72.7   | 53.9    |
| 67.8   | 65.6   | 121.0  | 84.6   | 188.8  | 310.0  | 202.0  | 216.8  | 276.0   |
| 117.2  | 107.4  | 128.4  | 81.4   | 111.2  | 115.7  | 156.1  | 109.7  | 166.5   |
| 27.8   | 31.6   | 52.5   | 37.2   | 62.9   | 113.0  | 64.3   | 69.6   | 111.1   |
| 280.1  | 277.2  | 338.3  | 236.2  | 416.7  | 400.9  | 383.3  | 485.4  | 254.7   |
| 177.9  | 155.5  | 371.5  | 224.9  | 2022.1 | 2125.6 | 2089.7 | 2264.8 | 2102.0  |
| 370.5  | 377.3  | 676.7  | 483.0  | 1561.8 | 2203.8 | 1626.2 | 1678.1 | 1306.4  |
| 1202.8 | 1008.1 | 2028.2 | 1179.5 | 2370.6 | 2033.0 | 2337.6 | 2574.6 | 2204.7  |
| 453.3  | 451.3  | 562.4  | 479.2  | 715.2  | 627.5  | 855.9  | 838.5  | 752.9   |
| 477.9  | 560.3  | 310.4  | 374.4  | 871.8  | 681.1  | 908.3  | 1036.6 | 318.2   |
| 264.2  | 284.0  | 211.7  | 243.8  | 179.7  | 279.5  | 187.4  | 205.4  | 95.6    |
| 168.0  | 164.9  | 227.4  | 170.0  | 262.0  | 215.1  | 233.4  | 243.3  | 320.3   |
| 614.6  | 582.9  | 770.1  | 629.3  | 449.7  | 342.1  | 401.7  | 575.5  | 548.3   |
| 127.0  | 141.1  | 164.0  | 140.5  | 87.5   | 71.9   | 105.1  | 107.0  | 165.7   |
| 148.9  | 126.4  | 209.0  | 128.6  | 146.7  | 152.5  | 123.9  | 180.0  | 110.4   |
| 141.0  | 149.2  | 162.8  | 157.9  | 213.0  | 253.9  | 221.9  | 267.6  | 182.2   |
| 160.9  | 176.4  | 246.4  | 158.8  | 272.3  | 260.9  | 281.8  | 311.3  | 306.3   |
| 238.5  | 283.3  | 212.5  | 212.5  | 174.7  | 279.8  | 197.7  | 196.3  | 329.3   |
| 36.2   | 34.2   | 49.5   | 31.7   | 77.7   | 78.0   | 81.2   | 89.8   | 58.7    |
| 78.8   | 79.7   | 108.7  | 91.6   | 121.4  | 142.3  | 130.7  | 144.6  | 119.1   |
| 47.2   | 46.1   | 41.8   | 45.0   | 65.7   | 63.6   | 58.7   | 84.7   | 44.3    |
| 22.9   | 26.1   | 37.0   | 25.6   | 524.4  | 982.5  | 634.8  | 684.7  | 102.2   |
| 349.5  | 341.5  | 437.1  | 284.2  | 399.8  | 315.3  | 289.1  | 304.0  | 203.5   |
| 162.7  | 167.3  | 225.3  | 187.4  | 172.3  | 181.5  | 155.5  | 189.2  | 224.1   |
| 35.6   | 38.1   | 47.6   | 56.3   | 991.8  | 1550.1 | 1261.0 | 1243.3 | 144.6   |
| 42.3   | 36.8   | 42.3   | 21.4   | 7.2    | 8.0    | 7.7    | 2.5    | 6.0     |
| 125.2  | 121.1  | 202.1  | 122.1  | 40.4   | 44.9   | 35.1   | 56.0   | 22.6    |
| 180.6  | 149.7  | 250.2  | 188.1  | 273.1  | 216.4  | 303.5  | 268.9  | 266.1   |
| 604.4  | 603.4  | 977.5  | 667.3  | 612.0  | 645.7  | 666.6  | 661.2  | 418.8   |
| 65.0   | 77.2   | 61.1   | 63.4   | 62.6   | 90.6   | 73.8   | 100.6  | 58.4    |
| 2007.6 | 1788.0 | 3337.3 | 1777.1 | 4748.8 | 3651.9 | 4714.5 | 5382.3 | 4176.1  |
| 245.2  | 261.3  | 324.3  | 276.3  | 170.0  | 199.2  | 175.2  | 191.0  | 101.0   |
| 804.4  | 830.9  | 1016.5 | 776.7  | 301.4  | 397.9  | 349.5  | 421.9  | 226.5   |
| 117.8  | 105.8  | 125.4  | 123.9  | 50.4   | 64.9   | 70.8   | 74.1   | 60.9    |
| 99.8   | 95.6   | 117.9  | 96.1   | 48.4   | 83.4   | 51.5   | 73.6   | 60.9    |
| 117.0  | 130.8  | 153.2  | 139.0  | 478.0  | 432.1  | 610.8  | 563.0  | 275.1   |
| 53.6   | 61.3   | 48.5   | 68.1   | 51.0   | 52.4   | 44.9   | 69.1   | 34.8    |
| 147.7  | 134.5  | 149.1  | 166.3  | 682.2  | 421.3  | 815.8  | 737.0  | 330.2   |

|        |        |        |        |        |        |        |        |        |
|--------|--------|--------|--------|--------|--------|--------|--------|--------|
| 131.9  | 142.3  | 126.6  | 155.4  | 615.8  | 328.7  | 645.9  | 592.6  | 312.9  |
| 161.0  | 150.8  | 189.0  | 159.4  | 291.8  | 341.5  | 319.4  | 321.7  | 295.2  |
| 506.1  | 450.3  | 873.4  | 463.2  | 1094.1 | 753.0  | 931.0  | 1156.4 | 2190.3 |
| 726.4  | 871.1  | 416.7  | 633.1  | 445.0  | 377.5  | 455.5  | 538.9  | 378.4  |
| 122.3  | 145.3  | 69.1   | 102.9  | 121.2  | 129.3  | 127.3  | 120.8  | 102.3  |
| 333.8  | 289.7  | 490.2  | 312.6  | 1365.4 | 1190.4 | 1570.8 | 1651.3 | 986.7  |
| 1173.5 | 1212.8 | 971.9  | 1355.2 | 990.7  | 1262.8 | 1055.7 | 1258.6 | 500.9  |
| 790.6  | 783.7  | 638.6  | 796.9  | 932.4  | 1131.2 | 1018.1 | 1171.7 | 319.5  |
| 33.5   | 34.9   | 35.0   | 37.4   | 104.8  | 108.7  | 91.3   | 108.6  | 45.0   |
| 542.0  | 536.7  | 451.3  | 478.8  | 426.1  | 472.8  | 418.1  | 486.2  | 165.3  |
| 270.4  | 223.3  | 313.8  | 223.6  | 26.5   | 46.1   | 37.0   | 34.1   | 29.4   |
| 46.2   | 47.9   | 42.8   | 56.9   | 41.6   | 60.3   | 37.8   | 58.0   | 32.3   |
| 142.1  | 126.6  | 199.0  | 145.6  | 155.3  | 170.3  | 152.9  | 195.4  | 204.0  |
| 406.4  | 414.5  | 621.1  | 507.2  | 381.1  | 426.4  | 389.3  | 413.9  | 423.4  |
| 101.3  | 78.2   | 164.3  | 107.5  | 124.2  | 120.8  | 126.7  | 133.2  | 113.2  |
| 78.2   | 66.4   | 121.7  | 90.8   | 73.9   | 86.3   | 66.3   | 80.5   | 47.0   |
| 2.2    | 2.7    | 2.0    | 5.7    | 3.1    | 8.8    | 13.3   | 31.1   | 44.6   |
| 235.8  | 258.2  | 268.1  | 245.8  | 291.3  | 281.5  | 282.8  | 310.6  | 363.3  |
| 90.6   | 111.6  | 64.2   | 86.8   | 45.4   | 39.2   | 23.7   | 42.2   | 26.4   |
| 255.3  | 284.4  | 186.8  | 241.4  | 66.9   | 87.2   | 90.3   | 100.5  | 87.2   |
| 372.2  | 387.1  | 492.0  | 355.4  | 373.4  | 277.3  | 354.3  | 485.6  | 423.7  |
| 63.5   | 61.4   | 90.1   | 68.5   | 137.2  | 127.1  | 125.4  | 148.6  | 108.7  |
| 43.8   | 37.9   | 70.0   | 31.1   | 504.8  | 461.7  | 498.1  | 562.2  | 157.1  |
| 280.3  | 234.7  | 396.8  | 281.5  | 230.4  | 224.5  | 228.1  | 263.8  | 289.0  |
| 1455.2 | 1217.6 | 1593.4 | 1183.6 | 1927.1 | 2033.7 | 2163.5 | 2551.9 | 791.3  |
| 5.6    | 9.0    | 7.3    | 3.8    | 7.8    | 9.9    | 11.5   | 16.5   | 38.5   |
| 5.3    | 2.5    | 2.8    | 7.0    | 10.8   | 12.0   | 23.6   | 37.0   | 57.6   |
| 358.5  | 355.5  | 332.0  | 295.8  | 179.5  | 174.8  | 174.9  | 219.2  | 300.9  |
| 248.4  | 340.0  | 141.0  | 240.9  | 80.3   | 129.6  | 89.3   | 111.5  | 100.6  |
| 297.3  | 276.2  | 336.5  | 273.6  | 130.0  | 118.9  | 142.5  | 185.5  | 157.2  |
| 6.3    | 10.3   | 8.1    | 18.8   | 2.5    | 5.1    | 2.8    | 5.0    | 35.7   |
| 128.3  | 134.2  | 158.3  | 129.6  | 182.8  | 258.3  | 183.4  | 211.1  | 172.3  |
| 3.4    | 4.7    | 22.5   | 17.7   | 402.2  | 378.6  | 519.8  | 535.8  | 237.4  |
| 157.9  | 168.2  | 148.4  | 191.5  | 441.3  | 361.8  | 428.2  | 483.5  | 477.2  |
| 31.8   | 25.5   | 42.3   | 35.9   | 52.6   | 42.3   | 39.7   | 54.8   | 59.8   |
| 5956.4 | 5884.6 | 6692.6 | 5367.8 | 6661.5 | 6262.8 | 6756.0 | 7168.0 | 8100.2 |
| 915.9  | 1086.5 | 958.2  | 880.5  | 793.9  | 478.0  | 638.2  | 907.2  | 205.3  |
| 585.5  | 673.0  | 597.2  | 524.2  | 599.2  | 568.4  | 692.1  | 725.4  | 210.2  |
| 142.7  | 167.5  | 152.0  | 180.4  | 87.3   | 71.3   | 88.8   | 102.2  | 50.8   |
| 448.8  | 445.6  | 455.8  | 439.5  | 159.2  | 184.2  | 172.1  | 186.5  | 223.9  |
| 314.8  | 360.7  | 301.5  | 370.2  | 162.4  | 159.4  | 192.4  | 221.1  | 97.7   |
| 213.0  | 217.2  | 271.0  | 225.5  | 372.1  | 345.8  | 355.5  | 411.3  | 414.0  |
| 481.8  | 535.8  | 298.0  | 518.1  | 536.7  | 826.9  | 670.8  | 699.1  | 333.4  |
| 516.3  | 478.5  | 759.2  | 464.6  | 714.4  | 708.6  | 676.7  | 783.7  | 787.1  |
| 280.6  | 287.4  | 293.4  | 277.5  | 873.2  | 649.7  | 910.2  | 1064.8 | 1120.6 |
| 226.5  | 230.0  | 273.2  | 193.9  | 145.9  | 153.2  | 155.5  | 165.8  | 206.0  |
| 54.2   | 50.0   | 42.9   | 48.5   | 45.3   | 43.9   | 46.4   | 53.8   | 96.3   |
| 142.8  | 120.2  | 133.0  | 147.7  | 103.2  | 104.9  | 108.7  | 121.1  | 110.8  |
| 85.0   | 89.0   | 126.3  | 91.9   | 90.4   | 108.6  | 90.4   | 122.4  | 103.0  |
| 647.8  | 624.3  | 637.4  | 519.9  | 1009.4 | 899.2  | 940.2  | 1139.4 | 880.8  |
| 389.5  | 364.6  | 542.0  | 398.8  | 733.8  | 777.9  | 745.6  | 969.6  | 613.9  |
| 250.6  | 220.0  | 348.2  | 231.8  | 466.2  | 523.4  | 440.8  | 499.0  | 446.0  |
| 194.2  | 185.7  | 162.0  | 195.5  | 238.1  | 286.6  | 291.5  | 266.8  | 192.8  |

|        |        |        |        |        |        |        |        |         |
|--------|--------|--------|--------|--------|--------|--------|--------|---------|
| 117.0  | 122.5  | 212.8  | 98.2   | 256.5  | 200.3  | 237.6  | 295.3  | 290.0   |
| 5.9    | 7.2    | 8.2    | 9.5    | 34.4   | 21.2   | 46.6   | 48.9   | 35.2    |
| 202.1  | 181.6  | 158.4  | 162.5  | 154.6  | 194.5  | 230.9  | 192.8  | 208.2   |
| 10.1   | 12.3   | 14.5   | 10.5   | 15.1   | 9.4    | 20.5   | 13.2   | 14.9    |
| 9.0    | 9.7    | 6.1    | 7.6    | 37.7   | 25.5   | 44.9   | 50.3   | 30.1    |
| 10.0   | 15.3   | 6.9    | 10.3   | 154.9  | 109.3  | 184.3  | 179.1  | 122.9   |
| 2.6    | 4.8    | 11.2   | 7.3    | 58.8   | 31.0   | 61.9   | 70.9   | 39.9    |
| 126.0  | 124.6  | 157.4  | 121.5  | 397.4  | 329.7  | 362.2  | 451.1  | 220.0   |
| 3.2    | 1.8    | 3.3    | 2.8    | 4.3    | 8.0    | 2.1    | 4.5    | 11.2    |
| 44.6   | 44.0   | 31.3   | 45.7   | 43.3   | 80.8   | 68.6   | 92.6   | 14.5    |
| 8190.1 | 7874.5 | 9051.5 | 7903.8 | 8036.2 | 8339.5 | 8448.7 | 8759.3 | 11426.2 |
| 29.8   | 23.9   | 57.7   | 32.8   | 40.3   | 35.7   | 38.1   | 52.3   | 40.1    |
| 59.9   | 55.0   | 50.6   | 68.3   | 121.6  | 157.8  | 129.0  | 139.3  | 59.6    |
| 49.2   | 30.8   | 48.3   | 34.9   | 65.7   | 71.4   | 75.8   | 96.3   | 51.2    |
| 68.6   | 55.8   | 84.3   | 57.1   | 147.3  | 164.1  | 151.1  | 166.5  | 107.6   |
| 110.1  | 95.6   | 146.1  | 80.1   | 332.4  | 440.8  | 382.9  | 424.8  | 346.5   |
| 118.8  | 130.3  | 241.4  | 120.7  | 2531.6 | 2206.2 | 2731.6 | 2941.1 | 1085.8  |
| 50.9   | 51.7   | 88.1   | 45.9   | 657.9  | 564.5  | 655.7  | 790.6  | 395.2   |
| 486.0  | 560.9  | 373.3  | 507.2  | 141.7  | 191.1  | 161.5  | 212.2  | 292.2   |
| 525.7  | 534.0  | 518.9  | 594.7  | 187.1  | 216.7  | 194.6  | 214.8  | 121.4   |
| 224.2  | 239.6  | 288.3  | 231.3  | 418.7  | 404.6  | 416.0  | 460.7  | 372.7   |
| 340.7  | 359.1  | 382.2  | 346.4  | 520.6  | 386.5  | 529.3  | 575.1  | 532.8   |
| 180.0  | 186.1  | 146.3  | 175.2  | 135.1  | 143.0  | 159.7  | 164.1  | 179.8   |
| 61.6   | 60.0   | 56.0   | 66.5   | 39.9   | 44.7   | 44.8   | 57.4   | 86.5    |
| 426.8  | 379.5  | 570.8  | 401.2  | 536.9  | 551.2  | 629.1  | 683.3  | 1012.0  |
| 510.6  | 645.4  | 223.5  | 514.1  | 353.1  | 457.8  | 356.7  | 436.8  | 449.1   |
| 251.8  | 212.5  | 323.8  | 232.3  | 258.9  | 239.4  | 288.0  | 275.7  | 482.4   |
| 378.9  | 421.3  | 393.8  | 297.1  | 739.8  | 722.5  | 697.9  | 808.4  | 1101.2  |
| 111.8  | 111.3  | 111.4  | 81.2   | 278.9  | 257.6  | 255.4  | 351.0  | 395.1   |
| 1154.6 | 1072.7 | 1648.9 | 1172.3 | 584.9  | 565.0  | 585.7  | 771.6  | 1477.5  |
| 422.0  | 371.8  | 562.9  | 421.3  | 801.3  | 795.4  | 857.5  | 821.6  | 835.6   |
| 668.9  | 734.8  | 696.3  | 672.3  | 588.0  | 473.6  | 1091.1 | 675.8  | 477.1   |
| 22.1   | 23.8   | 33.1   | 20.8   | 105.3  | 88.9   | 105.7  | 121.6  | 51.6    |
| 27.0   | 25.4   | 31.0   | 23.1   | 239.0  | 214.8  | 265.5  | 323.5  | 100.9   |
| 96.8   | 95.7   | 118.1  | 91.6   | 80.7   | 81.7   | 74.0   | 90.0   | 58.9    |
| 603.7  | 652.8  | 564.7  | 590.0  | 633.0  | 597.8  | 662.8  | 758.3  | 551.6   |
| 185.0  | 192.8  | 203.3  | 163.3  | 356.2  | 356.6  | 485.0  | 476.7  | 391.9   |
| 512.1  | 564.3  | 464.3  | 543.7  | 267.8  | 230.9  | 255.5  | 322.4  | 218.0   |
| 53.4   | 38.5   | 54.2   | 27.8   | 97.0   | 108.7  | 137.3  | 145.4  | 340.6   |
| 242.8  | 216.1  | 195.2  | 187.3  | 117.2  | 104.8  | 127.8  | 168.7  | 135.8   |
| 68.4   | 68.3   | 132.0  | 77.9   | 150.8  | 172.0  | 203.9  | 185.6  | 37.3    |
| 152.8  | 155.0  | 235.7  | 172.0  | 254.7  | 275.9  | 249.3  | 270.4  | 486.3   |
| 94.5   | 71.4   | 111.9  | 58.2   | 150.8  | 172.1  | 174.6  | 188.2  | 510.8   |
| 120.3  | 95.0   | 126.5  | 112.9  | 187.4  | 198.9  | 205.4  | 247.8  | 272.5   |
| 40.4   | 45.3   | 46.5   | 46.7   | 29.2   | 29.9   | 32.5   | 49.1   | 28.3    |
| 3872.5 | 3509.4 | 5828.6 | 3818.8 | 4041.7 | 3104.3 | 3740.4 | 4578.2 | 4739.7  |
| 34.8   | 44.2   | 38.6   | 44.1   | 21.0   | 17.2   | 22.1   | 31.9   | 47.0    |
| 386.2  | 364.7  | 459.8  | 385.5  | 555.3  | 675.2  | 558.5  | 652.7  | 526.1   |
| 436.2  | 433.9  | 611.2  | 407.5  | 718.8  | 715.7  | 737.2  | 897.9  | 781.3   |
| 445.2  | 435.3  | 673.6  | 397.2  | 74.6   | 74.6   | 63.6   | 85.5   | 61.9    |
| 105.8  | 91.5   | 83.4   | 95.9   | 173.6  | 163.9  | 206.4  | 145.1  | 169.3   |
| 196.5  | 162.8  | 344.4  | 205.7  | 434.7  | 423.9  | 460.9  | 459.6  | 822.1   |
| 6980.9 | 6704.7 | 8260.8 | 7012.0 | 7173.4 | 7479.6 | 7304.1 | 7843.9 | 10357.9 |

|        |        |        |        |        |        |        |        |        |
|--------|--------|--------|--------|--------|--------|--------|--------|--------|
| 229.4  | 202.3  | 357.9  | 213.1  | 325.1  | 302.0  | 320.8  | 329.9  | 896.9  |
| 279.0  | 257.9  | 309.7  | 301.3  | 272.3  | 228.9  | 262.0  | 324.9  | 224.2  |
| 154.5  | 168.9  | 179.5  | 141.1  | 165.0  | 167.3  | 142.0  | 168.1  | 148.2  |
| 300.1  | 270.7  | 409.0  | 283.6  | 315.7  | 311.5  | 306.6  | 359.4  | 733.7  |
| 242.4  | 232.0  | 350.6  | 232.7  | 926.1  | 892.1  | 997.1  | 1053.5 | 707.1  |
| 127.2  | 147.6  | 122.0  | 117.1  | 111.7  | 115.0  | 101.4  | 149.6  | 179.0  |
| 376.3  | 363.7  | 663.3  | 353.3  | 726.4  | 667.2  | 704.7  | 843.5  | 523.7  |
| 291.3  | 260.1  | 413.0  | 271.5  | 278.3  | 313.2  | 292.4  | 386.9  | 197.1  |
| 691.9  | 665.1  | 989.1  | 746.4  | 412.7  | 339.1  | 451.8  | 475.5  | 118.7  |
| 89.8   | 96.9   | 86.6   | 114.3  | 23.8   | 26.9   | 27.8   | 31.7   | 24.9   |
| 192.5  | 212.0  | 116.3  | 125.5  | 334.2  | 193.2  | 490.8  | 330.4  | 1073.2 |
| 775.0  | 825.5  | 695.6  | 736.2  | 634.0  | 577.4  | 441.1  | 553.4  | 861.7  |
| 644.1  | 601.1  | 875.3  | 675.9  | 281.1  | 208.2  | 271.1  | 346.8  | 101.2  |
| 263.4  | 319.7  | 327.5  | 273.3  | 301.1  | 276.7  | 261.0  | 332.4  | 416.3  |
| 182.3  | 232.7  | 192.5  | 302.9  | 71.7   | 42.8   | 45.6   | 57.7   | 72.8   |
| 2408.1 | 2159.4 | 3550.7 | 2328.2 | 1659.6 | 1327.8 | 1531.8 | 1867.0 | 2252.9 |
| 234.7  | 234.6  | 226.0  | 244.3  | 156.9  | 114.1  | 130.4  | 172.6  | 180.6  |
| 68.3   | 63.7   | 71.2   | 75.5   | 72.0   | 72.5   | 118.0  | 78.5   | 199.6  |
| 97.7   | 103.0  | 116.0  | 92.4   | 55.2   | 43.6   | 68.7   | 46.8   | 79.5   |
| 557.3  | 533.1  | 732.9  | 525.2  | 668.3  | 584.3  | 640.0  | 710.5  | 348.2  |
| 385.8  | 398.8  | 436.2  | 362.1  | 294.8  | 365.0  | 348.4  | 373.1  | 372.7  |
| 730.6  | 1006.1 | 1013.1 | 808.6  | 783.3  | 667.7  | 796.7  | 963.8  | 798.8  |
| 221.0  | 223.2  | 471.3  | 287.3  | 356.6  | 261.2  | 350.8  | 395.3  | 401.2  |
| 185.5  | 191.1  | 246.5  | 158.7  | 546.0  | 574.6  | 372.1  | 606.9  | 415.2  |
| 204.2  | 186.8  | 295.5  | 127.6  | 335.0  | 409.1  | 255.3  | 308.2  | 389.8  |
| 452.3  | 463.6  | 490.8  | 508.6  | 213.3  | 166.8  | 194.8  | 254.3  | 741.4  |
| 1505.7 | 1306.1 | 2022.5 | 1294.7 | 497.1  | 423.2  | 499.3  | 676.0  | 763.0  |
| 1362.9 | 1251.8 | 1833.6 | 1377.3 | 1051.3 | 1075.6 | 1005.6 | 1219.1 | 1058.2 |
| 252.7  | 255.8  | 274.7  | 289.7  | 121.8  | 110.6  | 132.4  | 154.1  | 132.0  |
| 217.7  | 271.1  | 123.4  | 201.3  | 370.3  | 293.0  | 353.6  | 347.2  | 515.9  |
| 2.4    | 8.3    | 5.5    | 7.6    | 2594.2 | 3097.4 | 3588.9 | 3044.3 | 140.5  |
| 242.3  | 275.1  | 305.8  | 215.2  | 436.8  | 321.9  | 443.2  | 332.2  | 304.4  |
| 14.9   | 12.3   | 30.1   | 11.4   | 30.3   | 30.5   | 17.4   | 23.8   | 37.1   |
| 540.2  | 493.4  | 725.0  | 526.4  | 348.2  | 338.4  | 397.5  | 394.1  | 414.2  |
| 61.7   | 65.3   | 66.5   | 45.9   | 89.5   | 102.0  | 119.5  | 94.5   | 109.7  |
| 173.3  | 203.1  | 173.8  | 172.3  | 342.8  | 375.1  | 334.4  | 398.7  | 95.5   |
| 298.5  | 258.5  | 331.7  | 251.6  | 710.6  | 730.6  | 810.0  | 829.9  | 638.8  |
| 74.1   | 68.5   | 78.8   | 70.1   | 69.1   | 73.6   | 63.4   | 72.2   | 100.9  |
| 36.3   | 27.2   | 89.5   | 37.1   | 419.5  | 724.6  | 662.8  | 414.8  | 29.7   |
| 69.4   | 58.6   | 192.8  | 41.7   | 1032.9 | 1607.1 | 1607.6 | 990.4  | 66.7   |
| 584.9  | 554.1  | 899.5  | 784.2  | 309.1  | 341.8  | 283.2  | 348.2  | 298.7  |
| 104.6  | 105.0  | 182.0  | 141.6  | 71.0   | 81.9   | 66.1   | 87.4   | 90.4   |
| 309.5  | 300.1  | 379.5  | 317.4  | 241.1  | 247.3  | 226.4  | 294.6  | 293.6  |
| 5.6    | 7.1    | 1.0    | 5.5    | 4.8    | 5.7    | 1.2    | 10.2   | 5.6    |
| 30.7   | 28.2   | 46.0   | 25.6   | 41.8   | 35.6   | 49.0   | 53.0   | 75.7   |
| 391.0  | 405.5  | 331.7  | 318.6  | 206.6  | 219.0  | 248.0  | 294.2  | 283.8  |
| 189.3  | 175.0  | 274.9  | 197.0  | 190.8  | 214.3  | 179.4  | 218.3  | 186.5  |
| 240.3  | 251.1  | 346.2  | 254.2  | 490.5  | 710.9  | 949.8  | 664.6  | 782.0  |
| 321.6  | 368.8  | 267.7  | 317.5  | 316.3  | 307.8  | 332.8  | 358.7  | 246.4  |
| 157.7  | 153.5  | 141.2  | 140.1  | 251.6  | 248.7  | 246.7  | 285.5  | 72.3   |
| 624.2  | 554.6  | 619.5  | 513.5  | 311.3  | 265.7  | 296.3  | 340.1  | 419.8  |
| 173.1  | 173.0  | 193.0  | 130.3  | 238.1  | 262.2  | 216.9  | 277.7  | 215.0  |
| 8.6    | 5.3    | 4.0    | 4.1    | 2.9    | 6.0    | 5.7    | 10.1   | 55.4   |

|        |        |        |        |        |        |        |        |        |
|--------|--------|--------|--------|--------|--------|--------|--------|--------|
| 57.2   | 48.5   | 47.9   | 45.9   | 66.7   | 72.2   | 70.6   | 80.9   | 93.9   |
| 14.8   | 17.2   | 14.1   | 18.3   | 156.3  | 156.7  | 203.4  | 182.8  | 55.5   |
| 1.0    | 2.1    | 4.8    | 1.0    | 82.5   | 91.6   | 82.8   | 106.8  | 35.8   |
| 49.6   | 43.5   | 58.0   | 33.1   | 58.7   | 45.9   | 60.6   | 70.7   | 54.4   |
| 206.6  | 202.2  | 236.0  | 204.3  | 365.7  | 340.7  | 351.2  | 412.4  | 391.9  |
| 200.9  | 178.1  | 170.4  | 179.2  | 76.5   | 102.1  | 102.5  | 96.8   | 156.1  |
| 130.9  | 133.2  | 165.0  | 132.6  | 206.5  | 187.3  | 193.8  | 237.6  | 192.3  |
| 53.5   | 53.3   | 38.4   | 31.8   | 49.7   | 33.1   | 41.7   | 71.0   | 61.9   |
| 139.1  | 125.1  | 165.6  | 130.9  | 48.4   | 67.7   | 34.0   | 71.8   | 46.6   |
| 349.9  | 322.7  | 351.5  | 368.2  | 144.8  | 176.0  | 129.4  | 180.7  | 147.6  |
| 49.5   | 38.4   | 57.2   | 36.9   | 120.1  | 86.0   | 119.6  | 138.6  | 113.5  |
| 701.7  | 712.2  | 624.0  | 701.5  | 890.9  | 714.5  | 842.1  | 933.2  | 422.7  |
| 387.1  | 369.6  | 416.7  | 289.8  | 659.7  | 630.7  | 696.1  | 808.7  | 486.6  |
| 231.2  | 262.5  | 245.0  | 204.6  | 269.0  | 276.9  | 271.3  | 321.8  | 297.8  |
| 1247.1 | 1095.6 | 1813.1 | 1009.6 | 2186.4 | 2537.9 | 2244.2 | 2548.0 | 2494.3 |
| 430.3  | 415.3  | 626.1  | 417.2  | 729.3  | 757.2  | 735.2  | 879.2  | 765.2  |
| 164.1  | 158.1  | 182.6  | 178.2  | 79.1   | 92.2   | 87.1   | 110.9  | 62.3   |
| 177.0  | 162.1  | 196.9  | 175.4  | 86.8   | 101.3  | 94.2   | 100.8  | 65.7   |
| 126.8  | 131.5  | 152.3  | 119.4  | 114.5  | 133.0  | 135.9  | 155.9  | 355.6  |
| 607.7  | 600.2  | 839.7  | 580.6  | 1947.1 | 1611.7 | 2062.2 | 2341.3 | 830.9  |
| 398.9  | 367.4  | 541.4  | 406.8  | 704.0  | 479.7  | 573.1  | 869.7  | 407.6  |
| 613.8  | 646.4  | 439.0  | 531.7  | 136.8  | 210.3  | 121.1  | 191.3  | 346.9  |
| 91.6   | 87.9   | 104.2  | 64.9   | 3211.3 | 3450.7 | 3300.3 | 3809.0 | 642.4  |
| 900.3  | 835.4  | 1045.3 | 969.9  | 128.4  | 142.1  | 135.2  | 163.3  | 306.2  |
| 107.1  | 112.7  | 169.1  | 108.8  | 284.0  | 201.9  | 359.3  | 331.7  | 190.4  |
| 348.2  | 325.0  | 382.2  | 302.7  | 208.4  | 207.5  | 192.0  | 202.8  | 226.5  |
| 500.4  | 516.5  | 580.2  | 434.7  | 968.3  | 816.2  | 1014.2 | 1165.5 | 763.5  |
| 387.8  | 269.7  | 729.7  | 333.4  | 693.3  | 551.3  | 649.5  | 827.1  | 1289.5 |
| 662.8  | 537.3  | 1286.3 | 580.7  | 1217.5 | 861.9  | 1098.2 | 1400.6 | 1875.2 |
| 85.4   | 99.2   | 74.8   | 91.7   | 70.1   | 75.9   | 71.1   | 77.1   | 53.5   |
| 244.2  | 266.4  | 203.2  | 228.3  | 198.8  | 230.8  | 204.4  | 241.3  | 151.5  |
| 212.1  | 215.3  | 209.2  | 204.5  | 133.8  | 149.7  | 134.8  | 154.4  | 145.9  |
| 921.6  | 972.2  | 1273.6 | 887.4  | 2069.5 | 1975.8 | 2216.7 | 2326.5 | 2100.8 |
| 365.5  | 316.6  | 567.8  | 357.4  | 215.7  | 187.8  | 240.0  | 260.6  | 311.5  |
| 49.1   | 47.6   | 82.6   | 48.4   | 174.7  | 172.7  | 166.7  | 196.0  | 156.7  |
| 49.1   | 37.6   | 110.1  | 64.2   | 272.7  | 225.1  | 288.9  | 327.1  | 253.3  |
| 54.9   | 57.1   | 70.7   | 48.1   | 71.9   | 75.1   | 76.3   | 94.3   | 68.6   |
| 2.4    | 1.9    | 2.4    | 2.1    | 8.3    | 4.6    | 6.6    | 2.0    | 5.5    |
| 133.6  | 119.1  | 300.7  | 110.6  | 509.8  | 259.9  | 339.3  | 437.5  | 593.0  |
| 16.7   | 16.0   | 27.1   | 16.4   | 609.6  | 443.4  | 634.9  | 783.2  | 598.7  |
| 110.6  | 90.9   | 174.0  | 106.6  | 193.5  | 201.5  | 217.5  | 238.2  | 346.5  |
| 69.9   | 50.1   | 110.8  | 63.5   | 117.1  | 82.8   | 98.9   | 123.1  | 166.4  |
| 94.9   | 74.3   | 104.6  | 63.3   | 239.2  | 244.6  | 303.5  | 315.5  | 308.2  |
| 664.8  | 728.7  | 621.3  | 494.0  | 736.1  | 615.8  | 746.5  | 854.9  | 1285.6 |
| 26.1   | 30.0   | 22.0   | 17.7   | 27.4   | 80.7   | 24.8   | 29.4   | 1737.2 |
| 287.3  | 229.9  | 377.8  | 221.8  | 804.3  | 772.3  | 815.7  | 907.3  | 690.6  |
| 649.2  | 784.7  | 1130.0 | 637.6  | 395.6  | 252.7  | 402.7  | 492.8  | 472.0  |
| 664.2  | 689.5  | 673.3  | 715.3  | 330.1  | 344.3  | 322.3  | 395.1  | 331.4  |
| 115.5  | 133.5  | 152.6  | 135.2  | 188.7  | 236.0  | 189.5  | 202.8  | 167.7  |
| 197.9  | 240.7  | 144.9  | 154.1  | 158.6  | 113.1  | 136.4  | 169.4  | 196.9  |
| 5431.5 | 5094.8 | 6544.6 | 5527.8 | 6208.0 | 6458.0 | 6605.9 | 6798.8 | 8418.1 |
| 167.2  | 168.5  | 195.3  | 182.2  | 190.6  | 215.7  | 183.2  | 205.5  | 96.8   |
| 176.2  | 161.7  | 291.3  | 189.9  | 765.9  | 820.4  | 763.9  | 856.7  | 507.6  |

|        |        |        |        |        |        |        |        |        |
|--------|--------|--------|--------|--------|--------|--------|--------|--------|
| 207.9  | 195.4  | 297.5  | 179.9  | 355.4  | 384.3  | 313.7  | 376.2  | 472.8  |
| 315.6  | 273.8  | 531.3  | 297.1  | 259.3  | 378.8  | 307.8  | 345.4  | 364.5  |
| 326.6  | 307.1  | 464.2  | 367.5  | 325.9  | 213.0  | 279.3  | 372.6  | 228.6  |
| 536.9  | 516.2  | 613.7  | 517.8  | 299.5  | 206.5  | 314.8  | 374.8  | 279.8  |
| 1263.2 | 1387.0 | 1650.6 | 1678.6 | 790.1  | 785.7  | 753.0  | 867.2  | 762.4  |
| 5.1    | 3.8    | 10.3   | 5.2    | 21.1   | 23.4   | 11.0   | 24.8   | 23.2   |
| 128.0  | 131.5  | 140.2  | 132.4  | 238.9  | 189.9  | 238.8  | 316.3  | 239.5  |
| 465.1  | 450.4  | 624.6  | 498.6  | 269.3  | 283.9  | 265.1  | 322.2  | 174.4  |
| 150.7  | 154.9  | 146.3  | 141.8  | 265.6  | 200.4  | 247.9  | 275.8  | 232.9  |
| 81.5   | 81.5   | 69.8   | 62.0   | 133.4  | 150.1  | 132.4  | 180.8  | 103.5  |
| 37.7   | 47.8   | 36.5   | 34.9   | 65.3   | 75.5   | 62.9   | 90.4   | 65.4   |
| 317.8  | 294.5  | 326.2  | 334.1  | 546.3  | 576.8  | 685.4  | 692.3  | 79.3   |
| 483.7  | 474.0  | 847.4  | 482.7  | 759.7  | 812.9  | 609.9  | 793.2  | 2579.2 |
| 759.2  | 653.6  | 802.0  | 653.7  | 234.4  | 195.5  | 220.1  | 203.6  | 274.0  |
| 439.5  | 429.2  | 536.9  | 483.0  | 926.7  | 811.0  | 1045.8 | 1133.6 | 114.4  |
| 152.5  | 130.4  | 231.9  | 155.8  | 69.7   | 87.0   | 77.3   | 73.7   | 102.1  |
| 334.6  | 327.2  | 331.7  | 349.2  | 409.8  | 416.3  | 371.5  | 510.3  | 459.0  |
| 152.5  | 145.1  | 181.8  | 154.1  | 144.8  | 202.1  | 152.4  | 191.9  | 64.6   |
| 55.6   | 54.0   | 77.1   | 57.7   | 29.9   | 27.2   | 33.1   | 46.9   | 46.0   |
| 133.5  | 100.4  | 160.5  | 132.7  | 49.8   | 74.4   | 65.1   | 65.8   | 82.6   |
| 233.8  | 250.8  | 146.1  | 192.0  | 303.8  | 236.2  | 263.0  | 370.1  | 10.7   |
| 227.3  | 255.5  | 288.6  | 208.9  | 423.4  | 472.4  | 403.9  | 475.6  | 312.0  |
| 11.6   | 2.5    | 2.1    | 1.3    | 4.5    | 2.0    | 2.7    | 1.6    | 3.5    |
| 99.6   | 79.9   | 308.8  | 99.7   | 613.7  | 575.9  | 606.6  | 646.6  | 524.1  |
| 57.2   | 57.3   | 68.4   | 50.6   | 109.1  | 135.1  | 109.4  | 103.7  | 75.5   |
| 41.2   | 40.6   | 53.9   | 58.3   | 63.5   | 35.9   | 82.3   | 63.7   | 61.7   |
| 276.7  | 268.4  | 298.8  | 262.1  | 689.8  | 957.1  | 857.5  | 915.7  | 178.4  |
| 49.7   | 54.3   | 55.6   | 53.5   | 145.6  | 175.0  | 136.8  | 139.2  | 44.7   |
| 275.2  | 247.5  | 471.3  | 273.9  | 666.7  | 598.8  | 628.4  | 778.8  | 469.3  |
| 236.4  | 237.0  | 433.5  | 200.7  | 340.6  | 303.2  | 300.9  | 410.8  | 132.2  |
| 32.7   | 40.3   | 57.7   | 41.0   | 199.9  | 193.8  | 268.3  | 212.2  | 163.6  |
| 445.7  | 379.3  | 426.8  | 342.0  | 169.5  | 174.6  | 148.7  | 192.6  | 184.1  |
| 361.8  | 371.7  | 371.1  | 363.7  | 316.8  | 315.3  | 505.5  | 399.1  | 236.1  |
| 111.2  | 97.5   | 125.4  | 107.0  | 422.7  | 304.0  | 343.0  | 410.4  | 205.8  |
| 138.0  | 131.8  | 192.4  | 127.9  | 155.6  | 152.8  | 160.8  | 178.2  | 202.9  |
| 34.2   | 36.4   | 66.8   | 35.6   | 56.6   | 58.6   | 86.1   | 82.0   | 129.5  |
| 237.8  | 247.8  | 284.2  | 250.6  | 133.0  | 144.1  | 127.5  | 179.7  | 273.3  |
| 198.4  | 199.4  | 302.9  | 203.3  | 408.4  | 313.2  | 304.8  | 416.3  | 105.7  |
| 4522.2 | 4097.3 | 5507.3 | 4469.1 | 4768.5 | 5055.6 | 5013.5 | 5344.4 | 7805.3 |
| 196.2  | 189.0  | 316.3  | 208.0  | 371.8  | 279.2  | 291.4  | 377.2  | 76.1   |
| 10.2   | 6.5    | 10.3   | 6.6    | 20.5   | 11.1   | 13.9   | 20.7   | 31.6   |
| 7111.8 | 6705.4 | 7724.2 | 6763.0 | 7118.0 | 7359.3 | 7099.9 | 7320.1 | 8879.1 |
| 830.5  | 855.1  | 1007.9 | 880.9  | 970.2  | 918.3  | 1031.7 | 1092.3 | 1236.1 |
| 75.1   | 60.3   | 67.4   | 91.0   | 39.5   | 35.6   | 28.7   | 51.8   | 40.0   |
| 329.9  | 333.5  | 386.2  | 332.5  | 321.7  | 329.3  | 320.4  | 349.0  | 419.4  |
| 586.6  | 589.4  | 723.1  | 564.6  | 898.8  | 779.6  | 834.4  | 939.0  | 732.8  |
| 200.2  | 214.7  | 283.7  | 205.4  | 1005.3 | 864.9  | 1042.4 | 1186.7 | 1180.8 |
| 6.6    | 4.7    | 3.8    | 6.3    | 0.9    | 3.0    | 6.7    | 1.2    | 4.5    |
| 3.7    | 3.4    | 5.5    | 4.4    | 1.6    | 6.2    | 3.4    | 6.0    | 9.0    |
| 299.8  | 286.5  | 284.4  | 234.0  | 379.8  | 554.4  | 443.1  | 460.1  | 142.6  |
| 301.0  | 293.7  | 373.4  | 255.8  | 678.5  | 862.8  | 767.7  | 845.2  | 190.0  |
| 620.0  | 592.0  | 843.9  | 598.9  | 789.2  | 784.0  | 886.0  | 907.1  | 1014.6 |
| 1.2    | 2.5    | 3.2    | 0.3    | 3.7    | 0.1    | 1.5    | 0.4    | 2.4    |

|        |        |        |        |        |        |        |        |         |
|--------|--------|--------|--------|--------|--------|--------|--------|---------|
| 1005.8 | 963.3  | 1005.5 | 989.5  | 265.8  | 357.4  | 379.0  | 402.4  | 559.8   |
| 469.7  | 422.7  | 563.4  | 470.0  | 85.2   | 88.5   | 89.1   | 134.1  | 121.8   |
| 842.6  | 871.8  | 970.1  | 903.3  | 650.2  | 615.9  | 644.6  | 735.8  | 847.9   |
| 316.5  | 325.5  | 380.6  | 306.6  | 316.8  | 281.7  | 296.5  | 306.1  | 310.4   |
| 290.7  | 271.5  | 405.6  | 294.0  | 338.8  | 312.3  | 298.6  | 383.9  | 313.4   |
| 52.8   | 37.4   | 54.8   | 43.8   | 55.4   | 31.6   | 49.8   | 53.2   | 20.7    |
| 593.4  | 607.5  | 799.8  | 778.7  | 55.7   | 31.1   | 54.3   | 82.1   | 7.6     |
| 972.5  | 897.7  | 1683.5 | 1259.4 | 1217.1 | 1147.9 | 1367.3 | 1513.3 | 1293.8  |
| 139.4  | 133.0  | 236.5  | 165.3  | 235.5  | 231.5  | 208.4  | 249.7  | 197.8   |
| 174.1  | 173.7  | 210.2  | 154.5  | 140.0  | 110.8  | 93.9   | 146.3  | 73.0    |
| 198.9  | 209.0  | 250.1  | 221.4  | 319.8  | 320.0  | 337.2  | 404.3  | 516.7   |
| 223.9  | 239.3  | 280.3  | 265.3  | 417.9  | 391.3  | 455.6  | 456.7  | 720.4   |
| 412.5  | 380.6  | 513.7  | 444.0  | 177.5  | 144.2  | 134.0  | 170.9  | 61.5    |
| 83.4   | 73.9   | 101.3  | 78.6   | 95.9   | 103.0  | 94.1   | 101.9  | 40.2    |
| 15.5   | 14.4   | 16.4   | 14.7   | 334.5  | 379.2  | 350.5  | 411.7  | 581.0   |
| 474.3  | 374.3  | 383.6  | 355.2  | 225.5  | 180.2  | 166.7  | 202.4  | 129.4   |
| 21.6   | 19.1   | 27.0   | 22.3   | 147.1  | 79.3   | 152.7  | 189.3  | 204.7   |
| 1305.9 | 1275.2 | 1954.6 | 1331.8 | 1885.6 | 1722.4 | 1876.3 | 2119.6 | 2432.0  |
| 90.4   | 84.2   | 155.8  | 78.4   | 171.4  | 175.2  | 199.6  | 215.6  | 33.9    |
| 601.8  | 524.3  | 587.6  | 419.6  | 371.3  | 246.2  | 382.1  | 469.1  | 278.6   |
| 42.8   | 47.4   | 9.5    | 36.6   | 136.0  | 161.8  | 170.7  | 167.1  | 51.1    |
| 707.4  | 831.3  | 572.8  | 625.6  | 124.3  | 84.3   | 185.2  | 174.7  | 96.4    |
| 128.6  | 127.3  | 90.7   | 95.4   | 111.3  | 146.7  | 116.7  | 158.2  | 192.1   |
| 220.6  | 208.0  | 122.3  | 146.7  | 177.0  | 195.1  | 146.1  | 199.5  | 326.8   |
| 59.2   | 55.8   | 88.6   | 59.2   | 58.8   | 51.4   | 56.9   | 65.7   | 62.6    |
| 46.8   | 54.1   | 88.5   | 55.3   | 48.9   | 52.7   | 44.4   | 56.5   | 62.0    |
| 106.7  | 75.9   | 202.2  | 75.7   | 167.7  | 204.5  | 148.9  | 201.7  | 176.0   |
| 40.4   | 39.8   | 58.8   | 39.6   | 34.5   | 37.1   | 34.6   | 35.9   | 84.1    |
| 151.5  | 146.5  | 333.5  | 165.7  | 525.9  | 431.5  | 418.3  | 492.4  | 437.8   |
| 410.3  | 443.2  | 497.2  | 476.8  | 295.4  | 282.4  | 327.8  | 336.0  | 192.5   |
| 626.5  | 658.0  | 841.4  | 740.3  | 376.0  | 377.2  | 378.5  | 421.0  | 230.2   |
| 66.8   | 59.5   | 163.8  | 67.4   | 532.3  | 558.1  | 552.9  | 583.0  | 129.8   |
| 112.7  | 113.2  | 160.4  | 97.6   | 263.0  | 236.9  | 304.0  | 302.9  | 563.9   |
| 2255.9 | 2428.4 | 3314.3 | 2204.3 | 2085.6 | 2191.5 | 2240.6 | 2656.3 | 2463.3  |
| 203.7  | 191.3  | 288.6  | 229.0  | 272.6  | 295.3  | 284.7  | 248.0  | 509.8   |
| 337.9  | 344.1  | 364.9  | 312.3  | 766.8  | 648.4  | 711.9  | 895.9  | 316.8   |
| 219.7  | 237.2  | 222.6  | 155.6  | 262.6  | 252.6  | 311.7  | 336.9  | 219.4   |
| 275.6  | 269.0  | 235.0  | 240.4  | 569.8  | 535.2  | 641.5  | 704.2  | 314.5   |
| 338.2  | 356.6  | 364.1  | 371.8  | 186.2  | 175.8  | 198.7  | 235.1  | 69.3    |
| 290.2  | 274.0  | 278.8  | 258.4  | 172.7  | 145.3  | 180.3  | 181.2  | 56.9    |
| 728.1  | 764.2  | 706.7  | 758.3  | 274.0  | 201.5  | 268.9  | 362.9  | 173.3   |
| 215.1  | 218.5  | 169.1  | 200.1  | 133.5  | 106.8  | 147.9  | 163.5  | 97.6    |
| 198.8  | 193.5  | 246.5  | 182.7  | 946.2  | 980.3  | 879.6  | 1049.9 | 434.0   |
| 3.6    | 8.2    | 12.5   | 6.7    | 195.3  | 185.4  | 185.2  | 200.7  | 117.4   |
| 312.9  | 282.7  | 462.2  | 348.0  | 240.9  | 188.3  | 247.0  | 338.2  | 162.0   |
| 874.2  | 826.6  | 1073.4 | 942.7  | 776.6  | 646.8  | 847.3  | 965.4  | 450.0   |
| 5907.2 | 5489.2 | 8480.2 | 5355.3 | 8231.0 | 7968.0 | 8353.1 | 8562.8 | 10637.4 |
| 915.1  | 834.1  | 1304.5 | 760.4  | 759.9  | 671.6  | 857.5  | 905.4  | 534.2   |
| 18.9   | 22.2   | 26.1   | 24.2   | 105.4  | 80.9   | 94.3   | 101.3  | 54.1    |
| 53.4   | 37.9   | 55.9   | 48.9   | 136.1  | 139.0  | 167.3  | 178.6  | 98.2    |
| 1048.2 | 978.1  | 1388.0 | 909.8  | 2018.2 | 1585.3 | 2285.5 | 2361.6 | 2087.3  |
| 408.1  | 379.0  | 536.2  | 348.6  | 754.6  | 537.1  | 770.6  | 899.1  | 610.4   |
| 143.1  | 140.8  | 209.0  | 142.4  | 189.9  | 194.5  | 236.0  | 217.5  | 139.0   |

|        |        |        |        |        |        |        |        |         |
|--------|--------|--------|--------|--------|--------|--------|--------|---------|
| 68.0   | 75.8   | 76.9   | 81.4   | 495.1  | 526.9  | 505.2  | 510.6  | 140.4   |
| 95.0   | 129.0  | 67.6   | 95.0   | 402.3  | 543.8  | 476.8  | 484.5  | 168.6   |
| 435.5  | 386.5  | 389.6  | 343.2  | 520.9  | 451.2  | 526.0  | 615.3  | 482.7   |
| 36.0   | 34.0   | 42.0   | 28.2   | 58.1   | 45.4   | 61.1   | 75.2   | 74.9    |
| 24.3   | 23.8   | 28.3   | 21.9   | 111.5  | 117.9  | 150.2  | 135.7  | 206.4   |
| 154.4  | 159.2  | 169.4  | 174.4  | 133.1  | 113.5  | 171.2  | 160.4  | 16.5    |
| 402.9  | 403.1  | 406.4  | 396.1  | 257.3  | 233.7  | 262.2  | 311.1  | 238.1   |
| 131.8  | 141.2  | 147.9  | 130.2  | 721.7  | 637.6  | 823.0  | 903.4  | 895.9   |
| 4.7    | 1.5    | 1.9    | 1.1    | 41.8   | 30.7   | 54.7   | 46.9   | 32.0    |
| 299.1  | 288.3  | 271.1  | 220.1  | 436.0  | 435.3  | 391.1  | 467.8  | 178.5   |
| 354.9  | 321.1  | 403.0  | 349.3  | 481.0  | 423.4  | 475.2  | 559.2  | 466.5   |
| 35.6   | 28.6   | 35.3   | 18.6   | 6.5    | 10.9   | 8.8    | 2.9    | 4.8     |
| 90.5   | 79.4   | 109.3  | 73.0   | 303.3  | 429.3  | 301.0  | 331.1  | 176.2   |
| 35.7   | 32.7   | 39.5   | 40.5   | 3.2    | 2.8    | 10.4   | 31.4   | 18.6    |
| 178.5  | 181.2  | 107.4  | 126.2  | 449.2  | 396.2  | 290.2  | 424.2  | 597.6   |
| 8566.1 | 7793.6 | 9795.3 | 8031.3 | 8046.8 | 7467.0 | 8313.4 | 8759.0 | 10984.8 |
| 31.0   | 23.9   | 48.2   | 28.4   | 274.2  | 320.1  | 268.3  | 230.9  | 150.8   |
| 251.2  | 228.7  | 249.0  | 217.2  | 317.8  | 380.4  | 257.8  | 292.1  | 270.1   |
| 23.0   | 21.7   | 22.8   | 7.2    | 33.7   | 31.6   | 38.7   | 46.9   | 23.9    |
| 206.8  | 237.8  | 198.4  | 220.4  | 629.8  | 722.1  | 693.3  | 787.2  | 1147.5  |
| 117.9  | 105.0  | 129.6  | 112.6  | 372.8  | 362.9  | 318.9  | 437.7  | 151.0   |
| 3.4    | 2.6    | 1.8    | 2.8    | 1152.4 | 747.8  | 1171.9 | 1379.7 | 906.4   |
| 25.2   | 11.0   | 32.1   | 29.6   | 63.7   | 49.7   | 37.0   | 57.8   | 37.4    |
| 149.3  | 148.1  | 194.1  | 152.5  | 189.9  | 140.8  | 143.5  | 200.7  | 77.2    |
| 2.6    | 2.4    | 5.3    | 3.0    | 2.4    | 1.9    | 4.0    | 4.3    | 2.1     |
| 0.5    | 0.8    | 19.9   | 15.9   | 1.6    | 1.1    | 1.3    | 4.2    | 538.0   |
| 73.1   | 70.5   | 55.7   | 71.7   | 247.0  | 221.9  | 277.1  | 306.0  | 152.3   |
| 440.8  | 441.7  | 641.3  | 483.0  | 736.0  | 628.8  | 719.7  | 770.1  | 518.6   |
| 192.4  | 176.7  | 265.8  | 197.7  | 312.3  | 275.9  | 285.2  | 382.7  | 772.0   |
| 223.6  | 260.9  | 179.1  | 208.3  | 176.7  | 180.0  | 176.6  | 238.9  | 118.0   |
| 252.3  | 216.6  | 347.8  | 221.5  | 426.1  | 368.2  | 375.8  | 471.2  | 283.4   |
| 145.3  | 173.7  | 91.6   | 127.7  | 107.3  | 123.1  | 129.1  | 141.9  | 70.9    |
| 166.8  | 143.8  | 196.9  | 148.9  | 146.1  | 138.6  | 126.2  | 193.9  | 106.4   |
| 15.8   | 19.8   | 21.9   | 13.9   | 7.2    | 7.3    | 9.5    | 7.5    | 16.3    |
| 1356.8 | 1335.0 | 2209.4 | 1326.5 | 1353.4 | 1417.1 | 1358.7 | 1467.3 | 2129.1  |
| 3.1    | 2.0    | 2.6    | 0.5    | 208.2  | 143.0  | 233.4  | 293.9  | 0.4     |
| 109.9  | 116.1  | 135.9  | 100.5  | 140.7  | 116.6  | 130.7  | 156.8  | 86.6    |
| 272.9  | 192.0  | 327.9  | 210.8  | 167.8  | 146.6  | 144.6  | 180.4  | 267.7   |
| 198.5  | 188.3  | 223.4  | 177.4  | 128.0  | 135.9  | 132.5  | 146.9  | 79.1    |
| 707.4  | 674.0  | 1029.4 | 690.4  | 232.3  | 245.2  | 255.4  | 281.1  | 552.9   |
| 132.0  | 102.6  | 130.2  | 99.4   | 114.4  | 113.8  | 122.9  | 139.9  | 43.8    |
| 298.1  | 278.3  | 505.3  | 293.3  | 1338.3 | 1058.2 | 1665.4 | 1593.1 | 634.3   |
| 262.0  | 273.2  | 311.6  | 274.3  | 290.1  | 256.1  | 254.3  | 320.2  | 298.7   |
| 418.3  | 459.8  | 340.4  | 450.4  | 443.2  | 536.7  | 481.8  | 535.4  | 283.8   |
| 200.0  | 202.9  | 202.6  | 221.4  | 191.0  | 202.0  | 205.7  | 219.1  | 93.1    |
| 241.9  | 209.8  | 474.8  | 236.5  | 262.6  | 261.8  | 222.2  | 249.2  | 377.0   |
| 613.1  | 561.5  | 668.2  | 656.1  | 162.2  | 174.4  | 127.1  | 138.3  | 32.3    |
| 108.2  | 117.2  | 143.6  | 123.0  | 166.2  | 149.7  | 159.9  | 208.5  | 103.1   |
| 651.0  | 635.3  | 761.2  | 701.7  | 481.7  | 508.9  | 567.5  | 523.9  | 404.8   |
| 22.8   | 18.6   | 5.4    | 21.1   | 6.0    | 21.0   | 10.9   | 18.1   | 6.8     |
| 463.8  | 457.6  | 686.2  | 447.7  | 490.7  | 452.1  | 494.3  | 538.0  | 505.1   |
| 484.5  | 536.3  | 345.8  | 400.8  | 378.5  | 410.7  | 360.9  | 434.1  | 394.8   |
| 364.5  | 382.6  | 471.7  | 454.1  | 1888.5 | 1743.2 | 1912.0 | 2040.1 | 611.7   |



|        |        |        |        |        |        |        |        |        |
|--------|--------|--------|--------|--------|--------|--------|--------|--------|
| 53.1   | 50.4   | 81.6   | 47.8   | 31.1   | 27.2   | 37.2   | 35.7   | 65.5   |
| 58.4   | 70.1   | 94.5   | 89.1   | 61.9   | 57.4   | 45.2   | 50.3   | 62.5   |
| 21.6   | 15.0   | 24.1   | 10.4   | 48.7   | 61.9   | 60.6   | 49.7   | 21.5   |
| 76.8   | 84.6   | 83.8   | 80.7   | 169.6  | 167.6  | 163.4  | 197.4  | 252.4  |
| 45.1   | 55.9   | 48.8   | 44.6   | 32.2   | 49.4   | 38.8   | 47.2   | 24.4   |
| 83.3   | 93.6   | 72.1   | 77.3   | 223.8  | 222.0  | 212.5  | 298.6  | 144.2  |
| 68.4   | 67.4   | 57.2   | 76.5   | 65.0   | 55.1   | 45.4   | 69.5   | 72.1   |
| 42.6   | 37.1   | 27.1   | 36.4   | 40.9   | 49.7   | 32.8   | 48.7   | 12.9   |
| 26.0   | 18.8   | 25.4   | 17.2   | 18.6   | 25.5   | 26.2   | 16.8   | 14.7   |
| 164.7  | 148.9  | 1497.8 | 973.6  | 389.6  | 320.9  | 355.4  | 453.7  | 521.2  |
| 295.6  | 283.7  | 485.7  | 273.6  | 892.9  | 590.0  | 867.5  | 1202.2 | 633.1  |
| 84.2   | 112.6  | 150.5  | 91.9   | 244.6  | 184.5  | 183.7  | 262.7  | 112.4  |
| 130.1  | 124.0  | 209.5  | 133.1  | 200.9  | 218.3  | 183.0  | 211.2  | 137.6  |
| 141.5  | 126.5  | 213.2  | 134.2  | 173.7  | 183.9  | 152.4  | 196.4  | 112.7  |
| 1.4    | 2.5    | 1.4    | 1.5    | 27.3   | 42.0   | 55.9   | 65.8   | 2.6    |
| 437.8  | 418.7  | 759.6  | 530.6  | 551.8  | 406.3  | 474.2  | 572.7  | 913.8  |
| 52.0   | 48.7   | 83.3   | 44.8   | 128.2  | 139.6  | 101.1  | 126.5  | 79.1   |
| 1989.4 | 1698.8 | 2686.1 | 1827.0 | 2577.4 | 2862.7 | 2751.7 | 2950.3 | 4249.0 |
| 159.6  | 159.9  | 84.1   | 131.1  | 147.0  | 196.8  | 148.4  | 227.2  | 156.3  |
| 1049.0 | 904.4  | 1505.1 | 926.4  | 1536.4 | 1277.3 | 1587.5 | 1782.8 | 1192.2 |
| 146.5  | 143.9  | 174.8  | 157.0  | 89.6   | 76.1   | 81.8   | 117.2  | 37.4   |
| 330.8  | 274.2  | 511.7  | 274.5  | 613.0  | 531.3  | 560.4  | 717.9  | 283.0  |
| 408.3  | 407.6  | 447.6  | 379.1  | 509.8  | 404.6  | 475.9  | 602.1  | 480.2  |
| 58.2   | 47.7   | 97.8   | 40.2   | 219.0  | 216.2  | 209.5  | 219.7  | 266.8  |
| 157.1  | 146.8  | 219.3  | 106.3  | 562.2  | 561.7  | 553.9  | 617.3  | 646.8  |
| 333.1  | 353.1  | 393.6  | 316.0  | 1323.4 | 2525.3 | 1642.4 | 1536.1 | 904.7  |
| 1213.1 | 1183.7 | 1014.4 | 1128.3 | 753.8  | 768.9  | 739.8  | 897.1  | 307.1  |
| 220.0  | 193.2  | 221.2  | 195.8  | 151.9  | 170.2  | 105.1  | 158.4  | 128.8  |
| 105.6  | 82.8   | 160.4  | 126.6  | 47.6   | 55.9   | 57.3   | 87.8   | 68.9   |
| 130.8  | 106.9  | 206.1  | 148.8  | 29.7   | 47.9   | 30.5   | 34.9   | 23.2   |
| 167.2  | 144.2  | 299.3  | 170.2  | 57.3   | 76.1   | 50.6   | 77.5   | 73.5   |
| 57.2   | 49.4   | 109.5  | 74.9   | 274.4  | 170.5  | 281.6  | 263.8  | 279.0  |
| 274.1  | 258.1  | 254.9  | 225.7  | 93.1   | 111.7  | 98.1   | 120.7  | 114.7  |
| 8.9    | 4.4    | 10.4   | 8.1    | 5.0    | 3.0    | 6.4    | 4.5    | 10.9   |
| 184.9  | 167.3  | 251.7  | 164.5  | 118.7  | 131.9  | 141.4  | 155.9  | 150.0  |
| 5750.7 | 5470.6 | 5774.5 | 5206.9 | 6178.6 | 6507.4 | 6338.3 | 6867.9 | 8906.6 |
| 72.4   | 50.5   | 65.1   | 55.4   | 29.1   | 26.6   | 22.4   | 29.5   | 30.0   |
| 29.5   | 28.8   | 29.3   | 31.6   | 10.7   | 8.5    | 13.3   | 18.2   | 196.0  |
| 242.3  | 240.5  | 171.0  | 171.4  | 357.3  | 406.6  | 403.6  | 439.0  | 270.6  |
| 44.2   | 38.8   | 96.5   | 42.6   | 147.2  | 118.6  | 118.2  | 166.7  | 188.2  |
| 300.6  | 255.3  | 638.0  | 377.7  | 655.7  | 710.9  | 733.7  | 869.6  | 516.9  |
| 266.4  | 260.7  | 234.7  | 251.4  | 374.3  | 314.9  | 378.1  | 382.5  | 467.5  |
| 20.8   | 4.0    | 9.7    | 10.0   | 247.0  | 251.5  | 200.5  | 270.2  | 34.6   |
| 331.5  | 314.8  | 362.2  | 290.8  | 469.3  | 455.4  | 471.2  | 582.0  | 518.6  |
| 139.4  | 112.2  | 122.2  | 90.0   | 29.3   | 23.8   | 29.5   | 31.4   | 25.1   |
| 99.1   | 102.2  | 78.4   | 97.3   | 85.2   | 89.0   | 77.6   | 94.5   | 106.9  |
| 88.8   | 61.0   | 60.8   | 77.3   | 77.7   | 66.4   | 67.6   | 73.1   | 86.6   |
| 180.0  | 173.6  | 145.3  | 120.9  | 348.2  | 320.6  | 399.4  | 387.3  | 372.8  |
| 236.3  | 216.8  | 301.6  | 243.1  | 259.1  | 290.7  | 311.1  | 343.4  | 177.1  |
| 61.9   | 54.9   | 77.6   | 58.2   | 118.9  | 116.8  | 136.3  | 121.3  | 48.6   |
| 1137.2 | 1016.3 | 1125.1 | 827.3  | 393.4  | 385.5  | 401.2  | 442.6  | 405.9  |
| 1.5    | 1.0    | 2.7    | 1.5    | 2.2    | 2.0    | 1.8    | 2.3    | 4.3    |
| 226.8  | 220.5  | 336.2  | 224.1  | 299.8  | 266.3  | 299.5  | 375.2  | 378.1  |

|        |        |        |        |        |        |        |        |         |
|--------|--------|--------|--------|--------|--------|--------|--------|---------|
| 139.6  | 113.0  | 137.7  | 141.0  | 215.5  | 197.7  | 218.7  | 195.9  | 293.2   |
| 111.2  | 117.4  | 172.0  | 127.7  | 96.6   | 85.3   | 109.1  | 146.9  | 164.7   |
| 224.7  | 222.7  | 224.3  | 214.7  | 185.2  | 166.4  | 155.4  | 151.8  | 223.7   |
| 12.8   | 7.4    | 8.3    | 14.7   | 7.4    | 8.4    | 10.3   | 11.4   | 8.5     |
| 177.2  | 186.1  | 207.3  | 189.9  | 124.3  | 151.0  | 134.2  | 142.5  | 130.5   |
| 177.8  | 149.7  | 206.4  | 161.6  | 237.8  | 215.9  | 217.7  | 252.6  | 104.1   |
| 1.2    | 2.6    | 6.8    | 1.4    | 98.3   | 93.5   | 129.5  | 117.1  | 113.2   |
| 24.1   | 16.8   | 10.3   | 15.9   | 14.3   | 16.6   | 18.3   | 12.2   | 68.7    |
| 275.8  | 289.5  | 268.2  | 275.1  | 196.4  | 169.5  | 198.1  | 224.6  | 149.4   |
| 200.6  | 200.3  | 200.9  | 153.6  | 369.5  | 335.2  | 354.5  | 420.9  | 1440.9  |
| 103.2  | 91.6   | 121.0  | 86.8   | 127.4  | 123.4  | 123.4  | 148.0  | 193.4   |
| 49.3   | 45.7   | 62.6   | 43.2   | 142.3  | 131.2  | 121.0  | 142.6  | 132.6   |
| 6.7    | 5.5    | 8.1    | 4.2    | 481.9  | 454.6  | 468.9  | 541.3  | 423.0   |
| 129.6  | 113.3  | 165.1  | 127.9  | 710.3  | 733.8  | 662.1  | 766.9  | 691.3   |
| 133.7  | 120.0  | 216.3  | 130.2  | 370.2  | 373.7  | 412.6  | 468.5  | 983.5   |
| 21.7   | 26.2   | 20.6   | 18.0   | 212.3  | 201.5  | 165.2  | 193.9  | 279.0   |
| 4.9    | 3.1    | 4.7    | 2.2    | 4.5    | 1.6    | 1.6    | 2.2    | 2.1     |
| 98.3   | 66.5   | 127.3  | 84.4   | 71.7   | 45.6   | 73.0   | 79.2   | 74.7    |
| 282.7  | 230.3  | 399.4  | 301.4  | 102.5  | 87.6   | 115.8  | 113.3  | 102.4   |
| 25.9   | 26.0   | 32.4   | 26.0   | 406.9  | 326.0  | 373.2  | 449.7  | 164.4   |
| 54.0   | 55.6   | 43.9   | 59.1   | 34.1   | 36.1   | 46.6   | 52.2   | 55.9    |
| 1527.1 | 1475.3 | 1908.7 | 1427.0 | 1199.9 | 1124.6 | 1314.7 | 1287.4 | 3668.7  |
| 494.9  | 509.6  | 502.0  | 465.4  | 473.7  | 415.5  | 496.1  | 547.1  | 294.7   |
| 439.7  | 485.5  | 331.5  | 495.8  | 224.5  | 262.7  | 306.3  | 266.1  | 416.6   |
| 269.4  | 310.4  | 245.6  | 311.1  | 153.7  | 192.4  | 204.5  | 201.3  | 251.0   |
| 56.5   | 54.4   | 83.3   | 70.1   | 78.6   | 87.0   | 82.9   | 99.5   | 108.2   |
| 198.6  | 183.2  | 171.8  | 150.8  | 102.3  | 156.2  | 120.5  | 120.4  | 52.0    |
| 209.3  | 228.1  | 138.8  | 211.9  | 217.9  | 307.1  | 248.8  | 255.3  | 65.7    |
| 117.4  | 117.0  | 164.8  | 147.6  | 210.5  | 221.0  | 241.2  | 275.0  | 294.5   |
| 345.6  | 320.0  | 448.0  | 348.3  | 267.4  | 216.1  | 265.5  | 319.9  | 497.4   |
| 1199.8 | 1183.3 | 1362.7 | 1178.2 | 2182.2 | 2197.8 | 2211.7 | 2499.6 | 2293.2  |
| 176.4  | 170.0  | 238.1  | 192.1  | 109.5  | 111.6  | 100.8  | 134.5  | 208.4   |
| 67.8   | 82.7   | 68.1   | 50.9   | 170.1  | 242.0  | 167.1  | 188.7  | 101.6   |
| 320.4  | 334.1  | 363.6  | 311.3  | 298.1  | 269.1  | 323.3  | 366.5  | 378.3   |
| 63.3   | 53.0   | 84.2   | 58.1   | 73.3   | 71.1   | 61.4   | 79.9   | 120.8   |
| 373.5  | 361.0  | 380.3  | 319.2  | 506.5  | 411.3  | 461.0  | 536.3  | 317.7   |
| 5867.9 | 5797.1 | 4953.8 | 5555.7 | 8404.5 | 8951.2 | 8536.9 | 8957.0 | 7010.8  |
| 164.2  | 168.1  | 343.6  | 142.8  | 419.0  | 230.8  | 353.5  | 459.2  | 497.6   |
| 6474.0 | 6078.3 | 6434.6 | 6531.3 | 7851.7 | 8267.0 | 8099.4 | 8330.1 | 12157.9 |
| 97.3   | 92.4   | 101.3  | 90.1   | 172.9  | 219.2  | 191.9  | 228.2  | 215.5   |
| 130.1  | 121.0  | 96.1   | 108.2  | 646.8  | 482.2  | 589.4  | 717.6  | 287.3   |
| 12.4   | 12.5   | 28.6   | 14.1   | 18.8   | 7.6    | 17.8   | 22.1   | 146.7   |
| 128.3  | 114.3  | 119.8  | 115.9  | 294.1  | 246.5  | 387.1  | 352.7  | 833.6   |
| 387.9  | 375.0  | 502.7  | 460.4  | 385.3  | 317.7  | 383.2  | 451.6  | 771.4   |
| 187.5  | 204.1  | 203.5  | 227.3  | 157.7  | 160.5  | 131.3  | 156.2  | 115.3   |
| 85.5   | 67.3   | 124.5  | 69.2   | 114.9  | 132.7  | 101.1  | 164.4  | 60.4    |
| 223.7  | 203.2  | 241.3  | 175.8  | 394.4  | 390.5  | 486.6  | 509.6  | 198.0   |
| 227.6  | 205.9  | 295.6  | 252.9  | 220.3  | 203.0  | 240.3  | 257.3  | 263.5   |
| 107.3  | 104.1  | 125.4  | 102.1  | 92.4   | 93.1   | 94.1   | 114.9  | 130.3   |
| 117.9  | 144.4  | 229.6  | 119.8  | 256.1  | 204.2  | 222.6  | 276.5  | 466.5   |
| 506.8  | 494.8  | 675.1  | 558.7  | 315.7  | 329.5  | 308.6  | 367.9  | 441.0   |
| 60.7   | 57.4   | 62.5   | 55.2   | 76.8   | 65.4   | 58.8   | 75.5   | 208.7   |
| 358.8  | 332.2  | 479.9  | 351.1  | 231.5  | 244.2  | 235.0  | 298.9  | 498.1   |

|        |        |        |        |        |        |        |        |        |
|--------|--------|--------|--------|--------|--------|--------|--------|--------|
| 70.9   | 79.9   | 88.6   | 86.8   | 94.8   | 121.6  | 193.3  | 119.4  | 12.5   |
| 27.8   | 24.7   | 35.9   | 26.4   | 40.9   | 55.6   | 81.6   | 64.9   | 11.6   |
| 135.5  | 106.0  | 177.8  | 118.4  | 251.5  | 278.4  | 298.8  | 325.9  | 137.4  |
| 77.4   | 74.8   | 93.7   | 73.3   | 73.1   | 53.6   | 47.8   | 65.4   | 87.4   |
| 155.5  | 175.9  | 201.5  | 148.9  | 136.6  | 154.0  | 139.9  | 176.2  | 335.6  |
| 160.6  | 140.5  | 349.7  | 191.4  | 118.9  | 335.3  | 131.4  | 136.4  | 412.6  |
| 363.6  | 284.5  | 641.4  | 395.7  | 210.9  | 598.6  | 268.0  | 261.9  | 718.9  |
| 604.1  | 605.0  | 506.6  | 515.7  | 250.3  | 218.2  | 264.5  | 247.2  | 212.8  |
| 6.1    | 12.4   | 5.6    | 8.4    | 208.6  | 181.9  | 203.0  | 242.9  | 430.9  |
| 116.3  | 117.5  | 143.0  | 132.6  | 107.7  | 132.0  | 104.4  | 122.2  | 107.8  |
| 383.8  | 336.5  | 585.6  | 367.1  | 316.0  | 245.0  | 298.9  | 350.8  | 275.1  |
| 47.1   | 40.3   | 105.2  | 53.2   | 4.9    | 4.2    | 5.5    | 1.0    | 62.4   |
| 45.1   | 38.7   | 66.6   | 33.7   | 43.4   | 36.7   | 45.4   | 53.6   | 27.7   |
| 48.8   | 49.1   | 58.2   | 44.3   | 99.9   | 125.8  | 82.3   | 117.9  | 102.5  |
| 22.6   | 17.1   | 23.6   | 19.2   | 51.6   | 66.3   | 39.6   | 67.6   | 47.4   |
| 96.2   | 99.1   | 106.8  | 86.1   | 165.8  | 168.5  | 170.7  | 194.3  | 124.2  |
| 2.6    | 2.6    | 3.4    | 2.2    | 2.4    | 3.7    | 4.7    | 3.1    | 6.3    |
| 12.5   | 16.6   | 12.6   | 8.1    | 343.0  | 332.8  | 503.1  | 427.2  | 102.9  |
| 84.1   | 90.5   | 107.2  | 72.4   | 61.0   | 52.7   | 49.8   | 67.7   | 30.3   |
| 890.9  | 877.6  | 1265.0 | 812.1  | 673.1  | 491.3  | 672.7  | 923.4  | 934.8  |
| 314.2  | 303.0  | 446.6  | 319.2  | 339.8  | 257.9  | 350.6  | 411.1  | 283.2  |
| 3606.6 | 3236.9 | 3028.1 | 2796.5 | 2221.9 | 2572.0 | 2242.3 | 2515.6 | 3967.3 |
| 11.5   | 22.5   | 25.2   | 13.2   | 9.8    | 3.8    | 18.7   | 26.9   | 11.6   |
| 144.3  | 128.7  | 193.1  | 168.5  | 347.6  | 313.8  | 389.1  | 412.8  | 199.7  |
| 172.0  | 157.2  | 277.1  | 189.2  | 441.8  | 439.8  | 504.0  | 564.8  | 135.8  |
| 766.3  | 702.5  | 798.6  | 623.2  | 127.7  | 109.1  | 117.0  | 138.2  | 112.3  |
| 89.8   | 78.4   | 88.6   | 60.1   | 17.5   | 15.8   | 21.0   | 18.5   | 27.6   |
| 294.6  | 254.2  | 420.9  | 270.1  | 1326.9 | 1187.9 | 1160.2 | 1388.1 | 407.8  |
| 299.7  | 295.0  | 411.9  | 320.8  | 672.0  | 763.7  | 685.6  | 764.1  | 1153.8 |
| 381.8  | 310.8  | 589.6  | 494.6  | 160.2  | 146.3  | 167.0  | 167.3  | 157.4  |
| 90.4   | 73.3   | 105.2  | 67.5   | 184.9  | 165.4  | 207.9  | 226.0  | 266.7  |
| 140.1  | 134.5  | 288.4  | 116.0  | 367.5  | 296.6  | 273.5  | 385.6  | 259.2  |
| 114.6  | 88.6   | 112.7  | 87.3   | 251.4  | 211.5  | 275.6  | 291.5  | 329.8  |
| 232.0  | 248.1  | 209.4  | 237.9  | 172.1  | 172.0  | 119.4  | 146.9  | 223.8  |
| 28.0   | 31.3   | 36.5   | 30.6   | 45.2   | 36.3   | 40.1   | 61.3   | 64.4   |
| 128.0  | 152.4  | 94.1   | 106.9  | 118.1  | 86.6   | 122.6  | 133.7  | 150.8  |
| 473.3  | 596.4  | 523.4  | 562.8  | 10.8   | 9.6    | 10.3   | 6.1    | 2.1    |
| 213.0  | 228.5  | 270.0  | 195.5  | 359.9  | 390.7  | 358.5  | 455.7  | 269.5  |
| 12.0   | 10.5   | 21.3   | 12.0   | 393.7  | 339.9  | 402.1  | 392.6  | 87.0   |
| 44.5   | 43.3   | 67.3   | 38.4   | 69.3   | 69.1   | 67.1   | 74.2   | 142.5  |
| 64.6   | 105.1  | 17.8   | 25.0   | 266.8  | 296.3  | 256.5  | 306.3  | 85.1   |
| 504.4  | 459.1  | 849.7  | 497.4  | 1282.0 | 1067.1 | 1316.0 | 1394.0 | 1588.7 |
| 150.1  | 119.8  | 246.8  | 150.6  | 120.4  | 84.2   | 110.8  | 150.9  | 109.6  |
| 222.6  | 249.5  | 164.6  | 175.8  | 238.3  | 111.5  | 411.0  | 309.0  | 255.4  |
| 72.6   | 89.6   | 121.0  | 83.6   | 38.5   | 69.8   | 33.3   | 71.1   | 23.2   |
| 6.1    | 7.9    | 1.6    | 5.4    | 45.7   | 36.7   | 46.8   | 55.9   | 51.4   |
| 72.4   | 68.9   | 97.3   | 64.5   | 172.2  | 146.7  | 170.8  | 198.3  | 116.0  |
| 865.1  | 798.2  | 946.9  | 806.5  | 742.1  | 712.8  | 859.1  | 825.8  | 1391.4 |
| 47.9   | 47.1   | 62.0   | 33.4   | 110.4  | 100.9  | 99.5   | 106.6  | 123.0  |
| 1154.2 | 1103.4 | 1381.6 | 1011.3 | 1149.8 | 1589.6 | 1090.0 | 1446.3 | 1142.0 |
| 181.9  | 171.4  | 255.4  | 166.8  | 291.7  | 141.5  | 212.0  | 327.2  | 255.0  |
| 266.0  | 268.6  | 282.0  | 281.3  | 75.4   | 87.9   | 70.6   | 94.3   | 85.0   |
| 3513.9 | 3271.5 | 3898.5 | 2914.2 | 4511.3 | 3849.7 | 4507.5 | 5388.0 | 4752.5 |

|        |        |        |        |        |        |        |        |         |
|--------|--------|--------|--------|--------|--------|--------|--------|---------|
| 138.1  | 113.4  | 192.7  | 108.5  | 124.9  | 87.3   | 100.3  | 121.4  | 122.6   |
| 76.7   | 62.3   | 94.8   | 79.6   | 65.9   | 76.9   | 83.7   | 95.9   | 153.6   |
| 87.3   | 78.7   | 131.9  | 77.8   | 157.7  | 161.4  | 158.7  | 163.8  | 126.5   |
| 135.3  | 120.4  | 179.7  | 151.5  | 281.2  | 287.8  | 305.7  | 338.1  | 335.0   |
| 165.7  | 158.9  | 215.5  | 140.7  | 186.8  | 235.0  | 180.7  | 206.3  | 210.3   |
| 926.5  | 914.0  | 1333.1 | 932.4  | 931.2  | 1019.1 | 849.7  | 1049.9 | 913.7   |
| 213.0  | 221.3  | 216.7  | 221.4  | 157.0  | 170.7  | 153.3  | 156.1  | 167.8   |
| 4.6    | 5.6    | 5.5    | 1.5    | 13.5   | 7.0    | 19.2   | 19.6   | 1.1     |
| 124.5  | 127.6  | 163.6  | 85.5   | 233.7  | 250.9  | 198.8  | 235.7  | 170.0   |
| 678.8  | 681.9  | 672.9  | 710.2  | 470.9  | 412.2  | 471.0  | 563.3  | 205.9   |
| 10.0   | 7.4    | 22.7   | 7.9    | 9.8    | 3.9    | 5.9    | 2.2    | 9.3     |
| 8218.0 | 7978.2 | 8371.9 | 8158.8 | 7385.1 | 7676.3 | 7743.9 | 8375.0 | 10272.8 |
| 425.6  | 461.2  | 333.2  | 335.1  | 155.2  | 167.7  | 154.5  | 193.2  | 178.5   |
| 197.1  | 213.4  | 380.2  | 191.3  | 158.0  | 221.3  | 172.3  | 202.3  | 294.7   |
| 229.0  | 245.0  | 217.5  | 194.1  | 317.2  | 414.0  | 395.5  | 391.9  | 202.1   |
| 5.2    | 7.9    | 17.5   | 8.5    | 59.7   | 74.5   | 59.9   | 81.8   | 8.5     |
| 1.3    | 0.7    | 1.6    | 1.3    | 0.8    | 0.5    | 1.0    | 1.5    | 1.8     |
| 314.0  | 285.9  | 314.6  | 277.5  | 208.8  | 172.4  | 203.2  | 277.4  | 14.7    |
| 79.0   | 65.0   | 107.4  | 70.6   | 84.9   | 73.9   | 107.7  | 105.0  | 115.9   |
| 318.2  | 270.8  | 371.4  | 222.5  | 157.2  | 108.6  | 157.8  | 182.7  | 115.5   |
| 556.5  | 476.7  | 647.9  | 422.9  | 376.1  | 381.5  | 360.4  | 410.6  | 471.5   |
| 73.0   | 74.8   | 102.1  | 55.1   | 73.4   | 58.7   | 65.5   | 75.3   | 80.1    |
| 152.9  | 135.4  | 150.5  | 134.4  | 124.6  | 134.6  | 101.1  | 131.1  | 77.3    |
| 130.4  | 117.7  | 150.9  | 117.3  | 118.8  | 99.9   | 128.1  | 135.8  | 91.4    |
| 59.1   | 54.2   | 89.9   | 53.4   | 152.7  | 155.7  | 146.0  | 172.9  | 309.1   |
| 5.0    | 3.8    | 7.2    | 5.0    | 6.0    | 0.3    | 9.0    | 6.8    | 8.4     |
| 21.6   | 27.5   | 26.2   | 25.6   | 51.5   | 50.2   | 71.9   | 57.6   | 32.6    |
| 233.5  | 227.0  | 340.6  | 265.1  | 355.1  | 305.8  | 419.8  | 452.1  | 471.6   |
| 13.2   | 8.5    | 7.1    | 9.7    | 12.5   | 18.3   | 12.7   | 8.6    | 20.8    |
| 882.6  | 801.9  | 1117.4 | 702.6  | 1471.2 | 1476.0 | 1810.7 | 2038.6 | 473.8   |
| 287.0  | 276.4  | 390.4  | 244.0  | 328.5  | 236.5  | 304.8  | 384.4  | 195.1   |
| 8.4    | 9.9    | 14.3   | 4.8    | 18.9   | 5.7    | 14.8   | 7.8    | 11.1    |
| 131.4  | 152.7  | 90.6   | 94.2   | 251.6  | 337.3  | 281.4  | 309.9  | 117.8   |
| 180.9  | 162.0  | 353.5  | 170.5  | 439.6  | 419.8  | 407.7  | 467.6  | 817.9   |
| 199.5  | 206.6  | 240.4  | 182.1  | 148.3  | 175.6  | 154.2  | 158.8  | 153.1   |
| 294.2  | 280.7  | 315.0  | 286.3  | 659.1  | 671.7  | 705.9  | 805.6  | 500.2   |
| 146.6  | 148.3  | 220.5  | 176.4  | 180.1  | 210.4  | 206.9  | 217.3  | 218.0   |
| 259.6  | 185.7  | 325.7  | 252.5  | 470.0  | 470.3  | 393.8  | 508.8  | 532.4   |
| 439.8  | 400.9  | 586.8  | 380.2  | 969.9  | 917.7  | 947.6  | 1112.7 | 1013.8  |
| 170.5  | 166.5  | 146.8  | 171.9  | 119.1  | 149.1  | 121.7  | 133.9  | 55.3    |
| 281.5  | 273.0  | 462.3  | 274.5  | 583.8  | 406.7  | 497.8  | 596.0  | 647.7   |
| 328.8  | 364.6  | 308.8  | 351.3  | 255.4  | 295.6  | 260.3  | 286.7  | 91.3    |
| 336.7  | 281.1  | 409.8  | 312.2  | 378.8  | 315.6  | 332.6  | 450.1  | 714.1   |
| 101.9  | 71.2   | 125.2  | 77.0   | 94.5   | 92.7   | 114.4  | 133.2  | 135.4   |
| 124.9  | 107.4  | 185.4  | 103.9  | 172.3  | 133.4  | 172.5  | 215.1  | 347.4   |
| 958.4  | 876.0  | 1224.6 | 901.8  | 997.0  | 999.2  | 1101.6 | 1159.4 | 2056.5  |
| 263.3  | 271.8  | 288.1  | 243.2  | 167.9  | 138.4  | 152.7  | 181.4  | 144.5   |
| 5.2    | 16.7   | 27.8   | 20.8   | 135.0  | 101.8  | 121.8  | 155.7  | 293.5   |
| 138.8  | 130.0  | 149.0  | 137.2  | 633.4  | 776.9  | 691.1  | 822.1  | 709.7   |
| 105.1  | 113.8  | 134.0  | 100.9  | 99.5   | 156.0  | 129.4  | 146.1  | 177.2   |
| 17.8   | 9.8    | 26.0   | 17.2   | 178.9  | 106.0  | 172.1  | 193.6  | 960.2   |
| 240.4  | 217.2  | 253.9  | 150.0  | 228.5  | 280.1  | 265.8  | 252.1  | 584.0   |
| 107.3  | 95.3   | 109.6  | 96.8   | 59.6   | 99.3   | 68.3   | 80.7   | 88.3    |

|        |        |        |        |        |        |        |        |        |
|--------|--------|--------|--------|--------|--------|--------|--------|--------|
| 64.1   | 66.7   | 70.7   | 96.8   | 125.3  | 218.5  | 134.8  | 142.5  | 41.8   |
| 37.8   | 41.2   | 31.7   | 24.9   | 32.0   | 41.3   | 29.1   | 34.9   | 41.2   |
| 39.8   | 49.6   | 19.4   | 30.2   | 50.6   | 52.2   | 52.2   | 50.1   | 75.3   |
| 71.9   | 79.5   | 49.6   | 74.6   | 1.6    | 5.5    | 7.4    | 6.5    | 78.2   |
| 136.1  | 122.8  | 178.6  | 130.3  | 61.0   | 69.6   | 64.2   | 77.5   | 138.0  |
| 247.3  | 242.3  | 311.6  | 200.7  | 1500.0 | 1203.1 | 1679.3 | 1733.8 | 1120.1 |
| 267.4  | 260.0  | 298.3  | 237.3  | 1507.1 | 1185.6 | 1395.4 | 1591.9 | 968.6  |
| 237.7  | 258.5  | 349.3  | 214.2  | 292.6  | 231.9  | 278.9  | 305.7  | 491.5  |
| 406.9  | 415.9  | 454.0  | 359.2  | 185.0  | 149.2  | 209.7  | 276.9  | 273.6  |
| 20.3   | 24.9   | 19.1   | 26.4   | 17.3   | 11.6   | 17.6   | 25.1   | 26.5   |
| 576.8  | 661.6  | 556.5  | 495.8  | 866.0  | 772.0  | 820.4  | 929.8  | 715.5  |
| 37.1   | 33.1   | 36.9   | 25.0   | 538.7  | 1049.9 | 567.4  | 605.4  | 558.9  |
| 10.0   | 3.2    | 9.2    | 3.9    | 15.1   | 15.9   | 9.1    | 2.6    | 18.0   |
| 391.3  | 429.1  | 522.8  | 358.8  | 277.5  | 199.4  | 283.7  | 352.0  | 35.3   |
| 45.4   | 39.0   | 74.9   | 43.9   | 102.3  | 96.1   | 110.9  | 119.4  | 264.9  |
| 83.4   | 79.7   | 153.9  | 75.9   | 153.1  | 138.4  | 187.7  | 223.6  | 271.4  |
| 339.3  | 303.0  | 279.2  | 253.1  | 330.3  | 262.2  | 317.9  | 445.7  | 230.3  |
| 186.0  | 207.1  | 135.2  | 203.5  | 222.5  | 312.3  | 265.7  | 286.1  | 136.0  |
| 69.1   | 72.4   | 60.6   | 58.4   | 246.8  | 428.2  | 239.3  | 286.2  | 105.6  |
| 117.7  | 98.6   | 147.7  | 116.6  | 198.3  | 183.2  | 196.3  | 214.3  | 229.7  |
| 114.9  | 111.9  | 127.8  | 92.0   | 111.6  | 170.2  | 153.2  | 144.8  | 103.5  |
| 3787.6 | 3746.7 | 3876.3 | 3295.9 | 4859.0 | 5167.0 | 5064.5 | 5440.9 | 7078.1 |
| 333.6  | 306.7  | 354.9  | 305.0  | 246.4  | 242.3  | 254.0  | 312.7  | 200.3  |
| 398.2  | 368.8  | 439.3  | 311.6  | 2.2    | 1.9    | 1.1    | 2.1    | 53.9   |
| 122.2  | 122.4  | 108.7  | 129.2  | 157.9  | 182.9  | 217.7  | 213.9  | 132.5  |
| 22.9   | 15.4   | 16.3   | 11.9   | 99.2   | 124.1  | 98.4   | 141.7  | 77.0   |
| 16.7   | 25.3   | 34.1   | 27.2   | 47.6   | 57.8   | 56.9   | 77.2   | 48.8   |
| 1.7    | 2.0    | 8.9    | 2.6    | 7.7    | 1.1    | 4.3    | 2.0    | 6.0    |
| 8.9    | 6.1    | 17.6   | 7.1    | 75.3   | 66.6   | 66.3   | 103.3  | 71.6   |
| 6.5    | 9.9    | 6.8    | 1.6    | 309.8  | 277.6  | 419.6  | 314.8  | 406.4  |
| 325.5  | 414.3  | 281.3  | 364.3  | 379.0  | 317.8  | 366.8  | 441.6  | 445.8  |
| 83.8   | 85.9   | 125.7  | 95.6   | 439.6  | 321.1  | 543.4  | 553.6  | 1502.6 |
| 127.4  | 120.3  | 109.1  | 132.2  | 121.6  | 132.8  | 107.2  | 120.3  | 96.9   |
| 160.8  | 142.2  | 236.0  | 238.8  | 167.5  | 175.5  | 168.6  | 177.4  | 168.1  |
| 139.1  | 145.6  | 133.4  | 165.5  | 101.4  | 133.0  | 93.2   | 106.9  | 109.0  |
| 91.3   | 83.9   | 135.5  | 117.9  | 78.8   | 142.5  | 77.9   | 74.2   | 200.1  |
| 77.8   | 68.5   | 192.3  | 82.8   | 388.1  | 205.7  | 316.8  | 434.3  | 261.6  |
| 6.3    | 10.0   | 5.1    | 4.7    | 8.5    | 8.2    | 7.0    | 9.4    | 8.5    |
| 1.8    | 5.8    | 2.4    | 1.5    | 4.3    | 6.6    | 1.1    | 3.1    | 1.4    |
| 542.6  | 447.1  | 468.9  | 466.3  | 951.8  | 810.1  | 873.1  | 844.7  | 875.8  |
| 620.4  | 520.9  | 613.6  | 653.9  | 591.0  | 794.9  | 766.6  | 699.7  | 557.6  |
| 83.9   | 78.9   | 95.0   | 84.6   | 167.3  | 214.7  | 202.2  | 149.7  | 128.2  |
| 342.3  | 300.5  | 514.9  | 292.6  | 841.3  | 1031.1 | 905.8  | 892.4  | 832.5  |
| 464.1  | 539.7  | 403.1  | 544.2  | 350.2  | 402.7  | 415.7  | 457.5  | 332.0  |
| 131.9  | 129.7  | 110.8  | 146.6  | 59.0   | 72.8   | 57.7   | 55.0   | 40.6   |
| 154.2  | 155.5  | 188.0  | 159.5  | 804.5  | 1011.3 | 798.2  | 1030.9 | 734.7  |
| 317.4  | 317.9  | 291.9  | 286.9  | 385.0  | 268.4  | 400.5  | 484.7  | 343.8  |
| 71.8   | 82.2   | 64.7   | 74.4   | 51.2   | 65.6   | 68.5   | 90.2   | 71.1   |
| 273.1  | 231.3  | 437.9  | 280.7  | 348.6  | 367.6  | 369.8  | 416.2  | 529.4  |
| 1.5    | 5.5    | 4.1    | 8.4    | 38.1   | 47.8   | 33.4   | 33.9   | 76.9   |
| 13.7   | 16.9   | 16.0   | 18.4   | 19.6   | 18.2   | 23.6   | 17.2   | 14.3   |
| 67.3   | 62.7   | 117.7  | 72.2   | 88.9   | 69.7   | 89.4   | 101.5  | 109.7  |
| 16.5   | 9.7    | 28.3   | 20.9   | 13.2   | 17.5   | 19.8   | 9.6    | 30.3   |

|        |        |        |        |        |        |        |        |        |
|--------|--------|--------|--------|--------|--------|--------|--------|--------|
| 60.0   | 52.4   | 89.2   | 52.4   | 79.9   | 66.3   | 92.4   | 100.4  | 90.3   |
| 1653.0 | 1616.4 | 1650.7 | 1614.7 | 3273.8 | 3650.7 | 3480.4 | 3680.1 | 4801.2 |
| 123.5  | 158.8  | 71.0   | 94.3   | 165.4  | 245.3  | 168.1  | 207.3  | 69.9   |
| 52.5   | 47.9   | 54.2   | 54.0   | 79.7   | 91.6   | 78.1   | 73.4   | 155.8  |
| 75.0   | 64.8   | 87.6   | 73.5   | 133.0  | 144.8  | 130.8  | 151.0  | 67.0   |
| 468.1  | 460.6  | 710.7  | 598.3  | 1227.8 | 2294.2 | 1401.8 | 1493.2 | 1458.9 |
| 26.8   | 17.2   | 17.9   | 22.0   | 30.1   | 22.6   | 35.0   | 31.9   | 31.3   |
| 197.5  | 179.3  | 207.7  | 167.0  | 436.5  | 428.1  | 458.7  | 462.8  | 470.5  |
| 31.9   | 39.5   | 35.4   | 31.9   | 26.2   | 29.7   | 26.7   | 32.3   | 25.9   |
| 11.9   | 25.3   | 9.1    | 8.0    | 44.1   | 37.7   | 50.3   | 50.5   | 37.3   |
| 14.9   | 12.9   | 24.3   | 19.8   | 26.8   | 24.9   | 22.2   | 33.5   | 7.6    |
| 873.0  | 1065.5 | 731.4  | 972.7  | 1501.3 | 1626.1 | 2468.5 | 2217.4 | 3.2    |
| 196.5  | 173.1  | 272.5  | 243.8  | 234.9  | 134.7  | 194.5  | 243.7  | 65.1   |
| 460.6  | 530.4  | 336.2  | 481.0  | 129.9  | 130.3  | 122.4  | 138.2  | 77.0   |
| 16.5   | 36.0   | 11.9   | 22.2   | 13.4   | 20.3   | 17.2   | 21.0   | 15.9   |
| 917.4  | 1020.4 | 751.8  | 851.6  | 402.7  | 258.5  | 411.4  | 588.3  | 271.5  |
| 228.7  | 243.1  | 212.0  | 210.4  | 197.8  | 168.9  | 178.9  | 214.2  | 311.0  |
| 154.7  | 140.0  | 377.9  | 137.3  | 470.6  | 492.0  | 490.6  | 509.1  | 473.1  |
| 470.1  | 457.6  | 414.2  | 431.5  | 478.9  | 369.8  | 369.2  | 479.4  | 207.2  |
| 95.5   | 104.4  | 158.2  | 130.5  | 253.6  | 302.9  | 280.3  | 293.6  | 82.6   |
| 166.4  | 162.5  | 162.5  | 123.8  | 227.4  | 190.5  | 208.0  | 250.0  | 225.0  |
| 671.2  | 706.9  | 663.8  | 666.0  | 947.9  | 783.4  | 975.7  | 1047.2 | 415.3  |
| 6634.7 | 6600.4 | 7345.5 | 6316.7 | 6679.0 | 5923.4 | 6721.8 | 7535.1 | 8875.5 |
| 513.7  | 597.0  | 379.3  | 512.2  | 298.9  | 248.6  | 280.3  | 383.3  | 135.5  |
| 58.4   | 61.2   | 112.1  | 58.4   | 120.3  | 100.8  | 97.2   | 127.6  | 165.0  |
| 21.5   | 30.7   | 27.6   | 25.4   | 16.5   | 15.7   | 17.0   | 17.7   | 15.8   |
| 11.7   | 13.0   | 16.6   | 11.8   | 259.5  | 392.0  | 349.8  | 366.7  | 70.9   |
| 150.1  | 148.1  | 218.3  | 162.0  | 234.5  | 222.2  | 310.3  | 319.5  | 359.8  |
| 67.5   | 64.7   | 96.2   | 57.5   | 98.9   | 106.9  | 132.4  | 129.4  | 180.4  |
| 896.9  | 784.5  | 1034.5 | 656.6  | 882.1  | 889.5  | 897.8  | 936.5  | 781.8  |
| 42.7   | 34.4   | 50.7   | 44.0   | 64.4   | 45.1   | 57.9   | 66.2   | 89.0   |
| 141.5  | 147.7  | 139.9  | 93.1   | 199.1  | 182.3  | 207.5  | 228.5  | 256.8  |
| 31.3   | 42.5   | 46.5   | 87.7   | 33.9   | 39.1   | 42.3   | 50.6   | 389.6  |
| 11.2   | 6.0    | 8.9    | 19.3   | 9.2    | 4.0    | 9.9    | 11.6   | 31.6   |
| 175.0  | 187.0  | 180.7  | 153.5  | 157.7  | 133.9  | 169.6  | 200.6  | 187.2  |
| 16.1   | 17.5   | 10.2   | 19.4   | 15.8   | 15.2   | 11.4   | 16.5   | 202.3  |
| 128.7  | 146.0  | 171.8  | 131.6  | 151.2  | 136.2  | 195.4  | 217.1  | 23.6   |
| 2.2    | 1.8    | 5.0    | 2.2    | 13.0   | 13.7   | 13.9   | 17.7   | 17.9   |
| 11.0   | 12.5   | 16.4   | 11.3   | 9.7    | 11.0   | 10.5   | 14.7   | 221.5  |
| 23.2   | 30.8   | 51.2   | 34.8   | 118.3  | 120.5  | 126.9  | 140.2  | 1002.6 |
| 5.3    | 2.8    | 2.6    | 1.1    | 8.2    | 3.6    | 8.2    | 7.5    | 9.1    |
| 148.0  | 137.8  | 375.6  | 125.8  | 630.6  | 386.3  | 551.4  | 608.0  | 710.4  |
| 90.9   | 93.6   | 300.2  | 69.5   | 342.3  | 295.8  | 273.7  | 355.9  | 424.9  |
| 1616.2 | 1457.9 | 2465.9 | 1725.5 | 871.5  | 736.5  | 1047.3 | 1156.5 | 444.5  |
| 4.6    | 3.5    | 1.1    | 4.5    | 298.3  | 189.2  | 268.4  | 351.1  | 1009.4 |
| 2638.9 | 2275.0 | 4183.9 | 2534.8 | 3285.2 | 3198.8 | 3569.7 | 3747.4 | 4595.8 |
| 95.6   | 123.6  | 151.7  | 143.0  | 180.8  | 176.8  | 155.4  | 199.7  | 383.9  |
| 35.2   | 39.3   | 68.9   | 38.0   | 94.6   | 80.3   | 92.6   | 122.0  | 67.9   |
| 22.8   | 15.7   | 32.0   | 11.8   | 54.8   | 60.6   | 43.1   | 59.5   | 42.9   |
| 178.9  | 164.5  | 158.7  | 122.7  | 224.4  | 257.2  | 358.6  | 370.8  | 422.6  |
| 252.2  | 279.4  | 248.3  | 203.3  | 777.2  | 649.0  | 838.8  | 1010.0 | 813.7  |
| 507.2  | 490.9  | 658.2  | 465.9  | 331.9  | 352.3  | 353.2  | 342.6  | 199.5  |
| 152.9  | 189.3  | 122.2  | 160.2  | 167.6  | 270.0  | 171.2  | 197.8  | 117.4  |

|        |        |        |        |        |        |        |        |        |
|--------|--------|--------|--------|--------|--------|--------|--------|--------|
| 83.3   | 74.8   | 87.1   | 59.4   | 447.2  | 320.3  | 425.0  | 553.5  | 579.3  |
| 236.2  | 251.3  | 295.5  | 277.3  | 151.0  | 160.6  | 157.2  | 201.6  | 145.8  |
| 395.6  | 336.7  | 544.1  | 378.5  | 350.7  | 389.7  | 352.1  | 390.7  | 297.8  |
| 60.5   | 64.1   | 53.4   | 49.2   | 87.7   | 83.5   | 82.8   | 86.2   | 62.5   |
| 28.9   | 24.1   | 38.3   | 26.5   | 49.8   | 46.6   | 40.0   | 48.6   | 35.7   |
| 90.9   | 95.1   | 115.8  | 84.1   | 155.9  | 113.5  | 148.8  | 193.3  | 227.2  |
| 286.2  | 253.7  | 424.7  | 319.6  | 302.8  | 236.9  | 294.7  | 366.9  | 447.7  |
| 163.8  | 163.1  | 307.5  | 163.2  | 672.6  | 876.1  | 799.9  | 800.4  | 876.2  |
| 284.8  | 255.8  | 370.7  | 299.1  | 284.5  | 234.6  | 259.8  | 357.4  | 347.5  |
| 99.1   | 112.7  | 120.1  | 116.5  | 172.5  | 157.4  | 156.3  | 167.8  | 134.7  |
| 92.2   | 75.6   | 119.1  | 61.3   | 228.3  | 185.3  | 200.7  | 269.2  | 230.3  |
| 41.1   | 35.5   | 48.9   | 37.4   | 66.0   | 71.5   | 85.1   | 71.8   | 19.7   |
| 197.6  | 187.1  | 223.5  | 153.0  | 278.3  | 348.8  | 288.9  | 304.2  | 527.6  |
| 29.9   | 25.4   | 50.8   | 22.6   | 108.5  | 75.4   | 101.4  | 131.5  | 139.9  |
| 3.6    | 12.2   | 34.2   | 2.4    | 34.7   | 27.6   | 14.8   | 31.6   | 45.7   |
| 87.9   | 84.5   | 125.0  | 94.7   | 200.6  | 217.4  | 188.1  | 232.1  | 166.8  |
| 67.0   | 69.1   | 116.2  | 66.3   | 192.3  | 145.5  | 171.5  | 223.2  | 350.0  |
| 997.9  | 865.8  | 1409.5 | 1309.3 | 1.5    | 1.5    | 1.7    | 2.6    | 2.1    |
| 1878.2 | 1859.5 | 2621.3 | 1852.4 | 1092.9 | 1137.6 | 1113.6 | 1264.8 | 1674.8 |
| 97.1   | 89.1   | 130.6  | 87.1   | 157.0  | 213.3  | 209.3  | 217.5  | 356.3  |
| 280.8  | 310.8  | 381.3  | 330.2  | 684.8  | 717.1  | 662.6  | 725.3  | 357.2  |
| 79.9   | 82.4   | 79.8   | 59.2   | 189.5  | 222.6  | 225.9  | 211.0  | 12.1   |
| 365.3  | 293.6  | 510.5  | 340.3  | 626.4  | 709.7  | 613.3  | 727.6  | 772.1  |
| 143.0  | 113.0  | 182.4  | 164.0  | 2.7    | 1.1    | 1.0    | 1.5    | 1.3    |
| 1805.7 | 1698.9 | 2863.8 | 2207.6 | 318.8  | 298.9  | 302.7  | 365.3  | 307.5  |
| 1257.8 | 1283.5 | 1501.5 | 1201.8 | 899.9  | 806.0  | 860.3  | 914.7  | 627.7  |
| 7.8    | 12.6   | 9.4    | 10.2   | 36.3   | 35.0   | 37.4   | 38.9   | 45.4   |
| 148.6  | 155.3  | 112.2  | 121.1  | 26.5   | 31.8   | 23.7   | 36.7   | 26.5   |
| 3087.4 | 2655.2 | 4767.4 | 2935.7 | 2211.9 | 2008.1 | 2217.0 | 2382.6 | 2699.9 |
| 4489.1 | 4073.0 | 4943.8 | 4233.8 | 4634.0 | 3942.1 | 4450.6 | 5233.2 | 6803.7 |
| 483.1  | 500.5  | 525.0  | 442.3  | 96.0   | 84.4   | 92.0   | 113.9  | 130.0  |
| 406.0  | 444.1  | 495.8  | 571.8  | 38.0   | 33.1   | 50.1   | 63.0   | 135.8  |
| 352.5  | 328.4  | 448.4  | 418.4  | 311.6  | 284.8  | 290.5  | 317.9  | 297.9  |
| 346.1  | 269.4  | 473.0  | 335.0  | 526.2  | 513.9  | 567.8  | 567.3  | 712.9  |
| 49.3   | 39.3   | 63.1   | 35.6   | 120.0  | 115.9  | 116.5  | 126.9  | 97.6   |
| 36.6   | 45.4   | 42.8   | 36.9   | 57.9   | 56.9   | 52.3   | 65.0   | 70.6   |
| 40.0   | 52.2   | 34.2   | 41.2   | 32.0   | 25.6   | 40.2   | 39.7   | 78.9   |
| 77.6   | 69.7   | 119.2  | 69.2   | 14.7   | 9.2    | 18.6   | 18.9   | 241.9  |
| 91.0   | 86.0   | 84.0   | 82.0   | 73.1   | 60.7   | 60.6   | 67.2   | 98.3   |
| 15.4   | 19.1   | 15.8   | 18.0   | 38.0   | 46.4   | 53.7   | 51.2   | 26.6   |
| 326.3  | 299.2  | 403.8  | 385.0  | 1137.0 | 1074.6 | 1416.9 | 1316.7 | 9.9    |
| 11.1   | 8.4    | 18.6   | 14.7   | 26.2   | 21.4   | 17.7   | 25.8   | 16.8   |
| 323.8  | 368.9  | 505.9  | 364.2  | 408.4  | 475.8  | 416.6  | 449.5  | 370.8  |
| 215.6  | 208.3  | 272.3  | 191.8  | 271.6  | 312.4  | 298.5  | 305.4  | 265.9  |
| 335.7  | 358.7  | 353.6  | 330.5  | 251.6  | 209.4  | 228.8  | 297.5  | 145.6  |
| 1018.6 | 1032.3 | 1033.7 | 944.3  | 494.4  | 448.9  | 530.7  | 590.1  | 485.6  |
| 162.7  | 161.9  | 156.1  | 183.2  | 200.9  | 223.1  | 206.0  | 270.4  | 263.2  |
| 5.0    | 2.7    | 2.7    | 7.1    | 67.6   | 114.9  | 81.5   | 78.6   | 77.7   |
| 17.8   | 21.7   | 18.1   | 15.0   | 110.1  | 92.0   | 181.7  | 125.0  | 200.0  |
| 5.9    | 4.5    | 6.0    | 7.0    | 1.5    | 0.5    | 5.0    | 0.6    | 4.2    |
| 7.2    | 20.5   | 3.1    | 7.2    | 1028.6 | 823.9  | 1844.5 | 1197.6 | 342.9  |
| 682.2  | 657.3  | 724.0  | 683.8  | 515.2  | 420.2  | 517.5  | 602.6  | 317.3  |
| 3.5    | 7.5    | 5.5    | 4.4    | 1.0    | 0.8    | 1.5    | 0.5    | 3.4    |

|        |        |        |        |        |        |        |        |         |
|--------|--------|--------|--------|--------|--------|--------|--------|---------|
| 93.8   | 76.7   | 84.3   | 87.4   | 55.9   | 95.0   | 64.1   | 68.5   | 43.6    |
| 106.5  | 110.5  | 75.4   | 94.3   | 85.3   | 97.6   | 89.2   | 99.2   | 66.5    |
| 388.0  | 335.6  | 602.9  | 437.8  | 443.8  | 271.6  | 360.4  | 460.0  | 224.7   |
| 5.8    | 2.7    | 6.3    | 4.0    | 48.2   | 39.2   | 49.0   | 82.0   | 125.0   |
| 129.8  | 132.9  | 112.3  | 130.9  | 55.6   | 65.5   | 69.6   | 64.5   | 45.1    |
| 132.2  | 116.7  | 175.1  | 120.5  | 282.9  | 264.4  | 275.3  | 373.9  | 197.2   |
| 30.7   | 27.6   | 34.4   | 19.0   | 67.8   | 59.9   | 66.6   | 81.7   | 66.3    |
| 315.3  | 279.2  | 379.8  | 287.1  | 288.6  | 263.7  | 275.7  | 308.4  | 162.3   |
| 7204.1 | 6707.7 | 7860.0 | 6848.8 | 6676.5 | 6620.3 | 6707.5 | 7111.7 | 8184.1  |
| 43.2   | 47.2   | 56.0   | 56.6   | 29.3   | 27.6   | 37.0   | 41.9   | 24.8    |
| 79.4   | 102.7  | 70.8   | 95.8   | 110.0  | 166.4  | 141.6  | 124.3  | 149.9   |
| 148.6  | 158.0  | 123.2  | 152.3  | 195.4  | 291.3  | 235.6  | 246.4  | 277.9   |
| 8828.2 | 8485.1 | 9705.4 | 8941.6 | 9197.4 | 9152.9 | 9263.6 | 9881.4 | 12993.8 |
| 252.1  | 257.2  | 415.5  | 268.6  | 355.1  | 300.6  | 366.5  | 375.1  | 77.8    |
| 1535.1 | 1442.8 | 1495.8 | 1160.9 | 1247.1 | 1410.8 | 1450.4 | 1498.7 | 1909.9  |
| 21.2   | 20.4   | 38.3   | 17.4   | 30.6   | 29.6   | 30.0   | 45.0   | 35.7    |
| 580.6  | 507.2  | 1119.4 | 496.0  | 1159.6 | 934.6  | 965.7  | 1259.1 | 920.9   |
| 29.5   | 28.6   | 12.4   | 19.3   | 32.0   | 35.5   | 24.6   | 36.4   | 38.4    |
| 271.8  | 278.3  | 295.5  | 247.9  | 313.3  | 311.2  | 312.3  | 361.6  | 326.0   |
| 10.3   | 39.5   | 37.9   | 16.6   | 5.4    | 14.7   | 5.1    | 5.4    | 25.5    |
| 101.7  | 82.9   | 268.9  | 91.7   | 498.6  | 325.1  | 404.4  | 497.3  | 315.8   |
| 48.5   | 46.6   | 58.8   | 39.4   | 681.9  | 691.4  | 685.7  | 814.6  | 162.2   |
| 139.0  | 166.2  | 129.4  | 136.1  | 296.4  | 256.3  | 303.8  | 286.5  | 173.6   |
| 2.1    | 1.8    | 2.4    | 1.9    | 1.2    | 0.9    | 1.2    | 1.4    | 2.3     |
| 16.2   | 11.9   | 18.2   | 14.7   | 42.9   | 51.9   | 46.8   | 52.9   | 41.6    |
| 404.7  | 436.5  | 690.3  | 423.7  | 749.3  | 602.3  | 827.5  | 863.2  | 893.7   |
| 52.1   | 52.0   | 99.5   | 39.2   | 129.9  | 110.6  | 122.7  | 137.3  | 149.5   |
| 208.4  | 196.0  | 168.2  | 167.0  | 77.1   | 92.8   | 92.6   | 81.0   | 61.6    |
| 10.6   | 5.8    | 11.0   | 17.4   | 6.3    | 19.4   | 6.7    | 2.9    | 11.4    |
| 2097.3 | 1857.4 | 2954.7 | 1941.3 | 4298.9 | 4158.0 | 4925.0 | 4987.9 | 3148.5  |
| 887.7  | 800.4  | 1245.6 | 810.3  | 2524.1 | 2006.6 | 3086.7 | 3116.2 | 988.6   |
| 147.7  | 186.9  | 83.8   | 156.4  | 105.5  | 80.9   | 73.0   | 112.0  | 140.0   |
| 107.6  | 123.9  | 196.3  | 143.2  | 283.6  | 312.2  | 270.5  | 326.4  | 385.2   |
| 174.8  | 163.2  | 261.0  | 181.5  | 313.2  | 344.4  | 330.9  | 377.6  | 454.1   |
| 76.9   | 78.6   | 31.2   | 70.8   | 18.8   | 17.4   | 21.2   | 31.2   | 17.7    |
| 20.8   | 22.8   | 45.6   | 24.7   | 177.0  | 183.2  | 233.0  | 242.5  | 69.7    |
| 7.8    | 2.5    | 10.0   | 4.5    | 4.7    | 2.4    | 5.5    | 1.8    | 10.6    |
| 13.0   | 13.8   | 22.3   | 16.3   | 79.5   | 63.5   | 102.1  | 82.2   | 37.6    |
| 21.3   | 25.4   | 14.9   | 19.0   | 143.3  | 163.4  | 151.3  | 220.6  | 24.8    |
| 139.7  | 156.0  | 129.9  | 137.6  | 229.1  | 193.9  | 231.5  | 279.9  | 274.5   |
| 34.8   | 21.6   | 38.4   | 31.1   | 490.7  | 770.8  | 299.8  | 687.1  | 251.6   |
| 29.3   | 24.3   | 16.6   | 31.7   | 262.7  | 279.7  | 190.0  | 207.6  | 1309.8  |
| 18.9   | 16.1   | 16.2   | 14.0   | 20.5   | 27.9   | 21.3   | 23.2   | 26.7    |
| 97.7   | 87.6   | 140.9  | 88.1   | 79.8   | 84.8   | 75.1   | 84.1   | 125.4   |
| 31.8   | 32.4   | 41.4   | 34.7   | 111.4  | 134.7  | 117.1  | 122.0  | 18.7    |
| 63.7   | 50.6   | 45.9   | 53.1   | 241.3  | 215.5  | 220.2  | 288.8  | 294.7   |
| 90.9   | 88.8   | 159.0  | 92.2   | 150.6  | 119.7  | 156.1  | 188.5  | 147.1   |
| 59.6   | 54.4   | 59.2   | 47.5   | 192.9  | 267.0  | 224.7  | 274.6  | 121.9   |
| 8.3    | 9.1    | 17.4   | 9.5    | 7.5    | 7.1    | 14.0   | 18.1   | 7.2     |
| 14.1   | 16.7   | 4.9    | 9.8    | 2.1    | 5.2    | 5.5    | 2.7    | 14.7    |
| 7.8    | 2.6    | 12.1   | 7.1    | 335.8  | 281.6  | 343.6  | 404.9  | 20.0    |
| 200.1  | 188.0  | 225.9  | 172.7  | 463.2  | 431.2  | 464.8  | 565.4  | 381.5   |
| 71.5   | 78.9   | 136.4  | 61.5   | 167.9  | 291.7  | 159.6  | 190.0  | 121.0   |



|        |        |        |        |        |        |        |        |        |
|--------|--------|--------|--------|--------|--------|--------|--------|--------|
| 10.5   | 4.8    | 5.0    | 9.0    | 54.7   | 23.8   | 72.4   | 58.5   | 11.9   |
| 72.9   | 75.0   | 94.6   | 78.1   | 194.9  | 250.4  | 217.5  | 203.3  | 328.1  |
| 67.8   | 75.1   | 101.3  | 82.8   | 222.0  | 270.5  | 237.1  | 262.0  | 360.6  |
| 323.5  | 310.4  | 498.8  | 393.3  | 364.2  | 261.4  | 300.5  | 388.9  | 525.6  |
| 762.6  | 670.7  | 875.6  | 564.1  | 1961.3 | 1485.9 | 2196.9 | 2222.2 | 1908.9 |
| 37.7   | 54.6   | 49.1   | 43.7   | 81.2   | 116.6  | 76.6   | 79.5   | 75.6   |
| 190.4  | 191.3  | 252.6  | 184.9  | 7.5    | 14.2   | 10.7   | 10.0   | 0.8    |
| 142.0  | 144.1  | 263.9  | 170.2  | 214.0  | 196.4  | 162.7  | 194.3  | 198.1  |
| 381.1  | 323.3  | 438.8  | 254.0  | 1645.6 | 1444.4 | 1898.7 | 1913.4 | 993.1  |
| 146.8  | 143.4  | 386.2  | 117.7  | 4.3    | 0.6    | 7.8    | 14.3   | 739.3  |
| 161.5  | 162.5  | 217.3  | 159.0  | 67.8   | 51.9   | 44.2   | 68.0   | 131.3  |
| 372.2  | 412.8  | 430.8  | 357.0  | 452.6  | 419.0  | 449.2  | 574.4  | 392.6  |
| 212.8  | 203.6  | 236.1  | 189.9  | 286.8  | 244.4  | 269.1  | 316.5  | 193.6  |
| 27.0   | 24.4   | 38.5   | 19.0   | 54.1   | 52.0   | 45.4   | 51.0   | 30.2   |
| 6.8    | 6.4    | 5.6    | 3.9    | 1879.8 | 2503.6 | 2686.4 | 2360.9 | 84.9   |
| 157.1  | 154.2  | 186.8  | 156.0  | 118.7  | 137.7  | 122.2  | 149.2  | 212.1  |
| 104.0  | 99.3   | 81.3   | 60.5   | 75.6   | 93.2   | 120.3  | 96.3   | 80.2   |
| 41.7   | 40.1   | 24.4   | 39.1   | 27.7   | 42.4   | 37.5   | 39.6   | 491.2  |
| 10.9   | 22.1   | 8.1    | 21.1   | 16.2   | 10.5   | 9.2    | 13.4   | 10.9   |
| 41.1   | 43.4   | 56.7   | 27.9   | 187.2  | 186.4  | 182.4  | 203.7  | 168.2  |
| 287.5  | 261.6  | 516.1  | 299.2  | 464.4  | 439.5  | 452.0  | 518.8  | 409.7  |
| 126.1  | 113.3  | 230.5  | 205.7  | 20.9   | 33.4   | 25.0   | 24.7   | 61.0   |
| 2.9    | 10.3   | 14.3   | 8.1    | 4.5    | 7.0    | 4.8    | 8.3    | 151.9  |
| 22.5   | 28.6   | 19.1   | 14.2   | 12.4   | 16.5   | 12.6   | 4.4    | 10.6   |
| 204.6  | 165.2  | 334.0  | 180.3  | 409.9  | 274.0  | 369.4  | 462.4  | 341.8  |
| 1.0    | 2.3    | 2.9    | 0.6    | 5.3    | 4.1    | 7.6    | 3.0    | 314.9  |
| 1911.3 | 1845.9 | 2562.8 | 1815.6 | 2046.4 | 1648.5 | 1936.0 | 2139.8 | 1848.7 |
| 178.5  | 165.8  | 206.6  | 144.8  | 305.1  | 281.3  | 321.9  | 372.9  | 525.2  |
| 430.1  | 338.8  | 365.7  | 367.9  | 198.5  | 178.7  | 232.6  | 257.0  | 520.5  |
| 205.3  | 200.7  | 239.7  | 219.5  | 381.8  | 329.1  | 361.2  | 448.3  | 674.6  |
| 0.8    | 1.3    | 1.5    | 1.0    | 16.8   | 21.1   | 3.7    | 10.2   | 3.6    |
| 19.4   | 17.9   | 3.5    | 23.5   | 60.0   | 77.1   | 82.5   | 77.5   | 19.5   |
| 5.9    | 17.9   | 19.6   | 12.7   | 18.9   | 18.1   | 16.6   | 18.7   | 18.6   |
| 45.2   | 51.9   | 13.3   | 42.8   | 156.1  | 167.9  | 150.8  | 187.7  | 58.8   |
| 35.9   | 33.7   | 22.4   | 17.1   | 74.7   | 65.8   | 69.8   | 57.7   | 23.6   |
| 1.7    | 1.7    | 6.3    | 2.9    | 23.6   | 19.3   | 25.9   | 33.1   | 4.7    |
| 218.3  | 239.0  | 216.2  | 234.9  | 232.7  | 321.0  | 258.3  | 277.0  | 222.0  |
| 6.7    | 14.0   | 17.5   | 14.5   | 22.1   | 13.6   | 15.9   | 16.2   | 11.2   |
| 147.4  | 151.0  | 181.9  | 160.7  | 413.2  | 268.3  | 378.7  | 463.0  | 1152.7 |
| 171.8  | 157.7  | 189.9  | 178.7  | 223.7  | 210.7  | 219.5  | 264.9  | 326.3  |
| 738.3  | 656.4  | 934.0  | 612.3  | 813.8  | 901.4  | 858.3  | 935.5  | 655.8  |
| 13.1   | 12.9   | 16.7   | 10.0   | 43.8   | 18.8   | 32.0   | 63.0   | 103.6  |
| 932.5  | 894.4  | 1068.0 | 831.6  | 894.6  | 803.2  | 930.2  | 1119.4 | 873.3  |
| 88.0   | 76.6   | 48.6   | 34.2   | 21.9   | 14.3   | 19.0   | 14.1   | 15.1   |
| 3.6    | 8.4    | 8.0    | 8.4    | 2.5    | 7.5    | 7.5    | 0.9    | 66.5   |
| 4.1    | 1.4    | 2.4    | 4.4    | 36.2   | 23.7   | 74.6   | 53.3   | 1.6    |
| 98.0   | 105.6  | 95.5   | 74.0   | 8.2    | 5.7    | 11.9   | 16.9   | 3.0    |
| 40.0   | 31.4   | 33.8   | 29.1   | 42.2   | 47.3   | 44.2   | 52.9   | 32.2   |
| 46.6   | 46.6   | 48.3   | 38.8   | 45.0   | 51.1   | 33.6   | 53.2   | 9.0    |
| 2053.3 | 1731.4 | 3531.3 | 1847.9 | 3624.2 | 3268.8 | 3481.9 | 3724.3 | 6137.1 |
| 7.9    | 5.8    | 6.5    | 4.6    | 37.3   | 39.1   | 11.0   | 7.2    | 64.3   |
| 5.8    | 10.7   | 5.0    | 13.4   | 5.9    | 4.3    | 9.7    | 18.4   | 11.8   |
| 60.4   | 60.4   | 64.2   | 59.9   | 32.4   | 27.5   | 22.4   | 41.7   | 66.8   |

|        |        |        |        |        |        |        |        |        |
|--------|--------|--------|--------|--------|--------|--------|--------|--------|
| 135.0  | 121.2  | 212.6  | 129.6  | 188.8  | 166.9  | 158.4  | 202.7  | 208.8  |
| 52.4   | 45.7   | 95.1   | 39.7   | 222.2  | 248.9  | 258.0  | 254.4  | 206.2  |
| 32.3   | 40.6   | 27.6   | 40.9   | 1.5    | 1.2    | 1.4    | 1.8    | 39.7   |
| 29.8   | 39.1   | 15.3   | 30.9   | 35.8   | 35.6   | 44.0   | 41.0   | 20.6   |
| 18.6   | 32.9   | 14.8   | 35.2   | 33.9   | 31.0   | 25.7   | 33.1   | 18.5   |
| 147.3  | 121.3  | 190.9  | 140.6  | 170.0  | 142.7  | 163.4  | 210.8  | 176.0  |
| 140.9  | 135.5  | 155.9  | 138.7  | 94.0   | 126.0  | 104.7  | 118.5  | 110.5  |
| 114.9  | 136.3  | 77.1   | 96.1   | 231.2  | 251.0  | 227.1  | 335.6  | 100.7  |
| 3917.7 | 3975.6 | 3111.5 | 3975.8 | 7788.6 | 8048.1 | 7730.0 | 8413.5 | 5372.6 |
| 326.2  | 294.1  | 384.1  | 289.7  | 468.6  | 477.2  | 513.9  | 555.1  | 467.6  |
| 208.5  | 187.1  | 288.0  | 201.3  | 468.8  | 524.1  | 557.8  | 540.0  | 380.8  |
| 72.9   | 86.8   | 124.8  | 94.4   | 80.1   | 81.5   | 53.1   | 90.4   | 97.6   |
| 36.9   | 40.8   | 43.6   | 35.1   | 24.7   | 34.4   | 30.5   | 41.9   | 63.8   |
| 8.4    | 22.7   | 9.5    | 12.9   | 25.9   | 49.5   | 26.5   | 25.3   | 39.9   |
| 20.4   | 28.3   | 29.5   | 17.8   | 58.0   | 50.9   | 46.1   | 55.3   | 44.4   |
| 112.4  | 92.3   | 163.3  | 72.8   | 161.9  | 114.5  | 200.1  | 227.2  | 429.6  |
| 64.2   | 85.1   | 59.3   | 58.2   | 23.4   | 24.5   | 26.3   | 26.8   | 31.7   |
| 212.7  | 229.5  | 268.0  | 205.0  | 122.8  | 108.2  | 109.4  | 136.9  | 88.5   |
| 1.8    | 2.3    | 7.4    | 1.0    | 2.9    | 2.0    | 1.2    | 1.5    | 9.4    |
| 317.6  | 369.8  | 316.2  | 364.3  | 127.5  | 152.4  | 147.9  | 153.1  | 205.8  |
| 219.1  | 238.8  | 260.5  | 196.0  | 189.8  | 175.0  | 172.8  | 216.2  | 157.2  |
| 7.0    | 4.9    | 6.3    | 3.1    | 5.4    | 1.6    | 3.8    | 14.8   | 3.7    |
| 3.4    | 9.5    | 10.7   | 3.6    | 220.1  | 302.8  | 291.0  | 265.1  | 47.1   |
| 12.2   | 26.2   | 36.4   | 39.1   | 26.3   | 13.0   | 13.8   | 33.7   | 19.2   |
| 374.2  | 323.3  | 478.0  | 362.8  | 483.6  | 645.0  | 516.3  | 601.5  | 537.2  |
| 91.9   | 91.8   | 61.9   | 89.6   | 34.8   | 58.8   | 27.3   | 41.9   | 29.3   |
| 7.5    | 11.7   | 25.0   | 8.5    | 36.2   | 34.8   | 6.2    | 25.5   | 148.9  |
| 32.6   | 33.0   | 40.1   | 24.0   | 138.5  | 132.9  | 130.9  | 151.3  | 75.9   |
| 33.3   | 27.2   | 59.2   | 24.5   | 152.1  | 174.9  | 151.5  | 138.8  | 90.9   |
| 170.6  | 173.2  | 159.7  | 207.5  | 55.6   | 76.8   | 58.4   | 60.2   | 38.4   |
| 49.4   | 48.8   | 53.7   | 41.8   | 44.9   | 42.4   | 44.3   | 52.6   | 105.9  |
| 24.7   | 21.9   | 32.1   | 24.7   | 20.1   | 23.3   | 14.0   | 25.9   | 68.6   |
| 47.7   | 37.6   | 48.9   | 26.5   | 48.3   | 44.6   | 46.4   | 44.9   | 100.1  |
| 118.4  | 135.0  | 110.7  | 132.7  | 63.2   | 69.7   | 56.1   | 81.6   | 55.5   |
| 30.7   | 26.7   | 30.8   | 26.6   | 58.8   | 46.1   | 44.9   | 57.5   | 47.0   |
| 7241.3 | 7108.5 | 7584.8 | 6583.9 | 7381.3 | 7202.8 | 7588.0 | 8068.7 | 9610.1 |
| 111.2  | 120.9  | 133.4  | 121.4  | 62.6   | 75.8   | 64.1   | 94.7   | 79.0   |
| 25.2   | 19.7   | 38.4   | 21.0   | 24.7   | 19.5   | 20.2   | 27.6   | 47.3   |
| 19.5   | 26.9   | 18.6   | 27.3   | 30.1   | 20.1   | 18.0   | 33.6   | 16.4   |
| 51.4   | 54.0   | 35.1   | 40.6   | 83.1   | 104.1  | 92.0   | 122.9  | 38.4   |
| 4.5    | 2.7    | 8.5    | 0.6    | 3.1    | 6.2    | 3.8    | 4.1    | 10.7   |
| 21.8   | 19.8   | 30.1   | 14.9   | 570.6  | 647.3  | 578.5  | 651.9  | 990.4  |
| 96.1   | 112.0  | 92.3   | 91.6   | 78.1   | 77.5   | 93.3   | 92.0   | 81.5   |
| 149.3  | 146.4  | 258.1  | 207.6  | 201.6  | 281.6  | 231.9  | 246.6  | 120.5  |
| 97.7   | 99.9   | 128.0  | 97.6   | 177.4  | 186.1  | 175.7  | 208.2  | 416.1  |
| 192.6  | 151.7  | 192.4  | 184.2  | 216.2  | 229.2  | 209.2  | 224.3  | 287.1  |
| 340.3  | 343.2  | 425.3  | 304.6  | 362.7  | 302.3  | 313.0  | 424.1  | 162.5  |
| 277.7  | 242.3  | 606.4  | 240.0  | 1049.5 | 610.3  | 945.7  | 1168.5 | 976.9  |
| 153.6  | 146.8  | 130.4  | 138.3  | 317.1  | 181.5  | 453.5  | 392.6  | 94.5   |
| 14.2   | 15.9   | 2.3    | 14.5   | 15.0   | 6.5    | 12.7   | 18.2   | 16.4   |
| 460.1  | 447.2  | 502.9  | 377.3  | 368.6  | 276.3  | 419.6  | 448.7  | 348.3  |
| 157.9  | 148.9  | 218.7  | 122.8  | 259.6  | 334.3  | 269.6  | 313.9  | 60.7   |
| 21.0   | 25.9   | 42.6   | 25.9   | 27.7   | 36.8   | 33.3   | 30.9   | 36.4   |

|       |       |       |       |       |       |       |       |       |
|-------|-------|-------|-------|-------|-------|-------|-------|-------|
| 7.4   | 10.1  | 7.0   | 11.2  | 15.7  | 8.8   | 2.4   | 7.0   | 8.8   |
| 162.8 | 139.7 | 140.2 | 150.3 | 560.5 | 578.0 | 611.5 | 728.1 | 623.9 |
| 126.1 | 142.4 | 166.6 | 124.2 | 72.1  | 85.8  | 82.2  | 74.2  | 78.0  |
| 57.4  | 68.4  | 121.5 | 70.8  | 67.8  | 55.3  | 76.5  | 66.5  | 121.4 |
| 110.8 | 126.7 | 140.6 | 132.7 | 72.5  | 75.1  | 50.6  | 71.6  | 186.1 |
| 253.3 | 230.2 | 431.4 | 331.9 | 192.0 | 170.2 | 171.1 | 182.8 | 223.5 |
| 25.8  | 23.8  | 5.3   | 10.1  | 234.8 | 178.6 | 260.6 | 308.3 | 97.5  |
| 110.0 | 123.0 | 105.7 | 129.3 | 205.2 | 194.1 | 237.3 | 222.0 | 250.9 |
| 43.8  | 43.5  | 31.3  | 25.8  | 1.9   | 3.8   | 6.2   | 5.4   | 1.7   |
| 9.2   | 9.0   | 9.7   | 8.1   | 20.0  | 16.0  | 11.1  | 25.9  | 10.9  |
| 246.0 | 289.8 | 175.1 | 163.9 | 95.1  | 111.9 | 92.3  | 83.5  | 99.0  |
| 140.6 | 141.3 | 124.8 | 149.6 | 152.9 | 181.3 | 189.6 | 187.1 | 78.1  |
| 85.1  | 90.9  | 108.6 | 75.9  | 128.7 | 200.0 | 134.0 | 147.8 | 95.4  |
| 47.4  | 46.2  | 35.2  | 38.7  | 6.0   | 8.2   | 4.1   | 10.0  | 36.9  |
| 591.8 | 507.6 | 553.3 | 502.3 | 354.3 | 489.2 | 408.4 | 435.5 | 351.3 |
| 4.5   | 4.6   | 4.3   | 3.6   | 30.6  | 41.2  | 22.9  | 29.7  | 9.1   |
| 57.4  | 60.5  | 89.1  | 54.6  | 153.2 | 77.6  | 190.4 | 151.8 | 71.2  |
| 36.5  | 35.7  | 36.4  | 38.2  | 158.4 | 109.0 | 177.2 | 188.5 | 23.8  |
| 7.5   | 11.8  | 25.6  | 10.7  | 15.7  | 10.0  | 9.0   | 16.1  | 35.2  |
| 327.2 | 326.1 | 497.7 | 338.0 | 327.8 | 244.3 | 351.4 | 447.7 | 336.6 |
| 22.8  | 22.9  | 27.7  | 15.0  | 15.9  | 16.5  | 19.3  | 33.8  | 96.1  |
| 79.6  | 86.7  | 257.2 | 76.0  | 166.4 | 111.9 | 144.0 | 185.3 | 267.9 |
| 88.2  | 92.8  | 114.8 | 106.3 | 85.0  | 77.0  | 83.9  | 112.1 | 86.9  |
| 12.1  | 14.6  | 12.8  | 5.5   | 151.9 | 129.9 | 117.0 | 123.7 | 12.3  |
| 24.1  | 21.8  | 30.4  | 21.2  | 9.9   | 14.2  | 7.9   | 11.5  | 57.4  |
| 6.1   | 7.7   | 10.9  | 10.1  | 342.3 | 344.8 | 323.2 | 470.5 | 7.6   |
| 24.8  | 26.3  | 8.9   | 23.6  | 8.8   | 16.7  | 15.0  | 24.1  | 118.1 |
| 21.5  | 13.1  | 24.5  | 19.8  | 106.6 | 65.9  | 62.2  | 90.8  | 126.3 |
| 23.3  | 23.7  | 15.0  | 21.7  | 39.6  | 31.7  | 33.0  | 43.7  | 47.4  |
| 45.2  | 43.8  | 49.2  | 29.7  | 694.3 | 547.4 | 620.1 | 709.8 | 913.1 |
| 107.8 | 120.6 | 174.2 | 142.7 | 144.7 | 105.7 | 126.3 | 125.9 | 233.3 |
| 74.7  | 51.4  | 144.5 | 82.6  | 135.1 | 81.1  | 118.1 | 112.7 | 247.9 |
| 7.9   | 13.4  | 16.1  | 11.7  | 14.7  | 12.0  | 6.7   | 5.8   | 12.8  |
| 79.8  | 85.9  | 59.2  | 77.3  | 69.3  | 71.2  | 72.9  | 87.2  | 74.4  |
| 6.8   | 14.1  | 8.1   | 13.2  | 2.7   | 4.6   | 2.8   | 5.3   | 5.7   |
| 31.3  | 44.1  | 43.8  | 28.4  | 10.5  | 14.7  | 10.0  | 13.1  | 5.5   |
| 19.1  | 14.6  | 29.6  | 24.0  | 41.3  | 49.8  | 34.1  | 39.3  | 29.2  |
| 9.1   | 10.4  | 7.0   | 10.2  | 38.9  | 45.6  | 48.3  | 61.7  | 27.9  |
| 197.0 | 190.8 | 158.5 | 130.6 | 47.9  | 45.6  | 36.0  | 47.8  | 70.4  |
| 104.2 | 68.0  | 103.8 | 77.0  | 57.8  | 116.3 | 96.8  | 93.2  | 33.9  |
| 6.6   | 6.6   | 12.3  | 16.8  | 35.5  | 26.9  | 29.7  | 19.2  | 2.0   |
| 54.6  | 49.8  | 49.4  | 40.4  | 262.4 | 326.1 | 316.3 | 319.8 | 155.0 |
| 97.2  | 114.4 | 75.6  | 92.4  | 456.3 | 415.0 | 455.3 | 461.1 | 292.2 |
| 9.4   | 17.0  | 11.5  | 4.1   | 0.7   | 0.8   | 0.7   | 0.9   | 2.4   |
| 11.5  | 4.9   | 11.7  | 9.8   | 3.7   | 8.6   | 7.2   | 5.7   | 9.2   |
| 51.0  | 44.7  | 39.1  | 41.0  | 101.5 | 99.0  | 109.0 | 125.4 | 142.8 |
| 257.8 | 282.6 | 214.9 | 206.3 | 82.1  | 45.0  | 65.5  | 93.5  | 179.1 |
| 81.1  | 80.1  | 96.2  | 120.0 | 44.2  | 74.6  | 35.8  | 57.8  | 83.4  |
| 29.0  | 45.0  | 51.4  | 24.6  | 62.6  | 68.4  | 56.7  | 67.1  | 42.7  |
| 260.8 | 229.4 | 323.5 | 248.7 | 202.9 | 197.2 | 197.8 | 241.9 | 162.7 |
| 36.6  | 41.1  | 42.5  | 28.2  | 19.6  | 6.2   | 17.3  | 21.4  | 41.0  |
| 9.5   | 1.1   | 10.4  | 7.1   | 1.5   | 12.6  | 8.4   | 11.0  | 4.9   |
| 468.4 | 485.6 | 403.3 | 360.8 | 19.0  | 20.4  | 19.7  | 25.4  | 14.7  |

|        |        |        |        |        |        |        |        |        |
|--------|--------|--------|--------|--------|--------|--------|--------|--------|
| 86.8   | 78.7   | 85.4   | 72.0   | 226.8  | 215.5  | 214.6  | 241.4  | 120.0  |
| 777.1  | 671.9  | 818.7  | 595.7  | 1548.4 | 1724.6 | 1678.2 | 1719.9 | 2279.1 |
| 253.3  | 228.9  | 240.0  | 280.7  | 150.6  | 119.6  | 141.0  | 168.5  | 99.3   |
| 148.1  | 120.4  | 182.0  | 138.8  | 159.9  | 170.7  | 158.8  | 189.2  | 88.9   |
| 4.6    | 5.6    | 11.0   | 9.0    | 23.1   | 41.1   | 26.2   | 33.0   | 30.6   |
| 433.9  | 454.1  | 687.6  | 492.2  | 390.9  | 322.8  | 354.2  | 411.3  | 490.3  |
| 273.5  | 270.2  | 318.7  | 250.2  | 309.8  | 289.3  | 341.3  | 396.7  | 147.7  |
| 7.2    | 3.5    | 5.4    | 6.7    | 1.7    | 0.5    | 2.4    | 7.8    | 42.5   |
| 330.1  | 309.1  | 433.0  | 338.0  | 376.4  | 418.9  | 323.5  | 422.1  | 365.3  |
| 56.2   | 50.4   | 50.3   | 61.0   | 148.5  | 110.0  | 92.4   | 145.0  | 60.5   |
| 79.4   | 74.1   | 105.1  | 66.6   | 112.3  | 128.5  | 103.5  | 141.6  | 219.2  |
| 32.0   | 33.0   | 59.4   | 46.5   | 43.3   | 37.3   | 41.9   | 51.1   | 112.2  |
| 25.4   | 18.6   | 25.4   | 20.9   | 25.8   | 37.0   | 31.7   | 45.6   | 40.1   |
| 20.2   | 20.8   | 23.8   | 17.2   | 9.9    | 10.4   | 9.0    | 13.9   | 30.1   |
| 359.9  | 387.2  | 336.8  | 341.9  | 116.9  | 108.0  | 108.0  | 178.7  | 172.7  |
| 547.3  | 547.5  | 565.4  | 453.2  | 216.6  | 167.1  | 233.7  | 263.7  | 266.0  |
| 69.9   | 68.2   | 175.3  | 94.9   | 585.4  | 448.9  | 601.9  | 601.2  | 545.3  |
| 24.5   | 35.5   | 43.9   | 19.8   | 11.7   | 8.0    | 6.4    | 17.7   | 20.1   |
| 95.2   | 108.5  | 71.2   | 81.0   | 178.0  | 233.0  | 187.2  | 231.1  | 124.9  |
| 442.2  | 389.0  | 588.8  | 308.1  | 329.6  | 259.8  | 300.9  | 371.4  | 289.4  |
| 43.5   | 42.7   | 40.7   | 42.0   | 0.7    | 1.2    | 2.2    | 0.9    | 140.3  |
| 219.5  | 187.3  | 245.1  | 274.3  | 11.6   | 12.6   | 8.1    | 17.3   | 13.9   |
| 787.5  | 660.9  | 1025.2 | 1007.5 | 28.4   | 28.3   | 31.5   | 44.7   | 7.0    |
| 4.0    | 1.8    | 1.2    | 1.6    | 84.2   | 55.1   | 66.2   | 75.7   | 65.3   |
| 192.9  | 164.7  | 327.3  | 177.4  | 213.6  | 212.5  | 195.6  | 235.2  | 160.2  |
| 178.7  | 206.2  | 215.1  | 171.0  | 307.3  | 242.5  | 389.4  | 405.8  | 185.0  |
| 114.4  | 115.1  | 95.1   | 107.7  | 109.2  | 136.8  | 129.5  | 148.7  | 103.8  |
| 1127.7 | 1109.7 | 1380.2 | 1195.2 | 270.3  | 322.7  | 302.8  | 350.0  | 182.3  |
| 25.9   | 18.1   | 36.9   | 22.7   | 25.6   | 25.9   | 25.3   | 23.7   | 22.7   |
| 268.7  | 244.0  | 498.3  | 301.1  | 374.0  | 364.1  | 382.5  | 434.7  | 520.6  |
| 0.4    | 0.7    | 4.4    | 0.7    | 82.5   | 52.0   | 66.1   | 67.9   | 3.8    |
| 2.5    | 3.7    | 4.7    | 0.5    | 2.6    | 2.0    | 4.1    | 1.2    | 2.5    |
| 982.1  | 906.9  | 1166.4 | 1041.7 | 1171.1 | 1421.5 | 1186.0 | 1330.0 | 1014.7 |
| 7.9    | 8.5    | 16.5   | 10.6   | 8.5    | 6.2    | 10.3   | 8.8    | 17.2   |
| 157.8  | 135.6  | 258.1  | 153.5  | 415.9  | 423.8  | 468.2  | 471.3  | 444.8  |
| 84.6   | 92.6   | 65.5   | 112.5  | 32.4   | 20.0   | 38.4   | 42.2   | 14.2   |
| 184.4  | 202.2  | 231.8  | 209.5  | 242.7  | 410.1  | 279.6  | 311.7  | 204.8  |
| 95.3   | 60.0   | 88.3   | 61.3   | 54.4   | 35.0   | 56.0   | 69.8   | 90.0   |
| 37.9   | 17.3   | 20.0   | 15.0   | 155.0  | 153.6  | 148.7  | 199.6  | 168.4  |
| 20.0   | 20.0   | 25.4   | 13.0   | 188.0  | 169.2  | 209.4  | 211.9  | 251.3  |
| 74.4   | 78.6   | 49.0   | 55.6   | 46.0   | 42.0   | 43.9   | 54.5   | 41.7   |
| 124.8  | 126.1  | 149.8  | 119.9  | 167.0  | 132.1  | 149.8  | 177.4  | 289.9  |
| 18.9   | 18.2   | 26.8   | 15.8   | 54.4   | 82.3   | 88.9   | 73.9   | 63.5   |
| 50.5   | 56.2   | 65.9   | 42.4   | 92.3   | 66.0   | 94.4   | 124.9  | 133.0  |
| 2084.6 | 1739.6 | 4052.8 | 2132.7 | 1611.8 | 1012.3 | 1672.4 | 1969.4 | 2635.1 |
| 68.4   | 70.2   | 68.9   | 75.8   | 170.4  | 204.4  | 162.1  | 205.4  | 126.9  |
| 15.1   | 22.5   | 22.2   | 16.5   | 31.7   | 61.0   | 34.8   | 30.9   | 18.8   |
| 193.5  | 162.7  | 203.5  | 199.7  | 76.0   | 99.1   | 85.0   | 105.7  | 252.2  |
| 55.8   | 52.2   | 90.8   | 47.1   | 253.9  | 245.2  | 275.0  | 265.6  | 168.4  |
| 2.2    | 1.0    | 1.9    | 0.6    | 2.7    | 4.4    | 1.2    | 0.3    | 1.2    |
| 15.4   | 29.7   | 52.0   | 15.8   | 16.3   | 17.0   | 12.8   | 21.8   | 30.8   |
| 5.9    | 21.4   | 14.0   | 10.6   | 9.8    | 11.5   | 8.1    | 6.8    | 22.8   |
| 34.0   | 28.4   | 75.6   | 32.6   | 205.0  | 147.0  | 267.5  | 203.5  | 429.8  |

|        |        |        |        |        |        |        |        |         |
|--------|--------|--------|--------|--------|--------|--------|--------|---------|
| 0.9    | 3.9    | 3.2    | 2.5    | 0.6    | 3.3    | 3.1    | 9.4    | 7.6     |
| 75.2   | 64.1   | 89.2   | 93.3   | 11.7   | 10.0   | 7.4    | 6.0    | 71.7    |
| 184.3  | 180.6  | 232.9  | 168.2  | 214.6  | 298.7  | 205.7  | 239.4  | 205.1   |
| 721.9  | 750.9  | 771.7  | 642.1  | 322.0  | 309.9  | 315.2  | 423.5  | 656.4   |
| 23.9   | 13.4   | 38.2   | 28.3   | 175.9  | 200.9  | 137.4  | 159.1  | 29.0    |
| 37.1   | 27.6   | 43.1   | 20.6   | 70.6   | 44.2   | 63.1   | 74.1   | 78.9    |
| 29.1   | 38.1   | 36.5   | 34.0   | 11.1   | 14.4   | 3.3    | 17.7   | 19.3    |
| 61.3   | 61.7   | 139.6  | 80.4   | 263.8  | 226.5  | 236.9  | 262.8  | 336.3   |
| 5147.3 | 4535.3 | 6026.9 | 4714.8 | 6700.5 | 6909.7 | 6908.3 | 7285.7 | 10108.7 |
| 79.3   | 88.2   | 76.2   | 93.9   | 69.3   | 85.1   | 87.1   | 130.3  | 53.2    |
| 338.6  | 373.5  | 260.6  | 259.2  | 117.0  | 129.8  | 99.1   | 106.4  | 61.0    |
| 57.4   | 50.8   | 55.0   | 47.1   | 52.1   | 60.5   | 66.4   | 42.6   | 130.1   |
| 184.6  | 187.3  | 134.9  | 163.4  | 76.6   | 89.5   | 41.1   | 67.0   | 19.6    |
| 157.3  | 168.3  | 136.4  | 148.1  | 59.9   | 69.1   | 46.0   | 58.4   | 17.1    |
| 27.2   | 39.4   | 20.7   | 33.6   | 18.5   | 20.8   | 23.5   | 22.1   | 57.0    |
| 0.5    | 0.6    | 0.6    | 0.5    | 0.7    | 0.4    | 0.6    | 0.3    | 0.8     |
| 0.8    | 1.7    | 5.0    | 0.6    | 9.7    | 9.9    | 12.8   | 9.4    | 59.2    |
| 4168.7 | 3773.0 | 5086.5 | 4426.3 | 5531.9 | 5040.2 | 5554.7 | 5778.1 | 8467.2  |
| 498.0  | 441.3  | 454.3  | 487.6  | 977.0  | 1038.3 | 1150.1 | 1209.7 | 792.4   |
| 40.8   | 47.9   | 42.6   | 31.1   | 378.5  | 347.0  | 451.0  | 408.0  | 51.3    |
| 15.7   | 19.8   | 9.8    | 13.0   | 37.0   | 47.8   | 34.0   | 30.3   | 26.2    |
| 1548.9 | 1302.3 | 1762.9 | 1298.3 | 849.7  | 866.9  | 736.7  | 984.1  | 1545.0  |
| 75.3   | 87.5   | 63.1   | 73.1   | 188.0  | 161.2  | 188.8  | 222.8  | 175.4   |
| 0.9    | 2.2    | 5.3    | 4.6    | 29.2   | 24.5   | 36.9   | 43.2   | 8.5     |
| 36.2   | 41.0   | 43.3   | 17.4   | 57.0   | 85.3   | 83.6   | 86.2   | 106.9   |
| 95.1   | 102.2  | 66.2   | 87.5   | 65.5   | 68.5   | 52.3   | 72.9   | 82.1    |
| 488.0  | 433.2  | 710.3  | 591.7  | 213.7  | 145.8  | 185.5  | 241.2  | 449.7   |
| 2612.8 | 2323.3 | 3536.5 | 2715.0 | 2472.9 | 2074.8 | 2573.3 | 2758.1 | 2606.9  |
| 54.4   | 50.6   | 34.1   | 52.1   | 30.1   | 34.9   | 20.5   | 22.4   | 29.2    |
| 53.4   | 31.9   | 100.0  | 52.2   | 45.4   | 49.2   | 33.4   | 58.3   | 84.0    |
| 1.1    | 0.8    | 3.3    | 3.6    | 0.9    | 0.8    | 1.5    | 0.7    | 3.8     |
| 46.7   | 44.8   | 61.4   | 43.9   | 216.1  | 241.7  | 220.6  | 229.0  | 125.4   |
| 9.4    | 8.0    | 9.3    | 7.8    | 7.1    | 5.0    | 8.2    | 13.4   | 8.5     |
| 107.8  | 115.4  | 123.5  | 74.1   | 504.3  | 466.7  | 454.2  | 524.4  | 443.6   |
| 337.1  | 328.2  | 300.0  | 292.6  | 385.0  | 313.9  | 320.7  | 471.3  | 264.6   |
| 284.6  | 264.1  | 348.9  | 270.0  | 268.9  | 205.5  | 279.6  | 335.2  | 282.0   |
| 24.3   | 56.1   | 6.0    | 27.8   | 1.1    | 5.0    | 6.4    | 3.7    | 7.3     |
| 280.8  | 272.0  | 274.7  | 214.9  | 275.7  | 338.0  | 301.0  | 324.4  | 262.2   |
| 5735.5 | 5369.0 | 6364.8 | 5393.3 | 7461.8 | 7772.0 | 7663.1 | 8223.4 | 9851.1  |
| 83.4   | 88.9   | 165.2  | 89.1   | 217.7  | 170.7  | 194.8  | 224.7  | 230.0   |
| 79.0   | 64.3   | 127.7  | 75.0   | 244.7  | 233.8  | 282.8  | 297.3  | 211.3   |
| 21.8   | 43.8   | 24.1   | 26.0   | 3.3    | 7.3    | 14.1   | 17.0   | 36.9    |
| 1.2    | 4.9    | 6.9    | 3.7    | 12.1   | 8.7    | 7.6    | 1.9    | 2.0     |
| 2.6    | 1.9    | 4.1    | 5.0    | 4.4    | 2.4    | 2.7    | 5.8    | 1.9     |
| 36.6   | 33.5   | 26.0   | 36.6   | 41.7   | 46.3   | 49.4   | 40.8   | 60.3    |
| 126.9  | 146.7  | 177.0  | 106.1  | 87.8   | 74.6   | 81.4   | 74.2   | 74.3    |
| 10.8   | 6.7    | 14.1   | 8.9    | 37.7   | 27.8   | 43.5   | 36.8   | 21.3    |
| 11.6   | 14.7   | 16.0   | 12.5   | 97.9   | 131.9  | 113.0  | 119.8  | 52.7    |
| 74.9   | 66.4   | 107.4  | 84.2   | 57.3   | 43.3   | 48.6   | 69.5   | 51.9    |
| 43.8   | 45.2   | 54.7   | 43.7   | 60.8   | 48.8   | 55.8   | 59.7   | 7.4     |
| 45.1   | 41.0   | 71.8   | 47.9   | 49.5   | 56.6   | 42.0   | 58.2   | 77.0    |
| 512.4  | 567.9  | 411.7  | 454.6  | 385.5  | 280.7  | 380.6  | 437.0  | 570.1   |
| 267.7  | 278.8  | 405.3  | 283.2  | 380.6  | 399.8  | 441.1  | 496.0  | 244.9   |

|        |        |        |        |        |        |        |        |         |
|--------|--------|--------|--------|--------|--------|--------|--------|---------|
| 113.6  | 108.5  | 157.0  | 115.9  | 120.0  | 175.1  | 142.3  | 151.8  | 106.4   |
| 45.1   | 53.9   | 62.7   | 54.5   | 33.4   | 39.1   | 38.4   | 35.5   | 18.2    |
| 50.1   | 39.7   | 36.2   | 37.8   | 70.6   | 69.9   | 77.8   | 68.7   | 152.7   |
| 1.4    | 0.5    | 0.9    | 1.6    | 1.1    | 1.1    | 4.7    | 7.0    | 5.7     |
| 121.6  | 130.9  | 152.4  | 142.7  | 147.5  | 123.7  | 109.0  | 136.6  | 216.8   |
| 70.0   | 97.3   | 38.0   | 65.6   | 48.9   | 69.1   | 73.6   | 72.6   | 6.6     |
| 447.8  | 402.9  | 528.8  | 452.7  | 202.0  | 206.6  | 193.0  | 206.8  | 315.7   |
| 852.9  | 784.0  | 1564.6 | 878.7  | 2349.9 | 2789.0 | 2680.1 | 2825.9 | 3340.0  |
| 483.0  | 535.0  | 548.7  | 432.5  | 164.0  | 158.6  | 234.5  | 237.6  | 484.0   |
| 27.8   | 18.9   | 37.0   | 19.3   | 9.3    | 12.3   | 16.4   | 17.5   | 40.8    |
| 43.8   | 31.6   | 74.6   | 33.2   | 132.9  | 164.1  | 127.6  | 140.1  | 77.9    |
| 22.1   | 24.7   | 35.5   | 28.1   | 17.1   | 19.5   | 23.2   | 17.8   | 15.7    |
| 1440.3 | 1338.5 | 2254.3 | 1421.7 | 2156.4 | 1865.8 | 2120.7 | 2408.1 | 1881.1  |
| 1122.0 | 1129.0 | 1182.0 | 1232.6 | 260.7  | 273.0  | 256.6  | 299.1  | 213.4   |
| 14.9   | 5.1    | 16.6   | 16.3   | 9.3    | 10.3   | 13.3   | 13.6   | 17.1    |
| 138.0  | 129.2  | 176.3  | 115.6  | 143.5  | 124.7  | 161.7  | 153.5  | 119.6   |
| 681.8  | 648.6  | 904.7  | 731.4  | 418.1  | 456.8  | 374.0  | 459.7  | 332.8   |
| 29.7   | 32.7   | 43.4   | 36.6   | 54.7   | 40.4   | 38.9   | 49.1   | 30.5    |
| 103.7  | 92.5   | 119.6  | 93.6   | 294.0  | 255.5  | 343.0  | 423.4  | 497.6   |
| 8.9    | 9.9    | 11.0   | 5.2    | 1.0    | 2.7    | 3.6    | 1.5    | 20.0    |
| 129.6  | 100.6  | 259.6  | 121.4  | 1.2    | 1.2    | 1.4    | 4.2    | 3.6     |
| 212.5  | 289.9  | 58.6   | 191.6  | 0.5    | 7.2    | 2.6    | 1.4    | 11.2    |
| 6947.6 | 6577.5 | 8011.2 | 6620.5 | 8973.4 | 8936.9 | 8859.1 | 9142.1 | 11810.9 |
| 7.1    | 5.5    | 6.5    | 8.7    | 130.0  | 158.2  | 153.3  | 189.1  | 0.8     |
| 0.5    | 0.9    | 1.1    | 3.7    | 34.7   | 30.3   | 45.8   | 45.1   | 80.5    |
| 71.8   | 56.4   | 6.2    | 41.8   | 2.4    | 3.5    | 8.0    | 9.0    | 81.8    |
| 11.0   | 15.1   | 15.0   | 1.7    | 21.1   | 29.7   | 27.8   | 30.8   | 29.5    |
| 32.6   | 37.7   | 63.6   | 50.2   | 163.9  | 184.4  | 164.7  | 198.2  | 38.9    |
| 73.6   | 73.0   | 58.3   | 50.1   | 162.3  | 150.5  | 135.9  | 181.3  | 101.3   |
| 22.3   | 23.3   | 17.2   | 21.5   | 35.5   | 47.0   | 27.9   | 38.1   | 38.6    |
| 35.9   | 17.8   | 30.5   | 35.2   | 132.3  | 140.0  | 167.5  | 167.5  | 10.9    |
| 15.7   | 2.0    | 26.3   | 11.2   | 1073.1 | 1206.8 | 1084.0 | 1247.9 | 628.1   |
| 103.0  | 91.3   | 169.5  | 103.6  | 75.3   | 65.7   | 79.1   | 108.3  | 51.4    |
| 7.1    | 5.9    | 3.1    | 3.8    | 221.6  | 124.8  | 245.5  | 223.9  | 850.0   |
| 7.7    | 11.1   | 3.9    | 8.6    | 35.2   | 23.9   | 38.5   | 37.1   | 16.3    |
| 189.2  | 154.0  | 350.2  | 196.8  | 554.6  | 511.9  | 621.0  | 773.5  | 275.3   |
| 113.3  | 118.7  | 96.8   | 105.1  | 1406.0 | 1558.4 | 1498.0 | 1557.7 | 349.2   |
| 0.4    | 2.2    | 4.5    | 0.4    | 1.7    | 1.6    | 5.7    | 6.1    | 42.1    |
| 6.7    | 8.8    | 11.0   | 8.0    | 6.5    | 5.1    | 6.6    | 9.9    | 6.7     |
| 31.0   | 39.1   | 53.3   | 33.3   | 45.8   | 42.0   | 44.8   | 50.7   | 43.2    |
| 6.3    | 2.3    | 5.5    | 2.1    | 1.1    | 1.1    | 0.7    | 1.3    | 8.1     |
| 6.8    | 10.7   | 15.0   | 8.9    | 20.5   | 23.5   | 20.0   | 25.1   | 41.2    |
| 50.5   | 49.8   | 74.5   | 53.8   | 167.3  | 171.4  | 162.7  | 204.7  | 144.8   |
| 24.7   | 19.1   | 12.7   | 19.7   | 124.4  | 95.4   | 95.9   | 125.5  | 104.5   |
| 5.9    | 0.7    | 5.7    | 3.1    | 20.5   | 14.2   | 15.5   | 24.1   | 78.4    |
| 8.2    | 14.4   | 22.8   | 16.2   | 18.8   | 43.3   | 21.3   | 38.4   | 14.3    |
| 7.4    | 6.9    | 12.9   | 13.5   | 62.8   | 74.3   | 52.0   | 63.0   | 15.4    |
| 5.5    | 32.1   | 24.7   | 15.5   | 30.5   | 20.3   | 22.2   | 22.9   | 40.8    |
| 173.2  | 157.5  | 279.8  | 188.7  | 407.1  | 352.1  | 439.3  | 483.4  | 261.0   |
| 861.4  | 759.4  | 1216.5 | 830.7  | 45.1   | 43.8   | 40.7   | 65.3   | 89.1    |
| 27.1   | 18.6   | 30.1   | 34.9   | 8.1    | 2.0    | 7.4    | 1.8    | 13.0    |
| 2.8    | 2.3    | 2.6    | 7.4    | 1.9    | 1.3    | 1.5    | 1.1    | 1.6     |
| 92.2   | 110.7  | 46.8   | 104.9  | 6.2    | 15.7   | 6.6    | 3.5    | 7.8     |

|        |        |        |        |        |        |        |        |         |
|--------|--------|--------|--------|--------|--------|--------|--------|---------|
| 156.3  | 148.2  | 174.0  | 122.4  | 102.7  | 125.0  | 89.3   | 120.2  | 83.5    |
| 113.9  | 101.6  | 139.8  | 84.0   | 194.2  | 263.0  | 251.1  | 279.5  | 231.0   |
| 136.8  | 107.0  | 149.0  | 118.4  | 141.5  | 160.4  | 126.3  | 184.3  | 179.7   |
| 99.8   | 114.8  | 63.7   | 86.8   | 99.1   | 127.6  | 103.1  | 105.1  | 119.5   |
| 57.3   | 65.4   | 114.1  | 58.3   | 89.5   | 70.2   | 98.4   | 71.6   | 132.1   |
| 64.2   | 45.6   | 100.0  | 56.9   | 39.0   | 23.2   | 16.1   | 30.7   | 71.5    |
| 2.9    | 8.1    | 7.2    | 7.5    | 24.7   | 23.5   | 15.6   | 27.6   | 21.4    |
| 70.8   | 78.8   | 80.1   | 59.3   | 184.6  | 184.1  | 200.2  | 244.1  | 96.1    |
| 6601.1 | 6044.6 | 7682.8 | 6286.5 | 7212.0 | 7571.0 | 7285.5 | 7990.1 | 9833.9  |
| 125.0  | 112.1  | 223.0  | 93.8   | 322.1  | 336.7  | 336.9  | 363.0  | 576.1   |
| 206.1  | 223.3  | 270.6  | 195.2  | 736.1  | 678.7  | 995.1  | 883.6  | 156.7   |
| 1.0    | 1.4    | 1.2    | 0.8    | 0.7    | 0.5    | 1.0    | 0.4    | 0.9     |
| 84.0   | 66.2   | 107.3  | 53.5   | 134.6  | 151.0  | 141.2  | 133.0  | 118.6   |
| 3.6    | 0.5    | 3.3    | 1.4    | 3.2    | 0.6    | 3.6    | 0.2    | 1.4     |
| 26.0   | 25.0   | 25.3   | 27.3   | 28.3   | 32.5   | 24.8   | 43.7   | 67.6    |
| 173.9  | 173.2  | 147.5  | 142.8  | 55.8   | 61.1   | 62.8   | 78.3   | 240.1   |
| 199.8  | 177.9  | 250.0  | 141.1  | 439.2  | 356.9  | 372.6  | 515.1  | 420.0   |
| 3.4    | 16.1   | 13.4   | 9.3    | 110.4  | 151.9  | 103.5  | 130.8  | 230.3   |
| 108.8  | 135.1  | 63.4   | 104.3  | 35.6   | 43.0   | 52.5   | 54.5   | 37.6    |
| 77.6   | 72.0   | 75.5   | 97.2   | 103.4  | 124.1  | 91.9   | 126.1  | 38.0    |
| 501.5  | 453.3  | 680.7  | 497.5  | 682.7  | 619.6  | 695.7  | 847.9  | 700.4   |
| 23.5   | 7.6    | 33.6   | 22.3   | 2.8    | 15.7   | 6.9    | 2.8    | 22.3    |
| 2.2    | 15.8   | 7.9    | 1.8    | 17.3   | 16.2   | 24.6   | 34.2   | 9.5     |
| 57.5   | 61.3   | 61.9   | 35.7   | 93.0   | 101.8  | 143.3  | 101.7  | 29.8    |
| 14.9   | 14.9   | 18.8   | 16.0   | 68.8   | 68.0   | 63.4   | 91.8   | 36.1    |
| 126.1  | 84.7   | 228.8  | 97.9   | 192.7  | 107.8  | 244.1  | 259.0  | 867.8   |
| 16.5   | 7.0    | 21.9   | 12.3   | 62.1   | 79.9   | 68.5   | 63.8   | 57.1    |
| 6.4    | 4.7    | 10.7   | 3.5    | 12.9   | 8.3    | 9.6    | 6.1    | 28.8    |
| 152.2  | 158.4  | 143.7  | 156.6  | 93.2   | 160.5  | 100.4  | 119.5  | 167.3   |
| 26.6   | 30.0   | 18.3   | 26.6   | 29.8   | 31.4   | 17.4   | 28.0   | 37.6    |
| 14.8   | 6.2    | 18.4   | 4.9    | 2.3    | 4.0    | 12.3   | 19.0   | 12.2    |
| 2110.7 | 1840.9 | 2950.1 | 1634.0 | 4216.5 | 3648.4 | 3797.0 | 4481.2 | 4784.0  |
| 8156.8 | 7204.3 | 7786.5 | 7718.7 | 6927.9 | 7042.8 | 7199.7 | 7256.5 | 10652.9 |
| 207.5  | 203.4  | 271.2  | 260.0  | 200.3  | 188.3  | 195.2  | 217.7  | 126.5   |
| 10.1   | 4.5    | 7.0    | 4.1    | 3.6    | 2.3    | 6.5    | 0.4    | 103.1   |
| 166.5  | 166.4  | 141.6  | 166.8  | 54.0   | 108.6  | 60.4   | 74.3   | 110.7   |
| 22.0   | 22.3   | 31.3   | 26.3   | 23.1   | 15.5   | 15.9   | 25.7   | 28.1    |
| 1.6    | 2.6    | 1.8    | 1.9    | 6.7    | 7.2    | 11.9   | 12.0   | 4.1     |
| 97.3   | 112.7  | 103.8  | 72.6   | 243.5  | 237.6  | 238.0  | 259.4  | 276.5   |
| 17.5   | 16.8   | 19.5   | 5.2    | 7.8    | 1.8    | 7.9    | 1.6    | 67.5    |
| 242.0  | 237.1  | 271.5  | 235.9  | 160.3  | 182.8  | 182.4  | 201.0  | 100.8   |
| 15.5   | 11.6   | 29.0   | 22.3   | 9.7    | 6.5    | 9.6    | 11.6   | 18.5    |
| 1.7    | 2.1    | 2.5    | 1.9    | 2.6    | 2.2    | 1.8    | 1.9    | 2.8     |
| 30.1   | 43.1   | 20.9   | 33.4   | 1.4    | 5.2    | 2.5    | 1.8    | 8.7     |
| 9.1    | 13.2   | 10.5   | 2.3    | 54.0   | 18.5   | 38.7   | 70.9   | 29.1    |
| 117.9  | 116.9  | 148.9  | 110.7  | 135.0  | 201.9  | 149.5  | 167.2  | 219.0   |
| 765.1  | 694.4  | 1330.4 | 724.9  | 2205.5 | 2556.8 | 2365.5 | 2596.3 | 3161.0  |
| 23.4   | 27.6   | 18.9   | 18.0   | 2.1    | 7.1    | 5.8    | 1.9    | 8.3     |
| 3.3    | 3.0    | 2.2    | 2.9    | 0.9    | 0.3    | 1.4    | 0.8    | 6.4     |
| 47.4   | 48.9   | 56.4   | 49.8   | 53.1   | 55.8   | 60.3   | 71.6   | 53.1    |
| 4.8    | 3.6    | 3.5    | 2.9    | 9.5    | 11.3   | 9.5    | 12.5   | 12.8    |
| 5.2    | 3.6    | 3.6    | 4.2    | 14.7   | 19.0   | 13.3   | 20.0   | 11.4    |
| 102.7  | 112.4  | 159.8  | 112.8  | 159.0  | 165.6  | 185.9  | 215.3  | 125.1   |

|        |        |        |        |        |        |        |        |        |
|--------|--------|--------|--------|--------|--------|--------|--------|--------|
| 70.0   | 62.1   | 109.1  | 77.4   | 295.2  | 305.8  | 341.2  | 370.2  | 16.3   |
| 22.8   | 35.4   | 33.4   | 27.5   | 29.5   | 21.3   | 26.6   | 15.2   | 38.2   |
| 30.1   | 41.4   | 69.6   | 55.8   | 75.2   | 36.5   | 59.7   | 84.8   | 84.7   |
| 149.7  | 154.5  | 115.8  | 109.1  | 102.2  | 128.0  | 124.4  | 148.3  | 133.5  |
| 29.7   | 42.3   | 39.1   | 45.2   | 30.0   | 41.0   | 28.1   | 19.2   | 35.2   |
| 2539.9 | 2586.5 | 2191.5 | 1796.6 | 6018.3 | 6187.3 | 6395.0 | 6625.1 | 4886.4 |
| 483.8  | 417.4  | 575.5  | 399.8  | 552.5  | 502.2  | 568.1  | 659.7  | 588.6  |
| 77.0   | 61.8   | 102.0  | 84.6   | 150.3  | 135.9  | 161.8  | 148.3  | 176.5  |
| 61.2   | 75.8   | 59.6   | 64.8   | 972.4  | 775.9  | 1233.8 | 914.0  | 52.0   |
| 972.7  | 981.9  | 1414.8 | 803.0  | 4262.1 | 3472.8 | 4074.5 | 4471.6 | 3466.2 |
| 531.8  | 487.7  | 516.2  | 524.4  | 82.8   | 82.8   | 81.3   | 83.7   | 112.2  |
| 377.4  | 372.4  | 280.6  | 282.8  | 160.6  | 205.1  | 162.0  | 222.3  | 176.4  |
| 887.6  | 706.4  | 1183.2 | 791.5  | 193.5  | 179.5  | 172.1  | 248.1  | 181.4  |
| 283.8  | 256.0  | 359.7  | 296.8  | 248.1  | 192.5  | 211.8  | 307.2  | 640.7  |
| 46.0   | 45.0   | 41.3   | 31.1   | 26.8   | 35.4   | 24.2   | 34.6   | 28.3   |
| 1353.3 | 1260.3 | 1783.9 | 1222.8 | 1915.4 | 1810.1 | 2109.6 | 2070.5 | 1389.3 |
| 131.4  | 127.7  | 183.0  | 99.4   | 183.3  | 154.4  | 171.9  | 227.0  | 179.0  |
| 4.1    | 7.4    | 4.8    | 2.3    | 5.3    | 12.1   | 10.5   | 3.4    | 32.2   |
| 4.7    | 3.6    | 3.3    | 4.2    | 2.4    | 0.5    | 3.2    | 0.5    | 4.6    |
| 93.0   | 89.2   | 58.8   | 60.8   | 42.5   | 40.5   | 59.9   | 52.5   | 96.7   |
| 308.0  | 284.3  | 444.0  | 312.8  | 347.2  | 323.8  | 309.7  | 391.2  | 202.1  |
| 4.5    | 7.6    | 17.7   | 7.7    | 27.0   | 21.7   | 24.3   | 28.2   | 26.8   |
| 62.4   | 64.1   | 98.3   | 25.3   | 103.1  | 91.5   | 90.8   | 113.2  | 80.3   |
| 143.9  | 124.0  | 128.6  | 121.8  | 139.0  | 118.4  | 119.2  | 169.2  | 162.9  |
| 6.1    | 7.2    | 13.1   | 8.1    | 12.0   | 9.0    | 11.3   | 8.6    | 1.1    |
| 52.6   | 46.5   | 102.4  | 39.4   | 267.7  | 181.5  | 256.3  | 298.8  | 208.4  |
| 6.7    | 12.6   | 16.2   | 5.8    | 164.5  | 260.0  | 194.5  | 152.0  | 14.5   |
| 6.8    | 5.0    | 14.1   | 12.3   | 4.0    | 5.8    | 7.6    | 14.9   | 11.1   |
| 202.6  | 185.0  | 174.8  | 192.6  | 174.3  | 201.9  | 202.0  | 196.8  | 191.2  |
| 94.6   | 102.5  | 114.7  | 107.0  | 38.0   | 51.3   | 53.7   | 60.4   | 96.9   |
| 555.9  | 624.3  | 467.3  | 425.8  | 284.1  | 256.5  | 298.3  | 289.8  | 327.8  |
| 49.0   | 52.3   | 48.1   | 56.2   | 17.9   | 19.1   | 20.7   | 30.1   | 40.8   |
| 187.7  | 165.8  | 228.6  | 179.2  | 192.6  | 241.2  | 177.0  | 251.7  | 60.8   |
| 538.5  | 547.1  | 610.4  | 528.2  | 588.5  | 770.7  | 628.2  | 739.7  | 449.8  |
| 291.7  | 283.1  | 299.6  | 273.8  | 498.3  | 613.6  | 514.5  | 617.5  | 237.0  |
| 11.1   | 7.6    | 12.4   | 1.7    | 5.6    | 2.4    | 13.1   | 13.0   | 20.2   |
| 41.6   | 30.0   | 73.5   | 30.6   | 115.6  | 77.6   | 98.1   | 117.5  | 41.4   |
| 996.6  | 824.4  | 1902.6 | 1120.1 | 1380.6 | 1250.8 | 1291.6 | 1339.8 | 2487.3 |
| 8.6    | 6.9    | 9.4    | 4.4    | 8.2    | 5.6    | 6.2    | 14.5   | 13.2   |
| 1.1    | 1.5    | 1.6    | 0.5    | 20.5   | 18.4   | 14.5   | 37.3   | 587.9  |
| 94.7   | 92.0   | 112.9  | 91.3   | 126.0  | 85.3   | 112.1  | 136.6  | 193.6  |
| 12.6   | 9.3    | 11.6   | 12.7   | 39.8   | 16.3   | 35.6   | 40.7   | 10.5   |
| 302.1  | 293.7  | 274.9  | 270.9  | 135.2  | 137.3  | 122.4  | 146.2  | 97.7   |
| 6.8    | 6.0    | 6.1    | 2.8    | 5.8    | 2.7    | 6.1    | 6.7    | 3.4    |
| 91.0   | 74.9   | 146.7  | 89.1   | 34.5   | 38.5   | 34.5   | 36.4   | 55.3   |
| 8.5    | 4.7    | 9.4    | 3.5    | 2.0    | 2.4    | 6.0    | 11.6   | 5.0    |
| 7.5    | 5.3    | 9.7    | 4.9    | 8.4    | 6.5    | 8.8    | 16.4   | 5.8    |
| 518.3  | 498.3  | 777.2  | 506.3  | 475.3  | 547.8  | 544.6  | 588.8  | 441.7  |
| 175.3  | 205.1  | 336.0  | 310.8  | 77.7   | 49.3   | 73.9   | 89.5   | 21.6   |
| 13.1   | 11.1   | 20.4   | 6.6    | 15.3   | 11.5   | 15.5   | 13.4   | 29.4   |
| 200.5  | 173.5  | 320.5  | 164.8  | 354.7  | 370.7  | 352.5  | 368.9  | 380.0  |
| 50.8   | 35.3   | 53.3   | 48.8   | 323.3  | 286.3  | 327.1  | 339.5  | 198.3  |
| 26.7   | 20.9   | 29.3   | 22.3   | 50.3   | 37.8   | 40.7   | 50.9   | 63.6   |



|        |        |        |        |        |        |        |        |        |
|--------|--------|--------|--------|--------|--------|--------|--------|--------|
| 513.1  | 447.6  | 829.6  | 523.1  | 107.7  | 97.2   | 95.4   | 144.8  | 145.5  |
| 86.5   | 82.8   | 95.3   | 76.7   | 195.4  | 157.9  | 177.3  | 225.6  | 95.5   |
| 8.0    | 21.1   | 18.5   | 15.3   | 49.6   | 51.6   | 65.9   | 70.5   | 52.6   |
| 212.4  | 206.9  | 329.1  | 186.9  | 356.0  | 421.7  | 404.2  | 385.2  | 488.8  |
| 193.6  | 214.9  | 121.5  | 177.3  | 31.1   | 43.2   | 33.6   | 27.5   | 40.4   |
| 4.5    | 13.4   | 6.6    | 4.5    | 4.2    | 5.3    | 12.2   | 16.9   | 25.9   |
| 641.5  | 647.3  | 600.9  | 791.2  | 13.0   | 23.3   | 21.4   | 21.5   | 23.5   |
| 78.4   | 79.4   | 65.8   | 71.4   | 169.5  | 277.4  | 210.2  | 170.6  | 47.7   |
| 0.8    | 1.4    | 7.6    | 1.2    | 1.5    | 3.4    | 1.5    | 2.4    | 2.6    |
| 9.7    | 17.9   | 9.8    | 13.5   | 24.2   | 12.3   | 22.9   | 24.9   | 13.0   |
| 32.7   | 33.1   | 40.8   | 28.1   | 48.5   | 36.2   | 43.8   | 54.8   | 45.6   |
| 168.5  | 109.6  | 437.8  | 105.0  | 319.7  | 180.1  | 353.3  | 370.8  | 97.2   |
| 9.7    | 5.4    | 19.2   | 5.2    | 3.7    | 7.3    | 12.0   | 3.9    | 12.9   |
| 330.4  | 272.3  | 885.6  | 358.7  | 5968.0 | 5548.4 | 6255.6 | 6411.6 | 7194.6 |
| 6.0    | 2.4    | 7.0    | 5.6    | 6.3    | 6.5    | 11.1   | 8.2    | 12.5   |
| 0.6    | 0.4    | 1.3    | 1.1    | 1.0    | 0.7    | 0.5    | 1.1    | 1.5    |
| 133.1  | 142.2  | 202.2  | 153.7  | 121.2  | 137.9  | 114.4  | 138.3  | 85.0   |
| 115.4  | 124.5  | 109.5  | 126.2  | 35.7   | 18.7   | 25.9   | 37.5   | 69.1   |
| 55.9   | 62.4   | 26.6   | 48.6   | 18.2   | 8.3    | 12.1   | 6.9    | 7.3    |
| 31.6   | 34.4   | 39.9   | 29.9   | 72.3   | 38.0   | 87.0   | 89.4   | 40.9   |
| 324.6  | 297.6  | 455.0  | 301.3  | 598.0  | 565.0  | 691.0  | 691.5  | 736.0  |
| 87.3   | 98.1   | 76.8   | 92.6   | 205.5  | 169.4  | 204.7  | 269.5  | 112.3  |
| 164.8  | 126.0  | 234.5  | 124.8  | 906.2  | 526.7  | 778.3  | 941.8  | 412.9  |
| 319.8  | 277.7  | 479.7  | 269.6  | 1153.0 | 794.1  | 1089.2 | 1186.3 | 887.7  |
| 16.2   | 16.5   | 11.3   | 7.6    | 12.8   | 8.5    | 5.1    | 16.1   | 22.8   |
| 111.3  | 86.6   | 303.0  | 102.6  | 280.3  | 164.9  | 421.0  | 338.9  | 149.1  |
| 284.9  | 269.0  | 335.5  | 258.2  | 248.3  | 203.0  | 261.5  | 274.2  | 276.6  |
| 87.5   | 77.6   | 110.1  | 87.4   | 77.2   | 66.2   | 59.7   | 92.7   | 40.6   |
| 2.8    | 0.9    | 9.6    | 3.1    | 5.1    | 7.9    | 5.3    | 5.6    | 6.2    |
| 100.6  | 84.1   | 154.0  | 92.6   | 435.9  | 323.0  | 409.1  | 473.4  | 608.2  |
| 13.9   | 13.3   | 29.7   | 14.4   | 64.4   | 48.5   | 67.0   | 61.9   | 61.5   |
| 6641.7 | 6366.2 | 7481.8 | 6402.0 | 6382.7 | 6747.1 | 6654.9 | 7057.6 | 9492.3 |
| 30.8   | 33.1   | 70.8   | 40.2   | 63.5   | 51.5   | 49.0   | 59.8   | 52.6   |
| 13.5   | 3.6    | 15.7   | 10.4   | 10.3   | 16.4   | 22.3   | 10.0   | 18.5   |
| 1.1    | 1.0    | 1.2    | 1.0    | 1.0    | 0.7    | 2.1    | 0.9    | 2.7    |
| 770.2  | 601.2  | 974.4  | 612.0  | 202.9  | 216.3  | 207.4  | 208.1  | 209.4  |
| 2201.2 | 2171.2 | 2588.3 | 2261.0 | 3114.2 | 3060.3 | 2917.2 | 3123.6 | 4947.1 |
| 9.3    | 2.9    | 3.3    | 9.5    | 35.8   | 36.9   | 29.7   | 28.1   | 89.3   |
| 216.2  | 197.5  | 218.7  | 189.2  | 29.0   | 39.3   | 27.2   | 26.7   | 64.8   |
| 41.1   | 31.4   | 52.7   | 35.1   | 33.9   | 29.6   | 32.2   | 36.7   | 24.8   |
| 2.4    | 5.2    | 4.7    | 3.6    | 1.4    | 2.1    | 2.4    | 3.1    | 8.2    |
| 57.7   | 67.6   | 47.4   | 60.1   | 24.2   | 22.2   | 31.6   | 28.7   | 53.7   |
| 310.9  | 259.5  | 449.3  | 242.5  | 378.7  | 227.3  | 286.4  | 373.0  | 427.3  |
| 23.4   | 30.1   | 28.2   | 22.8   | 72.5   | 54.4   | 50.1   | 77.1   | 70.1   |
| 5.9    | 6.9    | 8.3    | 7.4    | 9.5    | 9.3    | 8.2    | 5.8    | 9.6    |
| 4.6    | 7.1    | 21.5   | 4.8    | 1.9    | 5.0    | 1.9    | 13.7   | 4.4    |
| 99.1   | 92.5   | 146.3  | 88.1   | 270.1  | 181.4  | 234.3  | 301.0  | 187.8  |
| 147.3  | 122.6  | 315.6  | 119.9  | 684.6  | 484.7  | 680.6  | 739.5  | 609.3  |
| 149.8  | 128.1  | 251.1  | 150.2  | 56.4   | 63.2   | 66.0   | 78.9   | 49.6   |
| 37.8   | 28.1   | 39.6   | 23.1   | 20.8   | 15.6   | 21.5   | 33.3   | 47.0   |
| 2.1    | 2.6    | 3.1    | 5.3    | 1.3    | 1.2    | 1.1    | 1.2    | 2.5    |
| 9.2    | 12.9   | 5.0    | 2.5    | 585.9  | 591.3  | 387.0  | 490.5  | 20.1   |
| 309.5  | 288.2  | 376.3  | 293.5  | 388.0  | 319.8  | 328.1  | 422.8  | 612.8  |

|        |        |        |        |        |        |        |        |         |
|--------|--------|--------|--------|--------|--------|--------|--------|---------|
| 30.2   | 24.6   | 13.6   | 20.9   | 25.5   | 44.3   | 25.6   | 30.9   | 24.8    |
| 238.9  | 206.8  | 389.2  | 185.4  | 279.3  | 301.7  | 254.6  | 308.8  | 531.5   |
| 122.4  | 113.6  | 169.3  | 109.7  | 98.4   | 115.9  | 97.3   | 129.9  | 139.3   |
| 144.6  | 129.2  | 177.2  | 135.1  | 399.8  | 470.7  | 456.8  | 430.3  | 274.7   |
| 1.7    | 4.7    | 7.6    | 1.7    | 3.4    | 4.2    | 3.3    | 1.8    | 1.8     |
| 57.9   | 69.5   | 116.4  | 59.4   | 327.1  | 290.8  | 354.4  | 367.9  | 132.4   |
| 2.5    | 2.1    | 3.4    | 1.8    | 1.1    | 1.0    | 1.6    | 1.9    | 3.1     |
| 1384.6 | 1436.0 | 1524.6 | 1251.8 | 1524.0 | 2232.5 | 1453.1 | 1661.1 | 1717.5  |
| 9.1    | 12.7   | 14.9   | 7.9    | 7.4    | 15.0   | 12.7   | 19.0   | 4.7     |
| 8686.7 | 8367.7 | 9400.3 | 8229.5 | 8496.9 | 8320.9 | 8368.1 | 9063.1 | 11687.8 |
| 54.7   | 54.3   | 72.3   | 53.4   | 72.4   | 94.0   | 77.2   | 81.3   | 144.0   |
| 132.2  | 157.0  | 225.2  | 141.5  | 155.7  | 135.7  | 176.5  | 177.6  | 131.4   |
| 731.0  | 613.4  | 957.1  | 722.6  | 728.1  | 688.1  | 726.7  | 769.1  | 644.2   |
| 47.5   | 51.9   | 54.1   | 43.1   | 5.0    | 2.2    | 4.0    | 0.2    | 73.0    |
| 5293.5 | 4526.8 | 6980.3 | 4662.8 | 4767.3 | 3515.1 | 4245.5 | 4735.5 | 6519.0  |
| 8.0    | 3.9    | 5.6    | 6.1    | 23.0   | 31.6   | 31.1   | 14.3   | 7.8     |
| 12.6   | 11.5   | 22.7   | 12.1   | 13.0   | 6.3    | 5.8    | 11.0   | 7.3     |
| 136.1  | 135.2  | 207.5  | 143.6  | 35.4   | 22.5   | 40.4   | 37.9   | 43.5    |
| 30.7   | 31.0   | 43.1   | 19.3   | 98.9   | 116.6  | 155.8  | 133.4  | 157.6   |
| 419.9  | 473.2  | 384.9  | 501.7  | 83.2   | 76.6   | 96.5   | 119.5  | 129.3   |
| 60.5   | 72.6   | 61.2   | 53.1   | 52.6   | 53.9   | 61.6   | 59.0   | 42.1    |
| 133.7  | 150.0  | 245.0  | 189.1  | 47.4   | 39.7   | 47.4   | 55.5   | 128.0   |
| 1045.4 | 928.9  | 744.0  | 1088.0 | 306.1  | 281.1  | 526.1  | 499.8  | 66.6    |
| 125.3  | 111.8  | 180.7  | 104.5  | 186.7  | 172.0  | 198.6  | 246.0  | 188.7   |
| 236.9  | 171.5  | 504.1  | 284.2  | 214.5  | 233.1  | 138.2  | 225.9  | 126.4   |
| 3.5    | 2.7    | 4.4    | 2.8    | 2.4    | 2.7    | 1.3    | 3.1    | 2.9     |
| 23.3   | 19.4   | 32.4   | 17.2   | 29.5   | 21.1   | 26.7   | 35.7   | 39.8    |
| 34.8   | 27.6   | 42.9   | 36.1   | 114.6  | 111.5  | 114.6  | 144.3  | 141.2   |
| 16.4   | 22.3   | 37.0   | 19.4   | 19.9   | 8.9    | 16.6   | 26.1   | 31.6    |
| 59.3   | 57.4   | 81.8   | 48.4   | 79.7   | 66.0   | 74.0   | 62.5   | 122.8   |
| 25.0   | 15.2   | 27.2   | 15.6   | 22.0   | 21.4   | 13.9   | 30.5   | 35.7    |
| 4.8    | 23.0   | 18.3   | 4.9    | 10.8   | 12.6   | 7.9    | 16.1   | 13.0    |
| 492.3  | 454.2  | 791.9  | 669.4  | 154.2  | 178.6  | 158.4  | 175.5  | 205.4   |
| 4.7    | 5.1    | 9.5    | 5.0    | 9.7    | 11.0   | 20.6   | 16.9   | 78.7    |
| 71.9   | 79.1   | 71.6   | 72.8   | 39.5   | 41.6   | 30.8   | 33.8   | 41.9    |
| 1.1    | 5.5    | 2.9    | 1.8    | 0.8    | 4.4    | 4.8    | 1.2    | 1.6     |
| 24.2   | 18.5   | 16.1   | 27.1   | 2.8    | 15.8   | 7.4    | 20.0   | 10.8    |
| 205.1  | 142.0  | 373.7  | 153.8  | 113.9  | 77.2   | 111.9  | 103.9  | 252.4   |
| 11.4   | 3.7    | 23.0   | 2.5    | 16.8   | 28.9   | 19.2   | 18.8   | 71.6    |
| 8.1    | 7.4    | 5.0    | 6.0    | 44.1   | 43.2   | 45.5   | 52.7   | 26.8    |
| 86.8   | 86.5   | 89.0   | 86.1   | 79.1   | 103.2  | 77.7   | 95.1   | 88.2    |
| 5418.5 | 4987.0 | 7883.6 | 5019.6 | 7121.2 | 7039.3 | 7384.3 | 7518.5 | 9412.1  |
| 103.9  | 103.0  | 198.3  | 77.2   | 150.0  | 89.1   | 125.4  | 173.3  | 111.8   |
| 69.0   | 50.1   | 64.1   | 63.6   | 58.7   | 53.6   | 59.6   | 59.8   | 125.0   |
| 133.5  | 150.7  | 103.9  | 123.3  | 121.9  | 115.1  | 119.9  | 113.8  | 350.1   |
| 27.0   | 36.2   | 33.7   | 26.7   | 16.8   | 17.6   | 20.7   | 42.2   | 47.9    |
| 63.4   | 51.8   | 67.5   | 37.4   | 5.0    | 11.3   | 11.7   | 6.9    | 12.6    |
| 5.3    | 0.9    | 7.5    | 4.6    | 29.3   | 20.6   | 27.4   | 23.9   | 10.0    |
| 81.3   | 78.3   | 55.1   | 54.1   | 39.9   | 43.6   | 47.9   | 49.2   | 69.3    |
| 77.1   | 85.6   | 88.7   | 74.1   | 161.8  | 123.6  | 144.5  | 144.7  | 193.5   |
| 3034.0 | 2618.1 | 3705.4 | 2829.6 | 1865.9 | 1476.0 | 2101.1 | 2199.5 | 2162.9  |
| 267.3  | 249.8  | 280.3  | 250.9  | 238.6  | 387.2  | 247.0  | 317.8  | 453.8   |
| 73.8   | 100.6  | 36.3   | 91.9   | 23.5   | 20.6   | 33.2   | 33.8   | 14.7    |

|        |        |        |        |        |        |        |        |        |
|--------|--------|--------|--------|--------|--------|--------|--------|--------|
| 60.3   | 55.8   | 34.4   | 59.0   | 17.8   | 12.3   | 19.2   | 14.4   | 16.7   |
| 43.9   | 42.9   | 46.6   | 41.5   | 24.4   | 18.1   | 31.7   | 29.0   | 35.2   |
| 32.7   | 34.0   | 29.8   | 28.7   | 43.1   | 48.0   | 44.9   | 41.0   | 22.1   |
| 11.1   | 4.7    | 16.1   | 8.2    | 17.6   | 16.5   | 17.5   | 26.8   | 13.1   |
| 9.5    | 3.9    | 7.7    | 9.5    | 4.4    | 7.0    | 6.0    | 8.1    | 8.2    |
| 5.2    | 8.0    | 6.3    | 7.3    | 1.6    | 5.6    | 2.5    | 0.2    | 2.8    |
| 71.3   | 67.4   | 99.9   | 78.4   | 24.9   | 35.0   | 33.2   | 41.4   | 227.0  |
| 19.2   | 11.5   | 10.7   | 9.5    | 1.4    | 8.6    | 3.0    | 6.4    | 8.5    |
| 26.5   | 19.6   | 38.5   | 18.5   | 30.3   | 27.8   | 33.3   | 43.1   | 31.9   |
| 83.0   | 91.0   | 87.5   | 82.6   | 11.4   | 18.3   | 17.2   | 5.2    | 13.9   |
| 236.5  | 276.7  | 189.5  | 227.5  | 68.8   | 60.2   | 115.3  | 87.0   | 25.9   |
| 2.8    | 3.6    | 9.8    | 1.9    | 14.7   | 7.8    | 8.7    | 10.2   | 4.5    |
| 134.8  | 135.4  | 138.9  | 124.1  | 46.7   | 47.3   | 39.0   | 43.6   | 159.3  |
| 608.5  | 480.8  | 1138.9 | 686.0  | 1680.7 | 2605.5 | 1771.0 | 1935.0 | 1696.9 |
| 21.0   | 18.2   | 28.0   | 19.8   | 24.3   | 31.2   | 17.2   | 16.4   | 31.7   |
| 14.9   | 10.3   | 22.3   | 17.9   | 8.5    | 2.7    | 9.2    | 22.2   | 10.8   |
| 1.8    | 2.2    | 2.4    | 1.3    | 7.4    | 0.7    | 0.7    | 1.3    | 1.6    |
| 70.3   | 56.0   | 52.9   | 60.8   | 79.7   | 59.7   | 62.2   | 97.9   | 46.1   |
| 12.2   | 12.7   | 15.3   | 7.6    | 11.8   | 12.4   | 18.3   | 18.9   | 16.8   |
| 150.7  | 141.9  | 222.5  | 168.9  | 276.2  | 291.5  | 311.6  | 301.8  | 130.1  |
| 9.6    | 11.6   | 12.3   | 5.4    | 6.6    | 7.5    | 5.9    | 13.3   | 3.7    |
| 81.2   | 73.5   | 56.9   | 70.2   | 46.6   | 44.1   | 59.1   | 63.5   | 36.0   |
| 12.9   | 5.1    | 22.2   | 11.2   | 9.8    | 16.9   | 58.4   | 18.2   | 1033.2 |
| 92.4   | 92.5   | 92.1   | 88.5   | 60.6   | 45.4   | 57.9   | 61.3   | 57.4   |
| 465.2  | 437.6  | 747.9  | 409.1  | 551.9  | 335.0  | 460.3  | 569.4  | 736.9  |
| 7.8    | 1.7    | 9.6    | 3.6    | 4.4    | 3.0    | 3.1    | 6.4    | 8.3    |
| 26.4   | 21.2   | 22.0   | 26.0   | 18.4   | 12.0   | 37.3   | 21.9   | 17.7   |
| 81.1   | 89.6   | 82.6   | 76.0   | 58.3   | 104.6  | 62.8   | 64.4   | 77.7   |
| 38.9   | 42.0   | 61.9   | 51.0   | 46.4   | 41.1   | 45.9   | 49.3   | 57.9   |
| 3476.0 | 3322.0 | 3927.8 | 3377.3 | 3598.5 | 3333.9 | 3719.6 | 3852.2 | 5471.4 |
| 198.1  | 161.3  | 271.4  | 130.9  | 27.3   | 37.7   | 36.3   | 48.3   | 69.9   |
| 16.3   | 12.1   | 17.0   | 18.1   | 405.9  | 338.1  | 534.1  | 498.9  | 74.1   |
| 5.1    | 6.6    | 12.3   | 5.3    | 14.5   | 13.1   | 5.6    | 6.1    | 14.6   |
| 14.0   | 11.1   | 13.2   | 12.8   | 20.1   | 18.7   | 13.4   | 39.2   | 33.9   |
| 11.1   | 8.1    | 15.4   | 14.3   | 13.3   | 8.9    | 5.9    | 13.5   | 13.5   |
| 552.2  | 429.9  | 880.7  | 880.3  | 60.8   | 32.3   | 66.0   | 112.6  | 20.7   |
| 159.2  | 175.0  | 159.8  | 160.0  | 150.1  | 125.7  | 136.1  | 154.2  | 132.7  |
| 11.0   | 10.3   | 17.0   | 17.9   | 6.8    | 7.1    | 9.3    | 14.9   | 16.8   |
| 118.5  | 64.9   | 171.6  | 78.3   | 308.7  | 378.1  | 354.7  | 358.4  | 565.9  |
| 9.8    | 8.6    | 14.3   | 7.9    | 9.0    | 3.5    | 11.5   | 11.9   | 9.1    |
| 60.0   | 67.3   | 36.9   | 38.6   | 221.8  | 323.3  | 257.8  | 261.5  | 183.0  |
| 4376.2 | 3983.9 | 5689.8 | 4156.9 | 4325.9 | 3872.2 | 4420.4 | 4889.9 | 5502.4 |
| 57.1   | 59.8   | 54.4   | 51.9   | 25.1   | 22.7   | 25.2   | 36.0   | 44.2   |
| 201.6  | 223.0  | 244.9  | 203.8  | 260.5  | 226.5  | 229.5  | 269.5  | 492.4  |
| 2667.6 | 2587.7 | 2539.2 | 2223.7 | 1162.7 | 1370.5 | 1340.6 | 1484.8 | 679.0  |
| 27.3   | 20.7   | 14.7   | 16.3   | 7.1    | 13.9   | 9.6    | 7.8    | 14.9   |
| 177.0  | 159.4  | 254.8  | 159.5  | 309.2  | 274.9  | 275.0  | 358.6  | 305.1  |
| 42.5   | 37.8   | 42.2   | 39.6   | 45.4   | 52.0   | 58.4   | 57.9   | 81.8   |
| 2.2    | 4.7    | 3.1    | 2.1    | 3.9    | 1.5    | 2.4    | 1.7    | 2.6    |
| 19.7   | 17.0   | 16.7   | 16.0   | 4.9    | 3.0    | 7.3    | 7.4    | 8.2    |
| 297.2  | 273.8  | 290.1  | 218.9  | 361.9  | 444.0  | 376.2  | 394.1  | 731.3  |
| 18.6   | 17.1   | 32.2   | 14.9   | 54.8   | 53.8   | 43.4   | 62.6   | 9.0    |
| 267.1  | 183.5  | 236.5  | 181.5  | 76.3   | 46.7   | 50.9   | 63.3   | 187.2  |

|        |        |        |        |        |        |        |        |        |
|--------|--------|--------|--------|--------|--------|--------|--------|--------|
| 2.1    | 2.2    | 3.9    | 3.7    | 1702.4 | 2122.8 | 2628.2 | 1636.4 | 4.1    |
| 1.0    | 0.7    | 1.5    | 0.8    | 0.5    | 1.2    | 0.2    | 0.8    | 5.1    |
| 14.1   | 9.0    | 37.8   | 23.3   | 35.1   | 25.5   | 25.1   | 29.2   | 159.1  |
| 2.1    | 2.6    | 1.6    | 1.0    | 10.0   | 9.9    | 11.0   | 14.9   | 0.5    |
| 5.3    | 1.6    | 1.2    | 2.3    | 2.6    | 0.9    | 2.5    | 1.8    | 2.1    |
| 157.6  | 144.8  | 159.3  | 119.9  | 69.6   | 47.9   | 60.5   | 104.0  | 198.4  |
| 4.4    | 3.4    | 2.0    | 2.0    | 2.4    | 1.4    | 1.3    | 1.5    | 2.9    |
| 37.3   | 38.7   | 48.8   | 42.2   | 31.9   | 22.3   | 24.3   | 34.0   | 46.3   |
| 3.5    | 5.0    | 3.8    | 7.1    | 2.9    | 4.2    | 7.5    | 11.8   | 13.4   |
| 549.9  | 476.4  | 855.9  | 553.5  | 387.6  | 319.3  | 427.0  | 456.3  | 569.4  |
| 36.4   | 25.8   | 60.2   | 29.8   | 5.4    | 9.9    | 10.7   | 17.6   | 24.0   |
| 14.9   | 5.4    | 18.6   | 13.4   | 4.7    | 1.6    | 5.8    | 0.6    | 2.6    |
| 12.4   | 3.5    | 7.3    | 1.3    | 1.7    | 4.5    | 4.3    | 2.9    | 3.3    |
| 286.6  | 341.9  | 174.9  | 226.5  | 50.3   | 50.6   | 60.2   | 66.3   | 124.4  |
| 34.3   | 31.0   | 39.9   | 57.4   | 11.0   | 7.8    | 8.6    | 16.3   | 104.9  |
| 2465.6 | 2287.2 | 3580.9 | 2169.1 | 4453.0 | 3608.9 | 4008.2 | 4747.8 | 6609.0 |
| 186.2  | 208.0  | 188.7  | 172.1  | 124.5  | 162.4  | 141.6  | 199.9  | 92.7   |
| 79.4   | 71.7   | 94.3   | 94.7   | 138.6  | 86.4   | 114.6  | 93.0   | 90.9   |
| 524.9  | 526.1  | 722.0  | 494.8  | 959.4  | 823.0  | 1204.0 | 1017.9 | 849.0  |
| 222.0  | 203.0  | 319.7  | 219.6  | 139.6  | 146.7  | 163.8  | 180.3  | 105.5  |
| 2.0    | 2.5    | 6.1    | 4.3    | 1.8    | 1.8    | 2.1    | 3.1    | 3.9    |
| 2.7    | 1.3    | 4.1    | 3.6    | 10.9   | 3.6    | 5.3    | 3.6    | 4.6    |
| 38.7   | 34.9   | 38.2   | 33.8   | 13.5   | 1.7    | 6.6    | 8.1    | 23.0   |
| 365.1  | 310.5  | 476.5  | 270.4  | 298.6  | 232.0  | 377.3  | 368.2  | 481.9  |
| 2247.6 | 2033.3 | 2637.5 | 2172.3 | 2516.3 | 2812.5 | 2828.8 | 2904.8 | 2856.6 |
| 24.8   | 12.8   | 32.4   | 6.1    | 34.6   | 27.3   | 39.9   | 25.9   | 61.0   |
| 124.8  | 126.3  | 62.0   | 79.3   | 196.4  | 185.7  | 172.0  | 205.5  | 60.1   |
| 5440.6 | 4779.5 | 6273.8 | 5221.8 | 4617.3 | 4096.3 | 4813.0 | 5124.0 | 6015.8 |
| 16.8   | 17.0   | 24.6   | 17.6   | 40.9   | 48.9   | 38.6   | 48.5   | 46.2   |
| 1.7    | 1.8    | 2.3    | 1.1    | 1.3    | 3.0    | 1.9    | 1.9    | 1.5    |
| 235.5  | 193.2  | 336.4  | 210.2  | 221.2  | 175.4  | 200.2  | 275.7  | 212.3  |
| 37.8   | 40.7   | 33.3   | 40.1   | 29.1   | 29.0   | 38.9   | 42.8   | 100.3  |
| 170.3  | 148.8  | 182.3  | 142.1  | 89.4   | 56.0   | 79.2   | 81.5   | 73.6   |
| 8.6    | 5.0    | 12.0   | 7.5    | 4.9    | 2.4    | 7.3    | 10.0   | 16.8   |
| 4.2    | 2.6    | 2.4    | 1.1    | 2.5    | 3.9    | 4.3    | 13.1   | 0.6    |
| 658.3  | 673.9  | 547.8  | 481.7  | 1573.8 | 2179.0 | 1666.0 | 1811.8 | 834.8  |
| 68.1   | 50.2   | 66.3   | 49.1   | 51.4   | 46.7   | 57.3   | 41.7   | 86.6   |
| 27.4   | 29.9   | 27.3   | 22.5   | 16.3   | 11.6   | 20.9   | 18.6   | 27.6   |
| 3.2    | 5.3    | 6.1    | 2.4    | 1.5    | 1.3    | 3.4    | 0.9    | 2.4    |
| 434.4  | 443.4  | 392.5  | 535.6  | 87.8   | 126.1  | 93.5   | 92.3   | 177.6  |
| 15.9   | 14.7   | 29.9   | 19.2   | 10.9   | 15.1   | 11.9   | 12.6   | 22.6   |
| 8.5    | 9.2    | 4.9    | 5.3    | 3.4    | 7.1    | 2.8    | 2.4    | 9.3    |
| 93.9   | 82.4   | 115.9  | 83.8   | 82.5   | 103.8  | 124.2  | 121.3  | 892.2  |
| 1032.8 | 934.3  | 1352.5 | 917.2  | 1315.4 | 1346.3 | 1436.6 | 1488.0 | 687.7  |
| 1.2    | 3.9    | 3.9    | 2.8    | 1.2    | 1.6    | 2.3    | 1.1    | 9.8    |
| 86.5   | 92.4   | 111.8  | 75.9   | 91.4   | 117.8  | 98.0   | 118.7  | 121.3  |
| 571.6  | 498.6  | 1556.1 | 804.3  | 2038.3 | 1196.7 | 1939.4 | 1884.8 | 549.8  |
| 19.5   | 21.4   | 6.2    | 16.7   | 33.7   | 30.4   | 30.1   | 39.9   | 59.8   |
| 0.8    | 1.1    | 2.2    | 1.7    | 1.5    | 2.2    | 3.3    | 1.7    | 1.8    |
| 97.6   | 98.9   | 129.9  | 96.6   | 139.4  | 148.9  | 161.8  | 214.0  | 268.1  |
| 61.9   | 59.1   | 72.3   | 47.4   | 155.4  | 142.7  | 162.8  | 181.2  | 131.8  |
| 1314.4 | 1344.2 | 1570.0 | 1258.8 | 1380.4 | 921.8  | 1273.9 | 1505.2 | 1926.4 |
| 123.9  | 84.7   | 124.8  | 87.2   | 110.5  | 100.6  | 96.3   | 115.5  | 95.1   |

|        |        |        |        |        |        |        |        |         |
|--------|--------|--------|--------|--------|--------|--------|--------|---------|
| 1.2    | 1.0    | 0.5    | 0.6    | 86.6   | 49.4   | 132.0  | 99.6   | 2.3     |
| 5.1    | 3.5    | 5.1    | 8.2    | 97.1   | 57.8   | 142.7  | 94.7   | 8.0     |
| 501.2  | 487.0  | 725.5  | 493.4  | 296.6  | 284.7  | 263.3  | 360.1  | 468.6   |
| 6.9    | 6.5    | 14.5   | 6.1    | 11.7   | 15.6   | 17.7   | 17.1   | 7.5     |
| 3.1    | 4.0    | 7.4    | 8.9    | 1.8    | 1.7    | 1.5    | 1.9    | 3.3     |
| 12.2   | 4.8    | 2.4    | 2.5    | 5.2    | 10.2   | 6.0    | 11.7   | 12.9    |
| 3.2    | 6.3    | 5.9    | 8.8    | 4.2    | 1.5    | 3.2    | 4.0    | 10.0    |
| 94.0   | 71.7   | 93.3   | 66.7   | 64.6   | 68.5   | 73.0   | 97.6   | 114.9   |
| 74.7   | 58.0   | 121.3  | 65.8   | 85.9   | 71.4   | 92.4   | 95.8   | 77.0    |
| 443.7  | 462.8  | 631.0  | 433.6  | 139.9  | 186.5  | 154.7  | 169.8  | 784.3   |
| 3.5    | 3.8    | 3.1    | 2.4    | 1.3    | 3.8    | 5.8    | 4.3    | 2.6     |
| 433.6  | 429.8  | 361.7  | 403.4  | 679.3  | 699.8  | 681.5  | 806.8  | 479.1   |
| 25.6   | 21.4   | 31.2   | 22.7   | 11.6   | 18.6   | 17.8   | 15.8   | 8.6     |
| 7.7    | 10.2   | 8.6    | 7.6    | 6.7    | 1.2    | 2.8    | 2.5    | 7.0     |
| 23.1   | 13.1   | 21.3   | 13.8   | 16.4   | 24.4   | 13.5   | 17.9   | 16.1    |
| 40.3   | 35.3   | 30.4   | 24.9   | 19.8   | 7.8    | 20.0   | 25.1   | 11.6    |
| 14.2   | 17.2   | 12.4   | 6.9    | 14.5   | 9.1    | 11.0   | 13.0   | 15.4    |
| 21.0   | 13.2   | 12.2   | 14.4   | 7.4    | 11.1   | 11.7   | 3.2    | 3.2     |
| 0.3    | 0.4    | 1.2    | 0.7    | 0.4    | 0.9    | 0.3    | 0.8    | 0.6     |
| 5.3    | 8.8    | 12.8   | 12.0   | 10.6   | 6.4    | 7.7    | 20.3   | 15.2    |
| 31.5   | 29.1   | 25.4   | 21.7   | 21.2   | 14.5   | 19.8   | 17.4   | 22.4    |
| 91.5   | 91.0   | 140.3  | 85.6   | 99.2   | 99.3   | 90.7   | 120.8  | 80.0    |
| 492.5  | 478.8  | 476.5  | 493.7  | 205.9  | 194.9  | 200.5  | 346.3  | 264.9   |
| 235.5  | 180.4  | 697.7  | 177.2  | 593.0  | 389.8  | 746.0  | 657.9  | 753.7   |
| 365.8  | 302.5  | 423.2  | 347.9  | 153.9  | 128.4  | 151.9  | 194.5  | 187.1   |
| 120.3  | 85.1   | 168.7  | 83.2   | 148.5  | 158.6  | 196.7  | 159.3  | 124.9   |
| 1.2    | 4.1    | 1.4    | 3.3    | 77.4   | 52.6   | 117.6  | 92.2   | 11.0    |
| 8.9    | 6.8    | 14.0   | 6.3    | 5.9    | 6.9    | 8.4    | 12.4   | 15.0    |
| 95.4   | 120.4  | 60.6   | 100.4  | 37.0   | 43.9   | 52.0   | 48.7   | 38.5    |
| 240.0  | 196.1  | 315.8  | 165.6  | 360.3  | 326.0  | 343.2  | 400.4  | 389.3   |
| 743.4  | 712.7  | 849.1  | 650.1  | 496.2  | 514.8  | 510.7  | 619.0  | 1063.5  |
| 255.4  | 262.1  | 265.4  | 251.7  | 137.4  | 145.2  | 140.5  | 194.0  | 212.4   |
| 3.0    | 1.1    | 1.5    | 5.4    | 0.9    | 1.0    | 0.4    | 1.2    | 1.5     |
| 8.2    | 11.6   | 9.5    | 3.5    | 1.5    | 2.1    | 2.1    | 7.5    | 6.0     |
| 1331.2 | 1353.5 | 1863.6 | 1376.1 | 1721.4 | 1801.5 | 2104.0 | 1932.1 | 1660.1  |
| 118.3  | 109.7  | 139.5  | 96.0   | 85.3   | 100.8  | 74.9   | 123.8  | 128.6   |
| 1.6    | 1.2    | 1.1    | 1.9    | 37.1   | 43.6   | 39.1   | 43.0   | 6.9     |
| 4987.1 | 4714.3 | 6064.5 | 4689.3 | 6698.7 | 6819.6 | 6617.2 | 7124.2 | 10678.0 |
| 6.6    | 0.9    | 3.8    | 1.6    | 25.5   | 25.6   | 25.6   | 40.4   | 17.7    |
| 190.9  | 167.9  | 314.6  | 150.3  | 847.5  | 563.4  | 814.1  | 871.5  | 476.6   |
| 10.2   | 12.5   | 12.3   | 5.1    | 23.5   | 14.2   | 16.6   | 25.5   | 43.3    |
| 135.5  | 107.8  | 200.5  | 124.1  | 82.8   | 88.9   | 100.2  | 100.4  | 66.3    |
| 0.9    | 1.6    | 1.9    | 1.1    | 1.9    | 3.3    | 10.8   | 1.9    | 9.8     |
| 79.0   | 109.7  | 171.4  | 108.9  | 824.4  | 868.2  | 703.4  | 905.0  | 231.5   |
| 0.4    | 0.5    | 0.6    | 0.4    | 8.5    | 3.8    | 4.7    | 3.9    | 31.2    |
| 11.4   | 8.7    | 11.0   | 6.6    | 2.9    | 0.8    | 2.6    | 3.5    | 9.4     |
| 29.3   | 22.9   | 34.3   | 23.3   | 33.1   | 30.2   | 33.0   | 50.4   | 19.0    |
| 318.1  | 260.5  | 488.9  | 257.6  | 265.5  | 268.3  | 312.6  | 322.5  | 178.0   |
| 259.9  | 303.1  | 309.5  | 215.4  | 261.8  | 357.5  | 279.9  | 307.3  | 657.9   |
| 38.9   | 45.1   | 37.8   | 37.5   | 53.2   | 39.1   | 59.5   | 54.9   | 86.2    |
| 4.2    | 4.2    | 2.7    | 3.2    | 6.1    | 2.4    | 2.4    | 14.5   | 9.7     |
| 81.5   | 78.9   | 102.2  | 80.1   | 99.0   | 103.1  | 104.9  | 139.6  | 104.3   |
| 10.0   | 7.8    | 14.4   | 7.1    | 221.0  | 230.0  | 210.6  | 258.7  | 96.9    |

|        |        |        |        |        |        |        |        |        |
|--------|--------|--------|--------|--------|--------|--------|--------|--------|
| 0.7    | 2.1    | 0.4    | 1.8    | 2.4    | 2.9    | 0.5    | 5.6    | 3.4    |
| 7.7    | 2.9    | 4.9    | 4.3    | 4.4    | 10.1   | 10.5   | 18.0   | 1.6    |
| 10.6   | 13.0   | 18.0   | 9.9    | 10.3   | 10.9   | 14.1   | 14.0   | 7.4    |
| 57.3   | 60.1   | 70.0   | 82.0   | 43.3   | 30.8   | 26.0   | 56.2   | 25.9   |
| 2.6    | 10.8   | 17.1   | 6.5    | 8.4    | 3.2    | 2.8    | 10.4   | 2.6    |
| 32.8   | 25.1   | 61.0   | 31.9   | 93.7   | 88.5   | 119.9  | 123.9  | 145.8  |
| 22.9   | 5.9    | 24.7   | 16.6   | 2.0    | 5.1    | 2.5    | 2.1    | 64.5   |
| 1.2    | 8.2    | 4.6    | 5.6    | 5.6    | 3.8    | 2.2    | 0.6    | 16.2   |
| 3.3    | 5.0    | 1.3    | 4.9    | 6.4    | 1.7    | 4.5    | 9.2    | 36.0   |
| 44.5   | 30.9   | 77.0   | 40.0   | 65.4   | 69.9   | 67.8   | 114.5  | 95.1   |
| 26.5   | 20.5   | 32.5   | 25.3   | 33.6   | 30.2   | 29.8   | 41.5   | 6.5    |
| 7647.2 | 7320.6 | 7453.7 | 7281.4 | 4462.3 | 4179.2 | 4928.7 | 4935.7 | 7510.0 |
| 40.4   | 54.1   | 73.7   | 35.1   | 57.8   | 52.9   | 64.7   | 73.7   | 86.5   |
| 3.8    | 10.4   | 6.4    | 4.6    | 3.1    | 2.8    | 9.4    | 3.6    | 14.7   |
| 1.9    | 5.0    | 5.2    | 5.8    | 2.3    | 1.4    | 3.4    | 8.5    | 4.4    |
| 14.4   | 12.3   | 25.1   | 26.4   | 4.7    | 3.2    | 6.5    | 0.8    | 12.4   |
| 14.0   | 9.7    | 22.5   | 16.6   | 19.6   | 22.1   | 15.8   | 27.4   | 17.7   |
| 9.9    | 11.0   | 10.1   | 7.3    | 8.2    | 7.7    | 4.1    | 2.2    | 10.7   |
| 150.0  | 147.2  | 248.5  | 115.5  | 216.8  | 227.0  | 212.5  | 310.3  | 518.3  |
| 116.1  | 100.0  | 133.5  | 117.1  | 245.5  | 335.1  | 360.2  | 264.6  | 235.2  |
| 12.6   | 9.2    | 14.4   | 16.2   | 13.4   | 23.8   | 17.2   | 6.4    | 21.4   |
| 171.3  | 168.1  | 237.3  | 206.5  | 412.0  | 325.0  | 442.7  | 490.7  | 205.1  |
| 107.4  | 121.6  | 98.2   | 117.0  | 48.2   | 39.8   | 35.1   | 51.9   | 99.1   |
| 15.1   | 10.6   | 21.8   | 12.4   | 14.0   | 12.5   | 15.7   | 15.8   | 19.0   |
| 4.9    | 11.4   | 14.5   | 3.7    | 5.8    | 5.2    | 7.5    | 2.6    | 7.0    |
| 399.2  | 417.3  | 453.8  | 386.3  | 120.4  | 169.5  | 112.3  | 82.4   | 540.8  |
| 302.3  | 251.4  | 378.9  | 224.7  | 149.8  | 217.7  | 178.4  | 164.2  | 549.8  |
| 4.6    | 9.0    | 9.3    | 6.1    | 4.6    | 5.8    | 4.0    | 2.4    | 139.7  |
| 5.0    | 11.3   | 4.7    | 6.0    | 15.9   | 7.1    | 13.7   | 7.0    | 58.6   |
| 243.0  | 205.7  | 295.9  | 232.2  | 573.3  | 547.3  | 572.0  | 647.4  | 717.3  |
| 18.0   | 19.8   | 36.9   | 14.8   | 22.4   | 28.2   | 28.8   | 32.2   | 29.8   |
| 82.3   | 64.4   | 82.1   | 57.7   | 155.7  | 143.8  | 129.0  | 147.8  | 338.5  |
| 12.9   | 12.1   | 11.0   | 13.0   | 32.0   | 18.2   | 30.3   | 38.8   | 18.9   |
| 247.6  | 258.5  | 272.5  | 230.9  | 272.0  | 239.8  | 328.0  | 326.3  | 415.8  |
| 54.5   | 45.8   | 61.4   | 41.4   | 104.3  | 97.9   | 95.7   | 107.4  | 169.2  |
| 306.6  | 284.3  | 322.3  | 256.6  | 314.1  | 179.1  | 244.4  | 359.9  | 643.0  |
| 105.9  | 83.4   | 117.6  | 93.4   | 159.9  | 168.9  | 175.8  | 189.3  | 233.2  |
| 12.5   | 10.0   | 22.2   | 6.1    | 34.6   | 27.9   | 34.8   | 32.2   | 10.5   |
| 16.8   | 11.8   | 14.5   | 5.8    | 5.3    | 8.8    | 8.2    | 21.0   | 23.1   |
| 3.1    | 1.1    | 2.5    | 3.4    | 0.5    | 1.4    | 2.8    | 0.4    | 6.8    |
| 970.1  | 1101.7 | 680.4  | 732.1  | 1375.0 | 1144.0 | 1934.9 | 1994.4 | 1954.4 |
| 99.7   | 106.1  | 147.1  | 99.2   | 70.5   | 52.3   | 56.3   | 95.2   | 42.4   |
| 210.3  | 182.8  | 280.1  | 182.7  | 198.6  | 144.9  | 181.8  | 227.7  | 170.7  |
| 2373.1 | 2228.9 | 2298.4 | 1845.8 | 1981.9 | 2310.7 | 2281.2 | 2379.8 | 3041.4 |
| 103.8  | 103.3  | 91.4   | 81.6   | 113.3  | 160.5  | 115.1  | 153.8  | 115.1  |
| 5.0    | 6.3    | 6.6    | 2.1    | 1.7    | 1.3    | 7.3    | 7.6    | 5.7    |
| 3.6    | 3.4    | 10.5   | 1.4    | 9.1    | 3.5    | 5.4    | 2.9    | 12.9   |
| 1994.3 | 1965.4 | 2093.9 | 1968.2 | 3435.0 | 3844.1 | 3762.1 | 4042.3 | 4654.3 |
| 16.1   | 18.4   | 10.0   | 10.5   | 562.2  | 641.4  | 516.9  | 590.7  | 819.4  |
| 13.3   | 8.0    | 16.2   | 3.8    | 1.3    | 2.7    | 2.1    | 3.4    | 11.2   |
| 7851.9 | 7442.3 | 8492.9 | 7633.7 | 8206.5 | 8068.8 | 8341.0 | 9249.3 | 9883.3 |
| 9.1    | 11.4   | 8.0    | 11.7   | 1.7    | 5.0    | 5.4    | 11.4   | 9.2    |
| 12.9   | 12.5   | 18.9   | 12.9   | 359.7  | 239.7  | 342.8  | 341.5  | 18.1   |

|        |        |        |        |        |        |        |        |        |
|--------|--------|--------|--------|--------|--------|--------|--------|--------|
| 7.1    | 8.0    | 22.0   | 10.2   | 4.1    | 15.0   | 13.3   | 17.8   | 32.4   |
| 17.2   | 11.5   | 11.4   | 6.9    | 11.5   | 12.5   | 17.5   | 5.4    | 7.1    |
| 3159.6 | 2714.9 | 3276.1 | 2508.9 | 3586.6 | 3558.7 | 3339.5 | 3888.4 | 2068.7 |
| 7.7    | 8.9    | 15.7   | 8.9    | 20.5   | 21.1   | 27.2   | 21.9   | 39.5   |
| 14.6   | 9.9    | 15.0   | 17.5   | 12.9   | 13.0   | 8.7    | 13.8   | 20.7   |
| 108.0  | 106.9  | 157.6  | 105.8  | 119.3  | 116.7  | 115.8  | 147.4  | 131.8  |
| 113.0  | 111.5  | 117.4  | 101.4  | 76.0   | 72.5   | 78.1   | 88.8   | 114.1  |
| 21.4   | 32.5   | 54.5   | 45.5   | 103.2  | 87.2   | 137.1  | 76.3   | 178.6  |
| 212.1  | 209.6  | 297.0  | 276.5  | 215.0  | 228.2  | 207.8  | 240.3  | 463.7  |
| 272.2  | 239.8  | 280.0  | 220.8  | 283.9  | 262.1  | 329.0  | 304.1  | 511.8  |
| 2.4    | 0.8    | 2.5    | 3.4    | 0.6    | 1.4    | 3.2    | 3.8    | 2.9    |
| 3650.0 | 3438.6 | 3917.3 | 2811.0 | 4466.7 | 3876.7 | 4496.4 | 5088.5 | 5838.6 |
| 66.1   | 75.5   | 48.3   | 55.8   | 33.0   | 36.7   | 30.9   | 46.8   | 12.5   |
| 370.7  | 422.6  | 428.2  | 360.3  | 607.8  | 616.5  | 659.4  | 695.6  | 668.7  |
| 85.7   | 66.1   | 145.5  | 112.7  | 12.0   | 23.2   | 11.5   | 6.4    | 28.0   |
| 119.6  | 123.9  | 231.0  | 148.2  | 54.9   | 54.5   | 45.8   | 45.6   | 65.8   |
| 457.9  | 370.8  | 737.3  | 416.6  | 1019.3 | 965.1  | 968.0  | 1143.7 | 979.7  |
| 1.1    | 1.8    | 3.6    | 6.7    | 1.4    | 0.9    | 2.2    | 1.6    | 6.2    |
| 57.4   | 63.7   | 59.7   | 55.3   | 95.5   | 158.2  | 119.6  | 94.4   | 69.3   |
| 4635.1 | 4541.0 | 5128.3 | 4918.8 | 6662.8 | 6946.4 | 6790.9 | 7593.5 | 9318.6 |
| 11.3   | 12.4   | 9.5    | 8.4    | 106.0  | 59.3   | 94.9   | 87.3   | 59.1   |
| 586.5  | 490.9  | 713.0  | 484.8  | 1063.2 | 1196.4 | 1171.2 | 1209.2 | 1087.0 |
| 328.5  | 294.2  | 374.5  | 300.7  | 231.6  | 279.6  | 254.4  | 265.1  | 355.1  |
| 1.3    | 2.5    | 11.8   | 2.8    | 2.8    | 5.9    | 5.8    | 3.8    | 1.8    |
| 6.9    | 9.9    | 7.4    | 2.7    | 16.2   | 14.4   | 7.4    | 10.1   | 96.7   |
| 58.2   | 57.3   | 50.4   | 52.9   | 78.5   | 102.4  | 75.6   | 81.8   | 56.6   |
| 223.0  | 170.0  | 456.7  | 213.3  | 479.8  | 334.6  | 531.0  | 517.4  | 943.8  |
| 11.3   | 6.5    | 14.9   | 13.7   | 8.3    | 9.1    | 7.9    | 6.2    | 23.0   |
| 80.8   | 65.5   | 113.8  | 63.3   | 136.0  | 93.1   | 109.2  | 127.5  | 252.6  |
| 41.7   | 41.8   | 28.7   | 16.7   | 33.8   | 37.4   | 35.6   | 36.4   | 34.4   |
| 286.7  | 336.7  | 262.4  | 211.8  | 299.7  | 320.4  | 415.2  | 420.1  | 239.1  |
| 129.9  | 184.5  | 149.7  | 111.6  | 255.6  | 220.5  | 285.8  | 312.0  | 444.7  |
| 3.3    | 2.8    | 2.3    | 2.4    | 10.7   | 9.6    | 8.0    | 13.3   | 15.6   |
| 6.9    | 4.2    | 2.0    | 0.7    | 3.8    | 2.6    | 1.7    | 1.1    | 4.4    |
| 1.9    | 0.8    | 1.5    | 1.3    | 9.3    | 7.8    | 12.9   | 1.4    | 1.8    |
| 52.5   | 48.2   | 114.5  | 44.2   | 1004.7 | 683.4  | 1067.8 | 1108.3 | 254.8  |
| 24.0   | 23.7   | 30.9   | 18.9   | 57.0   | 44.2   | 47.1   | 78.3   | 42.0   |
| 9.4    | 8.6    | 8.9    | 6.2    | 12.8   | 21.0   | 14.5   | 17.6   | 25.0   |
| 7.6    | 12.2   | 25.0   | 10.7   | 39.3   | 36.3   | 64.8   | 44.2   | 37.3   |
| 2.6    | 0.7    | 3.1    | 2.4    | 0.4    | 0.6    | 1.9    | 2.3    | 1.0    |
| 2792.3 | 2403.8 | 4847.4 | 2766.8 | 4410.3 | 4011.3 | 4263.3 | 4875.0 | 5841.6 |
| 279.5  | 259.2  | 489.7  | 269.4  | 45.3   | 27.4   | 38.3   | 62.3   | 11.0   |
| 251.7  | 220.3  | 412.3  | 235.6  | 40.3   | 24.8   | 58.2   | 54.5   | 20.1   |
| 1.9    | 1.9    | 3.1    | 3.8    | 10.5   | 11.1   | 9.5    | 6.6    | 11.3   |
| 0.5    | 1.2    | 1.3    | 1.1    | 1.2    | 7.6    | 3.8    | 0.7    | 1.1    |
| 92.0   | 94.0   | 114.9  | 84.7   | 86.0   | 66.9   | 88.6   | 90.3   | 93.6   |
| 8.9    | 19.5   | 16.9   | 13.0   | 22.1   | 10.5   | 13.9   | 11.0   | 24.3   |
| 670.8  | 631.3  | 713.6  | 547.4  | 711.1  | 494.7  | 640.6  | 848.3  | 334.1  |
| 42.3   | 45.3   | 57.6   | 37.1   | 9.2    | 13.0   | 15.6   | 34.2   | 33.6   |
| 4.6    | 1.9    | 5.2    | 2.9    | 6.7    | 3.3    | 2.3    | 1.2    | 5.6    |
| 4.2    | 11.2   | 10.6   | 6.6    | 4.3    | 5.8    | 10.0   | 3.1    | 9.8    |
| 15.3   | 12.5   | 11.6   | 9.0    | 17.1   | 22.5   | 27.7   | 18.5   | 27.2   |
| 544.4  | 547.7  | 594.9  | 483.1  | 745.8  | 645.2  | 787.2  | 944.2  | 476.0  |

|        |        |        |        |        |        |        |        |        |
|--------|--------|--------|--------|--------|--------|--------|--------|--------|
| 2.0    | 1.5    | 8.8    | 5.0    | 125.7  | 106.3  | 122.8  | 176.7  | 24.7   |
| 10.7   | 8.5    | 30.6   | 16.0   | 12.6   | 5.2    | 8.9    | 18.2   | 23.7   |
| 98.6   | 95.6   | 220.3  | 84.8   | 273.7  | 189.3  | 309.3  | 333.2  | 163.4  |
| 87.0   | 71.7   | 76.1   | 53.1   | 99.8   | 97.5   | 116.0  | 96.4   | 49.3   |
| 8.9    | 4.4    | 18.2   | 17.6   | 14.5   | 11.2   | 21.8   | 34.0   | 13.4   |
| 143.5  | 165.1  | 212.5  | 155.2  | 134.8  | 157.1  | 104.5  | 127.4  | 9.2    |
| 65.5   | 62.4   | 73.1   | 57.2   | 48.5   | 37.7   | 49.6   | 61.4   | 98.1   |
| 35.6   | 35.5   | 38.0   | 47.5   | 1.2    | 2.9    | 3.9    | 8.3    | 7.6    |
| 167.4  | 162.1  | 188.2  | 145.0  | 4610.3 | 5476.5 | 4938.4 | 5167.9 | 3723.0 |
| 39.9   | 51.2   | 22.7   | 34.2   | 8.2    | 5.9    | 12.1   | 2.9    | 3.8    |
| 62.8   | 57.8   | 43.4   | 49.4   | 160.5  | 200.0  | 218.5  | 206.4  | 77.2   |
| 43.6   | 41.6   | 74.5   | 49.9   | 43.3   | 53.4   | 57.0   | 60.7   | 35.5   |
| 35.8   | 47.2   | 50.2   | 45.3   | 27.5   | 30.8   | 22.7   | 31.5   | 49.3   |
| 108.6  | 94.2   | 185.5  | 120.2  | 370.2  | 390.5  | 369.8  | 383.9  | 459.8  |
| 3.1    | 8.8    | 2.4    | 4.3    | 10.4   | 14.9   | 13.2   | 6.6    | 7.5    |
| 30.2   | 27.1   | 33.8   | 29.5   | 32.1   | 22.7   | 34.6   | 32.9   | 11.7   |
| 321.2  | 340.6  | 289.9  | 294.5  | 82.4   | 57.6   | 99.7   | 122.3  | 61.3   |
| 5013.2 | 4843.8 | 5883.4 | 4740.2 | 4968.5 | 5026.6 | 5166.3 | 5450.1 | 8355.5 |
| 37.8   | 58.3   | 27.3   | 40.3   | 9.4    | 18.0   | 10.5   | 21.7   | 7.9    |
| 314.4  | 325.5  | 164.9  | 232.2  | 3.1    | 3.0    | 2.6    | 0.9    | 291.4  |
| 192.3  | 201.8  | 261.2  | 187.1  | 199.4  | 173.5  | 187.0  | 239.4  | 235.1  |
| 29.5   | 25.7   | 30.7   | 23.7   | 11.1   | 11.0   | 5.0    | 9.8    | 12.5   |
| 10.4   | 5.8    | 18.7   | 8.5    | 5.3    | 2.8    | 1.7    | 9.2    | 21.5   |
| 119.7  | 114.8  | 169.2  | 108.6  | 25.5   | 40.8   | 40.1   | 27.9   | 11.3   |
| 6.5    | 10.7   | 10.3   | 3.6    | 24.8   | 26.9   | 30.6   | 33.5   | 12.1   |
| 5.8    | 4.0    | 10.1   | 2.9    | 7.3    | 3.2    | 7.8    | 3.2    | 7.4    |
| 6.5    | 7.3    | 14.0   | 4.1    | 5.6    | 4.5    | 9.3    | 5.2    | 6.7    |
| 38.0   | 44.5   | 73.8   | 22.7   | 349.7  | 236.4  | 279.4  | 355.7  | 274.3  |
| 4.9    | 8.2    | 10.5   | 9.0    | 6.6    | 6.0    | 8.8    | 12.1   | 5.9    |
| 5.2    | 2.8    | 6.4    | 5.3    | 11.4   | 10.3   | 17.1   | 6.4    | 6.6    |
| 52.6   | 44.0   | 30.6   | 18.4   | 80.6   | 82.8   | 77.1   | 77.1   | 94.1   |
| 4.2    | 3.7    | 5.7    | 6.5    | 2.2    | 3.3    | 11.3   | 2.2    | 7.7    |
| 54.0   | 47.5   | 45.6   | 39.8   | 37.6   | 39.1   | 47.6   | 35.6   | 94.9   |
| 24.7   | 23.2   | 34.8   | 17.3   | 37.4   | 27.0   | 41.1   | 50.0   | 54.7   |
| 5.1    | 7.3    | 9.1    | 6.9    | 23.6   | 24.9   | 13.2   | 28.4   | 7.2    |
| 22.8   | 23.5   | 14.8   | 13.3   | 136.5  | 108.7  | 154.0  | 157.7  | 46.2   |
| 3.3    | 4.8    | 4.5    | 6.4    | 2.1    | 1.4    | 1.0    | 1.0    | 10.9   |
| 3.9    | 1.7    | 2.1    | 1.8    | 1.0    | 6.2    | 0.9    | 1.1    | 4.7    |
| 2.3    | 9.9    | 7.8    | 6.4    | 16.4   | 9.9    | 15.5   | 11.0   | 15.3   |
| 13.6   | 9.0    | 34.9   | 17.4   | 18.8   | 11.5   | 15.6   | 32.3   | 8.4    |
| 21.7   | 26.5   | 12.3   | 19.7   | 4.9    | 8.2    | 4.2    | 14.0   | 15.9   |
| 12.8   | 11.6   | 5.0    | 6.9    | 1.7    | 0.8    | 1.3    | 2.6    | 2.1    |
| 12.9   | 9.4    | 7.4    | 10.4   | 4.2    | 5.3    | 1.6    | 0.6    | 1.7    |
| 1.9    | 2.3    | 6.6    | 1.9    | 8.6    | 2.9    | 13.4   | 15.5   | 1.3    |
| 6.0    | 15.1   | 6.3    | 1.9    | 9.9    | 2.8    | 12.2   | 8.9    | 4.5    |
| 3499.6 | 3316.2 | 4109.3 | 3445.0 | 4402.9 | 4338.7 | 4658.8 | 4888.9 | 8053.8 |
| 85.1   | 77.6   | 96.6   | 83.1   | 48.5   | 41.2   | 53.7   | 57.9   | 31.0   |
| 137.8  | 127.3  | 203.1  | 128.4  | 211.5  | 184.1  | 199.0  | 240.0  | 154.3  |
| 3.6    | 1.2    | 2.5    | 1.9    | 10.0   | 8.5    | 13.8   | 9.0    | 8.8    |
| 13.3   | 16.0   | 18.2   | 21.2   | 17.7   | 17.5   | 18.7   | 13.0   | 28.8   |
| 12.3   | 12.3   | 21.5   | 26.3   | 115.3  | 105.9  | 141.6  | 126.5  | 11.7   |
| 18.1   | 21.4   | 8.8    | 14.2   | 1.1    | 0.4    | 0.7    | 1.1    | 156.1  |
| 29.7   | 20.3   | 24.4   | 20.3   | 12.6   | 15.0   | 10.3   | 11.3   | 17.6   |



|        |        |        |        |        |        |        |        |         |
|--------|--------|--------|--------|--------|--------|--------|--------|---------|
| 510.5  | 489.6  | 665.0  | 421.1  | 371.4  | 516.5  | 371.6  | 429.0  | 310.2   |
| 6.7    | 3.6    | 8.9    | 9.7    | 8.6    | 9.8    | 12.5   | 9.6    | 4.2     |
| 67.3   | 52.9   | 79.5   | 51.8   | 129.7  | 117.1  | 121.8  | 140.7  | 127.0   |
| 667.6  | 635.2  | 962.9  | 639.4  | 684.7  | 667.2  | 637.2  | 764.1  | 575.9   |
| 21.1   | 14.2   | 23.8   | 22.3   | 29.1   | 42.2   | 26.1   | 31.2   | 30.0    |
| 41.5   | 39.6   | 49.1   | 40.2   | 168.1  | 146.1  | 203.5  | 214.1  | 85.1    |
| 109.2  | 101.5  | 198.0  | 101.6  | 132.0  | 117.8  | 125.6  | 178.6  | 140.2   |
| 98.9   | 90.4   | 187.0  | 87.6   | 77.8   | 56.6   | 83.3   | 93.3   | 138.4   |
| 1.8    | 1.4    | 1.2    | 3.3    | 1.9    | 1.7    | 3.6    | 1.1    | 1.7     |
| 107.2  | 98.1   | 123.3  | 92.5   | 154.9  | 148.3  | 145.5  | 179.8  | 189.4   |
| 1.0    | 1.2    | 1.8    | 1.3    | 0.7    | 0.5    | 0.8    | 0.7    | 1.9     |
| 1015.5 | 1397.1 | 893.3  | 1250.9 | 84.0   | 161.7  | 65.1   | 87.9   | 149.7   |
| 33.6   | 31.2   | 48.2   | 29.3   | 47.3   | 48.2   | 50.9   | 63.1   | 103.2   |
| 4.0    | 2.2    | 3.9    | 2.2    | 3.5    | 1.3    | 7.2    | 3.3    | 3.9     |
| 1.8    | 5.6    | 4.0    | 11.2   | 4.3    | 8.5    | 2.2    | 3.6    | 8.9     |
| 8.1    | 7.6    | 10.8   | 6.0    | 20.3   | 15.5   | 13.5   | 18.8   | 15.6    |
| 0.6    | 0.9    | 0.7    | 1.0    | 3.2    | 0.4    | 3.4    | 2.6    | 2.2     |
| 4.2    | 2.5    | 0.6    | 1.3    | 4.1    | 0.5    | 0.9    | 0.6    | 0.9     |
| 313.5  | 290.3  | 271.8  | 223.1  | 220.5  | 287.0  | 248.5  | 260.6  | 189.5   |
| 81.4   | 106.3  | 33.2   | 72.3   | 20.9   | 18.2   | 14.2   | 11.3   | 14.4    |
| 34.4   | 23.9   | 44.9   | 35.2   | 1.6    | 1.2    | 1.6    | 12.5   | 7.1     |
| 515.6  | 499.9  | 585.1  | 427.6  | 39.6   | 55.8   | 44.5   | 39.7   | 580.9   |
| 21.4   | 21.2   | 18.3   | 16.6   | 12.9   | 13.7   | 13.7   | 26.9   | 42.9    |
| 1.9    | 1.6    | 6.5    | 4.3    | 17.8   | 17.7   | 18.0   | 24.0   | 2.7     |
| 53.8   | 50.9   | 64.6   | 41.8   | 65.1   | 56.4   | 60.3   | 69.6   | 101.1   |
| 50.4   | 83.9   | 38.1   | 45.2   | 23.3   | 23.2   | 22.8   | 18.8   | 40.3    |
| 8224.6 | 7869.4 | 8530.7 | 8309.2 | 8525.4 | 8548.0 | 8383.6 | 9110.3 | 11105.3 |
| 348.1  | 394.2  | 282.1  | 347.5  | 75.6   | 104.3  | 115.9  | 101.1  | 277.6   |
| 133.2  | 103.3  | 174.7  | 128.7  | 270.4  | 213.9  | 276.4  | 300.7  | 310.1   |
| 89.7   | 90.4   | 147.0  | 84.1   | 204.3  | 177.6  | 206.4  | 229.7  | 213.3   |
| 348.4  | 298.5  | 395.4  | 319.4  | 559.1  | 499.7  | 492.5  | 595.7  | 832.5   |
| 14.8   | 12.0   | 23.2   | 16.4   | 28.8   | 24.3   | 35.1   | 37.9   | 44.4    |
| 72.3   | 67.0   | 89.3   | 61.8   | 23.1   | 17.3   | 22.5   | 17.3   | 80.7    |
| 8.9    | 6.4    | 8.5    | 19.0   | 18.7   | 7.1    | 10.6   | 22.0   | 1.6     |
| 301.5  | 289.6  | 462.2  | 412.7  | 971.4  | 1159.7 | 1180.5 | 1087.4 | 1486.8  |
| 21.1   | 35.6   | 18.4   | 22.3   | 6.9    | 16.5   | 7.7    | 14.8   | 6.7     |
| 1.2    | 0.6    | 2.9    | 1.0    | 4.2    | 5.2    | 2.7    | 0.7    | 3.1     |
| 48.5   | 37.8   | 91.2   | 45.2   | 36.3   | 50.6   | 40.8   | 43.6   | 82.3    |
| 41.8   | 37.7   | 79.9   | 52.5   | 20.6   | 27.6   | 23.3   | 22.6   | 24.6    |
| 191.6  | 210.0  | 178.9  | 169.0  | 114.3  | 130.1  | 76.3   | 85.1   | 201.0   |
| 76.6   | 80.5   | 104.4  | 72.2   | 119.1  | 123.7  | 123.6  | 133.2  | 142.6   |
| 0.8    | 1.7    | 2.4    | 1.3    | 2.3    | 11.0   | 2.2    | 0.9    | 1.8     |
| 9.2    | 11.6   | 12.6   | 16.3   | 12.0   | 12.6   | 19.1   | 18.6   | 12.7    |
| 105.9  | 156.3  | 181.5  | 85.4   | 83.5   | 117.6  | 95.1   | 178.8  | 211.9   |
| 10.7   | 10.7   | 18.3   | 12.5   | 18.7   | 16.6   | 22.6   | 14.1   | 44.8    |
| 15.9   | 14.5   | 25.2   | 19.0   | 19.1   | 15.0   | 19.4   | 30.1   | 25.0    |
| 3.9    | 4.5    | 13.7   | 1.9    | 13.5   | 14.0   | 18.9   | 14.0   | 31.6    |
| 2.4    | 3.9    | 4.3    | 2.0    | 10.1   | 5.2    | 5.3    | 3.3    | 8.0     |
| 4.3    | 6.7    | 4.8    | 5.1    | 12.3   | 5.5    | 14.6   | 11.6   | 8.1     |
| 2.6    | 3.3    | 0.7    | 0.5    | 0.9    | 1.5    | 1.0    | 1.6    | 0.8     |
| 5.3    | 4.8    | 7.2    | 4.6    | 5.5    | 6.7    | 16.5   | 13.4   | 5.4     |
| 26.8   | 20.3   | 43.1   | 29.2   | 16.1   | 13.6   | 16.5   | 18.3   | 49.2    |
| 6.7    | 3.5    | 5.3    | 5.5    | 1.6    | 2.2    | 1.9    | 9.0    | 1.6     |

|        |        |        |        |        |        |        |        |        |
|--------|--------|--------|--------|--------|--------|--------|--------|--------|
| 83.1   | 66.0   | 60.4   | 41.4   | 161.6  | 169.5  | 206.4  | 204.7  | 121.0  |
| 14.4   | 16.4   | 28.2   | 7.8    | 9.0    | 8.5    | 11.3   | 9.7    | 2.9    |
| 7.1    | 3.0    | 4.5    | 2.2    | 3.8    | 0.8    | 10.3   | 1.2    | 2.3    |
| 17.0   | 5.4    | 19.0   | 17.0   | 41.7   | 31.6   | 49.2   | 41.0   | 39.4   |
| 5.5    | 5.9    | 5.5    | 6.3    | 5.1    | 1.3    | 3.1    | 2.2    | 8.1    |
| 428.2  | 525.3  | 386.2  | 525.4  | 145.2  | 264.7  | 122.9  | 110.7  | 284.1  |
| 45.3   | 47.2   | 63.3   | 41.3   | 97.4   | 67.5   | 68.5   | 91.6   | 48.7   |
| 51.1   | 43.2   | 61.8   | 43.2   | 91.7   | 87.0   | 73.3   | 83.7   | 74.9   |
| 8.9    | 9.6    | 9.8    | 4.0    | 1.9    | 6.6    | 8.9    | 2.0    | 13.4   |
| 5423.0 | 4789.0 | 6394.6 | 4957.8 | 4605.3 | 4224.3 | 4821.9 | 5077.0 | 4338.0 |
| 381.9  | 386.0  | 245.1  | 291.3  | 56.3   | 66.0   | 50.1   | 45.6   | 321.7  |
| 153.4  | 119.6  | 185.4  | 123.6  | 199.9  | 173.7  | 235.4  | 203.0  | 471.6  |
| 1424.6 | 1305.1 | 1803.7 | 1381.3 | 1198.4 | 1118.8 | 1259.0 | 1419.6 | 1808.8 |
| 1.7    | 1.9    | 1.3    | 1.8    | 85.6   | 76.1   | 98.3   | 103.3  | 2.4    |
| 5.6    | 0.9    | 8.1    | 4.0    | 37.2   | 27.6   | 55.8   | 65.9   | 69.3   |
| 44.4   | 47.4   | 52.5   | 51.1   | 162.1  | 178.5  | 189.2  | 207.8  | 176.7  |
| 100.4  | 96.8   | 51.6   | 79.3   | 10.1   | 11.1   | 6.6    | 14.9   | 9.9    |
| 217.2  | 232.4  | 316.5  | 180.9  | 340.2  | 283.6  | 341.5  | 368.9  | 372.2  |
| 36.3   | 48.4   | 39.6   | 35.4   | 20.8   | 22.3   | 22.6   | 29.0   | 27.6   |
| 3.9    | 4.2    | 5.0    | 3.0    | 7.0    | 7.8    | 4.7    | 16.1   | 12.4   |
| 13.5   | 14.3   | 7.7    | 2.2    | 7.9    | 5.5    | 10.9   | 17.9   | 23.8   |
| 8.9    | 13.1   | 8.2    | 12.8   | 20.6   | 25.4   | 20.9   | 30.2   | 22.5   |
| 17.0   | 18.3   | 27.2   | 18.6   | 26.5   | 23.2   | 38.8   | 26.5   | 77.8   |
| 85.6   | 108.1  | 50.8   | 91.0   | 7.0    | 3.4    | 6.1    | 1.1    | 9.1    |
| 13.0   | 7.3    | 17.7   | 15.5   | 5.9    | 6.3    | 13.0   | 8.5    | 10.0   |
| 455.7  | 375.0  | 440.9  | 269.7  | 217.7  | 170.5  | 240.5  | 286.8  | 425.8  |
| 124.9  | 118.5  | 116.1  | 106.5  | 65.5   | 51.4   | 65.9   | 81.0   | 187.7  |
| 42.3   | 41.8   | 48.3   | 36.7   | 35.9   | 26.3   | 27.3   | 39.3   | 67.0   |
| 148.6  | 170.0  | 120.7  | 147.5  | 37.2   | 36.2   | 32.0   | 35.2   | 11.9   |
| 5.1    | 3.6    | 2.1    | 1.8    | 6.8    | 4.5    | 9.7    | 15.6   | 6.9    |
| 10.1   | 13.0   | 19.6   | 11.1   | 8.5    | 20.0   | 21.5   | 23.7   | 23.2   |
| 68.2   | 74.4   | 124.5  | 67.0   | 146.8  | 121.3  | 141.3  | 136.7  | 110.1  |
| 27.8   | 16.7   | 42.4   | 5.0    | 82.4   | 139.2  | 69.8   | 84.7   | 93.5   |
| 3.9    | 11.1   | 2.4    | 6.9    | 4.2    | 2.3    | 8.3    | 8.2    | 7.3    |
| 8.0    | 2.3    | 13.0   | 7.0    | 11.4   | 14.9   | 1.8    | 11.2   | 15.8   |
| 6.5    | 2.6    | 6.1    | 2.8    | 2.8    | 3.2    | 10.8   | 12.2   | 12.5   |
| 8.8    | 16.1   | 21.6   | 14.1   | 10.7   | 9.5    | 12.5   | 21.5   | 37.0   |
| 1.1    | 1.6    | 11.7   | 3.2    | 2.9    | 1.3    | 5.7    | 6.9    | 8.2    |
| 16.1   | 12.5   | 18.0   | 14.6   | 6.6    | 9.4    | 4.2    | 9.3    | 3.9    |
| 3.3    | 3.4    | 3.6    | 3.1    | 8.3    | 8.1    | 5.4    | 1.3    | 3.9    |
| 27.7   | 32.3   | 39.9   | 35.6   | 23.9   | 14.3   | 11.4   | 14.5   | 50.0   |
| 1.0    | 5.6    | 3.4    | 2.7    | 97.1   | 52.3   | 92.1   | 117.3  | 13.6   |
| 16.9   | 21.8   | 37.7   | 25.3   | 20.0   | 14.4   | 14.3   | 23.8   | 28.4   |
| 69.3   | 57.4   | 93.9   | 73.7   | 56.5   | 68.1   | 70.2   | 80.9   | 129.7  |
| 142.9  | 108.5  | 188.3  | 123.6  | 115.6  | 102.1  | 97.4   | 123.5  | 207.0  |
| 72.9   | 87.4   | 94.1   | 43.5   | 186.5  | 217.5  | 205.3  | 209.1  | 192.0  |
| 46.2   | 39.9   | 49.4   | 44.8   | 52.1   | 50.5   | 51.6   | 54.6   | 58.0   |
| 21.3   | 26.6   | 22.4   | 18.5   | 214.5  | 249.5  | 191.5  | 271.7  | 178.3  |
| 0.4    | 2.2    | 3.1    | 0.4    | 21.4   | 19.0   | 22.8   | 31.6   | 5.2    |
| 3542.3 | 3291.7 | 4610.3 | 4566.3 | 122.4  | 113.4  | 77.7   | 119.5  | 145.4  |
| 577.0  | 543.5  | 638.7  | 456.2  | 398.4  | 640.7  | 491.6  | 749.1  | 1385.6 |
| 17.2   | 16.1   | 23.6   | 17.3   | 7.7    | 8.4    | 9.3    | 8.3    | 9.2    |
| 84.7   | 108.4  | 49.9   | 65.3   | 3.7    | 11.0   | 11.0   | 3.3    | 15.8   |

|       |       |        |       |        |        |        |        |        |
|-------|-------|--------|-------|--------|--------|--------|--------|--------|
| 40.6  | 36.7  | 38.8   | 24.8  | 25.7   | 25.3   | 32.5   | 37.9   | 9.4    |
| 1.1   | 1.7   | 5.4    | 1.0   | 2.0    | 3.8    | 1.9    | 1.1    | 3.2    |
| 26.2  | 36.9  | 41.4   | 17.8  | 1175.6 | 1280.9 | 1687.8 | 1406.2 | 203.2  |
| 332.4 | 295.8 | 456.5  | 212.5 | 468.5  | 382.0  | 407.9  | 526.4  | 336.0  |
| 2.8   | 5.4   | 0.9    | 5.0   | 4.5    | 4.2    | 5.5    | 1.1    | 3.4    |
| 7.2   | 8.1   | 13.2   | 8.9   | 5.7    | 7.4    | 7.6    | 8.2    | 15.5   |
| 1.6   | 0.5   | 1.9    | 0.7   | 1.3    | 0.8    | 2.9    | 1.2    | 1.6    |
| 8.5   | 8.5   | 10.2   | 7.8   | 16.0   | 17.5   | 24.2   | 20.2   | 17.3   |
| 20.5  | 18.3  | 20.9   | 20.6  | 9.0    | 9.1    | 11.2   | 17.8   | 121.8  |
| 74.9  | 51.2  | 106.6  | 72.7  | 190.6  | 213.8  | 204.6  | 210.7  | 230.7  |
| 104.3 | 89.8  | 154.1  | 90.6  | 117.1  | 78.0   | 89.7   | 131.5  | 106.4  |
| 2.7   | 2.3   | 4.8    | 12.5  | 15.4   | 11.5   | 3.6    | 6.1    | 2.7    |
| 79.8  | 97.6  | 199.5  | 100.3 | 175.4  | 203.5  | 143.4  | 154.2  | 401.6  |
| 510.3 | 549.4 | 1017.9 | 676.4 | 945.0  | 1121.3 | 934.4  | 941.5  | 2094.6 |
| 72.5  | 73.6  | 104.3  | 60.6  | 440.0  | 451.3  | 505.8  | 549.9  | 1534.6 |
| 13.8  | 21.4  | 20.6   | 11.7  | 29.4   | 38.6   | 31.6   | 44.1   | 12.7   |
| 6.9   | 1.9   | 3.8    | 8.7   | 31.8   | 53.5   | 48.4   | 55.6   | 9.3    |
| 177.0 | 183.4 | 161.0  | 188.3 | 47.9   | 66.8   | 53.1   | 51.7   | 190.2  |
| 126.6 | 150.8 | 126.9  | 101.1 | 182.0  | 156.3  | 174.9  | 203.8  | 125.3  |
| 20.6  | 16.1  | 34.9   | 23.0  | 13.4   | 6.6    | 7.2    | 11.4   | 49.6   |
| 2.1   | 8.5   | 4.1    | 2.8   | 1.9    | 2.3    | 2.5    | 2.6    | 3.1    |
| 18.5  | 29.1  | 24.6   | 12.9  | 74.3   | 62.3   | 93.1   | 84.7   | 89.6   |
| 6.4   | 5.2   | 19.5   | 5.8   | 1.0    | 1.3    | 1.7    | 4.7    | 9.1    |
| 161.7 | 146.2 | 361.7  | 184.9 | 88.7   | 139.5  | 81.9   | 96.5   | 76.4   |
| 426.3 | 374.3 | 601.7  | 432.4 | 237.0  | 179.2  | 249.9  | 312.4  | 399.3  |
| 22.3  | 22.7  | 25.0   | 18.8  | 28.4   | 19.2   | 17.5   | 24.5   | 44.6   |
| 248.4 | 240.4 | 275.9  | 270.8 | 40.8   | 36.4   | 35.9   | 56.4   | 15.3   |
| 48.7  | 46.3  | 40.0   | 35.1  | 325.2  | 648.8  | 257.9  | 361.0  | 39.6   |
| 1.9   | 0.5   | 0.7    | 0.9   | 0.7    | 2.3    | 1.6    | 0.7    | 3.3    |
| 225.4 | 200.5 | 352.7  | 228.7 | 284.6  | 260.3  | 283.4  | 275.4  | 429.6  |
| 486.8 | 411.3 | 621.3  | 373.0 | 571.0  | 524.8  | 546.5  | 701.5  | 903.7  |
| 445.2 | 456.5 | 452.5  | 425.5 | 371.0  | 424.5  | 456.0  | 426.3  | 327.9  |
| 1.3   | 2.1   | 1.0    | 1.2   | 2.1    | 0.9    | 0.9    | 0.9    | 2.9    |
| 20.9  | 21.5  | 27.1   | 24.9  | 17.3   | 17.9   | 15.0   | 27.8   | 102.5  |
| 52.0  | 54.6  | 48.8   | 60.7  | 28.4   | 21.8   | 26.9   | 30.9   | 169.3  |
| 253.4 | 216.4 | 260.6  | 189.3 | 193.0  | 147.1  | 212.7  | 254.7  | 265.0  |
| 786.4 | 668.6 | 1235.8 | 723.9 | 1347.3 | 1429.3 | 1362.2 | 1540.5 | 1761.5 |
| 6.1   | 4.9   | 4.9    | 3.3   | 5.3    | 2.6    | 2.2    | 7.3    | 3.7    |
| 25.8  | 23.2  | 56.3   | 22.2  | 111.6  | 170.7  | 204.0  | 150.7  | 132.4  |
| 12.0  | 2.7   | 10.5   | 2.8   | 6.2    | 2.6    | 7.3    | 2.0    | 14.0   |
| 23.1  | 14.7  | 10.9   | 11.5  | 10.8   | 3.8    | 11.0   | 2.2    | 24.8   |
| 46.1  | 44.3  | 68.5   | 61.0  | 159.1  | 100.7  | 148.4  | 194.8  | 247.1  |
| 2.5   | 2.5   | 7.0    | 5.6   | 6.2    | 1.7    | 7.4    | 2.2    | 4.2    |
| 36.7  | 37.3  | 41.8   | 42.8  | 81.9   | 94.2   | 96.9   | 77.3   | 134.7  |
| 1.0   | 1.0   | 1.5    | 0.9   | 1.0    | 1.1    | 1.6    | 1.3    | 1.5    |
| 32.4  | 35.9  | 15.5   | 22.3  | 35.2   | 24.8   | 21.7   | 23.3   | 37.3   |
| 223.6 | 173.8 | 287.5  | 205.1 | 276.8  | 228.1  | 213.7  | 298.8  | 154.9  |
| 71.1  | 47.4  | 113.9  | 55.7  | 99.2   | 101.4  | 97.8   | 106.1  | 65.0   |
| 4.4   | 2.3   | 8.7    | 3.1   | 2.4    | 5.7    | 4.7    | 2.1    | 4.4    |
| 29.7  | 25.7  | 24.6   | 20.4  | 25.5   | 24.6   | 20.5   | 23.3   | 31.4   |
| 53.5  | 53.0  | 74.6   | 58.9  | 7.3    | 16.5   | 3.4    | 12.6   | 15.5   |
| 1.2   | 1.4   | 2.9    | 0.8   | 1.5    | 1.8    | 2.5    | 1.3    | 8.1    |
| 13.2  | 7.4   | 19.6   | 8.1   | 14.9   | 12.0   | 11.1   | 16.9   | 20.6   |

|        |        |        |        |        |        |        |        |        |
|--------|--------|--------|--------|--------|--------|--------|--------|--------|
| 23.8   | 20.1   | 21.5   | 24.2   | 5.8    | 5.7    | 3.6    | 6.1    | 32.5   |
| 13.6   | 15.9   | 24.8   | 13.6   | 16.9   | 7.2    | 15.6   | 16.0   | 13.7   |
| 87.1   | 83.8   | 82.9   | 67.5   | 36.4   | 46.6   | 38.4   | 31.1   | 38.4   |
| 9.0    | 10.0   | 13.3   | 11.9   | 8.8    | 3.0    | 8.3    | 7.1    | 9.3    |
| 99.6   | 107.0  | 122.0  | 104.5  | 49.2   | 62.5   | 55.4   | 54.7   | 49.1   |
| 1043.3 | 751.2  | 2025.1 | 953.6  | 2836.3 | 1931.9 | 2638.5 | 3194.5 | 3481.4 |
| 28.6   | 39.4   | 33.4   | 50.0   | 6.6    | 12.1   | 9.7    | 11.1   | 10.9   |
| 3345.3 | 3153.4 | 4147.3 | 3262.1 | 6179.3 | 5642.9 | 6390.9 | 6748.3 | 9433.7 |
| 64.9   | 71.1   | 103.2  | 60.7   | 68.7   | 67.9   | 79.5   | 90.4   | 97.4   |
| 3.4    | 1.8    | 2.7    | 2.2    | 2.1    | 8.7    | 4.8    | 6.7    | 3.9    |
| 1.3    | 2.0    | 0.4    | 4.5    | 2.9    | 0.2    | 0.4    | 7.3    | 3.1    |
| 7.2    | 2.9    | 2.1    | 4.7    | 7.3    | 3.9    | 1.9    | 18.6   | 2.8    |
| 33.8   | 33.5   | 26.3   | 27.1   | 14.8   | 22.5   | 16.4   | 26.2   | 37.6   |
| 59.9   | 57.0   | 80.5   | 54.9   | 143.0  | 136.0  | 180.4  | 161.1  | 112.3  |
| 1400.0 | 1341.1 | 1811.8 | 1599.3 | 2030.3 | 2072.3 | 2543.1 | 2374.5 | 1753.2 |
| 66.5   | 87.2   | 48.8   | 72.4   | 66.7   | 91.9   | 77.3   | 80.7   | 133.4  |
| 81.4   | 108.0  | 57.8   | 101.1  | 82.2   | 109.1  | 80.0   | 94.7   | 152.4  |
| 20.9   | 19.1   | 18.5   | 20.1   | 17.0   | 12.8   | 11.0   | 21.4   | 22.1   |
| 19.1   | 16.8   | 5.7    | 14.0   | 2.5    | 4.0    | 2.6    | 2.7    | 6.7    |
| 235.7  | 186.6  | 373.7  | 220.2  | 298.3  | 198.9  | 277.2  | 357.9  | 567.3  |
| 95.3   | 84.7   | 110.8  | 108.3  | 6.9    | 1.8    | 4.8    | 5.4    | 10.4   |
| 136.4  | 107.9  | 155.2  | 85.5   | 31.2   | 32.2   | 40.7   | 33.6   | 159.2  |
| 3.3    | 7.1    | 1.8    | 5.4    | 1.2    | 7.6    | 3.6    | 7.5    | 7.9    |
| 5.8    | 7.0    | 4.4    | 4.0    | 5.9    | 6.2    | 3.8    | 5.7    | 13.4   |
| 6.0    | 10.5   | 9.8    | 5.4    | 7.5    | 4.3    | 5.3    | 3.6    | 9.9    |
| 8.8    | 5.8    | 6.7    | 4.8    | 16.9   | 18.7   | 18.1   | 18.0   | 12.4   |
| 1.8    | 2.4    | 3.3    | 8.9    | 8.1    | 8.7    | 5.9    | 12.5   | 2.8    |
| 11.5   | 12.5   | 3.0    | 8.7    | 6.7    | 9.4    | 7.2    | 9.6    | 10.8   |
| 248.0  | 232.2  | 427.7  | 277.4  | 137.1  | 119.6  | 209.3  | 210.5  | 19.6   |
| 0.5    | 0.8    | 0.9    | 1.2    | 0.8    | 0.8    | 0.9    | 0.7    | 1.9    |
| 6.0    | 12.8   | 5.4    | 7.0    | 4.7    | 1.3    | 3.8    | 1.3    | 4.6    |
| 5334.2 | 5284.4 | 5863.3 | 5036.9 | 4606.9 | 4846.6 | 4593.4 | 4840.0 | 8177.4 |
| 235.8  | 217.5  | 324.5  | 223.7  | 315.0  | 341.9  | 259.5  | 341.3  | 133.6  |
| 39.8   | 38.3   | 30.6   | 39.4   | 54.4   | 32.3   | 47.1   | 59.8   | 32.9   |
| 1190.6 | 971.2  | 1813.4 | 1185.7 | 1003.3 | 750.9  | 1028.7 | 1104.8 | 1925.8 |
| 9.3    | 12.0   | 15.6   | 8.2    | 5.9    | 4.8    | 3.9    | 5.3    | 11.1   |
| 210.9  | 199.0  | 229.5  | 182.6  | 200.1  | 169.8  | 227.9  | 248.4  | 380.7  |
| 491.0  | 484.7  | 698.9  | 551.8  | 853.3  | 1014.0 | 823.4  | 925.5  | 1250.8 |
| 9.5    | 7.6    | 19.8   | 18.8   | 14.1   | 6.9    | 6.8    | 14.1   | 22.9   |
| 30.7   | 27.5   | 19.1   | 13.2   | 2.2    | 4.4    | 12.6   | 16.8   | 795.5  |
| 66.1   | 57.8   | 52.6   | 57.4   | 43.0   | 39.4   | 52.5   | 48.1   | 32.9   |
| 290.9  | 371.0  | 220.0  | 317.0  | 146.8  | 155.5  | 164.4  | 166.5  | 127.4  |
| 16.5   | 4.2    | 22.1   | 13.2   | 6.9    | 4.2    | 12.6   | 14.2   | 16.2   |
| 245.5  | 226.0  | 232.4  | 219.3  | 725.0  | 1219.4 | 739.0  | 809.5  | 439.1  |
| 30.5   | 21.6   | 54.1   | 24.6   | 20.5   | 12.8   | 16.6   | 17.9   | 50.6   |
| 4.8    | 1.8    | 2.6    | 1.6    | 3.3    | 2.4    | 9.4    | 1.0    | 10.1   |
| 524.2  | 487.2  | 570.9  | 396.5  | 355.0  | 266.6  | 356.2  | 389.1  | 552.7  |
| 1.5    | 2.0    | 2.8    | 2.2    | 1.2    | 1.2    | 1.6    | 1.3    | 2.9    |
| 8.2    | 8.6    | 12.0   | 6.2    | 5.1    | 5.7    | 3.2    | 7.3    | 11.3   |
| 22.8   | 30.6   | 28.5   | 21.3   | 12.5   | 9.1    | 8.7    | 13.4   | 26.7   |
| 5.8    | 4.4    | 4.5    | 6.3    | 10.1   | 7.3    | 5.2    | 14.7   | 2.6    |
| 6.9    | 19.6   | 12.9   | 18.6   | 6.5    | 4.2    | 5.4    | 17.8   | 3.6    |
| 4.0    | 3.8    | 1.0    | 1.9    | 0.9    | 1.3    | 1.6    | 2.1    | 20.0   |

|        |        |        |        |        |        |        |        |        |
|--------|--------|--------|--------|--------|--------|--------|--------|--------|
| 7.4    | 6.4    | 10.8   | 6.1    | 11.1   | 4.8    | 4.6    | 6.8    | 9.9    |
| 41.2   | 35.9   | 86.3   | 45.9   | 67.3   | 38.4   | 49.4   | 70.9   | 96.5   |
| 10.9   | 15.0   | 9.6    | 18.0   | 5.8    | 3.6    | 6.1    | 2.0    | 12.8   |
| 1.5    | 1.9    | 4.6    | 1.2    | 1.5    | 1.3    | 2.6    | 4.1    | 1.9    |
| 61.5   | 67.1   | 74.5   | 72.5   | 159.4  | 146.7  | 183.6  | 203.6  | 495.7  |
| 61.2   | 60.2   | 75.2   | 60.1   | 79.0   | 64.5   | 72.4   | 86.8   | 173.4  |
| 9.3    | 19.7   | 12.2   | 16.1   | 4.3    | 21.5   | 7.5    | 9.9    | 11.1   |
| 257.5  | 278.5  | 204.6  | 265.7  | 124.8  | 223.7  | 143.4  | 144.4  | 155.7  |
| 46.8   | 41.6   | 42.2   | 43.3   | 58.3   | 68.5   | 64.8   | 81.0   | 142.0  |
| 307.7  | 224.9  | 421.9  | 240.7  | 254.1  | 261.2  | 242.7  | 386.7  | 115.3  |
| 5.5    | 7.7    | 1.8    | 0.6    | 3.9    | 1.1    | 4.6    | 0.8    | 7.1    |
| 4.4    | 9.0    | 7.2    | 5.8    | 1.5    | 5.2    | 4.0    | 2.1    | 3.9    |
| 220.4  | 173.4  | 273.8  | 172.4  | 324.5  | 298.5  | 272.8  | 333.4  | 108.9  |
| 73.8   | 69.7   | 97.2   | 72.8   | 37.1   | 28.8   | 34.0   | 38.6   | 69.5   |
| 438.6  | 455.0  | 666.1  | 682.4  | 14.2   | 14.4   | 8.7    | 16.0   | 3.2    |
| 3.6    | 1.8    | 5.5    | 4.5    | 4.8    | 2.4    | 2.6    | 6.6    | 6.7    |
| 145.7  | 123.9  | 183.3  | 136.6  | 489.1  | 410.3  | 478.7  | 528.7  | 533.2  |
| 0.7    | 0.8    | 1.7    | 1.3    | 0.6    | 1.9    | 1.6    | 1.2    | 1.5    |
| 10.8   | 5.4    | 9.8    | 6.3    | 10.5   | 1.6    | 6.1    | 7.4    | 5.8    |
| 6.6    | 4.2    | 17.6   | 2.8    | 2.6    | 3.0    | 5.0    | 3.6    | 6.5    |
| 13.0   | 13.5   | 45.2   | 13.5   | 31.1   | 25.2   | 33.8   | 32.1   | 123.6  |
| 30.2   | 25.6   | 46.2   | 21.1   | 53.6   | 51.7   | 50.0   | 71.4   | 65.5   |
| 939.2  | 979.2  | 1224.8 | 959.4  | 1532.8 | 2029.4 | 1779.6 | 2010.8 | 1092.3 |
| 20.5   | 21.1   | 15.8   | 15.8   | 142.2  | 150.3  | 307.9  | 200.1  | 65.6   |
| 62.3   | 53.9   | 66.2   | 64.7   | 30.2   | 31.0   | 40.8   | 45.8   | 67.2   |
| 1408.8 | 1188.3 | 3421.5 | 2113.8 | 3078.6 | 2682.2 | 3105.8 | 3549.0 | 4696.9 |
| 5.2    | 11.8   | 16.3   | 10.8   | 1.4    | 1.5    | 2.1    | 4.0    | 6.4    |
| 59.4   | 39.9   | 96.2   | 58.2   | 55.1   | 53.6   | 54.1   | 69.2   | 104.8  |
| 9.1    | 3.7    | 4.7    | 4.6    | 3.2    | 1.9    | 4.2    | 7.1    | 1.2    |
| 5.6    | 1.6    | 6.5    | 4.4    | 4.4    | 5.0    | 4.3    | 6.5    | 132.2  |
| 1.6    | 1.6    | 2.3    | 1.6    | 1.0    | 1.1    | 1.1    | 1.2    | 1.6    |
| 58.4   | 60.2   | 67.3   | 45.3   | 177.1  | 164.3  | 171.3  | 197.0  | 105.2  |
| 69.4   | 52.4   | 71.8   | 51.3   | 128.6  | 120.9  | 142.2  | 153.3  | 110.6  |
| 18.5   | 8.7    | 10.0   | 6.9    | 10.7   | 12.1   | 14.9   | 18.3   | 15.0   |
| 6.3    | 1.7    | 4.8    | 3.6    | 5.8    | 3.1    | 1.5    | 2.2    | 6.1    |
| 434.7  | 395.2  | 479.9  | 397.8  | 426.7  | 486.1  | 490.3  | 557.6  | 813.4  |
| 17.0   | 19.6   | 18.4   | 14.4   | 9.7    | 14.3   | 12.1   | 3.9    | 22.2   |
| 26.0   | 16.8   | 36.0   | 11.3   | 34.0   | 27.1   | 24.2   | 15.2   | 53.2   |
| 2.2    | 3.1    | 2.2    | 2.6    | 2.5    | 4.0    | 3.0    | 0.9    | 4.5    |
| 6.1    | 3.8    | 3.5    | 2.7    | 1.6    | 8.9    | 2.1    | 1.5    | 3.2    |
| 13.5   | 11.2   | 6.9    | 3.0    | 6.5    | 6.8    | 8.6    | 11.6   | 7.0    |
| 7.1    | 12.0   | 14.7   | 10.7   | 8.5    | 5.9    | 6.2    | 13.1   | 39.8   |
| 40.5   | 40.4   | 92.7   | 52.8   | 56.7   | 48.2   | 57.1   | 66.7   | 90.8   |
| 25.8   | 31.5   | 41.6   | 29.7   | 48.3   | 62.8   | 61.4   | 76.2   | 85.4   |
| 12.6   | 5.1    | 9.5    | 1.8    | 5.5    | 8.0    | 1.6    | 15.7   | 8.8    |
| 8.8    | 4.5    | 4.4    | 4.5    | 8.9    | 4.6    | 5.5    | 9.6    | 3.3    |
| 5.4    | 3.2    | 3.7    | 1.5    | 6.8    | 11.0   | 7.3    | 6.8    | 7.9    |
| 13.3   | 5.7    | 4.7    | 6.0    | 14.7   | 17.0   | 11.7   | 26.3   | 19.2   |
| 51.3   | 60.9   | 61.4   | 44.9   | 58.4   | 55.3   | 84.4   | 59.5   | 53.3   |
| 18.3   | 15.5   | 29.4   | 16.9   | 7.9    | 10.1   | 10.2   | 13.4   | 12.8   |
| 1397.4 | 1296.9 | 2269.7 | 1524.8 | 202.2  | 168.0  | 192.3  | 224.3  | 238.3  |
| 21.3   | 16.2   | 130.3  | 28.8   | 7.3    | 0.8    | 0.7    | 9.0    | 158.1  |
| 45.3   | 36.2   | 31.7   | 29.5   | 23.6   | 22.5   | 15.3   | 19.4   | 24.9   |

|        |        |        |        |        |        |        |        |        |
|--------|--------|--------|--------|--------|--------|--------|--------|--------|
| 8.0    | 8.7    | 10.4   | 1.8    | 1.8    | 3.7    | 4.2    | 6.7    | 11.1   |
| 5.3    | 10.2   | 4.7    | 8.5    | 9.9    | 7.8    | 4.1    | 1.9    | 10.2   |
| 25.1   | 21.1   | 24.2   | 23.3   | 37.3   | 32.5   | 39.8   | 42.4   | 28.1   |
| 20.5   | 22.3   | 25.2   | 16.5   | 23.7   | 18.9   | 27.7   | 19.0   | 40.8   |
| 274.9  | 273.4  | 285.9  | 334.1  | 239.6  | 325.4  | 318.2  | 355.4  | 174.4  |
| 0.8    | 1.3    | 6.6    | 3.6    | 611.4  | 833.5  | 742.5  | 730.5  | 22.4   |
| 1.5    | 1.1    | 2.4    | 2.8    | 1.9    | 1.3    | 1.5    | 1.6    | 35.2   |
| 2.3    | 0.7    | 4.1    | 0.9    | 1.2    | 1.5    | 1.5    | 5.5    | 10.4   |
| 3.3    | 9.5    | 3.9    | 3.3    | 2.2    | 0.8    | 6.2    | 10.0   | 15.8   |
| 120.9  | 110.6  | 133.3  | 109.3  | 80.4   | 85.1   | 78.4   | 80.0   | 123.1  |
| 64.3   | 70.8   | 72.1   | 74.4   | 263.2  | 261.7  | 321.5  | 268.8  | 145.5  |
| 5.8    | 5.4    | 4.0    | 4.6    | 2.5    | 7.3    | 6.2    | 5.1    | 3.9    |
| 3.8    | 3.3    | 3.9    | 3.5    | 407.8  | 396.6  | 396.5  | 503.9  | 4599.9 |
| 9.2    | 2.9    | 25.3   | 3.9    | 40.5   | 45.2   | 68.5   | 75.6   | 10.4   |
| 9.8    | 8.3    | 10.2   | 8.1    | 13.8   | 8.1    | 3.7    | 21.1   | 13.1   |
| 1385.1 | 1233.5 | 1538.0 | 1268.0 | 1590.6 | 1197.6 | 1493.4 | 1686.1 | 1167.5 |
| 589.8  | 571.0  | 650.1  | 557.3  | 248.7  | 250.0  | 221.0  | 279.3  | 334.4  |
| 401.8  | 401.3  | 529.7  | 420.3  | 578.5  | 633.2  | 723.6  | 685.5  | 812.4  |
| 32.1   | 27.0   | 43.8   | 30.5   | 88.3   | 75.3   | 73.5   | 95.5   | 71.9   |
| 10.1   | 11.0   | 7.0    | 9.6    | 12.0   | 7.6    | 8.3    | 8.9    | 10.3   |
| 10.2   | 15.4   | 11.8   | 8.4    | 49.2   | 52.1   | 55.2   | 99.2   | 23.5   |
| 293.2  | 305.2  | 303.9  | 220.6  | 746.4  | 714.4  | 769.9  | 841.0  | 1208.4 |
| 260.2  | 240.2  | 348.1  | 204.4  | 183.0  | 195.4  | 197.9  | 190.4  | 300.4  |
| 4.3    | 5.2    | 2.1    | 7.2    | 1.3    | 7.0    | 7.1    | 15.6   | 11.0   |
| 27.1   | 34.9   | 61.7   | 31.5   | 282.3  | 269.1  | 376.6  | 363.0  | 150.0  |
| 2.7    | 2.9    | 4.9    | 1.4    | 1.7    | 1.6    | 2.8    | 2.7    | 1.8    |
| 409.1  | 405.1  | 459.5  | 388.6  | 384.7  | 340.6  | 419.4  | 461.1  | 220.5  |
| 1.1    | 1.8    | 3.1    | 1.5    | 5.1    | 1.3    | 1.3    | 0.8    | 1.7    |
| 16.3   | 15.7   | 36.8   | 15.7   | 50.8   | 63.7   | 47.2   | 87.1   | 61.9   |
| 4828.7 | 4521.2 | 5387.0 | 4717.1 | 5055.0 | 5963.9 | 5480.3 | 5586.3 | 7509.8 |
| 16.2   | 15.2   | 23.1   | 29.0   | 40.8   | 27.0   | 25.6   | 47.1   | 23.8   |
| 117.4  | 120.3  | 170.8  | 164.8  | 55.9   | 67.5   | 60.2   | 69.5   | 102.5  |
| 226.1  | 216.4  | 194.6  | 200.1  | 172.1  | 189.1  | 197.3  | 222.0  | 339.1  |
| 6.1    | 19.3   | 11.2   | 14.3   | 3.0    | 7.6    | 1.5    | 0.6    | 7.2    |
| 5.7    | 17.3   | 27.8   | 10.9   | 42.3   | 50.1   | 48.0   | 58.6   | 48.1   |
| 133.1  | 97.8   | 209.7  | 111.3  | 42.3   | 23.8   | 44.4   | 64.5   | 50.6   |
| 1.1    | 1.5    | 8.6    | 5.2    | 1.5    | 5.3    | 3.3    | 4.1    | 6.6    |
| 46.6   | 41.8   | 74.1   | 50.0   | 15.8   | 10.6   | 10.3   | 18.2   | 56.1   |
| 542.3  | 605.6  | 510.2  | 518.3  | 731.9  | 633.2  | 739.3  | 757.3  | 1567.2 |
| 895.3  | 820.5  | 914.3  | 653.9  | 315.5  | 265.3  | 310.2  | 364.3  | 306.4  |
| 2.2    | 3.8    | 3.9    | 1.2    | 3.0    | 2.6    | 2.5    | 0.4    | 6.4    |
| 71.6   | 48.8   | 97.8   | 43.9   | 107.2  | 98.7   | 119.2  | 128.6  | 89.4   |
| 5.0    | 1.9    | 13.8   | 4.3    | 6.0    | 7.6    | 6.9    | 10.1   | 10.8   |
| 8.4    | 6.0    | 12.2   | 8.8    | 6.0    | 6.4    | 8.6    | 8.7    | 7.3    |
| 1.8    | 4.4    | 4.5    | 3.4    | 1.4    | 2.1    | 1.5    | 1.6    | 4.1    |
| 7.2    | 9.1    | 10.8   | 8.0    | 10.7   | 10.3   | 8.2    | 19.0   | 10.9   |
| 1657.8 | 1564.3 | 2054.3 | 1570.8 | 3214.5 | 3178.9 | 3359.8 | 3633.3 | 4427.2 |
| 7.0    | 2.0    | 4.2    | 3.9    | 2.2    | 2.3    | 3.6    | 8.9    | 2.1    |
| 1223.4 | 1212.3 | 648.3  | 999.5  | 1026.1 | 1608.3 | 884.7  | 1382.1 | 577.5  |
| 47.9   | 38.5   | 51.8   | 39.8   | 40.8   | 32.4   | 35.5   | 50.3   | 59.7   |
| 1.3    | 2.8    | 3.9    | 1.5    | 4.2    | 1.5    | 1.7    | 1.2    | 5.9    |
| 57.5   | 63.1   | 89.6   | 53.6   | 66.0   | 65.4   | 71.7   | 80.5   | 58.1   |
| 11.5   | 9.0    | 14.4   | 12.9   | 10.5   | 8.3    | 10.1   | 17.0   | 23.8   |

|        |        |        |        |        |        |        |        |        |
|--------|--------|--------|--------|--------|--------|--------|--------|--------|
| 7.8    | 6.0    | 6.1    | 5.6    | 11.3   | 5.2    | 4.6    | 5.4    | 6.1    |
| 2.5    | 3.8    | 8.6    | 1.1    | 10.4   | 9.4    | 6.6    | 14.0   | 13.3   |
| 7.9    | 4.7    | 7.3    | 10.2   | 1.0    | 6.8    | 7.9    | 1.3    | 279.0  |
| 21.0   | 14.9   | 25.5   | 24.6   | 40.8   | 34.3   | 50.9   | 39.7   | 21.0   |
| 45.1   | 43.5   | 69.7   | 41.3   | 97.8   | 90.3   | 82.1   | 95.3   | 141.1  |
| 39.1   | 28.0   | 51.8   | 18.9   | 34.2   | 45.2   | 33.3   | 61.0   | 92.7   |
| 3.2    | 1.6    | 10.5   | 4.4    | 10.3   | 6.2    | 9.1    | 4.2    | 4.0    |
| 1.8    | 1.7    | 2.8    | 2.4    | 1.6    | 2.8    | 2.4    | 4.2    | 2.9    |
| 1.1    | 1.3    | 1.8    | 1.0    | 1.4    | 0.9    | 1.8    | 4.0    | 1.7    |
| 0.4    | 0.3    | 0.4    | 0.4    | 0.7    | 0.3    | 1.1    | 0.3    | 0.7    |
| 367.2  | 349.3  | 388.2  | 304.1  | 261.5  | 234.2  | 304.2  | 328.8  | 477.4  |
| 117.6  | 104.5  | 154.3  | 110.3  | 49.1   | 41.1   | 46.3   | 57.3   | 80.1   |
| 32.2   | 45.5   | 31.3   | 32.7   | 3.5    | 2.2    | 3.0    | 11.3   | 0.8    |
| 117.4  | 107.8  | 91.7   | 82.3   | 10.5   | 7.0    | 9.4    | 9.1    | 11.0   |
| 6.9    | 7.9    | 21.0   | 15.9   | 5.5    | 3.6    | 3.0    | 2.9    | 4.6    |
| 116.4  | 107.2  | 151.9  | 93.4   | 82.2   | 100.6  | 83.5   | 98.8   | 124.8  |
| 15.6   | 17.9   | 26.1   | 22.7   | 11.1   | 9.0    | 11.4   | 2.6    | 26.0   |
| 4.6    | 3.8    | 12.0   | 6.4    | 4.0    | 5.8    | 12.2   | 16.5   | 14.9   |
| 8.1    | 4.7    | 8.6    | 4.6    | 23.5   | 14.7   | 27.6   | 26.1   | 27.2   |
| 115.9  | 118.0  | 152.2  | 90.2   | 170.7  | 118.5  | 211.1  | 231.4  | 188.0  |
| 482.6  | 462.2  | 597.3  | 495.7  | 553.0  | 618.1  | 595.1  | 657.0  | 512.4  |
| 96.9   | 93.1   | 106.4  | 76.4   | 116.8  | 88.5   | 113.1  | 132.1  | 203.7  |
| 1903.6 | 1625.7 | 2638.5 | 1475.7 | 2881.4 | 2959.5 | 2719.0 | 3706.2 | 6578.8 |
| 9.0    | 12.8   | 11.2   | 7.8    | 12.3   | 10.7   | 7.6    | 19.5   | 25.0   |
| 7.4    | 4.3    | 10.8   | 4.1    | 10.3   | 7.4    | 10.5   | 8.8    | 11.2   |
| 13.5   | 16.6   | 16.8   | 6.8    | 6.9    | 12.8   | 10.2   | 15.8   | 17.9   |
| 26.3   | 33.1   | 21.8   | 14.6   | 188.1  | 248.8  | 252.1  | 208.1  | 291.4  |
| 17.9   | 20.0   | 10.9   | 13.8   | 17.0   | 9.8    | 14.9   | 21.0   | 16.5   |
| 690.6  | 610.1  | 852.6  | 713.6  | 516.6  | 606.5  | 497.8  | 633.2  | 681.9  |
| 6.4    | 2.0    | 9.1    | 9.7    | 4.1    | 0.9    | 3.8    | 1.8    | 2.2    |
| 3.3    | 0.8    | 1.8    | 2.1    | 0.9    | 2.5    | 2.3    | 1.3    | 1.7    |
| 157.6  | 176.5  | 165.3  | 141.2  | 66.4   | 101.8  | 53.7   | 78.6   | 92.0   |
| 6969.2 | 6864.1 | 7554.8 | 6546.1 | 5647.2 | 5530.3 | 5686.7 | 6211.3 | 8306.5 |
| 6847.0 | 6099.1 | 7743.2 | 5944.7 | 6773.1 | 5668.7 | 6617.9 | 7628.7 | 8985.9 |
| 94.9   | 118.1  | 36.4   | 99.3   | 103.5  | 67.8   | 200.0  | 188.3  | 4.8    |
| 25.6   | 19.9   | 32.9   | 23.3   | 43.6   | 26.8   | 32.6   | 45.3   | 40.6   |
| 44.6   | 36.7   | 58.6   | 47.9   | 94.6   | 64.3   | 81.3   | 103.1  | 79.5   |
| 24.7   | 20.6   | 29.8   | 39.5   | 31.4   | 24.4   | 38.7   | 42.8   | 38.9   |
| 81.5   | 60.9   | 91.6   | 68.7   | 84.7   | 49.4   | 74.8   | 85.5   | 135.8  |
| 546.5  | 609.6  | 696.2  | 646.9  | 1276.0 | 1298.5 | 1444.5 | 1330.5 | 778.9  |
| 24.0   | 30.8   | 31.4   | 22.1   | 16.1   | 27.9   | 18.8   | 14.3   | 43.4   |
| 325.6  | 255.7  | 436.5  | 266.6  | 338.3  | 443.6  | 408.1  | 464.8  | 528.2  |
| 12.2   | 18.5   | 17.0   | 16.0   | 20.3   | 11.9   | 22.7   | 25.8   | 38.3   |
| 41.9   | 32.0   | 47.2   | 37.4   | 40.5   | 32.3   | 62.9   | 43.7   | 60.9   |
| 24.2   | 24.6   | 34.6   | 32.2   | 17.8   | 11.0   | 14.1   | 19.3   | 34.5   |
| 8.9    | 2.8    | 9.1    | 1.3    | 13.0   | 8.7    | 12.0   | 9.0    | 15.0   |
| 9.8    | 4.9    | 9.3    | 4.6    | 6.5    | 3.3    | 1.2    | 8.8    | 9.2    |
| 9.4    | 12.1   | 23.6   | 5.4    | 9.3    | 12.2   | 13.4   | 10.2   | 16.0   |
| 17.6   | 11.9   | 22.6   | 5.1    | 29.6   | 27.4   | 31.0   | 25.0   | 37.8   |
| 17.4   | 12.2   | 5.5    | 5.1    | 3.9    | 0.7    | 0.6    | 2.6    | 8.3    |
| 4.5    | 15.1   | 17.1   | 19.9   | 1.6    | 1.5    | 14.1   | 2.6    | 5.9    |
| 1.0    | 1.2    | 1.9    | 1.2    | 0.4    | 0.7    | 0.7    | 0.7    | 0.5    |
| 1.3    | 1.5    | 3.7    | 6.1    | 0.7    | 1.2    | 0.7    | 2.9    | 3.2    |

|        |        |        |        |        |        |        |        |        |
|--------|--------|--------|--------|--------|--------|--------|--------|--------|
| 3.8    | 11.0   | 4.3    | 3.5    | 4.1    | 2.9    | 2.8    | 5.2    | 7.2    |
| 11.2   | 22.7   | 15.4   | 12.8   | 38.7   | 38.4   | 24.2   | 30.1   | 30.3   |
| 5.8    | 6.7    | 5.0    | 11.1   | 1.3    | 2.4    | 4.6    | 0.7    | 8.5    |
| 6024.9 | 5676.3 | 5953.9 | 5039.9 | 6739.6 | 7052.5 | 6627.3 | 7074.3 | 9946.9 |
| 494.3  | 492.7  | 609.6  | 482.7  | 663.7  | 710.9  | 1026.0 | 930.7  | 864.1  |
| 18.1   | 25.5   | 13.8   | 16.8   | 23.4   | 18.2   | 21.6   | 22.4   | 27.7   |
| 42.3   | 33.7   | 40.8   | 42.4   | 19.2   | 5.2    | 19.4   | 29.4   | 17.8   |
| 168.9  | 180.3  | 178.2  | 168.1  | 217.5  | 210.5  | 221.2  | 288.1  | 93.5   |
| 387.0  | 381.3  | 459.8  | 390.3  | 468.4  | 439.8  | 425.8  | 531.4  | 649.0  |
| 15.2   | 20.7   | 19.9   | 17.0   | 10.3   | 7.9    | 15.5   | 12.5   | 10.3   |
| 70.0   | 73.2   | 200.7  | 85.9   | 73.5   | 48.5   | 83.2   | 66.2   | 100.5  |
| 3219.1 | 2828.2 | 4638.5 | 3047.0 | 5208.6 | 3752.0 | 4826.1 | 5617.4 | 5593.6 |
| 10.8   | 1.5    | 16.6   | 8.5    | 6.2    | 0.9    | 5.1    | 3.7    | 8.5    |
| 10.3   | 16.5   | 13.8   | 10.9   | 5.0    | 5.8    | 8.4    | 3.9    | 17.5   |
| 6.9    | 7.7    | 10.7   | 2.6    | 3.9    | 7.8    | 0.6    | 7.5    | 4.5    |
| 2782.4 | 2644.3 | 3128.7 | 2562.3 | 3085.1 | 2817.5 | 2860.8 | 3363.1 | 3957.9 |
| 37.4   | 41.2   | 43.2   | 40.3   | 29.7   | 39.3   | 37.7   | 42.8   | 61.0   |
| 3.1    | 9.8    | 13.8   | 7.2    | 18.4   | 10.6   | 13.5   | 20.9   | 19.2   |
| 1.0    | 2.9    | 1.3    | 1.3    | 12.0   | 13.1   | 1.7    | 1.3    | 0.9    |
| 10.9   | 3.8    | 8.2    | 11.0   | 6.9    | 6.7    | 8.3    | 13.9   | 4.4    |
| 9.1    | 4.0    | 2.1    | 5.1    | 5.2    | 8.3    | 5.0    | 2.9    | 11.5   |
| 7.1    | 7.7    | 9.9    | 11.9   | 9.0    | 11.1   | 12.4   | 15.3   | 13.7   |
| 0.7    | 0.4    | 3.5    | 0.7    | 4.8    | 1.3    | 1.7    | 3.2    | 0.8    |
| 14.6   | 12.3   | 11.2   | 13.4   | 7.8    | 3.0    | 7.9    | 8.3    | 12.3   |
| 10.6   | 18.2   | 30.1   | 13.7   | 14.5   | 8.1    | 19.6   | 12.3   | 20.2   |
| 51.6   | 38.7   | 39.6   | 48.9   | 26.2   | 23.1   | 14.6   | 25.1   | 12.0   |
| 17.4   | 14.0   | 18.7   | 14.4   | 24.4   | 22.4   | 29.3   | 33.0   | 119.9  |
| 7.1    | 13.0   | 8.7    | 11.8   | 3.9    | 7.3    | 7.9    | 6.3    | 38.6   |
| 11.8   | 12.9   | 10.9   | 3.7    | 12.3   | 6.6    | 10.3   | 13.7   | 10.6   |
| 9.0    | 16.4   | 17.5   | 14.7   | 20.3   | 16.3   | 21.4   | 26.3   | 34.7   |
| 2.6    | 5.5    | 8.5    | 4.6    | 29.6   | 29.7   | 35.6   | 42.5   | 8.0    |
| 15.0   | 12.2   | 11.8   | 7.7    | 10.0   | 4.3    | 11.9   | 8.3    | 11.7   |
| 4.9    | 3.8    | 2.3    | 4.1    | 1.0    | 0.7    | 4.8    | 1.0    | 1.8    |
| 8.3    | 14.2   | 29.8   | 13.8   | 42.4   | 35.0   | 43.4   | 47.3   | 141.7  |
| 3.4    | 1.4    | 2.9    | 1.3    | 2.5    | 7.0    | 4.4    | 5.1    | 1.0    |
| 588.3  | 668.9  | 618.4  | 582.4  | 606.8  | 514.8  | 674.7  | 733.3  | 768.2  |
| 5.0    | 1.8    | 9.8    | 8.1    | 19.7   | 10.2   | 22.9   | 18.9   | 27.5   |
| 1.5    | 7.5    | 13.5   | 2.7    | 4.7    | 2.9    | 5.6    | 1.4    | 5.2    |
| 3.4    | 5.7    | 10.2   | 4.4    | 3.2    | 5.6    | 4.1    | 5.2    | 10.8   |
| 2.6    | 1.9    | 3.8    | 2.5    | 2.5    | 2.4    | 1.7    | 1.5    | 2.7    |
| 5.9    | 4.8    | 3.4    | 4.7    | 4.3    | 6.1    | 9.3    | 3.7    | 7.3    |
| 1.7    | 0.5    | 1.0    | 2.2    | 4.0    | 6.6    | 7.8    | 8.4    | 0.7    |
| 2.3    | 1.2    | 3.2    | 8.2    | 360.0  | 561.6  | 458.5  | 471.0  | 174.3  |
| 4.5    | 6.7    | 6.3    | 6.2    | 4.0    | 4.9    | 4.6    | 2.1    | 8.0    |
| 5.5    | 4.0    | 10.1   | 3.4    | 6.9    | 2.4    | 3.1    | 13.2   | 5.9    |
| 1.9    | 5.1    | 5.9    | 1.5    | 6.0    | 3.7    | 2.8    | 1.8    | 4.6    |
| 4203.9 | 3825.2 | 5306.7 | 3901.7 | 4340.9 | 5340.2 | 4659.6 | 4886.5 | 4097.4 |
| 28.8   | 36.5   | 40.1   | 29.8   | 39.5   | 38.3   | 49.7   | 44.4   | 40.6   |
| 10.6   | 10.1   | 25.7   | 9.5    | 12.6   | 7.5    | 5.3    | 5.4    | 12.0   |
| 8.5    | 9.3    | 13.4   | 7.5    | 2.2    | 3.4    | 4.7    | 0.4    | 11.3   |
| 34.5   | 19.7   | 50.9   | 28.1   | 75.3   | 55.9   | 76.8   | 69.5   | 118.9  |
| 0.9    | 0.7    | 2.5    | 1.7    | 1.8    | 1.0    | 3.0    | 1.2    | 1.4    |
| 0.9    | 2.1    | 4.5    | 3.1    | 3.7    | 2.3    | 2.0    | 5.7    | 3.4    |



|       |       |        |       |        |        |        |        |        |
|-------|-------|--------|-------|--------|--------|--------|--------|--------|
| 19.2  | 12.6  | 30.1   | 20.4  | 22.4   | 17.0   | 27.7   | 19.2   | 1.4    |
| 15.0  | 11.3  | 28.0   | 19.3  | 14.9   | 16.8   | 15.0   | 26.3   | 15.5   |
| 44.5  | 46.7  | 52.6   | 53.1  | 14.5   | 35.0   | 22.6   | 13.8   | 6.8    |
| 877.2 | 765.5 | 1140.0 | 671.4 | 7.1    | 5.5    | 6.3    | 4.3    | 11.4   |
| 5.7   | 2.4   | 5.7    | 2.7   | 3.7    | 0.6    | 3.1    | 1.4    | 3.2    |
| 3.1   | 2.9   | 4.3    | 2.8   | 1.2    | 1.8    | 2.3    | 2.6    | 3.9    |
| 2.3   | 11.8  | 9.5    | 7.1   | 6.6    | 6.4    | 4.8    | 2.0    | 10.6   |
| 10.1  | 9.4   | 11.8   | 3.9   | 7.1    | 10.2   | 7.5    | 10.2   | 10.5   |
| 8.5   | 13.2  | 8.6    | 9.3   | 6.8    | 3.9    | 5.9    | 0.2    | 4.4    |
| 4.3   | 2.4   | 1.3    | 6.4   | 2.6    | 1.3    | 3.5    | 1.1    | 0.7    |
| 21.5  | 22.0  | 35.1   | 11.4  | 12.2   | 9.5    | 4.7    | 7.4    | 25.8   |
| 2.0   | 1.7   | 4.5    | 1.6   | 1.0    | 0.7    | 1.5    | 1.0    | 1.7    |
| 0.9   | 4.5   | 6.3    | 3.3   | 2.1    | 2.3    | 0.8    | 0.7    | 5.3    |
| 25.4  | 19.4  | 62.4   | 45.6  | 20.6   | 16.3   | 15.9   | 18.4   | 29.8   |
| 18.7  | 21.4  | 9.7    | 17.6  | 9.9    | 9.9    | 8.9    | 12.1   | 12.3   |
| 1.1   | 2.0   | 1.2    | 2.4   | 2.9    | 0.6    | 5.1    | 3.5    | 0.5    |
| 8.7   | 15.1  | 12.5   | 10.0  | 7.5    | 4.5    | 7.3    | 2.7    | 10.8   |
| 9.5   | 15.0  | 9.7    | 7.5   | 1.1    | 3.1    | 1.0    | 1.7    | 2.3    |
| 11.2  | 9.6   | 10.4   | 8.3   | 8.2    | 4.3    | 4.3    | 10.5   | 3.7    |
| 0.9   | 3.1   | 2.0    | 3.2   | 4.3    | 2.3    | 6.1    | 2.1    | 2.0    |
| 13.3  | 14.6  | 22.4   | 23.1  | 19.4   | 10.1   | 23.0   | 19.3   | 16.9   |
| 7.9   | 6.9   | 7.1    | 7.9   | 2.9    | 1.2    | 4.9    | 4.5    | 9.6    |
| 28.8  | 23.7  | 39.9   | 22.7  | 28.5   | 21.7   | 37.0   | 43.9   | 47.9   |
| 6.7   | 6.5   | 6.6    | 5.4   | 2.1    | 4.0    | 1.6    | 1.4    | 6.6    |
| 17.2  | 12.0  | 12.7   | 16.4  | 12.9   | 13.0   | 8.2    | 23.2   | 16.3   |
| 119.8 | 108.6 | 198.9  | 89.6  | 232.2  | 166.6  | 210.9  | 246.2  | 289.0  |
| 244.1 | 175.8 | 390.7  | 241.4 | 525.8  | 541.2  | 538.4  | 529.6  | 921.5  |
| 16.0  | 18.8  | 16.3   | 25.2  | 10.3   | 29.6   | 25.9   | 19.3   | 2.6    |
| 359.4 | 351.6 | 549.3  | 399.0 | 544.1  | 580.7  | 574.9  | 663.6  | 676.1  |
| 131.4 | 106.3 | 189.9  | 118.4 | 618.6  | 387.5  | 597.9  | 675.4  | 613.1  |
| 396.8 | 358.9 | 805.5  | 438.5 | 898.1  | 632.0  | 841.3  | 1013.7 | 1065.7 |
| 7.8   | 10.1  | 6.6    | 6.3   | 34.8   | 33.1   | 33.6   | 47.3   | 4.9    |
| 423.6 | 364.9 | 369.9  | 446.1 | 22.7   | 13.7   | 26.2   | 37.7   | 8.1    |
| 11.8  | 12.0  | 26.4   | 14.9  | 105.2  | 88.6   | 113.4  | 121.1  | 27.6   |
| 767.8 | 713.8 | 1097.7 | 634.5 | 1111.3 | 1519.1 | 1291.5 | 1320.7 | 897.6  |
| 13.3  | 21.8  | 9.2    | 22.5  | 78.4   | 81.0   | 70.7   | 98.8   | 22.9   |
| 225.5 | 269.1 | 539.4  | 329.3 | 522.5  | 643.5  | 482.0  | 496.9  | 946.6  |
| 9.9   | 1.3   | 15.6   | 3.7   | 51.4   | 61.3   | 85.5   | 61.9   | 30.1   |
| 10.3  | 7.8   | 7.4    | 22.8  | 120.5  | 113.9  | 133.6  | 161.8  | 59.5   |
| 601.8 | 582.6 | 356.8  | 440.3 | 58.1   | 42.0   | 67.0   | 79.7   | 155.6  |
| 50.2  | 46.2  | 64.4   | 42.9  | 51.3   | 65.1   | 72.4   | 93.4   | 108.4  |
| 102.4 | 83.0  | 154.4  | 101.8 | 163.2  | 151.7  | 146.1  | 170.3  | 135.3  |
| 14.9  | 11.4  | 27.1   | 12.4  | 101.0  | 121.4  | 87.7   | 108.1  | 92.3   |
| 15.6  | 3.4   | 29.8   | 12.5  | 130.7  | 180.3  | 133.2  | 137.2  | 115.3  |
| 6.4   | 2.0   | 3.6    | 0.7   | 22.3   | 16.4   | 19.9   | 30.6   | 17.0   |
| 9.2   | 6.0   | 9.1    | 4.2   | 277.0  | 253.1  | 325.0  | 304.5  | 66.7   |
| 19.4  | 15.4  | 20.6   | 16.7  | 58.8   | 67.9   | 85.5   | 85.4   | 159.8  |
| 57.1  | 37.9  | 75.6   | 45.3  | 77.3   | 133.2  | 89.4   | 81.2   | 104.9  |
| 99.1  | 84.0  | 110.4  | 81.8  | 362.4  | 403.4  | 457.9  | 400.3  | 163.3  |
| 2.8   | 3.2   | 2.8    | 3.1   | 16.9   | 5.2    | 3.6    | 9.5    | 11.4   |
| 1.1   | 1.2   | 2.9    | 2.6   | 3.9    | 3.2    | 3.5    | 11.3   | 208.0  |
| 4.9   | 5.6   | 9.7    | 2.6   | 683.6  | 1021.3 | 788.2  | 834.8  | 240.9  |
| 5.1   | 13.7  | 10.8   | 4.8   | 174.4  | 108.5  | 129.9  | 211.4  | 144.9  |

|        |        |        |        |        |        |        |        |        |
|--------|--------|--------|--------|--------|--------|--------|--------|--------|
| 1.9    | 1.7    | 4.6    | 3.3    | 2.7    | 5.5    | 2.0    | 2.3    | 5.6    |
| 108.8  | 107.4  | 54.5   | 58.6   | 194.1  | 149.8  | 97.1   | 200.9  | 15.6   |
| 1.5    | 6.3    | 2.4    | 1.7    | 23.5   | 19.9   | 23.4   | 32.3   | 3.3    |
| 3.6    | 7.2    | 7.0    | 4.6    | 35.4   | 27.2   | 27.0   | 40.0   | 21.2   |
| 16.8   | 21.1   | 22.9   | 13.5   | 20.8   | 15.5   | 22.3   | 28.6   | 35.2   |
| 1862.1 | 1314.1 | 1611.1 | 1231.2 | 4794.4 | 5857.9 | 5185.4 | 5300.6 | 3730.3 |
| 1.2    | 1.3    | 1.9    | 0.8    | 2.2    | 1.6    | 2.2    | 2.2    | 24.4   |
| 1.7    | 0.6    | 1.8    | 1.5    | 1.7    | 1.8    | 1.0    | 0.9    | 2.1    |
| 90.3   | 85.8   | 144.5  | 89.4   | 87.0   | 85.1   | 84.3   | 108.2  | 102.3  |
| 52.9   | 41.9   | 71.3   | 40.4   | 48.6   | 41.4   | 49.9   | 45.1   | 48.8   |
| 68.3   | 71.0   | 83.4   | 57.0   | 124.6  | 133.8  | 210.7  | 136.5  | 213.5  |
| 5.2    | 1.1    | 1.8    | 1.7    | 1.7    | 0.9    | 1.3    | 4.0    | 1.8    |
| 1.8    | 3.0    | 4.6    | 2.2    | 3.1    | 0.9    | 1.6    | 3.6    | 9.4    |
| 3.8    | 1.8    | 4.0    | 1.3    | 2.2    | 2.6    | 2.9    | 7.7    | 4.7    |
| 1.6    | 5.4    | 3.3    | 2.4    | 3.7    | 10.3   | 6.1    | 8.2    | 7.1    |
| 98.6   | 102.5  | 38.7   | 63.8   | 4.2    | 5.8    | 0.7    | 1.3    | 10.4   |
| 6.7    | 3.8    | 1.6    | 3.2    | 0.6    | 2.2    | 1.8    | 1.8    | 0.9    |
| 4.2    | 10.5   | 3.6    | 6.5    | 116.6  | 82.9   | 95.8   | 149.2  | 4.6    |
| 44.0   | 45.1   | 43.3   | 44.6   | 46.8   | 46.7   | 48.0   | 66.5   | 17.7   |
| 365.9  | 336.1  | 546.9  | 358.1  | 350.9  | 395.0  | 309.4  | 363.8  | 321.0  |
| 24.9   | 21.5   | 36.5   | 23.8   | 54.9   | 91.4   | 64.3   | 55.3   | 68.8   |
| 6.3    | 6.8    | 1.1    | 7.5    | 1.1    | 0.5    | 0.4    | 0.4    | 0.6    |
| 18.8   | 8.4    | 18.7   | 17.0   | 17.9   | 19.0   | 26.8   | 38.2   | 33.2   |
| 2.6    | 4.7    | 9.4    | 1.7    | 1.1    | 1.8    | 0.9    | 2.4    | 8.2    |
| 4.6    | 5.4    | 1.9    | 6.8    | 2.9    | 5.7    | 3.5    | 8.4    | 2.2    |
| 2.3    | 3.7    | 1.4    | 1.8    | 3.9    | 1.3    | 1.6    | 3.9    | 2.6    |
| 1.4    | 4.1    | 3.3    | 2.0    | 3.6    | 3.0    | 5.8    | 3.4    | 24.2   |
| 39.8   | 45.5   | 17.5   | 36.7   | 38.4   | 28.9   | 42.2   | 48.2   | 12.7   |
| 31.3   | 25.5   | 20.3   | 24.7   | 51.2   | 57.1   | 33.0   | 50.9   | 31.7   |
| 158.2  | 156.8  | 217.6  | 168.2  | 177.7  | 159.3  | 156.5  | 202.9  | 168.1  |
| 80.2   | 73.0   | 160.2  | 47.6   | 506.3  | 457.1  | 459.9  | 439.4  | 914.1  |
| 6.1    | 8.1    | 15.2   | 11.4   | 9.4    | 6.6    | 4.8    | 1.3    | 10.7   |
| 50.6   | 46.8   | 37.6   | 46.9   | 32.6   | 27.4   | 33.9   | 36.1   | 22.0   |
| 81.5   | 83.6   | 76.6   | 76.0   | 169.2  | 184.4  | 174.0  | 194.4  | 300.5  |
| 8.9    | 10.9   | 10.3   | 11.9   | 17.1   | 14.1   | 15.4   | 24.1   | 13.8   |
| 8.1    | 2.2    | 6.3    | 1.7    | 1.7    | 4.4    | 1.2    | 1.5    | 8.8    |
| 4.9    | 2.7    | 5.9    | 6.4    | 1.5    | 1.0    | 3.4    | 1.7    | 4.6    |
| 4.6    | 2.9    | 4.3    | 3.4    | 2.0    | 2.6    | 6.3    | 1.2    | 4.2    |
| 1.3    | 4.1    | 5.5    | 4.6    | 4.3    | 8.4    | 4.3    | 1.0    | 15.5   |
| 35.9   | 43.4   | 29.8   | 36.8   | 34.9   | 22.7   | 25.8   | 40.5   | 5.8    |
| 283.2  | 297.9  | 247.3  | 236.3  | 248.7  | 239.2  | 263.8  | 285.4  | 192.8  |
| 2.2    | 5.3    | 8.0    | 3.1    | 7.1    | 8.5    | 6.4    | 9.9    | 4.7    |
| 87.4   | 79.9   | 96.6   | 77.2   | 50.3   | 45.0   | 48.3   | 53.7   | 66.3   |
| 0.7    | 0.8    | 1.0    | 0.7    | 0.6    | 1.3    | 0.6    | 0.9    | 1.3    |
| 4.3    | 5.8    | 2.0    | 6.0    | 1.3    | 2.9    | 2.9    | 7.5    | 1.6    |
| 245.3  | 219.3  | 315.3  | 195.6  | 358.5  | 317.3  | 322.9  | 374.3  | 537.4  |
| 258.7  | 220.9  | 202.7  | 169.7  | 314.9  | 288.3  | 372.8  | 341.7  | 133.9  |
| 986.8  | 916.4  | 1342.0 | 870.4  | 1000.8 | 871.7  | 1107.1 | 1224.5 | 1372.9 |
| 4.4    | 11.6   | 8.0    | 6.5    | 59.6   | 48.7   | 35.0   | 55.4   | 5.3    |
| 0.7    | 1.2    | 1.1    | 0.9    | 0.8    | 0.6    | 0.7    | 0.6    | 2.7    |
| 3.2    | 2.2    | 3.6    | 2.2    | 2.2    | 1.8    | 2.7    | 3.0    | 4.2    |
| 4.5    | 2.3    | 9.1    | 2.3    | 13.3   | 13.8   | 12.8   | 12.5   | 70.5   |
| 20.0   | 26.5   | 28.8   | 21.5   | 10.4   | 12.5   | 14.9   | 15.0   | 18.1   |

|        |        |        |        |        |        |        |        |        |
|--------|--------|--------|--------|--------|--------|--------|--------|--------|
| 122.2  | 138.3  | 262.6  | 123.5  | 271.0  | 226.6  | 273.8  | 263.1  | 554.8  |
| 112.8  | 111.5  | 156.3  | 117.4  | 77.6   | 83.3   | 64.6   | 85.3   | 274.4  |
| 0.9    | 1.4    | 1.8    | 1.0    | 1.7    | 0.6    | 1.7    | 1.3    | 7.1    |
| 1.3    | 2.4    | 6.2    | 8.2    | 6.5    | 1.8    | 5.2    | 8.8    | 3.8    |
| 6.0    | 9.6    | 9.8    | 7.6    | 1.1    | 4.6    | 1.2    | 2.2    | 4.1    |
| 1837.3 | 1452.8 | 2163.7 | 1343.5 | 2825.6 | 2044.1 | 2738.0 | 3244.7 | 2298.5 |
| 106.9  | 113.7  | 125.6  | 92.9   | 163.3  | 138.1  | 159.6  | 179.0  | 102.6  |
| 1.0    | 1.6    | 2.1    | 5.2    | 2.0    | 0.7    | 3.1    | 0.5    | 3.0    |
| 6.0    | 7.9    | 11.6   | 3.6    | 0.5    | 4.4    | 7.8    | 2.7    | 3.4    |
| 5.6    | 5.8    | 2.1    | 8.9    | 1.7    | 1.9    | 6.2    | 1.5    | 3.7    |
| 15.0   | 20.0   | 11.4   | 20.9   | 8.4    | 4.0    | 10.5   | 11.2   | 3.6    |
| 17.7   | 16.2   | 32.2   | 16.6   | 8.5    | 10.9   | 7.3    | 1.4    | 14.2   |
| 14.8   | 17.7   | 6.5    | 13.6   | 5.4    | 4.3    | 6.4    | 4.5    | 8.6    |
| 9.7    | 1.7    | 1.8    | 8.3    | 11.4   | 1.6    | 6.9    | 7.5    | 15.9   |
| 15.8   | 6.3    | 17.0   | 11.5   | 8.4    | 10.8   | 7.2    | 1.3    | 9.5    |
| 51.6   | 49.4   | 45.3   | 44.2   | 64.7   | 60.1   | 56.2   | 69.3   | 3.9    |
| 16.0   | 11.3   | 8.7    | 15.7   | 11.0   | 2.0    | 11.6   | 13.0   | 8.8    |
| 0.9    | 5.0    | 8.9    | 3.7    | 2.6    | 3.6    | 1.5    | 0.7    | 1.5    |
| 114.3  | 74.4   | 87.4   | 82.6   | 51.4   | 73.7   | 64.5   | 83.0   | 47.2   |
| 325.8  | 300.0  | 431.3  | 331.9  | 245.6  | 293.2  | 263.5  | 303.4  | 257.1  |
| 426.0  | 371.2  | 769.9  | 392.5  | 655.3  | 535.1  | 591.7  | 676.4  | 1289.9 |
| 1.2    | 0.3    | 1.7    | 0.9    | 11.8   | 14.0   | 11.3   | 2.7    | 12.1   |
| 14.6   | 16.3   | 18.4   | 11.8   | 5.7    | 8.3    | 10.7   | 13.9   | 22.3   |
| 1.2    | 1.2    | 2.0    | 1.4    | 1.1    | 3.8    | 1.7    | 1.1    | 4.2    |
| 241.2  | 245.0  | 254.4  | 250.2  | 335.0  | 320.8  | 355.7  | 384.0  | 489.1  |
| 13.4   | 17.6   | 13.2   | 20.0   | 4.3    | 5.0    | 7.9    | 23.7   | 28.8   |
| 11.7   | 2.5    | 8.1    | 7.3    | 7.6    | 2.8    | 5.0    | 7.7    | 6.7    |
| 4.8    | 2.3    | 8.6    | 2.6    | 3.9    | 1.4    | 5.3    | 1.7    | 11.5   |
| 2.5    | 5.9    | 2.9    | 11.5   | 9.5    | 7.5    | 3.5    | 9.4    | 10.7   |
| 7.0    | 9.9    | 21.4   | 5.4    | 14.1   | 11.0   | 13.0   | 7.2    | 28.3   |
| 22.8   | 28.6   | 27.8   | 19.2   | 50.1   | 46.0   | 48.1   | 65.0   | 21.2   |
| 4.6    | 4.1    | 5.0    | 4.3    | 9.3    | 4.9    | 9.5    | 8.2    | 3.8    |
| 7.8    | 7.2    | 10.6   | 2.2    | 4.4    | 5.2    | 3.3    | 6.0    | 7.6    |
| 11.5   | 10.3   | 19.6   | 11.0   | 16.1   | 21.6   | 12.6   | 10.4   | 6.7    |
| 0.6    | 1.7    | 1.3    | 1.4    | 3.4    | 1.9    | 2.7    | 2.9    | 1.8    |
| 49.3   | 49.4   | 44.2   | 49.4   | 58.5   | 58.3   | 47.3   | 83.0   | 50.7   |
| 34.8   | 38.3   | 64.9   | 47.4   | 204.3  | 250.6  | 244.4  | 259.8  | 217.5  |
| 355.5  | 344.0  | 348.0  | 344.1  | 399.6  | 343.1  | 426.5  | 591.0  | 386.5  |
| 127.9  | 126.8  | 152.9  | 106.4  | 139.9  | 157.8  | 134.5  | 174.0  | 75.8   |
| 21.5   | 22.3   | 26.9   | 29.3   | 11.2   | 18.1   | 8.2    | 4.1    | 51.1   |
| 0.9    | 0.6    | 0.7    | 2.8    | 1.9    | 4.3    | 1.0    | 3.0    | 5.2    |
| 5336.1 | 4519.3 | 5323.5 | 4903.0 | 5352.8 | 5737.2 | 5574.5 | 5482.0 | 4922.9 |
| 48.7   | 45.7   | 66.8   | 43.9   | 36.9   | 23.5   | 43.5   | 54.9   | 54.1   |
| 239.5  | 229.6  | 371.7  | 239.4  | 544.8  | 537.9  | 499.5  | 573.1  | 489.5  |
| 0.7    | 2.4    | 3.7    | 0.6    | 4.3    | 0.6    | 1.0    | 1.5    | 1.0    |
| 140.2  | 122.0  | 213.5  | 191.5  | 142.3  | 137.2  | 118.1  | 154.3  | 135.7  |
| 137.1  | 130.9  | 192.6  | 131.3  | 184.4  | 187.6  | 192.2  | 186.1  | 401.3  |
| 5.7    | 9.0    | 19.2   | 9.6    | 14.0   | 5.7    | 9.5    | 8.3    | 10.5   |
| 1.5    | 8.8    | 2.4    | 5.4    | 0.8    | 2.8    | 3.3    | 6.4    | 1.6    |
| 4.1    | 6.9    | 4.9    | 4.1    | 8.3    | 4.5    | 6.1    | 15.4   | 4.8    |
| 2.9    | 3.0    | 8.7    | 8.8    | 21.1   | 7.3    | 16.0   | 6.4    | 7.0    |
| 19.8   | 23.5   | 27.3   | 17.5   | 16.3   | 9.5    | 8.4    | 24.4   | 19.6   |
| 3.6    | 1.4    | 1.6    | 1.3    | 4.1    | 0.8    | 1.7    | 1.4    | 2.7    |

|       |       |       |       |        |        |        |        |        |
|-------|-------|-------|-------|--------|--------|--------|--------|--------|
| 10.0  | 9.4   | 15.5  | 2.1   | 2.1    | 1.7    | 8.1    | 1.7    | 9.7    |
| 1.8   | 4.7   | 8.7   | 5.3   | 5.7    | 0.4    | 7.8    | 5.9    | 7.6    |
| 1.0   | 4.2   | 1.0   | 2.9   | 0.8    | 3.4    | 0.9    | 0.6    | 4.4    |
| 3.5   | 4.0   | 5.0   | 2.7   | 4.2    | 6.1    | 11.0   | 8.1    | 18.7   |
| 33.8  | 35.5  | 38.9  | 26.8  | 24.1   | 18.8   | 16.8   | 19.7   | 133.2  |
| 2.0   | 6.3   | 0.9   | 1.5   | 1.1    | 0.6    | 2.9    | 1.5    | 2.9    |
| 2.8   | 8.5   | 5.4   | 8.4   | 7.5    | 0.8    | 3.9    | 1.0    | 7.2    |
| 0.8   | 1.1   | 1.3   | 0.5   | 1.1    | 0.7    | 0.7    | 0.6    | 3.0    |
| 2.2   | 2.7   | 2.9   | 3.4   | 0.9    | 0.9    | 1.8    | 2.2    | 8.4    |
| 5.2   | 7.8   | 6.5   | 6.1   | 1.6    | 0.8    | 6.5    | 3.7    | 10.3   |
| 4.1   | 2.4   | 10.7  | 5.3   | 12.4   | 13.4   | 8.0    | 9.7    | 4.0    |
| 2.4   | 1.6   | 1.8   | 2.4   | 5.0    | 2.6    | 1.8    | 0.5    | 2.3    |
| 7.4   | 5.1   | 14.0  | 6.5   | 11.1   | 9.5    | 5.0    | 8.7    | 6.3    |
| 6.6   | 4.4   | 10.1  | 2.7   | 11.4   | 15.6   | 10.5   | 9.9    | 15.2   |
| 5.1   | 4.5   | 3.8   | 9.2   | 2.3    | 4.1    | 7.0    | 1.4    | 5.5    |
| 1.0   | 0.7   | 0.9   | 0.5   | 0.7    | 0.3    | 0.5    | 0.6    | 1.1    |
| 3.4   | 8.7   | 5.6   | 9.7   | 574.0  | 889.7  | 661.0  | 727.1  | 109.1  |
| 324.7 | 319.6 | 343.5 | 329.3 | 186.0  | 182.7  | 166.0  | 214.6  | 87.6   |
| 38.9  | 49.0  | 18.6  | 29.0  | 70.7   | 72.6   | 73.1   | 79.8   | 175.8  |
| 2.1   | 1.5   | 2.8   | 2.4   | 83.2   | 55.4   | 218.5  | 128.0  | 13.7   |
| 47.8  | 53.4  | 54.1  | 48.4  | 608.9  | 452.6  | 746.6  | 700.4  | 570.1  |
| 14.5  | 9.0   | 24.4  | 11.8  | 5.8    | 4.6    | 7.3    | 7.4    | 13.5   |
| 111.9 | 102.3 | 136.0 | 102.0 | 78.2   | 72.9   | 76.2   | 99.3   | 211.6  |
| 6.2   | 11.3  | 5.5   | 2.0   | 1.9    | 9.5    | 9.8    | 17.1   | 7.2    |
| 610.5 | 616.3 | 672.3 | 695.9 | 504.6  | 545.8  | 527.3  | 543.6  | 434.7  |
| 1.0   | 5.7   | 4.5   | 2.7   | 3.9    | 2.1    | 1.5    | 5.3    | 5.1    |
| 0.3   | 0.3   | 5.9   | 0.4   | 19.9   | 20.7   | 21.5   | 26.3   | 5.1    |
| 61.6  | 48.1  | 59.4  | 38.4  | 94.1   | 89.7   | 101.7  | 126.7  | 81.1   |
| 11.7  | 3.9   | 10.8  | 3.9   | 9.5    | 11.0   | 5.3    | 2.4    | 1.5    |
| 168.6 | 152.3 | 148.1 | 138.8 | 120.3  | 109.7  | 111.6  | 173.7  | 83.4   |
| 9.2   | 0.9   | 5.0   | 2.4   | 29.5   | 9.5    | 26.8   | 34.1   | 6.0    |
| 18.1  | 11.9  | 18.2  | 11.4  | 12.4   | 14.8   | 15.7   | 11.5   | 19.7   |
| 17.5  | 17.7  | 12.2  | 18.2  | 9.6    | 12.5   | 19.2   | 22.0   | 11.4   |
| 419.1 | 364.1 | 454.7 | 379.4 | 63.7   | 87.9   | 78.5   | 86.6   | 147.3  |
| 83.2  | 94.9  | 109.4 | 135.9 | 61.0   | 131.3  | 80.1   | 58.3   | 345.4  |
| 11.6  | 12.2  | 4.3   | 6.0   | 82.3   | 66.5   | 98.4   | 94.2   | 96.7   |
| 6.2   | 3.9   | 5.4   | 4.8   | 7.0    | 4.0    | 3.6    | 4.8    | 8.1    |
| 114.4 | 144.2 | 53.4  | 78.8  | 1.4    | 4.3    | 8.3    | 2.6    | 6.3    |
| 23.3  | 19.5  | 15.0  | 11.7  | 6.6    | 5.4    | 11.2   | 15.0   | 15.4   |
| 37.8  | 27.8  | 38.9  | 21.0  | 50.1   | 42.6   | 71.2   | 69.2   | 104.8  |
| 3.6   | 0.3   | 1.3   | 0.3   | 5.3    | 3.2    | 4.7    | 0.3    | 3.3    |
| 1.4   | 1.3   | 1.8   | 0.8   | 1.6    | 1.1    | 9.9    | 1.4    | 1.5    |
| 4.0   | 5.3   | 2.5   | 0.9   | 946.3  | 886.4  | 989.6  | 1116.6 | 1891.9 |
| 2.1   | 5.2   | 7.2   | 0.9   | 18.1   | 11.7   | 21.5   | 24.3   | 9.4    |
| 11.7  | 8.9   | 7.6   | 7.3   | 117.5  | 124.7  | 92.6   | 116.6  | 11.5   |
| 4.5   | 0.5   | 3.6   | 2.1   | 14.9   | 7.7    | 23.8   | 16.2   | 13.7   |
| 16.2  | 2.4   | 5.0   | 3.4   | 18.0   | 10.1   | 2.9    | 17.1   | 5.9    |
| 1.5   | 2.3   | 8.0   | 4.6   | 39.9   | 23.0   | 41.7   | 56.2   | 255.7  |
| 3.8   | 9.7   | 21.6  | 11.3  | 5.6    | 5.6    | 10.5   | 15.8   | 11.2   |
| 0.5   | 2.4   | 5.1   | 4.4   | 8.2    | 6.3    | 6.9    | 7.1    | 8.8    |
| 5.5   | 4.4   | 8.8   | 8.1   | 2.3    | 3.2    | 4.6    | 5.2    | 14.2   |
| 5.1   | 5.4   | 2.1   | 1.1   | 3026.1 | 2830.3 | 3085.0 | 3491.9 | 5298.2 |
| 8.3   | 5.0   | 5.2   | 3.5   | 12.3   | 6.6    | 1.5    | 1.3    | 39.8   |

|        |        |        |        |        |        |        |        |        |
|--------|--------|--------|--------|--------|--------|--------|--------|--------|
| 223.7  | 216.1  | 277.9  | 190.9  | 52.1   | 45.4   | 46.5   | 53.3   | 79.7   |
| 9.2    | 4.8    | 5.6    | 4.3    | 3.8    | 2.5    | 1.1    | 4.7    | 0.8    |
| 49.2   | 46.4   | 34.9   | 40.3   | 5.6    | 9.2    | 13.5   | 20.3   | 20.3   |
| 23.8   | 3.9    | 8.0    | 7.3    | 6.1    | 15.2   | 11.6   | 11.8   | 27.4   |
| 2.0    | 4.0    | 5.6    | 6.0    | 2.9    | 2.8    | 4.4    | 0.5    | 6.7    |
| 20.2   | 20.6   | 26.4   | 12.0   | 12.1   | 13.3   | 11.2   | 1.1    | 7.8    |
| 42.2   | 35.5   | 62.7   | 63.6   | 384.9  | 390.0  | 336.8  | 573.6  | 177.3  |
| 1.1    | 0.8    | 3.3    | 0.8    | 1.9    | 1.2    | 1.8    | 0.2    | 0.4    |
| 2.9    | 1.2    | 2.6    | 2.2    | 2.3    | 1.0    | 3.4    | 13.3   | 2.7    |
| 6.2    | 5.6    | 15.8   | 11.7   | 0.9    | 1.0    | 1.5    | 1.6    | 1.6    |
| 72.0   | 60.2   | 67.9   | 49.6   | 7.8    | 4.4    | 8.4    | 9.0    | 2.6    |
| 8.2    | 13.6   | 12.6   | 27.7   | 14.4   | 4.2    | 17.0   | 14.6   | 26.1   |
| 518.7  | 487.5  | 709.5  | 459.0  | 686.7  | 766.8  | 640.2  | 734.4  | 919.2  |
| 16.5   | 12.8   | 26.8   | 20.0   | 13.2   | 12.0   | 8.2    | 12.8   | 28.6   |
| 2.8    | 2.3    | 3.6    | 2.7    | 5.1    | 2.2    | 4.5    | 9.1    | 2.5    |
| 2356.3 | 2354.8 | 2910.0 | 2165.3 | 5229.5 | 5405.0 | 5054.6 | 5755.0 | 4871.0 |
| 6.4    | 15.1   | 3.7    | 16.4   | 11.1   | 3.8    | 5.3    | 2.3    | 9.8    |
| 25.1   | 23.7   | 33.6   | 21.3   | 31.2   | 21.4   | 17.2   | 39.4   | 16.2   |
| 8.4    | 9.7    | 9.6    | 6.5    | 51.2   | 41.1   | 67.6   | 57.2   | 173.5  |
| 18.7   | 18.2   | 10.5   | 19.0   | 2.4    | 2.7    | 0.9    | 5.6    | 7.4    |
| 22.6   | 27.9   | 14.0   | 17.4   | 10.2   | 10.0   | 10.8   | 16.3   | 10.0   |
| 7.7    | 17.6   | 29.2   | 21.6   | 15.5   | 11.7   | 9.4    | 32.1   | 7.1    |
| 6.3    | 6.1    | 6.3    | 9.7    | 4.7    | 3.9    | 3.1    | 12.4   | 8.9    |
| 1.3    | 1.0    | 1.6    | 1.7    | 1.5    | 1.2    | 1.6    | 1.6    | 2.2    |
| 55.9   | 45.9   | 58.7   | 45.2   | 30.2   | 27.2   | 33.6   | 51.9   | 38.3   |
| 0.8    | 0.7    | 1.0    | 0.6    | 4.3    | 2.9    | 6.1    | 12.6   | 89.6   |
| 4.2    | 3.6    | 3.0    | 0.9    | 5.3    | 0.5    | 1.0    | 1.6    | 12.7   |
| 4.8    | 1.7    | 5.3    | 1.5    | 3.4    | 2.0    | 1.4    | 1.5    | 1.8    |
| 9.0    | 5.2    | 12.8   | 5.1    | 589.7  | 383.7  | 585.9  | 515.8  | 2502.3 |
| 9.1    | 9.2    | 16.9   | 6.0    | 52.3   | 39.8   | 39.4   | 55.6   | 33.3   |
| 4.2    | 4.0    | 5.6    | 3.2    | 1.2    | 3.6    | 1.9    | 1.5    | 4.8    |
| 6.8    | 12.2   | 13.6   | 6.1    | 5.6    | 4.2    | 2.3    | 4.5    | 1.3    |
| 8.0    | 6.3    | 4.9    | 7.8    | 4.2    | 4.3    | 10.7   | 7.7    | 3.1    |
| 2.8    | 3.7    | 1.4    | 3.6    | 49.6   | 54.2   | 56.9   | 73.4   | 30.7   |
| 2.4    | 12.5   | 6.8    | 5.7    | 4.7    | 6.0    | 5.9    | 11.6   | 6.6    |
| 52.9   | 47.4   | 81.9   | 43.2   | 427.4  | 380.9  | 467.9  | 563.8  | 312.3  |
| 8.4    | 8.0    | 6.8    | 5.5    | 3.6    | 3.2    | 5.0    | 11.1   | 10.7   |
| 1.0    | 4.2    | 1.9    | 4.1    | 27.3   | 19.2   | 24.6   | 22.9   | 15.4   |
| 0.6    | 0.8    | 1.3    | 0.7    | 8.2    | 5.1    | 13.0   | 13.6   | 0.8    |
| 7.6    | 5.4    | 7.2    | 3.0    | 1.4    | 0.6    | 4.9    | 1.1    | 3.6    |
| 196.5  | 201.4  | 299.3  | 216.2  | 426.0  | 461.4  | 440.7  | 472.9  | 177.6  |
| 59.8   | 70.7   | 47.4   | 41.2   | 20.8   | 35.7   | 25.3   | 28.4   | 69.8   |
| 230.5  | 204.8  | 399.5  | 223.0  | 724.5  | 505.1  | 692.1  | 887.2  | 1080.2 |
| 152.1  | 137.4  | 154.6  | 119.5  | 205.3  | 164.7  | 165.2  | 224.9  | 115.3  |
| 2.7    | 4.2    | 4.8    | 0.8    | 19.3   | 10.2   | 21.8   | 25.9   | 102.1  |
| 112.9  | 109.9  | 174.4  | 126.3  | 193.6  | 204.9  | 203.5  | 184.4  | 403.2  |
| 89.1   | 76.3   | 144.8  | 78.3   | 271.1  | 223.0  | 289.8  | 309.9  | 301.7  |
| 79.0   | 94.7   | 71.2   | 77.1   | 83.9   | 85.0   | 89.1   | 103.0  | 77.6   |
| 9.0    | 12.7   | 15.2   | 8.7    | 22.8   | 11.0   | 19.3   | 32.3   | 39.2   |
| 746.8  | 634.5  | 1085.8 | 779.7  | 735.9  | 787.7  | 825.2  | 822.7  | 729.4  |
| 204.8  | 176.7  | 271.1  | 176.6  | 104.8  | 63.7   | 95.3   | 167.5  | 194.7  |
| 89.6   | 87.1   | 160.5  | 108.8  | 27.1   | 27.2   | 33.8   | 24.2   | 2.7    |
| 15.6   | 19.6   | 32.3   | 16.2   | 25.9   | 36.6   | 33.0   | 40.9   | 49.3   |

|        |        |        |        |        |        |        |        |        |
|--------|--------|--------|--------|--------|--------|--------|--------|--------|
| 10.9   | 7.1    | 13.4   | 4.9    | 9.9    | 1.8    | 12.8   | 15.4   | 14.2   |
| 749.2  | 721.1  | 668.0  | 710.4  | 280.7  | 297.8  | 301.4  | 344.1  | 288.0  |
| 78.6   | 48.4   | 115.7  | 76.6   | 86.7   | 86.9   | 74.4   | 88.4   | 169.9  |
| 187.1  | 188.0  | 225.9  | 157.3  | 134.1  | 136.8  | 144.7  | 157.1  | 105.5  |
| 18.7   | 3.4    | 27.1   | 11.6   | 7.7    | 11.9   | 7.7    | 15.0   | 9.7    |
| 22.5   | 25.5   | 27.9   | 33.9   | 31.3   | 22.7   | 35.7   | 33.0   | 95.0   |
| 6.1    | 9.2    | 2.6    | 2.1    | 1.4    | 1.0    | 8.5    | 3.0    | 1.1    |
| 9.0    | 9.7    | 7.3    | 9.0    | 10.4   | 6.0    | 4.5    | 6.2    | 2.4    |
| 1.3    | 2.1    | 2.1    | 1.5    | 3.6    | 1.7    | 3.5    | 1.7    | 2.9    |
| 216.1  | 182.1  | 218.5  | 148.1  | 227.1  | 108.3  | 191.1  | 229.4  | 191.9  |
| 235.9  | 189.7  | 321.7  | 223.5  | 229.2  | 205.9  | 216.2  | 279.0  | 237.0  |
| 2.3    | 2.2    | 2.0    | 1.8    | 2.6    | 3.0    | 11.5   | 5.3    | 1.7    |
| 24.1   | 17.5   | 38.0   | 18.1   | 33.1   | 30.3   | 29.7   | 43.4   | 20.0   |
| 14.3   | 10.7   | 12.1   | 13.8   | 11.3   | 7.4    | 10.3   | 1.0    | 19.0   |
| 165.0  | 188.6  | 182.0  | 119.7  | 81.5   | 105.7  | 75.4   | 99.7   | 133.2  |
| 53.4   | 60.1   | 72.6   | 49.8   | 118.6  | 145.9  | 127.5  | 139.2  | 219.8  |
| 5.3    | 5.4    | 5.8    | 6.4    | 6.4    | 3.4    | 2.8    | 7.6    | 5.6    |
| 242.6  | 281.5  | 220.6  | 225.6  | 173.5  | 179.6  | 167.0  | 189.8  | 263.7  |
| 3963.4 | 3303.5 | 5888.5 | 4092.3 | 4080.4 | 4107.6 | 4230.4 | 4512.7 | 7152.5 |
| 6.7    | 7.6    | 9.2    | 5.9    | 16.5   | 6.5    | 15.4   | 18.4   | 54.1   |
| 8.7    | 9.4    | 10.3   | 11.2   | 7.3    | 1.9    | 13.8   | 1.3    | 8.6    |
| 26.0   | 31.5   | 47.6   | 28.7   | 59.8   | 42.8   | 57.9   | 88.2   | 61.1   |
| 56.9   | 66.2   | 51.1   | 58.1   | 67.8   | 80.7   | 76.6   | 81.6   | 74.2   |
| 135.7  | 141.0  | 82.8   | 139.5  | 25.7   | 42.8   | 25.6   | 44.0   | 66.1   |
| 302.2  | 271.3  | 287.5  | 207.8  | 470.8  | 735.1  | 500.5  | 507.6  | 644.8  |
| 23.3   | 29.6   | 23.9   | 28.8   | 36.4   | 32.9   | 31.7   | 31.5   | 52.4   |
| 94.3   | 76.0   | 136.6  | 76.7   | 103.6  | 85.1   | 106.0  | 134.3  | 84.6   |
| 43.0   | 48.4   | 62.6   | 42.3   | 176.1  | 174.4  | 176.9  | 204.2  | 140.7  |
| 153.3  | 142.7  | 240.2  | 141.5  | 224.4  | 180.0  | 245.9  | 292.9  | 172.4  |
| 83.1   | 63.1   | 149.3  | 57.7   | 127.4  | 106.6  | 163.5  | 193.3  | 133.2  |
| 81.6   | 90.3   | 61.4   | 87.7   | 52.5   | 68.6   | 51.5   | 59.9   | 69.4   |
| 126.4  | 158.4  | 216.0  | 122.5  | 277.9  | 208.0  | 232.9  | 312.2  | 273.0  |
| 16.8   | 18.6   | 18.2   | 8.0    | 121.6  | 161.2  | 170.4  | 144.2  | 35.2   |
| 0.4    | 2.9    | 2.4    | 4.8    | 7.0    | 7.4    | 15.1   | 5.8    | 0.4    |
| 195.4  | 174.2  | 162.8  | 216.5  | 132.1  | 154.7  | 176.0  | 160.1  | 63.2   |
| 4.6    | 1.8    | 1.7    | 1.1    | 1.7    | 1.3    | 1.0    | 2.0    | 5.4    |
| 40.8   | 51.9   | 19.0   | 46.4   | 6.5    | 4.1    | 5.8    | 6.9    | 1.5    |
| 59.0   | 44.3   | 74.6   | 49.6   | 157.2  | 144.2  | 166.8  | 216.4  | 260.4  |
| 67.1   | 65.3   | 78.1   | 66.9   | 47.3   | 50.0   | 50.4   | 101.1  | 51.9   |
| 3.7    | 6.5    | 6.0    | 1.1    | 2.9    | 4.1    | 8.1    | 8.2    | 130.0  |
| 1223.3 | 1204.3 | 1308.9 | 1036.7 | 1621.0 | 1468.3 | 1771.9 | 1914.1 | 1105.0 |
| 592.1  | 581.6  | 1051.7 | 489.9  | 3074.4 | 1950.2 | 2862.5 | 3173.6 | 3331.4 |
| 123.2  | 116.6  | 168.6  | 102.9  | 162.7  | 159.5  | 241.2  | 207.5  | 415.0  |
| 4.2    | 4.1    | 3.5    | 4.5    | 0.3    | 2.8    | 2.4    | 6.8    | 4.5    |
| 44.0   | 43.6   | 46.2   | 42.5   | 53.1   | 31.0   | 49.1   | 69.1   | 56.1   |
| 179.9  | 183.5  | 127.5  | 144.2  | 279.0  | 308.7  | 287.9  | 296.2  | 262.1  |
| 232.2  | 233.8  | 224.2  | 216.7  | 141.5  | 133.1  | 127.1  | 188.7  | 240.0  |
| 10.3   | 11.5   | 18.2   | 12.3   | 19.9   | 21.6   | 16.6   | 23.0   | 17.9   |
| 49.6   | 32.6   | 59.2   | 67.1   | 97.0   | 35.6   | 68.9   | 83.4   | 39.7   |
| 246.8  | 293.8  | 171.7  | 229.8  | 190.7  | 285.0  | 257.0  | 261.2  | 267.3  |
| 10.8   | 4.5    | 5.7    | 8.7    | 79.8   | 52.9   | 57.2   | 68.9   | 23.1   |
| 88.0   | 87.3   | 114.1  | 93.7   | 417.0  | 348.7  | 387.2  | 502.6  | 116.3  |
| 191.0  | 151.6  | 217.3  | 122.6  | 201.5  | 152.4  | 209.1  | 251.4  | 233.3  |

|        |        |        |        |        |        |        |        |        |
|--------|--------|--------|--------|--------|--------|--------|--------|--------|
| 328.2  | 326.0  | 268.4  | 276.8  | 636.2  | 1044.5 | 738.3  | 709.4  | 410.7  |
| 24.0   | 18.9   | 32.9   | 23.7   | 13.9   | 18.7   | 15.1   | 14.7   | 14.4   |
| 93.2   | 112.7  | 46.7   | 44.8   | 177.2  | 138.1  | 208.5  | 222.0  | 222.5  |
| 0.3    | 1.3    | 0.9    | 1.7    | 1.8    | 0.5    | 3.7    | 1.9    | 7.0    |
| 223.4  | 201.5  | 266.3  | 205.7  | 168.8  | 188.0  | 150.3  | 207.3  | 165.1  |
| 17.2   | 15.2   | 48.9   | 18.0   | 140.0  | 101.4  | 120.8  | 143.1  | 99.0   |
| 816.2  | 764.6  | 1317.1 | 887.9  | 591.5  | 548.7  | 573.7  | 636.6  | 803.2  |
| 34.1   | 31.5   | 49.8   | 26.7   | 71.4   | 67.7   | 73.6   | 73.1   | 63.4   |
| 481.1  | 505.8  | 512.5  | 372.4  | 707.9  | 862.2  | 850.0  | 870.0  | 698.3  |
| 11.1   | 12.2   | 16.8   | 12.0   | 11.2   | 13.8   | 10.7   | 15.2   | 17.6   |
| 42.0   | 28.8   | 63.6   | 21.6   | 34.8   | 31.7   | 43.2   | 34.7   | 39.9   |
| 243.0  | 207.1  | 278.3  | 232.7  | 279.9  | 255.8  | 282.4  | 274.1  | 187.0  |
| 281.8  | 298.8  | 356.5  | 288.1  | 139.8  | 198.3  | 140.6  | 152.1  | 10.2   |
| 1.7    | 8.6    | 9.0    | 8.3    | 6.1    | 3.4    | 5.9    | 11.3   | 7.5    |
| 457.2  | 422.2  | 488.4  | 444.3  | 458.3  | 461.1  | 446.0  | 522.3  | 327.3  |
| 2684.3 | 2633.6 | 3712.4 | 2660.5 | 2607.4 | 2598.2 | 2578.5 | 3074.0 | 4027.0 |
| 74.1   | 56.1   | 53.1   | 56.4   | 35.6   | 53.7   | 22.8   | 41.5   | 6.9    |
| 108.4  | 108.6  | 101.0  | 92.3   | 43.5   | 47.9   | 47.7   | 70.4   | 43.9   |
| 1.8    | 10.2   | 10.4   | 7.1    | 3.3    | 2.0    | 4.8    | 3.2    | 13.9   |
| 333.1  | 353.1  | 389.0  | 307.6  | 254.0  | 364.8  | 232.1  | 286.9  | 63.7   |
| 13.6   | 17.3   | 12.8   | 14.0   | 67.1   | 66.3   | 60.9   | 74.1   | 30.0   |
| 320.6  | 315.6  | 344.2  | 314.5  | 459.3  | 440.6  | 469.5  | 525.2  | 200.7  |
| 124.7  | 91.1   | 369.6  | 177.4  | 72.6   | 44.3   | 62.4   | 75.2   | 207.5  |
| 57.2   | 50.5   | 123.7  | 63.9   | 10.0   | 5.1    | 5.8    | 2.3    | 8.8    |
| 131.1  | 82.9   | 203.4  | 114.3  | 24.9   | 22.9   | 29.5   | 40.3   | 18.3   |
| 26.0   | 24.6   | 26.0   | 18.8   | 20.3   | 26.1   | 17.4   | 19.8   | 22.5   |
| 86.1   | 97.9   | 76.5   | 116.3  | 37.2   | 33.1   | 25.1   | 37.2   | 40.1   |
| 294.1  | 287.6  | 221.3  | 224.4  | 73.9   | 106.6  | 88.5   | 108.8  | 331.9  |
| 5.6    | 11.0   | 19.2   | 23.3   | 22.3   | 14.5   | 24.9   | 16.2   | 21.0   |
| 275.6  | 274.1  | 451.8  | 292.9  | 227.4  | 223.8  | 247.0  | 282.4  | 173.4  |
| 417.0  | 448.0  | 324.3  | 302.7  | 1020.4 | 1447.5 | 1041.3 | 1065.8 | 568.4  |
| 48.2   | 59.9   | 38.6   | 51.3   | 27.3   | 48.6   | 26.6   | 22.2   | 44.8   |
| 67.1   | 71.8   | 115.9  | 75.3   | 59.1   | 40.1   | 49.4   | 52.4   | 71.3   |
| 328.3  | 338.1  | 277.6  | 330.1  | 89.1   | 157.1  | 158.9  | 121.7  | 154.1  |
| 369.7  | 320.7  | 460.1  | 332.6  | 261.2  | 314.0  | 286.9  | 300.2  | 345.1  |
| 58.1   | 48.1   | 91.0   | 56.4   | 28.4   | 37.2   | 37.8   | 35.8   | 56.7   |
| 22.4   | 21.7   | 10.5   | 18.4   | 11.9   | 4.2    | 3.7    | 6.3    | 12.0   |
| 17.3   | 8.4    | 35.5   | 15.2   | 17.2   | 9.0    | 23.8   | 18.6   | 34.3   |
| 93.4   | 103.3  | 82.8   | 95.6   | 79.7   | 79.8   | 64.2   | 79.4   | 92.8   |
| 5.8    | 3.4    | 10.5   | 6.3    | 27.2   | 14.6   | 23.6   | 40.1   | 8.1    |
| 16.2   | 14.9   | 5.9    | 12.9   | 9.1    | 10.2   | 13.7   | 11.2   | 21.1   |
| 2.8    | 6.9    | 19.4   | 18.3   | 27.8   | 16.8   | 20.6   | 17.2   | 15.2   |
| 96.5   | 66.4   | 121.5  | 92.3   | 105.9  | 84.6   | 90.1   | 128.9  | 102.5  |
| 451.5  | 536.2  | 566.1  | 416.4  | 23.0   | 24.9   | 35.1   | 28.0   | 56.4   |
| 438.4  | 422.9  | 801.9  | 481.5  | 280.0  | 177.5  | 256.5  | 304.0  | 604.4  |
| 4.4    | 9.1    | 14.8   | 15.8   | 14.5   | 8.4    | 18.9   | 10.5   | 21.8   |
| 2.4    | 6.4    | 11.5   | 9.3    | 12.0   | 4.4    | 14.0   | 13.8   | 3.4    |
| 6.0    | 5.6    | 4.5    | 2.8    | 96.1   | 69.3   | 111.4  | 85.3   | 22.5   |
| 1.7    | 2.2    | 3.9    | 2.4    | 2.5    | 2.9    | 7.2    | 0.6    | 16.6   |
| 367.1  | 392.8  | 479.3  | 375.8  | 886.8  | 764.3  | 808.9  | 821.8  | 907.1  |
| 7.4    | 8.0    | 6.6    | 7.5    | 8.7    | 1.2    | 5.0    | 9.1    | 174.7  |
| 237.0  | 244.7  | 258.2  | 201.0  | 213.0  | 245.1  | 254.9  | 291.1  | 506.5  |
| 1054.3 | 1003.0 | 1820.3 | 945.5  | 0.4    | 3.4    | 0.6    | 0.4    | 0.3    |

|        |        |        |        |        |        |        |        |        |
|--------|--------|--------|--------|--------|--------|--------|--------|--------|
| 32.4   | 33.1   | 26.8   | 31.0   | 8.6    | 10.2   | 6.3    | 12.0   | 8.6    |
| 8.3    | 8.2    | 13.0   | 6.5    | 4.4    | 4.7    | 5.3    | 2.3    | 29.4   |
| 2.0    | 2.9    | 4.8    | 2.8    | 2.2    | 1.0    | 1.3    | 1.7    | 3.1    |
| 13.8   | 17.5   | 9.1    | 11.0   | 32.6   | 44.9   | 46.2   | 34.0   | 29.0   |
| 268.1  | 240.0  | 253.8  | 235.5  | 92.6   | 89.2   | 79.7   | 108.1  | 61.4   |
| 141.5  | 154.5  | 185.0  | 135.8  | 123.3  | 112.7  | 97.8   | 112.4  | 161.6  |
| 3.0    | 1.9    | 1.4    | 1.1    | 3.6    | 4.8    | 9.0    | 10.1   | 1.6    |
| 9.6    | 14.1   | 13.6   | 13.2   | 6.2    | 8.9    | 8.1    | 7.9    | 8.9    |
| 35.1   | 31.3   | 55.0   | 36.7   | 66.4   | 66.1   | 79.8   | 92.9   | 73.5   |
| 219.5  | 190.4  | 331.9  | 227.4  | 258.7  | 226.1  | 350.3  | 274.8  | 509.6  |
| 62.5   | 61.4   | 65.5   | 57.3   | 53.9   | 53.1   | 56.1   | 67.0   | 42.6   |
| 45.2   | 39.9   | 44.3   | 35.8   | 16.8   | 19.7   | 11.6   | 18.1   | 21.4   |
| 42.2   | 45.4   | 46.4   | 43.6   | 50.9   | 41.8   | 45.7   | 58.7   | 120.4  |
| 3.6    | 1.9    | 3.6    | 1.8    | 4.2    | 3.3    | 12.8   | 3.5    | 2.2    |
| 599.1  | 540.2  | 618.2  | 599.2  | 784.6  | 675.2  | 876.9  | 962.0  | 1604.6 |
| 27.7   | 27.8   | 57.0   | 33.7   | 21.3   | 16.6   | 23.5   | 22.1   | 25.3   |
| 9.9    | 13.4   | 3.6    | 9.7    | 183.8  | 209.7  | 200.9  | 208.7  | 145.8  |
| 54.4   | 56.4   | 73.3   | 69.0   | 36.2   | 61.9   | 33.1   | 46.3   | 64.1   |
| 21.5   | 16.4   | 28.9   | 19.4   | 28.1   | 23.7   | 24.6   | 37.1   | 61.6   |
| 246.3  | 223.3  | 510.3  | 234.9  | 544.7  | 398.6  | 418.2  | 517.2  | 1100.6 |
| 36.9   | 45.9   | 59.5   | 53.2   | 11.5   | 8.5    | 9.3    | 10.0   | 14.2   |
| 6.0    | 10.5   | 2.8    | 12.5   | 8.6    | 2.2    | 8.8    | 1.3    | 7.4    |
| 6.0    | 4.7    | 3.1    | 4.0    | 47.2   | 35.1   | 36.1   | 56.6   | 36.9   |
| 71.9   | 79.6   | 84.0   | 67.3   | 3.6    | 12.2   | 4.1    | 1.0    | 12.0   |
| 1.2    | 1.8    | 1.3    | 1.3    | 11.6   | 5.7    | 3.2    | 1.7    | 1.9    |
| 1775.3 | 1624.9 | 2043.1 | 1399.7 | 2355.9 | 2299.2 | 2387.0 | 2659.1 | 3653.5 |
| 111.9  | 77.1   | 255.1  | 97.6   | 627.9  | 457.4  | 620.1  | 743.3  | 761.4  |
| 28.3   | 24.4   | 14.6   | 13.4   | 2.8    | 5.6    | 11.3   | 14.0   | 33.2   |
| 3.8    | 1.6    | 2.0    | 0.8    | 1.3    | 0.8    | 1.1    | 1.1    | 2.1    |
| 22.8   | 26.6   | 61.4   | 23.0   | 273.5  | 152.2  | 266.7  | 305.7  | 66.6   |
| 76.4   | 83.4   | 139.8  | 100.8  | 104.3  | 80.4   | 111.1  | 127.9  | 211.7  |
| 8.1    | 8.3    | 13.9   | 1.6    | 50.2   | 41.1   | 61.6   | 58.4   | 57.4   |
| 13.7   | 14.5   | 10.5   | 17.6   | 19.0   | 19.9   | 35.8   | 29.7   | 3.6    |
| 109.8  | 118.7  | 68.3   | 110.8  | 85.3   | 93.5   | 79.5   | 82.4   | 44.1   |
| 7.8    | 8.9    | 6.1    | 9.9    | 1.9    | 1.9    | 4.1    | 8.1    | 1.6    |
| 3.0    | 5.8    | 4.8    | 0.7    | 2.6    | 5.8    | 1.9    | 1.4    | 5.7    |
| 457.0  | 440.8  | 610.7  | 474.9  | 755.8  | 551.1  | 666.1  | 777.4  | 616.1  |
| 48.8   | 51.4   | 62.8   | 46.8   | 27.3   | 25.5   | 27.6   | 29.6   | 41.2   |
| 15.2   | 16.5   | 16.6   | 17.7   | 10.2   | 7.0    | 10.1   | 13.0   | 21.4   |
| 12.1   | 13.9   | 14.2   | 11.9   | 4.2    | 7.5    | 8.7    | 6.4    | 12.0   |
| 30.7   | 38.9   | 50.5   | 26.2   | 57.4   | 55.8   | 62.6   | 68.6   | 86.8   |
| 2.1    | 1.5    | 2.0    | 1.4    | 1.6    | 2.8    | 2.9    | 1.2    | 1.8    |
| 10.5   | 6.1    | 13.3   | 15.2   | 1.4    | 1.3    | 1.5    | 1.3    | 2.8    |
| 16.1   | 19.5   | 15.9   | 17.9   | 4.9    | 11.9   | 12.0   | 16.3   | 16.1   |
| 53.3   | 47.9   | 73.2   | 76.4   | 65.5   | 53.6   | 79.9   | 87.4   | 32.4   |
| 9.0    | 12.8   | 16.2   | 14.3   | 1.4    | 10.3   | 8.7    | 7.8    | 16.0   |
| 72.3   | 41.3   | 86.2   | 42.1   | 1.6    | 1.9    | 4.4    | 1.8    | 3.2    |
| 1.3    | 3.7    | 1.0    | 2.2    | 14.7   | 25.3   | 13.9   | 16.5   | 5.6    |
| 2.6    | 2.2    | 3.2    | 2.2    | 1.3    | 0.9    | 1.2    | 1.8    | 3.1    |
| 1.7    | 2.0    | 2.4    | 4.2    | 37.0   | 32.6   | 29.0   | 30.9   | 5.3    |
| 13.7   | 13.5   | 17.6   | 14.1   | 13.3   | 18.3   | 16.6   | 21.2   | 44.4   |
| 17.0   | 15.5   | 17.3   | 11.3   | 4.4    | 0.9    | 4.8    | 5.1    | 5.2    |
| 63.9   | 53.0   | 94.6   | 57.6   | 58.6   | 64.4   | 62.7   | 64.0   | 72.5   |



|       |       |       |       |        |        |        |        |        |
|-------|-------|-------|-------|--------|--------|--------|--------|--------|
| 11.4  | 13.4  | 8.8   | 4.3   | 31.8   | 14.2   | 27.3   | 36.9   | 30.0   |
| 100.9 | 82.2  | 105.3 | 76.6  | 272.1  | 226.5  | 283.0  | 336.5  | 129.6  |
| 23.2  | 27.5  | 12.3  | 19.0  | 67.1   | 53.0   | 60.5   | 85.5   | 73.5   |
| 1.0   | 0.7   | 1.4   | 1.3   | 1.3    | 0.9    | 1.2    | 1.0    | 0.9    |
| 46.0  | 43.6  | 41.8  | 40.8  | 8.1    | 11.4   | 8.1    | 18.2   | 29.3   |
| 11.2  | 4.1   | 9.5   | 5.2   | 3.3    | 4.9    | 6.1    | 0.7    | 14.4   |
| 406.6 | 352.3 | 496.4 | 386.7 | 228.5  | 172.6  | 229.8  | 286.3  | 748.2  |
| 12.3  | 8.7   | 21.5  | 16.1  | 23.8   | 8.8    | 24.5   | 26.1   | 14.7   |
| 0.8   | 4.9   | 1.6   | 4.4   | 2.5    | 5.4    | 3.2    | 0.3    | 1.2    |
| 56.4  | 55.1  | 67.1  | 46.9  | 77.5   | 60.3   | 97.1   | 86.4   | 166.6  |
| 7.1   | 5.7   | 8.5   | 3.3   | 3.9    | 6.8    | 4.3    | 6.9    | 14.0   |
| 46.6  | 49.4  | 69.2  | 57.1  | 5.1    | 5.3    | 5.3    | 6.8    | 10.5   |
| 47.3  | 42.3  | 78.0  | 39.9  | 64.6   | 84.1   | 45.1   | 58.0   | 39.4   |
| 0.5   | 1.0   | 2.4   | 3.8   | 1.6    | 0.7    | 1.0    | 4.0    | 2.4    |
| 140.2 | 141.4 | 159.0 | 113.5 | 334.8  | 300.2  | 322.6  | 378.6  | 235.2  |
| 245.6 | 231.8 | 286.6 | 252.7 | 93.1   | 100.2  | 87.6   | 108.7  | 23.2   |
| 377.2 | 304.4 | 636.5 | 330.2 | 1805.4 | 1915.7 | 1690.9 | 1924.2 | 1069.7 |
| 2.5   | 1.7   | 7.9   | 7.0   | 3.9    | 2.0    | 5.7    | 7.9    | 7.6    |
| 19.2  | 31.7  | 24.3  | 16.0  | 29.9   | 30.7   | 28.3   | 30.9   | 40.4   |
| 40.9  | 34.2  | 56.6  | 40.7  | 57.8   | 40.3   | 50.8   | 46.0   | 69.2   |
| 136.6 | 131.5 | 191.2 | 128.7 | 143.5  | 127.4  | 137.0  | 195.4  | 114.3  |
| 43.7  | 43.1  | 42.0  | 52.7  | 23.0   | 16.4   | 22.1   | 23.9   | 36.6   |
| 12.8  | 10.0  | 9.8   | 8.3   | 1.9    | 2.9    | 3.1    | 30.0   | 12.0   |
| 17.0  | 14.3  | 12.2  | 10.9  | 6.1    | 11.3   | 5.1    | 11.0   | 4.3    |
| 668.9 | 664.5 | 744.2 | 662.0 | 1059.6 | 941.0  | 929.8  | 1148.3 | 1633.3 |
| 0.8   | 0.8   | 0.8   | 2.3   | 0.7    | 3.4    | 0.9    | 0.6    | 1.4    |
| 346.6 | 333.2 | 355.2 | 306.9 | 61.6   | 84.1   | 80.0   | 83.3   | 84.9   |
| 3.1   | 1.3   | 2.0   | 4.5   | 2.2    | 1.1    | 3.7    | 7.4    | 6.7    |
| 54.1  | 58.7  | 41.7  | 41.5  | 47.3   | 67.5   | 57.3   | 70.8   | 38.6   |
| 130.5 | 104.6 | 236.1 | 152.9 | 1.7    | 4.2    | 5.4    | 2.6    | 2.6    |
| 3.5   | 18.0  | 16.2  | 11.4  | 10.0   | 9.3    | 5.2    | 16.3   | 15.0   |
| 17.3  | 9.3   | 15.8  | 15.0  | 23.2   | 24.0   | 22.4   | 27.4   | 4.9    |
| 1.7   | 8.0   | 3.0   | 2.8   | 4.1    | 5.8    | 5.1    | 8.9    | 20.7   |
| 26.1  | 27.2  | 13.2  | 29.5  | 10.8   | 4.3    | 13.3   | 13.0   | 17.5   |
| 7.2   | 5.2   | 4.6   | 8.3   | 1.3    | 4.2    | 6.3    | 1.4    | 1.5    |
| 401.3 | 373.2 | 452.5 | 368.1 | 480.3  | 613.5  | 482.2  | 523.3  | 780.2  |
| 1.8   | 2.1   | 4.6   | 1.5   | 2.2    | 0.6    | 1.5    | 1.6    | 2.3    |
| 21.2  | 15.5  | 21.6  | 13.4  | 133.7  | 176.7  | 117.1  | 135.3  | 121.7  |
| 5.9   | 4.8   | 3.1   | 9.3   | 8.5    | 13.5   | 14.9   | 5.3    | 10.1   |
| 3.8   | 5.6   | 2.4   | 0.8   | 6.0    | 4.4    | 3.1    | 4.0    | 7.5    |
| 187.0 | 180.1 | 287.8 | 205.3 | 149.8  | 154.7  | 154.4  | 194.6  | 253.3  |
| 456.6 | 568.0 | 387.2 | 631.8 | 174.7  | 334.6  | 138.6  | 140.3  | 204.3  |
| 48.4  | 42.0  | 39.2  | 43.5  | 24.7   | 23.2   | 27.4   | 41.4   | 38.2   |
| 1.0   | 1.7   | 1.4   | 0.8   | 5.1    | 2.7    | 1.0    | 0.5    | 1.3    |
| 9.0   | 15.8  | 26.3  | 14.3  | 6.9    | 13.2   | 13.0   | 21.3   | 1.8    |
| 15.0  | 13.1  | 28.1  | 19.2  | 8.2    | 8.0    | 8.7    | 6.7    | 12.7   |
| 747.4 | 706.7 | 819.3 | 663.7 | 742.4  | 947.5  | 664.4  | 750.3  | 259.5  |
| 157.5 | 127.1 | 245.0 | 141.5 | 61.9   | 54.9   | 60.6   | 60.6   | 82.4   |
| 108.5 | 115.4 | 186.4 | 106.8 | 8.4    | 3.0    | 13.8   | 2.9    | 82.8   |
| 10.1  | 13.3  | 17.5  | 10.5  | 8.8    | 11.9   | 9.5    | 21.8   | 16.6   |
| 114.0 | 86.4  | 192.9 | 123.8 | 244.8  | 175.5  | 213.3  | 255.7  | 334.7  |
| 1.0   | 2.7   | 1.5   | 0.4   | 62.0   | 35.4   | 92.1   | 50.5   | 73.8   |
| 96.6  | 94.1  | 117.5 | 62.6  | 140.9  | 130.8  | 127.9  | 168.8  | 159.1  |

|        |       |        |       |        |       |        |        |        |
|--------|-------|--------|-------|--------|-------|--------|--------|--------|
| 1105.5 | 834.6 | 1826.1 | 913.1 | 2286.6 | 941.6 | 2098.0 | 2581.2 | 3210.3 |
| 3.7    | 15.5  | 12.4   | 14.2  | 17.3   | 11.5  | 8.6    | 19.5   | 17.7   |
| 3.4    | 1.8   | 6.1    | 0.6   | 0.5    | 5.7   | 0.4    | 3.7    | 12.5   |
| 33.9   | 38.7  | 46.3   | 38.4  | 25.2   | 26.7  | 20.5   | 37.0   | 52.1   |
| 0.9    | 0.7   | 1.3    | 0.6   | 0.4    | 0.6   | 0.4    | 0.8    | 3.5    |
| 0.3    | 1.2   | 1.3    | 1.7   | 4.3    | 1.5   | 2.4    | 0.5    | 2.5    |
| 10.0   | 17.9  | 4.5    | 10.3  | 2.8    | 13.5  | 13.9   | 13.0   | 18.6   |
| 17.9   | 13.6  | 15.4   | 8.6   | 4.9    | 6.1   | 4.8    | 4.5    | 15.4   |
| 3.2    | 10.3  | 14.3   | 2.5   | 0.6    | 3.3   | 1.0    | 1.4    | 9.2    |
| 9.1    | 6.0   | 4.4    | 6.1   | 3.2    | 3.8   | 0.9    | 3.6    | 2.3    |
| 90.3   | 96.1  | 111.5  | 79.9  | 110.6  | 118.5 | 98.8   | 120.1  | 138.2  |
| 17.5   | 14.6  | 27.0   | 9.4   | 32.4   | 23.6  | 36.7   | 18.5   | 10.2   |
| 232.7  | 218.6 | 280.2  | 191.0 | 307.9  | 247.3 | 246.0  | 250.2  | 292.4  |
| 153.3  | 177.0 | 166.5  | 147.9 | 334.3  | 298.9 | 356.5  | 400.0  | 292.9  |
| 7.5    | 17.4  | 12.0   | 16.6  | 2.5    | 5.3   | 6.2    | 8.9    | 23.3   |
| 4.2    | 8.6   | 2.1    | 1.4   | 1.2    | 5.4   | 2.4    | 1.0    | 9.7    |
| 1.7    | 1.9   | 3.0    | 1.3   | 5.7    | 5.9   | 2.1    | 2.3    | 2.6    |
| 8.1    | 6.8   | 7.3    | 1.6   | 4.6    | 4.6   | 5.6    | 6.2    | 11.4   |
| 70.1   | 68.4  | 99.1   | 67.8  | 50.6   | 58.5  | 44.9   | 67.0   | 72.1   |
| 70.5   | 59.6  | 76.1   | 67.1  | 59.6   | 68.6  | 80.2   | 92.1   | 66.9   |
| 94.6   | 94.5  | 96.4   | 70.0  | 65.1   | 63.6  | 79.8   | 87.6   | 98.9   |
| 16.6   | 9.6   | 19.8   | 21.2  | 9.5    | 10.6  | 15.2   | 16.8   | 16.4   |
| 21.0   | 22.8  | 20.9   | 12.4  | 11.5   | 11.1  | 15.8   | 13.9   | 23.9   |
| 1.6    | 6.3   | 9.1    | 2.2   | 11.1   | 6.0   | 9.2    | 8.0    | 11.9   |
| 23.8   | 26.2  | 30.7   | 30.5  | 11.0   | 23.3  | 22.2   | 23.2   | 18.4   |
| 4.2    | 6.3   | 17.7   | 15.7  | 6.1    | 10.6  | 4.3    | 11.9   | 3.4    |
| 133.3  | 129.0 | 170.4  | 119.4 | 178.0  | 163.3 | 139.6  | 196.9  | 130.8  |
| 288.3  | 247.3 | 302.3  | 211.8 | 121.6  | 153.8 | 136.7  | 129.8  | 32.3   |
| 21.8   | 28.8  | 40.4   | 22.1  | 24.6   | 24.5  | 20.5   | 22.3   | 28.9   |
| 611.5  | 559.1 | 695.6  | 573.4 | 651.3  | 595.0 | 612.7  | 744.7  | 482.3  |
| 4.6    | 6.5   | 3.2    | 5.0   | 3.9    | 1.1   | 5.6    | 0.9    | 10.2   |
| 5.3    | 8.9   | 7.4    | 7.5   | 99.6   | 72.0  | 82.6   | 112.7  | 64.1   |
| 0.8    | 0.8   | 0.8    | 1.9   | 0.5    | 3.4   | 0.3    | 1.6    | 3.3    |
| 10.1   | 11.2  | 14.5   | 13.0  | 3.0    | 3.6   | 9.5    | 18.6   | 10.3   |
| 13.1   | 12.1  | 13.8   | 9.1   | 2.7    | 2.8   | 7.0    | 12.0   | 10.2   |
| 19.2   | 19.7  | 12.8   | 13.1  | 15.7   | 10.3  | 14.3   | 9.0    | 10.8   |
| 17.5   | 16.8  | 19.7   | 13.8  | 5.9    | 7.4   | 10.2   | 12.9   | 20.6   |
| 89.6   | 92.1  | 79.1   | 56.7  | 142.6  | 150.7 | 149.5  | 146.7  | 85.0   |
| 5.8    | 3.1   | 1.8    | 5.0   | 5.8    | 5.0   | 4.4    | 7.9    | 3.8    |
| 1.5    | 6.2   | 7.1    | 1.9   | 2.0    | 6.5   | 5.0    | 6.4    | 9.1    |
| 8.7    | 16.3  | 14.3   | 15.2  | 19.0   | 20.4  | 20.0   | 33.4   | 30.1   |
| 24.2   | 22.8  | 32.8   | 20.0  | 21.7   | 21.8  | 22.3   | 25.1   | 34.6   |
| 146.0  | 177.2 | 162.7  | 202.4 | 140.3  | 142.2 | 155.2  | 143.3  | 118.8  |
| 31.6   | 40.9  | 37.9   | 43.5  | 22.9   | 12.2  | 18.5   | 5.3    | 7.7    |
| 1.8    | 1.4   | 2.8    | 4.2   | 8.4    | 7.5   | 8.3    | 11.8   | 7.7    |
| 10.5   | 11.2  | 4.2    | 7.0   | 127.0  | 108.2 | 100.3  | 145.0  | 6.4    |
| 1.6    | 5.1   | 3.5    | 2.2   | 2.4    | 4.9   | 1.3    | 0.8    | 2.3    |
| 27.4   | 22.2  | 25.8   | 20.8  | 18.5   | 19.5  | 21.1   | 27.5   | 18.1   |
| 2.4    | 1.9   | 3.0    | 1.2   | 7.5    | 1.6   | 8.4    | 8.8    | 29.8   |
| 158.8  | 145.9 | 179.8  | 124.2 | 139.9  | 155.8 | 133.2  | 175.5  | 112.7  |
| 8.8    | 2.8   | 5.7    | 1.8   | 3.4    | 3.9   | 3.5    | 9.6    | 5.3    |
| 8.8    | 14.5  | 19.5   | 14.2  | 13.6   | 16.2  | 11.1   | 27.5   | 31.6   |
| 111.6  | 112.6 | 81.3   | 99.1  | 61.2   | 76.4  | 58.2   | 52.3   | 25.5   |

|        |        |        |        |        |        |        |        |        |
|--------|--------|--------|--------|--------|--------|--------|--------|--------|
| 1.9    | 7.5    | 17.7   | 4.9    | 12.4   | 9.7    | 10.6   | 9.9    | 9.3    |
| 4.2    | 5.1    | 4.9    | 3.1    | 3.5    | 2.1    | 7.5    | 8.7    | 8.2    |
| 454.9  | 427.9  | 445.4  | 366.3  | 328.3  | 321.0  | 343.7  | 435.1  | 383.8  |
| 3346.8 | 3098.4 | 4068.0 | 3283.5 | 4156.3 | 3520.5 | 4080.6 | 4471.7 | 5611.7 |
| 41.2   | 39.7   | 42.3   | 38.4   | 54.7   | 41.1   | 32.5   | 45.4   | 1.6    |
| 38.1   | 33.5   | 52.4   | 42.8   | 44.3   | 63.6   | 45.7   | 29.6   | 6.0    |
| 339.7  | 320.1  | 505.5  | 290.3  | 554.6  | 445.8  | 678.2  | 665.5  | 726.0  |
| 8.3    | 5.2    | 15.2   | 6.8    | 13.5   | 10.9   | 15.3   | 13.9   | 22.5   |
| 240.2  | 189.8  | 331.7  | 166.3  | 266.5  | 208.2  | 285.8  | 331.0  | 271.2  |
| 20.8   | 23.4   | 18.1   | 21.2   | 19.3   | 8.1    | 10.2   | 18.1   | 18.4   |
| 8.0    | 6.7    | 7.8    | 7.6    | 23.8   | 18.4   | 20.7   | 21.1   | 4.8    |
| 390.3  | 410.4  | 245.0  | 442.6  | 480.9  | 741.6  | 581.9  | 572.7  | 244.9  |
| 3.2    | 5.7    | 7.3    | 5.8    | 11.4   | 6.4    | 9.6    | 13.1   | 5.6    |
| 329.2  | 318.0  | 443.5  | 301.4  | 446.6  | 377.3  | 447.4  | 489.4  | 582.0  |
| 341.9  | 346.9  | 421.1  | 345.9  | 312.9  | 271.1  | 304.1  | 329.7  | 397.3  |
| 6.1    | 4.2    | 23.6   | 10.0   | 7.1    | 4.1    | 5.0    | 8.8    | 11.6   |
| 10.5   | 2.7    | 12.9   | 7.5    | 9.1    | 8.6    | 6.4    | 1.0    | 8.8    |
| 1.8    | 1.3    | 2.3    | 5.7    | 9.0    | 6.1    | 3.7    | 9.3    | 2.9    |
| 421.9  | 520.9  | 650.2  | 466.2  | 1128.0 | 1277.2 | 968.7  | 1079.8 | 839.2  |
| 4.3    | 2.0    | 4.1    | 3.6    | 3.2    | 0.2    | 3.3    | 2.2    | 122.7  |
| 11.8   | 27.4   | 30.6   | 24.3   | 10.8   | 6.5    | 19.4   | 20.2   | 26.8   |
| 2.8    | 0.6    | 1.5    | 0.7    | 3.6    | 1.3    | 2.0    | 1.9    | 0.8    |
| 3.9    | 2.7    | 5.3    | 3.3    | 2.5    | 5.6    | 8.7    | 2.2    | 51.6   |
| 60.4   | 53.5   | 49.2   | 45.8   | 24.8   | 31.0   | 24.0   | 39.3   | 33.4   |
| 202.0  | 191.5  | 289.6  | 188.6  | 186.0  | 163.6  | 174.5  | 203.2  | 285.3  |
| 65.3   | 60.3   | 89.8   | 65.6   | 101.7  | 63.5   | 77.7   | 123.3  | 104.1  |
| 3.1    | 1.5    | 3.8    | 2.3    | 7.8    | 2.2    | 5.5    | 8.8    | 12.6   |
| 43.7   | 45.1   | 82.9   | 32.1   | 268.4  | 189.4  | 252.7  | 300.9  | 247.9  |
| 11.2   | 5.9    | 15.3   | 5.1    | 83.8   | 38.0   | 79.8   | 92.2   | 160.2  |
| 16.3   | 14.0   | 19.3   | 19.8   | 3.8    | 16.1   | 18.9   | 17.1   | 14.6   |
| 191.2  | 171.5  | 179.6  | 106.4  | 102.6  | 119.5  | 119.1  | 136.6  | 138.9  |
| 2.3    | 2.0    | 2.0    | 1.6    | 3.6    | 2.4    | 1.1    | 0.8    | 2.4    |
| 4.9    | 3.1    | 0.8    | 0.5    | 6.5    | 7.0    | 4.5    | 10.4   | 2.9    |
| 70.3   | 52.7   | 77.3   | 38.7   | 8.9    | 10.3   | 9.5    | 15.1   | 26.5   |
| 52.8   | 41.7   | 54.1   | 25.6   | 37.9   | 32.6   | 42.0   | 43.1   | 28.0   |
| 6.6    | 0.9    | 10.0   | 2.5    | 3.0    | 3.8    | 5.6    | 1.7    | 6.8    |
| 48.7   | 45.2   | 48.2   | 52.1   | 0.8    | 1.7    | 3.4    | 0.7    | 98.8   |
| 10.8   | 16.5   | 26.6   | 11.2   | 9.6    | 13.7   | 12.2   | 16.2   | 26.9   |
| 6.2    | 14.4   | 21.7   | 16.3   | 19.6   | 10.5   | 10.3   | 6.1    | 21.1   |
| 2.2    | 2.0    | 6.8    | 6.0    | 3.8    | 2.5    | 4.0    | 1.6    | 4.9    |
| 88.7   | 77.7   | 137.6  | 83.2   | 72.4   | 67.1   | 57.1   | 80.6   | 179.3  |
| 15.1   | 16.3   | 21.2   | 8.4    | 11.7   | 15.5   | 14.4   | 15.9   | 32.1   |
| 1.0    | 2.1    | 1.4    | 1.0    | 1.0    | 3.6    | 0.8    | 2.4    | 1.8    |
| 1.0    | 0.8    | 1.4    | 1.8    | 2.6    | 2.2    | 7.8    | 3.2    | 9.9    |
| 22.3   | 19.0   | 21.4   | 15.0   | 6.7    | 8.8    | 14.0   | 16.5   | 22.2   |
| 6.2    | 9.2    | 15.3   | 4.7    | 17.0   | 2.4    | 8.3    | 2.0    | 16.8   |
| 1.1    | 1.2    | 0.5    | 2.9    | 2.6    | 0.2    | 1.3    | 1.3    | 3.3    |
| 6.6    | 5.2    | 8.0    | 6.6    | 4.4    | 4.9    | 6.2    | 0.5    | 5.8    |
| 4.9    | 7.9    | 5.1    | 2.6    | 5.4    | 6.6    | 3.0    | 1.7    | 4.5    |
| 7.0    | 5.8    | 8.7    | 7.8    | 7.4    | 7.0    | 13.6   | 11.5   | 14.4   |
| 11.2   | 8.6    | 8.1    | 10.3   | 33.3   | 26.2   | 45.6   | 36.8   | 11.4   |
| 53.4   | 43.7   | 95.4   | 60.1   | 85.3   | 84.8   | 94.9   | 87.1   | 59.9   |
| 18.7   | 15.0   | 15.4   | 11.4   | 7.2    | 9.5    | 8.5    | 8.2    | 6.6    |

|        |        |        |        |        |        |        |        |        |
|--------|--------|--------|--------|--------|--------|--------|--------|--------|
| 1046.6 | 1049.6 | 1160.5 | 985.7  | 1091.8 | 783.1  | 994.6  | 1223.0 | 948.3  |
| 83.2   | 60.7   | 79.9   | 72.6   | 107.5  | 79.4   | 90.1   | 77.1   | 100.7  |
| 6.7    | 18.5   | 14.4   | 3.2    | 6.7    | 5.4    | 11.7   | 10.0   | 4.7    |
| 260.9  | 257.8  | 371.0  | 309.5  | 49.2   | 66.6   | 54.9   | 48.3   | 104.6  |
| 200.1  | 178.7  | 213.0  | 214.0  | 201.7  | 310.5  | 234.3  | 259.2  | 292.9  |
| 1.8    | 1.6    | 4.5    | 2.7    | 20.4   | 12.3   | 16.5   | 11.2   | 43.0   |
| 14.7   | 11.3   | 14.8   | 9.4    | 8.5    | 4.6    | 4.5    | 9.3    | 9.2    |
| 29.5   | 22.7   | 32.8   | 21.3   | 29.0   | 29.0   | 22.9   | 35.5   | 210.7  |
| 7.9    | 9.6    | 21.4   | 7.5    | 1.7    | 5.9    | 6.8    | 9.9    | 6.1    |
| 31.6   | 24.6   | 31.8   | 24.3   | 8.9    | 4.8    | 9.9    | 20.5   | 12.9   |
| 7.2    | 3.5    | 2.7    | 15.0   | 2.0    | 5.1    | 8.3    | 7.3    | 6.3    |
| 54.2   | 51.6   | 53.8   | 59.6   | 32.2   | 35.8   | 19.6   | 26.1   | 67.4   |
| 383.5  | 405.7  | 454.0  | 404.9  | 899.3  | 1140.2 | 1034.3 | 1109.1 | 674.5  |
| 1135.4 | 1541.6 | 704.8  | 1216.7 | 344.9  | 219.3  | 361.4  | 387.9  | 183.9  |
| 2.0    | 1.8    | 4.2    | 1.9    | 0.5    | 0.6    | 0.8    | 5.1    | 6.4    |
| 17.3   | 22.2   | 5.3    | 8.2    | 2.9    | 6.7    | 4.6    | 15.9   | 2.5    |
| 74.0   | 64.3   | 93.6   | 64.3   | 87.6   | 88.4   | 89.8   | 112.7  | 191.8  |
| 8.1    | 7.1    | 21.2   | 19.0   | 9.8    | 26.2   | 14.5   | 24.4   | 35.1   |
| 32.5   | 35.0   | 38.9   | 24.1   | 21.8   | 18.1   | 28.8   | 21.5   | 24.8   |
| 0.7    | 0.9    | 1.1    | 2.3    | 1.8    | 4.7    | 8.5    | 1.1    | 1.7    |
| 381.0  | 314.5  | 777.2  | 276.4  | 50.1   | 77.4   | 66.9   | 83.3   | 336.2  |
| 2.6    | 1.2    | 3.1    | 7.2    | 2.1    | 3.8    | 2.7    | 2.5    | 0.9    |
| 16.7   | 14.8   | 19.3   | 20.7   | 26.9   | 19.9   | 24.8   | 34.3   | 51.4   |
| 31.0   | 38.3   | 24.8   | 27.9   | 14.7   | 20.8   | 16.5   | 21.5   | 15.3   |
| 5.7    | 9.3    | 3.6    | 4.3    | 1.8    | 9.0    | 6.5    | 2.6    | 12.1   |
| 9.1    | 5.1    | 13.2   | 11.3   | 1.7    | 1.3    | 1.1    | 5.3    | 0.7    |
| 66.2   | 63.6   | 64.5   | 63.6   | 17.0   | 24.6   | 22.5   | 7.2    | 30.6   |
| 178.7  | 190.2  | 146.0  | 187.8  | 1027.5 | 894.9  | 904.4  | 1131.1 | 155.6  |
| 778.1  | 792.8  | 1052.2 | 757.6  | 358.8  | 398.4  | 439.7  | 453.8  | 123.7  |
| 2.5    | 0.6    | 1.4    | 0.6    | 0.9    | 0.4    | 2.0    | 4.3    | 0.6    |
| 69.0   | 86.1   | 58.3   | 73.6   | 33.7   | 58.5   | 45.1   | 59.4   | 46.1   |
| 10.0   | 6.4    | 6.1    | 10.6   | 2.7    | 1.0    | 4.1    | 4.0    | 2.8    |
| 11.5   | 7.3    | 4.5    | 12.7   | 4.5    | 3.8    | 4.6    | 1.4    | 2.5    |
| 79.1   | 107.5  | 90.8   | 81.2   | 69.6   | 80.2   | 87.4   | 78.7   | 40.8   |
| 162.1  | 170.8  | 170.1  | 178.9  | 62.1   | 83.2   | 44.9   | 81.8   | 85.6   |
| 34.2   | 30.6   | 17.2   | 24.9   | 15.8   | 17.8   | 18.8   | 13.5   | 18.7   |
| 2.5    | 2.6    | 16.9   | 1.7    | 2.2    | 4.0    | 10.6   | 12.6   | 8.6    |
| 18.8   | 13.3   | 39.2   | 19.1   | 5.0    | 1.2    | 1.2    | 2.1    | 3.8    |
| 7.9    | 4.1    | 15.0   | 3.4    | 3.4    | 0.8    | 7.3    | 0.8    | 3.5    |
| 4.7    | 4.2    | 2.3    | 0.5    | 5.3    | 5.6    | 0.8    | 4.5    | 4.9    |
| 7.3    | 8.9    | 13.5   | 6.4    | 10.9   | 9.6    | 23.0   | 14.3   | 34.9   |
| 59.2   | 48.3   | 105.1  | 65.0   | 80.3   | 47.0   | 62.7   | 82.0   | 105.6  |
| 71.6   | 71.0   | 126.1  | 73.7   | 137.0  | 117.2  | 140.5  | 126.1  | 237.9  |
| 20.1   | 18.3   | 15.3   | 21.3   | 18.7   | 13.9   | 18.0   | 19.6   | 22.8   |
| 2.1    | 2.3    | 1.4    | 1.2    | 3.9    | 2.3    | 0.8    | 0.9    | 2.9    |
| 119.3  | 147.1  | 167.4  | 89.8   | 340.5  | 144.1  | 420.6  | 346.3  | 1190.0 |
| 0.7    | 1.0    | 1.0    | 1.6    | 0.6    | 0.6    | 1.0    | 1.2    | 1.1    |
| 5.2    | 12.6   | 3.7    | 0.9    | 3.7    | 5.9    | 7.9    | 10.0   | 9.3    |
| 295.9  | 261.2  | 356.0  | 241.1  | 166.1  | 136.7  | 93.7   | 145.4  | 211.9  |
| 125.6  | 115.4  | 153.3  | 124.8  | 126.0  | 125.6  | 117.8  | 156.4  | 107.6  |
| 12.1   | 5.3    | 11.6   | 5.5    | 9.7    | 6.1    | 8.6    | 8.6    | 12.8   |
| 48.0   | 34.8   | 34.6   | 26.8   | 28.3   | 26.3   | 29.1   | 29.2   | 53.3   |
| 7.2    | 11.3   | 11.2   | 11.8   | 10.5   | 20.1   | 12.1   | 8.5    | 14.2   |

|        |        |        |        |        |        |        |        |        |
|--------|--------|--------|--------|--------|--------|--------|--------|--------|
| 1.7    | 2.2    | 5.5    | 2.0    | 1.7    | 1.5    | 5.1    | 13.7   | 12.1   |
| 75.5   | 81.8   | 74.3   | 59.8   | 25.2   | 15.6   | 27.4   | 39.8   | 44.7   |
| 84.6   | 84.1   | 94.7   | 77.6   | 104.5  | 132.3  | 119.8  | 133.3  | 115.3  |
| 5.0    | 3.3    | 3.6    | 2.1    | 1.3    | 3.4    | 1.7    | 8.9    | 1.8    |
| 55.7   | 52.0   | 34.5   | 46.2   | 33.9   | 32.1   | 31.1   | 40.9   | 10.8   |
| 0.7    | 3.5    | 1.4    | 2.0    | 378.8  | 511.6  | 455.9  | 523.7  | 296.0  |
| 3.5    | 2.5    | 5.5    | 4.9    | 3.6    | 5.2    | 5.3    | 1.9    | 6.1    |
| 9.3    | 2.4    | 5.6    | 6.5    | 6.3    | 1.4    | 1.9    | 9.8    | 2.4    |
| 54.2   | 49.9   | 67.6   | 42.9   | 95.6   | 116.9  | 104.5  | 92.2   | 85.3   |
| 1.6    | 2.1    | 2.1    | 2.7    | 1.1    | 1.2    | 1.0    | 1.3    | 1.7    |
| 5.4    | 1.1    | 6.8    | 2.7    | 1.2    | 3.7    | 4.3    | 3.9    | 13.5   |
| 5.4    | 2.1    | 21.5   | 11.2   | 15.1   | 6.5    | 12.1   | 8.1    | 19.6   |
| 57.1   | 68.7   | 73.8   | 59.7   | 41.9   | 49.8   | 39.5   | 30.0   | 61.4   |
| 17.2   | 12.6   | 24.2   | 16.4   | 18.6   | 10.3   | 20.8   | 17.5   | 22.1   |
| 10.0   | 16.9   | 13.2   | 14.5   | 4.1    | 1.8    | 5.7    | 14.8   | 11.3   |
| 7.9    | 10.4   | 28.7   | 23.3   | 8.1    | 11.8   | 7.5    | 9.6    | 10.2   |
| 11.1   | 11.9   | 14.1   | 13.7   | 47.0   | 66.4   | 62.9   | 69.1   | 29.9   |
| 0.9    | 3.1    | 1.3    | 1.5    | 3.2    | 3.4    | 0.8    | 6.8    | 5.6    |
| 4.6    | 6.6    | 8.6    | 4.7    | 4.9    | 5.0    | 5.7    | 9.9    | 20.5   |
| 1.0    | 2.1    | 1.5    | 1.1    | 0.8    | 2.6    | 4.9    | 1.2    | 3.3    |
| 6.7    | 3.8    | 2.7    | 6.0    | 4.7    | 9.7    | 8.9    | 9.6    | 10.4   |
| 51.3   | 38.7   | 50.9   | 37.8   | 32.9   | 28.1   | 39.9   | 42.1   | 61.4   |
| 20.6   | 18.5   | 18.4   | 23.2   | 34.4   | 21.7   | 24.6   | 43.1   | 3.0    |
| 7.8    | 14.4   | 12.2   | 5.6    | 7.2    | 2.0    | 3.0    | 7.9    | 9.8    |
| 32.9   | 33.2   | 28.6   | 36.2   | 4.9    | 8.1    | 7.9    | 9.7    | 16.2   |
| 23.2   | 14.1   | 28.1   | 23.1   | 22.5   | 15.3   | 16.8   | 8.5    | 30.7   |
| 265.9  | 235.5  | 235.3  | 238.8  | 216.7  | 240.6  | 272.4  | 210.2  | 148.5  |
| 13.7   | 13.3   | 7.6    | 10.1   | 19.9   | 16.9   | 21.9   | 21.9   | 14.6   |
| 9.7    | 14.3   | 12.1   | 17.0   | 6.1    | 9.9    | 7.2    | 10.4   | 16.4   |
| 648.5  | 734.3  | 351.6  | 605.1  | 901.9  | 1367.1 | 670.0  | 1138.5 | 122.5  |
| 10.4   | 6.3    | 8.5    | 6.5    | 25.1   | 13.6   | 20.8   | 18.9   | 41.4   |
| 326.6  | 309.3  | 428.0  | 301.8  | 156.4  | 134.8  | 125.6  | 159.4  | 264.7  |
| 2.6    | 3.7    | 5.1    | 5.9    | 3.0    | 4.4    | 5.1    | 1.7    | 5.0    |
| 177.2  | 149.3  | 239.1  | 148.8  | 316.5  | 260.8  | 355.6  | 371.7  | 527.3  |
| 3.5    | 4.2    | 1.2    | 1.3    | 2.4    | 6.0    | 33.7   | 9.3    | 1.5    |
| 3.6    | 4.6    | 1.2    | 2.4    | 1.3    | 5.2    | 4.1    | 0.9    | 1.8    |
| 4.0    | 3.4    | 3.7    | 3.3    | 2.5    | 4.3    | 6.7    | 5.3    | 9.5    |
| 46.0   | 39.8   | 38.8   | 46.9   | 43.0   | 59.8   | 48.1   | 45.7   | 42.3   |
| 1.2    | 5.9    | 4.4    | 3.2    | 5.5    | 4.0    | 5.5    | 4.2    | 6.3    |
| 9.4    | 3.2    | 8.0    | 5.4    | 8.3    | 12.2   | 5.5    | 1.0    | 4.2    |
| 18.2   | 18.1   | 24.0   | 14.8   | 26.8   | 29.5   | 33.5   | 19.8   | 28.1   |
| 4.0    | 8.3    | 7.0    | 1.0    | 6.0    | 2.8    | 0.6    | 0.8    | 3.2    |
| 208.9  | 232.0  | 215.9  | 158.4  | 464.3  | 541.4  | 522.1  | 557.6  | 211.3  |
| 12.9   | 8.3    | 20.7   | 12.2   | 13.3   | 7.2    | 2.3    | 1.9    | 4.4    |
| 3.7    | 4.1    | 2.3    | 2.2    | 0.7    | 3.4    | 3.1    | 0.5    | 2.0    |
| 11.5   | 12.7   | 25.4   | 9.9    | 24.5   | 22.2   | 29.8   | 19.7   | 32.1   |
| 1473.4 | 1329.1 | 1772.8 | 1304.6 | 622.9  | 619.4  | 755.9  | 1050.6 | 1633.2 |
| 282.2  | 257.2  | 351.0  | 270.0  | 488.0  | 474.8  | 397.5  | 553.2  | 479.9  |
| 401.3  | 367.4  | 597.0  | 447.4  | 228.5  | 162.2  | 239.6  | 295.3  | 344.1  |
| 1346.1 | 1201.4 | 2057.8 | 1538.4 | 1787.4 | 1970.3 | 1928.2 | 2010.6 | 2838.0 |
| 8.3    | 5.4    | 3.5    | 1.9    | 19.3   | 26.4   | 23.7   | 32.4   | 40.1   |
| 106.0  | 107.4  | 184.1  | 104.9  | 186.6  | 150.7  | 220.0  | 226.2  | 140.5  |
| 1.7    | 3.2    | 4.7    | 3.9    | 3.8    | 1.3    | 2.0    | 4.2    | 2.3    |

|        |        |        |        |        |        |        |        |        |
|--------|--------|--------|--------|--------|--------|--------|--------|--------|
| 4.1    | 3.2    | 4.6    | 3.7    | 9.2    | 10.8   | 11.4   | 10.0   | 9.1    |
| 47.4   | 48.8   | 33.0   | 27.4   | 1463.7 | 1325.4 | 1574.2 | 1672.3 | 1959.5 |
| 5.4    | 1.2    | 5.6    | 6.6    | 1.8    | 4.2    | 3.1    | 1.1    | 3.9    |
| 10.0   | 15.5   | 10.0   | 18.7   | 4.3    | 4.8    | 7.7    | 3.2    | 21.2   |
| 83.1   | 77.5   | 110.0  | 71.1   | 122.0  | 154.8  | 123.4  | 154.4  | 74.0   |
| 23.0   | 22.9   | 27.2   | 15.3   | 16.4   | 12.0   | 16.9   | 24.8   | 21.8   |
| 0.5    | 0.8    | 0.9    | 3.7    | 2.1    | 0.4    | 1.2    | 0.5    | 1.4    |
| 6.5    | 11.9   | 2.9    | 4.6    | 0.8    | 1.7    | 8.4    | 0.4    | 7.5    |
| 1.3    | 1.7    | 9.4    | 0.8    | 5.5    | 0.7    | 3.6    | 1.5    | 1.5    |
| 8.4    | 4.7    | 7.8    | 1.5    | 1.1    | 4.7    | 5.9    | 2.5    | 5.0    |
| 2.4    | 5.7    | 3.5    | 2.1    | 5.8    | 4.0    | 2.4    | 1.8    | 4.2    |
| 1.8    | 0.9    | 1.1    | 1.4    | 1.9    | 6.7    | 2.4    | 0.7    | 5.7    |
| 0.6    | 0.5    | 0.6    | 0.6    | 0.8    | 1.0    | 3.1    | 4.3    | 3.4    |
| 810.1  | 726.8  | 1194.0 | 792.8  | 2.0    | 1.9    | 1.8    | 0.2    | 0.3    |
| 20.6   | 20.3   | 13.1   | 20.0   | 12.4   | 11.9   | 13.2   | 12.6   | 21.3   |
| 0.7    | 0.6    | 2.5    | 1.3    | 0.7    | 0.8    | 1.3    | 1.7    | 2.9    |
| 1539.3 | 1589.5 | 1478.3 | 1640.1 | 1532.0 | 1885.4 | 1096.4 | 1579.8 | 2462.6 |
| 2.7    | 3.0    | 1.9    | 2.1    | 1.6    | 1.7    | 1.8    | 3.1    | 1.3    |
| 106.7  | 97.0   | 211.5  | 127.3  | 330.7  | 371.7  | 324.8  | 344.0  | 372.0  |
| 7.1    | 7.4    | 9.4    | 7.6    | 6.0    | 10.2   | 11.2   | 11.9   | 18.7   |
| 13.4   | 8.3    | 15.2   | 21.9   | 1.4    | 2.4    | 4.6    | 2.8    | 12.3   |
| 32.0   | 34.0   | 21.8   | 22.1   | 292.8  | 252.0  | 290.5  | 319.9  | 175.5  |
| 4.7    | 0.6    | 2.3    | 3.5    | 1.2    | 1.0    | 2.5    | 0.9    | 4.6    |
| 5.5    | 1.7    | 4.6    | 6.0    | 4.8    | 3.3    | 1.3    | 0.6    | 9.9    |
| 1.3    | 2.3    | 2.0    | 1.3    | 1.3    | 1.5    | 1.1    | 1.5    | 2.0    |
| 3.0    | 8.5    | 0.9    | 0.8    | 16.1   | 12.1   | 14.2   | 19.4   | 12.5   |
| 23.0   | 28.4   | 3.7    | 15.4   | 9.8    | 12.3   | 9.7    | 17.5   | 7.6    |
| 7.6    | 5.4    | 7.2    | 4.7    | 4.4    | 3.0    | 3.0    | 3.9    | 6.5    |
| 33.9   | 41.1   | 35.6   | 37.1   | 22.8   | 40.2   | 24.0   | 33.8   | 28.2   |
| 9.6    | 8.2    | 8.4    | 6.3    | 14.5   | 21.9   | 5.3    | 10.5   | 27.0   |
| 47.2   | 51.1   | 7.1    | 7.1    | 350.1  | 238.9  | 478.5  | 481.4  | 8.3    |
| 11.5   | 7.5    | 16.9   | 12.7   | 8.2    | 11.7   | 6.4    | 11.9   | 19.7   |
| 485.9  | 504.9  | 501.7  | 317.6  | 940.4  | 727.9  | 976.7  | 1032.8 | 558.4  |
| 43.1   | 37.7   | 72.1   | 43.0   | 21.4   | 16.5   | 20.9   | 18.7   | 45.3   |
| 7.6    | 11.2   | 15.1   | 12.2   | 7.0    | 5.8    | 9.6    | 14.1   | 16.3   |
| 30.8   | 34.5   | 46.9   | 36.7   | 40.9   | 59.4   | 56.2   | 71.0   | 41.3   |
| 28.2   | 15.5   | 34.7   | 33.7   | 34.9   | 40.7   | 34.2   | 46.1   | 44.6   |
| 37.3   | 36.6   | 18.5   | 27.4   | 7.7    | 9.2    | 6.7    | 12.9   | 9.3    |
| 10.2   | 6.2    | 9.7    | 7.7    | 5.9    | 2.7    | 7.4    | 6.1    | 5.3    |
| 15.4   | 15.1   | 16.4   | 16.2   | 55.3   | 45.3   | 49.6   | 53.1   | 80.8   |
| 16.8   | 13.6   | 19.0   | 12.4   | 17.4   | 6.9    | 4.3    | 10.7   | 8.5    |
| 262.2  | 230.3  | 629.9  | 304.3  | 752.3  | 789.9  | 861.2  | 908.5  | 964.7  |
| 4.4    | 2.7    | 17.2   | 3.9    | 6.3    | 3.8    | 2.4    | 4.5    | 9.7    |
| 28.8   | 24.2   | 35.4   | 27.5   | 30.6   | 39.5   | 32.3   | 21.8   | 21.8   |
| 5.5    | 8.1    | 3.1    | 8.8    | 8.0    | 7.0    | 6.3    | 11.4   | 6.1    |
| 2.1    | 2.1    | 2.3    | 5.3    | 1.7    | 1.9    | 2.4    | 3.0    | 4.9    |
| 17.5   | 3.0    | 2.9    | 5.8    | 4.2    | 5.7    | 1.0    | 9.6    | 2.6    |
| 1.9    | 1.1    | 1.9    | 1.6    | 3.9    | 4.4    | 3.9    | 2.2    | 5.2    |
| 2.7    | 5.0    | 2.3    | 8.3    | 75.7   | 81.1   | 50.0   | 73.2   | 61.9   |
| 1.3    | 1.7    | 1.7    | 1.2    | 1.6    | 1.2    | 3.7    | 1.1    | 3.2    |
| 95.7   | 68.7   | 532.2  | 250.2  | 199.5  | 107.6  | 331.9  | 325.1  | 1.6    |
| 15.0   | 12.3   | 17.4   | 18.1   | 33.6   | 44.1   | 37.2   | 28.5   | 13.2   |
| 4.1    | 5.7    | 15.5   | 15.3   | 7.6    | 3.1    | 9.1    | 4.0    | 7.9    |

|        |        |        |        |        |        |        |        |        |
|--------|--------|--------|--------|--------|--------|--------|--------|--------|
| 60.2   | 57.4   | 88.2   | 51.7   | 117.9  | 189.3  | 120.1  | 126.1  | 105.9  |
| 3.4    | 6.2    | 6.6    | 2.4    | 8.1    | 6.3    | 11.5   | 9.8    | 27.1   |
| 15.0   | 9.6    | 21.2   | 6.8    | 65.8   | 54.1   | 64.4   | 78.5   | 34.9   |
| 0.7    | 0.8    | 5.1    | 0.9    | 4.8    | 2.1    | 6.6    | 10.8   | 1.1    |
| 3.2    | 9.5    | 9.4    | 13.4   | 0.5    | 3.9    | 6.1    | 1.2    | 2.2    |
| 2.9    | 2.4    | 3.4    | 2.4    | 3.2    | 1.7    | 2.4    | 2.2    | 2.3    |
| 20.0   | 15.4   | 21.7   | 20.2   | 19.0   | 13.4   | 9.9    | 12.5   | 8.7    |
| 23.8   | 42.8   | 13.5   | 6.6    | 19.0   | 12.2   | 3.9    | 4.3    | 38.4   |
| 34.4   | 31.2   | 39.8   | 36.3   | 28.8   | 19.8   | 24.8   | 28.3   | 35.0   |
| 5506.4 | 5387.8 | 5797.6 | 5306.5 | 5238.5 | 5490.9 | 5373.4 | 5571.1 | 6200.1 |
| 465.5  | 490.7  | 519.7  | 435.8  | 348.0  | 284.9  | 313.5  | 403.7  | 510.2  |
| 46.8   | 41.9   | 62.4   | 49.3   | 45.7   | 39.6   | 37.3   | 35.3   | 67.5   |
| 104.3  | 94.1   | 112.9  | 116.5  | 446.5  | 511.3  | 486.9  | 584.4  | 644.1  |
| 1.9    | 1.2    | 2.4    | 1.9    | 0.9    | 0.8    | 1.5    | 1.1    | 1.4    |
| 21.8   | 15.3   | 17.3   | 19.5   | 9.1    | 6.3    | 3.4    | 9.4    | 5.2    |
| 0.9    | 1.1    | 2.5    | 2.1    | 5.2    | 3.0    | 2.3    | 1.3    | 1.5    |
| 6.7    | 0.3    | 4.7    | 4.2    | 1.6    | 1.5    | 2.1    | 0.7    | 4.1    |
| 399.5  | 386.6  | 655.5  | 382.9  | 575.9  | 459.5  | 622.4  | 645.1  | 829.5  |
| 1.3    | 1.2    | 1.4    | 1.4    | 1.0    | 1.1    | 0.6    | 1.2    | 3.5    |
| 26.8   | 23.7   | 29.9   | 20.8   | 30.2   | 32.2   | 28.5   | 40.4   | 29.4   |
| 1.4    | 1.2    | 1.2    | 6.1    | 1.5    | 0.5    | 3.5    | 6.0    | 5.8    |
| 34.0   | 32.3   | 17.2   | 23.8   | 5.1    | 11.0   | 9.0    | 1.5    | 14.4   |
| 16.1   | 15.5   | 27.4   | 9.0    | 24.8   | 17.7   | 24.2   | 30.0   | 29.2   |
| 786.4  | 684.2  | 1225.7 | 793.2  | 1683.6 | 1112.5 | 1807.2 | 1837.4 | 2217.8 |
| 0.6    | 0.3    | 0.2    | 1.7    | 221.5  | 239.0  | 234.6  | 289.7  | 0.5    |
| 5.7    | 5.9    | 11.3   | 3.3    | 9.0    | 8.9    | 7.5    | 10.2   | 8.9    |
| 5.3    | 1.2    | 8.7    | 3.3    | 1.5    | 4.6    | 0.8    | 2.8    | 3.4    |
| 4.4    | 5.6    | 5.1    | 4.7    | 12.0   | 7.6    | 16.4   | 9.8    | 21.0   |
| 0.9    | 1.4    | 3.8    | 1.6    | 1.0    | 0.9    | 2.6    | 1.1    | 3.9    |
| 71.1   | 67.9   | 94.4   | 43.3   | 417.3  | 432.2  | 307.9  | 378.3  | 606.4  |
| 92.1   | 81.3   | 107.3  | 101.7  | 27.3   | 20.8   | 51.4   | 51.7   | 27.7   |
| 189.5  | 198.0  | 203.0  | 233.5  | 187.6  | 147.0  | 151.6  | 208.0  | 237.5  |
| 3.4    | 9.7    | 2.8    | 5.7    | 6.5    | 7.9    | 7.5    | 2.5    | 1.5    |
| 6.0    | 0.9    | 4.1    | 3.5    | 24.9   | 20.8   | 30.7   | 22.4   | 2.5    |
| 45.5   | 40.3   | 73.2   | 36.3   | 83.1   | 70.2   | 66.0   | 88.5   | 64.7   |
| 11.2   | 12.0   | 7.6    | 14.0   | 1.0    | 4.1    | 9.7    | 4.9    | 13.9   |
| 11.9   | 4.2    | 5.0    | 5.9    | 2.3    | 2.4    | 4.6    | 9.8    | 4.5    |
| 47.1   | 48.2   | 68.0   | 57.4   | 19.3   | 23.1   | 12.9   | 4.9    | 17.0   |
| 28.1   | 31.6   | 37.5   | 32.7   | 13.9   | 13.0   | 19.3   | 7.7    | 19.5   |
| 2.4    | 5.3    | 5.3    | 6.1    | 2.0    | 5.7    | 2.6    | 6.1    | 6.5    |
| 7.3    | 1.9    | 7.0    | 5.3    | 2.7    | 1.3    | 1.1    | 1.4    | 7.9    |
| 21.2   | 19.0   | 26.4   | 21.5   | 139.4  | 147.4  | 403.5  | 169.0  | 11.5   |
| 16.3   | 19.3   | 21.3   | 14.9   | 10.3   | 6.7    | 9.3    | 9.9    | 17.4   |
| 19.0   | 19.1   | 22.4   | 17.7   | 5.8    | 11.0   | 13.2   | 14.9   | 9.7    |
| 8.8    | 9.0    | 3.0    | 7.1    | 1.1    | 0.4    | 1.3    | 0.5    | 0.6    |
| 40.5   | 37.0   | 47.5   | 74.3   | 83.6   | 70.1   | 84.5   | 100.5  | 1905.6 |
| 1.5    | 1.6    | 2.5    | 0.9    | 13.0   | 7.0    | 2.7    | 1.9    | 2.9    |
| 27.0   | 24.6   | 35.9   | 18.7   | 140.9  | 135.8  | 141.7  | 165.8  | 59.4   |
| 9.9    | 7.4    | 6.5    | 2.0    | 10.0   | 1.8    | 10.4   | 18.2   | 14.9   |
| 0.7    | 6.5    | 4.3    | 0.9    | 3.0    | 2.3    | 3.9    | 1.4    | 1.7    |
| 6.3    | 5.4    | 4.1    | 4.9    | 41.1   | 23.2   | 21.0   | 39.9   | 30.5   |
| 5.3    | 2.4    | 2.6    | 0.7    | 3.6    | 3.4    | 5.5    | 1.1    | 3.1    |
| 6.0    | 5.5    | 6.2    | 11.8   | 2.6    | 6.5    | 6.1    | 7.1    | 2.3    |

|        |        |        |        |       |       |       |       |        |
|--------|--------|--------|--------|-------|-------|-------|-------|--------|
| 2.9    | 5.1    | 5.8    | 9.8    | 2.4   | 4.0   | 5.3   | 1.7   | 1.0    |
| 3.1    | 5.4    | 5.7    | 2.8    | 2.3   | 3.8   | 2.2   | 2.6   | 4.2    |
| 11.6   | 14.3   | 15.2   | 17.0   | 14.7  | 13.5  | 12.6  | 14.2  | 48.0   |
| 8.3    | 6.4    | 10.8   | 10.6   | 10.9  | 6.3   | 2.6   | 5.6   | 9.9    |
| 3.5    | 10.2   | 23.5   | 20.4   | 4.9   | 12.6  | 14.5  | 9.4   | 2.7    |
| 16.0   | 15.8   | 17.4   | 9.9    | 17.7  | 25.2  | 17.9  | 19.4  | 20.3   |
| 88.9   | 77.4   | 144.5  | 69.0   | 160.8 | 94.4  | 157.0 | 204.7 | 216.0  |
| 6.9    | 4.3    | 16.4   | 11.0   | 2.8   | 3.9   | 11.3  | 12.7  | 24.6   |
| 5.9    | 2.7    | 6.9    | 6.0    | 4.8   | 8.8   | 4.8   | 5.2   | 3.9    |
| 393.4  | 417.7  | 395.5  | 290.2  | 282.7 | 256.6 | 299.9 | 358.7 | 499.5  |
| 1.2    | 1.9    | 3.6    | 2.2    | 1.2   | 1.3   | 3.8   | 0.9   | 2.4    |
| 5.9    | 3.4    | 1.9    | 6.8    | 2.7   | 2.2   | 2.2   | 1.4   | 4.1    |
| 4.9    | 6.5    | 3.9    | 9.0    | 2.0   | 3.7   | 4.7   | 3.4   | 1.1    |
| 3.8    | 3.7    | 6.6    | 9.9    | 5.1   | 6.3   | 2.8   | 9.1   | 5.7    |
| 28.8   | 37.9   | 80.1   | 51.3   | 38.5  | 42.3  | 33.9  | 37.3  | 88.8   |
| 3.5    | 8.6    | 0.9    | 3.9    | 6.4   | 2.5   | 1.8   | 0.6   | 10.1   |
| 5.4    | 5.3    | 6.1    | 10.1   | 7.1   | 3.6   | 17.4  | 9.4   | 13.4   |
| 33.3   | 21.9   | 80.8   | 35.1   | 82.1  | 78.6  | 68.2  | 120.6 | 55.0   |
| 8.8    | 0.5    | 7.5    | 9.3    | 10.2  | 6.6   | 1.3   | 15.3  | 10.4   |
| 63.6   | 59.9   | 60.7   | 55.3   | 105.6 | 98.5  | 95.3  | 117.2 | 131.7  |
| 11.6   | 14.1   | 31.2   | 21.3   | 26.9  | 23.6  | 30.9  | 24.6  | 33.5   |
| 140.3  | 173.6  | 190.2  | 140.0  | 257.1 | 164.9 | 225.3 | 222.1 | 296.3  |
| 70.0   | 53.4   | 124.0  | 55.5   | 204.1 | 187.6 | 186.4 | 200.9 | 399.4  |
| 87.4   | 95.0   | 103.0  | 106.4  | 15.0  | 5.2   | 16.0  | 14.7  | 57.6   |
| 1.3    | 0.7    | 6.5    | 2.8    | 6.3   | 1.3   | 7.1   | 7.6   | 5.6    |
| 5.1    | 7.7    | 10.0   | 13.0   | 8.7   | 4.6   | 8.2   | 5.2   | 6.5    |
| 684.6  | 656.2  | 994.3  | 676.4  | 697.8 | 737.3 | 689.6 | 734.0 | 839.1  |
| 4.1    | 4.9    | 3.3    | 5.9    | 2.5   | 2.7   | 4.6   | 7.0   | 15.3   |
| 0.4    | 2.7    | 0.7    | 0.5    | 3.9   | 3.2   | 3.6   | 1.0   | 1.2    |
| 2131.9 | 2128.1 | 3394.7 | 2551.7 | 817.5 | 921.3 | 845.2 | 794.2 | 4465.9 |
| 1.5    | 3.6    | 1.2    | 4.5    | 1.8   | 2.0   | 1.2   | 0.1   | 0.7    |
| 21.3   | 14.7   | 19.7   | 18.1   | 16.5  | 10.4  | 17.0  | 32.5  | 33.3   |
| 2.7    | 0.8    | 4.1    | 3.3    | 20.8  | 9.4   | 19.4  | 21.8  | 28.1   |
| 8.8    | 8.0    | 6.2    | 12.0   | 2.7   | 6.1   | 3.1   | 15.7  | 10.2   |
| 791.6  | 812.8  | 724.1  | 642.0  | 452.9 | 429.6 | 500.6 | 519.7 | 331.0  |
| 218.0  | 201.6  | 287.3  | 190.5  | 681.9 | 655.6 | 812.8 | 748.0 | 311.1  |
| 10.2   | 13.3   | 17.4   | 14.1   | 17.9  | 17.4  | 18.9  | 20.8  | 13.9   |
| 23.0   | 22.4   | 31.3   | 22.1   | 24.9  | 39.6  | 24.5  | 26.7  | 30.6   |
| 79.5   | 66.5   | 120.2  | 54.4   | 39.5  | 42.7  | 44.7  | 52.2  | 73.5   |
| 1.4    | 3.4    | 5.0    | 3.1    | 10.4  | 10.8  | 9.2   | 13.5  | 38.3   |
| 3.6    | 6.9    | 3.5    | 0.9    | 18.9  | 30.7  | 24.6  | 24.4  | 20.4   |
| 15.9   | 15.0   | 11.9   | 16.0   | 39.8  | 37.5  | 33.2  | 34.2  | 8.1    |
| 10.9   | 10.5   | 13.2   | 14.5   | 26.3  | 21.5  | 25.4  | 29.0  | 249.0  |
| 10.2   | 10.4   | 10.2   | 13.4   | 12.3  | 5.4   | 4.1   | 3.1   | 17.5   |
| 434.8  | 428.5  | 522.2  | 378.7  | 569.4 | 436.7 | 558.9 | 626.6 | 515.3  |
| 18.3   | 15.6   | 22.8   | 8.0    | 16.5  | 10.8  | 17.2  | 12.5  | 15.9   |
| 14.8   | 20.6   | 17.5   | 8.4    | 30.0  | 38.7  | 32.7  | 32.2  | 11.4   |
| 18.6   | 17.2   | 12.7   | 20.3   | 11.8  | 4.4   | 13.3  | 9.2   | 5.2    |
| 5.4    | 6.1    | 5.1    | 7.1    | 2.9   | 5.0   | 4.2   | 9.7   | 3.2    |
| 10.4   | 6.3    | 7.5    | 9.0    | 2.6   | 5.2   | 5.2   | 8.3   | 19.6   |
| 10.6   | 9.1    | 4.7    | 12.0   | 3.4   | 2.7   | 2.1   | 2.8   | 8.7    |
| 16.8   | 17.8   | 7.7    | 11.5   | 13.6  | 20.7  | 17.5  | 20.8  | 34.2   |
| 109.1  | 98.4   | 97.7   | 83.4   | 93.6  | 144.1 | 105.5 | 115.5 | 394.4  |



|       |       |       |       |       |       |       |       |       |
|-------|-------|-------|-------|-------|-------|-------|-------|-------|
| 11.7  | 4.6   | 3.1   | 5.6   | 8.1   | 4.8   | 6.9   | 2.0   | 15.0  |
| 11.9  | 9.5   | 3.2   | 15.8  | 7.2   | 4.4   | 10.9  | 2.2   | 15.7  |
| 12.5  | 13.0  | 10.4  | 13.9  | 12.6  | 10.1  | 5.5   | 5.8   | 18.3  |
| 1.6   | 1.8   | 1.4   | 0.8   | 4.3   | 5.9   | 4.3   | 0.8   | 5.0   |
| 3.3   | 10.4  | 6.7   | 9.5   | 9.2   | 8.5   | 8.3   | 1.6   | 66.6  |
| 7.8   | 9.4   | 12.7  | 2.9   | 7.0   | 9.2   | 10.4  | 13.9  | 67.4  |
| 55.0  | 62.0  | 127.6 | 65.2  | 104.5 | 70.3  | 80.1  | 96.5  | 42.9  |
| 4.9   | 5.3   | 4.0   | 7.3   | 9.5   | 4.4   | 1.9   | 6.1   | 5.5   |
| 10.2  | 5.3   | 11.0  | 12.4  | 9.2   | 6.0   | 13.0  | 9.2   | 9.4   |
| 25.3  | 36.1  | 30.7  | 29.4  | 12.7  | 20.7  | 15.2  | 19.4  | 14.2  |
| 3.7   | 1.6   | 6.6   | 3.9   | 5.0   | 2.0   | 2.4   | 11.9  | 2.1   |
| 4.9   | 5.4   | 10.2  | 6.6   | 1.3   | 2.4   | 3.6   | 7.3   | 5.9   |
| 7.6   | 6.7   | 10.6  | 15.2  | 5.0   | 3.4   | 6.8   | 4.7   | 12.3  |
| 3.3   | 1.8   | 4.3   | 3.3   | 2.2   | 1.4   | 1.3   | 3.1   | 2.2   |
| 1.0   | 2.9   | 6.9   | 1.0   | 0.9   | 2.8   | 2.6   | 1.0   | 6.0   |
| 24.7  | 20.4  | 21.2  | 19.0  | 18.8  | 14.0  | 18.9  | 27.1  | 23.9  |
| 24.7  | 42.7  | 45.4  | 34.4  | 17.8  | 13.6  | 15.8  | 13.5  | 15.0  |
| 6.1   | 6.8   | 15.1  | 3.7   | 9.6   | 4.6   | 3.9   | 20.8  | 16.1  |
| 6.1   | 13.3  | 13.0  | 5.8   | 7.7   | 7.5   | 6.1   | 15.6  | 16.1  |
| 422.3 | 398.6 | 638.5 | 409.6 | 285.5 | 413.5 | 403.9 | 305.4 | 395.0 |
| 12.2  | 12.4  | 16.7  | 12.6  | 14.8  | 19.1  | 12.0  | 10.2  | 18.1  |
| 13.1  | 6.7   | 7.6   | 11.8  | 5.1   | 2.6   | 5.5   | 7.2   | 10.0  |
| 3.6   | 11.0  | 11.0  | 1.9   | 9.4   | 8.8   | 2.6   | 12.8  | 7.3   |
| 14.5  | 17.3  | 12.6  | 11.3  | 3.3   | 4.8   | 4.6   | 1.6   | 18.6  |
| 3.9   | 3.1   | 11.2  | 2.6   | 1.4   | 1.1   | 3.4   | 1.3   | 2.8   |
| 19.9  | 24.6  | 15.9  | 22.4  | 12.3  | 16.8  | 11.3  | 23.5  | 25.6  |
| 35.8  | 35.9  | 83.3  | 40.9  | 42.3  | 50.7  | 47.7  | 55.8  | 61.9  |
| 12.5  | 17.3  | 12.0  | 13.0  | 14.4  | 18.2  | 11.6  | 10.8  | 23.1  |
| 3.5   | 1.9   | 1.0   | 3.7   | 3.1   | 2.5   | 8.8   | 0.8   | 16.4  |
| 23.0  | 18.6  | 24.0  | 22.7  | 37.5  | 39.1  | 40.7  | 40.5  | 68.0  |
| 8.0   | 5.2   | 6.3   | 8.3   | 1.3   | 3.3   | 2.4   | 5.7   | 9.0   |
| 18.3  | 13.6  | 26.7  | 13.8  | 181.2 | 145.3 | 156.5 | 220.0 | 134.5 |
| 41.5  | 33.8  | 77.3  | 41.9  | 30.2  | 20.0  | 43.1  | 33.8  | 56.2  |
| 52.9  | 50.4  | 62.2  | 57.8  | 62.1  | 38.0  | 57.9  | 73.4  | 56.3  |
| 6.7   | 4.4   | 5.2   | 1.1   | 4.3   | 6.3   | 1.6   | 1.5   | 9.3   |
| 6.5   | 6.1   | 10.6  | 7.2   | 19.8  | 18.1  | 19.0  | 18.1  | 16.4  |
| 5.3   | 0.9   | 5.4   | 1.1   | 0.4   | 0.6   | 0.6   | 0.7   | 3.6   |
| 1.3   | 1.3   | 2.7   | 0.9   | 10.0  | 11.4  | 9.2   | 19.4  | 6.8   |
| 15.5  | 19.4  | 7.8   | 13.1  | 24.3  | 23.1  | 32.9  | 55.5  | 26.9  |
| 216.9 | 205.3 | 218.7 | 199.2 | 140.0 | 184.1 | 147.4 | 164.0 | 164.3 |
| 3.1   | 4.4   | 3.1   | 1.6   | 192.4 | 148.8 | 160.3 | 218.3 | 121.2 |
| 5.2   | 5.1   | 10.7  | 7.6   | 0.7   | 2.3   | 3.4   | 7.7   | 6.0   |
| 9.5   | 8.2   | 2.7   | 9.7   | 5.0   | 5.5   | 7.1   | 2.5   | 7.6   |
| 0.7   | 0.5   | 1.2   | 2.4   | 0.8   | 0.3   | 1.4   | 0.2   | 1.2   |
| 5.4   | 10.6  | 13.7  | 7.4   | 5.8   | 7.0   | 9.9   | 10.7  | 10.9  |
| 303.1 | 280.1 | 365.8 | 326.8 | 94.3  | 81.5  | 122.2 | 134.4 | 118.8 |
| 9.6   | 5.5   | 6.5   | 14.1  | 1.4   | 0.7   | 0.6   | 1.5   | 2.2   |
| 3.7   | 3.0   | 5.2   | 2.4   | 5.2   | 7.0   | 8.2   | 6.6   | 2.1   |
| 13.8  | 5.0   | 5.0   | 8.5   | 4.3   | 8.7   | 9.8   | 1.1   | 33.8  |
| 15.7  | 15.5  | 26.3  | 27.4  | 15.1  | 11.7  | 17.0  | 22.3  | 6.4   |
| 18.4  | 22.1  | 21.0  | 14.8  | 3.9   | 6.6   | 6.0   | 13.2  | 8.6   |
| 2.1   | 1.5   | 1.7   | 1.8   | 1.6   | 4.5   | 2.0   | 3.2   | 15.1  |
| 72.9  | 84.0  | 21.0  | 57.6  | 3.2   | 4.3   | 2.2   | 4.3   | 10.0  |

|       |       |       |       |        |        |        |        |        |
|-------|-------|-------|-------|--------|--------|--------|--------|--------|
| 29.5  | 39.1  | 28.4  | 39.7  | 4.9    | 2.3    | 5.5    | 8.9    | 7.4    |
| 12.9  | 10.8  | 14.8  | 11.1  | 5.6    | 11.7   | 11.3   | 8.5    | 23.4   |
| 4.1   | 1.7   | 1.3   | 2.5   | 0.8    | 2.2    | 6.2    | 4.0    | 9.2    |
| 2.0   | 2.4   | 5.5   | 4.7   | 11.0   | 4.8    | 5.3    | 17.3   | 12.7   |
| 3.2   | 5.7   | 8.3   | 6.5   | 1.5    | 3.7    | 5.5    | 12.6   | 16.5   |
| 0.6   | 0.5   | 0.5   | 0.7   | 0.5    | 2.8    | 3.4    | 5.8    | 0.5    |
| 173.0 | 159.4 | 191.9 | 146.2 | 4707.3 | 5418.8 | 4733.7 | 5194.2 | 3792.0 |
| 24.8  | 19.7  | 17.5  | 19.1  | 3.7    | 0.5    | 4.3    | 5.2    | 3.6    |
| 19.7  | 9.6   | 18.9  | 13.5  | 11.5   | 21.8   | 16.1   | 13.2   | 17.2   |
| 8.7   | 3.6   | 4.9   | 6.3   | 1.6    | 4.6    | 5.4    | 1.7    | 6.6    |
| 4.0   | 4.1   | 8.0   | 1.2   | 1.7    | 1.9    | 5.2    | 5.3    | 6.9    |
| 8.5   | 10.3  | 8.1   | 10.7  | 6.5    | 5.7    | 9.4    | 7.4    | 7.3    |
| 7.3   | 3.0   | 1.8   | 1.9   | 7.2    | 1.4    | 12.4   | 20.2   | 1.7    |
| 0.5   | 0.5   | 1.1   | 2.8   | 0.3    | 0.2    | 0.4    | 0.4    | 0.6    |
| 124.1 | 132.7 | 56.9  | 130.8 | 9.0    | 15.0   | 15.6   | 7.2    | 9.9    |
| 9.3   | 9.0   | 12.3  | 10.8  | 10.4   | 10.4   | 7.0    | 9.5    | 17.0   |
| 10.4  | 13.3  | 15.5  | 11.0  | 8.4    | 15.3   | 3.6    | 15.9   | 7.5    |
| 2.0   | 2.9   | 2.7   | 4.7   | 3.8    | 8.8    | 3.4    | 1.5    | 4.1    |
| 13.2  | 9.5   | 6.8   | 2.6   | 4.6    | 10.3   | 3.5    | 12.1   | 14.8   |
| 4.7   | 12.3  | 5.9   | 3.3   | 4.9    | 1.0    | 4.3    | 7.9    | 1.5    |
| 1.8   | 3.7   | 4.1   | 5.1   | 2.4    | 2.6    | 1.8    | 7.7    | 6.1    |
| 5.5   | 6.2   | 13.4  | 8.1   | 1.7    | 5.4    | 6.3    | 0.8    | 15.2   |
| 66.3  | 76.6  | 117.2 | 71.6  | 118.9  | 114.6  | 97.2   | 141.7  | 146.0  |
| 3.8   | 6.3   | 3.3   | 1.7   | 1.6    | 1.8    | 2.8    | 1.0    | 9.9    |
| 9.5   | 9.8   | 11.8  | 7.6   | 8.9    | 6.7    | 7.6    | 13.9   | 13.2   |
| 1.9   | 2.3   | 1.2   | 2.4   | 1.6    | 2.9    | 0.8    | 1.9    | 3.6    |
| 118.2 | 125.2 | 132.2 | 143.9 | 184.3  | 157.3  | 228.5  | 248.5  | 219.3  |
| 13.4  | 13.6  | 15.7  | 14.7  | 16.6   | 8.2    | 10.0   | 20.4   | 11.0   |
| 7.0   | 7.0   | 11.1  | 8.3   | 3.2    | 5.2    | 1.5    | 1.1    | 5.4    |
| 14.8  | 13.9  | 17.8  | 11.8  | 13.3   | 12.0   | 10.5   | 17.6   | 22.9   |
| 11.8  | 13.2  | 21.8  | 19.2  | 15.2   | 4.8    | 2.8    | 13.4   | 4.4    |
| 97.5  | 106.1 | 86.4  | 77.4  | 93.4   | 102.9  | 127.6  | 119.4  | 177.6  |
| 2.1   | 2.5   | 0.3   | 2.6   | 1.9    | 2.3    | 2.4    | 2.9    | 6.8    |
| 4.0   | 9.4   | 11.4  | 2.3   | 2.9    | 5.0    | 7.9    | 0.8    | 5.8    |
| 19.6  | 5.8   | 11.1  | 17.3  | 4.5    | 3.3    | 3.3    | 3.9    | 7.9    |
| 31.6  | 31.4  | 34.9  | 34.9  | 5.8    | 6.3    | 9.3    | 7.9    | 17.0   |
| 23.3  | 21.5  | 41.1  | 22.1  | 8.2    | 1.3    | 8.6    | 13.9   | 2.4    |
| 1.7   | 0.4   | 3.0   | 0.8   | 1.0    | 2.5    | 0.8    | 2.0    | 2.5    |
| 8.6   | 9.3   | 20.5  | 1.3   | 7.4    | 3.6    | 3.9    | 15.7   | 19.2   |
| 1.0   | 4.9   | 1.1   | 1.6   | 21.6   | 18.0   | 18.9   | 30.5   | 7.4    |
| 1.7   | 1.2   | 0.7   | 0.7   | 0.3    | 0.4    | 0.6    | 0.6    | 0.8    |
| 10.6  | 8.7   | 12.5  | 19.5  | 9.1    | 8.0    | 6.8    | 19.7   | 22.4   |
| 2.2   | 0.7   | 1.0   | 3.5   | 0.8    | 0.6    | 1.0    | 0.8    | 1.2    |
| 3.8   | 0.8   | 7.4   | 1.7   | 4.9    | 3.2    | 0.9    | 0.2    | 6.6    |
| 2.9   | 2.4   | 2.0   | 2.8   | 6.1    | 7.7    | 5.5    | 5.3    | 3.3    |
| 3.4   | 0.7   | 1.1   | 0.7   | 1.3    | 0.8    | 0.5    | 0.6    | 2.7    |
| 11.5  | 6.4   | 7.8   | 2.7   | 9.6    | 5.0    | 7.1    | 7.3    | 25.6   |
| 109.9 | 90.3  | 146.2 | 114.7 | 262.6  | 208.9  | 264.0  | 294.2  | 144.9  |
| 0.9   | 3.4   | 2.7   | 3.1   | 3.3    | 1.4    | 1.0    | 0.6    | 0.5    |
| 2.2   | 2.0   | 2.6   | 2.1   | 4.0    | 1.3    | 1.5    | 1.0    | 1.3    |
| 122.7 | 120.4 | 201.8 | 123.0 | 128.7  | 108.6  | 91.7   | 134.2  | 193.3  |
| 10.4  | 14.1  | 12.7  | 13.2  | 15.7   | 14.0   | 17.4   | 7.0    | 14.3   |
| 163.1 | 117.0 | 203.7 | 125.7 | 74.6   | 98.0   | 76.2   | 93.9   | 204.8  |

|        |        |        |        |        |        |        |        |        |
|--------|--------|--------|--------|--------|--------|--------|--------|--------|
| 5.1    | 6.2    | 6.9    | 5.2    | 0.8    | 2.8    | 4.1    | 7.3    | 2.9    |
| 4.6    | 0.5    | 2.1    | 1.1    | 2.6    | 0.5    | 0.5    | 0.3    | 3.1    |
| 4.5    | 1.5    | 1.9    | 1.3    | 2.7    | 1.2    | 1.3    | 5.0    | 2.0    |
| 29.4   | 28.7   | 45.9   | 23.2   | 17.6   | 9.2    | 17.8   | 22.7   | 10.5   |
| 48.9   | 37.9   | 37.9   | 45.4   | 35.1   | 39.9   | 27.3   | 57.1   | 30.6   |
| 1.0    | 2.4    | 2.2    | 2.1    | 1.8    | 0.6    | 1.1    | 0.3    | 1.0    |
| 16.0   | 19.0   | 31.5   | 20.0   | 22.2   | 15.0   | 18.5   | 22.6   | 25.4   |
| 2.4    | 6.6    | 2.3    | 1.5    | 4.8    | 1.4    | 5.4    | 2.7    | 2.7    |
| 14.7   | 5.5    | 10.7   | 10.5   | 8.7    | 3.1    | 9.4    | 10.7   | 16.9   |
| 4.6    | 1.2    | 1.9    | 0.8    | 1.3    | 2.9    | 1.6    | 0.7    | 3.6    |
| 18.1   | 12.0   | 28.9   | 13.7   | 9.2    | 2.0    | 6.0    | 11.4   | 14.4   |
| 21.0   | 18.4   | 23.3   | 11.2   | 5.8    | 6.0    | 6.0    | 17.7   | 14.1   |
| 8.5    | 4.0    | 19.6   | 14.8   | 15.3   | 13.4   | 22.4   | 1.7    | 12.8   |
| 74.9   | 75.8   | 66.4   | 65.9   | 43.8   | 48.0   | 51.1   | 63.2   | 113.7  |
| 21.6   | 21.2   | 27.5   | 21.8   | 11.4   | 8.5    | 9.1    | 12.9   | 23.1   |
| 6.9    | 12.3   | 16.5   | 17.0   | 5.6    | 10.3   | 9.5    | 3.3    | 8.0    |
| 20.3   | 14.6   | 17.2   | 13.7   | 15.5   | 8.3    | 12.1   | 11.4   | 15.4   |
| 9.0    | 1.4    | 8.8    | 3.2    | 1.2    | 6.6    | 5.3    | 2.5    | 13.9   |
| 11.3   | 9.2    | 4.7    | 5.2    | 5.0    | 2.6    | 2.3    | 5.6    | 7.4    |
| 2.4    | 3.8    | 7.3    | 2.4    | 5.3    | 2.7    | 6.6    | 2.5    | 3.1    |
| 3264.3 | 2654.4 | 5012.6 | 3028.9 | 1457.8 | 1220.0 | 1512.6 | 1708.7 | 2295.5 |
| 4.3    | 1.8    | 1.3    | 1.9    | 2.0    | 1.0    | 0.4    | 4.2    | 3.1    |
| 1.9    | 2.5    | 2.6    | 2.3    | 4.0    | 1.3    | 3.5    | 1.2    | 1.8    |
| 88.4   | 95.8   | 106.1  | 89.8   | 49.3   | 43.9   | 52.9   | 37.0   | 102.3  |
| 2.3    | 12.3   | 3.9    | 10.4   | 7.2    | 8.8    | 10.5   | 11.9   | 12.2   |
| 9.4    | 7.4    | 8.7    | 6.7    | 15.3   | 8.7    | 12.1   | 13.0   | 15.0   |
| 3.4    | 2.3    | 4.4    | 10.4   | 0.7    | 0.5    | 0.6    | 0.7    | 1.7    |
| 11.9   | 7.7    | 9.6    | 6.9    | 17.1   | 19.8   | 16.3   | 9.9    | 23.1   |
| 2.7    | 1.6    | 6.1    | 3.1    | 34.0   | 29.6   | 34.9   | 50.0   | 21.5   |
| 11.0   | 9.3    | 11.6   | 9.0    | 7.6    | 8.5    | 8.6    | 8.1    | 11.5   |
| 12.1   | 14.6   | 16.8   | 13.4   | 8.9    | 6.6    | 7.1    | 8.4    | 13.5   |
| 1.9    | 3.3    | 5.4    | 0.8    | 4.4    | 0.5    | 0.3    | 4.3    | 3.4    |
| 8.1    | 10.1   | 6.9    | 10.4   | 3.6    | 1.3    | 5.2    | 7.0    | 8.5    |
| 9.9    | 9.5    | 19.1   | 13.3   | 11.6   | 9.7    | 14.5   | 19.7   | 15.5   |
| 6.6    | 16.2   | 10.2   | 7.0    | 10.4   | 5.6    | 15.4   | 10.8   | 9.7    |
| 16.8   | 21.3   | 30.8   | 28.3   | 13.9   | 14.8   | 17.5   | 9.9    | 25.1   |
| 0.5    | 0.4    | 0.8    | 1.5    | 0.4    | 1.5    | 2.4    | 0.3    | 2.2    |
| 14.0   | 11.5   | 21.6   | 18.7   | 21.9   | 14.1   | 14.4   | 15.4   | 17.8   |
| 7.1    | 9.4    | 2.9    | 1.5    | 2.0    | 8.8    | 10.3   | 5.5    | 7.0    |
| 555.2  | 575.3  | 770.6  | 622.2  | 746.6  | 1135.1 | 826.2  | 983.6  | 754.1  |
| 7.8    | 6.3    | 6.6    | 3.6    | 4.4    | 8.3    | 7.5    | 12.5   | 7.4    |
| 8.6    | 5.8    | 5.8    | 2.3    | 3.6    | 10.8   | 4.0    | 7.8    | 14.1   |
| 7.6    | 7.6    | 8.2    | 9.5    | 2.2    | 1.7    | 1.6    | 4.7    | 1.5    |
| 2.5    | 4.5    | 5.9    | 3.4    | 5.1    | 1.6    | 2.4    | 1.0    | 6.8    |
| 29.7   | 41.7   | 35.9   | 34.4   | 33.6   | 26.5   | 29.0   | 23.0   | 38.2   |
| 5.4    | 7.2    | 8.3    | 6.2    | 3.7    | 5.2    | 5.1    | 6.5    | 7.4    |
| 0.7    | 1.1    | 2.1    | 2.1    | 5.0    | 1.5    | 8.0    | 1.6    | 1.8    |
| 75.9   | 60.1   | 107.3  | 64.8   | 39.7   | 45.6   | 36.2   | 45.8   | 47.3   |
| 1.0    | 2.4    | 1.1    | 1.0    | 2.0    | 1.8    | 2.4    | 0.7    | 0.7    |
| 0.9    | 4.2    | 6.7    | 4.5    | 1.5    | 7.2    | 4.3    | 8.4    | 1.8    |
| 12.2   | 4.2    | 13.0   | 9.0    | 7.7    | 10.0   | 11.5   | 7.1    | 13.3   |
| 226.7  | 190.8  | 454.5  | 263.0  | 152.5  | 161.3  | 162.2  | 187.6  | 281.3  |
| 140.7  | 122.5  | 135.2  | 135.5  | 40.7   | 42.4   | 41.4   | 40.2   | 89.8   |

|        |        |        |        |        |        |        |        |        |
|--------|--------|--------|--------|--------|--------|--------|--------|--------|
| 5.0    | 7.5    | 19.3   | 17.2   | 2.0    | 1.3    | 3.3    | 4.0    | 12.0   |
| 7.1    | 1.9    | 3.3    | 7.8    | 1.5    | 1.3    | 3.4    | 2.1    | 2.4    |
| 6.8    | 7.1    | 19.9   | 14.0   | 18.8   | 13.1   | 13.8   | 22.1   | 21.1   |
| 2292.7 | 2141.1 | 3384.7 | 2243.9 | 904.3  | 936.7  | 962.4  | 981.3  | 1972.6 |
| 18.8   | 22.8   | 24.0   | 14.2   | 16.3   | 13.4   | 7.9    | 21.1   | 12.3   |
| 24.8   | 32.5   | 24.7   | 20.5   | 17.6   | 15.9   | 8.6    | 12.4   | 20.9   |
| 14.3   | 8.5    | 13.4   | 20.8   | 16.9   | 16.3   | 13.0   | 22.4   | 30.7   |
| 19.6   | 10.8   | 13.4   | 5.7    | 3.2    | 2.4    | 1.7    | 5.8    | 2.6    |
| 19.4   | 19.1   | 23.2   | 14.8   | 11.4   | 5.5    | 12.6   | 8.5    | 23.0   |
| 5.1    | 6.3    | 9.9    | 9.6    | 6.5    | 2.0    | 8.3    | 13.8   | 12.6   |
| 15.4   | 7.8    | 7.8    | 6.9    | 5.5    | 2.7    | 2.7    | 3.2    | 19.3   |
| 536.4  | 559.0  | 540.5  | 398.5  | 535.8  | 546.2  | 491.9  | 635.5  | 371.1  |
| 21.5   | 22.2   | 28.2   | 15.5   | 8.5    | 6.2    | 6.1    | 8.1    | 13.6   |
| 1.5    | 3.2    | 1.9    | 1.0    | 2.4    | 3.3    | 2.1    | 1.5    | 1.8    |
| 21.5   | 21.3   | 32.3   | 20.4   | 37.2   | 31.4   | 37.2   | 30.3   | 38.2   |
| 12.9   | 11.1   | 5.5    | 8.2    | 6.3    | 12.1   | 3.9    | 3.3    | 16.3   |
| 42.3   | 58.9   | 51.4   | 37.9   | 92.8   | 58.4   | 68.3   | 75.0   | 65.0   |
| 18.7   | 17.5   | 22.3   | 15.4   | 10.0   | 7.1    | 4.4    | 5.8    | 26.7   |
| 1.5    | 1.8    | 3.4    | 1.7    | 4.3    | 1.7    | 1.1    | 0.9    | 3.7    |
| 4.1    | 3.2    | 3.0    | 0.9    | 2.5    | 1.6    | 4.5    | 7.0    | 1.5    |
| 8.9    | 4.9    | 6.1    | 9.0    | 4.9    | 2.7    | 5.4    | 5.2    | 9.2    |
| 193.1  | 162.7  | 306.8  | 181.3  | 192.7  | 405.2  | 243.3  | 258.7  | 328.3  |
| 6.1    | 6.4    | 5.6    | 2.9    | 6.2    | 10.4   | 7.3    | 10.3   | 5.8    |
| 23.1   | 15.5   | 28.9   | 17.7   | 31.0   | 20.4   | 30.3   | 45.7   | 70.5   |
| 17.6   | 3.3    | 13.0   | 10.3   | 13.7   | 5.5    | 3.6    | 5.1    | 16.9   |
| 1326.8 | 1169.4 | 2134.6 | 1338.1 | 1418.4 | 1313.1 | 1389.7 | 1607.8 | 2182.4 |
| 7.6    | 10.8   | 7.2    | 12.5   | 7.1    | 4.1    | 8.1    | 14.5   | 12.1   |
| 15.8   | 13.8   | 6.1    | 10.1   | 1.4    | 6.4    | 2.2    | 5.4    | 80.1   |
| 2.8    | 5.2    | 4.0    | 4.6    | 3.1    | 7.3    | 5.0    | 5.9    | 2.9    |
| 1.6    | 0.3    | 2.2    | 1.0    | 0.4    | 2.3    | 1.2    | 0.3    | 2.2    |
| 0.5    | 0.4    | 2.1    | 4.0    | 1.0    | 1.0    | 3.6    | 0.3    | 1.7    |
| 8.8    | 6.8    | 13.4   | 2.9    | 2.4    | 4.0    | 3.0    | 6.1    | 2.5    |
| 12.4   | 4.1    | 16.0   | 11.9   | 11.2   | 10.7   | 11.8   | 10.6   | 12.6   |
| 4.6    | 2.7    | 8.5    | 5.5    | 3.7    | 3.0    | 1.5    | 2.0    | 0.6    |
| 6.6    | 1.7    | 7.0    | 3.5    | 5.9    | 6.0    | 3.1    | 4.3    | 3.8    |
| 1.2    | 0.8    | 1.6    | 1.3    | 0.5    | 3.4    | 0.6    | 9.5    | 2.9    |
| 4.2    | 3.2    | 6.1    | 6.2    | 10.1   | 2.3    | 8.0    | 3.2    | 6.5    |
| 202.8  | 187.4  | 247.3  | 176.3  | 222.6  | 180.3  | 231.6  | 257.4  | 434.4  |
| 9.4    | 11.6   | 17.1   | 5.6    | 14.4   | 10.2   | 9.5    | 11.2   | 22.9   |
| 427.6  | 399.3  | 485.1  | 305.0  | 454.0  | 368.5  | 500.1  | 639.0  | 623.4  |
| 7.6    | 1.8    | 6.7    | 2.3    | 1.9    | 1.6    | 2.3    | 3.0    | 1.8    |
| 14.4   | 13.2   | 13.1   | 11.6   | 13.6   | 9.5    | 13.3   | 22.0   | 22.3   |
| 4.5    | 7.6    | 9.6    | 6.6    | 3.7    | 6.4    | 3.2    | 7.0    | 8.0    |
| 1.6    | 3.6    | 5.1    | 3.2    | 3.5    | 2.4    | 5.9    | 2.4    | 9.5    |
| 57.2   | 42.1   | 62.1   | 48.8   | 95.2   | 117.1  | 105.6  | 101.6  | 85.6   |
| 9.4    | 5.0    | 15.5   | 6.7    | 4.5    | 6.5    | 7.3    | 5.5    | 12.0   |
| 200.8  | 247.1  | 236.6  | 253.0  | 83.9   | 83.6   | 70.5   | 105.2  | 90.2   |
| 15.8   | 12.1   | 19.5   | 20.3   | 5.2    | 3.4    | 4.6    | 5.1    | 5.6    |
| 20.4   | 22.5   | 19.7   | 13.5   | 9.3    | 9.8    | 4.8    | 30.6   | 22.3   |
| 6.9    | 5.6    | 10.8   | 6.0    | 6.4    | 4.9    | 4.3    | 9.7    | 13.6   |
| 554.4  | 520.5  | 862.9  | 567.1  | 929.5  | 788.8  | 1066.6 | 1079.3 | 743.1  |
| 60.0   | 41.1   | 101.9  | 61.6   | 1.3    | 1.8    | 3.3    | 1.9    | 7.3    |
| 10.2   | 11.4   | 16.9   | 5.6    | 5.8    | 5.9    | 10.8   | 13.9   | 8.4    |

|       |       |       |       |       |       |       |       |       |
|-------|-------|-------|-------|-------|-------|-------|-------|-------|
| 25.2  | 36.8  | 31.0  | 23.9  | 21.6  | 31.3  | 26.8  | 31.8  | 22.0  |
| 2.9   | 4.8   | 3.9   | 4.3   | 1.9   | 3.1   | 4.8   | 2.7   | 7.2   |
| 4.0   | 2.3   | 2.8   | 2.7   | 0.6   | 0.8   | 0.4   | 5.8   | 7.3   |
| 12.3  | 15.1  | 9.8   | 11.2  | 11.5  | 12.6  | 11.2  | 16.0  | 15.0  |
| 168.0 | 161.3 | 201.9 | 154.0 | 25.4  | 33.8  | 24.2  | 32.0  | 11.9  |
| 1.6   | 6.3   | 1.9   | 1.3   | 3.7   | 1.5   | 4.1   | 2.8   | 6.2   |
| 4.6   | 1.3   | 7.7   | 6.8   | 6.1   | 2.4   | 3.5   | 7.3   | 6.9   |
| 2.7   | 1.6   | 4.2   | 4.0   | 6.3   | 2.2   | 3.0   | 1.6   | 1.0   |
| 3.4   | 6.0   | 2.9   | 8.2   | 4.3   | 2.1   | 2.9   | 3.7   | 4.7   |
| 25.7  | 22.1  | 32.0  | 7.2   | 11.1  | 12.8  | 17.1  | 8.8   | 22.7  |
| 2.9   | 8.8   | 4.6   | 5.6   | 3.9   | 3.6   | 4.0   | 12.5  | 7.1   |
| 5.5   | 2.8   | 9.4   | 5.9   | 4.1   | 6.8   | 5.6   | 5.3   | 3.0   |
| 27.7  | 23.6  | 34.9  | 22.1  | 23.1  | 12.9  | 11.1  | 13.5  | 41.1  |
| 1.1   | 9.9   | 9.9   | 6.7   | 5.3   | 5.1   | 5.2   | 2.6   | 5.7   |
| 40.3  | 52.9  | 55.8  | 46.3  | 84.1  | 73.6  | 60.9  | 83.0  | 77.6  |
| 369.8 | 332.8 | 545.5 | 388.8 | 401.2 | 361.0 | 442.8 | 469.6 | 564.2 |
| 20.3  | 19.4  | 29.5  | 27.2  | 3.8   | 6.0   | 8.9   | 8.1   | 8.3   |
| 9.6   | 13.7  | 17.0  | 16.0  | 11.0  | 7.4   | 15.6  | 4.6   | 12.1  |
| 19.5  | 28.1  | 32.3  | 26.3  | 73.5  | 109.3 | 77.0  | 69.1  | 199.0 |
| 8.9   | 8.3   | 10.8  | 5.3   | 14.1  | 10.4  | 12.0  | 10.2  | 7.9   |
| 10.3  | 3.9   | 2.8   | 3.2   | 2.4   | 4.1   | 7.0   | 9.7   | 3.5   |
| 1.5   | 2.0   | 2.9   | 3.1   | 1.1   | 5.0   | 2.0   | 4.5   | 2.2   |
| 107.8 | 110.5 | 142.5 | 91.3  | 161.8 | 195.3 | 125.0 | 172.6 | 328.8 |
| 18.8  | 8.8   | 46.4  | 24.8  | 15.2  | 15.6  | 9.9   | 16.2  | 19.8  |
| 6.1   | 5.1   | 9.5   | 6.4   | 12.9  | 9.7   | 7.5   | 18.9  | 14.5  |
| 45.5  | 27.8  | 28.5  | 39.2  | 40.5  | 31.3  | 55.3  | 40.6  | 65.9  |
| 70.0  | 75.0  | 88.2  | 77.8  | 123.6 | 115.2 | 110.1 | 134.9 | 143.4 |
| 0.8   | 3.6   | 4.8   | 2.1   | 5.1   | 2.7   | 5.5   | 3.0   | 2.8   |
| 4.6   | 7.3   | 1.8   | 2.8   | 25.0  | 52.3  | 43.8  | 38.0  | 24.1  |
| 3.8   | 5.5   | 2.6   | 9.3   | 18.9  | 7.8   | 19.2  | 22.6  | 12.3  |
| 87.3  | 110.0 | 70.5  | 69.7  | 41.3  | 50.1  | 60.5  | 46.6  | 47.2  |
| 135.0 | 112.8 | 184.2 | 100.1 | 306.4 | 269.2 | 277.1 | 309.4 | 464.7 |
| 110.6 | 98.7  | 158.6 | 104.5 | 216.2 | 167.6 | 195.9 | 205.9 | 438.6 |
| 3.2   | 1.8   | 2.1   | 3.5   | 0.8   | 1.7   | 1.7   | 2.9   | 2.2   |
| 209.4 | 233.2 | 122.8 | 201.4 | 159.5 | 260.5 | 278.6 | 190.0 | 530.4 |
| 2.0   | 2.3   | 3.9   | 2.3   | 0.8   | 1.7   | 1.1   | 1.6   | 2.5   |
| 2.3   | 1.8   | 4.1   | 1.9   | 1.3   | 4.3   | 1.6   | 2.9   | 1.9   |
| 123.9 | 145.2 | 146.8 | 126.1 | 37.8  | 39.8  | 32.8  | 50.9  | 176.7 |
| 32.8  | 31.1  | 37.1  | 24.1  | 20.0  | 15.5  | 38.2  | 31.5  | 26.2  |
| 5.7   | 6.4   | 14.8  | 7.9   | 7.1   | 5.5   | 4.1   | 7.8   | 5.0   |
| 93.3  | 79.2  | 97.2  | 85.5  | 32.6  | 26.0  | 31.7  | 28.0  | 26.1  |
| 2.9   | 2.9   | 9.0   | 3.9   | 3.0   | 3.2   | 2.0   | 4.4   | 3.4   |
| 75.5  | 68.0  | 168.1 | 71.1  | 411.5 | 198.0 | 302.1 | 422.4 | 226.5 |
| 22.5  | 18.9  | 24.5  | 13.8  | 13.7  | 11.3  | 8.0   | 9.0   | 30.7  |
| 22.1  | 23.9  | 35.7  | 20.5  | 24.0  | 11.8  | 18.6  | 35.7  | 19.9  |
| 21.6  | 23.3  | 21.2  | 19.8  | 15.0  | 24.2  | 7.4   | 19.3  | 16.9  |
| 8.3   | 4.8   | 2.2   | 7.8   | 3.5   | 1.1   | 1.1   | 5.7   | 9.7   |
| 2.1   | 3.3   | 0.7   | 2.5   | 0.3   | 4.8   | 3.3   | 2.4   | 0.5   |
| 2.2   | 2.6   | 3.4   | 2.4   | 8.8   | 2.5   | 3.6   | 1.9   | 3.4   |
| 5.2   | 5.1   | 7.7   | 2.1   | 6.4   | 5.1   | 3.7   | 3.3   | 6.4   |
| 6.5   | 5.9   | 1.8   | 3.4   | 2.1   | 1.0   | 1.1   | 5.6   | 34.9  |
| 15.7  | 12.4  | 14.5  | 10.3  | 8.5   | 13.3  | 13.8  | 12.4  | 5.3   |
| 133.5 | 113.4 | 142.6 | 117.8 | 62.9  | 71.7  | 63.7  | 65.5  | 31.0  |

|        |       |        |       |       |       |       |       |       |
|--------|-------|--------|-------|-------|-------|-------|-------|-------|
| 0.6    | 3.8   | 6.1    | 7.9   | 5.2   | 7.8   | 1.2   | 0.9   | 4.9   |
| 7.3    | 17.5  | 14.5   | 14.2  | 10.3  | 9.0   | 12.6  | 13.6  | 27.4  |
| 2.6    | 0.7   | 0.8    | 1.8   | 1.6   | 3.3   | 0.6   | 0.7   | 4.0   |
| 9.8    | 3.0   | 7.6    | 7.7   | 13.0  | 16.5  | 13.1  | 8.8   | 15.5  |
| 1.4    | 1.0   | 2.2    | 0.6   | 0.9   | 1.3   | 2.3   | 1.1   | 1.6   |
| 9.5    | 8.6   | 10.5   | 7.3   | 15.0  | 13.0  | 8.7   | 13.6  | 14.5  |
| 5.0    | 0.8   | 2.6    | 6.7   | 2.4   | 1.4   | 1.5   | 2.1   | 11.2  |
| 6.2    | 2.9   | 6.0    | 0.7   | 8.1   | 7.4   | 4.8   | 13.4  | 5.3   |
| 10.6   | 17.5  | 18.9   | 12.3  | 11.3  | 13.1  | 12.3  | 10.5  | 11.8  |
| 88.9   | 85.4  | 102.2  | 99.7  | 75.4  | 62.4  | 66.4  | 66.3  | 97.7  |
| 13.4   | 13.5  | 20.6   | 6.9   | 25.4  | 17.3  | 19.8  | 28.7  | 36.5  |
| 6.3    | 4.9   | 5.0    | 2.7   | 29.7  | 23.3  | 41.5  | 31.8  | 11.0  |
| 6.7    | 4.7   | 7.8    | 6.0   | 19.7  | 12.0  | 20.6  | 17.6  | 162.7 |
| 164.1  | 131.4 | 194.5  | 162.6 | 152.8 | 121.6 | 152.5 | 189.7 | 161.2 |
| 1.5    | 4.5   | 4.1    | 1.7   | 19.1  | 29.8  | 23.3  | 25.4  | 22.7  |
| 273.0  | 272.5 | 315.9  | 257.0 | 467.3 | 602.4 | 529.9 | 574.9 | 334.0 |
| 12.4   | 8.0   | 18.1   | 12.5  | 4.2   | 12.0  | 12.5  | 11.4  | 10.2  |
| 354.4  | 320.8 | 353.9  | 258.4 | 116.1 | 129.8 | 136.3 | 168.9 | 26.4  |
| 15.6   | 9.3   | 9.4    | 17.8  | 8.2   | 7.6   | 6.4   | 18.5  | 14.1  |
| 4.2    | 1.9   | 1.0    | 3.2   | 6.5   | 3.4   | 3.0   | 3.1   | 3.6   |
| 14.5   | 17.6  | 19.9   | 6.7   | 9.4   | 2.7   | 3.7   | 27.3  | 15.7  |
| 110.1  | 91.1  | 158.2  | 96.9  | 146.2 | 108.6 | 137.8 | 202.5 | 223.9 |
| 2.8    | 5.0   | 4.2    | 2.6   | 2.1   | 2.4   | 3.2   | 0.4   | 7.6   |
| 213.4  | 202.1 | 270.0  | 261.4 | 2.4   | 2.5   | 2.7   | 2.4   | 25.8  |
| 105.1  | 100.1 | 116.9  | 96.8  | 65.7  | 91.9  | 59.8  | 55.8  | 33.5  |
| 20.2   | 26.6  | 22.7   | 20.8  | 19.6  | 19.5  | 21.7  | 27.6  | 24.1  |
| 6.0    | 2.4   | 1.2    | 1.9   | 2.8   | 1.3   | 2.9   | 6.5   | 4.1   |
| 4.6    | 7.3   | 6.4    | 3.0   | 0.7   | 3.9   | 7.4   | 8.6   | 6.5   |
| 1012.5 | 984.9 | 1253.0 | 904.3 | 579.9 | 554.0 | 651.0 | 687.8 | 303.0 |
| 104.4  | 91.4  | 111.3  | 108.5 | 147.0 | 130.9 | 167.9 | 141.1 | 53.7  |
| 1.5    | 2.5   | 12.0   | 7.3   | 3.8   | 4.5   | 6.5   | 2.5   | 8.4   |
| 16.1   | 11.8  | 20.4   | 20.0  | 12.5  | 14.2  | 4.5   | 2.3   | 17.2  |
| 25.0   | 19.9  | 26.3   | 26.3  | 7.9   | 8.0   | 10.7  | 11.2  | 11.0  |
| 51.6   | 50.8  | 64.9   | 49.4  | 43.3  | 37.5  | 45.5  | 57.9  | 53.0  |
| 5.9    | 1.6   | 2.7    | 5.0   | 4.1   | 3.0   | 6.0   | 2.5   | 1.4   |
| 0.5    | 5.5   | 0.4    | 3.0   | 5.4   | 7.9   | 5.1   | 1.3   | 2.3   |
| 2.1    | 11.5  | 11.9   | 8.0   | 2.0   | 2.2   | 5.4   | 15.4  | 7.5   |
| 7.5    | 10.6  | 11.2   | 17.7  | 7.0   | 5.8   | 5.9   | 8.8   | 16.7  |
| 8.7    | 8.0   | 5.9    | 1.6   | 4.4   | 1.2   | 8.8   | 10.5  | 5.5   |
| 0.8    | 0.5   | 1.0    | 2.4   | 1.4   | 1.0   | 4.8   | 1.8   | 3.7   |
| 13.5   | 11.4  | 19.7   | 14.6  | 12.9  | 10.9  | 7.8   | 13.2  | 16.6  |
| 15.8   | 20.1  | 11.8   | 15.7  | 13.7  | 16.0  | 13.7  | 16.2  | 7.6   |
| 2.1    | 5.5   | 7.0    | 9.1   | 1.3   | 1.8   | 6.5   | 21.7  | 2.8   |
| 1.8    | 10.9  | 1.6    | 10.5  | 5.1   | 1.1   | 5.5   | 1.4   | 2.4   |
| 0.7    | 0.8   | 3.0    | 0.6   | 0.3   | 0.5   | 1.3   | 0.6   | 6.9   |
| 1.0    | 1.9   | 1.3    | 2.6   | 1.3   | 2.5   | 3.2   | 1.0   | 5.1   |
| 288.0  | 240.9 | 351.3  | 262.0 | 149.2 | 154.4 | 150.8 | 180.7 | 682.0 |
| 15.0   | 15.2  | 11.7   | 15.7  | 11.3  | 9.2   | 13.0  | 17.3  | 19.3  |
| 110.4  | 81.6  | 136.0  | 85.8  | 86.4  | 59.5  | 101.8 | 97.3  | 272.7 |
| 45.5   | 40.9  | 44.3   | 36.0  | 7.9   | 12.1  | 12.5  | 12.5  | 23.9  |
| 27.1   | 37.3  | 45.8   | 29.5  | 43.7  | 47.4  | 52.3  | 64.5  | 66.9  |
| 14.8   | 19.5  | 9.2    | 10.0  | 8.6   | 6.9   | 3.8   | 6.7   | 5.4   |
| 3.9    | 1.2   | 1.2    | 2.0   | 1.1   | 0.8   | 4.4   | 1.1   | 7.8   |

|       |       |       |       |       |       |       |       |       |
|-------|-------|-------|-------|-------|-------|-------|-------|-------|
| 1.4   | 4.8   | 6.1   | 8.0   | 4.9   | 4.3   | 1.7   | 3.5   | 5.1   |
| 3.6   | 2.8   | 5.6   | 9.1   | 5.6   | 1.5   | 8.2   | 4.1   | 2.9   |
| 0.4   | 1.6   | 0.8   | 0.5   | 2.5   | 0.8   | 0.4   | 4.5   | 5.0   |
| 14.9  | 8.9   | 20.6  | 16.3  | 16.3  | 11.2  | 16.2  | 17.9  | 12.2  |
| 15.4  | 18.6  | 21.8  | 15.6  | 15.6  | 9.3   | 16.4  | 10.0  | 26.5  |
| 5.9   | 3.6   | 2.6   | 6.4   | 4.5   | 4.4   | 5.0   | 3.6   | 7.4   |
| 8.5   | 4.2   | 9.8   | 7.2   | 4.2   | 6.2   | 2.8   | 2.1   | 12.9  |
| 2.4   | 5.9   | 2.4   | 2.3   | 2.4   | 1.2   | 2.3   | 15.1  | 8.1   |
| 55.1  | 52.6  | 67.0  | 55.5  | 82.9  | 81.7  | 66.7  | 81.4  | 122.1 |
| 92.9  | 79.2  | 86.3  | 82.8  | 49.9  | 48.9  | 60.7  | 73.7  | 114.4 |
| 10.9  | 10.9  | 14.1  | 6.3   | 10.2  | 13.3  | 9.9   | 6.3   | 18.1  |
| 34.9  | 29.6  | 41.5  | 36.8  | 30.1  | 22.3  | 21.2  | 42.0  | 39.0  |
| 5.4   | 5.2   | 8.4   | 6.7   | 7.7   | 1.7   | 4.5   | 7.0   | 6.9   |
| 3.7   | 6.2   | 8.0   | 5.9   | 1.1   | 4.1   | 10.0  | 7.7   | 8.9   |
| 28.4  | 24.4  | 36.1  | 31.8  | 9.4   | 4.3   | 13.2  | 23.1  | 54.3  |
| 110.5 | 103.5 | 87.6  | 101.0 | 54.7  | 50.5  | 65.6  | 85.0  | 124.8 |
| 4.4   | 3.2   | 3.4   | 2.1   | 2.8   | 4.2   | 3.4   | 3.0   | 5.6   |
| 27.6  | 29.5  | 25.2  | 24.2  | 15.0  | 5.3   | 9.9   | 2.0   | 18.9  |
| 3.0   | 1.6   | 4.3   | 4.5   | 5.2   | 4.3   | 3.8   | 6.0   | 1.8   |
| 0.8   | 2.2   | 3.8   | 4.4   | 8.3   | 1.7   | 6.3   | 2.5   | 6.8   |
| 1.2   | 1.4   | 1.7   | 1.5   | 2.9   | 1.2   | 2.0   | 1.1   | 2.5   |
| 10.8  | 11.2  | 17.4  | 5.4   | 14.3  | 10.3  | 9.5   | 25.2  | 39.9  |
| 17.0  | 15.3  | 16.8  | 14.5  | 16.0  | 12.3  | 22.4  | 23.8  | 26.0  |
| 361.7 | 298.1 | 415.9 | 357.1 | 468.1 | 346.7 | 450.6 | 540.1 | 534.6 |
| 5.9   | 8.0   | 8.7   | 9.1   | 4.6   | 3.2   | 3.7   | 13.4  | 12.2  |
| 11.0  | 15.2  | 14.9  | 13.8  | 14.3  | 17.0  | 19.3  | 19.4  | 8.3   |
| 29.0  | 23.5  | 21.4  | 21.6  | 15.6  | 39.8  | 24.1  | 26.8  | 31.0  |
| 109.1 | 117.9 | 122.9 | 128.2 | 102.3 | 125.7 | 125.5 | 126.3 | 167.0 |
| 1.4   | 1.4   | 2.2   | 0.8   | 0.6   | 1.9   | 2.1   | 2.8   | 1.3   |
| 4.3   | 1.9   | 6.8   | 1.2   | 6.1   | 4.4   | 2.4   | 2.8   | 4.1   |
| 78.0  | 60.1  | 141.6 | 62.0  | 74.9  | 78.9  | 49.3  | 67.7  | 96.1  |
| 64.9  | 67.9  | 63.0  | 65.9  | 27.4  | 27.2  | 37.6  | 35.5  | 43.4  |
| 31.1  | 38.8  | 38.9  | 29.5  | 16.4  | 15.2  | 15.3  | 27.1  | 24.4  |
| 67.2  | 65.2  | 83.4  | 65.3  | 104.7 | 121.0 | 153.4 | 161.9 | 165.9 |
| 18.7  | 26.4  | 28.9  | 18.7  | 8.3   | 13.2  | 21.8  | 15.1  | 27.8  |
| 14.1  | 12.7  | 20.5  | 12.3  | 40.4  | 22.6  | 24.1  | 25.7  | 31.0  |
| 3.4   | 4.7   | 2.3   | 1.9   | 3.0   | 0.9   | 2.7   | 11.5  | 1.3   |
| 14.6  | 9.5   | 5.0   | 15.7  | 7.1   | 4.6   | 6.4   | 11.3  | 26.0  |
| 1.0   | 4.2   | 5.9   | 7.3   | 3.0   | 2.6   | 3.6   | 5.7   | 1.6   |
| 9.1   | 3.7   | 7.5   | 3.9   | 2.8   | 3.0   | 7.0   | 6.1   | 6.4   |
| 7.4   | 9.3   | 12.1  | 4.0   | 8.0   | 6.1   | 10.0  | 7.1   | 10.2  |
| 2.8   | 10.2  | 7.1   | 7.2   | 2.7   | 3.0   | 2.7   | 8.1   | 5.2   |
| 4.4   | 7.2   | 7.9   | 3.5   | 6.7   | 4.7   | 2.4   | 4.9   | 7.9   |
| 36.2  | 46.6  | 55.9  | 39.6  | 16.5  | 26.1  | 31.3  | 19.2  | 16.7  |
| 3.9   | 6.5   | 7.2   | 3.7   | 37.6  | 13.5  | 37.3  | 26.2  | 40.3  |
| 2.3   | 3.3   | 4.8   | 1.7   | 1.6   | 5.8   | 2.2   | 2.1   | 5.7   |
| 2.6   | 4.0   | 1.5   | 4.4   | 0.7   | 3.2   | 0.2   | 0.3   | 1.8   |
| 18.5  | 24.0  | 18.8  | 17.0  | 8.8   | 8.3   | 10.0  | 12.3  | 9.6   |
| 6.8   | 3.2   | 7.4   | 3.2   | 1.0   | 3.1   | 2.5   | 4.1   | 1.7   |
| 19.7  | 21.7  | 32.8  | 18.2  | 27.3  | 35.6  | 29.4  | 35.1  | 38.0  |
| 18.2  | 22.9  | 21.4  | 14.9  | 31.1  | 11.7  | 22.8  | 47.3  | 35.9  |
| 11.9  | 8.8   | 8.4   | 11.1  | 4.0   | 6.0   | 6.0   | 0.9   | 13.7  |
| 4.9   | 5.5   | 1.5   | 7.5   | 8.0   | 10.6  | 8.9   | 12.1  | 17.5  |

|       |       |       |       |       |       |       |       |       |
|-------|-------|-------|-------|-------|-------|-------|-------|-------|
| 1.9   | 1.0   | 3.7   | 6.1   | 7.3   | 1.7   | 4.0   | 5.5   | 6.6   |
| 2.6   | 1.9   | 3.1   | 3.4   | 4.6   | 1.4   | 6.8   | 2.1   | 4.8   |
| 75.1  | 85.0  | 102.4 | 70.0  | 70.6  | 60.4  | 64.7  | 75.7  | 113.0 |
| 19.7  | 21.6  | 88.9  | 18.6  | 181.4 | 61.7  | 164.7 | 212.3 | 665.6 |
| 1.4   | 7.3   | 7.0   | 1.1   | 1.1   | 0.9   | 1.1   | 0.7   | 9.6   |
| 381.8 | 344.1 | 579.0 | 339.1 | 482.5 | 457.4 | 509.4 | 621.3 | 641.3 |
| 0.9   | 1.0   | 0.7   | 1.3   | 0.9   | 0.5   | 0.8   | 1.1   | 2.2   |
| 1.3   | 2.0   | 4.5   | 1.4   | 6.3   | 2.0   | 3.0   | 1.2   | 1.8   |
| 3.9   | 2.5   | 4.1   | 6.1   | 1.1   | 3.6   | 0.2   | 0.5   | 4.5   |
| 2.1   | 4.6   | 4.2   | 5.9   | 1.2   | 4.2   | 4.1   | 2.3   | 5.8   |
| 1.3   | 4.9   | 2.1   | 1.9   | 4.4   | 0.8   | 5.1   | 1.2   | 13.4  |
| 7.4   | 9.9   | 9.8   | 12.4  | 10.1  | 9.5   | 8.2   | 11.5  | 12.4  |
| 12.3  | 11.1  | 22.1  | 13.4  | 13.9  | 12.7  | 14.0  | 22.3  | 30.1  |
| 4.3   | 3.7   | 2.9   | 6.1   | 5.5   | 3.5   | 3.4   | 13.3  | 2.9   |
| 29.4  | 30.6  | 32.8  | 25.4  | 12.1  | 14.9  | 12.8  | 22.8  | 24.8  |
| 9.4   | 6.3   | 6.5   | 3.0   | 4.1   | 6.2   | 3.7   | 10.1  | 2.6   |
| 5.8   | 1.0   | 1.4   | 4.7   | 3.9   | 5.1   | 7.4   | 14.8  | 1.8   |
| 3.4   | 4.9   | 4.5   | 4.3   | 3.8   | 5.2   | 7.1   | 11.1  | 4.7   |
| 12.3  | 9.7   | 15.7  | 19.0  | 6.0   | 2.7   | 3.7   | 22.8  | 15.8  |
| 29.4  | 33.4  | 27.5  | 34.7  | 12.5  | 15.3  | 14.0  | 25.0  | 21.3  |
| 2.1   | 0.2   | 2.5   | 2.0   | 5.5   | 3.3   | 16.9  | 0.9   | 16.3  |
| 0.3   | 4.3   | 5.3   | 5.4   | 1.6   | 0.7   | 0.9   | 2.8   | 0.8   |
| 5.2   | 4.3   | 11.1  | 6.4   | 9.7   | 7.3   | 5.1   | 6.9   | 7.5   |
| 95.4  | 62.0  | 174.9 | 70.1  | 80.6  | 57.3  | 82.8  | 82.1  | 58.2  |
| 10.7  | 12.7  | 2.4   | 3.6   | 6.7   | 1.4   | 2.2   | 9.0   | 14.3  |
| 8.3   | 9.5   | 7.8   | 15.0  | 13.6  | 8.4   | 6.5   | 17.8  | 12.6  |
| 7.2   | 8.3   | 4.1   | 6.5   | 3.2   | 3.6   | 6.2   | 6.7   | 7.0   |
| 2.1   | 5.1   | 1.9   | 3.6   | 3.5   | 0.3   | 1.8   | 4.6   | 3.5   |
| 15.2  | 11.3  | 16.0  | 15.7  | 7.6   | 5.1   | 7.8   | 15.3  | 7.2   |
| 0.6   | 3.4   | 2.4   | 0.2   | 0.2   | 2.4   | 2.7   | 2.3   | 2.7   |
| 3.0   | 0.4   | 0.5   | 5.1   | 3.9   | 2.1   | 6.0   | 9.1   | 1.1   |
| 1.8   | 1.2   | 5.6   | 0.7   | 2.5   | 1.2   | 3.5   | 0.7   | 0.9   |
| 0.8   | 0.7   | 1.3   | 2.6   | 3.7   | 2.8   | 4.0   | 8.4   | 3.5   |
| 53.3  | 77.4  | 28.5  | 66.5  | 2.4   | 8.0   | 8.0   | 9.5   | 4.3   |
| 40.5  | 32.0  | 69.5  | 39.2  | 27.3  | 45.4  | 25.4  | 26.4  | 33.4  |
| 10.2  | 12.5  | 6.0   | 9.8   | 5.1   | 5.2   | 1.8   | 6.7   | 13.5  |
| 32.8  | 22.8  | 28.6  | 18.1  | 16.7  | 11.7  | 16.0  | 21.0  | 22.0  |
| 2.0   | 3.1   | 3.8   | 7.1   | 0.9   | 4.8   | 2.5   | 0.2   | 11.9  |
| 2.1   | 0.8   | 1.2   | 1.8   | 4.5   | 2.6   | 9.7   | 11.9  | 2.5   |
| 4.6   | 3.9   | 1.8   | 2.0   | 2.9   | 2.9   | 6.2   | 0.5   | 3.0   |
| 1.8   | 2.2   | 0.5   | 2.4   | 0.3   | 1.6   | 0.6   | 0.4   | 27.0  |
| 352.0 | 318.0 | 441.5 | 331.6 | 233.7 | 241.8 | 215.2 | 326.7 | 312.7 |
| 6.8   | 17.7  | 5.3   | 11.7  | 2.9   | 11.4  | 3.0   | 3.2   | 12.3  |
| 8.0   | 6.9   | 7.4   | 8.5   | 1.9   | 6.2   | 10.1  | 6.7   | 13.2  |
| 11.4  | 12.5  | 4.1   | 8.9   | 15.5  | 35.1  | 18.9  | 24.2  | 35.8  |
| 3.0   | 2.2   | 3.1   | 3.7   | 1.7   | 0.8   | 3.0   | 1.3   | 0.2   |
| 36.9  | 30.9  | 47.8  | 38.7  | 44.2  | 50.9  | 44.2  | 53.1  | 46.8  |
| 1.8   | 3.5   | 0.9   | 2.2   | 0.4   | 1.1   | 2.4   | 0.6   | 1.5   |
| 5.5   | 4.7   | 3.4   | 1.8   | 2.7   | 1.5   | 2.9   | 3.0   | 3.4   |
| 1.6   | 1.0   | 2.8   | 1.6   | 0.8   | 3.1   | 1.4   | 4.4   | 1.6   |
| 5.2   | 5.4   | 4.0   | 2.0   | 2.5   | 2.4   | 3.6   | 3.2   | 8.2   |
| 8.2   | 2.9   | 4.8   | 2.1   | 1.3   | 0.8   | 1.6   | 3.7   | 2.4   |
| 2.9   | 3.7   | 3.3   | 3.3   | 4.1   | 2.9   | 7.8   | 3.3   | 7.1   |



|        |        |        |        |        |        |        |        |        |
|--------|--------|--------|--------|--------|--------|--------|--------|--------|
| 4.4    | 4.9    | 9.5    | 5.4    | 4.7    | 8.4    | 0.5    | 8.7    | 1.6    |
| 7.6    | 6.1    | 5.6    | 4.9    | 0.8    | 1.8    | 1.0    | 2.4    | 7.0    |
| 5.6    | 12.0   | 14.3   | 11.2   | 2.2    | 1.5    | 5.4    | 2.3    | 13.3   |
| 7.2    | 3.8    | 4.0    | 10.6   | 5.0    | 8.4    | 6.5    | 3.6    | 21.8   |
| 37.6   | 21.8   | 36.9   | 33.6   | 3.6    | 13.6   | 11.2   | 14.9   | 25.9   |
| 142.9  | 110.3  | 209.5  | 110.1  | 179.4  | 214.5  | 183.5  | 190.9  | 153.6  |
| 15.7   | 17.3   | 9.3    | 11.9   | 16.3   | 18.5   | 12.1   | 10.7   | 49.4   |
| 3.9    | 2.0    | 7.6    | 7.4    | 2.1    | 0.6    | 1.6    | 1.4    | 21.1   |
| 28.1   | 34.4   | 39.7   | 32.1   | 28.4   | 22.7   | 22.1   | 32.7   | 16.8   |
| 13.4   | 7.6    | 17.8   | 9.0    | 18.7   | 12.1   | 13.5   | 17.0   | 17.6   |
| 10.6   | 6.9    | 10.5   | 4.2    | 1.6    | 5.5    | 1.6    | 5.9    | 2.4    |
| 359.8  | 334.2  | 506.5  | 393.7  | 592.2  | 735.3  | 625.6  | 716.7  | 861.3  |
| 778.1  | 1070.8 | 749.0  | 657.4  | 1790.7 | 1258.7 | 2006.2 | 2322.7 | 1804.7 |
| 111.3  | 113.7  | 79.0   | 114.5  | 4.9    | 3.8    | 8.9    | 6.6    | 3.4    |
| 984.9  | 945.8  | 1177.5 | 947.7  | 610.7  | 582.5  | 692.5  | 713.8  | 424.3  |
| 10.3   | 10.1   | 10.7   | 10.7   | 9.6    | 7.9    | 8.3    | 6.4    | 18.3   |
| 10.4   | 6.0    | 13.6   | 9.4    | 5.8    | 1.3    | 4.4    | 9.4    | 5.7    |
| 1356.3 | 1193.4 | 1595.6 | 1274.4 | 449.2  | 439.7  | 420.1  | 535.9  | 436.0  |
| 11.3   | 3.5    | 13.9   | 6.1    | 4.2    | 6.7    | 4.7    | 7.0    | 6.6    |
| 86.8   | 75.6   | 105.0  | 82.9   | 122.3  | 116.5  | 145.3  | 164.2  | 174.2  |
| 30.6   | 39.5   | 47.3   | 32.1   | 42.7   | 47.3   | 42.4   | 47.1   | 49.3   |
| 2.9    | 3.0    | 3.5    | 2.5    | 3.7    | 2.5    | 3.5    | 3.3    | 4.7    |
| 22.3   | 16.8   | 20.5   | 11.6   | 12.5   | 5.8    | 5.5    | 16.5   | 22.2   |
| 0.9    | 7.1    | 1.8    | 3.1    | 3.5    | 3.4    | 3.7    | 4.0    | 4.6    |
| 2.4    | 6.3    | 3.2    | 3.5    | 6.9    | 0.9    | 2.4    | 0.6    | 0.2    |
| 0.3    | 4.1    | 1.0    | 2.9    | 269.1  | 203.5  | 527.4  | 384.7  | 51.0   |
| 13.0   | 15.3   | 12.2   | 12.5   | 30.7   | 17.2   | 18.9   | 29.5   | 23.8   |
| 238.3  | 279.5  | 269.7  | 216.3  | 749.4  | 912.1  | 1125.3 | 967.5  | 259.6  |
| 62.8   | 68.0   | 87.5   | 58.2   | 722.5  | 872.8  | 586.7  | 695.4  | 809.8  |
| 71.9   | 63.9   | 159.9  | 68.5   | 449.7  | 263.0  | 395.8  | 454.5  | 175.5  |
| 2.7    | 4.3    | 3.7    | 2.6    | 6.2    | 1.3    | 6.8    | 3.2    | 6.2    |
| 1.5    | 1.3    | 7.7    | 1.6    | 24.0   | 8.5    | 20.1   | 15.3   | 35.7   |
| 217.9  | 241.9  | 351.6  | 201.8  | 153.6  | 101.1  | 139.4  | 181.3  | 163.9  |
| 18.6   | 10.8   | 16.6   | 14.0   | 12.9   | 10.7   | 11.4   | 9.4    | 19.6   |
| 0.6    | 3.1    | 3.1    | 2.4    | 0.9    | 0.3    | 1.4    | 1.2    | 7.8    |
| 611.4  | 566.8  | 1000.1 | 669.2  | 380.3  | 367.9  | 321.3  | 358.9  | 489.5  |
| 2.1    | 1.7    | 1.6    | 1.6    | 2.2    | 2.5    | 3.4    | 1.8    | 2.8    |
| 141.8  | 153.6  | 167.7  | 135.5  | 778.4  | 986.2  | 663.6  | 800.9  | 482.3  |
| 1.5    | 5.3    | 6.3    | 4.4    | 4.8    | 0.7    | 3.8    | 7.1    | 1.3    |
| 69.3   | 64.6   | 82.7   | 63.3   | 44.5   | 46.6   | 49.4   | 65.3   | 100.0  |
| 3.3    | 2.0    | 5.9    | 1.8    | 60.8   | 57.9   | 70.8   | 71.4   | 442.8  |
| 29.7   | 26.5   | 35.6   | 33.0   | 59.7   | 34.2   | 42.8   | 60.2   | 47.7   |
| 1.7    | 1.4    | 4.7    | 3.6    | 1.2    | 1.1    | 3.8    | 4.0    | 2.4    |
| 216.7  | 188.1  | 283.4  | 152.2  | 301.1  | 175.6  | 289.7  | 349.5  | 454.9  |
| 17.4   | 23.4   | 5.5    | 14.4   | 35.6   | 50.8   | 32.4   | 38.0   | 27.8   |
| 0.8    | 2.6    | 0.6    | 0.4    | 1.8    | 6.4    | 2.7    | 2.0    | 1.8    |
| 20.1   | 19.3   | 58.3   | 26.7   | 56.7   | 30.8   | 41.3   | 41.2   | 16.6   |
| 541.5  | 457.0  | 940.2  | 520.1  | 406.5  | 322.6  | 460.3  | 519.0  | 271.5  |
| 12.8   | 6.6    | 7.0    | 8.3    | 10.3   | 6.4    | 12.8   | 3.4    | 11.0   |
| 65.6   | 50.7   | 229.8  | 66.1   | 241.1  | 207.8  | 227.8  | 245.9  | 699.0  |
| 4.4    | 15.2   | 4.5    | 3.4    | 0.9    | 0.3    | 0.3    | 1.4    | 1.8    |
| 4.1    | 7.7    | 6.3    | 5.0    | 3.3    | 5.0    | 3.3    | 7.4    | 14.0   |
| 43.6   | 30.6   | 84.9   | 43.4   | 76.0   | 26.2   | 53.3   | 84.6   | 69.7   |

|        |        |        |        |        |       |        |        |        |
|--------|--------|--------|--------|--------|-------|--------|--------|--------|
| 67.7   | 60.5   | 59.1   | 43.3   | 39.4   | 31.5  | 28.0   | 50.5   | 41.2   |
| 1.8    | 1.1    | 1.9    | 1.0    | 8.9    | 3.0   | 17.6   | 20.5   | 334.0  |
| 14.6   | 16.4   | 24.2   | 5.9    | 1.4    | 5.2   | 5.9    | 22.0   | 21.9   |
| 220.5  | 226.1  | 242.5  | 247.4  | 233.4  | 376.5 | 285.5  | 300.6  | 358.9  |
| 8.0    | 19.8   | 11.3   | 24.6   | 5.8    | 9.3   | 10.3   | 12.0   | 9.7    |
| 115.3  | 116.9  | 150.0  | 113.7  | 193.5  | 175.0 | 205.3  | 266.7  | 264.0  |
| 15.4   | 16.5   | 18.4   | 12.5   | 11.2   | 8.6   | 11.9   | 19.8   | 19.4   |
| 47.1   | 56.4   | 109.8  | 58.5   | 124.1  | 106.9 | 93.4   | 128.6  | 208.3  |
| 2.4    | 5.3    | 8.0    | 1.4    | 1.0    | 2.3   | 3.3    | 2.3    | 14.5   |
| 35.7   | 36.1   | 30.7   | 18.2   | 33.4   | 31.4  | 36.1   | 32.5   | 44.7   |
| 2.3    | 1.1    | 1.5    | 0.6    | 0.5    | 0.3   | 0.4    | 1.5    | 1.1    |
| 8.7    | 14.5   | 12.8   | 6.9    | 18.3   | 19.2  | 17.8   | 22.3   | 11.7   |
| 18.5   | 22.8   | 34.8   | 22.5   | 20.7   | 20.9  | 25.1   | 25.2   | 58.6   |
| 10.7   | 4.8    | 5.7    | 9.5    | 3.9    | 4.1   | 6.9    | 3.0    | 8.2    |
| 2.7    | 4.1    | 3.2    | 7.0    | 3.6    | 4.5   | 5.6    | 7.6    | 8.1    |
| 97.1   | 83.4   | 156.0  | 81.2   | 205.6  | 184.3 | 171.9  | 252.0  | 332.3  |
| 20.2   | 7.2    | 14.2   | 10.6   | 13.1   | 10.2  | 12.0   | 2.8    | 13.5   |
| 144.0  | 175.2  | 163.9  | 170.9  | 123.0  | 172.7 | 150.4  | 153.2  | 142.2  |
| 4.7    | 9.0    | 11.0   | 9.2    | 9.7    | 10.1  | 10.5   | 8.8    | 11.1   |
| 1.0    | 1.7    | 4.6    | 1.6    | 2.3    | 2.1   | 6.1    | 0.7    | 1.3    |
| 0.7    | 0.9    | 1.5    | 1.2    | 1.3    | 0.7   | 3.1    | 0.7    | 1.7    |
| 4.9    | 2.7    | 6.9    | 5.8    | 5.3    | 4.4   | 6.4    | 9.0    | 1.2    |
| 15.4   | 19.6   | 21.0   | 27.3   | 13.8   | 12.4  | 13.4   | 2.4    | 19.3   |
| 11.4   | 13.3   | 22.9   | 11.1   | 9.1    | 9.5   | 12.2   | 15.3   | 12.5   |
| 28.1   | 23.7   | 18.2   | 16.9   | 5.7    | 20.4  | 7.4    | 20.0   | 24.8   |
| 6.8    | 6.1    | 16.6   | 15.2   | 4.5    | 3.3   | 12.8   | 16.5   | 27.8   |
| 208.8  | 190.5  | 344.4  | 169.0  | 129.0  | 123.4 | 161.7  | 156.9  | 186.1  |
| 0.6    | 0.6    | 0.9    | 3.2    | 1.2    | 0.7   | 0.6    | 0.9    | 2.1    |
| 58.1   | 54.4   | 76.6   | 54.2   | 62.7   | 53.2  | 56.8   | 62.9   | 92.9   |
| 2.7    | 11.8   | 13.5   | 10.9   | 17.6   | 7.8   | 10.4   | 9.0    | 26.9   |
| 1.5    | 2.7    | 2.4    | 2.2    | 2.6    | 2.4   | 1.2    | 3.0    | 1.4    |
| 1.2    | 4.0    | 5.5    | 2.8    | 3.4    | 0.4   | 1.6    | 0.5    | 1.5    |
| 132.4  | 150.2  | 163.0  | 147.8  | 109.3  | 110.1 | 116.8  | 144.2  | 129.3  |
| 14.4   | 14.9   | 22.2   | 8.4    | 17.8   | 13.3  | 17.5   | 21.3   | 37.4   |
| 37.2   | 40.7   | 45.2   | 49.4   | 23.8   | 41.7  | 38.2   | 49.7   | 40.0   |
| 9.8    | 9.7    | 18.6   | 11.2   | 12.9   | 7.7   | 16.9   | 11.7   | 92.1   |
| 5.2    | 5.4    | 5.7    | 3.9    | 6.1    | 1.8   | 3.9    | 6.7    | 3.3    |
| 9.5    | 6.9    | 10.0   | 10.4   | 2.3    | 5.3   | 6.6    | 10.3   | 2.6    |
| 2.8    | 5.5    | 4.2    | 2.7    | 6.8    | 5.9   | 3.4    | 5.8    | 5.8    |
| 104.8  | 66.9   | 270.9  | 87.5   | 7.2    | 6.6   | 9.0    | 20.7   | 21.1   |
| 463.8  | 445.5  | 442.3  | 479.2  | 222.4  | 172.0 | 205.3  | 279.2  | 642.4  |
| 468.1  | 466.0  | 719.9  | 343.3  | 590.2  | 455.1 | 524.1  | 638.5  | 411.8  |
| 9.4    | 0.5    | 5.8    | 3.1    | 4.0    | 2.4   | 5.4    | 9.6    | 13.0   |
| 9.5    | 12.7   | 11.0   | 6.3    | 8.7    | 15.8  | 24.5   | 20.2   | 30.7   |
| 1.6    | 2.4    | 4.8    | 7.3    | 4.3    | 3.2   | 4.9    | 5.7    | 3.3    |
| 6.5    | 4.3    | 5.3    | 1.6    | 3.3    | 5.0   | 1.5    | 6.1    | 6.4    |
| 29.1   | 33.3   | 47.7   | 30.6   | 31.5   | 9.7   | 12.3   | 30.0   | 18.4   |
| 155.1  | 149.1  | 87.4   | 117.4  | 25.2   | 24.7  | 19.1   | 37.5   | 35.3   |
| 2012.6 | 1752.0 | 3538.7 | 1843.8 | 1099.7 | 879.4 | 1324.8 | 1395.0 | 2102.7 |
| 57.9   | 48.8   | 48.2   | 39.3   | 71.5   | 77.3  | 66.8   | 87.3   | 71.2   |
| 7.9    | 6.7    | 4.1    | 1.7    | 1.9    | 6.5   | 2.0    | 2.0    | 11.4   |
| 19.9   | 25.9   | 19.4   | 37.5   | 12.0   | 15.7  | 16.3   | 25.0   | 14.8   |
| 1.1    | 3.9    | 2.3    | 0.7    | 1.8    | 0.6   | 1.3    | 6.2    | 1.1    |

|        |        |        |        |        |        |        |        |        |
|--------|--------|--------|--------|--------|--------|--------|--------|--------|
| 621.1  | 599.4  | 519.9  | 441.6  | 23.2   | 23.3   | 24.5   | 21.0   | 168.1  |
| 8.9    | 8.5    | 9.0    | 8.0    | 11.9   | 8.1    | 10.5   | 9.7    | 12.0   |
| 4.6    | 3.7    | 8.9    | 6.8    | 4.8    | 2.9    | 7.9    | 10.8   | 6.7    |
| 25.1   | 11.5   | 13.8   | 8.1    | 17.5   | 10.9   | 15.0   | 6.7    | 24.0   |
| 7.6    | 5.9    | 8.7    | 6.9    | 7.0    | 7.9    | 10.6   | 14.4   | 70.7   |
| 0.6    | 0.7    | 0.8    | 0.6    | 0.4    | 0.6    | 0.7    | 0.4    | 12.2   |
| 12.4   | 10.3   | 12.0   | 9.2    | 6.5    | 7.5    | 11.1   | 4.1    | 6.5    |
| 180.5  | 159.9  | 265.0  | 170.5  | 270.1  | 282.8  | 262.4  | 319.5  | 444.6  |
| 1.5    | 3.8    | 3.6    | 1.8    | 2.1    | 0.4    | 2.0    | 6.5    | 3.6    |
| 281.3  | 306.4  | 347.1  | 307.2  | 268.1  | 343.2  | 320.9  | 380.0  | 352.3  |
| 1.7    | 8.7    | 7.0    | 2.1    | 0.7    | 2.5    | 1.4    | 1.1    | 9.9    |
| 5.9    | 7.8    | 4.5    | 10.0   | 2.6    | 0.6    | 6.3    | 0.9    | 9.0    |
| 15.9   | 16.3   | 14.7   | 16.4   | 5.5    | 5.3    | 10.7   | 12.7   | 11.4   |
| 24.6   | 14.7   | 29.7   | 23.6   | 11.2   | 14.0   | 23.7   | 14.7   | 24.0   |
| 1.9    | 1.6    | 2.5    | 2.1    | 5.0    | 1.2    | 3.2    | 2.8    | 2.2    |
| 7.5    | 1.3    | 6.4    | 1.2    | 3.7    | 3.3    | 9.7    | 8.2    | 5.4    |
| 3.8    | 2.7    | 3.4    | 7.0    | 3.9    | 0.6    | 0.8    | 1.0    | 0.4    |
| 1.3    | 4.3    | 6.5    | 3.2    | 7.5    | 2.9    | 9.5    | 5.5    | 10.8   |
| 5.6    | 0.2    | 0.5    | 1.6    | 0.8    | 2.5    | 1.7    | 0.2    | 0.3    |
| 2.6    | 1.4    | 3.3    | 2.2    | 1.3    | 2.1    | 1.2    | 1.3    | 9.1    |
| 2.5    | 3.2    | 12.9   | 4.1    | 5.0    | 1.5    | 2.1    | 1.4    | 9.5    |
| 289.3  | 203.3  | 224.5  | 375.2  | 6.7    | 3.8    | 3.5    | 15.6   | 8.5    |
| 58.5   | 71.2   | 59.3   | 61.4   | 2.0    | 5.0    | 5.7    | 2.9    | 2.6    |
| 7.4    | 12.1   | 18.0   | 10.3   | 9.4    | 10.9   | 7.2    | 5.5    | 10.0   |
| 15.3   | 8.3    | 9.5    | 6.8    | 8.8    | 7.0    | 34.5   | 8.9    | 7.1    |
| 7.8    | 9.1    | 9.8    | 15.4   | 7.7    | 9.0    | 8.9    | 5.9    | 4.3    |
| 4.2    | 4.6    | 7.6    | 9.0    | 6.1    | 5.6    | 5.2    | 10.2   | 10.4   |
| 182.5  | 159.5  | 197.3  | 124.8  | 121.6  | 142.8  | 114.7  | 112.0  | 329.0  |
| 14.8   | 8.5    | 17.6   | 14.8   | 26.2   | 12.5   | 24.3   | 22.4   | 27.3   |
| 3.3    | 2.8    | 5.8    | 4.0    | 5.3    | 4.6    | 4.2    | 1.5    | 3.4    |
| 2.3    | 2.1    | 4.8    | 1.2    | 3.0    | 1.8    | 1.4    | 2.2    | 8.2    |
| 9.8    | 10.1   | 8.3    | 4.5    | 4.3    | 6.0    | 12.5   | 17.5   | 11.5   |
| 4.9    | 8.0    | 8.5    | 4.2    | 5.6    | 2.6    | 4.9    | 1.8    | 5.4    |
| 5.4    | 6.2    | 3.5    | 9.7    | 13.1   | 3.2    | 13.8   | 16.0   | 15.8   |
| 14.7   | 15.8   | 6.1    | 10.8   | 3.3    | 13.7   | 10.9   | 3.9    | 10.9   |
| 71.4   | 45.8   | 78.6   | 51.9   | 136.3  | 129.3  | 139.3  | 171.3  | 65.4   |
| 41.4   | 46.0   | 46.1   | 28.6   | 28.4   | 36.5   | 33.2   | 35.2   | 37.8   |
| 16.4   | 9.9    | 20.4   | 20.3   | 2.4    | 3.1    | 15.0   | 5.4    | 20.0   |
| 4628.1 | 4573.2 | 4956.0 | 4485.8 | 4241.4 | 3969.4 | 4201.3 | 4610.1 | 4946.7 |
| 1.2    | 1.4    | 1.4    | 3.5    | 2.7    | 2.9    | 1.0    | 0.8    | 0.8    |
| 20.2   | 26.1   | 29.0   | 26.1   | 26.5   | 17.8   | 18.5   | 20.0   | 18.6   |
| 2.2    | 6.5    | 4.4    | 2.2    | 7.7    | 1.4    | 7.8    | 3.1    | 7.2    |
| 4.4    | 7.3    | 3.9    | 2.3    | 1.8    | 1.6    | 2.4    | 3.0    | 4.7    |
| 4.6    | 14.2   | 17.5   | 15.9   | 10.8   | 8.8    | 6.4    | 6.5    | 6.2    |
| 10.5   | 10.9   | 12.6   | 13.3   | 5.6    | 6.9    | 3.4    | 6.4    | 12.5   |
| 2.0    | 1.7    | 0.9    | 0.7    | 2.7    | 0.7    | 3.9    | 1.8    | 2.6    |
| 4.3    | 3.4    | 2.1    | 4.6    | 0.5    | 3.1    | 2.7    | 0.7    | 5.0    |
| 134.3  | 119.9  | 159.4  | 107.7  | 244.3  | 245.3  | 281.3  | 270.0  | 277.8  |
| 46.8   | 55.3   | 74.7   | 43.1   | 43.3   | 65.9   | 57.8   | 56.4   | 48.2   |
| 19.5   | 12.3   | 23.7   | 15.4   | 19.5   | 9.1    | 17.5   | 19.7   | 64.3   |
| 1.1    | 6.8    | 6.9    | 15.1   | 5.1    | 2.1    | 4.5    | 7.3    | 2.3    |
| 124.9  | 103.2  | 110.0  | 91.5   | 180.5  | 259.0  | 167.1  | 229.6  | 382.7  |
| 4.8    | 4.4    | 3.2    | 3.8    | 2.5    | 2.3    | 2.4    | 9.2    | 14.5   |

|       |       |       |       |        |       |        |        |       |
|-------|-------|-------|-------|--------|-------|--------|--------|-------|
| 7.0   | 5.5   | 5.5   | 8.9   | 9.0    | 3.0   | 7.0    | 0.5    | 11.4  |
| 8.6   | 7.4   | 6.5   | 8.0   | 2.2    | 5.9   | 5.9    | 5.8    | 6.6   |
| 2.1   | 2.2   | 2.5   | 3.5   | 1.6    | 1.8   | 8.7    | 1.4    | 3.1   |
| 7.7   | 11.7  | 9.2   | 9.8   | 9.4    | 2.7   | 4.0    | 4.4    | 18.1  |
| 12.6  | 9.6   | 26.1  | 9.5   | 29.8   | 25.5  | 30.2   | 40.9   | 22.8  |
| 5.1   | 4.5   | 3.1   | 3.1   | 11.8   | 1.5   | 8.5    | 20.9   | 3.8   |
| 2.7   | 3.7   | 8.0   | 2.6   | 1.4    | 6.2   | 3.9    | 0.7    | 8.7   |
| 35.0  | 30.0  | 30.5  | 35.7  | 15.1   | 18.7  | 22.2   | 17.8   | 26.5  |
| 0.7   | 3.5   | 0.5   | 5.0   | 0.7    | 2.8   | 4.4    | 0.6    | 2.2   |
| 1.9   | 2.1   | 0.8   | 1.8   | 0.9    | 0.6   | 1.5    | 1.8    | 29.2  |
| 18.2  | 21.8  | 26.6  | 23.8  | 18.3   | 17.1  | 16.6   | 17.7   | 20.7  |
| 4.7   | 14.0  | 24.4  | 19.4  | 19.1   | 16.2  | 22.8   | 22.4   | 30.7  |
| 12.0  | 12.6  | 7.9   | 15.0  | 4.2    | 2.0   | 6.3    | 8.7    | 5.4   |
| 5.1   | 6.3   | 5.1   | 7.8   | 3.2    | 1.4   | 0.9    | 8.5    | 4.3   |
| 10.8  | 20.2  | 23.7  | 19.4  | 12.9   | 11.9  | 9.6    | 16.0   | 17.4  |
| 3.4   | 1.1   | 6.0   | 4.6   | 5.3    | 1.4   | 3.2    | 0.9    | 7.2   |
| 12.7  | 13.8  | 18.5  | 12.0  | 7.9    | 7.2   | 6.5    | 16.7   | 18.0  |
| 6.7   | 2.9   | 20.0  | 6.6   | 12.9   | 11.8  | 13.8   | 9.5    | 16.4  |
| 27.5  | 22.2  | 19.7  | 21.8  | 19.2   | 25.6  | 25.2   | 34.5   | 24.2  |
| 8.3   | 1.6   | 2.7   | 1.8   | 1.6    | 3.8   | 1.7    | 3.1    | 3.8   |
| 10.3  | 14.5  | 18.5  | 9.7   | 13.0   | 9.4   | 10.6   | 7.0    | 16.8  |
| 9.4   | 8.7   | 13.6  | 7.7   | 4.6    | 9.5   | 3.6    | 11.4   | 10.3  |
| 6.6   | 3.3   | 11.6  | 10.3  | 7.0    | 6.9   | 10.5   | 16.2   | 9.0   |
| 10.5  | 13.6  | 14.7  | 14.1  | 7.4    | 1.7   | 5.6    | 10.1   | 8.6   |
| 8.8   | 1.3   | 6.5   | 2.2   | 4.8    | 6.6   | 1.5    | 3.3    | 12.3  |
| 4.8   | 10.1  | 19.3  | 12.0  | 4.0    | 3.3   | 5.3    | 3.0    | 9.7   |
| 12.3  | 8.5   | 16.3  | 12.5  | 5.3    | 8.5   | 12.0   | 18.2   | 14.8  |
| 7.8   | 4.7   | 18.8  | 12.4  | 17.2   | 18.7  | 11.3   | 26.3   | 39.8  |
| 13.5  | 12.6  | 21.5  | 13.8  | 10.4   | 7.2   | 12.4   | 3.3    | 12.5  |
| 249.7 | 223.5 | 448.2 | 277.2 | 144.8  | 120.2 | 213.9  | 205.7  | 37.8  |
| 7.9   | 12.0  | 15.2  | 12.9  | 9.9    | 9.6   | 10.3   | 11.9   | 19.8  |
| 1.9   | 6.9   | 4.7   | 2.3   | 7.8    | 1.8   | 1.9    | 9.1    | 3.7   |
| 11.9  | 5.8   | 5.1   | 2.2   | 0.6    | 0.8   | 0.3    | 0.5    | 1.6   |
| 6.2   | 6.7   | 5.5   | 2.9   | 4.0    | 0.5   | 1.0    | 2.6    | 7.1   |
| 2.9   | 1.6   | 3.7   | 2.7   | 2.6    | 3.5   | 1.4    | 1.1    | 3.3   |
| 136.6 | 127.3 | 130.6 | 135.3 | 106.8  | 129.4 | 123.1  | 127.5  | 55.6  |
| 3.9   | 4.3   | 11.8  | 10.5  | 1.2    | 4.9   | 6.6    | 7.0    | 1.9   |
| 22.3  | 20.4  | 20.3  | 13.0  | 24.6   | 12.2  | 9.2    | 16.0   | 28.9  |
| 5.7   | 5.5   | 14.6  | 1.9   | 12.9   | 15.4  | 14.8   | 3.7    | 4.3   |
| 4.9   | 8.0   | 6.3   | 2.6   | 5.7    | 1.5   | 9.8    | 12.1   | 3.0   |
| 2.9   | 4.6   | 4.0   | 2.6   | 4.6    | 3.8   | 5.3    | 4.4    | 9.1   |
| 0.4   | 3.4   | 1.5   | 3.4   | 0.3    | 1.9   | 0.9    | 4.2    | 0.5   |
| 5.2   | 0.9   | 13.1  | 1.8   | 1.2    | 1.9   | 1.8    | 4.0    | 1.0   |
| 24.7  | 21.0  | 27.6  | 12.3  | 156.1  | 96.1  | 155.0  | 177.9  | 167.2 |
| 6.1   | 9.7   | 13.0  | 5.6   | 12.5   | 9.8   | 8.9    | 13.1   | 10.1  |
| 20.2  | 16.0  | 26.2  | 9.5   | 17.6   | 12.8  | 17.6   | 15.9   | 24.2  |
| 655.5 | 639.0 | 746.3 | 632.3 | 1243.4 | 762.1 | 1261.5 | 1444.4 | 623.1 |
| 10.1  | 1.3   | 6.4   | 1.7   | 13.8   | 6.7   | 13.5   | 11.9   | 5.0   |
| 21.1  | 18.8  | 26.5  | 12.1  | 60.8   | 53.7  | 43.9   | 81.4   | 67.4  |
| 17.0  | 33.7  | 23.0  | 22.5  | 15.4   | 9.7   | 10.1   | 13.5   | 24.6  |
| 26.7  | 23.2  | 26.6  | 22.5  | 12.1   | 10.3  | 16.7   | 21.6   | 31.4  |
| 3.3   | 9.1   | 7.5   | 9.6   | 4.1    | 1.3   | 8.7    | 6.5    | 6.8   |
| 9.2   | 16.3  | 14.4  | 9.1   | 11.3   | 1.4   | 4.9    | 18.7   | 10.1  |

|       |       |       |       |       |       |       |       |       |
|-------|-------|-------|-------|-------|-------|-------|-------|-------|
| 53.6  | 44.5  | 44.9  | 36.3  | 99.5  | 87.7  | 112.0 | 104.6 | 145.0 |
| 4.4   | 4.6   | 4.1   | 5.8   | 3.2   | 2.6   | 2.7   | 1.2   | 7.8   |
| 2.6   | 3.4   | 1.5   | 4.8   | 8.1   | 5.8   | 3.5   | 4.4   | 10.5  |
| 2.4   | 2.1   | 3.9   | 2.6   | 3.4   | 0.5   | 4.4   | 2.3   | 3.2   |
| 13.2  | 10.9  | 24.4  | 8.8   | 11.8  | 12.9  | 13.5  | 17.8  | 33.7  |
| 5.6   | 6.9   | 8.3   | 11.9  | 8.3   | 7.6   | 7.4   | 12.1  | 8.8   |
| 14.8  | 12.8  | 18.7  | 15.0  | 19.0  | 14.5  | 13.1  | 21.3  | 19.9  |
| 6.0   | 8.6   | 4.5   | 8.4   | 5.7   | 3.5   | 3.2   | 3.6   | 9.5   |
| 20.7  | 21.2  | 19.3  | 9.4   | 6.7   | 6.7   | 7.1   | 10.4  | 20.3  |
| 7.5   | 6.3   | 1.6   | 5.6   | 10.6  | 8.1   | 9.8   | 10.9  | 6.0   |
| 5.8   | 9.2   | 11.7  | 5.9   | 3.4   | 5.0   | 6.3   | 7.8   | 0.4   |
| 6.3   | 14.5  | 11.9  | 10.3  | 6.9   | 3.0   | 5.0   | 8.5   | 6.2   |
| 171.6 | 171.7 | 201.8 | 153.8 | 224.5 | 226.5 | 170.7 | 251.5 | 128.5 |
| 11.9  | 14.4  | 12.5  | 9.3   | 8.5   | 2.7   | 2.2   | 5.3   | 3.5   |
| 137.5 | 122.7 | 353.5 | 141.0 | 533.7 | 491.1 | 521.3 | 607.6 | 620.3 |
| 12.4  | 12.2  | 3.5   | 12.9  | 7.1   | 2.9   | 2.7   | 0.9   | 7.1   |
| 3.2   | 18.0  | 11.4  | 14.4  | 10.4  | 20.8  | 14.5  | 17.1  | 12.0  |
| 13.1  | 10.6  | 4.8   | 9.4   | 5.0   | 9.5   | 14.6  | 19.9  | 11.6  |
| 43.0  | 54.2  | 65.2  | 60.9  | 32.2  | 46.5  | 38.0  | 47.6  | 49.7  |
| 35.9  | 38.2  | 40.3  | 21.5  | 64.9  | 68.7  | 56.5  | 79.5  | 55.3  |
| 2.9   | 3.4   | 6.7   | 3.9   | 2.5   | 3.1   | 2.3   | 7.7   | 7.0   |
| 2.6   | 3.4   | 5.7   | 1.2   | 0.6   | 0.3   | 0.8   | 0.4   | 1.7   |
| 284.0 | 372.7 | 211.9 | 289.6 | 148.2 | 240.1 | 119.1 | 135.5 | 285.9 |
| 12.3  | 6.5   | 2.1   | 9.6   | 7.1   | 3.7   | 7.8   | 9.9   | 8.7   |
| 2.5   | 5.6   | 3.4   | 2.8   | 1.4   | 1.8   | 1.3   | 3.1   | 9.6   |
| 6.2   | 13.9  | 16.4  | 9.1   | 9.2   | 5.6   | 3.1   | 7.9   | 9.8   |
| 5.0   | 3.5   | 5.2   | 4.0   | 3.7   | 2.1   | 5.0   | 4.2   | 0.4   |
| 12.8  | 20.5  | 20.6  | 17.2  | 40.8  | 47.6  | 27.3  | 33.1  | 74.0  |
| 17.6  | 14.8  | 16.8  | 16.6  | 16.8  | 8.4   | 8.8   | 15.0  | 23.2  |
| 27.3  | 26.0  | 23.3  | 22.9  | 3.1   | 10.7  | 14.7  | 8.1   | 8.2   |
| 57.7  | 67.4  | 51.5  | 56.4  | 2.9   | 9.7   | 2.9   | 9.1   | 34.6  |
| 3.5   | 3.3   | 9.1   | 7.3   | 2.9   | 7.1   | 5.5   | 1.1   | 8.6   |
| 68.5  | 69.6  | 81.7  | 68.5  | 16.5  | 23.8  | 13.9  | 16.1  | 36.8  |
| 3.2   | 0.4   | 0.8   | 0.6   | 2.7   | 2.5   | 1.7   | 0.8   | 2.4   |
| 12.8  | 2.7   | 6.6   | 2.9   | 0.7   | 0.5   | 1.6   | 1.1   | 1.5   |
| 30.3  | 70.3  | 55.4  | 14.4  | 62.4  | 36.3  | 37.4  | 46.9  | 165.8 |
| 15.5  | 8.6   | 13.8  | 9.9   | 9.8   | 2.4   | 6.6   | 7.3   | 12.8  |
| 6.6   | 1.1   | 1.7   | 2.5   | 1.7   | 1.2   | 2.8   | 2.0   | 4.9   |
| 1.9   | 3.4   | 1.1   | 0.5   | 1.5   | 2.5   | 1.0   | 0.7   | 2.1   |
| 110.3 | 114.2 | 151.0 | 105.4 | 25.5  | 23.1  | 36.9  | 32.8  | 23.1  |
| 188.7 | 175.2 | 252.5 | 220.5 | 71.6  | 90.2  | 83.6  | 81.9  | 78.8  |
| 3.6   | 7.5   | 5.9   | 11.3  | 1.2   | 6.4   | 3.7   | 6.3   | 2.4   |
| 5.4   | 5.3   | 7.0   | 5.8   | 193.3 | 195.4 | 157.3 | 204.0 | 220.6 |
| 2.0   | 2.2   | 1.3   | 2.0   | 3.6   | 0.9   | 3.0   | 2.6   | 1.5   |
| 2.9   | 1.7   | 7.1   | 7.1   | 6.1   | 3.4   | 2.5   | 10.0  | 7.0   |
| 88.5  | 89.8  | 96.8  | 91.8  | 196.2 | 194.9 | 259.3 | 233.9 | 497.8 |
| 0.7   | 0.9   | 1.0   | 0.5   | 1.5   | 2.2   | 0.5   | 1.2   | 0.7   |
| 20.9  | 23.2  | 15.2  | 25.2  | 14.9  | 16.8  | 21.5  | 22.9  | 25.3  |
| 4.6   | 5.8   | 3.6   | 6.8   | 1.2   | 2.4   | 2.3   | 0.8   | 3.5   |
| 2.0   | 2.7   | 5.0   | 1.7   | 0.5   | 0.4   | 3.7   | 2.5   | 1.0   |
| 7.0   | 9.3   | 3.8   | 2.8   | 7.5   | 4.7   | 3.2   | 2.7   | 3.4   |
| 69.5  | 55.4  | 106.9 | 57.9  | 197.0 | 126.0 | 127.9 | 199.0 | 125.2 |
| 13.5  | 16.9  | 12.8  | 8.8   | 0.9   | 0.3   | 1.0   | 0.6   | 3.5   |

|        |        |        |        |        |        |        |        |        |
|--------|--------|--------|--------|--------|--------|--------|--------|--------|
| 3.4    | 4.9    | 7.8    | 1.1    | 4.1    | 2.0    | 1.8    | 6.9    | 9.5    |
| 46.4   | 36.2   | 49.2   | 47.6   | 39.8   | 38.2   | 42.3   | 47.2   | 128.9  |
| 24.4   | 33.5   | 35.1   | 25.6   | 23.0   | 19.1   | 15.2   | 21.8   | 22.9   |
| 349.9  | 299.8  | 588.6  | 310.7  | 909.2  | 806.3  | 872.4  | 1014.7 | 1070.7 |
| 30.2   | 38.0   | 42.6   | 33.6   | 23.1   | 25.5   | 20.4   | 28.3   | 69.6   |
| 1.8    | 3.8    | 3.9    | 2.2    | 5.5    | 1.9    | 2.4    | 0.9    | 7.4    |
| 13.4   | 21.0   | 21.5   | 13.6   | 14.8   | 11.7   | 20.1   | 12.7   | 22.8   |
| 3848.4 | 3436.3 | 4971.2 | 3610.7 | 4565.8 | 4044.9 | 4767.9 | 5233.6 | 5654.3 |
| 3.9    | 2.1    | 5.0    | 6.7    | 2.5    | 4.7    | 7.9    | 7.5    | 12.6   |
| 110.6  | 108.9  | 100.2  | 91.9   | 140.7  | 170.7  | 137.4  | 148.7  | 121.8  |
| 4.6    | 2.1    | 10.9   | 6.5    | 15.3   | 7.8    | 10.5   | 10.2   | 18.4   |
| 15.5   | 6.6    | 11.3   | 11.7   | 1.1    | 6.9    | 5.1    | 12.9   | 10.0   |
| 4.0    | 2.8    | 4.5    | 0.2    | 1.2    | 1.5    | 2.7    | 0.4    | 1.9    |
| 1.9    | 2.2    | 2.2    | 2.9    | 3.1    | 1.9    | 1.6    | 8.1    | 5.7    |
| 13.4   | 19.1   | 28.2   | 14.3   | 11.6   | 9.4    | 7.3    | 15.0   | 16.9   |
| 1.8    | 4.3    | 14.3   | 2.1    | 2.2    | 2.6    | 1.1    | 5.5    | 6.9    |
| 0.9    | 1.9    | 1.0    | 1.4    | 3.9    | 3.1    | 4.3    | 1.6    | 5.3    |
| 1.1    | 0.2    | 1.5    | 2.6    | 3.0    | 1.3    | 4.5    | 2.9    | 4.7    |
| 4773.6 | 4428.7 | 4910.5 | 4526.1 | 5043.4 | 5720.5 | 5460.4 | 5595.1 | 8710.7 |
| 0.8    | 0.6    | 4.5    | 1.2    | 4.6    | 2.0    | 5.7    | 3.7    | 3.2    |
| 0.8    | 0.5    | 0.8    | 0.7    | 1.2    | 0.4    | 1.3    | 0.3    | 1.6    |
| 18.6   | 14.7   | 23.3   | 15.0   | 52.8   | 60.9   | 53.1   | 62.4   | 22.8   |
| 2.2    | 1.8    | 7.2    | 2.3    | 5.8    | 5.7    | 2.7    | 2.4    | 2.7    |
| 2.8    | 5.3    | 6.7    | 3.2    | 30.6   | 25.7   | 36.2   | 40.7   | 20.8   |
| 0.8    | 2.1    | 3.1    | 2.2    | 1.8    | 1.6    | 1.5    | 0.6    | 1.8    |
| 3.1    | 4.9    | 11.2   | 4.6    | 4.9    | 3.2    | 4.4    | 1.9    | 9.6    |
| 4.4    | 10.6   | 2.5    | 16.4   | 2.2    | 5.8    | 6.5    | 11.1   | 3.0    |
| 12.3   | 7.2    | 11.6   | 6.5    | 1.7    | 7.5    | 4.1    | 10.4   | 13.8   |
| 8.3    | 5.2    | 7.6    | 13.0   | 5.9    | 7.6    | 2.3    | 4.1    | 9.0    |
| 8.7    | 3.5    | 3.8    | 2.1    | 4.8    | 6.2    | 3.3    | 1.8    | 6.2    |
| 8.9    | 14.4   | 24.2   | 12.6   | 31.3   | 6.8    | 5.1    | 30.8   | 22.8   |
| 2.9    | 12.4   | 12.2   | 4.7    | 5.9    | 4.8    | 4.8    | 1.1    | 5.4    |
| 8.0    | 5.2    | 22.4   | 9.3    | 34.4   | 52.0   | 34.8   | 45.5   | 3.9    |
| 185.8  | 203.0  | 158.1  | 166.3  | 202.1  | 157.9  | 186.9  | 208.6  | 303.2  |
| 2.2    | 1.4    | 12.3   | 9.5    | 15.8   | 22.7   | 6.4    | 14.8   | 10.4   |
| 32.7   | 38.5   | 58.5   | 30.9   | 48.8   | 32.8   | 39.4   | 44.5   | 63.9   |
| 0.4    | 0.6    | 1.3    | 1.4    | 0.8    | 2.8    | 0.9    | 1.0    | 0.8    |
| 100.7  | 94.1   | 112.8  | 110.2  | 215.8  | 252.3  | 237.2  | 244.1  | 150.4  |
| 146.8  | 134.0  | 204.4  | 158.2  | 137.2  | 127.0  | 150.8  | 180.0  | 277.6  |
| 131.8  | 123.8  | 161.8  | 135.6  | 164.0  | 136.3  | 176.0  | 209.3  | 273.1  |
| 15.2   | 20.9   | 14.0   | 18.1   | 14.3   | 15.1   | 9.7    | 14.6   | 9.4    |
| 2.8    | 1.3    | 2.2    | 1.1    | 4.0    | 3.8    | 3.0    | 6.2    | 2.7    |
| 4.5    | 7.2    | 13.3   | 6.4    | 8.8    | 12.2   | 9.0    | 12.7   | 8.5    |
| 9.3    | 1.3    | 12.0   | 4.5    | 5.4    | 1.0    | 4.3    | 1.2    | 2.5    |
| 25.1   | 19.5   | 38.7   | 27.1   | 18.5   | 23.1   | 7.8    | 22.7   | 25.3   |
| 37.4   | 47.8   | 28.8   | 26.4   | 32.2   | 27.5   | 32.7   | 22.4   | 68.1   |
| 35.4   | 30.6   | 41.1   | 22.4   | 50.9   | 46.5   | 49.2   | 85.5   | 59.6   |
| 14.7   | 12.8   | 11.8   | 12.9   | 17.8   | 23.1   | 16.6   | 18.9   | 13.1   |
| 2.1    | 4.0    | 7.1    | 3.3    | 4.8    | 4.3    | 8.1    | 4.7    | 4.7    |
| 315.4  | 352.4  | 477.5  | 309.6  | 396.2  | 545.8  | 379.2  | 502.5  | 243.8  |
| 16.4   | 13.3   | 21.2   | 15.1   | 8.4    | 13.2   | 8.0    | 11.3   | 14.0   |
| 1.2    | 1.7    | 1.7    | 1.0    | 1.3    | 1.0    | 2.2    | 4.1    | 2.4    |
| 63.9   | 66.2   | 69.1   | 61.4   | 264.6  | 188.3  | 331.1  | 333.9  | 94.9   |

|       |       |       |       |        |        |        |        |        |
|-------|-------|-------|-------|--------|--------|--------|--------|--------|
| 1.3   | 1.3   | 2.4   | 2.2   | 5.8    | 0.4    | 0.6    | 1.0    | 1.7    |
| 13.6  | 16.7  | 12.7  | 11.2  | 15.2   | 19.4   | 14.0   | 25.2   | 24.5   |
| 0.8   | 0.7   | 1.5   | 0.8   | 1.1    | 0.8    | 2.4    | 0.9    | 1.5    |
| 12.2  | 11.8  | 7.1   | 9.8   | 9.3    | 8.6    | 3.4    | 6.7    | 16.6   |
| 8.2   | 4.2   | 3.4   | 4.4   | 1.3    | 4.6    | 1.8    | 7.5    | 3.9    |
| 3.0   | 5.9   | 2.2   | 2.2   | 2.8    | 3.5    | 1.4    | 10.7   | 6.1    |
| 18.2  | 16.6  | 29.7  | 20.4  | 24.7   | 17.0   | 17.6   | 15.5   | 26.9   |
| 7.1   | 5.9   | 3.4   | 8.6   | 6.1    | 4.1    | 7.7    | 6.0    | 16.5   |
| 8.3   | 4.9   | 21.2  | 29.2  | 7.0    | 10.0   | 9.3    | 16.1   | 13.3   |
| 3.8   | 5.0   | 1.8   | 0.9   | 1.2    | 3.2    | 8.1    | 5.5    | 5.6    |
| 67.1  | 55.3  | 93.9  | 68.5  | 114.8  | 110.0  | 97.1   | 125.8  | 113.1  |
| 19.0  | 22.8  | 23.9  | 16.3  | 6.2    | 12.9   | 7.7    | 24.0   | 32.6   |
| 12.6  | 5.1   | 12.3  | 9.0   | 5.7    | 7.6    | 9.1    | 2.6    | 3.0    |
| 1.6   | 8.2   | 1.8   | 12.1  | 4.6    | 0.6    | 1.0    | 1.5    | 3.9    |
| 13.5  | 11.0  | 12.1  | 10.0  | 5.9    | 4.5    | 8.5    | 14.3   | 23.6   |
| 26.9  | 18.3  | 22.8  | 19.0  | 9.9    | 20.7   | 11.6   | 13.5   | 17.7   |
| 18.5  | 23.4  | 13.7  | 5.9   | 6.3    | 17.5   | 9.8    | 5.1    | 7.8    |
| 1.4   | 0.9   | 1.0   | 1.1   | 1.9    | 1.8    | 1.0    | 1.1    | 2.4    |
| 2.8   | 0.6   | 1.2   | 0.4   | 0.4    | 0.9    | 0.5    | 4.7    | 1.1    |
| 29.6  | 31.8  | 45.6  | 33.7  | 27.8   | 30.3   | 19.8   | 20.0   | 127.7  |
| 9.0   | 14.3  | 6.1   | 11.3  | 6.3    | 1.9    | 4.4    | 10.3   | 5.9    |
| 18.3  | 15.0  | 18.6  | 14.0  | 6.4    | 5.0    | 7.7    | 6.6    | 17.4   |
| 0.5   | 2.1   | 0.9   | 0.3   | 7.5    | 2.7    | 5.7    | 6.4    | 3.6    |
| 8.1   | 2.4   | 9.5   | 8.4   | 1.6    | 6.4    | 8.8    | 4.9    | 16.4   |
| 12.0  | 12.5  | 8.7   | 10.9  | 9.2    | 4.7    | 11.0   | 6.3    | 12.8   |
| 2.5   | 2.2   | 8.8   | 1.7   | 0.8    | 2.6    | 1.3    | 0.8    | 4.4    |
| 7.4   | 8.2   | 2.7   | 5.2   | 3.6    | 5.4    | 1.3    | 0.7    | 1.5    |
| 18.7  | 20.8  | 31.9  | 19.6  | 21.4   | 24.3   | 23.9   | 26.6   | 14.6   |
| 76.8  | 69.9  | 190.0 | 74.7  | 111.5  | 66.8   | 74.6   | 109.5  | 95.5   |
| 3.9   | 4.9   | 1.4   | 5.1   | 4.6    | 2.8    | 1.8    | 4.3    | 8.6    |
| 199.6 | 146.9 | 366.7 | 158.5 | 201.4  | 134.9  | 191.5  | 208.9  | 155.8  |
| 12.7  | 8.6   | 15.3  | 12.7  | 13.3   | 3.1    | 9.3    | 11.5   | 34.0   |
| 2.8   | 2.1   | 3.4   | 4.3   | 0.4    | 2.8    | 0.7    | 2.2    | 4.6    |
| 77.5  | 92.3  | 114.8 | 96.4  | 111.2  | 129.4  | 103.2  | 105.4  | 152.2  |
| 338.2 | 313.5 | 385.2 | 328.2 | 1469.1 | 1841.6 | 1602.0 | 1730.8 | 1164.0 |
| 1.0   | 1.3   | 2.2   | 1.5   | 2.8    | 9.7    | 5.4    | 9.2    | 172.7  |
| 15.2  | 6.1   | 18.8  | 15.4  | 18.5   | 22.6   | 13.9   | 22.3   | 22.4   |
| 97.5  | 96.3  | 112.4 | 82.8  | 160.7  | 139.4  | 159.1  | 179.7  | 363.6  |
| 91.8  | 103.0 | 59.7  | 89.6  | 59.6   | 63.4   | 38.4   | 54.1   | 70.6   |
| 88.1  | 85.0  | 113.4 | 80.9  | 134.4  | 135.9  | 134.4  | 166.5  | 353.7  |
| 178.9 | 131.5 | 143.0 | 126.0 | 178.8  | 184.0  | 187.1  | 176.9  | 169.6  |
| 2.4   | 2.6   | 5.5   | 2.4   | 1.6    | 2.8    | 2.3    | 0.4    | 13.8   |
| 8.9   | 3.8   | 18.4  | 8.5   | 7.4    | 3.5    | 7.9    | 1.7    | 14.8   |
| 856.3 | 943.6 | 362.6 | 716.6 | 746.5  | 1218.0 | 941.5  | 948.9  | 514.7  |
| 29.8  | 27.1  | 22.7  | 30.0  | 18.6   | 11.8   | 10.0   | 21.8   | 64.3   |
| 22.8  | 24.0  | 31.8  | 13.8  | 16.3   | 14.0   | 17.0   | 27.4   | 31.2   |
| 23.8  | 18.8  | 26.6  | 26.4  | 438.1  | 359.4  | 553.6  | 525.3  | 77.6   |
| 2.8   | 3.5   | 2.9   | 4.6   | 1.1    | 2.5    | 1.0    | 1.3    | 3.6    |
| 11.6  | 16.1  | 6.9   | 8.5   | 8.8    | 2.5    | 1.6    | 10.9   | 4.9    |
| 4.8   | 17.2  | 39.7  | 16.8  | 3.9    | 17.3   | 16.6   | 28.4   | 4.4    |
| 60.9  | 69.6  | 75.0  | 54.9  | 231.6  | 189.9  | 403.3  | 316.8  | 52.0   |
| 8.4   | 8.4   | 11.5  | 5.7   | 18.5   | 9.5    | 22.2   | 29.4   | 21.7   |
| 0.9   | 0.5   | 2.2   | 1.8   | 1.1    | 0.7    | 1.3    | 0.9    | 0.8    |

|       |       |       |       |       |       |       |        |        |
|-------|-------|-------|-------|-------|-------|-------|--------|--------|
| 22.0  | 40.0  | 41.1  | 36.2  | 33.6  | 22.9  | 25.3  | 33.1   | 59.9   |
| 5.1   | 1.7   | 5.4   | 4.1   | 35.0  | 19.6  | 33.7  | 39.7   | 6.1    |
| 4.6   | 3.6   | 1.5   | 3.8   | 3.6   | 7.8   | 5.8   | 7.0    | 3.3    |
| 25.0  | 36.5  | 25.7  | 26.1  | 39.8  | 39.4  | 46.4  | 55.6   | 37.7   |
| 9.7   | 5.7   | 9.3   | 8.8   | 4.5   | 5.9   | 7.8   | 8.9    | 9.5    |
| 5.2   | 5.8   | 3.7   | 1.1   | 5.0   | 5.1   | 10.4  | 8.3    | 16.1   |
| 5.2   | 1.8   | 0.6   | 3.0   | 3.8   | 1.0   | 3.8   | 0.4    | 8.0    |
| 9.1   | 11.1  | 18.8  | 14.8  | 15.0  | 6.6   | 11.0  | 15.6   | 16.5   |
| 1.2   | 5.6   | 1.9   | 3.5   | 1.9   | 3.7   | 4.3   | 8.4    | 17.5   |
| 845.7 | 829.7 | 720.6 | 701.5 | 137.3 | 122.9 | 132.6 | 119.0  | 39.8   |
| 52.8  | 58.8  | 68.9  | 40.3  | 34.1  | 45.6  | 56.9  | 44.0   | 27.1   |
| 12.7  | 14.3  | 7.0   | 11.5  | 18.3  | 4.9   | 8.8   | 6.4    | 10.0   |
| 10.7  | 15.6  | 10.7  | 3.3   | 11.0  | 2.9   | 14.7  | 7.9    | 11.2   |
| 563.9 | 516.3 | 471.1 | 405.3 | 213.2 | 315.0 | 230.7 | 246.1  | 357.4  |
| 21.3  | 20.0  | 9.5   | 15.3  | 2.8   | 5.6   | 4.6   | 1.3    | 2.1    |
| 1.3   | 1.0   | 2.4   | 1.8   | 1.0   | 1.3   | 0.8   | 7.2    | 1.5    |
| 4.6   | 5.3   | 6.2   | 4.8   | 6.8   | 5.6   | 7.7   | 1.1    | 9.1    |
| 3.8   | 2.2   | 5.6   | 2.0   | 3.4   | 1.9   | 3.7   | 3.6    | 3.9    |
| 10.1  | 9.5   | 11.0  | 12.4  | 7.6   | 5.8   | 6.9   | 10.9   | 8.6    |
| 6.5   | 5.8   | 6.1   | 3.2   | 6.8   | 6.2   | 8.2   | 7.6    | 6.8    |
| 86.0  | 73.9  | 110.1 | 73.1  | 99.7  | 142.3 | 117.2 | 138.9  | 113.2  |
| 4.9   | 4.7   | 6.8   | 5.3   | 7.0   | 2.1   | 1.5   | 6.3    | 11.6   |
| 3.4   | 7.3   | 6.6   | 5.3   | 5.7   | 5.1   | 7.1   | 8.5    | 6.6    |
| 54.9  | 84.1  | 148.5 | 90.7  | 102.3 | 79.1  | 104.0 | 80.6   | 5.1    |
| 3.2   | 5.0   | 8.3   | 12.2  | 6.7   | 4.9   | 5.5   | 7.8    | 10.6   |
| 16.2  | 14.9  | 26.0  | 8.5   | 5.3   | 13.3  | 12.0  | 16.0   | 16.4   |
| 8.8   | 9.2   | 12.8  | 7.3   | 12.8  | 11.7  | 16.2  | 15.1   | 16.3   |
| 5.3   | 1.6   | 8.8   | 5.9   | 3.3   | 5.4   | 5.0   | 2.2    | 9.7    |
| 5.6   | 2.6   | 3.9   | 3.0   | 2.3   | 1.8   | 1.8   | 2.0    | 4.2    |
| 167.0 | 180.0 | 115.1 | 116.9 | 305.3 | 467.6 | 365.3 | 378.1  | 272.7  |
| 22.3  | 19.0  | 36.6  | 30.0  | 10.0  | 7.5   | 8.0   | 19.1   | 23.7   |
| 12.3  | 10.9  | 11.2  | 5.6   | 5.9   | 4.9   | 6.0   | 19.3   | 8.8    |
| 24.1  | 31.3  | 30.2  | 18.7  | 7.6   | 6.4   | 7.8   | 6.6    | 3.9    |
| 2.7   | 2.5   | 6.6   | 6.4   | 4.7   | 3.7   | 4.3   | 6.7    | 8.2    |
| 4.7   | 12.9  | 16.9  | 1.2   | 7.3   | 1.1   | 2.0   | 2.2    | 9.6    |
| 7.9   | 4.7   | 11.9  | 5.5   | 3.5   | 4.0   | 3.0   | 5.3    | 22.6   |
| 0.4   | 1.5   | 2.0   | 1.9   | 0.4   | 0.4   | 0.6   | 0.5    | 3.8    |
| 358.7 | 302.1 | 589.1 | 306.1 | 911.4 | 799.4 | 808.2 | 1078.1 | 1436.1 |
| 2.3   | 5.9   | 0.5   | 1.0   | 5.1   | 4.9   | 5.1   | 2.2    | 8.2    |
| 14.5  | 13.0  | 26.5  | 18.5  | 16.6  | 11.7  | 11.7  | 10.4   | 11.2   |
| 45.3  | 40.9  | 58.7  | 35.3  | 54.9  | 68.8  | 49.9  | 65.5   | 90.8   |
| 395.6 | 435.6 | 354.7 | 349.1 | 54.8  | 36.2  | 51.8  | 65.3   | 46.5   |
| 4.6   | 0.7   | 5.0   | 5.0   | 1.9   | 2.7   | 4.6   | 0.6    | 7.5    |
| 9.9   | 20.6  | 15.7  | 12.8  | 6.9   | 11.1  | 4.4   | 1.1    | 10.8   |
| 336.8 | 309.6 | 379.8 | 273.8 | 252.9 | 218.5 | 236.7 | 268.4  | 614.1  |
| 12.0  | 7.7   | 8.5   | 3.9   | 16.5  | 17.7  | 12.8  | 24.3   | 7.3    |
| 5.8   | 2.4   | 4.4   | 2.6   | 1.0   | 0.2   | 2.6   | 2.0    | 6.2    |
| 1.2   | 0.6   | 0.6   | 0.6   | 0.3   | 0.6   | 0.4   | 0.8    | 25.3   |
| 2.1   | 0.8   | 0.8   | 0.6   | 0.8   | 0.7   | 0.8   | 0.6    | 1.8    |
| 90.6  | 85.0  | 88.9  | 62.0  | 247.1 | 256.1 | 236.2 | 330.8  | 270.5  |
| 15.0  | 17.6  | 14.8  | 12.6  | 4.6   | 4.1   | 6.6   | 2.7    | 33.2   |
| 4.2   | 3.7   | 5.8   | 3.4   | 2.1   | 2.5   | 5.5   | 4.1    | 4.0    |
| 2.8   | 7.5   | 10.9  | 2.7   | 3.1   | 4.4   | 3.4   | 2.8    | 6.9    |



|       |       |       |       |       |       |       |       |       |
|-------|-------|-------|-------|-------|-------|-------|-------|-------|
| 5.4   | 0.5   | 2.8   | 5.8   | 3.2   | 1.8   | 5.9   | 2.9   | 4.2   |
| 498.5 | 421.8 | 737.3 | 569.3 | 188.9 | 150.4 | 146.9 | 155.2 | 233.3 |
| 1.1   | 5.5   | 6.3   | 5.7   | 5.8   | 2.8   | 6.1   | 2.4   | 16.7  |
| 7.2   | 16.9  | 8.4   | 17.2  | 14.3  | 15.1  | 15.2  | 25.4  | 15.8  |
| 3.7   | 1.6   | 2.1   | 1.4   | 0.6   | 0.6   | 4.8   | 6.1   | 8.5   |
| 11.5  | 12.2  | 10.5  | 14.8  | 5.7   | 4.1   | 7.4   | 6.7   | 8.2   |
| 5.3   | 3.9   | 5.0   | 9.8   | 6.0   | 8.2   | 3.3   | 7.3   | 6.6   |
| 113.7 | 115.3 | 158.8 | 79.1  | 105.1 | 131.8 | 110.5 | 133.0 | 176.3 |
| 19.3  | 19.0  | 31.7  | 22.8  | 19.6  | 20.4  | 17.1  | 26.5  | 24.6  |
| 4.3   | 0.9   | 2.2   | 3.1   | 3.2   | 0.7   | 2.2   | 5.5   | 2.9   |
| 27.1  | 19.6  | 18.9  | 22.4  | 25.5  | 27.2  | 27.0  | 28.6  | 61.1  |
| 11.7  | 18.7  | 27.8  | 13.0  | 21.3  | 14.8  | 19.5  | 22.3  | 22.2  |
| 0.9   | 0.9   | 0.9   | 0.9   | 1.5   | 0.9   | 1.0   | 1.0   | 3.7   |
| 9.2   | 6.2   | 8.9   | 9.1   | 10.0  | 1.4   | 3.8   | 4.5   | 7.4   |
| 8.0   | 14.3  | 8.5   | 10.9  | 6.5   | 11.6  | 4.0   | 1.1   | 17.7  |
| 20.9  | 20.7  | 33.3  | 19.0  | 20.8  | 26.5  | 11.6  | 25.0  | 24.8  |
| 6.0   | 4.7   | 5.4   | 5.5   | 1.7   | 3.0   | 1.1   | 9.4   | 2.9   |
| 7.6   | 4.4   | 10.1  | 5.8   | 4.8   | 2.1   | 2.6   | 4.5   | 5.4   |
| 1.1   | 1.2   | 2.5   | 2.1   | 0.7   | 2.9   | 1.7   | 1.3   | 2.6   |
| 5.3   | 8.0   | 6.3   | 4.8   | 3.4   | 1.9   | 4.0   | 0.3   | 13.8  |
| 5.6   | 3.9   | 3.7   | 0.7   | 2.8   | 0.3   | 0.4   | 2.1   | 6.5   |
| 192.7 | 184.3 | 327.8 | 221.1 | 154.5 | 144.6 | 138.4 | 198.2 | 106.5 |
| 32.1  | 33.4  | 36.2  | 23.8  | 20.7  | 14.5  | 20.3  | 16.7  | 34.9  |
| 1.7   | 1.3   | 2.9   | 0.9   | 1.8   | 0.7   | 1.2   | 1.5   | 3.1   |
| 26.8  | 26.9  | 16.2  | 19.8  | 18.8  | 16.0  | 15.6  | 35.7  | 17.1  |
| 26.2  | 34.8  | 25.2  | 26.8  | 2.4   | 5.5   | 5.5   | 9.5   | 9.6   |
| 1.3   | 1.8   | 1.9   | 2.2   | 1.7   | 1.2   | 0.8   | 0.9   | 1.6   |
| 3.8   | 2.9   | 4.5   | 2.6   | 6.2   | 1.5   | 1.7   | 9.7   | 2.3   |
| 5.6   | 2.0   | 11.5  | 5.4   | 2.8   | 5.0   | 5.9   | 9.7   | 7.5   |
| 8.8   | 9.5   | 9.1   | 9.4   | 5.0   | 4.4   | 7.8   | 14.8  | 5.1   |
| 4.3   | 1.5   | 1.5   | 3.8   | 1.0   | 1.0   | 2.5   | 3.9   | 2.5   |
| 0.7   | 3.5   | 2.2   | 2.4   | 0.6   | 0.9   | 4.1   | 2.3   | 9.1   |
| 0.6   | 1.4   | 1.7   | 0.4   | 1.3   | 3.1   | 1.6   | 0.6   | 0.6   |
| 1.6   | 2.1   | 2.1   | 2.0   | 1.3   | 1.7   | 2.4   | 1.2   | 3.9   |
| 2.2   | 2.9   | 3.3   | 2.3   | 1.1   | 0.7   | 1.3   | 2.2   | 3.2   |
| 3.8   | 6.0   | 4.5   | 8.1   | 5.8   | 1.7   | 2.5   | 5.4   | 4.8   |
| 0.9   | 2.5   | 5.1   | 3.4   | 3.2   | 4.9   | 1.0   | 0.9   | 5.8   |
| 19.3  | 15.5  | 14.5  | 18.2  | 11.3  | 8.3   | 5.2   | 6.8   | 1.0   |
| 4.1   | 3.7   | 1.0   | 3.0   | 0.9   | 7.1   | 3.3   | 2.2   | 7.5   |
| 7.9   | 3.3   | 10.6  | 1.7   | 1.7   | 1.3   | 4.8   | 2.2   | 4.4   |
| 0.9   | 1.1   | 3.3   | 5.6   | 1.8   | 0.8   | 4.5   | 1.5   | 1.5   |
| 4.2   | 8.4   | 5.8   | 4.7   | 8.4   | 5.0   | 8.0   | 17.1  | 21.6  |
| 8.1   | 7.3   | 9.9   | 6.1   | 5.6   | 6.6   | 6.9   | 9.7   | 12.1  |
| 18.2  | 17.2  | 22.2  | 18.2  | 4.1   | 3.4   | 4.3   | 6.7   | 11.8  |
| 8.2   | 4.3   | 11.5  | 1.9   | 2.6   | 4.0   | 2.6   | 1.0   | 1.9   |
| 12.6  | 11.4  | 8.2   | 12.8  | 6.1   | 2.2   | 3.8   | 4.1   | 2.7   |
| 17.9  | 12.3  | 23.8  | 17.0  | 12.7  | 13.0  | 10.8  | 19.3  | 15.3  |
| 0.4   | 1.1   | 0.8   | 0.9   | 0.2   | 0.5   | 0.3   | 0.1   | 5.5   |
| 29.2  | 27.9  | 42.3  | 27.2  | 14.5  | 23.2  | 18.3  | 24.9  | 50.9  |
| 234.3 | 285.0 | 204.7 | 202.0 | 89.0  | 72.8  | 93.3  | 99.0  | 115.1 |
| 1.4   | 3.6   | 9.6   | 2.5   | 1.4   | 2.9   | 6.5   | 10.2  | 4.3   |
| 4.2   | 3.3   | 2.4   | 4.2   | 3.1   | 5.5   | 6.8   | 11.6  | 8.8   |
| 3.9   | 2.7   | 0.7   | 2.4   | 1.3   | 0.5   | 3.0   | 2.3   | 2.4   |

|       |       |        |       |        |        |        |        |        |
|-------|-------|--------|-------|--------|--------|--------|--------|--------|
| 2.3   | 8.7   | 4.2    | 2.5   | 2.2    | 6.1    | 8.0    | 0.7    | 7.3    |
| 1.8   | 0.4   | 1.1    | 0.6   | 0.8    | 0.8    | 1.1    | 2.4    | 1.8    |
| 15.3  | 12.5  | 23.3   | 21.8  | 13.4   | 14.0   | 19.7   | 22.4   | 21.0   |
| 3.8   | 4.6   | 7.7    | 11.4  | 3.9    | 6.7    | 7.9    | 9.3    | 7.8    |
| 8.3   | 9.5   | 8.3    | 13.9  | 4.4    | 3.1    | 3.8    | 3.3    | 17.4   |
| 6.2   | 12.0  | 8.1    | 8.0   | 5.8    | 7.1    | 17.8   | 8.7    | 8.5    |
| 2.5   | 5.4   | 1.8    | 1.8   | 3.0    | 4.0    | 4.5    | 2.1    | 10.2   |
| 22.6  | 23.7  | 31.6   | 18.9  | 9.0    | 12.8   | 19.5   | 27.3   | 28.9   |
| 3.7   | 2.4   | 4.9    | 2.7   | 17.2   | 11.7   | 13.5   | 13.5   | 0.8    |
| 5.9   | 5.7   | 2.1    | 6.1   | 1.0    | 2.0    | 2.8    | 11.4   | 1.6    |
| 0.9   | 1.4   | 1.2    | 0.7   | 2.7    | 0.6    | 0.7    | 0.6    | 3.8    |
| 14.3  | 5.9   | 11.9   | 11.8  | 7.0    | 1.6    | 3.7    | 9.0    | 8.6    |
| 1.1   | 0.6   | 4.6    | 5.9   | 0.8    | 1.6    | 2.2    | 7.8    | 3.1    |
| 8.5   | 11.6  | 11.9   | 9.6   | 5.4    | 4.8    | 7.3    | 9.4    | 6.1    |
| 0.4   | 3.1   | 2.4    | 0.7   | 0.5    | 0.2    | 0.5    | 0.8    | 0.5    |
| 8.6   | 14.2  | 11.6   | 17.3  | 17.2   | 10.6   | 13.1   | 28.9   | 16.5   |
| 13.3  | 17.2  | 6.0    | 11.0  | 3.1    | 3.1    | 1.1    | 3.2    | 6.1    |
| 16.5  | 14.8  | 24.3   | 12.2  | 18.7   | 8.1    | 20.0   | 12.8   | 30.1   |
| 15.5  | 26.6  | 24.8   | 16.3  | 12.7   | 12.5   | 21.1   | 29.4   | 26.9   |
| 17.7  | 9.7   | 24.3   | 15.0  | 10.0   | 13.0   | 8.8    | 12.1   | 5.5    |
| 81.4  | 69.2  | 111.7  | 66.6  | 86.8   | 57.2   | 80.7   | 101.9  | 242.6  |
| 3.3   | 14.8  | 15.3   | 7.4   | 27.5   | 21.2   | 33.3   | 42.9   | 12.9   |
| 17.1  | 15.3  | 20.7   | 12.6  | 22.0   | 14.8   | 14.9   | 29.9   | 11.7   |
| 20.1  | 13.0  | 45.9   | 30.8  | 41.8   | 62.3   | 68.6   | 76.6   | 77.1   |
| 4.0   | 4.6   | 3.4    | 4.4   | 2.7    | 3.4    | 6.9    | 5.2    | 6.9    |
| 1.5   | 1.4   | 3.6    | 1.9   | 3.9    | 1.8    | 1.1    | 1.7    | 9.4    |
| 4.0   | 7.9   | 8.8    | 6.0   | 1.0    | 7.6    | 2.8    | 9.9    | 3.2    |
| 2.0   | 2.1   | 2.4    | 1.8   | 2.3    | 4.0    | 1.3    | 2.8    | 1.4    |
| 4.0   | 5.5   | 6.5    | 4.0   | 1.3    | 1.1    | 3.3    | 1.2    | 6.6    |
| 10.7  | 20.8  | 27.5   | 26.1  | 13.5   | 17.8   | 9.6    | 4.6    | 12.2   |
| 263.6 | 268.5 | 217.0  | 264.3 | 153.1  | 138.9  | 158.4  | 171.6  | 366.2  |
| 6.7   | 6.3   | 3.8    | 7.8   | 5.8    | 1.2    | 2.8    | 0.5    | 2.9    |
| 5.7   | 10.9  | 7.6    | 9.0   | 2.9    | 4.2    | 3.8    | 7.1    | 7.5    |
| 4.7   | 2.6   | 8.5    | 11.4  | 4.5    | 7.7    | 9.7    | 9.3    | 0.4    |
| 0.9   | 1.9   | 3.9    | 3.8   | 6.7    | 2.1    | 3.8    | 10.9   | 9.7    |
| 7.3   | 4.4   | 2.0    | 5.8   | 1.1    | 0.5    | 4.1    | 0.7    | 1.1    |
| 3.0   | 6.7   | 2.3    | 6.7   | 5.7    | 9.4    | 4.9    | 3.6    | 1.9    |
| 693.9 | 562.5 | 1072.0 | 554.8 | 1343.8 | 1502.3 | 1342.2 | 1429.8 | 1258.1 |
| 1.6   | 1.2   | 2.1    | 3.4   | 0.7    | 2.8    | 9.9    | 2.7    | 7.1    |
| 8.9   | 10.2  | 17.0   | 16.5  | 17.7   | 14.3   | 19.7   | 21.3   | 26.1   |
| 5.3   | 4.0   | 5.1    | 9.4   | 12.3   | 6.2    | 8.7    | 11.6   | 1.1    |
| 2.4   | 6.1   | 3.5    | 7.3   | 4.3    | 0.8    | 2.9    | 0.5    | 3.1    |
| 110.4 | 104.6 | 135.4  | 91.2  | 176.0  | 164.9  | 167.5  | 192.7  | 154.3  |
| 4.7   | 3.9   | 4.6    | 6.8   | 6.6    | 6.7    | 9.3    | 11.8   | 5.5    |
| 5.4   | 2.1   | 2.6    | 1.1   | 5.8    | 1.0    | 1.9    | 3.3    | 8.4    |
| 172.7 | 166.3 | 159.0  | 108.7 | 104.1  | 132.8  | 121.5  | 136.5  | 144.0  |
| 8.0   | 5.3   | 14.8   | 10.1  | 12.4   | 5.3    | 14.0   | 11.7   | 12.0   |
| 6.0   | 10.2  | 20.2   | 12.2  | 6.9    | 8.7    | 21.7   | 13.1   | 24.1   |
| 139.1 | 124.5 | 212.4  | 120.4 | 224.8  | 194.2  | 177.5  | 248.0  | 378.2  |
| 13.3  | 17.0  | 13.5   | 15.3  | 5.8    | 7.7    | 7.4    | 6.3    | 16.6   |
| 26.7  | 33.8  | 47.9   | 28.6  | 40.2   | 39.4   | 31.6   | 29.2   | 47.3   |
| 25.5  | 26.3  | 13.2   | 18.3  | 20.6   | 19.5   | 18.7   | 5.9    | 23.7   |
| 1.6   | 3.1   | 4.0    | 4.0   | 1.0    | 1.8    | 1.6    | 1.7    | 1.0    |

|        |        |        |        |        |        |        |        |        |
|--------|--------|--------|--------|--------|--------|--------|--------|--------|
| 272.6  | 271.7  | 231.7  | 211.5  | 231.5  | 248.2  | 209.0  | 230.8  | 541.4  |
| 6.8    | 7.5    | 14.3   | 7.3    | 9.6    | 5.6    | 5.8    | 1.6    | 14.2   |
| 116.7  | 90.0   | 271.5  | 138.7  | 484.8  | 378.2  | 478.0  | 517.7  | 893.4  |
| 9.4    | 7.5    | 11.5   | 7.3    | 4.4    | 8.3    | 7.8    | 8.8    | 4.0    |
| 4.9    | 1.3    | 5.7    | 2.4    | 2.4    | 0.6    | 4.7    | 1.9    | 3.3    |
| 233.5  | 276.3  | 201.7  | 262.3  | 513.1  | 462.6  | 606.0  | 615.8  | 231.7  |
| 3.9    | 4.2    | 5.0    | 10.2   | 7.7    | 1.8    | 3.8    | 1.7    | 4.1    |
| 9.3    | 6.9    | 16.1   | 12.1   | 8.3    | 8.4    | 1.9    | 7.1    | 1.5    |
| 2.6    | 8.3    | 4.2    | 3.0    | 35.0   | 25.0   | 36.1   | 44.2   | 29.2   |
| 18.0   | 8.7    | 8.9    | 8.1    | 8.7    | 14.1   | 12.7   | 12.1   | 20.2   |
| 16.0   | 13.2   | 19.0   | 18.8   | 10.2   | 11.9   | 9.6    | 15.1   | 18.9   |
| 608.8  | 635.1  | 650.6  | 695.3  | 389.3  | 417.5  | 390.4  | 435.6  | 484.0  |
| 10.1   | 4.9    | 35.0   | 11.3   | 68.1   | 49.9   | 81.6   | 63.3   | 11.4   |
| 4.1    | 9.1    | 7.0    | 3.2    | 3.7    | 2.8    | 4.5    | 3.0    | 0.8    |
| 23.1   | 13.0   | 36.5   | 23.4   | 31.5   | 37.5   | 20.8   | 18.6   | 10.0   |
| 5.2    | 5.7    | 3.5    | 1.2    | 3.2    | 0.9    | 1.6    | 2.6    | 1.5    |
| 19.1   | 26.1   | 30.3   | 36.6   | 23.7   | 21.3   | 20.4   | 19.0   | 48.6   |
| 6.6    | 3.8    | 5.8    | 8.0    | 6.1    | 7.1    | 5.2    | 1.6    | 2.4    |
| 70.8   | 63.5   | 140.7  | 48.1   | 156.8  | 100.6  | 150.4  | 238.7  | 95.6   |
| 37.5   | 45.2   | 34.3   | 37.4   | 27.3   | 19.1   | 22.1   | 27.9   | 38.0   |
| 73.8   | 65.1   | 54.1   | 77.4   | 44.1   | 50.4   | 36.0   | 37.2   | 75.5   |
| 2435.4 | 2154.9 | 2968.5 | 2309.0 | 6157.4 | 6746.0 | 6426.8 | 6881.3 | 7431.4 |
| 338.5  | 342.9  | 428.7  | 356.8  | 363.8  | 346.8  | 331.4  | 418.2  | 400.6  |
| 1.6    | 0.7    | 2.0    | 1.6    | 0.7    | 0.4    | 0.6    | 0.3    | 5.2    |
| 15.0   | 16.5   | 30.7   | 12.6   | 24.0   | 16.8   | 24.7   | 31.2   | 44.7   |
| 5.8    | 13.8   | 7.1    | 6.4    | 5.3    | 1.8    | 6.3    | 2.1    | 29.8   |
| 7.1    | 8.6    | 10.6   | 7.9    | 175.4  | 189.3  | 157.3  | 141.4  | 218.3  |
| 131.8  | 145.7  | 461.5  | 79.5   | 1129.1 | 477.7  | 1034.2 | 1188.2 | 594.3  |
| 4.3    | 4.8    | 0.8    | 2.8    | 1.0    | 0.6    | 7.9    | 5.6    | 3.8    |
| 11.4   | 7.8    | 6.7    | 5.9    | 10.3   | 8.4    | 13.2   | 12.2   | 9.4    |
| 5.3    | 6.8    | 5.3    | 10.3   | 8.0    | 4.8    | 1.7    | 1.7    | 15.3   |
| 1919.4 | 1779.0 | 2333.1 | 1794.7 | 2790.7 | 4333.4 | 2707.6 | 3272.5 | 2417.6 |
| 321.7  | 295.1  | 288.0  | 289.2  | 446.8  | 485.2  | 474.3  | 551.5  | 271.0  |
| 29.7   | 21.9   | 26.0   | 28.9   | 6.9    | 5.2    | 4.8    | 13.8   | 4.6    |
| 1.3    | 0.7    | 0.6    | 1.2    | 0.2    | 0.7    | 0.3    | 0.3    | 0.4    |
| 1.3    | 7.5    | 2.4    | 2.3    | 2.6    | 1.4    | 1.0    | 1.0    | 7.5    |
| 74.5   | 58.9   | 82.1   | 71.5   | 183.0  | 131.7  | 144.4  | 212.5  | 164.6  |
| 121.6  | 116.5  | 176.0  | 144.5  | 37.5   | 18.6   | 41.0   | 40.4   | 37.8   |
| 30.6   | 31.1   | 34.7   | 28.3   | 13.3   | 6.2    | 14.1   | 13.4   | 68.8   |
| 8.7    | 8.0    | 6.5    | 8.2    | 8.2    | 9.7    | 9.5    | 7.2    | 12.3   |
| 95.3   | 105.5  | 65.9   | 88.9   | 455.2  | 418.6  | 332.0  | 348.5  | 2431.8 |
| 329.4  | 318.2  | 489.2  | 351.7  | 573.1  | 483.7  | 558.2  | 633.6  | 426.2  |
| 1.8    | 6.8    | 9.2    | 4.6    | 45.8   | 42.3   | 44.4   | 59.8   | 300.1  |
| 28.6   | 36.3   | 41.3   | 24.6   | 23.3   | 34.7   | 25.2   | 26.2   | 47.4   |
| 3.3    | 4.6    | 3.0    | 2.6    | 4.2    | 2.2    | 2.3    | 8.2    | 3.4    |
| 1.6    | 0.5    | 1.7    | 1.0    | 5.6    | 3.5    | 2.4    | 5.0    | 20.1   |
| 15.5   | 11.0   | 9.3    | 9.3    | 11.0   | 10.3   | 12.3   | 16.8   | 22.4   |
| 1.0    | 2.8    | 1.2    | 0.7    | 1.2    | 2.2    | 1.5    | 0.6    | 1.4    |
| 3.8    | 5.7    | 2.0    | 5.4    | 0.9    | 0.7    | 0.6    | 7.6    | 3.9    |
| 9.3    | 6.6    | 11.4   | 9.2    | 8.4    | 2.4    | 8.7    | 9.1    | 8.8    |
| 10.0   | 10.1   | 21.8   | 6.2    | 9.0    | 2.9    | 8.9    | 2.7    | 13.0   |
| 6.6    | 12.4   | 14.5   | 9.2    | 20.6   | 17.7   | 23.9   | 16.1   | 31.8   |
| 106.0  | 109.9  | 172.5  | 111.6  | 132.9  | 109.2  | 128.5  | 153.9  | 139.5  |

|        |        |        |        |        |        |        |        |        |
|--------|--------|--------|--------|--------|--------|--------|--------|--------|
| 8.8    | 12.3   | 10.0   | 3.3    | 7.6    | 2.2    | 5.5    | 3.6    | 4.1    |
| 111.6  | 132.1  | 76.3   | 125.7  | 82.4   | 109.5  | 80.2   | 85.2   | 156.6  |
| 9.5    | 12.8   | 10.4   | 5.5    | 15.9   | 9.2    | 11.5   | 14.8   | 8.8    |
| 482.1  | 518.2  | 479.3  | 550.0  | 272.9  | 300.3  | 264.6  | 340.0  | 172.7  |
| 147.3  | 134.4  | 129.7  | 139.3  | 162.5  | 189.5  | 181.3  | 190.7  | 378.6  |
| 91.3   | 134.7  | 51.3   | 114.8  | 613.7  | 574.1  | 1044.2 | 683.1  | 596.8  |
| 1.4    | 9.3    | 8.0    | 2.6    | 6.3    | 2.0    | 6.4    | 10.3   | 6.2    |
| 0.8    | 0.8    | 1.2    | 1.3    | 0.8    | 0.6    | 0.7    | 0.8    | 1.2    |
| 17.4   | 26.7   | 23.0   | 25.5   | 35.1   | 35.9   | 32.2   | 33.2   | 61.8   |
| 27.9   | 24.6   | 24.8   | 20.1   | 78.2   | 98.4   | 75.0   | 75.6   | 183.6  |
| 16.1   | 10.0   | 14.3   | 14.7   | 6.4    | 10.4   | 11.2   | 21.6   | 17.8   |
| 919.7  | 823.8  | 1046.1 | 887.1  | 1347.1 | 1477.6 | 1472.7 | 1528.0 | 2219.4 |
| 13.8   | 9.2    | 30.0   | 4.2    | 21.7   | 11.8   | 19.6   | 20.7   | 15.9   |
| 2.6    | 4.7    | 0.8    | 1.2    | 6.8    | 2.2    | 2.8    | 6.8    | 4.5    |
| 5.5    | 4.8    | 7.4    | 1.7    | 10.5   | 1.7    | 6.5    | 11.7   | 21.1   |
| 5.0    | 2.8    | 0.7    | 6.5    | 5.7    | 0.4    | 3.6    | 0.4    | 3.3    |
| 13.0   | 13.5   | 12.5   | 12.5   | 20.8   | 21.0   | 23.5   | 27.6   | 30.3   |
| 7.8    | 1.2    | 18.1   | 7.2    | 4.2    | 1.2    | 3.5    | 7.7    | 11.0   |
| 1.0    | 1.2    | 2.3    | 0.8    | 0.5    | 1.1    | 1.8    | 1.0    | 8.1    |
| 46.5   | 48.2   | 60.7   | 42.9   | 33.5   | 28.3   | 50.8   | 57.1   | 99.7   |
| 23.3   | 15.3   | 29.7   | 7.6    | 116.0  | 126.4  | 119.1  | 98.8   | 142.3  |
| 4.6    | 4.3    | 12.2   | 4.5    | 4.3    | 8.0    | 2.7    | 4.2    | 6.1    |
| 4.3    | 5.5    | 4.1    | 5.8    | 3.6    | 8.3    | 3.9    | 3.2    | 3.4    |
| 0.5    | 0.5    | 1.3    | 6.0    | 4.2    | 2.1    | 3.8    | 2.8    | 10.6   |
| 4.0    | 7.0    | 8.7    | 5.7    | 2.8    | 1.8    | 3.9    | 0.4    | 8.0    |
| 8.5    | 3.3    | 6.0    | 5.0    | 4.4    | 5.7    | 4.6    | 2.9    | 7.8    |
| 4.8    | 3.4    | 4.1    | 3.8    | 1.6    | 3.5    | 3.8    | 1.0    | 8.7    |
| 5.6    | 9.1    | 2.7    | 3.9    | 14.1   | 4.9    | 6.2    | 10.0   | 15.8   |
| 1.5    | 3.9    | 1.5    | 6.0    | 2.7    | 0.9    | 3.5    | 4.6    | 1.1    |
| 15.7   | 20.3   | 26.3   | 19.2   | 13.0   | 14.3   | 17.6   | 17.3   | 35.2   |
| 17.5   | 9.8    | 8.2    | 9.4    | 36.4   | 5.9    | 28.9   | 21.8   | 19.0   |
| 48.4   | 40.7   | 36.6   | 37.6   | 49.5   | 55.9   | 54.3   | 65.6   | 33.9   |
| 1065.0 | 1006.7 | 1443.3 | 1016.3 | 1828.1 | 1980.4 | 2039.3 | 2112.6 | 2831.0 |
| 5.1    | 16.9   | 16.2   | 9.9    | 10.6   | 9.9    | 8.9    | 17.8   | 25.1   |
| 13.2   | 17.7   | 15.9   | 9.7    | 3.3    | 1.6    | 5.3    | 5.1    | 5.5    |
| 3.9    | 3.9    | 11.7   | 5.1    | 9.1    | 1.1    | 6.2    | 12.7   | 5.8    |
| 27.9   | 20.6   | 55.1   | 13.7   | 56.0   | 46.5   | 46.4   | 59.2   | 55.9   |
| 76.1   | 62.1   | 63.4   | 50.1   | 22.4   | 43.8   | 30.5   | 30.8   | 41.3   |
| 13.5   | 17.0   | 35.2   | 21.3   | 19.1   | 19.8   | 20.0   | 30.3   | 25.4   |
| 33.2   | 41.6   | 42.5   | 28.7   | 33.1   | 28.7   | 30.3   | 31.5   | 47.3   |
| 1.6    | 7.0    | 2.8    | 1.7    | 2.4    | 6.2    | 5.8    | 8.5    | 10.8   |
| 1422.6 | 1270.3 | 2076.7 | 1292.9 | 1794.5 | 1887.3 | 1869.1 | 2228.8 | 1754.6 |
| 71.2   | 77.9   | 106.9  | 80.8   | 187.9  | 175.2  | 164.6  | 163.4  | 162.9  |
| 1807.1 | 1617.6 | 3118.8 | 1739.5 | 2869.6 | 2449.8 | 2679.0 | 3033.8 | 3690.4 |
| 0.6    | 0.4    | 0.8    | 0.5    | 6.4    | 6.9    | 13.8   | 2.7    | 3.0    |
| 330.8  | 281.2  | 376.6  | 303.3  | 375.5  | 472.2  | 360.9  | 422.9  | 591.9  |
| 197.1  | 208.1  | 151.0  | 197.9  | 52.8   | 57.4   | 40.0   | 30.1   | 64.9   |
| 2.0    | 5.1    | 2.6    | 2.4    | 9.4    | 2.0    | 1.9    | 1.2    | 13.5   |
| 1.6    | 1.5    | 1.9    | 1.4    | 1.2    | 0.9    | 1.3    | 1.3    | 2.0    |
| 2.0    | 1.6    | 4.0    | 5.4    | 2.6    | 0.6    | 0.8    | 1.3    | 0.9    |
| 3.0    | 0.4    | 1.6    | 1.8    | 1.1    | 1.1    | 0.5    | 1.0    | 11.8   |
| 2.8    | 1.7    | 1.2    | 2.3    | 1.3    | 1.7    | 1.7    | 0.3    | 2.7    |
| 82.8   | 60.7   | 115.3  | 56.1   | 34.2   | 21.2   | 40.0   | 57.5   | 62.8   |

|        |        |        |        |        |        |        |        |        |
|--------|--------|--------|--------|--------|--------|--------|--------|--------|
| 17.2   | 7.7    | 21.1   | 14.7   | 35.4   | 59.5   | 34.1   | 59.1   | 12.5   |
| 19.2   | 40.7   | 11.4   | 19.1   | 3.6    | 7.4    | 10.6   | 12.6   | 21.3   |
| 6.6    | 4.7    | 11.8   | 7.6    | 6.2    | 6.5    | 4.4    | 9.1    | 5.9    |
| 11.5   | 6.4    | 8.5    | 2.6    | 6.1    | 0.5    | 7.0    | 0.6    | 1.0    |
| 27.4   | 36.4   | 19.0   | 24.5   | 16.0   | 13.6   | 5.5    | 23.6   | 40.2   |
| 132.6  | 184.7  | 114.4  | 137.5  | 905.8  | 901.7  | 996.6  | 1041.6 | 404.0  |
| 2.9    | 4.5    | 5.3    | 2.7    | 11.3   | 11.4   | 16.0   | 19.0   | 30.8   |
| 125.8  | 121.1  | 248.7  | 99.3   | 498.2  | 349.1  | 451.8  | 625.8  | 291.5  |
| 1.2    | 1.1    | 1.9    | 0.8    | 2.8    | 1.9    | 2.9    | 2.9    | 3.2    |
| 15.7   | 9.6    | 20.8   | 9.6    | 12.9   | 7.6    | 9.5    | 25.0   | 26.9   |
| 258.5  | 235.8  | 233.3  | 195.8  | 495.1  | 464.6  | 460.8  | 545.2  | 386.3  |
| 3.1    | 9.3    | 8.4    | 4.2    | 1.5    | 2.4    | 4.6    | 1.9    | 2.5    |
| 4.5    | 6.2    | 11.7   | 1.5    | 8.2    | 3.7    | 2.6    | 6.0    | 9.2    |
| 2.9    | 7.1    | 13.3   | 6.3    | 7.8    | 2.1    | 2.3    | 3.3    | 5.2    |
| 2.7    | 2.4    | 5.0    | 2.1    | 4.6    | 6.1    | 1.9    | 2.3    | 2.5    |
| 6.0    | 6.2    | 10.5   | 5.0    | 2.6    | 9.5    | 11.2   | 6.4    | 27.8   |
| 2.5    | 2.8    | 4.6    | 4.4    | 1.8    | 2.1    | 3.0    | 5.2    | 4.9    |
| 11.4   | 8.4    | 10.9   | 10.4   | 15.3   | 24.4   | 20.2   | 31.1   | 13.3   |
| 1.4    | 2.4    | 1.5    | 2.6    | 2.1    | 3.2    | 0.6    | 1.2    | 1.7    |
| 99.4   | 96.8   | 151.2  | 113.3  | 321.4  | 280.9  | 186.3  | 287.3  | 540.7  |
| 7.6    | 10.6   | 10.8   | 1.7    | 5.4    | 3.9    | 11.9   | 1.7    | 2.4    |
| 374.5  | 394.5  | 359.6  | 390.1  | 349.1  | 474.6  | 446.1  | 438.0  | 289.6  |
| 1.0    | 0.7    | 2.1    | 1.0    | 0.9    | 1.2    | 1.1    | 1.6    | 1.2    |
| 7.5    | 7.5    | 4.2    | 4.3    | 3.9    | 1.6    | 6.2    | 1.2    | 7.5    |
| 5.1    | 10.7   | 12.3   | 6.4    | 0.4    | 10.0   | 11.0   | 10.1   | 9.3    |
| 3059.0 | 2744.3 | 3295.8 | 2631.3 | 3356.4 | 3618.3 | 3650.3 | 4050.9 | 6117.5 |
| 2.7    | 1.2    | 1.7    | 1.2    | 1.3    | 1.0    | 1.0    | 0.8    | 1.9    |
| 20.5   | 16.1   | 17.2   | 13.9   | 14.6   | 11.2   | 16.3   | 15.2   | 17.0   |
| 3.7    | 1.5    | 8.0    | 4.8    | 0.5    | 0.7    | 4.3    | 0.9    | 1.3    |
| 0.4    | 0.4    | 0.6    | 0.6    | 0.4    | 0.5    | 0.3    | 0.4    | 1.1    |
| 98.8   | 103.3  | 124.4  | 87.0   | 37.2   | 29.3   | 35.5   | 41.8   | 40.8   |
| 426.5  | 372.1  | 746.0  | 423.4  | 340.3  | 266.4  | 300.6  | 424.2  | 793.9  |
| 59.9   | 29.0   | 58.8   | 38.6   | 22.6   | 27.4   | 24.9   | 29.3   | 44.3   |
| 24.0   | 32.7   | 33.2   | 21.5   | 18.1   | 20.6   | 22.4   | 33.3   | 21.2   |
| 2.1    | 3.9    | 12.0   | 2.4    | 0.7    | 2.6    | 1.1    | 10.8   | 2.2    |
| 15.4   | 14.0   | 8.1    | 9.7    | 21.5   | 19.6   | 10.5   | 16.5   | 43.9   |
| 0.4    | 2.8    | 1.8    | 3.9    | 5.5    | 0.5    | 3.2    | 4.9    | 5.8    |
| 43.4   | 35.7   | 48.3   | 35.4   | 42.8   | 28.1   | 30.8   | 34.8   | 41.1   |
| 9.7    | 9.2    | 16.2   | 8.2    | 11.5   | 12.0   | 13.9   | 11.4   | 15.6   |
| 4.4    | 4.7    | 6.4    | 3.8    | 7.8    | 3.4    | 3.0    | 11.0   | 6.4    |
| 2.6    | 4.2    | 13.9   | 4.6    | 7.4    | 3.4    | 2.6    | 10.2   | 3.5    |
| 11.1   | 10.2   | 19.9   | 12.4   | 9.7    | 4.1    | 4.9    | 10.8   | 12.1   |
| 2.2    | 4.8    | 5.2    | 0.7    | 3.3    | 3.6    | 5.1    | 0.7    | 8.5    |
| 43.9   | 39.9   | 70.3   | 31.6   | 97.5   | 100.4  | 93.8   | 120.2  | 320.3  |
| 12.6   | 6.6    | 21.4   | 13.0   | 7.8    | 9.5    | 10.8   | 10.1   | 13.9   |
| 1.7    | 1.4    | 1.5    | 2.2    | 8.8    | 10.7   | 13.0   | 2.0    | 3.8    |
| 17.3   | 22.4   | 25.0   | 11.1   | 15.5   | 20.8   | 9.9    | 27.7   | 18.0   |
| 1.3    | 1.8    | 3.3    | 5.2    | 1.8    | 1.2    | 4.1    | 1.5    | 1.6    |
| 1.4    | 2.1    | 2.9    | 1.4    | 1.0    | 0.7    | 4.4    | 0.7    | 3.4    |
| 47.5   | 47.2   | 48.8   | 31.5   | 51.8   | 46.7   | 52.2   | 81.0   | 62.4   |
| 3.8    | 4.6    | 2.9    | 3.1    | 5.6    | 1.1    | 1.8    | 3.2    | 3.2    |
| 8.1    | 7.3    | 9.7    | 7.3    | 2.8    | 4.6    | 5.7    | 4.2    | 12.6   |
| 3.6    | 3.3    | 9.0    | 5.0    | 2.9    | 2.0    | 3.4    | 5.2    | 9.5    |

|        |        |        |        |        |        |        |        |        |
|--------|--------|--------|--------|--------|--------|--------|--------|--------|
| 8.2    | 1.9    | 19.1   | 2.7    | 9.2    | 9.2    | 3.5    | 2.0    | 7.1    |
| 20.3   | 21.5   | 32.1   | 22.7   | 16.1   | 17.1   | 28.8   | 4.0    | 26.3   |
| 9.0    | 9.5    | 12.8   | 6.7    | 6.1    | 9.2    | 10.6   | 9.7    | 15.7   |
| 0.4    | 1.9    | 1.9    | 2.5    | 1.6    | 0.6    | 1.0    | 0.5    | 6.2    |
| 12.0   | 9.6    | 9.6    | 12.3   | 9.6    | 10.8   | 9.5    | 10.2   | 11.8   |
| 12.9   | 12.2   | 42.9   | 6.5    | 54.6   | 73.4   | 37.7   | 42.1   | 123.6  |
| 23.4   | 15.6   | 16.1   | 17.6   | 32.9   | 30.5   | 23.7   | 36.0   | 22.7   |
| 14.9   | 29.6   | 27.2   | 22.6   | 34.8   | 24.9   | 35.0   | 50.7   | 54.3   |
| 0.9    | 1.8    | 1.1    | 3.4    | 0.3    | 0.5    | 1.1    | 0.5    | 8.2    |
| 6628.1 | 6654.4 | 7583.2 | 7097.7 | 4115.8 | 2809.7 | 5878.0 | 5886.7 | 26.6   |
| 338.3  | 301.9  | 410.7  | 314.6  | 371.0  | 360.6  | 366.1  | 408.9  | 767.6  |
| 103.9  | 102.0  | 131.1  | 104.4  | 110.4  | 99.3   | 86.9   | 154.7  | 124.9  |
| 0.8    | 2.5    | 1.8    | 1.1    | 2.0    | 1.8    | 2.3    | 2.6    | 1.1    |
| 90.1   | 79.1   | 118.5  | 50.2   | 178.0  | 210.5  | 129.9  | 216.2  | 524.1  |
| 1003.4 | 900.1  | 1535.0 | 850.5  | 1679.0 | 832.5  | 1852.0 | 1609.3 | 1375.1 |
| 8.5    | 7.3    | 20.0   | 7.4    | 22.4   | 15.2   | 25.0   | 42.0   | 12.1   |
| 1.5    | 6.0    | 1.9    | 0.8    | 2.5    | 4.5    | 3.0    | 1.0    | 4.5    |
| 157.4  | 134.1  | 216.2  | 134.0  | 186.4  | 123.6  | 166.1  | 185.7  | 192.8  |
| 28.8   | 30.5   | 23.3   | 36.6   | 4.1    | 11.8   | 5.3    | 21.4   | 36.4   |
| 302.0  | 328.6  | 295.6  | 300.3  | 89.9   | 111.1  | 106.5  | 130.2  | 114.5  |
| 2.1    | 1.8    | 2.2    | 1.7    | 4.9    | 1.8    | 1.5    | 5.9    | 3.3    |
| 4.6    | 5.9    | 5.7    | 1.8    | 6.7    | 4.2    | 3.0    | 2.5    | 9.0    |
| 73.0   | 39.5   | 88.6   | 55.7   | 395.2  | 388.8  | 450.2  | 463.6  | 372.5  |
| 8.2    | 2.4    | 6.4    | 4.7    | 11.3   | 1.3    | 4.5    | 12.1   | 6.5    |
| 2.5    | 2.2    | 4.5    | 4.8    | 1.6    | 1.5    | 3.9    | 1.8    | 5.4    |
| 6.3    | 5.3    | 20.0   | 10.1   | 4.2    | 8.3    | 10.9   | 8.3    | 13.3   |
| 344.3  | 352.8  | 444.7  | 333.7  | 456.2  | 417.1  | 517.6  | 518.8  | 463.7  |
| 67.6   | 49.5   | 163.0  | 68.1   | 227.2  | 196.5  | 198.9  | 263.0  | 267.4  |
| 32.3   | 21.8   | 34.6   | 19.1   | 5.3    | 9.8    | 9.5    | 6.5    | 8.7    |
| 46.9   | 54.1   | 60.4   | 35.8   | 41.7   | 44.0   | 41.5   | 40.5   | 23.0   |
| 17.6   | 7.0    | 16.2   | 7.3    | 13.5   | 9.3    | 12.9   | 14.0   | 14.0   |
| 3.9    | 5.1    | 3.7    | 3.1    | 3.4    | 1.7    | 6.7    | 0.5    | 9.6    |
| 1.2    | 6.4    | 4.2    | 3.0    | 13.9   | 9.0    | 8.9    | 9.6    | 29.0   |
| 2.5    | 7.8    | 9.4    | 7.7    | 3.9    | 7.3    | 7.0    | 3.5    | 6.5    |
| 13.8   | 6.8    | 9.4    | 4.5    | 7.9    | 4.9    | 3.5    | 1.2    | 1.5    |
| 0.6    | 1.5    | 1.4    | 2.0    | 8.7    | 4.0    | 3.5    | 3.3    | 2.5    |
| 3.9    | 2.7    | 6.6    | 0.7    | 0.8    | 2.8    | 5.3    | 4.7    | 1.2    |
| 40.5   | 33.9   | 32.8   | 26.0   | 33.5   | 32.9   | 21.9   | 33.7   | 31.5   |
| 4.4    | 3.6    | 2.9    | 5.1    | 4.2    | 4.0    | 5.9    | 2.4    | 7.4    |
| 13.8   | 12.1   | 11.5   | 14.6   | 4.9    | 12.4   | 2.8    | 1.7    | 13.6   |
| 5.3    | 2.3    | 1.3    | 4.7    | 7.1    | 3.3    | 9.9    | 4.4    | 6.5    |
| 44.9   | 40.3   | 64.4   | 55.4   | 26.7   | 17.6   | 24.1   | 21.1   | 32.4   |
| 8.5    | 14.7   | 3.2    | 3.4    | 1.5    | 1.8    | 1.0    | 0.9    | 3.6    |
| 1.7    | 0.9    | 1.1    | 2.9    | 4.3    | 0.8    | 0.4    | 0.9    | 0.8    |
| 1.0    | 1.1    | 4.3    | 0.8    | 2.2    | 0.5    | 3.2    | 0.7    | 4.3    |
| 5.4    | 5.9    | 9.1    | 7.6    | 1.7    | 4.1    | 5.5    | 2.3    | 0.6    |
| 6.1    | 6.8    | 13.6   | 4.2    | 9.3    | 2.6    | 7.1    | 1.4    | 2.3    |
| 53.9   | 59.3   | 56.5   | 39.8   | 67.6   | 102.2  | 73.0   | 74.0   | 88.1   |
| 4.0    | 4.1    | 9.5    | 1.4    | 2.0    | 4.1    | 2.4    | 1.8    | 3.3    |
| 2.7    | 6.3    | 5.6    | 5.7    | 2.7    | 3.0    | 7.9    | 2.7    | 4.7    |
| 6.4    | 3.9    | 11.3   | 11.2   | 4.5    | 4.8    | 10.5   | 7.7    | 9.4    |
| 69.7   | 85.7   | 121.4  | 70.3   | 66.4   | 40.3   | 62.7   | 89.9   | 122.3  |
| 16.2   | 15.6   | 31.2   | 15.8   | 25.7   | 29.8   | 23.9   | 36.0   | 53.1   |

|        |        |        |        |        |        |        |        |        |
|--------|--------|--------|--------|--------|--------|--------|--------|--------|
| 8.4    | 8.4    | 10.4   | 4.8    | 5.6    | 8.0    | 7.0    | 9.7    | 17.1   |
| 0.5    | 0.4    | 2.7    | 0.5    | 0.4    | 0.6    | 0.3    | 0.4    | 0.9    |
| 2.0    | 1.7    | 2.0    | 1.8    | 4.3    | 2.4    | 2.5    | 3.6    | 7.3    |
| 3.9    | 2.9    | 10.4   | 4.7    | 1.9    | 1.2    | 1.7    | 18.9   | 6.7    |
| 1.1    | 1.5    | 1.0    | 0.7    | 1.1    | 4.3    | 0.9    | 3.4    | 2.8    |
| 10.5   | 11.2   | 14.0   | 13.9   | 3.1    | 2.8    | 6.3    | 6.4    | 12.2   |
| 3.9    | 14.8   | 10.9   | 6.9    | 2.4    | 3.2    | 7.1    | 1.6    | 15.5   |
| 2.1    | 4.5    | 2.1    | 1.8    | 1.0    | 1.1    | 2.4    | 0.8    | 1.3    |
| 3.2    | 2.5    | 3.3    | 8.3    | 2.2    | 1.8    | 2.1    | 8.3    | 9.8    |
| 1.5    | 1.4    | 1.6    | 6.0    | 0.8    | 3.3    | 6.4    | 0.7    | 2.6    |
| 2.7    | 2.8    | 0.7    | 5.5    | 1.6    | 4.0    | 2.7    | 3.9    | 2.5    |
| 7.2    | 2.2    | 3.6    | 1.7    | 2.0    | 1.2    | 1.6    | 2.6    | 3.1    |
| 0.6    | 1.2    | 4.9    | 5.5    | 0.5    | 0.2    | 2.2    | 2.8    | 2.3    |
| 2.3    | 3.2    | 5.5    | 6.5    | 4.1    | 4.5    | 5.4    | 7.6    | 8.3    |
| 11.9   | 16.5   | 19.5   | 16.1   | 3.8    | 5.8    | 10.4   | 13.3   | 9.3    |
| 8507.9 | 8068.3 | 8037.1 | 7019.9 | 7888.0 | 7398.3 | 7959.5 | 8523.2 | 1308.0 |
| 4.3    | 4.9    | 5.7    | 14.1   | 0.7    | 1.3    | 2.4    | 1.7    | 7.4    |
| 6.4    | 6.9    | 5.1    | 5.1    | 2.2    | 2.3    | 4.7    | 6.5    | 8.5    |
| 0.5    | 1.4    | 0.4    | 4.5    | 0.4    | 0.3    | 0.3    | 1.6    | 0.8    |
| 4.5    | 3.0    | 2.4    | 2.2    | 2598.5 | 3091.6 | 3534.0 | 2919.0 | 112.9  |
| 8.5    | 3.4    | 4.4    | 3.6    | 2.4    | 3.2    | 3.0    | 0.8    | 5.4    |
| 3.9    | 4.3    | 2.3    | 4.8    | 4.2    | 2.4    | 4.2    | 1.8    | 2.8    |
| 1.2    | 2.7    | 11.0   | 2.0    | 1.3    | 2.7    | 1.3    | 2.5    | 1.8    |
| 14.7   | 5.8    | 9.9    | 11.4   | 5.5    | 3.8    | 4.1    | 4.2    | 27.0   |
| 1.5    | 1.5    | 3.6    | 0.6    | 0.9    | 0.5    | 0.9    | 4.5    | 2.2    |
| 7.3    | 5.6    | 4.6    | 3.2    | 7.1    | 6.1    | 10.0   | 4.1    | 3.9    |
| 446.9  | 450.0  | 453.9  | 450.9  | 1256.3 | 1137.2 | 1401.3 | 1487.1 | 1085.2 |
| 45.4   | 44.6   | 60.7   | 40.6   | 124.1  | 84.2   | 127.6  | 138.9  | 114.8  |
| 7.6    | 11.7   | 13.1   | 8.5    | 11.9   | 1.7    | 6.9    | 16.2   | 6.8    |
| 16.4   | 4.6    | 14.2   | 7.9    | 1.5    | 5.1    | 3.0    | 4.8    | 7.0    |
| 7.0    | 8.6    | 13.5   | 7.7    | 7.3    | 10.2   | 3.6    | 1.2    | 9.3    |
| 0.5    | 6.5    | 0.7    | 2.6    | 0.6    | 2.1    | 1.8    | 2.4    | 3.4    |
| 28.1   | 18.4   | 28.6   | 24.3   | 23.1   | 12.7   | 26.8   | 32.3   | 35.4   |
| 4.3    | 4.8    | 4.8    | 9.4    | 5.1    | 3.3    | 1.5    | 11.2   | 1.3    |
| 512.8  | 515.7  | 655.7  | 471.3  | 783.4  | 727.2  | 856.2  | 952.5  | 854.1  |
| 19.0   | 4.1    | 6.2    | 4.9    | 9.0    | 3.5    | 13.7   | 10.5   | 9.5    |
| 10.8   | 5.6    | 12.4   | 11.7   | 13.6   | 4.8    | 6.1    | 2.5    | 18.8   |
| 2.1    | 3.2    | 3.5    | 2.8    | 7.3    | 3.8    | 4.0    | 2.5    | 10.5   |
| 12.2   | 15.7   | 17.3   | 13.7   | 14.1   | 8.0    | 6.5    | 2.5    | 9.2    |
| 0.2    | 0.7    | 2.2    | 2.2    | 49.4   | 25.8   | 40.2   | 41.5   | 27.6   |
| 0.5    | 0.5    | 1.1    | 3.1    | 3.8    | 0.5    | 5.1    | 3.0    | 9.1    |
| 2.2    | 1.3    | 4.1    | 3.2    | 4.9    | 5.0    | 11.5   | 5.0    | 3.4    |
| 4.9    | 3.7    | 6.7    | 1.7    | 2.1    | 4.6    | 3.8    | 2.8    | 2.0    |
| 1.1    | 1.7    | 1.4    | 0.2    | 1.8    | 5.3    | 3.6    | 2.6    | 5.6    |
| 15.4   | 6.9    | 11.8   | 9.1    | 10.7   | 3.4    | 15.6   | 19.3   | 16.1   |
| 2.9    | 2.3    | 1.9    | 1.2    | 4.3    | 4.2    | 0.9    | 1.3    | 16.6   |
| 2.8    | 0.7    | 4.4    | 2.9    | 3.3    | 0.7    | 0.5    | 7.3    | 6.0    |
| 5.6    | 9.0    | 9.1    | 6.5    | 18.8   | 19.8   | 13.7   | 25.1   | 18.1   |
| 4.2    | 2.0    | 5.3    | 3.1    | 1134.5 | 785.9  | 1005.8 | 1236.1 | 566.1  |
| 10.3   | 2.4    | 5.4    | 5.8    | 12.7   | 1.5    | 3.5    | 8.1    | 3.9    |
| 4.3    | 3.4    | 5.3    | 8.2    | 2.9    | 5.1    | 9.9    | 1.5    | 5.7    |
| 17.1   | 13.2   | 20.4   | 10.0   | 15.4   | 12.9   | 12.9   | 16.5   | 9.7    |
| 30.5   | 36.6   | 48.5   | 30.7   | 35.4   | 23.2   | 29.9   | 37.1   | 57.0   |

|        |        |        |        |        |        |        |        |         |
|--------|--------|--------|--------|--------|--------|--------|--------|---------|
| 26.3   | 16.3   | 22.5   | 20.8   | 17.9   | 7.4    | 8.9    | 19.1   | 17.3    |
| 7.5    | 4.5    | 5.3    | 1.7    | 3.9    | 0.6    | 2.1    | 1.1    | 10.1    |
| 1.9    | 3.7    | 1.0    | 0.3    | 5.8    | 1.3    | 2.2    | 1.2    | 4.1     |
| 18.5   | 20.7   | 19.1   | 19.0   | 19.6   | 16.3   | 14.1   | 19.6   | 38.9    |
| 6.4    | 11.7   | 14.7   | 11.5   | 14.5   | 12.3   | 17.6   | 13.9   | 13.8    |
| 7.1    | 9.8    | 6.3    | 3.8    | 6.1    | 11.5   | 12.3   | 4.8    | 15.2    |
| 16.2   | 8.9    | 18.3   | 12.9   | 9.0    | 4.0    | 8.9    | 9.1    | 9.4     |
| 260.6  | 253.9  | 441.0  | 282.5  | 874.4  | 806.1  | 938.0  | 936.4  | 1128.3  |
| 504.2  | 382.7  | 760.3  | 377.4  | 1096.7 | 991.4  | 1189.6 | 1322.9 | 1310.1  |
| 3.2    | 2.8    | 5.6    | 2.1    | 1.6    | 1.7    | 1.0    | 2.3    | 2.1     |
| 121.2  | 118.6  | 144.4  | 106.6  | 48.7   | 65.6   | 49.8   | 85.9   | 104.1   |
| 1.1    | 1.0    | 2.0    | 1.1    | 0.9    | 1.7    | 1.9    | 1.8    | 2.2     |
| 17.8   | 23.8   | 24.5   | 21.5   | 63.6   | 58.1   | 68.5   | 53.3   | 47.6    |
| 12.2   | 11.5   | 9.6    | 14.4   | 9.5    | 8.1    | 9.2    | 17.2   | 15.4    |
| 37.4   | 19.8   | 38.1   | 37.7   | 20.3   | 25.7   | 12.2   | 17.7   | 30.0    |
| 0.8    | 1.6    | 4.1    | 2.0    | 4.6    | 1.3    | 3.1    | 5.2    | 1.0     |
| 26.2   | 27.3   | 28.1   | 15.1   | 20.7   | 12.5   | 11.9   | 13.8   | 18.0    |
| 2.6    | 2.5    | 1.2    | 1.4    | 210.8  | 184.4  | 200.9  | 240.9  | 184.4   |
| 0.5    | 3.2    | 0.9    | 0.6    | 8.8    | 6.2    | 14.2   | 11.3   | 17.1    |
| 5.8    | 16.2   | 3.9    | 14.4   | 2.3    | 3.8    | 3.4    | 5.4    | 6.4     |
| 1.9    | 1.4    | 1.3    | 4.0    | 1.8    | 1.9    | 1.1    | 1.0    | 1.8     |
| 32.3   | 40.6   | 56.8   | 24.5   | 29.5   | 19.8   | 30.8   | 63.7   | 87.3    |
| 4.3    | 5.4    | 4.1    | 2.2    | 2.3    | 4.0    | 1.8    | 1.1    | 5.3     |
| 10.4   | 20.9   | 24.0   | 12.1   | 12.8   | 5.0    | 9.4    | 16.2   | 28.0    |
| 4.6    | 9.1    | 11.5   | 6.2    | 13.2   | 3.7    | 10.4   | 16.5   | 11.0    |
| 3.0    | 4.9    | 2.2    | 1.3    | 1.7    | 1.2    | 1.0    | 9.3    | 2.1     |
| 10.0   | 7.7    | 5.5    | 3.2    | 7.4    | 4.3    | 1.9    | 3.5    | 8.2     |
| 33.6   | 30.2   | 51.7   | 39.4   | 87.1   | 92.5   | 103.3  | 99.0   | 111.1   |
| 7.4    | 6.0    | 13.8   | 2.9    | 20.2   | 13.3   | 22.6   | 28.7   | 20.4    |
| 918.1  | 845.5  | 1232.6 | 897.7  | 1456.4 | 1400.9 | 1429.0 | 1717.6 | 1383.8  |
| 29.0   | 28.9   | 44.2   | 26.6   | 63.5   | 58.2   | 70.6   | 61.1   | 86.3    |
| 1.3    | 9.0    | 4.0    | 2.3    | 2.3    | 4.9    | 2.3    | 3.1    | 5.9     |
| 845.8  | 740.8  | 1356.2 | 742.6  | 1534.5 | 952.6  | 1455.7 | 1707.6 | 2579.2  |
| 20.0   | 12.7   | 17.7   | 16.6   | 14.2   | 12.8   | 16.1   | 17.0   | 21.1    |
| 2.9    | 3.7    | 1.7    | 1.8    | 2.4    | 0.6    | 4.2    | 0.7    | 1.1     |
| 85.1   | 89.5   | 92.4   | 76.5   | 134.5  | 120.7  | 123.2  | 139.5  | 369.0   |
| 10.6   | 18.1   | 29.2   | 13.9   | 11.6   | 13.2   | 14.6   | 12.6   | 10.7    |
| 1.0    | 2.0    | 8.6    | 2.0    | 1.2    | 4.9    | 0.8    | 0.7    | 0.7     |
| 13.0   | 7.6    | 15.9   | 10.4   | 9.5    | 6.8    | 6.1    | 6.2    | 9.7     |
| 2484.8 | 2306.5 | 3226.9 | 2224.3 | 1868.8 | 1172.1 | 1736.1 | 2241.1 | 2814.4  |
| 4.0    | 6.7    | 5.6    | 5.1    | 5.3    | 4.6    | 8.5    | 4.3    | 14.4    |
| 1.0    | 0.5    | 7.7    | 1.7    | 1.6    | 1.6    | 7.4    | 0.5    | 2.8     |
| 6.6    | 3.5    | 3.3    | 1.2    | 0.5    | 0.2    | 0.6    | 1.0    | 4.2     |
| 8.7    | 8.2    | 13.6   | 8.5    | 9.0    | 9.1    | 7.3    | 5.1    | 6.8     |
| 7965.8 | 7787.6 | 7912.0 | 7606.3 | 7525.7 | 7966.1 | 7331.9 | 8284.5 | 10477.0 |
| 206.9  | 176.9  | 311.2  | 205.8  | 137.1  | 109.6  | 125.3  | 150.4  | 226.2   |
| 18.1   | 20.6   | 27.5   | 12.8   | 2.9    | 14.3   | 31.0   | 27.7   | 12.6    |
| 65.7   | 74.3   | 52.7   | 60.3   | 38.8   | 46.8   | 59.5   | 73.8   | 109.3   |
| 538.8  | 408.1  | 657.8  | 499.6  | 402.0  | 442.0  | 410.8  | 402.2  | 580.4   |
| 2114.1 | 2044.9 | 2171.0 | 1638.9 | 4161.7 | 4971.0 | 4425.1 | 4745.5 | 3021.4  |
| 14.0   | 11.0   | 11.6   | 12.8   | 4.9    | 3.8    | 4.5    | 7.9    | 7.1     |
| 9.5    | 8.1    | 6.4    | 4.2    | 9.7    | 4.8    | 5.6    | 10.6   | 14.8    |
| 3.2    | 6.8    | 2.0    | 4.9    | 2.8    | 0.5    | 4.1    | 5.3    | 5.3     |



|       |       |        |       |        |       |       |        |        |
|-------|-------|--------|-------|--------|-------|-------|--------|--------|
| 17.0  | 18.0  | 6.0    | 12.9  | 6.3    | 4.6   | 4.6   | 1.2    | 9.5    |
| 40.9  | 50.8  | 72.2   | 38.4  | 38.8   | 39.7  | 37.6  | 45.9   | 40.5   |
| 42.9  | 79.8  | 121.7  | 70.7  | 411.1  | 230.4 | 425.7 | 475.9  | 548.0  |
| 2.5   | 6.3   | 1.3    | 1.6   | 0.5    | 4.6   | 2.1   | 0.1    | 2.7    |
| 2.9   | 1.3   | 7.2    | 2.0   | 1.5    | 0.8   | 2.3   | 2.0    | 2.2    |
| 3.5   | 11.8  | 4.7    | 5.0   | 6.3    | 9.8   | 3.1   | 7.2    | 24.0   |
| 1.6   | 0.6   | 2.0    | 0.8   | 1.0    | 3.7   | 1.3   | 1.1    | 3.6    |
| 11.0  | 9.5   | 9.3    | 5.8   | 3.3    | 7.7   | 6.7   | 1.7    | 8.0    |
| 15.6  | 7.4   | 27.6   | 15.1  | 13.3   | 8.5   | 11.0  | 25.9   | 16.5   |
| 6.8   | 6.0   | 8.6    | 8.2   | 2.6    | 2.9   | 0.8   | 4.9    | 5.3    |
| 11.0  | 7.9   | 17.6   | 12.6  | 9.6    | 9.0   | 3.8   | 13.5   | 13.3   |
| 5.1   | 4.6   | 2.0    | 1.5   | 1.1    | 1.1   | 2.9   | 0.4    | 4.2    |
| 15.5  | 20.1  | 34.0   | 21.9  | 16.7   | 15.7  | 21.7  | 5.0    | 23.9   |
| 0.6   | 0.6   | 2.1    | 1.7   | 0.6    | 2.6   | 1.3   | 1.0    | 1.4    |
| 6.7   | 12.7  | 5.9    | 1.4   | 5.5    | 3.4   | 8.5   | 1.7    | 14.3   |
| 36.4  | 39.1  | 58.1   | 34.6  | 25.0   | 22.5  | 34.4  | 41.6   | 46.5   |
| 10.5  | 9.3   | 14.0   | 17.8  | 3.4    | 5.3   | 1.8   | 4.4    | 16.4   |
| 97.1  | 117.3 | 167.8  | 115.8 | 140.9  | 116.2 | 132.2 | 157.2  | 225.2  |
| 91.7  | 70.1  | 135.6  | 65.1  | 223.3  | 149.0 | 285.6 | 248.8  | 166.2  |
| 21.9  | 25.4  | 40.4   | 18.0  | 38.8   | 42.1  | 36.7  | 53.0   | 21.2   |
| 65.4  | 62.2  | 77.7   | 44.9  | 31.5   | 23.7  | 35.9  | 53.3   | 42.7   |
| 37.0  | 41.9  | 52.3   | 41.7  | 78.9   | 54.6  | 73.0  | 58.3   | 86.3   |
| 2.2   | 3.4   | 2.9    | 1.6   | 4.9    | 2.8   | 6.0   | 4.8    | 2.7    |
| 11.3  | 10.2  | 15.9   | 16.6  | 7.2    | 7.8   | 4.9   | 6.9    | 9.3    |
| 61.1  | 54.2  | 102.2  | 73.1  | 107.0  | 80.7  | 108.4 | 115.3  | 170.0  |
| 12.7  | 12.9  | 19.8   | 9.6   | 7.9    | 10.4  | 13.0  | 13.4   | 18.7   |
| 20.2  | 20.1  | 24.9   | 19.4  | 19.0   | 12.3  | 21.3  | 24.4   | 29.9   |
| 4.6   | 5.8   | 4.3    | 3.8   | 12.7   | 6.3   | 3.5   | 9.0    | 2.8    |
| 8.6   | 4.6   | 1.3    | 2.3   | 1.1    | 4.3   | 5.9   | 0.6    | 6.0    |
| 464.6 | 456.1 | 644.8  | 361.5 | 557.3  | 487.8 | 576.2 | 655.2  | 1728.1 |
| 1.2   | 1.7   | 1.9    | 1.4   | 1.9    | 1.4   | 1.9   | 1.2    | 3.8    |
| 5.0   | 5.8   | 4.8    | 6.1   | 7.8    | 2.3   | 3.0   | 12.6   | 35.2   |
| 6.5   | 7.6   | 5.6    | 6.0   | 14.9   | 15.2  | 26.3  | 6.2    | 15.3   |
| 16.8  | 13.3  | 19.5   | 17.1  | 17.3   | 18.2  | 26.2  | 26.4   | 13.8   |
| 1.9   | 1.9   | 4.4    | 1.6   | 13.2   | 8.1   | 9.8   | 16.7   | 3.8    |
| 34.5  | 43.7  | 31.9   | 31.6  | 166.8  | 137.4 | 152.6 | 200.5  | 266.7  |
| 10.1  | 6.1   | 7.5    | 2.3   | 8.2    | 4.7   | 7.3   | 18.1   | 10.0   |
| 0.9   | 0.8   | 1.1    | 0.7   | 1.5    | 1.1   | 0.9   | 1.0    | 1.3    |
| 134.2 | 102.8 | 197.8  | 128.0 | 60.7   | 22.8  | 65.2  | 55.7   | 9.3    |
| 12.7  | 12.4  | 12.8   | 13.4  | 3.5    | 5.1   | 6.5   | 5.1    | 7.8    |
| 904.3 | 770.3 | 1049.7 | 766.4 | 1012.9 | 919.6 | 962.6 | 1062.9 | 3397.0 |
| 6.1   | 9.9   | 3.3    | 7.1   | 12.5   | 3.6   | 3.9   | 6.1    | 4.5    |
| 0.5   | 0.7   | 1.4    | 1.2   | 0.8    | 1.0   | 1.1   | 1.2    | 1.1    |
| 1.2   | 5.3   | 0.9    | 2.1   | 0.7    | 0.5   | 4.5   | 0.5    | 3.4    |
| 71.3  | 60.9  | 120.2  | 52.0  | 283.7  | 252.4 | 308.5 | 355.8  | 117.7  |
| 2.9   | 3.9   | 9.0    | 3.0   | 4.2    | 3.2   | 3.7   | 3.0    | 8.3    |
| 5.1   | 2.7   | 3.4    | 2.2   | 1.8    | 5.6   | 1.2   | 2.0    | 3.9    |
| 15.4  | 16.4  | 14.2   | 9.5   | 14.0   | 19.3  | 16.2  | 38.9   | 30.9   |
| 2.1   | 2.4   | 3.4    | 2.0   | 1.9    | 1.5   | 4.3   | 0.9    | 3.2    |
| 3.3   | 2.1   | 3.6    | 3.3   | 1.8    | 1.8   | 1.2   | 7.4    | 2.6    |
| 14.0  | 7.9   | 8.9    | 9.4   | 6.7    | 4.6   | 3.2   | 5.8    | 13.0   |
| 7.5   | 14.8  | 26.8   | 3.5   | 10.3   | 1.4   | 8.9   | 6.0    | 4.9    |
| 37.5  | 33.1  | 36.1   | 18.9  | 12.8   | 12.2  | 15.8  | 24.0   | 28.8   |

|        |        |        |        |        |        |        |        |        |
|--------|--------|--------|--------|--------|--------|--------|--------|--------|
| 79.8   | 79.0   | 113.4  | 97.2   | 152.3  | 146.7  | 171.4  | 179.9  | 252.3  |
| 2.1    | 2.5    | 4.1    | 7.2    | 1.3    | 3.0    | 2.2    | 19.0   | 1.8    |
| 12.3   | 9.0    | 22.6   | 9.5    | 5.5    | 5.3    | 3.2    | 10.1   | 14.3   |
| 1.8    | 18.7   | 14.3   | 3.2    | 4.2    | 4.8    | 6.0    | 2.2    | 9.4    |
| 7.4    | 6.8    | 2.9    | 2.1    | 4.7    | 1.3    | 2.8    | 1.4    | 55.1   |
| 2.7    | 6.2    | 3.7    | 5.3    | 2.3    | 2.8    | 0.3    | 3.0    | 7.4    |
| 15.9   | 30.4   | 34.7   | 25.2   | 21.5   | 18.2   | 22.1   | 28.8   | 24.6   |
| 5.4    | 5.2    | 6.8    | 6.6    | 5.1    | 6.3    | 3.1    | 5.6    | 6.6    |
| 1015.6 | 939.4  | 1161.9 | 831.7  | 612.0  | 656.4  | 707.6  | 758.9  | 1288.1 |
| 3.2    | 5.3    | 9.7    | 2.1    | 1.3    | 1.2    | 5.4    | 1.9    | 10.5   |
| 287.6  | 278.7  | 328.6  | 263.5  | 345.0  | 307.6  | 337.9  | 422.6  | 411.7  |
| 15.4   | 23.1   | 34.9   | 22.1   | 3829.0 | 2949.0 | 4470.9 | 4892.3 | 481.9  |
| 7.8    | 9.1    | 12.8   | 9.8    | 4.9    | 6.9    | 12.5   | 12.1   | 14.8   |
| 7.3    | 6.1    | 12.2   | 3.2    | 10.5   | 8.1    | 7.7    | 12.0   | 4.3    |
| 3.0    | 2.2    | 3.0    | 2.0    | 1.6    | 1.8    | 6.2    | 2.9    | 2.6    |
| 0.9    | 2.5    | 5.7    | 7.1    | 20.5   | 13.5   | 22.3   | 11.3   | 573.9  |
| 1.6    | 1.7    | 3.8    | 1.7    | 0.9    | 2.0    | 1.1    | 1.6    | 2.3    |
| 45.4   | 30.4   | 64.8   | 35.8   | 30.6   | 26.5   | 30.7   | 47.1   | 57.9   |
| 10.5   | 16.8   | 7.4    | 17.8   | 7.4    | 3.1    | 4.8    | 16.6   | 5.7    |
| 200.1  | 150.2  | 384.1  | 220.7  | 572.3  | 471.5  | 554.7  | 628.8  | 2343.8 |
| 8.4    | 6.3    | 3.3    | 7.7    | 1.6    | 0.8    | 1.1    | 1.1    | 8.8    |
| 37.6   | 40.4   | 44.6   | 44.8   | 20.8   | 9.2    | 26.4   | 26.3   | 25.5   |
| 1.3    | 1.0    | 2.8    | 2.9    | 4.8    | 3.2    | 4.3    | 1.6    | 7.0    |
| 180.4  | 149.2  | 227.2  | 109.5  | 133.7  | 99.4   | 118.4  | 115.0  | 442.5  |
| 494.2  | 402.3  | 970.0  | 370.8  | 868.9  | 830.4  | 1204.8 | 1022.8 | 351.4  |
| 7.0    | 16.2   | 9.6    | 5.5    | 2.7    | 6.6    | 1.1    | 3.9    | 5.1    |
| 91.0   | 88.2   | 104.2  | 89.3   | 163.5  | 138.2  | 153.1  | 204.7  | 238.9  |
| 7.5    | 4.9    | 2.3    | 1.1    | 2.9    | 1.0    | 6.4    | 7.2    | 8.9    |
| 12.6   | 2.4    | 7.8    | 2.3    | 6.9    | 1.4    | 2.7    | 1.6    | 3.2    |
| 4.2    | 6.5    | 1.8    | 7.4    | 4.0    | 2.3    | 3.7    | 1.2    | 7.9    |
| 3.7    | 2.7    | 3.3    | 2.6    | 4.1    | 2.2    | 3.7    | 0.5    | 2.2    |
| 6.4    | 5.9    | 3.4    | 3.2    | 1.6    | 5.4    | 2.4    | 7.8    | 7.3    |
| 20.0   | 18.3   | 15.7   | 20.1   | 62.4   | 71.1   | 59.8   | 77.6   | 16.0   |
| 0.9    | 1.6    | 1.5    | 1.9    | 3.6    | 0.8    | 0.9    | 2.5    | 1.0    |
| 1.1    | 1.1    | 3.0    | 2.4    | 0.6    | 0.9    | 2.9    | 1.0    | 1.1    |
| 3.9    | 2.7    | 10.5   | 3.8    | 6.0    | 5.6    | 8.8    | 4.0    | 8.2    |
| 3.9    | 1.6    | 3.7    | 1.0    | 0.3    | 0.2    | 0.2    | 1.1    | 2.5    |
| 118.1  | 130.0  | 78.6   | 106.9  | 352.7  | 445.1  | 337.4  | 367.1  | 109.3  |
| 13.6   | 9.8    | 7.9    | 10.7   | 8.5    | 3.8    | 5.7    | 2.3    | 6.0    |
| 4.0    | 1.8    | 5.6    | 4.8    | 2.2    | 3.3    | 5.5    | 9.3    | 10.8   |
| 1195.3 | 1017.8 | 1814.0 | 1005.8 | 0.4    | 1.1    | 1.4    | 4.1    | 1.6    |
| 28.9   | 22.0   | 39.1   | 24.7   | 32.8   | 24.3   | 34.9   | 55.6   | 43.1   |
| 4.1    | 3.7    | 4.6    | 2.7    | 3.3    | 5.5    | 4.2    | 3.0    | 7.9    |
| 5.5    | 6.7    | 1.6    | 3.9    | 2.8    | 3.8    | 2.9    | 1.6    | 1.5    |
| 47.0   | 40.5   | 78.4   | 30.1   | 29.6   | 21.5   | 33.0   | 33.4   | 60.7   |
| 4.3    | 5.0    | 11.4   | 8.1    | 8.7    | 10.2   | 5.8    | 11.1   | 6.4    |
| 8.5    | 5.8    | 1.8    | 4.9    | 0.9    | 6.3    | 9.3    | 6.8    | 8.7    |
| 1.6    | 3.3    | 2.9    | 2.1    | 1.4    | 1.2    | 2.3    | 1.3    | 2.6    |
| 14.0   | 22.8   | 41.4   | 18.8   | 8.7    | 9.2    | 4.7    | 9.1    | 27.3   |
| 0.5    | 2.4    | 0.7    | 0.8    | 0.4    | 0.4    | 0.4    | 0.4    | 2.2    |
| 12.7   | 2.0    | 23.3   | 7.1    | 3.7    | 2.7    | 8.4    | 1.9    | 7.0    |
| 6.3    | 4.3    | 14.2   | 7.1    | 3.5    | 3.6    | 2.9    | 8.2    | 5.7    |
| 5.4    | 9.0    | 8.6    | 6.4    | 3.9    | 3.9    | 3.8    | 8.7    | 9.5    |

|       |       |       |       |        |        |        |        |        |
|-------|-------|-------|-------|--------|--------|--------|--------|--------|
| 0.7   | 3.6   | 5.3   | 2.3   | 4.7    | 5.4    | 2.1    | 3.3    | 0.6    |
| 3.8   | 6.0   | 2.9   | 3.6   | 5.0    | 2.1    | 1.9    | 3.1    | 3.2    |
| 49.2  | 50.6  | 44.2  | 46.3  | 5.1    | 6.8    | 5.1    | 8.4    | 1.7    |
| 3.3   | 2.9   | 4.8   | 5.6   | 2.6    | 3.4    | 2.9    | 0.3    | 6.0    |
| 775.5 | 746.3 | 990.4 | 797.7 | 1774.3 | 1725.2 | 1960.4 | 2033.0 | 1924.4 |
| 83.2  | 75.3  | 215.3 | 88.8  | 9.9    | 6.9    | 3.8    | 5.0    | 43.5   |
| 2.6   | 7.6   | 2.9   | 7.9   | 5.7    | 1.1    | 5.6    | 1.0    | 10.3   |
| 2.7   | 8.3   | 9.7   | 3.9   | 0.9    | 6.4    | 2.6    | 5.5    | 6.6    |
| 6.1   | 7.2   | 10.7  | 5.9   | 5.4    | 3.8    | 3.1    | 8.1    | 6.6    |
| 6.7   | 19.3  | 26.2  | 13.4  | 5.0    | 4.8    | 3.9    | 29.4   | 23.5   |
| 1.4   | 2.0   | 1.8   | 1.8   | 1.2    | 4.0    | 1.1    | 3.2    | 3.5    |
| 15.4  | 9.9   | 4.4   | 8.2   | 3.5    | 4.5    | 5.0    | 14.3   | 6.4    |
| 5.0   | 4.2   | 9.9   | 4.0   | 9.1    | 3.2    | 5.0    | 4.9    | 11.8   |
| 2.0   | 1.4   | 0.6   | 1.1   | 0.7    | 0.4    | 1.0    | 0.8    | 1.5    |
| 38.5  | 40.8  | 73.5  | 41.0  | 39.2   | 39.3   | 27.0   | 54.5   | 70.9   |
| 7.7   | 6.5   | 10.3  | 6.0   | 7.0    | 6.7    | 2.3    | 15.2   | 1.2    |
| 205.8 | 176.7 | 270.8 | 152.2 | 572.8  | 565.5  | 602.9  | 635.0  | 383.0  |
| 3.9   | 3.4   | 4.7   | 4.4   | 2.3    | 3.6    | 0.7    | 1.0    | 7.5    |
| 8.4   | 9.0   | 4.8   | 10.2  | 1.8    | 2.2    | 3.2    | 3.4    | 4.2    |
| 4.5   | 9.7   | 2.3   | 6.0   | 1.0    | 2.2    | 1.4    | 9.7    | 1.3    |
| 1.1   | 1.5   | 1.9   | 1.0   | 1.0    | 1.2    | 0.7    | 0.9    | 1.1    |
| 5.2   | 10.1  | 10.7  | 12.0  | 10.9   | 3.9    | 4.6    | 10.9   | 11.1   |
| 3.1   | 7.1   | 14.0  | 13.3  | 8.1    | 5.3    | 14.1   | 14.6   | 11.5   |
| 8.6   | 0.7   | 4.3   | 4.0   | 2.8    | 0.2    | 2.9    | 3.7    | 1.2    |
| 0.6   | 0.7   | 0.5   | 0.8   | 0.5    | 1.0    | 0.4    | 1.6    | 0.9    |
| 19.9  | 4.4   | 20.8  | 16.6  | 20.3   | 18.2   | 17.4   | 23.7   | 20.4   |
| 12.8  | 14.6  | 16.3  | 10.5  | 15.0   | 8.0    | 8.9    | 3.0    | 14.8   |
| 9.5   | 4.7   | 15.4  | 11.0  | 12.2   | 16.1   | 14.7   | 25.4   | 13.6   |
| 4.8   | 6.3   | 1.9   | 3.8   | 2.1    | 1.8    | 2.0    | 10.1   | 6.3    |
| 1.1   | 1.8   | 1.3   | 1.8   | 1.3    | 0.8    | 1.5    | 2.1    | 0.9    |
| 2.1   | 2.1   | 14.0  | 0.8   | 4.6    | 1.1    | 3.4    | 9.9    | 24.5   |
| 2.1   | 4.2   | 3.7   | 2.9   | 7.6    | 9.3    | 8.0    | 1.0    | 10.5   |
| 18.0  | 28.7  | 39.9  | 23.5  | 15.5   | 11.8   | 3.6    | 4.7    | 27.4   |
| 6.0   | 5.2   | 6.6   | 4.8   | 6.9    | 2.2    | 6.1    | 8.7    | 16.1   |
| 1.0   | 1.3   | 1.3   | 1.2   | 0.8    | 1.0    | 1.2    | 1.3    | 1.5    |
| 2.8   | 4.1   | 3.4   | 2.6   | 2.6    | 2.2    | 2.9    | 5.5    | 6.1    |
| 0.4   | 3.1   | 3.1   | 3.2   | 3.0    | 7.1    | 1.7    | 2.8    | 3.8    |
| 9.7   | 9.7   | 18.9  | 13.6  | 8.3    | 2.3    | 3.3    | 13.4   | 10.3   |
| 2.9   | 1.8   | 0.7   | 1.1   | 5.5    | 4.6    | 0.7    | 1.1    | 2.8    |
| 11.8  | 16.7  | 24.1  | 25.8  | 12.5   | 10.1   | 12.9   | 11.2   | 17.3   |
| 7.7   | 1.4   | 9.4   | 3.3   | 3.8    | 2.0    | 2.6    | 3.3    | 2.1    |
| 14.0  | 15.7  | 22.2  | 18.2  | 14.1   | 12.6   | 17.9   | 20.2   | 12.4   |
| 38.9  | 46.2  | 54.0  | 47.2  | 65.3   | 48.9   | 49.5   | 61.6   | 72.4   |
| 8.4   | 6.3   | 9.4   | 3.2   | 10.3   | 3.9    | 8.9    | 12.5   | 2.4    |
| 77.1  | 82.6  | 104.5 | 81.4  | 107.0  | 91.8   | 86.5   | 77.7   | 49.9   |
| 3.6   | 2.5   | 2.8   | 3.7   | 2.3    | 3.3    | 2.9    | 6.2    | 13.1   |
| 14.6  | 15.7  | 15.5  | 15.0  | 11.0   | 7.7    | 7.1    | 13.4   | 13.5   |
| 7.4   | 6.1   | 4.4   | 3.9   | 7.9    | 4.2    | 6.2    | 8.4    | 7.1    |
| 182.7 | 153.3 | 187.1 | 146.5 | 169.0  | 149.8  | 157.9  | 182.1  | 186.0  |
| 26.7  | 24.0  | 31.4  | 19.7  | 99.9   | 68.0   | 90.0   | 106.6  | 482.8  |
| 0.7   | 2.9   | 2.7   | 3.2   | 3.0    | 2.8    | 1.4    | 1.4    | 3.2    |
| 31.6  | 29.9  | 10.4  | 16.0  | 3.9    | 0.8    | 3.4    | 12.6   | 1.2    |
| 4.9   | 4.9   | 4.2   | 2.5   | 6.4    | 8.8    | 5.2    | 1.2    | 16.1   |

|       |       |       |       |       |       |       |       |       |
|-------|-------|-------|-------|-------|-------|-------|-------|-------|
| 253.6 | 201.3 | 362.4 | 241.5 | 261.3 | 328.4 | 346.4 | 389.5 | 350.6 |
| 11.5  | 12.7  | 12.4  | 8.0   | 4.7   | 5.3   | 1.1   | 0.9   | 3.0   |
| 4.9   | 1.7   | 2.8   | 3.2   | 3.8   | 1.8   | 1.0   | 1.2   | 4.6   |
| 25.1  | 25.0  | 22.0  | 12.2  | 8.8   | 12.7  | 11.8  | 13.4  | 22.5  |
| 322.6 | 311.8 | 528.5 | 309.1 | 770.1 | 738.9 | 744.7 | 910.5 | 395.2 |
| 19.9  | 19.4  | 29.4  | 13.4  | 17.0  | 17.7  | 26.6  | 15.8  | 23.5  |
| 10.0  | 8.1   | 3.1   | 1.3   | 17.5  | 16.4  | 15.7  | 29.5  | 11.0  |
| 22.2  | 35.9  | 35.3  | 19.4  | 12.4  | 12.4  | 8.0   | 31.8  | 14.0  |
| 8.0   | 10.5  | 10.5  | 7.4   | 14.1  | 10.2  | 18.7  | 14.6  | 5.1   |
| 79.9  | 58.8  | 123.3 | 55.8  | 36.2  | 21.7  | 39.3  | 36.3  | 115.8 |
| 26.2  | 23.8  | 35.7  | 36.1  | 33.7  | 18.6  | 26.3  | 48.9  | 28.2  |
| 11.9  | 3.1   | 12.8  | 4.9   | 5.1   | 4.7   | 9.8   | 17.0  | 13.6  |
| 8.0   | 4.1   | 9.7   | 1.6   | 6.2   | 1.3   | 1.6   | 1.7   | 7.6   |
| 2.7   | 19.3  | 11.5  | 8.0   | 9.7   | 2.9   | 8.7   | 2.9   | 9.5   |
| 6.4   | 5.0   | 8.0   | 6.0   | 5.1   | 1.3   | 6.3   | 3.2   | 7.4   |
| 2.7   | 3.0   | 7.7   | 2.4   | 2.0   | 1.6   | 0.9   | 1.2   | 1.9   |
| 11.5  | 8.4   | 32.9  | 12.8  | 296.6 | 300.3 | 320.0 | 377.8 | 107.1 |
| 2.6   | 4.4   | 2.5   | 6.2   | 3.6   | 2.5   | 1.5   | 2.5   | 2.1   |
| 1.0   | 0.7   | 0.9   | 2.1   | 0.6   | 0.8   | 0.5   | 0.7   | 1.2   |
| 2.3   | 0.8   | 1.6   | 0.7   | 5.1   | 3.3   | 0.8   | 1.3   | 2.9   |
| 2.2   | 4.1   | 1.1   | 1.7   | 3.3   | 3.4   | 3.9   | 3.5   | 5.6   |
| 11.7  | 16.2  | 11.2  | 8.4   | 8.6   | 14.4  | 11.8  | 10.9  | 10.3  |
| 34.1  | 37.7  | 39.2  | 35.1  | 40.6  | 43.4  | 37.8  | 36.4  | 63.1  |
| 1.9   | 5.3   | 2.8   | 4.1   | 2.6   | 3.6   | 3.7   | 8.2   | 8.0   |
| 317.2 | 269.0 | 419.2 | 238.8 | 307.0 | 147.8 | 249.9 | 337.8 | 239.1 |
| 2.5   | 2.1   | 2.2   | 1.7   | 1.2   | 0.7   | 1.3   | 2.5   | 1.8   |
| 39.7  | 20.6  | 46.8  | 27.1  | 18.2  | 18.2  | 25.0  | 35.7  | 37.2  |
| 13.5  | 10.4  | 20.5  | 8.0   | 11.1  | 5.8   | 10.9  | 16.4  | 11.0  |
| 1.2   | 0.8   | 1.7   | 3.0   | 1.8   | 1.3   | 2.6   | 5.6   | 0.9   |
| 1.2   | 0.7   | 1.5   | 2.5   | 1.0   | 5.0   | 1.0   | 6.2   | 1.4   |
| 2.0   | 3.5   | 4.5   | 0.5   | 1.6   | 3.5   | 1.7   | 4.2   | 2.5   |
| 0.7   | 0.5   | 6.4   | 4.6   | 0.7   | 0.5   | 2.0   | 0.6   | 4.1   |
| 11.2  | 11.9  | 23.8  | 12.0  | 9.7   | 7.3   | 10.3  | 16.7  | 20.1  |
| 3.1   | 6.5   | 1.1   | 3.5   | 0.2   | 2.0   | 2.6   | 7.1   | 1.1   |
| 3.1   | 3.2   | 5.3   | 6.3   | 4.9   | 6.4   | 5.4   | 4.3   | 6.8   |
| 11.1  | 6.5   | 8.4   | 11.2  | 5.3   | 2.2   | 4.0   | 11.4  | 7.9   |
| 2.5   | 2.4   | 6.7   | 8.2   | 3.2   | 2.6   | 1.1   | 6.9   | 3.3   |
| 1.8   | 2.2   | 1.5   | 1.4   | 1.7   | 0.7   | 1.1   | 2.0   | 2.0   |
| 3.3   | 1.8   | 2.1   | 1.6   | 2.0   | 2.2   | 1.7   | 1.3   | 3.0   |
| 2.6   | 0.7   | 5.5   | 3.9   | 0.5   | 3.4   | 1.8   | 10.3  | 5.8   |
| 1.9   | 3.3   | 2.0   | 6.2   | 2.9   | 4.2   | 2.1   | 0.7   | 6.5   |
| 26.1  | 28.0  | 31.8  | 23.2  | 25.9  | 31.3  | 27.3  | 42.5  | 28.5  |
| 0.9   | 1.2   | 0.9   | 1.3   | 3.2   | 1.1   | 0.6   | 1.1   | 16.2  |
| 0.7   | 0.7   | 1.9   | 1.3   | 0.9   | 1.2   | 1.0   | 0.8   | 2.1   |
| 4.8   | 11.4  | 10.1  | 10.2  | 121.0 | 99.8  | 143.0 | 140.6 | 11.4  |
| 1.2   | 0.9   | 2.6   | 1.6   | 1.2   | 1.0   | 1.5   | 1.3   | 2.8   |
| 10.9  | 15.1  | 11.8  | 9.5   | 4.8   | 10.4  | 9.6   | 6.3   | 8.8   |
| 3.6   | 4.2   | 12.0  | 4.4   | 13.4  | 7.6   | 10.4  | 23.0  | 11.6  |
| 2.1   | 0.8   | 0.4   | 0.3   | 0.8   | 0.2   | 2.1   | 2.4   | 1.5   |
| 9.9   | 13.4  | 16.2  | 9.4   | 11.0  | 6.0   | 12.7  | 14.2  | 10.3  |
| 20.7  | 23.2  | 37.9  | 22.7  | 18.2  | 12.2  | 21.8  | 14.0  | 31.3  |
| 26.0  | 21.2  | 26.4  | 18.5  | 6.9   | 5.0   | 4.5   | 11.2  | 9.0   |
| 4.2   | 2.1   | 2.4   | 2.0   | 1.7   | 1.7   | 1.6   | 1.2   | 1.7   |

|      |      |      |      |      |      |      |      |      |
|------|------|------|------|------|------|------|------|------|
| 0.9  | 1.9  | 1.2  | 0.9  | 0.7  | 1.2  | 2.7  | 2.0  | 3.0  |
| 2.9  | 1.5  | 2.6  | 3.4  | 2.8  | 1.3  | 1.4  | 2.6  | 3.8  |
| 1.2  | 2.7  | 8.6  | 6.6  | 3.3  | 3.4  | 1.9  | 0.6  | 3.4  |
| 24.6 | 29.8 | 18.7 | 31.8 | 21.1 | 21.2 | 24.9 | 28.0 | 34.8 |
| 5.1  | 3.0  | 4.7  | 5.3  | 3.6  | 0.8  | 5.0  | 4.8  | 10.5 |
| 4.1  | 1.9  | 8.7  | 3.8  | 6.1  | 2.3  | 1.1  | 1.0  | 1.0  |
| 12.3 | 20.2 | 20.8 | 6.4  | 8.1  | 4.7  | 5.1  | 10.2 | 14.4 |
| 3.0  | 4.8  | 13.0 | 4.6  | 4.3  | 4.9  | 1.1  | 7.9  | 6.7  |
| 32.2 | 21.1 | 25.8 | 16.8 | 13.0 | 19.8 | 15.8 | 19.7 | 23.2 |
| 13.2 | 16.1 | 19.8 | 15.7 | 11.4 | 19.5 | 8.0  | 22.1 | 23.9 |
| 0.4  | 1.0  | 3.7  | 5.8  | 0.4  | 1.9  | 6.9  | 4.4  | 4.2  |
| 7.5  | 10.3 | 14.0 | 14.3 | 6.6  | 4.9  | 8.0  | 11.3 | 10.9 |
| 2.5  | 2.9  | 2.9  | 4.2  | 1.9  | 1.2  | 3.7  | 1.2  | 2.8  |
| 14.6 | 12.0 | 13.9 | 11.2 | 14.0 | 14.5 | 11.0 | 16.6 | 21.9 |
| 6.9  | 12.0 | 9.5  | 10.8 | 9.8  | 5.4  | 4.3  | 8.1  | 10.5 |
| 12.0 | 12.2 | 19.9 | 11.1 | 4.0  | 7.2  | 4.9  | 2.2  | 13.5 |
| 2.9  | 2.3  | 4.2  | 2.9  | 1.5  | 0.8  | 2.7  | 1.6  | 1.9  |
| 8.6  | 7.0  | 14.0 | 10.6 | 3.7  | 4.7  | 5.3  | 11.8 | 9.1  |
| 1.6  | 1.9  | 2.9  | 2.4  | 1.3  | 1.2  | 4.1  | 1.0  | 2.3  |
| 1.6  | 1.4  | 2.1  | 2.2  | 4.5  | 1.4  | 1.7  | 1.0  | 1.4  |
| 2.3  | 11.8 | 7.8  | 11.6 | 6.0  | 5.6  | 14.3 | 7.8  | 5.8  |
| 3.4  | 1.6  | 2.2  | 1.4  | 2.3  | 3.0  | 2.1  | 18.5 | 6.2  |
| 1.6  | 2.8  | 3.9  | 4.2  | 4.7  | 3.4  | 5.4  | 5.1  | 3.2  |
| 3.4  | 5.1  | 5.6  | 1.0  | 3.0  | 4.1  | 2.6  | 4.0  | 1.1  |
| 6.3  | 4.7  | 3.6  | 2.4  | 3.6  | 2.3  | 2.5  | 1.6  | 0.7  |
| 14.4 | 11.8 | 16.1 | 4.8  | 3.8  | 4.2  | 3.5  | 15.8 | 6.5  |
| 17.0 | 3.6  | 10.3 | 8.9  | 4.9  | 4.9  | 2.2  | 9.5  | 16.0 |
| 5.3  | 6.9  | 10.3 | 7.6  | 6.8  | 8.2  | 7.0  | 11.7 | 9.5  |
| 31.6 | 21.8 | 21.5 | 22.7 | 13.6 | 15.1 | 18.6 | 32.6 | 30.1 |
| 5.5  | 6.1  | 10.2 | 8.1  | 3.4  | 4.8  | 5.6  | 3.6  | 3.6  |
| 4.8  | 1.5  | 1.5  | 2.4  | 2.9  | 3.4  | 5.4  | 2.1  | 6.2  |
| 9.3  | 11.5 | 14.4 | 8.8  | 9.6  | 7.6  | 12.1 | 11.5 | 9.9  |
| 11.1 | 17.3 | 8.4  | 15.7 | 7.0  | 5.0  | 3.7  | 11.9 | 19.7 |
| 2.7  | 3.9  | 2.7  | 4.2  | 0.4  | 0.5  | 2.6  | 0.1  | 2.2  |
| 5.3  | 8.8  | 7.3  | 6.2  | 6.2  | 11.3 | 5.0  | 16.3 | 13.7 |
| 0.4  | 1.5  | 2.4  | 0.9  | 0.7  | 2.0  | 0.6  | 0.8  | 2.9  |
| 5.6  | 4.7  | 2.4  | 3.1  | 1.2  | 2.1  | 0.8  | 0.6  | 0.5  |
| 4.6  | 10.6 | 9.6  | 2.6  | 12.0 | 0.8  | 10.1 | 8.2  | 8.6  |
| 1.7  | 0.7  | 1.6  | 0.9  | 0.8  | 0.6  | 0.7  | 8.2  | 4.6  |
| 1.9  | 2.3  | 1.7  | 2.3  | 0.9  | 2.0  | 0.9  | 0.8  | 2.1  |
| 1.3  | 1.0  | 3.9  | 1.2  | 1.2  | 2.9  | 0.9  | 5.7  | 4.5  |
| 3.3  | 6.2  | 7.7  | 6.1  | 5.8  | 1.9  | 6.1  | 5.9  | 12.7 |
| 3.2  | 2.3  | 4.9  | 3.0  | 3.0  | 1.9  | 3.1  | 5.1  | 3.9  |
| 5.8  | 5.4  | 2.3  | 1.6  | 1.0  | 1.6  | 2.7  | 11.7 | 5.5  |
| 4.3  | 11.8 | 8.1  | 3.6  | 5.3  | 3.1  | 7.3  | 4.7  | 3.7  |
| 1.4  | 2.0  | 2.9  | 2.5  | 2.6  | 2.3  | 7.5  | 14.3 | 3.8  |
| 4.2  | 14.4 | 11.2 | 12.8 | 6.1  | 6.2  | 4.1  | 8.9  | 9.4  |
| 1.2  | 1.2  | 1.8  | 1.1  | 1.3  | 1.7  | 1.8  | 1.3  | 1.3  |
| 1.8  | 2.1  | 2.7  | 1.5  | 0.9  | 1.8  | 3.6  | 5.1  | 2.2  |
| 25.7 | 21.8 | 31.9 | 21.7 | 12.3 | 7.4  | 15.1 | 19.3 | 27.1 |
| 11.4 | 10.3 | 14.5 | 14.7 | 10.9 | 8.9  | 9.0  | 20.1 | 10.3 |
| 3.5  | 5.0  | 1.3  | 5.1  | 2.3  | 3.3  | 8.5  | 5.1  | 13.8 |
| 2.0  | 6.1  | 6.9  | 3.5  | 1.8  | 8.2  | 1.6  | 1.6  | 5.5  |

|        |        |        |        |       |       |       |       |       |
|--------|--------|--------|--------|-------|-------|-------|-------|-------|
| 4.2    | 2.7    | 2.5    | 3.5    | 8.7   | 8.3   | 7.2   | 7.1   | 3.4   |
| 0.7    | 0.4    | 1.1    | 0.6    | 0.4   | 1.1   | 0.8   | 0.7   | 0.4   |
| 1.7    | 1.1    | 1.9    | 2.7    | 0.8   | 0.5   | 0.7   | 1.9   | 1.9   |
| 8.5    | 9.7    | 8.6    | 8.0    | 1.7   | 7.5   | 10.0  | 2.3   | 12.1  |
| 1.0    | 6.2    | 9.3    | 5.1    | 3.2   | 7.3   | 4.9   | 1.8   | 19.8  |
| 6.7    | 3.3    | 3.4    | 6.4    | 3.9   | 6.7   | 9.8   | 11.5  | 3.3   |
| 18.6   | 3.3    | 13.7   | 4.6    | 11.9  | 15.4  | 6.0   | 15.4  | 22.1  |
| 1.0    | 2.1    | 2.1    | 3.4    | 4.8   | 1.8   | 0.7   | 0.4   | 3.7   |
| 2.7    | 3.6    | 1.2    | 6.7    | 2.3   | 2.7   | 4.1   | 2.1   | 2.4   |
| 215.5  | 213.2  | 230.1  | 180.0  | 230.1 | 198.4 | 514.8 | 270.7 | 191.1 |
| 3.0    | 5.2    | 1.6    | 0.7    | 5.2   | 7.2   | 5.4   | 8.8   | 4.6   |
| 52.3   | 45.3   | 66.2   | 45.0   | 80.2  | 56.6  | 60.6  | 91.7  | 165.6 |
| 17.7   | 14.2   | 15.7   | 16.4   | 12.7  | 12.0  | 11.0  | 4.4   | 19.3  |
| 11.3   | 10.0   | 12.9   | 14.2   | 1.7   | 1.0   | 5.9   | 1.5   | 1.3   |
| 5.5    | 4.1    | 20.5   | 12.1   | 8.3   | 5.6   | 9.3   | 14.0  | 15.3  |
| 5.4    | 3.1    | 4.6    | 2.7    | 4.1   | 3.0   | 6.9   | 0.4   | 4.3   |
| 3.0    | 13.9   | 3.5    | 2.3    | 4.8   | 5.4   | 3.5   | 2.8   | 2.4   |
| 1.3    | 3.0    | 2.6    | 2.4    | 1.4   | 2.9   | 1.4   | 1.2   | 8.0   |
| 4.1    | 7.7    | 3.3    | 3.2    | 1.0   | 1.0   | 3.3   | 0.5   | 3.1   |
| 6.4    | 4.5    | 8.0    | 10.6   | 9.4   | 5.4   | 10.7  | 39.6  | 13.8  |
| 1.7    | 5.5    | 0.8    | 3.1    | 2.9   | 1.2   | 1.4   | 2.0   | 4.8   |
| 10.9   | 7.4    | 19.5   | 14.2   | 5.1   | 1.5   | 7.0   | 6.9   | 10.4  |
| 11.5   | 12.0   | 9.5    | 3.6    | 6.2   | 7.9   | 3.5   | 3.6   | 12.8  |
| 0.8    | 1.0    | 2.5    | 3.4    | 1.0   | 2.0   | 1.1   | 1.5   | 3.7   |
| 0.5    | 2.3    | 2.7    | 3.2    | 2.4   | 0.6   | 3.8   | 5.9   | 4.0   |
| 3.8    | 1.9    | 2.2    | 3.4    | 0.7   | 0.9   | 3.4   | 4.1   | 8.1   |
| 28.1   | 22.1   | 32.2   | 24.0   | 21.5  | 14.1  | 15.0  | 18.3  | 11.5  |
| 15.3   | 10.0   | 33.7   | 12.9   | 93.3  | 46.2  | 72.7  | 65.6  | 50.6  |
| 70.9   | 63.1   | 75.4   | 65.6   | 44.7  | 38.8  | 21.4  | 37.5  | 83.0  |
| 7.8    | 4.9    | 16.8   | 12.6   | 7.6   | 3.2   | 9.3   | 16.6  | 6.9   |
| 1.7    | 1.8    | 5.4    | 1.7    | 0.9   | 1.7   | 4.6   | 3.0   | 2.8   |
| 4.9    | 2.1    | 1.6    | 0.9    | 5.6   | 1.5   | 1.5   | 0.7   | 1.8   |
| 1.8    | 1.1    | 1.8    | 1.3    | 4.5   | 4.9   | 4.2   | 1.5   | 1.0   |
| 5.1    | 9.4    | 8.0    | 8.2    | 15.0  | 16.5  | 23.0  | 23.7  | 9.3   |
| 0.6    | 0.7    | 1.6    | 1.3    | 0.9   | 0.8   | 0.6   | 6.5   | 5.0   |
| 4.5    | 0.8    | 7.3    | 0.7    | 7.2   | 4.2   | 4.5   | 10.3  | 5.4   |
| 0.5    | 2.4    | 1.0    | 0.9    | 0.9   | 0.8   | 2.1   | 0.7   | 3.2   |
| 31.2   | 19.6   | 32.7   | 25.1   | 16.3  | 13.8  | 19.5  | 22.7  | 6.3   |
| 13.8   | 21.1   | 20.7   | 28.8   | 12.1  | 17.3  | 15.8  | 10.9  | 27.1  |
| 0.4    | 0.5    | 0.2    | 2.1    | 0.4   | 0.2   | 1.1   | 2.3   | 0.3   |
| 27.5   | 17.8   | 20.1   | 21.5   | 34.9  | 37.9  | 30.4  | 39.1  | 59.1  |
| 6632.0 | 6192.7 | 7065.1 | 6805.8 | 178.4 | 196.0 | 163.2 | 217.8 | 123.4 |
| 8.3    | 4.6    | 3.3    | 6.1    | 8.5   | 5.1   | 9.0   | 2.8   | 8.2   |
| 26.6   | 12.5   | 24.7   | 9.4    | 11.2  | 16.6  | 25.0  | 13.3  | 17.1  |
| 1.7    | 2.9    | 2.0    | 1.7    | 2.3   | 1.4   | 1.3   | 0.2   | 3.3   |
| 2.6    | 1.9    | 2.9    | 4.8    | 14.2  | 15.4  | 21.1  | 23.7  | 9.7   |
| 98.3   | 88.7   | 162.3  | 69.2   | 204.2 | 185.3 | 220.5 | 279.1 | 395.6 |
| 6.9    | 4.9    | 8.4    | 6.0    | 9.1   | 5.1   | 6.8   | 2.0   | 19.2  |
| 379.9  | 343.3  | 486.7  | 361.8  | 239.7 | 299.5 | 260.6 | 302.3 | 322.5 |
| 1.1    | 0.7    | 1.1    | 1.8    | 0.7   | 0.9   | 0.5   | 0.4   | 1.2   |
| 2.2    | 2.9    | 1.9    | 4.1    | 3.9   | 2.5   | 9.2   | 2.3   | 2.9   |
| 3.1    | 2.3    | 2.7    | 2.5    | 1.7   | 6.4   | 1.1   | 1.8   | 3.4   |
| 9.6    | 4.7    | 17.8   | 9.8    | 5.2   | 7.4   | 6.6   | 21.7  | 14.9  |

|       |       |       |       |       |       |       |       |       |
|-------|-------|-------|-------|-------|-------|-------|-------|-------|
| 11.2  | 13.3  | 22.8  | 11.2  | 2.7   | 4.7   | 2.9   | 4.3   | 4.9   |
| 35.3  | 19.0  | 34.8  | 28.3  | 12.3  | 12.9  | 12.3  | 23.8  | 29.7  |
| 4.1   | 3.2   | 5.6   | 2.6   | 6.1   | 3.6   | 4.5   | 1.9   | 6.0   |
| 4.5   | 7.2   | 6.5   | 3.8   | 11.6  | 6.5   | 4.2   | 5.7   | 10.5  |
| 2.9   | 1.6   | 2.8   | 1.7   | 3.8   | 1.4   | 3.6   | 5.2   | 7.0   |
| 1.9   | 2.0   | 3.8   | 6.3   | 6.7   | 2.9   | 8.9   | 4.1   | 1.5   |
| 2.6   | 2.2   | 3.2   | 1.1   | 3.3   | 2.0   | 2.4   | 1.8   | 2.9   |
| 66.1  | 72.0  | 99.9  | 69.5  | 132.3 | 98.8  | 159.9 | 212.8 | 257.9 |
| 9.4   | 6.8   | 14.3  | 7.5   | 7.9   | 0.7   | 6.1   | 7.1   | 32.9  |
| 13.0  | 19.4  | 11.5  | 11.7  | 15.3  | 7.4   | 9.2   | 16.6  | 10.2  |
| 57.6  | 62.7  | 71.8  | 45.3  | 44.5  | 51.2  | 43.8  | 50.0  | 64.0  |
| 59.0  | 44.2  | 46.0  | 44.5  | 42.1  | 32.3  | 29.8  | 50.1  | 35.1  |
| 5.9   | 5.5   | 43.8  | 2.3   | 44.6  | 49.1  | 70.0  | 60.3  | 86.3  |
| 0.5   | 0.3   | 0.5   | 0.9   | 0.7   | 0.7   | 0.4   | 0.7   | 1.3   |
| 93.1  | 101.9 | 104.8 | 87.7  | 221.7 | 285.2 | 261.1 | 259.5 | 294.8 |
| 230.9 | 230.3 | 300.4 | 219.5 | 227.1 | 207.9 | 251.3 | 242.7 | 157.4 |
| 1.9   | 2.4   | 3.1   | 1.1   | 4.2   | 3.1   | 4.2   | 3.9   | 7.5   |
| 9.4   | 11.4  | 5.9   | 4.3   | 4.7   | 3.3   | 5.3   | 6.6   | 9.2   |
| 11.8  | 3.3   | 14.3  | 3.5   | 3.7   | 1.1   | 6.0   | 0.7   | 1.5   |
| 37.8  | 42.4  | 38.5  | 34.1  | 60.0  | 54.4  | 76.9  | 68.7  | 34.9  |
| 1.7   | 0.3   | 0.9   | 0.6   | 0.3   | 2.2   | 0.3   | 0.4   | 2.7   |
| 18.1  | 13.5  | 19.4  | 15.8  | 51.8  | 54.2  | 65.6  | 56.4  | 82.5  |
| 23.6  | 25.5  | 81.2  | 13.0  | 169.8 | 57.6  | 149.5 | 177.8 | 489.2 |
| 7.5   | 7.9   | 12.4  | 8.2   | 13.4  | 8.3   | 6.7   | 11.7  | 15.9  |
| 4.8   | 4.5   | 0.9   | 2.1   | 0.5   | 1.8   | 5.0   | 0.6   | 3.1   |
| 62.1  | 63.5  | 42.0  | 38.4  | 41.2  | 37.7  | 45.8  | 42.1  | 105.1 |
| 4.2   | 5.2   | 4.8   | 3.3   | 9.2   | 9.1   | 9.4   | 9.4   | 62.5  |
| 2.6   | 3.7   | 3.8   | 3.0   | 4.2   | 2.6   | 2.2   | 4.7   | 12.9  |
| 0.3   | 0.2   | 0.5   | 0.8   | 1.7   | 1.7   | 0.3   | 0.3   | 0.5   |
| 9.2   | 10.5  | 12.5  | 9.9   | 3.4   | 2.4   | 4.5   | 6.2   | 18.6  |
| 15.7  | 23.0  | 32.0  | 13.3  | 21.2  | 11.7  | 16.1  | 36.6  | 29.0  |
| 6.9   | 1.5   | 3.0   | 8.6   | 4.8   | 1.2   | 4.1   | 1.6   | 3.2   |
| 5.4   | 5.0   | 7.8   | 1.5   | 14.2  | 19.3  | 13.3  | 20.3  | 36.1  |
| 6.6   | 9.7   | 9.2   | 6.4   | 3.3   | 5.3   | 6.5   | 6.4   | 4.9   |
| 45.3  | 55.4  | 49.5  | 49.3  | 19.8  | 26.6  | 25.0  | 23.5  | 25.3  |
| 92.6  | 92.1  | 142.5 | 100.7 | 179.0 | 295.0 | 178.6 | 256.5 | 186.9 |
| 3.4   | 0.6   | 5.1   | 0.6   | 3.3   | 0.8   | 2.8   | 4.3   | 16.8  |
| 96.1  | 68.4  | 93.0  | 90.0  | 67.5  | 42.3  | 59.3  | 61.8  | 68.8  |
| 4.1   | 2.8   | 3.2   | 2.4   | 6.2   | 7.6   | 1.3   | 11.4  | 3.2   |
| 8.5   | 7.1   | 14.3  | 5.1   | 3.7   | 2.8   | 12.8  | 8.5   | 5.0   |
| 2.0   | 6.7   | 1.5   | 2.2   | 5.4   | 2.2   | 9.0   | 3.1   | 6.5   |
| 5.1   | 9.6   | 19.9  | 13.1  | 10.6  | 4.6   | 8.1   | 17.9  | 10.1  |
| 2.1   | 2.4   | 3.4   | 2.1   | 2.5   | 0.8   | 0.9   | 5.3   | 5.5   |
| 8.0   | 6.6   | 12.8  | 7.8   | 7.3   | 6.6   | 1.4   | 6.3   | 11.1  |
| 2.5   | 2.6   | 5.5   | 1.3   | 1.2   | 8.7   | 3.7   | 1.0   | 3.5   |
| 9.0   | 7.5   | 5.2   | 9.3   | 6.1   | 3.6   | 6.1   | 7.4   | 10.9  |
| 29.9  | 42.7  | 17.1  | 34.5  | 45.0  | 32.7  | 45.1  | 60.0  | 24.3  |
| 7.0   | 10.2  | 14.2  | 7.9   | 23.3  | 21.3  | 25.8  | 27.0  | 10.0  |
| 1.3   | 0.5   | 6.6   | 0.9   | 0.6   | 0.6   | 4.6   | 5.8   | 1.3   |
| 14.0  | 25.8  | 28.8  | 15.6  | 20.2  | 22.4  | 26.0  | 33.7  | 60.6  |
| 10.6  | 11.0  | 2.7   | 5.3   | 4.5   | 1.1   | 4.0   | 1.9   | 10.7  |
| 83.6  | 79.3  | 111.7 | 81.2  | 229.5 | 217.6 | 238.5 | 283.2 | 117.4 |
| 0.6   | 0.5   | 1.1   | 0.7   | 0.6   | 0.6   | 0.7   | 0.8   | 1.0   |

|       |       |       |       |       |       |       |       |       |
|-------|-------|-------|-------|-------|-------|-------|-------|-------|
| 6.8   | 4.4   | 6.2   | 1.2   | 3.7   | 1.2   | 1.8   | 1.4   | 6.3   |
| 139.3 | 116.8 | 282.1 | 162.0 | 193.7 | 194.2 | 188.1 | 226.0 | 433.4 |
| 433.6 | 447.5 | 364.0 | 445.1 | 410.5 | 354.9 | 372.7 | 430.1 | 271.4 |
| 6.2   | 11.5  | 11.8  | 5.8   | 3.4   | 3.4   | 9.6   | 1.3   | 3.0   |
| 193.7 | 160.6 | 246.8 | 185.4 | 8.0   | 12.5  | 6.6   | 11.9  | 0.9   |
| 4.0   | 1.2   | 3.7   | 2.2   | 5.7   | 6.1   | 3.6   | 8.4   | 10.9  |
| 10.5  | 2.5   | 3.1   | 7.8   | 6.6   | 6.6   | 5.9   | 9.8   | 3.8   |
| 153.6 | 135.7 | 207.5 | 108.3 | 134.3 | 247.5 | 170.4 | 183.5 | 223.3 |
| 2.2   | 10.2  | 11.7  | 4.2   | 12.7  | 4.7   | 4.9   | 11.8  | 27.8  |
| 15.5  | 10.9  | 20.6  | 13.8  | 3.1   | 2.6   | 8.2   | 4.6   | 11.8  |
| 1.3   | 2.2   | 1.8   | 1.6   | 0.7   | 1.8   | 1.0   | 1.0   | 5.5   |
| 1.2   | 1.6   | 2.0   | 4.1   | 1.7   | 1.9   | 2.0   | 3.3   | 1.5   |
| 56.5  | 39.0  | 136.5 | 60.5  | 291.0 | 324.4 | 340.0 | 323.1 | 708.2 |
| 2.7   | 1.8   | 6.8   | 6.8   | 12.6  | 13.4  | 12.2  | 14.4  | 6.9   |
| 133.7 | 120.0 | 150.5 | 109.0 | 64.5  | 57.8  | 59.5  | 65.2  | 304.3 |
| 1.7   | 0.9   | 2.3   | 2.7   | 1.7   | 1.8   | 1.4   | 2.3   | 1.6   |
| 1.6   | 3.2   | 3.6   | 1.5   | 1.9   | 2.5   | 1.9   | 5.8   | 1.2   |
| 4.6   | 6.2   | 5.4   | 6.2   | 19.9  | 6.9   | 6.4   | 26.9  | 3.8   |
| 10.1  | 10.5  | 24.3  | 21.5  | 22.1  | 2.6   | 16.0  | 8.5   | 9.4   |
| 282.8 | 206.5 | 240.6 | 393.7 | 7.5   | 6.2   | 5.4   | 9.8   | 7.1   |
| 7.5   | 2.0   | 7.0   | 6.3   | 3.5   | 0.6   | 4.3   | 6.7   | 4.0   |
| 4.8   | 2.9   | 17.8  | 1.0   | 7.8   | 1.7   | 6.9   | 2.6   | 4.6   |
| 8.3   | 6.6   | 5.5   | 6.5   | 7.1   | 10.1  | 14.0  | 11.8  | 15.8  |
| 8.1   | 14.0  | 7.7   | 2.0   | 12.8  | 8.7   | 5.3   | 20.1  | 12.1  |
| 4.6   | 8.7   | 5.8   | 12.4  | 14.6  | 8.6   | 9.5   | 25.2  | 2.8   |
| 19.0  | 17.4  | 17.0  | 15.6  | 10.1  | 12.2  | 11.6  | 8.5   | 65.1  |
| 5.2   | 3.7   | 2.0   | 1.8   | 8.0   | 2.3   | 4.6   | 1.8   | 12.5  |
| 1.5   | 1.6   | 2.9   | 1.4   | 1.3   | 0.4   | 1.0   | 0.8   | 1.2   |
| 2.1   | 2.9   | 25.8  | 10.9  | 5.4   | 3.1   | 2.2   | 3.3   | 14.3  |
| 6.6   | 6.5   | 15.5  | 3.9   | 6.9   | 4.7   | 5.6   | 5.9   | 10.1  |
| 8.8   | 6.4   | 12.1  | 10.3  | 10.1  | 9.8   | 7.5   | 6.4   | 8.3   |
| 4.6   | 17.1  | 25.1  | 9.8   | 19.8  | 14.4  | 20.9  | 4.2   | 34.5  |
| 9.3   | 7.6   | 8.9   | 9.2   | 3.5   | 9.7   | 4.9   | 13.4  | 27.0  |
| 14.6  | 19.1  | 19.0  | 14.1  | 8.1   | 7.2   | 8.6   | 11.1  | 19.8  |
| 0.7   | 5.6   | 3.2   | 6.6   | 4.1   | 3.5   | 1.5   | 0.8   | 0.6   |
| 12.6  | 2.6   | 23.9  | 6.3   | 12.3  | 9.8   | 11.3  | 3.9   | 15.2  |
| 9.8   | 1.6   | 7.5   | 5.8   | 4.9   | 1.4   | 7.7   | 6.3   | 7.2   |
| 18.5  | 16.2  | 16.3  | 18.3  | 24.5  | 15.2  | 22.4  | 32.6  | 48.4  |
| 3.9   | 4.3   | 2.4   | 2.2   | 5.4   | 2.5   | 6.2   | 1.5   | 4.4   |
| 15.0  | 8.0   | 14.2  | 2.3   | 8.1   | 8.9   | 8.9   | 5.4   | 7.9   |
| 78.9  | 83.3  | 94.5  | 72.2  | 216.4 | 184.0 | 192.6 | 208.0 | 165.3 |
| 84.7  | 82.8  | 119.1 | 60.2  | 447.1 | 394.9 | 472.6 | 532.4 | 679.5 |
| 6.1   | 1.2   | 3.3   | 1.5   | 3.6   | 10.5  | 3.4   | 7.4   | 9.2   |
| 27.8  | 17.2  | 40.6  | 37.0  | 26.1  | 33.1  | 30.2  | 43.7  | 48.6  |
| 27.0  | 21.1  | 51.7  | 14.4  | 80.1  | 56.4  | 68.5  | 89.0  | 21.2  |
| 7.0   | 8.4   | 7.8   | 12.0  | 5.8   | 3.6   | 6.7   | 9.4   | 4.8   |
| 3.1   | 3.0   | 6.4   | 3.5   | 1.6   | 3.0   | 1.5   | 5.8   | 7.6   |
| 0.6   | 0.3   | 0.7   | 2.3   | 3.1   | 2.4   | 0.7   | 2.2   | 6.0   |
| 5.9   | 9.2   | 4.8   | 9.8   | 10.1  | 19.7  | 3.9   | 19.5  | 12.7  |
| 14.4  | 12.5  | 14.5  | 14.7  | 6.3   | 12.2  | 14.3  | 11.9  | 23.2  |
| 1.5   | 2.4   | 5.6   | 3.9   | 0.8   | 0.4   | 0.6   | 0.5   | 7.5   |
| 138.9 | 104.2 | 323.3 | 125.6 | 482.8 | 398.8 | 477.5 | 595.0 | 272.7 |
| 1.0   | 0.5   | 1.6   | 0.9   | 15.6  | 4.2   | 13.9  | 2.1   | 59.2  |



|        |        |        |        |        |        |        |        |        |
|--------|--------|--------|--------|--------|--------|--------|--------|--------|
| 172.6  | 138.0  | 305.2  | 144.9  | 164.0  | 198.5  | 155.7  | 159.7  | 350.9  |
| 19.7   | 14.5   | 15.8   | 16.3   | 12.7   | 9.1    | 11.1   | 3.5    | 27.2   |
| 1.6    | 2.0    | 1.6    | 1.7    | 2.2    | 3.2    | 2.6    | 2.1    | 2.5    |
| 2.2    | 1.0    | 6.1    | 1.0    | 1.2    | 4.7    | 4.2    | 9.4    | 0.9    |
| 196.9  | 185.5  | 196.9  | 153.4  | 39.5   | 50.4   | 39.6   | 53.5   | 172.0  |
| 290.0  | 298.0  | 194.6  | 196.0  | 75.0   | 100.6  | 102.8  | 93.1   | 13.6   |
| 77.3   | 92.4   | 81.0   | 81.5   | 72.8   | 135.0  | 77.2   | 76.5   | 107.2  |
| 14.3   | 15.7   | 24.8   | 17.6   | 30.3   | 22.7   | 20.8   | 23.8   | 33.5   |
| 10.9   | 7.9    | 26.2   | 20.2   | 39.5   | 27.4   | 31.6   | 35.5   | 42.8   |
| 14.5   | 9.1    | 14.8   | 11.1   | 41.8   | 43.0   | 42.2   | 42.2   | 45.5   |
| 12.8   | 14.5   | 8.7    | 11.2   | 16.7   | 6.1    | 10.3   | 15.2   | 16.0   |
| 5.5    | 4.9    | 6.2    | 4.4    | 12.8   | 10.7   | 6.2    | 21.6   | 25.9   |
| 3.8    | 1.8    | 3.9    | 3.9    | 2.1    | 1.1    | 2.3    | 1.1    | 3.9    |
| 5.0    | 1.6    | 0.7    | 6.2    | 4.9    | 6.1    | 7.0    | 11.7   | 10.6   |
| 2.1    | 5.6    | 14.4   | 4.7    | 5.6    | 1.5    | 1.9    | 11.5   | 2.1    |
| 83.2   | 69.3   | 196.4  | 101.3  | 107.3  | 75.8   | 85.9   | 121.6  | 255.5  |
| 2.0    | 1.0    | 1.4    | 4.5    | 1.5    | 1.1    | 5.6    | 0.7    | 3.0    |
| 242.0  | 240.2  | 227.1  | 255.0  | 262.3  | 332.9  | 229.5  | 301.1  | 556.6  |
| 1.8    | 2.6    | 4.8    | 4.4    | 2.8    | 3.6    | 1.3    | 7.8    | 3.0    |
| 1534.3 | 1614.6 | 1837.6 | 1411.1 | 692.4  | 648.0  | 723.7  | 778.4  | 599.9  |
| 1.7    | 1.9    | 1.7    | 2.6    | 2.3    | 1.2    | 0.3    | 0.4    | 2.9    |
| 19.8   | 28.6   | 8.4    | 26.2   | 17.2   | 15.5   | 4.0    | 1.1    | 7.3    |
| 106.1  | 88.8   | 140.4  | 112.6  | 209.0  | 215.2  | 227.0  | 242.6  | 391.8  |
| 306.1  | 265.8  | 381.7  | 196.8  | 447.9  | 304.6  | 492.0  | 500.5  | 693.1  |
| 0.8    | 1.1    | 1.1    | 0.8    | 0.8    | 4.3    | 1.0    | 1.2    | 8.0    |
| 13.6   | 11.1   | 11.0   | 5.5    | 5.8    | 7.2    | 6.6    | 11.6   | 12.6   |
| 18.0   | 4.8    | 4.5    | 9.8    | 8.5    | 4.8    | 3.7    | 2.2    | 8.3    |
| 15.9   | 12.9   | 33.6   | 9.8    | 18.2   | 9.9    | 14.6   | 8.2    | 45.6   |
| 1.8    | 0.7    | 2.3    | 0.9    | 0.5    | 1.7    | 0.6    | 0.6    | 0.6    |
| 14.7   | 22.0   | 4.0    | 18.4   | 12.4   | 19.1   | 15.0   | 14.8   | 18.7   |
| 5.6    | 2.1    | 4.9    | 2.3    | 5.1    | 2.6    | 1.9    | 3.2    | 3.7    |
| 265.2  | 227.9  | 281.5  | 233.5  | 70.0   | 105.0  | 61.7   | 78.1   | 171.7  |
| 4.8    | 4.7    | 9.2    | 10.0   | 6.4    | 8.9    | 2.2    | 14.3   | 1.7    |
| 1.6    | 2.5    | 0.3    | 0.2    | 0.2    | 0.2    | 1.5    | 1.8    | 0.4    |
| 1457.9 | 1160.9 | 2499.8 | 1342.5 | 1810.3 | 2170.1 | 1846.9 | 2065.7 | 1652.0 |
| 5.0    | 5.9    | 13.0   | 4.6    | 4.4    | 2.6    | 7.3    | 5.6    | 11.8   |
| 4.1    | 3.9    | 2.8    | 0.6    | 0.7    | 5.3    | 0.5    | 3.9    | 6.2    |
| 3.3    | 8.8    | 4.4    | 6.5    | 3.9    | 5.1    | 4.1    | 10.3   | 7.6    |
| 9.1    | 4.9    | 5.4    | 5.6    | 6.8    | 4.4    | 7.8    | 4.6    | 16.3   |
| 43.9   | 43.1   | 52.8   | 50.8   | 39.0   | 34.8   | 39.2   | 45.4   | 69.1   |
| 10.3   | 6.2    | 12.3   | 7.5    | 29.3   | 22.2   | 34.9   | 31.2   | 12.7   |
| 0.9    | 1.8    | 3.4    | 1.7    | 8.9    | 10.3   | 1.3    | 1.5    | 4.1    |
| 224.6  | 210.3  | 434.5  | 244.4  | 707.6  | 599.3  | 690.4  | 808.1  | 526.9  |
| 1.0    | 2.7    | 2.7    | 1.8    | 20.6   | 8.0    | 26.2   | 26.6   | 150.2  |
| 11.4   | 6.1    | 13.8   | 5.0    | 10.0   | 4.1    | 5.0    | 3.2    | 13.5   |
| 3.1    | 0.8    | 4.9    | 1.1    | 0.7    | 4.3    | 3.6    | 5.4    | 5.5    |
| 9.6    | 5.0    | 11.1   | 13.0   | 1.9    | 4.9    | 3.4    | 0.9    | 2.1    |
| 36.2   | 27.4   | 43.6   | 24.1   | 25.4   | 13.2   | 19.1   | 25.1   | 39.8   |
| 2.3    | 2.7    | 13.3   | 2.3    | 23.2   | 44.7   | 26.1   | 43.6   | 2.5    |
| 9.8    | 6.6    | 13.9   | 4.1    | 10.8   | 7.6    | 5.8    | 9.4    | 12.8   |
| 9.1    | 11.2   | 16.5   | 12.4   | 14.4   | 7.1    | 8.2    | 29.3   | 23.7   |
| 2.0    | 3.9    | 6.5    | 4.1    | 1.3    | 1.7    | 1.0    | 9.7    | 4.0    |
| 8.8    | 9.2    | 17.8   | 1.8    | 13.0   | 0.8    | 7.2    | 2.8    | 15.6   |

|       |       |       |       |       |       |       |       |       |
|-------|-------|-------|-------|-------|-------|-------|-------|-------|
| 128.9 | 155.2 | 168.9 | 139.5 | 124.7 | 166.5 | 120.6 | 137.5 | 165.5 |
| 8.3   | 17.9  | 12.4  | 16.2  | 11.8  | 3.2   | 9.4   | 15.6  | 11.2  |
| 7.6   | 10.7  | 14.0  | 6.0   | 4.9   | 10.6  | 11.9  | 3.2   | 21.3  |
| 28.3  | 22.6  | 47.1  | 20.4  | 136.9 | 137.9 | 127.0 | 142.2 | 70.3  |
| 2.1   | 2.2   | 2.2   | 1.5   | 1.5   | 1.5   | 1.9   | 1.7   | 3.1   |
| 0.6   | 3.1   | 4.3   | 1.5   | 3.3   | 1.8   | 0.8   | 4.6   | 3.5   |
| 2.3   | 3.0   | 7.7   | 2.2   | 1.5   | 3.4   | 2.1   | 3.5   | 4.3   |
| 17.2  | 10.7  | 18.2  | 16.1  | 13.5  | 18.5  | 5.8   | 11.1  | 41.2  |
| 3.0   | 8.0   | 5.2   | 10.3  | 4.8   | 6.5   | 4.5   | 6.9   | 6.6   |
| 16.8  | 13.9  | 11.4  | 7.4   | 9.8   | 8.9   | 9.2   | 11.3  | 22.2  |
| 17.5  | 10.1  | 14.0  | 7.5   | 2.1   | 8.8   | 9.1   | 5.4   | 7.7   |
| 2.9   | 1.1   | 3.9   | 2.5   | 2.4   | 1.3   | 6.5   | 7.4   | 5.7   |
| 63.6  | 62.4  | 53.1  | 42.3  | 47.6  | 31.7  | 33.3  | 37.2  | 73.5  |
| 11.4  | 14.4  | 23.7  | 12.0  | 10.6  | 11.8  | 15.5  | 14.2  | 19.7  |
| 2.8   | 0.8   | 18.2  | 3.9   | 4.5   | 1.0   | 5.2   | 0.6   | 2.9   |
| 0.8   | 1.5   | 2.8   | 0.8   | 1.1   | 0.9   | 1.5   | 1.3   | 1.2   |
| 5.5   | 4.2   | 11.3  | 6.8   | 8.2   | 14.7  | 9.5   | 8.8   | 6.1   |
| 20.6  | 16.6  | 34.7  | 9.6   | 71.9  | 60.3  | 65.9  | 79.3  | 41.8  |
| 330.0 | 266.6 | 425.7 | 248.0 | 554.3 | 554.4 | 650.8 | 692.1 | 90.1  |
| 6.1   | 8.8   | 5.9   | 6.0   | 6.9   | 0.9   | 1.2   | 4.7   | 4.4   |
| 78.9  | 72.9  | 139.9 | 74.6  | 284.4 | 246.8 | 306.1 | 400.3 | 317.0 |
| 76.3  | 69.9  | 170.1 | 102.3 | 221.9 | 43.5  | 186.5 | 309.9 | 5.0   |
| 2.2   | 2.2   | 2.7   | 2.2   | 2.2   | 1.4   | 1.3   | 3.1   | 3.0   |
| 11.5  | 15.6  | 17.5  | 6.8   | 13.7  | 5.3   | 8.4   | 21.0  | 15.4  |
| 2.4   | 1.6   | 2.4   | 2.2   | 2.1   | 4.1   | 4.1   | 0.5   | 1.1   |
| 1.6   | 2.7   | 2.2   | 6.0   | 0.9   | 1.9   | 1.8   | 1.6   | 1.7   |
| 26.6  | 19.1  | 20.3  | 22.2  | 6.6   | 3.5   | 4.3   | 5.2   | 24.6  |
| 1.8   | 1.3   | 5.4   | 2.4   | 1.0   | 9.2   | 1.1   | 2.2   | 1.8   |
| 1.8   | 2.4   | 13.3  | 8.0   | 27.8  | 8.5   | 13.8  | 14.5  | 17.2  |
| 2.5   | 1.0   | 1.0   | 1.3   | 0.7   | 2.6   | 1.4   | 2.5   | 3.4   |
| 4.4   | 0.6   | 1.5   | 2.7   | 1.9   | 0.2   | 0.7   | 1.4   | 1.4   |
| 1.8   | 1.9   | 8.9   | 3.0   | 12.0  | 5.4   | 6.9   | 1.5   | 3.6   |
| 45.6  | 53.4  | 65.7  | 54.8  | 42.3  | 50.0  | 55.3  | 52.7  | 84.9  |
| 103.1 | 84.5  | 128.6 | 111.6 | 48.9  | 36.3  | 41.2  | 53.7  | 88.6  |
| 40.3  | 20.7  | 47.2  | 27.1  | 28.3  | 17.7  | 21.0  | 51.3  | 32.9  |
| 17.7  | 20.8  | 24.1  | 16.2  | 11.2  | 10.8  | 8.8   | 16.0  | 20.5  |
| 300.0 | 287.2 | 435.9 | 316.4 | 396.9 | 302.2 | 412.8 | 439.4 | 389.7 |
| 3.0   | 10.5  | 7.7   | 3.6   | 4.9   | 1.8   | 9.6   | 3.1   | 8.3   |
| 40.4  | 46.9  | 45.7  | 38.5  | 44.0  | 32.0  | 27.1  | 57.2  | 43.8  |
| 4.1   | 4.3   | 7.8   | 11.7  | 5.8   | 5.9   | 2.2   | 9.8   | 2.9   |
| 171.4 | 168.1 | 263.5 | 167.1 | 94.6  | 84.4  | 106.2 | 110.9 | 75.5  |
| 13.5  | 18.1  | 24.5  | 14.9  | 13.1  | 7.6   | 15.4  | 16.9  | 26.1  |
| 19.2  | 20.6  | 20.3  | 16.2  | 1.4   | 1.2   | 8.4   | 6.3   | 5.0   |
| 10.2  | 1.8   | 5.4   | 4.7   | 6.6   | 2.4   | 9.5   | 8.6   | 7.0   |
| 28.3  | 22.7  | 37.5  | 18.3  | 28.6  | 14.8  | 20.7  | 39.7  | 28.7  |
| 62.2  | 64.0  | 73.3  | 55.4  | 65.3  | 60.2  | 69.6  | 82.2  | 91.0  |
| 6.7   | 21.3  | 14.8  | 16.0  | 24.5  | 16.9  | 23.0  | 28.8  | 143.6 |
| 13.7  | 12.0  | 24.6  | 18.8  | 4.9   | 12.0  | 7.7   | 21.2  | 20.2  |
| 3.3   | 2.9   | 4.3   | 1.8   | 2.6   | 4.4   | 3.6   | 2.5   | 3.6   |
| 1.4   | 8.1   | 8.6   | 4.4   | 2.4   | 4.2   | 4.7   | 12.8  | 8.0   |
| 12.0  | 7.2   | 20.0  | 13.8  | 12.6  | 8.3   | 12.4  | 10.4  | 9.9   |
| 2.4   | 1.1   | 1.7   | 1.5   | 3.4   | 1.2   | 1.2   | 2.8   | 5.5   |
| 1.5   | 0.3   | 1.1   | 0.3   | 1.1   | 0.6   | 0.4   | 0.4   | 1.7   |

|        |       |        |        |        |       |        |        |        |
|--------|-------|--------|--------|--------|-------|--------|--------|--------|
| 1.8    | 6.6   | 4.9    | 6.3    | 4.1    | 5.5   | 3.6    | 3.4    | 4.5    |
| 6.1    | 3.4   | 3.2    | 13.2   | 29.3   | 17.7  | 18.3   | 23.0   | 121.3  |
| 1.7    | 6.4   | 2.6    | 2.7    | 1.8    | 1.4   | 2.8    | 1.5    | 2.1    |
| 6.5    | 8.3   | 12.8   | 7.3    | 4.6    | 3.3   | 6.9    | 2.7    | 10.5   |
| 6.4    | 5.5   | 11.8   | 10.5   | 4.7    | 4.6   | 2.6    | 12.8   | 14.1   |
| 40.7   | 26.7  | 62.2   | 33.1   | 5.4    | 26.2  | 5.6    | 12.5   | 6.3    |
| 0.7    | 1.1   | 0.7    | 1.0    | 4.5    | 0.3   | 0.9    | 0.8    | 4.5    |
| 5.0    | 3.7   | 8.1    | 6.4    | 1.5    | 1.8   | 4.6    | 3.6    | 5.8    |
| 6.3    | 5.5   | 2.4    | 6.1    | 5.4    | 2.0   | 3.4    | 1.6    | 8.2    |
| 2.9    | 6.6   | 4.6    | 5.6    | 1.8    | 4.9   | 2.5    | 9.5    | 1.9    |
| 2.8    | 3.2   | 2.2    | 2.1    | 1.3    | 2.8   | 2.6    | 2.4    | 4.2    |
| 4.6    | 7.5   | 8.5    | 5.6    | 18.2   | 6.1   | 7.3    | 2.5    | 14.5   |
| 1.6    | 2.1   | 4.0    | 6.5    | 4.7    | 2.4   | 2.8    | 2.5    | 10.5   |
| 3.2    | 3.4   | 5.9    | 3.0    | 2.8    | 3.7   | 2.0    | 2.0    | 16.5   |
| 6.1    | 3.0   | 2.5    | 1.5    | 3.3    | 7.5   | 6.5    | 8.4    | 4.7    |
| 2.3    | 0.6   | 0.8    | 0.6    | 2.6    | 3.2   | 1.3    | 1.1    | 1.4    |
| 2.1    | 8.7   | 3.1    | 9.4    | 7.9    | 15.2  | 3.3    | 13.5   | 8.9    |
| 1.2    | 0.5   | 0.8    | 0.8    | 0.8    | 0.4   | 1.0    | 0.5    | 0.5    |
| 2.2    | 4.1   | 3.4    | 4.6    | 0.8    | 5.3   | 5.4    | 0.8    | 2.0    |
| 111.3  | 95.5  | 209.6  | 121.3  | 74.9   | 114.6 | 90.6   | 80.2   | 111.5  |
| 1.5    | 7.5   | 6.1    | 6.0    | 7.6    | 0.6   | 4.4    | 1.8    | 6.8    |
| 4.1    | 1.3   | 0.8    | 5.9    | 4.2    | 1.0   | 1.0    | 1.5    | 2.0    |
| 0.4    | 0.9   | 0.7    | 0.7    | 0.6    | 0.3   | 0.8    | 0.7    | 0.8    |
| 2.3    | 2.7   | 1.6    | 5.0    | 0.6    | 0.4   | 0.6    | 0.3    | 0.6    |
| 3.3    | 4.0   | 2.4    | 3.9    | 3.4    | 1.6   | 4.2    | 2.5    | 4.5    |
| 1.1    | 0.6   | 3.2    | 1.0    | 0.7    | 0.6   | 0.8    | 0.4    | 1.1    |
| 9.5    | 2.8   | 4.1    | 3.2    | 15.8   | 7.0   | 6.6    | 20.9   | 2.6    |
| 2.5    | 1.5   | 1.7    | 0.9    | 0.9    | 0.8   | 1.1    | 1.1    | 2.0    |
| 5.6    | 0.7   | 8.2    | 6.8    | 2.7    | 3.6   | 3.4    | 8.2    | 8.3    |
| 1.0    | 4.1   | 2.5    | 3.0    | 1.5    | 2.4   | 0.6    | 1.3    | 2.2    |
| 1025.3 | 834.3 | 1471.0 | 1008.9 | 1147.8 | 852.3 | 1145.0 | 1916.3 | 3552.5 |
| 4.0    | 0.5   | 0.9    | 0.3    | 0.2    | 0.5   | 2.2    | 5.6    | 5.1    |
| 437.8  | 407.7 | 574.1  | 371.6  | 163.9  | 196.2 | 211.6  | 185.3  | 288.6  |
| 1.9    | 2.6   | 2.0    | 2.1    | 2.4    | 5.3   | 2.2    | 1.4    | 4.2    |
| 2.9    | 4.4   | 4.0    | 2.0    | 4.9    | 1.7   | 3.5    | 5.5    | 2.0    |
| 49.0   | 40.2  | 86.8   | 46.5   | 53.9   | 31.3  | 52.4   | 70.8   | 54.0   |
| 0.3    | 0.9   | 1.2    | 0.8    | 0.6    | 0.3   | 3.4    | 0.5    | 0.9    |
| 81.3   | 76.4  | 234.5  | 110.0  | 434.7  | 343.3 | 406.2  | 478.4  | 330.5  |
| 128.4  | 145.5 | 92.3   | 106.1  | 66.7   | 63.3  | 77.5   | 88.2   | 62.5   |
| 1.0    | 2.9   | 1.5    | 4.3    | 3.2    | 1.1   | 1.0    | 1.9    | 2.1    |
| 12.5   | 3.9   | 38.0   | 13.8   | 9.8    | 17.3  | 8.8    | 12.4   | 14.5   |
| 0.8    | 0.6   | 0.8    | 0.8    | 0.7    | 3.5   | 2.1    | 0.4    | 11.1   |
| 16.2   | 24.0  | 26.0   | 20.8   | 8.4    | 10.8  | 11.0   | 9.3    | 23.0   |
| 0.5    | 2.4   | 1.0    | 0.5    | 1.9    | 0.9   | 0.5    | 2.0    | 0.5    |
| 311.3  | 292.6 | 406.0  | 248.9  | 879.9  | 619.8 | 858.6  | 1036.4 | 1252.6 |
| 25.0   | 14.6  | 31.6   | 12.9   | 46.4   | 15.5  | 35.0   | 55.8   | 30.3   |
| 0.9    | 1.0   | 1.5    | 1.0    | 1.3    | 1.5   | 1.6    | 2.6    | 1.8    |
| 4.9    | 3.8   | 3.2    | 2.5    | 6.5    | 1.2   | 0.6    | 0.6    | 4.5    |
| 4.2    | 2.4   | 2.9    | 4.4    | 1.7    | 6.2   | 1.0    | 9.3    | 2.8    |
| 16.1   | 17.5  | 20.7   | 15.5   | 6.6    | 10.8  | 12.0   | 13.4   | 17.2   |
| 2.2    | 3.7   | 4.8    | 1.0    | 3.4    | 1.5   | 1.5    | 15.7   | 1.5    |
| 4.5    | 13.1  | 4.5    | 8.7    | 1.3    | 2.2   | 7.1    | 3.1    | 6.2    |
| 18.5   | 16.0  | 17.5   | 17.4   | 11.6   | 13.0  | 16.3   | 19.6   | 20.2   |

|        |        |        |        |        |        |        |        |        |
|--------|--------|--------|--------|--------|--------|--------|--------|--------|
| 4.9    | 0.8    | 1.5    | 1.5    | 0.8    | 1.1    | 0.9    | 1.3    | 2.1    |
| 31.2   | 31.1   | 39.8   | 28.4   | 25.6   | 19.0   | 23.8   | 25.1   | 44.9   |
| 180.8  | 156.8  | 348.4  | 198.7  | 468.2  | 382.9  | 667.0  | 668.6  | 245.2  |
| 5.9    | 3.8    | 16.5   | 15.8   | 3.0    | 3.1    | 14.8   | 11.3   | 3.8    |
| 21.2   | 27.1   | 23.4   | 22.1   | 14.7   | 11.7   | 14.5   | 13.0   | 18.7   |
| 2.0    | 8.1    | 18.5   | 1.6    | 11.5   | 5.7    | 14.8   | 23.4   | 7.4    |
| 781.7  | 775.1  | 778.6  | 755.4  | 476.6  | 692.0  | 492.2  | 629.2  | 390.3  |
| 4.6    | 2.5    | 4.2    | 1.2    | 1.0    | 2.7    | 5.5    | 0.3    | 10.9   |
| 19.4   | 17.5   | 21.8   | 18.1   | 40.7   | 47.9   | 47.1   | 58.4   | 23.4   |
| 84.3   | 71.4   | 114.7  | 69.1   | 52.6   | 40.2   | 48.4   | 111.8  | 51.6   |
| 0.4    | 0.4    | 0.7    | 4.3    | 1.7    | 2.4    | 1.1    | 0.8    | 0.7    |
| 54.2   | 55.9   | 66.1   | 57.7   | 260.8  | 479.0  | 494.4  | 470.9  | 125.3  |
| 18.0   | 14.4   | 8.7    | 15.0   | 12.3   | 14.3   | 16.2   | 22.9   | 17.1   |
| 8.7    | 21.2   | 20.7   | 8.4    | 15.8   | 18.7   | 22.4   | 30.0   | 26.2   |
| 11.7   | 15.2   | 9.5    | 8.9    | 5.5    | 3.0    | 3.0    | 11.0   | 15.2   |
| 4.2    | 7.1    | 12.2   | 5.1    | 7.9    | 6.0    | 2.5    | 3.0    | 8.5    |
| 4.1    | 2.4    | 1.4    | 5.8    | 0.3    | 1.5    | 1.3    | 2.5    | 2.5    |
| 17.3   | 22.0   | 41.1   | 35.1   | 10.3   | 7.8    | 10.2   | 13.5   | 19.8   |
| 7.4    | 5.1    | 10.9   | 6.6    | 7.4    | 4.5    | 4.4    | 3.9    | 5.3    |
| 30.2   | 20.7   | 54.2   | 29.2   | 44.3   | 43.5   | 38.0   | 58.1   | 42.2   |
| 10.5   | 10.5   | 12.9   | 9.3    | 8.8    | 3.3    | 9.8    | 10.0   | 14.3   |
| 16.9   | 20.0   | 8.7    | 12.0   | 18.8   | 8.0    | 4.2    | 20.2   | 18.3   |
| 1.7    | 1.7    | 2.4    | 2.1    | 1.6    | 2.3    | 3.8    | 2.8    | 3.5    |
| 26.8   | 31.0   | 38.9   | 18.7   | 32.1   | 18.3   | 22.5   | 33.4   | 55.2   |
| 1118.1 | 988.4  | 1356.3 | 947.4  | 1806.7 | 1390.1 | 1821.6 | 2034.1 | 1831.0 |
| 3.7    | 3.4    | 7.1    | 4.0    | 3.2    | 1.7    | 4.5    | 13.6   | 3.4    |
| 34.8   | 31.7   | 81.6   | 59.7   | 53.7   | 47.8   | 64.5   | 58.4   | 92.5   |
| 1.6    | 1.8    | 3.9    | 2.0    | 0.9    | 6.3    | 5.7    | 3.1    | 2.1    |
| 627.7  | 521.8  | 818.5  | 592.8  | 458.2  | 310.8  | 417.0  | 526.6  | 382.3  |
| 1.0    | 7.4    | 4.1    | 0.5    | 7.4    | 6.1    | 6.9    | 5.5    | 11.1   |
| 4.8    | 0.8    | 0.8    | 0.8    | 0.7    | 1.5    | 0.5    | 0.8    | 1.0    |
| 3.2    | 2.6    | 0.7    | 2.6    | 2.0    | 1.3    | 1.1    | 1.4    | 3.2    |
| 33.5   | 21.6   | 36.8   | 32.4   | 10.5   | 11.8   | 18.9   | 15.2   | 32.9   |
| 189.2  | 193.9  | 231.2  | 215.6  | 72.5   | 85.0   | 78.1   | 69.4   | 32.7   |
| 35.8   | 40.9   | 103.0  | 32.4   | 90.0   | 80.2   | 89.5   | 92.2   | 63.5   |
| 0.3    | 2.2    | 0.8    | 3.9    | 1.6    | 0.7    | 1.1    | 4.7    | 6.6    |
| 14.9   | 15.0   | 13.8   | 12.0   | 9.2    | 8.6    | 8.5    | 16.5   | 16.4   |
| 9.0    | 9.9    | 17.6   | 10.7   | 11.1   | 4.1    | 14.8   | 14.2   | 19.3   |
| 2.7    | 2.3    | 4.1    | 1.8    | 4.4    | 1.8    | 5.3    | 1.7    | 3.9    |
| 3.2    | 1.9    | 1.2    | 0.9    | 0.9    | 2.6    | 0.9    | 1.1    | 4.5    |
| 20.5   | 19.8   | 34.3   | 24.6   | 19.3   | 14.4   | 15.9   | 29.1   | 27.9   |
| 5.4    | 7.4    | 11.6   | 5.4    | 9.0    | 3.3    | 10.2   | 10.2   | 4.1    |
| 2.1    | 1.5    | 10.6   | 2.6    | 7.0    | 5.2    | 6.2    | 2.4    | 2.1    |
| 4.1    | 3.2    | 5.4    | 2.3    | 2.4    | 1.8    | 1.7    | 2.7    | 5.7    |
| 1.3    | 1.8    | 7.0    | 4.7    | 2.7    | 1.5    | 2.5    | 1.6    | 4.1    |
| 2.5    | 11.0   | 15.3   | 9.6    | 9.7    | 5.7    | 3.5    | 15.1   | 14.7   |
| 6.2    | 7.6    | 1.9    | 3.0    | 1.7    | 1.8    | 1.7    | 1.1    | 2.0    |
| 4.0    | 9.8    | 10.5   | 5.7    | 1.8    | 2.5    | 3.8    | 9.0    | 5.1    |
| 21.1   | 20.3   | 16.7   | 23.8   | 12.3   | 10.6   | 14.7   | 5.1    | 14.4   |
| 231.6  | 202.1  | 524.3  | 279.1  | 602.9  | 651.9  | 377.3  | 500.4  | 763.4  |
| 20.3   | 16.2   | 30.3   | 17.8   | 21.8   | 17.0   | 19.8   | 23.6   | 13.8   |
| 11.3   | 5.0    | 20.9   | 6.7    | 46.3   | 52.7   | 30.3   | 37.4   | 9.5    |
| 1447.2 | 1440.7 | 1665.0 | 1567.1 | 742.4  | 1290.2 | 994.3  | 913.7  | 948.1  |

|       |       |       |       |       |       |       |       |       |
|-------|-------|-------|-------|-------|-------|-------|-------|-------|
| 2.3   | 5.4   | 6.6   | 6.4   | 3.0   | 5.4   | 0.8   | 1.9   | 6.6   |
| 5.4   | 4.6   | 2.6   | 5.9   | 4.7   | 1.7   | 1.6   | 2.3   | 2.6   |
| 4.2   | 7.3   | 9.3   | 6.8   | 8.8   | 2.1   | 13.6  | 2.3   | 5.0   |
| 1.5   | 1.7   | 3.3   | 1.8   | 2.4   | 1.1   | 1.4   | 1.0   | 1.6   |
| 79.3  | 60.1  | 170.3 | 55.1  | 53.0  | 35.6  | 38.4  | 43.7  | 67.8  |
| 3.6   | 4.1   | 4.2   | 2.3   | 2.2   | 5.5   | 2.1   | 5.9   | 5.2   |
| 2.5   | 0.7   | 4.1   | 0.8   | 1.1   | 1.5   | 1.9   | 0.5   | 1.5   |
| 32.1  | 28.6  | 31.6  | 19.5  | 48.2  | 40.7  | 54.2  | 60.2  | 57.3  |
| 5.8   | 3.4   | 6.0   | 3.6   | 4.6   | 8.4   | 5.8   | 6.8   | 8.9   |
| 2.3   | 2.3   | 7.8   | 1.0   | 4.5   | 2.3   | 4.2   | 7.4   | 7.9   |
| 8.7   | 9.6   | 3.9   | 13.5  | 7.7   | 4.0   | 2.6   | 3.1   | 21.7  |
| 2.7   | 10.9  | 4.9   | 6.6   | 6.5   | 5.2   | 2.2   | 4.9   | 2.8   |
| 1.0   | 0.5   | 1.0   | 0.6   | 0.8   | 0.6   | 0.9   | 0.8   | 0.9   |
| 9.8   | 5.1   | 12.2  | 6.8   | 3.1   | 4.3   | 10.1  | 12.0  | 11.3  |
| 8.2   | 4.6   | 3.9   | 4.5   | 2.3   | 3.4   | 4.2   | 1.4   | 4.5   |
| 5.7   | 1.7   | 3.6   | 1.7   | 2.8   | 5.0   | 6.2   | 1.5   | 14.5  |
| 121.2 | 90.2  | 155.1 | 84.7  | 597.8 | 800.2 | 663.1 | 691.9 | 509.0 |
| 0.8   | 3.9   | 5.3   | 1.5   | 3.4   | 6.7   | 8.4   | 23.6  | 7.1   |
| 27.4  | 36.5  | 24.9  | 23.4  | 7.9   | 10.5  | 6.6   | 26.6  | 4.2   |
| 313.0 | 316.6 | 410.8 | 252.4 | 264.6 | 212.8 | 369.7 | 372.8 | 112.1 |
| 40.6  | 45.2  | 69.4  | 40.7  | 76.2  | 89.5  | 71.5  | 82.0  | 95.7  |
| 15.3  | 9.3   | 4.0   | 6.0   | 4.9   | 1.9   | 3.3   | 3.6   | 0.7   |
| 61.9  | 68.0  | 98.9  | 67.4  | 76.0  | 64.1  | 69.8  | 76.4  | 97.5  |
| 11.5  | 4.3   | 7.3   | 10.8  | 21.0  | 28.0  | 30.1  | 32.4  | 38.2  |
| 13.8  | 15.0  | 18.7  | 13.2  | 12.8  | 10.5  | 11.1  | 12.4  | 14.3  |
| 0.3   | 0.3   | 1.5   | 2.5   | 2.7   | 3.1   | 0.2   | 4.7   | 2.5   |
| 13.3  | 8.2   | 19.5  | 8.4   | 7.4   | 7.7   | 2.7   | 20.6  | 14.9  |
| 103.4 | 96.1  | 140.0 | 117.6 | 532.1 | 519.5 | 457.1 | 599.6 | 488.5 |
| 21.7  | 25.5  | 26.6  | 18.4  | 15.8  | 11.3  | 14.1  | 20.3  | 26.8  |
| 9.0   | 6.2   | 3.2   | 1.8   | 2.6   | 2.9   | 4.7   | 14.7  | 8.0   |
| 11.3  | 13.7  | 7.6   | 17.5  | 8.4   | 14.8  | 3.8   | 14.0  | 18.4  |
| 287.3 | 271.8 | 484.0 | 275.6 | 317.7 | 278.6 | 376.8 | 409.7 | 391.0 |
| 0.5   | 3.4   | 1.6   | 0.9   | 2.4   | 0.9   | 0.8   | 2.1   | 5.9   |
| 286.6 | 321.2 | 183.7 | 272.2 | 108.6 | 70.2  | 105.6 | 132.4 | 60.6  |
| 7.2   | 14.1  | 11.6  | 10.0  | 7.9   | 6.7   | 8.2   | 5.1   | 5.8   |
| 1.3   | 2.8   | 2.2   | 1.7   | 6.0   | 1.9   | 3.8   | 8.4   | 9.9   |
| 46.8  | 48.6  | 61.1  | 43.4  | 26.1  | 28.8  | 23.9  | 25.4  | 32.7  |
| 6.6   | 5.1   | 11.5  | 7.2   | 7.5   | 7.5   | 6.0   | 8.1   | 6.4   |
| 32.9  | 27.6  | 52.1  | 34.8  | 19.3  | 14.8  | 18.6  | 7.1   | 27.0  |
| 48.2  | 49.2  | 72.3  | 40.8  | 127.4 | 114.3 | 141.5 | 171.1 | 54.0  |
| 17.6  | 21.3  | 23.4  | 34.7  | 15.0  | 9.3   | 19.1  | 16.2  | 29.2  |
| 28.5  | 20.2  | 18.7  | 16.1  | 20.8  | 16.3  | 12.5  | 30.7  | 23.5  |
| 245.2 | 186.5 | 340.7 | 201.5 | 483.1 | 405.3 | 497.5 | 588.5 | 263.2 |
| 28.5  | 32.1  | 22.1  | 25.5  | 8.1   | 16.2  | 7.1   | 6.6   | 24.9  |
| 0.7   | 2.0   | 1.4   | 0.6   | 1.2   | 0.6   | 4.6   | 0.3   | 0.8   |
| 5.4   | 5.4   | 6.2   | 8.8   | 5.0   | 0.8   | 4.3   | 1.1   | 1.4   |
| 2.5   | 0.8   | 2.5   | 2.8   | 0.8   | 0.9   | 0.6   | 1.4   | 5.9   |
| 104.6 | 95.1  | 95.9  | 77.0  | 83.0  | 84.6  | 82.2  | 96.5  | 20.3  |
| 2.1   | 1.2   | 2.8   | 5.3   | 0.6   | 0.9   | 2.1   | 4.1   | 4.1   |
| 8.9   | 7.8   | 14.0  | 7.4   | 11.6  | 10.2  | 13.6  | 17.3  | 25.9  |
| 9.2   | 6.3   | 13.8  | 6.1   | 3.2   | 7.9   | 2.0   | 3.1   | 5.1   |
| 4.2   | 4.8   | 3.2   | 2.4   | 3.3   | 2.5   | 4.6   | 3.2   | 5.5   |
| 223.4 | 242.2 | 270.2 | 255.1 | 283.3 | 270.1 | 317.9 | 333.0 | 291.0 |

|        |        |        |        |        |        |        |        |        |
|--------|--------|--------|--------|--------|--------|--------|--------|--------|
| 2.1    | 3.6    | 1.6    | 2.7    | 1.8    | 1.9    | 7.2    | 4.3    | 7.2    |
| 78.8   | 85.0   | 105.3  | 93.1   | 56.6   | 62.8   | 78.0   | 64.0   | 49.7   |
| 4.7    | 8.5    | 5.6    | 8.3    | 12.7   | 9.8    | 9.9    | 4.1    | 13.4   |
| 594.6  | 616.8  | 968.3  | 729.2  | 1135.3 | 1388.8 | 1209.7 | 1310.7 | 1976.8 |
| 78.2   | 78.6   | 52.3   | 71.7   | 172.3  | 179.6  | 138.3  | 197.9  | 432.5  |
| 5.3    | 12.5   | 2.7    | 2.1    | 7.2    | 1.9    | 4.6    | 2.9    | 4.5    |
| 6.9    | 3.2    | 11.3   | 11.1   | 6.1    | 6.0    | 2.0    | 5.3    | 7.5    |
| 0.2    | 1.6    | 2.9    | 0.4    | 0.5    | 0.9    | 0.2    | 0.2    | 2.6    |
| 7.9    | 2.2    | 6.5    | 4.0    | 28.4   | 25.5   | 33.8   | 39.9   | 17.0   |
| 1.9    | 1.2    | 2.4    | 1.2    | 2.5    | 3.4    | 10.3   | 2.6    | 1.4    |
| 32.6   | 33.9   | 44.7   | 22.8   | 27.9   | 21.0   | 12.7   | 25.5   | 44.1   |
| 5.1    | 1.5    | 2.2    | 2.5    | 7.4    | 3.3    | 6.6    | 6.0    | 3.9    |
| 440.5  | 381.0  | 692.8  | 422.7  | 1029.6 | 893.9  | 1141.7 | 1083.8 | 715.8  |
| 16.3   | 20.0   | 6.4    | 3.5    | 9.8    | 12.5   | 8.4    | 12.7   | 26.5   |
| 7.8    | 10.3   | 15.2   | 12.9   | 10.2   | 7.8    | 5.3    | 6.1    | 11.8   |
| 1.1    | 1.5    | 2.0    | 2.1    | 1.1    | 1.1    | 1.8    | 3.6    | 1.4    |
| 1.1    | 0.7    | 1.0    | 2.7    | 0.4    | 0.4    | 0.4    | 0.8    | 0.9    |
| 4.2    | 2.3    | 0.6    | 0.9    | 1.3    | 0.8    | 2.2    | 0.5    | 9.8    |
| 14.2   | 6.5    | 8.6    | 5.0    | 12.3   | 10.4   | 4.2    | 9.9    | 9.1    |
| 9.4    | 1.1    | 2.6    | 3.8    | 1.0    | 0.6    | 5.5    | 1.9    | 8.7    |
| 10.2   | 5.0    | 3.3    | 2.8    | 6.9    | 2.9    | 4.4    | 4.1    | 3.1    |
| 11.1   | 11.2   | 16.5   | 4.2    | 1.7    | 1.9    | 2.7    | 3.4    | 0.8    |
| 8.4    | 10.3   | 12.0   | 6.6    | 16.3   | 10.2   | 12.9   | 13.6   | 30.4   |
| 22.2   | 18.2   | 42.9   | 23.3   | 28.5   | 22.3   | 27.9   | 34.6   | 84.5   |
| 81.6   | 72.8   | 64.9   | 59.1   | 7.0    | 10.7   | 8.7    | 13.3   | 3.4    |
| 426.8  | 448.3  | 818.1  | 451.7  | 664.1  | 575.0  | 606.1  | 661.5  | 595.1  |
| 7.6    | 2.2    | 2.0    | 5.0    | 6.6    | 13.8   | 6.1    | 8.3    | 3.2    |
| 3.4    | 2.5    | 9.0    | 3.7    | 3.7    | 7.0    | 3.3    | 10.6   | 4.1    |
| 3.0    | 4.9    | 10.8   | 2.2    | 6.2    | 3.8    | 4.2    | 8.7    | 10.4   |
| 53.3   | 67.6   | 69.5   | 60.5   | 26.5   | 30.1   | 29.1   | 41.5   | 77.1   |
| 10.8   | 12.8   | 20.4   | 12.1   | 12.2   | 7.7    | 9.7    | 18.5   | 14.3   |
| 1.0    | 1.2    | 1.5    | 1.2    | 0.7    | 0.6    | 0.8    | 1.3    | 1.5    |
| 1204.0 | 1131.7 | 1448.9 | 1018.9 | 1716.4 | 1642.9 | 1587.1 | 1909.8 | 2925.8 |
| 19.1   | 18.8   | 25.4   | 23.6   | 5.9    | 8.3    | 3.1    | 9.9    | 16.5   |
| 2.0    | 12.9   | 7.1    | 5.3    | 3.2    | 1.2    | 3.1    | 2.0    | 1.0    |
| 1.3    | 1.9    | 1.2    | 0.8    | 0.6    | 0.6    | 1.7    | 0.4    | 0.6    |
| 2.3    | 5.7    | 1.9    | 1.1    | 7.1    | 11.4   | 0.8    | 1.7    | 3.6    |
| 7.7    | 12.7   | 9.2    | 10.5   | 7.7    | 5.1    | 8.5    | 3.6    | 19.1   |
| 18.7   | 15.7   | 31.5   | 20.2   | 6.6    | 6.6    | 9.5    | 10.5   | 20.2   |
| 1.7    | 5.4    | 5.6    | 1.5    | 2.9    | 11.2   | 7.1    | 9.7    | 10.1   |
| 16.8   | 11.5   | 25.2   | 8.2    | 1.6    | 6.6    | 3.7    | 4.7    | 5.5    |
| 0.6    | 0.6    | 0.8    | 0.7    | 0.6    | 0.7    | 0.8    | 0.7    | 1.3    |
| 642.8  | 550.5  | 578.8  | 487.6  | 503.2  | 492.7  | 462.9  | 573.7  | 1043.8 |
| 1.7    | 2.4    | 2.1    | 0.2    | 1.5    | 3.4    | 2.8    | 5.4    | 5.0    |
| 0.2    | 0.5    | 4.4    | 1.6    | 0.2    | 3.6    | 2.4    | 0.3    | 1.2    |
| 49.9   | 31.7   | 55.0   | 53.8   | 23.9   | 31.8   | 27.8   | 43.1   | 41.1   |
| 62.6   | 54.4   | 55.1   | 56.2   | 18.2   | 28.9   | 21.7   | 36.7   | 37.3   |
| 4.5    | 1.3    | 4.2    | 5.9    | 1.6    | 4.2    | 1.7    | 3.5    | 6.0    |
| 3.1    | 1.0    | 8.7    | 5.6    | 6.9    | 1.3    | 5.6    | 8.7    | 8.8    |
| 2.9    | 1.1    | 4.6    | 1.7    | 2.7    | 7.9    | 3.3    | 3.4    | 11.0   |
| 15.7   | 10.9   | 26.9   | 17.7   | 12.1   | 11.3   | 12.8   | 19.4   | 30.5   |
| 5.1    | 4.8    | 5.3    | 4.8    | 4.3    | 3.4    | 1.6    | 5.4    | 5.9    |
| 10.2   | 4.2    | 9.5    | 4.7    | 4.3    | 2.5    | 10.2   | 2.0    | 13.6   |

|        |        |        |        |        |        |        |        |        |
|--------|--------|--------|--------|--------|--------|--------|--------|--------|
| 9.8    | 6.7    | 9.2    | 7.4    | 4.9    | 4.2    | 5.0    | 10.2   | 17.1   |
| 0.5    | 0.8    | 2.8    | 0.7    | 0.8    | 1.6    | 1.3    | 1.0    | 5.2    |
| 4.6    | 3.0    | 3.2    | 3.0    | 131.8  | 131.5  | 145.6  | 110.5  | 127.0  |
| 5.3    | 6.4    | 6.3    | 9.5    | 39.8   | 19.4   | 48.2   | 40.3   | 12.5   |
| 0.9    | 1.0    | 1.7    | 2.1    | 0.9    | 0.8    | 1.6    | 0.6    | 1.1    |
| 1.0    | 1.0    | 2.7    | 5.3    | 3.0    | 3.6    | 1.7    | 4.7    | 4.0    |
| 1.2    | 1.0    | 1.2    | 1.6    | 0.9    | 0.6    | 0.6    | 0.4    | 4.3    |
| 13.8   | 23.3   | 18.8   | 12.9   | 10.6   | 13.4   | 14.5   | 22.4   | 28.4   |
| 4.4    | 3.3    | 5.9    | 2.9    | 7.4    | 3.1    | 4.5    | 5.8    | 8.3    |
| 154.9  | 146.0  | 103.4  | 134.6  | 839.2  | 702.4  | 933.6  | 1056.6 | 521.9  |
| 4.0    | 3.2    | 8.1    | 6.0    | 10.6   | 5.2    | 3.6    | 3.1    | 3.2    |
| 12.8   | 6.5    | 12.1   | 17.3   | 6.1    | 3.4    | 5.6    | 9.8    | 13.6   |
| 88.2   | 87.9   | 126.6  | 96.4   | 93.1   | 68.9   | 86.6   | 78.7   | 194.5  |
| 1.5    | 0.7    | 1.3    | 0.9    | 0.8    | 0.6    | 1.2    | 2.0    | 7.0    |
| 16.1   | 27.1   | 26.8   | 15.5   | 14.2   | 5.1    | 13.8   | 29.9   | 22.4   |
| 3.9    | 2.0    | 2.8    | 3.8    | 6.7    | 2.7    | 1.8    | 8.2    | 11.0   |
| 13.9   | 14.1   | 20.0   | 14.1   | 12.6   | 8.8    | 13.7   | 11.7   | 16.9   |
| 2069.7 | 1702.0 | 2987.7 | 1745.4 | 4691.7 | 3940.7 | 4419.1 | 5160.8 | 7175.0 |
| 14.8   | 3.4    | 2.3    | 3.0    | 9.9    | 1.8    | 10.8   | 1.9    | 17.1   |
| 7.6    | 2.6    | 14.0   | 8.8    | 3.3    | 9.5    | 7.5    | 1.7    | 8.7    |
| 117.3  | 117.8  | 181.9  | 105.8  | 165.9  | 154.7  | 114.3  | 167.5  | 179.6  |
| 1.6    | 1.3    | 3.6    | 2.0    | 1.8    | 2.0    | 1.3    | 5.2    | 9.4    |
| 195.5  | 166.0  | 213.0  | 163.6  | 285.7  | 211.6  | 273.1  | 335.6  | 321.9  |
| 16.8   | 7.8    | 14.4   | 9.9    | 29.8   | 29.8   | 35.5   | 46.5   | 22.1   |
| 788.0  | 731.6  | 1133.2 | 730.1  | 905.6  | 611.0  | 886.8  | 1070.2 | 1201.7 |
| 7.5    | 1.4    | 9.8    | 9.1    | 12.6   | 4.0    | 6.5    | 1.1    | 7.9    |
| 1.3    | 1.2    | 1.4    | 1.6    | 1.1    | 7.3    | 1.3    | 0.9    | 1.9    |
| 9.5    | 13.2   | 7.7    | 3.3    | 5.6    | 10.8   | 9.3    | 16.7   | 16.0   |
| 5.0    | 6.9    | 7.0    | 11.3   | 7.5    | 7.2    | 5.0    | 4.6    | 7.2    |
| 0.3    | 0.6    | 3.2    | 2.9    | 0.9    | 2.7    | 4.8    | 2.6    | 4.7    |
| 26.9   | 19.2   | 40.0   | 31.3   | 29.9   | 18.6   | 11.2   | 16.6   | 28.2   |
| 4.9    | 1.3    | 0.8    | 1.1    | 4.6    | 1.4    | 0.7    | 1.1    | 2.5    |
| 55.6   | 50.2   | 75.3   | 58.5   | 78.5   | 101.9  | 71.8   | 81.2   | 112.9  |
| 38.2   | 35.8   | 65.1   | 45.4   | 46.2   | 53.9   | 49.3   | 67.9   | 112.7  |
| 0.7    | 1.1    | 1.8    | 1.9    | 0.7    | 0.7    | 0.9    | 1.0    | 1.8    |
| 34.7   | 44.1   | 28.3   | 32.7   | 115.9  | 141.8  | 89.6   | 117.1  | 45.4   |
| 69.9   | 58.4   | 67.6   | 48.9   | 106.4  | 85.0   | 120.0  | 134.6  | 427.3  |
| 1.2    | 1.3    | 5.0    | 1.7    | 2.2    | 0.9    | 1.6    | 2.4    | 3.5    |
| 6.1    | 9.0    | 8.1    | 10.7   | 8.5    | 8.0    | 5.9    | 5.8    | 9.2    |
| 6.5    | 5.4    | 6.2    | 5.6    | 4.6    | 2.8    | 4.4    | 1.2    | 10.0   |
| 564.7  | 636.1  | 434.0  | 557.0  | 107.6  | 103.8  | 93.6   | 114.8  | 254.0  |
| 10.0   | 12.4   | 12.7   | 5.6    | 12.2   | 10.1   | 14.0   | 7.4    | 6.7    |
| 6.6    | 4.8    | 10.1   | 4.0    | 5.3    | 7.6    | 6.1    | 5.2    | 12.2   |
| 4.6    | 0.6    | 1.8    | 6.3    | 0.7    | 3.1    | 5.1    | 2.6    | 0.8    |
| 0.3    | 2.7    | 0.9    | 0.5    | 4.0    | 3.8    | 1.4    | 2.1    | 6.2    |
| 21.0   | 17.2   | 37.7   | 22.7   | 30.7   | 37.4   | 22.1   | 47.3   | 62.0   |
| 1.8    | 3.9    | 2.5    | 4.0    | 7.0    | 4.7    | 4.8    | 1.8    | 17.1   |
| 24.5   | 15.8   | 23.2   | 13.4   | 23.3   | 18.4   | 18.6   | 26.0   | 33.8   |
| 7.6    | 7.8    | 8.6    | 4.1    | 1.9    | 2.9    | 3.0    | 3.9    | 3.9    |
| 8.0    | 2.6    | 4.2    | 4.1    | 0.8    | 2.0    | 2.6    | 0.9    | 7.5    |
| 3.3    | 3.9    | 4.3    | 1.6    | 2.3    | 0.8    | 4.0    | 1.9    | 2.1    |
| 3.2    | 2.5    | 1.7    | 0.8    | 4.1    | 0.9    | 3.5    | 1.1    | 2.0    |
| 171.8  | 130.5  | 222.8  | 192.0  | 346.2  | 224.5  | 300.5  | 273.1  | 380.0  |

|        |        |        |        |        |        |        |        |        |
|--------|--------|--------|--------|--------|--------|--------|--------|--------|
| 5.9    | 11.1   | 16.0   | 2.0    | 4.9    | 2.3    | 11.4   | 16.6   | 14.4   |
| 18.4   | 26.9   | 30.8   | 23.6   | 11.9   | 14.9   | 17.0   | 21.1   | 25.3   |
| 13.0   | 9.7    | 11.0   | 10.0   | 13.7   | 13.7   | 20.2   | 22.9   | 16.2   |
| 1.6    | 1.4    | 9.8    | 2.9    | 0.5    | 1.1    | 2.2    | 1.9    | 2.0    |
| 1.7    | 2.7    | 0.6    | 1.1    | 0.8    | 0.8    | 0.8    | 0.7    | 1.6    |
| 8.3    | 6.7    | 12.4   | 3.4    | 5.4    | 3.7    | 5.1    | 1.3    | 5.4    |
| 92.0   | 94.6   | 108.6  | 114.1  | 136.4  | 98.6   | 116.6  | 170.7  | 122.2  |
| 37.7   | 38.9   | 69.0   | 30.1   | 31.7   | 17.3   | 29.8   | 35.1   | 38.6   |
| 12.9   | 4.5    | 20.1   | 11.0   | 9.1    | 4.1    | 8.4    | 8.3    | 11.5   |
| 1.0    | 1.8    | 1.1    | 1.4    | 1.6    | 1.3    | 1.6    | 10.6   | 356.9  |
| 17.9   | 14.8   | 25.1   | 18.0   | 20.5   | 9.2    | 8.6    | 15.4   | 17.8   |
| 5.6    | 6.5    | 6.9    | 9.6    | 5.5    | 5.8    | 6.5    | 6.9    | 4.5    |
| 11.4   | 17.5   | 16.4   | 13.4   | 16.8   | 14.8   | 12.6   | 17.2   | 19.1   |
| 1.9    | 2.3    | 2.1    | 1.9    | 3.1    | 1.8    | 2.8    | 2.8    | 4.4    |
| 19.5   | 16.2   | 17.2   | 19.1   | 32.9   | 19.8   | 28.0   | 19.6   | 34.4   |
| 1.0    | 4.1    | 0.9    | 0.8    | 0.6    | 0.4    | 0.7    | 0.8    | 2.4    |
| 81.1   | 85.3   | 129.8  | 69.0   | 67.6   | 49.2   | 64.0   | 76.0   | 136.5  |
| 162.1  | 121.4  | 300.1  | 126.3  | 180.7  | 135.7  | 132.7  | 150.7  | 210.4  |
| 19.3   | 20.1   | 21.4   | 28.2   | 12.9   | 14.3   | 12.5   | 13.5   | 20.2   |
| 50.2   | 43.1   | 50.1   | 36.8   | 65.0   | 67.1   | 67.5   | 61.6   | 64.5   |
| 13.2   | 12.5   | 16.8   | 13.4   | 1.8    | 3.1    | 5.1    | 7.7    | 6.1    |
| 31.6   | 11.3   | 26.5   | 16.4   | 11.0   | 16.8   | 16.9   | 13.4   | 7.1    |
| 38.4   | 35.1   | 35.1   | 34.4   | 30.1   | 29.6   | 30.2   | 31.3   | 56.7   |
| 44.8   | 28.8   | 73.8   | 29.6   | 23.7   | 25.4   | 28.6   | 39.0   | 51.4   |
| 55.9   | 52.5   | 39.1   | 45.8   | 57.5   | 72.7   | 54.9   | 59.5   | 68.0   |
| 7.5    | 11.5   | 15.0   | 6.0    | 5.6    | 6.7    | 6.0    | 10.2   | 6.3    |
| 1596.6 | 1321.8 | 2373.7 | 1485.4 | 2425.1 | 1985.3 | 2433.6 | 2718.9 | 3814.5 |
| 4.7    | 2.7    | 2.2    | 1.3    | 2.1    | 8.5    | 6.8    | 12.7   | 7.1    |
| 22.6   | 21.2   | 25.8   | 21.9   | 9.0    | 11.6   | 29.7   | 19.5   | 29.5   |
| 10.2   | 7.8    | 18.2   | 3.9    | 13.5   | 8.8    | 12.3   | 16.7   | 15.0   |
| 2.4    | 1.7    | 6.4    | 0.6    | 0.8    | 2.2    | 3.8    | 4.3    | 4.6    |
| 2.3    | 11.6   | 14.2   | 14.9   | 5.1    | 6.0    | 6.4    | 16.1   | 18.0   |
| 32.7   | 32.4   | 53.5   | 42.3   | 77.3   | 81.4   | 78.4   | 106.7  | 380.0  |
| 25.8   | 107.1  | 66.9   | 66.3   | 27.5   | 63.3   | 23.5   | 31.8   | 49.2   |
| 58.9   | 53.6   | 83.4   | 71.3   | 88.8   | 78.3   | 101.7  | 131.5  | 122.5  |
| 22.3   | 19.1   | 36.9   | 22.1   | 31.0   | 36.4   | 35.8   | 29.1   | 33.2   |
| 1.3    | 1.6    | 3.0    | 1.0    | 1.3    | 6.9    | 3.9    | 0.7    | 19.8   |
| 18.4   | 14.2   | 20.2   | 25.2   | 58.6   | 47.7   | 41.5   | 62.7   | 55.7   |
| 35.9   | 29.2   | 47.1   | 29.3   | 32.2   | 25.3   | 21.9   | 43.6   | 49.7   |
| 17.9   | 16.4   | 29.4   | 23.1   | 22.7   | 18.3   | 27.8   | 30.1   | 18.5   |
| 260.3  | 236.3  | 320.5  | 163.8  | 421.8  | 249.8  | 436.6  | 556.4  | 964.1  |
| 9.0    | 9.5    | 5.8    | 7.2    | 64.3   | 56.9   | 45.9   | 67.1   | 10.5   |
| 0.7    | 2.0    | 0.9    | 1.1    | 0.7    | 0.5    | 2.6    | 1.1    | 1.1    |
| 11.2   | 9.9    | 20.0   | 12.1   | 15.6   | 10.4   | 6.8    | 12.0   | 110.8  |
| 3.2    | 2.2    | 2.7    | 2.4    | 2.7    | 2.7    | 3.4    | 3.0    | 9.0    |
| 5.6    | 3.0    | 3.8    | 4.2    | 3.9    | 3.4    | 5.1    | 5.7    | 7.8    |
| 8.5    | 11.0   | 3.4    | 13.0   | 9.7    | 12.0   | 4.7    | 8.3    | 16.8   |
| 7.3    | 21.6   | 22.5   | 23.8   | 7.9    | 11.9   | 11.7   | 14.4   | 12.7   |
| 2.8    | 2.6    | 3.7    | 2.8    | 1.3    | 1.3    | 3.1    | 1.8    | 3.0    |
| 1217.1 | 1032.7 | 1654.9 | 1355.2 | 1532.8 | 1692.3 | 1502.6 | 1525.9 | 2652.7 |
| 2.4    | 1.4    | 4.8    | 0.4    | 4.1    | 4.8    | 1.4    | 5.8    | 6.1    |
| 5.8    | 10.5   | 6.1    | 9.7    | 0.8    | 0.7    | 1.5    | 7.9    | 7.9    |
| 6.3    | 9.6    | 12.3   | 8.5    | 13.3   | 9.0    | 8.2    | 15.7   | 15.0   |



|        |        |        |        |        |        |        |        |        |
|--------|--------|--------|--------|--------|--------|--------|--------|--------|
| 35.1   | 22.5   | 46.1   | 25.1   | 25.6   | 23.3   | 28.6   | 35.0   | 56.3   |
| 1.3    | 1.9    | 6.6    | 5.7    | 1.4    | 3.3    | 1.4    | 1.0    | 6.3    |
| 1.9    | 2.4    | 1.4    | 1.1    | 3.9    | 1.3    | 2.9    | 11.6   | 9.2    |
| 13.5   | 8.0    | 17.9   | 16.5   | 7.5    | 4.1    | 7.8    | 9.4    | 11.7   |
| 2.4    | 2.0    | 3.1    | 3.8    | 0.6    | 0.4    | 3.1    | 4.3    | 6.5    |
| 36.3   | 31.3   | 17.8   | 19.2   | 1554.8 | 1101.1 | 1936.5 | 1996.4 | 2485.0 |
| 8.1    | 10.2   | 5.0    | 7.6    | 6.5    | 7.4    | 9.7    | 1.0    | 4.5    |
| 24.2   | 15.5   | 30.6   | 17.3   | 17.1   | 10.8   | 12.5   | 17.2   | 24.9   |
| 34.5   | 9.7    | 5.5    | 3.4    | 3.3    | 9.8    | 4.0    | 38.0   | 6.7    |
| 1.8    | 4.7    | 11.7   | 0.4    | 2.2    | 2.4    | 0.7    | 0.9    | 10.3   |
| 139.5  | 130.2  | 207.2  | 128.0  | 206.1  | 149.3  | 173.9  | 173.8  | 509.9  |
| 4.2    | 6.9    | 7.6    | 5.1    | 3.4    | 2.8    | 2.9    | 6.7    | 4.7    |
| 6.3    | 2.5    | 1.9    | 2.6    | 7.8    | 7.9    | 10.8   | 1.6    | 7.0    |
| 3.8    | 2.3    | 4.4    | 2.0    | 4.2    | 7.1    | 3.1    | 18.6   | 7.5    |
| 10.5   | 7.8    | 8.5    | 10.0   | 4.6    | 9.8    | 10.2   | 7.1    | 11.0   |
| 6625.8 | 6061.2 | 7651.7 | 6406.1 | 7056.6 | 7299.7 | 7202.2 | 7392.1 | 9170.3 |
| 101.6  | 125.7  | 91.3   | 106.4  | 33.6   | 23.1   | 30.2   | 44.8   | 21.1   |
| 6.3    | 8.0    | 7.7    | 2.0    | 7.3    | 5.1    | 3.7    | 4.5    | 14.2   |
| 4.6    | 3.9    | 4.6    | 1.3    | 6.0    | 1.4    | 3.4    | 2.7    | 5.2    |
| 0.4    | 3.4    | 1.5    | 0.3    | 0.3    | 1.6    | 0.3    | 5.1    | 1.8    |
| 81.6   | 71.0   | 71.8   | 65.9   | 125.2  | 198.8  | 138.0  | 145.7  | 115.6  |
| 7.4    | 3.0    | 4.9    | 5.0    | 0.6    | 0.8    | 5.1    | 2.5    | 1.4    |
| 12.5   | 2.3    | 13.3   | 9.5    | 7.9    | 8.3    | 12.9   | 5.3    | 18.2   |
| 24.1   | 32.2   | 32.3   | 31.6   | 24.7   | 20.6   | 21.1   | 25.7   | 25.8   |
| 58.5   | 70.6   | 98.7   | 88.3   | 101.2  | 111.9  | 98.0   | 145.4  | 71.8   |
| 812.8  | 848.7  | 1478.6 | 976.7  | 1480.0 | 1217.3 | 1479.1 | 1852.3 | 1239.9 |
| 2.3    | 1.3    | 3.0    | 1.3    | 4.9    | 1.0    | 0.9    | 6.3    | 7.0    |
| 5.1    | 4.0    | 5.3    | 5.4    | 1.8    | 2.7    | 1.9    | 2.9    | 4.8    |
| 11.2   | 1.2    | 3.1    | 7.6    | 3.5    | 6.1    | 9.8    | 14.6   | 3.6    |
| 7.0    | 4.9    | 8.0    | 7.1    | 1.9    | 2.5    | 1.2    | 3.2    | 5.3    |
| 15.5   | 6.9    | 12.4   | 6.8    | 15.5   | 3.7    | 5.9    | 5.2    | 12.6   |
| 2.3    | 2.5    | 5.9    | 2.9    | 2.2    | 2.9    | 1.9    | 2.5    | 3.8    |
| 8.7    | 12.4   | 10.6   | 5.0    | 5.7    | 7.9    | 6.2    | 5.9    | 6.3    |
| 47.9   | 46.7   | 93.8   | 45.8   | 70.7   | 59.6   | 68.5   | 78.5   | 62.0   |
| 4.0    | 0.7    | 0.8    | 0.5    | 2.3    | 2.9    | 1.6    | 2.5    | 6.6    |
| 4.4    | 7.8    | 6.0    | 6.8    | 5.5    | 0.8    | 1.5    | 1.7    | 7.8    |
| 132.1  | 117.2  | 121.6  | 118.6  | 390.8  | 588.1  | 381.3  | 383.9  | 86.7   |
| 8.0    | 13.3   | 15.0   | 11.6   | 8.6    | 9.3    | 11.0   | 13.9   | 1.1    |
| 1.5    | 1.7    | 2.9    | 2.6    | 1.4    | 0.9    | 1.3    | 1.4    | 2.1    |
| 1.0    | 0.6    | 2.0    | 0.8    | 1.8    | 13.5   | 1.3    | 1.3    | 14.5   |
| 10.2   | 10.9   | 12.8   | 10.1   | 8.9    | 9.1    | 6.8    | 11.0   | 13.2   |
| 1.4    | 0.8    | 1.0    | 1.3    | 1.0    | 0.9    | 0.4    | 0.6    | 1.1    |
| 0.8    | 0.8    | 1.2    | 0.8    | 1.7    | 0.4    | 0.7    | 2.1    | 1.5    |
| 3.9    | 3.3    | 23.1   | 2.9    | 23.2   | 14.1   | 11.5   | 30.5   | 43.4   |
| 239.0  | 208.5  | 283.2  | 208.7  | 267.6  | 254.6  | 313.6  | 424.1  | 398.6  |
| 8.1    | 1.4    | 4.8    | 2.1    | 2.0    | 1.8    | 5.6    | 9.1    | 4.0    |
| 1.5    | 8.4    | 12.2   | 3.5    | 4.1    | 2.4    | 1.2    | 4.6    | 4.7    |
| 74.1   | 59.6   | 93.8   | 37.1   | 734.1  | 833.9  | 1284.0 | 1234.0 | 127.9  |
| 0.8    | 6.3    | 0.9    | 2.8    | 1.2    | 0.5    | 3.3    | 0.9    | 5.9    |
| 23.4   | 26.5   | 20.3   | 20.5   | 41.1   | 63.1   | 41.9   | 53.9   | 57.3   |
| 1.7    | 2.1    | 1.0    | 0.4    | 9.9    | 9.3    | 9.7    | 10.4   | 1.4    |
| 1.9    | 4.3    | 1.9    | 4.2    | 1.2    | 5.1    | 3.0    | 1.5    | 3.3    |
| 14.8   | 14.1   | 23.6   | 13.0   | 8.2    | 13.9   | 9.2    | 11.7   | 7.2    |

|        |        |        |        |        |        |        |        |        |
|--------|--------|--------|--------|--------|--------|--------|--------|--------|
| 133.3  | 117.2  | 128.4  | 99.3   | 777.0  | 940.5  | 761.3  | 867.9  | 560.0  |
| 56.8   | 76.9   | 41.1   | 54.7   | 156.4  | 156.6  | 133.6  | 170.7  | 103.2  |
| 8.2    | 8.1    | 10.8   | 4.8    | 4.8    | 5.5    | 6.5    | 7.4    | 10.8   |
| 8.9    | 5.7    | 8.9    | 1.1    | 5.1    | 5.7    | 2.8    | 10.1   | 10.9   |
| 1.9    | 1.3    | 2.9    | 2.1    | 1.7    | 2.6    | 2.3    | 0.9    | 0.4    |
| 14.7   | 17.9   | 21.0   | 14.4   | 44.4   | 42.5   | 39.5   | 51.6   | 24.7   |
| 1.9    | 1.3    | 2.0    | 1.7    | 0.9    | 0.8    | 0.8    | 1.2    | 1.9    |
| 1.3    | 0.7    | 0.5    | 1.1    | 2.5    | 1.5    | 3.5    | 3.9    | 1.8    |
| 13.4   | 9.2    | 3.7    | 3.0    | 10.5   | 2.0    | 3.4    | 2.5    | 6.3    |
| 122.6  | 107.5  | 200.3  | 114.4  | 244.3  | 206.6  | 243.9  | 271.8  | 259.1  |
| 23.4   | 18.8   | 20.8   | 22.0   | 20.0   | 9.2    | 16.1   | 10.2   | 30.6   |
| 14.7   | 7.4    | 16.8   | 11.2   | 13.5   | 9.0    | 1.7    | 19.9   | 22.3   |
| 382.5  | 329.6  | 418.1  | 288.8  | 160.4  | 175.8  | 154.7  | 204.9  | 188.3  |
| 13.0   | 9.7    | 15.7   | 7.6    | 4.1    | 9.5    | 13.1   | 12.9   | 22.6   |
| 7.6    | 13.5   | 21.8   | 3.0    | 7.5    | 4.2    | 9.2    | 17.4   | 21.5   |
| 2.1    | 0.5    | 1.0    | 0.6    | 0.7    | 1.3    | 0.7    | 1.2    | 0.7    |
| 0.8    | 2.8    | 0.6    | 4.4    | 3.6    | 0.6    | 2.4    | 1.8    | 10.8   |
| 13.4   | 13.0   | 20.4   | 13.7   | 4.6    | 4.3    | 12.4   | 7.1    | 11.5   |
| 8.4    | 1.9    | 0.9    | 0.9    | 3.5    | 2.4    | 0.5    | 5.9    | 3.1    |
| 10.4   | 5.7    | 18.8   | 10.4   | 9.5    | 9.8    | 9.3    | 16.7   | 15.5   |
| 190.5  | 161.7  | 163.8  | 146.5  | 255.7  | 347.8  | 292.1  | 260.7  | 343.8  |
| 204.9  | 182.7  | 411.3  | 206.0  | 251.3  | 323.1  | 269.4  | 313.1  | 320.4  |
| 3.6    | 6.3    | 2.5    | 2.5    | 2.6    | 3.2    | 6.4    | 1.5    | 5.5    |
| 3.7    | 6.5    | 4.0    | 4.5    | 5.8    | 6.9    | 4.8    | 0.7    | 10.0   |
| 3.3    | 3.2    | 3.5    | 2.4    | 1.0    | 1.3    | 1.8    | 2.5    | 5.1    |
| 52.6   | 37.2   | 62.2   | 41.9   | 48.7   | 27.3   | 50.5   | 60.3   | 99.8   |
| 3.8    | 4.8    | 1.7    | 1.2    | 0.9    | 0.5    | 0.7    | 0.7    | 2.4    |
| 0.7    | 1.4    | 1.7    | 0.4    | 0.8    | 1.6    | 1.4    | 1.0    | 0.7    |
| 1.1    | 3.0    | 1.5    | 1.2    | 2.7    | 1.1    | 2.8    | 12.1   | 2.9    |
| 43.2   | 37.8   | 57.8   | 48.5   | 64.0   | 50.9   | 53.1   | 75.0   | 45.8   |
| 3767.8 | 2817.1 | 5073.1 | 3607.4 | 4012.2 | 4162.8 | 4065.2 | 4388.5 | 5397.5 |
| 21.2   | 14.3   | 19.2   | 15.9   | 21.0   | 8.8    | 10.8   | 34.1   | 44.7   |
| 11.5   | 11.3   | 8.4    | 13.7   | 11.0   | 7.0    | 11.4   | 17.4   | 11.6   |
| 6.6    | 8.8    | 10.0   | 3.8    | 3.0    | 3.7    | 2.1    | 2.1    | 4.1    |
| 2.1    | 0.9    | 2.7    | 1.9    | 2.7    | 4.8    | 4.3    | 7.4    | 4.3    |
| 10.5   | 9.9    | 13.7   | 6.9    | 5.6    | 6.1    | 6.7    | 11.7   | 16.7   |
| 14.0   | 4.2    | 22.2   | 6.7    | 8.5    | 14.5   | 13.8   | 1.1    | 1.7    |
| 44.7   | 43.2   | 43.9   | 50.4   | 33.0   | 45.3   | 35.8   | 48.1   | 47.5   |
| 12.8   | 11.1   | 13.2   | 8.5    | 13.1   | 6.9    | 2.9    | 7.2    | 13.3   |
| 106.2  | 109.6  | 131.4  | 113.3  | 16.2   | 13.5   | 9.4    | 15.6   | 45.9   |
| 1.3    | 2.1    | 1.9    | 1.8    | 1.5    | 1.1    | 2.2    | 2.1    | 2.1    |
| 7.8    | 4.9    | 27.1   | 11.7   | 10.4   | 4.8    | 13.9   | 4.3    | 17.8   |
| 14.3   | 14.0   | 11.5   | 18.2   | 109.7  | 110.1  | 162.5  | 168.1  | 595.2  |
| 2.6    | 4.8    | 7.7    | 5.3    | 1.4    | 1.7    | 1.9    | 7.3    | 8.8    |
| 26.6   | 37.3   | 58.2   | 33.2   | 35.0   | 42.3   | 47.8   | 50.7   | 66.3   |
| 7.1    | 11.2   | 15.9   | 9.1    | 8.7    | 5.1    | 7.2    | 7.8    | 13.6   |
| 12.1   | 15.7   | 16.3   | 17.4   | 10.0   | 13.5   | 16.8   | 17.0   | 25.6   |
| 3.0    | 9.9    | 14.1   | 7.4    | 6.5    | 6.3    | 5.8    | 4.7    | 9.8    |
| 11.9   | 11.2   | 20.1   | 12.0   | 11.8   | 5.2    | 14.3   | 8.7    | 13.6   |
| 354.4  | 340.5  | 473.3  | 346.1  | 265.4  | 319.8  | 308.6  | 321.8  | 326.9  |
| 18.8   | 16.1   | 14.8   | 14.0   | 14.8   | 16.6   | 22.9   | 20.4   | 33.3   |
| 38.1   | 38.2   | 55.6   | 35.9   | 23.2   | 15.6   | 25.5   | 26.7   | 25.8   |
| 2.1    | 1.7    | 2.4    | 1.3    | 1.9    | 0.9    | 1.6    | 1.3    | 2.3    |

|        |        |        |        |        |        |        |        |        |
|--------|--------|--------|--------|--------|--------|--------|--------|--------|
| 11.7   | 10.1   | 9.8    | 4.2    | 14.5   | 15.6   | 4.2    | 14.8   | 2.0    |
| 3.8    | 11.0   | 10.6   | 6.0    | 2.9    | 2.1    | 7.7    | 18.8   | 25.7   |
| 2166.2 | 2038.3 | 2549.9 | 2167.3 | 3800.9 | 3914.9 | 4087.7 | 4383.1 | 4960.7 |
| 396.6  | 367.3  | 560.4  | 363.5  | 63.8   | 76.1   | 56.6   | 78.6   | 729.9  |
| 36.0   | 25.0   | 40.6   | 6.5    | 22.5   | 24.8   | 22.9   | 35.9   | 25.5   |
| 9.2    | 12.8   | 15.5   | 6.8    | 7.7    | 7.9    | 4.4    | 4.0    | 15.9   |
| 1.4    | 1.3    | 1.7    | 1.3    | 1.2    | 0.9    | 2.3    | 1.3    | 2.8    |
| 217.6  | 188.3  | 316.4  | 198.1  | 392.5  | 356.1  | 378.2  | 501.9  | 352.7  |
| 4.1    | 3.1    | 2.0    | 8.3    | 2.0    | 5.7    | 7.9    | 6.5    | 11.1   |
| 2.0    | 5.5    | 2.5    | 6.7    | 3.1    | 6.8    | 5.8    | 5.0    | 5.5    |
| 164.7  | 124.7  | 247.6  | 143.6  | 151.6  | 206.5  | 202.0  | 197.5  | 616.1  |
| 4.4    | 6.2    | 8.3    | 1.6    | 23.4   | 12.9   | 15.5   | 17.3   | 10.1   |
| 179.8  | 153.9  | 157.9  | 167.9  | 189.7  | 221.6  | 160.2  | 189.8  | 190.8  |
| 17.2   | 14.7   | 25.4   | 5.1    | 22.0   | 18.7   | 20.8   | 28.3   | 14.0   |
| 18.6   | 14.0   | 27.2   | 15.3   | 35.0   | 32.1   | 34.9   | 49.7   | 20.7   |
| 1.3    | 1.4    | 6.7    | 5.1    | 0.7    | 5.5    | 5.7    | 1.1    | 7.8    |
| 0.7    | 0.3    | 1.9    | 1.7    | 0.7    | 2.3    | 1.4    | 6.7    | 6.0    |
| 11.9   | 14.8   | 11.3   | 18.0   | 27.4   | 33.0   | 34.3   | 30.6   | 30.8   |
| 3.2    | 4.3    | 7.2    | 4.5    | 3.3    | 4.5    | 3.6    | 1.2    | 5.6    |
| 59.9   | 60.0   | 91.6   | 58.5   | 69.1   | 85.6   | 80.6   | 96.5   | 89.4   |
| 42.6   | 29.3   | 21.3   | 37.4   | 28.6   | 24.2   | 34.2   | 19.7   | 57.7   |
| 1.8    | 3.3    | 2.5    | 2.9    | 1.1    | 0.6    | 1.2    | 1.4    | 1.3    |
| 73.3   | 55.2   | 88.0   | 83.7   | 7.2    | 1.8    | 4.5    | 6.2    | 14.0   |
| 9.5    | 0.9    | 4.4    | 6.4    | 7.8    | 5.1    | 2.9    | 1.2    | 4.4    |
| 0.6    | 1.2    | 0.6    | 0.7    | 15.9   | 22.0   | 13.4   | 8.3    | 0.6    |
| 4.8    | 9.4    | 7.2    | 4.9    | 5.5    | 2.8    | 3.1    | 8.7    | 11.0   |
| 8.5    | 8.6    | 10.2   | 3.8    | 7.7    | 8.3    | 2.7    | 1.5    | 6.6    |
| 16.9   | 54.7   | 30.8   | 37.9   | 21.4   | 23.1   | 15.6   | 11.1   | 28.1   |
| 9.7    | 7.5    | 19.6   | 8.1    | 14.3   | 25.3   | 12.8   | 27.6   | 23.9   |
| 17.5   | 16.4   | 9.7    | 17.5   | 10.4   | 19.8   | 13.1   | 18.2   | 32.4   |
| 4.4    | 3.0    | 4.9    | 2.4    | 2.6    | 3.6    | 2.2    | 1.9    | 1.4    |
| 18.8   | 13.8   | 18.9   | 7.7    | 215.2  | 169.6  | 219.4  | 300.1  | 162.9  |
| 5.6    | 14.3   | 11.4   | 5.8    | 8.3    | 14.0   | 9.3    | 2.8    | 11.6   |
| 4.9    | 6.7    | 8.3    | 1.0    | 4.9    | 7.5    | 6.9    | 0.9    | 9.4    |
| 16.2   | 23.8   | 14.5   | 25.1   | 24.3   | 17.2   | 14.6   | 26.1   | 44.3   |
| 4.6    | 2.7    | 2.5    | 3.9    | 2.7    | 0.1    | 3.9    | 1.6    | 5.5    |
| 0.9    | 1.8    | 4.8    | 2.2    | 2.0    | 0.9    | 4.1    | 6.1    | 0.8    |
| 154.3  | 168.1  | 192.6  | 181.2  | 154.8  | 145.2  | 129.6  | 161.9  | 176.2  |
| 167.5  | 177.5  | 218.9  | 200.2  | 210.2  | 192.2  | 187.2  | 235.2  | 246.5  |
| 48.3   | 28.6   | 48.0   | 28.3   | 1.4    | 4.0    | 2.4    | 5.5    | 2.2    |
| 8.6    | 13.2   | 18.0   | 11.7   | 83.3   | 88.3   | 82.2   | 92.9   | 64.9   |
| 5.5    | 9.7    | 11.4   | 5.8    | 4.1    | 5.2    | 6.8    | 5.3    | 6.7    |
| 4.5    | 10.3   | 4.9    | 3.6    | 0.9    | 2.8    | 2.2    | 1.0    | 3.9    |
| 11.1   | 2.7    | 2.9    | 2.9    | 2.1    | 3.0    | 0.6    | 2.0    | 3.5    |
| 3.6    | 2.9    | 4.4    | 6.2    | 2.4    | 1.6    | 1.6    | 1.9    | 5.1    |
| 13.0   | 14.4   | 5.6    | 5.4    | 1.3    | 3.8    | 0.8    | 1.1    | 0.9    |
| 2.0    | 2.8    | 4.2    | 6.0    | 4.1    | 2.9    | 8.5    | 8.7    | 2.4    |
| 4.5    | 2.7    | 2.3    | 4.4    | 1.6    | 0.4    | 0.3    | 7.5    | 0.6    |
| 2.3    | 2.4    | 2.0    | 2.8    | 5.9    | 5.0    | 1.7    | 2.3    | 2.9    |
| 12.7   | 17.9   | 13.8   | 9.3    | 15.3   | 14.3   | 7.9    | 18.6   | 14.9   |
| 35.7   | 28.7   | 44.6   | 29.3   | 52.5   | 53.6   | 42.1   | 62.9   | 54.4   |
| 7.3    | 3.6    | 5.1    | 7.6    | 182.9  | 117.1  | 172.6  | 231.7  | 98.1   |
| 56.1   | 58.9   | 73.3   | 58.4   | 57.0   | 61.3   | 63.0   | 82.4   | 32.5   |

|       |       |       |       |       |       |       |       |       |
|-------|-------|-------|-------|-------|-------|-------|-------|-------|
| 16.9  | 19.6  | 36.4  | 14.3  | 13.8  | 10.0  | 16.0  | 26.3  | 79.1  |
| 254.3 | 270.6 | 257.2 | 285.0 | 338.9 | 375.2 | 341.2 | 423.9 | 231.2 |
| 20.6  | 18.8  | 20.6  | 15.3  | 7.4   | 6.0   | 8.5   | 11.4  | 16.5  |
| 6.5   | 4.1   | 4.1   | 2.9   | 0.7   | 0.9   | 2.3   | 0.7   | 0.9   |
| 0.3   | 0.5   | 0.5   | 0.4   | 0.4   | 0.4   | 0.9   | 0.6   | 0.4   |
| 40.4  | 33.3  | 59.4  | 38.4  | 41.3  | 28.9  | 43.7  | 49.1  | 55.3  |
| 19.6  | 16.1  | 23.8  | 13.2  | 9.7   | 7.9   | 15.5  | 19.7  | 33.3  |
| 10.9  | 8.9   | 13.5  | 10.1  | 12.1  | 7.1   | 12.5  | 19.2  | 9.8   |
| 85.6  | 88.6  | 90.3  | 91.4  | 36.2  | 40.3  | 55.8  | 65.7  | 100.0 |
| 88.7  | 88.7  | 129.5 | 89.9  | 9.3   | 9.0   | 14.6  | 14.0  | 12.5  |
| 0.4   | 1.9   | 2.2   | 1.9   | 2.4   | 1.7   | 4.1   | 0.2   | 3.2   |
| 8.4   | 7.7   | 3.3   | 3.6   | 102.9 | 87.6  | 90.3  | 99.5  | 277.3 |
| 20.6  | 22.2  | 19.9  | 15.9  | 29.7  | 21.3  | 27.4  | 22.8  | 45.5  |
| 20.3  | 30.7  | 35.1  | 24.8  | 20.8  | 10.4  | 19.8  | 19.4  | 25.0  |
| 2.7   | 3.4   | 4.3   | 8.0   | 53.1  | 34.2  | 44.3  | 35.5  | 15.8  |
| 4.7   | 4.8   | 5.3   | 5.1   | 7.2   | 7.6   | 7.0   | 2.4   | 9.3   |
| 10.5  | 8.4   | 15.3  | 9.5   | 8.4   | 8.4   | 8.5   | 9.2   | 4.0   |
| 32.2  | 33.8  | 55.6  | 27.5  | 41.3  | 53.0  | 48.6  | 71.0  | 72.9  |
| 17.7  | 21.9  | 9.7   | 11.9  | 8.4   | 11.7  | 15.2  | 21.8  | 10.8  |
| 6.9   | 3.1   | 10.2  | 6.9   | 5.9   | 4.3   | 2.9   | 7.1   | 11.0  |
| 1.8   | 1.0   | 2.8   | 0.5   | 2.6   | 0.6   | 3.9   | 4.1   | 0.3   |
| 4.6   | 6.6   | 6.4   | 3.7   | 9.4   | 5.6   | 5.5   | 12.5  | 13.8  |
| 11.5  | 4.7   | 7.9   | 8.8   | 15.6  | 19.9  | 16.2  | 15.3  | 31.1  |
| 7.0   | 1.1   | 1.4   | 3.4   | 0.8   | 1.2   | 2.2   | 0.3   | 2.4   |
| 7.9   | 5.4   | 11.4  | 3.9   | 4.8   | 1.2   | 2.4   | 5.0   | 13.7  |
| 5.2   | 3.1   | 5.2   | 1.8   | 7.3   | 4.3   | 4.1   | 6.1   | 4.5   |
| 6.7   | 11.7  | 7.3   | 5.3   | 7.1   | 3.4   | 2.4   | 4.1   | 5.2   |
| 6.9   | 9.4   | 17.7  | 13.2  | 8.6   | 12.4  | 12.7  | 16.9  | 15.1  |
| 4.9   | 2.1   | 1.8   | 2.4   | 3.0   | 4.6   | 2.2   | 0.9   | 7.6   |
| 3.1   | 2.7   | 4.7   | 1.5   | 2.2   | 3.6   | 2.6   | 4.9   | 3.8   |
| 0.8   | 0.7   | 1.3   | 1.4   | 0.9   | 0.7   | 1.3   | 0.9   | 1.0   |
| 18.8  | 14.9  | 21.5  | 15.1  | 6.0   | 2.4   | 10.0  | 21.4  | 19.9  |
| 3.5   | 4.6   | 1.4   | 8.1   | 14.8  | 7.0   | 22.6  | 20.9  | 3.7   |
| 2.1   | 5.3   | 3.3   | 0.3   | 0.6   | 0.9   | 3.4   | 0.6   | 3.6   |
| 39.1  | 40.1  | 26.4  | 33.0  | 27.1  | 41.6  | 30.0  | 39.7  | 46.5  |
| 3.1   | 5.8   | 2.8   | 2.5   | 1.4   | 0.5   | 3.7   | 4.3   | 3.1   |
| 4.7   | 4.5   | 5.4   | 2.9   | 4.1   | 3.9   | 7.5   | 2.6   | 5.1   |
| 46.2  | 47.7  | 44.9  | 34.4  | 21.2  | 6.1   | 27.7  | 39.5  | 75.0  |
| 20.0  | 32.7  | 54.5  | 28.0  | 27.8  | 37.9  | 36.4  | 66.0  | 47.0  |
| 3.4   | 5.0   | 3.7   | 6.4   | 2.4   | 1.0   | 0.6   | 0.6   | 6.0   |
| 5.6   | 3.8   | 5.5   | 1.1   | 4.0   | 1.5   | 0.6   | 2.4   | 5.6   |
| 5.3   | 1.0   | 2.4   | 1.9   | 0.6   | 2.2   | 3.3   | 1.5   | 2.7   |
| 17.2  | 11.3  | 13.7  | 10.6  | 12.1  | 8.4   | 13.8  | 14.4  | 11.9  |
| 6.5   | 10.1  | 8.7   | 4.1   | 3.7   | 1.9   | 2.1   | 1.3   | 12.0  |
| 25.7  | 38.3  | 39.3  | 39.6  | 29.0  | 26.6  | 32.9  | 27.9  | 59.1  |
| 2.8   | 0.7   | 2.8   | 1.4   | 1.3   | 2.0   | 4.4   | 1.0   | 2.6   |
| 21.2  | 20.6  | 16.7  | 17.3  | 8.5   | 8.0   | 10.1  | 10.9  | 7.8   |
| 0.5   | 1.5   | 1.2   | 0.8   | 1.2   | 5.3   | 5.4   | 1.5   | 1.9   |
| 2.4   | 0.8   | 4.4   | 3.8   | 111.0 | 63.8  | 143.2 | 143.0 | 6.8   |
| 26.1  | 30.3  | 29.6  | 32.8  | 49.2  | 53.2  | 88.8  | 103.1 | 59.8  |
| 23.2  | 25.5  | 30.5  | 28.1  | 36.6  | 25.3  | 30.4  | 25.4  | 28.1  |
| 43.2  | 55.0  | 22.0  | 34.1  | 1.3   | 4.2   | 1.7   | 2.2   | 8.9   |
| 3.4   | 3.6   | 3.3   | 5.3   | 8.6   | 8.8   | 10.0  | 11.9  | 11.1  |

|       |       |       |       |       |       |       |       |       |
|-------|-------|-------|-------|-------|-------|-------|-------|-------|
| 43.4  | 33.9  | 114.7 | 46.9  | 50.2  | 30.6  | 36.6  | 45.3  | 35.6  |
| 13.4  | 6.4   | 19.1  | 3.9   | 33.2  | 40.8  | 30.2  | 40.6  | 36.2  |
| 16.7  | 3.6   | 17.4  | 11.0  | 38.7  | 21.0  | 31.7  | 36.9  | 27.0  |
| 39.4  | 34.2  | 29.8  | 28.1  | 28.3  | 30.5  | 25.8  | 35.1  | 38.0  |
| 11.1  | 14.4  | 10.1  | 9.9   | 153.4 | 127.5 | 139.3 | 188.6 | 102.0 |
| 11.8  | 15.0  | 13.2  | 8.3   | 8.4   | 6.2   | 6.9   | 1.7   | 8.1   |
| 36.7  | 28.8  | 82.9  | 30.4  | 26.3  | 23.6  | 21.6  | 32.3  | 98.7  |
| 13.0  | 13.9  | 13.9  | 13.9  | 12.5  | 6.6   | 17.0  | 18.7  | 31.0  |
| 2.6   | 10.6  | 5.0   | 6.5   | 3.5   | 5.0   | 7.0   | 9.7   | 6.8   |
| 145.8 | 126.8 | 145.9 | 137.3 | 116.1 | 104.1 | 116.0 | 128.3 | 84.1  |
| 14.3  | 16.3  | 15.3  | 15.0  | 15.5  | 15.8  | 16.8  | 28.5  | 23.1  |
| 7.5   | 17.3  | 16.8  | 5.5   | 33.0  | 24.8  | 33.1  | 39.2  | 22.5  |
| 12.2  | 9.4   | 15.1  | 5.8   | 12.5  | 3.6   | 11.8  | 8.3   | 21.2  |
| 51.8  | 66.6  | 44.5  | 41.0  | 63.1  | 47.9  | 56.9  | 52.8  | 75.0  |
| 7.2   | 10.6  | 5.4   | 6.2   | 26.7  | 30.0  | 38.7  | 23.7  | 33.7  |
| 21.0  | 27.6  | 19.7  | 23.2  | 19.3  | 20.5  | 12.0  | 30.0  | 38.0  |
| 10.9  | 2.1   | 2.6   | 5.7   | 2.1   | 4.0   | 4.1   | 1.2   | 6.1   |
| 46.9  | 35.9  | 49.4  | 41.6  | 37.9  | 46.9  | 39.1  | 50.4  | 59.3  |
| 2.3   | 0.6   | 3.6   | 3.3   | 1.6   | 0.4   | 0.5   | 0.4   | 4.0   |
| 8.7   | 10.4  | 14.9  | 13.2  | 14.6  | 11.9  | 8.1   | 12.1  | 17.1  |
| 2.4   | 1.3   | 2.6   | 2.8   | 5.1   | 1.9   | 4.7   | 3.7   | 3.2   |
| 5.5   | 6.0   | 7.5   | 7.0   | 1.8   | 3.5   | 4.9   | 0.4   | 8.2   |
| 41.4  | 55.8  | 30.0  | 38.8  | 0.8   | 1.4   | 0.8   | 1.0   | 3.9   |
| 57.5  | 48.2  | 73.3  | 37.5  | 162.7 | 127.6 | 133.4 | 146.4 | 105.0 |
| 54.5  | 42.5  | 59.3  | 71.5  | 38.8  | 31.6  | 46.4  | 58.8  | 74.0  |
| 45.4  | 36.6  | 47.7  | 29.7  | 64.9  | 54.4  | 56.9  | 86.5  | 92.7  |
| 0.8   | 1.0   | 1.3   | 0.3   | 2.9   | 0.9   | 1.8   | 0.2   | 0.6   |
| 21.8  | 32.4  | 32.8  | 22.9  | 22.4  | 17.4  | 14.9  | 28.4  | 27.3  |
| 3.5   | 2.5   | 4.6   | 0.4   | 4.1   | 1.8   | 2.0   | 0.7   | 3.6   |
| 5.4   | 7.5   | 4.5   | 4.2   | 32.3  | 25.1  | 39.3  | 44.2  | 24.3  |
| 22.8  | 20.1  | 38.3  | 29.9  | 30.6  | 24.7  | 13.8  | 26.2  | 29.2  |
| 5.8   | 2.5   | 5.4   | 4.2   | 17.4  | 20.1  | 21.0  | 37.5  | 3.3   |
| 55.9  | 54.0  | 56.3  | 60.6  | 40.7  | 40.7  | 50.2  | 55.5  | 64.1  |
| 6.9   | 7.5   | 14.0  | 2.5   | 4.0   | 5.2   | 3.7   | 6.2   | 7.9   |
| 12.9  | 16.2  | 18.8  | 15.0  | 33.6  | 31.6  | 22.1  | 35.2  | 23.2  |
| 25.9  | 20.4  | 24.2  | 23.1  | 15.3  | 13.5  | 15.1  | 23.1  | 46.8  |
| 45.3  | 38.8  | 55.3  | 47.0  | 34.4  | 32.3  | 46.0  | 36.7  | 78.9  |
| 21.6  | 13.4  | 23.8  | 19.2  | 24.5  | 24.8  | 30.2  | 37.9  | 32.5  |
| 22.5  | 21.5  | 24.3  | 18.8  | 2.8   | 6.9   | 12.8  | 9.5   | 26.9  |
| 7.0   | 9.1   | 5.8   | 7.0   | 12.2  | 5.6   | 2.3   | 12.0  | 4.1   |
| 39.8  | 39.9  | 58.0  | 55.6  | 52.4  | 40.7  | 35.5  | 38.4  | 56.6  |
| 4.0   | 5.0   | 2.4   | 1.8   | 1.6   | 1.0   | 1.8   | 1.9   | 8.4   |
| 22.4  | 16.4  | 27.3  | 16.6  | 15.0  | 13.1  | 20.1  | 17.4  | 24.9  |
| 20.3  | 18.6  | 14.9  | 6.0   | 19.7  | 5.5   | 12.7  | 7.0   | 3.3   |
| 9.0   | 1.6   | 7.4   | 3.1   | 5.6   | 8.6   | 7.2   | 4.3   | 7.7   |
| 86.5  | 74.4  | 224.6 | 60.1  | 290.8 | 240.6 | 218.3 | 285.0 | 142.2 |
| 2.4   | 9.4   | 5.7   | 2.8   | 8.6   | 7.4   | 6.6   | 7.6   | 9.2   |
| 3.4   | 2.0   | 2.8   | 2.5   | 5.6   | 3.2   | 7.8   | 1.7   | 7.0   |
| 14.5  | 14.1  | 14.0  | 15.2  | 5.5   | 14.5  | 11.4  | 9.6   | 24.1  |
| 55.6  | 52.7  | 51.3  | 44.3  | 29.4  | 32.2  | 26.6  | 38.3  | 50.8  |
| 68.0  | 67.8  | 66.8  | 74.1  | 65.1  | 36.6  | 58.8  | 83.1  | 74.1  |
| 5.6   | 12.1  | 1.1   | 7.3   | 1.4   | 1.2   | 1.0   | 0.7   | 3.3   |
| 12.7  | 12.1  | 23.8  | 14.8  | 28.8  | 33.3  | 28.3  | 44.7  | 44.6  |

|        |        |        |        |        |        |        |        |        |
|--------|--------|--------|--------|--------|--------|--------|--------|--------|
| 2.2    | 1.8    | 1.6    | 2.0    | 1.0    | 4.6    | 1.7    | 2.6    | 2.2    |
| 8.3    | 4.9    | 8.0    | 6.3    | 1.4    | 4.0    | 8.1    | 4.7    | 9.5    |
| 19.2   | 15.6   | 22.3   | 11.3   | 74.4   | 58.8   | 74.2   | 96.1   | 75.4   |
| 17.3   | 16.3   | 31.3   | 25.1   | 40.8   | 16.6   | 30.2   | 39.7   | 36.7   |
| 9.1    | 8.3    | 8.4    | 6.8    | 4.6    | 7.4    | 12.8   | 8.9    | 7.3    |
| 53.4   | 47.2   | 41.4   | 38.3   | 30.3   | 33.1   | 22.5   | 32.4   | 50.1   |
| 3.4    | 4.7    | 1.9    | 2.9    | 3.4    | 4.4    | 1.3    | 12.8   | 8.4    |
| 8.1    | 3.7    | 1.9    | 1.4    | 17.5   | 18.7   | 18.7   | 15.4   | 43.9   |
| 21.7   | 23.7   | 32.6   | 27.1   | 14.2   | 11.4   | 11.9   | 23.8   | 24.2   |
| 6.7    | 9.7    | 17.1   | 11.8   | 21.3   | 18.3   | 21.6   | 30.4   | 32.6   |
| 3.2    | 12.1   | 12.8   | 8.0    | 1.2    | 4.6    | 6.1    | 3.4    | 19.1   |
| 14.0   | 8.3    | 8.9    | 8.3    | 5.7    | 9.6    | 4.0    | 12.7   | 13.3   |
| 4.2    | 1.5    | 1.7    | 2.0    | 2.1    | 0.7    | 5.4    | 12.5   | 11.1   |
| 5.0    | 6.5    | 1.9    | 2.2    | 1.4    | 3.3    | 1.2    | 1.0    | 6.4    |
| 25.2   | 15.4   | 39.0   | 26.4   | 27.9   | 31.2   | 29.0   | 47.2   | 45.0   |
| 6.8    | 11.9   | 15.2   | 9.3    | 26.7   | 37.5   | 26.6   | 31.7   | 15.5   |
| 3.8    | 11.0   | 4.4    | 5.0    | 3.4    | 1.7    | 1.5    | 0.8    | 2.2    |
| 65.1   | 74.8   | 103.6  | 76.9   | 64.6   | 67.6   | 83.2   | 91.1   | 40.4   |
| 15.0   | 14.9   | 17.6   | 10.2   | 9.4    | 11.9   | 8.6    | 10.3   | 22.0   |
| 0.7    | 0.9    | 1.3    | 3.5    | 9.2    | 11.8   | 9.3    | 7.4    | 16.6   |
| 5.6    | 10.6   | 2.6    | 6.0    | 10.5   | 1.0    | 2.3    | 4.8    | 3.6    |
| 1.2    | 0.9    | 1.3    | 0.6    | 0.8    | 3.8    | 2.0    | 0.8    | 2.1    |
| 2.5    | 7.7    | 6.4    | 5.5    | 5.6    | 2.6    | 6.3    | 6.1    | 11.2   |
| 3.9    | 10.5   | 1.6    | 1.3    | 9.2    | 3.4    | 6.5    | 3.2    | 17.2   |
| 69.4   | 67.8   | 111.6  | 62.7   | 82.6   | 84.5   | 88.7   | 124.9  | 170.1  |
| 1366.2 | 1295.5 | 1773.4 | 1269.8 | 1967.5 | 1922.5 | 2230.5 | 2291.8 | 1133.1 |
| 5.4    | 1.8    | 2.1    | 1.8    | 1.9    | 0.9    | 2.0    | 1.4    | 6.9    |
| 34.8   | 26.9   | 38.0   | 31.1   | 0.5    | 0.5    | 1.1    | 0.7    | 0.6    |
| 9.5    | 3.1    | 11.9   | 8.5    | 5.1    | 2.0    | 11.4   | 2.6    | 5.7    |
| 16.8   | 9.4    | 12.2   | 13.0   | 40.5   | 41.7   | 35.5   | 45.6   | 19.7   |
| 18.5   | 19.9   | 47.7   | 43.5   | 1705.0 | 1804.5 | 1418.3 | 1984.8 | 524.8  |
| 98.1   | 110.0  | 100.0  | 105.2  | 68.5   | 73.1   | 75.0   | 86.4   | 156.7  |
| 16.6   | 12.0   | 10.5   | 7.8    | 8.0    | 9.5    | 4.9    | 5.4    | 14.0   |
| 34.4   | 39.6   | 28.8   | 37.1   | 70.6   | 42.4   | 60.0   | 71.5   | 2.3    |
| 40.0   | 39.6   | 102.9  | 49.8   | 53.1   | 53.0   | 78.9   | 87.3   | 65.2   |
| 5.2    | 7.0    | 3.1    | 8.2    | 9.4    | 1.9    | 2.5    | 2.0    | 9.6    |
| 9.6    | 15.4   | 5.0    | 4.4    | 11.2   | 8.5    | 6.7    | 13.1   | 10.9   |
| 11.2   | 6.4    | 17.4   | 6.1    | 3.9    | 7.0    | 9.3    | 3.3    | 15.7   |
| 2.4    | 1.5    | 3.0    | 3.9    | 7.1    | 10.3   | 9.5    | 11.6   | 28.4   |
| 13.7   | 19.8   | 27.2   | 12.8   | 13.3   | 12.3   | 12.7   | 21.0   | 25.8   |
| 8.2    | 6.9    | 17.3   | 5.7    | 9.9    | 6.7    | 8.9    | 23.9   | 13.4   |
| 7.0    | 5.1    | 9.8    | 10.1   | 0.8    | 1.5    | 6.6    | 4.5    | 2.8    |
| 21.1   | 29.6   | 43.5   | 15.6   | 25.7   | 20.3   | 24.0   | 27.8   | 33.7   |
| 62.4   | 61.9   | 99.4   | 77.9   | 116.3  | 103.2  | 113.5  | 137.4  | 43.7   |
| 15.2   | 10.7   | 22.7   | 13.4   | 13.4   | 14.7   | 20.3   | 25.5   | 25.0   |
| 53.6   | 48.7   | 65.5   | 48.8   | 66.8   | 49.6   | 85.5   | 91.3   | 132.3  |
| 3.8    | 3.6    | 3.9    | 3.6    | 3.1    | 2.5    | 1.8    | 0.3    | 3.5    |
| 14.8   | 10.9   | 13.5   | 15.1   | 6.9    | 14.3   | 16.9   | 10.6   | 12.9   |
| 19.8   | 11.0   | 27.5   | 17.6   | 5.3    | 15.0   | 8.9    | 3.4    | 25.5   |
| 2.7    | 1.8    | 0.7    | 2.0    | 3.0    | 3.4    | 1.8    | 7.1    | 0.6    |
| 0.3    | 1.1    | 1.7    | 0.9    | 2.7    | 2.1    | 2.5    | 0.6    | 2.7    |
| 6.4    | 6.6    | 11.2   | 3.9    | 7.9    | 7.6    | 8.1    | 5.3    | 10.7   |
| 6.8    | 13.3   | 1.9    | 7.3    | 4.6    | 2.4    | 8.2    | 2.6    | 2.8    |

|        |        |        |        |        |        |        |        |         |
|--------|--------|--------|--------|--------|--------|--------|--------|---------|
| 3.9    | 5.4    | 4.6    | 2.2    | 4.9    | 1.2    | 3.1    | 4.7    | 3.9     |
| 8.2    | 5.4    | 2.8    | 3.6    | 3.7    | 7.4    | 2.4    | 10.7   | 5.4     |
| 102.4  | 100.7  | 71.4   | 97.9   | 77.9   | 82.0   | 84.5   | 90.4   | 113.0   |
| 14.7   | 13.5   | 6.6    | 12.5   | 14.1   | 18.5   | 20.9   | 29.9   | 28.5    |
| 4.1    | 3.6    | 1.1    | 4.6    | 1.5    | 4.3    | 2.3    | 4.9    | 2.2     |
| 10.5   | 6.4    | 15.0   | 7.3    | 9.2    | 3.9    | 5.0    | 9.8    | 9.3     |
| 125.2  | 107.0  | 143.5  | 113.4  | 244.4  | 156.4  | 268.4  | 358.4  | 405.0   |
| 16.4   | 25.3   | 21.9   | 21.7   | 6.8    | 13.2   | 23.1   | 31.0   | 12.6    |
| 4.6    | 1.4    | 4.1    | 3.7    | 0.3    | 0.7    | 1.5    | 3.9    | 3.9     |
| 23.0   | 25.5   | 10.1   | 20.3   | 12.5   | 9.2    | 3.2    | 1.7    | 5.6     |
| 3.2    | 9.3    | 5.1    | 11.2   | 6.8    | 1.7    | 10.3   | 18.8   | 6.9     |
| 4.7    | 2.9    | 2.2    | 1.3    | 0.5    | 1.0    | 3.8    | 0.7    | 4.1     |
| 44.5   | 46.1   | 47.7   | 50.1   | 26.6   | 27.8   | 30.8   | 33.8   | 72.4    |
| 100.1  | 116.2  | 130.7  | 86.4   | 102.6  | 77.6   | 69.2   | 81.3   | 133.6   |
| 26.2   | 42.6   | 30.6   | 47.1   | 27.6   | 13.1   | 39.6   | 19.4   | 35.1    |
| 522.2  | 479.6  | 616.8  | 442.2  | 1089.3 | 1104.6 | 1143.1 | 1385.0 | 1346.4  |
| 2847.0 | 2842.7 | 3668.4 | 2596.4 | 1533.4 | 1451.9 | 1946.4 | 1850.5 | 1745.5  |
| 6416.5 | 5833.6 | 7324.8 | 6128.2 | 3179.8 | 3004.3 | 3373.7 | 3419.3 | 3656.4  |
| 3182.3 | 3107.4 | 3195.7 | 3438.6 | 3492.4 | 3393.5 | 3494.5 | 3860.7 | 6451.2  |
| 5754.3 | 5103.8 | 7532.7 | 5565.5 | 4296.7 | 4527.5 | 4716.0 | 4951.4 | 6520.2  |
| 36.7   | 43.1   | 52.7   | 46.2   | 35.6   | 20.4   | 22.5   | 33.3   | 28.5    |
| 1447.3 | 1275.5 | 2129.0 | 1272.3 | 1216.8 | 1625.2 | 1284.2 | 1456.8 | 1415.4  |
| 3.9    | 3.1    | 3.0    | 3.9    | 2.9    | 2.6    | 1.9    | 4.5    | 4.5     |
| 1386.1 | 1307.1 | 2387.5 | 1556.7 | 3096.8 | 2447.9 | 3072.1 | 3361.9 | 4186.3  |
| 1004.8 | 855.2  | 1605.4 | 1013.8 | 3155.1 | 2468.9 | 2977.0 | 3558.8 | 3305.6  |
| 453.3  | 410.3  | 809.9  | 471.9  | 927.0  | 868.8  | 1013.9 | 1050.7 | 1024.6  |
| 1824.1 | 1854.6 | 1818.3 | 1526.1 | 1464.8 | 1523.6 | 1698.2 | 1679.4 | 1216.7  |
| 2373.5 | 1863.0 | 4203.5 | 3219.3 | 5270.1 | 5751.9 | 4638.1 | 6006.8 | 11914.9 |
| 361.2  | 345.6  | 569.4  | 338.4  | 268.9  | 341.2  | 279.4  | 311.5  | 456.3   |
| 412.1  | 497.7  | 433.3  | 429.3  | 728.6  | 755.8  | 881.4  | 813.4  | 507.9   |
| 2292.6 | 2544.9 | 2339.4 | 2208.8 | 1623.7 | 1788.3 | 1899.4 | 2112.3 | 1704.4  |
| 2216.7 | 2423.9 | 2016.6 | 2007.2 | 1791.9 | 1904.8 | 2013.3 | 2152.9 | 1720.2  |
| 5590.8 | 5378.0 | 6423.9 | 5346.3 | 8258.0 | 8551.6 | 8623.0 | 8809.6 | 6786.3  |
| 247.2  | 257.5  | 179.2  | 217.8  | 217.1  | 189.6  | 230.8  | 284.5  | 328.2   |
| 66.1   | 80.4   | 76.4   | 72.1   | 161.9  | 101.1  | 164.6  | 173.1  | 88.3    |
| 2536.1 | 2491.1 | 2645.0 | 2560.6 | 1481.3 | 1470.1 | 1660.1 | 1868.2 | 701.0   |
| 1268.4 | 1138.8 | 1696.6 | 1197.3 | 797.9  | 941.1  | 929.6  | 1067.1 | 955.4   |
| 574.1  | 630.6  | 582.2  | 566.2  | 1841.8 | 1747.7 | 2125.3 | 2385.3 | 671.6   |
| 669.4  | 764.2  | 759.9  | 613.9  | 2111.5 | 2165.5 | 2588.3 | 2781.3 | 928.5   |
| 7255.1 | 6767.9 | 8108.2 | 7043.6 | 6480.1 | 6640.8 | 6478.2 | 6675.9 | 10395.4 |
| 651.4  | 590.0  | 767.0  | 534.8  | 1105.4 | 1002.3 | 1153.1 | 1372.9 | 1126.6  |
| 979.6  | 986.4  | 1247.0 | 960.6  | 697.6  | 817.2  | 697.5  | 772.3  | 510.4   |
| 678.1  | 656.4  | 690.3  | 552.2  | 906.3  | 801.7  | 992.1  | 1193.9 | 682.4   |
| 1573.8 | 1721.1 | 1447.6 | 1447.8 | 813.7  | 751.7  | 887.8  | 1015.9 | 813.6   |
| 1929.5 | 1615.8 | 3124.3 | 1773.2 | 2139.2 | 1626.1 | 1818.2 | 2316.2 | 2347.7  |
| 968.4  | 984.3  | 990.4  | 985.5  | 989.4  | 1002.8 | 936.8  | 1180.0 | 1391.6  |
| 2996.3 | 2728.9 | 3664.2 | 2823.4 | 4390.8 | 4342.6 | 4439.7 | 4880.0 | 7614.0  |
| 628.1  | 667.3  | 819.1  | 662.9  | 800.1  | 789.5  | 786.8  | 924.9  | 1165.4  |
| 279.8  | 273.8  | 514.3  | 315.5  | 397.1  | 453.5  | 490.8  | 450.8  | 288.2   |
| 2532.5 | 2346.3 | 2994.2 | 2468.0 | 908.1  | 883.0  | 867.7  | 1107.4 | 1060.0  |
| 741.1  | 816.4  | 547.8  | 804.3  | 464.8  | 533.1  | 580.5  | 535.3  | 582.8   |
| 649.1  | 623.9  | 947.2  | 726.7  | 678.0  | 807.3  | 767.1  | 836.7  | 407.2   |
| 2635.5 | 2095.2 | 4656.5 | 2330.8 | 4870.9 | 4055.5 | 4875.1 | 5206.2 | 8049.1  |

|        |        |        |        |        |        |        |        |        |
|--------|--------|--------|--------|--------|--------|--------|--------|--------|
| 436.2  | 378.8  | 589.6  | 434.5  | 532.9  | 574.5  | 517.9  | 604.8  | 867.7  |
| 736.8  | 638.6  | 875.1  | 405.6  | 1116.8 | 558.0  | 1003.8 | 1208.2 | 1397.2 |
| 2929.5 | 2644.8 | 3643.3 | 2935.3 | 1777.0 | 2125.5 | 2050.1 | 2148.7 | 1993.3 |
| 1.4    | 1.3    | 1.3    | 1.2    | 89.6   | 107.8  | 133.3  | 103.8  | 31.9   |
| 1366.5 | 1243.5 | 1541.4 | 1291.2 | 1280.3 | 1293.5 | 1365.4 | 1461.2 | 1428.6 |
| 677.9  | 675.1  | 680.3  | 706.6  | 596.7  | 638.8  | 556.4  | 632.3  | 868.9  |
| 371.7  | 357.2  | 426.7  | 366.6  | 351.3  | 356.3  | 342.4  | 387.9  | 473.8  |
| 391.5  | 392.5  | 487.6  | 403.8  | 632.4  | 529.3  | 520.1  | 763.2  | 1903.3 |
| 19.0   | 24.2   | 111.0  | 90.8   | 267.5  | 260.7  | 271.6  | 304.8  | 79.4   |
| 20.4   | 13.2   | 79.3   | 70.5   | 264.0  | 233.1  | 245.1  | 253.0  | 100.1  |
| 24.9   | 20.3   | 109.0  | 82.8   | 274.1  | 279.7  | 313.7  | 334.7  | 110.2  |
| 189.7  | 195.2  | 313.7  | 188.4  | 436.6  | 454.1  | 436.7  | 632.9  | 258.5  |
| 294.6  | 287.5  | 351.5  | 330.1  | 417.4  | 384.8  | 438.2  | 500.5  | 358.8  |
| 4.0    | 10.4   | 6.8    | 3.3    | 211.6  | 324.3  | 221.9  | 251.4  | 494.3  |
| 2265.3 | 2110.7 | 2505.1 | 1969.3 | 2377.0 | 2600.3 | 2816.5 | 2815.9 | 2464.5 |
| 1904.7 | 1679.7 | 2635.1 | 1864.0 | 3431.4 | 3225.2 | 3517.8 | 3649.4 | 7180.1 |
| 574.4  | 517.7  | 811.0  | 660.2  | 584.6  | 821.7  | 614.3  | 636.3  | 613.4  |
| 21.8   | 24.4   | 5.3    | 8.3    | 760.6  | 729.6  | 817.7  | 947.1  | 521.2  |
| 1109.1 | 974.1  | 2684.9 | 1318.8 | 3314.2 | 3131.6 | 3457.4 | 3675.0 | 2389.0 |
| 4194.0 | 4088.7 | 4832.2 | 4256.6 | 2985.7 | 3022.0 | 3016.8 | 3458.8 | 2804.0 |
| 3703.8 | 3290.2 | 4920.7 | 3789.5 | 2311.1 | 2241.8 | 2407.8 | 2583.6 | 6309.6 |
| 349.6  | 304.9  | 559.4  | 240.6  | 177.0  | 168.6  | 196.3  | 209.0  | 99.9   |
| 651.7  | 529.5  | 947.6  | 448.6  | 696.9  | 600.1  | 840.9  | 762.7  | 566.5  |
| 623.3  | 575.7  | 789.4  | 641.8  | 500.7  | 443.9  | 454.5  | 573.8  | 508.0  |
| 413.7  | 354.5  | 390.5  | 330.8  | 303.3  | 280.5  | 284.4  | 325.2  | 390.3  |
| 873.1  | 858.7  | 1015.7 | 765.8  | 656.7  | 491.5  | 644.9  | 754.0  | 1217.0 |
| 1391.5 | 1340.3 | 1427.6 | 1347.0 | 798.3  | 873.1  | 830.8  | 953.7  | 2788.9 |
| 239.2  | 245.2  | 353.1  | 239.0  | 297.2  | 304.5  | 264.1  | 316.1  | 233.4  |
| 523.3  | 519.8  | 658.3  | 390.6  | 535.4  | 515.4  | 527.7  | 586.0  | 631.3  |
| 467.2  | 536.8  | 325.4  | 542.5  | 747.3  | 1079.0 | 790.0  | 971.0  | 201.1  |
| 282.5  | 264.0  | 442.6  | 340.1  | 462.7  | 557.4  | 502.8  | 547.4  | 490.5  |
| 184.4  | 144.1  | 282.3  | 149.3  | 287.0  | 302.8  | 344.6  | 400.6  | 504.4  |
| 540.8  | 461.4  | 772.3  | 421.1  | 831.7  | 675.1  | 878.7  | 907.3  | 849.1  |
| 111.8  | 97.2   | 98.6   | 92.7   | 543.2  | 536.9  | 618.4  | 711.4  | 761.5  |
| 171.8  | 157.6  | 149.2  | 160.2  | 1075.5 | 1215.3 | 1592.3 | 1670.4 | 912.3  |
| 255.9  | 305.8  | 332.8  | 269.9  | 278.5  | 412.0  | 292.6  | 328.8  | 167.5  |
| 74.2   | 57.7   | 143.5  | 51.2   | 198.3  | 187.2  | 255.5  | 228.5  | 131.9  |
| 440.3  | 400.0  | 675.6  | 467.1  | 470.2  | 478.0  | 515.9  | 567.5  | 728.1  |
| 557.0  | 582.0  | 632.4  | 536.0  | 617.7  | 459.4  | 526.1  | 662.0  | 705.5  |
| 57.5   | 42.5   | 49.7   | 58.9   | 32.1   | 31.5   | 35.3   | 49.2   | 67.6   |
| 955.8  | 911.6  | 1455.1 | 1048.1 | 1300.5 | 1445.5 | 1510.0 | 1642.3 | 1167.4 |
| 328.8  | 340.5  | 355.2  | 310.1  | 440.9  | 604.1  | 491.5  | 483.5  | 635.8  |
| 247.5  | 231.7  | 310.0  | 217.3  | 536.8  | 421.0  | 499.4  | 590.1  | 452.3  |
| 1626.6 | 1547.1 | 1823.2 | 1580.5 | 1402.0 | 1317.8 | 1612.2 | 1728.4 | 2301.5 |
| 456.8  | 419.3  | 451.5  | 410.5  | 368.3  | 275.3  | 377.6  | 419.5  | 326.3  |
| 340.1  | 342.7  | 318.5  | 380.7  | 416.8  | 577.0  | 622.1  | 499.4  | 266.9  |
| 1316.8 | 1365.5 | 1174.3 | 1017.7 | 1584.8 | 1641.2 | 1543.3 | 1720.8 | 1262.1 |
| 2363.5 | 2031.7 | 3022.2 | 2017.5 | 4057.1 | 4031.5 | 4197.7 | 4549.9 | 6693.0 |
| 1527.2 | 1405.5 | 2100.2 | 1399.9 | 1351.8 | 1234.6 | 1292.3 | 1477.8 | 1385.9 |
| 2571.4 | 2529.7 | 2733.6 | 2238.0 | 2306.5 | 2131.6 | 2270.0 | 2584.7 | 1171.4 |
| 253.6  | 226.3  | 296.1  | 246.3  | 298.4  | 270.5  | 278.8  | 332.4  | 350.6  |
| 698.8  | 648.0  | 1064.8 | 617.5  | 578.0  | 510.3  | 563.4  | 690.5  | 759.8  |
| 486.7  | 449.7  | 681.5  | 451.2  | 530.9  | 566.1  | 555.9  | 539.0  | 691.3  |



|        |        |        |        |        |        |        |        |        |
|--------|--------|--------|--------|--------|--------|--------|--------|--------|
| 2544.4 | 2602.9 | 1910.2 | 2672.5 | 2260.1 | 2744.2 | 2403.2 | 2714.8 | 3815.3 |
| 379.8  | 378.5  | 539.6  | 383.4  | 281.3  | 292.6  | 287.9  | 293.6  | 327.2  |
| 2097.5 | 1830.9 | 3092.4 | 2140.5 | 2426.4 | 1931.4 | 2675.3 | 2398.7 | 3181.7 |
| 431.6  | 439.2  | 530.8  | 464.4  | 457.2  | 429.7  | 469.0  | 528.6  | 753.8  |
| 621.8  | 547.6  | 903.5  | 613.1  | 761.5  | 617.2  | 764.9  | 882.2  | 1141.4 |
| 961.6  | 931.4  | 1290.3 | 857.8  | 852.4  | 798.8  | 841.7  | 1012.3 | 1235.9 |
| 185.8  | 200.0  | 234.0  | 164.5  | 220.5  | 174.9  | 236.3  | 242.2  | 243.9  |
| 413.3  | 366.9  | 463.4  | 350.9  | 552.0  | 610.4  | 561.8  | 611.2  | 788.3  |
| 1208.0 | 1200.3 | 1508.3 | 1129.1 | 958.0  | 797.0  | 909.0  | 1151.7 | 1164.7 |
| 751.9  | 693.0  | 911.9  | 669.5  | 1379.0 | 1302.0 | 1417.6 | 1648.6 | 2224.6 |
| 474.1  | 448.5  | 719.0  | 477.3  | 476.4  | 452.2  | 557.2  | 490.7  | 767.9  |
| 220.5  | 189.8  | 343.4  | 247.0  | 299.1  | 276.3  | 457.6  | 375.3  | 611.2  |
| 367.3  | 402.4  | 425.7  | 367.7  | 729.1  | 939.8  | 747.6  | 838.9  | 850.2  |
| 575.5  | 544.3  | 1014.4 | 539.0  | 949.4  | 817.7  | 1587.6 | 1484.6 | 638.0  |
| 341.4  | 330.3  | 531.4  | 319.5  | 596.6  | 471.1  | 504.3  | 639.4  | 650.1  |
| 787.3  | 761.3  | 1223.1 | 741.9  | 1353.6 | 1096.8 | 1315.3 | 1551.2 | 1668.0 |
| 303.5  | 283.1  | 307.4  | 278.3  | 285.8  | 303.7  | 353.9  | 328.2  | 206.7  |
| 73.0   | 59.9   | 93.9   | 67.1   | 76.8   | 64.1   | 92.0   | 99.6   | 82.1   |
| 167.4  | 132.2  | 189.2  | 145.8  | 132.5  | 121.0  | 120.8  | 144.4  | 117.0  |
| 325.3  | 314.5  | 327.7  | 313.3  | 312.4  | 350.2  | 341.5  | 379.6  | 201.1  |
| 751.0  | 760.8  | 1087.8 | 885.5  | 807.8  | 971.4  | 936.2  | 918.7  | 905.8  |
| 483.9  | 464.2  | 591.7  | 520.2  | 356.7  | 327.8  | 369.6  | 412.8  | 538.3  |
| 215.1  | 197.5  | 295.8  | 197.7  | 476.1  | 314.3  | 439.1  | 537.7  | 305.9  |
| 204.2  | 183.0  | 271.9  | 204.6  | 209.8  | 180.8  | 199.9  | 213.2  | 184.0  |
| 306.6  | 316.7  | 401.2  | 304.8  | 393.0  | 388.0  | 326.2  | 392.6  | 346.7  |
| 940.8  | 871.5  | 1292.6 | 961.9  | 1219.2 | 761.8  | 1078.4 | 1249.1 | 1186.1 |
| 387.8  | 288.0  | 552.1  | 391.9  | 493.5  | 464.1  | 450.7  | 509.7  | 420.4  |
| 720.4  | 643.4  | 946.1  | 587.6  | 1274.0 | 969.9  | 1305.7 | 1429.3 | 1439.2 |
| 583.8  | 514.4  | 1060.3 | 587.4  | 3646.7 | 3307.4 | 3700.0 | 4073.8 | 4103.4 |
| 334.8  | 332.0  | 406.9  | 340.3  | 492.0  | 524.2  | 487.4  | 641.0  | 584.7  |
| 1019.9 | 996.4  | 1189.9 | 914.3  | 1046.8 | 1196.2 | 1131.6 | 1370.3 | 733.4  |
| 484.9  | 405.8  | 662.2  | 397.0  | 9.2    | 11.7   | 8.6    | 12.3   | 42.8   |
| 582.3  | 529.3  | 899.0  | 549.0  | 1916.0 | 1805.9 | 2196.4 | 2106.0 | 1280.2 |
| 495.0  | 456.2  | 583.8  | 436.7  | 553.4  | 596.9  | 631.9  | 597.8  | 346.8  |
| 311.2  | 330.7  | 464.7  | 353.7  | 312.4  | 315.4  | 373.1  | 318.2  | 450.6  |
| 285.8  | 256.4  | 446.7  | 292.6  | 183.2  | 126.4  | 150.8  | 187.2  | 307.5  |
| 350.8  | 319.2  | 410.8  | 317.6  | 246.2  | 209.7  | 237.7  | 311.8  | 462.1  |
| 241.8  | 218.8  | 264.4  | 231.0  | 164.4  | 176.3  | 166.2  | 170.4  | 150.0  |
| 1354.1 | 1204.6 | 2229.0 | 1180.1 | 1761.8 | 1616.3 | 1900.3 | 2066.4 | 1833.1 |
| 1369.1 | 1383.9 | 1231.4 | 1488.6 | 1485.0 | 1455.1 | 1536.7 | 1597.6 | 2506.6 |
| 41.7   | 34.9   | 39.5   | 24.1   | 12.3   | 28.1   | 30.9   | 26.3   | 81.1   |
| 3021.0 | 2880.1 | 4142.4 | 2853.4 | 3005.5 | 2312.3 | 2974.0 | 3337.9 | 2715.0 |
| 209.1  | 215.8  | 266.7  | 172.3  | 143.5  | 173.2  | 157.5  | 166.8  | 61.0   |
| 553.2  | 509.2  | 874.9  | 639.9  | 780.0  | 624.7  | 756.4  | 860.6  | 1781.0 |
| 322.4  | 313.4  | 527.4  | 293.4  | 683.6  | 570.9  | 642.9  | 749.5  | 1544.8 |
| 949.1  | 966.3  | 1236.5 | 1140.4 | 890.5  | 1165.2 | 966.1  | 1014.0 | 1059.4 |
| 210.9  | 279.1  | 225.9  | 213.1  | 845.8  | 660.6  | 1107.9 | 1184.9 | 404.8  |
| 469.7  | 365.7  | 736.1  | 367.1  | 1714.6 | 1915.6 | 1753.5 | 2036.7 | 1357.3 |
| 465.3  | 511.4  | 604.6  | 455.6  | 335.1  | 359.4  | 370.2  | 384.6  | 571.3  |
| 78.9   | 95.9   | 86.9   | 81.5   | 87.3   | 68.5   | 67.5   | 106.8  | 164.8  |
| 127.6  | 106.0  | 165.7  | 108.8  | 199.7  | 194.0  | 178.7  | 239.1  | 238.4  |
| 46.4   | 51.6   | 110.4  | 91.3   | 105.3  | 121.5  | 131.6  | 143.9  | 139.3  |
| 100.0  | 87.1   | 122.2  | 79.4   | 120.4  | 103.8  | 109.9  | 127.5  | 108.9  |

|        |        |        |        |        |        |        |        |        |
|--------|--------|--------|--------|--------|--------|--------|--------|--------|
| 1096.6 | 1007.9 | 1187.4 | 1102.8 | 873.0  | 819.6  | 851.9  | 1003.6 | 514.9  |
| 277.0  | 276.5  | 418.6  | 268.4  | 462.6  | 561.4  | 506.2  | 541.1  | 502.3  |
| 80.4   | 84.3   | 93.1   | 81.7   | 61.4   | 45.3   | 59.4   | 69.6   | 75.0   |
| 115.1  | 127.6  | 142.1  | 127.1  | 80.6   | 46.1   | 74.7   | 88.4   | 75.8   |
| 121.1  | 151.5  | 160.0  | 126.4  | 136.9  | 97.8   | 118.5  | 159.3  | 161.0  |
| 415.1  | 421.4  | 449.5  | 418.1  | 441.7  | 482.7  | 446.6  | 497.8  | 287.2  |
| 523.4  | 521.1  | 776.8  | 485.5  | 438.9  | 363.5  | 394.9  | 475.6  | 588.4  |
| 56.0   | 51.5   | 87.2   | 55.4   | 361.1  | 436.4  | 425.3  | 424.4  | 467.8  |
| 724.1  | 639.9  | 1007.9 | 788.2  | 752.0  | 853.8  | 897.1  | 755.6  | 1047.0 |
| 670.3  | 599.6  | 1349.2 | 496.1  | 2861.1 | 2940.5 | 3337.2 | 3034.2 | 1602.4 |
| 1095.9 | 1088.0 | 1583.8 | 1044.6 | 1284.0 | 1251.5 | 1266.2 | 1578.9 | 1647.7 |
| 2787.5 | 2418.9 | 4062.5 | 2987.1 | 3767.3 | 3808.5 | 3992.9 | 4141.9 | 4569.1 |
| 412.9  | 380.7  | 789.2  | 403.8  | 546.2  | 585.4  | 539.4  | 620.4  | 1107.8 |
| 519.1  | 579.4  | 495.2  | 524.4  | 829.6  | 768.6  | 877.1  | 871.9  | 803.7  |
| 865.6  | 734.8  | 1263.7 | 834.9  | 1417.8 | 1316.1 | 1393.9 | 1645.1 | 1032.6 |
| 303.5  | 330.7  | 346.8  | 268.1  | 200.8  | 261.4  | 222.6  | 186.2  | 202.5  |
| 96.1   | 86.8   | 136.4  | 94.1   | 74.2   | 62.4   | 70.9   | 104.6  | 172.0  |
| 372.6  | 367.0  | 417.3  | 367.9  | 287.7  | 306.5  | 248.3  | 346.9  | 328.0  |
| 62.1   | 56.9   | 90.8   | 43.4   | 205.2  | 166.4  | 227.6  | 276.5  | 223.6  |
| 211.5  | 183.5  | 252.0  | 146.3  | 612.1  | 466.5  | 584.1  | 694.5  | 552.9  |
| 164.5  | 143.4  | 239.5  | 109.7  | 751.7  | 533.3  | 702.0  | 852.8  | 614.5  |
| 114.6  | 91.6   | 149.5  | 72.9   | 396.7  | 290.3  | 346.6  | 399.8  | 305.4  |
| 516.0  | 529.3  | 669.7  | 506.8  | 735.7  | 786.6  | 830.8  | 892.9  | 1011.1 |
| 1725.9 | 1759.3 | 2494.1 | 1807.3 | 2763.3 | 2822.3 | 2930.0 | 3231.5 | 3311.3 |
| 348.2  | 339.2  | 387.1  | 362.6  | 331.6  | 268.0  | 344.1  | 297.3  | 574.5  |
| 337.3  | 297.2  | 526.6  | 293.2  | 807.0  | 631.6  | 836.8  | 967.3  | 927.7  |
| 151.3  | 169.9  | 130.3  | 155.9  | 186.8  | 144.8  | 187.8  | 229.1  | 208.7  |
| 349.6  | 368.6  | 450.3  | 361.5  | 572.3  | 520.5  | 596.1  | 685.2  | 439.9  |
| 161.8  | 161.4  | 235.5  | 153.7  | 331.6  | 321.3  | 395.4  | 387.0  | 221.6  |
| 1.2    | 13.7   | 1.8    | 2.1    | 13.8   | 23.3   | 28.2   | 29.4   | 87.0   |
| 152.8  | 156.4  | 172.0  | 150.4  | 355.6  | 431.2  | 380.0  | 397.5  | 174.3  |
| 301.6  | 265.3  | 394.1  | 371.4  | 173.4  | 230.9  | 188.6  | 179.1  | 162.6  |
| 988.4  | 1045.6 | 936.8  | 979.9  | 844.8  | 806.7  | 1129.2 | 957.5  | 824.4  |
| 80.3   | 81.0   | 130.8  | 72.4   | 289.3  | 287.2  | 346.1  | 330.9  | 312.3  |
| 668.2  | 708.1  | 662.2  | 601.0  | 437.7  | 256.9  | 394.6  | 498.9  | 556.9  |
| 280.1  | 255.0  | 395.1  | 244.5  | 506.2  | 466.8  | 500.0  | 619.8  | 350.5  |
| 149.9  | 118.8  | 181.5  | 117.7  | 164.5  | 148.2  | 171.0  | 194.8  | 151.2  |
| 14.4   | 30.6   | 1.9    | 16.2   | 1.5    | 6.0    | 1.1    | 0.9    | 11.0   |
| 770.5  | 699.2  | 1110.4 | 713.9  | 1179.5 | 1183.1 | 1196.6 | 1350.5 | 1990.8 |
| 285.0  | 308.6  | 361.2  | 298.6  | 528.5  | 627.4  | 557.6  | 579.7  | 511.5  |
| 1039.9 | 978.4  | 1367.3 | 1011.1 | 1435.7 | 1293.8 | 1547.6 | 1752.3 | 1447.0 |
| 789.7  | 851.4  | 628.4  | 712.5  | 1002.4 | 937.1  | 1097.0 | 1184.4 | 341.6  |
| 147.8  | 143.3  | 181.3  | 144.7  | 173.5  | 154.8  | 154.6  | 199.1  | 257.7  |
| 162.9  | 184.9  | 241.0  | 155.5  | 184.0  | 193.7  | 152.7  | 174.0  | 138.4  |
| 102.0  | 98.9   | 89.3   | 91.2   | 60.6   | 82.9   | 57.4   | 82.7   | 128.0  |
| 64.5   | 48.1   | 93.7   | 57.5   | 157.1  | 99.0   | 125.0  | 166.1  | 124.2  |
| 1220.2 | 1488.6 | 829.9  | 1010.4 | 357.5  | 406.2  | 399.4  | 462.4  | 556.7  |
| 452.3  | 366.0  | 834.6  | 431.0  | 1221.7 | 1072.7 | 1346.3 | 1305.0 | 1403.9 |
| 721.4  | 732.8  | 582.1  | 613.3  | 332.8  | 267.0  | 373.5  | 412.1  | 241.6  |
| 222.4  | 233.1  | 248.7  | 170.1  | 362.2  | 354.6  | 318.2  | 357.1  | 811.2  |
| 200.5  | 177.6  | 258.0  | 163.1  | 259.7  | 338.5  | 276.9  | 314.6  | 610.2  |
| 207.7  | 205.2  | 351.7  | 251.4  | 896.6  | 732.7  | 914.9  | 983.7  | 1339.2 |
| 406.7  | 371.3  | 477.7  | 354.5  | 285.1  | 303.6  | 287.0  | 349.4  | 373.3  |

|        |        |        |        |        |        |        |        |        |
|--------|--------|--------|--------|--------|--------|--------|--------|--------|
| 256.0  | 219.6  | 396.6  | 228.2  | 386.0  | 442.9  | 374.8  | 434.3  | 467.8  |
| 90.9   | 106.7  | 137.1  | 119.4  | 130.5  | 168.1  | 216.6  | 158.6  | 89.6   |
| 1248.0 | 1282.4 | 1230.6 | 1187.6 | 1472.4 | 1480.1 | 1465.9 | 1636.3 | 3072.2 |
| 340.1  | 304.8  | 441.3  | 288.7  | 625.6  | 529.6  | 717.8  | 780.0  | 643.2  |
| 5826.3 | 5656.3 | 6743.9 | 5996.0 | 1401.3 | 1475.3 | 1540.5 | 1652.9 | 2631.1 |
| 5474.8 | 5348.3 | 5854.6 | 5466.8 | 1522.6 | 1719.4 | 1748.5 | 1754.5 | 2572.5 |
| 569.3  | 492.5  | 996.6  | 590.3  | 894.1  | 786.1  | 883.1  | 961.5  | 1511.9 |
| 59.9   | 57.7   | 51.1   | 52.1   | 197.3  | 197.4  | 180.4  | 237.0  | 70.5   |
| 53.3   | 55.0   | 59.8   | 44.1   | 231.6  | 196.0  | 225.0  | 284.6  | 109.0  |
| 189.3  | 172.2  | 211.2  | 216.5  | 293.5  | 184.8  | 276.4  | 349.6  | 321.2  |
| 448.0  | 415.6  | 616.9  | 405.0  | 713.1  | 725.9  | 747.0  | 818.9  | 723.9  |
| 140.5  | 138.5  | 245.5  | 143.4  | 179.6  | 181.0  | 173.8  | 217.9  | 165.2  |
| 176.8  | 154.4  | 220.9  | 173.5  | 209.6  | 212.5  | 192.4  | 183.9  | 84.2   |
| 1089.6 | 919.2  | 1563.6 | 967.5  | 928.4  | 899.6  | 876.2  | 992.4  | 2005.1 |
| 1514.8 | 1449.1 | 1936.7 | 1506.6 | 2490.7 | 2552.0 | 2779.4 | 2799.1 | 4473.3 |
| 175.0  | 171.5  | 268.5  | 181.5  | 168.8  | 137.3  | 155.8  | 205.9  | 171.5  |
| 217.2  | 237.8  | 178.6  | 237.4  | 101.2  | 111.6  | 103.7  | 80.6   | 64.9   |
| 144.9  | 115.9  | 130.4  | 113.9  | 138.4  | 216.5  | 139.6  | 148.1  | 159.5  |
| 122.7  | 116.3  | 108.4  | 121.0  | 194.1  | 264.3  | 245.3  | 262.5  | 89.9   |
| 496.1  | 444.2  | 585.8  | 362.1  | 692.6  | 645.3  | 753.1  | 792.0  | 835.7  |
| 621.7  | 572.5  | 875.1  | 661.8  | 1296.8 | 1343.4 | 1442.7 | 1507.3 | 1441.0 |
| 488.3  | 420.6  | 800.7  | 543.4  | 761.2  | 757.9  | 823.1  | 889.0  | 1229.1 |
| 855.5  | 805.9  | 1009.4 | 925.6  | 300.2  | 269.6  | 318.2  | 328.8  | 212.3  |
| 271.6  | 263.1  | 328.0  | 251.9  | 267.0  | 223.9  | 247.1  | 300.3  | 142.9  |
| 41.3   | 41.4   | 53.6   | 36.4   | 79.4   | 57.8   | 63.5   | 74.8   | 64.1   |
| 849.4  | 829.9  | 1328.6 | 799.8  | 2090.5 | 2181.5 | 2213.1 | 2382.9 | 1404.7 |
| 549.8  | 580.1  | 532.1  | 632.9  | 331.9  | 385.5  | 372.8  | 445.3  | 332.3  |
| 426.9  | 418.6  | 616.7  | 446.7  | 245.7  | 313.3  | 214.7  | 266.8  | 714.1  |
| 540.2  | 554.7  | 518.2  | 467.2  | 1256.5 | 1073.0 | 1312.1 | 1419.4 | 856.9  |
| 1361.8 | 1256.8 | 2313.6 | 1622.1 | 1022.7 | 826.3  | 1115.3 | 1196.9 | 1052.8 |
| 153.4  | 167.0  | 244.7  | 161.5  | 657.5  | 578.4  | 658.8  | 791.0  | 345.6  |
| 108.9  | 110.8  | 147.2  | 108.6  | 172.8  | 127.3  | 172.8  | 219.1  | 450.8  |
| 687.6  | 643.4  | 935.6  | 698.5  | 1029.7 | 936.1  | 1000.1 | 1165.2 | 1441.2 |
| 870.9  | 795.0  | 1416.4 | 791.4  | 1186.7 | 1049.6 | 1130.6 | 1341.9 | 1200.0 |
| 386.4  | 368.0  | 434.7  | 343.3  | 1467.1 | 1429.6 | 1503.6 | 1658.7 | 1661.1 |
| 93.8   | 89.6   | 109.3  | 115.6  | 179.9  | 226.2  | 230.5  | 201.4  | 183.4  |
| 372.7  | 371.3  | 825.2  | 464.2  | 675.8  | 707.5  | 783.8  | 811.6  | 1459.8 |
| 341.2  | 294.8  | 438.0  | 263.9  | 560.8  | 667.4  | 597.4  | 671.2  | 925.5  |
| 28.4   | 27.5   | 30.0   | 25.0   | 30.3   | 26.3   | 29.8   | 42.1   | 52.4   |
| 205.7  | 206.0  | 184.7  | 200.8  | 229.5  | 211.2  | 199.3  | 284.4  | 319.5  |
| 10.4   | 11.4   | 17.8   | 10.2   | 8.1    | 5.5    | 9.0    | 6.1    | 11.1   |
| 357.3  | 358.0  | 413.5  | 365.5  | 390.4  | 354.1  | 400.9  | 494.1  | 476.7  |
| 294.5  | 315.3  | 346.2  | 347.2  | 348.8  | 461.7  | 367.8  | 395.5  | 243.8  |
| 1245.1 | 1065.1 | 2157.9 | 1146.7 | 1212.1 | 1134.4 | 1143.3 | 1278.9 | 1211.0 |
| 341.9  | 324.0  | 487.5  | 258.9  | 1090.1 | 853.9  | 990.8  | 1127.0 | 1222.9 |
| 487.4  | 457.8  | 607.1  | 447.4  | 955.1  | 1083.7 | 1052.2 | 1208.6 | 1846.8 |
| 448.6  | 386.8  | 513.9  | 360.7  | 875.4  | 877.4  | 846.3  | 968.5  | 2144.3 |
| 203.7  | 189.2  | 390.8  | 242.2  | 716.6  | 513.8  | 601.2  | 809.6  | 1091.8 |
| 190.5  | 192.2  | 228.9  | 169.6  | 268.8  | 347.6  | 270.8  | 340.1  | 482.3  |
| 942.6  | 967.4  | 1045.4 | 1052.4 | 1715.8 | 1910.4 | 1830.3 | 1809.2 | 2347.7 |
| 1307.2 | 1231.7 | 528.2  | 461.2  | 1969.4 | 1129.9 | 2177.0 | 2750.9 | 2217.9 |
| 887.5  | 816.4  | 1057.7 | 886.5  | 481.8  | 757.8  | 511.0  | 571.7  | 600.1  |
| 211.0  | 209.4  | 174.7  | 135.0  | 436.6  | 456.5  | 510.7  | 497.0  | 316.6  |

|        |        |        |        |        |        |        |        |        |
|--------|--------|--------|--------|--------|--------|--------|--------|--------|
| 24.4   | 19.9   | 47.2   | 38.8   | 196.0  | 455.2  | 230.0  | 236.8  | 218.2  |
| 63.3   | 59.2   | 139.8  | 121.0  | 550.5  | 1142.1 | 505.9  | 682.5  | 409.7  |
| 156.1  | 147.2  | 239.6  | 147.9  | 147.1  | 148.8  | 158.0  | 158.0  | 279.5  |
| 1596.3 | 1673.7 | 1544.5 | 1590.3 | 684.4  | 690.7  | 672.9  | 754.2  | 659.4  |
| 301.2  | 256.3  | 376.1  | 251.8  | 297.3  | 251.6  | 312.6  | 381.3  | 237.8  |
| 576.3  | 563.7  | 431.0  | 525.0  | 397.5  | 508.1  | 454.0  | 521.8  | 646.8  |
| 590.7  | 430.8  | 1213.2 | 534.6  | 819.1  | 879.4  | 830.7  | 951.7  | 962.8  |
| 2520.9 | 1996.8 | 4012.0 | 2404.7 | 635.8  | 755.0  | 698.9  | 687.2  | 530.0  |
| 74.4   | 71.1   | 62.2   | 53.2   | 154.8  | 128.5  | 175.5  | 212.3  | 101.6  |
| 2.9    | 4.4    | 6.3    | 4.4    | 1427.2 | 1196.7 | 1701.1 | 1998.3 | 683.4  |
| 67.1   | 72.6   | 101.6  | 69.1   | 285.1  | 234.7  | 262.1  | 361.3  | 414.0  |
| 264.6  | 250.5  | 427.1  | 296.5  | 648.8  | 370.9  | 639.0  | 731.0  | 383.0  |
| 524.7  | 495.7  | 545.2  | 502.3  | 772.4  | 841.5  | 803.9  | 871.9  | 1092.8 |
| 4630.6 | 4145.7 | 6445.1 | 4375.1 | 2663.9 | 1715.6 | 3058.0 | 3118.0 | 4135.7 |
| 1053.2 | 1078.1 | 826.9  | 1166.1 | 411.1  | 429.6  | 470.0  | 493.2  | 1207.3 |
| 178.8  | 185.3  | 365.1  | 215.5  | 163.0  | 176.8  | 167.5  | 177.9  | 171.7  |
| 2765.5 | 2622.0 | 3958.2 | 2520.3 | 3589.6 | 3345.8 | 4057.1 | 4295.4 | 4874.7 |
| 895.1  | 857.2  | 1230.2 | 1058.1 | 517.2  | 439.9  | 480.9  | 602.3  | 345.9  |
| 407.7  | 383.7  | 545.5  | 455.5  | 201.6  | 208.8  | 277.7  | 243.0  | 172.7  |
| 700.5  | 634.0  | 912.4  | 607.4  | 264.4  | 186.6  | 283.5  | 324.0  | 373.9  |
| 802.2  | 714.6  | 1136.9 | 730.3  | 383.8  | 264.3  | 364.5  | 389.7  | 346.0  |
| 457.2  | 447.8  | 569.8  | 450.7  | 755.2  | 753.6  | 768.3  | 878.3  | 455.4  |
| 776.2  | 725.4  | 1031.5 | 563.3  | 364.7  | 591.3  | 433.8  | 393.5  | 399.7  |
| 42.1   | 75.9   | 25.9   | 68.3   | 448.9  | 399.5  | 462.8  | 488.2  | 397.6  |
| 644.9  | 720.8  | 472.8  | 545.8  | 262.6  | 290.9  | 267.7  | 342.8  | 251.4  |
| 121.3  | 133.2  | 125.0  | 104.6  | 110.3  | 76.0   | 93.7   | 135.3  | 55.6   |
| 180.2  | 178.5  | 240.8  | 187.8  | 491.9  | 402.8  | 488.8  | 490.4  | 615.3  |
| 797.3  | 916.1  | 652.3  | 633.0  | 1659.7 | 1438.6 | 1645.5 | 1906.5 | 1890.9 |
| 215.4  | 183.6  | 239.6  | 170.6  | 393.7  | 471.8  | 405.2  | 414.3  | 429.9  |
| 428.7  | 481.9  | 523.1  | 427.4  | 349.8  | 274.5  | 333.0  | 387.9  | 211.5  |
| 23.2   | 20.2   | 36.6   | 10.8   | 824.2  | 1285.6 | 847.6  | 670.3  | 4012.3 |
| 9.3    | 5.2    | 7.1    | 7.4    | 216.2  | 336.6  | 217.1  | 152.7  | 1493.1 |
| 28.5   | 22.6   | 42.1   | 33.3   | 63.4   | 89.9   | 64.6   | 54.0   | 463.6  |
| 3.7    | 9.5    | 10.2   | 9.3    | 69.5   | 94.6   | 57.4   | 70.4   | 1009.5 |
| 4.4    | 2.8    | 2.0    | 2.6    | 189.3  | 326.6  | 203.9  | 153.5  | 1544.8 |
| 412.4  | 367.7  | 627.1  | 383.3  | 490.8  | 519.1  | 550.6  | 578.0  | 603.1  |
| 342.5  | 276.7  | 1022.9 | 288.6  | 5.5    | 1.3    | 6.4    | 8.7    | 3.2    |
| 2482.5 | 2308.4 | 1957.1 | 1780.0 | 1403.8 | 1258.8 | 1614.4 | 1827.2 | 986.0  |
| 356.2  | 375.8  | 345.0  | 327.6  | 182.5  | 192.5  | 186.8  | 214.0  | 275.0  |
| 257.7  | 270.0  | 314.5  | 334.4  | 588.0  | 679.3  | 543.0  | 606.3  | 256.0  |
| 102.3  | 96.4   | 119.6  | 93.9   | 272.9  | 323.1  | 300.7  | 344.0  | 143.0  |
| 912.5  | 994.6  | 827.5  | 1014.6 | 2426.0 | 2378.0 | 3154.0 | 3081.3 | 5884.6 |
| 551.3  | 530.8  | 700.0  | 471.8  | 436.8  | 430.7  | 461.7  | 458.9  | 730.1  |
| 396.9  | 399.6  | 1092.7 | 398.8  | 1427.8 | 1008.3 | 1139.2 | 1547.5 | 1498.6 |
| 756.1  | 692.3  | 976.2  | 661.5  | 101.9  | 132.9  | 108.5  | 124.5  | 145.0  |
| 777.6  | 686.0  | 878.4  | 692.9  | 1494.7 | 1441.9 | 1634.1 | 1739.8 | 2424.2 |
| 66.2   | 61.2   | 83.8   | 71.3   | 105.6  | 85.1   | 90.8   | 122.3  | 132.0  |
| 249.7  | 216.1  | 247.8  | 181.3  | 342.6  | 319.5  | 316.3  | 431.9  | 209.5  |
| 219.8  | 212.9  | 277.1  | 145.0  | 798.8  | 603.2  | 764.5  | 838.9  | 576.2  |
| 7.7    | 8.2    | 11.6   | 8.3    | 6.8    | 6.0    | 3.2    | 5.5    | 13.0   |
| 382.5  | 336.5  | 546.8  | 451.8  | 441.4  | 408.1  | 455.7  | 484.8  | 673.4  |
| 155.7  | 171.3  | 96.1   | 143.5  | 122.5  | 157.3  | 142.9  | 174.1  | 108.3  |
| 119.7  | 98.9   | 200.7  | 97.1   | 208.3  | 137.3  | 327.0  | 249.3  | 110.9  |

|        |        |        |        |        |        |        |        |        |
|--------|--------|--------|--------|--------|--------|--------|--------|--------|
| 265.4  | 273.7  | 259.1  | 326.8  | 547.1  | 382.6  | 641.6  | 648.0  | 152.2  |
| 295.3  | 287.3  | 387.4  | 296.8  | 252.7  | 492.1  | 246.0  | 300.2  | 161.5  |
| 426.8  | 341.9  | 438.0  | 329.1  | 140.4  | 143.6  | 160.5  | 163.4  | 246.2  |
| 164.2  | 172.6  | 169.6  | 184.0  | 143.5  | 153.7  | 158.5  | 185.5  | 145.2  |
| 283.7  | 315.6  | 308.1  | 242.8  | 464.6  | 470.5  | 476.3  | 577.2  | 345.0  |
| 122.2  | 99.2   | 195.5  | 113.2  | 380.3  | 330.3  | 319.7  | 427.0  | 413.4  |
| 1327.6 | 1141.9 | 1493.5 | 1216.8 | 914.3  | 785.6  | 845.4  | 1038.1 | 394.6  |
| 1133.2 | 1097.2 | 919.5  | 878.1  | 1492.7 | 1173.6 | 1537.9 | 1633.1 | 2065.1 |
| 1339.3 | 1221.0 | 1876.1 | 1276.3 | 1835.3 | 1888.6 | 1854.6 | 1951.6 | 1897.1 |
| 229.1  | 206.3  | 339.9  | 218.9  | 429.3  | 344.6  | 368.0  | 467.4  | 460.8  |
| 78.5   | 78.1   | 55.8   | 51.6   | 298.5  | 221.5  | 286.0  | 249.3  | 117.4  |
| 81.3   | 90.9   | 100.0  | 65.6   | 89.1   | 114.7  | 92.1   | 103.5  | 135.4  |
| 435.9  | 485.3  | 366.2  | 456.6  | 132.3  | 120.2  | 126.6  | 132.3  | 78.3   |
| 259.6  | 256.8  | 347.5  | 256.4  | 109.1  | 123.4  | 127.8  | 120.9  | 79.1   |
| 30.3   | 21.3   | 54.2   | 18.1   | 21.0   | 23.2   | 35.3   | 23.2   | 13.0   |
| 871.2  | 774.4  | 1231.0 | 899.2  | 1223.0 | 1146.3 | 1264.8 | 1334.3 | 1519.7 |
| 716.1  | 675.2  | 1105.5 | 859.1  | 187.5  | 193.9  | 189.5  | 254.4  | 130.3  |
| 392.6  | 403.9  | 458.8  | 319.4  | 580.0  | 596.0  | 613.4  | 703.5  | 641.4  |
| 364.9  | 349.2  | 272.5  | 336.8  | 366.3  | 522.1  | 403.1  | 408.2  | 174.6  |
| 309.1  | 266.0  | 413.6  | 272.7  | 344.6  | 314.4  | 349.2  | 408.6  | 368.1  |
| 281.0  | 267.2  | 522.1  | 255.6  | 1354.5 | 739.1  | 1040.1 | 1430.6 | 1453.4 |
| 133.9  | 107.7  | 209.0  | 119.6  | 149.0  | 137.2  | 144.2  | 154.1  | 230.1  |
| 1310.6 | 1253.3 | 1342.4 | 1232.7 | 1521.4 | 1956.5 | 1824.5 | 1905.9 | 1781.1 |
| 563.6  | 545.9  | 723.4  | 508.7  | 672.5  | 556.0  | 644.0  | 756.7  | 604.2  |
| 153.0  | 158.1  | 211.7  | 135.8  | 114.9  | 77.6   | 105.4  | 135.7  | 122.3  |
| 1.9    | 0.8    | 2.1    | 0.6    | 1.9    | 1.1    | 1.8    | 1.1    | 2.2    |
| 55.1   | 57.6   | 76.7   | 70.4   | 122.4  | 124.3  | 143.0  | 141.4  | 194.8  |
| 428.0  | 401.0  | 620.6  | 420.9  | 716.2  | 979.7  | 906.6  | 842.5  | 951.5  |
| 675.4  | 749.8  | 682.3  | 689.9  | 1306.9 | 1259.0 | 1597.7 | 1688.3 | 671.4  |
| 649.9  | 677.9  | 842.7  | 804.7  | 566.8  | 625.9  | 597.0  | 741.2  | 659.1  |
| 1087.5 | 1025.7 | 1348.6 | 1085.6 | 887.3  | 897.4  | 937.0  | 978.1  | 1294.6 |
| 259.2  | 300.2  | 444.0  | 300.7  | 558.9  | 726.8  | 608.1  | 692.6  | 502.6  |
| 200.6  | 165.1  | 386.8  | 175.8  | 361.6  | 326.8  | 428.4  | 398.3  | 500.1  |
| 144.5  | 148.7  | 204.7  | 179.4  | 243.6  | 269.6  | 282.8  | 279.2  | 732.7  |
| 1277.7 | 1216.1 | 1803.6 | 1206.5 | 1497.7 | 1320.8 | 1716.7 | 1739.3 | 1149.8 |
| 8.4    | 4.8    | 10.4   | 6.3    | 10.8   | 7.7    | 9.3    | 13.2   | 15.1   |
| 69.1   | 76.1   | 79.5   | 54.6   | 313.0  | 358.9  | 330.2  | 343.0  | 206.6  |
| 343.5  | 329.7  | 452.0  | 384.8  | 567.7  | 621.5  | 578.7  | 682.5  | 1084.7 |
| 481.0  | 432.8  | 705.6  | 386.3  | 1116.1 | 994.6  | 1073.0 | 1106.1 | 1106.4 |
| 213.2  | 213.4  | 190.1  | 175.9  | 240.5  | 296.6  | 221.3  | 247.1  | 268.6  |
| 1397.9 | 1345.4 | 1677.0 | 1460.8 | 1802.5 | 2017.0 | 1780.9 | 2049.6 | 2848.2 |
| 48.9   | 57.3   | 78.8   | 47.4   | 144.1  | 173.6  | 146.1  | 161.1  | 67.0   |
| 855.8  | 767.1  | 1094.1 | 756.7  | 1166.8 | 1363.8 | 1173.7 | 1356.8 | 1207.3 |
| 230.3  | 206.2  | 240.3  | 146.4  | 190.7  | 123.5  | 190.7  | 198.4  | 134.2  |
| 8.7    | 5.6    | 8.5    | 4.9    | 10.6   | 6.4    | 8.9    | 1.3    | 26.8   |
| 255.6  | 256.4  | 294.2  | 228.5  | 133.9  | 156.8  | 140.9  | 163.7  | 144.6  |
| 899.0  | 718.9  | 1218.4 | 930.6  | 459.2  | 536.8  | 450.7  | 616.7  | 627.9  |
| 478.8  | 461.3  | 523.0  | 448.2  | 409.3  | 377.0  | 359.6  | 465.1  | 411.7  |
| 412.9  | 362.8  | 488.7  | 325.0  | 531.5  | 388.0  | 550.8  | 753.2  | 959.3  |
| 241.3  | 229.1  | 295.8  | 232.4  | 192.2  | 184.1  | 170.4  | 183.3  | 264.8  |
| 425.1  | 422.9  | 1106.6 | 466.2  | 695.0  | 492.8  | 689.7  | 690.4  | 986.8  |
| 131.0  | 138.4  | 211.8  | 128.8  | 365.8  | 396.6  | 499.6  | 444.0  | 185.3  |
| 156.1  | 156.3  | 165.8  | 155.1  | 166.7  | 166.6  | 150.6  | 173.3  | 195.7  |

|        |        |        |        |        |        |        |        |        |
|--------|--------|--------|--------|--------|--------|--------|--------|--------|
| 206.8  | 213.9  | 299.5  | 254.2  | 241.3  | 219.2  | 222.2  | 204.4  | 290.9  |
| 86.9   | 77.7   | 224.3  | 87.6   | 618.8  | 390.9  | 588.4  | 699.6  | 502.4  |
| 826.1  | 826.4  | 964.9  | 714.5  | 2209.7 | 2712.0 | 2339.4 | 2485.1 | 3335.5 |
| 90.9   | 96.6   | 131.6  | 84.1   | 147.2  | 132.6  | 149.8  | 159.7  | 296.5  |
| 149.7  | 153.2  | 248.8  | 215.9  | 260.7  | 182.1  | 258.5  | 278.5  | 263.6  |
| 170.5  | 149.0  | 212.5  | 151.6  | 137.8  | 145.3  | 142.5  | 200.5  | 182.9  |
| 375.0  | 347.9  | 516.7  | 421.2  | 269.0  | 269.0  | 252.0  | 293.8  | 236.5  |
| 803.1  | 758.6  | 1369.0 | 1002.4 | 588.8  | 621.9  | 538.7  | 664.6  | 281.9  |
| 239.7  | 220.5  | 447.3  | 247.8  | 652.4  | 715.8  | 593.2  | 632.6  | 577.2  |
| 52.2   | 58.6   | 118.8  | 87.0   | 307.6  | 367.0  | 361.7  | 347.7  | 135.7  |
| 448.7  | 431.0  | 557.1  | 438.4  | 442.1  | 430.2  | 432.7  | 569.7  | 936.2  |
| 361.7  | 317.3  | 744.5  | 383.2  | 199.3  | 203.8  | 192.4  | 228.9  | 219.5  |
| 26.0   | 19.3   | 27.2   | 14.4   | 1914.3 | 1929.9 | 1884.4 | 1914.6 | 2090.8 |
| 685.4  | 680.2  | 794.2  | 645.7  | 792.3  | 796.3  | 910.3  | 1080.3 | 2329.7 |
| 421.4  | 398.0  | 485.0  | 400.0  | 84.6   | 124.2  | 101.0  | 126.0  | 166.9  |
| 11.2   | 9.2    | 8.0    | 11.9   | 35.5   | 14.1   | 23.3   | 30.9   | 57.2   |
| 558.5  | 570.2  | 501.6  | 538.4  | 455.3  | 720.3  | 570.2  | 557.2  | 569.0  |
| 271.5  | 272.0  | 303.0  | 303.7  | 431.0  | 464.0  | 407.3  | 515.6  | 589.7  |
| 140.3  | 132.9  | 136.3  | 144.9  | 546.8  | 485.8  | 601.1  | 672.9  | 389.2  |
| 147.4  | 132.1  | 217.3  | 156.7  | 308.2  | 199.1  | 373.5  | 402.7  | 159.5  |
| 389.3  | 287.9  | 735.5  | 338.5  | 852.8  | 585.4  | 998.7  | 1050.0 | 338.7  |
| 497.8  | 496.1  | 491.1  | 501.7  | 94.6   | 90.6   | 94.6   | 119.1  | 309.1  |
| 35.0   | 28.5   | 86.8   | 33.4   | 327.6  | 500.3  | 318.8  | 335.6  | 93.0   |
| 422.8  | 393.8  | 425.7  | 334.1  | 339.1  | 269.5  | 458.8  | 404.8  | 756.0  |
| 116.4  | 96.3   | 243.4  | 120.9  | 696.5  | 677.7  | 769.2  | 829.2  | 518.5  |
| 355.6  | 367.2  | 468.5  | 370.8  | 452.7  | 499.1  | 503.4  | 528.4  | 637.0  |
| 1426.1 | 1382.6 | 1479.4 | 1610.8 | 619.3  | 809.1  | 660.4  | 725.6  | 633.9  |
| 251.0  | 194.4  | 347.3  | 210.3  | 250.7  | 216.8  | 246.4  | 273.3  | 133.1  |
| 3.7    | 5.5    | 3.1    | 3.6    | 299.1  | 284.8  | 343.5  | 337.6  | 527.9  |
| 1361.6 | 1177.8 | 1924.2 | 1306.5 | 2216.7 | 2099.0 | 2507.8 | 2599.8 | 3229.0 |
| 505.3  | 595.3  | 683.2  | 655.9  | 761.3  | 593.2  | 797.7  | 925.6  | 663.6  |
| 229.3  | 196.3  | 189.9  | 152.7  | 884.4  | 752.6  | 915.7  | 940.7  | 1304.6 |
| 158.1  | 138.6  | 240.9  | 164.9  | 389.4  | 399.5  | 373.0  | 453.8  | 739.2  |
| 503.6  | 484.8  | 722.5  | 484.3  | 463.6  | 535.4  | 471.4  | 498.8  | 755.2  |
| 388.9  | 357.8  | 612.8  | 398.0  | 1005.6 | 1135.0 | 987.7  | 1185.1 | 401.3  |
| 860.8  | 839.3  | 1125.1 | 778.5  | 934.4  | 735.2  | 868.8  | 1126.0 | 1222.4 |
| 473.5  | 512.3  | 531.7  | 357.8  | 451.7  | 305.6  | 333.8  | 480.3  | 763.1  |
| 601.5  | 539.6  | 595.8  | 721.4  | 1507.6 | 1693.2 | 1706.5 | 1800.2 | 1034.9 |
| 35.6   | 27.5   | 46.9   | 36.6   | 39.5   | 42.0   | 45.4   | 61.4   | 106.7  |
| 212.5  | 183.3  | 262.1  | 196.9  | 371.3  | 293.3  | 362.2  | 405.1  | 352.7  |
| 310.3  | 267.8  | 596.1  | 331.0  | 433.2  | 388.2  | 457.9  | 506.7  | 755.2  |
| 118.6  | 96.6   | 113.3  | 98.5   | 138.7  | 77.3   | 124.1  | 172.3  | 1503.9 |
| 111.4  | 101.7  | 174.8  | 115.7  | 106.6  | 105.4  | 98.5   | 99.1   | 103.9  |
| 186.5  | 176.7  | 448.3  | 128.2  | 420.7  | 285.6  | 340.1  | 435.4  | 715.0  |
| 366.0  | 311.2  | 397.5  | 339.6  | 261.4  | 243.5  | 268.5  | 268.4  | 329.7  |
| 952.2  | 770.6  | 1519.7 | 907.6  | 1229.4 | 1090.6 | 1484.8 | 1617.5 | 1695.1 |
| 389.8  | 342.9  | 599.0  | 363.8  | 900.2  | 735.9  | 963.2  | 992.4  | 889.6  |
| 286.6  | 247.7  | 452.4  | 286.9  | 743.0  | 587.8  | 720.7  | 759.0  | 755.1  |
| 332.4  | 299.4  | 478.1  | 330.4  | 301.7  | 335.9  | 276.5  | 314.5  | 806.2  |
| 49.9   | 47.7   | 76.7   | 57.9   | 57.8   | 75.7   | 70.1   | 56.2   | 170.4  |
| 127.3  | 107.7  | 166.7  | 109.5  | 260.6  | 282.7  | 235.6  | 256.2  | 210.6  |
| 317.6  | 250.8  | 573.7  | 326.7  | 450.5  | 490.9  | 518.7  | 512.3  | 658.1  |
| 312.4  | 307.9  | 362.9  | 318.1  | 168.8  | 158.8  | 186.0  | 188.8  | 299.6  |

|        |        |        |        |        |        |        |        |        |
|--------|--------|--------|--------|--------|--------|--------|--------|--------|
| 102.6  | 117.2  | 86.7   | 99.3   | 86.1   | 90.7   | 89.1   | 137.1  | 151.4  |
| 153.2  | 165.2  | 196.0  | 138.0  | 250.1  | 271.2  | 221.7  | 291.8  | 383.3  |
| 153.0  | 164.4  | 185.5  | 169.7  | 154.8  | 142.7  | 160.8  | 168.1  | 201.3  |
| 166.4  | 165.3  | 180.5  | 164.5  | 117.2  | 101.2  | 130.9  | 152.3  | 153.7  |
| 238.6  | 220.1  | 239.3  | 180.3  | 139.3  | 118.8  | 150.2  | 181.9  | 217.0  |
| 218.8  | 199.5  | 261.3  | 184.8  | 224.6  | 181.4  | 232.7  | 275.1  | 131.5  |
| 174.7  | 157.7  | 267.9  | 172.9  | 352.2  | 363.7  | 365.6  | 439.2  | 540.3  |
| 555.0  | 547.2  | 852.3  | 485.8  | 676.1  | 615.0  | 734.6  | 847.2  | 836.5  |
| 267.8  | 302.3  | 443.1  | 291.1  | 582.9  | 532.7  | 555.1  | 637.9  | 477.1  |
| 402.3  | 384.0  | 475.9  | 302.3  | 977.3  | 654.8  | 997.6  | 1114.4 | 970.8  |
| 301.8  | 271.3  | 508.2  | 319.5  | 481.1  | 460.0  | 564.6  | 551.7  | 383.7  |
| 45.8   | 44.1   | 48.3   | 30.6   | 68.0   | 73.8   | 68.2   | 70.1   | 97.7   |
| 457.8  | 525.7  | 503.5  | 438.3  | 388.6  | 392.1  | 421.3  | 443.6  | 255.7  |
| 276.9  | 246.2  | 476.8  | 262.1  | 263.3  | 330.8  | 229.3  | 301.4  | 207.7  |
| 1111.1 | 1061.7 | 1032.7 | 953.7  | 440.9  | 339.5  | 443.4  | 540.7  | 282.1  |
| 324.1  | 276.4  | 504.8  | 267.1  | 586.3  | 652.6  | 647.7  | 666.9  | 687.9  |
| 55.6   | 63.6   | 40.3   | 39.4   | 97.9   | 80.2   | 66.1   | 100.7  | 48.6   |
| 297.8  | 302.9  | 271.5  | 266.8  | 106.1  | 129.3  | 130.2  | 141.8  | 232.6  |
| 245.6  | 265.8  | 352.0  | 245.1  | 254.2  | 283.8  | 300.3  | 281.3  | 395.0  |
| 180.5  | 179.1  | 188.7  | 134.2  | 97.8   | 111.8  | 120.5  | 141.1  | 68.1   |
| 1225.0 | 982.2  | 2080.6 | 1172.1 | 604.6  | 2923.7 | 971.5  | 639.7  | 952.8  |
| 197.6  | 187.8  | 184.6  | 159.4  | 366.8  | 443.4  | 402.5  | 480.0  | 628.8  |
| 170.8  | 184.2  | 141.6  | 153.0  | 238.3  | 320.2  | 328.7  | 284.0  | 350.3  |
| 44.0   | 51.8   | 58.0   | 34.5   | 71.5   | 84.0   | 65.5   | 88.3   | 70.1   |
| 160.9  | 184.9  | 147.9  | 161.5  | 339.5  | 278.0  | 322.7  | 390.7  | 178.3  |
| 457.5  | 389.6  | 657.9  | 441.6  | 617.9  | 561.7  | 735.4  | 789.5  | 454.7  |
| 312.8  | 235.8  | 499.8  | 246.6  | 554.8  | 439.8  | 540.3  | 615.9  | 518.5  |
| 244.8  | 199.2  | 271.5  | 209.5  | 225.7  | 220.1  | 215.5  | 289.5  | 244.5  |
| 210.8  | 158.6  | 320.3  | 183.0  | 368.0  | 371.3  | 389.7  | 374.8  | 466.4  |
| 43.5   | 44.6   | 40.9   | 41.4   | 151.4  | 149.0  | 139.7  | 221.4  | 178.3  |
| 84.2   | 81.7   | 110.6  | 72.1   | 174.0  | 169.5  | 154.3  | 166.7  | 236.2  |
| 152.4  | 106.4  | 299.0  | 144.1  | 1304.2 | 1285.2 | 1253.8 | 1395.8 | 1830.0 |
| 240.1  | 213.4  | 365.3  | 199.7  | 279.9  | 293.9  | 338.4  | 242.4  | 387.6  |
| 259.0  | 290.5  | 255.0  | 248.0  | 199.2  | 157.2  | 176.0  | 264.1  | 174.5  |
| 306.6  | 246.5  | 579.7  | 298.3  | 278.0  | 243.7  | 313.1  | 345.9  | 529.6  |
| 1539.3 | 1374.7 | 1911.9 | 1544.9 | 907.0  | 939.7  | 978.4  | 998.6  | 1191.2 |
| 33.1   | 16.2   | 83.4   | 41.1   | 90.9   | 73.1   | 77.9   | 81.5   | 110.9  |
| 2.9    | 4.8    | 5.8    | 0.7    | 826.6  | 674.7  | 1282.3 | 1173.0 | 12.7   |
| 513.0  | 437.7  | 832.2  | 557.2  | 1441.8 | 1479.3 | 1622.2 | 1678.4 | 2450.4 |
| 1447.5 | 1619.5 | 636.9  | 1126.1 | 276.7  | 357.5  | 296.6  | 395.4  | 254.9  |
| 806.7  | 922.8  | 663.0  | 752.4  | 417.3  | 356.7  | 450.5  | 475.5  | 596.3  |
| 86.8   | 70.9   | 86.8   | 63.8   | 127.7  | 124.4  | 151.3  | 164.4  | 138.8  |
| 1314.4 | 1316.7 | 1314.5 | 1004.9 | 945.3  | 1099.8 | 1097.9 | 1156.5 | 1349.2 |
| 152.5  | 192.3  | 115.1  | 188.3  | 181.1  | 131.0  | 189.6  | 188.0  | 393.2  |
| 348.7  | 323.4  | 300.9  | 318.0  | 201.7  | 389.1  | 240.5  | 263.3  | 186.2  |
| 1068.2 | 923.3  | 1655.1 | 1129.9 | 653.4  | 448.1  | 607.7  | 831.2  | 546.9  |
| 700.3  | 747.7  | 874.8  | 775.3  | 567.1  | 600.0  | 616.8  | 721.2  | 624.3  |
| 431.8  | 405.0  | 737.2  | 440.1  | 711.4  | 719.8  | 707.1  | 814.0  | 495.2  |
| 16.5   | 16.9   | 27.8   | 22.3   | 20.2   | 24.3   | 19.3   | 28.8   | 24.7   |
| 131.7  | 135.1  | 117.6  | 122.5  | 26.5   | 28.6   | 32.9   | 46.8   | 50.1   |
| 323.7  | 335.0  | 301.2  | 326.6  | 137.9  | 201.5  | 155.9  | 139.2  | 55.4   |
| 312.7  | 276.7  | 273.2  | 247.0  | 272.0  | 230.2  | 281.4  | 317.5  | 358.8  |
| 259.4  | 274.8  | 235.0  | 252.1  | 102.6  | 93.0   | 86.1   | 128.8  | 134.2  |

|        |        |        |        |        |        |        |        |        |
|--------|--------|--------|--------|--------|--------|--------|--------|--------|
| 1059.3 | 1007.1 | 988.3  | 1057.4 | 558.2  | 516.3  | 597.5  | 753.7  | 598.0  |
| 358.5  | 358.5  | 322.0  | 297.8  | 98.4   | 116.8  | 92.9   | 103.8  | 134.5  |
| 114.7  | 142.9  | 94.3   | 95.9   | 109.7  | 72.3   | 149.5  | 113.3  | 4.3    |
| 119.4  | 138.7  | 123.2  | 118.6  | 387.5  | 266.7  | 315.3  | 364.0  | 190.5  |
| 5.5    | 7.9    | 7.8    | 0.8    | 50.3   | 111.6  | 60.0   | 41.9   | 27.5   |
| 9.5    | 3.4    | 8.7    | 1.4    | 24.0   | 20.2   | 29.0   | 20.9   | 21.3   |
| 166.1  | 138.5  | 204.2  | 178.6  | 164.3  | 159.7  | 151.2  | 177.2  | 117.3  |
| 521.3  | 510.2  | 762.6  | 547.1  | 1047.5 | 1016.4 | 1058.6 | 1136.6 | 798.0  |
| 1062.0 | 1071.4 | 1054.1 | 1040.3 | 1.6    | 1.4    | 3.8    | 13.2   | 3.8    |
| 578.2  | 583.5  | 849.8  | 553.6  | 482.5  | 471.2  | 484.5  | 494.5  | 598.1  |
| 576.9  | 501.3  | 909.0  | 581.0  | 696.2  | 562.0  | 748.3  | 751.5  | 1219.8 |
| 700.3  | 615.8  | 1121.4 | 716.5  | 771.7  | 863.0  | 796.4  | 818.3  | 890.4  |
| 2144.3 | 1844.3 | 3361.3 | 2172.2 | 2602.5 | 2327.0 | 2493.7 | 2840.6 | 2283.9 |
| 608.4  | 648.3  | 637.3  | 671.4  | 385.6  | 346.3  | 432.0  | 503.0  | 258.1  |
| 103.5  | 97.3   | 85.3   | 81.5   | 163.3  | 124.8  | 176.3  | 226.0  | 195.5  |
| 255.0  | 209.8  | 375.2  | 206.0  | 1178.0 | 1333.1 | 1397.9 | 1332.3 | 966.6  |
| 1035.3 | 1222.9 | 764.6  | 1025.1 | 2142.5 | 2135.5 | 2619.4 | 2635.9 | 1632.1 |
| 1515.9 | 1319.2 | 1720.0 | 1655.4 | 475.1  | 423.4  | 479.2  | 618.8  | 392.7  |
| 89.0   | 90.9   | 160.5  | 120.1  | 622.7  | 635.5  | 707.2  | 775.6  | 357.1  |
| 214.9  | 234.7  | 308.6  | 203.4  | 201.5  | 191.5  | 210.5  | 233.4  | 198.8  |
| 231.5  | 245.4  | 212.4  | 212.1  | 45.6   | 38.1   | 35.9   | 63.9   | 570.3  |
| 70.6   | 59.6   | 134.3  | 77.4   | 160.1  | 143.1  | 153.6  | 193.7  | 273.1  |
| 2192.2 | 1980.9 | 2691.3 | 2152.8 | 1418.8 | 1496.3 | 1499.3 | 1549.9 | 2642.9 |
| 1201.4 | 919.5  | 1395.7 | 1031.3 | 870.9  | 914.8  | 955.6  | 1066.4 | 1845.6 |
| 118.3  | 98.2   | 149.7  | 106.6  | 84.9   | 72.5   | 83.4   | 122.5  | 87.9   |
| 470.9  | 464.5  | 724.9  | 504.8  | 652.7  | 680.8  | 767.8  | 739.0  | 1403.7 |
| 248.4  | 282.0  | 188.7  | 252.4  | 72.8   | 76.8   | 69.6   | 89.1   | 109.2  |
| 1549.1 | 1486.6 | 1442.2 | 1355.5 | 569.8  | 1196.0 | 621.5  | 638.2  | 564.3  |
| 710.1  | 660.7  | 581.8  | 667.5  | 446.5  | 461.1  | 529.3  | 598.8  | 1268.1 |
| 29.5   | 18.8   | 38.8   | 28.2   | 3.6    | 4.2    | 5.5    | 3.1    | 7.0    |
| 145.2  | 135.9  | 148.3  | 126.4  | 173.5  | 163.6  | 178.4  | 197.8  | 78.8   |
| 804.0  | 757.3  | 1105.3 | 710.9  | 436.1  | 562.6  | 419.0  | 508.0  | 249.3  |
| 310.7  | 329.7  | 458.7  | 233.8  | 429.8  | 333.7  | 391.5  | 459.4  | 388.3  |
| 1443.6 | 1442.1 | 1369.8 | 1463.9 | 360.0  | 347.4  | 358.2  | 305.7  | 71.1   |
| 111.1  | 113.6  | 129.4  | 88.5   | 360.3  | 345.0  | 334.3  | 420.2  | 416.3  |
| 2526.8 | 2526.6 | 3048.8 | 2391.8 | 2281.3 | 2530.6 | 2561.0 | 2666.6 | 4212.4 |
| 335.4  | 305.4  | 562.9  | 346.2  | 464.8  | 616.1  | 542.2  | 524.0  | 1754.1 |
| 131.8  | 145.3  | 159.0  | 145.4  | 235.6  | 312.7  | 280.9  | 311.1  | 376.5  |
| 332.1  | 331.8  | 383.8  | 266.3  | 397.9  | 478.2  | 422.9  | 425.0  | 546.8  |
| 150.1  | 142.1  | 83.8   | 106.4  | 510.8  | 616.0  | 561.7  | 657.6  | 342.2  |
| 203.0  | 259.4  | 195.8  | 223.1  | 224.4  | 214.2  | 197.6  | 269.2  | 197.6  |
| 409.9  | 384.6  | 640.3  | 374.6  | 310.1  | 225.9  | 319.7  | 329.3  | 444.5  |
| 224.2  | 220.5  | 335.8  | 258.3  | 359.3  | 468.2  | 398.7  | 403.8  | 756.2  |
| 82.3   | 87.4   | 88.8   | 78.9   | 116.2  | 105.3  | 137.6  | 143.5  | 92.2   |
| 32.3   | 30.5   | 37.7   | 31.6   | 52.7   | 69.7   | 72.0   | 66.0   | 73.3   |
| 2.7    | 3.5    | 15.4   | 1.0    | 20.3   | 23.5   | 30.3   | 34.5   | 31.0   |
| 998.2  | 1040.2 | 799.1  | 695.7  | 959.3  | 815.3  | 962.7  | 1205.2 | 331.3  |
| 214.3  | 183.6  | 308.8  | 206.6  | 276.6  | 262.5  | 283.0  | 331.9  | 382.2  |
| 3390.2 | 2940.0 | 4082.2 | 3289.1 | 2348.7 | 2287.1 | 2524.2 | 2753.8 | 3159.3 |
| 152.3  | 146.1  | 326.0  | 199.5  | 148.7  | 173.2  | 159.4  | 122.8  | 294.4  |
| 525.5  | 571.4  | 581.9  | 562.2  | 396.6  | 376.1  | 411.5  | 542.9  | 542.4  |
| 539.5  | 492.2  | 565.3  | 404.0  | 508.2  | 601.7  | 563.5  | 590.3  | 548.6  |
| 403.4  | 402.6  | 503.1  | 429.4  | 368.1  | 325.8  | 384.7  | 450.4  | 388.0  |



|        |        |        |        |        |        |        |        |        |
|--------|--------|--------|--------|--------|--------|--------|--------|--------|
| 416.5  | 424.1  | 472.9  | 416.3  | 675.9  | 853.4  | 681.8  | 778.1  | 452.9  |
| 4.7    | 2.0    | 7.2    | 5.3    | 1.4    | 1.6    | 1.9    | 1.3    | 13.3   |
| 2098.2 | 1817.5 | 2599.5 | 2023.9 | 3017.6 | 2333.2 | 3223.5 | 3155.6 | 3546.4 |
| 107.1  | 121.0  | 60.1   | 94.9   | 83.1   | 103.3  | 108.2  | 139.3  | 135.7  |
| 393.8  | 359.7  | 582.4  | 358.3  | 732.5  | 721.8  | 760.6  | 832.7  | 1086.9 |
| 89.6   | 90.6   | 178.5  | 100.8  | 6.1    | 5.0    | 11.7   | 7.1    | 611.7  |
| 1806.8 | 1918.8 | 2147.6 | 1793.9 | 715.3  | 1072.2 | 659.6  | 763.0  | 1213.9 |
| 243.4  | 219.2  | 612.3  | 256.3  | 887.9  | 758.3  | 895.2  | 1006.1 | 1009.4 |
| 544.6  | 467.8  | 1054.1 | 600.7  | 1220.3 | 910.6  | 1120.8 | 1413.7 | 1628.8 |
| 158.3  | 131.8  | 128.6  | 115.7  | 264.4  | 334.8  | 264.6  | 286.7  | 151.7  |
| 658.7  | 639.3  | 710.9  | 580.4  | 424.2  | 454.2  | 526.3  | 509.8  | 325.8  |
| 910.5  | 942.1  | 1034.1 | 1030.6 | 211.2  | 235.2  | 236.7  | 271.7  | 159.7  |
| 216.5  | 206.8  | 240.4  | 206.7  | 224.9  | 275.7  | 276.4  | 309.7  | 255.9  |
| 205.6  | 232.7  | 306.1  | 255.5  | 413.9  | 399.3  | 432.4  | 438.1  | 603.7  |
| 519.1  | 508.1  | 978.8  | 1008.9 | 282.5  | 294.2  | 302.2  | 321.2  | 89.5   |
| 119.7  | 101.8  | 85.6   | 92.6   | 147.0  | 201.0  | 174.3  | 178.6  | 197.1  |
| 695.4  | 684.7  | 802.2  | 575.3  | 542.9  | 611.3  | 568.8  | 667.9  | 686.7  |
| 357.8  | 388.5  | 204.4  | 245.8  | 497.0  | 240.7  | 319.6  | 462.8  | 414.7  |
| 186.6  | 194.9  | 320.5  | 212.7  | 357.4  | 347.0  | 368.5  | 421.4  | 598.1  |
| 811.6  | 753.7  | 895.3  | 615.7  | 1089.1 | 1007.0 | 1066.3 | 1256.4 | 783.9  |
| 149.8  | 113.4  | 254.0  | 177.2  | 140.9  | 141.7  | 152.5  | 99.6   | 191.4  |
| 443.0  | 382.8  | 677.5  | 418.8  | 1244.6 | 691.5  | 905.9  | 1269.7 | 934.9  |
| 110.5  | 111.6  | 113.3  | 106.5  | 573.7  | 666.2  | 627.9  | 728.6  | 744.3  |
| 654.5  | 594.9  | 730.6  | 480.4  | 811.8  | 834.2  | 819.8  | 965.2  | 1004.8 |
| 68.5   | 52.4   | 67.1   | 63.2   | 44.0   | 43.8   | 30.4   | 54.6   | 45.2   |
| 793.1  | 759.9  | 1059.0 | 646.6  | 624.2  | 488.8  | 590.4  | 719.3  | 867.3  |
| 41.6   | 51.0   | 72.4   | 54.4   | 111.3  | 171.4  | 128.2  | 146.0  | 168.0  |
| 492.1  | 552.5  | 686.9  | 656.7  | 1380.5 | 1502.7 | 1499.8 | 1645.9 | 1896.9 |
| 457.9  | 426.9  | 579.6  | 555.6  | 253.4  | 308.9  | 269.0  | 303.6  | 176.2  |
| 427.4  | 395.1  | 690.1  | 415.0  | 575.9  | 467.7  | 559.3  | 625.2  | 1325.9 |
| 816.8  | 775.2  | 876.2  | 688.6  | 307.5  | 228.1  | 308.8  | 391.8  | 63.7   |
| 219.7  | 206.8  | 270.0  | 205.4  | 168.8  | 240.8  | 141.0  | 157.9  | 173.1  |
| 333.8  | 303.2  | 325.5  | 254.4  | 425.7  | 415.4  | 516.1  | 535.5  | 419.0  |
| 106.7  | 92.0   | 99.4   | 99.4   | 217.6  | 136.9  | 188.3  | 213.0  | 134.3  |
| 155.1  | 160.5  | 167.3  | 190.4  | 97.6   | 107.0  | 87.7   | 130.9  | 146.1  |
| 37.8   | 28.3   | 85.1   | 22.4   | 125.5  | 143.0  | 148.0  | 161.3  | 67.8   |
| 84.0   | 76.4   | 115.7  | 81.5   | 90.9   | 72.6   | 86.9   | 111.6  | 134.9  |
| 322.8  | 361.8  | 324.3  | 381.8  | 267.2  | 274.9  | 266.6  | 310.3  | 329.5  |
| 625.2  | 571.5  | 753.8  | 514.2  | 1155.0 | 874.7  | 1194.1 | 1354.1 | 735.0  |
| 412.4  | 375.6  | 565.9  | 410.0  | 605.8  | 637.9  | 711.6  | 724.5  | 1185.7 |
| 470.3  | 466.1  | 489.1  | 406.0  | 564.0  | 576.7  | 625.4  | 662.2  | 616.3  |
| 51.7   | 49.5   | 64.7   | 51.8   | 93.5   | 74.8   | 93.4   | 112.3  | 61.7   |
| 117.6  | 104.2  | 89.4   | 69.5   | 494.1  | 477.3  | 528.6  | 587.3  | 679.6  |
| 75.1   | 90.0   | 54.3   | 80.0   | 69.5   | 88.5   | 91.4   | 102.9  | 84.8   |
| 149.3  | 103.1  | 334.2  | 96.8   | 150.5  | 134.6  | 143.7  | 188.1  | 160.0  |
| 241.8  | 280.7  | 190.8  | 202.3  | 131.2  | 135.1  | 104.3  | 126.1  | 86.8   |
| 1852.6 | 2011.4 | 1420.1 | 1745.1 | 715.9  | 730.7  | 761.8  | 835.6  | 550.8  |
| 107.1  | 120.4  | 165.9  | 166.7  | 209.3  | 306.9  | 206.4  | 220.2  | 303.3  |
| 11.3   | 12.2   | 10.2   | 11.4   | 11.6   | 10.2   | 11.3   | 25.1   | 10.1   |
| 533.4  | 561.5  | 309.4  | 456.8  | 529.6  | 735.7  | 414.5  | 626.8  | 212.8  |
| 739.0  | 643.1  | 1394.7 | 759.9  | 563.7  | 509.1  | 552.1  | 592.0  | 885.2  |
| 472.3  | 481.2  | 480.4  | 479.0  | 307.8  | 357.8  | 373.6  | 379.5  | 209.6  |
| 190.1  | 151.0  | 282.8  | 163.7  | 421.6  | 326.6  | 498.2  | 466.8  | 753.3  |

|        |        |        |        |        |        |        |        |        |
|--------|--------|--------|--------|--------|--------|--------|--------|--------|
| 57.4   | 58.4   | 48.6   | 51.6   | 331.7  | 251.4  | 326.7  | 354.9  | 227.8  |
| 467.4  | 499.7  | 225.5  | 317.5  | 120.8  | 99.7   | 149.5  | 160.7  | 220.2  |
| 412.0  | 334.5  | 430.8  | 312.5  | 532.9  | 594.2  | 566.0  | 556.1  | 301.9  |
| 168.7  | 150.4  | 202.0  | 159.2  | 162.5  | 155.6  | 178.6  | 187.4  | 270.9  |
| 398.8  | 392.1  | 351.9  | 297.0  | 852.7  | 993.0  | 997.0  | 887.5  | 884.3  |
| 216.6  | 189.9  | 291.4  | 194.8  | 228.7  | 211.3  | 227.4  | 267.3  | 276.5  |
| 180.1  | 186.7  | 239.3  | 180.8  | 217.5  | 217.9  | 227.8  | 245.7  | 165.5  |
| 321.6  | 298.7  | 307.7  | 324.8  | 387.5  | 416.5  | 382.7  | 407.5  | 678.5  |
| 49.9   | 48.6   | 66.8   | 49.3   | 226.2  | 241.8  | 230.0  | 222.2  | 67.8   |
| 1.6    | 2.2    | 2.9    | 0.7    | 11.1   | 4.9    | 7.3    | 10.0   | 11.3   |
| 118.0  | 136.9  | 192.7  | 101.3  | 225.5  | 118.6  | 153.7  | 169.1  | 183.5  |
| 109.8  | 88.6   | 167.2  | 74.7   | 299.2  | 253.8  | 314.9  | 350.7  | 193.4  |
| 82.5   | 65.4   | 120.8  | 69.8   | 194.3  | 174.6  | 231.2  | 209.9  | 269.7  |
| 168.2  | 156.7  | 220.0  | 176.3  | 122.3  | 140.7  | 114.7  | 153.8  | 160.9  |
| 321.5  | 234.0  | 301.3  | 237.7  | 14.8   | 15.3   | 17.5   | 16.4   | 88.6   |
| 182.3  | 137.6  | 272.7  | 151.1  | 213.9  | 240.2  | 227.6  | 247.4  | 287.1  |
| 150.3  | 115.6  | 295.6  | 168.4  | 178.2  | 157.2  | 167.0  | 166.6  | 462.4  |
| 77.7   | 79.4   | 80.0   | 87.7   | 57.7   | 68.6   | 49.1   | 83.0   | 42.9   |
| 191.2  | 168.2  | 232.3  | 156.3  | 428.3  | 563.2  | 578.2  | 533.8  | 604.6  |
| 785.8  | 857.3  | 644.8  | 703.0  | 331.4  | 412.6  | 408.1  | 452.8  | 232.6  |
| 192.6  | 176.5  | 279.6  | 194.0  | 303.7  | 322.8  | 297.8  | 348.1  | 434.5  |
| 227.4  | 198.4  | 457.9  | 216.1  | 389.0  | 376.7  | 377.5  | 445.8  | 439.7  |
| 183.9  | 192.5  | 164.7  | 186.0  | 121.3  | 108.6  | 116.5  | 134.6  | 138.9  |
| 452.6  | 458.7  | 510.1  | 591.5  | 229.1  | 332.3  | 227.7  | 210.3  | 360.4  |
| 123.1  | 120.9  | 243.3  | 95.6   | 572.0  | 346.7  | 470.9  | 575.2  | 427.8  |
| 591.3  | 549.9  | 881.6  | 557.9  | 379.2  | 294.1  | 307.3  | 376.9  | 817.7  |
| 171.0  | 176.1  | 186.6  | 175.9  | 75.7   | 71.4   | 56.1   | 69.3   | 273.8  |
| 323.0  | 319.5  | 318.2  | 317.1  | 295.9  | 256.1  | 288.2  | 391.6  | 211.0  |
| 365.6  | 403.7  | 289.3  | 335.8  | 3.4    | 8.2    | 1.8    | 8.5    | 14.5   |
| 489.2  | 438.0  | 909.0  | 492.3  | 1002.9 | 843.9  | 1070.1 | 1213.1 | 278.2  |
| 130.5  | 138.3  | 163.5  | 120.3  | 217.4  | 222.7  | 216.9  | 267.6  | 227.3  |
| 137.7  | 128.9  | 176.4  | 149.3  | 357.0  | 353.0  | 356.0  | 371.4  | 288.0  |
| 303.2  | 287.8  | 365.9  | 246.5  | 223.5  | 278.0  | 230.6  | 238.6  | 284.5  |
| 112.5  | 115.2  | 342.6  | 184.5  | 230.0  | 198.4  | 247.3  | 236.6  | 954.2  |
| 81.4   | 88.5   | 99.2   | 85.2   | 99.1   | 91.1   | 85.8   | 96.2   | 114.2  |
| 35.3   | 45.2   | 49.3   | 42.6   | 93.0   | 89.4   | 77.1   | 109.6  | 234.2  |
| 1535.2 | 1381.9 | 2184.2 | 1511.2 | 1060.2 | 1175.9 | 1072.2 | 1294.9 | 1557.4 |
| 338.7  | 345.4  | 396.2  | 314.3  | 154.7  | 218.8  | 211.7  | 228.6  | 292.5  |
| 13.1   | 14.8   | 9.2    | 12.3   | 26.2   | 19.0   | 25.6   | 33.5   | 14.4   |
| 592.7  | 561.9  | 844.9  | 601.5  | 455.2  | 477.7  | 433.4  | 463.8  | 407.5  |
| 116.9  | 115.0  | 248.5  | 140.1  | 203.8  | 226.8  | 209.5  | 216.8  | 87.5   |
| 70.8   | 64.7   | 131.2  | 56.4   | 148.7  | 110.8  | 143.3  | 150.0  | 78.0   |
| 319.1  | 315.3  | 294.4  | 261.7  | 127.5  | 46.5   | 172.0  | 159.4  | 64.8   |
| 139.3  | 163.1  | 234.8  | 142.5  | 256.8  | 273.2  | 289.8  | 306.4  | 136.2  |
| 255.4  | 269.4  | 252.6  | 279.4  | 77.8   | 104.1  | 62.6   | 78.8   | 320.6  |
| 233.7  | 238.8  | 291.9  | 285.8  | 210.0  | 279.9  | 223.7  | 277.9  | 279.2  |
| 20.3   | 21.9   | 39.8   | 11.8   | 241.8  | 170.1  | 158.8  | 199.2  | 62.2   |
| 229.2  | 204.7  | 309.0  | 195.3  | 850.2  | 705.6  | 770.8  | 988.7  | 867.0  |
| 14.9   | 20.2   | 15.7   | 17.8   | 1090.5 | 1167.8 | 1443.6 | 1390.2 | 34.6   |
| 254.7  | 217.7  | 268.8  | 205.0  | 685.5  | 614.1  | 795.7  | 770.5  | 697.3  |
| 401.4  | 383.6  | 633.3  | 373.2  | 1228.9 | 1107.5 | 1277.1 | 1446.8 | 1414.6 |
| 156.6  | 157.3  | 210.8  | 162.8  | 261.2  | 307.9  | 273.4  | 307.4  | 211.7  |
| 627.7  | 531.9  | 853.3  | 618.4  | 1403.6 | 1809.5 | 1451.8 | 1545.2 | 2803.5 |

|        |        |        |        |        |        |        |        |        |
|--------|--------|--------|--------|--------|--------|--------|--------|--------|
| 83.0   | 97.3   | 71.8   | 65.0   | 103.0  | 104.4  | 109.1  | 122.6  | 104.4  |
| 94.4   | 74.0   | 85.8   | 62.9   | 158.9  | 224.6  | 164.0  | 232.1  | 216.9  |
| 454.4  | 398.4  | 574.6  | 388.7  | 604.4  | 506.5  | 603.6  | 640.0  | 821.1  |
| 163.9  | 151.4  | 239.1  | 159.8  | 409.3  | 349.2  | 389.2  | 463.4  | 118.5  |
| 386.6  | 394.0  | 381.8  | 402.5  | 200.2  | 355.4  | 188.6  | 197.8  | 310.5  |
| 109.9  | 106.7  | 201.3  | 144.7  | 210.7  | 283.8  | 198.3  | 247.0  | 161.7  |
| 216.3  | 207.5  | 231.7  | 232.8  | 303.7  | 406.6  | 348.8  | 363.4  | 272.4  |
| 89.9   | 85.1   | 71.7   | 74.5   | 95.7   | 120.0  | 93.2   | 120.7  | 218.0  |
| 37.2   | 20.1   | 80.7   | 45.2   | 2.7    | 2.9    | 15.2   | 16.5   | 9.2    |
| 149.4  | 149.3  | 160.3  | 144.5  | 63.8   | 51.6   | 63.0   | 65.8   | 127.2  |
| 221.5  | 231.2  | 272.0  | 220.0  | 91.1   | 112.2  | 99.1   | 111.0  | 211.5  |
| 177.2  | 168.5  | 202.5  | 187.6  | 350.1  | 261.3  | 329.9  | 411.1  | 623.3  |
| 108.3  | 98.4   | 293.2  | 106.1  | 531.1  | 443.6  | 536.6  | 555.2  | 514.8  |
| 351.0  | 317.4  | 916.6  | 287.8  | 1668.3 | 1002.3 | 1405.9 | 1918.0 | 1327.0 |
| 557.3  | 462.5  | 681.3  | 441.4  | 1374.9 | 1159.9 | 1443.2 | 1586.8 | 1235.4 |
| 299.3  | 291.0  | 230.9  | 323.6  | 257.9  | 270.6  | 255.9  | 324.7  | 159.9  |
| 4.9    | 7.8    | 5.1    | 5.9    | 10.8   | 11.4   | 11.3   | 15.3   | 7.0    |
| 507.3  | 437.5  | 473.1  | 426.7  | 651.9  | 776.8  | 771.9  | 752.4  | 908.7  |
| 172.5  | 150.7  | 440.4  | 161.7  | 893.2  | 680.3  | 750.9  | 918.5  | 568.5  |
| 618.7  | 559.5  | 1062.3 | 574.8  | 815.4  | 822.7  | 810.2  | 945.6  | 778.0  |
| 774.3  | 581.7  | 1170.8 | 808.3  | 1458.2 | 1325.3 | 1567.1 | 1560.5 | 1482.2 |
| 491.0  | 435.8  | 572.5  | 473.2  | 729.9  | 604.9  | 890.5  | 777.9  | 484.5  |
| 201.3  | 156.6  | 218.3  | 153.8  | 62.3   | 60.7   | 91.6   | 96.3   | 181.6  |
| 1775.6 | 1683.4 | 2285.8 | 1680.8 | 429.4  | 516.7  | 463.0  | 520.9  | 400.7  |
| 112.4  | 135.8  | 82.4   | 123.9  | 222.4  | 226.4  | 222.2  | 265.2  | 206.4  |
| 35.4   | 36.2   | 30.9   | 35.5   | 37.7   | 27.9   | 29.0   | 44.5   | 92.5   |
| 506.7  | 490.1  | 418.1  | 379.3  | 145.3  | 160.5  | 150.0  | 197.5  | 121.1  |
| 138.1  | 124.4  | 140.6  | 129.1  | 122.9  | 149.0  | 121.9  | 138.6  | 189.3  |
| 328.4  | 310.6  | 532.1  | 303.5  | 273.2  | 205.4  | 282.7  | 292.4  | 526.1  |
| 286.5  | 310.3  | 318.3  | 274.2  | 372.2  | 437.5  | 360.3  | 404.1  | 620.4  |
| 467.2  | 459.7  | 421.8  | 368.8  | 221.7  | 252.5  | 257.6  | 326.5  | 220.8  |
| 356.4  | 380.4  | 412.1  | 210.9  | 1732.7 | 1805.6 | 1646.8 | 1893.4 | 2195.2 |
| 2.1    | 1.7    | 6.6    | 2.7    | 3.6    | 4.1    | 4.0    | 8.4    | 6.9    |
| 108.8  | 107.7  | 149.8  | 104.0  | 161.4  | 226.3  | 176.4  | 231.0  | 196.0  |
| 122.7  | 130.0  | 154.3  | 127.8  | 43.3   | 40.8   | 49.2   | 54.7   | 144.4  |
| 51.3   | 44.9   | 71.9   | 47.4   | 64.2   | 66.9   | 66.1   | 89.2   | 64.3   |
| 398.8  | 377.7  | 425.6  | 294.8  | 186.7  | 188.8  | 153.4  | 166.7  | 225.2  |
| 74.1   | 77.3   | 132.7  | 71.4   | 277.0  | 257.7  | 271.7  | 333.8  | 231.8  |
| 173.4  | 157.2  | 165.4  | 172.0  | 190.0  | 254.3  | 302.4  | 301.7  | 145.7  |
| 19.3   | 14.7   | 12.6   | 22.5   | 87.6   | 159.6  | 104.9  | 117.7  | 28.3   |
| 153.8  | 136.8  | 162.0  | 152.0  | 164.4  | 165.3  | 203.5  | 202.4  | 161.7  |
| 142.6  | 140.7  | 153.6  | 128.9  | 177.6  | 181.8  | 171.1  | 196.4  | 131.9  |
| 330.5  | 326.4  | 368.6  | 271.8  | 809.7  | 799.1  | 840.6  | 962.9  | 654.5  |
| 10.6   | 4.3    | 19.7   | 10.2   | 47.3   | 52.1   | 46.1   | 62.1   | 13.8   |
| 924.6  | 778.9  | 1458.0 | 822.2  | 1518.6 | 1120.6 | 1384.4 | 1740.0 | 1949.7 |
| 99.0   | 109.9  | 193.4  | 82.3   | 218.8  | 170.5  | 239.4  | 238.0  | 431.5  |
| 178.7  | 203.7  | 141.3  | 147.4  | 327.9  | 400.3  | 341.9  | 333.8  | 314.0  |
| 194.1  | 222.5  | 401.6  | 236.0  | 513.7  | 366.8  | 543.8  | 613.4  | 799.4  |
| 143.9  | 120.4  | 219.7  | 133.8  | 376.6  | 431.6  | 383.3  | 432.9  | 286.2  |
| 398.8  | 396.1  | 546.3  | 489.8  | 605.2  | 435.9  | 545.5  | 678.7  | 478.8  |
| 285.8  | 261.7  | 322.3  | 233.7  | 307.5  | 546.3  | 371.0  | 364.6  | 579.9  |
| 300.6  | 259.2  | 341.0  | 286.6  | 321.7  | 597.5  | 412.0  | 365.4  | 799.7  |
| 384.1  | 411.2  | 415.0  | 331.8  | 487.1  | 575.2  | 610.3  | 697.6  | 759.7  |

|        |        |        |        |        |        |        |        |        |
|--------|--------|--------|--------|--------|--------|--------|--------|--------|
| 21.9   | 22.8   | 20.9   | 10.0   | 32.4   | 42.2   | 40.9   | 62.2   | 60.9   |
| 2461.6 | 2150.0 | 2975.1 | 2206.0 | 890.9  | 1039.7 | 1071.7 | 1020.5 | 800.0  |
| 202.5  | 175.7  | 309.7  | 182.0  | 331.3  | 228.1  | 337.3  | 390.5  | 367.4  |
| 149.8  | 143.0  | 218.7  | 130.6  | 228.2  | 215.9  | 245.4  | 263.3  | 294.2  |
| 188.3  | 200.5  | 280.3  | 235.9  | 52.8   | 56.8   | 70.8   | 98.7   | 97.8   |
| 412.7  | 389.9  | 599.3  | 405.1  | 406.6  | 352.3  | 394.2  | 489.0  | 865.4  |
| 296.6  | 256.5  | 312.3  | 281.8  | 158.3  | 199.8  | 169.9  | 196.7  | 175.7  |
| 174.7  | 186.5  | 249.0  | 163.4  | 430.4  | 324.3  | 383.1  | 545.4  | 620.8  |
| 733.1  | 689.5  | 1073.7 | 723.9  | 1690.1 | 1761.1 | 1846.1 | 1867.0 | 1552.9 |
| 158.0  | 165.1  | 329.0  | 112.8  | 492.6  | 347.9  | 373.2  | 542.2  | 706.6  |
| 30.0   | 23.8   | 40.7   | 23.6   | 244.0  | 216.8  | 199.5  | 237.5  | 260.8  |
| 69.4   | 66.5   | 69.9   | 65.3   | 159.0  | 136.5  | 239.5  | 213.4  | 77.7   |
| 69.4   | 79.5   | 68.7   | 66.9   | 91.6   | 99.3   | 87.9   | 93.9   | 48.9   |
| 493.9  | 457.2  | 626.5  | 437.1  | 534.2  | 490.6  | 551.9  | 573.6  | 1062.7 |
| 183.1  | 198.8  | 159.3  | 192.8  | 654.3  | 633.2  | 651.6  | 766.9  | 680.1  |
| 136.5  | 127.4  | 174.2  | 144.2  | 328.2  | 273.8  | 268.6  | 312.2  | 281.1  |
| 14.3   | 16.1   | 25.5   | 16.3   | 5.8    | 7.3    | 6.0    | 16.4   | 12.5   |
| 312.4  | 259.8  | 306.8  | 213.5  | 464.9  | 531.5  | 509.6  | 560.8  | 446.6  |
| 238.0  | 221.9  | 389.4  | 215.4  | 560.1  | 530.8  | 535.9  | 617.6  | 1203.1 |
| 143.9  | 160.2  | 285.4  | 178.9  | 118.9  | 121.2  | 127.5  | 115.7  | 89.1   |
| 17.1   | 14.5   | 28.3   | 21.5   | 47.4   | 24.2   | 21.4   | 21.1   | 27.0   |
| 385.7  | 358.9  | 345.1  | 281.8  | 81.9   | 59.9   | 69.6   | 93.6   | 119.1  |
| 490.6  | 483.6  | 703.1  | 464.0  | 163.2  | 202.7  | 180.1  | 179.1  | 219.2  |
| 14.9   | 18.3   | 12.3   | 17.0   | 18.4   | 9.4    | 13.9   | 26.1   | 2.9    |
| 149.5  | 141.9  | 240.5  | 166.9  | 96.6   | 78.6   | 92.5   | 98.0   | 242.0  |
| 93.9   | 81.9   | 81.8   | 85.5   | 118.3  | 148.6  | 125.8  | 158.3  | 218.7  |
| 33.3   | 45.0   | 62.0   | 37.0   | 48.7   | 54.2   | 34.9   | 67.5   | 48.2   |
| 168.3  | 173.2  | 211.4  | 152.2  | 96.8   | 131.5  | 104.9  | 132.6  | 102.0  |
| 269.4  | 279.0  | 234.2  | 148.4  | 427.0  | 312.0  | 339.0  | 507.5  | 353.4  |
| 98.7   | 114.1  | 66.6   | 73.4   | 183.7  | 231.5  | 204.5  | 235.1  | 126.3  |
| 146.9  | 123.5  | 200.4  | 134.3  | 120.5  | 137.5  | 109.1  | 160.7  | 164.6  |
| 201.5  | 193.0  | 224.4  | 185.7  | 239.9  | 205.6  | 199.7  | 251.2  | 153.2  |
| 177.6  | 171.4  | 283.1  | 172.5  | 181.6  | 147.7  | 180.7  | 213.0  | 415.3  |
| 208.0  | 213.7  | 206.8  | 210.7  | 361.8  | 386.3  | 364.9  | 470.2  | 268.2  |
| 134.5  | 140.9  | 150.7  | 127.5  | 903.6  | 763.1  | 1170.1 | 1163.8 | 117.4  |
| 150.0  | 162.0  | 145.5  | 151.4  | 150.4  | 120.5  | 77.0   | 120.4  | 69.7   |
| 119.4  | 116.1  | 123.7  | 110.1  | 162.1  | 157.1  | 150.1  | 175.4  | 107.6  |
| 178.1  | 144.2  | 262.7  | 166.3  | 214.0  | 295.9  | 199.7  | 200.7  | 320.2  |
| 149.2  | 152.4  | 185.2  | 142.5  | 147.1  | 144.5  | 157.0  | 206.1  | 209.8  |
| 112.3  | 94.4   | 79.3   | 95.6   | 80.4   | 100.7  | 75.2   | 106.5  | 160.7  |
| 38.5   | 32.6   | 31.8   | 27.4   | 84.4   | 57.2   | 92.2   | 92.0   | 87.6   |
| 181.4  | 156.3  | 229.7  | 172.8  | 205.7  | 288.1  | 282.8  | 272.6  | 213.2  |
| 502.4  | 493.8  | 448.9  | 471.3  | 197.0  | 165.0  | 177.0  | 274.9  | 171.3  |
| 94.9   | 98.3   | 156.1  | 125.9  | 150.0  | 146.0  | 172.4  | 192.7  | 70.8   |
| 242.0  | 208.1  | 399.4  | 250.6  | 316.6  | 253.5  | 314.2  | 351.7  | 430.3  |
| 1002.5 | 1040.3 | 1878.4 | 1088.1 | 742.4  | 834.4  | 931.2  | 905.0  | 435.9  |
| 117.5  | 121.2  | 107.1  | 95.9   | 157.8  | 201.8  | 190.9  | 168.3  | 113.9  |
| 80.1   | 86.5   | 79.6   | 90.2   | 167.3  | 162.8  | 188.6  | 206.5  | 165.0  |
| 191.1  | 206.6  | 205.6  | 175.2  | 276.0  | 257.0  | 313.3  | 321.2  | 451.3  |
| 303.8  | 257.9  | 403.4  | 306.0  | 328.6  | 349.1  | 358.1  | 361.7  | 275.0  |
| 653.3  | 692.2  | 509.4  | 531.5  | 164.9  | 226.8  | 215.1  | 238.4  | 216.5  |
| 101.0  | 85.1   | 102.6  | 80.3   | 142.7  | 160.8  | 139.9  | 173.2  | 147.1  |
| 92.3   | 95.9   | 87.8   | 65.6   | 294.1  | 313.3  | 295.8  | 334.8  | 189.1  |

|        |        |        |        |        |        |        |        |        |
|--------|--------|--------|--------|--------|--------|--------|--------|--------|
| 251.4  | 246.1  | 461.6  | 255.1  | 574.6  | 505.9  | 584.6  | 630.0  | 613.0  |
| 68.1   | 47.0   | 58.5   | 60.0   | 40.6   | 51.8   | 58.2   | 59.6   | 47.5   |
| 339.7  | 318.1  | 366.9  | 248.7  | 51.1   | 43.2   | 49.9   | 30.8   | 70.8   |
| 337.8  | 313.7  | 455.5  | 334.1  | 734.1  | 667.6  | 796.2  | 920.7  | 794.8  |
| 334.8  | 291.5  | 620.9  | 281.0  | 1058.7 | 797.1  | 986.7  | 1052.5 | 952.0  |
| 677.3  | 638.9  | 932.8  | 657.7  | 387.1  | 503.8  | 377.5  | 454.4  | 521.3  |
| 217.7  | 193.1  | 279.1  | 214.8  | 257.0  | 338.0  | 306.2  | 333.8  | 319.1  |
| 868.6  | 877.6  | 1032.5 | 961.8  | 733.5  | 912.4  | 744.0  | 802.5  | 236.4  |
| 134.4  | 112.2  | 191.4  | 117.5  | 625.6  | 755.6  | 688.1  | 565.4  | 117.3  |
| 157.5  | 149.8  | 140.7  | 126.9  | 190.7  | 242.3  | 228.2  | 217.0  | 131.9  |
| 46.8   | 43.6   | 27.4   | 38.3   | 35.3   | 42.3   | 39.9   | 44.3   | 39.4   |
| 22.0   | 27.1   | 46.0   | 23.8   | 1227.1 | 1397.9 | 1396.0 | 1477.9 | 15.7   |
| 285.9  | 280.5  | 279.4  | 278.4  | 374.4  | 464.2  | 397.4  | 453.9  | 451.7  |
| 52.4   | 44.6   | 48.7   | 28.7   | 172.0  | 209.7  | 225.2  | 218.5  | 149.8  |
| 22.7   | 21.7   | 38.8   | 23.0   | 33.1   | 23.5   | 37.7   | 39.4   | 14.3   |
| 231.0  | 256.7  | 242.0  | 234.9  | 202.9  | 251.8  | 215.9  | 255.6  | 235.1  |
| 88.8   | 75.3   | 137.6  | 79.5   | 186.9  | 169.8  | 212.4  | 227.1  | 509.2  |
| 463.4  | 416.9  | 766.6  | 567.6  | 963.4  | 958.7  | 964.1  | 1122.6 | 592.8  |
| 284.0  | 307.8  | 534.7  | 282.9  | 600.4  | 546.8  | 655.5  | 759.8  | 949.6  |
| 881.4  | 860.2  | 1002.1 | 902.2  | 1687.1 | 1486.2 | 1647.0 | 1850.0 | 1637.1 |
| 202.4  | 196.4  | 228.9  | 151.8  | 304.0  | 323.5  | 403.2  | 391.0  | 258.1  |
| 166.6  | 175.3  | 232.3  | 158.8  | 153.8  | 170.8  | 121.7  | 158.0  | 205.2  |
| 190.4  | 196.2  | 330.7  | 232.2  | 551.5  | 431.8  | 568.9  | 649.1  | 773.4  |
| 106.9  | 114.6  | 114.3  | 85.6   | 74.2   | 88.7   | 103.0  | 114.1  | 72.4   |
| 2267.1 | 2357.7 | 2838.4 | 2443.5 | 2227.0 | 2091.2 | 2199.5 | 2462.5 | 1515.3 |
| 1.3    | 2.1    | 2.6    | 1.4    | 3.1    | 4.6    | 8.4    | 4.7    | 2.9    |
| 4.2    | 6.1    | 5.9    | 5.3    | 5.9    | 2.8    | 8.9    | 11.0   | 4.5    |
| 195.0  | 184.5  | 170.7  | 186.7  | 330.5  | 245.4  | 512.3  | 742.5  | 349.6  |
| 346.1  | 374.2  | 196.5  | 317.7  | 123.1  | 230.9  | 140.7  | 170.7  | 118.4  |
| 192.0  | 169.6  | 199.9  | 154.3  | 565.9  | 682.3  | 523.5  | 658.5  | 709.6  |
| 169.8  | 184.0  | 202.8  | 159.8  | 460.7  | 511.1  | 504.4  | 456.4  | 551.9  |
| 284.4  | 257.8  | 628.8  | 382.5  | 9.0    | 6.6    | 4.3    | 6.6    | 664.3  |
| 31.8   | 33.3   | 46.3   | 36.3   | 57.0   | 77.1   | 52.3   | 70.9   | 141.2  |
| 204.3  | 216.8  | 182.8  | 187.5  | 46.5   | 57.2   | 51.5   | 83.8   | 51.7   |
| 753.0  | 657.0  | 905.4  | 673.7  | 1642.9 | 1335.5 | 1987.4 | 1934.7 | 774.6  |
| 365.0  | 389.7  | 417.1  | 356.0  | 263.8  | 347.6  | 254.6  | 274.2  | 457.3  |
| 30.9   | 29.3   | 58.6   | 29.8   | 42.9   | 44.0   | 47.6   | 50.9   | 121.0  |
| 34.0   | 44.9   | 34.5   | 42.3   | 210.0  | 230.3  | 212.7  | 228.7  | 139.0  |
| 149.6  | 148.1  | 226.9  | 190.1  | 442.0  | 468.3  | 453.6  | 519.3  | 942.0  |
| 1107.5 | 1096.2 | 1407.6 | 1130.5 | 1892.5 | 1873.3 | 1972.4 | 1986.5 | 1952.7 |
| 149.1  | 150.6  | 157.3  | 136.4  | 154.0  | 222.0  | 149.8  | 166.9  | 376.4  |
| 4.1    | 4.0    | 10.3   | 6.6    | 12.1   | 24.5   | 24.2   | 16.0   | 11.5   |
| 46.9   | 45.0   | 74.0   | 49.8   | 217.8  | 220.2  | 277.8  | 225.0  | 114.0  |
| 114.0  | 145.0  | 159.0  | 118.3  | 135.0  | 186.1  | 138.1  | 198.9  | 55.3   |
| 125.9  | 105.4  | 111.8  | 93.2   | 95.0   | 118.8  | 111.5  | 104.9  | 208.5  |
| 113.2  | 157.1  | 243.4  | 113.1  | 440.2  | 383.3  | 416.6  | 463.0  | 502.5  |
| 37.3   | 34.7   | 33.1   | 29.8   | 34.4   | 44.2   | 32.5   | 39.6   | 113.8  |
| 318.8  | 306.3  | 235.6  | 273.1  | 249.2  | 352.1  | 259.0  | 318.6  | 215.5  |
| 310.4  | 309.3  | 255.2  | 282.0  | 378.8  | 471.2  | 394.3  | 484.3  | 669.6  |
| 107.8  | 109.1  | 169.2  | 104.2  | 116.9  | 101.0  | 115.4  | 123.0  | 184.3  |
| 822.1  | 700.3  | 1671.4 | 1103.7 | 845.2  | 584.9  | 852.4  | 944.3  | 965.3  |
| 829.2  | 735.7  | 1409.8 | 633.3  | 424.8  | 556.0  | 432.5  | 486.2  | 93.7   |
| 771.0  | 673.1  | 1096.3 | 810.3  | 1428.1 | 1547.2 | 1373.9 | 1525.4 | 2156.6 |

|        |        |        |        |        |        |        |        |        |
|--------|--------|--------|--------|--------|--------|--------|--------|--------|
| 204.1  | 173.2  | 384.7  | 218.2  | 302.1  | 232.0  | 267.9  | 296.2  | 483.6  |
| 285.7  | 250.6  | 494.0  | 282.7  | 583.6  | 541.6  | 642.2  | 642.4  | 1037.6 |
| 77.5   | 77.6   | 97.6   | 67.2   | 182.0  | 245.4  | 239.2  | 230.1  | 118.9  |
| 276.8  | 242.0  | 435.1  | 250.2  | 679.1  | 475.1  | 682.4  | 763.6  | 316.8  |
| 337.8  | 303.8  | 401.2  | 323.0  | 90.8   | 102.1  | 92.8   | 104.4  | 78.4   |
| 333.0  | 350.4  | 416.6  | 339.9  | 85.0   | 88.9   | 107.8  | 159.3  | 55.8   |
| 608.3  | 472.4  | 636.0  | 479.8  | 83.9   | 74.8   | 91.5   | 135.0  | 128.3  |
| 72.6   | 66.0   | 101.8  | 72.3   | 97.2   | 81.3   | 88.6   | 115.0  | 185.6  |
| 227.9  | 257.6  | 188.4  | 200.9  | 408.9  | 574.0  | 424.1  | 407.6  | 149.0  |
| 165.1  | 173.6  | 123.2  | 150.9  | 181.7  | 195.3  | 197.9  | 210.5  | 122.1  |
| 418.4  | 379.8  | 807.2  | 461.5  | 388.7  | 312.9  | 327.1  | 387.3  | 379.4  |
| 1231.0 | 1362.2 | 977.2  | 1110.5 | 174.1  | 170.7  | 166.8  | 219.7  | 138.3  |
| 92.4   | 90.3   | 118.0  | 90.6   | 75.3   | 70.5   | 65.8   | 82.2   | 147.7  |
| 72.7   | 60.0   | 93.1   | 64.9   | 46.8   | 40.9   | 40.5   | 51.9   | 66.2   |
| 89.9   | 94.6   | 76.1   | 93.9   | 34.3   | 38.2   | 24.9   | 40.6   | 53.7   |
| 230.5  | 211.8  | 269.9  | 170.5  | 272.3  | 293.8  | 259.3  | 306.5  | 327.4  |
| 312.7  | 290.3  | 506.5  | 321.2  | 801.7  | 938.3  | 818.8  | 833.5  | 988.1  |
| 152.7  | 123.5  | 142.4  | 143.4  | 144.3  | 68.0   | 125.0  | 138.1  | 169.6  |
| 1718.8 | 1672.8 | 1823.4 | 1643.4 | 370.8  | 354.7  | 379.6  | 415.8  | 381.2  |
| 114.0  | 115.3  | 190.6  | 118.3  | 141.3  | 137.6  | 160.8  | 187.3  | 226.7  |
| 190.8  | 152.3  | 328.6  | 177.9  | 435.3  | 370.2  | 512.0  | 540.0  | 675.7  |
| 81.5   | 79.6   | 96.6   | 72.8   | 162.5  | 132.5  | 144.8  | 159.7  | 121.5  |
| 162.3  | 166.8  | 126.9  | 110.0  | 338.7  | 251.0  | 339.2  | 358.3  | 285.8  |
| 217.1  | 211.0  | 244.7  | 240.6  | 382.1  | 406.9  | 376.2  | 415.2  | 436.3  |
| 557.6  | 546.5  | 726.8  | 702.9  | 425.0  | 380.0  | 404.3  | 429.2  | 480.2  |
| 78.1   | 66.4   | 108.1  | 71.6   | 83.7   | 79.8   | 82.3   | 107.8  | 78.4   |
| 98.2   | 94.9   | 110.3  | 67.0   | 143.6  | 154.9  | 132.8  | 113.9  | 198.9  |
| 50.9   | 39.2   | 55.6   | 49.1   | 53.8   | 62.4   | 41.9   | 45.4   | 26.4   |
| 75.8   | 68.9   | 101.2  | 77.1   | 86.2   | 78.7   | 70.5   | 95.3   | 136.8  |
| 103.6  | 108.7  | 134.7  | 84.4   | 86.1   | 84.9   | 97.4   | 120.9  | 148.5  |
| 148.5  | 118.3  | 352.9  | 198.1  | 414.0  | 569.7  | 399.5  | 460.8  | 533.1  |
| 320.8  | 284.6  | 473.4  | 297.8  | 348.5  | 383.9  | 385.4  | 409.6  | 459.8  |
| 149.9  | 151.7  | 173.4  | 145.6  | 203.1  | 176.9  | 215.1  | 257.6  | 197.4  |
| 111.7  | 79.6   | 205.5  | 100.6  | 318.0  | 288.5  | 288.2  | 280.1  | 654.3  |
| 115.9  | 108.7  | 139.0  | 91.6   | 155.4  | 101.2  | 146.2  | 175.8  | 188.0  |
| 332.1  | 327.3  | 336.5  | 295.5  | 110.9  | 134.9  | 129.0  | 134.3  | 126.3  |
| 120.5  | 170.4  | 116.2  | 173.0  | 124.9  | 167.6  | 126.7  | 155.2  | 183.2  |
| 328.6  | 351.4  | 351.2  | 288.3  | 279.8  | 283.9  | 264.1  | 260.7  | 316.1  |
| 263.4  | 315.1  | 175.6  | 187.1  | 488.3  | 459.5  | 494.3  | 581.7  | 672.8  |
| 132.1  | 129.4  | 181.1  | 133.9  | 292.5  | 346.3  | 338.5  | 359.0  | 263.8  |
| 139.5  | 117.3  | 221.5  | 157.6  | 189.8  | 124.2  | 170.7  | 230.8  | 81.2   |
| 82.6   | 95.6   | 102.1  | 108.0  | 55.2   | 78.8   | 187.1  | 78.0   | 160.9  |
| 282.3  | 291.5  | 374.1  | 266.1  | 230.7  | 211.3  | 234.3  | 268.4  | 163.2  |
| 281.4  | 280.6  | 303.5  | 245.9  | 292.9  | 261.5  | 313.1  | 333.9  | 212.0  |
| 376.4  | 367.8  | 349.6  | 319.5  | 114.0  | 121.9  | 120.5  | 128.6  | 241.1  |
| 3.8    | 4.1    | 2.9    | 1.7    | 0.3    | 0.5    | 1.8    | 0.3    | 0.4    |
| 337.8  | 211.2  | 983.1  | 301.2  | 1557.5 | 1135.5 | 1441.2 | 1767.7 | 1006.1 |
| 95.3   | 90.1   | 100.7  | 77.6   | 367.5  | 398.4  | 333.7  | 395.7  | 193.6  |
| 38.4   | 38.5   | 32.1   | 42.3   | 146.0  | 121.3  | 153.7  | 153.5  | 325.7  |
| 285.5  | 316.0  | 354.6  | 338.7  | 466.5  | 461.5  | 431.3  | 507.0  | 379.6  |
| 224.8  | 218.3  | 142.0  | 191.1  | 91.9   | 128.7  | 108.2  | 109.6  | 3.5    |
| 131.9  | 140.5  | 152.0  | 132.9  | 226.2  | 294.9  | 236.8  | 271.2  | 182.0  |
| 89.7   | 94.8   | 112.2  | 110.7  | 76.5   | 96.3   | 77.0   | 105.2  | 273.6  |

|       |       |        |       |        |        |        |        |        |
|-------|-------|--------|-------|--------|--------|--------|--------|--------|
| 511.3 | 499.0 | 584.6  | 525.2 | 456.0  | 541.1  | 523.5  | 561.0  | 610.6  |
| 68.9  | 51.3  | 90.6   | 62.6  | 184.5  | 196.4  | 146.5  | 158.4  | 36.6   |
| 31.8  | 24.0  | 58.6   | 32.9  | 32.5   | 80.6   | 64.0   | 59.0   | 82.4   |
| 35.8  | 30.1  | 38.3   | 33.0  | 125.9  | 150.9  | 127.0  | 140.5  | 112.5  |
| 77.2  | 68.8  | 86.3   | 81.8  | 175.8  | 224.8  | 176.3  | 179.1  | 158.0  |
| 27.3  | 28.9  | 35.3   | 24.6  | 31.0   | 26.8   | 30.9   | 23.3   | 46.4   |
| 168.6 | 166.5 | 161.8  | 165.2 | 141.2  | 154.6  | 137.5  | 194.9  | 126.9  |
| 718.4 | 604.8 | 873.8  | 678.0 | 769.6  | 751.3  | 949.3  | 931.9  | 1071.3 |
| 580.2 | 530.3 | 634.0  | 614.8 | 515.8  | 670.6  | 608.1  | 636.6  | 1070.7 |
| 268.5 | 280.0 | 483.5  | 314.0 | 647.6  | 483.0  | 599.6  | 622.2  | 962.4  |
| 429.2 | 339.6 | 452.9  | 519.5 | 21.5   | 18.3   | 92.9   | 43.1   | 65.0   |
| 86.7  | 74.3  | 75.3   | 66.2  | 69.2   | 96.9   | 82.5   | 91.3   | 127.0  |
| 234.3 | 197.0 | 433.4  | 252.9 | 756.9  | 830.8  | 760.3  | 838.1  | 381.8  |
| 140.6 | 117.6 | 198.5  | 109.8 | 88.3   | 94.3   | 111.3  | 117.0  | 106.6  |
| 612.1 | 534.5 | 646.7  | 590.7 | 626.0  | 628.8  | 635.3  | 620.9  | 559.2  |
| 84.1  | 72.6  | 152.9  | 64.5  | 287.6  | 186.1  | 216.5  | 310.1  | 266.6  |
| 79.4  | 72.3  | 129.3  | 70.1  | 107.6  | 102.2  | 109.3  | 130.4  | 187.0  |
| 379.5 | 297.3 | 737.0  | 307.1 | 1658.6 | 1127.0 | 1752.3 | 2043.9 | 1599.1 |
| 507.6 | 371.5 | 859.9  | 439.1 | 488.4  | 480.3  | 458.9  | 537.7  | 401.5  |
| 132.8 | 120.7 | 193.5  | 141.0 | 258.5  | 220.8  | 258.9  | 283.5  | 243.0  |
| 121.8 | 94.2  | 149.4  | 137.1 | 336.3  | 248.7  | 338.8  | 423.6  | 188.0  |
| 213.2 | 200.9 | 278.5  | 240.8 | 595.4  | 404.7  | 622.3  | 704.9  | 382.5  |
| 856.5 | 744.0 | 959.2  | 748.7 | 465.8  | 699.3  | 581.1  | 606.3  | 450.7  |
| 624.8 | 582.9 | 740.8  | 483.8 | 330.5  | 466.9  | 368.7  | 432.2  | 374.7  |
| 53.1  | 53.9  | 37.4   | 43.8  | 46.9   | 51.5   | 74.4   | 57.3   | 80.6   |
| 193.7 | 192.4 | 194.5  | 165.1 | 180.7  | 216.4  | 216.0  | 212.2  | 140.0  |
| 134.5 | 114.6 | 227.0  | 154.5 | 352.3  | 296.6  | 337.9  | 392.8  | 263.9  |
| 322.9 | 321.9 | 487.6  | 268.1 | 307.1  | 414.1  | 323.1  | 366.2  | 794.2  |
| 385.2 | 367.0 | 519.8  | 324.8 | 883.3  | 623.1  | 837.4  | 1040.5 | 668.4  |
| 287.5 | 233.8 | 349.8  | 204.4 | 456.7  | 451.3  | 452.5  | 533.7  | 455.1  |
| 21.1  | 18.6  | 25.3   | 19.0  | 84.7   | 103.7  | 92.6   | 82.9   | 83.2   |
| 844.4 | 729.0 | 1261.1 | 771.7 | 1330.8 | 1284.7 | 1345.0 | 1452.8 | 2824.2 |
| 263.8 | 311.1 | 195.3  | 233.7 | 328.8  | 355.7  | 393.3  | 378.9  | 208.9  |
| 364.6 | 364.7 | 446.2  | 316.0 | 467.9  | 497.8  | 463.1  | 493.7  | 258.8  |
| 300.8 | 317.8 | 396.1  | 305.6 | 272.6  | 227.3  | 256.6  | 329.3  | 225.0  |
| 109.7 | 121.6 | 76.0   | 87.5  | 125.4  | 142.9  | 123.5  | 154.2  | 107.5  |
| 105.3 | 102.2 | 347.2  | 76.7  | 974.3  | 689.4  | 800.8  | 995.2  | 1154.1 |
| 116.2 | 90.7  | 132.2  | 96.3  | 223.6  | 211.4  | 205.6  | 245.6  | 214.2  |
| 16.1  | 28.8  | 30.8   | 16.9  | 74.6   | 62.9   | 69.3   | 66.6   | 75.6   |
| 65.4  | 76.2  | 52.1   | 66.3  | 201.3  | 192.2  | 219.5  | 211.4  | 109.2  |
| 42.6  | 48.7  | 36.9   | 45.3  | 5.0    | 3.9    | 3.9    | 5.6    | 48.8   |
| 68.3  | 71.2  | 87.7   | 92.3  | 200.3  | 224.8  | 207.2  | 201.5  | 471.7  |
| 10.9  | 6.9   | 14.7   | 10.0  | 25.0   | 22.5   | 19.3   | 21.8   | 42.8   |
| 567.3 | 509.9 | 735.2  | 583.4 | 491.5  | 454.2  | 551.8  | 612.7  | 462.2  |
| 231.8 | 194.6 | 440.4  | 234.5 | 571.5  | 549.2  | 572.7  | 708.9  | 674.8  |
| 267.1 | 269.8 | 330.1  | 287.0 | 830.4  | 804.9  | 871.4  | 945.5  | 1240.0 |
| 247.5 | 264.7 | 328.0  | 272.3 | 662.8  | 633.0  | 726.0  | 799.3  | 1261.5 |
| 146.3 | 135.8 | 138.7  | 145.0 | 98.2   | 120.9  | 102.1  | 114.2  | 146.6  |
| 270.0 | 245.9 | 331.6  | 276.4 | 562.9  | 386.5  | 587.4  | 627.2  | 712.1  |
| 326.4 | 290.6 | 468.8  | 306.0 | 452.2  | 311.6  | 449.3  | 644.5  | 479.0  |
| 32.8  | 29.2  | 60.3   | 25.1  | 21.5   | 18.6   | 20.8   | 41.9   | 38.2   |
| 7.9   | 12.1  | 12.3   | 10.9  | 7.6    | 6.7    | 4.5    | 14.8   | 16.1   |
| 287.4 | 271.5 | 363.4  | 252.9 | 291.2  | 291.3  | 303.2  | 381.8  | 265.5  |

|        |        |        |        |        |        |        |        |        |
|--------|--------|--------|--------|--------|--------|--------|--------|--------|
| 25.3   | 24.5   | 53.9   | 23.2   | 183.2  | 118.8  | 162.1  | 220.2  | 466.6  |
| 189.9  | 299.7  | 116.6  | 216.9  | 179.8  | 165.0  | 185.2  | 232.5  | 196.5  |
| 404.5  | 434.2  | 467.8  | 406.3  | 350.3  | 333.5  | 369.9  | 396.8  | 401.7  |
| 1241.5 | 1191.6 | 1554.5 | 1447.1 | 1029.4 | 771.8  | 1166.2 | 1178.1 | 2241.0 |
| 619.0  | 643.0  | 385.4  | 474.3  | 678.8  | 766.0  | 823.2  | 802.3  | 475.8  |
| 546.0  | 526.7  | 686.0  | 538.9  | 226.2  | 256.7  | 229.7  | 251.2  | 129.0  |
| 44.9   | 49.7   | 29.5   | 53.7   | 94.2   | 142.5  | 93.6   | 99.2   | 76.1   |
| 99.1   | 125.7  | 142.5  | 133.0  | 170.3  | 172.4  | 236.8  | 218.2  | 172.7  |
| 27.1   | 23.8   | 39.9   | 30.4   | 38.6   | 42.4   | 44.1   | 57.4   | 34.8   |
| 143.6  | 144.5  | 183.6  | 88.9   | 949.4  | 777.7  | 903.9  | 885.8  | 1045.8 |
| 66.4   | 73.4   | 98.8   | 70.1   | 100.3  | 110.8  | 104.5  | 100.6  | 182.8  |
| 131.3  | 136.2  | 77.1   | 73.7   | 124.3  | 121.8  | 130.4  | 149.5  | 48.1   |
| 368.4  | 362.3  | 405.0  | 486.0  | 157.8  | 133.1  | 163.2  | 195.0  | 106.1  |
| 76.2   | 73.9   | 104.3  | 72.0   | 95.6   | 122.7  | 114.4  | 124.2  | 114.5  |
| 194.8  | 198.5  | 243.9  | 208.7  | 331.9  | 345.1  | 325.6  | 309.7  | 255.9  |
| 164.7  | 158.0  | 174.8  | 139.2  | 221.4  | 218.6  | 252.9  | 267.3  | 291.0  |
| 190.9  | 198.2  | 193.5  | 147.1  | 542.7  | 559.9  | 757.8  | 588.9  | 621.4  |
| 82.8   | 78.1   | 171.1  | 69.2   | 259.8  | 213.7  | 207.5  | 286.7  | 249.2  |
| 53.4   | 48.4   | 44.4   | 60.9   | 59.0   | 102.8  | 68.2   | 62.0   | 116.0  |
| 14.3   | 15.6   | 3.7    | 14.9   | 5.8    | 22.2   | 15.2   | 12.6   | 27.6   |
| 344.9  | 379.3  | 440.9  | 353.3  | 961.8  | 1043.6 | 1067.9 | 1105.0 | 1289.8 |
| 3.9    | 5.4    | 3.6    | 2.2    | 1.3    | 1.1    | 7.8    | 4.7    | 13.6   |
| 68.8   | 64.8   | 90.2   | 63.7   | 209.7  | 205.9  | 250.3  | 276.1  | 241.5  |
| 7.4    | 6.3    | 7.8    | 6.7    | 32.9   | 16.4   | 29.9   | 38.9   | 56.9   |
| 248.0  | 236.2  | 285.6  | 238.9  | 150.5  | 148.2  | 151.0  | 172.3  | 151.2  |
| 71.5   | 86.4   | 71.1   | 62.1   | 142.0  | 170.9  | 157.7  | 164.3  | 287.0  |
| 258.6  | 273.1  | 193.3  | 279.3  | 203.4  | 290.3  | 293.8  | 254.0  | 370.2  |
| 54.7   | 47.8   | 50.3   | 54.0   | 11.1   | 12.9   | 13.5   | 18.2   | 31.2   |
| 73.5   | 98.3   | 74.1   | 66.6   | 67.5   | 116.7  | 78.6   | 71.2   | 46.1   |
| 90.4   | 89.2   | 114.5  | 68.2   | 150.9  | 157.9  | 174.9  | 195.8  | 652.9  |
| 171.4  | 156.2  | 123.0  | 141.3  | 206.6  | 290.9  | 230.7  | 264.3  | 114.5  |
| 203.8  | 215.3  | 279.5  | 216.4  | 319.7  | 352.0  | 314.0  | 347.3  | 440.4  |
| 111.4  | 117.6  | 169.6  | 101.9  | 130.5  | 113.8  | 170.3  | 162.8  | 579.0  |
| 169.0  | 194.8  | 162.9  | 175.3  | 195.4  | 191.6  | 232.8  | 227.7  | 159.9  |
| 253.6  | 271.7  | 221.8  | 270.4  | 77.0   | 91.7   | 80.6   | 100.2  | 131.1  |
| 44.5   | 43.6   | 70.3   | 51.4   | 44.6   | 39.4   | 61.3   | 58.2   | 194.7  |
| 126.0  | 98.5   | 100.6  | 109.6  | 78.9   | 133.6  | 92.0   | 83.2   | 102.8  |
| 1693.1 | 1461.6 | 2009.7 | 1464.1 | 274.8  | 252.7  | 284.3  | 372.9  | 150.4  |
| 208.5  | 219.5  | 340.9  | 259.3  | 161.7  | 160.7  | 152.0  | 192.6  | 271.6  |
| 125.6  | 142.2  | 172.1  | 159.8  | 213.7  | 120.1  | 208.5  | 258.2  | 150.4  |
| 131.9  | 139.9  | 139.3  | 117.1  | 244.8  | 192.2  | 296.7  | 333.1  | 520.6  |
| 93.6   | 75.2   | 126.5  | 78.8   | 242.1  | 285.2  | 202.7  | 236.7  | 41.3   |
| 370.1  | 397.9  | 263.9  | 339.1  | 301.1  | 326.7  | 357.6  | 371.0  | 174.2  |
| 240.8  | 220.9  | 298.7  | 208.8  | 599.2  | 529.3  | 664.5  | 773.0  | 391.8  |
| 144.1  | 109.8  | 280.7  | 158.5  | 351.4  | 347.7  | 328.8  | 355.2  | 1472.4 |
| 258.7  | 278.0  | 257.3  | 211.7  | 226.5  | 316.1  | 246.3  | 268.4  | 250.3  |
| 406.5  | 354.9  | 466.2  | 311.4  | 251.7  | 203.3  | 277.7  | 334.8  | 325.7  |
| 96.8   | 94.4   | 105.9  | 80.0   | 151.4  | 87.0   | 125.2  | 174.5  | 131.8  |
| 44.0   | 49.2   | 36.4   | 25.3   | 75.1   | 210.4  | 94.1   | 103.9  | 48.4   |
| 278.6  | 303.7  | 305.8  | 294.8  | 367.8  | 466.2  | 492.0  | 485.9  | 489.3  |
| 140.7  | 117.4  | 256.9  | 152.1  | 243.8  | 249.5  | 249.0  | 271.7  | 624.0  |
| 781.9  | 728.7  | 975.6  | 756.8  | 693.4  | 969.1  | 841.4  | 890.1  | 1049.2 |
| 467.3  | 453.5  | 664.6  | 565.1  | 116.6  | 107.6  | 105.0  | 138.7  | 116.1  |



|       |       |        |       |       |       |       |       |        |
|-------|-------|--------|-------|-------|-------|-------|-------|--------|
| 4.7   | 6.1   | 14.2   | 3.9   | 178.2 | 223.0 | 179.7 | 207.9 | 157.7  |
| 57.2  | 29.0  | 221.1  | 149.7 | 7.6   | 3.5   | 6.3   | 13.9  | 7.9    |
| 67.3  | 61.7  | 71.1   | 45.9  | 31.4  | 26.9  | 37.7  | 35.2  | 111.6  |
| 532.7 | 504.4 | 548.1  | 557.3 | 778.9 | 905.4 | 669.4 | 777.9 | 882.0  |
| 51.2  | 54.7  | 82.0   | 65.9  | 166.6 | 346.1 | 186.8 | 201.6 | 52.6   |
| 164.0 | 160.6 | 249.6  | 184.6 | 110.4 | 126.8 | 129.6 | 112.4 | 144.2  |
| 153.6 | 143.8 | 378.5  | 144.6 | 728.4 | 324.8 | 512.3 | 646.1 | 802.5  |
| 193.7 | 208.6 | 503.6  | 182.0 | 882.8 | 430.3 | 662.8 | 878.5 | 799.6  |
| 82.3  | 65.1  | 129.5  | 103.8 | 148.2 | 164.9 | 153.0 | 175.4 | 135.9  |
| 67.1  | 67.1  | 94.9   | 67.1  | 45.9  | 47.6  | 54.8  | 39.3  | 127.5  |
| 120.9 | 104.9 | 152.7  | 98.6  | 67.6  | 75.0  | 54.3  | 98.6  | 93.9   |
| 200.4 | 220.5 | 212.1  | 192.6 | 427.3 | 439.7 | 416.9 | 460.8 | 263.6  |
| 192.3 | 166.9 | 357.5  | 185.4 | 290.0 | 249.0 | 236.1 | 358.2 | 368.2  |
| 138.9 | 136.8 | 279.5  | 150.0 | 367.0 | 362.3 | 333.3 | 415.7 | 327.7  |
| 156.8 | 126.9 | 213.6  | 161.5 | 199.3 | 159.1 | 207.2 | 220.6 | 286.5  |
| 774.5 | 617.0 | 970.9  | 632.9 | 404.0 | 417.5 | 448.6 | 522.2 | 1202.9 |
| 224.0 | 232.7 | 317.0  | 217.8 | 377.8 | 523.1 | 420.6 | 424.0 | 951.8  |
| 145.2 | 124.2 | 167.7  | 146.9 | 128.4 | 154.3 | 119.8 | 164.2 | 174.6  |
| 139.3 | 116.4 | 100.2  | 87.8  | 91.7  | 73.5  | 83.1  | 105.9 | 73.3   |
| 11.3  | 18.3  | 19.0   | 16.7  | 22.3  | 14.9  | 18.5  | 34.0  | 11.5   |
| 784.1 | 860.2 | 734.0  | 799.2 | 146.3 | 133.4 | 141.0 | 190.5 | 159.9  |
| 942.6 | 729.6 | 1299.2 | 701.8 | 18.0  | 14.2  | 17.3  | 12.2  | 24.2   |
| 6.6   | 4.2   | 3.9    | 9.1   | 58.4  | 38.7  | 53.4  | 75.8  | 740.9  |
| 744.5 | 895.4 | 829.3  | 890.2 | 567.5 | 822.0 | 649.1 | 651.3 | 587.3  |
| 376.1 | 348.2 | 847.8  | 460.7 | 536.7 | 478.4 | 563.2 | 643.5 | 2185.2 |
| 99.0  | 91.6  | 146.2  | 113.6 | 270.0 | 203.4 | 355.5 | 313.5 | 186.9  |
| 218.9 | 221.9 | 235.6  | 206.5 | 435.9 | 443.2 | 416.3 | 489.7 | 384.7  |
| 108.1 | 129.5 | 200.3  | 112.6 | 108.6 | 84.8  | 100.5 | 133.3 | 100.1  |
| 346.8 | 273.2 | 553.9  | 319.2 | 457.7 | 552.1 | 523.2 | 506.6 | 421.6  |
| 109.4 | 105.4 | 178.0  | 103.8 | 81.2  | 80.2  | 87.5  | 118.2 | 262.7  |
| 215.7 | 235.1 | 235.2  | 247.5 | 75.0  | 77.0  | 63.2  | 67.0  | 289.4  |
| 11.7  | 11.9  | 8.1    | 10.0  | 10.2  | 2.7   | 9.9   | 12.5  | 17.7   |
| 258.3 | 260.7 | 306.8  | 338.3 | 61.0  | 82.5  | 65.2  | 83.3  | 127.6  |
| 288.1 | 268.6 | 347.2  | 287.0 | 85.6  | 78.8  | 104.6 | 126.7 | 57.5   |
| 4.7   | 6.1   | 13.2   | 7.7   | 18.2  | 23.5  | 13.8  | 20.5  | 4.4    |
| 4.3   | 4.7   | 8.5    | 7.8   | 1.7   | 3.3   | 1.3   | 3.3   | 319.5  |
| 691.0 | 691.1 | 466.4  | 491.7 | 81.1  | 161.6 | 92.6  | 75.3  | 42.3   |
| 207.1 | 198.1 | 250.6  | 160.8 | 47.9  | 46.9  | 72.9  | 66.2  | 20.9   |
| 26.7  | 30.6  | 15.6   | 13.2  | 283.8 | 385.6 | 312.1 | 372.9 | 11.1   |
| 175.1 | 162.8 | 250.6  | 173.4 | 392.8 | 447.3 | 374.0 | 381.2 | 1481.8 |
| 343.8 | 342.5 | 364.9  | 329.0 | 311.0 | 312.7 | 353.7 | 369.4 | 158.8  |
| 108.2 | 101.8 | 141.2  | 107.0 | 192.6 | 171.2 | 166.1 | 187.2 | 170.4  |
| 433.1 | 392.6 | 528.0  | 375.7 | 531.0 | 470.1 | 496.1 | 628.6 | 723.3  |
| 226.2 | 230.8 | 182.9  | 242.1 | 337.2 | 424.5 | 362.9 | 397.5 | 618.1  |
| 230.7 | 237.5 | 165.1  | 243.0 | 223.7 | 286.1 | 272.1 | 301.7 | 485.2  |
| 395.7 | 361.0 | 562.0  | 437.4 | 186.5 | 162.7 | 217.9 | 248.0 | 367.4  |
| 76.3  | 74.1  | 137.5  | 59.7  | 141.4 | 87.8  | 133.9 | 153.2 | 210.7  |
| 115.5 | 116.7 | 127.0  | 112.1 | 150.5 | 154.2 | 156.4 | 143.9 | 102.9  |
| 268.7 | 245.2 | 268.6  | 194.9 | 50.4  | 29.9  | 66.8  | 77.5  | 8.8    |
| 65.6  | 66.6  | 112.4  | 52.0  | 245.4 | 322.5 | 220.1 | 267.6 | 181.0  |
| 127.7 | 128.9 | 172.2  | 114.1 | 288.8 | 173.4 | 433.0 | 295.3 | 78.5   |
| 95.6  | 66.3  | 123.4  | 87.8  | 72.9  | 72.8  | 65.7  | 85.8  | 64.3   |
| 231.0 | 197.3 | 468.2  | 226.3 | 608.5 | 684.3 | 613.5 | 685.2 | 646.5  |

|       |       |        |       |        |        |        |        |        |
|-------|-------|--------|-------|--------|--------|--------|--------|--------|
| 65.0  | 67.1  | 65.9   | 56.3  | 321.5  | 329.5  | 345.2  | 380.4  | 281.0  |
| 163.0 | 163.4 | 209.6  | 189.9 | 434.4  | 369.3  | 528.4  | 484.5  | 335.9  |
| 7.6   | 5.3   | 9.6    | 4.8   | 14.9   | 12.1   | 13.8   | 22.8   | 8.7    |
| 181.7 | 180.9 | 262.1  | 146.7 | 216.5  | 157.0  | 174.0  | 215.2  | 385.7  |
| 259.5 | 247.2 | 278.7  | 248.5 | 328.6  | 350.7  | 344.5  | 438.6  | 220.0  |
| 197.9 | 179.1 | 347.0  | 197.7 | 96.8   | 127.4  | 84.8   | 110.1  | 142.4  |
| 316.7 | 278.4 | 363.6  | 299.6 | 1114.1 | 1362.1 | 1291.7 | 1340.1 | 1465.5 |
| 261.2 | 209.8 | 378.5  | 245.5 | 317.5  | 450.0  | 339.4  | 387.9  | 282.6  |
| 2.6   | 1.6   | 2.9    | 1.8   | 540.3  | 433.3  | 671.2  | 683.7  | 49.5   |
| 80.9  | 77.5  | 142.2  | 71.4  | 1122.8 | 1005.9 | 1332.5 | 1289.5 | 203.5  |
| 58.5  | 50.5  | 133.5  | 35.2  | 268.1  | 205.5  | 200.1  | 249.0  | 208.4  |
| 57.4  | 45.0  | 39.9   | 56.0  | 40.4   | 75.4   | 50.1   | 52.0   | 84.1   |
| 105.9 | 111.6 | 157.0  | 107.3 | 222.2  | 255.1  | 296.9  | 259.9  | 401.6  |
| 194.6 | 179.5 | 315.2  | 217.5 | 385.8  | 430.3  | 443.8  | 360.5  | 758.1  |
| 2.3   | 3.1   | 2.8    | 1.8   | 125.3  | 60.4   | 360.5  | 249.5  | 0.6    |
| 46.6  | 50.1  | 82.0   | 51.8  | 60.8   | 52.5   | 44.8   | 75.4   | 84.3   |
| 48.1  | 51.3  | 140.2  | 66.1  | 131.0  | 122.8  | 134.3  | 141.4  | 278.1  |
| 131.7 | 136.4 | 272.4  | 92.7  | 1261.6 | 695.6  | 905.6  | 1183.1 | 733.5  |
| 111.1 | 120.0 | 66.6   | 96.0  | 90.9   | 128.6  | 95.5   | 95.5   | 54.6   |
| 552.3 | 516.0 | 860.4  | 479.8 | 737.0  | 692.3  | 795.4  | 815.0  | 1819.3 |
| 232.7 | 260.9 | 307.2  | 413.9 | 37.4   | 24.7   | 217.0  | 78.3   | 3.3    |
| 1.2   | 1.2   | 0.5    | 3.3   | 1.8    | 0.3    | 2.5    | 0.3    | 1.0    |
| 63.0  | 45.4  | 85.8   | 61.0  | 53.6   | 42.9   | 68.6   | 71.1   | 26.4   |
| 867.5 | 784.7 | 1178.5 | 872.5 | 349.9  | 370.1  | 365.8  | 391.4  | 752.1  |
| 112.4 | 111.1 | 123.3  | 104.6 | 130.6  | 106.0  | 127.6  | 146.3  | 172.8  |
| 221.4 | 241.1 | 338.8  | 229.7 | 200.2  | 168.2  | 230.2  | 224.2  | 162.3  |
| 215.7 | 218.5 | 270.0  | 233.1 | 332.0  | 314.5  | 318.0  | 366.3  | 363.2  |
| 71.2  | 59.4  | 58.1   | 41.0  | 12.0   | 8.3    | 14.5   | 14.6   | 1.9    |
| 116.2 | 113.8 | 185.2  | 126.8 | 102.6  | 55.5   | 101.6  | 111.3  | 163.5  |
| 720.6 | 679.9 | 1013.5 | 581.4 | 934.9  | 764.2  | 837.7  | 1084.6 | 912.4  |
| 111.8 | 105.5 | 151.9  | 110.5 | 247.2  | 257.3  | 291.7  | 257.9  | 174.5  |
| 333.3 | 372.8 | 181.5  | 275.7 | 523.1  | 540.9  | 634.9  | 640.2  | 558.0  |
| 71.3  | 70.0  | 101.3  | 41.4  | 389.7  | 296.8  | 348.3  | 492.9  | 242.0  |
| 84.0  | 76.2  | 119.5  | 90.7  | 76.4   | 63.9   | 75.3   | 80.3   | 109.4  |
| 64.7  | 51.4  | 58.6   | 45.2  | 136.5  | 85.7   | 134.2  | 141.0  | 128.8  |
| 96.7  | 92.8  | 142.5  | 75.8  | 268.4  | 229.7  | 259.4  | 257.4  | 219.0  |
| 92.1  | 57.0  | 65.9   | 68.1  | 132.4  | 138.2  | 148.6  | 132.0  | 229.3  |
| 104.5 | 89.3  | 72.6   | 85.4  | 31.0   | 35.5   | 37.3   | 42.6   | 35.0   |
| 103.4 | 95.0  | 55.1   | 82.7  | 22.5   | 27.7   | 27.8   | 25.0   | 58.5   |
| 227.2 | 214.8 | 248.1  | 162.9 | 304.5  | 260.8  | 291.9  | 347.7  | 167.4  |
| 60.4  | 49.3  | 74.7   | 62.9  | 54.6   | 52.8   | 48.4   | 78.8   | 40.6   |
| 46.0  | 50.6  | 39.8   | 46.1  | 74.5   | 86.8   | 66.9   | 71.3   | 126.3  |
| 44.1  | 42.5  | 48.1   | 37.7  | 32.9   | 32.8   | 40.3   | 38.2   | 44.4   |
| 127.0 | 127.4 | 156.0  | 122.8 | 98.1   | 124.3  | 103.7  | 79.2   | 99.1   |
| 162.0 | 135.4 | 197.5  | 110.7 | 209.3  | 244.4  | 211.3  | 231.0  | 180.3  |
| 209.5 | 169.4 | 253.3  | 176.2 | 389.1  | 374.0  | 412.8  | 415.9  | 482.3  |
| 281.6 | 258.1 | 427.0  | 221.2 | 1170.3 | 585.2  | 863.2  | 1239.4 | 665.6  |
| 128.8 | 129.4 | 249.5  | 168.9 | 111.3  | 148.5  | 117.5  | 138.0  | 177.1  |
| 145.5 | 139.6 | 170.7  | 120.0 | 218.4  | 211.5  | 193.4  | 219.6  | 302.9  |
| 56.2  | 70.6  | 98.3   | 50.4  | 75.6   | 88.0   | 70.9   | 59.6   | 135.2  |
| 44.3  | 42.5  | 84.4   | 46.0  | 104.6  | 102.5  | 103.9  | 113.0  | 81.2   |
| 95.3  | 69.6  | 91.7   | 81.4  | 57.5   | 77.7   | 56.1   | 67.5   | 51.8   |
| 239.1 | 204.1 | 253.9  | 198.3 | 347.3  | 373.0  | 332.5  | 414.9  | 284.7  |

|        |        |        |        |        |        |        |        |        |
|--------|--------|--------|--------|--------|--------|--------|--------|--------|
| 129.7  | 120.2  | 117.3  | 109.9  | 140.9  | 141.2  | 122.4  | 169.7  | 109.0  |
| 149.5  | 161.1  | 172.7  | 169.1  | 129.7  | 142.9  | 130.5  | 138.6  | 192.8  |
| 209.6  | 220.3  | 239.4  | 197.0  | 175.3  | 129.1  | 203.2  | 172.7  | 114.2  |
| 127.7  | 117.6  | 107.8  | 168.9  | 85.8   | 96.4   | 204.0  | 128.9  | 101.1  |
| 107.3  | 104.1  | 133.5  | 120.5  | 150.4  | 120.0  | 134.1  | 157.6  | 161.4  |
| 222.6  | 227.9  | 287.3  | 255.0  | 274.1  | 332.2  | 293.5  | 330.8  | 389.6  |
| 311.0  | 321.1  | 456.8  | 292.5  | 1091.7 | 1007.1 | 1096.8 | 1165.2 | 1084.1 |
| 182.1  | 218.7  | 113.6  | 152.0  | 95.8   | 183.3  | 118.2  | 144.5  | 239.3  |
| 50.9   | 67.3   | 74.1   | 55.9   | 173.8  | 128.7  | 131.8  | 158.7  | 149.3  |
| 119.5  | 110.7  | 140.4  | 101.6  | 140.3  | 119.1  | 109.2  | 150.9  | 160.7  |
| 209.0  | 193.0  | 470.9  | 159.2  | 682.9  | 786.4  | 661.6  | 792.8  | 383.4  |
| 683.8  | 614.9  | 628.2  | 578.8  | 265.6  | 374.3  | 319.0  | 311.8  | 97.8   |
| 127.0  | 111.8  | 279.2  | 114.1  | 434.1  | 380.8  | 463.4  | 460.6  | 792.9  |
| 56.0   | 83.0   | 74.1   | 81.9   | 124.4  | 106.0  | 130.9  | 142.9  | 153.2  |
| 161.3  | 145.4  | 191.3  | 145.3  | 85.2   | 117.8  | 105.5  | 93.9   | 144.7  |
| 163.5  | 144.2  | 241.8  | 118.4  | 356.4  | 332.2  | 318.3  | 441.8  | 359.8  |
| 45.8   | 42.0   | 67.0   | 40.2   | 12.8   | 4.1    | 12.0   | 10.9   | 16.2   |
| 148.7  | 133.5  | 136.0  | 115.3  | 16.8   | 9.4    | 14.8   | 21.0   | 21.1   |
| 242.0  | 210.9  | 287.7  | 194.3  | 76.1   | 93.2   | 72.1   | 92.0   | 32.0   |
| 137.1  | 144.8  | 193.4  | 107.9  | 277.4  | 298.0  | 267.3  | 301.9  | 397.0  |
| 232.3  | 212.5  | 575.9  | 135.8  | 576.6  | 271.1  | 401.4  | 623.5  | 565.6  |
| 28.5   | 27.3   | 48.3   | 30.4   | 117.2  | 100.6  | 99.1   | 140.7  | 129.1  |
| 108.6  | 102.9  | 77.4   | 100.3  | 30.7   | 38.7   | 37.4   | 45.4   | 23.5   |
| 67.1   | 67.6   | 49.8   | 46.4   | 39.4   | 41.3   | 25.7   | 55.6   | 65.9   |
| 49.3   | 37.9   | 66.1   | 43.6   | 41.5   | 45.1   | 40.2   | 50.0   | 79.5   |
| 96.5   | 96.0   | 138.0  | 88.2   | 173.9  | 140.9  | 151.4  | 194.8  | 241.7  |
| 174.6  | 174.8  | 212.2  | 189.0  | 191.7  | 259.9  | 238.2  | 208.4  | 204.7  |
| 115.1  | 143.8  | 97.4   | 119.9  | 48.7   | 47.4   | 49.3   | 74.3   | 66.0   |
| 14.9   | 25.2   | 18.1   | 20.5   | 15.5   | 16.8   | 14.0   | 19.4   | 13.3   |
| 68.8   | 81.1   | 98.9   | 75.4   | 60.9   | 57.8   | 60.6   | 69.7   | 80.4   |
| 116.3  | 93.3   | 137.3  | 96.3   | 12.4   | 14.6   | 20.9   | 25.7   | 8.3    |
| 127.8  | 119.3  | 172.3  | 77.3   | 167.9  | 131.4  | 173.7  | 173.0  | 235.6  |
| 70.3   | 76.3   | 86.6   | 69.7   | 128.3  | 170.7  | 114.3  | 142.3  | 182.4  |
| 266.1  | 286.0  | 189.4  | 225.4  | 150.8  | 164.5  | 180.2  | 172.7  | 591.2  |
| 22.3   | 22.2   | 12.7   | 13.1   | 319.1  | 300.0  | 296.6  | 245.9  | 769.0  |
| 265.8  | 247.9  | 331.4  | 237.0  | 286.8  | 365.7  | 325.0  | 413.4  | 248.5  |
| 57.4   | 72.4   | 104.2  | 80.6   | 58.1   | 64.6   | 54.7   | 80.2   | 135.5  |
| 173.1  | 138.4  | 173.4  | 144.3  | 270.1  | 304.0  | 256.2  | 298.3  | 491.4  |
| 32.1   | 31.8   | 32.1   | 15.4   | 25.3   | 25.3   | 32.2   | 33.2   | 33.1   |
| 52.1   | 55.2   | 77.8   | 65.8   | 103.7  | 95.4   | 92.9   | 120.4  | 184.7  |
| 427.4  | 486.1  | 749.1  | 423.3  | 353.1  | 299.4  | 314.0  | 345.9  | 332.2  |
| 260.3  | 259.7  | 437.1  | 285.2  | 220.0  | 222.3  | 244.0  | 228.3  | 191.9  |
| 520.1  | 497.7  | 949.7  | 775.1  | 4.6    | 7.6    | 5.4    | 4.8    | 277.5  |
| 21.2   | 17.8   | 25.2   | 9.2    | 31.3   | 40.0   | 30.0   | 23.3   | 19.3   |
| 598.9  | 638.1  | 602.3  | 558.3  | 2.1    | 4.1    | 3.8    | 9.1    | 2.9    |
| 1143.7 | 1290.0 | 1097.9 | 1150.0 | 23.2   | 15.0   | 14.9   | 15.7   | 25.3   |
| 26.8   | 20.0   | 38.1   | 31.2   | 21.2   | 21.1   | 14.6   | 21.2   | 20.2   |
| 316.7  | 280.7  | 379.0  | 255.2  | 550.4  | 457.3  | 519.4  | 565.8  | 735.6  |
| 66.1   | 74.7   | 58.7   | 42.4   | 61.2   | 40.7   | 51.3   | 62.1   | 159.7  |
| 18.8   | 14.1   | 22.5   | 11.4   | 83.0   | 67.9   | 65.5   | 104.2  | 87.4   |
| 15.4   | 16.9   | 32.4   | 10.3   | 241.5  | 237.7  | 264.8  | 305.7  | 133.9  |
| 331.3  | 376.5  | 307.3  | 303.7  | 79.2   | 91.1   | 72.7   | 85.5   | 97.0   |
| 10.2   | 9.9    | 12.8   | 11.8   | 9.8    | 10.5   | 10.1   | 16.9   | 16.4   |

|       |       |       |       |       |        |        |        |        |
|-------|-------|-------|-------|-------|--------|--------|--------|--------|
| 65.6  | 61.9  | 96.9  | 65.8  | 69.0  | 79.1   | 83.3   | 84.6   | 37.0   |
| 422.0 | 407.3 | 556.7 | 446.3 | 147.3 | 136.5  | 170.6  | 186.4  | 85.6   |
| 67.3  | 74.7  | 103.4 | 67.4  | 464.7 | 318.8  | 670.6  | 591.2  | 376.8  |
| 14.6  | 21.5  | 19.8  | 28.8  | 80.7  | 111.5  | 133.3  | 108.4  | 60.3   |
| 126.6 | 120.0 | 217.3 | 138.3 | 123.0 | 112.0  | 139.5  | 150.4  | 233.3  |
| 686.4 | 639.8 | 416.2 | 459.4 | 10.8  | 5.7    | 5.6    | 4.5    | 13.4   |
| 240.7 | 230.2 | 137.3 | 221.1 | 49.1  | 57.7   | 56.4   | 60.4   | 50.0   |
| 195.3 | 208.5 | 142.7 | 169.8 | 46.6  | 53.3   | 49.4   | 47.5   | 33.9   |
| 165.8 | 169.9 | 219.6 | 122.9 | 379.7 | 260.8  | 337.2  | 412.1  | 535.4  |
| 1.8   | 6.0   | 5.9   | 7.1   | 5.2   | 0.8    | 0.8    | 0.4    | 721.2  |
| 53.6  | 53.9  | 117.8 | 81.1  | 104.7 | 91.8   | 103.5  | 97.1   | 35.0   |
| 124.8 | 130.7 | 221.1 | 141.5 | 421.3 | 483.0  | 336.0  | 416.8  | 307.1  |
| 105.5 | 132.1 | 145.4 | 122.8 | 118.5 | 96.4   | 103.1  | 157.2  | 82.7   |
| 186.9 | 133.1 | 273.5 | 191.2 | 187.5 | 265.1  | 217.2  | 220.2  | 152.9  |
| 112.8 | 119.5 | 191.3 | 118.4 | 215.2 | 267.9  | 281.5  | 239.0  | 106.0  |
| 538.9 | 521.1 | 702.7 | 605.9 | 946.3 | 1105.7 | 1162.5 | 999.5  | 2113.9 |
| 2.6   | 4.1   | 3.6   | 2.5   | 3.4   | 3.6    | 3.4    | 2.5    | 3.7    |
| 63.4  | 67.5  | 112.4 | 50.3  | 31.3  | 18.1   | 29.7   | 37.6   | 6.4    |
| 25.1  | 26.6  | 40.3  | 31.3  | 58.2  | 34.4   | 53.9   | 64.0   | 51.0   |
| 466.4 | 474.7 | 642.4 | 547.8 | 144.2 | 124.6  | 170.6  | 184.9  | 112.0  |
| 81.4  | 107.1 | 25.1  | 66.0  | 1.8   | 7.7    | 7.0    | 9.8    | 12.2   |
| 333.0 | 315.2 | 496.4 | 310.5 | 496.4 | 516.9  | 508.8  | 556.5  | 283.3  |
| 318.1 | 272.3 | 410.7 | 275.0 | 205.8 | 217.7  | 259.7  | 239.5  | 212.0  |
| 144.8 | 161.1 | 142.5 | 137.0 | 144.7 | 139.6  | 146.0  | 144.1  | 220.6  |
| 10.3  | 2.0   | 19.8  | 7.4   | 94.8  | 116.1  | 96.6   | 117.3  | 72.6   |
| 69.8  | 74.4  | 85.1  | 79.8  | 108.8 | 144.8  | 126.3  | 136.6  | 66.5   |
| 126.8 | 130.6 | 126.3 | 127.3 | 42.2  | 49.8   | 41.6   | 64.0   | 84.4   |
| 550.5 | 505.0 | 739.7 | 503.8 | 596.0 | 502.9  | 566.4  | 724.5  | 695.4  |
| 2.8   | 2.6   | 4.1   | 2.6   | 16.7  | 28.4   | 8.2    | 17.1   | 5.9    |
| 322.3 | 328.3 | 398.9 | 216.0 | 58.5  | 49.5   | 53.1   | 78.0   | 42.0   |
| 156.0 | 175.4 | 134.4 | 157.8 | 341.1 | 357.4  | 385.8  | 416.3  | 128.8  |
| 489.7 | 505.6 | 284.2 | 374.9 | 178.7 | 158.3  | 167.5  | 214.2  | 200.3  |
| 3.8   | 4.4   | 7.0   | 6.4   | 440.9 | 556.1  | 519.7  | 472.2  | 306.5  |
| 104.6 | 96.6  | 237.5 | 126.3 | 131.5 | 216.4  | 236.7  | 162.6  | 315.4  |
| 221.0 | 214.4 | 308.5 | 178.1 | 287.1 | 339.1  | 348.1  | 300.1  | 41.8   |
| 64.3  | 64.5  | 97.6  | 61.6  | 70.4  | 80.4   | 74.8   | 91.9   | 45.4   |
| 20.5  | 22.3  | 30.7  | 22.2  | 22.6  | 16.2   | 18.3   | 21.6   | 10.0   |
| 175.5 | 156.0 | 389.3 | 190.6 | 557.3 | 573.4  | 564.4  | 619.7  | 401.5  |
| 205.7 | 197.3 | 275.7 | 202.7 | 330.1 | 335.1  | 391.3  | 368.5  | 280.6  |
| 47.5  | 48.5  | 19.6  | 37.1  | 802.9 | 577.8  | 824.2  | 984.4  | 28.6   |
| 88.3  | 92.1  | 122.2 | 82.8  | 139.5 | 125.5  | 174.8  | 170.6  | 216.5  |
| 82.6  | 82.6  | 103.6 | 70.2  | 916.1 | 675.7  | 1239.8 | 1125.4 | 1255.1 |
| 15.0  | 27.1  | 46.4  | 34.4  | 242.8 | 197.0  | 211.8  | 302.7  | 91.3   |
| 761.2 | 843.7 | 450.5 | 843.4 | 47.8  | 55.4   | 87.5   | 68.7   | 72.4   |
| 170.6 | 166.0 | 200.2 | 163.9 | 333.0 | 368.6  | 441.2  | 413.3  | 547.8  |
| 139.7 | 104.8 | 197.8 | 101.0 | 243.7 | 171.4  | 238.8  | 263.4  | 307.7  |
| 44.2  | 41.5  | 45.9  | 31.1  | 121.8 | 103.9  | 105.4  | 121.9  | 144.7  |
| 157.5 | 160.3 | 82.4  | 131.2 | 102.5 | 195.3  | 145.7  | 144.1  | 178.1  |
| 1.3   | 3.7   | 7.4   | 6.5   | 11.0  | 0.8    | 4.8    | 11.2   | 1.9    |
| 20.1  | 17.8  | 30.9  | 12.6  | 61.6  | 51.3   | 43.9   | 45.3   | 8.2    |
| 63.9  | 55.2  | 108.1 | 51.9  | 60.6  | 55.8   | 75.3   | 91.6   | 3.8    |
| 247.1 | 167.5 | 658.9 | 292.2 | 434.1 | 315.2  | 389.6  | 366.9  | 1633.3 |
| 144.9 | 145.0 | 198.7 | 135.1 | 92.4  | 89.5   | 118.0  | 117.5  | 244.4  |

|       |       |        |       |        |        |        |        |        |
|-------|-------|--------|-------|--------|--------|--------|--------|--------|
| 149.7 | 137.9 | 172.8  | 128.7 | 86.1   | 79.8   | 70.5   | 88.0   | 174.2  |
| 102.8 | 105.0 | 104.4  | 102.4 | 88.8   | 97.8   | 95.4   | 99.4   | 90.4   |
| 6.9   | 6.8   | 1.1    | 5.2   | 3.9    | 7.0    | 4.8    | 1.0    | 10.4   |
| 179.9 | 173.3 | 278.0  | 169.9 | 267.7  | 311.6  | 262.9  | 301.1  | 364.2  |
| 5.2   | 7.7   | 13.2   | 6.1   | 65.9   | 38.0   | 81.7   | 69.7   | 196.4  |
| 81.2  | 77.8  | 79.8   | 71.7  | 87.3   | 100.8  | 93.9   | 119.1  | 137.9  |
| 25.3  | 35.3  | 38.1   | 36.9  | 38.0   | 39.1   | 26.4   | 35.7   | 49.3   |
| 149.4 | 116.1 | 347.8  | 92.1  | 545.0  | 259.6  | 404.5  | 631.1  | 373.8  |
| 5.7   | 6.9   | 1.4    | 1.6   | 0.9    | 1.5    | 1.6    | 1.3    | 6.6    |
| 185.9 | 192.8 | 244.9  | 178.9 | 295.4  | 277.4  | 278.6  | 312.2  | 399.7  |
| 365.7 | 378.6 | 364.1  | 315.1 | 254.5  | 267.9  | 258.5  | 303.9  | 210.0  |
| 65.8  | 63.5  | 48.9   | 52.0  | 65.6   | 88.5   | 65.3   | 74.8   | 83.2   |
| 168.5 | 155.3 | 131.8  | 172.1 | 190.6  | 230.7  | 350.6  | 285.2  | 54.9   |
| 79.2  | 65.6  | 79.2   | 74.4  | 146.6  | 152.2  | 221.8  | 175.6  | 16.5   |
| 247.0 | 272.7 | 391.1  | 283.6 | 969.1  | 896.1  | 972.2  | 1050.8 | 1203.3 |
| 795.6 | 743.4 | 2338.4 | 764.4 | 621.3  | 362.3  | 518.5  | 602.0  | 1490.0 |
| 106.5 | 90.6  | 149.5  | 103.3 | 185.2  | 220.5  | 191.1  | 220.8  | 180.9  |
| 105.3 | 106.0 | 174.2  | 95.3  | 53.0   | 46.8   | 49.7   | 45.2   | 34.4   |
| 119.2 | 109.7 | 203.0  | 134.4 | 637.3  | 685.6  | 605.0  | 767.5  | 394.7  |
| 148.6 | 117.4 | 214.3  | 136.7 | 251.5  | 296.2  | 264.5  | 294.8  | 237.5  |
| 150.4 | 108.2 | 444.0  | 166.9 | 1604.0 | 1216.8 | 1530.1 | 1713.4 | 684.1  |
| 220.6 | 240.3 | 383.4  | 244.5 | 1061.1 | 983.5  | 1016.3 | 1194.1 | 1220.7 |
| 222.9 | 189.8 | 359.5  | 233.6 | 669.8  | 606.7  | 687.4  | 767.3  | 776.8  |
| 83.1  | 98.9  | 153.5  | 106.3 | 88.1   | 84.1   | 92.2   | 96.7   | 107.1  |
| 9.0   | 11.2  | 19.6   | 7.5   | 1.2    | 12.3   | 3.4    | 24.1   | 5.8    |
| 153.4 | 114.1 | 210.6  | 121.9 | 448.2  | 376.4  | 491.7  | 525.2  | 241.1  |
| 143.2 | 114.9 | 321.0  | 114.4 | 294.6  | 224.4  | 362.3  | 367.6  | 423.1  |
| 69.6  | 67.4  | 82.8   | 67.8  | 93.5   | 86.9   | 68.6   | 69.3   | 130.6  |
| 103.0 | 91.3  | 177.0  | 115.8 | 180.2  | 157.0  | 199.5  | 200.7  | 165.2  |
| 147.6 | 134.9 | 217.2  | 134.7 | 170.4  | 156.3  | 202.0  | 226.5  | 206.0  |
| 29.5  | 23.3  | 62.9   | 31.1  | 296.8  | 310.3  | 294.5  | 281.0  | 287.1  |
| 4.7   | 5.2   | 5.1    | 6.1   | 3.2    | 2.2    | 3.4    | 3.9    | 0.8    |
| 69.6  | 74.0  | 103.6  | 87.1  | 55.1   | 52.7   | 44.4   | 83.3   | 34.4   |
| 9.4   | 11.5  | 5.4    | 13.9  | 92.9   | 104.6  | 143.1  | 139.8  | 10.7   |
| 70.6  | 66.9  | 123.7  | 78.3  | 80.5   | 56.2   | 53.2   | 69.0   | 213.8  |
| 148.2 | 124.7 | 315.9  | 140.4 | 188.7  | 282.5  | 199.6  | 200.3  | 480.9  |
| 16.3  | 9.6   | 26.8   | 11.1  | 123.9  | 121.9  | 85.0   | 113.0  | 78.7   |
| 487.1 | 498.8 | 691.7  | 559.3 | 699.8  | 490.7  | 736.9  | 789.2  | 521.7  |
| 142.1 | 142.7 | 217.9  | 124.1 | 160.7  | 194.9  | 150.8  | 203.3  | 246.0  |
| 57.9  | 58.7  | 119.6  | 88.0  | 207.0  | 205.1  | 229.2  | 190.5  | 12.2   |
| 258.0 | 265.2 | 267.9  | 197.5 | 186.3  | 182.2  | 180.2  | 235.4  | 234.5  |
| 192.5 | 195.3 | 176.9  | 152.5 | 316.7  | 332.8  | 353.2  | 396.5  | 352.4  |
| 137.3 | 97.1  | 173.0  | 106.5 | 123.4  | 157.8  | 169.3  | 202.9  | 107.7  |
| 192.3 | 189.7 | 334.2  | 189.9 | 302.5  | 284.6  | 285.1  | 364.5  | 381.0  |
| 166.2 | 161.7 | 202.3  | 182.0 | 255.2  | 474.7  | 272.4  | 312.8  | 283.3  |
| 48.3  | 35.4  | 57.6   | 37.5  | 47.7   | 58.9   | 55.3   | 47.3   | 38.7   |
| 73.6  | 73.6  | 65.2   | 78.7  | 43.1   | 61.2   | 36.8   | 51.6   | 57.1   |
| 67.6  | 55.8  | 121.9  | 62.1  | 311.6  | 299.0  | 291.6  | 288.6  | 351.6  |
| 69.2  | 52.3  | 108.6  | 70.1  | 78.8   | 107.5  | 65.4   | 59.8   | 102.7  |
| 400.6 | 343.2 | 531.2  | 353.5 | 381.0  | 339.2  | 359.4  | 449.5  | 426.0  |
| 27.6  | 21.7  | 79.9   | 35.5  | 6.0    | 1.3    | 4.1    | 7.9    | 53.4   |
| 391.4 | 381.0 | 445.8  | 368.7 | 294.3  | 375.6  | 265.2  | 329.0  | 338.3  |
| 150.5 | 183.8 | 216.8  | 154.8 | 84.8   | 110.3  | 103.3  | 99.7   | 105.7  |

|        |        |        |        |       |        |        |        |       |
|--------|--------|--------|--------|-------|--------|--------|--------|-------|
| 64.9   | 59.4   | 91.7   | 45.1   | 40.4  | 31.9   | 40.6   | 24.3   | 102.2 |
| 180.7  | 187.1  | 193.1  | 226.4  | 7.5   | 2.4    | 7.9    | 3.8    | 2.9   |
| 45.1   | 71.1   | 43.9   | 52.5   | 76.0  | 72.3   | 68.2   | 84.7   | 80.5  |
| 77.9   | 78.1   | 61.0   | 64.1   | 107.3 | 144.9  | 138.8  | 152.9  | 90.9  |
| 2.6    | 6.7    | 6.4    | 4.3    | 3.4   | 4.8    | 4.4    | 5.0    | 7.2   |
| 144.7  | 141.5  | 183.7  | 146.8  | 172.0 | 205.3  | 191.5  | 201.4  | 123.1 |
| 127.2  | 99.3   | 154.5  | 103.7  | 382.0 | 323.7  | 339.8  | 443.9  | 198.6 |
| 117.2  | 122.9  | 178.8  | 125.0  | 21.6  | 22.2   | 30.1   | 25.3   | 2.3   |
| 346.1  | 353.2  | 365.8  | 292.0  | 134.5 | 126.8  | 138.0  | 143.6  | 207.5 |
| 810.1  | 838.7  | 767.9  | 771.3  | 880.2 | 762.1  | 1017.0 | 1138.8 | 406.3 |
| 135.7  | 138.3  | 138.0  | 158.0  | 32.6  | 32.0   | 47.1   | 33.2   | 82.8  |
| 203.7  | 204.0  | 307.0  | 208.5  | 711.4 | 745.7  | 870.3  | 850.5  | 425.6 |
| 55.3   | 61.2   | 80.7   | 59.7   | 89.5  | 79.5   | 77.1   | 88.0   | 138.1 |
| 10.5   | 5.5    | 10.8   | 3.8    | 12.1  | 13.9   | 4.4    | 10.4   | 5.4   |
| 22.1   | 14.9   | 28.6   | 15.6   | 165.3 | 193.6  | 176.0  | 213.6  | 322.6 |
| 471.0  | 446.5  | 603.0  | 455.0  | 396.7 | 361.1  | 395.8  | 454.1  | 703.3 |
| 117.8  | 113.7  | 187.0  | 146.5  | 136.9 | 154.9  | 162.8  | 177.5  | 107.1 |
| 77.2   | 77.1   | 67.4   | 70.1   | 96.4  | 101.3  | 102.8  | 109.7  | 126.5 |
| 44.4   | 33.7   | 69.0   | 50.6   | 72.8  | 57.6   | 80.6   | 60.8   | 117.2 |
| 105.0  | 115.0  | 111.1  | 74.7   | 81.8  | 77.3   | 75.5   | 86.1   | 97.1  |
| 188.0  | 169.5  | 293.8  | 157.3  | 195.9 | 238.8  | 207.2  | 223.5  | 262.8 |
| 420.8  | 406.7  | 543.8  | 403.9  | 569.8 | 613.9  | 595.3  | 703.6  | 364.8 |
| 21.3   | 19.0   | 15.5   | 15.9   | 43.0  | 38.0   | 60.4   | 52.0   | 31.8  |
| 47.4   | 39.2   | 77.0   | 57.7   | 106.1 | 103.3  | 109.5  | 105.8  | 131.8 |
| 103.6  | 90.0   | 185.3  | 127.6  | 163.0 | 199.4  | 160.8  | 165.5  | 146.3 |
| 423.3  | 407.5  | 467.8  | 365.5  | 729.3 | 801.5  | 787.9  | 813.1  | 519.7 |
| 164.2  | 172.2  | 249.9  | 165.0  | 190.4 | 180.8  | 182.4  | 207.9  | 148.9 |
| 150.4  | 141.5  | 179.0  | 167.1  | 110.5 | 101.8  | 118.6  | 143.2  | 83.0  |
| 251.5  | 247.4  | 364.6  | 258.0  | 339.3 | 326.6  | 391.1  | 406.4  | 228.2 |
| 9.7    | 10.8   | 15.5   | 20.7   | 205.6 | 178.4  | 185.0  | 253.1  | 377.3 |
| 88.0   | 97.4   | 143.8  | 87.2   | 98.6  | 72.7   | 105.5  | 155.3  | 157.7 |
| 139.9  | 180.4  | 126.1  | 145.6  | 35.8  | 20.7   | 16.5   | 24.6   | 44.7  |
| 97.6   | 87.6   | 58.4   | 51.9   | 94.3  | 140.3  | 133.2  | 121.2  | 74.5  |
| 74.6   | 59.6   | 88.2   | 68.1   | 83.6  | 90.0   | 73.8   | 110.7  | 57.7  |
| 168.1  | 175.3  | 187.6  | 147.0  | 163.2 | 203.5  | 178.8  | 176.1  | 136.4 |
| 181.0  | 147.9  | 212.2  | 141.7  | 191.5 | 240.0  | 202.1  | 225.0  | 134.5 |
| 1048.3 | 1005.5 | 1115.3 | 1017.3 | 390.8 | 461.8  | 422.2  | 453.7  | 256.0 |
| 96.4   | 82.8   | 75.1   | 73.3   | 132.8 | 136.6  | 128.9  | 111.0  | 373.2 |
| 447.4  | 404.3  | 653.4  | 395.4  | 83.4  | 49.7   | 88.6   | 121.6  | 501.3 |
| 9.9    | 5.4    | 50.3   | 3.3    | 1.0   | 1.3    | 1.6    | 0.8    | 1.3   |
| 127.1  | 120.0  | 177.4  | 111.7  | 235.9 | 263.9  | 256.5  | 240.3  | 234.5 |
| 159.0  | 151.3  | 204.4  | 179.4  | 311.8 | 329.6  | 326.7  | 347.5  | 177.2 |
| 1.6    | 1.5    | 1.7    | 1.1    | 1.6   | 2.7    | 0.9    | 1.0    | 11.6  |
| 7.9    | 14.3   | 18.1   | 6.4    | 10.8  | 23.3   | 17.7   | 32.7   | 17.2  |
| 27.0   | 31.6   | 33.7   | 32.4   | 33.2  | 20.4   | 25.2   | 45.6   | 39.7  |
| 595.3  | 563.2  | 691.4  | 596.9  | 140.3 | 123.8  | 158.8  | 151.5  | 47.6  |
| 293.4  | 285.6  | 386.5  | 338.2  | 191.0 | 187.7  | 200.7  | 216.9  | 164.1 |
| 628.4  | 590.3  | 763.8  | 639.8  | 452.8 | 404.0  | 495.3  | 573.3  | 486.9 |
| 75.7   | 84.1   | 177.4  | 73.1   | 229.8 | 245.1  | 226.0  | 252.2  | 413.2 |
| 149.7  | 157.2  | 175.7  | 144.3  | 238.6 | 211.9  | 254.2  | 280.5  | 296.5 |
| 36.7   | 50.4   | 45.0   | 33.2   | 50.8  | 46.5   | 56.1   | 57.4   | 67.9  |
| 149.8  | 219.1  | 166.3  | 200.2  | 782.0 | 1230.6 | 910.9  | 962.5  | 284.8 |
| 258.6  | 268.0  | 200.8  | 226.4  | 195.5 | 222.9  | 184.1  | 215.4  | 269.5 |

|       |       |       |       |        |        |        |        |       |
|-------|-------|-------|-------|--------|--------|--------|--------|-------|
| 12.5  | 20.3  | 8.0   | 11.5  | 66.1   | 49.5   | 68.1   | 82.5   | 81.5  |
| 2.1   | 1.6   | 1.9   | 1.4   | 2.9    | 1.7    | 8.6    | 9.0    | 6.0   |
| 208.6 | 175.1 | 98.9  | 122.3 | 8.9    | 10.3   | 10.3   | 10.8   | 257.8 |
| 73.3  | 75.9  | 91.8  | 73.2  | 147.5  | 143.7  | 155.4  | 165.2  | 135.6 |
| 4.4   | 2.5   | 8.5   | 4.3   | 13.3   | 5.5    | 13.9   | 12.6   | 21.4  |
| 239.4 | 224.6 | 484.2 | 195.0 | 419.7  | 256.3  | 339.0  | 451.5  | 359.5 |
| 6.2   | 5.0   | 23.5  | 26.8  | 241.8  | 162.0  | 198.7  | 238.7  | 60.3  |
| 0.3   | 0.5   | 3.6   | 2.8   | 134.4  | 126.3  | 124.5  | 164.0  | 204.7 |
| 619.9 | 535.4 | 842.7 | 627.4 | 1035.1 | 1157.9 | 1173.3 | 1228.2 | 870.2 |
| 110.0 | 98.0  | 54.2  | 82.0  | 74.5   | 96.1   | 73.0   | 128.0  | 39.8  |
| 375.1 | 325.2 | 643.5 | 429.8 | 540.9  | 590.3  | 640.0  | 642.7  | 535.1 |
| 128.1 | 92.2  | 165.2 | 76.4  | 60.4   | 64.6   | 64.4   | 85.4   | 16.1  |
| 38.4  | 52.4  | 31.2  | 33.9  | 38.6   | 51.1   | 36.1   | 55.9   | 40.4  |
| 183.5 | 164.7 | 236.5 | 148.3 | 334.7  | 332.4  | 374.7  | 411.1  | 325.2 |
| 158.2 | 142.0 | 138.6 | 125.3 | 240.4  | 229.2  | 277.7  | 293.6  | 357.9 |
| 305.1 | 284.3 | 309.3 | 233.8 | 569.9  | 577.3  | 630.5  | 698.5  | 570.1 |
| 18.3  | 23.3  | 25.1  | 19.8  | 7.4    | 13.7   | 15.6   | 13.1   | 8.8   |
| 272.2 | 312.9 | 244.7 | 259.2 | 98.4   | 110.3  | 106.5  | 96.9   | 140.6 |
| 196.3 | 155.0 | 162.3 | 171.6 | 291.3  | 430.5  | 365.7  | 315.9  | 313.8 |
| 248.2 | 238.8 | 362.5 | 306.2 | 343.1  | 382.0  | 301.3  | 354.1  | 397.3 |
| 58.5  | 43.1  | 124.9 | 59.7  | 7.7    | 13.5   | 12.5   | 10.0   | 21.0  |
| 62.4  | 66.1  | 22.8  | 23.7  | 158.4  | 148.9  | 346.8  | 184.6  | 18.5  |
| 256.1 | 206.5 | 272.6 | 211.1 | 180.9  | 205.3  | 158.9  | 212.0  | 670.4 |
| 48.1  | 48.4  | 79.1  | 56.8  | 324.3  | 335.5  | 390.2  | 370.0  | 393.3 |
| 98.7  | 95.6  | 137.5 | 95.1  | 247.0  | 406.0  | 268.6  | 308.7  | 292.0 |
| 22.0  | 15.5  | 13.9  | 4.2   | 25.9   | 31.5   | 18.7   | 33.0   | 24.3  |
| 73.0  | 76.1  | 297.2 | 61.9  | 498.0  | 320.8  | 430.5  | 561.8  | 722.9 |
| 95.7  | 95.3  | 116.3 | 110.6 | 76.4   | 142.1  | 87.7   | 99.5   | 61.5  |
| 230.8 | 193.5 | 289.0 | 216.4 | 397.8  | 331.7  | 466.2  | 507.7  | 119.5 |
| 75.4  | 79.8  | 83.2  | 70.8  | 112.2  | 64.4   | 110.7  | 162.1  | 102.3 |
| 169.2 | 145.2 | 298.2 | 109.0 | 169.7  | 157.5  | 145.5  | 182.2  | 115.0 |
| 5.0   | 2.9   | 5.8   | 3.4   | 7.4    | 15.5   | 10.0   | 15.5   | 7.8   |
| 469.7 | 398.1 | 876.9 | 549.3 | 809.4  | 726.2  | 761.1  | 881.5  | 898.6 |
| 262.7 | 257.3 | 419.0 | 242.2 | 697.8  | 789.6  | 697.8  | 758.1  | 700.2 |
| 128.2 | 141.6 | 118.2 | 114.1 | 77.2   | 46.5   | 62.9   | 73.4   | 138.0 |
| 52.9  | 59.8  | 40.2  | 61.8  | 28.0   | 20.8   | 28.8   | 36.2   | 31.5  |
| 66.5  | 69.5  | 85.3  | 53.9  | 112.4  | 108.6  | 108.9  | 95.0   | 390.9 |
| 1.1   | 1.0   | 1.3   | 1.1   | 3.8    | 2.6    | 1.8    | 0.9    | 24.0  |
| 86.5  | 111.4 | 138.7 | 73.6  | 29.5   | 20.1   | 29.8   | 51.9   | 46.1  |
| 404.1 | 439.2 | 315.0 | 349.7 | 392.1  | 388.8  | 494.8  | 471.2  | 224.9 |
| 7.1   | 4.8   | 9.0   | 4.8   | 209.5  | 192.0  | 390.1  | 302.1  | 41.2  |
| 90.9  | 72.3  | 149.4 | 83.6  | 269.5  | 244.2  | 280.3  | 311.7  | 503.7 |
| 206.7 | 193.8 | 274.8 | 188.6 | 266.6  | 182.6  | 237.5  | 281.6  | 374.1 |
| 211.4 | 198.3 | 332.2 | 211.2 | 231.2  | 180.9  | 279.7  | 281.7  | 422.2 |
| 42.0  | 31.2  | 53.3  | 45.7  | 74.5   | 63.4   | 60.6   | 66.1   | 31.8  |
| 8.9   | 6.5   | 5.1   | 5.6   | 31.3   | 21.2   | 17.1   | 28.3   | 62.1  |
| 383.3 | 421.6 | 272.1 | 389.5 | 210.6  | 438.3  | 314.0  | 303.5  | 177.9 |
| 22.8  | 16.8  | 25.6  | 13.1  | 74.8   | 67.9   | 73.7   | 102.4  | 96.6  |
| 166.3 | 169.3 | 251.4 | 165.3 | 232.9  | 229.1  | 220.4  | 277.6  | 240.6 |
| 214.1 | 238.6 | 294.1 | 238.5 | 185.9  | 228.3  | 229.3  | 272.4  | 224.6 |
| 17.8  | 28.6  | 33.1  | 20.8  | 65.7   | 75.6   | 87.1   | 106.8  | 85.3  |
| 16.2  | 23.0  | 21.6  | 29.6  | 20.2   | 22.0   | 28.4   | 25.9   | 42.2  |
| 9.8   | 2.9   | 6.8   | 4.3   | 113.2  | 162.0  | 122.3  | 142.2  | 263.2 |

|        |        |        |        |        |        |        |        |        |
|--------|--------|--------|--------|--------|--------|--------|--------|--------|
| 45.7   | 45.6   | 58.8   | 45.2   | 42.1   | 26.1   | 38.1   | 34.9   | 44.1   |
| 73.8   | 80.7   | 64.5   | 69.4   | 39.4   | 46.6   | 55.7   | 61.4   | 55.4   |
| 292.0  | 295.1  | 337.6  | 299.8  | 535.4  | 639.1  | 600.8  | 644.8  | 289.0  |
| 572.7  | 473.6  | 1118.2 | 520.9  | 1536.6 | 1842.5 | 1663.3 | 1710.7 | 2414.5 |
| 241.6  | 240.5  | 339.7  | 193.4  | 952.3  | 851.7  | 1043.0 | 1224.4 | 1739.1 |
| 609.2  | 635.9  | 590.1  | 624.7  | 63.4   | 92.8   | 73.4   | 76.6   | 65.9   |
| 69.1   | 77.7   | 80.8   | 71.2   | 105.4  | 104.4  | 87.8   | 110.4  | 133.3  |
| 52.9   | 48.5   | 53.9   | 58.1   | 83.2   | 99.9   | 83.6   | 85.0   | 96.7   |
| 450.6  | 409.5  | 551.4  | 383.0  | 414.0  | 367.9  | 438.1  | 484.5  | 705.1  |
| 129.2  | 112.3  | 136.7  | 104.2  | 149.1  | 128.5  | 166.6  | 179.3  | 109.4  |
| 224.0  | 191.4  | 307.0  | 179.4  | 545.5  | 528.4  | 549.8  | 621.4  | 923.6  |
| 169.4  | 155.6  | 316.7  | 159.9  | 155.6  | 135.5  | 179.2  | 168.8  | 62.6   |
| 78.5   | 65.4   | 112.8  | 63.3   | 51.7   | 61.7   | 67.8   | 74.4   | 118.9  |
| 12.3   | 27.1   | 29.8   | 21.2   | 16.6   | 20.9   | 15.9   | 1.8    | 36.2   |
| 1406.9 | 1310.5 | 1582.0 | 1428.0 | 794.3  | 643.6  | 737.3  | 909.1  | 653.8  |
| 0.8    | 4.8    | 7.9    | 0.9    | 31.6   | 13.2   | 35.3   | 37.9   | 5.6    |
| 493.1  | 451.3  | 668.1  | 467.2  | 632.1  | 479.8  | 711.2  | 713.0  | 720.2  |
| 144.1  | 122.2  | 68.7   | 133.2  | 40.5   | 140.3  | 62.5   | 88.0   | 52.0   |
| 18.3   | 14.3   | 30.0   | 19.7   | 68.2   | 60.9   | 80.6   | 73.2   | 185.4  |
| 13.5   | 11.4   | 21.2   | 7.3    | 78.7   | 86.0   | 88.0   | 102.2  | 74.5   |
| 42.2   | 27.7   | 88.8   | 29.0   | 71.3   | 70.1   | 73.3   | 89.7   | 125.9  |
| 217.8  | 234.1  | 283.8  | 206.4  | 94.5   | 105.6  | 88.5   | 142.3  | 38.9   |
| 18.6   | 10.2   | 8.0    | 10.0   | 43.8   | 43.7   | 52.7   | 57.2   | 254.3  |
| 114.4  | 116.8  | 146.5  | 138.1  | 69.6   | 78.2   | 66.5   | 74.2   | 122.2  |
| 136.2  | 159.3  | 235.2  | 184.2  | 283.7  | 307.9  | 450.0  | 352.6  | 315.3  |
| 133.2  | 152.3  | 151.1  | 131.5  | 131.5  | 145.9  | 170.0  | 179.5  | 167.6  |
| 840.9  | 797.7  | 1088.1 | 1006.4 | 202.2  | 210.9  | 182.9  | 199.0  | 310.8  |
| 279.0  | 216.0  | 556.4  | 151.5  | 237.2  | 227.3  | 324.2  | 326.3  | 4.6    |
| 98.3   | 70.7   | 132.8  | 78.0   | 230.7  | 193.0  | 258.6  | 266.9  | 195.8  |
| 16.1   | 12.9   | 32.2   | 13.8   | 86.6   | 72.1   | 104.5  | 112.3  | 81.2   |
| 47.1   | 41.6   | 73.3   | 43.5   | 16.4   | 12.8   | 20.4   | 18.2   | 49.3   |
| 20.2   | 26.2   | 15.7   | 23.3   | 185.6  | 143.3  | 169.2  | 160.5  | 291.1  |
| 10.9   | 12.9   | 8.1    | 9.1    | 5.3    | 1.1    | 8.7    | 19.2   | 2.4    |
| 194.3  | 141.2  | 311.2  | 142.9  | 229.4  | 221.6  | 232.8  | 248.3  | 135.7  |
| 228.8  | 180.9  | 426.9  | 175.1  | 420.6  | 409.7  | 475.1  | 496.1  | 300.9  |
| 269.7  | 242.4  | 327.0  | 254.2  | 178.0  | 133.4  | 196.5  | 255.3  | 70.1   |
| 154.7  | 168.1  | 134.2  | 122.0  | 127.2  | 109.4  | 113.1  | 107.6  | 120.9  |
| 4.7    | 6.3    | 10.3   | 8.0    | 19.5   | 8.4    | 6.6    | 3.3    | 28.9   |
| 437.0  | 357.6  | 817.7  | 402.4  | 851.3  | 674.4  | 882.5  | 1010.7 | 856.4  |
| 90.5   | 93.4   | 124.6  | 75.0   | 119.9  | 142.6  | 106.3  | 92.8   | 99.4   |
| 145.7  | 132.3  | 185.9  | 124.2  | 448.4  | 378.5  | 430.2  | 496.7  | 687.9  |
| 53.6   | 46.5   | 112.7  | 56.2   | 177.3  | 152.4  | 206.0  | 210.5  | 343.6  |
| 221.0  | 227.6  | 230.3  | 211.5  | 193.0  | 253.3  | 226.9  | 242.8  | 201.5  |
| 170.7  | 151.1  | 159.0  | 148.5  | 189.7  | 162.4  | 165.9  | 192.0  | 125.4  |
| 423.9  | 342.4  | 615.8  | 357.3  | 249.4  | 210.5  | 251.9  | 259.6  | 401.0  |
| 148.2  | 185.0  | 206.3  | 219.9  | 156.4  | 252.7  | 219.7  | 272.5  | 368.2  |
| 333.2  | 276.7  | 545.3  | 294.7  | 553.8  | 519.6  | 610.8  | 628.7  | 1080.3 |
| 248.2  | 300.4  | 251.0  | 216.3  | 175.2  | 229.2  | 203.9  | 224.7  | 200.6  |
| 43.6   | 47.7   | 57.5   | 48.8   | 42.3   | 45.2   | 39.8   | 56.6   | 70.4   |
| 173.5  | 169.0  | 289.8  | 180.3  | 322.9  | 313.9  | 339.8  | 365.0  | 166.4  |
| 101.4  | 101.2  | 101.6  | 88.5   | 104.2  | 94.8   | 129.9  | 132.3  | 111.7  |
| 92.7   | 108.8  | 116.0  | 69.8   | 67.7   | 67.0   | 66.8   | 68.6   | 95.2   |
| 172.6  | 174.8  | 228.2  | 194.1  | 301.2  | 294.2  | 327.2  | 384.1  | 153.8  |



|        |       |        |       |        |        |        |        |        |
|--------|-------|--------|-------|--------|--------|--------|--------|--------|
| 329.1  | 325.9 | 370.6  | 288.6 | 86.9   | 87.6   | 93.0   | 110.9  | 102.0  |
| 104.9  | 102.4 | 114.2  | 81.9  | 250.9  | 220.0  | 258.0  | 247.6  | 265.2  |
| 37.4   | 47.7  | 43.8   | 62.8  | 35.2   | 71.9   | 54.8   | 55.7   | 81.7   |
| 97.2   | 82.4  | 149.4  | 118.0 | 231.3  | 199.3  | 234.0  | 303.5  | 682.2  |
| 40.9   | 34.4  | 70.7   | 60.5  | 97.6   | 80.6   | 82.5   | 101.7  | 88.9   |
| 9.8    | 15.4  | 16.7   | 9.4   | 10.5   | 9.5    | 19.2   | 15.7   | 12.7   |
| 70.7   | 75.2  | 63.5   | 51.9  | 39.9   | 28.7   | 32.3   | 39.3   | 41.1   |
| 1.2    | 2.2   | 1.5    | 1.4   | 0.6    | 0.8    | 4.1    | 1.4    | 1.0    |
| 57.8   | 41.9  | 71.4   | 34.7  | 106.3  | 107.5  | 110.6  | 112.1  | 164.1  |
| 98.3   | 90.7  | 130.2  | 101.1 | 143.0  | 112.2  | 113.7  | 147.4  | 205.5  |
| 330.1  | 305.6 | 265.1  | 444.6 | 3.0    | 3.1    | 4.3    | 8.5    | 176.3  |
| 15.2   | 16.7  | 23.8   | 19.0  | 9.6    | 9.0    | 8.4    | 6.7    | 17.8   |
| 47.6   | 42.7  | 87.8   | 54.4  | 66.9   | 66.8   | 65.8   | 90.6   | 208.7  |
| 7.7    | 7.3   | 5.8    | 5.7   | 238.7  | 260.3  | 279.2  | 226.0  | 22.8   |
| 28.8   | 22.1  | 38.7   | 27.8  | 37.0   | 24.7   | 32.7   | 46.5   | 47.0   |
| 30.6   | 28.3  | 11.5   | 34.3  | 16.8   | 11.4   | 15.0   | 4.3    | 15.9   |
| 82.7   | 69.6  | 95.7   | 63.4  | 130.6  | 146.3  | 144.9  | 182.3  | 93.9   |
| 280.3  | 264.8 | 442.7  | 298.5 | 394.3  | 347.2  | 369.4  | 467.9  | 688.6  |
| 140.4  | 131.7 | 249.3  | 171.6 | 205.3  | 170.4  | 230.0  | 235.8  | 318.1  |
| 110.3  | 95.6  | 211.0  | 113.7 | 630.4  | 634.7  | 688.9  | 683.1  | 774.9  |
| 149.1  | 129.0 | 163.6  | 124.0 | 132.2  | 180.3  | 140.6  | 182.3  | 292.3  |
| 10.3   | 20.2  | 21.2   | 12.2  | 10.9   | 23.1   | 15.4   | 25.0   | 46.4   |
| 6.9    | 7.8   | 5.6    | 2.3   | 1.6    | 2.2    | 4.6    | 7.3    | 20.5   |
| 36.9   | 31.6  | 34.0   | 23.3  | 29.2   | 26.8   | 38.7   | 42.8   | 7.2    |
| 123.9  | 117.3 | 120.4  | 95.4  | 183.3  | 147.8  | 154.4  | 238.4  | 79.6   |
| 316.4  | 261.6 | 761.3  | 227.9 | 557.1  | 333.2  | 468.7  | 638.2  | 836.3  |
| 8.7    | 7.7   | 3.9    | 6.3   | 1.3    | 4.6    | 3.2    | 2.9    | 6.5    |
| 4.1    | 5.5   | 5.5    | 3.8   | 3.4    | 3.9    | 6.4    | 4.6    | 6.6    |
| 771.3  | 802.9 | 946.5  | 776.3 | 491.4  | 513.2  | 576.0  | 598.1  | 599.4  |
| 64.1   | 57.2  | 70.2   | 63.3  | 261.8  | 301.2  | 339.6  | 351.2  | 121.0  |
| 347.2  | 287.2 | 384.4  | 346.8 | 650.6  | 746.7  | 748.5  | 909.0  | 1157.1 |
| 102.4  | 102.1 | 187.5  | 103.0 | 153.8  | 114.9  | 156.5  | 189.4  | 173.7  |
| 19.7   | 13.8  | 25.5   | 11.5  | 41.8   | 32.4   | 35.4   | 41.3   | 32.7   |
| 20.6   | 16.7  | 15.5   | 21.6  | 44.8   | 62.2   | 60.8   | 44.7   | 6.7    |
| 4.8    | 7.8   | 3.4    | 13.8  | 33.5   | 55.6   | 26.3   | 34.0   | 32.4   |
| 0.7    | 0.4   | 1.4    | 2.8   | 37.7   | 16.6   | 50.4   | 41.5   | 2.1    |
| 72.9   | 63.1  | 119.0  | 75.1  | 56.9   | 63.5   | 65.6   | 61.2   | 92.9   |
| 96.5   | 86.5  | 138.5  | 105.8 | 127.1  | 101.6  | 142.9  | 146.6  | 1088.3 |
| 44.7   | 37.7  | 64.1   | 61.0  | 48.6   | 37.2   | 49.0   | 47.2   | 414.8  |
| 441.8  | 398.3 | 732.2  | 401.9 | 1607.1 | 1503.5 | 1682.1 | 2107.9 | 1020.6 |
| 41.9   | 43.9  | 48.2   | 36.8  | 137.3  | 151.4  | 143.3  | 184.7  | 108.7  |
| 1162.6 | 991.1 | 1607.9 | 794.2 | 17.4   | 63.1   | 17.6   | 20.0   | 13.8   |
| 82.4   | 107.9 | 117.9  | 86.8  | 212.5  | 253.4  | 243.6  | 264.8  | 266.2  |
| 136.2  | 132.0 | 265.9  | 180.5 | 241.2  | 271.6  | 265.7  | 240.6  | 426.3  |
| 126.1  | 129.9 | 175.5  | 123.8 | 140.9  | 150.5  | 141.0  | 165.1  | 157.4  |
| 413.8  | 371.0 | 414.1  | 390.6 | 102.0  | 180.7  | 141.6  | 139.7  | 260.5  |
| 155.9  | 163.8 | 200.4  | 174.8 | 298.9  | 238.7  | 278.3  | 334.8  | 516.6  |
| 394.8  | 299.8 | 485.1  | 254.4 | 10.9   | 4.6    | 4.2    | 5.3    | 15.3   |
| 74.0   | 78.1  | 68.2   | 53.6  | 95.8   | 104.6  | 110.6  | 114.3  | 111.0  |
| 147.0  | 149.4 | 152.1  | 121.8 | 219.4  | 192.5  | 252.5  | 219.5  | 158.2  |
| 118.4  | 118.8 | 158.2  | 95.8  | 172.9  | 187.4  | 175.2  | 212.7  | 257.3  |
| 44.2   | 39.5  | 59.2   | 42.4  | 114.7  | 117.6  | 116.6  | 135.9  | 240.5  |
| 6.9    | 15.5  | 0.6    | 11.6  | 54.3   | 32.1   | 78.7   | 70.3   | 67.3   |

|       |       |       |       |        |        |        |        |        |
|-------|-------|-------|-------|--------|--------|--------|--------|--------|
| 300.2 | 294.1 | 340.3 | 322.6 | 160.7  | 192.3  | 186.9  | 177.2  | 301.5  |
| 1.2   | 0.3   | 0.4   | 1.8   | 133.0  | 150.3  | 113.8  | 109.6  | 45.1   |
| 50.4  | 45.6  | 84.1  | 65.8  | 3.4    | 10.9   | 10.8   | 2.1    | 36.3   |
| 27.8  | 11.0  | 40.6  | 52.7  | 2.3    | 5.4    | 2.7    | 1.9    | 23.5   |
| 323.7 | 331.8 | 403.1 | 359.0 | 433.6  | 319.2  | 442.8  | 497.4  | 327.3  |
| 27.6  | 11.9  | 19.0  | 15.5  | 31.3   | 32.4   | 43.9   | 36.7   | 69.3   |
| 18.3  | 4.9   | 11.5  | 8.3   | 5.0    | 9.2    | 6.5    | 8.3    | 5.8    |
| 1.9   | 4.9   | 2.5   | 1.4   | 25.1   | 12.8   | 41.4   | 38.3   | 2.9    |
| 112.1 | 115.6 | 147.7 | 100.0 | 277.2  | 274.9  | 236.5  | 292.8  | 118.8  |
| 114.6 | 105.7 | 160.0 | 99.7  | 20.3   | 39.0   | 33.6   | 27.4   | 9.1    |
| 137.6 | 125.8 | 249.6 | 150.0 | 315.2  | 450.0  | 286.5  | 309.5  | 532.6  |
| 2.4   | 6.0   | 2.1   | 1.2   | 6.5    | 10.3   | 2.5    | 11.4   | 3.1    |
| 135.0 | 129.6 | 179.1 | 150.0 | 48.4   | 43.4   | 44.1   | 88.3   | 92.5   |
| 291.7 | 263.6 | 354.2 | 248.4 | 405.8  | 544.0  | 488.8  | 545.2  | 301.8  |
| 223.2 | 239.3 | 208.9 | 210.5 | 60.0   | 107.7  | 70.5   | 81.3   | 36.0   |
| 340.4 | 336.3 | 935.5 | 350.1 | 1449.5 | 854.2  | 1118.1 | 1413.4 | 1917.8 |
| 191.3 | 120.5 | 249.1 | 136.9 | 218.7  | 154.8  | 217.9  | 263.4  | 310.1  |
| 83.5  | 97.1  | 73.8  | 74.6  | 26.9   | 25.6   | 27.4   | 44.9   | 37.3   |
| 75.5  | 74.9  | 64.6  | 75.1  | 177.3  | 253.4  | 222.0  | 222.6  | 144.7  |
| 37.6  | 36.7  | 60.7  | 48.7  | 3.1    | 1.0    | 1.5    | 1.7    | 36.4   |
| 28.8  | 34.4  | 20.8  | 26.9  | 8.0    | 18.3   | 8.2    | 13.9   | 12.3   |
| 32.7  | 30.4  | 24.3  | 28.2  | 68.8   | 55.7   | 68.4   | 96.5   | 37.4   |
| 228.0 | 208.8 | 321.6 | 208.1 | 80.9   | 92.6   | 81.7   | 74.0   | 862.9  |
| 416.8 | 329.2 | 379.7 | 268.0 | 238.1  | 228.3  | 272.5  | 333.5  | 247.1  |
| 115.8 | 133.8 | 139.7 | 101.7 | 354.9  | 409.2  | 341.4  | 368.8  | 328.8  |
| 155.9 | 138.4 | 285.6 | 147.9 | 353.8  | 233.4  | 505.2  | 481.1  | 600.6  |
| 4.7   | 7.4   | 5.0   | 8.0   | 53.0   | 92.5   | 42.1   | 48.8   | 9.1    |
| 12.5  | 13.1  | 11.1  | 13.2  | 10.5   | 12.9   | 11.2   | 9.3    | 16.6   |
| 297.2 | 235.8 | 413.5 | 176.9 | 1113.6 | 1108.0 | 1068.2 | 1243.5 | 909.6  |
| 417.5 | 425.0 | 606.4 | 370.4 | 719.7  | 710.0  | 699.3  | 873.7  | 655.3  |
| 140.4 | 103.9 | 166.2 | 127.6 | 72.1   | 99.5   | 89.6   | 84.7   | 139.5  |
| 191.2 | 157.3 | 98.7  | 139.4 | 44.2   | 36.1   | 30.1   | 50.1   | 58.2   |
| 34.3  | 38.3  | 40.3  | 29.6  | 223.3  | 183.3  | 239.3  | 250.3  | 334.8  |
| 257.8 | 258.3 | 316.1 | 192.7 | 352.9  | 289.2  | 466.3  | 443.9  | 565.7  |
| 2.9   | 5.4   | 13.8  | 8.3   | 1.4    | 8.5    | 21.1   | 13.0   | 18.8   |
| 63.9  | 64.0  | 141.8 | 65.0  | 45.8   | 31.3   | 35.2   | 53.5   | 65.9   |
| 75.2  | 71.1  | 128.5 | 89.0  | 106.4  | 128.2  | 130.8  | 145.1  | 512.5  |
| 4.4   | 7.9   | 5.3   | 3.4   | 8.0    | 5.6    | 5.5    | 1.8    | 265.2  |
| 41.3  | 35.1  | 40.2  | 41.9  | 13.0   | 17.2   | 14.7   | 22.5   | 14.5   |
| 15.6  | 21.7  | 29.2  | 24.3  | 47.3   | 64.3   | 45.7   | 58.7   | 68.8   |
| 16.5  | 18.6  | 10.6  | 11.2  | 2.8    | 7.5    | 3.3    | 19.3   | 23.2   |
| 18.8  | 22.9  | 22.9  | 19.2  | 75.1   | 78.5   | 89.8   | 77.4   | 105.8  |
| 122.8 | 146.8 | 129.2 | 124.8 | 165.0  | 200.1  | 177.6  | 170.6  | 208.0  |
| 380.5 | 378.1 | 533.6 | 395.6 | 601.3  | 727.0  | 692.5  | 706.0  | 444.2  |
| 225.0 | 217.8 | 451.6 | 192.5 | 674.9  | 484.1  | 538.6  | 890.8  | 450.8  |
| 123.8 | 116.6 | 176.0 | 126.0 | 223.4  | 191.2  | 207.6  | 255.3  | 245.8  |
| 1.4   | 1.3   | 4.5   | 2.2   | 108.6  | 86.5   | 238.4  | 166.4  | 30.7   |
| 78.8  | 71.1  | 118.2 | 66.8  | 82.0   | 114.0  | 113.2  | 99.8   | 181.8  |
| 7.0   | 4.3   | 18.0  | 6.2   | 61.4   | 54.3   | 73.5   | 78.4   | 6.4    |
| 20.8  | 26.0  | 22.9  | 19.1  | 155.8  | 234.9  | 203.0  | 182.5  | 108.1  |
| 22.1  | 15.5  | 21.4  | 22.1  | 26.0   | 21.4   | 26.1   | 40.4   | 43.9   |
| 59.9  | 45.1  | 89.0  | 61.3  | 226.4  | 203.7  | 236.2  | 283.3  | 111.9  |
| 125.8 | 141.0 | 118.9 | 138.8 | 74.1   | 126.6  | 93.5   | 96.2   | 40.1   |

|       |       |        |        |       |       |       |       |        |
|-------|-------|--------|--------|-------|-------|-------|-------|--------|
| 69.8  | 67.9  | 126.1  | 97.7   | 75.1  | 67.2  | 76.1  | 74.9  | 82.5   |
| 61.6  | 64.5  | 73.2   | 63.9   | 133.4 | 127.2 | 129.5 | 124.1 | 92.2   |
| 742.3 | 781.7 | 749.2  | 1019.2 | 42.2  | 73.6  | 49.6  | 32.7  | 97.7   |
| 76.3  | 66.8  | 114.3  | 69.9   | 75.2  | 77.0  | 77.7  | 75.6  | 123.0  |
| 48.7  | 52.2  | 39.7   | 57.5   | 14.7  | 23.8  | 14.0  | 19.7  | 16.8   |
| 2.4   | 1.8   | 3.1    | 2.0    | 1.0   | 2.0   | 0.9   | 1.3   | 2.4    |
| 338.0 | 343.2 | 409.9  | 358.4  | 410.0 | 347.6 | 476.7 | 468.9 | 547.1  |
| 334.3 | 351.6 | 251.8  | 294.7  | 544.5 | 560.1 | 591.1 | 595.5 | 269.0  |
| 15.9  | 26.0  | 16.7   | 11.3   | 16.4  | 16.6  | 20.8  | 27.8  | 19.0   |
| 36.2  | 38.7  | 26.7   | 37.0   | 12.8  | 14.2  | 11.9  | 13.4  | 4.7    |
| 4.2   | 0.2   | 0.5    | 3.1    | 1.2   | 0.7   | 1.2   | 0.4   | 0.6    |
| 74.2  | 71.2  | 49.8   | 68.3   | 2.2   | 2.0   | 3.9   | 10.4  | 0.6    |
| 256.8 | 244.3 | 335.4  | 231.0  | 161.0 | 125.2 | 151.5 | 182.7 | 238.8  |
| 30.7  | 25.3  | 42.8   | 33.5   | 47.2  | 48.3  | 37.0  | 46.3  | 80.2   |
| 323.3 | 294.6 | 353.5  | 286.8  | 895.9 | 693.7 | 844.9 | 864.1 | 624.6  |
| 102.5 | 118.1 | 140.0  | 114.9  | 255.4 | 196.0 | 229.0 | 310.1 | 66.4   |
| 21.2  | 18.1  | 25.9   | 11.6   | 122.9 | 185.9 | 139.0 | 141.2 | 40.1   |
| 320.3 | 233.7 | 529.6  | 218.1  | 145.8 | 119.7 | 158.0 | 199.6 | 203.2  |
| 48.1  | 34.2  | 66.8   | 52.9   | 110.1 | 130.1 | 117.1 | 130.7 | 114.7  |
| 60.3  | 51.4  | 77.0   | 66.3   | 74.9  | 100.5 | 87.5  | 84.5  | 46.4   |
| 862.1 | 868.2 | 1070.9 | 1011.7 | 319.5 | 403.6 | 340.0 | 350.6 | 1339.1 |
| 102.0 | 139.1 | 130.5  | 94.2   | 103.1 | 109.6 | 98.8  | 121.4 | 276.0  |
| 39.8  | 32.8  | 57.2   | 21.0   | 61.8  | 35.3  | 51.3  | 83.9  | 45.9   |
| 84.9  | 74.3  | 58.4   | 71.3   | 70.2  | 80.2  | 69.2  | 78.0  | 60.9   |
| 16.1  | 17.5  | 28.4   | 21.2   | 115.3 | 100.0 | 133.8 | 159.9 | 66.9   |
| 191.8 | 146.6 | 482.1  | 201.1  | 29.7  | 19.7  | 41.2  | 42.4  | 55.9   |
| 299.1 | 244.1 | 620.9  | 285.7  | 431.9 | 251.5 | 395.9 | 471.8 | 749.8  |
| 5.4   | 1.1   | 1.6    | 1.3    | 18.3  | 29.2  | 21.8  | 35.3  | 2.2    |
| 68.8  | 56.8  | 66.3   | 63.7   | 87.3  | 135.7 | 120.0 | 102.2 | 195.7  |
| 62.9  | 54.8  | 76.3   | 65.5   | 246.2 | 259.7 | 300.9 | 289.3 | 89.9   |
| 28.8  | 38.6  | 34.2   | 32.3   | 89.7  | 42.3  | 79.8  | 92.1  | 81.4   |
| 199.3 | 179.1 | 327.9  | 240.6  | 540.4 | 600.9 | 583.9 | 590.5 | 359.9  |
| 14.1  | 21.6  | 20.6   | 12.3   | 50.7  | 28.9  | 27.5  | 50.0  | 35.2   |
| 172.5 | 169.8 | 303.4  | 164.1  | 188.2 | 191.1 | 213.6 | 224.6 | 241.0  |
| 512.7 | 481.0 | 670.1  | 446.5  | 722.4 | 708.1 | 747.7 | 804.7 | 1106.6 |
| 193.0 | 199.9 | 113.3  | 126.3  | 318.8 | 310.0 | 358.9 | 346.1 | 1361.9 |
| 38.4  | 29.6  | 29.6   | 20.7   | 81.0  | 130.2 | 118.3 | 128.8 | 16.9   |
| 142.4 | 136.5 | 185.5  | 164.3  | 25.2  | 34.1  | 30.0  | 38.1  | 22.2   |
| 90.6  | 111.1 | 115.9  | 101.5  | 185.8 | 320.5 | 250.5 | 264.3 | 148.7  |
| 38.7  | 44.4  | 59.2   | 39.3   | 97.3  | 96.6  | 108.0 | 113.2 | 7.6    |
| 192.8 | 153.8 | 691.9  | 262.3  | 288.1 | 223.3 | 272.2 | 305.5 | 266.3  |
| 32.9  | 33.7  | 36.3   | 29.8   | 8.9   | 6.4   | 6.4   | 4.6   | 69.1   |
| 128.3 | 117.1 | 144.5  | 124.0  | 85.5  | 108.7 | 87.3  | 90.4  | 78.2   |
| 15.4  | 17.3  | 39.8   | 9.2    | 50.2  | 48.0  | 49.6  | 52.2  | 47.2   |
| 3.7   | 5.0   | 5.5    | 6.8    | 12.5  | 6.6   | 11.0  | 11.3  | 11.7   |
| 104.5 | 109.8 | 133.4  | 110.4  | 303.9 | 262.2 | 259.2 | 297.1 | 330.3  |
| 38.7  | 38.0  | 53.3   | 21.6   | 21.2  | 4.8   | 16.9  | 23.9  | 9.3    |
| 161.7 | 207.7 | 106.4  | 214.9  | 14.9  | 14.4  | 13.9  | 15.4  | 22.4   |
| 41.5  | 47.1  | 45.5   | 43.6   | 46.1  | 58.8  | 48.6  | 54.5  | 40.4   |
| 160.0 | 178.6 | 157.5  | 156.3  | 52.6  | 52.0  | 48.1  | 66.2  | 68.3   |
| 43.3  | 52.9  | 28.6   | 63.8   | 1.7   | 2.0   | 1.8   | 1.7   | 20.8   |
| 237.1 | 233.2 | 251.6  | 205.5  | 197.0 | 152.0 | 222.7 | 208.1 | 224.7  |
| 192.5 | 226.5 | 155.3  | 172.2  | 136.5 | 150.3 | 145.7 | 165.2 | 257.7  |

|       |       |        |       |       |        |        |        |       |
|-------|-------|--------|-------|-------|--------|--------|--------|-------|
| 34.2  | 38.4  | 45.4   | 36.9  | 9.7   | 8.6    | 10.5   | 8.4    | 43.3  |
| 34.7  | 29.5  | 41.7   | 36.2  | 115.5 | 113.7  | 114.9  | 134.1  | 126.1 |
| 318.8 | 326.8 | 289.0  | 294.2 | 62.2  | 44.8   | 68.3   | 79.8   | 46.9  |
| 118.0 | 120.6 | 116.8  | 112.8 | 115.3 | 112.1  | 131.1  | 102.9  | 139.8 |
| 1.9   | 3.5   | 6.9    | 4.5   | 1.7   | 2.4    | 1.6    | 0.3    | 1.7   |
| 199.0 | 178.1 | 294.6  | 199.1 | 276.0 | 260.4  | 299.3  | 328.3  | 537.9 |
| 103.5 | 104.1 | 112.6  | 84.3  | 117.8 | 138.5  | 129.4  | 125.7  | 182.9 |
| 34.8  | 38.8  | 32.1   | 24.8  | 54.8  | 59.3   | 51.0   | 59.5   | 58.4  |
| 30.4  | 5.9   | 8.4    | 3.3   | 19.9  | 59.4   | 30.2   | 10.0   | 14.9  |
| 92.6  | 79.3  | 134.5  | 84.3  | 197.9 | 114.5  | 122.7  | 204.6  | 111.2 |
| 1.4   | 1.7   | 1.6    | 1.1   | 124.4 | 154.8  | 133.8  | 169.9  | 258.0 |
| 41.4  | 27.6  | 36.9   | 32.0  | 11.7  | 9.2    | 22.4   | 18.8   | 346.8 |
| 40.5  | 34.6  | 54.5   | 40.9  | 21.8  | 16.2   | 37.2   | 49.5   | 34.9  |
| 36.3  | 39.9  | 42.7   | 37.9  | 28.6  | 27.8   | 31.1   | 30.4   | 13.3  |
| 116.1 | 101.1 | 113.1  | 94.0  | 512.3 | 486.7  | 463.5  | 546.4  | 104.2 |
| 54.6  | 53.7  | 49.2   | 49.3  | 50.4  | 52.9   | 49.9   | 54.7   | 37.1  |
| 61.5  | 57.1  | 114.6  | 53.6  | 1.5   | 4.2    | 1.2    | 3.0    | 2.4   |
| 26.8  | 26.3  | 44.4   | 21.5  | 40.6  | 34.0   | 26.8   | 38.5   | 100.0 |
| 30.7  | 21.7  | 25.4   | 22.2  | 352.2 | 468.0  | 386.4  | 329.4  | 140.8 |
| 92.3  | 83.8  | 242.8  | 69.2  | 456.0 | 271.0  | 456.7  | 504.8  | 591.4 |
| 40.3  | 41.3  | 38.3   | 28.4  | 9.6   | 6.3    | 1.2    | 2.6    | 5.1   |
| 86.8  | 79.0  | 186.4  | 111.3 | 715.9 | 714.3  | 717.8  | 822.7  | 681.1 |
| 250.3 | 227.5 | 283.9  | 226.7 | 152.1 | 199.9  | 145.9  | 146.5  | 177.5 |
| 17.2  | 8.7   | 31.0   | 10.0  | 33.0  | 27.7   | 45.6   | 35.9   | 55.8  |
| 89.1  | 87.7  | 124.6  | 150.2 | 83.6  | 48.6   | 90.3   | 106.1  | 192.1 |
| 57.6  | 60.6  | 57.1   | 45.6  | 29.2  | 48.2   | 32.6   | 35.9   | 22.7  |
| 11.8  | 21.8  | 31.6   | 22.0  | 47.0  | 39.5   | 40.5   | 43.5   | 27.9  |
| 127.5 | 174.0 | 96.8   | 114.3 | 60.2  | 69.6   | 75.7   | 70.9   | 54.8  |
| 77.9  | 70.4  | 115.7  | 93.0  | 126.9 | 132.8  | 122.8  | 142.1  | 145.0 |
| 207.9 | 159.9 | 386.3  | 236.2 | 38.1  | 28.1   | 32.0   | 29.8   | 28.3  |
| 106.1 | 120.9 | 108.5  | 111.3 | 23.7  | 29.9   | 41.8   | 15.5   | 42.1  |
| 26.9  | 24.5  | 61.9   | 30.3  | 69.1  | 245.0  | 86.5   | 98.4   | 100.0 |
| 14.7  | 6.3   | 62.3   | 11.5  | 266.4 | 232.8  | 284.0  | 274.5  | 238.2 |
| 63.6  | 58.9  | 85.4   | 40.2  | 45.5  | 33.8   | 43.0   | 43.9   | 74.8  |
| 2.5   | 1.7   | 8.8    | 9.8   | 2.1   | 3.6    | 5.7    | 2.9    | 4.3   |
| 287.8 | 382.3 | 243.8  | 311.3 | 356.8 | 319.7  | 335.6  | 381.6  | 105.8 |
| 167.7 | 153.4 | 262.9  | 150.2 | 607.6 | 576.4  | 586.4  | 630.2  | 667.5 |
| 81.9  | 71.2  | 86.6   | 77.1  | 323.2 | 309.9  | 293.9  | 389.8  | 824.5 |
| 11.6  | 20.7  | 12.2   | 7.5   | 6.2   | 1.6    | 2.1    | 8.4    | 8.0   |
| 66.4  | 44.8  | 115.1  | 53.2  | 74.5  | 63.4   | 80.7   | 88.6   | 75.0  |
| 2.2   | 2.3   | 3.3    | 1.0   | 259.1 | 206.3  | 348.0  | 314.1  | 9.4   |
| 38.7  | 38.5  | 44.0   | 41.3  | 39.9  | 30.3   | 40.6   | 57.6   | 40.7  |
| 22.8  | 23.2  | 16.4   | 13.5  | 170.6 | 201.4  | 171.2  | 200.6  | 190.7 |
| 7.3   | 8.6   | 19.3   | 8.2   | 13.3  | 8.3    | 8.0    | 10.6   | 232.9 |
| 168.4 | 171.2 | 155.2  | 195.9 | 456.5 | 465.8  | 537.8  | 527.7  | 506.1 |
| 55.9  | 57.7  | 32.9   | 59.2  | 49.5  | 137.9  | 60.4   | 62.3   | 111.4 |
| 7.1   | 3.8   | 10.0   | 3.3   | 2.8   | 3.6    | 6.2    | 4.2    | 3.1   |
| 306.3 | 288.2 | 420.2  | 278.6 | 549.6 | 419.3  | 489.3  | 564.3  | 471.7 |
| 39.5  | 27.5  | 43.8   | 32.6  | 83.0  | 60.2   | 75.1   | 98.9   | 27.0  |
| 811.9 | 736.4 | 1126.1 | 912.4 | 963.9 | 1019.0 | 1071.8 | 1032.9 | 729.4 |
| 174.7 | 111.6 | 219.0  | 134.3 | 276.9 | 223.1  | 255.8  | 334.9  | 258.8 |
| 39.4  | 28.0  | 38.1   | 39.1  | 24.2  | 22.4   | 25.6   | 22.6   | 36.5  |
| 128.7 | 71.5  | 137.5  | 128.8 | 126.7 | 181.9  | 119.6  | 127.1  | 280.2 |

|        |        |        |        |        |        |        |        |        |
|--------|--------|--------|--------|--------|--------|--------|--------|--------|
| 115.0  | 124.1  | 133.3  | 108.3  | 142.2  | 125.3  | 137.5  | 158.9  | 112.0  |
| 1475.4 | 1485.5 | 2600.8 | 1206.0 | 1808.8 | 1511.4 | 1728.9 | 1981.0 | 2111.2 |
| 69.3   | 76.6   | 159.5  | 39.9   | 223.8  | 164.6  | 207.4  | 255.0  | 192.3  |
| 1.3    | 6.1    | 8.1    | 3.4    | 480.6  | 446.1  | 566.5  | 600.6  | 163.8  |
| 151.0  | 167.1  | 204.8  | 140.7  | 200.9  | 191.7  | 239.5  | 275.6  | 117.1  |
| 103.0  | 101.6  | 120.1  | 100.3  | 107.1  | 88.9   | 119.9  | 127.8  | 98.4   |
| 28.8   | 31.7   | 32.9   | 37.0   | 10.3   | 2.8    | 7.7    | 2.5    | 16.3   |
| 211.2  | 204.2  | 265.2  | 216.2  | 199.5  | 287.8  | 283.8  | 317.9  | 208.8  |
| 133.7  | 73.8   | 702.6  | 265.5  | 193.7  | 74.2   | 449.0  | 403.9  | 8.5    |
| 110.8  | 84.9   | 635.8  | 303.6  | 358.3  | 195.5  | 441.5  | 479.0  | 4.4    |
| 55.4   | 38.1   | 311.0  | 110.2  | 137.0  | 83.0   | 195.3  | 242.8  | 0.3    |
| 173.8  | 179.8  | 299.3  | 174.7  | 371.8  | 285.9  | 333.3  | 386.3  | 521.0  |
| 78.4   | 75.4   | 98.1   | 82.9   | 121.3  | 87.3   | 119.7  | 130.7  | 85.4   |
| 33.9   | 27.2   | 30.9   | 23.5   | 235.2  | 275.0  | 339.0  | 322.9  | 17.9   |
| 63.5   | 60.4   | 134.6  | 55.7   | 209.9  | 169.7  | 174.2  | 246.9  | 191.9  |
| 127.3  | 118.0  | 197.1  | 148.3  | 148.4  | 200.5  | 161.6  | 180.7  | 138.4  |
| 3.3    | 11.5   | 1.7    | 3.7    | 11.0   | 18.4   | 12.7   | 11.4   | 10.7   |
| 29.0   | 27.3   | 23.8   | 23.3   | 38.2   | 36.9   | 36.0   | 30.8   | 47.3   |
| 16.5   | 22.8   | 45.9   | 35.2   | 11.6   | 6.1    | 6.7    | 11.0   | 14.3   |
| 177.9  | 170.6  | 280.0  | 156.5  | 248.5  | 131.4  | 250.5  | 256.2  | 133.3  |
| 340.1  | 345.7  | 275.3  | 327.7  | 175.2  | 118.1  | 138.9  | 179.0  | 83.8   |
| 102.6  | 111.1  | 83.1   | 125.2  | 39.0   | 50.2   | 50.8   | 48.6   | 17.1   |
| 35.8   | 52.0   | 48.1   | 47.1   | 43.7   | 40.9   | 36.4   | 61.6   | 37.4   |
| 6.2    | 4.6    | 17.0   | 4.3    | 7.1    | 1.1    | 7.4    | 1.0    | 11.7   |
| 54.6   | 58.0   | 59.4   | 49.6   | 37.4   | 59.7   | 71.0   | 73.3   | 24.0   |
| 188.0  | 201.7  | 199.8  | 186.7  | 75.4   | 112.9  | 90.2   | 88.0   | 85.0   |
| 20.0   | 26.7   | 40.9   | 26.0   | 28.0   | 28.2   | 30.7   | 40.9   | 47.9   |
| 1.3    | 1.0    | 7.0    | 3.8    | 4.3    | 4.0    | 2.7    | 4.3    | 19.6   |
| 48.7   | 54.3   | 179.0  | 69.3   | 91.7   | 56.9   | 75.7   | 102.7  | 103.0  |
| 263.8  | 232.2  | 243.2  | 182.9  | 279.9  | 235.7  | 244.8  | 289.5  | 172.1  |
| 86.2   | 105.0  | 106.6  | 79.4   | 139.7  | 167.1  | 143.9  | 163.4  | 380.7  |
| 13.0   | 3.7    | 5.4    | 6.2    | 8.1    | 8.8    | 14.9   | 20.4   | 18.1   |
| 70.1   | 61.7   | 104.1  | 65.3   | 183.7  | 155.5  | 160.6  | 187.5  | 241.5  |
| 8.0    | 10.7   | 3.4    | 8.6    | 10.2   | 13.5   | 10.1   | 12.4   | 22.0   |
| 167.1  | 152.2  | 305.7  | 202.7  | 216.8  | 248.3  | 230.3  | 223.5  | 94.8   |
| 146.3  | 121.1  | 155.6  | 141.2  | 117.0  | 106.0  | 122.2  | 120.4  | 1.4    |
| 117.9  | 93.1   | 131.8  | 101.6  | 105.8  | 89.4   | 97.2   | 108.1  | 127.8  |
| 966.3  | 958.6  | 1127.7 | 988.0  | 1180.5 | 1493.3 | 1461.4 | 1503.3 | 1760.5 |
| 137.7  | 104.0  | 231.1  | 103.9  | 371.4  | 290.8  | 388.6  | 381.6  | 152.4  |
| 4.1    | 4.1    | 9.8    | 5.5    | 6.1    | 6.3    | 4.2    | 7.6    | 1.8    |
| 124.0  | 79.9   | 121.8  | 84.1   | 115.7  | 99.8   | 91.2   | 104.1  | 58.5   |
| 14.6   | 18.6   | 2.4    | 16.6   | 28.0   | 45.2   | 46.6   | 39.2   | 17.7   |
| 7.1    | 7.4    | 14.5   | 6.1    | 36.9   | 26.2   | 36.5   | 46.2   | 16.5   |
| 139.0  | 139.0  | 173.2  | 156.0  | 169.5  | 190.8  | 201.9  | 222.3  | 87.3   |
| 196.4  | 194.7  | 183.2  | 160.5  | 207.9  | 170.5  | 217.1  | 264.1  | 154.7  |
| 35.5   | 37.3   | 62.4   | 36.1   | 48.3   | 46.3   | 43.8   | 58.5   | 60.5   |
| 20.6   | 23.7   | 16.0   | 11.5   | 58.0   | 63.5   | 51.1   | 61.7   | 99.0   |
| 61.9   | 69.3   | 81.4   | 68.7   | 22.1   | 24.8   | 28.7   | 20.0   | 41.4   |
| 60.6   | 54.4   | 68.4   | 48.8   | 69.4   | 80.7   | 82.2   | 92.7   | 85.2   |
| 24.5   | 32.0   | 18.0   | 28.6   | 11.5   | 28.0   | 22.5   | 33.7   | 17.5   |
| 203.8  | 201.6  | 215.4  | 218.2  | 115.2  | 141.1  | 125.0  | 136.8  | 84.5   |
| 50.6   | 53.9   | 59.0   | 43.7   | 162.2  | 177.0  | 194.0  | 178.6  | 293.1  |
| 86.9   | 103.3  | 47.7   | 74.0   | 69.0   | 51.0   | 87.4   | 79.2   | 61.5   |

|       |       |        |       |        |        |        |        |        |
|-------|-------|--------|-------|--------|--------|--------|--------|--------|
| 53.3  | 65.1  | 56.9   | 53.7  | 70.3   | 92.6   | 59.8   | 75.0   | 23.6   |
| 57.1  | 50.3  | 67.7   | 49.7  | 105.8  | 123.2  | 130.0  | 131.8  | 58.1   |
| 162.9 | 129.4 | 318.8  | 155.0 | 564.2  | 433.6  | 457.8  | 586.9  | 835.1  |
| 139.9 | 122.3 | 157.3  | 119.9 | 62.7   | 88.1   | 68.4   | 60.8   | 480.1  |
| 122.1 | 136.5 | 193.6  | 152.2 | 154.4  | 160.9  | 169.9  | 191.8  | 72.4   |
| 757.0 | 711.8 | 1033.6 | 715.1 | 694.6  | 734.0  | 791.2  | 876.2  | 1055.0 |
| 342.2 | 322.6 | 270.2  | 298.2 | 105.4  | 121.9  | 109.8  | 122.1  | 104.2  |
| 103.8 | 106.7 | 55.9   | 75.8  | 76.5   | 73.5   | 76.1   | 97.3   | 50.6   |
| 52.1  | 40.9  | 82.6   | 41.7  | 155.5  | 99.9   | 143.9  | 194.7  | 163.2  |
| 44.2  | 43.5  | 45.5   | 34.7  | 40.1   | 32.4   | 28.0   | 40.0   | 81.6   |
| 10.7  | 13.0  | 21.7   | 11.1  | 111.0  | 101.6  | 78.7   | 123.2  | 47.0   |
| 883.0 | 912.2 | 907.9  | 862.2 | 1071.6 | 1148.5 | 1180.8 | 1251.5 | 2206.8 |
| 207.9 | 188.6 | 258.1  | 179.5 | 178.3  | 169.5  | 171.1  | 196.2  | 160.3  |
| 29.0  | 22.6  | 27.9   | 16.6  | 18.3   | 15.5   | 14.2   | 18.6   | 19.5   |
| 6.0   | 17.8  | 8.5    | 12.5  | 22.1   | 16.9   | 28.3   | 29.7   | 16.3   |
| 130.9 | 144.2 | 139.6  | 121.0 | 9.5    | 16.4   | 5.0    | 3.7    | 1.5    |
| 22.2  | 6.5   | 65.8   | 29.3  | 171.9  | 128.4  | 143.3  | 186.1  | 380.7  |
| 121.1 | 109.5 | 141.4  | 113.0 | 128.9  | 161.8  | 158.5  | 150.3  | 197.3  |
| 475.5 | 453.2 | 619.1  | 461.5 | 601.1  | 581.8  | 622.1  | 680.2  | 784.9  |
| 5.2   | 2.3   | 2.9    | 1.9   | 1.3    | 1.1    | 1.1    | 1.8    | 2.5    |
| 13.8  | 15.7  | 14.8   | 3.1   | 7.6    | 14.7   | 6.9    | 8.6    | 11.4   |
| 191.8 | 141.3 | 254.2  | 186.5 | 152.9  | 163.9  | 183.5  | 168.2  | 174.2  |
| 5.2   | 10.9  | 14.0   | 1.7   | 51.4   | 25.4   | 69.6   | 58.7   | 113.4  |
| 76.0  | 72.3  | 35.4   | 30.0  | 314.6  | 215.2  | 330.2  | 461.9  | 29.6   |
| 42.2  | 22.9  | 39.6   | 25.3  | 54.7   | 45.5   | 37.8   | 43.0   | 62.0   |
| 7.9   | 13.8  | 16.1   | 11.4  | 111.8  | 89.1   | 135.6  | 172.8  | 28.0   |
| 185.2 | 145.3 | 320.1  | 132.8 | 177.6  | 129.1  | 80.1   | 139.1  | 203.8  |
| 38.5  | 33.4  | 43.3   | 30.7  | 132.1  | 107.1  | 162.9  | 206.1  | 218.3  |
| 163.6 | 158.9 | 129.6  | 164.5 | 169.4  | 212.1  | 213.5  | 220.9  | 446.5  |
| 96.6  | 81.1  | 137.6  | 87.0  | 155.7  | 125.5  | 153.6  | 143.7  | 181.7  |
| 124.3 | 108.4 | 124.3  | 97.3  | 213.7  | 203.6  | 247.2  | 229.7  | 246.7  |
| 159.1 | 125.0 | 140.7  | 138.0 | 185.7  | 236.1  | 203.5  | 219.0  | 92.0   |
| 274.1 | 266.4 | 232.6  | 221.2 | 100.7  | 74.5   | 77.7   | 119.3  | 91.6   |
| 172.6 | 157.4 | 317.9  | 229.9 | 145.7  | 104.1  | 127.5  | 188.3  | 227.0  |
| 48.8  | 81.3  | 63.0   | 62.3  | 32.3   | 60.5   | 56.5   | 50.0   | 60.5   |
| 68.3  | 60.6  | 38.3   | 44.9  | 51.5   | 29.0   | 35.4   | 62.9   | 85.2   |
| 54.4  | 50.2  | 27.5   | 23.3  | 31.3   | 30.5   | 28.3   | 29.5   | 8.5    |
| 151.7 | 116.1 | 218.7  | 120.7 | 145.5  | 116.3  | 164.5  | 179.9  | 66.1   |
| 3.0   | 0.5   | 3.8    | 2.4   | 46.6   | 61.1   | 59.9   | 65.2   | 8.3    |
| 165.5 | 152.2 | 150.5  | 136.6 | 244.7  | 266.5  | 259.9  | 269.4  | 221.4  |
| 7.9   | 5.5   | 6.5    | 12.2  | 15.9   | 12.4   | 14.0   | 11.9   | 10.8   |
| 2.0   | 1.2   | 1.1    | 1.0   | 0.4    | 4.1    | 2.9    | 0.7    | 2.3    |
| 1.6   | 1.6   | 2.5    | 0.3   | 35.5   | 30.7   | 52.2   | 65.9   | 61.4   |
| 430.3 | 418.0 | 473.9  | 376.0 | 7.0    | 8.7    | 4.6    | 14.2   | 18.6   |
| 22.6  | 17.3  | 18.4   | 34.9  | 166.0  | 123.9  | 201.5  | 222.9  | 11.7   |
| 66.1  | 63.0  | 166.3  | 54.3  | 474.3  | 421.0  | 664.8  | 639.8  | 175.5  |
| 5.4   | 3.9   | 1.3    | 1.3   | 1.9    | 4.4    | 2.4    | 0.5    | 3.7    |
| 708.6 | 657.2 | 1149.7 | 645.9 | 613.2  | 519.6  | 634.6  | 545.9  | 627.6  |
| 10.3  | 13.8  | 18.1   | 11.6  | 42.0   | 47.0   | 37.3   | 49.3   | 134.9  |
| 76.9  | 78.1  | 54.2   | 51.7  | 150.1  | 139.9  | 126.5  | 162.1  | 188.5  |
| 538.9 | 478.4 | 585.6  | 458.9 | 49.6   | 31.5   | 56.3   | 49.7   | 8.7    |
| 34.8  | 30.3  | 31.4   | 25.3  | 1.6    | 3.3    | 7.5    | 3.7    | 4.9    |
| 240.2 | 193.0 | 329.4  | 241.6 | 302.4  | 324.0  | 318.8  | 335.7  | 409.2  |

|       |       |        |       |        |        |        |        |        |
|-------|-------|--------|-------|--------|--------|--------|--------|--------|
| 50.8  | 43.7  | 59.7   | 37.7  | 27.6   | 43.6   | 34.3   | 33.8   | 52.1   |
| 298.5 | 265.2 | 467.0  | 296.9 | 447.1  | 398.3  | 439.2  | 535.2  | 471.8  |
| 6.0   | 9.8   | 1.9    | 10.6  | 91.0   | 114.1  | 87.9   | 101.6  | 77.0   |
| 99.1  | 96.5  | 120.4  | 95.6  | 60.4   | 30.5   | 53.7   | 69.6   | 59.6   |
| 442.2 | 383.5 | 694.0  | 395.0 | 863.7  | 947.3  | 944.9  | 961.5  | 831.8  |
| 5.4   | 1.3   | 7.0    | 4.0   | 61.6   | 66.4   | 77.3   | 90.4   | 50.7   |
| 27.7  | 11.1  | 27.4   | 16.1  | 11.4   | 9.2    | 2.5    | 25.5   | 17.3   |
| 82.0  | 74.6  | 86.6   | 79.7  | 123.3  | 151.6  | 120.4  | 129.7  | 107.5  |
| 51.4  | 52.1  | 58.1   | 40.7  | 84.4   | 101.6  | 93.0   | 89.7   | 97.5   |
| 14.5  | 6.0   | 21.2   | 15.7  | 14.4   | 10.4   | 6.7    | 18.5   | 25.5   |
| 120.9 | 126.0 | 127.9  | 96.4  | 228.8  | 217.4  | 267.8  | 312.5  | 178.0  |
| 77.7  | 99.5  | 88.5   | 75.6  | 85.5   | 84.2   | 86.6   | 98.4   | 136.0  |
| 4.0   | 6.2   | 11.2   | 4.1   | 1073.6 | 1217.9 | 1625.9 | 1284.8 | 53.2   |
| 139.6 | 130.6 | 137.9  | 122.3 | 21.5   | 24.2   | 15.5   | 26.1   | 35.0   |
| 64.7  | 41.5  | 75.3   | 48.3  | 1.3    | 3.7    | 3.7    | 6.9    | 651.7  |
| 36.8  | 46.6  | 27.6   | 11.7  | 13.8   | 15.3   | 20.4   | 26.6   | 58.0   |
| 19.5  | 13.9  | 69.2   | 23.7  | 7.6    | 13.0   | 8.1    | 16.7   | 1.1    |
| 3.7   | 1.2   | 2.6    | 1.7   | 1.4    | 0.9    | 1.4    | 1.8    | 1.4    |
| 39.5  | 52.1  | 65.1   | 41.1  | 29.3   | 17.0   | 19.6   | 42.6   | 15.1   |
| 30.3  | 10.4  | 25.4   | 31.0  | 45.8   | 43.7   | 52.3   | 50.7   | 26.9   |
| 31.5  | 30.8  | 58.2   | 36.6  | 135.2  | 136.3  | 118.8  | 174.8  | 103.9  |
| 94.9  | 80.6  | 109.2  | 98.8  | 138.1  | 123.7  | 118.3  | 136.8  | 134.3  |
| 92.7  | 85.8  | 118.9  | 83.2  | 197.3  | 255.5  | 308.2  | 247.6  | 273.7  |
| 118.1 | 136.9 | 65.4   | 95.9  | 295.2  | 327.6  | 276.7  | 358.3  | 90.2   |
| 5.2   | 7.3   | 16.9   | 10.4  | 2.7    | 5.8    | 1.8    | 16.4   | 8.3    |
| 20.3  | 19.3  | 21.8   | 16.9  | 24.1   | 15.4   | 19.5   | 18.8   | 82.5   |
| 1.5   | 1.3   | 1.3    | 0.5   | 9.8    | 15.7   | 7.6    | 1.0    | 54.9   |
| 6.9   | 7.5   | 4.2    | 8.3   | 9.2    | 21.7   | 14.0   | 21.4   | 3.7    |
| 52.0  | 50.0  | 71.9   | 49.6  | 101.2  | 104.5  | 119.6  | 115.2  | 195.5  |
| 9.0   | 6.2   | 9.7    | 5.8   | 81.9   | 66.0   | 105.6  | 94.3   | 47.9   |
| 46.2  | 42.5  | 63.8   | 43.8  | 146.8  | 110.3  | 146.8  | 170.3  | 201.1  |
| 239.1 | 198.9 | 318.1  | 198.6 | 8.8    | 11.8   | 10.5   | 17.5   | 11.2   |
| 53.0  | 49.0  | 98.9   | 52.0  | 48.7   | 64.5   | 43.6   | 44.1   | 87.9   |
| 110.4 | 100.7 | 114.0  | 123.8 | 95.0   | 78.3   | 78.6   | 94.7   | 71.9   |
| 45.6  | 63.4  | 12.0   | 40.9  | 85.7   | 136.2  | 79.6   | 99.6   | 66.3   |
| 190.0 | 180.5 | 242.5  | 184.1 | 120.4  | 73.8   | 90.6   | 133.3  | 191.6  |
| 12.0  | 6.9   | 15.5   | 6.3   | 6.1    | 10.7   | 6.1    | 11.1   | 9.2    |
| 39.1  | 48.3  | 60.6   | 40.0  | 31.2   | 34.7   | 35.0   | 34.3   | 63.4   |
| 3.3   | 0.6   | 2.2    | 7.1   | 1.2    | 1.2    | 4.9    | 1.4    | 1.3    |
| 37.5  | 32.1  | 34.5   | 32.9  | 74.5   | 158.8  | 127.7  | 73.7   | 95.6   |
| 36.1  | 34.6  | 90.1   | 54.0  | 8.1    | 21.1   | 20.3   | 13.7   | 15.9   |
| 117.4 | 93.0  | 150.6  | 95.1  | 419.3  | 431.4  | 409.5  | 465.4  | 291.3  |
| 236.4 | 289.0 | 102.6  | 179.8 | 32.8   | 22.3   | 43.6   | 43.1   | 6.5    |
| 15.5  | 13.2  | 8.3    | 12.9  | 30.7   | 27.2   | 36.5   | 26.7   | 40.3   |
| 44.0  | 63.2  | 58.1   | 55.0  | 19.0   | 27.4   | 18.3   | 27.8   | 36.7   |
| 58.1  | 69.5  | 97.4   | 79.2  | 83.4   | 95.2   | 96.9   | 109.8  | 141.8  |
| 51.0  | 54.5  | 72.8   | 51.3  | 91.0   | 81.1   | 89.2   | 113.4  | 90.0   |
| 65.1  | 87.0  | 94.8   | 65.3  | 56.6   | 77.0   | 60.6   | 105.4  | 61.2   |
| 50.0  | 54.8  | 68.5   | 46.6  | 107.8  | 84.2   | 93.0   | 124.4  | 207.1  |
| 156.0 | 142.9 | 156.2  | 154.6 | 161.0  | 196.5  | 152.5  | 205.8  | 270.5  |
| 37.6  | 34.3  | 61.0   | 31.6  | 49.8   | 21.5   | 38.3   | 46.9   | 72.1   |
| 969.8 | 869.2 | 1373.8 | 894.2 | 1164.0 | 1143.3 | 1174.7 | 1266.6 | 1344.3 |
| 106.0 | 107.4 | 94.6   | 91.7  | 185.5  | 201.4  | 206.0  | 180.2  | 36.6   |

|       |       |       |       |        |        |        |        |        |
|-------|-------|-------|-------|--------|--------|--------|--------|--------|
| 38.5  | 32.0  | 43.8  | 41.0  | 23.4   | 30.7   | 29.4   | 25.4   | 5.3    |
| 1.5   | 1.2   | 1.7   | 1.8   | 1.5    | 0.8    | 1.2    | 1.6    | 2.2    |
| 41.3  | 45.9  | 42.4  | 45.7  | 57.0   | 40.8   | 46.4   | 51.4   | 34.2   |
| 6.5   | 5.2   | 9.1   | 8.9   | 4.5    | 9.7    | 2.4    | 6.7    | 10.3   |
| 7.9   | 16.4  | 3.9   | 4.8   | 23.3   | 27.8   | 24.0   | 29.9   | 15.3   |
| 1.6   | 7.1   | 2.0   | 4.9   | 2.0    | 1.6    | 1.7    | 1.2    | 26.1   |
| 1.8   | 1.8   | 2.4   | 1.6   | 1.8    | 4.0    | 3.9    | 1.6    | 61.8   |
| 55.7  | 61.7  | 65.3  | 59.8  | 106.8  | 93.9   | 121.8  | 152.8  | 189.0  |
| 104.3 | 95.0  | 159.4 | 118.6 | 257.5  | 191.2  | 238.8  | 283.9  | 323.6  |
| 202.6 | 168.2 | 257.9 | 197.6 | 325.8  | 398.1  | 325.3  | 365.0  | 173.8  |
| 137.0 | 117.2 | 160.0 | 106.1 | 30.8   | 19.8   | 18.5   | 27.6   | 35.4   |
| 31.5  | 26.1  | 47.0  | 48.9  | 41.6   | 54.4   | 55.4   | 65.8   | 73.0   |
| 3.1   | 3.7   | 4.9   | 4.2   | 10.4   | 5.9    | 3.7    | 1.6    | 3.8    |
| 4.4   | 9.2   | 7.8   | 10.0  | 12.8   | 4.3    | 6.4    | 5.2    | 15.7   |
| 2.6   | 1.3   | 14.4  | 5.2   | 8.4    | 4.1    | 3.7    | 7.2    | 13.9   |
| 0.6   | 5.3   | 3.9   | 2.3   | 0.9    | 2.7    | 6.0    | 1.2    | 11.5   |
| 121.6 | 95.3  | 150.1 | 94.6  | 113.1  | 105.2  | 130.4  | 138.0  | 181.0  |
| 131.8 | 125.0 | 164.7 | 101.3 | 75.4   | 102.2  | 96.6   | 94.8   | 77.7   |
| 8.8   | 12.5  | 14.7  | 6.9   | 54.4   | 87.0   | 49.4   | 74.7   | 135.3  |
| 93.7  | 87.8  | 160.2 | 100.6 | 83.6   | 82.1   | 89.9   | 95.2   | 138.4  |
| 8.5   | 12.7  | 8.5   | 6.5   | 25.0   | 56.6   | 33.1   | 17.7   | 36.7   |
| 26.7  | 20.3  | 57.3  | 19.0  | 45.5   | 37.4   | 48.1   | 56.2   | 61.2   |
| 30.1  | 36.9  | 49.8  | 32.8  | 49.0   | 67.0   | 45.0   | 49.9   | 78.2   |
| 76.8  | 68.5  | 99.9  | 65.9  | 94.6   | 89.9   | 95.6   | 119.9  | 73.6   |
| 46.7  | 44.3  | 38.7  | 29.9  | 157.4  | 198.1  | 92.9   | 161.8  | 45.0   |
| 79.2  | 83.7  | 67.0  | 59.9  | 9.5    | 12.0   | 27.3   | 27.8   | 2.7    |
| 68.9  | 76.4  | 51.6  | 69.7  | 33.2   | 34.8   | 25.2   | 40.0   | 54.6   |
| 1.6   | 4.0   | 8.2   | 8.1   | 1.2    | 0.8    | 1.0    | 1.8    | 3.4    |
| 23.1  | 30.6  | 16.0  | 13.8  | 242.3  | 207.6  | 285.5  | 256.3  | 583.9  |
| 3.6   | 7.5   | 3.6   | 1.9   | 24.0   | 17.6   | 41.4   | 8.4    | 46.6   |
| 93.4  | 86.3  | 205.8 | 78.8  | 85.9   | 95.9   | 96.4   | 112.7  | 233.7  |
| 32.1  | 32.9  | 32.8  | 26.7  | 40.8   | 45.4   | 36.2   | 34.0   | 40.9   |
| 60.7  | 49.7  | 60.8  | 52.7  | 441.0  | 624.3  | 421.0  | 403.9  | 170.2  |
| 45.2  | 31.3  | 66.6  | 35.4  | 62.7   | 48.5   | 56.0   | 59.7   | 130.8  |
| 648.2 | 565.1 | 940.8 | 544.1 | 1209.1 | 1291.0 | 1452.5 | 1423.6 | 1373.6 |
| 133.0 | 125.9 | 108.8 | 62.8  | 218.8  | 173.5  | 213.5  | 219.7  | 177.4  |
| 186.0 | 245.3 | 133.8 | 180.0 | 101.5  | 101.9  | 111.2  | 136.8  | 213.7  |
| 7.5   | 5.1   | 3.9   | 4.8   | 6.6    | 3.9    | 4.2    | 7.0    | 6.5    |
| 26.2  | 12.9  | 23.9  | 16.7  | 972.8  | 898.6  | 1363.2 | 1287.1 | 26.2   |
| 35.7  | 36.4  | 63.2  | 28.5  | 114.8  | 124.3  | 127.1  | 150.1  | 83.1   |
| 197.5 | 142.3 | 262.9 | 173.0 | 179.8  | 220.8  | 191.9  | 223.5  | 209.4  |
| 177.8 | 177.8 | 163.7 | 157.2 | 288.2  | 290.0  | 298.4  | 353.7  | 554.6  |
| 90.5  | 83.7  | 221.1 | 57.2  | 992.0  | 527.8  | 887.4  | 1098.6 | 762.5  |
| 107.6 | 92.9  | 247.2 | 71.6  | 251.4  | 169.3  | 219.6  | 222.6  | 224.6  |
| 68.4  | 61.5  | 112.0 | 62.9  | 119.7  | 90.1   | 108.7  | 119.3  | 103.3  |
| 200.0 | 207.8 | 308.2 | 264.8 | 143.9  | 126.6  | 136.2  | 149.2  | 72.5   |
| 2.9   | 1.1   | 9.2   | 3.4   | 98.0   | 58.5   | 107.5  | 122.4  | 3.6    |
| 6.0   | 1.6   | 6.8   | 4.8   | 71.2   | 38.0   | 72.1   | 72.0   | 13.2   |
| 76.4  | 73.9  | 90.2  | 61.1  | 42.0   | 55.7   | 58.8   | 58.4   | 49.2   |
| 42.2  | 51.6  | 39.3  | 35.1  | 122.0  | 107.8  | 128.1  | 146.7  | 151.0  |
| 30.8  | 44.4  | 39.9  | 37.8  | 35.5   | 37.9   | 39.2   | 25.6   | 21.8   |
| 44.8  | 41.8  | 104.3 | 28.0  | 352.8  | 181.6  | 301.5  | 365.9  | 143.9  |
| 18.6  | 20.1  | 26.5  | 21.0  | 23.3   | 21.5   | 14.6   | 24.0   | 15.7   |



|        |        |        |        |        |        |        |        |        |
|--------|--------|--------|--------|--------|--------|--------|--------|--------|
| 44.0   | 34.4   | 40.1   | 39.5   | 34.9   | 39.0   | 44.8   | 34.4   | 31.0   |
| 1.2    | 1.3    | 1.5    | 1.3    | 2.7    | 1.0    | 1.5    | 6.2    | 1.6    |
| 12.2   | 8.5    | 13.3   | 7.7    | 4.5    | 11.7   | 7.2    | 7.7    | 28.0   |
| 72.8   | 58.0   | 116.3  | 53.7   | 131.9  | 131.0  | 183.9  | 176.5  | 191.9  |
| 11.3   | 8.0    | 8.2    | 13.1   | 19.0   | 12.4   | 17.1   | 8.0    | 16.7   |
| 9.3    | 6.2    | 17.0   | 13.7   | 15.3   | 6.9    | 10.2   | 12.8   | 11.4   |
| 69.1   | 64.0   | 151.1  | 58.3   | 161.7  | 111.5  | 147.3  | 177.3  | 214.1  |
| 3.0    | 2.7    | 2.4    | 1.8    | 7.9    | 3.0    | 20.9   | 3.6    | 2.5    |
| 49.9   | 62.9   | 95.2   | 34.4   | 336.5  | 291.5  | 281.4  | 398.3  | 299.7  |
| 48.5   | 56.6   | 53.5   | 45.3   | 34.3   | 34.1   | 35.7   | 32.3   | 6.9    |
| 1.0    | 3.3    | 1.9    | 7.1    | 5.8    | 1.6    | 7.9    | 11.5   | 83.0   |
| 157.7  | 141.5  | 175.3  | 149.6  | 125.4  | 89.2   | 113.2  | 137.8  | 110.8  |
| 9.0    | 6.8    | 4.5    | 12.1   | 3.3    | 7.0    | 4.1    | 1.5    | 108.1  |
| 229.9  | 223.2  | 264.9  | 232.6  | 49.8   | 59.9   | 51.4   | 80.1   | 23.4   |
| 139.3  | 113.8  | 143.6  | 125.2  | 40.1   | 33.4   | 38.0   | 45.0   | 21.0   |
| 1.3    | 1.7    | 2.3    | 1.3    | 1.3    | 1.3    | 3.5    | 2.8    | 1.4    |
| 528.0  | 624.6  | 450.0  | 423.8  | 201.8  | 253.5  | 210.8  | 243.4  | 67.1   |
| 3.0    | 1.9    | 7.8    | 2.6    | 1.5    | 1.0    | 3.1    | 7.5    | 30.1   |
| 11.4   | 8.1    | 28.9   | 12.2   | 263.1  | 259.8  | 235.5  | 272.1  | 339.2  |
| 59.6   | 62.8   | 30.8   | 49.9   | 409.9  | 353.2  | 566.3  | 518.4  | 128.4  |
| 5.7    | 6.9    | 13.0   | 9.7    | 6.0    | 2.7    | 7.7    | 6.5    | 11.3   |
| 11.5   | 14.2   | 7.8    | 2.9    | 25.5   | 17.8   | 22.2   | 14.6   | 124.4  |
| 295.2  | 250.5  | 418.0  | 233.3  | 305.0  | 262.7  | 299.4  | 352.7  | 325.3  |
| 105.1  | 94.3   | 88.2   | 67.8   | 66.6   | 60.8   | 58.3   | 64.8   | 16.7   |
| 5.0    | 9.8    | 38.7   | 13.2   | 80.5   | 53.1   | 93.1   | 120.1  | 10.2   |
| 39.8   | 43.9   | 34.5   | 22.8   | 193.9  | 183.9  | 464.1  | 321.6  | 5.4    |
| 82.1   | 89.2   | 148.9  | 90.1   | 155.4  | 189.8  | 162.9  | 171.7  | 237.4  |
| 41.7   | 39.3   | 79.6   | 31.5   | 107.0  | 133.7  | 114.1  | 142.5  | 49.9   |
| 1.1    | 0.5    | 3.2    | 3.9    | 0.6    | 1.8    | 0.8    | 0.6    | 114.6  |
| 0.8    | 0.6    | 1.0    | 0.9    | 0.6    | 0.6    | 1.0    | 0.7    | 1.0    |
| 36.7   | 50.7   | 16.7   | 38.6   | 43.0   | 53.3   | 53.4   | 61.4   | 35.4   |
| 13.4   | 11.2   | 16.4   | 7.0    | 3.7    | 7.5    | 4.2    | 8.6    | 7.4    |
| 31.1   | 35.6   | 44.8   | 35.6   | 15.3   | 18.8   | 20.7   | 29.2   | 8.2    |
| 4.8    | 10.4   | 18.7   | 3.0    | 17.7   | 12.4   | 18.9   | 19.3   | 103.8  |
| 153.0  | 170.3  | 134.7  | 150.4  | 94.4   | 85.9   | 96.0   | 106.4  | 135.6  |
| 131.0  | 142.1  | 155.6  | 136.7  | 617.1  | 582.3  | 648.0  | 627.5  | 852.0  |
| 120.8  | 90.4   | 180.6  | 115.8  | 171.3  | 122.7  | 165.4  | 232.2  | 205.7  |
| 23.3   | 35.7   | 33.1   | 25.3   | 14.2   | 27.7   | 5.1    | 18.5   | 25.4   |
| 41.7   | 41.6   | 35.8   | 26.7   | 41.3   | 52.3   | 54.3   | 62.5   | 27.6   |
| 118.3  | 124.6  | 76.5   | 99.9   | 40.6   | 55.4   | 52.9   | 50.4   | 27.3   |
| 92.4   | 91.8   | 173.7  | 92.0   | 308.6  | 201.4  | 281.0  | 322.7  | 257.7  |
| 6.3    | 1.3    | 2.2    | 1.4    | 1.7    | 3.1    | 3.8    | 3.1    | 5.0    |
| 32.2   | 31.2   | 64.2   | 44.5   | 64.4   | 32.0   | 75.6   | 67.4   | 56.6   |
| 246.3  | 234.0  | 273.8  | 251.1  | 347.4  | 401.6  | 379.2  | 419.6  | 347.9  |
| 102.7  | 108.6  | 127.1  | 96.3   | 77.8   | 69.0   | 74.6   | 86.9   | 77.3   |
| 1207.8 | 1273.9 | 1753.5 | 1267.6 | 495.4  | 536.2  | 447.5  | 636.8  | 634.1  |
| 1.7    | 1.3    | 2.3    | 1.4    | 29.1   | 54.6   | 29.1   | 29.5   | 53.9   |
| 153.6  | 119.4  | 202.8  | 170.6  | 43.5   | 35.5   | 47.6   | 66.7   | 45.2   |
| 3.0    | 1.8    | 3.3    | 1.9    | 3.8    | 4.3    | 5.7    | 5.0    | 2.7    |
| 160.9  | 153.8  | 67.3   | 86.4   | 1123.0 | 1354.8 | 1324.7 | 1163.8 | 626.8  |
| 4.0    | 1.1    | 8.3    | 5.5    | 27.5   | 33.2   | 24.4   | 22.5   | 3.4    |
| 156.5  | 127.8  | 407.3  | 95.4   | 1535.3 | 1733.2 | 1479.9 | 1684.0 | 1158.4 |
| 2.3    | 3.3    | 20.7   | 12.0   | 88.6   | 90.4   | 107.8  | 112.2  | 72.6   |

|       |       |       |       |       |       |       |       |       |
|-------|-------|-------|-------|-------|-------|-------|-------|-------|
| 42.4  | 33.3  | 71.0  | 41.9  | 126.6 | 105.3 | 110.1 | 158.7 | 89.8  |
| 119.0 | 102.9 | 133.9 | 101.9 | 197.8 | 214.0 | 210.2 | 198.6 | 117.2 |
| 11.9  | 10.1  | 23.9  | 21.6  | 28.1  | 9.1   | 29.3  | 4.7   | 148.5 |
| 86.6  | 54.4  | 96.2  | 52.3  | 61.2  | 58.2  | 65.1  | 70.8  | 38.0  |
| 3.3   | 6.8   | 9.3   | 4.9   | 95.3  | 107.8 | 108.1 | 98.7  | 167.8 |
| 36.9  | 26.4  | 47.5  | 38.6  | 36.4  | 25.8  | 38.7  | 44.2  | 17.1  |
| 14.2  | 13.8  | 23.2  | 30.5  | 5.9   | 7.7   | 6.4   | 9.6   | 294.6 |
| 8.9   | 4.5   | 7.6   | 3.1   | 4.6   | 5.6   | 4.2   | 1.9   | 4.1   |
| 67.2  | 80.0  | 74.8  | 68.7  | 75.9  | 116.1 | 96.3  | 87.6  | 87.3  |
| 106.8 | 112.8 | 72.0  | 72.5  | 127.0 | 224.6 | 135.0 | 145.2 | 174.9 |
| 11.7  | 15.7  | 11.8  | 6.3   | 9.2   | 13.5  | 9.4   | 11.1  | 13.3  |
| 15.0  | 12.3  | 14.5  | 11.4  | 9.5   | 10.4  | 16.2  | 17.2  | 7.3   |
| 11.6  | 10.9  | 10.9  | 12.7  | 265.2 | 269.7 | 227.3 | 273.4 | 567.7 |
| 497.3 | 487.9 | 586.4 | 587.8 | 115.0 | 118.1 | 115.0 | 131.3 | 96.9  |
| 558.0 | 553.8 | 598.0 | 490.7 | 308.4 | 342.0 | 362.8 | 368.8 | 245.3 |
| 148.7 | 133.0 | 389.6 | 132.1 | 90.1  | 65.2  | 75.2  | 92.6  | 46.5  |
| 71.7  | 83.6  | 79.3  | 85.5  | 82.4  | 59.2  | 75.9  | 67.4  | 51.1  |
| 1.0   | 3.4   | 2.8   | 3.8   | 35.9  | 41.4  | 37.7  | 40.4  | 5.1   |
| 228.4 | 191.4 | 310.3 | 204.9 | 593.1 | 555.3 | 614.1 | 696.6 | 708.9 |
| 3.4   | 2.4   | 1.5   | 2.8   | 14.9  | 4.0   | 21.1  | 21.1  | 79.7  |
| 35.4  | 33.3  | 29.8  | 41.1  | 41.0  | 45.8  | 37.2  | 39.8  | 22.5  |
| 2.8   | 1.5   | 3.9   | 2.5   | 80.8  | 71.1  | 69.4  | 88.2  | 68.4  |
| 56.0  | 66.5  | 91.3  | 61.8  | 32.7  | 51.1  | 46.3  | 53.6  | 65.1  |
| 120.1 | 117.6 | 160.2 | 185.0 | 17.0  | 16.4  | 23.7  | 23.3  | 2.8   |
| 50.7  | 35.7  | 98.6  | 67.9  | 84.8  | 110.9 | 146.4 | 107.6 | 176.4 |
| 73.7  | 48.0  | 61.9  | 48.3  | 119.8 | 98.2  | 108.6 | 114.8 | 73.0  |
| 139.7 | 154.3 | 82.9  | 99.6  | 57.3  | 49.7  | 49.9  | 67.6  | 28.8  |
| 4.0   | 3.5   | 1.8   | 0.7   | 0.9   | 1.8   | 1.7   | 2.3   | 1.2   |
| 5.3   | 1.0   | 8.1   | 3.0   | 5.2   | 1.7   | 4.5   | 4.1   | 10.1  |
| 9.6   | 16.8  | 20.3  | 7.9   | 19.7  | 16.5  | 17.9  | 28.7  | 16.2  |
| 34.9  | 32.8  | 36.2  | 28.4  | 60.4  | 71.3  | 65.1  | 78.2  | 23.3  |
| 217.8 | 197.4 | 606.3 | 179.8 | 520.4 | 353.2 | 442.8 | 446.1 | 382.9 |
| 7.1   | 5.3   | 13.2  | 2.9   | 14.8  | 8.5   | 8.1   | 16.9  | 13.7  |
| 340.3 | 400.3 | 397.8 | 368.5 | 423.5 | 474.4 | 495.3 | 490.7 | 477.2 |
| 13.9  | 5.4   | 26.0  | 8.4   | 4.9   | 5.4   | 16.7  | 24.7  | 33.8  |
| 27.8  | 30.9  | 42.6  | 21.2  | 36.5  | 43.5  | 41.2  | 52.8  | 45.0  |
| 2.8   | 2.3   | 5.0   | 3.3   | 7.9   | 2.1   | 2.2   | 3.3   | 3.6   |
| 8.2   | 6.0   | 13.8  | 8.4   | 26.2  | 26.7  | 32.3  | 60.6  | 19.1  |
| 104.2 | 112.7 | 148.9 | 108.2 | 71.6  | 109.6 | 76.9  | 90.8  | 127.3 |
| 76.8  | 107.1 | 83.4  | 64.9  | 150.7 | 185.1 | 119.5 | 142.4 | 238.0 |
| 7.1   | 4.8   | 10.0  | 7.5   | 2.8   | 13.4  | 6.0   | 15.5  | 6.5   |
| 624.5 | 544.4 | 697.7 | 512.8 | 597.2 | 522.1 | 669.6 | 719.4 | 690.2 |
| 290.3 | 206.1 | 267.6 | 233.6 | 123.6 | 97.0  | 111.2 | 112.0 | 254.6 |
| 482.6 | 462.3 | 484.7 | 476.9 | 221.2 | 215.0 | 277.9 | 233.1 | 310.7 |
| 2.0   | 1.3   | 5.3   | 1.5   | 16.9  | 10.0  | 14.3  | 10.2  | 13.1  |
| 15.4  | 8.1   | 15.3  | 13.3  | 50.0  | 56.7  | 85.0  | 99.4  | 11.3  |
| 184.9 | 175.0 | 252.3 | 265.9 | 114.4 | 154.0 | 169.6 | 170.9 | 161.1 |
| 23.7  | 18.0  | 23.8  | 31.9  | 7.9   | 13.1  | 8.0   | 14.0  | 9.5   |
| 12.1  | 13.6  | 8.8   | 10.1  | 10.8  | 9.3   | 6.8   | 5.6   | 7.1   |
| 9.5   | 7.9   | 7.3   | 5.1   | 2.4   | 5.5   | 7.3   | 4.0   | 9.1   |
| 1.5   | 1.8   | 0.6   | 1.3   | 5.7   | 3.6   | 9.3   | 10.2  | 4.1   |
| 2.7   | 3.0   | 2.5   | 1.2   | 47.8  | 43.1  | 50.4  | 53.5  | 80.8  |
| 27.5  | 16.3  | 7.6   | 11.2  | 19.7  | 16.7  | 19.2  | 37.4  | 43.4  |

|       |       |       |       |       |       |        |       |       |
|-------|-------|-------|-------|-------|-------|--------|-------|-------|
| 14.8  | 20.8  | 14.9  | 8.7   | 52.2  | 40.1  | 47.8   | 50.6  | 64.8  |
| 81.2  | 84.3  | 128.2 | 77.2  | 160.6 | 136.9 | 139.3  | 187.8 | 164.7 |
| 2.7   | 3.8   | 6.7   | 5.8   | 2.2   | 12.0  | 7.9    | 2.0   | 2.9   |
| 94.4  | 95.8  | 115.5 | 71.9  | 91.4  | 108.9 | 92.9   | 122.4 | 171.3 |
| 0.4   | 2.1   | 3.4   | 1.5   | 7.1   | 0.8   | 8.7    | 11.3  | 1.8   |
| 63.9  | 67.2  | 70.6  | 66.1  | 10.0  | 8.7   | 13.3   | 15.9  | 66.1  |
| 22.4  | 23.5  | 25.0  | 21.1  | 81.2  | 92.9  | 82.5   | 98.4  | 55.3  |
| 44.3  | 50.8  | 80.2  | 65.6  | 30.9  | 31.5  | 34.8   | 49.4  | 35.6  |
| 49.0  | 63.8  | 52.8  | 62.4  | 31.4  | 54.2  | 39.7   | 37.8  | 34.6  |
| 10.4  | 13.1  | 6.3   | 15.2  | 1.2   | 3.4   | 3.1    | 3.2   | 3.4   |
| 27.3  | 31.8  | 32.6  | 23.9  | 70.6  | 65.6  | 55.4   | 70.1  | 33.1  |
| 6.4   | 2.2   | 4.3   | 6.2   | 10.4  | 9.3   | 11.3   | 24.4  | 12.5  |
| 183.9 | 184.4 | 307.7 | 171.4 | 52.8  | 68.4  | 76.5   | 79.0  | 153.7 |
| 32.2  | 32.1  | 44.5  | 32.6  | 150.7 | 141.5 | 162.8  | 148.4 | 124.0 |
| 37.1  | 34.7  | 31.2  | 28.7  | 47.0  | 52.5  | 51.2   | 54.0  | 38.1  |
| 263.2 | 240.9 | 238.6 | 203.4 | 146.4 | 110.2 | 174.9  | 190.1 | 338.2 |
| 14.6  | 17.2  | 25.7  | 15.7  | 41.5  | 19.7  | 36.0   | 34.7  | 95.0  |
| 72.4  | 66.0  | 57.8  | 73.6  | 27.0  | 44.1  | 29.0   | 42.0  | 46.9  |
| 81.7  | 79.4  | 74.7  | 82.9  | 116.2 | 139.7 | 143.8  | 145.1 | 154.6 |
| 27.9  | 32.8  | 46.1  | 23.7  | 42.3  | 57.3  | 54.6   | 47.8  | 43.3  |
| 2.2   | 3.8   | 3.5   | 1.5   | 9.8   | 10.5  | 10.7   | 10.1  | 10.3  |
| 19.2  | 19.0  | 32.1  | 14.8  | 606.5 | 541.9 | 512.4  | 646.7 | 152.6 |
| 40.4  | 37.4  | 45.0  | 37.8  | 25.1  | 32.2  | 24.8   | 34.2  | 31.6  |
| 340.8 | 341.3 | 291.1 | 249.9 | 230.6 | 266.9 | 268.7  | 232.5 | 292.8 |
| 26.1  | 22.8  | 50.3  | 43.6  | 169.5 | 130.6 | 170.3  | 157.3 | 275.3 |
| 107.8 | 112.3 | 98.5  | 96.0  | 42.2  | 55.0  | 50.9   | 50.6  | 21.8  |
| 27.2  | 25.8  | 37.5  | 31.3  | 119.5 | 64.9  | 137.2  | 148.7 | 97.4  |
| 47.1  | 43.8  | 67.0  | 40.3  | 231.6 | 175.1 | 332.8  | 318.8 | 199.1 |
| 19.4  | 15.6  | 25.5  | 15.8  | 6.7   | 11.8  | 12.0   | 12.0  | 25.1  |
| 249.6 | 288.1 | 294.2 | 235.1 | 162.4 | 301.1 | 177.4  | 162.0 | 180.9 |
| 91.9  | 130.5 | 101.3 | 103.3 | 49.8  | 119.3 | 57.9   | 96.1  | 86.8  |
| 93.7  | 103.2 | 98.0  | 120.1 | 83.3  | 131.8 | 105.1  | 120.0 | 145.8 |
| 5.7   | 6.9   | 7.0   | 7.1   | 3.3   | 0.5   | 3.4    | 0.8   | 5.6   |
| 1.3   | 4.5   | 1.2   | 1.8   | 2.7   | 0.2   | 0.7    | 5.1   | 3.7   |
| 67.3  | 67.6  | 93.2  | 72.3  | 128.3 | 95.7  | 136.4  | 153.0 | 80.9  |
| 6.1   | 5.8   | 8.2   | 4.5   | 8.5   | 6.3   | 7.3    | 8.9   | 5.8   |
| 71.0  | 66.1  | 102.2 | 43.8  | 329.3 | 284.8 | 366.4  | 337.8 | 457.3 |
| 4.8   | 5.7   | 4.0   | 1.3   | 2.8   | 3.6   | 4.5    | 3.2   | 1.3   |
| 469.2 | 462.1 | 597.7 | 486.9 | 282.5 | 323.1 | 299.8  | 360.4 | 137.4 |
| 254.8 | 245.0 | 423.5 | 264.7 | 402.0 | 348.3 | 475.1  | 481.0 | 281.6 |
| 46.1  | 53.2  | 95.0  | 34.7  | 267.2 | 158.7 | 234.0  | 275.2 | 251.7 |
| 1.4   | 2.1   | 2.7   | 1.9   | 5.8   | 2.9   | 4.9    | 15.1  | 1.1   |
| 1.1   | 0.8   | 1.2   | 0.7   | 0.7   | 0.7   | 1.3    | 0.9   | 1.1   |
| 43.3  | 34.4  | 48.7  | 28.3  | 34.7  | 36.8  | 49.5   | 50.6  | 69.2  |
| 53.8  | 59.7  | 59.0  | 42.3  | 740.2 | 952.3 | 1152.5 | 917.1 | 148.4 |
| 1.0   | 2.7   | 2.2   | 1.1   | 10.5  | 12.0  | 29.3   | 1.0   | 9.5   |
| 14.4  | 3.8   | 16.3  | 27.3  | 23.9  | 41.6  | 36.6   | 17.4  | 38.0  |
| 76.8  | 57.2  | 105.0 | 59.3  | 62.4  | 82.3  | 75.3   | 101.0 | 58.3  |
| 18.1  | 30.6  | 14.7  | 13.5  | 24.4  | 36.4  | 47.0   | 46.1  | 88.4  |
| 62.4  | 58.7  | 42.8  | 53.5  | 31.0  | 29.1  | 21.3   | 37.7  | 69.6  |
| 19.3  | 21.1  | 35.4  | 20.8  | 23.0  | 20.4  | 22.1   | 26.4  | 42.9  |
| 38.5  | 41.9  | 32.4  | 40.6  | 65.7  | 39.3  | 61.3   | 77.4  | 43.9  |
| 93.9  | 88.2  | 111.8 | 82.0  | 162.0 | 196.4 | 160.2  | 200.5 | 192.0 |

|       |       |       |       |       |       |       |       |       |
|-------|-------|-------|-------|-------|-------|-------|-------|-------|
| 8.2   | 8.9   | 4.6   | 1.5   | 7.9   | 6.0   | 10.3  | 9.5   | 43.7  |
| 138.5 | 115.8 | 201.0 | 157.8 | 52.2  | 33.2  | 80.7  | 64.2  | 31.2  |
| 42.9  | 50.3  | 20.5  | 41.2  | 12.6  | 10.5  | 18.0  | 25.0  | 25.4  |
| 8.9   | 5.9   | 6.1   | 8.5   | 9.0   | 0.9   | 4.2   | 4.8   | 3.7   |
| 8.7   | 8.3   | 7.4   | 8.0   | 16.8  | 18.7  | 29.2  | 16.2  | 7.5   |
| 9.0   | 6.5   | 28.3  | 8.1   | 12.7  | 20.0  | 21.8  | 30.0  | 10.1  |
| 8.4   | 3.8   | 10.2  | 7.5   | 9.8   | 14.2  | 7.9   | 5.1   | 14.3  |
| 11.9  | 13.9  | 9.6   | 10.4  | 6.8   | 4.4   | 7.8   | 11.3  | 10.1  |
| 13.5  | 12.8  | 12.6  | 11.9  | 9.0   | 9.6   | 6.6   | 17.8  | 12.7  |
| 18.7  | 7.2   | 25.5  | 13.0  | 15.7  | 10.7  | 13.5  | 15.6  | 23.6  |
| 208.1 | 184.5 | 194.9 | 182.5 | 53.4  | 36.4  | 52.5  | 60.1  | 62.7  |
| 7.0   | 12.1  | 11.3  | 10.6  | 6.4   | 8.7   | 7.6   | 0.8   | 10.9  |
| 146.1 | 146.0 | 186.9 | 138.1 | 442.8 | 426.0 | 419.2 | 529.4 | 471.9 |
| 138.2 | 139.8 | 113.8 | 124.0 | 51.9  | 50.9  | 34.6  | 59.8  | 67.2  |
| 37.7  | 45.2  | 35.3  | 35.1  | 85.5  | 94.4  | 80.7  | 106.9 | 49.8  |
| 141.8 | 137.0 | 234.7 | 132.0 | 123.3 | 122.1 | 107.6 | 142.3 | 81.6  |
| 382.0 | 394.4 | 434.1 | 336.8 | 280.3 | 322.0 | 302.2 | 351.8 | 195.0 |
| 150.3 | 147.1 | 136.3 | 140.2 | 119.9 | 163.2 | 119.9 | 101.3 | 187.8 |
| 428.0 | 447.8 | 521.9 | 475.7 | 261.3 | 285.0 | 297.0 | 334.6 | 74.8  |
| 582.6 | 458.9 | 826.3 | 472.4 | 114.6 | 88.4  | 135.3 | 172.1 | 195.6 |
| 103.9 | 85.4  | 167.1 | 115.7 | 98.3  | 90.2  | 122.4 | 119.5 | 48.5  |
| 1.5   | 1.5   | 6.4   | 2.1   | 1.1   | 4.1   | 5.1   | 10.4  | 27.3  |
| 5.3   | 9.1   | 8.7   | 3.2   | 2.2   | 1.8   | 3.1   | 0.4   | 4.8   |
| 2.4   | 2.7   | 5.7   | 7.9   | 141.0 | 169.8 | 131.8 | 163.4 | 265.1 |
| 45.0  | 41.5  | 35.3  | 45.0  | 86.8  | 82.0  | 106.8 | 112.1 | 127.1 |
| 55.4  | 59.8  | 53.4  | 39.0  | 98.7  | 99.5  | 97.8  | 105.3 | 57.9  |
| 9.4   | 6.4   | 18.0  | 13.8  | 20.7  | 6.2   | 20.2  | 4.4   | 23.5  |
| 42.1  | 29.2  | 83.3  | 31.8  | 73.6  | 65.3  | 81.9  | 76.9  | 69.4  |
| 11.0  | 3.7   | 11.1  | 7.4   | 106.5 | 86.0  | 93.0  | 139.3 | 81.3  |
| 16.7  | 2.8   | 38.8  | 11.8  | 11.7  | 4.0   | 13.3  | 11.5  | 11.2  |
| 1.7   | 3.2   | 4.2   | 4.1   | 22.3  | 25.0  | 33.0  | 25.8  | 17.1  |
| 3.8   | 5.5   | 6.7   | 0.9   | 131.0 | 94.1  | 123.0 | 133.6 | 15.1  |
| 10.4  | 16.4  | 25.0  | 10.0  | 10.2  | 26.0  | 3.9   | 15.3  | 4.6   |
| 663.7 | 669.8 | 423.6 | 401.5 | 36.7  | 29.7  | 26.9  | 43.3  | 87.7  |
| 21.0  | 12.8  | 23.3  | 7.3   | 13.0  | 11.6  | 16.3  | 16.9  | 13.4  |
| 122.2 | 111.0 | 191.0 | 104.9 | 212.2 | 171.9 | 174.8 | 218.4 | 110.1 |
| 3.3   | 2.5   | 2.7   | 3.1   | 12.7  | 8.3   | 4.1   | 2.9   | 2.0   |
| 10.4  | 7.2   | 14.0  | 7.2   | 16.2  | 16.9  | 24.4  | 15.6  | 11.5  |
| 2.8   | 2.5   | 1.4   | 4.1   | 13.4  | 22.6  | 10.3  | 12.7  | 13.6  |
| 8.8   | 10.0  | 26.4  | 10.3  | 26.3  | 18.6  | 38.9  | 33.0  | 31.2  |
| 9.6   | 10.7  | 19.5  | 10.3  | 204.5 | 125.2 | 191.0 | 224.0 | 85.0  |
| 74.3  | 64.2  | 160.0 | 114.0 | 10.5  | 12.9  | 6.5   | 4.5   | 5.6   |
| 15.5  | 9.6   | 25.9  | 15.3  | 27.1  | 23.4  | 24.6  | 18.3  | 57.7  |
| 130.9 | 125.9 | 183.1 | 135.3 | 140.9 | 128.1 | 148.3 | 172.5 | 148.7 |
| 34.0  | 31.8  | 49.1  | 24.5  | 30.5  | 26.3  | 24.7  | 34.8  | 31.2  |
| 9.6   | 6.4   | 11.8  | 8.3   | 14.3  | 14.8  | 18.9  | 24.0  | 10.7  |
| 156.8 | 153.1 | 260.7 | 217.6 | 183.9 | 205.9 | 171.3 | 195.8 | 338.1 |
| 7.6   | 5.1   | 5.0   | 5.5   | 17.4  | 4.6   | 11.3  | 1.4   | 91.3  |
| 67.3  | 75.5  | 69.3  | 56.9  | 93.1  | 135.8 | 85.1  | 140.3 | 154.5 |
| 2.4   | 2.4   | 3.5   | 2.8   | 2.0   | 1.7   | 2.2   | 2.0   | 6.2   |
| 28.6  | 30.0  | 64.8  | 30.7  | 37.5  | 18.0  | 37.5  | 34.1  | 39.5  |
| 4.7   | 5.3   | 15.1  | 4.1   | 32.8  | 13.0  | 49.5  | 35.7  | 8.4   |
| 318.2 | 296.3 | 403.3 | 267.1 | 220.5 | 165.3 | 188.3 | 216.3 | 266.3 |

|        |        |        |        |        |        |        |        |        |
|--------|--------|--------|--------|--------|--------|--------|--------|--------|
| 4.8    | 12.1   | 6.1    | 7.5    | 25.3   | 37.9   | 32.2   | 35.5   | 57.7   |
| 16.0   | 23.3   | 33.0   | 17.6   | 50.7   | 54.3   | 66.9   | 67.7   | 123.4  |
| 77.9   | 85.5   | 93.2   | 76.8   | 61.2   | 68.2   | 70.5   | 74.7   | 40.0   |
| 2.2    | 2.4    | 3.1    | 5.1    | 4.4    | 7.5    | 6.2    | 5.5    | 13.3   |
| 18.1   | 10.0   | 26.0   | 14.2   | 49.9   | 60.9   | 48.6   | 31.7   | 44.4   |
| 3.4    | 1.5    | 2.7    | 2.1    | 2.9    | 1.3    | 3.8    | 1.3    | 1.8    |
| 117.5  | 89.2   | 204.2  | 117.5  | 22.5   | 22.7   | 22.6   | 33.3   | 32.9   |
| 37.0   | 37.0   | 61.8   | 43.4   | 23.6   | 23.4   | 17.3   | 36.2   | 62.9   |
| 13.8   | 10.0   | 8.9    | 9.1    | 5.7    | 11.0   | 7.6    | 18.4   | 11.0   |
| 7.0    | 6.0    | 3.7    | 2.0    | 5.9    | 2.7    | 2.9    | 1.3    | 3.6    |
| 9.6    | 11.2   | 10.9   | 7.7    | 6.6    | 6.0    | 1.6    | 0.8    | 8.5    |
| 1.3    | 4.2    | 6.2    | 1.6    | 0.8    | 0.6    | 0.6    | 1.0    | 9.4    |
| 4.7    | 1.1    | 5.1    | 2.7    | 1.8    | 0.7    | 5.9    | 5.2    | 2.4    |
| 7.0    | 8.0    | 14.8   | 5.9    | 5.7    | 3.2    | 4.5    | 5.8    | 5.1    |
| 4.5    | 3.3    | 6.3    | 4.0    | 13.3   | 18.4   | 26.4   | 26.4   | 42.7   |
| 116.0  | 105.6  | 188.2  | 133.2  | 153.3  | 170.0  | 137.3  | 171.1  | 166.7  |
| 12.3   | 12.7   | 25.6   | 9.1    | 7.0    | 6.0    | 4.7    | 1.6    | 18.9   |
| 10.2   | 14.1   | 14.5   | 12.4   | 38.8   | 34.6   | 33.6   | 58.0   | 171.4  |
| 339.7  | 275.7  | 363.0  | 202.7  | 10.2   | 8.2    | 10.4   | 11.8   | 7.5    |
| 16.5   | 17.6   | 19.4   | 15.8   | 28.2   | 24.8   | 25.0   | 39.4   | 18.6   |
| 134.5  | 107.6  | 211.8  | 131.3  | 46.9   | 71.2   | 40.2   | 58.8   | 60.9   |
| 23.3   | 21.5   | 17.7   | 14.2   | 42.7   | 28.1   | 45.4   | 54.4   | 73.1   |
| 3.0    | 5.3    | 1.5    | 3.4    | 7.5    | 12.6   | 3.5    | 7.4    | 2.2    |
| 13.8   | 9.8    | 8.1    | 8.6    | 3.9    | 5.7    | 8.7    | 3.3    | 6.5    |
| 13.2   | 10.8   | 15.0   | 7.4    | 0.8    | 1.4    | 3.5    | 3.6    | 7.3    |
| 316.6  | 342.5  | 163.3  | 186.7  | 78.6   | 74.4   | 94.1   | 93.4   | 103.3  |
| 49.4   | 41.0   | 63.5   | 38.3   | 73.1   | 68.1   | 67.2   | 56.5   | 122.9  |
| 82.3   | 75.5   | 93.6   | 106.9  | 23.7   | 16.0   | 21.6   | 32.5   | 10.5   |
| 8.0    | 1.5    | 7.8    | 12.0   | 1.6    | 6.4    | 1.8    | 1.7    | 3.0    |
| 11.3   | 8.8    | 9.3    | 6.8    | 84.7   | 112.8  | 90.2   | 96.0   | 61.9   |
| 22.7   | 19.6   | 27.0   | 16.2   | 17.3   | 17.4   | 14.8   | 21.9   | 23.1   |
| 9.0    | 14.5   | 22.0   | 22.3   | 33.3   | 26.4   | 34.1   | 52.7   | 17.4   |
| 6.3    | 9.4    | 12.1   | 5.9    | 7.7    | 14.8   | 4.4    | 8.7    | 11.0   |
| 114.1  | 113.7  | 108.9  | 93.6   | 255.2  | 208.2  | 220.5  | 233.9  | 126.9  |
| 17.7   | 13.9   | 17.9   | 14.5   | 31.7   | 40.2   | 40.1   | 49.8   | 16.6   |
| 118.9  | 123.3  | 106.0  | 105.1  | 93.4   | 90.5   | 95.3   | 130.9  | 158.2  |
| 22.5   | 28.2   | 17.3   | 17.3   | 17.1   | 17.5   | 10.9   | 27.4   | 67.6   |
| 13.4   | 8.9    | 17.6   | 5.2    | 17.6   | 6.4    | 9.2    | 1.6    | 12.1   |
| 57.6   | 57.4   | 49.3   | 53.8   | 58.4   | 39.4   | 68.6   | 88.0   | 52.6   |
| 27.6   | 34.6   | 46.4   | 25.3   | 70.0   | 60.9   | 73.3   | 82.2   | 42.4   |
| 177.4  | 144.1  | 204.6  | 142.3  | 6.4    | 9.7    | 8.8    | 6.9    | 1.4    |
| 169.1  | 203.6  | 134.4  | 150.3  | 147.7  | 166.6  | 197.2  | 186.0  | 69.9   |
| 20.8   | 35.4   | 22.5   | 28.8   | 93.9   | 97.8   | 102.3  | 137.6  | 136.5  |
| 7.6    | 11.3   | 0.9    | 5.9    | 640.9  | 800.1  | 611.8  | 679.0  | 10.0   |
| 15.3   | 18.2   | 24.1   | 17.9   | 32.4   | 54.2   | 41.9   | 44.4   | 39.2   |
| 9.9    | 5.8    | 5.8    | 5.0    | 7.8    | 8.4    | 12.0   | 13.1   | 16.3   |
| 1819.8 | 1624.6 | 2414.7 | 1654.0 | 2721.0 | 2909.2 | 2801.0 | 2901.9 | 5584.8 |
| 55.3   | 34.7   | 152.3  | 42.3   | 92.8   | 80.0   | 100.8  | 108.1  | 99.9   |
| 0.8    | 2.2    | 6.1    | 3.6    | 1.8    | 1.4    | 3.2    | 2.1    | 5.1    |
| 149.5  | 133.4  | 136.2  | 109.9  | 107.0  | 134.3  | 130.1  | 154.7  | 102.9  |
| 14.0   | 15.1   | 8.1    | 14.0   | 34.7   | 28.7   | 35.0   | 22.2   | 39.7   |
| 148.8  | 153.0  | 176.5  | 130.8  | 109.7  | 116.3  | 143.7  | 152.9  | 93.3   |
| 152.7  | 173.5  | 128.7  | 154.9  | 0.6    | 1.5    | 3.4    | 3.1    | 1.9    |

|       |       |        |       |       |       |       |       |        |
|-------|-------|--------|-------|-------|-------|-------|-------|--------|
| 50.2  | 39.0  | 71.6   | 32.8  | 57.2  | 41.5  | 54.0  | 59.1  | 165.4  |
| 55.9  | 62.4  | 94.3   | 64.1  | 72.3  | 83.1  | 60.7  | 86.2  | 92.4   |
| 41.6  | 36.7  | 52.3   | 45.0  | 27.0  | 23.2  | 33.2  | 35.7  | 3.9    |
| 0.4   | 0.8   | 2.5    | 2.3   | 9.1   | 13.3  | 9.9   | 4.7   | 9.3    |
| 0.7   | 3.9   | 5.3    | 6.7   | 8.3   | 10.0  | 8.4   | 3.0   | 51.4   |
| 46.8  | 43.7  | 59.9   | 39.4  | 80.8  | 76.6  | 91.2  | 79.5  | 70.9   |
| 5.8   | 2.0   | 9.0    | 3.2   | 5.9   | 4.5   | 1.8   | 8.1   | 4.7    |
| 7.4   | 6.1   | 4.0    | 2.4   | 8.0   | 5.1   | 2.1   | 3.2   | 10.1   |
| 1.6   | 0.8   | 0.2    | 0.4   | 13.7  | 20.8  | 9.6   | 20.0  | 0.7    |
| 2.8   | 4.1   | 7.1    | 5.5   | 105.0 | 79.2  | 128.3 | 144.5 | 25.3   |
| 27.0  | 30.3  | 22.2   | 28.5  | 31.4  | 21.8  | 29.3  | 40.3  | 58.4   |
| 0.9   | 3.2   | 1.6    | 2.3   | 6.9   | 2.4   | 4.6   | 5.3   | 0.7    |
| 44.2  | 34.8  | 44.8   | 25.3  | 26.1  | 43.1  | 50.1  | 56.3  | 41.3   |
| 0.8   | 1.0   | 1.1    | 3.6   | 4.2   | 0.8   | 0.4   | 1.3   | 0.9    |
| 91.6  | 90.9  | 95.9   | 87.4  | 101.6 | 112.6 | 111.6 | 135.7 | 122.8  |
| 21.8  | 5.8   | 17.8   | 12.2  | 27.8  | 30.8  | 28.0  | 59.6  | 49.6   |
| 22.9  | 21.5  | 18.2   | 21.5  | 45.6  | 55.1  | 57.4  | 51.5  | 49.7   |
| 109.0 | 99.0  | 63.4   | 115.6 | 10.5  | 17.6  | 15.0  | 10.3  | 2.8    |
| 811.4 | 700.6 | 1974.3 | 786.9 | 864.6 | 455.3 | 591.8 | 957.1 | 874.5  |
| 5.3   | 5.4   | 6.6    | 7.6   | 2.0   | 5.9   | 1.3   | 8.3   | 5.6    |
| 136.1 | 104.7 | 238.9  | 68.5  | 96.3  | 71.3  | 137.5 | 128.3 | 6.4    |
| 57.5  | 38.4  | 124.0  | 29.5  | 50.2  | 46.6  | 74.4  | 65.5  | 2.1    |
| 0.4   | 0.5   | 0.5    | 0.4   | 0.5   | 0.3   | 0.7   | 0.5   | 1.3    |
| 16.3  | 22.0  | 27.6   | 18.5  | 26.1  | 22.2  | 25.6  | 26.1  | 12.7   |
| 69.8  | 64.3  | 75.1   | 59.2  | 94.2  | 68.1  | 61.2  | 107.0 | 70.2   |
| 14.2  | 5.9   | 7.1    | 9.9   | 4.5   | 5.0   | 4.5   | 8.3   | 14.8   |
| 490.6 | 504.8 | 182.7  | 179.3 | 1.9   | 2.1   | 3.5   | 4.2   | 6.0    |
| 2.1   | 2.2   | 5.7    | 1.5   | 0.8   | 6.0   | 0.9   | 0.8   | 1.9    |
| 56.6  | 63.4  | 143.2  | 86.8  | 17.9  | 22.2  | 21.9  | 26.3  | 9.7    |
| 401.8 | 395.9 | 499.2  | 315.7 | 912.1 | 746.1 | 727.4 | 944.0 | 874.1  |
| 13.5  | 15.3  | 16.3   | 6.6   | 15.6  | 10.9  | 13.8  | 21.5  | 18.4   |
| 46.3  | 41.4  | 25.9   | 47.7  | 18.4  | 24.8  | 20.9  | 27.9  | 38.6   |
| 55.1  | 51.5  | 46.5   | 50.0  | 28.6  | 32.2  | 32.6  | 27.6  | 32.0   |
| 124.9 | 141.4 | 199.2  | 181.7 | 128.9 | 136.9 | 137.3 | 155.0 | 183.7  |
| 3.1   | 3.2   | 6.6    | 3.9   | 2.9   | 2.4   | 5.0   | 0.7   | 1.1    |
| 17.7  | 18.2  | 16.1   | 21.2  | 0.5   | 2.9   | 6.8   | 0.2   | 5.5    |
| 47.5  | 53.0  | 63.8   | 33.3  | 43.1  | 50.7  | 57.4  | 67.1  | 89.1   |
| 24.3  | 31.4  | 62.6   | 24.2  | 435.4 | 476.3 | 493.8 | 525.7 | 89.0   |
| 95.4  | 82.6  | 113.9  | 87.1  | 97.4  | 86.4  | 112.3 | 117.4 | 144.9  |
| 4.9   | 3.3   | 8.1    | 2.9   | 47.5  | 28.3  | 52.3  | 42.5  | 35.4   |
| 261.6 | 260.8 | 308.7  | 230.6 | 268.6 | 306.7 | 271.7 | 290.9 | 226.4  |
| 27.3  | 28.6  | 24.6   | 31.3  | 46.9  | 32.6  | 42.2  | 59.7  | 49.3   |
| 19.4  | 22.2  | 23.0   | 26.8  | 22.6  | 3.2   | 15.4  | 8.7   | 25.6   |
| 7.3   | 9.3   | 25.5   | 15.6  | 14.4  | 12.2  | 6.4   | 10.6  | 19.8   |
| 14.1  | 15.5  | 20.5   | 12.2  | 20.4  | 20.4  | 16.2  | 17.9  | 22.2   |
| 4.5   | 6.1   | 12.6   | 4.3   | 14.1  | 14.0  | 15.3  | 22.3  | 19.2   |
| 12.2  | 2.6   | 8.6    | 13.8  | 31.6  | 28.8  | 31.1  | 41.7  | 56.3   |
| 722.2 | 628.8 | 840.9  | 552.1 | 494.2 | 384.2 | 463.7 | 585.9 | 585.9  |
| 141.5 | 153.5 | 187.2  | 156.4 | 105.4 | 117.3 | 120.3 | 101.2 | 117.8  |
| 132.8 | 143.2 | 161.9  | 145.5 | 172.2 | 183.7 | 167.0 | 200.3 | 155.7  |
| 803.5 | 770.5 | 1193.6 | 820.8 | 858.8 | 567.4 | 882.9 | 987.9 | 1056.5 |
| 34.1  | 35.0  | 40.4   | 54.6  | 3.4   | 1.8   | 6.8   | 6.9   | 4.9    |
| 73.3  | 50.7  | 90.0   | 67.9  | 152.4 | 156.0 | 173.0 | 170.4 | 76.2   |

|       |       |       |       |       |       |       |       |       |
|-------|-------|-------|-------|-------|-------|-------|-------|-------|
| 66.7  | 87.9  | 92.2  | 86.6  | 71.4  | 91.1  | 80.4  | 89.8  | 104.5 |
| 10.7  | 7.0   | 10.6  | 13.0  | 1.8   | 1.0   | 4.5   | 1.5   | 9.3   |
| 13.7  | 13.5  | 13.3  | 15.9  | 12.5  | 6.8   | 7.3   | 16.1  | 19.8  |
| 1.8   | 2.4   | 1.7   | 2.4   | 193.6 | 171.1 | 195.3 | 241.8 | 28.7  |
| 89.1  | 79.2  | 80.0  | 90.4  | 63.5  | 113.3 | 75.8  | 84.6  | 72.7  |
| 5.8   | 5.9   | 7.8   | 7.6   | 5.4   | 12.0  | 3.9   | 24.9  | 13.5  |
| 28.3  | 28.3  | 48.1  | 30.3  | 41.7  | 41.2  | 52.2  | 52.6  | 75.1  |
| 6.3   | 8.4   | 2.7   | 3.4   | 7.8   | 1.7   | 1.1   | 2.0   | 3.8   |
| 11.2  | 7.2   | 13.4  | 13.5  | 3.5   | 5.9   | 3.3   | 9.6   | 10.5  |
| 26.1  | 37.8  | 11.5  | 16.5  | 17.3  | 48.6  | 24.9  | 38.2  | 38.6  |
| 33.4  | 27.3  | 63.8  | 17.2  | 10.4  | 11.3  | 8.2   | 8.2   | 92.4  |
| 21.6  | 30.5  | 16.7  | 29.3  | 180.8 | 200.4 | 197.5 | 209.2 | 102.3 |
| 17.9  | 19.8  | 13.7  | 18.7  | 7.3   | 11.4  | 10.2  | 8.3   | 9.9   |
| 1.1   | 0.8   | 1.1   | 0.8   | 1.2   | 0.8   | 1.2   | 1.6   | 1.9   |
| 1.7   | 4.9   | 4.8   | 2.2   | 4.5   | 3.9   | 4.3   | 1.7   | 8.5   |
| 4.0   | 1.9   | 1.7   | 1.6   | 3.7   | 5.6   | 3.6   | 4.0   | 2.3   |
| 43.6  | 45.9  | 50.5  | 47.0  | 66.5  | 62.7  | 57.8  | 95.6  | 118.6 |
| 2.0   | 1.0   | 1.0   | 1.2   | 1.2   | 1.2   | 1.3   | 3.0   | 2.1   |
| 5.0   | 4.1   | 8.1   | 3.2   | 2.9   | 2.8   | 3.7   | 3.1   | 2.8   |
| 2.0   | 1.6   | 3.6   | 5.4   | 4.2   | 0.6   | 10.6  | 6.7   | 4.9   |
| 28.2  | 24.5  | 19.7  | 23.6  | 26.2  | 18.2  | 36.0  | 32.2  | 39.4  |
| 155.8 | 162.3 | 151.6 | 165.9 | 41.9  | 46.5  | 52.3  | 48.3  | 69.3  |
| 26.5  | 26.4  | 25.6  | 18.3  | 38.1  | 36.0  | 37.6  | 55.9  | 28.4  |
| 7.1   | 1.2   | 6.1   | 9.3   | 6.1   | 3.9   | 7.5   | 1.1   | 62.4  |
| 16.9  | 21.6  | 18.5  | 19.7  | 18.6  | 14.7  | 12.7  | 26.7  | 36.6  |
| 22.6  | 27.4  | 47.9  | 17.8  | 5.1   | 9.7   | 10.3  | 2.0   | 17.0  |
| 87.5  | 89.9  | 91.4  | 102.3 | 54.2  | 73.4  | 84.4  | 107.9 | 94.3  |
| 4.2   | 5.8   | 15.9  | 8.3   | 8.2   | 4.3   | 10.7  | 7.2   | 21.0  |
| 188.4 | 156.8 | 158.3 | 126.9 | 37.5  | 21.4  | 55.6  | 70.4  | 4.9   |
| 20.6  | 8.1   | 24.7  | 10.9  | 14.5  | 12.3  | 13.1  | 14.0  | 12.8  |
| 2.4   | 7.0   | 9.9   | 11.9  | 2.6   | 2.3   | 8.8   | 1.4   | 5.5   |
| 17.3  | 9.7   | 10.0  | 8.1   | 40.6  | 38.9  | 42.4  | 34.5  | 40.2  |
| 68.0  | 68.4  | 62.3  | 56.1  | 30.9  | 35.1  | 29.4  | 36.5  | 55.0  |
| 2.5   | 4.2   | 5.4   | 2.6   | 7.6   | 6.6   | 4.8   | 16.7  | 51.5  |
| 45.6  | 43.9  | 53.9  | 38.2  | 30.3  | 18.1  | 40.1  | 25.7  | 1.0   |
| 8.2   | 5.1   | 5.1   | 4.8   | 1.6   | 2.6   | 6.1   | 6.3   | 1.7   |
| 75.2  | 72.1  | 69.9  | 60.0  | 46.9  | 74.4  | 58.1  | 68.2  | 26.0  |
| 5.9   | 9.6   | 7.3   | 11.1  | 6.6   | 6.4   | 3.7   | 7.1   | 11.0  |
| 57.6  | 54.4  | 43.3  | 40.9  | 21.7  | 25.7  | 21.7  | 28.9  | 27.5  |
| 80.9  | 70.7  | 150.9 | 79.3  | 66.7  | 63.4  | 56.0  | 80.1  | 105.5 |
| 301.5 | 271.5 | 430.3 | 245.4 | 345.6 | 338.2 | 400.5 | 372.6 | 250.6 |
| 8.7   | 12.0  | 15.1  | 10.8  | 227.5 | 154.5 | 213.8 | 242.4 | 54.1  |
| 29.5  | 33.8  | 53.6  | 31.7  | 34.5  | 39.3  | 44.3  | 41.4  | 34.9  |
| 77.6  | 77.9  | 89.7  | 63.8  | 13.1  | 14.4  | 16.9  | 26.6  | 195.8 |
| 13.3  | 13.5  | 26.1  | 12.5  | 10.4  | 5.8   | 6.2   | 18.4  | 16.5  |
| 5.3   | 10.3  | 14.1  | 1.7   | 8.3   | 10.1  | 7.0   | 14.4  | 9.8   |
| 107.7 | 80.8  | 207.8 | 116.6 | 158.5 | 169.3 | 131.6 | 171.4 | 118.1 |
| 27.6  | 31.2  | 59.9  | 22.1  | 186.4 | 178.1 | 214.5 | 218.5 | 229.3 |
| 3.6   | 6.1   | 7.5   | 8.4   | 4.8   | 8.7   | 2.4   | 13.6  | 25.9  |
| 15.3  | 19.2  | 4.6   | 11.9  | 4.2   | 0.9   | 2.9   | 0.2   | 1.0   |
| 31.3  | 31.6  | 32.8  | 26.4  | 158.1 | 127.6 | 194.9 | 246.5 | 8.5   |
| 2.1   | 7.2   | 5.8   | 2.6   | 11.8  | 14.0  | 10.2  | 8.5   | 12.1  |
| 56.4  | 55.4  | 90.0  | 74.3  | 490.6 | 333.2 | 653.4 | 631.0 | 23.4  |

|       |       |       |       |        |       |       |        |        |
|-------|-------|-------|-------|--------|-------|-------|--------|--------|
| 82.7  | 63.6  | 179.2 | 62.4  | 81.3   | 77.2  | 63.5  | 131.3  | 89.3   |
| 10.5  | 9.3   | 11.8  | 12.1  | 3.4    | 3.7   | 6.3   | 2.8    | 9.1    |
| 11.8  | 4.9   | 4.7   | 12.5  | 2.3    | 5.7   | 3.2   | 3.1    | 4.2    |
| 13.6  | 23.6  | 6.2   | 12.4  | 15.0   | 22.5  | 23.8  | 33.3   | 4.8    |
| 10.9  | 13.5  | 15.9  | 9.5   | 66.1   | 56.3  | 53.6  | 68.0   | 67.9   |
| 93.0  | 89.8  | 69.4  | 78.8  | 75.0   | 125.8 | 68.9  | 102.8  | 177.5  |
| 28.6  | 30.3  | 35.6  | 25.5  | 22.9   | 24.2  | 37.9  | 38.9   | 37.9   |
| 24.2  | 19.6  | 50.4  | 36.3  | 127.4  | 154.2 | 123.1 | 135.9  | 26.9   |
| 35.0  | 25.2  | 42.5  | 24.3  | 73.2   | 89.3  | 63.6  | 82.2   | 51.2   |
| 32.1  | 30.3  | 54.6  | 38.9  | 43.4   | 32.6  | 33.4  | 63.2   | 49.8   |
| 0.5   | 2.0   | 0.9   | 2.1   | 92.7   | 77.9  | 77.8  | 79.2   | 76.6   |
| 17.1  | 16.0  | 16.5  | 11.9  | 52.5   | 40.2  | 41.5  | 67.4   | 64.8   |
| 3.4   | 3.6   | 4.6   | 3.8   | 2.8    | 3.2   | 2.5   | 2.8    | 2.7    |
| 13.2  | 9.3   | 13.9  | 5.6   | 37.9   | 36.6  | 38.4  | 56.6   | 26.5   |
| 92.1  | 96.5  | 53.4  | 100.6 | 23.7   | 26.5  | 26.9  | 32.6   | 70.1   |
| 0.7   | 2.2   | 4.2   | 1.8   | 3.3    | 1.4   | 0.5   | 1.0    | 2.1    |
| 28.1  | 22.1  | 30.3  | 20.4  | 31.7   | 36.4  | 30.8  | 31.9   | 103.1  |
| 4.5   | 9.9   | 12.7  | 9.2   | 13.9   | 9.5   | 16.1  | 15.7   | 13.1   |
| 33.9  | 50.3  | 17.6  | 35.8  | 14.5   | 4.1   | 14.2  | 16.3   | 37.7   |
| 1.5   | 2.3   | 1.2   | 1.9   | 8.9    | 27.3  | 14.9  | 10.3   | 1.1    |
| 0.6   | 1.6   | 0.8   | 1.5   | 2.2    | 0.2   | 1.8   | 2.8    | 113.5  |
| 4.7   | 3.5   | 3.6   | 1.1   | 2.2    | 4.4   | 1.8   | 9.3    | 5.9    |
| 26.1  | 37.5  | 28.8  | 26.3  | 8.4    | 9.1   | 10.1  | 19.0   | 19.0   |
| 3.2   | 3.1   | 5.9   | 5.3   | 8.7    | 5.1   | 8.5   | 10.3   | 9.6    |
| 15.5  | 27.8  | 44.4  | 22.4  | 33.8   | 31.9  | 36.2  | 28.1   | 20.2   |
| 35.9  | 29.7  | 27.1  | 33.3  | 67.7   | 74.6  | 58.4  | 67.5   | 62.3   |
| 36.9  | 42.3  | 50.8  | 42.7  | 122.3  | 82.4  | 123.2 | 170.4  | 12.3   |
| 4.3   | 6.1   | 2.3   | 1.0   | 6.6    | 3.4   | 2.6   | 0.7    | 1.6    |
| 2.4   | 8.6   | 2.9   | 2.3   | 2.4    | 1.2   | 1.1   | 5.4    | 3.3    |
| 13.8  | 10.8  | 10.2  | 14.6  | 109.2  | 98.0  | 126.7 | 131.5  | 209.8  |
| 41.3  | 39.4  | 31.8  | 38.6  | 25.6   | 17.9  | 16.5  | 34.6   | 8.6    |
| 2.2   | 3.1   | 5.2   | 2.6   | 1.3    | 1.0   | 1.7   | 0.8    | 1.9    |
| 31.9  | 44.1  | 37.7  | 33.7  | 47.3   | 56.5  | 38.1  | 32.6   | 42.9   |
| 4.4   | 6.9   | 1.5   | 2.2   | 0.6    | 1.0   | 0.4   | 2.6    | 28.4   |
| 0.7   | 1.3   | 7.3   | 5.1   | 6.2    | 0.8   | 3.4   | 8.8    | 1.3    |
| 67.7  | 61.0  | 81.9  | 58.8  | 52.8   | 67.4  | 56.3  | 67.5   | 85.3   |
| 54.8  | 58.1  | 83.1  | 49.2  | 62.5   | 59.0  | 55.2  | 61.4   | 1897.2 |
| 8.4   | 4.1   | 12.2  | 1.5   | 9.5    | 4.7   | 12.4  | 4.4    | 4.5    |
| 457.5 | 431.6 | 677.3 | 530.9 | 237.0  | 241.0 | 238.9 | 267.9  | 306.0  |
| 1.5   | 5.7   | 2.1   | 2.4   | 1.1    | 1.2   | 2.1   | 2.5    | 3.9    |
| 6.2   | 7.1   | 7.0   | 5.8   | 9.6    | 3.6   | 3.8   | 1.9    | 5.3    |
| 150.2 | 195.1 | 86.4  | 122.5 | 8.5    | 20.4  | 39.6  | 32.4   | 6.7    |
| 30.9  | 32.4  | 47.2  | 29.7  | 66.0   | 63.8  | 64.8  | 73.5   | 59.9   |
| 733.9 | 880.0 | 805.2 | 577.4 | 1089.2 | 541.0 | 793.7 | 1065.1 | 1385.0 |
| 300.5 | 248.5 | 251.8 | 273.8 | 32.1   | 48.8  | 48.5  | 48.8   | 27.9   |
| 71.3  | 57.9  | 142.4 | 74.5  | 119.8  | 67.5  | 131.5 | 156.1  | 123.8  |
| 25.6  | 30.7  | 28.3  | 15.7  | 51.4   | 55.5  | 44.6  | 71.3   | 57.7   |
| 503.1 | 517.8 | 511.3 | 519.4 | 131.0  | 150.9 | 153.0 | 194.0  | 369.1  |
| 61.0  | 72.3  | 60.2  | 56.8  | 56.1   | 68.5  | 67.6  | 65.3   | 38.4   |
| 35.3  | 46.7  | 33.1  | 35.5  | 161.6  | 245.6 | 190.3 | 215.7  | 122.9  |
| 29.6  | 27.1  | 35.2  | 32.1  | 27.0   | 28.0  | 26.0  | 42.7   | 23.4   |
| 4.3   | 4.6   | 3.3   | 3.6   | 2.4    | 1.0   | 4.8   | 5.1    | 731.9  |
| 78.0  | 74.6  | 68.9  | 48.2  | 159.3  | 170.1 | 174.4 | 199.2  | 134.6  |



|        |        |        |        |        |        |        |        |        |
|--------|--------|--------|--------|--------|--------|--------|--------|--------|
| 45.4   | 51.8   | 26.3   | 24.8   | 105.9  | 69.8   | 101.7  | 123.5  | 63.2   |
| 416.5  | 351.5  | 376.0  | 285.9  | 133.9  | 126.1  | 133.4  | 160.3  | 79.0   |
| 38.9   | 33.7   | 38.3   | 33.7   | 3.9    | 2.3    | 1.8    | 1.2    | 3.2    |
| 100.8  | 114.4  | 99.0   | 100.4  | 105.9  | 161.0  | 107.8  | 114.4  | 128.7  |
| 5.6    | 5.6    | 11.3   | 5.7    | 37.7   | 45.2   | 41.0   | 45.2   | 3.2    |
| 223.7  | 192.9  | 434.9  | 233.6  | 941.6  | 1181.1 | 896.5  | 1037.7 | 1852.0 |
| 5.9    | 4.9    | 9.9    | 6.3    | 0.5    | 3.7    | 1.6    | 7.8    | 6.0    |
| 2.9    | 5.5    | 7.1    | 6.1    | 103.4  | 132.9  | 76.8   | 90.7   | 3.7    |
| 3.4    | 4.0    | 5.5    | 2.5    | 29.9   | 10.6   | 20.3   | 38.0   | 2.2    |
| 3.9    | 2.6    | 4.5    | 5.6    | 35.6   | 17.6   | 34.0   | 37.2   | 309.3  |
| 86.0   | 85.8   | 103.6  | 91.9   | 4.0    | 5.8    | 5.1    | 9.2    | 5.8    |
| 2304.9 | 2149.5 | 3123.1 | 2204.8 | 1894.9 | 1837.8 | 1879.4 | 2274.8 | 1386.3 |
| 355.0  | 377.7  | 433.9  | 357.4  | 506.2  | 579.5  | 477.8  | 554.8  | 855.1  |
| 4.5    | 4.4    | 12.2   | 4.8    | 9.3    | 10.5   | 13.1   | 10.0   | 15.0   |
| 2.9    | 2.3    | 3.5    | 2.2    | 1.3    | 4.4    | 17.2   | 2.7    | 2.3    |
| 2.9    | 2.3    | 3.6    | 1.7    | 2.2    | 1.3    | 6.4    | 1.3    | 3.9    |
| 7.8    | 3.6    | 3.3    | 1.3    | 114.7  | 220.5  | 136.9  | 203.5  | 213.5  |
| 5.6    | 5.1    | 2.2    | 4.4    | 8.6    | 1.0    | 7.6    | 1.4    | 9.6    |
| 192.0  | 219.6  | 135.1  | 123.7  | 62.6   | 48.8   | 46.2   | 58.3   | 46.3   |
| 5.2    | 5.9    | 5.0    | 1.8    | 4.2    | 6.8    | 5.0    | 8.5    | 2.2    |
| 3.4    | 0.6    | 1.9    | 2.8    | 4.5    | 0.3    | 1.0    | 7.0    | 0.7    |
| 1.0    | 4.5    | 0.2    | 1.1    | 6.5    | 12.4   | 12.1   | 11.9   | 6.5    |
| 2.8    | 7.1    | 5.7    | 2.1    | 8.6    | 5.0    | 12.0   | 2.9    | 15.3   |
| 5.9    | 5.7    | 4.2    | 2.9    | 17.5   | 16.8   | 21.1   | 23.7   | 33.2   |
| 44.6   | 40.0   | 83.0   | 65.8   | 236.1  | 293.9  | 296.5  | 319.3  | 333.3  |
| 188.2  | 149.5  | 276.7  | 184.3  | 271.0  | 409.2  | 380.4  | 361.4  | 241.7  |
| 4.3    | 6.7    | 9.0    | 8.0    | 6.2    | 6.4    | 8.3    | 11.1   | 11.4   |
| 12.8   | 11.7   | 11.7   | 11.5   | 8.5    | 2.8    | 9.8    | 1.6    | 11.4   |
| 186.0  | 147.0  | 409.3  | 212.0  | 67.8   | 77.4   | 69.8   | 91.6   | 55.7   |
| 15.9   | 16.4   | 15.3   | 17.9   | 2.5    | 3.5    | 6.4    | 11.7   | 6.3    |
| 29.2   | 28.6   | 33.7   | 12.3   | 25.2   | 15.7   | 16.2   | 23.7   | 9.8    |
| 95.8   | 84.6   | 160.6  | 106.7  | 243.5  | 776.3  | 315.2  | 296.0  | 922.9  |
| 283.9  | 258.8  | 517.4  | 228.8  | 711.4  | 628.6  | 687.8  | 823.3  | 1460.7 |
| 81.1   | 92.0   | 69.1   | 88.2   | 139.0  | 181.4  | 164.3  | 168.3  | 74.4   |
| 7.7    | 7.9    | 7.3    | 5.3    | 2.3    | 3.7    | 5.3    | 4.7    | 11.8   |
| 6.1    | 16.7   | 28.7   | 17.0   | 12.2   | 4.6    | 11.0   | 8.6    | 6.7    |
| 10.5   | 17.0   | 21.0   | 19.4   | 10.7   | 28.2   | 26.0   | 26.9   | 7.2    |
| 10.1   | 2.3    | 1.6    | 6.5    | 3.9    | 1.6    | 2.1    | 0.8    | 1.3    |
| 211.8  | 217.1  | 180.4  | 195.8  | 301.3  | 325.5  | 368.8  | 360.4  | 298.3  |
| 47.0   | 37.9   | 114.1  | 62.6   | 86.9   | 99.5   | 83.4   | 114.1  | 107.8  |
| 28.6   | 28.2   | 27.5   | 21.7   | 31.0   | 27.4   | 39.2   | 21.2   | 86.3   |
| 70.4   | 72.1   | 93.6   | 52.7   | 44.9   | 38.8   | 29.8   | 53.8   | 79.5   |
| 3.3    | 1.8    | 0.7    | 2.6    | 49.5   | 44.0   | 48.3   | 58.7   | 3.9    |
| 1.8    | 2.8    | 5.2    | 3.4    | 3.8    | 7.0    | 1.5    | 1.1    | 10.6   |
| 107.7  | 104.4  | 104.1  | 76.1   | 262.2  | 245.7  | 211.3  | 318.2  | 157.8  |
| 79.9   | 70.6   | 25.3   | 12.3   | 147.1  | 84.9   | 125.0  | 140.3  | 75.8   |
| 3.4    | 1.3    | 7.4    | 1.1    | 6.3    | 2.1    | 5.7    | 13.9   | 424.1  |
| 3.5    | 6.2    | 4.5    | 4.6    | 6.6    | 74.3   | 7.4    | 4.0    | 5.6    |
| 49.6   | 43.0   | 59.2   | 59.9   | 29.2   | 19.3   | 29.8   | 29.6   | 3.2    |
| 9.5    | 12.8   | 17.4   | 13.2   | 6.9    | 6.4    | 11.5   | 8.8    | 5.1    |
| 103.4  | 84.9   | 193.9  | 75.6   | 594.2  | 319.6  | 491.6  | 585.2  | 705.1  |
| 222.9  | 198.2  | 327.6  | 216.4  | 488.7  | 454.7  | 564.8  | 678.1  | 505.0  |
| 41.4   | 28.9   | 42.5   | 36.2   | 16.8   | 8.9    | 16.0   | 19.4   | 18.0   |

|       |       |       |       |       |       |       |       |       |
|-------|-------|-------|-------|-------|-------|-------|-------|-------|
| 272.2 | 259.2 | 291.0 | 224.7 | 209.1 | 247.5 | 273.8 | 255.7 | 179.7 |
| 61.1  | 67.3  | 60.6  | 60.8  | 64.7  | 56.8  | 90.0  | 83.4  | 102.1 |
| 17.9  | 14.0  | 42.6  | 18.8  | 125.9 | 149.3 | 115.8 | 154.7 | 9.0   |
| 10.6  | 8.3   | 22.8  | 14.3  | 61.8  | 70.9  | 59.1  | 59.5  | 8.8   |
| 14.2  | 8.1   | 5.7   | 6.7   | 180.6 | 127.0 | 182.9 | 175.2 | 243.9 |
| 55.3  | 69.0  | 54.4  | 71.7  | 29.4  | 28.5  | 35.8  | 37.8  | 62.7  |
| 27.8  | 25.1  | 37.9  | 29.4  | 1.9   | 1.1   | 6.0   | 5.5   | 21.4  |
| 145.5 | 158.8 | 155.9 | 168.1 | 190.7 | 271.0 | 191.5 | 233.2 | 299.2 |
| 1.9   | 5.3   | 1.4   | 5.3   | 3.0   | 1.8   | 0.6   | 2.3   | 4.7   |
| 65.5  | 53.2  | 149.2 | 52.5  | 249.5 | 93.6  | 205.7 | 283.7 | 118.6 |
| 31.8  | 28.1  | 39.7  | 28.1  | 22.7  | 21.0  | 21.6  | 17.3  | 37.2  |
| 49.1  | 52.9  | 60.5  | 39.6  | 28.0  | 30.3  | 40.7  | 56.0  | 47.2  |
| 9.6   | 3.2   | 7.5   | 5.9   | 49.7  | 55.6  | 42.8  | 53.8  | 7.3   |
| 2.4   | 6.9   | 4.2   | 8.8   | 43.5  | 34.3  | 40.1  | 32.6  | 7.3   |
| 81.0  | 77.9  | 74.7  | 82.5  | 2.7   | 2.0   | 4.1   | 0.4   | 3.2   |
| 21.5  | 22.5  | 38.5  | 28.1  | 28.1  | 31.5  | 30.8  | 26.9  | 54.4  |
| 73.3  | 72.5  | 86.1  | 68.6  | 216.8 | 158.7 | 197.0 | 251.6 | 141.2 |
| 17.2  | 6.5   | 36.2  | 6.5   | 32.1  | 43.0  | 28.3  | 37.6  | 52.6  |
| 17.2  | 18.8  | 13.4  | 19.9  | 18.6  | 18.7  | 10.5  | 12.3  | 21.4  |
| 9.3   | 3.4   | 8.2   | 3.0   | 3.3   | 2.9   | 4.5   | 4.0   | 13.5  |
| 1.5   | 2.9   | 3.8   | 2.9   | 3.1   | 1.5   | 2.0   | 11.6  | 6.0   |
| 1.9   | 6.6   | 7.1   | 6.3   | 13.2  | 10.1  | 9.8   | 13.7  | 12.0  |
| 14.4  | 3.1   | 32.3  | 17.0  | 10.1  | 8.0   | 11.4  | 29.2  | 5.6   |
| 1.0   | 0.5   | 0.9   | 2.9   | 231.9 | 255.2 | 279.9 | 315.5 | 1.2   |
| 0.9   | 5.6   | 1.0   | 0.7   | 0.8   | 0.6   | 3.1   | 0.5   | 0.9   |
| 1.1   | 1.1   | 2.5   | 1.1   | 0.8   | 0.8   | 1.1   | 1.1   | 1.1   |
| 81.7  | 75.4  | 100.6 | 70.7  | 49.0  | 52.7  | 59.9  | 53.4  | 52.6  |
| 5.6   | 2.8   | 5.1   | 4.8   | 4.4   | 8.3   | 5.1   | 9.1   | 8.8   |
| 38.5  | 28.2  | 46.1  | 26.4  | 82.2  | 72.7  | 78.5  | 114.3 | 77.9  |
| 1.4   | 1.1   | 2.9   | 0.9   | 14.3  | 9.2   | 20.8  | 14.9  | 5.1   |
| 71.5  | 66.8  | 189.9 | 74.6  | 133.6 | 109.1 | 128.7 | 157.7 | 176.9 |
| 10.6  | 10.7  | 13.4  | 5.6   | 17.3  | 19.5  | 14.9  | 19.3  | 80.1  |
| 5.5   | 4.3   | 5.4   | 1.9   | 8.2   | 2.1   | 6.5   | 11.7  | 43.0  |
| 9.7   | 5.9   | 4.9   | 7.8   | 16.7  | 16.0  | 22.6  | 28.2  | 36.8  |
| 53.0  | 48.9  | 78.1  | 42.0  | 72.1  | 56.6  | 71.4  | 92.0  | 59.5  |
| 49.3  | 44.6  | 85.5  | 51.3  | 1.3   | 6.1   | 4.5   | 1.6   | 5.5   |
| 12.6  | 12.7  | 11.2  | 12.0  | 8.1   | 3.9   | 7.7   | 6.5   | 5.8   |
| 164.9 | 172.1 | 227.3 | 149.4 | 117.8 | 112.8 | 109.8 | 172.1 | 249.1 |
| 50.2  | 44.9  | 34.8  | 45.1  | 41.5  | 58.7  | 52.9  | 58.7  | 52.2  |
| 76.6  | 72.6  | 81.7  | 69.3  | 46.9  | 75.0  | 65.3  | 60.3  | 55.0  |
| 34.5  | 31.3  | 39.6  | 32.9  | 30.8  | 30.3  | 29.8  | 31.9  | 49.8  |
| 0.5   | 1.0   | 5.0   | 0.4   | 4.2   | 11.6  | 6.1   | 3.2   | 13.7  |
| 27.0  | 32.8  | 12.2  | 43.9  | 3.7   | 3.9   | 5.8   | 1.3   | 1.9   |
| 5.2   | 6.4   | 5.0   | 21.3  | 1.8   | 1.8   | 2.5   | 2.1   | 10.7  |
| 6.6   | 9.1   | 11.7  | 11.8  | 4.1   | 1.5   | 3.9   | 1.1   | 5.2   |
| 0.3   | 2.7   | 2.7   | 4.8   | 2.2   | 1.0   | 1.8   | 0.9   | 2.3   |
| 8.9   | 17.0  | 17.5  | 8.4   | 12.0  | 12.4  | 10.6  | 9.9   | 11.5  |
| 42.7  | 36.9  | 49.5  | 33.8  | 37.5  | 35.7  | 39.8  | 44.6  | 75.6  |
| 8.7   | 16.8  | 21.6  | 13.3  | 2.6   | 3.7   | 5.3   | 9.0   | 17.6  |
| 27.3  | 24.8  | 19.4  | 28.3  | 130.5 | 107.5 | 81.1  | 108.2 | 9.4   |
| 1.5   | 1.4   | 2.5   | 1.0   | 0.9   | 1.6   | 0.8   | 0.9   | 5.3   |
| 14.4  | 20.3  | 30.2  | 20.1  | 25.8  | 28.0  | 27.3  | 26.9  | 19.7  |
| 55.3  | 71.9  | 78.1  | 58.0  | 84.3  | 98.9  | 88.4  | 69.4  | 38.8  |

|        |        |        |        |        |       |        |        |        |
|--------|--------|--------|--------|--------|-------|--------|--------|--------|
| 1.0    | 1.9    | 4.4    | 8.7    | 2.5    | 3.3   | 1.5    | 6.3    | 3.9    |
| 77.2   | 77.1   | 55.7   | 41.1   | 6.0    | 9.0   | 11.0   | 16.1   | 2.0    |
| 54.8   | 69.2   | 54.9   | 48.3   | 66.6   | 70.9  | 73.7   | 84.1   | 86.6   |
| 0.5    | 0.6    | 1.4    | 1.9    | 1.3    | 0.7   | 1.5    | 1.4    | 2.9    |
| 260.1  | 300.2  | 260.2  | 300.6  | 149.4  | 119.4 | 141.3  | 177.7  | 79.6   |
| 47.8   | 48.4   | 78.2   | 55.9   | 9.5    | 3.7   | 6.5    | 5.5    | 36.7   |
| 2.4    | 13.9   | 4.6    | 3.4    | 8.7    | 12.6  | 3.7    | 13.4   | 43.3   |
| 59.8   | 57.5   | 42.9   | 38.6   | 9.9    | 25.3  | 19.6   | 25.4   | 29.8   |
| 8.5    | 9.6    | 12.9   | 6.5    | 49.1   | 28.3  | 37.2   | 49.8   | 71.1   |
| 17.8   | 12.4   | 16.3   | 12.4   | 35.9   | 51.8  | 52.3   | 48.7   | 82.9   |
| 1391.8 | 1352.8 | 1934.9 | 1387.5 | 1039.5 | 775.0 | 1000.2 | 1083.4 | 1363.9 |
| 7.6    | 8.7    | 6.3    | 7.8    | 5.6    | 1.8   | 10.3   | 6.7    | 10.0   |
| 169.4  | 180.5  | 172.2  | 157.3  | 131.9  | 162.4 | 132.8  | 149.1  | 312.7  |
| 30.8   | 32.5   | 28.6   | 24.3   | 6.8    | 10.6  | 6.4    | 11.9   | 13.0   |
| 47.9   | 33.8   | 60.4   | 28.1   | 29.7   | 27.0  | 28.9   | 33.6   | 38.0   |
| 1.2    | 1.2    | 1.8    | 0.8    | 8.6    | 28.3  | 20.4   | 4.4    | 1.1    |
| 29.9   | 33.9   | 36.9   | 29.9   | 44.2   | 93.7  | 53.5   | 54.9   | 53.8   |
| 5.7    | 6.1    | 9.0    | 6.3    | 69.7   | 74.4  | 71.0   | 78.3   | 12.8   |
| 337.7  | 348.2  | 252.9  | 280.1  | 116.1  | 106.7 | 122.6  | 111.1  | 95.8   |
| 25.2   | 22.9   | 31.5   | 24.6   | 15.5   | 9.3   | 13.5   | 26.2   | 20.7   |
| 12.3   | 7.8    | 23.2   | 11.5   | 18.0   | 18.5  | 12.2   | 21.7   | 29.8   |
| 16.6   | 14.9   | 9.3    | 12.5   | 2.5    | 5.5   | 4.1    | 8.8    | 15.0   |
| 27.3   | 21.0   | 22.6   | 16.6   | 17.0   | 15.1  | 14.5   | 24.4   | 34.8   |
| 3.8    | 10.2   | 3.6    | 4.8    | 738.3  | 726.1 | 923.6  | 898.8  | 1926.6 |
| 23.2   | 22.7   | 19.0   | 13.8   | 76.3   | 109.6 | 85.1   | 89.0   | 90.4   |
| 2.0    | 0.6    | 3.5    | 3.4    | 2.9    | 0.3   | 0.6    | 7.3    | 1.4    |
| 52.8   | 49.3   | 172.9  | 59.9   | 177.3  | 126.1 | 166.5  | 210.8  | 296.3  |
| 2.5    | 9.1    | 7.1    | 8.8    | 5.1    | 3.8   | 1.9    | 2.3    | 4.1    |
| 8.4    | 2.5    | 13.2   | 4.4    | 688.2  | 815.0 | 843.4  | 925.5  | 1277.4 |
| 24.0   | 12.7   | 24.5   | 14.3   | 17.4   | 12.0  | 11.0   | 24.8   | 23.2   |
| 3.1    | 3.4    | 1.5    | 1.3    | 0.5    | 3.4   | 1.1    | 0.4    | 3.4    |
| 1.3    | 1.5    | 1.5    | 0.7    | 1.0    | 0.9   | 1.3    | 0.9    | 1.3    |
| 37.1   | 35.5   | 35.9   | 38.3   | 1.9    | 4.1   | 1.1    | 1.6    | 4.8    |
| 14.8   | 14.5   | 8.9    | 18.0   | 12.9   | 12.3  | 9.8    | 9.8    | 11.2   |
| 13.0   | 8.6    | 11.5   | 14.3   | 11.3   | 5.6   | 1.4    | 2.6    | 13.2   |
| 10.9   | 10.3   | 8.1    | 5.3    | 8.3    | 6.0   | 9.5    | 5.4    | 3.2    |
| 20.7   | 22.8   | 26.1   | 22.6   | 14.8   | 13.4  | 16.7   | 13.1   | 21.5   |
| 137.8  | 130.3  | 162.7  | 151.4  | 183.5  | 161.5 | 167.4  | 179.2  | 219.4  |
| 41.8   | 43.0   | 34.7   | 40.8   | 69.7   | 48.6  | 78.1   | 70.0   | 70.4   |
| 120.7  | 114.1  | 174.5  | 119.7  | 28.8   | 17.7  | 31.2   | 29.9   | 26.9   |
| 1.0    | 1.2    | 1.1    | 1.3    | 1.0    | 0.9   | 0.8    | 1.6    | 1.9    |
| 0.8    | 0.6    | 1.2    | 0.7    | 1.2    | 0.5   | 0.2    | 0.4    | 1.1    |
| 2.0    | 1.5    | 2.6    | 4.2    | 16.1   | 22.3  | 15.1   | 16.7   | 29.7   |
| 11.0   | 7.1    | 11.7   | 2.2    | 12.3   | 13.6  | 21.2   | 10.2   | 32.3   |
| 21.1   | 26.0   | 27.5   | 11.8   | 39.4   | 22.3  | 30.7   | 40.2   | 45.2   |
| 261.7  | 233.2  | 302.0  | 228.7  | 441.3  | 358.8 | 445.1  | 446.0  | 324.0  |
| 8.3    | 13.9   | 1.3    | 11.2   | 10.3   | 1.3   | 9.9    | 16.6   | 4.7    |
| 261.8  | 236.9  | 522.7  | 202.0  | 345.3  | 185.6 | 401.3  | 371.3  | 435.0  |
| 26.1   | 24.2   | 37.9   | 25.7   | 19.4   | 10.3  | 24.4   | 15.2   | 12.0   |
| 74.8   | 68.5   | 146.4  | 64.1   | 247.7  | 187.2 | 221.0  | 246.0  | 582.4  |
| 0.6    | 3.0    | 5.5    | 2.7    | 2.2    | 1.5   | 1.6    | 0.5    | 0.6    |
| 31.6   | 24.5   | 107.6  | 19.3   | 132.9  | 62.4  | 125.0  | 157.7  | 131.9  |
| 57.2   | 54.6   | 63.0   | 40.8   | 101.1  | 53.8  | 106.6  | 116.5  | 150.6  |

|       |       |        |       |       |        |       |        |       |
|-------|-------|--------|-------|-------|--------|-------|--------|-------|
| 16.3  | 14.2  | 22.3   | 15.7  | 6.3   | 3.0    | 4.1   | 18.8   | 12.2  |
| 11.0  | 13.1  | 5.4    | 11.3  | 11.4  | 38.7   | 7.0   | 8.1    | 9.3   |
| 86.0  | 76.0  | 106.4  | 67.8  | 32.7  | 24.9   | 33.7  | 42.0   | 37.9  |
| 4.6   | 0.9   | 3.2    | 2.7   | 2.4   | 2.3    | 1.5   | 1.2    | 8.0   |
| 1.2   | 2.0   | 21.3   | 4.1   | 55.5  | 69.6   | 102.8 | 96.9   | 76.1  |
| 9.6   | 4.5   | 13.0   | 8.0   | 116.8 | 103.1  | 171.0 | 133.8  | 82.3  |
| 4.5   | 1.3   | 2.2    | 6.5   | 18.9  | 4.4    | 28.6  | 25.7   | 1.4   |
| 508.0 | 449.3 | 653.7  | 470.0 | 850.1 | 1002.7 | 959.1 | 1065.9 | 830.1 |
| 0.8   | 0.6   | 5.2    | 1.8   | 18.1  | 13.9   | 14.2  | 17.9   | 15.1  |
| 11.0  | 13.4  | 26.9   | 10.6  | 7.3   | 13.8   | 9.2   | 18.8   | 21.9  |
| 22.5  | 21.9  | 29.0   | 22.8  | 115.3 | 108.0  | 137.1 | 117.1  | 66.5  |
| 8.8   | 8.7   | 8.4    | 6.1   | 10.7  | 3.8    | 11.4  | 3.5    | 2.9   |
| 818.1 | 746.9 | 1393.4 | 841.4 | 557.9 | 424.1  | 517.4 | 660.9  | 811.6 |
| 1.9   | 2.4   | 1.7    | 1.7   | 1.5   | 1.5    | 0.9   | 0.7    | 2.7   |
| 6.7   | 14.2  | 6.6    | 9.4   | 7.4   | 1.9    | 10.5  | 15.1   | 11.6  |
| 8.7   | 8.7   | 9.8    | 11.9  | 1.6   | 3.4    | 4.7   | 9.9    | 4.6   |
| 12.1  | 9.5   | 13.8   | 11.9  | 13.1  | 6.6    | 9.7   | 16.1   | 8.3   |
| 44.0  | 42.0  | 56.6   | 44.9  | 22.6  | 28.8   | 21.5  | 43.3   | 74.6  |
| 3.6   | 1.2   | 1.6    | 1.5   | 1.8   | 0.8    | 6.3   | 2.5    | 2.0   |
| 6.1   | 6.0   | 15.3   | 1.2   | 5.8   | 6.3    | 4.8   | 6.1    | 3.5   |
| 8.6   | 1.7   | 4.3    | 1.9   | 14.9  | 17.4   | 22.3  | 14.4   | 7.4   |
| 35.9  | 25.1  | 25.9   | 18.4  | 1.0   | 3.7    | 6.4   | 7.8    | 2.7   |
| 2.7   | 4.4   | 3.2    | 2.0   | 4.2   | 2.4    | 1.3   | 0.8    | 3.6   |
| 2.5   | 3.9   | 1.8    | 3.6   | 5.7   | 8.0    | 8.9   | 1.2    | 3.1   |
| 35.4  | 46.1  | 40.7   | 55.7  | 3.9   | 7.7    | 15.5  | 18.8   | 1.7   |
| 8.7   | 14.9  | 8.7    | 12.7  | 10.9  | 8.9    | 9.4   | 12.4   | 18.7  |
| 88.6  | 84.3  | 97.8   | 79.4  | 78.0  | 64.6   | 75.1  | 101.9  | 90.2  |
| 6.5   | 8.2   | 9.4    | 5.8   | 5.1   | 5.6    | 7.0   | 10.7   | 10.2  |
| 8.2   | 4.5   | 15.2   | 8.0   | 10.6  | 10.0   | 8.8   | 7.9    | 18.6  |
| 18.0  | 24.1  | 11.6   | 21.0  | 13.2  | 15.0   | 8.6   | 14.9   | 2.8   |
| 0.9   | 1.1   | 1.1    | 1.7   | 20.8  | 19.8   | 28.6  | 17.1   | 1.6   |
| 1.3   | 6.7   | 1.6    | 1.4   | 5.8   | 1.4    | 7.1   | 2.6    | 3.6   |
| 34.9  | 32.5  | 37.6   | 31.1  | 46.6  | 39.7   | 41.5  | 64.8   | 21.4  |
| 25.7  | 24.4  | 36.2   | 32.9  | 27.2  | 37.3   | 26.3  | 31.7   | 15.5  |
| 8.9   | 10.5  | 16.6   | 6.3   | 11.9  | 18.1   | 26.0  | 32.2   | 25.4  |
| 9.6   | 15.8  | 11.6   | 9.8   | 34.2  | 47.1   | 26.3  | 29.6   | 45.4  |
| 13.5  | 13.3  | 16.2   | 12.1  | 46.2  | 31.4   | 43.1  | 58.7   | 44.8  |
| 20.9  | 27.2  | 34.7   | 13.9  | 34.6  | 22.9   | 44.8  | 56.1   | 16.1  |
| 18.4  | 11.6  | 6.1    | 14.2  | 6.9   | 5.5    | 2.6   | 0.9    | 1.5   |
| 7.9   | 4.0   | 9.6    | 11.0  | 6.6   | 3.7    | 5.6   | 1.7    | 9.2   |
| 215.9 | 216.5 | 232.1  | 188.6 | 251.3 | 340.3  | 285.4 | 299.5  | 248.0 |
| 34.9  | 40.7  | 45.5   | 43.6  | 16.8  | 33.1   | 25.5  | 29.0   | 42.6  |
| 8.3   | 4.1   | 7.8    | 4.5   | 791.2 | 710.5  | 909.2 | 993.6  | 364.4 |
| 2.4   | 2.3   | 1.9    | 1.1   | 2.0   | 0.7    | 1.1   | 4.5    | 3.7   |
| 6.3   | 5.1   | 7.2    | 7.3   | 3.7   | 5.8    | 1.2   | 2.8    | 15.7  |
| 10.8  | 13.1  | 15.0   | 13.8  | 2.1   | 6.6    | 4.8   | 8.5    | 8.8   |
| 34.7  | 29.8  | 34.7   | 27.8  | 5.5   | 1.1    | 3.2   | 11.7   | 7.2   |
| 23.0  | 45.3  | 28.4   | 31.2  | 47.0  | 69.0   | 43.9  | 68.3   | 84.4  |
| 19.0  | 31.1  | 20.4   | 21.2  | 12.0  | 11.0   | 12.5  | 24.4   | 19.0  |
| 1.8   | 1.1   | 1.6    | 0.6   | 71.6  | 90.9   | 107.0 | 107.8  | 3.8   |
| 65.1  | 66.1  | 67.4   | 54.0  | 44.1  | 48.2   | 46.5  | 63.5   | 63.1  |
| 23.9  | 17.3  | 39.7   | 29.4  | 12.5  | 11.3   | 20.0  | 23.1   | 19.0  |
| 5.1   | 9.5   | 6.0    | 3.1   | 3.0   | 4.8    | 10.6  | 2.5    | 1.8   |

|        |       |        |        |       |       |       |       |        |
|--------|-------|--------|--------|-------|-------|-------|-------|--------|
| 59.5   | 61.1  | 62.1   | 61.8   | 134.6 | 150.2 | 131.3 | 164.0 | 157.0  |
| 1.3    | 1.4   | 7.8    | 2.9    | 50.1  | 50.1  | 57.6  | 44.9  | 40.5   |
| 8.2    | 8.3   | 9.3    | 2.6    | 5.5   | 3.9   | 5.7   | 3.8   | 7.0    |
| 78.9   | 71.6  | 112.8  | 91.2   | 99.5  | 56.3  | 108.3 | 140.5 | 125.9  |
| 94.4   | 77.9  | 73.9   | 92.1   | 85.0  | 91.4  | 84.2  | 102.0 | 28.2   |
| 2.9    | 1.1   | 5.5    | 5.3    | 43.0  | 44.3  | 59.2  | 58.8  | 87.7   |
| 3.2    | 0.3   | 1.2    | 5.1    | 2.2   | 1.5   | 0.2   | 1.3   | 6.0    |
| 597.3  | 641.6 | 945.4  | 648.0  | 835.2 | 732.9 | 853.4 | 896.5 | 1388.4 |
| 17.3   | 15.8  | 17.5   | 16.2   | 2.1   | 3.1   | 5.2   | 3.8   | 0.7    |
| 32.9   | 28.6  | 45.3   | 30.3   | 10.9  | 10.6  | 10.7  | 11.4  | 11.7   |
| 29.9   | 30.3  | 35.0   | 22.8   | 33.7  | 30.8  | 34.0  | 48.0  | 21.9   |
| 4.4    | 9.9   | 14.0   | 13.5   | 4.0   | 16.9  | 6.8   | 5.8   | 3.6    |
| 7.5    | 8.8   | 5.5    | 4.5    | 2.7   | 1.3   | 2.1   | 2.1   | 5.3    |
| 27.8   | 27.0  | 51.4   | 21.6   | 69.4  | 66.3  | 82.0  | 71.7  | 75.8   |
| 8.6    | 5.8   | 7.5    | 6.5    | 29.5  | 21.0  | 19.9  | 29.4  | 12.0   |
| 136.0  | 141.5 | 179.2  | 126.6  | 521.9 | 409.6 | 560.2 | 503.4 | 227.2  |
| 11.4   | 13.8  | 9.3    | 5.4    | 8.2   | 2.7   | 8.6   | 13.8  | 1.4    |
| 54.5   | 39.3  | 54.1   | 41.4   | 70.5  | 66.6  | 73.0  | 70.1  | 43.4   |
| 15.7   | 19.2  | 22.1   | 14.2   | 11.3  | 12.0  | 10.3  | 17.5  | 19.4   |
| 102.6  | 90.1  | 125.1  | 83.3   | 46.0  | 61.1  | 39.7  | 68.1  | 54.4   |
| 90.4   | 79.6  | 170.6  | 87.8   | 113.2 | 100.9 | 122.3 | 148.8 | 147.1  |
| 322.3  | 297.5 | 527.2  | 305.2  | 401.6 | 505.0 | 397.6 | 443.7 | 84.0   |
| 5.1    | 6.5   | 9.4    | 8.8    | 4.5   | 11.6  | 6.8   | 12.0  | 23.4   |
| 30.1   | 26.0  | 22.6   | 22.3   | 19.4  | 14.7  | 17.1  | 13.5  | 78.1   |
| 2.6    | 1.7   | 1.9    | 3.3    | 0.6   | 3.8   | 1.1   | 1.5   | 1.5    |
| 22.6   | 22.6  | 26.3   | 26.6   | 20.9  | 3.0   | 22.9  | 19.8  | 28.6   |
| 37.4   | 53.3  | 34.6   | 33.7   | 37.5  | 62.1  | 44.1  | 55.1  | 9.5    |
| 27.1   | 24.6  | 33.3   | 23.1   | 108.6 | 122.7 | 179.7 | 133.3 | 87.6   |
| 1.3    | 3.7   | 5.8    | 4.9    | 3.8   | 5.5   | 8.3   | 9.6   | 4.1    |
| 3.1    | 6.8   | 6.1    | 0.4    | 165.1 | 115.4 | 153.4 | 124.4 | 3.8    |
| 0.5    | 2.8   | 4.5    | 1.2    | 2.7   | 1.2   | 3.8   | 1.1   | 6.6    |
| 71.0   | 53.1  | 53.7   | 45.1   | 119.3 | 84.0  | 101.2 | 139.4 | 77.7   |
| 31.3   | 33.2  | 40.1   | 26.4   | 67.3  | 117.1 | 71.9  | 92.3  | 22.5   |
| 60.7   | 68.1  | 44.4   | 49.8   | 65.7  | 83.0  | 102.4 | 95.0  | 23.2   |
| 96.7   | 86.0  | 83.8   | 98.3   | 78.3  | 100.0 | 69.7  | 66.4  | 33.5   |
| 239.5  | 175.4 | 165.7  | 201.2  | 496.1 | 461.3 | 575.4 | 627.6 | 450.1  |
| 252.1  | 238.6 | 238.5  | 247.4  | 181.5 | 182.5 | 223.1 | 222.8 | 124.1  |
| 142.4  | 178.3 | 94.2   | 186.0  | 6.9   | 3.4   | 8.2   | 5.0   | 3.2    |
| 37.1   | 40.3  | 42.7   | 32.9   | 176.1 | 203.3 | 180.5 | 190.2 | 450.5  |
| 1.8    | 1.8   | 1.7    | 1.3    | 3.3   | 0.9   | 4.3   | 8.7   | 1.4    |
| 1.7    | 6.1   | 7.8    | 1.1    | 29.3  | 38.5  | 31.3  | 31.2  | 4.7    |
| 60.9   | 65.1  | 64.7   | 68.9   | 111.3 | 120.5 | 115.1 | 123.9 | 193.8  |
| 32.8   | 19.8  | 36.9   | 22.1   | 33.9  | 39.0  | 55.0  | 44.5  | 7.2    |
| 16.0   | 23.8  | 5.3    | 12.5   | 62.5  | 68.3  | 65.1  | 80.9  | 61.9   |
| 0.6    | 1.3   | 0.7    | 1.5    | 2.0   | 0.6   | 0.9   | 0.7   | 1.3    |
| 4.7    | 5.5   | 5.8    | 7.4    | 16.8  | 17.8  | 16.2  | 9.5   | 13.2   |
| 18.6   | 26.8  | 20.7   | 14.8   | 21.0  | 13.5  | 26.4  | 34.8  | 21.5   |
| 3.1    | 1.6   | 8.7    | 4.7    | 3.3   | 1.0   | 5.6   | 3.4   | 6.6    |
| 6.3    | 4.0   | 15.3   | 4.6    | 5.9   | 5.6   | 4.9   | 4.9   | 11.3   |
| 505.7  | 537.8 | 438.8  | 460.4  | 645.2 | 925.3 | 777.2 | 770.4 | 764.2  |
| 8.9    | 13.3  | 2.7    | 8.4    | 2.9   | 0.4   | 3.7   | 0.2   | 1.1    |
| 3.5    | 4.6   | 1.9    | 1.7    | 3.8   | 1.0   | 7.7   | 0.6   | 3.7    |
| 1113.2 | 934.1 | 1526.3 | 1102.6 | 8.5   | 10.0  | 9.0   | 9.7   | 48.5   |

|       |       |        |       |        |        |        |        |       |
|-------|-------|--------|-------|--------|--------|--------|--------|-------|
| 22.4  | 21.1  | 21.7   | 18.1  | 8.1    | 4.1    | 12.1   | 4.0    | 6.2   |
| 11.4  | 15.3  | 14.4   | 13.4  | 6.1    | 1.1    | 3.3    | 3.2    | 5.2   |
| 33.6  | 30.9  | 78.2   | 44.2  | 51.9   | 59.3   | 60.2   | 66.6   | 25.9  |
| 1.0   | 1.8   | 1.3    | 1.3   | 0.9    | 0.9    | 1.4    | 1.1    | 2.2   |
| 431.1 | 374.7 | 1085.1 | 754.8 | 25.9   | 19.3   | 23.3   | 18.0   | 255.6 |
| 11.5  | 7.4   | 8.5    | 3.6   | 129.3  | 128.5  | 113.2  | 126.8  | 73.0  |
| 457.9 | 443.6 | 688.8  | 413.5 | 1110.1 | 1283.0 | 1047.1 | 1250.2 | 764.3 |
| 93.3  | 90.8  | 157.2  | 74.6  | 72.6   | 84.0   | 77.0   | 75.8   | 161.6 |
| 213.8 | 196.7 | 287.3  | 211.2 | 32.8   | 33.7   | 54.4   | 38.4   | 110.9 |
| 481.6 | 438.2 | 749.0  | 537.1 | 196.9  | 222.3  | 193.6  | 231.9  | 365.4 |
| 5.6   | 4.6   | 3.1    | 2.7   | 2.6    | 2.2    | 2.9    | 12.6   | 22.4  |
| 3.9   | 3.3   | 4.4    | 3.1   | 2.2    | 6.5    | 2.6    | 2.9    | 3.5   |
| 2.3   | 2.3   | 4.0    | 2.7   | 27.1   | 22.7   | 27.9   | 32.0   | 93.6  |
| 74.8  | 68.6  | 118.1  | 69.0  | 126.6  | 99.5   | 120.1  | 145.6  | 151.5 |
| 31.6  | 46.6  | 24.2   | 37.8  | 35.2   | 24.4   | 29.2   | 40.9   | 17.4  |
| 20.2  | 25.9  | 33.2   | 12.3  | 9.7    | 8.0    | 11.2   | 18.5   | 26.9  |
| 2.0   | 1.6   | 3.7    | 1.7   | 2.4    | 2.7    | 1.6    | 2.7    | 2.8   |
| 5.6   | 12.3  | 16.5   | 10.8  | 17.7   | 10.4   | 10.6   | 19.3   | 12.6  |
| 0.4   | 1.7   | 5.6    | 3.4   | 0.5    | 1.5    | 1.4    | 0.4    | 4.8   |
| 89.0  | 96.5  | 90.7   | 84.0  | 161.9  | 120.9  | 153.8  | 156.1  | 164.4 |
| 6.6   | 4.6   | 10.2   | 6.2   | 16.0   | 20.4   | 29.1   | 39.4   | 9.3   |
| 1.5   | 2.3   | 1.5    | 1.0   | 27.8   | 29.3   | 19.5   | 33.9   | 58.8  |
| 99.2  | 91.6  | 104.2  | 74.1  | 45.8   | 45.9   | 54.8   | 51.4   | 76.1  |
| 30.4  | 29.5  | 19.1   | 24.7  | 16.1   | 8.8    | 15.6   | 19.6   | 7.9   |
| 9.1   | 22.5  | 21.3   | 11.8  | 2458.3 | 2238.9 | 2674.8 | 2644.9 | 30.1  |
| 2.4   | 2.1   | 5.5    | 5.3   | 2.5    | 2.3    | 2.5    | 0.5    | 2.9   |
| 51.0  | 50.2  | 36.4   | 35.7  | 24.5   | 26.1   | 29.6   | 25.9   | 24.3  |
| 42.4  | 38.5  | 43.5   | 32.8  | 3.0    | 0.7    | 8.7    | 6.6    | 24.2  |
| 3.1   | 10.1  | 7.4    | 9.4   | 7.9    | 6.1    | 6.8    | 0.6    | 9.0   |
| 0.5   | 0.7   | 0.7    | 0.5   | 0.5    | 0.8    | 0.7    | 0.9    | 0.8   |
| 17.8  | 21.7  | 47.6   | 25.8  | 77.9   | 38.7   | 65.3   | 82.8   | 111.9 |
| 1.1   | 0.8   | 5.1    | 0.8   | 5.6    | 5.4    | 0.9    | 5.5    | 13.2  |
| 278.3 | 237.5 | 486.1  | 251.5 | 0.7    | 1.3    | 1.3    | 1.2    | 3.9   |
| 13.1  | 11.7  | 14.9   | 20.1  | 22.1   | 12.5   | 19.4   | 32.8   | 14.7  |
| 16.4  | 8.1   | 15.7   | 9.3   | 17.0   | 19.3   | 15.1   | 22.7   | 17.2  |
| 1.5   | 0.4   | 1.3    | 0.8   | 4.1    | 0.4    | 3.2    | 2.0    | 4.6   |
| 9.2   | 7.1   | 13.4   | 10.2  | 20.3   | 15.0   | 13.7   | 24.4   | 24.1  |
| 17.9  | 12.5  | 33.1   | 17.2  | 4.7    | 6.7    | 3.5    | 13.2   | 271.2 |
| 12.7  | 17.8  | 20.3   | 11.8  | 6.4    | 5.2    | 11.0   | 14.0   | 15.5  |
| 39.0  | 71.6  | 48.0   | 65.0  | 26.6   | 12.0   | 14.6   | 23.9   | 17.0  |
| 1.0   | 4.6   | 1.2    | 1.6   | 108.3  | 125.7  | 87.2   | 81.4   | 14.1  |
| 78.1  | 61.2  | 159.4  | 84.1  | 47.3   | 36.0   | 43.9   | 58.1   | 9.0   |
| 417.5 | 376.6 | 547.6  | 380.9 | 416.0  | 598.3  | 418.1  | 503.3  | 289.7 |
| 28.0  | 23.1  | 22.2   | 17.2  | 30.3   | 26.4   | 18.5   | 32.5   | 69.5  |
| 15.3  | 14.0  | 29.9   | 14.8  | 26.4   | 10.4   | 20.6   | 24.1   | 32.7  |
| 103.7 | 85.6  | 197.6  | 89.1  | 253.3  | 238.2  | 300.8  | 369.9  | 301.8 |
| 46.4  | 37.6  | 121.6  | 52.0  | 406.7  | 417.3  | 466.2  | 444.8  | 460.0 |
| 228.6 | 252.5 | 225.7  | 220.0 | 187.4  | 226.6  | 180.2  | 238.5  | 140.3 |
| 29.9  | 25.9  | 41.3   | 29.0  | 44.8   | 55.6   | 52.9   | 62.4   | 49.6  |
| 73.6  | 75.8  | 84.2   | 61.6  | 50.6   | 51.1   | 75.6   | 76.0   | 43.1  |
| 1.8   | 3.4   | 14.8   | 2.2   | 4.6    | 7.4    | 4.8    | 4.9    | 1.4   |
| 29.1  | 33.1  | 35.3   | 25.9  | 25.1   | 17.0   | 23.7   | 26.5   | 36.4  |
| 15.3  | 15.6  | 19.0   | 6.2   | 17.5   | 5.8    | 10.3   | 23.7   | 26.6  |

|       |       |       |       |       |       |       |       |       |
|-------|-------|-------|-------|-------|-------|-------|-------|-------|
| 10.8  | 4.3   | 12.8  | 13.4  | 21.2  | 17.6  | 13.9  | 16.8  | 2.1   |
| 6.4   | 3.6   | 3.5   | 3.4   | 1.4   | 2.1   | 0.8   | 2.1   | 5.3   |
| 589.7 | 569.8 | 781.1 | 649.7 | 690.8 | 647.4 | 616.4 | 726.3 | 686.5 |
| 1.4   | 2.6   | 4.4   | 1.5   | 2.8   | 0.5   | 2.0   | 5.0   | 3.2   |
| 13.2  | 17.1  | 24.4  | 17.8  | 48.9  | 38.9  | 60.3  | 70.3  | 87.6  |
| 95.6  | 102.8 | 89.9  | 117.7 | 68.6  | 69.0  | 65.9  | 81.7  | 122.8 |
| 14.8  | 16.2  | 18.6  | 15.1  | 7.6   | 9.1   | 10.2  | 18.5  | 23.2  |
| 15.0  | 14.0  | 28.1  | 10.5  | 428.7 | 362.6 | 359.5 | 531.9 | 134.9 |
| 12.7  | 5.1   | 15.5  | 4.3   | 232.4 | 220.1 | 207.5 | 245.6 | 68.5  |
| 55.4  | 53.7  | 99.1  | 45.7  | 127.7 | 107.1 | 97.3  | 122.0 | 125.6 |
| 4.7   | 14.2  | 15.0  | 9.6   | 23.3  | 44.1  | 14.8  | 22.3  | 26.8  |
| 29.3  | 19.3  | 25.8  | 18.0  | 287.8 | 198.6 | 300.6 | 351.5 | 54.5  |
| 29.2  | 17.3  | 68.3  | 35.6  | 195.1 | 181.0 | 163.0 | 195.8 | 163.2 |
| 14.9  | 6.8   | 10.3  | 1.6   | 4.9   | 1.7   | 3.1   | 14.2  | 2.2   |
| 4.5   | 6.4   | 2.8   | 6.7   | 63.7  | 107.8 | 99.6  | 75.6  | 64.8  |
| 446.0 | 515.6 | 418.5 | 422.6 | 113.0 | 181.2 | 124.5 | 124.1 | 262.5 |
| 3.6   | 5.0   | 11.9  | 2.9   | 144.5 | 148.4 | 148.6 | 157.4 | 31.9  |
| 15.6  | 14.3  | 13.1  | 12.2  | 2.8   | 0.8   | 9.7   | 5.9   | 15.2  |
| 5.1   | 8.8   | 5.0   | 13.0  | 45.1  | 21.0  | 34.8  | 25.8  | 55.1  |
| 9.1   | 5.0   | 6.2   | 11.6  | 28.8  | 11.7  | 27.2  | 27.2  | 52.8  |
| 98.6  | 78.8  | 70.0  | 60.0  | 52.9  | 123.9 | 47.3  | 64.5  | 116.1 |
| 4.4   | 5.6   | 4.6   | 3.4   | 1.6   | 5.8   | 10.8  | 9.1   | 7.0   |
| 5.5   | 6.0   | 1.6   | 5.1   | 1.0   | 3.4   | 1.5   | 1.2   | 10.4  |
| 1.0   | 2.7   | 0.9   | 1.0   | 0.9   | 5.3   | 2.0   | 1.5   | 4.4   |
| 1.3   | 1.1   | 8.1   | 8.1   | 3.0   | 0.8   | 1.2   | 3.8   | 9.9   |
| 1.5   | 1.9   | 1.3   | 1.9   | 1.4   | 1.8   | 1.9   | 2.3   | 4.1   |
| 9.3   | 15.0  | 11.1  | 4.0   | 57.8  | 44.4  | 63.3  | 73.1  | 94.0  |
| 6.1   | 1.4   | 1.9   | 3.3   | 10.8  | 6.9   | 16.5  | 21.2  | 7.3   |
| 6.5   | 10.5  | 21.1  | 7.0   | 11.5  | 7.9   | 10.4  | 10.4  | 3.6   |
| 14.2  | 15.6  | 9.3   | 12.8  | 26.8  | 23.7  | 21.1  | 25.7  | 35.4  |
| 0.6   | 0.7   | 1.0   | 0.8   | 0.6   | 0.7   | 1.0   | 5.5   | 2.4   |
| 9.0   | 14.0  | 8.8   | 33.3  | 28.1  | 18.2  | 23.6  | 27.7  | 14.1  |
| 6.5   | 14.6  | 9.1   | 9.5   | 16.4  | 31.5  | 24.5  | 14.5  | 22.8  |
| 4.4   | 9.6   | 3.8   | 0.8   | 2.4   | 3.9   | 8.3   | 9.9   | 7.4   |
| 21.5  | 23.4  | 21.8  | 28.5  | 1.6   | 3.8   | 1.0   | 4.1   | 1.2   |
| 3.8   | 0.8   | 3.3   | 3.7   | 3.6   | 2.7   | 3.7   | 0.2   | 3.5   |
| 12.0  | 14.5  | 6.6   | 10.6  | 8.1   | 8.2   | 13.5  | 9.1   | 7.5   |
| 22.7  | 20.6  | 27.0  | 25.5  | 62.1  | 56.3  | 78.2  | 107.4 | 18.1  |
| 11.6  | 8.1   | 21.4  | 20.0  | 8.3   | 5.0   | 5.6   | 3.6   | 5.5   |
| 80.0  | 74.9  | 85.6  | 78.6  | 77.4  | 55.5  | 65.5  | 81.5  | 192.5 |
| 5.6   | 6.9   | 8.7   | 1.7   | 2.2   | 6.1   | 0.7   | 5.9   | 1.7   |
| 20.9  | 21.3  | 31.4  | 20.1  | 18.0  | 9.7   | 18.1  | 16.2  | 29.3  |
| 9.6   | 11.8  | 13.6  | 8.1   | 9.4   | 6.7   | 5.8   | 11.8  | 13.4  |
| 24.6  | 19.5  | 25.6  | 12.4  | 25.0  | 6.9   | 25.3  | 12.2  | 2.9   |
| 27.1  | 24.4  | 25.8  | 15.8  | 15.5  | 7.0   | 8.1   | 19.3  | 5.4   |
| 5.2   | 5.9   | 7.9   | 6.8   | 4.6   | 3.6   | 5.3   | 6.5   | 10.9  |
| 35.8  | 25.2  | 41.2  | 25.6  | 30.2  | 38.6  | 34.6  | 67.2  | 29.1  |
| 78.4  | 60.5  | 69.6  | 43.8  | 8.9   | 4.4   | 3.4   | 5.1   | 10.3  |
| 7.3   | 6.0   | 11.0  | 4.1   | 17.5  | 11.9  | 12.0  | 14.5  | 0.5   |
| 82.2  | 78.9  | 139.7 | 65.0  | 774.5 | 427.2 | 617.6 | 650.6 | 288.4 |
| 32.6  | 20.5  | 8.8   | 10.7  | 57.2  | 58.9  | 59.9  | 52.2  | 15.0  |
| 30.8  | 37.3  | 25.0  | 24.1  | 33.2  | 28.5  | 36.8  | 32.8  | 25.6  |
| 11.3  | 12.5  | 5.5   | 1.6   | 16.4  | 23.4  | 17.1  | 28.8  | 62.6  |

|       |       |       |       |       |       |       |       |       |
|-------|-------|-------|-------|-------|-------|-------|-------|-------|
| 10.9  | 8.9   | 11.8  | 9.7   | 21.8  | 29.3  | 22.8  | 29.9  | 69.3  |
| 8.7   | 11.9  | 17.6  | 9.1   | 11.8  | 8.8   | 15.3  | 15.5  | 8.3   |
| 7.1   | 3.3   | 1.5   | 2.1   | 0.8   | 3.6   | 7.2   | 7.4   | 30.1  |
| 3.2   | 5.1   | 1.5   | 0.9   | 7.3   | 6.8   | 7.2   | 2.8   | 8.0   |
| 2.8   | 4.3   | 5.2   | 2.0   | 2.4   | 3.7   | 3.5   | 4.6   | 4.8   |
| 3.8   | 7.2   | 12.4  | 3.6   | 10.2  | 7.3   | 12.2  | 23.3  | 9.1   |
| 369.6 | 327.1 | 336.1 | 297.0 | 238.2 | 291.1 | 294.2 | 302.8 | 339.5 |
| 33.1  | 25.3  | 123.3 | 34.5  | 17.1  | 13.7  | 16.2  | 35.1  | 3.2   |
| 10.7  | 6.0   | 2.8   | 9.1   | 7.1   | 8.6   | 3.5   | 1.6   | 14.4  |
| 6.3   | 4.5   | 12.5  | 3.9   | 16.8  | 17.8  | 27.9  | 31.5  | 14.5  |
| 1.2   | 3.3   | 2.9   | 2.7   | 9.2   | 3.8   | 8.8   | 17.9  | 5.5   |
| 16.3  | 25.8  | 13.2  | 16.7  | 14.2  | 16.8  | 13.8  | 18.8  | 8.5   |
| 45.4  | 29.0  | 49.7  | 42.8  | 91.6  | 83.5  | 120.5 | 89.5  | 71.3  |
| 40.3  | 48.7  | 32.4  | 47.7  | 0.5   | 0.7   | 0.8   | 0.8   | 1.1   |
| 4.4   | 4.8   | 3.5   | 1.5   | 4.0   | 1.6   | 4.6   | 6.7   | 5.5   |
| 14.3  | 25.4  | 8.5   | 16.9  | 18.6  | 20.3  | 21.6  | 15.0  | 9.1   |
| 10.9  | 10.1  | 10.5  | 6.1   | 17.5  | 21.3  | 15.6  | 13.6  | 20.8  |
| 40.3  | 49.5  | 11.5  | 19.7  | 5.4   | 1.9   | 3.6   | 2.3   | 8.9   |
| 6.5   | 11.2  | 3.2   | 7.1   | 0.7   | 1.2   | 0.7   | 5.5   | 23.1  |
| 262.0 | 196.9 | 563.6 | 259.9 | 8.0   | 2.3   | 9.3   | 4.6   | 5.7   |
| 351.8 | 380.2 | 394.0 | 453.4 | 50.4  | 56.9  | 67.0  | 59.1  | 65.8  |
| 10.2  | 6.6   | 16.8  | 8.4   | 16.3  | 10.6  | 19.9  | 20.1  | 14.3  |
| 42.0  | 43.6  | 30.6  | 33.9  | 15.8  | 11.0  | 14.1  | 17.3  | 20.8  |
| 16.0  | 6.6   | 8.2   | 6.5   | 10.2  | 7.9   | 13.9  | 9.9   | 14.0  |
| 21.7  | 27.4  | 26.3  | 22.8  | 37.8  | 28.7  | 34.9  | 22.1  | 25.0  |
| 2.1   | 5.4   | 0.8   | 3.7   | 11.4  | 6.9   | 11.4  | 10.8  | 14.0  |
| 15.6  | 10.1  | 10.5  | 7.2   | 3.4   | 5.0   | 3.0   | 12.1  | 3.7   |
| 51.7  | 61.9  | 21.1  | 20.0  | 130.5 | 106.7 | 107.7 | 144.8 | 105.6 |
| 1.0   | 3.8   | 0.4   | 3.9   | 10.8  | 6.1   | 10.8  | 12.0  | 7.0   |
| 4.4   | 5.9   | 7.7   | 2.4   | 2.7   | 0.6   | 4.7   | 0.4   | 2.9   |
| 400.3 | 399.8 | 354.0 | 464.1 | 203.5 | 240.3 | 219.4 | 241.1 | 210.0 |
| 3.2   | 5.3   | 3.9   | 4.6   | 0.1   | 4.4   | 2.2   | 0.2   | 3.5   |
| 2.2   | 6.6   | 5.9   | 4.9   | 9.6   | 2.0   | 1.0   | 2.2   | 15.7  |
| 18.3  | 16.1  | 12.0  | 6.3   | 9.4   | 6.8   | 9.6   | 23.1  | 26.9  |
| 2.9   | 6.0   | 12.6  | 8.7   | 33.2  | 24.2  | 33.6  | 34.8  | 15.4  |
| 3.5   | 1.5   | 3.2   | 4.7   | 4.4   | 5.4   | 1.3   | 9.7   | 33.6  |
| 32.0  | 38.8  | 31.9  | 32.3  | 42.1  | 55.6  | 47.1  | 59.6  | 43.2  |
| 20.2  | 19.5  | 22.6  | 25.8  | 17.4  | 34.1  | 21.3  | 52.4  | 11.0  |
| 1.3   | 1.4   | 5.1   | 6.0   | 7.0   | 5.3   | 4.3   | 8.5   | 11.3  |
| 7.2   | 8.2   | 7.6   | 14.5  | 4.2   | 3.2   | 6.6   | 7.2   | 15.2  |
| 9.5   | 25.8  | 24.2  | 14.7  | 24.7  | 13.5  | 24.3  | 25.5  | 45.6  |
| 27.8  | 22.7  | 22.0  | 13.6  | 17.0  | 12.6  | 19.0  | 15.3  | 15.1  |
| 38.6  | 37.9  | 42.0  | 35.0  | 20.4  | 25.8  | 24.3  | 9.8   | 17.9  |
| 86.0  | 70.1  | 87.6  | 81.0  | 152.9 | 133.9 | 161.6 | 187.6 | 263.1 |
| 12.5  | 9.7   | 27.0  | 6.7   | 13.7  | 7.3   | 12.9  | 15.6  | 6.1   |
| 3.8   | 6.3   | 5.8   | 3.6   | 13.8  | 3.4   | 6.2   | 5.2   | 4.8   |
| 2.7   | 4.1   | 4.0   | 3.2   | 17.2  | 4.0   | 41.9  | 44.5  | 1.4   |
| 68.1  | 65.8  | 86.0  | 75.3  | 36.4  | 30.4  | 39.2  | 41.5  | 84.1  |
| 9.0   | 6.2   | 14.7  | 11.4  | 7.2   | 7.6   | 3.5   | 11.5  | 8.2   |
| 9.2   | 6.4   | 9.5   | 7.4   | 2.8   | 2.2   | 7.9   | 0.7   | 9.8   |
| 46.9  | 53.9  | 34.7  | 33.9  | 48.0  | 61.9  | 56.9  | 68.5  | 75.9  |
| 16.6  | 26.2  | 12.8  | 12.3  | 34.0  | 50.5  | 49.4  | 50.9  | 41.6  |
| 6.4   | 0.3   | 6.0   | 3.3   | 0.7   | 0.4   | 5.5   | 0.4   | 4.5   |



|       |       |       |       |       |       |       |       |       |
|-------|-------|-------|-------|-------|-------|-------|-------|-------|
| 65.1  | 66.6  | 67.2  | 63.5  | 59.8  | 68.2  | 52.8  | 60.6  | 57.4  |
| 53.5  | 49.4  | 78.2  | 66.4  | 66.7  | 46.7  | 54.0  | 63.0  | 97.5  |
| 46.6  | 51.1  | 62.2  | 41.5  | 8.1   | 3.6   | 3.8   | 9.6   | 25.2  |
| 210.1 | 201.3 | 262.5 | 222.5 | 205.7 | 163.9 | 220.4 | 244.7 | 344.7 |
| 1.1   | 0.4   | 1.4   | 1.2   | 2.9   | 4.0   | 1.8   | 0.2   | 2.2   |
| 17.1  | 20.3  | 30.8  | 16.6  | 19.0  | 28.0  | 25.8  | 40.7  | 12.7  |
| 12.8  | 15.5  | 13.9  | 9.9   | 45.7  | 53.2  | 45.1  | 60.8  | 60.4  |
| 1.5   | 1.0   | 1.8   | 5.4   | 4.4   | 0.8   | 2.1   | 7.5   | 1.5   |
| 15.3  | 16.2  | 17.7  | 15.0  | 9.8   | 14.0  | 6.6   | 14.6  | 8.3   |
| 5.2   | 9.1   | 3.4   | 5.6   | 3.0   | 9.0   | 5.6   | 1.5   | 8.0   |
| 9.6   | 6.8   | 8.7   | 9.4   | 27.5  | 24.3  | 15.4  | 38.7  | 10.0  |
| 99.3  | 93.3  | 141.7 | 81.7  | 126.5 | 132.0 | 134.5 | 147.3 | 113.4 |
| 7.7   | 10.4  | 8.3   | 12.6  | 1.4   | 10.2  | 10.0  | 2.2   | 7.7   |
| 20.6  | 0.9   | 8.4   | 10.4  | 6.1   | 8.9   | 13.8  | 3.5   | 6.5   |
| 11.5  | 8.9   | 15.1  | 12.0  | 15.6  | 11.1  | 10.9  | 17.8  | 15.5  |
| 213.7 | 201.0 | 295.3 | 195.9 | 282.5 | 214.4 | 271.0 | 333.4 | 196.2 |
| 335.8 | 290.1 | 517.4 | 303.1 | 189.9 | 156.7 | 183.7 | 227.8 | 253.3 |
| 6.9   | 3.8   | 8.8   | 11.3  | 1.6   | 5.2   | 2.1   | 2.3   | 3.3   |
| 16.3  | 17.8  | 15.4  | 11.7  | 25.8  | 44.7  | 18.9  | 27.1  | 47.9  |
| 76.3  | 70.7  | 69.0  | 59.4  | 87.2  | 95.6  | 93.3  | 115.1 | 76.0  |
| 14.5  | 14.5  | 12.8  | 5.9   | 12.7  | 11.5  | 11.7  | 9.6   | 3.9   |
| 2.1   | 2.9   | 1.3   | 1.6   | 1.8   | 10.1  | 2.9   | 6.3   | 3.3   |
| 15.2  | 8.1   | 13.4  | 11.5  | 9.1   | 4.4   | 11.9  | 1.9   | 21.7  |
| 34.8  | 45.0  | 52.4  | 33.3  | 42.2  | 32.1  | 32.5  | 50.3  | 45.5  |
| 1.6   | 5.5   | 5.7   | 3.3   | 5.2   | 5.1   | 3.7   | 2.6   | 0.8   |
| 1.1   | 1.0   | 1.3   | 1.1   | 1.8   | 1.1   | 2.6   | 2.4   | 2.0   |
| 4.4   | 6.5   | 8.1   | 3.0   | 13.7  | 5.8   | 9.3   | 12.8  | 12.5  |
| 27.7  | 25.9  | 34.8  | 21.5  | 13.5  | 10.2  | 4.2   | 25.1  | 11.9  |
| 13.1  | 12.0  | 6.6   | 11.9  | 8.3   | 1.6   | 3.2   | 6.4   | 11.8  |
| 0.8   | 0.9   | 3.2   | 1.3   | 15.0  | 12.3  | 22.6  | 34.6  | 4.3   |
| 2.9   | 9.4   | 6.5   | 6.2   | 26.0  | 21.3  | 53.4  | 45.6  | 9.3   |
| 3.8   | 1.5   | 1.8   | 0.8   | 0.7   | 0.4   | 2.0   | 6.4   | 2.9   |
| 0.5   | 0.6   | 0.9   | 0.7   | 0.4   | 1.0   | 1.1   | 0.5   | 1.0   |
| 0.9   | 0.8   | 1.3   | 1.0   | 1.9   | 1.7   | 15.4  | 2.9   | 1.4   |
| 73.0  | 79.3  | 143.5 | 95.8  | 312.5 | 222.4 | 252.1 | 363.8 | 132.2 |
| 67.3  | 72.6  | 30.0  | 45.4  | 198.7 | 387.4 | 236.1 | 245.9 | 69.9  |
| 0.9   | 1.0   | 2.1   | 0.5   | 0.5   | 2.9   | 2.4   | 0.9   | 0.9   |
| 10.5  | 9.7   | 12.0  | 3.4   | 9.4   | 5.1   | 1.1   | 3.5   | 5.7   |
| 4.0   | 3.3   | 57.9  | 64.3  | 10.8  | 11.0  | 18.3  | 15.8  | 6.1   |
| 36.8  | 36.4  | 50.1  | 31.4  | 14.6  | 18.6  | 16.6  | 20.3  | 37.0  |
| 5.3   | 9.5   | 7.3   | 4.8   | 1.7   | 6.2   | 3.3   | 7.8   | 4.1   |
| 5.5   | 5.5   | 2.8   | 1.6   | 0.7   | 0.4   | 0.4   | 4.3   | 3.6   |
| 0.5   | 1.9   | 3.5   | 1.7   | 1.1   | 0.6   | 0.8   | 1.8   | 1.4   |
| 50.2  | 26.7  | 90.5  | 43.9  | 22.9  | 26.8  | 49.4  | 70.7  | 77.6  |
| 12.0  | 3.3   | 8.6   | 19.4  | 4.9   | 1.3   | 1.6   | 2.7   | 6.9   |
| 13.7  | 14.1  | 39.0  | 14.0  | 39.5  | 30.0  | 37.1  | 61.0  | 39.7  |
| 17.5  | 15.4  | 17.9  | 13.9  | 25.6  | 21.7  | 21.9  | 11.9  | 22.8  |
| 9.9   | 12.3  | 9.1   | 8.8   | 11.8  | 9.6   | 12.1  | 13.2  | 14.7  |
| 10.4  | 7.6   | 10.6  | 6.4   | 11.5  | 8.0   | 9.7   | 14.1  | 20.3  |
| 3.6   | 5.1   | 3.7   | 7.1   | 3.3   | 6.2   | 5.6   | 1.5   | 1.8   |
| 5.6   | 4.1   | 4.6   | 5.9   | 3.0   | 1.1   | 0.7   | 7.5   | 4.5   |
| 2.2   | 4.6   | 3.6   | 4.4   | 5.6   | 0.8   | 6.6   | 1.5   | 3.7   |
| 12.0  | 21.4  | 17.1  | 11.9  | 12.0  | 8.7   | 9.7   | 6.1   | 24.9  |

|       |       |       |       |       |       |        |       |       |
|-------|-------|-------|-------|-------|-------|--------|-------|-------|
| 5.3   | 5.4   | 2.5   | 6.1   | 3.6   | 2.4   | 4.9    | 0.9   | 7.5   |
| 4.3   | 12.0  | 14.0  | 15.7  | 11.0  | 10.4  | 18.7   | 18.9  | 7.1   |
| 6.7   | 14.1  | 7.1   | 8.9   | 720.2 | 671.6 | 1128.3 | 864.5 | 22.0  |
| 109.8 | 88.9  | 134.7 | 89.5  | 145.3 | 173.8 | 171.4  | 159.6 | 154.8 |
| 10.1  | 11.3  | 16.0  | 7.1   | 4.3   | 8.0   | 5.0    | 2.2   | 9.8   |
| 7.7   | 5.8   | 13.0  | 6.6   | 2.3   | 7.0   | 4.9    | 3.0   | 9.5   |
| 14.9  | 20.8  | 4.4   | 20.4  | 31.7  | 38.5  | 34.7   | 40.6  | 16.0  |
| 2.7   | 2.3   | 3.5   | 8.4   | 2.2   | 5.7   | 1.9    | 1.8   | 3.1   |
| 5.5   | 5.5   | 23.1  | 7.7   | 4.1   | 3.4   | 5.0    | 2.2   | 2.2   |
| 340.8 | 352.6 | 780.2 | 593.1 | 9.8   | 3.3   | 14.4   | 2.7   | 3.8   |
| 12.2  | 10.8  | 7.4   | 3.7   | 4.4   | 5.9   | 5.3    | 3.2   | 0.6   |
| 6.5   | 3.7   | 10.5  | 6.5   | 0.5   | 1.2   | 0.2    | 0.3   | 7.7   |
| 221.9 | 212.9 | 320.1 | 208.2 | 295.2 | 318.0 | 285.9  | 319.1 | 274.9 |
| 1.0   | 1.2   | 3.1   | 1.1   | 0.4   | 1.0   | 0.4    | 5.6   | 0.9   |
| 151.7 | 167.1 | 157.6 | 170.4 | 7.2   | 3.7   | 7.3    | 4.0   | 126.9 |
| 2.1   | 1.7   | 2.4   | 3.2   | 1.5   | 1.4   | 1.2    | 1.4   | 2.2   |
| 1.7   | 7.2   | 4.0   | 4.6   | 11.0  | 6.0   | 6.6    | 2.7   | 16.4  |
| 1.3   | 1.2   | 5.9   | 4.4   | 3.1   | 3.3   | 1.4    | 4.3   | 4.0   |
| 1.5   | 1.2   | 2.2   | 1.7   | 1.5   | 1.2   | 1.2    | 1.7   | 3.8   |
| 2.1   | 4.6   | 4.4   | 6.0   | 5.6   | 2.9   | 2.0    | 9.9   | 6.9   |
| 8.5   | 15.3  | 18.4  | 10.7  | 16.9  | 13.4  | 13.3   | 4.5   | 95.3  |
| 30.8  | 25.6  | 12.1  | 18.2  | 14.1  | 11.3  | 6.3    | 4.5   | 7.6   |
| 2.4   | 2.4   | 3.3   | 4.8   | 5.3   | 4.1   | 5.3    | 4.1   | 3.1   |
| 6.5   | 11.2  | 8.9   | 7.4   | 5.3   | 8.0   | 5.7    | 9.1   | 10.9  |
| 7.2   | 11.8  | 11.1  | 7.2   | 1.6   | 3.0   | 7.7    | 5.3   | 9.8   |
| 3.5   | 9.4   | 8.4   | 7.2   | 9.5   | 9.5   | 14.4   | 8.1   | 6.5   |
| 7.0   | 8.2   | 8.2   | 4.4   | 4.5   | 2.0   | 0.9    | 4.4   | 5.8   |
| 5.4   | 2.4   | 5.5   | 4.3   | 33.1  | 31.0  | 49.4   | 58.7  | 7.0   |
| 2.5   | 3.4   | 4.9   | 5.0   | 2.4   | 3.5   | 2.7    | 1.4   | 13.7  |
| 9.7   | 9.7   | 7.8   | 9.4   | 5.5   | 6.6   | 7.1    | 11.4  | 11.0  |
| 0.8   | 2.9   | 1.5   | 0.5   | 2.2   | 3.6   | 1.0    | 9.8   | 0.6   |
| 8.3   | 8.2   | 8.8   | 9.6   | 11.6  | 9.2   | 5.7    | 12.9  | 31.7  |
| 0.7   | 0.6   | 1.0   | 0.8   | 1.0   | 0.7   | 0.6    | 2.4   | 1.1   |
| 2.4   | 8.3   | 3.5   | 2.3   | 22.3  | 15.0  | 40.0   | 35.2  | 9.0   |
| 12.8  | 12.3  | 13.2  | 12.1  | 7.1   | 7.4   | 11.3   | 14.8  | 15.0  |
| 3.8   | 4.9   | 5.8   | 6.1   | 3.8   | 5.3   | 6.5    | 6.2   | 4.2   |
| 31.9  | 35.9  | 73.3  | 51.7  | 32.9  | 27.8  | 35.4   | 51.5  | 74.4  |
| 24.7  | 19.3  | 15.1  | 15.5  | 20.9  | 18.8  | 18.2   | 20.2  | 31.9  |
| 54.0  | 38.1  | 61.9  | 43.7  | 8.8   | 6.3   | 4.9    | 21.9  | 30.0  |
| 69.0  | 57.0  | 71.4  | 57.8  | 36.1  | 41.1  | 51.3   | 35.5  | 77.5  |
| 1.6   | 1.0   | 1.3   | 0.8   | 388.6 | 469.3 | 455.5  | 420.2 | 493.4 |
| 23.4  | 15.1  | 22.5  | 17.7  | 56.9  | 33.7  | 63.4   | 63.3  | 25.8  |
| 0.9   | 1.2   | 1.1   | 0.9   | 1.5   | 6.3   | 1.7    | 3.8   | 0.7   |
| 1.9   | 0.8   | 1.8   | 3.2   | 3.4   | 5.1   | 3.5    | 9.3   | 2.3   |
| 13.1  | 4.7   | 12.1  | 15.7  | 18.7  | 14.8  | 7.9    | 18.1  | 3.1   |
| 4.1   | 6.5   | 2.8   | 6.2   | 1.0   | 0.9   | 8.0    | 2.1   | 9.0   |
| 4.3   | 13.8  | 21.7  | 16.3  | 9.3   | 7.5   | 13.5   | 11.9  | 14.5  |
| 120.9 | 92.8  | 117.6 | 114.1 | 151.8 | 196.3 | 126.0  | 181.5 | 73.5  |
| 22.0  | 19.9  | 38.6  | 24.1  | 6.7   | 9.0   | 14.9   | 27.2  | 18.3  |
| 17.3  | 18.3  | 17.7  | 12.6  | 17.8  | 13.2  | 17.6   | 12.2  | 25.9  |
| 3.2   | 2.5   | 5.8   | 9.6   | 3.2   | 5.1   | 9.1    | 2.9   | 4.3   |
| 0.8   | 4.3   | 8.0   | 7.9   | 5.4   | 3.7   | 5.8    | 5.0   | 4.8   |
| 4.6   | 4.8   | 11.2  | 3.5   | 6.0   | 14.3  | 6.0    | 8.2   | 15.9  |

|       |       |       |       |        |        |        |        |        |
|-------|-------|-------|-------|--------|--------|--------|--------|--------|
| 16.2  | 17.7  | 16.3  | 8.3   | 15.0   | 12.2   | 15.8   | 21.4   | 14.5   |
| 56.2  | 43.3  | 54.6  | 42.4  | 29.4   | 39.4   | 56.3   | 47.9   | 14.4   |
| 3.3   | 1.2   | 10.2  | 6.6   | 0.9    | 4.9    | 5.7    | 0.4    | 2.4    |
| 1.4   | 1.3   | 3.4   | 2.6   | 1.4    | 0.8    | 0.7    | 1.5    | 1.1    |
| 8.5   | 10.2  | 11.9  | 6.9   | 5.4    | 4.1    | 5.3    | 7.1    | 5.4    |
| 13.6  | 11.5  | 17.6  | 15.8  | 14.0   | 15.6   | 15.1   | 29.6   | 27.9   |
| 56.5  | 60.1  | 61.3  | 67.8  | 4.8    | 10.0   | 7.2    | 7.2    | 17.8   |
| 50.6  | 51.4  | 64.2  | 48.0  | 36.7   | 28.1   | 38.4   | 28.6   | 48.5   |
| 15.9  | 14.7  | 14.6  | 12.1  | 82.1   | 87.3   | 85.0   | 95.4   | 161.1  |
| 18.7  | 15.3  | 9.5   | 17.3  | 21.3   | 21.0   | 14.0   | 13.1   | 25.0   |
| 2.8   | 9.4   | 1.2   | 3.0   | 53.2   | 27.3   | 34.8   | 43.6   | 4.4    |
| 1.8   | 11.8  | 1.8   | 7.2   | 3.6    | 4.0    | 9.9    | 0.9    | 5.3    |
| 33.8  | 27.7  | 42.0  | 25.5  | 42.7   | 57.7   | 57.6   | 64.2   | 50.0   |
| 6.1   | 3.1   | 3.8   | 7.6   | 4.6    | 8.9    | 7.1    | 1.1    | 12.9   |
| 4.0   | 5.3   | 8.3   | 10.2  | 47.3   | 29.8   | 36.1   | 38.5   | 25.4   |
| 21.1  | 17.4  | 29.5  | 12.5  | 124.6  | 77.8   | 100.3  | 201.0  | 66.2   |
| 33.8  | 28.3  | 35.1  | 21.5  | 2.6    | 0.8    | 1.4    | 2.6    | 26.1   |
| 18.0  | 16.8  | 26.0  | 17.3  | 15.2   | 10.0   | 16.1   | 17.5   | 13.2   |
| 3.2   | 2.1   | 3.3   | 8.3   | 12.9   | 14.1   | 12.2   | 9.6    | 21.5   |
| 496.0 | 455.8 | 477.6 | 508.5 | 1269.1 | 1592.9 | 1344.1 | 1470.0 | 1263.8 |
| 1.4   | 1.7   | 2.3   | 2.0   | 2.4    | 1.5    | 2.0    | 2.6    | 1.8    |
| 2.5   | 3.9   | 7.5   | 1.9   | 1.3    | 0.8    | 0.7    | 0.8    | 2.1    |
| 0.8   | 2.2   | 2.2   | 0.8   | 0.8    | 0.7    | 0.7    | 0.7    | 2.4    |
| 2.3   | 7.4   | 5.4   | 5.0   | 3.4    | 7.6    | 1.9    | 6.7    | 14.1   |
| 29.1  | 29.6  | 30.6  | 27.5  | 16.0   | 17.1   | 26.2   | 21.9   | 50.8   |
| 45.0  | 50.4  | 34.8  | 37.2  | 26.7   | 29.7   | 27.3   | 29.8   | 20.2   |
| 10.2  | 9.5   | 13.4  | 7.9   | 42.4   | 57.0   | 44.2   | 55.5   | 35.8   |
| 2.2   | 3.8   | 4.6   | 1.1   | 3.5    | 6.4    | 1.8    | 8.8    | 1.3    |
| 230.2 | 224.1 | 292.4 | 218.0 | 203.5  | 161.7  | 202.2  | 241.8  | 128.6  |
| 1.3   | 0.4   | 1.0   | 0.6   | 0.8    | 0.7    | 1.3    | 0.5    | 0.5    |
| 243.8 | 261.2 | 199.9 | 228.8 | 61.0   | 108.9  | 75.3   | 97.0   | 64.3   |
| 6.1   | 8.9   | 14.4  | 11.6  | 3.9    | 3.5    | 7.6    | 11.7   | 20.3   |
| 5.3   | 1.3   | 5.3   | 1.3   | 11.5   | 1.6    | 4.7    | 18.2   | 8.2    |
| 22.2  | 20.7  | 20.4  | 12.0  | 15.2   | 11.9   | 13.1   | 18.7   | 19.9   |
| 1.4   | 1.2   | 1.5   | 1.1   | 1.2    | 1.3    | 3.8    | 1.6    | 1.7    |
| 3.0   | 1.2   | 1.0   | 1.3   | 90.2   | 85.9   | 118.7  | 132.2  | 1.3    |
| 324.5 | 295.4 | 313.5 | 244.5 | 215.3  | 194.4  | 199.5  | 244.9  | 312.1  |
| 191.7 | 201.4 | 153.1 | 149.5 | 802.2  | 692.5  | 865.3  | 875.1  | 474.7  |
| 14.4  | 9.0   | 14.4  | 12.6  | 6.6    | 3.5    | 3.6    | 17.5   | 11.1   |
| 1.2   | 4.6   | 2.6   | 2.3   | 2.3    | 2.7    | 1.8    | 4.3    | 8.2    |
| 3.1   | 2.4   | 1.5   | 2.5   | 6.1    | 3.0    | 1.1    | 2.4    | 1.7    |
| 6.8   | 1.3   | 8.1   | 2.7   | 2.3    | 5.7    | 4.6    | 8.9    | 5.1    |
| 65.3  | 65.6  | 72.1  | 66.7  | 155.6  | 207.1  | 178.0  | 187.1  | 153.2  |
| 2.2   | 11.1  | 6.4   | 2.8   | 3.2    | 4.6    | 2.4    | 2.7    | 11.2   |
| 1.8   | 2.4   | 2.5   | 0.2   | 0.5    | 1.9    | 2.0    | 0.3    | 2.4    |
| 0.4   | 0.3   | 1.8   | 0.2   | 3.1    | 0.6    | 0.2    | 3.1    | 2.8    |
| 3.1   | 2.2   | 5.3   | 1.3   | 6.6    | 3.3    | 3.7    | 6.9    | 4.4    |
| 1.0   | 0.9   | 2.3   | 1.0   | 1.4    | 1.8    | 1.4    | 2.2    | 1.5    |
| 2.9   | 5.8   | 6.3   | 1.8   | 2.0    | 6.4    | 3.7    | 7.1    | 1.9    |
| 1.0   | 1.5   | 2.0   | 1.9   | 1.4    | 1.2    | 3.3    | 1.9    | 5.6    |
| 4.7   | 3.5   | 8.4   | 5.0   | 6.1    | 1.3    | 1.6    | 9.9    | 1.1    |
| 4.5   | 1.4   | 1.3   | 3.8   | 0.3    | 2.1    | 4.2    | 4.4    | 8.5    |
| 4.1   | 9.7   | 24.3  | 22.2  | 1.8    | 1.8    | 3.0    | 1.6    | 3.7    |

|       |       |        |       |        |        |        |        |        |
|-------|-------|--------|-------|--------|--------|--------|--------|--------|
| 7.1   | 14.5  | 13.1   | 8.7   | 4.4    | 7.1    | 7.9    | 10.2   | 16.5   |
| 6.3   | 6.7   | 12.9   | 4.1   | 16.2   | 14.1   | 17.4   | 14.3   | 30.7   |
| 0.6   | 1.0   | 4.3    | 0.3   | 196.6  | 186.8  | 272.8  | 247.6  | 0.5    |
| 1.5   | 1.4   | 2.3    | 3.7   | 1.1    | 5.4    | 4.8    | 2.4    | 2.2    |
| 1.3   | 1.2   | 1.0    | 5.2   | 1.2    | 1.3    | 0.5    | 1.6    | 0.9    |
| 4.8   | 8.8   | 10.5   | 6.4   | 7.5    | 11.9   | 11.1   | 16.3   | 5.8    |
| 7.5   | 12.6  | 13.2   | 7.0   | 5.3    | 4.2    | 6.5    | 3.7    | 7.6    |
| 0.9   | 1.3   | 2.6    | 3.1   | 0.4    | 2.1    | 2.3    | 6.7    | 3.5    |
| 7.5   | 7.1   | 7.0    | 7.2   | 6.6    | 3.9    | 4.1    | 4.1    | 14.9   |
| 3.8   | 4.2   | 7.7    | 8.6   | 63.6   | 52.6   | 52.3   | 79.3   | 3.9    |
| 16.5  | 20.1  | 19.1   | 14.0  | 11.0   | 9.9    | 8.1    | 11.1   | 24.5   |
| 6.3   | 2.9   | 7.5    | 5.9   | 11.5   | 1.8    | 6.5    | 19.1   | 6.7    |
| 2.5   | 4.8   | 3.3    | 4.9   | 2.4    | 0.7    | 0.3    | 2.6    | 5.2    |
| 7.7   | 7.5   | 9.9    | 2.9   | 6.4    | 1.8    | 4.5    | 9.3    | 3.7    |
| 447.4 | 419.2 | 641.5  | 449.1 | 507.3  | 554.8  | 575.5  | 542.1  | 1004.7 |
| 979.9 | 815.7 | 1343.4 | 848.2 | 1445.0 | 1083.7 | 1535.6 | 1644.3 | 3700.3 |
| 1.4   | 1.3   | 1.7    | 2.3   | 4.1    | 1.5    | 3.3    | 0.6    | 10.0   |
| 1.0   | 2.9   | 4.0    | 4.8   | 0.8    | 4.7    | 1.1    | 1.3    | 2.5    |
| 11.0  | 9.5   | 13.5   | 15.0  | 12.0   | 5.5    | 14.9   | 24.7   | 7.5    |
| 4.6   | 2.0   | 7.1    | 2.0   | 1.3    | 2.9    | 2.2    | 11.6   | 10.8   |
| 0.6   | 0.7   | 1.2    | 0.7   | 0.7    | 0.9    | 0.6    | 0.7    | 0.9    |
| 3.9   | 8.8   | 9.3    | 3.7   | 15.3   | 11.1   | 11.4   | 22.6   | 6.1    |
| 15.5  | 14.4  | 11.8   | 12.8  | 11.4   | 10.6   | 9.1    | 16.3   | 19.5   |
| 13.8  | 8.8   | 16.9   | 14.4  | 7.8    | 5.2    | 3.8    | 5.6    | 15.4   |
| 1.5   | 2.5   | 2.7    | 1.9   | 8.0    | 12.3   | 12.2   | 10.0   | 5.1    |
| 4.2   | 5.1   | 2.8    | 4.1   | 2.3    | 3.2    | 5.1    | 7.9    | 2.7    |
| 6.6   | 3.3   | 7.1    | 7.6   | 1.6    | 4.3    | 1.2    | 0.9    | 0.6    |
| 7.7   | 17.8  | 19.5   | 13.2  | 22.5   | 7.0    | 16.5   | 8.7    | 47.0   |
| 1.3   | 1.9   | 1.0    | 0.9   | 2.1    | 3.2    | 7.6    | 0.4    | 8.8    |
| 15.8  | 20.8  | 10.5   | 11.7  | 2.1    | 0.2    | 0.7    | 0.4    | 1.3    |
| 11.6  | 13.3  | 18.3   | 9.0   | 10.4   | 10.2   | 8.2    | 6.6    | 19.8   |
| 34.7  | 18.7  | 25.8   | 13.5  | 15.7   | 15.2   | 11.1   | 15.2   | 24.4   |
| 12.9  | 12.0  | 23.6   | 16.8  | 6.1    | 5.1    | 12.1   | 14.4   | 12.2   |
| 9.8   | 4.5   | 7.8    | 1.5   | 3.5    | 2.4    | 0.5    | 3.6    | 6.5    |
| 4.4   | 12.0  | 18.1   | 7.4   | 4.6    | 8.0    | 6.6    | 13.1   | 13.3   |
| 3.8   | 5.6   | 2.2    | 3.8   | 4.1    | 2.4    | 5.6    | 12.0   | 1.8    |
| 738.0 | 673.4 | 1274.0 | 839.3 | 596.9  | 619.9  | 583.4  | 671.9  | 961.1  |
| 1.6   | 1.4   | 2.9    | 3.3   | 1.6    | 1.3    | 0.8    | 1.3    | 2.4    |
| 5.9   | 9.2   | 20.7   | 5.1   | 32.4   | 24.3   | 27.7   | 29.1   | 43.9   |
| 5.3   | 1.4   | 3.9    | 4.2   | 17.1   | 13.0   | 14.0   | 17.7   | 18.8   |
| 1.8   | 3.1   | 2.0    | 3.1   | 3.3    | 5.6    | 2.3    | 10.0   | 1.1    |
| 2.4   | 4.9   | 0.5    | 1.1   | 1.5    | 3.4    | 3.3    | 0.5    | 2.2    |
| 123.3 | 112.1 | 126.5  | 109.9 | 107.1  | 96.6   | 110.8  | 150.0  | 132.1  |
| 1.5   | 5.5   | 9.5    | 7.4   | 5.1    | 2.3    | 1.6    | 1.1    | 2.8    |
| 22.8  | 28.8  | 19.0   | 17.3  | 21.8   | 15.0   | 21.2   | 22.3   | 10.4   |
| 1.8   | 2.1   | 2.1    | 2.0   | 3.9    | 2.6    | 3.4    | 7.3    | 1.1    |
| 28.5  | 35.4  | 47.9   | 26.4  | 32.6   | 21.7   | 27.2   | 24.7   | 12.4   |
| 32.7  | 15.2  | 36.0   | 21.1  | 13.0   | 17.3   | 31.6   | 27.6   | 19.2   |
| 17.0  | 18.1  | 11.1   | 12.4  | 11.2   | 10.5   | 19.3   | 19.2   | 49.5   |
| 12.0  | 12.3  | 13.2   | 17.8  | 16.4   | 9.2    | 8.2    | 13.5   | 10.1   |
| 3.8   | 3.9   | 4.8    | 2.4   | 3.2    | 2.6    | 2.5    | 5.6    | 3.6    |
| 6.4   | 8.4   | 11.0   | 7.7   | 9.7    | 6.7    | 12.0   | 10.6   | 15.9   |
| 3.9   | 3.4   | 1.8    | 1.8   | 4.6    | 8.7    | 1.4    | 2.4    | 4.2    |

|       |       |       |       |        |        |        |        |        |
|-------|-------|-------|-------|--------|--------|--------|--------|--------|
| 6.3   | 7.3   | 5.8   | 5.4   | 3.9    | 2.4    | 5.8    | 4.5    | 4.8    |
| 1.5   | 8.5   | 3.5   | 4.2   | 8.4    | 10.0   | 7.0    | 7.4    | 9.8    |
| 30.8  | 31.8  | 50.9  | 34.1  | 33.4   | 33.9   | 31.0   | 38.7   | 29.7   |
| 5.3   | 1.7   | 15.5  | 6.1   | 2.8    | 1.4    | 2.6    | 0.8    | 2.4    |
| 0.8   | 1.0   | 3.7   | 1.1   | 1.1    | 0.8    | 2.8    | 10.1   | 3.3    |
| 1.9   | 1.4   | 2.3   | 7.2   | 6.3    | 6.0    | 6.3    | 2.8    | 11.6   |
| 3.3   | 5.8   | 12.2  | 12.5  | 4.5    | 9.8    | 6.8    | 17.7   | 17.3   |
| 11.9  | 9.9   | 27.3  | 19.1  | 17.2   | 13.8   | 23.9   | 24.5   | 11.2   |
| 8.9   | 11.2  | 6.6   | 8.8   | 8.2    | 10.4   | 9.3    | 10.1   | 26.5   |
| 2.1   | 3.4   | 2.1   | 2.3   | 2.4    | 3.4    | 2.7    | 3.0    | 1.8    |
| 10.3  | 9.8   | 12.7  | 7.7   | 7.8    | 8.0    | 18.1   | 11.2   | 11.6   |
| 13.4  | 8.3   | 15.6  | 10.0  | 6.9    | 10.4   | 10.9   | 8.1    | 19.3   |
| 1.0   | 7.1   | 2.3   | 4.2   | 11.0   | 8.8    | 11.0   | 14.5   | 11.0   |
| 11.4  | 8.6   | 8.8   | 6.1   | 5.1    | 6.5    | 8.6    | 5.9    | 15.0   |
| 3.2   | 10.8  | 3.6   | 5.6   | 18.5   | 16.4   | 14.9   | 13.7   | 14.7   |
| 1.5   | 0.8   | 2.3   | 0.8   | 1.5    | 1.1    | 1.7    | 1.0    | 5.2    |
| 15.2  | 16.0  | 25.9  | 15.4  | 7.5    | 5.4    | 9.2    | 6.2    | 25.0   |
| 120.5 | 144.4 | 79.4  | 131.6 | 2.1    | 1.3    | 2.9    | 2.2    | 2.6    |
| 6.6   | 1.9   | 0.7   | 3.0   | 4.7    | 3.6    | 4.5    | 0.9    | 9.0    |
| 2.7   | 11.9  | 5.2   | 9.9   | 19.9   | 5.5    | 13.7   | 25.6   | 4.2    |
| 2.6   | 2.4   | 4.6   | 3.1   | 1.0    | 1.2    | 1.0    | 1.1    | 1.2    |
| 1.1   | 1.9   | 8.7   | 4.2   | 292.9  | 368.0  | 255.4  | 329.0  | 51.1   |
| 1.1   | 2.9   | 5.6   | 2.6   | 0.5    | 3.7    | 5.0    | 3.6    | 6.5    |
| 156.0 | 139.9 | 309.5 | 202.4 | 196.5  | 222.4  | 199.2  | 204.5  | 398.0  |
| 101.5 | 93.4  | 103.9 | 88.4  | 56.9   | 87.2   | 108.4  | 71.4   | 48.1   |
| 17.1  | 14.2  | 27.3  | 18.6  | 16.4   | 14.5   | 18.3   | 24.6   | 45.1   |
| 13.2  | 16.9  | 22.8  | 19.7  | 18.3   | 14.2   | 11.4   | 3.3    | 24.4   |
| 9.9   | 13.5  | 12.0  | 9.1   | 4.1    | 7.8    | 3.1    | 1.3    | 7.5    |
| 12.7  | 14.4  | 17.9  | 13.5  | 12.2   | 14.1   | 13.3   | 16.9   | 16.0   |
| 9.3   | 7.9   | 14.1  | 11.3  | 13.4   | 9.1    | 10.9   | 9.3    | 20.5   |
| 9.2   | 3.9   | 11.4  | 1.5   | 1.1    | 3.8    | 3.9    | 2.0    | 13.8   |
| 6.4   | 3.4   | 7.0   | 3.6   | 2.5    | 1.7    | 2.1    | 2.2    | 3.6    |
| 18.6  | 18.7  | 23.4  | 14.2  | 16.5   | 11.4   | 9.7    | 12.1   | 21.0   |
| 182.7 | 170.7 | 250.4 | 195.4 | 205.1  | 236.6  | 225.5  | 229.8  | 309.1  |
| 1.1   | 4.3   | 1.8   | 4.9   | 1.3    | 2.9    | 0.8    | 1.3    | 1.4    |
| 21.8  | 21.7  | 24.1  | 19.3  | 9.6    | 14.9   | 11.0   | 16.6   | 28.5   |
| 18.2  | 17.6  | 7.5   | 13.7  | 13.7   | 8.2    | 7.0    | 20.1   | 14.6   |
| 2.3   | 1.7   | 6.8   | 5.2   | 3.6    | 1.3    | 0.8    | 1.3    | 3.9    |
| 75.6  | 59.5  | 102.0 | 68.3  | 53.8   | 56.5   | 46.5   | 56.1   | 66.1   |
| 47.4  | 35.9  | 40.3  | 24.2  | 48.2   | 41.3   | 52.4   | 55.8   | 29.3   |
| 3.6   | 17.4  | 5.6   | 8.3   | 4.5    | 1.9    | 4.3    | 23.5   | 4.6    |
| 188.1 | 190.5 | 178.8 | 163.7 | 100.2  | 115.4  | 117.8  | 127.3  | 184.8  |
| 49.6  | 40.5  | 69.9  | 70.7  | 106.0  | 154.8  | 81.3   | 94.3   | 122.6  |
| 623.3 | 596.0 | 806.7 | 632.6 | 1236.4 | 1081.6 | 1251.1 | 1397.6 | 1805.1 |
| 14.8  | 19.5  | 21.1  | 18.8  | 25.9   | 24.1   | 25.4   | 25.5   | 24.4   |
| 9.5   | 6.0   | 12.8  | 5.8   | 4.7    | 11.1   | 12.2   | 15.1   | 16.8   |
| 42.8  | 58.3  | 63.7  | 53.1  | 92.9   | 111.3  | 101.6  | 108.1  | 124.4  |
| 1.4   | 1.3   | 1.6   | 1.2   | 1.5    | 0.9    | 1.5    | 1.0    | 2.3    |
| 9.8   | 8.7   | 9.6   | 7.4   | 2.2    | 1.5    | 1.5    | 4.6    | 5.4    |
| 42.7  | 25.4  | 33.1  | 21.8  | 24.3   | 17.9   | 24.0   | 21.9   | 21.6   |
| 2.7   | 2.4   | 0.6   | 1.3   | 6.1    | 4.1    | 6.3    | 6.0    | 2.9    |
| 185.0 | 183.2 | 441.4 | 313.6 | 20.6   | 25.7   | 27.8   | 15.6   | 130.6  |
| 2.9   | 9.7   | 3.1   | 2.4   | 11.7   | 6.5    | 12.5   | 14.1   | 17.5   |

|       |       |       |       |       |       |       |       |       |
|-------|-------|-------|-------|-------|-------|-------|-------|-------|
| 37.3  | 45.8  | 81.9  | 47.2  | 492.9 | 520.4 | 461.1 | 591.6 | 172.1 |
| 22.0  | 37.8  | 9.5   | 17.4  | 22.1  | 52.0  | 38.3  | 35.6  | 11.9  |
| 3.1   | 5.7   | 2.8   | 4.7   | 0.9   | 1.1   | 1.3   | 5.5   | 6.1   |
| 1.3   | 2.0   | 5.3   | 1.1   | 0.6   | 0.5   | 2.8   | 0.5   | 3.9   |
| 1.5   | 1.9   | 2.2   | 2.0   | 5.1   | 4.8   | 3.3   | 8.3   | 8.1   |
| 4.9   | 4.6   | 4.3   | 2.4   | 3.5   | 3.0   | 4.9   | 0.5   | 1.7   |
| 32.5  | 30.0  | 24.0  | 22.8  | 1.7   | 2.2   | 4.6   | 7.5   | 14.0  |
| 109.3 | 105.8 | 94.3  | 88.7  | 1.2   | 0.9   | 1.1   | 1.3   | 0.7   |
| 388.3 | 391.1 | 305.6 | 323.8 | 0.3   | 2.8   | 4.1   | 5.1   | 1.0   |
| 8.5   | 4.8   | 6.2   | 5.1   | 0.9   | 2.5   | 7.1   | 1.3   | 2.9   |
| 5.5   | 11.0  | 2.6   | 14.1  | 14.4  | 7.9   | 8.7   | 9.1   | 7.4   |
| 2.4   | 3.8   | 3.9   | 5.8   | 2.4   | 9.9   | 6.2   | 0.9   | 1.4   |
| 3.0   | 1.9   | 3.6   | 3.6   | 6.5   | 2.4   | 6.0   | 4.4   | 3.5   |
| 7.5   | 8.4   | 14.2  | 5.7   | 7.1   | 8.0   | 4.3   | 3.1   | 13.6  |
| 103.2 | 106.3 | 95.8  | 107.9 | 87.2  | 94.6  | 112.6 | 122.4 | 131.2 |
| 20.5  | 24.6  | 47.9  | 10.8  | 70.9  | 83.1  | 82.0  | 93.7  | 43.3  |
| 165.8 | 148.7 | 253.3 | 144.7 | 148.4 | 172.8 | 159.6 | 155.1 | 160.5 |
| 2.7   | 2.1   | 4.0   | 1.9   | 1.5   | 2.2   | 2.4   | 12.2  | 6.6   |
| 4.4   | 5.6   | 14.7  | 2.6   | 4.7   | 2.7   | 3.5   | 3.9   | 4.4   |
| 2.3   | 5.0   | 4.6   | 1.2   | 4.7   | 5.3   | 5.8   | 1.6   | 14.8  |
| 1.3   | 1.5   | 2.4   | 1.1   | 3.1   | 0.8   | 1.7   | 9.2   | 6.2   |
| 1.8   | 1.0   | 1.7   | 1.6   | 2.2   | 2.0   | 3.3   | 4.6   | 1.5   |
| 1.7   | 7.0   | 3.3   | 8.5   | 5.5   | 4.5   | 3.3   | 6.9   | 9.9   |
| 3.8   | 6.9   | 3.8   | 2.9   | 5.9   | 6.6   | 7.1   | 10.8  | 8.2   |
| 8.8   | 8.4   | 11.0  | 7.7   | 18.8  | 14.4  | 12.5  | 21.0  | 10.7  |
| 200.5 | 207.9 | 230.9 | 196.4 | 408.5 | 406.8 | 378.0 | 411.0 | 402.8 |
| 469.9 | 475.4 | 418.9 | 352.8 | 411.5 | 452.7 | 457.2 | 499.3 | 592.9 |
| 1.8   | 2.5   | 3.9   | 2.8   | 2.2   | 2.3   | 1.5   | 1.4   | 7.1   |
| 1.7   | 2.9   | 2.1   | 2.2   | 1.4   | 1.3   | 1.0   | 1.3   | 3.4   |
| 9.5   | 6.7   | 4.5   | 3.4   | 4.0   | 5.5   | 4.2   | 1.2   | 4.0   |
| 707.2 | 622.6 | 899.4 | 707.2 | 580.1 | 589.3 | 577.1 | 645.6 | 819.2 |
| 2.5   | 3.9   | 8.0   | 4.1   | 9.8   | 5.7   | 8.3   | 2.2   | 7.6   |
| 8.9   | 9.1   | 3.2   | 7.2   | 2.8   | 1.1   | 1.8   | 0.9   | 3.1   |
| 10.9  | 11.0  | 17.8  | 9.6   | 19.2  | 24.6  | 28.3  | 25.3  | 48.5  |
| 93.8  | 75.4  | 371.5 | 60.4  | 480.8 | 237.9 | 419.6 | 478.0 | 408.1 |
| 4.3   | 5.7   | 8.2   | 2.9   | 1.4   | 8.6   | 0.7   | 2.0   | 9.4   |
| 15.9  | 28.6  | 36.7  | 31.2  | 21.0  | 13.9  | 19.7  | 17.3  | 17.8  |
| 0.6   | 1.7   | 5.0   | 2.5   | 2.5   | 0.7   | 1.0   | 0.5   | 6.5   |
| 4.0   | 2.6   | 2.7   | 3.4   | 52.4  | 31.6  | 50.0  | 53.3  | 2.1   |
| 3.8   | 1.0   | 1.5   | 2.8   | 2.7   | 3.1   | 3.1   | 2.3   | 6.6   |
| 10.8  | 7.4   | 13.0  | 2.1   | 24.2  | 18.2  | 19.1  | 28.9  | 25.7  |
| 7.1   | 12.2  | 33.3  | 10.5  | 260.5 | 268.6 | 325.0 | 315.3 | 85.8  |
| 47.5  | 33.6  | 49.7  | 33.7  | 93.7  | 91.5  | 75.6  | 89.5  | 71.9  |
| 1.3   | 6.5   | 6.8   | 1.7   | 1.1   | 2.5   | 1.2   | 6.0   | 1.2   |
| 125.3 | 129.3 | 145.7 | 128.5 | 74.2  | 108.5 | 84.2  | 79.7  | 174.1 |
| 3.5   | 3.3   | 4.8   | 4.2   | 3.6   | 5.9   | 4.2   | 3.1   | 4.6   |
| 4.9   | 10.2  | 7.0   | 9.4   | 26.1  | 27.8  | 20.7  | 22.2  | 181.0 |
| 7.1   | 5.8   | 10.4  | 5.0   | 8.0   | 0.5   | 0.7   | 2.0   | 3.6   |
| 8.1   | 4.1   | 4.3   | 1.3   | 1.8   | 1.7   | 3.9   | 2.6   | 17.3  |
| 1.3   | 8.4   | 6.4   | 4.5   | 3.2   | 2.4   | 3.7   | 4.9   | 4.4   |
| 5.5   | 2.2   | 8.8   | 3.6   | 1.6   | 1.9   | 6.4   | 0.6   | 10.9  |
| 153.8 | 150.4 | 243.1 | 134.6 | 115.4 | 58.7  | 91.0  | 146.4 | 85.1  |
| 5.3   | 6.0   | 12.8  | 6.8   | 12.2  | 10.7  | 11.5  | 13.3  | 51.8  |

|       |       |       |       |       |       |       |       |       |
|-------|-------|-------|-------|-------|-------|-------|-------|-------|
| 1.1   | 0.6   | 1.4   | 2.9   | 2.2   | 0.5   | 4.3   | 8.1   | 2.8   |
| 41.6  | 30.8  | 48.4  | 29.6  | 34.9  | 32.6  | 29.3  | 29.6  | 61.8  |
| 5.3   | 7.3   | 7.5   | 5.8   | 11.7  | 8.0   | 12.9  | 21.8  | 27.7  |
| 1.7   | 2.2   | 1.4   | 1.5   | 6.4   | 7.5   | 7.6   | 5.4   | 22.2  |
| 2.5   | 0.9   | 6.5   | 6.4   | 6.7   | 7.3   | 2.7   | 7.2   | 2.3   |
| 8.1   | 2.1   | 6.8   | 5.4   | 54.6  | 37.0  | 71.8  | 77.8  | 37.4  |
| 0.8   | 4.1   | 11.2  | 1.8   | 1.1   | 1.1   | 1.0   | 8.6   | 6.8   |
| 2.5   | 3.8   | 14.6  | 4.2   | 7.9   | 2.4   | 7.0   | 2.6   | 20.9  |
| 3.3   | 3.9   | 2.9   | 3.1   | 4.8   | 1.4   | 12.6  | 16.6  | 8.3   |
| 1.4   | 1.7   | 6.6   | 5.0   | 9.6   | 13.0  | 17.3  | 12.5  | 1.5   |
| 1.6   | 0.9   | 3.7   | 0.8   | 5.7   | 7.6   | 4.2   | 3.7   | 7.5   |
| 9.1   | 4.6   | 6.6   | 5.8   | 4.4   | 4.8   | 16.4  | 10.4  | 24.0  |
| 18.0  | 18.5  | 21.3  | 18.4  | 38.6  | 28.8  | 37.1  | 43.7  | 74.3  |
| 11.1  | 14.5  | 27.0  | 14.4  | 12.4  | 9.5   | 15.0  | 24.0  | 19.0  |
| 13.0  | 13.0  | 21.3  | 16.5  | 9.9   | 7.7   | 13.7  | 15.9  | 7.1   |
| 2.9   | 2.3   | 2.3   | 3.7   | 37.5  | 41.8  | 48.6  | 36.1  | 77.2  |
| 12.4  | 12.4  | 13.1  | 11.1  | 3.4   | 9.2   | 3.4   | 10.4  | 7.2   |
| 10.5  | 8.6   | 7.2   | 2.7   | 5.4   | 4.8   | 3.1   | 12.4  | 10.6  |
| 125.0 | 153.2 | 234.5 | 108.0 | 440.7 | 385.7 | 513.4 | 478.5 | 926.4 |
| 26.9  | 17.5  | 20.3  | 25.9  | 5.2   | 6.6   | 3.1   | 7.1   | 19.8  |
| 128.7 | 148.0 | 187.2 | 145.8 | 181.8 | 221.4 | 219.8 | 233.0 | 306.6 |
| 15.5  | 18.3  | 11.4  | 16.8  | 13.8  | 11.0  | 11.0  | 19.4  | 13.1  |
| 10.1  | 15.0  | 14.1  | 10.9  | 20.5  | 19.7  | 25.8  | 34.6  | 21.0  |
| 3.2   | 2.6   | 6.3   | 8.2   | 7.5   | 8.2   | 12.5  | 2.5   | 15.7  |
| 17.6  | 19.0  | 7.1   | 13.0  | 6.0   | 5.5   | 1.9   | 11.1  | 16.3  |
| 1.3   | 2.8   | 4.4   | 3.3   | 3.6   | 1.3   | 1.2   | 2.0   | 4.1   |
| 12.9  | 6.8   | 10.7  | 6.7   | 0.6   | 4.9   | 2.3   | 1.0   | 7.7   |
| 2.8   | 1.0   | 2.6   | 0.9   | 1.3   | 2.5   | 6.8   | 10.2  | 5.3   |
| 8.7   | 2.9   | 5.2   | 2.3   | 67.0  | 55.1  | 45.8  | 66.6  | 33.4  |
| 1.4   | 5.0   | 8.0   | 2.4   | 0.8   | 0.8   | 3.2   | 0.9   | 9.1   |
| 4.4   | 0.9   | 2.6   | 2.5   | 1.5   | 0.6   | 2.7   | 0.9   | 2.4   |
| 15.0  | 12.9  | 9.6   | 8.9   | 13.8  | 8.4   | 10.8  | 15.7  | 5.1   |
| 7.6   | 7.6   | 11.4  | 3.6   | 12.6  | 7.1   | 13.3  | 13.4  | 11.1  |
| 13.0  | 12.0  | 22.3  | 9.5   | 22.3  | 14.4  | 22.5  | 33.0  | 10.9  |
| 3.8   | 1.7   | 3.4   | 1.8   | 0.6   | 1.6   | 1.7   | 4.8   | 0.5   |
| 19.8  | 22.6  | 26.5  | 29.1  | 12.1  | 5.4   | 16.6  | 13.4  | 23.8  |
| 6.6   | 9.8   | 4.1   | 3.0   | 1.5   | 1.5   | 2.5   | 1.3   | 5.0   |
| 90.1  | 85.3  | 117.9 | 92.3  | 70.5  | 72.3  | 73.9  | 83.7  | 66.4  |
| 22.1  | 21.6  | 18.3  | 18.2  | 17.9  | 16.4  | 12.3  | 20.6  | 23.5  |
| 2.2   | 1.8   | 1.5   | 1.4   | 0.9   | 0.7   | 1.0   | 1.3   | 31.6  |
| 4.7   | 4.7   | 3.8   | 4.3   | 3.3   | 1.7   | 3.6   | 0.6   | 7.1   |
| 16.8  | 15.0  | 11.4  | 15.4  | 6.3   | 3.0   | 1.5   | 1.4   | 3.4   |
| 27.9  | 23.7  | 22.7  | 21.8  | 21.7  | 6.6   | 17.5  | 21.4  | 34.2  |
| 10.8  | 12.4  | 31.8  | 16.0  | 14.0  | 4.1   | 19.6  | 1.5   | 16.8  |
| 4.3   | 8.2   | 8.4   | 3.3   | 6.6   | 2.5   | 7.8   | 3.0   | 10.8  |
| 24.3  | 42.6  | 24.1  | 34.0  | 10.2  | 14.0  | 15.1  | 4.1   | 27.0  |
| 15.7  | 15.3  | 22.6  | 8.1   | 30.8  | 30.6  | 27.8  | 35.9  | 21.2  |
| 4.2   | 6.6   | 10.8  | 4.6   | 4.8   | 5.8   | 10.4  | 6.9   | 13.2  |
| 1.6   | 7.3   | 5.6   | 5.0   | 0.8   | 1.1   | 0.9   | 2.1   | 1.6   |
| 6.6   | 2.7   | 8.4   | 12.5  | 9.9   | 5.4   | 9.4   | 2.1   | 5.5   |
| 42.2  | 64.7  | 33.5  | 47.2  | 25.9  | 26.2  | 35.0  | 37.4  | 55.6  |
| 56.8  | 34.8  | 51.6  | 37.5  | 59.4  | 63.7  | 64.7  | 88.5  | 54.2  |
| 6.9   | 12.5  | 20.1  | 11.6  | 11.3  | 3.2   | 9.3   | 1.5   | 12.5  |

|        |        |        |        |       |        |       |       |       |
|--------|--------|--------|--------|-------|--------|-------|-------|-------|
| 5.1    | 1.5    | 3.5    | 4.7    | 1.3   | 3.9    | 4.8   | 2.3   | 7.2   |
| 0.6    | 2.3    | 1.7    | 1.1    | 1.3   | 1.9    | 1.0   | 1.3   | 3.2   |
| 137.9  | 135.2  | 175.9  | 140.7  | 94.2  | 123.6  | 128.2 | 147.8 | 171.4 |
| 0.4    | 1.1    | 1.4    | 0.5    | 1.9   | 3.0    | 2.3   | 0.7   | 1.4   |
| 12.2   | 5.4    | 18.0   | 7.5    | 10.2  | 8.8    | 11.8  | 9.7   | 11.9  |
| 12.0   | 4.3    | 4.9    | 9.0    | 3.4   | 5.0    | 7.7   | 7.0   | 8.5   |
| 7.0    | 8.9    | 15.3   | 6.3    | 20.6  | 8.0    | 9.6   | 23.9  | 8.4   |
| 45.8   | 31.8   | 51.4   | 38.2   | 33.8  | 39.4   | 32.3  | 42.5  | 36.5  |
| 173.0  | 204.3  | 131.5  | 157.4  | 241.0 | 274.3  | 242.7 | 258.2 | 350.4 |
| 2.7    | 2.7    | 8.0    | 4.3    | 5.3   | 5.0    | 7.5   | 1.8   | 2.5   |
| 1.5    | 2.0    | 2.2    | 3.8    | 2.0   | 7.2    | 1.8   | 2.3   | 1.9   |
| 131.5  | 130.8  | 166.7  | 121.4  | 84.8  | 100.4  | 103.1 | 109.3 | 120.6 |
| 35.8   | 40.3   | 35.9   | 36.3   | 31.9  | 24.8   | 29.7  | 30.4  | 22.0  |
| 7.8    | 11.3   | 10.6   | 2.7    | 10.3  | 7.8    | 8.2   | 10.1  | 44.9  |
| 4.6    | 5.4    | 10.0   | 3.9    | 8.6   | 1.4    | 15.3  | 8.2   | 6.6   |
| 17.7   | 12.9   | 18.3   | 17.5   | 1.1   | 2.3    | 3.9   | 0.8   | 1.2   |
| 96.9   | 117.9  | 109.1  | 124.4  | 130.9 | 116.8  | 153.6 | 159.1 | 141.0 |
| 26.7   | 29.1   | 18.5   | 23.1   | 24.6  | 27.3   | 23.0  | 36.7  | 31.7  |
| 1331.9 | 1187.7 | 1941.6 | 1340.1 | 414.0 | 478.4  | 476.3 | 538.5 | 611.0 |
| 462.4  | 456.2  | 509.0  | 481.3  | 303.0 | 384.8  | 349.4 | 355.8 | 275.6 |
| 13.5   | 12.9   | 18.3   | 14.5   | 19.8  | 10.3   | 9.0   | 13.1  | 21.3  |
| 116.1  | 107.2  | 140.3  | 95.5   | 112.9 | 108.6  | 118.9 | 141.8 | 75.0  |
| 16.9   | 18.1   | 19.2   | 17.1   | 9.1   | 2.9    | 7.8   | 2.6   | 19.3  |
| 147.3  | 159.3  | 176.6  | 142.5  | 242.3 | 275.3  | 233.3 | 267.0 | 210.8 |
| 6.3    | 3.1    | 25.3   | 2.9    | 4.9   | 7.1    | 3.0   | 5.3   | 10.6  |
| 139.3  | 157.0  | 75.1   | 124.7  | 126.9 | 201.5  | 133.3 | 189.1 | 113.6 |
| 8.4    | 10.9   | 4.8    | 7.4    | 9.1   | 2.1    | 4.1   | 12.3  | 5.8   |
| 59.3   | 53.5   | 53.8   | 46.9   | 329.8 | 330.7  | 331.4 | 342.1 | 318.8 |
| 3.3    | 1.8    | 2.6    | 2.5    | 7.4   | 10.6   | 44.2  | 27.3  | 26.4  |
| 3.0    | 7.3    | 7.5    | 5.6    | 8.1   | 1.7    | 6.6   | 9.1   | 2.9   |
| 94.1   | 91.7   | 75.9   | 70.5   | 31.2  | 36.1   | 27.5  | 33.8  | 66.3  |
| 1.0    | 0.7    | 1.2    | 1.3    | 1.8   | 1.2    | 1.6   | 0.8   | 1.2   |
| 899.0  | 909.5  | 783.1  | 648.1  | 643.8 | 1750.3 | 704.9 | 787.7 | 678.1 |
| 8.5    | 4.7    | 9.6    | 5.3    | 10.0  | 9.2    | 8.2   | 8.7   | 18.2  |
| 114.0  | 126.1  | 96.5   | 138.3  | 148.2 | 191.5  | 144.3 | 160.7 | 140.2 |
| 20.6   | 19.4   | 27.6   | 17.7   | 16.1  | 20.4   | 17.2  | 15.6  | 54.2  |
| 2.4    | 4.6    | 1.0    | 4.1    | 0.9   | 0.5    | 0.4   | 1.2   | 1.6   |
| 225.3  | 241.6  | 223.2  | 217.5  | 246.8 | 241.3  | 319.8 | 330.8 | 153.1 |
| 415.9  | 475.6  | 334.8  | 491.9  | 139.4 | 133.8  | 118.9 | 159.9 | 165.6 |
| 20.7   | 28.0   | 33.5   | 22.1   | 17.7  | 31.0   | 28.3  | 26.0  | 54.1  |
| 1.4    | 1.3    | 2.1    | 1.6    | 0.7   | 1.6    | 0.9   | 1.4   | 1.6   |
| 13.8   | 21.6   | 24.4   | 15.5   | 23.9  | 10.7   | 12.4  | 22.4  | 42.3  |
| 17.7   | 9.0    | 23.1   | 7.2    | 30.3  | 36.2   | 48.2  | 33.3  | 26.4  |
| 5.7    | 1.2    | 5.3    | 1.9    | 7.8   | 2.6    | 5.3   | 5.1   | 9.1   |
| 4.3    | 5.0    | 10.4   | 4.1    | 6.8   | 5.6    | 5.9   | 10.0  | 3.9   |
| 163.1  | 190.8  | 227.4  | 179.8  | 551.4 | 583.2  | 579.4 | 659.4 | 566.7 |
| 7.1    | 6.1    | 7.3    | 2.4    | 5.0   | 15.2   | 10.6  | 11.9  | 7.7   |
| 53.8   | 63.6   | 23.7   | 40.4   | 142.9 | 151.5  | 132.0 | 148.2 | 122.1 |
| 2.1    | 2.1    | 7.9    | 11.1   | 14.9  | 16.3   | 10.9  | 23.8  | 103.8 |
| 2.4    | 0.5    | 0.4    | 1.7    | 1.8   | 1.6    | 0.2   | 0.5   | 1.1   |
| 57.7   | 58.5   | 73.6   | 57.0   | 81.5  | 77.1   | 69.8  | 92.5  | 62.2  |
| 8.2    | 8.9    | 11.4   | 9.0    | 1.6   | 4.6    | 4.5   | 4.6   | 3.1   |
| 264.2  | 233.9  | 313.0  | 235.2  | 131.6 | 128.2  | 148.3 | 168.0 | 79.8  |



|       |       |       |       |       |       |       |       |       |
|-------|-------|-------|-------|-------|-------|-------|-------|-------|
| 18.3  | 22.2  | 22.6  | 20.8  | 21.6  | 34.3  | 22.1  | 30.2  | 24.9  |
| 7.7   | 5.5   | 4.0   | 14.9  | 8.4   | 2.9   | 2.6   | 10.5  | 7.5   |
| 6.7   | 7.6   | 12.3  | 16.0  | 17.7  | 15.8  | 18.1  | 29.3  | 12.5  |
| 3.0   | 3.9   | 8.6   | 3.5   | 3.7   | 2.2   | 4.0   | 2.1   | 11.2  |
| 1.3   | 1.9   | 2.7   | 2.3   | 1.6   | 3.4   | 4.0   | 10.3  | 16.1  |
| 1.3   | 3.3   | 3.3   | 10.4  | 3.5   | 2.8   | 5.6   | 4.8   | 13.3  |
| 111.4 | 113.5 | 65.9  | 101.3 | 15.2  | 22.5  | 26.4  | 37.0  | 22.2  |
| 10.7  | 12.8  | 14.9  | 8.2   | 5.8   | 8.5   | 6.9   | 10.8  | 16.3  |
| 3.2   | 1.8   | 3.6   | 3.0   | 7.3   | 9.9   | 3.1   | 9.4   | 8.0   |
| 3.5   | 6.9   | 2.6   | 5.9   | 4.1   | 7.6   | 5.1   | 6.0   | 11.7  |
| 4.4   | 2.9   | 0.7   | 2.1   | 1.6   | 1.7   | 2.6   | 1.8   | 5.5   |
| 0.5   | 2.7   | 3.2   | 0.4   | 1.3   | 0.2   | 2.1   | 0.5   | 3.5   |
| 139.9 | 119.3 | 116.9 | 99.6  | 89.1  | 95.9  | 95.9  | 93.1  | 70.5  |
| 359.8 | 363.0 | 680.0 | 396.1 | 516.3 | 479.3 | 495.5 | 648.0 | 633.9 |
| 3.8   | 4.3   | 1.7   | 2.4   | 2.4   | 1.5   | 2.6   | 1.5   | 4.4   |
| 4.6   | 7.8   | 6.9   | 6.9   | 9.4   | 9.1   | 12.3  | 16.1  | 10.7  |
| 13.8  | 5.4   | 17.4  | 9.3   | 14.7  | 15.2  | 13.9  | 10.2  | 20.5  |
| 5.1   | 1.0   | 1.2   | 2.5   | 86.9  | 65.4  | 84.8  | 98.2  | 81.5  |
| 2.4   | 3.9   | 3.6   | 4.9   | 44.3  | 17.9  | 86.9  | 58.6  | 2.7   |
| 16.3  | 15.1  | 24.0  | 7.6   | 11.2  | 29.0  | 23.6  | 24.5  | 23.6  |
| 281.5 | 264.4 | 228.5 | 202.8 | 183.9 | 169.0 | 169.7 | 283.8 | 280.5 |
| 41.6  | 39.1  | 56.7  | 37.9  | 63.1  | 59.8  | 67.0  | 72.9  | 82.0  |
| 7.8   | 12.1  | 6.9   | 10.3  | 16.6  | 14.7  | 18.3  | 23.5  | 5.1   |
| 6.8   | 5.3   | 2.3   | 0.6   | 7.4   | 2.7   | 4.8   | 3.3   | 3.8   |
| 142.9 | 138.3 | 235.9 | 128.5 | 323.8 | 259.2 | 288.2 | 373.7 | 173.6 |
| 5.7   | 17.6  | 7.6   | 10.4  | 4.5   | 3.6   | 11.5  | 21.8  | 11.4  |
| 12.3  | 11.4  | 15.9  | 8.6   | 5.2   | 12.6  | 5.4   | 20.1  | 14.4  |
| 0.6   | 4.4   | 2.0   | 2.8   | 2.7   | 5.0   | 2.6   | 2.9   | 6.1   |
| 1.0   | 0.7   | 2.4   | 0.9   | 0.8   | 0.6   | 0.7   | 5.1   | 2.5   |
| 15.8  | 14.0  | 18.0  | 10.6  | 15.1  | 5.9   | 4.2   | 18.9  | 17.1  |
| 21.4  | 10.0  | 30.5  | 14.4  | 2.3   | 9.8   | 1.3   | 7.6   | 2.2   |
| 0.9   | 1.1   | 1.1   | 1.5   | 2.8   | 0.8   | 1.1   | 1.0   | 1.6   |
| 3.8   | 5.6   | 9.0   | 5.2   | 2.6   | 1.6   | 3.8   | 5.1   | 8.1   |
| 3.1   | 1.0   | 1.8   | 1.8   | 4.6   | 3.7   | 6.3   | 13.3  | 1.8   |
| 2.9   | 0.6   | 0.8   | 2.4   | 3.0   | 2.4   | 2.0   | 1.5   | 2.9   |
| 6.5   | 15.7  | 3.5   | 1.6   | 1.1   | 5.0   | 6.6   | 1.5   | 13.0  |
| 1.4   | 4.8   | 10.0  | 1.3   | 0.9   | 3.8   | 3.4   | 4.6   | 8.1   |
| 13.3  | 7.1   | 11.3  | 10.9  | 6.4   | 4.4   | 10.2  | 8.0   | 11.6  |
| 1.7   | 2.8   | 0.9   | 2.2   | 1.1   | 0.7   | 4.2   | 0.7   | 5.3   |
| 5.6   | 12.0  | 4.9   | 2.8   | 3.0   | 3.3   | 1.9   | 1.9   | 5.6   |
| 8.5   | 12.9  | 15.9  | 6.1   | 5.7   | 7.9   | 10.3  | 5.0   | 145.3 |
| 3.1   | 0.3   | 3.4   | 2.7   | 33.8  | 58.6  | 146.1 | 48.2  | 2.4   |
| 0.7   | 1.6   | 1.9   | 1.1   | 15.8  | 29.8  | 78.6  | 16.6  | 1.1   |
| 7.3   | 5.4   | 5.6   | 4.4   | 15.3  | 11.4  | 9.9   | 6.4   | 26.8  |
| 1.6   | 6.3   | 12.9  | 6.1   | 7.5   | 5.7   | 10.2  | 7.9   | 11.2  |
| 1.8   | 2.4   | 1.1   | 1.2   | 0.7   | 1.4   | 0.8   | 6.7   | 1.6   |
| 2.3   | 1.1   | 3.3   | 5.0   | 5.6   | 1.1   | 1.1   | 11.4  | 4.1   |
| 17.7  | 13.7  | 21.5  | 15.5  | 7.8   | 11.1  | 16.8  | 18.2  | 18.3  |
| 3.0   | 3.0   | 6.4   | 3.7   | 2.9   | 1.6   | 3.4   | 2.0   | 4.4   |
| 1.8   | 9.6   | 4.3   | 3.5   | 41.2  | 29.1  | 43.1  | 34.6  | 26.2  |
| 9.5   | 12.9  | 19.0  | 15.0  | 14.4  | 9.3   | 7.7   | 14.6  | 16.0  |
| 1.9   | 4.7   | 2.1   | 4.1   | 6.3   | 4.4   | 6.3   | 10.9  | 3.3   |
| 4.1   | 4.4   | 9.2   | 7.9   | 5.3   | 3.5   | 3.7   | 0.3   | 4.3   |

|        |        |        |        |        |        |        |        |        |
|--------|--------|--------|--------|--------|--------|--------|--------|--------|
| 2.2    | 3.1    | 1.3    | 4.6    | 1.3    | 3.3    | 0.8    | 4.2    | 2.7    |
| 5.0    | 2.6    | 7.8    | 2.3    | 2.6    | 2.6    | 2.4    | 9.0    | 0.9    |
| 7.1    | 1.5    | 6.7    | 2.6    | 5.5    | 1.4    | 4.8    | 1.5    | 6.1    |
| 1.8    | 7.8    | 7.9    | 4.0    | 4.0    | 2.6    | 1.4    | 11.9   | 9.0    |
| 6.0    | 3.2    | 4.2    | 3.2    | 6.6    | 5.1    | 7.1    | 3.1    | 4.0    |
| 1.3    | 2.0    | 5.1    | 1.3    | 1.1    | 1.1    | 5.2    | 2.5    | 6.9    |
| 20.1   | 15.3   | 19.6   | 20.1   | 13.2   | 15.4   | 12.0   | 21.0   | 12.8   |
| 2.2    | 2.7    | 5.6    | 7.4    | 0.6    | 3.6    | 1.3    | 0.3    | 4.4    |
| 2.3    | 0.5    | 1.9    | 1.0    | 0.2    | 0.3    | 0.3    | 2.5    | 0.4    |
| 39.1   | 31.3   | 41.5   | 34.7   | 22.6   | 25.1   | 26.8   | 32.8   | 38.3   |
| 17.2   | 18.5   | 24.8   | 27.4   | 20.1   | 17.1   | 22.6   | 19.4   | 22.1   |
| 91.0   | 80.6   | 197.8  | 52.5   | 233.5  | 155.6  | 206.0  | 248.1  | 250.2  |
| 26.7   | 19.1   | 41.3   | 21.0   | 78.3   | 66.6   | 91.0   | 96.3   | 34.2   |
| 1.4    | 3.0    | 13.7   | 4.5    | 21.7   | 17.8   | 24.2   | 23.4   | 12.8   |
| 6.7    | 4.4    | 5.3    | 5.1    | 5.1    | 3.9    | 9.3    | 6.7    | 11.9   |
| 10.9   | 8.4    | 7.9    | 9.6    | 5.0    | 6.3    | 5.8    | 0.9    | 8.4    |
| 2.9    | 2.6    | 2.4    | 3.4    | 2.7    | 0.6    | 1.2    | 1.1    | 4.6    |
| 4.0    | 4.1    | 6.4    | 3.1    | 2.3    | 14.0   | 3.4    | 3.3    | 4.9    |
| 4.8    | 4.8    | 3.7    | 1.3    | 8.8    | 6.2    | 3.6    | 2.1    | 10.6   |
| 2.2    | 1.7    | 2.1    | 2.1    | 1.3    | 1.1    | 1.3    | 1.8    | 1.5    |
| 8.5    | 1.9    | 6.3    | 2.4    | 2.0    | 7.3    | 7.6    | 13.3   | 9.9    |
| 0.3    | 0.3    | 1.5    | 1.8    | 0.5    | 1.2    | 0.4    | 0.1    | 2.9    |
| 8.3    | 3.8    | 3.8    | 5.3    | 3.9    | 2.9    | 4.7    | 5.0    | 3.6    |
| 11.5   | 5.7    | 5.5    | 2.5    | 1.1    | 3.3    | 1.9    | 0.8    | 10.4   |
| 13.2   | 13.7   | 22.6   | 15.4   | 11.2   | 4.6    | 13.1   | 15.5   | 10.3   |
| 5.4    | 3.5    | 5.7    | 7.2    | 3.0    | 0.5    | 2.1    | 1.5    | 4.7    |
| 22.6   | 20.4   | 22.0   | 27.8   | 11.7   | 8.5    | 6.7    | 9.1    | 7.3    |
| 466.2  | 496.0  | 444.8  | 462.7  | 715.9  | 517.3  | 556.9  | 624.3  | 565.3  |
| 15.3   | 11.5   | 18.6   | 15.2   | 3.2    | 5.8    | 11.3   | 13.5   | 9.5    |
| 5.0    | 9.1    | 5.1    | 1.5    | 6.2    | 5.7    | 1.4    | 10.5   | 15.2   |
| 4.5    | 2.9    | 7.9    | 14.3   | 1.2    | 3.1    | 8.9    | 4.1    | 9.5    |
| 4.4    | 3.2    | 4.4    | 4.6    | 4.1    | 1.1    | 1.1    | 7.1    | 2.0    |
| 4.6    | 2.9    | 16.2   | 1.8    | 1.1    | 0.6    | 1.2    | 5.0    | 9.6    |
| 1.8    | 1.8    | 3.3    | 2.0    | 4.1    | 2.1    | 2.4    | 2.9    | 6.5    |
| 10.3   | 7.8    | 13.9   | 7.1    | 9.0    | 7.4    | 7.1    | 5.5    | 10.0   |
| 1283.4 | 1081.5 | 1944.5 | 1207.6 | 1539.0 | 1756.5 | 1747.6 | 1764.0 | 3955.3 |
| 109.0  | 73.2   | 329.5  | 94.5   | 274.7  | 230.3  | 280.5  | 301.6  | 484.5  |
| 8.4    | 2.0    | 7.5    | 3.0    | 17.8   | 10.9   | 7.9    | 11.1   | 6.2    |
| 10.5   | 9.6    | 6.9    | 7.9    | 11.7   | 11.0   | 7.5    | 10.6   | 7.3    |
| 2.2    | 4.1    | 3.2    | 8.5    | 3.7    | 1.7    | 8.1    | 2.4    | 1.7    |
| 3.6    | 8.2    | 6.9    | 10.8   | 2.5    | 4.9    | 6.0    | 5.3    | 8.8    |
| 1.8    | 12.0   | 2.7    | 11.0   | 3.1    | 4.2    | 3.4    | 12.5   | 13.8   |
| 14.3   | 7.6    | 11.2   | 10.9   | 8.6    | 3.9    | 4.2    | 4.6    | 3.4    |
| 3.0    | 6.4    | 8.0    | 1.1    | 4.1    | 1.2    | 3.4    | 1.0    | 5.1    |
| 13.7   | 10.2   | 12.7   | 7.6    | 9.5    | 8.5    | 9.9    | 12.6   | 16.0   |
| 11.4   | 16.4   | 9.3    | 13.7   | 7.9    | 2.9    | 11.4   | 11.2   | 12.9   |
| 6.6    | 6.0    | 10.1   | 3.4    | 8.1    | 7.6    | 7.9    | 13.1   | 12.0   |
| 3.6    | 0.3    | 1.3    | 4.2    | 0.6    | 3.6    | 3.2    | 1.1    | 1.8    |
| 9.3    | 5.6    | 9.1    | 6.9    | 6.9    | 5.9    | 5.5    | 12.0   | 8.9    |
| 1.8    | 3.4    | 0.5    | 1.1    | 0.8    | 3.0    | 1.1    | 1.9    | 0.5    |
| 3.6    | 6.3    | 8.3    | 5.8    | 3.5    | 6.4    | 4.7    | 4.7    | 2.4    |
| 3.1    | 7.8    | 2.9    | 2.9    | 1.8    | 1.5    | 3.5    | 8.6    | 5.4    |
| 10.4   | 10.5   | 11.5   | 9.7    | 5.5    | 5.2    | 10.8   | 14.7   | 9.0    |

|        |        |        |        |        |        |        |        |        |
|--------|--------|--------|--------|--------|--------|--------|--------|--------|
| 1.3    | 1.6    | 2.1    | 1.2    | 1.6    | 1.8    | 1.1    | 1.7    | 2.5    |
| 2.1    | 4.1    | 6.1    | 4.9    | 2.0    | 2.6    | 4.7    | 6.4    | 12.2   |
| 0.5    | 2.6    | 5.1    | 0.9    | 0.6    | 1.9    | 2.8    | 2.6    | 6.6    |
| 33.2   | 27.1   | 59.9   | 26.2   | 93.6   | 81.4   | 88.5   | 116.5  | 127.6  |
| 19.1   | 16.4   | 26.7   | 14.9   | 12.5   | 12.3   | 18.1   | 26.4   | 9.7    |
| 22.9   | 21.0   | 28.0   | 14.3   | 8.4    | 8.5    | 9.7    | 2.9    | 21.4   |
| 10.3   | 18.2   | 18.3   | 7.4    | 1.7    | 2.4    | 5.3    | 2.2    | 6.3    |
| 1.6    | 3.4    | 0.7    | 0.8    | 0.6    | 1.5    | 0.6    | 0.8    | 1.1    |
| 498.6  | 475.3  | 759.0  | 470.7  | 1856.5 | 1300.9 | 2232.4 | 2211.7 | 2810.8 |
| 7.8    | 12.2   | 9.5    | 8.4    | 7.2    | 7.0    | 7.7    | 8.6    | 14.1   |
| 186.0  | 131.8  | 571.4  | 240.9  | 245.0  | 489.5  | 272.8  | 277.8  | 1560.2 |
| 10.0   | 1.7    | 4.7    | 2.3    | 3.1    | 3.7    | 6.1    | 9.7    | 3.1    |
| 2.4    | 2.5    | 3.3    | 2.4    | 2.0    | 2.3    | 1.7    | 2.3    | 3.2    |
| 7.3    | 9.0    | 7.2    | 9.1    | 6.2    | 1.5    | 3.1    | 1.5    | 4.9    |
| 30.8   | 42.6   | 32.1   | 19.8   | 29.8   | 39.4   | 34.6   | 40.0   | 38.6   |
| 3.4    | 6.4    | 6.5    | 5.1    | 6.0    | 3.1    | 0.4    | 9.2    | 7.0    |
| 13.4   | 12.8   | 10.7   | 5.4    | 4.0    | 9.0    | 5.2    | 5.0    | 11.5   |
| 1.7    | 7.6    | 6.9    | 5.0    | 0.9    | 3.9    | 1.1    | 1.2    | 7.1    |
| 0.3    | 0.1    | 0.9    | 1.1    | 0.3    | 0.2    | 0.3    | 0.6    | 1.8    |
| 14.4   | 13.7   | 17.2   | 10.5   | 11.3   | 3.2    | 7.1    | 11.1   | 14.9   |
| 2.9    | 1.3    | 2.7    | 4.5    | 4.4    | 3.0    | 0.6    | 8.6    | 6.7    |
| 1.6    | 1.2    | 4.0    | 3.5    | 0.7    | 1.8    | 0.7    | 5.1    | 5.0    |
| 6.4    | 11.2   | 11.0   | 12.8   | 1.8    | 6.8    | 5.8    | 9.7    | 9.4    |
| 18.4   | 26.2   | 11.2   | 23.8   | 17.8   | 14.5   | 18.7   | 18.5   | 10.4   |
| 10.5   | 8.7    | 6.3    | 7.2    | 5.2    | 5.2    | 2.6    | 1.0    | 12.0   |
| 0.7    | 2.9    | 6.7    | 5.2    | 3.9    | 2.2    | 2.6    | 4.4    | 33.2   |
| 9.6    | 9.4    | 25.1   | 13.0   | 9.3    | 1.5    | 16.0   | 15.0   | 13.4   |
| 1.8    | 3.0    | 4.9    | 6.5    | 6.3    | 1.0    | 2.4    | 0.4    | 3.0    |
| 19.7   | 5.4    | 13.3   | 10.0   | 9.3    | 10.2   | 4.3    | 29.8   | 10.3   |
| 6.8    | 9.7    | 4.2    | 5.8    | 14.1   | 4.5    | 14.3   | 8.8    | 18.2   |
| 9.9    | 5.2    | 10.9   | 3.7    | 8.3    | 3.6    | 9.2    | 4.9    | 11.5   |
| 3.3    | 1.2    | 5.8    | 2.1    | 3.4    | 2.7    | 7.1    | 1.0    | 2.4    |
| 14.4   | 6.9    | 7.4    | 11.7   | 33.8   | 18.8   | 27.7   | 43.0   | 34.4   |
| 12.2   | 13.8   | 19.8   | 16.7   | 57.7   | 21.6   | 52.5   | 56.8   | 41.5   |
| 1.4    | 2.2    | 6.2    | 4.0    | 1.1    | 3.9    | 6.6    | 6.6    | 4.4    |
| 60.3   | 64.4   | 30.1   | 55.0   | 89.2   | 137.4  | 117.1  | 101.5  | 75.6   |
| 5.6    | 2.1    | 6.6    | 2.0    | 8.4    | 8.2    | 2.0    | 1.6    | 25.5   |
| 4.2    | 0.6    | 0.2    | 0.6    | 3.1    | 2.4    | 4.3    | 9.5    | 4.1    |
| 7.9    | 17.8   | 3.5    | 6.7    | 1.6    | 2.7    | 5.5    | 2.5    | 12.8   |
| 6.0    | 2.8    | 1.0    | 4.9    | 60.9   | 47.1   | 79.7   | 60.5   | 12.0   |
| 1.5    | 1.1    | 1.7    | 1.1    | 2836.8 | 2524.4 | 3108.2 | 2927.6 | 43.6   |
| 14.2   | 12.3   | 11.2   | 9.5    | 12.9   | 11.4   | 9.0    | 19.6   | 31.3   |
| 1203.5 | 1209.3 | 1218.6 | 1150.7 | 1338.0 | 1764.8 | 1651.8 | 1628.1 | 1647.6 |
| 193.8  | 209.9  | 244.9  | 184.3  | 216.7  | 242.4  | 282.5  | 286.4  | 456.1  |
| 122.8  | 106.8  | 115.7  | 106.2  | 187.5  | 164.3  | 163.7  | 202.5  | 232.2  |
| 0.9    | 0.8    | 1.4    | 2.0    | 1.8    | 0.6    | 1.2    | 0.8    | 0.9    |
| 13.3   | 5.5    | 24.5   | 15.1   | 2.3    | 7.3    | 1.3    | 10.4   | 2.1    |
| 19.3   | 16.3   | 24.0   | 14.7   | 26.1   | 20.2   | 29.1   | 22.7   | 20.8   |
| 6.8    | 3.6    | 5.1    | 0.5    | 4.1    | 3.5    | 3.3    | 3.7    | 7.6    |
| 5.1    | 4.2    | 8.3    | 8.4    | 8.8    | 2.6    | 5.3    | 8.0    | 7.6    |
| 0.8    | 0.6    | 0.6    | 0.7    | 0.9    | 0.4    | 0.7    | 0.5    | 0.9    |
| 98.3   | 91.4   | 101.6  | 109.3  | 114.5  | 120.1  | 116.5  | 125.8  | 149.5  |
| 88.4   | 86.0   | 111.0  | 78.8   | 174.5  | 214.5  | 208.4  | 198.5  | 384.9  |

|        |        |        |        |        |        |        |        |        |
|--------|--------|--------|--------|--------|--------|--------|--------|--------|
| 160.8  | 170.9  | 291.3  | 174.3  | 226.3  | 225.4  | 211.2  | 274.5  | 159.7  |
| 31.5   | 33.3   | 28.8   | 28.7   | 4.7    | 2.0    | 8.8    | 12.8   | 6.6    |
| 7.1    | 6.5    | 12.8   | 5.0    | 96.2   | 80.6   | 100.9  | 110.2  | 137.3  |
| 33.0   | 47.0   | 38.2   | 25.0   | 53.5   | 52.1   | 71.4   | 85.9   | 69.9   |
| 382.4  | 410.3  | 409.8  | 380.9  | 449.8  | 448.5  | 473.5  | 494.5  | 387.3  |
| 63.4   | 68.8   | 29.6   | 39.4   | 12.7   | 24.2   | 13.9   | 11.8   | 19.6   |
| 8.0    | 10.1   | 12.7   | 11.5   | 2.2    | 0.8    | 0.9    | 0.7    | 47.0   |
| 493.7  | 370.8  | 601.9  | 529.7  | 401.5  | 469.9  | 452.7  | 525.0  | 1072.2 |
| 31.4   | 45.6   | 35.8   | 38.5   | 113.5  | 84.4   | 80.5   | 149.3  | 129.2  |
| 13.7   | 21.4   | 15.9   | 12.0   | 13.4   | 10.4   | 16.8   | 20.3   | 12.2   |
| 312.0  | 254.6  | 393.0  | 295.7  | 151.0  | 111.1  | 125.7  | 184.8  | 467.2  |
| 26.7   | 24.1   | 33.0   | 23.0   | 32.0   | 26.2   | 30.1   | 33.9   | 43.7   |
| 232.9  | 213.2  | 411.0  | 237.2  | 298.0  | 313.2  | 273.8  | 337.1  | 293.8  |
| 416.4  | 379.6  | 877.2  | 515.7  | 1319.5 | 1304.4 | 1501.8 | 1522.7 | 3242.0 |
| 207.2  | 192.3  | 326.3  | 200.2  | 283.3  | 268.6  | 256.7  | 292.7  | 500.9  |
| 12.3   | 7.2    | 5.0    | 3.1    | 4.3    | 21.0   | 10.1   | 18.4   | 12.4   |
| 25.1   | 23.7   | 33.3   | 27.6   | 21.0   | 16.8   | 22.0   | 17.7   | 23.9   |
| 203.3  | 212.9  | 198.0  | 219.5  | 465.6  | 503.2  | 483.9  | 570.8  | 290.6  |
| 90.1   | 96.4   | 131.1  | 88.3   | 114.7  | 103.8  | 91.4   | 126.5  | 69.8   |
| 80.5   | 101.7  | 73.5   | 92.8   | 49.2   | 60.3   | 51.9   | 59.8   | 54.2   |
| 23.2   | 23.0   | 54.0   | 20.1   | 149.4  | 163.8  | 155.3  | 178.4  | 56.8   |
| 358.5  | 414.7  | 332.2  | 435.6  | 275.9  | 223.4  | 329.3  | 364.9  | 167.9  |
| 9.3    | 9.2    | 11.5   | 11.3   | 6.5    | 4.6    | 6.1    | 9.6    | 8.8    |
| 5.6    | 1.3    | 9.1    | 6.1    | 5.6    | 10.2   | 3.5    | 12.7   | 17.2   |
| 8.5    | 6.6    | 14.1   | 8.3    | 7.3    | 6.8    | 6.3    | 10.9   | 13.7   |
| 4157.9 | 3913.0 | 4666.2 | 3990.3 | 4789.4 | 4819.8 | 5020.9 | 5474.0 | 6692.9 |
| 43.2   | 36.7   | 40.5   | 58.2   | 21.3   | 29.8   | 26.1   | 26.8   | 53.5   |
| 29.8   | 46.7   | 73.9   | 36.8   | 47.3   | 34.4   | 40.5   | 52.6   | 43.3   |
| 19.2   | 8.5    | 19.2   | 15.9   | 11.3   | 12.9   | 15.2   | 14.9   | 21.5   |
| 1233.3 | 995.7  | 1820.0 | 1220.7 | 607.4  | 655.9  | 592.6  | 733.1  | 775.4  |
| 28.1   | 23.0   | 31.7   | 24.3   | 5.2    | 11.7   | 9.0    | 11.5   | 21.2   |
| 1014.9 | 924.1  | 1679.0 | 951.0  | 828.8  | 693.4  | 777.5  | 897.7  | 1801.9 |
| 49.6   | 47.1   | 76.7   | 47.0   | 68.6   | 66.8   | 79.6   | 74.4   | 66.1   |
| 104.3  | 98.7   | 142.0  | 87.6   | 92.9   | 101.8  | 70.3   | 122.9  | 37.1   |
| 26.7   | 21.1   | 27.5   | 21.9   | 20.3   | 14.0   | 22.8   | 21.9   | 34.6   |
| 1.4    | 1.4    | 1.3    | 1.0    | 0.5    | 0.7    | 0.4    | 3.6    | 1.2    |
| 4.8    | 7.7    | 11.3   | 2.2    | 6.6    | 2.4    | 5.1    | 15.1   | 5.6    |
| 0.5    | 0.4    | 3.1    | 2.3    | 1.1    | 0.4    | 0.6    | 3.0    | 3.3    |
| 219.0  | 185.2  | 238.5  | 153.5  | 115.8  | 117.2  | 129.3  | 147.2  | 108.7  |
| 83.0   | 106.6  | 54.3   | 73.0   | 210.8  | 220.9  | 219.5  | 251.2  | 605.3  |
| 10.9   | 6.1    | 31.3   | 5.9    | 72.6   | 97.4   | 67.7   | 73.3   | 110.4  |
| 13.4   | 17.8   | 17.9   | 10.0   | 7.3    | 8.2    | 7.3    | 2.5    | 18.3   |
| 7.8    | 11.9   | 22.9   | 15.3   | 25.2   | 17.8   | 19.1   | 24.6   | 20.1   |
| 3.0    | 1.0    | 4.9    | 3.1    | 0.5    | 3.4    | 2.7    | 2.0    | 1.8    |
| 2.5    | 7.8    | 7.7    | 2.7    | 51.3   | 59.0   | 41.7   | 59.2   | 9.8    |
| 297.7  | 300.3  | 304.0  | 258.7  | 487.4  | 441.7  | 567.4  | 624.6  | 523.1  |
| 16.0   | 19.0   | 15.4   | 15.4   | 263.1  | 191.8  | 310.3  | 288.4  | 50.1   |
| 1.6    | 1.5    | 4.4    | 2.7    | 4.1    | 1.5    | 1.1    | 0.9    | 2.7    |
| 5.2    | 5.8    | 2.7    | 5.6    | 1.9    | 3.6    | 5.0    | 0.8    | 0.8    |
| 5.7    | 2.6    | 8.8    | 2.0    | 17.6   | 16.4   | 24.4   | 6.5    | 13.6   |
| 49.0   | 53.4   | 46.9   | 33.6   | 71.5   | 99.3   | 106.1  | 73.7   | 47.3   |
| 27.8   | 39.1   | 12.2   | 18.5   | 12.0   | 12.0   | 12.4   | 8.6    | 9.0    |
| 66.0   | 58.5   | 97.5   | 44.9   | 130.9  | 181.5  | 126.6  | 155.1  | 82.4   |

|        |        |        |        |        |        |        |        |        |
|--------|--------|--------|--------|--------|--------|--------|--------|--------|
| 53.6   | 49.9   | 28.6   | 53.5   | 9.3    | 13.9   | 14.4   | 14.2   | 19.2   |
| 21.1   | 29.7   | 24.2   | 29.6   | 16.1   | 1.6    | 8.4    | 13.2   | 7.8    |
| 2935.9 | 2688.2 | 3852.0 | 2999.9 | 1446.0 | 1399.4 | 1633.0 | 1747.0 | 1490.7 |
| 20.3   | 23.9   | 14.5   | 21.7   | 5.1    | 6.6    | 4.8    | 7.0    | 5.1    |
| 89.4   | 99.8   | 67.3   | 94.6   | 128.8  | 117.3  | 137.7  | 121.4  | 115.4  |
| 12.8   | 9.2    | 15.0   | 9.5    | 35.7   | 28.1   | 28.0   | 32.2   | 14.7   |
| 11.6   | 6.9    | 17.0   | 10.0   | 231.3  | 196.5  | 232.6  | 256.1  | 3.2    |
| 12.9   | 11.2   | 20.5   | 14.5   | 7.6    | 7.0    | 9.9    | 16.1   | 14.2   |
| 4.5    | 8.0    | 2.4    | 7.4    | 4.7    | 3.8    | 5.4    | 8.6    | 7.4    |
| 0.9    | 4.1    | 1.8    | 1.8    | 5.4    | 3.6    | 4.2    | 5.2    | 3.9    |
| 63.4   | 76.0   | 58.9   | 59.4   | 46.5   | 49.0   | 46.6   | 62.3   | 28.5   |
| 248.3  | 259.2  | 156.3  | 178.8  | 7.1    | 12.2   | 1.1    | 11.2   | 55.1   |
| 45.1   | 38.1   | 46.8   | 40.9   | 21.8   | 17.5   | 17.0   | 20.8   | 42.2   |
| 9.5    | 2.9    | 5.1    | 3.2    | 9.1    | 4.2    | 3.3    | 2.6    | 9.8    |
| 192.5  | 191.2  | 427.3  | 228.2  | 149.4  | 117.1  | 153.6  | 170.5  | 174.1  |
| 34.3   | 23.8   | 32.2   | 26.7   | 14.8   | 7.3    | 13.2   | 1.4    | 6.1    |
| 57.9   | 66.6   | 83.0   | 41.3   | 380.2  | 463.8  | 346.8  | 427.0  | 379.7  |
| 30.9   | 33.6   | 57.5   | 37.5   | 97.3   | 95.3   | 85.0   | 85.0   | 73.2   |
| 151.8  | 132.0  | 194.7  | 115.1  | 106.6  | 135.4  | 152.1  | 141.9  | 147.1  |
| 158.6  | 163.2  | 204.2  | 144.1  | 179.2  | 189.2  | 207.4  | 223.4  | 301.8  |
| 5.5    | 4.8    | 3.8    | 3.9    | 10.7   | 7.2    | 13.0   | 14.0   | 22.7   |
| 5.7    | 4.2    | 10.5   | 12.8   | 6.0    | 10.1   | 8.1    | 5.0    | 69.7   |
| 33.2   | 27.7   | 29.0   | 25.3   | 32.3   | 27.0   | 26.2   | 40.5   | 19.4   |
| 40.3   | 46.9   | 159.6  | 108.6  | 161.9  | 108.8  | 265.9  | 213.2  | 19.3   |
| 196.5  | 231.5  | 153.5  | 172.8  | 479.7  | 472.8  | 361.2  | 508.5  | 597.5  |
| 22.2   | 29.3   | 5.0    | 14.7   | 9.0    | 1.9    | 2.2    | 1.3    | 3.8    |
| 83.9   | 94.4   | 92.6   | 81.6   | 72.9   | 98.4   | 67.2   | 83.6   | 47.4   |
| 14.8   | 18.2   | 15.5   | 18.1   | 17.7   | 13.3   | 11.0   | 14.7   | 20.3   |
| 122.9  | 140.8  | 106.6  | 103.1  | 77.9   | 95.6   | 83.9   | 75.7   | 17.3   |
| 1.7    | 0.9    | 2.4    | 1.7    | 1.4    | 1.1    | 1.3    | 2.8    | 2.9    |
| 3.1    | 2.9    | 10.3   | 2.1    | 0.8    | 1.4    | 5.1    | 1.3    | 8.1    |
| 1176.9 | 1348.0 | 991.4  | 1507.0 | 9.7    | 19.4   | 10.0   | 10.2   | 27.6   |
| 273.0  | 244.6  | 605.1  | 329.4  | 989.8  | 881.2  | 1018.6 | 1068.0 | 1370.4 |
| 162.3  | 131.4  | 167.8  | 143.6  | 340.2  | 328.4  | 350.3  | 349.7  | 336.8  |
| 2.1    | 2.9    | 2.6    | 4.2    | 1.7    | 0.9    | 1.2    | 9.0    | 2.7    |
| 12.8   | 10.5   | 6.5    | 5.9    | 5.9    | 7.9    | 2.4    | 7.1    | 4.6    |
| 1820.5 | 1887.6 | 1473.8 | 2512.0 | 4.5    | 15.3   | 7.8    | 7.5    | 8.8    |
| 88.9   | 93.2   | 104.0  | 69.7   | 97.6   | 94.6   | 102.4  | 107.3  | 77.9   |
| 1.2    | 4.2    | 1.5    | 1.8    | 1.3    | 0.5    | 1.8    | 1.1    | 1.3    |
| 248.7  | 193.8  | 338.9  | 214.5  | 145.0  | 141.2  | 135.6  | 211.3  | 128.7  |
| 49.5   | 52.5   | 34.2   | 31.2   | 76.9   | 57.2   | 58.3   | 80.8   | 55.6   |
| 0.9    | 1.0    | 1.8    | 2.4    | 2.2    | 1.6    | 1.2    | 0.7    | 4.2    |
| 11.4   | 4.6    | 14.5   | 14.6   | 16.3   | 11.7   | 15.5   | 16.8   | 6.3    |
| 73.1   | 71.1   | 52.4   | 54.9   | 61.3   | 56.3   | 52.8   | 76.8   | 30.8   |
| 5.1    | 6.4    | 22.7   | 8.5    | 18.3   | 13.4   | 21.0   | 26.0   | 51.2   |
| 8.3    | 4.8    | 4.4    | 7.2    | 3.9    | 3.4    | 3.3    | 6.4    | 8.5    |
| 5.7    | 6.1    | 3.4    | 5.9    | 10.0   | 6.8    | 2.0    | 10.3   | 14.0   |
| 35.6   | 27.6   | 28.3   | 25.8   | 5.1    | 7.4    | 1.6    | 17.8   | 1.3    |
| 27.0   | 34.4   | 29.7   | 28.8   | 90.4   | 122.8  | 148.1  | 129.5  | 64.5   |
| 0.2    | 2.3    | 0.2    | 2.1    | 1.4    | 1.2    | 0.2    | 4.0    | 7.2    |
| 9.5    | 10.9   | 15.7   | 10.6   | 29.0   | 25.5   | 23.1   | 22.6   | 37.9   |
| 197.8  | 221.7  | 193.0  | 177.0  | 527.3  | 487.3  | 473.1  | 543.5  | 91.5   |
| 1.2    | 0.4    | 3.5    | 1.1    | 2.2    | 1.6    | 1.9    | 0.5    | 5.7    |

|       |       |       |       |        |        |        |        |        |
|-------|-------|-------|-------|--------|--------|--------|--------|--------|
| 175.9 | 153.4 | 162.9 | 166.3 | 53.5   | 72.0   | 70.9   | 67.3   | 72.9   |
| 85.4  | 94.6  | 95.4  | 96.8  | 73.7   | 63.2   | 60.7   | 59.5   | 71.3   |
| 8.2   | 2.7   | 1.0   | 7.7   | 4.4    | 5.0    | 7.3    | 6.3    | 11.1   |
| 157.2 | 147.3 | 300.4 | 145.8 | 29.8   | 24.5   | 30.5   | 41.9   | 41.4   |
| 85.4  | 87.8  | 118.7 | 101.0 | 78.3   | 77.9   | 85.6   | 113.2  | 19.0   |
| 169.9 | 187.9 | 221.6 | 156.2 | 355.2  | 342.1  | 482.1  | 446.3  | 480.4  |
| 27.8  | 34.1  | 61.1  | 27.0  | 116.1  | 122.1  | 101.3  | 142.7  | 87.1   |
| 25.5  | 31.9  | 26.5  | 14.0  | 49.0   | 57.6   | 54.9   | 60.4   | 60.9   |
| 36.9  | 44.2  | 20.5  | 31.1  | 41.1   | 45.9   | 34.4   | 28.4   | 36.0   |
| 123.3 | 117.4 | 143.8 | 115.5 | 191.5  | 489.8  | 176.8  | 213.9  | 205.9  |
| 26.3  | 20.1  | 30.9  | 24.3  | 11.8   | 10.6   | 9.2    | 13.0   | 20.0   |
| 17.7  | 21.4  | 17.1  | 19.9  | 11.2   | 10.8   | 14.1   | 20.9   | 28.8   |
| 18.6  | 11.5  | 17.3  | 13.7  | 10.3   | 9.7    | 11.7   | 14.7   | 35.6   |
| 0.7   | 3.9   | 3.5   | 0.9   | 0.3    | 1.1    | 2.0    | 0.7    | 1.1    |
| 49.4  | 49.2  | 75.7  | 46.7  | 67.4   | 45.6   | 58.3   | 75.1   | 86.0   |
| 3.4   | 3.9   | 4.6   | 2.3   | 0.8    | 0.4    | 3.1    | 3.6    | 7.1    |
| 86.0  | 99.6  | 150.0 | 64.1  | 436.2  | 590.8  | 469.3  | 508.5  | 331.9  |
| 129.6 | 104.3 | 228.6 | 162.0 | 1737.5 | 1671.7 | 1904.7 | 1788.7 | 1367.3 |
| 16.0  | 14.0  | 15.1  | 11.7  | 28.7   | 28.7   | 31.0   | 38.3   | 342.2  |
| 22.8  | 7.4   | 31.0  | 9.8   | 21.4   | 15.0   | 16.8   | 16.9   | 15.2   |
| 6.9   | 5.9   | 8.6   | 6.9   | 9.0    | 11.9   | 12.5   | 15.3   | 18.1   |
| 97.7  | 80.3  | 85.6  | 87.8  | 110.7  | 127.4  | 119.7  | 147.7  | 179.3  |
| 94.3  | 103.4 | 133.7 | 106.6 | 207.7  | 207.9  | 150.1  | 241.9  | 81.2   |
| 29.3  | 31.7  | 24.5  | 46.1  | 3.8    | 4.2    | 5.0    | 3.9    | 6.6    |
| 1.5   | 0.7   | 1.0   | 0.8   | 0.6    | 0.6    | 0.7    | 0.6    | 1.2    |
| 13.1  | 21.7  | 24.8  | 33.3  | 69.7   | 330.2  | 55.2   | 80.9   | 15.0   |
| 2.2   | 2.6   | 6.8   | 3.2   | 4.3    | 4.3    | 1.3    | 5.0    | 7.3    |
| 179.3 | 161.0 | 207.3 | 145.4 | 317.1  | 315.2  | 316.0  | 365.2  | 343.1  |
| 0.4   | 1.6   | 1.1   | 1.1   | 0.8    | 1.2    | 1.2    | 0.8    | 0.9    |
| 5.1   | 12.3  | 14.9  | 6.3   | 9.3    | 5.7    | 12.4   | 12.9   | 19.5   |
| 8.3   | 3.4   | 8.8   | 5.3   | 4.2    | 4.5    | 2.1    | 2.9    | 5.8    |
| 79.3  | 80.5  | 106.5 | 65.6  | 69.3   | 84.5   | 73.5   | 73.2   | 80.5   |
| 8.1   | 1.6   | 2.0   | 2.9   | 1.5    | 2.2    | 3.7    | 1.9    | 3.8    |
| 3.7   | 2.9   | 4.8   | 2.3   | 1.5    | 3.6    | 2.5    | 0.7    | 2.4    |
| 1.9   | 0.4   | 2.3   | 2.4   | 3.3    | 6.1    | 1.5    | 0.5    | 4.2    |
| 16.4  | 11.5  | 15.7  | 20.3  | 16.2   | 14.4   | 8.7    | 17.1   | 16.9   |
| 2.7   | 2.5   | 3.4   | 0.9   | 105.0  | 97.6   | 97.3   | 142.0  | 47.0   |
| 153.2 | 122.2 | 224.0 | 126.6 | 291.3  | 326.0  | 325.5  | 339.4  | 295.0  |
| 13.0  | 13.9  | 23.8  | 8.2   | 7.7    | 6.5    | 12.4   | 7.0    | 27.2   |
| 88.9  | 85.8  | 123.3 | 94.8  | 72.3   | 127.8  | 73.1   | 83.8   | 2.8    |
| 74.7  | 69.4  | 85.0  | 54.7  | 279.2  | 248.4  | 283.1  | 340.8  | 198.2  |
| 8.9   | 10.3  | 6.9   | 9.7   | 2.5    | 1.7    | 2.2    | 2.1    | 4.6    |
| 8.0   | 3.7   | 6.8   | 5.8   | 5.4    | 0.9    | 5.5    | 16.1   | 3.9    |
| 79.1  | 109.4 | 17.3  | 53.5  | 4.3    | 1.3    | 3.4    | 6.7    | 6.1    |
| 4.8   | 2.1   | 4.6   | 1.0   | 0.5    | 3.4    | 1.9    | 0.2    | 2.5    |
| 4.4   | 1.3   | 4.4   | 1.8   | 13.1   | 7.5    | 17.1   | 8.5    | 17.3   |
| 47.1  | 46.9  | 51.8  | 42.7  | 17.3   | 18.7   | 15.0   | 9.7    | 28.0   |
| 0.7   | 1.3   | 1.1   | 0.6   | 0.7    | 0.5    | 0.4    | 0.6    | 0.9    |
| 197.6 | 198.9 | 295.6 | 180.1 | 311.2  | 300.8  | 290.1  | 355.3  | 385.0  |
| 1.9   | 4.3   | 4.1   | 8.3   | 1.1    | 3.6    | 4.4    | 1.2    | 7.5    |
| 45.3  | 35.2  | 46.6  | 33.7  | 1.3    | 3.4    | 9.7    | 1.9    | 4.8    |
| 1.9   | 6.1   | 3.2   | 1.0   | 1.2    | 1.0    | 1.2    | 0.8    | 1.4    |
| 172.7 | 174.1 | 194.5 | 212.6 | 215.7  | 260.2  | 228.2  | 268.8  | 236.2  |

|       |       |      |       |       |       |       |       |       |
|-------|-------|------|-------|-------|-------|-------|-------|-------|
| 3.2   | 2.6   | 3.8  | 9.4   | 4.0   | 9.4   | 2.5   | 16.9  | 8.1   |
| 81.0  | 100.1 | 64.8 | 70.9  | 72.4  | 76.6  | 65.0  | 63.8  | 111.3 |
| 17.6  | 13.8  | 15.6 | 15.2  | 7.0   | 5.0   | 7.6   | 11.6  | 15.5  |
| 18.4  | 8.1   | 27.4 | 13.2  | 44.9  | 23.2  | 26.0  | 48.9  | 72.6  |
| 10.3  | 6.9   | 15.1 | 3.6   | 10.5  | 3.9   | 9.6   | 3.6   | 7.1   |
| 12.9  | 6.4   | 18.7 | 6.4   | 6.1   | 12.9  | 13.1  | 4.6   | 8.8   |
| 1.6   | 2.4   | 1.5  | 1.0   | 1.3   | 1.1   | 4.1   | 5.1   | 6.3   |
| 7.3   | 2.6   | 2.8  | 5.5   | 25.1  | 25.2  | 25.8  | 36.0  | 13.1  |
| 23.5  | 20.5  | 29.7 | 22.5  | 23.2  | 30.3  | 22.5  | 24.3  | 18.6  |
| 6.8   | 8.3   | 8.9  | 8.5   | 8.2   | 10.9  | 5.1   | 5.3   | 11.0  |
| 1.5   | 5.0   | 2.8  | 4.6   | 1.0   | 1.7   | 1.3   | 1.8   | 1.3   |
| 1.6   | 4.7   | 2.1  | 3.4   | 3.3   | 1.3   | 5.9   | 12.5  | 15.1  |
| 7.8   | 5.5   | 7.7  | 2.8   | 19.9  | 23.4  | 15.1  | 13.7  | 12.5  |
| 1.8   | 4.9   | 2.9  | 2.9   | 1.4   | 6.1   | 1.7   | 2.8   | 3.9   |
| 2.7   | 1.8   | 4.5  | 4.1   | 2.5   | 5.1   | 9.1   | 2.2   | 4.4   |
| 18.1  | 16.9  | 19.2 | 9.9   | 10.8  | 11.1  | 10.7  | 6.8   | 12.2  |
| 0.5   | 3.2   | 0.6  | 0.7   | 2.1   | 1.8   | 3.1   | 0.8   | 0.7   |
| 16.0  | 24.9  | 27.0 | 27.0  | 10.3  | 12.0  | 5.8   | 1.4   | 20.6  |
| 23.3  | 16.0  | 28.3 | 18.9  | 24.0  | 19.4  | 28.7  | 21.5  | 28.6  |
| 3.9   | 3.3   | 7.8  | 3.1   | 5.3   | 4.6   | 5.6   | 3.5   | 15.0  |
| 43.8  | 27.1  | 36.2 | 26.3  | 18.0  | 15.3  | 15.1  | 11.9  | 24.9  |
| 3.5   | 6.1   | 8.1  | 2.4   | 2.8   | 9.3   | 4.3   | 3.0   | 7.0   |
| 0.8   | 1.9   | 1.7  | 0.8   | 0.9   | 0.5   | 1.4   | 0.5   | 2.1   |
| 6.0   | 3.1   | 4.1  | 5.8   | 6.6   | 3.6   | 7.2   | 1.0   | 4.3   |
| 11.6  | 19.6  | 13.1 | 10.7  | 5.2   | 3.7   | 6.2   | 2.6   | 6.2   |
| 15.0  | 19.2  | 10.5 | 6.3   | 17.6  | 5.1   | 11.5  | 11.3  | 22.3  |
| 3.3   | 11.2  | 7.5  | 6.9   | 214.1 | 166.4 | 203.4 | 253.3 | 24.5  |
| 84.3  | 100.1 | 79.1 | 81.4  | 6.5   | 9.9   | 10.5  | 13.3  | 13.2  |
| 84.8  | 112.7 | 95.2 | 89.2  | 162.7 | 150.9 | 169.9 | 182.2 | 86.9  |
| 2.3   | 2.6   | 1.1  | 0.8   | 3.6   | 2.8   | 1.5   | 0.9   | 1.9   |
| 16.5  | 17.6  | 6.9  | 14.7  | 17.1  | 26.4  | 18.5  | 23.2  | 5.9   |
| 3.4   | 7.3   | 4.3  | 3.9   | 4.4   | 0.5   | 5.1   | 3.6   | 1.6   |
| 0.6   | 1.3   | 3.8  | 4.5   | 26.5  | 27.0  | 26.5  | 37.2  | 2.2   |
| 8.6   | 14.1  | 9.3  | 10.7  | 12.3  | 9.0   | 13.3  | 14.5  | 10.5  |
| 8.0   | 5.7   | 8.1  | 5.9   | 6.6   | 10.3  | 7.5   | 2.9   | 7.5   |
| 4.3   | 2.1   | 3.1  | 1.5   | 3.7   | 1.8   | 1.4   | 2.0   | 2.8   |
| 13.0  | 16.0  | 14.5 | 13.9  | 12.4  | 14.0  | 15.2  | 11.5  | 7.0   |
| 0.9   | 1.5   | 1.7  | 1.0   | 0.8   | 0.7   | 0.7   | 0.7   | 1.6   |
| 7.2   | 0.8   | 2.1  | 1.8   | 2.4   | 4.1   | 2.6   | 0.6   | 2.6   |
| 15.3  | 17.8  | 13.4 | 12.7  | 8.5   | 6.6   | 7.2   | 10.1  | 6.8   |
| 56.2  | 53.5  | 53.0 | 47.1  | 50.9  | 42.3  | 55.9  | 45.9  | 71.6  |
| 7.8   | 15.3  | 18.1 | 12.6  | 7.2   | 9.3   | 13.0  | 8.4   | 17.7  |
| 7.3   | 10.6  | 14.7 | 7.3   | 7.3   | 0.4   | 15.1  | 8.4   | 22.6  |
| 2.9   | 4.7   | 7.8  | 7.2   | 2.1   | 5.8   | 2.9   | 4.6   | 6.5   |
| 148.5 | 154.0 | 76.2 | 129.5 | 15.8  | 16.8  | 14.9  | 15.4  | 25.8  |
| 1.0   | 1.8   | 1.3  | 1.3   | 3.1   | 0.6   | 1.1   | 1.7   | 1.8   |
| 26.5  | 23.5  | 43.4 | 29.6  | 29.6  | 39.4  | 32.3  | 35.5  | 32.3  |
| 32.4  | 32.0  | 38.4 | 28.9  | 76.8  | 80.0  | 87.8  | 100.2 | 44.4  |
| 1.3   | 0.6   | 2.2  | 1.3   | 7.1   | 3.8   | 4.6   | 6.4   | 8.2   |
| 2.3   | 7.2   | 6.6  | 2.9   | 1.0   | 1.5   | 2.9   | 2.0   | 7.7   |
| 1.6   | 3.8   | 0.9  | 4.1   | 0.6   | 0.4   | 2.6   | 0.7   | 7.8   |
| 1.0   | 1.6   | 2.8  | 2.3   | 2.1   | 1.3   | 1.1   | 2.8   | 8.3   |
| 47.8  | 38.3  | 36.5 | 41.9  | 37.6  | 34.1  | 48.1  | 59.6  | 53.6  |

|       |       |       |       |       |       |       |       |       |
|-------|-------|-------|-------|-------|-------|-------|-------|-------|
| 9.4   | 4.1   | 10.5  | 8.6   | 7.3   | 7.0   | 4.8   | 4.1   | 16.5  |
| 6.4   | 7.5   | 10.8  | 14.4  | 0.9   | 2.5   | 4.0   | 1.4   | 5.8   |
| 2.5   | 3.1   | 3.8   | 6.6   | 1.2   | 2.1   | 2.1   | 3.9   | 4.5   |
| 3.8   | 1.6   | 5.5   | 3.8   | 4.7   | 1.9   | 2.4   | 3.9   | 2.8   |
| 3.8   | 2.6   | 2.9   | 3.7   | 8.1   | 5.4   | 4.6   | 4.0   | 5.8   |
| 5.7   | 1.6   | 8.1   | 0.8   | 5.5   | 1.5   | 4.1   | 0.4   | 13.0  |
| 2.8   | 4.6   | 4.0   | 1.7   | 1.4   | 3.9   | 5.3   | 5.5   | 5.4   |
| 11.8  | 23.1  | 5.5   | 14.9  | 16.1  | 18.7  | 13.1  | 15.1  | 15.5  |
| 57.7  | 64.9  | 41.4  | 54.2  | 113.9 | 103.9 | 112.9 | 141.3 | 297.3 |
| 6.3   | 6.4   | 6.2   | 7.9   | 7.2   | 10.4  | 7.5   | 1.0   | 12.7  |
| 77.8  | 76.1  | 99.5  | 74.7  | 102.2 | 73.0  | 94.0  | 117.2 | 213.6 |
| 6.3   | 14.7  | 12.9  | 11.8  | 1.0   | 1.0   | 3.7   | 6.5   | 20.0  |
| 1.1   | 1.8   | 1.7   | 0.8   | 0.9   | 0.6   | 0.7   | 0.8   | 1.4   |
| 5.3   | 3.7   | 5.7   | 1.9   | 8.1   | 2.2   | 7.9   | 6.6   | 9.7   |
| 6.5   | 9.3   | 25.2  | 24.5  | 10.0  | 3.9   | 8.8   | 17.1  | 23.8  |
| 15.7  | 4.2   | 3.0   | 6.1   | 2.1   | 6.7   | 5.5   | 3.4   | 3.2   |
| 19.2  | 37.1  | 9.3   | 31.6  | 26.0  | 20.7  | 24.1  | 27.1  | 22.2  |
| 8.8   | 13.6  | 18.3  | 10.9  | 14.6  | 12.6  | 14.8  | 25.7  | 12.9  |
| 2.3   | 1.1   | 1.5   | 0.8   | 4.3   | 3.2   | 5.3   | 1.1   | 5.3   |
| 12.2  | 12.1  | 11.3  | 8.3   | 11.3  | 7.8   | 7.7   | 7.2   | 8.5   |
| 2.9   | 0.9   | 1.7   | 5.8   | 7.6   | 6.3   | 8.2   | 4.6   | 63.0  |
| 3.2   | 5.5   | 12.4  | 6.8   | 3.4   | 0.5   | 8.8   | 6.2   | 4.3   |
| 3.3   | 4.7   | 2.6   | 2.4   | 5.5   | 2.1   | 5.5   | 3.8   | 5.4   |
| 5.8   | 4.3   | 15.9  | 15.5  | 4.8   | 5.1   | 6.2   | 6.6   | 14.1  |
| 2.4   | 7.9   | 4.1   | 1.3   | 6.1   | 1.2   | 16.9  | 1.1   | 8.2   |
| 2.2   | 3.9   | 5.9   | 3.7   | 3.0   | 4.6   | 5.1   | 1.9   | 8.4   |
| 3.9   | 4.2   | 2.3   | 2.8   | 0.2   | 5.2   | 4.0   | 7.9   | 4.9   |
| 1.1   | 4.4   | 6.7   | 4.2   | 4.9   | 4.4   | 4.5   | 1.8   | 3.2   |
| 38.2  | 29.3  | 21.8  | 29.2  | 19.7  | 21.8  | 10.5  | 13.9  | 26.4  |
| 3.3   | 2.5   | 3.4   | 9.3   | 6.7   | 5.9   | 9.3   | 5.3   | 1.3   |
| 3.9   | 2.8   | 1.7   | 2.0   | 2.4   | 0.9   | 3.0   | 2.2   | 11.8  |
| 7.5   | 2.1   | 5.4   | 10.2  | 1.4   | 1.6   | 4.0   | 1.7   | 2.1   |
| 12.5  | 3.5   | 7.7   | 9.0   | 2.9   | 2.9   | 11.0  | 3.4   | 12.7  |
| 4.0   | 4.2   | 8.1   | 10.0  | 2.6   | 4.4   | 3.4   | 1.6   | 4.3   |
| 2.1   | 5.0   | 0.7   | 1.9   | 1.2   | 2.5   | 2.4   | 3.3   | 6.6   |
| 1.5   | 2.4   | 3.0   | 2.6   | 0.8   | 3.5   | 1.2   | 4.5   | 2.1   |
| 2.2   | 11.0  | 15.7  | 2.3   | 9.2   | 6.8   | 8.4   | 3.7   | 12.9  |
| 51.1  | 40.8  | 47.4  | 47.0  | 32.6  | 40.7  | 52.3  | 65.4  | 15.9  |
| 7.6   | 1.3   | 2.1   | 1.8   | 8.2   | 6.3   | 13.7  | 15.1  | 5.0   |
| 46.6  | 53.1  | 22.7  | 37.3  | 57.3  | 52.5  | 55.1  | 81.1  | 209.6 |
| 13.8  | 19.9  | 46.3  | 26.7  | 21.8  | 17.7  | 15.0  | 24.1  | 10.0  |
| 168.3 | 227.5 | 247.2 | 161.6 | 178.4 | 210.5 | 169.4 | 194.1 | 252.9 |
| 186.1 | 180.0 | 295.8 | 208.1 | 249.3 | 232.6 | 245.2 | 302.6 | 279.0 |
| 32.0  | 35.7  | 29.0  | 28.8  | 5.4   | 5.0   | 1.8   | 0.9   | 13.7  |
| 37.9  | 42.7  | 26.8  | 27.6  | 49.4  | 23.1  | 33.7  | 48.4  | 29.4  |
| 124.3 | 108.5 | 185.4 | 110.3 | 246.9 | 242.3 | 236.5 | 274.6 | 231.9 |
| 362.5 | 356.5 | 406.9 | 388.5 | 149.8 | 147.1 | 164.2 | 176.3 | 127.0 |
| 31.8  | 38.3  | 31.1  | 52.9  | 11.2  | 10.4  | 15.1  | 11.9  | 14.4  |
| 500.6 | 447.8 | 865.2 | 568.6 | 369.6 | 298.6 | 368.6 | 460.9 | 314.8 |
| 3.2   | 7.0   | 5.4   | 1.6   | 9.3   | 12.3  | 11.9  | 17.8  | 15.2  |
| 0.8   | 1.0   | 1.1   | 1.0   | 0.8   | 2.4   | 0.9   | 0.8   | 1.0   |
| 2.7   | 3.7   | 3.1   | 2.4   | 2.9   | 1.8   | 3.2   | 3.4   | 3.2   |
| 4.6   | 4.6   | 7.0   | 3.6   | 0.6   | 4.9   | 1.5   | 0.8   | 5.9   |



|        |        |        |        |        |        |        |        |        |
|--------|--------|--------|--------|--------|--------|--------|--------|--------|
| 27.5   | 26.8   | 26.6   | 21.0   | 41.6   | 62.5   | 46.1   | 37.8   | 27.1   |
| 4.6    | 4.5    | 4.7    | 1.2    | 5.7    | 7.1    | 1.7    | 1.3    | 10.0   |
| 111.9  | 121.5  | 115.4  | 105.3  | 143.1  | 128.6  | 136.1  | 179.0  | 86.3   |
| 16.2   | 12.6   | 14.5   | 15.0   | 13.8   | 10.9   | 11.4   | 12.0   | 28.3   |
| 8.0    | 9.3    | 7.1    | 5.2    | 5.1    | 6.1    | 5.8    | 10.0   | 8.6    |
| 184.2  | 211.4  | 304.1  | 194.7  | 86.7   | 110.8  | 97.0   | 109.2  | 128.4  |
| 123.6  | 135.8  | 98.1   | 143.8  | 55.9   | 60.6   | 57.8   | 64.3   | 73.0   |
| 97.5   | 81.0   | 81.1   | 81.6   | 172.4  | 177.3  | 161.4  | 198.5  | 268.9  |
| 11.5   | 6.0    | 16.5   | 11.8   | 1.0    | 1.8    | 7.5    | 1.9    | 10.0   |
| 4.4    | 6.0    | 1.2    | 1.6    | 19.6   | 29.6   | 28.5   | 21.6   | 87.6   |
| 28.0   | 30.7   | 34.4   | 34.2   | 37.6   | 38.7   | 127.9  | 32.5   | 6.7    |
| 3.8    | 3.3    | 3.9    | 4.8    | 4.3    | 3.7    | 3.5    | 4.3    | 5.3    |
| 42.3   | 38.1   | 38.2   | 35.7   | 40.4   | 50.4   | 46.9   | 47.5   | 27.1   |
| 370.9  | 342.1  | 424.3  | 272.1  | 292.5  | 341.3  | 310.8  | 314.9  | 160.1  |
| 167.3  | 167.9  | 183.0  | 164.3  | 362.1  | 217.5  | 383.1  | 564.7  | 693.2  |
| 94.3   | 105.4  | 133.8  | 93.6   | 131.2  | 119.0  | 124.0  | 157.4  | 91.3   |
| 4.7    | 7.8    | 7.4    | 1.5    | 14.8   | 8.6    | 6.3    | 15.4   | 3.5    |
| 81.4   | 73.4   | 86.4   | 71.0   | 68.9   | 62.5   | 72.6   | 86.5   | 25.5   |
| 80.4   | 79.6   | 98.9   | 70.5   | 129.5  | 139.6  | 123.5  | 175.3  | 165.7  |
| 141.5  | 152.3  | 222.2  | 135.8  | 163.3  | 165.2  | 144.5  | 170.8  | 153.8  |
| 7.5    | 7.4    | 11.9   | 9.4    | 18.1   | 5.7    | 20.0   | 9.1    | 10.0   |
| 112.3  | 95.8   | 89.4   | 107.9  | 64.3   | 69.6   | 69.9   | 70.7   | 130.0  |
| 198.7  | 195.0  | 247.8  | 202.5  | 42.7   | 38.3   | 34.7   | 48.8   | 42.3   |
| 25.2   | 31.8   | 32.0   | 25.3   | 21.3   | 32.2   | 32.0   | 26.6   | 34.0   |
| 2.1    | 1.1    | 1.3    | 3.0    | 1.1    | 2.7    | 0.7    | 1.0    | 1.7    |
| 15.2   | 5.3    | 4.4    | 4.8    | 2.6    | 8.0    | 3.2    | 4.1    | 9.6    |
| 110.6  | 109.8  | 187.4  | 111.1  | 170.7  | 151.7  | 172.9  | 185.4  | 210.1  |
| 1.5    | 1.4    | 5.5    | 1.6    | 3.7    | 0.8    | 0.7    | 3.3    | 2.1    |
| 216.1  | 192.3  | 236.0  | 212.4  | 391.3  | 415.3  | 450.8  | 412.0  | 280.1  |
| 639.8  | 652.5  | 817.7  | 656.3  | 278.8  | 243.6  | 259.7  | 350.8  | 527.4  |
| 3.4    | 10.3   | 1.6    | 1.7    | 1.2    | 1.2    | 2.3    | 1.1    | 0.9    |
| 7.3    | 10.9   | 3.7    | 6.3    | 5.6    | 1.6    | 2.1    | 2.7    | 6.3    |
| 0.6    | 0.4    | 0.8    | 3.4    | 4.3    | 2.6    | 1.4    | 0.5    | 0.7    |
| 17.7   | 18.9   | 12.2   | 7.5    | 38.1   | 31.6   | 56.1   | 46.2   | 18.1   |
| 135.4  | 152.2  | 168.3  | 179.6  | 166.0  | 160.5  | 122.1  | 127.2  | 113.9  |
| 12.4   | 11.8   | 9.2    | 12.4   | 11.5   | 3.8    | 6.5    | 11.7   | 13.8   |
| 6.2    | 5.8    | 14.7   | 18.6   | 4.7    | 8.3    | 3.2    | 4.8    | 4.0    |
| 18.3   | 18.9   | 15.2   | 14.4   | 11.0   | 12.3   | 16.8   | 8.8    | 12.1   |
| 8.3    | 8.5    | 3.0    | 3.1    | 4.9    | 4.8    | 2.9    | 1.1    | 9.5    |
| 53.8   | 49.4   | 46.7   | 40.2   | 23.2   | 17.0   | 25.8   | 54.6   | 38.4   |
| 24.3   | 10.7   | 3.4    | 15.0   | 3.5    | 2.2    | 3.1    | 7.7    | 5.5    |
| 8.9    | 11.7   | 17.2   | 13.7   | 20.7   | 14.8   | 23.4   | 22.6   | 28.7   |
| 2.3    | 8.0    | 5.1    | 1.3    | 3.6    | 4.3    | 5.9    | 1.8    | 5.4    |
| 14.6   | 11.3   | 17.0   | 11.5   | 18.0   | 12.5   | 16.8   | 25.7   | 14.3   |
| 66.3   | 78.1   | 76.1   | 38.0   | 34.9   | 34.6   | 38.4   | 48.3   | 78.2   |
| 59.7   | 52.0   | 54.9   | 52.9   | 67.8   | 49.2   | 69.2   | 69.6   | 18.2   |
| 339.8  | 282.5  | 435.3  | 311.3  | 151.0  | 128.2  | 152.7  | 185.0  | 533.5  |
| 18.3   | 5.2    | 17.9   | 5.8    | 16.9   | 28.0   | 18.8   | 31.8   | 22.3   |
| 459.7  | 443.8  | 365.2  | 446.3  | 80.2   | 64.6   | 95.3   | 88.4   | 43.8   |
| 60.8   | 71.2   | 59.7   | 43.4   | 59.8   | 37.3   | 32.0   | 78.4   | 22.7   |
| 16.7   | 38.6   | 6.7    | 21.3   | 52.5   | 63.5   | 51.4   | 49.2   | 116.4  |
| 2.0    | 3.3    | 6.9    | 1.3    | 9.3    | 10.5   | 11.3   | 14.8   | 8.2    |
| 1156.0 | 1116.1 | 1568.1 | 1124.8 | 2547.8 | 2431.6 | 2679.2 | 2827.4 | 1682.6 |

|       |       |       |       |        |        |        |        |        |
|-------|-------|-------|-------|--------|--------|--------|--------|--------|
| 1.2   | 0.8   | 1.8   | 0.8   | 1.0    | 0.5    | 0.7    | 0.8    | 1.6    |
| 348.0 | 293.0 | 693.2 | 404.5 | 832.8  | 862.9  | 930.2  | 970.8  | 850.4  |
| 134.6 | 130.0 | 110.6 | 117.2 | 68.5   | 72.6   | 71.5   | 74.9   | 33.9   |
| 6.8   | 7.5   | 9.4   | 4.4   | 249.4  | 238.3  | 245.9  | 255.1  | 343.7  |
| 110.2 | 110.6 | 180.6 | 87.3  | 312.1  | 203.4  | 275.4  | 347.7  | 137.2  |
| 0.9   | 9.3   | 1.8   | 1.2   | 1.7    | 2.9    | 2.8    | 4.4    | 1.7    |
| 219.1 | 211.3 | 254.5 | 211.6 | 60.9   | 78.6   | 65.0   | 57.4   | 101.1  |
| 36.2  | 36.8  | 27.2  | 29.2  | 24.5   | 32.4   | 45.7   | 34.8   | 3.4    |
| 32.0  | 30.6  | 23.7  | 30.9  | 12.8   | 24.4   | 19.9   | 15.6   | 32.7   |
| 528.7 | 464.9 | 711.9 | 520.3 | 1220.4 | 1278.0 | 1382.6 | 1520.8 | 1443.3 |
| 65.8  | 47.1  | 90.5  | 58.9  | 102.9  | 79.3   | 90.3   | 115.1  | 93.4   |
| 230.3 | 213.0 | 227.5 | 223.7 | 245.7  | 270.6  | 258.4  | 286.5  | 472.8  |
| 4.8   | 6.1   | 9.8   | 8.0   | 9.1    | 5.3    | 6.4    | 3.1    | 18.2   |
| 477.7 | 429.9 | 622.8 | 442.2 | 450.0  | 477.7  | 473.8  | 513.5  | 530.3  |
| 146.8 | 140.4 | 138.2 | 100.6 | 234.7  | 263.1  | 204.3  | 319.2  | 126.4  |
| 265.9 | 238.9 | 347.4 | 219.9 | 1659.3 | 1976.9 | 1609.3 | 1750.7 | 2734.1 |
| 56.0  | 82.6  | 62.7  | 58.3  | 110.2  | 134.7  | 118.4  | 134.5  | 210.8  |
| 2.6   | 6.4   | 6.8   | 5.9   | 7.7    | 6.9    | 10.7   | 9.3    | 6.1    |
| 14.3  | 13.3  | 28.1  | 18.6  | 11.9   | 12.8   | 16.2   | 27.2   | 17.8   |
| 65.5  | 72.9  | 88.6  | 62.2  | 23.9   | 16.9   | 21.0   | 21.6   | 17.4   |
| 182.2 | 196.2 | 208.7 | 169.2 | 343.7  | 385.8  | 359.2  | 413.3  | 128.7  |
| 1.7   | 1.8   | 2.9   | 6.4   | 9.2    | 1.8    | 1.7    | 3.1    | 3.9    |
| 55.1  | 38.4  | 64.7  | 40.2  | 126.6  | 125.8  | 209.6  | 187.7  | 160.9  |
| 122.3 | 107.3 | 142.8 | 118.7 | 0.9    | 2.2    | 3.8    | 1.9    | 378.8  |
| 3.5   | 8.0   | 3.5   | 1.6   | 3.5    | 2.7    | 1.3    | 1.3    | 11.7   |
| 30.2  | 25.3  | 53.8  | 27.0  | 63.1   | 72.4   | 78.4   | 70.8   | 98.3   |
| 36.9  | 52.5  | 41.8  | 33.9  | 56.1   | 46.1   | 37.8   | 65.9   | 12.2   |
| 1.9   | 1.7   | 3.7   | 4.9   | 3.6    | 1.5    | 1.6    | 2.1    | 7.5    |
| 9.5   | 2.9   | 4.3   | 3.4   | 8.8    | 10.2   | 20.0   | 19.0   | 7.0    |
| 3.7   | 5.0   | 9.0   | 4.8   | 3.3    | 1.0    | 5.0    | 1.7    | 1.5    |
| 1.5   | 2.1   | 3.8   | 3.4   | 22.5   | 21.5   | 19.5   | 10.8   | 28.3   |
| 0.8   | 0.7   | 1.4   | 1.4   | 2.6    | 0.9    | 1.3    | 2.4    | 1.8    |
| 5.1   | 3.0   | 6.8   | 6.6   | 1.0    | 0.9    | 1.4    | 1.4    | 4.6    |
| 26.3  | 19.8  | 32.0  | 27.7  | 28.9   | 21.7   | 23.3   | 42.1   | 58.5   |
| 3.5   | 5.1   | 1.1   | 0.3   | 1.9    | 3.6    | 0.3    | 0.9    | 2.7    |
| 9.5   | 1.7   | 1.5   | 1.7   | 1.2    | 0.9    | 0.8    | 2.6    | 6.8    |
| 86.6  | 83.2  | 99.9  | 85.2  | 82.5   | 99.5   | 81.4   | 101.2  | 42.3   |
| 7.3   | 3.8   | 8.4   | 3.0   | 110.5  | 139.7  | 117.1  | 132.8  | 137.3  |
| 3.6   | 3.9   | 4.6   | 5.2   | 6.3    | 0.9    | 2.4    | 4.2    | 5.5    |
| 26.3  | 15.4  | 22.5  | 8.1   | 28.0   | 20.4   | 26.8   | 33.3   | 8.5    |
| 28.8  | 22.6  | 36.7  | 25.4  | 20.7   | 20.3   | 15.4   | 20.5   | 29.7   |
| 10.7  | 6.9   | 21.3  | 2.9   | 8.3    | 9.5    | 14.4   | 4.0    | 10.6   |
| 6.7   | 12.4  | 14.0  | 10.4  | 2.3    | 6.0    | 1.2    | 0.6    | 4.9    |
| 25.3  | 5.9   | 35.5  | 25.8  | 14.8   | 15.2   | 26.2   | 30.2   | 42.2   |
| 3.1   | 3.3   | 2.7   | 2.1   | 2.4    | 1.6    | 1.7    | 2.1    | 3.8    |
| 8.5   | 13.9  | 29.8  | 13.7  | 14.8   | 12.5   | 13.0   | 10.0   | 19.7   |
| 26.1  | 31.0  | 39.3  | 24.8  | 10.5   | 7.8    | 15.8   | 14.4   | 24.3   |
| 2.3   | 2.9   | 2.1   | 1.9   | 2.3    | 3.0    | 2.8    | 2.9    | 3.3    |
| 36.4  | 47.7  | 43.8  | 50.4  | 3.7    | 3.2    | 4.7    | 19.5   | 4.1    |
| 8.6   | 9.8   | 9.3   | 8.2   | 8.4    | 5.5    | 11.3   | 1.6    | 12.5   |
| 4.9   | 5.0   | 2.8   | 6.7   | 12.5   | 3.1    | 9.5    | 16.6   | 12.0   |
| 3.7   | 4.1   | 0.8   | 4.3   | 181.8  | 104.5  | 256.5  | 263.7  | 7.6    |
| 39.4  | 32.8  | 42.7  | 30.4  | 18.6   | 13.7   | 15.8   | 28.6   | 23.9   |

|       |       |       |       |       |       |       |       |       |
|-------|-------|-------|-------|-------|-------|-------|-------|-------|
| 6.8   | 7.3   | 8.4   | 6.9   | 6.0   | 7.0   | 4.6   | 10.0  | 9.3   |
| 38.8  | 25.7  | 45.0  | 41.2  | 39.7  | 29.4  | 29.7  | 49.0  | 49.1  |
| 16.2  | 16.7  | 16.8  | 12.2  | 8.0   | 11.9  | 8.8   | 6.1   | 24.8  |
| 2.2   | 2.3   | 1.5   | 4.0   | 4.4   | 3.2   | 3.1   | 1.6   | 7.4   |
| 345.2 | 318.6 | 355.8 | 352.4 | 303.7 | 311.3 | 297.5 | 336.3 | 306.2 |
| 2.6   | 1.5   | 1.0   | 3.7   | 3.8   | 8.4   | 19.6  | 21.4  | 1.2   |
| 1.1   | 1.5   | 1.4   | 1.5   | 0.9   | 1.6   | 2.1   | 1.0   | 1.9   |
| 19.2  | 24.2  | 21.8  | 16.9  | 16.2  | 15.5  | 19.5  | 24.4  | 19.8  |
| 4.9   | 11.1  | 19.7  | 10.6  | 14.6  | 14.4  | 15.0  | 22.1  | 21.8  |
| 2.1   | 9.0   | 2.8   | 4.9   | 13.3  | 6.5   | 6.4   | 5.3   | 10.3  |
| 2.6   | 3.5   | 3.8   | 4.4   | 46.8  | 35.9  | 61.6  | 60.2  | 71.4  |
| 4.7   | 10.1  | 19.8  | 6.2   | 12.1  | 5.9   | 10.5  | 14.4  | 16.4  |
| 5.3   | 1.6   | 2.4   | 1.2   | 38.4  | 25.3  | 50.7  | 50.2  | 28.5  |
| 1.3   | 6.4   | 1.2   | 8.0   | 9.6   | 9.1   | 12.6  | 12.1  | 2.3   |
| 10.1  | 5.9   | 9.1   | 5.4   | 7.6   | 5.1   | 3.4   | 5.8   | 6.6   |
| 2.4   | 5.0   | 3.6   | 5.2   | 0.4   | 3.4   | 2.8   | 1.9   | 6.9   |
| 14.2  | 12.3  | 12.0  | 13.7  | 19.7  | 45.5  | 13.9  | 8.5   | 7.9   |
| 11.7  | 8.7   | 15.8  | 15.2  | 5.5   | 8.5   | 11.7  | 22.3  | 6.7   |
| 4.6   | 2.8   | 2.7   | 1.7   | 1.7   | 2.7   | 4.5   | 9.1   | 4.5   |
| 334.5 | 349.6 | 421.0 | 289.4 | 79.7  | 67.0  | 75.4  | 109.3 | 71.5  |
| 1.4   | 1.3   | 2.2   | 1.0   | 1.0   | 1.0   | 1.0   | 1.0   | 4.2   |
| 9.0   | 15.2  | 7.3   | 7.8   | 12.3  | 7.8   | 5.2   | 2.5   | 10.4  |
| 12.2  | 7.3   | 28.0  | 6.5   | 6.8   | 6.3   | 1.8   | 13.6  | 12.4  |
| 0.8   | 1.0   | 1.6   | 1.1   | 0.7   | 1.7   | 5.0   | 10.4  | 1.8   |
| 10.0  | 2.1   | 8.5   | 3.8   | 7.3   | 1.3   | 6.1   | 7.3   | 6.7   |
| 17.3  | 14.2  | 13.6  | 21.4  | 16.8  | 12.9  | 8.8   | 5.6   | 14.7  |
| 0.8   | 2.6   | 1.2   | 1.0   | 3.2   | 3.5   | 1.2   | 0.8   | 1.7   |
| 11.4  | 10.6  | 16.2  | 10.3  | 9.0   | 7.0   | 6.3   | 10.7  | 25.0  |
| 83.8  | 51.9  | 138.9 | 72.8  | 174.4 | 204.8 | 127.9 | 178.0 | 154.9 |
| 2.1   | 12.6  | 15.6  | 10.8  | 1.7   | 0.8   | 1.5   | 8.1   | 11.9  |
| 4.5   | 5.4   | 2.7   | 5.1   | 6.3   | 1.8   | 5.6   | 1.5   | 5.6   |
| 1.2   | 5.0   | 1.9   | 1.4   | 0.6   | 2.6   | 1.5   | 1.1   | 6.5   |
| 16.9  | 12.9  | 18.3  | 12.5  | 14.4  | 10.3  | 9.8   | 6.4   | 8.3   |
| 1.6   | 2.4   | 2.1   | 1.3   | 2.1   | 3.4   | 1.5   | 2.3   | 2.9   |
| 1.6   | 2.7   | 6.8   | 2.8   | 7.8   | 5.5   | 9.8   | 7.1   | 2.7   |
| 5.2   | 6.0   | 10.1  | 5.7   | 7.2   | 6.3   | 9.6   | 12.1  | 5.2   |
| 1.3   | 3.3   | 0.8   | 1.4   | 2.2   | 1.7   | 2.2   | 0.4   | 2.9   |
| 15.7  | 9.7   | 13.9  | 12.1  | 8.1   | 14.8  | 13.8  | 16.7  | 25.2  |
| 25.0  | 18.9  | 40.7  | 20.7  | 5.8   | 2.8   | 12.8  | 8.9   | 10.9  |
| 63.5  | 43.1  | 50.8  | 47.2  | 9.0   | 8.8   | 3.2   | 6.4   | 9.6   |
| 2.1   | 6.4   | 17.0  | 3.6   | 4.2   | 6.5   | 4.1   | 7.0   | 4.4   |
| 1.2   | 3.7   | 0.8   | 2.3   | 0.7   | 0.5   | 0.6   | 1.2   | 4.9   |
| 1.3   | 4.8   | 10.7  | 3.0   | 1.6   | 4.7   | 1.6   | 3.8   | 3.4   |
| 8.5   | 6.9   | 8.7   | 10.8  | 13.0  | 15.2  | 18.7  | 19.2  | 32.0  |
| 7.6   | 4.4   | 1.5   | 1.4   | 5.3   | 1.0   | 3.4   | 1.9   | 4.8   |
| 7.5   | 5.7   | 4.6   | 5.8   | 7.5   | 4.4   | 10.9  | 13.3  | 9.4   |
| 1.6   | 1.6   | 0.9   | 3.0   | 1.0   | 1.2   | 1.2   | 0.5   | 2.0   |
| 2.0   | 1.3   | 7.4   | 3.8   | 8.8   | 1.6   | 5.0   | 1.4   | 5.1   |
| 21.3  | 12.4  | 16.8  | 15.9  | 12.2  | 11.2  | 3.6   | 17.0  | 13.5  |
| 8.6   | 9.0   | 29.8  | 18.4  | 19.3  | 15.0  | 20.3  | 15.8  | 7.6   |
| 11.0  | 4.8   | 19.5  | 19.2  | 9.1   | 19.7  | 12.9  | 39.2  | 39.6  |
| 6.6   | 15.2  | 5.3   | 8.7   | 0.7   | 1.2   | 4.8   | 0.7   | 1.2   |
| 2.6   | 11.0  | 6.5   | 2.8   | 6.8   | 5.6   | 9.5   | 7.0   | 7.9   |

|        |       |        |       |        |        |        |        |        |
|--------|-------|--------|-------|--------|--------|--------|--------|--------|
| 0.9    | 1.2   | 1.3    | 1.5   | 1.3    | 0.5    | 0.7    | 0.8    | 1.3    |
| 1.3    | 1.6   | 1.1    | 0.8   | 1.0    | 0.9    | 1.6    | 1.4    | 1.7    |
| 2.0    | 0.9   | 1.3    | 1.7   | 5.2    | 1.4    | 2.4    | 3.7    | 2.6    |
| 0.5    | 2.6   | 4.7    | 3.6   | 4.3    | 5.4    | 2.3    | 9.6    | 0.5    |
| 4.5    | 4.2   | 5.8    | 5.5   | 8.2    | 3.6    | 12.7   | 5.2    | 3.8    |
| 4.0    | 2.9   | 4.4    | 3.9   | 1.6    | 0.3    | 2.1    | 2.7    | 1.8    |
| 0.9    | 1.3   | 2.3    | 1.4   | 1.9    | 1.2    | 2.1    | 2.1    | 5.5    |
| 18.9   | 7.8   | 21.1   | 14.8  | 14.1   | 15.7   | 9.1    | 16.9   | 12.7   |
| 7.5    | 5.3   | 3.8    | 1.2   | 4.0    | 3.8    | 1.2    | 1.7    | 7.1    |
| 2.3    | 9.4   | 7.0    | 5.1   | 3.4    | 5.0    | 4.6    | 2.3    | 5.7    |
| 10.4   | 3.2   | 8.4    | 13.2  | 4.1    | 4.3    | 5.3    | 5.4    | 5.4    |
| 9.9    | 11.5  | 12.0   | 7.6   | 6.0    | 11.4   | 3.1    | 17.1   | 6.9    |
| 11.8   | 13.8  | 19.2   | 16.3  | 5.0    | 9.8    | 5.2    | 7.8    | 6.0    |
| 15.1   | 2.9   | 22.8   | 19.2  | 15.7   | 15.0   | 18.5   | 13.4   | 19.6   |
| 8.7    | 3.3   | 4.2    | 8.3   | 4.1    | 2.7    | 6.4    | 1.4    | 10.0   |
| 5.6    | 4.1   | 7.5    | 3.3   | 5.1    | 5.6    | 2.5    | 11.1   | 8.4    |
| 3.5    | 10.5  | 6.9    | 16.8  | 2.4    | 2.8    | 2.6    | 2.2    | 5.9    |
| 9.5    | 5.9   | 13.7   | 3.4   | 2.6    | 1.3    | 5.5    | 3.8    | 4.0    |
| 13.3   | 16.2  | 23.4   | 11.9  | 11.3   | 21.0   | 12.9   | 18.3   | 8.2    |
| 18.4   | 14.5  | 8.4    | 26.0  | 14.4   | 9.7    | 16.0   | 24.3   | 20.3   |
| 7.9    | 6.2   | 7.5    | 4.8   | 1.3    | 2.6    | 4.9    | 3.4    | 2.5    |
| 1007.9 | 852.1 | 1804.7 | 848.5 | 1610.5 | 1497.1 | 1797.6 | 2189.2 | 2149.3 |
| 10.6   | 8.0   | 20.1   | 4.6   | 22.1   | 9.8    | 13.9   | 0.9    | 14.2   |
| 4.1    | 2.7   | 2.9    | 1.8   | 2.0    | 1.0    | 1.9    | 1.4    | 2.9    |
| 9.4    | 8.3   | 2.9    | 5.6   | 1.5    | 2.0    | 2.6    | 3.0    | 5.5    |
| 8.2    | 1.8   | 3.7    | 7.0   | 6.8    | 1.3    | 9.3    | 1.3    | 8.1    |
| 8.8    | 13.6  | 11.5   | 9.9   | 2.9    | 2.7    | 3.8    | 4.9    | 7.8    |
| 15.5   | 24.8  | 20.3   | 15.0  | 5.4    | 6.3    | 8.7    | 8.9    | 12.7   |
| 1.2    | 1.8   | 2.4    | 2.0   | 1.4    | 1.1    | 1.6    | 2.5    | 2.1    |
| 2.2    | 6.6   | 8.2    | 4.1   | 6.3    | 1.7    | 1.1    | 4.7    | 2.5    |
| 9.7    | 6.7   | 3.4    | 4.0   | 13.9   | 5.8    | 11.3   | 3.7    | 5.8    |
| 10.6   | 11.6  | 12.4   | 11.0  | 10.3   | 7.9    | 6.0    | 15.5   | 18.7   |
| 4.5    | 11.9  | 4.9    | 6.5   | 3.7    | 2.2    | 0.8    | 13.9   | 6.0    |
| 1.5    | 4.0   | 1.4    | 1.6   | 0.7    | 3.9    | 4.5    | 1.8    | 1.9    |
| 9.1    | 3.7   | 4.6    | 1.0   | 6.7    | 3.1    | 9.0    | 11.3   | 8.9    |
| 1.7    | 5.1   | 1.2    | 3.5   | 4.2    | 2.1    | 0.4    | 2.2    | 3.9    |
| 3.2    | 0.8   | 1.8    | 2.4   | 0.6    | 2.9    | 3.1    | 1.6    | 3.3    |
| 8.0    | 9.1   | 5.9    | 7.5   | 4.0    | 5.7    | 3.4    | 6.3    | 3.4    |
| 0.9    | 1.4   | 1.1    | 1.7   | 0.6    | 1.4    | 1.0    | 1.2    | 0.9    |
| 9.6    | 10.4  | 22.9   | 19.7  | 2.0    | 4.1    | 2.3    | 2.4    | 24.7   |
| 6.5    | 1.1   | 0.8    | 1.2   | 1.2    | 4.4    | 0.7    | 2.1    | 1.0    |
| 2.3    | 2.2   | 3.6    | 3.6   | 1.1    | 1.9    | 2.9    | 2.2    | 4.4    |
| 9.1    | 14.1  | 22.6   | 13.9  | 3.2    | 6.8    | 7.9    | 11.5   | 12.0   |
| 1.2    | 3.3   | 0.9    | 0.7   | 5.5    | 1.7    | 3.6    | 1.7    | 14.0   |
| 10.5   | 11.5  | 14.9   | 13.0  | 7.9    | 8.0    | 8.0    | 14.8   | 14.3   |
| 13.0   | 20.7  | 16.6   | 13.0  | 11.1   | 2.8    | 9.5    | 13.8   | 19.6   |
| 1.9    | 1.1   | 2.1    | 1.3   | 5.5    | 5.6    | 3.2    | 4.4    | 1.0    |
| 27.9   | 28.2  | 36.3   | 32.9  | 25.4   | 16.0   | 20.9   | 24.0   | 30.2   |
| 8.0    | 9.1   | 4.6    | 1.8   | 31.8   | 25.4   | 29.3   | 42.5   | 41.9   |
| 15.8   | 20.0  | 23.0   | 20.2  | 15.6   | 16.1   | 14.5   | 20.0   | 19.8   |
| 2.3    | 1.8   | 2.0    | 1.7   | 49.7   | 32.6   | 57.5   | 58.6   | 87.7   |
| 0.6    | 0.7   | 0.8    | 0.7   | 0.4    | 0.5    | 0.5    | 0.5    | 0.8    |
| 8.3    | 14.3  | 16.3   | 10.3  | 6.0    | 11.6   | 9.8    | 11.5   | 9.3    |

|        |        |        |        |        |        |        |        |        |
|--------|--------|--------|--------|--------|--------|--------|--------|--------|
| 2.1    | 11.6   | 7.1    | 2.0    | 10.4   | 7.0    | 2.8    | 15.3   | 11.4   |
| 8.7    | 9.1    | 10.6   | 3.9    | 7.9    | 11.2   | 15.3   | 8.3    | 6.2    |
| 14.6   | 12.7   | 9.6    | 15.5   | 16.8   | 5.7    | 19.6   | 19.1   | 22.0   |
| 2.7    | 3.9    | 4.4    | 6.4    | 2.3    | 2.8    | 5.0    | 16.5   | 3.5    |
| 1.0    | 0.8    | 0.8    | 0.8    | 1.3    | 0.9    | 1.3    | 1.2    | 1.6    |
| 83.9   | 97.8   | 122.5  | 82.6   | 77.5   | 94.7   | 73.8   | 100.3  | 83.6   |
| 569.5  | 576.4  | 642.0  | 497.1  | 396.2  | 342.8  | 584.6  | 487.4  | 764.2  |
| 2.4    | 1.2    | 0.6    | 1.0    | 3.8    | 1.8    | 2.2    | 0.1    | 0.5    |
| 25.8   | 24.5   | 34.4   | 30.2   | 29.8   | 31.3   | 47.3   | 52.4   | 22.6   |
| 16.5   | 15.7   | 27.0   | 13.9   | 9.6    | 10.1   | 7.5    | 2.9    | 2.5    |
| 253.6  | 234.4  | 256.7  | 197.9  | 630.5  | 728.1  | 789.0  | 751.4  | 477.4  |
| 1.2    | 1.7    | 2.3    | 1.9    | 2.4    | 2.2    | 1.1    | 1.9    | 1.5    |
| 161.3  | 180.5  | 186.7  | 164.2  | 235.5  | 223.8  | 221.7  | 247.3  | 471.1  |
| 16.7   | 11.2   | 24.5   | 16.1   | 14.2   | 9.8    | 9.0    | 15.1   | 18.7   |
| 89.1   | 99.2   | 65.6   | 78.9   | 61.3   | 82.7   | 67.2   | 64.3   | 159.4  |
| 530.6  | 530.7  | 670.4  | 503.7  | 442.0  | 332.1  | 366.0  | 508.6  | 267.8  |
| 2.4    | 5.0    | 7.4    | 3.4    | 7.5    | 1.3    | 1.5    | 0.6    | 7.0    |
| 168.7  | 166.0  | 177.5  | 153.0  | 81.0   | 97.9   | 80.1   | 97.6   | 71.2   |
| 3.8    | 1.8    | 7.1    | 1.5    | 1.1    | 0.7    | 1.7    | 0.8    | 2.8    |
| 98.0   | 114.2  | 133.9  | 90.6   | 81.6   | 108.5  | 91.0   | 84.4   | 147.2  |
| 13.3   | 13.2   | 20.1   | 15.0   | 4.6    | 10.0   | 12.7   | 2.4    | 16.2   |
| 1426.8 | 1217.2 | 2251.5 | 1204.2 | 3354.3 | 3033.0 | 3558.8 | 3573.9 | 4422.5 |
| 64.0   | 52.9   | 73.2   | 53.5   | 120.8  | 145.4  | 117.1  | 120.7  | 142.8  |
| 97.1   | 97.8   | 223.2  | 118.4  | 607.7  | 343.5  | 506.0  | 602.8  | 404.3  |
| 369.6  | 303.5  | 555.7  | 314.5  | 622.4  | 645.0  | 668.6  | 753.6  | 710.7  |
| 0.8    | 1.3    | 3.8    | 2.5    | 1.4    | 0.8    | 2.6    | 0.4    | 0.8    |
| 5.8    | 3.8    | 4.3    | 5.9    | 9.5    | 6.9    | 2.3    | 9.8    | 6.4    |
| 24.0   | 21.5   | 31.9   | 17.5   | 40.4   | 41.2   | 39.6   | 54.0   | 38.8   |
| 0.7    | 0.4    | 1.2    | 0.8    | 0.8    | 0.9    | 3.3    | 0.4    | 1.0    |
| 8.6    | 4.3    | 4.6    | 1.1    | 8.3    | 3.6    | 5.2    | 1.6    | 3.9    |
| 18.8   | 15.8   | 28.4   | 25.3   | 9.9    | 18.3   | 21.0   | 15.7   | 16.4   |
| 9.0    | 4.6    | 10.9   | 5.2    | 7.9    | 5.3    | 3.3    | 7.7    | 9.9    |
| 4.3    | 3.7    | 4.6    | 1.0    | 0.6    | 1.3    | 1.7    | 2.7    | 1.1    |
| 13.3   | 6.0    | 8.6    | 10.0   | 7.3    | 7.9    | 9.8    | 2.9    | 15.2   |
| 15.6   | 4.4    | 14.6   | 15.5   | 2.7    | 6.6    | 3.8    | 5.7    | 34.8   |
| 15.6   | 11.8   | 20.0   | 15.9   | 122.4  | 86.7   | 111.2  | 119.5  | 11.6   |
| 433.8  | 447.6  | 364.9  | 393.0  | 611.0  | 703.9  | 694.9  | 749.2  | 468.6  |
| 1.3    | 1.1    | 1.8    | 1.6    | 47.9   | 20.0   | 50.7   | 40.9   | 57.3   |
| 8.0    | 4.4    | 6.6    | 4.0    | 2.3    | 0.8    | 4.9    | 6.8    | 5.8    |
| 1234.6 | 1079.2 | 1673.5 | 1123.7 | 3272.9 | 2881.4 | 3303.4 | 3864.2 | 1943.9 |
| 13.7   | 8.1    | 14.9   | 14.3   | 18.9   | 8.5    | 12.2   | 28.2   | 28.0   |
| 0.8    | 2.4    | 1.3    | 0.8    | 1.7    | 1.8    | 1.8    | 1.9    | 2.4    |
| 11.2   | 2.4    | 8.1    | 1.6    | 14.0   | 17.8   | 6.9    | 3.6    | 13.9   |
| 0.9    | 1.0    | 1.3    | 0.8    | 1.2    | 3.2    | 0.8    | 2.2    | 1.0    |
| 2.4    | 2.0    | 3.2    | 6.9    | 4.7    | 1.8    | 2.1    | 3.3    | 3.2    |
| 11.2   | 11.3   | 11.6   | 10.9   | 9.4    | 4.3    | 7.7    | 8.1    | 16.7   |
| 3.5    | 1.7    | 2.9    | 3.3    | 2.2    | 2.0    | 1.1    | 2.4    | 5.6    |
| 14.9   | 17.2   | 15.8   | 8.8    | 14.0   | 6.3    | 14.8   | 19.4   | 17.7   |
| 7.0    | 7.6    | 8.4    | 5.1    | 4.0    | 5.9    | 4.8    | 1.4    | 5.3    |
| 4.6    | 1.8    | 6.4    | 4.1    | 1.5    | 3.3    | 9.2    | 9.3    | 11.5   |
| 5.9    | 4.7    | 8.0    | 1.9    | 5.1    | 11.0   | 9.2    | 11.2   | 3.6    |
| 28.0   | 23.1   | 39.4   | 30.9   | 16.1   | 11.7   | 15.9   | 15.7   | 30.8   |
| 9.8    | 14.0   | 19.1   | 18.7   | 1.9    | 8.5    | 6.5    | 5.2    | 9.1    |

|        |        |        |        |        |        |        |        |        |
|--------|--------|--------|--------|--------|--------|--------|--------|--------|
| 21.0   | 13.2   | 26.4   | 18.6   | 14.4   | 11.9   | 12.9   | 12.0   | 14.2   |
| 6.5    | 3.8    | 12.0   | 8.3    | 10.6   | 11.9   | 10.2   | 9.9    | 17.4   |
| 2.0    | 2.9    | 1.6    | 5.4    | 2.9    | 2.2    | 1.5    | 5.9    | 5.3    |
| 3.1    | 4.5    | 1.3    | 2.1    | 2.5    | 1.6    | 5.1    | 1.7    | 2.7    |
| 0.8    | 1.0    | 1.2    | 0.8    | 0.8    | 1.7    | 0.8    | 1.9    | 40.1   |
| 2412.2 | 2281.9 | 2450.2 | 2185.8 | 1306.8 | 1725.6 | 1487.9 | 1678.6 | 1731.5 |
| 1515.8 | 1504.3 | 1497.6 | 1416.8 | 477.3  | 587.6  | 478.0  | 578.1  | 581.0  |
| 1699.1 | 1800.6 | 1787.1 | 1654.1 | 747.6  | 901.5  | 977.7  | 940.0  | 989.3  |
| 5974.5 | 5944.8 | 6420.0 | 5864.2 | 3775.7 | 3296.0 | 4139.8 | 4813.6 | 3156.4 |
| 4638.0 | 4530.0 | 4739.5 | 4529.9 | 4541.6 | 4799.0 | 4733.0 | 4693.2 | 8192.6 |
| 2645.3 | 2665.1 | 2795.6 | 2939.2 | 1825.2 | 1711.2 | 1851.6 | 2029.0 | 3190.8 |
| 125.3  | 100.2  | 161.0  | 93.2   | 175.0  | 173.4  | 184.5  | 190.4  | 222.6  |
| 674.1  | 708.1  | 592.5  | 558.3  | 728.5  | 739.7  | 653.3  | 829.6  | 309.2  |
| 315.9  | 316.7  | 259.9  | 242.0  | 354.5  | 465.5  | 360.8  | 381.7  | 257.3  |
| 160.8  | 136.1  | 303.5  | 164.4  | 319.3  | 188.5  | 248.7  | 325.8  | 422.8  |
| 1372.5 | 1267.1 | 2024.1 | 1208.6 | 1649.8 | 1174.2 | 1507.9 | 1831.7 | 2242.0 |
| 440.9  | 403.9  | 664.1  | 352.8  | 535.4  | 523.3  | 568.4  | 726.3  | 1041.7 |
| 802.7  | 751.7  | 1142.1 | 807.2  | 929.7  | 901.8  | 908.3  | 1084.9 | 1532.5 |
| 298.8  | 312.8  | 437.8  | 266.4  | 279.8  | 283.3  | 292.2  | 334.6  | 421.5  |
| 572.5  | 537.8  | 657.4  | 454.7  | 418.0  | 365.0  | 440.8  | 499.3  | 661.0  |
| 136.6  | 126.6  | 178.3  | 113.8  | 131.7  | 147.8  | 142.6  | 170.3  | 156.7  |
| 66.2   | 55.7   | 89.9   | 64.0   | 119.9  | 128.8  | 123.4  | 138.5  | 128.9  |
| 918.8  | 913.0  | 755.8  | 937.2  | 2194.1 | 2503.2 | 2448.6 | 2429.3 | 1367.1 |
| 18.5   | 11.5   | 40.8   | 21.0   | 28.7   | 32.0   | 22.3   | 24.2   | 339.0  |
| 224.5  | 216.7  | 321.6  | 236.6  | 166.8  | 171.5  | 158.7  | 230.8  | 165.3  |
| 2.9    | 2.9    | 5.6    | 4.8    | 5.8    | 4.6    | 3.7    | 0.7    | 3.7    |
| 1224.0 | 1128.1 | 1577.9 | 1104.2 | 1377.8 | 1504.5 | 1419.1 | 1562.7 | 1651.9 |
| 1796.5 | 1587.9 | 1802.3 | 1524.6 | 1248.7 | 883.8  | 1278.0 | 1542.4 | 662.7  |
| 1326.1 | 1150.2 | 1747.8 | 1357.1 | 2326.4 | 2658.8 | 2401.2 | 2619.4 | 3330.6 |
| 336.1  | 336.3  | 400.8  | 273.8  | 607.1  | 520.2  | 576.4  | 645.6  | 344.6  |
| 151.7  | 164.4  | 120.3  | 116.1  | 49.4   | 68.8   | 77.5   | 72.0   | 146.5  |
| 51.8   | 40.5   | 60.9   | 48.6   | 240.9  | 238.4  | 262.0  | 270.4  | 495.8  |
| 242.5  | 203.8  | 288.6  | 235.5  | 238.8  | 253.8  | 247.2  | 351.9  | 319.1  |
| 720.5  | 684.4  | 802.2  | 644.6  | 350.1  | 406.5  | 344.9  | 529.7  | 641.5  |
| 1153.4 | 1138.4 | 1313.6 | 1163.8 | 365.5  | 409.2  | 369.8  | 412.7  | 490.3  |
| 623.8  | 768.2  | 513.5  | 824.5  | 233.7  | 482.2  | 229.5  | 228.0  | 317.2  |
| 506.8  | 436.8  | 864.1  | 565.1  | 1027.6 | 761.0  | 1033.3 | 1159.1 | 913.3  |
| 184.5  | 160.4  | 326.0  | 204.7  | 322.6  | 214.2  | 332.2  | 360.2  | 312.4  |
| 507.1  | 454.3  | 595.9  | 557.4  | 533.1  | 543.4  | 509.2  | 611.1  | 514.2  |
| 144.7  | 131.8  | 231.2  | 139.0  | 1317.4 | 723.0  | 1280.9 | 1621.0 | 1577.1 |
| 583.6  | 532.7  | 883.9  | 545.0  | 205.4  | 167.5  | 203.0  | 233.1  | 631.7  |
| 325.9  | 309.2  | 498.5  | 318.3  | 126.9  | 116.8  | 127.8  | 157.8  | 269.0  |
| 72.9   | 57.9   | 59.5   | 79.7   | 31.6   | 31.5   | 29.6   | 29.2   | 38.5   |
| 1105.2 | 905.3  | 1716.6 | 1048.8 | 1281.7 | 1378.1 | 1303.9 | 1396.1 | 2007.1 |
| 108.4  | 90.9   | 195.5  | 88.1   | 893.2  | 529.5  | 1041.2 | 1028.6 | 903.4  |
| 102.1  | 122.5  | 68.7   | 110.4  | 102.0  | 136.5  | 92.9   | 85.6   | 155.5  |
| 197.9  | 173.7  | 246.8  | 176.1  | 274.7  | 264.1  | 300.0  | 318.4  | 532.9  |
| 161.7  | 134.9  | 220.2  | 167.7  | 345.5  | 266.1  | 357.0  | 374.6  | 539.6  |
| 120.8  | 115.0  | 176.1  | 142.2  | 481.4  | 371.2  | 520.9  | 541.1  | 1041.7 |
| 288.4  | 301.8  | 491.9  | 354.3  | 395.5  | 462.5  | 403.2  | 458.2  | 540.1  |
| 283.1  | 273.9  | 387.5  | 292.2  | 370.3  | 360.8  | 347.2  | 403.1  | 386.7  |
| 283.2  | 265.2  | 404.1  | 257.2  | 544.3  | 452.0  | 588.6  | 662.3  | 1100.8 |
| 512.4  | 491.9  | 677.2  | 504.3  | 251.3  | 313.2  | 288.6  | 294.6  | 220.7  |

|        |        |        |       |        |        |        |        |        |
|--------|--------|--------|-------|--------|--------|--------|--------|--------|
| 163.7  | 141.5  | 181.4  | 149.6 | 50.4   | 100.1  | 73.3   | 69.5   | 123.9  |
| 168.8  | 131.9  | 346.3  | 139.3 | 659.0  | 423.5  | 517.1  | 592.7  | 603.7  |
| 127.6  | 117.1  | 390.6  | 78.0  | 736.5  | 360.6  | 634.3  | 739.8  | 498.7  |
| 555.9  | 589.2  | 720.7  | 646.1 | 594.1  | 642.9  | 739.6  | 747.4  | 389.7  |
| 33.7   | 31.4   | 38.9   | 33.3  | 206.2  | 261.4  | 215.4  | 255.4  | 78.4   |
| 53.0   | 50.9   | 36.1   | 59.8  | 465.8  | 581.9  | 568.9  | 469.9  | 349.3  |
| 54.2   | 53.9   | 82.8   | 60.5  | 29.7   | 35.4   | 25.9   | 50.2   | 19.7   |
| 132.0  | 139.4  | 192.3  | 133.7 | 264.8  | 278.9  | 255.7  | 300.3  | 150.6  |
| 54.8   | 72.0   | 64.9   | 64.0  | 78.7   | 59.5   | 72.4   | 77.0   | 37.1   |
| 185.3  | 159.3  | 248.9  | 172.7 | 248.9  | 270.8  | 241.5  | 318.7  | 217.5  |
| 4.4    | 7.6    | 16.2   | 4.6   | 13.0   | 9.8    | 6.3    | 4.9    | 14.0   |
| 62.8   | 64.6   | 102.0  | 88.2  | 258.0  | 311.0  | 453.4  | 417.9  | 62.9   |
| 474.8  | 416.3  | 575.8  | 468.2 | 499.1  | 438.2  | 535.8  | 587.8  | 520.4  |
| 1050.1 | 924.3  | 1206.0 | 955.0 | 1074.3 | 835.5  | 1177.8 | 1328.9 | 1160.0 |
| 17.9   | 20.0   | 22.8   | 15.9  | 11.4   | 10.4   | 14.3   | 19.0   | 18.9   |
| 240.3  | 289.8  | 228.0  | 221.2 | 373.4  | 557.8  | 434.6  | 419.0  | 509.1  |
| 227.3  | 207.5  | 286.3  | 199.7 | 378.7  | 334.3  | 368.1  | 418.6  | 128.0  |
| 260.7  | 238.5  | 371.1  | 261.6 | 409.9  | 327.4  | 400.8  | 489.1  | 236.5  |
| 66.8   | 58.2   | 61.3   | 46.9  | 77.8   | 92.5   | 85.7   | 69.1   | 70.9   |
| 92.4   | 120.9  | 66.6   | 112.0 | 342.5  | 299.6  | 315.1  | 339.7  | 135.2  |
| 206.6  | 220.7  | 491.2  | 292.1 | 726.9  | 1224.0 | 776.3  | 728.7  | 1824.1 |
| 257.6  | 226.3  | 262.4  | 159.2 | 273.6  | 232.1  | 284.9  | 341.3  | 457.1  |
| 154.8  | 152.0  | 104.4  | 89.8  | 278.5  | 141.6  | 585.8  | 418.7  | 25.1   |
| 149.9  | 180.3  | 122.4  | 161.9 | 229.0  | 310.2  | 270.7  | 262.3  | 68.6   |
| 325.4  | 342.4  | 251.4  | 320.5 | 500.5  | 566.8  | 622.5  | 639.8  | 227.0  |
| 54.8   | 55.8   | 92.2   | 45.4  | 47.4   | 38.9   | 45.2   | 60.2   | 86.5   |
| 139.2  | 142.0  | 186.5  | 151.1 | 114.8  | 134.1  | 101.1  | 144.5  | 102.8  |
| 11.3   | 17.3   | 8.7    | 9.1   | 8.7    | 9.2    | 9.5    | 7.0    | 15.9   |
| 189.8  | 204.5  | 221.4  | 213.9 | 303.2  | 264.3  | 332.3  | 380.7  | 397.2  |
| 101.5  | 120.7  | 203.3  | 103.9 | 250.8  | 259.9  | 255.5  | 263.3  | 315.0  |
| 65.2   | 76.2   | 162.8  | 86.8  | 366.6  | 268.7  | 401.3  | 510.1  | 505.9  |
| 161.9  | 162.1  | 177.7  | 167.2 | 228.3  | 236.0  | 243.9  | 264.6  | 227.2  |
| 13.3   | 7.1    | 14.6   | 13.8  | 68.0   | 60.8   | 79.0   | 81.9   | 101.6  |
| 18.1   | 24.3   | 22.9   | 36.9  | 51.0   | 65.4   | 45.4   | 62.8   | 166.9  |
| 403.7  | 379.6  | 457.0  | 362.3 | 384.3  | 349.9  | 441.0  | 517.0  | 246.5  |
| 100.5  | 93.2   | 105.6  | 78.2  | 104.9  | 106.6  | 119.3  | 124.8  | 167.7  |
| 29.3   | 46.1   | 31.1   | 33.1  | 81.7   | 76.9   | 96.1   | 101.1  | 53.3   |
| 62.9   | 106.5  | 46.7   | 52.8  | 274.4  | 235.8  | 258.6  | 318.3  | 119.8  |
| 3.9    | 3.2    | 10.1   | 8.7   | 4.6    | 2.1    | 6.6    | 2.1    | 30.9   |
| 51.0   | 41.4   | 82.8   | 101.4 | 104.2  | 99.3   | 116.8  | 143.9  | 474.2  |
| 205.2  | 196.5  | 332.5  | 187.4 | 427.9  | 407.7  | 393.4  | 467.5  | 556.3  |
| 12.2   | 24.2   | 13.5   | 12.0  | 75.7   | 90.4   | 51.8   | 46.8   | 11.1   |
| 92.2   | 95.5   | 97.0   | 59.0  | 851.7  | 779.4  | 829.0  | 937.0  | 666.9  |
| 74.3   | 82.9   | 60.9   | 64.7  | 56.0   | 67.3   | 51.5   | 61.5   | 36.0   |
| 224.7  | 251.5  | 152.5  | 229.2 | 162.7  | 296.1  | 306.3  | 185.1  | 594.0  |
| 135.5  | 144.0  | 136.1  | 142.3 | 123.2  | 129.9  | 120.5  | 157.7  | 139.6  |
| 105.3  | 182.8  | 77.3   | 72.8  | 146.8  | 146.1  | 138.9  | 118.6  | 209.5  |
| 272.7  | 182.5  | 279.4  | 213.3 | 127.4  | 103.9  | 123.2  | 111.1  | 133.2  |
| 262.9  | 185.6  | 288.7  | 202.0 | 112.7  | 107.7  | 117.6  | 98.2   | 126.1  |
| 532.8  | 463.3  | 728.6  | 570.4 | 558.2  | 486.3  | 600.1  | 772.2  | 629.6  |
| 49.9   | 49.1   | 63.4   | 53.8  | 87.4   | 86.6   | 95.0   | 82.3   | 52.4   |
| 1154.1 | 1126.4 | 1227.8 | 944.6 | 1960.5 | 2380.1 | 2204.4 | 2348.0 | 825.2  |
| 28.8   | 22.7   | 26.6   | 27.2  | 278.0  | 276.3  | 246.8  | 347.4  | 245.3  |

|        |        |        |        |        |        |        |        |         |
|--------|--------|--------|--------|--------|--------|--------|--------|---------|
| 63.8   | 56.0   | 87.0   | 52.8   | 65.9   | 79.5   | 59.8   | 88.2   | 92.5    |
| 125.8  | 128.4  | 128.5  | 123.8  | 168.4  | 177.4  | 175.7  | 183.7  | 124.5   |
| 74.6   | 68.1   | 100.1  | 69.1   | 127.6  | 113.9  | 117.5  | 127.8  | 160.0   |
| 1.0    | 0.5    | 0.9    | 1.0    | 1.1    | 0.6    | 0.8    | 0.8    | 1.0     |
| 28.2   | 40.6   | 57.3   | 33.8   | 23.2   | 241.0  | 26.9   | 35.0   | 115.9   |
| 19.0   | 13.9   | 18.9   | 8.6    | 13.8   | 12.0   | 20.5   | 30.8   | 18.0    |
| 239.7  | 220.0  | 309.5  | 227.5  | 273.7  | 263.3  | 277.3  | 314.2  | 257.7   |
| 327.7  | 348.8  | 361.7  | 338.8  | 859.1  | 853.4  | 892.6  | 958.0  | 1361.6  |
| 5.6    | 3.0    | 5.0    | 3.2    | 17.2   | 5.1    | 7.3    | 12.9   | 40.6    |
| 233.4  | 300.4  | 185.0  | 306.1  | 204.1  | 265.3  | 194.9  | 277.3  | 262.7   |
| 17.3   | 12.8   | 55.8   | 13.5   | 1.2    | 0.4    | 1.7    | 1.1    | 21.0    |
| 108.2  | 70.8   | 354.0  | 247.8  | 4.1    | 9.9    | 10.1   | 20.4   | 94.5    |
| 317.0  | 291.0  | 191.6  | 262.1  | 2.2    | 1.8    | 7.3    | 9.8    | 2.9     |
| 61.8   | 58.0   | 89.7   | 69.2   | 171.5  | 147.3  | 139.3  | 164.0  | 95.3    |
| 76.7   | 78.4   | 151.2  | 83.4   | 165.4  | 138.3  | 154.6  | 182.1  | 182.0   |
| 699.2  | 778.2  | 307.8  | 490.1  | 76.0   | 107.8  | 97.3   | 98.2   | 43.2    |
| 657.2  | 653.8  | 320.1  | 462.7  | 102.9  | 125.9  | 126.1  | 141.8  | 43.5    |
| 162.3  | 169.7  | 80.4   | 102.1  | 27.4   | 49.3   | 42.7   | 40.9   | 16.5    |
| 118.6  | 94.4   | 288.4  | 94.3   | 782.8  | 529.9  | 593.6  | 791.0  | 339.1   |
| 1.6    | 3.5    | 4.4    | 2.9    | 2.2    | 1.9    | 3.0    | 1.4    | 9.9     |
| 102.9  | 90.8   | 94.5   | 87.9   | 169.8  | 136.4  | 206.7  | 224.7  | 126.4   |
| 14.9   | 18.8   | 16.0   | 11.3   | 13.7   | 13.0   | 9.4    | 17.3   | 15.1    |
| 58.2   | 78.0   | 89.0   | 75.7   | 51.5   | 67.6   | 49.5   | 83.5   | 74.3    |
| 267.6  | 277.1  | 297.5  | 263.6  | 191.6  | 208.5  | 195.3  | 260.0  | 220.0   |
| 358.5  | 311.9  | 390.6  | 297.0  | 565.3  | 554.7  | 659.0  | 658.5  | 1248.6  |
| 161.3  | 128.4  | 269.3  | 143.4  | 198.7  | 180.6  | 195.1  | 198.7  | 235.5   |
| 130.8  | 130.5  | 120.1  | 139.7  | 175.6  | 209.5  | 202.7  | 201.6  | 100.1   |
| 88.6   | 80.4   | 87.0   | 77.1   | 155.3  | 192.0  | 172.9  | 148.2  | 64.7    |
| 22.3   | 11.0   | 11.0   | 32.2   | 118.3  | 118.7  | 119.6  | 119.6  | 110.7   |
| 8.5    | 15.3   | 16.8   | 19.7   | 65.9   | 62.6   | 48.5   | 49.5   | 76.1    |
| 10.1   | 24.6   | 25.2   | 20.4   | 50.6   | 63.0   | 71.3   | 66.9   | 60.1    |
| 72.2   | 99.3   | 94.0   | 79.9   | 253.9  | 331.1  | 269.4  | 293.4  | 332.3   |
| 14.5   | 20.8   | 20.5   | 19.1   | 9.9    | 8.2    | 10.3   | 1.3    | 7.6     |
| 119.8  | 83.3   | 191.7  | 69.5   | 106.4  | 87.5   | 109.9  | 189.0  | 51.1    |
| 7637.8 | 7596.2 | 8404.4 | 7084.5 | 7832.6 | 7716.8 | 7925.0 | 8555.4 | 10435.4 |
| 0.8    | 0.9    | 0.8    | 1.2    | 5.8    | 1.9    | 2.5    | 12.8   | 1.5     |
| 2.4    | 1.3    | 3.8    | 3.8    | 31.2   | 12.0   | 41.3   | 29.8   | 1.8     |
| 274.2  | 241.2  | 299.8  | 254.9  | 26.8   | 37.0   | 36.0   | 35.0   | 49.3    |
| 4.6    | 10.4   | 4.9    | 4.1    | 15.9   | 15.2   | 15.0   | 17.3   | 10.5    |
| 16.1   | 14.7   | 20.4   | 11.0   | 13.0   | 2.0    | 4.1    | 2.7    | 5.4     |
| 1162.5 | 1123.3 | 1530.3 | 1288.4 | 828.3  | 658.9  | 835.2  | 1062.8 | 874.1   |
| 114.6  | 86.1   | 199.1  | 132.2  | 45.2   | 69.8   | 37.8   | 52.7   | 8.1     |
| 21.1   | 18.7   | 25.6   | 10.5   | 24.8   | 29.4   | 24.0   | 27.3   | 28.1    |
| 12.3   | 16.1   | 19.8   | 21.4   | 15.9   | 14.0   | 17.2   | 22.3   | 27.9    |
| 21.4   | 20.9   | 21.0   | 16.9   | 17.8   | 18.9   | 23.5   | 34.7   | 22.9    |
| 202.3  | 180.6  | 201.6  | 117.9  | 325.0  | 278.3  | 271.7  | 379.5  | 198.3   |
| 2282.9 | 2114.9 | 3075.0 | 2359.9 | 2798.3 | 3046.9 | 2983.4 | 3164.8 | 1601.6  |
| 283.9  | 215.2  | 444.8  | 225.9  | 350.3  | 309.8  | 326.0  | 383.7  | 508.0   |
| 29.7   | 32.7   | 46.4   | 22.7   | 22.1   | 18.3   | 21.1   | 25.5   | 59.6    |
| 634.4  | 606.0  | 837.8  | 612.2  | 1254.8 | 1245.5 | 1458.1 | 1480.2 | 1316.2  |
| 3.9    | 1.7    | 3.4    | 3.3    | 1.1    | 1.1    | 3.6    | 1.1    | 2.0     |
| 3.4    | 3.9    | 3.3    | 2.4    | 2.5    | 0.9    | 0.9    | 2.4    | 2.1     |
| 0.8    | 2.3    | 3.3    | 5.1    | 8.4    | 3.3    | 6.6    | 8.8    | 11.0    |



|       |       |       |       |        |        |        |        |        |
|-------|-------|-------|-------|--------|--------|--------|--------|--------|
| 45.1  | 48.9  | 55.7  | 34.5  | 13.4   | 12.2   | 12.9   | 17.6   | 28.1   |
| 24.9  | 27.5  | 30.2  | 22.3  | 9.7    | 8.5    | 12.6   | 19.3   | 14.6   |
| 86.0  | 75.6  | 128.4 | 86.6  | 58.9   | 56.0   | 63.9   | 67.8   | 108.9  |
| 215.8 | 172.0 | 221.3 | 188.0 | 150.2  | 137.7  | 178.5  | 196.2  | 151.4  |
| 0.5   | 1.1   | 0.7   | 0.3   | 0.7    | 0.6    | 1.6    | 3.4    | 1.0    |
| 23.3  | 24.1  | 24.4  | 23.5  | 17.4   | 21.6   | 24.3   | 22.8   | 18.3   |
| 28.6  | 25.7  | 49.6  | 37.1  | 60.5   | 46.7   | 56.7   | 58.2   | 59.3   |
| 19.0  | 11.8  | 24.6  | 19.1  | 14.0   | 13.2   | 7.1    | 17.2   | 24.8   |
| 127.5 | 115.8 | 116.2 | 106.9 | 234.0  | 272.7  | 232.1  | 193.4  | 110.5  |
| 202.8 | 199.1 | 179.9 | 150.5 | 60.5   | 62.8   | 70.4   | 74.6   | 29.8   |
| 312.3 | 237.8 | 490.5 | 293.6 | 642.5  | 671.4  | 613.9  | 683.7  | 1393.6 |
| 256.9 | 228.3 | 350.9 | 216.3 | 161.1  | 167.0  | 148.9  | 164.4  | 270.5  |
| 5.0   | 2.7   | 1.7   | 3.3   | 1.6    | 14.2   | 8.0    | 3.0    | 8.6    |
| 10.4  | 16.2  | 14.6  | 8.8   | 33.3   | 23.4   | 23.8   | 38.2   | 47.2   |
| 264.8 | 297.5 | 345.6 | 233.3 | 428.3  | 523.6  | 438.5  | 461.9  | 530.3  |
| 18.4  | 16.3  | 20.6  | 25.3  | 16.5   | 19.1   | 22.0   | 13.9   | 41.8   |
| 75.1  | 71.5  | 94.2  | 77.2  | 36.7   | 44.0   | 27.3   | 53.6   | 42.4   |
| 2.6   | 1.1   | 9.2   | 2.4   | 2.2    | 7.7    | 3.4    | 3.7    | 13.8   |
| 182.4 | 201.8 | 183.8 | 196.0 | 143.5  | 158.6  | 148.8  | 190.6  | 56.2   |
| 381.0 | 425.5 | 276.4 | 357.3 | 28.6   | 96.3   | 23.3   | 35.5   | 106.2  |
| 167.6 | 176.3 | 153.2 | 173.0 | 710.8  | 657.2  | 695.6  | 773.2  | 432.3  |
| 12.1  | 5.6   | 7.2   | 7.2   | 119.5  | 127.1  | 161.4  | 141.7  | 13.2   |
| 175.7 | 124.1 | 329.2 | 131.9 | 263.0  | 223.8  | 285.1  | 297.5  | 469.8  |
| 41.6  | 45.4  | 39.2  | 36.9  | 34.7   | 30.7   | 48.7   | 45.7   | 115.6  |
| 4.2   | 4.4   | 7.1   | 13.0  | 31.9   | 13.8   | 20.7   | 14.5   | 13.0   |
| 486.3 | 427.1 | 712.2 | 505.4 | 1551.8 | 1489.9 | 1837.7 | 1949.6 | 1078.9 |
| 37.9  | 52.5  | 40.5  | 39.9  | 100.1  | 65.1   | 74.0   | 87.5   | 58.4   |
| 365.7 | 369.8 | 504.9 | 359.4 | 354.3  | 329.8  | 348.0  | 382.4  | 447.1  |
| 126.1 | 120.6 | 127.3 | 124.5 | 5.0    | 9.3    | 11.3   | 7.6    | 24.7   |
| 103.8 | 93.5  | 105.0 | 92.8  | 57.0   | 54.6   | 54.0   | 58.2   | 37.1   |
| 102.2 | 120.7 | 114.5 | 95.6  | 114.5  | 83.8   | 103.4  | 110.5  | 294.7  |
| 1.8   | 1.8   | 7.0   | 1.3   | 13.8   | 11.1   | 14.7   | 14.1   | 21.8   |
| 11.4  | 5.8   | 21.6  | 11.5  | 11.7   | 12.9   | 16.7   | 9.9    | 23.8   |
| 16.8  | 41.4  | 53.8  | 15.5  | 27.9   | 30.7   | 11.9   | 18.4   | 25.3   |
| 0.7   | 0.8   | 1.2   | 3.5   | 2.1    | 3.6    | 2.0    | 2.8    | 5.5    |
| 12.8  | 20.8  | 35.1  | 23.6  | 21.8   | 18.3   | 27.8   | 19.5   | 29.7   |
| 17.6  | 11.7  | 18.5  | 22.7  | 8.0    | 6.9    | 24.7   | 26.9   | 23.3   |
| 494.2 | 431.3 | 656.2 | 392.1 | 199.3  | 186.9  | 281.2  | 274.3  | 71.7   |
| 119.0 | 89.0  | 122.9 | 108.8 | 4.5    | 5.8    | 13.4   | 12.5   | 21.8   |
| 125.7 | 114.5 | 150.5 | 120.5 | 76.2   | 86.6   | 101.8  | 86.3   | 2.1    |
| 699.2 | 864.3 | 212.0 | 372.3 | 528.7  | 628.6  | 463.3  | 673.9  | 96.4   |
| 6.5   | 5.8   | 10.1  | 6.5   | 16.6   | 9.0    | 2.1    | 2.4    | 15.8   |
| 236.6 | 232.0 | 207.9 | 250.1 | 173.2  | 164.7  | 162.8  | 209.8  | 204.9  |
| 28.1  | 29.4  | 34.6  | 25.4  | 14.8   | 13.6   | 14.5   | 10.8   | 16.3   |
| 3.9   | 7.1   | 9.2   | 6.3   | 19.1   | 6.1    | 12.7   | 11.6   | 5.0    |
| 27.1  | 27.2  | 50.7  | 31.3  | 3.4    | 1.3    | 2.4    | 1.7    | 1.9    |
| 19.4  | 19.4  | 31.7  | 21.8  | 32.1   | 41.6   | 47.6   | 42.7   | 58.1   |
| 3.3   | 7.1   | 8.4   | 3.5   | 5.7    | 2.1    | 2.6    | 1.3    | 7.5    |
| 206.5 | 175.2 | 326.8 | 175.3 | 467.3  | 449.5  | 544.2  | 537.3  | 1616.9 |
| 295.1 | 251.6 | 506.1 | 286.8 | 2212.1 | 1977.1 | 2385.8 | 2333.4 | 1432.8 |
| 171.8 | 163.4 | 490.6 | 142.0 | 580.8  | 447.1  | 524.5  | 665.7  | 274.9  |
| 1.4   | 5.5   | 2.2   | 8.2   | 1.6    | 0.9    | 0.9    | 3.4    | 2.2    |
| 29.4  | 31.3  | 39.3  | 43.8  | 59.1   | 71.6   | 60.2   | 62.7   | 209.4  |

|        |        |        |        |        |        |        |        |        |
|--------|--------|--------|--------|--------|--------|--------|--------|--------|
| 15.8   | 12.5   | 15.7   | 11.1   | 10.5   | 11.1   | 15.8   | 10.0   | 20.2   |
| 7.1    | 10.0   | 15.0   | 6.4    | 17.8   | 11.3   | 17.6   | 27.6   | 21.1   |
| 5.5    | 4.0    | 4.4    | 1.8    | 2.5    | 1.4    | 2.1    | 6.8    | 1.7    |
| 4.4    | 4.6    | 10.9   | 3.9    | 19.9   | 22.7   | 42.6   | 28.3   | 42.5   |
| 6.9    | 3.9    | 5.2    | 9.5    | 4.4    | 8.3    | 8.5    | 1.4    | 11.2   |
| 149.2  | 148.7  | 376.3  | 123.0  | 1301.7 | 777.8  | 1353.5 | 1320.6 | 616.2  |
| 77.9   | 61.5   | 56.4   | 40.9   | 83.0   | 86.3   | 123.4  | 116.7  | 146.3  |
| 86.6   | 100.6  | 92.6   | 83.9   | 19.4   | 23.9   | 11.4   | 21.2   | 36.3   |
| 469.7  | 447.8  | 568.2  | 460.6  | 713.6  | 603.4  | 665.6  | 769.2  | 1389.8 |
| 422.6  | 473.8  | 407.7  | 514.4  | 344.4  | 408.8  | 479.4  | 413.1  | 459.2  |
| 603.4  | 589.7  | 683.1  | 607.8  | 61.8   | 60.7   | 69.5   | 86.0   | 39.3   |
| 2415.7 | 2328.0 | 3321.4 | 2498.9 | 4993.6 | 4392.0 | 5093.7 | 5084.2 | 6904.2 |
| 565.3  | 552.4  | 647.6  | 611.2  | 427.6  | 468.6  | 431.6  | 511.8  | 1186.5 |
| 225.1  | 212.8  | 332.7  | 195.2  | 413.1  | 484.4  | 456.4  | 482.4  | 414.8  |
| 122.8  | 89.9   | 133.2  | 93.7   | 172.0  | 191.0  | 178.5  | 200.0  | 115.9  |
| 31.8   | 30.5   | 27.1   | 21.5   | 102.2  | 101.0  | 93.8   | 104.9  | 15.1   |
| 9.3    | 8.4    | 8.5    | 0.8    | 12.3   | 8.7    | 10.7   | 18.3   | 5.2    |
| 10.5   | 11.7   | 13.7   | 5.6    | 7.4    | 8.2    | 5.4    | 19.5   | 15.6   |
| 462.3  | 461.0  | 617.0  | 506.3  | 358.8  | 476.8  | 477.2  | 459.0  | 383.1  |
| 2062.8 | 1913.3 | 2741.6 | 2040.5 | 3953.9 | 4282.5 | 4122.4 | 4296.2 | 7287.5 |
| 24.3   | 21.6   | 33.8   | 22.5   | 28.5   | 25.3   | 36.0   | 45.6   | 129.9  |
| 359.8  | 367.6  | 337.3  | 334.5  | 316.9  | 408.5  | 367.0  | 453.3  | 711.3  |
| 47.5   | 45.9   | 113.6  | 26.1   | 154.2  | 93.6   | 146.9  | 153.0  | 56.1   |
| 515.7  | 479.2  | 805.4  | 576.4  | 246.9  | 266.4  | 255.3  | 299.0  | 377.5  |
| 36.2   | 21.8   | 41.7   | 26.5   | 80.8   | 104.2  | 106.4  | 97.4   | 79.8   |
| 163.7  | 139.0  | 194.7  | 136.3  | 73.3   | 92.5   | 82.6   | 88.5   | 574.6  |
| 19.2   | 21.9   | 26.4   | 13.0   | 20.3   | 25.6   | 32.2   | 26.8   | 27.7   |
| 130.1  | 127.5  | 117.5  | 107.9  | 132.5  | 134.1  | 152.9  | 146.7  | 194.3  |
| 52.6   | 67.0   | 23.0   | 16.3   | 22.9   | 25.5   | 19.4   | 24.5   | 39.8   |
| 17.6   | 32.4   | 22.8   | 33.9   | 46.7   | 61.6   | 46.8   | 76.1   | 98.0   |
| 751.3  | 728.8  | 859.2  | 723.6  | 656.3  | 687.8  | 615.5  | 630.8  | 1594.1 |
| 226.6  | 225.6  | 372.4  | 240.5  | 389.5  | 419.2  | 383.8  | 442.9  | 1159.4 |
| 72.8   | 72.0   | 56.5   | 42.6   | 36.3   | 32.9   | 36.5   | 37.4   | 19.6   |
| 3.6    | 2.8    | 6.2    | 8.8    | 4.9    | 1.8    | 2.6    | 4.6    | 1.3    |
| 3.8    | 11.7   | 11.5   | 11.0   | 6.5    | 7.6    | 8.4    | 10.2   | 13.1   |
| 5.0    | 5.6    | 19.7   | 7.0    | 14.2   | 4.2    | 2.5    | 14.7   | 10.4   |
| 20.2   | 17.8   | 25.7   | 17.1   | 12.8   | 16.1   | 13.2   | 13.1   | 8.8    |
| 107.3  | 110.2  | 99.6   | 91.7   | 112.5  | 120.5  | 145.1  | 123.7  | 111.1  |
| 3.3    | 3.4    | 9.8    | 3.4    | 2.3    | 1.7    | 6.4    | 3.1    | 2.8    |
| 1.2    | 1.1    | 1.3    | 1.2    | 0.9    | 0.7    | 6.0    | 0.4    | 1.6    |
| 0.4    | 0.5    | 0.7    | 0.5    | 0.4    | 0.4    | 3.4    | 0.6    | 0.6    |
| 0.8    | 0.6    | 0.8    | 0.6    | 0.9    | 0.5    | 2.3    | 0.8    | 1.4    |
| 12.4   | 21.3   | 19.8   | 20.6   | 9.7    | 14.4   | 11.0   | 7.1    | 19.3   |
| 0.8    | 1.5    | 1.2    | 5.9    | 2.1    | 4.2    | 1.8    | 1.9    | 1.7    |
| 342.8  | 330.3  | 399.2  | 324.6  | 369.0  | 414.4  | 392.3  | 421.9  | 239.6  |
| 1377.6 | 1368.4 | 1615.6 | 1505.0 | 1018.3 | 1268.3 | 1078.9 | 1180.1 | 1407.5 |
| 407.5  | 386.7  | 638.3  | 408.0  | 574.2  | 362.6  | 447.1  | 648.2  | 197.1  |
| 10.5   | 7.0    | 14.3   | 9.7    | 5.2    | 4.9    | 4.7    | 1.1    | 170.5  |
| 253.0  | 289.8  | 247.1  | 255.4  | 40.1   | 35.1   | 74.1   | 50.9   | 204.9  |
| 78.5   | 91.4   | 64.9   | 65.6   | 28.1   | 20.8   | 38.2   | 48.2   | 101.0  |
| 3.3    | 13.4   | 11.5   | 6.8    | 17.7   | 16.4   | 26.8   | 15.8   | 32.5   |
| 716.3  | 611.3  | 740.7  | 549.1  | 655.1  | 521.7  | 648.2  | 742.1  | 291.8  |
| 10.2   | 10.2   | 9.2    | 10.6   | 5.3    | 8.6    | 14.7   | 12.6   | 20.0   |

|        |        |        |        |        |        |        |        |        |
|--------|--------|--------|--------|--------|--------|--------|--------|--------|
| 161.5  | 134.5  | 224.7  | 164.6  | 194.5  | 233.5  | 243.9  | 230.9  | 218.9  |
| 151.3  | 148.4  | 137.3  | 173.5  | 176.8  | 172.4  | 182.3  | 224.3  | 323.8  |
| 143.1  | 114.4  | 182.4  | 154.8  | 250.2  | 293.8  | 260.8  | 292.9  | 194.6  |
| 75.5   | 66.9   | 191.6  | 96.1   | 228.4  | 183.5  | 224.8  | 234.8  | 91.1   |
| 38.6   | 37.4   | 42.0   | 44.7   | 102.9  | 100.3  | 101.8  | 109.2  | 121.9  |
| 281.9  | 235.6  | 449.1  | 315.8  | 998.6  | 1090.8 | 1167.4 | 1165.0 | 1102.1 |
| 49.4   | 40.6   | 41.6   | 35.3   | 106.6  | 103.8  | 106.5  | 126.7  | 30.3   |
| 1115.4 | 1036.9 | 1404.0 | 1080.0 | 813.6  | 757.1  | 846.4  | 929.3  | 931.2  |
| 193.1  | 187.4  | 247.6  | 161.1  | 241.9  | 263.5  | 265.8  | 308.9  | 273.3  |
| 827.4  | 791.1  | 918.9  | 783.6  | 1257.3 | 1320.7 | 1396.9 | 1486.0 | 1446.6 |
| 219.0  | 191.0  | 185.6  | 149.8  | 225.7  | 224.5  | 185.5  | 254.7  | 138.7  |
| 168.3  | 141.4  | 147.9  | 114.9  | 163.7  | 161.3  | 160.4  | 181.8  | 211.5  |
| 176.0  | 127.9  | 275.6  | 171.5  | 246.5  | 227.2  | 234.8  | 271.3  | 436.8  |
| 54.4   | 32.1   | 74.3   | 39.2   | 49.0   | 45.8   | 69.4   | 52.1   | 9.9    |
| 97.0   | 77.3   | 106.1  | 86.9   | 116.6  | 108.0  | 154.9  | 148.9  | 3.1    |
| 979.6  | 932.4  | 1186.9 | 999.3  | 1204.3 | 985.7  | 1083.3 | 1285.8 | 917.6  |
| 440.1  | 284.0  | 1026.9 | 273.3  | 634.5  | 384.8  | 796.2  | 853.0  | 94.0   |
| 669.0  | 592.3  | 999.1  | 705.5  | 695.9  | 630.8  | 688.0  | 804.3  | 598.1  |
| 74.8   | 78.3   | 88.2   | 80.7   | 146.1  | 204.8  | 160.1  | 188.6  | 616.7  |
| 68.6   | 61.6   | 95.1   | 73.6   | 153.6  | 200.3  | 216.9  | 192.9  | 753.8  |
| 460.1  | 385.6  | 507.3  | 462.5  | 198.7  | 249.8  | 273.0  | 244.5  | 129.8  |
| 1.4    | 1.4    | 1.6    | 1.1    | 111.3  | 100.2  | 89.8   | 135.9  | 188.8  |
| 210.9  | 350.3  | 62.4   | 218.3  | 17.2   | 13.4   | 16.3   | 13.6   | 5.1    |
| 255.9  | 301.7  | 107.0  | 228.2  | 20.6   | 25.3   | 22.8   | 6.6    | 44.2   |
| 47.0   | 42.7   | 75.4   | 36.6   | 124.7  | 103.0  | 123.1  | 121.7  | 259.6  |
| 222.6  | 188.2  | 271.2  | 186.4  | 324.9  | 421.0  | 416.9  | 413.7  | 525.5  |
| 987.7  | 1056.7 | 764.8  | 1478.3 | 492.7  | 310.2  | 519.1  | 639.0  | 39.9   |
| 794.1  | 750.0  | 1018.9 | 709.6  | 457.0  | 357.1  | 488.5  | 545.8  | 872.1  |
| 127.5  | 140.0  | 145.7  | 139.3  | 97.8   | 89.3   | 93.3   | 100.9  | 90.1   |
| 309.7  | 347.3  | 232.1  | 286.7  | 183.8  | 179.4  | 168.0  | 233.6  | 198.0  |
| 364.8  | 340.9  | 466.4  | 347.2  | 226.6  | 350.1  | 224.0  | 269.4  | 205.9  |
| 101.0  | 101.1  | 149.2  | 135.1  | 323.9  | 293.0  | 439.6  | 419.8  | 421.1  |
| 182.8  | 175.1  | 192.2  | 187.6  | 238.9  | 197.6  | 278.2  | 286.9  | 229.5  |
| 789.6  | 776.7  | 1301.1 | 859.7  | 985.3  | 1258.2 | 1053.3 | 1030.0 | 573.1  |
| 85.2   | 104.5  | 87.0   | 85.4   | 40.2   | 34.7   | 37.1   | 46.2   | 53.9   |
| 64.2   | 71.6   | 66.8   | 94.7   | 53.2   | 42.1   | 29.9   | 33.2   | 86.9   |
| 181.0  | 153.4  | 283.0  | 138.0  | 554.4  | 425.6  | 539.3  | 609.0  | 254.9  |
| 204.6  | 221.9  | 200.2  | 215.0  | 69.3   | 69.6   | 66.5   | 92.3   | 166.2  |
| 37.5   | 32.0   | 51.3   | 38.1   | 118.5  | 101.4  | 88.9   | 115.2  | 76.0   |
| 26.7   | 31.9   | 37.2   | 25.6   | 856.7  | 645.8  | 594.4  | 790.3  | 1437.9 |
| 123.9  | 101.5  | 150.0  | 129.1  | 195.4  | 214.4  | 225.5  | 254.8  | 179.7  |
| 4116.7 | 3950.1 | 4718.0 | 3987.5 | 4832.8 | 4904.5 | 5113.9 | 5417.0 | 6908.7 |
| 484.8  | 480.5  | 543.0  | 405.0  | 626.1  | 556.3  | 488.4  | 649.5  | 328.3  |
| 371.6  | 357.1  | 475.6  | 329.1  | 205.8  | 229.1  | 252.9  | 226.2  | 302.7  |
| 223.2  | 227.0  | 177.9  | 248.6  | 28.5   | 37.6   | 42.6   | 46.4   | 48.7   |
| 32.7   | 49.1   | 72.0   | 31.9   | 329.3  | 565.4  | 341.6  | 324.0  | 362.6  |
| 484.0  | 492.2  | 561.2  | 477.5  | 360.8  | 357.2  | 418.7  | 400.2  | 435.8  |
| 178.2  | 136.0  | 331.0  | 169.0  | 505.5  | 598.0  | 564.0  | 558.9  | 171.7  |
| 208.5  | 174.2  | 403.1  | 229.0  | 483.5  | 555.9  | 559.4  | 587.7  | 209.6  |
| 157.9  | 170.8  | 185.2  | 142.2  | 104.0  | 119.5  | 104.1  | 103.3  | 110.7  |
| 13.9   | 11.0   | 28.6   | 12.4   | 9.8    | 18.8   | 6.4    | 2.8    | 23.8   |
| 145.5  | 122.5  | 167.2  | 91.2   | 50.5   | 63.3   | 43.8   | 47.9   | 59.8   |
| 202.5  | 191.0  | 211.6  | 191.3  | 335.6  | 443.4  | 393.6  | 435.9  | 217.5  |

|        |        |        |        |        |        |        |        |         |
|--------|--------|--------|--------|--------|--------|--------|--------|---------|
| 165.6  | 188.4  | 156.3  | 178.0  | 142.3  | 160.3  | 151.7  | 166.3  | 105.4   |
| 191.7  | 192.3  | 162.9  | 191.5  | 109.7  | 116.6  | 104.5  | 127.6  | 52.9    |
| 65.5   | 86.6   | 135.5  | 85.6   | 168.4  | 147.3  | 186.5  | 184.9  | 218.5   |
| 121.3  | 115.0  | 188.1  | 109.3  | 124.1  | 138.7  | 125.8  | 160.8  | 183.7   |
| 3282.2 | 3073.8 | 4131.7 | 2931.8 | 4204.9 | 3733.9 | 4456.2 | 4423.8 | 7403.2  |
| 10.3   | 17.9   | 20.9   | 15.0   | 31.6   | 51.8   | 38.8   | 47.4   | 44.6    |
| 5.5    | 2.1    | 6.7    | 7.6    | 1.2    | 1.9    | 3.9    | 2.2    | 3.6     |
| 167.0  | 152.6  | 203.0  | 139.7  | 51.7   | 74.4   | 43.6   | 70.4   | 34.2    |
| 4.9    | 10.3   | 5.0    | 3.0    | 39.5   | 21.6   | 55.4   | 36.7   | 8.0     |
| 1.9    | 1.7    | 3.7    | 6.4    | 49.6   | 30.3   | 56.9   | 55.2   | 5.9     |
| 125.3  | 120.4  | 65.5   | 83.6   | 109.8  | 166.0  | 157.0  | 164.2  | 241.7   |
| 8782.4 | 8513.6 | 9778.5 | 8566.2 | 8515.0 | 8767.3 | 8706.7 | 8739.7 | 11293.7 |
| 88.7   | 103.5  | 138.4  | 68.5   | 175.3  | 122.8  | 213.5  | 183.9  | 117.9   |
| 105.4  | 95.0   | 101.4  | 67.8   | 170.7  | 172.4  | 184.6  | 197.8  | 119.7   |
| 0.7    | 2.9    | 3.7    | 3.8    | 0.6    | 1.9    | 6.6    | 2.6    | 187.3   |
| 358.7  | 345.8  | 448.1  | 376.4  | 164.8  | 161.1  | 156.3  | 228.7  | 154.0   |
| 236.0  | 205.9  | 265.3  | 218.8  | 321.2  | 386.1  | 380.0  | 397.3  | 232.8   |
| 505.8  | 513.3  | 479.1  | 418.3  | 413.3  | 579.4  | 462.7  | 483.9  | 446.8   |
| 4.2    | 3.9    | 4.4    | 0.8    | 1.0    | 2.1    | 1.6    | 10.2   | 1711.4  |
| 610.2  | 597.6  | 760.3  | 655.5  | 354.2  | 384.5  | 319.7  | 464.6  | 353.5   |
| 44.1   | 39.6   | 65.2   | 42.5   | 123.6  | 139.9  | 120.6  | 116.1  | 126.4   |
| 956.6  | 945.4  | 760.5  | 746.3  | 428.8  | 492.9  | 510.1  | 507.9  | 447.3   |
| 107.7  | 119.1  | 91.0   | 84.4   | 97.3   | 79.4   | 86.6   | 103.6  | 61.7    |
| 121.8  | 109.1  | 156.4  | 113.6  | 192.8  | 177.1  | 140.7  | 206.1  | 49.4    |
| 1311.1 | 1313.8 | 1186.0 | 1506.9 | 37.4   | 41.9   | 35.0   | 41.9   | 41.7    |
| 46.6   | 43.0   | 56.9   | 51.7   | 54.3   | 57.9   | 47.2   | 37.4   | 67.2    |
| 139.6  | 148.6  | 171.5  | 140.1  | 74.3   | 111.8  | 102.9  | 124.6  | 137.8   |
| 3.3    | 2.4    | 7.3    | 1.3    | 42.0   | 72.4   | 60.1   | 48.5   | 12.2    |
| 47.9   | 43.7   | 77.5   | 53.9   | 93.0   | 82.6   | 96.7   | 120.1  | 174.0   |
| 133.7  | 138.5  | 82.6   | 113.1  | 195.0  | 278.2  | 248.5  | 286.1  | 93.6    |
| 458.7  | 393.1  | 821.3  | 434.5  | 239.0  | 198.2  | 228.3  | 314.6  | 289.9   |
| 109.3  | 103.1  | 133.2  | 141.4  | 158.5  | 173.3  | 170.5  | 205.0  | 200.8   |
| 229.7  | 258.3  | 318.5  | 264.0  | 277.0  | 261.3  | 252.9  | 290.9  | 258.3   |
| 258.3  | 252.8  | 346.0  | 327.0  | 98.3   | 135.6  | 101.8  | 157.6  | 217.0   |
| 339.6  | 315.0  | 492.8  | 308.7  | 194.8  | 211.8  | 208.1  | 206.8  | 290.3   |
| 88.3   | 93.2   | 143.0  | 101.0  | 85.7   | 79.0   | 95.9   | 92.7   | 135.6   |
| 591.1  | 538.6  | 621.6  | 665.8  | 223.4  | 197.8  | 214.0  | 286.4  | 305.2   |
| 175.9  | 218.1  | 78.8   | 223.8  | 219.0  | 243.1  | 222.7  | 240.3  | 82.4    |
| 246.2  | 278.5  | 245.9  | 237.1  | 223.9  | 235.0  | 276.0  | 301.9  | 361.0   |
| 123.9  | 115.1  | 103.1  | 96.6   | 119.2  | 133.4  | 115.6  | 127.6  | 190.3   |
| 585.8  | 540.6  | 734.5  | 591.9  | 879.7  | 2427.1 | 1067.6 | 939.5  | 818.2   |
| 41.8   | 52.3   | 54.9   | 59.7   | 12.5   | 18.7   | 7.8    | 16.4   | 4.1     |
| 1070.6 | 1073.5 | 1146.4 | 814.4  | 2120.8 | 2354.9 | 2727.0 | 2515.7 | 3408.4  |
| 251.2  | 283.5  | 311.8  | 270.7  | 498.1  | 444.3  | 607.1  | 562.0  | 1219.9  |
| 53.0   | 44.2   | 59.9   | 48.9   | 141.9  | 113.5  | 170.1  | 173.2  | 82.9    |
| 42.9   | 43.8   | 49.6   | 35.2   | 123.3  | 97.1   | 154.0  | 138.1  | 127.4   |
| 32.0   | 32.7   | 23.6   | 32.7   | 21.5   | 18.5   | 26.8   | 21.7   | 24.8    |
| 97.4   | 85.1   | 81.0   | 66.8   | 58.2   | 70.1   | 65.9   | 83.7   | 82.9    |
| 31.8   | 35.1   | 18.8   | 29.3   | 10.5   | 21.1   | 20.9   | 3.7    | 19.7    |
| 116.3  | 105.4  | 145.2  | 107.6  | 42.6   | 39.8   | 32.9   | 48.4   | 41.2    |
| 73.4   | 53.5   | 90.7   | 70.0   | 22.8   | 24.2   | 17.8   | 40.4   | 25.0    |
| 131.8  | 111.7  | 149.1  | 100.5  | 45.5   | 56.6   | 43.0   | 61.4   | 44.5    |
| 269.6  | 243.3  | 275.1  | 225.8  | 321.8  | 305.7  | 400.6  | 371.4  | 407.6   |

|        |        |        |        |        |        |        |        |         |
|--------|--------|--------|--------|--------|--------|--------|--------|---------|
| 9.4    | 9.1    | 7.1    | 8.5    | 83.7   | 86.3   | 62.9   | 66.1   | 37.4    |
| 500.6  | 569.9  | 397.0  | 385.4  | 329.2  | 743.2  | 316.6  | 413.2  | 731.5   |
| 435.5  | 438.1  | 544.9  | 395.5  | 398.0  | 492.6  | 429.4  | 452.1  | 169.3   |
| 48.0   | 57.7   | 30.3   | 44.4   | 286.7  | 260.1  | 253.3  | 277.2  | 36.0    |
| 503.5  | 489.8  | 677.5  | 517.5  | 1284.3 | 1007.8 | 1965.8 | 1639.0 | 1074.0  |
| 86.7   | 63.2   | 184.4  | 74.6   | 84.0   | 80.1   | 106.6  | 113.8  | 225.4   |
| 58.4   | 77.1   | 70.8   | 60.5   | 102.2  | 96.7   | 74.0   | 80.1   | 22.6    |
| 778.9  | 689.8  | 844.2  | 739.4  | 1266.8 | 1328.3 | 1480.6 | 1450.0 | 1144.9  |
| 100.0  | 82.8   | 124.9  | 97.3   | 138.3  | 91.5   | 140.9  | 155.2  | 215.2   |
| 94.3   | 94.0   | 164.8  | 65.1   | 72.8   | 86.3   | 89.9   | 102.1  | 104.8   |
| 106.5  | 121.8  | 111.4  | 87.3   | 118.1  | 123.3  | 112.9  | 168.1  | 113.4   |
| 91.7   | 95.3   | 161.8  | 78.3   | 95.5   | 67.5   | 70.9   | 106.1  | 173.1   |
| 1.3    | 1.0    | 1.3    | 2.5    | 0.7    | 0.6    | 1.5    | 1.0    | 2.1     |
| 373.2  | 336.5  | 508.7  | 431.3  | 623.5  | 792.7  | 690.8  | 742.8  | 1208.2  |
| 20.3   | 12.8   | 5.8    | 4.1    | 0.9    | 1.2    | 1.5    | 1.1    | 1.7     |
| 202.6  | 176.8  | 278.6  | 182.1  | 204.3  | 192.0  | 218.9  | 245.9  | 327.9   |
| 95.8   | 108.4  | 84.2   | 99.3   | 83.7   | 76.4   | 74.5   | 87.3   | 102.6   |
| 42.5   | 44.6   | 40.4   | 40.7   | 51.5   | 63.6   | 47.6   | 72.5   | 44.3    |
| 116.6  | 120.8  | 113.3  | 108.3  | 123.7  | 85.3   | 87.9   | 111.8  | 84.8    |
| 12.6   | 10.7   | 20.5   | 15.5   | 24.7   | 11.9   | 23.8   | 28.1   | 14.1    |
| 73.0   | 76.0   | 48.8   | 66.5   | 13.7   | 17.0   | 12.7   | 24.2   | 25.9    |
| 564.6  | 607.0  | 367.0  | 658.6  | 42.6   | 45.4   | 46.1   | 62.4   | 19.5    |
| 13.9   | 8.4    | 30.5   | 8.1    | 11.3   | 6.0    | 12.4   | 15.3   | 17.4    |
| 9.8    | 18.7   | 21.8   | 8.8    | 5.5    | 23.3   | 5.3    | 4.7    | 37.4    |
| 107.6  | 121.0  | 64.8   | 171.5  | 74.1   | 90.6   | 80.3   | 94.8   | 133.2   |
| 67.6   | 67.8   | 130.8  | 73.3   | 100.7  | 223.1  | 106.4  | 114.5  | 108.2   |
| 2.6    | 5.9    | 5.5    | 12.1   | 7.6    | 1.4    | 6.0    | 16.7   | 7.9     |
| 40.9   | 44.9   | 40.5   | 31.6   | 58.3   | 70.1   | 69.4   | 99.3   | 43.4    |
| 48.2   | 43.9   | 56.3   | 56.3   | 15.2   | 16.8   | 10.0   | 20.8   | 3.7     |
| 177.2  | 204.3  | 153.3  | 153.9  | 59.8   | 56.9   | 46.2   | 94.5   | 82.3    |
| 2.6    | 2.3    | 3.3    | 2.1    | 791.9  | 1088.8 | 941.2  | 1046.5 | 50.0    |
| 42.2   | 38.1   | 46.3   | 31.8   | 79.5   | 67.6   | 84.2   | 96.0   | 56.0    |
| 37.3   | 35.5   | 62.4   | 61.5   | 31.3   | 26.0   | 47.5   | 39.8   | 0.8     |
| 125.4  | 127.0  | 173.1  | 148.3  | 192.6  | 154.8  | 208.5  | 229.2  | 180.9   |
| 279.4  | 253.5  | 301.9  | 344.0  | 9.3    | 7.4    | 9.0    | 21.6   | 8.9     |
| 206.5  | 145.8  | 185.9  | 140.3  | 1092.0 | 1408.1 | 1149.6 | 1233.7 | 833.3   |
| 69.0   | 61.8   | 57.5   | 64.6   | 84.9   | 88.6   | 74.9   | 95.4   | 82.7    |
| 269.2  | 258.6  | 388.4  | 291.0  | 357.0  | 141.0  | 281.8  | 390.1  | 261.5   |
| 19.9   | 21.8   | 18.6   | 18.7   | 79.0   | 98.6   | 86.1   | 115.2  | 50.6    |
| 28.4   | 27.3   | 67.1   | 34.4   | 48.5   | 45.5   | 36.3   | 60.7   | 56.3    |
| 111.4  | 92.2   | 143.1  | 110.5  | 34.4   | 33.7   | 36.5   | 67.9   | 8.8     |
| 140.4  | 120.6  | 189.6  | 122.9  | 275.3  | 307.3  | 381.3  | 340.4  | 203.5   |
| 205.7  | 172.1  | 257.1  | 174.3  | 276.9  | 342.6  | 285.4  | 332.8  | 213.7   |
| 91.5   | 88.0   | 100.4  | 90.1   | 91.3   | 59.3   | 63.9   | 95.5   | 81.1    |
| 3.9    | 3.6    | 1.3    | 2.0    | 102.5  | 77.4   | 129.9  | 124.1  | 44.2    |
| 7.9    | 3.9    | 1.3    | 3.7    | 117.1  | 90.0   | 87.6   | 100.4  | 8.0     |
| 3.8    | 1.4    | 3.5    | 2.8    | 5.0    | 1.7    | 4.4    | 4.0    | 2.4     |
| 119.0  | 188.6  | 89.9   | 125.8  | 14.8   | 28.7   | 13.3   | 9.1    | 12.5    |
| 96.6   | 82.9   | 79.9   | 66.0   | 48.6   | 44.1   | 42.2   | 54.7   | 66.7    |
| 78.0   | 86.2   | 96.1   | 99.6   | 49.3   | 66.8   | 57.5   | 49.8   | 119.5   |
| 81.6   | 97.7   | 87.2   | 70.5   | 110.5  | 75.3   | 100.9  | 104.5  | 108.4   |
| 7016.3 | 6113.9 | 9584.0 | 6856.7 | 7701.9 | 5911.9 | 7855.1 | 8835.0 | 11479.6 |
| 99.9   | 117.4  | 51.3   | 93.7   | 50.7   | 76.1   | 49.0   | 59.9   | 64.2    |

|        |        |        |        |        |        |        |        |        |
|--------|--------|--------|--------|--------|--------|--------|--------|--------|
| 188.0  | 181.9  | 232.5  | 176.7  | 78.6   | 63.5   | 58.2   | 62.7   | 110.9  |
| 91.9   | 91.4   | 110.9  | 72.8   | 35.1   | 39.3   | 33.5   | 33.5   | 83.4   |
| 109.2  | 97.2   | 88.9   | 89.0   | 89.2   | 100.6  | 97.0   | 109.0  | 81.3   |
| 751.6  | 590.6  | 1262.7 | 666.0  | 1234.9 | 1252.2 | 1310.8 | 1251.4 | 1265.3 |
| 50.9   | 51.8   | 40.3   | 45.6   | 60.4   | 65.6   | 56.5   | 75.5   | 69.7   |
| 1.0    | 1.1    | 1.3    | 1.5    | 385.6  | 302.0  | 356.7  | 358.9  | 5.5    |
| 42.3   | 47.9   | 38.8   | 47.8   | 27.8   | 31.8   | 24.0   | 27.8   | 26.4   |
| 1.0    | 2.4    | 1.5    | 1.0    | 0.8    | 3.7    | 2.5    | 6.2    | 1.6    |
| 9.2    | 5.3    | 11.0   | 2.4    | 31.6   | 17.8   | 36.7   | 35.8   | 56.8   |
| 10.7   | 15.9   | 20.3   | 25.3   | 31.5   | 22.7   | 23.2   | 30.9   | 174.8  |
| 46.7   | 59.1   | 22.9   | 53.8   | 298.7  | 348.6  | 276.1  | 367.5  | 105.9  |
| 145.4  | 130.4  | 131.2  | 119.5  | 136.6  | 199.6  | 150.0  | 160.3  | 97.5   |
| 47.3   | 47.7   | 37.9   | 46.7   | 112.6  | 91.7   | 98.0   | 129.6  | 48.4   |
| 42.6   | 41.8   | 31.9   | 38.2   | 39.5   | 38.3   | 44.1   | 47.9   | 40.4   |
| 137.2  | 104.6  | 174.4  | 116.8  | 159.4  | 180.0  | 173.5  | 190.3  | 167.7  |
| 56.4   | 37.7   | 71.5   | 38.2   | 40.7   | 43.8   | 37.0   | 47.5   | 75.4   |
| 67.8   | 62.6   | 126.5  | 66.1   | 32.2   | 51.6   | 25.6   | 33.4   | 132.2  |
| 3.7    | 4.8    | 6.6    | 4.6    | 8.7    | 8.9    | 8.5    | 6.4    | 25.1   |
| 0.5    | 0.3    | 3.8    | 0.6    | 60.2   | 32.3   | 42.2   | 50.9   | 450.1  |
| 10.6   | 13.3   | 14.3   | 10.0   | 26.8   | 22.8   | 39.2   | 41.3   | 125.5  |
| 31.6   | 27.8   | 42.9   | 36.9   | 22.2   | 29.5   | 34.8   | 28.9   | 42.8   |
| 12.8   | 5.4    | 8.5    | 10.5   | 1.5    | 10.4   | 4.1    | 9.7    | 10.4   |
| 24.6   | 22.4   | 28.5   | 10.0   | 15.9   | 18.5   | 21.5   | 18.6   | 32.6   |
| 8.3    | 7.4    | 11.5   | 4.7    | 5.7    | 4.1    | 2.6    | 2.3    | 1105.4 |
| 11.1   | 18.1   | 29.3   | 13.2   | 25.8   | 23.4   | 23.3   | 36.5   | 29.9   |
| 157.0  | 142.2  | 227.1  | 171.5  | 357.6  | 422.8  | 342.0  | 350.4  | 402.7  |
| 52.0   | 52.4   | 43.6   | 41.8   | 38.3   | 43.8   | 34.2   | 50.7   | 74.3   |
| 34.3   | 37.3   | 51.6   | 29.4   | 94.8   | 93.8   | 79.5   | 86.2   | 100.1  |
| 2.1    | 0.8    | 1.7    | 1.2    | 2.1    | 7.3    | 1.9    | 3.6    | 1.7    |
| 189.1  | 122.1  | 338.6  | 168.5  | 484.1  | 348.0  | 503.4  | 626.0  | 305.2  |
| 1128.4 | 1046.6 | 1823.7 | 1189.3 | 3039.3 | 2724.4 | 3357.5 | 3268.5 | 5313.4 |
| 56.7   | 61.9   | 76.5   | 49.1   | 58.7   | 62.9   | 75.9   | 76.2   | 47.0   |
| 73.6   | 71.7   | 79.0   | 79.9   | 60.3   | 57.0   | 69.3   | 83.2   | 72.8   |
| 102.8  | 90.1   | 67.2   | 93.4   | 40.7   | 48.3   | 53.1   | 71.8   | 133.3  |
| 697.4  | 631.5  | 1023.8 | 645.7  | 88.1   | 68.7   | 71.3   | 111.9  | 214.9  |
| 2.7    | 2.1    | 3.7    | 3.8    | 6.8    | 2.0    | 7.8    | 5.6    | 19.3   |
| 22.0   | 17.4   | 11.9   | 23.6   | 17.1   | 16.1   | 14.7   | 27.6   | 27.1   |
| 5.6    | 6.0    | 6.3    | 8.2    | 3.3    | 8.1    | 3.6    | 8.7    | 11.1   |
| 795.2  | 658.8  | 1644.5 | 887.9  | 1507.6 | 1208.5 | 1451.2 | 1714.5 | 841.6  |
| 617.8  | 516.0  | 729.1  | 480.8  | 727.3  | 656.4  | 689.4  | 791.5  | 693.5  |
| 36.0   | 22.7   | 8.7    | 14.0   | 165.8  | 120.2  | 192.7  | 202.0  | 547.2  |
| 269.3  | 236.7  | 561.9  | 408.7  | 294.8  | 410.8  | 315.3  | 338.2  | 290.5  |
| 8.6    | 3.6    | 8.0    | 0.8    | 148.3  | 136.9  | 149.6  | 152.8  | 263.7  |
| 2.4    | 1.6    | 2.2    | 2.0    | 2.8    | 1.6    | 2.2    | 1.8    | 7.8    |
| 2195.4 | 2017.9 | 2263.1 | 2055.6 | 262.4  | 242.4  | 208.5  | 322.6  | 240.3  |
| 153.4  | 134.5  | 175.1  | 120.8  | 93.0   | 106.3  | 113.0  | 95.5   | 105.7  |
| 124.7  | 125.4  | 163.3  | 118.5  | 129.8  | 149.4  | 130.9  | 135.9  | 186.0  |
| 66.2   | 79.5   | 93.1   | 69.6   | 114.0  | 114.7  | 125.8  | 110.6  | 198.3  |
| 15.9   | 13.5   | 14.4   | 5.8    | 17.9   | 21.8   | 16.6   | 22.6   | 6.2    |
| 246.9  | 210.5  | 295.4  | 202.5  | 66.6   | 70.0   | 93.9   | 107.6  | 2.4    |
| 209.3  | 170.3  | 303.2  | 185.8  | 297.5  | 229.7  | 317.8  | 345.9  | 389.9  |
| 17.9   | 23.2   | 24.3   | 19.3   | 34.4   | 57.8   | 38.2   | 40.1   | 15.1   |
| 29.2   | 20.3   | 26.7   | 22.3   | 30.1   | 14.2   | 11.4   | 18.2   | 25.7   |

|        |        |        |        |        |        |        |        |        |
|--------|--------|--------|--------|--------|--------|--------|--------|--------|
| 3.2    | 4.3    | 4.5    | 2.9    | 8.8    | 7.1    | 14.1   | 23.5   | 13.1   |
| 16.2   | 18.8   | 26.7   | 8.4    | 11.8   | 11.9   | 7.8    | 5.0    | 20.9   |
| 2.9    | 4.2    | 5.5    | 2.6    | 1.6    | 1.4    | 1.0    | 1.2    | 1.8    |
| 61.8   | 62.9   | 95.0   | 68.1   | 47.4   | 58.5   | 61.4   | 59.3   | 62.1   |
| 4.0    | 0.5    | 1.1    | 3.3    | 2.6    | 1.2    | 3.2    | 4.2    | 1.6    |
| 83.8   | 89.2   | 88.4   | 118.6  | 50.8   | 55.4   | 62.9   | 65.2   | 82.4   |
| 3642.4 | 3440.2 | 4865.9 | 3330.0 | 3854.3 | 3326.6 | 3231.6 | 4258.6 | 5817.9 |
| 135.8  | 131.7  | 165.5  | 158.9  | 50.3   | 45.5   | 50.1   | 69.6   | 79.1   |
| 82.4   | 103.7  | 90.8   | 102.1  | 195.5  | 257.6  | 230.9  | 260.5  | 179.6  |
| 1.3    | 1.2    | 1.4    | 1.5    | 5.1    | 0.8    | 1.6    | 7.3    | 2.8    |
| 18.3   | 9.3    | 14.6   | 8.1    | 9.1    | 17.1   | 14.4   | 32.2   | 23.4   |
| 175.5  | 155.0  | 214.8  | 137.5  | 69.9   | 74.1   | 94.7   | 81.2   | 101.8  |
| 431.5  | 486.6  | 537.4  | 398.5  | 329.5  | 342.0  | 331.0  | 445.1  | 359.5  |
| 136.5  | 163.5  | 161.8  | 137.0  | 45.4   | 42.9   | 42.1   | 58.3   | 6.0    |
| 47.6   | 37.7   | 54.8   | 35.4   | 61.0   | 55.1   | 74.7   | 73.4   | 41.6   |
| 14.4   | 20.3   | 18.3   | 27.8   | 11.1   | 30.8   | 21.4   | 26.4   | 25.8   |
| 277.8  | 313.6  | 254.4  | 292.6  | 445.5  | 625.2  | 610.2  | 565.8  | 245.2  |
| 102.9  | 101.0  | 122.3  | 95.9   | 201.3  | 204.4  | 204.8  | 236.7  | 273.8  |
| 75.9   | 80.9   | 73.7   | 62.7   | 122.2  | 134.8  | 132.6  | 116.5  | 98.8   |
| 89.6   | 70.7   | 167.6  | 96.4   | 166.8  | 75.7   | 107.5  | 167.0  | 103.8  |
| 78.6   | 65.8   | 141.1  | 88.8   | 41.4   | 61.7   | 36.8   | 47.8   | 35.6   |
| 27.0   | 30.6   | 43.3   | 32.6   | 35.6   | 39.2   | 35.2   | 51.5   | 31.5   |
| 2.7    | 2.6    | 2.2    | 1.3    | 1.6    | 1.5    | 2.2    | 1.3    | 1.8    |
| 9.3    | 9.1    | 12.8   | 8.3    | 5.6    | 5.4    | 1.5    | 5.6    | 14.8   |
| 864.1  | 841.3  | 1308.8 | 790.7  | 1072.6 | 762.6  | 1027.4 | 1166.5 | 1366.2 |
| 95.8   | 100.5  | 109.7  | 97.4   | 122.6  | 122.6  | 76.9   | 121.0  | 116.7  |
| 317.1  | 320.1  | 488.2  | 301.6  | 514.8  | 640.4  | 591.0  | 625.5  | 514.8  |
| 93.6   | 84.6   | 37.7   | 55.2   | 11.3   | 20.8   | 6.4    | 4.3    | 14.4   |
| 165.7  | 117.1  | 198.8  | 144.3  | 180.3  | 165.4  | 165.5  | 234.4  | 141.9  |
| 12.9   | 25.3   | 24.7   | 21.0   | 4.9    | 4.0    | 8.4    | 4.2    | 8.2    |
| 3.0    | 4.8    | 9.6    | 7.8    | 17.3   | 12.0   | 14.4   | 18.5   | 8.7    |
| 1.6    | 1.3    | 3.8    | 0.8    | 0.5    | 0.6    | 1.3    | 0.4    | 1.1    |
| 11.9   | 14.2   | 12.9   | 9.9    | 18.1   | 18.8   | 19.3   | 23.3   | 13.4   |
| 10.0   | 29.2   | 9.9    | 6.3    | 37.3   | 45.8   | 35.2   | 54.6   | 49.8   |
| 5.4    | 13.7   | 6.4    | 6.0    | 6.7    | 1.6    | 1.0    | 10.6   | 20.8   |
| 30.4   | 33.7   | 19.7   | 24.3   | 30.5   | 33.9   | 31.9   | 39.5   | 25.3   |
| 2.0    | 6.1    | 5.4    | 3.1    | 4.5    | 4.2    | 3.9    | 6.6    | 3.8    |
| 209.5  | 269.2  | 137.7  | 215.5  | 388.2  | 442.9  | 410.4  | 465.0  | 230.9  |
| 649.7  | 712.4  | 482.1  | 625.8  | 850.8  | 1151.3 | 929.8  | 992.6  | 443.1  |
| 209.5  | 243.8  | 124.1  | 191.0  | 39.3   | 64.3   | 62.6   | 70.4   | 99.8   |
| 151.4  | 176.9  | 74.5   | 142.0  | 24.6   | 44.9   | 46.4   | 48.0   | 44.1   |
| 65.0   | 69.1   | 128.0  | 64.6   | 605.6  | 505.0  | 572.8  | 657.2  | 803.3  |
| 59.0   | 45.3   | 86.7   | 63.2   | 72.3   | 91.5   | 60.8   | 95.2   | 142.6  |
| 54.1   | 55.5   | 70.0   | 56.8   | 83.2   | 95.2   | 62.3   | 80.5   | 217.9  |
| 7.6    | 8.0    | 9.2    | 6.2    | 10.2   | 11.4   | 4.5    | 12.3   | 11.1   |
| 28.3   | 30.8   | 44.1   | 40.8   | 37.8   | 20.5   | 22.9   | 28.5   | 54.7   |
| 52.5   | 58.9   | 45.8   | 54.3   | 23.5   | 30.2   | 23.7   | 31.4   | 33.5   |
| 0.8    | 0.7    | 0.8    | 0.8    | 0.9    | 3.2    | 1.1    | 0.6    | 1.9    |
| 13.8   | 19.8   | 17.3   | 10.7   | 8.1    | 13.0   | 16.7   | 7.2    | 19.7   |
| 37.8   | 29.6   | 39.6   | 37.4   | 28.4   | 19.9   | 23.5   | 63.1   | 65.7   |
| 11.9   | 8.9    | 10.2   | 4.3    | 9.1    | 7.8    | 8.2    | 18.4   | 11.7   |
| 30.5   | 29.4   | 30.3   | 16.6   | 30.6   | 42.4   | 39.9   | 27.8   | 38.7   |
| 165.5  | 163.0  | 197.4  | 151.8  | 320.1  | 342.2  | 354.8  | 336.0  | 194.6  |

|        |        |        |        |        |        |        |        |        |
|--------|--------|--------|--------|--------|--------|--------|--------|--------|
| 63.8   | 71.3   | 88.0   | 61.4   | 267.8  | 266.3  | 271.8  | 280.4  | 103.1  |
| 237.6  | 246.6  | 422.5  | 223.1  | 412.3  | 384.4  | 498.3  | 545.7  | 544.9  |
| 92.9   | 104.7  | 121.6  | 107.3  | 458.4  | 652.1  | 472.1  | 545.6  | 818.7  |
| 1.0    | 1.0    | 1.5    | 0.8    | 4.4    | 1.1    | 3.0    | 1.4    | 6.3    |
| 109.9  | 108.5  | 106.4  | 99.1   | 32.6   | 50.2   | 21.3   | 26.1   | 33.4   |
| 1.3    | 6.1    | 2.4    | 3.7    | 0.7    | 2.5    | 5.8    | 2.0    | 1.3    |
| 24.8   | 30.4   | 34.0   | 24.3   | 11.3   | 11.5   | 20.6   | 34.6   | 34.3   |
| 132.4  | 104.9  | 222.1  | 144.8  | 130.6  | 135.4  | 139.4  | 188.0  | 225.3  |
| 1.5    | 1.8    | 3.4    | 2.0    | 4.5    | 1.3    | 3.1    | 1.4    | 1.7    |
| 1.3    | 1.1    | 2.3    | 1.4    | 2.1    | 1.9    | 2.1    | 1.8    | 3.5    |
| 3.6    | 2.5    | 4.9    | 9.2    | 0.8    | 1.2    | 0.7    | 1.0    | 1.4    |
| 218.8  | 200.7  | 330.6  | 226.5  | 251.0  | 212.4  | 249.7  | 273.8  | 394.5  |
| 305.5  | 265.0  | 565.5  | 324.0  | 386.7  | 264.8  | 339.0  | 417.6  | 457.0  |
| 11.5   | 3.7    | 7.9    | 9.4    | 3.9    | 4.6    | 3.2    | 3.2    | 5.5    |
| 33.1   | 14.1   | 50.1   | 56.1   | 24.1   | 88.0   | 63.2   | 140.2  | 179.1  |
| 202.2  | 178.6  | 315.0  | 193.4  | 297.0  | 434.2  | 322.5  | 342.2  | 193.0  |
| 37.0   | 44.3   | 43.3   | 60.1   | 43.4   | 54.2   | 48.6   | 41.7   | 93.3   |
| 55.2   | 61.3   | 42.4   | 50.1   | 67.9   | 34.9   | 56.2   | 91.3   | 10.6   |
| 13.9   | 18.5   | 28.0   | 8.9    | 19.6   | 19.6   | 28.0   | 24.3   | 23.2   |
| 30.1   | 26.5   | 31.9   | 29.7   | 31.7   | 36.4   | 39.5   | 59.2   | 44.8   |
| 24.4   | 22.7   | 39.1   | 24.6   | 59.6   | 48.1   | 73.0   | 72.8   | 69.3   |
| 1.0    | 1.6    | 1.4    | 5.3    | 13.5   | 22.3   | 20.2   | 28.7   | 127.2  |
| 1621.3 | 1492.4 | 1899.3 | 1570.5 | 1194.0 | 1008.3 | 1143.3 | 1390.5 | 625.2  |
| 12.5   | 6.2    | 23.7   | 13.4   | 22.4   | 10.5   | 14.8   | 15.6   | 15.9   |
| 4.5    | 6.7    | 5.6    | 5.3    | 3.5    | 2.8    | 5.7    | 0.3    | 1.7    |
| 44.4   | 52.2   | 50.3   | 48.1   | 50.4   | 45.9   | 56.2   | 58.0   | 46.1   |
| 9.0    | 6.9    | 18.4   | 7.5    | 28.6   | 38.3   | 26.8   | 15.0   | 21.3   |
| 51.9   | 54.5   | 94.1   | 64.8   | 46.0   | 37.0   | 45.4   | 75.0   | 75.0   |
| 29.6   | 42.3   | 66.3   | 28.7   | 84.7   | 64.9   | 102.0  | 138.2  | 87.3   |
| 143.0  | 145.0  | 133.5  | 127.2  | 314.8  | 406.2  | 332.3  | 348.1  | 339.5  |
| 212.4  | 207.2  | 240.1  | 186.1  | 364.9  | 439.2  | 520.0  | 550.3  | 738.8  |
| 40.9   | 37.1   | 44.2   | 28.5   | 32.0   | 22.3   | 29.2   | 33.3   | 32.3   |
| 14.0   | 10.0   | 12.5   | 8.4    | 4.2    | 6.9    | 8.1    | 7.8    | 18.8   |
| 19.0   | 11.1   | 40.5   | 35.6   | 27.1   | 18.7   | 28.3   | 21.1   | 15.2   |
| 11.5   | 7.5    | 14.1   | 6.9    | 6.9    | 5.3    | 7.2    | 9.0    | 31.7   |
| 49.2   | 41.0   | 56.9   | 42.4   | 63.4   | 46.1   | 60.3   | 63.9   | 109.7  |
| 1146.2 | 1117.0 | 1288.4 | 891.1  | 794.6  | 650.4  | 866.4  | 966.5  | 973.4  |
| 370.9  | 325.7  | 880.9  | 338.3  | 1621.5 | 862.8  | 1375.0 | 1801.3 | 1151.4 |
| 129.7  | 133.2  | 288.3  | 109.0  | 654.4  | 363.8  | 563.4  | 836.6  | 391.0  |
| 12.7   | 13.5   | 20.0   | 13.1   | 18.2   | 14.1   | 14.0   | 21.8   | 31.6   |
| 117.1  | 102.6  | 170.6  | 73.7   | 402.3  | 317.4  | 333.5  | 406.5  | 492.4  |
| 30.6   | 31.9   | 31.1   | 26.6   | 25.8   | 21.1   | 18.1   | 34.2   | 81.9   |
| 36.6   | 36.9   | 35.3   | 38.7   | 44.1   | 35.3   | 37.1   | 32.1   | 103.1  |
| 1.7    | 5.0    | 5.5    | 13.5   | 10.0   | 8.1    | 2.3    | 0.7    | 10.6   |
| 17.1   | 18.8   | 16.0   | 17.2   | 42.5   | 42.3   | 48.0   | 62.6   | 17.3   |
| 53.9   | 43.6   | 80.5   | 49.4   | 61.8   | 40.8   | 72.9   | 74.4   | 130.2  |
| 76.4   | 71.2   | 95.9   | 70.6   | 50.8   | 42.8   | 53.2   | 69.6   | 114.1  |
| 14.7   | 19.2   | 22.2   | 10.0   | 13.5   | 10.6   | 11.9   | 20.2   | 29.9   |
| 773.9  | 604.0  | 1071.0 | 768.1  | 1212.8 | 560.9  | 1089.6 | 1359.3 | 2075.3 |
| 2.8    | 7.9    | 7.8    | 2.2    | 36.8   | 38.4   | 39.5   | 50.2   | 25.1   |
| 0.9    | 0.8    | 1.9    | 1.6    | 0.9    | 0.6    | 2.1    | 0.6    | 1.1    |
| 8.2    | 5.8    | 10.5   | 9.1    | 17.3   | 14.4   | 13.0   | 14.0   | 13.4   |
| 8.3    | 9.3    | 10.0   | 6.1    | 8.7    | 7.7    | 9.2    | 13.2   | 8.2    |



|        |        |        |        |        |        |        |        |        |
|--------|--------|--------|--------|--------|--------|--------|--------|--------|
| 145.8  | 176.5  | 130.6  | 168.7  | 161.0  | 221.3  | 170.9  | 181.6  | 217.2  |
| 1.5    | 5.0    | 7.2    | 6.0    | 4.5    | 3.3    | 5.8    | 1.2    | 13.9   |
| 7.9    | 3.0    | 6.8    | 6.4    | 1.7    | 1.6    | 1.2    | 7.9    | 8.2    |
| 0.7    | 0.9    | 1.5    | 1.0    | 5.1    | 0.8    | 8.2    | 1.9    | 9.9    |
| 233.3  | 238.0  | 216.0  | 228.4  | 375.6  | 387.7  | 369.3  | 404.2  | 191.9  |
| 8.5    | 16.5   | 3.4    | 8.6    | 5.8    | 7.5    | 11.0   | 10.3   | 18.5   |
| 21.3   | 16.8   | 23.5   | 13.6   | 14.1   | 3.3    | 7.4    | 8.8    | 16.7   |
| 6.2    | 1.4    | 2.6    | 2.4    | 2.6    | 0.8    | 1.3    | 1.9    | 2.0    |
| 88.4   | 83.9   | 83.6   | 76.6   | 49.2   | 37.4   | 55.9   | 42.7   | 83.9   |
| 5.9    | 3.7    | 3.3    | 7.9    | 2.3    | 9.7    | 9.4    | 5.9    | 10.5   |
| 2.8    | 0.7    | 6.1    | 1.3    | 110.8  | 144.3  | 118.2  | 139.8  | 208.0  |
| 4.2    | 5.2    | 4.7    | 6.4    | 3.6    | 4.3    | 1.5    | 3.0    | 2.1    |
| 108.9  | 91.6   | 142.8  | 88.8   | 186.7  | 193.3  | 205.6  | 188.1  | 236.9  |
| 447.0  | 431.1  | 493.4  | 364.4  | 939.7  | 1032.7 | 775.4  | 995.8  | 404.3  |
| 7.7    | 7.8    | 8.2    | 10.2   | 10.7   | 4.9    | 8.8    | 16.2   | 19.4   |
| 1450.1 | 1238.6 | 1076.2 | 1332.1 | 754.7  | 621.7  | 677.3  | 1256.0 | 185.9  |
| 7.1    | 2.6    | 7.1    | 5.3    | 2.1    | 1.0    | 2.7    | 1.1    | 2.9    |
| 1.6    | 7.2    | 2.5    | 2.6    | 1.0    | 1.3    | 1.2    | 1.9    | 3.5    |
| 40.9   | 51.0   | 48.0   | 39.8   | 48.6   | 36.6   | 61.2   | 61.7   | 80.1   |
| 15.7   | 12.2   | 14.8   | 15.8   | 27.5   | 54.9   | 34.8   | 38.2   | 9.3    |
| 1.8    | 3.1    | 9.2    | 3.9    | 9.5    | 1.4    | 4.9    | 3.0    | 4.7    |
| 5.1    | 8.0    | 7.4    | 6.0    | 2.8    | 1.7    | 5.5    | 0.7    | 10.5   |
| 6.5    | 7.5    | 8.5    | 3.5    | 10.3   | 9.0    | 8.2    | 10.3   | 31.1   |
| 15.8   | 13.0   | 28.4   | 22.3   | 31.8   | 29.5   | 34.5   | 31.1   | 39.9   |
| 1.0    | 2.0    | 0.9    | 0.8    | 1.7    | 1.0    | 1.8    | 2.9    | 2.5    |
| 554.2  | 518.4  | 1328.5 | 492.8  | 1425.0 | 879.3  | 1238.9 | 1597.1 | 1475.6 |
| 3.4    | 2.5    | 6.2    | 4.8    | 3.8    | 0.6    | 2.3    | 2.2    | 6.0    |
| 7.6    | 2.2    | 10.1   | 6.2    | 6.4    | 7.3    | 6.8    | 7.6    | 6.7    |
| 3.4    | 3.4    | 6.6    | 1.3    | 2.9    | 3.1    | 1.7    | 2.2    | 2.8    |
| 10.4   | 6.0    | 5.7    | 12.6   | 7.6    | 3.7    | 2.2    | 17.0   | 12.8   |
| 7.9    | 12.1   | 4.5    | 3.9    | 10.0   | 6.1    | 8.8    | 2.3    | 8.0    |
| 1.3    | 0.8    | 2.0    | 0.9    | 1.3    | 1.1    | 1.3    | 1.3    | 2.1    |
| 3.6    | 8.1    | 6.3    | 1.2    | 1.0    | 1.5    | 0.9    | 2.1    | 2.7    |
| 13.1   | 11.9   | 13.6   | 10.2   | 5.8    | 5.0    | 8.5    | 2.2    | 8.5    |
| 0.8    | 1.3    | 1.1    | 1.7    | 1.2    | 1.1    | 0.9    | 0.5    | 1.4    |
| 1.9    | 5.5    | 1.4    | 6.4    | 2.7    | 1.5    | 2.9    | 2.2    | 7.0    |
| 7.7    | 9.1    | 8.5    | 6.7    | 85.4   | 108.6  | 82.3   | 80.0   | 86.0   |
| 2.6    | 8.0    | 1.3    | 0.8    | 1.2    | 4.5    | 1.4    | 8.3    | 6.5    |
| 20.4   | 15.4   | 11.4   | 10.4   | 14.0   | 9.5    | 17.0   | 30.0   | 31.1   |
| 5.0    | 5.3    | 19.0   | 14.8   | 2.4    | 3.8    | 2.7    | 8.9    | 5.6    |
| 1.6    | 5.2    | 6.9    | 4.4    | 7.0    | 8.2    | 8.9    | 1.6    | 5.0    |
| 78.8   | 99.7   | 54.8   | 62.8   | 150.6  | 196.7  | 185.0  | 214.7  | 309.6  |
| 16.4   | 9.7    | 26.2   | 13.7   | 18.2   | 22.1   | 25.9   | 33.0   | 25.5   |
| 1.7    | 5.8    | 9.3    | 2.4    | 5.6    | 3.2    | 5.6    | 2.2    | 7.5    |
| 15.2   | 28.6   | 21.1   | 21.1   | 14.3   | 12.3   | 25.7   | 29.9   | 18.6   |
| 3.2    | 6.5    | 13.0   | 3.3    | 11.7   | 4.5    | 4.0    | 12.7   | 14.6   |
| 2.0    | 6.7    | 4.7    | 3.5    | 1.2    | 1.7    | 2.3    | 0.7    | 1.2    |
| 225.8  | 239.3  | 286.2  | 196.9  | 213.8  | 317.8  | 207.3  | 221.0  | 320.1  |
| 2.1    | 1.2    | 1.3    | 3.5    | 1.9    | 2.9    | 1.0    | 1.1    | 2.3    |
| 9.1    | 13.7   | 28.4   | 12.2   | 3.2    | 8.7    | 1.4    | 2.6    | 4.0    |
| 15.1   | 16.4   | 11.2   | 16.3   | 3.0    | 2.5    | 3.0    | 12.3   | 9.5    |
| 217.4  | 213.4  | 288.3  | 210.5  | 459.6  | 461.6  | 442.9  | 492.8  | 704.3  |
| 161.7  | 169.5  | 170.4  | 155.0  | 197.2  | 208.6  | 225.6  | 219.4  | 417.8  |

|       |       |       |       |        |        |        |        |        |
|-------|-------|-------|-------|--------|--------|--------|--------|--------|
| 124.2 | 114.6 | 100.4 | 92.5  | 231.7  | 308.8  | 230.3  | 261.6  | 155.2  |
| 3.8   | 6.6   | 12.0  | 9.1   | 1.5    | 10.2   | 7.1    | 6.8    | 6.2    |
| 21.3  | 7.9   | 23.4  | 8.2   | 14.0   | 9.1    | 17.9   | 5.0    | 8.0    |
| 318.9 | 496.1 | 290.6 | 364.2 | 3309.1 | 3699.9 | 3603.1 | 3438.4 | 2641.4 |
| 32.7  | 16.0  | 48.1  | 21.2  | 39.4   | 35.2   | 60.4   | 48.9   | 56.3   |
| 31.2  | 19.5  | 38.5  | 17.2  | 29.6   | 26.1   | 30.7   | 39.9   | 41.9   |
| 112.0 | 132.6 | 93.9  | 104.1 | 95.3   | 98.6   | 103.8  | 110.4  | 101.7  |
| 1.2   | 3.5   | 0.9   | 2.4   | 1.3    | 3.3    | 8.5    | 4.8    | 4.1    |
| 34.2  | 31.5  | 53.2  | 36.8  | 47.1   | 32.8   | 49.9   | 58.9   | 82.0   |
| 5.9   | 10.6  | 9.2   | 6.6   | 20.8   | 27.1   | 23.9   | 22.7   | 26.4   |
| 53.6  | 53.6  | 72.9  | 53.5  | 77.9   | 69.9   | 72.4   | 83.6   | 85.9   |
| 211.0 | 202.3 | 175.8 | 165.8 | 178.2  | 180.4  | 198.8  | 239.5  | 197.2  |
| 15.0  | 7.2   | 14.9  | 18.3  | 5.0    | 6.7    | 15.5   | 5.2    | 19.1   |
| 45.3  | 42.9  | 114.4 | 28.7  | 220.8  | 140.4  | 181.3  | 215.4  | 244.3  |
| 311.3 | 326.7 | 352.2 | 305.6 | 326.0  | 266.9  | 303.5  | 370.3  | 351.2  |
| 27.0  | 17.9  | 46.8  | 28.0  | 31.2   | 29.8   | 30.0   | 30.5   | 52.8   |
| 37.6  | 27.5  | 43.8  | 26.0  | 16.8   | 10.4   | 15.7   | 11.8   | 10.6   |
| 144.8 | 131.6 | 207.4 | 150.7 | 151.8  | 132.3  | 166.7  | 164.2  | 216.8  |
| 8.6   | 19.9  | 18.6  | 11.4  | 9.1    | 6.4    | 5.2    | 9.2    | 12.8   |
| 5.3   | 3.9   | 7.6   | 1.7   | 6.5    | 6.3    | 11.0   | 4.1    | 14.8   |
| 301.2 | 296.2 | 334.7 | 305.9 | 170.3  | 196.6  | 152.5  | 188.3  | 39.0   |
| 44.6  | 34.0  | 69.4  | 24.3  | 170.9  | 154.4  | 237.8  | 260.8  | 93.5   |
| 241.4 | 260.2 | 200.3 | 259.7 | 415.7  | 502.8  | 471.3  | 526.3  | 634.7  |
| 9.1   | 17.7  | 10.9  | 7.4   | 10.5   | 6.8    | 12.0   | 18.6   | 13.5   |
| 49.6  | 48.4  | 35.1  | 47.7  | 249.4  | 258.9  | 235.5  | 268.1  | 90.5   |
| 306.5 | 275.3 | 419.7 | 286.8 | 448.8  | 485.9  | 438.3  | 458.3  | 314.1  |
| 53.1  | 74.4  | 116.1 | 84.5  | 122.3  | 147.7  | 132.7  | 154.3  | 224.6  |
| 271.8 | 277.3 | 359.9 | 261.0 | 303.2  | 307.0  | 325.6  | 357.0  | 312.3  |
| 58.9  | 64.5  | 45.9  | 55.6  | 32.8   | 49.9   | 29.7   | 37.1   | 37.9   |
| 3.1   | 7.5   | 3.0   | 1.9   | 6.0    | 6.6    | 9.1    | 12.3   | 43.4   |
| 3.8   | 4.3   | 3.7   | 7.7   | 5.1    | 2.7    | 1.7    | 0.4    | 3.6    |
| 148.9 | 156.0 | 267.8 | 130.5 | 53.6   | 40.8   | 44.0   | 49.3   | 252.8  |
| 17.5  | 15.3  | 12.0  | 19.7  | 6.9    | 2.5    | 8.2    | 8.5    | 6.9    |
| 165.7 | 162.4 | 176.7 | 171.6 | 220.9  | 321.7  | 211.6  | 246.4  | 418.0  |
| 4.3   | 4.3   | 3.0   | 1.9   | 7.3    | 8.3    | 3.5    | 12.9   | 7.9    |
| 150.5 | 163.0 | 200.2 | 167.6 | 306.7  | 339.4  | 331.2  | 344.7  | 322.7  |
| 13.5  | 9.6   | 11.4  | 10.7  | 7.0    | 4.1    | 5.6    | 5.3    | 8.6    |
| 8.9   | 3.6   | 8.7   | 5.3   | 10.3   | 18.8   | 13.2   | 15.4   | 12.8   |
| 281.8 | 292.5 | 241.7 | 325.1 | 186.8  | 231.3  | 196.5  | 227.7  | 407.7  |
| 1.1   | 0.8   | 1.3   | 1.7   | 1.8    | 5.1    | 0.8    | 1.4    | 1.4    |
| 21.1  | 25.8  | 16.7  | 20.7  | 9.1    | 23.7   | 18.0   | 24.1   | 32.2   |
| 7.5   | 12.9  | 5.3   | 7.4   | 46.9   | 20.6   | 44.8   | 37.3   | 50.1   |
| 35.9  | 28.3  | 53.1  | 32.8  | 112.7  | 110.9  | 112.8  | 139.6  | 109.1  |
| 723.3 | 688.5 | 864.1 | 709.9 | 306.5  | 409.1  | 332.3  | 359.1  | 284.0  |
| 41.3  | 43.6  | 39.4  | 42.1  | 38.6   | 48.2   | 47.8   | 53.4   | 55.5   |
| 38.6  | 42.2  | 20.4  | 27.7  | 18.3   | 28.0   | 29.6   | 32.6   | 451.2  |
| 87.4  | 85.3  | 99.0  | 79.7  | 69.7   | 84.5   | 75.4   | 79.8   | 124.0  |
| 27.3  | 7.5   | 20.6  | 23.3  | 5.1    | 5.9    | 2.5    | 2.2    | 3.5    |
| 7.4   | 7.0   | 12.2  | 2.9   | 2.6    | 8.5    | 6.0    | 9.6    | 12.0   |
| 396.9 | 375.5 | 544.4 | 350.8 | 1456.8 | 1356.0 | 1459.3 | 1594.9 | 838.8  |
| 391.7 | 319.7 | 639.2 | 411.4 | 634.5  | 715.3  | 662.3  | 741.7  | 592.1  |
| 69.7  | 88.4  | 59.0  | 94.0  | 58.8   | 91.5   | 65.5   | 78.7   | 103.2  |
| 111.5 | 104.3 | 106.6 | 100.2 | 102.2  | 96.3   | 88.3   | 114.5  | 215.3  |

|       |       |       |       |       |       |       |       |       |
|-------|-------|-------|-------|-------|-------|-------|-------|-------|
| 217.9 | 191.9 | 279.1 | 160.4 | 393.4 | 358.1 | 478.0 | 426.7 | 671.0 |
| 19.8  | 17.1  | 24.9  | 8.2   | 29.4  | 20.8  | 12.4  | 21.6  | 24.9  |
| 19.6  | 16.1  | 29.4  | 16.3  | 2.1   | 5.3   | 3.6   | 3.8   | 35.1  |
| 0.5   | 1.2   | 2.1   | 2.9   | 20.1  | 15.2  | 14.8  | 24.7  | 10.7  |
| 51.9  | 33.5  | 29.3  | 15.3  | 73.6  | 98.3  | 85.1  | 107.0 | 48.3  |
| 139.1 | 133.5 | 210.6 | 119.3 | 305.4 | 283.6 | 317.4 | 360.6 | 616.0 |
| 67.6  | 55.5  | 104.9 | 50.5  | 59.9  | 47.7  | 46.4  | 74.4  | 107.1 |
| 349.6 | 254.7 | 362.8 | 243.0 | 122.6 | 176.2 | 115.6 | 136.7 | 259.3 |
| 2.9   | 6.8   | 7.5   | 8.0   | 2.9   | 6.8   | 6.6   | 3.8   | 15.7  |
| 12.6  | 17.7  | 20.3  | 12.5  | 8.9   | 5.7   | 17.1  | 19.2  | 19.3  |
| 0.4   | 0.7   | 1.6   | 1.3   | 0.5   | 2.2   | 1.1   | 4.0   | 33.7  |
| 36.3  | 43.6  | 45.9  | 39.5  | 32.8  | 28.9  | 43.6  | 33.9  | 58.8  |
| 35.2  | 23.4  | 35.9  | 28.9  | 21.6  | 20.2  | 20.7  | 29.9  | 28.1  |
| 3.8   | 10.0  | 11.9  | 3.6   | 37.9  | 37.5  | 60.0  | 45.2  | 36.6  |
| 13.4  | 9.0   | 9.7   | 5.8   | 3.6   | 3.1   | 3.6   | 3.8   | 9.9   |
| 30.8  | 41.3  | 45.2  | 30.5  | 89.2  | 70.0  | 90.2  | 88.4  | 25.7  |
| 3.9   | 6.5   | 1.9   | 2.6   | 3.3   | 7.4   | 0.7   | 7.0   | 10.8  |
| 120.4 | 125.5 | 142.5 | 111.7 | 247.0 | 340.6 | 215.5 | 296.0 | 158.5 |
| 1.1   | 4.3   | 1.2   | 3.3   | 0.7   | 1.8   | 0.3   | 7.7   | 4.0   |
| 3.1   | 1.6   | 1.7   | 0.6   | 6.3   | 15.0  | 6.1   | 7.3   | 17.2  |
| 0.5   | 2.1   | 6.4   | 3.9   | 3.1   | 2.8   | 0.8   | 0.8   | 2.4   |
| 2.6   | 8.0   | 20.6  | 10.1  | 17.0  | 10.5  | 13.5  | 17.7  | 22.8  |
| 19.8  | 17.9  | 20.2  | 14.3  | 9.0   | 9.7   | 11.1  | 12.3  | 17.1  |
| 6.5   | 13.5  | 14.9  | 6.7   | 5.0   | 8.6   | 7.1   | 14.6  | 10.7  |
| 550.8 | 560.7 | 571.2 | 537.6 | 447.2 | 362.6 | 428.3 | 514.6 | 345.3 |
| 43.1  | 26.9  | 57.6  | 56.6  | 58.0  | 58.1  | 53.4  | 56.2  | 101.4 |
| 11.1  | 14.4  | 15.4  | 11.4  | 11.4  | 11.7  | 18.7  | 16.8  | 17.1  |
| 26.9  | 15.0  | 27.0  | 14.0  | 24.3  | 6.6   | 18.6  | 35.9  | 26.8  |
| 18.4  | 26.1  | 28.3  | 16.0  | 12.3  | 9.0   | 11.2  | 1.4   | 7.5   |
| 41.7  | 33.6  | 57.0  | 46.4  | 47.2  | 41.5  | 48.2  | 48.7  | 85.8  |
| 3.8   | 2.9   | 1.3   | 2.5   | 1.6   | 0.3   | 0.8   | 1.4   | 0.9   |
| 9.9   | 6.1   | 1.7   | 6.6   | 5.2   | 0.4   | 0.9   | 5.0   | 5.5   |
| 136.2 | 141.2 | 214.0 | 192.2 | 109.1 | 115.8 | 97.1  | 111.3 | 93.4  |
| 59.7  | 61.0  | 71.7  | 64.0  | 118.6 | 121.1 | 133.0 | 126.4 | 88.2  |
| 129.6 | 158.2 | 159.4 | 136.8 | 92.4  | 81.5  | 88.6  | 114.5 | 124.1 |
| 38.7  | 39.8  | 50.3  | 38.9  | 44.5  | 34.2  | 43.3  | 55.7  | 72.1  |
| 1.6   | 1.3   | 2.3   | 2.2   | 1.1   | 1.2   | 1.0   | 2.5   | 1.8   |
| 37.0  | 26.1  | 28.3  | 56.3  | 84.3  | 98.5  | 59.9  | 89.1  | 133.0 |
| 3.0   | 5.6   | 5.9   | 2.4   | 2.1   | 2.4   | 2.5   | 0.6   | 4.3   |
| 2.3   | 3.7   | 7.4   | 1.7   | 3.1   | 1.5   | 2.0   | 0.7   | 8.1   |
| 2.0   | 2.2   | 1.5   | 1.3   | 2.3   | 0.8   | 1.3   | 2.7   | 2.3   |
| 76.6  | 73.1  | 99.1  | 59.3  | 203.4 | 212.5 | 228.2 | 225.2 | 573.8 |
| 414.8 | 399.7 | 362.6 | 358.9 | 174.3 | 242.5 | 173.2 | 141.6 | 248.3 |
| 171.5 | 186.0 | 316.6 | 167.1 | 160.9 | 148.7 | 164.8 | 196.0 | 146.7 |
| 0.8   | 2.3   | 0.4   | 1.5   | 1.2   | 1.0   | 0.5   | 0.6   | 0.4   |
| 468.0 | 452.6 | 518.3 | 455.1 | 469.1 | 494.9 | 456.8 | 533.9 | 484.6 |
| 370.9 | 328.6 | 712.7 | 465.3 | 490.1 | 459.9 | 587.4 | 673.9 | 668.1 |
| 2.5   | 2.8   | 15.2  | 7.8   | 6.4   | 7.3   | 1.0   | 2.2   | 10.6  |
| 91.0  | 83.4  | 131.9 | 71.6  | 178.0 | 167.5 | 195.7 | 171.8 | 212.4 |
| 91.7  | 112.0 | 112.4 | 99.7  | 63.1  | 70.5  | 50.8  | 81.4  | 100.0 |
| 25.5  | 20.9  | 21.0  | 19.8  | 20.7  | 21.6  | 20.5  | 28.4  | 25.9  |
| 327.3 | 281.8 | 431.8 | 347.3 | 263.9 | 287.0 | 356.7 | 305.4 | 328.7 |
| 18.0  | 8.2   | 12.0  | 5.1   | 5.1   | 3.4   | 2.6   | 2.0   | 7.2   |

|        |        |        |        |        |        |        |        |        |
|--------|--------|--------|--------|--------|--------|--------|--------|--------|
| 11.8   | 12.6   | 9.8    | 18.0   | 18.7   | 15.7   | 19.4   | 14.9   | 8.1    |
| 634.6  | 606.7  | 900.7  | 609.6  | 1231.3 | 1373.1 | 1301.8 | 1436.5 | 1764.0 |
| 8.5    | 10.4   | 10.7   | 9.6    | 8.0    | 6.5    | 5.3    | 11.8   | 11.0   |
| 5.7    | 10.0   | 20.0   | 13.1   | 16.7   | 17.6   | 10.2   | 26.7   | 10.9   |
| 14.3   | 10.5   | 10.1   | 6.1    | 11.8   | 5.4    | 7.1    | 24.2   | 25.0   |
| 383.3  | 353.7  | 669.1  | 365.5  | 612.1  | 577.7  | 631.1  | 637.4  | 800.3  |
| 289.0  | 279.7  | 333.7  | 280.4  | 28.9   | 34.9   | 35.1   | 29.9   | 56.4   |
| 28.2   | 24.8   | 22.5   | 19.8   | 12.0   | 7.9    | 3.7    | 15.1   | 16.5   |
| 11.6   | 17.9   | 16.4   | 10.1   | 13.0   | 8.5    | 7.4    | 10.6   | 15.0   |
| 32.6   | 26.3   | 26.6   | 24.4   | 18.0   | 16.6   | 18.2   | 14.5   | 36.1   |
| 185.2  | 180.7  | 222.1  | 140.2  | 94.1   | 74.4   | 82.9   | 91.4   | 247.8  |
| 8.6    | 28.2   | 40.9   | 8.7    | 59.4   | 55.7   | 28.3   | 45.7   | 96.6   |
| 6.7    | 6.6    | 3.0    | 3.3    | 7.3    | 4.3    | 5.9    | 5.3    | 12.8   |
| 16.8   | 9.3    | 20.7   | 13.9   | 9.5    | 9.0    | 14.5   | 17.9   | 30.7   |
| 6.3    | 3.9    | 4.0    | 8.8    | 6.9    | 18.4   | 6.5    | 15.0   | 7.1    |
| 1.5    | 2.3    | 1.6    | 1.6    | 6.1    | 2.7    | 4.3    | 3.6    | 2.5    |
| 3.2    | 5.1    | 3.9    | 4.2    | 3.0    | 5.5    | 3.4    | 1.1    | 4.8    |
| 98.6   | 94.7   | 93.8   | 91.1   | 127.0  | 101.8  | 114.9  | 127.3  | 97.8   |
| 1956.3 | 1902.4 | 3124.8 | 2781.2 | 3764.0 | 3494.4 | 3392.0 | 3598.1 | 5456.0 |
| 1058.8 | 1101.9 | 944.9  | 861.7  | 1117.6 | 1324.0 | 1203.1 | 1291.8 | 571.3  |
| 3867.7 | 3194.5 | 6269.2 | 3537.2 | 2831.7 | 2856.0 | 3004.1 | 3067.7 | 2822.0 |
| 81.7   | 86.1   | 123.3  | 72.1   | 75.1   | 74.3   | 67.3   | 77.5   | 63.3   |
| 142.1  | 111.5  | 129.7  | 80.4   | 57.8   | 54.2   | 52.4   | 52.1   | 115.8  |
| 110.6  | 104.0  | 160.2  | 95.6   | 312.3  | 367.6  | 346.2  | 336.9  | 395.0  |
| 56.7   | 42.4   | 52.4   | 38.6   | 43.6   | 63.3   | 53.7   | 68.5   | 32.1   |
| 77.4   | 84.6   | 54.1   | 61.8   | 84.9   | 144.6  | 104.2  | 93.2   | 77.2   |
| 43.8   | 37.6   | 33.8   | 38.4   | 19.3   | 28.8   | 19.0   | 26.9   | 41.2   |
| 105.5  | 98.7   | 156.4  | 99.3   | 121.2  | 88.6   | 113.4  | 113.2  | 145.0  |
| 61.5   | 53.1   | 46.2   | 55.9   | 75.4   | 57.7   | 72.6   | 92.9   | 55.9   |
| 20.5   | 12.3   | 21.6   | 16.4   | 15.0   | 12.1   | 11.0   | 18.9   | 25.9   |
| 20.1   | 9.8    | 21.8   | 13.4   | 29.0   | 22.1   | 65.1   | 52.9   | 28.7   |
| 525.9  | 511.5  | 452.8  | 419.0  | 188.4  | 187.2  | 194.7  | 243.2  | 294.0  |
| 1885.9 | 1798.1 | 1408.4 | 1796.3 | 1110.4 | 1165.6 | 996.0  | 1323.5 | 410.5  |
| 28.2   | 19.0   | 16.3   | 20.0   | 19.2   | 23.6   | 13.1   | 28.1   | 19.9   |
| 3.3    | 1.2    | 5.1    | 4.3    | 4.1    | 0.5    | 1.8    | 7.9    | 4.3    |
| 2.7    | 9.8    | 6.4    | 6.0    | 5.6    | 6.5    | 6.2    | 5.8    | 2.9    |
| 36.4   | 41.1   | 24.3   | 31.6   | 10.4   | 17.2   | 10.4   | 13.9   | 10.3   |
| 6.2    | 3.1    | 7.6    | 4.5    | 2.5    | 3.4    | 5.6    | 8.0    | 3.0    |
| 113.8  | 99.7   | 229.7  | 126.1  | 337.0  | 264.3  | 294.8  | 359.2  | 399.9  |
| 158.9  | 158.7  | 187.4  | 164.9  | 142.9  | 93.4   | 131.5  | 151.9  | 89.3   |
| 36.5   | 38.4   | 32.0   | 25.0   | 22.3   | 16.7   | 17.2   | 27.8   | 30.8   |
| 0.8    | 3.9    | 0.9    | 1.4    | 1.4    | 1.3    | 2.1    | 6.5    | 7.8    |
| 3.2    | 4.4    | 8.0    | 3.8    | 4.8    | 2.7    | 3.7    | 3.9    | 3.1    |
| 0.7    | 0.6    | 0.8    | 0.8    | 3.1    | 1.0    | 1.1    | 4.1    | 1.3    |
| 97.1   | 80.9   | 94.6   | 83.3   | 40.5   | 40.1   | 34.7   | 62.4   | 63.9   |
| 3.6    | 21.6   | 8.7    | 6.3    | 3.6    | 3.7    | 2.8    | 4.8    | 13.5   |
| 485.1  | 486.1  | 743.7  | 536.3  | 1280.5 | 1209.4 | 1503.4 | 1578.5 | 168.0  |
| 2.9    | 8.8    | 5.0    | 6.0    | 6.9    | 5.9    | 6.3    | 1.0    | 5.6    |
| 2.3    | 1.2    | 4.2    | 1.3    | 1.7    | 2.8    | 2.5    | 3.5    | 2.8    |
| 1.2    | 2.8    | 2.0    | 1.8    | 2.2    | 2.1    | 3.7    | 3.2    | 4.4    |
| 112.2  | 96.4   | 168.5  | 93.3   | 120.3  | 96.1   | 136.0  | 142.7  | 227.4  |
| 118.5  | 98.9   | 153.0  | 137.1  | 104.5  | 129.7  | 136.6  | 148.1  | 154.9  |
| 47.7   | 54.4   | 52.4   | 45.6   | 30.4   | 28.5   | 33.0   | 24.6   | 100.3  |

|       |       |       |       |       |       |       |       |       |
|-------|-------|-------|-------|-------|-------|-------|-------|-------|
| 10.4  | 10.3  | 24.4  | 11.3  | 16.5  | 13.6  | 19.8  | 5.9   | 15.1  |
| 86.8  | 92.6  | 77.1  | 97.9  | 136.0 | 125.4 | 140.4 | 160.9 | 143.3 |
| 42.2  | 27.3  | 66.5  | 38.3  | 55.4  | 66.1  | 50.9  | 72.6  | 54.2  |
| 10.5  | 14.6  | 15.9  | 15.0  | 6.4   | 2.4   | 1.8   | 0.8   | 12.1  |
| 52.6  | 53.2  | 63.3  | 49.0  | 49.9  | 55.5  | 62.6  | 67.3  | 156.9 |
| 14.4  | 10.1  | 36.8  | 16.3  | 32.4  | 22.7  | 27.5  | 37.5  | 73.1  |
| 12.5  | 9.7   | 12.4  | 12.5  | 2.2   | 10.9  | 8.3   | 10.2  | 19.7  |
| 23.9  | 35.5  | 25.9  | 28.0  | 13.8  | 12.7  | 10.8  | 17.5  | 17.8  |
| 53.3  | 49.6  | 46.3  | 68.5  | 49.4  | 32.1  | 43.8  | 61.3  | 80.7  |
| 15.8  | 20.4  | 18.8  | 23.7  | 6.1   | 4.7   | 6.8   | 7.7   | 1.8   |
| 293.2 | 251.5 | 360.9 | 285.4 | 235.3 | 206.1 | 245.5 | 269.6 | 153.2 |
| 32.2  | 38.7  | 63.1  | 34.8  | 51.9  | 39.6  | 53.0  | 54.5  | 41.6  |
| 96.8  | 106.7 | 112.1 | 92.9  | 55.3  | 44.5  | 53.7  | 52.1  | 79.6  |
| 1.4   | 5.9   | 9.5   | 1.5   | 2.0   | 1.3   | 8.5   | 4.0   | 10.2  |
| 160.7 | 115.8 | 191.0 | 138.9 | 113.4 | 119.8 | 141.4 | 163.9 | 291.1 |
| 132.6 | 123.9 | 88.9  | 149.6 | 107.1 | 190.5 | 107.1 | 152.6 | 393.2 |
| 6.7   | 5.8   | 2.7   | 1.9   | 3.2   | 4.8   | 3.1   | 6.2   | 1.9   |
| 22.6  | 18.3  | 20.1  | 21.4  | 20.6  | 13.9  | 18.6  | 19.8  | 21.1  |
| 61.9  | 48.5  | 61.5  | 54.2  | 56.6  | 48.2  | 65.4  | 73.3  | 42.0  |
| 17.7  | 11.4  | 19.6  | 16.3  | 7.6   | 9.7   | 10.6  | 17.6  | 20.6  |
| 10.0  | 10.2  | 7.2   | 6.3   | 2.9   | 6.7   | 1.0   | 4.8   | 13.5  |
| 10.5  | 13.3  | 9.9   | 12.7  | 16.1  | 11.0  | 12.3  | 21.2  | 27.3  |
| 0.4   | 0.6   | 0.8   | 0.9   | 4.4   | 7.2   | 4.2   | 8.1   | 0.5   |
| 5.0   | 0.8   | 9.6   | 1.1   | 68.8  | 60.9  | 106.6 | 109.3 | 74.6  |
| 2.0   | 2.7   | 7.9   | 1.6   | 1.3   | 4.5   | 2.8   | 2.9   | 3.2   |
| 46.2  | 45.9  | 26.0  | 35.1  | 57.4  | 69.4  | 65.6  | 72.3  | 9.6   |
| 5.0   | 5.2   | 9.1   | 9.2   | 2.7   | 1.5   | 2.6   | 7.6   | 3.3   |
| 1.7   | 5.4   | 3.9   | 1.6   | 3.6   | 2.3   | 2.7   | 7.9   | 2.7   |
| 15.7  | 4.0   | 10.3  | 9.2   | 8.9   | 3.8   | 4.2   | 13.2  | 26.5  |
| 6.8   | 11.5  | 11.7  | 8.2   | 61.9  | 44.9  | 38.2  | 67.7  | 35.7  |
| 7.2   | 11.2  | 6.5   | 8.7   | 3.7   | 8.1   | 2.7   | 9.4   | 6.2   |
| 4.3   | 9.6   | 5.5   | 1.7   | 1.5   | 1.5   | 6.6   | 8.6   | 7.4   |
| 182.6 | 176.0 | 247.9 | 167.9 | 136.5 | 128.9 | 124.5 | 165.8 | 294.7 |
| 2.2   | 1.7   | 4.5   | 0.6   | 6.7   | 1.0   | 2.4   | 1.3   | 6.7   |
| 2.9   | 0.8   | 3.8   | 0.9   | 0.1   | 2.6   | 4.6   | 1.8   | 1.3   |
| 2.0   | 1.7   | 1.0   | 2.3   | 4.1   | 3.4   | 0.9   | 4.6   | 3.5   |
| 21.5  | 22.3  | 34.1  | 20.4  | 10.3  | 19.7  | 15.6  | 18.1  | 24.7  |
| 10.6  | 21.9  | 22.1  | 5.6   | 23.5  | 9.3   | 10.3  | 12.5  | 27.8  |
| 1.8   | 2.7   | 2.7   | 4.5   | 24.3  | 25.5  | 32.6  | 31.3  | 12.6  |
| 21.8  | 22.6  | 25.8  | 35.5  | 2.9   | 11.6  | 10.1  | 14.6  | 42.4  |
| 20.3  | 7.1   | 23.5  | 21.4  | 46.4  | 41.2  | 48.2  | 47.4  | 46.6  |
| 9.1   | 12.4  | 14.1  | 9.2   | 4.9   | 7.8   | 5.0   | 1.3   | 19.7  |
| 11.2  | 8.6   | 11.0  | 10.6  | 6.0   | 4.3   | 5.8   | 12.6  | 8.3   |
| 2.4   | 2.2   | 2.2   | 1.5   | 0.8   | 1.5   | 1.3   | 4.5   | 0.5   |
| 46.4  | 36.8  | 87.2  | 26.3  | 129.7 | 101.8 | 112.3 | 142.4 | 147.9 |
| 6.5   | 12.9  | 8.9   | 12.7  | 6.8   | 6.8   | 5.3   | 6.6   | 15.5  |
| 27.0  | 27.7  | 41.9  | 18.7  | 20.5  | 20.9  | 21.2  | 31.2  | 47.7  |
| 69.4  | 87.1  | 108.1 | 98.3  | 39.6  | 55.8  | 42.6  | 48.7  | 24.5  |
| 9.9   | 13.0  | 10.5  | 11.7  | 7.4   | 0.8   | 2.9   | 8.7   | 9.0   |
| 2.1   | 4.7   | 8.4   | 6.0   | 2.9   | 1.1   | 3.2   | 3.4   | 4.9   |
| 36.5  | 65.1  | 8.1   | 41.9  | 1.5   | 3.0   | 2.9   | 0.9   | 6.2   |
| 68.1  | 74.8  | 71.3  | 74.5  | 8.1   | 11.5  | 13.7  | 14.2  | 10.3  |
| 1.9   | 0.7   | 13.2  | 4.2   | 1.2   | 0.7   | 1.1   | 4.5   | 3.7   |

|       |       |       |       |       |       |       |       |       |
|-------|-------|-------|-------|-------|-------|-------|-------|-------|
| 36.4  | 34.6  | 34.6  | 39.6  | 46.9  | 51.5  | 51.3  | 61.9  | 44.0  |
| 9.7   | 10.2  | 3.4   | 13.1  | 2.2   | 4.0   | 4.4   | 15.2  | 2.5   |
| 7.0   | 3.7   | 3.0   | 3.5   | 3.8   | 4.2   | 3.8   | 5.9   | 14.1  |
| 8.2   | 16.8  | 8.0   | 13.9  | 7.3   | 8.6   | 5.6   | 2.3   | 4.3   |
| 2.0   | 0.1   | 4.6   | 2.9   | 1.9   | 1.9   | 4.8   | 0.3   | 3.3   |
| 3.0   | 4.1   | 3.0   | 3.7   | 3.1   | 4.8   | 3.1   | 4.3   | 2.2   |
| 13.0  | 18.3  | 8.6   | 7.4   | 3.2   | 5.7   | 3.7   | 12.7  | 12.8  |
| 0.8   | 5.3   | 2.7   | 2.1   | 0.9   | 0.5   | 1.3   | 0.6   | 3.4   |
| 6.0   | 0.9   | 3.7   | 1.2   | 2.4   | 0.3   | 0.8   | 4.0   | 4.5   |
| 43.5  | 49.4  | 59.2  | 34.2  | 52.9  | 76.3  | 46.7  | 55.6  | 209.4 |
| 9.3   | 14.3  | 10.3  | 5.6   | 8.2   | 8.7   | 10.0  | 12.6  | 13.0  |
| 22.1  | 40.0  | 31.5  | 30.1  | 44.1  | 46.2  | 33.4  | 55.0  | 89.7  |
| 1.0   | 1.9   | 1.9   | 1.8   | 2.2   | 0.5   | 1.2   | 0.1   | 1.0   |
| 1.3   | 1.8   | 1.5   | 1.7   | 2.1   | 5.7   | 5.9   | 3.0   | 10.3  |
| 2.4   | 2.4   | 4.3   | 3.9   | 0.2   | 0.3   | 0.3   | 0.6   | 0.6   |
| 71.4  | 80.6  | 69.2  | 62.7  | 53.2  | 62.4  | 61.4  | 48.4  | 66.8  |
| 25.1  | 15.0  | 17.2  | 18.0  | 8.5   | 5.1   | 9.2   | 6.3   | 16.8  |
| 25.3  | 18.9  | 40.8  | 27.8  | 64.8  | 37.9  | 60.3  | 71.0  | 84.3  |
| 10.1  | 14.8  | 4.6   | 11.2  | 6.0   | 6.5   | 0.6   | 1.9   | 4.8   |
| 2.0   | 10.6  | 7.9   | 10.8  | 7.0   | 3.6   | 4.5   | 7.1   | 9.4   |
| 100.4 | 101.6 | 181.7 | 96.3  | 122.9 | 106.1 | 114.0 | 133.3 | 147.6 |
| 8.3   | 13.4  | 31.6  | 5.8   | 10.2  | 11.8  | 17.6  | 19.0  | 24.2  |
| 5.3   | 2.5   | 6.0   | 4.3   | 2.0   | 4.7   | 9.3   | 10.9  | 4.3   |
| 6.6   | 6.4   | 7.0   | 6.2   | 6.6   | 8.9   | 6.5   | 6.8   | 13.7  |
| 2.3   | 0.2   | 0.4   | 1.1   | 0.6   | 1.8   | 1.0   | 5.0   | 0.8   |
| 35.7  | 33.9  | 53.4  | 29.3  | 17.6  | 14.0  | 23.0  | 24.7  | 28.6  |
| 0.5   | 3.9   | 7.3   | 3.9   | 25.5  | 13.5  | 48.1  | 40.1  | 28.2  |
| 2.0   | 2.5   | 8.8   | 4.2   | 1.0   | 3.6   | 1.0   | 0.8   | 2.2   |
| 4.3   | 2.5   | 5.0   | 2.3   | 11.6  | 9.0   | 10.0  | 11.1  | 12.2  |
| 8.1   | 25.2  | 13.3  | 14.7  | 23.2  | 26.6  | 21.2  | 24.2  | 39.1  |
| 0.9   | 1.4   | 1.7   | 3.4   | 1.1   | 3.9   | 1.3   | 1.8   | 1.8   |
| 32.3  | 39.4  | 42.3  | 27.9  | 32.1  | 40.4  | 38.9  | 40.2  | 106.3 |
| 11.0  | 12.7  | 9.2   | 8.1   | 10.4  | 8.6   | 6.4   | 8.8   | 7.2   |
| 2.2   | 2.1   | 5.8   | 0.9   | 9.4   | 16.2  | 11.7  | 27.7  | 14.0  |
| 22.3  | 14.9  | 27.5  | 22.6  | 31.2  | 40.3  | 33.9  | 32.3  | 38.3  |
| 8.4   | 4.7   | 4.4   | 2.5   | 3.6   | 0.8   | 1.0   | 4.2   | 1.1   |
| 68.6  | 60.2  | 101.2 | 63.0  | 37.8  | 24.5  | 35.4  | 45.7  | 4.2   |
| 3.2   | 1.5   | 6.1   | 5.1   | 7.2   | 4.9   | 7.3   | 2.9   | 3.2   |
| 6.2   | 5.6   | 11.9  | 9.7   | 6.7   | 1.5   | 6.5   | 3.7   | 12.5  |
| 5.6   | 10.1  | 2.0   | 7.0   | 2.5   | 3.9   | 4.0   | 0.8   | 2.3   |
| 13.4  | 9.5   | 18.4  | 9.8   | 12.2  | 17.6  | 12.9  | 17.3  | 15.3  |
| 8.2   | 3.4   | 2.3   | 1.4   | 5.4   | 1.3   | 3.2   | 0.9   | 3.1   |
| 43.7  | 39.1  | 39.1  | 45.1  | 65.8  | 77.0  | 65.8  | 65.7  | 45.3  |
| 59.9  | 75.9  | 62.5  | 81.5  | 1.6   | 2.7   | 4.5   | 2.3   | 9.4   |
| 25.0  | 17.3  | 27.6  | 14.3  | 25.0  | 18.6  | 25.0  | 36.7  | 15.4  |
| 3.5   | 11.4  | 6.8   | 7.0   | 8.3   | 8.9   | 10.8  | 0.7   | 11.9  |
| 11.6  | 15.4  | 5.2   | 4.6   | 11.9  | 5.5   | 13.2  | 12.7  | 38.4  |
| 7.3   | 5.2   | 5.0   | 8.0   | 8.0   | 4.7   | 1.6   | 2.3   | 3.5   |
| 42.1  | 36.6  | 33.2  | 37.4  | 19.5  | 20.0  | 15.7  | 12.3  | 35.9  |
| 10.0  | 8.6   | 4.1   | 10.6  | 7.6   | 2.9   | 3.8   | 5.5   | 10.5  |
| 43.0  | 40.7  | 44.8  | 23.7  | 25.1  | 23.7  | 24.9  | 42.1  | 33.0  |
| 523.8 | 475.7 | 755.7 | 487.1 | 392.1 | 243.3 | 351.4 | 402.2 | 336.4 |
| 21.5  | 24.0  | 21.2  | 20.5  | 9.4   | 13.0  | 9.8   | 14.0  | 17.1  |

|        |        |        |        |        |        |        |        |       |
|--------|--------|--------|--------|--------|--------|--------|--------|-------|
| 15.2   | 17.6   | 16.3   | 10.9   | 7.7    | 7.9    | 6.6    | 6.1    | 11.5  |
| 2.7    | 2.6    | 4.5    | 2.5    | 5.2    | 6.2    | 4.6    | 6.3    | 2.6   |
| 1.2    | 1.2    | 3.0    | 1.2    | 0.8    | 0.4    | 4.1    | 1.8    | 5.4   |
| 4.3    | 12.2   | 1.7    | 4.5    | 3.9    | 1.2    | 1.6    | 17.8   | 3.8   |
| 7.1    | 10.1   | 8.9    | 8.1    | 6.6    | 9.1    | 5.8    | 8.2    | 12.3  |
| 10.7   | 15.3   | 21.3   | 10.1   | 79.8   | 94.1   | 92.0   | 83.7   | 42.9  |
| 17.3   | 11.0   | 30.0   | 17.3   | 1.6    | 2.5    | 11.8   | 4.3    | 8.3   |
| 4.8    | 8.0    | 1.0    | 3.3    | 1.7    | 0.4    | 2.6    | 0.6    | 5.6   |
| 2.1    | 2.9    | 6.5    | 3.8    | 74.6   | 75.0   | 132.2  | 131.3  | 16.5  |
| 47.8   | 49.7   | 37.8   | 58.1   | 12.9   | 20.0   | 15.7   | 16.8   | 31.6  |
| 8.5    | 10.7   | 9.8    | 11.0   | 2.5    | 7.9    | 2.6    | 9.1    | 13.0  |
| 42.4   | 37.6   | 70.8   | 36.6   | 45.5   | 25.9   | 50.1   | 28.4   | 63.1  |
| 0.8    | 1.1    | 1.1    | 0.4    | 5.3    | 17.7   | 4.9    | 2.6    | 0.9   |
| 8.4    | 5.5    | 6.3    | 11.1   | 6.4    | 3.8    | 1.9    | 4.4    | 12.0  |
| 441.8  | 438.5  | 493.4  | 360.2  | 1022.3 | 1142.5 | 1076.7 | 1240.3 | 466.8 |
| 4598.7 | 4410.8 | 5614.8 | 4431.9 | 1869.0 | 1118.3 | 2979.3 | 3224.4 | 4.3   |
| 57.1   | 55.1   | 97.8   | 99.9   | 60.2   | 81.3   | 58.0   | 90.8   | 96.6  |
| 30.6   | 26.7   | 51.9   | 41.1   | 55.2   | 16.4   | 42.3   | 57.5   | 63.4  |
| 207.7  | 198.1  | 229.9  | 172.4  | 365.0  | 387.2  | 350.9  | 393.9  | 829.8 |
| 175.2  | 181.5  | 216.1  | 169.0  | 228.1  | 269.6  | 232.7  | 245.0  | 208.7 |
| 5.7    | 10.7   | 6.1    | 14.6   | 4.3    | 9.9    | 10.4   | 12.5   | 7.0   |
| 187.5  | 171.3  | 215.8  | 171.2  | 184.3  | 189.7  | 178.4  | 216.0  | 167.2 |
| 42.9   | 29.6   | 50.4   | 27.8   | 426.9  | 424.5  | 644.6  | 542.4  | 124.1 |
| 475.2  | 432.8  | 585.7  | 409.8  | 375.3  | 484.7  | 397.8  | 463.0  | 152.1 |
| 105.5  | 93.9   | 150.9  | 95.6   | 115.4  | 109.1  | 110.4  | 145.8  | 136.3 |
| 247.1  | 240.1  | 440.7  | 285.2  | 485.8  | 380.9  | 364.7  | 442.8  | 187.4 |
| 130.6  | 124.4  | 104.6  | 104.5  | 79.3   | 122.3  | 104.6  | 85.2   | 66.5  |
| 59.2   | 65.0   | 102.3  | 90.8   | 60.8   | 52.9   | 60.7   | 68.7   | 73.9  |
| 125.1  | 98.4   | 145.9  | 101.5  | 185.7  | 196.3  | 187.8  | 220.8  | 163.5 |
| 45.2   | 50.8   | 53.7   | 47.9   | 96.6   | 106.1  | 103.9  | 129.7  | 67.8  |
| 74.6   | 82.1   | 46.0   | 79.4   | 48.8   | 45.7   | 34.1   | 66.3   | 92.1  |
| 304.3  | 313.5  | 261.7  | 211.0  | 360.5  | 353.1  | 381.3  | 414.2  | 182.2 |
| 111.6  | 99.8   | 102.0  | 90.4   | 148.4  | 130.2  | 141.0  | 169.6  | 130.2 |
| 521.8  | 481.4  | 702.5  | 465.5  | 356.8  | 304.8  | 287.7  | 331.0  | 631.5 |
| 42.2   | 34.4   | 42.4   | 13.4   | 295.5  | 338.7  | 302.8  | 339.8  | 107.8 |
| 309.0  | 350.5  | 412.0  | 286.4  | 391.5  | 320.9  | 326.0  | 425.2  | 559.2 |
| 6.1    | 3.8    | 1.7    | 4.2    | 7.7    | 8.0    | 9.0    | 8.1    | 18.8  |
| 138.5  | 127.4  | 125.7  | 95.7   | 85.2   | 51.3   | 92.1   | 78.5   | 34.4  |
| 1032.7 | 930.2  | 1074.1 | 881.3  | 326.3  | 347.8  | 353.7  | 386.4  | 546.0 |
| 109.4  | 130.7  | 57.4   | 89.4   | 92.6   | 164.9  | 134.4  | 140.0  | 112.0 |
| 92.7   | 91.6   | 84.0   | 86.5   | 112.3  | 124.8  | 101.3  | 122.5  | 146.0 |
| 60.4   | 51.1   | 94.4   | 57.8   | 231.8  | 274.7  | 203.2  | 223.3  | 70.2  |
| 16.2   | 12.4   | 13.0   | 15.2   | 7.8    | 9.7    | 9.0    | 10.7   | 23.6  |
| 42.5   | 41.4   | 43.4   | 38.0   | 58.7   | 63.2   | 56.4   | 60.8   | 90.6  |
| 10.7   | 4.7    | 7.9    | 6.1    | 29.1   | 28.8   | 65.0   | 37.0   | 18.2  |
| 44.9   | 46.9   | 85.6   | 48.5   | 164.0  | 203.8  | 159.3  | 182.4  | 185.2 |
| 892.7  | 861.4  | 1133.8 | 792.6  | 256.0  | 178.1  | 253.8  | 352.9  | 302.5 |
| 207.2  | 210.2  | 287.4  | 221.7  | 234.3  | 267.8  | 239.2  | 293.7  | 151.9 |
| 347.2  | 342.0  | 416.9  | 332.3  | 508.3  | 587.5  | 514.7  | 556.4  | 474.6 |
| 371.1  | 403.2  | 411.5  | 369.6  | 212.4  | 228.8  | 252.8  | 267.2  | 454.5 |
| 447.8  | 430.3  | 424.5  | 367.2  | 297.9  | 349.0  | 339.5  | 316.4  | 188.4 |
| 66.8   | 64.8   | 93.5   | 46.6   | 153.9  | 118.2  | 138.0  | 190.3  | 119.6 |
| 16.5   | 19.3   | 26.0   | 13.8   | 26.7   | 34.9   | 26.4   | 34.4   | 18.6  |

|       |       |       |       |        |        |        |        |       |
|-------|-------|-------|-------|--------|--------|--------|--------|-------|
| 66.3  | 51.9  | 114.1 | 55.4  | 17.7   | 37.1   | 18.0   | 19.0   | 467.7 |
| 58.2  | 54.6  | 109.7 | 50.7  | 185.4  | 193.3  | 203.8  | 179.3  | 190.4 |
| 437.0 | 333.7 | 626.8 | 227.4 | 4667.3 | 4140.8 | 4487.7 | 4892.5 | 138.9 |
| 326.3 | 267.0 | 477.4 | 170.0 | 3899.7 | 3143.1 | 3665.2 | 4399.1 | 67.0  |
| 105.1 | 81.2  | 124.3 | 98.1  | 57.6   | 46.9   | 53.1   | 83.7   | 86.6  |
| 15.2  | 14.8  | 44.4  | 21.8  | 29.2   | 28.9   | 24.9   | 31.4   | 20.8  |
| 8.1   | 4.8   | 5.8   | 11.0  | 70.4   | 49.8   | 55.1   | 81.6   | 43.1  |
| 72.5  | 64.5  | 69.1  | 55.5  | 107.5  | 103.7  | 113.8  | 126.1  | 130.9 |
| 55.9  | 56.1  | 46.4  | 49.7  | 79.0   | 92.4   | 85.6   | 82.3   | 107.7 |
| 185.9 | 176.0 | 261.8 | 191.5 | 230.5  | 205.1  | 230.0  | 282.8  | 255.7 |
| 1.2   | 2.5   | 0.8   | 0.4   | 2.3    | 5.6    | 2.3    | 5.1    | 1.6   |
| 89.1  | 99.8  | 113.7 | 84.9  | 99.2   | 170.6  | 117.5  | 146.4  | 136.8 |
| 165.7 | 174.0 | 181.1 | 163.2 | 141.5  | 205.8  | 150.5  | 180.4  | 243.0 |
| 517.7 | 409.6 | 889.6 | 507.3 | 449.9  | 461.9  | 464.6  | 575.8  | 330.1 |
| 50.6  | 59.1  | 83.0  | 61.7  | 146.9  | 176.5  | 145.5  | 172.1  | 42.9  |
| 325.6 | 337.9 | 382.8 | 305.7 | 629.9  | 608.1  | 681.1  | 809.8  | 445.7 |
| 36.5  | 24.9  | 28.2  | 28.9  | 34.1   | 44.4   | 30.9   | 53.8   | 66.8  |
| 23.1  | 32.5  | 20.1  | 16.3  | 114.9  | 119.9  | 83.9   | 99.1   | 70.6  |
| 122.1 | 137.9 | 115.1 | 153.8 | 135.4  | 123.1  | 112.6  | 159.2  | 99.9  |
| 0.4   | 0.7   | 1.4   | 2.3   | 2.0    | 1.1    | 1.1    | 0.8    | 0.7   |
| 104.9 | 85.9  | 90.9  | 74.4  | 259.9  | 257.4  | 297.9  | 309.3  | 238.5 |
| 191.1 | 193.0 | 248.0 | 187.8 | 142.5  | 145.8  | 130.9  | 166.2  | 175.5 |
| 56.8  | 60.7  | 102.0 | 54.4  | 80.2   | 57.9   | 66.0   | 77.0   | 76.0  |
| 180.2 | 160.9 | 182.7 | 119.5 | 92.5   | 140.5  | 119.2  | 116.0  | 68.6  |
| 52.7  | 54.1  | 68.6  | 102.7 | 132.6  | 186.5  | 188.2  | 152.2  | 116.8 |
| 56.7  | 45.3  | 90.8  | 39.1  | 33.9   | 31.1   | 43.6   | 50.8   | 57.3  |
| 3.1   | 2.0   | 16.3  | 1.7   | 22.4   | 12.3   | 60.3   | 53.8   | 7.6   |
| 53.4  | 62.4  | 58.6  | 46.5  | 38.2   | 44.7   | 36.6   | 51.0   | 77.7  |
| 187.9 | 201.8 | 176.8 | 204.0 | 93.1   | 78.3   | 79.9   | 115.3  | 306.1 |
| 65.4  | 57.4  | 80.5  | 54.3  | 63.3   | 49.0   | 97.9   | 78.7   | 126.5 |
| 197.0 | 160.7 | 246.7 | 199.9 | 62.0   | 45.8   | 66.0   | 76.1   | 87.3  |
| 180.7 | 166.5 | 259.6 | 168.8 | 249.2  | 206.1  | 256.3  | 282.8  | 346.0 |
| 48.7  | 49.0  | 49.1  | 40.2  | 42.3   | 32.4   | 29.4   | 38.1   | 43.7  |
| 118.8 | 116.8 | 124.2 | 89.5  | 194.4  | 231.5  | 188.2  | 211.8  | 161.4 |
| 391.3 | 299.7 | 459.1 | 315.4 | 400.1  | 487.5  | 405.3  | 453.3  | 266.8 |
| 507.8 | 453.3 | 531.2 | 472.0 | 27.7   | 29.7   | 23.1   | 40.5   | 108.6 |
| 172.7 | 149.6 | 300.5 | 169.0 | 5.0    | 4.0    | 3.4    | 10.8   | 2.6   |
| 42.8  | 32.9  | 55.9  | 32.4  | 101.2  | 74.2   | 54.2   | 99.5   | 109.6 |
| 195.3 | 212.6 | 193.5 | 127.6 | 352.2  | 443.9  | 366.5  | 402.0  | 293.3 |
| 101.8 | 109.4 | 131.7 | 124.2 | 131.4  | 122.6  | 148.8  | 178.5  | 144.8 |
| 45.6  | 36.3  | 67.1  | 36.9  | 95.9   | 101.9  | 112.7  | 132.8  | 170.8 |
| 261.3 | 228.7 | 397.6 | 214.1 | 573.1  | 487.0  | 777.7  | 742.2  | 869.7 |
| 254.5 | 240.7 | 263.0 | 222.3 | 106.1  | 78.8   | 135.4  | 145.4  | 190.5 |
| 146.3 | 151.7 | 380.6 | 251.6 | 365.9  | 335.6  | 316.1  | 407.0  | 413.5 |
| 365.3 | 328.4 | 477.2 | 364.1 | 166.9  | 167.5  | 245.4  | 215.0  | 212.5 |
| 45.6  | 43.9  | 74.9  | 45.2  | 123.0  | 141.2  | 132.3  | 146.2  | 57.5  |
| 90.9  | 77.6  | 102.2 | 73.3  | 40.2   | 74.7   | 38.8   | 47.2   | 121.3 |
| 353.2 | 285.8 | 495.0 | 314.3 | 59.1   | 58.6   | 62.0   | 84.7   | 64.4  |
| 307.8 | 291.5 | 362.1 | 328.0 | 312.3  | 211.5  | 269.5  | 313.9  | 369.4 |
| 295.7 | 294.6 | 274.4 | 238.3 | 429.8  | 470.6  | 464.8  | 511.0  | 308.9 |
| 73.8  | 83.6  | 137.3 | 105.1 | 162.4  | 125.9  | 170.7  | 200.7  | 94.3  |
| 127.7 | 118.6 | 95.6  | 104.7 | 217.9  | 217.3  | 224.9  | 217.4  | 132.1 |
| 59.4  | 65.3  | 155.2 | 160.5 | 31.0   | 34.4   | 35.7   | 46.0   | 31.1  |



|        |       |        |        |        |        |        |        |        |
|--------|-------|--------|--------|--------|--------|--------|--------|--------|
| 1.9    | 1.0   | 1.7    | 4.0    | 4.4    | 6.1    | 4.7    | 6.9    | 4.5    |
| 98.0   | 98.3  | 115.8  | 99.9   | 163.1  | 173.3  | 164.6  | 228.0  | 119.4  |
| 166.1  | 165.4 | 175.2  | 146.5  | 177.4  | 273.5  | 203.9  | 231.4  | 137.9  |
| 15.9   | 18.6  | 22.4   | 14.3   | 22.1   | 18.3   | 18.3   | 10.7   | 165.7  |
| 158.8  | 172.8 | 163.8  | 169.4  | 95.9   | 149.3  | 110.6  | 142.9  | 106.1  |
| 196.8  | 215.4 | 190.9  | 181.7  | 265.0  | 236.8  | 254.0  | 315.2  | 201.6  |
| 198.0  | 159.8 | 272.8  | 173.5  | 273.0  | 228.7  | 267.6  | 295.3  | 103.7  |
| 150.3  | 142.7 | 160.8  | 143.5  | 68.9   | 58.4   | 82.3   | 75.3   | 72.8   |
| 30.4   | 40.0  | 33.6   | 23.4   | 31.2   | 46.6   | 32.6   | 35.9   | 35.7   |
| 182.3  | 184.6 | 216.4  | 184.0  | 149.4  | 150.6  | 152.6  | 178.5  | 136.2  |
| 206.8  | 225.7 | 267.3  | 220.4  | 7.9    | 8.8    | 14.1   | 11.4   | 57.1   |
| 122.7  | 132.9 | 167.6  | 134.4  | 9.6    | 7.9    | 11.0   | 7.1    | 46.7   |
| 106.1  | 101.8 | 116.4  | 102.0  | 157.9  | 210.9  | 185.2  | 167.5  | 389.7  |
| 86.5   | 74.2  | 105.0  | 97.9   | 170.4  | 253.1  | 182.0  | 191.2  | 197.9  |
| 322.8  | 264.3 | 359.3  | 269.9  | 109.9  | 84.1   | 93.6   | 154.0  | 143.4  |
| 30.7   | 45.8  | 43.1   | 32.4   | 325.7  | 450.8  | 156.0  | 193.4  | 1856.6 |
| 4.1    | 6.8   | 4.5    | 11.2   | 14.5   | 19.7   | 19.0   | 31.9   | 10.3   |
| 55.7   | 53.0  | 81.4   | 43.9   | 58.4   | 60.9   | 66.2   | 75.5   | 56.1   |
| 824.8  | 829.3 | 642.4  | 752.3  | 137.8  | 127.9  | 188.2  | 149.2  | 191.0  |
| 144.2  | 132.6 | 104.4  | 114.9  | 61.9   | 71.6   | 60.1   | 69.2   | 44.7   |
| 80.6   | 102.1 | 92.9   | 79.7   | 108.6  | 102.7  | 98.2   | 126.5  | 161.3  |
| 188.2  | 160.3 | 342.9  | 179.5  | 179.7  | 158.7  | 210.9  | 240.4  | 202.5  |
| 43.7   | 45.4  | 59.9   | 42.8   | 41.7   | 36.3   | 44.6   | 57.2   | 90.9   |
| 651.9  | 540.5 | 1143.4 | 591.1  | 514.6  | 537.1  | 588.9  | 636.4  | 668.0  |
| 1038.0 | 881.7 | 1394.3 | 1058.9 | 993.1  | 976.4  | 1018.4 | 1094.9 | 1474.1 |
| 5.5    | 7.5   | 17.6   | 7.6    | 9.5    | 7.3    | 7.1    | 7.3    | 13.2   |
| 80.1   | 67.6  | 277.8  | 178.1  | 333.5  | 323.0  | 337.1  | 365.0  | 250.7  |
| 866.6  | 786.3 | 1523.0 | 899.4  | 1406.6 | 1587.8 | 1720.2 | 1673.2 | 1255.0 |
| 0.5    | 0.5   | 1.0    | 1.2    | 1.3    | 0.8    | 1.1    | 0.8    | 1.2    |
| 17.5   | 28.1  | 25.5   | 22.1   | 19.3   | 17.9   | 20.8   | 31.1   | 47.5   |
| 133.4  | 141.0 | 99.6   | 96.4   | 381.2  | 1000.1 | 350.7  | 394.1  | 608.6  |
| 68.5   | 52.1  | 94.1   | 54.9   | 102.9  | 73.3   | 121.8  | 124.4  | 118.8  |
| 588.3  | 544.7 | 701.2  | 643.2  | 50.7   | 52.0   | 53.4   | 75.5   | 12.8   |
| 4.3    | 3.8   | 3.9    | 1.6    | 3.1    | 2.2    | 1.9    | 2.3    | 2.0    |
| 378.3  | 346.3 | 481.0  | 374.4  | 304.7  | 296.8  | 286.0  | 317.6  | 163.7  |
| 10.4   | 15.1  | 17.7   | 13.3   | 31.3   | 32.0   | 35.6   | 37.6   | 22.8   |
| 16.3   | 11.9  | 13.5   | 12.6   | 2.2    | 5.5    | 6.8    | 1.0    | 11.4   |
| 61.2   | 46.9  | 88.9   | 39.4   | 103.5  | 119.6  | 100.7  | 123.7  | 140.3  |
| 42.6   | 50.8  | 51.8   | 34.1   | 50.5   | 41.7   | 49.9   | 59.4   | 51.1   |
| 82.6   | 91.2  | 71.6   | 68.5   | 68.5   | 130.4  | 81.1   | 122.9  | 117.7  |
| 40.7   | 42.3  | 47.4   | 32.7   | 57.6   | 83.0   | 62.0   | 84.6   | 102.6  |
| 42.1   | 39.5  | 40.9   | 31.0   | 203.8  | 181.4  | 173.0  | 228.7  | 272.0  |
| 47.9   | 50.5  | 66.7   | 30.2   | 181.2  | 179.0  | 173.6  | 210.4  | 197.5  |
| 63.4   | 81.6  | 82.3   | 63.5   | 125.0  | 117.8  | 114.9  | 136.4  | 63.6   |
| 54.9   | 52.4  | 57.5   | 42.4   | 106.3  | 104.0  | 102.4  | 122.9  | 54.5   |
| 69.0   | 58.8  | 77.1   | 55.2   | 62.9   | 47.9   | 68.1   | 95.9   | 78.1   |
| 225.5  | 221.1 | 251.8  | 188.4  | 279.6  | 259.2  | 309.7  | 313.2  | 259.0  |
| 8.0    | 9.4   | 10.0   | 6.0    | 47.1   | 43.3   | 141.4  | 58.8   | 17.1   |
| 9.3    | 13.2  | 6.2    | 6.4    | 19.9   | 19.1   | 29.4   | 29.9   | 8.2    |
| 55.8   | 72.5  | 30.5   | 44.5   | 72.6   | 70.1   | 86.6   | 98.9   | 42.1   |
| 3.2    | 4.0   | 7.5    | 5.2    | 6.6    | 8.0    | 9.1    | 10.1   | 7.0    |
| 30.0   | 30.1  | 76.3   | 36.1   | 133.0  | 97.9   | 106.1  | 145.1  | 195.0  |
| 51.3   | 52.9  | 74.7   | 42.8   | 58.0   | 47.4   | 52.0   | 58.2   | 54.6   |

|        |        |        |        |       |       |       |       |        |
|--------|--------|--------|--------|-------|-------|-------|-------|--------|
| 76.5   | 71.8   | 39.6   | 80.1   | 20.4  | 18.8  | 28.5  | 23.3  | 12.1   |
| 181.2  | 174.3  | 229.2  | 177.2  | 112.3 | 138.3 | 122.9 | 171.5 | 89.6   |
| 32.4   | 38.7   | 74.0   | 42.5   | 47.6  | 70.9  | 43.3  | 45.9  | 35.4   |
| 33.8   | 29.0   | 24.4   | 41.8   | 22.1  | 33.9  | 17.8  | 29.9  | 27.3   |
| 20.2   | 36.3   | 19.7   | 34.4   | 20.3  | 18.9  | 18.0  | 30.9  | 35.5   |
| 135.0  | 123.7  | 212.2  | 120.7  | 90.8  | 94.8  | 81.5  | 76.5  | 73.3   |
| 90.3   | 98.1   | 85.3   | 74.1   | 68.3  | 93.9  | 73.9  | 97.1  | 82.4   |
| 130.1  | 152.7  | 103.4  | 129.2  | 61.1  | 62.7  | 50.4  | 87.9  | 60.4   |
| 0.7    | 0.9    | 1.0    | 1.0    | 59.5  | 66.6  | 142.2 | 74.1  | 10.6   |
| 115.8  | 124.3  | 82.2   | 90.3   | 69.7  | 115.2 | 81.9  | 98.5  | 62.4   |
| 152.1  | 130.0  | 198.8  | 145.8  | 161.1 | 127.6 | 164.4 | 197.4 | 151.9  |
| 7.0    | 9.1    | 10.5   | 2.5    | 51.1  | 34.1  | 45.8  | 44.8  | 20.2   |
| 138.9  | 141.0  | 171.7  | 113.6  | 110.0 | 119.5 | 98.9  | 120.7 | 174.8  |
| 61.4   | 54.0   | 77.8   | 58.0   | 67.6  | 72.2  | 62.4  | 96.5  | 72.5   |
| 102.3  | 109.9  | 65.0   | 69.6   | 38.8  | 46.5  | 40.3  | 46.5  | 62.6   |
| 159.3  | 144.1  | 280.5  | 151.3  | 75.6  | 125.3 | 74.3  | 111.9 | 58.6   |
| 9.3    | 2.0    | 3.2    | 3.9    | 174.6 | 221.3 | 163.3 | 157.0 | 142.2  |
| 122.0  | 107.2  | 124.8  | 92.6   | 93.5  | 136.2 | 119.1 | 115.7 | 142.1  |
| 248.4  | 279.6  | 227.2  | 353.8  | 208.1 | 360.2 | 257.2 | 274.2 | 213.4  |
| 8.2    | 11.2   | 13.5   | 15.9   | 8.8   | 16.2  | 11.4  | 9.2   | 26.2   |
| 72.4   | 72.2   | 104.2  | 89.4   | 132.3 | 174.8 | 169.0 | 158.4 | 120.3  |
| 129.6  | 124.6  | 270.8  | 115.5  | 428.3 | 331.3 | 323.7 | 413.7 | 420.9  |
| 19.8   | 25.5   | 4.5    | 14.1   | 65.8  | 67.9  | 71.9  | 93.9  | 34.2   |
| 181.3  | 180.4  | 216.3  | 143.2  | 381.2 | 434.1 | 340.8 | 435.1 | 207.6  |
| 24.1   | 22.7   | 40.0   | 23.7   | 90.5  | 94.9  | 87.7  | 113.7 | 59.5   |
| 247.0  | 239.3  | 339.4  | 236.0  | 249.2 | 275.7 | 265.7 | 300.9 | 145.9  |
| 108.2  | 102.8  | 124.3  | 105.0  | 176.8 | 190.6 | 173.6 | 230.2 | 152.4  |
| 124.4  | 114.0  | 186.4  | 95.7   | 112.6 | 114.8 | 123.1 | 142.8 | 130.1  |
| 35.9   | 25.6   | 38.3   | 33.0   | 25.3  | 13.8  | 10.4  | 14.7  | 3.6    |
| 28.9   | 8.2    | 32.9   | 29.0   | 32.1  | 35.4  | 39.5  | 26.9  | 27.9   |
| 109.4  | 96.8   | 154.6  | 98.1   | 210.3 | 191.4 | 228.3 | 251.5 | 222.5  |
| 28.3   | 23.9   | 39.1   | 26.9   | 29.9  | 26.5  | 32.4  | 39.7  | 28.1   |
| 439.5  | 420.9  | 566.0  | 426.3  | 492.3 | 507.3 | 578.8 | 571.8 | 294.4  |
| 315.0  | 295.2  | 350.7  | 251.8  | 352.0 | 345.0 | 350.8 | 410.5 | 458.6  |
| 857.4  | 812.1  | 1169.2 | 855.0  | 233.3 | 206.6 | 227.2 | 303.9 | 359.7  |
| 103.7  | 101.5  | 94.9   | 97.8   | 41.4  | 44.1  | 32.8  | 60.7  | 56.2   |
| 177.2  | 183.7  | 145.2  | 197.1  | 61.8  | 54.1  | 54.1  | 67.7  | 43.8   |
| 257.2  | 257.4  | 375.0  | 268.0  | 55.9  | 53.4  | 53.0  | 70.4  | 65.4   |
| 38.6   | 46.5   | 47.2   | 33.4   | 20.3  | 31.8  | 25.4  | 40.3  | 38.6   |
| 18.8   | 10.2   | 14.6   | 8.8    | 31.4  | 13.5  | 22.3  | 44.1  | 236.9  |
| 24.0   | 31.6   | 25.3   | 17.2   | 15.1  | 6.9   | 11.9  | 31.2  | 62.8   |
| 8.4    | 7.1    | 7.8    | 8.0    | 10.7  | 9.9   | 13.1  | 10.2  | 13.7   |
| 10.6   | 16.6   | 13.1   | 11.7   | 32.0  | 31.2  | 33.6  | 40.0  | 6.7    |
| 13.9   | 17.2   | 25.1   | 16.3   | 27.5  | 25.4  | 18.3  | 29.7  | 35.7   |
| 6.3    | 8.2    | 10.0   | 6.0    | 48.4  | 51.6  | 46.3  | 44.4  | 88.4   |
| 3.4    | 7.5    | 7.7    | 5.2    | 104.7 | 120.0 | 103.9 | 110.6 | 217.5  |
| 30.5   | 29.4   | 22.6   | 35.6   | 128.3 | 67.2  | 70.1  | 108.7 | 32.1   |
| 190.9  | 214.1  | 259.4  | 156.7  | 193.4 | 170.0 | 175.8 | 228.7 | 156.7  |
| 28.3   | 35.6   | 23.9   | 21.5   | 37.2  | 46.8  | 28.5  | 37.5  | 41.0   |
| 55.2   | 52.7   | 58.2   | 51.9   | 60.2  | 69.6  | 58.6  | 65.5  | 79.8   |
| 4015.5 | 3534.1 | 5073.2 | 3669.9 | 312.9 | 296.5 | 313.0 | 340.7 | 4094.8 |
| 82.7   | 74.9   | 104.6  | 78.7   | 42.4  | 41.6  | 37.8  | 63.6  | 63.1   |
| 259.1  | 230.2  | 228.6  | 237.1  | 269.2 | 303.0 | 307.4 | 292.8 | 293.4  |

|        |        |        |        |        |        |        |        |        |
|--------|--------|--------|--------|--------|--------|--------|--------|--------|
| 120.9  | 125.0  | 127.5  | 131.7  | 261.2  | 311.1  | 238.6  | 290.5  | 191.0  |
| 436.6  | 509.4  | 513.8  | 461.1  | 426.9  | 252.8  | 314.8  | 502.3  | 384.6  |
| 94.2   | 87.9   | 127.6  | 83.4   | 79.5   | 67.7   | 81.1   | 81.3   | 75.7   |
| 14.6   | 15.5   | 27.8   | 10.7   | 24.6   | 19.8   | 28.3   | 29.5   | 22.4   |
| 50.6   | 46.6   | 35.5   | 43.5   | 38.3   | 45.4   | 43.9   | 51.9   | 55.6   |
| 111.9  | 122.5  | 93.2   | 107.6  | 58.2   | 92.3   | 63.5   | 69.1   | 51.3   |
| 266.7  | 273.8  | 210.0  | 252.9  | 28.9   | 38.6   | 18.5   | 51.0   | 24.7   |
| 28.1   | 36.1   | 40.2   | 32.4   | 121.8  | 171.8  | 145.9  | 145.5  | 42.7   |
| 67.3   | 59.8   | 75.3   | 74.3   | 91.7   | 67.9   | 90.3   | 95.5   | 121.4  |
| 2919.0 | 2629.0 | 4238.0 | 2977.0 | 1830.7 | 1567.0 | 1740.5 | 1996.6 | 2155.2 |
| 497.0  | 472.5  | 589.3  | 526.6  | 386.7  | 314.0  | 394.6  | 475.7  | 680.2  |
| 252.1  | 250.7  | 210.7  | 183.4  | 179.8  | 169.0  | 179.7  | 205.9  | 232.5  |
| 60.1   | 59.0   | 62.3   | 62.4   | 122.8  | 134.5  | 121.6  | 145.4  | 181.8  |
| 1.0    | 1.4    | 1.0    | 0.7    | 65.6   | 45.3   | 79.2   | 82.8   | 5.0    |
| 214.4  | 192.3  | 244.4  | 189.4  | 288.7  | 223.6  | 317.6  | 309.0  | 167.2  |
| 35.6   | 32.3   | 35.9   | 40.7   | 258.5  | 299.7  | 261.5  | 264.4  | 429.7  |
| 199.3  | 202.1  | 271.5  | 210.7  | 340.0  | 392.8  | 329.9  | 416.3  | 349.1  |
| 226.4  | 232.5  | 285.9  | 207.4  | 299.3  | 227.8  | 279.2  | 348.5  | 317.9  |
| 35.0   | 32.0   | 24.4   | 29.5   | 106.1  | 99.0   | 130.9  | 124.0  | 83.6   |
| 104.7  | 109.2  | 127.1  | 91.7   | 116.3  | 138.2  | 105.0  | 113.0  | 76.1   |
| 14.3   | 20.8   | 17.7   | 28.1   | 52.2   | 72.4   | 59.1   | 75.8   | 15.2   |
| 121.2  | 131.0  | 67.4   | 110.0  | 16.0   | 13.8   | 4.0    | 15.0   | 135.1  |
| 251.1  | 278.0  | 320.4  | 264.5  | 281.8  | 252.1  | 249.3  | 325.0  | 266.2  |
| 91.6   | 85.1   | 68.6   | 80.8   | 97.1   | 115.4  | 109.3  | 124.6  | 89.5   |
| 84.0   | 78.3   | 82.5   | 68.1   | 24.2   | 20.4   | 24.4   | 34.8   | 33.1   |
| 34.3   | 34.9   | 48.8   | 31.1   | 37.8   | 28.9   | 32.2   | 28.8   | 37.8   |
| 0.7    | 1.9    | 3.8    | 4.0    | 16.3   | 13.6   | 25.4   | 20.6   | 3.9    |
| 5.5    | 5.9    | 13.5   | 7.8    | 6.2    | 3.6    | 6.1    | 5.2    | 4.9    |
| 226.9  | 248.7  | 199.8  | 233.7  | 150.3  | 170.5  | 165.7  | 197.4  | 210.2  |
| 145.3  | 139.1  | 151.5  | 103.1  | 35.4   | 41.4   | 30.3   | 38.1   | 61.2   |
| 95.4   | 95.3   | 93.5   | 80.3   | 78.9   | 119.8  | 95.5   | 93.2   | 123.9  |
| 144.1  | 113.4  | 294.4  | 128.1  | 571.6  | 465.5  | 408.5  | 485.6  | 238.9  |
| 803.3  | 709.9  | 947.1  | 817.0  | 329.3  | 501.2  | 362.8  | 401.6  | 742.6  |
| 49.7   | 60.2   | 49.4   | 54.8   | 32.5   | 28.0   | 25.9   | 38.4   | 24.3   |
| 272.5  | 263.3  | 395.7  | 323.1  | 377.7  | 384.8  | 299.2  | 371.4  | 419.1  |
| 1228.1 | 1227.1 | 1379.6 | 929.7  | 2297.8 | 2173.9 | 2298.2 | 2601.2 | 3218.0 |
| 350.4  | 405.5  | 269.4  | 236.3  | 60.4   | 57.8   | 53.8   | 54.9   | 108.5  |
| 148.0  | 160.2  | 284.6  | 211.9  | 75.5   | 115.6  | 74.1   | 120.6  | 171.3  |
| 209.8  | 182.7  | 341.6  | 277.8  | 80.7   | 98.4   | 94.3   | 125.6  | 221.7  |
| 46.4   | 45.8   | 43.4   | 28.2   | 20.5   | 16.0   | 18.3   | 13.4   | 4.8    |
| 30.9   | 21.7   | 31.7   | 22.2   | 16.7   | 18.2   | 20.5   | 24.1   | 10.8   |
| 102.3  | 104.9  | 94.3   | 93.6   | 56.5   | 77.3   | 64.1   | 72.0   | 130.5  |
| 12.0   | 17.9   | 26.1   | 22.3   | 19.7   | 30.6   | 30.1   | 37.6   | 25.3   |
| 0.7    | 1.1    | 0.9    | 0.8    | 0.6    | 1.1    | 1.3    | 0.9    | 1.5    |
| 105.6  | 109.7  | 119.3  | 115.3  | 77.4   | 74.4   | 64.6   | 89.1   | 184.9  |
| 80.1   | 119.0  | 120.7  | 91.5   | 128.2  | 113.1  | 158.4  | 111.6  | 117.4  |
| 257.5  | 230.0  | 258.9  | 333.8  | 128.2  | 202.1  | 120.5  | 159.3  | 57.8   |
| 31.7   | 39.1   | 59.9   | 33.2   | 42.9   | 51.0   | 42.4   | 53.3   | 69.5   |
| 206.0  | 207.9  | 225.7  | 174.3  | 116.8  | 149.3  | 130.4  | 160.5  | 164.3  |
| 59.7   | 63.3   | 56.9   | 48.9   | 95.1   | 92.3   | 76.0   | 117.1  | 36.1   |
| 10.2   | 7.1    | 10.2   | 8.0    | 11.6   | 9.7    | 16.2   | 15.2   | 18.8   |
| 728.8  | 743.9  | 460.3  | 750.9  | 68.4   | 60.8   | 60.0   | 83.7   | 38.8   |
| 228.0  | 238.9  | 263.1  | 212.3  | 204.4  | 220.3  | 202.2  | 242.9  | 207.0  |

|       |       |       |       |       |       |       |       |       |
|-------|-------|-------|-------|-------|-------|-------|-------|-------|
| 134.2 | 120.4 | 216.5 | 120.4 | 94.7  | 106.6 | 80.3  | 96.3  | 182.1 |
| 153.2 | 142.0 | 160.8 | 130.3 | 191.5 | 200.8 | 234.1 | 213.7 | 379.8 |
| 55.9  | 57.4  | 51.4  | 51.7  | 69.5  | 96.6  | 96.1  | 105.2 | 71.6  |
| 106.2 | 98.8  | 140.3 | 96.5  | 117.8 | 118.6 | 142.2 | 142.1 | 151.5 |
| 189.7 | 171.2 | 203.6 | 155.5 | 162.8 | 172.1 | 184.2 | 218.3 | 312.7 |
| 242.9 | 204.0 | 244.7 | 195.8 | 82.6  | 92.2  | 86.8  | 83.8  | 182.8 |
| 215.8 | 216.7 | 248.7 | 210.0 | 194.8 | 175.6 | 180.1 | 227.1 | 127.5 |
| 86.3  | 65.5  | 188.0 | 75.9  | 454.2 | 502.1 | 397.9 | 466.5 | 421.6 |
| 131.7 | 131.5 | 158.8 | 118.3 | 153.9 | 183.6 | 147.7 | 197.9 | 227.8 |
| 426.7 | 350.7 | 480.9 | 320.1 | 689.5 | 767.2 | 782.1 | 754.0 | 951.1 |
| 141.9 | 124.4 | 190.7 | 136.3 | 184.1 | 168.6 | 175.8 | 206.2 | 211.2 |
| 29.2  | 26.0  | 29.8  | 15.9  | 19.7  | 15.8  | 10.2  | 18.7  | 26.8  |
| 237.8 | 251.4 | 247.9 | 211.6 | 192.8 | 178.6 | 161.4 | 146.1 | 206.6 |
| 57.3  | 95.9  | 74.3  | 61.9  | 234.5 | 236.9 | 185.3 | 221.0 | 474.1 |
| 26.1  | 20.3  | 46.0  | 22.6  | 147.2 | 184.2 | 152.2 | 169.4 | 149.3 |
| 1.4   | 0.4   | 0.6   | 1.5   | 10.0  | 54.9  | 22.0  | 18.9  | 27.0  |
| 59.2  | 63.3  | 82.0  | 59.6  | 43.7  | 56.9  | 52.8  | 40.6  | 110.5 |
| 35.4  | 37.6  | 39.5  | 43.2  | 47.8  | 66.1  | 50.7  | 66.7  | 176.3 |
| 4.5   | 3.9   | 6.9   | 4.2   | 635.4 | 992.7 | 773.1 | 850.1 | 62.2  |
| 607.4 | 581.7 | 884.8 | 702.2 | 401.3 | 426.5 | 440.1 | 471.8 | 612.1 |
| 326.1 | 279.6 | 525.8 | 335.7 | 398.3 | 490.4 | 397.3 | 479.4 | 566.6 |
| 63.6  | 68.9  | 151.9 | 47.5  | 313.3 | 213.4 | 274.6 | 343.6 | 290.8 |
| 95.1  | 93.8  | 111.2 | 115.4 | 47.5  | 79.6  | 57.6  | 63.6  | 104.4 |
| 250.3 | 226.5 | 331.1 | 249.3 | 131.2 | 169.2 | 132.1 | 153.0 | 229.5 |
| 198.1 | 206.2 | 181.0 | 179.0 | 119.3 | 154.4 | 289.7 | 162.7 | 245.1 |
| 256.3 | 279.5 | 233.2 | 165.2 | 844.8 | 693.7 | 878.9 | 825.6 | 436.4 |
| 599.5 | 515.8 | 755.9 | 494.6 | 525.3 | 429.3 | 528.6 | 620.6 | 614.3 |
| 54.7  | 47.2  | 90.3  | 63.9  | 6.7   | 13.6  | 11.6  | 11.7  | 45.4  |
| 146.8 | 135.5 | 175.4 | 138.9 | 466.9 | 465.6 | 449.8 | 496.2 | 248.2 |
| 361.6 | 448.8 | 395.5 | 511.8 | 198.3 | 264.8 | 201.5 | 233.2 | 316.3 |
| 236.7 | 237.3 | 273.2 | 248.3 | 171.6 | 169.3 | 191.9 | 206.5 | 174.5 |
| 861.0 | 733.8 | 892.7 | 729.8 | 729.8 | 575.3 | 692.3 | 762.4 | 392.6 |
| 403.5 | 421.1 | 556.2 | 424.2 | 205.1 | 189.8 | 248.7 | 240.1 | 846.8 |
| 34.7  | 39.5  | 55.0  | 26.9  | 76.5  | 75.6  | 125.3 | 117.8 | 78.7  |
| 141.4 | 118.9 | 196.7 | 135.4 | 44.3  | 39.4  | 46.0  | 55.2  | 102.6 |
| 323.2 | 327.1 | 394.2 | 311.8 | 247.6 | 302.4 | 222.2 | 267.9 | 289.7 |
| 110.4 | 100.5 | 111.3 | 77.8  | 135.9 | 132.5 | 152.1 | 143.2 | 111.9 |
| 57.2  | 60.1  | 78.4  | 67.8  | 80.2  | 93.6  | 74.0  | 75.3  | 162.6 |
| 9.2   | 7.4   | 15.8  | 5.9   | 86.2  | 35.4  | 92.2  | 108.9 | 42.9  |
| 141.6 | 187.8 | 84.0  | 154.5 | 10.8  | 26.5  | 16.0  | 15.8  | 28.1  |
| 193.2 | 183.2 | 219.5 | 206.4 | 49.9  | 55.7  | 46.9  | 67.4  | 91.0  |
| 103.4 | 110.2 | 104.2 | 104.5 | 76.5  | 71.9  | 74.8  | 93.9  | 90.0  |
| 184.9 | 201.9 | 285.9 | 167.3 | 264.6 | 339.1 | 249.7 | 346.2 | 344.5 |
| 67.0  | 65.5  | 82.4  | 64.9  | 66.5  | 77.9  | 61.8  | 84.7  | 89.7  |
| 105.7 | 89.6  | 74.7  | 47.7  | 160.8 | 107.4 | 171.8 | 168.7 | 89.8  |
| 11.7  | 3.9   | 7.0   | 8.0   | 34.3  | 23.9  | 59.9  | 39.3  | 42.8  |
| 175.9 | 183.2 | 209.3 | 134.3 | 96.3  | 149.6 | 118.2 | 140.1 | 122.8 |
| 90.4  | 93.9  | 158.0 | 89.7  | 64.0  | 80.8  | 62.2  | 73.5  | 121.8 |
| 169.3 | 165.7 | 195.2 | 182.2 | 302.0 | 323.8 | 319.9 | 334.8 | 187.4 |
| 413.8 | 415.4 | 405.4 | 367.3 | 467.2 | 569.0 | 476.7 | 541.4 | 464.1 |
| 257.9 | 261.3 | 319.4 | 246.4 | 259.8 | 237.9 | 278.0 | 323.4 | 277.3 |
| 179.1 | 156.5 | 278.3 | 175.2 | 200.1 | 251.4 | 217.3 | 227.1 | 282.6 |
| 252.2 | 197.0 | 464.2 | 147.2 | 789.2 | 335.8 | 693.2 | 821.8 | 662.3 |

|       |       |       |       |       |       |       |       |        |
|-------|-------|-------|-------|-------|-------|-------|-------|--------|
| 105.6 | 109.4 | 69.3  | 115.8 | 72.3  | 86.4  | 83.1  | 116.3 | 132.8  |
| 38.6  | 44.4  | 35.9  | 40.3  | 21.0  | 38.1  | 24.7  | 29.8  | 25.2   |
| 33.7  | 38.9  | 25.3  | 29.1  | 18.4  | 22.7  | 18.6  | 18.7  | 27.3   |
| 429.1 | 449.1 | 578.2 | 450.7 | 317.3 | 320.6 | 416.9 | 376.3 | 490.6  |
| 486.2 | 503.8 | 303.3 | 496.3 | 40.9  | 50.4  | 38.3  | 42.8  | 23.3   |
| 1.1   | 1.7   | 1.8   | 3.6   | 25.1  | 20.7  | 28.9  | 27.6  | 22.1   |
| 89.1  | 77.6  | 95.8  | 74.8  | 73.1  | 94.5  | 89.4  | 85.2  | 109.8  |
| 141.2 | 139.3 | 183.4 | 141.8 | 57.9  | 73.1  | 75.5  | 83.7  | 56.2   |
| 10.2  | 10.7  | 9.5   | 6.4   | 17.0  | 16.8  | 19.8  | 22.9  | 24.9   |
| 158.6 | 171.2 | 183.1 | 182.5 | 151.5 | 188.3 | 147.9 | 176.7 | 144.3  |
| 131.7 | 121.1 | 171.3 | 169.4 | 53.9  | 62.0  | 44.8  | 48.9  | 89.0   |
| 297.6 | 266.0 | 331.8 | 328.8 | 544.9 | 699.0 | 577.9 | 689.3 | 762.0  |
| 16.8  | 17.8  | 23.0  | 16.4  | 28.3  | 18.6  | 30.0  | 41.1  | 15.0   |
| 334.3 | 299.1 | 546.9 | 314.5 | 373.1 | 484.3 | 386.4 | 443.9 | 557.8  |
| 155.5 | 135.8 | 293.6 | 157.2 | 561.2 | 577.3 | 591.1 | 611.5 | 316.7  |
| 285.2 | 311.3 | 180.2 | 232.6 | 225.8 | 294.0 | 260.8 | 285.3 | 434.3  |
| 158.3 | 171.7 | 262.3 | 173.3 | 157.6 | 162.8 | 152.7 | 166.3 | 104.1  |
| 28.6  | 30.5  | 29.9  | 25.8  | 27.1  | 34.4  | 41.4  | 39.0  | 8.8    |
| 40.9  | 27.1  | 67.6  | 49.1  | 41.3  | 34.5  | 43.0  | 56.3  | 33.5   |
| 149.8 | 168.6 | 126.6 | 130.9 | 85.3  | 79.0  | 79.9  | 91.5  | 184.1  |
| 308.8 | 291.7 | 449.9 | 321.0 | 33.6  | 37.4  | 38.7  | 43.1  | 14.5   |
| 354.7 | 327.2 | 540.1 | 332.4 | 371.8 | 324.0 | 334.4 | 404.3 | 532.6  |
| 393.5 | 381.0 | 353.6 | 347.6 | 65.7  | 59.2  | 77.6  | 93.6  | 33.3   |
| 224.2 | 226.2 | 226.4 | 220.5 | 369.8 | 391.9 | 352.9 | 447.5 | 1019.3 |
| 4.6   | 6.4   | 8.5   | 3.8   | 3.9   | 7.3   | 4.2   | 7.6   | 8.4    |
| 124.5 | 121.7 | 96.4  | 90.6  | 155.8 | 124.0 | 174.3 | 179.1 | 160.7  |
| 199.4 | 196.9 | 266.8 | 200.0 | 171.1 | 194.5 | 192.4 | 213.3 | 176.8  |
| 310.5 | 292.8 | 358.3 | 242.6 | 167.5 | 172.2 | 158.3 | 200.3 | 195.2  |
| 226.4 | 209.0 | 265.6 | 229.0 | 234.7 | 193.9 | 215.5 | 294.6 | 371.7  |
| 87.5  | 82.4  | 70.6  | 67.3  | 87.6  | 130.0 | 106.5 | 108.9 | 155.2  |
| 367.7 | 312.8 | 621.1 | 296.3 | 481.4 | 518.9 | 564.1 | 588.9 | 912.1  |
| 154.2 | 136.7 | 133.9 | 106.6 | 165.8 | 168.5 | 161.8 | 195.8 | 279.5  |
| 2.4   | 8.8   | 6.3   | 6.9   | 29.4  | 29.1  | 45.2  | 30.2  | 38.4   |
| 232.8 | 231.7 | 425.8 | 241.5 | 290.1 | 176.9 | 275.1 | 346.0 | 179.8  |
| 19.3  | 15.9  | 16.2  | 18.2  | 7.2   | 5.2   | 8.4   | 15.2  | 7.5    |
| 151.6 | 137.0 | 202.8 | 129.0 | 260.1 | 199.8 | 273.2 | 374.3 | 236.0  |
| 72.3  | 82.7  | 99.7  | 70.8  | 110.3 | 132.0 | 127.8 | 118.4 | 76.0   |
| 6.5   | 6.4   | 7.3   | 8.3   | 17.8  | 26.0  | 37.1  | 42.1  | 71.1   |
| 191.5 | 173.9 | 314.9 | 184.2 | 119.7 | 120.9 | 111.2 | 130.8 | 284.1  |
| 189.1 | 176.7 | 227.2 | 214.5 | 43.9  | 50.4  | 39.4  | 27.7  | 74.6   |
| 336.3 | 294.9 | 374.4 | 234.6 | 337.4 | 357.9 | 336.6 | 398.5 | 260.6  |
| 74.2  | 73.1  | 73.8  | 71.2  | 159.7 | 175.0 | 173.2 | 175.1 | 114.5  |
| 96.3  | 106.6 | 113.9 | 96.5  | 82.8  | 80.9  | 85.3  | 110.1 | 97.4   |
| 79.4  | 84.5  | 56.5  | 65.9  | 78.3  | 102.8 | 98.6  | 110.7 | 109.7  |
| 143.2 | 178.3 | 226.4 | 108.4 | 133.8 | 130.1 | 159.1 | 132.3 | 324.7  |
| 241.4 | 235.9 | 201.1 | 243.8 | 287.8 | 347.2 | 269.2 | 331.0 | 324.4  |
| 114.1 | 116.9 | 126.6 | 83.3  | 98.6  | 90.3  | 97.3  | 99.5  | 73.1   |
| 1.5   | 2.7   | 1.7   | 0.5   | 226.8 | 145.4 | 151.4 | 200.2 | 7.7    |
| 71.7  | 62.1  | 57.3  | 52.6  | 90.6  | 90.6  | 85.1  | 107.0 | 53.9   |
| 57.3  | 45.4  | 50.3  | 44.3  | 36.1  | 19.2  | 25.5  | 31.0  | 36.4   |
| 94.7  | 115.1 | 89.7  | 94.9  | 209.1 | 249.1 | 241.7 | 227.8 | 221.8  |
| 718.8 | 638.3 | 950.1 | 585.9 | 344.3 | 299.9 | 376.6 | 427.2 | 241.0  |
| 150.0 | 128.6 | 164.5 | 124.4 | 332.3 | 413.4 | 349.7 | 364.2 | 151.4  |

|        |        |        |        |       |       |       |       |        |
|--------|--------|--------|--------|-------|-------|-------|-------|--------|
| 87.9   | 78.3   | 101.4  | 79.4   | 484.8 | 776.9 | 538.8 | 530.8 | 732.2  |
| 141.3  | 142.6  | 171.9  | 134.6  | 316.0 | 236.6 | 331.6 | 329.5 | 185.2  |
| 188.2  | 179.6  | 177.6  | 144.2  | 61.7  | 69.8  | 53.2  | 65.1  | 37.9   |
| 1738.6 | 1790.4 | 1497.0 | 1972.1 | 63.8  | 69.0  | 75.1  | 99.9  | 63.8   |
| 94.0   | 82.3   | 110.8  | 79.6   | 61.9  | 61.0  | 66.9  | 80.0  | 80.9   |
| 273.5  | 261.2  | 331.2  | 239.1  | 361.2 | 401.1 | 350.3 | 417.2 | 263.7  |
| 514.8  | 456.9  | 681.6  | 462.1  | 426.4 | 520.0 | 481.4 | 583.1 | 415.0  |
| 547.1  | 529.8  | 392.6  | 425.0  | 147.3 | 149.0 | 131.8 | 185.5 | 258.3  |
| 294.3  | 310.5  | 401.9  | 325.8  | 539.4 | 584.8 | 609.8 | 670.7 | 634.4  |
| 442.1  | 445.1  | 452.0  | 476.9  | 364.1 | 434.4 | 734.8 | 506.8 | 372.2  |
| 344.7  | 364.5  | 452.5  | 348.2  | 320.2 | 293.3 | 271.0 | 314.9 | 318.3  |
| 8.4    | 3.8    | 4.3    | 6.0    | 9.6   | 2.0   | 7.8   | 7.2   | 6.6    |
| 142.2  | 138.8  | 83.9   | 120.5  | 107.2 | 151.4 | 123.1 | 131.3 | 62.6   |
| 200.6  | 199.2  | 259.0  | 199.5  | 92.5  | 104.8 | 91.2  | 132.3 | 129.1  |
| 164.0  | 201.6  | 174.9  | 177.6  | 35.8  | 55.1  | 47.6  | 47.5  | 158.8  |
| 120.8  | 118.4  | 196.1  | 101.6  | 273.8 | 275.9 | 235.8 | 287.9 | 302.0  |
| 319.5  | 297.9  | 486.3  | 319.6  | 515.9 | 392.6 | 512.1 | 568.8 | 574.2  |
| 36.1   | 30.8   | 78.4   | 40.5   | 44.8  | 41.3  | 49.8  | 67.0  | 70.1   |
| 164.8  | 172.8  | 242.4  | 202.9  | 246.9 | 302.8 | 252.4 | 260.3 | 164.7  |
| 100.6  | 91.1   | 121.0  | 99.9   | 124.5 | 100.6 | 125.5 | 144.9 | 200.0  |
| 29.5   | 19.7   | 18.8   | 10.5   | 83.1  | 114.7 | 124.0 | 102.4 | 23.4   |
| 340.0  | 334.7  | 247.5  | 488.0  | 6.5   | 4.1   | 9.7   | 12.7  | 125.1  |
| 54.8   | 57.7   | 79.0   | 52.2   | 44.3  | 62.6  | 56.4  | 62.2  | 98.4   |
| 105.3  | 155.4  | 79.7   | 78.7   | 132.1 | 121.6 | 146.8 | 147.0 | 178.8  |
| 102.4  | 105.4  | 103.2  | 80.5   | 89.3  | 87.9  | 93.4  | 111.0 | 149.2  |
| 72.5   | 55.8   | 104.0  | 69.8   | 48.7  | 51.1  | 52.4  | 72.0  | 80.3   |
| 119.4  | 125.9  | 138.4  | 115.3  | 123.7 | 174.5 | 130.9 | 143.7 | 132.4  |
| 315.2  | 274.3  | 369.0  | 278.4  | 428.3 | 474.1 | 402.5 | 442.1 | 1368.6 |
| 89.8   | 98.7   | 48.9   | 50.6   | 228.1 | 163.6 | 204.6 | 293.2 | 192.4  |
| 167.9  | 162.2  | 204.5  | 158.6  | 157.4 | 166.0 | 166.3 | 181.5 | 127.9  |
| 2.0    | 6.3    | 9.3    | 3.7    | 3.6   | 5.1   | 7.5   | 8.2   | 4.2    |
| 148.1  | 157.8  | 188.4  | 125.2  | 60.8  | 73.6  | 72.5  | 85.1  | 121.3  |
| 27.5   | 41.6   | 40.7   | 39.0   | 24.2  | 22.6  | 24.5  | 37.2  | 38.9   |
| 29.2   | 26.7   | 46.4   | 27.0   | 19.6  | 22.3  | 18.3  | 19.1  | 36.7   |
| 26.6   | 32.4   | 77.0   | 36.3   | 45.7  | 46.0  | 50.3  | 54.2  | 46.0   |
| 312.3  | 263.4  | 311.9  | 256.2  | 149.4 | 145.7 | 160.7 | 167.7 | 151.8  |
| 50.3   | 48.4   | 49.4   | 51.3   | 42.7  | 32.9  | 49.8  | 41.8  | 37.6   |
| 40.2   | 39.9   | 66.8   | 45.3   | 74.2  | 45.9  | 91.5  | 89.9  | 64.7   |
| 177.8  | 155.6  | 239.3  | 138.3  | 293.5 | 268.0 | 255.1 | 292.3 | 69.6   |
| 12.9   | 6.9    | 15.8   | 8.7    | 107.9 | 66.0  | 133.1 | 114.6 | 48.6   |
| 116.0  | 106.0  | 152.1  | 98.7   | 100.7 | 116.6 | 137.4 | 142.2 | 162.3  |
| 6.2    | 4.5    | 3.9    | 4.5    | 12.5  | 14.9  | 11.5  | 16.0  | 10.2   |
| 19.0   | 16.2   | 23.4   | 17.5   | 15.7  | 9.1   | 10.8  | 18.3  | 121.0  |
| 25.1   | 19.3   | 25.7   | 13.7   | 340.7 | 276.7 | 306.0 | 348.4 | 786.9  |
| 112.5  | 97.3   | 96.5   | 88.9   | 78.3  | 68.0  | 58.0  | 83.5  | 129.3  |
| 65.3   | 62.6   | 72.5   | 46.5   | 60.7  | 70.5  | 82.0  | 97.3  | 47.9   |
| 24.5   | 21.2   | 23.9   | 18.9   | 19.8  | 19.6  | 15.5  | 27.4  | 44.7   |
| 67.1   | 66.1   | 62.5   | 43.9   | 70.7  | 79.0  | 58.9  | 94.3  | 30.7   |
| 9.0    | 12.3   | 11.8   | 11.5   | 16.6  | 15.4  | 16.4  | 28.1  | 31.7   |
| 10.9   | 6.9    | 15.8   | 3.7    | 3.2   | 3.4   | 3.3   | 21.1  | 57.2   |
| 216.0  | 174.5  | 300.2  | 222.8  | 91.3  | 94.1  | 95.9  | 138.8 | 60.6   |
| 77.7   | 77.0   | 105.2  | 69.5   | 97.1  | 118.3 | 121.1 | 128.5 | 149.1  |
| 445.8  | 537.8  | 420.8  | 365.5  | 121.8 | 135.7 | 165.3 | 216.1 | 76.9   |

|        |        |        |        |       |       |       |       |        |
|--------|--------|--------|--------|-------|-------|-------|-------|--------|
| 61.1   | 63.7   | 103.5  | 67.8   | 142.3 | 103.8 | 147.2 | 171.4 | 398.8  |
| 116.3  | 114.3  | 176.8  | 102.2  | 92.7  | 93.9  | 108.0 | 100.2 | 154.9  |
| 21.1   | 19.5   | 23.8   | 17.0   | 90.4  | 91.9  | 115.0 | 124.3 | 59.5   |
| 84.7   | 88.4   | 72.2   | 77.0   | 45.8  | 69.3  | 41.6  | 65.2  | 43.3   |
| 146.3  | 140.0  | 210.6  | 131.7  | 180.9 | 160.7 | 156.2 | 214.2 | 233.0  |
| 19.9   | 13.0   | 18.7   | 7.0    | 44.5  | 47.3  | 35.6  | 52.4  | 23.3   |
| 35.1   | 31.2   | 40.3   | 35.7   | 66.0  | 54.7  | 48.2  | 56.5  | 54.0   |
| 13.9   | 18.1   | 34.9   | 14.6   | 19.5  | 23.9  | 23.0  | 27.0  | 22.7   |
| 1665.0 | 1478.1 | 1963.4 | 1483.1 | 214.9 | 288.8 | 236.3 | 297.1 | 161.5  |
| 162.5  | 162.7  | 121.6  | 157.7  | 157.4 | 165.5 | 126.3 | 150.2 | 129.9  |
| 131.0  | 129.2  | 141.9  | 110.1  | 116.6 | 95.1  | 139.2 | 128.5 | 99.9   |
| 179.4  | 196.7  | 196.0  | 180.5  | 144.7 | 136.0 | 141.1 | 193.1 | 225.0  |
| 155.8  | 132.0  | 205.3  | 145.6  | 237.2 | 146.4 | 219.8 | 221.3 | 183.3  |
| 1470.2 | 1282.6 | 1526.1 | 1417.0 | 628.3 | 751.6 | 795.0 | 806.0 | 432.5  |
| 258.9  | 233.2  | 329.1  | 243.8  | 257.5 | 279.5 | 246.4 | 295.5 | 296.3  |
| 130.2  | 124.9  | 104.6  | 97.0   | 95.2  | 115.5 | 93.0  | 123.0 | 84.0   |
| 137.5  | 107.1  | 211.4  | 130.5  | 104.7 | 89.7  | 106.3 | 93.1  | 110.6  |
| 13.4   | 19.2   | 20.9   | 11.4   | 183.0 | 261.9 | 229.2 | 232.4 | 131.7  |
| 77.5   | 84.5   | 111.4  | 79.8   | 83.9  | 87.1  | 74.6  | 102.8 | 342.0  |
| 132.7  | 128.1  | 168.1  | 123.1  | 109.1 | 118.2 | 122.0 | 114.4 | 199.3  |
| 61.1   | 84.6   | 44.7   | 56.8   | 92.6  | 140.8 | 110.4 | 95.3  | 199.5  |
| 36.4   | 38.3   | 21.9   | 26.3   | 136.3 | 136.6 | 135.5 | 132.3 | 15.5   |
| 19.8   | 22.6   | 15.1   | 14.5   | 71.9  | 85.4  | 68.3  | 84.4  | 42.7   |
| 252.9  | 275.3  | 207.9  | 233.7  | 74.2  | 91.9  | 77.0  | 65.0  | 82.2   |
| 674.0  | 585.9  | 634.2  | 552.1  | 185.6 | 125.8 | 192.8 | 233.6 | 38.9   |
| 163.8  | 144.5  | 200.7  | 136.7  | 149.7 | 133.0 | 145.6 | 162.3 | 178.8  |
| 110.8  | 93.3   | 130.0  | 106.0  | 89.4  | 120.1 | 99.1  | 99.6  | 297.3  |
| 64.4   | 57.4   | 109.6  | 62.9   | 136.5 | 237.0 | 133.9 | 131.8 | 1625.8 |
| 164.8  | 170.7  | 182.0  | 177.1  | 177.5 | 165.6 | 203.6 | 225.7 | 313.3  |
| 96.8   | 88.9   | 101.8  | 116.2  | 51.2  | 67.9  | 62.0  | 74.5  | 72.0   |
| 130.0  | 114.8  | 119.3  | 109.0  | 118.5 | 130.3 | 102.1 | 132.6 | 149.8  |
| 11.4   | 14.8   | 15.1   | 11.8   | 41.1  | 42.5  | 55.9  | 53.5  | 24.5   |
| 176.8  | 160.8  | 275.2  | 178.5  | 188.6 | 154.0 | 188.5 | 233.8 | 299.3  |
| 287.1  | 283.4  | 271.2  | 258.1  | 300.3 | 362.8 | 334.8 | 361.7 | 196.4  |
| 24.1   | 24.5   | 28.5   | 19.6   | 17.2  | 11.7  | 20.8  | 23.9  | 81.0   |
| 42.8   | 47.6   | 53.8   | 41.9   | 33.0  | 27.0  | 37.0  | 52.7  | 29.2   |
| 209.8  | 194.5  | 355.1  | 194.6  | 142.8 | 95.3  | 127.4 | 168.0 | 213.8  |
| 30.6   | 25.4   | 35.6   | 26.9   | 35.8  | 32.2  | 34.3  | 39.9  | 85.4   |
| 108.7  | 115.5  | 169.5  | 108.6  | 74.7  | 61.1  | 76.3  | 103.0 | 128.7  |
| 369.2  | 339.9  | 461.6  | 436.2  | 150.5 | 146.2 | 147.0 | 150.3 | 276.7  |
| 13.8   | 8.9    | 23.1   | 15.4   | 12.8  | 13.7  | 17.7  | 12.7  | 23.5   |
| 28.4   | 28.5   | 32.1   | 36.4   | 37.9  | 40.0  | 73.6  | 80.3  | 82.8   |
| 81.8   | 87.4   | 113.0  | 81.7   | 100.3 | 122.6 | 113.3 | 126.3 | 154.3  |
| 137.0  | 119.0  | 167.6  | 125.1  | 135.7 | 162.4 | 143.3 | 176.9 | 221.0  |
| 19.4   | 21.4   | 13.4   | 19.6   | 17.6  | 21.4  | 16.6  | 8.7   | 26.0   |
| 49.6   | 42.2   | 51.4   | 47.8   | 22.6  | 24.1  | 23.9  | 21.8  | 47.2   |
| 116.8  | 131.8  | 139.9  | 130.0  | 5.8   | 6.5   | 8.3   | 4.9   | 11.5   |
| 47.1   | 40.3   | 79.9   | 34.8   | 59.5  | 59.7  | 71.7  | 85.7  | 94.9   |
| 141.3  | 130.9  | 114.5  | 122.7  | 8.5   | 15.5  | 17.0  | 20.6  | 30.1   |
| 52.4   | 57.2   | 77.1   | 63.9   | 61.6  | 42.1  | 66.2  | 66.3  | 116.8  |
| 10.3   | 13.2   | 16.6   | 15.5   | 6.8   | 8.2   | 6.6   | 11.5  | 18.3   |
| 246.7  | 247.8  | 337.1  | 227.0  | 99.9  | 101.4 | 98.1  | 95.0  | 69.0   |
| 84.8   | 76.5   | 160.0  | 89.0   | 126.9 | 96.7  | 109.1 | 151.1 | 134.7  |

|       |       |       |       |       |       |       |       |       |
|-------|-------|-------|-------|-------|-------|-------|-------|-------|
| 3.2   | 1.8   | 1.1   | 3.6   | 5.0   | 1.6   | 3.0   | 0.6   | 3.0   |
| 76.4  | 63.8  | 94.7  | 59.8  | 75.3  | 39.8  | 62.3  | 84.2  | 70.3  |
| 54.3  | 45.0  | 109.6 | 44.0  | 42.0  | 36.9  | 45.8  | 62.3  | 68.6  |
| 133.5 | 108.5 | 183.8 | 110.8 | 202.3 | 218.9 | 174.4 | 182.5 | 584.0 |
| 14.1  | 12.1  | 17.8  | 12.3  | 170.6 | 159.9 | 145.1 | 190.8 | 220.0 |
| 265.5 | 278.1 | 421.6 | 173.3 | 222.2 | 215.8 | 215.4 | 263.9 | 38.9  |
| 178.4 | 152.9 | 172.4 | 125.1 | 2.8   | 2.2   | 1.6   | 3.3   | 5.1   |
| 33.6  | 25.4  | 46.6  | 49.5  | 35.1  | 27.4  | 25.1  | 38.1  | 50.0  |
| 105.6 | 101.1 | 166.6 | 80.3  | 108.1 | 101.0 | 118.1 | 120.6 | 177.7 |

---



Batch.12 fBatch.12 (Batch.12 (Batch.12 (Batch.12 fBatch.12 TAK-733\_2.00E-08M\_A375\_6h

|         |         |         |         |         |         |
|---------|---------|---------|---------|---------|---------|
| 557.8   | 377.8   | 518.3   | 598.9   | 619.5   | 653.4   |
| 481.9   | 506.3   | 535.5   | 538.1   | 577.6   | 638.7   |
| 21.6    | 26.7    | 31.1    | 28.6    | 21.8    | 36.2    |
| 158.5   | 168.5   | 156.4   | 167.3   | 152.9   | 190.4   |
| 5.3     | 13.8    | 4.5     | 2.2     | 7.2     | 14.2    |
| 43.0    | 51.3    | 56.7    | 58.0    | 50.3    | 56.2    |
| 24.0    | 28.9    | 23.6    | 23.2    | 21.8    | 26.9    |
| 22.6    | 17.3    | 11.8    | 19.8    | 17.3    | 20.1    |
| 2.6     | 0.6     | 5.0     | 1.3     | 1.2     | 0.8     |
| 9.6     | 14.0    | 8.6     | 9.3     | 15.4    | 15.8    |
| 36.0    | 19.7    | 33.7    | 27.9    | 50.7    | 42.5    |
| 299.1   | 410.1   | 355.4   | 396.9   | 360.4   | 453.6   |
| 25.7    | 30.0    | 22.7    | 26.0    | 18.9    | 27.0    |
| 135.0   | 127.3   | 162.5   | 191.2   | 163.7   | 184.7   |
| 214.4   | 229.6   | 195.2   | 217.4   | 236.5   | 258.8   |
| 122.4   | 70.8    | 133.5   | 127.9   | 161.7   | 143.3   |
| 34.0    | 20.5    | 30.5    | 37.9    | 39.4    | 43.7    |
| 164.9   | 130.4   | 167.7   | 183.9   | 193.9   | 204.3   |
| 167.5   | 161.7   | 150.0   | 161.8   | 142.4   | 171.9   |
| 150.9   | 138.1   | 172.7   | 223.7   | 192.8   | 207.7   |
| 1387.4  | 1168.6  | 1280.4  | 1355.9  | 1669.3  | 1465.3  |
| 2069.9  | 1954.8  | 2251.2  | 2280.3  | 2684.9  | 2574.7  |
| 8628.3  | 8260.5  | 8599.2  | 9359.8  | 9498.5  | 9642.6  |
| 13469.4 | 12708.7 | 12682.4 | 13844.5 | 14036.1 | 13936.9 |
| 5317.3  | 4798.1  | 4681.3  | 5117.8  | 5424.2  | 5798.0  |
| 2390.7  | 2189.7  | 2534.6  | 2620.6  | 2757.7  | 2940.3  |
| 6935.3  | 6343.9  | 7031.8  | 7481.8  | 7720.4  | 7798.9  |
| 5618.3  | 4345.7  | 5199.8  | 5500.6  | 5654.4  | 5664.7  |
| 1726.5  | 1612.4  | 1812.8  | 1833.1  | 1912.3  | 2006.3  |
| 2828.1  | 2694.0  | 3067.4  | 3121.5  | 3315.5  | 3191.2  |
| 9476.5  | 8547.7  | 8787.6  | 9327.6  | 9854.8  | 9731.0  |
| 1105.4  | 976.2   | 958.1   | 971.6   | 1291.5  | 1342.8  |
| 7902.6  | 7261.5  | 7639.9  | 7945.2  | 8222.5  | 8193.4  |
| 10988.6 | 10100.5 | 10295.9 | 11161.0 | 11428.7 | 11672.8 |
| 2658.3  | 2201.8  | 2652.7  | 2705.5  | 2718.0  | 3090.6  |
| 1784.3  | 1678.9  | 1762.7  | 1743.7  | 1921.8  | 2054.5  |
| 10436.1 | 9757.0  | 8735.4  | 9946.8  | 10395.1 | 10479.9 |
| 11750.0 | 10648.3 | 10269.3 | 11791.5 | 12013.7 | 12664.6 |
| 11276.9 | 10653.4 | 11243.4 | 11859.5 | 11911.2 | 11847.6 |
| 8234.1  | 7764.0  | 8302.1  | 8832.1  | 8966.1  | 8935.7  |
| 2062.7  | 1924.3  | 2013.5  | 2012.2  | 2324.9  | 2347.3  |
| 9191.3  | 8844.1  | 9083.0  | 9266.0  | 9730.6  | 9665.1  |
| 9434.0  | 8381.0  | 9365.4  | 10143.1 | 9904.2  | 9748.7  |
| 4003.8  | 3954.1  | 4059.4  | 4294.4  | 4308.2  | 4553.6  |
| 8077.6  | 6939.6  | 7661.8  | 8663.4  | 8603.3  | 8733.3  |
| 11815.8 | 10799.0 | 10294.9 | 11970.0 | 12673.8 | 12000.5 |
| 7855.3  | 7523.6  | 8078.3  | 8319.1  | 8463.3  | 8425.6  |
| 3390.9  | 2857.6  | 3166.5  | 3291.5  | 3586.4  | 3827.3  |
| 873.5   | 781.2   | 898.8   | 934.9   | 1024.1  | 1079.4  |
| 8602.4  | 8181.5  | 8460.6  | 9035.5  | 8979.5  | 9226.4  |
| 6429.5  | 6007.9  | 6150.4  | 6788.8  | 6839.5  | 6933.5  |
| 12738.0 | 11833.2 | 12187.8 | 12957.3 | 12974.9 | 13042.9 |

|         |         |         |         |         |         |
|---------|---------|---------|---------|---------|---------|
| 10866.7 | 10106.3 | 10845.8 | 11799.3 | 11552.0 | 11818.7 |
| 5024.7  | 5237.7  | 4458.6  | 5042.3  | 5417.0  | 5750.0  |
| 10620.6 | 9997.1  | 10366.8 | 11112.9 | 11055.7 | 11456.7 |
| 402.3   | 413.5   | 427.5   | 420.2   | 452.6   | 470.5   |
| 6034.2  | 5093.1  | 5965.1  | 6618.3  | 6471.8  | 6871.7  |
| 3869.0  | 3802.3  | 3488.4  | 3846.8  | 3844.6  | 4946.7  |
| 11280.5 | 10170.8 | 11317.9 | 12107.4 | 11597.4 | 12067.6 |
| 3836.9  | 3594.0  | 4112.4  | 4059.3  | 4371.9  | 4451.2  |
| 2922.1  | 2410.4  | 3066.6  | 3446.0  | 3422.9  | 3666.5  |
| 2327.3  | 2147.9  | 2356.8  | 2391.0  | 2588.8  | 2716.5  |
| 804.6   | 612.5   | 888.2   | 832.2   | 901.3   | 934.9   |
| 5210.7  | 4813.2  | 5142.8  | 5475.7  | 5674.4  | 6198.0  |
| 2471.5  | 2204.6  | 2611.7  | 2566.5  | 2739.0  | 3003.2  |
| 726.2   | 737.5   | 726.1   | 766.3   | 855.2   | 842.8   |
| 2017.2  | 2106.2  | 2069.6  | 2479.0  | 2501.7  | 2588.2  |
| 1967.0  | 1776.8  | 1910.8  | 2067.6  | 2107.9  | 2365.9  |
| 4299.2  | 3995.6  | 4382.5  | 4612.2  | 4708.3  | 5005.3  |
| 323.2   | 284.8   | 312.6   | 333.1   | 374.1   | 391.3   |
| 1778.6  | 1748.2  | 1674.2  | 1892.6  | 2036.4  | 2176.5  |
| 484.3   | 434.2   | 445.3   | 443.9   | 568.5   | 575.7   |
| 3023.1  | 2699.4  | 3124.4  | 3325.9  | 3351.7  | 3348.2  |
| 606.9   | 576.7   | 573.0   | 678.2   | 710.7   | 769.1   |
| 571.8   | 592.5   | 600.0   | 613.9   | 595.3   | 663.1   |
| 1371.9  | 1250.2  | 1560.9  | 1561.5  | 1660.1  | 1691.5  |
| 781.9   | 769.1   | 724.9   | 813.3   | 818.8   | 971.4   |
| 4539.5  | 4070.4  | 4436.4  | 4442.6  | 4800.5  | 5084.2  |
| 1810.8  | 1363.0  | 1515.4  | 1499.5  | 1896.1  | 1793.3  |
| 5073.8  | 4624.0  | 5093.8  | 5514.2  | 5684.4  | 5840.6  |
| 2303.8  | 2382.6  | 2474.9  | 2621.9  | 2730.5  | 2795.2  |
| 9546.5  | 8906.9  | 8757.4  | 9536.6  | 9886.7  | 9757.1  |
| 10198.5 | 9835.1  | 9783.0  | 10479.1 | 10927.9 | 11095.1 |
| 9325.4  | 8354.2  | 8456.7  | 8903.2  | 9175.0  | 9274.9  |
| 7549.3  | 7012.5  | 7022.3  | 7347.9  | 7706.2  | 7619.8  |
| 4364.8  | 3705.1  | 4953.3  | 5040.0  | 4781.7  | 4751.3  |
| 1110.7  | 969.2   | 1056.8  | 1015.2  | 1225.9  | 1249.9  |
| 1292.6  | 1125.1  | 1321.5  | 1554.5  | 1467.1  | 1657.1  |
| 3032.0  | 2476.1  | 3020.5  | 3014.4  | 3385.8  | 3523.9  |
| 279.8   | 306.4   | 285.0   | 279.4   | 314.7   | 344.5   |
| 175.2   | 153.1   | 201.7   | 194.3   | 245.2   | 244.8   |
| 1256.6  | 1098.9  | 1078.5  | 1281.1  | 1294.5  | 1420.3  |
| 3428.9  | 3303.4  | 3354.1  | 3216.4  | 3840.3  | 3835.2  |
| 2894.3  | 2681.1  | 2654.7  | 2568.4  | 2986.8  | 3414.3  |
| 6158.1  | 5256.3  | 5881.7  | 6115.8  | 6473.5  | 6781.2  |
| 1041.3  | 938.5   | 1281.5  | 1418.4  | 1357.6  | 1412.6  |
| 876.0   | 735.4   | 1049.2  | 1070.3  | 1085.4  | 1143.4  |
| 5999.6  | 5850.1  | 6277.6  | 6605.7  | 6704.0  | 6846.1  |
| 2641.0  | 3067.9  | 3320.1  | 3604.6  | 3737.8  | 3752.9  |
| 3590.4  | 3582.3  | 3710.4  | 3787.2  | 4053.3  | 4092.3  |
| 6496.2  | 5582.9  | 5663.0  | 6353.6  | 6625.0  | 7310.3  |
| 10916.4 | 10337.5 | 10621.2 | 11345.7 | 11255.1 | 11299.8 |
| 10013.0 | 9077.0  | 9925.8  | 10403.3 | 11017.3 | 10744.3 |
| 1294.6  | 1024.3  | 1137.0  | 1050.1  | 1154.0  | 1252.1  |
| 1547.0  | 1535.9  | 1530.1  | 1668.9  | 1782.4  | 2060.1  |

|         |         |         |         |         |         |
|---------|---------|---------|---------|---------|---------|
| 3054.0  | 2802.3  | 3372.7  | 3705.6  | 3481.2  | 3713.6  |
| 4335.6  | 3636.6  | 4511.8  | 4752.5  | 4809.8  | 4974.8  |
| 3968.8  | 3728.6  | 4091.1  | 4378.3  | 4248.2  | 4837.1  |
| 10102.8 | 9113.6  | 9758.4  | 10328.6 | 10709.9 | 10567.9 |
| 8571.4  | 8316.4  | 8100.4  | 9706.4  | 9216.2  | 9210.4  |
| 814.5   | 766.3   | 894.2   | 964.2   | 914.3   | 962.3   |
| 8897.4  | 8120.4  | 7945.1  | 9160.4  | 9476.6  | 9901.0  |
| 10742.4 | 9527.8  | 10078.0 | 10836.1 | 11077.2 | 11342.9 |
| 4165.1  | 3591.1  | 4000.5  | 4453.2  | 4406.3  | 4644.1  |
| 6707.4  | 5778.9  | 6410.1  | 6648.1  | 6984.9  | 6859.7  |
| 10841.8 | 10652.6 | 10805.7 | 11116.2 | 10953.1 | 11204.9 |
| 2115.0  | 1851.0  | 2192.3  | 2287.5  | 2408.7  | 2483.4  |
| 2526.6  | 2243.3  | 2411.3  | 2504.1  | 2645.7  | 2982.3  |
| 2076.8  | 1895.2  | 1978.3  | 2019.0  | 2232.1  | 2366.6  |
| 11748.1 | 11035.7 | 10906.1 | 12153.9 | 12182.3 | 12682.5 |
| 2351.9  | 2052.1  | 2165.8  | 2027.7  | 2484.6  | 2603.7  |
| 3491.9  | 3175.0  | 3255.5  | 3450.2  | 3665.7  | 3818.3  |
| 2929.7  | 2606.0  | 2886.7  | 3527.3  | 3204.7  | 3451.4  |
| 1065.3  | 913.3   | 938.6   | 849.4   | 1126.5  | 1163.6  |
| 221.3   | 243.1   | 207.3   | 223.1   | 219.8   | 263.6   |
| 1018.8  | 962.9   | 1030.3  | 1033.2  | 1247.7  | 1257.4  |
| 3174.2  | 3046.2  | 3070.0  | 3108.8  | 3599.5  | 3761.0  |
| 1656.3  | 1406.0  | 1529.6  | 1667.9  | 1885.8  | 2051.9  |
| 1109.6  | 1040.0  | 1350.3  | 975.7   | 1385.1  | 1361.0  |
| 618.2   | 393.0   | 443.6   | 475.8   | 510.3   | 715.6   |
| 3739.5  | 3957.6  | 3519.5  | 4497.9  | 4390.4  | 4706.1  |
| 1701.7  | 2103.5  | 1965.7  | 1765.0  | 2061.7  | 2041.1  |
| 2659.9  | 2847.1  | 2704.3  | 2703.9  | 2942.5  | 3017.0  |
| 203.4   | 133.2   | 175.2   | 216.2   | 240.4   | 202.5   |
| 924.7   | 882.2   | 940.0   | 983.7   | 1110.8  | 1243.0  |
| 2589.8  | 2167.8  | 2304.2  | 2507.7  | 2555.2  | 3181.3  |
| 1836.7  | 1565.7  | 1846.3  | 1947.0  | 2238.1  | 2297.3  |
| 4787.7  | 4461.9  | 4468.1  | 4783.2  | 5052.7  | 5464.5  |
| 2339.0  | 1946.0  | 2285.9  | 2378.4  | 2836.4  | 2717.4  |
| 627.4   | 572.2   | 582.4   | 654.5   | 674.0   | 751.3   |
| 1822.1  | 1783.5  | 1885.2  | 2151.2  | 2343.5  | 2450.9  |
| 5085.8  | 4296.2  | 4857.4  | 4861.5  | 5652.0  | 5270.8  |
| 507.6   | 411.0   | 517.1   | 513.3   | 554.5   | 586.0   |
| 518.3   | 555.0   | 616.4   | 577.4   | 600.9   | 587.6   |
| 454.3   | 373.8   | 428.8   | 484.7   | 546.4   | 585.1   |
| 1376.0  | 1250.2  | 1097.6  | 1298.9  | 1568.6  | 1550.4  |
| 1222.6  | 1109.6  | 1144.7  | 1071.6  | 1306.9  | 1288.9  |
| 2311.3  | 2066.6  | 2519.8  | 2751.0  | 2620.9  | 2722.4  |
| 986.7   | 1057.8  | 1112.2  | 1178.6  | 1227.3  | 1320.7  |
| 371.7   | 352.5   | 330.8   | 366.7   | 477.7   | 427.2   |
| 348.9   | 338.5   | 387.3   | 364.3   | 513.7   | 462.8   |
| 2228.0  | 2089.6  | 2127.9  | 2115.8  | 2328.7  | 2586.3  |
| 2323.3  | 2231.4  | 2276.8  | 2599.5  | 2656.9  | 2859.6  |
| 3157.2  | 2939.5  | 3212.1  | 3359.4  | 3611.4  | 3827.3  |
| 8016.3  | 7733.4  | 7666.9  | 7867.1  | 7881.1  | 8322.1  |
| 836.4   | 661.5   | 793.8   | 954.1   | 1023.5  | 1120.5  |
| 832.4   | 704.2   | 936.6   | 1019.4  | 1049.0  | 1010.7  |
| 964.4   | 921.6   | 1039.6  | 1072.4  | 1087.9  | 1195.2  |

|         |         |         |         |         |         |
|---------|---------|---------|---------|---------|---------|
| 2500.4  | 2329.9  | 2591.5  | 2609.3  | 2779.8  | 2758.7  |
| 454.1   | 417.7   | 467.3   | 469.6   | 565.6   | 594.6   |
| 8487.2  | 8565.7  | 8417.4  | 8494.1  | 8853.2  | 8913.6  |
| 7117.6  | 6551.3  | 6781.2  | 7624.3  | 7452.9  | 7929.8  |
| 51.5    | 44.4    | 51.3    | 39.9    | 48.0    | 51.0    |
| 190.0   | 198.8   | 160.6   | 180.9   | 258.1   | 238.6   |
| 43.7    | 44.8    | 39.9    | 32.9    | 45.1    | 42.8    |
| 5570.2  | 5362.6  | 5024.3  | 5725.5  | 6128.7  | 6666.1  |
| 3452.8  | 3742.5  | 3726.7  | 3434.9  | 4216.1  | 5366.0  |
| 4107.7  | 3855.5  | 3864.8  | 4077.8  | 4526.8  | 4934.8  |
| 4317.3  | 4136.4  | 4546.7  | 4563.8  | 4774.5  | 4937.4  |
| 4984.5  | 4695.0  | 4803.1  | 4981.1  | 5581.2  | 5652.0  |
| 336.8   | 249.7   | 352.4   | 346.6   | 392.9   | 408.6   |
| 2125.8  | 1838.2  | 2025.0  | 2235.4  | 2507.2  | 2631.1  |
| 2785.4  | 2279.7  | 2997.5  | 2994.2  | 3382.7  | 3380.2  |
| 313.4   | 301.5   | 336.7   | 320.9   | 439.6   | 404.8   |
| 5869.3  | 5233.8  | 5795.6  | 6268.6  | 6482.0  | 6410.2  |
| 66.2    | 40.8    | 60.9    | 64.8    | 78.5    | 93.9    |
| 522.8   | 508.2   | 521.1   | 518.1   | 706.9   | 613.2   |
| 8940.4  | 8696.5  | 8381.9  | 9393.4  | 9696.3  | 9694.7  |
| 11340.5 | 10390.3 | 10071.1 | 11534.9 | 11283.8 | 11375.9 |
| 4593.7  | 3840.4  | 4642.0  | 4789.9  | 4761.5  | 4949.3  |
| 3020.7  | 3232.2  | 2645.3  | 3140.1  | 3337.3  | 3814.9  |
| 2928.3  | 2692.5  | 2872.2  | 3059.9  | 3491.0  | 3459.0  |
| 1933.9  | 1753.9  | 1743.1  | 1817.4  | 1984.0  | 2354.2  |
| 1661.5  | 1586.7  | 1676.8  | 1714.2  | 1983.8  | 2153.9  |
| 6497.8  | 6287.0  | 6354.3  | 6843.0  | 7085.1  | 7091.1  |
| 2492.1  | 2287.7  | 2642.2  | 2787.8  | 2866.0  | 2939.6  |
| 703.1   | 678.7   | 820.2   | 829.2   | 802.2   | 818.2   |
| 3961.6  | 3904.0  | 3747.3  | 3918.9  | 4374.5  | 4468.3  |
| 1101.1  | 870.5   | 1156.0  | 1251.1  | 1334.5  | 1311.2  |
| 4754.2  | 4213.8  | 4477.1  | 4423.8  | 4925.0  | 4933.3  |
| 4198.1  | 4182.3  | 4372.5  | 4645.5  | 4754.2  | 4930.6  |
| 980.3   | 877.2   | 973.4   | 1023.9  | 1156.0  | 1222.4  |
| 4270.9  | 3722.3  | 4091.4  | 4310.8  | 4364.5  | 4736.9  |
| 1615.8  | 1404.4  | 1542.4  | 1704.6  | 1861.3  | 1909.4  |
| 859.8   | 715.0   | 814.2   | 887.9   | 900.6   | 964.7   |
| 3536.2  | 3289.2  | 3633.2  | 4015.0  | 3884.8  | 4348.3  |
| 2024.7  | 1996.9  | 2319.4  | 2405.6  | 2405.2  | 2631.3  |
| 310.2   | 290.4   | 284.8   | 345.7   | 338.0   | 396.8   |
| 208.4   | 188.7   | 194.7   | 168.0   | 243.7   | 226.7   |
| 400.2   | 325.2   | 326.3   | 344.6   | 451.7   | 416.1   |
| 2978.0  | 2725.3  | 2789.7  | 3260.6  | 3238.7  | 3736.8  |
| 8146.8  | 7633.1  | 7949.0  | 8563.9  | 8417.0  | 8184.2  |
| 1325.4  | 1226.7  | 1362.0  | 1477.3  | 1680.9  | 1721.0  |
| 148.6   | 153.2   | 176.5   | 185.8   | 201.2   | 226.9   |
| 1505.2  | 1512.1  | 1556.9  | 1749.5  | 1680.8  | 2023.5  |
| 859.2   | 840.9   | 892.3   | 970.1   | 1095.0  | 1083.0  |
| 4477.6  | 3962.0  | 4283.0  | 4028.8  | 4581.8  | 5048.1  |
| 7613.1  | 7004.9  | 7123.3  | 7364.5  | 7820.9  | 8032.1  |
| 1569.6  | 1717.5  | 1854.8  | 2066.1  | 2041.8  | 2156.2  |
| 2112.4  | 1869.0  | 2176.9  | 2145.4  | 2248.8  | 2443.2  |
| 600.7   | 563.2   | 613.7   | 661.5   | 692.4   | 740.1   |

|         |         |         |         |         |         |
|---------|---------|---------|---------|---------|---------|
| 338.0   | 333.0   | 346.7   | 356.2   | 398.0   | 442.7   |
| 250.5   | 184.4   | 195.0   | 234.3   | 238.7   | 277.8   |
| 2451.7  | 2004.2  | 3097.5  | 2892.0  | 3221.8  | 3317.7  |
| 1254.1  | 1081.0  | 1191.4  | 1179.8  | 1380.1  | 1345.4  |
| 121.4   | 145.8   | 139.2   | 159.4   | 133.4   | 163.5   |
| 7577.8  | 7277.1  | 7149.6  | 7727.3  | 7979.3  | 8032.8  |
| 334.3   | 241.3   | 322.1   | 313.3   | 323.8   | 375.9   |
| 2906.7  | 2358.0  | 2540.4  | 2545.4  | 2796.6  | 3006.8  |
| 1794.4  | 1569.4  | 1549.8  | 1466.9  | 1737.5  | 2019.0  |
| 5066.8  | 4400.2  | 5138.2  | 5638.2  | 5751.0  | 5881.8  |
| 627.4   | 529.1   | 682.0   | 645.3   | 673.2   | 696.2   |
| 577.1   | 561.5   | 518.5   | 592.5   | 644.0   | 675.7   |
| 1169.9  | 984.7   | 1040.2  | 1093.6  | 1298.9  | 1225.1  |
| 671.7   | 686.6   | 622.4   | 598.1   | 756.6   | 837.3   |
| 1873.3  | 1881.2  | 1577.5  | 1730.7  | 1823.4  | 2394.7  |
| 693.1   | 725.9   | 766.1   | 796.3   | 868.4   | 883.3   |
| 1365.0  | 1235.2  | 1432.6  | 1542.4  | 1604.3  | 1680.2  |
| 1248.2  | 1206.5  | 1421.0  | 1505.3  | 1603.3  | 1610.6  |
| 236.4   | 239.0   | 222.5   | 229.6   | 257.7   | 272.7   |
| 5892.6  | 5708.8  | 5787.4  | 6024.9  | 6049.4  | 6709.1  |
| 937.3   | 786.3   | 973.0   | 924.9   | 1092.1  | 1151.2  |
| 7065.2  | 6852.6  | 7283.4  | 7339.1  | 7519.3  | 8355.1  |
| 421.0   | 319.1   | 369.6   | 352.7   | 472.6   | 491.2   |
| 2023.9  | 1760.7  | 1950.3  | 1959.5  | 2264.4  | 2169.9  |
| 1113.5  | 1004.7  | 1336.1  | 1221.3  | 1195.9  | 1323.8  |
| 3022.0  | 2541.0  | 3042.8  | 3165.4  | 3473.7  | 3510.5  |
| 1617.3  | 1274.1  | 1425.7  | 1610.0  | 1808.5  | 1712.6  |
| 1065.4  | 1158.7  | 1038.6  | 1244.8  | 1161.3  | 1294.5  |
| 974.0   | 832.6   | 892.4   | 824.5   | 1063.0  | 1061.8  |
| 1879.1  | 1745.6  | 1951.8  | 2011.1  | 2260.1  | 2334.7  |
| 871.8   | 879.9   | 788.1   | 881.6   | 1000.7  | 1044.9  |
| 8299.1  | 7122.8  | 8036.6  | 8838.6  | 8671.8  | 9173.0  |
| 10958.4 | 9814.2  | 10613.9 | 10975.7 | 11068.1 | 10891.9 |
| 12003.1 | 11159.6 | 11236.8 | 12150.2 | 12577.3 | 12706.1 |
| 7317.9  | 6018.6  | 6435.8  | 7379.1  | 7680.2  | 7918.5  |
| 210.2   | 192.5   | 177.3   | 206.3   | 232.4   | 254.7   |
| 561.2   | 493.8   | 548.4   | 592.8   | 635.6   | 696.8   |
| 519.6   | 415.6   | 544.1   | 488.4   | 567.0   | 592.6   |
| 1269.7  | 1303.7  | 1337.3  | 1343.1  | 1445.6  | 1519.9  |
| 4001.4  | 3850.9  | 3938.6  | 4069.1  | 4242.5  | 4596.3  |
| 20.2    | 34.0    | 25.4    | 22.3    | 24.1    | 25.1    |
| 6882.7  | 5832.4  | 6774.5  | 7730.6  | 7621.8  | 7373.6  |
| 3746.3  | 3512.1  | 3668.9  | 4076.9  | 3851.1  | 4246.1  |
| 939.9   | 984.6   | 1150.1  | 1068.4  | 1093.8  | 1288.1  |
| 2271.7  | 2067.8  | 2414.5  | 2339.5  | 2590.0  | 2700.3  |
| 2020.4  | 1818.1  | 1896.1  | 2005.0  | 2189.8  | 2409.3  |
| 1066.6  | 1238.0  | 1181.5  | 1263.0  | 1183.1  | 1371.2  |
| 507.8   | 555.4   | 550.4   | 586.0   | 546.3   | 604.3   |
| 776.9   | 732.5   | 731.5   | 815.0   | 810.9   | 854.4   |
| 2559.7  | 2325.6  | 1939.5  | 1873.2  | 1981.2  | 3327.3  |
| 1416.6  | 1398.6  | 1572.0  | 1463.1  | 1700.8  | 1691.7  |
| 9602.9  | 8723.8  | 9096.9  | 9338.3  | 9883.0  | 10052.8 |
| 4599.2  | 4348.2  | 5088.4  | 5577.5  | 5172.7  | 5618.0  |

|         |         |         |         |         |         |
|---------|---------|---------|---------|---------|---------|
| 1858.8  | 1979.3  | 1918.1  | 2110.1  | 2183.8  | 2365.7  |
| 6457.6  | 5618.0  | 6146.5  | 6990.8  | 6995.9  | 7101.1  |
| 309.9   | 292.9   | 358.8   | 308.5   | 409.4   | 391.3   |
| 1129.3  | 1150.7  | 1156.6  | 1115.7  | 1287.0  | 1400.3  |
| 11402.3 | 10155.5 | 10541.4 | 11187.4 | 11434.1 | 11648.9 |
| 326.8   | 350.3   | 306.6   | 309.0   | 401.5   | 433.4   |
| 530.0   | 466.1   | 525.3   | 514.6   | 657.9   | 670.0   |
| 1505.8  | 1408.8  | 1611.2  | 1538.1  | 1684.6  | 1729.3  |
| 1373.9  | 1415.2  | 1522.7  | 1514.4  | 1586.5  | 1777.3  |
| 1536.9  | 1367.7  | 1645.2  | 1756.8  | 1851.1  | 1917.8  |
| 376.5   | 280.0   | 382.5   | 395.9   | 428.3   | 396.0   |
| 11327.6 | 9539.8  | 10201.2 | 10764.6 | 11543.9 | 11436.4 |
| 1049.1  | 1084.4  | 982.4   | 1140.4  | 1151.6  | 1361.3  |
| 6853.4  | 6672.4  | 6979.4  | 7242.6  | 7412.1  | 7685.7  |
| 3165.9  | 2799.6  | 3479.8  | 3367.0  | 3754.3  | 4158.3  |
| 125.2   | 114.3   | 99.5    | 122.5   | 123.1   | 144.9   |
| 2235.2  | 2195.9  | 2231.1  | 2368.0  | 2423.0  | 2770.4  |
| 3432.0  | 3580.3  | 3496.5  | 3766.0  | 3906.0  | 3962.5  |
| 927.3   | 847.0   | 1007.6  | 971.4   | 1093.5  | 1179.4  |
| 942.6   | 645.3   | 803.4   | 758.5   | 1063.0  | 1047.0  |
| 892.8   | 802.7   | 1011.1  | 1003.4  | 996.4   | 1116.5  |
| 850.6   | 722.3   | 773.6   | 720.0   | 990.8   | 917.9   |
| 802.2   | 608.5   | 702.8   | 774.2   | 899.8   | 903.6   |
| 1373.1  | 1176.9  | 1593.5  | 1751.0  | 1660.2  | 1848.1  |
| 1561.4  | 1122.3  | 1543.2  | 1600.8  | 1664.2  | 1829.4  |
| 1141.1  | 1139.8  | 1105.6  | 1290.0  | 1232.2  | 1399.5  |
| 12026.6 | 10768.6 | 11147.5 | 11701.6 | 12037.5 | 12009.9 |
| 2183.3  | 1835.5  | 1954.3  | 1906.6  | 2370.5  | 2330.5  |
| 3158.1  | 2866.4  | 2986.4  | 2905.4  | 3507.6  | 3435.5  |
| 208.0   | 213.0   | 223.5   | 227.2   | 278.2   | 329.4   |
| 92.4    | 90.5    | 98.2    | 84.6    | 93.0    | 109.1   |
| 1132.6  | 1299.8  | 1237.3  | 1371.1  | 1290.5  | 1397.9  |
| 507.3   | 559.1   | 547.1   | 604.0   | 611.1   | 626.3   |
| 608.0   | 680.1   | 605.0   | 650.2   | 716.7   | 770.7   |
| 1190.6  | 1473.1  | 1228.6  | 1283.9  | 1422.5  | 1391.5  |
| 3215.0  | 3203.3  | 3588.2  | 3400.0  | 3725.9  | 3939.7  |
| 4504.2  | 4641.9  | 4638.8  | 5041.0  | 5001.5  | 5318.0  |
| 2505.0  | 2260.2  | 2463.4  | 2482.4  | 2853.9  | 3054.3  |
| 5180.3  | 5001.0  | 4961.7  | 5334.9  | 5316.7  | 5697.6  |
| 1808.1  | 1706.5  | 1897.8  | 2016.8  | 1939.8  | 2312.5  |
| 1648.0  | 1663.7  | 1717.3  | 1833.7  | 1801.3  | 2116.6  |
| 1027.0  | 1117.5  | 1258.9  | 1223.2  | 1343.0  | 1509.4  |
| 3074.2  | 2448.4  | 2547.0  | 2772.5  | 3077.1  | 3108.9  |
| 5689.5  | 5577.6  | 5710.9  | 5774.8  | 6335.1  | 6427.2  |
| 8259.0  | 7755.7  | 7808.2  | 8583.0  | 8511.9  | 8890.6  |
| 2402.3  | 2114.0  | 2500.7  | 2596.5  | 2619.1  | 2713.4  |
| 770.8   | 686.6   | 778.9   | 836.2   | 954.7   | 979.4   |
| 5.7     | 6.6     | 9.5     | 8.6     | 7.3     | 10.6    |
| 22.9    | 14.7    | 17.4    | 15.1    | 25.9    | 31.7    |
| 5803.1  | 5071.7  | 5385.4  | 5536.1  | 5814.2  | 5915.7  |
| 930.5   | 958.7   | 1051.8  | 1046.2  | 1187.4  | 1280.0  |
| 1888.3  | 1576.8  | 1901.6  | 1955.6  | 2103.4  | 2128.8  |
| 721.6   | 588.1   | 816.2   | 884.6   | 905.6   | 938.1   |

|         |         |         |         |         |         |
|---------|---------|---------|---------|---------|---------|
| 573.9   | 608.0   | 619.6   | 666.2   | 654.1   | 713.4   |
| 658.4   | 619.0   | 669.4   | 627.0   | 831.2   | 819.6   |
| 3273.1  | 2846.0  | 3186.0  | 3238.1  | 3501.9  | 3441.6  |
| 637.1   | 414.7   | 594.1   | 589.3   | 670.3   | 708.0   |
| 2903.9  | 2454.2  | 2742.8  | 2812.7  | 3065.1  | 3262.6  |
| 8.8     | 12.1    | 4.1     | 4.6     | 5.5     | 3.1     |
| 279.4   | 317.0   | 266.7   | 335.8   | 350.7   | 395.0   |
| 1299.5  | 1464.9  | 1201.1  | 1669.0  | 1480.4  | 1631.0  |
| 1628.8  | 1645.9  | 1243.5  | 1647.5  | 1663.5  | 1779.4  |
| 1885.9  | 1614.4  | 1974.7  | 1830.9  | 2476.5  | 2301.5  |
| 1233.1  | 883.0   | 1001.2  | 890.1   | 1196.1  | 1231.2  |
| 11553.0 | 11057.0 | 10524.0 | 10799.6 | 11696.7 | 11051.9 |
| 1193.7  | 1052.1  | 1308.2  | 1246.5  | 1414.3  | 1480.4  |
| 3393.2  | 2870.5  | 3283.5  | 3476.4  | 3709.9  | 3824.7  |
| 1525.1  | 1427.2  | 1590.3  | 1644.6  | 1781.4  | 1864.9  |
| 614.7   | 532.4   | 621.6   | 666.8   | 727.4   | 702.8   |
| 5640.0  | 5408.2  | 5350.2  | 5683.1  | 6074.5  | 6156.7  |
| 9462.3  | 8651.0  | 8506.3  | 9157.2  | 9855.7  | 10122.9 |
| 300.8   | 310.5   | 336.6   | 304.6   | 424.0   | 437.2   |
| 9174.1  | 7753.9  | 9330.1  | 9656.1  | 9738.1  | 9825.4  |
| 1213.5  | 891.5   | 1268.9  | 1300.9  | 1511.6  | 1558.5  |
| 581.0   | 523.9   | 682.8   | 626.0   | 818.5   | 796.8   |
| 3970.0  | 3309.1  | 3752.6  | 3859.5  | 4161.3  | 4065.0  |
| 282.0   | 247.7   | 258.6   | 283.2   | 336.7   | 363.7   |
| 739.6   | 651.0   | 883.8   | 922.1   | 916.5   | 932.0   |
| 772.9   | 632.6   | 753.4   | 720.5   | 955.2   | 899.1   |
| 611.9   | 422.9   | 629.0   | 628.7   | 737.1   | 785.8   |
| 11761.2 | 11241.0 | 11621.4 | 11979.1 | 12072.4 | 11990.6 |
| 2675.0  | 2423.7  | 2661.0  | 2788.5  | 2908.3  | 3065.0  |
| 9094.0  | 8485.0  | 8862.3  | 9408.3  | 9733.8  | 9700.4  |
| 2977.6  | 2650.1  | 3246.5  | 3485.5  | 3516.0  | 3577.4  |
| 1137.1  | 807.3   | 894.1   | 1100.7  | 1025.0  | 1349.7  |
| 4628.0  | 3993.1  | 4862.5  | 4946.5  | 5148.6  | 5047.6  |
| 7947.0  | 7327.9  | 8173.1  | 8562.6  | 8458.7  | 8689.6  |
| 3084.7  | 2687.5  | 3370.8  | 3460.5  | 3746.5  | 3573.8  |
| 965.9   | 898.5   | 1040.0  | 1007.6  | 1150.7  | 1079.3  |
| 7744.7  | 7261.6  | 7967.2  | 8475.7  | 8474.9  | 8502.0  |
| 546.4   | 452.5   | 523.6   | 591.5   | 639.2   | 626.6   |
| 3103.2  | 2816.0  | 3215.5  | 3549.6  | 3628.6  | 3499.8  |
| 1881.8  | 1676.8  | 1894.2  | 1947.2  | 2059.5  | 2141.2  |
| 1568.0  | 1268.9  | 1606.3  | 1751.3  | 1813.9  | 1810.9  |
| 256.1   | 219.3   | 288.8   | 274.5   | 337.9   | 356.1   |
| 476.6   | 408.1   | 422.9   | 441.2   | 510.8   | 555.7   |
| 1961.7  | 2128.5  | 1942.3  | 2211.3  | 2094.6  | 2404.6  |
| 12243.1 | 12070.5 | 11998.9 | 12439.1 | 12515.0 | 12722.5 |
| 57.4    | 26.6    | 58.1    | 40.9    | 85.6    | 72.2    |
| 153.0   | 133.5   | 139.4   | 147.6   | 179.6   | 158.9   |
| 2227.2  | 2099.7  | 2394.8  | 2578.3  | 2583.9  | 2656.0  |
| 741.2   | 621.4   | 838.2   | 868.4   | 884.0   | 945.2   |
| 1013.4  | 869.3   | 1031.2  | 1184.6  | 1112.3  | 1217.4  |
| 6630.5  | 5982.3  | 6178.6  | 6603.8  | 6874.0  | 6970.2  |
| 425.3   | 381.7   | 411.2   | 417.0   | 516.6   | 532.1   |
| 1209.1  | 848.2   | 1084.7  | 1042.9  | 1276.1  | 1327.6  |

|         |         |         |         |         |         |
|---------|---------|---------|---------|---------|---------|
| 1105.0  | 926.3   | 1176.3  | 1239.6  | 1311.8  | 1314.6  |
| 3428.6  | 3257.4  | 3756.0  | 3899.7  | 3891.4  | 3837.0  |
| 3125.6  | 2889.4  | 3217.0  | 3418.2  | 3417.9  | 3645.4  |
| 2103.7  | 1977.3  | 2206.4  | 2499.1  | 2507.6  | 2512.8  |
| 1525.4  | 1171.6  | 1390.3  | 1495.2  | 1535.4  | 1772.6  |
| 469.0   | 351.9   | 487.1   | 534.0   | 571.4   | 501.3   |
| 473.5   | 441.6   | 545.3   | 553.4   | 575.9   | 633.8   |
| 1078.9  | 923.3   | 1040.8  | 1136.9  | 1303.1  | 1334.5  |
| 941.2   | 842.3   | 874.8   | 885.3   | 1019.6  | 1108.4  |
| 1099.6  | 949.6   | 1260.8  | 1316.3  | 1415.4  | 1252.5  |
| 7168.0  | 6398.4  | 7047.5  | 7342.0  | 7490.4  | 7624.8  |
| 198.7   | 172.6   | 220.4   | 231.6   | 245.4   | 236.7   |
| 56.4    | 40.6    | 57.3    | 48.9    | 50.1    | 56.7    |
| 60.2    | 57.4    | 47.5    | 58.9    | 62.0    | 74.8    |
| 165.4   | 156.1   | 183.6   | 195.6   | 276.4   | 243.6   |
| 8325.7  | 7448.8  | 8876.3  | 9671.3  | 9791.9  | 10408.0 |
| 1606.6  | 1247.4  | 1445.4  | 1522.1  | 1928.9  | 1675.7  |
| 804.2   | 750.3   | 826.6   | 841.8   | 974.4   | 1041.7  |
| 269.0   | 235.3   | 280.1   | 285.9   | 341.7   | 333.4   |
| 963.7   | 788.7   | 735.2   | 829.7   | 931.2   | 862.7   |
| 2383.9  | 2349.6  | 2447.4  | 2609.0  | 2650.1  | 2774.6  |
| 405.8   | 307.5   | 326.1   | 351.4   | 364.0   | 478.2   |
| 11.9    | 5.1     | 12.5    | 5.0     | 7.7     | 7.8     |
| 1668.1  | 1557.9  | 1586.8  | 1686.4  | 1954.8  | 1851.2  |
| 591.1   | 528.1   | 596.0   | 578.7   | 618.7   | 738.8   |
| 863.2   | 884.9   | 752.2   | 968.6   | 1050.3  | 1130.3  |
| 12923.0 | 11749.2 | 12237.1 | 13563.9 | 13264.8 | 13336.8 |
| 4932.9  | 4559.2  | 4549.3  | 5027.1  | 5042.0  | 5425.9  |
| 2495.2  | 1866.3  | 2168.0  | 2418.2  | 2708.1  | 2787.5  |
| 6241.0  | 5744.8  | 6503.7  | 6679.7  | 6973.3  | 7051.6  |
| 4297.7  | 3492.2  | 3682.1  | 3702.1  | 4001.8  | 4156.6  |
| 261.0   | 318.1   | 300.9   | 299.3   | 289.3   | 323.2   |
| 1670.4  | 1985.1  | 1778.1  | 1874.3  | 1890.7  | 1872.4  |
| 3827.5  | 3635.5  | 3810.0  | 4055.1  | 4386.4  | 4623.5  |
| 4631.7  | 3735.4  | 4660.7  | 5089.9  | 4879.3  | 4919.9  |
| 28.9    | 18.9    | 39.3    | 27.7    | 32.8    | 32.2    |
| 9.4     | 3.3     | 8.8     | 2.7     | 13.3    | 13.8    |
| 1878.4  | 1526.8  | 1651.3  | 2038.1  | 1766.4  | 1858.4  |
| 4028.3  | 3322.6  | 3807.4  | 3821.2  | 4247.1  | 4559.4  |
| 3772.6  | 3653.0  | 3573.5  | 3778.3  | 4277.0  | 4155.5  |
| 1343.2  | 1128.3  | 1108.1  | 1292.0  | 1544.3  | 1449.8  |
| 177.9   | 151.4   | 246.6   | 195.4   | 269.4   | 299.7   |
| 1596.4  | 1843.0  | 1778.3  | 1875.2  | 1845.6  | 1940.2  |
| 4850.4  | 4637.8  | 4973.2  | 5381.8  | 5401.2  | 5520.0  |
| 637.8   | 496.6   | 668.2   | 696.4   | 731.2   | 783.4   |
| 7017.6  | 6220.9  | 6586.5  | 6950.9  | 7094.4  | 7419.3  |
| 790.9   | 844.6   | 806.6   | 870.1   | 914.9   | 1108.2  |
| 339.9   | 321.8   | 297.8   | 374.2   | 379.8   | 384.5   |
| 1819.4  | 1637.8  | 1617.2  | 1714.8  | 1823.5  | 2257.7  |
| 2732.8  | 2413.8  | 2660.0  | 2721.4  | 2910.0  | 3252.5  |
| 4104.1  | 3854.6  | 3795.4  | 4122.2  | 4142.3  | 4535.8  |
| 388.8   | 399.7   | 494.8   | 375.1   | 431.9   | 456.6   |
| 754.2   | 811.3   | 859.4   | 764.4   | 915.0   | 1061.3  |



|         |         |         |         |         |         |
|---------|---------|---------|---------|---------|---------|
| 2944.2  | 2636.9  | 3266.3  | 3079.3  | 3375.6  | 3483.7  |
| 256.5   | 138.8   | 266.2   | 305.0   | 352.1   | 313.3   |
| 410.4   | 316.9   | 454.3   | 443.3   | 467.2   | 623.7   |
| 837.3   | 686.5   | 864.2   | 825.4   | 1105.9  | 1135.6  |
| 1404.3  | 1533.4  | 1622.7  | 1502.4  | 1774.4  | 1712.8  |
| 1439.8  | 1393.3  | 1506.1  | 1687.6  | 1688.9  | 1817.2  |
| 1699.4  | 1641.8  | 1496.5  | 1523.2  | 1573.0  | 2149.1  |
| 1060.0  | 1049.5  | 1204.4  | 1260.1  | 1286.8  | 1295.0  |
| 152.9   | 111.8   | 184.1   | 183.0   | 204.5   | 229.4   |
| 935.1   | 795.0   | 1023.3  | 1048.6  | 1119.1  | 1134.3  |
| 39.1    | 38.8    | 45.4    | 39.3    | 49.3    | 53.3    |
| 189.0   | 105.0   | 179.0   | 182.8   | 236.5   | 207.7   |
| 60.2    | 59.7    | 52.1    | 69.1    | 59.4    | 76.8    |
| 9841.3  | 8365.6  | 9425.4  | 9530.3  | 10036.7 | 9953.3  |
| 4423.5  | 3935.4  | 4402.1  | 4370.6  | 4944.9  | 4902.4  |
| 483.3   | 586.7   | 498.3   | 540.6   | 613.5   | 586.5   |
| 2832.0  | 2315.1  | 2649.5  | 2655.2  | 2995.0  | 3230.3  |
| 606.5   | 465.9   | 553.6   | 560.7   | 632.8   | 646.5   |
| 357.8   | 287.4   | 285.8   | 266.8   | 304.1   | 463.1   |
| 1388.2  | 1235.6  | 1329.5  | 1459.5  | 1590.1  | 1826.3  |
| 3831.2  | 3580.8  | 3906.1  | 4148.3  | 4441.6  | 4395.3  |
| 557.1   | 425.0   | 488.0   | 507.2   | 501.8   | 670.7   |
| 1897.0  | 2210.8  | 1986.3  | 2033.5  | 2242.3  | 2307.9  |
| 625.7   | 786.3   | 557.4   | 834.4   | 718.9   | 809.9   |
| 2750.2  | 2726.6  | 3040.8  | 2899.6  | 3196.5  | 3254.6  |
| 2490.2  | 2436.6  | 2248.8  | 2660.7  | 2660.9  | 2947.4  |
| 383.9   | 319.2   | 403.1   | 399.0   | 482.2   | 466.6   |
| 2815.0  | 2533.7  | 2980.4  | 3287.5  | 3420.4  | 3404.7  |
| 2031.2  | 1595.6  | 2097.8  | 1976.3  | 2333.3  | 2251.8  |
| 7337.6  | 6844.5  | 7124.8  | 7804.5  | 7771.8  | 8113.4  |
| 14363.5 | 12756.5 | 12941.8 | 13830.7 | 14434.9 | 14409.4 |
| 780.2   | 713.5   | 804.1   | 863.1   | 895.2   | 983.4   |
| 16.7    | 22.5    | 11.6    | 19.3    | 19.9    | 17.8    |
| 1310.5  | 1275.9  | 1459.3  | 1670.8  | 1747.0  | 1913.1  |
| 9.0     | 3.6     | 16.5    | 15.1    | 12.3    | 10.5    |
| 364.6   | 318.9   | 357.9   | 403.3   | 439.7   | 462.6   |
| 842.2   | 749.4   | 949.1   | 1050.6  | 1070.4  | 1080.4  |
| 11413.4 | 10850.9 | 10638.7 | 11644.7 | 11844.9 | 11462.8 |
| 1805.3  | 1648.5  | 1858.2  | 1876.0  | 1938.5  | 2320.4  |
| 485.9   | 543.2   | 560.5   | 497.2   | 548.9   | 713.5   |
| 10935.9 | 10445.7 | 11358.9 | 11079.4 | 11124.6 | 11393.2 |
| 6212.6  | 5760.3  | 6409.1  | 6478.1  | 6370.3  | 7444.0  |
| 7.2     | 9.2     | 8.1     | 6.3     | 4.2     | 1.0     |
| 10.7    | 5.9     | 11.6    | 10.1    | 14.9    | 16.1    |
| 131.6   | 124.5   | 118.1   | 118.8   | 143.8   | 148.7   |
| 1556.3  | 1328.0  | 1676.1  | 1739.6  | 1807.6  | 1833.4  |
| 4192.7  | 4057.9  | 4667.4  | 4874.4  | 4900.9  | 4690.5  |
| 3616.2  | 3267.4  | 4027.6  | 4340.5  | 4607.5  | 4803.5  |
| 2828.7  | 2382.4  | 3085.6  | 3158.2  | 3152.2  | 3484.5  |
| 966.5   | 859.9   | 960.7   | 986.7   | 1116.3  | 1146.5  |
| 521.2   | 497.2   | 590.9   | 582.8   | 599.3   | 632.4   |
| 604.8   | 508.3   | 561.8   | 577.7   | 632.4   | 630.7   |
| 1698.4  | 1515.0  | 1750.8  | 1683.0  | 2032.9  | 2108.5  |

|         |        |         |         |         |         |
|---------|--------|---------|---------|---------|---------|
| 8159.5  | 7576.9 | 8652.5  | 8578.5  | 8896.0  | 8634.4  |
| 2205.5  | 2090.0 | 2255.6  | 2426.0  | 2598.0  | 2631.5  |
| 3.8     | 2.4    | 2.4     | 1.7     | 1.3     | 2.7     |
| 1.3     | 3.5    | 1.6     | 1.9     | 2.8     | 1.5     |
| 3.8     | 8.8    | 3.9     | 5.5     | 10.6    | 13.5    |
| 957.6   | 957.9  | 972.4   | 1006.8  | 1183.0  | 1345.9  |
| 1673.6  | 1323.7 | 1570.5  | 1591.6  | 1749.9  | 1752.6  |
| 1588.2  | 1425.8 | 1454.1  | 1361.7  | 1601.4  | 1686.1  |
| 1503.9  | 1407.2 | 1498.7  | 1442.5  | 1694.9  | 1711.5  |
| 1865.8  | 1636.3 | 1579.7  | 1884.7  | 1916.4  | 2315.1  |
| 2289.4  | 1881.6 | 2114.9  | 1834.7  | 2212.0  | 2366.5  |
| 4130.9  | 4280.3 | 4429.3  | 4171.2  | 4548.9  | 4915.5  |
| 1199.9  | 1178.7 | 1265.3  | 1325.1  | 1400.7  | 1548.5  |
| 63.3    | 59.6   | 59.4    | 69.4    | 80.7    | 85.3    |
| 10528.2 | 9536.6 | 10834.8 | 11197.9 | 11296.9 | 10959.4 |
| 2797.8  | 2505.1 | 2856.2  | 2599.3  | 3390.7  | 3291.3  |
| 111.3   | 124.3  | 132.1   | 145.3   | 133.6   | 132.4   |
| 7301.8  | 6956.4 | 6937.5  | 7620.9  | 7754.5  | 7783.1  |
| 5739.0  | 5199.1 | 5145.5  | 5750.7  | 6108.0  | 6224.5  |
| 3418.6  | 3141.9 | 3520.2  | 3653.0  | 3872.6  | 3804.8  |
| 567.6   | 495.4  | 532.5   | 510.9   | 542.2   | 612.4   |
| 693.3   | 657.2  | 712.9   | 719.3   | 707.2   | 884.8   |
| 2973.8  | 3250.5 | 3236.7  | 3346.9  | 3310.0  | 3624.5  |
| 2016.4  | 1767.9 | 2128.0  | 2118.5  | 2328.1  | 2457.8  |
| 1175.0  | 1177.4 | 1194.4  | 1243.7  | 1399.9  | 1433.6  |
| 223.7   | 169.3  | 235.0   | 238.9   | 237.9   | 291.8   |
| 2704.1  | 2411.5 | 2531.8  | 2858.1  | 2971.5  | 3310.8  |
| 930.2   | 912.9  | 1049.1  | 1060.5  | 1139.2  | 1217.3  |
| 1574.6  | 1373.7 | 1612.6  | 1631.2  | 1777.5  | 1857.2  |
| 3669.2  | 3226.2 | 4004.4  | 4153.2  | 4334.5  | 4430.1  |
| 172.9   | 133.9  | 158.1   | 156.3   | 205.3   | 210.8   |
| 1416.0  | 1110.2 | 1391.8  | 1406.3  | 1597.3  | 1685.0  |
| 5539.4  | 5396.6 | 5410.6  | 5483.3  | 6120.7  | 6401.0  |
| 172.1   | 139.3  | 189.2   | 176.2   | 218.6   | 228.1   |
| 3342.9  | 3505.2 | 3858.0  | 4088.7  | 4122.3  | 4391.9  |
| 2812.9  | 2617.7 | 2736.4  | 3138.4  | 3245.0  | 3500.8  |
| 2620.6  | 2558.4 | 2690.5  | 2780.7  | 2933.8  | 3052.7  |
| 1.8     | 2.1    | 1.2     | 2.0     | 1.3     | 1.6     |
| 1416.4  | 1202.9 | 1341.1  | 1162.2  | 1310.3  | 1396.8  |
| 209.1   | 287.6  | 244.2   | 238.2   | 277.7   | 300.7   |
| 4014.9  | 3617.7 | 4047.8  | 4248.9  | 4389.7  | 4429.2  |
| 2423.3  | 2055.2 | 2337.4  | 2435.3  | 2880.8  | 2818.7  |
| 931.9   | 692.0  | 962.1   | 1094.5  | 1105.0  | 954.0   |
| 2000.8  | 1787.4 | 2078.5  | 2185.0  | 2269.8  | 2481.4  |
| 1973.9  | 2003.7 | 1956.2  | 2269.7  | 2322.0  | 2567.8  |
| 1729.8  | 1770.3 | 1721.9  | 1969.9  | 1913.7  | 2184.5  |
| 484.2   | 527.1  | 529.2   | 518.7   | 546.4   | 609.1   |
| 2297.5  | 1956.3 | 2210.9  | 2307.4  | 2513.8  | 2770.6  |
| 1057.8  | 871.0  | 1078.1  | 1110.1  | 1303.7  | 1309.6  |
| 606.9   | 520.2  | 581.1   | 601.0   | 750.6   | 708.8   |
| 541.8   | 436.9  | 773.3   | 787.7   | 813.1   | 740.4   |
| 1449.6  | 1126.1 | 1402.0  | 1455.3  | 1727.8  | 1666.1  |
| 1261.6  | 1077.9 | 1349.8  | 1365.8  | 1440.4  | 1399.9  |

|        |        |        |         |        |         |
|--------|--------|--------|---------|--------|---------|
| 1426.3 | 1328.4 | 1384.5 | 1419.8  | 1683.7 | 1731.8  |
| 931.9  | 967.3  | 1020.8 | 1128.5  | 1327.9 | 1215.7  |
| 1905.6 | 1762.1 | 2456.5 | 2719.0  | 2442.1 | 2427.3  |
| 2330.3 | 2154.9 | 2276.8 | 2304.0  | 2523.8 | 2710.4  |
| 51.2   | 54.6   | 46.2   | 72.5    | 54.4   | 70.5    |
| 1424.7 | 1326.7 | 1301.3 | 1377.3  | 1477.0 | 1649.0  |
| 362.2  | 263.1  | 353.0  | 357.8   | 375.0  | 465.3   |
| 321.7  | 228.3  | 287.9  | 312.2   | 359.9  | 364.9   |
| 404.2  | 232.6  | 382.4  | 403.9   | 475.1  | 461.8   |
| 1176.1 | 1027.4 | 1204.2 | 1235.3  | 1358.9 | 1384.7  |
| 5272.1 | 5007.6 | 5262.2 | 5842.5  | 5996.0 | 6423.3  |
| 2442.4 | 2316.8 | 2331.1 | 2602.2  | 2664.8 | 2911.7  |
| 2619.0 | 2527.1 | 2587.5 | 2592.7  | 2793.3 | 3025.2  |
| 12.1   | 8.5    | 27.8   | 18.1    | 31.1   | 25.8    |
| 1443.6 | 1394.9 | 1412.3 | 1455.1  | 1458.6 | 1838.6  |
| 525.7  | 507.8  | 592.4  | 590.1   | 593.8  | 642.7   |
| 441.5  | 442.4  | 415.8  | 488.8   | 465.2  | 537.9   |
| 2215.8 | 2187.7 | 1919.0 | 2160.6  | 2366.6 | 2803.4  |
| 374.0  | 474.3  | 403.4  | 424.4   | 447.9  | 473.0   |
| 4060.6 | 3554.7 | 3973.2 | 3698.3  | 4162.5 | 4781.9  |
| 3778.1 | 3456.2 | 3623.1 | 3936.9  | 4397.7 | 4530.4  |
| 1444.6 | 1258.9 | 1342.0 | 1518.9  | 1615.8 | 1825.1  |
| 530.5  | 474.0  | 481.1  | 487.8   | 546.1  | 654.4   |
| 198.3  | 184.6  | 148.5  | 193.2   | 193.8  | 232.4   |
| 64.1   | 80.1   | 58.9   | 83.1    | 70.5   | 81.1    |
| 262.6  | 223.2  | 276.8  | 255.0   | 319.3  | 307.3   |
| 151.1  | 119.5  | 151.6  | 151.4   | 170.6  | 183.8   |
| 316.5  | 292.4  | 281.5  | 298.4   | 363.4  | 363.3   |
| 7445.1 | 6928.2 | 7381.7 | 7562.1  | 7741.5 | 7815.1  |
| 4003.1 | 4196.4 | 3748.8 | 4493.2  | 4689.8 | 5273.5  |
| 726.3  | 589.6  | 731.3  | 697.9   | 829.0  | 853.3   |
| 9998.3 | 9133.2 | 9230.9 | 10101.8 | 9993.6 | 10704.8 |
| 2877.5 | 1706.1 | 2529.1 | 2411.2  | 3141.9 | 2985.5  |
| 233.9  | 246.8  | 215.3  | 200.3   | 275.6  | 217.7   |
| 349.9  | 342.0  | 405.3  | 462.0   | 305.8  | 493.5   |
| 1162.5 | 1325.8 | 1179.0 | 1198.4  | 1210.2 | 1293.0  |
| 440.9  | 329.8  | 413.5  | 422.4   | 482.6  | 560.9   |
| 1051.0 | 931.2  | 1079.5 | 1156.7  | 1071.3 | 1147.0  |
| 317.5  | 254.6  | 326.2  | 302.7   | 370.1  | 328.2   |
| 104.0  | 106.1  | 119.7  | 137.0   | 107.1  | 136.6   |
| 120.1  | 126.3  | 130.6  | 137.6   | 111.9  | 153.8   |
| 1167.0 | 1210.3 | 1246.6 | 1150.6  | 1426.8 | 1495.5  |
| 8.2    | 2.6    | 10.4   | 11.0    | 7.6    | 11.7    |
| 31.4   | 38.8   | 44.5   | 36.8    | 43.2   | 47.5    |
| 1075.0 | 1033.0 | 1248.9 | 1269.3  | 1294.3 | 1286.1  |
| 914.8  | 810.1  | 881.1  | 872.7   | 981.8  | 1075.8  |
| 99.6   | 120.0  | 130.0  | 130.5   | 141.2  | 184.0   |
| 9760.4 | 8954.4 | 9037.8 | 9901.2  | 9992.6 | 9870.1  |
| 241.3  | 193.1  | 262.6  | 277.0   | 365.0  | 320.0   |
| 1472.3 | 1442.0 | 1377.8 | 1512.5  | 1675.5 | 1767.9  |
| 704.4  | 621.8  | 718.8  | 741.4   | 822.7  | 873.9   |
| 590.2  | 533.1  | 537.9  | 576.8   | 614.4  | 690.1   |
| 1520.2 | 1442.2 | 1583.6 | 1773.0  | 1667.3 | 1832.4  |

|        |        |        |         |         |         |
|--------|--------|--------|---------|---------|---------|
| 526.2  | 432.7  | 507.4  | 517.1   | 646.4   | 528.1   |
| 141.9  | 109.7  | 119.6  | 141.8   | 157.0   | 170.0   |
| 341.5  | 242.9  | 315.3  | 320.4   | 375.4   | 346.1   |
| 29.8   | 8.2    | 19.2   | 22.2    | 50.1    | 49.8    |
| 469.6  | 504.2  | 605.6  | 665.6   | 618.2   | 639.8   |
| 1402.5 | 1375.7 | 1664.9 | 1791.3  | 1793.1  | 1917.9  |
| 1520.1 | 1445.0 | 1680.7 | 1617.5  | 1706.6  | 1791.6  |
| 2.9    | 4.4    | 4.0    | 10.3    | 3.4     | 6.7     |
| 1290.6 | 1049.1 | 1168.1 | 1218.6  | 1370.2  | 1511.0  |
| 2896.5 | 2488.7 | 3024.7 | 2991.1  | 3374.0  | 3160.0  |
| 1270.8 | 1007.4 | 1189.1 | 1294.0  | 1476.4  | 1508.3  |
| 3211.3 | 3156.2 | 3693.5 | 3961.2  | 3854.1  | 3988.6  |
| 213.8  | 158.3  | 195.3  | 204.3   | 217.4   | 250.6   |
| 3666.0 | 3304.2 | 3694.4 | 3905.8  | 4027.7  | 4185.3  |
| 847.6  | 818.4  | 914.3  | 1001.6  | 1077.9  | 1065.9  |
| 407.4  | 342.2  | 435.8  | 409.3   | 437.2   | 512.2   |
| 2265.3 | 2001.4 | 2192.5 | 2234.9  | 2475.4  | 2667.8  |
| 225.4  | 186.7  | 200.4  | 209.9   | 281.0   | 282.9   |
| 220.9  | 332.9  | 298.0  | 292.6   | 358.2   | 390.1   |
| 1070.7 | 906.4  | 838.2  | 947.3   | 1137.1  | 1419.0  |
| 606.1  | 558.3  | 546.7  | 523.1   | 661.3   | 649.3   |
| 480.6  | 448.0  | 478.5  | 522.0   | 539.1   | 601.6   |
| 2934.5 | 2819.6 | 2960.4 | 3280.7  | 3337.9  | 3405.5  |
| 2039.2 | 1875.4 | 2082.9 | 2127.3  | 2259.4  | 2427.0  |
| 381.7  | 397.9  | 455.6  | 456.8   | 473.4   | 511.3   |
| 164.5  | 137.6  | 181.1  | 167.3   | 210.1   | 187.1   |
| 94.4   | 97.1   | 89.8   | 83.5    | 105.5   | 113.5   |
| 249.2  | 240.9  | 254.5  | 229.4   | 297.5   | 276.9   |
| 486.9  | 424.0  | 454.7  | 501.6   | 498.1   | 636.8   |
| 2097.3 | 1878.5 | 1939.9 | 2133.4  | 2312.2  | 2479.5  |
| 159.8  | 135.4  | 155.0  | 145.7   | 179.8   | 182.9   |
| 696.1  | 577.2  | 650.0  | 637.6   | 771.8   | 785.0   |
| 256.1  | 271.8  | 241.1  | 278.8   | 239.6   | 320.6   |
| 4423.9 | 3702.1 | 3567.1 | 4369.9  | 4356.6  | 5008.6  |
| 590.3  | 522.0  | 645.8  | 689.3   | 729.9   | 771.0   |
| 8671.3 | 8223.9 | 8252.1 | 8764.3  | 8717.0  | 8802.5  |
| 2960.8 | 2685.6 | 2682.7 | 3243.9  | 3170.5  | 3494.8  |
| 2345.1 | 2275.3 | 2379.4 | 2541.3  | 2694.4  | 3010.5  |
| 603.6  | 450.3  | 602.7  | 601.1   | 712.9   | 666.5   |
| 9916.3 | 9114.7 | 9888.2 | 10478.8 | 10427.4 | 10381.3 |
| 335.2  | 358.6  | 333.7  | 404.8   | 401.4   | 412.3   |
| 2633.4 | 2637.4 | 2861.3 | 2853.9  | 2967.4  | 3068.3  |
| 3174.3 | 3194.7 | 3030.2 | 3424.9  | 3367.0  | 3937.2  |
| 1384.6 | 1116.3 | 1293.8 | 1358.5  | 1454.0  | 1615.6  |
| 295.4  | 229.4  | 297.2  | 305.8   | 371.3   | 354.2   |
| 503.4  | 398.1  | 514.7  | 643.5   | 564.9   | 801.9   |
| 804.3  | 818.4  | 918.9  | 905.2   | 983.9   | 1022.5  |
| 192.8  | 139.3  | 221.9  | 196.9   | 224.8   | 209.4   |
| 1555.8 | 1418.8 | 1474.3 | 1659.7  | 1653.8  | 1625.5  |
| 509.8  | 577.3  | 580.8  | 566.8   | 590.3   | 626.4   |
| 6061.5 | 5057.2 | 6329.5 | 6668.4  | 6659.6  | 6654.2  |
| 2072.7 | 1794.2 | 2520.6 | 2549.9  | 2633.9  | 2692.7  |
| 984.2  | 748.9  | 892.9  | 903.0   | 1179.4  | 1183.6  |

|        |        |        |        |        |        |
|--------|--------|--------|--------|--------|--------|
| 4569.1 | 3759.8 | 3701.7 | 4125.9 | 4770.4 | 4505.8 |
| 4607.7 | 4053.8 | 4508.9 | 4383.0 | 4884.1 | 5300.4 |
| 5939.3 | 4170.4 | 4444.8 | 4834.6 | 5234.6 | 6417.7 |
| 1933.6 | 1583.1 | 1925.3 | 2055.6 | 2092.6 | 2090.4 |
| 4523.6 | 4347.0 | 4686.1 | 4960.9 | 4895.9 | 5326.3 |
| 3269.8 | 2825.5 | 3427.5 | 3581.9 | 3704.7 | 3648.7 |
| 3643.0 | 3260.3 | 4673.6 | 4388.3 | 4342.7 | 4359.6 |
| 820.3  | 802.8  | 853.5  | 893.1  | 986.9  | 1011.2 |
| 98.7   | 86.4   | 101.5  | 111.4  | 91.4   | 100.7  |
| 86.1   | 74.0   | 66.7   | 92.0   | 86.3   | 101.9  |
| 990.5  | 858.3  | 1036.3 | 1030.0 | 1196.4 | 1172.0 |
| 4505.1 | 4357.8 | 4857.8 | 5248.5 | 5349.2 | 5404.4 |
| 835.9  | 756.4  | 891.3  | 920.7  | 966.4  | 963.5  |
| 1163.9 | 1062.2 | 1222.3 | 1334.0 | 1366.0 | 1507.2 |
| 2566.0 | 2427.4 | 2728.9 | 2975.2 | 2874.5 | 2972.1 |
| 7744.6 | 7027.2 | 7438.1 | 7654.4 | 8059.7 | 8358.8 |
| 39.4   | 46.4   | 45.6   | 34.9   | 48.6   | 41.4   |
| 494.4  | 520.9  | 497.5  | 554.3  | 550.9  | 570.8  |
| 202.5  | 204.2  | 240.5  | 225.0  | 256.9  | 290.3  |
| 353.3  | 296.0  | 324.0  | 309.1  | 386.6  | 405.0  |
| 1600.8 | 1807.3 | 1503.6 | 1625.0 | 1881.5 | 1923.7 |
| 738.5  | 671.8  | 764.3  | 809.2  | 832.7  | 825.6  |
| 1.6    | 9.0    | 4.7    | 1.0    | 1.0    | 1.6    |
| 5.0    | 1.2    | 1.9    | 8.4    | 3.1    | 7.2    |
| 861.5  | 671.2  | 739.4  | 721.9  | 934.8  | 958.4  |
| 386.9  | 318.1  | 438.0  | 425.0  | 466.5  | 551.3  |
| 5011.6 | 4556.7 | 4966.1 | 5096.8 | 5383.8 | 5481.1 |
| 1772.4 | 1626.5 | 1947.7 | 2021.5 | 2101.4 | 2063.6 |
| 1899.9 | 2147.2 | 2165.4 | 2317.0 | 2461.9 | 2637.7 |
| 430.5  | 388.4  | 419.8  | 439.6  | 491.9  | 513.3  |
| 530.8  | 451.6  | 542.6  | 506.4  | 584.5  | 631.4  |
| 474.9  | 422.5  | 429.2  | 396.0  | 461.5  | 607.9  |
| 1128.0 | 1109.8 | 1275.3 | 1275.8 | 1452.8 | 1456.0 |
| 1580.8 | 1451.3 | 1722.1 | 1627.6 | 1869.0 | 1963.8 |
| 555.8  | 593.9  | 639.0  | 682.5  | 621.2  | 672.5  |
| 440.3  | 423.2  | 409.6  | 396.5  | 427.6  | 470.1  |
| 1506.8 | 1551.3 | 1834.1 | 1801.1 | 1845.8 | 1917.2 |
| 2216.7 | 2284.2 | 2960.3 | 3153.7 | 2889.6 | 3316.9 |
| 1681.1 | 1531.5 | 1656.1 | 1826.1 | 1922.9 | 2157.1 |
| 1816.0 | 1847.1 | 1540.7 | 1758.8 | 1620.1 | 2021.8 |
| 596.9  | 1009.5 | 659.6  | 620.5  | 671.9  | 691.9  |
| 1830.9 | 2430.3 | 1804.3 | 1886.0 | 1932.1 | 2182.5 |
| 903.4  | 1858.9 | 682.8  | 1049.4 | 773.6  | 1109.9 |
| 555.2  | 588.5  | 619.2  | 743.7  | 580.2  | 833.7  |
| 1337.8 | 1283.3 | 1363.8 | 1525.6 | 1530.6 | 1544.5 |
| 1532.4 | 1442.8 | 1524.8 | 1703.6 | 1613.0 | 1867.5 |
| 7388.9 | 6760.9 | 7569.0 | 7894.8 | 7912.9 | 7877.8 |
| 552.9  | 469.1  | 547.9  | 492.9  | 653.7  | 635.3  |
| 1180.6 | 1288.9 | 1248.4 | 1249.5 | 1470.3 | 1429.3 |
| 1097.7 | 932.8  | 1077.0 | 1083.3 | 1245.2 | 1212.4 |
| 234.2  | 185.9  | 196.2  | 202.6  | 234.0  | 275.8  |
| 73.1   | 71.2   | 65.2   | 79.5   | 83.9   | 65.7   |
| 3958.5 | 4007.0 | 3687.3 | 4388.3 | 4453.9 | 4716.0 |

|        |        |        |        |        |        |
|--------|--------|--------|--------|--------|--------|
| 1523.9 | 1681.7 | 1795.8 | 1651.9 | 1739.2 | 1840.2 |
| 252.2  | 202.8  | 290.3  | 282.1  | 289.7  | 295.6  |
| 436.3  | 321.1  | 395.6  | 438.3  | 478.3  | 553.6  |
| 430.6  | 357.2  | 471.5  | 449.4  | 639.8  | 649.0  |
| 394.2  | 362.1  | 436.7  | 456.4  | 547.8  | 546.5  |
| 1149.0 | 1099.8 | 1156.7 | 1130.3 | 1243.6 | 1356.3 |
| 298.2  | 309.2  | 324.4  | 270.3  | 349.0  | 327.6  |
| 820.2  | 828.4  | 964.5  | 808.4  | 1094.5 | 1032.4 |
| 46.9   | 43.6   | 44.5   | 57.3   | 60.0   | 64.7   |
| 172.7  | 113.8  | 145.2  | 195.5  | 218.8  | 228.5  |
| 37.4   | 34.6   | 41.8   | 45.6   | 43.0   | 48.8   |
| 1975.4 | 1734.3 | 1893.1 | 2156.2 | 2199.8 | 2361.5 |
| 1920.7 | 1889.2 | 2144.2 | 2029.8 | 2344.4 | 2312.9 |
| 689.0  | 612.2  | 711.6  | 716.3  | 808.2  | 800.7  |
| 2192.7 | 2197.6 | 2429.0 | 2421.0 | 2432.3 | 2592.2 |
| 1150.0 | 1165.6 | 1165.4 | 1129.9 | 1362.2 | 1378.5 |
| 2809.3 | 2621.2 | 2361.0 | 2666.4 | 2711.0 | 3361.1 |
| 785.4  | 758.6  | 843.0  | 855.9  | 890.7  | 884.7  |
| 662.1  | 560.4  | 656.6  | 758.1  | 733.2  | 784.2  |
| 1802.0 | 1695.1 | 1748.8 | 1897.4 | 2005.5 | 2146.8 |
| 166.4  | 122.3  | 178.2  | 181.6  | 198.3  | 244.2  |
| 217.0  | 173.2  | 199.9  | 181.8  | 273.4  | 220.2  |
| 543.3  | 435.6  | 461.8  | 480.6  | 630.6  | 563.0  |
| 629.0  | 521.6  | 644.9  | 638.5  | 775.5  | 696.4  |
| 201.0  | 226.9  | 251.6  | 255.5  | 268.1  | 284.7  |
| 520.5  | 441.1  | 570.7  | 509.4  | 610.0  | 635.9  |
| 19.6   | 27.2   | 25.2   | 15.5   | 37.3   | 25.4   |
| 245.1  | 236.8  | 236.0  | 232.8  | 335.7  | 245.6  |
| 430.3  | 350.4  | 396.1  | 447.8  | 461.6  | 435.8  |
| 544.5  | 587.2  | 559.1  | 611.9  | 607.2  | 655.2  |
| 291.6  | 246.7  | 289.4  | 290.6  | 319.3  | 336.7  |
| 559.3  | 569.8  | 590.5  | 551.2  | 665.5  | 735.8  |
| 1334.1 | 1083.3 | 1376.9 | 1320.9 | 1244.1 | 1603.4 |
| 719.7  | 654.5  | 858.9  | 761.9  | 936.6  | 985.4  |
| 4641.8 | 3487.4 | 4419.4 | 3971.9 | 5323.6 | 5096.7 |
| 1120.0 | 1260.2 | 1162.7 | 1358.5 | 1239.6 | 1429.8 |
| 1115.9 | 1234.7 | 1179.2 | 1314.0 | 1221.4 | 1358.3 |
| 1138.0 | 915.2  | 1120.0 | 1101.6 | 1243.3 | 1101.1 |
| 1068.2 | 921.3  | 1202.0 | 1212.8 | 1288.2 | 1303.9 |
| 1455.1 | 1203.0 | 1233.6 | 1436.7 | 1357.7 | 1815.8 |
| 1939.3 | 1884.4 | 2273.3 | 2221.5 | 2345.6 | 2255.2 |
| 3726.9 | 3440.7 | 3442.0 | 4560.5 | 4204.4 | 4699.0 |
| 114.7  | 96.1   | 128.5  | 100.1  | 135.9  | 116.2  |
| 573.6  | 467.4  | 465.6  | 464.2  | 589.0  | 563.3  |
| 37.8   | 45.3   | 40.6   | 43.2   | 34.2   | 42.7   |
| 167.1  | 146.1  | 134.2  | 128.8  | 195.0  | 171.0  |
| 335.6  | 369.4  | 364.2  | 427.6  | 415.1  | 414.9  |
| 221.2  | 212.4  | 250.6  | 257.8  | 262.3  | 275.6  |
| 1806.5 | 1512.8 | 1693.1 | 1683.1 | 1885.6 | 2004.3 |
| 3322.2 | 3253.3 | 3196.3 | 3191.0 | 3676.7 | 3686.2 |
| 507.3  | 457.7  | 513.9  | 437.3  | 542.4  | 631.4  |
| 140.5  | 109.4  | 225.1  | 236.0  | 195.7  | 221.7  |
| 64.6   | 61.8   | 63.6   | 70.3   | 84.9   | 82.0   |

|         |         |         |         |         |         |
|---------|---------|---------|---------|---------|---------|
| 371.1   | 374.8   | 399.1   | 407.7   | 443.9   | 490.6   |
| 1194.7  | 1027.3  | 1091.9  | 1145.4  | 1290.6  | 1388.1  |
| 1557.6  | 1391.5  | 1541.0  | 1512.0  | 1786.9  | 1696.5  |
| 10699.0 | 9707.4  | 10409.5 | 10259.7 | 10947.2 | 10933.2 |
| 1379.6  | 1386.9  | 1358.9  | 1420.5  | 1448.7  | 1777.8  |
| 206.8   | 203.4   | 216.4   | 211.6   | 228.4   | 263.3   |
| 1280.2  | 1219.5  | 1080.2  | 1115.6  | 1271.7  | 1355.6  |
| 879.2   | 791.4   | 1009.7  | 954.1   | 1216.9  | 1108.6  |
| 3187.7  | 2887.1  | 3243.5  | 3229.2  | 3331.4  | 3702.0  |
| 1874.5  | 1633.8  | 1700.5  | 1883.9  | 1958.5  | 2268.3  |
| 311.4   | 309.8   | 283.9   | 281.5   | 414.6   | 294.0   |
| 1163.3  | 1048.6  | 1135.3  | 1184.0  | 1309.1  | 1332.0  |
| 2746.0  | 2514.7  | 3327.9  | 3134.9  | 3273.9  | 3385.1  |
| 2882.8  | 2746.2  | 3163.2  | 3469.7  | 3304.4  | 3697.5  |
| 98.2    | 104.2   | 101.4   | 117.3   | 119.2   | 163.5   |
| 282.4   | 261.4   | 290.6   | 276.0   | 316.7   | 355.1   |
| 244.5   | 239.0   | 211.0   | 246.0   | 257.5   | 298.9   |
| 9996.1  | 9059.4  | 9734.1  | 10415.1 | 10479.4 | 10891.4 |
| 1580.2  | 1264.8  | 1692.6  | 1732.3  | 1884.3  | 1766.3  |
| 708.7   | 631.1   | 727.8   | 701.6   | 817.3   | 814.3   |
| 615.9   | 536.6   | 747.2   | 856.2   | 778.7   | 787.7   |
| 68.7    | 62.9    | 66.4    | 56.4    | 89.1    | 82.8    |
| 146.5   | 127.5   | 152.6   | 142.8   | 160.1   | 177.5   |
| 754.4   | 640.7   | 872.8   | 859.7   | 839.5   | 946.8   |
| 1997.3  | 1836.1  | 1906.2  | 2229.5  | 2147.9  | 2416.7  |
| 1459.4  | 1347.7  | 1579.9  | 1609.1  | 1713.4  | 1804.6  |
| 1939.8  | 1927.8  | 2167.0  | 2196.4  | 2341.2  | 2410.4  |
| 2345.4  | 2281.3  | 2379.6  | 2375.4  | 2623.3  | 2630.8  |
| 2686.5  | 1698.8  | 2809.1  | 2443.0  | 3049.8  | 3090.6  |
| 991.0   | 712.8   | 1186.3  | 1057.9  | 1255.5  | 1217.5  |
| 743.3   | 522.9   | 758.0   | 676.7   | 877.9   | 850.9   |
| 1251.9  | 1127.9  | 1372.6  | 1444.4  | 1512.5  | 1555.6  |
| 213.9   | 184.5   | 262.1   | 261.6   | 331.7   | 310.3   |
| 83.0    | 69.8    | 86.9    | 85.7    | 109.1   | 126.5   |
| 65.5    | 58.2    | 98.1    | 83.1    | 78.1    | 75.6    |
| 40.4    | 26.1    | 55.4    | 26.9    | 38.7    | 55.0    |
| 453.9   | 529.3   | 572.5   | 537.4   | 578.5   | 625.5   |
| 4999.8  | 4310.4  | 4921.5  | 5161.2  | 5418.6  | 5342.0  |
| 2796.2  | 2066.6  | 2259.1  | 2988.8  | 2777.3  | 2829.2  |
| 2798.8  | 2377.0  | 2843.3  | 2726.4  | 3149.2  | 3778.5  |
| 12872.2 | 12443.6 | 12710.2 | 13442.4 | 13509.8 | 13084.8 |
| 894.1   | 791.0   | 839.2   | 842.0   | 885.6   | 872.6   |
| 1395.9  | 1264.4  | 1579.6  | 1620.4  | 1623.6  | 1736.2  |
| 11835.5 | 11122.4 | 11253.2 | 12149.3 | 12215.5 | 12279.1 |
| 10514.9 | 9474.5  | 10586.8 | 11049.7 | 10839.6 | 11003.7 |
| 1254.1  | 1385.8  | 1592.1  | 1643.8  | 1553.0  | 1675.9  |
| 778.1   | 752.7   | 730.2   | 876.1   | 809.9   | 1013.7  |
| 4.1     | 7.3     | 10.7    | 18.4    | 13.2    | 23.6    |
| 3.3     | 2.6     | 2.1     | 2.9     | 9.8     | 4.4     |
| 2005.5  | 1835.1  | 1925.5  | 1923.5  | 2131.0  | 2327.9  |
| 2555.6  | 2318.1  | 2724.9  | 2805.3  | 2963.2  | 2921.7  |
| 9.2     | 1.2     | 13.3    | 11.7    | 9.6     | 12.2    |
| 3433.8  | 3043.9  | 3122.3  | 3169.2  | 3589.7  | 3586.0  |

|         |         |         |         |         |         |
|---------|---------|---------|---------|---------|---------|
| 2704.0  | 2558.4  | 2927.6  | 2802.4  | 3346.3  | 3450.4  |
| 4526.9  | 4265.6  | 4656.6  | 4953.1  | 5037.9  | 5156.1  |
| 20.0    | 18.1    | 30.4    | 17.1    | 22.2    | 23.8    |
| 342.6   | 235.6   | 301.6   | 317.0   | 372.9   | 372.4   |
| 413.1   | 445.8   | 450.1   | 475.5   | 552.8   | 521.0   |
| 3194.1  | 3046.6  | 3537.8  | 3855.2  | 3812.2  | 3836.0  |
| 4964.1  | 4766.4  | 4948.8  | 5180.9  | 5541.4  | 5853.0  |
| 1988.1  | 1910.3  | 2112.2  | 2190.3  | 2191.2  | 2227.1  |
| 1726.2  | 1457.4  | 1632.0  | 1748.0  | 1924.1  | 1783.3  |
| 322.6   | 300.1   | 281.4   | 311.3   | 359.6   | 376.4   |
| 4741.3  | 4786.0  | 4770.8  | 4746.8  | 5308.7  | 5225.4  |
| 148.9   | 128.8   | 140.6   | 181.2   | 192.5   | 203.2   |
| 137.8   | 141.6   | 146.5   | 173.3   | 186.2   | 197.6   |
| 164.8   | 122.0   | 149.4   | 166.5   | 194.2   | 207.0   |
| 2342.8  | 2279.8  | 2836.8  | 2830.3  | 3076.2  | 2932.2  |
| 195.0   | 190.6   | 245.7   | 195.8   | 269.0   | 266.7   |
| 26.5    | 12.4    | 35.0    | 15.7    | 39.9    | 33.1    |
| 573.7   | 475.1   | 591.7   | 658.1   | 661.7   | 694.8   |
| 703.6   | 638.3   | 663.5   | 724.7   | 809.1   | 850.8   |
| 104.9   | 129.3   | 116.2   | 128.5   | 140.0   | 124.4   |
| 342.6   | 346.6   | 425.7   | 373.3   | 371.5   | 444.2   |
| 12.9    | 20.0    | 13.0    | 10.8    | 10.3    | 18.4    |
| 635.7   | 631.7   | 746.2   | 740.7   | 845.6   | 679.5   |
| 3027.5  | 2541.5  | 3173.0  | 3188.5  | 3398.3  | 3441.9  |
| 2146.9  | 1505.5  | 1852.4  | 1791.8  | 2350.2  | 2191.7  |
| 1585.4  | 1374.6  | 1462.8  | 1761.2  | 2037.5  | 1798.6  |
| 11297.9 | 10654.6 | 10953.9 | 11512.2 | 11764.9 | 11488.4 |
| 16.1    | 15.7    | 22.5    | 14.1    | 18.1    | 25.8    |
| 5.5     | 10.2    | 3.9     | 9.5     | 7.8     | 7.3     |
| 459.3   | 367.8   | 467.5   | 523.2   | 548.6   | 591.3   |
| 295.5   | 289.0   | 354.3   | 286.6   | 316.7   | 382.2   |
| 1068.3  | 1028.1  | 1168.7  | 1161.9  | 1196.0  | 1401.4  |
| 325.3   | 296.7   | 325.3   | 384.9   | 384.5   | 478.2   |
| 2143.9  | 2423.4  | 1971.8  | 2298.4  | 2217.6  | 2764.1  |
| 637.8   | 537.2   | 692.3   | 659.2   | 724.4   | 790.9   |
| 433.1   | 382.8   | 440.8   | 471.7   | 507.8   | 545.2   |
| 1747.0  | 1819.9  | 1845.1  | 1929.5  | 2111.4  | 2263.2  |
| 1499.1  | 1188.2  | 1231.7  | 1312.3  | 1369.5  | 1715.4  |
| 3265.2  | 2556.4  | 2912.7  | 2601.1  | 3400.4  | 3600.6  |
| 4283.0  | 3686.4  | 4365.1  | 4178.5  | 4844.7  | 4729.7  |
| 442.2   | 534.9   | 496.8   | 519.5   | 540.5   | 582.8   |
| 173.5   | 206.3   | 175.0   | 170.0   | 184.4   | 238.8   |
| 257.6   | 202.4   | 261.0   | 266.4   | 322.4   | 345.7   |
| 520.7   | 364.3   | 563.9   | 530.6   | 657.1   | 628.1   |
| 221.9   | 181.5   | 259.4   | 254.2   | 243.0   | 261.6   |
| 380.0   | 287.4   | 356.5   | 383.4   | 390.0   | 483.5   |
| 187.0   | 210.9   | 190.8   | 167.5   | 250.5   | 242.4   |
| 140.9   | 150.7   | 161.4   | 168.7   | 179.4   | 181.9   |
| 887.3   | 713.9   | 827.5   | 900.9   | 947.6   | 1005.7  |
| 410.9   | 395.8   | 420.7   | 436.3   | 459.5   | 535.5   |
| 3562.5  | 2930.7  | 3484.8  | 3753.2  | 3701.1  | 4369.3  |
| 2489.6  | 2441.8  | 2430.5  | 2751.1  | 2608.7  | 3030.7  |
| 532.1   | 710.9   | 797.3   | 1190.1  | 1100.5  | 810.5   |



|        |        |        |        |        |        |
|--------|--------|--------|--------|--------|--------|
| 143.8  | 104.1  | 102.5  | 133.2  | 155.4  | 159.8  |
| 272.7  | 217.2  | 243.5  | 224.0  | 289.6  | 314.9  |
| 5367.2 | 4968.9 | 5479.5 | 5776.1 | 5983.5 | 5967.8 |
| 1447.0 | 1400.5 | 1456.5 | 1376.6 | 1496.8 | 1736.6 |
| 1295.6 | 1669.4 | 866.4  | 1347.5 | 921.8  | 1524.8 |
| 388.9  | 706.5  | 361.7  | 569.9  | 368.8  | 558.8  |
| 1746.2 | 1632.3 | 1651.0 | 1546.7 | 1767.2 | 1905.3 |
| 3965.1 | 2976.7 | 3331.1 | 3584.9 | 3917.2 | 4038.2 |
| 87.3   | 57.0   | 79.6   | 84.7   | 107.2  | 101.4  |
| 111.6  | 80.8   | 113.7  | 90.2   | 114.5  | 112.1  |
| 4271.5 | 4024.1 | 4279.7 | 4526.1 | 4690.7 | 4839.9 |
| 423.5  | 380.1  | 433.8  | 423.8  | 514.6  | 515.7  |
| 82.3   | 77.2   | 75.9   | 75.2   | 91.6   | 105.8  |
| 105.0  | 132.1  | 135.5  | 112.7  | 129.5  | 169.0  |
| 548.1  | 532.9  | 441.1  | 709.7  | 788.3  | 702.6  |
| 27.3   | 25.4   | 18.2   | 28.7   | 33.4   | 32.6   |
| 1632.2 | 1436.7 | 1677.1 | 1790.4 | 2021.5 | 1871.5 |
| 908.9  | 812.5  | 843.9  | 884.1  | 961.5  | 1143.5 |
| 2050.9 | 1979.8 | 2220.7 | 2397.2 | 2328.0 | 2496.8 |
| 812.4  | 702.3  | 858.2  | 860.1  | 897.3  | 1024.8 |
| 438.7  | 291.6  | 332.8  | 490.1  | 402.4  | 535.3  |
| 554.8  | 426.5  | 471.5  | 604.6  | 597.0  | 684.1  |
| 1046.9 | 966.6  | 1218.1 | 1251.3 | 1307.8 | 1356.5 |
| 625.2  | 606.3  | 615.2  | 606.1  | 669.1  | 739.6  |
| 72.5   | 69.3   | 62.9   | 68.4   | 72.4   | 87.5   |
| 892.6  | 881.1  | 943.3  | 928.1  | 1031.8 | 1117.9 |
| 631.4  | 560.8  | 686.7  | 817.3  | 816.9  | 854.1  |
| 687.8  | 654.7  | 815.1  | 884.1  | 875.8  | 841.4  |
| 166.0  | 137.6  | 157.7  | 139.9  | 178.3  | 183.0  |
| 154.3  | 125.8  | 157.8  | 134.0  | 177.1  | 193.0  |
| 181.4  | 198.0  | 232.5  | 249.5  | 270.5  | 270.4  |
| 1823.4 | 1695.6 | 1827.5 | 1776.4 | 1967.4 | 2149.5 |
| 1726.9 | 1305.9 | 1377.2 | 1486.7 | 1575.6 | 1789.1 |
| 157.2  | 118.0  | 156.0  | 154.6  | 192.9  | 196.3  |
| 41.5   | 53.0   | 57.0   | 45.8   | 85.6   | 49.5   |
| 55.8   | 38.8   | 32.4   | 18.5   | 40.8   | 57.3   |
| 782.7  | 745.4  | 775.2  | 814.1  | 928.2  | 981.7  |
| 172.6  | 136.4  | 174.5  | 161.5  | 226.6  | 193.0  |
| 2687.0 | 2079.3 | 2759.2 | 2698.5 | 2889.0 | 3105.2 |
| 1533.6 | 1235.1 | 1427.4 | 1544.2 | 1662.6 | 1788.1 |
| 783.0  | 859.5  | 993.2  | 1005.0 | 1136.8 | 1140.1 |
| 497.8  | 553.3  | 560.4  | 586.5  | 624.1  | 652.7  |
| 94.4   | 114.4  | 95.1   | 104.5  | 96.4   | 141.5  |
| 101.1  | 109.0  | 106.4  | 104.2  | 105.2  | 122.8  |
| 575.4  | 584.5  | 673.4  | 595.5  | 727.8  | 737.6  |
| 293.7  | 286.3  | 311.4  | 352.9  | 352.7  | 385.4  |
| 889.3  | 680.5  | 865.8  | 976.1  | 985.8  | 1099.6 |
| 165.3  | 123.1  | 142.1  | 154.6  | 194.9  | 185.5  |
| 566.6  | 499.2  | 495.4  | 628.7  | 613.3  | 684.6  |
| 86.2   | 77.9   | 110.0  | 108.3  | 101.5  | 97.9   |
| 77.5   | 91.8   | 76.1   | 84.9   | 84.9   | 91.0   |
| 1399.2 | 1206.7 | 1137.6 | 1115.5 | 1326.8 | 1457.9 |
| 4.2    | 7.0    | 4.1    | 9.8    | 5.1    | 3.0    |

|         |        |        |         |         |         |
|---------|--------|--------|---------|---------|---------|
| 268.2   | 242.5  | 320.3  | 289.8   | 452.8   | 286.2   |
| 17.6    | 12.2   | 10.6   | 7.7     | 24.7    | 22.6    |
| 1443.6  | 1384.4 | 1407.0 | 1447.4  | 1584.9  | 1743.7  |
| 914.8   | 865.4  | 906.5  | 891.0   | 950.4   | 1026.4  |
| 1406.3  | 1372.9 | 1359.4 | 1508.8  | 1691.3  | 1674.1  |
| 1287.5  | 1201.1 | 1288.2 | 1204.8  | 1464.1  | 1391.4  |
| 856.9   | 838.1  | 1005.3 | 1026.3  | 1089.2  | 1119.1  |
| 517.9   | 487.8  | 512.7  | 532.5   | 563.3   | 570.4   |
| 3507.8  | 3107.4 | 3024.0 | 3368.7  | 3411.8  | 3670.2  |
| 46.5    | 52.6   | 41.1   | 48.9    | 44.4    | 60.2    |
| 385.4   | 351.1  | 366.0  | 367.5   | 412.7   | 465.5   |
| 732.3   | 599.0  | 647.7  | 655.6   | 762.9   | 847.2   |
| 4872.2  | 4905.9 | 4975.3 | 5354.2  | 5283.4  | 5495.3  |
| 2363.9  | 2505.2 | 2319.8 | 2427.2  | 2492.4  | 2734.8  |
| 13.5    | 21.8   | 17.0   | 24.3    | 24.7    | 23.7    |
| 1091.2  | 895.9  | 1094.0 | 1132.5  | 1235.1  | 1385.2  |
| 344.1   | 385.1  | 358.5  | 339.2   | 423.2   | 374.3   |
| 1905.4  | 2003.8 | 2436.7 | 2464.4  | 2430.4  | 2522.4  |
| 953.8   | 914.9  | 1103.5 | 1206.6  | 1138.2  | 1187.0  |
| 151.1   | 101.9  | 134.7  | 138.2   | 185.7   | 152.6   |
| 390.5   | 294.1  | 348.6  | 373.9   | 470.2   | 410.3   |
| 251.9   | 185.3  | 198.2  | 173.0   | 282.5   | 271.8   |
| 459.6   | 369.1  | 498.3  | 499.7   | 566.2   | 576.2   |
| 175.9   | 189.4  | 192.5  | 200.7   | 207.2   | 215.8   |
| 825.4   | 781.3  | 960.9  | 935.9   | 1027.4  | 1026.5  |
| 1808.7  | 1592.6 | 1705.6 | 1874.0  | 1964.8  | 2174.5  |
| 1243.3  | 1257.0 | 1493.5 | 1625.5  | 1611.3  | 1726.3  |
| 5613.8  | 5405.8 | 6507.2 | 6881.6  | 6569.0  | 6678.5  |
| 123.1   | 116.4  | 112.1  | 112.4   | 130.0   | 145.4   |
| 4.7     | 7.8    | 6.5    | 3.2     | 3.6     | 5.6     |
| 1009.1  | 670.6  | 1000.0 | 1086.8  | 1146.3  | 1101.7  |
| 439.1   | 504.0  | 511.1  | 549.7   | 386.4   | 756.0   |
| 1509.0  | 1465.5 | 1627.5 | 1647.4  | 1868.3  | 1866.4  |
| 10533.6 | 9742.0 | 9800.9 | 10333.8 | 10746.6 | 10972.4 |
| 849.8   | 680.6  | 749.6  | 833.3   | 795.7   | 1105.1  |
| 169.5   | 185.1  | 214.8  | 207.5   | 224.5   | 264.3   |
| 558.0   | 531.1  | 627.1  | 585.8   | 651.6   | 738.9   |
| 878.4   | 879.8  | 1019.1 | 1001.8  | 1084.8  | 1203.9  |
| 604.6   | 519.1  | 586.3  | 557.3   | 706.5   | 727.5   |
| 449.9   | 408.9  | 480.7  | 474.7   | 559.4   | 541.6   |
| 815.6   | 641.5  | 688.2  | 736.4   | 852.4   | 931.7   |
| 339.8   | 336.3  | 394.8  | 432.0   | 412.2   | 421.2   |
| 1011.4  | 866.0  | 1116.0 | 1213.1  | 1259.6  | 1241.0  |
| 44.7    | 33.1   | 48.8   | 38.1    | 77.1    | 75.4    |
| 345.3   | 273.4  | 468.9  | 400.7   | 527.4   | 457.0   |
| 59.4    | 47.0   | 69.5   | 48.5    | 86.3    | 98.6    |
| 259.8   | 208.3  | 277.6  | 235.5   | 302.2   | 298.5   |
| 811.7   | 855.2  | 896.5  | 872.3   | 979.2   | 1011.4  |
| 447.3   | 389.5  | 501.1  | 479.9   | 435.6   | 562.1   |
| 1193.8  | 912.8  | 1279.0 | 1202.8  | 1361.7  | 1368.1  |
| 577.8   | 590.5  | 593.4  | 598.6   | 644.9   | 737.5   |
| 905.7   | 787.3  | 889.0  | 854.4   | 850.7   | 1131.4  |
| 171.6   | 174.8  | 180.8  | 167.4   | 200.7   | 234.4   |

|         |         |         |         |         |         |
|---------|---------|---------|---------|---------|---------|
| 8932.5  | 8180.6  | 8579.9  | 8700.6  | 9067.5  | 9117.2  |
| 1.1     | 2.0     | 0.9     | 1.1     | 1.3     | 1.8     |
| 13.6    | 6.8     | 6.1     | 6.4     | 9.0     | 15.5    |
| 12560.3 | 11528.7 | 12485.4 | 12944.2 | 12214.8 | 12170.2 |
| 125.8   | 85.5    | 138.2   | 93.0    | 163.9   | 121.5   |
| 200.9   | 128.0   | 206.0   | 190.1   | 268.9   | 239.2   |
| 1241.0  | 1159.1  | 1292.1  | 1405.8  | 1412.1  | 1550.4  |
| 1628.5  | 1657.2  | 1857.7  | 1763.9  | 1865.5  | 1935.5  |
| 766.1   | 658.7   | 830.6   | 838.9   | 908.4   | 1006.4  |
| 909.1   | 937.1   | 846.5   | 975.4   | 914.8   | 1177.7  |
| 124.1   | 119.3   | 99.1    | 132.9   | 111.4   | 149.2   |
| 604.5   | 691.1   | 614.2   | 685.2   | 580.8   | 833.7   |
| 87.0    | 83.8    | 83.6    | 87.6    | 102.1   | 103.1   |
| 154.9   | 101.2   | 135.5   | 141.0   | 176.2   | 153.7   |
| 445.3   | 417.3   | 439.9   | 458.0   | 558.4   | 544.8   |
| 3606.9  | 3070.1  | 4074.6  | 4632.4  | 4199.2  | 4310.3  |
| 14.5    | 12.4    | 15.5    | 6.5     | 18.0    | 12.5    |
| 2615.2  | 2138.4  | 2603.4  | 2528.3  | 2728.9  | 3030.9  |
| 1211.1  | 1065.9  | 1191.1  | 1154.0  | 1293.4  | 1369.7  |
| 812.3   | 741.6   | 843.2   | 927.0   | 887.4   | 1118.3  |
| 260.1   | 233.6   | 318.2   | 288.6   | 308.3   | 357.2   |
| 92.5    | 90.1    | 110.1   | 135.3   | 118.1   | 131.3   |
| 305.1   | 215.9   | 259.2   | 292.9   | 292.1   | 341.2   |
| 69.1    | 64.7    | 55.8    | 69.0    | 80.7    | 71.7    |
| 249.2   | 202.1   | 286.3   | 305.6   | 290.7   | 346.4   |
| 15.5    | 6.8     | 18.4    | 12.3    | 19.2    | 13.0    |
| 35.8    | 52.5    | 60.2    | 70.0    | 72.9    | 76.8    |
| 2937.0  | 2839.4  | 2976.9  | 3204.2  | 3333.7  | 3538.1  |
| 379.9   | 350.5   | 421.6   | 388.5   | 447.3   | 432.3   |
| 289.7   | 205.2   | 288.2   | 337.6   | 355.3   | 374.1   |
| 1092.9  | 935.0   | 1076.3  | 1194.0  | 1188.3  | 1288.8  |
| 3516.2  | 3245.2  | 3605.7  | 3799.2  | 3818.3  | 4054.8  |
| 1362.9  | 1252.5  | 1520.4  | 1585.2  | 1591.1  | 1717.8  |
| 2376.0  | 2298.1  | 2622.7  | 2833.7  | 2744.8  | 2825.8  |
| 259.8   | 269.0   | 286.4   | 300.5   | 346.9   | 343.3   |
| 139.8   | 132.0   | 130.3   | 130.5   | 167.4   | 165.3   |
| 760.2   | 837.2   | 777.3   | 851.8   | 829.6   | 926.9   |
| 2343.3  | 1910.3  | 2390.6  | 2612.3  | 2480.5  | 2629.7  |
| 567.7   | 297.3   | 585.7   | 576.7   | 707.9   | 719.9   |
| 118.6   | 79.6    | 102.5   | 98.9    | 133.8   | 141.9   |
| 118.5   | 44.3    | 103.5   | 122.0   | 155.0   | 141.5   |
| 2833.7  | 2481.7  | 2916.3  | 2765.5  | 3064.5  | 3157.3  |
| 5185.2  | 4584.7  | 5057.2  | 5102.2  | 5191.3  | 5386.5  |
| 414.1   | 421.3   | 476.0   | 468.5   | 545.0   | 539.7   |
| 3187.9  | 3133.3  | 3290.3  | 3631.3  | 3567.0  | 3707.0  |
| 3996.0  | 3399.7  | 3885.3  | 4124.7  | 4719.2  | 4606.8  |
| 1993.2  | 1792.6  | 2032.7  | 2044.0  | 2173.5  | 2311.8  |
| 270.9   | 193.1   | 262.4   | 276.3   | 337.0   | 342.0   |
| 180.8   | 211.2   | 217.6   | 234.3   | 256.1   | 257.9   |
| 1641.6  | 1432.5  | 1652.2  | 1588.2  | 1863.1  | 1832.3  |
| 778.7   | 744.9   | 819.2   | 816.1   | 952.7   | 881.7   |
| 2042.6  | 1786.5  | 1818.1  | 1915.1  | 2245.5  | 2272.7  |
| 1788.1  | 2129.2  | 1846.3  | 1859.2  | 2037.7  | 2095.5  |

|         |         |         |         |         |         |
|---------|---------|---------|---------|---------|---------|
| 2481.6  | 2802.8  | 2629.3  | 2611.0  | 2787.1  | 2782.8  |
| 258.5   | 295.8   | 316.3   | 284.2   | 335.4   | 345.8   |
| 1843.6  | 1998.4  | 2029.8  | 2128.3  | 2251.0  | 2438.5  |
| 234.8   | 227.3   | 317.1   | 291.6   | 323.6   | 342.3   |
| 1295.7  | 1379.6  | 1338.3  | 1462.7  | 1483.3  | 1704.8  |
| 405.9   | 502.8   | 545.9   | 547.3   | 658.9   | 613.3   |
| 1406.1  | 1254.2  | 1502.4  | 1581.8  | 1764.0  | 1829.0  |
| 2528.9  | 2065.7  | 2237.2  | 2631.0  | 2711.3  | 3053.5  |
| 1698.9  | 1604.6  | 1647.8  | 1676.0  | 1726.0  | 1972.5  |
| 1169.9  | 959.0   | 1101.6  | 1120.7  | 1326.0  | 1411.1  |
| 1755.0  | 1341.2  | 1983.2  | 1681.7  | 1953.4  | 1738.6  |
| 1711.8  | 1653.3  | 1902.3  | 1790.2  | 2047.3  | 2027.6  |
| 1819.8  | 1699.1  | 1858.8  | 1847.8  | 1986.6  | 2096.2  |
| 11053.6 | 10329.9 | 10520.8 | 10962.4 | 10951.9 | 11062.5 |
| 845.2   | 789.3   | 886.3   | 916.0   | 987.4   | 1058.2  |
| 518.8   | 424.8   | 513.3   | 526.2   | 563.3   | 601.7   |
| 2.2     | 1.1     | 2.7     | 2.8     | 3.4     | 1.8     |
| 15.7    | 12.5    | 11.1    | 5.4     | 11.5    | 7.9     |
| 4.2     | 9.2     | 6.9     | 4.1     | 2.2     | 5.7     |
| 526.4   | 499.8   | 517.9   | 518.3   | 583.4   | 616.5   |
| 638.5   | 586.7   | 781.2   | 846.8   | 878.4   | 793.1   |
| 1013.9  | 943.4   | 1023.3  | 1035.1  | 1145.6  | 1211.1  |
| 409.3   | 427.1   | 423.5   | 428.5   | 425.5   | 520.3   |
| 1134.3  | 738.1   | 1219.9  | 1111.2  | 1434.8  | 1300.6  |
| 2677.6  | 2921.8  | 2753.4  | 2742.8  | 2779.1  | 3070.4  |
| 385.6   | 381.3   | 418.1   | 434.7   | 478.4   | 514.1   |
| 1155.1  | 989.2   | 849.9   | 900.7   | 1038.2  | 1175.0  |
| 1892.3  | 1833.9  | 1850.1  | 2024.8  | 2093.2  | 2361.5  |
| 475.0   | 234.5   | 536.8   | 596.6   | 666.4   | 716.0   |
| 227.5   | 367.2   | 256.6   | 332.2   | 304.5   | 308.3   |
| 555.7   | 631.5   | 695.0   | 592.3   | 634.5   | 675.9   |
| 14.0    | 2.7     | 11.4    | 4.8     | 5.3     | 18.0    |
| 776.3   | 718.0   | 725.5   | 705.4   | 878.3   | 926.7   |
| 774.0   | 757.6   | 843.5   | 854.6   | 908.2   | 924.8   |
| 122.6   | 124.8   | 116.6   | 95.6    | 112.1   | 142.3   |
| 1005.1  | 1296.8  | 1163.7  | 1323.0  | 1274.7  | 1378.3  |
| 836.2   | 840.8   | 782.6   | 780.3   | 869.8   | 997.3   |
| 1183.3  | 1186.6  | 1350.8  | 1298.3  | 1522.7  | 1445.1  |
| 840.4   | 775.3   | 802.4   | 824.3   | 920.9   | 971.4   |
| 1177.9  | 1076.7  | 1121.2  | 1133.5  | 1265.3  | 1383.7  |
| 1115.7  | 1073.2  | 1225.1  | 1125.0  | 1211.2  | 1310.3  |
| 748.7   | 871.1   | 853.1   | 841.5   | 900.4   | 983.4   |
| 667.7   | 601.8   | 669.6   | 613.8   | 770.5   | 754.4   |
| 1361.4  | 1227.4  | 1419.3  | 1471.3  | 1540.5  | 1631.9  |
| 1549.6  | 1698.5  | 1832.9  | 1938.2  | 1859.9  | 1916.6  |
| 3290.7  | 3259.7  | 3412.1  | 3534.5  | 3540.7  | 3730.0  |
| 62.2    | 67.5    | 55.1    | 62.9    | 69.8    | 84.4    |
| 313.3   | 255.5   | 396.0   | 434.1   | 463.9   | 447.7   |
| 2004.5  | 1729.0  | 2055.2  | 2083.0  | 2238.4  | 2325.3  |
| 1150.0  | 1103.6  | 1200.3  | 1182.8  | 1400.9  | 1446.4  |
| 891.3   | 816.6   | 891.8   | 864.9   | 1044.1  | 1039.5  |
| 8788.4  | 8095.3  | 8353.8  | 8813.6  | 9106.2  | 9078.1  |
| 144.0   | 100.5   | 133.4   | 132.4   | 153.9   | 171.5   |

|        |        |        |        |         |         |
|--------|--------|--------|--------|---------|---------|
| 2828.9 | 2559.6 | 2649.9 | 2857.8 | 3052.7  | 3275.9  |
| 989.7  | 909.8  | 934.2  | 1168.0 | 1013.9  | 1228.1  |
| 353.0  | 400.3  | 384.8  | 382.0  | 457.3   | 467.4   |
| 224.9  | 191.3  | 214.4  | 229.1  | 223.0   | 267.8   |
| 249.9  | 195.3  | 226.9  | 233.9  | 304.3   | 274.3   |
| 235.0  | 198.6  | 261.8  | 256.9  | 271.3   | 299.9   |
| 164.0  | 137.3  | 189.3  | 199.5  | 221.1   | 232.4   |
| 75.0   | 75.1   | 85.6   | 108.5  | 95.9    | 104.5   |
| 327.6  | 274.0  | 332.0  | 425.4  | 396.4   | 400.7   |
| 1201.3 | 1244.7 | 1367.6 | 1419.1 | 1380.7  | 1635.3  |
| 344.6  | 353.5  | 375.8  | 422.7  | 413.4   | 421.8   |
| 564.0  | 566.6  | 631.7  | 643.0  | 659.9   | 732.4   |
| 1021.0 | 937.8  | 1080.1 | 1035.8 | 1261.8  | 1343.5  |
| 307.1  | 351.9  | 369.2  | 389.5  | 387.0   | 434.0   |
| 961.1  | 792.0  | 976.4  | 915.3  | 1109.2  | 1085.5  |
| 3.6    | 3.4    | 2.7    | 1.8    | 4.3     | 2.6     |
| 432.3  | 346.7  | 402.8  | 371.0  | 530.7   | 519.3   |
| 535.9  | 462.7  | 552.9  | 475.2  | 685.0   | 605.2   |
| 9621.3 | 8830.0 | 9383.4 | 9912.3 | 10203.0 | 10048.5 |
| 679.9  | 663.2  | 651.3  | 734.9  | 910.7   | 847.5   |
| 1641.8 | 1380.3 | 1571.1 | 1580.1 | 2026.5  | 1979.6  |
| 3727.5 | 2795.4 | 3689.0 | 3754.2 | 3996.2  | 3962.8  |
| 1152.6 | 1120.7 | 1247.8 | 1360.3 | 1476.3  | 1593.0  |
| 937.4  | 916.6  | 969.4  | 991.3  | 1129.6  | 1199.9  |
| 84.2   | 57.3   | 73.3   | 69.6   | 117.6   | 100.2   |
| 68.1   | 53.2   | 78.7   | 61.1   | 68.9    | 79.7    |
| 1730.1 | 1387.5 | 1715.4 | 1978.9 | 1861.9  | 1983.3  |
| 897.8  | 741.4  | 974.6  | 988.9  | 1086.4  | 1119.1  |
| 1662.6 | 1434.7 | 1889.8 | 2008.1 | 2035.3  | 2099.2  |
| 487.9  | 401.6  | 468.4  | 457.1  | 630.4   | 560.2   |
| 235.8  | 165.8  | 212.0  | 212.5  | 230.6   | 249.9   |
| 694.6  | 679.8  | 685.8  | 725.7  | 750.6   | 912.5   |
| 521.4  | 526.7  | 622.2  | 605.1  | 643.0   | 622.1   |
| 105.3  | 61.4   | 121.9  | 92.1   | 142.2   | 131.2   |
| 30.8   | 16.9   | 37.1   | 35.7   | 35.2    | 38.7    |
| 705.5  | 616.0  | 660.2  | 656.4  | 675.3   | 925.1   |
| 4824.9 | 4399.3 | 5643.5 | 6075.9 | 5972.9  | 5709.5  |
| 648.5  | 723.4  | 710.4  | 727.3  | 840.5   | 864.5   |
| 885.8  | 833.3  | 915.2  | 966.8  | 1066.1  | 1077.6  |
| 524.0  | 500.3  | 472.5  | 504.7  | 555.2   | 610.5   |
| 622.3  | 677.7  | 698.0  | 782.9  | 792.8   | 881.2   |
| 1354.1 | 1353.6 | 1552.0 | 1585.4 | 1639.1  | 1794.8  |
| 2266.5 | 2095.2 | 2275.1 | 2419.8 | 2482.3  | 2572.7  |
| 972.9  | 769.5  | 815.8  | 905.9  | 989.3   | 1121.3  |
| 548.0  | 442.8  | 585.3  | 571.0  | 648.2   | 649.7   |
| 5944.6 | 5433.1 | 6271.4 | 6562.1 | 6434.6  | 6440.5  |
| 67.1   | 98.1   | 65.5   | 76.4   | 87.1    | 100.8   |
| 671.8  | 560.1  | 572.5  | 687.4  | 778.7   | 712.3   |
| 708.3  | 923.8  | 833.4  | 807.3  | 894.6   | 925.8   |
| 971.8  | 1109.5 | 933.0  | 962.4  | 966.6   | 1091.2  |
| 170.0  | 155.7  | 143.9  | 157.9  | 181.7   | 202.7   |
| 716.9  | 648.5  | 684.3  | 687.6  | 803.3   | 882.9   |
| 4298.3 | 4024.7 | 4160.7 | 4840.3 | 4558.7  | 4734.3  |

|        |        |        |        |        |        |
|--------|--------|--------|--------|--------|--------|
| 1920.5 | 1598.6 | 1503.8 | 1377.4 | 2000.8 | 1949.7 |
| 2792.9 | 2514.3 | 2532.8 | 2564.3 | 3008.5 | 3001.5 |
| 1544.5 | 1664.2 | 1593.2 | 1560.3 | 1731.1 | 1737.0 |
| 2116.8 | 2066.3 | 2133.9 | 2099.5 | 2288.1 | 2387.6 |
| 1713.7 | 1493.6 | 1777.8 | 1670.5 | 1854.6 | 1907.0 |
| 5720.2 | 4801.0 | 5813.3 | 5645.5 | 6300.1 | 6048.0 |
| 192.5  | 178.4  | 204.3  | 188.4  | 235.0  | 230.6  |
| 2966.0 | 2758.9 | 3336.8 | 3481.8 | 3513.2 | 3417.3 |
| 1094.7 | 1228.4 | 1131.6 | 1064.5 | 1174.2 | 1341.9 |
| 381.7  | 323.3  | 398.2  | 420.6  | 426.5  | 420.8  |
| 951.7  | 801.0  | 921.3  | 977.2  | 961.6  | 1149.7 |
| 1384.1 | 1747.0 | 1518.1 | 1668.2 | 1511.1 | 1641.1 |
| 4210.8 | 3388.7 | 3882.7 | 4827.7 | 4437.7 | 4771.3 |
| 172.3  | 148.1  | 213.2  | 166.2  | 243.4  | 221.8  |
| 2757.9 | 2677.6 | 2527.0 | 2701.3 | 2954.8 | 3267.1 |
| 7266.8 | 6699.9 | 7626.5 | 8031.8 | 7997.2 | 8257.5 |
| 37.8   | 30.3   | 25.7   | 69.0   | 51.6   | 51.2   |
| 261.4  | 196.5  | 210.5  | 197.3  | 276.6  | 299.8  |
| 789.3  | 565.0  | 686.1  | 736.7  | 816.9  | 798.7  |
| 278.8  | 207.7  | 258.5  | 250.4  | 265.3  | 325.5  |
| 271.9  | 280.7  | 370.4  | 347.2  | 358.6  | 355.5  |
| 1457.9 | 1412.6 | 1521.3 | 1559.0 | 1576.1 | 1690.7 |
| 205.5  | 211.8  | 219.5  | 197.0  | 234.8  | 249.4  |
| 824.5  | 875.7  | 932.0  | 926.2  | 999.7  | 1071.9 |
| 682.5  | 669.6  | 684.8  | 732.1  | 748.7  | 819.5  |
| 3.7    | 0.9    | 5.6    | 1.9    | 7.5    | 1.7    |
| 302.5  | 297.8  | 310.2  | 350.5  | 369.1  | 370.1  |
| 870.4  | 942.4  | 826.6  | 907.4  | 913.7  | 1043.0 |
| 48.0   | 46.2   | 63.6   | 64.6   | 69.4   | 74.9   |
| 927.3  | 821.6  | 1100.7 | 1073.2 | 1072.7 | 1147.4 |
| 124.9  | 117.3  | 117.4  | 112.3  | 132.5  | 132.5  |
| 359.2  | 345.9  | 370.6  | 358.8  | 403.8  | 467.7  |
| 461.1  | 410.8  | 454.8  | 490.0  | 499.7  | 632.9  |
| 889.4  | 776.2  | 1009.6 | 1037.5 | 1061.0 | 1137.6 |
| 2361.8 | 2393.6 | 2755.4 | 2847.9 | 2915.3 | 2965.1 |
| 317.7  | 283.1  | 330.6  | 359.3  | 373.5  | 419.3  |
| 139.0  | 136.4  | 171.1  | 180.0  | 173.0  | 207.4  |
| 473.9  | 389.6  | 517.3  | 499.4  | 582.0  | 570.4  |
| 571.8  | 487.7  | 542.3  | 526.0  | 611.9  | 630.7  |
| 484.4  | 462.7  | 508.3  | 497.2  | 605.8  | 683.8  |
| 60.6   | 45.7   | 66.7   | 74.5   | 85.6   | 78.1   |
| 161.7  | 114.3  | 134.4  | 135.5  | 178.2  | 211.7  |
| 80.4   | 62.3   | 81.1   | 81.2   | 107.4  | 114.0  |
| 1968.4 | 1892.3 | 2046.5 | 2283.2 | 2432.9 | 2717.5 |
| 994.3  | 853.6  | 993.3  | 1039.2 | 1108.4 | 1233.5 |
| 906.9  | 782.1  | 1018.9 | 993.8  | 1044.4 | 1080.3 |
| 1456.5 | 1219.2 | 1329.1 | 1745.6 | 1646.2 | 1755.7 |
| 1651.4 | 1475.4 | 1714.6 | 1802.0 | 1807.7 | 2071.5 |
| 704.2  | 741.7  | 694.2  | 660.1  | 712.8  | 805.2  |
| 488.4  | 446.5  | 530.1  | 540.1  | 583.8  | 660.7  |
| 786.5  | 662.2  | 822.3  | 728.1  | 865.1  | 972.8  |
| 506.9  | 379.9  | 519.8  | 481.1  | 546.5  | 552.9  |
| 1094.4 | 833.9  | 995.9  | 1001.7 | 1190.7 | 1288.0 |

|         |        |        |        |         |        |
|---------|--------|--------|--------|---------|--------|
| 32.9    | 33.0   | 32.4   | 41.0   | 35.0    | 39.8   |
| 208.6   | 208.8  | 221.2  | 241.9  | 281.2   | 250.2  |
| 350.3   | 366.6  | 354.9  | 388.3  | 429.7   | 408.3  |
| 1.1     | 1.2    | 1.8    | 1.8    | 1.9     | 3.7    |
| 773.2   | 995.3  | 877.7  | 1124.9 | 1008.9  | 1046.6 |
| 373.3   | 300.3  | 383.2  | 394.3  | 456.8   | 432.8  |
| 524.9   | 461.1  | 578.1  | 602.9  | 647.9   | 640.0  |
| 1593.5  | 1430.3 | 1354.7 | 1642.7 | 1748.6  | 1693.6 |
| 366.5   | 313.1  | 341.2  | 351.3  | 379.3   | 429.1  |
| 180.1   | 182.2  | 219.2  | 199.5  | 218.4   | 240.3  |
| 464.6   | 390.9  | 437.9  | 464.4  | 517.1   | 560.9  |
| 600.1   | 547.1  | 705.5  | 739.6  | 698.3   | 737.2  |
| 1.4     | 0.5    | 0.8    | 0.8    | 0.5     | 0.6    |
| 505.2   | 560.0  | 417.2  | 476.1  | 434.3   | 504.4  |
| 2379.5  | 2108.9 | 2405.6 | 2432.9 | 2518.7  | 2922.3 |
| 2209.4  | 2031.9 | 2397.8 | 2488.2 | 2410.7  | 2701.4 |
| 16.3    | 4.3    | 14.4   | 21.3   | 24.5    | 20.3   |
| 121.8   | 69.2   | 110.8  | 111.5  | 134.4   | 105.2  |
| 757.6   | 807.8  | 776.4  | 911.9  | 930.3   | 1035.9 |
| 308.6   | 278.0  | 298.3  | 311.6  | 313.0   | 385.7  |
| 250.0   | 235.8  | 283.4  | 261.7  | 315.3   | 325.7  |
| 690.9   | 667.1  | 680.9  | 696.8  | 800.0   | 868.6  |
| 155.6   | 185.2  | 154.2  | 182.0  | 168.8   | 182.3  |
| 114.6   | 136.0  | 103.3  | 125.3  | 100.8   | 123.0  |
| 759.1   | 872.2  | 697.9  | 894.1  | 719.8   | 922.3  |
| 971.1   | 862.7  | 1116.8 | 1071.3 | 1194.6  | 1184.5 |
| 1924.6  | 1712.5 | 1915.7 | 2070.9 | 2230.2  | 2370.3 |
| 9227.2  | 8560.5 | 8739.2 | 9164.0 | 9253.7  | 9308.6 |
| 10147.3 | 8756.1 | 9389.2 | 9920.6 | 10241.5 | 9932.6 |
| 5.1     | 0.7    | 4.2    | 4.7    | 4.0     | 1.6    |
| 67.8    | 39.4   | 67.5   | 55.4   | 91.7    | 80.0   |
| 523.6   | 250.6  | 426.0  | 454.5  | 571.0   | 626.6  |
| 148.3   | 94.6   | 147.5  | 123.2  | 158.7   | 187.5  |
| 305.4   | 250.0  | 283.3  | 338.7  | 375.7   | 400.4  |
| 1430.7  | 1272.9 | 1463.2 | 1410.4 | 1575.2  | 1602.2 |
| 306.0   | 267.0  | 301.4  | 330.4  | 368.0   | 304.5  |
| 276.0   | 284.9  | 307.7  | 276.5  | 310.2   | 362.0  |
| 457.7   | 504.1  | 466.5  | 553.1  | 531.3   | 557.9  |
| 2366.1  | 2093.3 | 2551.6 | 2520.4 | 2511.7  | 2716.9 |
| 114.0   | 108.6  | 122.3  | 100.7  | 147.1   | 134.0  |
| 600.0   | 689.9  | 685.9  | 685.6  | 725.0   | 744.9  |
| 228.8   | 151.8  | 197.2  | 208.4  | 272.0   | 263.8  |
| 826.5   | 855.9  | 731.8  | 843.0  | 1023.5  | 991.2  |
| 271.3   | 212.2  | 235.3  | 263.3  | 281.8   | 299.5  |
| 2101.9  | 1925.1 | 2109.2 | 2203.8 | 2507.5  | 2725.0 |
| 236.0   | 195.7  | 281.3  | 262.1  | 299.3   | 306.3  |
| 393.7   | 376.1  | 487.7  | 484.0  | 508.1   | 509.7  |
| 97.6    | 84.0   | 112.8  | 99.1   | 136.9   | 118.5  |
| 294.7   | 293.6  | 286.8  | 297.7  | 328.8   | 331.4  |
| 1007.3  | 873.9  | 995.1  | 958.4  | 1115.6  | 1229.2 |
| 576.6   | 515.6  | 645.8  | 661.5  | 673.7   | 738.2  |
| 734.2   | 758.6  | 730.1  | 788.5  | 816.1   | 994.2  |
| 1362.2  | 1323.7 | 1173.2 | 1272.9 | 1437.1  | 1571.5 |

|        |        |        |        |        |        |
|--------|--------|--------|--------|--------|--------|
| 42.3   | 38.7   | 31.3   | 42.5   | 42.1   | 43.5   |
| 933.6  | 905.9  | 928.8  | 911.4  | 1067.4 | 1150.8 |
| 16.2   | 24.0   | 16.3   | 16.6   | 13.4   | 21.2   |
| 12.7   | 14.4   | 18.6   | 22.0   | 20.7   | 15.0   |
| 341.9  | 519.9  | 458.7  | 526.4  | 420.3  | 460.6  |
| 629.4  | 602.9  | 648.4  | 594.0  | 706.4  | 775.8  |
| 1396.0 | 1254.2 | 1273.6 | 1378.7 | 1624.6 | 1628.1 |
| 1935.2 | 2388.9 | 2055.0 | 2262.8 | 2640.4 | 2465.2 |
| 1994.5 | 1746.1 | 1708.6 | 1856.3 | 2099.5 | 2369.2 |
| 544.2  | 635.1  | 659.1  | 672.7  | 723.3  | 720.1  |
| 219.3  | 161.4  | 258.4  | 231.0  | 257.8  | 279.3  |
| 91.3   | 72.7   | 82.6   | 79.8   | 99.3   | 102.2  |
| 196.0  | 185.6  | 208.0  | 196.5  | 256.1  | 237.9  |
| 302.2  | 358.0  | 320.0  | 347.9  | 381.0  | 370.7  |
| 1543.1 | 1507.1 | 1561.0 | 1472.3 | 1725.4 | 1871.4 |
| 436.5  | 403.9  | 443.2  | 494.2  | 522.4  | 543.1  |
| 233.8  | 193.9  | 242.1  | 234.5  | 279.8  | 276.9  |
| 124.5  | 107.9  | 140.2  | 111.7  | 144.0  | 157.6  |
| 303.1  | 231.6  | 302.2  | 338.3  | 457.8  | 458.7  |
| 356.5  | 291.2  | 367.4  | 410.1  | 492.9  | 384.2  |
| 333.7  | 306.4  | 380.8  | 384.6  | 400.1  | 433.1  |
| 93.5   | 94.9   | 80.1   | 97.7   | 98.1   | 113.6  |
| 496.9  | 432.7  | 443.6  | 542.4  | 572.8  | 606.7  |
| 1507.3 | 1420.5 | 1525.2 | 1620.0 | 1685.8 | 1857.3 |
| 271.0  | 251.4  | 249.4  | 222.6  | 300.9  | 290.3  |
| 623.3  | 626.8  | 697.8  | 721.0  | 727.0  | 794.3  |
| 1361.5 | 1308.9 | 1525.2 | 1492.5 | 1598.6 | 1661.6 |
| 267.0  | 176.6  | 236.5  | 230.7  | 328.2  | 323.2  |
| 366.5  | 233.2  | 350.1  | 356.6  | 459.5  | 416.7  |
| 29.7   | 27.9   | 30.7   | 27.4   | 36.4   | 27.3   |
| 67.9   | 77.0   | 65.6   | 70.7   | 75.7   | 87.2   |
| 410.3  | 400.8  | 475.2  | 449.5  | 487.2  | 597.3  |
| 312.5  | 281.2  | 307.2  | 342.4  | 314.7  | 364.7  |
| 221.1  | 214.5  | 216.2  | 231.5  | 248.6  | 271.9  |
| 2389.4 | 2119.4 | 2385.5 | 2329.0 | 2427.6 | 2590.3 |
| 1760.4 | 1678.1 | 1860.1 | 1988.9 | 2140.5 | 2129.3 |
| 482.7  | 435.1  | 503.3  | 514.2  | 587.9  | 613.7  |
| 124.7  | 123.1  | 106.1  | 112.4  | 126.5  | 138.6  |
| 504.9  | 376.2  | 429.5  | 454.5  | 581.9  | 529.9  |
| 745.0  | 615.5  | 661.5  | 699.1  | 759.0  | 824.7  |
| 657.9  | 642.5  | 696.2  | 710.3  | 703.3  | 759.1  |
| 153.5  | 131.9  | 142.1  | 136.4  | 175.6  | 172.8  |
| 78.2   | 65.6   | 95.0   | 91.0   | 101.8  | 105.4  |
| 321.9  | 261.6  | 304.0  | 302.3  | 343.3  | 353.3  |
| 386.1  | 344.9  | 344.9  | 337.9  | 418.7  | 448.6  |
| 614.5  | 621.2  | 706.6  | 673.9  | 822.1  | 787.6  |
| 586.5  | 495.0  | 515.2  | 481.3  | 608.4  | 636.2  |
| 1991.5 | 1704.8 | 1904.1 | 2152.1 | 2164.7 | 2524.6 |
| 683.9  | 822.2  | 751.3  | 912.9  | 839.7  | 955.7  |
| 1851.3 | 1717.6 | 2051.2 | 2131.8 | 2182.9 | 2204.8 |
| 29.5   | 24.3   | 27.1   | 32.8   | 30.1   | 49.0   |
| 2435.5 | 2453.0 | 2354.7 | 2539.8 | 2509.6 | 2981.0 |
| 1.0    | 1.3    | 1.0    | 2.6    | 6.9    | 2.5    |



|        |        |        |        |        |        |
|--------|--------|--------|--------|--------|--------|
| 105.6  | 50.5   | 93.3   | 97.1   | 105.5  | 160.7  |
| 2119.6 | 1753.9 | 1735.2 | 1844.7 | 1949.2 | 2535.5 |
| 454.3  | 354.4  | 489.3  | 444.2  | 558.7  | 591.7  |
| 212.9  | 153.6  | 147.9  | 156.7  | 211.3  | 218.9  |
| 306.2  | 279.4  | 292.2  | 274.2  | 340.4  | 326.0  |
| 99.9   | 81.3   | 81.7   | 107.4  | 102.5  | 92.2   |
| 44.3   | 62.3   | 36.6   | 56.5   | 43.3   | 69.4   |
| 404.3  | 322.3  | 418.8  | 390.6  | 455.7  | 453.6  |
| 1406.0 | 1051.2 | 1536.0 | 1431.8 | 1810.2 | 1759.3 |
| 2236.2 | 1438.7 | 1977.6 | 2057.3 | 2268.8 | 2712.2 |
| 4091.2 | 3745.4 | 4185.7 | 4255.0 | 4452.9 | 4835.7 |
| 196.8  | 176.9  | 240.8  | 249.3  | 300.2  | 254.2  |
| 917.4  | 942.7  | 1058.3 | 1124.1 | 1142.1 | 1276.8 |
| 3878.0 | 3725.2 | 4259.0 | 4333.1 | 4499.1 | 4911.5 |
| 965.7  | 967.7  | 1017.8 | 1156.1 | 1148.9 | 1241.2 |
| 55.7   | 56.6   | 69.1   | 63.1   | 69.3   | 77.3   |
| 1297.3 | 1076.7 | 1227.7 | 1371.9 | 1365.9 | 1527.1 |
| 3166.6 | 2735.4 | 3168.7 | 3359.4 | 3429.6 | 3610.9 |
| 1538.8 | 1462.0 | 1539.1 | 1608.2 | 1686.9 | 1844.1 |
| 222.2  | 254.1  | 258.8  | 263.3  | 294.2  | 307.8  |
| 1107.7 | 935.3  | 1222.8 | 1151.4 | 1206.8 | 1360.3 |
| 444.8  | 373.5  | 474.7  | 496.4  | 614.9  | 550.6  |
| 29.8   | 28.9   | 19.0   | 17.2   | 20.3   | 21.3   |
| 519.4  | 389.3  | 544.7  | 516.5  | 599.7  | 533.3  |
| 481.6  | 456.6  | 479.7  | 530.6  | 574.3  | 575.7  |
| 1006.6 | 985.3  | 1022.7 | 1091.2 | 1081.4 | 1216.4 |
| 1147.4 | 1127.4 | 1371.6 | 1474.2 | 1427.2 | 1374.6 |
| 1628.7 | 1720.3 | 1984.0 | 2015.8 | 2096.0 | 2067.3 |
| 1678.7 | 1556.1 | 1660.2 | 1806.6 | 2013.3 | 2111.5 |
| 1368.9 | 1476.3 | 1373.4 | 1600.3 | 1644.2 | 1793.8 |
| 625.0  | 466.4  | 599.9  | 613.2  | 743.1  | 692.9  |
| 177.7  | 159.4  | 153.7  | 168.5  | 200.4  | 193.2  |
| 291.8  | 264.0  | 271.3  | 296.6  | 333.9  | 364.0  |
| 139.8  | 155.5  | 172.6  | 171.5  | 177.2  | 191.2  |
| 349.3  | 377.5  | 366.1  | 353.7  | 409.3  | 426.3  |
| 652.1  | 622.6  | 756.6  | 756.7  | 733.3  | 830.9  |
| 492.7  | 410.8  | 553.4  | 593.9  | 579.6  | 603.6  |
| 582.4  | 548.6  | 605.3  | 654.7  | 709.4  | 763.3  |
| 761.4  | 677.9  | 821.4  | 849.1  | 836.1  | 912.0  |
| 431.5  | 426.8  | 475.1  | 468.9  | 558.1  | 572.4  |
| 1778.5 | 1725.0 | 1892.2 | 2172.1 | 2349.9 | 2538.8 |
| 15.4   | 28.3   | 11.9   | 22.3   | 29.8   | 23.9   |
| 1577.6 | 1255.8 | 1454.8 | 1454.1 | 1665.3 | 1696.9 |
| 5.1    | 4.0    | 5.0    | 3.9    | 6.1    | 4.6    |
| 429.5  | 415.1  | 404.6  | 413.5  | 489.8  | 565.5  |
| 2.0    | 0.6    | 4.6    | 5.6    | 0.7    | 3.6    |
| 117.9  | 123.6  | 122.0  | 142.3  | 153.0  | 155.5  |
| 87.5   | 97.9   | 96.9   | 101.9  | 128.5  | 122.2  |
| 55.6   | 34.4   | 76.9   | 57.1   | 118.9  | 75.1   |
| 57.8   | 46.7   | 51.1   | 58.8   | 65.8   | 70.6   |
| 294.9  | 268.6  | 325.6  | 290.0  | 368.5  | 378.1  |
| 843.9  | 582.3  | 835.9  | 828.5  | 949.5  | 939.8  |
| 151.1  | 121.5  | 139.9  | 121.9  | 172.7  | 158.1  |

|        |        |        |        |        |        |
|--------|--------|--------|--------|--------|--------|
| 521.8  | 457.5  | 545.3  | 577.6  | 614.4  | 623.6  |
| 2198.9 | 1834.9 | 2028.1 | 2220.9 | 2420.1 | 2450.9 |
| 332.7  | 310.8  | 273.0  | 364.9  | 377.7  | 384.7  |
| 342.4  | 280.4  | 345.5  | 372.6  | 422.9  | 418.4  |
| 168.6  | 182.0  | 200.4  | 192.1  | 221.0  | 215.8  |
| 106.0  | 117.8  | 124.8  | 109.7  | 135.5  | 141.7  |
| 1850.9 | 1907.7 | 1862.7 | 1768.8 | 2114.7 | 2098.9 |
| 1157.8 | 1144.5 | 1170.1 | 1242.6 | 1430.7 | 1351.1 |
| 1426.9 | 1206.2 | 1437.7 | 1442.0 | 1636.8 | 1650.0 |
| 51.1   | 48.5   | 48.3   | 53.5   | 61.2   | 64.6   |
| 1205.4 | 1100.8 | 1214.5 | 1282.2 | 1345.5 | 1434.8 |
| 77.8   | 79.8   | 61.0   | 80.7   | 85.4   | 96.8   |
| 113.6  | 122.4  | 133.6  | 151.8  | 161.9  | 164.3  |
| 161.1  | 173.6  | 185.9  | 154.5  | 155.8  | 221.2  |
| 271.6  | 258.9  | 313.0  | 353.0  | 339.2  | 343.1  |
| 4985.1 | 4194.8 | 4754.9 | 5707.3 | 5482.3 | 5481.8 |
| 296.1  | 275.6  | 281.1  | 316.1  | 379.4  | 399.7  |
| 282.4  | 190.0  | 257.4  | 309.3  | 302.1  | 352.8  |
| 85.8   | 105.5  | 85.2   | 136.0  | 123.7  | 136.5  |
| 1219.3 | 1027.1 | 1053.3 | 1226.9 | 1303.7 | 1526.0 |
| 454.1  | 468.2  | 476.5  | 516.8  | 521.9  | 570.9  |
| 221.2  | 262.4  | 217.9  | 234.4  | 253.5  | 256.2  |
| 285.1  | 275.5  | 303.1  | 311.3  | 321.8  | 355.0  |
| 12.8   | 1.3    | 6.8    | 2.5    | 2.4    | 3.0    |
| 1747.8 | 1752.4 | 1945.9 | 2020.5 | 2067.2 | 2220.4 |
| 57.3   | 61.4   | 58.9   | 61.4   | 54.2   | 62.8   |
| 685.1  | 556.3  | 647.4  | 651.6  | 772.6  | 826.7  |
| 385.0  | 335.2  | 340.8  | 360.8  | 437.5  | 504.0  |
| 700.8  | 559.2  | 739.0  | 758.7  | 885.2  | 878.0  |
| 151.0  | 154.0  | 170.2  | 195.7  | 177.7  | 217.4  |
| 263.3  | 231.6  | 272.4  | 297.4  | 360.5  | 314.2  |
| 999.1  | 931.0  | 1108.3 | 1142.2 | 1213.4 | 1255.5 |
| 278.0  | 253.6  | 228.5  | 256.6  | 268.9  | 294.4  |
| 308.3  | 381.0  | 306.4  | 365.2  | 308.8  | 416.1  |
| 310.5  | 298.6  | 331.2  | 323.1  | 385.0  | 401.6  |
| 606.2  | 575.9  | 686.3  | 670.4  | 729.1  | 789.7  |
| 1024.6 | 942.6  | 1032.5 | 1027.8 | 1051.2 | 1279.3 |
| 181.8  | 163.1  | 196.5  | 239.1  | 206.6  | 242.6  |
| 214.5  | 216.3  | 206.4  | 237.9  | 244.5  | 267.8  |
| 96.4   | 90.6   | 103.7  | 103.8  | 118.0  | 136.0  |
| 536.4  | 448.7  | 517.5  | 520.1  | 574.3  | 635.8  |
| 58.8   | 59.1   | 59.3   | 56.6   | 80.2   | 93.8   |
| 6.1    | 16.5   | 8.5    | 6.2    | 7.4    | 5.5    |
| 2904.3 | 2554.3 | 2756.2 | 2765.3 | 3380.2 | 3453.4 |
| 2184.5 | 1612.7 | 2434.7 | 2431.3 | 2735.0 | 2710.4 |
| 37.4   | 25.6   | 34.6   | 42.3   | 36.1   | 49.3   |
| 5.9    | 9.1    | 3.3    | 2.4    | 8.5    | 8.1    |
| 186.9  | 183.4  | 239.6  | 209.9  | 236.9  | 286.1  |
| 371.8  | 289.7  | 358.3  | 395.0  | 450.4  | 461.2  |
| 370.7  | 333.0  | 342.4  | 402.7  | 428.6  | 414.1  |
| 774.7  | 699.7  | 759.4  | 796.9  | 846.4  | 895.3  |
| 461.7  | 501.4  | 564.3  | 585.5  | 448.5  | 644.6  |
| 1089.6 | 1008.7 | 1075.0 | 1126.3 | 1379.5 | 1492.4 |

|        |        |        |        |        |        |
|--------|--------|--------|--------|--------|--------|
| 1411.8 | 1269.8 | 1511.4 | 1664.7 | 1819.0 | 1764.1 |
| 500.7  | 474.3  | 571.7  | 574.7  | 583.5  | 652.4  |
| 10.9   | 5.9    | 7.9    | 2.0    | 1.3    | 14.5   |
| 987.8  | 725.0  | 859.2  | 923.6  | 1173.6 | 1145.0 |
| 311.7  | 271.4  | 366.6  | 356.6  | 399.8  | 407.3  |
| 391.8  | 335.9  | 410.5  | 373.5  | 442.3  | 478.5  |
| 359.0  | 284.4  | 401.1  | 373.8  | 418.8  | 451.0  |
| 1846.1 | 1384.1 | 1761.8 | 2030.6 | 2030.0 | 2218.7 |
| 37.2   | 35.3   | 56.8   | 41.5   | 44.3   | 62.2   |
| 96.2   | 89.7   | 114.0  | 116.4  | 133.1  | 134.2  |
| 319.3  | 623.7  | 322.7  | 395.6  | 350.5  | 415.0  |
| 148.6  | 156.8  | 143.5  | 108.6  | 175.4  | 163.4  |
| 367.3  | 379.5  | 319.0  | 328.0  | 386.3  | 466.0  |
| 1393.7 | 1451.4 | 1487.8 | 1430.8 | 1589.9 | 1656.3 |
| 866.3  | 983.2  | 969.7  | 959.4  | 1127.1 | 1163.1 |
| 806.7  | 735.3  | 811.5  | 680.3  | 826.4  | 785.1  |
| 198.7  | 205.2  | 242.5  | 204.7  | 294.8  | 251.0  |
| 263.8  | 367.5  | 293.2  | 347.2  | 332.1  | 273.0  |
| 56.9   | 97.8   | 66.3   | 85.7   | 79.9   | 91.4   |
| 67.7   | 71.8   | 69.1   | 69.4   | 59.4   | 87.1   |
| 1171.3 | 1014.4 | 1209.6 | 1288.7 | 1344.0 | 1315.7 |
| 1056.3 | 903.9  | 990.6  | 1021.6 | 1241.8 | 1217.8 |
| 1398.5 | 1457.6 | 1574.1 | 1547.3 | 1549.4 | 1752.3 |
| 687.1  | 727.3  | 681.5  | 682.6  | 700.8  | 799.3  |
| 271.0  | 325.7  | 304.0  | 292.6  | 345.3  | 376.2  |
| 138.5  | 111.8  | 135.1  | 144.0  | 159.8  | 155.9  |
| 1192.3 | 922.5  | 1155.4 | 1213.4 | 1289.6 | 1378.5 |
| 218.2  | 231.6  | 228.9  | 270.7  | 276.7  | 332.9  |
| 206.8  | 194.0  | 182.1  | 201.8  | 238.9  | 264.1  |
| 246.1  | 249.4  | 248.3  | 231.6  | 260.7  | 318.7  |
| 358.7  | 305.6  | 308.3  | 325.6  | 364.6  | 392.0  |
| 378.3  | 321.3  | 384.1  | 390.4  | 445.9  | 441.3  |
| 19.8   | 16.6   | 15.7   | 16.6   | 25.7   | 17.8   |
| 74.6   | 85.2   | 126.2  | 120.4  | 98.9   | 150.6  |
| 6.2    | 2.0    | 8.2    | 6.4    | 6.5    | 9.9    |
| 1089.5 | 955.1  | 1042.4 | 1014.5 | 1211.7 | 1235.8 |
| 175.2  | 142.5  | 155.1  | 184.2  | 178.3  | 201.8  |
| 144.4  | 155.8  | 161.3  | 160.8  | 178.1  | 174.3  |
| 82.8   | 64.4   | 76.1   | 70.3   | 79.4   | 102.1  |
| 1439.2 | 1567.2 | 1319.4 | 1420.2 | 1364.7 | 1734.4 |
| 3615.4 | 3978.8 | 3894.5 | 3824.1 | 4135.1 | 4039.7 |
| 7831.7 | 7341.8 | 7655.9 | 8582.4 | 8540.4 | 9037.2 |
| 4754.4 | 4058.9 | 4484.8 | 4600.0 | 5085.4 | 4819.7 |
| 44.0   | 38.6   | 40.1   | 59.3   | 46.9   | 60.2   |
| 433.3  | 536.4  | 537.6  | 515.3  | 546.9  | 605.1  |
| 514.2  | 508.2  | 416.3  | 529.3  | 594.4  | 654.1  |
| 403.7  | 269.7  | 380.9  | 399.2  | 481.7  | 456.2  |
| 3154.8 | 2936.0 | 3287.5 | 3703.1 | 3643.9 | 3676.4 |
| 1237.9 | 1122.5 | 1211.2 | 1270.3 | 1399.8 | 1563.0 |
| 1269.7 | 1089.4 | 1100.5 | 1179.2 | 1225.0 | 1537.4 |
| 494.2  | 473.7  | 567.8  | 631.3  | 597.5  | 601.1  |
| 777.4  | 637.9  | 743.1  | 712.6  | 874.0  | 893.8  |
| 7.4    | 7.4    | 17.3   | 11.6   | 15.9   | 19.4   |

|        |        |        |        |        |        |
|--------|--------|--------|--------|--------|--------|
| 2378.5 | 2145.9 | 2571.8 | 2735.5 | 2765.8 | 2811.2 |
| 24.8   | 78.5   | 34.1   | 38.0   | 34.2   | 41.1   |
| 32.4   | 38.2   | 49.5   | 38.6   | 36.5   | 47.6   |
| 36.1   | 114.6  | 63.4   | 69.2   | 54.2   | 59.9   |
| 14.6   | 7.9    | 22.1   | 5.6    | 12.3   | 28.0   |
| 140.9  | 147.6  | 145.5  | 163.4  | 196.3  | 175.5  |
| 38.7   | 46.5   | 9.9    | 19.6   | 23.8   | 11.2   |
| 157.5  | 176.0  | 199.2  | 174.5  | 200.7  | 208.7  |
| 167.2  | 130.0  | 173.8  | 143.2  | 174.0  | 168.6  |
| 1702.5 | 1735.3 | 1755.5 | 1622.3 | 1815.1 | 2005.7 |
| 920.8  | 912.0  | 1205.0 | 1249.3 | 1194.8 | 1264.0 |
| 203.0  | 188.0  | 187.6  | 197.5  | 246.2  | 242.6  |
| 48.6   | 17.4   | 29.0   | 27.6   | 40.6   | 43.4   |
| 440.2  | 420.9  | 423.0  | 447.7  | 499.1  | 574.9  |
| 485.3  | 454.4  | 479.0  | 508.8  | 539.9  | 615.6  |
| 362.3  | 377.6  | 384.1  | 390.8  | 424.3  | 476.2  |
| 606.0  | 620.8  | 543.4  | 611.6  | 560.1  | 668.0  |
| 748.1  | 1174.6 | 637.0  | 852.0  | 716.5  | 907.3  |
| 1528.7 | 1314.1 | 1550.7 | 1730.5 | 1767.3 | 2030.1 |
| 3969.0 | 3864.0 | 3678.4 | 3737.8 | 4124.1 | 4543.8 |
| 2563.5 | 2749.4 | 2801.5 | 3029.0 | 3091.4 | 3261.4 |
| 267.6  | 195.1  | 207.8  | 218.6  | 263.6  | 327.1  |
| 632.9  | 673.2  | 632.7  | 651.6  | 640.1  | 775.4  |
| 587.7  | 516.8  | 597.0  | 634.0  | 692.3  | 689.1  |
| 77.4   | 83.2   | 85.5   | 78.8   | 95.3   | 111.3  |
| 214.6  | 234.1  | 184.0  | 214.4  | 208.1  | 258.4  |
| 105.4  | 79.7   | 92.8   | 102.5  | 113.0  | 123.0  |
| 979.8  | 997.0  | 1121.9 | 1279.3 | 1188.6 | 1344.9 |
| 2091.4 | 1720.8 | 2064.7 | 2043.0 | 2272.7 | 2351.8 |
| 462.3  | 373.6  | 449.7  | 479.8  | 555.9  | 585.3  |
| 343.3  | 286.5  | 344.7  | 356.1  | 435.3  | 486.0  |
| 1828.1 | 2107.2 | 1384.0 | 1930.0 | 2091.4 | 2412.8 |
| 232.4  | 232.3  | 215.0  | 206.1  | 267.7  | 281.2  |
| 216.6  | 196.3  | 214.7  | 223.4  | 216.5  | 258.1  |
| 226.8  | 243.8  | 268.6  | 289.8  | 286.8  | 300.1  |
| 4637.3 | 5183.7 | 5125.9 | 5397.5 | 5753.3 | 5447.0 |
| 1254.6 | 908.8  | 1166.4 | 1266.8 | 1272.2 | 1493.2 |
| 221.4  | 194.0  | 212.2  | 229.1  | 261.1  | 280.4  |
| 225.3  | 200.2  | 226.1  | 232.1  | 280.0  | 279.2  |
| 192.2  | 168.0  | 177.4  | 199.3  | 210.3  | 197.0  |
| 274.8  | 216.9  | 258.3  | 283.3  | 335.4  | 326.1  |
| 1720.7 | 1458.0 | 1654.3 | 1805.7 | 1951.8 | 1926.2 |
| 91.9   | 93.4   | 62.8   | 86.3   | 98.7   | 67.6   |
| 4058.0 | 3863.9 | 3951.6 | 4046.2 | 4318.4 | 4359.6 |
| 6249.1 | 5734.7 | 5793.3 | 6281.4 | 6423.2 | 6729.9 |
| 759.0  | 668.8  | 613.5  | 551.0  | 719.2  | 775.6  |
| 982.4  | 952.0  | 1228.8 | 1129.9 | 1329.6 | 1499.7 |
| 1444.1 | 1265.4 | 1479.4 | 1469.3 | 1649.5 | 1643.0 |
| 166.1  | 96.7   | 129.9  | 159.0  | 188.6  | 209.4  |
| 270.0  | 237.1  | 254.3  | 275.7  | 320.9  | 349.5  |
| 919.5  | 854.1  | 1033.9 | 1123.6 | 1057.4 | 1161.6 |
| 1880.5 | 1740.5 | 1814.6 | 2129.3 | 2201.8 | 2355.4 |
| 1276.2 | 1159.5 | 1135.7 | 1153.6 | 1271.6 | 1460.5 |

|        |        |        |        |        |        |
|--------|--------|--------|--------|--------|--------|
| 468.5  | 454.0  | 506.1  | 515.8  | 560.1  | 586.8  |
| 64.0   | 60.1   | 61.2   | 81.1   | 83.0   | 85.8   |
| 2.8    | 1.9    | 1.7    | 8.2    | 3.1    | 1.9    |
| 157.3  | 136.0  | 122.7  | 157.6  | 152.1  | 156.2  |
| 373.2  | 359.6  | 359.4  | 424.8  | 437.4  | 422.9  |
| 263.1  | 229.1  | 303.1  | 281.3  | 314.0  | 316.6  |
| 161.9  | 141.4  | 183.9  | 180.3  | 203.1  | 192.4  |
| 1192.3 | 649.3  | 904.5  | 857.8  | 1173.4 | 1202.7 |
| 48.1   | 40.9   | 49.6   | 47.6   | 66.6   | 65.6   |
| 54.3   | 69.4   | 50.1   | 66.1   | 56.4   | 50.0   |
| 2339.7 | 1920.2 | 2237.9 | 2319.2 | 2565.9 | 2607.6 |
| 238.3  | 223.6  | 242.3  | 248.6  | 274.2  | 300.8  |
| 738.4  | 855.0  | 896.5  | 959.3  | 990.5  | 1125.9 |
| 173.3  | 166.9  | 167.6  | 155.9  | 189.5  | 193.4  |
| 1449.0 | 1308.8 | 1386.4 | 1390.6 | 1595.1 | 1608.0 |
| 787.3  | 695.3  | 734.6  | 752.8  | 918.1  | 896.0  |
| 1398.1 | 1060.6 | 1356.1 | 1461.6 | 1611.1 | 1668.7 |
| 3193.5 | 3193.7 | 3225.1 | 3427.6 | 3749.9 | 3853.2 |
| 26.3   | 38.1   | 30.6   | 33.6   | 15.0   | 25.8   |
| 449.2  | 311.5  | 389.9  | 372.4  | 464.7  | 527.8  |
| 29.3   | 44.1   | 30.9   | 35.1   | 35.1   | 29.3   |
| 133.2  | 116.0  | 139.0  | 147.6  | 161.3  | 157.2  |
| 300.9  | 321.1  | 284.3  | 359.1  | 404.4  | 464.1  |
| 325.3  | 402.4  | 414.3  | 404.6  | 403.8  | 459.1  |
| 744.9  | 739.7  | 697.6  | 742.4  | 838.4  | 850.6  |
| 8.7    | 17.8   | 7.6    | 8.9    | 13.4   | 17.4   |
| 34.3   | 26.3   | 16.7   | 26.7   | 30.0   | 22.4   |
| 98.5   | 85.3   | 86.2   | 97.7   | 114.1  | 130.6  |
| 64.5   | 56.5   | 59.9   | 48.5   | 70.9   | 72.9   |
| 360.8  | 311.4  | 367.0  | 414.4  | 429.1  | 437.2  |
| 306.7  | 270.3  | 282.8  | 284.0  | 320.8  | 372.7  |
| 433.0  | 380.9  | 408.0  | 464.1  | 528.9  | 516.5  |
| 259.8  | 330.9  | 300.7  | 345.0  | 358.8  | 344.1  |
| 592.4  | 573.8  | 628.9  | 665.0  | 633.3  | 726.2  |
| 287.5  | 275.6  | 223.3  | 291.0  | 232.8  | 332.8  |
| 2330.8 | 2204.8 | 2205.8 | 2193.3 | 2485.6 | 2738.8 |
| 353.5  | 394.7  | 391.4  | 415.6  | 437.5  | 478.8  |
| 2927.5 | 2444.0 | 2590.5 | 2228.7 | 2654.1 | 2812.7 |
| 5429.2 | 5146.6 | 5474.5 | 5791.8 | 6068.6 | 6392.4 |
| 256.9  | 245.2  | 212.6  | 278.3  | 293.1  | 271.2  |
| 185.1  | 161.6  | 159.7  | 197.8  | 197.7  | 231.5  |
| 303.4  | 303.8  | 285.8  | 352.2  | 384.8  | 377.8  |
| 272.6  | 263.9  | 281.3  | 267.6  | 309.7  | 325.7  |
| 2047.6 | 2002.3 | 2385.5 | 2586.9 | 2400.5 | 2468.4 |
| 252.7  | 231.7  | 274.9  | 276.9  | 299.3  | 311.7  |
| 1337.9 | 1227.7 | 1247.4 | 1516.9 | 1591.4 | 1800.0 |
| 22.5   | 16.3   | 30.2   | 25.0   | 32.5   | 21.0   |
| 207.0  | 215.4  | 256.2  | 230.6  | 245.7  | 234.0  |
| 1548.0 | 1500.7 | 1555.0 | 1628.8 | 1817.9 | 1772.1 |
| 3.9    | 2.4    | 7.2    | 4.8    | 4.2    | 6.3    |
| 746.5  | 857.3  | 590.9  | 816.1  | 729.7  | 928.0  |
| 484.5  | 389.1  | 433.0  | 450.4  | 506.9  | 527.8  |
| 139.0  | 121.8  | 125.8  | 118.3  | 178.4  | 178.0  |

|        |        |        |        |        |         |
|--------|--------|--------|--------|--------|---------|
| 339.8  | 315.9  | 433.1  | 450.8  | 438.0  | 438.6   |
| 363.7  | 305.5  | 345.7  | 368.4  | 396.3  | 420.5   |
| 921.0  | 805.3  | 775.1  | 911.3  | 954.9  | 1115.7  |
| 778.1  | 674.8  | 759.4  | 792.7  | 841.1  | 868.1   |
| 275.1  | 302.2  | 340.8  | 338.8  | 354.9  | 356.6   |
| 375.7  | 328.6  | 442.9  | 385.1  | 389.9  | 464.0   |
| 6.3    | 10.0   | 6.1    | 2.8    | 6.2    | 8.5     |
| 204.7  | 219.6  | 206.3  | 227.9  | 244.2  | 270.5   |
| 235.7  | 263.0  | 304.1  | 308.5  | 441.1  | 338.4   |
| 2.0    | 1.3    | 1.3    | 1.8    | 1.2    | 1.8     |
| 172.8  | 177.7  | 212.5  | 202.9  | 224.2  | 232.5   |
| 348.2  | 253.6  | 347.9  | 367.2  | 401.5  | 404.8   |
| 4735.7 | 4507.4 | 4896.2 | 5355.8 | 5104.8 | 4969.3  |
| 222.4  | 190.9  | 223.3  | 241.1  | 249.7  | 259.1   |
| 300.4  | 182.3  | 409.8  | 316.8  | 485.0  | 380.6   |
| 1164.7 | 1122.9 | 1413.9 | 1527.1 | 1434.1 | 1466.8  |
| 217.9  | 194.5  | 228.6  | 219.8  | 248.6  | 255.4   |
| 1609.5 | 1321.4 | 1423.4 | 1734.2 | 1663.4 | 1955.9  |
| 202.5  | 192.1  | 219.7  | 229.5  | 259.9  | 271.9   |
| 403.4  | 414.3  | 395.6  | 497.1  | 471.7  | 532.7   |
| 9408.2 | 8973.8 | 8950.6 | 9466.4 | 9802.6 | 10133.2 |
| 274.5  | 253.2  | 288.7  | 367.5  | 306.0  | 332.9   |
| 718.6  | 703.5  | 697.0  | 765.5  | 800.2  | 844.9   |
| 158.6  | 134.9  | 160.3  | 183.2  | 203.9  | 174.3   |
| 633.2  | 534.1  | 592.4  | 561.3  | 633.7  | 803.1   |
| 479.4  | 352.2  | 459.5  | 510.4  | 544.7  | 530.3   |
| 138.6  | 270.3  | 147.9  | 239.4  | 162.2  | 214.9   |
| 314.6  | 580.8  | 331.3  | 421.4  | 317.5  | 402.6   |
| 603.9  | 975.4  | 639.8  | 841.6  | 632.2  | 721.0   |
| 1203.4 | 1168.2 | 1104.5 | 1254.3 | 1355.0 | 1467.4  |
| 214.3  | 171.3  | 189.8  | 180.6  | 236.4  | 229.9   |
| 403.2  | 311.2  | 406.9  | 413.4  | 498.6  | 480.2   |
| 2259.3 | 2214.6 | 2780.5 | 3016.8 | 2960.4 | 2884.4  |
| 1486.0 | 1396.3 | 1462.6 | 1419.9 | 1614.1 | 1644.1  |
| 2764.1 | 2526.1 | 2569.7 | 2678.9 | 2904.2 | 3218.2  |
| 47.1   | 44.7   | 43.7   | 42.3   | 45.8   | 63.4    |
| 47.7   | 53.6   | 62.0   | 62.8   | 71.3   | 70.4    |
| 47.9   | 46.2   | 38.2   | 33.7   | 55.3   | 42.0    |
| 446.8  | 422.5  | 563.6  | 491.6  | 592.4  | 556.6   |
| 158.8  | 177.5  | 225.0  | 227.9  | 214.5  | 204.7   |
| 190.9  | 163.9  | 171.0  | 187.6  | 207.6  | 224.8   |
| 182.3  | 193.5  | 176.4  | 186.9  | 198.1  | 237.3   |
| 228.0  | 237.3  | 224.7  | 216.8  | 256.1  | 305.8   |
| 230.2  | 257.3  | 278.2  | 250.7  | 298.0  | 301.1   |
| 677.6  | 679.4  | 643.6  | 716.2  | 800.1  | 883.1   |
| 377.8  | 282.4  | 355.6  | 408.4  | 436.2  | 427.6   |
| 268.5  | 276.0  | 300.3  | 303.2  | 313.8  | 319.0   |
| 250.9  | 206.6  | 251.0  | 262.1  | 252.5  | 269.7   |
| 40.6   | 31.9   | 60.1   | 46.8   | 38.0   | 53.8    |
| 326.8  | 354.7  | 340.9  | 354.2  | 372.9  | 461.3   |
| 305.0  | 331.7  | 348.7  | 285.3  | 358.6  | 445.4   |
| 1012.8 | 944.5  | 833.3  | 836.2  | 965.4  | 1121.1  |
| 286.1  | 241.6  | 287.9  | 294.8  | 341.0  | 357.5   |

|        |        |        |        |        |        |
|--------|--------|--------|--------|--------|--------|
| 169.0  | 141.9  | 173.6  | 182.0  | 185.1  | 187.4  |
| 8.9    | 8.1    | 4.3    | 8.1    | 8.8    | 12.7   |
| 121.7  | 111.3  | 126.5  | 115.7  | 126.3  | 148.9  |
| 151.3  | 161.7  | 168.9  | 162.8  | 186.9  | 158.4  |
| 588.9  | 487.2  | 501.4  | 514.3  | 607.5  | 677.6  |
| 12.0   | 18.2   | 6.7    | 19.9   | 2.2    | 14.2   |
| 75.9   | 115.9  | 46.0   | 116.0  | 70.6   | 91.2   |
| 966.2  | 937.6  | 958.3  | 928.3  | 969.9  | 1104.0 |
| 391.6  | 339.0  | 440.0  | 418.2  | 470.3  | 518.0  |
| 1486.1 | 1150.8 | 1603.3 | 1479.0 | 1853.5 | 1818.8 |
| 488.0  | 502.1  | 499.9  | 495.0  | 583.1  | 675.9  |
| 142.1  | 115.1  | 125.2  | 154.6  | 168.5  | 162.0  |
| 354.6  | 334.3  | 366.8  | 394.0  | 464.2  | 461.1  |
| 303.9  | 253.8  | 328.6  | 333.9  | 414.6  | 413.2  |
| 2078.9 | 1884.7 | 1949.2 | 2136.0 | 2236.9 | 2356.4 |
| 5657.7 | 5737.7 | 5937.6 | 5968.9 | 6534.3 | 6567.3 |
| 1128.7 | 997.2  | 1120.1 | 1190.4 | 1184.1 | 1376.4 |
| 62.5   | 45.4   | 59.9   | 42.9   | 79.1   | 69.6   |
| 129.1  | 113.1  | 135.6  | 144.2  | 165.3  | 154.5  |
| 1139.7 | 1334.3 | 1169.6 | 1311.5 | 1414.3 | 1527.4 |
| 130.3  | 130.5  | 143.4  | 138.1  | 153.6  | 190.4  |
| 95.7   | 74.1   | 81.1   | 85.3   | 98.4   | 111.6  |
| 305.3  | 270.0  | 321.8  | 253.6  | 360.9  | 398.2  |
| 563.3  | 567.2  | 543.2  | 548.0  | 528.2  | 668.5  |
| 49.0   | 60.7   | 78.1   | 50.4   | 66.4   | 65.4   |
| 971.3  | 986.5  | 1136.6 | 1010.3 | 1078.9 | 1174.9 |
| 2261.5 | 2399.5 | 2125.1 | 2448.3 | 2571.3 | 2795.4 |
| 1050.4 | 1124.2 | 1098.7 | 1144.7 | 1253.6 | 1297.8 |
| 1703.6 | 1501.9 | 2029.7 | 2625.4 | 2253.5 | 2475.7 |
| 18.0   | 28.0   | 14.6   | 16.2   | 20.2   | 27.6   |
| 502.2  | 503.4  | 582.5  | 590.4  | 618.5  | 697.8  |
| 253.4  | 209.3  | 275.2  | 247.0  | 336.6  | 336.6  |
| 341.3  | 309.8  | 361.7  | 332.9  | 366.4  | 397.7  |
| 871.4  | 802.8  | 945.7  | 1007.8 | 1024.8 | 1141.9 |
| 1140.6 | 1119.2 | 1375.3 | 1515.4 | 1439.7 | 1566.9 |
| 663.4  | 751.0  | 647.3  | 730.8  | 700.3  | 841.7  |
| 145.1  | 161.7  | 203.2  | 243.0  | 246.7  | 250.0  |
| 33.7   | 27.9   | 40.6   | 48.0   | 50.4   | 46.8   |
| 282.2  | 342.7  | 276.7  | 334.0  | 322.8  | 347.2  |
| 161.4  | 150.7  | 134.6  | 122.5  | 158.4  | 180.7  |
| 336.5  | 319.6  | 345.6  | 350.0  | 409.6  | 389.0  |
| 129.5  | 150.0  | 183.2  | 172.2  | 172.5  | 172.5  |
| 190.5  | 175.8  | 187.8  | 191.3  | 224.2  | 206.5  |
| 398.3  | 358.6  | 457.1  | 461.8  | 454.4  | 515.6  |
| 224.3  | 189.1  | 212.3  | 257.9  | 246.8  | 229.7  |
| 1876.0 | 1994.8 | 2054.9 | 2187.8 | 2358.4 | 2479.3 |
| 486.1  | 304.5  | 486.2  | 436.0  | 472.8  | 569.2  |
| 425.5  | 518.0  | 475.3  | 455.7  | 541.8  | 511.4  |
| 4578.7 | 4317.9 | 4687.7 | 4609.1 | 4899.1 | 5281.1 |
| 499.3  | 454.5  | 483.4  | 432.5  | 585.7  | 619.5  |
| 7.1    | 18.7   | 16.8   | 12.2   | 4.6    | 6.0    |
| 1142.0 | 1028.0 | 1033.7 | 1098.0 | 1129.1 | 1408.1 |
| 421.3  | 288.0  | 505.5  | 395.3  | 494.7  | 451.6  |

|        |        |        |        |        |        |
|--------|--------|--------|--------|--------|--------|
| 596.2  | 536.3  | 674.9  | 651.6  | 782.3  | 726.7  |
| 412.3  | 393.4  | 421.7  | 494.1  | 474.3  | 513.6  |
| 1300.0 | 1127.4 | 1319.5 | 1399.8 | 1482.8 | 1558.9 |
| 828.3  | 827.8  | 763.3  | 827.0  | 845.7  | 1053.3 |
| 1133.9 | 878.9  | 1088.4 | 977.5  | 1155.2 | 1188.5 |
| 1399.1 | 1308.1 | 1428.9 | 1595.7 | 1604.4 | 1592.6 |
| 1741.8 | 1733.4 | 1832.8 | 1945.1 | 2055.2 | 2225.7 |
| 261.8  | 207.8  | 287.3  | 277.8  | 339.1  | 337.3  |
| 340.2  | 323.6  | 315.4  | 323.0  | 423.1  | 414.7  |
| 227.9  | 165.5  | 184.1  | 188.6  | 211.6  | 231.1  |
| 133.6  | 96.4   | 119.5  | 130.2  | 147.8  | 149.6  |
| 515.5  | 471.4  | 454.1  | 527.5  | 515.7  | 612.0  |
| 87.2   | 75.3   | 65.6   | 81.0   | 103.8  | 107.4  |
| 212.0  | 214.5  | 196.2  | 191.3  | 248.7  | 263.9  |
| 353.7  | 308.2  | 387.9  | 379.3  | 456.4  | 421.2  |
| 829.3  | 580.4  | 786.9  | 872.0  | 932.2  | 990.5  |
| 465.2  | 268.4  | 395.1  | 348.2  | 399.3  | 465.5  |
| 472.1  | 524.4  | 464.6  | 624.3  | 515.0  | 616.0  |
| 2538.7 | 2657.5 | 2213.4 | 2981.4 | 2575.7 | 3096.1 |
| 561.9  | 624.3  | 523.7  | 640.3  | 600.1  | 688.1  |
| 334.7  | 338.4  | 378.0  | 402.2  | 441.9  | 419.4  |
| 515.5  | 429.4  | 545.1  | 550.8  | 598.2  | 626.8  |
| 124.2  | 112.1  | 155.9  | 116.2  | 146.9  | 154.0  |
| 1293.2 | 1294.5 | 1556.6 | 1534.1 | 1545.3 | 1545.0 |
| 1054.3 | 932.3  | 1097.1 | 1195.7 | 1223.9 | 1285.0 |
| 183.8  | 198.1  | 179.0  | 198.7  | 215.2  | 241.2  |
| 925.6  | 984.1  | 933.3  | 1005.0 | 1042.7 | 1148.1 |
| 488.8  | 558.1  | 475.3  | 438.1  | 527.6  | 568.6  |
| 658.7  | 602.2  | 646.6  | 768.0  | 754.1  | 838.9  |
| 1880.8 | 1613.2 | 2027.5 | 2004.2 | 2116.4 | 2322.5 |
| 913.9  | 807.3  | 1182.9 | 1184.0 | 1291.8 | 1131.6 |
| 580.6  | 458.1  | 550.6  | 561.9  | 610.8  | 693.9  |
| 247.7  | 214.0  | 259.6  | 218.8  | 228.3  | 257.8  |
| 288.7  | 249.7  | 337.2  | 379.7  | 359.2  | 376.3  |
| 215.1  | 201.5  | 220.4  | 238.9  | 257.2  | 246.3  |
| 99.4   | 112.8  | 129.8  | 103.2  | 92.5   | 144.3  |
| 393.5  | 330.1  | 421.7  | 438.0  | 480.3  | 461.1  |
| 357.7  | 364.4  | 324.7  | 392.8  | 465.3  | 371.4  |
| 420.0  | 373.0  | 508.4  | 477.7  | 546.2  | 512.1  |
| 3678.2 | 3347.7 | 4010.4 | 3781.5 | 4230.0 | 4313.2 |
| 160.7  | 201.3  | 167.4  | 178.0  | 205.4  | 186.8  |
| 0.9    | 0.5    | 0.9    | 2.1    | 1.4    | 0.9    |
| 19.4   | 9.5    | 16.7   | 15.4   | 12.0   | 15.6   |
| 3.9    | 5.7    | 5.2    | 8.3    | 8.3    | 2.4    |
| 1316.5 | 1351.3 | 1592.2 | 1604.5 | 1671.1 | 1721.1 |
| 579.2  | 387.0  | 488.0  | 526.6  | 563.2  | 637.4  |
| 187.2  | 163.0  | 195.0  | 179.9  | 248.5  | 222.0  |
| 450.0  | 413.4  | 414.6  | 504.2  | 567.4  | 589.3  |
| 326.1  | 286.2  | 269.3  | 277.8  | 298.4  | 350.1  |
| 426.1  | 359.3  | 443.5  | 477.5  | 490.3  | 527.9  |
| 144.7  | 128.5  | 144.2  | 162.4  | 174.1  | 181.9  |
| 356.0  | 374.7  | 403.7  | 408.0  | 403.6  | 506.4  |
| 402.1  | 331.7  | 428.1  | 443.6  | 460.3  | 471.6  |



|        |        |        |        |        |        |
|--------|--------|--------|--------|--------|--------|
| 1463.1 | 1276.8 | 1457.5 | 1600.5 | 1612.0 | 1758.6 |
| 1356.5 | 1378.0 | 1370.5 | 1513.6 | 1542.7 | 1637.9 |
| 728.2  | 752.7  | 881.8  | 919.6  | 879.3  | 989.3  |
| 742.1  | 676.1  | 660.6  | 813.9  | 812.7  | 924.3  |
| 367.0  | 315.4  | 315.4  | 381.2  | 410.6  | 454.1  |
| 463.9  | 374.5  | 381.2  | 428.9  | 448.1  | 526.5  |
| 463.6  | 414.2  | 415.4  | 410.0  | 478.7  | 564.3  |
| 158.2  | 127.0  | 247.5  | 216.0  | 222.1  | 242.6  |
| 311.3  | 269.2  | 290.6  | 310.5  | 336.6  | 384.6  |
| 49.1   | 50.6   | 52.6   | 74.9   | 69.8   | 60.3   |
| 146.5  | 160.6  | 174.0  | 138.1  | 154.5  | 208.3  |
| 444.7  | 408.0  | 474.0  | 451.0  | 527.1  | 556.5  |
| 412.7  | 323.4  | 414.4  | 413.0  | 500.7  | 506.6  |
| 105.5  | 91.2   | 130.5  | 140.3  | 138.8  | 133.9  |
| 151.6  | 156.2  | 198.0  | 228.2  | 207.0  | 243.9  |
| 545.3  | 444.2  | 562.9  | 600.3  | 659.0  | 650.5  |
| 573.0  | 458.6  | 531.3  | 583.6  | 646.4  | 681.1  |
| 2491.0 | 2551.6 | 2389.3 | 2547.7 | 2945.5 | 2906.8 |
| 1.5    | 6.7    | 4.6    | 3.5    | 10.3   | 13.6   |
| 168.3  | 161.4  | 152.3  | 200.4  | 206.0  | 210.6  |
| 467.5  | 446.6  | 472.5  | 466.0  | 540.8  | 552.6  |
| 2074.1 | 1928.2 | 1995.4 | 2020.5 | 2115.0 | 2379.5 |
| 281.8  | 281.1  | 327.0  | 352.0  | 371.0  | 345.2  |
| 824.2  | 673.2  | 719.1  | 774.3  | 876.8  | 920.0  |
| 504.3  | 440.5  | 460.2  | 455.9  | 531.0  | 565.0  |
| 206.0  | 114.5  | 199.6  | 158.5  | 247.5  | 229.6  |
| 927.7  | 795.6  | 903.9  | 978.4  | 981.0  | 1147.4 |
| 199.2  | 180.5  | 207.6  | 222.5  | 243.7  | 259.3  |
| 24.2   | 13.1   | 35.6   | 17.0   | 29.6   | 30.1   |
| 105.3  | 111.7  | 107.3  | 111.1  | 146.8  | 111.0  |
| 34.9   | 24.1   | 22.5   | 29.4   | 36.2   | 32.1   |
| 212.0  | 277.0  | 220.4  | 231.5  | 235.5  | 265.1  |
| 538.2  | 545.4  | 586.3  | 586.2  | 589.4  | 664.8  |
| 437.8  | 329.8  | 447.4  | 500.4  | 553.6  | 553.9  |
| 523.9  | 515.4  | 517.6  | 591.6  | 630.9  | 652.6  |
| 76.9   | 58.6   | 79.1   | 71.0   | 60.8   | 86.3   |
| 80.7   | 87.5   | 93.3   | 75.3   | 109.7  | 114.9  |
| 228.5  | 198.7  | 234.7  | 249.9  | 275.1  | 259.3  |
| 431.9  | 392.2  | 463.8  | 422.4  | 529.6  | 525.9  |
| 808.4  | 599.5  | 702.9  | 676.4  | 842.9  | 873.5  |
| 254.0  | 165.1  | 251.2  | 220.0  | 317.9  | 303.4  |
| 2043.8 | 1847.9 | 2351.2 | 2314.2 | 2307.2 | 2318.5 |
| 38.6   | 75.5   | 46.8   | 59.9   | 52.5   | 77.3   |
| 184.1  | 187.4  | 161.9  | 204.3  | 178.0  | 250.8  |
| 618.8  | 628.9  | 627.4  | 588.3  | 718.1  | 711.4  |
| 349.6  | 301.1  | 339.1  | 360.0  | 400.7  | 503.1  |
| 294.8  | 193.7  | 293.5  | 290.1  | 333.4  | 367.7  |
| 249.5  | 229.2  | 244.9  | 267.2  | 294.5  | 326.4  |
| 330.5  | 313.7  | 362.4  | 377.3  | 403.0  | 409.1  |
| 549.0  | 432.9  | 529.5  | 543.8  | 613.0  | 725.4  |
| 55.1   | 36.1   | 52.7   | 45.1   | 53.8   | 65.4   |
| 415.8  | 382.1  | 476.2  | 463.8  | 587.0  | 568.3  |
| 852.3  | 854.3  | 909.3  | 999.7  | 1021.0 | 1044.1 |

|        |        |        |        |        |        |
|--------|--------|--------|--------|--------|--------|
| 134.8  | 102.6  | 103.4  | 122.0  | 136.8  | 152.6  |
| 13.3   | 9.8    | 21.7   | 19.4   | 13.9   | 19.9   |
| 1106.3 | 862.2  | 1073.2 | 1079.6 | 1248.5 | 1235.2 |
| 348.4  | 346.2  | 348.3  | 351.4  | 410.4  | 457.7  |
| 616.9  | 610.5  | 587.1  | 645.6  | 736.5  | 801.5  |
| 307.5  | 301.8  | 301.2  | 305.8  | 323.4  | 340.8  |
| 1067.9 | 780.2  | 919.8  | 913.2  | 1208.2 | 1075.1 |
| 3051.9 | 2742.8 | 2687.0 | 2805.2 | 2925.9 | 3419.1 |
| 31.4   | 28.0   | 32.0   | 27.2   | 40.9   | 38.1   |
| 1075.2 | 1019.9 | 933.9  | 1102.1 | 1178.8 | 1300.9 |
| 5929.0 | 5873.0 | 6040.9 | 6341.3 | 6675.0 | 7468.6 |
| 4172.2 | 3776.3 | 3565.8 | 4221.5 | 3932.7 | 5118.2 |
| 7162.6 | 6666.8 | 6923.2 | 7364.3 | 7468.0 | 7630.7 |
| 148.0  | 145.4  | 149.2  | 168.4  | 156.4  | 163.7  |
| 89.7   | 90.3   | 84.5   | 77.8   | 98.1   | 91.1   |
| 1014.6 | 1173.8 | 1138.1 | 1228.5 | 1229.6 | 1260.2 |
| 676.5  | 593.9  | 721.1  | 775.1  | 812.3  | 868.7  |
| 295.1  | 214.6  | 380.3  | 373.5  | 435.8  | 386.0  |
| 702.4  | 898.4  | 708.4  | 738.4  | 675.2  | 876.5  |
| 978.0  | 750.7  | 934.4  | 959.8  | 1038.2 | 998.4  |
| 293.3  | 311.7  | 218.7  | 402.5  | 316.0  | 400.2  |
| 12.9   | 6.4    | 11.7   | 4.9    | 9.0    | 4.3    |
| 6146.8 | 5598.2 | 6176.8 | 6652.1 | 6705.3 | 6791.0 |
| 7372.4 | 5750.1 | 6256.1 | 7058.0 | 7169.7 | 7558.0 |
| 251.7  | 239.4  | 257.4  | 274.5  | 323.3  | 316.7  |
| 3689.6 | 3136.6 | 3669.3 | 3811.8 | 3915.2 | 4142.6 |
| 53.3   | 63.0   | 46.7   | 48.7   | 65.1   | 61.0   |
| 182.4  | 168.4  | 204.7  | 203.3  | 233.7  | 228.3  |
| 146.5  | 103.8  | 137.7  | 140.9  | 164.0  | 163.7  |
| 144.6  | 123.5  | 129.4  | 127.8  | 166.5  | 180.2  |
| 260.7  | 251.0  | 266.1  | 260.7  | 310.1  | 338.0  |
| 2128.3 | 1743.1 | 2021.4 | 2104.2 | 2354.2 | 2412.7 |
| 272.2  | 242.2  | 237.8  | 219.8  | 294.8  | 299.9  |
| 6.0    | 1.8    | 2.1    | 2.6    | 6.5    | 7.6    |
| 39.6   | 41.6   | 41.5   | 51.3   | 45.8   | 46.5   |
| 395.6  | 336.2  | 464.0  | 390.8  | 481.8  | 502.3  |
| 348.1  | 221.7  | 444.6  | 440.5  | 490.5  | 400.3  |
| 801.2  | 477.7  | 688.9  | 786.2  | 870.9  | 927.9  |
| 190.9  | 176.8  | 167.7  | 180.0  | 204.6  | 256.2  |
| 335.8  | 345.9  | 347.6  | 339.6  | 377.2  | 389.5  |
| 583.1  | 550.2  | 618.5  | 622.2  | 738.8  | 726.1  |
| 37.1   | 44.5   | 37.9   | 44.6   | 64.9   | 52.5   |
| 581.6  | 393.0  | 553.7  | 569.5  | 633.0  | 641.0  |
| 567.6  | 587.3  | 663.6  | 640.0  | 722.4  | 723.9  |
| 945.3  | 773.1  | 957.1  | 1045.2 | 1017.1 | 1131.1 |
| 604.5  | 500.6  | 617.0  | 628.4  | 748.6  | 788.3  |
| 15.3   | 25.9   | 13.9   | 12.0   | 22.0   | 22.2   |
| 2142.5 | 1969.6 | 1966.9 | 2093.6 | 2059.9 | 2318.2 |
| 110.1  | 72.6   | 113.7  | 129.4  | 158.7  | 161.1  |
| 178.7  | 86.6   | 140.0  | 174.7  | 187.3  | 195.6  |
| 413.3  | 373.3  | 427.9  | 473.4  | 490.4  | 484.8  |
| 703.1  | 697.1  | 725.2  | 715.9  | 780.3  | 836.5  |
| 11.9   | 13.3   | 49.5   | 40.6   | 37.1   | 21.8   |

|        |        |        |        |        |        |
|--------|--------|--------|--------|--------|--------|
| 20.3   | 21.7   | 20.0   | 19.2   | 10.7   | 23.3   |
| 686.1  | 626.2  | 761.1  | 793.3  | 913.1  | 901.3  |
| 2561.9 | 2712.9 | 2674.3 | 2625.6 | 3071.1 | 2840.9 |
| 1399.3 | 1431.4 | 1482.9 | 1656.3 | 1656.3 | 1854.9 |
| 320.3  | 336.6  | 402.0  | 426.3  | 423.7  | 389.3  |
| 1242.9 | 1076.9 | 1220.2 | 1345.9 | 1377.8 | 1530.5 |
| 2.5    | 3.3    | 1.1    | 0.8    | 5.0    | 1.8    |
| 234.6  | 188.2  | 231.5  | 276.4  | 271.4  | 283.4  |
| 1625.4 | 1641.4 | 1866.2 | 1892.1 | 1963.3 | 2081.3 |
| 31.8   | 30.1   | 37.0   | 33.7   | 51.6   | 38.7   |
| 1739.6 | 1475.7 | 1983.3 | 1731.0 | 2163.7 | 2120.8 |
| 8.4    | 18.6   | 14.4   | 12.0   | 5.9    | 17.1   |
| 1.3    | 2.8    | 10.4   | 5.0    | 5.3    | 2.4    |
| 13.5   | 2.3    | 10.3   | 5.2    | 5.2    | 9.4    |
| 101.9  | 85.3   | 94.0   | 93.6   | 130.7  | 148.9  |
| 183.2  | 159.7  | 159.4  | 193.1  | 182.9  | 209.7  |
| 1437.0 | 1487.9 | 1399.1 | 1281.6 | 1516.4 | 1780.0 |
| 32.2   | 18.8   | 44.2   | 39.2   | 48.6   | 59.4   |
| 466.1  | 490.0  | 606.2  | 600.2  | 665.8  | 708.5  |
| 320.1  | 247.1  | 287.5  | 295.4  | 349.3  | 364.9  |
| 286.0  | 248.3  | 295.0  | 264.5  | 311.7  | 329.8  |
| 172.4  | 159.9  | 197.2  | 203.6  | 192.3  | 233.0  |
| 1975.9 | 1725.0 | 2011.6 | 2191.4 | 2287.7 | 2386.0 |
| 1677.9 | 1568.7 | 1630.1 | 1857.0 | 2086.4 | 2206.3 |
| 2760.8 | 3029.4 | 2912.2 | 2750.1 | 3261.9 | 3558.3 |
| 2675.7 | 2371.0 | 2949.7 | 3125.2 | 3053.8 | 3247.7 |
| 2608.0 | 2577.5 | 2779.6 | 2896.6 | 2925.4 | 3010.0 |
| 355.7  | 363.8  | 350.0  | 332.6  | 389.3  | 407.5  |
| 917.4  | 812.4  | 880.4  | 920.1  | 1112.7 | 1114.6 |
| 478.4  | 415.6  | 462.9  | 467.6  | 521.5  | 578.5  |
| 355.1  | 266.3  | 324.7  | 365.7  | 362.3  | 424.1  |
| 244.0  | 215.2  | 219.0  | 228.9  | 248.8  | 312.8  |
| 2258.8 | 2108.9 | 2332.2 | 2578.3 | 2531.6 | 2690.4 |
| 268.3  | 236.9  | 292.9  | 313.0  | 305.5  | 309.0  |
| 124.2  | 129.0  | 148.5  | 158.3  | 227.2  | 164.5  |
| 1885.9 | 1724.4 | 1799.5 | 1620.7 | 1817.7 | 1779.0 |
| 11.4   | 1.0    | 3.8    | 3.6    | 6.7    | 4.5    |
| 1.3    | 6.0    | 4.3    | 5.0    | 5.7    | 6.4    |
| 4.6    | 5.7    | 4.9    | 10.3   | 6.9    | 7.6    |
| 726.5  | 622.8  | 740.0  | 768.8  | 856.1  | 866.2  |
| 268.9  | 228.2  | 264.0  | 250.4  | 274.7  | 347.6  |
| 109.5  | 95.8   | 85.3   | 93.4   | 107.9  | 123.6  |
| 184.2  | 168.8  | 212.8  | 186.7  | 214.8  | 202.9  |
| 276.3  | 262.2  | 269.8  | 280.4  | 336.4  | 339.9  |
| 315.8  | 265.9  | 267.2  | 295.0  | 323.9  | 357.6  |
| 55.8   | 48.0   | 62.5   | 56.2   | 52.6   | 64.6   |
| 231.9  | 186.1  | 240.5  | 239.3  | 310.0  | 257.9  |
| 98.3   | 86.1   | 92.8   | 113.1  | 94.3   | 120.6  |
| 484.9  | 358.6  | 455.3  | 464.2  | 552.8  | 532.7  |
| 367.9  | 311.2  | 345.7  | 338.7  | 428.9  | 445.2  |
| 848.2  | 727.4  | 808.9  | 858.1  | 933.6  | 956.1  |
| 4338.5 | 3775.3 | 4292.6 | 4299.8 | 4567.5 | 5093.3 |
| 132.8  | 109.1  | 150.6  | 131.4  | 159.2  | 156.7  |

|        |        |        |        |        |        |
|--------|--------|--------|--------|--------|--------|
| 8.9    | 9.7    | 15.8   | 17.7   | 17.4   | 12.3   |
| 39.8   | 38.3   | 38.4   | 43.0   | 51.8   | 66.4   |
| 615.1  | 693.2  | 704.0  | 700.8  | 819.3  | 668.5  |
| 701.2  | 833.3  | 754.8  | 806.1  | 791.8  | 906.5  |
| 252.7  | 226.2  | 327.7  | 344.6  | 354.2  | 356.6  |
| 73.6   | 77.1   | 98.4   | 82.8   | 71.6   | 99.2   |
| 914.8  | 831.6  | 961.5  | 1029.1 | 1050.2 | 1189.5 |
| 264.1  | 234.7  | 266.3  | 252.8  | 281.7  | 294.8  |
| 14.8   | 13.9   | 29.3   | 22.0   | 24.0   | 23.6   |
| 1004.4 | 854.9  | 998.8  | 1071.7 | 1098.5 | 1228.9 |
| 589.3  | 491.4  | 684.5  | 710.1  | 745.1  | 767.1  |
| 533.0  | 527.3  | 531.0  | 566.4  | 616.2  | 642.8  |
| 77.1   | 63.5   | 87.1   | 77.6   | 85.9   | 97.6   |
| 314.3  | 317.5  | 366.5  | 296.7  | 438.6  | 376.5  |
| 176.4  | 108.2  | 174.5  | 165.3  | 213.0  | 216.1  |
| 1126.1 | 686.5  | 1020.7 | 1025.7 | 1189.2 | 1372.1 |
| 2537.5 | 2160.6 | 2756.5 | 2951.1 | 2819.1 | 2906.4 |
| 185.7  | 224.0  | 242.4  | 238.4  | 276.0  | 248.2  |
| 2466.7 | 2589.5 | 2619.2 | 2527.6 | 2747.7 | 2961.2 |
| 602.3  | 649.8  | 630.4  | 697.3  | 732.3  | 792.9  |
| 1270.6 | 1216.7 | 1153.6 | 1186.0 | 1453.2 | 1649.6 |
| 686.2  | 809.8  | 786.8  | 817.1  | 896.9  | 795.8  |
| 224.8  | 257.5  | 269.6  | 275.5  | 300.8  | 315.8  |
| 10.9   | 10.1   | 10.1   | 8.5    | 10.0   | 11.9   |
| 761.5  | 691.8  | 789.7  | 924.2  | 939.9  | 1039.2 |
| 2035.0 | 1910.3 | 1957.5 | 1891.0 | 2198.1 | 2325.4 |
| 634.2  | 646.7  | 703.4  | 721.9  | 775.5  | 818.8  |
| 417.0  | 347.0  | 446.9  | 381.2  | 501.3  | 463.5  |
| 561.5  | 511.7  | 541.9  | 502.4  | 615.4  | 685.1  |
| 370.6  | 366.7  | 401.8  | 383.5  | 482.8  | 468.3  |
| 12.5   | 12.5   | 14.0   | 3.1    | 15.0   | 4.1    |
| 171.1  | 153.4  | 125.5  | 144.0  | 200.9  | 164.7  |
| 120.8  | 96.2   | 108.5  | 130.2  | 137.6  | 158.5  |
| 351.2  | 325.5  | 299.1  | 348.5  | 354.4  | 403.6  |
| 432.0  | 327.4  | 385.7  | 365.0  | 450.7  | 481.7  |
| 1038.9 | 867.7  | 738.5  | 1274.6 | 1120.2 | 1285.4 |
| 656.0  | 545.4  | 687.9  | 643.7  | 715.9  | 709.5  |
| 538.2  | 492.8  | 580.6  | 554.2  | 707.5  | 682.5  |
| 489.7  | 443.2  | 449.7  | 470.9  | 525.0  | 530.1  |
| 36.0   | 38.6   | 36.6   | 48.2   | 41.4   | 40.5   |
| 106.9  | 117.7  | 119.2  | 115.7  | 133.9  | 127.4  |
| 174.9  | 140.1  | 159.2  | 160.2  | 191.4  | 189.5  |
| 656.1  | 489.4  | 671.4  | 629.1  | 760.2  | 749.8  |
| 1034.6 | 1195.4 | 1053.0 | 1121.1 | 1213.9 | 1265.6 |
| 795.0  | 736.9  | 806.3  | 871.5  | 992.7  | 1122.3 |
| 298.5  | 276.4  | 309.2  | 323.7  | 324.1  | 371.6  |
| 403.6  | 343.4  | 408.4  | 410.7  | 454.5  | 476.1  |
| 203.1  | 169.6  | 198.5  | 235.5  | 250.3  | 238.8  |
| 120.8  | 100.8  | 87.8   | 110.0  | 121.5  | 159.7  |
| 791.7  | 802.9  | 872.9  | 1035.6 | 982.2  | 1114.5 |
| 312.9  | 487.3  | 337.8  | 373.4  | 347.3  | 405.9  |
| 170.0  | 267.9  | 179.4  | 237.7  | 194.0  | 221.6  |
| 355.3  | 301.7  | 310.7  | 302.8  | 375.4  | 343.3  |

|        |        |        |        |        |        |
|--------|--------|--------|--------|--------|--------|
| 87.9   | 71.5   | 110.7  | 83.3   | 98.9   | 121.4  |
| 942.4  | 740.8  | 892.8  | 878.0  | 923.8  | 1076.6 |
| 1086.7 | 894.3  | 1255.1 | 1312.6 | 1424.8 | 1412.9 |
| 136.7  | 89.4   | 141.7  | 104.3  | 129.8  | 134.4  |
| 144.6  | 124.3  | 135.4  | 136.5  | 163.7  | 163.4  |
| 212.6  | 241.8  | 223.5  | 222.8  | 263.7  | 276.1  |
| 206.5  | 175.4  | 204.8  | 195.6  | 260.4  | 220.5  |
| 375.0  | 447.8  | 480.8  | 385.4  | 543.6  | 484.5  |
| 278.0  | 252.3  | 283.2  | 298.8  | 303.5  | 331.7  |
| 75.7   | 83.5   | 86.0   | 96.0   | 113.7  | 104.9  |
| 45.1   | 21.5   | 20.2   | 32.3   | 37.1   | 33.9   |
| 5.5    | 10.6   | 7.6    | 11.2   | 13.0   | 5.7    |
| 98.3   | 102.3  | 100.5  | 98.7   | 134.3  | 119.2  |
| 561.5  | 402.1  | 487.0  | 534.5  | 514.1  | 628.1  |
| 161.8  | 130.5  | 167.6  | 139.0  | 172.8  | 173.5  |
| 635.4  | 534.0  | 677.8  | 655.9  | 768.9  | 698.9  |
| 947.7  | 948.1  | 980.5  | 1030.1 | 1063.3 | 1134.6 |
| 1456.6 | 1296.5 | 1570.4 | 1648.7 | 1582.2 | 1645.9 |
| 59.9   | 65.5   | 71.9   | 83.7   | 64.5   | 82.2   |
| 590.6  | 546.5  | 598.6  | 603.7  | 643.5  | 755.4  |
| 34.8   | 37.9   | 48.4   | 46.3   | 64.6   | 45.9   |
| 81.8   | 80.2   | 91.7   | 65.3   | 124.8  | 111.3  |
| 267.4  | 192.5  | 257.3  | 352.7  | 342.2  | 344.5  |
| 7.5    | 14.2   | 3.7    | 7.8    | 9.1    | 10.3   |
| 5.9    | 1.2    | 5.1    | 2.0    | 0.4    | 5.7    |
| 156.9  | 138.0  | 155.4  | 182.0  | 172.1  | 220.1  |
| 842.1  | 877.4  | 817.1  | 775.1  | 933.3  | 1051.3 |
| 436.1  | 381.6  | 421.5  | 427.2  | 488.7  | 511.7  |
| 989.8  | 969.5  | 981.6  | 981.4  | 1161.0 | 1188.7 |
| 16.3   | 24.7   | 15.6   | 15.8   | 18.9   | 21.3   |
| 2.2    | 5.6    | 2.4    | 2.7    | 2.2    | 2.2    |
| 3.3    | 1.4    | 10.9   | 5.6    | 7.8    | 15.1   |
| 818.8  | 770.7  | 722.6  | 720.0  | 885.4  | 868.9  |
| 1581.8 | 1481.8 | 1497.9 | 1610.1 | 1566.0 | 1748.9 |
| 221.8  | 175.1  | 171.4  | 177.9  | 202.5  | 239.3  |
| 566.7  | 816.0  | 684.0  | 751.3  | 752.3  | 786.2  |
| 947.6  | 1008.8 | 997.6  | 972.9  | 996.3  | 1215.7 |
| 576.6  | 449.8  | 552.4  | 548.6  | 646.7  | 655.9  |
| 764.6  | 762.0  | 953.9  | 962.7  | 971.9  | 1079.9 |
| 364.0  | 388.1  | 347.1  | 340.7  | 362.1  | 452.8  |
| 1501.8 | 1469.2 | 1381.6 | 1318.3 | 1552.6 | 1560.4 |
| 261.8  | 377.2  | 228.9  | 320.0  | 260.0  | 332.6  |
| 82.3   | 89.7   | 73.4   | 83.2   | 60.4   | 123.7  |
| 218.9  | 192.7  | 211.4  | 205.8  | 255.8  | 265.3  |
| 852.2  | 699.7  | 859.8  | 799.8  | 975.0  | 1005.9 |
| 140.0  | 132.1  | 121.7  | 138.9  | 126.0  | 189.6  |
| 49.5   | 33.2   | 42.8   | 49.3   | 66.6   | 66.2   |
| 823.6  | 728.8  | 917.2  | 925.1  | 989.6  | 1088.4 |
| 2999.1 | 2678.8 | 2707.3 | 3021.7 | 3108.1 | 3220.7 |
| 321.7  | 350.6  | 340.7  | 353.1  | 371.5  | 360.5  |
| 155.3  | 120.6  | 177.2  | 189.7  | 144.3  | 190.0  |
| 53.4   | 153.8  | 45.7   | 122.8  | 40.2   | 84.2   |
| 250.6  | 197.7  | 226.5  | 275.5  | 311.1  | 344.5  |

|        |        |        |        |        |        |
|--------|--------|--------|--------|--------|--------|
| 637.6  | 623.6  | 696.9  | 726.2  | 814.3  | 780.6  |
| 5.6    | 2.4    | 8.3    | 5.4    | 2.7    | 6.2    |
| 77.6   | 64.4   | 95.0   | 45.0   | 74.2   | 74.3   |
| 136.2  | 106.4  | 152.8  | 113.1  | 180.8  | 178.8  |
| 141.4  | 104.3  | 171.8  | 120.3  | 170.8  | 189.9  |
| 41.4   | 40.0   | 38.0   | 38.6   | 38.9   | 63.4   |
| 138.0  | 129.7  | 153.3  | 143.8  | 158.7  | 186.3  |
| 72.1   | 76.8   | 88.1   | 79.3   | 85.4   | 116.4  |
| 790.9  | 852.9  | 694.7  | 824.8  | 778.9  | 1018.9 |
| 3012.0 | 2644.1 | 2959.9 | 2771.0 | 3026.5 | 3479.6 |
| 987.3  | 828.7  | 848.6  | 937.5  | 1017.3 | 1001.3 |
| 308.0  | 302.0  | 329.3  | 288.1  | 321.7  | 342.3  |
| 34.2   | 32.0   | 30.2   | 34.3   | 35.6   | 43.9   |
| 442.8  | 491.8  | 457.8  | 551.3  | 477.7  | 582.4  |
| 313.2  | 274.7  | 324.2  | 333.0  | 364.4  | 395.4  |
| 89.0   | 69.7   | 86.3   | 62.4   | 82.8   | 91.4   |
| 199.0  | 118.5  | 187.8  | 169.5  | 247.8  | 235.6  |
| 261.0  | 229.8  | 308.0  | 335.2  | 341.7  | 343.2  |
| 460.7  | 452.0  | 546.3  | 612.3  | 546.6  | 562.9  |
| 60.7   | 63.9   | 79.8   | 78.2   | 97.1   | 96.3   |
| 294.6  | 305.3  | 346.7  | 367.6  | 355.8  | 428.0  |
| 974.4  | 695.9  | 935.5  | 826.5  | 1201.2 | 1100.5 |
| 131.5  | 114.9  | 159.9  | 164.6  | 177.3  | 183.2  |
| 63.7   | 5.8    | 65.3   | 50.4   | 93.9   | 77.3   |
| 251.9  | 274.6  | 254.2  | 291.0  | 306.3  | 318.5  |
| 2262.3 | 2010.1 | 2072.8 | 2286.4 | 2218.0 | 2732.8 |
| 75.8   | 80.8   | 69.3   | 77.5   | 93.4   | 86.4   |
| 130.0  | 103.9  | 119.7  | 157.6  | 141.5  | 149.8  |
| 696.3  | 673.7  | 723.8  | 754.5  | 747.6  | 800.3  |
| 1650.4 | 1683.9 | 1572.3 | 1729.1 | 1786.6 | 2001.4 |
| 128.6  | 121.5  | 129.5  | 159.7  | 217.9  | 175.8  |
| 142.4  | 154.5  | 129.5  | 167.1  | 141.2  | 175.6  |
| 333.8  | 248.1  | 375.6  | 475.8  | 445.5  | 460.0  |
| 286.6  | 249.0  | 299.1  | 289.9  | 303.4  | 348.8  |
| 2156.5 | 2019.3 | 2289.0 | 2388.0 | 2452.9 | 2630.3 |
| 660.1  | 598.4  | 676.0  | 725.2  | 789.3  | 800.2  |
| 1337.3 | 1137.6 | 1166.4 | 1315.2 | 1401.9 | 1633.6 |
| 68.6   | 99.4   | 80.2   | 84.9   | 78.1   | 85.6   |
| 920.3  | 842.8  | 996.9  | 1060.7 | 1169.1 | 1196.5 |
| 140.0  | 92.4   | 157.8  | 174.6  | 182.0  | 181.2  |
| 21.0   | 3.1    | 11.9   | 14.7   | 16.8   | 22.8   |
| 205.3  | 223.1  | 302.7  | 368.3  | 348.2  | 383.6  |
| 1444.6 | 1471.7 | 1647.6 | 1726.0 | 1806.0 | 1888.4 |
| 140.4  | 115.3  | 135.4  | 132.7  | 156.5  | 165.8  |
| 439.5  | 347.9  | 424.7  | 413.2  | 556.1  | 500.0  |
| 150.2  | 175.5  | 101.8  | 205.0  | 129.1  | 175.4  |
| 83.7   | 88.5   | 63.0   | 102.0  | 70.3   | 93.7   |
| 190.7  | 184.0  | 187.4  | 191.5  | 212.2  | 248.3  |
| 312.3  | 175.3  | 333.9  | 303.4  | 353.6  | 388.8  |
| 60.8   | 43.2   | 116.9  | 66.5   | 109.2  | 111.6  |
| 3826.7 | 3814.3 | 3953.5 | 4340.5 | 4597.4 | 4844.9 |
| 728.1  | 670.3  | 641.8  | 691.2  | 786.0  | 799.7  |
| 11.0   | 15.8   | 13.5   | 13.2   | 15.1   | 13.7   |

|        |        |        |        |        |        |
|--------|--------|--------|--------|--------|--------|
| 338.7  | 317.3  | 276.3  | 338.9  | 425.5  | 392.5  |
| 1803.3 | 1732.6 | 1797.2 | 1899.1 | 2084.1 | 2061.3 |
| 221.7  | 194.8  | 236.5  | 227.2  | 255.5  | 267.8  |
| 395.2  | 364.2  | 441.3  | 491.8  | 500.1  | 584.9  |
| 23.0   | 31.6   | 26.0   | 22.6   | 25.3   | 32.1   |
| 708.7  | 532.3  | 668.9  | 685.3  | 810.3  | 774.3  |
| 236.2  | 209.4  | 253.6  | 262.0  | 319.4  | 283.4  |
| 0.6    | 0.9    | 1.0    | 0.8    | 0.6    | 0.9    |
| 303.6  | 309.9  | 354.7  | 338.1  | 368.2  | 372.5  |
| 329.2  | 356.7  | 369.9  | 389.8  | 498.7  | 502.0  |
| 189.5  | 157.1  | 201.9  | 209.6  | 246.3  | 222.7  |
| 137.1  | 179.3  | 88.5   | 154.7  | 125.1  | 163.7  |
| 47.2   | 37.8   | 30.7   | 50.1   | 35.0   | 57.9   |
| 38.8   | 44.0   | 30.6   | 45.8   | 36.6   | 49.1   |
| 131.8  | 82.1   | 157.0  | 131.5  | 197.4  | 174.3  |
| 399.5  | 375.7  | 417.7  | 454.1  | 435.0  | 477.6  |
| 927.2  | 795.0  | 916.5  | 950.4  | 1041.3 | 1171.6 |
| 5251.6 | 4873.2 | 5091.5 | 5322.2 | 5549.8 | 5732.4 |
| 29.5   | 29.8   | 22.4   | 15.3   | 25.0   | 13.6   |
| 5312.3 | 5830.5 | 5358.7 | 5601.3 | 5386.4 | 6197.7 |
| 345.0  | 416.5  | 305.4  | 415.4  | 327.5  | 537.9  |
| 31.6   | 30.3   | 30.4   | 28.0   | 21.2   | 35.7   |
| 10.2   | 7.1    | 7.5    | 10.9   | 8.3    | 15.8   |
| 15.3   | 11.5   | 13.5   | 15.7   | 24.9   | 15.1   |
| 98.6   | 82.0   | 133.4  | 122.8  | 188.5  | 167.4  |
| 540.0  | 469.6  | 524.9  | 606.1  | 606.2  | 601.9  |
| 46.7   | 29.5   | 41.7   | 61.8   | 55.3   | 50.7   |
| 144.9  | 230.1  | 182.5  | 221.6  | 230.6  | 235.7  |
| 231.7  | 152.3  | 242.1  | 238.2  | 234.3  | 260.4  |
| 234.4  | 254.2  | 214.5  | 220.5  | 249.3  | 267.8  |
| 85.4   | 65.4   | 91.2   | 79.5   | 85.4   | 110.3  |
| 25.9   | 45.9   | 32.1   | 24.3   | 19.0   | 21.8   |
| 244.8  | 233.1  | 268.5  | 260.2  | 285.8  | 303.0  |
| 86.6   | 66.7   | 76.3   | 89.9   | 100.7  | 105.5  |
| 1000.6 | 920.0  | 997.6  | 1091.0 | 1102.3 | 1206.3 |
| 658.7  | 527.0  | 658.9  | 624.0  | 770.5  | 740.9  |
| 973.3  | 1011.5 | 1007.7 | 1008.1 | 1041.6 | 1119.4 |
| 32.0   | 36.8   | 36.0   | 43.0   | 20.9   | 35.4   |
| 20.5   | 19.5   | 24.7   | 25.7   | 19.8   | 25.4   |
| 9.1    | 13.4   | 10.2   | 17.0   | 12.3   | 21.1   |
| 28.8   | 26.7   | 22.3   | 34.0   | 25.6   | 40.4   |
| 402.4  | 379.7  | 374.5  | 380.8  | 421.1  | 497.5  |
| 846.8  | 562.1  | 906.8  | 833.1  | 841.3  | 773.3  |
| 512.7  | 428.1  | 481.0  | 559.3  | 561.1  | 581.2  |
| 189.9  | 150.0  | 193.8  | 195.6  | 203.9  | 221.5  |
| 167.4  | 160.9  | 199.7  | 193.7  | 239.0  | 255.7  |
| 227.6  | 197.5  | 192.9  | 186.9  | 203.0  | 223.3  |
| 342.1  | 299.2  | 330.8  | 310.9  | 351.4  | 391.2  |
| 1071.5 | 871.1  | 982.8  | 1020.6 | 1157.5 | 1250.6 |
| 655.7  | 585.5  | 691.3  | 762.9  | 710.8  | 795.8  |
| 727.3  | 604.2  | 643.3  | 685.1  | 757.4  | 866.1  |
| 486.8  | 408.7  | 457.6  | 415.6  | 498.0  | 589.9  |
| 478.7  | 449.9  | 511.2  | 508.7  | 519.9  | 604.7  |

|        |        |        |        |        |        |
|--------|--------|--------|--------|--------|--------|
| 594.4  | 449.5  | 537.5  | 487.3  | 629.9  | 651.4  |
| 452.4  | 364.3  | 431.8  | 428.3  | 562.3  | 559.5  |
| 637.9  | 519.1  | 573.1  | 583.9  | 606.5  | 703.7  |
| 1265.9 | 1330.9 | 1414.3 | 1470.1 | 1500.0 | 1587.5 |
| 489.5  | 508.2  | 543.8  | 558.2  | 526.2  | 602.9  |
| 897.6  | 772.4  | 847.1  | 880.5  | 991.3  | 998.3  |
| 418.9  | 335.9  | 347.1  | 385.9  | 535.2  | 548.1  |
| 594.6  | 541.6  | 628.9  | 627.8  | 688.5  | 748.0  |
| 203.2  | 161.1  | 229.4  | 209.1  | 264.6  | 247.4  |
| 666.7  | 527.6  | 658.2  | 678.8  | 724.7  | 637.9  |
| 32.0   | 36.9   | 47.0   | 41.3   | 32.6   | 46.1   |
| 379.9  | 333.8  | 349.4  | 391.5  | 410.1  | 403.0  |
| 494.8  | 406.7  | 449.2  | 483.1  | 520.5  | 556.8  |
| 265.4  | 221.8  | 236.5  | 253.0  | 229.3  | 316.2  |
| 773.3  | 631.2  | 797.8  | 779.7  | 842.7  | 1118.7 |
| 357.5  | 430.4  | 415.2  | 436.6  | 426.4  | 481.5  |
| 260.7  | 87.9   | 258.2  | 191.1  | 327.4  | 291.6  |
| 479.8  | 433.7  | 595.6  | 679.8  | 660.9  | 634.2  |
| 429.4  | 397.2  | 418.8  | 508.9  | 480.6  | 545.1  |
| 338.8  | 298.1  | 374.6  | 376.9  | 401.3  | 467.4  |
| 732.0  | 692.0  | 753.0  | 831.4  | 867.2  | 907.6  |
| 885.2  | 796.7  | 811.5  | 935.2  | 1030.0 | 1075.4 |
| 160.2  | 133.7  | 151.3  | 146.9  | 174.7  | 148.4  |
| 168.2  | 161.3  | 187.0  | 206.5  | 234.2  | 236.0  |
| 5.1    | 5.1    | 11.0   | 11.2   | 6.7    | 15.9   |
| 897.6  | 866.2  | 1002.9 | 1051.1 | 1046.7 | 1215.5 |
| 440.6  | 373.0  | 422.1  | 460.5  | 464.9  | 453.8  |
| 196.2  | 248.5  | 168.8  | 160.2  | 215.5  | 240.9  |
| 2622.9 | 2554.3 | 2721.0 | 2661.0 | 2934.7 | 3170.1 |
| 276.4  | 237.4  | 286.4  | 265.3  | 301.4  | 324.8  |
| 176.8  | 142.5  | 142.1  | 149.5  | 187.4  | 208.1  |
| 107.1  | 115.2  | 109.0  | 131.6  | 136.4  | 151.0  |
| 62.1   | 49.2   | 68.1   | 60.2   | 57.6   | 66.5   |
| 115.8  | 150.9  | 116.9  | 133.7  | 154.4  | 169.8  |
| 148.0  | 144.9  | 152.3  | 153.7  | 182.8  | 188.7  |
| 84.9   | 47.8   | 76.3   | 64.7   | 116.4  | 86.9   |
| 37.2   | 47.6   | 54.1   | 47.4   | 45.1   | 60.0   |
| 470.0  | 376.3  | 407.3  | 453.3  | 520.4  | 538.1  |
| 536.2  | 368.4  | 492.1  | 527.2  | 554.6  | 579.5  |
| 538.7  | 503.2  | 557.2  | 545.1  | 616.2  | 611.9  |
| 950.7  | 936.5  | 948.9  | 958.4  | 1073.2 | 1184.1 |
| 634.3  | 538.5  | 655.4  | 680.8  | 811.2  | 754.4  |
| 546.0  | 481.9  | 475.8  | 450.5  | 581.6  | 652.9  |
| 601.3  | 522.9  | 534.8  | 655.4  | 669.2  | 745.2  |
| 142.5  | 161.7  | 144.3  | 156.2  | 176.8  | 193.8  |
| 172.4  | 137.7  | 205.9  | 182.5  | 223.7  | 200.4  |
| 109.9  | 106.0  | 117.2  | 93.6   | 113.6  | 140.9  |
| 158.6  | 142.1  | 198.5  | 212.8  | 228.0  | 204.8  |
| 1045.6 | 814.7  | 1092.3 | 1046.9 | 1163.5 | 1203.0 |
| 77.6   | 71.3   | 77.3   | 125.0  | 93.1   | 107.9  |
| 4768.3 | 4517.1 | 5100.5 | 4993.8 | 5276.7 | 5790.9 |
| 121.5  | 92.3   | 128.5  | 117.1  | 119.8  | 146.0  |
| 4828.0 | 4459.6 | 4735.7 | 4620.7 | 5136.9 | 5315.7 |



|        |        |        |        |        |        |
|--------|--------|--------|--------|--------|--------|
| 693.6  | 673.4  | 815.7  | 931.7  | 900.1  | 916.4  |
| 638.2  | 621.5  | 701.3  | 734.2  | 772.4  | 747.4  |
| 296.7  | 312.3  | 331.8  | 350.8  | 343.0  | 388.1  |
| 459.7  | 450.0  | 474.9  | 536.6  | 586.7  | 560.6  |
| 2295.9 | 1875.7 | 2188.9 | 2397.6 | 2495.4 | 2561.0 |
| 19.4   | 4.1    | 14.8   | 27.8   | 26.0   | 29.4   |
| 2830.4 | 2344.3 | 3375.4 | 3587.1 | 3496.1 | 3438.3 |
| 456.8  | 457.6  | 398.2  | 490.9  | 435.2  | 604.7  |
| 724.0  | 729.0  | 599.2  | 788.7  | 619.1  | 883.6  |
| 120.7  | 120.0  | 124.5  | 120.6  | 138.6  | 143.5  |
| 917.2  | 840.3  | 749.0  | 739.1  | 852.4  | 1105.0 |
| 1899.8 | 1585.0 | 1953.8 | 1809.7 | 2038.9 | 2242.8 |
| 373.4  | 319.9  | 402.6  | 410.6  | 437.2  | 487.8  |
| 663.9  | 565.9  | 679.1  | 672.7  | 716.9  | 796.5  |
| 164.7  | 132.7  | 175.0  | 159.3  | 179.2  | 196.9  |
| 87.5   | 89.1   | 105.6  | 124.5  | 135.1  | 127.0  |
| 30.3   | 31.8   | 19.7   | 29.3   | 30.0   | 44.4   |
| 1209.7 | 954.4  | 1142.5 | 1307.0 | 1327.6 | 1470.5 |
| 279.8  | 284.7  | 240.1  | 276.0  | 289.3  | 393.0  |
| 126.1  | 134.7  | 126.2  | 139.3  | 129.8  | 166.3  |
| 2.2    | 1.1    | 10.5   | 8.0    | 1.8    | 10.0   |
| 886.8  | 928.4  | 927.9  | 969.3  | 952.4  | 939.4  |
| 707.3  | 554.5  | 654.8  | 640.4  | 646.1  | 837.6  |
| 222.5  | 185.0  | 287.6  | 217.2  | 326.2  | 271.1  |
| 38.8   | 42.5   | 46.6   | 46.8   | 54.6   | 44.1   |
| 37.2   | 59.2   | 57.6   | 70.6   | 71.5   | 78.9   |
| 98.3   | 104.9  | 109.0  | 121.4  | 109.9  | 128.2  |
| 248.5  | 225.0  | 269.6  | 258.9  | 318.7  | 323.0  |
| 423.1  | 386.8  | 441.7  | 480.9  | 531.0  | 559.4  |
| 358.4  | 368.6  | 449.4  | 404.8  | 476.4  | 461.4  |
| 224.3  | 203.1  | 222.5  | 205.0  | 258.1  | 247.2  |
| 568.5  | 501.1  | 643.4  | 616.4  | 694.1  | 733.3  |
| 72.8   | 76.4   | 71.5   | 74.9   | 83.4   | 95.6   |
| 69.4   | 55.9   | 50.4   | 66.1   | 66.5   | 68.7   |
| 72.3   | 89.5   | 60.7   | 53.9   | 79.3   | 79.2   |
| 19.8   | 21.9   | 10.2   | 24.1   | 13.0   | 9.7    |
| 3.9    | 2.4    | 3.6    | 7.9    | 3.0    | 10.9   |
| 247.3  | 192.4  | 239.0  | 223.0  | 323.1  | 321.3  |
| 89.8   | 63.8   | 81.3   | 93.9   | 100.0  | 110.5  |
| 186.3  | 134.7  | 191.3  | 168.3  | 189.8  | 221.8  |
| 481.9  | 361.3  | 550.7  | 588.2  | 570.3  | 605.1  |
| 515.9  | 525.5  | 515.1  | 528.2  | 536.1  | 640.7  |
| 953.6  | 703.6  | 1055.0 | 1060.0 | 1173.3 | 1171.0 |
| 2588.3 | 2417.4 | 2532.6 | 2696.9 | 2820.9 | 2900.6 |
| 281.7  | 217.9  | 275.7  | 261.3  | 313.8  | 332.5  |
| 371.2  | 440.2  | 336.8  | 411.6  | 412.7  | 455.4  |
| 324.7  | 305.1  | 279.5  | 402.8  | 361.3  | 448.2  |
| 249.2  | 219.3  | 272.3  | 275.2  | 314.5  | 278.0  |
| 109.5  | 112.4  | 109.7  | 110.6  | 136.8  | 134.0  |
| 791.9  | 674.1  | 803.9  | 770.4  | 872.6  | 934.0  |
| 222.0  | 209.4  | 230.9  | 245.4  | 331.7  | 243.7  |
| 173.7  | 128.1  | 152.6  | 193.1  | 237.4  | 282.9  |
| 353.1  | 259.9  | 332.4  | 385.5  | 410.8  | 453.2  |

|         |         |         |         |         |         |
|---------|---------|---------|---------|---------|---------|
| 450.5   | 447.4   | 494.7   | 498.2   | 596.8   | 625.4   |
| 1047.6  | 976.7   | 955.7   | 1039.0  | 1202.9  | 1279.8  |
| 625.5   | 510.1   | 577.4   | 587.9   | 713.2   | 738.1   |
| 65.4    | 53.2    | 60.1    | 71.0    | 58.9    | 58.1    |
| 11585.7 | 11180.1 | 11626.5 | 12294.8 | 12154.2 | 12391.5 |
| 60.3    | 66.4    | 74.6    | 61.9    | 75.6    | 81.1    |
| 864.2   | 646.6   | 776.9   | 734.9   | 905.7   | 968.7   |
| 21.8    | 25.7    | 17.9    | 24.1    | 38.1    | 36.9    |
| 533.7   | 386.1   | 448.2   | 504.7   | 516.0   | 639.3   |
| 287.2   | 289.4   | 292.2   | 324.1   | 322.0   | 405.9   |
| 1192.1  | 1098.3  | 1160.8  | 1184.3  | 1281.2  | 1378.6  |
| 604.2   | 463.8   | 618.9   | 572.0   | 710.9   | 717.8   |
| 633.4   | 531.1   | 712.1   | 665.5   | 839.6   | 790.9   |
| 368.9   | 304.4   | 376.6   | 390.7   | 430.6   | 488.3   |
| 387.2   | 287.6   | 487.9   | 495.6   | 518.9   | 492.2   |
| 72.1    | 68.4    | 57.0    | 89.0    | 70.1    | 83.6    |
| 17.5    | 3.1     | 11.0    | 15.0    | 14.6    | 9.2     |
| 42.2    | 47.7    | 58.1    | 48.5    | 35.1    | 44.8    |
| 85.1    | 107.9   | 59.2    | 73.9    | 62.5    | 92.6    |
| 183.1   | 224.1   | 167.6   | 198.7   | 163.1   | 191.6   |
| 103.2   | 116.2   | 122.2   | 114.1   | 130.7   | 124.4   |
| 808.9   | 713.9   | 805.6   | 862.7   | 828.3   | 1119.5  |
| 329.9   | 283.8   | 397.3   | 361.3   | 405.8   | 401.0   |
| 235.7   | 215.9   | 303.0   | 244.0   | 289.7   | 291.4   |
| 124.4   | 110.6   | 142.3   | 122.9   | 140.5   | 143.3   |
| 489.4   | 537.6   | 548.4   | 549.4   | 656.6   | 700.8   |
| 310.8   | 286.4   | 347.8   | 349.9   | 372.8   | 362.1   |
| 369.2   | 314.1   | 516.4   | 342.7   | 514.5   | 430.6   |
| 4956.8  | 4755.4  | 4681.6  | 5181.4  | 5120.2  | 5928.5  |
| 6.2     | 10.1    | 9.6     | 13.9    | 9.4     | 7.5     |
| 1508.3  | 1338.9  | 1653.6  | 1701.9  | 1759.3  | 1692.9  |
| 240.7   | 248.1   | 277.8   | 263.7   | 287.0   | 318.8   |
| 664.7   | 680.2   | 665.8   | 639.2   | 751.0   | 767.9   |
| 2165.4  | 2248.5  | 2384.5  | 2432.6  | 2420.2  | 2645.9  |
| 295.1   | 253.3   | 249.3   | 283.0   | 333.0   | 326.1   |
| 298.4   | 288.5   | 303.5   | 308.2   | 345.2   | 358.9   |
| 372.8   | 310.5   | 399.1   | 390.5   | 441.5   | 388.6   |
| 402.6   | 325.7   | 365.2   | 384.0   | 440.0   | 482.7   |
| 276.6   | 254.7   | 295.4   | 289.6   | 316.0   | 354.8   |
| 85.6    | 89.3    | 92.7    | 94.0    | 112.7   | 117.9   |
| 163.4   | 176.8   | 198.2   | 181.0   | 181.1   | 202.4   |
| 926.5   | 894.7   | 1022.4  | 1038.4  | 1105.6  | 1147.0  |
| 0.8     | 7.1     | 5.5     | 0.8     | 1.7     | 1.8     |
| 8.1     | 1.7     | 13.1    | 7.3     | 1.7     | 4.4     |
| 182.6   | 217.7   | 194.2   | 185.7   | 200.7   | 233.2   |
| 2990.4  | 2740.7  | 2847.9  | 2785.6  | 3274.1  | 4107.4  |
| 525.1   | 478.5   | 523.7   | 499.7   | 524.0   | 592.3   |
| 205.3   | 215.4   | 196.5   | 222.6   | 264.0   | 286.5   |
| 713.4   | 1072.5  | 614.9   | 896.9   | 720.7   | 988.7   |
| 14.3    | 27.8    | 18.9    | 23.2    | 18.8    | 20.1    |
| 70.8    | 81.7    | 71.9    | 98.4    | 77.1    | 97.1    |
| 837.4   | 712.1   | 839.0   | 837.0   | 966.2   | 998.2   |
| 1893.8  | 1763.0  | 2120.5  | 2153.7  | 2193.6  | 2179.5  |

|        |        |        |        |        |        |
|--------|--------|--------|--------|--------|--------|
| 5871.1 | 5694.3 | 6193.6 | 6636.3 | 6554.9 | 6564.8 |
| 70.6   | 90.0   | 88.3   | 109.2  | 97.3   | 98.3   |
| 43.7   | 58.6   | 48.9   | 40.8   | 63.1   | 50.5   |
| 53.3   | 46.3   | 55.9   | 61.1   | 84.1   | 64.5   |
| 138.9  | 160.9  | 153.6  | 157.0  | 188.0  | 162.0  |
| 518.4  | 436.5  | 557.0  | 554.2  | 562.8  | 582.0  |
| 797.4  | 596.8  | 593.7  | 728.6  | 726.7  | 920.0  |
| 1759.1 | 1516.9 | 1717.1 | 1826.4 | 2081.5 | 2255.5 |
| 622.4  | 703.4  | 677.4  | 684.7  | 697.2  | 786.5  |
| 53.3   | 41.3   | 57.3   | 47.2   | 54.8   | 57.6   |
| 95.4   | 60.3   | 100.9  | 89.1   | 110.5  | 109.9  |
| 29.2   | 38.0   | 42.9   | 26.0   | 23.8   | 36.7   |
| 320.1  | 286.5  | 352.7  | 374.3  | 364.2  | 411.9  |
| 9.2    | 16.2   | 24.0   | 18.0   | 5.2    | 13.9   |
| 25.4   | 23.0   | 25.5   | 23.6   | 15.1   | 32.3   |
| 246.5  | 189.8  | 289.8  | 275.6  | 283.4  | 297.8  |
| 28.8   | 25.4   | 28.1   | 33.8   | 25.8   | 29.1   |
| 507.8  | 434.9  | 467.4  | 468.3  | 640.2  | 556.4  |
| 214.6  | 240.5  | 250.9  | 275.4  | 281.0  | 292.9  |
| 813.3  | 695.6  | 795.9  | 817.5  | 879.6  | 963.7  |
| 121.5  | 123.3  | 136.7  | 131.2  | 164.2  | 157.4  |
| 178.7  | 166.0  | 187.8  | 184.8  | 209.9  | 206.3  |
| 762.1  | 656.9  | 720.2  | 859.0  | 804.8  | 901.0  |
| 330.0  | 321.2  | 362.2  | 315.4  | 403.7  | 429.9  |
| 474.1  | 445.2  | 500.1  | 458.1  | 542.5  | 566.4  |
| 10.0   | 6.6    | 10.4   | 12.9   | 7.9    | 19.5   |
| 86.1   | 97.0   | 89.5   | 79.8   | 99.7   | 108.1  |
| 208.0  | 204.2  | 215.6  | 205.2  | 307.6  | 248.0  |
| 184.9  | 148.2  | 162.3  | 210.0  | 211.2  | 255.8  |
| 230.5  | 184.8  | 221.3  | 252.1  | 237.7  | 285.1  |
| 2.3    | 3.9    | 2.8    | 2.7    | 3.1    | 2.3    |
| 19.8   | 19.0   | 22.8   | 28.0   | 26.6   | 23.4   |
| 219.5  | 200.3  | 194.8  | 186.9  | 240.9  | 249.8  |
| 394.6  | 292.6  | 341.6  | 323.9  | 371.4  | 415.2  |
| 407.7  | 445.4  | 472.7  | 497.0  | 464.9  | 555.2  |
| 448.3  | 402.8  | 439.6  | 516.2  | 584.2  | 604.7  |
| 202.5  | 191.4  | 250.2  | 252.7  | 248.8  | 279.2  |
| 548.3  | 453.0  | 561.9  | 551.2  | 530.0  | 551.1  |
| 2716.5 | 2132.0 | 2406.4 | 2623.4 | 2866.5 | 2930.7 |
| 1929.2 | 1620.9 | 2304.7 | 2379.0 | 2540.4 | 2460.0 |
| 162.6  | 135.1  | 159.5  | 159.6  | 172.7  | 190.4  |
| 83.9   | 63.8   | 61.2   | 63.9   | 70.6   | 97.7   |
| 996.5  | 968.4  | 1045.8 | 1175.6 | 1066.3 | 1268.9 |
| 426.3  | 332.1  | 390.6  | 422.1  | 448.8  | 532.8  |
| 161.5  | 172.1  | 182.1  | 204.9  | 207.4  | 225.7  |
| 93.9   | 90.5   | 97.7   | 91.8   | 117.7  | 114.0  |
| 55.7   | 69.6   | 51.8   | 60.5   | 45.0   | 78.3   |
| 391.3  | 318.4  | 395.2  | 392.2  | 437.5  | 488.2  |
| 0.5    | 5.1    | 0.6    | 3.9    | 5.9    | 0.8    |
| 3.9    | 2.8    | 13.9   | 12.7   | 13.1   | 3.3    |
| 81.0   | 101.4  | 96.4   | 107.9  | 74.1   | 85.4   |
| 554.1  | 507.5  | 523.7  | 594.8  | 590.3  | 661.7  |
| 233.7  | 214.1  | 218.8  | 259.2  | 270.3  | 297.1  |

|        |        |        |        |        |        |
|--------|--------|--------|--------|--------|--------|
| 24.0   | 35.5   | 33.2   | 32.2   | 35.6   | 34.5   |
| 37.6   | 9.7    | 40.0   | 29.9   | 29.1   | 40.0   |
| 3612.4 | 3311.3 | 3841.0 | 3831.3 | 4008.3 | 4140.0 |
| 352.0  | 296.9  | 314.6  | 326.5  | 364.7  | 424.8  |
| 24.4   | 8.3    | 25.9   | 15.6   | 28.1   | 27.2   |
| 175.2  | 151.2  | 197.9  | 215.5  | 272.1  | 188.3  |
| 430.7  | 399.1  | 468.3  | 468.0  | 536.8  | 519.0  |
| 564.2  | 570.8  | 698.4  | 684.3  | 780.9  | 801.6  |
| 279.3  | 295.2  | 304.0  | 319.6  | 361.4  | 354.7  |
| 357.7  | 301.5  | 274.5  | 317.4  | 384.8  | 390.0  |
| 62.8   | 44.4   | 52.0   | 56.8   | 71.3   | 59.4   |
| 433.2  | 461.1  | 380.4  | 406.0  | 477.2  | 544.5  |
| 546.8  | 472.0  | 521.9  | 580.4  | 617.6  | 687.9  |
| 61.8   | 53.2   | 54.1   | 64.9   | 66.4   | 61.9   |
| 83.5   | 55.2   | 81.9   | 68.7   | 100.8  | 84.4   |
| 240.2  | 126.8  | 209.8  | 208.0  | 307.6  | 257.0  |
| 302.8  | 242.8  | 313.7  | 307.2  | 363.6  | 361.1  |
| 14.3   | 5.5    | 3.2    | 19.8   | 5.9    | 24.3   |
| 316.2  | 204.6  | 321.5  | 274.1  | 402.5  | 436.1  |
| 149.9  | 74.5   | 176.3  | 122.6  | 181.6  | 216.5  |
| 363.1  | 316.0  | 418.2  | 408.2  | 425.3  | 461.2  |
| 201.3  | 149.6  | 271.3  | 233.5  | 258.5  | 242.7  |
| 104.1  | 76.4   | 113.6  | 103.9  | 117.3  | 143.2  |
| 195.0  | 172.0  | 179.0  | 186.6  | 188.6  | 222.3  |
| 124.0  | 141.1  | 119.7  | 121.3  | 148.0  | 161.9  |
| 1112.9 | 1173.7 | 1075.1 | 1134.8 | 1214.5 | 1401.6 |
| 701.5  | 722.0  | 720.1  | 712.4  | 826.7  | 863.5  |
| 443.3  | 316.7  | 431.3  | 419.8  | 485.2  | 534.0  |
| 4252.3 | 4307.9 | 4860.7 | 4802.6 | 5033.3 | 4786.2 |
| 434.7  | 404.1  | 513.6  | 453.2  | 550.8  | 493.6  |
| 210.7  | 218.2  | 227.9  | 225.2  | 271.2  | 268.6  |
| 198.6  | 188.7  | 212.7  | 236.3  | 258.7  | 257.5  |
| 563.7  | 393.4  | 498.8  | 436.6  | 559.7  | 638.2  |
| 298.2  | 222.0  | 320.5  | 298.9  | 385.4  | 382.0  |
| 587.4  | 449.8  | 760.0  | 794.2  | 776.2  | 681.2  |
| 80.9   | 77.2   | 61.7   | 74.6   | 71.0   | 82.2   |
| 217.0  | 205.0  | 222.8  | 215.6  | 240.7  | 249.1  |
| 286.3  | 366.6  | 319.1  | 351.7  | 321.6  | 332.4  |
| 156.9  | 148.8  | 158.1  | 168.7  | 205.3  | 190.0  |
| 0.9    | 0.7    | 7.2    | 4.2    | 7.4    | 1.1    |
| 57.6   | 47.7   | 66.5   | 53.6   | 71.6   | 81.3   |
| 36.6   | 20.2   | 30.9   | 34.0   | 40.4   | 42.2   |
| 122.9  | 118.6  | 138.9  | 168.8  | 192.1  | 183.5  |
| 305.0  | 299.9  | 282.4  | 387.8  | 381.3  | 433.8  |
| 338.3  | 313.7  | 412.9  | 405.6  | 394.9  | 529.9  |
| 71.9   | 54.1   | 95.5   | 65.3   | 103.8  | 98.4   |
| 877.2  | 725.8  | 731.3  | 750.0  | 831.1  | 940.4  |
| 557.2  | 505.4  | 531.4  | 548.4  | 658.9  | 658.3  |
| 601.0  | 637.9  | 701.9  | 765.6  | 710.3  | 803.8  |
| 82.5   | 101.7  | 92.2   | 91.0   | 108.1  | 101.0  |
| 26.8   | 44.6   | 36.4   | 40.0   | 31.1   | 31.0   |
| 135.4  | 156.2  | 126.3  | 146.2  | 152.6  | 176.1  |
| 453.5  | 484.6  | 490.9  | 540.3  | 545.6  | 603.5  |

|        |        |        |        |        |        |
|--------|--------|--------|--------|--------|--------|
| 18.1   | 2.2    | 1.8    | 7.6    | 1.2    | 3.9    |
| 247.3  | 219.1  | 278.8  | 278.3  | 324.3  | 289.8  |
| 127.4  | 105.7  | 95.3   | 113.3  | 143.2  | 135.9  |
| 152.0  | 161.7  | 140.0  | 162.2  | 159.4  | 220.3  |
| 67.9   | 50.9   | 78.0   | 75.9   | 85.3   | 88.3   |
| 286.4  | 218.4  | 270.7  | 280.3  | 311.2  | 358.4  |
| 394.4  | 320.1  | 412.3  | 456.4  | 464.3  | 455.9  |
| 964.6  | 1011.7 | 1084.0 | 1069.1 | 1092.6 | 1212.0 |
| 649.2  | 639.8  | 693.0  | 703.5  | 712.8  | 895.9  |
| 108.2  | 96.4   | 146.4  | 115.6  | 161.4  | 126.0  |
| 161.0  | 128.7  | 166.5  | 178.0  | 180.4  | 173.1  |
| 901.0  | 719.6  | 834.2  | 808.1  | 1007.6 | 1083.4 |
| 136.9  | 94.6   | 128.1  | 137.2  | 155.8  | 177.4  |
| 782.7  | 639.5  | 722.1  | 701.6  | 846.9  | 867.1  |
| 429.8  | 294.9  | 356.0  | 353.7  | 453.3  | 491.2  |
| 538.4  | 528.7  | 519.2  | 531.5  | 589.6  | 634.2  |
| 553.9  | 517.0  | 587.8  | 615.8  | 673.9  | 700.0  |
| 309.2  | 276.9  | 328.5  | 354.1  | 306.2  | 401.8  |
| 58.4   | 24.0   | 55.6   | 44.5   | 63.7   | 56.4   |
| 103.3  | 81.2   | 109.8  | 99.8   | 117.7  | 117.1  |
| 585.3  | 569.0  | 619.9  | 659.4  | 546.6  | 877.3  |
| 3899.1 | 3373.0 | 3830.8 | 4017.3 | 3995.5 | 4514.0 |
| 1201.4 | 1093.5 | 1337.8 | 1330.6 | 1471.0 | 1413.7 |
| 3.4    | 4.7    | 3.8    | 4.3    | 4.8    | 5.4    |
| 93.5   | 81.3   | 62.9   | 69.2   | 96.7   | 125.5  |
| 71.6   | 60.8   | 93.5   | 78.8   | 71.1   | 100.2  |
| 1098.4 | 959.0  | 1092.0 | 1146.4 | 1173.1 | 1328.5 |
| 319.1  | 283.9  | 329.2  | 346.0  | 425.5  | 433.3  |
| 4.5    | 5.8    | 16.6   | 21.7   | 8.0    | 12.9   |
| 181.4  | 184.7  | 192.7  | 202.3  | 227.8  | 225.6  |
| 49.5   | 51.4   | 58.9   | 69.3   | 62.7   | 66.3   |
| 17.4   | 24.6   | 14.4   | 19.9   | 22.6   | 20.3   |
| 36.7   | 29.9   | 31.8   | 33.1   | 46.0   | 36.4   |
| 1519.1 | 1509.1 | 1732.2 | 1672.3 | 1781.2 | 1877.8 |
| 68.1   | 67.3   | 67.6   | 95.1   | 114.1  | 98.9   |
| 341.8  | 341.6  | 326.6  | 419.2  | 364.4  | 398.8  |
| 1774.8 | 1471.9 | 1897.4 | 2060.6 | 2178.3 | 2285.9 |
| 264.1  | 244.9  | 291.8  | 267.4  | 318.3  | 318.7  |
| 212.2  | 221.0  | 228.6  | 224.7  | 240.4  | 247.0  |
| 200.2  | 213.1  | 202.1  | 232.2  | 235.5  | 255.5  |
| 47.3   | 41.0   | 60.3   | 54.5   | 65.3   | 72.6   |
| 131.1  | 80.9   | 124.7  | 131.0  | 130.2  | 155.5  |
| 216.0  | 273.2  | 215.9  | 194.7  | 267.1  | 231.3  |
| 676.2  | 617.4  | 662.5  | 690.5  | 785.2  | 816.7  |
| 179.7  | 154.8  | 200.8  | 209.2  | 224.3  | 226.7  |
| 98.0   | 75.4   | 94.8   | 78.5   | 120.0  | 99.3   |
| 60.7   | 22.7   | 61.1   | 15.2   | 69.4   | 30.8   |
| 584.3  | 434.8  | 550.1  | 607.3  | 676.0  | 788.7  |
| 9.2    | 8.5    | 21.3   | 14.2   | 27.4   | 37.5   |
| 421.3  | 389.4  | 498.0  | 497.5  | 551.6  | 586.5  |
| 936.4  | 993.6  | 901.4  | 933.9  | 980.5  | 1185.9 |
| 1319.8 | 1277.1 | 1405.8 | 1510.5 | 1489.0 | 1647.7 |
| 28.0   | 35.9   | 25.3   | 27.1   | 31.0   | 32.8   |

|        |        |        |        |        |        |
|--------|--------|--------|--------|--------|--------|
| 39.2   | 51.1   | 39.3   | 44.8   | 33.7   | 42.5   |
| 2475.3 | 2218.6 | 2513.0 | 2663.2 | 2705.0 | 2893.0 |
| 1406.8 | 1143.2 | 1256.2 | 1628.8 | 1464.7 | 1463.1 |
| 4151.8 | 3299.9 | 3323.8 | 4652.4 | 3774.8 | 4957.9 |
| 266.2  | 263.3  | 281.3  | 259.5  | 308.4  | 289.6  |
| 38.2   | 20.3   | 32.8   | 19.3   | 38.8   | 32.9   |
| 212.6  | 187.9  | 212.8  | 206.8  | 236.5  | 251.9  |
| 200.8  | 134.8  | 197.5  | 190.4  | 228.5  | 261.7  |
| 226.4  | 213.9  | 226.3  | 246.0  | 285.8  | 286.8  |
| 100.1  | 71.5   | 82.3   | 75.5   | 76.6   | 101.0  |
| 243.2  | 211.0  | 241.3  | 227.0  | 297.9  | 312.6  |
| 168.0  | 187.5  | 189.0  | 183.8  | 220.8  | 220.9  |
| 1374.1 | 1316.6 | 1321.7 | 1535.6 | 1615.2 | 1687.6 |
| 91.2   | 101.2  | 99.4   | 122.0  | 114.8  | 122.2  |
| 1980.4 | 1832.7 | 1969.0 | 2148.4 | 2213.5 | 2249.9 |
| 175.7  | 163.1  | 256.5  | 279.4  | 297.0  | 314.3  |
| 391.4  | 344.6  | 419.0  | 434.6  | 461.8  | 519.2  |
| 105.2  | 88.1   | 129.9  | 100.2  | 130.4  | 159.9  |
| 900.3  | 905.8  | 912.6  | 942.5  | 1060.0 | 1169.7 |
| 125.9  | 101.1  | 101.3  | 119.0  | 145.3  | 132.3  |
| 85.5   | 94.8   | 89.5   | 92.3   | 110.4  | 114.8  |
| 7.2    | 9.0    | 8.5    | 8.1    | 5.4    | 9.7    |
| 14.1   | 19.9   | 14.6   | 5.2    | 20.6   | 17.3   |
| 23.5   | 28.2   | 14.7   | 15.9   | 8.4    | 34.3   |
| 76.9   | 87.6   | 104.2  | 103.5  | 110.1  | 125.2  |
| 9.5    | 17.4   | 2.0    | 16.1   | 10.7   | 14.9   |
| 1795.7 | 1712.1 | 1520.7 | 1583.4 | 1778.9 | 1962.9 |
| 231.3  | 236.1  | 238.6  | 250.2  | 270.4  | 286.8  |
| 245.5  | 204.2  | 261.3  | 230.0  | 265.2  | 287.9  |
| 6.4    | 1.5    | 8.7    | 13.7   | 11.9   | 18.0   |
| 283.2  | 288.3  | 303.4  | 314.3  | 334.2  | 374.5  |
| 1496.1 | 1631.2 | 1568.4 | 1502.6 | 1842.1 | 2133.9 |
| 582.5  | 664.4  | 622.3  | 611.4  | 740.1  | 747.7  |
| 15.7   | 21.5   | 18.2   | 10.4   | 15.7   | 8.2    |
| 11.2   | 15.5   | 8.5    | 8.7    | 12.2   | 11.1   |
| 427.5  | 339.0  | 459.1  | 502.9  | 550.8  | 568.1  |
| 587.6  | 475.9  | 536.6  | 580.4  | 625.6  | 684.2  |
| 170.2  | 142.1  | 181.4  | 170.2  | 201.1  | 189.1  |
| 162.3  | 168.2  | 176.0  | 210.9  | 218.3  | 206.0  |
| 48.0   | 41.0   | 32.4   | 36.3   | 43.6   | 46.8   |
| 110.5  | 99.5   | 118.1  | 112.1  | 135.7  | 141.6  |
| 72.5   | 61.3   | 72.6   | 74.1   | 78.8   | 76.9   |
| 73.6   | 69.9   | 77.1   | 71.3   | 84.7   | 78.6   |
| 4666.3 | 4435.6 | 4853.6 | 4827.8 | 5100.5 | 5463.6 |
| 1053.9 | 1041.5 | 1037.1 | 1040.6 | 1088.8 | 1224.6 |
| 74.3   | 65.8   | 73.5   | 63.4   | 57.6   | 90.8   |
| 208.8  | 221.5  | 227.0  | 237.9  | 246.8  | 281.2  |
| 178.0  | 162.3  | 169.3  | 206.1  | 193.8  | 233.0  |
| 301.3  | 267.3  | 301.7  | 326.7  | 315.0  | 417.7  |
| 397.3  | 338.3  | 355.1  | 357.9  | 390.1  | 439.2  |
| 675.6  | 584.0  | 590.8  | 700.7  | 731.6  | 864.4  |
| 851.1  | 830.1  | 894.3  | 1022.7 | 970.1  | 1075.0 |
| 118.6  | 100.8  | 123.3  | 123.1  | 127.6  | 142.5  |

|        |        |        |        |        |        |
|--------|--------|--------|--------|--------|--------|
| 267.1  | 229.1  | 290.4  | 253.2  | 336.9  | 359.3  |
| 483.6  | 467.0  | 482.6  | 568.8  | 555.4  | 563.6  |
| 1297.3 | 1259.8 | 1150.1 | 1148.4 | 1228.6 | 1339.6 |
| 215.2  | 304.8  | 241.5  | 258.6  | 223.9  | 301.5  |
| 146.4  | 166.8  | 144.0  | 151.2  | 162.3  | 174.0  |
| 92.8   | 96.7   | 88.0   | 87.2   | 104.2  | 115.0  |
| 523.2  | 640.7  | 654.9  | 630.9  | 653.8  | 724.6  |
| 421.6  | 359.1  | 444.3  | 421.5  | 499.6  | 544.1  |
| 9.8    | 12.1   | 7.8    | 4.8    | 8.2    | 10.3   |
| 1300.9 | 1135.5 | 1110.1 | 1230.9 | 1269.0 | 1609.4 |
| 287.0  | 338.7  | 330.8  | 371.0  | 393.7  | 409.2  |
| 40.3   | 37.3   | 38.4   | 48.2   | 52.2   | 50.2   |
| 20.7   | 19.8   | 25.3   | 23.7   | 30.1   | 27.7   |
| 181.0  | 144.2  | 181.5  | 190.9  | 180.8  | 208.8  |
| 437.7  | 394.9  | 412.2  | 423.2  | 476.8  | 509.4  |
| 62.3   | 41.3   | 64.1   | 57.5   | 77.2   | 65.5   |
| 103.5  | 122.1  | 127.8  | 135.8  | 121.8  | 137.7  |
| 148.5  | 82.4   | 141.7  | 107.4  | 141.8  | 151.2  |
| 530.3  | 509.3  | 570.1  | 657.3  | 671.9  | 712.0  |
| 27.3   | 17.4   | 25.4   | 33.8   | 32.1   | 31.4   |
| 950.0  | 937.5  | 1093.7 | 1170.6 | 1203.9 | 1311.3 |
| 723.1  | 624.0  | 626.9  | 668.8  | 797.7  | 903.8  |
| 44.5   | 34.5   | 58.7   | 65.0   | 72.7   | 70.0   |
| 271.6  | 288.2  | 296.4  | 278.4  | 354.1  | 387.8  |
| 550.3  | 455.5  | 494.3  | 523.6  | 659.5  | 802.1  |
| 347.3  | 447.5  | 335.9  | 293.6  | 323.4  | 314.5  |
| 9.5    | 0.3    | 10.2   | 2.3    | 1.6    | 5.3    |
| 6.5    | 3.5    | 3.7    | 9.6    | 7.8    | 12.2   |
| 198.7  | 233.6  | 252.4  | 255.0  | 268.0  | 295.4  |
| 63.2   | 50.8   | 60.3   | 56.4   | 67.4   | 69.4   |
| 1756.5 | 1692.7 | 1708.7 | 1737.2 | 1896.5 | 2077.2 |
| 21.1   | 24.4   | 17.1   | 20.2   | 15.9   | 28.6   |
| 1363.0 | 1327.7 | 1411.2 | 1381.2 | 1604.9 | 1805.3 |
| 1336.6 | 1255.6 | 1376.6 | 1520.1 | 1599.0 | 1616.4 |
| 135.3  | 123.4  | 130.6  | 151.5  | 163.5  | 178.0  |
| 66.7   | 60.5   | 60.9   | 66.6   | 89.5   | 69.3   |
| 149.0  | 146.2  | 205.7  | 244.8  | 269.1  | 200.2  |
| 683.9  | 570.0  | 611.6  | 721.4  | 714.2  | 884.5  |
| 347.5  | 298.8  | 366.3  | 463.2  | 410.0  | 413.1  |
| 8.1    | 5.1    | 8.7    | 6.0    | 5.9    | 15.3   |
| 824.6  | 889.5  | 871.9  | 997.4  | 982.9  | 1055.3 |
| 847.4  | 805.0  | 884.6  | 925.5  | 994.2  | 1032.1 |
| 280.5  | 197.5  | 251.2  | 229.8  | 323.2  | 319.6  |
| 9.3    | 5.3    | 24.2   | 21.7   | 21.4   | 31.7   |
| 12.5   | 12.4   | 11.9   | 16.1   | 7.9    | 17.6   |
| 2652.0 | 2111.8 | 2636.5 | 2693.9 | 3086.9 | 2713.1 |
| 167.2  | 129.9  | 168.0  | 158.0  | 193.5  | 201.6  |
| 265.3  | 205.2  | 263.0  | 264.9  | 324.1  | 342.5  |
| 2.4    | 7.3    | 2.8    | 7.3    | 7.8    | 8.4    |
| 117.5  | 128.0  | 121.2  | 129.2  | 115.9  | 131.3  |
| 98.8   | 98.8   | 114.0  | 105.3  | 116.5  | 130.1  |
| 250.3  | 205.7  | 253.1  | 266.1  | 272.6  | 310.8  |
| 4004.0 | 4167.6 | 4412.6 | 4855.7 | 4619.5 | 4559.6 |

|        |        |        |        |         |         |
|--------|--------|--------|--------|---------|---------|
| 72.9   | 73.7   | 71.6   | 74.6   | 65.1    | 82.9    |
| 1064.6 | 1007.5 | 904.8  | 1033.8 | 1159.1  | 1203.0  |
| 443.6  | 445.3  | 440.8  | 445.4  | 527.3   | 558.0   |
| 6.0    | 0.6    | 1.4    | 5.0    | 5.1     | 1.4     |
| 2.5    | 10.0   | 6.9    | 5.9    | 6.1     | 5.4     |
| 163.7  | 151.6  | 169.1  | 184.4  | 208.5   | 239.1   |
| 159.9  | 160.3  | 155.5  | 183.8  | 194.7   | 206.2   |
| 177.5  | 161.2  | 161.1  | 184.4  | 203.2   | 205.3   |
| 43.6   | 20.7   | 44.0   | 33.8   | 33.8    | 46.1    |
| 150.2  | 138.0  | 137.4  | 141.6  | 158.2   | 203.5   |
| 46.6   | 34.4   | 42.2   | 43.7   | 57.0    | 58.0    |
| 141.8  | 126.9  | 141.5  | 161.2  | 184.4   | 191.8   |
| 121.9  | 131.1  | 135.1  | 169.1  | 169.4   | 199.5   |
| 248.1  | 191.3  | 266.3  | 268.1  | 312.3   | 341.9   |
| 216.5  | 137.3  | 220.5  | 223.5  | 270.6   | 257.7   |
| 43.3   | 28.9   | 40.1   | 33.9   | 44.3    | 37.4    |
| 111.8  | 123.8  | 125.6  | 105.5  | 129.5   | 140.6   |
| 83.7   | 79.3   | 92.9   | 104.6  | 113.3   | 147.0   |
| 89.9   | 68.0   | 88.4   | 94.3   | 99.0    | 110.9   |
| 313.5  | 266.1  | 349.2  | 374.2  | 351.8   | 421.4   |
| 184.1  | 189.5  | 216.6  | 190.3  | 196.3   | 248.2   |
| 402.6  | 340.9  | 372.9  | 354.6  | 410.7   | 459.8   |
| 125.0  | 137.4  | 126.4  | 140.9  | 139.8   | 170.5   |
| 458.0  | 460.6  | 455.4  | 496.8  | 533.1   | 520.8   |
| 81.6   | 103.2  | 74.3   | 74.0   | 80.2    | 94.0    |
| 12.7   | 11.9   | 11.5   | 5.4    | 10.4    | 16.6    |
| 1.2    | 0.4    | 0.9    | 1.7    | 1.2     | 2.8     |
| 2.3    | 0.4    | 2.7    | 1.5    | 0.2     | 5.3     |
| 405.0  | 348.0  | 396.1  | 385.3  | 457.1   | 483.2   |
| 123.4  | 139.1  | 162.0  | 160.5  | 137.3   | 154.7   |
| 2.2    | 10.4   | 6.0    | 5.6    | 6.4     | 6.9     |
| 440.8  | 410.1  | 419.4  | 448.3  | 539.6   | 515.8   |
| 7.6    | 1.7    | 3.2    | 8.2    | 8.2     | 2.1     |
| 3.9    | 0.4    | 13.8   | 8.0    | 10.4    | 12.1    |
| 298.0  | 207.8  | 312.6  | 394.6  | 378.4   | 349.8   |
| 17.8   | 20.3   | 16.7   | 25.5   | 13.2    | 29.2    |
| 250.1  | 202.1  | 228.5  | 254.3  | 276.0   | 282.6   |
| 5.5    | 9.3    | 4.6    | 3.6    | 8.2     | 3.1     |
| 1.4    | 3.4    | 1.3    | 2.8    | 1.2     | 6.4     |
| 5.8    | 2.0    | 15.0   | 13.8   | 2.6     | 6.5     |
| 693.3  | 619.7  | 702.2  | 742.4  | 868.6   | 902.8   |
| 13.6   | 18.4   | 32.9   | 16.6   | 21.2    | 23.5    |
| 26.9   | 26.1   | 28.6   | 36.4   | 32.2    | 32.1    |
| 308.5  | 319.9  | 317.9  | 367.1  | 356.6   | 405.6   |
| 420.8  | 435.9  | 464.1  | 443.3  | 524.9   | 523.4   |
| 1122.4 | 1153.6 | 1204.0 | 1393.5 | 1246.3  | 1523.1  |
| 917.0  | 715.4  | 850.6  | 941.2  | 939.6   | 1209.5  |
| 11.4   | 2.2    | 13.5   | 4.2    | 9.8     | 12.5    |
| 119.5  | 120.3  | 121.3  | 148.8  | 160.7   | 162.8   |
| 1334.2 | 1358.1 | 1335.7 | 1289.6 | 1421.7  | 1653.6  |
| 9758.7 | 9278.9 | 9437.6 | 9677.4 | 10027.7 | 10016.7 |
| 321.5  | 327.7  | 351.4  | 339.3  | 360.8   | 392.6   |
| 61.0   | 42.0   | 72.4   | 65.0   | 74.0    | 74.4    |



|         |         |         |         |         |         |
|---------|---------|---------|---------|---------|---------|
| 102.5   | 111.2   | 126.7   | 112.0   | 157.7   | 148.5   |
| 192.2   | 165.3   | 188.8   | 175.6   | 221.5   | 235.9   |
| 99.2    | 77.7    | 102.9   | 107.0   | 98.8    | 118.3   |
| 82.4    | 63.6    | 89.6    | 65.6    | 93.9    | 78.4    |
| 39.7    | 37.1    | 41.7    | 41.8    | 45.2    | 55.3    |
| 61.7    | 51.2    | 52.7    | 63.4    | 73.8    | 80.6    |
| 35.8    | 25.1    | 45.4    | 19.4    | 23.9    | 30.7    |
| 1388.9  | 1271.8  | 1397.9  | 1487.2  | 1554.1  | 1665.8  |
| 760.5   | 879.6   | 801.3   | 818.2   | 730.4   | 925.9   |
| 1528.8  | 1219.4  | 1463.5  | 1561.0  | 1617.6  | 1762.1  |
| 751.5   | 735.2   | 828.6   | 910.2   | 870.4   | 934.0   |
| 195.8   | 217.8   | 217.7   | 225.8   | 241.0   | 253.0   |
| 22.3    | 4.9     | 25.2    | 9.2     | 17.8    | 29.0    |
| 859.3   | 753.7   | 973.2   | 1139.1  | 1043.0  | 1097.4  |
| 1.3     | 1.6     | 1.8     | 1.8     | 1.1     | 4.1     |
| 1.2     | 0.8     | 3.4     | 1.2     | 1.0     | 1.6     |
| 182.6   | 179.7   | 195.4   | 204.5   | 210.5   | 231.7   |
| 727.1   | 666.0   | 710.8   | 705.2   | 796.3   | 965.9   |
| 2304.8  | 2066.8  | 2289.3  | 2350.5  | 2614.1  | 2590.1  |
| 11852.9 | 10715.1 | 11711.2 | 12644.9 | 12930.0 | 12681.1 |
| 144.3   | 122.7   | 159.0   | 152.3   | 190.3   | 198.8   |
| 2.8     | 5.4     | 1.5     | 4.4     | 4.2     | 3.4     |
| 36.3    | 28.4    | 32.5    | 29.2    | 38.3    | 36.4    |
| 359.8   | 229.7   | 332.8   | 303.1   | 416.8   | 396.5   |
| 662.3   | 612.8   | 703.0   | 657.8   | 739.1   | 835.0   |
| 608.3   | 511.3   | 617.5   | 704.9   | 674.5   | 805.0   |
| 637.6   | 486.2   | 598.6   | 706.9   | 783.4   | 690.9   |
| 264.2   | 220.4   | 270.1   | 275.9   | 308.3   | 336.8   |
| 129.0   | 113.8   | 134.5   | 141.6   | 176.3   | 172.5   |
| 700.7   | 663.7   | 585.7   | 817.2   | 754.6   | 761.0   |
| 152.1   | 148.5   | 185.2   | 160.2   | 188.1   | 229.0   |
| 438.2   | 394.0   | 423.3   | 410.2   | 518.0   | 500.7   |
| 183.6   | 276.0   | 193.3   | 226.0   | 264.5   | 257.6   |
| 381.9   | 334.6   | 384.6   | 418.2   | 454.5   | 476.8   |
| 907.4   | 737.2   | 789.7   | 896.2   | 920.8   | 1153.9  |
| 236.3   | 252.1   | 217.4   | 233.2   | 249.5   | 244.7   |
| 84.4    | 78.0    | 93.6    | 89.1    | 120.7   | 113.3   |
| 14.7    | 3.8     | 19.5    | 18.3    | 19.0    | 22.7    |
| 1113.9  | 1035.0  | 1053.9  | 1060.4  | 1164.8  | 1333.6  |
| 460.3   | 329.3   | 429.7   | 443.5   | 534.1   | 569.3   |
| 260.3   | 223.3   | 212.7   | 221.3   | 258.7   | 275.7   |
| 51.5    | 40.3    | 75.2    | 54.2    | 57.7    | 66.5    |
| 225.7   | 218.9   | 214.5   | 221.9   | 267.1   | 287.0   |
| 162.3   | 156.6   | 163.8   | 160.8   | 180.2   | 187.9   |
| 59.7    | 81.2    | 101.3   | 111.0   | 97.5    | 89.9    |
| 331.4   | 310.8   | 368.0   | 363.5   | 375.9   | 401.4   |
| 49.7    | 52.9    | 43.4    | 53.3    | 56.4    | 44.4    |
| 156.7   | 140.7   | 142.9   | 157.7   | 180.1   | 166.5   |
| 208.1   | 237.7   | 233.2   | 236.7   | 275.7   | 266.3   |
| 141.9   | 159.1   | 159.0   | 143.2   | 151.6   | 173.8   |
| 349.9   | 263.0   | 388.3   | 406.8   | 446.7   | 458.7   |
| 11.7    | 7.8     | 5.1     | 8.0     | 9.6     | 11.2    |
| 878.4   | 787.4   | 728.8   | 734.2   | 879.2   | 1039.3  |

|         |         |         |         |         |         |
|---------|---------|---------|---------|---------|---------|
| 1053.8  | 835.5   | 1116.4  | 962.9   | 1148.6  | 1143.7  |
| 164.1   | 118.7   | 175.6   | 161.4   | 218.0   | 216.0   |
| 2.4     | 2.6     | 10.0    | 3.6     | 1.3     | 2.1     |
| 221.1   | 212.1   | 244.6   | 269.5   | 354.1   | 279.7   |
| 242.2   | 343.0   | 251.8   | 318.6   | 270.1   | 320.9   |
| 335.5   | 334.0   | 351.8   | 418.6   | 390.0   | 455.9   |
| 62.5    | 55.5    | 46.9    | 51.9    | 58.7    | 64.8    |
| 439.7   | 345.5   | 334.7   | 379.1   | 371.9   | 436.5   |
| 497.6   | 548.9   | 495.4   | 528.6   | 602.3   | 610.4   |
| 302.3   | 268.0   | 288.6   | 308.2   | 308.4   | 401.3   |
| 74.5    | 52.5    | 50.6    | 62.9    | 57.3    | 89.6    |
| 311.3   | 234.5   | 370.5   | 368.6   | 388.8   | 375.5   |
| 79.8    | 61.3    | 75.4    | 73.1    | 96.1    | 95.2    |
| 85.0    | 138.7   | 109.4   | 115.8   | 116.0   | 112.6   |
| 428.8   | 408.7   | 372.9   | 394.7   | 460.2   | 479.2   |
| 18.4    | 16.1    | 20.3    | 17.2    | 20.6    | 16.8    |
| 14.2    | 9.5     | 19.3    | 3.4     | 22.5    | 7.4     |
| 512.9   | 429.0   | 620.2   | 606.3   | 753.8   | 641.9   |
| 83.2    | 81.4    | 84.5    | 79.9    | 85.0    | 108.7   |
| 585.2   | 584.9   | 571.1   | 643.2   | 676.4   | 731.7   |
| 30.1    | 1.0     | 26.3    | 21.5    | 30.8    | 21.3    |
| 324.3   | 237.8   | 298.8   | 331.5   | 362.0   | 362.8   |
| 299.7   | 248.1   | 301.5   | 291.6   | 330.5   | 355.2   |
| 735.2   | 541.0   | 750.1   | 618.3   | 832.6   | 836.9   |
| 244.9   | 232.4   | 270.5   | 265.9   | 310.7   | 329.4   |
| 256.4   | 272.8   | 317.7   | 329.8   | 370.7   | 363.9   |
| 290.5   | 312.2   | 339.5   | 410.8   | 350.8   | 405.8   |
| 1081.3  | 802.5   | 900.7   | 899.4   | 1055.6  | 1129.0  |
| 57.9    | 67.6    | 55.9    | 43.3    | 50.6    | 58.9    |
| 376.8   | 346.5   | 349.3   | 355.0   | 401.2   | 401.1   |
| 121.6   | 94.8    | 121.2   | 124.2   | 141.5   | 139.7   |
| 52.7    | 73.7    | 77.8    | 83.5    | 89.1    | 74.5    |
| 128.0   | 103.2   | 103.7   | 104.0   | 117.0   | 139.1   |
| 39.9    | 52.0    | 43.6    | 51.1    | 70.4    | 62.2    |
| 974.7   | 760.2   | 924.7   | 964.3   | 1055.3  | 1164.7  |
| 1875.0  | 1635.0  | 1981.6  | 1986.9  | 2174.6  | 2293.6  |
| 25.9    | 2.7     | 19.5    | 1.9     | 25.0    | 17.3    |
| 561.3   | 465.2   | 601.4   | 597.8   | 599.2   | 669.2   |
| 42.1    | 38.3    | 38.4    | 46.2    | 46.9    | 63.0    |
| 10557.6 | 10052.2 | 10727.2 | 11206.4 | 11042.0 | 10979.7 |
| 1059.6  | 1843.5  | 1157.5  | 1286.0  | 1074.9  | 1257.5  |
| 2350.7  | 2193.4  | 2529.6  | 2553.9  | 2804.0  | 2652.3  |
| 16.9    | 11.5    | 3.4     | 6.4     | 3.2     | 7.1     |
| 2.7     | 7.3     | 5.3     | 4.4     | 7.9     | 3.5     |
| 180.6   | 141.1   | 171.8   | 200.1   | 198.8   | 235.8   |
| 4022.9  | 3791.8  | 3884.6  | 3683.8  | 4260.3  | 4081.1  |
| 656.3   | 689.9   | 798.7   | 856.6   | 788.7   | 788.2   |
| 75.3    | 53.9    | 53.9    | 80.8    | 81.0    | 95.0    |
| 215.3   | 206.8   | 253.4   | 239.0   | 287.4   | 292.4   |
| 166.2   | 124.6   | 135.4   | 150.2   | 165.0   | 168.2   |
| 285.3   | 245.2   | 309.8   | 280.1   | 350.7   | 329.3   |
| 680.0   | 772.1   | 725.6   | 812.4   | 827.8   | 907.7   |
| 340.7   | 301.0   | 323.9   | 318.8   | 389.8   | 404.3   |

|        |        |        |        |        |        |
|--------|--------|--------|--------|--------|--------|
| 129.1  | 123.5  | 150.8  | 160.7  | 152.3  | 158.0  |
| 165.4  | 134.1  | 194.3  | 200.5  | 205.9  | 226.0  |
| 261.6  | 202.8  | 238.0  | 240.1  | 260.6  | 294.2  |
| 123.1  | 117.2  | 128.4  | 116.6  | 126.5  | 143.0  |
| 225.4  | 191.9  | 258.7  | 247.3  | 274.4  | 275.5  |
| 177.4  | 171.2  | 191.5  | 195.2  | 202.1  | 201.0  |
| 57.3   | 58.9   | 49.1   | 54.5   | 58.8   | 64.2   |
| 15.6   | 26.8   | 16.1   | 6.9    | 15.3   | 18.2   |
| 62.4   | 83.1   | 76.7   | 97.8   | 104.5  | 106.6  |
| 9.5    | 8.6    | 6.4    | 4.9    | 3.5    | 7.2    |
| 784.3  | 675.8  | 653.4  | 704.4  | 772.8  | 1003.4 |
| 3067.4 | 2724.7 | 3139.5 | 3160.4 | 3268.3 | 3424.6 |
| 84.9   | 116.5  | 70.9   | 84.9   | 74.3   | 110.5  |
| 214.5  | 257.9  | 192.5  | 227.0  | 233.3  | 265.1  |
| 556.7  | 526.8  | 650.7  | 725.6  | 783.4  | 777.0  |
| 872.3  | 825.1  | 886.4  | 923.0  | 1015.4 | 1114.4 |
| 1202.1 | 1009.4 | 1141.9 | 1033.8 | 1149.4 | 1256.6 |
| 93.2   | 81.8   | 97.1   | 108.5  | 103.0  | 102.1  |
| 360.7  | 287.7  | 370.7  | 350.5  | 444.1  | 454.5  |
| 77.9   | 61.2   | 93.9   | 79.4   | 95.9   | 103.9  |
| 332.8  | 248.1  | 365.1  | 369.1  | 388.3  | 423.8  |
| 42.8   | 61.8   | 47.3   | 53.4   | 41.9   | 42.0   |
| 25.2   | 29.0   | 17.6   | 25.7   | 4.4    | 24.7   |
| 778.7  | 579.7  | 682.1  | 711.2  | 899.5  | 802.9  |
| 30.3   | 20.0   | 29.6   | 26.1   | 40.1   | 31.0   |
| 66.1   | 82.2   | 78.6   | 60.2   | 70.8   | 75.6   |
| 222.3  | 237.9  | 231.6  | 269.2  | 270.8  | 295.7  |
| 87.0   | 80.3   | 90.6   | 101.9  | 113.0  | 121.6  |
| 366.3  | 404.5  | 481.1  | 479.1  | 505.1  | 482.1  |
| 68.8   | 65.8   | 72.4   | 76.6   | 87.3   | 65.1   |
| 813.6  | 723.6  | 937.0  | 917.2  | 984.4  | 1018.6 |
| 96.1   | 78.6   | 110.1  | 105.2  | 124.2  | 135.1  |
| 249.4  | 264.8  | 295.7  | 269.8  | 368.3  | 348.2  |
| 179.5  | 164.2  | 206.6  | 211.2  | 216.1  | 238.3  |
| 517.8  | 523.5  | 492.8  | 535.2  | 568.5  | 588.5  |
| 35.3   | 52.6   | 27.9   | 41.7   | 35.1   | 33.2   |
| 44.1   | 41.0   | 36.2   | 43.1   | 47.6   | 50.4   |
| 59.7   | 79.7   | 82.6   | 62.1   | 85.5   | 94.9   |
| 234.9  | 231.1  | 238.0  | 251.8  | 266.4  | 281.4  |
| 2.5    | 2.1    | 5.0    | 3.1    | 1.0    | 1.1    |
| 508.4  | 539.7  | 558.3  | 520.6  | 588.1  | 622.7  |
| 218.0  | 248.2  | 243.7  | 261.1  | 282.7  | 262.0  |
| 231.6  | 202.4  | 241.3  | 225.7  | 275.2  | 276.0  |
| 132.2  | 122.2  | 130.2  | 139.2  | 139.2  | 163.4  |
| 245.4  | 247.7  | 255.5  | 225.1  | 279.3  | 323.5  |
| 268.3  | 250.6  | 315.1  | 299.6  | 352.5  | 350.8  |
| 31.1   | 39.8   | 29.4   | 27.0   | 33.9   | 33.2   |
| 149.4  | 123.7  | 146.1  | 136.3  | 162.6  | 131.9  |
| 18.3   | 19.3   | 21.9   | 10.8   | 9.7    | 16.7   |
| 198.2  | 212.0  | 219.2  | 239.9  | 241.1  | 280.6  |
| 137.5  | 141.5  | 149.0  | 142.6  | 192.2  | 168.1  |
| 276.5  | 249.3  | 274.8  | 295.7  | 322.6  | 303.5  |
| 75.3   | 63.6   | 113.7  | 54.3   | 60.1   | 104.3  |

|        |        |        |        |        |        |
|--------|--------|--------|--------|--------|--------|
| 416.9  | 378.5  | 418.6  | 429.4  | 494.2  | 558.5  |
| 477.5  | 557.6  | 538.9  | 542.9  | 530.2  | 618.0  |
| 661.0  | 620.5  | 642.6  | 733.1  | 681.4  | 780.7  |
| 5.7    | 7.1    | 3.0    | 6.9    | 10.8   | 7.7    |
| 195.4  | 160.3  | 207.7  | 223.7  | 231.6  | 234.2  |
| 3066.9 | 3541.9 | 3030.9 | 2937.5 | 3094.8 | 3300.0 |
| 124.5  | 94.0   | 143.9  | 140.5  | 141.9  | 135.4  |
| 446.9  | 429.6  | 497.4  | 493.0  | 517.8  | 555.8  |
| 91.3   | 90.4   | 119.3  | 108.6  | 130.3  | 116.2  |
| 5.6    | 12.3   | 9.8    | 6.3    | 8.7    | 5.3    |
| 18.7   | 15.7   | 14.1   | 13.2   | 19.3   | 23.0   |
| 5041.5 | 4843.9 | 5510.1 | 6726.8 | 5913.8 | 6132.0 |
| 96.2   | 74.8   | 94.6   | 93.3   | 114.9  | 132.3  |
| 316.3  | 279.3  | 332.8  | 333.5  | 386.2  | 390.1  |
| 1185.3 | 860.9  | 1068.9 | 1187.1 | 1121.3 | 1508.6 |
| 1551.6 | 1391.2 | 1768.8 | 1933.2 | 1934.3 | 1866.8 |
| 1.5    | 2.4    | 1.1    | 1.2    | 0.8    | 1.8    |
| 276.2  | 158.4  | 247.1  | 254.2  | 343.1  | 296.8  |
| 70.1   | 78.3   | 70.7   | 104.9  | 62.4   | 97.8   |
| 241.0  | 207.3  | 246.4  | 259.4  | 287.7  | 255.2  |
| 114.2  | 108.8  | 103.3  | 108.9  | 138.5  | 120.1  |
| 371.8  | 337.0  | 302.5  | 306.6  | 396.5  | 406.2  |
| 491.0  | 467.3  | 568.1  | 580.3  | 615.4  | 623.0  |
| 405.1  | 339.0  | 393.8  | 426.6  | 503.2  | 488.9  |
| 125.7  | 122.6  | 145.6  | 155.9  | 131.0  | 147.6  |
| 368.8  | 426.0  | 401.4  | 406.5  | 384.1  | 460.3  |
| 296.0  | 314.8  | 339.0  | 383.8  | 349.8  | 428.3  |
| 544.7  | 588.7  | 550.2  | 562.2  | 594.0  | 712.7  |
| 542.8  | 447.1  | 428.3  | 380.3  | 475.0  | 599.4  |
| 109.4  | 99.4   | 104.4  | 88.8   | 127.9  | 123.5  |
| 132.0  | 110.7  | 115.5  | 152.3  | 138.5  | 149.9  |
| 76.4   | 64.6   | 75.8   | 95.9   | 87.1   | 86.3   |
| 319.3  | 411.3  | 369.5  | 392.5  | 389.5  | 448.6  |
| 550.0  | 558.8  | 546.3  | 551.7  | 572.4  | 683.2  |
| 680.9  | 515.5  | 652.9  | 665.2  | 728.2  | 784.3  |
| 405.0  | 441.5  | 485.3  | 499.7  | 509.8  | 551.4  |
| 844.5  | 806.1  | 814.8  | 799.0  | 819.3  | 1024.1 |
| 165.9  | 140.5  | 178.9  | 175.5  | 191.8  | 213.5  |
| 1941.5 | 1775.5 | 2181.2 | 1818.7 | 2236.7 | 1849.0 |
| 936.9  | 855.9  | 941.6  | 1029.4 | 1099.9 | 1070.9 |
| 30.2   | 15.4   | 12.4   | 24.8   | 38.4   | 42.4   |
| 128.7  | 93.5   | 100.6  | 96.5   | 122.0  | 133.7  |
| 116.3  | 161.0  | 102.5  | 117.8  | 119.1  | 141.6  |
| 385.7  | 315.9  | 338.2  | 362.7  | 418.7  | 488.3  |
| 554.4  | 517.1  | 726.4  | 761.4  | 772.0  | 763.0  |
| 78.1   | 84.9   | 82.4   | 92.1   | 97.0   | 103.8  |
| 562.9  | 549.0  | 484.4  | 627.6  | 590.7  | 640.1  |
| 145.8  | 91.5   | 116.0  | 128.7  | 149.9  | 139.9  |
| 118.1  | 78.1   | 94.6   | 89.7   | 107.3  | 134.3  |
| 552.4  | 486.6  | 548.4  | 509.3  | 506.6  | 641.2  |
| 737.4  | 815.4  | 853.7  | 849.4  | 844.8  | 955.8  |
| 307.6  | 297.1  | 307.2  | 325.3  | 375.0  | 401.1  |
| 406.3  | 324.3  | 448.4  | 520.9  | 535.0  | 628.4  |

|        |        |        |        |        |        |
|--------|--------|--------|--------|--------|--------|
| 467.2  | 309.0  | 521.0  | 572.0  | 563.4  | 601.6  |
| 273.0  | 339.1  | 239.2  | 264.9  | 407.1  | 346.7  |
| 187.7  | 240.5  | 248.4  | 239.7  | 283.3  | 272.1  |
| 18.7   | 19.1   | 25.1   | 23.6   | 30.9   | 27.2   |
| 63.9   | 60.9   | 48.3   | 61.3   | 74.4   | 93.4   |
| 44.0   | 61.3   | 45.9   | 72.7   | 61.6   | 57.6   |
| 216.7  | 257.8  | 289.6  | 307.1  | 259.0  | 298.6  |
| 182.6  | 130.1  | 195.5  | 242.0  | 228.3  | 217.3  |
| 4.3    | 3.8    | 7.5    | 5.0    | 4.3    | 8.4    |
| 12.7   | 5.9    | 6.7    | 7.6    | 4.8    | 4.9    |
| 15.5   | 15.3   | 24.5   | 15.4   | 28.5   | 28.7   |
| 198.5  | 227.8  | 218.6  | 218.1  | 265.2  | 270.3  |
| 12.2   | 13.9   | 14.9   | 9.9    | 10.1   | 13.1   |
| 179.7  | 193.0  | 213.3  | 218.6  | 210.5  | 228.6  |
| 84.4   | 116.1  | 91.3   | 96.6   | 87.4   | 127.5  |
| 256.7  | 377.5  | 259.0  | 255.1  | 274.5  | 335.2  |
| 188.5  | 206.4  | 165.5  | 167.6  | 185.8  | 231.5  |
| 260.5  | 224.8  | 252.7  | 262.6  | 302.0  | 332.1  |
| 642.6  | 565.6  | 717.0  | 799.1  | 784.5  | 836.2  |
| 352.0  | 264.7  | 305.3  | 320.7  | 376.2  | 400.3  |
| 134.9  | 124.8  | 132.0  | 143.7  | 144.8  | 172.4  |
| 88.7   | 90.6   | 78.4   | 103.7  | 121.8  | 126.8  |
| 605.5  | 481.0  | 531.9  | 575.2  | 650.9  | 727.8  |
| 370.2  | 306.8  | 397.3  | 394.2  | 462.5  | 499.2  |
| 502.7  | 432.4  | 469.5  | 489.2  | 516.8  | 649.1  |
| 158.4  | 113.3  | 115.4  | 125.0  | 164.4  | 156.7  |
| 212.0  | 229.0  | 215.7  | 256.3  | 268.1  | 273.7  |
| 2.3    | 2.7    | 2.3    | 5.4    | 3.1    | 3.2    |
| 254.8  | 223.0  | 261.6  | 311.9  | 299.6  | 322.4  |
| 1375.6 | 1397.3 | 1417.6 | 1480.5 | 1682.5 | 1700.2 |
| 893.9  | 860.5  | 875.2  | 849.1  | 953.5  | 1092.1 |
| 90.8   | 79.2   | 81.3   | 73.9   | 87.1   | 101.1  |
| 689.5  | 713.1  | 823.8  | 771.4  | 840.9  | 844.9  |
| 509.6  | 485.0  | 564.5  | 551.4  | 612.5  | 614.5  |
| 141.1  | 106.3  | 129.0  | 132.6  | 168.7  | 171.5  |
| 84.5   | 92.4   | 87.5   | 86.7   | 122.3  | 98.0   |
| 92.1   | 87.6   | 106.7  | 131.8  | 115.6  | 125.1  |
| 133.7  | 127.3  | 162.9  | 165.3  | 183.7  | 183.6  |
| 415.6  | 389.5  | 439.2  | 458.8  | 478.1  | 510.5  |
| 179.8  | 191.2  | 220.4  | 271.6  | 314.6  | 252.4  |
| 783.9  | 774.4  | 764.2  | 829.0  | 891.9  | 927.4  |
| 445.3  | 376.0  | 531.0  | 600.3  | 560.6  | 522.8  |
| 56.4   | 40.2   | 64.6   | 69.4   | 70.4   | 84.0   |
| 605.8  | 558.7  | 663.0  | 805.2  | 774.5  | 850.2  |
| 234.0  | 248.4  | 243.8  | 226.0  | 265.3  | 282.3  |
| 443.4  | 377.0  | 452.6  | 451.5  | 494.9  | 528.1  |
| 123.5  | 112.0  | 129.4  | 123.2  | 159.1  | 190.8  |
| 767.9  | 638.6  | 689.7  | 814.8  | 735.5  | 1027.3 |
| 323.0  | 314.2  | 318.2  | 308.3  | 294.4  | 391.0  |
| 114.2  | 75.9   | 141.7  | 139.9  | 158.5  | 187.8  |
| 319.6  | 327.5  | 332.0  | 353.6  | 379.6  | 397.4  |
| 138.0  | 116.4  | 153.6  | 134.7  | 173.0  | 151.9  |
| 38.4   | 39.2   | 27.6   | 25.9   | 35.9   | 27.2   |

|        |        |        |        |        |        |
|--------|--------|--------|--------|--------|--------|
| 852.9  | 725.0  | 824.5  | 867.5  | 927.8  | 991.4  |
| 123.5  | 161.2  | 96.9   | 111.3  | 107.0  | 130.7  |
| 151.4  | 145.3  | 151.8  | 162.0  | 162.3  | 185.3  |
| 62.3   | 72.2   | 69.8   | 78.6   | 73.0   | 62.5   |
| 152.7  | 164.9  | 166.3  | 195.6  | 207.5  | 216.6  |
| 52.8   | 76.2   | 73.7   | 62.4   | 74.8   | 70.5   |
| 112.1  | 137.0  | 101.6  | 119.8  | 143.1  | 137.0  |
| 82.0   | 100.1  | 103.0  | 96.8   | 120.7  | 113.4  |
| 4.3    | 6.4    | 2.8    | 7.0    | 2.9    | 8.0    |
| 245.0  | 196.0  | 216.1  | 217.3  | 272.6  | 282.9  |
| 199.2  | 158.0  | 215.5  | 221.4  | 223.9  | 236.7  |
| 126.8  | 155.4  | 149.9  | 126.0  | 116.3  | 139.2  |
| 91.6   | 107.1  | 108.0  | 102.2  | 143.1  | 152.0  |
| 11.6   | 12.7   | 5.0    | 5.3    | 6.8    | 9.9    |
| 8.8    | 7.1    | 3.1    | 6.1    | 10.1   | 3.0    |
| 241.1  | 196.1  | 208.8  | 180.0  | 248.2  | 284.0  |
| 190.0  | 207.1  | 215.5  | 211.7  | 264.8  | 251.4  |
| 287.6  | 316.9  | 314.7  | 286.3  | 308.7  | 326.4  |
| 1070.5 | 1137.8 | 1123.9 | 1163.5 | 1211.6 | 1295.8 |
| 172.8  | 151.1  | 175.0  | 186.5  | 191.0  | 224.5  |
| 529.6  | 534.0  | 545.2  | 638.7  | 549.7  | 646.8  |
| 1609.3 | 1541.7 | 1403.0 | 1717.1 | 1517.3 | 1785.9 |
| 1511.5 | 1420.8 | 1437.8 | 1457.6 | 1616.7 | 1792.6 |
| 8.5    | 15.3   | 5.4    | 11.8   | 8.8    | 15.4   |
| 388.6  | 299.8  | 330.2  | 347.6  | 386.6  | 431.5  |
| 95.3   | 95.5   | 108.6  | 108.6  | 84.6   | 95.7   |
| 85.9   | 65.7   | 82.6   | 76.7   | 89.1   | 95.0   |
| 40.6   | 42.0   | 49.6   | 43.7   | 45.4   | 41.4   |
| 568.2  | 459.1  | 584.6  | 581.7  | 643.1  | 741.9  |
| 372.3  | 388.3  | 335.8  | 344.7  | 371.9  | 477.3  |
| 548.5  | 670.3  | 494.4  | 664.4  | 611.1  | 710.4  |
| 269.4  | 265.8  | 230.4  | 304.7  | 280.2  | 358.8  |
| 246.4  | 243.9  | 301.0  | 318.4  | 360.6  | 291.8  |
| 327.9  | 540.1  | 298.9  | 325.9  | 381.1  | 363.2  |
| 6253.5 | 5739.1 | 5704.7 | 6069.3 | 6330.7 | 6999.9 |
| 26.8   | 28.4   | 29.3   | 26.3   | 38.4   | 28.7   |
| 285.5  | 217.1  | 264.1  | 284.0  | 314.5  | 340.3  |
| 340.9  | 283.9  | 326.6  | 312.0  | 373.6  | 402.9  |
| 259.2  | 476.9  | 212.6  | 328.8  | 246.1  | 355.0  |
| 341.3  | 297.4  | 360.4  | 359.4  | 395.2  | 417.3  |
| 181.2  | 165.7  | 210.5  | 186.1  | 202.8  | 223.0  |
| 131.7  | 114.2  | 129.8  | 156.9  | 158.6  | 200.7  |
| 425.7  | 324.7  | 390.3  | 433.8  | 455.2  | 524.5  |
| 38.4   | 37.1   | 40.0   | 33.8   | 55.4   | 47.2   |
| 3.8    | 3.8    | 3.7    | 5.2    | 4.7    | 4.6    |
| 356.2  | 329.6  | 341.4  | 385.0  | 426.7  | 443.6  |
| 265.8  | 265.4  | 308.1  | 342.6  | 307.1  | 354.2  |
| 51.4   | 42.4   | 49.8   | 49.5   | 70.0   | 68.4   |
| 152.1  | 123.7  | 158.4  | 161.0  | 216.9  | 196.9  |
| 1.0    | 2.0    | 2.1    | 3.2    | 1.4    | 4.4    |
| 28.0   | 15.1   | 21.3   | 17.7   | 22.5   | 27.2   |
| 673.3  | 471.4  | 520.6  | 542.2  | 589.3  | 604.9  |
| 333.3  | 259.8  | 311.5  | 301.2  | 384.7  | 342.0  |

|        |        |        |        |        |        |
|--------|--------|--------|--------|--------|--------|
| 489.0  | 393.8  | 497.8  | 536.5  | 605.2  | 607.8  |
| 836.2  | 761.7  | 874.3  | 972.3  | 977.7  | 1000.2 |
| 105.8  | 65.3   | 97.2   | 79.4   | 101.6  | 106.1  |
| 526.1  | 426.6  | 515.7  | 545.2  | 528.9  | 569.1  |
| 151.2  | 114.2  | 133.8  | 151.9  | 164.2  | 180.3  |
| 216.3  | 187.2  | 217.2  | 228.0  | 250.7  | 284.6  |
| 1087.7 | 1084.4 | 1029.0 | 979.6  | 1110.8 | 1252.5 |
| 411.3  | 426.3  | 516.6  | 554.7  | 577.7  | 613.5  |
| 307.1  | 313.4  | 311.0  | 310.7  | 322.3  | 398.0  |
| 492.4  | 511.4  | 558.2  | 515.5  | 576.4  | 585.3  |
| 335.3  | 358.6  | 303.8  | 346.3  | 372.6  | 372.3  |
| 161.2  | 180.1  | 164.2  | 177.5  | 180.9  | 200.3  |
| 121.0  | 131.7  | 112.8  | 99.4   | 124.5  | 157.6  |
| 40.6   | 278.1  | 35.9   | 95.6   | 24.9   | 66.2   |
| 53.6   | 287.2  | 58.4   | 160.5  | 51.8   | 71.9   |
| 480.2  | 398.7  | 443.6  | 421.1  | 535.5  | 574.6  |
| 578.0  | 425.8  | 580.7  | 633.8  | 624.8  | 618.7  |
| 83.1   | 87.4   | 101.1  | 106.7  | 103.1  | 119.8  |
| 342.1  | 311.0  | 318.8  | 317.3  | 402.0  | 361.2  |
| 13.3   | 17.7   | 12.5   | 21.8   | 23.6   | 38.0   |
| 16.5   | 17.8   | 23.7   | 17.2   | 22.0   | 22.7   |
| 600.8  | 497.3  | 553.9  | 578.5  | 579.7  | 679.7  |
| 536.7  | 507.2  | 583.8  | 504.2  | 644.4  | 666.0  |
| 423.0  | 349.8  | 439.1  | 456.4  | 461.3  | 510.1  |
| 599.6  | 560.5  | 576.0  | 722.2  | 634.7  | 764.7  |
| 695.7  | 665.8  | 741.0  | 904.9  | 797.3  | 854.6  |
| 108.8  | 120.9  | 124.3  | 143.5  | 138.8  | 148.9  |
| 2301.1 | 2154.8 | 1943.0 | 2563.9 | 2191.5 | 2713.5 |
| 413.9  | 317.4  | 442.6  | 425.1  | 484.9  | 477.6  |
| 381.1  | 359.1  | 414.6  | 405.8  | 477.6  | 478.7  |
| 9.5    | 1.7    | 16.6   | 6.6    | 8.1    | 7.8    |
| 156.7  | 145.4  | 133.0  | 153.9  | 152.6  | 208.5  |
| 755.8  | 742.1  | 795.9  | 874.4  | 882.3  | 980.2  |
| 60.7   | 54.6   | 66.4   | 75.3   | 74.9   | 77.4   |
| 59.2   | 63.5   | 76.0   | 58.8   | 48.2   | 69.4   |
| 212.0  | 279.7  | 246.0  | 261.9  | 268.2  | 273.5  |
| 997.5  | 936.3  | 1352.4 | 1126.2 | 1191.4 | 1304.6 |
| 171.8  | 123.1  | 179.2  | 135.5  | 188.4  | 194.0  |
| 399.6  | 320.2  | 395.8  | 387.5  | 530.8  | 511.8  |
| 250.1  | 320.2  | 251.7  | 296.8  | 295.2  | 326.5  |
| 325.7  | 275.7  | 291.8  | 301.3  | 316.7  | 395.6  |
| 338.8  | 273.7  | 332.7  | 339.6  | 396.3  | 393.5  |
| 130.5  | 110.0  | 122.4  | 123.4  | 135.2  | 153.7  |
| 71.9   | 73.9   | 67.7   | 76.4   | 78.0   | 88.1   |
| 211.6  | 185.4  | 232.2  | 252.8  | 277.2  | 270.3  |
| 793.2  | 604.1  | 801.8  | 755.5  | 859.5  | 982.8  |
| 1.7    | 14.4   | 10.9   | 3.0    | 3.4    | 5.2    |
| 6.8    | 5.2    | 2.8    | 4.9    | 23.8   | 16.3   |
| 247.4  | 189.5  | 228.3  | 251.2  | 292.3  | 299.7  |
| 96.0   | 67.0   | 89.0   | 103.4  | 119.4  | 127.5  |
| 206.2  | 157.1  | 186.8  | 189.5  | 220.4  | 205.3  |
| 181.6  | 293.5  | 180.0  | 259.7  | 180.7  | 250.5  |
| 173.7  | 313.2  | 198.4  | 202.8  | 207.5  | 248.9  |

|        |        |        |        |        |        |
|--------|--------|--------|--------|--------|--------|
| 54.7   | 70.1   | 82.3   | 78.4   | 105.6  | 101.0  |
| 67.0   | 83.1   | 77.6   | 75.7   | 79.5   | 86.4   |
| 290.2  | 248.0  | 306.9  | 269.5  | 370.6  | 329.4  |
| 388.3  | 461.2  | 491.9  | 483.3  | 596.0  | 590.0  |
| 1076.0 | 1118.3 | 1041.2 | 1073.1 | 1257.8 | 1303.1 |
| 8.6    | 2.4    | 1.5    | 4.4    | 2.2    | 3.0    |
| 33.1   | 61.2   | 34.8   | 50.2   | 30.3   | 54.0   |
| 50.6   | 45.5   | 45.6   | 75.0   | 64.8   | 58.9   |
| 3947.4 | 3635.1 | 3574.1 | 3714.5 | 4167.8 | 4688.8 |
| 5.6    | 0.4    | 3.9    | 1.6    | 3.5    | 0.8    |
| 17.9   | 2.3    | 11.1   | 13.3   | 13.1   | 6.9    |
| 8.9    | 0.4    | 8.3    | 10.3   | 11.5   | 14.9   |
| 8.5    | 11.4   | 14.6   | 13.8   | 12.3   | 10.9   |
| 857.6  | 815.2  | 779.8  | 939.4  | 925.3  | 1044.6 |
| 64.6   | 56.7   | 58.3   | 63.1   | 66.9   | 58.6   |
| 1268.9 | 1238.7 | 1315.9 | 1304.7 | 1378.0 | 1550.3 |
| 1.8    | 3.2    | 9.4    | 0.7    | 5.4    | 3.2    |
| 1208.3 | 1066.6 | 1201.7 | 1122.5 | 1249.8 | 1495.7 |
| 996.4  | 943.6  | 954.4  | 995.3  | 1092.6 | 1154.9 |
| 5.1    | 2.0    | 9.0    | 2.4    | 8.1    | 9.1    |
| 71.4   | 48.0   | 64.6   | 66.5   | 82.4   | 65.2   |
| 1012.3 | 753.7  | 1212.4 | 1289.8 | 1344.8 | 1315.3 |
| 112.6  | 129.6  | 101.9  | 125.0  | 125.0  | 121.6  |
| 4613.5 | 4203.9 | 4406.8 | 4537.0 | 5277.3 | 5117.2 |
| 75.8   | 70.9   | 89.6   | 99.8   | 94.3   | 120.2  |
| 57.8   | 34.6   | 40.9   | 51.9   | 51.5   | 48.3   |
| 221.9  | 257.2  | 232.8  | 279.3  | 276.4  | 282.8  |
| 1621.2 | 1621.3 | 1665.0 | 1763.5 | 1919.4 | 1916.4 |
| 36.3   | 50.0   | 46.1   | 44.7   | 40.9   | 56.2   |
| 751.9  | 865.1  | 877.2  | 969.8  | 861.7  | 1006.9 |
| 678.9  | 644.0  | 722.0  | 736.9  | 800.7  | 789.8  |
| 80.1   | 103.3  | 86.3   | 83.1   | 95.0   | 100.9  |
| 201.9  | 179.8  | 170.6  | 182.9  | 199.4  | 241.1  |
| 7.4    | 3.4    | 3.4    | 2.0    | 5.6    | 4.1    |
| 324.2  | 347.5  | 363.0  | 358.6  | 374.8  | 387.7  |
| 10.3   | 5.4    | 10.3   | 4.1    | 4.4    | 3.0    |
| 1.9    | 12.0   | 4.1    | 6.1    | 7.1    | 5.9    |
| 19.9   | 18.1   | 15.0   | 26.7   | 22.0   | 12.9   |
| 3.8    | 2.0    | 11.2   | 6.2    | 2.5    | 7.3    |
| 354.4  | 281.3  | 302.5  | 335.3  | 357.8  | 450.2  |
| 593.9  | 535.4  | 605.3  | 628.5  | 680.5  | 768.7  |
| 588.6  | 543.6  | 566.8  | 652.5  | 698.9  | 717.4  |
| 260.2  | 277.1  | 306.1  | 318.3  | 335.9  | 368.5  |
| 26.8   | 24.9   | 40.9   | 19.5   | 26.0   | 29.5   |
| 1136.9 | 1042.4 | 1111.7 | 1151.3 | 1222.2 | 1370.6 |
| 261.7  | 222.0  | 244.4  | 288.6  | 273.5  | 306.6  |
| 3.1    | 0.6    | 0.7    | 0.5    | 0.5    | 0.8    |
| 2.4    | 3.5    | 2.8    | 2.0    | 2.1    | 2.8    |
| 807.7  | 802.1  | 848.3  | 955.7  | 891.2  | 994.3  |
| 480.9  | 546.3  | 536.3  | 613.0  | 595.4  | 612.8  |
| 33.5   | 67.5   | 29.6   | 64.2   | 37.9   | 44.8   |
| 51.3   | 54.4   | 55.4   | 59.0   | 52.7   | 58.6   |
| 804.4  | 587.7  | 740.5  | 702.8  | 822.5  | 853.5  |



|        |        |        |        |        |        |
|--------|--------|--------|--------|--------|--------|
| 242.9  | 209.3  | 221.8  | 226.3  | 215.5  | 284.2  |
| 149.7  | 165.3  | 184.4  | 193.0  | 228.6  | 218.7  |
| 3.6    | 1.3    | 2.5    | 2.8    | 2.4    | 3.2    |
| 45.7   | 48.3   | 50.8   | 47.7   | 49.0   | 53.6   |
| 400.7  | 399.5  | 396.3  | 387.4  | 473.7  | 478.3  |
| 187.1  | 149.5  | 191.2  | 170.1  | 244.5  | 255.6  |
| 449.4  | 454.1  | 525.6  | 498.8  | 576.4  | 525.0  |
| 259.9  | 227.4  | 196.4  | 205.0  | 185.5  | 282.3  |
| 251.2  | 216.4  | 233.1  | 255.4  | 270.1  | 296.1  |
| 56.0   | 40.2   | 72.6   | 59.2   | 72.5   | 95.1   |
| 147.9  | 89.8   | 130.5  | 133.3  | 141.2  | 145.3  |
| 203.4  | 155.6  | 197.5  | 176.9  | 203.6  | 217.0  |
| 2.1    | 2.4    | 2.0    | 1.8    | 1.5    | 1.6    |
| 2341.6 | 2574.5 | 2849.5 | 2888.2 | 2967.1 | 2981.1 |
| 201.8  | 362.3  | 219.8  | 268.6  | 167.0  | 304.4  |
| 574.8  | 517.2  | 563.3  | 562.4  | 631.1  | 648.2  |
| 34.5   | 47.5   | 32.5   | 47.7   | 37.3   | 56.5   |
| 414.5  | 396.5  | 484.8  | 486.7  | 510.0  | 498.3  |
| 261.8  | 237.1  | 291.3  | 297.2  | 336.1  | 309.4  |
| 305.0  | 227.7  | 239.2  | 272.0  | 285.0  | 354.7  |
| 6.5    | 13.0   | 8.0    | 9.4    | 13.2   | 17.0   |
| 1680.9 | 1637.6 | 1768.8 | 1800.6 | 2014.3 | 2029.8 |
| 32.3   | 43.0   | 44.3   | 29.6   | 40.3   | 54.1   |
| 75.2   | 67.9   | 72.7   | 82.2   | 96.9   | 91.0   |
| 466.5  | 395.2  | 342.8  | 391.5  | 395.6  | 551.1  |
| 558.1  | 490.3  | 550.9  | 616.9  | 652.7  | 667.4  |
| 132.2  | 129.9  | 138.3  | 151.5  | 163.2  | 175.3  |
| 100.6  | 82.0   | 100.4  | 122.1  | 121.3  | 133.2  |
| 53.3   | 63.4   | 84.7   | 75.6   | 92.9   | 88.4   |
| 7.6    | 5.3    | 13.7   | 8.5    | 12.1   | 4.9    |
| 12.4   | 13.2   | 18.2   | 9.6    | 9.4    | 19.1   |
| 6.1    | 1.0    | 7.1    | 1.3    | 3.8    | 5.1    |
| 22.5   | 21.9   | 22.1   | 35.2   | 32.2   | 32.0   |
| 44.5   | 37.2   | 31.6   | 29.6   | 50.1   | 49.6   |
| 7.4    | 1.4    | 5.8    | 1.7    | 3.6    | 9.0    |
| 264.5  | 285.6  | 205.2  | 288.9  | 249.3  | 307.0  |
| 3.8    | 5.8    | 2.5    | 3.7    | 6.8    | 4.4    |
| 2333.2 | 2142.7 | 2484.0 | 2385.3 | 2558.9 | 2788.5 |
| 32.0   | 49.1   | 33.1   | 40.3   | 35.0   | 44.8   |
| 275.1  | 334.6  | 254.4  | 293.2  | 310.9  | 340.1  |
| 136.6  | 111.6  | 136.5  | 143.7  | 165.2  | 183.4  |
| 118.9  | 118.8  | 120.0  | 133.1  | 113.3  | 145.3  |
| 3.7    | 7.4    | 7.1    | 2.4    | 1.3    | 3.6    |
| 2256.9 | 2125.1 | 2232.7 | 2450.2 | 2471.0 | 2912.2 |
| 4.8    | 0.7    | 1.0    | 2.1    | 1.3    | 1.7    |
| 204.0  | 203.1  | 226.2  | 232.9  | 222.2  | 268.8  |
| 83.6   | 71.5   | 74.7   | 81.4   | 85.4   | 83.9   |
| 40.4   | 31.8   | 36.8   | 35.6   | 42.8   | 46.0   |
| 464.7  | 458.6  | 618.9  | 728.6  | 631.4  | 608.6  |
| 35.8   | 30.3   | 46.0   | 25.8   | 37.9   | 36.3   |
| 201.6  | 144.8  | 197.5  | 189.7  | 224.0  | 234.6  |
| 294.8  | 235.4  | 306.2  | 323.4  | 353.0  | 355.1  |
| 252.2  | 202.7  | 240.0  | 244.2  | 280.8  | 334.8  |

|        |        |        |        |        |        |
|--------|--------|--------|--------|--------|--------|
| 289.8  | 193.3  | 266.3  | 261.6  | 295.3  | 317.0  |
| 54.3   | 65.3   | 83.3   | 79.3   | 84.2   | 85.9   |
| 163.7  | 155.8  | 199.0  | 161.5  | 192.5  | 231.5  |
| 989.3  | 868.7  | 835.1  | 858.7  | 996.1  | 1100.8 |
| 10.5   | 6.7    | 7.0    | 9.0    | 14.1   | 10.1   |
| 198.4  | 261.5  | 137.7  | 255.3  | 173.7  | 233.6  |
| 174.7  | 161.2  | 190.6  | 197.0  | 215.4  | 194.7  |
| 19.1   | 22.3   | 18.4   | 4.7    | 12.8   | 20.6   |
| 121.7  | 87.7   | 108.5  | 116.0  | 132.3  | 151.5  |
| 134.3  | 108.6  | 117.4  | 172.7  | 124.2  | 131.6  |
| 64.8   | 59.9   | 65.9   | 67.9   | 76.2   | 75.2   |
| 111.5  | 54.0   | 80.7   | 105.0  | 94.8   | 79.6   |
| 91.4   | 117.8  | 96.6   | 124.2  | 154.0  | 123.6  |
| 16.3   | 37.9   | 26.5   | 18.1   | 20.1   | 30.6   |
| 9.4    | 3.7    | 10.0   | 19.6   | 10.9   | 7.6    |
| 27.0   | 45.4   | 29.2   | 26.7   | 23.7   | 20.0   |
| 642.2  | 703.2  | 528.7  | 567.4  | 550.1  | 665.5  |
| 875.2  | 847.9  | 943.3  | 934.8  | 1038.3 | 1135.3 |
| 427.3  | 384.7  | 421.2  | 457.5  | 497.7  | 524.9  |
| 276.3  | 245.3  | 230.4  | 261.9  | 283.6  | 338.7  |
| 52.2   | 47.8   | 56.3   | 53.8   | 58.4   | 66.6   |
| 567.9  | 530.2  | 621.9  | 648.5  | 691.4  | 732.2  |
| 64.3   | 57.2   | 68.7   | 67.8   | 70.5   | 67.0   |
| 408.9  | 432.4  | 445.7  | 456.9  | 480.8  | 538.6  |
| 154.9  | 116.1  | 110.8  | 139.6  | 166.3  | 161.4  |
| 264.5  | 231.1  | 230.1  | 236.1  | 311.4  | 341.3  |
| 77.3   | 79.5   | 87.0   | 67.0   | 75.8   | 86.1   |
| 96.4   | 78.9   | 95.1   | 95.0   | 145.4  | 124.9  |
| 168.4  | 140.5  | 198.8  | 187.6  | 223.3  | 226.8  |
| 1.2    | 2.4    | 1.5    | 1.4    | 1.4    | 1.3    |
| 157.5  | 197.0  | 216.4  | 192.8  | 192.3  | 218.3  |
| 423.3  | 282.6  | 385.3  | 376.9  | 416.5  | 466.9  |
| 122.3  | 116.6  | 138.3  | 105.7  | 119.1  | 145.1  |
| 52.2   | 42.3   | 52.2   | 48.6   | 69.5   | 57.4   |
| 38.8   | 47.7   | 61.4   | 36.5   | 46.2   | 48.9   |
| 1036.8 | 1070.1 | 1175.9 | 1188.7 | 1290.4 | 1329.7 |
| 301.3  | 359.2  | 321.2  | 346.8  | 389.9  | 391.5  |
| 423.6  | 415.6  | 419.1  | 436.4  | 499.1  | 492.9  |
| 68.4   | 82.1   | 71.3   | 65.4   | 74.3   | 81.0   |
| 87.9   | 69.3   | 73.6   | 83.1   | 93.3   | 113.3  |
| 829.9  | 783.9  | 911.6  | 896.5  | 984.5  | 1082.0 |
| 11.5   | 2.9    | 4.9    | 11.2   | 2.0    | 8.6    |
| 474.0  | 442.3  | 578.9  | 568.1  | 538.1  | 592.8  |
| 292.5  | 207.0  | 322.6  | 327.3  | 345.4  | 349.8  |
| 703.9  | 624.3  | 730.9  | 743.0  | 894.9  | 873.5  |
| 2.5    | 2.3    | 2.4    | 4.4    | 3.1    | 3.6    |
| 0.7    | 2.3    | 2.3    | 5.5    | 3.2    | 1.5    |
| 11.0   | 25.8   | 7.3    | 14.6   | 26.7   | 19.2   |
| 353.5  | 372.6  | 328.1  | 362.0  | 382.1  | 435.5  |
| 532.2  | 502.8  | 385.7  | 513.7  | 475.0  | 697.6  |
| 470.8  | 310.0  | 468.8  | 458.3  | 515.6  | 565.0  |
| 960.1  | 900.8  | 981.5  | 1050.6 | 1109.9 | 1193.5 |
| 226.4  | 193.4  | 217.1  | 226.0  | 236.0  | 283.0  |

|        |        |        |        |        |        |
|--------|--------|--------|--------|--------|--------|
| 13.3   | 8.4    | 6.9    | 15.0   | 4.0    | 4.6    |
| 45.2   | 70.6   | 61.0   | 57.4   | 52.8   | 66.7   |
| 58.1   | 77.0   | 69.8   | 51.8   | 60.4   | 63.3   |
| 716.1  | 600.1  | 735.2  | 752.5  | 776.9  | 697.3  |
| 104.2  | 91.4   | 100.7  | 119.4  | 115.5  | 119.7  |
| 267.1  | 163.5  | 264.3  | 222.3  | 275.9  | 311.1  |
| 261.9  | 233.9  | 277.9  | 244.1  | 317.9  | 307.7  |
| 4798.0 | 4179.8 | 5097.7 | 5397.9 | 5266.6 | 5352.0 |
| 121.0  | 142.2  | 125.9  | 151.6  | 177.6  | 167.3  |
| 48.7   | 63.7   | 70.5   | 50.0   | 77.8   | 77.5   |
| 238.8  | 245.8  | 279.1  | 302.3  | 337.8  | 352.0  |
| 41.8   | 13.7   | 29.9   | 18.3   | 35.9   | 40.8   |
| 8.9    | 5.8    | 2.0    | 12.4   | 4.2    | 9.0    |
| 1060.4 | 961.3  | 1050.6 | 1107.6 | 1151.2 | 1342.8 |
| 23.6   | 47.3   | 36.9   | 28.1   | 31.1   | 32.5   |
| 507.4  | 506.1  | 504.3  | 539.7  | 565.9  | 598.2  |
| 26.5   | 25.1   | 21.7   | 27.8   | 26.1   | 32.4   |
| 420.1  | 364.7  | 420.8  | 410.2  | 486.8  | 529.6  |
| 137.5  | 109.7  | 154.3  | 152.9  | 159.6  | 166.3  |
| 447.2  | 330.9  | 343.9  | 421.8  | 458.0  | 488.4  |
| 90.4   | 86.1   | 96.1   | 83.9   | 136.3  | 126.9  |
| 105.6  | 79.1   | 101.6  | 96.3   | 124.0  | 130.6  |
| 348.7  | 267.6  | 293.9  | 303.7  | 370.3  | 394.7  |
| 1.2    | 1.8    | 0.7    | 1.3    | 0.9    | 1.0    |
| 3.0    | 1.0    | 1.7    | 1.5    | 1.3    | 2.3    |
| 485.4  | 475.0  | 495.9  | 514.7  | 599.6  | 639.8  |
| 211.3  | 224.0  | 266.1  | 269.7  | 311.0  | 285.9  |
| 165.1  | 130.6  | 187.2  | 162.9  | 204.3  | 195.2  |
| 366.4  | 326.2  | 387.5  | 367.4  | 440.6  | 439.6  |
| 426.0  | 368.9  | 497.5  | 523.2  | 463.5  | 543.9  |
| 148.0  | 113.1  | 142.7  | 149.9  | 151.1  | 177.3  |
| 130.7  | 133.6  | 136.0  | 137.9  | 148.0  | 177.9  |
| 150.7  | 188.0  | 165.3  | 155.4  | 171.4  | 171.6  |
| 275.2  | 283.0  | 292.2  | 239.5  | 296.9  | 300.9  |
| 433.0  | 352.8  | 379.3  | 410.6  | 409.0  | 534.4  |
| 350.8  | 311.6  | 385.0  | 382.6  | 420.1  | 419.9  |
| 495.8  | 447.1  | 500.8  | 515.0  | 557.6  | 651.3  |
| 370.4  | 334.1  | 342.4  | 325.6  | 363.0  | 487.6  |
| 41.7   | 30.8   | 36.7   | 50.4   | 57.2   | 48.2   |
| 118.3  | 91.9   | 115.3  | 115.0  | 146.0  | 146.4  |
| 10.1   | 9.1    | 11.0   | 7.7    | 6.4    | 7.4    |
| 241.1  | 202.0  | 240.2  | 266.0  | 265.6  | 332.5  |
| 106.2  | 74.8   | 69.1   | 92.3   | 142.4  | 130.3  |
| 547.4  | 381.0  | 540.2  | 562.9  | 654.7  | 626.3  |
| 1.7    | 3.4    | 3.3    | 13.5   | 4.0    | 10.1   |
| 172.5  | 154.4  | 200.0  | 188.5  | 250.2  | 209.8  |
| 257.8  | 266.3  | 267.3  | 280.0  | 298.6  | 366.1  |
| 1175.8 | 1106.4 | 1250.2 | 1244.7 | 1366.2 | 1496.4 |
| 402.9  | 447.5  | 383.0  | 451.1  | 438.6  | 504.5  |
| 127.5  | 125.7  | 115.8  | 120.6  | 123.1  | 151.3  |
| 169.5  | 153.2  | 183.9  | 167.3  | 217.2  | 229.2  |
| 293.7  | 225.6  | 266.1  | 234.3  | 296.7  | 315.7  |
| 177.7  | 135.8  | 164.3  | 179.3  | 215.3  | 228.7  |

|        |        |        |        |        |        |
|--------|--------|--------|--------|--------|--------|
| 125.5  | 125.7  | 148.1  | 145.9  | 165.5  | 158.9  |
| 34.5   | 7.6    | 26.6   | 34.1   | 43.3   | 21.5   |
| 173.4  | 157.7  | 200.4  | 218.8  | 227.2  | 239.2  |
| 315.8  | 195.4  | 223.7  | 266.3  | 295.6  | 384.8  |
| 35.1   | 45.4   | 28.5   | 47.1   | 36.9   | 39.7   |
| 572.9  | 582.5  | 635.9  | 633.2  | 713.2  | 765.3  |
| 2897.5 | 3044.8 | 3026.2 | 2949.0 | 3434.1 | 3606.5 |
| 356.1  | 438.6  | 260.1  | 402.7  | 344.6  | 411.0  |
| 93.6   | 70.0   | 79.5   | 85.3   | 125.2  | 116.6  |
| 19.2   | 7.4    | 8.1    | 18.3   | 16.9   | 14.1   |
| 81.6   | 52.7   | 64.8   | 68.3   | 88.3   | 95.0   |
| 241.7  | 217.2  | 246.3  | 254.7  | 289.8  | 287.8  |
| 426.9  | 399.6  | 407.2  | 461.3  | 480.4  | 513.6  |
| 2492.3 | 2218.2 | 2237.6 | 2360.9 | 2686.4 | 2687.8 |
| 290.9  | 255.4  | 284.2  | 323.8  | 361.7  | 396.0  |
| 93.6   | 110.9  | 93.9   | 104.6  | 126.1  | 129.4  |
| 393.3  | 413.1  | 393.3  | 419.0  | 428.1  | 476.5  |
| 352.6  | 447.0  | 380.5  | 402.9  | 457.6  | 510.1  |
| 15.3   | 34.8   | 22.7   | 21.1   | 17.1   | 29.2   |
| 13.9   | 5.7    | 11.7   | 11.2   | 8.4    | 6.8    |
| 104.8  | 98.3   | 113.2  | 129.2  | 126.7  | 131.5  |
| 1721.7 | 1505.8 | 1755.0 | 1964.4 | 1981.7 | 2140.2 |
| 871.0  | 1075.8 | 1042.0 | 1084.6 | 976.2  | 1117.0 |
| 29.1   | 11.6   | 28.3   | 31.0   | 44.1   | 35.9   |
| 439.8  | 344.5  | 329.4  | 385.6  | 375.0  | 444.3  |
| 704.8  | 722.5  | 891.5  | 831.9  | 792.4  | 896.1  |
| 227.4  | 267.5  | 279.6  | 277.7  | 274.2  | 307.6  |
| 743.1  | 506.3  | 664.5  | 635.4  | 735.1  | 706.7  |
| 370.5  | 388.5  | 397.5  | 412.7  | 430.7  | 480.6  |
| 76.5   | 70.3   | 71.9   | 69.1   | 71.4   | 98.3   |
| 166.5  | 166.8  | 171.9  | 190.1  | 187.1  | 208.7  |
| 20.1   | 12.3   | 26.9   | 16.0   | 16.8   | 24.5   |
| 74.2   | 66.5   | 84.3   | 87.3   | 79.9   | 91.2   |
| 182.1  | 179.5  | 208.6  | 205.1  | 245.0  | 244.5  |
| 37.2   | 25.5   | 49.8   | 59.1   | 48.4   | 48.3   |
| 210.4  | 124.9  | 170.7  | 163.8  | 198.7  | 195.6  |
| 529.0  | 441.2  | 494.1  | 596.8  | 617.6  | 641.9  |
| 584.3  | 393.3  | 460.8  | 540.3  | 551.7  | 608.6  |
| 3.5    | 1.2    | 2.2    | 2.0    | 3.2    | 5.6    |
| 0.8    | 0.8    | 1.2    | 0.8    | 0.8    | 0.9    |
| 1339.4 | 897.0  | 1346.7 | 1092.8 | 1557.5 | 1603.1 |
| 25.5   | 30.1   | 42.9   | 32.1   | 39.6   | 35.1   |
| 63.9   | 49.1   | 71.8   | 60.2   | 66.1   | 78.5   |
| 289.7  | 256.3  | 281.8  | 290.8  | 337.6  | 371.8  |
| 113.5  | 87.4   | 120.7  | 135.1  | 151.1  | 132.2  |
| 4.6    | 17.3   | 9.2    | 5.5    | 3.4    | 9.4    |
| 227.7  | 162.0  | 292.1  | 261.6  | 244.6  | 271.8  |
| 539.4  | 546.4  | 597.1  | 585.7  | 616.3  | 735.6  |
| 318.9  | 327.9  | 349.7  | 328.3  | 372.1  | 397.0  |
| 2.2    | 1.5    | 1.6    | 1.9    | 4.3    | 2.2    |
| 365.2  | 361.0  | 333.4  | 393.7  | 397.5  | 453.8  |
| 147.8  | 123.6  | 150.6  | 159.6  | 166.0  | 202.9  |
| 263.0  | 242.7  | 270.1  | 284.3  | 304.4  | 331.0  |

|        |        |        |        |        |        |
|--------|--------|--------|--------|--------|--------|
| 123.4  | 107.0  | 136.3  | 134.9  | 147.9  | 155.9  |
| 384.3  | 397.5  | 375.6  | 375.9  | 389.5  | 511.8  |
| 137.4  | 112.5  | 124.3  | 137.3  | 157.2  | 187.3  |
| 119.9  | 110.3  | 117.6  | 144.2  | 151.0  | 159.4  |
| 145.6  | 140.2  | 162.2  | 164.8  | 203.0  | 180.7  |
| 328.5  | 322.9  | 325.6  | 365.4  | 364.6  | 383.8  |
| 287.6  | 266.0  | 291.5  | 330.6  | 315.1  | 365.1  |
| 210.3  | 183.1  | 211.2  | 212.6  | 279.5  | 248.0  |
| 40.2   | 33.4   | 34.7   | 29.6   | 37.3   | 45.1   |
| 13.8   | 4.9    | 9.5    | 6.3    | 8.3    | 8.8    |
| 4280.8 | 3894.4 | 4298.6 | 4630.7 | 4994.1 | 5140.1 |
| 384.4  | 428.5  | 439.3  | 461.0  | 456.6  | 471.7  |
| 239.8  | 170.9  | 307.2  | 267.3  | 248.7  | 322.5  |
| 28.1   | 23.7   | 12.3   | 18.7   | 13.2   | 27.1   |
| 4835.8 | 3818.4 | 4176.1 | 4369.6 | 4563.7 | 4726.9 |
| 98.1   | 65.6   | 99.7   | 116.8  | 119.5  | 135.8  |
| 178.8  | 151.1  | 187.8  | 200.4  | 234.0  | 207.8  |
| 7.6    | 2.3    | 1.8    | 3.2    | 17.7   | 15.6   |
| 43.1   | 24.9   | 51.1   | 41.6   | 27.0   | 39.2   |
| 215.9  | 209.0  | 254.8  | 268.2  | 263.8  | 322.6  |
| 28.8   | 3.2    | 21.0   | 19.4   | 14.3   | 21.6   |
| 206.3  | 168.5  | 220.7  | 197.8  | 292.8  | 257.7  |
| 155.5  | 122.0  | 136.6  | 118.1  | 157.5  | 186.4  |
| 132.1  | 118.4  | 140.5  | 147.7  | 178.9  | 180.9  |
| 514.2  | 408.1  | 632.7  | 650.9  | 726.2  | 735.1  |
| 150.0  | 119.5  | 136.6  | 153.3  | 147.4  | 173.8  |
| 377.8  | 327.1  | 414.3  | 372.2  | 449.2  | 436.1  |
| 347.0  | 321.0  | 356.8  | 381.1  | 354.2  | 420.6  |
| 1.1    | 3.5    | 0.7    | 3.3    | 1.6    | 0.9    |
| 195.8  | 211.7  | 169.1  | 189.8  | 231.5  | 227.7  |
| 137.2  | 117.7  | 147.8  | 167.6  | 166.2  | 163.1  |
| 14.7   | 18.8   | 20.6   | 13.5   | 10.0   | 27.3   |
| 68.9   | 61.1   | 53.5   | 73.3   | 48.6   | 60.8   |
| 687.9  | 672.4  | 784.6  | 911.4  | 847.8  | 880.5  |
| 2.8    | 4.2    | 8.6    | 5.4    | 3.6    | 4.8    |
| 186.7  | 137.6  | 160.8  | 155.7  | 172.5  | 212.0  |
| 358.8  | 341.5  | 367.6  | 357.4  | 381.2  | 429.5  |
| 640.0  | 512.5  | 561.1  | 559.7  | 575.7  | 696.3  |
| 5.6    | 12.5   | 2.6    | 14.2   | 5.5    | 4.4    |
| 105.3  | 117.9  | 113.9  | 112.1  | 144.8  | 112.9  |
| 165.7  | 224.1  | 178.8  | 188.2  | 200.3  | 234.0  |
| 556.3  | 448.6  | 588.7  | 495.3  | 640.2  | 706.6  |
| 216.4  | 213.5  | 226.6  | 220.0  | 245.6  | 275.5  |
| 991.3  | 827.2  | 804.4  | 756.8  | 823.6  | 1063.9 |
| 1.4    | 8.0    | 5.5    | 5.4    | 1.0    | 6.0    |
| 3.1    | 2.5    | 0.7    | 2.5    | 1.6    | 8.3    |
| 16.9   | 16.0   | 7.8    | 3.3    | 11.5   | 12.1   |
| 17.4   | 13.0   | 13.7   | 13.8   | 12.5   | 18.6   |
| 402.3  | 374.0  | 452.6  | 468.6  | 486.6  | 508.5  |
| 169.7  | 149.1  | 217.5  | 204.3  | 218.5  | 188.1  |
| 32.7   | 46.2   | 41.5   | 44.0   | 52.6   | 49.8   |
| 192.8  | 182.1  | 204.7  | 219.2  | 212.8  | 226.1  |
| 101.8  | 114.6  | 92.4   | 126.3  | 114.9  | 135.5  |

|        |        |        |        |        |        |
|--------|--------|--------|--------|--------|--------|
| 114.6  | 130.4  | 103.5  | 116.4  | 114.0  | 128.5  |
| 185.5  | 205.5  | 178.1  | 192.3  | 217.4  | 215.0  |
| 98.8   | 79.9   | 87.6   | 105.8  | 107.0  | 118.4  |
| 118.8  | 98.1   | 104.4  | 130.9  | 124.6  | 121.3  |
| 53.8   | 53.4   | 60.4   | 64.4   | 78.1   | 66.6   |
| 166.1  | 141.7  | 159.3  | 138.0  | 152.9  | 211.9  |
| 1012.1 | 1075.9 | 1044.5 | 1046.5 | 1108.4 | 1118.6 |
| 19.0   | 16.2   | 27.2   | 17.0   | 25.8   | 14.3   |
| 765.3  | 689.5  | 754.3  | 785.4  | 885.2  | 911.6  |
| 309.6  | 280.2  | 287.5  | 266.1  | 292.4  | 364.8  |
| 1.7    | 0.9    | 1.6    | 1.6    | 2.6    | 1.9    |
| 21.5   | 1.4    | 25.4   | 18.8   | 25.6   | 9.9    |
| 267.7  | 254.6  | 274.6  | 288.6  | 361.8  | 332.0  |
| 698.1  | 611.3  | 741.6  | 879.9  | 829.4  | 857.3  |
| 924.2  | 1086.8 | 1155.2 | 1254.3 | 1230.2 | 1290.3 |
| 1132.8 | 1071.6 | 1102.1 | 1103.3 | 1143.7 | 1345.3 |
| 54.9   | 34.7   | 55.5   | 41.1   | 68.3   | 49.2   |
| 74.4   | 76.6   | 80.2   | 83.9   | 82.4   | 93.1   |
| 13.1   | 6.7    | 14.4   | 12.0   | 14.0   | 12.1   |
| 995.6  | 772.1  | 953.1  | 997.5  | 1152.0 | 1197.7 |
| 1.7    | 1.6    | 10.3   | 4.9    | 7.5    | 4.9    |
| 207.6  | 186.6  | 204.5  | 290.6  | 316.4  | 235.1  |
| 147.0  | 149.4  | 170.0  | 202.2  | 191.8  | 211.9  |
| 2244.0 | 2251.8 | 2003.5 | 2269.7 | 2552.5 | 2863.8 |
| 144.8  | 110.1  | 120.7  | 143.1  | 160.0  | 176.0  |
| 100.4  | 63.0   | 100.4  | 92.0   | 118.8  | 112.1  |
| 345.5  | 319.3  | 359.2  | 378.1  | 401.8  | 444.7  |
| 158.8  | 133.9  | 172.5  | 165.6  | 210.4  | 219.0  |
| 139.4  | 149.7  | 151.5  | 140.0  | 175.0  | 172.7  |
| 535.2  | 545.5  | 464.4  | 560.8  | 529.9  | 664.2  |
| 217.4  | 237.7  | 186.8  | 234.1  | 223.5  | 282.0  |
| 168.3  | 203.2  | 202.6  | 228.7  | 209.0  | 201.7  |
| 801.3  | 760.9  | 730.8  | 815.8  | 829.8  | 964.3  |
| 686.4  | 563.1  | 599.1  | 718.0  | 634.5  | 831.5  |
| 463.6  | 485.1  | 492.5  | 507.9  | 513.5  | 572.8  |
| 65.5   | 49.0   | 59.3   | 79.9   | 69.9   | 90.5   |
| 123.0  | 139.7  | 103.0  | 72.3   | 116.9  | 91.6   |
| 653.6  | 578.2  | 583.7  | 572.7  | 598.6  | 800.7  |
| 772.7  | 737.4  | 773.0  | 651.4  | 956.1  | 835.9  |
| 562.4  | 523.2  | 600.5  | 600.2  | 656.6  | 740.2  |
| 1104.3 | 1092.0 | 1122.2 | 1136.5 | 1144.5 | 1273.2 |
| 42.2   | 43.2   | 11.5   | 49.4   | 46.4   | 47.4   |
| 226.0  | 225.3  | 208.9  | 221.3  | 253.3  | 259.9  |
| 98.2   | 98.7   | 109.4  | 113.7  | 118.7  | 128.4  |
| 20.7   | 21.2   | 22.5   | 12.5   | 22.0   | 27.3   |
| 114.9  | 88.0   | 127.6  | 116.8  | 157.5  | 147.2  |
| 1319.4 | 1147.4 | 1442.6 | 1430.7 | 1728.9 | 1708.3 |
| 98.6   | 50.2   | 93.3   | 85.0   | 126.7  | 103.4  |
| 32.0   | 40.9   | 39.0   | 38.4   | 50.5   | 53.0   |
| 1061.8 | 840.1  | 1070.2 | 1011.8 | 1281.1 | 1276.8 |
| 5.9    | 5.7    | 18.0   | 6.4    | 11.2   | 7.7    |
| 6.9    | 3.2    | 2.4    | 2.8    | 1.7    | 3.3    |
| 37.6   | 42.7   | 36.7   | 41.6   | 44.3   | 41.9   |

|        |        |        |        |        |        |
|--------|--------|--------|--------|--------|--------|
| 359.1  | 456.8  | 372.1  | 413.7  | 330.5  | 476.4  |
| 1.7    | 1.9    | 2.2    | 1.8    | 2.8    | 3.6    |
| 19.5   | 17.5   | 21.0   | 24.6   | 11.9   | 28.0   |
| 99.7   | 113.5  | 98.6   | 99.5   | 141.7  | 169.4  |
| 85.5   | 81.8   | 78.0   | 82.6   | 89.1   | 114.9  |
| 809.0  | 608.7  | 803.4  | 831.8  | 870.4  | 875.4  |
| 58.4   | 44.4   | 56.9   | 44.2   | 57.9   | 62.8   |
| 7.6    | 1.2    | 2.5    | 4.9    | 3.4    | 3.3    |
| 5.8    | 6.2    | 3.7    | 0.8    | 5.1    | 5.3    |
| 2.4    | 6.9    | 3.6    | 8.4    | 5.5    | 7.0    |
| 5.1    | 0.6    | 2.0    | 2.7    | 8.3    | 1.3    |
| 1.3    | 1.0    | 7.4    | 2.1    | 0.5    | 0.7    |
| 177.8  | 167.2  | 190.4  | 168.2  | 180.0  | 229.8  |
| 1.8    | 18.4   | 9.8    | 8.2    | 9.7    | 1.0    |
| 529.8  | 400.2  | 619.0  | 456.3  | 557.4  | 587.2  |
| 511.4  | 437.7  | 489.6  | 526.0  | 514.3  | 599.4  |
| 482.6  | 438.9  | 441.6  | 497.5  | 524.6  | 596.7  |
| 374.7  | 352.3  | 403.0  | 374.8  | 455.8  | 468.7  |
| 151.8  | 128.8  | 195.4  | 211.9  | 215.2  | 198.4  |
| 129.5  | 140.8  | 129.1  | 118.4  | 153.6  | 126.1  |
| 1.2    | 1.6    | 1.9    | 2.6    | 0.8    | 0.6    |
| 3.9    | 0.4    | 3.6    | 2.3    | 4.3    | 4.3    |
| 3062.6 | 2521.1 | 2584.9 | 2802.9 | 2882.4 | 3466.6 |
| 283.5  | 231.4  | 323.9  | 294.7  | 351.1  | 376.0  |
| 39.6   | 47.3   | 42.1   | 60.0   | 65.6   | 64.2   |
| 43.6   | 49.5   | 42.8   | 52.3   | 43.3   | 52.5   |
| 146.2  | 120.3  | 144.1  | 150.0  | 139.6  | 184.0  |
| 625.0  | 619.0  | 665.0  | 736.1  | 674.6  | 754.7  |
| 169.7  | 130.2  | 163.6  | 169.9  | 234.3  | 210.5  |
| 222.3  | 145.2  | 229.8  | 218.1  | 273.9  | 303.5  |
| 1169.3 | 680.9  | 1005.0 | 1035.5 | 1250.1 | 1391.9 |
| 332.2  | 369.6  | 360.1  | 392.8  | 414.5  | 495.2  |
| 214.1  | 118.7  | 172.3  | 170.0  | 218.7  | 236.1  |
| 80.5   | 60.5   | 99.0   | 78.1   | 90.7   | 96.9   |
| 111.5  | 91.5   | 100.4  | 71.2   | 76.2   | 101.8  |
| 123.4  | 109.5  | 124.4  | 151.4  | 146.2  | 137.5  |
| 30.9   | 15.0   | 45.2   | 34.0   | 35.5   | 29.6   |
| 36.7   | 38.3   | 29.8   | 35.0   | 32.5   | 41.4   |
| 55.7   | 76.7   | 67.1   | 65.3   | 62.3   | 72.8   |
| 22.1   | 34.1   | 21.9   | 30.8   | 28.2   | 32.9   |
| 122.1  | 108.0  | 146.0  | 135.6  | 142.4  | 163.7  |
| 849.7  | 883.2  | 1001.0 | 1085.1 | 1022.4 | 1069.3 |
| 75.4   | 51.4   | 74.6   | 69.7   | 83.9   | 95.1   |
| 457.3  | 490.5  | 587.4  | 626.1  | 541.8  | 580.9  |
| 140.8  | 126.9  | 143.9  | 127.1  | 140.5  | 160.2  |
| 1363.1 | 1041.7 | 1085.3 | 1336.8 | 1078.1 | 1549.0 |
| 61.9   | 47.5   | 48.0   | 54.5   | 54.7   | 68.2   |
| 30.5   | 53.0   | 58.1   | 40.4   | 38.4   | 39.6   |
| 1.1    | 0.8    | 1.5    | 0.8    | 1.8    | 1.0    |
| 14.9   | 13.5   | 22.4   | 11.4   | 12.9   | 12.3   |
| 87.2   | 68.4   | 85.8   | 72.2   | 104.3  | 89.5   |
| 236.7  | 142.3  | 241.3  | 202.9  | 266.8  | 320.9  |
| 156.1  | 123.6  | 186.5  | 136.5  | 197.0  | 198.5  |

|        |        |        |        |        |        |
|--------|--------|--------|--------|--------|--------|
| 20.3   | 24.2   | 16.1   | 16.3   | 23.8   | 32.1   |
| 3.3    | 5.9    | 3.6    | 8.8    | 3.7    | 2.8    |
| 357.2  | 303.9  | 397.6  | 364.7  | 420.8  | 432.2  |
| 132.3  | 116.3  | 141.9  | 154.3  | 176.4  | 170.2  |
| 520.5  | 465.1  | 596.7  | 648.4  | 623.4  | 659.6  |
| 8.1    | 2.1    | 3.2    | 4.4    | 4.4    | 8.3    |
| 669.6  | 681.7  | 721.5  | 773.2  | 789.9  | 806.9  |
| 561.3  | 679.2  | 574.1  | 574.8  | 632.4  | 686.6  |
| 826.7  | 798.9  | 799.4  | 849.9  | 837.4  | 950.5  |
| 73.9   | 73.6   | 58.1   | 84.9   | 66.1   | 90.2   |
| 169.0  | 149.2  | 146.1  | 177.3  | 201.5  | 176.7  |
| 118.5  | 98.1   | 104.9  | 122.6  | 125.8  | 144.6  |
| 6.4    | 5.7    | 12.2   | 0.6    | 3.3    | 8.2    |
| 236.9  | 243.6  | 237.6  | 254.1  | 281.7  | 286.4  |
| 61.6   | 54.1   | 73.3   | 65.7   | 86.2   | 81.0   |
| 341.3  | 261.9  | 331.9  | 314.5  | 409.5  | 396.2  |
| 2.7    | 2.9    | 5.3    | 1.7    | 3.8    | 4.1    |
| 157.3  | 141.9  | 167.4  | 182.1  | 209.0  | 208.1  |
| 341.6  | 327.6  | 316.0  | 316.6  | 431.0  | 453.7  |
| 143.4  | 161.4  | 200.2  | 186.5  | 226.8  | 235.2  |
| 2896.7 | 2636.7 | 3141.8 | 2854.8 | 3180.8 | 3368.0 |
| 306.8  | 400.3  | 372.8  | 386.4  | 400.1  | 400.7  |
| 199.7  | 216.9  | 208.6  | 220.4  | 242.0  | 270.5  |
| 3.1    | 5.7    | 4.1    | 7.5    | 1.9    | 2.3    |
| 42.7   | 40.4   | 39.6   | 42.7   | 38.2   | 41.1   |
| 70.9   | 62.4   | 71.1   | 68.1   | 60.6   | 60.7   |
| 5.2    | 3.5    | 8.2    | 8.3    | 13.5   | 13.9   |
| 14.4   | 20.8   | 21.6   | 19.1   | 25.6   | 17.6   |
| 346.8  | 306.6  | 201.2  | 258.6  | 217.2  | 474.3  |
| 63.0   | 29.0   | 39.9   | 50.4   | 69.1   | 76.9   |
| 12.3   | 4.6    | 23.3   | 19.4   | 22.8   | 12.6   |
| 698.0  | 701.1  | 708.2  | 743.5  | 809.4  | 890.6  |
| 3.3    | 11.0   | 11.1   | 11.5   | 6.9    | 6.0    |
| 398.2  | 237.9  | 306.6  | 330.6  | 385.1  | 484.6  |
| 369.9  | 358.2  | 390.4  | 425.3  | 481.3  | 519.6  |
| 271.1  | 288.5  | 277.0  | 299.8  | 355.1  | 337.9  |
| 181.3  | 198.0  | 171.4  | 184.0  | 199.2  | 215.0  |
| 8.3    | 10.8   | 2.4    | 19.3   | 15.3   | 5.2    |
| 2.2    | 1.0    | 4.5    | 3.2    | 6.6    | 5.9    |
| 397.8  | 344.3  | 468.6  | 489.5  | 539.4  | 490.0  |
| 642.5  | 581.5  | 563.2  | 523.9  | 574.4  | 764.3  |
| 105.6  | 90.7   | 77.5   | 109.5  | 120.3  | 138.5  |
| 50.5   | 35.0   | 47.1   | 56.4   | 47.1   | 57.5   |
| 162.7  | 134.1  | 156.6  | 137.7  | 200.1  | 181.0  |
| 432.6  | 508.9  | 463.5  | 430.1  | 469.2  | 528.2  |
| 119.9  | 129.5  | 123.3  | 108.6  | 125.8  | 118.7  |
| 280.9  | 286.0  | 308.3  | 322.6  | 305.2  | 268.2  |
| 23.7   | 5.8    | 20.6   | 19.3   | 25.3   | 13.1   |
| 81.6   | 69.3   | 73.7   | 86.8   | 94.8   | 106.9  |
| 4.6    | 3.9    | 3.8    | 2.4    | 2.9    | 4.5    |
| 11.5   | 9.1    | 10.4   | 1.3    | 6.3    | 17.8   |
| 1.8    | 1.1    | 5.5    | 7.4    | 7.9    | 3.1    |
| 23.1   | 41.2   | 22.9   | 20.2   | 27.2   | 21.5   |



|        |        |        |        |        |        |
|--------|--------|--------|--------|--------|--------|
| 51.8   | 55.3   | 56.4   | 67.1   | 43.4   | 60.1   |
| 70.8   | 65.9   | 76.3   | 64.2   | 69.9   | 92.7   |
| 205.7  | 251.8  | 216.4  | 214.4  | 229.5  | 263.0  |
| 8.0    | 15.7   | 15.6   | 8.2    | 7.5    | 8.6    |
| 125.9  | 137.1  | 125.2  | 118.7  | 151.9  | 149.2  |
| 111.6  | 111.8  | 102.7  | 108.5  | 108.0  | 147.8  |
| 387.0  | 380.8  | 398.3  | 479.3  | 461.1  | 419.7  |
| 16.9   | 9.1    | 12.6   | 4.6    | 8.4    | 11.4   |
| 11.2   | 10.1   | 14.5   | 11.9   | 11.4   | 19.0   |
| 192.8  | 152.0  | 189.7  | 175.0  | 203.7  | 222.0  |
| 183.2  | 149.2  | 186.0  | 201.7  | 189.6  | 230.3  |
| 4.7    | 5.7    | 6.6    | 4.7    | 1.5    | 1.6    |
| 4.1    | 7.3    | 6.3    | 2.4    | 8.3    | 4.8    |
| 34.2   | 30.6   | 26.3   | 27.6   | 36.1   | 38.7   |
| 119.2  | 200.8  | 160.6  | 188.9  | 134.6  | 156.5  |
| 2035.8 | 1769.1 | 2098.3 | 2171.4 | 2434.9 | 2186.9 |
| 23.7   | 15.6   | 22.3   | 23.7   | 20.9   | 22.6   |
| 93.9   | 55.9   | 90.8   | 102.4  | 122.4  | 123.0  |
| 302.6  | 291.3  | 327.7  | 336.8  | 367.7  | 381.1  |
| 217.2  | 197.4  | 197.4  | 236.8  | 236.7  | 273.6  |
| 489.8  | 442.6  | 496.9  | 494.3  | 558.9  | 582.7  |
| 4.6    | 2.4    | 2.6    | 1.2    | 1.1    | 1.5    |
| 6.0    | 4.5    | 1.8    | 8.0    | 5.0    | 5.4    |
| 2.8    | 3.6    | 1.4    | 2.6    | 9.9    | 6.8    |
| 51.8   | 63.4   | 60.9   | 55.0   | 75.5   | 63.5   |
| 351.1  | 269.9  | 314.0  | 300.8  | 411.8  | 408.0  |
| 82.5   | 59.9   | 109.2  | 96.8   | 146.3  | 126.6  |
| 35.3   | 35.8   | 31.0   | 30.3   | 30.2   | 37.4   |
| 715.3  | 863.3  | 817.5  | 908.6  | 883.0  | 879.7  |
| 63.5   | 62.4   | 70.3   | 68.6   | 66.6   | 73.6   |
| 61.8   | 73.9   | 61.6   | 76.5   | 64.6   | 75.2   |
| 22.3   | 20.6   | 27.4   | 23.6   | 26.8   | 33.0   |
| 371.0  | 340.9  | 397.3  | 441.1  | 397.1  | 487.5  |
| 164.0  | 142.5  | 144.5  | 157.7  | 150.5  | 220.1  |
| 118.2  | 127.8  | 135.9  | 139.4  | 159.3  | 145.7  |
| 30.3   | 21.1   | 25.0   | 25.0   | 45.2   | 31.4   |
| 42.4   | 43.4   | 43.1   | 43.4   | 48.1   | 54.8   |
| 4.5    | 12.1   | 7.9    | 3.6    | 7.2    | 2.7    |
| 6.0    | 6.9    | 9.3    | 8.2    | 8.8    | 10.0   |
| 72.5   | 52.2   | 56.4   | 59.3   | 34.0   | 48.6   |
| 606.4  | 571.0  | 611.1  | 545.7  | 717.1  | 702.9  |
| 58.6   | 63.5   | 49.7   | 42.9   | 66.3   | 69.8   |
| 55.9   | 44.8   | 75.4   | 68.3   | 90.4   | 102.8  |
| 18.9   | 12.1   | 18.6   | 20.5   | 28.5   | 31.1   |
| 253.8  | 207.5  | 251.5  | 235.5  | 302.1  | 285.7  |
| 273.4  | 239.6  | 324.2  | 282.5  | 338.9  | 353.5  |
| 81.0   | 52.7   | 74.4   | 80.9   | 100.3  | 89.5   |
| 174.8  | 155.8  | 200.3  | 192.6  | 230.7  | 236.2  |
| 45.2   | 22.2   | 43.8   | 42.7   | 48.3   | 51.4   |
| 27.7   | 22.3   | 39.4   | 27.0   | 26.8   | 41.6   |
| 7.0    | 15.9   | 16.3   | 12.9   | 13.6   | 12.2   |
| 126.4  | 107.4  | 96.6   | 124.0  | 137.0  | 168.4  |
| 106.4  | 101.7  | 96.3   | 105.8  | 115.5  | 125.9  |

|        |       |        |        |        |        |
|--------|-------|--------|--------|--------|--------|
| 135.9  | 99.0  | 128.9  | 111.8  | 188.7  | 138.8  |
| 150.9  | 111.0 | 155.6  | 176.7  | 189.7  | 168.6  |
| 91.4   | 80.1  | 120.1  | 113.2  | 124.3  | 115.1  |
| 62.4   | 73.9  | 60.4   | 48.0   | 56.1   | 53.3   |
| 4.8    | 21.5  | 6.0    | 16.5   | 14.0   | 13.4   |
| 8.0    | 9.8   | 9.0    | 10.3   | 9.4    | 11.3   |
| 3.8    | 7.4   | 7.6    | 2.6    | 18.5   | 5.2    |
| 1026.6 | 907.2 | 1119.9 | 1006.9 | 1148.8 | 1292.3 |
| 221.7  | 293.2 | 318.9  | 304.0  | 314.2  | 264.3  |
| 85.0   | 106.7 | 94.1   | 120.6  | 97.3   | 124.8  |
| 28.7   | 20.6  | 27.6   | 31.8   | 34.5   | 47.4   |
| 16.0   | 15.4  | 11.4   | 20.5   | 23.2   | 12.0   |
| 1.6    | 4.5   | 7.0    | 8.0    | 14.0   | 3.8    |
| 945.4  | 938.7 | 1000.3 | 1199.3 | 1160.2 | 1173.2 |
| 297.9  | 272.8 | 332.8  | 319.6  | 333.3  | 355.3  |
| 116.5  | 82.8  | 95.0   | 91.8   | 121.0  | 124.5  |
| 32.2   | 66.9  | 18.3   | 51.2   | 19.7   | 30.2   |
| 165.9  | 159.6 | 128.8  | 185.0  | 173.4  | 203.0  |
| 75.5   | 72.8  | 90.8   | 74.5   | 82.3   | 81.1   |
| 43.5   | 36.6  | 38.1   | 40.9   | 35.4   | 48.1   |
| 106.0  | 107.3 | 112.0  | 125.1  | 119.7  | 130.1  |
| 248.0  | 293.7 | 250.0  | 238.5  | 243.6  | 289.0  |
| 31.2   | 35.5  | 37.0   | 33.3   | 39.5   | 60.9   |
| 187.5  | 166.0 | 193.3  | 189.7  | 208.3  | 230.1  |
| 16.3   | 12.5  | 8.9    | 14.4   | 35.4   | 22.8   |
| 182.2  | 136.8 | 150.0  | 167.2  | 168.3  | 193.0  |
| 145.8  | 148.7 | 121.7  | 146.1  | 158.9  | 138.5  |
| 65.5   | 61.1  | 63.7   | 61.7   | 70.4   | 79.2   |
| 174.6  | 145.8 | 190.7  | 193.0  | 205.0  | 234.6  |
| 607.6  | 353.1 | 710.2  | 728.6  | 685.3  | 743.2  |
| 2.0    | 22.7  | 8.5    | 5.2    | 3.6    | 2.6    |
| 7.4    | 7.2   | 11.6   | 18.3   | 8.4    | 12.9   |
| 40.7   | 38.1  | 20.8   | 36.4   | 45.1   | 28.4   |
| 3.4    | 2.3   | 11.0   | 7.2    | 6.6    | 8.8    |
| 239.9  | 282.1 | 137.6  | 171.8  | 301.0  | 130.9  |
| 2.3    | 1.7   | 2.0    | 12.7   | 6.8    | 1.9    |
| 9.2    | 3.3   | 7.0    | 9.2    | 2.9    | 2.6    |
| 119.7  | 87.1  | 104.1  | 100.8  | 132.7  | 137.0  |
| 413.8  | 484.8 | 386.2  | 436.5  | 570.9  | 583.7  |
| 357.4  | 353.3 | 355.3  | 423.6  | 420.5  | 475.5  |
| 57.5   | 50.0  | 57.4   | 56.9   | 68.0   | 68.3   |
| 121.6  | 110.8 | 125.0  | 121.3  | 137.9  | 152.7  |
| 530.0  | 463.0 | 544.9  | 506.7  | 566.6  | 620.4  |
| 27.2   | 44.9  | 40.7   | 34.7   | 32.5   | 37.2   |
| 38.2   | 34.4  | 45.6   | 46.9   | 39.1   | 57.3   |
| 8.6    | 13.6  | 14.3   | 4.6    | 7.9    | 8.0    |
| 363.7  | 348.5 | 373.5  | 397.6  | 422.1  | 436.7  |
| 52.6   | 56.1  | 75.9   | 89.8   | 53.5   | 81.4   |
| 280.8  | 248.7 | 383.8  | 365.7  | 432.6  | 469.4  |
| 560.2  | 672.0 | 570.8  | 568.3  | 610.3  | 692.4  |
| 497.1  | 650.9 | 602.0  | 525.9  | 634.2  | 668.3  |
| 11.5   | 19.8  | 16.7   | 12.6   | 16.5   | 15.6   |
| 217.0  | 234.1 | 217.3  | 226.8  | 220.3  | 237.8  |

|        |        |        |        |        |        |
|--------|--------|--------|--------|--------|--------|
| 352.1  | 265.7  | 371.8  | 364.8  | 400.9  | 456.8  |
| 300.6  | 293.9  | 330.5  | 335.3  | 343.6  | 368.3  |
| 503.4  | 306.9  | 507.6  | 615.8  | 566.4  | 658.6  |
| 11.0   | 3.0    | 8.1    | 11.9   | 9.2    | 5.9    |
| 185.7  | 254.1  | 193.7  | 177.2  | 220.5  | 225.1  |
| 141.5  | 160.7  | 161.4  | 182.5  | 209.3  | 203.5  |
| 11.8   | 9.1    | 10.0   | 21.3   | 33.9   | 31.4   |
| 490.5  | 398.0  | 532.3  | 534.3  | 537.8  | 608.2  |
| 93.2   | 40.4   | 106.3  | 89.6   | 144.6  | 136.1  |
| 1.2    | 5.1    | 1.1    | 3.9    | 2.7    | 4.4    |
| 134.6  | 116.4  | 139.1  | 129.4  | 164.4  | 189.1  |
| 10.0   | 11.9   | 16.4   | 7.8    | 14.7   | 24.1   |
| 1204.2 | 1020.9 | 1061.7 | 1243.9 | 1172.8 | 1380.5 |
| 127.2  | 125.3  | 131.3  | 149.0  | 156.7  | 173.4  |
| 117.8  | 96.7   | 116.8  | 122.6  | 149.5  | 160.1  |
| 65.2   | 55.5   | 56.2   | 73.0   | 81.1   | 70.8   |
| 442.3  | 464.5  | 442.2  | 493.0  | 476.5  | 558.4  |
| 100.9  | 122.8  | 122.1  | 106.1  | 138.8  | 118.9  |
| 450.7  | 267.6  | 544.8  | 374.5  | 507.3  | 538.2  |
| 73.0   | 66.0   | 73.0   | 70.0   | 89.5   | 80.4   |
| 70.2   | 53.7   | 60.3   | 74.6   | 68.7   | 86.3   |
| 117.2  | 116.6  | 120.8  | 111.0  | 142.3  | 144.2  |
| 1.9    | 2.1    | 2.8    | 1.7    | 3.1    | 2.6    |
| 30.8   | 25.4   | 44.4   | 42.1   | 39.5   | 34.2   |
| 13.3   | 30.9   | 13.8   | 17.1   | 17.8   | 24.8   |
| 39.3   | 16.7   | 33.6   | 31.4   | 41.1   | 55.6   |
| 185.3  | 219.5  | 161.7  | 200.5  | 175.5  | 226.0  |
| 21.1   | 14.1   | 18.3   | 13.6   | 15.9   | 27.7   |
| 73.7   | 55.2   | 78.5   | 69.1   | 83.2   | 88.1   |
| 150.9  | 133.9  | 148.1  | 148.5  | 147.7  | 165.3  |
| 241.1  | 277.1  | 234.5  | 280.9  | 273.3  | 330.2  |
| 34.9   | 31.0   | 38.9   | 38.6   | 54.5   | 35.9   |
| 143.3  | 170.7  | 180.2  | 201.0  | 188.9  | 210.1  |
| 343.6  | 345.3  | 423.9  | 375.8  | 426.8  | 439.1  |
| 406.5  | 358.1  | 512.1  | 428.2  | 453.5  | 475.5  |
| 4.6    | 2.1    | 2.1    | 1.5    | 1.3    | 6.1    |
| 5.7    | 11.8   | 5.1    | 2.9    | 4.6    | 6.8    |
| 49.4   | 21.3   | 54.9   | 55.6   | 53.9   | 61.4   |
| 872.1  | 768.1  | 860.3  | 985.3  | 999.4  | 1004.0 |
| 14.3   | 9.2    | 13.4   | 13.8   | 15.4   | 14.9   |
| 348.3  | 657.0  | 134.5  | 622.5  | 171.9  | 457.6  |
| 575.4  | 500.5  | 513.3  | 609.3  | 678.3  | 651.1  |
| 4.1    | 7.2    | 9.1    | 6.8    | 3.4    | 4.0    |
| 234.8  | 315.9  | 121.7  | 238.4  | 176.1  | 244.4  |
| 433.5  | 564.3  | 277.5  | 478.8  | 382.0  | 476.1  |
| 226.3  | 195.6  | 203.1  | 212.5  | 219.6  | 252.5  |
| 306.3  | 200.0  | 318.8  | 354.0  | 391.7  | 446.9  |
| 35.4   | 28.1   | 37.8   | 32.9   | 38.9   | 55.0   |
| 21.9   | 21.5   | 37.4   | 21.5   | 23.0   | 35.7   |
| 436.4  | 444.3  | 396.6  | 434.7  | 487.3  | 540.8  |
| 139.5  | 133.8  | 136.2  | 134.3  | 144.2  | 156.9  |
| 277.8  | 238.4  | 329.4  | 300.3  | 358.4  | 393.5  |
| 704.8  | 650.1  | 685.6  | 723.3  | 720.1  | 810.2  |

|        |        |        |        |        |        |
|--------|--------|--------|--------|--------|--------|
| 35.4   | 34.9   | 40.8   | 37.8   | 46.8   | 50.8   |
| 230.8  | 215.9  | 201.2  | 233.3  | 215.0  | 303.1  |
| 2013.3 | 2073.3 | 2164.3 | 2232.3 | 2392.4 | 2594.5 |
| 184.6  | 199.0  | 217.2  | 233.4  | 217.7  | 232.3  |
| 177.6  | 141.3  | 186.3  | 179.5  | 249.7  | 265.4  |
| 72.0   | 57.1   | 64.4   | 74.2   | 72.4   | 78.9   |
| 1034.8 | 781.1  | 1130.8 | 1136.4 | 1239.2 | 1043.1 |
| 4096.1 | 3597.8 | 3887.4 | 4132.3 | 4604.4 | 4789.1 |
| 239.7  | 262.2  | 221.0  | 280.6  | 239.2  | 287.3  |
| 1232.7 | 1216.2 | 1313.6 | 1351.9 | 1456.8 | 1462.2 |
| 1096.6 | 1222.9 | 1332.7 | 1412.0 | 1393.1 | 1429.1 |
| 33.0   | 39.6   | 33.3   | 52.8   | 39.4   | 33.2   |
| 11.3   | 11.1   | 14.5   | 12.8   | 12.3   | 13.2   |
| 13.4   | 12.0   | 16.0   | 12.5   | 11.2   | 15.3   |
| 38.6   | 24.4   | 48.4   | 45.7   | 36.5   | 45.1   |
| 20.8   | 12.2   | 16.3   | 19.9   | 15.3   | 10.3   |
| 184.6  | 169.6  | 218.9  | 212.1  | 250.0  | 244.1  |
| 16.7   | 26.0   | 27.9   | 26.2   | 22.8   | 23.8   |
| 149.6  | 195.9  | 197.6  | 195.3  | 201.9  | 212.9  |
| 39.3   | 40.2   | 34.5   | 50.4   | 58.0   | 62.0   |
| 6.8    | 17.6   | 7.2    | 8.2    | 17.7   | 12.9   |
| 353.0  | 250.7  | 402.6  | 344.9  | 430.6  | 460.7  |
| 10.0   | 9.6    | 8.1    | 12.0   | 8.6    | 13.1   |
| 26.9   | 27.5   | 18.8   | 20.0   | 33.4   | 27.7   |
| 96.6   | 86.6   | 94.6   | 90.1   | 103.0  | 112.4  |
| 105.3  | 127.0  | 118.4  | 106.1  | 114.8  | 143.3  |
| 2684.9 | 2391.6 | 2531.4 | 2621.4 | 2828.3 | 3023.6 |
| 17.8   | 10.7   | 10.9   | 11.3   | 2.1    | 14.2   |
| 7.2    | 4.6    | 2.9    | 1.0    | 1.6    | 1.6    |
| 1080.2 | 720.6  | 1021.6 | 950.1  | 1213.1 | 1178.4 |
| 272.0  | 192.7  | 311.6  | 251.3  | 322.1  | 313.3  |
| 3.1    | 1.0    | 2.0    | 6.2    | 4.9    | 9.5    |
| 69.3   | 36.3   | 73.7   | 99.6   | 78.8   | 102.3  |
| 30.3   | 30.0   | 44.9   | 25.9   | 26.6   | 34.2   |
| 430.4  | 356.0  | 378.8  | 430.7  | 432.9  | 529.4  |
| 706.7  | 573.9  | 690.8  | 751.8  | 814.7  | 870.0  |
| 66.1   | 67.4   | 92.1   | 75.4   | 94.1   | 82.8   |
| 51.1   | 42.8   | 47.0   | 46.7   | 60.3   | 54.0   |
| 19.1   | 23.7   | 20.0   | 24.5   | 22.8   | 29.7   |
| 17.7   | 14.9   | 14.4   | 22.4   | 18.3   | 16.1   |
| 319.3  | 238.7  | 277.6  | 247.3  | 249.8  | 329.4  |
| 155.2  | 173.1  | 178.3  | 197.5  | 214.7  | 217.0  |
| 113.1  | 93.4   | 115.7  | 106.5  | 138.5  | 120.0  |
| 151.5  | 106.1  | 151.2  | 133.8  | 167.8  | 193.3  |
| 396.0  | 310.1  | 396.9  | 419.0  | 411.2  | 475.8  |
| 61.8   | 51.9   | 54.7   | 64.0   | 74.2   | 71.6   |
| 30.7   | 19.1   | 34.8   | 35.0   | 39.3   | 43.1   |
| 453.7  | 350.1  | 395.6  | 424.2  | 443.6  | 554.4  |
| 12.5   | 7.3    | 6.6    | 11.8   | 18.1   | 25.2   |
| 31.6   | 14.2   | 31.2   | 29.4   | 28.1   | 29.1   |
| 135.6  | 150.6  | 131.6  | 146.6  | 166.3  | 155.8  |
| 78.8   | 78.7   | 71.7   | 42.9   | 79.5   | 99.6   |
| 469.3  | 419.8  | 481.8  | 533.7  | 541.0  | 546.2  |

|        |        |        |        |        |        |
|--------|--------|--------|--------|--------|--------|
| 40.8   | 26.7   | 25.9   | 29.9   | 36.8   | 36.7   |
| 211.8  | 207.7  | 216.9  | 274.6  | 266.1  | 287.9  |
| 102.1  | 114.1  | 124.5  | 129.9  | 136.9  | 151.5  |
| 331.8  | 351.7  | 342.9  | 359.9  | 375.8  | 411.5  |
| 128.7  | 117.4  | 154.0  | 146.8  | 172.8  | 163.4  |
| 149.5  | 130.1  | 115.4  | 156.5  | 163.8  | 164.5  |
| 915.5  | 779.2  | 870.2  | 859.9  | 981.9  | 1073.9 |
| 284.5  | 237.1  | 263.7  | 279.0  | 323.0  | 360.4  |
| 99.9   | 89.6   | 98.5   | 106.5  | 124.6  | 120.9  |
| 743.3  | 635.4  | 759.4  | 804.0  | 894.4  | 971.9  |
| 358.7  | 377.4  | 430.5  | 393.6  | 434.3  | 431.0  |
| 33.9   | 71.2   | 46.9   | 44.7   | 55.7   | 48.8   |
| 171.8  | 137.9  | 157.2  | 160.9  | 191.7  | 162.5  |
| 138.3  | 122.4  | 137.5  | 138.5  | 157.4  | 173.3  |
| 273.8  | 244.7  | 285.4  | 277.1  | 304.5  | 346.3  |
| 1358.7 | 1127.9 | 1358.4 | 1349.0 | 1498.6 | 1585.5 |
| 1077.5 | 1125.8 | 1100.1 | 1189.1 | 1237.3 | 1375.8 |
| 279.3  | 295.2  | 259.0  | 295.1  | 302.1  | 311.8  |
| 62.6   | 36.7   | 39.5   | 52.1   | 75.6   | 55.2   |
| 41.2   | 54.5   | 46.7   | 36.1   | 44.6   | 48.9   |
| 198.6  | 181.3  | 215.2  | 202.4  | 211.9  | 246.9  |
| 141.8  | 182.4  | 162.7  | 147.7  | 153.7  | 183.4  |
| 64.0   | 49.6   | 61.1   | 70.3   | 77.8   | 88.6   |
| 1.8    | 14.1   | 10.5   | 1.3    | 10.9   | 12.3   |
| 73.8   | 48.7   | 58.9   | 57.0   | 64.7   | 83.4   |
| 7858.0 | 6975.2 | 6956.0 | 7480.0 | 7722.8 | 8469.1 |
| 1.1    | 3.3    | 2.5    | 2.4    | 1.5    | 2.1    |
| 75.4   | 65.0   | 95.9   | 91.4   | 89.9   | 98.3   |
| 35.1   | 26.8   | 36.5   | 43.6   | 40.6   | 43.3   |
| 145.3  | 126.4  | 149.0  | 117.5  | 137.2  | 168.9  |
| 91.4   | 115.4  | 112.9  | 119.9  | 133.7  | 132.3  |
| 173.5  | 171.4  | 196.9  | 160.9  | 177.5  | 205.3  |
| 120.0  | 117.2  | 108.7  | 99.0   | 138.9  | 141.5  |
| 8.4    | 10.0   | 9.0    | 10.0   | 9.7    | 8.8    |
| 3.7    | 5.7    | 2.5    | 2.2    | 1.3    | 8.7    |
| 79.1   | 66.0   | 57.7   | 96.2   | 83.6   | 74.1   |
| 153.3  | 166.8  | 131.6  | 135.2  | 143.2  | 171.8  |
| 21.3   | 15.3   | 15.8   | 11.2   | 19.9   | 19.1   |
| 1037.6 | 1072.5 | 992.6  | 1057.7 | 1065.4 | 1263.5 |
| 17.4   | 22.7   | 31.2   | 12.9   | 10.8   | 21.7   |
| 259.6  | 246.6  | 298.9  | 334.7  | 327.7  | 371.7  |
| 27.2   | 26.6   | 8.4    | 13.8   | 16.3   | 12.3   |
| 824.7  | 779.1  | 930.4  | 1012.4 | 1002.8 | 1055.4 |
| 121.5  | 80.1   | 87.4   | 90.1   | 110.6  | 163.3  |
| 11.9   | 30.9   | 10.5   | 13.6   | 13.7   | 14.6   |
| 8.9    | 2.4    | 5.2    | 9.2    | 3.1    | 2.5    |
| 110.3  | 128.1  | 118.4  | 117.4  | 147.1  | 175.0  |
| 7.7    | 9.5    | 11.3   | 3.6    | 3.4    | 5.2    |
| 628.6  | 525.6  | 575.5  | 600.4  | 707.8  | 689.4  |
| 253.8  | 283.0  | 279.1  | 256.2  | 296.4  | 242.8  |
| 1132.1 | 1100.9 | 1126.9 | 1175.3 | 1185.6 | 1305.0 |
| 582.9  | 771.2  | 678.3  | 727.3  | 740.1  | 832.5  |
| 76.8   | 56.1   | 66.6   | 63.0   | 83.7   | 88.4   |

|        |        |        |        |        |        |
|--------|--------|--------|--------|--------|--------|
| 2.5    | 7.9    | 3.3    | 4.7    | 1.3    | 2.7    |
| 172.3  | 138.2  | 183.0  | 152.5  | 210.6  | 186.8  |
| 130.2  | 96.1   | 116.0  | 110.1  | 144.3  | 133.1  |
| 254.4  | 248.7  | 305.9  | 287.3  | 314.6  | 341.3  |
| 21.9   | 10.8   | 13.9   | 31.5   | 21.0   | 30.1   |
| 6.4    | 2.2    | 3.9    | 3.4    | 8.5    | 8.1    |
| 57.4   | 45.2   | 42.9   | 50.0   | 63.4   | 49.5   |
| 288.8  | 250.2  | 287.8  | 291.0  | 347.0  | 347.6  |
| 37.1   | 21.7   | 26.9   | 25.6   | 37.5   | 23.8   |
| 70.9   | 69.6   | 85.5   | 77.7   | 87.9   | 85.9   |
| 516.9  | 412.3  | 513.4  | 630.1  | 561.7  | 665.1  |
| 1652.1 | 1110.3 | 1930.5 | 1859.3 | 2081.7 | 2214.0 |
| 180.3  | 140.2  | 138.1  | 173.4  | 171.0  | 181.2  |
| 174.6  | 234.4  | 208.3  | 145.0  | 213.1  | 194.0  |
| 51.8   | 34.4   | 53.1   | 52.0   | 49.2   | 48.2   |
| 938.1  | 817.1  | 913.6  | 921.9  | 1013.4 | 1088.6 |
| 796.3  | 721.9  | 819.6  | 815.8  | 893.6  | 929.7  |
| 311.7  | 288.6  | 328.1  | 291.5  | 421.5  | 350.6  |
| 342.9  | 314.7  | 396.8  | 361.1  | 457.9  | 441.3  |
| 160.4  | 143.8  | 172.8  | 170.8  | 203.3  | 206.3  |
| 29.8   | 30.2   | 13.9   | 25.8   | 19.0   | 18.2   |
| 466.8  | 492.0  | 469.8  | 641.9  | 574.2  | 651.4  |
| 4.3    | 17.5   | 18.8   | 12.6   | 14.9   | 20.2   |
| 8.7    | 19.3   | 33.8   | 22.1   | 33.8   | 29.5   |
| 71.4   | 47.2   | 61.1   | 71.6   | 76.3   | 79.9   |
| 38.7   | 36.5   | 45.4   | 45.0   | 54.6   | 52.5   |
| 54.2   | 53.3   | 44.5   | 55.5   | 57.7   | 74.2   |
| 113.2  | 89.1   | 102.0  | 94.3   | 119.7  | 125.7  |
| 95.6   | 66.7   | 134.3  | 105.4  | 143.3  | 136.8  |
| 1323.0 | 769.0  | 1251.1 | 1075.4 | 1521.8 | 1557.2 |
| 59.3   | 54.1   | 70.1   | 57.7   | 76.1   | 71.7   |
| 23.7   | 19.4   | 19.9   | 23.1   | 20.7   | 27.1   |
| 509.6  | 344.9  | 385.5  | 377.4  | 494.7  | 557.2  |
| 213.5  | 186.7  | 194.1  | 203.8  | 291.4  | 271.4  |
| 63.4   | 55.3   | 52.8   | 67.2   | 74.3   | 81.3   |
| 245.0  | 251.0  | 210.9  | 235.2  | 292.2  | 324.3  |
| 102.0  | 111.9  | 123.9  | 123.1  | 148.9  | 135.5  |
| 147.4  | 117.4  | 141.6  | 159.2  | 168.7  | 162.3  |
| 301.4  | 298.2  | 362.3  | 409.2  | 393.5  | 445.3  |
| 190.8  | 229.9  | 195.5  | 218.6  | 247.0  | 201.9  |
| 4577.1 | 4274.5 | 4799.9 | 4917.0 | 5007.5 | 5199.9 |
| 319.1  | 318.2  | 426.7  | 297.1  | 313.3  | 425.3  |
| 599.9  | 567.8  | 610.9  | 754.5  | 696.7  | 760.8  |
| 2086.5 | 1929.6 | 2227.3 | 2344.3 | 2446.9 | 2514.5 |
| 13.8   | 28.2   | 14.6   | 11.3   | 12.6   | 20.9   |
| 596.7  | 743.8  | 746.3  | 822.9  | 759.6  | 828.8  |
| 242.3  | 156.2  | 186.1  | 260.1  | 273.2  | 341.2  |
| 221.9  | 188.9  | 230.2  | 209.2  | 257.7  | 298.1  |
| 764.7  | 677.5  | 785.4  | 741.8  | 893.3  | 933.3  |
| 9.4    | 14.8   | 1.9    | 11.4   | 8.2    | 6.7    |
| 118.1  | 102.5  | 131.2  | 112.3  | 145.5  | 146.0  |
| 136.5  | 143.7  | 148.9  | 181.5  | 195.8  | 158.4  |
| 104.3  | 92.3   | 108.9  | 107.1  | 103.7  | 105.1  |

|        |        |        |        |        |        |
|--------|--------|--------|--------|--------|--------|
| 6.7    | 16.9   | 16.5   | 16.3   | 5.5    | 14.7   |
| 10.5   | 17.5   | 12.7   | 3.9    | 9.4    | 6.2    |
| 1166.0 | 1149.6 | 1141.0 | 1266.0 | 1215.6 | 1349.6 |
| 728.6  | 684.1  | 659.9  | 708.4  | 788.7  | 801.0  |
| 18.8   | 4.0    | 18.2   | 7.4    | 29.2   | 30.4   |
| 277.2  | 211.6  | 286.3  | 251.8  | 340.3  | 347.8  |
| 146.5  | 125.6  | 200.2  | 146.0  | 238.7  | 170.5  |
| 147.4  | 137.2  | 121.8  | 130.3  | 141.7  | 165.0  |
| 54.5   | 53.0   | 58.1   | 57.9   | 59.5   | 67.1   |
| 2.7    | 1.1    | 4.1    | 2.8    | 4.8    | 2.2    |
| 95.1   | 86.0   | 113.4  | 103.2  | 122.1  | 149.4  |
| 127.4  | 93.8   | 113.0  | 130.9  | 139.5  | 166.8  |
| 100.2  | 83.5   | 113.4  | 90.1   | 96.0   | 116.0  |
| 29.3   | 25.2   | 29.7   | 20.4   | 27.2   | 29.4   |
| 185.5  | 207.9  | 173.6  | 190.1  | 181.5  | 215.8  |
| 126.8  | 159.6  | 125.3  | 142.8  | 139.7  | 153.1  |
| 10.0   | 2.1    | 7.6    | 8.4    | 8.7    | 9.9    |
| 6.9    | 1.9    | 9.5    | 2.8    | 2.2    | 12.0   |
| 69.5   | 39.9   | 59.8   | 67.6   | 68.0   | 82.8   |
| 79.1   | 83.3   | 91.1   | 82.3   | 89.2   | 116.1  |
| 183.1  | 146.2  | 176.2  | 181.8  | 200.0  | 223.4  |
| 84.8   | 57.8   | 76.2   | 93.8   | 106.0  | 110.1  |
| 368.1  | 376.1  | 386.6  | 369.8  | 395.6  | 471.1  |
| 116.4  | 106.3  | 122.2  | 197.0  | 157.9  | 150.7  |
| 194.9  | 214.3  | 223.3  | 221.8  | 229.8  | 259.2  |
| 145.4  | 117.5  | 130.5  | 141.4  | 148.7  | 166.1  |
| 153.7  | 130.2  | 154.0  | 149.5  | 217.2  | 198.9  |
| 105.3  | 73.9   | 108.0  | 99.0   | 119.4  | 128.1  |
| 603.4  | 537.2  | 570.0  | 602.4  | 683.1  | 757.4  |
| 227.5  | 240.3  | 306.3  | 344.3  | 340.8  | 281.2  |
| 45.8   | 35.4   | 48.7   | 32.3   | 30.7   | 51.8   |
| 350.1  | 351.1  | 405.3  | 415.9  | 417.7  | 456.9  |
| 455.1  | 476.2  | 457.6  | 510.6  | 477.1  | 570.3  |
| 414.8  | 357.1  | 419.1  | 395.3  | 465.6  | 462.7  |
| 59.6   | 62.7   | 79.8   | 60.9   | 68.8   | 66.9   |
| 507.9  | 476.0  | 421.8  | 513.6  | 550.4  | 602.0  |
| 2000.1 | 1873.9 | 1926.0 | 1957.9 | 2164.1 | 2269.6 |
| 13.8   | 2.8    | 14.2   | 10.4   | 7.8    | 12.4   |
| 59.3   | 46.9   | 52.1   | 45.2   | 50.4   | 54.3   |
| 122.6  | 131.1  | 148.7  | 157.6  | 143.5  | 172.8  |
| 51.8   | 5.6    | 43.4   | 23.8   | 62.7   | 55.4   |
| 171.9  | 164.3  | 157.2  | 170.9  | 185.8  | 190.5  |
| 83.1   | 92.6   | 80.4   | 95.0   | 86.6   | 96.0   |
| 82.6   | 71.5   | 72.9   | 82.7   | 84.3   | 85.5   |
| 52.0   | 61.7   | 62.8   | 52.2   | 74.8   | 76.3   |
| 1116.0 | 1034.3 | 1136.5 | 1117.1 | 1299.3 | 1351.7 |
| 14.4   | 6.8    | 4.0    | 6.2    | 13.2   | 6.1    |
| 31.4   | 40.8   | 28.3   | 14.8   | 27.1   | 33.8   |
| 9.9    | 4.7    | 9.8    | 11.2   | 22.5   | 21.9   |
| 29.5   | 27.0   | 33.2   | 27.2   | 27.6   | 25.4   |
| 111.2  | 90.0   | 117.3  | 85.8   | 127.4  | 124.5  |
| 99.0   | 112.2  | 99.8   | 109.4  | 100.0  | 137.7  |
| 1194.8 | 919.4  | 1205.3 | 1122.8 | 1283.0 | 1461.3 |

|        |        |        |        |        |        |
|--------|--------|--------|--------|--------|--------|
| 22.4   | 31.3   | 13.6   | 32.2   | 25.3   | 36.3   |
| 1951.0 | 1429.0 | 1851.3 | 1789.1 | 2132.5 | 2572.2 |
| 380.0  | 385.7  | 414.3  | 417.1  | 496.4  | 488.9  |
| 7.4    | 3.3    | 3.7    | 2.5    | 3.7    | 4.2    |
| 508.2  | 482.8  | 552.8  | 516.5  | 525.3  | 643.2  |
| 101.3  | 95.5   | 106.3  | 98.5   | 120.3  | 139.9  |
| 85.7   | 63.7   | 92.1   | 86.4   | 95.0   | 115.5  |
| 104.0  | 110.3  | 124.2  | 137.5  | 124.8  | 147.4  |
| 789.9  | 767.6  | 749.5  | 856.3  | 857.7  | 1025.1 |
| 271.4  | 302.6  | 335.5  | 357.7  | 325.4  | 375.3  |
| 1777.1 | 1619.0 | 2054.3 | 2126.5 | 2191.7 | 2159.1 |
| 740.8  | 625.7  | 798.7  | 898.1  | 997.9  | 1003.3 |
| 229.7  | 181.5  | 189.0  | 175.1  | 216.7  | 210.1  |
| 66.8   | 63.3   | 55.8   | 56.9   | 79.2   | 84.2   |
| 58.1   | 80.8   | 62.0   | 61.6   | 72.1   | 68.9   |
| 160.8  | 157.1  | 166.9  | 123.3  | 194.3  | 167.1  |
| 1155.2 | 1453.6 | 1403.8 | 1558.5 | 1332.7 | 1484.4 |
| 14.2   | 26.0   | 7.1    | 6.8    | 13.8   | 11.5   |
| 148.9  | 166.0  | 144.3  | 141.9  | 149.5  | 142.6  |
| 47.7   | 44.7   | 41.7   | 30.8   | 41.4   | 42.9   |
| 195.8  | 228.5  | 196.3  | 241.9  | 215.0  | 266.5  |
| 191.8  | 226.2  | 189.2  | 185.7  | 183.9  | 240.5  |
| 335.5  | 344.9  | 365.3  | 364.0  | 374.1  | 417.0  |
| 7.8    | 6.6    | 12.0   | 3.2    | 16.6   | 14.4   |
| 30.0   | 22.6   | 25.0   | 18.1   | 21.3   | 25.7   |
| 62.7   | 48.5   | 63.1   | 62.6   | 79.0   | 77.4   |
| 195.8  | 149.6  | 169.8  | 184.1  | 207.1  | 195.7  |
| 91.8   | 75.1   | 124.2  | 106.2  | 123.0  | 104.9  |
| 332.1  | 281.8  | 323.1  | 319.3  | 327.0  | 449.7  |
| 41.9   | 49.7   | 46.3   | 42.6   | 35.8   | 72.7   |
| 100.7  | 119.6  | 143.4  | 119.5  | 147.0  | 143.8  |
| 256.1  | 340.6  | 331.9  | 291.9  | 308.3  | 314.7  |
| 1389.0 | 1465.5 | 1403.1 | 1641.9 | 1550.8 | 1700.3 |
| 80.0   | 100.3  | 108.3  | 93.0   | 125.8  | 122.0  |
| 49.3   | 52.1   | 49.7   | 47.5   | 57.7   | 73.7   |
| 395.5  | 393.8  | 373.5  | 435.4  | 408.8  | 458.5  |
| 7.7    | 4.2    | 4.3    | 11.2   | 15.8   | 23.2   |
| 62.8   | 63.6   | 54.8   | 72.5   | 58.4   | 82.5   |
| 599.0  | 528.0  | 522.3  | 603.2  | 647.2  | 731.2  |
| 101.6  | 133.8  | 119.5  | 114.3  | 121.5  | 152.2  |
| 84.0   | 100.2  | 92.7   | 105.8  | 130.2  | 114.8  |
| 25.6   | 35.0   | 29.9   | 25.8   | 30.1   | 33.4   |
| 188.2  | 139.9  | 160.8  | 166.4  | 187.4  | 210.6  |
| 388.0  | 336.9  | 443.3  | 488.2  | 508.2  | 512.8  |
| 31.5   | 16.0   | 21.1   | 20.3   | 36.5   | 48.3   |
| 212.7  | 247.3  | 278.3  | 296.5  | 310.1  | 303.4  |
| 69.6   | 75.5   | 76.7   | 81.5   | 82.8   | 96.2   |
| 152.2  | 141.4  | 135.9  | 143.9  | 152.5  | 167.8  |
| 16.8   | 26.5   | 14.3   | 10.9   | 8.3    | 12.6   |
| 299.3  | 399.1  | 315.9  | 385.1  | 303.6  | 398.1  |
| 151.3  | 163.6  | 155.7  | 175.7  | 133.0  | 207.4  |
| 15.8   | 8.2    | 10.7   | 11.3   | 17.0   | 25.4   |
| 843.0  | 955.7  | 1040.4 | 1144.1 | 1108.3 | 1308.3 |



|        |        |        |        |        |        |
|--------|--------|--------|--------|--------|--------|
| 1.6    | 1.4    | 4.4    | 1.8    | 1.0    | 1.8    |
| 43.4   | 25.6   | 60.8   | 68.5   | 63.3   | 67.5   |
| 143.4  | 143.3  | 127.3  | 144.1  | 150.2  | 182.3  |
| 16.9   | 6.5    | 21.9   | 24.4   | 18.3   | 9.4    |
| 33.2   | 23.6   | 21.8   | 22.7   | 20.5   | 29.7   |
| 32.0   | 48.3   | 39.3   | 34.5   | 40.5   | 49.4   |
| 793.5  | 786.9  | 862.0  | 914.1  | 916.5  | 946.3  |
| 12.9   | 10.4   | 15.5   | 4.3    | 14.1   | 23.5   |
| 533.1  | 444.5  | 537.3  | 530.0  | 533.2  | 636.7  |
| 3.1    | 12.4   | 7.3    | 4.6    | 1.8    | 6.6    |
| 312.3  | 264.7  | 286.7  | 296.8  | 329.6  | 375.1  |
| 157.2  | 142.1  | 162.1  | 168.4  | 169.8  | 190.3  |
| 6.0    | 5.3    | 5.5    | 1.9    | 6.2    | 3.2    |
| 19.2   | 15.9   | 20.5   | 19.5   | 20.8   | 35.0   |
| 37.3   | 32.1   | 37.4   | 39.0   | 43.9   | 52.7   |
| 21.0   | 21.5   | 21.6   | 22.9   | 27.4   | 30.9   |
| 247.8  | 227.9  | 277.3  | 258.0  | 264.9  | 281.4  |
| 564.3  | 516.4  | 612.9  | 648.7  | 740.3  | 680.9  |
| 22.7   | 22.6   | 18.6   | 23.3   | 30.4   | 32.1   |
| 77.5   | 49.1   | 70.9   | 73.7   | 74.6   | 95.9   |
| 13.3   | 18.1   | 21.8   | 11.3   | 13.4   | 15.8   |
| 28.0   | 22.7   | 23.5   | 28.0   | 33.5   | 27.7   |
| 3.1    | 11.7   | 21.9   | 10.0   | 7.7    | 16.7   |
| 166.3  | 154.5  | 186.4  | 184.5  | 198.8  | 218.2  |
| 224.8  | 214.4  | 237.0  | 256.1  | 241.7  | 248.4  |
| 156.9  | 125.3  | 160.2  | 138.5  | 148.4  | 220.0  |
| 137.3  | 113.4  | 141.7  | 130.0  | 158.9  | 167.4  |
| 24.4   | 42.3   | 35.6   | 42.7   | 32.0   | 38.4   |
| 117.1  | 93.0   | 115.4  | 105.5  | 148.0  | 138.8  |
| 203.5  | 177.3  | 211.7  | 221.9  | 277.1  | 254.3  |
| 147.6  | 145.8  | 132.2  | 139.7  | 138.1  | 153.1  |
| 6.8    | 2.1    | 13.2   | 6.3    | 11.0   | 12.0   |
| 84.7   | 44.1   | 65.1   | 50.5   | 75.4   | 72.6   |
| 3.7    | 3.8    | 3.7    | 2.7    | 3.9    | 3.1    |
| 26.0   | 17.6   | 34.3   | 30.7   | 36.3   | 43.9   |
| 66.4   | 81.0   | 73.1   | 77.8   | 70.0   | 87.6   |
| 34.5   | 34.9   | 38.0   | 29.3   | 36.9   | 50.7   |
| 1366.0 | 1251.0 | 1139.3 | 1230.6 | 1287.2 | 1555.1 |
| 113.2  | 113.8  | 118.8  | 132.7  | 134.8  | 131.0  |
| 32.9   | 39.5   | 38.3   | 34.7   | 48.3   | 51.9   |
| 39.7   | 31.8   | 36.5   | 36.2   | 48.1   | 46.0   |
| 65.7   | 70.8   | 83.5   | 80.0   | 86.1   | 103.6  |
| 1472.7 | 1619.3 | 1577.1 | 1713.9 | 1715.3 | 1760.3 |
| 821.8  | 631.0  | 752.1  | 817.1  | 937.5  | 975.4  |
| 305.4  | 263.3  | 291.8  | 330.3  | 362.8  | 379.0  |
| 48.4   | 33.1   | 39.2   | 48.8   | 57.2   | 53.3   |
| 218.3  | 187.6  | 201.1  | 219.8  | 239.2  | 253.4  |
| 267.2  | 273.3  | 267.4  | 314.8  | 284.9  | 354.7  |
| 4.8    | 9.9    | 3.1    | 1.4    | 3.4    | 2.9    |
| 1.2    | 0.5    | 0.6    | 0.7    | 0.7    | 0.8    |
| 5.1    | 8.0    | 7.5    | 2.9    | 4.3    | 3.6    |
| 32.4   | 21.1   | 29.4   | 37.6   | 50.5   | 38.4   |
| 486.8  | 310.6  | 533.2  | 519.9  | 609.2  | 631.3  |

|        |        |        |        |        |        |
|--------|--------|--------|--------|--------|--------|
| 817.7  | 825.3  | 748.5  | 870.7  | 971.6  | 1029.4 |
| 2.4    | 18.2   | 3.9    | 3.4    | 13.8   | 4.0    |
| 96.3   | 107.5  | 144.9  | 95.9   | 127.5  | 139.5  |
| 87.4   | 80.8   | 86.8   | 98.2   | 119.0  | 137.5  |
| 122.9  | 141.5  | 147.7  | 130.8  | 153.0  | 157.0  |
| 68.9   | 84.4   | 78.8   | 90.4   | 65.3   | 82.9   |
| 298.4  | 308.3  | 351.2  | 382.8  | 345.2  | 327.0  |
| 317.1  | 191.6  | 286.7  | 281.9  | 297.1  | 329.3  |
| 359.6  | 248.6  | 369.2  | 385.4  | 398.7  | 476.5  |
| 43.2   | 45.4   | 79.0   | 54.0   | 57.7   | 52.8   |
| 108.6  | 98.2   | 93.8   | 118.6  | 118.2  | 120.5  |
| 241.9  | 226.5  | 289.2  | 283.8  | 304.5  | 337.3  |
| 307.6  | 250.5  | 317.5  | 317.2  | 310.6  | 351.7  |
| 503.3  | 502.3  | 469.8  | 509.9  | 586.9  | 597.4  |
| 1.5    | 1.3    | 3.4    | 1.6    | 2.1    | 1.7    |
| 37.4   | 38.1   | 30.8   | 37.3   | 55.1   | 39.4   |
| 63.6   | 74.4   | 66.1   | 65.7   | 73.4   | 71.3   |
| 137.8  | 156.9  | 164.1  | 156.1  | 161.9  | 194.1  |
| 136.2  | 111.6  | 140.0  | 159.0  | 196.0  | 173.7  |
| 77.1   | 61.2   | 78.3   | 83.9   | 90.8   | 121.2  |
| 223.6  | 192.9  | 220.8  | 210.8  | 238.7  | 273.0  |
| 20.0   | 55.6   | 17.0   | 47.8   | 26.4   | 39.4   |
| 115.1  | 78.1   | 103.1  | 126.5  | 124.8  | 130.2  |
| 44.4   | 49.8   | 60.6   | 56.4   | 65.6   | 59.0   |
| 700.2  | 668.4  | 719.1  | 733.7  | 828.3  | 803.6  |
| 403.7  | 418.6  | 400.3  | 346.1  | 541.3  | 456.9  |
| 12.7   | 29.2   | 25.2   | 10.8   | 22.1   | 23.9   |
| 127.8  | 120.1  | 124.0  | 114.1  | 147.0  | 152.1  |
| 598.9  | 530.8  | 541.7  | 624.9  | 640.7  | 704.5  |
| 96.7   | 104.7  | 107.5  | 85.9   | 92.4   | 113.4  |
| 892.2  | 770.2  | 1013.6 | 1002.3 | 1060.4 | 1234.9 |
| 294.7  | 218.0  | 284.9  | 286.8  | 330.6  | 327.7  |
| 62.4   | 61.2   | 79.6   | 88.6   | 88.4   | 99.4   |
| 19.0   | 25.3   | 15.7   | 23.3   | 18.6   | 20.0   |
| 22.1   | 14.8   | 27.5   | 35.8   | 20.4   | 27.2   |
| 29.7   | 20.2   | 28.6   | 26.2   | 26.0   | 30.6   |
| 9.5    | 10.8   | 9.9    | 10.3   | 14.5   | 13.9   |
| 26.0   | 4.6    | 32.3   | 35.7   | 38.3   | 25.3   |
| 15.7   | 14.5   | 9.5    | 4.7    | 7.6    | 14.6   |
| 34.2   | 27.7   | 40.2   | 42.8   | 45.9   | 41.5   |
| 157.1  | 160.9  | 189.8  | 179.3  | 195.1  | 208.1  |
| 108.1  | 104.5  | 119.0  | 121.9  | 135.3  | 132.0  |
| 122.9  | 93.4   | 106.6  | 96.3   | 144.0  | 142.0  |
| 904.3  | 822.4  | 1008.3 | 1162.6 | 1135.6 | 1203.8 |
| 1619.9 | 1653.3 | 1797.7 | 1859.5 | 1982.1 | 1995.8 |
| 129.1  | 119.0  | 131.3  | 159.3  | 163.4  | 193.7  |
| 26.6   | 29.2   | 27.9   | 31.2   | 33.9   | 30.0   |
| 25.0   | 7.8    | 21.3   | 22.5   | 17.8   | 33.1   |
| 1.4    | 0.6    | 2.1    | 1.5    | 1.7    | 1.0    |
| 294.1  | 231.7  | 282.8  | 302.1  | 260.6  | 317.8  |
| 35.7   | 27.6   | 23.3   | 28.0   | 41.4   | 43.5   |
| 116.6  | 126.8  | 105.6  | 114.1  | 104.2  | 116.3  |
| 74.8   | 100.6  | 84.6   | 90.7   | 78.0   | 105.1  |

|        |        |        |        |        |        |
|--------|--------|--------|--------|--------|--------|
| 57.2   | 93.5   | 58.1   | 47.8   | 64.1   | 73.4   |
| 151.5  | 230.3  | 135.1  | 194.4  | 155.9  | 164.8  |
| 29.4   | 25.3   | 31.6   | 29.7   | 45.8   | 43.0   |
| 136.9  | 141.7  | 133.1  | 145.7  | 134.8  | 171.0  |
| 53.9   | 48.7   | 66.6   | 56.5   | 55.6   | 64.9   |
| 4.4    | 2.4    | 6.1    | 0.8    | 2.7    | 5.1    |
| 178.7  | 372.4  | 190.7  | 297.7  | 177.8  | 257.5  |
| 57.4   | 65.0   | 66.1   | 89.3   | 93.8   | 83.5   |
| 135.7  | 107.4  | 117.5  | 112.7  | 157.9  | 185.3  |
| 315.7  | 273.3  | 288.0  | 282.7  | 346.0  | 352.0  |
| 1281.1 | 1170.9 | 1218.9 | 1195.6 | 1290.3 | 1476.0 |
| 0.8    | 2.6    | 4.7    | 2.7    | 5.8    | 9.3    |
| 377.0  | 318.4  | 267.5  | 400.4  | 319.2  | 437.2  |
| 207.2  | 247.5  | 222.5  | 224.7  | 261.2  | 253.8  |
| 3.2    | 0.9    | 4.4    | 4.6    | 3.6    | 7.4    |
| 5.4    | 3.0    | 2.4    | 2.8    | 1.9    | 2.4    |
| 27.8   | 31.2   | 12.0   | 20.6   | 28.4   | 13.8   |
| 4.7    | 1.4    | 7.0    | 1.9    | 4.3    | 3.9    |
| 51.3   | 41.5   | 52.2   | 50.7   | 66.2   | 72.2   |
| 1.0    | 1.2    | 1.3    | 2.7    | 0.9    | 1.1    |
| 113.5  | 90.2   | 126.3  | 126.3  | 105.1  | 143.1  |
| 34.0   | 29.4   | 43.6   | 44.8   | 43.2   | 59.0   |
| 138.7  | 123.2  | 131.7  | 114.6  | 156.1  | 169.9  |
| 324.2  | 339.5  | 350.0  | 367.1  | 440.1  | 452.9  |
| 20.9   | 26.6   | 35.4   | 16.1   | 23.3   | 47.1   |
| 452.5  | 747.2  | 355.7  | 563.2  | 451.7  | 560.0  |
| 65.2   | 75.0   | 67.5   | 64.0   | 67.4   | 66.7   |
| 50.5   | 46.2   | 58.7   | 65.3   | 49.1   | 54.6   |
| 188.1  | 173.9  | 217.7  | 219.6  | 237.0  | 261.4  |
| 3.6    | 1.4    | 23.1   | 10.4   | 8.8    | 23.3   |
| 27.6   | 43.4   | 48.4   | 50.4   | 68.0   | 58.5   |
| 1414.5 | 1340.9 | 1467.4 | 1257.4 | 1504.7 | 1765.3 |
| 1544.7 | 1619.6 | 1594.4 | 1585.7 | 1767.3 | 1936.4 |
| 6.5    | 21.1   | 5.1    | 12.1   | 16.5   | 16.8   |
| 44.3   | 40.7   | 54.8   | 61.8   | 45.4   | 45.6   |
| 3.3    | 3.0    | 6.0    | 5.1    | 8.8    | 2.1    |
| 29.7   | 25.0   | 11.1   | 14.6   | 46.4   | 27.6   |
| 54.4   | 48.3   | 50.4   | 55.6   | 58.0   | 57.2   |
| 134.4  | 147.1  | 143.5  | 161.9  | 198.8  | 219.4  |
| 77.2   | 85.9   | 88.9   | 98.0   | 85.3   | 98.4   |
| 131.3  | 109.8  | 124.6  | 115.9  | 116.9  | 135.9  |
| 167.7  | 223.3  | 191.6  | 185.5  | 200.3  | 228.5  |
| 28.1   | 19.2   | 34.2   | 18.4   | 25.8   | 36.4   |
| 5.4    | 4.1    | 8.5    | 3.4    | 2.7    | 3.6    |
| 2.1    | 9.2    | 1.2    | 2.7    | 0.8    | 0.7    |
| 126.1  | 103.7  | 110.6  | 98.5   | 131.1  | 135.3  |
| 445.1  | 474.5  | 391.7  | 538.6  | 473.9  | 603.4  |
| 81.1   | 71.7   | 115.9  | 98.2   | 123.0  | 122.3  |
| 21.9   | 26.9   | 6.1    | 40.1   | 30.7   | 25.7   |
| 850.7  | 711.5  | 724.4  | 734.8  | 875.1  | 918.5  |
| 12.5   | 3.3    | 5.5    | 13.3   | 2.7    | 9.4    |
| 0.4    | 0.4    | 2.3    | 7.9    | 1.6    | 4.1    |
| 41.4   | 13.9   | 40.5   | 55.2   | 43.7   | 51.1   |

|        |        |        |        |        |        |
|--------|--------|--------|--------|--------|--------|
| 191.0  | 149.4  | 214.0  | 205.2  | 253.1  | 254.7  |
| 150.3  | 143.9  | 119.4  | 131.4  | 143.7  | 185.7  |
| 2.2    | 18.4   | 11.1   | 5.5    | 7.5    | 13.7   |
| 107.9  | 118.4  | 94.6   | 121.1  | 120.6  | 130.3  |
| 25.4   | 47.5   | 31.5   | 36.8   | 29.0   | 41.5   |
| 171.7  | 127.1  | 139.2  | 157.5  | 165.1  | 187.9  |
| 221.4  | 289.8  | 259.0  | 267.3  | 352.3  | 356.3  |
| 6.8    | 0.5    | 11.4   | 10.2   | 5.1    | 17.1   |
| 66.8   | 35.5   | 72.1   | 50.3   | 59.4   | 71.4   |
| 419.3  | 350.2  | 541.2  | 411.3  | 569.4  | 511.2  |
| 99.3   | 95.8   | 110.1  | 128.6  | 150.8  | 126.1  |
| 508.3  | 510.8  | 507.5  | 492.1  | 544.9  | 588.4  |
| 375.8  | 376.9  | 349.4  | 424.7  | 401.7  | 415.0  |
| 723.1  | 732.5  | 702.0  | 730.9  | 745.8  | 866.4  |
| 22.4   | 12.0   | 12.1   | 3.6    | 9.9    | 17.4   |
| 18.3   | 25.7   | 20.2   | 19.8   | 16.4   | 26.6   |
| 47.7   | 70.2   | 53.0   | 63.2   | 58.1   | 58.9   |
| 12.7   | 17.9   | 21.8   | 15.3   | 17.1   | 4.3    |
| 268.5  | 299.1  | 279.5  | 407.7  | 305.0  | 353.5  |
| 65.2   | 98.6   | 62.8   | 96.7   | 79.6   | 80.3   |
| 0.7    | 2.6    | 7.8    | 2.1    | 1.3    | 1.3    |
| 25.7   | 32.5   | 30.6   | 38.7   | 39.2   | 44.4   |
| 1834.8 | 1600.7 | 1610.8 | 1788.9 | 1871.3 | 1992.9 |
| 57.7   | 52.9   | 66.3   | 57.6   | 65.4   | 70.9   |
| 185.2  | 141.4  | 223.3  | 190.8  | 259.3  | 239.9  |
| 111.6  | 92.2   | 118.0  | 117.5  | 121.5  | 129.9  |
| 119.6  | 125.3  | 105.7  | 127.7  | 133.4  | 143.5  |
| 21.7   | 19.4   | 16.3   | 20.0   | 21.4   | 26.0   |
| 155.3  | 120.2  | 151.7  | 153.6  | 166.9  | 166.8  |
| 74.1   | 38.5   | 60.2   | 74.4   | 75.4   | 64.6   |
| 335.1  | 285.2  | 329.4  | 373.9  | 350.7  | 392.2  |
| 191.3  | 136.3  | 204.4  | 199.9  | 195.6  | 202.4  |
| 781.4  | 820.3  | 902.1  | 990.4  | 1084.6 | 1103.2 |
| 89.0   | 83.1   | 118.8  | 102.0  | 101.9  | 114.6  |
| 4.2    | 8.4    | 2.9    | 10.1   | 1.8    | 4.5    |
| 60.4   | 46.3   | 70.6   | 59.2   | 65.7   | 71.5   |
| 142.5  | 130.8  | 132.0  | 144.1  | 177.3  | 188.7  |
| 198.2  | 164.9  | 231.3  | 240.4  | 238.0  | 277.3  |
| 3.6    | 1.1    | 9.8    | 5.5    | 2.5    | 6.7    |
| 3.2    | 1.5    | 3.4    | 2.5    | 3.9    | 2.6    |
| 221.7  | 181.5  | 203.0  | 230.8  | 262.3  | 284.9  |
| 1256.0 | 1480.9 | 1450.5 | 1562.3 | 1470.8 | 1548.7 |
| 1055.1 | 1170.0 | 1048.0 | 1143.2 | 1128.3 | 1258.4 |
| 94.4   | 148.6  | 81.9   | 129.9  | 92.5   | 106.3  |
| 94.3   | 77.5   | 95.7   | 79.9   | 112.1  | 113.9  |
| 148.6  | 136.7  | 145.9  | 163.0  | 142.9  | 167.6  |
| 66.7   | 71.1   | 70.4   | 78.1   | 78.5   | 85.3   |
| 94.7   | 134.0  | 113.1  | 136.9  | 120.0  | 114.1  |
| 216.8  | 162.9  | 214.3  | 230.6  | 236.5  | 312.5  |
| 115.5  | 100.9  | 126.0  | 112.0  | 129.7  | 147.7  |
| 60.9   | 58.2   | 58.6   | 50.1   | 66.0   | 67.9   |
| 4.2    | 3.8    | 12.7   | 8.5    | 8.6    | 7.0    |
| 125.2  | 124.6  | 108.6  | 116.4  | 130.7  | 158.4  |

|        |        |        |        |        |        |
|--------|--------|--------|--------|--------|--------|
| 385.4  | 144.8  | 343.6  | 439.0  | 496.3  | 508.9  |
| 83.3   | 79.0   | 78.1   | 89.8   | 86.9   | 110.6  |
| 2.3    | 3.0    | 2.9    | 2.9    | 1.8    | 7.7    |
| 284.6  | 277.5  | 291.2  | 269.8  | 356.6  | 402.3  |
| 15.4   | 9.5    | 22.5   | 23.7   | 4.8    | 34.1   |
| 68.2   | 69.0   | 65.8   | 79.4   | 44.5   | 100.8  |
| 107.8  | 121.6  | 134.7  | 118.6  | 127.0  | 156.8  |
| 2.4    | 1.1    | 1.7    | 1.5    | 1.7    | 1.4    |
| 13.7   | 27.1   | 11.9   | 9.8    | 16.5   | 15.0   |
| 197.8  | 212.1  | 202.7  | 218.2  | 223.0  | 263.6  |
| 16.2   | 10.6   | 11.5   | 17.2   | 10.7   | 19.3   |
| 104.3  | 104.2  | 90.7   | 124.6  | 139.7  | 120.3  |
| 204.4  | 233.7  | 196.0  | 214.7  | 235.2  | 240.3  |
| 259.4  | 330.6  | 300.5  | 277.1  | 321.0  | 371.0  |
| 10.7   | 0.8    | 1.7    | 5.6    | 2.9    | 12.3   |
| 286.1  | 253.1  | 212.6  | 256.0  | 295.1  | 337.0  |
| 865.9  | 722.8  | 894.1  | 983.2  | 984.6  | 1113.3 |
| 261.3  | 260.9  | 253.5  | 300.0  | 342.6  | 352.5  |
| 14.1   | 15.4   | 18.2   | 22.0   | 20.6   | 23.1   |
| 90.6   | 81.8   | 76.9   | 83.1   | 119.9  | 103.0  |
| 756.2  | 765.7  | 868.9  | 882.2  | 855.9  | 1026.7 |
| 84.7   | 74.3   | 84.2   | 74.0   | 96.6   | 89.7   |
| 194.9  | 157.3  | 150.1  | 183.9  | 204.4  | 239.9  |
| 61.2   | 43.9   | 69.7   | 59.7   | 71.3   | 76.9   |
| 23.7   | 23.7   | 23.4   | 24.1   | 24.7   | 26.7   |
| 126.1  | 120.1  | 124.5  | 155.9  | 139.8  | 171.3  |
| 251.4  | 238.8  | 248.0  | 247.9  | 298.6  | 320.2  |
| 2724.8 | 2580.2 | 2588.0 | 2774.3 | 3122.1 | 3364.6 |
| 6.9    | 5.2    | 3.2    | 9.2    | 7.6    | 12.5   |
| 4.5    | 14.6   | 8.1    | 7.4    | 4.4    | 4.2    |
| 270.1  | 274.5  | 289.7  | 295.9  | 304.1  | 359.0  |
| 18.9   | 21.7   | 38.5   | 21.1   | 27.6   | 32.9   |
| 64.9   | 25.6   | 54.6   | 48.8   | 86.5   | 84.8   |
| 1.7    | 3.6    | 9.6    | 1.0    | 0.9    | 1.2    |
| 11.9   | 26.5   | 39.2   | 28.9   | 40.1   | 31.0   |
| 6.9    | 9.6    | 8.8    | 13.9   | 9.2    | 7.9    |
| 6.2    | 1.1    | 9.6    | 2.7    | 5.6    | 1.1    |
| 399.6  | 368.6  | 437.1  | 380.7  | 465.0  | 455.0  |
| 3.2    | 2.0    | 7.3    | 1.7    | 1.6    | 2.3    |
| 517.0  | 417.2  | 564.3  | 508.7  | 628.6  | 648.9  |
| 42.8   | 50.5   | 52.2   | 58.9   | 72.5   | 44.5   |
| 34.7   | 30.6   | 35.3   | 29.9   | 33.8   | 37.5   |
| 15.0   | 14.0   | 9.0    | 12.1   | 13.3   | 17.5   |
| 518.9  | 435.0  | 449.0  | 433.6  | 528.5  | 563.2  |
| 54.5   | 66.0   | 75.9   | 47.3   | 68.5   | 62.2   |
| 24.3   | 31.8   | 43.9   | 48.4   | 53.5   | 53.1   |
| 107.8  | 71.0   | 92.1   | 88.6   | 109.1  | 103.3  |
| 4.2    | 2.1    | 1.8    | 3.9    | 2.1    | 1.3    |
| 86.2   | 89.4   | 96.1   | 108.7  | 120.4  | 143.9  |
| 279.5  | 257.2  | 325.3  | 351.8  | 372.0  | 351.7  |
| 1.2    | 1.1    | 4.3    | 5.9    | 4.9    | 3.4    |
| 32.2   | 38.8   | 47.0   | 34.8   | 43.8   | 45.9   |
| 33.6   | 25.6   | 39.7   | 47.7   | 49.7   | 46.6   |

|        |        |        |        |        |        |
|--------|--------|--------|--------|--------|--------|
| 100.3  | 108.3  | 103.1  | 108.3  | 109.8  | 144.1  |
| 30.9   | 48.9   | 39.8   | 38.2   | 53.4   | 63.6   |
| 279.2  | 235.6  | 262.5  | 277.3  | 301.5  | 335.3  |
| 205.5  | 165.7  | 182.0  | 168.3  | 187.1  | 224.6  |
| 106.7  | 132.5  | 171.8  | 128.7  | 157.5  | 157.5  |
| 1401.6 | 1443.5 | 1585.5 | 1550.9 | 1476.9 | 1496.0 |
| 34.6   | 36.7   | 20.8   | 38.2   | 41.7   | 50.0   |
| 2.4    | 4.3    | 3.3    | 8.1    | 3.1    | 3.9    |
| 30.5   | 29.5   | 42.7   | 30.4   | 45.3   | 35.7   |
| 13.8   | 12.2   | 14.2   | 15.7   | 11.1   | 13.2   |
| 78.5   | 87.4   | 84.4   | 70.3   | 96.5   | 95.7   |
| 185.1  | 174.6  | 184.0  | 212.8  | 243.5  | 246.5  |
| 715.4  | 599.9  | 710.6  | 691.6  | 786.9  | 832.9  |
| 8.5    | 5.9    | 14.9   | 12.9   | 14.4   | 13.3   |
| 115.3  | 111.2  | 127.8  | 121.0  | 139.2  | 143.8  |
| 66.7   | 73.2   | 50.8   | 49.2   | 33.4   | 72.3   |
| 1.8    | 1.3    | 1.4    | 1.6    | 2.3    | 1.2    |
| 923.3  | 877.9  | 955.6  | 905.3  | 1069.5 | 1219.7 |
| 50.4   | 83.0   | 50.7   | 53.4   | 68.7   | 70.7   |
| 136.9  | 112.4  | 112.1  | 133.4  | 144.8  | 175.5  |
| 15.2   | 18.0   | 38.4   | 23.5   | 36.6   | 38.7   |
| 39.4   | 32.6   | 48.9   | 42.5   | 50.7   | 57.6   |
| 123.5  | 129.3  | 109.3  | 114.4  | 122.8  | 142.0  |
| 44.4   | 51.6   | 42.1   | 53.4   | 72.7   | 72.4   |
| 49.2   | 50.6   | 51.5   | 38.2   | 70.9   | 56.9   |
| 33.6   | 51.3   | 51.4   | 50.1   | 62.4   | 62.6   |
| 9.1    | 14.9   | 8.0    | 10.5   | 7.7    | 8.4    |
| 13.9   | 5.5    | 9.8    | 15.8   | 19.3   | 25.2   |
| 8.7    | 2.1    | 8.3    | 5.5    | 4.3    | 2.9    |
| 10.5   | 10.3   | 18.7   | 16.8   | 17.8   | 17.0   |
| 232.5  | 193.9  | 238.4  | 246.7  | 290.5  | 293.2  |
| 3.1    | 12.7   | 12.6   | 2.4    | 6.5    | 14.5   |
| 1.8    | 3.5    | 2.2    | 2.3    | 2.1    | 4.4    |
| 309.9  | 332.2  | 332.0  | 347.7  | 342.8  | 392.2  |
| 17.3   | 16.5   | 14.3   | 16.1   | 25.8   | 33.0   |
| 81.1   | 52.1   | 84.2   | 75.0   | 82.2   | 87.6   |
| 133.9  | 96.5   | 131.8  | 145.0  | 142.4  | 163.0  |
| 3.4    | 7.7    | 1.6    | 3.3    | 4.4    | 1.3    |
| 22.1   | 19.6   | 12.7   | 20.2   | 25.6   | 24.9   |
| 365.9  | 286.5  | 348.2  | 392.8  | 405.7  | 422.8  |
| 231.2  | 257.3  | 239.7  | 263.8  | 269.0  | 294.3  |
| 16.8   | 23.6   | 28.7   | 16.5   | 12.0   | 26.4   |
| 22.2   | 20.7   | 19.6   | 24.2   | 29.3   | 23.2   |
| 13.0   | 20.8   | 9.2    | 14.5   | 13.4   | 17.1   |
| 44.4   | 61.4   | 51.2   | 69.3   | 67.5   | 63.4   |
| 498.1  | 559.4  | 535.4  | 559.5  | 535.5  | 516.2  |
| 57.2   | 50.2   | 57.6   | 53.3   | 62.2   | 58.7   |
| 90.0   | 65.2   | 85.8   | 85.1   | 93.5   | 79.1   |
| 1756.4 | 2021.3 | 1645.6 | 2260.2 | 1875.0 | 2241.9 |
| 489.3  | 428.2  | 480.6  | 475.7  | 483.2  | 530.8  |
| 154.1  | 134.1  | 114.9  | 130.5  | 183.5  | 165.0  |
| 110.2  | 92.0   | 121.5  | 143.3  | 142.3  | 142.6  |
| 12.8   | 4.1    | 16.2   | 7.9    | 11.8   | 9.9    |

|        |       |        |        |        |        |
|--------|-------|--------|--------|--------|--------|
| 1.3    | 5.3   | 3.3    | 4.0    | 1.7    | 2.2    |
| 305.3  | 297.6 | 424.7  | 403.9  | 435.8  | 451.7  |
| 8.1    | 11.0  | 8.1    | 8.1    | 4.6    | 7.0    |
| 1444.0 | 821.1 | 1661.4 | 1597.4 | 1927.9 | 1782.7 |
| 28.8   | 43.3  | 49.6   | 57.8   | 61.0   | 33.5   |
| 72.6   | 77.3  | 71.4   | 78.2   | 82.6   | 90.1   |
| 30.6   | 30.1  | 36.2   | 35.0   | 39.1   | 33.4   |
| 20.7   | 69.0  | 29.6   | 17.8   | 18.0   | 20.5   |
| 395.1  | 358.7 | 373.9  | 454.5  | 469.2  | 463.3  |
| 813.6  | 740.4 | 801.5  | 823.4  | 929.1  | 993.8  |
| 598.4  | 599.3 | 661.6  | 666.0  | 738.6  | 711.7  |
| 190.7  | 206.5 | 213.6  | 209.8  | 206.2  | 217.0  |
| 17.3   | 22.4  | 16.8   | 15.9   | 20.5   | 18.9   |
| 37.0   | 53.7  | 47.4   | 59.4   | 52.2   | 51.4   |
| 23.3   | 29.4  | 31.2   | 26.5   | 33.9   | 38.0   |
| 39.4   | 28.0  | 36.5   | 39.3   | 49.2   | 43.8   |
| 44.0   | 53.5  | 58.4   | 49.7   | 59.0   | 59.7   |
| 30.1   | 25.5  | 29.1   | 18.4   | 32.3   | 36.5   |
| 92.0   | 107.7 | 89.2   | 82.6   | 122.4  | 114.0  |
| 78.1   | 82.0  | 93.0   | 74.5   | 78.6   | 89.7   |
| 276.5  | 329.5 | 253.3  | 241.9  | 301.6  | 301.9  |
| 118.9  | 145.9 | 116.0  | 125.4  | 128.9  | 138.5  |
| 119.2  | 122.1 | 135.6  | 147.9  | 166.4  | 190.8  |
| 904.6  | 863.8 | 866.1  | 1014.3 | 1007.4 | 1258.1 |
| 5.4    | 8.8   | 6.1    | 12.1   | 8.4    | 8.4    |
| 128.7  | 147.0 | 192.8  | 188.0  | 167.1  | 229.1  |
| 103.3  | 111.4 | 106.2  | 109.7  | 119.3  | 123.0  |
| 331.8  | 314.6 | 294.4  | 295.9  | 331.9  | 402.8  |
| 58.9   | 56.2  | 74.1   | 84.3   | 82.7   | 80.3   |
| 1.9    | 2.7   | 2.1    | 2.9    | 2.7    | 8.7    |
| 4.0    | 1.6   | 2.0    | 1.6    | 1.2    | 1.7    |
| 162.8  | 156.0 | 165.4  | 205.5  | 199.7  | 213.9  |
| 160.3  | 152.8 | 181.7  | 177.1  | 187.3  | 189.4  |
| 476.0  | 380.5 | 448.5  | 443.8  | 517.0  | 528.0  |
| 1003.8 | 780.1 | 935.8  | 966.8  | 1111.8 | 1207.3 |
| 4.1    | 14.2  | 11.4   | 5.9    | 11.4   | 5.4    |
| 141.7  | 132.3 | 130.9  | 132.5  | 175.9  | 167.1  |
| 14.4   | 16.2  | 15.1   | 15.0   | 15.2   | 16.4   |
| 101.6  | 83.8  | 84.1   | 90.1   | 105.5  | 130.3  |
| 198.2  | 217.0 | 187.3  | 203.8  | 198.8  | 264.8  |
| 353.5  | 320.2 | 381.0  | 429.7  | 454.6  | 480.2  |
| 4.5    | 5.1   | 7.0    | 4.0    | 3.1    | 8.7    |
| 207.8  | 227.7 | 224.4  | 234.9  | 285.9  | 276.6  |
| 34.4   | 41.7  | 46.8   | 49.3   | 60.3   | 68.0   |
| 91.7   | 96.1  | 93.1   | 104.5  | 92.1   | 114.4  |
| 83.1   | 77.3  | 85.1   | 87.1   | 94.4   | 114.6  |
| 127.8  | 111.2 | 159.7  | 119.6  | 187.5  | 141.7  |
| 18.8   | 24.0  | 29.8   | 15.8   | 22.2   | 23.4   |
| 13.0   | 12.1  | 14.0   | 12.4   | 5.5    | 13.9   |
| 13.5   | 24.0  | 28.8   | 36.1   | 28.5   | 26.4   |
| 27.3   | 44.2  | 30.0   | 37.8   | 28.4   | 35.5   |
| 985.7  | 775.9 | 1005.9 | 988.3  | 1130.3 | 1173.2 |
| 138.3  | 114.4 | 138.0  | 172.3  | 167.0  | 201.2  |

|        |        |        |        |        |        |
|--------|--------|--------|--------|--------|--------|
| 21.3   | 20.4   | 19.7   | 7.4    | 22.6   | 9.2    |
| 1.6    | 3.0    | 1.9    | 5.6    | 2.1    | 1.6    |
| 287.5  | 287.1  | 329.1  | 330.3  | 334.4  | 366.7  |
| 91.1   | 78.0   | 99.0   | 115.2  | 123.6  | 107.6  |
| 21.9   | 1.0    | 10.1   | 1.6    | 34.6   | 19.3   |
| 17.0   | 18.7   | 20.3   | 23.3   | 20.8   | 15.5   |
| 45.3   | 48.3   | 55.8   | 57.5   | 58.7   | 74.1   |
| 7.9    | 9.6    | 9.1    | 8.5    | 18.6   | 19.0   |
| 72.6   | 62.4   | 77.2   | 82.1   | 92.4   | 87.4   |
| 31.3   | 32.5   | 38.9   | 39.1   | 43.9   | 40.1   |
| 1755.7 | 1430.8 | 1944.6 | 2214.0 | 2159.3 | 2166.5 |
| 22.0   | 21.8   | 21.2   | 30.0   | 32.5   | 30.8   |
| 16.0   | 9.0    | 10.4   | 12.5   | 9.8    | 19.3   |
| 15.6   | 12.9   | 29.2   | 18.2   | 17.2   | 24.3   |
| 1.7    | 3.9    | 7.4    | 2.1    | 2.9    | 2.7    |
| 263.8  | 246.6  | 283.9  | 294.7  | 314.5  | 335.1  |
| 330.7  | 329.4  | 310.4  | 324.2  | 364.2  | 406.0  |
| 3.0    | 1.8    | 2.6    | 1.5    | 2.2    | 1.4    |
| 23.0   | 31.1   | 20.8   | 16.8   | 28.5   | 18.6   |
| 71.8   | 95.4   | 95.8   | 99.3   | 113.1  | 98.1   |
| 18.9   | 32.7   | 30.4   | 28.3   | 23.5   | 29.9   |
| 26.3   | 19.7   | 19.3   | 29.0   | 20.0   | 22.2   |
| 19.1   | 20.2   | 11.2   | 13.2   | 10.8   | 21.3   |
| 22.3   | 29.7   | 21.4   | 28.6   | 25.1   | 24.1   |
| 13.3   | 8.0    | 11.6   | 21.2   | 9.4    | 11.0   |
| 5.3    | 2.0    | 3.9    | 6.7    | 12.9   | 2.9    |
| 160.7  | 105.9  | 111.6  | 142.0  | 134.3  | 152.5  |
| 39.1   | 45.3   | 25.6   | 36.0   | 34.3   | 20.6   |
| 206.5  | 201.3  | 226.0  | 239.8  | 239.8  | 288.8  |
| 78.4   | 126.8  | 73.5   | 107.5  | 88.4   | 137.9  |
| 380.2  | 371.7  | 431.8  | 472.0  | 480.8  | 504.2  |
| 58.8   | 104.1  | 87.7   | 87.8   | 72.1   | 91.6   |
| 52.5   | 56.8   | 67.5   | 52.3   | 66.1   | 70.4   |
| 17.5   | 22.8   | 17.3   | 16.7   | 22.4   | 18.8   |
| 22.4   | 17.1   | 25.0   | 20.7   | 16.5   | 26.9   |
| 165.7  | 253.7  | 178.8  | 251.4  | 165.9  | 241.7  |
| 92.5   | 125.9  | 137.6  | 115.2  | 110.6  | 141.6  |
| 7.4    | 13.3   | 2.1    | 11.0   | 4.2    | 6.6    |
| 366.2  | 377.3  | 363.4  | 416.3  | 439.6  | 463.3  |
| 557.6  | 496.9  | 620.2  | 579.7  | 625.5  | 714.3  |
| 605.7  | 558.9  | 619.5  | 664.2  | 660.7  | 744.4  |
| 73.1   | 36.8   | 68.7   | 60.9   | 67.8   | 100.7  |
| 251.3  | 252.7  | 209.1  | 241.7  | 248.2  | 279.0  |
| 91.3   | 97.1   | 80.1   | 97.9   | 108.1  | 98.1   |
| 2.7    | 5.2    | 0.5    | 0.9    | 1.7    | 2.1    |
| 1.9    | 1.7    | 1.7    | 1.5    | 1.8    | 1.3    |
| 149.0  | 134.3  | 196.6  | 179.7  | 207.7  | 233.9  |
| 2.0    | 7.1    | 3.9    | 4.6    | 13.9   | 6.5    |
| 7.9    | 0.6    | 5.7    | 4.9    | 8.3    | 2.3    |
| 653.3  | 554.6  | 592.3  | 585.2  | 703.5  | 724.7  |
| 1029.2 | 974.9  | 1074.4 | 1042.1 | 1160.4 | 1351.6 |
| 145.5  | 138.5  | 140.5  | 142.2  | 180.3  | 189.3  |
| 1.0    | 3.4    | 0.5    | 2.5    | 2.6    | 4.0    |



|        |        |        |        |        |        |
|--------|--------|--------|--------|--------|--------|
| 4.0    | 2.3    | 3.1    | 2.8    | 3.8    | 4.2    |
| 11.1   | 2.3    | 7.0    | 15.5   | 2.4    | 15.6   |
| 173.5  | 164.2  | 159.5  | 171.9  | 189.6  | 220.2  |
| 117.6  | 145.1  | 173.5  | 165.7  | 155.4  | 184.8  |
| 40.2   | 49.9   | 39.7   | 33.1   | 46.6   | 40.2   |
| 21.4   | 23.4   | 20.9   | 20.6   | 22.0   | 38.5   |
| 11.5   | 1.8    | 8.8    | 13.6   | 9.4    | 8.7    |
| 375.4  | 277.1  | 358.4  | 378.1  | 419.3  | 454.4  |
| 11.8   | 6.3    | 7.4    | 5.0    | 7.9    | 7.6    |
| 2.5    | 1.9    | 2.1    | 8.9    | 6.4    | 5.4    |
| 6.3    | 7.2    | 4.0    | 2.2    | 2.2    | 4.6    |
| 509.5  | 437.4  | 592.0  | 510.7  | 664.7  | 665.3  |
| 159.3  | 166.5  | 166.6  | 162.8  | 193.2  | 185.9  |
| 161.4  | 191.8  | 156.0  | 206.2  | 172.9  | 251.3  |
| 33.8   | 24.3   | 41.9   | 36.1   | 35.5   | 45.6   |
| 55.8   | 50.5   | 60.5   | 57.8   | 49.0   | 78.2   |
| 53.3   | 39.0   | 49.2   | 67.2   | 65.4   | 55.1   |
| 9.1    | 6.3    | 7.3    | 7.6    | 16.7   | 14.7   |
| 16.3   | 9.7    | 11.7   | 11.4   | 23.9   | 13.7   |
| 161.3  | 106.8  | 125.7  | 129.5  | 154.2  | 196.2  |
| 18.5   | 7.2    | 20.5   | 16.1   | 28.9   | 22.7   |
| 24.4   | 31.1   | 37.3   | 51.4   | 42.3   | 53.1   |
| 195.3  | 206.7  | 183.8  | 192.4  | 228.8  | 221.1  |
| 129.9  | 139.4  | 125.9  | 126.1  | 157.8  | 119.2  |
| 0.4    | 1.2    | 0.9    | 0.5    | 0.7    | 0.6    |
| 88.8   | 74.1   | 87.0   | 71.5   | 88.2   | 87.6   |
| 107.8  | 85.0   | 98.9   | 94.4   | 121.0  | 98.9   |
| 15.5   | 16.3   | 10.6   | 11.0   | 12.6   | 21.1   |
| 26.5   | 46.2   | 52.6   | 46.7   | 48.0   | 59.6   |
| 45.6   | 36.0   | 49.5   | 49.9   | 49.6   | 46.4   |
| 75.6   | 91.7   | 102.8  | 79.1   | 93.0   | 94.8   |
| 2705.3 | 2309.6 | 2388.4 | 2629.3 | 2865.5 | 3065.8 |
| 667.1  | 844.7  | 787.4  | 897.9  | 829.5  | 832.6  |
| 52.5   | 62.8   | 48.5   | 50.9   | 58.4   | 49.9   |
| 124.9  | 115.7  | 104.6  | 128.7  | 143.1  | 156.9  |
| 235.7  | 204.1  | 211.2  | 161.0  | 257.8  | 257.6  |
| 111.1  | 64.1   | 94.9   | 97.4   | 108.8  | 115.0  |
| 12.7   | 12.7   | 18.1   | 15.5   | 10.7   | 16.3   |
| 21.7   | 16.6   | 27.5   | 16.2   | 25.1   | 24.6   |
| 488.2  | 423.4  | 464.8  | 458.9  | 530.9  | 489.2  |
| 5.1    | 2.0    | 4.3    | 6.6    | 7.2    | 7.6    |
| 5.0    | 9.4    | 9.9    | 4.0    | 5.0    | 2.0    |
| 0.8    | 1.6    | 2.0    | 13.3   | 1.1    | 1.0    |
| 90.9   | 68.3   | 97.0   | 109.5  | 127.1  | 104.7  |
| 114.3  | 41.8   | 108.0  | 73.1   | 118.2  | 84.8   |
| 17.2   | 16.2   | 11.3   | 10.5   | 14.8   | 17.6   |
| 88.2   | 52.2   | 72.1   | 51.1   | 73.0   | 74.1   |
| 11.8   | 16.9   | 7.6    | 18.4   | 23.9   | 14.2   |
| 116.6  | 115.3  | 93.2   | 103.8  | 102.5  | 130.3  |
| 17.9   | 21.5   | 25.2   | 24.3   | 22.7   | 23.6   |
| 18.2   | 5.0    | 11.0   | 8.2    | 10.8   | 12.4   |
| 130.7  | 122.2  | 152.7  | 169.4  | 171.0  | 164.8  |
| 22.5   | 30.2   | 22.6   | 22.8   | 20.6   | 31.4   |

|        |        |        |        |        |        |
|--------|--------|--------|--------|--------|--------|
| 147.4  | 127.1  | 189.3  | 174.0  | 197.5  | 164.6  |
| 1822.6 | 1655.4 | 1756.3 | 1800.3 | 2073.3 | 2217.0 |
| 1505.5 | 1531.6 | 1408.6 | 1454.2 | 1715.9 | 1867.7 |
| 209.3  | 212.5  | 249.2  | 280.3  | 292.2  | 330.6  |
| 12.5   | 27.2   | 42.7   | 34.5   | 18.5   | 27.7   |
| 319.8  | 350.4  | 319.0  | 345.8  | 359.4  | 395.1  |
| 241.8  | 246.1  | 228.0  | 217.9  | 277.7  | 298.7  |
| 52.6   | 50.5   | 48.6   | 51.0   | 60.0   | 67.3   |
| 27.3   | 27.4   | 19.5   | 33.8   | 18.0   | 31.3   |
| 113.7  | 108.5  | 143.1  | 109.5  | 127.9  | 139.0  |
| 26.5   | 28.9   | 21.9   | 27.8   | 29.7   | 37.9   |
| 14.7   | 19.4   | 19.0   | 19.4   | 27.0   | 24.4   |
| 200.6  | 175.7  | 220.0  | 203.9  | 245.5  | 232.4  |
| 623.9  | 561.2  | 722.7  | 683.0  | 714.2  | 788.5  |
| 626.5  | 604.3  | 679.5  | 728.6  | 709.6  | 887.3  |
| 385.0  | 357.4  | 371.8  | 399.5  | 386.9  | 473.9  |
| 21.2   | 8.5    | 7.7    | 7.4    | 12.4   | 17.6   |
| 99.6   | 75.3   | 83.5   | 116.7  | 115.9  | 117.9  |
| 252.0  | 227.9  | 301.1  | 286.4  | 299.7  | 350.2  |
| 155.3  | 147.9  | 189.6  | 182.0  | 210.8  | 198.8  |
| 69.8   | 57.2   | 74.9   | 86.6   | 69.9   | 81.7   |
| 2.1    | 2.0    | 2.3    | 2.3    | 4.8    | 3.1    |
| 193.7  | 169.9  | 197.2  | 234.5  | 248.3  | 263.4  |
| 4.9    | 7.6    | 15.2   | 10.2   | 9.0    | 8.5    |
| 42.4   | 50.9   | 44.9   | 43.4   | 52.9   | 56.0   |
| 139.7  | 116.5  | 143.2  | 145.7  | 148.7  | 179.4  |
| 39.6   | 21.0   | 30.3   | 36.3   | 23.3   | 30.7   |
| 6.5    | 0.3    | 12.8   | 2.8    | 5.5    | 7.8    |
| 40.7   | 35.7   | 35.8   | 38.2   | 31.6   | 36.9   |
| 185.3  | 182.9  | 188.0  | 205.2  | 204.2  | 196.5  |
| 38.7   | 24.4   | 40.7   | 45.4   | 35.6   | 43.3   |
| 79.1   | 66.3   | 80.8   | 73.5   | 91.4   | 92.0   |
| 14.8   | 18.3   | 20.1   | 25.0   | 24.3   | 23.3   |
| 64.8   | 77.5   | 67.1   | 71.1   | 91.9   | 87.0   |
| 37.5   | 28.8   | 37.1   | 44.0   | 36.6   | 38.7   |
| 12.8   | 19.3   | 31.9   | 9.5    | 16.2   | 25.0   |
| 3.5    | 0.8    | 0.9    | 2.3    | 1.5    | 2.7    |
| 2.2    | 12.8   | 3.0    | 5.0    | 1.7    | 6.4    |
| 69.5   | 56.8   | 76.1   | 87.1   | 113.5  | 90.3   |
| 1072.8 | 1122.9 | 1260.1 | 1317.8 | 1486.9 | 1618.3 |
| 635.4  | 477.7  | 734.4  | 804.1  | 709.4  | 890.1  |
| 253.2  | 263.9  | 260.5  | 303.1  | 304.3  | 324.4  |
| 998.8  | 1039.7 | 1072.0 | 1260.2 | 1278.5 | 1223.3 |
| 615.3  | 516.1  | 596.0  | 567.9  | 653.4  | 736.6  |
| 3.2    | 1.1    | 3.5    | 9.5    | 5.6    | 2.8    |
| 17.3   | 13.4   | 16.6   | 11.7   | 13.3   | 17.1   |
| 364.8  | 293.1  | 359.7  | 375.5  | 377.0  | 412.2  |
| 28.4   | 28.3   | 37.3   | 29.9   | 22.7   | 42.1   |
| 5.6    | 1.5    | 1.0    | 6.8    | 3.0    | 1.3    |
| 118.9  | 105.9  | 126.6  | 123.3  | 136.8  | 134.0  |
| 3.7    | 12.3   | 7.2    | 9.0    | 10.3   | 5.7    |
| 389.8  | 451.5  | 388.1  | 394.7  | 422.0  | 452.4  |
| 0.9    | 1.5    | 5.9    | 4.0    | 1.2    | 1.3    |

|        |        |        |        |        |        |
|--------|--------|--------|--------|--------|--------|
| 71.6   | 76.9   | 77.3   | 78.8   | 85.3   | 78.0   |
| 224.3  | 195.3  | 249.5  | 243.7  | 269.8  | 295.0  |
| 61.4   | 59.3   | 47.2   | 36.5   | 63.8   | 63.8   |
| 647.2  | 453.9  | 546.9  | 644.0  | 678.4  | 726.5  |
| 5.0    | 3.5    | 4.0    | 6.9    | 3.4    | 7.9    |
| 244.7  | 200.3  | 295.5  | 294.9  | 352.8  | 324.0  |
| 1388.7 | 1198.9 | 1312.1 | 1306.3 | 1481.2 | 1520.5 |
| 272.0  | 207.9  | 240.3  | 219.0  | 272.4  | 272.2  |
| 122.3  | 104.3  | 110.4  | 122.7  | 152.5  | 161.0  |
| 170.9  | 156.8  | 159.7  | 184.9  | 188.8  | 212.0  |
| 3.8    | 2.2    | 10.8   | 5.3    | 6.4    | 7.9    |
| 6.9    | 3.8    | 3.3    | 5.5    | 6.5    | 10.0   |
| 331.7  | 289.9  | 374.3  | 384.7  | 395.4  | 418.8  |
| 238.8  | 183.7  | 223.7  | 260.9  | 248.6  | 286.0  |
| 273.0  | 298.8  | 360.7  | 345.2  | 349.6  | 373.1  |
| 8.9    | 4.4    | 3.4    | 8.0    | 8.0    | 7.3    |
| 210.1  | 203.1  | 216.1  | 197.7  | 240.2  | 232.2  |
| 104.4  | 121.1  | 106.6  | 121.0  | 110.7  | 110.6  |
| 110.7  | 110.0  | 112.3  | 106.6  | 119.6  | 138.0  |
| 8.6    | 20.2   | 3.7    | 9.0    | 7.6    | 8.6    |
| 1354.2 | 1363.4 | 1485.5 | 1421.2 | 1723.0 | 1686.0 |
| 36.5   | 16.5   | 32.1   | 21.6   | 28.3   | 37.3   |
| 99.7   | 91.9   | 91.2   | 108.1  | 108.8  | 135.1  |
| 1040.4 | 1090.7 | 1043.6 | 1160.6 | 1031.6 | 1393.9 |
| 114.4  | 103.3  | 107.7  | 102.5  | 145.8  | 108.6  |
| 33.2   | 24.9   | 32.5   | 22.0   | 31.1   | 35.9   |
| 17.9   | 11.3   | 13.5   | 13.3   | 16.9   | 26.7   |
| 4.7    | 8.7    | 9.9    | 9.5    | 5.1    | 3.4    |
| 449.5  | 431.3  | 402.2  | 498.2  | 467.2  | 564.0  |
| 6.2    | 15.5   | 11.0   | 16.3   | 6.9    | 13.4   |
| 238.9  | 233.7  | 277.0  | 305.6  | 288.0  | 312.1  |
| 4.9    | 3.9    | 6.0    | 5.7    | 6.0    | 6.4    |
| 2.9    | 1.0    | 5.0    | 0.8    | 3.3    | 0.7    |
| 17.1   | 21.6   | 13.6   | 23.8   | 15.5   | 7.4    |
| 216.5  | 218.5  | 191.0  | 226.2  | 205.6  | 271.3  |
| 48.9   | 47.9   | 41.4   | 37.6   | 59.5   | 53.1   |
| 1.2    | 0.9    | 0.9    | 3.8    | 6.7    | 1.5    |
| 7.6    | 15.3   | 14.2   | 4.3    | 12.2   | 5.1    |
| 194.0  | 159.1  | 152.3  | 153.0  | 195.0  | 198.9  |
| 16.3   | 33.9   | 57.5   | 43.3   | 39.4   | 27.7   |
| 89.0   | 78.6   | 76.5   | 80.3   | 108.6  | 106.5  |
| 17.0   | 14.3   | 9.7    | 26.0   | 29.9   | 10.9   |
| 14.6   | 21.2   | 22.7   | 23.8   | 29.9   | 27.0   |
| 190.3  | 143.8  | 285.1  | 276.8  | 245.1  | 263.9  |
| 138.0  | 126.8  | 161.6  | 178.0  | 131.5  | 188.9  |
| 63.7   | 100.8  | 101.0  | 112.6  | 108.5  | 129.1  |
| 2.4    | 0.6    | 1.5    | 3.0    | 3.2    | 3.9    |
| 120.5  | 116.4  | 115.2  | 116.1  | 136.1  | 141.9  |
| 170.9  | 156.6  | 235.1  | 261.6  | 265.8  | 261.7  |
| 444.8  | 466.8  | 503.3  | 503.7  | 566.5  | 597.9  |
| 7.2    | 8.1    | 9.2    | 5.8    | 5.5    | 7.7    |
| 1.0    | 1.4    | 2.7    | 1.7    | 5.3    | 2.8    |
| 212.0  | 196.4  | 214.0  | 202.5  | 223.0  | 282.1  |

|         |         |         |         |         |         |
|---------|---------|---------|---------|---------|---------|
| 273.0   | 368.3   | 276.3   | 295.3   | 241.2   | 341.4   |
| 104.7   | 78.9    | 103.1   | 84.3    | 100.9   | 119.8   |
| 3.8     | 1.5     | 3.4     | 2.8     | 1.4     | 3.4     |
| 139.6   | 127.6   | 179.1   | 147.3   | 170.0   | 178.2   |
| 29.5    | 29.4    | 33.9    | 27.9    | 45.1    | 35.7    |
| 95.3    | 91.5    | 76.7    | 79.3    | 103.1   | 121.5   |
| 37.8    | 23.6    | 58.6    | 56.1    | 62.8    | 60.6    |
| 1.8     | 6.5     | 2.8     | 2.8     | 5.1     | 2.8     |
| 136.9   | 127.5   | 155.4   | 141.3   | 142.6   | 179.2   |
| 1341.1  | 1500.4  | 1420.0  | 1300.7  | 1490.8  | 1840.3  |
| 1.5     | 6.4     | 2.7     | 8.2     | 8.0     | 5.0     |
| 329.0   | 184.7   | 273.0   | 276.2   | 331.6   | 332.1   |
| 52.2    | 43.2    | 50.4    | 47.1    | 68.5    | 55.2    |
| 1.8     | 5.4     | 3.6     | 6.4     | 11.9    | 5.6     |
| 160.1   | 112.7   | 140.9   | 151.1   | 169.5   | 189.6   |
| 195.2   | 216.5   | 265.1   | 258.5   | 258.0   | 264.1   |
| 20.5    | 23.4    | 15.1    | 14.5    | 21.1    | 12.4    |
| 47.3    | 38.9    | 33.6    | 26.2    | 29.6    | 41.9    |
| 2.9     | 3.5     | 2.4     | 1.3     | 2.9     | 3.3     |
| 1.0     | 1.1     | 4.1     | 2.1     | 1.7     | 1.6     |
| 11202.0 | 10333.2 | 10211.3 | 10885.6 | 11499.9 | 11327.1 |
| 75.4    | 79.6    | 83.3    | 94.7    | 83.5    | 95.3    |
| 8.9     | 13.5    | 6.3     | 10.1    | 14.8    | 13.8    |
| 2.2     | 1.6     | 2.2     | 1.1     | 2.7     | 7.8     |
| 5.4     | 5.0     | 4.3     | 4.8     | 9.3     | 3.4     |
| 21.5    | 5.9     | 21.1    | 25.5    | 20.9    | 28.7    |
| 7.0     | 15.0    | 13.5    | 19.4    | 15.7    | 12.8    |
| 96.6    | 110.9   | 131.8   | 128.3   | 168.6   | 175.4   |
| 522.7   | 366.4   | 570.9   | 518.4   | 564.5   | 644.3   |
| 81.7    | 69.1    | 84.0    | 93.9    | 82.3    | 86.8    |
| 49.4    | 48.7    | 40.5    | 44.7    | 37.8    | 48.3    |
| 266.0   | 241.4   | 299.6   | 293.2   | 327.4   | 316.9   |
| 2.0     | 2.6     | 4.7     | 5.5     | 3.5     | 3.9     |
| 730.7   | 767.9   | 825.5   | 842.8   | 775.1   | 975.5   |
| 44.2    | 31.8    | 46.7    | 46.7    | 40.6    | 44.8    |
| 57.8    | 63.1    | 61.3    | 67.1    | 74.0    | 83.9    |
| 128.7   | 83.7    | 119.9   | 120.1   | 171.7   | 159.0   |
| 54.8    | 45.6    | 42.7    | 40.0    | 38.4    | 51.8    |
| 4.6     | 10.8    | 21.7    | 13.0    | 11.8    | 13.4    |
| 82.9    | 64.7    | 73.4    | 77.5    | 98.9    | 98.1    |
| 17.4    | 7.1     | 20.4    | 19.7    | 15.2    | 25.4    |
| 99.8    | 116.9   | 96.4    | 108.7   | 110.6   | 116.1   |
| 110.5   | 169.4   | 136.1   | 127.5   | 135.5   | 140.2   |
| 65.4    | 72.7    | 56.3    | 66.6    | 76.5    | 72.9    |
| 182.1   | 226.6   | 233.2   | 240.0   | 224.8   | 228.5   |
| 108.4   | 119.5   | 119.1   | 106.2   | 122.5   | 113.3   |
| 70.9    | 51.0    | 67.4    | 64.6    | 76.2    | 96.2    |
| 99.3    | 119.6   | 100.6   | 108.0   | 97.0    | 100.5   |
| 79.1    | 67.9    | 67.4    | 74.6    | 90.5    | 94.5    |
| 43.2    | 54.0    | 49.6    | 69.0    | 77.3    | 88.3    |
| 52.1    | 46.1    | 61.8    | 58.5    | 78.7    | 71.5    |
| 20.4    | 23.1    | 35.7    | 28.5    | 15.0    | 25.6    |
| 19.6    | 16.1    | 23.9    | 17.9    | 26.4    | 35.1    |

|        |        |        |        |        |        |
|--------|--------|--------|--------|--------|--------|
| 214.6  | 178.0  | 195.3  | 176.8  | 199.8  | 240.2  |
| 76.0   | 47.1   | 85.8   | 49.4   | 74.0   | 71.4   |
| 101.3  | 145.0  | 80.1   | 137.9  | 138.1  | 121.0  |
| 216.4  | 260.5  | 322.7  | 288.1  | 322.5  | 314.2  |
| 261.0  | 255.7  | 353.6  | 419.0  | 353.5  | 401.1  |
| 140.3  | 130.7  | 169.4  | 180.2  | 184.8  | 187.4  |
| 1.0    | 0.6    | 2.1    | 3.3    | 9.5    | 1.5    |
| 37.4   | 23.5   | 29.8   | 50.9   | 30.0   | 46.4   |
| 15.6   | 31.7   | 23.7   | 20.7   | 33.0   | 36.4   |
| 23.9   | 16.8   | 25.2   | 24.7   | 16.9   | 30.9   |
| 31.1   | 16.2   | 20.5   | 28.6   | 26.1   | 36.3   |
| 57.7   | 71.3   | 76.1   | 47.1   | 75.8   | 89.9   |
| 277.2  | 238.7  | 272.3  | 287.6  | 332.8  | 340.1  |
| 0.5    | 0.6    | 3.7    | 2.6    | 2.3    | 4.6    |
| 4.6    | 9.0    | 5.8    | 0.9    | 1.5    | 1.0    |
| 4.6    | 2.4    | 1.2    | 8.6    | 0.4    | 0.3    |
| 1.7    | 2.5    | 1.2    | 0.9    | 0.8    | 2.1    |
| 1.7    | 6.7    | 11.0   | 9.6    | 7.6    | 13.4   |
| 3.7    | 12.9   | 17.0   | 4.7    | 22.3   | 25.9   |
| 122.0  | 105.4  | 142.2  | 163.4  | 143.5  | 179.5  |
| 16.7   | 15.8   | 15.4   | 17.0   | 14.5   | 15.4   |
| 133.0  | 112.1  | 145.8  | 136.7  | 148.4  | 147.5  |
| 121.8  | 143.0  | 121.6  | 107.6  | 124.3  | 116.1  |
| 191.1  | 689.5  | 210.5  | 278.6  | 213.5  | 252.7  |
| 261.2  | 324.5  | 292.5  | 333.4  | 303.0  | 386.8  |
| 49.8   | 49.8   | 47.0   | 50.3   | 41.6   | 60.5   |
| 2.8    | 18.7   | 3.7    | 3.4    | 4.8    | 20.8   |
| 32.5   | 47.8   | 41.7   | 48.2   | 44.1   | 35.7   |
| 2.7    | 2.1    | 2.0    | 7.3    | 1.9    | 3.1    |
| 26.2   | 32.8   | 39.4   | 27.4   | 35.5   | 36.7   |
| 1124.3 | 1046.3 | 1177.5 | 1252.8 | 1268.3 | 1377.2 |
| 322.8  | 308.6  | 246.7  | 302.0  | 306.0  | 408.8  |
| 424.6  | 397.6  | 449.8  | 529.9  | 536.0  | 516.4  |
| 35.3   | 21.9   | 33.8   | 59.4   | 36.6   | 46.4   |
| 0.5    | 1.0    | 0.6    | 7.5    | 1.0    | 3.1    |
| 14.0   | 1.4    | 8.9    | 18.4   | 18.2   | 10.7   |
| 1.0    | 3.1    | 2.7    | 3.2    | 1.7    | 1.5    |
| 982.8  | 808.7  | 1001.6 | 977.4  | 1122.9 | 1134.5 |
| 7.5    | 11.0   | 6.4    | 5.5    | 1.5    | 3.8    |
| 3.6    | 2.5    | 1.6    | 4.3    | 0.9    | 0.8    |
| 1.1    | 3.3    | 3.2    | 0.6    | 9.0    | 4.0    |
| 30.0   | 25.8   | 30.8   | 30.8   | 34.8   | 34.6   |
| 237.9  | 396.4  | 184.3  | 345.1  | 194.9  | 311.8  |
| 68.3   | 61.3   | 71.6   | 84.7   | 78.3   | 61.0   |
| 227.8  | 164.2  | 227.6  | 200.3  | 248.0  | 275.8  |
| 62.1   | 74.2   | 50.6   | 67.9   | 76.8   | 62.8   |
| 5.1    | 8.1    | 6.0    | 8.9    | 10.1   | 7.4    |
| 42.1   | 28.4   | 39.7   | 34.0   | 40.2   | 49.9   |
| 73.9   | 122.8  | 92.4   | 109.7  | 89.4   | 113.6  |
| 29.9   | 40.0   | 36.2   | 36.6   | 49.8   | 29.7   |
| 516.4  | 466.3  | 544.2  | 603.2  | 601.3  | 621.3  |
| 313.2  | 231.2  | 321.0  | 259.9  | 347.4  | 372.3  |
| 286.8  | 301.2  | 292.4  | 305.8  | 319.3  | 348.9  |

|        |        |        |        |        |        |
|--------|--------|--------|--------|--------|--------|
| 216.5  | 210.7  | 192.7  | 243.5  | 288.8  | 269.8  |
| 12.0   | 17.4   | 15.8   | 14.8   | 17.4   | 18.8   |
| 133.0  | 152.4  | 135.1  | 185.0  | 148.8  | 151.9  |
| 88.9   | 78.2   | 82.6   | 101.1  | 110.5  | 120.7  |
| 50.0   | 46.1   | 38.9   | 45.2   | 48.8   | 60.6   |
| 30.6   | 16.4   | 32.1   | 28.6   | 30.0   | 35.4   |
| 26.3   | 15.1   | 19.8   | 12.7   | 14.8   | 29.2   |
| 65.3   | 42.5   | 73.4   | 87.9   | 72.7   | 80.8   |
| 104.2  | 76.8   | 83.4   | 84.9   | 105.5  | 98.0   |
| 16.1   | 1.7    | 13.4   | 15.2   | 11.5   | 10.6   |
| 1.9    | 3.8    | 8.3    | 1.5    | 2.0    | 2.4    |
| 1.8    | 3.9    | 3.3    | 3.8    | 4.9    | 9.1    |
| 6.3    | 7.8    | 3.8    | 5.3    | 20.7   | 11.1   |
| 41.5   | 34.2   | 36.3   | 36.8   | 50.3   | 69.6   |
| 3081.6 | 2718.4 | 3481.6 | 3591.0 | 3750.8 | 3811.0 |
| 22.6   | 22.6   | 16.0   | 31.1   | 25.9   | 31.0   |
| 380.1  | 386.8  | 406.5  | 416.2  | 473.8  | 454.5  |
| 32.3   | 27.6   | 37.1   | 36.8   | 35.3   | 50.6   |
| 1.0    | 1.2    | 5.6    | 2.1    | 1.5    | 1.8    |
| 3.5    | 1.3    | 2.8    | 1.3    | 2.6    | 1.3    |
| 91.5   | 76.1   | 77.5   | 79.3   | 103.5  | 103.2  |
| 34.7   | 45.3   | 59.9   | 32.0   | 42.3   | 41.0   |
| 7.1    | 2.4    | 4.6    | 2.7    | 5.3    | 5.5    |
| 7.1    | 9.5    | 5.3    | 5.1    | 2.4    | 2.6    |
| 34.6   | 52.5   | 48.1   | 54.1   | 62.4   | 51.7   |
| 90.6   | 112.8  | 85.3   | 116.1  | 107.1  | 112.7  |
| 249.5  | 203.1  | 275.3  | 260.8  | 281.0  | 273.4  |
| 104.9  | 79.9   | 106.2  | 103.5  | 116.2  | 119.0  |
| 128.2  | 89.1   | 131.2  | 117.1  | 157.0  | 145.0  |
| 31.1   | 28.7   | 34.7   | 23.0   | 27.0   | 38.6   |
| 26.1   | 39.4   | 27.9   | 49.2   | 38.9   | 48.6   |
| 9.1    | 14.0   | 18.2   | 4.9    | 1.6    | 10.4   |
| 233.8  | 270.2  | 260.5  | 246.8  | 267.5  | 322.9  |
| 39.6   | 25.1   | 33.3   | 39.6   | 43.9   | 46.4   |
| 287.0  | 242.9  | 286.2  | 289.5  | 316.2  | 353.3  |
| 7.3    | 16.8   | 14.3   | 27.1   | 11.1   | 23.4   |
| 23.7   | 28.1   | 19.9   | 25.0   | 18.0   | 30.7   |
| 93.0   | 281.1  | 92.8   | 153.7  | 96.9   | 118.5  |
| 565.8  | 1789.6 | 337.4  | 1011.3 | 378.5  | 756.0  |
| 159.5  | 187.5  | 288.4  | 238.1  | 277.3  | 315.2  |
| 358.6  | 362.2  | 531.3  | 408.2  | 521.9  | 578.9  |
| 9.2    | 48.0   | 30.9   | 29.8   | 8.8    | 17.4   |
| 459.2  | 401.0  | 589.1  | 470.2  | 633.3  | 571.4  |
| 28.9   | 59.3   | 40.9   | 16.4   | 58.3   | 36.0   |
| 84.3   | 98.5   | 80.3   | 82.5   | 83.1   | 109.5  |
| 17.5   | 21.6   | 17.3   | 24.6   | 20.7   | 20.6   |
| 319.5  | 371.4  | 346.3  | 348.1  | 388.2  | 402.5  |
| 78.2   | 38.9   | 75.8   | 76.4   | 82.4   | 84.0   |
| 60.1   | 41.0   | 58.1   | 46.8   | 64.3   | 66.7   |
| 9.0    | 0.8    | 14.5   | 11.3   | 10.1   | 10.5   |
| 3.1    | 0.2    | 1.4    | 6.6    | 3.4    | 3.6    |
| 24.7   | 27.0   | 31.3   | 24.4   | 24.7   | 29.7   |
| 88.0   | 77.4   | 76.2   | 73.9   | 93.8   | 99.2   |

|        |        |        |        |        |        |
|--------|--------|--------|--------|--------|--------|
| 24.2   | 41.5   | 36.9   | 41.1   | 46.6   | 25.8   |
| 58.1   | 89.0   | 67.9   | 75.1   | 76.5   | 91.0   |
| 9.2    | 19.1   | 14.2   | 12.2   | 8.6    | 11.5   |
| 276.3  | 352.4  | 320.8  | 351.4  | 298.2  | 394.1  |
| 77.3   | 74.9   | 79.7   | 87.1   | 91.8   | 96.7   |
| 600.4  | 692.6  | 587.6  | 626.5  | 654.4  | 831.9  |
| 79.4   | 84.8   | 87.9   | 81.6   | 91.4   | 83.4   |
| 2.4    | 1.2    | 4.7    | 2.1    | 3.7    | 1.1    |
| 4.8    | 36.7   | 43.2   | 45.4   | 41.8   | 60.1   |
| 1.3    | 9.9    | 2.9    | 3.4    | 6.3    | 1.1    |
| 1.3    | 9.1    | 2.1    | 4.1    | 9.1    | 3.1    |
| 412.3  | 567.3  | 360.5  | 455.7  | 437.0  | 556.4  |
| 1.9    | 2.3    | 1.7    | 1.8    | 0.9    | 1.3    |
| 1.2    | 0.6    | 1.3    | 1.4    | 1.5    | 1.1    |
| 67.1   | 66.9   | 94.1   | 84.7   | 94.4   | 97.4   |
| 308.5  | 243.9  | 280.1  | 276.3  | 377.3  | 375.8  |
| 1250.7 | 991.1  | 1309.6 | 1338.3 | 1375.9 | 1447.5 |
| 460.3  | 347.1  | 471.2  | 453.2  | 526.4  | 595.1  |
| 3.5    | 15.5   | 4.8    | 4.8    | 5.7    | 10.4   |
| 20.7   | 21.9   | 10.7   | 15.1   | 10.6   | 16.1   |
| 2.6    | 5.4    | 1.6    | 4.4    | 2.4    | 1.7    |
| 187.9  | 146.2  | 202.4  | 189.0  | 211.1  | 239.4  |
| 640.0  | 657.8  | 768.4  | 784.9  | 778.3  | 813.8  |
| 10.7   | 7.5    | 1.6    | 7.0    | 15.3   | 13.0   |
| 1199.9 | 1052.8 | 1397.5 | 1478.4 | 1391.7 | 1441.9 |
| 2.6    | 31.4   | 6.3    | 3.9    | 3.6    | 3.7    |
| 2.0    | 3.3    | 3.3    | 2.1    | 10.8   | 5.0    |
| 8.4    | 17.4   | 14.4   | 9.1    | 16.1   | 11.0   |
| 74.0   | 68.6   | 77.9   | 84.1   | 90.6   | 96.8   |
| 191.2  | 137.2  | 220.5  | 201.5  | 239.2  | 321.4  |
| 335.4  | 428.5  | 393.4  | 414.0  | 426.5  | 514.8  |
| 47.3   | 49.5   | 67.9   | 58.9   | 49.8   | 73.1   |
| 181.4  | 162.9  | 147.5  | 142.7  | 175.3  | 206.8  |
| 8.7    | 13.9   | 4.2    | 11.9   | 8.5    | 12.0   |
| 4.8    | 5.5    | 9.0    | 2.9    | 5.3    | 1.8    |
| 53.6   | 35.8   | 54.7   | 58.4   | 66.6   | 68.9   |
| 30.0   | 45.7   | 36.2   | 25.2   | 31.9   | 39.2   |
| 45.7   | 27.6   | 33.8   | 50.7   | 41.2   | 54.7   |
| 6.9    | 2.5    | 7.4    | 5.5    | 9.5    | 4.5    |
| 303.1  | 314.4  | 320.7  | 322.4  | 347.3  | 401.3  |
| 105.2  | 97.0   | 115.4  | 121.2  | 126.5  | 137.9  |
| 94.2   | 69.5   | 88.6   | 82.8   | 73.7   | 109.5  |
| 49.7   | 57.1   | 49.8   | 40.8   | 63.5   | 54.4   |
| 71.7   | 79.0   | 81.5   | 84.2   | 92.2   | 92.6   |
| 8.5    | 25.4   | 14.2   | 36.8   | 25.7   | 29.5   |
| 27.3   | 30.7   | 32.0   | 25.7   | 39.3   | 44.5   |
| 505.3  | 459.9  | 546.3  | 541.9  | 564.5  | 622.4  |
| 413.0  | 382.5  | 455.9  | 482.1  | 449.0  | 521.4  |
| 91.9   | 71.1   | 70.1   | 91.1   | 90.8   | 110.1  |
| 24.3   | 16.7   | 28.3   | 21.5   | 39.6   | 28.3   |
| 3.6    | 6.9    | 1.8    | 2.3    | 5.1    | 1.7    |
| 22.7   | 13.9   | 18.8   | 16.1   | 24.8   | 21.7   |
| 13.6   | 10.8   | 8.9    | 17.2   | 23.4   | 23.9   |

|        |        |        |        |        |        |
|--------|--------|--------|--------|--------|--------|
| 269.9  | 248.6  | 270.7  | 277.0  | 266.5  | 372.1  |
| 295.4  | 276.3  | 345.2  | 356.8  | 363.5  | 398.8  |
| 118.4  | 107.1  | 138.0  | 132.0  | 138.6  | 158.7  |
| 277.0  | 276.6  | 278.0  | 312.5  | 386.9  | 409.8  |
| 31.0   | 43.7   | 38.9   | 36.7   | 50.3   | 40.4   |
| 200.1  | 192.4  | 186.6  | 233.5  | 268.9  | 265.7  |
| 115.1  | 94.0   | 112.4  | 124.6  | 145.8  | 149.4  |
| 515.2  | 445.2  | 422.5  | 420.6  | 506.0  | 577.3  |
| 11.3   | 12.1   | 10.8   | 8.9    | 5.7    | 11.0   |
| 6.9    | 1.8    | 4.5    | 3.8    | 3.1    | 9.0    |
| 287.0  | 232.8  | 280.6  | 295.9  | 338.8  | 364.6  |
| 104.1  | 87.5   | 110.1  | 108.1  | 124.2  | 127.1  |
| 29.3   | 39.4   | 26.2   | 30.7   | 33.1   | 29.0   |
| 1808.7 | 2850.0 | 1444.7 | 2390.3 | 1362.4 | 2066.1 |
| 12.2   | 14.0   | 17.3   | 11.2   | 1.8    | 14.9   |
| 5.9    | 2.9    | 8.3    | 1.8    | 9.2    | 4.2    |
| 268.1  | 206.7  | 278.0  | 221.3  | 332.7  | 343.4  |
| 27.0   | 35.5   | 17.5   | 27.9   | 25.9   | 26.8   |
| 23.2   | 6.3    | 5.0    | 8.5    | 15.0   | 5.2    |
| 29.6   | 52.4   | 31.2   | 38.1   | 32.1   | 35.8   |
| 34.1   | 22.7   | 43.0   | 36.1   | 45.4   | 37.9   |
| 128.7  | 139.0  | 145.0  | 162.8  | 166.3  | 186.8  |
| 32.5   | 34.9   | 25.6   | 28.8   | 26.4   | 23.9   |
| 114.6  | 111.9  | 113.6  | 108.4  | 133.1  | 116.7  |
| 13.0   | 15.7   | 6.0    | 7.9    | 6.9    | 12.6   |
| 39.2   | 62.1   | 38.2   | 44.4   | 39.1   | 48.9   |
| 375.5  | 483.0  | 362.4  | 441.1  | 395.2  | 466.9  |
| 59.1   | 26.9   | 52.9   | 40.2   | 76.4   | 70.0   |
| 51.5   | 24.0   | 43.6   | 45.7   | 59.8   | 58.7   |
| 14.5   | 1.8    | 16.3   | 17.8   | 14.0   | 14.7   |
| 7.0    | 3.6    | 6.7    | 2.6    | 8.4    | 1.8    |
| 124.1  | 123.4  | 135.7  | 123.5  | 138.9  | 133.2  |
| 10.8   | 18.8   | 17.7   | 13.1   | 12.2   | 21.0   |
| 56.4   | 17.0   | 48.0   | 55.9   | 51.0   | 59.8   |
| 0.7    | 1.3    | 3.8    | 7.0    | 2.0    | 6.4    |
| 9.0    | 1.9    | 11.7   | 7.6    | 8.8    | 9.5    |
| 786.5  | 671.9  | 800.9  | 809.1  | 951.8  | 964.8  |
| 73.2   | 50.5   | 69.8   | 72.1   | 90.5   | 95.2   |
| 66.8   | 56.2   | 59.9   | 67.9   | 48.0   | 98.0   |
| 21.9   | 34.9   | 24.0   | 22.7   | 32.6   | 37.2   |
| 2.8    | 4.6    | 7.4    | 3.7    | 10.2   | 9.3    |
| 66.6   | 67.4   | 81.5   | 74.7   | 74.0   | 59.7   |
| 288.2  | 258.5  | 269.3  | 308.0  | 344.0  | 378.7  |
| 2.4    | 2.1    | 6.3    | 2.0    | 2.1    | 2.7    |
| 23.0   | 25.4   | 14.2   | 21.8   | 30.6   | 29.0   |
| 571.7  | 530.5  | 776.5  | 800.6  | 774.4  | 766.9  |
| 1186.1 | 1557.5 | 1176.9 | 1488.1 | 1190.1 | 1358.5 |
| 30.2   | 21.4   | 39.9   | 40.9   | 42.3   | 45.4   |
| 47.9   | 12.1   | 44.8   | 34.0   | 33.8   | 39.9   |
| 4707.8 | 4247.1 | 4529.4 | 4720.3 | 4893.0 | 4620.9 |
| 118.3  | 160.2  | 136.4  | 145.6  | 168.7  | 167.1  |
| 193.4  | 203.8  | 218.6  | 225.8  | 200.2  | 212.3  |
| 56.3   | 73.9   | 73.2   | 81.5   | 58.5   | 78.1   |



|       |       |       |       |       |       |
|-------|-------|-------|-------|-------|-------|
| 5.6   | 6.5   | 4.1   | 8.5   | 10.3  | 6.3   |
| 6.9   | 4.4   | 12.5  | 4.2   | 5.9   | 8.8   |
| 42.7  | 45.9  | 32.3  | 49.1  | 48.4  | 54.0  |
| 217.2 | 205.3 | 195.2 | 220.4 | 208.6 | 282.5 |
| 22.0  | 9.0   | 21.7  | 31.5  | 36.7  | 32.3  |
| 84.1  | 62.4  | 70.4  | 74.6  | 102.9 | 128.6 |
| 5.6   | 6.2   | 9.5   | 2.7   | 11.6  | 6.9   |
| 28.1  | 28.8  | 38.9  | 46.5  | 40.5  | 28.3  |
| 83.1  | 74.1  | 100.3 | 96.6  | 83.9  | 107.8 |
| 44.3  | 42.9  | 50.5  | 39.8  | 64.9  | 79.0  |
| 18.7  | 24.3  | 14.5  | 13.0  | 16.8  | 17.1  |
| 47.4  | 39.3  | 43.8  | 49.3  | 53.2  | 45.3  |
| 14.4  | 21.0  | 18.4  | 31.6  | 22.3  | 28.7  |
| 11.5  | 18.8  | 15.0  | 13.5  | 12.0  | 13.1  |
| 6.9   | 15.0  | 2.5   | 18.7  | 12.0  | 5.7   |
| 5.2   | 1.8   | 2.3   | 5.7   | 1.4   | 0.7   |
| 27.2  | 29.8  | 26.2  | 42.7  | 29.9  | 39.9  |
| 4.0   | 6.7   | 4.1   | 10.7  | 4.1   | 8.2   |
| 58.6  | 70.1  | 83.1  | 75.2  | 91.5  | 83.2  |
| 21.1  | 14.8  | 32.2  | 33.9  | 30.6  | 35.1  |
| 28.2  | 14.1  | 11.8  | 7.1   | 4.9   | 15.8  |
| 9.9   | 8.2   | 11.4  | 11.6  | 14.4  | 11.6  |
| 4.1   | 7.3   | 7.5   | 5.2   | 2.4   | 10.4  |
| 115.5 | 68.4  | 99.7  | 110.0 | 130.5 | 146.2 |
| 39.8  | 43.7  | 46.7  | 61.2  | 52.8  | 69.0  |
| 98.4  | 80.1  | 109.5 | 109.0 | 110.2 | 115.3 |
| 4.8   | 19.4  | 10.3  | 7.5   | 14.7  | 12.1  |
| 47.6  | 51.2  | 93.0  | 81.6  | 87.8  | 102.9 |
| 20.8  | 22.3  | 29.3  | 19.6  | 34.1  | 30.5  |
| 108.0 | 97.0  | 125.4 | 85.3  | 118.6 | 121.5 |
| 191.0 | 114.4 | 186.8 | 185.5 | 229.0 | 215.1 |
| 166.3 | 119.3 | 188.6 | 211.5 | 206.0 | 230.8 |
| 209.5 | 195.6 | 186.6 | 203.5 | 198.0 | 230.0 |
| 99.3  | 93.7  | 103.1 | 105.2 | 126.0 | 124.0 |
| 78.6  | 72.5  | 84.3  | 88.1  | 104.3 | 98.2  |
| 245.8 | 310.6 | 373.0 | 290.2 | 302.5 | 396.0 |
| 780.9 | 952.0 | 783.1 | 997.3 | 804.2 | 965.3 |
| 200.6 | 140.9 | 178.9 | 208.9 | 192.7 | 254.6 |
| 10.4  | 5.5   | 4.8   | 14.5  | 4.5   | 4.9   |
| 703.2 | 689.4 | 753.7 | 823.9 | 873.9 | 916.5 |
| 1.5   | 1.0   | 2.3   | 1.6   | 1.8   | 1.4   |
| 195.9 | 156.0 | 136.5 | 157.7 | 186.0 | 191.4 |
| 8.2   | 11.0  | 10.9  | 13.6  | 20.9  | 14.9  |
| 20.3  | 40.3  | 23.3  | 21.7  | 29.8  | 26.7  |
| 43.0  | 38.2  | 30.9  | 22.0  | 30.8  | 40.5  |
| 42.7  | 58.8  | 69.9  | 42.3  | 73.6  | 84.9  |
| 1.1   | 0.4   | 1.1   | 1.1   | 4.9   | 1.3   |
| 336.3 | 410.1 | 404.0 | 396.6 | 424.1 | 447.8 |
| 7.6   | 17.7  | 3.4   | 9.2   | 2.4   | 6.0   |
| 0.9   | 1.1   | 1.9   | 1.3   | 2.8   | 2.2   |
| 288.7 | 235.2 | 267.6 | 297.6 | 241.5 | 364.8 |
| 137.2 | 138.9 | 139.5 | 161.1 | 149.4 | 180.4 |
| 97.1  | 83.9  | 92.1  | 88.5  | 120.7 | 114.1 |

|        |        |        |        |        |        |
|--------|--------|--------|--------|--------|--------|
| 179.2  | 242.1  | 177.2  | 195.7  | 159.0  | 213.5  |
| 133.4  | 78.7   | 99.3   | 120.5  | 116.8  | 150.8  |
| 89.0   | 106.7  | 113.4  | 122.6  | 115.4  | 125.7  |
| 78.7   | 124.8  | 67.2   | 100.0  | 77.7   | 80.3   |
| 750.9  | 471.9  | 589.1  | 679.7  | 728.0  | 891.8  |
| 384.6  | 516.3  | 546.8  | 608.9  | 375.0  | 728.4  |
| 441.3  | 606.3  | 615.1  | 696.1  | 436.7  | 838.4  |
| 82.6   | 84.7   | 77.4   | 79.2   | 89.7   | 87.0   |
| 34.4   | 26.9   | 33.3   | 31.9   | 32.8   | 39.3   |
| 23.8   | 25.0   | 33.1   | 32.5   | 32.6   | 40.2   |
| 2.2    | 2.2    | 2.5    | 4.6    | 1.4    | 1.6    |
| 74.5   | 57.7   | 67.8   | 63.9   | 63.6   | 72.3   |
| 1158.4 | 1063.1 | 1102.4 | 1129.5 | 1244.2 | 1419.1 |
| 56.7   | 41.7   | 49.2   | 52.6   | 61.4   | 70.9   |
| 535.7  | 480.6  | 686.8  | 651.4  | 679.4  | 718.1  |
| 131.0  | 164.8  | 155.0  | 147.2  | 174.0  | 171.2  |
| 7.3    | 1.5    | 4.5    | 8.0    | 1.3    | 6.8    |
| 30.7   | 32.0   | 38.5   | 39.9   | 31.8   | 33.3   |
| 11.4   | 35.5   | 13.5   | 13.9   | 19.7   | 20.8   |
| 77.6   | 77.3   | 76.5   | 69.8   | 62.0   | 90.8   |
| 78.4   | 76.5   | 71.6   | 87.7   | 97.3   | 95.3   |
| 113.6  | 88.5   | 127.3  | 117.7  | 136.8  | 148.7  |
| 2.0    | 5.4    | 12.3   | 7.8    | 8.2    | 12.1   |
| 5.3    | 1.9    | 1.8    | 2.3    | 3.2    | 2.6    |
| 21.3   | 26.6   | 32.4   | 46.0   | 36.7   | 39.9   |
| 47.6   | 27.3   | 45.1   | 44.7   | 44.4   | 54.4   |
| 4.6    | 0.7    | 9.6    | 3.1    | 9.4    | 6.3    |
| 166.3  | 154.8  | 172.8  | 173.6  | 169.0  | 221.0  |
| 270.7  | 241.3  | 252.7  | 274.1  | 262.2  | 314.9  |
| 273.7  | 277.8  | 279.8  | 288.8  | 286.8  | 342.7  |
| 4.3    | 0.9    | 5.5    | 6.5    | 3.0    | 6.8    |
| 2.2    | 3.0    | 3.1    | 1.4    | 2.7    | 3.6    |
| 34.4   | 30.5   | 31.4   | 35.2   | 32.8   | 53.6   |
| 15.4   | 28.0   | 26.4   | 32.4   | 26.1   | 17.3   |
| 346.5  | 292.2  | 300.2  | 354.6  | 348.4  | 359.8  |
| 11.0   | 15.0   | 4.1    | 9.0    | 3.7    | 2.9    |
| 30.1   | 28.4   | 32.2   | 30.9   | 29.1   | 40.7   |
| 30.3   | 34.2   | 37.2   | 37.7   | 37.0   | 55.6   |
| 49.2   | 48.8   | 50.6   | 45.8   | 48.0   | 51.3   |
| 96.1   | 110.1  | 96.9   | 109.0  | 104.0  | 122.0  |
| 9.3    | 19.5   | 27.1   | 14.0   | 25.3   | 26.8   |
| 94.9   | 81.8   | 75.8   | 84.5   | 95.4   | 112.1  |
| 120.9  | 96.9   | 101.4  | 95.4   | 104.1  | 132.7  |
| 48.7   | 55.3   | 42.8   | 73.5   | 59.4   | 69.2   |
| 162.5  | 83.1   | 137.6  | 160.1  | 137.6  | 260.3  |
| 364.4  | 322.6  | 355.0  | 336.4  | 438.8  | 396.5  |
| 35.3   | 53.7   | 44.5   | 38.2   | 47.3   | 54.8   |
| 6.9    | 10.3   | 4.2    | 11.7   | 13.8   | 7.9    |
| 59.8   | 66.4   | 103.3  | 99.1   | 89.9   | 124.9  |
| 44.8   | 81.7   | 48.4   | 52.8   | 46.0   | 50.2   |
| 270.1  | 189.7  | 283.2  | 241.5  | 300.7  | 316.5  |
| 406.3  | 362.0  | 472.5  | 578.5  | 526.6  | 520.2  |
| 1.0    | 1.9    | 0.9    | 3.0    | 3.0    | 1.8    |

|        |        |        |        |        |        |
|--------|--------|--------|--------|--------|--------|
| 14.7   | 23.2   | 8.9    | 4.8    | 4.7    | 8.3    |
| 2.5    | 1.6    | 9.0    | 3.5    | 9.3    | 3.9    |
| 45.4   | 39.5   | 65.7   | 59.5   | 66.0   | 49.1   |
| 120.3  | 100.2  | 101.7  | 113.1  | 139.0  | 142.4  |
| 24.2   | 28.3   | 27.4   | 34.3   | 31.8   | 38.6   |
| 12.0   | 9.0    | 17.6   | 22.6   | 17.4   | 15.9   |
| 10.5   | 14.0   | 16.6   | 10.6   | 22.9   | 21.8   |
| 121.6  | 108.0  | 104.2  | 128.2  | 131.5  | 182.5  |
| 58.4   | 44.7   | 52.8   | 90.6   | 66.9   | 61.9   |
| 93.1   | 97.9   | 97.7   | 105.6  | 92.4   | 118.9  |
| 2.2    | 3.1    | 5.5    | 4.4    | 11.7   | 6.3    |
| 6.3    | 6.8    | 14.2   | 4.6    | 8.3    | 8.1    |
| 84.1   | 103.3  | 85.2   | 86.0   | 111.0  | 115.9  |
| 50.1   | 58.7   | 73.6   | 60.8   | 72.8   | 84.0   |
| 11.7   | 15.6   | 18.7   | 9.0    | 11.7   | 9.9    |
| 13.5   | 1.2    | 6.7    | 3.2    | 7.6    | 6.7    |
| 15.9   | 13.3   | 12.7   | 16.9   | 16.4   | 25.5   |
| 194.2  | 177.1  | 199.3  | 233.1  | 215.9  | 201.5  |
| 9.0    | 42.4   | 35.4   | 20.5   | 35.6   | 30.9   |
| 2.8    | 3.4    | 2.0    | 3.2    | 2.1    | 10.7   |
| 397.4  | 315.7  | 360.8  | 486.6  | 422.0  | 534.2  |
| 318.5  | 393.7  | 292.4  | 371.6  | 327.9  | 375.3  |
| 12.4   | 8.8    | 23.5   | 19.6   | 15.7   | 25.9   |
| 110.1  | 132.2  | 87.4   | 133.5  | 112.3  | 135.1  |
| 3.3    | 1.5    | 3.8    | 6.0    | 11.8   | 5.2    |
| 136.4  | 101.1  | 133.2  | 135.1  | 165.7  | 152.9  |
| 13.0   | 11.7   | 10.2   | 9.3    | 5.9    | 13.0   |
| 3.3    | 11.2   | 4.4    | 9.1    | 11.1   | 10.2   |
| 70.7   | 79.3   | 104.9  | 100.1  | 92.5   | 109.5  |
| 3.6    | 3.2    | 1.7    | 3.9    | 3.0    | 2.8    |
| 472.9  | 417.3  | 474.0  | 501.4  | 545.1  | 559.4  |
| 2.2    | 3.9    | 3.6    | 2.5    | 5.1    | 2.5    |
| 13.8   | 5.0    | 25.0   | 12.0   | 5.9    | 16.9   |
| 4.4    | 6.2    | 19.6   | 12.0   | 6.8    | 13.3   |
| 51.8   | 56.3   | 49.4   | 55.5   | 54.7   | 58.9   |
| 16.8   | 6.4    | 11.4   | 13.5   | 22.6   | 18.6   |
| 37.6   | 32.1   | 42.4   | 36.1   | 36.9   | 40.3   |
| 28.2   | 28.0   | 31.8   | 31.7   | 22.3   | 41.7   |
| 331.1  | 293.6  | 332.4  | 340.7  | 379.7  | 435.5  |
| 408.6  | 475.8  | 408.7  | 445.6  | 445.4  | 485.6  |
| 128.2  | 144.1  | 127.7  | 136.5  | 132.8  | 177.0  |
| 176.6  | 224.8  | 176.6  | 238.9  | 234.8  | 266.6  |
| 26.2   | 13.5   | 16.7   | 31.0   | 24.2   | 27.7   |
| 507.5  | 703.7  | 433.3  | 593.9  | 546.2  | 656.1  |
| 93.3   | 138.0  | 85.6   | 124.9  | 115.1  | 123.1  |
| 35.0   | 22.3   | 26.4   | 32.8   | 27.7   | 36.1   |
| 286.5  | 264.8  | 379.3  | 314.6  | 370.5  | 445.8  |
| 109.3  | 125.2  | 140.7  | 111.7  | 134.3  | 145.4  |
| 30.4   | 30.8   | 29.3   | 29.5   | 27.8   | 30.8   |
| 7557.0 | 6770.8 | 6489.8 | 6345.6 | 7231.1 | 7905.1 |
| 28.0   | 3.3    | 44.6   | 40.2   | 41.6   | 33.2   |
| 42.6   | 45.6   | 58.1   | 57.6   | 68.5   | 64.4   |
| 10.0   | 13.3   | 16.6   | 12.9   | 21.6   | 13.2   |

|        |        |        |        |        |        |
|--------|--------|--------|--------|--------|--------|
| 146.8  | 129.2  | 101.4  | 141.5  | 137.9  | 181.0  |
| 9.7    | 2.7    | 13.2   | 3.1    | 2.9    | 5.8    |
| 108.8  | 109.6  | 126.6  | 112.3  | 126.8  | 139.2  |
| 14.8   | 13.6   | 17.9   | 21.7   | 24.8   | 27.8   |
| 215.9  | 179.8  | 207.7  | 201.6  | 242.3  | 221.7  |
| 108.4  | 137.8  | 111.1  | 116.5  | 129.9  | 131.5  |
| 9.3    | 5.6    | 13.5   | 10.4   | 5.2    | 7.1    |
| 4.5    | 21.3   | 13.7   | 11.9   | 9.9    | 14.8   |
| 1.4    | 5.7    | 3.9    | 4.4    | 2.6    | 2.6    |
| 8.2    | 18.9   | 6.9    | 9.5    | 10.7   | 10.0   |
| 11.4   | 7.9    | 10.7   | 7.9    | 8.7    | 13.3   |
| 5.8    | 7.0    | 2.1    | 11.5   | 6.4    | 0.5    |
| 101.5  | 96.4   | 110.5  | 118.1  | 117.2  | 119.9  |
| 1.0    | 0.9    | 1.6    | 1.5    | 1.6    | 1.8    |
| 200.6  | 125.3  | 179.0  | 180.5  | 199.7  | 229.8  |
| 7.6    | 1.7    | 4.6    | 4.7    | 7.6    | 7.0    |
| 5.1    | 1.8    | 5.9    | 2.1    | 1.6    | 2.6    |
| 41.0   | 27.3   | 21.0   | 11.8   | 28.6   | 24.9   |
| 4.3    | 0.8    | 1.5    | 3.3    | 0.9    | 1.7    |
| 295.3  | 371.8  | 322.8  | 329.7  | 314.4  | 381.5  |
| 17.0   | 13.1   | 14.3   | 7.5    | 10.9   | 19.6   |
| 22.1   | 17.6   | 15.2   | 13.5   | 15.6   | 29.5   |
| 23.4   | 9.7    | 28.4   | 13.3   | 18.7   | 27.1   |
| 18.2   | 14.6   | 17.2   | 16.7   | 22.0   | 22.1   |
| 32.1   | 15.4   | 27.0   | 14.4   | 12.4   | 34.4   |
| 1403.1 | 1332.4 | 1428.0 | 1377.2 | 1434.7 | 1692.3 |
| 61.7   | 77.4   | 73.8   | 52.3   | 89.3   | 95.7   |
| 84.0   | 78.8   | 73.1   | 90.1   | 80.6   | 72.3   |
| 1679.4 | 1574.8 | 1557.1 | 1386.3 | 1483.7 | 1852.8 |
| 15.3   | 9.2    | 17.3   | 14.2   | 20.5   | 20.5   |
| 16.0   | 16.0   | 24.6   | 16.5   | 14.2   | 17.2   |
| 97.9   | 100.7  | 117.6  | 86.4   | 111.9  | 106.6  |
| 11.3   | 5.5    | 18.8   | 7.6    | 2.9    | 18.7   |
| 218.6  | 218.2  | 229.5  | 249.3  | 252.3  | 291.0  |
| 18.2   | 15.5   | 17.2   | 12.3   | 23.2   | 16.4   |
| 57.4   | 32.5   | 40.1   | 50.4   | 48.9   | 85.8   |
| 2.9    | 9.3    | 5.5    | 3.9    | 3.1    | 4.3    |
| 102.6  | 118.9  | 131.7  | 171.7  | 129.7  | 138.5  |
| 588.7  | 567.3  | 670.5  | 598.6  | 682.3  | 605.8  |
| 1350.7 | 1371.0 | 1374.8 | 1432.6 | 1550.4 | 1751.4 |
| 8.0    | 9.7    | 13.0   | 8.0    | 3.8    | 11.0   |
| 13.7   | 1.1    | 6.8    | 8.8    | 15.9   | 15.7   |
| 20.5   | 23.1   | 25.0   | 16.8   | 19.3   | 24.6   |
| 573.5  | 446.5  | 517.2  | 598.2  | 545.0  | 650.0  |
| 124.8  | 125.0  | 119.0  | 177.8  | 142.8  | 135.9  |
| 34.6   | 43.2   | 69.5   | 53.5   | 61.7   | 57.3   |
| 1.3    | 8.6    | 1.6    | 3.3    | 8.4    | 5.7    |
| 9.0    | 6.5    | 7.8    | 6.5    | 0.7    | 6.0    |
| 3.4    | 4.2    | 3.2    | 2.8    | 4.4    | 3.2    |
| 152.0  | 165.3  | 169.4  | 187.6  | 179.9  | 182.3  |
| 21.1   | 26.5   | 24.6   | 24.8   | 27.9   | 34.9   |
| 49.9   | 39.6   | 47.5   | 61.6   | 58.3   | 69.4   |
| 85.3   | 64.6   | 84.4   | 79.9   | 100.7  | 98.0   |

|        |        |        |        |        |        |
|--------|--------|--------|--------|--------|--------|
| 4.0    | 11.1   | 9.4    | 3.5    | 13.7   | 12.4   |
| 7.6    | 4.7    | 2.4    | 8.3    | 5.5    | 11.8   |
| 185.1  | 163.3  | 181.6  | 188.5  | 198.9  | 217.6  |
| 31.8   | 26.3   | 33.7   | 25.3   | 33.4   | 27.2   |
| 604.4  | 600.2  | 675.2  | 665.0  | 723.2  | 789.4  |
| 184.5  | 166.8  | 219.6  | 218.0  | 213.2  | 218.7  |
| 112.7  | 69.7   | 81.8   | 95.1   | 89.1   | 206.8  |
| 255.8  | 221.1  | 235.6  | 279.1  | 303.1  | 283.8  |
| 59.0   | 27.8   | 61.3   | 47.7   | 74.5   | 68.2   |
| 7.3    | 3.4    | 6.3    | 2.7    | 27.8   | 24.9   |
| 9.5    | 18.4   | 20.8   | 11.2   | 9.2    | 14.6   |
| 22.4   | 8.1    | 17.1   | 17.1   | 13.6   | 18.6   |
| 2343.1 | 2148.2 | 2380.8 | 2561.7 | 2432.0 | 3147.4 |
| 174.5  | 122.1  | 155.5  | 172.9  | 130.8  | 239.2  |
| 1.2    | 0.8    | 0.9    | 0.5    | 0.4    | 4.4    |
| 294.3  | 342.2  | 301.9  | 343.0  | 335.3  | 364.1  |
| 17.8   | 8.6    | 12.8   | 11.1   | 15.7   | 18.4   |
| 57.1   | 47.2   | 52.2   | 59.0   | 63.9   | 56.2   |
| 76.2   | 124.0  | 104.3  | 112.6  | 96.2   | 92.0   |
| 1.8    | 2.0    | 8.6    | 5.6    | 8.8    | 7.6    |
| 125.7  | 97.4   | 149.5  | 138.6  | 149.8  | 157.9  |
| 516.8  | 470.6  | 510.9  | 554.3  | 634.9  | 631.6  |
| 76.4   | 51.8   | 66.3   | 75.8   | 76.5   | 91.7   |
| 51.6   | 40.8   | 55.2   | 40.7   | 59.0   | 54.4   |
| 1.2    | 1.3    | 1.5    | 2.8    | 5.7    | 1.8    |
| 9.8    | 6.1    | 7.9    | 9.2    | 6.8    | 15.4   |
| 8.0    | 6.7    | 7.2    | 6.9    | 11.2   | 5.2    |
| 426.7  | 415.1  | 414.3  | 440.0  | 415.6  | 492.6  |
| 8.0    | 3.3    | 6.8    | 3.0    | 12.6   | 3.0    |
| 0.6    | 1.7    | 1.0    | 2.0    | 1.8    | 1.3    |
| 327.2  | 306.3  | 325.6  | 407.0  | 379.3  | 386.5  |
| 14.8   | 5.7    | 20.5   | 15.9   | 24.8   | 25.6   |
| 12.5   | 20.3   | 12.7   | 18.7   | 21.3   | 16.8   |
| 11.2   | 18.3   | 16.8   | 21.3   | 20.6   | 23.5   |
| 191.5  | 115.0  | 214.6  | 210.0  | 244.9  | 230.1  |
| 12.5   | 3.0    | 18.5   | 14.7   | 10.9   | 13.7   |
| 5.0    | 7.3    | 14.3   | 13.9   | 12.8   | 16.6   |
| 77.7   | 75.8   | 58.1   | 60.2   | 67.0   | 72.7   |
| 10.2   | 5.5    | 10.7   | 9.7    | 9.9    | 13.9   |
| 16.0   | 22.5   | 15.3   | 6.8    | 18.2   | 15.2   |
| 2.3    | 2.1    | 12.5   | 2.7    | 1.1    | 1.6    |
| 1.5    | 2.6    | 2.7    | 4.1    | 6.2    | 2.0    |
| 2.2    | 2.7    | 2.3    | 2.4    | 2.7    | 2.1    |
| 9.0    | 16.5   | 10.6   | 10.0   | 15.0   | 6.4    |
| 462.1  | 414.2  | 436.6  | 433.7  | 441.8  | 518.9  |
| 522.6  | 545.9  | 499.5  | 558.4  | 545.2  | 615.9  |
| 306.2  | 260.2  | 299.6  | 266.4  | 312.3  | 359.8  |
| 86.4   | 125.7  | 76.1   | 98.0   | 86.5   | 121.8  |
| 41.6   | 87.1   | 81.1   | 112.9  | 80.8   | 73.1   |
| 175.9  | 163.5  | 147.9  | 180.9  | 166.0  | 194.0  |
| 13.0   | 9.4    | 16.9   | 8.4    | 10.7   | 11.5   |
| 8.2    | 4.6    | 3.8    | 1.6    | 6.5    | 8.8    |
| 660.3  | 661.6  | 655.7  | 636.3  | 745.9  | 795.3  |

|        |        |        |        |        |        |
|--------|--------|--------|--------|--------|--------|
| 17.6   | 16.6   | 14.7   | 24.8   | 15.4   | 23.0   |
| 3.3    | 4.6    | 9.5    | 11.1   | 2.7    | 11.3   |
| 7.4    | 7.3    | 10.5   | 11.9   | 16.3   | 14.6   |
| 4.3    | 3.1    | 3.8    | 5.0    | 7.5    | 6.9    |
| 190.2  | 156.3  | 179.5  | 195.5  | 197.0  | 231.7  |
| 47.4   | 42.8   | 54.9   | 56.8   | 60.5   | 63.5   |
| 80.7   | 88.5   | 95.4   | 109.5  | 99.4   | 112.6  |
| 51.7   | 34.6   | 47.8   | 40.2   | 54.8   | 55.3   |
| 43.3   | 52.7   | 41.6   | 49.7   | 67.1   | 56.1   |
| 49.2   | 57.4   | 55.9   | 56.3   | 70.9   | 60.2   |
| 943.2  | 839.1  | 942.8  | 926.2  | 1098.1 | 1193.5 |
| 67.4   | 26.1   | 63.3   | 52.1   | 85.6   | 78.4   |
| 5.2    | 2.5    | 11.9   | 8.4    | 10.0   | 8.2    |
| 149.7  | 120.1  | 125.1  | 123.7  | 152.5  | 197.7  |
| 76.0   | 57.8   | 79.9   | 76.2   | 71.5   | 108.4  |
| 1792.3 | 1479.8 | 1786.4 | 1850.6 | 2300.5 | 2088.4 |
| 3.9    | 2.3    | 2.7    | 7.3    | 4.6    | 1.6    |
| 2.4    | 2.4    | 4.1    | 6.5    | 6.1    | 6.9    |
| 62.1   | 53.5   | 62.4   | 60.1   | 70.8   | 80.8   |
| 0.4    | 0.2    | 2.6    | 2.4    | 0.2    | 2.4    |
| 2.9    | 5.5    | 0.6    | 0.4    | 1.3    | 1.5    |
| 188.3  | 158.9  | 175.1  | 199.6  | 177.2  | 193.2  |
| 6.7    | 3.1    | 8.6    | 16.1   | 21.4   | 9.2    |
| 171.9  | 127.3  | 136.5  | 161.7  | 193.4  | 190.3  |
| 63.9   | 50.5   | 66.6   | 52.6   | 71.1   | 71.1   |
| 140.8  | 124.5  | 129.7  | 137.5  | 147.1  | 166.7  |
| 178.2  | 172.0  | 182.1  | 198.6  | 210.8  | 210.8  |
| 156.0  | 223.6  | 147.6  | 169.6  | 163.6  | 182.5  |
| 4.3    | 0.9    | 5.7    | 1.2    | 3.4    | 2.8    |
| 19.9   | 16.9   | 22.0   | 17.3   | 24.6   | 14.5   |
| 25.1   | 34.8   | 41.9   | 24.3   | 37.3   | 37.8   |
| 49.7   | 40.0   | 51.1   | 57.3   | 67.2   | 72.1   |
| 112.0  | 94.8   | 114.3  | 130.7  | 155.9  | 149.9  |
| 24.0   | 11.3   | 40.8   | 35.9   | 34.9   | 22.2   |
| 2744.5 | 2746.7 | 3049.0 | 3075.4 | 3400.5 | 3466.9 |
| 81.3   | 44.1   | 61.0   | 80.9   | 91.3   | 103.8  |
| 3.1    | 1.3    | 2.8    | 10.2   | 8.8    | 1.6    |
| 11.5   | 17.2   | 12.5   | 28.9   | 21.7   | 17.9   |
| 9.1    | 8.1    | 9.1    | 5.9    | 12.5   | 10.2   |
| 150.3  | 102.2  | 165.5  | 179.3  | 182.2  | 218.9  |
| 31.8   | 27.8   | 26.6   | 34.6   | 39.1   | 33.0   |
| 1217.4 | 1135.1 | 1310.3 | 1383.5 | 1434.9 | 1832.0 |
| 8.4    | 8.2    | 22.3   | 13.6   | 12.4   | 9.4    |
| 15.2   | 11.6   | 10.8   | 19.1   | 9.6    | 16.2   |
| 130.1  | 138.9  | 138.8  | 151.7  | 149.1  | 170.7  |
| 83.9   | 76.0   | 79.1   | 68.7   | 93.5   | 80.8   |
| 91.8   | 90.5   | 109.9  | 100.0  | 102.8  | 160.8  |
| 727.5  | 707.8  | 858.2  | 808.3  | 923.5  | 880.4  |
| 157.2  | 164.3  | 153.8  | 167.5  | 176.9  | 201.1  |
| 39.2   | 36.8   | 53.4   | 53.3   | 66.7   | 68.3   |
| 223.5  | 182.6  | 226.1  | 222.2  | 251.4  | 281.3  |
| 356.7  | 389.9  | 415.5  | 405.8  | 444.9  | 411.9  |
| 5.1    | 17.4   | 7.6    | 7.3    | 12.4   | 2.2    |

|       |       |       |        |       |        |
|-------|-------|-------|--------|-------|--------|
| 6.9   | 11.7  | 17.1  | 13.9   | 11.9  | 13.8   |
| 24.3  | 30.9  | 15.8  | 12.5   | 25.1  | 14.2   |
| 75.6  | 78.1  | 61.7  | 79.9   | 93.4  | 72.5   |
| 50.3  | 43.6  | 46.9  | 44.8   | 59.2  | 52.7   |
| 90.3  | 134.1 | 91.0  | 114.2  | 106.9 | 122.0  |
| 108.2 | 131.6 | 124.0 | 155.0  | 94.1  | 125.1  |
| 185.2 | 175.3 | 194.2 | 197.3  | 203.2 | 227.4  |
| 654.6 | 754.4 | 731.1 | 702.6  | 786.3 | 807.4  |
| 68.0  | 48.5  | 74.1  | 72.4   | 76.4  | 86.1   |
| 4.9   | 8.8   | 8.4   | 3.8    | 1.7   | 2.3    |
| 11.0  | 3.5   | 15.4  | 9.3    | 8.8   | 8.8    |
| 70.5  | 52.7  | 98.0  | 74.1   | 106.4 | 104.2  |
| 25.7  | 20.1  | 34.3  | 30.7   | 38.8  | 42.4   |
| 4.7   | 3.8   | 8.9   | 3.5    | 6.9   | 7.8    |
| 39.7  | 36.9  | 46.7  | 31.8   | 46.1  | 46.1   |
| 5.9   | 3.8   | 9.9   | 10.9   | 12.0  | 8.1    |
| 9.8   | 0.6   | 7.0   | 6.2    | 4.6   | 7.8    |
| 1.6   | 1.5   | 4.2   | 5.4    | 8.8   | 2.8    |
| 4.4   | 7.4   | 12.9  | 11.3   | 1.8   | 5.2    |
| 713.7 | 716.0 | 693.4 | 721.1  | 756.7 | 835.4  |
| 22.1  | 20.0  | 23.1  | 11.7   | 16.1  | 18.8   |
| 7.7   | 5.3   | 7.9   | 8.8    | 6.2   | 4.4    |
| 2.9   | 2.0   | 3.1   | 5.7    | 3.1   | 3.0    |
| 1.6   | 2.4   | 5.4   | 1.8    | 1.6   | 1.6    |
| 5.9   | 17.2  | 4.1   | 4.9    | 6.5   | 7.4    |
| 966.4 | 913.4 | 997.2 | 1165.8 | 963.7 | 1174.1 |
| 52.9  | 41.4  | 51.6  | 42.0   | 40.2  | 51.8   |
| 215.6 | 192.0 | 258.6 | 241.2  | 263.8 | 280.5  |
| 177.1 | 137.9 | 209.5 | 256.1  | 231.5 | 269.3  |
| 3.1   | 4.8   | 4.7   | 7.8    | 7.3   | 13.7   |
| 23.4  | 27.0  | 20.4  | 25.3   | 27.9  | 12.9   |
| 88.8  | 64.1  | 88.6  | 89.1   | 116.5 | 106.6  |
| 2.8   | 2.2   | 1.8   | 2.9    | 7.0   | 15.4   |
| 7.8   | 14.6  | 7.4   | 5.0    | 7.0   | 10.7   |
| 5.6   | 12.2  | 4.2   | 13.9   | 11.1  | 15.9   |
| 300.3 | 298.2 | 291.7 | 345.7  | 356.4 | 345.5  |
| 4.0   | 11.2  | 12.9  | 5.0    | 7.7   | 1.7    |
| 4.2   | 11.8  | 2.8   | 5.4    | 3.4   | 3.4    |
| 10.2  | 2.1   | 10.3  | 7.2    | 6.4   | 7.4    |
| 21.5  | 25.7  | 36.1  | 34.7   | 24.2  | 25.6   |
| 3.9   | 3.7   | 21.5  | 3.2    | 4.8   | 4.1    |
| 1.0   | 0.3   | 2.1   | 1.8    | 0.5   | 1.3    |
| 119.0 | 87.2  | 74.2  | 71.8   | 103.6 | 96.1   |
| 41.9  | 41.0  | 41.1  | 33.6   | 39.8  | 53.1   |
| 35.2  | 34.0  | 32.4  | 43.6   | 33.7  | 42.7   |
| 12.4  | 9.9   | 15.6  | 1.0    | 6.3   | 10.6   |
| 12.2  | 16.8  | 8.0   | 16.0   | 15.7  | 14.6   |
| 7.6   | 20.9  | 15.7  | 15.2   | 7.3   | 24.2   |
| 53.9  | 71.3  | 47.4  | 57.1   | 57.3  | 64.7   |
| 2.2   | 3.0   | 3.1   | 2.0    | 3.7   | 2.6    |
| 57.2  | 57.6  | 51.9  | 49.9   | 56.8  | 71.0   |
| 6.4   | 2.9   | 5.6   | 2.1    | 1.5   | 1.7    |
| 28.9  | 7.8   | 25.0  | 27.5   | 19.9  | 15.8   |

|       |       |       |        |        |        |
|-------|-------|-------|--------|--------|--------|
| 33.4  | 32.2  | 49.3  | 48.1   | 41.2   | 43.0   |
| 0.9   | 2.1   | 1.5   | 2.8    | 4.1    | 1.0    |
| 84.0  | 48.2  | 73.2  | 70.4   | 89.1   | 91.7   |
| 17.2  | 13.3  | 9.1   | 23.0   | 20.8   | 29.5   |
| 606.0 | 529.5 | 621.8 | 541.5  | 670.6  | 678.6  |
| 77.4  | 83.7  | 84.6  | 89.6   | 92.6   | 121.3  |
| 11.0  | 8.0   | 3.2   | 8.1    | 5.6    | 8.7    |
| 22.0  | 19.2  | 26.5  | 15.7   | 28.4   | 23.8   |
| 390.8 | 317.3 | 448.9 | 374.5  | 456.2  | 445.9  |
| 68.8  | 53.8  | 51.1  | 51.4   | 63.0   | 72.4   |
| 13.3  | 1.0   | 13.9  | 12.6   | 11.9   | 13.9   |
| 76.6  | 77.6  | 89.9  | 100.9  | 78.5   | 117.3  |
| 49.3  | 35.9  | 55.8  | 70.2   | 48.7   | 70.9   |
| 112.6 | 80.5  | 110.5 | 121.1  | 122.8  | 130.3  |
| 15.9  | 2.9   | 20.2  | 12.5   | 8.6    | 21.8   |
| 158.1 | 159.1 | 143.5 | 141.0  | 156.8  | 182.8  |
| 130.8 | 96.3  | 117.2 | 119.5  | 109.4  | 121.1  |
| 14.9  | 9.0   | 10.6  | 11.8   | 20.4   | 20.7   |
| 211.4 | 180.6 | 176.7 | 175.4  | 240.7  | 238.5  |
| 255.9 | 258.4 | 239.2 | 278.8  | 279.1  | 313.6  |
| 16.5  | 16.9  | 17.9  | 15.3   | 22.0   | 23.5   |
| 39.4  | 26.7  | 32.5  | 38.6   | 45.7   | 46.4   |
| 88.2  | 73.8  | 89.3  | 95.9   | 97.5   | 113.2  |
| 7.5   | 3.1   | 2.7   | 1.5    | 2.0    | 2.6    |
| 5.8   | 6.8   | 8.3   | 0.8    | 2.6    | 0.2    |
| 7.6   | 0.5   | 6.1   | 3.4    | 4.2    | 6.0    |
| 25.6  | 28.1  | 38.7  | 36.7   | 36.9   | 38.1   |
| 15.8  | 3.5   | 4.9   | 10.1   | 11.4   | 5.9    |
| 40.2  | 41.3  | 31.9  | 23.5   | 28.2   | 33.9   |
| 1.9   | 6.4   | 6.5   | 3.7    | 4.9    | 4.3    |
| 34.2  | 33.4  | 30.8  | 29.1   | 29.1   | 33.0   |
| 11.3  | 12.0  | 13.0  | 6.4    | 13.8   | 11.0   |
| 46.0  | 29.7  | 38.6  | 53.4   | 51.2   | 65.1   |
| 381.3 | 331.7 | 379.1 | 424.4  | 463.7  | 471.0  |
| 247.9 | 279.2 | 268.2 | 298.3  | 283.3  | 313.2  |
| 102.4 | 102.2 | 102.1 | 96.6   | 109.6  | 137.0  |
| 1.3   | 2.2   | 0.9   | 1.0    | 1.0    | 0.9    |
| 855.8 | 773.0 | 996.9 | 1023.7 | 1135.9 | 1065.5 |
| 309.7 | 313.0 | 358.8 | 398.4  | 408.0  | 434.2  |
| 21.2  | 16.5  | 25.1  | 19.0   | 18.5   | 24.3   |
| 298.6 | 303.1 | 344.7 | 335.7  | 385.3  | 402.1  |
| 5.6   | 12.3  | 6.0   | 1.5    | 6.0    | 10.7   |
| 373.3 | 318.3 | 366.2 | 405.7  | 442.8  | 466.8  |
| 1.7   | 7.9   | 3.6   | 1.5    | 2.6    | 1.7    |
| 96.7  | 96.7  | 91.0  | 112.1  | 112.1  | 123.8  |
| 0.6   | 0.5   | 1.2   | 1.0    | 2.5    | 2.0    |
| 10.9  | 6.4   | 18.1  | 9.5    | 7.1    | 10.8   |
| 58.1  | 64.3  | 59.4  | 74.6   | 65.3   | 59.2   |
| 2.8   | 1.9   | 11.1  | 7.4    | 8.6    | 4.6    |
| 21.5  | 15.2  | 14.6  | 19.7   | 21.6   | 7.2    |
| 111.1 | 114.2 | 119.0 | 141.5  | 134.4  | 126.1  |
| 16.7  | 11.8  | 17.1  | 10.4   | 7.7    | 23.5   |
| 13.0  | 18.4  | 17.8  | 12.9   | 16.1   | 17.9   |



|       |       |       |       |       |       |
|-------|-------|-------|-------|-------|-------|
| 38.6  | 24.5  | 47.9  | 44.6  | 44.9  | 46.1  |
| 158.7 | 165.6 | 157.0 | 188.7 | 176.1 | 184.0 |
| 7.2   | 3.3   | 3.9   | 4.3   | 5.1   | 4.3   |
| 6.1   | 5.8   | 11.7  | 3.9   | 4.5   | 7.5   |
| 246.3 | 193.3 | 266.0 | 264.3 | 271.8 | 320.2 |
| 179.0 | 168.2 | 191.6 | 156.9 | 233.5 | 243.4 |
| 192.3 | 174.5 | 184.1 | 179.7 | 222.8 | 255.6 |
| 2.6   | 2.5   | 3.1   | 7.6   | 2.0   | 7.5   |
| 13.6  | 12.0  | 14.8  | 7.9   | 14.3  | 10.2  |
| 23.8  | 36.5  | 35.6  | 31.8  | 23.8  | 33.5  |
| 90.5  | 78.4  | 97.9  | 104.2 | 95.2  | 109.7 |
| 2.3   | 3.0   | 1.2   | 1.3   | 1.2   | 1.6   |
| 587.4 | 622.7 | 648.9 | 678.9 | 688.2 | 802.3 |
| 62.7  | 48.6  | 72.8  | 72.1  | 83.9  | 73.3  |
| 35.7  | 26.6  | 38.3  | 46.3  | 40.7  | 45.7  |
| 90.8  | 92.5  | 111.4 | 84.0  | 108.6 | 113.6 |
| 18.9  | 7.2   | 28.1  | 32.4  | 23.4  | 29.7  |
| 1.5   | 0.9   | 1.5   | 4.5   | 3.9   | 1.5   |
| 47.1  | 62.0  | 31.8  | 56.0  | 49.0  | 54.1  |
| 22.1  | 27.6  | 27.8  | 37.4  | 25.5  | 35.4  |
| 0.9   | 0.9   | 0.8   | 0.8   | 1.5   | 1.9   |
| 1.8   | 1.4   | 1.5   | 1.7   | 1.3   | 1.5   |
| 48.0  | 40.6  | 49.6  | 46.5  | 49.8  | 71.3  |
| 23.9  | 35.6  | 22.0  | 20.2  | 25.8  | 29.8  |
| 20.6  | 42.0  | 23.9  | 43.0  | 24.2  | 33.3  |
| 53.2  | 75.2  | 69.8  | 78.1  | 90.7  | 86.5  |
| 5.0   | 1.4   | 1.8   | 1.3   | 1.0   | 1.8   |
| 220.2 | 215.1 | 213.8 | 209.9 | 231.3 | 261.2 |
| 31.4  | 40.6  | 30.9  | 27.0  | 32.6  | 32.6  |
| 23.5  | 11.8  | 21.2  | 26.4  | 30.3  | 32.7  |
| 2.2   | 2.0   | 1.3   | 2.0   | 2.3   | 2.3   |
| 15.3  | 3.8   | 5.6   | 3.9   | 5.4   | 7.5   |
| 2.4   | 18.2  | 8.7   | 2.9   | 14.7  | 3.0   |
| 81.3  | 92.8  | 94.8  | 91.1  | 85.4  | 135.3 |
| 11.5  | 3.4   | 5.0   | 3.7   | 1.2   | 1.8   |
| 689.0 | 719.8 | 618.4 | 694.3 | 697.0 | 852.0 |
| 18.8  | 19.3  | 27.2  | 28.2  | 23.2  | 30.1  |
| 84.4  | 82.8  | 102.1 | 86.6  | 105.7 | 102.8 |
| 54.4  | 38.0  | 49.3  | 57.1  | 71.7  | 64.3  |
| 46.2  | 71.5  | 57.4  | 61.2  | 62.4  | 55.8  |
| 55.9  | 73.5  | 67.6  | 53.2  | 76.9  | 71.6  |
| 9.8   | 19.9  | 3.0   | 2.3   | 11.6  | 8.6   |
| 240.9 | 224.4 | 247.0 | 263.6 | 268.0 | 289.0 |
| 59.8  | 65.3  | 63.4  | 77.1  | 84.8  | 94.9  |
| 2.1   | 1.2   | 3.3   | 4.5   | 1.8   | 1.4   |
| 110.3 | 97.1  | 138.7 | 105.0 | 114.5 | 117.9 |
| 118.2 | 98.2  | 132.7 | 114.9 | 146.2 | 134.8 |
| 124.8 | 116.5 | 169.7 | 149.2 | 164.9 | 167.3 |
| 168.3 | 109.7 | 175.4 | 169.5 | 167.5 | 187.7 |
| 8.6   | 12.8  | 6.6   | 17.3  | 17.9  | 8.2   |
| 3.7   | 1.2   | 2.5   | 5.3   | 4.8   | 4.1   |
| 2.6   | 2.8   | 4.5   | 4.7   | 7.5   | 2.8   |
| 1.6   | 1.7   | 7.0   | 2.2   | 3.5   | 4.6   |

|        |        |        |        |        |        |
|--------|--------|--------|--------|--------|--------|
| 25.8   | 25.9   | 62.4   | 23.0   | 54.4   | 22.4   |
| 1.3    | 7.1    | 1.1    | 2.4    | 4.7    | 1.4    |
| 9.3    | 15.5   | 15.1   | 13.8   | 9.7    | 20.3   |
| 20.0   | 28.8   | 31.2   | 17.6   | 18.1   | 20.2   |
| 123.8  | 108.2  | 115.3  | 110.1  | 129.9  | 141.8  |
| 6.5    | 14.4   | 12.0   | 18.4   | 8.2    | 12.4   |
| 2.2    | 2.1    | 1.5    | 2.3    | 2.3    | 1.7    |
| 241.4  | 231.2  | 276.2  | 263.5  | 262.2  | 334.4  |
| 47.5   | 22.6   | 48.4   | 54.6   | 49.9   | 61.6   |
| 2.9    | 13.5   | 2.8    | 9.6    | 10.4   | 7.6    |
| 1.3    | 8.3    | 2.0    | 3.0    | 5.3    | 7.4    |
| 6.8    | 13.0   | 6.3    | 12.1   | 5.2    | 4.4    |
| 12.3   | 11.1   | 14.0   | 8.3    | 9.6    | 13.7   |
| 1.6    | 2.1    | 4.0    | 1.2    | 3.4    | 12.4   |
| 165.0  | 133.7  | 131.3  | 142.6  | 142.8  | 161.4  |
| 4.4    | 2.9    | 10.7   | 4.7    | 2.3    | 4.4    |
| 1.0    | 6.9    | 8.3    | 8.8    | 1.8    | 9.3    |
| 108.1  | 87.1   | 101.9  | 116.9  | 111.4  | 115.4  |
| 9.0    | 4.4    | 9.4    | 8.9    | 5.6    | 10.5   |
| 821.2  | 685.1  | 831.8  | 917.3  | 953.3  | 987.6  |
| 184.3  | 181.6  | 232.6  | 218.1  | 238.4  | 255.7  |
| 4.4    | 2.2    | 10.9   | 9.6    | 9.8    | 7.3    |
| 17.1   | 25.5   | 13.1   | 13.0   | 10.4   | 11.2   |
| 20.3   | 50.3   | 25.3   | 32.2   | 21.3   | 27.4   |
| 5.6    | 2.4    | 5.9    | 9.3    | 15.6   | 10.5   |
| 2.2    | 1.6    | 9.9    | 1.9    | 2.6    | 3.4    |
| 111.3  | 97.3   | 106.9  | 96.8   | 142.6  | 114.9  |
| 155.2  | 116.2  | 127.4  | 123.5  | 168.3  | 168.3  |
| 43.9   | 52.2   | 71.8   | 56.1   | 75.1   | 58.4   |
| 18.4   | 21.5   | 12.0   | 16.7   | 15.8   | 21.1   |
| 6508.8 | 6183.3 | 6477.8 | 6846.4 | 7130.6 | 7359.9 |
| 9.1    | 3.1    | 6.4    | 7.3    | 2.1    | 3.6    |
| 2.9    | 5.0    | 6.8    | 10.6   | 5.0    | 11.0   |
| 28.7   | 33.2   | 41.4   | 40.9   | 37.3   | 38.2   |
| 3.5    | 3.2    | 6.7    | 3.3    | 12.8   | 13.1   |
| 2.8    | 1.2    | 5.7    | 3.7    | 1.8    | 2.6    |
| 9.6    | 18.4   | 19.3   | 4.1    | 13.3   | 20.4   |
| 6.9    | 4.4    | 7.5    | 3.8    | 9.3    | 10.2   |
| 31.2   | 28.0   | 29.3   | 51.1   | 42.1   | 50.2   |
| 4.8    | 19.2   | 31.0   | 15.1   | 21.2   | 24.6   |
| 26.5   | 12.5   | 18.0   | 18.0   | 16.5   | 21.5   |
| 43.1   | 50.0   | 47.6   | 37.1   | 39.7   | 53.5   |
| 60.4   | 47.6   | 52.9   | 57.9   | 67.8   | 73.2   |
| 30.0   | 5.3    | 16.1   | 25.6   | 14.0   | 17.3   |
| 112.7  | 91.7   | 124.2  | 132.9  | 125.6  | 128.3  |
| 272.5  | 237.6  | 221.6  | 298.1  | 290.2  | 388.7  |
| 29.6   | 28.0   | 20.1   | 28.0   | 20.5   | 32.1   |
| 377.8  | 334.2  | 450.7  | 490.4  | 494.8  | 509.9  |
| 96.7   | 127.3  | 144.5  | 156.1  | 140.7  | 159.6  |
| 15.9   | 9.7    | 4.9    | 15.2   | 8.4    | 12.2   |
| 243.2  | 210.1  | 173.0  | 214.5  | 212.5  | 367.8  |
| 32.1   | 26.6   | 22.9   | 27.3   | 27.8   | 23.6   |
| 4.5    | 9.3    | 14.1   | 6.0    | 3.6    | 11.0   |

|        |        |        |        |        |        |
|--------|--------|--------|--------|--------|--------|
| 94.5   | 91.9   | 72.1   | 79.5   | 90.5   | 97.8   |
| 0.7    | 0.8    | 3.4    | 3.3    | 0.5    | 4.0    |
| 9.5    | 7.6    | 8.8    | 10.6   | 11.5   | 15.1   |
| 2.5    | 1.8    | 3.3    | 1.0    | 1.1    | 3.9    |
| 20.6   | 1.8    | 23.6   | 19.0   | 32.2   | 30.8   |
| 160.3  | 160.9  | 162.8  | 180.2  | 210.1  | 180.4  |
| 304.1  | 268.5  | 303.8  | 342.4  | 347.8  | 383.8  |
| 21.5   | 10.0   | 13.2   | 14.4   | 28.9   | 22.6   |
| 2.6    | 0.7    | 1.9    | 4.2    | 3.5    | 3.9    |
| 176.4  | 192.4  | 226.6  | 238.9  | 222.9  | 260.5  |
| 544.4  | 526.0  | 577.8  | 560.6  | 585.8  | 612.9  |
| 8.4    | 11.5   | 14.8   | 13.0   | 8.0    | 7.8    |
| 42.1   | 36.8   | 46.0   | 37.2   | 59.9   | 52.6   |
| 15.3   | 11.1   | 7.4    | 18.1   | 8.8    | 21.9   |
| 161.6  | 139.9  | 121.3  | 122.9  | 165.4  | 182.6  |
| 52.0   | 58.3   | 54.2   | 52.0   | 52.8   | 72.2   |
| 3.8    | 5.7    | 4.5    | 6.5    | 9.9    | 6.6    |
| 123.3  | 122.5  | 131.3  | 142.4  | 132.8  | 175.0  |
| 12.0   | 2.2    | 5.1    | 10.3   | 18.0   | 17.7   |
| 2.7    | 3.7    | 7.8    | 2.5    | 4.0    | 6.5    |
| 415.1  | 396.7  | 434.3  | 423.3  | 484.9  | 518.7  |
| 31.6   | 63.2   | 26.0   | 37.7   | 28.8   | 35.0   |
| 4.2    | 4.8    | 3.9    | 8.9    | 7.6    | 6.3    |
| 1540.3 | 1407.5 | 1705.9 | 1721.6 | 1823.1 | 1855.2 |
| 27.0   | 6.5    | 26.2   | 30.5   | 33.7   | 34.2   |
| 1.8    | 2.2    | 2.6    | 11.5   | 4.4    | 3.3    |
| 6.3    | 16.0   | 10.8   | 8.0    | 6.5    | 16.2   |
| 21.1   | 5.8    | 12.2   | 8.3    | 16.1   | 11.4   |
| 25.9   | 21.3   | 14.3   | 25.3   | 28.7   | 25.9   |
| 5.2    | 4.9    | 5.9    | 11.7   | 10.9   | 5.2    |
| 14.8   | 8.5    | 5.1    | 9.3    | 14.3   | 10.3   |
| 191.1  | 133.9  | 197.5  | 242.4  | 212.5  | 224.7  |
| 13.9   | 4.6    | 15.6   | 15.7   | 8.8    | 11.9   |
| 10.4   | 2.3    | 2.3    | 15.6   | 7.2    | 12.3   |
| 78.4   | 81.5   | 84.3   | 80.4   | 89.1   | 108.0  |
| 95.7   | 89.8   | 102.5  | 87.0   | 113.2  | 119.6  |
| 0.9    | 1.8    | 1.6    | 1.4    | 2.1    | 2.8    |
| 93.0   | 87.3   | 112.3  | 122.5  | 129.8  | 121.0  |
| 23.5   | 18.1   | 15.1   | 13.2   | 23.5   | 21.9   |
| 26.1   | 29.6   | 28.3   | 19.1   | 25.2   | 27.7   |
| 99.2   | 123.7  | 123.5  | 86.1   | 129.4  | 115.5  |
| 136.9  | 122.3  | 155.2  | 151.0  | 162.7  | 211.0  |
| 72.5   | 46.0   | 38.9   | 88.0   | 77.7   | 65.9   |
| 14.8   | 16.3   | 19.7   | 13.0   | 15.0   | 12.1   |
| 2307.8 | 2287.7 | 2594.6 | 2790.2 | 2638.5 | 2853.7 |
| 1.9    | 4.5    | 6.1    | 6.4    | 5.0    | 4.0    |
| 3.4    | 2.0    | 0.7    | 2.2    | 0.9    | 2.1    |
| 6.6    | 3.3    | 14.0   | 11.4   | 16.2   | 16.2   |
| 129.8  | 69.9   | 92.2   | 103.9  | 131.0  | 136.4  |
| 82.7   | 35.2   | 89.1   | 124.7  | 102.7  | 101.8  |
| 396.6  | 341.2  | 327.1  | 371.0  | 396.0  | 427.7  |
| 7.8    | 4.2    | 2.4    | 13.4   | 4.8    | 3.3    |
| 7.7    | 5.2    | 2.3    | 3.4    | 3.5    | 3.6    |

|       |       |       |       |       |       |
|-------|-------|-------|-------|-------|-------|
| 2.9   | 3.6   | 2.8   | 1.9   | 5.3   | 2.2   |
| 2.3   | 2.0   | 4.7   | 4.4   | 7.7   | 4.1   |
| 2.5   | 1.7   | 2.0   | 2.6   | 3.6   | 2.1   |
| 21.4  | 8.4   | 26.0  | 34.9  | 30.3  | 35.2  |
| 8.2   | 1.1   | 2.0   | 11.8  | 15.9  | 15.3  |
| 10.7  | 1.2   | 5.2   | 12.8  | 5.1   | 8.5   |
| 219.4 | 214.9 | 220.9 | 222.1 | 258.3 | 273.9 |
| 4.2   | 6.3   | 5.5   | 11.5  | 5.5   | 6.3   |
| 23.7  | 29.5  | 22.9  | 24.6  | 32.7  | 30.2  |
| 42.4  | 47.3  | 32.3  | 42.6  | 34.9  | 48.7  |
| 32.4  | 22.5  | 36.3  | 39.1  | 35.4  | 37.4  |
| 35.4  | 29.6  | 30.5  | 30.1  | 32.9  | 52.9  |
| 36.1  | 37.0  | 44.5  | 38.1  | 53.9  | 50.8  |
| 211.7 | 197.2 | 220.8 | 220.6 | 237.8 | 227.2 |
| 1.1   | 0.7   | 0.9   | 1.9   | 0.9   | 1.8   |
| 1.8   | 9.7   | 2.0   | 2.7   | 2.0   | 4.3   |
| 6.6   | 7.0   | 8.2   | 2.6   | 4.8   | 3.2   |
| 3.6   | 1.5   | 12.2  | 15.3  | 8.9   | 1.8   |
| 14.3  | 8.5   | 9.5   | 12.5  | 5.5   | 14.3  |
| 82.6  | 78.5  | 69.8  | 89.7  | 87.3  | 97.1  |
| 581.1 | 523.3 | 578.5 | 678.1 | 722.9 | 734.3 |
| 54.7  | 34.8  | 57.1  | 62.0  | 77.3  | 67.8  |
| 9.8   | 18.8  | 11.6  | 19.7  | 19.9  | 17.6  |
| 76.9  | 85.1  | 92.2  | 77.9  | 98.3  | 94.3  |
| 14.2  | 19.8  | 10.7  | 19.0  | 15.7  | 25.8  |
| 285.4 | 201.7 | 286.8 | 302.7 | 307.6 | 336.8 |
| 140.7 | 84.9  | 120.9 | 123.6 | 146.3 | 151.5 |
| 22.9  | 18.6  | 20.3  | 17.1  | 30.8  | 30.7  |
| 453.8 | 472.3 | 471.3 | 483.2 | 520.6 | 537.9 |
| 97.4  | 108.6 | 133.4 | 82.3  | 135.8 | 140.5 |
| 42.9  | 51.6  | 36.6  | 40.4  | 48.8  | 46.0  |
| 5.6   | 5.9   | 0.5   | 3.9   | 2.9   | 1.0   |
| 26.8  | 56.9  | 41.5  | 28.4  | 35.1  | 43.9  |
| 1.3   | 1.2   | 2.3   | 2.2   | 2.0   | 3.4   |
| 5.1   | 2.3   | 7.5   | 7.3   | 4.7   | 7.6   |
| 7.9   | 2.7   | 7.2   | 7.2   | 16.1  | 4.9   |
| 70.1  | 70.5  | 62.2  | 70.3  | 79.5  | 91.0  |
| 34.0  | 24.8  | 28.1  | 26.1  | 34.6  | 43.9  |
| 3.6   | 4.5   | 10.9  | 6.9   | 2.6   | 9.4   |
| 25.7  | 20.3  | 15.4  | 25.8  | 28.6  | 24.3  |
| 93.4  | 88.5  | 98.5  | 107.1 | 121.6 | 126.7 |
| 153.3 | 179.7 | 152.0 | 179.0 | 182.2 | 184.2 |
| 55.5  | 56.5  | 35.2  | 45.7  | 44.2  | 58.1  |
| 389.6 | 436.2 | 454.0 | 442.4 | 433.5 | 481.4 |
| 2.9   | 2.9   | 1.7   | 4.6   | 5.9   | 0.7   |
| 5.6   | 4.8   | 1.0   | 5.5   | 5.0   | 2.9   |
| 7.9   | 4.9   | 8.3   | 9.4   | 11.2  | 7.5   |
| 2.0   | 11.7  | 5.6   | 9.5   | 3.7   | 1.8   |
| 17.0  | 10.3  | 21.1  | 9.2   | 7.6   | 11.4  |
| 9.9   | 12.1  | 10.0  | 13.3  | 11.1  | 16.3  |
| 247.3 | 232.4 | 244.0 | 250.2 | 298.8 | 322.8 |
| 190.4 | 134.8 | 192.3 | 194.5 | 235.8 | 229.3 |
| 2.6   | 3.9   | 2.3   | 3.3   | 6.2   | 6.4   |

|        |        |        |        |        |        |
|--------|--------|--------|--------|--------|--------|
| 11.3   | 8.8    | 10.5   | 14.1   | 9.2    | 14.5   |
| 74.5   | 115.8  | 116.0  | 100.5  | 95.8   | 107.3  |
| 126.9  | 115.6  | 105.4  | 138.3  | 147.0  | 152.5  |
| 21.7   | 14.8   | 16.7   | 20.1   | 30.0   | 18.8   |
| 45.7   | 49.5   | 46.6   | 35.4   | 48.6   | 47.3   |
| 28.0   | 32.1   | 11.3   | 13.1   | 9.6    | 19.9   |
| 2.8    | 4.0    | 2.3    | 3.1    | 3.6    | 3.3    |
| 42.4   | 35.0   | 53.8   | 64.4   | 67.7   | 58.7   |
| 44.8   | 40.0   | 58.8   | 42.6   | 62.7   | 51.0   |
| 4.4    | 1.7    | 3.4    | 5.0    | 7.5    | 3.7    |
| 13.7   | 26.8   | 25.9   | 26.6   | 23.4   | 16.8   |
| 5.9    | 2.7    | 4.4    | 18.3   | 4.6    | 4.9    |
| 22.5   | 42.9   | 12.8   | 16.9   | 26.6   | 19.9   |
| 7.6    | 3.7    | 14.3   | 9.0    | 8.2    | 15.2   |
| 243.5  | 230.8  | 245.6  | 236.0  | 250.5  | 278.4  |
| 1319.4 | 1196.2 | 1238.7 | 1275.6 | 1517.8 | 1571.0 |
| 23.9   | 26.6   | 22.6   | 30.8   | 25.6   | 32.1   |
| 19.5   | 19.4   | 24.8   | 14.4   | 12.8   | 29.3   |
| 59.6   | 48.3   | 61.7   | 62.9   | 52.9   | 72.6   |
| 18.3   | 13.6   | 6.9    | 2.6    | 21.2   | 21.5   |
| 18.2   | 37.2   | 29.2   | 15.2   | 20.4   | 21.1   |
| 32.4   | 13.6   | 16.6   | 26.5   | 31.7   | 26.9   |
| 3.4    | 3.7    | 2.3    | 4.6    | 2.9    | 3.5    |
| 212.5  | 127.5  | 193.3  | 183.6  | 228.9  | 233.9  |
| 112.5  | 90.7   | 140.7  | 118.2  | 179.6  | 153.8  |
| 135.7  | 90.4   | 114.1  | 163.5  | 145.5  | 139.8  |
| 22.0   | 23.8   | 23.9   | 17.1   | 11.7   | 18.3   |
| 1.0    | 1.0    | 1.0    | 1.3    | 1.7    | 0.8    |
| 0.9    | 1.3    | 2.4    | 1.5    | 1.5    | 1.1    |
| 40.8   | 29.0   | 40.7   | 43.2   | 29.1   | 46.4   |
| 43.3   | 28.2   | 33.4   | 41.9   | 40.2   | 43.1   |
| 2.2    | 5.5    | 3.4    | 1.7    | 11.0   | 13.3   |
| 10.4   | 13.9   | 16.9   | 12.0   | 11.2   | 16.9   |
| 30.1   | 15.9   | 30.7   | 28.6   | 34.3   | 35.0   |
| 316.5  | 269.8  | 315.3  | 303.1  | 341.2  | 366.6  |
| 49.8   | 59.1   | 52.0   | 57.3   | 62.6   | 62.9   |
| 266.3  | 260.8  | 259.0  | 259.9  | 311.0  | 346.9  |
| 23.6   | 36.1   | 43.3   | 56.2   | 51.0   | 66.0   |
| 144.1  | 146.5  | 151.3  | 158.7  | 156.0  | 212.4  |
| 1765.3 | 1695.1 | 1984.1 | 1949.6 | 2118.5 | 2288.4 |
| 3.4    | 1.7    | 3.3    | 6.5    | 3.3    | 4.6    |
| 1.2    | 11.3   | 7.2    | 6.5    | 10.2   | 9.3    |
| 6.4    | 12.6   | 15.4   | 10.7   | 14.0   | 9.0    |
| 102.6  | 129.8  | 106.6  | 113.0  | 103.8  | 139.5  |
| 49.6   | 78.6   | 70.5   | 87.3   | 93.7   | 80.0   |
| 1.5    | 12.6   | 6.4    | 12.2   | 17.5   | 10.7   |
| 5.9    | 3.3    | 3.6    | 2.8    | 5.8    | 10.2   |
| 5.6    | 2.4    | 3.1    | 5.2    | 3.4    | 4.3    |
| 10.5   | 4.0    | 13.0   | 2.9    | 3.5    | 3.4    |
| 78.1   | 86.1   | 100.5  | 69.9   | 66.1   | 113.0  |
| 30.9   | 35.9   | 33.7   | 41.4   | 44.6   | 51.2   |
| 1.3    | 1.7    | 1.3    | 1.2    | 2.5    | 1.2    |
| 27.6   | 30.0   | 16.7   | 25.6   | 27.1   | 22.0   |

|        |        |        |        |        |        |
|--------|--------|--------|--------|--------|--------|
| 2.9    | 3.6    | 5.6    | 8.2    | 6.9    | 9.9    |
| 15.7   | 23.4   | 21.4   | 22.3   | 15.0   | 33.9   |
| 11.5   | 11.5   | 16.1   | 6.3    | 6.1    | 7.2    |
| 40.4   | 63.6   | 58.0   | 72.5   | 77.5   | 84.1   |
| 44.5   | 40.0   | 35.6   | 41.2   | 40.9   | 42.4   |
| 7.3    | 0.6    | 15.8   | 8.5    | 7.0    | 10.5   |
| 110.8  | 77.0   | 124.1  | 100.4  | 143.5  | 179.7  |
| 193.8  | 175.8  | 226.1  | 236.1  | 197.7  | 201.3  |
| 28.1   | 39.6   | 31.8   | 31.9   | 26.6   | 45.4   |
| 62.6   | 45.7   | 52.9   | 59.1   | 54.3   | 67.5   |
| 81.5   | 67.5   | 77.6   | 83.1   | 88.8   | 93.0   |
| 6.8    | 0.6    | 3.3    | 2.7    | 5.6    | 3.5    |
| 2.1    | 2.3    | 6.7    | 2.0    | 3.6    | 8.1    |
| 5.5    | 2.6    | 27.3   | 10.2   | 3.3    | 10.8   |
| 2.6    | 19.6   | 2.8    | 1.8    | 1.9    | 2.5    |
| 31.6   | 24.0   | 20.0   | 21.8   | 32.4   | 30.9   |
| 68.9   | 77.1   | 75.4   | 76.7   | 90.0   | 99.4   |
| 61.8   | 40.5   | 54.2   | 23.2   | 59.0   | 48.4   |
| 9.7    | 4.1    | 4.3    | 2.9    | 3.5    | 4.8    |
| 2.4    | 2.3    | 2.4    | 2.3    | 1.8    | 2.8    |
| 17.5   | 16.1   | 13.6   | 12.0   | 26.3   | 25.8   |
| 28.2   | 36.1   | 45.2   | 39.3   | 40.7   | 45.1   |
| 21.7   | 18.7   | 27.4   | 28.1   | 27.9   | 30.9   |
| 4459.4 | 3846.7 | 4179.4 | 3998.1 | 4542.0 | 5054.5 |
| 28.5   | 29.3   | 34.8   | 32.7   | 41.8   | 37.8   |
| 129.9  | 110.0  | 131.5  | 138.3  | 165.3  | 165.9  |
| 6.7    | 23.3   | 7.7    | 8.7    | 12.9   | 15.2   |
| 4.4    | 5.7    | 3.9    | 5.0    | 4.1    | 17.8   |
| 275.6  | 214.8  | 285.7  | 254.6  | 353.2  | 341.2  |
| 51.3   | 42.2   | 40.7   | 51.7   | 66.9   | 70.2   |
| 20.9   | 19.4   | 26.2   | 17.0   | 34.1   | 20.8   |
| 1.6    | 5.4    | 3.1    | 2.4    | 5.8    | 5.4    |
| 42.0   | 49.0   | 30.8   | 24.4   | 19.1   | 53.3   |
| 32.4   | 26.3   | 35.0   | 30.7   | 35.6   | 40.9   |
| 16.6   | 2.1    | 24.7   | 10.7   | 12.8   | 18.9   |
| 12.2   | 11.5   | 12.3   | 10.1   | 11.2   | 10.8   |
| 25.2   | 17.2   | 28.6   | 21.4   | 30.8   | 33.9   |
| 3.7    | 17.1   | 9.6    | 7.1    | 3.0    | 10.6   |
| 20.4   | 14.2   | 12.5   | 14.5   | 12.9   | 28.3   |
| 23.0   | 32.9   | 20.2   | 24.5   | 17.7   | 27.1   |
| 6.1    | 2.7    | 7.4    | 16.0   | 4.6    | 8.3    |
| 94.7   | 69.7   | 81.3   | 61.8   | 76.0   | 83.3   |
| 153.7  | 152.7  | 157.5  | 136.3  | 173.1  | 189.5  |
| 5.0    | 2.1    | 1.9    | 4.8    | 5.8    | 3.8    |
| 3.9    | 2.1    | 3.6    | 2.9    | 5.0    | 3.1    |
| 24.5   | 17.2   | 16.8   | 20.9   | 19.2   | 25.3   |
| 75.6   | 23.2   | 66.9   | 48.8   | 106.8  | 77.1   |
| 46.7   | 58.7   | 50.2   | 48.8   | 44.9   | 62.4   |
| 1.2    | 1.6    | 1.8    | 1.5    | 1.4    | 1.4    |
| 217.6  | 135.7  | 313.5  | 298.7  | 321.9  | 262.3  |
| 21.7   | 16.0   | 14.4   | 15.1   | 17.3   | 27.7   |
| 67.7   | 45.6   | 49.2   | 52.8   | 52.9   | 62.3   |
| 3.9    | 10.5   | 8.3    | 4.6    | 15.6   | 15.1   |

|        |        |        |        |        |        |
|--------|--------|--------|--------|--------|--------|
| 27.6   | 23.9   | 20.0   | 34.1   | 30.0   | 28.0   |
| 125.0  | 63.9   | 106.3  | 107.3  | 123.5  | 156.0  |
| 36.8   | 48.9   | 41.3   | 53.6   | 55.4   | 60.7   |
| 1199.0 | 861.1  | 1217.0 | 1145.9 | 1486.1 | 1541.1 |
| 6.9    | 15.5   | 8.2    | 16.6   | 14.3   | 9.7    |
| 37.0   | 29.6   | 35.8   | 35.0   | 31.6   | 44.0   |
| 46.4   | 45.2   | 51.7   | 43.8   | 53.4   | 64.0   |
| 15.4   | 9.5    | 19.8   | 17.5   | 4.5    | 15.2   |
| 216.1  | 195.4  | 221.1  | 216.6  | 186.2  | 292.9  |
| 77.6   | 39.2   | 59.5   | 65.9   | 85.9   | 81.7   |
| 4.3    | 9.0    | 5.8    | 4.1    | 8.7    | 8.8    |
| 29.1   | 6.5    | 22.1   | 12.4   | 30.2   | 39.1   |
| 441.7  | 476.6  | 469.4  | 504.3  | 501.8  | 563.5  |
| 1.9    | 1.6    | 1.7    | 2.5    | 3.3    | 0.9    |
| 42.6   | 43.9   | 55.2   | 52.7   | 52.8   | 66.4   |
| 39.8   | 57.4   | 46.1   | 55.9   | 49.4   | 63.7   |
| 1049.6 | 1259.6 | 1113.6 | 1107.0 | 1216.4 | 1239.9 |
| 74.2   | 68.4   | 93.6   | 80.8   | 88.9   | 104.2  |
| 4.0    | 13.2   | 19.3   | 3.3    | 3.3    | 5.1    |
| 4.3    | 11.2   | 0.9    | 5.2    | 1.9    | 5.4    |
| 116.0  | 122.2  | 88.1   | 119.0  | 129.0  | 130.7  |
| 13.4   | 14.8   | 8.5    | 9.4    | 13.5   | 11.2   |
| 1.7    | 1.0    | 10.9   | 1.7    | 5.6    | 2.7    |
| 1.3    | 2.1    | 1.9    | 1.8    | 3.9    | 2.1    |
| 8.0    | 1.0    | 12.5   | 7.9    | 14.8   | 6.5    |
| 291.4  | 300.3  | 338.4  | 354.7  | 362.7  | 374.3  |
| 169.4  | 149.6  | 191.6  | 186.7  | 226.0  | 231.5  |
| 6.0    | 2.2    | 2.4    | 2.8    | 3.9    | 3.9    |
| 5.8    | 5.4    | 5.3    | 11.2   | 7.0    | 5.8    |
| 2.5    | 7.7    | 3.4    | 6.7    | 5.3    | 6.0    |
| 212.1  | 215.2  | 243.1  | 252.0  | 246.3  | 269.0  |
| 1.3    | 0.9    | 2.5    | 1.8    | 2.2    | 7.6    |
| 13.0   | 23.3   | 14.8   | 16.1   | 16.3   | 26.6   |
| 1.7    | 0.9    | 1.8    | 6.2    | 4.8    | 8.4    |
| 4.2    | 2.0    | 3.6    | 3.3    | 3.1    | 2.9    |
| 1.8    | 1.7    | 2.4    | 1.7    | 2.1    | 1.5    |
| 15.2   | 3.3    | 17.5   | 7.4    | 8.0    | 12.7   |
| 1.9    | 2.2    | 1.9    | 1.6    | 1.3    | 1.1    |
| 101.6  | 92.5   | 100.9  | 108.0  | 126.5  | 141.0  |
| 2.2    | 2.2    | 2.3    | 1.8    | 3.5    | 3.1    |
| 243.9  | 173.2  | 227.8  | 244.9  | 230.4  | 240.9  |
| 40.1   | 47.4   | 38.4   | 37.6   | 56.2   | 51.9   |
| 30.2   | 32.0   | 30.1   | 23.3   | 38.3   | 40.2   |
| 0.8    | 0.7    | 1.4    | 0.7    | 0.7    | 1.0    |
| 2.1    | 7.5    | 9.2    | 10.2   | 15.5   | 13.1   |
| 3.4    | 2.5    | 2.4    | 3.4    | 10.2   | 2.8    |
| 9.8    | 12.8   | 12.8   | 10.0   | 8.3    | 6.8    |
| 145.1  | 152.4  | 183.2  | 162.9  | 187.8  | 183.0  |
| 12.3   | 19.6   | 19.5   | 21.3   | 23.1   | 20.6   |
| 121.8  | 121.0  | 108.7  | 139.1  | 138.1  | 153.2  |
| 10.2   | 3.9    | 13.6   | 17.5   | 17.0   | 23.5   |
| 228.8  | 184.9  | 214.3  | 228.7  | 246.2  | 298.8  |
| 7.6    | 5.6    | 8.1    | 8.2    | 1.2    | 3.5    |

|       |       |       |       |       |       |
|-------|-------|-------|-------|-------|-------|
| 132.6 | 134.0 | 162.4 | 164.9 | 203.1 | 191.4 |
| 26.2  | 24.9  | 29.9  | 15.7  | 32.3  | 21.0  |
| 6.6   | 6.0   | 13.5  | 5.7   | 13.5  | 9.4   |
| 50.1  | 83.6  | 56.7  | 54.2  | 69.3  | 79.1  |
| 3.0   | 3.2   | 2.2   | 2.1   | 3.8   | 3.2   |
| 47.6  | 51.9  | 39.0  | 51.4  | 58.7  | 71.2  |
| 19.4  | 29.5  | 24.6  | 21.0  | 25.1  | 32.8  |
| 12.0  | 12.2  | 6.5   | 7.0   | 16.0  | 9.4   |
| 2.8   | 1.4   | 5.3   | 5.1   | 3.6   | 4.3   |
| 4.4   | 1.4   | 4.7   | 5.6   | 10.2  | 3.2   |
| 6.8   | 9.4   | 2.8   | 4.4   | 6.3   | 6.6   |
| 9.2   | 13.9  | 13.7  | 10.2  | 12.7  | 16.0  |
| 66.8  | 45.7  | 73.1  | 55.7  | 67.8  | 83.9  |
| 24.2  | 8.6   | 17.2  | 20.1  | 32.9  | 18.5  |
| 5.5   | 6.4   | 6.6   | 5.1   | 7.2   | 8.5   |
| 2.2   | 3.0   | 1.3   | 1.0   | 1.7   | 1.6   |
| 23.2  | 7.5   | 4.8   | 2.8   | 6.0   | 15.9  |
| 13.7  | 14.8  | 11.0  | 12.5  | 3.2   | 4.9   |
| 13.9  | 21.5  | 18.4  | 14.3  | 12.3  | 14.7  |
| 4.1   | 3.7   | 6.3   | 3.2   | 3.8   | 1.4   |
| 8.5   | 7.1   | 12.5  | 13.3  | 6.2   | 10.3  |
| 68.5  | 63.8  | 79.8  | 78.0  | 83.2  | 82.5  |
| 144.7 | 182.6 | 165.4 | 187.9 | 173.9 | 207.7 |
| 26.0  | 27.7  | 33.1  | 22.6  | 20.0  | 34.4  |
| 236.4 | 257.1 | 276.8 | 273.2 | 306.4 | 352.6 |
| 119.0 | 81.1  | 119.6 | 122.0 | 160.5 | 161.3 |
| 1.6   | 2.1   | 1.9   | 1.5   | 1.2   | 3.6   |
| 0.8   | 0.7   | 1.9   | 1.7   | 0.8   | 1.4   |
| 22.6  | 24.8  | 32.2  | 35.2  | 33.4  | 45.4  |
| 691.6 | 627.2 | 699.3 | 704.1 | 770.8 | 808.2 |
| 1.9   | 2.2   | 3.9   | 4.0   | 5.4   | 12.5  |
| 595.3 | 619.5 | 791.1 | 765.6 | 825.8 | 840.9 |
| 108.9 | 121.5 | 140.5 | 122.7 | 124.8 | 147.7 |
| 4.8   | 6.6   | 8.8   | 9.8   | 7.4   | 4.9   |
| 51.8  | 53.1  | 41.9  | 45.8  | 50.1  | 75.5  |
| 652.7 | 494.5 | 580.6 | 884.8 | 709.3 | 834.8 |
| 416.4 | 420.8 | 413.8 | 427.2 | 445.6 | 492.5 |
| 1.6   | 2.7   | 1.2   | 1.6   | 3.0   | 6.5   |
| 27.8  | 21.7  | 40.5  | 31.3  | 34.6  | 31.8  |
| 4.6   | 14.5  | 1.9   | 1.7   | 2.1   | 1.1   |
| 7.5   | 32.9  | 15.3  | 3.3   | 8.5   | 8.7   |
| 53.0  | 37.9  | 64.0  | 49.8  | 60.8  | 58.1  |
| 2.0   | 1.7   | 2.3   | 3.3   | 1.3   | 4.6   |
| 22.1  | 27.4  | 25.7  | 27.7  | 19.5  | 22.8  |
| 7.4   | 17.0  | 6.5   | 9.5   | 9.7   | 7.8   |
| 12.1  | 23.0  | 22.6  | 8.8   | 16.4  | 22.1  |
| 2.1   | 1.2   | 3.8   | 6.0   | 4.6   | 5.6   |
| 0.3   | 1.1   | 0.9   | 1.9   | 0.4   | 1.3   |
| 3.2   | 1.4   | 0.9   | 1.4   | 0.9   | 2.4   |
| 223.7 | 192.3 | 236.9 | 234.0 | 256.9 | 270.2 |
| 1.8   | 2.1   | 2.0   | 2.1   | 2.0   | 2.0   |
| 15.4  | 5.0   | 14.4  | 8.8   | 25.7  | 6.5   |
| 14.6  | 5.8   | 7.2   | 1.4   | 2.0   | 5.9   |



|       |       |       |       |       |        |
|-------|-------|-------|-------|-------|--------|
| 3.6   | 5.9   | 2.2   | 8.7   | 2.5   | 8.0    |
| 18.6  | 43.3  | 36.8  | 28.0  | 39.7  | 48.6   |
| 2.4   | 3.1   | 9.8   | 3.3   | 9.5   | 6.1    |
| 11.3  | 9.3   | 10.7  | 14.3  | 14.3  | 10.1   |
| 3.0   | 3.7   | 5.3   | 1.9   | 3.6   | 4.6    |
| 749.8 | 713.2 | 811.8 | 738.1 | 731.4 | 872.1  |
| 163.7 | 219.7 | 185.2 | 196.8 | 186.6 | 222.9  |
| 28.7  | 22.2  | 34.2  | 35.8  | 44.7  | 39.9   |
| 57.9  | 65.5  | 50.2  | 54.5  | 58.5  | 78.6   |
| 41.2  | 22.5  | 29.8  | 35.9  | 35.9  | 46.2   |
| 158.1 | 152.6 | 178.0 | 179.0 | 168.3 | 201.4  |
| 883.8 | 837.4 | 915.8 | 907.9 | 943.4 | 1022.1 |
| 1.2   | 1.7   | 0.8   | 0.8   | 1.1   | 0.9    |
| 46.7  | 46.6  | 48.1  | 37.1  | 10.0  | 55.7   |
| 9.3   | 14.4  | 9.5   | 18.9  | 16.6  | 16.1   |
| 1.5   | 1.7   | 2.8   | 2.4   | 3.8   | 6.4    |
| 18.6  | 21.5  | 21.1  | 14.3  | 14.8  | 6.2    |
| 7.6   | 4.1   | 1.1   | 3.9   | 5.4   | 9.5    |
| 97.9  | 81.2  | 84.3  | 84.1  | 90.4  | 112.7  |
| 13.0  | 1.5   | 11.0  | 9.6   | 4.5   | 11.6   |
| 16.4  | 7.0   | 19.7  | 17.7  | 20.0  | 24.3   |
| 24.8  | 18.3  | 27.0  | 19.0  | 23.1  | 21.2   |
| 3.4   | 1.1   | 2.4   | 0.4   | 1.9   | 1.8    |
| 5.2   | 1.3   | 2.5   | 2.2   | 2.1   | 3.1    |
| 15.6  | 21.7  | 21.9  | 15.3  | 29.5  | 24.8   |
| 25.3  | 24.2  | 16.8  | 18.8  | 17.3  | 24.8   |
| 0.8   | 2.6   | 1.2   | 9.4   | 3.0   | 8.8    |
| 12.7  | 13.7  | 19.2  | 3.5   | 4.1   | 8.5    |
| 0.8   | 1.1   | 1.3   | 1.6   | 0.5   | 0.7    |
| 1.1   | 1.0   | 1.2   | 1.2   | 1.3   | 1.3    |
| 559.5 | 523.8 | 498.3 | 556.9 | 603.2 | 646.9  |
| 211.6 | 173.9 | 199.5 | 202.9 | 253.2 | 268.3  |
| 1.3   | 2.1   | 3.2   | 1.6   | 5.0   | 5.8    |
| 8.9   | 9.6   | 1.5   | 2.3   | 5.3   | 2.1    |
| 34.4  | 45.9  | 45.6  | 33.5  | 27.1  | 22.9   |
| 106.6 | 143.1 | 86.1  | 162.1 | 104.1 | 174.0  |
| 27.8  | 13.8  | 10.7  | 19.9  | 9.8   | 20.2   |
| 5.8   | 9.0   | 12.7  | 7.0   | 14.1  | 9.0    |
| 205.5 | 183.5 | 220.3 | 217.4 | 249.9 | 261.1  |
| 8.1   | 13.7  | 3.6   | 2.1   | 1.8   | 2.7    |
| 19.1  | 32.7  | 31.4  | 28.6  | 30.1  | 32.6   |
| 30.6  | 17.0  | 27.4  | 14.8  | 31.5  | 37.5   |
| 188.3 | 193.7 | 212.4 | 224.6 | 229.5 | 219.0  |
| 11.5  | 6.5   | 2.7   | 9.2   | 7.2   | 7.6    |
| 9.2   | 18.7  | 8.5   | 15.1  | 9.5   | 14.7   |
| 2.1   | 6.2   | 3.0   | 2.1   | 7.5   | 13.5   |
| 216.5 | 153.9 | 240.7 | 207.7 | 260.6 | 275.2  |
| 55.3  | 52.5  | 54.5  | 41.6  | 61.7  | 59.3   |
| 75.7  | 39.8  | 66.1  | 63.4  | 77.5  | 77.4   |
| 244.4 | 284.6 | 238.3 | 291.2 | 282.8 | 334.9  |
| 23.4  | 19.8  | 14.4  | 16.5  | 13.5  | 19.2   |
| 54.9  | 49.7  | 52.5  | 42.6  | 66.9  | 73.2   |
| 72.4  | 76.7  | 67.7  | 87.9  | 88.5  | 89.3   |

|        |        |        |        |        |        |
|--------|--------|--------|--------|--------|--------|
| 59.4   | 72.6   | 81.7   | 61.1   | 68.3   | 82.1   |
| 11.7   | 16.5   | 14.2   | 17.5   | 15.0   | 20.5   |
| 2.8    | 1.8    | 1.7    | 2.0    | 2.7    | 3.3    |
| 900.5  | 838.4  | 925.6  | 1002.3 | 1081.8 | 1134.4 |
| 3.4    | 1.0    | 13.7   | 9.7    | 2.2    | 4.8    |
| 60.6   | 56.4   | 69.6   | 61.7   | 78.6   | 63.2   |
| 5.2    | 1.5    | 1.7    | 7.1    | 5.9    | 0.7    |
| 152.8  | 133.7  | 133.3  | 142.2  | 163.5  | 173.4  |
| 28.7   | 45.8   | 42.4   | 36.9   | 32.1   | 45.1   |
| 2.7    | 13.1   | 8.3    | 11.5   | 9.3    | 4.6    |
| 31.2   | 20.1   | 11.3   | 19.5   | 19.0   | 23.4   |
| 992.6  | 983.2  | 1243.8 | 1302.1 | 1347.2 | 1424.1 |
| 19.7   | 14.1   | 7.0    | 1.9    | 4.1    | 4.7    |
| 1141.9 | 1430.4 | 1188.6 | 1268.5 | 1341.5 | 1406.5 |
| 55.4   | 40.0   | 52.2   | 60.7   | 63.7   | 70.3   |
| 1.9    | 0.9    | 3.6    | 2.4    | 1.5    | 1.9    |
| 1972.0 | 2039.4 | 1592.3 | 1967.7 | 1908.2 | 2376.4 |
| 61.9   | 63.5   | 56.8   | 61.6   | 56.2   | 59.8   |
| 29.3   | 56.0   | 25.6   | 44.4   | 46.8   | 51.1   |
| 10.8   | 10.5   | 8.4    | 3.4    | 8.4    | 7.3    |
| 180.9  | 141.5  | 156.5  | 137.8  | 162.7  | 206.8  |
| 20.5   | 51.1   | 22.4   | 47.5   | 25.8   | 46.0   |
| 156.0  | 137.2  | 144.2  | 142.8  | 153.7  | 157.0  |
| 12.7   | 13.4   | 16.2   | 11.1   | 19.7   | 13.5   |
| 48.2   | 25.1   | 64.2   | 53.0   | 62.4   | 78.5   |
| 46.2   | 44.1   | 48.3   | 48.9   | 72.0   | 69.8   |
| 8.6    | 5.9    | 6.4    | 11.8   | 4.5    | 10.8   |
| 316.8  | 292.4  | 338.8  | 337.8  | 380.8  | 451.3  |
| 146.3  | 187.0  | 121.6  | 154.2  | 145.1  | 157.6  |
| 30.8   | 37.3   | 25.6   | 26.6   | 25.0   | 32.0   |
| 12.4   | 13.3   | 11.5   | 6.0    | 16.1   | 9.7    |
| 332.5  | 369.3  | 300.4  | 381.0  | 330.1  | 419.6  |
| 76.3   | 92.9   | 72.9   | 101.7  | 100.3  | 100.4  |
| 9.0    | 14.4   | 12.3   | 23.9   | 22.0   | 17.7   |
| 3.0    | 1.7    | 11.0   | 14.4   | 14.6   | 8.9    |
| 1523.0 | 1731.3 | 1829.5 | 1696.5 | 1978.3 | 2068.2 |
| 499.2  | 426.8  | 588.1  | 612.9  | 659.8  | 704.7  |
| 68.7   | 61.8   | 61.1   | 62.0   | 76.5   | 72.5   |
| 4.8    | 8.6    | 6.7    | 9.3    | 11.6   | 11.8   |
| 23.4   | 6.4    | 5.7    | 11.0   | 15.5   | 7.8    |
| 106.2  | 92.8   | 126.1  | 107.5  | 129.6  | 125.3  |
| 5.5    | 11.4   | 9.4    | 9.1    | 9.1    | 20.7   |
| 102.1  | 84.3   | 91.1   | 109.9  | 140.0  | 122.3  |
| 52.2   | 43.1   | 63.7   | 58.8   | 62.7   | 53.6   |
| 2.5    | 3.6    | 2.4    | 2.6    | 4.1    | 3.5    |
| 60.7   | 38.0   | 64.5   | 60.9   | 85.5   | 85.5   |
| 124.4  | 72.3   | 123.8  | 107.5  | 156.7  | 145.0  |
| 46.9   | 44.4   | 44.1   | 40.7   | 57.0   | 61.1   |
| 86.0   | 78.1   | 90.3   | 110.1  | 91.2   | 128.2  |
| 16.2   | 16.4   | 14.9   | 9.0    | 4.7    | 16.4   |
| 2.4    | 1.6    | 3.0    | 2.0    | 6.0    | 1.4    |
| 7.3    | 20.6   | 21.2   | 6.6    | 11.8   | 23.0   |
| 17.9   | 7.5    | 14.5   | 14.0   | 14.7   | 19.6   |

|        |        |        |        |        |        |
|--------|--------|--------|--------|--------|--------|
| 58.6   | 51.5   | 72.7   | 64.0   | 69.3   | 78.8   |
| 12.7   | 8.3    | 6.1    | 10.8   | 14.3   | 23.8   |
| 17.5   | 6.8    | 17.0   | 5.6    | 22.8   | 22.2   |
| 1328.6 | 1310.6 | 1388.5 | 1440.1 | 1562.5 | 1552.1 |
| 96.0   | 76.5   | 93.9   | 92.1   | 102.1  | 118.9  |
| 29.5   | 66.5   | 36.3   | 59.0   | 30.5   | 56.5   |
| 85.8   | 69.6   | 94.7   | 96.6   | 98.0   | 114.8  |
| 58.8   | 50.6   | 57.0   | 43.5   | 56.7   | 78.6   |
| 13.3   | 18.1   | 19.2   | 17.5   | 24.1   | 20.6   |
| 64.6   | 29.1   | 67.7   | 62.4   | 77.4   | 98.2   |
| 809.1  | 768.9  | 810.4  | 808.7  | 880.5  | 978.1  |
| 13.4   | 6.2    | 18.5   | 21.8   | 26.1   | 22.1   |
| 118.5  | 72.8   | 107.0  | 102.3  | 153.1  | 115.1  |
| 16.8   | 10.9   | 22.7   | 16.4   | 9.7    | 20.4   |
| 64.3   | 57.5   | 76.9   | 75.3   | 91.0   | 99.7   |
| 5.2    | 12.8   | 11.3   | 2.4    | 2.6    | 3.4    |
| 568.2  | 614.2  | 640.7  | 609.1  | 520.6  | 785.2  |
| 18.5   | 18.9   | 16.3   | 21.2   | 14.2   | 17.2   |
| 17.2   | 16.3   | 21.7   | 18.5   | 26.3   | 33.9   |
| 16.4   | 22.7   | 19.7   | 10.0   | 17.8   | 13.7   |
| 3.3    | 1.2    | 3.4    | 2.4    | 6.9    | 1.9    |
| 500.4  | 444.8  | 469.6  | 433.3  | 508.3  | 639.5  |
| 13.5   | 18.8   | 10.5   | 12.9   | 8.3    | 7.6    |
| 64.1   | 81.0   | 89.6   | 104.8  | 111.4  | 125.6  |
| 531.7  | 511.5  | 551.3  | 595.6  | 595.6  | 569.9  |
| 23.8   | 36.6   | 16.1   | 28.2   | 30.3   | 25.5   |
| 12.4   | 16.6   | 20.9   | 8.9    | 6.8    | 3.6    |
| 13.5   | 10.4   | 13.0   | 5.7    | 9.8    | 4.8    |
| 16.9   | 7.5    | 17.0   | 25.3   | 17.2   | 19.5   |
| 6.9    | 19.3   | 6.0    | 3.1    | 9.8    | 6.6    |
| 7.7    | 2.6    | 4.1    | 4.9    | 4.0    | 4.6    |
| 24.3   | 8.7    | 9.5    | 9.9    | 16.3   | 31.7   |
| 35.6   | 27.4   | 37.4   | 23.1   | 31.1   | 25.3   |
| 13.6   | 15.7   | 7.9    | 15.4   | 5.6    | 9.0    |
| 10.3   | 3.1    | 5.4    | 4.5    | 9.4    | 6.4    |
| 32.7   | 51.1   | 36.7   | 42.0   | 33.6   | 40.8   |
| 2.6    | 2.2    | 11.5   | 4.1    | 5.1    | 6.5    |
| 69.1   | 65.7   | 79.4   | 77.5   | 74.9   | 88.3   |
| 3.4    | 3.2    | 3.6    | 3.9    | 4.4    | 4.9    |
| 15.3   | 15.0   | 21.3   | 16.1   | 21.8   | 21.3   |
| 150.4  | 110.0  | 129.3  | 117.4  | 163.8  | 162.6  |
| 1.8    | 5.0    | 8.7    | 12.3   | 6.6    | 12.0   |
| 4.6    | 10.3   | 4.6    | 14.4   | 2.6    | 1.8    |
| 3.1    | 0.4    | 1.0    | 2.5    | 2.4    | 0.8    |
| 8.7    | 3.8    | 4.1    | 4.0    | 5.6    | 11.3   |
| 21.3   | 26.2   | 27.1   | 25.8   | 31.0   | 32.9   |
| 876.9  | 551.6  | 969.5  | 972.8  | 1097.8 | 976.7  |
| 116.8  | 104.9  | 116.2  | 141.8  | 136.4  | 161.8  |
| 3.1    | 6.9    | 2.1    | 1.7    | 3.8    | 0.8    |
| 260.7  | 280.8  | 259.3  | 265.4  | 289.4  | 281.8  |
| 2.7    | 5.1    | 2.1    | 1.8    | 1.7    | 1.3    |
| 2.1    | 1.2    | 2.7    | 0.5    | 0.9    | 1.9    |
| 4.8    | 4.3    | 4.7    | 11.5   | 12.8   | 17.4   |

|        |        |        |        |        |        |
|--------|--------|--------|--------|--------|--------|
| 6.6    | 8.3    | 13.7   | 4.3    | 5.4    | 8.2    |
| 2.0    | 1.1    | 8.0    | 1.9    | 1.3    | 8.3    |
| 236.8  | 305.2  | 268.2  | 277.2  | 281.8  | 285.6  |
| 1.9    | 1.3    | 2.0    | 2.2    | 1.5    | 1.7    |
| 1.3    | 1.6    | 2.7    | 2.0    | 2.3    | 1.4    |
| 19.6   | 14.8   | 18.1   | 6.6    | 8.4    | 12.4   |
| 2.9    | 4.2    | 3.9    | 2.5    | 3.4    | 3.9    |
| 17.4   | 15.8   | 26.2   | 20.0   | 26.4   | 31.9   |
| 0.5    | 0.3    | 1.7    | 1.0    | 0.9    | 1.2    |
| 52.3   | 53.4   | 57.6   | 44.1   | 50.4   | 51.9   |
| 194.7  | 119.9  | 186.2  | 150.8  | 251.0  | 260.3  |
| 3.9    | 2.2    | 6.5    | 3.2    | 4.3    | 2.6    |
| 1136.2 | 881.1  | 815.7  | 1153.0 | 1103.5 | 1490.5 |
| 3980.5 | 3811.3 | 3723.7 | 3763.5 | 3884.1 | 4480.7 |
| 10.2   | 2.3    | 2.8    | 1.4    | 3.0    | 5.0    |
| 14.7   | 15.3   | 20.9   | 22.5   | 19.1   | 17.2   |
| 29.4   | 18.2   | 28.0   | 32.1   | 36.1   | 30.5   |
| 17.1   | 22.7   | 14.1   | 19.6   | 15.7   | 23.7   |
| 45.2   | 61.6   | 33.8   | 54.9   | 46.7   | 62.2   |
| 2.8    | 2.8    | 2.9    | 5.0    | 3.9    | 2.9    |
| 3.8    | 1.4    | 0.7    | 5.7    | 7.6    | 4.8    |
| 7.8    | 11.4   | 11.5   | 1.9    | 15.2   | 4.4    |
| 5.6    | 0.9    | 10.4   | 9.3    | 6.4    | 7.0    |
| 9.0    | 12.3   | 6.7    | 16.7   | 7.2    | 24.2   |
| 21.3   | 39.9   | 36.6   | 46.1   | 48.7   | 44.3   |
| 40.1   | 40.4   | 28.6   | 30.9   | 26.8   | 32.0   |
| 15.8   | 18.8   | 11.2   | 12.2   | 2.0    | 11.7   |
| 7916.7 | 7747.2 | 7678.1 | 8390.1 | 8446.7 | 8494.3 |
| 184.9  | 141.3  | 203.2  | 201.5  | 204.2  | 198.2  |
| 853.5  | 826.6  | 882.7  | 836.9  | 1001.6 | 1036.3 |
| 55.0   | 43.0   | 48.6   | 49.4   | 55.8   | 58.6   |
| 47.7   | 70.0   | 53.3   | 61.2   | 57.9   | 47.2   |
| 9.8    | 2.4    | 4.1    | 2.7    | 3.6    | 6.3    |
| 15.6   | 23.3   | 11.4   | 15.1   | 14.0   | 7.4    |
| 9.2    | 4.2    | 7.7    | 5.3    | 5.9    | 21.4   |
| 66.6   | 48.6   | 45.4   | 51.3   | 76.9   | 94.8   |
| 5.1    | 4.2    | 10.2   | 6.5    | 12.8   | 13.7   |
| 98.4   | 124.0  | 97.8   | 96.8   | 116.8  | 136.2  |
| 16.1   | 25.1   | 19.3   | 15.9   | 19.9   | 27.8   |
| 97.6   | 86.2   | 100.5  | 84.8   | 112.9  | 123.2  |
| 1.6    | 1.7    | 2.0    | 2.3    | 1.7    | 2.2    |
| 16.9   | 24.4   | 41.3   | 14.6   | 26.3   | 16.4   |
| 12.1   | 21.1   | 7.8    | 8.5    | 7.0    | 11.9   |
| 102.6  | 92.2   | 94.6   | 112.3  | 139.8  | 164.0  |
| 6.9    | 2.7    | 8.4    | 4.7    | 4.9    | 2.4    |
| 0.5    | 1.8    | 1.4    | 0.9    | 1.5    | 6.7    |
| 9.4    | 2.2    | 8.6    | 9.7    | 3.6    | 14.9   |
| 5.0    | 6.6    | 5.9    | 3.2    | 3.7    | 5.1    |
| 2.3    | 4.9    | 5.9    | 1.9    | 3.9    | 4.1    |
| 245.2  | 246.3  | 245.5  | 266.4  | 241.0  | 254.0  |
| 2.4    | 1.1    | 1.1    | 1.4    | 3.0    | 1.9    |
| 5.9    | 12.4   | 26.9   | 7.9    | 16.6   | 19.9   |
| 7.7    | 1.0    | 6.8    | 12.5   | 1.6    | 11.5   |

|        |       |        |        |        |        |
|--------|-------|--------|--------|--------|--------|
| 4.8    | 7.7   | 2.0    | 6.9    | 0.7    | 4.2    |
| 8.3    | 10.1  | 13.8   | 13.7   | 16.0   | 12.0   |
| 1263.8 | 906.0 | 1416.8 | 1377.7 | 1463.6 | 1491.8 |
| 637.3  | 514.5 | 439.5  | 703.1  | 545.1  | 770.5  |
| 0.5    | 4.0   | 2.0    | 3.4    | 0.2    | 0.4    |
| 4.2    | 6.4   | 4.9    | 3.2    | 2.9    | 1.9    |
| 3.4    | 0.2   | 4.3    | 0.5    | 0.8    | 1.2    |
| 160.4  | 112.7 | 159.2  | 151.4  | 167.4  | 163.2  |
| 6.0    | 2.0   | 7.7    | 3.8    | 2.3    | 3.4    |
| 4.6    | 8.8   | 7.5    | 5.7    | 10.2   | 9.8    |
| 2.4    | 2.8   | 1.9    | 2.1    | 1.6    | 1.1    |
| 7.3    | 14.9  | 12.4   | 15.1   | 8.2    | 20.3   |
| 4.1    | 0.5   | 2.6    | 4.9    | 2.6    | 0.8    |
| 7.4    | 4.3   | 1.8    | 7.5    | 3.5    | 3.9    |
| 41.4   | 25.0  | 39.1   | 29.1   | 28.6   | 35.4   |
| 19.9   | 8.5   | 40.8   | 33.0   | 20.4   | 35.4   |
| 70.8   | 97.4  | 70.8   | 75.2   | 78.7   | 70.7   |
| 16.5   | 17.6  | 16.6   | 8.1    | 3.4    | 22.4   |
| 29.2   | 9.6   | 19.2   | 29.1   | 33.6   | 31.5   |
| 4.3    | 11.7  | 5.4    | 3.7    | 12.3   | 3.0    |
| 49.3   | 44.3  | 35.7   | 64.8   | 46.2   | 58.2   |
| 14.8   | 24.3  | 12.9   | 10.4   | 12.3   | 5.9    |
| 95.6   | 110.6 | 74.4   | 89.9   | 93.9   | 93.1   |
| 6.4    | 29.8  | 12.1   | 14.8   | 13.4   | 15.8   |
| 5.1    | 5.1   | 4.1    | 6.8    | 6.3    | 7.8    |
| 42.3   | 45.6  | 28.3   | 26.7   | 40.3   | 28.1   |
| 5.1    | 7.7   | 1.7    | 3.6    | 8.2    | 3.3    |
| 20.8   | 18.7  | 17.8   | 10.9   | 9.5    | 15.2   |
| 2.3    | 13.7  | 5.3    | 4.1    | 11.0   | 8.0    |
| 13.3   | 24.3  | 21.0   | 29.5   | 10.7   | 31.6   |
| 1.4    | 15.5  | 11.5   | 9.2    | 16.0   | 13.7   |
| 9.3    | 12.0  | 5.8    | 12.1   | 12.8   | 5.6    |
| 12.5   | 25.5  | 24.8   | 19.4   | 23.1   | 20.7   |
| 18.3   | 34.0  | 43.6   | 35.7   | 37.6   | 34.2   |
| 38.1   | 61.4  | 38.7   | 51.0   | 42.7   | 48.9   |
| 157.9  | 239.3 | 140.9  | 187.7  | 165.8  | 195.8  |
| 40.7   | 38.1  | 38.0   | 29.5   | 34.8   | 24.9   |
| 128.6  | 103.3 | 147.8  | 122.3  | 141.5  | 187.5  |
| 7.5    | 17.4  | 15.3   | 12.1   | 1.2    | 10.0   |
| 2.0    | 3.7   | 10.4   | 3.5    | 15.4   | 7.4    |
| 132.8  | 159.4 | 153.0  | 166.9  | 163.3  | 181.3  |
| 4.1    | 13.8  | 5.3    | 7.2    | 10.9   | 3.4    |
| 123.5  | 121.5 | 134.6  | 133.1  | 157.6  | 161.8  |
| 18.3   | 16.2  | 25.6   | 17.2   | 27.3   | 24.7   |
| 12.3   | 9.1   | 17.2   | 11.0   | 17.3   | 8.0    |
| 5.7    | 0.8   | 1.1    | 1.7    | 0.8    | 3.9    |
| 4.9    | 2.1   | 3.0    | 1.7    | 2.6    | 3.8    |
| 499.6  | 508.3 | 507.8  | 501.9  | 522.9  | 557.8  |
| 39.8   | 37.8  | 42.3   | 34.9   | 45.7   | 52.2   |
| 300.3  | 272.2 | 294.8  | 266.2  | 331.9  | 390.2  |
| 25.9   | 27.4  | 24.8   | 32.7   | 21.3   | 29.4   |
| 10.2   | 2.8   | 2.7    | 2.6    | 1.9    | 2.3    |
| 2.3    | 11.8  | 9.0    | 2.2    | 2.6    | 2.0    |

|       |       |       |       |        |        |
|-------|-------|-------|-------|--------|--------|
| 4.8   | 6.0   | 11.1  | 1.2   | 2.8    | 2.2    |
| 2.1   | 10.4  | 4.4   | 3.1   | 1.6    | 5.4    |
| 12.2  | 9.2   | 6.6   | 3.5   | 9.2    | 8.2    |
| 19.1  | 5.6   | 27.4  | 21.3  | 41.5   | 31.6   |
| 2.2   | 24.2  | 2.6   | 8.6   | 3.6    | 9.9    |
| 110.6 | 141.2 | 115.0 | 133.3 | 121.0  | 140.4  |
| 53.0  | 75.5  | 78.2  | 68.4  | 83.1   | 79.3   |
| 1.9   | 1.7   | 2.3   | 5.9   | 2.4    | 2.5    |
| 1.7   | 1.5   | 1.1   | 1.3   | 1.9    | 2.6    |
| 3.6   | 15.0  | 3.1   | 6.4   | 10.7   | 12.3   |
| 45.0  | 48.7  | 55.3  | 44.0  | 34.6   | 44.4   |
| 1.2   | 0.6   | 5.7   | 2.8   | 2.5    | 1.0    |
| 35.1  | 23.1  | 41.7  | 31.1  | 37.5   | 38.1   |
| 15.1  | 14.4  | 2.3   | 9.5   | 8.3    | 9.7    |
| 5.5   | 2.2   | 3.7   | 1.7   | 4.5    | 2.6    |
| 2.0   | 0.9   | 4.2   | 2.5   | 4.2    | 1.6    |
| 2.4   | 1.7   | 6.7   | 5.5   | 3.2    | 3.5    |
| 12.5  | 21.3  | 7.0   | 9.0   | 9.6    | 10.5   |
| 1.7   | 0.9   | 1.6   | 1.8   | 4.9    | 9.2    |
| 2.2   | 2.1   | 2.2   | 2.9   | 2.8    | 1.2    |
| 164.6 | 102.4 | 127.3 | 156.6 | 226.5  | 234.1  |
| 97.9  | 84.0  | 95.8  | 103.8 | 106.5  | 116.6  |
| 14.5  | 11.5  | 22.7  | 18.0  | 18.7   | 18.7   |
| 28.3  | 27.2  | 27.3  | 21.2  | 28.6   | 31.4   |
| 12.8  | 7.0   | 14.8  | 8.7   | 14.8   | 10.5   |
| 4.3   | 4.6   | 12.2  | 2.9   | 9.8    | 12.4   |
| 1.8   | 3.1   | 5.0   | 0.8   | 5.9    | 2.8    |
| 13.3  | 11.9  | 2.7   | 11.5  | 4.0    | 14.1   |
| 18.3  | 11.6  | 14.5  | 6.5   | 32.7   | 22.4   |
| 9.2   | 13.6  | 8.7   | 3.8   | 12.8   | 11.3   |
| 7.1   | 14.1  | 10.5  | 1.9   | 13.2   | 5.4    |
| 4.8   | 1.6   | 0.9   | 1.8   | 2.9    | 4.8    |
| 10.3  | 0.7   | 6.3   | 6.1   | 6.7    | 11.4   |
| 426.6 | 450.7 | 523.8 | 507.0 | 536.8  | 548.4  |
| 10.1  | 3.9   | 6.0   | 13.2  | 11.3   | 12.0   |
| 3.8   | 3.4   | 12.2  | 5.2   | 1.8    | 6.9    |
| 1.9   | 1.8   | 1.8   | 1.6   | 1.7    | 1.8    |
| 64.4  | 43.4  | 49.6  | 62.8  | 69.5   | 81.0   |
| 78.5  | 79.3  | 91.8  | 97.8  | 91.7   | 93.1   |
| 34.3  | 19.7  | 31.0  | 33.1  | 33.8   | 44.8   |
| 9.0   | 6.4   | 2.6   | 5.4   | 6.7    | 1.7    |
| 10.4  | 8.6   | 11.1  | 4.0   | 9.5    | 3.9    |
| 3.8   | 0.9   | 0.8   | 2.7   | 0.8    | 0.5    |
| 1.1   | 14.0  | 1.8   | 9.1   | 5.4    | 1.6    |
| 3.7   | 0.8   | 5.3   | 7.5   | 2.5    | 10.3   |
| 2.6   | 1.7   | 1.5   | 1.7   | 1.7    | 2.4    |
| 21.1  | 11.7  | 21.0  | 23.6  | 11.7   | 14.4   |
| 3.9   | 3.2   | 2.6   | 9.7   | 1.7    | 2.2    |
| 16.0  | 13.3  | 16.5  | 12.4  | 13.8   | 11.1   |
| 39.1  | 42.0  | 39.4  | 38.3  | 42.8   | 66.3   |
| 1.8   | 2.2   | 5.6   | 2.4   | 3.0    | 2.1    |
| 992.9 | 911.2 | 957.4 | 949.6 | 1087.0 | 1254.8 |
| 382.5 | 277.7 | 349.8 | 394.0 | 445.5  | 543.0  |

|        |       |        |        |        |        |
|--------|-------|--------|--------|--------|--------|
| 6.2    | 2.7   | 4.8    | 2.9    | 2.7    | 3.1    |
| 4.0    | 1.9   | 1.0    | 2.9    | 7.5    | 3.9    |
| 8.8    | 12.5  | 14.6   | 7.5    | 8.7    | 14.5   |
| 250.3  | 341.2 | 250.6  | 329.8  | 270.1  | 337.5  |
| 42.6   | 37.2  | 47.7   | 64.0   | 58.4   | 70.1   |
| 9.9    | 9.5   | 4.6    | 2.4    | 8.0    | 15.0   |
| 4.4    | 8.0   | 5.8    | 4.5    | 5.6    | 7.2    |
| 12.9   | 15.4  | 11.1   | 5.9    | 10.8   | 13.4   |
| 5.2    | 2.4   | 5.1    | 4.9    | 8.2    | 11.8   |
| 23.4   | 24.8  | 18.8   | 29.4   | 21.4   | 21.5   |
| 4.0    | 7.2   | 2.1    | 1.6    | 1.5    | 5.0    |
| 15.8   | 12.4  | 30.3   | 23.0   | 25.1   | 20.1   |
| 165.9  | 166.3 | 187.6  | 200.6  | 214.3  | 224.3  |
| 34.7   | 26.9  | 51.4   | 64.5   | 51.5   | 54.8   |
| 4.4    | 10.3  | 7.5    | 4.7    | 3.7    | 7.7    |
| 11.3   | 8.3   | 5.4    | 4.7    | 12.5   | 1.5    |
| 4.1    | 2.5   | 2.2    | 1.8    | 4.8    | 3.8    |
| 4.6    | 3.5   | 2.1    | 2.1    | 4.4    | 4.7    |
| 10.0   | 4.9   | 11.1   | 21.1   | 11.6   | 14.3   |
| 509.3  | 484.6 | 524.3  | 631.0  | 642.8  | 688.9  |
| 3.9    | 7.8   | 5.9    | 4.4    | 9.6    | 4.6    |
| 63.1   | 25.5  | 54.9   | 43.3   | 63.5   | 70.4   |
| 6.5    | 0.9   | 2.3    | 2.1    | 1.0    | 2.3    |
| 16.6   | 23.6  | 36.1   | 21.0   | 22.8   | 13.3   |
| 1.3    | 1.2   | 1.3    | 1.2    | 1.4    | 1.3    |
| 26.6   | 50.0  | 29.3   | 31.7   | 37.1   | 33.3   |
| 2.4    | 2.2   | 8.1    | 1.9    | 1.6    | 3.3    |
| 12.5   | 10.6  | 5.1    | 4.0    | 2.7    | 5.9    |
| 1169.5 | 910.0 | 1040.0 | 1123.1 | 1194.5 | 1419.6 |
| 1.9    | 1.4   | 1.5    | 1.4    | 1.4    | 4.5    |
| 5.9    | 8.7   | 12.4   | 7.4    | 10.6   | 5.1    |
| 113.3  | 93.6  | 120.2  | 109.3  | 148.4  | 133.6  |
| 0.7    | 7.2   | 1.3    | 3.8    | 4.5    | 2.3    |
| 1.5    | 8.2   | 2.5    | 8.2    | 8.7    | 5.1    |
| 4.7    | 2.2   | 9.5    | 2.2    | 3.5    | 3.5    |
| 19.3   | 22.8  | 28.0   | 20.6   | 33.0   | 40.6   |
| 4.9    | 8.8   | 3.8    | 1.3    | 2.0    | 2.5    |
| 3.4    | 8.3   | 7.2    | 11.0   | 9.0    | 1.7    |
| 205.9  | 186.3 | 247.7  | 229.8  | 239.4  | 258.1  |
| 23.4   | 18.4  | 30.3   | 30.3   | 28.7   | 28.0   |
| 3.6    | 4.4   | 6.5    | 3.1    | 5.6    | 4.7    |
| 25.7   | 19.7  | 19.4   | 21.1   | 16.6   | 23.0   |
| 0.3    | 2.7   | 3.3    | 3.2    | 2.5    | 0.3    |
| 33.8   | 38.3  | 30.5   | 32.8   | 35.4   | 37.8   |
| 91.4   | 71.8  | 78.2   | 93.0   | 105.8  | 119.8  |
| 2.6    | 1.0   | 1.1    | 0.8    | 0.9    | 1.1    |
| 14.0   | 5.7   | 10.3   | 13.8   | 7.2    | 9.5    |
| 102.0  | 101.8 | 127.5  | 111.1  | 137.4  | 110.6  |
| 116.2  | 96.9  | 115.4  | 115.4  | 134.2  | 132.5  |
| 21.4   | 25.8  | 39.4   | 25.3   | 27.2   | 32.5   |
| 5.1    | 7.6   | 6.8    | 4.8    | 6.3    | 8.8    |
| 11.6   | 6.1   | 7.5    | 11.3   | 10.9   | 12.2   |
| 8.0    | 16.5  | 13.4   | 5.0    | 8.7    | 9.2    |

|       |       |       |       |       |       |
|-------|-------|-------|-------|-------|-------|
| 81.4  | 72.1  | 47.0  | 75.2  | 88.2  | 97.6  |
| 11.0  | 2.9   | 12.8  | 3.4   | 4.9   | 3.2   |
| 7.0   | 2.3   | 4.1   | 1.6   | 3.9   | 3.9   |
| 31.6  | 37.9  | 39.8  | 27.8  | 44.4  | 37.3  |
| 7.0   | 29.7  | 10.0  | 29.5  | 20.7  | 34.7  |
| 8.4   | 10.1  | 5.1   | 6.3   | 5.9   | 6.8   |
| 776.0 | 770.1 | 784.7 | 803.9 | 827.7 | 951.1 |
| 740.6 | 596.2 | 652.7 | 696.9 | 881.9 | 911.2 |
| 12.4  | 7.9   | 1.3   | 7.5   | 3.2   | 0.9   |
| 11.8  | 1.1   | 10.8  | 6.8   | 10.2  | 22.5  |
| 1.9   | 5.9   | 6.2   | 2.4   | 2.7   | 7.4   |
| 6.1   | 11.5  | 2.9   | 2.6   | 3.4   | 3.8   |
| 1.5   | 1.7   | 2.1   | 1.8   | 1.1   | 1.5   |
| 3.7   | 10.6  | 3.6   | 2.5   | 0.5   | 3.9   |
| 4.5   | 4.9   | 13.7  | 14.3  | 17.5  | 26.7  |
| 6.6   | 15.2  | 7.1   | 5.1   | 5.7   | 2.9   |
| 162.7 | 157.9 | 161.1 | 178.0 | 149.5 | 187.4 |
| 6.6   | 6.8   | 13.4  | 2.9   | 11.1  | 6.4   |
| 40.4  | 7.8   | 34.9  | 29.8  | 45.8  | 54.8  |
| 439.2 | 454.6 | 500.7 | 503.5 | 546.1 | 548.4 |
| 109.5 | 128.1 | 133.4 | 106.2 | 132.2 | 134.9 |
| 0.6   | 4.1   | 3.4   | 2.3   | 2.9   | 3.2   |
| 41.0  | 37.9  | 45.2  | 36.7  | 44.1  | 45.0  |
| 0.8   | 1.4   | 1.1   | 1.6   | 1.0   | 1.1   |
| 14.1  | 2.2   | 11.3  | 12.9  | 16.9  | 12.4  |
| 55.6  | 48.5  | 54.8  | 39.7  | 47.1  | 42.2  |
| 217.7 | 248.6 | 258.2 | 260.5 | 273.1 | 291.8 |
| 2.1   | 1.6   | 1.3   | 1.3   | 3.1   | 2.0   |
| 684.3 | 304.9 | 501.7 | 547.6 | 720.7 | 774.3 |
| 11.3  | 15.2  | 8.5   | 5.7   | 9.2   | 10.0  |
| 2.9   | 2.0   | 3.3   | 1.7   | 3.4   | 2.8   |
| 10.3  | 14.2  | 18.0  | 14.1  | 12.3  | 9.5   |
| 14.8  | 20.2  | 5.0   | 9.4   | 3.9   | 13.5  |
| 20.7  | 8.7   | 20.5  | 22.5  | 26.5  | 26.0  |
| 1.1   | 2.4   | 2.6   | 1.8   | 1.5   | 1.1   |
| 0.5   | 0.4   | 0.9   | 0.8   | 0.4   | 0.5   |
| 1.9   | 0.9   | 1.3   | 2.3   | 1.7   | 1.2   |
| 11.3  | 5.0   | 4.7   | 1.5   | 18.2  | 3.6   |
| 50.5  | 52.8  | 50.3  | 57.8  | 43.8  | 68.4  |
| 51.0  | 45.6  | 54.1  | 49.3  | 38.5  | 35.9  |
| 73.7  | 59.4  | 88.1  | 92.1  | 101.3 | 105.2 |
| 9.6   | 7.7   | 6.0   | 1.3   | 9.5   | 2.4   |
| 2.8   | 3.1   | 3.8   | 4.3   | 3.6   | 3.2   |
| 3.7   | 11.5  | 8.8   | 13.0  | 17.1  | 4.0   |
| 15.7  | 30.8  | 27.8  | 25.9  | 32.0  | 34.4  |
| 3.4   | 4.2   | 5.2   | 3.2   | 3.0   | 4.4   |
| 94.9  | 67.6  | 95.2  | 89.2  | 112.1 | 108.2 |
| 3.8   | 5.4   | 9.0   | 8.1   | 2.6   | 3.4   |
| 102.9 | 78.3  | 114.1 | 98.1  | 109.5 | 114.5 |
| 2.7   | 2.0   | 5.6   | 1.8   | 1.3   | 3.2   |
| 11.7  | 3.1   | 9.7   | 12.5  | 2.7   | 6.0   |
| 2.3   | 14.0  | 8.1   | 5.6   | 6.8   | 7.9   |
| 30.1  | 25.1  | 21.8  | 23.7  | 40.6  | 32.1  |



|        |        |        |        |        |        |
|--------|--------|--------|--------|--------|--------|
| 13.2   | 4.3    | 7.0    | 5.1    | 5.0    | 4.2    |
| 79.3   | 81.4   | 92.4   | 94.0   | 113.3  | 120.9  |
| 108.4  | 93.6   | 106.8  | 83.1   | 118.6  | 124.3  |
| 4.3    | 3.9    | 3.5    | 2.9    | 4.7    | 1.9    |
| 318.0  | 347.5  | 288.3  | 339.1  | 343.1  | 413.2  |
| 6.8    | 1.1    | 1.1    | 5.0    | 1.1    | 2.8    |
| 28.7   | 34.6   | 36.7   | 37.5   | 39.2   | 34.5   |
| 21.1   | 16.4   | 19.0   | 18.3   | 19.2   | 14.0   |
| 1.8    | 1.3    | 1.0    | 0.5    | 0.8    | 5.1    |
| 34.1   | 35.8   | 18.9   | 8.6    | 28.2   | 30.6   |
| 8.1    | 9.1    | 4.9    | 4.5    | 12.8   | 12.8   |
| 34.6   | 22.5   | 43.9   | 45.2   | 25.8   | 58.0   |
| 1.7    | 1.8    | 3.0    | 0.8    | 1.1    | 1.1    |
| 11.3   | 10.3   | 7.0    | 9.3    | 4.8    | 1.6    |
| 4.4    | 4.0    | 6.6    | 3.8    | 5.6    | 3.9    |
| 8.7    | 7.7    | 15.7   | 10.2   | 8.2    | 9.3    |
| 3.9    | 6.9    | 7.4    | 6.7    | 6.1    | 8.4    |
| 6.3    | 10.2   | 11.9   | 15.9   | 2.5    | 7.8    |
| 0.9    | 1.1    | 1.0    | 1.9    | 2.7    | 1.5    |
| 15.3   | 14.7   | 26.7   | 22.2   | 10.1   | 13.2   |
| 5.3    | 6.7    | 5.8    | 4.0    | 3.7    | 4.2    |
| 209.0  | 186.2  | 187.1  | 210.9  | 226.9  | 223.7  |
| 6.1    | 0.4    | 9.3    | 12.0   | 10.5   | 9.0    |
| 9.6    | 6.8    | 8.6    | 2.5    | 2.4    | 8.5    |
| 4.7    | 6.8    | 8.7    | 1.2    | 5.6    | 5.5    |
| 183.8  | 187.2  | 203.6  | 182.4  | 201.7  | 191.3  |
| 17.4   | 18.0   | 13.8   | 22.2   | 15.6   | 8.4    |
| 44.7   | 18.6   | 43.8   | 50.0   | 58.2   | 42.4   |
| 184.5  | 181.3  | 214.0  | 226.6  | 228.7  | 225.6  |
| 3.0    | 6.2    | 0.4    | 2.8    | 2.9    | 3.8    |
| 5.5    | 1.9    | 7.8    | 8.6    | 10.5   | 15.6   |
| 1099.5 | 1005.4 | 1154.4 | 1277.3 | 1386.5 | 1427.9 |
| 2.8    | 8.8    | 5.8    | 1.8    | 4.8    | 3.1    |
| 65.0   | 72.3   | 57.1   | 49.8   | 66.4   | 68.9   |
| 3.2    | 5.1    | 3.2    | 2.5    | 2.6    | 3.2    |
| 3048.8 | 2758.1 | 3469.9 | 3529.9 | 3470.4 | 3462.2 |
| 2.6    | 1.7    | 8.3    | 4.1    | 2.5    | 6.5    |
| 11.4   | 4.3    | 1.2    | 7.0    | 3.6    | 8.0    |
| 95.7   | 112.0  | 71.8   | 108.1  | 96.1   | 112.8  |
| 12.0   | 11.9   | 7.1    | 3.4    | 12.4   | 10.3   |
| 1.8    | 2.0    | 3.1    | 3.4    | 2.7    | 10.6   |
| 181.7  | 161.5  | 137.3  | 184.5  | 188.0  | 216.9  |
| 245.3  | 221.9  | 244.8  | 282.6  | 291.0  | 278.5  |
| 66.5   | 41.9   | 73.5   | 60.2   | 62.2   | 51.3   |
| 8.3    | 0.8    | 11.7   | 7.1    | 13.1   | 6.3    |
| 12.3   | 33.7   | 26.1   | 34.5   | 24.9   | 15.6   |
| 5.5    | 0.6    | 1.6    | 2.4    | 2.1    | 1.6    |
| 9.0    | 12.3   | 14.5   | 11.5   | 9.8    | 5.4    |
| 8.4    | 4.4    | 6.1    | 4.6    | 5.1    | 4.7    |
| 10.2   | 7.4    | 11.7   | 13.7   | 4.7    | 17.3   |
| 49.1   | 81.2   | 64.5   | 44.0   | 55.0   | 66.6   |
| 1214.6 | 1386.1 | 1580.1 | 1649.1 | 1614.3 | 1973.5 |
| 13.8   | 11.4   | 10.1   | 7.0    | 17.4   | 10.1   |

|       |       |        |        |        |        |
|-------|-------|--------|--------|--------|--------|
| 113.5 | 83.6  | 95.0   | 93.5   | 116.7  | 113.5  |
| 6.7   | 8.8   | 5.7    | 8.1    | 3.5    | 8.6    |
| 2.4   | 9.3   | 6.5    | 1.8    | 1.5    | 4.4    |
| 5.5   | 0.9   | 10.4   | 7.6    | 6.1    | 9.7    |
| 47.5  | 50.9  | 46.2   | 69.2   | 59.9   | 49.2   |
| 428.7 | 530.7 | 412.1  | 470.1  | 470.8  | 544.3  |
| 157.8 | 130.6 | 190.9  | 166.1  | 179.6  | 210.7  |
| 1.2   | 0.6   | 2.4    | 2.0    | 9.6    | 7.4    |
| 8.6   | 5.3   | 2.8    | 5.3    | 10.6   | 17.4   |
| 83.7  | 62.5  | 103.1  | 78.7   | 119.3  | 97.9   |
| 204.2 | 209.0 | 203.7  | 234.5  | 231.0  | 256.8  |
| 47.7  | 49.1  | 58.6   | 59.4   | 54.7   | 67.7   |
| 1.3   | 2.1   | 1.3    | 1.8    | 3.8    | 2.4    |
| 1.0   | 0.5   | 0.5    | 1.4    | 1.1    | 1.2    |
| 23.3  | 23.0  | 36.6   | 13.0   | 47.4   | 32.1   |
| 13.2  | 21.8  | 19.3   | 7.2    | 9.7    | 12.4   |
| 3.6   | 6.1   | 5.2    | 4.9    | 2.2    | 2.7    |
| 1.7   | 3.7   | 3.0    | 1.6    | 2.3    | 2.7    |
| 8.3   | 15.6  | 1.0    | 11.3   | 14.0   | 15.3   |
| 0.9   | 1.6   | 1.5    | 1.0    | 1.2    | 0.8    |
| 34.5  | 41.7  | 32.2   | 29.9   | 28.3   | 25.6   |
| 2.8   | 5.0   | 4.3    | 2.6    | 7.7    | 3.2    |
| 13.7  | 8.3   | 11.4   | 26.8   | 19.9   | 21.8   |
| 1.6   | 14.6  | 5.4    | 14.0   | 11.7   | 5.6    |
| 3.3   | 12.9  | 7.3    | 8.5    | 18.1   | 13.7   |
| 7.9   | 1.2   | 6.6    | 1.5    | 13.5   | 13.9   |
| 1.8   | 0.6   | 2.7    | 4.3    | 2.3    | 2.9    |
| 2.3   | 1.1   | 1.6    | 5.6    | 7.1    | 13.5   |
| 617.3 | 564.7 | 685.0  | 692.8  | 761.9  | 779.1  |
| 11.1  | 14.1  | 14.8   | 15.5   | 18.3   | 14.5   |
| 6.4   | 14.4  | 16.7   | 12.5   | 16.3   | 13.4   |
| 1.5   | 1.2   | 1.8    | 1.7    | 3.6    | 2.8    |
| 133.6 | 123.8 | 117.1  | 121.8  | 123.1  | 160.7  |
| 1.3   | 0.7   | 2.2    | 4.6    | 1.0    | 0.8    |
| 49.8  | 57.6  | 54.7   | 56.9   | 41.9   | 67.1   |
| 135.8 | 134.7 | 157.6  | 147.5  | 150.0  | 158.1  |
| 708.2 | 650.5 | 633.1  | 598.5  | 603.4  | 725.0  |
| 80.2  | 68.1  | 61.0   | 51.4   | 76.0   | 76.8   |
| 54.1  | 107.0 | 63.5   | 92.4   | 57.0   | 84.1   |
| 4.9   | 3.0   | 3.5    | 4.7    | 11.9   | 7.4    |
| 43.4  | 67.5  | 61.5   | 61.9   | 43.0   | 74.2   |
| 4.5   | 1.6   | 1.8    | 3.4    | 4.8    | 7.6    |
| 0.4   | 3.7   | 0.1    | 3.2    | 3.9    | 0.9    |
| 49.9  | 41.7  | 68.6   | 59.7   | 68.3   | 71.6   |
| 23.8  | 17.0  | 32.2   | 25.1   | 28.5   | 40.2   |
| 844.4 | 792.8 | 1092.7 | 1009.5 | 1211.2 | 1289.7 |
| 8.6   | 6.2   | 26.9   | 5.5    | 14.6   | 26.3   |
| 16.4  | 12.1  | 9.8    | 9.2    | 18.3   | 14.6   |
| 11.9  | 11.5  | 18.5   | 12.2   | 19.3   | 5.2    |
| 4.8   | 8.9   | 7.9    | 5.1    | 8.1    | 8.4    |
| 350.8 | 223.7 | 292.8  | 302.6  | 386.7  | 427.0  |
| 8.8   | 4.8   | 3.8    | 3.1    | 4.4    | 3.2    |
| 3.2   | 12.4  | 4.9    | 3.0    | 6.8    | 7.2    |

|         |         |         |         |         |        |
|---------|---------|---------|---------|---------|--------|
| 26.7    | 24.9    | 18.4    | 21.6    | 38.1    | 17.7   |
| 3.4     | 24.4    | 3.4     | 8.1     | 10.5    | 15.0   |
| 5.3     | 1.0     | 9.3     | 1.1     | 1.8     | 6.7    |
| 3.9     | 0.4     | 2.8     | 2.5     | 3.1     | 2.5    |
| 38.3    | 40.1    | 35.9    | 36.7    | 37.6    | 35.6   |
| 38.8    | 25.2    | 57.2    | 42.9    | 37.7    | 47.7   |
| 9.3     | 0.9     | 0.9     | 1.0     | 1.6     | 1.2    |
| 36.8    | 32.3    | 14.9    | 24.8    | 40.2    | 43.8   |
| 13.7    | 32.4    | 7.3     | 11.2    | 14.1    | 24.8   |
| 8.8     | 3.8     | 6.2     | 11.1    | 9.5     | 12.4   |
| 1.5     | 1.0     | 2.7     | 2.1     | 1.2     | 1.0    |
| 53.7    | 38.1    | 62.2    | 60.6    | 68.0    | 78.5   |
| 0.6     | 2.2     | 1.9     | 4.9     | 5.7     | 0.7    |
| 12.5    | 11.2    | 14.9    | 12.4    | 12.2    | 23.9   |
| 53.3    | 49.3    | 55.3    | 58.9    | 64.2    | 66.6   |
| 19.6    | 9.1     | 21.7    | 9.8     | 13.6    | 14.4   |
| 47.5    | 36.0    | 40.7    | 57.7    | 30.6    | 59.2   |
| 34.0    | 68.4    | 53.9    | 59.5    | 62.7    | 74.0   |
| 4.5     | 13.4    | 6.5     | 5.6     | 1.9     | 9.9    |
| 0.4     | 1.0     | 1.1     | 2.8     | 0.9     | 1.0    |
| 70.3    | 71.0    | 61.8    | 76.8    | 73.0    | 85.7   |
| 54.9    | 43.3    | 35.0    | 21.3    | 34.5    | 41.4   |
| 33.1    | 24.5    | 34.9    | 34.0    | 25.0    | 36.9   |
| 6.6     | 7.3     | 5.8     | 10.3    | 6.7     | 10.4   |
| 35.9    | 28.5    | 24.5    | 29.6    | 28.9    | 38.8   |
| 2.1     | 1.3     | 2.9     | 5.3     | 3.0     | 3.4    |
| 383.8   | 324.2   | 388.6   | 373.6   | 362.6   | 453.3  |
| 17.2    | 10.5    | 13.5    | 9.5     | 11.3    | 20.0   |
| 239.0   | 198.3   | 223.7   | 227.6   | 259.2   | 275.7  |
| 11.9    | 9.5     | 13.7    | 5.2     | 7.5     | 6.9    |
| 4.9     | 5.8     | 3.2     | 7.3     | 2.8     | 8.0    |
| 76.4    | 56.5    | 93.5    | 66.1    | 104.5   | 107.7  |
| 5.8     | 6.1     | 0.7     | 0.8     | 6.8     | 6.7    |
| 21.9    | 26.3    | 16.6    | 25.3    | 24.2    | 24.1   |
| 495.0   | 433.8   | 557.5   | 534.2   | 581.7   | 607.5  |
| 97.8    | 78.5    | 98.7    | 98.9    | 120.0   | 124.3  |
| 773.8   | 1019.7  | 837.0   | 750.9   | 709.9   | 977.3  |
| 40.9    | 18.9    | 34.3    | 20.5    | 27.9    | 20.5   |
| 103.6   | 87.3    | 104.9   | 101.2   | 117.8   | 128.2  |
| 414.3   | 323.0   | 371.3   | 379.8   | 421.3   | 423.6  |
| 4.9     | 7.7     | 7.6     | 4.1     | 2.1     | 6.0    |
| 17.2    | 19.7    | 13.2    | 20.9    | 17.5    | 17.0   |
| 5.0     | 12.3    | 4.5     | 11.8    | 1.8     | 22.8   |
| 10521.3 | 10342.9 | 10722.7 | 10453.2 | 11461.3 | 9985.4 |
| 2179.8  | 2318.3  | 2429.6  | 2561.7  | 2470.9  | 2609.5 |
| 30.3    | 25.4    | 34.1    | 22.0    | 40.0    | 43.4   |
| 1654.4  | 1596.6  | 1965.1  | 1948.6  | 2122.8  | 2206.3 |
| 19.6    | 21.8    | 9.1     | 19.2    | 21.7    | 14.6   |
| 10.8    | 12.0    | 24.1    | 6.7     | 9.7     | 14.1   |
| 53.0    | 39.6    | 66.7    | 46.4    | 53.8    | 75.1   |
| 91.5    | 75.5    | 89.2    | 78.6    | 96.7    | 98.0   |
| 53.6    | 61.0    | 62.4    | 56.1    | 57.1    | 76.6   |
| 5.7     | 1.6     | 18.1    | 14.3    | 12.7    | 10.3   |

|        |        |        |        |        |        |
|--------|--------|--------|--------|--------|--------|
| 2129.7 | 2707.6 | 2208.9 | 2291.9 | 2391.9 | 2701.6 |
| 17.9   | 31.0   | 11.2   | 9.2    | 10.3   | 27.1   |
| 239.7  | 205.4  | 257.0  | 270.6  | 253.0  | 283.4  |
| 222.3  | 109.7  | 149.2  | 173.0  | 202.0  | 267.5  |
| 19.2   | 13.9   | 16.0   | 18.6   | 14.9   | 22.0   |
| 17.7   | 19.2   | 24.3   | 16.2   | 21.6   | 20.9   |
| 7.8    | 6.7    | 11.4   | 16.6   | 3.0    | 2.6    |
| 16.5   | 35.3   | 21.2   | 12.9   | 11.9   | 20.1   |
| 1.2    | 1.3    | 7.6    | 1.6    | 0.7    | 0.5    |
| 159.4  | 203.6  | 184.5  | 214.8  | 245.2  | 232.1  |
| 25.3   | 18.3   | 22.9   | 24.4   | 32.4   | 33.6   |
| 34.9   | 45.0   | 42.2   | 39.7   | 39.1   | 43.5   |
| 19.9   | 11.0   | 16.2   | 12.6   | 18.5   | 15.6   |
| 98.0   | 100.2  | 131.4  | 97.8   | 126.6  | 123.4  |
| 200.3  | 167.4  | 171.8  | 171.8  | 182.7  | 224.2  |
| 65.6   | 40.4   | 48.2   | 65.1   | 61.3   | 64.5   |
| 6.3    | 12.9   | 19.8   | 16.1   | 7.6    | 13.2   |
| 27.3   | 27.3   | 29.8   | 18.8   | 29.5   | 32.9   |
| 42.7   | 39.8   | 32.8   | 41.2   | 30.0   | 37.5   |
| 7.4    | 1.0    | 9.2    | 2.3    | 5.1    | 5.7    |
| 9.8    | 6.4    | 5.5    | 1.6    | 7.1    | 8.0    |
| 34.2   | 58.4   | 54.1   | 48.8   | 29.7   | 40.9   |
| 5.8    | 7.3    | 12.4   | 9.7    | 8.0    | 14.7   |
| 656.0  | 699.8  | 682.0  | 723.7  | 795.6  | 825.6  |
| 141.9  | 142.9  | 164.3  | 166.3  | 173.3  | 172.5  |
| 14.9   | 16.1   | 18.2   | 26.5   | 16.6   | 18.8   |
| 13.0   | 10.8   | 10.4   | 14.6   | 10.8   | 11.4   |
| 10.2   | 3.4    | 6.3    | 4.1    | 2.4    | 2.7    |
| 8.8    | 2.6    | 5.9    | 2.3    | 4.1    | 8.1    |
| 1.3    | 0.7    | 2.7    | 3.4    | 2.0    | 1.3    |
| 69.6   | 65.9   | 60.6   | 74.2   | 76.5   | 73.3   |
| 148.2  | 126.1  | 130.7  | 199.0  | 183.5  | 197.9  |
| 9.5    | 15.4   | 10.0   | 2.2    | 10.6   | 3.2    |
| 1.5    | 2.2    | 3.7    | 1.3    | 3.4    | 2.4    |
| 2.4    | 10.1   | 9.9    | 2.6    | 1.3    | 1.8    |
| 9.1    | 4.1    | 20.5   | 14.3   | 14.8   | 19.1   |
| 3.0    | 1.5    | 2.7    | 3.9    | 11.0   | 8.4    |
| 1.5    | 2.0    | 1.7    | 1.7    | 1.3    | 6.5    |
| 47.4   | 33.6   | 36.0   | 42.4   | 39.8   | 60.1   |
| 15.2   | 15.9   | 6.1    | 24.3   | 16.9   | 19.9   |
| 19.2   | 10.6   | 24.2   | 5.5    | 20.5   | 22.1   |
| 7.8    | 12.7   | 8.2    | 8.5    | 10.1   | 7.9    |
| 37.2   | 30.4   | 30.5   | 30.3   | 32.9   | 47.9   |
| 4.9    | 2.2    | 16.2   | 3.9    | 7.9    | 18.8   |
| 175.4  | 196.5  | 161.7  | 176.7  | 159.4  | 207.2  |
| 9.1    | 17.3   | 14.5   | 4.3    | 7.3    | 19.0   |
| 21.7   | 18.8   | 24.0   | 16.7   | 18.8   | 26.0   |
| 9.2    | 5.5    | 9.1    | 2.4    | 2.8    | 2.0    |
| 6.1    | 1.4    | 4.4    | 1.9    | 2.2    | 1.8    |
| 10.6   | 12.2   | 10.4   | 11.3   | 12.0   | 6.2    |
| 8.3    | 7.3    | 3.9    | 1.5    | 3.7    | 1.3    |
| 1.4    | 8.4    | 14.2   | 8.8    | 9.7    | 3.7    |
| 2530.4 | 2264.5 | 2696.5 | 2669.5 | 2884.9 | 2939.7 |

|        |       |        |        |        |        |
|--------|-------|--------|--------|--------|--------|
| 6.5    | 6.6   | 12.1   | 14.0   | 15.7   | 3.2    |
| 16.6   | 15.3  | 18.1   | 10.5   | 14.5   | 14.9   |
| 0.6    | 0.3   | 1.2    | 0.7    | 1.8    | 1.8    |
| 12.7   | 36.4  | 4.0    | 21.3   | 14.1   | 6.1    |
| 296.1  | 293.4 | 321.9  | 269.7  | 350.8  | 371.6  |
| 14.1   | 4.1   | 7.6    | 3.7    | 10.0   | 15.4   |
| 13.8   | 16.4  | 7.9    | 9.2    | 11.4   | 11.7   |
| 1.2    | 0.7   | 1.0    | 1.3    | 2.3    | 1.4    |
| 10.9   | 5.8   | 24.8   | 12.7   | 15.5   | 24.4   |
| 9.2    | 1.5   | 5.4    | 2.2    | 4.0    | 5.8    |
| 1125.7 | 924.7 | 1094.3 | 1077.0 | 1131.3 | 1312.1 |
| 8.8    | 0.4   | 1.9    | 9.4    | 1.1    | 1.8    |
| 11.3   | 6.1   | 5.6    | 1.1    | 7.1    | 2.2    |
| 31.5   | 24.4  | 46.4   | 14.5   | 29.8   | 53.3   |
| 48.9   | 60.4  | 35.9   | 45.6   | 45.6   | 55.6   |
| 4.1    | 9.5   | 3.2    | 9.1    | 10.3   | 5.0    |
| 2.5    | 6.7   | 1.1    | 6.2    | 3.4    | 5.9    |
| 5.7    | 5.9   | 9.5    | 5.2    | 8.1    | 5.5    |
| 500.0  | 440.8 | 545.5  | 578.8  | 604.8  | 645.2  |
| 2.8    | 0.8   | 1.7    | 1.2    | 1.9    | 1.6    |
| 2.6    | 1.2   | 3.3    | 4.1    | 4.0    | 1.2    |
| 5.4    | 8.9   | 10.1   | 2.6    | 9.6    | 11.5   |
| 8.7    | 7.8   | 11.3   | 11.4   | 11.2   | 14.9   |
| 23.2   | 12.2  | 12.0   | 16.2   | 18.4   | 20.3   |
| 6.7    | 2.3   | 8.1    | 5.6    | 2.9    | 15.2   |
| 0.7    | 1.4   | 1.0    | 0.9    | 0.9    | 1.6    |
| 17.7   | 23.8  | 24.9   | 21.5   | 36.3   | 27.4   |
| 154.3  | 162.3 | 158.2  | 162.7  | 200.1  | 219.6  |
| 27.8   | 31.3  | 35.8   | 27.2   | 41.1   | 54.1   |
| 9.0    | 9.2   | 7.2    | 9.9    | 14.5   | 8.5    |
| 63.1   | 57.3  | 54.6   | 53.1   | 56.0   | 72.3   |
| 190.2  | 294.2 | 197.3  | 238.0  | 213.9  | 254.4  |
| 94.2   | 141.2 | 113.4  | 106.5  | 99.8   | 138.2  |
| 6.5    | 4.3   | 13.4   | 7.4    | 9.7    | 13.2   |
| 1025.1 | 938.9 | 1149.5 | 1139.2 | 1286.8 | 1351.4 |
| 5.5    | 5.1   | 3.6    | 6.4    | 2.8    | 4.9    |
| 6.5    | 11.6  | 15.5   | 6.2    | 13.0   | 2.8    |
| 39.9   | 32.8  | 40.6   | 33.4   | 41.1   | 57.8   |
| 13.6   | 3.8   | 2.8    | 3.0    | 10.4   | 6.4    |
| 29.0   | 22.5  | 24.8   | 27.1   | 25.2   | 28.6   |
| 485.3  | 594.6 | 445.6  | 636.6  | 367.9  | 534.9  |
| 18.0   | 3.5   | 18.6   | 19.3   | 18.9   | 15.9   |
| 3.2    | 3.2   | 1.6    | 3.4    | 2.6    | 0.5    |
| 111.1  | 118.1 | 102.0  | 110.7  | 133.0  | 138.8  |
| 18.4   | 20.0  | 3.3    | 13.4   | 16.3   | 4.0    |
| 140.0  | 115.4 | 143.2  | 157.7  | 159.7  | 167.6  |
| 130.2  | 102.0 | 132.5  | 133.9  | 118.2  | 153.0  |
| 95.1   | 54.8  | 91.1   | 106.4  | 118.6  | 115.1  |
| 92.6   | 73.7  | 93.5   | 108.1  | 95.4   | 101.3  |
| 4.0    | 22.0  | 17.4   | 9.4    | 8.5    | 8.6    |
| 22.2   | 33.4  | 28.5   | 18.3   | 26.8   | 35.0   |
| 121.0  | 107.4 | 104.8  | 101.4  | 133.3  | 133.0  |
| 12.1   | 3.1   | 16.2   | 18.2   | 1.9    | 9.3    |

|       |       |       |       |       |       |
|-------|-------|-------|-------|-------|-------|
| 23.5  | 28.3  | 21.3  | 24.5  | 24.2  | 30.0  |
| 1.2   | 0.9   | 5.8   | 1.1   | 3.4   | 3.3   |
| 12.3  | 11.5  | 10.0  | 7.1   | 8.1   | 10.9  |
| 0.9   | 1.4   | 1.3   | 4.2   | 3.8   | 3.3   |
| 11.5  | 13.9  | 17.0  | 7.2   | 15.2  | 24.1  |
| 2.6   | 2.2   | 3.5   | 1.4   | 3.0   | 2.1   |
| 9.1   | 1.2   | 8.9   | 8.1   | 3.1   | 16.0  |
| 8.3   | 1.3   | 14.0  | 2.2   | 9.8   | 2.2   |
| 22.5  | 17.3  | 14.3  | 16.6  | 14.1  | 21.3  |
| 20.0  | 11.7  | 25.5  | 20.8  | 23.8  | 27.1  |
| 36.2  | 22.4  | 39.9  | 22.9  | 39.3  | 33.6  |
| 62.4  | 79.6  | 62.6  | 90.1  | 84.4  | 88.7  |
| 26.2  | 30.1  | 33.2  | 25.6  | 31.6  | 40.5  |
| 450.8 | 449.1 | 455.3 | 523.3 | 542.5 | 529.6 |
| 257.2 | 222.1 | 276.8 | 295.8 | 302.0 | 321.0 |
| 22.2  | 16.9  | 11.6  | 9.8   | 16.8  | 8.9   |
| 4.7   | 14.9  | 15.4  | 1.9   | 11.4  | 7.5   |
| 4.1   | 4.5   | 7.2   | 2.8   | 1.3   | 4.3   |
| 83.3  | 103.4 | 74.6  | 99.9  | 80.3  | 102.4 |
| 4.6   | 12.2  | 8.0   | 5.2   | 2.9   | 6.1   |
| 166.0 | 174.1 | 180.9 | 142.9 | 153.5 | 202.7 |
| 2.0   | 0.6   | 7.1   | 2.5   | 1.0   | 3.7   |
| 16.7  | 4.8   | 6.0   | 16.8  | 9.9   | 10.7  |
| 20.5  | 28.8  | 31.7  | 41.7  | 30.6  | 28.4  |
| 4.0   | 4.1   | 19.9  | 5.2   | 17.8  | 26.1  |
| 10.8  | 13.0  | 14.9  | 6.5   | 7.4   | 18.2  |
| 140.5 | 150.7 | 143.9 | 170.3 | 159.5 | 169.4 |
| 32.7  | 15.6  | 21.8  | 24.7  | 28.6  | 26.8  |
| 71.2  | 56.8  | 98.7  | 64.9  | 104.7 | 90.6  |
| 42.4  | 18.1  | 24.4  | 35.3  | 33.9  | 27.3  |
| 4.1   | 10.3  | 6.6   | 9.6   | 10.6  | 9.3   |
| 16.9  | 28.2  | 14.2  | 23.6  | 11.8  | 13.6  |
| 21.4  | 21.7  | 18.1  | 16.2  | 21.7  | 20.5  |
| 40.2  | 52.7  | 56.3  | 55.0  | 49.1  | 46.4  |
| 19.8  | 26.2  | 15.3  | 8.1   | 15.2  | 18.8  |
| 2.2   | 2.4   | 0.8   | 3.4   | 1.2   | 1.1   |
| 4.1   | 0.9   | 1.4   | 1.2   | 1.5   | 1.6   |
| 7.9   | 2.5   | 3.2   | 12.6  | 14.9  | 1.9   |
| 8.7   | 9.5   | 6.9   | 12.6  | 8.0   | 15.4  |
| 11.7  | 3.0   | 6.5   | 7.1   | 16.5  | 12.5  |
| 4.5   | 13.7  | 11.9  | 3.3   | 7.8   | 10.0  |
| 3.1   | 8.6   | 6.3   | 2.4   | 7.3   | 2.9   |
| 1.1   | 0.9   | 2.6   | 1.4   | 0.7   | 1.8   |
| 19.2  | 22.6  | 24.9  | 29.3  | 24.1  | 19.2  |
| 6.8   | 14.5  | 15.6  | 18.0  | 16.6  | 14.5  |
| 10.7  | 16.7  | 16.8  | 8.6   | 17.9  | 10.5  |
| 33.3  | 30.9  | 48.9  | 42.3  | 49.1  | 59.2  |
| 13.5  | 13.3  | 19.1  | 25.8  | 33.3  | 27.3  |
| 31.3  | 3.9   | 30.7  | 12.7  | 26.8  | 28.4  |
| 105.3 | 96.1  | 90.3  | 95.7  | 140.7 | 89.8  |
| 9.5   | 12.6  | 9.7   | 5.3   | 10.1  | 10.0  |
| 4.8   | 2.7   | 12.0  | 1.3   | 5.7   | 1.5   |
| 5.9   | 6.5   | 2.6   | 6.3   | 7.1   | 4.9   |

|       |       |       |       |       |       |
|-------|-------|-------|-------|-------|-------|
| 3.4   | 1.9   | 2.8   | 2.2   | 3.7   | 3.6   |
| 21.6  | 18.9  | 23.6  | 15.7  | 24.9  | 21.5  |
| 0.7   | 8.6   | 4.6   | 2.8   | 2.0   | 0.6   |
| 5.3   | 5.4   | 5.4   | 12.2  | 10.2  | 9.5   |
| 2.9   | 1.7   | 12.0  | 4.1   | 4.4   | 7.9   |
| 15.2  | 21.2  | 12.2  | 13.4  | 13.5  | 9.4   |
| 206.6 | 173.9 | 204.6 | 252.4 | 192.6 | 251.0 |
| 8.2   | 15.4  | 18.9  | 14.5  | 16.0  | 8.4   |
| 6.0   | 15.7  | 9.7   | 10.6  | 5.7   | 3.4   |
| 1.3   | 2.8   | 1.5   | 1.6   | 1.1   | 1.8   |
| 26.3  | 23.9  | 22.2  | 19.1  | 27.3  | 31.7  |
| 99.4  | 80.7  | 76.8  | 83.0  | 98.1  | 120.0 |
| 2.0   | 12.5  | 7.3   | 7.9   | 8.1   | 2.4   |
| 80.6  | 48.1  | 62.4  | 66.8  | 99.4  | 93.1  |
| 6.8   | 17.6  | 16.5  | 7.3   | 18.8  | 9.1   |
| 9.3   | 20.5  | 5.7   | 4.2   | 7.3   | 1.7   |
| 30.6  | 19.6  | 34.0  | 30.7  | 33.4  | 38.9  |
| 113.5 | 123.5 | 141.0 | 123.0 | 136.0 | 130.9 |
| 23.6  | 46.2  | 27.0  | 41.0  | 29.8  | 45.4  |
| 33.9  | 44.6  | 38.4  | 38.5  | 40.3  | 52.9  |
| 241.8 | 207.0 | 235.5 | 227.3 | 275.4 | 296.7 |
| 6.2   | 9.0   | 1.8   | 7.4   | 14.3  | 7.2   |
| 37.2  | 18.0  | 29.4  | 33.4  | 32.4  | 30.1  |
| 25.4  | 17.5  | 27.8  | 19.8  | 41.4  | 38.5  |
| 55.3  | 40.5  | 56.6  | 53.9  | 56.9  | 67.5  |
| 3.1   | 1.1   | 8.4   | 5.4   | 9.4   | 7.1   |
| 3.4   | 0.9   | 1.2   | 1.0   | 5.9   | 1.2   |
| 16.7  | 27.3  | 2.7   | 7.8   | 13.5  | 10.5  |
| 75.8  | 95.7  | 85.4  | 93.2  | 105.1 | 104.2 |
| 3.6   | 7.7   | 1.2   | 3.9   | 4.3   | 7.4   |
| 11.8  | 4.9   | 12.6  | 2.9   | 16.7  | 27.8  |
| 1.4   | 0.9   | 1.4   | 1.4   | 1.4   | 4.9   |
| 1.1   | 1.6   | 1.3   | 0.9   | 1.3   | 1.0   |
| 253.5 | 235.8 | 323.1 | 307.1 | 319.1 | 387.8 |
| 1.9   | 1.2   | 1.2   | 3.8   | 2.6   | 0.8   |
| 15.5  | 25.6  | 19.9  | 11.4  | 11.7  | 23.7  |
| 20.2  | 45.6  | 29.0  | 36.1  | 65.5  | 39.9  |
| 21.6  | 21.4  | 25.0  | 18.3  | 30.4  | 28.4  |
| 28.6  | 30.9  | 19.5  | 22.3  | 36.0  | 21.0  |
| 79.5  | 41.8  | 71.2  | 57.2  | 62.3  | 72.0  |
| 6.9   | 10.4  | 4.2   | 15.4  | 3.0   | 6.1   |
| 12.3  | 19.2  | 17.8  | 12.0  | 4.4   | 24.0  |
| 365.4 | 324.9 | 387.4 | 391.5 | 392.6 | 486.8 |
| 2.0   | 2.0   | 2.0   | 1.3   | 1.2   | 1.4   |
| 8.8   | 6.9   | 10.4  | 12.1  | 6.7   | 2.6   |
| 14.2  | 14.9  | 6.3   | 7.1   | 8.1   | 12.5  |
| 9.4   | 19.0  | 3.8   | 8.6   | 3.2   | 14.4  |
| 4.1   | 4.1   | 4.8   | 5.6   | 4.2   | 3.5   |
| 11.9  | 21.5  | 9.2   | 7.4   | 13.3  | 17.3  |
| 47.2  | 39.2  | 45.3  | 41.9  | 56.8  | 53.9  |
| 2.8   | 3.5   | 4.4   | 4.9   | 4.3   | 4.4   |
| 2.8   | 1.8   | 4.0   | 1.7   | 3.3   | 9.2   |
| 10.4  | 18.9  | 8.2   | 4.9   | 6.1   | 15.5  |

|        |        |        |        |        |        |
|--------|--------|--------|--------|--------|--------|
| 16.2   | 22.9   | 14.8   | 5.2    | 17.1   | 18.6   |
| 98.6   | 73.6   | 86.8   | 100.7  | 97.1   | 102.0  |
| 16.5   | 14.5   | 18.5   | 15.0   | 22.1   | 22.5   |
| 2.5    | 3.3    | 4.9    | 3.0    | 3.8    | 4.0    |
| 12.5   | 3.5    | 7.1    | 7.0    | 16.2   | 17.4   |
| 0.5    | 0.2    | 1.0    | 0.4    | 0.2    | 0.7    |
| 5.0    | 1.2    | 1.1    | 2.9    | 5.6    | 10.6   |
| 544.7  | 586.1  | 553.5  | 614.9  | 688.1  | 673.3  |
| 58.7   | 78.9   | 87.7   | 87.5   | 88.9   | 90.6   |
| 2836.1 | 2791.9 | 2938.5 | 3402.9 | 3435.3 | 3302.0 |
| 42.5   | 42.9   | 40.9   | 46.2   | 43.1   | 52.9   |
| 318.2  | 257.5  | 287.5  | 345.5  | 353.7  | 396.4  |
| 11.7   | 17.2   | 8.8    | 22.0   | 19.5   | 22.4   |
| 4.0    | 5.7    | 6.1    | 7.8    | 2.2    | 8.2    |
| 1.9    | 12.2   | 7.8    | 1.1    | 2.4    | 6.7    |
| 5.3    | 1.0    | 14.4   | 3.6    | 2.2    | 3.9    |
| 3.0    | 8.9    | 1.5    | 2.0    | 2.1    | 6.1    |
| 15.5   | 10.7   | 5.6    | 7.9    | 12.3   | 25.5   |
| 7.3    | 0.8    | 4.7    | 1.2    | 2.6    | 0.7    |
| 20.5   | 4.7    | 35.7   | 19.6   | 19.1   | 17.9   |
| 15.2   | 12.7   | 3.9    | 15.4   | 10.4   | 10.3   |
| 2.5    | 1.5    | 6.8    | 9.0    | 4.1    | 16.2   |
| 1.3    | 3.3    | 2.5    | 3.8    | 3.4    | 3.6    |
| 3.6    | 3.6    | 2.4    | 4.1    | 5.3    | 4.4    |
| 76.7   | 87.4   | 83.1   | 95.4   | 103.9  | 109.5  |
| 9.2    | 14.7   | 11.1   | 6.7    | 1.2    | 11.8   |
| 30.7   | 12.7   | 22.6   | 39.2   | 28.1   | 30.2   |
| 29.8   | 34.1   | 28.4   | 29.8   | 17.6   | 32.4   |
| 687.7  | 598.1  | 671.0  | 723.3  | 733.9  | 790.5  |
| 7.4    | 7.8    | 5.0    | 7.1    | 4.9    | 5.6    |
| 17.0   | 7.7    | 8.6    | 5.5    | 2.1    | 5.8    |
| 7.5    | 8.9    | 2.0    | 1.6    | 7.1    | 4.3    |
| 7.1    | 3.2    | 4.5    | 2.3    | 2.7    | 13.8   |
| 13.5   | 4.4    | 2.6    | 12.1   | 3.4    | 17.8   |
| 2.4    | 1.7    | 1.3    | 1.4    | 1.0    | 2.5    |
| 2.0    | 24.1   | 17.7   | 21.6   | 17.6   | 19.0   |
| 3.7    | 2.1    | 3.6    | 3.2    | 8.4    | 9.1    |
| 55.7   | 44.1   | 55.5   | 58.2   | 71.4   | 65.5   |
| 7.8    | 2.1    | 6.2    | 11.6   | 7.2    | 8.4    |
| 2.7    | 1.8    | 3.3    | 2.2    | 2.8    | 2.2    |
| 34.3   | 40.4   | 46.6   | 41.3   | 44.3   | 58.6   |
| 7.1    | 14.3   | 1.2    | 6.0    | 12.5   | 1.7    |
| 8.3    | 4.5    | 12.0   | 17.2   | 4.1    | 4.0    |
| 1.4    | 5.5    | 3.9    | 1.5    | 1.0    | 1.0    |
| 24.1   | 24.3   | 33.8   | 22.2   | 29.6   | 27.3   |
| 8.9    | 6.4    | 3.4    | 1.7    | 4.2    | 7.3    |
| 6.1    | 5.4    | 2.9    | 5.1    | 3.4    | 10.9   |
| 11.1   | 18.6   | 7.6    | 14.6   | 9.7    | 16.8   |
| 212.9  | 215.0  | 230.5  | 195.4  | 222.9  | 255.2  |
| 4.3    | 3.5    | 5.5    | 3.9    | 0.8    | 6.0    |
| 11.5   | 14.3   | 14.8   | 18.6   | 14.0   | 9.1    |
| 3.0    | 2.8    | 2.5    | 2.7    | 3.6    | 4.7    |
| 138.4  | 137.9  | 139.7  | 184.0  | 179.4  | 187.8  |



|       |       |       |       |       |       |
|-------|-------|-------|-------|-------|-------|
| 6.0   | 8.9   | 10.7  | 8.4   | 8.3   | 3.1   |
| 5.4   | 7.9   | 6.1   | 4.5   | 5.0   | 9.5   |
| 16.1  | 34.4  | 35.7  | 25.1  | 25.9  | 28.1  |
| 320.1 | 261.9 | 368.4 | 376.0 | 452.9 | 437.7 |
| 32.9  | 30.1  | 35.0  | 27.9  | 36.4  | 36.6  |
| 10.3  | 17.3  | 20.1  | 4.5   | 21.6  | 12.8  |
| 1.9   | 1.4   | 1.3   | 6.5   | 11.2  | 8.4   |
| 3.9   | 1.0   | 6.9   | 1.7   | 5.4   | 4.8   |
| 2.8   | 2.9   | 5.1   | 1.8   | 1.6   | 2.2   |
| 1.3   | 1.4   | 1.2   | 1.1   | 0.8   | 1.5   |
| 1.7   | 2.5   | 1.3   | 1.1   | 2.3   | 1.6   |
| 350.4 | 334.0 | 409.6 | 384.7 | 468.0 | 408.8 |
| 143.0 | 118.7 | 132.7 | 136.1 | 154.7 | 170.4 |
| 22.8  | 11.3  | 23.6  | 18.9  | 15.7  | 24.1  |
| 74.5  | 68.6  | 72.2  | 70.7  | 74.5  | 111.6 |
| 18.5  | 3.2   | 15.5  | 19.3  | 18.7  | 11.3  |
| 23.3  | 21.7  | 30.7  | 15.0  | 18.3  | 31.4  |
| 12.8  | 2.6   | 4.6   | 2.7   | 3.5   | 3.4   |
| 6.6   | 2.7   | 9.3   | 10.0  | 10.3  | 7.0   |
| 111.1 | 121.6 | 127.6 | 132.1 | 128.8 | 133.5 |
| 318.6 | 282.8 | 258.7 | 306.8 | 332.2 | 378.6 |
| 231.7 | 234.4 | 252.6 | 285.4 | 299.3 | 312.9 |
| 11.3  | 8.1   | 12.6  | 2.1   | 8.0   | 2.6   |
| 65.8  | 75.3  | 67.5  | 70.7  | 89.1  | 95.1  |
| 781.5 | 475.2 | 792.5 | 702.1 | 963.4 | 983.5 |
| 1.9   | 14.0  | 13.7  | 6.2   | 13.7  | 8.3   |
| 184.6 | 164.0 | 172.3 | 196.9 | 205.9 | 239.0 |
| 510.8 | 481.7 | 603.7 | 565.2 | 642.6 | 667.2 |
| 23.8  | 16.9  | 23.3  | 24.3  | 33.1  | 35.0  |
| 8.8   | 10.8  | 7.8   | 2.8   | 5.9   | 6.1   |
| 14.3  | 14.9  | 17.8  | 15.3  | 15.1  | 20.3  |
| 2.9   | 1.0   | 3.0   | 8.5   | 2.2   | 5.3   |
| 2.5   | 2.5   | 5.5   | 2.1   | 2.9   | 1.7   |
| 7.5   | 7.2   | 18.6  | 4.2   | 4.5   | 15.3  |
| 24.1  | 25.1  | 21.2  | 23.4  | 35.9  | 24.9  |
| 2.3   | 2.1   | 1.7   | 2.1   | 1.5   | 2.3   |
| 16.4  | 11.2  | 10.9  | 22.3  | 29.3  | 18.9  |
| 5.1   | 16.0  | 7.0   | 7.1   | 1.9   | 12.0  |
| 5.1   | 8.4   | 3.4   | 8.7   | 4.1   | 10.9  |
| 5.9   | 12.5  | 7.5   | 4.6   | 11.7  | 3.6   |
| 226.3 | 254.1 | 177.3 | 218.8 | 229.8 | 264.4 |
| 434.3 | 357.9 | 362.6 | 404.6 | 375.8 | 469.2 |
| 11.2  | 6.4   | 10.1  | 8.0   | 11.2  | 13.6  |
| 32.2  | 28.2  | 32.5  | 15.1  | 27.9  | 36.6  |
| 14.8  | 20.5  | 29.2  | 21.7  | 25.8  | 21.0  |
| 26.7  | 41.8  | 51.5  | 53.4  | 38.2  | 50.4  |
| 16.5  | 3.5   | 26.9  | 16.3  | 28.4  | 32.4  |
| 0.9   | 1.3   | 1.0   | 1.8   | 2.0   | 1.3   |
| 2.7   | 3.0   | 6.0   | 6.6   | 2.7   | 11.8  |
| 8.4   | 7.4   | 4.9   | 4.0   | 5.6   | 12.9  |
| 7.2   | 10.9  | 9.0   | 12.9  | 8.0   | 18.3  |
| 1.9   | 2.7   | 1.8   | 2.9   | 1.8   | 2.1   |
| 7.7   | 2.2   | 1.9   | 6.2   | 1.8   | 10.2  |

|       |       |       |       |       |       |
|-------|-------|-------|-------|-------|-------|
| 18.5  | 31.7  | 22.2  | 12.4  | 15.8  | 31.0  |
| 23.0  | 43.9  | 30.3  | 35.5  | 34.1  | 44.9  |
| 5.5   | 11.1  | 7.5   | 26.4  | 4.8   | 15.7  |
| 18.3  | 45.4  | 23.2  | 30.6  | 27.1  | 16.9  |
| 11.3  | 27.6  | 4.2   | 21.9  | 10.9  | 16.0  |
| 5.2   | 2.5   | 2.8   | 2.9   | 2.9   | 6.6   |
| 105.3 | 91.4  | 116.3 | 85.8  | 150.5 | 131.4 |
| 8.4   | 9.4   | 16.7  | 6.7   | 13.2  | 11.3  |
| 0.6   | 4.4   | 0.3   | 0.6   | 1.0   | 3.2   |
| 23.4  | 3.9   | 14.0  | 18.3  | 13.7  | 20.4  |
| 53.9  | 43.2  | 48.9  | 38.5  | 46.7  | 48.1  |
| 872.5 | 597.3 | 707.6 | 835.0 | 843.7 | 921.4 |
| 0.8   | 0.9   | 0.9   | 0.7   | 0.7   | 0.8   |
| 85.7  | 86.2  | 88.6  | 97.3  | 107.8 | 113.6 |
| 5.5   | 4.4   | 5.4   | 4.6   | 5.2   | 6.8   |
| 64.1  | 38.3  | 50.4  | 61.9  | 81.3  | 74.9  |
| 7.0   | 13.7  | 10.0  | 2.3   | 4.3   | 14.9  |
| 11.1  | 4.3   | 10.8  | 3.5   | 7.8   | 14.1  |
| 12.0  | 6.0   | 9.0   | 3.9   | 6.5   | 5.4   |
| 19.0  | 30.2  | 31.7  | 25.8  | 17.9  | 18.5  |
| 227.2 | 190.1 | 212.3 | 252.1 | 221.5 | 322.4 |
| 17.4  | 24.8  | 12.9  | 35.0  | 28.1  | 25.1  |
| 1.3   | 1.8   | 1.3   | 3.7   | 2.0   | 8.2   |
| 13.0  | 17.7  | 20.5  | 16.2  | 15.8  | 28.7  |
| 116.3 | 123.3 | 136.5 | 135.1 | 166.8 | 148.2 |
| 7.7   | 1.5   | 3.6   | 4.0   | 0.7   | 6.6   |
| 3.4   | 1.3   | 9.0   | 11.1  | 5.6   | 4.8   |
| 2.3   | 3.9   | 6.8   | 0.7   | 0.8   | 2.5   |
| 16.8  | 14.6  | 18.3  | 17.6  | 15.1  | 22.6  |
| 20.8  | 35.5  | 27.7  | 40.9  | 21.8  | 25.8  |
| 92.6  | 120.9 | 135.4 | 120.8 | 145.2 | 180.3 |
| 307.8 | 275.0 | 278.2 | 340.6 | 365.8 | 375.6 |
| 30.8  | 18.3  | 28.0  | 39.3  | 31.4  | 33.5  |
| 416.5 | 352.6 | 386.5 | 389.6 | 453.6 | 468.0 |
| 54.6  | 43.5  | 50.3  | 45.5  | 57.3  | 51.3  |
| 25.3  | 31.0  | 27.3  | 24.0  | 29.6  | 34.4  |
| 19.6  | 22.2  | 22.3  | 10.3  | 25.1  | 28.4  |
| 26.9  | 32.6  | 45.7  | 23.0  | 33.6  | 25.0  |
| 56.3  | 40.9  | 88.3  | 64.5  | 82.2  | 74.2  |
| 13.6  | 6.9   | 26.8  | 31.7  | 28.6  | 25.2  |
| 10.9  | 5.1   | 13.5  | 4.8   | 9.9   | 2.6   |
| 175.2 | 165.9 | 175.6 | 205.5 | 168.9 | 207.4 |
| 56.8  | 56.1  | 72.4  | 62.1  | 65.4  | 61.9  |
| 7.6   | 2.8   | 12.8  | 6.2   | 6.7   | 20.1  |
| 30.8  | 32.5  | 44.9  | 30.8  | 38.8  | 47.2  |
| 7.6   | 14.5  | 8.5   | 6.5   | 8.4   | 2.6   |
| 22.1  | 2.1   | 17.1  | 9.8   | 8.0   | 2.7   |
| 10.6  | 15.5  | 20.3  | 1.5   | 7.3   | 18.8  |
| 0.8   | 4.1   | 2.4   | 0.7   | 3.9   | 0.3   |
| 101.8 | 81.6  | 108.2 | 113.9 | 104.9 | 135.9 |
| 11.0  | 8.8   | 11.3  | 9.8   | 1.8   | 10.7  |
| 17.0  | 15.2  | 2.7   | 3.9   | 2.5   | 4.6   |
| 8.3   | 11.9  | 2.3   | 3.9   | 16.1  | 8.5   |

|        |        |        |        |        |        |
|--------|--------|--------|--------|--------|--------|
| 16.4   | 8.5    | 22.7   | 16.6   | 17.8   | 22.0   |
| 0.8    | 11.8   | 7.8    | 5.0    | 7.8    | 1.3    |
| 20.2   | 31.8   | 22.0   | 15.2   | 27.0   | 30.2   |
| 64.3   | 75.2   | 79.9   | 68.3   | 79.1   | 87.2   |
| 17.7   | 32.1   | 19.5   | 11.1   | 14.6   | 8.7    |
| 24.8   | 24.0   | 10.5   | 10.6   | 18.4   | 26.7   |
| 7.1    | 4.3    | 4.7    | 8.8    | 10.2   | 6.5    |
| 7.5    | 5.3    | 8.5    | 13.2   | 4.9    | 11.3   |
| 27.1   | 19.5   | 32.9   | 23.6   | 29.8   | 32.4   |
| 467.2  | 508.7  | 513.0  | 469.3  | 562.2  | 591.6  |
| 4.8    | 0.6    | 3.0    | 1.3    | 1.0    | 1.3    |
| 36.3   | 18.5   | 28.1   | 38.5   | 42.4   | 35.9   |
| 0.9    | 0.9    | 1.9    | 2.3    | 0.7    | 1.8    |
| 90.1   | 81.2   | 79.1   | 100.6  | 107.5  | 107.6  |
| 25.5   | 20.9   | 27.7   | 29.7   | 23.4   | 31.3   |
| 5.6    | 4.0    | 5.8    | 6.0    | 7.1    | 7.1    |
| 62.3   | 64.9   | 84.2   | 80.9   | 84.3   | 87.7   |
| 5.5    | 7.8    | 5.3    | 2.9    | 7.0    | 10.4   |
| 394.3  | 354.3  | 475.0  | 440.8  | 513.5  | 529.9  |
| 57.9   | 74.9   | 73.2   | 65.5   | 76.3   | 80.5   |
| 0.6    | 1.2    | 6.0    | 7.6    | 5.4    | 7.9    |
| 110.3  | 95.7   | 141.9  | 137.8  | 167.0  | 169.7  |
| 18.3   | 31.9   | 1.5    | 14.0   | 19.8   | 4.0    |
| 1.1    | 3.0    | 1.9    | 1.6    | 1.8    | 6.6    |
| 10.5   | 0.8    | 1.8    | 6.0    | 1.7    | 4.1    |
| 6.5    | 7.7    | 6.3    | 7.9    | 2.9    | 6.5    |
| 32.7   | 42.6   | 57.7   | 39.3   | 37.6   | 54.4   |
| 102.9  | 84.8   | 106.3  | 101.4  | 140.2  | 128.0  |
| 161.1  | 118.4  | 168.3  | 180.4  | 192.0  | 189.9  |
| 1.2    | 1.2    | 1.4    | 1.0    | 2.0    | 1.0    |
| 5.1    | 4.6    | 3.0    | 1.9    | 2.9    | 1.2    |
| 32.3   | 24.3   | 30.6   | 32.4   | 34.4   | 37.5   |
| 31.4   | 48.4   | 40.6   | 38.1   | 54.0   | 58.7   |
| 1.5    | 1.3    | 2.7    | 5.0    | 4.7    | 1.8    |
| 5.6    | 26.6   | 17.3   | 6.8    | 9.5    | 15.2   |
| 1.6    | 1.1    | 1.7    | 1.3    | 1.5    | 1.6    |
| 2772.2 | 2857.1 | 2648.8 | 2666.9 | 2988.3 | 3036.9 |
| 1.7    | 6.8    | 8.9    | 6.3    | 1.0    | 5.2    |
| 8.5    | 4.5    | 11.0   | 9.7    | 12.2   | 8.9    |
| 12.5   | 24.5   | 23.5   | 10.7   | 11.0   | 23.5   |
| 7.8    | 42.8   | 25.5   | 46.9   | 46.5   | 38.6   |
| 2.3    | 4.8    | 3.3    | 2.8    | 6.0    | 5.8    |
| 5.2    | 3.7    | 2.9    | 6.7    | 1.5    | 1.7    |
| 5.0    | 1.1    | 7.9    | 3.7    | 3.1    | 6.3    |
| 3.9    | 7.0    | 0.7    | 2.7    | 0.7    | 4.4    |
| 47.0   | 34.4   | 66.6   | 67.3   | 83.5   | 68.4   |
| 4.9    | 6.6    | 2.4    | 6.9    | 7.4    | 13.5   |
| 1.6    | 1.2    | 6.6    | 6.7    | 3.6    | 2.7    |
| 1.9    | 6.9    | 12.6   | 2.3    | 3.6    | 3.9    |
| 830.4  | 566.2  | 654.1  | 647.4  | 788.0  | 815.8  |
| 7.1    | 10.6   | 4.3    | 2.9    | 6.1    | 5.7    |
| 8.2    | 5.6    | 6.3    | 12.0   | 15.6   | 5.0    |
| 177.0  | 161.9  | 193.5  | 215.4  | 218.2  | 223.2  |

|        |        |        |        |        |        |
|--------|--------|--------|--------|--------|--------|
| 78.1   | 70.6   | 83.8   | 91.0   | 87.5   | 88.1   |
| 22.2   | 5.1    | 15.6   | 24.1   | 24.9   | 21.4   |
| 5.8    | 6.9    | 5.6    | 7.8    | 8.3    | 5.8    |
| 12.8   | 21.0   | 16.7   | 10.6   | 23.1   | 32.6   |
| 36.1   | 28.3   | 27.8   | 10.8   | 24.4   | 22.0   |
| 12.7   | 9.0    | 3.9    | 21.2   | 24.8   | 32.0   |
| 3.3    | 5.3    | 7.4    | 4.4    | 1.9    | 4.8    |
| 66.0   | 63.8   | 73.5   | 65.5   | 76.5   | 87.0   |
| 13.3   | 14.6   | 28.6   | 14.7   | 24.9   | 30.8   |
| 27.9   | 12.3   | 21.5   | 18.5   | 21.3   | 24.8   |
| 10.3   | 6.4    | 7.6    | 27.4   | 18.3   | 17.3   |
| 24.8   | 19.3   | 20.5   | 20.4   | 9.9    | 15.3   |
| 4.6    | 11.3   | 16.7   | 14.4   | 8.6    | 3.3    |
| 73.9   | 69.2   | 83.0   | 90.2   | 107.9  | 102.5  |
| 7.0    | 9.9    | 12.7   | 11.3   | 10.8   | 11.6   |
| 5.1    | 5.4    | 4.8    | 5.1    | 12.5   | 5.8    |
| 6.5    | 2.0    | 5.2    | 2.0    | 5.4    | 9.2    |
| 3.4    | 3.2    | 4.7    | 4.4    | 2.1    | 4.1    |
| 45.1   | 37.3   | 43.6   | 37.2   | 56.9   | 62.3   |
| 249.6  | 204.8  | 248.1  | 226.0  | 277.7  | 271.1  |
| 99.6   | 105.1  | 101.2  | 98.3   | 96.7   | 118.3  |
| 16.5   | 18.8   | 14.7   | 16.3   | 17.6   | 15.8   |
| 11.6   | 3.4    | 10.4   | 9.8    | 7.6    | 11.4   |
| 4.8    | 0.8    | 2.8    | 2.9    | 5.5    | 1.8    |
| 85.5   | 59.4   | 131.6  | 92.1   | 128.5  | 134.2  |
| 176.3  | 134.0  | 158.9  | 147.2  | 174.1  | 204.1  |
| 11.0   | 2.4    | 10.2   | 3.5    | 6.5    | 4.7    |
| 14.8   | 2.1    | 20.2   | 9.0    | 21.5   | 23.3   |
| 3.0    | 3.5    | 4.6    | 2.6    | 6.8    | 7.2    |
| 114.6  | 107.0  | 105.3  | 130.0  | 133.1  | 152.5  |
| 1619.3 | 1640.5 | 1813.8 | 1895.4 | 2042.9 | 2117.8 |
| 2.8    | 3.9    | 3.7    | 2.4    | 1.4    | 3.0    |
| 6.4    | 2.2    | 2.8    | 8.6    | 2.6    | 6.3    |
| 6.2    | 10.1   | 5.3    | 3.3    | 14.2   | 2.6    |
| 2.6    | 2.2    | 3.6    | 4.1    | 4.2    | 3.2    |
| 3.8    | 2.4    | 1.7    | 6.4    | 4.1    | 2.3    |
| 21.3   | 17.0   | 30.2   | 23.6   | 23.7   | 22.1   |
| 1848.4 | 1332.4 | 1778.3 | 1714.0 | 2040.6 | 2188.8 |
| 25.3   | 14.7   | 28.4   | 19.8   | 25.9   | 35.4   |
| 4.2    | 7.7    | 10.0   | 1.9    | 2.0    | 5.4    |
| 1.8    | 2.7    | 1.3    | 7.2    | 4.0    | 5.4    |
| 25.4   | 32.1   | 23.3   | 37.8   | 33.5   | 33.2   |
| 4.9    | 6.4    | 6.6    | 6.5    | 4.2    | 4.5    |
| 1.7    | 1.1    | 1.4    | 1.3    | 1.0    | 1.2    |
| 0.8    | 0.7    | 6.7    | 6.7    | 1.4    | 2.9    |
| 33.7   | 64.2   | 34.0   | 32.9   | 28.4   | 45.5   |
| 8.1    | 10.9   | 6.7    | 4.0    | 12.9   | 16.0   |
| 2493.5 | 2327.9 | 2584.9 | 2584.5 | 2928.1 | 3045.7 |
| 16.5   | 16.5   | 19.1   | 19.0   | 16.9   | 14.9   |
| 19.0   | 18.8   | 21.7   | 20.0   | 21.4   | 23.6   |
| 68.9   | 50.6   | 64.8   | 60.4   | 85.5   | 78.5   |
| 23.2   | 15.3   | 18.8   | 18.1   | 16.5   | 11.0   |
| 38.2   | 33.6   | 36.3   | 37.4   | 34.2   | 43.8   |

|       |       |       |       |       |       |
|-------|-------|-------|-------|-------|-------|
| 40.9  | 42.6  | 45.6  | 35.3  | 47.5  | 46.0  |
| 7.0   | 12.7  | 2.1   | 9.7   | 13.5  | 16.5  |
| 15.9  | 1.1   | 8.0   | 10.2  | 9.3   | 9.8   |
| 1.1   | 2.6   | 2.1   | 3.3   | 2.1   | 1.6   |
| 13.4  | 25.7  | 32.4  | 37.5  | 18.6  | 38.8  |
| 17.8  | 15.6  | 23.4  | 21.0  | 8.8   | 18.7  |
| 5.7   | 11.6  | 6.9   | 9.4   | 5.5   | 7.8   |
| 1.2   | 1.3   | 1.8   | 4.5   | 2.9   | 4.4   |
| 0.5   | 0.8   | 0.6   | 1.3   | 2.1   | 0.2   |
| 3.9   | 3.6   | 6.2   | 4.2   | 18.3  | 5.5   |
| 21.0  | 18.9  | 19.2  | 14.2  | 24.1  | 26.1  |
| 415.3 | 521.1 | 435.8 | 454.2 | 460.1 | 565.6 |
| 5.4   | 12.9  | 6.8   | 1.6   | 10.2  | 3.5   |
| 59.6  | 60.3  | 61.7  | 61.4  | 65.4  | 77.7  |
| 83.0  | 90.7  | 81.0  | 81.5  | 93.7  | 92.7  |
| 36.6  | 40.0  | 35.1  | 28.9  | 36.3  | 36.3  |
| 0.6   | 0.5   | 1.0   | 5.5   | 0.8   | 0.9   |
| 1.5   | 0.4   | 2.2   | 0.7   | 1.1   | 1.6   |
| 23.6  | 21.4  | 8.7   | 22.0  | 14.2  | 23.5  |
| 31.1  | 30.4  | 23.9  | 12.8  | 25.1  | 25.1  |
| 5.1   | 2.4   | 3.2   | 1.9   | 3.4   | 1.1   |
| 12.2  | 8.5   | 9.2   | 8.6   | 12.2  | 13.8  |
| 55.3  | 37.7  | 56.0  | 46.3  | 45.7  | 52.7  |
| 118.8 | 93.0  | 122.5 | 108.7 | 116.1 | 137.8 |
| 12.3  | 26.1  | 11.6  | 19.7  | 18.0  | 17.6  |
| 326.6 | 290.1 | 309.5 | 354.2 | 371.7 | 376.5 |
| 11.4  | 3.3   | 3.9   | 2.4   | 12.7  | 6.5   |
| 5.6   | 7.5   | 11.8  | 1.8   | 5.8   | 3.6   |
| 1.8   | 1.8   | 2.4   | 2.3   | 2.3   | 4.7   |
| 14.1  | 17.9  | 5.5   | 2.7   | 8.0   | 10.4  |
| 15.6  | 11.7  | 17.0  | 18.5  | 20.4  | 25.8  |
| 1.9   | 1.3   | 1.1   | 5.3   | 5.6   | 3.8   |
| 10.2  | 3.6   | 9.2   | 4.7   | 7.6   | 4.2   |
| 582.0 | 503.4 | 518.4 | 544.6 | 629.2 | 653.8 |
| 6.6   | 0.7   | 1.8   | 3.4   | 1.1   | 1.3   |
| 128.6 | 115.3 | 130.5 | 124.0 | 147.0 | 153.1 |
| 7.5   | 12.1  | 2.8   | 4.3   | 2.5   | 5.7   |
| 42.3  | 27.5  | 28.8  | 9.2   | 37.6  | 32.2  |
| 49.0  | 39.8  | 29.1  | 42.4  | 24.4  | 43.0  |
| 1.5   | 2.7   | 5.1   | 4.5   | 3.7   | 4.2   |
| 560.5 | 547.0 | 616.7 | 623.6 | 623.0 | 722.7 |
| 7.4   | 4.9   | 8.4   | 13.8  | 10.9  | 12.3  |
| 840.2 | 756.1 | 946.3 | 919.0 | 992.1 | 984.7 |
| 0.6   | 3.8   | 3.4   | 7.6   | 5.0   | 5.5   |
| 62.4  | 64.0  | 59.3  | 54.4  | 68.1  | 76.5  |
| 10.1  | 18.3  | 10.2  | 13.0  | 13.0  | 17.5  |
| 3.9   | 13.9  | 1.6   | 4.4   | 3.4   | 0.6   |
| 9.7   | 12.7  | 18.3  | 10.9  | 14.1  | 16.7  |
| 12.0  | 5.9   | 5.4   | 4.9   | 5.5   | 3.8   |
| 11.3  | 15.4  | 12.2  | 10.1  | 10.6  | 6.8   |
| 26.6  | 30.0  | 25.0  | 25.3  | 22.6  | 24.3  |
| 1.3   | 1.7   | 10.0  | 6.1   | 2.7   | 6.5   |
| 391.3 | 342.0 | 410.1 | 413.2 | 424.0 | 481.0 |

|        |        |        |        |        |        |
|--------|--------|--------|--------|--------|--------|
| 59.4   | 50.2   | 44.5   | 50.6   | 58.5   | 50.6   |
| 27.6   | 19.3   | 8.0    | 15.5   | 32.1   | 27.1   |
| 22.1   | 12.4   | 38.9   | 20.3   | 24.5   | 33.9   |
| 8.7    | 4.1    | 4.4    | 3.7    | 7.6    | 3.2    |
| 3.9    | 1.4    | 2.7    | 2.8    | 1.9    | 9.9    |
| 2.3    | 2.8    | 2.1    | 1.6    | 2.4    | 2.6    |
| 81.8   | 77.8   | 78.6   | 73.5   | 91.8   | 103.6  |
| 9.8    | 8.7    | 6.2    | 6.8    | 9.7    | 10.3   |
| 4.6    | 5.8    | 3.4    | 1.6    | 1.8    | 0.3    |
| 110.5  | 100.9  | 90.6   | 99.0   | 112.6  | 132.8  |
| 12.0   | 0.5    | 7.1    | 10.3   | 5.5    | 6.6    |
| 10.8   | 20.9   | 12.1   | 18.7   | 2.6    | 4.7    |
| 411.8  | 407.8  | 485.3  | 448.1  | 498.1  | 541.0  |
| 17.3   | 23.2   | 15.3   | 13.9   | 21.0   | 29.1   |
| 5.9    | 3.2    | 10.5   | 7.1    | 10.7   | 7.8    |
| 32.1   | 8.2    | 26.2   | 29.2   | 29.9   | 23.6   |
| 21.1   | 14.3   | 24.6   | 17.0   | 29.6   | 35.9   |
| 14.1   | 23.1   | 10.1   | 10.6   | 12.5   | 10.1   |
| 6.3    | 7.2    | 6.4    | 3.0    | 7.4    | 7.2    |
| 1.9    | 1.9    | 1.2    | 0.9    | 1.0    | 1.0    |
| 1.3    | 5.6    | 1.5    | 0.3    | 7.5    | 3.6    |
| 2.7    | 0.4    | 0.5    | 0.8    | 2.1    | 3.1    |
| 1463.1 | 1180.6 | 1468.4 | 1517.4 | 1731.8 | 1644.9 |
| 92.5   | 106.8  | 111.5  | 110.7  | 118.1  | 133.0  |
| 20.9   | 18.6   | 31.5   | 28.3   | 40.5   | 24.1   |
| 184.2  | 185.0  | 188.2  | 214.9  | 226.3  | 240.9  |
| 33.4   | 29.7   | 30.0   | 28.3   | 35.7   | 40.8   |
| 15.9   | 14.1   | 24.3   | 21.1   | 23.7   | 14.6   |
| 765.4  | 679.1  | 602.7  | 564.4  | 694.9  | 836.7  |
| 53.0   | 44.5   | 44.4   | 34.5   | 41.1   | 54.2   |
| 22.7   | 24.0   | 25.4   | 10.5   | 14.5   | 27.9   |
| 8.6    | 13.9   | 21.8   | 11.7   | 15.0   | 14.7   |
| 90.8   | 86.4   | 75.2   | 90.7   | 93.9   | 95.5   |
| 2694.2 | 2539.6 | 2742.5 | 3007.9 | 3051.3 | 3195.5 |
| 30.3   | 5.1    | 34.6   | 25.5   | 63.0   | 40.9   |
| 3.6    | 5.9    | 3.0    | 10.9   | 4.6    | 7.4    |
| 23.2   | 33.5   | 18.5   | 19.5   | 21.2   | 25.2   |
| 24.4   | 43.1   | 32.6   | 44.4   | 45.0   | 38.1   |
| 8.6    | 1.5    | 7.1    | 8.9    | 11.0   | 8.7    |
| 3.1    | 14.6   | 2.7    | 15.5   | 3.4    | 6.6    |
| 3.2    | 6.1    | 9.1    | 11.5   | 3.6    | 12.9   |
| 1.0    | 0.9    | 1.0    | 0.9    | 1.2    | 0.9    |
| 14.0   | 12.5   | 21.3   | 13.1   | 11.2   | 18.6   |
| 3.8    | 0.4    | 4.6    | 5.5    | 2.2    | 0.8    |
| 61.5   | 102.2  | 64.1   | 65.7   | 75.4   | 74.3   |
| 31.8   | 22.6   | 42.9   | 59.5   | 63.6   | 66.7   |
| 2.0    | 3.7    | 4.7    | 0.6    | 1.1    | 1.3    |
| 19.9   | 5.2    | 25.4   | 24.4   | 26.7   | 32.8   |
| 319.8  | 326.6  | 297.0  | 314.8  | 328.3  | 374.3  |
| 1.1    | 2.3    | 5.6    | 4.7    | 7.5    | 5.1    |
| 64.7   | 60.8   | 53.7   | 62.3   | 51.6   | 80.9   |
| 7.6    | 14.1   | 7.6    | 9.7    | 7.3    | 11.2   |
| 10.5   | 3.9    | 8.3    | 11.2   | 18.3   | 8.8    |

|        |        |        |        |        |        |
|--------|--------|--------|--------|--------|--------|
| 12.9   | 11.2   | 27.7   | 17.0   | 9.8    | 17.9   |
| 184.5  | 163.8  | 154.7  | 230.9  | 210.2  | 212.1  |
| 21.5   | 10.6   | 17.3   | 9.4    | 14.8   | 9.4    |
| 5.7    | 10.9   | 2.1    | 4.6    | 6.0    | 4.5    |
| 61.2   | 26.2   | 43.1   | 52.8   | 57.4   | 59.3   |
| 2185.9 | 2134.7 | 2214.0 | 2446.8 | 2618.0 | 2650.0 |
| 10.3   | 2.0    | 6.8    | 5.0    | 8.5    | 15.3   |
| 103.1  | 79.1   | 85.0   | 92.3   | 123.7  | 99.1   |
| 16.0   | 19.6   | 15.6   | 17.2   | 20.9   | 22.6   |
| 2.7    | 0.3    | 1.7    | 0.6    | 0.8    | 6.4    |
| 1.3    | 1.1    | 2.0    | 1.0    | 1.3    | 1.5    |
| 215.6  | 205.5  | 231.0  | 224.1  | 311.2  | 272.2  |
| 28.8   | 22.3   | 26.5   | 25.1   | 32.2   | 33.0   |
| 1649.1 | 1070.1 | 1196.1 | 1339.3 | 1626.3 | 1787.8 |
| 8.1    | 11.6   | 0.8    | 6.2    | 10.2   | 4.2    |
| 21.9   | 15.2   | 11.3   | 7.9    | 5.5    | 11.1   |
| 3841.6 | 3478.5 | 3763.1 | 3942.6 | 4186.3 | 4500.7 |
| 408.3  | 286.3  | 415.5  | 371.7  | 510.3  | 497.5  |
| 437.1  | 366.6  | 486.7  | 491.2  | 562.2  | 531.9  |
| 9.1    | 22.0   | 3.7    | 2.3    | 3.6    | 5.0    |
| 10.5   | 3.2    | 5.0    | 2.8    | 0.7    | 5.6    |
| 2.7    | 4.4    | 1.5    | 5.7    | 5.1    | 2.4    |
| 3.8    | 1.5    | 6.3    | 1.9    | 9.8    | 9.5    |
| 20.9   | 46.8   | 21.4   | 25.6   | 13.7   | 24.8   |
| 1.8    | 0.8    | 1.3    | 1.0    | 3.6    | 0.8    |
| 3.7    | 0.9    | 3.9    | 3.8    | 6.7    | 10.1   |
| 2.5    | 1.6    | 5.7    | 2.2    | 6.6    | 2.5    |
| 590.9  | 386.1  | 627.9  | 517.2  | 634.9  | 687.9  |
| 252.6  | 219.6  | 219.8  | 236.8  | 220.7  | 284.9  |
| 0.6    | 0.7    | 0.5    | 0.4    | 0.6    | 2.3    |
| 51.4   | 49.9   | 44.2   | 49.0   | 48.9   | 61.9   |
| 13.5   | 33.9   | 40.4   | 23.1   | 16.7   | 15.5   |
| 16.4   | 22.0   | 20.9   | 13.1   | 10.7   | 12.0   |
| 178.8  | 144.2  | 157.7  | 148.6  | 214.5  | 200.3  |
| 49.1   | 59.5   | 50.3   | 43.9   | 49.4   | 60.2   |
| 9.0    | 9.2    | 9.5    | 8.0    | 10.4   | 11.7   |
| 33.0   | 22.3   | 32.5   | 39.9   | 33.3   | 40.4   |
| 2.1    | 2.1    | 2.5    | 1.1    | 2.4    | 1.3    |
| 10.2   | 8.1    | 8.9    | 7.4    | 7.6    | 5.8    |
| 29.5   | 5.1    | 19.1   | 24.8   | 18.5   | 26.2   |
| 3.1    | 5.2    | 21.2   | 25.3   | 14.5   | 15.4   |
| 8.7    | 14.5   | 8.2    | 11.0   | 5.8    | 14.2   |
| 8.7    | 8.4    | 1.8    | 5.6    | 5.5    | 6.7    |
| 349.8  | 305.1  | 355.6  | 368.0  | 431.0  | 457.0  |
| 2.0    | 8.5    | 7.1    | 6.7    | 10.7   | 7.6    |
| 286.9  | 379.1  | 319.9  | 257.0  | 371.1  | 410.2  |
| 10.7   | 13.2   | 13.5   | 11.3   | 7.5    | 5.5    |
| 1.5    | 3.1    | 5.2    | 0.9    | 1.6    | 1.7    |
| 5.5    | 1.3    | 2.0    | 1.2    | 5.3    | 3.1    |
| 1.2    | 2.6    | 6.8    | 2.4    | 4.8    | 8.1    |
| 7.7    | 3.1    | 4.5    | 6.2    | 8.4    | 4.1    |
| 0.7    | 1.5    | 1.2    | 0.8    | 1.4    | 1.3    |
| 28.4   | 13.0   | 30.6   | 32.0   | 35.9   | 36.3   |

|        |        |        |        |         |         |
|--------|--------|--------|--------|---------|---------|
| 5.3    | 11.1   | 10.7   | 7.6    | 12.4    | 14.6    |
| 5.2    | 5.2    | 8.3    | 11.0   | 9.9     | 2.0     |
| 2.1    | 2.1    | 1.2    | 2.9    | 6.4     | 2.3     |
| 6.2    | 27.3   | 14.5   | 12.8   | 10.4    | 11.5    |
| 2.3    | 6.0    | 1.6    | 5.8    | 5.4     | 16.0    |
| 4.4    | 2.0    | 2.6    | 4.2    | 2.7     | 3.8     |
| 3.0    | 1.6    | 2.3    | 2.9    | 2.3     | 5.6     |
| 2.9    | 2.1    | 3.2    | 8.9    | 1.9     | 2.7     |
| 23.5   | 31.0   | 30.8   | 37.1   | 29.7    | 29.5    |
| 4.7    | 1.2    | 2.2    | 3.7    | 7.2     | 5.4     |
| 13.8   | 34.6   | 18.7   | 20.9   | 14.1    | 34.9    |
| 15.6   | 4.3    | 9.3    | 9.7    | 8.2     | 9.3     |
| 1.6    | 1.6    | 2.6    | 6.0    | 7.2     | 5.3     |
| 43.9   | 38.0   | 49.3   | 48.7   | 40.9    | 49.9    |
| 7.6    | 7.4    | 5.5    | 6.3    | 9.8     | 3.8     |
| 0.7    | 7.7    | 7.8    | 3.5    | 0.9     | 0.7     |
| 3.3    | 15.0   | 14.5   | 14.0   | 22.1    | 19.7    |
| 100.6  | 101.7  | 130.7  | 113.5  | 121.4   | 128.0   |
| 4.6    | 10.4   | 3.3    | 3.3    | 6.0     | 5.2     |
| 2.6    | 0.4    | 1.2    | 1.5    | 1.5     | 2.2     |
| 10.9   | 1.3    | 12.6   | 4.3    | 10.9    | 16.1    |
| 11.5   | 7.2    | 8.3    | 8.9    | 19.5    | 32.0    |
| 2.3    | 4.6    | 8.4    | 1.9    | 5.6     | 8.0     |
| 4.7    | 9.3    | 4.7    | 7.9    | 1.4     | 4.0     |
| 14.2   | 19.1   | 14.4   | 13.9   | 26.0    | 21.8    |
| 29.7   | 13.6   | 16.3   | 25.3   | 25.3    | 30.2    |
| 28.4   | 34.1   | 71.5   | 54.2   | 74.0    | 67.4    |
| 230.8  | 171.2  | 264.2  | 281.1  | 291.5   | 310.1   |
| 12.4   | 11.3   | 15.9   | 14.5   | 11.9    | 24.7    |
| 7.8    | 0.8    | 1.8    | 0.7    | 2.5     | 2.6     |
| 12.9   | 4.8    | 14.5   | 14.9   | 18.6    | 15.0    |
| 1.8    | 2.6    | 1.8    | 1.3    | 4.5     | 6.8     |
| 1.3    | 1.2    | 0.7    | 1.2    | 1.2     | 0.8     |
| 281.8  | 229.5  | 349.6  | 278.7  | 349.4   | 366.0   |
| 4.7    | 5.1    | 2.8    | 4.4    | 3.2     | 0.8     |
| 7.2    | 1.0    | 1.6    | 4.8    | 6.0     | 3.4     |
| 2.3    | 2.0    | 1.7    | 3.9    | 5.0     | 4.7     |
| 9912.0 | 8849.8 | 8997.1 | 9886.9 | 10086.5 | 10479.7 |
| 2.9    | 5.0    | 3.2    | 3.6    | 5.6     | 6.5     |
| 0.4    | 8.7    | 1.5    | 2.4    | 1.3     | 0.4     |
| 2.7    | 1.4    | 5.3    | 0.8    | 2.2     | 1.7     |
| 72.5   | 64.5   | 70.4   | 64.7   | 77.2    | 83.4    |
| 7.7    | 8.1    | 11.1   | 23.5   | 10.2    | 16.2    |
| 2.3    | 1.7    | 1.3    | 5.4    | 5.2     | 1.1     |
| 1.9    | 8.0    | 4.9    | 1.4    | 8.6     | 4.2     |
| 8.1    | 26.3   | 5.5    | 4.1    | 11.2    | 12.8    |
| 37.7   | 26.3   | 26.3   | 19.8   | 23.3    | 33.1    |
| 145.5  | 168.8  | 125.9  | 142.5  | 150.4   | 160.7   |
| 3.5    | 4.0    | 6.1    | 6.5    | 8.0     | 2.8     |
| 9.5    | 22.2   | 4.3    | 2.8    | 8.2     | 4.6     |
| 7.6    | 6.8    | 6.5    | 3.3    | 3.8     | 4.4     |
| 1.2    | 2.4    | 2.8    | 4.4    | 0.8     | 2.2     |
| 3.7    | 4.4    | 3.4    | 2.9    | 8.0     | 3.2     |



|       |       |       |       |       |       |
|-------|-------|-------|-------|-------|-------|
| 3.2   | 1.3   | 1.3   | 0.6   | 0.7   | 3.9   |
| 2.0   | 3.5   | 1.8   | 1.9   | 2.1   | 6.7   |
| 0.7   | 0.3   | 2.9   | 0.6   | 0.6   | 0.7   |
| 5.0   | 4.6   | 4.6   | 0.8   | 1.5   | 5.0   |
| 7.9   | 9.3   | 13.2  | 16.4  | 13.6  | 22.1  |
| 26.7  | 29.0  | 16.4  | 29.5  | 38.2  | 33.0  |
| 163.2 | 177.1 | 202.6 | 231.9 | 213.4 | 243.3 |
| 199.7 | 174.4 | 194.7 | 210.7 | 229.5 | 259.3 |
| 1.5   | 5.1   | 8.4   | 10.8  | 9.6   | 7.3   |
| 186.4 | 162.5 | 207.6 | 217.8 | 217.0 | 223.1 |
| 5.6   | 14.2  | 10.8  | 4.9   | 5.5   | 7.3   |
| 17.8  | 19.5  | 23.8  | 25.8  | 29.7  | 25.1  |
| 0.7   | 0.9   | 0.8   | 0.9   | 2.9   | 0.9   |
| 4.3   | 7.1   | 1.5   | 0.8   | 6.8   | 4.8   |
| 4.9   | 3.7   | 13.5  | 3.7   | 7.0   | 8.4   |
| 12.8  | 2.1   | 9.3   | 10.4  | 15.2  | 10.8  |
| 494.8 | 320.1 | 496.8 | 437.5 | 642.5 | 599.3 |
| 0.5   | 3.5   | 0.3   | 0.3   | 0.3   | 2.9   |
| 15.2  | 22.7  | 18.2  | 10.7  | 20.8  | 27.4  |
| 7.1   | 1.5   | 15.8  | 8.4   | 7.9   | 20.9  |
| 19.7  | 32.7  | 21.2  | 31.8  | 28.7  | 26.2  |
| 6.5   | 1.8   | 7.9   | 2.0   | 7.8   | 9.8   |
| 317.5 | 282.3 | 365.7 | 338.0 | 374.8 | 372.9 |
| 3.2   | 1.8   | 4.2   | 2.0   | 2.4   | 2.2   |
| 86.1  | 112.3 | 81.9  | 89.4  | 99.9  | 135.6 |
| 3.6   | 0.8   | 9.8   | 6.3   | 1.5   | 5.4   |
| 1.7   | 1.0   | 12.4  | 5.9   | 5.6   | 5.1   |
| 11.6  | 3.1   | 8.4   | 10.1  | 8.8   | 7.9   |
| 14.4  | 29.7  | 18.4  | 20.5  | 8.2   | 26.3  |
| 0.8   | 1.1   | 1.3   | 1.7   | 1.4   | 1.7   |
| 7.9   | 8.7   | 16.6  | 2.8   | 13.1  | 26.4  |
| 5.7   | 2.4   | 2.3   | 7.0   | 7.8   | 7.3   |
| 68.8  | 71.6  | 63.3  | 60.0  | 60.8  | 78.0  |
| 15.3  | 10.5  | 61.5  | 25.9  | 29.0  | 16.5  |
| 1.6   | 7.5   | 5.6   | 2.8   | 2.9   | 5.4   |
| 0.7   | 2.5   | 2.8   | 3.8   | 1.3   | 4.4   |
| 9.2   | 11.5  | 7.7   | 16.1  | 6.3   | 20.6  |
| 35.7  | 18.4  | 40.7  | 36.7  | 27.9  | 30.2  |
| 2.4   | 11.1  | 3.8   | 1.4   | 1.3   | 5.2   |
| 2.6   | 1.4   | 1.5   | 6.7   | 0.8   | 1.8   |
| 21.1  | 36.0  | 16.9  | 34.1  | 21.2  | 25.1  |
| 8.7   | 2.7   | 17.0  | 3.1   | 9.8   | 5.7   |
| 13.3  | 11.1  | 12.5  | 11.6  | 12.5  | 9.3   |
| 193.7 | 147.5 | 177.1 | 162.3 | 192.0 | 222.3 |
| 148.9 | 147.8 | 144.5 | 154.0 | 175.7 | 157.6 |
| 382.8 | 321.3 | 398.3 | 407.7 | 430.2 | 451.7 |
| 8.1   | 7.9   | 23.9  | 10.9  | 13.4  | 20.9  |
| 2.0   | 0.8   | 0.5   | 1.2   | 0.6   | 1.1   |
| 3.4   | 0.7   | 4.4   | 2.4   | 9.8   | 4.0   |
| 21.1  | 21.2  | 24.3  | 16.0  | 21.7  | 20.6  |
| 3.5   | 2.5   | 5.0   | 3.1   | 3.8   | 2.7   |
| 3.1   | 2.2   | 3.6   | 7.9   | 13.1  | 3.4   |
| 15.4  | 20.4  | 14.2  | 16.0  | 8.3   | 23.2  |

|        |        |        |        |        |        |
|--------|--------|--------|--------|--------|--------|
| 7.7    | 12.0   | 18.5   | 10.3   | 14.6   | 3.9    |
| 1.8    | 2.4    | 5.7    | 1.3    | 7.0    | 3.5    |
| 1.0    | 1.1    | 9.5    | 4.5    | 3.6    | 17.7   |
| 4.2    | 1.6    | 4.9    | 3.4    | 2.2    | 2.0    |
| 5.9    | 5.7    | 7.8    | 1.7    | 3.4    | 3.5    |
| 319.1  | 277.3  | 317.5  | 299.9  | 373.1  | 378.1  |
| 107.9  | 108.4  | 107.2  | 117.3  | 123.1  | 123.9  |
| 1567.0 | 1631.4 | 1708.3 | 1660.5 | 1830.0 | 1800.7 |
| 157.3  | 108.1  | 149.5  | 154.5  | 192.0  | 220.6  |
| 10.7   | 2.7    | 4.8    | 4.3    | 3.0    | 8.3    |
| 23.2   | 18.7   | 16.0   | 23.4   | 14.1   | 27.0   |
| 0.7    | 2.0    | 3.8    | 1.0    | 4.8    | 1.5    |
| 303.2  | 334.1  | 313.1  | 335.6  | 340.2  | 399.9  |
| 12.9   | 16.7   | 16.4   | 18.1   | 15.8   | 23.4   |
| 64.2   | 77.5   | 60.0   | 82.3   | 40.8   | 91.1   |
| 8.0    | 1.1    | 1.3    | 4.5    | 4.6    | 5.6    |
| 55.5   | 58.5   | 60.4   | 63.9   | 50.4   | 82.3   |
| 18.1   | 2.7    | 3.9    | 7.2    | 14.1   | 23.4   |
| 28.1   | 21.4   | 25.2   | 31.0   | 39.3   | 41.1   |
| 3158.7 | 2866.5 | 3227.2 | 3226.4 | 3505.0 | 3368.5 |
| 1.0    | 6.3    | 4.8    | 2.7    | 1.2    | 1.1    |
| 10.1   | 12.3   | 8.9    | 18.3   | 15.3   | 24.6   |
| 2337.8 | 2292.7 | 2459.6 | 2254.7 | 2313.1 | 3013.5 |
| 331.1  | 377.0  | 302.1  | 367.3  | 331.0  | 440.0  |
| 3.3    | 8.7    | 3.5    | 3.3    | 2.7    | 3.3    |
| 273.3  | 279.5  | 265.2  | 299.9  | 286.7  | 337.3  |
| 10.4   | 12.8   | 9.9    | 9.9    | 9.0    | 18.0   |
| 4.3    | 12.7   | 7.5    | 5.0    | 2.4    | 10.3   |
| 5.1    | 1.7    | 4.2    | 0.8    | 2.2    | 1.5    |
| 19.6   | 4.3    | 27.3   | 24.8   | 27.8   | 14.1   |
| 2.2    | 1.5    | 2.7    | 3.4    | 3.4    | 2.4    |
| 31.0   | 77.5   | 28.4   | 40.9   | 35.6   | 26.5   |
| 49.7   | 26.1   | 20.7   | 35.9   | 31.8   | 35.2   |
| 45.7   | 62.8   | 60.4   | 53.7   | 60.8   | 61.1   |
| 127.0  | 125.0  | 107.9  | 141.0  | 144.0  | 140.3  |
| 4.0    | 12.2   | 5.4    | 8.4    | 4.3    | 9.9    |
| 93.6   | 96.3   | 113.9  | 116.1  | 127.6  | 123.6  |
| 21.5   | 33.6   | 22.8   | 21.8   | 25.8   | 28.9   |
| 6.0    | 4.5    | 14.5   | 12.9   | 4.8    | 14.7   |
| 3.3    | 3.8    | 6.9    | 3.1    | 3.9    | 3.6    |
| 1.0    | 2.3    | 2.7    | 3.9    | 4.7    | 2.4    |
| 18.3   | 24.1   | 14.6   | 17.3   | 28.9   | 21.4   |
| 3.6    | 3.7    | 3.2    | 1.7    | 2.9    | 2.8    |
| 34.6   | 50.9   | 42.4   | 43.5   | 38.6   | 46.1   |
| 261.5  | 270.1  | 235.1  | 283.6  | 303.0  | 288.3  |
| 4.2    | 6.1    | 2.3    | 9.4    | 6.0    | 10.3   |
| 4.5    | 1.5    | 3.7    | 4.0    | 3.8    | 3.1    |
| 18.1   | 2.1    | 13.3   | 12.4   | 19.2   | 10.6   |
| 11.7   | 19.5   | 10.2   | 16.0   | 11.1   | 15.4   |
| 2.9    | 8.9    | 6.4    | 3.8    | 8.2    | 9.3    |
| 1.6    | 3.3    | 2.4    | 2.1    | 2.2    | 1.5    |
| 150.1  | 135.5  | 143.9  | 144.6  | 165.0  | 180.5  |
| 27.3   | 11.7   | 24.4   | 12.8   | 29.8   | 35.2   |

|       |       |       |       |       |       |
|-------|-------|-------|-------|-------|-------|
| 16.5  | 4.3   | 17.1  | 6.8   | 15.4  | 12.9  |
| 5.5   | 2.6   | 1.4   | 3.9   | 5.1   | 10.3  |
| 7.8   | 13.0  | 8.9   | 11.8  | 8.7   | 11.7  |
| 14.8  | 9.0   | 6.1   | 9.3   | 2.4   | 9.5   |
| 1.1   | 10.1  | 2.7   | 0.9   | 5.4   | 5.3   |
| 4.7   | 5.3   | 2.4   | 2.8   | 2.2   | 3.8   |
| 2.4   | 0.8   | 1.4   | 4.7   | 2.1   | 4.2   |
| 0.5   | 11.2  | 5.0   | 12.6  | 12.0  | 5.3   |
| 54.5  | 60.3  | 62.8  | 61.6  | 73.1  | 75.2  |
| 2.3   | 6.8   | 6.1   | 3.0   | 2.8   | 11.1  |
| 1.3   | 6.5   | 1.7   | 0.8   | 8.4   | 1.6   |
| 1.2   | 1.0   | 1.1   | 1.7   | 1.3   | 0.7   |
| 13.4  | 15.7  | 4.8   | 11.8  | 9.0   | 9.7   |
| 16.3  | 22.3  | 6.5   | 7.8   | 9.8   | 20.5  |
| 16.0  | 23.0  | 17.4  | 20.1  | 11.1  | 18.9  |
| 7.9   | 12.1  | 13.4  | 6.6   | 6.9   | 14.3  |
| 3.3   | 2.4   | 8.0   | 7.1   | 7.0   | 1.5   |
| 3.6   | 4.2   | 4.4   | 4.8   | 4.7   | 3.7   |
| 4.6   | 8.8   | 1.1   | 1.8   | 2.5   | 1.5   |
| 6.3   | 9.6   | 5.7   | 4.9   | 6.6   | 7.4   |
| 11.4  | 18.3  | 12.8  | 16.6  | 14.9  | 13.2  |
| 47.3  | 20.3  | 45.9  | 52.4  | 54.9  | 35.6  |
| 40.1  | 50.8  | 44.3  | 22.5  | 39.7  | 41.5  |
| 151.5 | 177.1 | 165.1 | 164.9 | 182.7 | 210.7 |
| 530.0 | 471.6 | 641.1 | 684.4 | 541.0 | 746.2 |
| 12.0  | 18.1  | 11.7  | 14.9  | 10.2  | 17.1  |
| 7.6   | 10.4  | 8.3   | 5.5   | 9.8   | 2.2   |
| 21.8  | 18.7  | 11.5  | 15.0  | 13.7  | 15.1  |
| 7.2   | 1.9   | 1.5   | 7.2   | 6.0   | 1.4   |
| 581.8 | 633.6 | 630.3 | 641.9 | 733.3 | 820.8 |
| 44.6  | 78.2  | 49.5  | 67.5  | 69.0  | 85.2  |
| 41.9  | 61.5  | 48.1  | 61.9  | 56.3  | 51.2  |
| 7.7   | 4.4   | 8.6   | 11.8  | 10.0  | 8.1   |
| 15.8  | 11.8  | 4.9   | 9.8   | 5.9   | 10.6  |
| 13.4  | 7.7   | 12.3  | 15.1  | 14.8  | 15.0  |
| 6.3   | 6.7   | 6.1   | 9.4   | 5.8   | 13.2  |
| 19.6  | 18.7  | 17.0  | 17.2  | 16.1  | 16.4  |
| 11.7  | 8.4   | 11.5  | 7.9   | 8.4   | 6.5   |
| 345.9 | 309.2 | 295.6 | 332.0 | 395.1 | 439.2 |
| 3.4   | 0.6   | 3.5   | 5.1   | 2.6   | 6.1   |
| 2.5   | 8.6   | 10.9  | 9.2   | 5.7   | 7.6   |
| 34.2  | 74.3  | 49.6  | 45.3  | 51.2  | 50.2  |
| 6.7   | 8.0   | 1.0   | 6.5   | 7.2   | 1.2   |
| 1.8   | 0.6   | 0.9   | 1.1   | 1.2   | 1.9   |
| 2.3   | 3.5   | 6.9   | 1.9   | 2.6   | 6.1   |
| 3.0   | 9.7   | 12.3  | 11.1  | 12.1  | 18.3  |
| 15.2  | 8.4   | 5.6   | 9.8   | 20.4  | 12.6  |
| 6.8   | 0.8   | 1.4   | 3.0   | 2.8   | 4.9   |
| 52.0  | 66.0  | 69.7  | 73.0  | 81.6  | 81.5  |
| 18.8  | 9.0   | 25.1  | 17.8  | 21.0  | 26.8  |
| 25.8  | 21.4  | 24.6  | 24.9  | 33.9  | 10.5  |
| 3.0   | 1.8   | 6.0   | 1.6   | 1.7   | 1.5   |
| 7.1   | 7.8   | 1.6   | 6.2   | 10.8  | 14.1  |

|        |       |        |        |        |        |
|--------|-------|--------|--------|--------|--------|
| 5.5    | 1.1   | 2.2    | 1.4    | 2.1    | 1.1    |
| 13.0   | 2.4   | 3.4    | 2.2    | 10.3   | 10.4   |
| 11.6   | 7.1   | 17.8   | 14.0   | 9.5    | 9.1    |
| 4.1    | 1.1   | 2.1    | 6.8    | 3.2    | 4.7    |
| 71.4   | 80.2  | 47.0   | 47.8   | 93.3   | 86.7   |
| 10.9   | 17.7  | 9.1    | 19.3   | 11.1   | 11.3   |
| 3.9    | 4.5   | 2.2    | 3.2    | 11.8   | 2.9    |
| 170.3  | 187.3 | 174.0  | 194.1  | 195.9  | 220.4  |
| 4.2    | 1.7   | 1.3    | 1.4    | 2.0    | 1.7    |
| 3.1    | 0.9   | 0.4    | 7.7    | 2.5    | 0.5    |
| 768.7  | 752.9 | 856.7  | 883.1  | 874.1  | 912.9  |
| 3.9    | 10.4  | 17.2   | 20.1   | 10.2   | 13.7   |
| 9.1    | 14.2  | 3.9    | 9.0    | 1.0    | 10.3   |
| 17.9   | 3.4   | 22.4   | 12.5   | 22.5   | 6.9    |
| 176.7  | 191.1 | 198.2  | 217.7  | 222.3  | 194.4  |
| 131.6  | 124.0 | 130.0  | 160.9  | 175.4  | 172.0  |
| 3.6    | 2.6   | 5.5    | 5.7    | 6.1    | 8.0    |
| 552.7  | 417.7 | 498.6  | 582.1  | 550.4  | 608.6  |
| 208.4  | 202.6 | 225.3  | 231.7  | 262.2  | 273.2  |
| 81.3   | 27.7  | 56.7   | 63.6   | 64.5   | 83.7   |
| 1.1    | 3.2   | 1.7    | 1.6    | 0.9    | 1.2    |
| 2.1    | 2.2   | 4.0    | 2.1    | 3.8    | 2.4    |
| 1.1    | 2.4   | 4.8    | 1.4    | 1.8    | 5.8    |
| 1.1    | 1.0   | 1.4    | 1.3    | 1.4    | 2.2    |
| 7.5    | 13.9  | 6.0    | 7.6    | 1.7    | 13.4   |
| 25.3   | 40.1  | 19.6   | 18.2   | 31.4   | 33.9   |
| 4.9    | 2.3   | 6.8    | 3.8    | 1.6    | 3.2    |
| 2.4    | 2.5   | 1.9    | 5.9    | 2.4    | 2.6    |
| 19.1   | 20.1  | 25.1   | 20.4   | 28.0   | 26.3   |
| 2.2    | 2.0   | 1.8    | 1.6    | 0.4    | 0.8    |
| 12.2   | 5.7   | 3.0    | 2.7    | 4.8    | 11.3   |
| 10.7   | 12.6  | 12.0   | 6.8    | 6.5    | 5.7    |
| 6.4    | 1.0   | 6.1    | 1.0    | 1.1    | 3.4    |
| 1.3    | 1.0   | 4.7    | 4.3    | 2.3    | 1.5    |
| 12.5   | 22.8  | 22.1   | 23.5   | 21.5   | 21.7   |
| 9.1    | 3.5   | 4.5    | 14.0   | 2.6    | 12.0   |
| 1.5    | 9.3   | 7.8    | 4.5    | 2.7    | 10.7   |
| 49.9   | 63.5  | 64.2   | 60.5   | 76.2   | 59.1   |
| 6.7    | 14.7  | 6.6    | 21.7   | 12.5   | 13.2   |
| 2.3    | 2.5   | 3.1    | 4.6    | 7.2    | 2.5    |
| 4.8    | 0.9   | 7.7    | 6.1    | 2.9    | 7.2    |
| 14.9   | 25.2  | 15.8   | 17.1   | 17.5   | 34.2   |
| 26.2   | 24.3  | 28.7   | 38.3   | 30.5   | 21.7   |
| 9.3    | 14.5  | 8.1    | 11.1   | 8.8    | 13.2   |
| 0.5    | 4.2   | 0.4    | 2.8    | 0.3    | 2.5    |
| 13.1   | 11.4  | 16.8   | 15.1   | 17.0   | 8.8    |
| 909.5  | 973.5 | 945.6  | 957.8  | 1018.2 | 1120.2 |
| 8.0    | 4.2   | 2.7    | 6.3    | 5.3    | 6.1    |
| 1070.2 | 820.5 | 1052.5 | 1064.8 | 1026.7 | 1210.8 |
| 8.3    | 2.0   | 1.2    | 4.2    | 0.9    | 8.4    |
| 3.7    | 0.5   | 2.9    | 0.5    | 7.8    | 4.3    |
| 1.3    | 1.8   | 7.5    | 0.6    | 6.4    | 1.5    |
| 15.2   | 16.6  | 15.0   | 18.5   | 22.5   | 27.8   |

|        |        |        |        |        |        |
|--------|--------|--------|--------|--------|--------|
| 3.2    | 9.3    | 3.6    | 4.8    | 4.4    | 5.5    |
| 5.7    | 13.7   | 7.5    | 9.4    | 11.6   | 12.4   |
| 6.2    | 5.8    | 3.0    | 3.1    | 2.4    | 2.5    |
| 1.9    | 13.1   | 3.7    | 0.8    | 2.4    | 3.9    |
| 5.6    | 5.9    | 7.7    | 6.5    | 4.6    | 6.9    |
| 5.7    | 7.2    | 4.4    | 8.0    | 2.7    | 4.3    |
| 389.5  | 357.4  | 438.4  | 352.2  | 533.3  | 490.7  |
| 4.6    | 0.4    | 1.8    | 0.9    | 1.4    | 6.6    |
| 12.0   | 2.4    | 11.9   | 19.7   | 21.7   | 17.2   |
| 936.0  | 852.7  | 971.1  | 941.9  | 1062.3 | 1219.3 |
| 29.3   | 26.1   | 39.4   | 28.3   | 53.3   | 48.3   |
| 25.1   | 22.7   | 19.6   | 29.5   | 40.2   | 28.8   |
| 9.0    | 19.0   | 13.0   | 22.7   | 20.4   | 16.6   |
| 4.0    | 1.1    | 3.8    | 5.0    | 2.8    | 0.7    |
| 1.7    | 2.6    | 2.7    | 1.6    | 2.2    | 1.7    |
| 1.2    | 1.1    | 1.9    | 4.1    | 4.1    | 1.3    |
| 31.1   | 18.4   | 23.5   | 8.9    | 13.0   | 30.8   |
| 6.8    | 12.5   | 12.2   | 5.1    | 14.0   | 9.8    |
| 11.8   | 20.7   | 15.7   | 10.4   | 21.6   | 20.8   |
| 384.9  | 372.8  | 444.7  | 419.5  | 432.2  | 458.4  |
| 25.2   | 26.0   | 24.2   | 35.7   | 37.7   | 33.4   |
| 55.4   | 46.1   | 58.2   | 52.6   | 66.0   | 72.2   |
| 1.6    | 10.3   | 2.3    | 5.0    | 7.7    | 0.7    |
| 9.2    | 6.0    | 3.2    | 13.8   | 1.2    | 1.9    |
| 16.4   | 15.8   | 3.6    | 7.2    | 7.9    | 2.5    |
| 165.9  | 127.7  | 181.9  | 174.0  | 248.2  | 281.3  |
| 5.3    | 13.1   | 7.5    | 6.7    | 8.8    | 10.5   |
| 23.6   | 33.2   | 18.3   | 19.1   | 18.0   | 31.3   |
| 4.4    | 1.7    | 5.4    | 2.3    | 1.5    | 3.0    |
| 17.0   | 22.0   | 17.3   | 20.3   | 20.5   | 19.5   |
| 7.6    | 32.1   | 15.8   | 4.4    | 8.1    | 2.6    |
| 2.4    | 4.3    | 15.6   | 11.9   | 3.7    | 9.3    |
| 42.5   | 35.8   | 31.3   | 41.5   | 41.7   | 28.3   |
| 3704.5 | 3256.8 | 3648.5 | 3977.4 | 3904.4 | 4111.3 |
| 3467.2 | 3409.3 | 3548.3 | 3768.4 | 3865.8 | 4262.4 |
| 17.2   | 3.7    | 19.3   | 20.3   | 9.3    | 6.9    |
| 5.5    | 9.1    | 19.4   | 7.2    | 9.3    | 9.0    |
| 73.1   | 61.5   | 80.0   | 70.5   | 97.0   | 77.6   |
| 186.7  | 172.9  | 182.4  | 189.7  | 204.6  | 239.8  |
| 2.4    | 1.0    | 1.8    | 0.8    | 1.3    | 1.9    |
| 367.0  | 434.6  | 398.5  | 434.1  | 442.5  | 479.1  |
| 5.2    | 10.4   | 2.7    | 5.6    | 6.6    | 4.2    |
| 10.5   | 15.6   | 0.5    | 5.9    | 4.7    | 8.2    |
| 5.9    | 4.2    | 11.5   | 9.1    | 2.3    | 5.3    |
| 7.9    | 4.4    | 5.8    | 11.3   | 6.3    | 11.6   |
| 22.6   | 22.6   | 37.7   | 26.0   | 29.5   | 27.1   |
| 1.2    | 1.2    | 8.3    | 0.8    | 14.1   | 3.4    |
| 4.1    | 2.4    | 1.3    | 1.1    | 1.7    | 1.4    |
| 6.4    | 1.8    | 12.1   | 5.9    | 2.2    | 5.6    |
| 63.7   | 71.4   | 68.9   | 58.3   | 63.0   | 77.6   |
| 638.2  | 620.1  | 750.5  | 699.9  | 796.9  | 848.8  |
| 12.2   | 17.0   | 15.7   | 11.3   | 14.6   | 14.9   |
| 11.0   | 15.4   | 15.5   | 14.1   | 10.9   | 21.3   |

|        |        |        |        |        |        |
|--------|--------|--------|--------|--------|--------|
| 75.3   | 114.9  | 99.6   | 97.4   | 97.7   | 104.6  |
| 18.5   | 17.5   | 13.6   | 12.7   | 5.5    | 9.3    |
| 3.1    | 3.6    | 1.7    | 1.6    | 1.3    | 2.1    |
| 1.6    | 3.5    | 2.9    | 8.2    | 6.9    | 10.8   |
| 3.3    | 2.7    | 18.3   | 8.8    | 4.8    | 11.2   |
| 2.8    | 2.8    | 2.6    | 2.1    | 2.6    | 1.9    |
| 7.8    | 6.0    | 3.6    | 10.4   | 3.3    | 5.1    |
| 333.2  | 312.0  | 317.2  | 299.1  | 386.4  | 389.6  |
| 59.5   | 38.9   | 53.8   | 59.3   | 71.2   | 81.0   |
| 17.1   | 30.6   | 10.2   | 18.4   | 22.7   | 27.9   |
| 4.4    | 0.8    | 9.8    | 11.3   | 6.8    | 0.9    |
| 2.3    | 1.1    | 2.5    | 1.1    | 1.5    | 2.2    |
| 1.2    | 1.8    | 2.0    | 1.3    | 2.1    | 2.5    |
| 492.1  | 397.8  | 468.5  | 429.1  | 506.0  | 584.1  |
| 24.3   | 16.1   | 22.3   | 23.2   | 14.5   | 19.2   |
| 324.3  | 341.7  | 327.7  | 339.5  | 346.8  | 404.3  |
| 12.1   | 8.4    | 7.0    | 2.3    | 4.2    | 5.1    |
| 59.1   | 45.6   | 46.0   | 55.2   | 64.3   | 83.9   |
| 6.4    | 11.7   | 14.1   | 5.3    | 13.9   | 6.5    |
| 15.1   | 3.8    | 9.8    | 3.9    | 9.5    | 6.9    |
| 3.5    | 5.8    | 4.9    | 3.4    | 2.4    | 2.6    |
| 367.3  | 392.4  | 506.5  | 520.2  | 466.2  | 548.2  |
| 4.1    | 9.7    | 7.9    | 5.2    | 5.2    | 8.6    |
| 255.1  | 284.1  | 292.4  | 312.2  | 287.4  | 309.1  |
| 8.8    | 3.0    | 5.7    | 3.4    | 11.7   | 7.7    |
| 16.3   | 15.2   | 19.0   | 14.5   | 14.9   | 8.5    |
| 66.8   | 55.0   | 61.2   | 73.8   | 77.0   | 88.0   |
| 27.7   | 27.0   | 30.2   | 27.8   | 16.9   | 28.4   |
| 244.4  | 216.2  | 268.5  | 228.9  | 296.3  | 265.6  |
| 21.5   | 27.4   | 19.8   | 20.9   | 24.8   | 29.4   |
| 57.8   | 50.3   | 66.1   | 53.4   | 68.4   | 62.9   |
| 199.1  | 149.6  | 195.6  | 177.4  | 218.8  | 200.9  |
| 14.9   | 3.5    | 19.6   | 7.8    | 6.8    | 18.8   |
| 15.9   | 13.6   | 8.3    | 15.2   | 17.6   | 13.8   |
| 2.2    | 21.3   | 4.7    | 11.0   | 4.9    | 8.6    |
| 244.5  | 287.4  | 242.1  | 296.3  | 299.3  | 358.3  |
| 283.9  | 262.3  | 242.0  | 307.4  | 324.7  | 331.5  |
| 61.0   | 48.8   | 71.2   | 67.1   | 62.7   | 72.5   |
| 23.7   | 19.6   | 24.2   | 17.5   | 18.3   | 35.2   |
| 6.4    | 12.2   | 4.8    | 7.1    | 2.4    | 2.7    |
| 33.6   | 20.0   | 24.8   | 27.6   | 43.2   | 38.7   |
| 14.5   | 14.6   | 6.6    | 8.2    | 11.7   | 10.9   |
| 2.8    | 4.1    | 4.5    | 1.8    | 1.2    | 3.1    |
| 46.6   | 36.2   | 43.4   | 32.6   | 46.7   | 45.6   |
| 8.0    | 6.1    | 11.3   | 11.9   | 11.5   | 6.6    |
| 4630.8 | 4517.2 | 5081.5 | 5556.0 | 5421.3 | 5498.2 |
| 180.4  | 172.6  | 237.5  | 221.9  | 256.2  | 271.1  |
| 4.9    | 17.9   | 3.6    | 6.2    | 6.3    | 9.1    |
| 9.6    | 17.3   | 12.4   | 6.9    | 9.0    | 12.2   |
| 2.9    | 2.7    | 4.3    | 6.7    | 6.5    | 4.7    |
| 95.2   | 100.5  | 90.7   | 81.6   | 40.0   | 34.8   |
| 1.2    | 1.6    | 4.7    | 8.8    | 3.4    | 8.0    |
| 3.2    | 3.1    | 1.9    | 3.5    | 5.8    | 0.9    |

|        |        |        |        |        |        |
|--------|--------|--------|--------|--------|--------|
| 1.2    | 3.6    | 1.5    | 1.6    | 6.8    | 2.0    |
| 30.7   | 47.3   | 35.2   | 34.0   | 48.8   | 39.1   |
| 2.3    | 0.9    | 1.6    | 3.3    | 4.9    | 4.3    |
| 2.6    | 0.3    | 8.7    | 0.8    | 5.5    | 0.6    |
| 2217.1 | 1857.7 | 2166.8 | 2139.2 | 2312.4 | 2415.3 |
| 4.1    | 0.9    | 2.4    | 2.1    | 1.1    | 8.3    |
| 5.3    | 2.7    | 15.1   | 11.0   | 1.5    | 3.1    |
| 0.5    | 5.8    | 1.0    | 3.1    | 0.5    | 4.8    |
| 15.8   | 4.6    | 6.1    | 11.3   | 9.8    | 18.7   |
| 65.8   | 58.9   | 56.7   | 47.6   | 67.8   | 68.5   |
| 21.8   | 16.2   | 11.8   | 27.2   | 32.4   | 15.0   |
| 6.9    | 8.1    | 5.5    | 13.6   | 6.9    | 9.4    |
| 13.0   | 17.4   | 17.5   | 15.0   | 16.0   | 22.4   |
| 49.0   | 53.4   | 51.5   | 47.7   | 62.3   | 57.7   |
| 74.9   | 71.9   | 81.7   | 85.9   | 90.8   | 66.6   |
| 3.7    | 5.6    | 6.5    | 6.0    | 5.1    | 5.1    |
| 12.7   | 9.8    | 12.9   | 5.4    | 14.3   | 16.1   |
| 66.1   | 95.0   | 88.6   | 82.3   | 64.8   | 89.0   |
| 2.9    | 1.3    | 1.7    | 1.2    | 1.8    | 4.1    |
| 17.0   | 23.1   | 4.6    | 17.4   | 13.8   | 21.2   |
| 104.4  | 91.6   | 120.4  | 116.2  | 123.8  | 139.3  |
| 21.3   | 36.8   | 16.3   | 19.9   | 20.6   | 23.9   |
| 14.0   | 16.5   | 3.8    | 6.1    | 10.0   | 16.8   |
| 77.2   | 126.6  | 85.4   | 99.7   | 57.7   | 85.1   |
| 27.4   | 46.7   | 39.0   | 35.2   | 42.2   | 35.6   |
| 252.1  | 275.3  | 203.4  | 305.6  | 249.5  | 309.8  |
| 0.3    | 0.2    | 0.5    | 1.9    | 0.5    | 0.6    |
| 45.9   | 67.9   | 37.1   | 48.9   | 60.6   | 61.1   |
| 1.9    | 6.8    | 1.7    | 5.4    | 4.3    | 4.0    |
| 46.6   | 48.5   | 55.6   | 46.8   | 64.9   | 70.2   |
| 1.4    | 1.9    | 5.9    | 5.5    | 11.1   | 9.0    |
| 3.3    | 2.4    | 3.3    | 4.8    | 1.7    | 1.0    |
| 3.1    | 2.0    | 2.0    | 6.3    | 1.8    | 1.9    |
| 509.2  | 560.1  | 523.8  | 569.2  | 612.9  | 616.9  |
| 1.7    | 3.2    | 9.3    | 6.5    | 1.2    | 4.1    |
| 184.0  | 163.6  | 181.1  | 173.5  | 179.5  | 210.2  |
| 9.5    | 8.9    | 3.6    | 5.5    | 3.6    | 5.1    |
| 378.4  | 389.6  | 462.2  | 490.6  | 488.8  | 499.5  |
| 0.7    | 0.6    | 2.7    | 1.2    | 2.4    | 1.6    |
| 56.7   | 53.8   | 57.1   | 59.9   | 52.7   | 66.7   |
| 387.0  | 390.3  | 485.5  | 500.9  | 488.4  | 531.3  |
| 721.6  | 647.3  | 810.7  | 755.6  | 819.7  | 857.6  |
| 10.1   | 17.2   | 13.8   | 14.4   | 18.0   | 10.5   |
| 106.8  | 130.6  | 90.5   | 97.3   | 105.9  | 111.8  |
| 92.9   | 88.6   | 96.8   | 92.2   | 111.1  | 97.7   |
| 7.0    | 15.8   | 10.8   | 7.5    | 9.9    | 14.4   |
| 214.9  | 173.3  | 210.3  | 200.3  | 244.0  | 251.8  |
| 991.6  | 827.1  | 952.7  | 992.7  | 1096.0 | 1116.4 |
| 142.7  | 161.3  | 129.3  | 139.4  | 150.9  | 156.3  |
| 212.5  | 231.4  | 215.3  | 237.5  | 241.9  | 249.0  |
| 7.8    | 4.7    | 11.5   | 7.5    | 19.0   | 11.4   |
| 3.6    | 10.1   | 1.4    | 1.1    | 1.4    | 0.9    |
| 6.3    | 11.9   | 12.8   | 4.9    | 2.7    | 11.3   |

|        |        |        |        |        |        |
|--------|--------|--------|--------|--------|--------|
| 4.0    | 8.2    | 3.6    | 7.5    | 9.4    | 17.1   |
| 5.1    | 1.2    | 3.5    | 7.3    | 0.8    | 2.1    |
| 6.8    | 6.2    | 8.7    | 4.2    | 7.9    | 3.3    |
| 4.9    | 1.1    | 2.6    | 1.7    | 3.4    | 1.5    |
| 5.9    | 11.2   | 7.7    | 9.5    | 15.6   | 14.1   |
| 13.9   | 16.9   | 16.6   | 8.2    | 19.8   | 8.6    |
| 2.3    | 0.8    | 10.0   | 5.2    | 2.3    | 4.7    |
| 23.2   | 24.7   | 18.2   | 34.4   | 37.2   | 34.2   |
| 10.2   | 15.5   | 9.4    | 8.3    | 15.4   | 23.5   |
| 620.4  | 541.7  | 592.8  | 729.7  | 679.7  | 739.2  |
| 10.3   | 10.9   | 7.7    | 12.3   | 8.8    | 11.6   |
| 90.1   | 80.6   | 104.9  | 72.4   | 112.6  | 113.1  |
| 1.8    | 8.4    | 9.9    | 10.8   | 10.6   | 8.0    |
| 3.4    | 7.8    | 2.6    | 2.7    | 3.5    | 1.7    |
| 31.0   | 32.6   | 7.3    | 10.9   | 8.5    | 24.7   |
| 17.4   | 19.3   | 8.6    | 22.2   | 13.2   | 18.5   |
| 4.6    | 4.7    | 7.5    | 4.9    | 11.6   | 6.5    |
| 1.8    | 3.2    | 1.3    | 3.9    | 5.7    | 1.1    |
| 13.7   | 3.7    | 2.9    | 11.9   | 2.8    | 8.0    |
| 17.3   | 15.4   | 17.8   | 24.2   | 20.0   | 23.3   |
| 547.0  | 516.3  | 535.4  | 527.9  | 578.3  | 599.9  |
| 1.9    | 8.7    | 2.4    | 5.2    | 5.6    | 8.8    |
| 5.5    | 2.3    | 8.2    | 4.6    | 2.9    | 2.5    |
| 1790.8 | 1653.8 | 1821.8 | 1893.6 | 1915.4 | 1967.9 |
| 17.6   | 5.5    | 6.8    | 15.3   | 14.8   | 11.2   |
| 6.6    | 1.5    | 3.6    | 1.8    | 6.8    | 8.2    |
| 6.3    | 0.7    | 8.9    | 4.9    | 4.2    | 8.9    |
| 55.0   | 42.5   | 52.6   | 52.7   | 60.8   | 72.4   |
| 3.4    | 8.2    | 11.2   | 10.7   | 8.0    | 9.8    |
| 266.9  | 229.6  | 240.7  | 311.9  | 263.5  | 320.1  |
| 1.6    | 0.9    | 6.9    | 1.1    | 3.9    | 1.4    |
| 9.0    | 10.4   | 9.5    | 10.3   | 12.9   | 13.9   |
| 384.3  | 334.7  | 380.3  | 284.0  | 402.7  | 397.0  |
| 355.5  | 350.6  | 332.9  | 354.0  | 387.3  | 377.6  |
| 2244.3 | 2057.2 | 2241.7 | 2319.2 | 2510.2 | 2525.5 |
| 2.0    | 15.0   | 14.5   | 2.1    | 7.4    | 2.7    |
| 4.1    | 3.6    | 11.5   | 8.4    | 21.8   | 28.2   |
| 21.2   | 12.7   | 17.8   | 15.3   | 10.3   | 22.7   |
| 1.2    | 1.0    | 0.9    | 2.2    | 0.9    | 2.5    |
| 9.8    | 2.2    | 1.6    | 5.2    | 6.3    | 1.7    |
| 2.1    | 8.2    | 2.4    | 2.8    | 1.7    | 5.7    |
| 23.2   | 12.4   | 20.2   | 7.9    | 11.4   | 21.8   |
| 3.2    | 6.9    | 6.2    | 2.9    | 6.7    | 1.8    |
| 4.8    | 0.8    | 1.9    | 0.9    | 1.5    | 1.3    |
| 7.4    | 3.8    | 12.2   | 1.7    | 1.8    | 5.9    |
| 9.1    | 10.7   | 11.7   | 8.5    | 11.7   | 10.8   |
| 35.8   | 32.8   | 37.0   | 44.4   | 46.2   | 47.5   |
| 8.9    | 2.6    | 10.8   | 4.6    | 5.2    | 1.8    |
| 4.4    | 3.2    | 5.5    | 8.8    | 3.2    | 9.0    |
| 2.2    | 1.3    | 0.9    | 2.1    | 2.3    | 2.6    |
| 29.2   | 20.9   | 19.4   | 15.0   | 19.8   | 23.5   |
| 1.8    | 1.5    | 2.6    | 1.6    | 1.8    | 2.7    |
| 71.0   | 92.1   | 74.3   | 91.2   | 92.2   | 107.7  |



|        |        |        |        |        |        |
|--------|--------|--------|--------|--------|--------|
| 18.6   | 25.7   | 23.0   | 15.3   | 19.7   | 30.7   |
| 131.2  | 86.9   | 121.7  | 119.8  | 120.6  | 135.0  |
| 12.1   | 17.0   | 12.7   | 10.2   | 15.6   | 18.2   |
| 4.9    | 3.8    | 8.6    | 3.8    | 2.7    | 2.1    |
| 21.3   | 17.1   | 21.6   | 16.0   | 9.3    | 18.6   |
| 37.7   | 33.3   | 45.4   | 39.3   | 52.5   | 53.3   |
| 1.7    | 3.4    | 3.9    | 1.7    | 1.3    | 1.6    |
| 16.8   | 6.9    | 13.4   | 11.2   | 8.2    | 13.3   |
| 4.5    | 7.6    | 12.4   | 7.9    | 3.9    | 8.1    |
| 0.3    | 9.5    | 0.8    | 1.9    | 0.8    | 0.5    |
| 14.8   | 5.1    | 9.1    | 7.2    | 11.0   | 2.7    |
| 14.8   | 21.3   | 7.9    | 17.1   | 12.7   | 11.2   |
| 13.6   | 12.6   | 26.9   | 23.4   | 9.5    | 25.5   |
| 136.7  | 137.5  | 128.9  | 158.3  | 177.8  | 174.6  |
| 25.7   | 30.0   | 20.8   | 20.6   | 15.7   | 34.1   |
| 8.5    | 1.1    | 14.9   | 8.3    | 15.1   | 19.3   |
| 0.8    | 6.2    | 4.4    | 1.5    | 2.6    | 5.4    |
| 338.0  | 309.3  | 369.8  | 386.8  | 435.0  | 458.7  |
| 54.9   | 20.8   | 79.2   | 26.3   | 98.1   | 63.4   |
| 7.0    | 0.9    | 3.3    | 7.1    | 1.7    | 3.1    |
| 1163.1 | 965.4  | 1229.3 | 1176.4 | 1302.8 | 1340.4 |
| 30.4   | 13.9   | 11.0   | 19.7   | 22.5   | 28.8   |
| 42.2   | 32.1   | 30.3   | 38.2   | 39.1   | 43.6   |
| 3.3    | 6.9    | 9.1    | 9.4    | 9.5    | 6.6    |
| 21.0   | 20.3   | 28.3   | 34.7   | 36.9   | 29.3   |
| 464.4  | 470.3  | 509.3  | 458.8  | 497.5  | 572.2  |
| 100.7  | 98.2   | 114.8  | 97.6   | 133.6  | 129.7  |
| 448.0  | 425.3  | 412.8  | 469.6  | 510.5  | 549.1  |
| 14.3   | 28.5   | 13.4   | 7.6    | 14.2   | 23.6   |
| 14.0   | 23.7   | 22.1   | 19.4   | 12.9   | 23.1   |
| 3.3    | 1.0    | 7.5    | 4.7    | 4.0    | 7.9    |
| 15.8   | 19.7   | 14.7   | 14.9   | 10.1   | 26.5   |
| 828.3  | 579.8  | 665.5  | 787.9  | 811.2  | 1010.3 |
| 2.7    | 4.5    | 1.8    | 4.9    | 2.9    | 1.0    |
| 4496.0 | 4700.0 | 5084.4 | 5174.5 | 5216.0 | 5121.5 |
| 56.4   | 51.4   | 45.8   | 55.4   | 81.8   | 71.2   |
| 13.6   | 8.5    | 11.4   | 4.0    | 18.9   | 13.3   |
| 141.6  | 138.5  | 136.3  | 150.0  | 162.1  | 187.7  |
| 3.7    | 8.8    | 10.4   | 8.3    | 10.7   | 10.5   |
| 2.6    | 2.5    | 1.6    | 1.9    | 2.4    | 2.3    |
| 207.2  | 179.0  | 224.8  | 229.0  | 263.5  | 267.1  |
| 7.6    | 6.0    | 10.0   | 8.8    | 14.3   | 13.6   |
| 10.7   | 15.0   | 7.5    | 2.4    | 4.0    | 2.0    |
| 173.3  | 149.6  | 169.9  | 179.4  | 168.0  | 192.9  |
| 6.7    | 11.0   | 1.8    | 11.8   | 1.9    | 6.7    |
| 38.4   | 35.4   | 33.5   | 31.5   | 40.5   | 51.2   |
| 25.5   | 34.9   | 21.9   | 15.2   | 12.1   | 11.9   |
| 16.8   | 19.2   | 18.8   | 18.2   | 16.0   | 23.0   |
| 41.9   | 51.2   | 38.0   | 44.1   | 40.6   | 55.8   |
| 1.4    | 6.8    | 2.1    | 2.1    | 0.9    | 0.8    |
| 1.5    | 5.8    | 1.5    | 1.5    | 2.1    | 6.1    |
| 1754.6 | 1650.6 | 1690.9 | 1466.2 | 1767.3 | 2155.6 |
| 502.4  | 501.8  | 525.1  | 551.0  | 571.1  | 647.4  |

|        |        |        |         |         |         |
|--------|--------|--------|---------|---------|---------|
| 110.6  | 129.3  | 104.9  | 131.6   | 135.7   | 152.6   |
| 12.3   | 1.7    | 9.5    | 7.3     | 7.8     | 8.6     |
| 4.8    | 5.6    | 5.4    | 11.4    | 6.3     | 13.4    |
| 2.6    | 4.3    | 3.5    | 4.0     | 2.8     | 3.6     |
| 3.4    | 4.9    | 8.9    | 5.9     | 4.0     | 2.1     |
| 4.8    | 1.1    | 3.1    | 1.3     | 5.9     | 7.6     |
| 26.0   | 33.3   | 36.7   | 37.4    | 42.1    | 34.8    |
| 46.6   | 83.0   | 58.7   | 69.9    | 55.3    | 73.4    |
| 16.4   | 33.5   | 33.0   | 23.8    | 14.0    | 43.0    |
| 191.7  | 162.8  | 238.0  | 228.0   | 200.8   | 209.9   |
| 2.0    | 3.5    | 2.1    | 2.8     | 2.1     | 4.7     |
| 8.8    | 12.2   | 13.0   | 10.3    | 2.9     | 6.9     |
| 7.5    | 6.3    | 6.4    | 5.2     | 3.6     | 8.3     |
| 92.2   | 81.4   | 91.0   | 97.1    | 83.9    | 107.4   |
| 49.8   | 64.4   | 57.9   | 58.4    | 59.4    | 69.8    |
| 8.8    | 8.0    | 8.9    | 11.0    | 8.1     | 5.8     |
| 2.7    | 1.8    | 3.9    | 1.0     | 2.5     | 1.4     |
| 4.3    | 0.9    | 1.8    | 4.3     | 6.4     | 3.2     |
| 10.1   | 2.5    | 8.7    | 5.1     | 10.6    | 13.0    |
| 6.2    | 1.4    | 7.1    | 3.0     | 7.9     | 10.8    |
| 267.8  | 284.9  | 286.8  | 298.3   | 372.3   | 323.4   |
| 41.7   | 22.2   | 31.3   | 37.0    | 44.4    | 52.4    |
| 2.5    | 2.5    | 1.1    | 1.6     | 3.2     | 2.8     |
| 1.3    | 8.6    | 4.4    | 6.9     | 4.2     | 6.5     |
| 55.7   | 57.4   | 52.3   | 46.0    | 71.7    | 77.5    |
| 55.6   | 57.4   | 71.6   | 62.5    | 65.9    | 68.3    |
| 4.3    | 12.4   | 5.1    | 6.6     | 4.1     | 10.3    |
| 24.8   | 30.6   | 21.6   | 17.1    | 24.7    | 32.9    |
| 3.3    | 0.4    | 1.9    | 6.4     | 3.6     | 3.4     |
| 1070.6 | 927.8  | 1100.1 | 1079.9  | 1212.5  | 1220.7  |
| 5.7    | 24.6   | 2.9    | 5.4     | 1.9     | 18.3    |
| 23.5   | 48.5   | 22.3   | 9.5     | 22.1    | 35.8    |
| 2.7    | 0.9    | 1.2    | 4.8     | 7.4     | 3.8     |
| 8.4    | 3.6    | 4.7    | 3.9     | 4.0     | 3.5     |
| 19.1   | 26.3   | 11.5   | 17.5    | 16.1    | 25.7    |
| 5.6    | 9.7    | 3.7    | 4.7     | 2.4     | 8.8     |
| 7.6    | 7.4    | 10.2   | 5.2     | 12.0    | 24.7    |
| 7.2    | 14.6   | 3.0    | 4.5     | 3.3     | 8.7     |
| 1.7    | 10.0   | 1.1    | 7.9     | 2.6     | 10.0    |
| 11.2   | 9.9    | 14.3   | 9.5     | 9.5     | 9.5     |
| 9.1    | 11.2   | 10.2   | 10.0    | 9.7     | 10.3    |
| 1.3    | 1.0    | 0.8    | 1.4     | 2.1     | 0.4     |
| 225.0  | 183.9  | 227.3  | 239.6   | 265.1   | 281.2   |
| 9704.8 | 8236.7 | 5971.5 | 10056.5 | 10293.2 | 10444.9 |
| 3.8    | 2.1    | 2.1    | 4.9     | 4.2     | 9.5     |
| 648.3  | 660.3  | 722.4  | 696.2   | 756.5   | 830.9   |
| 26.3   | 31.5   | 27.4   | 31.0    | 26.9    | 38.6    |
| 6.9    | 2.1    | 3.6    | 2.5     | 3.1     | 2.9     |
| 84.1   | 66.5   | 74.1   | 80.6    | 86.4    | 109.6   |
| 12.4   | 18.1   | 17.0   | 11.3    | 4.6     | 10.1    |
| 11.7   | 7.0    | 13.4   | 8.5     | 15.0    | 12.4    |
| 1074.7 | 1078.5 | 1118.4 | 1072.9  | 1215.3  | 1351.3  |
| 23.2   | 24.6   | 13.3   | 7.7     | 29.4    | 23.4    |

|        |       |        |        |        |        |
|--------|-------|--------|--------|--------|--------|
| 29.1   | 28.6  | 19.3   | 19.9   | 33.4   | 32.9   |
| 4.2    | 9.8   | 8.3    | 8.2    | 1.2    | 9.3    |
| 4.6    | 13.4  | 15.8   | 6.4    | 13.0   | 5.1    |
| 7.8    | 15.3  | 13.9   | 7.6    | 2.7    | 14.6   |
| 12.0   | 10.9  | 7.0    | 7.4    | 15.6   | 9.6    |
| 51.3   | 30.8  | 43.2   | 45.5   | 57.8   | 57.0   |
| 2.8    | 2.4   | 1.9    | 7.1    | 1.9    | 5.5    |
| 9.0    | 4.3   | 3.0    | 4.1    | 1.7    | 4.2    |
| 315.7  | 249.1 | 368.3  | 314.7  | 385.9  | 410.9  |
| 1.8    | 0.8   | 2.3    | 1.1    | 0.6    | 0.5    |
| 2.3    | 2.4   | 1.6    | 2.4    | 1.7    | 1.8    |
| 10.6   | 12.2  | 4.2    | 5.0    | 2.5    | 8.1    |
| 979.4  | 871.1 | 1107.8 | 1137.7 | 1189.4 | 1265.4 |
| 130.1  | 95.1  | 118.2  | 117.5  | 169.2  | 173.2  |
| 931.7  | 684.5 | 944.1  | 934.6  | 1129.3 | 1044.8 |
| 1.6    | 0.5   | 0.9    | 1.2    | 1.6    | 4.4    |
| 24.0   | 29.1  | 21.2   | 33.4   | 28.3   | 35.2   |
| 271.3  | 253.4 | 283.1  | 285.8  | 347.0  | 354.1  |
| 249.1  | 221.9 | 281.6  | 290.8  | 320.1  | 327.4  |
| 8.6    | 3.1   | 2.4    | 3.7    | 1.9    | 3.9    |
| 3.2    | 3.6   | 8.2    | 6.1    | 0.3    | 5.6    |
| 2.2    | 9.3   | 2.1    | 5.2    | 3.4    | 3.1    |
| 1.9    | 1.9   | 8.7    | 6.0    | 1.8    | 2.7    |
| 12.8   | 28.0  | 14.3   | 21.0   | 16.8   | 22.1   |
| 16.0   | 13.6  | 16.2   | 11.1   | 17.4   | 8.9    |
| 8.7    | 3.7   | 5.6    | 4.6    | 10.0   | 7.0    |
| 121.8  | 148.7 | 157.9  | 172.1  | 177.5  | 194.9  |
| 14.1   | 1.4   | 8.9    | 14.0   | 4.9    | 13.8   |
| 5.7    | 1.7   | 9.2    | 3.6    | 7.5    | 3.6    |
| 564.3  | 527.5 | 541.3  | 512.7  | 639.2  | 642.2  |
| 4.3    | 3.2   | 2.6    | 8.8    | 9.8    | 6.4    |
| 620.1  | 605.9 | 764.5  | 826.8  | 780.0  | 837.4  |
| 160.1  | 142.3 | 167.9  | 173.8  | 154.0  | 151.5  |
| 1288.0 | 976.7 | 1204.2 | 1224.2 | 1497.6 | 1340.9 |
| 163.1  | 151.6 | 183.2  | 211.0  | 207.1  | 204.9  |
| 763.2  | 726.6 | 776.5  | 806.9  | 863.3  | 907.9  |
| 788.4  | 787.7 | 928.7  | 1044.0 | 1013.1 | 1056.4 |
| 10.8   | 4.8   | 10.1   | 12.5   | 14.0   | 8.5    |
| 9.1    | 23.6  | 28.5   | 25.3   | 18.8   | 23.6   |
| 2.7    | 11.8  | 3.4    | 10.8   | 3.1    | 9.0    |
| 39.6   | 43.7  | 16.9   | 28.4   | 33.9   | 16.3   |
| 56.9   | 46.7  | 70.9   | 57.5   | 67.1   | 61.6   |
| 4.3    | 0.8   | 5.9    | 1.9    | 5.4    | 4.0    |
| 75.9   | 26.7  | 33.7   | 40.1   | 65.3   | 61.7   |
| 28.5   | 23.7  | 26.7   | 33.3   | 34.6   | 36.0   |
| 6.3    | 11.3  | 5.3    | 7.6    | 2.6    | 8.0    |
| 3.4    | 9.3   | 14.6   | 5.0    | 4.3    | 6.3    |
| 590.3  | 523.9 | 553.6  | 565.9  | 667.5  | 741.5  |
| 277.6  | 283.9 | 287.8  | 310.3  | 302.9  | 339.8  |
| 24.3   | 3.0   | 23.0   | 27.9   | 10.9   | 21.7   |
| 189.5  | 213.9 | 209.3  | 213.3  | 227.5  | 271.8  |
| 5.7    | 0.3   | 3.2    | 3.0    | 3.6    | 2.4    |
| 26.9   | 24.3  | 49.0   | 31.7   | 31.9   | 34.1   |

|       |       |       |       |       |       |
|-------|-------|-------|-------|-------|-------|
| 3.8   | 1.4   | 3.4   | 4.3   | 3.6   | 4.7   |
| 7.4   | 1.2   | 1.1   | 0.9   | 4.3   | 1.3   |
| 485.1 | 355.8 | 511.2 | 548.7 | 439.3 | 676.7 |
| 11.3  | 10.0  | 15.0  | 7.9   | 9.0   | 12.6  |
| 4.2   | 3.5   | 6.8   | 1.8   | 5.4   | 4.2   |
| 4.3   | 2.0   | 3.2   | 3.0   | 4.4   | 3.5   |
| 8.5   | 0.7   | 2.6   | 4.7   | 5.7   | 1.7   |
| 143.1 | 110.5 | 134.5 | 137.4 | 149.1 | 185.7 |
| 167.8 | 208.1 | 164.2 | 159.5 | 204.5 | 215.7 |
| 9.7   | 8.7   | 5.1   | 7.8   | 10.6  | 11.5  |
| 2.3   | 1.2   | 2.0   | 2.5   | 1.3   | 1.3   |
| 9.5   | 1.4   | 15.5  | 2.9   | 10.8  | 8.5   |
| 1.5   | 2.8   | 2.2   | 5.4   | 2.0   | 6.3   |
| 3.0   | 7.2   | 2.8   | 2.7   | 2.4   | 9.2   |
| 11.7  | 9.5   | 16.6  | 2.0   | 2.8   | 16.2  |
| 46.3  | 41.1  | 40.9  | 31.2  | 48.1  | 49.2  |
| 8.5   | 3.9   | 4.7   | 0.8   | 1.5   | 3.1   |
| 28.6  | 48.0  | 35.4  | 42.6  | 43.6  | 40.1  |
| 6.3   | 12.8  | 11.0  | 7.0   | 8.4   | 13.3  |
| 8.4   | 9.6   | 1.2   | 3.2   | 3.8   | 4.0   |
| 32.1  | 35.1  | 14.2  | 23.7  | 26.4  | 47.8  |
| 0.5   | 10.5  | 1.5   | 2.4   | 3.3   | 0.5   |
| 1.4   | 11.8  | 7.0   | 1.0   | 3.4   | 1.0   |
| 82.0  | 68.9  | 72.7  | 81.1  | 92.3  | 89.2  |
| 4.3   | 9.4   | 2.9   | 1.5   | 7.7   | 5.7   |
| 2.8   | 13.3  | 3.1   | 17.3  | 7.0   | 3.1   |
| 11.7  | 13.7  | 14.9  | 19.1  | 17.7  | 21.5  |
| 1.5   | 0.9   | 1.0   | 0.6   | 6.6   | 0.6   |
| 36.6  | 30.5  | 38.6  | 38.1  | 32.2  | 42.1  |
| 174.5 | 133.0 | 176.3 | 145.2 | 167.1 | 164.2 |
| 3.3   | 2.0   | 5.1   | 3.7   | 1.5   | 4.6   |
| 2.3   | 0.5   | 4.8   | 0.4   | 0.5   | 0.6   |
| 4.7   | 8.5   | 6.6   | 4.9   | 5.0   | 6.6   |
| 6.5   | 5.9   | 4.5   | 5.5   | 3.0   | 4.3   |
| 19.4  | 22.5  | 3.6   | 7.9   | 14.3  | 22.0  |
| 22.5  | 24.7  | 13.2  | 13.6  | 12.6  | 18.3  |
| 11.0  | 19.0  | 23.7  | 19.3  | 12.0  | 24.1  |
| 1.3   | 11.0  | 2.9   | 1.2   | 1.3   | 1.4   |
| 2.0   | 0.6   | 1.2   | 5.0   | 1.8   | 6.0   |
| 5.6   | 10.1  | 14.1  | 11.2  | 5.2   | 10.0  |
| 5.6   | 1.0   | 0.9   | 0.9   | 1.6   | 0.6   |
| 1.2   | 5.1   | 6.2   | 1.3   | 1.0   | 2.5   |
| 26.5  | 20.5  | 22.6  | 31.7  | 37.8  | 25.0  |
| 114.1 | 122.5 | 124.2 | 126.5 | 136.9 | 135.0 |
| 1.7   | 3.4   | 8.4   | 6.3   | 9.6   | 3.3   |
| 1.4   | 2.3   | 1.9   | 2.1   | 1.5   | 2.7   |
| 6.1   | 13.7  | 7.3   | 9.3   | 19.7  | 9.0   |
| 4.7   | 4.0   | 3.2   | 6.4   | 3.3   | 3.9   |
| 1.1   | 2.6   | 1.3   | 3.6   | 1.4   | 1.9   |
| 14.1  | 2.2   | 19.0  | 20.4  | 8.8   | 9.2   |
| 7.0   | 5.0   | 8.0   | 5.9   | 3.3   | 5.8   |
| 9.9   | 15.2  | 3.2   | 9.0   | 7.2   | 2.3   |
| 5.7   | 10.2  | 4.6   | 5.0   | 3.4   | 6.1   |

|        |        |        |        |        |        |
|--------|--------|--------|--------|--------|--------|
| 3.9    | 2.6    | 10.2   | 10.8   | 5.5    | 5.0    |
| 72.3   | 77.9   | 98.6   | 89.8   | 89.0   | 107.9  |
| 2.1    | 1.1    | 4.1    | 4.0    | 1.6    | 2.1    |
| 1.3    | 0.9    | 4.6    | 4.6    | 0.9    | 1.1    |
| 9.1    | 18.6   | 8.3    | 14.6   | 12.2   | 9.9    |
| 5.9    | 2.2    | 0.4    | 1.9    | 4.4    | 3.8    |
| 2.2    | 8.2    | 1.0    | 9.1    | 0.8    | 3.7    |
| 4.4    | 16.6   | 5.0    | 5.7    | 7.3    | 19.5   |
| 3.9    | 1.0    | 0.6    | 0.8    | 0.5    | 3.4    |
| 2.0    | 7.7    | 3.4    | 12.9   | 7.3    | 1.8    |
| 4.6    | 3.7    | 5.3    | 6.9    | 5.7    | 7.4    |
| 8.3    | 15.6   | 11.2   | 12.7   | 10.3   | 6.8    |
| 8.7    | 7.6    | 15.5   | 5.9    | 9.2    | 10.7   |
| 43.1   | 49.8   | 51.4   | 31.3   | 41.2   | 42.9   |
| 1.7    | 0.6    | 1.6    | 1.5    | 0.8    | 2.1    |
| 16.8   | 18.7   | 23.4   | 17.9   | 16.3   | 26.6   |
| 144.4  | 121.3  | 108.4  | 142.7  | 188.5  | 185.0  |
| 7.0    | 21.8   | 16.5   | 7.8    | 10.2   | 7.1    |
| 859.7  | 748.4  | 870.9  | 909.1  | 995.2  | 1002.6 |
| 2.2    | 3.4    | 9.8    | 8.4    | 16.5   | 8.6    |
| 3.1    | 1.2    | 2.6    | 2.5    | 2.4    | 8.0    |
| 15.0   | 17.9   | 15.0   | 24.6   | 10.1   | 24.9   |
| 11.3   | 14.0   | 9.7    | 6.6    | 6.2    | 11.2   |
| 4.6    | 9.3    | 10.5   | 8.9    | 7.3    | 15.9   |
| 1.9    | 6.8    | 3.9    | 0.3    | 3.1    | 4.3    |
| 38.2   | 53.8   | 37.5   | 31.6   | 39.7   | 45.1   |
| 17.5   | 34.5   | 19.5   | 23.3   | 22.7   | 22.8   |
| 19.4   | 21.2   | 42.8   | 23.5   | 33.4   | 17.2   |
| 1.0    | 0.4    | 1.6    | 3.7    | 0.5    | 3.7    |
| 2.1    | 0.9    | 3.4    | 2.2    | 4.8    | 2.9    |
| 0.5    | 3.1    | 0.8    | 3.2    | 0.7    | 0.9    |
| 3.3    | 0.6    | 1.0    | 3.8    | 0.8    | 4.6    |
| 35.8   | 37.9   | 42.6   | 30.9   | 42.5   | 37.2   |
| 70.2   | 73.9   | 53.4   | 81.6   | 79.0   | 75.2   |
| 33.0   | 45.4   | 41.3   | 40.0   | 35.2   | 38.4   |
| 557.7  | 612.4  | 485.1  | 567.1  | 760.4  | 630.4  |
| 10.8   | 13.5   | 16.5   | 18.6   | 18.1   | 12.2   |
| 1398.7 | 1204.0 | 1204.4 | 1292.8 | 1356.1 | 1485.5 |
| 25.9   | 21.1   | 27.4   | 22.0   | 28.1   | 34.9   |
| 8.8    | 4.8    | 6.7    | 6.9    | 5.2    | 11.8   |
| 391.8  | 385.7  | 388.1  | 411.7  | 481.7  | 496.7  |
| 7.2    | 28.0   | 26.3   | 5.9    | 14.3   | 14.2   |
| 61.5   | 52.1   | 62.9   | 75.4   | 73.1   | 87.5   |
| 31.2   | 21.7   | 38.0   | 36.7   | 45.7   | 41.7   |
| 4.7    | 3.7    | 17.3   | 5.0    | 6.9    | 7.0    |
| 1.5    | 1.7    | 0.6    | 1.3    | 1.1    | 2.6    |
| 13.0   | 11.7   | 18.9   | 12.0   | 11.5   | 15.4   |
| 45.2   | 32.7   | 29.1   | 36.5   | 42.7   | 47.0   |
| 5.4    | 5.4    | 1.9    | 10.7   | 2.5    | 9.7    |
| 399.9  | 400.0  | 427.2  | 461.8  | 494.4  | 493.7  |
| 1.0    | 1.8    | 4.6    | 2.3    | 0.6    | 6.8    |
| 7.0    | 6.1    | 10.0   | 3.9    | 10.9   | 5.2    |
| 22.4   | 16.7   | 16.2   | 25.1   | 22.1   | 19.7   |

|        |        |        |        |        |        |
|--------|--------|--------|--------|--------|--------|
| 34.4   | 26.6   | 38.9   | 29.6   | 25.5   | 34.1   |
| 2.8    | 3.6    | 3.3    | 2.8    | 2.6    | 3.4    |
| 1.8    | 26.9   | 6.3    | 3.8    | 5.0    | 11.2   |
| 8.0    | 9.8    | 8.8    | 11.9   | 11.6   | 8.3    |
| 4.5    | 7.9    | 5.0    | 6.3    | 6.1    | 5.2    |
| 8.6    | 1.0    | 5.6    | 2.9    | 3.2    | 3.4    |
| 213.8  | 218.1  | 262.2  | 234.9  | 279.1  | 287.0  |
| 9.6    | 19.0   | 12.2   | 14.5   | 12.2   | 16.5   |
| 45.4   | 19.0   | 25.6   | 33.0   | 50.8   | 47.4   |
| 19.1   | 18.5   | 18.0   | 17.6   | 19.7   | 18.3   |
| 50.3   | 57.4   | 57.4   | 45.3   | 65.8   | 66.3   |
| 13.1   | 17.3   | 11.9   | 5.5    | 4.4    | 10.9   |
| 10.4   | 3.6    | 11.0   | 15.3   | 13.5   | 13.1   |
| 3161.2 | 2753.7 | 3008.1 | 3430.1 | 3386.2 | 3972.5 |
| 20.5   | 16.2   | 5.6    | 18.3   | 12.0   | 20.0   |
| 2.9    | 15.0   | 1.5    | 5.6    | 4.1    | 4.0    |
| 25.5   | 18.5   | 36.6   | 28.9   | 32.0   | 36.6   |
| 4.4    | 5.6    | 7.8    | 13.0   | 9.1    | 3.7    |
| 165.0  | 136.0  | 253.3  | 161.0  | 267.5  | 223.2  |
| 16.2   | 7.9    | 13.5   | 12.3   | 15.5   | 15.5   |
| 4.2    | 1.1    | 1.7    | 1.6    | 2.3    | 5.5    |
| 276.8  | 275.8  | 244.3  | 213.6  | 275.3  | 309.2  |
| 89.3   | 89.4   | 79.1   | 96.6   | 93.4   | 111.9  |
| 4.7    | 3.7    | 4.3    | 5.2    | 4.5    | 10.2   |
| 303.5  | 419.5  | 367.4  | 374.1  | 419.1  | 458.5  |
| 5.1    | 1.6    | 7.9    | 9.4    | 4.5    | 6.3    |
| 1240.5 | 1123.3 | 1246.8 | 1287.5 | 1300.3 | 1431.3 |
| 5.9    | 10.5   | 13.8   | 3.1    | 6.6    | 1.1    |
| 20.5   | 29.8   | 14.1   | 10.7   | 13.4   | 22.6   |
| 21.3   | 12.0   | 12.0   | 9.0    | 10.2   | 16.1   |
| 31.8   | 32.3   | 20.0   | 35.2   | 27.9   | 33.4   |
| 186.5  | 179.7  | 196.2  | 219.7  | 192.9  | 229.9  |
| 0.9    | 1.0    | 1.0    | 1.2    | 1.1    | 0.7    |
| 4.0    | 13.1   | 15.7   | 10.4   | 9.4    | 12.9   |
| 2.9    | 0.3    | 1.3    | 7.0    | 3.4    | 2.7    |
| 19.6   | 17.6   | 15.2   | 23.0   | 19.9   | 23.7   |
| 28.0   | 48.7   | 22.3   | 25.7   | 28.2   | 27.3   |
| 6.7    | 21.0   | 23.0   | 18.0   | 7.2    | 11.8   |
| 2004.5 | 1982.9 | 2126.1 | 2275.6 | 2319.9 | 2361.8 |
| 218.5  | 224.1  | 268.2  | 314.6  | 280.2  | 278.2  |
| 14.7   | 23.8   | 9.4    | 10.3   | 13.4   | 21.8   |
| 17.3   | 1.3    | 9.1    | 8.3    | 12.9   | 16.2   |
| 2.2    | 4.4    | 13.4   | 6.5    | 3.2    | 4.8    |
| 4.9    | 3.3    | 2.4    | 3.7    | 5.7    | 4.3    |
| 14.5   | 8.1    | 5.0    | 16.0   | 14.7   | 13.6   |
| 15.6   | 16.5   | 7.4    | 14.2   | 8.6    | 17.1   |
| 5.8    | 19.3   | 2.3    | 13.8   | 5.0    | 14.6   |
| 5.4    | 0.5    | 4.8    | 2.8    | 1.4    | 1.9    |
| 206.7  | 201.4  | 231.5  | 226.3  | 266.5  | 269.6  |
| 24.3   | 20.5   | 14.2   | 17.3   | 11.8   | 22.2   |
| 17.0   | 19.7   | 25.4   | 25.2   | 21.4   | 28.1   |
| 4.0    | 5.7    | 2.4    | 0.4    | 1.4    | 8.9    |
| 32.4   | 15.1   | 33.3   | 30.5   | 44.0   | 36.3   |

|        |        |        |        |        |        |
|--------|--------|--------|--------|--------|--------|
| 25.0   | 31.8   | 21.1   | 29.7   | 27.4   | 33.5   |
| 9.3    | 8.2    | 17.6   | 8.2    | 11.5   | 10.3   |
| 5.4    | 4.0    | 4.6    | 5.3    | 4.8    | 3.2    |
| 1.6    | 5.9    | 5.1    | 2.3    | 9.7    | 1.3    |
| 275.1  | 242.4  | 300.3  | 305.0  | 332.0  | 331.3  |
| 60.1   | 48.1   | 63.5   | 55.2   | 62.3   | 64.1   |
| 11.8   | 13.8   | 10.2   | 10.4   | 15.5   | 14.6   |
| 381.4  | 322.7  | 455.1  | 488.6  | 448.5  | 478.6  |
| 712.0  | 1227.0 | 773.0  | 1032.1 | 722.0  | 951.5  |
| 6.3    | 5.5    | 15.0   | 5.4    | 8.9    | 14.6   |
| 6.9    | 1.7    | 14.5   | 1.7    | 5.6    | 1.7    |
| 7.2    | 12.5   | 10.1   | 2.0    | 3.7    | 12.3   |
| 1908.4 | 1679.9 | 2053.1 | 2029.0 | 2224.0 | 2279.9 |
| 360.5  | 310.2  | 365.9  | 387.1  | 490.2  | 473.2  |
| 13.3   | 8.8    | 19.8   | 15.6   | 7.3    | 7.8    |
| 1.8    | 1.3    | 4.3    | 9.5    | 6.8    | 5.0    |
| 20.8   | 38.2   | 21.3   | 36.3   | 30.4   | 28.2   |
| 2.4    | 17.8   | 7.4    | 16.6   | 4.2    | 11.8   |
| 15.8   | 16.3   | 13.2   | 11.5   | 18.2   | 17.3   |
| 2.6    | 3.3    | 2.0    | 2.4    | 6.9    | 2.1    |
| 20.7   | 18.0   | 20.6   | 28.0   | 30.9   | 32.2   |
| 4.2    | 9.3    | 7.0    | 10.6   | 2.2    | 2.0    |
| 28.5   | 34.1   | 31.2   | 27.8   | 20.6   | 21.5   |
| 5.4    | 10.1   | 9.7    | 10.1   | 30.9   | 8.4    |
| 9.2    | 25.5   | 12.7   | 8.3    | 2.4    | 5.1    |
| 248.2  | 256.4  | 321.9  | 263.3  | 358.8  | 409.0  |
| 1.2    | 2.5    | 1.6    | 1.5    | 0.9    | 4.3    |
| 24.7   | 24.4   | 28.3   | 17.5   | 38.8   | 28.4   |
| 5.4    | 6.3    | 6.3    | 7.3    | 1.0    | 7.2    |
| 3.7    | 7.5    | 1.9    | 8.6    | 6.1    | 8.0    |
| 99.7   | 122.2  | 113.3  | 93.1   | 111.5  | 139.9  |
| 4.0    | 18.2   | 10.1   | 7.2    | 13.6   | 4.6    |
| 1.0    | 2.1    | 1.2    | 4.3    | 6.1    | 1.4    |
| 94.6   | 96.4   | 116.0  | 106.7  | 81.6   | 119.8  |
| 428.0  | 355.2  | 456.8  | 450.1  | 527.0  | 495.3  |
| 45.7   | 40.4   | 36.3   | 38.3   | 32.3   | 40.4   |
| 1.5    | 2.9    | 1.3    | 4.1    | 6.5    | 1.3    |
| 2.9    | 2.8    | 6.5    | 5.3    | 0.6    | 6.2    |
| 79.7   | 76.3   | 84.0   | 62.6   | 95.0   | 82.5   |
| 14.2   | 2.2    | 7.9    | 17.4   | 8.3    | 9.4    |
| 6.5    | 11.3   | 2.0    | 10.2   | 3.2    | 4.2    |
| 5.2    | 21.6   | 6.8    | 9.4    | 7.7    | 13.5   |
| 2.5    | 1.2    | 2.3    | 1.7    | 3.2    | 2.6    |
| 12.1   | 18.0   | 12.9   | 4.0    | 2.8    | 20.3   |
| 2.0    | 5.8    | 4.7    | 4.2    | 8.6    | 8.2    |
| 13.3   | 18.6   | 25.2   | 28.2   | 19.3   | 13.4   |
| 4.1    | 2.6    | 3.9    | 4.3    | 3.2    | 18.1   |
| 6.7    | 15.9   | 15.6   | 10.1   | 3.6    | 7.0    |
| 4.6    | 0.9    | 3.4    | 2.7    | 0.6    | 2.0    |
| 574.1  | 499.9  | 594.4  | 613.8  | 715.2  | 677.3  |
| 40.8   | 45.2   | 38.1   | 45.9   | 39.7   | 47.5   |
| 2.4    | 2.5    | 5.9    | 7.8    | 6.8    | 22.2   |
| 1.6    | 2.4    | 1.5    | 2.5    | 2.1    | 1.6    |

|        |        |        |        |        |        |
|--------|--------|--------|--------|--------|--------|
| 255.4  | 246.6  | 241.9  | 298.5  | 303.2  | 320.9  |
| 11.2   | 4.6    | 2.9    | 4.8    | 12.0   | 8.9    |
| 92.8   | 84.5   | 97.8   | 93.9   | 105.2  | 106.5  |
| 401.7  | 300.5  | 325.5  | 363.1  | 414.9  | 426.6  |
| 3907.2 | 3628.6 | 4052.5 | 4267.1 | 4207.0 | 4496.3 |
| 13.6   | 5.7    | 5.0    | 1.2    | 3.3    | 5.8    |
| 14.4   | 6.4    | 9.8    | 22.0   | 18.1   | 26.1   |
| 14.5   | 21.9   | 19.6   | 13.3   | 21.8   | 18.3   |
| 67.0   | 63.5   | 84.0   | 64.6   | 92.2   | 99.3   |
| 1636.1 | 1376.2 | 1611.8 | 1545.7 | 1872.8 | 1851.9 |
| 33.7   | 37.1   | 28.8   | 30.8   | 25.5   | 44.7   |
| 17.0   | 1.8    | 12.3   | 15.2   | 15.1   | 16.2   |
| 174.8  | 159.7  | 167.7  | 177.7  | 196.8  | 267.3  |
| 0.6    | 6.2    | 1.6    | 0.5    | 0.9    | 2.6    |
| 4.0    | 1.6    | 1.7    | 2.0    | 1.9    | 2.5    |
| 2.4    | 2.2    | 3.9    | 1.3    | 3.8    | 6.0    |
| 7.1    | 8.1    | 8.5    | 7.7    | 5.8    | 13.8   |
| 3.4    | 1.6    | 4.0    | 1.8    | 6.3    | 12.4   |
| 0.6    | 0.5    | 0.6    | 0.5    | 1.2    | 0.8    |
| 141.7  | 110.4  | 114.5  | 115.7  | 137.8  | 151.1  |
| 25.5   | 26.3   | 18.8   | 7.9    | 14.3   | 18.6   |
| 219.4  | 182.6  | 210.7  | 206.7  | 252.1  | 245.6  |
| 12.1   | 20.4   | 11.2   | 16.5   | 3.2    | 8.9    |
| 282.1  | 310.9  | 317.2  | 291.5  | 366.0  | 347.3  |
| 99.8   | 90.9   | 135.9  | 147.2  | 133.9  | 143.2  |
| 1015.7 | 866.1  | 909.9  | 906.1  | 979.0  | 1133.3 |
| 7.1    | 6.7    | 8.8    | 11.6   | 7.4    | 10.2   |
| 688.0  | 796.7  | 784.3  | 868.6  | 840.2  | 856.0  |
| 2.0    | 7.3    | 7.1    | 2.5    | 2.9    | 9.0    |
| 16.6   | 14.1   | 23.3   | 18.8   | 13.9   | 22.7   |
| 3.7    | 16.0   | 3.6    | 5.7    | 8.4    | 6.9    |
| 910.9  | 895.0  | 1124.1 | 1163.7 | 1165.6 | 1254.6 |
| 6.8    | 4.8    | 3.9    | 3.4    | 5.6    | 15.7   |
| 1140.7 | 977.4  | 1108.9 | 1069.2 | 1150.3 | 1312.6 |
| 46.5   | 28.2   | 49.1   | 50.0   | 52.1   | 60.3   |
| 10.4   | 13.7   | 3.4    | 6.4    | 16.9   | 2.6    |
| 23.8   | 32.5   | 15.8   | 24.5   | 36.9   | 45.6   |
| 126.3  | 84.2   | 144.9  | 140.4  | 146.3  | 157.5  |
| 4.7    | 3.5    | 1.6    | 4.4    | 2.7    | 1.9    |
| 0.8    | 1.3    | 2.4    | 0.5    | 0.5    | 0.8    |
| 5.0    | 4.5    | 6.5    | 5.6    | 4.6    | 7.3    |
| 4.9    | 2.1    | 1.2    | 2.0    | 4.2    | 5.2    |
| 131.7  | 164.6  | 144.6  | 176.5  | 202.3  | 193.3  |
| 5785.1 | 5151.1 | 5295.5 | 5771.4 | 6227.1 | 6434.5 |
| 843.8  | 989.0  | 909.0  | 837.6  | 867.2  | 1171.7 |
| 41.2   | 45.5   | 47.8   | 38.4   | 44.4   | 53.1   |
| 23.9   | 17.0   | 18.5   | 22.1   | 23.6   | 22.3   |
| 355.8  | 357.7  | 377.9  | 361.1  | 397.2  | 402.8  |
| 122.1  | 147.7  | 147.9  | 150.6  | 150.8  | 132.5  |
| 112.0  | 91.6   | 128.2  | 112.0  | 142.5  | 134.7  |
| 228.4  | 169.1  | 232.2  | 225.2  | 280.3  | 271.1  |
| 3.6    | 5.2    | 2.4    | 4.8    | 3.9    | 5.9    |
| 2.4    | 3.2    | 2.3    | 1.6    | 1.8    | 2.4    |



|        |        |        |        |        |        |
|--------|--------|--------|--------|--------|--------|
| 3.1    | 16.2   | 1.3    | 0.8    | 4.2    | 6.0    |
| 45.7   | 44.9   | 50.0   | 59.8   | 62.2   | 61.1   |
| 1.8    | 4.5    | 3.6    | 6.1    | 2.4    | 9.0    |
| 230.4  | 170.0  | 172.6  | 218.9  | 255.7  | 263.7  |
| 34.3   | 47.6   | 27.0   | 36.9   | 39.9   | 23.6   |
| 52.1   | 62.0   | 52.1   | 56.7   | 59.8   | 58.2   |
| 16.3   | 12.1   | 24.3   | 11.3   | 25.7   | 31.5   |
| 3.1    | 2.9    | 9.7    | 2.8    | 4.4    | 6.1    |
| 156.1  | 107.3  | 180.5  | 197.8  | 215.0  | 169.0  |
| 8.7    | 1.2    | 12.7   | 1.4    | 8.4    | 5.2    |
| 1.8    | 6.5    | 2.5    | 1.4    | 3.1    | 2.3    |
| 3.9    | 5.5    | 1.8    | 9.5    | 11.4   | 8.4    |
| 17.6   | 21.9   | 14.1   | 18.5   | 17.6   | 12.6   |
| 141.2  | 108.3  | 141.2  | 125.1  | 108.6  | 149.7  |
| 34.6   | 35.4   | 29.3   | 33.2   | 31.3   | 30.8   |
| 9.8    | 8.3    | 7.6    | 10.1   | 2.4    | 7.7    |
| 51.7   | 38.1   | 50.1   | 59.4   | 61.7   | 59.3   |
| 138.7  | 118.6  | 140.5  | 120.4  | 157.8  | 156.2  |
| 0.9    | 6.6    | 1.5    | 1.0    | 2.5    | 9.7    |
| 4.8    | 3.5    | 1.2    | 2.4    | 0.9    | 3.8    |
| 21.6   | 12.3   | 20.3   | 14.3   | 20.3   | 25.7   |
| 2.5    | 4.3    | 3.9    | 7.2    | 2.7    | 5.9    |
| 126.6  | 120.1  | 139.0  | 126.6  | 143.8  | 154.0  |
| 0.8    | 5.1    | 5.0    | 2.3    | 1.0    | 0.7    |
| 1.2    | 9.5    | 3.7    | 1.4    | 0.7    | 1.4    |
| 325.7  | 217.1  | 264.0  | 269.5  | 331.1  | 336.0  |
| 498.3  | 464.9  | 538.9  | 587.7  | 589.7  | 598.9  |
| 1106.4 | 1167.1 | 1041.8 | 1085.6 | 1211.7 | 1276.3 |
| 7.6    | 17.2   | 14.6   | 15.8   | 3.9    | 12.9   |
| 17.7   | 11.5   | 15.4   | 9.0    | 13.3   | 16.7   |
| 459.7  | 436.5  | 529.3  | 576.0  | 627.8  | 646.9  |
| 25.4   | 24.2   | 25.4   | 26.9   | 25.6   | 31.1   |
| 1.4    | 2.5    | 5.0    | 3.2    | 1.3    | 1.8    |
| 214.5  | 149.3  | 213.5  | 221.8  | 261.4  | 276.3  |
| 297.0  | 269.0  | 242.4  | 298.4  | 309.1  | 305.8  |
| 1.9    | 1.7    | 13.4   | 2.7    | 4.1    | 5.2    |
| 5.4    | 4.0    | 7.1    | 8.5    | 9.7    | 6.9    |
| 3.8    | 1.9    | 4.4    | 4.1    | 3.6    | 1.3    |
| 34.4   | 29.8   | 32.0   | 23.3   | 41.7   | 32.4   |
| 8.9    | 2.0    | 2.3    | 7.6    | 3.4    | 6.9    |
| 5.5    | 1.3    | 0.9    | 5.4    | 7.5    | 5.0    |
| 14.8   | 9.7    | 19.1   | 16.5   | 18.9   | 23.1   |
| 163.9  | 189.9  | 160.2  | 149.0  | 175.2  | 197.0  |
| 11.0   | 8.3    | 5.6    | 2.8    | 7.6    | 3.1    |
| 2.2    | 12.0   | 2.7    | 2.7    | 6.9    | 9.3    |
| 6.5    | 5.1    | 2.5    | 8.8    | 7.5    | 1.2    |
| 12.6   | 26.5   | 20.7   | 10.1   | 5.8    | 7.0    |
| 2.1    | 0.6    | 1.4    | 1.3    | 0.8    | 1.0    |
| 104.1  | 126.0  | 105.4  | 114.3  | 130.2  | 138.0  |
| 0.4    | 1.3    | 2.2    | 1.4    | 0.5    | 0.7    |
| 12.2   | 23.6   | 7.2    | 10.3   | 10.2   | 10.6   |
| 9.8    | 3.0    | 8.7    | 10.0   | 8.8    | 8.8    |
| 206.0  | 231.6  | 238.1  | 230.8  | 220.9  | 233.1  |

|       |       |       |       |       |       |
|-------|-------|-------|-------|-------|-------|
| 12.8  | 17.9  | 22.6  | 11.2  | 17.1  | 15.3  |
| 20.3  | 16.1  | 18.4  | 21.5  | 22.9  | 28.2  |
| 2.6   | 4.2   | 6.7   | 2.2   | 4.6   | 3.6   |
| 3.8   | 6.4   | 10.0  | 9.8   | 3.8   | 2.3   |
| 2.2   | 5.4   | 8.0   | 12.3  | 3.1   | 6.1   |
| 67.9  | 66.4  | 58.2  | 68.6  | 76.5  | 84.4  |
| 56.0  | 45.4  | 54.1  | 63.5  | 63.3  | 54.0  |
| 40.6  | 2.2   | 33.6  | 14.5  | 29.1  | 26.5  |
| 2.2   | 10.8  | 5.4   | 8.3   | 8.9   | 6.7   |
| 101.1 | 53.7  | 90.7  | 93.3  | 110.0 | 118.4 |
| 1.6   | 4.7   | 3.4   | 4.8   | 4.0   | 2.2   |
| 114.7 | 120.4 | 184.8 | 197.6 | 216.9 | 215.3 |
| 16.3  | 22.0  | 9.8   | 7.5   | 17.0  | 22.3  |
| 2.8   | 6.4   | 3.1   | 2.9   | 1.8   | 0.6   |
| 1.0   | 1.4   | 3.7   | 4.0   | 1.5   | 5.8   |
| 53.2  | 63.6  | 59.5  | 50.2  | 60.9  | 74.0  |
| 16.3  | 16.0  | 10.8  | 9.0   | 4.0   | 10.5  |
| 21.5  | 9.6   | 3.7   | 8.8   | 10.5  | 10.2  |
| 5.2   | 6.8   | 5.8   | 3.6   | 2.8   | 6.4   |
| 32.0  | 38.9  | 26.7  | 26.3  | 25.9  | 34.4  |
| 18.4  | 22.2  | 17.0  | 17.2  | 22.1  | 23.3  |
| 3.3   | 7.7   | 4.7   | 3.4   | 4.5   | 1.5   |
| 49.6  | 32.3  | 48.3  | 50.3  | 54.8  | 72.3  |
| 3.5   | 2.8   | 6.3   | 6.4   | 14.8  | 4.9   |
| 10.5  | 9.9   | 6.3   | 23.9  | 4.5   | 18.3  |
| 37.0  | 23.2  | 35.7  | 29.8  | 32.9  | 28.1  |
| 1.8   | 4.5   | 8.4   | 7.5   | 15.6  | 14.7  |
| 5.3   | 1.4   | 2.1   | 10.0  | 5.0   | 5.9   |
| 10.0  | 14.8  | 15.5  | 18.1  | 7.8   | 18.1  |
| 15.3  | 2.0   | 10.5  | 10.8  | 6.4   | 12.2  |
| 16.9  | 1.0   | 1.9   | 13.4  | 17.2  | 15.3  |
| 14.4  | 9.9   | 10.5  | 13.2  | 11.8  | 16.7  |
| 13.1  | 15.7  | 12.0  | 12.5  | 12.3  | 23.7  |
| 2.0   | 1.7   | 6.7   | 7.0   | 6.0   | 8.5   |
| 3.9   | 1.1   | 1.2   | 2.3   | 2.6   | 1.2   |
| 0.9   | 3.4   | 7.6   | 9.7   | 1.5   | 1.8   |
| 32.9  | 26.6  | 27.6  | 32.8  | 39.2  | 42.6  |
| 15.3  | 19.7  | 20.3  | 22.8  | 14.8  | 16.9  |
| 24.2  | 44.7  | 29.8  | 33.6  | 33.7  | 27.0  |
| 10.2  | 18.4  | 13.6  | 16.0  | 7.6   | 9.2   |
| 6.1   | 1.6   | 13.0  | 7.5   | 13.7  | 8.4   |
| 6.6   | 12.2  | 4.4   | 5.7   | 11.2  | 16.8  |
| 14.7  | 12.4  | 12.2  | 8.3   | 8.2   | 10.7  |
| 34.0  | 39.2  | 30.1  | 30.1  | 34.7  | 47.5  |
| 12.3  | 3.6   | 6.5   | 8.3   | 4.1   | 7.7   |
| 2.2   | 0.8   | 3.7   | 1.2   | 2.2   | 1.7   |
| 25.5  | 43.6  | 27.2  | 38.0  | 19.2  | 30.6  |
| 43.4  | 28.4  | 35.6  | 29.9  | 36.4  | 36.2  |
| 14.5  | 16.6  | 21.8  | 13.8  | 20.1  | 15.7  |
| 35.2  | 17.8  | 33.0  | 29.3  | 27.8  | 39.9  |
| 9.1   | 1.1   | 7.6   | 9.3   | 7.0   | 11.5  |
| 5.5   | 17.0  | 7.5   | 9.3   | 10.1  | 7.5   |
| 11.2  | 0.9   | 8.2   | 17.5  | 12.5  | 15.3  |

|        |        |        |        |        |        |
|--------|--------|--------|--------|--------|--------|
| 7.4    | 9.7    | 9.0    | 10.4   | 6.4    | 2.5    |
| 3.0    | 4.8    | 4.1    | 4.6    | 5.1    | 4.3    |
| 444.7  | 422.9  | 472.6  | 501.1  | 515.3  | 573.2  |
| 38.4   | 24.2   | 37.9   | 33.6   | 41.4   | 50.7   |
| 114.1  | 103.7  | 199.7  | 180.1  | 153.4  | 180.2  |
| 3.1    | 1.1    | 5.5    | 1.5    | 2.8    | 2.1    |
| 34.1   | 15.0   | 25.8   | 25.7   | 31.5   | 34.9   |
| 8.0    | 21.2   | 12.0   | 6.7    | 11.5   | 10.2   |
| 2.4    | 4.3    | 3.1    | 2.9    | 2.8    | 4.3    |
| 2.3    | 1.4    | 2.0    | 2.3    | 2.3    | 12.5   |
| 1.4    | 2.1    | 5.4    | 1.1    | 0.8    | 1.5    |
| 2.3    | 6.1    | 1.8    | 1.0    | 7.6    | 0.7    |
| 234.4  | 208.4  | 219.0  | 209.1  | 262.9  | 284.2  |
| 6.3    | 15.1   | 14.4   | 2.5    | 5.9    | 12.3   |
| 756.4  | 696.0  | 763.9  | 786.0  | 932.6  | 907.2  |
| 470.4  | 419.6  | 466.4  | 501.9  | 535.9  | 612.2  |
| 36.9   | 73.6   | 37.1   | 42.7   | 60.3   | 55.6   |
| 4.9    | 28.7   | 7.8    | 13.2   | 12.2   | 13.3   |
| 14.3   | 8.2    | 14.0   | 9.8    | 24.2   | 17.0   |
| 2.0    | 1.0    | 17.1   | 1.4    | 13.0   | 3.4    |
| 2.4    | 18.0   | 2.8    | 7.4    | 2.6    | 7.0    |
| 110.4  | 119.2  | 124.9  | 136.6  | 162.4  | 173.0  |
| 9.2    | 8.5    | 5.8    | 5.3    | 4.6    | 18.6   |
| 3.5    | 3.3    | 3.2    | 2.9    | 3.3    | 2.8    |
| 4.1    | 7.5    | 4.3    | 19.3   | 33.4   | 35.2   |
| 5.0    | 4.3    | 0.9    | 1.9    | 5.8    | 4.9    |
| 15.7   | 60.6   | 10.4   | 63.0   | 35.1   | 40.1   |
| 5.5    | 12.7   | 6.6    | 11.3   | 8.8    | 6.7    |
| 37.7   | 57.5   | 49.6   | 38.1   | 40.7   | 46.5   |
| 6.8    | 9.8    | 7.8    | 5.5    | 11.2   | 9.8    |
| 310.9  | 285.9  | 349.5  | 340.7  | 378.2  | 378.8  |
| 4.5    | 0.8    | 5.1    | 11.1   | 10.6   | 4.4    |
| 6.7    | 8.6    | 14.9   | 11.0   | 9.9    | 1.4    |
| 3.5    | 20.4   | 16.2   | 12.9   | 14.6   | 9.7    |
| 2.5    | 9.4    | 1.8    | 3.3    | 0.8    | 5.2    |
| 14.5   | 3.0    | 11.7   | 6.6    | 4.1    | 15.9   |
| 1393.8 | 1190.2 | 1427.0 | 1470.3 | 1554.1 | 1589.9 |
| 1.7    | 0.9    | 4.8    | 1.2    | 7.0    | 1.5    |
| 14.2   | 7.0    | 9.9    | 15.1   | 23.8   | 11.8   |
| 13.0   | 21.1   | 20.1   | 21.4   | 25.7   | 26.7   |
| 9.4    | 9.0    | 24.7   | 7.6    | 21.7   | 14.9   |
| 13.8   | 5.1    | 16.0   | 12.4   | 11.8   | 11.1   |
| 16.2   | 13.8   | 22.6   | 13.7   | 14.7   | 16.1   |
| 4.4    | 5.5    | 3.3    | 4.0    | 6.5    | 5.9    |
| 0.9    | 1.4    | 2.7    | 1.2    | 6.8    | 2.5    |
| 2.6    | 21.5   | 17.8   | 2.9    | 3.9    | 11.1   |
| 9.4    | 8.5    | 8.2    | 3.9    | 5.0    | 9.3    |
| 12.2   | 20.1   | 18.5   | 16.7   | 26.0   | 16.2   |
| 4.6    | 12.7   | 6.2    | 1.8    | 5.6    | 4.1    |
| 6.5    | 2.0    | 5.1    | 11.0   | 8.8    | 19.1   |
| 99.4   | 79.5   | 92.4   | 96.0   | 99.4   | 108.1  |
| 3.9    | 4.1    | 1.6    | 2.8    | 3.8    | 3.8    |
| 21.5   | 33.2   | 13.8   | 7.9    | 16.5   | 7.3    |

|        |        |        |        |        |        |
|--------|--------|--------|--------|--------|--------|
| 8.5    | 12.4   | 13.7   | 5.2    | 3.4    | 16.5   |
| 2.7    | 1.1    | 0.9    | 2.5    | 0.8    | 1.7    |
| 1096.1 | 781.3  | 1052.1 | 983.3  | 1057.6 | 1133.9 |
| 655.9  | 699.6  | 706.9  | 700.7  | 788.0  | 850.5  |
| 0.6    | 1.6    | 1.8    | 6.5    | 4.5    | 4.6    |
| 9.8    | 5.5    | 5.4    | 12.7   | 8.3    | 7.2    |
| 7.6    | 2.8    | 6.9    | 1.8    | 7.6    | 9.4    |
| 6.4    | 1.0    | 9.0    | 16.9   | 1.3    | 2.9    |
| 3.4    | 8.4    | 7.7    | 12.4   | 2.7    | 4.8    |
| 88.3   | 82.9   | 89.1   | 94.3   | 85.9   | 93.4   |
| 29.5   | 25.7   | 31.7   | 33.9   | 27.3   | 23.5   |
| 1.0    | 1.7    | 5.2    | 1.6    | 5.1    | 8.5    |
| 22.0   | 5.1    | 26.5   | 19.0   | 22.4   | 25.5   |
| 30.3   | 18.7   | 29.9   | 27.4   | 39.9   | 46.5   |
| 17.9   | 17.9   | 21.5   | 31.1   | 19.4   | 29.3   |
| 4.7    | 8.4    | 8.6    | 8.3    | 11.5   | 9.1    |
| 2.0    | 18.6   | 3.4    | 2.2    | 12.9   | 3.1    |
| 1.1    | 6.4    | 14.5   | 2.7    | 6.4    | 7.1    |
| 7.3    | 1.1    | 5.0    | 0.6    | 0.6    | 0.8    |
| 2678.5 | 2414.2 | 2818.1 | 2961.5 | 3002.9 | 3112.3 |
| 2.1    | 1.1    | 1.4    | 1.8    | 1.0    | 1.2    |
| 2682.8 | 2579.1 | 2830.7 | 2978.5 | 3130.5 | 3143.2 |
| 103.8  | 187.4  | 106.1  | 131.3  | 102.0  | 135.4  |
| 1393.0 | 1126.1 | 1313.1 | 1332.4 | 1411.2 | 1486.3 |
| 1.6    | 4.0    | 2.2    | 2.2    | 2.2    | 2.8    |
| 1.6    | 1.4    | 2.9    | 2.8    | 1.3    | 2.6    |
| 612.0  | 666.5  | 715.2  | 554.4  | 748.7  | 690.1  |
| 9.6    | 10.2   | 8.0    | 5.3    | 11.3   | 6.8    |
| 74.9   | 63.5   | 70.2   | 63.4   | 80.9   | 84.5   |
| 119.8  | 131.1  | 139.4  | 120.2  | 150.5  | 128.5  |
| 4.7    | 1.8    | 2.8    | 6.5    | 8.1    | 12.0   |
| 68.3   | 84.6   | 69.6   | 76.6   | 77.4   | 86.0   |
| 2624.0 | 2198.7 | 2230.5 | 2529.0 | 2552.6 | 3125.6 |
| 1.8    | 1.8    | 1.3    | 1.5    | 1.2    | 1.2    |
| 4.7    | 1.9    | 2.2    | 1.8    | 2.4    | 2.7    |
| 9.3    | 3.5    | 12.8   | 8.4    | 5.5    | 12.0   |
| 4.4    | 1.6    | 2.2    | 6.2    | 4.9    | 3.3    |
| 5.7    | 13.4   | 8.4    | 11.0   | 10.3   | 5.0    |
| 22.8   | 25.8   | 11.2   | 21.4   | 20.7   | 21.3   |
| 10.3   | 13.6   | 3.7    | 2.7    | 2.7    | 2.9    |
| 58.9   | 52.6   | 37.2   | 45.6   | 58.3   | 72.2   |
| 1.9    | 3.1    | 3.6    | 4.0    | 0.8    | 1.2    |
| 5.6    | 6.3    | 7.8    | 4.5    | 17.6   | 13.5   |
| 3.9    | 4.6    | 2.6    | 3.5    | 9.2    | 2.7    |
| 23.1   | 37.3   | 22.5   | 19.4   | 32.4   | 18.6   |
| 2.7    | 3.9    | 5.5    | 1.9    | 2.4    | 2.5    |
| 9.2    | 1.9    | 2.2    | 1.5    | 1.8    | 13.4   |
| 0.9    | 2.7    | 6.3    | 3.4    | 2.0    | 3.6    |
| 1182.0 | 1118.9 | 1460.3 | 1423.5 | 1559.9 | 1492.3 |
| 10.2   | 9.2    | 13.6   | 9.5    | 13.7   | 11.5   |
| 1.1    | 2.0    | 2.2    | 1.1    | 1.2    | 1.2    |
| 5.5    | 12.0   | 3.8    | 7.4    | 3.1    | 13.4   |
| 1.0    | 3.5    | 1.7    | 2.9    | 2.5    | 5.7    |

|        |        |        |        |        |        |
|--------|--------|--------|--------|--------|--------|
| 2.3    | 1.4    | 2.2    | 2.8    | 2.8    | 2.4    |
| 2.3    | 3.4    | 1.9    | 2.4    | 1.8    | 2.9    |
| 12.5   | 4.7    | 5.0    | 3.4    | 5.3    | 5.5    |
| 4.1    | 15.3   | 6.6    | 3.3    | 9.6    | 5.3    |
| 11.4   | 0.8    | 6.1    | 13.4   | 9.6    | 16.4   |
| 3.9    | 3.0    | 1.6    | 1.3    | 2.5    | 5.7    |
| 34.3   | 22.7   | 31.4   | 56.9   | 53.8   | 68.1   |
| 0.7    | 0.8    | 1.8    | 7.2    | 7.0    | 0.6    |
| 15.3   | 11.9   | 9.9    | 15.2   | 8.4    | 13.2   |
| 6.0    | 9.9    | 2.4    | 1.4    | 7.4    | 1.6    |
| 345.5  | 271.5  | 366.2  | 327.2  | 383.4  | 428.6  |
| 1.9    | 3.9    | 4.1    | 4.3    | 2.5    | 2.2    |
| 11.2   | 14.7   | 14.9   | 18.2   | 17.8   | 21.7   |
| 1.8    | 2.6    | 2.6    | 2.3    | 2.4    | 1.9    |
| 2.8    | 1.7    | 2.1    | 2.1    | 1.7    | 2.6    |
| 2.3    | 2.0    | 2.2    | 2.0    | 3.1    | 2.6    |
| 113.8  | 92.9   | 140.4  | 116.8  | 134.5  | 151.6  |
| 1.4    | 4.7    | 7.5    | 2.6    | 4.6    | 1.6    |
| 14.0   | 16.7   | 15.4   | 17.7   | 16.0   | 14.2   |
| 201.6  | 184.9  | 221.3  | 233.5  | 251.2  | 235.9  |
| 51.1   | 38.5   | 52.6   | 51.6   | 47.4   | 37.2   |
| 9.8    | 16.2   | 13.9   | 23.3   | 15.8   | 7.0    |
| 13.4   | 9.0    | 7.0    | 14.3   | 15.9   | 12.5   |
| 2.1    | 5.8    | 10.0   | 2.7    | 5.6    | 7.4    |
| 2.3    | 3.0    | 2.3    | 1.8    | 1.8    | 2.0    |
| 89.9   | 72.7   | 88.3   | 85.3   | 93.1   | 109.6  |
| 154.2  | 121.9  | 175.8  | 189.5  | 192.9  | 199.7  |
| 751.3  | 1170.3 | 793.0  | 958.4  | 754.4  | 904.9  |
| 292.6  | 237.7  | 371.7  | 334.3  | 373.3  | 374.7  |
| 28.8   | 21.9   | 32.4   | 38.2   | 33.2   | 29.7   |
| 5.7    | 5.5    | 15.8   | 13.9   | 12.9   | 16.9   |
| 2557.9 | 2406.0 | 2395.6 | 2633.6 | 2537.0 | 2985.2 |
| 5.7    | 2.0    | 1.2    | 4.7    | 1.6    | 7.7    |
| 17.3   | 7.3    | 13.4   | 11.2   | 12.1   | 15.9   |
| 2.0    | 2.4    | 1.8    | 2.3    | 5.9    | 3.4    |
| 10.1   | 8.7    | 2.6    | 10.0   | 6.3    | 4.2    |
| 3.9    | 8.4    | 10.9   | 9.9    | 2.8    | 3.8    |
| 1.3    | 1.2    | 1.1    | 1.1    | 1.3    | 1.3    |
| 21.6   | 31.1   | 30.4   | 18.7   | 26.3   | 22.0   |
| 14.2   | 5.8    | 6.0    | 14.2   | 15.9   | 17.4   |
| 3.9    | 8.7    | 1.3    | 2.5    | 6.0    | 2.2    |
| 54.2   | 51.6   | 62.2   | 43.5   | 57.8   | 64.9   |
| 3.4    | 3.5    | 4.1    | 2.4    | 3.0    | 7.2    |
| 12.7   | 6.3    | 10.4   | 9.5    | 11.2   | 16.1   |
| 9.6    | 11.7   | 19.4   | 16.2   | 6.3    | 10.5   |
| 14.0   | 1.4    | 3.5    | 2.2    | 9.7    | 13.7   |
| 15.0   | 2.4    | 18.0   | 11.0   | 9.5    | 18.5   |
| 32.8   | 27.3   | 17.2   | 31.2   | 32.8   | 26.4   |
| 2.5    | 1.1    | 2.6    | 3.6    | 1.6    | 1.0    |
| 36.8   | 26.2   | 42.5   | 33.6   | 42.0   | 47.7   |
| 206.8  | 205.2  | 207.7  | 223.7  | 241.9  | 264.2  |
| 0.8    | 22.5   | 9.8    | 14.7   | 5.5    | 16.8   |
| 10.9   | 9.0    | 7.5    | 19.5   | 21.4   | 17.2   |

|        |        |        |        |        |        |
|--------|--------|--------|--------|--------|--------|
| 1.8    | 7.4    | 1.5    | 1.5    | 3.4    | 1.3    |
| 3.2    | 4.9    | 2.9    | 2.9    | 3.9    | 2.0    |
| 507.4  | 500.3  | 519.3  | 595.2  | 560.0  | 616.6  |
| 3.8    | 9.7    | 9.1    | 5.1    | 5.4    | 12.1   |
| 7.5    | 4.2    | 2.8    | 2.7    | 5.6    | 2.4    |
| 4.3    | 10.1   | 5.0    | 1.6    | 7.1    | 7.9    |
| 3.3    | 1.9    | 8.1    | 1.6    | 5.9    | 19.4   |
| 92.7   | 94.4   | 93.7   | 122.5  | 105.8  | 137.8  |
| 11.7   | 23.5   | 12.0   | 5.0    | 18.1   | 21.6   |
| 1538.4 | 1325.4 | 1551.1 | 1571.2 | 1635.5 | 1934.4 |
| 1.8    | 2.6    | 2.1    | 2.3    | 1.4    | 1.3    |
| 227.1  | 175.9  | 164.3  | 187.0  | 238.8  | 256.7  |
| 3.2    | 13.5   | 12.7   | 8.4    | 4.2    | 12.3   |
| 5.9    | 20.7   | 2.9    | 5.0    | 7.7    | 7.0    |
| 6.5    | 12.7   | 6.6    | 9.3    | 14.5   | 6.7    |
| 1.2    | 12.5   | 1.5    | 4.7    | 1.1    | 4.3    |
| 6.9    | 7.2    | 2.2    | 7.7    | 10.2   | 2.4    |
| 1.7    | 2.1    | 2.4    | 2.2    | 1.7    | 3.1    |
| 30.5   | 18.4   | 24.0   | 23.8   | 27.3   | 34.0   |
| 363.1  | 309.8  | 299.1  | 308.1  | 312.2  | 393.1  |
| 22.1   | 4.9    | 21.1   | 14.2   | 15.9   | 13.2   |
| 15.5   | 35.4   | 23.1   | 22.1   | 32.5   | 22.2   |
| 289.7  | 262.3  | 276.2  | 267.6  | 341.2  | 329.7  |
| 13.3   | 21.5   | 15.3   | 11.4   | 9.2    | 13.8   |
| 1.5    | 2.2    | 2.9    | 2.8    | 2.8    | 4.6    |
| 13.1   | 13.2   | 17.3   | 12.4   | 12.2   | 10.7   |
| 728.1  | 684.2  | 672.9  | 804.6  | 783.4  | 879.8  |
| 40.4   | 40.6   | 21.8   | 39.7   | 40.1   | 44.2   |
| 5.2    | 20.5   | 16.3   | 10.9   | 12.0   | 3.8    |
| 14.4   | 11.9   | 18.1   | 12.3   | 12.9   | 12.6   |
| 4.8    | 6.5    | 0.8    | 5.3    | 8.4    | 1.1    |
| 11.7   | 27.1   | 12.7   | 26.7   | 12.8   | 25.3   |
| 6.1    | 8.5    | 7.0    | 8.8    | 5.7    | 16.4   |
| 12.3   | 18.9   | 14.2   | 19.4   | 19.3   | 23.2   |
| 4.2    | 0.8    | 1.6    | 3.0    | 2.2    | 3.5    |
| 249.9  | 269.5  | 233.7  | 274.2  | 281.8  | 252.3  |
| 0.6    | 0.4    | 1.1    | 0.7    | 0.7    | 2.7    |
| 3.2    | 1.5    | 2.3    | 1.9    | 2.6    | 4.2    |
| 85.3   | 73.3   | 103.3  | 100.9  | 121.0  | 112.3  |
| 17.6   | 19.7   | 7.2    | 10.8   | 17.6   | 22.7   |
| 10.7   | 3.4    | 18.1   | 16.5   | 13.2   | 22.3   |
| 7.8    | 7.3    | 9.4    | 4.7    | 11.7   | 7.1    |
| 2.7    | 3.4    | 2.0    | 5.5    | 3.7    | 1.8    |
| 8.6    | 7.0    | 12.5   | 10.9   | 15.1   | 7.4    |
| 46.5   | 46.8   | 46.4   | 37.9   | 50.0   | 57.2   |
| 44.6   | 46.4   | 62.7   | 55.9   | 68.0   | 50.1   |
| 349.1  | 342.8  | 384.9  | 383.3  | 433.7  | 433.3  |
| 20.8   | 29.1   | 35.2   | 34.9   | 34.8   | 41.8   |
| 510.8  | 516.8  | 551.6  | 561.8  | 592.4  | 650.7  |
| 4.2    | 6.8    | 8.1    | 9.0    | 7.0    | 6.1    |
| 1.5    | 0.9    | 7.5    | 0.7    | 0.6    | 0.8    |
| 1.0    | 5.4    | 3.1    | 2.3    | 1.8    | 3.2    |
| 24.4   | 12.1   | 13.4   | 14.5   | 32.9   | 30.3   |

|       |       |       |       |       |        |
|-------|-------|-------|-------|-------|--------|
| 45.8  | 50.9  | 64.7  | 50.3  | 66.2  | 53.7   |
| 457.2 | 430.0 | 461.3 | 466.9 | 538.8 | 564.9  |
| 12.2  | 3.2   | 13.2  | 14.2  | 13.4  | 10.3   |
| 17.8  | 3.2   | 3.6   | 7.7   | 4.8   | 13.7   |
| 116.5 | 106.8 | 133.5 | 117.5 | 164.9 | 160.0  |
| 2.7   | 2.1   | 2.4   | 7.8   | 7.4   | 6.4    |
| 5.8   | 4.5   | 3.5   | 11.2  | 5.4   | 8.9    |
| 241.1 | 244.7 | 245.3 | 258.8 | 244.9 | 336.6  |
| 133.7 | 137.0 | 148.8 | 157.4 | 178.1 | 181.2  |
| 0.5   | 0.5   | 0.7   | 0.7   | 0.8   | 1.3    |
| 8.6   | 8.3   | 16.1  | 8.5   | 2.7   | 5.1    |
| 12.2  | 7.6   | 12.5  | 8.5   | 19.8  | 8.2    |
| 3.3   | 3.1   | 2.4   | 4.9   | 2.4   | 2.8    |
| 14.0  | 23.1  | 14.2  | 10.9  | 14.4  | 7.4    |
| 39.8  | 45.6  | 27.9  | 39.9  | 38.5  | 34.4   |
| 26.1  | 16.0  | 17.3  | 30.1  | 25.0  | 32.3   |
| 2.4   | 5.3   | 10.8  | 4.6   | 3.6   | 1.9    |
| 22.8  | 19.2  | 23.5  | 11.4  | 23.4  | 18.5   |
| 13.2  | 0.8   | 2.1   | 1.9   | 5.8   | 2.2    |
| 6.3   | 6.1   | 6.4   | 8.5   | 7.6   | 10.8   |
| 23.1  | 21.8  | 22.1  | 25.3  | 21.5  | 26.0   |
| 3.9   | 2.2   | 8.9   | 12.3  | 3.0   | 3.3    |
| 3.9   | 3.7   | 15.9  | 10.6  | 11.1  | 11.5   |
| 6.1   | 6.2   | 5.5   | 10.0  | 2.1   | 8.9    |
| 43.3  | 47.1  | 33.6  | 48.8  | 42.3  | 46.7   |
| 8.5   | 2.5   | 3.0   | 2.6   | 1.2   | 3.8    |
| 745.0 | 718.6 | 773.8 | 822.9 | 695.2 | 1023.7 |
| 8.7   | 12.0  | 10.9  | 16.6  | 7.8   | 8.2    |
| 2.7   | 5.6   | 6.7   | 2.1   | 1.7   | 4.9    |
| 3.9   | 5.2   | 8.9   | 4.9   | 3.8   | 6.0    |
| 1.7   | 9.7   | 9.7   | 1.7   | 1.3   | 2.5    |
| 1.4   | 1.7   | 2.0   | 2.4   | 1.2   | 2.5    |
| 1.5   | 1.6   | 8.7   | 1.3   | 2.4   | 2.2    |
| 31.0  | 22.0  | 25.9  | 27.7  | 31.3  | 37.1   |
| 19.4  | 10.9  | 6.6   | 18.7  | 24.4  | 22.7   |
| 1.5   | 2.8   | 3.6   | 1.6   | 2.3   | 1.8    |
| 9.6   | 18.5  | 21.8  | 22.1  | 12.4  | 19.0   |
| 5.1   | 2.2   | 8.0   | 12.5  | 8.0   | 11.7   |
| 180.1 | 195.0 | 195.0 | 218.8 | 211.5 | 258.3  |
| 2.0   | 3.2   | 1.5   | 2.3   | 1.8   | 1.6    |
| 34.5  | 50.7  | 51.3  | 28.6  | 41.4  | 48.4   |
| 7.5   | 20.9  | 7.1   | 10.0  | 6.2   | 6.9    |
| 1.5   | 2.0   | 2.1   | 1.8   | 3.3   | 2.5    |
| 5.1   | 18.4  | 13.0  | 11.7  | 4.4   | 6.0    |
| 51.9  | 61.0  | 54.6  | 73.5  | 70.6  | 112.8  |
| 10.9  | 11.5  | 9.7   | 5.2   | 11.4  | 19.7   |
| 4.3   | 0.1   | 2.0   | 1.7   | 0.6   | 5.5    |
| 236.0 | 197.8 | 247.0 | 221.9 | 229.6 | 271.5  |
| 42.2  | 22.7  | 61.3  | 47.2  | 81.5  | 89.0   |
| 1.5   | 7.9   | 10.3  | 11.5  | 7.2   | 13.4   |
| 1.6   | 1.6   | 1.8   | 2.8   | 1.5   | 2.1    |
| 224.5 | 221.4 | 258.2 | 236.0 | 268.5 | 296.1  |
| 33.7  | 22.6  | 36.4  | 28.6  | 63.2  | 37.1   |

|        |        |        |        |        |        |
|--------|--------|--------|--------|--------|--------|
| 11.9   | 28.2   | 22.7   | 15.2   | 19.6   | 17.0   |
| 17.1   | 31.3   | 22.4   | 24.2   | 24.7   | 29.3   |
| 2.6    | 2.6    | 2.8    | 1.8    | 2.7    | 3.9    |
| 6.1    | 6.6    | 5.9    | 3.0    | 3.3    | 7.4    |
| 15.2   | 14.1   | 10.5   | 15.8   | 10.9   | 14.0   |
| 246.3  | 361.2  | 241.9  | 314.6  | 255.5  | 312.0  |
| 201.5  | 125.0  | 196.0  | 232.2  | 234.0  | 257.1  |
| 1.7    | 2.0    | 2.1    | 2.4    | 0.8    | 1.2    |
| 5.0    | 0.8    | 4.1    | 1.8    | 1.3    | 4.4    |
| 13.5   | 10.1   | 7.9    | 13.4   | 12.8   | 16.5   |
| 13.6   | 11.3   | 18.9   | 25.5   | 18.8   | 23.2   |
| 1.4    | 2.1    | 2.8    | 1.5    | 1.9    | 2.0    |
| 7676.2 | 6923.1 | 7304.0 | 7656.2 | 8044.5 | 8105.0 |
| 1.9    | 1.0    | 2.0    | 1.8    | 2.7    | 3.6    |
| 6.1    | 31.9   | 10.9   | 16.4   | 31.8   | 22.4   |
| 11.8   | 11.5   | 10.7   | 4.2    | 5.2    | 11.3   |
| 8.2    | 10.6   | 8.4    | 4.5    | 5.1    | 19.7   |
| 3.9    | 4.5    | 1.8    | 2.7    | 8.1    | 3.5    |
| 80.8   | 72.5   | 61.6   | 69.7   | 82.6   | 88.6   |
| 12.8   | 23.2   | 5.0    | 12.8   | 10.6   | 9.4    |
| 7.1    | 0.6    | 0.8    | 1.0    | 2.5    | 0.5    |
| 12.0   | 8.8    | 13.0   | 11.3   | 7.0    | 14.0   |
| 207.4  | 209.1  | 236.3  | 253.7  | 284.8  | 277.6  |
| 8.7    | 7.5    | 12.2   | 13.3   | 17.9   | 4.7    |
| 6.0    | 0.4    | 2.8    | 4.3    | 2.4    | 3.8    |
| 10.2   | 3.0    | 5.6    | 9.8    | 2.8    | 14.0   |
| 2.6    | 2.1    | 7.7    | 6.5    | 3.8    | 3.3    |
| 3.7    | 3.8    | 5.6    | 6.4    | 3.7    | 4.0    |
| 1.5    | 2.4    | 1.7    | 1.5    | 1.7    | 1.9    |
| 2.0    | 1.4    | 6.5    | 14.0   | 2.6    | 8.7    |
| 8.6    | 15.4   | 1.8    | 2.1    | 10.4   | 11.5   |
| 7.9    | 12.8   | 11.2   | 15.7   | 9.7    | 11.4   |
| 1.6    | 0.8    | 2.0    | 1.3    | 1.2    | 1.7    |
| 1.1    | 1.5    | 3.9    | 2.0    | 5.9    | 5.4    |
| 451.2  | 609.6  | 434.7  | 450.9  | 474.7  | 559.0  |
| 1728.2 | 1171.3 | 1948.6 | 1512.3 | 1570.4 | 2193.0 |
| 228.5  | 232.0  | 284.4  | 263.0  | 297.4  | 282.3  |
| 20.8   | 16.6   | 11.0   | 16.5   | 15.1   | 12.6   |
| 2.3    | 3.1    | 1.6    | 0.9    | 4.1    | 1.6    |
| 13.7   | 4.9    | 9.7    | 1.5    | 7.8    | 3.3    |
| 1.5    | 1.7    | 3.6    | 1.3    | 1.9    | 2.0    |
| 117.5  | 107.0  | 120.1  | 113.9  | 128.4  | 157.3  |
| 10.2   | 8.3    | 3.4    | 11.2   | 17.3   | 18.0   |
| 8.0    | 2.0    | 3.5    | 4.7    | 7.1    | 8.0    |
| 1681.5 | 1396.3 | 1417.5 | 1626.5 | 1856.9 | 1985.1 |
| 2.1    | 3.3    | 3.3    | 1.1    | 4.6    | 1.1    |
| 10.7   | 17.6   | 11.3   | 14.8   | 14.8   | 10.6   |
| 1.7    | 1.6    | 2.1    | 2.1    | 1.3    | 1.3    |
| 10.1   | 15.5   | 17.6   | 26.8   | 22.2   | 11.2   |
| 0.8    | 0.6    | 0.9    | 1.3    | 0.6    | 1.1    |
| 8.7    | 16.2   | 3.7    | 9.0    | 6.1    | 23.0   |
| 2.7    | 4.9    | 3.4    | 2.9    | 6.1    | 5.4    |
| 9.2    | 17.6   | 15.8   | 16.7   | 11.8   | 13.3   |



|        |        |        |        |        |        |
|--------|--------|--------|--------|--------|--------|
| 18.6   | 2.9    | 9.1    | 3.7    | 18.2   | 10.3   |
| 1.9    | 1.0    | 1.7    | 1.6    | 1.4    | 2.0    |
| 2.2    | 1.8    | 1.9    | 4.6    | 3.6    | 6.8    |
| 4.5    | 4.4    | 4.2    | 4.2    | 4.8    | 5.9    |
| 7.4    | 10.1   | 3.9    | 5.5    | 2.1    | 9.3    |
| 8.9    | 13.8   | 7.6    | 10.1   | 17.0   | 21.1   |
| 4.7    | 2.2    | 9.0    | 13.6   | 8.0    | 4.1    |
| 6.7    | 8.0    | 7.5    | 10.7   | 13.1   | 17.6   |
| 0.9    | 1.0    | 1.2    | 0.6    | 0.7    | 3.6    |
| 1.8    | 1.8    | 1.8    | 5.2    | 2.8    | 1.3    |
| 11.0   | 12.1   | 10.9   | 14.1   | 12.4   | 27.8   |
| 9.8    | 11.2   | 17.1   | 11.8   | 14.8   | 9.3    |
| 7.2    | 9.0    | 8.1    | 10.5   | 7.8    | 10.6   |
| 1.3    | 11.5   | 2.9    | 1.7    | 1.5    | 2.4    |
| 3.0    | 1.1    | 1.4    | 8.5    | 4.0    | 6.8    |
| 20.6   | 11.3   | 14.9   | 15.5   | 21.8   | 14.1   |
| 1.0    | 1.8    | 1.0    | 0.7    | 0.7    | 0.8    |
| 8.3    | 11.5   | 10.4   | 11.3   | 10.7   | 11.6   |
| 18.7   | 22.3   | 24.7   | 25.8   | 18.5   | 20.5   |
| 11.0   | 13.7   | 31.0   | 26.5   | 17.3   | 40.4   |
| 32.5   | 46.1   | 31.7   | 15.4   | 28.6   | 19.0   |
| 497.5  | 466.9  | 570.8  | 558.9  | 621.6  | 611.9  |
| 62.6   | 53.3   | 85.7   | 89.6   | 73.9   | 65.8   |
| 2665.6 | 2901.1 | 2669.8 | 2809.5 | 3039.7 | 3161.2 |
| 0.5    | 1.1    | 1.3    | 1.1    | 0.6    | 2.0    |
| 123.1  | 98.4   | 128.7  | 138.1  | 151.6  | 160.5  |
| 9.2    | 3.0    | 8.3    | 14.0   | 3.9    | 3.4    |
| 17.4   | 19.0   | 14.2   | 17.2   | 25.3   | 31.6   |
| 16.4   | 9.2    | 16.4   | 21.4   | 15.4   | 25.1   |
| 17.2   | 29.8   | 16.5   | 13.3   | 13.0   | 16.3   |
| 13.1   | 11.2   | 13.4   | 15.8   | 14.0   | 15.9   |
| 0.6    | 0.6    | 0.9    | 0.8    | 0.7    | 0.6    |
| 3.8    | 3.4    | 3.3    | 4.5    | 6.0    | 5.1    |
| 14.5   | 5.4    | 14.5   | 6.5    | 14.8   | 23.9   |
| 7.6    | 5.9    | 11.2   | 4.5    | 8.0    | 8.1    |
| 14.3   | 21.4   | 5.7    | 7.9    | 10.0   | 11.9   |
| 10.1   | 4.0    | 18.8   | 3.1    | 2.7    | 9.3    |
| 146.3  | 110.9  | 152.0  | 130.3  | 173.8  | 171.3  |
| 6.2    | 3.0    | 6.5    | 12.9   | 6.1    | 11.2   |
| 18.8   | 14.8   | 10.4   | 8.8    | 24.1   | 16.3   |
| 657.8  | 645.8  | 607.6  | 671.4  | 828.8  | 790.2  |
| 2.7    | 11.6   | 6.3    | 10.1   | 3.6    | 2.6    |
| 11.9   | 16.4   | 19.4   | 20.5   | 14.9   | 29.1   |
| 8.3    | 17.1   | 18.6   | 11.5   | 8.3    | 8.5    |
| 4.2    | 1.6    | 1.8    | 1.6    | 2.6    | 2.6    |
| 5.3    | 8.0    | 7.1    | 6.3    | 3.6    | 5.1    |
| 6.1    | 38.4   | 7.9    | 18.6   | 5.9    | 11.0   |
| 1.3    | 1.1    | 2.3    | 1.1    | 1.2    | 1.2    |
| 1.4    | 1.9    | 1.5    | 3.2    | 1.2    | 1.6    |
| 1.5    | 7.2    | 1.9    | 7.9    | 1.0    | 1.4    |
| 70.8   | 81.4   | 78.6   | 88.7   | 68.3   | 99.0   |
| 23.5   | 26.2   | 25.8   | 20.3   | 14.4   | 16.3   |
| 179.8  | 175.8  | 225.1  | 224.2  | 226.9  | 231.7  |

|         |         |         |         |         |         |
|---------|---------|---------|---------|---------|---------|
| 760.3   | 506.1   | 732.6   | 772.6   | 1048.5  | 768.0   |
| 2336.2  | 1883.4  | 2162.8  | 2405.8  | 2606.6  | 2758.5  |
| 149.9   | 87.8    | 148.1   | 143.7   | 227.4   | 164.5   |
| 161.6   | 153.4   | 159.7   | 169.3   | 245.5   | 212.6   |
| 912.2   | 838.2   | 847.4   | 1021.9  | 990.9   | 1201.1  |
| 3053.1  | 2777.6  | 3084.2  | 3011.7  | 3207.3  | 3325.4  |
| 1507.9  | 1474.7  | 1191.1  | 1439.0  | 1639.8  | 1756.3  |
| 1472.9  | 1469.3  | 1432.7  | 1497.0  | 1879.7  | 1715.0  |
| 2384.9  | 2090.3  | 2519.2  | 2453.4  | 2964.1  | 2886.5  |
| 959.7   | 570.9   | 828.5   | 713.1   | 1012.6  | 951.2   |
| 920.3   | 647.7   | 913.5   | 772.0   | 1127.2  | 1117.4  |
| 1363.3  | 998.9   | 1316.9  | 1221.1  | 1483.6  | 1590.1  |
| 422.4   | 402.6   | 347.0   | 328.4   | 507.2   | 456.2   |
| 867.9   | 787.5   | 793.3   | 731.4   | 1049.3  | 1015.9  |
| 738.3   | 638.8   | 765.1   | 727.0   | 932.3   | 836.7   |
| 6977.1  | 6598.6  | 6970.3  | 6921.2  | 7479.9  | 7424.1  |
| 8031.7  | 7202.5  | 7564.6  | 7834.5  | 8578.0  | 8581.4  |
| 766.0   | 599.3   | 710.1   | 738.1   | 868.4   | 847.4   |
| 609.3   | 541.2   | 691.4   | 600.4   | 742.8   | 667.7   |
| 878.1   | 855.2   | 997.6   | 876.1   | 991.4   | 1010.1  |
| 81.8    | 83.8    | 98.3    | 86.4    | 100.5   | 126.3   |
| 140.6   | 129.6   | 120.5   | 153.0   | 152.4   | 157.4   |
| 381.3   | 404.2   | 341.2   | 437.5   | 441.9   | 429.6   |
| 10230.7 | 9124.7  | 9479.8  | 9665.3  | 10188.3 | 10416.4 |
| 1750.3  | 2109.6  | 1744.8  | 1825.1  | 1868.1  | 2128.9  |
| 628.9   | 713.6   | 727.4   | 700.3   | 693.8   | 757.3   |
| 1897.6  | 1599.6  | 1799.2  | 1909.4  | 2005.7  | 2126.5  |
| 2194.9  | 1981.4  | 2115.8  | 2156.0  | 2510.1  | 2751.4  |
| 3101.7  | 3150.7  | 3242.6  | 3319.9  | 3593.9  | 3567.5  |
| 2488.2  | 2277.8  | 2431.2  | 2528.3  | 2721.5  | 2786.8  |
| 3211.6  | 3052.3  | 2918.7  | 2975.0  | 3440.3  | 3673.4  |
| 1288.8  | 1345.6  | 1427.5  | 1366.1  | 1434.4  | 1607.6  |
| 1451.8  | 1374.6  | 1419.0  | 1591.5  | 1569.6  | 1749.9  |
| 10958.9 | 10818.2 | 10688.1 | 11093.7 | 11368.9 | 11020.6 |
| 6946.7  | 6418.4  | 7053.2  | 7871.0  | 7558.7  | 7972.1  |
| 1083.5  | 908.2   | 1131.6  | 1155.0  | 1234.2  | 1314.9  |
| 793.9   | 653.9   | 780.2   | 791.7   | 915.3   | 939.4   |
| 2084.4  | 1694.3  | 1901.0  | 1868.2  | 2385.8  | 2369.5  |
| 50.8    | 14.1    | 48.5    | 36.9    | 68.0    | 51.3    |
| 30.0    | 14.5    | 36.3    | 36.4    | 59.0    | 57.1    |
| 1934.0  | 1934.8  | 1916.3  | 2094.4  | 2249.8  | 2421.2  |
| 742.7   | 714.6   | 851.9   | 821.2   | 795.6   | 893.5   |
| 1121.5  | 1138.3  | 1134.6  | 1253.6  | 1232.5  | 1496.6  |
| 1005.3  | 916.4   | 972.8   | 986.9   | 1142.0  | 1287.9  |
| 859.7   | 746.7   | 957.6   | 893.9   | 1104.1  | 1008.9  |
| 251.7   | 204.5   | 274.9   | 238.8   | 277.9   | 279.1   |
| 246.5   | 217.0   | 250.9   | 260.7   | 303.5   | 280.6   |
| 1879.4  | 1983.6  | 2192.2  | 2495.8  | 2330.4  | 2544.2  |
| 1741.0  | 1351.5  | 2089.5  | 1888.8  | 2209.4  | 2205.2  |
| 166.9   | 161.2   | 185.8   | 174.2   | 214.3   | 238.0   |
| 370.5   | 285.6   | 333.2   | 326.3   | 408.0   | 421.4   |
| 99.4    | 73.0    | 95.4    | 104.6   | 101.6   | 118.7   |
| 52.1    | 42.4    | 69.6    | 64.6    | 66.0    | 52.5    |

|         |         |         |         |         |         |
|---------|---------|---------|---------|---------|---------|
| 376.5   | 324.5   | 339.2   | 368.1   | 411.6   | 445.6   |
| 886.4   | 812.9   | 899.6   | 916.4   | 1001.4  | 1092.5  |
| 8132.4  | 7270.1  | 7596.9  | 8209.3  | 8631.7  | 8537.5  |
| 2004.8  | 1929.9  | 1972.0  | 1989.0  | 1976.1  | 2507.4  |
| 648.4   | 590.5   | 734.3   | 778.3   | 775.4   | 770.2   |
| 1072.3  | 861.5   | 846.0   | 916.1   | 1151.1  | 1327.6  |
| 5019.4  | 4407.1  | 4854.3  | 4872.0  | 5206.0  | 5729.5  |
| 1449.1  | 1296.6  | 1191.9  | 1412.2  | 1455.7  | 1838.8  |
| 1936.8  | 1844.5  | 1697.4  | 1742.4  | 1958.7  | 2175.0  |
| 3626.0  | 3914.4  | 3912.0  | 4058.6  | 4244.3  | 4382.9  |
| 1428.6  | 1562.7  | 1664.1  | 1541.9  | 1703.8  | 1886.3  |
| 1983.6  | 1816.1  | 2202.6  | 2362.1  | 2501.3  | 2460.7  |
| 1187.7  | 1079.3  | 1482.0  | 1495.0  | 1574.8  | 1517.5  |
| 3078.5  | 3265.9  | 2830.6  | 3158.9  | 3229.5  | 3699.5  |
| 8824.0  | 8093.5  | 8786.4  | 9250.2  | 9243.2  | 9538.3  |
| 249.8   | 191.9   | 210.6   | 249.1   | 220.6   | 278.9   |
| 3570.1  | 3258.5  | 3401.4  | 3617.3  | 3860.2  | 3971.0  |
| 1174.4  | 930.4   | 1200.8  | 1163.0  | 1400.8  | 1299.1  |
| 384.9   | 379.3   | 400.3   | 418.5   | 511.8   | 429.0   |
| 252.5   | 240.9   | 243.3   | 295.8   | 362.0   | 352.8   |
| 10901.6 | 10397.7 | 9778.7  | 11084.1 | 11176.4 | 11751.8 |
| 1785.2  | 1514.0  | 2064.0  | 1937.9  | 2124.7  | 2081.3  |
| 2731.4  | 2391.4  | 2828.6  | 3046.9  | 3218.8  | 3301.4  |
| 463.3   | 332.1   | 496.4   | 457.7   | 596.4   | 563.7   |
| 4907.5  | 4577.9  | 4637.9  | 5036.0  | 5311.8  | 5622.6  |
| 10467.8 | 9753.0  | 10067.1 | 10645.7 | 11030.5 | 11177.9 |
| 1734.2  | 1468.2  | 1693.1  | 1698.4  | 1892.0  | 1970.1  |
| 1087.6  | 890.6   | 926.4   | 1018.3  | 1222.4  | 1116.6  |
| 12447.6 | 11779.7 | 10812.6 | 12450.1 | 12199.4 | 11755.1 |
| 5077.3  | 4768.7  | 5177.0  | 5128.8  | 5316.8  | 5507.7  |
| 4730.4  | 4164.4  | 4663.1  | 4710.8  | 5060.1  | 5330.7  |
| 2784.2  | 2472.3  | 2556.5  | 2338.8  | 2942.5  | 2994.3  |
| 3075.3  | 3026.6  | 3358.9  | 3547.9  | 3799.0  | 3708.0  |
| 4986.1  | 5412.1  | 5764.8  | 5570.5  | 6068.7  | 5702.5  |
| 27.1    | 32.4    | 27.1    | 11.7    | 32.8    | 39.3    |
| 634.8   | 518.3   | 559.5   | 606.8   | 666.3   | 711.5   |
| 393.2   | 338.1   | 383.7   | 356.1   | 445.4   | 464.7   |
| 719.4   | 667.8   | 668.0   | 685.1   | 827.6   | 803.1   |
| 1314.5  | 1336.6  | 1524.5  | 1471.7  | 1442.1  | 1647.2  |
| 803.0   | 697.8   | 811.3   | 779.2   | 914.7   | 911.0   |
| 50.7    | 55.7    | 51.3    | 52.7    | 54.2    | 64.5    |
| 1169.4  | 1180.6  | 1067.0  | 1185.0  | 1323.9  | 1377.9  |
| 801.8   | 678.2   | 716.5   | 884.4   | 991.9   | 976.9   |
| 81.2    | 113.3   | 106.0   | 86.0    | 127.0   | 128.5   |
| 389.0   | 1062.6  | 466.3   | 679.0   | 330.2   | 506.2   |
| 594.3   | 1966.0  | 583.6   | 953.2   | 465.0   | 654.7   |
| 1193.2  | 1048.6  | 1149.6  | 1220.5  | 1470.3  | 1559.2  |
| 2231.3  | 1985.4  | 2285.8  | 2347.6  | 2572.9  | 2380.8  |
| 485.1   | 458.3   | 535.1   | 496.8   | 522.5   | 550.5   |
| 2945.9  | 2669.9  | 2716.5  | 2733.8  | 2899.5  | 3397.3  |
| 879.7   | 876.4   | 1072.1  | 1172.1  | 1136.4  | 1225.0  |
| 1325.6  | 1473.8  | 1436.5  | 1475.8  | 1547.8  | 1722.4  |
| 522.4   | 520.0   | 485.0   | 498.3   | 589.8   | 619.2   |

|        |        |        |        |        |        |
|--------|--------|--------|--------|--------|--------|
| 1300.0 | 1223.5 | 1167.4 | 1169.5 | 1365.4 | 1598.1 |
| 815.4  | 689.3  | 868.4  | 856.2  | 937.9  | 974.3  |
| 734.9  | 567.7  | 853.7  | 889.1  | 977.2  | 906.5  |
| 1122.8 | 946.3  | 1189.9 | 1129.6 | 1393.4 | 1271.1 |
| 4759.1 | 4390.5 | 4262.9 | 4999.1 | 5237.0 | 5334.1 |
| 92.5   | 103.6  | 100.4  | 130.1  | 130.0  | 139.6  |
| 3812.0 | 3369.2 | 3695.8 | 4020.5 | 3992.5 | 4050.2 |
| 782.5  | 875.0  | 934.4  | 898.8  | 795.6  | 1013.5 |
| 381.9  | 333.8  | 458.1  | 480.0  | 436.9  | 566.8  |
| 2012.0 | 1978.0 | 2389.3 | 2508.3 | 2690.1 | 2568.3 |
| 80.1   | 83.7   | 101.2  | 96.6   | 94.5   | 91.7   |
| 1034.8 | 903.2  | 1108.9 | 1061.5 | 1169.8 | 1329.2 |
| 202.5  | 188.0  | 200.9  | 194.7  | 220.1  | 251.1  |
| 15.5   | 12.7   | 22.5   | 25.2   | 19.9   | 24.8   |
| 1053.9 | 1110.0 | 1122.0 | 1164.6 | 1306.1 | 1455.7 |
| 263.8  | 217.1  | 251.5  | 274.8  | 322.7  | 316.9  |
| 3179.8 | 2993.7 | 3416.6 | 3883.6 | 3554.6 | 4020.4 |
| 1605.9 | 1457.1 | 1656.7 | 1697.8 | 1843.0 | 2048.8 |
| 3290.6 | 2748.6 | 3290.5 | 3219.9 | 3243.2 | 3902.8 |
| 3408.9 | 3293.8 | 3405.6 | 3527.6 | 3785.1 | 4093.0 |
| 289.2  | 263.5  | 274.1  | 255.8  | 315.4  | 369.3  |
| 77.4   | 90.8   | 91.2   | 83.0   | 71.6   | 109.5  |
| 3582.8 | 3537.2 | 3750.6 | 4004.4 | 4078.1 | 4318.2 |
| 2773.5 | 2377.8 | 2403.7 | 2863.2 | 3085.2 | 2926.2 |
| 1324.9 | 1293.3 | 1236.7 | 1228.4 | 1472.7 | 1389.6 |
| 417.2  | 371.9  | 406.0  | 454.6  | 454.4  | 512.8  |
| 6326.8 | 5661.9 | 6362.4 | 6780.4 | 6856.0 | 6843.6 |
| 1.3    | 2.7    | 1.6    | 3.1    | 2.6    | 2.0    |
| 61.1   | 44.3   | 45.1   | 66.2   | 94.3   | 100.0  |
| 528.7  | 496.2  | 542.9  | 612.3  | 616.9  | 703.1  |
| 2107.4 | 1961.2 | 2147.0 | 2247.1 | 2462.5 | 2518.7 |
| 331.9  | 304.9  | 329.8  | 355.2  | 438.2  | 452.7  |
| 5212.8 | 4836.7 | 5033.1 | 5013.4 | 5744.9 | 6208.4 |
| 1047.4 | 1017.1 | 1150.1 | 1199.2 | 1227.6 | 1420.5 |
| 1753.5 | 1555.7 | 1659.4 | 1886.4 | 1865.0 | 2265.0 |
| 7842.6 | 6909.1 | 7607.2 | 7824.4 | 8157.4 | 8156.2 |
| 4544.2 | 4450.3 | 5771.3 | 5345.8 | 5589.0 | 5139.8 |
| 573.3  | 470.5  | 563.7  | 631.8  | 707.8  | 774.8  |
| 1488.8 | 1380.4 | 1517.1 | 1591.8 | 1743.7 | 1655.4 |
| 422.5  | 279.6  | 446.6  | 438.0  | 488.3  | 491.1  |
| 83.1   | 79.8   | 102.1  | 106.7  | 110.8  | 122.3  |
| 1441.4 | 1427.7 | 1523.3 | 1663.2 | 1701.1 | 1824.4 |
| 161.0  | 102.0  | 107.0  | 156.2  | 118.4  | 198.0  |
| 87.2   | 68.7   | 100.4  | 89.7   | 115.4  | 100.8  |
| 4132.4 | 3595.0 | 4077.8 | 4230.9 | 4523.6 | 4477.0 |
| 757.6  | 762.0  | 833.7  | 773.2  | 944.8  | 915.8  |
| 4588.7 | 4034.9 | 4067.4 | 4676.6 | 4910.0 | 5180.1 |
| 2460.7 | 2238.9 | 2579.5 | 2675.1 | 2837.1 | 2905.4 |
| 7226.8 | 6535.9 | 6988.3 | 7252.2 | 7318.6 | 7480.9 |
| 47.1   | 50.1   | 60.5   | 52.7   | 58.3   | 60.4   |
| 229.8  | 255.6  | 232.5  | 231.0  | 286.8  | 297.5  |
| 1101.0 | 901.3  | 1089.7 | 1120.3 | 1292.9 | 1315.0 |
| 138.2  | 100.7  | 157.9  | 126.5  | 158.7  | 162.0  |

|         |         |         |         |         |         |
|---------|---------|---------|---------|---------|---------|
| 390.3   | 309.5   | 357.9   | 414.3   | 461.0   | 427.1   |
| 383.6   | 423.7   | 379.4   | 404.0   | 424.0   | 462.3   |
| 4415.3  | 3641.6  | 3945.4  | 4289.1  | 4653.2  | 4566.1  |
| 121.8   | 115.1   | 138.0   | 144.5   | 146.7   | 187.9   |
| 2655.2  | 2454.2  | 2479.1  | 2502.6  | 2874.1  | 2958.1  |
| 2860.0  | 2680.3  | 2840.6  | 2804.5  | 3231.8  | 3446.7  |
| 396.8   | 319.8   | 406.0   | 382.3   | 468.6   | 529.6   |
| 2299.4  | 1982.0  | 2278.9  | 2286.3  | 2509.2  | 2673.9  |
| 1479.7  | 1478.6  | 1435.3  | 1422.0  | 1586.6  | 1476.0  |
| 26.5    | 16.2    | 24.9    | 27.9    | 29.2    | 40.3    |
| 1132.3  | 955.9   | 1104.8  | 1111.8  | 1166.6  | 1278.2  |
| 514.9   | 476.7   | 607.3   | 590.3   | 656.4   | 649.7   |
| 884.7   | 818.2   | 876.1   | 1088.7  | 1055.7  | 1167.7  |
| 885.8   | 840.3   | 906.9   | 1042.3  | 992.5   | 1105.0  |
| 4184.6  | 3895.1  | 4031.8  | 4231.1  | 4207.8  | 4652.9  |
| 1726.7  | 1350.7  | 1643.0  | 1773.2  | 1799.0  | 1865.9  |
| 1353.6  | 932.7   | 1316.5  | 1195.4  | 1604.0  | 1469.3  |
| 260.7   | 182.5   | 253.9   | 215.0   | 317.2   | 324.1   |
| 90.0    | 85.7    | 67.6    | 102.4   | 114.0   | 102.1   |
| 102.7   | 74.8    | 95.8    | 93.4    | 107.8   | 114.3   |
| 264.3   | 214.8   | 224.2   | 211.2   | 289.8   | 235.2   |
| 1236.7  | 1062.1  | 1100.9  | 1099.6  | 1380.9  | 1273.2  |
| 1155.3  | 1187.8  | 1184.1  | 1145.5  | 1273.6  | 1281.0  |
| 2481.0  | 1834.4  | 2613.0  | 2622.1  | 2951.4  | 3018.8  |
| 24.8    | 14.3    | 20.0    | 20.7    | 24.4    | 22.9    |
| 224.6   | 183.9   | 195.9   | 194.6   | 243.5   | 296.2   |
| 2288.5  | 2156.5  | 2437.5  | 2524.8  | 2540.5  | 2631.7  |
| 638.9   | 667.8   | 762.3   | 796.6   | 777.3   | 859.7   |
| 2311.8  | 2095.0  | 2198.0  | 2320.2  | 2397.6  | 2565.5  |
| 400.7   | 395.2   | 368.3   | 401.2   | 404.0   | 489.7   |
| 330.1   | 340.3   | 347.9   | 336.3   | 359.9   | 446.0   |
| 1295.1  | 1112.4  | 1257.1  | 1301.0  | 1345.2  | 1430.9  |
| 4930.3  | 3847.2  | 5018.0  | 5442.6  | 5269.7  | 5411.8  |
| 22.2    | 21.5    | 18.5    | 23.3    | 30.6    | 27.2    |
| 114.0   | 105.1   | 105.1   | 121.6   | 155.9   | 147.3   |
| 3883.4  | 2811.9  | 3443.0  | 3271.2  | 4034.1  | 4130.9  |
| 764.0   | 593.9   | 638.1   | 751.4   | 842.0   | 942.9   |
| 765.9   | 712.5   | 587.8   | 649.3   | 629.1   | 872.2   |
| 1095.2  | 968.4   | 1011.0  | 1124.6  | 1147.7  | 953.1   |
| 4034.0  | 3817.4  | 4006.0  | 4291.3  | 4626.7  | 4551.0  |
| 503.8   | 488.6   | 539.9   | 581.2   | 562.6   | 570.9   |
| 166.1   | 136.1   | 143.3   | 160.4   | 163.7   | 172.2   |
| 1568.2  | 1396.1  | 1272.6  | 1384.1  | 1645.8  | 1716.1  |
| 1227.4  | 2002.8  | 1273.0  | 1416.6  | 1414.9  | 1623.3  |
| 359.3   | 347.0   | 431.6   | 469.8   | 493.0   | 505.4   |
| 621.9   | 681.3   | 721.6   | 779.2   | 836.3   | 811.8   |
| 1088.7  | 986.7   | 1010.8  | 1127.4  | 1243.3  | 1260.3  |
| 286.1   | 308.6   | 261.9   | 300.1   | 320.8   | 382.6   |
| 4002.8  | 3819.0  | 4329.3  | 4761.8  | 4622.2  | 4711.8  |
| 2064.5  | 1936.9  | 2050.3  | 2235.6  | 2389.0  | 2478.3  |
| 245.3   | 201.1   | 212.0   | 266.6   | 343.1   | 295.9   |
| 358.0   | 303.8   | 377.7   | 349.0   | 481.5   | 470.0   |
| 13144.6 | 12140.9 | 12588.4 | 13072.7 | 13103.7 | 12727.6 |

|         |         |         |         |         |         |
|---------|---------|---------|---------|---------|---------|
| 4584.0  | 4371.5  | 4802.4  | 5056.0  | 5000.8  | 5427.5  |
| 2455.5  | 2410.1  | 2502.3  | 2695.6  | 2939.1  | 2988.9  |
| 1528.0  | 1629.3  | 1591.4  | 1792.3  | 1898.1  | 1941.3  |
| 323.8   | 312.8   | 340.3   | 330.0   | 472.0   | 456.1   |
| 240.4   | 204.7   | 243.8   | 256.6   | 298.5   | 284.5   |
| 246.2   | 249.9   | 263.1   | 223.6   | 295.1   | 307.3   |
| 78.3    | 88.8    | 72.8    | 90.0    | 80.6    | 117.9   |
| 1234.0  | 1232.1  | 1124.4  | 1239.1  | 1377.1  | 1346.7  |
| 13248.2 | 12315.3 | 12612.3 | 13024.2 | 13366.1 | 13199.0 |
| 584.2   | 571.4   | 654.4   | 619.2   | 731.2   | 804.2   |
| 3754.5  | 3039.1  | 3810.5  | 3707.9  | 3886.9  | 3461.8  |
| 616.7   | 566.3   | 629.9   | 606.4   | 701.1   | 730.9   |
| 425.8   | 380.1   | 380.5   | 420.8   | 432.6   | 495.7   |
| 393.6   | 387.9   | 406.9   | 411.1   | 460.5   | 497.2   |
| 532.3   | 597.8   | 608.2   | 595.5   | 622.6   | 732.9   |
| 713.8   | 768.5   | 700.0   | 775.4   | 772.5   | 883.5   |
| 340.6   | 305.8   | 341.0   | 374.8   | 380.9   | 386.8   |
| 235.9   | 222.9   | 243.9   | 234.9   | 262.5   | 276.4   |
| 30.7    | 37.5    | 33.6    | 36.3    | 30.6    | 43.2    |
| 2978.3  | 2503.9  | 2869.0  | 3007.9  | 3200.3  | 3511.5  |
| 1376.4  | 1084.4  | 1419.6  | 1376.0  | 1529.8  | 1626.9  |
| 1304.5  | 1146.7  | 1566.4  | 1452.5  | 1588.6  | 1794.3  |
| 308.5   | 241.7   | 310.1   | 315.2   | 340.9   | 369.0   |
| 6.9     | 14.6    | 10.9    | 9.7     | 11.9    | 12.5    |
| 13.0    | 8.0     | 24.3    | 16.0    | 15.3    | 27.3    |
| 32.5    | 23.7    | 26.1    | 23.5    | 32.0    | 44.3    |
| 1922.0  | 1641.7  | 2091.5  | 1858.4  | 2137.1  | 2143.4  |
| 1267.6  | 1117.0  | 1211.2  | 1224.4  | 1357.3  | 1491.3  |
| 713.8   | 782.4   | 726.5   | 758.6   | 869.9   | 919.6   |
| 2011.3  | 2267.8  | 2025.0  | 2069.4  | 2193.9  | 2432.7  |
| 10402.0 | 9343.0  | 9617.2  | 10307.7 | 10545.9 | 10729.2 |
| 910.1   | 775.3   | 950.3   | 946.3   | 1003.2  | 1281.5  |
| 531.1   | 399.4   | 502.5   | 531.9   | 553.3   | 525.7   |
| 133.2   | 104.3   | 114.6   | 121.3   | 138.4   | 155.5   |
| 148.4   | 151.7   | 161.5   | 195.9   | 180.6   | 231.0   |
| 317.8   | 268.5   | 309.5   | 377.1   | 375.2   | 393.7   |
| 524.3   | 478.4   | 547.9   | 339.1   | 630.9   | 572.6   |
| 1247.6  | 1085.4  | 1377.0  | 1298.9  | 1391.6  | 1513.7  |
| 5975.1  | 5603.1  | 5927.2  | 6045.5  | 6306.3  | 7239.9  |
| 1234.4  | 1116.5  | 1294.2  | 1316.1  | 1452.6  | 1595.5  |
| 129.2   | 121.4   | 122.3   | 108.8   | 142.2   | 165.3   |
| 402.0   | 381.6   | 485.4   | 513.7   | 463.5   | 506.5   |
| 148.9   | 85.7    | 143.9   | 123.8   | 140.4   | 161.7   |
| 164.0   | 126.6   | 188.7   | 145.8   | 165.8   | 187.0   |
| 2815.6  | 2800.9  | 2990.1  | 3258.3  | 3101.7  | 3418.5  |
| 30.3    | 48.6    | 36.8    | 36.5    | 35.2    | 38.8    |
| 1574.3  | 1501.3  | 1941.4  | 2125.2  | 2030.9  | 2115.4  |
| 523.3   | 439.5   | 530.1   | 530.6   | 546.0   | 592.7   |
| 345.4   | 365.3   | 368.7   | 423.5   | 422.4   | 421.5   |
| 185.7   | 294.3   | 215.4   | 246.8   | 256.7   | 278.4   |
| 103.5   | 101.3   | 99.1    | 101.6   | 115.0   | 124.6   |
| 274.7   | 332.0   | 255.1   | 299.6   | 329.7   | 340.6   |
| 196.7   | 200.9   | 187.1   | 193.1   | 214.0   | 232.8   |

|        |        |        |        |        |        |
|--------|--------|--------|--------|--------|--------|
| 432.1  | 384.7  | 383.2  | 377.0  | 496.1  | 478.5  |
| 759.4  | 630.0  | 705.2  | 703.8  | 867.1  | 872.7  |
| 364.3  | 384.6  | 479.1  | 408.9  | 506.5  | 464.3  |
| 196.8  | 131.4  | 188.4  | 188.7  | 245.4  | 223.1  |
| 107.1  | 57.9   | 73.1   | 82.2   | 117.8  | 112.1  |
| 350.4  | 358.2  | 304.2  | 318.1  | 421.3  | 415.3  |
| 43.8   | 34.5   | 39.8   | 44.4   | 48.4   | 56.1   |
| 1874.0 | 1702.1 | 1884.0 | 2087.5 | 2182.9 | 2333.5 |
| 2767.6 | 2753.0 | 3221.2 | 3364.3 | 3354.6 | 3384.4 |
| 1.4    | 1.4    | 1.5    | 4.3    | 3.1    | 2.8    |
| 18.1   | 4.9    | 9.0    | 6.7    | 20.0   | 6.7    |
| 429.7  | 331.2  | 495.3  | 482.2  | 604.9  | 583.9  |
| 90.1   | 189.4  | 12.1   | 250.0  | 22.3   | 150.8  |
| 89.7   | 197.3  | 15.0   | 216.0  | 26.7   | 135.9  |
| 17.7   | 78.0   | 1.0    | 55.9   | 1.0    | 28.8   |
| 3554.2 | 3371.6 | 3604.9 | 4067.9 | 4065.1 | 4270.2 |
| 1235.3 | 1223.7 | 1182.2 | 1198.8 | 1316.6 | 1474.2 |
| 423.5  | 558.8  | 466.5  | 489.6  | 524.3  | 555.3  |
| 814.1  | 882.6  | 1001.6 | 1008.4 | 977.8  | 1070.6 |
| 872.6  | 755.8  | 910.6  | 916.7  | 974.3  | 1087.6 |
| 1126.5 | 832.5  | 1054.1 | 946.9  | 1246.1 | 1107.3 |
| 244.4  | 268.7  | 213.3  | 238.2  | 241.0  | 250.8  |
| 1317.8 | 1454.1 | 1428.4 | 1552.0 | 1525.8 | 1608.7 |
| 36.2   | 31.8   | 42.9   | 50.9   | 45.4   | 41.8   |
| 78.7   | 74.8   | 81.6   | 100.6  | 72.9   | 102.6  |
| 6923.7 | 6748.4 | 7434.2 | 7151.4 | 7526.2 | 7291.9 |
| 5216.1 | 5065.6 | 5112.2 | 5468.1 | 5607.5 | 6135.3 |
| 630.7  | 488.8  | 606.3  | 647.1  | 711.2  | 731.3  |
| 750.8  | 715.4  | 826.0  | 934.1  | 999.1  | 990.1  |
| 535.8  | 523.6  | 587.9  | 571.5  | 636.9  | 684.2  |
| 3330.2 | 3184.5 | 3616.6 | 3860.9 | 3852.7 | 3969.7 |
| 5889.7 | 5111.5 | 5640.8 | 5516.0 | 6290.7 | 6144.7 |
| 1174.1 | 1023.7 | 1137.3 | 1161.9 | 1348.8 | 1398.1 |
| 858.0  | 799.1  | 1050.4 | 984.4  | 1146.8 | 1144.4 |
| 152.1  | 147.2  | 145.9  | 133.0  | 155.3  | 184.6  |
| 70.8   | 69.5   | 91.1   | 82.7   | 106.8  | 105.6  |
| 143.4  | 116.6  | 129.1  | 128.8  | 108.0  | 141.0  |
| 510.7  | 538.3  | 487.7  | 544.8  | 540.5  | 624.8  |
| 97.3   | 80.2   | 125.6  | 104.7  | 101.0  | 100.6  |
| 675.5  | 600.7  | 624.7  | 648.6  | 709.4  | 847.5  |
| 317.0  | 322.9  | 345.2  | 379.0  | 409.2  | 424.6  |
| 248.4  | 226.0  | 280.2  | 273.0  | 297.5  | 325.6  |
| 2057.9 | 2071.4 | 2205.8 | 2158.0 | 2252.1 | 2432.5 |
| 552.4  | 438.4  | 519.2  | 545.8  | 682.8  | 657.4  |
| 1514.2 | 1202.5 | 1382.4 | 1585.1 | 1820.8 | 1714.6 |
| 925.6  | 712.9  | 752.7  | 799.9  | 816.5  | 1034.7 |
| 632.9  | 667.4  | 579.8  | 657.4  | 756.8  | 812.1  |
| 344.3  | 290.2  | 370.0  | 377.0  | 425.5  | 419.1  |
| 217.5  | 171.8  | 224.3  | 230.9  | 270.4  | 300.0  |
| 130.9  | 113.2  | 150.5  | 150.9  | 167.8  | 171.4  |
| 8298.5 | 8056.6 | 8724.8 | 9015.9 | 8883.7 | 9033.4 |
| 593.1  | 537.8  | 525.6  | 538.4  | 637.7  | 677.9  |
| 960.6  | 842.3  | 852.9  | 891.5  | 1059.7 | 1110.3 |

|        |        |        |        |        |        |
|--------|--------|--------|--------|--------|--------|
| 1378.0 | 1254.9 | 1720.0 | 1642.5 | 1755.8 | 1668.6 |
| 273.5  | 185.6  | 260.1  | 262.1  | 322.8  | 355.3  |
| 693.4  | 631.1  | 742.2  | 750.0  | 826.7  | 875.4  |
| 138.9  | 86.8   | 143.1  | 127.3  | 148.0  | 149.4  |
| 373.1  | 312.3  | 386.8  | 410.7  | 457.1  | 471.2  |
| 748.6  | 829.1  | 916.5  | 1089.6 | 1013.9 | 868.0  |
| 457.0  | 418.3  | 433.7  | 433.3  | 514.4  | 596.6  |
| 374.1  | 346.9  | 428.8  | 388.9  | 443.4  | 423.6  |
| 144.1  | 111.1  | 145.7  | 128.5  | 156.0  | 168.7  |
| 393.9  | 383.6  | 463.6  | 476.1  | 513.3  | 513.8  |
| 446.6  | 470.3  | 415.9  | 436.2  | 478.0  | 603.3  |
| 461.1  | 549.3  | 520.3  | 518.7  | 588.4  | 653.1  |
| 124.4  | 136.4  | 128.2  | 157.7  | 149.3  | 166.7  |
| 498.8  | 460.6  | 460.8  | 522.4  | 565.0  | 614.5  |
| 817.1  | 828.7  | 767.4  | 762.9  | 858.7  | 984.6  |
| 203.1  | 210.0  | 206.8  | 196.6  | 241.4  | 224.3  |
| 1743.3 | 1678.3 | 1808.0 | 1742.6 | 1946.1 | 2090.2 |
| 2451.0 | 1819.4 | 2450.5 | 2605.9 | 2779.0 | 2915.1 |
| 569.9  | 492.8  | 531.0  | 547.4  | 608.1  | 666.8  |
| 379.6  | 346.6  | 377.6  | 375.7  | 472.4  | 494.5  |
| 189.4  | 200.1  | 225.1  | 247.3  | 244.2  | 259.4  |
| 207.4  | 205.7  | 214.6  | 228.1  | 248.8  | 260.3  |
| 110.1  | 108.1  | 110.2  | 121.9  | 133.5  | 131.8  |
| 293.0  | 290.8  | 342.7  | 386.8  | 423.4  | 355.7  |
| 3188.9 | 2850.8 | 3075.2 | 3366.9 | 3423.8 | 3822.0 |
| 34.8   | 37.8   | 40.0   | 24.2   | 37.0   | 39.6   |
| 15.0   | 17.9   | 17.1   | 20.1   | 20.6   | 18.8   |
| 778.8  | 728.2  | 858.0  | 862.5  | 908.6  | 949.4  |
| 38.1   | 43.9   | 29.1   | 17.6   | 34.1   | 32.3   |
| 56.8   | 45.6   | 69.5   | 59.8   | 76.8   | 72.5   |
| 288.5  | 277.1  | 299.6  | 291.6  | 343.0  | 359.7  |
| 433.1  | 379.2  | 430.5  | 394.7  | 539.4  | 519.1  |
| 573.8  | 571.6  | 564.6  | 591.8  | 631.4  | 633.7  |
| 429.5  | 349.8  | 337.7  | 441.5  | 463.9  | 444.0  |
| 1135.7 | 790.9  | 968.4  | 1003.8 | 1147.5 | 1293.0 |
| 1807.5 | 1617.8 | 1969.0 | 1970.5 | 2034.5 | 2150.7 |
| 1430.3 | 1401.4 | 1539.2 | 1632.0 | 1684.1 | 1766.5 |
| 856.3  | 726.7  | 917.7  | 911.0  | 923.9  | 1089.6 |
| 1601.3 | 1686.2 | 1754.7 | 1666.4 | 1847.1 | 1944.2 |
| 772.1  | 739.0  | 833.9  | 935.4  | 920.6  | 968.4  |
| 927.9  | 940.3  | 1081.2 | 1218.2 | 1215.0 | 1202.7 |
| 388.2  | 366.7  | 488.5  | 545.8  | 510.4  | 558.6  |
| 2707.1 | 2166.8 | 2395.5 | 2187.7 | 2662.3 | 2643.4 |
| 1221.9 | 1101.1 | 1321.5 | 1283.0 | 1403.5 | 1565.7 |
| 6548.5 | 6020.5 | 6523.4 | 6748.8 | 7234.7 | 6720.3 |
| 200.0  | 174.5  | 234.9  | 243.8  | 271.3  | 296.7  |
| 331.4  | 254.3  | 300.1  | 288.3  | 371.4  | 345.3  |
| 8676.1 | 7342.9 | 8264.0 | 8621.1 | 9039.7 | 9103.5 |
| 9.2    | 8.6    | 10.5   | 11.7   | 13.4   | 15.2   |
| 10.1   | 9.2    | 18.1   | 18.1   | 20.8   | 11.7   |
| 2.1    | 1.5    | 1.9    | 4.6    | 1.2    | 3.4    |
| 418.3  | 348.0  | 412.2  | 405.2  | 491.9  | 490.8  |
| 1521.5 | 1597.7 | 1597.1 | 1627.0 | 1621.3 | 1841.4 |



|        |        |        |        |        |        |
|--------|--------|--------|--------|--------|--------|
| 871.6  | 641.4  | 861.7  | 934.7  | 1023.4 | 1123.5 |
| 106.6  | 105.2  | 144.0  | 132.8  | 154.9  | 154.4  |
| 286.0  | 203.4  | 228.2  | 248.2  | 316.8  | 319.3  |
| 83.0   | 52.4   | 72.1   | 73.3   | 52.6   | 70.1   |
| 650.9  | 663.5  | 666.5  | 652.9  | 708.8  | 790.7  |
| 535.2  | 461.5  | 518.3  | 469.1  | 641.2  | 657.1  |
| 337.4  | 356.5  | 332.7  | 316.3  | 468.3  | 472.6  |
| 158.6  | 129.0  | 150.9  | 158.5  | 188.6  | 167.1  |
| 123.5  | 112.0  | 102.8  | 94.1   | 118.2  | 144.6  |
| 75.9   | 68.9   | 71.0   | 69.8   | 65.8   | 105.5  |
| 1132.1 | 918.0  | 1067.3 | 1259.0 | 1211.3 | 1240.7 |
| 53.3   | 54.9   | 58.9   | 46.4   | 64.3   | 84.6   |
| 32.3   | 29.9   | 65.5   | 50.2   | 56.4   | 53.1   |
| 281.3  | 257.3  | 276.6  | 278.0  | 341.6  | 373.1  |
| 140.0  | 132.5  | 161.4  | 154.1  | 180.5  | 184.0  |
| 1763.0 | 1742.2 | 1841.6 | 1933.8 | 1939.5 | 2165.8 |
| 153.8  | 156.9  | 154.6  | 153.6  | 189.8  | 186.3  |
| 487.0  | 483.0  | 674.7  | 680.9  | 663.8  | 550.9  |
| 797.8  | 653.9  | 724.3  | 758.3  | 796.5  | 957.8  |
| 159.2  | 116.3  | 125.6  | 166.1  | 166.3  | 182.6  |
| 149.4  | 132.8  | 144.2  | 164.2  | 217.3  | 216.5  |
| 481.7  | 321.2  | 532.0  | 513.8  | 577.9  | 595.9  |
| 64.7   | 51.7   | 77.1   | 75.7   | 73.6   | 87.9   |
| 1984.0 | 1599.4 | 1905.0 | 2021.3 | 2082.6 | 2302.5 |
| 20.6   | 22.9   | 10.6   | 13.6   | 14.6   | 19.0   |
| 324.1  | 238.0  | 252.6  | 251.2  | 368.6  | 311.1  |
| 162.1  | 129.1  | 148.9  | 188.0  | 219.2  | 171.0  |
| 217.2  | 191.8  | 194.8  | 185.4  | 208.5  | 207.4  |
| 880.8  | 773.3  | 884.9  | 867.0  | 1042.9 | 1074.5 |
| 462.2  | 414.8  | 449.7  | 486.8  | 508.7  | 622.2  |
| 33.7   | 51.2   | 44.7   | 38.7   | 36.3   | 50.9   |
| 874.8  | 807.5  | 901.9  | 887.6  | 1065.3 | 1032.6 |
| 260.3  | 204.5  | 286.7  | 263.2  | 299.3  | 309.5  |
| 223.6  | 133.3  | 212.2  | 212.3  | 292.0  | 279.2  |
| 674.2  | 514.1  | 790.1  | 803.9  | 787.7  | 716.2  |
| 399.9  | 358.2  | 436.6  | 384.2  | 404.4  | 447.4  |
| 570.7  | 533.4  | 558.5  | 609.1  | 693.7  | 719.1  |
| 444.3  | 276.1  | 301.0  | 309.4  | 365.1  | 437.6  |
| 1522.3 | 1532.3 | 1395.1 | 1378.7 | 1524.1 | 1831.1 |
| 724.1  | 641.5  | 655.5  | 662.8  | 821.0  | 809.4  |
| 6762.5 | 6296.6 | 6741.7 | 6717.4 | 6964.7 | 6879.1 |
| 455.7  | 375.3  | 485.8  | 445.6  | 489.1  | 602.7  |
| 207.3  | 160.0  | 178.2  | 182.2  | 203.5  | 242.2  |
| 830.2  | 752.3  | 851.3  | 869.4  | 976.5  | 979.8  |
| 722.7  | 615.8  | 671.8  | 710.2  | 823.5  | 827.4  |
| 489.6  | 392.3  | 503.3  | 447.7  | 543.6  | 527.9  |
| 118.7  | 132.2  | 136.6  | 120.2  | 141.5  | 175.7  |
| 585.4  | 554.6  | 552.4  | 579.4  | 621.0  | 693.8  |
| 385.7  | 148.0  | 245.6  | 218.3  | 369.3  | 371.0  |
| 127.1  | 117.6  | 147.9  | 119.9  | 183.2  | 162.0  |
| 4824.5 | 4344.2 | 4708.2 | 4836.1 | 5052.2 | 5241.7 |
| 208.9  | 212.8  | 179.1  | 213.3  | 230.5  | 240.8  |
| 65.8   | 72.6   | 52.4   | 64.2   | 64.6   | 71.5   |

|        |        |        |        |        |        |
|--------|--------|--------|--------|--------|--------|
| 236.5  | 224.4  | 262.6  | 333.1  | 292.0  | 313.4  |
| 474.0  | 494.7  | 505.8  | 520.0  | 588.8  | 651.5  |
| 484.2  | 465.6  | 507.6  | 513.4  | 583.8  | 629.5  |
| 302.8  | 298.7  | 299.7  | 321.7  | 339.4  | 367.5  |
| 974.4  | 809.7  | 883.9  | 975.7  | 1083.4 | 1157.3 |
| 1512.3 | 1468.1 | 1600.1 | 1586.9 | 1872.1 | 1880.6 |
| 668.2  | 607.7  | 579.4  | 696.4  | 710.2  | 813.5  |
| 1599.7 | 1487.3 | 1681.1 | 1701.3 | 1819.9 | 1881.6 |
| 11.0   | 16.3   | 8.2    | 11.2   | 15.3   | 11.6   |
| 359.6  | 289.2  | 354.2  | 316.2  | 406.4  | 420.2  |
| 809.6  | 730.5  | 793.3  | 812.4  | 949.6  | 934.9  |
| 209.8  | 207.1  | 280.2  | 231.2  | 291.0  | 265.1  |
| 99.0   | 85.8   | 121.7  | 119.8  | 156.4  | 140.7  |
| 188.3  | 179.1  | 174.4  | 184.8  | 192.5  | 221.0  |
| 356.8  | 334.2  | 372.3  | 339.4  | 447.4  | 406.0  |
| 349.8  | 293.2  | 274.6  | 292.3  | 364.2  | 363.0  |
| 335.7  | 352.9  | 409.5  | 354.2  | 402.3  | 485.6  |
| 612.0  | 497.3  | 527.7  | 536.3  | 583.1  | 721.4  |
| 256.1  | 216.9  | 262.3  | 300.7  | 325.8  | 317.1  |
| 1606.8 | 1268.4 | 1742.6 | 1703.5 | 1811.2 | 1822.8 |
| 1743.4 | 1510.0 | 1680.1 | 1602.4 | 1818.7 | 1960.1 |
| 99.0   | 78.8   | 89.1   | 99.5   | 117.0  | 115.4  |
| 129.4  | 99.3   | 108.8  | 124.9  | 127.1  | 140.4  |
| 91.5   | 103.8  | 86.8   | 102.8  | 118.2  | 122.4  |
| 945.9  | 748.9  | 859.6  | 784.8  | 934.3  | 1086.9 |
| 527.2  | 487.0  | 521.7  | 573.9  | 608.3  | 617.7  |
| 260.8  | 261.1  | 260.0  | 285.0  | 301.8  | 312.1  |
| 4000.2 | 3374.3 | 3586.7 | 3793.5 | 4228.2 | 4712.3 |
| 2231.9 | 2022.8 | 2037.3 | 1951.5 | 2335.3 | 2511.4 |
| 204.7  | 187.5  | 203.5  | 212.5  | 244.3  | 237.5  |
| 5461.4 | 5224.5 | 5286.1 | 5515.2 | 6021.9 | 6397.6 |
| 9.1    | 5.6    | 11.7   | 8.5    | 3.9    | 23.5   |
| 16.9   | 8.7    | 11.2   | 5.9    | 17.7   | 17.5   |
| 7.9    | 5.5    | 6.9    | 5.2    | 6.6    | 4.4    |
| 116.0  | 99.1   | 125.0  | 116.2  | 125.6  | 148.9  |
| 1.3    | 1.3    | 2.3    | 2.0    | 1.8    | 1.8    |
| 2425.8 | 2137.1 | 2338.1 | 2386.1 | 2914.2 | 2851.0 |
| 687.0  | 734.2  | 746.7  | 1007.1 | 808.2  | 985.1  |
| 574.6  | 450.3  | 647.2  | 651.7  | 720.4  | 686.4  |
| 441.0  | 410.6  | 467.3  | 500.8  | 526.6  | 600.5  |
| 383.2  | 316.7  | 431.7  | 359.1  | 457.9  | 370.9  |
| 2329.4 | 2262.0 | 2428.7 | 2650.6 | 2513.2 | 2802.3 |
| 46.2   | 44.8   | 42.7   | 47.3   | 59.4   | 58.0   |
| 41.7   | 48.8   | 55.2   | 49.7   | 53.3   | 55.1   |
| 56.9   | 38.6   | 56.7   | 55.4   | 49.6   | 47.8   |
| 147.8  | 104.8  | 145.0  | 137.9  | 154.1  | 169.0  |
| 414.8  | 365.0  | 415.4  | 384.3  | 436.8  | 504.8  |
| 255.1  | 259.7  | 241.3  | 277.6  | 293.4  | 298.5  |
| 573.7  | 637.9  | 589.9  | 661.4  | 655.7  | 712.2  |
| 158.5  | 187.9  | 147.8  | 160.9  | 164.9  | 164.8  |
| 1150.4 | 1000.8 | 1290.4 | 1251.1 | 1458.3 | 1504.9 |
| 203.3  | 199.5  | 188.7  | 211.3  | 218.2  | 245.0  |
| 722.7  | 601.8  | 732.7  | 709.2  | 789.1  | 832.4  |

|         |         |         |         |         |         |
|---------|---------|---------|---------|---------|---------|
| 668.9   | 566.2   | 588.0   | 642.4   | 720.9   | 802.8   |
| 463.1   | 318.2   | 485.1   | 492.8   | 592.7   | 600.1   |
| 231.2   | 256.5   | 246.5   | 259.3   | 261.3   | 263.1   |
| 2590.8  | 2055.3  | 2400.5  | 2411.1  | 2709.7  | 3006.0  |
| 1322.4  | 1342.4  | 1228.5  | 1303.9  | 1550.4  | 1647.8  |
| 2.3     | 1.5     | 3.2     | 15.3    | 1.8     | 6.7     |
| 40.6    | 54.4    | 35.3    | 53.5    | 29.1    | 50.3    |
| 175.0   | 351.1   | 145.2   | 342.2   | 200.2   | 278.8   |
| 954.2   | 938.7   | 1066.4  | 1152.6  | 1155.8  | 1083.5  |
| 549.2   | 479.4   | 632.1   | 564.1   | 717.3   | 641.9   |
| 319.2   | 249.9   | 380.8   | 394.4   | 496.6   | 482.7   |
| 1664.1  | 1635.7  | 1786.7  | 1871.7  | 1791.0  | 1925.1  |
| 4509.4  | 4719.9  | 4977.4  | 5014.3  | 5223.9  | 5162.3  |
| 65.7    | 51.1    | 70.9    | 85.6    | 103.4   | 100.6   |
| 89.6    | 74.8    | 77.4    | 82.0    | 110.8   | 109.3   |
| 88.7    | 72.5    | 94.9    | 73.5    | 95.9    | 82.9    |
| 262.8   | 250.4   | 244.4   | 280.6   | 297.2   | 272.9   |
| 452.6   | 361.8   | 393.1   | 401.2   | 479.3   | 490.8   |
| 97.4    | 113.8   | 86.9    | 101.9   | 106.6   | 113.1   |
| 674.7   | 654.4   | 716.6   | 693.9   | 809.1   | 871.6   |
| 908.3   | 638.7   | 848.6   | 857.5   | 998.3   | 1085.4  |
| 728.8   | 604.1   | 713.5   | 693.4   | 905.2   | 922.1   |
| 11.5    | 4.6     | 16.2    | 8.9     | 9.4     | 17.8    |
| 1067.5  | 913.6   | 1018.4  | 1098.1  | 1129.4  | 1389.0  |
| 22.5    | 11.6    | 16.8    | 16.5    | 15.9    | 9.2     |
| 234.7   | 251.7   | 263.6   | 230.2   | 298.5   | 328.2   |
| 1898.7  | 1206.9  | 1810.6  | 1932.3  | 2267.2  | 2424.3  |
| 20.1    | 18.0    | 22.4    | 26.2    | 21.2    | 32.5    |
| 617.2   | 630.2   | 519.4   | 758.7   | 620.5   | 816.7   |
| 238.6   | 269.4   | 238.9   | 291.8   | 274.3   | 288.3   |
| 2506.5  | 2876.4  | 2519.7  | 3093.9  | 2788.4  | 3087.6  |
| 2037.3  | 2109.2  | 2102.0  | 2231.8  | 2385.9  | 2497.2  |
| 550.4   | 509.0   | 526.9   | 585.7   | 590.0   | 643.4   |
| 46.8    | 28.7    | 39.0    | 33.9    | 38.6    | 46.2    |
| 259.7   | 389.0   | 369.1   | 254.7   | 317.0   | 274.6   |
| 472.6   | 429.8   | 480.3   | 428.2   | 544.7   | 557.1   |
| 610.4   | 512.6   | 622.5   | 578.8   | 695.2   | 749.9   |
| 1137.8  | 1194.2  | 1438.8  | 1451.5  | 1577.6  | 1595.3  |
| 1080.4  | 885.4   | 1077.0  | 1039.1  | 1071.2  | 1320.5  |
| 205.7   | 223.7   | 244.3   | 209.0   | 239.5   | 259.1   |
| 1037.7  | 1012.3  | 1195.0  | 1243.5  | 1400.3  | 1371.6  |
| 42.5    | 46.5    | 48.7    | 41.8    | 51.2    | 57.2    |
| 11731.8 | 11214.1 | 11115.9 | 12383.3 | 12293.7 | 12636.1 |
| 791.2   | 729.8   | 533.2   | 737.2   | 705.0   | 965.0   |
| 324.1   | 400.2   | 394.0   | 408.1   | 429.6   | 451.7   |
| 341.2   | 375.6   | 362.8   | 381.7   | 389.0   | 417.8   |
| 18.1    | 2.8     | 7.9     | 13.5    | 20.2    | 9.8     |
| 315.1   | 307.8   | 344.1   | 341.8   | 355.9   | 398.9   |
| 3279.5  | 3461.5  | 3474.3  | 3668.1  | 4039.1  | 4003.2  |
| 765.7   | 725.3   | 801.0   | 746.0   | 830.1   | 897.4   |
| 744.8   | 732.2   | 786.5   | 792.7   | 867.9   | 945.1   |
| 2403.9  | 2152.3  | 2337.3  | 2464.9  | 2558.0  | 2772.3  |
| 24.1    | 23.8    | 22.4    | 25.2    | 38.3    | 38.7    |

|        |        |        |        |        |        |
|--------|--------|--------|--------|--------|--------|
| 15.5   | 9.3    | 23.6   | 19.1   | 23.5   | 24.2   |
| 244.2  | 215.9  | 239.9  | 262.5  | 251.4  | 294.6  |
| 481.8  | 289.5  | 546.9  | 545.6  | 719.2  | 612.7  |
| 253.5  | 153.7  | 230.3  | 188.4  | 224.1  | 208.5  |
| 314.4  | 281.2  | 309.0  | 313.6  | 358.0  | 371.6  |
| 445.7  | 394.4  | 538.9  | 456.3  | 602.0  | 623.7  |
| 30.6   | 30.2   | 33.2   | 25.5   | 34.2   | 43.4   |
| 45.5   | 48.0   | 33.1   | 35.6   | 45.2   | 49.2   |
| 129.9  | 131.0  | 143.5  | 150.7  | 144.9  | 183.0  |
| 2526.9 | 2090.5 | 2659.8 | 2685.1 | 2921.6 | 3049.1 |
| 401.3  | 321.8  | 424.3  | 421.2  | 464.7  | 511.3  |
| 82.7   | 62.9   | 78.5   | 72.5   | 96.6   | 96.6   |
| 1111.0 | 984.8  | 1043.8 | 1099.9 | 1252.9 | 1214.5 |
| 237.0  | 177.1  | 237.9  | 223.6  | 292.4  | 268.5  |
| 75.3   | 55.4   | 63.9   | 69.8   | 86.0   | 90.6   |
| 177.4  | 175.4  | 209.3  | 211.6  | 208.3  | 237.4  |
| 909.8  | 986.6  | 975.3  | 1000.5 | 1028.9 | 1110.7 |
| 1159.2 | 1263.7 | 1187.1 | 1125.2 | 1309.4 | 1360.0 |
| 322.5  | 321.1  | 323.3  | 360.1  | 361.9  | 406.0  |
| 193.5  | 280.3  | 199.2  | 222.1  | 260.2  | 249.0  |
| 1043.5 | 904.8  | 1021.1 | 976.0  | 1101.0 | 1150.2 |
| 367.7  | 365.0  | 461.8  | 407.7  | 519.9  | 502.0  |
| 6.1    | 5.6    | 7.5    | 12.0   | 5.4    | 5.4    |
| 11.4   | 27.4   | 14.7   | 12.6   | 9.4    | 20.0   |
| 5.0    | 13.5   | 5.0    | 5.7    | 5.3    | 7.0    |
| 6.7    | 8.9    | 7.6    | 6.1    | 10.1   | 9.6    |
| 1176.2 | 1105.7 | 1283.1 | 1364.2 | 1408.3 | 1438.2 |
| 259.0  | 190.8  | 196.5  | 207.6  | 273.8  | 274.8  |
| 2.1    | 1.8    | 1.8    | 2.0    | 1.4    | 1.5    |
| 438.5  | 368.8  | 481.8  | 469.3  | 526.1  | 543.8  |
| 524.9  | 471.4  | 519.8  | 525.8  | 557.6  | 663.8  |
| 82.1   | 77.6   | 83.2   | 92.9   | 94.1   | 108.1  |
| 740.0  | 695.1  | 799.3  | 849.2  | 895.7  | 909.5  |
| 275.3  | 197.5  | 235.3  | 217.7  | 277.4  | 291.0  |
| 214.1  | 190.7  | 211.0  | 207.3  | 302.2  | 268.2  |
| 1255.2 | 1249.0 | 1438.1 | 1329.3 | 1577.7 | 1438.4 |
| 2854.6 | 2544.8 | 2887.9 | 2917.8 | 3301.4 | 3585.1 |
| 26.4   | 22.1   | 31.4   | 37.9   | 40.8   | 40.1   |
| 26.4   | 6.3    | 25.2   | 8.0    | 46.2   | 41.1   |
| 668.9  | 767.5  | 783.4  | 860.3  | 857.8  | 806.8  |
| 3722.9 | 3860.2 | 3836.3 | 4037.5 | 4024.5 | 4113.6 |
| 2754.7 | 2744.3 | 2705.2 | 2577.3 | 3309.0 | 3123.1 |
| 903.1  | 912.6  | 1087.7 | 950.7  | 950.7  | 1097.5 |
| 500.4  | 486.0  | 501.4  | 546.9  | 534.1  | 596.6  |
| 7.6    | 3.0    | 3.3    | 6.8    | 3.4    | 8.1    |
| 874.6  | 864.9  | 816.2  | 888.0  | 1040.4 | 1000.5 |
| 1788.7 | 1457.1 | 1496.7 | 1649.8 | 1938.9 | 1788.8 |
| 253.4  | 263.7  | 265.7  | 275.9  | 329.9  | 317.6  |
| 54.1   | 55.5   | 55.5   | 58.0   | 69.0   | 58.6   |
| 511.6  | 414.2  | 556.9  | 569.0  | 637.3  | 703.0  |
| 119.5  | 104.2  | 133.0  | 118.3  | 160.1  | 130.6  |
| 319.8  | 356.7  | 323.1  | 341.0  | 423.2  | 427.5  |
| 131.3  | 108.6  | 130.6  | 141.0  | 161.5  | 166.8  |

|        |        |        |        |        |        |
|--------|--------|--------|--------|--------|--------|
| 196.7  | 191.1  | 173.8  | 205.4  | 218.0  | 262.8  |
| 117.4  | 58.0   | 118.9  | 127.3  | 153.7  | 174.9  |
| 46.4   | 25.3   | 36.0   | 68.5   | 61.9   | 73.3   |
| 3.1    | 3.0    | 2.5    | 1.9    | 3.0    | 4.5    |
| 50.0   | 47.8   | 47.7   | 47.2   | 60.2   | 58.1   |
| 144.0  | 173.4  | 192.4  | 174.5  | 203.5  | 188.4  |
| 33.9   | 25.6   | 34.0   | 32.7   | 33.5   | 40.8   |
| 151.4  | 186.6  | 150.9  | 234.4  | 171.7  | 217.9  |
| 182.1  | 149.4  | 197.8  | 197.2  | 216.4  | 257.8  |
| 175.2  | 162.5  | 193.0  | 193.8  | 198.4  | 293.6  |
| 1639.6 | 1490.7 | 1687.2 | 1806.6 | 1938.4 | 1948.0 |
| 225.1  | 180.3  | 247.0  | 247.1  | 270.4  | 300.3  |
| 641.5  | 426.5  | 650.1  | 667.7  | 747.0  | 755.4  |
| 708.3  | 492.7  | 654.1  | 526.6  | 720.8  | 902.0  |
| 257.0  | 186.0  | 315.5  | 197.9  | 339.7  | 289.4  |
| 598.7  | 582.8  | 649.2  | 694.6  | 702.4  | 773.7  |
| 1653.3 | 1557.2 | 1627.6 | 1567.1 | 1896.3 | 2079.8 |
| 169.3  | 179.9  | 193.1  | 207.1  | 236.5  | 229.8  |
| 713.9  | 710.9  | 746.9  | 778.9  | 866.8  | 917.7  |
| 418.9  | 365.6  | 473.9  | 476.2  | 522.0  | 547.6  |
| 267.5  | 289.7  | 288.8  | 313.5  | 299.4  | 335.8  |
| 845.2  | 684.3  | 963.5  | 993.5  | 1021.6 | 947.6  |
| 12.4   | 12.4   | 18.5   | 14.8   | 10.0   | 15.1   |
| 106.9  | 88.6   | 102.8  | 93.8   | 100.9  | 120.8  |
| 187.2  | 185.1  | 222.7  | 195.0  | 207.0  | 253.8  |
| 26.0   | 31.6   | 21.4   | 30.1   | 18.0   | 33.6   |
| 2163.4 | 1898.0 | 2515.9 | 2892.2 | 2565.1 | 2745.9 |
| 1719.1 | 1779.1 | 1771.1 | 1416.2 | 1708.8 | 2103.5 |
| 1723.6 | 1607.5 | 1738.9 | 1768.5 | 1814.5 | 1998.2 |
| 63.9   | 76.1   | 63.9   | 64.1   | 81.5   | 80.4   |
| 531.9  | 522.5  | 631.4  | 650.9  | 657.2  | 598.8  |
| 373.0  | 353.0  | 408.2  | 402.6  | 421.7  | 492.7  |
| 34.8   | 24.7   | 30.1   | 50.3   | 44.2   | 54.3   |
| 350.9  | 329.2  | 361.2  | 386.3  | 409.3  | 444.5  |
| 285.3  | 225.2  | 281.0  | 279.3  | 321.0  | 370.6  |
| 2563.5 | 2167.4 | 2781.2 | 2829.5 | 2825.9 | 2648.2 |
| 165.1  | 92.5   | 134.0  | 122.3  | 165.4  | 148.3  |
| 107.5  | 65.2   | 101.8  | 77.1   | 87.1   | 109.3  |
| 232.0  | 180.9  | 183.9  | 244.4  | 271.3  | 299.4  |
| 69.1   | 67.7   | 86.1   | 72.0   | 106.3  | 94.1   |
| 388.4  | 308.5  | 367.1  | 386.6  | 426.9  | 454.6  |
| 521.9  | 618.4  | 599.4  | 637.1  | 622.6  | 765.5  |
| 540.3  | 533.1  | 528.8  | 616.1  | 691.9  | 727.1  |
| 41.3   | 27.9   | 43.8   | 30.7   | 53.7   | 43.9   |
| 22.3   | 13.4   | 27.6   | 18.5   | 26.5   | 25.2   |
| 4.3    | 4.4    | 6.5    | 6.9    | 4.2    | 3.6    |
| 107.9  | 85.3   | 73.6   | 60.5   | 82.9   | 68.7   |
| 2.1    | 3.1    | 7.0    | 4.6    | 2.1    | 3.1    |
| 119.4  | 142.2  | 137.1  | 145.9  | 166.1  | 162.2  |
| 790.5  | 686.9  | 885.4  | 867.6  | 939.5  | 870.4  |
| 3507.2 | 3338.9 | 3386.6 | 3671.7 | 3960.5 | 4224.4 |
| 4148.5 | 3917.8 | 4139.1 | 4254.2 | 4548.6 | 4755.3 |
| 1076.3 | 1014.4 | 1035.0 | 1098.0 | 1108.5 | 1247.6 |

|        |        |        |        |        |        |
|--------|--------|--------|--------|--------|--------|
| 7978.8 | 7487.1 | 7001.8 | 7954.0 | 7933.0 | 8191.2 |
| 601.6  | 488.8  | 566.8  | 564.2  | 664.3  | 632.4  |
| 80.5   | 74.3   | 107.9  | 91.3   | 104.4  | 129.1  |
| 154.0  | 133.4  | 165.3  | 161.1  | 184.7  | 172.5  |
| 126.2  | 86.0   | 102.9  | 139.4  | 139.2  | 140.4  |
| 101.0  | 108.8  | 112.6  | 94.4   | 121.6  | 129.4  |
| 686.1  | 683.7  | 606.1  | 537.3  | 710.8  | 751.3  |
| 326.8  | 253.4  | 272.1  | 232.2  | 292.7  | 328.4  |
| 913.5  | 806.2  | 732.9  | 862.7  | 874.6  | 1089.5 |
| 22.1   | 6.3    | 15.9   | 6.2    | 19.0   | 16.9   |
| 124.6  | 141.3  | 146.9  | 147.5  | 152.0  | 187.2  |
| 514.4  | 594.2  | 661.1  | 687.9  | 715.0  | 662.0  |
| 460.9  | 388.3  | 479.8  | 500.3  | 498.5  | 558.2  |
| 393.9  | 374.7  | 458.8  | 448.3  | 504.1  | 504.8  |
| 588.9  | 567.3  | 607.9  | 644.5  | 662.7  | 739.0  |
| 1.8    | 2.7    | 9.1    | 2.3    | 8.3    | 10.7   |
| 385.4  | 375.5  | 381.8  | 404.0  | 415.5  | 481.9  |
| 483.3  | 432.4  | 478.7  | 542.8  | 563.7  | 653.6  |
| 4.0    | 1.4    | 0.8    | 4.1    | 2.5    | 7.6    |
| 134.3  | 87.0   | 119.1  | 139.5  | 154.0  | 157.2  |
| 187.8  | 165.7  | 156.2  | 200.9  | 219.0  | 235.5  |
| 317.7  | 310.3  | 303.8  | 376.2  | 352.7  | 394.1  |
| 795.7  | 733.0  | 791.2  | 850.3  | 934.9  | 945.7  |
| 804.4  | 833.1  | 774.6  | 747.9  | 886.5  | 851.4  |
| 235.3  | 201.5  | 261.0  | 268.0  | 230.9  | 240.7  |
| 255.7  | 327.1  | 289.9  | 335.1  | 280.4  | 331.5  |
| 525.7  | 639.1  | 472.1  | 459.9  | 469.7  | 633.2  |
| 1100.5 | 1379.9 | 1276.1 | 1304.1 | 1310.9 | 1456.8 |
| 151.0  | 154.5  | 162.7  | 177.4  | 181.3  | 180.6  |
| 3.7    | 3.7    | 6.0    | 7.1    | 5.6    | 10.3   |
| 204.8  | 223.1  | 189.7  | 184.8  | 204.6  | 219.4  |
| 167.9  | 157.6  | 166.1  | 210.1  | 210.9  | 210.9  |
| 33.7   | 23.8   | 38.6   | 43.5   | 43.1   | 39.8   |
| 495.1  | 438.3  | 415.1  | 459.6  | 451.0  | 545.8  |
| 186.3  | 152.6  | 163.4  | 190.4  | 203.1  | 219.4  |
| 114.6  | 128.4  | 94.6   | 113.7  | 123.3  | 155.3  |
| 123.7  | 126.3  | 113.4  | 148.3  | 132.7  | 164.2  |
| 364.7  | 352.6  | 274.9  | 371.3  | 334.1  | 437.6  |
| 473.7  | 462.5  | 489.8  | 448.2  | 597.2  | 607.9  |
| 326.6  | 307.5  | 357.3  | 305.5  | 397.7  | 377.2  |
| 12.8   | 15.9   | 6.6    | 9.8    | 9.0    | 14.7   |
| 3.6    | 6.3    | 4.8    | 7.1    | 4.0    | 5.5    |
| 15.1   | 30.2   | 8.7    | 14.8   | 3.3    | 10.7   |
| 236.9  | 321.4  | 254.3  | 267.2  | 266.4  | 291.0  |
| 1013.5 | 974.9  | 994.9  | 1036.1 | 1127.5 | 1398.9 |
| 421.7  | 370.8  | 377.5  | 419.8  | 448.2  | 521.4  |
| 113.3  | 122.9  | 105.0  | 93.5   | 122.1  | 88.0   |
| 58.0   | 51.4   | 51.7   | 54.7   | 53.8   | 80.6   |
| 45.7   | 32.1   | 32.7   | 38.6   | 58.4   | 39.6   |
| 405.0  | 369.9  | 403.3  | 441.0  | 487.3  | 505.7  |
| 6.4    | 8.6    | 1.1    | 0.7    | 1.3    | 2.5    |
| 1159.5 | 1202.7 | 1289.6 | 1429.8 | 1433.8 | 1406.6 |
| 1053.9 | 957.7  | 1152.3 | 1200.8 | 1206.1 | 1346.9 |

|        |        |        |        |        |        |
|--------|--------|--------|--------|--------|--------|
| 150.6  | 114.8  | 185.0  | 169.1  | 177.9  | 189.8  |
| 160.1  | 133.3  | 181.6  | 212.7  | 212.6  | 196.5  |
| 344.7  | 272.9  | 284.6  | 306.7  | 368.3  | 410.8  |
| 227.9  | 180.7  | 192.8  | 186.6  | 214.9  | 268.6  |
| 598.2  | 634.2  | 650.8  | 639.4  | 661.2  | 597.7  |
| 103.8  | 65.2   | 90.4   | 77.5   | 102.4  | 100.7  |
| 163.1  | 168.4  | 182.0  | 177.2  | 170.5  | 194.8  |
| 323.3  | 278.9  | 300.6  | 299.3  | 343.7  | 337.5  |
| 2703.7 | 2597.6 | 3099.8 | 3176.3 | 2995.1 | 3061.1 |
| 425.8  | 438.6  | 519.8  | 552.4  | 526.1  | 596.4  |
| 112.1  | 90.2   | 82.9   | 95.1   | 102.4  | 139.2  |
| 4.2    | 2.0    | 3.7    | 0.9    | 4.1    | 5.9    |
| 335.6  | 319.1  | 331.0  | 334.6  | 371.7  | 402.8  |
| 298.8  | 327.7  | 272.2  | 353.3  | 305.1  | 414.0  |
| 40.2   | 25.9   | 34.3   | 41.5   | 44.8   | 53.1   |
| 79.7   | 92.5   | 93.2   | 86.3   | 89.1   | 98.8   |
| 173.9  | 163.7  | 189.9  | 192.7  | 219.2  | 222.5  |
| 53.5   | 58.7   | 64.4   | 61.3   | 81.2   | 54.8   |
| 734.2  | 620.6  | 676.9  | 874.8  | 763.7  | 888.2  |
| 23.3   | 41.2   | 39.5   | 42.9   | 39.1   | 47.4   |
| 52.0   | 48.3   | 46.6   | 54.9   | 62.9   | 60.1   |
| 544.3  | 576.8  | 574.6  | 522.1  | 634.4  | 717.6  |
| 11.3   | 3.3    | 9.8    | 7.8    | 1.3    | 4.5    |
| 93.6   | 85.7   | 124.3  | 108.0  | 104.6  | 131.5  |
| 1521.8 | 1324.9 | 1616.4 | 1693.1 | 1856.6 | 1846.1 |
| 2093.3 | 1773.2 | 1709.4 | 1701.7 | 1959.5 | 2148.0 |
| 257.2  | 282.4  | 311.3  | 308.8  | 233.5  | 358.3  |
| 822.9  | 885.8  | 951.1  | 924.6  | 1008.9 | 1014.9 |
| 55.6   | 37.6   | 55.6   | 53.5   | 65.9   | 61.7   |
| 46.1   | 46.5   | 59.4   | 65.7   | 65.6   | 64.6   |
| 12.1   | 9.5    | 7.7    | 19.5   | 9.2    | 6.2    |
| 255.3  | 305.6  | 305.4  | 289.2  | 280.7  | 314.6  |
| 1276.0 | 1113.6 | 1211.8 | 1174.5 | 1375.3 | 1449.5 |
| 237.5  | 137.8  | 266.9  | 250.7  | 297.7  | 292.8  |
| 134.3  | 133.7  | 156.2  | 150.4  | 168.2  | 164.0  |
| 1327.6 | 1833.1 | 1310.1 | 1490.0 | 1315.4 | 1532.3 |
| 108.3  | 81.0   | 82.8   | 87.3   | 110.3  | 114.9  |
| 42.2   | 53.9   | 38.3   | 67.3   | 63.9   | 57.3   |
| 4.1    | 6.6    | 10.2   | 3.4    | 6.5    | 12.5   |
| 457.3  | 418.3  | 557.8  | 423.7  | 552.5  | 603.5  |
| 476.2  | 412.3  | 459.2  | 515.7  | 523.3  | 598.5  |
| 142.5  | 104.9  | 128.9  | 135.4  | 157.5  | 154.6  |
| 86.6   | 84.8   | 104.5  | 56.6   | 85.9   | 104.3  |
| 682.4  | 557.2  | 625.2  | 725.6  | 722.6  | 857.4  |
| 68.2   | 77.5   | 67.2   | 71.7   | 77.1   | 76.9   |
| 1123.6 | 950.6  | 978.1  | 961.7  | 1208.5 | 1332.9 |
| 456.2  | 302.5  | 524.1  | 549.9  | 628.1  | 604.2  |
| 57.0   | 34.6   | 61.6   | 63.8   | 87.9   | 81.1   |
| 7.6    | 8.4    | 1.7    | 1.4    | 4.4    | 8.2    |
| 37.4   | 47.1   | 42.6   | 42.6   | 45.2   | 72.2   |
| 316.9  | 226.8  | 311.0  | 321.6  | 390.6  | 432.2  |
| 21.3   | 25.2   | 20.4   | 8.9    | 4.7    | 14.2   |
| 210.5  | 152.0  | 289.4  | 220.6  | 305.3  | 291.2  |

|        |        |        |        |        |        |
|--------|--------|--------|--------|--------|--------|
| 497.6  | 419.5  | 504.0  | 524.9  | 549.3  | 616.7  |
| 45.5   | 41.8   | 61.0   | 45.3   | 57.8   | 61.2   |
| 401.2  | 327.4  | 401.9  | 366.5  | 473.2  | 410.2  |
| 582.9  | 551.1  | 649.8  | 664.7  | 791.5  | 783.9  |
| 308.9  | 298.5  | 352.8  | 375.6  | 409.3  | 457.7  |
| 301.0  | 257.1  | 346.5  | 357.7  | 354.7  | 397.2  |
| 168.4  | 179.0  | 243.2  | 240.9  | 229.8  | 222.7  |
| 134.8  | 163.2  | 157.9  | 169.7  | 198.7  | 231.5  |
| 339.3  | 347.5  | 387.2  | 355.4  | 419.7  | 407.4  |
| 6.1    | 13.9   | 25.2   | 15.3   | 28.5   | 10.3   |
| 3.9    | 8.0    | 8.8    | 7.1    | 8.8    | 4.4    |
| 5.5    | 8.3    | 1.6    | 6.9    | 10.5   | 10.4   |
| 141.0  | 153.9  | 142.4  | 158.6  | 152.4  | 180.5  |
| 22.0   | 48.2   | 17.0   | 25.7   | 42.8   | 37.8   |
| 774.0  | 718.7  | 781.5  | 810.1  | 861.1  | 912.8  |
| 8.3    | 3.4    | 2.5    | 12.4   | 9.3    | 4.3    |
| 7.1    | 26.7   | 25.8   | 11.0   | 11.1   | 9.7    |
| 293.4  | 250.9  | 379.6  | 341.2  | 385.4  | 355.1  |
| 305.3  | 276.4  | 339.6  | 315.6  | 371.4  | 402.7  |
| 1795.7 | 1472.2 | 1612.3 | 1734.0 | 1911.3 | 2086.7 |
| 102.0  | 121.0  | 145.6  | 156.8  | 146.4  | 161.1  |
| 167.1  | 138.7  | 173.3  | 184.2  | 166.6  | 197.3  |
| 171.0  | 170.5  | 163.0  | 181.8  | 190.9  | 201.8  |
| 136.1  | 135.9  | 139.6  | 137.6  | 179.9  | 167.6  |
| 618.5  | 555.8  | 590.4  | 665.1  | 711.3  | 751.1  |
| 180.5  | 250.8  | 189.2  | 203.0  | 202.8  | 255.0  |
| 255.7  | 242.7  | 288.6  | 308.2  | 309.9  | 337.1  |
| 228.3  | 199.8  | 237.3  | 212.7  | 274.8  | 297.4  |
| 979.1  | 1351.9 | 895.1  | 1293.4 | 986.2  | 1169.0 |
| 628.0  | 942.0  | 631.3  | 791.2  | 607.0  | 883.4  |
| 469.6  | 449.3  | 437.5  | 473.2  | 503.1  | 658.1  |
| 1612.9 | 1532.6 | 1737.6 | 1712.1 | 1924.1 | 1932.9 |
| 152.8  | 144.8  | 132.6  | 153.1  | 177.2  | 186.6  |
| 859.8  | 721.6  | 891.7  | 904.7  | 962.7  | 875.4  |
| 40.4   | 32.8   | 43.9   | 52.4   | 54.2   | 59.9   |
| 683.9  | 661.0  | 693.5  | 690.4  | 830.9  | 774.5  |
| 16.4   | 6.1    | 27.8   | 24.2   | 24.1   | 9.6    |
| 5.5    | 0.6    | 1.3    | 1.8    | 1.3    | 1.0    |
| 4.8    | 2.3    | 4.7    | 9.0    | 0.8    | 10.7   |
| 832.0  | 823.9  | 863.4  | 876.8  | 963.4  | 1073.8 |
| 159.1  | 133.0  | 188.5  | 167.8  | 220.7  | 213.2  |
| 72.2   | 68.3   | 57.2   | 56.3   | 79.8   | 65.2   |
| 8.7    | 14.2   | 5.9    | 10.5   | 10.7   | 14.7   |
| 59.1   | 47.2   | 57.1   | 40.5   | 79.7   | 66.2   |
| 90.4   | 86.0   | 72.0   | 127.0  | 140.6  | 97.4   |
| 43.8   | 41.1   | 72.8   | 65.5   | 71.5   | 69.8   |
| 821.8  | 880.5  | 773.4  | 817.6  | 775.6  | 965.5  |
| 98.0   | 107.1  | 103.6  | 118.1  | 116.6  | 126.8  |
| 482.0  | 454.8  | 532.1  | 506.3  | 575.2  | 636.3  |
| 127.9  | 102.8  | 129.6  | 118.5  | 142.3  | 129.3  |
| 1349.1 | 1016.9 | 1235.4 | 1245.1 | 1565.8 | 1499.5 |
| 121.4  | 125.8  | 124.6  | 148.2  | 155.9  | 160.0  |
| 109.4  | 110.7  | 106.1  | 120.8  | 114.6  | 123.3  |



|        |       |        |        |        |        |
|--------|-------|--------|--------|--------|--------|
| 150.2  | 127.0 | 176.5  | 170.7  | 167.2  | 194.1  |
| 54.9   | 47.1  | 51.0   | 54.2   | 64.4   | 61.6   |
| 102.6  | 131.6 | 101.6  | 127.8  | 139.6  | 147.3  |
| 44.8   | 29.9  | 45.9   | 40.6   | 47.4   | 47.2   |
| 39.7   | 59.6  | 47.9   | 40.1   | 57.5   | 45.5   |
| 162.8  | 124.5 | 151.5  | 143.3  | 189.8  | 179.9  |
| 307.9  | 306.6 | 366.6  | 442.4  | 425.6  | 433.3  |
| 729.0  | 632.7 | 686.7  | 671.4  | 711.0  | 792.9  |
| 27.3   | 19.7  | 26.3   | 30.6   | 31.1   | 34.2   |
| 146.7  | 103.8 | 145.6  | 149.1  | 183.9  | 171.3  |
| 673.7  | 591.5 | 702.4  | 632.4  | 666.6  | 813.1  |
| 425.8  | 400.9 | 448.5  | 509.7  | 447.3  | 494.8  |
| 35.8   | 34.8  | 48.1   | 42.5   | 41.9   | 37.9   |
| 196.1  | 196.0 | 189.5  | 189.9  | 200.5  | 228.2  |
| 97.7   | 114.1 | 99.1   | 96.5   | 119.5  | 124.2  |
| 152.0  | 142.0 | 141.1  | 144.1  | 164.5  | 184.8  |
| 126.0  | 184.2 | 114.7  | 159.4  | 149.2  | 157.1  |
| 314.3  | 310.2 | 384.3  | 337.0  | 331.7  | 335.9  |
| 541.3  | 505.9 | 593.5  | 587.9  | 625.8  | 683.6  |
| 270.7  | 219.8 | 235.6  | 237.9  | 290.5  | 292.4  |
| 103.1  | 121.7 | 88.5   | 80.3   | 115.3  | 120.3  |
| 485.8  | 467.3 | 583.0  | 638.4  | 647.7  | 645.5  |
| 270.8  | 390.5 | 302.7  | 321.8  | 317.4  | 342.8  |
| 122.8  | 149.6 | 160.8  | 136.7  | 147.8  | 185.5  |
| 466.7  | 401.8 | 357.8  | 508.3  | 509.8  | 553.3  |
| 28.0   | 37.6  | 42.1   | 20.6   | 25.3   | 25.2   |
| 11.1   | 5.5   | 5.3    | 10.8   | 6.5    | 10.9   |
| 18.7   | 22.0  | 23.1   | 24.8   | 35.0   | 26.1   |
| 70.5   | 58.0  | 78.3   | 66.6   | 99.5   | 91.6   |
| 676.6  | 671.6 | 843.2  | 816.4  | 845.8  | 841.9  |
| 20.1   | 20.9  | 13.8   | 24.5   | 21.9   | 27.7   |
| 64.9   | 33.3  | 59.8   | 58.4   | 91.3   | 80.3   |
| 54.5   | 69.5  | 58.0   | 65.2   | 63.9   | 75.3   |
| 371.0  | 349.1 | 389.8  | 393.4  | 408.7  | 461.2  |
| 329.6  | 339.4 | 369.8  | 386.5  | 385.4  | 403.2  |
| 17.5   | 15.7  | 16.4   | 19.2   | 25.2   | 34.1   |
| 73.5   | 56.1  | 61.4   | 64.6   | 77.9   | 61.6   |
| 1193.5 | 872.6 | 1177.8 | 1181.8 | 1263.4 | 1441.8 |
| 367.9  | 358.5 | 471.8  | 477.8  | 463.3  | 481.0  |
| 92.9   | 84.6  | 95.8   | 98.2   | 108.8  | 124.5  |
| 156.0  | 90.4  | 107.2  | 154.2  | 132.7  | 182.4  |
| 862.8  | 713.8 | 984.1  | 903.8  | 951.3  | 945.1  |
| 84.5   | 86.3  | 83.3   | 104.0  | 102.4  | 113.6  |
| 52.4   | 27.7  | 47.4   | 53.4   | 53.6   | 46.9   |
| 557.5  | 510.7 | 559.9  | 631.3  | 640.4  | 659.9  |
| 182.0  | 206.6 | 196.8  | 188.4  | 193.6  | 213.7  |
| 90.9   | 115.8 | 81.3   | 112.0  | 91.1   | 116.9  |
| 33.5   | 39.4  | 50.5   | 57.9   | 50.9   | 50.6   |
| 388.2  | 192.5 | 328.8  | 285.0  | 394.9  | 414.7  |
| 163.0  | 85.3  | 122.2  | 163.1  | 163.7  | 212.1  |
| 704.3  | 637.5 | 784.6  | 856.8  | 822.6  | 814.6  |
| 20.3   | 35.6  | 27.4   | 34.1   | 29.1   | 25.1   |
| 199.6  | 170.5 | 220.2  | 227.8  | 241.4  | 228.1  |

|        |        |        |        |        |        |
|--------|--------|--------|--------|--------|--------|
| 603.9  | 528.5  | 694.1  | 591.7  | 700.8  | 720.5  |
| 36.9   | 19.6   | 32.1   | 39.6   | 42.9   | 50.7   |
| 52.3   | 54.3   | 62.4   | 48.6   | 50.3   | 58.3   |
| 323.8  | 302.0  | 317.3  | 351.7  | 398.7  | 413.1  |
| 31.2   | 34.8   | 45.2   | 39.8   | 34.8   | 40.2   |
| 6.6    | 3.3    | 6.3    | 8.5    | 10.3   | 7.5    |
| 8.2    | 1.6    | 4.0    | 3.8    | 5.1    | 8.7    |
| 312.3  | 304.1  | 321.3  | 348.0  | 357.8  | 378.8  |
| 189.2  | 131.2  | 186.2  | 194.7  | 226.4  | 249.3  |
| 38.4   | 22.5   | 25.5   | 25.7   | 25.8   | 38.9   |
| 2.1    | 2.0    | 3.6    | 10.9   | 2.9    | 7.1    |
| 106.9  | 87.3   | 139.4  | 125.9  | 114.7  | 130.3  |
| 1506.8 | 1499.8 | 1455.8 | 1615.4 | 1560.9 | 1838.6 |
| 220.4  | 184.5  | 272.3  | 317.8  | 317.4  | 375.8  |
| 904.8  | 860.6  | 1091.5 | 1073.5 | 1073.6 | 925.5  |
| 275.1  | 228.7  | 287.1  | 280.8  | 330.3  | 334.8  |
| 2.1    | 1.0    | 2.3    | 4.4    | 3.4    | 3.5    |
| 295.4  | 235.3  | 289.7  | 316.2  | 341.2  | 350.9  |
| 709.4  | 733.3  | 891.3  | 982.9  | 867.0  | 859.8  |
| 21.0   | 15.1   | 15.2   | 16.4   | 16.1   | 18.7   |
| 765.4  | 601.6  | 706.5  | 778.1  | 832.3  | 907.2  |
| 128.0  | 99.0   | 147.7  | 137.9  | 162.4  | 163.7  |
| 514.8  | 527.9  | 509.6  | 536.4  | 570.7  | 643.6  |
| 239.0  | 248.6  | 230.8  | 216.3  | 253.2  | 342.2  |
| 152.7  | 177.6  | 199.1  | 174.6  | 229.5  | 227.3  |
| 197.9  | 215.8  | 195.9  | 185.5  | 271.1  | 276.4  |
| 185.5  | 232.4  | 273.4  | 239.7  | 241.8  | 355.3  |
| 2.5    | 9.4    | 9.6    | 11.8   | 2.0    | 14.4   |
| 4320.3 | 3654.2 | 4310.9 | 4321.6 | 4574.0 | 4947.9 |
| 10.6   | 19.3   | 11.8   | 16.5   | 7.1    | 19.7   |
| 165.9  | 180.1  | 207.3  | 214.0  | 223.4  | 223.2  |
| 163.2  | 115.0  | 137.0  | 141.1  | 185.1  | 181.8  |
| 6.4    | 1.3    | 2.4    | 2.8    | 1.6    | 3.4    |
| 169.2  | 127.4  | 163.6  | 181.6  | 206.3  | 227.4  |
| 1.5    | 1.6    | 1.1    | 5.0    | 3.6    | 1.8    |
| 16.8   | 25.9   | 16.6   | 9.0    | 7.0    | 15.6   |
| 25.3   | 32.7   | 26.8   | 26.4   | 19.0   | 21.7   |
| 281.0  | 254.1  | 314.9  | 268.2  | 286.8  | 329.4  |
| 85.1   | 63.4   | 104.8  | 95.7   | 98.3   | 108.0  |
| 3385.9 | 2812.0 | 3181.3 | 3202.5 | 3684.7 | 3669.7 |
| 107.4  | 93.7   | 107.5  | 117.8  | 109.1  | 150.8  |
| 25.7   | 29.0   | 46.6   | 40.4   | 44.9   | 41.8   |
| 5.2    | 23.3   | 25.7   | 8.3    | 21.2   | 10.7   |
| 2309.9 | 2060.8 | 2361.3 | 2506.7 | 2567.6 | 2942.9 |
| 21.3   | 18.9   | 26.3   | 22.3   | 32.2   | 35.2   |
| 566.6  | 542.3  | 637.3  | 626.8  | 730.4  | 773.6  |
| 359.3  | 337.4  | 360.2  | 407.5  | 431.5  | 453.5  |
| 2391.5 | 2332.0 | 2763.6 | 2815.9 | 2675.7 | 2866.1 |
| 266.8  | 251.4  | 262.0  | 268.3  | 290.7  | 309.4  |
| 519.9  | 440.0  | 481.5  | 495.6  | 574.6  | 620.4  |
| 199.8  | 194.9  | 203.3  | 211.1  | 249.7  | 251.3  |
| 75.5   | 60.7   | 77.8   | 69.3   | 101.5  | 110.7  |
| 143.0  | 187.5  | 196.0  | 203.6  | 205.1  | 216.6  |

|        |        |        |        |        |        |
|--------|--------|--------|--------|--------|--------|
| 693.7  | 634.6  | 739.4  | 738.5  | 813.8  | 832.6  |
| 219.0  | 198.3  | 278.9  | 202.7  | 221.7  | 265.1  |
| 62.6   | 51.0   | 47.9   | 64.2   | 62.9   | 88.8   |
| 506.6  | 469.2  | 499.2  | 511.1  | 580.3  | 615.0  |
| 16.1   | 10.2   | 13.7   | 2.5    | 14.6   | 5.1    |
| 138.8  | 91.1   | 158.2  | 143.7  | 188.9  | 186.3  |
| 611.7  | 525.7  | 526.6  | 573.9  | 623.6  | 713.3  |
| 433.3  | 422.3  | 451.7  | 430.4  | 454.6  | 523.4  |
| 47.3   | 53.4   | 49.7   | 38.2   | 47.0   | 53.8   |
| 389.2  | 390.0  | 371.8  | 373.1  | 419.1  | 466.2  |
| 384.0  | 415.4  | 414.9  | 397.8  | 407.1  | 452.8  |
| 63.1   | 58.8   | 55.1   | 49.3   | 62.8   | 64.4   |
| 509.1  | 496.9  | 635.1  | 642.0  | 638.9  | 671.7  |
| 61.2   | 59.6   | 69.1   | 84.0   | 85.9   | 91.8   |
| 145.4  | 101.6  | 160.3  | 150.2  | 158.0  | 156.8  |
| 90.4   | 72.9   | 82.8   | 94.9   | 83.6   | 99.3   |
| 973.1  | 840.7  | 982.6  | 932.4  | 1134.3 | 1146.4 |
| 48.5   | 45.1   | 53.3   | 41.6   | 56.5   | 55.4   |
| 47.9   | 49.6   | 37.9   | 41.3   | 38.9   | 59.6   |
| 1504.4 | 1163.2 | 1303.6 | 1307.9 | 1600.8 | 1671.5 |
| 295.3  | 285.3  | 294.1  | 350.9  | 320.3  | 362.5  |
| 148.8  | 159.3  | 171.3  | 203.9  | 182.7  | 194.7  |
| 115.8  | 88.8   | 105.5  | 106.9  | 131.3  | 131.8  |
| 6.2    | 1.7    | 1.1    | 1.9    | 5.4    | 4.5    |
| 0.8    | 1.0    | 4.6    | 2.6    | 2.4    | 6.0    |
| 10.9   | 17.5   | 12.3   | 9.6    | 20.6   | 10.0   |
| 16.3   | 10.8   | 20.3   | 16.6   | 9.3    | 6.2    |
| 41.6   | 48.2   | 45.9   | 42.9   | 56.1   | 73.3   |
| 257.8  | 275.6  | 292.1  | 294.0  | 268.1  | 289.2  |
| 8.1    | 7.3    | 10.3   | 4.3    | 13.4   | 11.0   |
| 47.3   | 42.1   | 11.6   | 36.9   | 19.3   | 39.6   |
| 1376.9 | 1385.6 | 1581.5 | 1695.4 | 1681.9 | 1822.6 |
| 243.9  | 199.9  | 239.2  | 278.0  | 309.0  | 303.8  |
| 337.2  | 293.1  | 343.2  | 280.8  | 314.3  | 408.6  |
| 18.2   | 22.8   | 21.4   | 28.1   | 32.9   | 33.6   |
| 84.0   | 64.7   | 79.0   | 87.0   | 90.9   | 88.4   |
| 4.6    | 12.1   | 1.8    | 1.8    | 1.6    | 4.5    |
| 9.4    | 8.0    | 5.2    | 3.1    | 19.3   | 11.1   |
| 132.1  | 127.8  | 128.4  | 141.8  | 156.9  | 158.5  |
| 50.4   | 36.9   | 47.5   | 30.8   | 62.9   | 69.7   |
| 73.2   | 66.7   | 67.1   | 94.6   | 90.1   | 76.3   |
| 4.6    | 9.0    | 7.0    | 3.8    | 5.8    | 11.8   |
| 11.6   | 14.6   | 17.0   | 15.1   | 11.0   | 19.3   |
| 67.3   | 47.9   | 63.6   | 60.5   | 82.4   | 72.8   |
| 2274.8 | 2230.4 | 2416.8 | 2423.2 | 2472.0 | 2739.2 |
| 331.8  | 341.9  | 321.8  | 371.4  | 402.8  | 416.0  |
| 85.6   | 85.3   | 89.5   | 70.0   | 93.5   | 103.7  |
| 948.6  | 1024.8 | 812.4  | 910.1  | 861.9  | 1032.8 |
| 117.9  | 75.7   | 143.5  | 140.3  | 142.8  | 141.4  |
| 7.8    | 11.2   | 6.5    | 9.0    | 15.0   | 7.8    |
| 8.7    | 7.1    | 8.7    | 23.2   | 14.9   | 12.7   |
| 53.9   | 57.7   | 50.0   | 53.8   | 64.5   | 68.2   |
| 1180.9 | 1219.4 | 1179.1 | 1246.1 | 1277.1 | 1457.3 |

|        |        |        |        |        |        |
|--------|--------|--------|--------|--------|--------|
| 4.0    | 7.5    | 6.5    | 2.2    | 15.8   | 11.0   |
| 10.0   | 18.3   | 13.3   | 8.3    | 14.8   | 14.5   |
| 149.8  | 108.4  | 127.6  | 126.7  | 148.7  | 190.5  |
| 174.1  | 123.5  | 213.5  | 182.5  | 227.1  | 225.1  |
| 81.7   | 104.8  | 88.6   | 88.3   | 104.9  | 91.4   |
| 53.6   | 75.5   | 64.4   | 62.0   | 59.4   | 85.5   |
| 476.4  | 430.5  | 501.1  | 518.5  | 565.8  | 550.3  |
| 391.8  | 357.5  | 362.2  | 405.5  | 412.5  | 506.6  |
| 354.4  | 319.2  | 421.1  | 409.1  | 431.9  | 425.3  |
| 8.8    | 11.5   | 4.6    | 6.4    | 10.5   | 10.5   |
| 11.1   | 8.8    | 5.2    | 7.9    | 7.2    | 4.3    |
| 324.9  | 290.2  | 327.6  | 332.4  | 368.5  | 457.5  |
| 758.4  | 712.3  | 746.1  | 772.6  | 845.4  | 969.9  |
| 337.5  | 247.7  | 347.7  | 321.3  | 360.5  | 353.2  |
| 1.6    | 0.8    | 2.6    | 3.1    | 2.0    | 3.1    |
| 62.8   | 49.5   | 63.9   | 61.9   | 57.1   | 68.2   |
| 66.6   | 116.0  | 82.3   | 96.9   | 83.7   | 88.3   |
| 40.0   | 34.8   | 50.0   | 26.0   | 45.9   | 36.8   |
| 20.2   | 25.5   | 32.0   | 19.1   | 32.3   | 31.9   |
| 242.9  | 215.0  | 252.0  | 240.2  | 273.8  | 286.6  |
| 316.1  | 303.9  | 330.0  | 368.7  | 354.0  | 388.6  |
| 16.1   | 23.9   | 20.7   | 20.8   | 21.9   | 26.9   |
| 295.0  | 297.5  | 298.4  | 256.4  | 323.6  | 467.6  |
| 8.3    | 7.4    | 14.0   | 5.9    | 4.7    | 9.3    |
| 6.7    | 6.7    | 12.8   | 2.4    | 4.2    | 12.3   |
| 13.5   | 18.0   | 14.0   | 16.5   | 2.9    | 11.9   |
| 61.2   | 57.5   | 61.1   | 69.0   | 89.3   | 72.6   |
| 196.7  | 197.2  | 204.7  | 236.0  | 237.5  | 259.7  |
| 2.2    | 3.2    | 1.3    | 3.0    | 6.0    | 1.6    |
| 4.1    | 0.6    | 0.6    | 1.8    | 3.1    | 5.7    |
| 2.6    | 3.5    | 2.2    | 2.5    | 1.4    | 5.0    |
| 40.7   | 51.7   | 32.2   | 38.6   | 30.7   | 36.1   |
| 220.0  | 214.9  | 251.6  | 267.9  | 251.7  | 296.9  |
| 4.5    | 1.3    | 6.7    | 3.6    | 7.5    | 4.4    |
| 143.3  | 158.1  | 173.4  | 156.9  | 174.6  | 177.9  |
| 466.9  | 411.4  | 462.5  | 472.4  | 532.1  | 556.2  |
| 1488.3 | 1410.2 | 1539.3 | 1491.1 | 1657.9 | 1762.5 |
| 1172.1 | 859.8  | 1301.2 | 1084.8 | 1507.0 | 1391.8 |
| 323.5  | 276.2  | 325.9  | 327.9  | 441.1  | 369.5  |
| 1.2    | 0.9    | 7.1    | 8.0    | 0.8    | 1.7    |
| 1.6    | 0.6    | 0.9    | 7.1    | 2.2    | 5.4    |
| 6.3    | 6.9    | 4.8    | 1.2    | 7.1    | 4.8    |
| 84.9   | 77.1   | 78.1   | 79.7   | 95.6   | 124.9  |
| 7.3    | 5.0    | 4.7    | 5.4    | 2.1    | 4.6    |
| 6.8    | 18.6   | 5.6    | 9.2    | 7.5    | 10.5   |
| 2.6    | 1.1    | 3.1    | 4.9    | 2.1    | 2.2    |
| 4308.1 | 4240.9 | 4376.8 | 4344.0 | 4775.4 | 4849.6 |
| 202.1  | 166.5  | 185.0  | 179.7  | 203.0  | 225.0  |
| 110.0  | 133.3  | 141.8  | 169.7  | 157.4  | 187.8  |
| 163.0  | 143.8  | 174.4  | 196.5  | 185.0  | 203.6  |
| 1009.6 | 1016.7 | 1034.5 | 1034.1 | 1232.6 | 1252.8 |
| 472.3  | 362.1  | 466.3  | 440.1  | 522.8  | 511.3  |
| 131.8  | 126.5  | 177.3  | 164.7  | 162.4  | 192.7  |

|        |        |        |        |        |        |
|--------|--------|--------|--------|--------|--------|
| 326.9  | 379.7  | 320.9  | 356.5  | 380.3  | 414.6  |
| 192.5  | 193.9  | 189.5  | 218.4  | 193.5  | 231.6  |
| 432.3  | 318.6  | 345.0  | 395.8  | 398.7  | 497.8  |
| 146.4  | 167.1  | 189.7  | 207.1  | 191.4  | 216.3  |
| 355.2  | 316.8  | 365.9  | 357.6  | 390.7  | 405.4  |
| 21.2   | 34.0   | 23.7   | 20.0   | 36.1   | 33.7   |
| 255.2  | 212.2  | 240.0  | 255.3  | 241.8  | 286.8  |
| 284.2  | 265.9  | 260.5  | 317.3  | 337.3  | 392.5  |
| 309.8  | 463.6  | 395.8  | 511.5  | 401.7  | 725.5  |
| 102.7  | 98.8   | 112.7  | 118.9  | 132.7  | 123.5  |
| 31.2   | 44.3   | 33.1   | 33.2   | 21.0   | 23.5   |
| 4.6    | 10.7   | 6.3    | 4.1    | 6.5    | 11.5   |
| 14.0   | 15.7   | 11.8   | 10.1   | 9.7    | 18.7   |
| 59.5   | 46.4   | 44.3   | 44.9   | 48.6   | 53.7   |
| 3.5    | 5.3    | 4.4    | 4.8    | 5.4    | 5.5    |
| 475.9  | 344.9  | 446.8  | 417.1  | 533.6  | 539.5  |
| 81.1   | 78.2   | 80.5   | 83.5   | 95.5   | 101.0  |
| 72.4   | 62.0   | 67.5   | 85.8   | 84.3   | 89.8   |
| 103.4  | 116.3  | 124.0  | 115.0  | 134.7  | 133.2  |
| 124.3  | 125.2  | 125.8  | 116.6  | 126.3  | 144.5  |
| 361.6  | 314.2  | 348.8  | 413.0  | 425.0  | 449.4  |
| 196.4  | 148.1  | 167.4  | 180.3  | 193.6  | 252.6  |
| 250.5  | 236.6  | 216.1  | 269.5  | 279.2  | 359.4  |
| 63.2   | 39.8   | 66.9   | 65.0   | 71.1   | 64.1   |
| 311.6  | 273.2  | 329.3  | 342.8  | 450.3  | 419.1  |
| 13.4   | 4.6    | 11.9   | 8.4    | 7.4    | 8.7    |
| 400.6  | 475.4  | 425.7  | 442.6  | 493.8  | 511.0  |
| 447.7  | 332.6  | 385.0  | 364.0  | 479.9  | 425.4  |
| 84.0   | 40.8   | 83.4   | 60.5   | 103.7  | 94.4   |
| 255.1  | 122.8  | 279.8  | 197.7  | 349.5  | 305.8  |
| 122.5  | 130.0  | 143.3  | 145.0  | 184.5  | 192.2  |
| 631.9  | 498.1  | 700.4  | 722.9  | 740.6  | 735.3  |
| 1058.1 | 917.8  | 1038.2 | 1104.6 | 1189.8 | 1309.5 |
| 25.3   | 45.3   | 26.1   | 17.5   | 35.9   | 36.7   |
| 54.2   | 45.7   | 51.9   | 63.5   | 62.6   | 52.9   |
| 1288.6 | 1063.9 | 1141.9 | 1152.8 | 1378.4 | 1575.5 |
| 25.8   | 19.8   | 17.6   | 22.7   | 24.5   | 29.8   |
| 3.9    | 6.0    | 6.0    | 3.5    | 4.6    | 8.7    |
| 346.6  | 296.0  | 378.7  | 398.0  | 414.2  | 390.3  |
| 401.7  | 317.7  | 349.8  | 399.6  | 410.4  | 443.6  |
| 175.0  | 156.9  | 204.2  | 198.2  | 230.7  | 272.5  |
| 165.6  | 134.9  | 161.5  | 171.6  | 204.5  | 212.1  |
| 3535.8 | 3220.3 | 2913.0 | 2869.7 | 3518.4 | 4073.5 |
| 13.5   | 6.9    | 12.9   | 17.5   | 18.5   | 19.2   |
| 5.3    | 3.1    | 8.0    | 12.0   | 10.0   | 8.3    |
| 19.8   | 24.1   | 18.8   | 14.8   | 15.0   | 20.6   |
| 267.4  | 245.6  | 239.6  | 276.3  | 249.8  | 288.6  |
| 371.6  | 336.6  | 359.1  | 263.4  | 393.8  | 498.7  |
| 7.1    | 10.2   | 4.5    | 1.1    | 4.3    | 9.0    |
| 29.7   | 35.7   | 33.3   | 24.8   | 27.2   | 31.2   |
| 744.9  | 711.8  | 710.3  | 774.2  | 891.1  | 873.3  |
| 463.4  | 774.3  | 592.4  | 641.6  | 581.5  | 691.6  |
| 352.8  | 294.2  | 367.7  | 342.8  | 417.8  | 438.1  |

|        |        |        |        |        |        |
|--------|--------|--------|--------|--------|--------|
| 280.4  | 201.5  | 205.0  | 255.5  | 294.8  | 297.1  |
| 198.4  | 167.3  | 248.6  | 239.5  | 256.1  | 242.5  |
| 1.2    | 1.6    | 0.4    | 0.6    | 0.6    | 0.7    |
| 168.4  | 175.6  | 176.1  | 228.8  | 200.8  | 225.4  |
| 12.2   | 9.5    | 10.3   | 8.5    | 4.0    | 11.9   |
| 237.7  | 190.8  | 215.9  | 275.4  | 246.5  | 315.8  |
| 0.8    | 1.1    | 1.3    | 6.4    | 0.8    | 6.0    |
| 89.6   | 77.7   | 86.0   | 96.6   | 106.4  | 105.4  |
| 60.7   | 49.6   | 62.8   | 59.8   | 56.2   | 51.9   |
| 60.7   | 42.4   | 63.6   | 90.2   | 90.8   | 76.7   |
| 60.9   | 67.3   | 78.3   | 79.3   | 82.8   | 91.4   |
| 7.1    | 1.1    | 12.5   | 4.2    | 1.8    | 2.3    |
| 49.2   | 42.5   | 54.5   | 60.1   | 69.5   | 75.3   |
| 1486.0 | 1499.7 | 1581.1 | 1619.6 | 1690.5 | 1892.6 |
| 31.3   | 27.8   | 25.7   | 24.3   | 12.9   | 24.4   |
| 21.6   | 18.9   | 17.0   | 18.8   | 10.3   | 16.6   |
| 7.6    | 3.2    | 15.3   | 16.8   | 4.4    | 14.5   |
| 59.5   | 67.0   | 69.9   | 75.3   | 62.3   | 81.0   |
| 388.6  | 383.0  | 401.4  | 463.1  | 431.4  | 464.7  |
| 11.1   | 4.5    | 7.6    | 6.2    | 13.3   | 14.0   |
| 27.4   | 27.2   | 27.9   | 27.1   | 29.9   | 25.7   |
| 352.6  | 304.2  | 360.0  | 358.2  | 408.6  | 443.0  |
| 17.8   | 31.1   | 30.8   | 25.0   | 28.0   | 19.8   |
| 84.4   | 97.2   | 92.6   | 95.7   | 99.0   | 115.0  |
| 86.1   | 74.6   | 63.2   | 86.5   | 68.2   | 95.8   |
| 112.5  | 121.9  | 143.1  | 121.3  | 144.6  | 146.7  |
| 376.1  | 290.5  | 383.2  | 413.8  | 457.6  | 467.6  |
| 27.5   | 35.3   | 29.4   | 32.7   | 30.6   | 18.8   |
| 683.9  | 544.3  | 723.0  | 688.9  | 825.0  | 837.3  |
| 72.3   | 87.4   | 102.2  | 90.4   | 105.8  | 98.1   |
| 453.8  | 335.7  | 386.0  | 379.1  | 479.3  | 502.2  |
| 126.7  | 124.9  | 167.7  | 132.6  | 157.5  | 167.3  |
| 98.1   | 74.8   | 99.4   | 81.5   | 90.6   | 111.3  |
| 583.4  | 509.9  | 656.8  | 706.4  | 685.4  | 758.6  |
| 259.6  | 243.8  | 222.5  | 255.5  | 264.5  | 307.9  |
| 51.2   | 48.5   | 44.1   | 50.6   | 55.7   | 40.0   |
| 132.2  | 163.5  | 141.3  | 146.2  | 104.7  | 167.7  |
| 43.0   | 29.9   | 39.6   | 48.4   | 53.1   | 40.1   |
| 15.5   | 1.5    | 14.6   | 12.0   | 10.7   | 12.6   |
| 0.3    | 0.6    | 0.7    | 1.4    | 0.6    | 1.3    |
| 140.2  | 138.6  | 181.4  | 173.4  | 196.4  | 193.8  |
| 3.2    | 1.5    | 3.9    | 1.3    | 3.6    | 2.0    |
| 6.8    | 6.6    | 0.7    | 3.4    | 1.9    | 6.9    |
| 46.0   | 53.8   | 44.0   | 49.1   | 57.9   | 67.4   |
| 283.5  | 269.3  | 279.0  | 279.9  | 338.2  | 270.3  |
| 47.3   | 43.3   | 44.7   | 51.0   | 68.5   | 61.2   |
| 153.0  | 132.2  | 136.5  | 158.0  | 172.8  | 174.8  |
| 1066.9 | 1158.4 | 1303.3 | 1330.5 | 1358.0 | 1468.6 |
| 70.5   | 81.5   | 84.6   | 86.3   | 93.5   | 82.5   |
| 8.9    | 2.2    | 11.8   | 7.0    | 4.0    | 15.2   |
| 281.5  | 328.6  | 346.0  | 365.5  | 314.8  | 347.8  |
| 672.5  | 553.4  | 618.1  | 674.5  | 769.4  | 894.0  |
| 35.2   | 35.6   | 37.1   | 23.2   | 31.7   | 36.1   |

|        |        |        |        |        |        |
|--------|--------|--------|--------|--------|--------|
| 5.5    | 6.8    | 5.8    | 6.3    | 19.0   | 20.0   |
| 74.7   | 65.9   | 82.1   | 70.4   | 68.2   | 87.3   |
| 65.4   | 48.3   | 68.4   | 75.3   | 81.6   | 67.3   |
| 40.8   | 45.8   | 48.2   | 41.2   | 51.0   | 56.3   |
| 19.1   | 19.9   | 23.0   | 9.3    | 18.3   | 17.3   |
| 1.8    | 3.0    | 2.1    | 2.1    | 2.4    | 2.1    |
| 3.5    | 1.8    | 1.8    | 3.5    | 1.0    | 1.6    |
| 34.7   | 41.4   | 37.0   | 30.4   | 52.6   | 48.3   |
| 5.7    | 2.5    | 3.6    | 4.5    | 2.4    | 1.8    |
| 196.4  | 139.0  | 191.9  | 193.4  | 207.9  | 238.9  |
| 337.9  | 309.9  | 320.6  | 335.5  | 375.8  | 385.4  |
| 86.2   | 78.9   | 78.8   | 80.4   | 106.1  | 110.2  |
| 412.7  | 391.7  | 408.3  | 359.4  | 456.2  | 459.6  |
| 41.9   | 34.3   | 45.5   | 37.3   | 51.2   | 57.6   |
| 235.2  | 200.9  | 237.6  | 247.6  | 258.0  | 276.9  |
| 2.7    | 14.4   | 1.8    | 3.4    | 6.2    | 3.2    |
| 282.3  | 242.4  | 271.7  | 288.5  | 302.9  | 342.8  |
| 494.3  | 390.3  | 496.3  | 556.3  | 561.7  | 613.6  |
| 9.4    | 15.2   | 13.0   | 14.9   | 3.4    | 7.3    |
| 312.6  | 307.3  | 335.2  | 332.8  | 361.0  | 392.8  |
| 450.7  | 541.8  | 453.3  | 415.4  | 455.7  | 564.2  |
| 30.8   | 47.4   | 28.9   | 27.7   | 45.1   | 19.8   |
| 2.3    | 2.3    | 2.3    | 5.4    | 4.8    | 3.6    |
| 3.9    | 0.7    | 4.6    | 7.3    | 4.2    | 9.1    |
| 13.7   | 21.5   | 16.1   | 9.8    | 13.8   | 12.5   |
| 290.7  | 303.6  | 419.8  | 450.4  | 472.8  | 507.6  |
| 60.0   | 81.0   | 63.9   | 70.3   | 63.4   | 83.3   |
| 165.1  | 133.8  | 160.2  | 171.6  | 200.9  | 187.0  |
| 177.1  | 173.7  | 181.5  | 209.7  | 223.5  | 213.4  |
| 64.0   | 50.6   | 66.6   | 66.7   | 77.6   | 94.5   |
| 8.8    | 13.1   | 10.1   | 3.6    | 1.8    | 11.3   |
| 85.7   | 135.7  | 94.2   | 96.2   | 116.5  | 121.4  |
| 24.1   | 31.4   | 20.3   | 36.3   | 24.9   | 35.4   |
| 23.3   | 26.9   | 31.3   | 19.2   | 27.5   | 10.7   |
| 1.7    | 2.0    | 14.8   | 1.8    | 3.3    | 5.5    |
| 6.1    | 1.6    | 4.9    | 5.2    | 4.6    | 5.6    |
| 81.1   | 68.9   | 95.6   | 93.3   | 103.2  | 104.7  |
| 95.5   | 23.7   | 130.9  | 99.1   | 133.0  | 113.9  |
| 27.7   | 12.1   | 31.9   | 30.7   | 39.8   | 25.5   |
| 3856.7 | 3956.1 | 4131.8 | 3911.8 | 4286.1 | 4359.7 |
| 1034.7 | 616.4  | 1047.4 | 960.7  | 1266.4 | 1265.1 |
| 6.0    | 24.8   | 3.6    | 13.3   | 20.3   | 21.5   |
| 37.8   | 40.1   | 50.6   | 38.7   | 46.8   | 57.2   |
| 88.1   | 121.6  | 83.3   | 111.3  | 115.3  | 110.3  |
| 72.3   | 62.8   | 76.2   | 73.2   | 97.1   | 96.7   |
| 21.9   | 26.5   | 18.4   | 15.3   | 13.7   | 22.1   |
| 427.0  | 381.1  | 442.3  | 378.8  | 448.8  | 502.1  |
| 103.2  | 178.8  | 81.3   | 79.2   | 112.1  | 79.1   |
| 87.6   | 66.6   | 108.8  | 87.8   | 116.5  | 115.0  |
| 18.2   | 13.1   | 18.1   | 24.7   | 23.7   | 27.8   |
| 23.2   | 7.2    | 30.9   | 24.3   | 29.5   | 19.0   |
| 1.7    | 11.4   | 1.0    | 8.9    | 9.0    | 7.4    |
| 453.7  | 369.5  | 487.7  | 505.1  | 529.0  | 578.7  |

|        |        |        |        |        |        |
|--------|--------|--------|--------|--------|--------|
| 623.9  | 544.0  | 573.9  | 697.6  | 652.6  | 780.7  |
| 510.5  | 414.5  | 466.9  | 493.2  | 516.2  | 577.3  |
| 29.6   | 25.5   | 23.8   | 20.3   | 24.2   | 30.2   |
| 122.6  | 106.7  | 133.3  | 137.6  | 159.1  | 173.3  |
| 10.3   | 40.3   | 26.3   | 25.8   | 16.3   | 16.7   |
| 2.5    | 1.3    | 1.8    | 1.6    | 1.2    | 3.1    |
| 6.6    | 2.9    | 1.3    | 2.9    | 1.7    | 7.7    |
| 25.5   | 31.1   | 29.9   | 40.1   | 40.4   | 31.0   |
| 9.8    | 5.9    | 0.3    | 6.0    | 5.6    | 2.1    |
| 1897.1 | 1647.2 | 1851.3 | 1963.2 | 2160.0 | 2199.2 |
| 502.9  | 478.3  | 492.9  | 580.7  | 594.4  | 668.9  |
| 172.6  | 172.3  | 119.8  | 149.3  | 142.2  | 184.8  |
| 171.3  | 135.5  | 151.5  | 198.4  | 198.4  | 239.5  |
| 14.3   | 2.0    | 16.8   | 6.2    | 8.6    | 18.0   |
| 15.8   | 8.6    | 8.0    | 12.1   | 10.1   | 5.6    |
| 915.2  | 1037.4 | 964.2  | 1092.2 | 972.4  | 1059.1 |
| 155.0  | 155.3  | 165.5  | 154.4  | 163.2  | 194.0  |
| 82.7   | 75.2   | 69.0   | 81.9   | 95.4   | 99.0   |
| 939.0  | 813.5  | 1010.9 | 1002.6 | 1090.7 | 1150.0 |
| 17.8   | 24.8   | 28.7   | 23.3   | 46.6   | 35.9   |
| 140.4  | 142.1  | 181.8  | 152.2  | 221.8  | 183.0  |
| 2.1    | 3.3    | 5.0    | 1.8    | 11.2   | 3.9    |
| 57.0   | 63.5   | 56.7   | 54.2   | 62.9   | 77.5   |
| 60.1   | 64.9   | 57.9   | 49.1   | 69.5   | 81.4   |
| 1.9    | 2.1    | 7.8    | 1.6    | 12.8   | 6.3    |
| 628.8  | 631.2  | 579.6  | 556.9  | 665.7  | 742.3  |
| 119.4  | 141.0  | 105.9  | 132.6  | 135.6  | 160.2  |
| 8.9    | 16.3   | 6.5    | 10.1   | 11.0   | 9.6    |
| 123.0  | 126.7  | 103.1  | 117.3  | 147.5  | 134.5  |
| 28.1   | 43.8   | 48.1   | 48.6   | 41.4   | 58.2   |
| 7.0    | 5.3    | 4.8    | 1.3    | 4.5    | 7.1    |
| 178.3  | 199.4  | 230.0  | 191.0  | 242.4  | 218.2  |
| 3.7    | 0.4    | 1.4    | 4.3    | 0.9    | 1.8    |
| 63.1   | 60.6   | 64.0   | 70.5   | 99.2   | 96.4   |
| 405.3  | 415.6  | 442.7  | 442.4  | 401.2  | 449.2  |
| 94.8   | 96.0   | 107.6  | 115.7  | 125.5  | 125.6  |
| 570.5  | 796.5  | 715.8  | 743.7  | 700.3  | 757.7  |
| 37.7   | 23.6   | 37.2   | 37.9   | 42.1   | 45.3   |
| 48.9   | 42.3   | 46.5   | 40.3   | 58.6   | 45.3   |
| 14.5   | 12.2   | 17.0   | 12.7   | 18.5   | 8.6    |
| 1.8    | 11.2   | 9.7    | 9.7    | 6.9    | 7.0    |
| 23.9   | 33.1   | 29.0   | 21.0   | 48.8   | 29.5   |
| 515.1  | 456.1  | 492.4  | 455.4  | 585.3  | 645.8  |
| 128.7  | 150.5  | 152.2  | 156.6  | 159.7  | 155.6  |
| 208.8  | 195.7  | 269.5  | 255.8  | 257.7  | 271.4  |
| 156.7  | 97.7   | 130.1  | 149.2  | 182.2  | 165.7  |
| 959.4  | 1109.7 | 1050.6 | 1133.1 | 1085.9 | 1316.0 |
| 2849.7 | 2689.1 | 3226.2 | 3444.0 | 3429.1 | 3287.9 |
| 108.4  | 108.2  | 107.9  | 126.6  | 149.1  | 146.4  |
| 146.0  | 119.9  | 120.0  | 143.6  | 131.8  | 185.3  |
| 19.1   | 13.8   | 16.5   | 18.6   | 16.0   | 21.5   |
| 1.3    | 9.3    | 1.7    | 3.0    | 2.8    | 2.6    |
| 13.7   | 27.5   | 13.8   | 17.3   | 10.5   | 22.1   |



|        |        |        |        |        |        |
|--------|--------|--------|--------|--------|--------|
| 1039.3 | 1175.4 | 1268.5 | 979.6  | 1216.5 | 1237.0 |
| 137.4  | 186.2  | 179.0  | 150.2  | 210.9  | 210.2  |
| 70.8   | 56.8   | 79.9   | 99.0   | 126.6  | 107.7  |
| 192.9  | 261.5  | 192.1  | 210.3  | 255.4  | 266.4  |
| 63.4   | 80.1   | 77.0   | 66.1   | 69.1   | 74.0   |
| 3.7    | 2.1    | 7.5    | 3.0    | 1.8    | 5.4    |
| 17.7   | 9.6    | 14.7   | 29.8   | 17.7   | 30.7   |
| 405.3  | 411.4  | 456.1  | 464.0  | 477.4  | 502.1  |
| 45.1   | 86.3   | 45.7   | 71.9   | 60.6   | 93.9   |
| 20.0   | 22.3   | 17.1   | 9.5    | 13.5   | 18.6   |
| 1507.8 | 1458.6 | 1570.0 | 1671.4 | 1752.5 | 1847.6 |
| 1135.8 | 1016.2 | 1053.8 | 986.3  | 1147.1 | 1226.7 |
| 7.4    | 12.8   | 3.1    | 4.9    | 3.2    | 13.6   |
| 2.9    | 2.7    | 3.2    | 1.8    | 1.8    | 2.1    |
| 130.4  | 137.5  | 142.4  | 143.7  | 157.2  | 157.8  |
| 69.5   | 38.5   | 69.8   | 63.6   | 101.7  | 82.3   |
| 67.6   | 22.8   | 56.2   | 51.7   | 73.6   | 60.3   |
| 46.2   | 30.7   | 35.4   | 35.5   | 43.5   | 41.5   |
| 1075.0 | 1063.1 | 1198.0 | 1313.6 | 1373.9 | 1329.8 |
| 2035.8 | 2034.9 | 2145.6 | 2003.8 | 2164.9 | 2538.7 |
| 226.8  | 157.9  | 251.6  | 228.1  | 256.7  | 293.9  |
| 14.9   | 14.5   | 8.5    | 12.5   | 5.7    | 6.8    |
| 254.2  | 303.9  | 269.1  | 277.0  | 308.8  | 330.0  |
| 130.3  | 99.7   | 120.8  | 112.8  | 139.7  | 163.4  |
| 21.8   | 10.0   | 18.2   | 12.1   | 17.1   | 21.4   |
| 15.9   | 30.9   | 14.2   | 17.3   | 32.1   | 18.8   |
| 214.6  | 189.4  | 211.5  | 210.7  | 237.7  | 263.9  |
| 7.5    | 9.1    | 5.6    | 6.9    | 8.8    | 3.6    |
| 119.1  | 137.4  | 132.6  | 156.9  | 134.3  | 175.5  |
| 82.1   | 67.4   | 75.4   | 81.3   | 81.5   | 77.8   |
| 41.8   | 47.1   | 52.3   | 57.7   | 63.4   | 81.4   |
| 133.1  | 116.7  | 162.5  | 128.3  | 138.4  | 150.6  |
| 68.8   | 41.9   | 68.6   | 70.2   | 84.3   | 99.4   |
| 129.5  | 110.1  | 123.4  | 146.7  | 150.2  | 175.6  |
| 145.2  | 173.1  | 152.9  | 156.3  | 192.4  | 186.8  |
| 6.4    | 3.8    | 12.4   | 6.7    | 11.4   | 4.4    |
| 292.0  | 271.8  | 223.3  | 265.2  | 314.5  | 314.6  |
| 18.7   | 21.6   | 14.2   | 20.0   | 19.0   | 15.9   |
| 8.2    | 2.4    | 6.0    | 5.2    | 5.1    | 29.2   |
| 9.6    | 6.8    | 5.7    | 6.9    | 4.6    | 5.0    |
| 484.4  | 267.0  | 437.8  | 392.0  | 510.1  | 515.8  |
| 25.0   | 31.0   | 32.9   | 27.7   | 34.1   | 33.9   |
| 227.1  | 263.1  | 122.1  | 254.4  | 204.9  | 286.1  |
| 8.0    | 6.7    | 5.6    | 2.0    | 2.0    | 1.7    |
| 16.0   | 11.5   | 13.4   | 10.2   | 13.2   | 19.3   |
| 2.3    | 1.0    | 2.9    | 5.6    | 7.0    | 17.2   |
| 8.8    | 6.3    | 4.4    | 7.1    | 2.2    | 5.8    |
| 2.8    | 1.1    | 4.2    | 3.3    | 2.7    | 2.1    |
| 39.9   | 35.0   | 37.3   | 40.2   | 52.0   | 46.7   |
| 200.5  | 189.7  | 200.4  | 197.5  | 231.8  | 283.3  |
| 5.5    | 3.0    | 1.9    | 5.7    | 4.9    | 4.0    |
| 5.8    | 6.7    | 11.2   | 8.3    | 1.5    | 9.3    |
| 23.5   | 26.3   | 19.8   | 26.0   | 24.9   | 33.3   |

|        |        |        |        |        |        |
|--------|--------|--------|--------|--------|--------|
| 315.2  | 419.3  | 322.1  | 346.9  | 441.2  | 446.7  |
| 864.1  | 905.0  | 1010.2 | 905.7  | 1028.4 | 1053.0 |
| 60.2   | 63.8   | 59.1   | 58.7   | 69.6   | 83.2   |
| 435.3  | 399.4  | 469.9  | 422.4  | 468.5  | 491.0  |
| 2132.7 | 1945.1 | 2069.7 | 2126.7 | 2504.2 | 2345.3 |
| 330.8  | 305.5  | 319.0  | 347.3  | 318.5  | 369.2  |
| 2.5    | 2.0    | 2.0    | 1.9    | 8.6    | 2.5    |
| 183.8  | 163.5  | 179.3  | 190.0  | 217.8  | 230.9  |
| 426.9  | 399.9  | 411.2  | 456.6  | 464.8  | 491.8  |
| 1.1    | 1.2    | 1.0    | 0.8    | 1.2    | 1.2    |
| 2.1    | 1.9    | 3.5    | 1.6    | 10.8   | 5.8    |
| 13.4   | 10.7   | 10.0   | 9.2    | 11.6   | 14.7   |
| 150.3  | 103.9  | 129.4  | 120.7  | 160.0  | 151.9  |
| 9.3    | 2.3    | 7.6    | 8.0    | 4.8    | 10.6   |
| 29.0   | 16.6   | 12.5   | 21.8   | 19.6   | 23.0   |
| 28.1   | 18.7   | 29.8   | 30.2   | 22.8   | 36.9   |
| 242.8  | 207.4  | 264.6  | 276.6  | 329.8  | 348.6  |
| 40.3   | 35.8   | 56.8   | 55.1   | 61.6   | 50.6   |
| 78.0   | 72.6   | 94.7   | 74.5   | 109.4  | 109.6  |
| 1.9    | 7.0    | 2.3    | 2.4    | 13.0   | 16.6   |
| 4.0    | 9.0    | 2.1    | 0.9    | 4.7    | 1.3    |
| 55.8   | 40.3   | 56.6   | 48.4   | 61.4   | 81.0   |
| 76.9   | 50.2   | 76.1   | 97.6   | 90.8   | 110.4  |
| 1.8    | 2.3    | 5.3    | 2.1    | 2.6    | 2.9    |
| 90.6   | 102.8  | 97.4   | 92.1   | 111.6  | 113.3  |
| 32.4   | 41.2   | 39.3   | 39.2   | 40.6   | 48.8   |
| 386.7  | 462.6  | 404.2  | 389.9  | 404.7  | 452.6  |
| 118.5  | 88.0   | 102.8  | 89.9   | 116.7  | 137.1  |
| 114.6  | 130.2  | 141.8  | 132.8  | 178.7  | 162.3  |
| 11.8   | 2.7    | 11.9   | 15.5   | 11.7   | 10.4   |
| 9.3    | 1.0    | 6.6    | 5.8    | 1.3    | 3.8    |
| 42.9   | 27.4   | 44.8   | 30.2   | 29.9   | 41.4   |
| 432.1  | 381.9  | 493.1  | 543.3  | 557.0  | 532.1  |
| 155.3  | 67.5   | 110.4  | 95.0   | 143.5  | 177.9  |
| 236.3  | 254.5  | 296.9  | 291.7  | 292.5  | 376.3  |
| 19.1   | 11.4   | 27.2   | 27.1   | 32.8   | 14.8   |
| 28.3   | 30.6   | 29.6   | 25.7   | 27.5   | 36.3   |
| 2835.8 | 2606.9 | 2835.5 | 2921.0 | 3132.3 | 3232.1 |
| 6.2    | 17.4   | 9.2    | 13.3   | 2.4    | 8.2    |
| 99.9   | 90.2   | 90.1   | 96.5   | 114.1  | 127.0  |
| 200.0  | 145.3  | 163.7  | 152.3  | 168.5  | 227.7  |
| 17.3   | 10.7   | 13.1   | 15.0   | 18.6   | 13.8   |
| 3.4    | 2.3    | 3.8    | 5.5    | 3.6    | 6.1    |
| 60.5   | 64.2   | 71.6   | 78.3   | 96.4   | 87.3   |
| 143.7  | 139.3  | 144.8  | 121.0  | 159.5  | 158.8  |
| 74.1   | 56.8   | 86.1   | 79.3   | 93.0   | 98.3   |
| 106.6  | 73.8   | 82.6   | 85.6   | 92.1   | 95.5   |
| 5123.2 | 5004.1 | 5089.4 | 5351.8 | 5550.5 | 5711.1 |
| 74.9   | 67.2   | 73.4   | 74.2   | 77.3   | 103.7  |
| 715.9  | 651.1  | 745.2  | 827.3  | 831.8  | 911.9  |
| 292.0  | 291.0  | 300.7  | 285.0  | 351.8  | 353.5  |
| 32.9   | 44.8   | 39.8   | 44.1   | 45.4   | 40.0   |
| 73.8   | 51.3   | 67.4   | 52.4   | 57.7   | 52.7   |

|        |        |        |        |        |        |
|--------|--------|--------|--------|--------|--------|
| 17.6   | 33.0   | 18.4   | 5.0    | 12.3   | 19.3   |
| 1.9    | 1.3    | 6.7    | 0.9    | 6.7    | 4.6    |
| 13.4   | 22.7   | 35.2   | 16.2   | 22.8   | 36.6   |
| 14.6   | 25.4   | 22.3   | 19.9   | 18.9   | 18.3   |
| 15.4   | 12.6   | 15.7   | 20.6   | 13.3   | 11.0   |
| 1797.7 | 1638.5 | 1838.7 | 1760.5 | 1956.0 | 2003.8 |
| 236.3  | 190.4  | 237.4  | 252.0  | 300.4  | 316.7  |
| 17.0   | 23.1   | 17.0   | 27.8   | 17.4   | 18.2   |
| 8.5    | 7.4    | 13.0   | 9.7    | 7.1    | 9.7    |
| 19.5   | 11.6   | 34.3   | 17.0   | 22.3   | 22.9   |
| 72.3   | 60.9   | 87.0   | 88.2   | 96.6   | 114.1  |
| 12.8   | 6.5    | 7.1    | 14.0   | 15.5   | 17.2   |
| 0.6    | 0.4    | 1.6    | 0.4    | 0.3    | 1.9    |
| 22.3   | 23.2   | 17.1   | 18.8   | 21.8   | 25.2   |
| 68.6   | 72.8   | 81.5   | 74.3   | 96.7   | 106.7  |
| 61.3   | 51.0   | 78.1   | 72.8   | 78.1   | 81.0   |
| 64.9   | 67.5   | 68.3   | 69.3   | 70.0   | 87.9   |
| 93.1   | 104.8  | 96.6   | 86.7   | 112.7  | 131.4  |
| 17.6   | 0.9    | 24.3   | 16.1   | 16.1   | 22.6   |
| 170.9  | 256.9  | 207.7  | 199.7  | 210.0  | 240.4  |
| 8.4    | 3.7    | 10.8   | 17.6   | 8.6    | 13.1   |
| 75.6   | 73.0   | 64.4   | 69.5   | 83.9   | 101.2  |
| 33.3   | 32.7   | 26.0   | 21.3   | 22.3   | 44.0   |
| 1510.0 | 1476.8 | 1562.5 | 1642.1 | 1677.4 | 1814.8 |
| 58.1   | 70.5   | 61.2   | 59.9   | 71.6   | 79.5   |
| 85.5   | 96.5   | 110.4  | 96.6   | 123.4  | 119.1  |
| 2769.4 | 2314.3 | 2534.1 | 2845.4 | 2887.5 | 3190.8 |
| 10.3   | 10.6   | 11.3   | 14.5   | 12.0   | 22.0   |
| 8.4    | 2.9    | 7.6    | 4.8    | 9.5    | 4.0    |
| 6.9    | 2.2    | 5.2    | 4.1    | 7.2    | 5.8    |
| 6.5    | 2.7    | 3.4    | 2.7    | 6.7    | 2.2    |
| 10.0   | 2.7    | 3.3    | 1.3    | 1.5    | 6.0    |
| 354.6  | 242.1  | 388.0  | 397.3  | 473.6  | 423.8  |
| 4.0    | 6.1    | 18.9   | 15.0   | 14.7   | 2.7    |
| 1.1    | 2.5    | 2.0    | 6.8    | 8.4    | 17.5   |
| 0.8    | 1.0    | 2.3    | 1.1    | 1.3    | 2.3    |
| 169.4  | 132.5  | 193.0  | 181.8  | 207.0  | 209.8  |
| 4.1    | 3.0    | 4.1    | 8.4    | 8.6    | 5.8    |
| 7.9    | 8.5    | 2.4    | 3.8    | 7.7    | 1.8    |
| 1.6    | 9.2    | 4.4    | 10.4   | 6.9    | 0.9    |
| 2.3    | 6.0    | 5.5    | 7.3    | 5.3    | 1.0    |
| 83.2   | 53.1   | 56.2   | 57.4   | 82.0   | 91.6   |
| 4.0    | 11.2   | 4.9    | 2.0    | 7.7    | 10.1   |
| 18.4   | 26.9   | 25.2   | 20.8   | 15.2   | 24.7   |
| 17.3   | 7.6    | 15.2   | 4.8    | 12.1   | 15.0   |
| 51.8   | 44.0   | 55.5   | 63.7   | 54.8   | 64.2   |
| 42.5   | 49.1   | 38.1   | 46.9   | 50.9   | 54.5   |
| 5.1    | 4.4    | 15.8   | 10.3   | 13.6   | 24.9   |
| 12.8   | 28.8   | 27.6   | 25.4   | 22.2   | 29.1   |
| 81.3   | 62.7   | 81.8   | 68.8   | 74.6   | 86.3   |
| 355.3  | 238.3  | 362.3  | 370.4  | 409.2  | 441.5  |
| 2.5    | 2.9    | 7.6    | 4.3    | 6.2    | 10.7   |
| 2.9    | 5.9    | 7.4    | 1.3    | 4.1    | 8.4    |

|        |        |        |        |        |        |
|--------|--------|--------|--------|--------|--------|
| 2.7    | 1.6    | 9.7    | 6.8    | 7.3    | 5.2    |
| 27.8   | 24.4   | 25.1   | 24.3   | 26.5   | 32.6   |
| 11.4   | 9.4    | 16.2   | 3.9    | 4.2    | 4.0    |
| 414.0  | 280.6  | 282.4  | 316.6  | 331.4  | 381.8  |
| 239.9  | 219.1  | 266.0  | 262.3  | 305.5  | 321.5  |
| 97.1   | 85.7   | 113.1  | 106.4  | 113.6  | 123.8  |
| 191.1  | 209.2  | 216.4  | 239.9  | 209.8  | 227.5  |
| 176.3  | 210.3  | 187.5  | 191.5  | 209.6  | 267.0  |
| 210.8  | 203.9  | 261.6  | 261.2  | 333.2  | 307.0  |
| 482.3  | 483.7  | 511.1  | 483.6  | 645.5  | 558.9  |
| 30.0   | 28.1   | 31.6   | 30.1   | 30.3   | 36.0   |
| 3.4    | 5.0    | 11.4   | 22.2   | 10.2   | 11.6   |
| 1604.6 | 1405.7 | 1609.1 | 1734.2 | 1816.8 | 1803.6 |
| 3.9    | 1.7    | 1.9    | 2.8    | 2.8    | 3.5    |
| 6.5    | 2.5    | 5.1    | 6.6    | 8.2    | 4.8    |
| 54.7   | 81.8   | 42.8   | 79.4   | 49.7   | 64.8   |
| 109.6  | 165.7  | 100.5  | 134.0  | 106.1  | 134.7  |
| 1.9    | 1.4    | 10.4   | 5.9    | 9.2    | 12.5   |
| 22.7   | 28.1   | 31.5   | 19.6   | 21.8   | 27.1   |
| 113.1  | 134.4  | 152.5  | 154.8  | 148.1  | 155.8  |
| 282.1  | 253.4  | 323.4  | 314.8  | 378.5  | 351.3  |
| 298.8  | 250.1  | 270.6  | 350.3  | 308.9  | 378.7  |
| 981.2  | 1239.8 | 1050.8 | 1115.8 | 1044.1 | 1318.5 |
| 4.7    | 3.3    | 11.2   | 5.9    | 20.8   | 4.9    |
| 421.4  | 422.2  | 452.0  | 417.3  | 505.3  | 502.2  |
| 1395.7 | 1293.7 | 1452.0 | 1455.4 | 1564.2 | 1538.4 |
| 181.2  | 140.4  | 202.2  | 217.5  | 224.2  | 228.6  |
| 21.8   | 4.2    | 14.3   | 30.1   | 13.7   | 17.1   |
| 6.9    | 10.5   | 2.3    | 2.8    | 4.8    | 6.6    |
| 10.0   | 3.9    | 19.6   | 2.8    | 16.0   | 15.3   |
| 5.9    | 3.8    | 3.6    | 6.1    | 1.0    | 4.0    |
| 3.1    | 5.9    | 12.1   | 7.4    | 8.2    | 4.0    |
| 9.3    | 9.3    | 9.0    | 7.5    | 15.2   | 11.5   |
| 6.4    | 5.3    | 7.6    | 4.5    | 7.7    | 4.6    |
| 11.8   | 32.5   | 19.3   | 12.8   | 13.6   | 5.5    |
| 5.5    | 15.1   | 14.4   | 11.5   | 6.9    | 8.7    |
| 84.4   | 84.5   | 66.3   | 82.3   | 93.3   | 108.9  |
| 67.8   | 69.2   | 75.9   | 67.0   | 71.1   | 73.0   |
| 8.7    | 7.8    | 15.3   | 7.3    | 10.3   | 5.5    |
| 194.0  | 142.0  | 185.6  | 190.1  | 200.3  | 229.2  |
| 151.8  | 138.5  | 110.7  | 129.8  | 142.5  | 169.9  |
| 55.9   | 47.2   | 60.6   | 59.8   | 68.0   | 84.9   |
| 32.7   | 12.0   | 24.1   | 54.6   | 48.4   | 39.1   |
| 27.8   | 21.6   | 21.8   | 20.6   | 23.2   | 28.4   |
| 178.6  | 149.6  | 188.8  | 202.6  | 229.1  | 261.0  |
| 11.6   | 18.4   | 9.6    | 17.5   | 20.8   | 20.7   |
| 127.3  | 129.8  | 144.5  | 127.0  | 149.7  | 172.6  |
| 1.2    | 1.2    | 2.3    | 1.7    | 13.7   | 2.2    |
| 87.7   | 91.1   | 91.6   | 103.8  | 97.6   | 115.7  |
| 1.4    | 3.0    | 2.2    | 3.5    | 2.2    | 2.4    |
| 1421.2 | 1229.7 | 1366.5 | 1384.7 | 1579.6 | 1643.6 |
| 253.6  | 234.3  | 219.5  | 258.1  | 232.2  | 246.5  |
| 160.9  | 137.2  | 143.4  | 159.9  | 172.4  | 176.8  |

|        |        |        |        |        |        |
|--------|--------|--------|--------|--------|--------|
| 1.6    | 1.1    | 0.8    | 4.5    | 0.6    | 0.8    |
| 30.0   | 4.7    | 23.8   | 17.3   | 38.3   | 35.0   |
| 90.3   | 72.5   | 72.6   | 69.3   | 83.1   | 106.5  |
| 22.7   | 24.2   | 16.6   | 15.8   | 17.7   | 26.9   |
| 7.4    | 1.3    | 6.0    | 8.7    | 14.6   | 6.5    |
| 4.1    | 12.1   | 7.8    | 7.9    | 10.5   | 7.8    |
| 63.2   | 64.2   | 55.7   | 58.6   | 61.7   | 78.4   |
| 75.2   | 65.2   | 69.5   | 58.9   | 77.4   | 71.8   |
| 11.3   | 4.2    | 4.8    | 9.5    | 4.3    | 7.5    |
| 11.5   | 18.8   | 9.3    | 10.8   | 19.1   | 18.3   |
| 13.5   | 7.4    | 2.5    | 1.6    | 7.0    | 5.5    |
| 0.7    | 0.9    | 0.6    | 0.4    | 1.7    | 2.5    |
| 0.2    | 0.6    | 0.6    | 1.7    | 1.7    | 0.8    |
| 9.0    | 8.7    | 6.1    | 5.1    | 4.0    | 5.3    |
| 58.9   | 46.0   | 60.0   | 45.6   | 77.4   | 66.6   |
| 47.2   | 33.1   | 39.7   | 46.0   | 43.9   | 50.7   |
| 7.8    | 4.6    | 16.9   | 11.4   | 4.4    | 16.3   |
| 12.9   | 10.5   | 4.0    | 3.6    | 10.0   | 19.2   |
| 77.9   | 68.3   | 71.0   | 78.0   | 87.6   | 94.5   |
| 51.7   | 42.8   | 58.5   | 53.5   | 70.4   | 62.5   |
| 445.1  | 601.0  | 402.5  | 421.3  | 453.9  | 541.2  |
| 24.2   | 18.5   | 27.3   | 25.1   | 27.7   | 25.8   |
| 38.2   | 38.3   | 31.2   | 27.7   | 32.3   | 37.5   |
| 7.2    | 7.7    | 19.5   | 21.8   | 14.6   | 20.7   |
| 12.9   | 18.7   | 5.3    | 5.7    | 9.1    | 4.5    |
| 15.1   | 5.2    | 12.0   | 8.2    | 14.6   | 16.4   |
| 7.9    | 2.7    | 3.1    | 2.1    | 2.9    | 7.6    |
| 6.0    | 15.5   | 23.8   | 10.3   | 23.6   | 11.2   |
| 1.6    | 2.1    | 3.4    | 2.2    | 1.9    | 1.7    |
| 26.7   | 4.2    | 30.1   | 30.3   | 32.3   | 51.6   |
| 58.1   | 55.8   | 58.6   | 67.4   | 52.6   | 62.9   |
| 156.8  | 182.7  | 184.3  | 184.3  | 196.5  | 209.3  |
| 72.6   | 79.2   | 83.8   | 98.1   | 96.8   | 88.3   |
| 94.3   | 127.5  | 103.8  | 170.7  | 126.1  | 153.6  |
| 3.3    | 1.8    | 1.6    | 2.7    | 2.8    | 3.9    |
| 1.3    | 2.3    | 6.8    | 1.0    | 2.3    | 1.5    |
| 1530.6 | 1282.8 | 1362.7 | 1410.9 | 1568.2 | 1591.8 |
| 1226.6 | 1089.7 | 1063.0 | 1136.2 | 1215.6 | 1491.1 |
| 192.7  | 170.9  | 168.4  | 197.4  | 227.4  | 236.8  |
| 246.4  | 643.5  | 300.4  | 326.2  | 237.3  | 284.8  |
| 2.0    | 3.5    | 1.5    | 0.5    | 0.4    | 0.3    |
| 1600.9 | 1504.9 | 1450.9 | 1442.9 | 1698.4 | 1913.4 |
| 44.7   | 47.4   | 36.1   | 51.1   | 57.2   | 63.0   |
| 1.6    | 3.4    | 1.0    | 1.0    | 1.1    | 1.1    |
| 46.1   | 33.7   | 49.7   | 49.7   | 36.1   | 51.2   |
| 533.8  | 514.9  | 589.2  | 540.3  | 615.4  | 641.3  |
| 235.8  | 202.9  | 216.2  | 253.2  | 257.3  | 257.6  |
| 2.3    | 1.6    | 1.3    | 3.0    | 2.1    | 2.0    |
| 427.6  | 397.9  | 412.1  | 425.4  | 467.1  | 526.6  |
| 389.4  | 377.1  | 357.1  | 406.2  | 424.4  | 449.3  |
| 20.3   | 39.6   | 56.2   | 31.4   | 49.9   | 42.2   |
| 3.0    | 2.7    | 10.7   | 7.7    | 7.4    | 4.0    |
| 20.5   | 17.2   | 16.5   | 12.4   | 19.7   | 24.2   |

|        |        |        |        |        |        |
|--------|--------|--------|--------|--------|--------|
| 2.3    | 10.9   | 14.0   | 20.3   | 3.4    | 15.9   |
| 418.8  | 457.7  | 400.6  | 321.4  | 529.3  | 497.7  |
| 452.2  | 393.6  | 444.1  | 494.1  | 523.0  | 568.6  |
| 99.6   | 74.8   | 85.5   | 105.6  | 107.5  | 116.0  |
| 1.1    | 4.2    | 1.8    | 1.9    | 2.7    | 1.9    |
| 139.2  | 91.8   | 146.8  | 113.7  | 172.1  | 143.8  |
| 220.1  | 176.5  | 252.2  | 270.6  | 276.3  | 302.1  |
| 5.8    | 8.4    | 5.8    | 6.7    | 6.9    | 4.6    |
| 183.5  | 217.3  | 184.0  | 223.2  | 205.7  | 253.6  |
| 35.9   | 36.4   | 32.4   | 35.1   | 34.3   | 43.2   |
| 1.6    | 0.9    | 0.9    | 4.5    | 1.0    | 5.5    |
| 92.3   | 97.2   | 102.2  | 85.5   | 114.4  | 122.2  |
| 13.6   | 7.3    | 6.1    | 13.7   | 12.2   | 9.9    |
| 0.7    | 1.0    | 1.1    | 1.7    | 1.8    | 1.6    |
| 4.2    | 1.6    | 12.1   | 6.0    | 14.6   | 8.0    |
| 102.1  | 100.0  | 102.3  | 103.5  | 123.4  | 141.0  |
| 3451.6 | 3111.3 | 3599.2 | 3802.7 | 3752.7 | 4034.0 |
| 7.1    | 4.0    | 6.7    | 14.5   | 3.3    | 3.4    |
| 37.5   | 27.0   | 45.8   | 44.9   | 37.9   | 47.9   |
| 18.2   | 8.1    | 16.9   | 17.8   | 23.0   | 30.7   |
| 10.0   | 4.7    | 17.3   | 1.7    | 3.4    | 4.7    |
| 24.2   | 28.3   | 31.1   | 29.5   | 36.6   | 30.9   |
| 1548.6 | 1435.1 | 1545.1 | 1591.1 | 1830.2 | 1788.8 |
| 13.5   | 32.5   | 31.0   | 23.6   | 36.3   | 27.7   |
| 10.4   | 3.1    | 3.4    | 19.3   | 13.6   | 14.1   |
| 18.6   | 13.6   | 14.9   | 28.4   | 9.0    | 15.7   |
| 85.6   | 74.8   | 99.3   | 77.3   | 111.6  | 111.6  |
| 1.9    | 14.0   | 3.5    | 3.3    | 1.6    | 3.2    |
| 716.6  | 695.9  | 694.8  | 756.4  | 778.1  | 897.0  |
| 85.3   | 54.2   | 99.5   | 88.6   | 95.4   | 117.7  |
| 4067.0 | 3355.3 | 4007.3 | 3992.0 | 4632.9 | 5048.7 |
| 4.1    | 3.2    | 10.9   | 23.0   | 7.6    | 8.7    |
| 18.8   | 20.4   | 21.8   | 19.0   | 26.1   | 26.9   |
| 499.8  | 420.8  | 431.8  | 524.4  | 627.8  | 669.4  |
| 7.8    | 2.0    | 2.9    | 5.3    | 5.5    | 1.8    |
| 37.3   | 36.6   | 41.7   | 43.9   | 42.4   | 51.1   |
| 250.6  | 184.0  | 224.1  | 224.7  | 288.0  | 317.0  |
| 2.9    | 9.4    | 2.5    | 6.0    | 4.1    | 4.3    |
| 121.5  | 98.5   | 128.4  | 103.8  | 140.0  | 164.7  |
| 84.8   | 78.3   | 88.5   | 84.4   | 113.2  | 112.4  |
| 4038.9 | 3829.0 | 4234.0 | 4453.8 | 4470.6 | 4807.1 |
| 87.1   | 84.4   | 102.0  | 88.1   | 113.6  | 110.5  |
| 162.0  | 150.2  | 153.9  | 189.9  | 161.0  | 189.3  |
| 15.3   | 8.2    | 9.8    | 14.2   | 6.9    | 11.9   |
| 629.8  | 558.8  | 646.3  | 652.5  | 682.1  | 719.2  |
| 392.2  | 338.2  | 456.6  | 471.4  | 482.4  | 478.6  |
| 8.4    | 11.6   | 16.4   | 27.5   | 9.2    | 16.3   |
| 1572.8 | 1322.4 | 1611.6 | 1515.0 | 1803.3 | 1784.5 |
| 29.7   | 27.1   | 15.0   | 7.3    | 16.3   | 28.1   |
| 38.8   | 44.2   | 30.6   | 36.8   | 26.8   | 60.7   |
| 3.9    | 2.8    | 13.8   | 8.6    | 1.8    | 5.9    |
| 137.2  | 131.1  | 130.1  | 118.2  | 138.1  | 144.0  |
| 15.1   | 4.6    | 13.8   | 11.5   | 13.8   | 19.8   |

|        |        |        |        |        |        |
|--------|--------|--------|--------|--------|--------|
| 38.3   | 36.7   | 26.3   | 16.8   | 56.9   | 39.7   |
| 12.2   | 6.9    | 17.4   | 12.3   | 21.3   | 19.2   |
| 5.6    | 11.3   | 7.7    | 8.0    | 4.8    | 5.9    |
| 1.3    | 1.5    | 1.8    | 1.8    | 2.3    | 2.2    |
| 20.6   | 10.2   | 20.1   | 20.8   | 27.8   | 19.1   |
| 9.7    | 0.6    | 3.1    | 8.3    | 3.3    | 11.2   |
| 15.7   | 20.8   | 13.9   | 14.6   | 21.1   | 10.7   |
| 17.2   | 22.5   | 27.9   | 24.3   | 13.7   | 21.2   |
| 16.7   | 18.7   | 21.8   | 15.6   | 22.2   | 19.7   |
| 5.3    | 0.6    | 7.4    | 5.5    | 3.6    | 2.3    |
| 29.9   | 33.0   | 27.6   | 37.5   | 34.6   | 44.8   |
| 16.2   | 37.6   | 19.2   | 18.4   | 27.3   | 29.2   |
| 22.7   | 18.5   | 24.3   | 21.2   | 19.0   | 27.5   |
| 259.8  | 246.5  | 235.3  | 277.4  | 295.7  | 374.3  |
| 15.4   | 14.0   | 13.7   | 7.9    | 19.3   | 10.5   |
| 2.0    | 2.9    | 3.8    | 10.9   | 3.8    | 8.0    |
| 838.9  | 752.1  | 924.1  | 945.4  | 941.8  | 997.5  |
| 11.1   | 10.4   | 7.1    | 4.1    | 1.3    | 1.8    |
| 362.5  | 346.6  | 389.3  | 361.6  | 383.1  | 432.1  |
| 8.0    | 3.6    | 8.8    | 0.9    | 5.2    | 7.6    |
| 26.4   | 24.0   | 24.5   | 31.6   | 20.6   | 28.1   |
| 1992.8 | 1663.5 | 2488.3 | 2489.5 | 2581.0 | 2512.6 |
| 3.4    | 3.1    | 3.2    | 2.5    | 7.7    | 14.7   |
| 32.2   | 28.4   | 34.2   | 26.4   | 32.8   | 40.9   |
| 1670.8 | 1556.9 | 1658.8 | 1655.9 | 1842.5 | 1863.2 |
| 92.1   | 93.1   | 121.1  | 112.7  | 105.5  | 136.3  |
| 102.0  | 129.1  | 126.6  | 139.3  | 126.2  | 141.6  |
| 19.0   | 19.8   | 17.4   | 17.5   | 21.3   | 15.1   |
| 6.0    | 1.3    | 6.2    | 3.6    | 7.4    | 1.9    |
| 124.7  | 103.8  | 125.4  | 148.6  | 168.5  | 179.3  |
| 2.2    | 15.0   | 6.4    | 7.2    | 14.8   | 12.8   |
| 15.5   | 6.6    | 11.0   | 7.7    | 21.2   | 17.5   |
| 1.0    | 0.7    | 1.4    | 1.2    | 0.7    | 5.6    |
| 9.0    | 16.0   | 15.5   | 13.9   | 10.7   | 14.5   |
| 5.6    | 8.7    | 9.0    | 9.2    | 4.6    | 4.6    |
| 10.9   | 25.0   | 20.5   | 17.4   | 12.6   | 12.8   |
| 736.7  | 364.7  | 720.1  | 646.8  | 891.8  | 976.7  |
| 14.7   | 29.8   | 22.3   | 17.3   | 12.8   | 22.2   |
| 56.1   | 33.9   | 69.0   | 54.1   | 73.5   | 90.2   |
| 82.6   | 83.7   | 90.8   | 101.5  | 109.5  | 93.9   |
| 30.1   | 32.0   | 20.4   | 32.9   | 31.9   | 33.6   |
| 1.9    | 1.7    | 3.6    | 6.5    | 12.5   | 14.5   |
| 14.9   | 21.3   | 20.3   | 17.3   | 17.9   | 24.7   |
| 31.8   | 32.3   | 36.2   | 45.7   | 45.6   | 41.6   |
| 143.0  | 132.1  | 157.1  | 135.2  | 176.6  | 184.7  |
| 1184.7 | 1075.4 | 1168.1 | 1111.1 | 1247.1 | 1241.6 |
| 22.0   | 20.1   | 12.5   | 19.0   | 12.2   | 16.1   |
| 7124.3 | 6129.5 | 6448.0 | 6601.4 | 6998.7 | 7476.5 |
| 215.2  | 197.1  | 265.4  | 273.9  | 285.8  | 288.8  |
| 4108.3 | 3813.0 | 3997.6 | 3617.0 | 4421.3 | 4666.0 |
| 34.7   | 46.4   | 48.0   | 48.6   | 55.4   | 51.0   |
| 2.4    | 1.9    | 4.1    | 2.0    | 1.8    | 1.0    |
| 493.7  | 477.2  | 496.8  | 536.2  | 518.7  | 568.7  |

|        |        |        |        |        |        |
|--------|--------|--------|--------|--------|--------|
| 100.6  | 102.2  | 92.9   | 89.4   | 105.4  | 118.3  |
| 20.7   | 12.7   | 19.6   | 12.6   | 18.7   | 28.1   |
| 247.6  | 171.0  | 310.8  | 245.0  | 343.8  | 303.5  |
| 11.2   | 19.0   | 8.3    | 6.1    | 9.0    | 10.8   |
| 1.4    | 3.0    | 4.6    | 0.8    | 1.1    | 3.8    |
| 77.1   | 63.8   | 89.9   | 78.5   | 102.4  | 100.1  |
| 76.1   | 49.4   | 63.9   | 70.1   | 70.2   | 77.4   |
| 3.1    | 6.2    | 7.2    | 3.6    | 3.6    | 3.5    |
| 12.6   | 6.4    | 9.4    | 9.1    | 10.8   | 7.9    |
| 2.3    | 7.1    | 3.4    | 5.6    | 4.3    | 1.8    |
| 4.4    | 3.3    | 5.3    | 5.4    | 3.2    | 5.2    |
| 55.4   | 155.2  | 49.4   | 98.9   | 34.6   | 99.3   |
| 32.3   | 24.2   | 28.7   | 15.9   | 30.3   | 26.7   |
| 1210.2 | 1155.0 | 1251.4 | 1261.5 | 1353.2 | 1579.0 |
| 36.9   | 35.3   | 39.0   | 36.0   | 36.3   | 46.6   |
| 22.6   | 35.8   | 28.3   | 29.3   | 25.2   | 31.2   |
| 41.5   | 4.9    | 28.4   | 28.2   | 12.5   | 22.7   |
| 155.8  | 121.7  | 168.7  | 160.9  | 174.7  | 168.2  |
| 82.9   | 93.2   | 97.9   | 104.9  | 105.7  | 130.8  |
| 2.0    | 3.6    | 2.9    | 4.3    | 2.6    | 3.7    |
| 45.1   | 41.5   | 38.8   | 53.0   | 45.9   | 51.0   |
| 73.6   | 65.2   | 71.6   | 89.0   | 84.0   | 77.9   |
| 59.9   | 56.3   | 103.4  | 86.2   | 89.6   | 98.4   |
| 111.0  | 147.7  | 149.4  | 156.2  | 146.3  | 155.1  |
| 386.2  | 365.3  | 446.0  | 421.4  | 462.3  | 466.8  |
| 29.5   | 43.9   | 27.0   | 44.8   | 39.0   | 51.9   |
| 2.0    | 2.0    | 2.3    | 2.6    | 1.5    | 2.2    |
| 19.0   | 6.3    | 9.5    | 7.8    | 8.9    | 6.7    |
| 15.0   | 26.7   | 23.6   | 13.0   | 20.3   | 25.0   |
| 7.5    | 2.9    | 17.7   | 3.4    | 18.1   | 7.7    |
| 67.2   | 59.3   | 68.7   | 72.1   | 89.0   | 79.8   |
| 884.2  | 847.3  | 1443.2 | 1579.3 | 1253.2 | 1498.9 |
| 41.9   | 37.1   | 42.9   | 36.6   | 50.5   | 56.7   |
| 174.4  | 188.1  | 182.0  | 185.0  | 220.5  | 214.4  |
| 74.4   | 55.8   | 71.7   | 96.2   | 93.5   | 125.6  |
| 3.7    | 3.3    | 5.5    | 4.3    | 5.9    | 5.9    |
| 20.2   | 16.6   | 25.3   | 24.0   | 30.9   | 20.8   |
| 94.5   | 83.1   | 124.6  | 117.4  | 105.5  | 101.4  |
| 180.3  | 163.3  | 196.3  | 182.5  | 234.8  | 246.7  |
| 4.4    | 3.4    | 1.9    | 1.0    | 0.4    | 4.2    |
| 17.0   | 16.4   | 18.9   | 13.8   | 6.4    | 14.0   |
| 95.9   | 82.4   | 95.6   | 121.6  | 129.6  | 118.1  |
| 9.9    | 14.0   | 10.9   | 15.5   | 13.3   | 18.3   |
| 14.7   | 13.8   | 13.7   | 8.6    | 8.3    | 18.6   |
| 3.8    | 10.7   | 8.4    | 2.7    | 3.0    | 3.0    |
| 16.7   | 29.5   | 20.2   | 19.3   | 13.3   | 18.9   |
| 3.5    | 6.7    | 4.6    | 12.6   | 14.4   | 6.6    |
| 77.6   | 102.8  | 87.5   | 87.6   | 122.6  | 98.5   |
| 13.1   | 24.3   | 11.8   | 18.2   | 23.4   | 26.6   |
| 10.6   | 12.8   | 15.1   | 15.0   | 10.7   | 21.7   |
| 78.5   | 49.5   | 62.0   | 67.8   | 75.7   | 88.9   |
| 3.4    | 2.9    | 3.9    | 7.4    | 3.8    | 2.6    |
| 1.5    | 15.9   | 16.3   | 9.4    | 11.0   | 5.6    |



|        |        |        |        |        |        |
|--------|--------|--------|--------|--------|--------|
| 8.5    | 15.8   | 12.2   | 15.7   | 16.0   | 20.2   |
| 28.9   | 29.1   | 43.7   | 35.0   | 32.2   | 41.1   |
| 5.5    | 6.9    | 5.7    | 3.1    | 14.6   | 8.6    |
| 1955.3 | 1516.2 | 1973.7 | 1999.4 | 2317.4 | 2278.1 |
| 483.3  | 514.0  | 449.0  | 474.3  | 505.5  | 620.8  |
| 59.3   | 48.2   | 57.6   | 71.8   | 55.5   | 77.0   |
| 44.6   | 49.7   | 45.5   | 52.1   | 47.4   | 62.6   |
| 2.9    | 4.4    | 3.4    | 1.6    | 1.1    | 1.0    |
| 28.6   | 22.9   | 25.3   | 31.7   | 29.5   | 38.3   |
| 124.4  | 111.8  | 126.1  | 115.4  | 161.7  | 164.1  |
| 25.7   | 33.4   | 23.8   | 28.8   | 39.2   | 30.2   |
| 724.9  | 643.9  | 679.0  | 744.9  | 812.7  | 754.2  |
| 325.9  | 321.2  | 329.6  | 352.1  | 381.8  | 413.8  |
| 342.5  | 363.9  | 388.9  | 394.5  | 434.8  | 460.4  |
| 49.6   | 71.0   | 45.9   | 54.2   | 45.0   | 55.9   |
| 15.9   | 15.4   | 8.2    | 11.4   | 10.2   | 10.5   |
| 42.1   | 46.2   | 55.2   | 54.1   | 63.6   | 75.2   |
| 7.7    | 3.0    | 1.0    | 1.5    | 7.9    | 3.1    |
| 53.7   | 67.9   | 66.2   | 80.5   | 90.9   | 87.6   |
| 87.2   | 85.3   | 89.4   | 96.5   | 104.0  | 120.4  |
| 5.3    | 1.4    | 4.1    | 8.5    | 5.5    | 6.8    |
| 1291.7 | 925.1  | 1065.3 | 1030.4 | 1198.9 | 1435.4 |
| 15.4   | 16.9   | 6.1    | 23.9   | 33.1   | 30.3   |
| 207.9  | 204.9  | 208.9  | 210.8  | 186.8  | 261.0  |
| 427.9  | 364.5  | 422.7  | 449.2  | 466.3  | 560.8  |
| 3.2    | 1.6    | 2.0    | 3.4    | 8.2    | 6.2    |
| 101.4  | 67.8   | 111.3  | 107.1  | 145.3  | 121.4  |
| 86.8   | 58.4   | 75.7   | 79.4   | 100.3  | 106.9  |
| 13.3   | 16.2   | 4.3    | 10.7   | 3.7    | 12.7   |
| 46.3   | 51.9   | 42.1   | 46.0   | 48.9   | 43.7   |
| 11.1   | 10.9   | 7.0    | 4.9    | 1.3    | 3.6    |
| 0.7    | 0.5    | 1.4    | 4.2    | 3.8    | 1.1    |
| 3.0    | 25.6   | 19.2   | 10.1   | 13.8   | 21.9   |
| 19.0   | 1.6    | 15.3   | 11.9   | 21.2   | 21.6   |
| 7.0    | 3.2    | 3.6    | 4.8    | 4.1    | 1.5    |
| 9.3    | 7.9    | 16.3   | 22.8   | 44.1   | 32.7   |
| 4.1    | 1.8    | 1.6    | 2.5    | 2.3    | 2.4    |
| 3.4    | 1.6    | 1.6    | 2.7    | 2.0    | 7.1    |
| 8.2    | 13.1   | 6.8    | 6.5    | 11.7   | 3.2    |
| 694.6  | 635.3  | 757.2  | 753.5  | 659.1  | 793.7  |
| 7.0    | 2.4    | 9.9    | 6.8    | 1.5    | 10.2   |
| 19.1   | 19.3   | 4.5    | 12.1   | 6.4    | 13.4   |
| 11.2   | 22.2   | 16.5   | 12.3   | 5.4    | 9.1    |
| 15.4   | 14.8   | 4.9    | 15.9   | 9.4    | 9.7    |
| 2623.8 | 2497.4 | 2557.0 | 2355.7 | 2984.3 | 2977.6 |
| 3.5    | 1.7    | 7.1    | 7.5    | 5.3    | 3.0    |
| 84.8   | 79.9   | 66.5   | 93.8   | 107.8  | 110.6  |
| 138.6  | 133.5  | 145.1  | 157.3  | 161.9  | 179.1  |
| 5.8    | 3.0    | 3.9    | 2.0    | 3.1    | 8.1    |
| 9.8    | 8.0    | 9.7    | 15.7   | 6.8    | 5.0    |
| 6.0    | 11.4   | 18.6   | 9.5    | 11.3   | 22.1   |
| 0.9    | 3.8    | 1.5    | 2.4    | 2.3    | 1.5    |
| 11.1   | 15.4   | 4.2    | 3.8    | 10.7   | 11.2   |

|        |        |        |        |        |        |
|--------|--------|--------|--------|--------|--------|
| 5.9    | 4.9    | 3.1    | 5.3    | 18.2   | 1.9    |
| 15.0   | 20.4   | 10.6   | 7.5    | 7.8    | 4.2    |
| 1.0    | 1.2    | 2.3    | 1.3    | 1.0    | 2.4    |
| 26.5   | 29.6   | 38.9   | 18.6   | 18.4   | 30.8   |
| 10.5   | 9.0    | 10.9   | 9.0    | 7.3    | 10.3   |
| 13.8   | 18.3   | 12.2   | 21.1   | 14.0   | 17.9   |
| 2.6    | 2.2    | 9.3    | 2.3    | 2.4    | 2.9    |
| 1.3    | 2.3    | 1.3    | 1.2    | 2.3    | 3.3    |
| 460.2  | 371.5  | 402.0  | 463.2  | 546.5  | 574.8  |
| 3.4    | 0.3    | 4.3    | 4.1    | 5.5    | 15.2   |
| 105.5  | 83.1   | 90.7   | 95.9   | 105.7  | 115.4  |
| 718.4  | 729.2  | 706.7  | 663.5  | 801.7  | 840.2  |
| 9602.7 | 9168.2 | 9192.6 | 9604.3 | 9574.6 | 9790.1 |
| 12.4   | 13.7   | 4.4    | 9.0    | 6.6    | 19.2   |
| 5.8    | 1.8    | 3.2    | 2.2    | 1.6    | 6.5    |
| 2.2    | 1.6    | 2.7    | 1.6    | 2.1    | 5.0    |
| 6.6    | 7.8    | 6.1    | 8.1    | 2.6    | 11.5   |
| 2.9    | 5.1    | 3.6    | 2.8    | 7.3    | 9.2    |
| 2.9    | 5.1    | 7.7    | 3.7    | 5.3    | 10.2   |
| 37.8   | 39.5   | 37.9   | 41.4   | 51.0   | 50.8   |
| 131.6  | 129.2  | 134.0  | 148.9  | 167.5  | 162.3  |
| 18.7   | 2.8    | 24.8   | 10.2   | 8.0    | 16.2   |
| 3.7    | 6.2    | 17.5   | 2.4    | 6.2    | 11.1   |
| 137.8  | 148.4  | 178.3  | 144.9  | 145.1  | 157.8  |
| 124.9  | 121.3  | 204.8  | 161.8  | 167.3  | 190.4  |
| 1.3    | 8.0    | 1.8    | 9.3    | 6.9    | 4.7    |
| 1.9    | 1.0    | 3.4    | 2.3    | 2.8    | 2.3    |
| 10.4   | 8.5    | 8.7    | 6.7    | 7.2    | 14.1   |
| 29.5   | 48.0   | 37.9   | 38.3   | 39.1   | 47.8   |
| 10.4   | 8.9    | 9.3    | 16.1   | 5.6    | 4.4    |
| 76.1   | 115.2  | 94.4   | 127.8  | 109.0  | 118.6  |
| 48.0   | 47.4   | 70.7   | 51.0   | 59.2   | 60.8   |
| 12.0   | 2.0    | 4.5    | 8.8    | 2.4    | 7.3    |
| 15.4   | 11.8   | 13.7   | 18.0   | 5.2    | 14.9   |
| 111.9  | 115.8  | 109.6  | 106.2  | 113.9  | 163.4  |
| 184.7  | 148.5  | 159.7  | 169.7  | 206.0  | 192.0  |
| 1.4    | 1.1    | 1.6    | 0.8    | 1.7    | 1.4    |
| 10.0   | 19.5   | 11.4   | 8.6    | 14.6   | 9.3    |
| 27.1   | 26.4   | 28.3   | 24.7   | 25.5   | 26.1   |
| 17.3   | 6.0    | 14.0   | 17.1   | 16.1   | 14.8   |
| 36.7   | 45.7   | 43.2   | 44.9   | 66.6   | 61.4   |
| 5.6    | 4.7    | 16.3   | 3.9    | 11.5   | 2.8    |
| 3.1    | 21.8   | 11.4   | 5.4    | 8.9    | 2.9    |
| 3.6    | 1.8    | 7.2    | 2.7    | 7.8    | 3.3    |
| 1314.2 | 1250.2 | 1377.0 | 1370.2 | 1441.6 | 1592.1 |
| 219.9  | 217.7  | 229.9  | 254.0  | 274.9  | 297.5  |
| 13.4   | 23.0   | 21.0   | 15.0   | 6.4    | 19.5   |
| 14.4   | 5.9    | 16.9   | 10.9   | 12.7   | 3.9    |
| 2.7    | 0.9    | 12.7   | 2.2    | 4.2    | 4.4    |
| 245.5  | 239.5  | 237.0  | 228.1  | 286.3  | 331.2  |
| 5.6    | 12.2   | 9.8    | 8.0    | 14.6   | 9.0    |
| 506.1  | 472.9  | 533.3  | 656.4  | 692.8  | 681.6  |
| 59.6   | 48.3   | 42.3   | 49.4   | 61.1   | 61.2   |

|        |        |        |        |        |        |
|--------|--------|--------|--------|--------|--------|
| 9.7    | 12.0   | 7.3    | 8.0    | 3.9    | 5.5    |
| 9.5    | 16.0   | 6.0    | 13.1   | 5.9    | 9.0    |
| 1.3    | 3.6    | 1.4    | 1.4    | 2.2    | 1.9    |
| 0.3    | 0.3    | 1.0    | 4.3    | 2.2    | 7.4    |
| 10.3   | 13.2   | 12.3   | 6.9    | 9.9    | 16.5   |
| 212.7  | 201.6  | 191.1  | 229.6  | 247.8  | 290.3  |
| 1277.2 | 1189.2 | 1524.2 | 1593.3 | 1591.9 | 1671.6 |
| 45.9   | 45.5   | 51.0   | 43.8   | 63.4   | 61.0   |
| 1.6    | 2.1    | 2.6    | 1.8    | 3.2    | 3.9    |
| 189.3  | 146.7  | 177.1  | 177.6  | 190.4  | 183.8  |
| 3.6    | 6.7    | 2.3    | 3.8    | 3.4    | 6.6    |
| 2.7    | 3.5    | 4.0    | 2.5    | 2.4    | 2.3    |
| 13.3   | 18.6   | 20.6   | 16.4   | 25.8   | 34.8   |
| 1.3    | 0.8    | 4.5    | 2.7    | 7.8    | 9.8    |
| 172.2  | 169.3  | 168.0  | 170.7  | 190.5  | 207.2  |
| 73.7   | 88.6   | 70.6   | 81.3   | 92.0   | 82.3   |
| 1295.6 | 1216.5 | 1322.9 | 1415.9 | 1369.3 | 1651.8 |
| 1.7    | 17.5   | 7.0    | 1.1    | 1.5    | 2.0    |
| 1.8    | 0.7    | 4.2    | 1.8    | 6.1    | 2.2    |
| 8.0    | 36.9   | 21.4   | 16.2   | 32.8   | 28.9   |
| 1.8    | 2.1    | 1.3    | 1.7    | 1.9    | 1.5    |
| 13.3   | 18.5   | 25.6   | 14.2   | 22.4   | 19.5   |
| 3.2    | 1.6    | 5.5    | 2.4    | 2.0    | 1.2    |
| 4.5    | 11.0   | 2.4    | 1.4    | 0.8    | 2.1    |
| 3.7    | 3.2    | 6.8    | 6.6    | 5.3    | 4.1    |
| 263.8  | 266.6  | 251.3  | 294.8  | 318.4  | 332.3  |
| 1102.8 | 1032.7 | 1097.4 | 1112.6 | 1172.6 | 1372.4 |
| 30.5   | 25.1   | 41.3   | 41.1   | 46.4   | 40.7   |
| 2.1    | 1.5    | 3.1    | 3.2    | 2.5    | 2.4    |
| 1.3    | 7.5    | 5.6    | 5.6    | 5.9    | 6.2    |
| 59.4   | 49.7   | 47.7   | 69.9   | 57.7   | 62.0   |
| 2.6    | 13.0   | 9.6    | 9.5    | 8.9    | 3.8    |
| 10.6   | 17.6   | 15.7   | 9.6    | 12.2   | 11.6   |
| 17.5   | 22.0   | 22.5   | 17.8   | 8.8    | 12.8   |
| 18.1   | 6.2    | 28.3   | 29.8   | 31.0   | 45.5   |
| 90.2   | 66.9   | 75.6   | 60.6   | 75.9   | 71.6   |
| 103.4  | 92.4   | 114.9  | 121.4  | 141.3  | 133.3  |
| 353.7  | 302.5  | 344.7  | 350.5  | 453.1  | 415.5  |
| 1352.6 | 1238.8 | 1385.3 | 1399.6 | 1468.3 | 1545.4 |
| 5.6    | 7.8    | 4.9    | 8.1    | 7.7    | 6.6    |
| 10.6   | 4.3    | 10.7   | 10.8   | 18.1   | 8.8    |
| 34.6   | 15.4   | 31.3   | 26.3   | 13.1   | 25.1   |
| 48.6   | 50.3   | 65.4   | 60.1   | 56.0   | 84.4   |
| 22.8   | 21.5   | 37.5   | 32.3   | 27.7   | 37.2   |
| 20.4   | 30.8   | 20.1   | 39.6   | 42.3   | 45.6   |
| 65.7   | 66.3   | 58.9   | 66.6   | 89.3   | 96.7   |
| 26.9   | 25.5   | 19.2   | 18.3   | 26.7   | 25.8   |
| 5708.7 | 4830.0 | 5837.3 | 5742.7 | 6170.8 | 6087.5 |
| 835.1  | 818.3  | 1005.9 | 993.3  | 1166.9 | 1078.4 |
| 4.8    | 1.6    | 2.1    | 4.0    | 2.3    | 0.8    |
| 14.0   | 6.3    | 7.7    | 6.9    | 27.6   | 10.6   |
| 5.2    | 1.5    | 2.2    | 1.7    | 2.6    | 5.8    |
| 4.1    | 0.4    | 5.5    | 5.1    | 0.6    | 2.3    |

|        |        |        |        |        |        |
|--------|--------|--------|--------|--------|--------|
| 6.6    | 9.8    | 2.1    | 7.3    | 7.4    | 6.1    |
| 4371.9 | 4126.1 | 4588.3 | 4704.0 | 4683.5 | 4844.1 |
| 11.6   | 9.2    | 5.9    | 1.6    | 5.7    | 6.3    |
| 13.9   | 12.8   | 12.7   | 12.1   | 10.8   | 14.8   |
| 25.5   | 21.9   | 27.8   | 10.9   | 22.8   | 15.1   |
| 838.9  | 777.8  | 865.8  | 862.7  | 977.5  | 1049.6 |
| 1.1    | 1.2    | 1.0    | 1.4    | 1.1    | 0.8    |
| 20.3   | 26.5   | 20.4   | 17.8   | 22.3   | 34.0   |
| 1.9    | 2.2    | 2.4    | 14.7   | 2.5    | 8.8    |
| 2.0    | 4.7    | 3.0    | 3.7    | 14.8   | 12.5   |
| 183.8  | 163.7  | 151.7  | 181.9  | 209.9  | 209.5  |
| 13.8   | 4.8    | 21.4   | 14.8   | 20.1   | 18.8   |
| 85.0   | 97.8   | 86.8   | 109.1  | 107.6  | 122.1  |
| 13.6   | 19.7   | 19.8   | 9.6    | 18.4   | 25.1   |
| 36.8   | 22.4   | 21.3   | 45.2   | 35.7   | 41.6   |
| 153.3  | 176.8  | 135.9  | 162.5  | 168.7  | 208.3  |
| 150.4  | 156.2  | 167.0  | 176.2  | 184.3  | 194.9  |
| 4.1    | 7.5    | 0.8    | 1.2    | 1.1    | 1.1    |
| 0.9    | 2.5    | 2.8    | 2.4    | 12.0   | 2.5    |
| 2.7    | 2.3    | 7.1    | 2.4    | 2.0    | 4.6    |
| 6088.9 | 5625.2 | 6235.4 | 6774.6 | 6776.9 | 6745.7 |
| 6.5    | 5.9    | 4.0    | 2.0    | 2.1    | 6.0    |
| 101.5  | 84.3   | 103.5  | 92.8   | 115.2  | 117.1  |
| 22.6   | 17.1   | 21.1   | 22.8   | 42.7   | 24.7   |
| 174.5  | 194.3  | 195.7  | 187.6  | 235.0  | 258.1  |
| 55.0   | 45.0   | 58.6   | 65.9   | 64.1   | 71.0   |
| 0.9    | 2.2    | 1.4    | 1.0    | 1.3    | 1.4    |
| 2864.7 | 2572.6 | 3007.2 | 3054.8 | 3319.5 | 3340.1 |
| 22.0   | 19.3   | 27.8   | 28.7   | 35.4   | 24.2   |
| 12.0   | 14.7   | 14.7   | 17.4   | 10.6   | 14.6   |
| 394.3  | 383.1  | 465.7  | 446.1  | 499.2  | 494.1  |
| 2.6    | 8.1    | 2.6    | 5.7    | 1.6    | 4.7    |
| 258.7  | 229.1  | 229.9  | 242.2  | 274.2  | 314.4  |
| 7213.2 | 6122.8 | 6373.1 | 6537.3 | 6489.2 | 7091.7 |
| 3399.8 | 3411.4 | 3260.8 | 3628.2 | 3665.7 | 4094.9 |
| 10.3   | 4.3    | 6.3    | 5.3    | 4.0    | 6.4    |
| 3145.9 | 2906.1 | 2963.7 | 2884.6 | 3411.1 | 3335.5 |
| 16.6   | 12.3   | 14.0   | 23.7   | 21.9   | 23.4   |
| 11.3   | 6.3    | 10.9   | 13.0   | 10.1   | 5.4    |
| 271.7  | 263.0  | 311.1  | 281.7  | 343.8  | 355.8  |
| 79.7   | 54.4   | 65.4   | 79.5   | 84.6   | 77.1   |
| 4.7    | 2.4    | 1.7    | 2.1    | 2.2    | 5.2    |
| 6.5    | 16.0   | 18.0   | 6.6    | 7.3    | 15.9   |
| 18.8   | 21.6   | 29.8   | 23.8   | 25.5   | 32.5   |
| 23.7   | 28.3   | 27.7   | 23.4   | 21.3   | 30.7   |
| 34.8   | 40.8   | 43.9   | 34.8   | 54.3   | 45.9   |
| 6.7    | 10.1   | 3.9    | 3.0    | 2.6    | 2.5    |
| 50.5   | 33.9   | 63.5   | 61.8   | 86.1   | 86.9   |
| 32.8   | 49.5   | 34.9   | 46.8   | 50.6   | 46.5   |
| 9.3    | 17.4   | 21.2   | 18.7   | 36.2   | 29.9   |
| 12.3   | 16.0   | 16.3   | 22.6   | 12.3   | 11.5   |
| 2.0    | 2.6    | 2.4    | 2.1    | 4.2    | 3.9    |
| 9.5    | 5.0    | 15.2   | 9.1    | 14.1   | 10.9   |

|        |        |        |        |        |        |
|--------|--------|--------|--------|--------|--------|
| 12.3   | 8.3    | 9.8    | 14.7   | 17.6   | 6.1    |
| 22.6   | 17.8   | 20.3   | 23.5   | 25.8   | 21.8   |
| 143.3  | 113.1  | 126.1  | 143.8  | 146.1  | 147.6  |
| 13.8   | 14.7   | 13.0   | 10.3   | 12.5   | 10.3   |
| 574.5  | 605.5  | 678.5  | 630.6  | 730.5  | 726.4  |
| 8.2    | 10.7   | 9.3    | 5.1    | 6.8    | 2.8    |
| 29.1   | 34.3   | 24.9   | 20.0   | 33.4   | 35.7   |
| 6.9    | 2.0    | 8.3    | 1.1    | 9.7    | 5.8    |
| 3426.1 | 3260.8 | 3831.4 | 4170.0 | 3997.7 | 3948.0 |
| 586.9  | 537.1  | 604.3  | 638.2  | 687.6  | 740.6  |
| 450.3  | 438.9  | 339.9  | 435.8  | 430.5  | 580.1  |
| 5.9    | 4.2    | 7.1    | 7.5    | 11.1   | 2.1    |
| 12.3   | 17.8   | 11.6   | 10.0   | 17.0   | 19.4   |
| 1.9    | 6.6    | 2.3    | 1.7    | 6.4    | 3.2    |
| 6.3    | 2.1    | 10.0   | 6.1    | 4.4    | 6.8    |
| 6.2    | 20.2   | 2.0    | 11.7   | 5.0    | 6.7    |
| 109.8  | 117.2  | 121.2  | 109.6  | 107.6  | 148.4  |
| 435.5  | 426.3  | 558.4  | 326.5  | 565.7  | 535.6  |
| 423.6  | 343.9  | 443.5  | 457.7  | 532.3  | 544.8  |
| 160.7  | 134.1  | 174.1  | 122.0  | 180.4  | 173.6  |
| 434.5  | 441.5  | 428.9  | 455.5  | 443.1  | 518.2  |
| 37.0   | 33.4   | 27.7   | 35.6   | 48.5   | 54.3   |
| 5.6    | 0.4    | 7.5    | 3.2    | 6.6    | 2.9    |
| 1299.3 | 1805.9 | 1319.4 | 1157.6 | 1811.7 | 1578.1 |
| 12.2   | 12.1   | 21.8   | 19.0   | 13.0   | 23.1   |
| 5990.2 | 5757.6 | 6386.1 | 6878.5 | 7338.3 | 7121.6 |
| 5.1    | 12.9   | 2.3    | 1.3    | 3.6    | 4.0    |
| 6.3    | 9.4    | 10.9   | 12.6   | 12.5   | 12.4   |
| 5.6    | 0.8    | 4.4    | 8.7    | 4.5    | 4.4    |
| 81.6   | 58.8   | 81.8   | 93.8   | 90.0   | 63.1   |
| 11.4   | 3.4    | 9.1    | 6.8    | 3.1    | 12.2   |
| 275.2  | 270.1  | 240.8  | 308.8  | 255.2  | 295.7  |
| 9.9    | 4.1    | 5.1    | 3.9    | 8.6    | 6.4    |
| 150.0  | 140.6  | 142.4  | 130.7  | 179.6  | 175.5  |
| 64.8   | 35.2   | 74.5   | 82.0   | 68.2   | 55.7   |
| 40.0   | 35.3   | 34.6   | 44.2   | 30.1   | 39.1   |
| 3430.4 | 3026.4 | 3337.8 | 3359.7 | 3402.3 | 3775.8 |
| 6.8    | 12.4   | 11.2   | 6.8    | 9.5    | 12.2   |
| 255.5  | 185.0  | 283.2  | 302.3  | 274.4  | 278.8  |
| 2.6    | 12.6   | 22.9   | 7.2    | 4.1    | 5.6    |
| 13.3   | 13.3   | 13.8   | 1.7    | 8.1    | 8.1    |
| 50.8   | 55.8   | 24.6   | 33.4   | 26.9   | 38.8   |
| 662.5  | 416.5  | 525.0  | 507.9  | 680.6  | 776.9  |
| 3.1    | 13.6   | 9.9    | 13.5   | 3.8    | 12.0   |
| 217.7  | 136.4  | 165.6  | 171.9  | 204.0  | 222.0  |
| 299.3  | 309.2  | 299.3  | 366.4  | 353.8  | 382.0  |
| 29.2   | 36.6   | 35.9   | 43.3   | 41.9   | 48.9   |
| 558.1  | 472.8  | 508.9  | 581.7  | 698.7  | 573.4  |
| 172.4  | 169.4  | 163.3  | 178.9  | 211.9  | 192.9  |
| 3.6    | 6.6    | 13.9   | 17.6   | 13.6   | 12.2   |
| 1425.5 | 1229.7 | 1611.2 | 1671.7 | 1766.8 | 1876.7 |
| 64.8   | 38.4   | 64.3   | 76.3   | 66.3   | 87.5   |
| 3.3    | 11.6   | 4.3    | 0.8    | 2.2    | 6.2    |

|        |        |        |        |        |        |
|--------|--------|--------|--------|--------|--------|
| 4.2    | 1.9    | 1.5    | 2.4    | 2.0    | 2.3    |
| 4.4    | 1.4    | 2.7    | 3.8    | 3.3    | 4.1    |
| 2.1    | 2.6    | 1.3    | 1.1    | 1.6    | 5.3    |
| 16.5   | 22.1   | 20.8   | 15.8   | 28.6   | 30.8   |
| 1.6    | 2.3    | 3.4    | 2.3    | 4.5    | 3.0    |
| 1207.1 | 1149.3 | 1048.8 | 1210.4 | 1288.2 | 1355.3 |
| 130.2  | 101.3  | 128.3  | 125.4  | 139.7  | 154.2  |
| 15.6   | 17.4   | 16.8   | 9.9    | 17.1   | 10.2   |
| 18.7   | 1.5    | 12.2   | 7.6    | 8.6    | 9.7    |
| 6.8    | 6.3    | 8.3    | 6.0    | 10.4   | 6.8    |
| 1210.9 | 1127.9 | 1250.3 | 1276.8 | 1366.2 | 1456.6 |
| 3.1    | 0.9    | 5.4    | 1.5    | 0.9    | 1.1    |
| 291.6  | 219.7  | 272.3  | 275.5  | 322.5  | 369.1  |
| 0.8    | 0.9    | 4.2    | 0.6    | 1.1    | 0.7    |
| 126.2  | 90.5   | 116.7  | 105.2  | 125.0  | 132.5  |
| 26.3   | 31.7   | 35.4   | 43.4   | 41.8   | 51.3   |
| 2.8    | 4.6    | 3.2    | 7.1    | 7.4    | 6.9    |
| 392.9  | 415.7  | 417.3  | 426.0  | 393.9  | 492.7  |
| 571.9  | 529.6  | 549.5  | 550.1  | 580.4  | 689.1  |
| 1.7    | 0.8    | 2.4    | 5.0    | 2.7    | 5.4    |
| 185.1  | 157.2  | 178.5  | 174.5  | 204.0  | 191.4  |
| 5.6    | 3.2    | 3.0    | 1.3    | 5.6    | 2.8    |
| 19.5   | 14.7   | 16.2   | 28.1   | 23.1   | 27.2   |
| 650.5  | 519.3  | 708.0  | 717.3  | 713.9  | 742.7  |
| 1772.9 | 1534.5 | 1719.4 | 1676.0 | 1916.9 | 1895.1 |
| 2.2    | 2.7    | 2.5    | 2.6    | 2.2    | 6.4    |
| 3.1    | 0.6    | 7.0    | 1.7    | 0.9    | 1.4    |
| 2.6    | 2.5    | 13.2   | 4.0    | 2.4    | 2.1    |
| 13.8   | 12.6   | 13.1   | 6.4    | 7.6    | 12.0   |
| 8.9    | 9.3    | 3.9    | 6.4    | 14.9   | 10.7   |
| 156.9  | 145.0  | 191.4  | 172.3  | 201.8  | 216.2  |
| 52.4   | 57.0   | 57.6   | 55.9   | 63.1   | 76.8   |
| 197.3  | 125.6  | 200.5  | 155.5  | 276.3  | 246.4  |
| 7.3    | 11.5   | 2.8    | 15.4   | 9.1    | 27.8   |
| 8.4    | 4.0    | 12.4   | 8.0    | 6.6    | 7.5    |
| 82.2   | 93.0   | 64.4   | 72.1   | 93.3   | 102.9  |
| 9.3    | 6.7    | 22.5   | 17.3   | 13.4   | 16.3   |
| 16.3   | 8.5    | 15.8   | 10.8   | 16.8   | 13.7   |
| 482.2  | 530.8  | 482.5  | 444.4  | 511.3  | 537.3  |
| 574.4  | 418.8  | 600.1  | 592.3  | 638.7  | 690.8  |
| 193.1  | 259.9  | 181.0  | 266.4  | 191.5  | 235.4  |
| 9.1    | 12.0   | 3.9    | 5.1    | 1.8    | 7.4    |
| 231.4  | 208.6  | 227.6  | 250.3  | 249.8  | 269.6  |
| 12.7   | 10.7   | 9.2    | 8.7    | 2.7    | 7.6    |
| 109.2  | 86.3   | 93.6   | 94.1   | 118.8  | 128.2  |
| 14.0   | 5.2    | 11.2   | 21.4   | 9.7    | 7.7    |
| 13.6   | 15.2   | 11.8   | 17.5   | 18.3   | 26.7   |
| 11.4   | 15.2   | 5.3    | 15.2   | 11.1   | 13.5   |
| 2.3    | 0.9    | 0.4    | 0.8    | 0.6    | 2.4    |
| 9.3    | 5.6    | 18.6   | 14.8   | 15.3   | 11.7   |
| 10.4   | 20.6   | 24.1   | 8.3    | 14.9   | 12.1   |
| 305.7  | 281.3  | 331.0  | 358.3  | 360.0  | 368.8  |
| 1.7    | 2.4    | 1.8    | 3.1    | 9.3    | 8.1    |

|         |         |         |         |         |         |
|---------|---------|---------|---------|---------|---------|
| 79.5    | 84.7    | 99.4    | 91.4    | 117.0   | 117.7   |
| 5.8     | 2.2     | 4.4     | 2.5     | 3.1     | 1.9     |
| 31.0    | 20.5    | 30.1    | 29.3    | 30.2    | 44.6    |
| 16.0    | 25.4    | 22.9    | 20.3    | 26.9    | 14.1    |
| 854.0   | 616.8   | 851.8   | 800.3   | 1000.5  | 1007.8  |
| 23.1    | 15.1    | 10.7    | 15.1    | 9.7     | 3.8     |
| 6.5     | 8.1     | 9.9     | 5.3     | 7.0     | 9.6     |
| 55.7    | 52.9    | 46.5    | 48.2    | 47.2    | 58.8    |
| 40.3    | 48.1    | 69.6    | 59.9    | 82.1    | 87.3    |
| 14.0    | 5.7     | 17.6    | 13.1    | 12.1    | 13.7    |
| 4.8     | 5.1     | 12.1    | 1.8     | 3.9     | 2.9     |
| 405.5   | 374.7   | 425.8   | 439.8   | 496.3   | 444.6   |
| 48.0    | 34.5    | 46.5    | 48.7    | 52.7    | 48.3    |
| 5.2     | 18.8    | 3.8     | 15.4    | 6.4     | 11.1    |
| 3.2     | 4.8     | 8.0     | 8.2     | 2.8     | 6.7     |
| 269.1   | 263.6   | 288.7   | 306.4   | 330.7   | 317.2   |
| 351.7   | 349.0   | 363.7   | 372.0   | 418.3   | 445.2   |
| 206.1   | 197.1   | 224.6   | 232.2   | 244.0   | 271.9   |
| 9.7     | 23.1    | 14.1    | 20.8    | 22.2    | 24.6    |
| 488.0   | 411.3   | 495.1   | 526.3   | 573.1   | 580.9   |
| 144.3   | 162.6   | 144.4   | 140.5   | 178.4   | 165.2   |
| 10.7    | 15.2    | 2.9     | 20.0    | 16.3    | 5.3     |
| 361.6   | 389.6   | 373.4   | 399.4   | 477.2   | 468.6   |
| 44.9    | 48.4    | 33.8    | 53.4    | 62.2    | 58.9    |
| 11.5    | 6.0     | 4.9     | 10.7    | 16.3    | 13.1    |
| 44.2    | 36.3    | 38.4    | 43.0    | 52.7    | 52.9    |
| 27.1    | 25.0    | 26.6    | 35.2    | 20.2    | 29.3    |
| 0.9     | 0.9     | 0.9     | 1.3     | 0.8     | 1.2     |
| 2629.3  | 2327.6  | 2526.1  | 2899.3  | 3017.0  | 2983.6  |
| 3.6     | 2.6     | 17.3    | 16.1    | 11.7    | 9.9     |
| 156.4   | 120.9   | 156.0   | 125.1   | 157.1   | 170.7   |
| 11.1    | 12.6    | 10.0    | 14.7    | 16.5    | 12.8    |
| 1.7     | 12.6    | 3.0     | 4.6     | 3.8     | 13.7    |
| 524.7   | 505.1   | 596.7   | 608.7   | 620.2   | 700.1   |
| 263.1   | 283.0   | 293.7   | 317.6   | 299.2   | 371.4   |
| 12.6    | 1.8     | 10.5    | 11.9    | 20.5    | 15.6    |
| 10.0    | 13.9    | 13.0    | 11.2    | 14.3    | 22.3    |
| 1.3     | 3.1     | 6.4     | 3.3     | 2.2     | 1.8     |
| 1.8     | 0.4     | 6.0     | 8.7     | 4.1     | 2.5     |
| 15.6    | 13.5    | 22.4    | 20.5    | 13.5    | 22.3    |
| 405.2   | 294.5   | 318.2   | 321.8   | 428.1   | 397.4   |
| 13122.6 | 12253.2 | 12432.8 | 13016.4 | 13086.9 | 12866.7 |
| 54.9    | 56.9    | 74.8    | 75.5    | 72.6    | 86.2    |
| 2171.0  | 2072.8  | 2284.4  | 2437.3  | 2440.0  | 2794.1  |
| 253.9   | 158.8   | 224.7   | 198.7   | 298.6   | 237.5   |
| 26.3    | 12.1    | 29.6    | 29.1    | 29.2    | 28.5    |
| 60.9    | 74.5    | 91.4    | 90.7    | 91.8    | 89.2    |
| 13.3    | 2.5     | 5.5     | 7.2     | 7.0     | 10.6    |
| 64.9    | 43.4    | 72.6    | 78.3    | 96.0    | 94.9    |
| 0.7     | 0.7     | 1.7     | 3.0     | 7.2     | 5.9     |
| 59.7    | 50.2    | 46.6    | 57.0    | 72.4    | 51.6    |
| 4.4     | 13.1    | 3.7     | 0.9     | 2.2     | 1.2     |
| 4.3     | 11.9    | 7.8     | 10.2    | 12.3    | 7.9     |

|        |        |        |        |        |        |
|--------|--------|--------|--------|--------|--------|
| 163.8  | 132.4  | 168.8  | 158.7  | 181.0  | 192.0  |
| 17.4   | 22.9   | 4.8    | 8.7    | 18.3   | 18.1   |
| 2.6    | 8.9    | 7.8    | 2.9    | 1.2    | 4.2    |
| 2.4    | 7.8    | 5.4    | 2.6    | 8.2    | 2.5    |
| 68.3   | 64.0   | 54.3   | 62.4   | 70.9   | 83.1   |
| 1622.6 | 1455.0 | 1895.1 | 2146.3 | 1875.0 | 1970.9 |
| 14.5   | 17.4   | 10.8   | 11.3   | 10.9   | 13.8   |
| 6.9    | 1.0    | 3.6    | 3.8    | 4.1    | 3.3    |
| 27.2   | 10.5   | 22.6   | 3.4    | 12.5   | 23.6   |
| 291.9  | 267.6  | 280.2  | 264.0  | 304.8  | 358.7  |
| 9.0    | 5.8    | 7.6    | 13.6   | 9.8    | 7.3    |
| 10.0   | 13.9   | 13.9   | 17.6   | 9.7    | 11.2   |
| 20.7   | 25.0   | 16.9   | 20.6   | 24.4   | 30.5   |
| 135.3  | 131.9  | 167.4  | 170.9  | 158.7  | 191.0  |
| 14.4   | 12.3   | 7.6    | 1.0    | 15.9   | 6.0    |
| 82.4   | 64.1   | 79.7   | 93.7   | 80.7   | 108.5  |
| 67.2   | 31.9   | 73.7   | 75.7   | 73.1   | 75.1   |
| 154.3  | 144.7  | 151.8  | 161.5  | 169.8  | 197.0  |
| 3.4    | 1.6    | 5.0    | 2.1    | 2.2    | 3.3    |
| 123.4  | 116.8  | 140.3  | 128.3  | 131.9  | 158.8  |
| 61.0   | 66.6   | 60.2   | 83.6   | 82.7   | 86.7   |
| 28.8   | 22.2   | 17.3   | 22.1   | 20.1   | 39.3   |
| 423.3  | 373.1  | 484.3  | 456.1  | 483.0  | 539.5  |
| 3.0    | 4.0    | 7.4    | 1.9    | 4.8    | 7.2    |
| 3.4    | 6.4    | 4.9    | 10.4   | 1.3    | 5.8    |
| 4.7    | 2.9    | 6.3    | 9.5    | 8.4    | 5.9    |
| 254.5  | 254.9  | 262.6  | 252.9  | 293.7  | 332.6  |
| 243.0  | 284.1  | 383.5  | 297.0  | 334.8  | 372.1  |
| 2.9    | 20.2   | 13.2   | 8.8    | 9.8    | 17.0   |
| 40.7   | 27.3   | 41.6   | 47.3   | 50.7   | 65.0   |
| 17.5   | 7.9    | 13.0   | 9.5    | 12.2   | 5.9    |
| 0.4    | 5.0    | 0.7    | 1.7    | 3.6    | 0.8    |
| 2923.7 | 2691.8 | 2614.5 | 2559.1 | 2714.2 | 3217.6 |
| 613.1  | 815.8  | 622.5  | 714.1  | 621.4  | 725.1  |
| 15.7   | 21.2   | 23.2   | 26.1   | 23.5   | 29.0   |
| 27.8   | 20.7   | 20.0   | 23.3   | 28.0   | 29.5   |
| 114.6  | 121.0  | 122.4  | 132.1  | 143.7  | 151.5  |
| 61.2   | 64.9   | 68.0   | 71.4   | 72.4   | 90.9   |
| 6.9    | 2.3    | 5.2    | 7.0    | 7.6    | 7.4    |
| 3.2    | 2.3    | 11.3   | 4.1    | 6.0    | 9.5    |
| 2.2    | 14.2   | 17.8   | 18.8   | 21.5   | 18.8   |
| 2.0    | 9.2    | 7.6    | 2.9    | 2.2    | 4.7    |
| 6.0    | 7.0    | 7.1    | 4.3    | 7.5    | 5.4    |
| 15.5   | 14.3   | 8.0    | 11.1   | 14.3   | 15.7   |
| 149.5  | 86.3   | 113.2  | 132.9  | 157.4  | 174.0  |
| 91.8   | 87.3   | 107.0  | 115.1  | 118.6  | 134.2  |
| 309.6  | 292.6  | 349.7  | 332.3  | 338.3  | 388.8  |
| 26.4   | 34.3   | 31.0   | 14.8   | 28.8   | 28.1   |
| 0.6    | 0.8    | 0.8    | 3.0    | 4.7    | 2.2    |
| 62.4   | 60.3   | 57.5   | 59.7   | 54.6   | 51.6   |
| 12.0   | 1.6    | 12.6   | 3.0    | 16.3   | 7.8    |
| 5.0    | 0.4    | 9.0    | 8.9    | 5.4    | 4.9    |
| 19.0   | 7.9    | 4.8    | 5.1    | 4.1    | 19.2   |



|        |        |        |        |        |        |
|--------|--------|--------|--------|--------|--------|
| 2.7    | 5.6    | 7.6    | 8.7    | 16.4   | 9.8    |
| 6.0    | 5.3    | 3.7    | 5.6    | 5.9    | 13.4   |
| 185.5  | 155.4  | 200.0  | 185.7  | 237.2  | 242.5  |
| 13.9   | 9.9    | 6.6    | 7.8    | 20.1   | 20.1   |
| 11.3   | 12.4   | 4.8    | 9.5    | 17.9   | 5.2    |
| 1024.6 | 872.6  | 1104.6 | 1031.1 | 1266.8 | 1279.5 |
| 122.1  | 123.2  | 129.1  | 145.5  | 156.0  | 155.8  |
| 2.3    | 4.2    | 1.1    | 3.4    | 1.0    | 1.1    |
| 1.6    | 0.9    | 1.9    | 2.3    | 0.5    | 4.3    |
| 14.9   | 15.4   | 20.7   | 16.8   | 14.8   | 22.1   |
| 7.1    | 1.2    | 8.0    | 6.7    | 10.3   | 7.7    |
| 4.7    | 9.1    | 14.2   | 9.7    | 1.4    | 12.5   |
| 7.8    | 3.0    | 12.3   | 12.2   | 16.6   | 10.4   |
| 1.2    | 2.1    | 3.4    | 1.9    | 1.3    | 1.3    |
| 0.5    | 0.2    | 0.6    | 4.4    | 0.3    | 0.9    |
| 13.2   | 13.1   | 12.3   | 17.6   | 14.1   | 14.9   |
| 29.1   | 21.0   | 39.4   | 27.2   | 40.1   | 41.0   |
| 377.1  | 331.6  | 351.8  | 354.7  | 400.2  | 441.0  |
| 144.3  | 181.5  | 164.6  | 188.9  | 135.9  | 168.8  |
| 164.8  | 192.1  | 222.7  | 246.6  | 169.9  | 255.5  |
| 21.0   | 28.7   | 19.7   | 26.3   | 24.9   | 22.5   |
| 32.9   | 4.9    | 16.8   | 25.1   | 25.3   | 34.8   |
| 27.3   | 38.0   | 20.1   | 28.0   | 26.1   | 29.2   |
| 4.0    | 7.6    | 2.8    | 3.9    | 4.2    | 1.3    |
| 12.7   | 16.3   | 17.9   | 13.6   | 13.6   | 18.3   |
| 276.5  | 367.6  | 307.7  | 285.8  | 322.5  | 340.7  |
| 3.7    | 5.2    | 4.9    | 7.2    | 8.6    | 5.6    |
| 8.9    | 4.2    | 10.8   | 6.9    | 5.4    | 11.1   |
| 16.8   | 14.8   | 22.3   | 20.0   | 18.1   | 22.3   |
| 3.5    | 2.5    | 3.9    | 2.6    | 3.2    | 2.8    |
| 8.8    | 11.8   | 4.6    | 13.0   | 4.9    | 9.2    |
| 3.6    | 1.9    | 3.7    | 5.6    | 2.3    | 4.2    |
| 4.2    | 9.2    | 19.3   | 11.6   | 5.1    | 8.5    |
| 9.4    | 5.6    | 17.4   | 8.9    | 9.5    | 18.7   |
| 543.0  | 414.6  | 568.8  | 495.5  | 628.1  | 581.5  |
| 3.8    | 31.3   | 26.3   | 8.1    | 14.4   | 8.4    |
| 8.2    | 9.7    | 2.2    | 8.8    | 7.0    | 11.3   |
| 57.3   | 37.1   | 53.4   | 49.3   | 51.5   | 67.2   |
| 41.2   | 44.0   | 49.6   | 43.2   | 66.5   | 61.2   |
| 114.1  | 117.0  | 107.6  | 115.6  | 127.5  | 128.9  |
| 2.2    | 5.8    | 8.4    | 3.8    | 0.8    | 1.0    |
| 273.8  | 273.3  | 324.4  | 358.3  | 348.3  | 312.1  |
| 241.2  | 193.8  | 240.5  | 243.5  | 287.3  | 277.4  |
| 143.0  | 164.5  | 147.4  | 151.4  | 151.6  | 153.5  |
| 2123.1 | 2037.1 | 2297.0 | 2436.1 | 2380.4 | 2535.9 |
| 30.6   | 34.9   | 28.1   | 33.5   | 39.5   | 44.7   |
| 24.7   | 44.7   | 29.2   | 25.7   | 26.3   | 31.2   |
| 265.2  | 257.9  | 240.4  | 286.5  | 254.2  | 293.2  |
| 5.8    | 2.6    | 3.1    | 2.2    | 5.3    | 9.3    |
| 330.3  | 435.7  | 364.7  | 436.9  | 516.1  | 449.4  |
| 26.6   | 22.2   | 38.7   | 50.0   | 34.0   | 41.6   |
| 2495.6 | 2532.1 | 2555.3 | 2814.0 | 2813.8 | 3252.8 |
| 12.1   | 19.5   | 18.6   | 19.7   | 15.1   | 18.8   |

|        |        |        |        |        |        |
|--------|--------|--------|--------|--------|--------|
| 1015.2 | 854.0  | 1001.7 | 1241.3 | 1273.2 | 1387.9 |
| 18.1   | 10.6   | 16.6   | 20.8   | 11.8   | 18.9   |
| 20.5   | 20.8   | 12.9   | 14.5   | 31.6   | 15.5   |
| 10.8   | 11.0   | 20.1   | 14.2   | 13.9   | 13.3   |
| 7.4    | 7.8    | 5.4    | 8.2    | 5.6    | 6.0    |
| 5.4    | 6.5    | 9.9    | 17.6   | 9.7    | 7.6    |
| 2142.9 | 1783.9 | 2249.4 | 2173.9 | 2424.5 | 2366.3 |
| 158.0  | 137.7  | 150.4  | 162.5  | 164.7  | 178.3  |
| 141.2  | 106.8  | 127.1  | 139.4  | 129.8  | 126.1  |
| 45.5   | 22.5   | 78.1   | 52.1   | 83.4   | 73.4   |
| 134.1  | 131.2  | 130.7  | 147.8  | 140.7  | 142.8  |
| 7.4    | 3.5    | 17.3   | 6.5    | 7.1    | 13.0   |
| 3.9    | 6.8    | 6.2    | 4.0    | 4.7    | 4.1    |
| 25.7   | 40.4   | 14.0   | 36.9   | 28.5   | 18.1   |
| 27.8   | 28.9   | 30.7   | 32.2   | 43.1   | 47.9   |
| 5.8    | 4.4    | 6.0    | 3.0    | 3.1    | 3.9    |
| 41.9   | 41.5   | 42.6   | 45.5   | 51.3   | 56.7   |
| 22.6   | 38.7   | 18.9   | 34.7   | 24.6   | 39.8   |
| 49.6   | 44.6   | 42.2   | 43.4   | 57.4   | 59.6   |
| 347.0  | 285.9  | 303.8  | 311.2  | 344.9  | 379.6  |
| 23.9   | 18.2   | 16.2   | 8.0    | 21.0   | 5.4    |
| 81.9   | 90.4   | 83.0   | 94.8   | 100.4  | 112.9  |
| 31.0   | 18.8   | 24.3   | 30.3   | 24.4   | 29.1   |
| 322.4  | 329.6  | 553.4  | 515.1  | 453.3  | 448.8  |
| 267.9  | 275.9  | 240.2  | 254.7  | 262.9  | 312.0  |
| 4.1    | 1.9    | 5.4    | 1.6    | 8.9    | 2.3    |
| 4.2    | 1.7    | 5.2    | 6.3    | 3.7    | 7.6    |
| 36.1   | 28.8   | 31.0   | 32.6   | 30.1   | 28.5   |
| 24.6   | 39.0   | 29.9   | 22.8   | 28.6   | 29.5   |
| 2.7    | 3.4    | 5.1    | 2.8    | 3.7    | 2.9    |
| 23.3   | 19.7   | 18.1   | 11.4   | 10.6   | 9.0    |
| 6.1    | 7.0    | 5.8    | 3.8    | 3.1    | 0.8    |
| 34.6   | 31.9   | 35.5   | 34.6   | 40.9   | 41.7   |
| 563.1  | 549.5  | 623.8  | 623.4  | 628.1  | 729.2  |
| 21.2   | 21.9   | 27.0   | 22.3   | 26.1   | 31.7   |
| 3.3    | 4.2    | 7.1    | 14.5   | 18.9   | 19.1   |
| 33.3   | 16.5   | 26.8   | 22.1   | 29.8   | 19.2   |
| 2.8    | 1.0    | 1.1    | 1.2    | 1.6    | 3.4    |
| 168.5  | 201.0  | 172.6  | 193.5  | 180.4  | 226.1  |
| 12.3   | 4.5    | 4.4    | 4.1    | 6.8    | 10.2   |
| 4.5    | 1.6    | 7.0    | 6.4    | 10.6   | 3.7    |
| 6.9    | 8.1    | 2.1    | 2.0    | 1.0    | 2.3    |
| 471.4  | 401.9  | 495.9  | 462.1  | 560.9  | 557.2  |
| 5.1    | 25.5   | 24.5   | 21.5   | 21.7   | 21.8   |
| 128.1  | 108.7  | 130.8  | 125.1  | 116.1  | 141.9  |
| 2.1    | 7.2    | 6.4    | 6.0    | 8.9    | 3.2    |
| 9.5    | 2.3    | 3.0    | 9.4    | 7.2    | 14.3   |
| 59.3   | 46.1   | 68.6   | 63.3   | 76.7   | 64.9   |
| 552.7  | 489.1  | 603.7  | 600.5  | 663.6  | 698.2  |
| 29.1   | 19.3   | 30.7   | 31.0   | 36.7   | 35.2   |
| 21.2   | 15.9   | 19.6   | 32.7   | 34.8   | 25.5   |
| 378.9  | 335.8  | 374.3  | 336.2  | 417.5  | 429.2  |
| 391.6  | 416.3  | 507.8  | 424.9  | 494.5  | 480.3  |

|        |        |        |        |        |        |
|--------|--------|--------|--------|--------|--------|
| 72.4   | 46.3   | 74.1   | 71.5   | 98.8   | 64.5   |
| 21.5   | 18.2   | 18.2   | 19.5   | 22.8   | 33.4   |
| 25.9   | 37.6   | 15.2   | 19.3   | 24.2   | 38.9   |
| 1544.2 | 1352.3 | 1665.6 | 1734.1 | 1777.3 | 1938.8 |
| 215.4  | 198.9  | 223.9  | 224.1  | 247.4  | 257.4  |
| 38.6   | 28.4   | 46.1   | 33.5   | 67.2   | 62.2   |
| 68.0   | 50.9   | 55.6   | 62.1   | 102.5  | 78.4   |
| 118.5  | 77.8   | 109.8  | 124.8  | 140.0  | 141.6  |
| 982.9  | 805.7  | 962.6  | 1155.8 | 1144.0 | 1313.7 |
| 1.7    | 11.0   | 17.5   | 3.6    | 5.0    | 8.6    |
| 9.5    | 2.4    | 4.0    | 8.6    | 7.8    | 3.3    |
| 1.9    | 3.6    | 0.4    | 1.1    | 2.9    | 0.9    |
| 1.1    | 0.9    | 2.7    | 1.8    | 7.0    | 9.4    |
| 982.4  | 894.1  | 1035.2 | 1028.9 | 1062.8 | 1078.0 |
| 24.5   | 41.0   | 25.3   | 42.2   | 23.9   | 36.5   |
| 21.3   | 28.3   | 20.2   | 30.7   | 18.6   | 29.5   |
| 18.4   | 6.2    | 9.9    | 16.3   | 7.8    | 15.4   |
| 36.7   | 31.5   | 34.7   | 36.3   | 40.9   | 45.7   |
| 564.6  | 507.4  | 665.4  | 602.0  | 704.7  | 691.4  |
| 123.6  | 102.8  | 122.9  | 128.4  | 142.4  | 138.7  |
| 26.3   | 21.6   | 23.4   | 30.0   | 26.7   | 30.0   |
| 8.0    | 6.9    | 4.4    | 7.3    | 7.3    | 8.5    |
| 3331.6 | 3000.5 | 3064.8 | 3324.1 | 3811.3 | 3762.0 |
| 171.5  | 209.1  | 172.2  | 240.8  | 189.6  | 249.4  |
| 48.3   | 53.9   | 56.1   | 55.1   | 59.8   | 59.4   |
| 23.7   | 35.0   | 14.8   | 30.8   | 21.1   | 18.8   |
| 8.6    | 5.8    | 12.1   | 15.6   | 12.1   | 9.2    |
| 305.2  | 217.4  | 293.2  | 289.5  | 327.6  | 355.7  |
| 45.6   | 34.6   | 59.7   | 41.6   | 62.3   | 64.5   |
| 34.0   | 23.1   | 36.4   | 38.7   | 48.2   | 46.9   |
| 4.3    | 0.7    | 3.0    | 9.3    | 6.1    | 4.6    |
| 558.7  | 588.4  | 687.9  | 552.2  | 806.8  | 685.8  |
| 6.1    | 2.0    | 11.2   | 2.8    | 5.0    | 2.7    |
| 85.3   | 78.8   | 78.6   | 74.9   | 82.4   | 99.4   |
| 233.4  | 217.0  | 286.0  | 261.7  | 282.1  | 310.2  |
| 67.0   | 48.0   | 78.5   | 61.3   | 74.3   | 83.8   |
| 6.4    | 1.1    | 2.4    | 3.2    | 1.4    | 8.6    |
| 34.7   | 48.0   | 37.2   | 30.4   | 42.7   | 50.0   |
| 12.1   | 19.1   | 9.6    | 13.2   | 17.0   | 17.8   |
| 60.4   | 60.2   | 54.7   | 54.3   | 67.0   | 80.3   |
| 7.1    | 3.3    | 8.3    | 6.3    | 10.7   | 5.3    |
| 114.1  | 163.1  | 108.1  | 129.9  | 113.0  | 163.2  |
| 573.9  | 625.9  | 662.9  | 767.7  | 794.9  | 846.0  |
| 58.5   | 82.7   | 57.3   | 70.3   | 75.4   | 75.6   |
| 63.1   | 62.0   | 53.6   | 58.7   | 72.4   | 64.8   |
| 226.2  | 182.8  | 226.1  | 225.0  | 261.2  | 264.7  |
| 23.5   | 36.6   | 21.6   | 19.1   | 22.3   | 32.7   |
| 91.6   | 111.0  | 99.7   | 101.9  | 111.6  | 123.1  |
| 51.4   | 77.5   | 57.6   | 53.4   | 58.0   | 86.4   |
| 34.5   | 27.3   | 29.4   | 32.8   | 29.1   | 46.7   |
| 356.1  | 245.6  | 338.2  | 352.3  | 377.4  | 377.6  |
| 78.7   | 78.0   | 71.9   | 93.9   | 97.7   | 117.8  |
| 10.0   | 13.2   | 6.4    | 7.3    | 5.7    | 5.7    |

|        |        |        |        |        |        |
|--------|--------|--------|--------|--------|--------|
| 1.4    | 4.2    | 2.2    | 1.7    | 3.2    | 1.3    |
| 13.1   | 22.0   | 16.1   | 11.5   | 14.0   | 5.0    |
| 29.0   | 33.6   | 14.9   | 32.4   | 19.7   | 31.9   |
| 7.0    | 9.6    | 7.8    | 16.5   | 7.9    | 10.4   |
| 3.8    | 2.6    | 4.4    | 1.2    | 1.4    | 2.9    |
| 111.2  | 95.7   | 139.2  | 133.5  | 135.7  | 130.5  |
| 12.3   | 25.3   | 37.5   | 25.9   | 34.7   | 10.9   |
| 10.0   | 2.4    | 2.4    | 5.6    | 5.1    | 1.4    |
| 7.5    | 11.3   | 2.4    | 10.4   | 2.8    | 4.9    |
| 1.6    | 2.9    | 2.6    | 2.3    | 2.3    | 2.8    |
| 2350.3 | 1787.0 | 2189.0 | 2230.0 | 2487.9 | 2695.0 |
| 428.7  | 346.9  | 426.6  | 388.6  | 486.0  | 502.4  |
| 0.8    | 6.7    | 0.9    | 5.1    | 2.4    | 4.5    |
| 28.0   | 21.1   | 27.5   | 20.8   | 31.1   | 30.9   |
| 7.3    | 2.2    | 6.0    | 3.8    | 5.8    | 1.0    |
| 534.1  | 545.6  | 529.9  | 519.4  | 557.9  | 637.7  |
| 120.5  | 147.2  | 127.1  | 133.5  | 162.3  | 167.8  |
| 5.6    | 3.2    | 2.6    | 2.2    | 1.8    | 6.7    |
| 2.1    | 0.4    | 4.3    | 2.4    | 0.6    | 0.8    |
| 1493.8 | 1579.7 | 1579.9 | 1453.8 | 1565.2 | 1763.4 |
| 2772.9 | 2600.0 | 3039.4 | 3241.6 | 3204.2 | 3328.5 |
| 7.2    | 10.1   | 5.7    | 1.7    | 1.3    | 2.4    |
| 341.3  | 293.6  | 357.4  | 371.2  | 432.2  | 465.4  |
| 3.6    | 10.3   | 0.7    | 2.4    | 4.4    | 1.1    |
| 56.3   | 59.1   | 61.8   | 68.3   | 71.7   | 79.0   |
| 1.3    | 2.5    | 1.8    | 1.7    | 0.9    | 0.8    |
| 1.7    | 11.2   | 4.9    | 4.4    | 2.1    | 3.9    |
| 29.2   | 33.3   | 35.1   | 22.2   | 38.7   | 34.9   |
| 713.9  | 773.9  | 843.2  | 893.2  | 880.4  | 1077.1 |
| 3.4    | 1.5    | 5.4    | 8.8    | 7.3    | 7.3    |
| 15.5   | 20.7   | 13.0   | 9.9    | 13.4   | 13.4   |
| 0.4    | 0.9    | 0.9    | 0.4    | 0.5    | 2.3    |
| 3.6    | 8.8    | 8.8    | 8.0    | 9.3    | 10.5   |
| 1.2    | 6.1    | 0.9    | 1.6    | 1.6    | 0.9    |
| 1.7    | 2.5    | 4.1    | 1.6    | 1.8    | 2.9    |
| 14.1   | 24.0   | 27.6   | 14.9   | 22.8   | 29.5   |
| 11.0   | 17.2   | 8.8    | 8.0    | 9.4    | 7.5    |
| 6.4    | 39.4   | 28.0   | 12.5   | 20.3   | 35.0   |
| 295.8  | 203.1  | 253.0  | 261.8  | 274.9  | 252.6  |
| 4111.0 | 4061.4 | 4386.8 | 4533.3 | 4500.1 | 4739.3 |
| 2.8    | 0.9    | 5.9    | 7.5    | 2.9    | 3.6    |
| 6.3    | 0.4    | 4.5    | 2.0    | 4.1    | 7.9    |
| 36.7   | 21.1   | 33.2   | 30.3   | 47.5   | 34.9   |
| 2.2    | 1.7    | 1.4    | 0.7    | 3.6    | 7.5    |
| 124.2  | 111.8  | 101.3  | 100.5  | 117.0  | 151.5  |
| 935.9  | 1014.6 | 902.1  | 912.6  | 1007.8 | 1198.6 |
| 14.1   | 22.7   | 9.4    | 3.5    | 12.1   | 7.7    |
| 1046.9 | 828.6  | 966.4  | 873.1  | 1106.5 | 1178.9 |
| 23.6   | 26.6   | 16.1   | 22.0   | 25.5   | 37.9   |
| 8.5    | 10.1   | 8.3    | 11.9   | 4.1    | 9.4    |
| 8.9    | 5.9    | 2.7    | 4.5    | 17.1   | 7.8    |
| 14.2   | 5.3    | 9.3    | 13.0   | 12.2   | 18.0   |
| 0.9    | 2.4    | 5.6    | 6.1    | 7.7    | 5.1    |

|        |        |        |        |        |        |
|--------|--------|--------|--------|--------|--------|
| 7.3    | 5.4    | 6.6    | 8.3    | 4.1    | 10.0   |
| 48.4   | 50.4   | 41.8   | 50.2   | 37.0   | 42.6   |
| 112.1  | 99.3   | 94.6   | 85.0   | 107.8  | 109.1  |
| 23.3   | 20.1   | 19.0   | 21.6   | 24.8   | 29.4   |
| 3.0    | 8.7    | 4.4    | 9.5    | 9.2    | 2.1    |
| 580.7  | 334.9  | 640.1  | 609.4  | 745.3  | 734.2  |
| 229.8  | 221.3  | 210.5  | 168.5  | 289.5  | 341.4  |
| 34.2   | 41.0   | 29.9   | 48.4   | 38.5   | 46.1   |
| 6783.3 | 6193.4 | 6568.3 | 7010.4 | 7406.5 | 7446.0 |
| 759.5  | 700.4  | 823.7  | 763.2  | 842.6  | 873.7  |
| 227.7  | 212.5  | 232.7  | 205.8  | 257.7  | 278.4  |
| 9.6    | 6.1    | 8.7    | 16.3   | 13.2   | 13.7   |
| 5.0    | 7.9    | 5.3    | 8.1    | 2.3    | 14.1   |
| 15.0   | 13.7   | 12.1   | 13.4   | 15.2   | 17.0   |
| 13.6   | 25.9   | 13.7   | 13.3   | 11.4   | 10.0   |
| 12.2   | 15.7   | 4.7    | 6.8    | 3.2    | 12.6   |
| 1.0    | 3.2    | 1.6    | 1.1    | 0.9    | 3.6    |
| 38.7   | 10.5   | 26.1   | 31.3   | 13.4   | 24.6   |
| 106.9  | 107.8  | 101.4  | 140.0  | 119.2  | 130.3  |
| 6.5    | 2.3    | 1.6    | 1.9    | 1.8    | 6.1    |
| 5.5    | 0.5    | 10.9   | 9.2    | 16.6   | 1.8    |
| 344.6  | 306.1  | 322.3  | 340.2  | 435.8  | 385.0  |
| 21.3   | 15.1   | 25.7   | 19.3   | 21.8   | 20.2   |
| 3.0    | 6.8    | 1.6    | 2.9    | 1.9    | 3.4    |
| 3.6    | 7.8    | 1.8    | 3.7    | 2.9    | 6.7    |
| 255.0  | 250.0  | 274.5  | 266.7  | 332.1  | 289.3  |
| 10.9   | 21.1   | 28.3   | 10.8   | 20.0   | 31.6   |
| 4268.2 | 3734.1 | 3682.0 | 3573.9 | 4081.7 | 4725.6 |
| 9.2    | 10.9   | 10.5   | 7.8    | 9.3    | 8.4    |
| 564.1  | 435.8  | 424.9  | 397.2  | 530.2  | 552.5  |
| 117.9  | 108.3  | 97.6   | 108.2  | 111.1  | 134.8  |
| 5.9    | 17.6   | 6.4    | 8.8    | 7.9    | 3.0    |
| 86.5   | 84.4   | 114.5  | 108.2  | 105.7  | 127.2  |
| 87.4   | 100.6  | 79.4   | 74.0   | 94.8   | 114.9  |
| 247.3  | 252.6  | 259.9  | 256.2  | 300.5  | 340.0  |
| 952.0  | 929.5  | 988.1  | 976.1  | 1163.6 | 1167.5 |
| 8.3    | 6.2    | 7.6    | 8.1    | 8.0    | 8.7    |
| 2095.7 | 1678.5 | 2408.9 | 2434.3 | 2415.8 | 2484.5 |
| 2.2    | 1.9    | 4.3    | 4.0    | 1.0    | 4.0    |
| 349.7  | 301.4  | 343.6  | 386.7  | 324.6  | 418.0  |
| 132.3  | 93.4   | 132.9  | 116.8  | 154.0  | 171.4  |
| 2277.0 | 2191.6 | 2558.1 | 2680.9 | 2608.7 | 2742.7 |
| 1778.6 | 1732.5 | 1648.9 | 1672.1 | 1979.5 | 2040.6 |
| 5.6    | 6.0    | 9.3    | 4.8    | 5.9    | 3.0    |
| 31.8   | 35.2   | 22.9   | 28.2   | 28.3   | 31.2   |
| 1186.9 | 1124.0 | 1116.7 | 1180.5 | 1229.1 | 1365.4 |
| 705.2  | 727.2  | 758.3  | 777.4  | 828.6  | 898.6  |
| 160.2  | 141.2  | 192.5  | 176.7  | 199.0  | 191.4  |
| 9.7    | 7.1    | 9.8    | 14.0   | 11.0   | 12.4   |
| 193.1  | 165.3  | 177.3  | 193.3  | 210.6  | 237.3  |
| 12.9   | 22.7   | 7.3    | 22.3   | 18.4   | 15.7   |
| 21.6   | 8.6    | 26.5   | 6.7    | 20.5   | 11.8   |
| 76.0   | 56.3   | 84.5   | 79.8   | 90.8   | 72.4   |

|        |        |        |        |        |        |
|--------|--------|--------|--------|--------|--------|
| 88.0   | 103.3  | 98.0   | 106.9  | 104.4  | 132.6  |
| 101.2  | 89.2   | 93.8   | 113.2  | 105.6  | 117.2  |
| 3462.8 | 2882.5 | 2909.2 | 3279.9 | 3454.4 | 3957.1 |
| 1.1    | 0.9    | 0.4    | 1.0    | 3.5    | 3.1    |
| 1.7    | 2.3    | 1.3    | 2.1    | 11.6   | 2.3    |
| 117.2  | 124.4  | 110.5  | 139.0  | 133.1  | 118.0  |
| 116.5  | 129.9  | 108.1  | 119.9  | 109.6  | 153.7  |
| 10.2   | 4.1    | 13.5   | 16.1   | 2.8    | 5.8    |
| 8.1    | 3.9    | 5.4    | 2.0    | 17.7   | 3.1    |
| 57.1   | 77.0   | 64.0   | 72.1   | 49.9   | 64.0   |
| 50.7   | 40.4   | 47.1   | 59.4   | 60.9   | 64.2   |
| 6.8    | 0.9    | 9.4    | 11.4   | 8.6    | 16.9   |
| 12.2   | 11.6   | 11.5   | 10.1   | 15.0   | 6.0    |
| 12.7   | 3.3    | 15.4   | 15.5   | 6.3    | 16.3   |
| 92.0   | 98.1   | 100.9  | 88.0   | 112.0  | 104.3  |
| 8.9    | 10.5   | 4.8    | 5.5    | 12.3   | 6.9    |
| 16.5   | 24.5   | 16.1   | 7.0    | 13.8   | 18.9   |
| 106.4  | 78.0   | 94.6   | 117.7  | 139.4  | 127.1  |
| 95.9   | 68.4   | 76.0   | 70.8   | 72.0   | 89.1   |
| 75.0   | 67.5   | 96.6   | 90.3   | 90.7   | 98.0   |
| 2221.6 | 1849.4 | 1870.1 | 1923.5 | 2295.9 | 2587.0 |
| 874.3  | 861.3  | 914.4  | 938.6  | 1092.2 | 1062.5 |
| 96.1   | 75.3   | 91.5   | 90.4   | 103.1  | 107.8  |
| 13.8   | 3.2    | 9.4    | 13.0   | 3.1    | 8.2    |
| 32.5   | 35.6   | 48.2   | 40.4   | 40.4   | 39.4   |
| 43.3   | 21.3   | 32.1   | 33.0   | 47.3   | 37.4   |
| 1.2    | 1.1    | 3.1    | 0.8    | 1.4    | 1.6    |
| 31.1   | 31.3   | 31.3   | 41.6   | 37.2   | 39.3   |
| 1981.1 | 1967.5 | 2098.6 | 2114.7 | 2164.7 | 2283.2 |
| 2.4    | 12.2   | 2.8    | 2.7    | 5.8    | 4.4    |
| 2139.9 | 2014.1 | 2638.8 | 2708.9 | 2605.8 | 2694.7 |
| 154.0  | 266.8  | 199.0  | 246.8  | 192.4  | 210.3  |
| 67.0   | 63.3   | 48.3   | 59.9   | 64.7   | 71.4   |
| 87.6   | 58.1   | 62.5   | 71.4   | 87.3   | 95.3   |
| 4.2    | 1.4    | 7.8    | 10.0   | 4.3    | 2.7    |
| 11.8   | 4.4    | 3.7    | 9.3    | 13.4   | 11.4   |
| 47.3   | 54.8   | 64.7   | 46.0   | 73.5   | 63.2   |
| 5.5    | 6.4    | 3.1    | 4.0    | 7.0    | 3.7    |
| 73.1   | 82.0   | 91.0   | 100.9  | 79.2   | 121.7  |
| 71.3   | 56.9   | 80.7   | 83.0   | 85.0   | 101.9  |
| 1472.1 | 1462.7 | 1613.6 | 1724.5 | 1734.0 | 1870.8 |
| 32.1   | 38.2   | 34.8   | 49.0   | 50.2   | 30.7   |
| 293.0  | 327.9  | 352.9  | 339.3  | 410.5  | 397.8  |
| 2.3    | 2.9    | 5.2    | 3.4    | 1.1    | 0.8    |
| 294.0  | 237.3  | 322.8  | 327.8  | 466.9  | 419.6  |
| 573.6  | 520.1  | 587.3  | 659.9  | 590.4  | 634.1  |
| 561.5  | 630.4  | 680.5  | 732.5  | 837.7  | 738.8  |
| 17.0   | 14.8   | 14.5   | 10.2   | 15.9   | 13.2   |
| 5.1    | 3.4    | 7.8    | 7.1    | 3.3    | 4.6    |
| 1.7    | 1.8    | 2.9    | 5.4    | 1.6    | 4.3    |
| 4116.7 | 3688.6 | 4044.1 | 4630.5 | 4566.1 | 4542.3 |
| 617.1  | 585.3  | 676.0  | 658.1  | 738.1  | 641.6  |
| 16.0   | 17.6   | 10.2   | 10.9   | 23.2   | 16.6   |

|        |        |        |        |         |        |
|--------|--------|--------|--------|---------|--------|
| 76.4   | 75.2   | 74.5   | 100.3  | 118.1   | 88.1   |
| 76.5   | 65.2   | 69.8   | 66.7   | 75.4    | 88.5   |
| 139.2  | 122.7  | 134.0  | 117.5  | 163.4   | 154.3  |
| 24.6   | 25.4   | 35.0   | 17.3   | 34.1    | 41.3   |
| 1.2    | 1.3    | 6.0    | 7.7    | 8.9     | 8.8    |
| 12.0   | 7.7    | 7.8    | 11.8   | 11.3    | 14.4   |
| 76.9   | 86.0   | 88.1   | 102.3  | 116.3   | 102.1  |
| 14.6   | 4.2    | 15.6   | 4.5    | 8.1     | 7.9    |
| 9585.1 | 8718.5 | 9164.4 | 9696.8 | 9766.1  | 9864.5 |
| 92.8   | 80.6   | 106.7  | 88.6   | 131.5   | 102.2  |
| 903.1  | 797.7  | 1076.3 | 1123.8 | 1192.3  | 1164.2 |
| 482.2  | 357.4  | 420.3  | 444.0  | 514.4   | 561.2  |
| 3.6    | 2.2    | 3.9    | 1.3    | 2.7     | 3.0    |
| 237.0  | 213.8  | 252.8  | 290.3  | 281.6   | 323.7  |
| 20.7   | 11.2   | 18.3   | 17.5   | 18.9    | 23.4   |
| 170.9  | 172.7  | 188.7  | 187.5  | 199.8   | 206.8  |
| 538.5  | 465.3  | 491.6  | 443.3  | 607.6   | 585.1  |
| 482.1  | 367.0  | 457.0  | 459.1  | 520.4   | 553.0  |
| 325.1  | 260.5  | 337.0  | 317.7  | 392.7   | 402.8  |
| 1637.2 | 1395.6 | 1558.6 | 1651.0 | 1616.5  | 1943.2 |
| 2153.6 | 2046.1 | 2127.1 | 2159.8 | 2340.8  | 2429.7 |
| 2977.4 | 2495.7 | 2703.8 | 2684.0 | 3231.9  | 3256.8 |
| 9059.8 | 8794.4 | 8651.3 | 9313.1 | 9329.4  | 9450.3 |
| 9816.4 | 9063.5 | 9439.4 | 9279.4 | 10325.3 | 9988.7 |
| 1109.2 | 960.8  | 970.9  | 1151.6 | 1018.8  | 1230.5 |
| 1433.2 | 1343.2 | 1508.6 | 1572.9 | 1749.9  | 1813.0 |
| 17.6   | 6.0    | 15.5   | 16.7   | 10.0    | 20.5   |
| 38.2   | 53.8   | 37.8   | 45.1   | 32.4    | 51.9   |
| 33.3   | 33.7   | 32.6   | 28.1   | 27.6    | 41.7   |
| 30.2   | 15.1   | 26.7   | 18.2   | 26.1    | 22.1   |
| 493.9  | 407.5  | 454.8  | 472.0  | 585.1   | 650.7  |
| 89.5   | 75.8   | 82.3   | 72.3   | 95.2    | 95.5   |
| 26.9   | 26.2   | 14.3   | 20.6   | 31.9    | 26.3   |
| 0.8    | 0.3    | 0.7    | 1.1    | 0.6     | 1.0    |
| 253.8  | 250.5  | 285.5  | 324.2  | 351.0   | 323.5  |
| 101.2  | 112.8  | 97.5   | 95.6   | 104.4   | 127.6  |
| 17.4   | 26.8   | 24.3   | 29.2   | 34.2    | 23.2   |
| 50.4   | 69.5   | 49.8   | 60.5   | 56.2    | 54.8   |
| 62.6   | 56.0   | 57.8   | 55.5   | 55.9    | 74.2   |
| 6.8    | 19.8   | 4.0    | 10.7   | 10.0    | 7.9    |
| 421.9  | 451.8  | 491.2  | 465.6  | 516.6   | 571.5  |
| 89.6   | 90.0   | 77.7   | 64.9   | 87.7    | 118.3  |
| 100.8  | 77.3   | 90.0   | 102.7  | 103.3   | 108.0  |
| 0.3    | 2.8    | 1.6    | 0.2    | 0.3     | 2.2    |
| 56.5   | 38.3   | 43.9   | 43.0   | 55.2    | 48.4   |
| 6.0    | 1.1    | 15.0   | 13.9   | 8.0     | 5.0    |
| 23.5   | 25.9   | 21.8   | 23.7   | 25.5    | 46.2   |
| 83.0   | 66.1   | 69.2   | 59.7   | 80.3    | 92.4   |
| 1159.6 | 1009.1 | 1435.1 | 1495.2 | 1534.7  | 1545.1 |
| 8.9    | 1.7    | 2.4    | 2.4    | 4.4     | 2.0    |
| 26.1   | 3.8    | 4.5    | 9.1    | 9.2     | 14.6   |
| 8.6    | 15.7   | 8.7    | 5.1    | 5.0     | 4.1    |
| 3.6    | 1.3    | 0.7    | 0.7    | 1.0     | 0.9    |

|       |       |        |        |        |        |
|-------|-------|--------|--------|--------|--------|
| 3.5   | 6.7   | 3.3    | 6.1    | 2.2    | 2.6    |
| 5.1   | 1.8   | 0.9    | 1.3    | 0.9    | 6.9    |
| 35.9  | 39.4  | 41.1   | 33.6   | 41.9   | 46.8   |
| 18.3  | 26.7  | 18.8   | 23.6   | 14.9   | 21.3   |
| 4.3   | 2.7   | 7.6    | 3.2    | 5.1    | 9.5    |
| 2.4   | 2.9   | 2.9    | 2.3    | 0.8    | 1.3    |
| 6.5   | 7.4   | 1.7    | 5.0    | 8.4    | 9.4    |
| 10.3  | 32.6  | 18.4   | 6.9    | 14.1   | 24.8   |
| 5.7   | 1.7   | 4.3    | 5.0    | 2.1    | 1.8    |
| 5.6   | 21.8  | 30.1   | 9.6    | 17.0   | 28.2   |
| 14.0  | 22.7  | 13.8   | 17.7   | 17.1   | 20.3   |
| 141.8 | 129.2 | 142.8  | 152.0  | 162.8  | 186.9  |
| 226.5 | 235.3 | 241.4  | 251.2  | 288.3  | 280.0  |
| 1.8   | 1.7   | 1.4    | 5.1    | 5.2    | 1.2    |
| 7.1   | 1.4   | 7.5    | 8.8    | 1.2    | 9.8    |
| 3.5   | 3.7   | 7.0    | 3.3    | 3.8    | 10.4   |
| 4.8   | 7.4   | 1.2    | 0.8    | 1.6    | 0.5    |
| 5.4   | 16.1  | 4.5    | 7.3    | 9.5    | 5.6    |
| 57.0  | 65.3  | 39.9   | 84.6   | 45.8   | 76.6   |
| 17.7  | 10.5  | 13.3   | 17.1   | 23.4   | 28.6   |
| 24.7  | 42.5  | 31.1   | 24.3   | 25.7   | 32.7   |
| 15.2  | 16.1  | 22.2   | 18.7   | 24.5   | 18.4   |
| 3.3   | 2.3   | 9.4    | 7.0    | 11.9   | 8.2    |
| 573.9 | 509.8 | 668.5  | 586.3  | 764.2  | 783.2  |
| 0.4   | 1.4   | 10.0   | 4.9    | 6.3    | 7.8    |
| 2.2   | 4.9   | 2.9    | 6.6    | 7.9    | 2.5    |
| 5.8   | 12.1  | 5.1    | 5.4    | 1.0    | 13.3   |
| 16.6  | 14.0  | 16.8   | 22.3   | 15.3   | 20.5   |
| 6.1   | 6.7   | 6.2    | 4.2    | 4.8    | 3.6    |
| 2.9   | 2.3   | 7.6    | 1.6    | 9.6    | 2.9    |
| 6.6   | 5.9   | 5.2    | 5.5    | 4.9    | 8.9    |
| 2.1   | 2.6   | 4.2    | 2.5    | 4.7    | 4.8    |
| 999.7 | 843.1 | 1012.3 | 1059.0 | 1284.9 | 1238.1 |
| 159.9 | 131.3 | 143.7  | 144.3  | 157.7  | 187.5  |
| 6.0   | 11.7  | 3.2    | 7.3    | 6.4    | 12.2   |
| 125.9 | 140.3 | 136.7  | 144.2  | 142.9  | 159.4  |
| 47.9  | 56.6  | 55.0   | 40.4   | 40.4   | 67.7   |
| 44.7  | 24.2  | 42.8   | 36.5   | 49.4   | 43.4   |
| 12.9  | 2.0   | 7.1    | 7.8    | 20.3   | 10.2   |
| 60.9  | 77.8  | 75.6   | 63.0   | 59.6   | 70.5   |
| 5.4   | 18.2  | 8.2    | 11.0   | 6.7    | 11.1   |
| 1.2   | 2.8   | 1.2    | 1.3    | 1.9    | 1.7    |
| 1.1   | 1.3   | 2.4    | 1.0    | 1.3    | 0.9    |
| 1.8   | 1.7   | 6.6    | 1.7    | 8.4    | 3.7    |
| 1.3   | 0.5   | 6.2    | 4.6    | 4.2    | 1.5    |
| 2.5   | 4.1   | 4.8    | 5.8    | 4.0    | 2.1    |
| 416.8 | 360.8 | 426.4  | 420.9  | 471.5  | 510.5  |
| 1.1   | 2.4   | 1.5    | 4.1    | 2.3    | 1.1    |
| 276.7 | 281.7 | 285.0  | 268.3  | 313.9  | 374.8  |
| 4.8   | 1.0   | 1.2    | 3.1    | 2.1    | 1.8    |
| 5.3   | 4.5   | 3.0    | 2.1    | 11.4   | 10.4   |
| 6.0   | 5.1   | 0.9    | 1.3    | 3.2    | 1.2    |
| 3.6   | 2.0   | 7.3    | 2.0    | 5.5    | 3.6    |



|        |        |        |        |        |        |
|--------|--------|--------|--------|--------|--------|
| 4.2    | 14.5   | 16.5   | 13.1   | 16.6   | 16.5   |
| 182.8  | 159.5  | 187.6  | 181.4  | 212.0  | 207.9  |
| 264.3  | 314.3  | 356.2  | 399.7  | 372.7  | 416.1  |
| 3.6    | 4.3    | 5.4    | 3.2    | 3.8    | 2.6    |
| 123.7  | 142.0  | 135.8  | 138.7  | 179.4  | 164.3  |
| 5.3    | 1.9    | 1.4    | 3.4    | 2.6    | 3.0    |
| 2.0    | 2.7    | 2.6    | 5.8    | 1.6    | 1.7    |
| 21.5   | 3.7    | 22.0   | 16.7   | 31.3   | 32.2   |
| 21.3   | 10.8   | 11.9   | 14.9   | 27.7   | 22.1   |
| 2.0    | 3.5    | 2.9    | 2.8    | 2.1    | 3.4    |
| 312.3  | 279.4  | 345.7  | 334.7  | 417.8  | 373.1  |
| 0.9    | 1.4    | 5.5    | 1.5    | 2.9    | 3.5    |
| 7.0    | 13.8   | 7.4    | 7.9    | 7.0    | 3.6    |
| 28.2   | 9.1    | 23.7   | 17.5   | 18.8   | 14.4   |
| 36.1   | 50.0   | 41.2   | 26.9   | 31.6   | 38.1   |
| 8.7    | 3.0    | 5.1    | 4.7    | 5.1    | 7.4    |
| 16.6   | 23.0   | 16.8   | 19.5   | 26.4   | 21.7   |
| 3.2    | 1.2    | 5.6    | 2.6    | 6.8    | 9.3    |
| 7.3    | 4.2    | 10.8   | 6.6    | 15.6   | 13.1   |
| 359.1  | 294.3  | 443.1  | 391.5  | 400.9  | 478.8  |
| 8.8    | 3.8    | 11.4   | 15.4   | 13.8   | 4.0    |
| 0.6    | 3.6    | 4.5    | 0.9    | 3.9    | 1.3    |
| 57.9   | 50.3   | 56.9   | 58.6   | 56.3   | 68.3   |
| 41.3   | 18.8   | 38.8   | 17.8   | 46.9   | 73.5   |
| 36.0   | 36.5   | 29.8   | 44.4   | 35.7   | 37.9   |
| 8.4    | 2.7    | 17.0   | 10.1   | 14.8   | 11.3   |
| 2537.7 | 2266.6 | 2165.3 | 2301.3 | 2642.8 | 2870.9 |
| 1.7    | 1.6    | 1.5    | 1.4    | 2.2    | 2.7    |
| 3.6    | 3.9    | 5.4    | 0.5    | 0.8    | 0.4    |
| 13.1   | 10.7   | 22.7   | 9.7    | 11.6   | 18.0   |
| 16.2   | 15.9   | 15.1   | 13.0   | 9.1    | 15.9   |
| 8.8    | 3.0    | 2.6    | 5.4    | 12.5   | 6.4    |
| 1.1    | 0.8    | 0.7    | 0.7    | 1.0    | 1.2    |
| 2.0    | 9.0    | 4.0    | 1.2    | 4.0    | 4.3    |
| 9.8    | 7.4    | 10.0   | 13.0   | 8.3    | 6.1    |
| 4.1    | 1.1    | 2.2    | 4.5    | 4.7    | 6.7    |
| 20.1   | 8.7    | 9.5    | 13.4   | 18.6   | 12.4   |
| 2.0    | 9.3    | 15.2   | 11.0   | 12.6   | 4.6    |
| 26.1   | 17.2   | 25.3   | 16.0   | 25.8   | 20.2   |
| 3.3    | 2.6    | 4.9    | 2.4    | 5.0    | 4.0    |
| 6.9    | 10.8   | 8.7    | 3.2    | 2.2    | 2.2    |
| 45.5   | 38.7   | 35.9   | 49.0   | 35.2   | 64.5   |
| 3.0    | 1.3    | 2.3    | 1.5    | 1.9    | 1.5    |
| 575.4  | 394.4  | 534.1  | 477.4  | 680.3  | 596.8  |
| 43.3   | 36.3   | 47.1   | 42.5   | 51.4   | 45.5   |
| 10.0   | 7.0    | 22.5   | 3.6    | 5.8    | 8.8    |
| 176.0  | 153.5  | 211.3  | 204.5  | 159.9  | 235.7  |
| 2.9    | 7.8    | 0.5    | 8.3    | 3.9    | 3.4    |
| 201.5  | 173.3  | 179.9  | 206.8  | 258.5  | 250.0  |
| 3.7    | 4.3    | 3.3    | 5.6    | 17.1   | 5.2    |
| 22.9   | 28.6   | 17.3   | 23.9   | 25.5   | 23.7   |
| 17.1   | 18.5   | 19.2   | 7.4    | 10.8   | 2.8    |
| 244.9  | 213.5  | 216.0  | 265.9  | 256.2  | 313.0  |

|        |        |        |        |        |        |
|--------|--------|--------|--------|--------|--------|
| 24.1   | 16.9   | 16.8   | 14.3   | 20.5   | 20.3   |
| 6.5    | 5.7    | 2.7    | 3.8    | 10.6   | 5.5    |
| 10.3   | 8.7    | 21.5   | 9.9    | 22.7   | 14.4   |
| 44.3   | 17.9   | 42.5   | 43.0   | 50.8   | 76.7   |
| 1.8    | 2.9    | 3.3    | 7.2    | 3.4    | 4.3    |
| 4.7    | 2.1    | 1.6    | 3.2    | 2.6    | 2.4    |
| 75.9   | 76.9   | 51.3   | 63.1   | 74.4   | 94.0   |
| 15.0   | 1.8    | 11.4   | 6.1    | 16.0   | 14.7   |
| 8.9    | 20.1   | 26.2   | 15.5   | 18.0   | 18.9   |
| 5.0    | 7.6    | 8.5    | 1.7    | 1.9    | 3.4    |
| 3.1    | 3.6    | 13.7   | 3.7    | 3.4    | 3.1    |
| 12.6   | 5.1    | 4.1    | 3.6    | 8.8    | 5.1    |
| 17.0   | 14.4   | 25.6   | 10.2   | 15.9   | 16.0   |
| 3.9    | 4.7    | 9.5    | 4.7    | 2.8    | 3.7    |
| 183.1  | 174.3  | 209.3  | 178.0  | 209.1  | 221.8  |
| 32.6   | 45.9   | 36.3   | 43.0   | 37.2   | 41.4   |
| 15.1   | 32.2   | 22.0   | 14.3   | 21.4   | 11.1   |
| 3.3    | 5.0    | 2.9    | 4.4    | 2.3    | 4.2    |
| 3.6    | 8.7    | 5.4    | 20.4   | 10.0   | 15.4   |
| 3.4    | 8.3    | 9.6    | 9.6    | 3.3    | 9.7    |
| 11.2   | 4.0    | 9.0    | 8.5    | 7.3    | 12.3   |
| 7.6    | 14.2   | 14.7   | 11.7   | 6.1    | 2.1    |
| 5.7    | 3.0    | 3.6    | 3.7    | 7.2    | 14.2   |
| 1.2    | 6.2    | 4.9    | 2.3    | 3.6    | 0.9    |
| 356.5  | 311.8  | 398.4  | 330.3  | 415.2  | 415.0  |
| 75.5   | 45.4   | 88.1   | 88.5   | 60.3   | 95.0   |
| 8.6    | 7.6    | 13.5   | 14.2   | 12.0   | 7.2    |
| 3.7    | 10.7   | 6.4    | 6.6    | 3.2    | 2.7    |
| 17.4   | 20.0   | 10.8   | 23.8   | 14.5   | 9.2    |
| 11.5   | 22.5   | 19.0   | 21.8   | 12.6   | 28.4   |
| 65.7   | 60.2   | 68.4   | 78.2   | 88.1   | 85.1   |
| 322.9  | 302.5  | 357.4  | 341.7  | 382.9  | 397.5  |
| 80.6   | 91.5   | 78.8   | 97.9   | 107.9  | 84.1   |
| 3.3    | 2.4    | 4.0    | 7.3    | 4.6    | 3.9    |
| 17.7   | 34.7   | 22.9   | 31.0   | 23.5   | 26.1   |
| 230.5  | 195.0  | 275.0  | 286.6  | 313.0  | 310.1  |
| 75.8   | 75.3   | 67.4   | 71.5   | 84.3   | 95.1   |
| 396.9  | 348.8  | 368.3  | 366.5  | 471.7  | 479.9  |
| 69.3   | 208.9  | 63.7   | 150.1  | 90.1   | 115.6  |
| 16.7   | 17.6   | 4.6    | 31.7   | 19.4   | 25.0   |
| 18.8   | 30.0   | 17.3   | 21.5   | 26.5   | 24.8   |
| 43.7   | 46.9   | 49.1   | 46.8   | 49.3   | 35.7   |
| 15.3   | 8.2    | 18.3   | 1.5    | 5.5    | 11.5   |
| 17.0   | 2.7    | 16.6   | 12.4   | 19.2   | 15.7   |
| 3.1    | 0.5    | 0.9    | 1.4    | 0.5    | 2.6    |
| 0.7    | 0.7    | 5.5    | 6.0    | 3.6    | 0.6    |
| 14.0   | 17.8   | 13.2   | 10.5   | 17.2   | 8.3    |
| 11.9   | 8.2    | 3.5    | 7.4    | 15.5   | 17.5   |
| 18.3   | 14.4   | 4.3    | 7.5    | 10.3   | 19.4   |
| 2217.3 | 1988.3 | 1989.6 | 1954.3 | 2143.9 | 2392.7 |
| 1868.3 | 2147.4 | 1885.9 | 1932.9 | 2165.0 | 2105.8 |
| 105.5  | 82.8   | 88.3   | 110.6  | 124.5  | 133.8  |
| 0.9    | 0.9    | 1.0    | 0.5    | 0.6    | 0.6    |

|        |        |        |        |        |        |
|--------|--------|--------|--------|--------|--------|
| 7.2    | 11.4   | 6.0    | 8.6    | 2.1    | 4.0    |
| 1586.9 | 1314.6 | 1552.6 | 1741.7 | 1860.7 | 1990.2 |
| 10.0   | 15.8   | 8.4    | 11.9   | 9.4    | 10.0   |
| 110.1  | 86.9   | 94.1   | 86.6   | 109.2  | 119.8  |
| 22.2   | 9.2    | 19.2   | 16.4   | 27.5   | 20.2   |
| 33.9   | 21.3   | 26.5   | 34.4   | 35.1   | 41.9   |
| 41.7   | 44.3   | 32.8   | 46.4   | 54.3   | 42.8   |
| 477.1  | 429.6  | 538.2  | 541.8  | 653.4  | 650.4  |
| 624.1  | 540.1  | 646.7  | 599.9  | 666.6  | 727.6  |
| 3.6    | 12.2   | 2.0    | 1.0    | 2.9    | 2.6    |
| 3.9    | 19.1   | 21.0   | 6.2    | 11.9   | 12.4   |
| 80.2   | 106.3  | 129.0  | 126.2  | 134.0  | 125.6  |
| 6.1    | 29.7   | 40.8   | 16.2   | 18.4   | 26.6   |
| 9021.7 | 8171.9 | 8609.1 | 9257.7 | 9318.2 | 9242.4 |
| 1044.6 | 955.0  | 1030.1 | 1149.6 | 1206.2 | 1248.6 |
| 1.8    | 6.5    | 6.2    | 10.1   | 6.7    | 4.3    |
| 113.4  | 89.6   | 108.1  | 95.1   | 129.6  | 143.6  |
| 310.4  | 203.2  | 284.2  | 305.1  | 357.5  | 376.3  |
| 11.1   | 18.8   | 8.8    | 5.3    | 5.7    | 11.1   |
| 82.7   | 76.3   | 66.7   | 88.8   | 85.2   | 95.8   |
| 12.0   | 11.2   | 12.3   | 10.1   | 23.9   | 20.4   |
| 12.4   | 21.5   | 18.6   | 15.4   | 22.1   | 24.2   |
| 20.3   | 21.0   | 21.4   | 12.2   | 9.5    | 18.0   |
| 0.9    | 0.5    | 0.8    | 0.7    | 3.6    | 1.3    |
| 1.1    | 8.2    | 1.3    | 6.0    | 5.1    | 3.5    |
| 4.2    | 0.6    | 3.6    | 2.6    | 8.0    | 7.6    |
| 2.1    | 2.4    | 1.5    | 3.0    | 2.1    | 3.4    |
| 8.8    | 12.3   | 16.7   | 4.8    | 10.7   | 1.8    |
| 1.6    | 1.4    | 1.6    | 1.6    | 1.7    | 1.3    |
| 7.6    | 7.6    | 5.7    | 5.8    | 3.1    | 4.2    |
| 51.1   | 39.8   | 59.7   | 36.5   | 50.6   | 62.9   |
| 27.3   | 26.0   | 28.6   | 34.3   | 36.9   | 47.7   |
| 1029.5 | 1059.5 | 1079.9 | 1211.4 | 1169.8 | 1243.8 |
| 6.6    | 5.8    | 4.8    | 4.4    | 9.2    | 8.7    |
| 49.0   | 59.3   | 52.2   | 52.4   | 67.3   | 69.1   |
| 5.1    | 3.3    | 16.8   | 2.0    | 4.2    | 3.6    |
| 28.5   | 43.2   | 31.6   | 40.7   | 40.5   | 33.1   |
| 0.8    | 11.6   | 5.6    | 0.6    | 0.6    | 0.6    |
| 246.6  | 213.6  | 255.9  | 249.1  | 268.7  | 301.2  |
| 32.8   | 35.7   | 39.4   | 38.9   | 41.0   | 43.7   |
| 60.0   | 57.2   | 61.9   | 51.6   | 58.7   | 74.9   |
| 51.4   | 62.2   | 59.1   | 60.2   | 70.6   | 76.9   |
| 57.3   | 63.4   | 59.9   | 54.9   | 71.2   | 81.8   |
| 38.1   | 38.4   | 36.1   | 39.2   | 43.7   | 60.5   |
| 5.0    | 16.4   | 23.6   | 7.5    | 19.2   | 20.3   |
| 30.9   | 39.0   | 47.6   | 55.0   | 56.5   | 51.1   |
| 8.7    | 20.1   | 13.2   | 6.1    | 2.0    | 10.5   |
| 6.8    | 9.3    | 6.0    | 6.9    | 7.1    | 8.8    |
| 13.7   | 15.9   | 7.1    | 14.1   | 4.3    | 5.8    |
| 231.9  | 224.2  | 258.7  | 262.1  | 277.8  | 295.7  |
| 0.6    | 0.9    | 2.1    | 3.2    | 7.2    | 2.7    |
| 7.9    | 12.6   | 7.5    | 10.3   | 15.0   | 8.0    |
| 753.4  | 690.8  | 602.7  | 670.7  | 675.2  | 848.7  |

|         |         |         |         |         |         |
|---------|---------|---------|---------|---------|---------|
| 7.0     | 8.7     | 8.4     | 15.3    | 5.4     | 11.8    |
| 139.9   | 127.9   | 119.4   | 111.8   | 142.0   | 143.3   |
| 22.6    | 37.6    | 21.3    | 12.3    | 21.9    | 21.0    |
| 7353.3  | 7091.6  | 7207.9  | 7793.8  | 7753.8  | 7938.0  |
| 18.5    | 14.4    | 11.7    | 18.0    | 25.3    | 18.5    |
| 12.0    | 15.6    | 9.2     | 21.2    | 12.8    | 18.6    |
| 14.8    | 18.2    | 23.9    | 17.0    | 20.3    | 13.5    |
| 2.9     | 1.4     | 9.0     | 4.4     | 10.8    | 5.1     |
| 3.9     | 1.6     | 0.9     | 0.6     | 2.8     | 0.9     |
| 43.6    | 33.8    | 40.8    | 47.1    | 56.3    | 59.1    |
| 4.4     | 2.1     | 2.8     | 2.1     | 0.9     | 2.1     |
| 13.3    | 13.9    | 9.0     | 12.6    | 20.0    | 11.4    |
| 17.2    | 26.4    | 21.8    | 17.8    | 15.7    | 28.5    |
| 14.5    | 17.2    | 20.6    | 25.5    | 18.6    | 23.2    |
| 1.6     | 0.4     | 1.4     | 1.8     | 1.4     | 1.0     |
| 341.9   | 259.1   | 295.3   | 293.0   | 391.5   | 376.2   |
| 7.3     | 19.2    | 15.5    | 9.3     | 12.3    | 6.3     |
| 4.6     | 8.9     | 10.4    | 3.6     | 4.1     | 17.8    |
| 2.8     | 0.2     | 1.8     | 0.3     | 0.6     | 3.3     |
| 8.1     | 10.4    | 12.3    | 14.1    | 12.4    | 9.3     |
| 289.5   | 343.7   | 284.6   | 324.3   | 305.0   | 349.3   |
| 22.4    | 30.2    | 27.0    | 28.5    | 25.0    | 27.5    |
| 2.6     | 2.5     | 6.3     | 2.1     | 1.2     | 2.0     |
| 54.6    | 42.4    | 66.1    | 62.1    | 52.2    | 60.2    |
| 3.0     | 7.0     | 4.8     | 7.5     | 5.5     | 2.4     |
| 4.4     | 2.1     | 1.8     | 5.3     | 2.8     | 4.6     |
| 8.9     | 7.6     | 2.3     | 6.9     | 5.0     | 1.1     |
| 119.3   | 120.0   | 132.6   | 111.4   | 158.7   | 149.9   |
| 3.1     | 19.4    | 6.1     | 1.7     | 9.6     | 5.5     |
| 7.1     | 1.5     | 2.5     | 1.8     | 3.0     | 4.8     |
| 151.4   | 137.1   | 176.4   | 177.3   | 199.3   | 196.2   |
| 9.5     | 9.3     | 6.8     | 10.8    | 9.8     | 18.4    |
| 1105.0  | 923.9   | 1113.9  | 1203.4  | 1369.4  | 1377.8  |
| 718.6   | 591.5   | 652.2   | 717.3   | 632.4   | 897.5   |
| 0.8     | 1.5     | 0.9     | 0.9     | 0.9     | 1.0     |
| 10883.4 | 10319.9 | 10805.0 | 11110.0 | 11354.1 | 11242.0 |
| 3.3     | 2.6     | 1.9     | 2.4     | 1.6     | 6.6     |
| 3.6     | 3.0     | 15.0    | 7.6     | 12.9    | 2.7     |
| 1.5     | 1.8     | 2.1     | 1.7     | 0.9     | 1.1     |
| 102.2   | 120.9   | 100.6   | 98.0    | 110.0   | 130.4   |
| 135.5   | 120.2   | 116.8   | 121.4   | 146.6   | 158.4   |
| 1.7     | 14.7    | 2.7     | 4.5     | 2.1     | 7.4     |
| 105.0   | 124.8   | 94.0    | 118.3   | 111.8   | 109.9   |
| 7.1     | 11.2    | 3.8     | 4.7     | 8.3     | 6.9     |
| 44.4    | 42.1    | 35.2    | 42.8    | 41.5    | 47.8    |
| 21.8    | 11.2    | 16.3    | 13.7    | 8.0     | 14.1    |
| 2.6     | 3.2     | 1.7     | 1.4     | 1.7     | 1.4     |
| 0.5     | 9.7     | 0.6     | 0.9     | 1.1     | 0.5     |
| 61.1    | 67.2    | 66.2    | 66.3    | 78.9    | 82.3    |
| 183.1   | 179.3   | 179.0   | 167.6   | 190.6   | 217.0   |
| 19.9    | 8.0     | 18.1    | 10.5    | 22.6    | 22.9    |
| 36.1    | 46.6    | 39.9    | 35.6    | 28.6    | 38.3    |
| 14.4    | 2.6     | 5.4     | 5.0     | 10.8    | 2.0     |

|       |       |       |       |       |       |
|-------|-------|-------|-------|-------|-------|
| 8.3   | 1.6   | 7.4   | 2.5   | 3.4   | 9.1   |
| 22.4  | 7.7   | 13.5  | 11.0  | 22.2  | 26.0  |
| 6.4   | 4.2   | 3.8   | 1.3   | 10.9  | 6.1   |
| 2.6   | 0.9   | 2.0   | 1.9   | 2.0   | 2.8   |
| 1.3   | 3.1   | 2.3   | 2.9   | 6.9   | 1.7   |
| 17.5  | 6.2   | 20.4  | 14.1  | 25.4  | 21.7  |
| 194.2 | 171.7 | 241.8 | 256.9 | 234.0 | 275.2 |
| 416.1 | 473.2 | 431.0 | 445.3 | 532.8 | 537.5 |
| 20.3  | 30.5  | 33.9  | 26.7  | 22.5  | 26.3  |
| 77.1  | 82.9  | 79.8  | 85.4  | 87.0  | 114.5 |
| 20.4  | 22.4  | 32.5  | 25.5  | 23.9  | 20.6  |
| 21.5  | 3.7   | 5.4   | 18.7  | 4.7   | 6.1   |
| 4.7   | 4.8   | 7.1   | 9.5   | 2.5   | 5.7   |
| 0.8   | 0.9   | 0.7   | 2.9   | 5.5   | 1.1   |
| 7.1   | 1.1   | 2.6   | 1.8   | 2.2   | 2.6   |
| 13.7  | 19.4  | 17.3  | 15.6  | 14.7  | 13.1  |
| 49.3  | 49.8  | 56.3  | 54.0  | 53.4  | 58.6  |
| 155.3 | 125.1 | 130.9 | 147.6 | 135.7 | 164.4 |
| 4.4   | 2.0   | 3.9   | 5.1   | 11.2  | 8.3   |
| 3.8   | 12.7  | 2.0   | 5.5   | 2.9   | 7.2   |
| 4.9   | 14.5  | 11.9  | 10.3  | 1.7   | 12.8  |
| 383.3 | 367.7 | 400.0 | 423.3 | 410.1 | 475.4 |
| 7.4   | 9.1   | 5.2   | 3.7   | 8.4   | 7.0   |
| 177.1 | 194.7 | 162.8 | 179.2 | 192.2 | 207.4 |
| 119.5 | 136.7 | 128.9 | 137.8 | 144.6 | 142.6 |
| 0.7   | 6.2   | 2.4   | 0.9   | 0.4   | 0.1   |
| 3.3   | 5.2   | 4.3   | 4.5   | 7.4   | 0.8   |
| 88.4  | 92.9  | 113.5 | 109.8 | 100.8 | 109.3 |
| 8.7   | 19.3  | 14.3  | 7.5   | 16.1  | 18.0  |
| 72.9  | 57.8  | 74.4  | 73.1  | 82.9  | 83.4  |
| 171.9 | 154.7 | 186.1 | 162.1 | 208.8 | 222.9 |
| 84.6  | 69.3  | 90.8  | 85.6  | 81.0  | 93.1  |
| 4.3   | 22.4  | 6.3   | 2.4   | 8.3   | 15.6  |
| 6.1   | 12.9  | 11.7  | 12.8  | 17.7  | 12.9  |
| 2.4   | 0.8   | 7.1   | 2.1   | 3.2   | 9.1   |
| 0.5   | 1.1   | 0.6   | 0.8   | 3.6   | 0.8   |
| 1.5   | 1.1   | 2.0   | 3.0   | 1.9   | 1.1   |
| 47.5  | 53.7  | 51.8  | 37.9  | 53.7  | 64.4  |
| 17.3  | 12.5  | 22.7  | 19.6  | 15.3  | 26.2  |
| 11.7  | 8.0   | 10.8  | 11.0  | 25.6  | 20.8  |
| 20.8  | 9.1   | 10.8  | 6.8   | 16.2  | 0.9   |
| 58.3  | 61.4  | 63.6  | 55.5  | 64.3  | 71.1  |
| 725.2 | 541.9 | 670.1 | 630.9 | 898.4 | 931.1 |
| 13.8  | 31.0  | 22.5  | 12.0  | 3.7   | 14.2  |
| 29.2  | 30.3  | 16.3  | 24.0  | 23.2  | 23.2  |
| 1.3   | 2.1   | 6.0   | 6.1   | 1.6   | 3.6   |
| 2.2   | 4.2   | 6.2   | 3.9   | 4.6   | 5.0   |
| 651.5 | 714.1 | 667.7 | 630.1 | 731.4 | 713.7 |
| 7.0   | 2.2   | 2.9   | 1.6   | 1.3   | 9.9   |
| 793.2 | 873.8 | 918.3 | 897.9 | 937.0 | 994.5 |
| 60.3  | 49.4  | 69.0  | 67.1  | 100.9 | 84.3  |
| 198.6 | 211.1 | 184.4 | 220.9 | 278.1 | 256.8 |
| 8.3   | 11.3  | 24.3  | 7.4   | 3.6   | 21.3  |

|        |        |        |        |        |        |
|--------|--------|--------|--------|--------|--------|
| 1763.2 | 1681.7 | 1529.4 | 1602.1 | 2015.2 | 2219.2 |
| 7.9    | 12.0   | 5.3    | 5.5    | 10.5   | 9.7    |
| 260.8  | 189.4  | 254.3  | 257.4  | 276.5  | 322.3  |
| 4.1    | 2.9    | 1.9    | 5.3    | 2.9    | 4.0    |
| 13.2   | 12.2   | 7.5    | 11.0   | 13.4   | 6.0    |
| 2.9    | 2.7    | 1.7    | 3.4    | 2.5    | 4.0    |
| 9.8    | 19.2   | 12.4   | 12.4   | 13.2   | 21.8   |
| 5.4    | 1.3    | 4.4    | 5.3    | 9.3    | 2.2    |
| 110.6  | 109.2  | 113.6  | 122.4  | 122.6  | 146.5  |
| 127.7  | 101.0  | 87.5   | 131.8  | 103.9  | 136.2  |
| 11.2   | 9.7    | 6.8    | 5.4    | 10.4   | 8.6    |
| 102.9  | 101.3  | 98.9   | 67.0   | 122.9  | 115.3  |
| 48.6   | 5.0    | 46.6   | 38.7   | 56.5   | 42.3   |
| 4.4    | 3.1    | 3.8    | 3.7    | 4.6    | 3.9    |
| 3.0    | 3.7    | 1.5    | 0.6    | 1.0    | 3.2    |
| 75.3   | 88.3   | 93.2   | 99.3   | 89.7   | 99.7   |
| 1.7    | 2.1    | 1.8    | 2.0    | 1.9    | 3.1    |
| 1.8    | 1.3    | 5.4    | 2.1    | 8.0    | 1.8    |
| 588.1  | 491.0  | 666.0  | 694.5  | 706.1  | 778.7  |
| 507.7  | 417.3  | 497.8  | 482.7  | 575.2  | 560.8  |
| 4.6    | 1.2    | 1.3    | 1.1    | 2.8    | 5.1    |
| 8.2    | 10.5   | 7.9    | 1.4    | 13.9   | 9.4    |
| 4.3    | 4.0    | 2.2    | 8.7    | 6.1    | 8.3    |
| 0.9    | 1.6    | 3.9    | 2.4    | 6.4    | 5.5    |
| 8.1    | 3.9    | 14.1   | 4.2    | 6.1    | 3.6    |
| 12.0   | 10.2   | 11.6   | 19.6   | 4.1    | 19.5   |
| 9.0    | 4.3    | 12.4   | 5.0    | 13.6   | 7.4    |
| 17.9   | 10.6   | 11.5   | 11.5   | 6.6    | 3.6    |
| 1.4    | 3.1    | 2.9    | 1.5    | 1.5    | 1.5    |
| 8570.0 | 8045.5 | 8247.8 | 8675.2 | 8829.6 | 8861.3 |
| 66.0   | 73.6   | 75.1   | 72.6   | 81.7   | 92.1   |
| 8.5    | 6.5    | 1.7    | 12.8   | 8.3    | 14.8   |
| 2.6    | 7.7    | 4.5    | 1.4    | 9.1    | 12.2   |
| 1.6    | 14.9   | 10.3   | 5.6    | 2.5    | 2.9    |
| 7.0    | 1.2    | 2.0    | 2.8    | 8.1    | 4.7    |
| 29.8   | 23.8   | 12.8   | 27.1   | 23.4   | 25.8   |
| 2.2    | 26.0   | 17.0   | 8.3    | 5.4    | 7.2    |
| 14.1   | 21.4   | 6.6    | 17.4   | 4.7    | 28.6   |
| 5.4    | 0.5    | 7.0    | 2.8    | 2.5    | 1.4    |
| 32.6   | 37.2   | 35.4   | 44.9   | 43.3   | 43.3   |
| 3.6    | 4.2    | 4.9    | 4.1    | 3.4    | 6.0    |
| 45.4   | 44.6   | 76.0   | 67.8   | 74.9   | 68.1   |
| 4.5    | 6.7    | 6.0    | 5.3    | 5.4    | 6.6    |
| 1072.3 | 1165.5 | 1063.9 | 965.8  | 1305.0 | 1332.0 |
| 42.3   | 40.0   | 33.6   | 38.9   | 39.2   | 49.4   |
| 1257.9 | 1213.1 | 1240.9 | 1320.9 | 1398.9 | 1595.0 |
| 206.7  | 262.8  | 216.9  | 241.9  | 249.7  | 274.9  |
| 919.7  | 982.4  | 898.8  | 964.6  | 1115.6 | 1226.1 |
| 1882.3 | 1914.4 | 1865.0 | 2451.9 | 1992.8 | 2662.6 |
| 26.1   | 20.2   | 23.3   | 20.6   | 22.5   | 27.8   |
| 4.3    | 6.8    | 4.2    | 0.7    | 4.6    | 0.6    |
| 4714.9 | 4144.4 | 5021.6 | 4957.9 | 5300.4 | 5794.5 |
| 2.4    | 1.3    | 0.8    | 6.1    | 9.3    | 0.9    |

|         |         |         |         |         |         |
|---------|---------|---------|---------|---------|---------|
| 82.5    | 113.9   | 86.9    | 107.6   | 123.0   | 98.8    |
| 104.1   | 110.2   | 120.3   | 119.1   | 155.7   | 130.7   |
| 31.8    | 34.7    | 28.7    | 23.9    | 31.0    | 50.3    |
| 67.3    | 59.4    | 85.2    | 78.3    | 97.0    | 90.8    |
| 8.5     | 7.8     | 8.1     | 10.2    | 5.5     | 8.8     |
| 2.0     | 2.6     | 0.9     | 3.3     | 0.8     | 0.6     |
| 1.7     | 3.3     | 3.4     | 2.3     | 4.1     | 2.1     |
| 689.3   | 543.1   | 625.0   | 619.9   | 769.5   | 763.9   |
| 7.2     | 1.4     | 4.1     | 3.7     | 3.1     | 1.9     |
| 17.1    | 14.0    | 9.6     | 16.6    | 10.0    | 13.2    |
| 1.2     | 0.3     | 0.3     | 0.7     | 1.1     | 0.8     |
| 2.4     | 0.7     | 6.2     | 6.8     | 4.2     | 0.5     |
| 4.1     | 17.5    | 14.6    | 4.7     | 9.3     | 1.1     |
| 0.8     | 0.5     | 4.1     | 4.0     | 3.5     | 0.6     |
| 22.9    | 13.5    | 11.4    | 20.8    | 21.8    | 27.8    |
| 86.9    | 67.1    | 96.5    | 69.2    | 84.1    | 98.5    |
| 2189.5  | 1664.7  | 1769.7  | 2199.0  | 2312.4  | 2334.4  |
| 1544.3  | 1098.8  | 1590.5  | 1773.3  | 1906.9  | 1984.2  |
| 798.9   | 1068.5  | 1062.5  | 1027.8  | 1089.5  | 1471.8  |
| 17.1    | 5.6     | 19.3    | 10.0    | 13.5    | 12.8    |
| 1.6     | 1.9     | 2.2     | 1.6     | 2.1     | 2.3     |
| 6.1     | 8.5     | 3.5     | 0.8     | 5.3     | 6.0     |
| 16.5    | 19.3    | 10.0    | 4.5     | 4.2     | 3.9     |
| 101.3   | 93.1    | 111.0   | 115.4   | 116.1   | 112.2   |
| 214.0   | 194.8   | 227.4   | 210.2   | 224.6   | 262.3   |
| 274.9   | 287.2   | 290.6   | 280.3   | 328.0   | 350.9   |
| 142.2   | 94.2    | 121.6   | 118.0   | 147.7   | 162.1   |
| 89.6    | 154.6   | 157.7   | 127.6   | 112.8   | 182.7   |
| 36.0    | 19.8    | 49.2    | 36.3    | 43.5    | 34.0    |
| 11728.6 | 11604.8 | 11659.6 | 12195.6 | 12342.8 | 12219.0 |
| 105.1   | 111.8   | 135.7   | 99.8    | 151.3   | 128.7   |
| 15.6    | 20.2    | 8.3     | 16.4    | 18.0    | 14.7    |
| 10.3    | 8.1     | 4.7     | 4.9     | 3.4     | 5.2     |
| 128.5   | 111.3   | 132.7   | 160.3   | 146.6   | 153.7   |
| 251.0   | 207.1   | 262.1   | 238.0   | 295.9   | 333.8   |
| 25.8    | 12.6    | 27.3    | 23.2    | 21.7    | 28.5    |
| 15.8    | 17.8    | 15.6    | 28.0    | 27.8    | 26.2    |
| 2.6     | 1.8     | 1.7     | 2.6     | 1.9     | 2.9     |
| 21.7    | 33.8    | 30.5    | 30.0    | 38.7    | 38.4    |
| 41.6    | 41.0    | 59.3    | 52.5    | 64.9    | 52.3    |
| 22.4    | 17.1    | 18.3    | 22.7    | 28.8    | 33.6    |
| 34.2    | 41.4    | 38.2    | 54.3    | 52.4    | 55.7    |
| 5.7     | 1.3     | 5.9     | 2.3     | 1.4     | 6.8     |
| 0.9     | 7.8     | 2.6     | 3.9     | 7.4     | 0.9     |
| 7.8     | 19.2    | 7.8     | 5.3     | 16.1    | 9.6     |
| 610.7   | 654.7   | 693.8   | 780.1   | 722.8   | 813.3   |
| 113.9   | 93.1    | 126.4   | 99.6    | 144.8   | 148.0   |
| 1.8     | 2.6     | 2.3     | 1.7     | 2.2     | 1.5     |
| 166.0   | 180.9   | 183.6   | 173.6   | 199.0   | 221.2   |
| 13.8    | 7.5     | 5.8     | 5.4     | 4.4     | 12.6    |
| 211.1   | 214.6   | 215.5   | 211.9   | 235.0   | 287.8   |
| 412.2   | 502.8   | 544.8   | 674.6   | 587.8   | 621.1   |
| 11.0    | 11.9    | 12.8    | 12.4    | 19.4    | 20.5    |

|        |        |        |        |        |        |
|--------|--------|--------|--------|--------|--------|
| 145.4  | 141.8  | 187.8  | 159.0  | 180.1  | 200.0  |
| 5.1    | 2.9    | 2.8    | 1.5    | 1.6    | 8.6    |
| 2.1    | 2.7    | 1.7    | 1.7    | 5.5    | 3.5    |
| 253.3  | 225.4  | 266.2  | 265.7  | 263.9  | 334.6  |
| 5.7    | 8.5    | 7.8    | 5.4    | 3.0    | 4.5    |
| 6.3    | 13.2   | 5.5    | 12.3   | 16.3   | 12.0   |
| 121.7  | 98.2   | 109.2  | 103.9  | 133.6  | 140.9  |
| 29.9   | 57.6   | 41.8   | 50.2   | 35.7   | 41.6   |
| 285.7  | 314.5  | 343.8  | 356.6  | 370.1  | 391.8  |
| 256.1  | 246.7  | 309.5  | 303.0  | 354.8  | 323.9  |
| 125.2  | 166.8  | 174.8  | 148.3  | 128.3  | 155.2  |
| 18.8   | 27.9   | 27.9   | 20.4   | 10.9   | 36.9   |
| 138.1  | 129.9  | 156.0  | 151.5  | 158.2  | 177.5  |
| 15.0   | 20.8   | 13.1   | 12.3   | 11.9   | 7.2    |
| 29.7   | 32.5   | 27.1   | 26.0   | 25.9   | 33.7   |
| 3.8    | 2.4    | 3.9    | 4.2    | 5.5    | 12.0   |
| 2.2    | 3.0    | 10.6   | 2.9    | 2.6    | 3.9    |
| 2.3    | 6.0    | 4.9    | 4.3    | 4.1    | 3.4    |
| 46.7   | 54.8   | 58.3   | 57.1   | 60.8   | 71.1   |
| 4.5    | 3.7    | 5.2    | 5.0    | 5.0    | 3.7    |
| 1.0    | 1.6    | 0.9    | 1.4    | 0.9    | 0.9    |
| 9.2    | 12.9   | 7.8    | 5.9    | 10.2   | 13.6   |
| 34.1   | 25.1   | 11.6   | 39.8   | 32.6   | 26.6   |
| 4.2    | 2.6    | 25.1   | 7.6    | 6.8    | 3.1    |
| 46.8   | 48.1   | 48.1   | 62.7   | 51.0   | 58.2   |
| 3.1    | 2.0    | 2.1    | 1.2    | 2.1    | 5.7    |
| 3.0    | 4.6    | 4.9    | 6.8    | 3.8    | 7.8    |
| 118.8  | 108.5  | 129.6  | 122.6  | 152.9  | 142.0  |
| 866.2  | 832.2  | 809.9  | 921.6  | 916.3  | 1052.2 |
| 942.5  | 876.5  | 1098.9 | 1140.4 | 1163.1 | 1180.5 |
| 42.8   | 35.3   | 38.2   | 42.9   | 39.5   | 36.7   |
| 9.2    | 7.5    | 2.7    | 10.8   | 1.8    | 7.5    |
| 16.5   | 8.5    | 1.7    | 9.9    | 6.3    | 2.6    |
| 192.3  | 248.7  | 221.6  | 269.8  | 251.4  | 306.6  |
| 495.3  | 606.0  | 656.7  | 578.5  | 623.6  | 927.7  |
| 0.8    | 0.2    | 0.3    | 0.5    | 0.3    | 0.8    |
| 16.8   | 20.9   | 15.0   | 17.9   | 23.8   | 25.7   |
| 178.3  | 341.3  | 231.9  | 256.0  | 244.6  | 272.9  |
| 6.1    | 7.6    | 5.2    | 4.7    | 3.5    | 12.7   |
| 18.8   | 8.6    | 8.9    | 15.7   | 26.6   | 10.7   |
| 5.1    | 4.8    | 1.5    | 4.5    | 9.2    | 6.0    |
| 9.7    | 17.1   | 11.5   | 3.3    | 5.8    | 2.8    |
| 2.6    | 2.2    | 1.1    | 3.2    | 0.9    | 3.4    |
| 3411.0 | 3041.9 | 3401.9 | 3566.6 | 3819.6 | 3858.7 |
| 18.8   | 24.5   | 12.6   | 17.0   | 12.3   | 21.2   |
| 16.0   | 18.5   | 15.9   | 12.4   | 28.6   | 16.7   |
| 99.3   | 103.5  | 100.2  | 103.7  | 109.9  | 113.3  |
| 36.8   | 44.5   | 47.0   | 52.6   | 48.2   | 54.1   |
| 3.4    | 10.5   | 1.9    | 1.1    | 3.0    | 6.3    |
| 438.3  | 416.1  | 443.2  | 434.0  | 510.7  | 499.9  |
| 7.8    | 0.9    | 7.8    | 5.0    | 2.8    | 4.5    |
| 13.6   | 8.6    | 5.5    | 5.3    | 1.8    | 4.1    |
| 6.5    | 1.0    | 1.3    | 1.5    | 1.4    | 2.8    |



|        |        |        |        |         |         |
|--------|--------|--------|--------|---------|---------|
| 10.9   | 1.4    | 16.9   | 14.4   | 15.6    | 16.9    |
| 34.8   | 41.2   | 45.2   | 38.1   | 44.9    | 41.6    |
| 9.9    | 6.0    | 14.7   | 16.9   | 8.4     | 17.1    |
| 474.9  | 443.7  | 524.5  | 495.5  | 602.7   | 609.4   |
| 2841.9 | 2828.2 | 2994.2 | 3255.6 | 3338.3  | 3356.0  |
| 3.0    | 2.9    | 2.4    | 1.7    | 4.3     | 8.0     |
| 2.7    | 0.6    | 4.3    | 0.6    | 2.1     | 1.7     |
| 0.9    | 0.5    | 6.6    | 2.2    | 6.4     | 2.2     |
| 1.9    | 10.1   | 2.8    | 2.8    | 1.9     | 4.1     |
| 9458.9 | 8687.6 | 8960.3 | 9795.1 | 10214.8 | 10358.6 |
| 934.2  | 932.2  | 1166.4 | 1202.0 | 1265.8  | 1256.1  |
| 56.4   | 67.5   | 68.2   | 60.8   | 56.3    | 74.9    |
| 1.2    | 4.0    | 3.2    | 5.6    | 1.1     | 2.8     |
| 4.5    | 1.4    | 7.2    | 2.9    | 1.6     | 7.7     |
| 2.8    | 1.7    | 3.7    | 3.9    | 3.4     | 1.8     |
| 11.3   | 3.4    | 9.2    | 15.3   | 7.6     | 5.6     |
| 1.7    | 0.9    | 1.4    | 3.7    | 2.1     | 1.6     |
| 19.5   | 5.3    | 15.7   | 6.6    | 16.1    | 13.0    |
| 4.6    | 1.3    | 4.7    | 3.4    | 1.3     | 1.8     |
| 2.2    | 2.5    | 1.9    | 2.0    | 3.1     | 1.1     |
| 1.6    | 2.1    | 1.9    | 2.4    | 3.9     | 6.8     |
| 11.7   | 22.9   | 16.1   | 21.3   | 6.0     | 16.4    |
| 0.8    | 0.5    | 0.7    | 0.7    | 0.9     | 1.0     |
| 16.5   | 13.4   | 7.0    | 7.3    | 18.6    | 6.3     |
| 3.1    | 1.9    | 2.7    | 3.3    | 4.5     | 3.1     |
| 4.1    | 7.0    | 13.0   | 6.2    | 5.2     | 12.8    |
| 5.1    | 5.7    | 3.5    | 5.5    | 0.5     | 1.8     |
| 8.6    | 18.3   | 2.7    | 9.3    | 5.0     | 6.6     |
| 1.1    | 6.6    | 1.5    | 0.9    | 1.0     | 1.6     |
| 7.7    | 1.8    | 14.7   | 3.4    | 6.6     | 10.9    |
| 0.9    | 2.6    | 1.6    | 1.7    | 2.3     | 1.8     |
| 772.3  | 691.6  | 591.8  | 652.6  | 760.9   | 801.2   |
| 24.3   | 33.2   | 26.9   | 16.5   | 25.6    | 20.3    |
| 281.8  | 339.8  | 332.7  | 413.7  | 357.2   | 446.0   |
| 213.9  | 246.9  | 256.5  | 236.9  | 286.3   | 257.8   |
| 4.8    | 0.4    | 0.6    | 3.3    | 3.2     | 4.2     |
| 545.3  | 402.4  | 502.0  | 560.2  | 577.0   | 546.4   |
| 20.6   | 18.8   | 15.7   | 10.7   | 11.2    | 19.7    |
| 1103.6 | 1245.1 | 1241.5 | 2095.7 | 1827.6  | 1747.1  |
| 2.8    | 1.2    | 2.2    | 1.3    | 2.1     | 2.5     |
| 17.9   | 15.6   | 8.7    | 16.0   | 19.5    | 22.7    |
| 28.1   | 19.8   | 25.0   | 43.5   | 47.1    | 43.3    |
| 2053.8 | 1885.5 | 2113.7 | 2157.8 | 2289.1  | 2436.2  |
| 29.5   | 27.0   | 35.4   | 30.8   | 44.0    | 25.5    |
| 44.2   | 41.2   | 33.6   | 41.0   | 46.4    | 47.0    |
| 7032.4 | 6460.1 | 7046.9 | 7336.9 | 8071.6  | 8322.6  |
| 13.4   | 5.8    | 10.1   | 10.6   | 8.3     | 11.8    |
| 7.6    | 4.0    | 8.3    | 4.8    | 3.3     | 6.2     |
| 112.8  | 95.1   | 118.8  | 116.7  | 111.7   | 141.2   |
| 600.6  | 485.4  | 618.8  | 564.9  | 725.5   | 706.4   |
| 911.9  | 844.1  | 936.3  | 936.2  | 1064.8  | 1148.8  |
| 30.7   | 34.6   | 43.5   | 33.4   | 32.8    | 38.1    |
| 1563.3 | 1465.2 | 1829.1 | 1897.4 | 2011.3  | 2068.4  |

|         |        |        |         |         |         |
|---------|--------|--------|---------|---------|---------|
| 471.5   | 429.8  | 557.7  | 507.2   | 553.9   | 641.6   |
| 107.3   | 99.0   | 105.8  | 128.5   | 130.6   | 131.7   |
| 9.0     | 12.2   | 21.0   | 9.5     | 13.7    | 18.9    |
| 949.4   | 826.2  | 901.0  | 977.9   | 1034.4  | 1187.6  |
| 7.7     | 3.3    | 4.1    | 21.2    | 7.5     | 20.3    |
| 2.3     | 4.5    | 3.0    | 3.3     | 0.3     | 5.9     |
| 102.9   | 98.7   | 91.4   | 110.9   | 102.8   | 120.8   |
| 39.6    | 36.9   | 25.1   | 39.4    | 37.1    | 54.4    |
| 660.8   | 555.4  | 598.1  | 622.9   | 658.8   | 705.7   |
| 53.3    | 39.9   | 89.5   | 68.8    | 75.7    | 87.4    |
| 437.3   | 502.2  | 455.4  | 512.5   | 502.3   | 528.3   |
| 2.9     | 2.1    | 7.8    | 5.5     | 4.3     | 3.2     |
| 1.5     | 1.3    | 1.6    | 2.7     | 1.9     | 2.0     |
| 1.3     | 1.8    | 1.9    | 0.6     | 1.5     | 1.7     |
| 17.1    | 16.2   | 18.7   | 12.7    | 7.9     | 15.2    |
| 55.7    | 58.4   | 44.8   | 59.0    | 51.6    | 53.4    |
| 128.3   | 110.3  | 119.9  | 122.1   | 135.2   | 119.8   |
| 22.0    | 8.5    | 18.6   | 9.5     | 19.5    | 19.4    |
| 0.5     | 0.5    | 1.6    | 8.1     | 2.0     | 0.9     |
| 18.0    | 18.3   | 18.2   | 17.0    | 14.4    | 21.4    |
| 36.8    | 32.3   | 33.6   | 28.5    | 33.6    | 44.2    |
| 514.9   | 446.4  | 491.6  | 560.9   | 544.8   | 547.7   |
| 1539.3  | 1211.7 | 1263.4 | 1368.0  | 1448.7  | 1898.0  |
| 36.7    | 44.6   | 18.7   | 39.7    | 52.1    | 53.8    |
| 7.8     | 3.6    | 8.6    | 4.4     | 3.6     | 9.0     |
| 8.5     | 10.9   | 5.7    | 2.6     | 7.5     | 2.1     |
| 138.3   | 128.2  | 137.7  | 139.8   | 171.0   | 194.7   |
| 387.8   | 409.5  | 422.5  | 493.3   | 481.7   | 496.0   |
| 125.8   | 87.5   | 90.7   | 121.0   | 111.0   | 152.0   |
| 8.5     | 1.8    | 3.3    | 4.8     | 3.4     | 3.6     |
| 2.1     | 1.9    | 4.7    | 2.7     | 3.4     | 4.2     |
| 131.0   | 143.2  | 140.0  | 156.4   | 170.0   | 172.7   |
| 145.8   | 152.0  | 169.8  | 154.6   | 183.6   | 173.2   |
| 53.0    | 57.5   | 59.4   | 69.0    | 76.6    | 70.0    |
| 7441.5  | 6813.5 | 7576.8 | 7757.6  | 7937.6  | 7773.0  |
| 938.1   | 654.1  | 951.9  | 893.8   | 1054.2  | 1088.3  |
| 18.2    | 18.2   | 35.4   | 30.0    | 32.4    | 28.9    |
| 544.7   | 500.0  | 487.3  | 457.5   | 574.2   | 643.1   |
| 9037.0  | 8504.3 | 8813.7 | 8934.5  | 9466.7  | 9603.7  |
| 106.9   | 91.8   | 111.5  | 105.9   | 122.0   | 141.5   |
| 822.1   | 907.1  | 944.3  | 900.3   | 1090.2  | 1080.4  |
| 222.8   | 222.6  | 241.0  | 237.5   | 265.5   | 289.2   |
| 8.9     | 10.8   | 1.8    | 3.7     | 5.9     | 3.8     |
| 113.7   | 108.0  | 121.5  | 127.6   | 142.2   | 113.7   |
| 10208.4 | 9247.4 | 9782.3 | 10468.7 | 10262.6 | 10809.2 |
| 206.4   | 202.5  | 153.8  | 160.3   | 168.5   | 234.4   |
| 14.6    | 14.2   | 22.5   | 25.0    | 17.1    | 27.4    |
| 214.8   | 158.7  | 179.8  | 229.0   | 223.5   | 245.1   |
| 355.2   | 318.5  | 392.3  | 448.6   | 403.6   | 472.1   |
| 14.0    | 16.5   | 16.8   | 14.2    | 10.3    | 17.7    |
| 1126.0  | 973.9  | 1105.3 | 1145.2  | 1198.9  | 1300.1  |
| 45.2    | 29.7   | 33.8   | 59.4    | 58.2    | 49.2    |
| 470.8   | 439.2  | 521.4  | 553.2   | 571.9   | 597.8   |

|         |         |         |         |         |         |
|---------|---------|---------|---------|---------|---------|
| 3694.6  | 3645.1  | 4042.7  | 4247.6  | 4460.0  | 4707.8  |
| 101.3   | 94.6    | 96.8    | 106.2   | 114.6   | 133.2   |
| 43.3    | 29.5    | 44.4    | 44.5    | 52.8    | 47.6    |
| 1174.3  | 909.0   | 1219.9  | 1230.4  | 1352.4  | 1449.8  |
| 8.1     | 5.3     | 8.2     | 5.9     | 3.9     | 8.3     |
| 2.1     | 3.0     | 2.1     | 2.5     | 1.8     | 3.0     |
| 8.7     | 9.6     | 5.6     | 8.3     | 4.4     | 11.2    |
| 44.2    | 38.4    | 46.2    | 35.2    | 44.1    | 50.2    |
| 31.9    | 39.1    | 37.1    | 36.8    | 36.2    | 28.9    |
| 1.0     | 1.1     | 1.2     | 0.9     | 0.7     | 0.8     |
| 7.0     | 1.3     | 2.0     | 15.6    | 15.8    | 5.1     |
| 9.0     | 13.6    | 10.5    | 16.3    | 7.6     | 16.8    |
| 1.0     | 12.3    | 5.0     | 8.5     | 7.3     | 4.5     |
| 5.4     | 2.7     | 8.0     | 3.7     | 13.1    | 3.7     |
| 450.0   | 525.3   | 475.8   | 543.9   | 482.9   | 573.0   |
| 43.9    | 30.8    | 58.3    | 46.5    | 47.7    | 66.2    |
| 2774.0  | 2401.5  | 2761.0  | 2773.8  | 2899.4  | 3137.3  |
| 3311.2  | 2895.5  | 3048.1  | 3293.5  | 3509.7  | 3797.2  |
| 35.1    | 63.9    | 20.2    | 31.3    | 46.1    | 41.9    |
| 1531.1  | 1382.5  | 1613.0  | 1585.1  | 1726.0  | 1724.0  |
| 7661.1  | 7195.6  | 7131.0  | 7876.9  | 7966.0  | 7971.0  |
| 5.2     | 1.0     | 7.7     | 1.2     | 3.1     | 8.6     |
| 614.8   | 615.9   | 716.9   | 825.6   | 763.7   | 782.2   |
| 13.6    | 8.5     | 4.5     | 11.0    | 14.7    | 19.0    |
| 278.4   | 272.4   | 335.7   | 345.8   | 325.4   | 371.0   |
| 5758.6  | 5000.1  | 5817.5  | 6163.6  | 6350.6  | 6517.3  |
| 64.8    | 68.1    | 55.4    | 60.6    | 72.1    | 73.3    |
| 967.7   | 916.3   | 948.9   | 1007.3  | 989.4   | 1206.0  |
| 1083.8  | 1077.3  | 1162.5  | 1220.8  | 1305.7  | 1278.7  |
| 85.2    | 73.5    | 85.0    | 96.2    | 95.3    | 128.5   |
| 1680.6  | 1630.1  | 1668.7  | 1686.5  | 1661.7  | 1888.4  |
| 4758.2  | 4363.4  | 5812.7  | 5764.9  | 6019.7  | 5362.6  |
| 385.1   | 420.2   | 384.5   | 447.7   | 479.2   | 460.8   |
| 346.8   | 363.8   | 309.4   | 339.3   | 379.0   | 499.4   |
| 11217.9 | 10915.5 | 11036.5 | 11495.3 | 11732.3 | 11507.3 |
| 3.0     | 1.1     | 5.3     | 3.4     | 5.5     | 2.4     |
| 115.0   | 127.5   | 123.1   | 138.0   | 121.1   | 151.7   |
| 12.4    | 11.7    | 13.3    | 17.6    | 19.4    | 20.6    |
| 1106.5  | 969.2   | 1185.6  | 1158.0  | 1339.1  | 1343.7  |
| 2.4     | 1.2     | 3.4     | 1.8     | 0.9     | 2.5     |
| 4.5     | 3.2     | 5.2     | 9.3     | 5.3     | 13.8    |
| 42.9    | 37.1    | 40.2    | 43.7    | 56.0    | 55.8    |
| 137.5   | 139.9   | 157.6   | 165.9   | 141.4   | 175.0   |
| 2.2     | 2.5     | 5.6     | 3.9     | 6.8     | 3.4     |
| 11.6    | 8.3     | 10.5    | 3.1     | 5.7     | 15.4    |
| 33.1    | 25.8    | 51.0    | 29.8    | 40.6    | 38.0    |
| 213.6   | 209.0   | 235.0   | 239.8   | 277.8   | 282.6   |
| 330.1   | 276.7   | 354.5   | 378.0   | 423.8   | 437.1   |
| 33.4    | 27.1    | 34.2    | 31.4    | 35.2    | 43.2    |
| 24.6    | 19.8    | 13.0    | 18.7    | 18.3    | 23.3    |
| 238.2   | 195.8   | 253.6   | 208.8   | 277.3   | 282.7   |
| 4078.0  | 3597.7  | 4024.9  | 4061.7  | 4158.0  | 4459.2  |
| 14.1    | 18.4    | 17.9    | 17.6    | 21.9    | 24.8    |

|        |        |        |        |        |        |
|--------|--------|--------|--------|--------|--------|
| 9272.2 | 8174.9 | 8607.8 | 8612.7 | 9044.2 | 8743.0 |
| 1.2    | 1.8    | 1.1    | 0.9    | 1.4    | 1.0    |
| 10.5   | 2.6    | 5.8    | 3.5    | 7.0    | 9.8    |
| 13.6   | 20.0   | 9.8    | 8.6    | 17.1   | 13.2   |
| 12.2   | 27.6   | 26.8   | 15.3   | 26.6   | 33.8   |
| 490.8  | 286.9  | 467.0  | 459.1  | 577.0  | 568.9  |
| 237.7  | 161.5  | 249.7  | 254.8  | 261.7  | 274.5  |
| 16.4   | 5.2    | 4.1    | 19.7   | 4.3    | 6.3    |
| 39.2   | 20.9   | 39.8   | 34.9   | 52.4   | 47.3   |
| 13.2   | 4.1    | 24.3   | 17.5   | 23.9   | 19.3   |
| 333.5  | 320.7  | 364.3  | 365.9  | 400.0  | 422.4  |
| 16.9   | 10.0   | 15.7   | 15.7   | 17.0   | 8.9    |
| 826.1  | 762.6  | 981.5  | 1008.4 | 1074.0 | 1095.9 |
| 397.8  | 272.6  | 391.3  | 365.9  | 438.3  | 427.5  |
| 159.4  | 181.7  | 166.9  | 184.2  | 177.7  | 191.5  |
| 7.6    | 8.1    | 8.7    | 11.6   | 21.6   | 9.2    |
| 28.7   | 30.3   | 37.6   | 28.4   | 30.6   | 44.4   |
| 773.4  | 1041.5 | 825.6  | 961.6  | 831.7  | 935.9  |
| 9.9    | 4.1    | 8.2    | 12.0   | 9.1    | 11.5   |
| 28.5   | 15.9   | 11.9   | 28.3   | 21.3   | 17.4   |
| 65.1   | 46.2   | 59.6   | 46.0   | 40.7   | 52.9   |
| 30.6   | 11.4   | 15.1   | 24.2   | 31.2   | 34.3   |
| 27.0   | 26.2   | 26.6   | 22.9   | 30.4   | 24.0   |
| 70.9   | 56.9   | 67.6   | 70.1   | 75.1   | 76.3   |
| 41.5   | 39.0   | 34.7   | 36.9   | 50.7   | 48.2   |
| 6.3    | 9.1    | 6.8    | 7.8    | 2.2    | 3.3    |
| 29.0   | 22.4   | 14.9   | 25.9   | 17.2   | 20.3   |
| 124.5  | 196.8  | 161.0  | 162.3  | 156.4  | 184.2  |
| 56.8   | 57.8   | 65.9   | 56.8   | 77.0   | 85.7   |
| 10.2   | 34.3   | 11.6   | 14.9   | 4.1    | 9.5    |
| 5.4    | 17.0   | 21.5   | 3.9    | 17.2   | 12.8   |
| 30.4   | 16.9   | 29.5   | 24.0   | 6.6    | 17.6   |
| 78.2   | 59.4   | 73.3   | 83.0   | 94.4   | 112.3  |
| 2.2    | 0.9    | 1.3    | 1.0    | 2.7    | 1.2    |
| 6.2    | 0.9    | 1.4    | 1.7    | 2.9    | 3.2    |
| 15.5   | 11.2   | 8.4    | 11.1   | 12.5   | 12.2   |
| 119.4  | 145.2  | 125.1  | 130.6  | 144.7  | 139.0  |
| 9.2    | 15.6   | 4.0    | 5.5    | 8.4    | 6.3    |
| 30.2   | 38.0   | 16.5   | 38.9   | 30.7   | 29.2   |
| 17.6   | 18.0   | 19.6   | 15.4   | 15.2   | 30.4   |
| 1.8    | 1.8    | 13.3   | 9.7    | 3.7    | 8.1    |
| 38.3   | 28.0   | 36.2   | 34.7   | 53.3   | 49.4   |
| 3.4    | 0.8    | 1.0    | 7.0    | 2.9    | 2.1    |
| 3.3    | 6.0    | 8.5    | 2.9    | 6.0    | 4.9    |
| 8.1    | 14.1   | 4.1    | 4.2    | 4.1    | 6.3    |
| 49.5   | 30.6   | 51.4   | 46.4   | 54.4   | 74.7   |
| 574.6  | 564.9  | 660.1  | 673.1  | 616.8  | 818.4  |
| 1.5    | 12.4   | 1.7    | 7.2    | 2.4    | 1.3    |
| 1.5    | 1.5    | 2.4    | 4.6    | 2.1    | 3.5    |
| 1.2    | 7.6    | 3.8    | 9.7    | 1.0    | 1.5    |
| 5.4    | 3.9    | 8.2    | 7.2    | 7.3    | 6.9    |
| 34.1   | 65.7   | 54.6   | 32.1   | 41.1   | 63.9   |
| 5.4    | 4.1    | 8.8    | 6.4    | 5.6    | 4.7    |

|        |        |        |        |        |        |
|--------|--------|--------|--------|--------|--------|
| 18.2   | 26.0   | 17.1   | 14.7   | 17.4   | 16.8   |
| 19.8   | 21.3   | 25.2   | 17.4   | 23.8   | 25.9   |
| 16.8   | 12.1   | 21.7   | 23.7   | 22.5   | 20.6   |
| 2.8    | 7.3    | 4.1    | 1.4    | 10.2   | 8.4    |
| 77.8   | 46.7   | 56.8   | 73.5   | 67.6   | 98.1   |
| 1.9    | 1.3    | 2.3    | 1.7    | 1.7    | 3.3    |
| 17.2   | 28.6   | 25.1   | 17.2   | 20.0   | 16.3   |
| 6.2    | 16.5   | 2.1    | 5.7    | 3.0    | 5.1    |
| 53.9   | 52.0   | 61.1   | 54.6   | 62.1   | 59.9   |
| 101.5  | 106.2  | 126.8  | 122.3  | 99.8   | 148.0  |
| 152.0  | 120.0  | 153.6  | 150.2  | 168.9  | 174.0  |
| 236.5  | 251.7  | 251.5  | 263.8  | 278.9  | 307.4  |
| 6.7    | 14.6   | 6.3    | 12.9   | 10.8   | 6.4    |
| 3410.9 | 3601.6 | 3524.4 | 3756.1 | 4028.5 | 3980.8 |
| 1.5    | 1.7    | 3.6    | 3.1    | 2.3    | 5.2    |
| 25.8   | 35.6   | 28.0   | 34.2   | 39.9   | 55.6   |
| 40.1   | 37.9   | 37.1   | 48.1   | 50.7   | 62.5   |
| 1412.1 | 1381.8 | 1409.6 | 1423.1 | 1613.6 | 1589.2 |
| 71.2   | 61.4   | 78.5   | 65.0   | 87.8   | 82.3   |
| 39.2   | 42.8   | 47.1   | 38.7   | 46.1   | 48.9   |
| 15.8   | 16.0   | 14.3   | 2.2    | 8.6    | 20.3   |
| 7.4    | 2.4    | 13.1   | 6.8    | 11.2   | 4.7    |
| 2.0    | 2.1    | 1.6    | 2.1    | 11.3   | 2.1    |
| 11.2   | 13.6   | 11.2   | 5.6    | 10.2   | 29.6   |
| 123.6  | 140.2  | 161.5  | 127.3  | 138.8  | 182.2  |
| 24.2   | 15.7   | 10.5   | 14.3   | 15.9   | 13.4   |
| 4.2    | 2.8    | 2.8    | 6.2    | 4.4    | 10.2   |
| 73.4   | 62.4   | 75.5   | 69.2   | 81.3   | 71.5   |
| 1.6    | 1.9    | 1.7    | 5.0    | 2.7    | 3.8    |
| 57.8   | 40.5   | 68.6   | 62.3   | 97.6   | 79.5   |
| 5.2    | 0.4    | 1.4    | 0.9    | 0.9    | 4.1    |
| 1.5    | 3.5    | 2.1    | 1.1    | 6.4    | 2.7    |
| 8.9    | 10.3   | 13.3   | 12.5   | 27.7   | 20.4   |
| 29.3   | 40.4   | 35.2   | 29.3   | 34.9   | 38.1   |
| 22.6   | 28.2   | 30.9   | 24.6   | 20.7   | 18.8   |
| 2.7    | 1.6    | 2.9    | 2.4    | 4.7    | 2.9    |
| 6.2    | 5.5    | 10.4   | 13.6   | 6.6    | 11.1   |
| 9.3    | 33.1   | 18.6   | 25.6   | 19.2   | 19.8   |
| 5.5    | 3.2    | 7.2    | 4.2    | 10.9   | 3.3    |
| 9.2    | 29.9   | 22.7   | 18.9   | 21.9   | 30.0   |
| 14.7   | 19.0   | 11.8   | 20.7   | 15.8   | 24.4   |
| 12.4   | 26.6   | 8.7    | 7.1    | 11.3   | 9.4    |
| 3.9    | 7.0    | 10.1   | 8.9    | 10.6   | 5.0    |
| 13.8   | 3.5    | 17.0   | 19.3   | 14.7   | 9.7    |
| 24.8   | 28.2   | 23.1   | 31.5   | 25.3   | 26.0   |
| 16.0   | 22.5   | 18.0   | 19.4   | 19.5   | 24.3   |
| 3.8    | 8.9    | 2.4    | 5.1    | 8.3    | 3.5    |
| 27.1   | 13.6   | 22.1   | 23.1   | 13.3   | 13.5   |
| 25.9   | 24.2   | 24.1   | 17.1   | 24.6   | 28.8   |
| 9.8    | 12.4   | 2.8    | 9.5    | 14.8   | 3.9    |
| 4.4    | 11.5   | 3.8    | 7.0    | 14.7   | 14.8   |
| 181.3  | 170.4  | 215.9  | 218.0  | 248.9  | 226.0  |
| 22.8   | 13.7   | 9.7    | 17.7   | 13.5   | 19.1   |

|        |        |        |        |        |        |
|--------|--------|--------|--------|--------|--------|
| 14.9   | 21.3   | 15.6   | 18.4   | 14.5   | 18.1   |
| 2.2    | 4.8    | 9.5    | 5.9    | 14.8   | 7.4    |
| 1.8    | 0.7    | 10.7   | 6.8    | 3.4    | 1.3    |
| 32.7   | 25.3   | 23.2   | 23.5   | 25.2   | 36.9   |
| 14.1   | 17.9   | 20.7   | 12.7   | 17.2   | 10.0   |
| 0.7    | 5.1    | 7.0    | 0.8    | 0.7    | 0.9    |
| 3.6    | 2.3    | 8.9    | 2.9    | 2.0    | 1.4    |
| 8.3    | 1.7    | 2.5    | 6.7    | 4.1    | 4.2    |
| 5.1    | 8.2    | 13.3   | 4.4    | 2.4    | 5.2    |
| 3.4    | 1.8    | 1.7    | 1.9    | 2.8    | 2.6    |
| 2841.0 | 2799.7 | 3038.5 | 3055.7 | 3419.2 | 3369.3 |
| 5.4    | 2.0    | 1.4    | 5.1    | 6.5    | 4.0    |
| 21.2   | 21.7   | 21.4   | 20.2   | 17.4   | 20.3   |
| 20.7   | 16.4   | 17.3   | 19.4   | 26.3   | 35.7   |
| 3.9    | 3.1    | 4.4    | 1.8    | 1.0    | 1.5    |
| 13.3   | 19.7   | 11.9   | 17.0   | 19.5   | 26.3   |
| 3.7    | 1.1    | 2.9    | 4.2    | 11.6   | 3.3    |
| 58.9   | 58.2   | 50.6   | 40.6   | 76.1   | 75.9   |
| 14.6   | 31.3   | 13.1   | 15.3   | 17.8   | 34.7   |
| 1.2    | 2.0    | 3.8    | 1.1    | 5.2    | 1.8    |
| 3548.6 | 2837.7 | 3692.0 | 3178.3 | 3932.9 | 3900.3 |
| 371.5  | 320.4  | 416.4  | 443.0  | 445.1  | 475.5  |
| 3.5    | 4.7    | 11.6   | 8.1    | 6.8    | 7.4    |
| 126.1  | 203.6  | 93.7   | 171.4  | 148.4  | 158.0  |
| 13.0   | 3.3    | 22.7   | 17.6   | 20.6   | 14.7   |
| 268.7  | 178.3  | 335.7  | 279.2  | 333.6  | 277.3  |
| 8437.5 | 7916.7 | 8243.7 | 8597.4 | 8857.4 | 8514.1 |
| 383.1  | 291.6  | 347.3  | 406.1  | 572.0  | 428.7  |
| 455.0  | 394.9  | 413.2  | 446.2  | 436.7  | 530.0  |
| 278.7  | 246.0  | 295.0  | 293.4  | 360.0  | 317.5  |
| 1777.7 | 1571.0 | 1615.8 | 1802.3 | 2051.1 | 1984.8 |
| 1492.4 | 1430.5 | 1560.6 | 1481.5 | 1681.6 | 1795.1 |
| 677.2  | 631.6  | 707.8  | 715.5  | 735.1  | 842.9  |
| 1995.1 | 1891.8 | 1881.7 | 1896.7 | 2195.4 | 2282.9 |
| 3206.9 | 2690.1 | 2924.7 | 2927.0 | 3376.1 | 3536.8 |
| 4215.8 | 4017.0 | 3646.9 | 3691.9 | 4200.3 | 4437.5 |
| 2788.2 | 2656.4 | 2831.5 | 2848.6 | 3243.6 | 3329.0 |
| 2121.9 | 1992.6 | 2173.7 | 2250.5 | 2257.7 | 2430.1 |
| 8511.0 | 7636.3 | 8120.1 | 8710.4 | 9195.2 | 9569.4 |
| 6910.6 | 6280.4 | 6947.3 | 6743.3 | 7100.4 | 7022.7 |
| 1353.6 | 1334.6 | 1415.6 | 1535.6 | 1586.4 | 1675.5 |
| 8119.7 | 7525.6 | 8613.8 | 9287.4 | 9279.3 | 8164.1 |
| 9413.5 | 8476.2 | 8808.3 | 9515.8 | 9622.0 | 9869.2 |
| 323.5  | 300.8  | 280.2  | 278.3  | 369.7  | 361.1  |
| 3067.3 | 2634.5 | 2829.4 | 2838.1 | 3150.5 | 3389.5 |
| 2486.2 | 2175.5 | 2073.9 | 2306.6 | 2671.8 | 2628.4 |
| 83.8   | 95.7   | 98.4   | 92.1   | 108.2  | 116.5  |
| 333.6  | 342.1  | 314.3  | 319.6  | 397.3  | 393.3  |
| 360.4  | 374.7  | 363.5  | 335.0  | 327.2  | 365.1  |
| 526.8  | 410.1  | 474.2  | 552.3  | 687.9  | 542.3  |
| 1927.3 | 2054.8 | 1853.1 | 2015.2 | 2031.4 | 2135.7 |
| 140.1  | 130.5  | 134.2  | 134.5  | 147.4  | 168.9  |
| 745.5  | 764.7  | 880.8  | 865.2  | 862.9  | 1017.6 |

|         |         |         |         |         |         |
|---------|---------|---------|---------|---------|---------|
| 1195.4  | 1221.6  | 1269.1  | 1320.2  | 1383.5  | 1460.3  |
| 973.1   | 928.3   | 1119.8  | 1101.3  | 1130.6  | 1198.0  |
| 9987.1  | 8873.4  | 9607.2  | 10011.8 | 10326.7 | 10467.5 |
| 20.0    | 21.0    | 8.7     | 3.2     | 12.2    | 10.5    |
| 27.6    | 26.4    | 29.3    | 29.8    | 34.1    | 50.5    |
| 1472.5  | 1402.9  | 1560.8  | 1471.1  | 1628.1  | 1923.1  |
| 1276.6  | 1328.9  | 1324.1  | 1417.1  | 1653.8  | 1769.4  |
| 333.6   | 273.5   | 298.9   | 317.0   | 354.1   | 432.1   |
| 2342.4  | 2160.3  | 2513.5  | 2725.7  | 2725.4  | 2965.3  |
| 1257.6  | 1201.8  | 1148.1  | 1153.1  | 1383.9  | 1322.8  |
| 28.5    | 28.6    | 27.6    | 35.4    | 29.2    | 38.5    |
| 361.6   | 350.3   | 347.7   | 346.8   | 446.5   | 398.0   |
| 2026.3  | 1729.9  | 1970.0  | 2168.6  | 2064.0  | 2448.5  |
| 4536.8  | 4145.9  | 4364.1  | 4204.2  | 4786.2  | 5230.8  |
| 8538.7  | 7696.5  | 7807.9  | 8144.2  | 8492.9  | 9000.5  |
| 9538.0  | 8868.9  | 9428.6  | 9962.5  | 10234.4 | 10096.9 |
| 1260.2  | 1140.0  | 1148.1  | 1167.1  | 1376.5  | 1498.4  |
| 9762.1  | 9001.7  | 9280.2  | 9999.0  | 10112.6 | 10158.6 |
| 79.0    | 65.4    | 69.9    | 67.7    | 74.6    | 73.3    |
| 590.4   | 584.8   | 638.9   | 573.7   | 596.4   | 681.7   |
| 546.1   | 450.6   | 626.7   | 602.9   | 750.2   | 727.0   |
| 170.8   | 189.9   | 173.5   | 214.3   | 242.2   | 233.0   |
| 96.7    | 87.6    | 111.9   | 98.5    | 105.8   | 118.7   |
| 11290.5 | 10709.5 | 11167.6 | 11606.8 | 11652.3 | 11484.9 |
| 86.0    | 87.2    | 99.4    | 110.4   | 102.7   | 104.1   |
| 699.9   | 833.4   | 782.3   | 768.8   | 819.5   | 846.4   |
| 172.9   | 213.4   | 174.6   | 195.2   | 228.1   | 226.0   |
| 600.8   | 621.1   | 641.5   | 642.9   | 735.1   | 725.9   |
| 10557.6 | 9802.7  | 10235.2 | 10862.7 | 10913.3 | 10973.0 |
| 405.4   | 452.4   | 373.1   | 400.9   | 430.3   | 519.2   |
| 410.8   | 474.0   | 381.6   | 414.5   | 476.6   | 440.5   |
| 461.2   | 444.8   | 400.2   | 637.1   | 647.6   | 499.3   |
| 949.5   | 740.3   | 616.0   | 859.0   | 899.0   | 1068.3  |
| 893.2   | 767.6   | 781.9   | 794.2   | 888.8   | 1083.0  |
| 954.5   | 847.8   | 882.5   | 825.2   | 964.4   | 1125.6  |
| 3743.7  | 3340.8  | 3693.1  | 3893.1  | 3822.2  | 3650.3  |
| 1215.8  | 1238.0  | 1313.2  | 1365.4  | 1481.5  | 1486.5  |
| 650.8   | 466.6   | 616.1   | 650.7   | 756.2   | 731.2   |
| 74.4    | 76.6    | 75.1    | 75.1    | 74.1    | 89.6    |
| 441.7   | 332.5   | 393.2   | 374.7   | 460.4   | 434.7   |
| 9571.9  | 8844.6  | 8806.6  | 9977.3  | 9865.5  | 10009.3 |
| 109.6   | 111.7   | 133.6   | 123.3   | 142.2   | 136.3   |
| 7206.6  | 6590.9  | 6557.6  | 7210.5  | 7430.9  | 7715.3  |
| 238.2   | 262.2   | 243.3   | 254.2   | 300.5   | 300.5   |
| 4865.4  | 4590.3  | 4451.3  | 4991.3  | 5435.4  | 5640.1  |
| 44.2    | 55.9    | 37.8    | 50.2    | 44.1    | 52.2    |
| 86.4    | 82.2    | 92.3    | 107.9   | 124.3   | 111.8   |
| 338.9   | 362.5   | 363.5   | 369.5   | 427.4   | 438.7   |
| 513.3   | 489.7   | 616.8   | 651.4   | 694.9   | 710.4   |
| 529.5   | 475.5   | 599.5   | 667.6   | 723.1   | 623.4   |
| 382.2   | 313.2   | 460.6   | 497.2   | 483.5   | 513.4   |
| 411.5   | 378.5   | 428.3   | 426.0   | 464.2   | 544.1   |
| 292.7   | 258.2   | 314.6   | 310.2   | 350.9   | 333.1   |

|         |        |        |         |         |         |
|---------|--------|--------|---------|---------|---------|
| 208.2   | 192.9  | 242.7  | 250.9   | 267.0   | 279.0   |
| 1812.6  | 1471.4 | 1568.3 | 1571.1  | 1875.6  | 1798.5  |
| 2748.7  | 2173.0 | 2503.8 | 2631.3  | 2792.2  | 2718.4  |
| 17.4    | 30.2   | 26.1   | 19.7    | 25.8    | 29.6    |
| 4.0     | 5.9    | 9.3    | 9.8     | 9.7     | 11.7    |
| 763.2   | 734.7  | 812.4  | 870.9   | 854.0   | 908.3   |
| 1663.9  | 1639.3 | 1738.2 | 1769.4  | 2043.8  | 1947.7  |
| 1171.3  | 1082.9 | 1337.8 | 1239.7  | 1535.5  | 1419.9  |
| 495.9   | 440.1  | 568.2  | 506.3   | 647.7   | 585.8   |
| 1862.3  | 1909.6 | 1964.6 | 2082.9  | 2031.2  | 2496.8  |
| 23.6    | 34.6   | 23.8   | 27.8    | 24.8    | 31.3    |
| 305.9   | 262.9  | 283.9  | 320.8   | 391.7   | 324.2   |
| 609.0   | 483.8  | 506.3  | 563.7   | 705.5   | 657.9   |
| 542.5   | 493.8  | 471.2  | 448.6   | 650.2   | 520.4   |
| 263.3   | 276.7  | 202.4  | 222.0   | 293.3   | 240.2   |
| 410.1   | 268.9  | 440.9  | 514.2   | 493.5   | 566.8   |
| 317.1   | 250.8  | 287.6  | 314.2   | 352.1   | 416.3   |
| 122.4   | 84.2   | 104.4  | 83.8    | 106.1   | 132.9   |
| 490.5   | 417.0  | 361.0  | 336.9   | 448.1   | 501.5   |
| 445.3   | 422.8  | 394.8  | 449.5   | 468.8   | 536.4   |
| 2.8     | 5.8    | 2.9    | 2.5     | 5.3     | 4.1     |
| 227.0   | 226.5  | 226.8  | 224.7   | 255.8   | 274.5   |
| 349.7   | 362.4  | 345.2  | 339.0   | 407.6   | 416.2   |
| 266.7   | 218.1  | 269.9  | 255.3   | 308.0   | 332.3   |
| 636.1   | 505.1  | 518.6  | 524.9   | 627.1   | 660.8   |
| 517.0   | 552.9  | 539.8  | 496.6   | 617.4   | 589.8   |
| 218.5   | 193.5  | 208.0  | 200.3   | 242.6   | 243.0   |
| 553.0   | 620.9  | 555.4  | 530.7   | 600.3   | 660.5   |
| 307.1   | 393.7  | 357.0  | 360.1   | 375.2   | 419.9   |
| 3519.4  | 3250.9 | 3061.0 | 3160.1  | 3525.6  | 4127.4  |
| 9962.9  | 9102.7 | 9826.6 | 9119.2  | 10195.9 | 9644.7  |
| 250.4   | 235.4  | 203.7  | 229.1   | 270.0   | 283.0   |
| 1443.9  | 1403.1 | 1531.0 | 1616.8  | 1762.0  | 1922.9  |
| 10818.7 | 9424.5 | 9328.1 | 10756.4 | 10682.3 | 11335.1 |
| 1925.0  | 1653.2 | 1745.0 | 1872.1  | 2055.1  | 2126.5  |
| 210.4   | 176.5  | 189.3  | 244.2   | 240.9   | 254.9   |
| 88.9    | 65.8   | 64.4   | 76.9    | 95.1    | 77.7    |
| 194.7   | 190.1  | 194.3  | 212.8   | 203.3   | 202.5   |
| 651.7   | 624.8  | 869.6  | 848.8   | 932.6   | 963.7   |
| 1710.6  | 1454.8 | 1638.6 | 1699.0  | 1975.4  | 2022.6  |
| 117.9   | 101.1  | 128.9  | 129.4   | 139.1   | 146.0   |
| 365.6   | 311.0  | 429.3  | 385.2   | 519.2   | 527.5   |
| 247.0   | 213.3  | 263.7  | 241.9   | 342.8   | 327.9   |
| 348.8   | 324.2  | 347.3  | 373.4   | 419.1   | 405.7   |
| 345.7   | 355.7  | 402.7  | 424.1   | 399.8   | 422.5   |
| 157.6   | 140.2  | 157.6  | 179.7   | 189.8   | 204.2   |
| 434.0   | 361.9  | 402.2  | 397.9   | 433.5   | 510.2   |
| 74.5    | 42.4   | 61.5   | 57.7    | 62.2    | 72.0    |
| 166.0   | 121.2  | 169.4  | 151.8   | 200.3   | 200.7   |
| 1862.3  | 1992.0 | 1892.2 | 2185.3  | 2282.6  | 2398.1  |
| 257.8   | 218.2  | 299.6  | 331.9   | 358.7   | 377.3   |
| 577.5   | 474.8  | 513.4  | 512.1   | 564.4   | 632.9   |
| 160.5   | 181.3  | 165.2  | 172.7   | 183.5   | 192.2   |



|        |        |        |        |        |        |
|--------|--------|--------|--------|--------|--------|
| 151.7  | 134.7  | 168.7  | 126.4  | 172.9  | 183.9  |
| 3177.0 | 3103.6 | 2887.6 | 3174.6 | 3103.9 | 3604.8 |
| 943.7  | 1007.2 | 1160.5 | 807.9  | 1365.0 | 1255.4 |
| 133.8  | 112.9  | 137.1  | 129.0  | 144.6  | 162.9  |
| 537.7  | 399.6  | 524.3  | 503.3  | 650.7  | 649.9  |
| 56.4   | 40.8   | 52.4   | 66.0   | 64.6   | 55.2   |
| 104.8  | 146.6  | 111.5  | 161.7  | 166.9  | 128.8  |
| 165.3  | 112.6  | 172.5  | 153.7  | 235.8  | 182.6  |
| 457.5  | 450.1  | 497.5  | 482.5  | 569.3  | 577.8  |
| 2391.1 | 1944.3 | 1919.1 | 2037.6 | 2420.5 | 2444.6 |
| 1226.9 | 1066.1 | 1066.6 | 1183.2 | 1254.1 | 1361.6 |
| 217.4  | 214.1  | 231.0  | 230.9  | 251.3  | 288.8  |
| 675.4  | 567.9  | 554.4  | 538.1  | 617.0  | 736.8  |
| 801.4  | 707.8  | 793.5  | 810.0  | 930.4  | 959.9  |
| 128.5  | 121.5  | 122.4  | 128.3  | 150.3  | 143.6  |
| 1912.7 | 1294.1 | 1489.2 | 1616.9 | 1877.7 | 2000.7 |
| 81.9   | 104.9  | 87.6   | 93.9   | 85.3   | 74.2   |
| 30.7   | 27.9   | 32.2   | 33.6   | 41.7   | 24.4   |
| 107.9  | 112.0  | 128.6  | 142.3  | 153.0  | 157.6  |
| 171.5  | 164.4  | 190.6  | 214.0  | 222.8  | 218.9  |
| 6244.9 | 5603.8 | 6510.0 | 6712.2 | 6843.1 | 7498.2 |
| 824.2  | 720.1  | 809.3  | 770.8  | 951.9  | 985.1  |
| 167.8  | 169.1  | 176.0  | 179.4  | 198.2  | 213.1  |
| 4675.0 | 4008.4 | 4784.9 | 4807.6 | 5235.6 | 5196.2 |
| 3812.2 | 3149.7 | 3767.8 | 4118.3 | 4418.0 | 4335.3 |
| 346.4  | 280.7  | 417.0  | 405.6  | 454.8  | 438.8  |
| 770.2  | 789.3  | 847.2  | 904.3  | 875.5  | 929.8  |
| 921.6  | 663.2  | 814.7  | 978.5  | 831.9  | 1005.8 |
| 203.8  | 197.4  | 246.8  | 214.8  | 266.3  | 251.9  |
| 91.0   | 111.0  | 100.4  | 113.6  | 122.9  | 88.8   |
| 13.5   | 3.4    | 18.0   | 9.8    | 21.2   | 24.3   |
| 182.8  | 117.8  | 201.0  | 167.6  | 215.1  | 252.7  |
| 10.4   | 19.0   | 6.3    | 13.0   | 15.0   | 15.8   |
| 147.2  | 104.8  | 151.2  | 147.9  | 160.9  | 186.0  |
| 537.8  | 338.8  | 528.7  | 523.7  | 617.3  | 563.9  |
| 1489.6 | 983.8  | 1300.8 | 1430.3 | 1522.4 | 1743.0 |
| 403.6  | 403.0  | 353.0  | 391.6  | 455.3  | 493.4  |
| 1143.7 | 681.5  | 989.2  | 1052.4 | 1246.3 | 1332.8 |
| 327.8  | 348.7  | 358.6  | 371.6  | 434.8  | 422.8  |
| 232.2  | 211.1  | 220.7  | 195.9  | 282.2  | 269.9  |
| 149.0  | 162.5  | 160.7  | 175.0  | 191.6  | 214.7  |
| 94.2   | 73.8   | 109.5  | 98.6   | 104.3  | 117.0  |
| 204.1  | 183.6  | 221.9  | 222.2  | 255.5  | 279.3  |
| 721.4  | 673.8  | 635.9  | 615.8  | 773.4  | 874.9  |
| 225.2  | 195.9  | 206.0  | 230.4  | 234.0  | 235.5  |
| 1373.8 | 1195.1 | 1318.4 | 1284.4 | 1554.7 | 1492.7 |
| 666.7  | 502.6  | 580.9  | 615.9  | 780.0  | 767.7  |
| 155.0  | 133.4  | 170.5  | 170.0  | 146.0  | 251.3  |
| 1110.5 | 1087.4 | 1164.5 | 1202.6 | 1353.3 | 1367.6 |
| 200.7  | 151.6  | 186.5  | 185.1  | 249.6  | 252.0  |
| 464.9  | 310.0  | 408.8  | 426.6  | 472.3  | 517.3  |
| 215.0  | 238.5  | 256.3  | 229.5  | 264.6  | 248.4  |
| 746.3  | 791.4  | 839.7  | 801.8  | 951.1  | 944.9  |

|        |        |        |        |        |        |
|--------|--------|--------|--------|--------|--------|
| 1214.8 | 1250.1 | 1197.4 | 1261.6 | 1410.4 | 1377.7 |
| 459.8  | 514.7  | 535.4  | 574.9  | 556.3  | 622.6  |
| 331.1  | 306.2  | 315.1  | 328.4  | 403.3  | 449.3  |
| 187.1  | 203.5  | 205.0  | 192.0  | 193.6  | 212.5  |
| 487.6  | 370.7  | 490.5  | 530.7  | 589.7  | 662.0  |
| 426.2  | 340.9  | 435.6  | 465.7  | 514.5  | 554.4  |
| 393.8  | 404.9  | 449.7  | 487.2  | 480.2  | 517.9  |
| 82.6   | 74.5   | 80.9   | 98.1   | 105.6  | 108.2  |
| 208.7  | 206.1  | 237.3  | 275.9  | 261.4  | 316.8  |
| 646.7  | 516.2  | 681.6  | 665.3  | 802.9  | 796.8  |
| 830.6  | 735.7  | 820.1  | 700.9  | 993.6  | 971.6  |
| 194.4  | 184.5  | 178.4  | 230.7  | 250.3  | 230.8  |
| 268.3  | 208.4  | 337.6  | 229.5  | 357.6  | 358.8  |
| 249.2  | 212.1  | 267.4  | 230.5  | 359.3  | 311.6  |
| 1502.5 | 1576.9 | 1598.5 | 1472.9 | 1681.5 | 1668.8 |
| 4894.1 | 4654.4 | 5018.4 | 5404.4 | 5201.4 | 5098.8 |
| 933.6  | 780.0  | 876.1  | 819.5  | 910.8  | 987.4  |
| 991.6  | 803.0  | 769.7  | 769.3  | 804.2  | 1034.5 |
| 290.4  | 392.1  | 323.0  | 307.3  | 329.2  | 427.8  |
| 136.6  | 133.6  | 139.9  | 122.3  | 156.7  | 181.1  |
| 316.5  | 249.8  | 319.9  | 299.5  | 394.6  | 323.5  |
| 362.7  | 208.9  | 326.2  | 328.1  | 413.8  | 398.2  |
| 2678.1 | 2148.1 | 2386.0 | 2472.9 | 2773.2 | 2532.5 |
| 882.2  | 901.4  | 866.1  | 907.6  | 939.9  | 1034.1 |
| 575.7  | 471.3  | 605.0  | 572.2  | 735.1  | 589.3  |
| 381.6  | 344.3  | 443.3  | 456.3  | 466.6  | 514.6  |
| 597.9  | 631.2  | 713.4  | 670.0  | 793.1  | 770.5  |
| 264.3  | 244.9  | 265.7  | 258.1  | 294.1  | 337.2  |
| 112.0  | 248.0  | 162.0  | 139.0  | 122.3  | 148.0  |
| 114.5  | 103.0  | 137.6  | 115.1  | 151.3  | 128.4  |
| 961.1  | 862.1  | 964.4  | 979.5  | 1065.9 | 1021.3 |
| 138.4  | 120.6  | 171.3  | 142.2  | 178.9  | 207.3  |
| 114.3  | 84.1   | 130.8  | 143.6  | 158.4  | 149.2  |
| 24.6   | 27.9   | 25.5   | 20.8   | 25.7   | 29.2   |
| 606.6  | 515.8  | 556.9  | 530.1  | 630.0  | 695.5  |
| 214.1  | 186.7  | 204.9  | 234.6  | 270.0  | 300.2  |
| 82.2   | 81.3   | 89.0   | 91.2   | 109.1  | 87.4   |
| 368.9  | 315.7  | 363.0  | 321.6  | 442.7  | 413.0  |
| 255.7  | 233.9  | 265.8  | 333.9  | 317.4  | 283.3  |
| 131.9  | 147.3  | 146.2  | 146.9  | 157.7  | 172.8  |
| 732.8  | 730.4  | 859.6  | 846.0  | 937.8  | 996.9  |
| 142.9  | 98.8   | 139.5  | 129.2  | 169.2  | 160.8  |
| 54.9   | 37.6   | 44.2   | 60.2   | 42.1   | 60.5   |
| 135.4  | 134.9  | 121.9  | 131.4  | 144.1  | 156.5  |
| 214.7  | 196.0  | 239.1  | 222.5  | 276.8  | 258.7  |
| 2326.4 | 1876.5 | 1959.5 | 2285.0 | 2249.1 | 2824.5 |
| 56.7   | 61.8   | 64.3   | 55.0   | 75.3   | 73.5   |
| 113.2  | 182.3  | 128.0  | 141.0  | 152.3  | 148.6  |
| 324.7  | 264.4  | 309.2  | 284.0  | 354.7  | 403.9  |
| 93.4   | 91.4   | 89.3   | 78.4   | 94.4   | 93.7   |
| 883.2  | 697.0  | 1005.3 | 1067.0 | 1072.1 | 1079.4 |
| 567.0  | 642.4  | 560.4  | 578.3  | 712.6  | 705.6  |
| 408.2  | 365.0  | 436.0  | 462.4  | 533.9  | 534.4  |

|         |        |        |         |         |         |
|---------|--------|--------|---------|---------|---------|
| 1412.1  | 1257.5 | 1281.4 | 1375.9  | 1514.7  | 1604.6  |
| 273.3   | 251.1  | 292.0  | 308.7   | 310.9   | 343.3   |
| 80.0    | 70.4   | 72.3   | 78.6    | 88.5    | 90.4    |
| 171.8   | 174.8  | 203.3  | 193.0   | 248.1   | 240.0   |
| 19.4    | 22.4   | 18.3   | 15.2    | 23.3    | 29.9    |
| 137.5   | 127.7  | 160.8  | 117.6   | 164.8   | 170.9   |
| 982.1   | 984.1  | 1029.4 | 984.3   | 1079.4  | 1173.1  |
| 1269.4  | 1218.0 | 1371.9 | 1328.6  | 1426.6  | 1663.8  |
| 193.9   | 173.7  | 201.0  | 193.5   | 255.8   | 265.1   |
| 67.6    | 43.6   | 55.9   | 32.7    | 67.3    | 80.2    |
| 286.2   | 271.6  | 271.1  | 275.8   | 369.8   | 334.7   |
| 104.3   | 105.0  | 88.3   | 96.9    | 110.8   | 125.3   |
| 336.1   | 353.6  | 279.7  | 339.3   | 366.4   | 434.7   |
| 905.7   | 735.3  | 819.9  | 891.1   | 936.0   | 1117.4  |
| 10.1    | 3.0    | 6.7    | 10.7    | 4.5     | 11.4    |
| 106.1   | 102.5  | 119.9  | 122.3   | 130.4   | 132.3   |
| 282.3   | 176.2  | 271.5  | 300.9   | 329.6   | 343.1   |
| 4574.6  | 4202.8 | 4754.6 | 4771.7  | 4862.7  | 4932.5  |
| 280.4   | 162.3  | 170.4  | 187.1   | 186.5   | 198.9   |
| 7.4     | 9.7    | 16.2   | 20.6    | 23.8    | 15.5    |
| 26.8    | 38.0   | 43.5   | 40.6    | 30.1    | 37.4    |
| 242.0   | 295.0  | 243.5  | 260.0   | 319.0   | 287.2   |
| 10195.6 | 9734.1 | 9357.4 | 10585.2 | 10306.7 | 10142.8 |
| 9001.4  | 8250.3 | 9259.6 | 9858.9  | 9633.5  | 9646.8  |
| 36.4    | 54.2   | 39.6   | 45.0    | 33.6    | 45.7    |
| 269.7   | 270.3  | 280.1  | 264.8   | 387.5   | 294.8   |
| 442.8   | 436.6  | 414.9  | 430.0   | 523.4   | 529.0   |
| 1250.4  | 1370.3 | 1211.2 | 1287.4  | 1295.1  | 1464.9  |
| 360.5   | 383.7  | 392.8  | 404.7   | 436.8   | 454.2   |
| 719.9   | 724.8  | 758.2  | 717.8   | 842.3   | 811.1   |
| 136.7   | 82.0   | 106.7  | 106.6   | 114.1   | 134.8   |
| 949.7   | 752.4  | 866.1  | 842.8   | 1040.9  | 1089.7  |
| 119.6   | 104.4  | 111.3  | 114.4   | 134.5   | 156.2   |
| 166.8   | 169.7  | 160.5  | 178.9   | 204.3   | 199.6   |
| 286.0   | 284.9  | 304.3  | 266.2   | 326.7   | 366.0   |
| 1854.5  | 1438.5 | 1535.4 | 1492.9  | 1858.2  | 1852.8  |
| 471.7   | 476.5  | 535.6  | 557.6   | 677.1   | 650.4   |
| 969.7   | 811.0  | 840.7  | 916.3   | 1008.6  | 1134.0  |
| 210.6   | 223.0  | 253.3  | 242.0   | 293.0   | 309.0   |
| 47.5    | 37.0   | 52.8   | 38.8    | 51.7    | 59.9    |
| 98.8    | 77.8   | 97.6   | 102.6   | 95.1    | 96.2    |
| 147.9   | 140.0  | 121.1  | 169.0   | 170.2   | 173.7   |
| 12.9    | 24.3   | 30.3   | 18.4    | 21.2    | 24.1    |
| 256.7   | 286.9  | 277.9  | 305.5   | 328.7   | 366.0   |
| 350.2   | 285.5  | 390.8  | 381.5   | 447.8   | 418.7   |
| 201.1   | 184.1  | 195.7  | 205.2   | 217.0   | 243.2   |
| 142.9   | 170.8  | 145.3  | 151.9   | 182.8   | 199.6   |
| 624.6   | 490.5  | 506.7  | 543.5   | 617.5   | 744.8   |
| 381.3   | 331.1  | 408.0  | 403.0   | 459.0   | 475.3   |
| 316.2   | 278.9  | 355.4  | 373.9   | 429.4   | 439.9   |
| 224.4   | 250.7  | 245.4  | 225.4   | 286.3   | 263.8   |
| 636.5   | 577.7  | 608.8  | 668.9   | 774.7   | 743.4   |
| 178.6   | 194.8  | 224.6  | 217.3   | 281.7   | 299.9   |

|        |        |        |        |        |        |
|--------|--------|--------|--------|--------|--------|
| 369.2  | 348.5  | 433.3  | 419.6  | 408.1  | 470.4  |
| 162.8  | 139.8  | 162.2  | 181.6  | 177.3  | 183.2  |
| 205.3  | 183.5  | 230.4  | 211.0  | 192.1  | 275.3  |
| 1.9    | 1.0    | 2.0    | 3.6    | 7.0    | 0.7    |
| 21.1   | 24.3   | 37.8   | 29.5   | 30.2   | 44.4   |
| 441.6  | 330.3  | 431.3  | 482.0  | 535.6  | 580.4  |
| 5628.0 | 5377.3 | 5719.8 | 6146.2 | 6138.3 | 6048.8 |
| 844.9  | 703.9  | 877.1  | 910.9  | 1010.4 | 915.6  |
| 473.8  | 436.8  | 488.2  | 491.0  | 536.4  | 548.7  |
| 289.3  | 171.8  | 214.6  | 218.1  | 277.1  | 339.6  |
| 327.8  | 286.7  | 321.8  | 308.6  | 360.9  | 360.4  |
| 280.8  | 270.3  | 300.6  | 304.8  | 340.6  | 341.4  |
| 638.8  | 477.3  | 636.7  | 700.1  | 850.9  | 667.7  |
| 160.9  | 117.6  | 148.2  | 153.8  | 190.5  | 194.9  |
| 101.4  | 87.9   | 119.3  | 113.2  | 108.6  | 114.9  |
| 71.4   | 60.7   | 81.5   | 73.8   | 69.1   | 100.8  |
| 261.7  | 223.8  | 232.2  | 245.8  | 295.2  | 298.7  |
| 224.7  | 162.2  | 209.5  | 219.6  | 271.8  | 257.8  |
| 209.9  | 143.7  | 139.7  | 192.7  | 191.7  | 228.0  |
| 271.0  | 221.0  | 253.5  | 282.0  | 287.9  | 324.6  |
| 184.2  | 158.3  | 223.0  | 213.2  | 216.5  | 255.3  |
| 98.0   | 115.7  | 152.1  | 129.8  | 161.3  | 165.2  |
| 293.6  | 288.6  | 288.0  | 317.8  | 305.7  | 367.3  |
| 294.2  | 240.0  | 263.6  | 275.5  | 285.3  | 365.4  |
| 1449.9 | 1421.6 | 1303.9 | 1398.1 | 1428.5 | 1730.8 |
| 599.3  | 663.7  | 618.5  | 664.2  | 669.5  | 783.6  |
| 620.1  | 573.3  | 645.8  | 648.6  | 737.2  | 743.7  |
| 1011.3 | 932.4  | 856.6  | 943.9  | 1088.0 | 1165.4 |
| 63.3   | 51.7   | 69.6   | 86.3   | 66.7   | 80.4   |
| 1154.6 | 942.7  | 1066.6 | 1037.2 | 1225.5 | 1284.6 |
| 442.2  | 407.6  | 459.3  | 447.2  | 496.2  | 564.4  |
| 102.4  | 105.6  | 119.2  | 131.5  | 145.0  | 148.0  |
| 23.5   | 5.9    | 9.1    | 12.8   | 38.8   | 17.3   |
| 170.2  | 153.6  | 169.0  | 183.3  | 199.4  | 195.8  |
| 222.9  | 175.7  | 212.0  | 232.4  | 242.3  | 289.1  |
| 28.6   | 35.0   | 25.4   | 30.8   | 47.3   | 40.9   |
| 111.5  | 93.1   | 95.5   | 95.9   | 119.3  | 127.0  |
| 13.5   | 11.4   | 17.5   | 11.5   | 14.5   | 16.3   |
| 133.3  | 78.8   | 118.6  | 132.6  | 157.7  | 169.5  |
| 148.6  | 153.2  | 134.9  | 149.1  | 181.4  | 181.0  |
| 214.9  | 148.5  | 215.0  | 197.8  | 244.4  | 211.6  |
| 391.0  | 237.8  | 362.9  | 378.3  | 466.5  | 505.3  |
| 787.6  | 465.8  | 714.1  | 640.5  | 851.9  | 869.2  |
| 556.1  | 521.7  | 542.9  | 587.5  | 635.9  | 674.9  |
| 3414.0 | 2338.4 | 2835.8 | 3231.5 | 3783.9 | 4266.2 |
| 983.3  | 811.2  | 1037.3 | 1011.6 | 1204.8 | 1196.2 |
| 395.7  | 381.0  | 361.4  | 397.5  | 444.3  | 438.3  |
| 216.9  | 201.7  | 245.0  | 272.3  | 269.3  | 315.3  |
| 221.7  | 220.1  | 212.8  | 228.3  | 269.2  | 268.1  |
| 8846.7 | 8226.6 | 8974.9 | 9221.8 | 9248.6 | 9252.8 |
| 874.2  | 817.3  | 897.4  | 857.5  | 1030.2 | 1059.9 |
| 24.5   | 21.5   | 29.1   | 30.8   | 26.2   | 20.8   |
| 5417.5 | 5405.4 | 5529.2 | 5511.4 | 6139.0 | 6284.0 |

|         |         |         |         |         |         |
|---------|---------|---------|---------|---------|---------|
| 79.1    | 59.8    | 77.4    | 95.4    | 106.1   | 107.9   |
| 66.6    | 43.0    | 58.5    | 57.1    | 63.5    | 82.0    |
| 189.0   | 140.2   | 167.7   | 186.1   | 198.2   | 207.0   |
| 244.3   | 232.0   | 256.7   | 244.7   | 297.5   | 294.2   |
| 13.0    | 17.9    | 29.2    | 27.6    | 24.5    | 23.0    |
| 771.4   | 1047.2  | 873.2   | 986.9   | 936.8   | 1024.1  |
| 240.8   | 200.7   | 315.7   | 315.5   | 349.3   | 289.7   |
| 609.7   | 619.3   | 698.0   | 713.1   | 777.5   | 729.1   |
| 577.9   | 642.4   | 709.8   | 658.2   | 704.4   | 722.6   |
| 12.7    | 11.7    | 29.6    | 19.2    | 6.6     | 16.9    |
| 11621.1 | 10433.9 | 10851.7 | 11919.8 | 11932.8 | 11648.2 |
| 153.6   | 124.9   | 157.0   | 159.5   | 214.9   | 183.0   |
| 96.2    | 84.9    | 96.1    | 86.6    | 120.8   | 108.2   |
| 1114.7  | 963.5   | 1169.5  | 1107.0  | 1299.1  | 1444.0  |
| 126.2   | 97.9    | 119.3   | 109.3   | 136.9   | 144.9   |
| 55.9    | 35.1    | 41.0    | 56.1    | 58.3    | 63.4    |
| 259.7   | 209.9   | 270.9   | 237.5   | 294.8   | 270.2   |
| 120.4   | 104.0   | 82.5    | 113.8   | 133.2   | 116.2   |
| 75.3    | 70.3    | 86.3    | 104.4   | 108.3   | 111.3   |
| 202.9   | 209.8   | 205.5   | 221.1   | 211.2   | 258.8   |
| 1682.5  | 1957.1  | 1734.3  | 1963.9  | 1835.0  | 2060.2  |
| 1308.5  | 1254.6  | 1235.8  | 1373.7  | 1496.4  | 1420.0  |
| 2156.2  | 2056.4  | 2086.2  | 2212.6  | 2367.7  | 2621.5  |
| 687.9   | 473.6   | 462.7   | 554.9   | 504.7   | 541.8   |
| 207.0   | 230.6   | 219.6   | 213.7   | 260.9   | 283.1   |
| 92.3    | 80.4    | 98.0    | 113.1   | 112.7   | 126.6   |
| 367.5   | 312.8   | 382.0   | 354.0   | 459.2   | 442.5   |
| 666.2   | 572.8   | 568.2   | 585.0   | 684.8   | 681.2   |
| 117.5   | 139.9   | 209.1   | 187.3   | 169.5   | 209.1   |
| 94.9    | 79.2    | 135.9   | 136.1   | 137.1   | 124.0   |
| 233.5   | 175.4   | 239.3   | 222.3   | 267.4   | 255.9   |
| 286.8   | 247.4   | 274.9   | 317.2   | 363.7   | 350.1   |
| 342.0   | 307.2   | 313.8   | 376.1   | 369.8   | 407.4   |
| 51.7    | 40.5    | 47.8    | 49.5    | 53.2    | 67.7    |
| 132.5   | 86.8    | 118.2   | 121.6   | 146.3   | 137.2   |
| 49.7    | 39.4    | 46.2    | 44.9    | 53.9    | 48.7    |
| 120.7   | 93.0    | 104.8   | 127.1   | 151.8   | 150.5   |
| 184.2   | 192.6   | 215.3   | 232.8   | 180.0   | 201.3   |
| 184.3   | 186.2   | 188.4   | 156.5   | 218.8   | 231.7   |
| 201.1   | 144.2   | 164.4   | 172.0   | 230.6   | 219.2   |
| 6.7     | 2.2     | 4.9     | 3.2     | 4.3     | 1.9     |
| 24.9    | 20.4    | 25.8    | 24.6    | 35.7    | 28.2    |
| 336.5   | 258.4   | 283.7   | 288.3   | 297.8   | 309.2   |
| 476.1   | 380.7   | 410.0   | 479.7   | 610.4   | 558.4   |
| 44.1    | 77.5    | 54.4    | 38.6    | 52.9    | 56.6    |
| 4429.1  | 3914.6  | 4183.5  | 4146.3  | 4796.7  | 4830.9  |
| 87.8    | 83.8    | 97.9    | 93.5    | 103.6   | 112.9   |
| 257.9   | 192.8   | 184.5   | 197.8   | 244.0   | 281.1   |
| 81.0    | 66.5    | 73.3    | 70.5    | 97.5    | 109.9   |
| 95.1    | 61.7    | 80.8    | 74.8    | 112.1   | 118.5   |
| 635.6   | 342.8   | 552.0   | 538.0   | 706.0   | 730.4   |
| 48.1    | 34.1    | 36.3    | 23.7    | 61.4    | 49.3    |
| 780.3   | 490.1   | 842.0   | 809.8   | 1001.4  | 976.5   |

|        |        |        |        |        |        |
|--------|--------|--------|--------|--------|--------|
| 728.7  | 380.8  | 574.3  | 561.5  | 760.1  | 696.3  |
| 267.9  | 249.5  | 266.8  | 282.2  | 331.6  | 319.1  |
| 1836.4 | 2014.0 | 2016.8 | 2007.6 | 2135.1 | 2152.4 |
| 364.3  | 324.2  | 359.6  | 406.1  | 384.3  | 451.5  |
| 101.3  | 83.4   | 98.5   | 103.7  | 130.0  | 131.1  |
| 916.3  | 874.4  | 954.0  | 920.1  | 1056.4 | 1084.0 |
| 580.4  | 429.2  | 585.7  | 605.8  | 702.2  | 718.6  |
| 385.9  | 366.1  | 365.3  | 358.1  | 433.4  | 497.5  |
| 48.1   | 39.8   | 49.3   | 35.9   | 46.4   | 57.4   |
| 199.7  | 193.1  | 193.1  | 189.1  | 255.4  | 261.6  |
| 38.8   | 36.7   | 34.6   | 34.1   | 49.9   | 41.9   |
| 27.9   | 35.2   | 30.7   | 36.0   | 34.4   | 41.9   |
| 179.8  | 157.5  | 174.7  | 200.7  | 186.8  | 225.1  |
| 384.8  | 347.6  | 379.9  | 413.3  | 449.7  | 459.8  |
| 106.1  | 97.3   | 95.7   | 100.5  | 111.3  | 132.6  |
| 44.4   | 31.5   | 45.3   | 50.3   | 47.2   | 52.1   |
| 75.5   | 47.6   | 59.2   | 70.9   | 80.4   | 76.6   |
| 414.1  | 379.8  | 489.7  | 454.5  | 498.5  | 543.7  |
| 24.9   | 31.3   | 47.1   | 38.6   | 46.5   | 53.0   |
| 122.2  | 114.0  | 141.0  | 111.2  | 151.9  | 143.9  |
| 474.7  | 449.2  | 564.5  | 516.8  | 573.5  | 649.7  |
| 103.5  | 101.5  | 96.3   | 109.5  | 126.2  | 157.0  |
| 172.1  | 173.3  | 174.1  | 164.2  | 201.8  | 210.3  |
| 267.9  | 254.5  | 262.8  | 267.5  | 289.9  | 314.1  |
| 876.8  | 748.7  | 996.8  | 1050.1 | 1061.3 | 1052.3 |
| 53.1   | 30.6   | 42.8   | 56.4   | 54.8   | 80.1   |
| 94.1   | 60.8   | 90.3   | 122.4  | 106.1  | 127.6  |
| 332.0  | 286.7  | 297.4  | 303.4  | 399.8  | 397.8  |
| 96.4   | 90.7   | 95.8   | 91.5   | 119.0  | 101.1  |
| 195.4  | 185.7  | 190.2  | 218.0  | 222.5  | 237.7  |
| 39.5   | 64.8   | 67.5   | 35.6   | 66.2   | 77.9   |
| 176.0  | 158.2  | 198.0  | 199.8  | 230.0  | 225.9  |
| 213.8  | 201.9  | 256.9  | 251.2  | 260.5  | 264.8  |
| 511.3  | 474.1  | 536.0  | 491.1  | 616.4  | 576.9  |
| 58.0   | 51.2   | 48.1   | 54.4   | 78.3   | 66.2   |
| 8686.4 | 8260.8 | 8880.0 | 9118.2 | 8992.9 | 9140.7 |
| 213.8  | 151.3  | 190.5  | 176.5  | 205.2  | 261.3  |
| 254.8  | 203.0  | 254.8  | 270.8  | 273.2  | 300.6  |
| 50.7   | 53.0   | 51.6   | 71.6   | 56.6   | 81.7   |
| 249.8  | 215.9  | 255.9  | 254.0  | 269.9  | 320.7  |
| 121.1  | 84.0   | 126.4  | 114.1  | 141.7  | 143.3  |
| 394.7  | 373.6  | 443.2  | 463.1  | 452.6  | 501.5  |
| 374.3  | 340.7  | 389.7  | 387.5  | 460.6  | 453.3  |
| 731.8  | 742.4  | 765.9  | 874.8  | 892.5  | 974.6  |
| 1161.8 | 1067.1 | 1060.8 | 1145.6 | 1353.3 | 1289.2 |
| 226.1  | 196.5  | 218.6  | 212.4  | 242.7  | 269.5  |
| 100.3  | 86.3   | 121.4  | 123.3  | 110.1  | 124.7  |
| 112.4  | 71.0   | 78.5   | 100.4  | 116.2  | 113.3  |
| 128.4  | 106.6  | 125.6  | 101.6  | 146.3  | 120.0  |
| 862.7  | 767.8  | 782.1  | 846.3  | 958.9  | 943.9  |
| 555.8  | 499.8  | 584.1  | 660.3  | 640.5  | 656.9  |
| 408.4  | 407.6  | 441.9  | 442.5  | 493.5  | 507.7  |
| 254.4  | 184.6  | 242.4  | 223.4  | 270.5  | 284.2  |

|         |         |         |         |         |         |
|---------|---------|---------|---------|---------|---------|
| 275.2   | 237.8   | 317.3   | 224.5   | 269.7   | 324.3   |
| 57.9    | 40.1    | 44.8    | 48.4    | 62.2    | 53.6    |
| 217.2   | 241.8   | 272.1   | 258.1   | 311.7   | 259.6   |
| 12.9    | 15.5    | 10.3    | 16.4    | 25.5    | 24.9    |
| 47.8    | 37.0    | 53.1    | 48.8    | 54.9    | 57.5    |
| 195.7   | 105.7   | 185.1   | 156.8   | 224.4   | 220.2   |
| 50.0    | 42.5    | 58.7    | 66.0    | 63.8    | 58.1    |
| 217.5   | 165.9   | 183.4   | 188.9   | 239.7   | 243.1   |
| 26.6    | 2.3     | 6.7     | 7.9     | 5.9     | 9.7     |
| 20.5    | 28.8    | 22.8    | 11.6    | 7.9     | 25.1    |
| 11997.6 | 11375.2 | 11545.3 | 12389.6 | 12819.1 | 12529.3 |
| 38.9    | 39.7    | 38.7    | 42.3    | 60.9    | 56.6    |
| 58.7    | 66.2    | 88.9    | 88.0    | 98.4    | 76.5    |
| 53.2    | 53.6    | 60.6    | 64.3    | 59.3    | 67.5    |
| 96.0    | 89.1    | 113.9   | 96.0    | 122.9   | 112.9   |
| 343.7   | 297.6   | 354.3   | 341.8   | 399.7   | 419.9   |
| 1907.0  | 1435.4  | 2079.7  | 1893.3  | 2355.5  | 2326.3  |
| 600.4   | 489.4   | 734.6   | 684.2   | 808.7   | 890.4   |
| 426.0   | 315.9   | 374.3   | 366.5   | 458.1   | 480.9   |
| 141.7   | 104.0   | 146.0   | 145.0   | 214.2   | 191.2   |
| 415.8   | 354.4   | 458.3   | 499.7   | 539.1   | 533.1   |
| 504.1   | 504.1   | 493.4   | 533.1   | 584.1   | 570.1   |
| 229.1   | 199.9   | 185.3   | 201.6   | 242.9   | 227.4   |
| 102.4   | 66.7    | 72.3    | 79.2    | 95.9    | 111.8   |
| 669.1   | 768.6   | 678.2   | 752.0   | 737.9   | 812.9   |
| 603.1   | 456.8   | 533.1   | 538.4   | 646.7   | 669.5   |
| 375.3   | 419.5   | 351.3   | 359.5   | 356.7   | 405.7   |
| 1098.7  | 1077.0  | 1213.7  | 1274.4  | 1343.7  | 1434.0  |
| 423.3   | 391.5   | 454.8   | 487.0   | 449.2   | 526.5   |
| 1363.4  | 1195.2  | 1219.2  | 1364.5  | 1413.0  | 1742.6  |
| 818.2   | 851.2   | 944.7   | 936.4   | 1016.0  | 856.2   |
| 323.2   | 345.3   | 341.1   | 342.4   | 345.3   | 365.7   |
| 60.8    | 56.6    | 63.7    | 54.7    | 59.2    | 93.6    |
| 137.5   | 108.2   | 142.5   | 134.1   | 174.4   | 169.7   |
| 71.4    | 58.8    | 73.4    | 66.3    | 79.8    | 75.5    |
| 538.0   | 526.3   | 579.6   | 589.7   | 601.4   | 692.9   |
| 271.7   | 304.3   | 268.1   | 301.6   | 324.0   | 334.2   |
| 444.3   | 241.6   | 440.1   | 418.8   | 538.3   | 532.7   |
| 156.2   | 210.1   | 111.6   | 195.5   | 178.4   | 209.2   |
| 248.0   | 143.3   | 287.3   | 267.1   | 361.2   | 322.5   |
| 28.5    | 33.2    | 45.2    | 27.7    | 40.5    | 41.6    |
| 444.1   | 435.1   | 461.3   | 453.8   | 522.8   | 522.7   |
| 215.3   | 275.3   | 175.6   | 291.6   | 218.8   | 288.8   |
| 213.8   | 241.4   | 272.4   | 286.3   | 331.6   | 406.0   |
| 19.8    | 24.1    | 25.8    | 24.8    | 31.5    | 34.7    |
| 5391.2  | 4530.0  | 4246.3  | 5683.9  | 5688.2  | 6097.9  |
| 38.4    | 35.3    | 36.0    | 41.2    | 47.3    | 51.9    |
| 545.5   | 505.8   | 541.1   | 553.3   | 663.2   | 672.5   |
| 721.9   | 636.3   | 723.8   | 733.1   | 868.5   | 808.8   |
| 59.4    | 65.2    | 53.4    | 53.8    | 64.8    | 64.1    |
| 168.5   | 198.1   | 191.3   | 176.8   | 202.7   | 222.9   |
| 702.4   | 791.7   | 853.0   | 826.4   | 882.6   | 885.7   |
| 11019.0 | 10056.0 | 10722.2 | 11262.4 | 11236.8 | 11174.3 |

|        |        |        |        |        |        |
|--------|--------|--------|--------|--------|--------|
| 489.2  | 675.0  | 570.6  | 592.4  | 596.1  | 690.0  |
| 181.9  | 177.0  | 174.0  | 203.8  | 198.9  | 222.5  |
| 135.1  | 154.2  | 123.1  | 182.0  | 160.9  | 194.0  |
| 582.7  | 671.8  | 661.2  | 668.2  | 787.8  | 808.1  |
| 665.0  | 649.0  | 772.6  | 827.8  | 782.9  | 844.8  |
| 199.4  | 147.0  | 243.7  | 222.3  | 257.9  | 291.3  |
| 500.3  | 457.7  | 510.1  | 526.2  | 582.1  | 664.9  |
| 326.3  | 261.3  | 320.2  | 282.4  | 360.0  | 367.7  |
| 83.4   | 100.3  | 110.6  | 100.6  | 112.5  | 130.8  |
| 20.9   | 16.5   | 19.0   | 20.6   | 36.8   | 29.8   |
| 357.3  | 790.0  | 406.0  | 492.7  | 385.8  | 402.6  |
| 224.7  | 379.7  | 200.4  | 309.6  | 219.3  | 283.3  |
| 68.2   | 82.4   | 65.1   | 78.4   | 74.2   | 88.8   |
| 314.8  | 282.7  | 255.1  | 356.9  | 343.0  | 391.5  |
| 19.0   | 50.2   | 14.3   | 15.1   | 33.3   | 23.0   |
| 2219.6 | 1806.7 | 2125.8 | 2370.4 | 2096.9 | 2566.2 |
| 179.6  | 147.5  | 172.0  | 198.4  | 233.4  | 255.8  |
| 200.5  | 185.5  | 212.3  | 189.2  | 236.9  | 242.4  |
| 101.3  | 79.8   | 86.9   | 81.3   | 108.9  | 111.7  |
| 407.1  | 356.3  | 384.0  | 419.4  | 439.2  | 485.3  |
| 392.9  | 422.6  | 402.7  | 386.3  | 433.0  | 585.0  |
| 739.6  | 890.0  | 812.2  | 697.7  | 817.7  | 921.0  |
| 257.5  | 302.2  | 321.2  | 292.2  | 354.7  | 360.9  |
| 437.3  | 476.5  | 374.2  | 495.6  | 522.0  | 585.9  |
| 159.9  | 249.7  | 95.2   | 253.5  | 139.8  | 227.0  |
| 833.7  | 791.7  | 739.3  | 765.1  | 853.1  | 1014.2 |
| 817.5  | 716.7  | 744.3  | 861.2  | 944.8  | 1055.2 |
| 1160.1 | 1002.8 | 1204.9 | 1261.2 | 1271.3 | 1265.3 |
| 168.0  | 167.5  | 167.0  | 191.2  | 208.7  | 199.3  |
| 534.4  | 514.7  | 561.5  | 596.3  | 628.4  | 698.3  |
| 150.3  | 84.9   | 147.9  | 138.1  | 164.1  | 168.8  |
| 231.8  | 214.7  | 277.7  | 310.3  | 312.7  | 264.9  |
| 20.8   | 28.5   | 16.7   | 20.8   | 18.5   | 19.6   |
| 439.9  | 375.4  | 420.2  | 434.6  | 469.1  | 536.9  |
| 129.4  | 85.2   | 107.6  | 123.7  | 137.9  | 136.6  |
| 92.9   | 99.9   | 106.0  | 116.2  | 116.6  | 120.2  |
| 651.8  | 567.1  | 600.1  | 586.0  | 695.0  | 783.0  |
| 88.0   | 73.3   | 98.7   | 106.0  | 117.5  | 121.4  |
| 31.6   | 26.5   | 36.9   | 34.8   | 34.9   | 39.7   |
| 84.7   | 57.0   | 57.1   | 62.0   | 66.8   | 82.4   |
| 253.2  | 251.4  | 225.5  | 254.4  | 297.4  | 305.3  |
| 64.6   | 66.3   | 54.7   | 62.9   | 78.3   | 90.5   |
| 271.1  | 230.4  | 242.1  | 236.3  | 251.4  | 300.8  |
| 5.0    | 3.8    | 6.5    | 8.0    | 4.6    | 4.3    |
| 65.9   | 52.4   | 64.8   | 51.9   | 72.6   | 73.5   |
| 280.1  | 309.3  | 282.7  | 288.8  | 365.7  | 366.5  |
| 165.9  | 180.6  | 204.2  | 182.0  | 221.0  | 225.5  |
| 781.1  | 627.8  | 764.8  | 680.5  | 880.7  | 844.2  |
| 290.4  | 219.3  | 279.8  | 293.8  | 302.2  | 340.5  |
| 74.9   | 56.6   | 57.5   | 66.0   | 79.2   | 73.7   |
| 320.8  | 350.2  | 362.7  | 468.2  | 416.7  | 391.6  |
| 222.8  | 197.8  | 217.7  | 210.2  | 259.1  | 283.0  |
| 36.2   | 49.4   | 45.1   | 44.6   | 50.6   | 59.9   |



|        |        |        |        |        |        |
|--------|--------|--------|--------|--------|--------|
| 69.3   | 92.8   | 94.3   | 99.8   | 84.6   | 103.0  |
| 46.7   | 59.6   | 60.3   | 60.7   | 53.9   | 68.0   |
| 19.6   | 13.4   | 24.8   | 22.2   | 20.5   | 23.9   |
| 61.4   | 39.7   | 63.3   | 56.7   | 81.7   | 80.9   |
| 396.3  | 329.1  | 452.6  | 491.9  | 538.2  | 538.5  |
| 181.0  | 99.0   | 143.5  | 120.5  | 189.8  | 171.0  |
| 231.6  | 153.8  | 242.8  | 251.5  | 301.5  | 247.4  |
| 69.9   | 71.0   | 76.8   | 85.7   | 99.5   | 96.3   |
| 63.3   | 62.4   | 64.9   | 66.2   | 69.6   | 75.7   |
| 167.0  | 124.2  | 206.0  | 188.2  | 218.8  | 175.7  |
| 100.9  | 105.1  | 125.1  | 122.8  | 156.8  | 156.7  |
| 418.3  | 395.2  | 446.1  | 487.1  | 519.0  | 497.3  |
| 565.9  | 479.7  | 528.2  | 606.7  | 568.8  | 627.7  |
| 204.3  | 205.0  | 173.4  | 218.9  | 176.9  | 254.5  |
| 1488.9 | 1455.1 | 1420.1 | 1733.2 | 1656.9 | 2038.8 |
| 503.3  | 584.0  | 478.3  | 587.1  | 558.2  | 678.5  |
| 61.3   | 58.6   | 56.8   | 65.5   | 77.4   | 66.4   |
| 63.8   | 53.2   | 61.5   | 62.7   | 70.6   | 73.9   |
| 330.9  | 289.8  | 340.3  | 309.3  | 400.6  | 368.6  |
| 763.1  | 871.1  | 717.1  | 874.5  | 863.8  | 1007.0 |
| 352.2  | 302.2  | 254.0  | 293.7  | 303.0  | 360.8  |
| 390.2  | 320.6  | 334.2  | 362.8  | 408.0  | 443.7  |
| 724.8  | 699.3  | 751.8  | 748.9  | 902.4  | 909.9  |
| 282.3  | 304.8  | 306.2  | 323.0  | 309.8  | 339.3  |
| 148.7  | 146.4  | 139.4  | 173.6  | 163.1  | 202.8  |
| 228.5  | 217.5  | 245.9  | 256.4  | 302.2  | 318.2  |
| 750.3  | 632.1  | 630.5  | 711.1  | 763.2  | 912.4  |
| 1159.0 | 1176.2 | 1153.6 | 1158.8 | 1297.4 | 1404.9 |
| 1657.3 | 1710.1 | 1336.1 | 1528.7 | 1740.0 | 1844.7 |
| 55.2   | 42.3   | 75.1   | 66.1   | 69.6   | 71.9   |
| 169.5  | 117.9  | 141.5  | 143.4  | 161.0  | 185.4  |
| 145.8  | 120.1  | 146.7  | 147.0  | 182.0  | 179.7  |
| 2235.3 | 1919.2 | 2409.4 | 2566.9 | 2424.6 | 2685.4 |
| 264.4  | 255.4  | 263.8  | 250.6  | 328.1  | 324.7  |
| 163.0  | 142.7  | 182.4  | 172.8  | 190.3  | 172.4  |
| 240.0  | 213.0  | 214.7  | 230.9  | 250.6  | 300.2  |
| 50.9   | 33.8   | 49.6   | 52.2   | 60.7   | 63.5   |
| 1.6    | 2.4    | 2.2    | 1.9    | 6.5    | 13.2   |
| 583.9  | 544.7  | 658.5  | 692.1  | 744.7  | 753.5  |
| 607.0  | 499.2  | 514.9  | 544.4  | 583.1  | 729.3  |
| 333.9  | 340.0  | 307.1  | 370.0  | 357.4  | 446.7  |
| 167.1  | 158.2  | 179.4  | 190.2  | 185.0  | 191.2  |
| 267.0  | 297.3  | 319.2  | 343.1  | 317.9  | 396.8  |
| 991.0  | 853.3  | 893.5  | 921.1  | 949.2  | 1103.2 |
| 1685.3 | 1444.9 | 1596.9 | 1729.8 | 1994.0 | 1972.3 |
| 700.8  | 703.6  | 807.0  | 805.3  | 849.9  | 901.9  |
| 374.6  | 351.8  | 460.2  | 394.1  | 360.7  | 459.6  |
| 333.7  | 271.0  | 358.9  | 351.2  | 378.5  | 397.2  |
| 152.4  | 129.7  | 145.4  | 133.9  | 170.5  | 162.0  |
| 183.6  | 131.1  | 164.8  | 202.4  | 170.0  | 200.8  |
| 9014.1 | 8501.5 | 9003.2 | 9283.5 | 9766.4 | 9205.2 |
| 107.5  | 81.2   | 92.3   | 84.2   | 104.6  | 135.4  |
| 533.0  | 514.8  | 549.3  | 565.9  | 683.4  | 644.6  |

|        |        |        |        |        |        |
|--------|--------|--------|--------|--------|--------|
| 428.0  | 512.9  | 489.4  | 529.1  | 562.9  | 583.4  |
| 408.9  | 326.4  | 505.4  | 526.5  | 483.9  | 520.4  |
| 218.5  | 185.5  | 209.6  | 204.1  | 248.7  | 255.5  |
| 356.0  | 274.6  | 337.1  | 349.3  | 390.8  | 396.5  |
| 766.3  | 796.3  | 827.6  | 893.0  | 921.6  | 1033.0 |
| 28.0   | 22.8   | 9.5    | 24.8   | 23.5   | 25.7   |
| 223.7  | 183.3  | 207.8  | 228.9  | 254.6  | 245.3  |
| 172.1  | 163.6  | 184.5  | 193.4  | 208.9  | 203.2  |
| 183.8  | 252.7  | 165.0  | 251.2  | 201.7  | 259.3  |
| 128.0  | 98.7   | 127.9  | 138.0  | 150.9  | 128.6  |
| 72.2   | 82.0   | 89.3   | 78.7   | 95.0   | 85.0   |
| 97.5   | 86.4   | 93.4   | 109.3  | 105.0  | 128.4  |
| 1775.3 | 1969.3 | 1893.6 | 1939.6 | 2115.9 | 2055.7 |
| 224.9  | 244.3  | 236.2  | 242.5  | 245.3  | 312.7  |
| 127.1  | 72.0   | 125.1  | 122.0  | 140.3  | 182.6  |
| 100.1  | 80.3   | 93.4   | 101.0  | 111.1  | 116.9  |
| 458.1  | 392.1  | 483.9  | 484.8  | 537.7  | 557.4  |
| 81.3   | 66.6   | 73.1   | 84.7   | 87.9   | 99.8   |
| 16.4   | 27.8   | 16.3   | 20.0   | 21.3   | 16.3   |
| 83.7   | 98.7   | 119.9  | 119.6  | 119.8  | 103.8  |
| 11.5   | 2.1    | 2.5    | 7.2    | 5.5    | 7.7    |
| 328.2  | 269.1  | 343.8  | 350.6  | 372.7  | 361.3  |
| 14.0   | 3.1    | 16.0   | 7.1    | 3.4    | 6.4    |
| 512.1  | 516.4  | 572.5  | 614.5  | 680.6  | 644.7  |
| 74.9   | 91.3   | 104.5  | 109.4  | 110.3  | 91.5   |
| 65.4   | 43.9   | 42.4   | 54.2   | 48.9   | 67.7   |
| 228.0  | 152.2  | 228.9  | 246.4  | 267.1  | 260.4  |
| 70.0   | 54.3   | 24.9   | 45.4   | 74.2   | 54.5   |
| 458.9  | 444.4  | 494.4  | 525.4  | 569.3  | 607.0  |
| 87.1   | 98.9   | 89.0   | 111.2  | 114.6  | 112.9  |
| 135.3  | 114.5  | 163.1  | 174.7  | 154.7  | 163.2  |
| 224.5  | 197.2  | 211.0  | 196.5  | 253.5  | 208.5  |
| 257.8  | 222.8  | 236.4  | 266.6  | 214.8  | 290.6  |
| 202.3  | 208.4  | 254.2  | 260.9  | 241.1  | 250.4  |
| 183.1  | 197.1  | 177.2  | 193.5  | 226.4  | 226.3  |
| 116.2  | 131.0  | 115.6  | 102.0  | 155.5  | 147.0  |
| 291.8  | 265.9  | 318.5  | 292.0  | 412.7  | 361.6  |
| 99.3   | 110.7  | 121.5  | 122.0  | 112.5  | 131.8  |
| 8098.8 | 7263.4 | 7683.8 | 7994.4 | 8231.8 | 8411.3 |
| 68.0   | 75.3   | 71.1   | 63.7   | 61.2   | 86.5   |
| 32.8   | 24.4   | 24.8   | 20.0   | 22.1   | 33.4   |
| 9204.7 | 8962.1 | 9037.5 | 9327.0 | 9308.4 | 9306.9 |
| 1105.9 | 1019.1 | 1050.4 | 1069.9 | 1187.4 | 1241.6 |
| 28.5   | 30.1   | 30.1   | 36.8   | 43.6   | 48.8   |
| 422.7  | 367.5  | 420.0  | 415.9  | 503.0  | 521.7  |
| 671.4  | 655.9  | 621.1  | 736.6  | 663.9  | 889.0  |
| 1192.5 | 1044.9 | 1160.6 | 1275.8 | 1345.3 | 1393.8 |
| 9.4    | 8.8    | 10.4   | 5.1    | 9.6    | 7.8    |
| 8.4    | 6.8    | 4.3    | 4.1    | 4.0    | 0.5    |
| 150.0  | 122.1  | 168.5  | 155.8  | 168.0  | 186.4  |
| 237.5  | 186.7  | 242.8  | 214.5  | 244.5  | 273.3  |
| 1117.5 | 956.9  | 1103.9 | 1048.3 | 1205.0 | 1292.0 |
| 2.9    | 0.3    | 1.2    | 0.8    | 0.6    | 0.9    |

|         |         |         |         |         |         |
|---------|---------|---------|---------|---------|---------|
| 616.9   | 490.5   | 636.1   | 625.3   | 756.3   | 762.4   |
| 111.9   | 118.0   | 111.4   | 105.4   | 121.6   | 186.9   |
| 1080.7  | 961.7   | 1263.2  | 1318.4  | 1436.6  | 1412.6  |
| 300.3   | 242.6   | 277.5   | 311.4   | 343.7   | 353.3   |
| 299.3   | 249.5   | 285.3   | 304.9   | 297.1   | 329.6   |
| 27.4    | 25.3    | 19.5    | 16.2    | 26.1    | 33.6    |
| 6.7     | 5.0     | 3.4     | 3.7     | 8.3     | 5.2     |
| 1529.1  | 1299.5  | 1542.8  | 1540.8  | 1678.6  | 1860.7  |
| 265.2   | 183.1   | 209.5   | 209.0   | 260.0   | 235.0   |
| 65.7    | 82.9    | 61.5    | 70.2    | 85.4    | 83.2    |
| 652.5   | 566.1   | 604.2   | 670.6   | 713.8   | 747.5   |
| 804.3   | 604.9   | 711.1   | 719.8   | 774.8   | 854.7   |
| 77.3    | 60.5    | 60.1    | 68.3    | 90.1    | 89.8    |
| 45.5    | 33.0    | 46.6    | 36.9    | 40.6    | 40.7    |
| 494.3   | 560.8   | 513.4   | 532.3   | 558.5   | 573.9   |
| 91.6    | 94.9    | 144.5   | 132.1   | 156.9   | 153.4   |
| 158.3   | 191.1   | 154.0   | 173.1   | 156.3   | 183.6   |
| 2370.9  | 2158.4  | 2316.2  | 2508.4  | 2623.8  | 2799.9  |
| 31.3    | 33.7    | 46.5    | 33.4    | 40.0    | 52.1    |
| 237.1   | 212.6   | 240.7   | 239.6   | 264.1   | 290.1   |
| 67.0    | 44.8    | 58.3    | 66.1    | 70.2    | 73.0    |
| 121.8   | 91.9    | 129.8   | 123.6   | 157.3   | 148.9   |
| 228.4   | 164.4   | 219.1   | 288.1   | 290.2   | 289.2   |
| 375.2   | 309.6   | 304.8   | 332.4   | 420.1   | 408.4   |
| 41.4    | 48.8    | 37.3    | 36.7    | 64.2    | 63.2    |
| 48.1    | 58.9    | 57.8    | 53.5    | 73.3    | 78.3    |
| 145.8   | 158.6   | 182.7   | 158.6   | 180.8   | 224.0   |
| 41.7    | 43.1    | 50.2    | 49.9    | 68.2    | 49.4    |
| 449.5   | 369.4   | 409.1   | 407.7   | 500.4   | 458.1   |
| 187.6   | 154.7   | 155.8   | 211.2   | 194.3   | 219.3   |
| 183.9   | 217.8   | 206.1   | 210.4   | 224.3   | 271.7   |
| 214.5   | 144.8   | 250.2   | 211.3   | 283.3   | 257.9   |
| 565.8   | 577.5   | 609.3   | 660.8   | 737.4   | 751.2   |
| 3177.0  | 3334.4  | 4029.3  | 4256.4  | 4133.6  | 4446.2  |
| 501.1   | 495.1   | 585.4   | 574.1   | 625.0   | 562.5   |
| 336.2   | 312.0   | 325.0   | 367.5   | 372.6   | 441.1   |
| 243.3   | 230.4   | 252.0   | 210.3   | 270.0   | 300.1   |
| 346.4   | 326.7   | 385.8   | 378.2   | 460.8   | 397.3   |
| 87.9    | 70.9    | 85.7    | 80.5    | 126.7   | 118.0   |
| 54.8    | 41.5    | 63.2    | 58.3    | 75.0    | 69.0    |
| 192.1   | 151.3   | 161.8   | 185.9   | 192.0   | 267.7   |
| 111.8   | 95.5    | 101.6   | 108.4   | 122.9   | 147.3   |
| 394.8   | 362.3   | 352.7   | 421.4   | 465.6   | 526.0   |
| 196.4   | 109.6   | 176.8   | 145.0   | 223.5   | 230.4   |
| 149.3   | 121.8   | 115.7   | 126.8   | 153.7   | 183.9   |
| 431.5   | 392.9   | 383.7   | 385.4   | 444.4   | 490.6   |
| 11574.4 | 11139.5 | 10645.0 | 11451.7 | 11644.7 | 11863.6 |
| 718.4   | 548.0   | 694.6   | 648.3   | 785.3   | 855.1   |
| 31.2    | 37.6    | 34.1    | 33.8    | 36.7    | 30.0    |
| 76.2    | 101.9   | 60.6    | 91.6    | 87.5    | 70.5    |
| 1982.4  | 1978.9  | 1916.0  | 1912.0  | 2178.7  | 2266.6  |
| 530.0   | 557.8   | 597.4   | 562.5   | 667.2   | 721.9   |
| 176.9   | 188.2   | 209.3   | 202.7   | 197.5   | 231.5   |

|         |         |         |         |         |         |
|---------|---------|---------|---------|---------|---------|
| 130.0   | 108.9   | 134.9   | 136.4   | 153.3   | 162.2   |
| 175.8   | 135.3   | 169.8   | 208.2   | 223.9   | 252.9   |
| 622.9   | 456.8   | 493.5   | 501.8   | 586.0   | 617.5   |
| 83.3    | 65.0    | 61.1    | 73.7    | 87.8    | 112.8   |
| 156.1   | 144.7   | 166.6   | 147.5   | 153.8   | 209.9   |
| 19.3    | 17.4    | 28.7    | 32.3    | 22.6    | 30.9    |
| 296.6   | 244.4   | 275.4   | 295.7   | 333.2   | 372.5   |
| 562.2   | 681.7   | 535.4   | 615.8   | 575.7   | 744.9   |
| 35.3    | 38.4    | 29.8    | 33.4    | 37.9    | 40.0    |
| 178.6   | 157.8   | 163.8   | 187.3   | 217.0   | 190.5   |
| 517.4   | 493.9   | 551.9   | 529.1   | 507.3   | 603.1   |
| 7.1     | 14.7    | 8.1     | 9.0     | 7.4     | 8.6     |
| 169.7   | 153.6   | 179.0   | 179.3   | 200.3   | 228.3   |
| 17.6    | 10.5    | 11.8    | 5.0     | 13.5    | 14.6    |
| 521.8   | 486.5   | 507.5   | 591.0   | 637.9   | 651.8   |
| 11610.3 | 11227.2 | 11323.1 | 11855.9 | 11917.5 | 11872.4 |
| 136.0   | 135.2   | 118.5   | 107.1   | 135.2   | 140.5   |
| 230.0   | 222.4   | 210.0   | 229.5   | 325.2   | 347.5   |
| 26.8    | 29.1    | 31.5    | 28.8    | 15.4    | 27.6    |
| 1022.9  | 1025.8  | 1131.4  | 1167.9  | 1238.6  | 1309.9  |
| 136.2   | 106.0   | 121.3   | 122.8   | 147.3   | 152.6   |
| 800.3   | 829.3   | 842.2   | 879.9   | 886.9   | 1021.4  |
| 40.7    | 26.6    | 33.2    | 33.9    | 39.2    | 34.8    |
| 74.5    | 62.5    | 91.1    | 85.2    | 102.4   | 104.0   |
| 2.5     | 2.2     | 3.8     | 3.1     | 1.7     | 2.7     |
| 575.8   | 556.1   | 617.5   | 700.4   | 649.9   | 720.8   |
| 132.5   | 124.7   | 129.9   | 124.6   | 142.0   | 161.8   |
| 477.4   | 388.4   | 355.3   | 430.7   | 423.3   | 527.5   |
| 689.4   | 681.7   | 749.3   | 794.5   | 882.6   | 880.3   |
| 135.6   | 110.6   | 116.8   | 148.7   | 134.3   | 179.1   |
| 269.2   | 310.1   | 248.2   | 273.1   | 297.4   | 343.4   |
| 90.7    | 73.1    | 75.2    | 90.4    | 99.9    | 119.6   |
| 93.2    | 104.5   | 101.5   | 115.5   | 115.6   | 117.9   |
| 25.0    | 30.4    | 15.6    | 17.2    | 12.2    | 21.5    |
| 2325.2  | 2226.3  | 2580.8  | 2742.0  | 2650.0  | 2573.8  |
| 1.7     | 2.0     | 2.3     | 0.7     | 2.8     | 2.8     |
| 110.0   | 83.0    | 116.4   | 120.6   | 140.5   | 144.8   |
| 275.1   | 220.7   | 281.5   | 245.4   | 330.2   | 330.3   |
| 88.0    | 69.9    | 72.6    | 100.4   | 111.6   | 131.9   |
| 456.0   | 456.0   | 434.9   | 453.8   | 440.7   | 530.9   |
| 50.6    | 44.9    | 50.9    | 50.5    | 61.1    | 93.6    |
| 517.6   | 650.4   | 569.8   | 642.6   | 560.1   | 702.2   |
| 301.0   | 274.3   | 291.3   | 276.9   | 314.5   | 335.5   |
| 303.8   | 205.7   | 330.7   | 317.8   | 355.5   | 354.6   |
| 114.0   | 97.6    | 97.2    | 93.6    | 119.0   | 125.9   |
| 428.9   | 366.5   | 385.6   | 393.4   | 451.5   | 430.7   |
| 37.2    | 21.6    | 38.3    | 24.0    | 39.1    | 36.6    |
| 90.9    | 88.5    | 80.7    | 104.9   | 100.7   | 87.6    |
| 464.5   | 433.1   | 492.4   | 513.0   | 528.9   | 551.2   |
| 4.9     | 4.4     | 3.2     | 6.1     | 2.7     | 11.9    |
| 439.0   | 440.0   | 417.7   | 472.8   | 466.8   | 492.7   |
| 395.9   | 359.8   | 429.3   | 379.6   | 482.9   | 502.2   |
| 623.8   | 512.1   | 629.3   | 664.4   | 647.9   | 731.5   |

|        |        |        |         |        |         |
|--------|--------|--------|---------|--------|---------|
| 76.5   | 67.3   | 93.1   | 98.4    | 105.6  | 101.2   |
| 55.2   | 53.2   | 50.3   | 73.4    | 60.6   | 68.0    |
| 23.2   | 8.6    | 16.7   | 21.5    | 14.8   | 28.7    |
| 181.7  | 216.4  | 199.6  | 220.4   | 232.2  | 230.3   |
| 28.8   | 38.7   | 37.4   | 28.9    | 31.8   | 43.7    |
| 144.3  | 130.9  | 170.4  | 170.3   | 214.2  | 224.0   |
| 90.4   | 66.5   | 87.4   | 73.2    | 92.7   | 77.9    |
| 13.4   | 14.6   | 4.4    | 18.7    | 19.9   | 17.9    |
| 12.8   | 26.0   | 15.6   | 19.7    | 24.1   | 13.0    |
| 474.8  | 416.9  | 477.8  | 475.1   | 526.1  | 535.8   |
| 540.8  | 473.6  | 487.2  | 475.8   | 496.6  | 591.5   |
| 84.8   | 104.5  | 92.4   | 109.8   | 109.6  | 112.7   |
| 115.7  | 97.9   | 103.3  | 120.9   | 136.3  | 139.1   |
| 102.8  | 86.9   | 101.9  | 100.0   | 105.0  | 118.4   |
| 1.2    | 1.0    | 1.9    | 3.5     | 3.0    | 2.4     |
| 896.1  | 853.4  | 922.7  | 995.6   | 985.5  | 1015.8  |
| 49.4   | 40.8   | 46.6   | 61.4    | 59.1   | 56.8    |
| 4857.0 | 4624.1 | 4692.8 | 5390.4  | 5210.7 | 5819.1  |
| 179.6  | 137.7  | 168.5  | 181.2   | 216.1  | 227.2   |
| 1180.4 | 1078.5 | 1139.9 | 1177.0  | 1282.1 | 1386.5  |
| 87.2   | 56.5   | 84.9   | 75.6    | 102.0  | 102.1   |
| 279.0  | 255.7  | 313.5  | 297.2   | 328.5  | 375.6   |
| 601.5  | 554.3  | 593.6  | 610.8   | 716.9  | 756.2   |
| 228.0  | 227.6  | 235.8  | 238.5   | 260.1  | 301.8   |
| 523.9  | 465.1  | 463.9  | 512.8   | 525.1  | 604.4   |
| 494.1  | 546.2  | 488.8  | 596.1   | 496.9  | 627.0   |
| 345.6  | 308.0  | 363.5  | 355.8   | 425.2  | 450.0   |
| 123.7  | 116.3  | 119.2  | 122.4   | 132.8  | 149.4   |
| 48.2   | 45.6   | 48.3   | 42.0    | 48.4   | 55.9    |
| 20.0   | 21.7   | 5.9    | 10.7    | 22.0   | 31.8    |
| 57.9   | 62.4   | 60.7   | 42.2    | 55.8   | 68.9    |
| 335.3  | 279.5  | 252.2  | 309.3   | 309.6  | 347.1   |
| 98.1   | 113.8  | 102.4  | 111.4   | 110.7  | 126.4   |
| 9.3    | 12.1   | 7.2    | 3.0     | 12.0   | 7.4     |
| 138.9  | 105.6  | 126.3  | 149.5   | 202.2  | 199.3   |
| 9649.2 | 9077.8 | 9324.3 | 10192.9 | 9903.7 | 10016.9 |
| 38.1   | 14.2   | 35.1   | 27.9    | 23.6   | 33.9    |
| 151.8  | 191.7  | 176.4  | 178.1   | 183.7  | 205.5   |
| 346.8  | 247.1  | 352.5  | 320.3   | 374.9  | 394.0   |
| 212.4  | 206.2  | 189.7  | 199.6   | 227.5  | 247.2   |
| 545.5  | 572.9  | 633.3  | 660.4   | 727.5  | 704.8   |
| 472.5  | 388.4  | 445.0  | 430.3   | 505.2  | 513.6   |
| 51.4   | 44.3   | 54.4   | 37.2    | 66.0   | 70.3    |
| 589.7  | 532.1  | 635.3  | 630.9   | 738.9  | 750.9   |
| 15.2   | 39.1   | 28.6   | 32.6    | 23.5   | 28.0    |
| 122.6  | 81.8   | 111.2  | 130.5   | 144.5  | 147.8   |
| 81.4   | 61.7   | 95.3   | 94.5    | 79.3   | 94.5    |
| 318.6  | 259.0  | 319.3  | 347.3   | 377.2  | 390.0   |
| 184.6  | 168.7  | 156.6  | 173.9   | 171.5  | 160.5   |
| 48.5   | 52.0   | 76.4   | 57.8    | 70.1   | 61.3    |
| 311.6  | 358.0  | 337.8  | 326.9   | 300.7  | 393.5   |
| 6.6    | 7.7    | 2.5    | 2.5     | 6.1    | 3.7     |
| 306.7  | 314.1  | 313.5  | 335.2   | 316.9  | 372.7   |

|         |         |         |         |         |         |
|---------|---------|---------|---------|---------|---------|
| 314.7   | 258.1   | 294.4   | 319.2   | 400.4   | 407.1   |
| 134.2   | 121.2   | 140.6   | 164.4   | 182.8   | 181.8   |
| 243.0   | 175.9   | 224.2   | 271.8   | 265.7   | 301.3   |
| 9.5     | 12.1    | 13.5    | 11.4    | 10.5    | 14.3    |
| 136.9   | 115.9   | 144.0   | 150.1   | 170.2   | 176.1   |
| 105.7   | 92.9    | 143.7   | 108.8   | 153.1   | 149.7   |
| 62.4    | 85.7    | 65.0    | 79.1    | 81.3    | 84.5    |
| 59.1    | 40.8    | 39.5    | 47.4    | 41.4    | 45.5    |
| 219.4   | 135.7   | 170.7   | 186.5   | 194.2   | 231.6   |
| 1008.9  | 1015.2  | 760.7   | 1322.4  | 993.1   | 1262.6  |
| 127.8   | 130.0   | 134.5   | 195.5   | 130.8   | 197.4   |
| 158.5   | 129.2   | 160.2   | 152.4   | 175.4   | 195.9   |
| 194.0   | 229.4   | 182.3   | 185.8   | 190.5   | 212.9   |
| 689.4   | 581.2   | 616.2   | 643.8   | 757.7   | 752.6   |
| 682.4   | 811.5   | 703.4   | 829.7   | 810.5   | 827.9   |
| 298.4   | 312.7   | 393.8   | 453.0   | 430.6   | 423.1   |
| 0.8     | 0.6     | 0.6     | 2.1     | 1.1     | 2.1     |
| 70.0    | 46.3    | 75.5    | 49.6    | 76.8    | 84.2    |
| 97.0    | 68.2    | 108.5   | 76.2    | 142.1   | 104.8   |
| 153.6   | 163.3   | 142.3   | 160.2   | 158.7   | 159.0   |
| 59.9    | 72.8    | 72.6    | 81.8    | 67.3    | 58.3    |
| 3448.4  | 3504.3  | 3391.0  | 3783.9  | 3636.3  | 4314.4  |
| 343.2   | 311.1   | 305.0   | 302.0   | 348.8   | 407.2   |
| 483.7   | 423.1   | 516.6   | 522.4   | 653.3   | 584.3   |
| 297.0   | 272.0   | 370.8   | 330.8   | 414.2   | 374.5   |
| 117.3   | 99.8    | 121.0   | 126.7   | 136.3   | 145.6   |
| 55.9    | 58.9    | 47.4    | 63.6    | 68.1    | 70.4    |
| 108.2   | 58.4    | 102.8   | 113.7   | 146.9   | 102.0   |
| 327.7   | 256.2   | 350.3   | 318.6   | 391.1   | 394.5   |
| 489.5   | 432.1   | 460.0   | 474.6   | 519.5   | 589.6   |
| 2615.7  | 2226.1  | 2561.6  | 2520.4  | 2781.1  | 2856.9  |
| 219.0   | 173.9   | 199.4   | 173.9   | 235.1   | 250.7   |
| 97.4    | 107.7   | 109.2   | 174.0   | 203.7   | 128.3   |
| 377.1   | 338.8   | 364.4   | 381.9   | 392.0   | 456.3   |
| 134.5   | 85.3    | 105.6   | 104.1   | 106.3   | 120.6   |
| 272.0   | 254.8   | 230.8   | 250.3   | 332.0   | 318.9   |
| 8272.8  | 6592.0  | 7781.2  | 8486.4  | 8895.8  | 8927.9  |
| 431.5   | 461.2   | 472.4   | 502.5   | 545.3   | 542.5   |
| 12539.6 | 12218.6 | 11726.8 | 12345.6 | 12469.9 | 12342.5 |
| 268.3   | 235.8   | 275.0   | 299.7   | 339.5   | 306.6   |
| 223.5   | 266.9   | 203.3   | 238.9   | 260.0   | 284.1   |
| 115.8   | 136.5   | 112.7   | 125.1   | 146.9   | 158.3   |
| 873.7   | 647.8   | 788.5   | 772.1   | 922.8   | 968.8   |
| 837.1   | 715.1   | 846.6   | 857.2   | 875.4   | 1019.9  |
| 107.0   | 95.8    | 107.6   | 108.5   | 118.3   | 121.7   |
| 72.8    | 65.0    | 51.8    | 65.3    | 88.0    | 89.8    |
| 278.8   | 190.9   | 269.6   | 264.5   | 341.9   | 293.9   |
| 221.8   | 234.0   | 221.8   | 245.3   | 260.4   | 273.6   |
| 108.3   | 105.1   | 102.8   | 117.5   | 121.2   | 152.0   |
| 416.0   | 416.1   | 427.7   | 443.3   | 514.6   | 481.0   |
| 405.5   | 381.2   | 371.1   | 388.5   | 489.3   | 449.9   |
| 160.0   | 160.6   | 169.9   | 164.4   | 200.4   | 225.7   |
| 453.8   | 398.7   | 440.3   | 438.5   | 459.1   | 542.1   |

|        |        |        |        |        |        |
|--------|--------|--------|--------|--------|--------|
| 47.4   | 3.9    | 44.3   | 58.6   | 65.1   | 61.9   |
| 23.3   | 7.2    | 22.1   | 17.9   | 28.5   | 23.0   |
| 168.6  | 152.0  | 164.8  | 162.8  | 200.0  | 214.0  |
| 69.9   | 68.3   | 75.9   | 69.4   | 77.9   | 95.1   |
| 309.9  | 297.2  | 333.8  | 325.4  | 380.7  | 363.1  |
| 559.5  | 472.6  | 620.3  | 515.6  | 684.1  | 612.6  |
| 1049.2 | 825.8  | 1071.9 | 963.2  | 1245.6 | 1207.4 |
| 214.9  | 181.2  | 223.2  | 221.4  | 220.3  | 287.7  |
| 453.9  | 411.0  | 480.2  | 514.9  | 557.4  | 541.6  |
| 107.3  | 102.4  | 99.7   | 130.6  | 132.5  | 135.2  |
| 269.1  | 230.5  | 268.5  | 278.3  | 311.5  | 353.0  |
| 84.5   | 57.4   | 89.9   | 86.4   | 107.4  | 108.6  |
| 53.9   | 42.2   | 52.9   | 53.8   | 70.1   | 65.8   |
| 98.0   | 88.0   | 101.7  | 100.1  | 113.0  | 101.5  |
| 41.5   | 34.8   | 31.4   | 29.9   | 42.3   | 37.6   |
| 150.4  | 113.8  | 117.7  | 125.3  | 153.9  | 164.5  |
| 4.3    | 4.9    | 6.0    | 4.6    | 4.8    | 5.1    |
| 90.2   | 66.1   | 82.9   | 96.0   | 106.0  | 90.5   |
| 29.1   | 25.4   | 22.2   | 36.2   | 30.0   | 13.0   |
| 1100.6 | 792.3  | 811.3  | 1121.3 | 932.7  | 1270.4 |
| 211.1  | 234.5  | 223.3  | 235.6  | 228.9  | 263.8  |
| 4047.5 | 3797.9 | 4227.4 | 4418.5 | 4828.3 | 4940.1 |
| 13.6   | 19.0   | 35.4   | 14.2   | 12.0   | 16.8   |
| 85.9   | 99.2   | 66.5   | 102.2  | 76.5   | 104.6  |
| 147.6  | 131.2  | 165.3  | 180.9  | 186.7  | 184.9  |
| 149.1  | 124.4  | 148.6  | 159.4  | 172.2  | 145.8  |
| 27.6   | 29.4   | 27.6   | 31.5   | 18.4   | 33.9   |
| 521.0  | 377.4  | 515.3  | 522.4  | 633.7  | 639.2  |
| 1363.5 | 1005.5 | 1215.8 | 1132.9 | 1223.0 | 1377.0 |
| 142.3  | 127.4  | 140.5  | 119.1  | 153.7  | 160.0  |
| 269.5  | 255.1  | 289.6  | 284.3  | 316.5  | 320.6  |
| 224.8  | 211.5  | 232.2  | 251.9  | 247.2  | 267.3  |
| 289.4  | 241.2  | 310.4  | 322.1  | 346.9  | 414.7  |
| 125.4  | 153.6  | 120.0  | 154.3  | 156.3  | 182.7  |
| 63.3   | 46.4   | 54.9   | 59.6   | 59.1   | 87.1   |
| 164.5  | 135.6  | 174.2  | 166.2  | 207.9  | 208.6  |
| 1.7    | 4.9    | 4.5    | 2.0    | 1.7    | 3.1    |
| 268.4  | 253.3  | 202.0  | 222.4  | 257.5  | 285.9  |
| 84.7   | 72.7   | 76.5   | 87.0   | 91.1   | 83.8   |
| 112.9  | 134.0  | 126.2  | 97.4   | 107.8  | 138.5  |
| 51.1   | 72.4   | 53.6   | 67.5   | 56.6   | 74.6   |
| 1097.9 | 1256.9 | 977.5  | 1128.7 | 1219.2 | 1336.2 |
| 126.5  | 103.7  | 126.0  | 122.5  | 127.6  | 152.3  |
| 201.0  | 249.9  | 209.5  | 247.3  | 227.9  | 220.3  |
| 53.9   | 33.4   | 55.2   | 60.4   | 68.4   | 66.5   |
| 71.5   | 52.2   | 49.6   | 64.5   | 70.2   | 68.9   |
| 150.8  | 132.4  | 165.7  | 172.8  | 176.0  | 189.7  |
| 1323.5 | 1057.6 | 1228.4 | 1176.3 | 1394.2 | 1394.9 |
| 122.6  | 120.9  | 147.5  | 136.1  | 137.2  | 157.7  |
| 1280.6 | 980.7  | 1066.9 | 1384.7 | 1272.4 | 1357.6 |
| 322.9  | 266.7  | 269.6  | 270.6  | 316.2  | 337.3  |
| 64.5   | 101.5  | 71.1   | 65.3   | 73.0   | 86.1   |
| 4911.0 | 4679.6 | 4524.6 | 5018.5 | 5161.4 | 5763.3 |

|         |         |         |         |         |         |
|---------|---------|---------|---------|---------|---------|
| 126.4   | 146.5   | 162.5   | 186.9   | 169.6   | 141.2   |
| 152.3   | 171.8   | 168.4   | 132.1   | 153.7   | 152.9   |
| 108.0   | 109.1   | 120.1   | 122.2   | 122.9   | 137.7   |
| 331.3   | 298.5   | 334.6   | 343.4   | 394.8   | 412.0   |
| 225.5   | 189.9   | 235.5   | 238.3   | 266.7   | 278.3   |
| 972.1   | 876.1   | 1040.2  | 1066.1  | 1159.7  | 1102.9  |
| 201.4   | 131.9   | 169.9   | 165.9   | 247.8   | 203.9   |
| 3.6     | 10.4    | 10.2    | 6.1     | 4.4     | 13.1    |
| 184.1   | 150.3   | 198.6   | 187.4   | 214.9   | 236.9   |
| 259.3   | 172.5   | 225.0   | 250.1   | 295.3   | 301.1   |
| 16.7    | 15.3    | 11.8    | 20.7    | 21.8    | 24.8    |
| 10575.7 | 10326.1 | 10656.1 | 10625.4 | 10935.2 | 10769.1 |
| 137.2   | 117.0   | 125.5   | 131.0   | 135.0   | 169.7   |
| 238.7   | 280.4   | 253.8   | 270.0   | 309.8   | 309.7   |
| 283.2   | 225.1   | 273.5   | 257.4   | 337.2   | 338.5   |
| 3.1     | 16.4    | 10.4    | 9.1     | 3.3     | 8.9     |
| 1.2     | 1.3     | 1.4     | 1.0     | 1.0     | 1.8     |
| 10.8    | 26.0    | 22.4    | 15.1    | 14.9    | 21.7    |
| 116.3   | 109.9   | 117.4   | 106.3   | 137.9   | 153.9   |
| 122.4   | 111.1   | 130.8   | 141.6   | 146.5   | 155.4   |
| 414.3   | 385.4   | 362.2   | 376.6   | 426.2   | 486.3   |
| 114.8   | 75.3    | 110.5   | 105.7   | 123.5   | 127.4   |
| 81.0    | 65.0    | 76.0    | 73.1    | 99.1    | 97.9    |
| 107.1   | 97.1    | 115.9   | 120.1   | 135.1   | 121.3   |
| 235.7   | 245.0   | 290.7   | 282.9   | 324.5   | 284.6   |
| 1.0     | 7.5     | 14.1    | 4.6     | 9.8     | 3.9     |
| 34.1    | 39.9    | 52.1    | 40.0    | 45.3    | 41.5    |
| 457.8   | 388.9   | 441.0   | 411.4   | 464.5   | 530.5   |
| 16.4    | 15.7    | 22.8    | 23.8    | 31.7    | 42.5    |
| 504.9   | 406.3   | 549.9   | 503.3   | 546.7   | 665.2   |
| 181.2   | 162.4   | 168.3   | 179.4   | 164.0   | 208.4   |
| 5.5     | 11.2    | 3.2     | 8.9     | 6.1     | 7.5     |
| 105.8   | 116.7   | 163.3   | 133.5   | 184.8   | 182.5   |
| 817.4   | 764.0   | 939.5   | 941.9   | 961.2   | 1061.9  |
| 142.1   | 136.0   | 152.8   | 164.8   | 194.4   | 191.0   |
| 608.7   | 409.0   | 620.4   | 598.5   | 566.3   | 640.4   |
| 208.5   | 184.6   | 204.5   | 211.5   | 224.7   | 239.8   |
| 484.7   | 457.6   | 434.0   | 426.7   | 511.7   | 493.3   |
| 980.4   | 910.4   | 911.7   | 910.4   | 1036.6  | 1177.6  |
| 73.9    | 71.7    | 75.0    | 79.9    | 94.8    | 86.3    |
| 622.9   | 512.7   | 470.9   | 487.6   | 535.6   | 663.4   |
| 122.0   | 91.6    | 111.6   | 127.1   | 146.1   | 137.1   |
| 542.3   | 473.4   | 450.8   | 546.6   | 547.7   | 645.4   |
| 138.2   | 126.3   | 125.5   | 128.2   | 128.7   | 172.0   |
| 285.3   | 331.3   | 320.2   | 308.5   | 337.2   | 408.5   |
| 2001.4  | 1721.5  | 1820.3  | 2027.4  | 2264.7  | 2308.2  |
| 159.7   | 158.5   | 169.3   | 189.9   | 179.0   | 208.3   |
| 180.8   | 243.2   | 178.8   | 207.4   | 222.0   | 224.2   |
| 534.4   | 439.6   | 521.4   | 629.0   | 603.0   | 633.8   |
| 163.3   | 153.6   | 144.9   | 168.4   | 180.7   | 204.2   |
| 1174.4  | 914.3   | 1334.9  | 1121.9  | 1468.6  | 1392.9  |
| 512.5   | 445.8   | 416.5   | 489.4   | 506.3   | 605.9   |
| 86.4    | 81.5    | 75.3    | 81.0    | 93.9    | 105.9   |



|        |        |        |        |        |        |
|--------|--------|--------|--------|--------|--------|
| 36.9   | 28.9   | 33.3   | 35.1   | 44.9   | 37.6   |
| 35.9   | 25.6   | 36.4   | 38.5   | 33.5   | 42.5   |
| 90.2   | 69.6   | 99.2   | 75.6   | 88.1   | 103.5  |
| 118.0  | 71.0   | 114.7  | 89.0   | 115.0  | 129.2  |
| 135.7  | 96.0   | 137.1  | 149.5  | 162.7  | 134.9  |
| 1083.8 | 970.3  | 862.6  | 977.2  | 1028.5 | 1373.9 |
| 989.8  | 774.4  | 1008.2 | 1080.6 | 1026.2 | 1088.8 |
| 431.0  | 432.7  | 400.2  | 411.6  | 408.7  | 477.2  |
| 285.9  | 246.9  | 245.5  | 323.2  | 259.7  | 381.3  |
| 17.6   | 15.8   | 26.6   | 22.4   | 16.2   | 19.6   |
| 677.1  | 697.6  | 651.8  | 679.8  | 733.0  | 763.7  |
| 657.6  | 418.6  | 726.6  | 661.1  | 806.0  | 758.9  |
| 9.5    | 3.8    | 4.4    | 12.4   | 9.7    | 21.4   |
| 47.3   | 34.0   | 75.8   | 27.3   | 52.3   | 53.2   |
| 225.2  | 225.0  | 224.2  | 225.6  | 252.3  | 294.4  |
| 249.7  | 257.4  | 231.1  | 256.0  | 336.6  | 335.3  |
| 276.0  | 267.0  | 266.9  | 287.1  | 292.5  | 375.4  |
| 142.0  | 115.6  | 137.0  | 126.2  | 167.8  | 160.2  |
| 77.3   | 62.7   | 72.4   | 76.4   | 93.3   | 91.7   |
| 217.3  | 180.5  | 175.5  | 186.0  | 207.8  | 213.3  |
| 104.1  | 89.5   | 91.5   | 100.3  | 134.3  | 137.8  |
| 7337.4 | 6988.4 | 7303.4 | 7999.6 | 7988.7 | 8183.3 |
| 232.5  | 185.5  | 256.4  | 226.7  | 206.4  | 293.3  |
| 46.3   | 46.5   | 31.1   | 47.1   | 44.2   | 51.2   |
| 182.3  | 155.0  | 181.6  | 194.0  | 217.0  | 214.0  |
| 56.4   | 56.4   | 62.0   | 64.6   | 74.9   | 70.3   |
| 42.9   | 37.4   | 52.4   | 38.0   | 61.4   | 55.2   |
| 8.3    | 1.7    | 3.6    | 5.1    | 3.1    | 3.7    |
| 55.8   | 46.2   | 59.1   | 58.4   | 70.6   | 59.5   |
| 19.1   | 70.4   | 20.6   | 16.8   | 25.3   | 13.5   |
| 513.7  | 420.5  | 512.1  | 503.3  | 531.4  | 581.3  |
| 1379.4 | 1306.0 | 1188.5 | 1520.6 | 1601.5 | 1662.9 |
| 94.0   | 75.5   | 92.4   | 96.8   | 98.5   | 88.5   |
| 182.0  | 177.7  | 163.8  | 175.4  | 203.3  | 196.6  |
| 100.0  | 66.3   | 96.7   | 94.5   | 96.0   | 115.2  |
| 210.9  | 172.5  | 250.1  | 244.5  | 300.2  | 239.0  |
| 258.9  | 262.4  | 312.5  | 255.6  | 292.9  | 326.7  |
| 10.1   | 8.0    | 13.0   | 10.4   | 4.6    | 3.7    |
| 1.8    | 0.8    | 3.1    | 1.9    | 6.3    | 1.9    |
| 1097.8 | 1042.3 | 1545.9 | 1873.1 | 2055.7 | 1213.0 |
| 622.7  | 589.3  | 794.0  | 842.7  | 614.1  | 880.1  |
| 141.9  | 137.7  | 174.5  | 212.3  | 185.3  | 205.3  |
| 935.2  | 898.5  | 965.2  | 1072.3 | 1060.5 | 1142.6 |
| 298.7  | 262.4  | 268.3  | 297.3  | 347.2  | 358.7  |
| 35.5   | 31.3   | 44.6   | 44.4   | 46.4   | 59.2   |
| 788.3  | 732.1  | 762.4  | 844.6  | 859.1  | 971.6  |
| 413.4  | 338.8  | 345.5  | 392.6  | 401.3  | 478.8  |
| 63.8   | 61.8   | 72.0   | 91.0   | 86.0   | 88.8   |
| 620.9  | 508.8  | 656.3  | 641.6  | 713.6  | 735.5  |
| 59.7   | 45.3   | 70.0   | 57.8   | 80.4   | 99.2   |
| 19.6   | 43.8   | 18.3   | 27.9   | 31.0   | 26.7   |
| 87.4   | 90.8   | 90.2   | 81.9   | 95.7   | 97.3   |
| 12.3   | 19.3   | 19.0   | 23.0   | 22.4   | 24.2   |

|        |        |        |        |         |         |
|--------|--------|--------|--------|---------|---------|
| 86.6   | 66.8   | 65.0   | 66.4   | 85.1    | 84.6    |
| 5151.3 | 4692.4 | 4742.2 | 5088.9 | 5342.2  | 5482.7  |
| 79.1   | 79.0   | 113.0  | 101.0  | 122.8   | 113.7   |
| 139.8  | 157.8  | 167.4  | 183.3  | 224.1   | 195.0   |
| 58.1   | 42.3   | 61.2   | 60.4   | 63.5    | 71.6    |
| 1507.7 | 1522.1 | 1632.3 | 1656.3 | 1835.2  | 1904.4  |
| 16.5   | 24.4   | 20.2   | 13.0   | 11.9    | 21.6    |
| 367.0  | 321.1  | 372.4  | 369.6  | 383.3   | 425.2   |
| 33.6   | 37.6   | 34.3   | 36.1   | 46.4    | 43.5    |
| 43.2   | 50.7   | 50.6   | 64.9   | 60.6    | 68.2    |
| 7.4    | 8.3    | 3.5    | 7.9    | 9.8     | 10.0    |
| 0.7    | 8.1    | 6.8    | 2.6    | 1.8     | 5.6     |
| 48.1   | 54.7   | 53.8   | 45.7   | 39.5    | 43.6    |
| 107.4  | 66.8   | 97.8   | 89.7   | 119.0   | 123.2   |
| 25.5   | 16.3   | 13.5   | 19.5   | 22.8    | 37.5    |
| 414.7  | 232.9  | 346.1  | 284.3  | 440.9   | 506.3   |
| 247.5  | 231.8  | 253.4  | 246.6  | 275.7   | 321.6   |
| 453.1  | 444.1  | 542.6  | 531.1  | 579.6   | 587.9   |
| 223.6  | 213.2  | 177.4  | 224.3  | 240.0   | 323.2   |
| 94.3   | 84.3   | 70.3   | 85.1   | 88.6    | 95.5    |
| 219.8  | 211.7  | 223.6  | 228.2  | 264.5   | 273.5   |
| 426.8  | 414.1  | 388.8  | 453.6  | 467.2   | 516.7   |
| 9495.6 | 8769.8 | 9350.2 | 9944.7 | 10074.5 | 10092.1 |
| 138.0  | 121.9  | 93.5   | 150.4  | 136.6   | 158.5   |
| 164.6  | 165.5  | 153.9  | 163.8  | 189.5   | 173.7   |
| 12.2   | 22.8   | 8.5    | 12.7   | 8.0     | 17.3    |
| 93.9   | 62.8   | 78.8   | 87.1   | 111.1   | 103.7   |
| 338.0  | 351.3  | 365.7  | 368.0  | 439.6   | 431.1   |
| 149.7  | 175.0  | 144.5  | 146.3  | 160.9   | 199.2   |
| 882.9  | 878.8  | 1030.5 | 1115.4 | 1119.1  | 1160.8  |
| 73.8   | 66.8   | 75.4   | 67.6   | 92.2    | 98.8    |
| 224.8  | 201.1  | 245.5  | 226.9  | 260.5   | 294.7   |
| 363.5  | 317.6  | 460.8  | 420.4  | 453.3   | 488.8   |
| 20.7   | 9.6    | 26.7   | 18.4   | 23.5    | 31.4    |
| 181.9  | 150.2  | 166.8  | 190.6  | 179.4   | 229.7   |
| 135.6  | 158.6  | 144.3  | 128.5  | 164.5   | 155.3   |
| 52.2   | 29.0   | 41.8   | 59.9   | 60.6    | 64.3    |
| 25.0   | 24.3   | 21.8   | 17.4   | 24.5    | 8.6     |
| 151.9  | 177.2  | 162.2  | 157.5  | 191.3   | 191.8   |
| 664.0  | 735.5  | 449.6  | 708.5  | 606.3   | 793.0   |
| 47.1   | 12.9   | 25.6   | 33.5   | 40.3    | 41.8    |
| 647.3  | 653.8  | 575.4  | 621.1  | 592.4   | 734.4   |
| 415.0  | 381.5  | 409.4  | 443.3  | 470.0   | 463.3   |
| 559.2  | 455.4  | 620.0  | 569.3  | 617.3   | 685.5   |
| 1015.4 | 996.9  | 970.2  | 1123.5 | 1111.1  | 1256.5  |
| 5040.2 | 4672.7 | 5548.9 | 5306.1 | 5681.1  | 6040.4  |
| 439.4  | 397.1  | 497.4  | 483.5  | 510.8   | 569.5   |
| 60.3   | 53.5   | 58.6   | 78.9   | 77.8    | 89.3    |
| 55.3   | 40.3   | 43.2   | 39.7   | 54.5    | 54.6    |
| 463.9  | 402.9  | 508.7  | 498.7  | 537.0   | 574.4   |
| 999.3  | 710.5  | 937.1  | 909.5  | 1110.7  | 1117.3  |
| 245.1  | 157.7  | 205.1  | 229.4  | 264.2   | 332.0   |
| 125.2  | 128.6  | 120.6  | 138.2  | 151.4   | 168.2   |

|        |        |        |        |        |        |
|--------|--------|--------|--------|--------|--------|
| 599.1  | 530.3  | 570.2  | 587.2  | 597.7  | 702.1  |
| 143.7  | 127.9  | 151.8  | 181.2  | 185.8  | 224.5  |
| 259.5  | 239.8  | 226.3  | 258.9  | 305.3  | 324.2  |
| 67.9   | 59.0   | 68.9   | 72.4   | 92.5   | 77.5   |
| 41.6   | 40.6   | 38.2   | 42.6   | 45.1   | 45.4   |
| 239.3  | 200.9  | 217.2  | 221.0  | 245.3  | 288.9  |
| 439.2  | 343.5  | 397.7  | 431.1  | 457.5  | 557.4  |
| 577.4  | 674.9  | 630.3  | 644.7  | 691.9  | 709.5  |
| 357.3  | 308.4  | 346.2  | 366.5  | 391.2  | 443.8  |
| 161.1  | 109.3  | 174.8  | 178.2  | 187.1  | 158.8  |
| 254.5  | 237.6  | 337.0  | 308.3  | 343.5  | 317.4  |
| 21.5   | 14.5   | 14.7   | 15.6   | 14.0   | 25.8   |
| 598.9  | 538.8  | 628.1  | 663.0  | 664.7  | 741.2  |
| 122.5  | 129.0  | 129.4  | 117.0  | 137.2  | 151.2  |
| 12.5   | 36.0   | 36.3   | 23.4   | 39.6   | 52.8   |
| 125.6  | 115.1  | 132.9  | 135.5  | 133.1  | 158.3  |
| 357.2  | 337.6  | 379.8  | 431.4  | 373.8  | 419.0  |
| 1.8    | 2.2    | 2.1    | 2.0    | 2.3    | 2.4    |
| 1696.8 | 1505.0 | 1669.9 | 1706.8 | 1856.9 | 1845.3 |
| 360.1  | 293.6  | 384.5  | 370.5  | 463.4  | 437.4  |
| 369.4  | 343.4  | 447.2  | 387.3  | 480.6  | 426.2  |
| 19.3   | 1.7    | 19.8   | 9.3    | 20.2   | 15.0   |
| 812.4  | 866.1  | 949.0  | 1065.1 | 1103.5 | 1141.4 |
| 5.2    | 0.6    | 1.1    | 4.5    | 4.4    | 1.5    |
| 363.9  | 244.6  | 309.2  | 301.8  | 393.0  | 330.8  |
| 587.5  | 470.4  | 506.8  | 589.9  | 572.1  | 594.4  |
| 42.8   | 30.5   | 50.3   | 60.4   | 53.5   | 48.3   |
| 33.0   | 32.9   | 36.7   | 29.4   | 43.2   | 43.4   |
| 2921.1 | 2707.9 | 2952.9 | 2989.3 | 3281.8 | 3298.0 |
| 7030.9 | 6541.9 | 6952.5 | 7233.1 | 7534.5 | 7586.3 |
| 125.0  | 113.3  | 113.7  | 113.5  | 144.0  | 142.7  |
| 188.0  | 124.7  | 186.4  | 179.8  | 238.4  | 213.2  |
| 347.0  | 240.7  | 252.5  | 326.8  | 330.9  | 376.6  |
| 685.8  | 766.6  | 812.1  | 892.2  | 905.9  | 963.7  |
| 127.7  | 97.3   | 104.4  | 113.9  | 150.1  | 154.9  |
| 74.0   | 65.7   | 66.9   | 81.6   | 79.9   | 96.4   |
| 75.2   | 60.4   | 64.6   | 84.1   | 79.0   | 98.5   |
| 70.5   | 112.9  | 52.8   | 76.7   | 54.2   | 87.6   |
| 128.0  | 99.4   | 127.5  | 121.5  | 132.7  | 148.0  |
| 25.6   | 23.8   | 25.5   | 24.8   | 33.6   | 38.0   |
| 5.8    | 3.6    | 6.0    | 7.1    | 6.6    | 9.8    |
| 23.3   | 25.5   | 18.5   | 13.3   | 24.0   | 28.3   |
| 394.2  | 375.9  | 442.8  | 407.0  | 464.4  | 525.5  |
| 290.6  | 246.1  | 277.5  | 322.5  | 327.1  | 378.3  |
| 140.8  | 126.7  | 146.4  | 154.0  | 158.8  | 171.9  |
| 421.7  | 471.5  | 317.0  | 426.0  | 406.5  | 535.6  |
| 339.3  | 263.7  | 361.8  | 392.6  | 397.7  | 395.6  |
| 72.3   | 77.3   | 73.0   | 78.8   | 87.2   | 93.3   |
| 180.7  | 152.3  | 140.8  | 172.1  | 201.6  | 207.9  |
| 5.3    | 4.2    | 3.6    | 10.0   | 8.1    | 1.8    |
| 340.6  | 317.0  | 282.0  | 268.5  | 344.9  | 327.6  |
| 351.5  | 318.2  | 333.7  | 325.1  | 402.9  | 451.8  |
| 3.9    | 7.4    | 1.2    | 2.3    | 2.1    | 5.5    |

|         |         |         |         |         |         |
|---------|---------|---------|---------|---------|---------|
| 48.1    | 43.3    | 41.4    | 44.1    | 52.2    | 44.6    |
| 81.1    | 66.7    | 67.7    | 68.2    | 78.8    | 94.2    |
| 242.9   | 315.5   | 255.5   | 263.4   | 307.9   | 337.5   |
| 257.0   | 120.1   | 295.0   | 225.0   | 410.1   | 313.5   |
| 52.7    | 45.0    | 71.2    | 43.5    | 77.0    | 76.3    |
| 175.4   | 156.5   | 153.9   | 173.0   | 191.5   | 236.1   |
| 62.0    | 52.6    | 52.1    | 66.2    | 74.2    | 72.4    |
| 160.4   | 155.7   | 171.0   | 194.2   | 182.0   | 188.0   |
| 8886.2  | 8066.3  | 8394.2  | 10254.9 | 10014.0 | 9701.1  |
| 20.7    | 12.5    | 21.0    | 15.2    | 49.3    | 16.6    |
| 201.9   | 157.0   | 188.2   | 161.6   | 236.5   | 232.7   |
| 373.1   | 293.8   | 336.5   | 388.3   | 434.3   | 485.2   |
| 13481.4 | 12582.9 | 13158.1 | 12905.9 | 13741.4 | 13643.5 |
| 63.7    | 61.1    | 61.7    | 70.3    | 76.5    | 82.0    |
| 2078.7  | 1806.1  | 2146.5  | 2218.5  | 2319.9  | 2515.7  |
| 28.3    | 27.1    | 29.0    | 28.7    | 35.6    | 46.1    |
| 928.3   | 938.4   | 916.1   | 900.4   | 1125.1  | 1184.5  |
| 39.4    | 20.6    | 28.2    | 23.8    | 45.9    | 34.6    |
| 297.1   | 296.7   | 285.3   | 327.5   | 311.4   | 347.4   |
| 5.4     | 36.8    | 10.2    | 12.8    | 9.2     | 19.3    |
| 282.2   | 237.2   | 273.0   | 335.3   | 294.1   | 364.8   |
| 209.3   | 169.5   | 204.8   | 205.8   | 237.6   | 271.9   |
| 216.4   | 154.1   | 189.0   | 200.5   | 232.9   | 235.5   |
| 1.9     | 2.2     | 2.1     | 1.9     | 2.0     | 2.2     |
| 44.1    | 45.4    | 42.5    | 37.7    | 40.7    | 48.6    |
| 677.5   | 709.8   | 628.3   | 598.2   | 676.8   | 789.6   |
| 147.1   | 151.9   | 147.4   | 154.9   | 144.0   | 170.0   |
| 60.2    | 53.0    | 78.3    | 90.1    | 90.9    | 71.0    |
| 17.5    | 20.6    | 16.3    | 18.6    | 13.6    | 13.0    |
| 3349.7  | 3097.5  | 3501.0  | 3730.9  | 3842.0  | 4111.3  |
| 1106.2  | 912.8   | 1009.8  | 1070.2  | 1118.6  | 1337.6  |
| 201.6   | 131.6   | 203.8   | 198.8   | 232.7   | 222.5   |
| 412.1   | 339.1   | 425.5   | 400.5   | 499.7   | 414.8   |
| 422.4   | 424.8   | 449.3   | 412.7   | 455.6   | 561.3   |
| 21.7    | 16.7    | 24.8    | 28.3    | 17.5    | 27.4    |
| 79.0    | 90.0    | 69.2    | 96.1    | 85.7    | 100.2   |
| 1.8     | 1.3     | 9.8     | 2.9     | 2.6     | 3.7     |
| 44.4    | 34.2    | 32.0    | 43.3    | 48.9    | 48.5    |
| 30.2    | 21.1    | 28.8    | 35.0    | 41.8    | 45.0    |
| 227.5   | 221.6   | 204.2   | 255.9   | 260.6   | 306.7   |
| 268.3   | 218.6   | 329.8   | 300.6   | 415.5   | 354.9   |
| 815.0   | 1099.5  | 753.5   | 900.4   | 870.6   | 937.9   |
| 36.6    | 28.8    | 42.9    | 31.8    | 27.1    | 44.2    |
| 135.2   | 132.1   | 144.9   | 144.9   | 189.9   | 176.6   |
| 14.9    | 15.8    | 8.8     | 18.3    | 13.2    | 13.9    |
| 319.0   | 284.4   | 319.5   | 376.7   | 375.8   | 465.3   |
| 172.2   | 129.3   | 154.5   | 160.4   | 181.0   | 204.3   |
| 95.1    | 77.2    | 89.3    | 82.1    | 96.0    | 105.0   |
| 3.0     | 12.0    | 8.2     | 1.0     | 4.3     | 19.4    |
| 6.0     | 11.5    | 3.9     | 14.9    | 17.7    | 9.4     |
| 11.8    | 1.3     | 7.7     | 2.4     | 6.1     | 4.9     |
| 357.4   | 343.9   | 410.0   | 403.5   | 430.5   | 464.0   |
| 86.0    | 122.0   | 111.6   | 112.5   | 122.5   | 95.4    |

|        |        |        |        |        |        |
|--------|--------|--------|--------|--------|--------|
| 9.3    | 11.8   | 10.6   | 1.9    | 1.8    | 3.3    |
| 332.8  | 244.5  | 327.4  | 432.1  | 386.3  | 589.2  |
| 412.4  | 377.8  | 430.7  | 490.5  | 493.9  | 512.9  |
| 481.0  | 393.4  | 393.3  | 421.2  | 481.4  | 560.6  |
| 2149.1 | 1933.4 | 2092.3 | 2245.9 | 2237.9 | 2468.8 |
| 68.8   | 58.6   | 71.4   | 58.8   | 62.6   | 71.2   |
| 7.9    | 7.6    | 9.0    | 2.2    | 9.3    | 6.4    |
| 145.1  | 149.0  | 175.9  | 174.3  | 170.5  | 205.1  |
| 1179.5 | 1040.7 | 1291.7 | 1329.3 | 1321.0 | 1454.9 |
| 581.2  | 638.8  | 648.9  | 599.8  | 629.3  | 688.6  |
| 117.1  | 90.5   | 118.3  | 140.2  | 138.9  | 127.7  |
| 370.7  | 358.1  | 348.1  | 355.9  | 395.8  | 400.3  |
| 186.7  | 224.2  | 165.0  | 151.4  | 182.9  | 206.6  |
| 6.4    | 29.1   | 24.1   | 8.8    | 28.4   | 21.0   |
| 216.0  | 128.7  | 222.3  | 150.8  | 239.4  | 254.2  |
| 163.0  | 157.8  | 140.6  | 166.5  | 178.8  | 186.5  |
| 105.5  | 99.8   | 93.8   | 94.9   | 92.5   | 99.0   |
| 130.4  | 202.2  | 139.5  | 163.8  | 124.5  | 178.0  |
| 5.7    | 7.0    | 9.0    | 11.0   | 5.6    | 4.9    |
| 158.3  | 185.9  | 195.0  | 196.5  | 205.2  | 199.8  |
| 339.4  | 287.9  | 345.6  | 291.4  | 330.7  | 367.6  |
| 46.2   | 33.6   | 45.6   | 38.1   | 58.9   | 58.9   |
| 121.6  | 143.5  | 125.6  | 160.9  | 153.4  | 148.8  |
| 16.6   | 4.5    | 6.5    | 5.7    | 21.3   | 17.4   |
| 370.2  | 299.6  | 292.6  | 335.3  | 337.1  | 441.3  |
| 229.6  | 243.5  | 207.8  | 234.8  | 250.0  | 297.0  |
| 2136.0 | 1755.5 | 2029.3 | 2208.6 | 2274.4 | 2513.7 |
| 536.3  | 498.8  | 636.1  | 630.4  | 599.6  | 689.5  |
| 333.0  | 323.7  | 407.7  | 284.0  | 451.5  | 398.2  |
| 521.7  | 578.7  | 483.2  | 516.2  | 531.8  | 575.3  |
| 1.4    | 2.8    | 2.6    | 2.1    | 1.8    | 5.2    |
| 31.8   | 23.5   | 33.4   | 35.8   | 48.3   | 41.5   |
| 26.1   | 20.7   | 18.6   | 30.3   | 18.6   | 23.4   |
| 111.1  | 53.9   | 96.3   | 104.4  | 142.2  | 133.6  |
| 36.2   | 33.2   | 40.8   | 41.1   | 52.8   | 59.0   |
| 7.0    | 8.1    | 2.8    | 11.8   | 2.1    | 3.5    |
| 285.6  | 238.5  | 313.4  | 302.4  | 327.2  | 355.8  |
| 8.9    | 7.2    | 16.5   | 12.9   | 12.8   | 12.8   |
| 1114.8 | 1017.7 | 1110.8 | 1217.4 | 1363.7 | 1306.5 |
| 330.7  | 282.8  | 376.3  | 391.2  | 433.5  | 426.7  |
| 765.4  | 651.8  | 853.9  | 873.2  | 941.5  | 916.2  |
| 102.1  | 102.8  | 114.2  | 125.5  | 120.5  | 141.6  |
| 807.3  | 708.0  | 827.0  | 932.2  | 869.9  | 1066.1 |
| 14.5   | 12.2   | 18.2   | 15.2   | 8.7    | 5.5    |
| 73.5   | 55.9   | 67.9   | 77.2   | 72.8   | 88.2   |
| 1.3    | 1.7    | 2.2    | 1.2    | 2.0    | 2.3    |
| 5.7    | 6.8    | 2.8    | 2.7    | 1.5    | 7.4    |
| 23.1   | 20.5   | 29.0   | 25.8   | 30.8   | 38.4   |
| 1.5    | 3.5    | 2.6    | 2.2    | 2.1    | 5.4    |
| 6418.1 | 6649.5 | 6735.7 | 7056.4 | 6997.2 | 6695.6 |
| 58.6   | 50.4   | 61.6   | 64.0   | 75.0   | 71.3   |
| 12.8   | 31.9   | 26.0   | 19.6   | 13.0   | 21.6   |
| 72.7   | 75.0   | 69.5   | 66.7   | 84.8   | 81.2   |

|         |        |         |         |         |         |
|---------|--------|---------|---------|---------|---------|
| 197.0   | 238.9  | 263.6   | 287.2   | 253.9   | 297.5   |
| 202.8   | 197.7  | 211.0   | 211.9   | 264.2   | 235.0   |
| 46.7    | 39.4   | 44.7    | 44.1    | 53.5    | 46.0    |
| 40.0    | 26.3   | 54.8    | 22.2    | 54.6    | 46.9    |
| 27.7    | 12.9   | 33.4    | 25.5    | 34.4    | 41.3    |
| 164.3   | 143.0  | 156.2   | 182.4   | 178.7   | 182.7   |
| 110.6   | 113.9  | 117.7   | 96.6    | 115.8   | 137.6   |
| 141.1   | 95.1   | 135.0   | 137.2   | 151.2   | 177.6   |
| 6285.5  | 5093.5 | 6016.9  | 6251.1  | 6627.5  | 7067.1  |
| 427.3   | 408.2  | 402.7   | 413.2   | 423.3   | 489.7   |
| 336.7   | 366.9  | 352.8   | 376.8   | 400.3   | 454.8   |
| 100.9   | 69.0   | 105.1   | 123.5   | 127.0   | 112.5   |
| 55.4    | 37.4   | 49.6    | 47.8    | 50.9    | 82.0    |
| 42.9    | 35.7   | 47.4    | 62.8    | 66.0    | 63.6    |
| 51.6    | 35.9   | 47.7    | 41.8    | 39.3    | 37.3    |
| 596.8   | 460.6  | 570.1   | 592.5   | 735.1   | 711.2   |
| 43.1    | 37.2   | 30.7    | 27.6    | 33.1    | 44.1    |
| 119.4   | 120.9  | 115.6   | 114.5   | 150.1   | 126.8   |
| 13.0    | 12.2   | 14.8    | 17.1    | 14.8    | 12.2    |
| 190.4   | 202.5  | 212.6   | 192.3   | 243.2   | 244.1   |
| 169.6   | 151.9  | 148.3   | 175.4   | 192.9   | 217.5   |
| 2.8     | 13.6   | 4.8     | 4.0     | 9.4     | 13.0    |
| 61.1    | 56.3   | 75.4    | 64.0    | 68.1    | 74.1    |
| 20.5    | 18.0   | 19.4    | 20.0    | 8.7     | 40.2    |
| 619.0   | 630.4  | 632.9   | 678.0   | 718.6   | 775.6   |
| 23.5    | 26.5   | 28.5    | 34.4    | 34.8    | 39.6    |
| 139.4   | 72.2   | 116.7   | 100.0   | 119.3   | 124.2   |
| 94.6    | 63.2   | 74.1    | 77.5    | 91.5    | 122.3   |
| 75.9    | 82.4   | 96.8    | 87.5    | 110.6   | 116.4   |
| 46.5    | 45.7   | 49.9    | 48.1    | 52.4    | 63.3    |
| 130.9   | 108.6  | 122.7   | 116.4   | 152.5   | 160.0   |
| 81.4    | 98.5   | 81.0    | 83.8    | 105.3   | 110.1   |
| 105.5   | 75.7   | 132.8   | 99.7    | 124.6   | 119.9   |
| 76.9    | 53.7   | 72.7    | 78.5    | 88.4    | 97.5    |
| 57.9    | 44.2   | 70.1    | 59.3    | 51.2    | 67.5    |
| 10358.2 | 9512.7 | 10080.0 | 10728.1 | 10845.1 | 11056.7 |
| 120.9   | 87.8   | 138.9   | 132.7   | 153.9   | 134.0   |
| 46.3    | 43.3   | 47.1    | 41.4    | 51.7    | 78.4    |
| 13.0    | 4.9    | 9.0     | 7.2     | 10.6    | 5.8     |
| 48.0    | 34.1   | 54.4    | 42.1    | 47.0    | 52.7    |
| 1.3     | 5.4    | 7.7     | 4.9     | 3.3     | 6.1     |
| 1077.8  | 1034.6 | 1020.4  | 1018.1  | 1113.4  | 1276.1  |
| 87.6    | 66.6   | 82.8    | 77.0    | 68.7    | 94.0    |
| 127.8   | 91.0   | 132.4   | 122.0   | 134.5   | 129.2   |
| 383.5   | 422.6  | 435.3   | 511.3   | 477.1   | 471.6   |
| 271.0   | 272.4  | 294.4   | 304.0   | 302.9   | 337.1   |
| 160.5   | 130.4  | 136.8   | 147.2   | 144.3   | 176.7   |
| 995.4   | 839.2  | 859.0   | 943.2   | 1004.0  | 1286.8  |
| 128.4   | 116.1  | 129.0   | 131.1   | 118.3   | 140.5   |
| 26.6    | 24.3   | 24.5    | 20.1    | 13.9    | 31.2    |
| 311.8   | 286.6  | 266.2   | 282.7   | 321.3   | 360.7   |
| 61.5    | 77.1   | 74.9    | 60.4    | 78.5    | 86.2    |
| 34.7    | 14.5   | 43.9    | 35.1    | 33.7    | 38.4    |

|       |       |       |       |       |       |
|-------|-------|-------|-------|-------|-------|
| 7.0   | 3.0   | 17.1  | 2.6   | 4.1   | 4.3   |
| 873.7 | 579.7 | 801.8 | 869.2 | 886.7 | 915.9 |
| 66.3  | 60.3  | 89.8  | 79.8  | 75.1  | 80.2  |
| 96.6  | 103.1 | 100.8 | 111.6 | 116.4 | 146.8 |
| 192.4 | 188.6 | 202.5 | 235.9 | 261.3 | 260.6 |
| 211.8 | 210.1 | 219.5 | 209.5 | 242.7 | 287.6 |
| 141.3 | 120.6 | 118.6 | 139.5 | 164.8 | 142.1 |
| 199.8 | 190.4 | 202.2 | 201.8 | 192.7 | 239.9 |
| 4.5   | 3.3   | 2.1   | 8.6   | 2.3   | 8.1   |
| 31.5  | 16.9  | 28.6  | 29.9  | 31.3  | 42.1  |
| 70.6  | 79.1  | 91.1  | 89.9  | 80.5  | 98.1  |
| 67.9  | 77.5  | 70.0  | 72.8  | 80.8  | 83.9  |
| 91.3  | 84.6  | 103.9 | 105.3 | 119.1 | 116.8 |
| 23.1  | 39.9  | 21.4  | 25.8  | 24.6  | 22.3  |
| 347.8 | 326.9 | 358.5 | 393.6 | 385.3 | 421.2 |
| 10.5  | 4.0   | 6.4   | 10.0  | 5.5   | 5.0   |
| 100.9 | 89.6  | 96.7  | 100.4 | 107.3 | 142.9 |
| 28.9  | 30.7  | 27.6  | 26.1  | 24.6  | 36.9  |
| 27.7  | 36.0  | 23.4  | 9.8   | 20.3  | 23.5  |
| 334.9 | 347.4 | 324.3 | 360.1 | 368.3 | 430.0 |
| 62.5  | 64.0  | 61.4  | 56.4  | 77.5  | 70.3  |
| 273.4 | 234.3 | 211.5 | 233.1 | 247.6 | 296.3 |
| 107.0 | 87.4  | 117.1 | 113.6 | 142.2 | 128.2 |
| 19.9  | 7.4   | 22.1  | 25.2  | 16.3  | 28.5  |
| 59.2  | 59.7  | 64.3  | 68.6  | 79.5  | 74.5  |
| 9.5   | 7.5   | 9.8   | 8.8   | 10.5  | 15.0  |
| 113.0 | 118.1 | 134.4 | 124.3 | 154.3 | 140.7 |
| 129.1 | 102.0 | 131.5 | 143.8 | 197.5 | 155.3 |
| 49.3  | 53.3  | 50.9  | 81.2  | 58.1  | 71.1  |
| 758.3 | 769.0 | 679.5 | 830.6 | 782.7 | 900.3 |
| 238.7 | 204.0 | 239.0 | 226.9 | 257.6 | 269.6 |
| 273.2 | 258.1 | 283.8 | 291.3 | 301.0 | 324.1 |
| 10.8  | 11.4  | 7.6   | 11.6  | 19.1  | 9.3   |
| 76.6  | 74.6  | 76.6  | 81.5  | 93.9  | 87.7  |
| 9.4   | 13.4  | 4.9   | 7.9   | 12.3  | 8.4   |
| 1.1   | 1.2   | 3.2   | 1.9   | 2.1   | 2.1   |
| 39.2  | 28.8  | 44.2  | 32.9  | 55.0  | 50.4  |
| 30.6  | 24.7  | 26.8  | 30.4  | 56.8  | 37.4  |
| 91.1  | 79.0  | 97.8  | 76.5  | 100.8 | 128.6 |
| 33.6  | 25.0  | 40.6  | 40.9  | 48.4  | 68.5  |
| 1.7   | 3.4   | 5.0   | 2.4   | 5.7   | 11.9  |
| 136.9 | 137.5 | 133.9 | 173.5 | 150.7 | 174.7 |
| 300.2 | 246.9 | 287.8 | 321.7 | 332.4 | 362.0 |
| 2.1   | 1.7   | 3.7   | 3.2   | 2.4   | 1.5   |
| 5.3   | 3.6   | 12.3  | 8.1   | 4.7   | 6.6   |
| 119.5 | 106.2 | 128.3 | 121.8 | 136.1 | 135.6 |
| 219.6 | 204.0 | 195.4 | 195.9 | 252.8 | 238.7 |
| 61.1  | 72.8  | 43.0  | 59.9  | 80.3  | 73.6  |
| 37.3  | 28.3  | 45.5  | 31.1  | 42.8  | 51.8  |
| 199.6 | 155.5 | 180.9 | 197.5 | 220.7 | 254.6 |
| 49.7  | 20.9  | 40.4  | 48.6  | 56.4  | 57.2  |
| 11.6  | 2.4   | 6.3   | 3.9   | 11.8  | 1.9   |
| 11.0  | 11.5  | 5.9   | 3.7   | 10.7  | 10.9  |

|        |        |        |        |        |        |
|--------|--------|--------|--------|--------|--------|
| 139.4  | 159.7  | 165.0  | 171.9  | 166.5  | 198.4  |
| 2706.1 | 1968.8 | 2274.9 | 2504.1 | 2624.0 | 2934.3 |
| 69.4   | 73.5   | 79.2   | 86.5   | 101.2  | 108.1  |
| 102.9  | 90.1   | 107.5  | 111.0  | 130.4  | 125.2  |
| 23.3   | 15.0   | 18.2   | 21.8   | 24.1   | 14.8   |
| 471.1  | 445.2  | 522.1  | 545.2  | 587.1  | 520.7  |
| 185.3  | 160.0  | 181.3  | 190.1  | 221.3  | 223.6  |
| 49.2   | 37.7   | 49.1   | 50.6   | 58.3   | 51.3   |
| 428.5  | 351.8  | 388.7  | 397.8  | 455.5  | 515.3  |
| 70.1   | 51.3   | 63.0   | 55.8   | 91.3   | 99.7   |
| 221.7  | 211.4  | 248.5  | 234.2  | 250.7  | 281.0  |
| 98.5   | 127.2  | 83.7   | 94.4   | 104.5  | 120.3  |
| 47.9   | 26.6   | 35.6   | 41.0   | 43.7   | 45.3   |
| 23.6   | 28.5   | 18.8   | 21.2   | 20.8   | 24.1   |
| 190.9  | 178.4  | 182.2  | 192.8  | 256.2  | 203.7  |
| 304.0  | 251.2  | 254.6  | 299.0  | 293.2  | 376.1  |
| 550.4  | 504.8  | 548.2  | 614.0  | 669.3  | 638.4  |
| 17.5   | 16.3   | 8.5    | 10.8   | 7.0    | 10.7   |
| 137.3  | 127.8  | 134.3  | 134.0  | 147.4  | 160.3  |
| 283.7  | 287.1  | 274.2  | 316.5  | 322.9  | 432.6  |
| 205.4  | 235.6  | 157.2  | 303.9  | 224.4  | 187.5  |
| 13.5   | 13.3   | 9.5    | 10.9   | 10.2   | 5.7    |
| 1.6    | 14.0   | 3.1    | 1.2    | 5.1    | 3.9    |
| 56.2   | 54.4   | 46.8   | 56.2   | 67.0   | 59.3   |
| 92.1   | 123.4  | 94.0   | 89.0   | 104.1  | 101.1  |
| 267.1  | 181.5  | 206.8  | 224.4  | 276.5  | 255.0  |
| 97.7   | 96.5   | 114.0  | 120.1  | 122.0  | 130.9  |
| 230.4  | 196.8  | 210.4  | 226.1  | 287.8  | 280.6  |
| 28.1   | 26.7   | 24.6   | 25.0   | 34.2   | 34.1   |
| 646.4  | 573.5  | 636.7  | 623.3  | 750.4  | 803.9  |
| 2.9    | 8.5    | 3.1    | 0.5    | 1.1    | 0.9    |
| 2.6    | 4.1    | 7.3    | 6.8    | 5.3    | 7.4    |
| 999.8  | 965.8  | 1120.9 | 1007.8 | 1225.5 | 1173.8 |
| 12.0   | 10.1   | 8.5    | 15.1   | 13.0   | 10.1   |
| 443.3  | 390.3  | 439.9  | 500.2  | 487.5  | 566.9  |
| 35.3   | 24.5   | 46.9   | 46.6   | 37.3   | 32.0   |
| 270.3  | 233.6  | 295.8  | 271.6  | 306.3  | 349.6  |
| 58.6   | 84.7   | 87.6   | 94.4   | 115.6  | 87.9   |
| 136.6  | 154.9  | 125.2  | 130.9  | 145.6  | 170.6  |
| 268.1  | 238.5  | 291.8  | 280.7  | 263.6  | 306.5  |
| 49.5   | 49.6   | 56.2   | 58.1   | 64.2   | 76.5   |
| 202.8  | 215.8  | 182.7  | 205.3  | 208.4  | 253.2  |
| 86.9   | 44.4   | 55.5   | 62.5   | 102.9  | 95.6   |
| 114.0  | 114.6  | 113.7  | 125.8  | 135.8  | 130.5  |
| 2596.9 | 2248.4 | 2559.3 | 2321.2 | 2837.1 | 3149.4 |
| 174.0  | 113.5  | 138.8  | 147.3  | 201.5  | 214.4  |
| 10.3   | 14.5   | 25.1   | 20.7   | 21.1   | 18.3   |
| 239.9  | 247.6  | 301.1  | 319.8  | 316.7  | 332.6  |
| 173.7  | 169.8  | 182.6  | 179.9  | 188.7  | 205.5  |
| 0.7    | 1.1    | 1.1    | 5.2    | 0.8    | 5.5    |
| 56.6   | 41.5   | 9.9    | 40.2   | 62.1   | 54.2   |
| 21.1   | 15.5   | 23.2   | 19.2   | 4.2    | 16.7   |
| 157.4  | 248.8  | 194.0  | 193.6  | 174.3  | 181.9  |



|         |         |         |         |         |         |
|---------|---------|---------|---------|---------|---------|
| 14.0    | 4.6     | 9.6     | 11.5    | 14.3    | 13.0    |
| 90.1    | 53.0    | 71.9    | 78.0    | 91.6    | 88.9    |
| 210.0   | 163.3   | 220.7   | 212.2   | 298.0   | 282.4   |
| 475.2   | 500.4   | 407.0   | 556.0   | 484.7   | 645.4   |
| 48.9    | 24.7    | 49.7    | 58.2    | 69.5    | 58.9    |
| 88.9    | 77.8    | 81.5    | 100.3   | 96.8    | 109.6   |
| 39.0    | 27.9    | 25.9    | 26.4    | 38.2    | 42.1    |
| 250.7   | 281.0   | 266.2   | 282.8   | 310.8   | 370.5   |
| 11117.9 | 10438.2 | 10440.2 | 11059.2 | 11111.5 | 10549.5 |
| 87.3    | 65.5    | 120.8   | 79.3    | 124.2   | 117.3   |
| 76.3    | 47.5    | 69.0    | 72.3    | 78.9    | 83.6    |
| 131.8   | 132.9   | 131.8   | 148.8   | 152.8   | 156.6   |
| 18.7    | 14.5    | 23.5    | 22.0    | 26.5    | 8.4     |
| 16.5    | 11.0    | 15.6    | 15.6    | 15.1    | 18.1    |
| 76.3    | 42.3    | 55.8    | 54.6    | 76.3    | 82.7    |
| 1.0     | 4.2     | 1.4     | 0.5     | 0.8     | 1.1     |
| 43.2    | 54.0    | 30.8    | 37.6    | 39.6    | 50.4    |
| 9241.4  | 8118.2  | 7961.5  | 8734.4  | 9209.1  | 9185.0  |
| 1017.3  | 691.4   | 897.4   | 919.4   | 1048.7  | 1125.8  |
| 58.6    | 52.6    | 57.7    | 50.7    | 62.7    | 67.7    |
| 33.5    | 26.8    | 40.8    | 29.7    | 35.6    | 49.8    |
| 1642.4  | 1599.4  | 1423.6  | 1464.1  | 1900.5  | 2003.6  |
| 182.6   | 142.9   | 152.5   | 205.2   | 180.2   | 198.0   |
| 6.3     | 12.7    | 13.0    | 4.2     | 2.7     | 3.1     |
| 114.8   | 88.0    | 95.1    | 106.2   | 131.3   | 115.7   |
| 82.4    | 57.0    | 68.9    | 93.4    | 97.1    | 100.1   |
| 475.8   | 403.7   | 412.3   | 428.4   | 464.5   | 582.2   |
| 2784.1  | 2706.4  | 2997.1  | 3168.9  | 3054.7  | 3337.9  |
| 42.9    | 34.1    | 55.3    | 37.6    | 43.6    | 46.4    |
| 76.5    | 80.0    | 92.9    | 95.0    | 110.2   | 109.1   |
| 2.2     | 1.4     | 1.3     | 7.1     | 7.5     | 3.7     |
| 133.8   | 106.4   | 129.3   | 157.4   | 131.6   | 149.7   |
| 5.6     | 3.1     | 7.4     | 7.5     | 3.8     | 4.9     |
| 370.0   | 331.2   | 340.1   | 402.9   | 404.0   | 444.0   |
| 232.5   | 241.9   | 213.3   | 266.2   | 250.6   | 317.4   |
| 316.6   | 246.3   | 282.4   | 287.7   | 314.5   | 366.8   |
| 7.3     | 4.4     | 7.4     | 13.1    | 10.5    | 16.1    |
| 267.6   | 228.8   | 273.7   | 277.9   | 317.5   | 375.0   |
| 10699.9 | 9580.8  | 10519.7 | 11968.9 | 11782.7 | 11768.3 |
| 216.9   | 229.4   | 228.7   | 211.9   | 276.2   | 273.4   |
| 217.8   | 224.7   | 278.7   | 262.0   | 285.1   | 315.8   |
| 43.7    | 33.4    | 55.2    | 48.1    | 68.3    | 59.3    |
| 4.1     | 2.8     | 3.8     | 1.8     | 1.5     | 8.1     |
| 6.0     | 3.2     | 0.9     | 2.4     | 1.8     | 1.9     |
| 62.7    | 40.3    | 76.1    | 67.3    | 79.0    | 76.1    |
| 75.8    | 57.7    | 76.3    | 99.6    | 93.4    | 93.6    |
| 13.0    | 17.1    | 7.9     | 14.7    | 6.1     | 6.9     |
| 59.8    | 64.1    | 50.3    | 49.3    | 58.1    | 66.2    |
| 57.0    | 48.9    | 64.9    | 61.3    | 61.4    | 63.4    |
| 10.7    | 8.8     | 7.3     | 4.9     | 14.6    | 16.9    |
| 81.0    | 76.3    | 76.2    | 71.9    | 71.0    | 64.7    |
| 608.9   | 519.0   | 624.0   | 568.4   | 644.1   | 741.1   |
| 260.3   | 239.6   | 258.5   | 258.1   | 304.2   | 299.2   |

|         |         |         |         |         |         |
|---------|---------|---------|---------|---------|---------|
| 102.7   | 102.4   | 108.1   | 119.1   | 131.5   | 141.2   |
| 16.9    | 16.3    | 22.1    | 15.0    | 18.8    | 20.2    |
| 147.0   | 103.0   | 143.1   | 126.1   | 158.3   | 168.5   |
| 8.1     | 1.8     | 3.5     | 4.8     | 3.4     | 7.0     |
| 205.4   | 223.1   | 214.6   | 244.7   | 242.7   | 258.8   |
| 8.5     | 11.0    | 5.6     | 9.0     | 3.1     | 16.3    |
| 374.4   | 370.0   | 389.5   | 458.0   | 474.5   | 516.5   |
| 3544.9  | 3063.0  | 3999.5  | 4124.6  | 4040.9  | 4005.3  |
| 306.3   | 386.6   | 350.4   | 385.9   | 354.0   | 394.7   |
| 26.4    | 31.7    | 31.3    | 27.4    | 9.5     | 35.1    |
| 64.4    | 90.2    | 97.6    | 106.7   | 99.1    | 100.0   |
| 11.3    | 2.5     | 11.8    | 11.6    | 12.4    | 16.1    |
| 1972.6  | 1357.8  | 1539.9  | 1797.4  | 1784.5  | 2191.1  |
| 226.7   | 184.4   | 253.1   | 250.9   | 268.6   | 250.4   |
| 16.3    | 21.9    | 13.7    | 19.4    | 10.3    | 19.6    |
| 123.9   | 126.2   | 131.6   | 132.3   | 157.8   | 144.4   |
| 373.8   | 304.7   | 335.6   | 316.2   | 390.5   | 392.1   |
| 36.8    | 27.3    | 32.7    | 33.3    | 38.9    | 42.9    |
| 409.0   | 392.2   | 414.5   | 406.0   | 432.6   | 501.4   |
| 18.7    | 22.1    | 16.8    | 22.1    | 27.3    | 33.9    |
| 10.5    | 1.7     | 2.7     | 1.6     | 10.3    | 2.3     |
| 69.2    | 34.0    | 80.0    | 59.9    | 113.1   | 104.1   |
| 13069.7 | 11883.7 | 12448.8 | 13195.4 | 12765.9 | 13082.4 |
| 9.2     | 1.0     | 5.6     | 2.6     | 3.7     | 7.1     |
| 89.5    | 76.6    | 79.5    | 101.1   | 82.3    | 106.0   |
| 49.3    | 62.7    | 29.7    | 49.3    | 19.9    | 59.4    |
| 17.7    | 24.4    | 19.4    | 14.2    | 22.8    | 23.3    |
| 53.3    | 42.9    | 68.2    | 65.3    | 70.2    | 68.3    |
| 119.6   | 130.4   | 112.7   | 103.2   | 137.9   | 131.8   |
| 29.3    | 35.7    | 33.0    | 31.4    | 32.1    | 35.2    |
| 11.6    | 21.4    | 16.1    | 14.2    | 21.1    | 15.0    |
| 635.4   | 612.2   | 716.7   | 764.5   | 777.9   | 800.4   |
| 55.1    | 37.7    | 43.9    | 36.5    | 37.9    | 44.1    |
| 395.6   | 491.4   | 343.8   | 352.6   | 356.5   | 436.6   |
| 20.7    | 12.2    | 7.8     | 18.0    | 22.0    | 22.3    |
| 270.5   | 248.2   | 278.3   | 309.3   | 305.2   | 355.4   |
| 301.8   | 346.3   | 308.4   | 317.8   | 364.6   | 361.4   |
| 43.3    | 33.5    | 27.6    | 33.8    | 39.1    | 56.6    |
| 11.7    | 11.6    | 11.0    | 8.7     | 10.8    | 6.8     |
| 46.9    | 49.1    | 51.3    | 59.2    | 69.3    | 68.8    |
| 4.0     | 10.0    | 5.2     | 9.0     | 15.5    | 5.1     |
| 27.4    | 25.9    | 29.3    | 39.4    | 32.4    | 41.8    |
| 131.9   | 119.0   | 143.8   | 140.2   | 157.7   | 177.8   |
| 77.6    | 84.7    | 93.1    | 96.4    | 110.8   | 106.2   |
| 93.8    | 61.5    | 99.7    | 102.5   | 127.7   | 118.0   |
| 13.1    | 7.1     | 23.0    | 14.7    | 10.2    | 22.0    |
| 12.2    | 1.9     | 8.6     | 16.7    | 21.7    | 16.9    |
| 24.1    | 72.3    | 44.7    | 59.6    | 39.2    | 44.9    |
| 300.7   | 207.5   | 250.4   | 245.4   | 276.3   | 318.1   |
| 61.8    | 59.5    | 100.5   | 44.1    | 72.1    | 109.9   |
| 14.8    | 2.6     | 18.6    | 14.7    | 14.6    | 23.6    |
| 1.0     | 3.6     | 2.1     | 6.1     | 2.2     | 1.7     |
| 10.6    | 3.0     | 9.8     | 8.1     | 7.1     | 8.5     |

|         |         |         |         |         |         |
|---------|---------|---------|---------|---------|---------|
| 82.0    | 128.7   | 87.5    | 112.8   | 89.5    | 114.9   |
| 212.8   | 262.3   | 274.5   | 258.5   | 320.4   | 308.7   |
| 178.7   | 166.4   | 162.7   | 157.5   | 181.9   | 227.2   |
| 152.3   | 145.8   | 136.3   | 117.2   | 170.1   | 173.1   |
| 137.0   | 111.9   | 131.0   | 113.6   | 141.0   | 144.9   |
| 65.5    | 53.5    | 64.3    | 33.6    | 29.5    | 52.3    |
| 20.1    | 6.6     | 8.7     | 15.4    | 7.6     | 14.3    |
| 107.4   | 78.9    | 100.6   | 95.5    | 109.0   | 119.6   |
| 10973.6 | 9501.5  | 10436.7 | 10806.6 | 11021.0 | 10774.2 |
| 627.6   | 556.1   | 574.0   | 596.7   | 653.8   | 792.5   |
| 206.8   | 204.7   | 198.3   | 235.8   | 239.8   | 288.7   |
| 0.7     | 0.9     | 1.3     | 0.7     | 1.3     | 5.1     |
| 101.6   | 115.4   | 117.8   | 106.6   | 140.6   | 104.2   |
| 1.9     | 1.5     | 7.3     | 0.9     | 2.8     | 0.6     |
| 67.1    | 59.7    | 54.4    | 68.1    | 66.9    | 82.1    |
| 208.1   | 210.1   | 256.7   | 284.4   | 263.8   | 254.5   |
| 372.8   | 395.6   | 385.1   | 365.0   | 365.6   | 477.4   |
| 79.6    | 158.8   | 60.9    | 101.1   | 60.3    | 90.7    |
| 40.1    | 54.0    | 52.2    | 44.1    | 46.8    | 51.4    |
| 42.6    | 36.5    | 57.7    | 44.6    | 44.3    | 37.3    |
| 800.6   | 678.2   | 821.3   | 809.9   | 882.5   | 920.9   |
| 21.2    | 27.9    | 12.2    | 10.3    | 33.9    | 19.3    |
| 13.9    | 15.9    | 13.3    | 2.2     | 4.9     | 12.0    |
| 54.8    | 62.6    | 54.2    | 66.4    | 69.3    | 62.0    |
| 47.3    | 32.1    | 39.6    | 41.7    | 43.2    | 53.7    |
| 806.9   | 691.6   | 624.9   | 606.6   | 706.1   | 929.2   |
| 67.5    | 38.2    | 66.8    | 62.5    | 80.6    | 67.7    |
| 34.5    | 33.4    | 37.6    | 28.5    | 37.2    | 46.7    |
| 168.8   | 129.5   | 179.3   | 158.1   | 177.7   | 197.4   |
| 58.3    | 37.5    | 63.4    | 69.4    | 74.2    | 64.9    |
| 12.4    | 1.4     | 9.2     | 13.6    | 11.7    | 13.2    |
| 5246.5  | 4488.8  | 5113.0  | 5305.0  | 5862.3  | 5692.3  |
| 11030.3 | 11138.8 | 10522.9 | 11874.8 | 11960.2 | 11814.4 |
| 86.0    | 97.5    | 75.0    | 85.5    | 74.3    | 91.1    |
| 70.6    | 74.7    | 82.4    | 82.3    | 86.3    | 93.3    |
| 94.4    | 93.0    | 90.4    | 88.8    | 92.0    | 112.9   |
| 27.3    | 31.2    | 38.0    | 29.6    | 19.1    | 32.3    |
| 2.7     | 3.0     | 16.9    | 12.0    | 18.1    | 16.8    |
| 286.0   | 245.0   | 291.5   | 285.4   | 303.3   | 365.3   |
| 62.4    | 71.2    | 58.7    | 62.9    | 73.6    | 80.6    |
| 131.3   | 95.9    | 113.2   | 120.5   | 135.7   | 148.2   |
| 13.1    | 18.0    | 18.2    | 16.4    | 19.0    | 16.4    |
| 3.9     | 1.7     | 2.9     | 4.8     | 2.2     | 4.8     |
| 13.0    | 19.0    | 18.3    | 23.9    | 16.6    | 16.1    |
| 25.8    | 23.4    | 20.3    | 21.8    | 20.0    | 34.9    |
| 237.5   | 230.8   | 251.4   | 202.5   | 270.6   | 273.2   |
| 3283.8  | 2924.8  | 3713.3  | 3863.2  | 3805.2  | 3780.8  |
| 15.1    | 4.1     | 13.4    | 20.6    | 19.6    | 20.0    |
| 1.4     | 0.9     | 1.9     | 2.0     | 1.4     | 1.4     |
| 62.8    | 62.4    | 54.4    | 66.7    | 73.4    | 69.6    |
| 5.7     | 10.9    | 6.9     | 13.0    | 12.2    | 18.3    |
| 16.8    | 12.4    | 16.2    | 10.3    | 13.2    | 8.9     |
| 70.8    | 90.9    | 62.9    | 85.2    | 73.5    | 85.3    |

|        |        |        |        |        |        |
|--------|--------|--------|--------|--------|--------|
| 6.6    | 7.1    | 12.4   | 8.7    | 9.3    | 18.6   |
| 33.7   | 39.5   | 48.6   | 42.2   | 53.7   | 49.7   |
| 72.6   | 88.3   | 100.4  | 98.9   | 110.8  | 110.9  |
| 157.7  | 127.6  | 175.7  | 170.8  | 171.8  | 219.5  |
| 36.0   | 29.3   | 43.3   | 21.6   | 62.8   | 26.8   |
| 5661.0 | 4815.7 | 5704.9 | 5735.0 | 6209.1 | 6155.7 |
| 607.9  | 587.5  | 680.5  | 603.2  | 669.9  | 674.0  |
| 148.7  | 142.3  | 187.2  | 148.2  | 161.2  | 213.5  |
| 15.2   | 21.3   | 18.3   | 29.8   | 20.4   | 39.9   |
| 3666.0 | 3352.1 | 3620.0 | 3795.4 | 4541.6 | 4580.9 |
| 114.1  | 85.0   | 93.8   | 125.9  | 111.5  | 115.1  |
| 184.9  | 194.4  | 206.1  | 185.9  | 207.4  | 240.6  |
| 207.5  | 175.5  | 185.3  | 176.0  | 198.7  | 228.7  |
| 560.1  | 573.1  | 603.5  | 552.1  | 601.8  | 612.9  |
| 26.9   | 34.1   | 34.0   | 36.9   | 35.9   | 29.0   |
| 1403.0 | 1244.5 | 1458.4 | 1333.2 | 1447.6 | 1631.4 |
| 185.6  | 168.0  | 160.6  | 171.2  | 198.0  | 186.5  |
| 29.6   | 28.6   | 59.7   | 44.8   | 30.4   | 50.8   |
| 8.4    | 5.2    | 3.4    | 1.7    | 6.3    | 3.1    |
| 86.1   | 70.2   | 90.3   | 82.2   | 113.6  | 106.9  |
| 210.1  | 159.7  | 204.2  | 185.2  | 213.2  | 217.0  |
| 9.0    | 13.0   | 23.7   | 18.7   | 21.8   | 22.4   |
| 98.8   | 75.9   | 96.4   | 107.9  | 132.2  | 120.9  |
| 143.2  | 159.5  | 177.8  | 151.0  | 135.9  | 184.6  |
| 1.7    | 5.3    | 6.0    | 5.7    | 5.1    | 6.2    |
| 121.8  | 177.8  | 167.0  | 145.7  | 177.4  | 185.0  |
| 9.7    | 5.6    | 12.6   | 10.0   | 9.7    | 20.7   |
| 11.2   | 3.8    | 13.4   | 8.3    | 8.7    | 10.0   |
| 212.3  | 247.3  | 240.6  | 232.7  | 250.4  | 287.2  |
| 103.0  | 94.9   | 123.5  | 117.5  | 131.5  | 137.9  |
| 396.2  | 309.3  | 377.0  | 438.4  | 421.6  | 474.3  |
| 47.3   | 37.3   | 71.1   | 61.7   | 63.1   | 79.1   |
| 86.7   | 73.4   | 70.4   | 71.4   | 92.7   | 93.7   |
| 450.7  | 409.6  | 375.8  | 406.7  | 444.5  | 507.1  |
| 287.9  | 209.6  | 275.8  | 265.6  | 343.7  | 364.3  |
| 23.2   | 30.9   | 14.4   | 15.7   | 21.7   | 12.0   |
| 36.8   | 40.4   | 37.7   | 53.7   | 37.2   | 52.6   |
| 2501.0 | 2241.4 | 2431.6 | 2458.0 | 2611.0 | 2988.8 |
| 7.9    | 16.0   | 15.2   | 11.5   | 27.4   | 13.3   |
| 581.3  | 539.8  | 574.6  | 580.3  | 640.6  | 668.9  |
| 179.0  | 177.3  | 204.8  | 216.9  | 195.3  | 202.5  |
| 4.4    | 16.9   | 8.1    | 5.6    | 9.8    | 6.0    |
| 150.7  | 66.4   | 159.8  | 162.9  | 194.0  | 193.5  |
| 4.2    | 2.6    | 4.3    | 4.7    | 9.4    | 12.6   |
| 74.9   | 31.3   | 54.5   | 14.3   | 35.9   | 56.7   |
| 8.5    | 3.6    | 10.8   | 5.7    | 8.1    | 7.8    |
| 8.5    | 9.6    | 11.2   | 11.2   | 7.8    | 18.5   |
| 484.1  | 486.1  | 486.5  | 571.9  | 532.9  | 640.5  |
| 26.5   | 22.9   | 10.0   | 13.9   | 21.1   | 24.1   |
| 28.3   | 25.1   | 31.0   | 32.2   | 42.0   | 28.6   |
| 373.9  | 373.0  | 357.9  | 357.4  | 426.7  | 470.9  |
| 184.6  | 173.2  | 164.0  | 168.8  | 204.9  | 191.5  |
| 58.6   | 70.2   | 63.2   | 88.6   | 88.1   | 92.8   |

|         |        |        |         |         |         |
|---------|--------|--------|---------|---------|---------|
| 138.0   | 144.7  | 171.5  | 160.5   | 213.0   | 181.5   |
| 90.5    | 87.5   | 87.0   | 84.5    | 86.1    | 88.8    |
| 48.1    | 81.3   | 68.6   | 60.8    | 45.3    | 67.5    |
| 439.1   | 502.5  | 446.0  | 437.9   | 502.9   | 552.9   |
| 43.9    | 48.7   | 49.2   | 43.6    | 55.4    | 55.6    |
| 14.0    | 16.9   | 14.3   | 10.7    | 13.5    | 19.0    |
| 22.8    | 27.1   | 30.6   | 28.3    | 26.3    | 34.4    |
| 78.6    | 48.5   | 63.5   | 69.7    | 80.9    | 73.2    |
| 7.8     | 3.3    | 3.6    | 2.5     | 2.6     | 3.8     |
| 24.2    | 25.1   | 12.6   | 29.0    | 30.1    | 35.4    |
| 39.3    | 48.1   | 39.9   | 46.7    | 47.2    | 55.3    |
| 66.6    | 100.3  | 72.5   | 77.1    | 89.1    | 100.6   |
| 13.1    | 6.9    | 10.9   | 25.3    | 14.0    | 17.2    |
| 7467.1  | 6857.2 | 7102.1 | 7797.0  | 8001.9  | 8027.0  |
| 14.2    | 15.4   | 25.7   | 29.5    | 31.6    | 25.5    |
| 2.2     | 1.5    | 1.3    | 0.7     | 1.1     | 1.8     |
| 77.4    | 75.3   | 78.7   | 85.6    | 99.3    | 106.8   |
| 72.5    | 80.1   | 93.6   | 85.4    | 83.8    | 82.4    |
| 18.5    | 26.8   | 10.5   | 6.4     | 15.7    | 7.3     |
| 37.4    | 40.7   | 36.9   | 40.6    | 52.1    | 43.8    |
| 756.2   | 721.8  | 888.8  | 899.1   | 879.1   | 1003.4  |
| 140.5   | 127.4  | 143.7  | 160.3   | 152.1   | 174.6   |
| 459.5   | 482.0  | 440.9  | 461.2   | 519.7   | 537.6   |
| 830.8   | 804.1  | 884.7  | 925.9   | 964.7   | 978.3   |
| 19.0    | 17.9   | 20.1   | 14.2    | 25.0    | 28.9    |
| 101.1   | 128.5  | 152.3  | 140.9   | 142.8   | 158.6   |
| 302.5   | 241.6  | 242.9  | 259.9   | 297.8   | 348.5   |
| 53.3    | 40.8   | 71.0   | 51.4    | 57.4    | 67.0    |
| 6.2     | 5.7    | 4.9    | 5.5     | 5.5     | 5.2     |
| 615.6   | 591.7  | 642.3  | 645.8   | 681.6   | 731.7   |
| 41.6    | 34.1   | 39.9   | 34.4    | 43.3    | 41.1    |
| 10266.0 | 9543.9 | 9669.9 | 10491.1 | 10364.8 | 10395.1 |
| 60.2    | 65.6   | 63.8   | 62.5    | 76.0    | 80.3    |
| 22.3    | 15.6   | 14.2   | 9.4     | 11.5    | 20.4    |
| 1.7     | 2.0    | 1.1    | 2.4     | 1.3     | 2.4     |
| 292.1   | 241.9  | 300.2  | 287.8   | 372.3   | 329.8   |
| 5236.6  | 4644.6 | 5159.7 | 5357.1  | 5588.0  | 5893.0  |
| 87.1    | 77.2   | 109.4  | 113.6   | 105.1   | 117.2   |
| 80.4    | 77.9   | 80.9   | 96.5    | 104.8   | 92.6    |
| 30.3    | 36.2   | 24.1   | 29.2    | 27.5    | 30.3    |
| 3.7     | 3.7    | 2.6    | 2.8     | 2.3     | 3.4     |
| 63.0    | 27.6   | 54.9   | 45.5    | 68.3    | 60.2    |
| 418.5   | 422.5  | 417.9  | 472.7   | 449.8   | 495.6   |
| 46.7    | 40.9   | 47.1   | 48.8    | 61.5    | 39.9    |
| 13.5    | 21.0   | 11.5   | 9.1     | 11.7    | 16.8    |
| 1.2     | 2.7    | 3.5    | 6.8     | 2.8     | 2.5     |
| 164.4   | 127.1  | 172.4  | 165.9   | 162.7   | 186.4   |
| 630.6   | 613.0  | 647.3  | 650.0   | 760.4   | 800.2   |
| 40.1    | 25.7   | 49.2   | 40.4    | 48.6    | 47.8    |
| 40.4    | 34.1   | 43.3   | 36.0    | 27.1    | 48.8    |
| 3.4     | 1.5    | 2.5    | 2.4     | 2.0     | 2.5     |
| 25.9    | 18.8   | 21.7   | 23.3    | 18.1    | 26.6    |
| 463.2   | 511.8  | 492.7  | 516.0   | 501.0   | 585.1   |

|         |         |         |         |         |         |
|---------|---------|---------|---------|---------|---------|
| 29.1    | 16.4    | 18.6    | 33.6    | 37.5    | 43.1    |
| 451.2   | 366.8   | 398.4   | 335.0   | 513.6   | 497.8   |
| 171.4   | 113.3   | 147.7   | 174.0   | 195.9   | 186.0   |
| 214.1   | 254.1   | 250.0   | 262.9   | 250.8   | 278.4   |
| 8.6     | 2.9     | 14.4    | 2.7     | 5.8     | 5.9     |
| 119.6   | 113.4   | 102.0   | 124.4   | 92.8    | 127.3   |
| 2.8     | 2.7     | 3.3     | 1.6     | 2.7     | 1.8     |
| 1568.4  | 1505.1  | 1463.8  | 1688.5  | 1605.5  | 1635.8  |
| 7.1     | 10.7    | 13.8    | 9.7     | 14.1    | 9.7     |
| 12248.9 | 11173.8 | 11556.1 | 12433.4 | 12716.4 | 12652.1 |
| 136.6   | 86.2    | 128.9   | 118.6   | 130.5   | 146.7   |
| 141.9   | 133.0   | 154.6   | 174.7   | 156.3   | 165.7   |
| 705.2   | 630.2   | 695.6   | 732.3   | 776.0   | 837.4   |
| 51.5    | 62.8    | 57.0    | 55.9    | 56.6    | 61.9    |
| 6486.3  | 5924.6  | 6343.2  | 7084.4  | 6712.3  | 8095.5  |
| 18.9    | 8.9     | 10.6    | 4.6     | 9.6     | 8.0     |
| 21.3    | 24.3    | 16.0    | 14.8    | 10.7    | 8.3     |
| 57.5    | 46.1    | 70.8    | 60.7    | 62.2    | 66.5    |
| 152.9   | 149.9   | 167.5   | 169.8   | 200.0   | 221.7   |
| 146.7   | 106.5   | 148.4   | 154.6   | 164.4   | 160.0   |
| 57.9    | 48.2    | 60.0    | 69.6    | 74.9    | 80.5    |
| 179.7   | 119.0   | 142.0   | 152.0   | 156.9   | 192.0   |
| 100.4   | 63.1    | 107.6   | 82.6    | 123.5   | 141.0   |
| 195.4   | 164.2   | 210.9   | 192.3   | 243.7   | 269.3   |
| 127.2   | 81.4    | 91.2    | 127.6   | 121.5   | 151.7   |
| 3.4     | 2.5     | 2.3     | 7.7     | 2.8     | 3.8     |
| 31.7    | 26.8    | 23.8    | 40.7    | 36.5    | 35.2    |
| 130.5   | 141.4   | 141.1   | 138.5   | 144.5   | 161.5   |
| 29.2    | 32.5    | 28.8    | 24.1    | 31.0    | 40.7    |
| 104.3   | 102.9   | 137.9   | 125.3   | 128.4   | 164.6   |
| 22.3    | 20.4    | 33.8    | 19.3    | 23.0    | 29.0    |
| 16.0    | 27.3    | 5.0     | 18.1    | 8.4     | 24.3    |
| 186.6   | 158.3   | 189.3   | 206.5   | 248.0   | 223.3   |
| 259.8   | 107.7   | 272.3   | 263.0   | 335.5   | 346.7   |
| 44.2    | 38.4    | 41.7    | 49.7    | 49.5    | 56.2    |
| 2.5     | 2.7     | 1.5     | 1.0     | 2.4     | 2.9     |
| 16.2    | 13.4    | 6.6     | 11.2    | 23.4    | 18.5    |
| 259.1   | 270.0   | 274.1   | 376.2   | 315.7   | 372.0   |
| 87.0    | 66.3    | 75.4    | 68.3    | 88.5    | 79.7    |
| 24.8    | 16.4    | 21.1    | 21.4    | 22.4    | 24.6    |
| 89.5    | 81.3    | 85.6    | 94.2    | 95.8    | 111.7   |
| 9264.1  | 8823.9  | 9087.4  | 9813.0  | 9838.7  | 10122.9 |
| 109.2   | 96.2    | 109.5   | 95.9    | 102.7   | 117.4   |
| 113.2   | 131.3   | 118.3   | 145.2   | 140.2   | 161.0   |
| 303.5   | 311.0   | 296.4   | 301.7   | 310.9   | 388.0   |
| 40.1    | 41.5    | 41.5    | 52.7    | 47.7    | 78.1    |
| 3.9     | 16.4    | 3.8     | 7.8     | 15.8    | 5.7     |
| 23.5    | 13.9    | 26.8    | 19.0    | 27.5    | 32.6    |
| 64.3    | 53.9    | 68.1    | 78.0    | 77.8    | 81.6    |
| 151.8   | 180.1   | 179.3   | 205.1   | 197.8   | 213.2   |
| 2152.1  | 2187.7  | 2630.7  | 2927.9  | 2432.2  | 2861.2  |
| 386.1   | 355.9   | 321.0   | 359.2   | 389.3   | 431.8   |
| 17.6    | 19.4    | 25.5    | 21.3    | 13.4    | 25.4    |

|        |        |        |        |        |        |
|--------|--------|--------|--------|--------|--------|
| 18.7   | 16.9   | 11.0   | 11.4   | 19.5   | 22.4   |
| 25.3   | 24.5   | 25.1   | 30.6   | 30.0   | 34.1   |
| 35.8   | 34.4   | 23.4   | 41.4   | 36.4   | 40.6   |
| 20.5   | 19.9   | 25.0   | 5.5    | 16.2   | 19.6   |
| 10.1   | 9.7    | 7.3    | 7.0    | 11.9   | 3.1    |
| 5.0    | 6.8    | 4.8    | 3.5    | 7.3    | 5.6    |
| 89.5   | 134.6  | 95.5   | 104.1  | 83.2   | 118.1  |
| 0.7    | 2.6    | 7.7    | 4.9    | 7.1    | 11.3   |
| 30.3   | 32.5   | 32.1   | 30.6   | 29.6   | 31.8   |
| 22.1   | 4.7    | 16.9   | 23.6   | 28.7   | 6.9    |
| 55.4   | 38.1   | 75.6   | 46.2   | 72.4   | 58.7   |
| 16.3   | 5.5    | 14.2   | 5.8    | 13.0   | 19.1   |
| 127.8  | 186.3  | 204.3  | 200.1  | 195.1  | 196.7  |
| 1774.6 | 1547.1 | 1460.8 | 1544.1 | 1684.0 | 1958.8 |
| 39.4   | 40.5   | 45.1   | 48.4   | 50.5   | 54.3   |
| 5.9    | 7.1    | 4.3    | 5.5    | 20.7   | 7.1    |
| 4.4    | 1.0    | 1.2    | 0.9    | 1.3    | 2.4    |
| 55.1   | 49.7   | 52.3   | 49.1   | 75.1   | 52.8   |
| 17.4   | 15.7   | 18.5   | 20.4   | 16.0   | 19.4   |
| 141.0  | 111.7  | 132.0  | 149.4  | 146.3  | 178.0  |
| 9.3    | 16.7   | 10.8   | 5.6    | 7.3    | 6.3    |
| 52.4   | 38.5   | 40.2   | 28.1   | 47.2   | 45.0   |
| 910.7  | 904.1  | 884.1  | 915.5  | 978.7  | 1128.5 |
| 69.6   | 54.5   | 71.2   | 67.5   | 89.4   | 72.7   |
| 622.3  | 684.4  | 601.4  | 691.4  | 761.0  | 769.9  |
| 2.8    | 3.4    | 7.6    | 8.5    | 11.6   | 2.9    |
| 18.4   | 21.6   | 13.4   | 20.1   | 17.4   | 25.0   |
| 108.1  | 84.6   | 107.3  | 110.9  | 144.8  | 151.4  |
| 50.0   | 48.8   | 39.5   | 45.5   | 54.0   | 64.1   |
| 6073.7 | 5390.0 | 6053.0 | 6532.4 | 6494.6 | 6637.3 |
| 46.3   | 64.2   | 54.2   | 64.6   | 50.5   | 49.8   |
| 102.0  | 66.3   | 94.8   | 78.8   | 85.3   | 118.1  |
| 11.7   | 7.9    | 15.4   | 15.4   | 6.8    | 11.1   |
| 18.3   | 36.4   | 36.4   | 34.9   | 17.6   | 34.1   |
| 6.2    | 18.1   | 19.5   | 7.3    | 9.7    | 9.3    |
| 25.2   | 19.0   | 39.3   | 33.6   | 43.5   | 33.0   |
| 102.8  | 93.2   | 97.3   | 122.4  | 120.7  | 150.0  |
| 8.8    | 13.3   | 14.9   | 14.8   | 13.8   | 5.6    |
| 579.1  | 493.1  | 609.0  | 612.6  | 664.0  | 681.7  |
| 12.7   | 17.2   | 18.5   | 14.8   | 11.2   | 12.3   |
| 210.2  | 193.2  | 226.0  | 255.6  | 258.0  | 281.3  |
| 6087.4 | 5288.8 | 5731.5 | 6309.1 | 6578.7 | 6729.7 |
| 26.6   | 25.1   | 31.6   | 46.3   | 42.5   | 47.4   |
| 454.5  | 442.9  | 474.2  | 508.3  | 471.1  | 515.7  |
| 883.0  | 751.4  | 700.6  | 902.0  | 868.8  | 1135.3 |
| 4.8    | 12.9   | 15.5   | 12.2   | 11.0   | 15.9   |
| 277.4  | 242.8  | 291.5  | 298.9  | 319.3  | 374.9  |
| 58.5   | 77.3   | 57.7   | 83.1   | 67.5   | 77.4   |
| 2.2    | 3.6    | 3.1    | 2.2    | 2.5    | 2.7    |
| 12.4   | 8.8    | 22.6   | 13.6   | 11.0   | 16.4   |
| 493.5  | 552.1  | 544.4  | 712.3  | 632.4  | 702.0  |
| 16.6   | 20.0   | 17.9   | 8.4    | 25.9   | 13.8   |
| 193.2  | 167.7  | 160.0  | 181.5  | 184.7  | 151.3  |

|        |        |        |        |        |        |
|--------|--------|--------|--------|--------|--------|
| 2.2    | 3.0    | 5.5    | 2.6    | 2.3    | 3.5    |
| 12.6   | 6.5    | 4.5    | 11.4   | 10.3   | 8.8    |
| 139.5  | 157.5  | 169.1  | 167.0  | 184.7  | 179.9  |
| 0.7    | 1.7    | 4.2    | 4.9    | 5.5    | 1.9    |
| 1.3    | 1.5    | 9.6    | 12.8   | 1.3    | 2.4    |
| 172.1  | 265.9  | 214.5  | 225.2  | 257.1  | 235.0  |
| 2.9    | 2.1    | 4.4    | 2.6    | 5.9    | 3.2    |
| 45.1   | 32.8   | 45.6   | 48.4   | 43.5   | 53.2   |
| 11.9   | 15.2   | 9.7    | 16.3   | 15.5   | 7.5    |
| 602.3  | 537.6  | 686.4  | 719.2  | 777.6  | 748.6  |
| 48.2   | 37.7   | 67.2   | 42.1   | 50.2   | 61.6   |
| 11.4   | 15.4   | 9.2    | 9.9    | 18.1   | 24.1   |
| 2.9    | 1.4    | 8.4    | 7.3    | 16.0   | 18.3   |
| 138.4  | 136.8  | 167.1  | 200.9  | 190.0  | 215.8  |
| 43.8   | 74.0   | 63.1   | 65.8   | 66.1   | 66.9   |
| 6928.9 | 6518.9 | 7118.4 | 7082.7 | 7672.6 | 7282.5 |
| 102.3  | 75.0   | 95.2   | 122.5  | 130.7  | 107.4  |
| 84.4   | 100.5  | 138.4  | 79.6   | 167.1  | 130.8  |
| 873.4  | 885.6  | 879.5  | 874.8  | 1012.6 | 1082.3 |
| 83.4   | 100.1  | 138.1  | 100.8  | 112.1  | 124.8  |
| 2.5    | 4.4    | 9.9    | 4.6    | 23.8   | 3.6    |
| 5.5    | 14.4   | 2.5    | 4.6    | 1.1    | 3.6    |
| 30.8   | 27.0   | 35.6   | 40.4   | 35.8   | 44.4   |
| 537.7  | 521.2  | 609.0  | 563.6  | 583.3  | 758.7  |
| 3361.2 | 2981.9 | 3285.2 | 3588.4 | 3609.8 | 3832.9 |
| 51.4   | 69.1   | 38.3   | 56.6   | 59.4   | 59.7   |
| 97.3   | 54.3   | 65.6   | 57.0   | 88.9   | 87.2   |
| 5980.2 | 6474.6 | 6096.6 | 6279.8 | 6615.6 | 6693.2 |
| 47.2   | 36.1   | 52.9   | 45.3   | 44.6   | 47.0   |
| 2.6    | 1.5    | 12.4   | 4.0    | 2.0    | 3.1    |
| 249.2  | 227.8  | 230.8  | 237.0  | 257.8  | 333.0  |
| 96.9   | 106.4  | 123.0  | 128.8  | 127.6  | 137.1  |
| 70.9   | 59.7   | 68.8   | 75.5   | 77.4   | 105.9  |
| 7.1    | 22.2   | 18.4   | 13.9   | 15.4   | 16.1   |
| 6.4    | 0.5    | 2.5    | 0.4    | 5.7    | 0.7    |
| 893.9  | 694.5  | 783.8  | 738.0  | 1021.1 | 892.8  |
| 83.2   | 73.7   | 78.3   | 80.4   | 96.1   | 95.0   |
| 27.4   | 29.4   | 33.2   | 33.8   | 39.0   | 38.8   |
| 2.8    | 3.3    | 7.0    | 4.5    | 2.5    | 3.0    |
| 123.9  | 161.8  | 146.3  | 156.8  | 144.4  | 162.8  |
| 21.0   | 17.0   | 20.5   | 12.7   | 24.6   | 18.5   |
| 4.6    | 1.6    | 2.6    | 6.8    | 2.0    | 4.8    |
| 948.8  | 922.5  | 1041.1 | 1104.7 | 1167.6 | 1087.2 |
| 709.7  | 590.5  | 686.8  | 689.4  | 776.9  | 800.2  |
| 2.7    | 2.3    | 8.2    | 8.9    | 6.6    | 4.7    |
| 114.4  | 111.1  | 135.9  | 121.0  | 133.5  | 141.9  |
| 484.8  | 535.2  | 683.9  | 655.4  | 659.7  | 675.0  |
| 52.6   | 59.2   | 61.5   | 49.6   | 83.8   | 62.3   |
| 4.1    | 3.0    | 3.7    | 1.5    | 1.8    | 3.4    |
| 331.7  | 296.5  | 311.4  | 356.2  | 325.0  | 353.8  |
| 147.0  | 114.2  | 140.2  | 135.5  | 145.7  | 167.6  |
| 2087.7 | 1965.3 | 2212.6 | 2101.6 | 2255.9 | 2557.4 |
| 62.9   | 113.3  | 59.6   | 60.9   | 63.8   | 70.0   |



|         |         |         |         |         |         |
|---------|---------|---------|---------|---------|---------|
| 1.7     | 1.6     | 1.5     | 3.5     | 2.2     | 2.9     |
| 5.1     | 4.2     | 8.6     | 4.3     | 4.3     | 5.6     |
| 420.6   | 384.3   | 450.0   | 447.5   | 489.8   | 562.2   |
| 3.3     | 7.1     | 7.5     | 8.0     | 12.8    | 7.9     |
| 2.4     | 2.5     | 5.6     | 1.9     | 3.7     | 2.5     |
| 10.9    | 16.5    | 18.1    | 7.3     | 3.9     | 12.5    |
| 8.7     | 20.8    | 8.6     | 7.8     | 16.6    | 15.4    |
| 106.4   | 87.1    | 122.1   | 118.5   | 150.5   | 175.1   |
| 85.3    | 77.2    | 70.9    | 83.1    | 119.2   | 127.5   |
| 732.1   | 795.7   | 870.8   | 951.2   | 897.8   | 916.0   |
| 3.4     | 4.7     | 5.2     | 9.9     | 10.9    | 8.1     |
| 475.7   | 395.3   | 437.5   | 407.3   | 531.1   | 544.5   |
| 17.8    | 21.7    | 14.7    | 20.6    | 30.6    | 9.4     |
| 9.5     | 6.8     | 13.2    | 15.2    | 11.5    | 11.1    |
| 25.9    | 2.3     | 32.8    | 28.3    | 36.3    | 37.9    |
| 6.2     | 11.5    | 17.4    | 6.8     | 8.1     | 7.0     |
| 25.1    | 23.7    | 20.0    | 16.2    | 21.2    | 28.7    |
| 2.6     | 2.5     | 4.3     | 5.2     | 14.5    | 5.8     |
| 1.0     | 4.9     | 2.0     | 0.5     | 3.1     | 3.7     |
| 10.5    | 2.6     | 11.1    | 19.0    | 12.2    | 8.5     |
| 18.2    | 14.8    | 15.9    | 13.7    | 12.5    | 22.1    |
| 86.4    | 72.6    | 92.8    | 109.6   | 105.9   | 95.0    |
| 246.6   | 195.8   | 209.5   | 213.3   | 214.7   | 249.4   |
| 826.9   | 797.5   | 1023.7  | 1104.1  | 1098.8  | 1126.2  |
| 190.0   | 208.5   | 242.8   | 275.0   | 242.6   | 268.0   |
| 128.6   | 146.7   | 191.8   | 185.0   | 184.9   | 194.4   |
| 8.7     | 13.9    | 11.6    | 9.6     | 7.0     | 11.8    |
| 11.8    | 2.8     | 8.6     | 13.1    | 8.8     | 12.7    |
| 29.9    | 43.9    | 41.5    | 47.8    | 45.9    | 46.0    |
| 303.9   | 279.5   | 278.7   | 263.5   | 299.7   | 371.6   |
| 795.0   | 847.8   | 920.3   | 962.9   | 928.2   | 986.7   |
| 208.9   | 213.8   | 209.0   | 212.3   | 228.5   | 280.6   |
| 1.2     | 0.8     | 1.1     | 0.7     | 0.5     | 0.5     |
| 1.7     | 12.7    | 7.5     | 3.0     | 1.0     | 1.8     |
| 1601.9  | 1507.3  | 1867.7  | 1951.1  | 2065.6  | 2130.1  |
| 132.8   | 137.1   | 146.9   | 124.5   | 136.0   | 181.9   |
| 12.6    | 1.6     | 1.7     | 1.9     | 1.3     | 4.7     |
| 10851.9 | 10502.3 | 10753.8 | 11606.3 | 11592.2 | 11472.8 |
| 27.0    | 26.0    | 26.7    | 25.5    | 34.2    | 41.1    |
| 467.9   | 418.2   | 527.2   | 512.4   | 479.3   | 492.1   |
| 63.1    | 67.6    | 75.4    | 84.6    | 97.2    | 92.7    |
| 47.9    | 64.5    | 57.0    | 57.4    | 67.2    | 66.2    |
| 3.1     | 12.9    | 13.9    | 10.0    | 2.3     | 5.7     |
| 136.3   | 217.6   | 176.7   | 205.2   | 168.4   | 210.6   |
| 39.3    | 33.4    | 43.6    | 40.1    | 40.5    | 52.2    |
| 6.7     | 3.8     | 6.4     | 4.5     | 3.8     | 4.9     |
| 28.4    | 21.3    | 17.1    | 19.5    | 19.4    | 21.5    |
| 174.1   | 222.9   | 185.4   | 189.2   | 224.4   | 208.0   |
| 473.0   | 733.3   | 598.6   | 741.1   | 708.8   | 623.0   |
| 104.6   | 112.0   | 109.2   | 182.4   | 113.8   | 138.8   |
| 12.0    | 12.6    | 12.4    | 11.1    | 11.4    | 19.5    |
| 93.7    | 106.2   | 143.6   | 110.9   | 114.1   | 131.7   |
| 49.9    | 66.0    | 65.5    | 64.9    | 65.0    | 69.3    |

|         |        |        |        |         |        |
|---------|--------|--------|--------|---------|--------|
| 0.4     | 0.1    | 0.2    | 1.4    | 0.8     | 0.2    |
| 2.4     | 1.5    | 9.0    | 13.5   | 1.8     | 4.6    |
| 4.3     | 11.4   | 3.9    | 7.7    | 9.9     | 11.7   |
| 51.5    | 17.5   | 24.9   | 24.5   | 39.9    | 40.4   |
| 1.2     | 2.9    | 5.5    | 3.3    | 15.1    | 9.3    |
| 157.6   | 181.8  | 181.8  | 199.0  | 207.2   | 211.6  |
| 63.5    | 64.4   | 57.0   | 72.5   | 64.0    | 80.6   |
| 8.7     | 12.6   | 9.0    | 8.5    | 10.8    | 7.3    |
| 20.5    | 17.0   | 16.0   | 25.5   | 4.9     | 18.0   |
| 109.7   | 112.7  | 126.2  | 154.2  | 154.2   | 177.7  |
| 37.5    | 5.4    | 9.3    | 12.2   | 34.1    | 18.5   |
| 8011.4  | 7363.5 | 7840.5 | 8048.1 | 8423.2  | 8405.9 |
| 76.1    | 92.5   | 106.2  | 86.4   | 108.5   | 100.5  |
| 6.5     | 5.1    | 14.9   | 7.8    | 3.3     | 2.9    |
| 8.2     | 6.7    | 4.5    | 10.0   | 4.0     | 5.7    |
| 13.0    | 8.3    | 12.5   | 3.6    | 8.9     | 10.9   |
| 25.0    | 48.6   | 16.2   | 15.2   | 14.1    | 29.1   |
| 16.4    | 17.1   | 9.0    | 12.9   | 8.4     | 14.6   |
| 426.5   | 399.1  | 419.7  | 490.7  | 431.5   | 505.8  |
| 337.7   | 233.6  | 281.0  | 299.8  | 319.5   | 392.5  |
| 11.6    | 13.5   | 13.8   | 16.2   | 14.3    | 15.0   |
| 198.4   | 255.3  | 211.0  | 218.7  | 235.3   | 250.5  |
| 64.3    | 53.5   | 53.8   | 49.7   | 57.0    | 69.4   |
| 23.2    | 24.7   | 16.5   | 32.1   | 28.3    | 21.1   |
| 4.2     | 5.1    | 3.6    | 4.4    | 3.0     | 4.5    |
| 544.6   | 566.4  | 672.4  | 691.0  | 705.8   | 714.3  |
| 511.9   | 533.1  | 585.3  | 543.0  | 623.6   | 691.2  |
| 129.0   | 129.7  | 152.7  | 167.8  | 178.8   | 174.6  |
| 83.5    | 88.5   | 87.2   | 79.4   | 91.9    | 107.6  |
| 820.7   | 737.8  | 894.9  | 929.4  | 1056.9  | 1086.9 |
| 27.9    | 22.7   | 31.9   | 35.5   | 29.2    | 36.8   |
| 176.1   | 191.4  | 176.4  | 211.5  | 198.3   | 227.0  |
| 20.8    | 14.9   | 20.5   | 21.6   | 21.6    | 23.4   |
| 501.4   | 407.4  | 476.8  | 429.2  | 548.7   | 609.7  |
| 170.4   | 184.4  | 198.9  | 202.0  | 224.7   | 237.8  |
| 605.3   | 521.3  | 588.5  | 598.4  | 683.1   | 738.3  |
| 187.0   | 204.6  | 232.5  | 214.3  | 225.7   | 271.6  |
| 6.2     | 24.1   | 23.1   | 4.0    | 5.0     | 10.9   |
| 21.7    | 10.3   | 15.5   | 9.9    | 15.1    | 14.5   |
| 3.2     | 6.4    | 1.5    | 5.3    | 2.1     | 5.0    |
| 1982.8  | 1762.3 | 1823.1 | 1949.9 | 2181.3  | 2351.6 |
| 47.4    | 51.0   | 53.7   | 43.8   | 47.3    | 70.1   |
| 167.6   | 143.7  | 158.2  | 170.2  | 179.0   | 235.7  |
| 3428.7  | 3279.8 | 3285.0 | 3416.8 | 3665.1  | 4001.4 |
| 122.7   | 114.8  | 123.0  | 123.1  | 133.2   | 143.1  |
| 3.4     | 8.1    | 1.8    | 5.1    | 5.3     | 10.1   |
| 6.3     | 1.9    | 7.4    | 15.3   | 22.0    | 9.3    |
| 5303.3  | 4399.9 | 4685.0 | 4640.8 | 5200.4  | 5563.8 |
| 396.0   | 698.3  | 446.1  | 480.9  | 465.7   | 531.9  |
| 11.5    | 11.6   | 13.7   | 15.1   | 15.5    | 17.9   |
| 10178.4 | 9026.1 | 9282.8 | 9682.2 | 10094.3 | 9535.2 |
| 10.0    | 2.2    | 10.9   | 7.0    | 8.3     | 6.0    |
| 13.6    | 19.5   | 10.4   | 9.7    | 2.7     | 12.2   |

|        |        |        |         |         |         |
|--------|--------|--------|---------|---------|---------|
| 52.3   | 46.6   | 39.9   | 39.9    | 44.7    | 27.6    |
| 39.1   | 9.6    | 13.5   | 22.6    | 25.3    | 23.1    |
| 2704.9 | 2243.6 | 2486.2 | 2864.9  | 2955.2  | 3145.5  |
| 22.6   | 23.0   | 24.1   | 31.5    | 23.1    | 39.6    |
| 10.6   | 13.6   | 10.5   | 14.0    | 24.2    | 16.7    |
| 148.4  | 154.6  | 168.8  | 170.7   | 180.6   | 224.7   |
| 123.4  | 119.8  | 102.4  | 110.9   | 129.3   | 136.9   |
| 160.2  | 154.9  | 188.0  | 206.9   | 183.0   | 196.9   |
| 426.3  | 376.2  | 430.1  | 446.3   | 466.9   | 544.6   |
| 429.5  | 361.6  | 432.8  | 430.2   | 387.6   | 614.4   |
| 1.4    | 3.3    | 0.8    | 4.1     | 1.0     | 1.7     |
| 5994.1 | 6005.3 | 5958.8 | 6537.9  | 6457.8  | 7107.6  |
| 6.0    | 9.9    | 3.9    | 9.9     | 6.5     | 9.4     |
| 628.1  | 605.5  | 637.7  | 697.5   | 683.7   | 809.8   |
| 11.6   | 6.7    | 9.9    | 37.9    | 24.5    | 40.4    |
| 69.2   | 73.2   | 68.7   | 76.8    | 82.2    | 81.4    |
| 1075.7 | 954.7  | 1119.3 | 1102.2  | 1187.6  | 1233.1  |
| 5.8    | 1.3    | 2.6    | 2.0     | 6.8     | 7.0     |
| 72.6   | 72.2   | 87.4   | 99.9    | 89.8    | 105.7   |
| 9721.3 | 9275.8 | 9705.4 | 10082.4 | 10045.3 | 10033.2 |
| 89.5   | 62.2   | 102.2  | 96.7    | 117.5   | 116.0   |
| 1151.9 | 1097.3 | 1290.9 | 1457.6  | 1434.2  | 1490.1  |
| 342.1  | 339.1  | 353.9  | 376.6   | 427.6   | 460.3   |
| 1.9    | 6.5    | 9.0    | 0.8     | 4.0     | 2.6     |
| 31.3   | 78.6   | 41.2   | 53.3    | 37.6    | 59.3    |
| 55.4   | 51.6   | 81.8   | 63.5    | 80.1    | 80.5    |
| 1103.1 | 896.7  | 1010.4 | 1069.6  | 1181.8  | 1272.2  |
| 21.3   | 19.8   | 21.6   | 12.5    | 20.8    | 26.7    |
| 217.0  | 215.4  | 219.3  | 209.5   | 237.1   | 247.0   |
| 16.4   | 31.9   | 27.8   | 27.2    | 28.6    | 33.7    |
| 173.6  | 166.4  | 199.8  | 193.5   | 202.5   | 214.9   |
| 475.0  | 459.8  | 471.8  | 511.2   | 555.4   | 573.1   |
| 7.9    | 18.9   | 8.0    | 9.0     | 10.7    | 4.4     |
| 4.1    | 0.5    | 2.8    | 2.4     | 1.8     | 3.7     |
| 7.4    | 1.8    | 2.7    | 6.3     | 1.3     | 1.5     |
| 172.5  | 211.2  | 140.6  | 178.1   | 132.1   | 187.0   |
| 36.3   | 53.2   | 36.5   | 39.6    | 45.7    | 48.8    |
| 28.8   | 16.3   | 20.3   | 23.3    | 21.3    | 18.0    |
| 41.9   | 43.7   | 65.8   | 47.9    | 69.9    | 67.6    |
| 1.1    | 2.8    | 3.9    | 1.2     | 0.6     | 0.5     |
| 6507.2 | 5666.8 | 6009.0 | 6775.2  | 6752.6  | 7269.8  |
| 5.7    | 21.1   | 10.6   | 13.6    | 8.7     | 22.7    |
| 21.3   | 16.8   | 17.8   | 17.6    | 14.9    | 15.2    |
| 11.9   | 16.3   | 20.5   | 12.0    | 22.3    | 18.6    |
| 1.5    | 0.7    | 2.0    | 0.9     | 1.3     | 3.4     |
| 116.1  | 90.5   | 122.4  | 113.6   | 117.5   | 135.4   |
| 19.3   | 6.8    | 19.8   | 23.8    | 12.9    | 15.0    |
| 371.8  | 237.6  | 315.5  | 337.7   | 411.2   | 410.7   |
| 35.1   | 36.6   | 34.7   | 41.3    | 37.4    | 46.2    |
| 8.6    | 10.4   | 13.2   | 12.1    | 3.8     | 5.1     |
| 5.1    | 11.0   | 5.3    | 3.5     | 15.2    | 9.5     |
| 33.6   | 19.7   | 41.1   | 30.4    | 43.2    | 49.2    |
| 424.6  | 395.9  | 415.7  | 449.4   | 468.3   | 532.1   |

|        |        |        |        |        |        |
|--------|--------|--------|--------|--------|--------|
| 12.5   | 48.3   | 17.5   | 30.6   | 20.3   | 31.1   |
| 10.2   | 21.1   | 6.5    | 22.5   | 14.2   | 20.9   |
| 163.4  | 165.4  | 202.0  | 182.0  | 206.0  | 221.5  |
| 19.6   | 15.9   | 21.5   | 32.9   | 19.1   | 29.0   |
| 13.2   | 17.8   | 19.2   | 8.2    | 21.2   | 13.9   |
| 8.0    | 7.1    | 7.6    | 7.3    | 7.0    | 6.5    |
| 77.8   | 87.3   | 94.0   | 65.5   | 71.6   | 97.9   |
| 3.2    | 1.2    | 2.4    | 1.6    | 5.9    | 3.5    |
| 3927.1 | 3847.2 | 3756.9 | 4120.9 | 4371.5 | 4593.8 |
| 7.0    | 21.1   | 12.6   | 6.0    | 7.4    | 2.8    |
| 82.6   | 77.4   | 69.7   | 75.9   | 78.6   | 90.4   |
| 31.2   | 30.9   | 38.8   | 33.0   | 37.8   | 33.9   |
| 50.0   | 74.3   | 60.8   | 47.8   | 55.9   | 65.1   |
| 494.5  | 399.6  | 568.2  | 553.8  | 584.6  | 588.4  |
| 5.2    | 7.0    | 6.6    | 12.0   | 5.2    | 8.3    |
| 25.9   | 17.4   | 27.0   | 16.0   | 22.4   | 30.2   |
| 71.6   | 58.2   | 61.6   | 69.7   | 84.6   | 83.3   |
| 8848.8 | 8263.4 | 8392.7 | 8760.8 | 9217.5 | 9625.6 |
| 6.5    | 3.8    | 3.7    | 2.4    | 9.0    | 4.5    |
| 269.7  | 212.9  | 333.1  | 330.3  | 339.5  | 350.6  |
| 246.7  | 249.0  | 247.6  | 278.0  | 283.2  | 295.0  |
| 8.7    | 17.7   | 7.7    | 16.0   | 14.2   | 8.8    |
| 33.7   | 28.9   | 40.2   | 33.2   | 36.7   | 49.7   |
| 28.8   | 19.5   | 18.7   | 24.1   | 43.2   | 44.4   |
| 16.4   | 5.3    | 22.5   | 13.8   | 19.6   | 21.8   |
| 9.1    | 14.6   | 4.2    | 11.2   | 2.6    | 10.5   |
| 15.3   | 19.2   | 13.1   | 7.9    | 2.5    | 17.3   |
| 254.2  | 259.0  | 302.3  | 304.0  | 320.7  | 362.1  |
| 9.2    | 5.3    | 8.6    | 15.4   | 8.5    | 9.9    |
| 6.5    | 9.1    | 10.0   | 1.8    | 7.3    | 3.9    |
| 106.9  | 88.2   | 80.5   | 89.0   | 95.3   | 117.0  |
| 3.2    | 3.9    | 4.0    | 2.8    | 3.5    | 4.4    |
| 101.0  | 64.6   | 94.9   | 82.3   | 137.4  | 109.1  |
| 57.7   | 48.0   | 70.7   | 53.9   | 61.6   | 56.3   |
| 8.7    | 7.6    | 9.4    | 9.6    | 10.5   | 9.4    |
| 43.8   | 40.7   | 39.9   | 40.8   | 43.8   | 42.2   |
| 8.3    | 11.8   | 7.5    | 7.1    | 5.9    | 7.3    |
| 9.1    | 9.4    | 9.9    | 14.6   | 7.4    | 12.4   |
| 14.5   | 5.4    | 16.7   | 19.6   | 24.3   | 27.4   |
| 19.6   | 21.3   | 18.8   | 15.8   | 43.3   | 23.7   |
| 19.6   | 14.6   | 23.6   | 19.6   | 19.2   | 27.7   |
| 2.1    | 13.6   | 2.7    | 2.5    | 2.3    | 2.9    |
| 8.9    | 2.5    | 4.0    | 10.3   | 2.2    | 2.1    |
| 1.0    | 5.0    | 1.8    | 4.3    | 2.8    | 1.3    |
| 6.6    | 7.8    | 13.2   | 11.9   | 4.4    | 14.7   |
| 8692.9 | 8114.9 | 9074.7 | 9766.9 | 9383.6 | 9449.2 |
| 28.1   | 27.7   | 30.0   | 42.3   | 34.3   | 45.8   |
| 204.2  | 230.5  | 239.5  | 269.5  | 235.0  | 272.2  |
| 3.9    | 3.4    | 5.1    | 2.9    | 14.6   | 8.7    |
| 23.2   | 33.0   | 23.5   | 27.3   | 29.3   | 35.7   |
| 5.5    | 7.8    | 7.6    | 10.0   | 10.7   | 7.3    |
| 154.1  | 163.0  | 151.3  | 172.2  | 165.9  | 190.8  |
| 20.7   | 16.8   | 21.8   | 15.5   | 21.3   | 23.5   |

|         |         |         |         |         |         |
|---------|---------|---------|---------|---------|---------|
| 367.2   | 308.6   | 361.5   | 279.6   | 408.3   | 394.4   |
| 4.4     | 8.9     | 7.7     | 4.3     | 7.0     | 9.3     |
| 123.8   | 110.0   | 118.8   | 134.2   | 115.0   | 147.7   |
| 598.3   | 548.4   | 696.8   | 698.8   | 715.3   | 795.6   |
| 16.5    | 27.1    | 30.4    | 26.9    | 22.6    | 20.9    |
| 87.4    | 82.3    | 82.3    | 76.3    | 87.7    | 117.2   |
| 165.6   | 133.6   | 148.8   | 128.9   | 175.9   | 157.4   |
| 139.0   | 126.1   | 121.7   | 133.5   | 140.9   | 169.5   |
| 5.3     | 1.4     | 3.6     | 5.7     | 6.4     | 1.4     |
| 199.1   | 248.7   | 181.3   | 199.8   | 251.5   | 245.6   |
| 0.9     | 2.5     | 1.6     | 1.3     | 1.3     | 2.0     |
| 141.7   | 138.7   | 105.8   | 181.4   | 141.1   | 167.3   |
| 109.0   | 119.5   | 124.7   | 132.0   | 117.6   | 155.9   |
| 10.2    | 3.0     | 10.3    | 1.8     | 5.7     | 5.0     |
| 4.8     | 11.2    | 7.0     | 2.3     | 3.8     | 3.2     |
| 9.4     | 7.2     | 11.4    | 12.4    | 8.1     | 12.9    |
| 6.5     | 7.5     | 0.5     | 4.4     | 0.7     | 2.3     |
| 1.0     | 0.4     | 0.8     | 2.4     | 0.6     | 1.1     |
| 224.6   | 203.9   | 215.7   | 250.1   | 252.5   | 353.0   |
| 14.9    | 13.8    | 15.0    | 21.8    | 25.7    | 21.9    |
| 12.1    | 4.6     | 3.7     | 6.5     | 6.1     | 3.9     |
| 486.0   | 496.0   | 493.2   | 510.8   | 493.3   | 570.9   |
| 33.0    | 36.4    | 19.7    | 22.2    | 34.4    | 31.7    |
| 7.3     | 10.7    | 5.6     | 8.1     | 10.5    | 13.7    |
| 104.6   | 101.8   | 160.5   | 197.0   | 129.7   | 152.9   |
| 50.0    | 25.3    | 46.8    | 50.4    | 68.6    | 65.0    |
| 11268.3 | 10708.0 | 11548.3 | 11929.4 | 12414.8 | 11762.4 |
| 401.1   | 244.4   | 399.7   | 346.7   | 486.3   | 443.3   |
| 386.0   | 291.0   | 432.4   | 373.7   | 377.7   | 439.6   |
| 218.4   | 234.0   | 261.2   | 316.5   | 295.4   | 321.4   |
| 758.1   | 855.7   | 1036.7  | 1005.1  | 959.7   | 1049.1  |
| 43.8    | 54.7    | 47.8    | 59.7    | 66.7    | 61.5    |
| 81.4    | 73.7    | 56.9    | 76.9    | 49.7    | 91.3    |
| 8.1     | 3.2     | 7.9     | 3.1     | 3.0     | 4.1     |
| 1083.6  | 1356.5  | 1261.5  | 1481.9  | 1316.9  | 1384.6  |
| 12.8    | 9.8     | 10.1    | 16.3    | 13.4    | 16.5    |
| 6.7     | 10.8    | 1.3     | 0.9     | 3.6     | 6.5     |
| 29.0    | 15.9    | 6.0     | 42.0    | 25.6    | 49.3    |
| 13.5    | 14.2    | 24.8    | 26.0    | 22.3    | 18.6    |
| 220.7   | 169.8   | 170.9   | 190.2   | 226.2   | 253.8   |
| 113.1   | 88.2    | 116.9   | 109.4   | 139.2   | 136.8   |
| 1.1     | 1.3     | 1.4     | 1.7     | 1.6     | 1.8     |
| 16.9    | 23.8    | 18.4    | 14.0    | 20.5    | 26.0    |
| 147.6   | 265.1   | 124.1   | 163.3   | 165.0   | 205.5   |
| 44.4    | 51.7    | 52.8    | 61.0    | 45.3    | 63.9    |
| 47.6    | 45.3    | 39.1    | 35.2    | 37.9    | 45.3    |
| 56.3    | 35.4    | 49.9    | 40.7    | 64.1    | 67.8    |
| 11.9    | 3.8     | 3.6     | 3.9     | 11.5    | 5.8     |
| 6.3     | 13.6    | 11.9    | 4.1     | 7.5     | 14.3    |
| 1.1     | 1.3     | 1.1     | 1.7     | 1.2     | 1.6     |
| 5.9     | 6.2     | 14.3    | 5.0     | 5.9     | 19.2    |
| 53.9    | 28.0    | 23.0    | 31.0    | 49.4    | 52.6    |
| 5.7     | 3.6     | 5.8     | 1.6     | 1.1     | 3.0     |

|        |        |        |        |        |        |
|--------|--------|--------|--------|--------|--------|
| 138.0  | 112.8  | 99.8   | 120.4  | 118.1  | 133.6  |
| 6.9    | 0.9    | 1.3    | 7.0    | 5.9    | 1.4    |
| 2.0    | 1.0    | 4.8    | 3.4    | 1.7    | 2.4    |
| 50.1   | 63.0   | 47.4   | 51.1   | 50.0   | 64.3   |
| 7.7    | 5.7    | 7.5    | 2.0    | 3.5    | 5.8    |
| 293.6  | 275.5  | 253.5  | 211.9  | 294.8  | 334.6  |
| 26.4   | 39.4   | 39.4   | 39.1   | 30.1   | 47.2   |
| 92.1   | 94.4   | 72.1   | 86.8   | 97.0   | 95.8   |
| 10.5   | 6.7    | 5.7    | 1.6    | 1.9    | 13.1   |
| 4474.3 | 3976.9 | 4148.1 | 4329.1 | 4748.8 | 4968.3 |
| 311.3  | 292.9  | 270.2  | 308.2  | 421.7  | 394.9  |
| 440.9  | 462.3  | 617.2  | 744.3  | 557.8  | 697.5  |
| 2007.9 | 1793.6 | 1910.9 | 1839.8 | 1989.6 | 2477.8 |
| 1.4    | 10.3   | 4.1    | 1.6    | 6.1    | 4.1    |
| 77.2   | 74.9   | 72.1   | 79.2   | 61.2   | 67.4   |
| 179.9  | 163.9  | 220.7  | 192.9  | 222.5  | 231.9  |
| 13.1   | 8.2    | 17.2   | 13.1   | 20.2   | 12.1   |
| 329.3  | 319.1  | 322.4  | 378.9  | 376.3  | 435.1  |
| 21.8   | 39.3   | 26.4   | 23.8   | 33.7   | 40.5   |
| 15.7   | 18.0   | 14.1   | 12.1   | 12.5   | 2.8    |
| 18.0   | 3.0    | 23.9   | 22.5   | 23.8   | 31.8   |
| 14.2   | 19.1   | 16.2   | 27.8   | 18.9   | 25.7   |
| 52.9   | 64.0   | 61.8   | 69.3   | 59.9   | 67.2   |
| 3.4    | 13.9   | 9.8    | 4.9    | 6.9    | 6.4    |
| 2.3    | 17.2   | 11.7   | 26.1   | 11.8   | 17.8   |
| 393.8  | 396.3  | 380.6  | 359.4  | 443.8  | 472.8  |
| 116.3  | 98.6   | 63.3   | 101.2  | 91.7   | 120.6  |
| 48.4   | 59.8   | 37.9   | 64.6   | 39.9   | 66.6   |
| 14.3   | 11.0   | 22.7   | 19.0   | 13.2   | 16.2   |
| 2.9    | 1.7    | 11.4   | 14.4   | 5.6    | 5.1    |
| 24.1   | 25.3   | 15.7   | 20.8   | 37.8   | 20.9   |
| 80.9   | 82.7   | 102.8  | 109.8  | 107.0  | 129.2  |
| 83.3   | 10.8   | 81.9   | 72.9   | 93.5   | 110.4  |
| 12.2   | 8.5    | 7.7    | 18.1   | 8.0    | 26.2   |
| 3.6    | 28.1   | 12.1   | 11.6   | 8.8    | 13.3   |
| 6.3    | 4.4    | 7.3    | 3.2    | 9.2    | 6.3    |
| 42.7   | 42.9   | 39.3   | 41.5   | 45.9   | 55.8   |
| 2.4    | 3.2    | 5.9    | 4.9    | 6.8    | 1.8    |
| 8.4    | 12.7   | 11.8   | 9.6    | 8.3    | 4.3    |
| 2.2    | 6.2    | 7.1    | 3.6    | 3.3    | 7.5    |
| 78.3   | 63.8   | 58.3   | 71.1   | 92.1   | 79.6   |
| 15.7   | 18.1   | 15.1   | 13.5   | 15.8   | 20.9   |
| 23.5   | 29.8   | 37.7   | 46.3   | 29.9   | 37.2   |
| 128.5  | 120.3  | 126.4  | 147.5  | 132.4  | 154.7  |
| 194.3  | 162.7  | 194.7  | 188.1  | 213.7  | 233.1  |
| 206.7  | 189.9  | 203.6  | 229.9  | 243.4  | 243.2  |
| 48.4   | 45.0   | 63.0   | 63.8   | 62.6   | 68.2   |
| 129.4  | 153.2  | 94.3   | 164.5  | 125.2  | 186.7  |
| 2.4    | 6.7    | 4.0    | 1.3    | 2.8    | 6.0    |
| 198.0  | 128.3  | 181.7  | 180.1  | 223.6  | 230.4  |
| 1429.6 | 1307.5 | 1391.7 | 1525.4 | 1736.1 | 1683.1 |
| 17.1   | 12.3   | 16.9   | 14.2   | 14.7   | 16.6   |
| 14.0   | 3.3    | 11.3   | 9.5    | 18.0   | 15.7   |

|        |        |        |        |        |        |
|--------|--------|--------|--------|--------|--------|
| 23.3   | 16.6   | 12.1   | 20.7   | 33.2   | 36.9   |
| 1.5    | 1.7    | 5.6    | 2.4    | 1.7    | 6.8    |
| 183.5  | 145.8  | 170.6  | 192.5  | 192.9  | 214.2  |
| 325.6  | 309.9  | 327.7  | 289.8  | 363.3  | 413.7  |
| 6.8    | 16.2   | 6.1    | 11.9   | 5.7    | 5.0    |
| 11.1   | 13.5   | 12.0   | 6.5    | 8.6    | 5.0    |
| 2.7    | 1.3    | 0.8    | 0.9    | 1.6    | 7.2    |
| 12.8   | 2.6    | 19.0   | 17.2   | 12.9   | 17.5   |
| 144.4  | 102.1  | 155.7  | 153.7  | 163.9  | 175.2  |
| 248.3  | 209.8  | 223.2  | 198.8  | 255.7  | 269.8  |
| 126.3  | 134.7  | 142.8  | 145.5  | 187.3  | 190.8  |
| 3.6    | 4.6    | 9.8    | 14.2   | 18.8   | 16.3   |
| 408.8  | 387.6  | 482.1  | 468.4  | 525.3  | 552.6  |
| 2316.5 | 2087.3 | 2465.9 | 2657.5 | 2748.6 | 2704.7 |
| 1491.1 | 1478.9 | 1610.0 | 1822.6 | 1877.4 | 1897.8 |
| 12.7   | 13.3   | 14.4   | 12.6   | 14.6   | 12.8   |
| 26.0   | 3.6    | 26.0   | 5.1    | 18.4   | 20.8   |
| 191.0  | 217.9  | 269.0  | 269.3  | 258.2  | 266.6  |
| 208.4  | 173.3  | 227.9  | 259.9  | 251.5  | 290.9  |
| 27.7   | 18.8   | 25.1   | 36.5   | 42.6   | 38.4   |
| 3.7    | 3.3    | 3.6    | 4.1    | 3.1    | 4.0    |
| 87.8   | 74.8   | 77.7   | 87.5   | 83.4   | 100.5  |
| 6.3    | 8.9    | 3.5    | 11.1   | 12.5   | 7.5    |
| 78.9   | 108.6  | 93.0   | 89.7   | 105.8  | 121.9  |
| 448.2  | 350.2  | 456.7  | 468.6  | 543.4  | 516.3  |
| 32.7   | 28.4   | 35.2   | 31.2   | 45.2   | 40.2   |
| 13.6   | 25.4   | 11.6   | 16.2   | 17.7   | 16.2   |
| 37.7   | 45.0   | 48.2   | 44.7   | 52.8   | 55.1   |
| 2.9    | 2.0    | 1.6    | 1.0    | 3.2    | 5.9    |
| 485.8  | 451.1  | 517.8  | 522.3  | 574.3  | 608.2  |
| 840.9  | 802.1  | 844.0  | 833.1  | 921.9  | 1041.5 |
| 386.5  | 327.2  | 405.8  | 479.9  | 510.8  | 552.6  |
| 1.3    | 1.1    | 1.7    | 1.7    | 1.4    | 1.6    |
| 99.6   | 85.3   | 93.9   | 90.6   | 95.2   | 114.8  |
| 185.9  | 171.9  | 185.8  | 224.1  | 212.5  | 261.5  |
| 232.4  | 235.3  | 192.4  | 273.2  | 250.9  | 221.1  |
| 1856.8 | 1364.7 | 1992.9 | 2093.3 | 2061.4 | 2189.5 |
| 0.8    | 0.5    | 1.4    | 1.3    | 1.2    | 3.2    |
| 114.6  | 118.7  | 119.1  | 122.7  | 109.4  | 139.6  |
| 13.0   | 5.5    | 11.3   | 11.2   | 10.4   | 15.7   |
| 18.1   | 27.7   | 26.5   | 32.4   | 39.0   | 33.7   |
| 219.1  | 216.4  | 178.3  | 238.7  | 228.5  | 254.1  |
| 2.4    | 3.2    | 4.1    | 10.5   | 4.4    | 6.7    |
| 156.5  | 141.4  | 170.0  | 157.7  | 184.5  | 190.8  |
| 1.3    | 2.0    | 1.7    | 1.4    | 1.1    | 1.4    |
| 38.3   | 32.7   | 29.9   | 37.6   | 31.8   | 36.7   |
| 206.9  | 150.1  | 191.1  | 159.2  | 250.2  | 227.1  |
| 85.2   | 54.2   | 70.5   | 79.7   | 78.6   | 85.1   |
| 6.2    | 1.5    | 6.1    | 5.3    | 6.5    | 2.4    |
| 26.9   | 23.7   | 29.1   | 36.0   | 30.8   | 40.9   |
| 21.5   | 27.3   | 23.0   | 20.9   | 14.3   | 10.8   |
| 1.8    | 4.0    | 8.3    | 1.8    | 6.0    | 8.4    |
| 21.8   | 27.8   | 11.8   | 18.5   | 13.4   | 18.4   |

|         |        |        |         |         |         |
|---------|--------|--------|---------|---------|---------|
| 47.6    | 25.9   | 45.9   | 52.8    | 47.3    | 54.6    |
| 17.8    | 10.8   | 20.3   | 17.0    | 16.3    | 19.9    |
| 64.5    | 37.6   | 51.5   | 64.9    | 64.0    | 68.7    |
| 12.0    | 15.7   | 14.1   | 9.8     | 9.3     | 15.7    |
| 60.1    | 53.6   | 48.9   | 57.3    | 61.8    | 79.3    |
| 3434.3  | 3467.2 | 3432.6 | 3655.5  | 3847.5  | 4015.3  |
| 12.7    | 22.9   | 2.6    | 7.3     | 10.8    | 15.8    |
| 10156.4 | 8982.8 | 8568.4 | 10071.8 | 10356.6 | 10683.0 |
| 82.1    | 80.6   | 87.5   | 86.4    | 103.9   | 117.7   |
| 3.3     | 1.2    | 3.1    | 13.4    | 10.8    | 3.0     |
| 1.7     | 0.4    | 3.5    | 4.4     | 2.8     | 0.8     |
| 3.2     | 5.9    | 7.8    | 2.2     | 2.9     | 14.5    |
| 36.3    | 38.8   | 41.5   | 34.7    | 41.2    | 42.5    |
| 124.7   | 99.7   | 151.6  | 171.1   | 133.4   | 156.4   |
| 2080.1  | 1774.4 | 2071.4 | 2163.0  | 2358.8  | 2584.3  |
| 128.0   | 117.8  | 122.3  | 147.9   | 136.9   | 154.7   |
| 156.0   | 129.3  | 117.7  | 154.7   | 154.0   | 200.3   |
| 19.8    | 10.9   | 12.8   | 15.5    | 19.0    | 19.7    |
| 5.2     | 1.8    | 2.4    | 1.8     | 1.1     | 3.3     |
| 508.7   | 471.4  | 445.5  | 497.6   | 512.0   | 661.0   |
| 20.6    | 11.7   | 14.9   | 18.2    | 26.7    | 27.0    |
| 140.6   | 142.3  | 129.8  | 137.8   | 154.2   | 181.8   |
| 10.1    | 16.0   | 10.5   | 9.5     | 11.5    | 13.0    |
| 11.2    | 0.6    | 12.3   | 10.2    | 15.9    | 14.3    |
| 13.8    | 6.7    | 14.3   | 11.6    | 5.7     | 11.9    |
| 11.4    | 9.3    | 11.9   | 5.5     | 10.2    | 26.3    |
| 2.7     | 1.8    | 3.8    | 3.1     | 1.1     | 3.0     |
| 8.9     | 15.2   | 14.2   | 14.2    | 13.8    | 17.5    |
| 36.6    | 31.8   | 27.9   | 29.2    | 28.5    | 30.5    |
| 1.6     | 3.3    | 1.0    | 0.8     | 2.8     | 0.9     |
| 2.6     | 1.6    | 4.3    | 1.9     | 4.0     | 2.0     |
| 8701.3  | 8289.8 | 8478.0 | 9195.8  | 9196.7  | 9260.9  |
| 167.1   | 131.8  | 149.5  | 160.1   | 176.8   | 202.4   |
| 35.3    | 37.5   | 35.5   | 43.0    | 59.6    | 60.2    |
| 2104.1  | 1964.6 | 2174.3 | 2076.0  | 2294.6  | 2492.0  |
| 7.0     | 18.4   | 11.0   | 3.7     | 5.1     | 9.8     |
| 345.0   | 365.1  | 342.2  | 352.2   | 373.2   | 451.2   |
| 1245.3  | 1028.1 | 1266.4 | 1238.0  | 1413.1  | 1491.8  |
| 7.0     | 24.1   | 15.1   | 29.6    | 9.3     | 18.4    |
| 634.3   | 774.2  | 740.0  | 920.0   | 815.5   | 834.3   |
| 45.4    | 54.0   | 63.6   | 70.3    | 73.0    | 78.6    |
| 143.7   | 119.6  | 150.9  | 158.7   | 201.3   | 203.2   |
| 12.6    | 20.9   | 29.3   | 12.3    | 24.2    | 16.8    |
| 479.9   | 392.8  | 467.1  | 436.7   | 578.5   | 554.3   |
| 56.1    | 41.9   | 47.7   | 49.9    | 57.9    | 65.5    |
| 3.2     | 3.1    | 3.1    | 5.7     | 2.1     | 1.7     |
| 446.8   | 449.3  | 498.1  | 551.9   | 475.4   | 645.2   |
| 6.0     | 5.4    | 2.4    | 12.8    | 13.4    | 9.6     |
| 8.5     | 1.3    | 17.7   | 9.0     | 22.3    | 9.5     |
| 17.4    | 30.5   | 25.9   | 29.1    | 21.9    | 20.4    |
| 17.7    | 4.1    | 2.3    | 3.5     | 6.2     | 11.3    |
| 2.6     | 3.7    | 2.4    | 3.2     | 3.1     | 4.6     |
| 23.5    | 1.5    | 18.5   | 27.5    | 16.4    | 11.0    |



|        |        |        |        |        |        |
|--------|--------|--------|--------|--------|--------|
| 9.2    | 14.5   | 12.0   | 10.7   | 13.5   | 16.8   |
| 88.9   | 86.7   | 101.1  | 82.3   | 93.4   | 105.6  |
| 13.0   | 18.8   | 3.2    | 2.9    | 3.2    | 9.8    |
| 8.9    | 26.8   | 4.3    | 5.4    | 2.3    | 8.5    |
| 421.2  | 367.3  | 406.4  | 417.2  | 431.0  | 513.8  |
| 146.8  | 151.9  | 171.3  | 169.9  | 172.2  | 179.0  |
| 5.9    | 7.5    | 7.2    | 6.0    | 8.5    | 16.9   |
| 164.0  | 159.3  | 172.5  | 181.6  | 213.7  | 227.4  |
| 141.7  | 141.1  | 146.6  | 143.7  | 170.9  | 156.5  |
| 161.6  | 133.9  | 154.4  | 135.9  | 169.4  | 191.6  |
| 1.7    | 2.3    | 4.7    | 1.8    | 1.8    | 2.9    |
| 2.0    | 1.5    | 3.7    | 6.9    | 0.8    | 4.6    |
| 141.3  | 122.3  | 135.7  | 136.4  | 163.3  | 174.3  |
| 70.5   | 71.1   | 77.8   | 76.7   | 87.2   | 87.4   |
| 10.8   | 5.2    | 14.9   | 4.8    | 5.6    | 14.7   |
| 1.0    | 8.0    | 1.2    | 5.0    | 5.6    | 3.1    |
| 568.4  | 566.5  | 624.5  | 678.1  | 658.4  | 703.0  |
| 1.6    | 0.9    | 1.6    | 1.2    | 1.0    | 1.7    |
| 2.4    | 4.1    | 3.9    | 4.4    | 4.1    | 1.6    |
| 5.6    | 3.0    | 7.3    | 7.3    | 9.5    | 11.9   |
| 143.5  | 111.5  | 179.8  | 137.0  | 225.3  | 203.7  |
| 50.2   | 57.4   | 61.9   | 61.5   | 70.4   | 67.7   |
| 1344.3 | 1035.1 | 1459.3 | 1381.5 | 1606.0 | 1567.1 |
| 107.9  | 53.0   | 121.8  | 130.0  | 124.6  | 151.8  |
| 57.6   | 64.3   | 61.4   | 62.4   | 81.1   | 53.1   |
| 4818.8 | 4118.4 | 4168.3 | 4403.8 | 4760.0 | 5419.6 |
| 2.1    | 10.1   | 9.3    | 4.5    | 4.2    | 16.5   |
| 79.9   | 94.6   | 80.4   | 71.6   | 84.9   | 98.0   |
| 1.3    | 9.7    | 1.2    | 0.4    | 7.9    | 4.2    |
| 137.0  | 150.9  | 154.3  | 159.6  | 163.3  | 182.8  |
| 1.3    | 1.3    | 3.4    | 3.3    | 2.4    | 3.2    |
| 100.6  | 84.0   | 94.5   | 79.5   | 94.4   | 115.2  |
| 123.2  | 93.5   | 101.1  | 101.2  | 122.0  | 125.6  |
| 14.7   | 11.6   | 13.3   | 9.7    | 8.4    | 7.9    |
| 7.8    | 6.0    | 2.6    | 1.8    | 4.2    | 5.4    |
| 899.4  | 808.9  | 883.2  | 899.4  | 982.9  | 1179.8 |
| 15.6   | 11.4   | 15.3   | 21.1   | 17.7   | 20.0   |
| 45.2   | 43.5   | 46.8   | 46.4   | 53.4   | 48.6   |
| 1.9    | 3.7    | 8.7    | 2.2    | 2.2    | 2.5    |
| 1.9    | 2.0    | 8.8    | 3.2    | 4.6    | 8.0    |
| 6.8    | 3.0    | 5.4    | 7.2    | 9.3    | 9.8    |
| 49.1   | 58.6   | 54.5   | 50.1   | 54.4   | 60.0   |
| 81.7   | 67.9   | 71.9   | 77.7   | 77.5   | 99.2   |
| 79.0   | 108.1  | 86.3   | 87.5   | 86.1   | 106.5  |
| 5.8    | 4.7    | 16.4   | 5.3    | 9.4    | 7.4    |
| 14.0   | 1.0    | 3.8    | 9.7    | 7.5    | 10.9   |
| 2.2    | 2.3    | 10.9   | 6.7    | 15.5   | 4.2    |
| 15.3   | 17.1   | 24.8   | 11.8   | 21.0   | 18.2   |
| 57.8   | 57.4   | 74.1   | 70.2   | 68.7   | 74.6   |
| 12.8   | 15.2   | 12.5   | 14.7   | 16.9   | 29.5   |
| 226.2  | 217.9  | 263.1  | 254.1  | 286.9  | 304.5  |
| 152.8  | 157.9  | 158.9  | 163.4  | 173.3  | 181.7  |
| 27.1   | 20.6   | 25.2   | 25.4   | 33.2   | 33.9   |

|        |        |        |        |        |        |
|--------|--------|--------|--------|--------|--------|
| 6.2    | 1.7    | 3.1    | 6.1    | 3.5    | 3.3    |
| 5.9    | 3.8    | 9.6    | 6.7    | 6.1    | 5.9    |
| 30.8   | 27.2   | 20.8   | 29.7   | 36.7   | 44.3   |
| 34.2   | 40.4   | 43.5   | 37.4   | 53.6   | 47.8   |
| 143.5  | 142.7  | 162.5  | 170.2  | 194.9  | 178.4  |
| 86.1   | 24.8   | 73.8   | 56.1   | 105.4  | 105.8  |
| 58.2   | 33.5   | 55.2   | 50.6   | 78.6   | 74.9   |
| 12.5   | 22.3   | 10.1   | 12.3   | 24.7   | 8.7    |
| 8.6    | 2.1    | 4.2    | 3.6    | 10.7   | 11.7   |
| 175.8  | 116.3  | 118.1  | 109.4  | 175.6  | 172.4  |
| 202.2  | 153.3  | 175.2  | 184.6  | 216.7  | 236.5  |
| 6.1    | 4.3    | 5.1    | 5.2    | 3.1    | 9.7    |
| 4918.9 | 4119.3 | 4369.2 | 5066.3 | 5109.9 | 5972.6 |
| 26.0   | 16.5   | 11.8   | 5.6    | 20.7   | 7.9    |
| 17.4   | 30.7   | 16.4   | 11.8   | 16.1   | 19.3   |
| 1208.7 | 1076.3 | 1253.6 | 1260.2 | 1340.5 | 1595.9 |
| 337.7  | 299.5  | 334.6  | 360.8  | 404.2  | 442.8  |
| 837.8  | 815.6  | 862.2  | 986.9  | 1065.7 | 1093.2 |
| 41.0   | 45.7   | 50.1   | 59.4   | 57.1   | 73.5   |
| 6.6    | 12.4   | 11.8   | 13.3   | 6.8    | 17.6   |
| 41.4   | 42.7   | 31.8   | 38.3   | 41.0   | 44.0   |
| 1179.8 | 1104.2 | 1230.1 | 1240.9 | 1279.6 | 1430.8 |
| 301.1  | 249.2  | 274.3  | 292.0  | 309.7  | 347.8  |
| 5.4    | 1.9    | 14.6   | 8.8    | 9.9    | 6.1    |
| 135.4  | 141.4  | 146.1  | 161.7  | 160.1  | 171.5  |
| 0.9    | 0.9    | 2.1    | 1.2    | 1.4    | 3.2    |
| 265.7  | 190.3  | 258.4  | 242.3  | 293.1  | 278.3  |
| 1.3    | 5.7    | 2.3    | 6.1    | 5.6    | 3.0    |
| 71.4   | 42.0   | 77.2   | 85.4   | 97.4   | 91.3   |
| 7990.5 | 7364.1 | 7933.3 | 8202.1 | 8416.2 | 8502.6 |
| 21.0   | 31.5   | 22.5   | 30.9   | 30.5   | 32.3   |
| 96.1   | 107.8  | 110.3  | 137.0  | 125.5  | 125.7  |
| 357.1  | 330.0  | 329.1  | 363.1  | 404.0  | 416.6  |
| 6.5    | 9.9    | 7.7    | 3.4    | 6.6    | 15.2   |
| 45.8   | 61.7   | 30.2   | 39.5   | 59.3   | 67.6   |
| 59.3   | 44.7   | 54.0   | 59.6   | 45.1   | 65.0   |
| 1.5    | 1.3    | 7.7    | 3.9    | 2.7    | 4.4    |
| 71.7   | 55.0   | 71.2   | 67.9   | 77.1   | 81.4   |
| 1622.7 | 1444.9 | 1506.4 | 1472.0 | 1794.5 | 1701.2 |
| 234.5  | 240.1  | 237.6  | 287.8  | 226.3  | 292.0  |
| 0.4    | 2.5    | 1.0    | 2.3    | 2.1    | 2.1    |
| 84.4   | 88.5   | 95.1   | 100.2  | 80.6   | 94.2   |
| 7.1    | 4.3    | 8.1    | 7.8    | 11.2   | 7.8    |
| 8.7    | 13.7   | 6.9    | 5.9    | 1.5    | 0.8    |
| 1.5    | 3.6    | 3.7    | 3.4    | 3.4    | 3.6    |
| 11.5   | 1.7    | 12.7   | 15.0   | 16.5   | 18.0   |
| 4810.4 | 4008.8 | 4513.3 | 4853.2 | 5197.7 | 5234.1 |
| 12.0   | 8.0    | 10.7   | 7.0    | 8.2    | 4.1    |
| 643.0  | 685.8  | 923.4  | 891.2  | 929.9  | 920.0  |
| 54.5   | 51.1   | 54.3   | 43.6   | 54.0   | 63.1   |
| 3.6    | 2.6    | 3.0    | 3.0    | 1.3    | 4.5    |
| 54.1   | 41.3   | 38.3   | 47.6   | 51.8   | 68.7   |
| 34.0   | 16.9   | 21.4   | 13.0   | 20.8   | 27.6   |

|        |        |        |        |        |        |
|--------|--------|--------|--------|--------|--------|
| 8.3    | 13.4   | 7.5    | 2.9    | 1.2    | 5.7    |
| 10.3   | 7.4    | 15.0   | 17.5   | 11.3   | 10.8   |
| 201.0  | 205.2  | 182.0  | 227.8  | 211.7  | 195.9  |
| 28.5   | 17.3   | 29.8   | 23.7   | 25.3   | 27.1   |
| 125.5  | 140.8  | 122.5  | 125.5  | 149.3  | 130.4  |
| 78.7   | 66.4   | 72.5   | 69.1   | 81.5   | 81.6   |
| 8.4    | 19.4   | 9.3    | 4.0    | 11.5   | 6.1    |
| 2.7    | 3.1    | 2.6    | 2.6    | 3.9    | 3.9    |
| 1.8    | 1.3    | 2.4    | 2.2    | 1.3    | 1.5    |
| 0.6    | 1.9    | 0.8    | 0.7    | 0.8    | 1.0    |
| 481.2  | 426.7  | 460.1  | 481.2  | 499.8  | 603.3  |
| 77.7   | 70.8   | 58.4   | 60.4   | 62.8   | 70.1   |
| 1.2    | 1.4    | 2.1    | 1.5    | 1.3    | 2.4    |
| 2.8    | 10.0   | 6.1    | 9.6    | 6.2    | 3.2    |
| 7.0    | 5.9    | 16.1   | 8.0    | 2.4    | 6.8    |
| 145.0  | 137.6  | 139.0  | 147.1  | 164.4  | 183.9  |
| 25.1   | 20.9   | 21.1   | 33.1   | 28.4   | 28.6   |
| 2.9    | 7.3    | 16.6   | 15.8   | 8.4    | 17.1   |
| 31.6   | 24.5   | 23.3   | 33.1   | 43.7   | 34.8   |
| 149.7  | 123.7  | 98.8   | 96.5   | 132.3  | 173.8  |
| 487.6  | 666.5  | 551.8  | 595.2  | 528.2  | 747.1  |
| 222.8  | 160.1  | 253.7  | 210.5  | 275.6  | 233.6  |
| 7343.8 | 5854.2 | 7645.0 | 7779.8 | 7327.8 | 8026.9 |
| 26.1   | 15.0   | 19.0   | 17.2   | 22.5   | 30.3   |
| 16.3   | 16.8   | 14.0   | 26.6   | 25.7   | 28.2   |
| 15.4   | 19.2   | 22.8   | 28.8   | 15.8   | 27.7   |
| 794.8  | 355.5  | 632.1  | 829.7  | 858.3  | 960.1  |
| 11.4   | 12.0   | 23.6   | 22.6   | 14.2   | 17.4   |
| 773.1  | 653.9  | 778.3  | 850.1  | 880.9  | 981.2  |
| 7.4    | 2.9    | 3.6    | 6.1    | 1.9    | 2.1    |
| 2.4    | 2.2    | 1.1    | 1.1    | 1.8    | 2.1    |
| 125.8  | 105.3  | 139.1  | 125.9  | 158.4  | 139.5  |
| 8562.0 | 8067.2 | 7796.8 | 8701.1 | 8556.6 | 9309.4 |
| 9350.0 | 8652.3 | 8881.2 | 9724.0 | 9821.1 | 9982.7 |
| 5.4    | 2.5    | 1.3    | 4.8    | 3.3    | 5.5    |
| 37.9   | 36.3   | 42.4   | 41.7   | 50.7   | 50.1   |
| 61.8   | 77.1   | 73.7   | 75.3   | 87.0   | 84.8   |
| 32.1   | 24.5   | 35.0   | 30.8   | 24.5   | 39.4   |
| 137.3  | 158.1  | 182.5  | 150.9  | 171.3  | 177.7  |
| 905.3  | 787.5  | 965.5  | 977.8  | 956.9  | 1060.8 |
| 30.8   | 45.7   | 31.7   | 47.7   | 51.1   | 48.9   |
| 557.6  | 519.2  | 497.0  | 550.0  | 635.5  | 641.6  |
| 42.3   | 26.2   | 32.9   | 37.3   | 41.7   | 58.2   |
| 52.5   | 54.1   | 47.5   | 56.7   | 53.7   | 62.1   |
| 24.6   | 15.0   | 26.8   | 21.7   | 33.3   | 35.2   |
| 5.8    | 2.8    | 5.5    | 6.4    | 4.5    | 11.3   |
| 5.8    | 8.8    | 5.2    | 3.5    | 6.1    | 5.9    |
| 12.3   | 16.2   | 11.8   | 16.0   | 16.8   | 17.6   |
| 24.0   | 24.2   | 24.3   | 32.7   | 30.5   | 48.7   |
| 2.8    | 1.8    | 8.2    | 5.6    | 5.5    | 6.7    |
| 8.3    | 17.7   | 13.5   | 1.8    | 12.5   | 4.1    |
| 1.1    | 1.3    | 1.1    | 0.8    | 1.7    | 1.0    |
| 1.4    | 4.7    | 6.3    | 3.4    | 6.5    | 5.3    |

|         |         |         |         |         |         |
|---------|---------|---------|---------|---------|---------|
| 5.0     | 10.5    | 4.2     | 3.4     | 9.8     | 5.1     |
| 26.0    | 34.2    | 27.7    | 40.3    | 45.4    | 45.9    |
| 8.2     | 3.2     | 5.7     | 4.7     | 5.3     | 2.7     |
| 10660.4 | 10043.0 | 10731.2 | 11626.5 | 11525.2 | 11731.7 |
| 958.4   | 906.3   | 983.9   | 1021.4  | 1178.1  | 1193.0  |
| 28.1    | 20.7    | 21.1    | 32.1    | 29.5    | 23.2    |
| 34.7    | 15.3    | 31.4    | 9.0     | 20.6    | 26.6    |
| 72.5    | 94.5    | 80.1    | 78.6    | 66.9    | 80.5    |
| 684.8   | 544.8   | 532.5   | 534.3   | 614.0   | 706.4   |
| 9.8     | 22.7    | 13.6    | 10.2    | 15.8    | 16.3    |
| 99.1    | 145.4   | 104.2   | 115.8   | 119.2   | 122.7   |
| 6012.8  | 5800.1  | 5430.1  | 6022.3  | 6698.4  | 6920.7  |
| 4.3     | 1.3     | 7.0     | 9.0     | 8.5     | 13.0    |
| 17.9    | 5.4     | 21.1    | 11.7    | 10.3    | 13.8    |
| 2.0     | 1.8     | 6.5     | 4.1     | 6.6     | 3.3     |
| 4161.5  | 3807.2  | 3884.9  | 3993.7  | 4247.6  | 4504.2  |
| 56.0    | 63.4    | 60.4    | 62.5    | 74.1    | 79.7    |
| 16.2    | 19.4    | 10.3    | 13.2    | 4.3     | 17.6    |
| 1.4     | 0.6     | 1.9     | 2.6     | 2.2     | 1.9     |
| 7.3     | 10.1    | 7.9     | 8.7     | 17.3    | 5.0     |
| 5.8     | 3.6     | 6.0     | 8.4     | 8.3     | 9.5     |
| 9.6     | 15.4    | 15.9    | 13.5    | 16.1    | 14.9    |
| 0.9     | 0.7     | 1.1     | 0.5     | 1.1     | 1.4     |
| 6.5     | 0.9     | 17.1    | 10.5    | 9.8     | 7.6     |
| 45.6    | 33.0    | 14.5    | 27.5    | 28.8    | 17.0    |
| 18.7    | 24.5    | 36.3    | 23.1    | 35.5    | 37.0    |
| 74.8    | 66.2    | 70.4    | 71.4    | 67.7    | 105.0   |
| 25.8    | 22.0    | 30.7    | 34.6    | 30.0    | 43.1    |
| 11.1    | 4.2     | 7.0     | 7.5     | 16.4    | 12.9    |
| 24.5    | 34.5    | 40.9    | 32.8    | 38.3    | 46.6    |
| 8.4     | 15.5    | 9.7     | 7.0     | 4.2     | 13.1    |
| 12.2    | 9.2     | 14.9    | 11.0    | 13.1    | 5.7     |
| 6.3     | 1.8     | 1.8     | 1.5     | 1.4     | 2.6     |
| 172.2   | 189.8   | 182.8   | 197.6   | 208.3   | 232.1   |
| 1.1     | 0.7     | 1.8     | 1.8     | 1.8     | 1.5     |
| 728.0   | 733.1   | 837.8   | 804.2   | 851.3   | 952.3   |
| 25.4    | 20.7    | 26.2    | 27.9    | 26.3    | 39.9    |
| 8.5     | 2.0     | 8.2     | 9.3     | 3.9     | 9.5     |
| 2.7     | 3.9     | 2.9     | 3.9     | 7.0     | 7.0     |
| 2.9     | 2.3     | 2.4     | 3.4     | 2.5     | 2.5     |
| 11.9    | 1.2     | 3.2     | 1.9     | 9.0     | 2.9     |
| 6.6     | 2.6     | 1.3     | 3.3     | 3.0     | 8.1     |
| 171.2   | 162.0   | 225.1   | 209.9   | 197.2   | 218.9   |
| 8.5     | 8.7     | 7.7     | 13.5    | 8.2     | 11.9    |
| 10.8    | 4.8     | 7.1     | 4.8     | 7.6     | 6.2     |
| 12.1    | 7.2     | 4.4     | 3.9     | 4.7     | 7.6     |
| 4934.9  | 3887.9  | 4498.1  | 4567.7  | 5037.9  | 5002.2  |
| 47.9    | 45.4    | 57.1    | 72.0    | 50.1    | 57.8    |
| 17.1    | 15.8    | 19.4    | 19.4    | 18.2    | 13.2    |
| 4.7     | 7.8     | 7.4     | 8.1     | 4.4     | 1.5     |
| 122.6   | 128.9   | 123.7   | 136.5   | 164.0   | 140.2   |
| 1.2     | 0.8     | 2.2     | 2.0     | 2.3     | 2.6     |
| 2.7     | 7.6     | 2.4     | 1.8     | 3.5     | 2.0     |

|        |       |        |        |        |        |
|--------|-------|--------|--------|--------|--------|
| 9.4    | 6.2   | 14.3   | 2.6    | 20.1   | 8.0    |
| 18.8   | 17.9  | 24.8   | 19.8   | 16.3   | 23.9   |
| 15.3   | 14.7  | 14.3   | 6.2    | 20.8   | 6.7    |
| 32.4   | 33.6  | 19.7   | 13.0   | 16.0   | 12.0   |
| 0.3    | 0.2   | 1.4    | 0.4    | 5.1    | 2.6    |
| 4.2    | 2.4   | 3.3    | 3.6    | 3.6    | 3.7    |
| 10.6   | 1.5   | 22.2   | 15.0   | 14.0   | 17.3   |
| 11.6   | 10.6  | 6.3    | 8.3    | 8.4    | 12.0   |
| 4.1    | 8.5   | 7.1    | 6.0    | 4.7    | 5.0    |
| 1.1    | 1.1   | 1.0    | 0.7    | 0.9    | 2.7    |
| 17.2   | 35.8  | 21.2   | 21.7   | 23.1   | 18.7   |
| 1.8    | 2.8   | 2.5    | 2.9    | 3.5    | 1.0    |
| 1.2    | 9.6   | 7.2    | 3.0    | 9.2    | 1.8    |
| 26.4   | 14.8  | 12.1   | 23.1   | 21.2   | 26.5   |
| 7.5    | 11.3  | 12.9   | 15.1   | 15.1   | 17.9   |
| 3.0    | 6.4   | 3.3    | 0.9    | 3.4    | 2.3    |
| 6.5    | 4.2   | 9.2    | 11.2   | 11.9   | 8.2    |
| 1.5    | 0.9   | 7.9    | 6.7    | 8.4    | 2.6    |
| 5.1    | 10.4  | 4.1    | 4.9    | 6.5    | 7.5    |
| 1.6    | 2.0   | 4.2    | 5.5    | 2.3    | 3.2    |
| 16.1   | 18.2  | 14.7   | 19.1   | 13.2   | 24.6   |
| 8.1    | 12.2  | 10.9   | 17.2   | 13.9   | 19.8   |
| 50.2   | 44.8  | 55.2   | 44.2   | 38.3   | 56.8   |
| 6.7    | 12.2  | 2.6    | 6.9    | 6.2    | 8.3    |
| 10.1   | 29.0  | 14.8   | 17.9   | 20.4   | 26.9   |
| 294.8  | 326.4 | 311.3  | 267.4  | 308.7  | 369.4  |
| 724.0  | 748.3 | 718.4  | 773.6  | 744.7  | 821.9  |
| 20.7   | 14.4  | 13.3   | 22.5   | 26.4   | 26.6   |
| 592.8  | 568.2 | 558.8  | 623.3  | 688.3  | 808.9  |
| 659.9  | 596.0 | 610.4  | 667.5  | 678.1  | 746.4  |
| 1052.4 | 950.0 | 1048.4 | 1030.9 | 1113.4 | 1210.2 |
| 7.3    | 3.3   | 6.7    | 8.0    | 2.8    | 14.1   |
| 6.3    | 8.6   | 7.4    | 11.1   | 5.3    | 10.6   |
| 29.1   | 37.7  | 29.0   | 31.8   | 38.1   | 31.3   |
| 864.8  | 772.3 | 874.6  | 899.9  | 872.1  | 1084.5 |
| 53.5   | 42.7  | 58.8   | 54.8   | 72.7   | 75.7   |
| 1079.6 | 974.2 | 1144.0 | 1178.2 | 1255.1 | 1329.2 |
| 20.9   | 27.1  | 33.8   | 27.3   | 34.4   | 21.6   |
| 68.2   | 59.3  | 83.2   | 38.2   | 81.5   | 76.2   |
| 215.5  | 157.0 | 197.8  | 210.5  | 235.7  | 264.2  |
| 134.4  | 132.0 | 124.1  | 142.0  | 148.1  | 180.4  |
| 155.1  | 167.3 | 188.6  | 150.7  | 196.5  | 203.2  |
| 57.3   | 72.1  | 67.6   | 63.3   | 76.8   | 74.6   |
| 102.2  | 120.7 | 99.9   | 77.6   | 90.1   | 94.7   |
| 9.9    | 5.6   | 8.4    | 13.0   | 8.5    | 14.3   |
| 66.7   | 55.0  | 54.3   | 63.1   | 72.1   | 77.8   |
| 177.5  | 149.8 | 171.7  | 183.1  | 196.5  | 222.0  |
| 81.8   | 84.1  | 117.1  | 111.6  | 111.7  | 130.8  |
| 194.0  | 180.4 | 182.8  | 187.0  | 241.3  | 259.2  |
| 4.4    | 32.0  | 6.7    | 4.3    | 22.8   | 6.3    |
| 168.7  | 167.5 | 148.0  | 168.9  | 181.0  | 211.5  |
| 231.8  | 253.5 | 280.5  | 261.5  | 258.3  | 306.3  |
| 154.5  | 148.2 | 157.3  | 178.2  | 181.5  | 186.5  |

|        |        |        |        |        |        |
|--------|--------|--------|--------|--------|--------|
| 11.9   | 3.6    | 9.9    | 5.7    | 2.8    | 6.1    |
| 14.1   | 12.3   | 16.0   | 19.3   | 24.4   | 19.7   |
| 3.0    | 5.8    | 5.3    | 2.8    | 3.1    | 3.3    |
| 12.0   | 11.0   | 16.4   | 23.1   | 9.4    | 11.2   |
| 29.4   | 15.9   | 24.3   | 26.0   | 24.0   | 35.5   |
| 3854.1 | 3567.3 | 3869.8 | 4277.1 | 4568.1 | 4419.3 |
| 40.3   | 11.1   | 17.9   | 27.9   | 21.8   | 24.4   |
| 3.1    | 3.0    | 6.8    | 1.7    | 2.7    | 2.4    |
| 76.9   | 80.1   | 78.4   | 98.8   | 77.9   | 98.9   |
| 76.7   | 84.5   | 100.7  | 88.5   | 86.6   | 92.9   |
| 191.0  | 188.9  | 181.8  | 205.7  | 222.7  | 242.0  |
| 3.1    | 1.9    | 2.4    | 1.2    | 2.1    | 2.2    |
| 3.7    | 16.6   | 16.3   | 6.9    | 15.5   | 4.8    |
| 4.7    | 9.5    | 5.0    | 4.0    | 3.8    | 5.3    |
| 6.4    | 3.1    | 2.7    | 6.4    | 2.3    | 12.3   |
| 10.8   | 2.8    | 4.7    | 15.1   | 21.5   | 15.3   |
| 1.3    | 1.2    | 1.1    | 0.9    | 1.0    | 2.9    |
| 3.3    | 2.3    | 16.3   | 3.4    | 12.0   | 13.5   |
| 20.6   | 17.8   | 21.3   | 19.7   | 23.4   | 18.3   |
| 371.5  | 347.9  | 416.8  | 423.6  | 461.3  | 490.4  |
| 82.0   | 55.0   | 113.8  | 96.3   | 118.4  | 115.4  |
| 3.4    | 13.8   | 6.8    | 5.8    | 14.0   | 13.3   |
| 37.4   | 44.0   | 44.3   | 79.8   | 38.1   | 52.4   |
| 1.8    | 7.1    | 7.8    | 6.3    | 12.6   | 3.9    |
| 9.4    | 8.9    | 2.0    | 2.2    | 3.7    | 6.2    |
| 2.9    | 3.8    | 2.0    | 3.6    | 3.1    | 1.7    |
| 13.2   | 3.3    | 5.7    | 2.3    | 8.5    | 13.0   |
| 12.2   | 30.4   | 8.4    | 18.1   | 16.8   | 22.5   |
| 47.3   | 32.2   | 41.8   | 51.0   | 49.6   | 55.2   |
| 173.9  | 173.8  | 190.9  | 189.6  | 197.4  | 220.6  |
| 907.1  | 959.5  | 865.2  | 897.8  | 1024.5 | 1031.3 |
| 17.5   | 15.9   | 4.0    | 6.6    | 8.7    | 15.1   |
| 22.1   | 13.4   | 25.8   | 18.7   | 26.5   | 40.9   |
| 274.7  | 316.4  | 320.8  | 279.8  | 316.8  | 380.6  |
| 19.9   | 8.9    | 14.1   | 7.6    | 5.6    | 13.6   |
| 2.0    | 1.7    | 11.7   | 3.6    | 4.0    | 3.9    |
| 2.4    | 4.8    | 7.2    | 2.1    | 3.5    | 4.4    |
| 3.6    | 3.7    | 5.0    | 5.5    | 7.0    | 3.3    |
| 35.1   | 24.4   | 17.3   | 11.6   | 24.0   | 33.9   |
| 8.9    | 11.9   | 6.5    | 3.3    | 2.6    | 3.0    |
| 223.0  | 190.5  | 222.0  | 231.6  | 286.7  | 287.6  |
| 11.0   | 18.4   | 3.7    | 3.3    | 6.0    | 8.8    |
| 61.5   | 78.2   | 88.5   | 86.7   | 69.3   | 89.9   |
| 1.0    | 1.4    | 1.4    | 1.3    | 2.3    | 2.5    |
| 5.9    | 11.7   | 6.8    | 3.4    | 1.3    | 6.0    |
| 592.2  | 525.1  | 589.2  | 557.1  | 627.1  | 697.0  |
| 136.0  | 115.3  | 147.0  | 138.2  | 165.2  | 174.4  |
| 1399.9 | 1382.3 | 1521.6 | 1502.1 | 1632.8 | 1719.5 |
| 6.6    | 4.8    | 7.3    | 10.9   | 12.1   | 9.5    |
| 1.4    | 1.6    | 1.6    | 2.2    | 2.3    | 1.6    |
| 2.7    | 4.8    | 4.7    | 3.8    | 1.6    | 1.6    |
| 111.6  | 76.1   | 120.0  | 110.9  | 144.7  | 134.8  |
| 18.9   | 17.8   | 31.2   | 26.0   | 18.9   | 30.5   |

|        |        |        |        |        |        |
|--------|--------|--------|--------|--------|--------|
| 511.4  | 469.2  | 486.0  | 525.3  | 555.3  | 557.7  |
| 153.3  | 205.1  | 175.9  | 172.7  | 178.3  | 183.2  |
| 1.6    | 1.0    | 7.0    | 1.3    | 1.4    | 2.9    |
| 4.8    | 13.2   | 4.0    | 3.4    | 6.8    | 5.6    |
| 2.7    | 7.4    | 9.5    | 1.7    | 7.7    | 2.5    |
| 2409.3 | 2490.0 | 2528.7 | 2341.2 | 2732.8 | 3009.5 |
| 105.0  | 105.8  | 110.8  | 120.4  | 111.3  | 118.6  |
| 3.8    | 1.2    | 4.8    | 1.4    | 3.0    | 1.4    |
| 6.7    | 6.2    | 6.9    | 8.8    | 4.3    | 6.7    |
| 4.7    | 2.6    | 7.1    | 10.2   | 3.8    | 6.5    |
| 8.8    | 4.9    | 8.0    | 6.4    | 7.5    | 2.3    |
| 2.7    | 5.6    | 11.2   | 9.5    | 9.8    | 7.1    |
| 5.4    | 12.4   | 4.2    | 5.3    | 1.8    | 4.4    |
| 2.0    | 21.7   | 3.2    | 5.0    | 5.5    | 6.9    |
| 11.5   | 2.5    | 10.1   | 8.0    | 17.8   | 16.4   |
| 28.7   | 7.1    | 29.2   | 37.7   | 50.7   | 43.9   |
| 12.5   | 1.8    | 16.9   | 11.4   | 16.4   | 18.1   |
| 2.6    | 5.1    | 2.7    | 1.7    | 3.5    | 4.7    |
| 28.2   | 40.1   | 34.6   | 31.6   | 33.4   | 45.1   |
| 300.8  | 273.8  | 342.3  | 337.7  | 371.1  | 415.0  |
| 1305.2 | 1245.3 | 1381.9 | 1374.1 | 1534.8 | 1604.8 |
| 9.4    | 17.8   | 11.7   | 9.4    | 7.2    | 12.9   |
| 14.5   | 26.0   | 10.3   | 17.1   | 20.5   | 17.1   |
| 8.3    | 4.1    | 6.0    | 15.5   | 12.0   | 12.8   |
| 533.0  | 443.3  | 546.8  | 571.6  | 589.5  | 663.1  |
| 13.9   | 26.3   | 9.5    | 8.7    | 12.4   | 14.3   |
| 9.6    | 7.5    | 1.1    | 4.8    | 3.7    | 6.7    |
| 6.5    | 3.2    | 7.5    | 7.9    | 1.8    | 10.7   |
| 1.9    | 3.3    | 5.2    | 4.9    | 14.3   | 12.5   |
| 19.7   | 20.7   | 16.6   | 13.7   | 20.7   | 12.7   |
| 32.6   | 14.3   | 45.3   | 38.9   | 28.3   | 35.5   |
| 2.9    | 2.8    | 2.3    | 2.1    | 3.5    | 4.8    |
| 4.2    | 4.1    | 17.1   | 3.0    | 8.9    | 12.2   |
| 12.1   | 4.2    | 12.8   | 9.0    | 5.9    | 15.2   |
| 8.4    | 1.5    | 16.1   | 12.7   | 4.9    | 7.4    |
| 46.6   | 40.0   | 68.5   | 59.6   | 63.2   | 95.5   |
| 360.8  | 224.6  | 344.2  | 274.0  | 415.8  | 463.8  |
| 415.0  | 408.3  | 453.2  | 442.7  | 476.5  | 514.5  |
| 83.5   | 79.0   | 85.2   | 86.9   | 98.1   | 107.5  |
| 41.3   | 30.7   | 32.0   | 47.5   | 44.9   | 64.8   |
| 6.7    | 4.6    | 5.3    | 4.6    | 4.1    | 6.3    |
| 5146.8 | 4584.6 | 5235.5 | 5415.5 | 6045.8 | 5657.1 |
| 40.9   | 52.6   | 43.9   | 38.2   | 49.9   | 49.0   |
| 471.8  | 363.8  | 506.8  | 499.2  | 613.8  | 550.8  |
| 1.3    | 1.8    | 1.4    | 1.8    | 1.2    | 2.6    |
| 125.0  | 125.6  | 126.1  | 127.4  | 152.2  | 182.7  |
| 363.5  | 442.4  | 419.4  | 438.1  | 417.3  | 488.8  |
| 8.2    | 12.2   | 9.3    | 9.8    | 10.1   | 7.9    |
| 2.2    | 1.5    | 2.0    | 3.9    | 1.2    | 8.2    |
| 1.3    | 24.7   | 12.6   | 11.4   | 17.1   | 4.0    |
| 15.5   | 6.6    | 13.7   | 12.0   | 14.7   | 12.5   |
| 22.9   | 19.6   | 21.6   | 23.7   | 16.6   | 21.0   |
| 11.9   | 1.0    | 0.7    | 2.6    | 4.4    | 4.1    |

|        |        |        |        |        |        |
|--------|--------|--------|--------|--------|--------|
| 8.0    | 16.4   | 3.4    | 6.9    | 4.8    | 8.1    |
| 4.6    | 10.3   | 6.8    | 7.1    | 7.0    | 9.7    |
| 5.9    | 1.8    | 8.5    | 2.7    | 0.7    | 3.2    |
| 20.0   | 3.6    | 18.0   | 17.9   | 5.1    | 13.0   |
| 105.9  | 103.4  | 104.3  | 97.2   | 132.9  | 126.8  |
| 3.9    | 2.0    | 1.8    | 6.0    | 2.8    | 4.4    |
| 6.2    | 0.7    | 10.1   | 6.5    | 4.9    | 3.8    |
| 5.0    | 0.9    | 4.8    | 8.1    | 5.3    | 5.3    |
| 2.2    | 1.2    | 1.5    | 4.6    | 3.1    | 1.8    |
| 3.6    | 13.9   | 5.0    | 5.0    | 1.3    | 7.3    |
| 11.8   | 5.4    | 18.6   | 5.5    | 8.7    | 21.2   |
| 1.4    | 1.8    | 1.3    | 1.1    | 1.1    | 1.9    |
| 13.9   | 8.7    | 8.4    | 11.8   | 5.8    | 9.2    |
| 6.5    | 7.1    | 8.4    | 13.9   | 5.0    | 6.8    |
| 6.4    | 10.6   | 3.3    | 3.9    | 1.2    | 5.3    |
| 0.6    | 0.8    | 0.8    | 0.5    | 1.2    | 0.8    |
| 272.4  | 118.3  | 202.0  | 205.6  | 315.0  | 262.5  |
| 108.7  | 119.0  | 72.3   | 111.1  | 108.0  | 141.4  |
| 167.3  | 127.9  | 121.7  | 180.0  | 143.8  | 164.0  |
| 10.4   | 2.5    | 9.0    | 10.4   | 10.2   | 5.2    |
| 78.6   | 225.7  | 74.1   | 122.2  | 68.2   | 107.5  |
| 11.9   | 9.9    | 9.9    | 17.4   | 10.5   | 16.0   |
| 195.1  | 164.4  | 172.2  | 189.9  | 185.6  | 221.3  |
| 3.7    | 1.9    | 10.6   | 13.2   | 13.0   | 12.3   |
| 451.8  | 404.2  | 399.6  | 427.1  | 498.8  | 530.0  |
| 3.0    | 1.2    | 0.7    | 3.1    | 5.9    | 3.4    |
| 5.0    | 0.4    | 4.2    | 3.7    | 3.5    | 4.4    |
| 81.7   | 78.1   | 61.9   | 70.0   | 93.9   | 100.9  |
| 7.1    | 7.3    | 11.0   | 12.9   | 2.6    | 7.0    |
| 77.8   | 66.9   | 88.2   | 111.8  | 78.2   | 103.9  |
| 1.3    | 1.0    | 11.5   | 8.8    | 3.7    | 4.1    |
| 30.1   | 16.8   | 33.2   | 29.6   | 28.3   | 33.0   |
| 7.6    | 14.8   | 13.0   | 8.4    | 19.0   | 19.9   |
| 142.4  | 109.2  | 112.2  | 80.7   | 70.5   | 118.4  |
| 299.1  | 291.1  | 212.5  | 277.5  | 256.8  | 258.5  |
| 55.6   | 92.3   | 54.7   | 58.6   | 51.6   | 68.0   |
| 5.5    | 4.8    | 13.6   | 5.6    | 12.5   | 12.0   |
| 4.8    | 3.8    | 4.1    | 4.7    | 6.4    | 3.1    |
| 16.5   | 8.9    | 8.6    | 11.2   | 21.3   | 19.6   |
| 91.2   | 115.2  | 103.0  | 127.7  | 106.2  | 131.8  |
| 4.0    | 2.9    | 3.3    | 9.7    | 3.6    | 6.7    |
| 1.3    | 3.5    | 2.7    | 1.0    | 2.1    | 2.2    |
| 1816.8 | 1871.6 | 1875.5 | 1925.5 | 2129.0 | 2222.8 |
| 2.4    | 9.0    | 15.9   | 5.6    | 10.7   | 6.8    |
| 14.4   | 12.5   | 4.9    | 12.1   | 10.5   | 4.6    |
| 11.0   | 9.4    | 7.6    | 11.1   | 7.9    | 14.0   |
| 8.4    | 5.2    | 5.6    | 8.4    | 2.9    | 3.4    |
| 111.3  | 101.6  | 108.1  | 102.7  | 117.4  | 159.9  |
| 11.3   | 18.7   | 15.4   | 16.9   | 18.0   | 19.0   |
| 5.3    | 0.6    | 9.1    | 7.9    | 8.6    | 7.7    |
| 8.4    | 2.1    | 12.8   | 8.2    | 6.3    | 5.3    |
| 5510.8 | 5232.4 | 5167.3 | 5636.7 | 5867.7 | 6246.2 |
| 12.2   | 21.4   | 15.0   | 14.8   | 6.4    | 4.6    |



|        |        |        |        |        |        |
|--------|--------|--------|--------|--------|--------|
| 69.6   | 81.4   | 75.4   | 68.0   | 57.9   | 97.4   |
| 2.8    | 0.2    | 0.9    | 2.7    | 0.6    | 2.8    |
| 21.0   | 22.9   | 22.3   | 23.3   | 26.0   | 26.0   |
| 18.3   | 16.8   | 28.9   | 14.8   | 25.4   | 24.3   |
| 2.6    | 2.5    | 3.5    | 8.3    | 3.1    | 6.0    |
| 7.3    | 14.7   | 25.9   | 22.5   | 16.9   | 8.3    |
| 242.8  | 181.4  | 226.6  | 192.2  | 244.2  | 350.3  |
| 0.7    | 4.9    | 1.8    | 0.9    | 0.3    | 0.8    |
| 2.6    | 2.0    | 5.1    | 2.1    | 10.1   | 3.9    |
| 2.3    | 1.0    | 2.3    | 9.5    | 1.7    | 2.7    |
| 9.6    | 2.7    | 3.8    | 7.7    | 2.7    | 5.8    |
| 2.9    | 3.2    | 6.8    | 4.7    | 16.8   | 4.0    |
| 997.1  | 894.7  | 1018.4 | 1143.9 | 1337.4 | 1348.6 |
| 13.7   | 18.4   | 24.0   | 24.2   | 20.0   | 29.1   |
| 3.8    | 2.1    | 4.4    | 4.4    | 3.3    | 2.1    |
| 4892.6 | 4803.0 | 4772.1 | 4891.0 | 5347.8 | 5701.7 |
| 11.8   | 13.9   | 7.6    | 9.1    | 3.7    | 5.6    |
| 23.9   | 17.3   | 28.8   | 33.3   | 20.1   | 29.4   |
| 138.5  | 135.1  | 125.3  | 114.5  | 177.4  | 149.3  |
| 4.3    | 13.7   | 2.6    | 7.0    | 1.2    | 8.6    |
| 3.4    | 1.9    | 11.0   | 12.6   | 14.3   | 13.5   |
| 11.4   | 11.2   | 17.1   | 2.5    | 8.2    | 11.5   |
| 10.3   | 3.4    | 9.5    | 1.4    | 6.9    | 5.9    |
| 1.7    | 1.4    | 3.4    | 1.8    | 1.7    | 1.4    |
| 44.1   | 41.3   | 42.7   | 44.9   | 42.0   | 55.0   |
| 59.3   | 50.2   | 65.6   | 67.9   | 60.9   | 70.4   |
| 1.0    | 3.4    | 12.3   | 12.9   | 6.3    | 6.4    |
| 1.7    | 2.3    | 1.1    | 2.2    | 3.4    | 12.0   |
| 2739.0 | 2195.0 | 2181.9 | 2467.5 | 2437.3 | 2273.2 |
| 25.4   | 27.9   | 18.0   | 19.6   | 27.3   | 34.8   |
| 2.3    | 0.3    | 2.8    | 1.8    | 0.8    | 1.0    |
| 7.5    | 7.9    | 10.0   | 11.3   | 3.8    | 8.7    |
| 9.1    | 10.1   | 1.4    | 9.7    | 2.9    | 5.8    |
| 26.3   | 24.2   | 41.9   | 30.9   | 30.9   | 49.6   |
| 5.8    | 3.6    | 8.5    | 8.9    | 7.1    | 16.0   |
| 357.5  | 336.6  | 403.2  | 397.8  | 429.3  | 441.0  |
| 6.0    | 8.4    | 10.8   | 9.5    | 15.8   | 5.0    |
| 14.8   | 18.7   | 13.2   | 22.7   | 18.2   | 17.0   |
| 1.0    | 0.5    | 0.7    | 0.5    | 2.3    | 1.1    |
| 3.2    | 3.2    | 8.8    | 4.2    | 1.6    | 2.1    |
| 176.3  | 118.3  | 200.3  | 220.0  | 209.7  | 176.0  |
| 115.8  | 92.7   | 111.7  | 110.0  | 137.1  | 193.3  |
| 834.2  | 804.2  | 756.3  | 717.1  | 721.4  | 1053.9 |
| 118.5  | 99.9   | 105.6  | 99.9   | 137.1  | 123.1  |
| 84.0   | 85.9   | 76.2   | 77.4   | 87.3   | 96.9   |
| 382.8  | 406.0  | 466.8  | 424.5  | 470.0  | 444.2  |
| 269.5  | 266.3  | 260.1  | 321.7  | 245.7  | 338.3  |
| 83.2   | 60.5   | 75.7   | 63.6   | 97.8   | 99.3   |
| 30.2   | 41.4   | 32.6   | 37.2   | 32.9   | 37.9   |
| 794.5  | 694.4  | 854.9  | 860.4  | 955.2  | 1034.4 |
| 174.9  | 168.3  | 168.3  | 170.4  | 185.2  | 214.1  |
| 8.6    | 1.4    | 3.8    | 10.0   | 2.1    | 4.0    |
| 51.3   | 45.3   | 52.5   | 55.6   | 61.2   | 75.3   |

|        |        |        |        |        |        |
|--------|--------|--------|--------|--------|--------|
| 6.7    | 18.8   | 8.3    | 10.9   | 13.0   | 5.7    |
| 340.0  | 247.4  | 300.2  | 310.9  | 353.6  | 388.4  |
| 126.5  | 121.8  | 123.1  | 129.0  | 151.4  | 150.2  |
| 102.8  | 93.3   | 116.9  | 96.6   | 120.3  | 118.5  |
| 15.7   | 15.1   | 15.7   | 22.5   | 17.6   | 21.0   |
| 81.7   | 66.0   | 92.0   | 132.2  | 128.7  | 112.9  |
| 7.3    | 2.9    | 3.2    | 7.0    | 12.8   | 4.3    |
| 10.0   | 21.7   | 12.0   | 12.5   | 6.6    | 2.6    |
| 3.1    | 2.9    | 2.9    | 1.6    | 5.0    | 3.3    |
| 256.3  | 193.2  | 242.6  | 252.5  | 172.9  | 353.0  |
| 250.3  | 227.4  | 262.7  | 244.6  | 273.0  | 276.8  |
| 1.3    | 4.7    | 1.8    | 1.4    | 2.0    | 3.6    |
| 12.8   | 9.7    | 17.0   | 13.3   | 20.2   | 15.2   |
| 9.8    | 2.9    | 13.0   | 11.9   | 14.3   | 33.5   |
| 134.3  | 119.6  | 110.8  | 125.2  | 121.3  | 165.8  |
| 234.3  | 170.9  | 168.8  | 215.0  | 228.4  | 255.3  |
| 5.1    | 0.3    | 2.2    | 0.9    | 2.6    | 2.9    |
| 307.8  | 194.0  | 295.0  | 297.3  | 336.6  | 342.8  |
| 7454.3 | 7140.0 | 7070.9 | 7677.8 | 7948.2 | 8034.6 |
| 36.2   | 34.6   | 27.3   | 24.0   | 26.6   | 32.6   |
| 6.5    | 5.8    | 8.8    | 4.6    | 13.4   | 13.4   |
| 58.6   | 40.4   | 35.2   | 45.5   | 44.7   | 60.1   |
| 79.6   | 88.3   | 70.2   | 90.0   | 99.8   | 100.7  |
| 64.7   | 37.6   | 49.0   | 72.2   | 74.3   | 64.9   |
| 494.8  | 506.2  | 494.9  | 508.2  | 589.1  | 589.3  |
| 42.8   | 22.6   | 37.1   | 38.1   | 39.0   | 43.8   |
| 88.3   | 62.2   | 92.7   | 88.6   | 96.9   | 99.8   |
| 184.3  | 132.9  | 224.0  | 193.3  | 218.1  | 248.5  |
| 151.0  | 153.9  | 151.9  | 192.4  | 211.2  | 207.3  |
| 115.9  | 131.7  | 118.9  | 132.7  | 134.2  | 152.4  |
| 68.8   | 58.4   | 70.1   | 56.6   | 69.4   | 64.7   |
| 214.5  | 247.9  | 206.2  | 230.3  | 211.9  | 287.5  |
| 32.9   | 24.3   | 19.7   | 27.4   | 27.5   | 30.9   |
| 3.8    | 6.3    | 5.1    | 0.8    | 0.6    | 1.0    |
| 83.0   | 69.5   | 79.3   | 75.9   | 90.1   | 86.0   |
| 1.8    | 4.4    | 3.1    | 4.1    | 3.9    | 3.8    |
| 0.6    | 4.9    | 1.8    | 2.8    | 0.7    | 3.3    |
| 196.3  | 184.5  | 202.8  | 215.6  | 208.7  | 255.3  |
| 81.3   | 71.4   | 69.1   | 77.1   | 80.1   | 103.4  |
| 71.7   | 113.7  | 82.6   | 94.3   | 58.3   | 98.8   |
| 1175.1 | 1000.7 | 1152.3 | 1192.3 | 1332.1 | 1404.6 |
| 3702.7 | 3388.2 | 3702.8 | 4029.7 | 4089.5 | 4364.4 |
| 298.2  | 352.9  | 380.0  | 383.3  | 349.0  | 453.2  |
| 1.1    | 7.0    | 8.0    | 7.5    | 7.1    | 8.6    |
| 48.3   | 50.8   | 53.6   | 57.0   | 60.4   | 68.1   |
| 223.8  | 249.1  | 220.6  | 204.7  | 240.7  | 278.5  |
| 228.5  | 168.8  | 274.3  | 257.8  | 257.3  | 367.7  |
| 20.4   | 19.1   | 13.9   | 14.2   | 22.9   | 27.4   |
| 42.1   | 28.6   | 48.1   | 38.4   | 40.0   | 43.7   |
| 254.2  | 201.1  | 227.2  | 223.8  | 258.3  | 280.2  |
| 32.1   | 16.9   | 37.4   | 22.7   | 40.0   | 49.9   |
| 110.1  | 112.8  | 128.2  | 134.2  | 136.2  | 150.6  |
| 232.3  | 163.9  | 209.0  | 224.7  | 240.2  | 285.4  |

|        |        |        |        |        |        |
|--------|--------|--------|--------|--------|--------|
| 268.2  | 242.1  | 276.8  | 324.5  | 385.0  | 349.3  |
| 13.9   | 12.4   | 16.1   | 11.6   | 11.8   | 15.7   |
| 164.3  | 195.8  | 149.3  | 157.8  | 148.9  | 163.7  |
| 3.4    | 6.3    | 1.0    | 3.2    | 2.8    | 3.2    |
| 208.1  | 165.0  | 197.3  | 187.2  | 240.1  | 209.9  |
| 92.3   | 84.5   | 91.1   | 107.9  | 102.9  | 119.9  |
| 800.3  | 742.9  | 808.4  | 805.0  | 942.7  | 911.1  |
| 40.7   | 41.0   | 48.3   | 52.0   | 52.9   | 62.4   |
| 733.0  | 586.8  | 686.4  | 705.7  | 796.0  | 795.5  |
| 13.8   | 9.4    | 16.4   | 17.4   | 24.4   | 26.1   |
| 36.1   | 36.7   | 54.0   | 39.5   | 46.2   | 62.9   |
| 157.6  | 167.7  | 170.8  | 189.7  | 205.5  | 201.4  |
| 16.0   | 16.3   | 13.8   | 14.4   | 14.3   | 26.2   |
| 3.1    | 5.8    | 6.6    | 9.0    | 9.5    | 1.1    |
| 370.4  | 319.1  | 410.2  | 347.6  | 483.9  | 441.2  |
| 4282.2 | 4681.0 | 4445.8 | 4978.5 | 4867.7 | 5325.7 |
| 26.0   | 8.2    | 22.0   | 21.8   | 27.6   | 23.1   |
| 51.9   | 53.5   | 59.7   | 56.6   | 56.6   | 84.6   |
| 13.4   | 17.8   | 28.8   | 39.8   | 33.2   | 34.4   |
| 58.8   | 48.8   | 74.9   | 69.6   | 70.2   | 78.2   |
| 47.0   | 39.4   | 59.8   | 48.4   | 50.9   | 53.2   |
| 232.0  | 168.2  | 176.3  | 215.0  | 241.7  | 214.8  |
| 193.1  | 206.2  | 211.3  | 227.1  | 234.1  | 238.8  |
| 14.4   | 4.3    | 13.6   | 14.0   | 13.0   | 9.4    |
| 18.9   | 13.2   | 26.2   | 13.9   | 15.0   | 18.0   |
| 17.7   | 23.4   | 8.7    | 7.6    | 31.5   | 22.5   |
| 40.8   | 30.0   | 28.8   | 30.3   | 29.2   | 31.2   |
| 540.1  | 430.3  | 569.1  | 573.4  | 654.7  | 647.0  |
| 22.1   | 18.1   | 33.6   | 26.6   | 8.9    | 23.6   |
| 170.8  | 135.8  | 202.5  | 176.5  | 220.7  | 235.2  |
| 620.5  | 473.0  | 575.3  | 504.2  | 793.7  | 668.9  |
| 39.6   | 19.1   | 43.5   | 46.3   | 71.9   | 53.5   |
| 50.3   | 53.1   | 51.1   | 54.3   | 59.5   | 60.3   |
| 208.5  | 164.3  | 239.4  | 196.2  | 299.9  | 296.5  |
| 364.7  | 345.1  | 401.3  | 412.9  | 440.6  | 462.4  |
| 58.3   | 55.3   | 61.2   | 67.6   | 76.8   | 64.6   |
| 12.9   | 6.8    | 9.0    | 13.9   | 7.2    | 14.7   |
| 21.8   | 26.0   | 31.4   | 38.5   | 33.0   | 33.4   |
| 94.9   | 112.1  | 107.9  | 108.6  | 123.3  | 124.2  |
| 6.9    | 5.3    | 5.8    | 8.5    | 16.4   | 17.1   |
| 25.3   | 13.5   | 19.6   | 20.1   | 18.5   | 29.8   |
| 3.2    | 26.6   | 22.8   | 14.9   | 12.6   | 14.8   |
| 82.0   | 65.0   | 86.3   | 78.3   | 81.8   | 107.0  |
| 65.4   | 31.4   | 63.4   | 53.9   | 64.1   | 78.6   |
| 450.0  | 329.6  | 393.8  | 336.6  | 383.8  | 495.8  |
| 16.3   | 14.7   | 22.4   | 16.8   | 14.3   | 15.4   |
| 9.2    | 8.1    | 2.8    | 5.2    | 2.2    | 9.8    |
| 37.1   | 15.1   | 24.6   | 25.7   | 43.7   | 37.8   |
| 19.5   | 13.7   | 15.2   | 18.9   | 18.3   | 22.9   |
| 703.6  | 795.4  | 798.2  | 756.4  | 857.7  | 932.6  |
| 146.0  | 140.7  | 117.0  | 183.2  | 168.3  | 180.9  |
| 454.5  | 451.1  | 524.2  | 555.9  | 513.5  | 563.8  |
| 0.3    | 0.5    | 1.7    | 3.1    | 2.9    | 0.6    |

|        |        |        |        |        |        |
|--------|--------|--------|--------|--------|--------|
| 10.4   | 12.9   | 10.6   | 7.0    | 7.6    | 12.3   |
| 26.0   | 19.9   | 14.4   | 20.4   | 23.1   | 28.2   |
| 3.3    | 2.1    | 2.4    | 1.7    | 1.2    | 2.7    |
| 28.6   | 19.1   | 23.7   | 26.8   | 41.3   | 33.3   |
| 74.2   | 47.6   | 76.7   | 70.7   | 96.9   | 99.1   |
| 110.6  | 136.4  | 185.0  | 165.7  | 171.6  | 214.3  |
| 0.7    | 0.5    | 1.9    | 1.8    | 1.1    | 1.0    |
| 13.8   | 9.8    | 3.9    | 11.1   | 11.6   | 9.1    |
| 77.7   | 58.3   | 68.6   | 67.8   | 81.0   | 75.3   |
| 390.8  | 412.8  | 409.8  | 421.9  | 508.6  | 620.9  |
| 48.1   | 25.7   | 42.4   | 41.2   | 46.9   | 54.8   |
| 17.7   | 23.1   | 26.1   | 19.8   | 19.8   | 24.6   |
| 122.7  | 79.0   | 89.1   | 125.2  | 105.8  | 136.2  |
| 3.5    | 1.9    | 2.1    | 8.7    | 5.7    | 6.1    |
| 1416.0 | 1348.2 | 1403.1 | 1761.3 | 1600.2 | 1600.7 |
| 27.6   | 21.0   | 26.9   | 25.7   | 27.0   | 33.1   |
| 131.9  | 125.9  | 138.3  | 159.0  | 169.2  | 176.8  |
| 57.7   | 49.2   | 58.1   | 58.4   | 77.4   | 85.9   |
| 17.4   | 56.8   | 33.6   | 38.1   | 46.2   | 55.5   |
| 954.4  | 1029.5 | 992.7  | 944.5  | 1125.3 | 1184.1 |
| 16.2   | 10.0   | 16.3   | 17.9   | 12.4   | 11.9   |
| 4.0    | 1.4    | 2.7    | 8.9    | 10.6   | 6.3    |
| 36.1   | 34.3   | 39.1   | 40.2   | 45.3   | 34.2   |
| 2.8    | 4.7    | 10.5   | 9.1    | 10.9   | 15.9   |
| 6.0    | 2.4    | 6.4    | 4.4    | 2.4    | 4.3    |
| 3760.9 | 3247.1 | 4084.3 | 3846.4 | 3835.6 | 4245.4 |
| 882.1  | 832.8  | 913.2  | 942.4  | 1125.6 | 1174.3 |
| 12.6   | 5.7    | 13.6   | 12.7   | 29.2   | 28.3   |
| 1.2    | 5.4    | 4.9    | 3.3    | 3.8    | 1.3    |
| 82.1   | 45.6   | 79.0   | 56.6   | 76.4   | 91.8   |
| 199.3  | 181.9  | 217.2  | 230.6  | 242.3  | 266.3  |
| 53.7   | 66.3   | 67.3   | 59.1   | 67.6   | 58.3   |
| 7.0    | 14.5   | 5.7    | 5.3    | 5.0    | 0.5    |
| 43.4   | 16.6   | 42.8   | 38.8   | 47.9   | 47.1   |
| 4.2    | 10.6   | 7.1    | 13.0   | 7.6    | 13.9   |
| 3.5    | 0.8    | 1.2    | 3.4    | 1.1    | 4.5    |
| 622.4  | 603.3  | 680.8  | 671.4  | 747.8  | 839.4  |
| 39.4   | 38.3   | 41.7   | 39.2   | 42.7   | 44.9   |
| 17.8   | 12.9   | 16.7   | 23.6   | 26.7   | 17.9   |
| 9.9    | 8.5    | 6.1    | 7.2    | 2.3    | 3.4    |
| 82.3   | 78.6   | 76.8   | 62.9   | 77.9   | 88.5   |
| 2.5    | 2.6    | 2.4    | 5.1    | 1.7    | 9.0    |
| 3.3    | 1.8    | 8.9    | 2.4    | 10.8   | 9.1    |
| 19.8   | 21.5   | 12.0   | 13.9   | 9.2    | 26.8   |
| 28.3   | 29.2   | 35.4   | 29.8   | 37.2   | 45.4   |
| 10.0   | 10.7   | 20.1   | 12.9   | 17.7   | 17.9   |
| 4.4    | 2.2    | 1.6    | 1.2    | 1.9    | 2.6    |
| 7.9    | 7.1    | 15.8   | 9.2    | 14.7   | 9.8    |
| 2.1    | 2.2    | 3.3    | 3.9    | 3.1    | 2.1    |
| 1.8    | 4.9    | 4.4    | 7.3    | 1.3    | 10.5   |
| 31.0   | 33.1   | 48.4   | 32.7   | 38.4   | 38.3   |
| 3.8    | 8.8    | 6.5    | 2.9    | 0.9    | 4.6    |
| 49.1   | 73.2   | 55.7   | 59.6   | 77.2   | 67.3   |

|        |        |        |        |        |        |
|--------|--------|--------|--------|--------|--------|
| 45.0   | 29.7   | 22.2   | 40.6   | 39.5   | 48.3   |
| 158.7  | 122.2  | 143.2  | 151.8  | 163.5  | 197.1  |
| 62.4   | 74.3   | 92.0   | 94.0   | 91.6   | 89.6   |
| 1.2    | 1.3    | 1.1    | 1.3    | 1.6    | 1.2    |
| 21.2   | 24.1   | 21.2   | 27.7   | 20.8   | 34.6   |
| 15.1   | 14.1   | 16.0   | 18.4   | 14.5   | 17.3   |
| 719.3  | 699.3  | 790.0  | 1065.1 | 949.6  | 1294.8 |
| 7.1    | 1.5    | 23.5   | 12.0   | 3.9    | 25.6   |
| 1.4    | 7.0    | 3.8    | 7.8    | 0.5    | 4.8    |
| 228.6  | 191.9  | 243.7  | 233.3  | 259.4  | 257.3  |
| 14.2   | 10.4   | 19.8   | 4.2    | 13.9   | 10.0   |
| 9.6    | 8.6    | 9.8    | 8.1    | 18.2   | 12.7   |
| 22.3   | 17.1   | 18.9   | 30.9   | 26.0   | 26.5   |
| 5.8    | 2.8    | 2.4    | 4.7    | 1.5    | 5.6    |
| 255.2  | 232.8  | 240.8  | 254.1  | 298.7  | 320.7  |
| 17.6   | 22.6   | 19.7   | 22.8   | 23.9   | 30.6   |
| 1134.0 | 960.8  | 994.4  | 932.3  | 1177.8 | 1274.5 |
| 2.1    | 2.5    | 4.0    | 3.6    | 2.1    | 10.9   |
| 21.0   | 32.1   | 36.3   | 32.6   | 30.6   | 36.7   |
| 47.9   | 52.6   | 53.5   | 42.0   | 44.1   | 46.9   |
| 118.8  | 102.4  | 102.6  | 103.2  | 117.1  | 129.7  |
| 30.2   | 35.1   | 38.0   | 30.0   | 35.8   | 53.1   |
| 6.3    | 12.0   | 5.3    | 6.1    | 19.3   | 26.0   |
| 4.6    | 6.2    | 14.9   | 8.3    | 8.1    | 7.6    |
| 1486.4 | 1419.1 | 1445.3 | 1523.8 | 1702.3 | 1807.8 |
| 1.8    | 1.1    | 6.0    | 1.5    | 2.0    | 1.5    |
| 88.1   | 82.4   | 79.1   | 93.3   | 113.5  | 117.6  |
| 1.3    | 6.8    | 10.8   | 1.8    | 3.6    | 0.9    |
| 70.1   | 44.6   | 59.0   | 57.5   | 51.4   | 65.4   |
| 8.4    | 7.6    | 2.9    | 3.9    | 5.4    | 2.8    |
| 2.7    | 16.3   | 2.9    | 4.7    | 23.8   | 4.2    |
| 8.2    | 2.5    | 12.8   | 14.4   | 5.9    | 19.5   |
| 15.2   | 14.2   | 6.2    | 12.6   | 9.5    | 19.4   |
| 21.7   | 16.3   | 17.7   | 21.1   | 21.1   | 30.4   |
| 7.3    | 12.2   | 6.0    | 4.5    | 5.5    | 6.5    |
| 841.0  | 866.3  | 1013.6 | 1038.8 | 1081.4 | 1147.6 |
| 2.7    | 1.5    | 2.3    | 2.8    | 2.2    | 2.5    |
| 86.0   | 126.8  | 93.0   | 103.1  | 116.0  | 115.7  |
| 10.2   | 10.8   | 22.8   | 26.3   | 21.5   | 12.4   |
| 9.1    | 5.7    | 9.9    | 1.1    | 1.7    | 6.4    |
| 247.9  | 268.0  | 304.1  | 297.7  | 304.3  | 331.9  |
| 271.1  | 225.5  | 261.8  | 160.0  | 300.1  | 294.2  |
| 37.0   | 36.1   | 33.7   | 36.9   | 57.1   | 66.8   |
| 5.4    | 7.3    | 1.2    | 1.8    | 1.0    | 0.8    |
| 2.3    | 22.4   | 1.4    | 8.5    | 8.2    | 6.6    |
| 2.6    | 2.6    | 11.4   | 9.3    | 11.5   | 16.7   |
| 354.5  | 320.0  | 313.8  | 354.5  | 414.8  | 442.7  |
| 86.1   | 74.3   | 92.5   | 84.7   | 106.5  | 93.1   |
| 89.2   | 118.1  | 65.0   | 82.6   | 99.5   | 93.8   |
| 15.0   | 12.8   | 10.5   | 9.3    | 14.2   | 11.2   |
| 214.0  | 263.2  | 283.7  | 306.0  | 368.4  | 331.6  |
| 78.3   | 79.6   | 82.5   | 58.7   | 72.2   | 64.5   |
| 180.6  | 140.1  | 146.9  | 156.3  | 196.3  | 214.4  |

|        |        |        |        |        |        |
|--------|--------|--------|--------|--------|--------|
| 2801.4 | 2911.4 | 3104.7 | 3222.6 | 3151.8 | 3268.4 |
| 13.0   | 16.5   | 13.5   | 25.7   | 10.4   | 20.9   |
| 14.3   | 12.3   | 10.8   | 11.5   | 8.3    | 13.0   |
| 53.6   | 63.2   | 50.9   | 52.7   | 50.3   | 45.6   |
| 4.1    | 0.5    | 2.6    | 1.1    | 7.4    | 4.3    |
| 0.4    | 0.3    | 3.5    | 0.7    | 2.6    | 1.0    |
| 14.3   | 9.6    | 21.8   | 18.6   | 16.0   | 29.5   |
| 12.9   | 13.8   | 9.7    | 18.9   | 23.1   | 27.6   |
| 10.0   | 2.8    | 12.4   | 10.8   | 5.6    | 10.6   |
| 1.6    | 2.7    | 1.4    | 1.6    | 1.4    | 3.0    |
| 123.1  | 115.1  | 138.6  | 136.6  | 160.7  | 152.6  |
| 7.1    | 20.1   | 17.3   | 19.8   | 13.6   | 5.6    |
| 222.4  | 218.9  | 188.2  | 217.8  | 218.3  | 217.5  |
| 381.1  | 371.5  | 435.9  | 431.2  | 484.1  | 494.7  |
| 10.9   | 23.0   | 11.4   | 20.8   | 10.3   | 21.0   |
| 1.8    | 1.2    | 5.6    | 0.9    | 3.1    | 1.5    |
| 7.5    | 1.9    | 2.2    | 2.1    | 2.3    | 2.5    |
| 12.0   | 11.1   | 8.5    | 5.1    | 7.7    | 17.3   |
| 92.6   | 46.4   | 62.8   | 90.2   | 107.1  | 78.7   |
| 68.4   | 45.7   | 80.2   | 79.6   | 96.0   | 96.7   |
| 87.2   | 93.9   | 83.8   | 82.1   | 90.4   | 98.1   |
| 18.3   | 12.7   | 3.2    | 29.2   | 23.1   | 8.4    |
| 24.8   | 19.6   | 17.8   | 24.9   | 27.5   | 30.5   |
| 3.7    | 0.9    | 7.3    | 10.9   | 11.2   | 14.4   |
| 36.2   | 17.9   | 10.4   | 18.4   | 19.8   | 31.7   |
| 4.5    | 13.8   | 9.0    | 5.6    | 3.3    | 6.0    |
| 111.4  | 124.1  | 89.3   | 115.0  | 130.8  | 111.6  |
| 40.5   | 39.1   | 49.5   | 30.7   | 54.3   | 49.8   |
| 32.1   | 26.1   | 38.3   | 18.3   | 28.3   | 46.4   |
| 494.4  | 416.4  | 463.6  | 453.6  | 571.9  | 521.1  |
| 3.6    | 3.0    | 2.5    | 8.1    | 3.2    | 4.7    |
| 49.0   | 44.2   | 42.4   | 34.2   | 44.2   | 46.5   |
| 7.5    | 2.9    | 1.0    | 3.4    | 1.1    | 0.5    |
| 21.6   | 15.8   | 13.6   | 10.9   | 11.4   | 16.3   |
| 14.5   | 15.6   | 16.7   | 10.5   | 18.4   | 15.8   |
| 12.1   | 8.5    | 12.8   | 8.6    | 8.8    | 12.9   |
| 22.1   | 13.6   | 17.5   | 19.1   | 18.0   | 15.5   |
| 98.9   | 89.8   | 96.4   | 120.1  | 127.6  | 119.2  |
| 5.6    | 4.0    | 6.1    | 10.3   | 4.7    | 7.0    |
| 6.3    | 7.9    | 4.7    | 2.9    | 7.5    | 6.7    |
| 23.0   | 19.1   | 26.6   | 22.1   | 20.1   | 29.3   |
| 31.0   | 34.1   | 33.1   | 42.7   | 24.7   | 34.5   |
| 223.3  | 111.7  | 211.2  | 208.9  | 243.6  | 306.1  |
| 18.8   | 15.1   | 10.0   | 19.4   | 19.2   | 23.0   |
| 7.3    | 21.9   | 4.2    | 4.2    | 8.7    | 9.2    |
| 17.6   | 23.5   | 3.0    | 14.5   | 5.2    | 14.3   |
| 4.6    | 11.6   | 13.3   | 1.5    | 6.9    | 2.6    |
| 18.8   | 20.2   | 8.8    | 17.6   | 24.5   | 12.9   |
| 21.3   | 18.6   | 25.2   | 44.7   | 49.0   | 42.5   |
| 124.7  | 100.4  | 136.4  | 135.2  | 135.5  | 142.9  |
| 8.0    | 1.1    | 14.8   | 0.8    | 8.7    | 4.7    |
| 42.6   | 23.6   | 45.6   | 35.1   | 47.8   | 48.4   |
| 31.4   | 22.4   | 13.5   | 24.8   | 27.5   | 34.3   |

|        |        |        |        |        |        |
|--------|--------|--------|--------|--------|--------|
| 2.4    | 11.8   | 5.8    | 4.8    | 4.6    | 6.8    |
| 11.2   | 9.0    | 4.2    | 8.7    | 12.7   | 10.3   |
| 406.6  | 305.4  | 384.8  | 349.1  | 416.3  | 448.5  |
| 5777.7 | 5208.8 | 5895.6 | 5999.6 | 6039.8 | 6095.2 |
| 3.6    | 3.0    | 4.1    | 2.0    | 3.3    | 3.6    |
| 10.5   | 12.5   | 10.6   | 13.9   | 12.0   | 13.4   |
| 741.6  | 696.4  | 786.1  | 802.0  | 905.9  | 927.2  |
| 36.1   | 27.4   | 21.4   | 29.7   | 23.8   | 30.7   |
| 358.1  | 239.4  | 252.8  | 236.3  | 259.3  | 398.7  |
| 11.0   | 14.1   | 12.8   | 4.9    | 15.8   | 6.1    |
| 8.5    | 16.7   | 5.7    | 8.2    | 9.3    | 7.4    |
| 319.6  | 211.7  | 291.1  | 252.5  | 349.7  | 342.6  |
| 3.8    | 14.2   | 5.7    | 11.6   | 9.8    | 10.6   |
| 486.5  | 420.2  | 350.6  | 425.4  | 441.2  | 493.5  |
| 292.1  | 290.1  | 257.2  | 242.0  | 310.0  | 328.2  |
| 21.8   | 9.4    | 27.0   | 21.1   | 17.3   | 21.3   |
| 4.3    | 22.4   | 12.2   | 9.9    | 8.7    | 3.3    |
| 1.6    | 6.1    | 5.1    | 6.9    | 12.4   | 10.7   |
| 1020.3 | 820.8  | 772.6  | 942.0  | 947.1  | 1178.8 |
| 134.6  | 106.2  | 124.5  | 107.8  | 142.3  | 161.5  |
| 29.3   | 17.7   | 45.4   | 51.5   | 33.8   | 38.4   |
| 1.0    | 0.9    | 0.9    | 0.6    | 2.1    | 4.3    |
| 61.2   | 62.3   | 84.1   | 61.3   | 74.8   | 72.7   |
| 23.5   | 32.0   | 40.1   | 17.1   | 38.8   | 41.9   |
| 285.4  | 316.3  | 269.7  | 281.8  | 296.6  | 360.7  |
| 131.5  | 89.0   | 118.0  | 121.7  | 146.7  | 150.9  |
| 9.4    | 11.0   | 16.1   | 17.0   | 16.7   | 17.6   |
| 234.6  | 218.2  | 252.3  | 240.7  | 264.3  | 311.0  |
| 134.0  | 135.6  | 155.5  | 150.2  | 142.3  | 159.2  |
| 17.7   | 23.8   | 25.5   | 19.5   | 21.8   | 29.0   |
| 124.1  | 106.7  | 118.4  | 155.4  | 120.3  | 161.7  |
| 2.2    | 2.0    | 1.1    | 2.2    | 2.1    | 4.0    |
| 1.2    | 0.6    | 2.8    | 6.8    | 5.0    | 3.6    |
| 29.2   | 18.7   | 20.0   | 24.1   | 47.2   | 28.7   |
| 16.9   | 26.8   | 13.2   | 20.3   | 17.5   | 18.3   |
| 13.2   | 9.5    | 8.5    | 8.4    | 2.3    | 3.6    |
| 64.5   | 70.7   | 70.6   | 67.8   | 73.5   | 88.1   |
| 21.3   | 31.0   | 26.7   | 25.7   | 26.0   | 30.0   |
| 24.7   | 29.2   | 28.0   | 19.4   | 11.4   | 13.9   |
| 3.1    | 9.5    | 6.9    | 7.5    | 3.0    | 3.2    |
| 185.1  | 162.3  | 173.3  | 168.7  | 187.2  | 204.8  |
| 30.8   | 27.2   | 34.0   | 24.1   | 17.7   | 30.7   |
| 1.2    | 1.1    | 0.9    | 1.9    | 0.9    | 1.7    |
| 12.7   | 2.3    | 5.5    | 12.1   | 19.6   | 10.2   |
| 14.2   | 6.9    | 17.5   | 15.9   | 11.5   | 18.9   |
| 12.2   | 18.5   | 19.4   | 7.3    | 17.8   | 27.1   |
| 0.5    | 2.3    | 2.7    | 5.0    | 3.6    | 0.8    |
| 2.4    | 1.2    | 6.1    | 1.3    | 3.9    | 5.9    |
| 2.2    | 13.8   | 5.1    | 1.0    | 9.0    | 8.2    |
| 14.7   | 19.0   | 16.4   | 13.0   | 17.1   | 20.1   |
| 11.1   | 7.2    | 12.5   | 8.5    | 11.5   | 14.8   |
| 58.8   | 46.6   | 69.3   | 68.4   | 62.2   | 64.2   |
| 7.6    | 1.8    | 13.8   | 10.5   | 7.3    | 3.4    |

|       |       |       |       |       |       |
|-------|-------|-------|-------|-------|-------|
| 930.9 | 731.9 | 748.6 | 780.4 | 969.2 | 976.9 |
| 115.3 | 73.1  | 109.0 | 119.9 | 132.9 | 139.3 |
| 2.8   | 3.3   | 6.5   | 11.9  | 15.2  | 4.7   |
| 122.1 | 93.1  | 130.9 | 126.5 | 170.0 | 151.8 |
| 319.3 | 261.3 | 343.0 | 346.8 | 419.7 | 417.8 |
| 23.1  | 25.4  | 31.8  | 36.6  | 48.7  | 55.9  |
| 17.1  | 17.8  | 11.3  | 9.0   | 11.1  | 12.5  |
| 176.9 | 191.5 | 171.9 | 180.9 | 207.1 | 228.1 |
| 2.9   | 1.7   | 11.5  | 2.6   | 3.5   | 5.9   |
| 11.2  | 12.1  | 1.8   | 10.1  | 8.4   | 12.9  |
| 3.1   | 10.3  | 7.0   | 3.1   | 12.0  | 11.9  |
| 73.4  | 94.5  | 76.0  | 82.1  | 70.5  | 106.2 |
| 524.4 | 575.6 | 533.8 | 598.8 | 600.6 | 625.8 |
| 152.3 | 122.9 | 161.9 | 147.2 | 190.9 | 189.6 |
| 5.3   | 4.6   | 1.7   | 4.5   | 2.9   | 9.0   |
| 10.0  | 4.5   | 12.5  | 11.1  | 8.5   | 12.2  |
| 174.4 | 191.3 | 159.1 | 202.4 | 212.0 | 216.7 |
| 17.5  | 27.0  | 25.0  | 29.7  | 17.8  | 6.5   |
| 34.9  | 31.7  | 18.5  | 16.3  | 36.1  | 40.1  |
| 1.7   | 12.1  | 5.3   | 3.4   | 4.1   | 1.6   |
| 350.1 | 306.7 | 335.3 | 357.5 | 356.5 | 440.4 |
| 0.8   | 7.1   | 2.4   | 3.0   | 4.8   | 1.7   |
| 44.9  | 51.4  | 47.2  | 38.6  | 56.7  | 58.6  |
| 15.4  | 14.0  | 11.5  | 13.2  | 19.4  | 21.2  |
| 6.3   | 15.7  | 5.7   | 9.3   | 11.2  | 7.0   |
| 4.4   | 5.6   | 5.3   | 1.1   | 2.8   | 1.4   |
| 28.1  | 16.4  | 29.7  | 29.1  | 32.6  | 25.0  |
| 164.6 | 120.2 | 146.4 | 191.5 | 208.1 | 210.4 |
| 183.8 | 114.3 | 163.7 | 144.7 | 193.7 | 209.2 |
| 12.3  | 0.5   | 13.5  | 3.9   | 5.0   | 4.9   |
| 53.1  | 50.5  | 49.3  | 56.8  | 61.7  | 74.7  |
| 1.9   | 4.9   | 4.3   | 1.9   | 1.8   | 2.4   |
| 3.8   | 3.5   | 2.2   | 7.7   | 7.6   | 4.3   |
| 52.9  | 42.7  | 45.2  | 47.9  | 60.4  | 67.4  |
| 97.6  | 84.6  | 104.8 | 96.8  | 106.5 | 123.3 |
| 21.5  | 16.4  | 21.3  | 26.4  | 25.9  | 31.1  |
| 7.1   | 3.9   | 4.4   | 12.3  | 7.4   | 6.6   |
| 3.7   | 9.1   | 7.1   | 12.7  | 2.4   | 4.5   |
| 8.6   | 7.8   | 9.3   | 7.5   | 5.8   | 8.2   |
| 0.9   | 0.6   | 2.5   | 10.6  | 2.4   | 2.9   |
| 23.9  | 24.9  | 31.2  | 33.8  | 33.3  | 42.1  |
| 85.0  | 106.8 | 85.7  | 107.4 | 102.7 | 119.5 |
| 196.4 | 201.5 | 201.7 | 212.5 | 225.8 | 239.7 |
| 15.0  | 9.9   | 34.8  | 19.1  | 24.7  | 23.0  |
| 2.4   | 0.9   | 6.2   | 7.3   | 1.8   | 3.2   |
| 546.2 | 811.4 | 553.9 | 670.4 | 540.4 | 698.3 |
| 1.4   | 1.6   | 1.2   | 1.0   | 0.8   | 1.6   |
| 2.8   | 2.3   | 4.0   | 6.9   | 5.3   | 1.6   |
| 141.6 | 156.5 | 134.5 | 144.8 | 158.2 | 175.0 |
| 112.3 | 98.7  | 109.4 | 98.4  | 124.5 | 133.5 |
| 12.6  | 13.7  | 13.2  | 13.2  | 8.9   | 15.5  |
| 43.8  | 30.0  | 40.0  | 54.4  | 62.5  | 77.9  |
| 17.0  | 18.6  | 22.0  | 9.4   | 17.0  | 23.3  |



|        |        |        |        |        |        |
|--------|--------|--------|--------|--------|--------|
| 2.4    | 1.8    | 12.0   | 2.3    | 2.4    | 5.6    |
| 53.8   | 39.7   | 51.6   | 42.3   | 60.7   | 62.7   |
| 107.4  | 76.0   | 119.4  | 108.4  | 147.5  | 124.6  |
| 4.2    | 3.8    | 2.9    | 5.3    | 5.0    | 3.1    |
| 24.7   | 22.2   | 19.5   | 16.1   | 24.0   | 26.6   |
| 440.1  | 265.6  | 399.9  | 341.2  | 540.5  | 525.5  |
| 2.5    | 10.3   | 14.7   | 5.5    | 6.1    | 9.1    |
| 6.9    | 1.2    | 1.8    | 13.2   | 1.8    | 2.6    |
| 59.3   | 52.6   | 64.8   | 61.5   | 81.6   | 78.2   |
| 1.5    | 1.6    | 1.8    | 1.8    | 3.0    | 2.2    |
| 12.5   | 8.9    | 5.3    | 1.5    | 15.9   | 19.3   |
| 14.8   | 15.5   | 26.6   | 23.8   | 28.0   | 33.6   |
| 76.0   | 56.4   | 91.3   | 106.9  | 94.2   | 104.8  |
| 22.6   | 21.2   | 19.3   | 13.2   | 7.3    | 21.5   |
| 7.9    | 13.0   | 10.9   | 6.8    | 9.6    | 11.0   |
| 17.7   | 16.5   | 14.4   | 12.9   | 16.1   | 21.7   |
| 53.1   | 24.2   | 34.0   | 41.6   | 49.7   | 79.9   |
| 2.8    | 9.4    | 8.3    | 4.3    | 1.3    | 3.7    |
| 13.5   | 14.1   | 10.2   | 13.1   | 2.7    | 12.5   |
| 5.1    | 2.1    | 8.0    | 2.8    | 2.5    | 2.5    |
| 7.2    | 8.5    | 8.6    | 12.8   | 8.4    | 9.4    |
| 64.9   | 54.0   | 51.4   | 54.7   | 45.2   | 63.4   |
| 8.5    | 9.8    | 10.2   | 8.0    | 8.6    | 4.8    |
| 4.3    | 13.7   | 13.1   | 6.6    | 12.8   | 5.1    |
| 8.8    | 11.0   | 8.3    | 20.3   | 7.2    | 5.3    |
| 24.8   | 35.7   | 33.1   | 12.8   | 33.3   | 61.7   |
| 166.0  | 141.3  | 132.8  | 141.1  | 173.9  | 186.8  |
| 14.2   | 20.5   | 21.6   | 11.1   | 14.9   | 11.9   |
| 9.0    | 13.7   | 8.4    | 11.7   | 12.4   | 8.8    |
| 271.9  | 149.2  | 282.5  | 298.9  | 345.3  | 355.5  |
| 43.0   | 25.5   | 23.3   | 36.7   | 33.9   | 44.3   |
| 155.8  | 169.3  | 133.4  | 161.1  | 148.6  | 203.6  |
| 3.4    | 0.3    | 7.7    | 8.8    | 6.6    | 4.2    |
| 453.2  | 372.6  | 469.8  | 461.4  | 507.3  | 568.3  |
| 1.3    | 1.8    | 5.6    | 1.4    | 1.1    | 4.8    |
| 5.7    | 7.3    | 7.8    | 1.7    | 3.7    | 2.1    |
| 16.7   | 8.0    | 18.6   | 13.4   | 18.1   | 18.8   |
| 50.1   | 41.7   | 45.2   | 56.9   | 45.0   | 53.8   |
| 5.8    | 2.7    | 5.7    | 1.7    | 2.9    | 5.2    |
| 7.7    | 4.1    | 13.5   | 3.8    | 12.7   | 12.3   |
| 27.7   | 26.2   | 47.3   | 45.8   | 29.8   | 40.5   |
| 9.3    | 1.3    | 8.1    | 8.0    | 1.6    | 16.6   |
| 241.6  | 204.1  | 254.6  | 239.0  | 278.1  | 297.1  |
| 3.9    | 5.0    | 4.2    | 5.0    | 9.4    | 7.2    |
| 2.6    | 1.0    | 0.6    | 3.6    | 4.1    | 3.5    |
| 19.8   | 28.2   | 14.3   | 16.2   | 28.3   | 27.2   |
| 1723.4 | 1297.2 | 1534.4 | 1568.9 | 1672.7 | 2003.6 |
| 490.2  | 438.3  | 485.7  | 422.6  | 593.8  | 661.4  |
| 415.8  | 302.3  | 455.7  | 389.1  | 506.8  | 484.3  |
| 2711.3 | 2663.3 | 2955.9 | 3122.4 | 3013.1 | 3223.2 |
| 38.0   | 43.8   | 40.5   | 48.5   | 42.9   | 49.9   |
| 127.8  | 103.9  | 135.9  | 130.0  | 150.8  | 196.3  |
| 3.7    | 7.3    | 5.9    | 4.6    | 0.7    | 5.9    |

|        |        |        |        |        |        |
|--------|--------|--------|--------|--------|--------|
| 17.6   | 14.7   | 13.1   | 17.8   | 17.5   | 12.9   |
| 2234.4 | 1830.0 | 1861.3 | 1915.8 | 2126.5 | 2492.4 |
| 1.4    | 0.8    | 10.5   | 2.0    | 3.7    | 2.0    |
| 11.7   | 8.7    | 11.4   | 3.6    | 11.7   | 7.7    |
| 91.6   | 65.4   | 92.2   | 87.7   | 114.9  | 112.6  |
| 20.8   | 22.0   | 26.5   | 20.2   | 18.3   | 26.7   |
| 0.7    | 1.6    | 2.4    | 1.1    | 2.9    | 0.9    |
| 1.2    | 0.9    | 3.4    | 7.1    | 6.8    | 8.7    |
| 1.4    | 2.5    | 9.5    | 1.0    | 2.4    | 1.4    |
| 3.8    | 2.1    | 7.5    | 2.8    | 6.6    | 5.7    |
| 4.0    | 1.5    | 8.6    | 6.3    | 5.8    | 1.3    |
| 1.1    | 4.5    | 3.8    | 2.6    | 3.0    | 2.0    |
| 3.2    | 5.0    | 1.1    | 0.8    | 1.2    | 2.1    |
| 1.8    | 0.4    | 0.5    | 2.9    | 3.9    | 0.7    |
| 17.5   | 22.7   | 17.7   | 27.7   | 23.5   | 26.2   |
| 1.6    | 2.7    | 2.3    | 5.3    | 2.9    | 3.4    |
| 2301.2 | 2087.5 | 2296.1 | 2269.7 | 2693.9 | 2840.9 |
| 1.6    | 3.1    | 1.7    | 4.1    | 1.5    | 2.3    |
| 306.8  | 357.2  | 351.3  | 348.2  | 395.8  | 419.2  |
| 15.0   | 15.7   | 12.0   | 14.3   | 15.6   | 17.3   |
| 6.5    | 21.4   | 16.1   | 17.4   | 3.8    | 12.5   |
| 202.3  | 194.6  | 194.3  | 195.6  | 273.7  | 240.6  |
| 3.8    | 4.1    | 0.6    | 1.6    | 2.4    | 0.3    |
| 5.1    | 3.3    | 4.1    | 3.6    | 6.3    | 4.5    |
| 2.7    | 1.5    | 2.7    | 2.6    | 1.8    | 2.9    |
| 2.7    | 13.9   | 8.4    | 3.4    | 4.8    | 1.6    |
| 14.7   | 9.9    | 23.3   | 20.0   | 12.9   | 9.5    |
| 8.3    | 8.7    | 2.5    | 7.1    | 2.9    | 4.0    |
| 27.4   | 22.5   | 37.3   | 45.0   | 38.8   | 38.6   |
| 25.4   | 31.3   | 26.8   | 28.4   | 26.9   | 23.8   |
| 8.4    | 12.6   | 11.1   | 7.6    | 1.8    | 6.4    |
| 10.9   | 9.9    | 9.0    | 17.0   | 18.2   | 19.2   |
| 513.1  | 418.0  | 429.6  | 507.5  | 482.3  | 626.6  |
| 40.9   | 45.5   | 41.2   | 48.5   | 56.2   | 49.8   |
| 13.3   | 6.0    | 6.8    | 10.5   | 10.4   | 6.5    |
| 49.4   | 45.0   | 47.5   | 51.2   | 49.3   | 50.8   |
| 43.9   | 30.3   | 42.6   | 42.5   | 44.2   | 30.4   |
| 9.8    | 13.0   | 13.5   | 16.1   | 11.4   | 15.6   |
| 7.8    | 1.4    | 6.4    | 6.1    | 2.8    | 1.6    |
| 63.7   | 53.7   | 70.1   | 87.4   | 69.4   | 83.8   |
| 9.8    | 12.7   | 16.4   | 14.3   | 7.6    | 14.9   |
| 1018.2 | 913.5  | 1119.7 | 1170.1 | 1124.5 | 1250.9 |
| 7.6    | 2.1    | 4.8    | 9.0    | 5.4    | 3.1    |
| 18.7   | 30.6   | 21.7   | 17.4   | 25.5   | 21.3   |
| 5.9    | 0.5    | 2.6    | 4.2    | 7.9    | 6.3    |
| 2.5    | 5.1    | 2.7    | 2.9    | 3.1    | 3.5    |
| 3.2    | 1.8    | 15.3   | 7.7    | 2.3    | 2.9    |
| 6.7    | 3.8    | 4.1    | 9.7    | 3.2    | 5.1    |
| 55.2   | 59.8   | 41.9   | 64.5   | 58.8   | 60.2   |
| 3.1    | 3.2    | 2.6    | 4.1    | 4.1    | 3.1    |
| 1.2    | 1.6    | 1.9    | 1.4    | 1.0    | 2.2    |
| 19.4   | 21.1   | 20.1   | 16.8   | 22.7   | 32.7   |
| 19.0   | 3.1    | 18.5   | 9.5    | 16.6   | 10.0   |

|        |        |        |        |        |        |
|--------|--------|--------|--------|--------|--------|
| 106.8  | 109.4  | 133.9  | 133.0  | 146.1  | 139.6  |
| 9.8    | 16.9   | 22.5   | 14.5   | 14.3   | 23.4   |
| 47.1   | 43.1   | 38.2   | 42.7   | 45.2   | 52.7   |
| 0.7    | 5.5    | 0.8    | 1.3    | 3.6    | 1.6    |
| 9.1    | 11.4   | 5.9    | 6.4    | 5.7    | 3.6    |
| 2.7    | 3.2    | 3.8    | 2.0    | 2.5    | 2.9    |
| 6.2    | 5.7    | 5.2    | 3.3    | 9.4    | 6.8    |
| 32.0   | 38.3   | 27.0   | 24.4   | 44.3   | 59.0   |
| 45.8   | 39.3   | 43.1   | 43.1   | 49.7   | 51.8   |
| 7009.2 | 6245.6 | 6815.4 | 7046.6 | 7364.3 | 7343.8 |
| 508.5  | 478.9  | 500.6  | 545.9  | 597.5  | 645.7  |
| 74.2   | 61.6   | 82.4   | 73.7   | 84.5   | 73.8   |
| 733.7  | 625.6  | 739.6  | 786.7  | 853.5  | 958.4  |
| 1.6    | 1.9    | 1.4    | 1.5    | 2.0    | 1.8    |
| 3.6    | 10.8   | 1.1    | 7.6    | 4.6    | 9.3    |
| 1.5    | 7.2    | 6.1    | 3.5    | 1.7    | 6.6    |
| 3.7    | 6.4    | 2.5    | 4.7    | 1.3    | 0.7    |
| 741.8  | 838.1  | 861.2  | 891.6  | 905.3  | 1017.2 |
| 1.8    | 1.4    | 2.6    | 1.0    | 1.7    | 1.0    |
| 22.1   | 20.7   | 22.3   | 17.8   | 26.3   | 20.6   |
| 2.1    | 1.0    | 4.1    | 3.2    | 4.1    | 6.4    |
| 16.1   | 13.4   | 21.8   | 14.4   | 19.9   | 19.9   |
| 23.3   | 26.2   | 17.7   | 23.2   | 29.1   | 30.3   |
| 2356.1 | 2213.1 | 2211.2 | 2626.0 | 2636.2 | 2677.0 |
| 0.5    | 0.3    | 4.8    | 2.7    | 1.3    | 0.5    |
| 11.5   | 5.8    | 7.1    | 8.6    | 17.2   | 8.3    |
| 4.1    | 0.8    | 12.9   | 2.9    | 0.5    | 2.5    |
| 14.0   | 6.5    | 7.5    | 15.3   | 20.4   | 19.0   |
| 2.9    | 4.3    | 2.2    | 1.9    | 3.0    | 7.2    |
| 407.6  | 491.8  | 447.1  | 509.6  | 494.2  | 468.8  |
| 46.5   | 39.5   | 43.3   | 50.9   | 38.7   | 62.8   |
| 235.0  | 193.4  | 233.7  | 224.9  | 261.3  | 280.2  |
| 9.5    | 1.4    | 8.2    | 6.8    | 8.7    | 3.9    |
| 9.7    | 3.1    | 4.5    | 6.1    | 1.7    | 3.0    |
| 89.4   | 69.1   | 71.4   | 107.5  | 118.2  | 122.4  |
| 5.7    | 1.8    | 2.8    | 6.6    | 11.7   | 12.9   |
| 3.3    | 3.4    | 11.7   | 5.4    | 3.4    | 8.6    |
| 60.8   | 30.6   | 50.7   | 49.2   | 71.2   | 65.0   |
| 22.4   | 2.4    | 21.5   | 22.1   | 24.3   | 25.5   |
| 5.6    | 1.0    | 11.7   | 9.7    | 3.6    | 5.3    |
| 4.5    | 3.0    | 2.6    | 5.3    | 6.7    | 2.1    |
| 25.8   | 33.1   | 14.3   | 28.1   | 19.4   | 24.7   |
| 13.0   | 16.8   | 13.9   | 15.8   | 19.3   | 21.8   |
| 13.0   | 12.7   | 8.5    | 8.4    | 8.7    | 9.6    |
| 1.0    | 3.9    | 1.1    | 0.5    | 2.6    | 0.8    |
| 1916.8 | 1793.7 | 2163.2 | 2265.2 | 2370.1 | 2404.5 |
| 3.0    | 3.1    | 2.7    | 4.8    | 6.5    | 4.0    |
| 72.6   | 56.8   | 96.2   | 79.9   | 84.1   | 113.3  |
| 6.5    | 15.1   | 8.1    | 6.0    | 15.4   | 15.9   |
| 1.6    | 8.8    | 1.7    | 7.4    | 5.0    | 1.3    |
| 41.8   | 23.7   | 22.8   | 37.1   | 34.5   | 37.4   |
| 5.3    | 8.0    | 8.3    | 8.0    | 8.0    | 1.5    |
| 2.2    | 16.4   | 6.9    | 9.5    | 16.3   | 5.4    |

|        |        |        |        |        |        |
|--------|--------|--------|--------|--------|--------|
| 5.8    | 2.7    | 5.6    | 2.7    | 1.5    | 1.6    |
| 2.7    | 3.1    | 6.7    | 3.9    | 3.1    | 4.2    |
| 28.7   | 24.1   | 32.3   | 31.9   | 43.8   | 50.2   |
| 4.9    | 5.3    | 3.7    | 10.1   | 7.2    | 10.0   |
| 2.2    | 1.8    | 6.9    | 3.6    | 2.0    | 2.1    |
| 12.9   | 1.8    | 18.5   | 12.8   | 11.6   | 22.8   |
| 156.7  | 166.7  | 154.5  | 141.3  | 149.6  | 205.6  |
| 31.2   | 19.9   | 8.0    | 11.5   | 25.6   | 29.8   |
| 5.6    | 1.4    | 3.5    | 2.1    | 2.0    | 5.3    |
| 497.7  | 486.7  | 487.7  | 498.7  | 529.3  | 637.0  |
| 1.0    | 2.5    | 1.7    | 2.6    | 1.1    | 2.1    |
| 2.3    | 0.5    | 3.8    | 2.9    | 3.9    | 0.4    |
| 5.0    | 1.2    | 7.0    | 3.8    | 4.6    | 3.1    |
| 1.0    | 12.1   | 8.4    | 11.7   | 8.8    | 18.5   |
| 117.9  | 83.7   | 116.3  | 114.8  | 108.9  | 115.9  |
| 4.3    | 4.5    | 2.9    | 3.7    | 2.9    | 6.3    |
| 7.2    | 6.0    | 15.0   | 9.0    | 13.7   | 19.0   |
| 57.3   | 61.1   | 74.6   | 60.6   | 66.5   | 54.7   |
| 11.9   | 10.9   | 10.7   | 2.4    | 11.2   | 7.0    |
| 131.8  | 125.3  | 103.0  | 108.4  | 127.0  | 166.8  |
| 26.4   | 21.8   | 29.8   | 22.6   | 29.1   | 37.6   |
| 194.7  | 229.9  | 187.2  | 236.5  | 214.6  | 209.9  |
| 636.1  | 598.0  | 836.8  | 606.8  | 827.0  | 867.0  |
| 54.1   | 52.1   | 51.1   | 60.2   | 55.7   | 50.7   |
| 1.5    | 1.0    | 7.6    | 5.9    | 1.7    | 3.3    |
| 3.0    | 2.0    | 2.1    | 8.1    | 7.8    | 13.7   |
| 977.2  | 771.4  | 975.3  | 1138.4 | 1153.6 | 1367.9 |
| 17.3   | 17.5   | 19.3   | 22.8   | 22.8   | 23.0   |
| 1.5    | 4.9    | 1.8    | 1.0    | 3.0    | 1.3    |
| 4561.3 | 3873.6 | 4545.9 | 5006.8 | 4843.4 | 4957.4 |
| 0.4    | 1.6    | 2.4    | 2.1    | 4.0    | 5.0    |
| 18.4   | 30.0   | 25.7   | 24.4   | 24.7   | 32.9   |
| 31.7   | 1.8    | 25.7   | 31.1   | 21.8   | 38.1   |
| 2.6    | 5.3    | 2.7    | 6.1    | 7.6    | 8.3    |
| 489.2  | 360.0  | 419.2  | 468.7  | 608.5  | 501.1  |
| 247.6  | 304.9  | 289.3  | 338.7  | 331.0  | 350.0  |
| 15.1   | 2.4    | 11.9   | 15.9   | 16.4   | 15.5   |
| 14.3   | 22.2   | 25.8   | 24.4   | 30.2   | 21.0   |
| 67.5   | 83.6   | 66.2   | 71.1   | 73.4   | 89.4   |
| 30.6   | 33.0   | 34.7   | 39.1   | 30.4   | 45.9   |
| 31.1   | 15.9   | 40.5   | 31.7   | 29.7   | 42.4   |
| 5.9    | 14.5   | 17.1   | 12.3   | 7.8    | 16.3   |
| 140.8  | 157.5  | 145.4  | 167.2  | 186.7  | 218.8  |
| 3.4    | 3.2    | 28.8   | 13.1   | 6.1    | 4.2    |
| 604.1  | 425.0  | 543.3  | 577.6  | 580.4  | 641.4  |
| 24.3   | 10.4   | 10.5   | 19.1   | 25.4   | 20.2   |
| 20.0   | 10.6   | 20.1   | 21.1   | 8.0    | 24.4   |
| 7.6    | 2.2    | 8.4    | 1.2    | 7.2    | 3.2    |
| 8.8    | 7.0    | 4.6    | 8.2    | 9.6    | 11.0   |
| 10.8   | 10.3   | 21.1   | 15.0   | 20.6   | 13.5   |
| 1.8    | 20.6   | 5.4    | 5.6    | 16.3   | 7.6    |
| 28.3   | 43.7   | 32.0   | 38.4   | 50.9   | 50.3   |
| 235.0  | 323.3  | 235.4  | 314.1  | 235.3  | 278.8  |

|       |       |       |       |       |       |
|-------|-------|-------|-------|-------|-------|
| 13.7  | 22.3  | 15.2  | 15.1  | 14.9  | 17.2  |
| 12.1  | 4.4   | 6.6   | 13.5  | 6.9   | 18.5  |
| 7.0   | 17.0  | 19.9  | 13.1  | 35.2  | 31.7  |
| 15.1  | 1.4   | 2.4   | 3.8   | 1.8   | 9.5   |
| 83.6  | 51.0  | 77.2  | 82.7  | 101.1 | 85.0  |
| 66.4  | 71.4  | 69.9  | 63.1  | 86.3  | 100.2 |
| 24.3  | 27.2  | 30.5  | 37.3  | 37.8  | 35.8  |
| 4.4   | 2.5   | 5.7   | 8.7   | 3.9   | 6.6   |
| 9.4   | 14.3  | 10.4  | 13.0  | 14.6  | 25.4  |
| 17.9  | 11.8  | 7.8   | 8.7   | 15.2  | 12.3  |
| 1.1   | 1.1   | 2.1   | 1.2   | 1.5   | 3.6   |
| 6.1   | 3.7   | 10.0  | 3.1   | 4.9   | 3.6   |
| 4.3   | 4.1   | 6.5   | 6.7   | 23.5  | 15.2  |
| 1.2   | 1.1   | 8.0   | 3.4   | 2.0   | 2.7   |
| 1.1   | 1.0   | 2.8   | 0.8   | 5.8   | 1.8   |
| 19.2  | 18.3  | 20.9  | 18.4  | 32.4  | 22.8  |
| 8.9   | 20.9  | 23.3  | 14.7  | 5.0   | 20.3  |
| 8.9   | 5.6   | 16.7  | 19.1  | 12.6  | 11.3  |
| 5.8   | 2.6   | 13.0  | 17.7  | 4.8   | 12.6  |
| 419.9 | 373.3 | 470.5 | 464.9 | 554.4 | 617.2 |
| 11.4  | 2.1   | 19.9  | 18.2  | 13.6  | 20.2  |
| 8.3   | 6.8   | 9.9   | 3.5   | 2.9   | 7.2   |
| 12.3  | 10.5  | 7.3   | 8.4   | 8.7   | 11.8  |
| 21.6  | 3.2   | 21.9  | 11.1  | 21.1  | 19.1  |
| 2.9   | 2.6   | 2.0   | 2.2   | 7.6   | 2.6   |
| 17.0  | 15.0  | 11.3  | 24.4  | 16.4  | 18.8  |
| 39.0  | 62.3  | 65.7  | 56.2  | 58.2  | 59.7  |
| 17.1  | 18.9  | 15.8  | 13.4  | 19.4  | 20.5  |
| 13.5  | 6.8   | 8.1   | 10.6  | 10.9  | 11.1  |
| 63.6  | 55.8  | 65.5  | 74.8  | 73.7  | 72.8  |
| 3.1   | 0.6   | 8.8   | 1.3   | 8.8   | 2.6   |
| 173.8 | 154.6 | 146.2 | 159.0 | 189.4 | 207.4 |
| 47.0  | 63.3  | 63.5  | 67.5  | 75.4  | 80.6  |
| 57.8  | 45.5  | 47.7  | 57.2  | 71.8  | 64.5  |
| 4.9   | 7.4   | 3.0   | 2.4   | 13.7  | 7.5   |
| 14.3  | 15.0  | 14.8  | 9.8   | 8.4   | 7.8   |
| 3.1   | 1.0   | 1.6   | 1.5   | 2.0   | 1.3   |
| 3.6   | 1.2   | 6.5   | 10.8  | 3.1   | 9.8   |
| 24.7  | 11.0  | 20.5  | 11.6  | 9.5   | 24.5  |
| 154.8 | 219.5 | 182.4 | 191.8 | 212.0 | 206.3 |
| 143.6 | 113.5 | 122.6 | 124.7 | 143.2 | 185.8 |
| 7.9   | 5.2   | 3.5   | 6.0   | 2.6   | 9.8   |
| 1.1   | 1.5   | 4.7   | 6.9   | 1.7   | 6.5   |
| 0.8   | 1.3   | 0.8   | 0.6   | 0.7   | 1.0   |
| 13.6  | 20.1  | 12.7  | 10.3  | 15.2  | 13.8  |
| 95.8  | 99.5  | 114.0 | 112.4 | 123.4 | 121.6 |
| 3.6   | 2.0   | 1.3   | 3.0   | 1.2   | 1.8   |
| 2.4   | 4.7   | 2.1   | 3.3   | 1.1   | 2.9   |
| 33.5  | 29.6  | 35.4  | 34.8  | 34.5  | 59.5  |
| 2.2   | 0.7   | 1.1   | 4.3   | 1.2   | 5.3   |
| 7.6   | 5.4   | 4.8   | 10.7  | 16.0  | 8.9   |
| 2.7   | 33.6  | 3.8   | 8.3   | 2.3   | 4.2   |
| 8.6   | 1.6   | 7.1   | 14.7  | 12.8  | 9.2   |

|        |        |        |        |        |        |
|--------|--------|--------|--------|--------|--------|
| 7.6    | 11.3   | 9.2    | 6.0    | 12.4   | 12.5   |
| 14.8   | 17.3   | 11.2   | 25.7   | 12.0   | 24.8   |
| 4.3    | 5.2    | 5.4    | 4.6    | 11.6   | 6.7    |
| 13.9   | 24.0   | 9.8    | 9.6    | 9.3    | 15.5   |
| 9.8    | 8.0    | 8.3    | 6.5    | 11.5   | 10.2   |
| 6.2    | 1.1    | 1.1    | 4.8    | 1.2    | 5.1    |
| 4163.0 | 3502.8 | 4075.6 | 4260.6 | 4741.6 | 4899.3 |
| 6.9    | 13.2   | 11.9   | 14.0   | 11.2   | 15.8   |
| 17.3   | 20.2   | 13.6   | 20.0   | 17.0   | 22.0   |
| 0.6    | 2.3    | 1.6    | 8.5    | 5.3    | 8.7    |
| 3.6    | 4.5    | 4.0    | 5.2    | 3.9    | 0.8    |
| 4.4    | 13.0   | 9.3    | 10.3   | 13.4   | 9.2    |
| 2.5    | 5.8    | 1.8    | 8.7    | 6.4    | 2.4    |
| 1.1    | 0.8    | 0.5    | 0.7    | 0.8    | 0.5    |
| 11.3   | 9.3    | 18.2   | 17.1   | 18.7   | 16.2   |
| 13.0   | 11.9   | 20.4   | 8.5    | 9.6    | 14.5   |
| 3.6    | 14.6   | 18.8   | 17.3   | 15.0   | 3.3    |
| 5.9    | 11.0   | 0.6    | 8.1    | 5.9    | 1.3    |
| 3.4    | 1.3    | 10.6   | 5.8    | 5.5    | 6.7    |
| 8.5    | 1.8    | 3.7    | 2.4    | 2.0    | 4.1    |
| 5.8    | 5.6    | 3.6    | 2.4    | 4.6    | 8.5    |
| 19.2   | 30.1   | 8.2    | 21.5   | 12.4   | 21.3   |
| 140.2  | 147.7  | 167.9  | 175.0  | 157.4  | 179.9  |
| 5.3    | 7.2    | 7.9    | 0.5    | 6.4    | 9.6    |
| 11.2   | 7.6    | 15.5   | 11.8   | 12.9   | 13.7   |
| 7.1    | 0.5    | 3.9    | 4.3    | 1.7    | 5.8    |
| 278.3  | 231.3  | 262.3  | 310.9  | 352.1  | 324.9  |
| 21.0   | 9.3    | 28.1   | 10.6   | 24.2   | 18.7   |
| 1.3    | 1.7    | 6.9    | 1.2    | 3.3    | 3.3    |
| 23.3   | 31.3   | 30.0   | 17.6   | 33.7   | 25.7   |
| 2.5    | 14.8   | 2.3    | 3.5    | 8.5    | 9.0    |
| 231.2  | 174.1  | 202.6  | 199.6  | 260.7  | 247.7  |
| 3.8    | 7.1    | 7.5    | 0.4    | 5.5    | 1.8    |
| 6.0    | 3.4    | 4.9    | 6.6    | 1.4    | 2.1    |
| 4.4    | 8.3    | 6.1    | 10.5   | 17.7   | 19.1   |
| 18.8   | 13.5   | 7.6    | 13.3   | 13.6   | 20.5   |
| 0.7    | 0.7    | 7.4    | 4.1    | 1.3    | 0.9    |
| 3.8    | 1.6    | 1.8    | 3.2    | 5.5    | 2.3    |
| 18.9   | 31.7   | 11.0   | 2.9    | 1.8    | 23.6   |
| 14.5   | 3.9    | 12.2   | 15.9   | 16.3   | 13.0   |
| 0.8    | 1.5    | 1.1    | 0.6    | 1.4    | 1.4    |
| 6.6    | 6.7    | 19.5   | 16.7   | 9.8    | 15.1   |
| 5.8    | 0.4    | 0.8    | 1.5    | 1.0    | 1.1    |
| 7.4    | 0.3    | 7.5    | 6.4    | 7.5    | 9.8    |
| 2.0    | 1.6    | 3.3    | 8.1    | 5.4    | 6.0    |
| 1.3    | 1.4    | 1.7    | 1.0    | 4.1    | 0.7    |
| 16.6   | 4.6    | 13.0   | 7.3    | 3.0    | 18.3   |
| 120.9  | 110.7  | 109.8  | 125.8  | 150.8  | 164.7  |
| 2.5    | 1.0    | 2.7    | 0.8    | 0.4    | 2.0    |
| 1.2    | 1.8    | 1.6    | 1.3    | 0.6    | 2.2    |
| 187.2  | 189.8  | 182.2  | 202.9  | 228.6  | 232.3  |
| 10.9   | 6.5    | 10.1   | 17.0   | 17.0   | 23.1   |
| 211.0  | 136.8  | 203.2  | 170.8  | 204.8  | 286.0  |

|        |        |        |        |        |        |
|--------|--------|--------|--------|--------|--------|
| 3.7    | 1.0    | 1.7    | 7.0    | 0.8    | 4.6    |
| 3.8    | 10.9   | 1.6    | 3.4    | 1.2    | 6.9    |
| 5.8    | 1.0    | 2.1    | 5.3    | 2.2    | 7.0    |
| 17.8   | 24.4   | 22.8   | 18.2   | 19.2   | 30.9   |
| 35.5   | 22.0   | 42.5   | 31.9   | 50.2   | 34.7   |
| 2.0    | 2.4    | 5.0    | 1.8    | 1.4    | 2.2    |
| 22.5   | 19.0   | 19.0   | 24.3   | 20.7   | 28.0   |
| 14.1   | 4.9    | 2.1    | 7.1    | 3.0    | 4.2    |
| 13.5   | 16.3   | 12.3   | 13.4   | 10.6   | 5.2    |
| 8.2    | 2.6    | 2.4    | 1.7    | 5.9    | 8.5    |
| 3.3    | 16.7   | 14.8   | 10.4   | 6.1    | 10.3   |
| 8.0    | 5.5    | 14.9   | 12.5   | 13.6   | 9.8    |
| 29.4   | 29.6   | 43.0   | 9.1    | 19.5   | 20.2   |
| 92.1   | 62.5   | 99.9   | 100.3  | 101.2  | 107.2  |
| 19.4   | 14.5   | 23.2   | 16.5   | 15.1   | 23.0   |
| 9.9    | 10.7   | 7.7    | 6.2    | 10.1   | 6.9    |
| 14.6   | 6.9    | 20.4   | 11.8   | 10.0   | 17.7   |
| 11.8   | 3.7    | 5.2    | 7.6    | 10.8   | 3.8    |
| 0.4    | 4.0    | 7.4    | 5.3    | 4.9    | 5.0    |
| 10.8   | 7.7    | 4.0    | 10.6   | 14.6   | 3.8    |
| 2204.7 | 2171.3 | 2157.3 | 2267.5 | 2252.0 | 2382.6 |
| 0.8    | 0.7    | 8.4    | 2.3    | 2.9    | 1.8    |
| 7.4    | 3.7    | 2.7    | 2.2    | 6.4    | 2.3    |
| 93.4   | 81.6   | 97.4   | 80.3   | 107.2  | 111.1  |
| 15.8   | 4.4    | 21.6   | 5.3    | 13.2   | 12.6   |
| 11.9   | 29.1   | 13.4   | 14.7   | 23.5   | 12.8   |
| 0.7    | 0.7    | 1.3    | 1.5    | 1.2    | 5.8    |
| 15.3   | 8.7    | 16.1   | 15.0   | 22.2   | 25.0   |
| 24.7   | 27.3   | 29.4   | 34.6   | 28.4   | 36.0   |
| 2.6    | 6.7    | 7.7    | 17.1   | 8.6    | 18.7   |
| 14.6   | 5.5    | 17.0   | 14.5   | 16.6   | 14.7   |
| 5.4    | 1.1    | 3.2    | 1.9    | 0.6    | 2.3    |
| 1.0    | 6.3    | 4.6    | 2.9    | 7.0    | 10.6   |
| 14.2   | 11.4   | 20.2   | 13.5   | 11.4   | 20.1   |
| 10.9   | 6.0    | 16.2   | 22.0   | 8.9    | 14.0   |
| 13.6   | 11.4   | 21.2   | 10.1   | 21.6   | 30.2   |
| 0.8    | 3.7    | 3.5    | 0.6    | 0.8    | 2.6    |
| 21.7   | 9.3    | 21.7   | 10.0   | 7.1    | 25.1   |
| 9.8    | 2.3    | 9.3    | 8.2    | 4.3    | 9.0    |
| 824.3  | 694.7  | 667.2  | 794.5  | 965.1  | 1022.8 |
| 14.7   | 17.3   | 10.4   | 9.8    | 2.9    | 19.0   |
| 19.2   | 3.2    | 13.0   | 15.3   | 25.6   | 18.6   |
| 2.3    | 1.2    | 7.2    | 0.7    | 5.0    | 4.4    |
| 2.8    | 2.5    | 2.0    | 2.7    | 2.4    | 3.4    |
| 36.5   | 32.5   | 21.2   | 32.2   | 54.9   | 48.7   |
| 0.9    | 6.7    | 4.5    | 9.5    | 6.5    | 9.5    |
| 3.3    | 5.9    | 4.5    | 5.1    | 6.4    | 3.4    |
| 57.8   | 44.9   | 48.4   | 55.6   | 57.4   | 69.7   |
| 3.5    | 1.1    | 0.9    | 5.1    | 1.0    | 2.5    |
| 2.4    | 5.2    | 10.0   | 5.8    | 8.2    | 3.9    |
| 10.6   | 9.6    | 15.0   | 6.9    | 10.4   | 10.1   |
| 218.8  | 241.4  | 225.4  | 290.1  | 253.5  | 286.2  |
| 91.5   | 89.5   | 97.0   | 106.6  | 123.9  | 110.9  |

|        |        |        |        |        |        |
|--------|--------|--------|--------|--------|--------|
| 4.0    | 24.5   | 25.1   | 20.6   | 12.2   | 29.9   |
| 2.3    | 4.2    | 3.6    | 2.8    | 3.3    | 7.6    |
| 23.1   | 22.5   | 37.2   | 33.5   | 31.4   | 27.1   |
| 2153.3 | 1823.4 | 2119.8 | 2360.5 | 2471.3 | 2541.2 |
| 8.6    | 8.2    | 14.2   | 12.8   | 13.0   | 17.8   |
| 14.4   | 18.7   | 10.1   | 14.4   | 16.2   | 18.4   |
| 21.0   | 13.9   | 28.9   | 15.9   | 19.6   | 32.2   |
| 5.1    | 2.6    | 6.1    | 4.3    | 3.1    | 5.6    |
| 13.5   | 23.3   | 15.2   | 15.9   | 14.7   | 21.2   |
| 6.4    | 11.0   | 10.4   | 2.4    | 7.3    | 11.8   |
| 15.1   | 21.3   | 14.4   | 15.2   | 11.0   | 22.3   |
| 430.4  | 413.1  | 397.5  | 363.6  | 472.3  | 550.9  |
| 14.8   | 11.2   | 15.7   | 16.4   | 15.9   | 18.7   |
| 1.3    | 2.1    | 1.8    | 1.6    | 1.3    | 1.3    |
| 27.6   | 18.1   | 18.3   | 35.1   | 21.4   | 29.1   |
| 13.8   | 7.4    | 21.2   | 10.5   | 14.0   | 13.3   |
| 76.7   | 64.9   | 117.1  | 103.9  | 112.1  | 98.0   |
| 15.3   | 16.1   | 13.9   | 16.3   | 16.7   | 32.6   |
| 2.1    | 1.2    | 2.4    | 2.0    | 1.0    | 1.5    |
| 2.1    | 1.7    | 3.1    | 2.5    | 2.4    | 6.8    |
| 4.3    | 9.0    | 11.4   | 10.1   | 10.4   | 13.2   |
| 283.3  | 259.3  | 259.8  | 288.8  | 310.8  | 312.3  |
| 10.1   | 5.8    | 7.6    | 8.7    | 9.7    | 10.7   |
| 60.6   | 56.8   | 45.9   | 73.7   | 59.1   | 100.1  |
| 15.8   | 14.3   | 12.8   | 8.7    | 18.5   | 9.0    |
| 2165.2 | 1939.5 | 2152.5 | 2398.3 | 2408.4 | 2619.7 |
| 15.5   | 14.8   | 14.0   | 11.4   | 13.5   | 5.9    |
| 99.0   | 76.6   | 98.5   | 91.4   | 115.1  | 122.2  |
| 5.0    | 3.0    | 8.5    | 3.9    | 5.0    | 8.0    |
| 1.2    | 2.3    | 0.9    | 1.1    | 2.6    | 3.1    |
| 1.2    | 2.4    | 2.5    | 1.2    | 1.2    | 1.1    |
| 8.4    | 6.0    | 5.1    | 4.4    | 4.5    | 10.9   |
| 16.4   | 8.0    | 17.3   | 12.3   | 10.0   | 13.2   |
| 5.1    | 3.8    | 3.1    | 2.5    | 0.7    | 3.7    |
| 8.8    | 5.6    | 8.1    | 13.9   | 0.6    | 8.5    |
| 3.0    | 0.9    | 2.3    | 0.8    | 4.0    | 1.2    |
| 2.9    | 5.5    | 2.9    | 6.1    | 5.2    | 13.7   |
| 455.2  | 424.1  | 451.6  | 560.4  | 494.1  | 604.4  |
| 22.0   | 23.6   | 21.0   | 15.3   | 14.7   | 21.9   |
| 630.4  | 564.9  | 582.2  | 653.4  | 647.1  | 779.6  |
| 2.8    | 3.8    | 7.8    | 9.8    | 1.7    | 9.9    |
| 20.0   | 20.1   | 28.8   | 28.9   | 32.9   | 28.5   |
| 25.3   | 24.7   | 19.8   | 10.5   | 15.2   | 27.6   |
| 5.9    | 7.7    | 10.8   | 10.1   | 11.5   | 7.4    |
| 87.8   | 77.6   | 76.1   | 77.4   | 112.6  | 96.3   |
| 13.4   | 17.7   | 10.9   | 6.3    | 11.1   | 9.7    |
| 100.1  | 69.2   | 87.4   | 89.9   | 77.1   | 120.4  |
| 8.1    | 4.2    | 4.4    | 3.6    | 6.1    | 3.7    |
| 25.1   | 12.6   | 24.2   | 18.2   | 25.1   | 24.0   |
| 12.5   | 8.7    | 8.8    | 8.7    | 5.6    | 7.4    |
| 861.0  | 775.1  | 931.2  | 1035.6 | 1115.4 | 1145.6 |
| 15.7   | 8.5    | 4.5    | 8.3    | 11.0   | 11.1   |
| 12.0   | 15.4   | 7.0    | 23.3   | 7.9    | 12.5   |



|       |       |       |       |       |       |
|-------|-------|-------|-------|-------|-------|
| 28.8  | 33.3  | 26.8  | 19.0  | 28.5  | 35.3  |
| 2.6   | 1.5   | 7.5   | 5.5   | 8.1   | 1.6   |
| 3.8   | 1.0   | 2.7   | 1.2   | 2.4   | 5.0   |
| 23.1  | 14.7  | 12.5  | 17.1  | 18.9  | 26.5  |
| 17.3  | 11.7  | 12.9  | 21.3  | 20.8  | 23.2  |
| 9.7   | 12.5  | 9.1   | 9.3   | 16.3  | 16.0  |
| 9.1   | 7.3   | 10.4  | 5.1   | 3.8   | 7.3   |
| 5.0   | 0.7   | 1.9   | 0.5   | 1.0   | 1.6   |
| 2.8   | 9.2   | 6.6   | 1.9   | 4.2   | 9.8   |
| 31.7  | 24.6  | 30.8  | 20.6  | 23.4  | 19.8  |
| 11.3  | 11.9  | 4.1   | 12.1  | 3.9   | 10.0  |
| 8.9   | 13.9  | 12.8  | 11.3  | 5.4   | 6.8   |
| 15.6  | 38.2  | 40.3  | 29.6  | 31.8  | 36.4  |
| 14.0  | 11.1  | 5.9   | 6.8   | 6.4   | 8.4   |
| 87.6  | 59.7  | 65.9  | 71.8  | 76.4  | 70.2  |
| 525.8 | 618.2 | 667.7 | 699.8 | 648.6 | 633.9 |
| 6.1   | 0.5   | 4.6   | 5.5   | 11.6  | 13.9  |
| 12.0  | 17.9  | 22.7  | 16.5  | 15.5  | 20.3  |
| 135.0 | 113.5 | 117.5 | 145.2 | 140.5 | 180.0 |
| 8.8   | 11.8  | 4.1   | 13.7  | 14.4  | 9.4   |
| 5.6   | 1.9   | 7.1   | 7.4   | 9.4   | 2.3   |
| 1.7   | 1.5   | 2.1   | 1.7   | 1.2   | 1.8   |
| 284.8 | 336.7 | 312.6 | 306.8 | 385.9 | 382.3 |
| 16.6  | 4.0   | 22.8  | 23.8  | 9.7   | 31.1  |
| 5.6   | 2.8   | 16.1  | 11.2  | 15.3  | 7.9   |
| 46.5  | 64.0  | 72.5  | 88.1  | 75.8  | 74.1  |
| 119.1 | 114.2 | 109.5 | 107.4 | 141.2 | 125.2 |
| 2.1   | 10.2  | 5.4   | 1.0   | 3.7   | 7.0   |
| 9.7   | 16.4  | 16.1  | 17.6  | 11.6  | 11.3  |
| 11.7  | 14.2  | 16.0  | 17.7  | 11.7  | 15.2  |
| 42.7  | 50.6  | 44.3  | 47.3  | 60.3  | 41.4  |
| 282.2 | 352.3 | 302.1 | 345.5 | 382.6 | 365.1 |
| 311.9 | 433.9 | 373.4 | 419.6 | 357.0 | 360.6 |
| 1.7   | 5.4   | 1.2   | 9.5   | 6.4   | 3.6   |
| 535.3 | 429.8 | 486.9 | 484.5 | 614.2 | 716.8 |
| 8.6   | 3.7   | 5.7   | 4.6   | 4.8   | 8.7   |
| 1.0   | 1.8   | 2.4   | 2.0   | 1.8   | 1.8   |
| 175.5 | 187.8 | 180.3 | 151.8 | 169.1 | 175.1 |
| 21.9  | 21.2  | 20.2  | 12.8  | 23.4  | 34.9  |
| 9.7   | 10.1  | 11.3  | 10.4  | 13.0  | 11.0  |
| 25.5  | 24.1  | 37.0  | 36.4  | 26.7  | 37.2  |
| 7.2   | 10.8  | 3.9   | 7.5   | 4.4   | 3.1   |
| 245.5 | 224.3 | 250.5 | 254.2 | 282.6 | 307.6 |
| 23.9  | 26.5  | 32.8  | 42.0  | 41.6  | 48.6  |
| 31.9  | 29.0  | 25.1  | 21.2  | 28.8  | 32.2  |
| 16.3  | 7.9   | 12.5  | 10.6  | 18.6  | 24.4  |
| 6.4   | 1.2   | 10.5  | 6.2   | 7.8   | 3.6   |
| 2.8   | 1.4   | 2.8   | 0.8   | 3.4   | 2.6   |
| 12.4  | 2.7   | 17.7  | 4.0   | 8.2   | 6.5   |
| 6.2   | 5.1   | 6.4   | 3.6   | 0.5   | 4.5   |
| 37.8  | 42.1  | 46.5  | 41.1  | 38.7  | 52.4  |
| 4.5   | 9.5   | 9.4   | 16.7  | 6.8   | 2.1   |
| 61.0  | 58.8  | 52.8  | 71.6  | 70.3  | 85.7  |

|       |       |       |       |       |       |
|-------|-------|-------|-------|-------|-------|
| 5.4   | 9.5   | 7.2   | 5.5   | 3.4   | 6.9   |
| 19.8  | 25.2  | 18.8  | 20.8  | 20.5  | 26.8  |
| 0.3   | 0.4   | 2.9   | 0.9   | 0.3   | 0.7   |
| 10.3  | 7.9   | 6.7   | 7.9   | 15.1  | 18.6  |
| 1.2   | 2.1   | 1.8   | 1.5   | 0.9   | 1.0   |
| 11.3  | 22.2  | 13.1  | 14.9  | 9.1   | 7.8   |
| 2.2   | 11.5  | 2.5   | 6.6   | 4.6   | 1.0   |
| 3.2   | 2.5   | 5.5   | 9.7   | 2.2   | 2.5   |
| 13.2  | 9.7   | 16.5  | 14.5  | 22.1  | 23.8  |
| 82.0  | 88.4  | 78.6  | 112.1 | 94.7  | 131.0 |
| 30.5  | 23.0  | 36.4  | 39.6  | 36.3  | 35.6  |
| 10.3  | 7.9   | 1.8   | 4.4   | 10.1  | 5.7   |
| 134.4 | 136.8 | 126.8 | 148.2 | 128.7 | 182.0 |
| 169.9 | 165.7 | 164.9 | 166.7 | 212.7 | 209.7 |
| 11.3  | 11.5  | 11.3  | 13.1  | 14.3  | 10.9  |
| 345.2 | 372.4 | 416.6 | 356.8 | 429.6 | 453.3 |
| 14.5  | 18.4  | 15.7  | 20.7  | 17.4  | 15.7  |
| 36.9  | 36.4  | 39.9  | 37.8  | 54.1  | 52.1  |
| 9.3   | 7.3   | 14.6  | 9.9   | 1.8   | 15.5  |
| 5.8   | 3.3   | 5.4   | 2.7   | 3.6   | 3.9   |
| 14.5  | 5.8   | 4.1   | 6.0   | 3.8   | 11.2  |
| 214.0 | 164.2 | 216.5 | 198.1 | 214.1 | 224.0 |
| 3.9   | 7.7   | 1.2   | 4.5   | 0.8   | 9.6   |
| 49.8  | 40.0  | 36.8  | 53.2  | 46.0  | 53.0  |
| 45.8  | 32.3  | 41.4  | 18.1  | 51.6  | 63.1  |
| 26.1  | 32.6  | 24.6  | 29.0  | 29.2  | 27.9  |
| 2.9   | 1.0   | 1.5   | 9.5   | 0.8   | 2.2   |
| 6.5   | 4.7   | 3.9   | 5.7   | 3.7   | 12.5  |
| 326.6 | 313.7 | 311.3 | 314.5 | 352.2 | 425.9 |
| 59.5  | 57.2  | 62.6  | 53.4  | 57.9  | 57.0  |
| 9.0   | 13.6  | 7.2   | 7.9   | 12.2  | 7.4   |
| 17.0  | 13.8  | 24.2  | 10.3  | 21.0  | 12.7  |
| 12.4  | 13.5  | 6.9   | 9.8   | 10.1  | 7.9   |
| 72.3  | 75.0  | 59.1  | 85.1  | 73.1  | 89.6  |
| 4.4   | 3.5   | 3.1   | 7.5   | 8.6   | 2.0   |
| 1.8   | 1.3   | 2.3   | 9.6   | 4.1   | 5.0   |
| 12.6  | 19.6  | 6.5   | 3.0   | 14.3  | 2.6   |
| 14.8  | 9.4   | 22.7  | 12.7  | 8.0   | 16.2  |
| 9.1   | 1.3   | 8.5   | 7.9   | 0.9   | 4.4   |
| 4.2   | 1.1   | 3.7   | 4.2   | 2.8   | 2.4   |
| 12.5  | 21.1  | 24.0  | 15.0  | 17.1  | 28.3  |
| 1.7   | 12.3  | 13.1  | 9.7   | 7.1   | 8.7   |
| 2.0   | 1.5   | 9.2   | 6.0   | 2.7   | 13.6  |
| 0.9   | 1.2   | 4.8   | 5.8   | 6.2   | 8.3   |
| 0.5   | 8.4   | 2.1   | 0.3   | 1.1   | 1.2   |
| 2.7   | 0.5   | 1.2   | 1.1   | 3.6   | 1.2   |
| 621.7 | 686.0 | 778.2 | 781.2 | 838.8 | 851.0 |
| 10.3  | 17.0  | 12.2  | 14.8  | 22.7  | 18.8  |
| 153.1 | 224.6 | 258.0 | 232.7 | 225.8 | 274.4 |
| 36.4  | 19.3  | 30.1  | 19.4  | 42.3  | 39.4  |
| 48.8  | 52.3  | 58.1  | 68.7  | 69.6  | 85.5  |
| 10.3  | 5.1   | 11.3  | 7.0   | 8.5   | 9.6   |
| 1.1   | 1.5   | 2.9   | 5.0   | 9.3   | 3.1   |

|       |       |       |       |       |       |
|-------|-------|-------|-------|-------|-------|
| 9.3   | 1.7   | 10.3  | 7.1   | 11.5  | 9.8   |
| 11.7  | 2.2   | 6.3   | 2.1   | 3.9   | 6.5   |
| 3.2   | 1.0   | 2.3   | 2.4   | 0.5   | 4.8   |
| 15.2  | 17.9  | 12.1  | 17.1  | 14.2  | 25.4  |
| 23.8  | 15.3  | 26.0  | 13.2  | 27.9  | 25.7  |
| 0.7   | 8.3   | 2.9   | 3.6   | 3.2   | 2.5   |
| 9.5   | 3.1   | 6.8   | 2.7   | 8.6   | 15.0  |
| 3.7   | 8.7   | 4.3   | 4.0   | 4.1   | 4.6   |
| 112.1 | 88.0  | 84.0  | 78.9  | 123.6 | 100.7 |
| 111.9 | 103.3 | 110.9 | 114.8 | 109.3 | 150.3 |
| 13.7  | 14.2  | 30.8  | 28.1  | 22.3  | 30.0  |
| 36.3  | 38.6  | 27.4  | 29.3  | 31.3  | 38.9  |
| 5.0   | 1.1   | 11.7  | 1.8   | 3.1   | 10.2  |
| 1.3   | 9.4   | 10.1  | 8.6   | 11.1  | 3.5   |
| 41.2  | 32.2  | 35.1  | 51.4  | 49.6  | 45.9  |
| 131.1 | 84.2  | 119.4 | 136.6 | 137.4 | 138.5 |
| 4.5   | 6.8   | 1.1   | 3.5   | 5.0   | 5.0   |
| 26.5  | 12.2  | 21.7  | 27.8  | 27.7  | 29.2  |
| 6.7   | 5.6   | 3.0   | 9.1   | 2.4   | 4.3   |
| 16.2  | 15.1  | 4.7   | 16.7  | 15.7  | 15.2  |
| 2.8   | 4.4   | 3.9   | 1.9   | 4.2   | 2.7   |
| 46.1  | 41.9  | 55.1  | 44.4  | 52.6  | 59.9  |
| 21.0  | 22.4  | 27.0  | 35.5  | 38.3  | 30.9  |
| 436.6 | 481.8 | 475.7 | 439.6 | 494.3 | 577.4 |
| 8.1   | 4.3   | 4.2   | 8.4   | 4.7   | 2.8   |
| 7.4   | 11.2  | 15.1  | 4.8   | 2.2   | 6.0   |
| 28.0  | 29.2  | 25.8  | 38.6  | 44.4  | 51.6  |
| 151.7 | 129.7 | 163.6 | 160.6 | 182.8 | 180.8 |
| 4.1   | 0.8   | 0.7   | 3.6   | 2.3   | 1.7   |
| 3.9   | 0.4   | 5.5   | 0.9   | 6.6   | 3.0   |
| 110.6 | 84.4  | 85.8  | 101.1 | 103.1 | 95.2  |
| 54.0  | 58.8  | 62.7  | 58.2  | 53.3  | 62.2  |
| 21.6  | 19.1  | 25.9  | 25.3  | 21.4  | 40.3  |
| 189.6 | 159.1 | 193.9 | 189.6 | 200.9 | 253.3 |
| 34.8  | 25.9  | 38.0  | 32.2  | 23.6  | 36.6  |
| 32.5  | 43.1  | 52.1  | 43.6  | 31.4  | 44.8  |
| 2.3   | 1.4   | 2.6   | 1.8   | 1.2   | 6.8   |
| 19.5  | 31.4  | 35.2  | 34.5  | 35.9  | 32.3  |
| 5.4   | 1.2   | 4.3   | 4.9   | 0.7   | 4.9   |
| 1.1   | 5.1   | 6.9   | 2.7   | 14.3  | 8.4   |
| 9.8   | 4.0   | 9.3   | 8.7   | 5.3   | 8.7   |
| 8.0   | 2.9   | 7.9   | 5.0   | 5.3   | 8.1   |
| 8.0   | 7.2   | 11.0  | 6.7   | 6.8   | 19.5  |
| 17.1  | 25.2  | 26.7  | 17.2  | 32.3  | 24.2  |
| 34.7  | 23.9  | 33.6  | 29.7  | 29.5  | 39.8  |
| 1.6   | 11.3  | 2.5   | 4.4   | 5.0   | 2.1   |
| 1.0   | 0.3   | 3.3   | 5.1   | 3.7   | 3.1   |
| 12.5  | 17.6  | 15.3  | 5.6   | 14.1  | 10.3  |
| 1.1   | 3.2   | 2.0   | 6.6   | 2.3   | 4.6   |
| 41.2  | 49.1  | 39.3  | 42.7  | 35.0  | 40.6  |
| 34.5  | 36.1  | 30.1  | 42.9  | 36.1  | 38.2  |
| 13.0  | 22.1  | 16.7  | 27.4  | 22.6  | 14.7  |
| 17.6  | 12.2  | 17.9  | 18.3  | 21.3  | 14.5  |

|       |       |       |       |       |       |
|-------|-------|-------|-------|-------|-------|
| 6.4   | 9.7   | 1.5   | 7.1   | 6.9   | 8.3   |
| 0.8   | 1.1   | 3.3   | 5.6   | 4.2   | 4.6   |
| 109.9 | 111.6 | 111.5 | 122.1 | 131.3 | 149.0 |
| 785.4 | 625.1 | 693.5 | 703.2 | 773.2 | 901.9 |
| 4.7   | 1.9   | 6.5   | 7.4   | 2.0   | 6.3   |
| 612.2 | 566.1 | 643.9 | 631.9 | 764.0 | 777.9 |
| 1.3   | 0.7   | 1.6   | 1.0   | 1.1   | 3.0   |
| 3.1   | 13.0  | 7.8   | 7.1   | 6.7   | 7.2   |
| 0.6   | 0.7   | 2.9   | 1.3   | 1.2   | 5.1   |
| 0.9   | 1.4   | 3.6   | 7.7   | 5.0   | 9.6   |
| 4.0   | 2.8   | 4.3   | 7.6   | 10.9  | 11.8  |
| 14.1  | 16.6  | 13.3  | 11.1  | 22.8  | 23.0  |
| 25.7  | 35.1  | 27.3  | 32.6  | 37.8  | 27.6  |
| 1.2   | 8.0   | 8.6   | 5.1   | 8.9   | 1.9   |
| 26.3  | 11.4  | 27.0  | 27.3  | 29.5  | 13.7  |
| 3.6   | 5.9   | 1.5   | 3.9   | 4.4   | 6.5   |
| 2.4   | 0.7   | 1.8   | 1.1   | 0.9   | 4.4   |
| 2.9   | 20.8  | 12.5  | 1.3   | 6.6   | 8.0   |
| 16.8  | 10.9  | 4.9   | 4.2   | 5.3   | 29.5  |
| 16.1  | 14.2  | 22.9  | 27.6  | 27.6  | 25.9  |
| 16.7  | 14.0  | 18.6  | 11.8  | 17.8  | 10.4  |
| 6.5   | 0.3   | 0.5   | 2.1   | 3.1   | 0.6   |
| 12.5  | 5.6   | 1.1   | 8.2   | 5.3   | 1.6   |
| 108.6 | 66.6  | 101.3 | 73.6  | 102.9 | 98.1  |
| 13.0  | 10.4  | 12.5  | 3.6   | 4.2   | 3.0   |
| 22.3  | 15.9  | 9.8   | 16.4  | 23.4  | 24.9  |
| 3.6   | 1.7   | 1.9   | 8.3   | 6.8   | 6.7   |
| 2.6   | 2.7   | 6.6   | 3.6   | 3.8   | 2.3   |
| 8.4   | 15.7  | 16.3  | 9.9   | 16.7  | 20.3  |
| 1.9   | 6.0   | 2.6   | 0.4   | 6.3   | 6.9   |
| 3.8   | 5.1   | 1.3   | 1.7   | 5.3   | 5.3   |
| 1.4   | 1.6   | 1.6   | 3.5   | 3.8   | 1.8   |
| 3.8   | 10.3  | 8.7   | 1.9   | 7.1   | 5.2   |
| 1.9   | 3.9   | 0.9   | 1.3   | 1.3   | 1.0   |
| 36.2  | 23.5  | 19.4  | 25.8  | 35.3  | 38.7  |
| 10.0  | 3.1   | 6.4   | 7.0   | 10.2  | 14.1  |
| 26.3  | 19.4  | 23.1  | 21.1  | 9.8   | 20.6  |
| 5.0   | 1.5   | 11.4  | 10.8  | 10.7  | 17.2  |
| 1.5   | 6.9   | 8.9   | 1.5   | 7.7   | 5.7   |
| 3.0   | 0.4   | 0.7   | 5.0   | 1.3   | 3.9   |
| 16.0  | 18.9  | 30.2  | 19.9  | 24.3  | 29.3  |
| 334.9 | 347.9 | 378.9 | 383.9 | 404.9 | 450.9 |
| 14.0  | 14.2  | 4.8   | 22.0  | 14.0  | 19.5  |
| 9.0   | 11.1  | 14.2  | 16.7  | 17.3  | 16.1  |
| 30.1  | 44.5  | 37.4  | 43.5  | 35.4  | 54.9  |
| 2.2   | 0.5   | 4.9   | 3.8   | 1.0   | 2.6   |
| 51.8  | 52.6  | 43.9  | 47.5  | 54.9  | 58.8  |
| 2.2   | 4.8   | 2.6   | 1.6   | 0.6   | 1.8   |
| 5.7   | 5.9   | 3.3   | 5.4   | 5.1   | 2.5   |
| 6.9   | 1.2   | 2.8   | 8.2   | 1.7   | 5.2   |
| 3.8   | 2.9   | 2.7   | 2.6   | 3.9   | 4.1   |
| 8.1   | 4.7   | 1.9   | 2.6   | 7.6   | 3.5   |
| 4.3   | 6.1   | 4.8   | 3.3   | 6.1   | 10.2  |

|        |        |        |        |        |        |
|--------|--------|--------|--------|--------|--------|
| 6.1    | 1.5    | 8.2    | 4.2    | 0.6    | 10.4   |
| 3.6    | 1.7    | 7.3    | 2.7    | 8.4    | 2.4    |
| 10.3   | 9.1    | 13.3   | 8.8    | 13.7   | 14.7   |
| 2.8    | 17.3   | 20.6   | 12.7   | 13.4   | 14.9   |
| 11.7   | 8.9    | 3.7    | 10.5   | 21.6   | 26.4   |
| 172.4  | 137.6  | 159.5  | 150.7  | 176.9  | 179.0  |
| 24.5   | 45.5   | 43.9   | 39.0   | 51.7   | 56.8   |
| 19.5   | 16.9   | 17.5   | 19.9   | 22.6   | 16.2   |
| 18.0   | 17.3   | 25.5   | 18.4   | 22.4   | 19.3   |
| 12.1   | 14.1   | 20.1   | 15.9   | 16.3   | 23.8   |
| 3.3    | 2.4    | 4.8    | 4.6    | 2.8    | 4.5    |
| 959.6  | 924.1  | 1158.7 | 1153.3 | 1248.2 | 1302.8 |
| 1886.7 | 1818.2 | 2098.6 | 2033.1 | 2088.4 | 2319.3 |
| 14.4   | 13.5   | 21.9   | 20.5   | 29.0   | 26.6   |
| 494.6  | 446.5  | 498.8  | 452.7  | 560.5  | 539.2  |
| 16.8   | 14.3   | 11.5   | 19.2   | 16.3   | 15.8   |
| 4.6    | 12.6   | 6.4    | 4.5    | 1.5    | 14.8   |
| 480.5  | 361.8  | 440.5  | 449.8  | 570.2  | 533.4  |
| 8.0    | 4.7    | 12.4   | 11.3   | 13.2   | 6.9    |
| 176.9  | 209.5  | 189.1  | 178.8  | 188.0  | 207.5  |
| 56.6   | 29.9   | 48.9   | 57.0   | 53.4   | 58.2   |
| 2.8    | 3.5    | 3.5    | 3.7    | 4.7    | 4.2    |
| 14.0   | 5.5    | 21.7   | 10.2   | 19.7   | 23.0   |
| 0.9    | 5.3    | 3.4    | 1.8    | 1.3    | 0.6    |
| 2.7    | 10.0   | 1.6    | 2.5    | 4.0    | 2.2    |
| 125.5  | 64.6   | 67.1   | 73.7   | 123.3  | 132.4  |
| 31.0   | 31.7   | 40.7   | 38.7   | 36.0   | 40.1   |
| 250.9  | 230.0  | 279.2  | 280.2  | 327.2  | 353.9  |
| 475.7  | 565.1  | 537.8  | 565.2  | 539.3  | 591.8  |
| 171.2  | 195.2  | 161.2  | 195.8  | 206.3  | 224.6  |
| 8.7    | 3.6    | 9.0    | 6.9    | 9.3    | 6.7    |
| 20.7   | 47.2   | 46.7   | 46.6   | 44.5   | 41.2   |
| 138.8  | 153.5  | 142.2  | 156.2  | 159.0  | 169.2  |
| 15.9   | 8.9    | 13.5   | 17.1   | 20.5   | 18.5   |
| 2.0    | 4.7    | 3.0    | 3.7    | 3.1    | 2.1    |
| 489.9  | 433.4  | 450.6  | 446.7  | 487.0  | 528.9  |
| 3.5    | 3.6    | 8.4    | 13.9   | 2.2    | 6.0    |
| 388.8  | 344.1  | 353.6  | 396.5  | 383.9  | 442.9  |
| 10.5   | 9.1    | 6.1    | 3.9    | 1.2    | 5.1    |
| 94.0   | 97.3   | 77.6   | 72.7   | 75.6   | 104.1  |
| 460.8  | 493.9  | 505.3  | 516.0  | 482.6  | 631.3  |
| 37.6   | 48.0   | 42.1   | 45.2   | 58.7   | 59.1   |
| 2.0    | 3.2    | 6.4    | 2.3    | 1.8    | 1.7    |
| 410.1  | 396.8  | 436.8  | 434.6  | 440.7  | 511.9  |
| 43.7   | 38.2   | 37.1   | 33.0   | 54.2   | 48.8   |
| 1.0    | 0.6    | 2.7    | 2.0    | 1.5    | 1.7    |
| 19.2   | 16.3   | 15.5   | 18.7   | 16.5   | 31.7   |
| 259.1  | 248.8  | 302.9  | 295.3  | 311.1  | 345.9  |
| 6.4    | 8.5    | 16.5   | 7.2    | 7.1    | 11.3   |
| 635.2  | 574.3  | 677.8  | 736.2  | 732.7  | 766.7  |
| 0.7    | 1.4    | 1.7    | 0.4    | 1.0    | 0.7    |
| 1.7    | 12.8   | 10.5   | 9.6    | 9.6    | 9.5    |
| 80.8   | 72.1   | 60.6   | 65.3   | 83.6   | 81.1   |

|        |        |        |        |        |        |
|--------|--------|--------|--------|--------|--------|
| 30.2   | 23.4   | 38.3   | 37.5   | 46.4   | 44.2   |
| 406.6  | 493.3  | 538.4  | 555.9  | 618.4  | 588.6  |
| 34.5   | 18.0   | 23.3   | 23.3   | 25.8   | 38.4   |
| 309.7  | 287.3  | 421.2  | 397.5  | 465.2  | 498.8  |
| 14.9   | 13.4   | 8.3    | 11.6   | 10.2   | 14.3   |
| 266.2  | 281.6  | 305.3  | 298.6  | 334.1  | 318.0  |
| 8.8    | 25.1   | 16.9   | 13.1   | 17.3   | 23.0   |
| 181.0  | 162.6  | 143.4  | 167.9  | 189.8  | 193.3  |
| 6.8    | 9.9    | 4.7    | 14.5   | 6.6    | 6.2    |
| 45.7   | 40.2   | 41.0   | 41.4   | 63.0   | 49.7   |
| 0.7    | 2.2    | 4.5    | 5.6    | 2.3    | 4.2    |
| 16.9   | 14.4   | 15.5   | 7.4    | 18.0   | 17.9   |
| 42.6   | 46.2   | 60.1   | 35.4   | 62.2   | 62.5   |
| 8.3    | 4.3    | 17.5   | 4.6    | 15.2   | 11.6   |
| 3.8    | 8.9    | 1.6    | 1.8    | 1.8    | 5.6    |
| 305.9  | 274.0  | 310.6  | 301.1  | 291.3  | 384.6  |
| 12.0   | 35.4   | 8.2    | 17.4   | 24.1   | 24.5   |
| 140.8  | 151.0  | 164.1  | 155.6  | 172.6  | 219.5  |
| 10.2   | 7.6    | 12.6   | 11.9   | 9.5    | 9.5    |
| 1.0    | 1.0    | 1.3    | 2.1    | 2.0    | 2.3    |
| 2.3    | 0.7    | 1.3    | 1.8    | 3.0    | 2.3    |
| 8.5    | 2.5    | 4.0    | 5.9    | 1.4    | 10.8   |
| 12.7   | 19.9   | 24.9   | 17.4   | 13.2   | 23.0   |
| 14.9   | 19.1   | 13.4   | 13.6   | 13.6   | 19.8   |
| 23.2   | 31.6   | 17.6   | 18.7   | 23.3   | 20.9   |
| 5.1    | 8.9    | 12.3   | 21.3   | 10.9   | 7.8    |
| 192.0  | 185.9  | 227.9  | 233.2  | 226.5  | 265.7  |
| 1.8    | 2.3    | 1.7    | 0.6    | 5.1    | 3.6    |
| 69.8   | 59.8   | 56.9   | 63.2   | 80.8   | 81.3   |
| 12.3   | 14.7   | 13.4   | 13.8   | 22.3   | 14.9   |
| 5.5    | 3.3    | 3.9    | 1.3    | 2.6    | 5.9    |
| 3.8    | 0.3    | 2.1    | 3.2    | 4.4    | 3.3    |
| 105.8  | 107.7  | 112.2  | 89.5   | 116.9  | 107.3  |
| 34.0   | 43.1   | 46.0   | 28.5   | 42.9   | 55.9   |
| 46.6   | 29.0   | 42.3   | 47.8   | 32.4   | 56.9   |
| 66.1   | 56.0   | 63.2   | 61.3   | 75.7   | 80.2   |
| 2.3    | 13.6   | 7.0    | 3.7    | 5.8    | 6.0    |
| 8.2    | 7.2    | 7.5    | 4.9    | 10.0   | 14.0   |
| 11.4   | 11.9   | 12.1   | 7.5    | 9.5    | 7.5    |
| 19.1   | 38.9   | 18.5   | 21.9   | 12.8   | 19.4   |
| 736.9  | 698.5  | 675.7  | 724.0  | 794.6  | 886.5  |
| 473.7  | 394.9  | 461.7  | 476.0  | 551.7  | 514.3  |
| 14.2   | 11.8   | 20.4   | 4.6    | 5.7    | 12.8   |
| 36.7   | 27.3   | 48.9   | 45.4   | 39.6   | 43.6   |
| 4.1    | 8.2    | 9.8    | 8.7    | 10.4   | 2.5    |
| 3.4    | 3.8    | 3.8    | 2.8    | 2.0    | 7.0    |
| 9.7    | 33.1   | 16.3   | 27.6   | 15.0   | 10.8   |
| 37.5   | 28.7   | 45.1   | 33.3   | 41.8   | 46.5   |
| 1870.0 | 1798.0 | 1741.8 | 1820.8 | 1944.6 | 2372.0 |
| 67.8   | 67.8   | 73.9   | 90.5   | 106.3  | 97.9   |
| 6.8    | 10.7   | 11.2   | 18.0   | 3.1    | 17.9   |
| 17.1   | 22.8   | 22.8   | 18.8   | 15.4   | 17.9   |
| 0.9    | 0.9    | 5.8    | 0.5    | 1.2    | 5.3    |

|        |        |        |        |        |        |
|--------|--------|--------|--------|--------|--------|
| 188.7  | 159.6  | 172.8  | 178.0  | 228.3  | 225.3  |
| 10.9   | 16.9   | 8.0    | 9.9    | 15.7   | 17.2   |
| 7.9    | 7.7    | 6.6    | 9.2    | 4.1    | 2.6    |
| 30.3   | 13.5   | 24.3   | 24.5   | 38.4   | 22.5   |
| 45.4   | 69.4   | 57.5   | 46.2   | 49.5   | 51.0   |
| 3.2    | 5.7    | 5.0    | 10.1   | 6.5    | 8.5    |
| 6.7    | 11.0   | 7.9    | 3.7    | 7.0    | 12.6   |
| 391.2  | 431.1  | 411.8  | 456.0  | 508.9  | 503.2  |
| 0.3    | 11.9   | 4.3    | 3.5    | 3.5    | 7.1    |
| 306.8  | 329.1  | 310.8  | 346.8  | 366.3  | 367.1  |
| 15.2   | 2.5    | 9.5    | 8.2    | 8.9    | 2.3    |
| 8.8    | 2.5    | 9.9    | 9.0    | 6.0    | 3.4    |
| 13.2   | 22.4   | 8.3    | 16.0   | 9.1    | 6.7    |
| 14.6   | 16.1   | 19.5   | 19.5   | 15.7   | 31.6   |
| 2.2    | 1.8    | 6.6    | 2.4    | 3.3    | 2.7    |
| 4.3    | 7.0    | 7.6    | 3.5    | 4.1    | 2.4    |
| 1.2    | 2.9    | 1.0    | 0.5    | 0.7    | 4.7    |
| 6.0    | 10.6   | 14.8   | 8.3    | 4.2    | 7.0    |
| 2.3    | 0.4    | 3.6    | 2.0    | 2.5    | 3.3    |
| 1.7    | 3.0    | 4.5    | 8.0    | 2.8    | 2.7    |
| 7.1    | 14.2   | 13.1   | 2.8    | 13.1   | 2.1    |
| 3.4    | 0.4    | 6.7    | 4.7    | 6.4    | 10.5   |
| 15.4   | 2.2    | 20.8   | 13.7   | 18.4   | 13.6   |
| 6.8    | 6.9    | 9.4    | 7.4    | 3.6    | 12.2   |
| 11.9   | 3.6    | 16.2   | 7.4    | 7.1    | 7.3    |
| 13.8   | 9.2    | 8.6    | 7.8    | 9.0    | 6.7    |
| 7.1    | 7.6    | 1.5    | 13.5   | 6.0    | 6.3    |
| 365.7  | 302.4  | 368.0  | 396.9  | 459.5  | 433.7  |
| 14.7   | 17.4   | 21.0   | 21.0   | 19.0   | 20.2   |
| 2.8    | 4.0    | 10.1   | 1.2    | 1.5    | 1.2    |
| 1.1    | 1.7    | 1.9    | 1.3    | 2.1    | 3.2    |
| 13.5   | 10.2   | 16.0   | 12.9   | 18.7   | 18.9   |
| 2.2    | 2.0    | 6.3    | 7.9    | 4.5    | 2.7    |
| 9.3    | 21.4   | 7.5    | 20.8   | 14.6   | 12.8   |
| 2.4    | 11.9   | 6.7    | 24.7   | 22.6   | 15.8   |
| 88.2   | 70.1   | 90.2   | 85.7   | 106.0  | 108.5  |
| 29.1   | 37.8   | 30.7   | 45.4   | 37.9   | 45.2   |
| 14.4   | 26.2   | 30.0   | 18.2   | 26.8   | 37.0   |
| 5458.7 | 5083.0 | 5096.6 | 5525.6 | 5744.5 | 6452.3 |
| 0.8    | 2.9    | 5.0    | 0.9    | 1.1    | 2.9    |
| 18.8   | 20.7   | 19.5   | 13.2   | 14.9   | 13.1   |
| 17.4   | 19.7   | 7.1    | 6.8    | 11.2   | 24.1   |
| 4.5    | 2.8    | 3.1    | 2.8    | 5.2    | 6.6    |
| 10.6   | 10.7   | 2.4    | 4.1    | 15.5   | 2.5    |
| 11.5   | 14.6   | 16.6   | 12.8   | 12.9   | 12.1   |
| 1.6    | 1.4    | 5.0    | 1.7    | 3.9    | 4.7    |
| 5.0    | 1.6    | 8.4    | 4.1    | 4.1    | 4.4    |
| 225.2  | 231.8  | 274.8  | 310.6  | 303.9  | 262.0  |
| 45.8   | 31.9   | 41.3   | 47.9   | 39.3   | 59.1   |
| 39.8   | 35.0   | 46.1   | 50.4   | 49.8   | 39.9   |
| 9.2    | 3.0    | 3.5    | 3.8    | 4.3    | 10.8   |
| 341.1  | 295.1  | 443.6  | 358.7  | 436.7  | 447.3  |
| 5.0    | 1.2    | 2.9    | 7.0    | 9.2    | 5.6    |

|       |       |       |       |       |       |
|-------|-------|-------|-------|-------|-------|
| 4.6   | 9.1   | 9.8   | 12.3  | 12.3  | 8.5   |
| 3.1   | 3.5   | 2.1   | 2.4   | 5.4   | 11.0  |
| 5.9   | 2.3   | 9.3   | 2.7   | 6.4   | 12.1  |
| 5.8   | 6.0   | 6.7   | 21.5  | 8.0   | 13.0  |
| 21.7  | 14.7  | 26.6  | 25.8  | 30.5  | 26.2  |
| 6.3   | 3.4   | 3.8   | 9.8   | 12.2  | 7.5   |
| 5.3   | 1.5   | 4.8   | 5.1   | 2.9   | 12.7  |
| 31.9  | 24.9  | 31.1  | 34.9  | 40.2  | 42.1  |
| 1.0   | 4.7   | 3.6   | 3.8   | 7.0   | 0.8   |
| 31.6  | 16.4  | 29.0  | 35.5  | 27.6  | 38.0  |
| 24.3  | 31.5  | 29.4  | 23.9  | 17.1  | 27.7  |
| 32.0  | 41.6  | 40.2  | 34.8  | 34.5  | 26.2  |
| 2.9   | 8.4   | 8.5   | 1.9   | 5.9   | 12.6  |
| 6.2   | 0.9   | 5.7   | 12.3  | 5.6   | 5.8   |
| 11.7  | 13.1  | 18.7  | 17.3  | 17.0  | 18.7  |
| 1.1   | 5.1   | 8.6   | 3.8   | 9.2   | 4.2   |
| 23.9  | 23.6  | 18.0  | 28.2  | 28.3  | 21.3  |
| 26.8  | 15.6  | 25.1  | 27.1  | 17.6  | 26.2  |
| 38.0  | 35.5  | 31.3  | 27.0  | 30.7  | 18.6  |
| 4.0   | 4.3   | 2.9   | 3.9   | 3.1   | 3.4   |
| 9.8   | 10.7  | 24.6  | 15.7  | 13.6  | 10.6  |
| 13.8  | 17.7  | 7.3   | 16.9  | 18.1  | 8.0   |
| 14.2  | 14.9  | 13.7  | 8.4   | 13.9  | 10.3  |
| 14.1  | 5.5   | 5.6   | 10.4  | 9.6   | 12.2  |
| 14.9  | 18.6  | 6.4   | 2.0   | 10.0  | 14.8  |
| 18.4  | 2.4   | 17.8  | 9.8   | 19.5  | 15.6  |
| 13.1  | 28.9  | 10.0  | 14.4  | 15.4  | 10.5  |
| 27.1  | 33.6  | 27.1  | 32.2  | 14.6  | 7.8   |
| 6.3   | 6.5   | 12.7  | 7.6   | 11.8  | 23.4  |
| 18.8  | 37.0  | 22.2  | 35.4  | 29.6  | 38.2  |
| 11.0  | 19.4  | 12.7  | 16.7  | 12.5  | 12.2  |
| 3.3   | 2.2   | 2.2   | 7.7   | 9.4   | 6.1   |
| 3.1   | 1.2   | 1.6   | 1.0   | 2.1   | 0.9   |
| 3.7   | 0.5   | 1.2   | 1.1   | 3.9   | 7.7   |
| 0.6   | 1.9   | 1.9   | 2.4   | 2.7   | 4.1   |
| 76.5  | 68.0  | 63.0  | 99.4  | 104.9 | 79.3  |
| 5.1   | 6.4   | 5.6   | 4.0   | 4.0   | 7.7   |
| 15.3  | 18.0  | 12.1  | 15.8  | 19.0  | 26.2  |
| 13.3  | 3.7   | 21.6  | 11.7  | 20.1  | 10.9  |
| 8.9   | 17.0  | 12.1  | 9.6   | 5.5   | 6.6   |
| 5.4   | 9.9   | 1.3   | 4.1   | 7.4   | 10.2  |
| 1.7   | 1.2   | 0.4   | 1.6   | 3.8   | 4.5   |
| 1.5   | 1.1   | 1.7   | 6.8   | 3.2   | 4.7   |
| 158.7 | 138.5 | 157.7 | 152.8 | 177.6 | 185.8 |
| 7.9   | 7.3   | 14.7  | 7.5   | 7.8   | 7.9   |
| 14.3  | 33.8  | 25.8  | 20.2  | 21.1  | 28.8  |
| 613.7 | 553.0 | 589.0 | 594.3 | 704.4 | 773.5 |
| 1.9   | 9.9   | 4.5   | 2.3   | 7.0   | 8.2   |
| 49.1  | 46.3  | 50.1  | 53.3  | 47.7  | 75.4  |
| 33.6  | 16.0  | 28.8  | 26.1  | 23.8  | 36.4  |
| 19.4  | 31.7  | 26.6  | 23.2  | 25.4  | 28.2  |
| 8.6   | 13.5  | 10.6  | 4.3   | 9.6   | 8.5   |
| 7.1   | 23.0  | 8.1   | 10.4  | 5.5   | 14.6  |



|       |       |       |       |       |       |
|-------|-------|-------|-------|-------|-------|
| 138.8 | 138.5 | 161.7 | 133.1 | 177.1 | 209.7 |
| 5.6   | 8.0   | 7.0   | 3.8   | 3.6   | 1.5   |
| 6.1   | 2.0   | 6.3   | 5.6   | 3.2   | 10.1  |
| 1.5   | 0.5   | 7.1   | 2.9   | 2.6   | 1.3   |
| 33.8  | 24.7  | 32.7  | 30.7  | 29.2  | 22.1  |
| 8.1   | 9.8   | 5.8   | 12.5  | 10.5  | 10.7  |
| 18.5  | 13.4  | 9.8   | 14.2  | 18.5  | 21.5  |
| 7.0   | 0.9   | 6.3   | 4.7   | 4.8   | 1.9   |
| 13.4  | 12.6  | 14.4  | 17.5  | 16.2  | 15.8  |
| 5.8   | 2.9   | 6.8   | 7.9   | 5.0   | 9.0   |
| 2.0   | 11.4  | 5.1   | 2.6   | 6.9   | 4.1   |
| 7.8   | 12.3  | 8.8   | 12.7  | 5.1   | 8.4   |
| 141.9 | 155.2 | 165.3 | 155.1 | 178.2 | 170.2 |
| 1.8   | 1.2   | 7.0   | 3.0   | 4.1   | 8.1   |
| 657.5 | 592.0 | 727.5 | 751.4 | 776.8 | 792.4 |
| 2.5   | 5.3   | 3.4   | 4.1   | 2.5   | 6.4   |
| 20.3  | 6.4   | 10.5  | 13.7  | 19.5  | 15.4  |
| 5.6   | 12.8  | 10.9  | 13.8  | 6.5   | 7.9   |
| 38.5  | 45.8  | 56.6  | 52.5  | 58.5  | 59.5  |
| 59.9  | 58.6  | 62.1  | 71.5  | 69.4  | 83.7  |
| 4.0   | 3.7   | 12.1  | 1.4   | 9.4   | 1.9   |
| 5.3   | 2.5   | 1.4   | 4.7   | 1.1   | 5.4   |
| 513.5 | 443.5 | 692.2 | 654.1 | 705.1 | 743.9 |
| 15.8  | 1.9   | 9.0   | 6.9   | 9.5   | 13.9  |
| 8.4   | 4.4   | 7.0   | 3.3   | 4.1   | 1.2   |
| 4.3   | 4.7   | 4.6   | 11.3  | 7.5   | 9.9   |
| 0.7   | 0.6   | 0.7   | 2.9   | 5.3   | 5.1   |
| 66.5  | 62.4  | 69.9  | 57.5  | 81.3  | 75.6  |
| 17.1  | 18.9  | 20.5  | 19.4  | 20.0  | 19.3  |
| 7.3   | 15.2  | 19.0  | 15.1  | 15.8  | 15.6  |
| 19.2  | 20.1  | 23.1  | 15.0  | 21.3  | 31.1  |
| 8.8   | 5.8   | 10.9  | 7.2   | 8.5   | 7.2   |
| 11.9  | 24.1  | 24.4  | 25.7  | 36.8  | 26.8  |
| 3.8   | 4.7   | 0.9   | 7.1   | 2.3   | 3.1   |
| 0.9   | 1.6   | 2.6   | 1.3   | 0.7   | 3.5   |
| 146.0 | 125.8 | 172.7 | 140.0 | 189.2 | 172.5 |
| 4.1   | 10.4  | 11.7  | 19.9  | 6.8   | 8.8   |
| 2.1   | 3.3   | 5.5   | 3.1   | 1.7   | 1.6   |
| 0.7   | 4.4   | 4.9   | 0.3   | 1.5   | 7.5   |
| 24.6  | 36.8  | 29.2  | 32.1  | 25.8  | 34.1  |
| 138.9 | 88.8  | 120.0 | 97.1  | 118.8 | 137.3 |
| 7.3   | 0.7   | 4.5   | 11.3  | 9.4   | 5.5   |
| 82.7  | 136.3 | 77.6  | 121.4 | 87.5  | 119.1 |
| 1.6   | 2.6   | 2.1   | 2.3   | 1.5   | 2.2   |
| 1.1   | 16.2  | 9.8   | 11.0  | 7.8   | 10.3  |
| 537.5 | 434.7 | 536.2 | 521.3 | 624.9 | 648.1 |
| 3.4   | 0.8   | 0.8   | 0.6   | 3.1   | 1.0   |
| 30.1  | 20.1  | 34.4  | 35.8  | 40.9  | 22.3  |
| 4.3   | 2.3   | 11.0  | 2.4   | 4.1   | 8.8   |
| 0.9   | 0.7   | 1.5   | 3.0   | 1.2   | 3.9   |
| 3.9   | 3.1   | 11.4  | 6.6   | 9.1   | 12.2  |
| 136.2 | 115.7 | 135.2 | 121.8 | 152.7 | 172.5 |
| 1.5   | 1.5   | 5.8   | 3.6   | 3.2   | 1.9   |

|        |        |        |        |        |        |
|--------|--------|--------|--------|--------|--------|
| 7.5    | 4.7    | 3.1    | 4.1    | 5.3    | 4.7    |
| 163.0  | 163.1  | 223.0  | 189.0  | 232.7  | 189.7  |
| 27.3   | 35.3   | 34.6   | 27.8   | 24.3   | 47.3   |
| 1042.6 | 1086.6 | 1113.3 | 1219.3 | 1156.7 | 1243.4 |
| 96.3   | 68.2   | 102.0  | 110.9  | 113.3  | 125.8  |
| 2.9    | 2.3    | 3.9    | 2.5    | 2.7    | 2.6    |
| 16.8   | 24.0   | 20.0   | 18.0   | 19.0   | 28.8   |
| 6178.9 | 5542.0 | 5981.9 | 6530.1 | 6970.4 | 7199.7 |
| 8.5    | 15.8   | 10.9   | 9.9    | 20.0   | 10.7   |
| 118.1  | 107.0  | 154.8  | 151.7  | 174.2  | 153.9  |
| 12.8   | 3.0    | 2.8    | 5.4    | 5.3    | 6.1    |
| 8.2    | 10.2   | 7.0    | 12.9   | 11.3   | 2.4    |
| 8.3    | 8.2    | 8.8    | 4.3    | 3.9    | 2.7    |
| 3.1    | 3.6    | 8.8    | 5.3    | 6.3    | 7.9    |
| 12.0   | 20.3   | 19.8   | 5.1    | 1.5    | 6.6    |
| 3.7    | 3.0    | 1.7    | 3.3    | 1.3    | 2.2    |
| 1.2    | 4.6    | 3.1    | 1.8    | 3.4    | 1.6    |
| 2.6    | 7.9    | 0.3    | 0.9    | 4.7    | 3.0    |
| 9301.7 | 8779.7 | 9196.4 | 9073.0 | 9789.8 | 9618.1 |
| 2.5    | 1.3    | 1.4    | 1.1    | 1.5    | 2.4    |
| 1.6    | 0.9    | 4.0    | 2.3    | 1.3    | 0.9    |
| 22.3   | 18.1   | 11.8   | 13.9   | 17.4   | 30.9   |
| 3.3    | 1.9    | 4.0    | 10.0   | 3.6    | 1.8    |
| 34.5   | 19.4   | 30.1   | 19.8   | 28.3   | 39.7   |
| 3.3    | 10.6   | 3.4    | 4.3    | 4.9    | 6.4    |
| 15.5   | 14.4   | 13.6   | 6.8    | 9.5    | 13.6   |
| 4.8    | 20.3   | 10.2   | 16.4   | 18.2   | 2.7    |
| 10.4   | 16.3   | 2.6    | 6.5    | 3.4    | 6.4    |
| 9.2    | 19.4   | 19.0   | 13.8   | 5.7    | 2.8    |
| 7.3    | 2.9    | 9.5    | 9.3    | 7.0    | 4.3    |
| 8.1    | 7.0    | 9.0    | 21.5   | 13.1   | 28.0   |
| 5.3    | 10.2   | 10.7   | 6.8    | 4.3    | 4.1    |
| 5.6    | 13.4   | 21.5   | 18.5   | 13.4   | 15.3   |
| 257.3  | 240.9  | 229.9  | 271.5  | 272.9  | 277.8  |
| 12.4   | 26.1   | 11.6   | 21.1   | 13.7   | 13.8   |
| 62.2   | 51.8   | 56.9   | 64.1   | 51.1   | 75.3   |
| 0.8    | 0.9    | 0.9    | 0.7    | 1.1    | 6.0    |
| 192.9  | 149.3  | 223.0  | 216.3  | 231.8  | 224.9  |
| 260.2  | 240.2  | 272.8  | 273.0  | 276.6  | 351.7  |
| 285.5  | 225.3  | 293.5  | 258.3  | 362.7  | 418.1  |
| 15.1   | 13.5   | 14.9   | 13.8   | 16.5   | 12.3   |
| 7.7    | 5.9    | 1.7    | 6.0    | 6.9    | 2.7    |
| 5.1    | 6.9    | 13.2   | 9.2    | 5.3    | 15.0   |
| 1.7    | 1.5    | 2.3    | 2.3    | 1.7    | 1.3    |
| 18.3   | 20.4   | 19.6   | 18.1   | 22.3   | 28.2   |
| 84.5   | 107.9  | 109.2  | 87.1   | 103.3  | 132.6  |
| 49.6   | 29.5   | 42.3   | 43.4   | 52.9   | 46.2   |
| 17.2   | 14.1   | 17.8   | 9.5    | 15.3   | 20.3   |
| 4.9    | 5.5    | 7.5    | 2.6    | 11.9   | 10.8   |
| 216.0  | 235.1  | 241.4  | 235.5  | 268.3  | 298.3  |
| 11.6   | 12.7   | 16.3   | 7.6    | 10.3   | 13.2   |
| 3.4    | 2.8    | 3.4    | 2.2    | 2.6    | 2.8    |
| 112.1  | 80.1   | 112.6  | 96.5   | 130.6  | 148.5  |

|        |        |        |        |        |        |
|--------|--------|--------|--------|--------|--------|
| 0.6    | 2.1    | 1.7    | 0.7    | 2.3    | 2.0    |
| 21.5   | 18.8   | 15.6   | 13.8   | 16.3   | 18.1   |
| 1.1    | 1.5    | 1.6    | 0.7    | 1.1    | 1.0    |
| 18.8   | 2.3    | 2.1    | 2.3    | 9.8    | 13.5   |
| 1.9    | 12.3   | 1.1    | 0.8    | 9.5    | 5.3    |
| 1.3    | 1.7    | 1.4    | 1.2    | 1.7    | 1.8    |
| 27.1   | 12.2   | 29.1   | 13.3   | 16.2   | 22.7   |
| 13.7   | 27.7   | 14.2   | 15.2   | 14.5   | 20.2   |
| 17.4   | 11.3   | 16.3   | 13.6   | 26.2   | 21.0   |
| 3.8    | 1.5    | 3.7    | 2.2    | 1.9    | 1.3    |
| 104.1  | 140.0  | 131.4  | 128.5  | 127.7  | 146.8  |
| 23.6   | 15.3   | 27.5   | 19.0   | 20.7   | 30.4   |
| 8.2    | 2.1    | 9.0    | 7.0    | 5.8    | 4.2    |
| 2.0    | 2.5    | 1.3    | 2.4    | 3.2    | 7.7    |
| 16.8   | 18.1   | 20.9   | 19.0   | 22.6   | 19.3   |
| 9.6    | 1.1    | 9.6    | 6.8    | 17.6   | 17.6   |
| 7.0    | 1.4    | 3.1    | 8.7    | 6.9    | 6.4    |
| 1.3    | 2.2    | 1.1    | 1.0    | 0.9    | 1.6    |
| 0.8    | 1.2    | 3.2    | 1.9    | 3.2    | 0.6    |
| 100.0  | 77.9   | 93.2   | 98.1   | 134.0  | 120.9  |
| 12.4   | 1.8    | 4.3    | 17.0   | 4.3    | 3.9    |
| 16.6   | 34.4   | 6.9    | 12.0   | 14.2   | 8.1    |
| 8.5    | 15.0   | 7.1    | 11.7   | 15.1   | 11.1   |
| 3.8    | 3.4    | 7.9    | 20.5   | 6.9    | 8.1    |
| 14.0   | 11.2   | 19.6   | 20.5   | 13.5   | 18.5   |
| 2.4    | 9.2    | 17.0   | 4.1    | 9.4    | 1.8    |
| 2.9    | 1.8    | 3.4    | 2.1    | 2.0    | 2.0    |
| 18.6   | 17.0   | 16.8   | 15.2   | 20.7   | 27.2   |
| 102.9  | 85.7   | 80.8   | 92.7   | 113.6  | 117.1  |
| 8.9    | 1.5    | 3.7    | 3.1    | 1.9    | 1.7    |
| 125.2  | 134.2  | 113.0  | 119.8  | 129.2  | 156.3  |
| 20.9   | 32.9   | 19.4   | 12.4   | 24.3   | 25.7   |
| 5.5    | 0.8    | 1.0    | 4.8    | 0.7    | 1.7    |
| 201.9  | 166.9  | 150.6  | 196.7  | 206.9  | 182.2  |
| 1293.2 | 1214.6 | 1330.9 | 1402.2 | 1474.1 | 1464.1 |
| 149.9  | 152.5  | 134.9  | 152.5  | 158.3  | 189.6  |
| 25.3   | 17.4   | 18.8   | 15.9   | 18.6   | 17.7   |
| 261.4  | 251.7  | 262.9  | 363.4  | 298.8  | 355.6  |
| 73.1   | 87.7   | 64.3   | 56.9   | 73.1   | 76.1   |
| 246.6  | 242.3  | 212.1  | 326.5  | 264.7  | 331.7  |
| 165.6  | 133.7  | 173.3  | 182.0  | 169.3  | 183.2  |
| 20.9   | 12.9   | 19.1   | 18.4   | 15.2   | 18.9   |
| 20.3   | 19.1   | 17.8   | 18.6   | 7.6    | 13.0   |
| 687.3  | 566.9  | 641.8  | 703.6  | 779.0  | 756.9  |
| 38.8   | 52.9   | 30.5   | 12.5   | 42.4   | 40.2   |
| 20.1   | 26.8   | 26.8   | 23.3   | 32.4   | 27.9   |
| 97.3   | 84.2   | 104.3  | 94.1   | 107.1  | 114.8  |
| 2.8    | 1.6    | 6.4    | 5.4    | 2.9    | 4.8    |
| 3.4    | 20.1   | 20.6   | 2.8    | 6.9    | 11.7   |
| 11.8   | 35.9   | 5.4    | 17.3   | 13.8   | 10.8   |
| 66.6   | 50.5   | 69.8   | 73.2   | 83.1   | 76.0   |
| 21.0   | 24.3   | 21.6   | 23.6   | 34.0   | 34.4   |
| 3.8    | 1.3    | 0.7    | 1.2    | 4.6    | 0.6    |

|        |        |        |        |        |        |
|--------|--------|--------|--------|--------|--------|
| 59.4   | 70.2   | 56.6   | 31.0   | 55.6   | 80.8   |
| 15.0   | 2.5    | 4.3    | 4.6    | 7.7    | 4.7    |
| 7.1    | 1.2    | 9.1    | 6.5    | 2.6    | 2.3    |
| 40.7   | 37.5   | 53.9   | 38.9   | 29.4   | 40.7   |
| 9.3    | 6.9    | 7.4    | 8.2    | 3.3    | 2.0    |
| 13.9   | 2.6    | 10.7   | 14.0   | 16.6   | 16.4   |
| 6.2    | 3.1    | 5.6    | 4.9    | 3.8    | 10.7   |
| 5.1    | 17.1   | 21.1   | 18.4   | 18.6   | 12.0   |
| 5.9    | 3.7    | 16.8   | 17.3   | 4.7    | 18.2   |
| 52.6   | 27.7   | 47.9   | 29.6   | 53.9   | 62.9   |
| 17.2   | 24.5   | 27.6   | 23.7   | 25.6   | 16.4   |
| 10.9   | 13.0   | 24.4   | 13.7   | 17.7   | 20.1   |
| 10.0   | 14.9   | 10.2   | 11.3   | 7.7    | 11.1   |
| 439.6  | 354.3  | 493.9  | 472.3  | 505.1  | 548.5  |
| 6.1    | 7.1    | 9.0    | 7.6    | 10.8   | 11.0   |
| 2.9    | 4.3    | 3.9    | 6.6    | 1.5    | 9.4    |
| 5.6    | 2.4    | 8.0    | 6.0    | 5.0    | 10.6   |
| 1.8    | 3.2    | 1.5    | 4.2    | 3.3    | 3.4    |
| 6.5    | 7.4    | 3.7    | 15.3   | 9.9    | 19.8   |
| 1.8    | 6.5    | 6.1    | 4.3    | 6.6    | 6.3    |
| 142.2  | 110.7  | 119.6  | 125.2  | 173.2  | 141.2  |
| 8.7    | 12.5   | 17.4   | 17.2   | 7.3    | 15.1   |
| 3.6    | 0.5    | 1.3    | 2.7    | 3.8    | 7.2    |
| 17.8   | 2.7    | 8.3    | 6.7    | 5.3    | 5.2    |
| 6.6    | 13.2   | 9.7    | 10.6   | 1.7    | 10.9   |
| 8.3    | 7.4    | 5.1    | 17.2   | 15.9   | 9.4    |
| 7.6    | 10.7   | 13.7   | 20.5   | 18.7   | 25.4   |
| 9.8    | 12.5   | 11.8   | 5.6    | 16.3   | 14.7   |
| 2.8    | 3.8    | 3.5    | 3.8    | 2.6    | 4.1    |
| 347.0  | 284.8  | 303.5  | 334.6  | 359.1  | 359.7  |
| 16.6   | 27.2   | 21.3   | 8.1    | 17.3   | 22.8   |
| 7.7    | 12.5   | 9.5    | 10.0   | 13.0   | 12.9   |
| 6.6    | 3.1    | 4.1    | 4.5    | 6.7    | 14.5   |
| 2.4    | 7.0    | 2.5    | 5.9    | 6.0    | 1.9    |
| 4.8    | 12.6   | 7.9    | 7.0    | 8.5    | 9.4    |
| 26.8   | 22.2   | 29.0   | 24.6   | 34.3   | 43.9   |
| 1.7    | 0.6    | 2.4    | 3.6    | 2.2    | 0.6    |
| 1340.9 | 1113.2 | 1453.0 | 1612.0 | 1612.4 | 1892.2 |
| 1.8    | 8.0    | 3.4    | 1.8    | 3.0    | 3.6    |
| 14.5   | 13.0   | 13.0   | 11.2   | 20.0   | 17.6   |
| 110.0  | 95.2   | 105.1  | 110.7  | 133.9  | 118.8  |
| 38.4   | 41.4   | 51.7   | 40.8   | 37.1   | 57.4   |
| 4.9    | 0.9    | 3.9    | 1.9    | 3.3    | 2.4    |
| 6.9    | 4.5    | 10.7   | 10.1   | 1.1    | 21.0   |
| 568.4  | 663.3  | 564.3  | 502.4  | 604.3  | 639.0  |
| 4.2    | 4.5    | 4.8    | 4.6    | 3.6    | 2.0    |
| 6.5    | 6.2    | 4.5    | 5.6    | 4.0    | 4.0    |
| 4.7    | 24.7   | 7.4    | 8.0    | 7.9    | 5.2    |
| 2.0    | 2.9    | 1.0    | 3.6    | 7.0    | 2.9    |
| 280.7  | 334.8  | 350.2  | 361.4  | 368.4  | 369.0  |
| 41.2   | 46.7   | 49.4   | 43.6   | 47.7   | 46.7   |
| 13.2   | 4.9    | 3.4    | 5.3    | 12.6   | 6.5    |
| 5.5    | 2.5    | 3.5    | 7.7    | 6.3    | 8.8    |

|       |       |       |       |       |       |
|-------|-------|-------|-------|-------|-------|
| 0.7   | 5.1   | 1.4   | 7.5   | 0.9   | 3.3   |
| 240.5 | 227.2 | 269.6 | 237.2 | 282.7 | 266.4 |
| 6.9   | 2.7   | 9.6   | 5.0   | 8.5   | 9.9   |
| 9.0   | 10.4  | 32.3  | 7.9   | 21.0  | 35.0  |
| 0.8   | 8.4   | 1.5   | 3.8   | 0.5   | 5.0   |
| 3.2   | 4.6   | 7.5   | 10.6  | 11.5  | 14.0  |
| 5.4   | 4.4   | 6.1   | 1.7   | 9.1   | 5.1   |
| 169.6 | 138.2 | 197.5 | 184.1 | 183.9 | 184.9 |
| 29.0  | 29.4  | 28.3  | 27.3  | 27.6  | 29.0  |
| 4.8   | 10.6  | 1.7   | 3.2   | 4.5   | 4.7   |
| 50.1  | 44.1  | 59.5  | 46.9  | 51.6  | 46.4  |
| 16.6  | 24.2  | 21.2  | 22.9  | 15.8  | 21.8  |
| 1.9   | 2.1   | 1.8   | 1.4   | 1.3   | 1.7   |
| 9.4   | 5.3   | 13.9  | 10.9  | 3.8   | 5.7   |
| 19.0  | 3.4   | 2.7   | 5.2   | 17.5  | 10.6  |
| 27.0  | 35.7  | 24.6  | 39.8  | 32.4  | 34.1  |
| 8.2   | 13.2  | 1.5   | 2.7   | 6.2   | 6.1   |
| 2.4   | 4.1   | 4.3   | 3.4   | 9.5   | 3.0   |
| 1.6   | 1.6   | 4.0   | 1.8   | 1.9   | 2.0   |
| 13.2  | 15.9  | 8.8   | 4.8   | 1.8   | 8.8   |
| 1.4   | 0.3   | 2.1   | 2.7   | 2.7   | 5.5   |
| 79.8  | 83.6  | 79.6  | 99.2  | 105.6 | 116.9 |
| 32.8  | 25.5  | 28.6  | 22.6  | 29.3  | 29.9  |
| 8.1   | 1.4   | 1.3   | 1.2   | 1.0   | 5.2   |
| 14.5  | 30.0  | 23.1  | 30.5  | 25.9  | 23.5  |
| 9.8   | 11.6  | 12.6  | 13.7  | 19.8  | 15.3  |
| 2.2   | 4.4   | 1.3   | 1.0   | 1.7   | 2.2   |
| 4.0   | 8.4   | 6.0   | 1.8   | 4.5   | 5.7   |
| 1.1   | 3.3   | 1.3   | 9.8   | 9.7   | 7.2   |
| 11.5  | 1.6   | 7.0   | 4.5   | 6.5   | 12.8  |
| 1.2   | 4.9   | 2.8   | 1.3   | 1.1   | 1.5   |
| 4.0   | 6.3   | 3.1   | 7.6   | 7.7   | 3.6   |
| 1.3   | 0.4   | 7.0   | 7.4   | 2.1   | 5.6   |
| 1.9   | 1.8   | 3.6   | 4.3   | 3.1   | 2.7   |
| 2.7   | 5.9   | 3.8   | 2.6   | 2.4   | 2.8   |
| 3.5   | 17.5  | 5.5   | 4.0   | 5.4   | 17.7  |
| 1.3   | 13.9  | 4.4   | 3.4   | 4.9   | 1.9   |
| 7.3   | 1.0   | 7.0   | 7.0   | 21.8  | 21.5  |
| 5.5   | 6.2   | 5.8   | 3.4   | 5.5   | 2.4   |
| 4.0   | 6.2   | 3.1   | 3.2   | 4.0   | 5.7   |
| 6.7   | 0.8   | 9.8   | 4.9   | 1.8   | 10.2  |
| 10.6  | 15.1  | 13.7  | 22.1  | 10.0  | 23.3  |
| 12.3  | 9.8   | 8.5   | 16.1  | 12.0  | 13.8  |
| 8.8   | 11.0  | 3.9   | 7.0   | 8.7   | 10.4  |
| 1.8   | 1.3   | 2.2   | 2.3   | 3.5   | 6.2   |
| 6.5   | 20.8  | 8.0   | 6.2   | 11.4  | 8.2   |
| 19.7  | 14.2  | 13.2  | 13.6  | 20.2  | 17.8  |
| 2.3   | 1.0   | 0.9   | 1.5   | 5.9   | 4.2   |
| 35.1  | 48.1  | 42.8  | 33.8  | 33.3  | 41.6  |
| 104.4 | 106.9 | 111.5 | 109.9 | 134.0 | 135.1 |
| 12.7  | 11.8  | 4.3   | 12.2  | 4.1   | 6.9   |
| 6.5   | 11.9  | 6.4   | 3.6   | 11.5  | 5.6   |
| 0.8   | 4.1   | 1.2   | 4.8   | 9.5   | 5.7   |

|        |        |        |        |        |        |
|--------|--------|--------|--------|--------|--------|
| 4.9    | 14.5   | 3.4    | 10.9   | 6.8    | 3.1    |
| 1.3    | 1.8    | 2.0    | 1.6    | 3.1    | 2.3    |
| 14.5   | 17.2   | 15.2   | 16.6   | 22.8   | 13.6   |
| 3.2    | 4.7    | 7.6    | 8.8    | 6.8    | 8.4    |
| 11.4   | 17.2   | 11.6   | 12.2   | 16.7   | 17.5   |
| 10.7   | 11.4   | 6.8    | 6.3    | 8.0    | 7.6    |
| 2.7    | 6.0    | 11.8   | 5.5    | 7.4    | 9.5    |
| 19.9   | 6.9    | 13.9   | 24.2   | 25.6   | 32.0   |
| 4.9    | 0.3    | 1.6    | 0.5    | 2.4    | 4.8    |
| 8.3    | 3.1    | 5.5    | 2.4    | 2.3    | 5.4    |
| 0.4    | 1.0    | 7.0    | 0.9    | 0.5    | 0.8    |
| 9.5    | 8.3    | 2.3    | 12.1   | 2.9    | 16.9   |
| 9.4    | 5.8    | 9.2    | 6.5    | 6.8    | 3.7    |
| 8.0    | 14.7   | 7.6    | 6.5    | 7.2    | 11.6   |
| 4.1    | 0.8    | 1.2    | 0.7    | 0.8    | 3.9    |
| 15.0   | 14.1   | 18.3   | 14.8   | 14.9   | 16.1   |
| 2.2    | 9.1    | 5.7    | 3.9    | 8.0    | 14.9   |
| 21.1   | 26.4   | 19.2   | 20.4   | 17.0   | 14.8   |
| 15.3   | 25.9   | 18.5   | 26.3   | 20.8   | 29.7   |
| 3.3    | 1.1    | 14.8   | 9.0    | 7.1    | 19.3   |
| 244.1  | 224.4  | 230.2  | 262.2  | 235.7  | 308.0  |
| 12.7   | 20.9   | 16.7   | 9.9    | 7.9    | 17.3   |
| 12.5   | 5.7    | 14.3   | 11.2   | 7.6    | 12.5   |
| 49.6   | 46.1   | 67.9   | 44.7   | 47.6   | 74.8   |
| 7.2    | 4.5    | 6.8    | 21.9   | 13.4   | 8.9    |
| 3.9    | 4.8    | 7.7    | 5.1    | 6.4    | 3.6    |
| 9.6    | 11.5   | 15.2   | 3.8    | 8.9    | 6.1    |
| 0.7    | 3.9    | 1.0    | 1.7    | 1.2    | 2.4    |
| 4.6    | 1.8    | 8.9    | 2.8    | 7.5    | 1.8    |
| 10.6   | 12.8   | 9.9    | 8.7    | 17.2   | 15.3   |
| 300.4  | 276.8  | 303.2  | 325.2  | 435.0  | 391.2  |
| 4.7    | 6.0    | 1.5    | 3.0    | 2.1    | 13.0   |
| 4.0    | 2.1    | 10.0   | 10.1   | 10.9   | 6.3    |
| 7.9    | 5.6    | 3.7    | 7.7    | 5.0    | 1.9    |
| 7.3    | 10.4   | 4.3    | 1.5    | 6.4    | 6.9    |
| 4.3    | 7.1    | 2.5    | 1.2    | 6.0    | 3.0    |
| 11.9   | 3.5    | 1.6    | 16.2   | 1.3    | 9.3    |
| 1396.2 | 1267.6 | 1516.1 | 1318.3 | 1540.4 | 1418.0 |
| 6.5    | 3.3    | 3.6    | 3.2    | 4.0    | 9.2    |
| 24.0   | 24.2   | 20.5   | 16.0   | 32.7   | 24.6   |
| 9.0    | 10.6   | 3.1    | 11.1   | 8.2    | 11.4   |
| 8.1    | 8.9    | 5.1    | 3.6    | 3.1    | 1.5    |
| 194.2  | 144.7  | 213.4  | 172.5  | 220.3  | 205.7  |
| 5.4    | 11.0   | 10.6   | 11.4   | 7.9    | 12.9   |
| 1.0    | 0.8    | 1.4    | 7.6    | 1.4    | 4.8    |
| 132.3  | 143.4  | 128.5  | 131.6  | 125.0  | 154.4  |
| 17.0   | 20.3   | 20.7   | 19.4   | 13.0   | 18.1   |
| 9.7    | 36.5   | 24.6   | 17.0   | 8.1    | 13.4   |
| 419.5  | 311.8  | 395.3  | 359.1  | 465.6  | 415.2  |
| 8.3    | 20.3   | 13.9   | 17.9   | 24.0   | 23.1   |
| 47.3   | 85.3   | 57.4   | 55.7   | 57.2   | 46.5   |
| 18.0   | 22.1   | 11.5   | 21.7   | 28.5   | 26.3   |
| 1.5    | 0.5    | 0.9    | 1.5    | 1.6    | 0.9    |

|        |        |        |        |        |        |
|--------|--------|--------|--------|--------|--------|
| 413.6  | 457.3  | 388.0  | 450.2  | 435.0  | 505.7  |
| 7.0    | 7.8    | 9.0    | 8.0    | 11.9   | 13.5   |
| 690.9  | 687.0  | 660.7  | 616.6  | 689.9  | 736.3  |
| 12.3   | 8.9    | 11.2   | 9.4    | 6.4    | 8.3    |
| 2.0    | 6.4    | 3.8    | 4.0    | 2.8    | 5.2    |
| 208.1  | 242.7  | 198.2  | 242.6  | 240.3  | 229.2  |
| 8.4    | 4.9    | 9.3    | 9.5    | 8.0    | 15.7   |
| 11.7   | 2.6    | 7.7    | 11.4   | 6.8    | 20.8   |
| 29.8   | 26.2   | 27.2   | 30.1   | 31.8   | 41.3   |
| 20.8   | 15.3   | 10.6   | 15.5   | 20.1   | 16.9   |
| 24.6   | 16.1   | 14.3   | 19.3   | 19.9   | 20.8   |
| 445.7  | 416.6  | 430.7  | 537.5  | 541.1  | 562.4  |
| 6.4    | 15.1   | 11.7   | 4.8    | 3.7    | 5.0    |
| 6.9    | 1.4    | 3.1    | 2.1    | 0.9    | 1.6    |
| 13.5   | 7.7    | 16.8   | 21.8   | 9.3    | 30.7   |
| 2.4    | 2.4    | 9.5    | 2.1    | 5.7    | 9.5    |
| 40.3   | 25.8   | 32.4   | 31.2   | 31.0   | 40.5   |
| 2.3    | 2.0    | 3.5    | 4.1    | 6.5    | 4.0    |
| 78.8   | 77.7   | 79.3   | 88.5   | 83.7   | 109.6  |
| 45.7   | 43.7   | 38.6   | 30.8   | 43.4   | 48.7   |
| 47.6   | 56.6   | 73.5   | 79.0   | 81.9   | 79.3   |
| 8214.8 | 8004.7 | 8397.4 | 9028.9 | 9108.9 | 9057.4 |
| 370.8  | 285.3  | 343.5  | 318.7  | 430.0  | 360.3  |
| 0.7    | 1.6    | 2.1    | 1.8    | 0.7    | 1.9    |
| 37.2   | 42.7   | 36.2   | 35.4   | 44.6   | 47.6   |
| 24.7   | 28.8   | 26.6   | 27.9   | 19.5   | 27.1   |
| 115.1  | 143.4  | 97.5   | 140.0  | 122.5  | 135.2  |
| 569.2  | 500.9  | 694.1  | 708.5  | 762.5  | 797.0  |
| 1.4    | 2.7    | 0.6    | 1.3    | 4.9    | 3.3    |
| 14.4   | 2.0    | 15.0   | 12.7   | 7.1    | 11.4   |
| 11.5   | 24.7   | 6.6    | 6.9    | 15.3   | 9.6    |
| 2629.7 | 2394.0 | 2530.9 | 2430.4 | 2971.4 | 3198.0 |
| 342.6  | 260.5  | 265.3  | 298.1  | 308.2  | 349.3  |
| 5.8    | 20.7   | 9.5    | 6.6    | 13.0   | 14.0   |
| 0.7    | 0.4    | 1.4    | 0.9    | 5.3    | 0.7    |
| 5.2    | 2.3    | 6.3    | 0.8    | 1.9    | 7.3    |
| 169.0  | 162.3  | 188.4  | 232.0  | 224.2  | 248.3  |
| 40.5   | 41.6   | 45.7   | 44.1   | 44.2   | 58.5   |
| 33.8   | 31.1   | 45.0   | 28.2   | 34.2   | 48.9   |
| 17.6   | 14.2   | 14.8   | 22.4   | 12.2   | 25.2   |
| 1504.7 | 2271.7 | 1834.2 | 1707.7 | 1859.0 | 2122.7 |
| 373.0  | 365.1  | 411.7  | 391.9  | 419.6  | 399.4  |
| 311.1  | 289.8  | 316.6  | 341.1  | 330.3  | 430.8  |
| 51.4   | 58.6   | 53.9   | 70.4   | 67.5   | 60.3   |
| 2.7    | 10.5   | 3.2    | 5.4    | 6.3    | 10.6   |
| 63.9   | 38.2   | 55.1   | 46.3   | 80.2   | 84.2   |
| 46.0   | 36.4   | 40.2   | 46.2   | 61.3   | 47.0   |
| 1.9    | 1.0    | 1.7    | 1.1    | 1.8    | 1.6    |
| 1.0    | 1.5    | 7.1    | 0.7    | 0.8    | 1.0    |
| 6.9    | 9.7    | 8.8    | 10.0   | 6.4    | 11.7   |
| 13.9   | 8.0    | 16.5   | 13.0   | 14.9   | 5.7    |
| 27.8   | 19.8   | 21.7   | 25.9   | 23.2   | 29.8   |
| 149.4  | 138.1  | 169.3  | 163.1  | 170.7  | 167.3  |

|        |        |        |        |        |        |
|--------|--------|--------|--------|--------|--------|
| 5.4    | 9.8    | 8.1    | 11.0   | 11.4   | 8.4    |
| 209.3  | 146.7  | 185.4  | 178.4  | 217.2  | 182.9  |
| 10.4   | 17.0   | 13.0   | 11.5   | 9.8    | 17.0   |
| 205.5  | 166.8  | 224.9  | 187.8  | 214.3  | 226.9  |
| 380.6  | 351.8  | 395.3  | 445.3  | 472.5  | 468.9  |
| 194.0  | 288.1  | 177.0  | 327.9  | 170.0  | 234.2  |
| 7.3    | 16.1   | 7.5    | 3.2    | 3.4    | 3.2    |
| 1.0    | 0.9    | 1.5    | 1.3    | 0.9    | 1.4    |
| 58.0   | 61.9   | 70.7   | 70.9   | 72.4   | 74.4   |
| 181.0  | 160.4  | 131.5  | 168.0  | 165.7  | 172.9  |
| 13.8   | 24.0   | 5.9    | 18.4   | 26.8   | 13.8   |
| 2378.3 | 2319.4 | 2612.7 | 2621.7 | 2836.1 | 2845.6 |
| 14.9   | 30.4   | 22.1   | 25.0   | 27.1   | 22.8   |
| 1.0    | 1.1    | 1.0    | 7.8    | 5.4    | 3.4    |
| 20.0   | 11.7   | 16.8   | 14.0   | 5.1    | 19.8   |
| 3.5    | 5.7    | 7.1    | 4.7    | 3.8    | 8.3    |
| 26.0   | 22.4   | 29.5   | 24.4   | 26.3   | 28.5   |
| 9.6    | 14.0   | 14.4   | 10.2   | 18.3   | 11.3   |
| 7.8    | 1.1    | 1.3    | 1.2    | 2.2    | 1.8    |
| 72.4   | 130.1  | 102.4  | 97.2   | 88.3   | 113.4  |
| 103.5  | 116.4  | 89.9   | 105.0  | 123.5  | 116.0  |
| 5.1    | 5.6    | 8.4    | 5.5    | 9.7    | 6.4    |
| 6.3    | 5.5    | 3.3    | 3.5    | 3.8    | 4.6    |
| 10.4   | 2.8    | 6.3    | 3.2    | 7.6    | 7.8    |
| 13.4   | 7.4    | 2.2    | 7.8    | 3.3    | 9.6    |
| 9.5    | 4.8    | 9.0    | 9.0    | 8.0    | 5.5    |
| 2.3    | 1.4    | 2.7    | 2.0    | 2.8    | 4.2    |
| 17.0   | 1.6    | 11.9   | 12.2   | 17.4   | 30.3   |
| 4.4    | 1.7    | 12.4   | 6.6    | 8.8    | 9.9    |
| 17.4   | 4.9    | 22.8   | 36.3   | 23.1   | 29.5   |
| 14.4   | 32.0   | 9.1    | 26.0   | 8.2    | 39.7   |
| 33.0   | 34.5   | 42.3   | 36.2   | 49.7   | 51.9   |
| 2963.4 | 2738.9 | 3172.1 | 3429.7 | 3471.3 | 3568.4 |
| 12.3   | 10.0   | 19.0   | 16.6   | 24.9   | 27.5   |
| 4.6    | 0.9    | 6.5    | 8.9    | 6.0    | 1.7    |
| 3.6    | 1.2    | 7.6    | 4.5    | 1.1    | 8.9    |
| 50.1   | 38.4   | 62.9   | 57.5   | 63.1   | 58.4   |
| 39.3   | 22.4   | 27.3   | 49.9   | 46.0   | 47.0   |
| 28.3   | 23.2   | 29.0   | 22.6   | 8.8    | 34.5   |
| 52.8   | 38.0   | 26.9   | 22.0   | 59.7   | 57.2   |
| 11.6   | 11.3   | 15.9   | 20.4   | 17.8   | 31.1   |
| 1872.4 | 1702.2 | 1860.2 | 1869.5 | 1986.6 | 2211.9 |
| 218.3  | 187.4  | 198.0  | 226.5  | 183.7  | 216.9  |
| 3495.9 | 3557.0 | 3206.9 | 3525.4 | 3885.9 | 3691.6 |
| 1.0    | 1.8    | 0.8    | 6.1    | 1.9    | 0.4    |
| 665.9  | 609.8  | 757.7  | 787.4  | 863.9  | 833.3  |
| 67.1   | 79.6   | 75.8   | 86.2   | 94.1   | 94.9   |
| 4.5    | 7.5    | 9.1    | 8.7    | 4.0    | 5.4    |
| 1.9    | 1.6    | 1.7    | 1.5    | 1.5    | 3.4    |
| 2.0    | 6.6    | 3.1    | 1.2    | 1.4    | 1.2    |
| 20.0   | 10.7   | 9.6    | 8.2    | 16.7   | 11.2   |
| 1.4    | 5.9    | 6.8    | 7.0    | 1.6    | 0.7    |
| 59.8   | 55.6   | 43.5   | 64.7   | 56.5   | 75.4   |



|        |        |        |        |        |        |
|--------|--------|--------|--------|--------|--------|
| 14.1   | 10.6   | 14.3   | 19.4   | 14.7   | 17.2   |
| 14.7   | 14.4   | 20.4   | 24.3   | 16.8   | 24.4   |
| 12.9   | 20.0   | 5.0    | 9.8    | 3.2    | 4.5    |
| 0.4    | 1.2    | 1.1    | 2.8    | 0.4    | 0.7    |
| 50.1   | 54.0   | 68.0   | 58.7   | 67.0   | 59.1   |
| 546.9  | 429.1  | 622.9  | 547.5  | 630.1  | 671.6  |
| 25.1   | 19.7   | 18.0   | 23.3   | 18.4   | 23.9   |
| 273.1  | 312.8  | 267.9  | 259.0  | 302.6  | 326.3  |
| 2.8    | 1.4    | 2.3    | 2.7    | 3.0    | 3.3    |
| 17.1   | 22.1   | 36.3   | 29.5   | 27.4   | 28.2   |
| 380.4  | 390.5  | 380.3  | 446.1  | 462.7  | 468.3  |
| 2.3    | 11.4   | 15.6   | 3.7    | 8.3    | 1.9    |
| 2.9    | 4.4    | 11.2   | 8.7    | 10.1   | 8.5    |
| 8.1    | 4.9    | 5.5    | 2.4    | 6.4    | 10.9   |
| 3.1    | 3.7    | 2.9    | 5.4    | 17.8   | 2.5    |
| 36.2   | 23.8   | 25.8   | 39.7   | 57.1   | 37.4   |
| 2.6    | 5.6    | 6.6    | 2.9    | 4.3    | 4.6    |
| 10.2   | 16.1   | 10.1   | 8.0    | 10.7   | 26.9   |
| 4.1    | 7.4    | 2.6    | 1.7    | 2.4    | 1.0    |
| 409.2  | 361.0  | 375.8  | 507.7  | 410.1  | 559.0  |
| 3.0    | 4.3    | 2.3    | 2.9    | 10.7   | 9.5    |
| 330.0  | 260.5  | 351.9  | 331.2  | 414.1  | 414.4  |
| 1.3    | 2.4    | 1.2    | 0.9    | 1.8    | 2.3    |
| 2.8    | 2.5    | 5.0    | 10.7   | 8.9    | 7.6    |
| 14.0   | 23.8   | 17.1   | 15.8   | 7.8    | 6.6    |
| 7075.5 | 5872.9 | 5930.2 | 6906.9 | 6710.0 | 7171.3 |
| 1.3    | 1.3    | 2.4    | 2.2    | 1.5    | 2.0    |
| 18.3   | 11.4   | 17.1   | 17.0   | 18.8   | 26.2   |
| 1.8    | 1.7    | 2.2    | 1.2    | 3.2    | 2.1    |
| 0.5    | 3.8    | 7.7    | 5.8    | 1.0    | 1.1    |
| 43.4   | 41.7   | 33.9   | 43.8   | 40.7   | 53.4   |
| 949.7  | 729.6  | 716.5  | 847.1  | 834.3  | 1142.6 |
| 47.6   | 53.2   | 45.2   | 35.6   | 43.2   | 33.7   |
| 24.1   | 20.7   | 27.0   | 25.2   | 26.4   | 21.3   |
| 5.5    | 6.9    | 10.3   | 9.3    | 6.9    | 1.4    |
| 49.3   | 50.3   | 58.9   | 44.4   | 56.2   | 58.7   |
| 3.6    | 1.2    | 1.6    | 1.7    | 4.8    | 0.6    |
| 47.5   | 54.8   | 48.0   | 41.9   | 49.3   | 46.4   |
| 17.3   | 10.1   | 23.4   | 23.6   | 14.2   | 15.3   |
| 2.9    | 12.2   | 6.3    | 7.1    | 4.3    | 6.3    |
| 8.4    | 2.6    | 8.6    | 3.2    | 4.5    | 3.4    |
| 16.4   | 23.3   | 15.2   | 2.1    | 12.2   | 11.4   |
| 0.8    | 2.0    | 5.8    | 6.7    | 0.9    | 0.9    |
| 289.0  | 245.2  | 288.2  | 285.5  | 379.5  | 332.8  |
| 18.5   | 10.0   | 22.5   | 14.7   | 21.6   | 25.8   |
| 4.0    | 2.3    | 2.7    | 5.2    | 16.6   | 8.1    |
| 20.7   | 16.3   | 14.8   | 11.3   | 16.6   | 19.6   |
| 4.9    | 1.4    | 4.1    | 1.3    | 1.3    | 1.5    |
| 2.3    | 2.8    | 5.4    | 1.7    | 3.3    | 1.7    |
| 51.2   | 61.4   | 59.6   | 73.4   | 83.0   | 72.3   |
| 3.9    | 2.4    | 5.1    | 4.6    | 1.6    | 2.9    |
| 18.5   | 9.6    | 7.2    | 13.9   | 9.0    | 17.6   |
| 6.9    | 0.3    | 3.5    | 7.1    | 7.8    | 7.5    |

|        |       |       |        |        |        |
|--------|-------|-------|--------|--------|--------|
| 14.7   | 15.1  | 17.1  | 24.1   | 16.4   | 11.7   |
| 29.6   | 29.3  | 41.6  | 26.0   | 19.4   | 33.7   |
| 10.0   | 11.7  | 13.0  | 16.7   | 7.0    | 18.9   |
| 3.3    | 2.1   | 4.8   | 0.5    | 3.0    | 0.8    |
| 15.9   | 8.2   | 9.4   | 8.4    | 13.1   | 12.7   |
| 29.1   | 105.9 | 38.0  | 69.5   | 27.9   | 32.1   |
| 13.3   | 19.1  | 17.8  | 21.8   | 33.7   | 28.4   |
| 52.9   | 58.4  | 49.6  | 52.4   | 57.6   | 74.4   |
| 1.0    | 0.6   | 2.0   | 4.3    | 1.2    | 0.9    |
| 86.8   | 40.8  | 130.2 | 99.5   | 143.9  | 96.7   |
| 793.2  | 736.7 | 927.6 | 1017.7 | 925.6  | 1038.6 |
| 147.0  | 104.7 | 140.1 | 171.0  | 162.9  | 195.4  |
| 2.1    | 2.7   | 2.8   | 2.9    | 3.9    | 3.0    |
| 538.7  | 415.5 | 522.5 | 580.8  | 545.4  | 749.8  |
| 1422.2 | 796.5 | 893.3 | 827.3  | 1038.2 | 1507.9 |
| 18.2   | 52.6  | 19.9  | 16.2   | 27.1   | 27.8   |
| 2.8    | 14.6  | 11.3  | 7.9    | 7.7    | 5.1    |
| 221.1  | 142.2 | 225.0 | 197.9  | 187.1  | 216.7  |
| 17.6   | 29.7  | 32.1  | 35.2   | 41.8   | 38.5   |
| 134.9  | 134.6 | 150.7 | 144.1  | 153.7  | 161.5  |
| 3.7    | 7.0   | 2.4   | 2.6    | 2.3    | 3.4    |
| 3.9    | 6.0   | 6.2   | 5.2    | 3.9    | 10.4   |
| 344.9  | 438.0 | 407.2 | 427.3  | 429.7  | 466.9  |
| 12.0   | 2.3   | 14.0  | 12.7   | 5.6    | 6.0    |
| 2.9    | 8.8   | 4.7   | 2.2    | 2.2    | 2.8    |
| 13.1   | 10.8  | 11.6  | 12.7   | 17.2   | 14.1   |
| 412.4  | 402.3 | 522.5 | 472.9  | 562.1  | 566.5  |
| 236.5  | 211.4 | 275.2 | 260.7  | 304.0  | 285.1  |
| 2.0    | 18.9  | 5.0   | 2.1    | 2.9    | 8.2    |
| 30.2   | 16.8  | 29.0  | 28.5   | 30.2   | 30.2   |
| 12.5   | 9.2   | 14.0  | 14.0   | 6.4    | 13.2   |
| 2.6    | 1.2   | 2.0   | 4.6    | 3.8    | 6.5    |
| 27.1   | 36.5  | 30.9  | 34.6   | 38.7   | 56.9   |
| 3.0    | 2.3   | 8.0   | 4.8    | 3.9    | 7.6    |
| 12.7   | 2.5   | 10.6  | 11.5   | 11.9   | 3.6    |
| 7.9    | 2.3   | 0.9   | 1.7    | 6.9    | 7.1    |
| 2.4    | 1.3   | 3.9   | 0.8    | 0.7    | 5.1    |
| 38.4   | 18.5  | 29.9  | 21.3   | 32.4   | 16.7   |
| 1.5    | 5.5   | 2.7   | 2.5    | 5.0    | 1.9    |
| 18.7   | 14.7  | 8.8   | 10.0   | 14.9   | 13.5   |
| 5.6    | 4.4   | 8.2   | 4.1    | 3.6    | 3.7    |
| 36.0   | 31.3  | 35.6  | 34.0   | 40.9   | 39.4   |
| 12.1   | 12.1  | 7.9   | 2.2    | 2.6    | 3.8    |
| 3.3    | 0.5   | 3.0   | 2.7    | 1.2    | 0.9    |
| 1.7    | 0.5   | 0.9   | 7.9    | 0.8    | 7.8    |
| 7.7    | 0.6   | 5.2   | 5.0    | 4.4    | 3.2    |
| 3.8    | 3.1   | 9.7   | 1.8    | 11.2   | 5.0    |
| 84.1   | 57.0  | 67.5  | 64.1   | 54.6   | 82.4   |
| 3.4    | 2.5   | 5.5   | 2.8    | 7.1    | 6.1    |
| 6.0    | 18.3  | 13.7  | 13.2   | 7.8    | 14.7   |
| 15.4   | 12.0  | 12.6  | 2.2    | 7.1    | 6.0    |
| 101.0  | 84.7  | 83.6  | 84.8   | 112.0  | 115.6  |
| 42.6   | 23.8  | 34.0  | 38.2   | 40.6   | 45.1   |

|        |        |        |        |        |        |
|--------|--------|--------|--------|--------|--------|
| 2.9    | 13.5   | 6.3    | 18.8   | 9.5    | 15.0   |
| 0.6    | 0.8    | 0.5    | 0.5    | 0.7    | 0.6    |
| 4.1    | 4.1    | 6.3    | 1.2    | 8.5    | 5.0    |
| 8.4    | 3.1    | 6.2    | 11.7   | 14.1   | 16.6   |
| 1.7    | 0.7    | 0.9    | 5.4    | 6.6    | 4.5    |
| 13.1   | 9.7    | 5.9    | 13.3   | 7.6    | 14.2   |
| 8.6    | 21.7   | 12.3   | 9.1    | 16.1   | 18.4   |
| 1.3    | 1.1    | 1.5    | 1.9    | 1.5    | 1.6    |
| 7.6    | 1.1    | 3.1    | 2.6    | 2.2    | 9.6    |
| 2.1    | 4.7    | 3.3    | 9.0    | 3.0    | 2.0    |
| 5.1    | 1.1    | 4.1    | 12.2   | 6.1    | 4.5    |
| 3.9    | 2.7    | 3.1    | 2.6    | 2.7    | 3.6    |
| 1.2    | 1.9    | 1.0    | 0.8    | 2.8    | 0.6    |
| 4.8    | 7.9    | 9.3    | 7.8    | 10.5   | 5.6    |
| 9.9    | 11.7   | 18.2   | 5.3    | 9.8    | 12.3   |
| 1309.9 | 1260.1 | 1282.5 | 1485.8 | 1452.6 | 1615.0 |
| 2.5    | 8.6    | 21.7   | 3.2    | 6.1    | 6.3    |
| 7.6    | 6.1    | 10.7   | 8.3    | 10.3   | 6.3    |
| 0.6    | 6.5    | 1.6    | 3.4    | 1.6    | 2.4    |
| 121.2  | 83.5   | 137.0  | 98.8   | 175.1  | 124.9  |
| 3.4    | 4.1    | 4.8    | 3.1    | 5.2    | 5.1    |
| 2.8    | 5.3    | 1.9    | 1.2    | 3.6    | 7.1    |
| 1.3    | 1.6    | 2.4    | 1.4    | 1.1    | 4.4    |
| 12.8   | 5.2    | 30.6   | 24.2   | 16.0   | 7.7    |
| 1.3    | 0.9    | 2.7    | 2.2    | 3.0    | 0.9    |
| 7.4    | 2.6    | 4.4    | 2.0    | 2.0    | 3.6    |
| 1126.8 | 1089.4 | 1089.5 | 1042.7 | 1207.9 | 1284.6 |
| 122.2  | 105.7  | 115.2  | 124.4  | 141.7  | 133.6  |
| 3.1    | 10.2   | 13.4   | 3.7    | 6.2    | 6.3    |
| 8.3    | 9.6    | 10.7   | 13.8   | 9.3    | 20.4   |
| 12.7   | 9.8    | 17.6   | 11.3   | 14.6   | 5.7    |
| 4.9    | 0.9    | 1.3    | 2.1    | 1.4    | 2.0    |
| 26.0   | 40.7   | 46.3   | 32.7   | 39.7   | 43.3   |
| 6.0    | 3.4    | 6.1    | 1.6    | 6.2    | 7.2    |
| 856.0  | 786.4  | 777.3  | 867.2  | 976.8  | 1084.3 |
| 5.2    | 6.1    | 8.2    | 7.6    | 11.5   | 6.0    |
| 13.6   | 17.8   | 12.1   | 10.7   | 24.3   | 18.5   |
| 14.5   | 4.1    | 4.3    | 4.8    | 7.9    | 10.6   |
| 7.6    | 4.9    | 11.3   | 4.9    | 14.6   | 5.9    |
| 37.8   | 35.1   | 31.6   | 21.6   | 47.1   | 31.8   |
| 15.4   | 9.3    | 11.3   | 3.2    | 1.5    | 10.2   |
| 3.4    | 11.0   | 1.9    | 3.3    | 11.4   | 3.3    |
| 2.3    | 1.3    | 4.5    | 7.2    | 1.8    | 5.3    |
| 2.2    | 0.7    | 4.1    | 0.7    | 3.2    | 8.0    |
| 12.5   | 10.3   | 15.3   | 15.9   | 14.5   | 16.6   |
| 21.8   | 13.8   | 21.2   | 22.5   | 25.9   | 33.4   |
| 0.7    | 4.8    | 1.0    | 1.5    | 2.4    | 3.6    |
| 9.0    | 3.0    | 16.6   | 18.1   | 10.2   | 8.4    |
| 551.2  | 544.5  | 673.4  | 621.0  | 707.4  | 738.2  |
| 3.6    | 16.7   | 6.7    | 6.4    | 5.0    | 6.3    |
| 16.1   | 6.5    | 5.1    | 5.8    | 8.4    | 4.3    |
| 16.7   | 13.7   | 16.4   | 15.1   | 2.4    | 16.6   |
| 55.1   | 56.2   | 47.6   | 43.5   | 66.4   | 85.5   |

|         |         |         |         |         |         |
|---------|---------|---------|---------|---------|---------|
| 16.4    | 25.8    | 10.8    | 12.3    | 15.4    | 4.4     |
| 7.5     | 8.4     | 5.1     | 9.2     | 2.4     | 11.7    |
| 3.0     | 2.0     | 7.6     | 0.9     | 6.1     | 1.3     |
| 20.8    | 7.0     | 30.2    | 21.3    | 27.7    | 25.1    |
| 11.9    | 17.2    | 13.2    | 9.0     | 14.2    | 18.8    |
| 6.3     | 6.2     | 9.9     | 8.2     | 9.8     | 8.0     |
| 15.0    | 11.4    | 9.3     | 9.9     | 9.7     | 16.2    |
| 1140.4  | 1078.5  | 1243.7  | 1260.0  | 1351.5  | 1390.1  |
| 1392.9  | 1410.6  | 1332.7  | 1398.1  | 1493.5  | 1710.7  |
| 3.5     | 2.1     | 2.4     | 1.2     | 1.2     | 2.2     |
| 106.5   | 85.9    | 104.9   | 101.5   | 109.9   | 127.3   |
| 3.6     | 1.9     | 1.2     | 2.6     | 3.9     | 2.1     |
| 44.9    | 48.4    | 35.0    | 39.6    | 58.1    | 48.5    |
| 11.6    | 15.5    | 12.1    | 13.5    | 14.7    | 13.1    |
| 25.1    | 23.5    | 29.4    | 31.7    | 30.6    | 55.1    |
| 1.6     | 0.9     | 2.4     | 10.5    | 9.2     | 2.1     |
| 13.8    | 17.5    | 16.4    | 17.9    | 18.0    | 23.1    |
| 147.6   | 168.7   | 158.5   | 159.2   | 153.4   | 173.1   |
| 8.6     | 15.0    | 11.6    | 7.9     | 9.8     | 5.4     |
| 3.4     | 4.2     | 5.3     | 24.6    | 11.0    | 6.2     |
| 1.4     | 5.9     | 1.0     | 1.0     | 7.4     | 2.5     |
| 98.1    | 80.4    | 75.6    | 49.9    | 75.5    | 134.9   |
| 5.1     | 11.5    | 5.8     | 7.5     | 17.2    | 6.3     |
| 20.5    | 11.8    | 21.4    | 15.4    | 14.0    | 30.4    |
| 12.5    | 8.9     | 6.7     | 9.5     | 25.3    | 24.6    |
| 1.4     | 2.9     | 1.1     | 1.0     | 0.8     | 2.5     |
| 1.7     | 10.4    | 8.7     | 5.7     | 10.0    | 6.6     |
| 108.2   | 126.4   | 102.5   | 152.0   | 148.3   | 177.9   |
| 17.4    | 23.3    | 15.3    | 12.9    | 18.8    | 29.7    |
| 1497.9  | 1266.7  | 1441.5  | 1617.5  | 1575.1  | 1809.0  |
| 86.7    | 89.0    | 121.6   | 110.2   | 119.7   | 119.7   |
| 12.9    | 12.7    | 6.2     | 7.6     | 3.8     | 13.2    |
| 2606.8  | 2425.2  | 2269.1  | 2379.8  | 2658.2  | 3041.9  |
| 21.7    | 27.7    | 11.8    | 14.3    | 15.9    | 19.6    |
| 1.0     | 1.2     | 4.4     | 5.4     | 1.0     | 6.9     |
| 259.7   | 283.2   | 234.6   | 348.9   | 286.6   | 349.2   |
| 34.7    | 20.9    | 23.2    | 11.9    | 34.3    | 28.3    |
| 1.6     | 7.2     | 10.1    | 6.9     | 5.9     | 1.2     |
| 10.6    | 15.3    | 6.8     | 6.6     | 5.0     | 15.5    |
| 2824.0  | 2653.2  | 2793.4  | 3026.3  | 3065.2  | 3449.0  |
| 11.7    | 11.1    | 11.3    | 9.1     | 3.5     | 12.3    |
| 2.4     | 9.7     | 1.9     | 11.5    | 2.2     | 4.3     |
| 3.1     | 5.9     | 4.3     | 3.1     | 9.1     | 3.6     |
| 8.3     | 15.4    | 7.9     | 15.2    | 5.9     | 8.9     |
| 11032.9 | 10733.5 | 10435.6 | 11161.7 | 11372.1 | 11357.0 |
| 236.3   | 232.1   | 241.0   | 219.4   | 264.8   | 275.7   |
| 13.0    | 4.2     | 9.6     | 24.1    | 7.4     | 6.7     |
| 124.1   | 82.3    | 51.4    | 79.6    | 99.5    | 106.7   |
| 761.0   | 680.2   | 686.7   | 802.8   | 901.4   | 926.6   |
| 3216.4  | 3162.9  | 3155.0  | 3572.0  | 3856.3  | 4027.3  |
| 7.6     | 14.8    | 3.7     | 12.6    | 11.4    | 10.1    |
| 7.1     | 12.8    | 18.2    | 2.6     | 9.9     | 8.8     |
| 3.9     | 7.0     | 3.9     | 2.0     | 0.8     | 3.2     |

|        |        |        |        |        |        |
|--------|--------|--------|--------|--------|--------|
| 10.5   | 23.8   | 19.8   | 9.8    | 10.2   | 4.1    |
| 55.9   | 54.6   | 47.9   | 54.2   | 50.3   | 53.8   |
| 775.4  | 803.1  | 788.2  | 722.8  | 709.8  | 1057.0 |
| 4.5    | 3.3    | 1.1    | 5.6    | 1.5    | 1.1    |
| 1.1    | 1.6    | 5.0    | 1.9    | 1.7    | 1.7    |
| 4.5    | 6.9    | 3.1    | 4.0    | 11.8   | 10.1   |
| 1.1    | 0.7    | 1.6    | 3.0    | 0.8    | 1.0    |
| 6.6    | 5.2    | 14.8   | 4.0    | 9.3    | 14.0   |
| 14.4   | 22.4   | 13.8   | 14.7   | 19.4   | 15.4   |
| 6.0    | 6.8    | 12.7   | 4.9    | 2.3    | 6.8    |
| 13.2   | 5.4    | 10.0   | 12.3   | 19.5   | 11.7   |
| 3.1    | 15.8   | 2.4    | 3.3    | 1.5    | 2.6    |
| 28.9   | 15.6   | 18.8   | 40.4   | 14.4   | 40.1   |
| 0.5    | 2.1    | 2.1    | 0.9    | 3.7    | 2.4    |
| 6.2    | 13.6   | 8.3    | 5.1    | 9.5    | 7.3    |
| 40.7   | 39.8   | 42.6   | 36.9   | 35.8   | 39.3   |
| 6.6    | 2.1    | 2.2    | 13.2   | 3.9    | 4.2    |
| 248.3  | 238.7  | 282.0  | 279.2  | 265.1  | 317.4  |
| 201.7  | 114.7  | 183.5  | 179.8  | 234.3  | 230.5  |
| 22.7   | 20.6   | 36.4   | 27.1   | 27.1   | 32.0   |
| 35.0   | 21.6   | 34.4   | 24.4   | 26.2   | 32.6   |
| 91.6   | 74.3   | 90.3   | 93.8   | 108.3  | 113.9  |
| 3.9    | 1.3    | 2.8    | 3.3    | 9.0    | 15.5   |
| 12.5   | 10.9   | 19.6   | 15.3   | 10.4   | 18.1   |
| 156.7  | 156.8  | 147.0  | 214.0  | 185.9  | 204.6  |
| 21.6   | 18.3   | 14.3   | 21.1   | 23.8   | 7.3    |
| 26.8   | 38.1   | 20.0   | 21.3   | 20.6   | 31.1   |
| 2.5    | 6.3    | 8.4    | 13.5   | 7.7    | 8.7    |
| 1.9    | 0.7    | 1.6    | 5.2    | 0.6    | 1.2    |
| 1725.0 | 1238.7 | 1178.1 | 1488.4 | 1739.2 | 1927.7 |
| 1.5    | 1.2    | 2.8    | 1.5    | 3.0    | 2.9    |
| 33.9   | 19.6   | 21.5   | 19.6   | 19.3   | 31.5   |
| 5.1    | 17.1   | 10.2   | 32.4   | 15.3   | 8.4    |
| 15.9   | 15.2   | 13.5   | 18.5   | 23.6   | 19.5   |
| 2.9    | 3.5    | 3.4    | 7.8    | 2.1    | 2.7    |
| 283.8  | 254.0  | 261.3  | 418.3  | 461.0  | 402.6  |
| 10.3   | 6.6    | 6.4    | 8.0    | 16.3   | 5.0    |
| 1.2    | 2.6    | 2.3    | 1.1    | 2.0    | 2.1    |
| 6.0    | 15.6   | 4.5    | 7.4    | 15.6   | 11.5   |
| 2.7    | 2.3    | 15.1   | 10.4   | 18.2   | 9.8    |
| 4105.6 | 3254.0 | 4681.6 | 5479.5 | 4897.3 | 4961.5 |
| 8.0    | 2.6    | 2.7    | 13.0   | 12.4   | 13.6   |
| 1.1    | 0.6    | 0.9    | 1.7    | 0.8    | 1.3    |
| 2.6    | 0.5    | 2.0    | 6.8    | 1.9    | 3.1    |
| 127.2  | 119.9  | 163.1  | 148.8  | 168.3  | 166.6  |
| 9.8    | 3.2    | 9.0    | 7.8    | 6.8    | 4.6    |
| 2.1    | 4.9    | 5.1    | 2.9    | 2.3    | 2.6    |
| 12.0   | 36.7   | 20.5   | 9.7    | 16.7   | 12.2   |
| 3.2    | 3.4    | 2.5    | 1.5    | 2.3    | 5.9    |
| 3.3    | 4.8    | 2.7    | 2.8    | 3.8    | 2.5    |
| 7.8    | 10.5   | 8.2    | 12.2   | 4.0    | 14.6   |
| 2.2    | 18.6   | 18.7   | 3.4    | 11.4   | 5.3    |
| 24.9   | 33.2   | 25.4   | 19.2   | 23.5   | 31.0   |

|        |        |        |        |        |        |
|--------|--------|--------|--------|--------|--------|
| 247.6  | 259.7  | 272.0  | 252.8  | 313.3  | 303.9  |
| 2.8    | 1.7    | 1.7    | 3.6    | 1.8    | 5.0    |
| 3.4    | 1.9    | 10.0   | 8.6    | 4.3    | 6.4    |
| 1.2    | 0.7    | 10.8   | 2.0    | 9.5    | 11.4   |
| 24.2   | 20.2   | 27.9   | 35.8   | 30.8   | 26.0   |
| 3.9    | 0.5    | 9.8    | 5.7    | 4.4    | 9.3    |
| 34.7   | 43.0   | 25.3   | 40.3   | 34.3   | 25.7   |
| 2.3    | 7.3    | 1.6    | 5.1    | 8.8    | 7.4    |
| 1401.6 | 1248.6 | 1316.2 | 1480.5 | 1711.2 | 1713.6 |
| 3.2    | 8.0    | 9.1    | 8.0    | 6.1    | 9.5    |
| 411.2  | 393.9  | 425.7  | 424.0  | 469.8  | 567.8  |
| 420.6  | 400.3  | 561.4  | 617.6  | 584.3  | 534.5  |
| 18.2   | 14.9   | 14.8   | 19.3   | 14.0   | 19.2   |
| 9.1    | 21.3   | 7.7    | 11.3   | 10.4   | 12.7   |
| 9.7    | 2.3    | 1.8    | 3.9    | 2.2    | 3.4    |
| 1946.0 | 722.8  | 1546.3 | 1683.1 | 2051.2 | 2334.1 |
| 1.8    | 4.4    | 1.8    | 2.4    | 1.6    | 1.9    |
| 52.6   | 60.9   | 45.0   | 32.3   | 46.6   | 60.3   |
| 7.9    | 4.4    | 15.5   | 4.4    | 24.8   | 19.7   |
| 2106.8 | 2055.1 | 2281.0 | 2079.0 | 2354.8 | 2446.2 |
| 3.0    | 2.1    | 2.7    | 2.0    | 3.0    | 2.1    |
| 25.0   | 36.7   | 35.2   | 27.4   | 34.1   | 47.7   |
| 1.8    | 8.4    | 2.2    | 8.1    | 2.6    | 5.8    |
| 288.1  | 371.5  | 407.4  | 342.8  | 503.3  | 522.8  |
| 341.8  | 399.2  | 365.6  | 351.3  | 390.9  | 422.2  |
| 6.7    | 21.0   | 6.3    | 2.4    | 5.9    | 11.1   |
| 236.4  | 210.3  | 230.9  | 256.2  | 253.0  | 311.7  |
| 16.0   | 18.7   | 10.6   | 13.8   | 13.0   | 9.2    |
| 5.3    | 3.3    | 6.3    | 2.4    | 2.5    | 2.7    |
| 9.2    | 3.5    | 4.7    | 8.4    | 5.5    | 4.8    |
| 5.8    | 4.0    | 1.9    | 2.0    | 3.3    | 1.3    |
| 8.8    | 9.7    | 5.7    | 8.0    | 2.4    | 4.3    |
| 18.0   | 25.5   | 16.8   | 11.8   | 22.0   | 28.3   |
| 4.9    | 0.7    | 4.5    | 4.2    | 1.1    | 2.3    |
| 1.2    | 0.8    | 2.1    | 1.1    | 0.9    | 1.5    |
| 5.1    | 11.7   | 13.8   | 9.4    | 11.1   | 5.4    |
| 0.6    | 0.3    | 0.4    | 0.5    | 1.1    | 1.0    |
| 92.4   | 117.0  | 92.4   | 92.5   | 98.4   | 97.7   |
| 3.2    | 10.7   | 9.8    | 4.3    | 7.7    | 8.4    |
| 2.3    | 0.8    | 2.8    | 4.1    | 5.6    | 10.5   |
| 1.0    | 0.7    | 4.7    | 0.6    | 2.1    | 0.4    |
| 44.9   | 31.3   | 29.2   | 38.7   | 53.6   | 31.9   |
| 3.8    | 3.4    | 2.8    | 6.8    | 2.8    | 5.9    |
| 11.1   | 10.7   | 8.6    | 4.9    | 4.2    | 7.6    |
| 65.7   | 47.9   | 57.2   | 49.8   | 78.9   | 61.2   |
| 5.0    | 6.1    | 4.8    | 7.3    | 4.3    | 8.9    |
| 11.2   | 0.6    | 11.9   | 9.5    | 8.3    | 10.8   |
| 1.9    | 2.4    | 3.4    | 1.9    | 2.7    | 2.9    |
| 23.9   | 22.0   | 21.6   | 9.2    | 24.5   | 17.6   |
| 1.0    | 1.2    | 1.0    | 1.0    | 1.0    | 0.5    |
| 12.9   | 1.5    | 1.5    | 1.9    | 8.5    | 2.5    |
| 4.6    | 2.6    | 8.6    | 2.5    | 6.9    | 4.3    |
| 7.8    | 4.2    | 7.1    | 9.4    | 5.8    | 8.4    |

|        |        |        |        |        |        |
|--------|--------|--------|--------|--------|--------|
| 1.4    | 4.9    | 2.3    | 1.0    | 3.2    | 9.3    |
| 1.6    | 4.7    | 2.8    | 2.8    | 3.3    | 6.5    |
| 1.1    | 2.1    | 3.1    | 5.7    | 1.4    | 9.1    |
| 4.4    | 1.7    | 5.8    | 2.8    | 2.6    | 2.5    |
| 1881.1 | 1864.4 | 1973.5 | 1838.1 | 2209.8 | 2040.6 |
| 54.4   | 36.9   | 61.6   | 38.8   | 51.3   | 61.1   |
| 6.8    | 7.8    | 4.7    | 5.6    | 1.6    | 5.7    |
| 1.7    | 13.0   | 2.6    | 2.2    | 2.1    | 2.1    |
| 7.2    | 13.3   | 4.3    | 6.6    | 7.3    | 6.4    |
| 29.2   | 30.2   | 5.7    | 4.9    | 8.5    | 7.2    |
| 3.8    | 5.8    | 1.8    | 2.3    | 1.8    | 6.1    |
| 14.9   | 7.1    | 10.5   | 13.2   | 4.2    | 21.7   |
| 11.3   | 26.7   | 14.3   | 9.8    | 10.4   | 17.9   |
| 3.6    | 1.7    | 1.6    | 6.5    | 3.6    | 5.6    |
| 100.9  | 72.8   | 62.8   | 104.7  | 102.6  | 112.0  |
| 12.5   | 14.2   | 12.2   | 3.4    | 11.5   | 14.6   |
| 370.9  | 350.6  | 402.5  | 392.1  | 435.0  | 483.7  |
| 4.0    | 1.4    | 1.7    | 7.2    | 9.8    | 5.2    |
| 3.1    | 9.6    | 4.7    | 6.1    | 2.9    | 2.9    |
| 3.4    | 5.2    | 5.6    | 1.6    | 1.8    | 2.2    |
| 1.6    | 1.4    | 1.2    | 2.4    | 1.5    | 2.0    |
| 4.1    | 14.5   | 8.3    | 6.5    | 10.3   | 13.3   |
| 13.5   | 2.3    | 5.7    | 17.0   | 12.8   | 21.2   |
| 8.7    | 5.9    | 4.6    | 0.7    | 3.7    | 4.3    |
| 0.6    | 0.4    | 1.1    | 0.6    | 1.1    | 0.6    |
| 23.2   | 19.6   | 12.5   | 12.1   | 10.5   | 15.9   |
| 15.0   | 14.7   | 15.4   | 8.1    | 19.3   | 8.6    |
| 15.0   | 15.8   | 20.4   | 13.6   | 20.0   | 15.7   |
| 1.2    | 5.9    | 2.7    | 2.9    | 1.5    | 3.7    |
| 4.0    | 0.5    | 0.8    | 0.4    | 1.2    | 1.0    |
| 29.1   | 22.3   | 26.2   | 20.7   | 31.1   | 38.5   |
| 3.9    | 4.6    | 8.8    | 3.6    | 10.7   | 10.9   |
| 36.4   | 22.3   | 13.4   | 28.3   | 30.3   | 39.4   |
| 7.4    | 11.9   | 14.2   | 9.2    | 11.1   | 15.6   |
| 1.1    | 1.3    | 2.4    | 1.5    | 1.5    | 1.5    |
| 4.0    | 5.4    | 5.4    | 4.6    | 4.4    | 4.6    |
| 0.6    | 0.5    | 3.5    | 2.2    | 2.6    | 1.5    |
| 10.1   | 18.5   | 16.8   | 15.3   | 8.7    | 17.5   |
| 2.4    | 2.1    | 1.4    | 2.8    | 7.0    | 3.8    |
| 13.1   | 23.1   | 25.2   | 7.6    | 19.0   | 10.5   |
| 2.3    | 2.4    | 2.5    | 1.6    | 2.6    | 2.4    |
| 22.2   | 16.0   | 16.8   | 10.9   | 18.6   | 20.8   |
| 67.1   | 59.9   | 77.8   | 70.0   | 72.3   | 73.2   |
| 7.2    | 3.5    | 8.3    | 9.5    | 4.4    | 9.4    |
| 61.4   | 62.0   | 78.2   | 56.0   | 70.4   | 61.4   |
| 4.5    | 1.2    | 7.9    | 8.6    | 0.3    | 7.8    |
| 19.0   | 17.4   | 17.3   | 17.8   | 26.8   | 22.5   |
| 11.1   | 7.3    | 7.9    | 12.0   | 10.0   | 12.0   |
| 230.3  | 187.0  | 237.1  | 197.7  | 265.1  | 258.1  |
| 276.4  | 345.1  | 262.3  | 340.2  | 317.5  | 387.0  |
| 3.1    | 8.3    | 1.9    | 0.5    | 3.3    | 1.7    |
| 5.2    | 3.0    | 5.2    | 1.9    | 2.3    | 4.5    |
| 1.8    | 3.6    | 6.9    | 9.2    | 11.7   | 9.4    |

|       |       |       |       |       |       |
|-------|-------|-------|-------|-------|-------|
| 303.1 | 301.0 | 361.6 | 402.6 | 438.4 | 451.6 |
| 2.7   | 4.1   | 11.3  | 4.2   | 4.8   | 8.5   |
| 4.1   | 1.8   | 1.4   | 5.0   | 1.2   | 10.1  |
| 5.4   | 18.1  | 25.8  | 14.5  | 21.6  | 20.5  |
| 398.7 | 409.4 | 417.9 | 424.4 | 454.5 | 522.4 |
| 22.5  | 36.0  | 26.4  | 22.3  | 16.6  | 33.4  |
| 13.9  | 21.4  | 16.9  | 15.5  | 28.0  | 17.0  |
| 21.9  | 37.9  | 19.7  | 23.7  | 19.8  | 41.4  |
| 5.7   | 7.7   | 7.1   | 6.3   | 7.9   | 5.5   |
| 115.5 | 103.7 | 118.9 | 127.9 | 142.3 | 152.0 |
| 17.7  | 39.6  | 37.3  | 20.3  | 42.7  | 29.7  |
| 3.8   | 9.6   | 4.3   | 8.3   | 15.2  | 6.0   |
| 8.0   | 3.1   | 4.3   | 9.5   | 5.0   | 3.4   |
| 9.0   | 4.2   | 9.3   | 8.2   | 13.8  | 7.0   |
| 11.6  | 12.1  | 8.0   | 8.1   | 9.0   | 9.0   |
| 7.7   | 8.6   | 5.0   | 4.8   | 2.8   | 2.1   |
| 154.8 | 107.4 | 185.6 | 149.0 | 188.4 | 222.5 |
| 2.6   | 4.2   | 6.9   | 2.8   | 5.5   | 5.0   |
| 0.8   | 0.8   | 1.2   | 2.1   | 2.8   | 1.1   |
| 2.4   | 9.2   | 4.2   | 5.6   | 4.5   | 9.4   |
| 4.4   | 5.1   | 6.8   | 9.3   | 7.8   | 5.9   |
| 11.1  | 25.5  | 23.4  | 22.9  | 33.2  | 28.2  |
| 65.8  | 53.8  | 77.4  | 67.0  | 68.8  | 79.9  |
| 5.7   | 19.0  | 8.1   | 7.0   | 4.5   | 7.4   |
| 332.7 | 264.4 | 203.0 | 226.7 | 197.6 | 429.3 |
| 1.2   | 2.7   | 2.0   | 1.6   | 1.1   | 1.8   |
| 31.2  | 23.7  | 28.0  | 28.1  | 20.6  | 32.6  |
| 13.6  | 13.2  | 9.4   | 17.8  | 21.1  | 15.7  |
| 0.6   | 1.3   | 0.7   | 2.5   | 1.3   | 0.9   |
| 5.0   | 0.8   | 1.2   | 1.9   | 1.5   | 1.6   |
| 3.5   | 3.3   | 3.3   | 5.1   | 0.7   | 7.7   |
| 4.3   | 0.8   | 0.6   | 1.2   | 0.6   | 1.1   |
| 22.3  | 29.2  | 34.8  | 26.5  | 28.6  | 29.1  |
| 0.4   | 4.9   | 3.3   | 4.0   | 2.7   | 2.3   |
| 6.0   | 11.5  | 14.8  | 8.3   | 6.3   | 6.5   |
| 17.5  | 4.1   | 3.4   | 1.6   | 7.5   | 17.4  |
| 2.6   | 3.8   | 2.2   | 6.6   | 3.8   | 11.7  |
| 1.9   | 1.3   | 1.7   | 1.7   | 1.6   | 2.1   |
| 2.0   | 2.2   | 3.0   | 2.0   | 7.3   | 3.2   |
| 4.7   | 12.6  | 7.7   | 7.7   | 6.6   | 10.1  |
| 1.3   | 2.1   | 4.9   | 3.1   | 1.4   | 2.5   |
| 29.3  | 37.4  | 41.6  | 39.9  | 34.5  | 29.4  |
| 20.3  | 9.2   | 37.4  | 28.4  | 31.4  | 25.7  |
| 0.6   | 6.5   | 1.2   | 0.9   | 0.8   | 1.8   |
| 12.9  | 2.4   | 13.4  | 7.7   | 13.7  | 13.6  |
| 2.6   | 0.9   | 2.7   | 1.7   | 2.6   | 1.9   |
| 8.9   | 5.9   | 14.0  | 7.0   | 7.8   | 12.6  |
| 7.9   | 5.5   | 10.8  | 9.9   | 4.9   | 6.8   |
| 3.4   | 3.8   | 2.9   | 6.2   | 1.0   | 6.0   |
| 5.8   | 4.6   | 21.2  | 15.0  | 16.4  | 21.1  |
| 13.8  | 4.9   | 15.6  | 19.5  | 27.5  | 28.2  |
| 7.9   | 6.7   | 10.5  | 6.7   | 8.0   | 13.7  |
| 2.2   | 1.6   | 3.4   | 3.1   | 2.1   | 3.4   |



|      |      |      |      |      |      |
|------|------|------|------|------|------|
| 2.9  | 4.4  | 2.9  | 4.7  | 1.6  | 4.9  |
| 3.9  | 3.6  | 3.0  | 3.4  | 4.2  | 3.1  |
| 3.4  | 3.3  | 7.1  | 7.1  | 3.4  | 2.9  |
| 24.7 | 31.6 | 46.1 | 24.6 | 31.3 | 40.6 |
| 6.8  | 7.6  | 4.4  | 7.4  | 4.7  | 7.2  |
| 7.5  | 2.0  | 5.1  | 4.9  | 8.5  | 17.6 |
| 17.5 | 10.1 | 7.9  | 10.9 | 9.9  | 14.4 |
| 4.3  | 6.8  | 7.1  | 3.4  | 0.7  | 4.1  |
| 8.9  | 17.4 | 13.5 | 16.1 | 10.9 | 17.4 |
| 19.3 | 19.6 | 23.2 | 20.2 | 29.7 | 15.9 |
| 1.8  | 0.2  | 3.1  | 4.3  | 7.4  | 5.1  |
| 7.6  | 18.6 | 5.7  | 6.9  | 8.2  | 6.8  |
| 2.7  | 12.1 | 5.2  | 3.8  | 3.8  | 2.5  |
| 24.6 | 24.0 | 13.4 | 32.8 | 31.8 | 23.8 |
| 12.4 | 13.0 | 17.5 | 5.5  | 13.5 | 14.9 |
| 13.5 | 13.3 | 4.8  | 7.5  | 10.0 | 4.9  |
| 0.8  | 5.0  | 8.2  | 10.0 | 3.7  | 3.5  |
| 13.0 | 16.4 | 14.9 | 2.2  | 10.7 | 9.2  |
| 2.0  | 3.3  | 2.5  | 12.1 | 2.0  | 2.2  |
| 1.3  | 2.0  | 2.4  | 1.4  | 1.3  | 2.1  |
| 17.7 | 16.5 | 10.7 | 5.6  | 9.0  | 12.5 |
| 2.5  | 8.7  | 3.4  | 7.0  | 7.2  | 10.8 |
| 3.7  | 9.7  | 5.9  | 3.1  | 6.8  | 4.3  |
| 1.2  | 12.3 | 4.0  | 1.8  | 3.8  | 6.9  |
| 0.6  | 10.8 | 4.7  | 1.3  | 0.8  | 0.4  |
| 13.3 | 15.3 | 6.0  | 14.7 | 8.6  | 13.6 |
| 9.5  | 6.6  | 23.0 | 12.3 | 1.8  | 14.1 |
| 8.3  | 3.5  | 6.8  | 9.9  | 6.8  | 6.6  |
| 28.3 | 27.2 | 24.2 | 29.3 | 26.2 | 30.2 |
| 5.6  | 6.8  | 6.0  | 8.2  | 7.0  | 6.8  |
| 2.3  | 0.6  | 7.9  | 1.3  | 3.3  | 1.4  |
| 8.8  | 6.2  | 15.3 | 13.0 | 24.0 | 21.3 |
| 9.4  | 16.1 | 5.2  | 2.7  | 11.0 | 3.2  |
| 2.2  | 7.8  | 2.7  | 3.1  | 4.3  | 2.6  |
| 7.8  | 7.4  | 8.5  | 6.5  | 14.4 | 9.4  |
| 1.1  | 7.8  | 1.4  | 1.2  | 1.9  | 0.8  |
| 0.9  | 0.7  | 1.6  | 2.4  | 2.8  | 7.6  |
| 5.5  | 0.5  | 12.7 | 3.9  | 11.9 | 3.2  |
| 0.8  | 1.2  | 0.7  | 1.2  | 7.6  | 1.4  |
| 1.5  | 2.6  | 2.5  | 5.4  | 2.3  | 2.4  |
| 7.1  | 1.5  | 3.9  | 8.7  | 1.0  | 2.3  |
| 6.3  | 8.0  | 2.6  | 2.9  | 3.2  | 16.0 |
| 2.2  | 3.7  | 4.0  | 7.2  | 5.6  | 3.7  |
| 6.3  | 1.3  | 9.2  | 2.3  | 4.8  | 10.3 |
| 6.9  | 11.6 | 0.7  | 6.0  | 4.8  | 9.2  |
| 1.6  | 7.0  | 11.2 | 3.8  | 7.3  | 2.6  |
| 11.5 | 7.2  | 6.9  | 13.8 | 8.4  | 2.4  |
| 1.2  | 1.4  | 2.3  | 2.4  | 1.4  | 1.8  |
| 6.6  | 2.4  | 1.2  | 3.8  | 8.2  | 6.1  |
| 35.1 | 14.9 | 23.1 | 42.5 | 17.1 | 30.7 |
| 3.6  | 15.2 | 7.6  | 15.5 | 10.5 | 17.6 |
| 5.6  | 1.7  | 3.0  | 5.4  | 3.4  | 9.9  |
| 2.9  | 2.0  | 1.8  | 3.0  | 1.6  | 1.4  |

|       |       |       |       |       |       |
|-------|-------|-------|-------|-------|-------|
| 2.7   | 2.5   | 1.2   | 9.5   | 4.1   | 4.4   |
| 6.1   | 0.4   | 4.0   | 0.9   | 1.4   | 1.3   |
| 4.7   | 0.8   | 0.7   | 0.6   | 1.1   | 0.7   |
| 16.5  | 2.0   | 9.8   | 10.4  | 9.2   | 7.3   |
| 12.8  | 3.0   | 10.0  | 14.7  | 15.3  | 10.9  |
| 11.3  | 24.3  | 5.0   | 11.9  | 16.7  | 18.0  |
| 29.4  | 5.7   | 14.7  | 20.7  | 13.0  | 28.6  |
| 1.2   | 7.8   | 0.9   | 3.0   | 5.1   | 0.7   |
| 6.7   | 7.4   | 5.6   | 0.7   | 3.5   | 10.4  |
| 123.4 | 151.9 | 127.5 | 149.3 | 157.7 | 163.6 |
| 0.7   | 4.5   | 0.6   | 3.5   | 4.7   | 1.9   |
| 162.2 | 185.2 | 139.7 | 181.6 | 141.1 | 185.3 |
| 20.3  | 18.1  | 17.7  | 8.7   | 15.3  | 18.1  |
| 1.8   | 1.9   | 3.4   | 3.0   | 1.3   | 6.4   |
| 13.9  | 12.3  | 14.3  | 10.7  | 14.2  | 7.6   |
| 2.2   | 5.6   | 7.6   | 0.6   | 4.2   | 6.3   |
| 6.7   | 0.9   | 11.6  | 2.1   | 2.4   | 2.8   |
| 2.0   | 9.2   | 6.5   | 1.7   | 5.0   | 2.3   |
| 1.8   | 4.2   | 8.0   | 4.1   | 3.9   | 8.2   |
| 11.0  | 13.8  | 11.8  | 5.1   | 12.0  | 11.3  |
| 1.1   | 0.7   | 1.3   | 1.2   | 3.0   | 0.8   |
| 18.0  | 18.3  | 19.5  | 12.7  | 2.4   | 6.6   |
| 10.2  | 4.5   | 5.9   | 9.3   | 6.6   | 9.8   |
| 5.0   | 2.7   | 4.0   | 1.8   | 1.4   | 2.0   |
| 2.2   | 11.4  | 2.7   | 1.1   | 0.9   | 0.7   |
| 5.1   | 10.1  | 1.8   | 1.0   | 4.9   | 1.8   |
| 7.8   | 6.4   | 17.5  | 20.5  | 11.6  | 16.4  |
| 36.5  | 42.4  | 58.2  | 35.7  | 43.8  | 50.4  |
| 65.5  | 72.1  | 65.1  | 49.9  | 59.8  | 100.8 |
| 4.4   | 16.3  | 9.4   | 6.1   | 5.6   | 12.6  |
| 1.7   | 1.2   | 2.3   | 2.7   | 2.1   | 2.2   |
| 1.7   | 2.0   | 1.5   | 2.1   | 4.4   | 1.2   |
| 2.1   | 3.4   | 1.9   | 4.3   | 2.4   | 5.9   |
| 7.9   | 16.0  | 9.8   | 11.2  | 8.9   | 11.2  |
| 1.2   | 2.5   | 1.5   | 2.2   | 4.8   | 1.3   |
| 1.7   | 7.8   | 3.4   | 10.6  | 2.0   | 7.0   |
| 1.8   | 1.1   | 2.5   | 2.5   | 1.0   | 1.3   |
| 16.2  | 21.9  | 19.1  | 11.5  | 9.1   | 12.2  |
| 19.9  | 41.1  | 15.7  | 35.4  | 25.3  | 37.7  |
| 2.4   | 0.8   | 0.8   | 1.6   | 0.8   | 0.8   |
| 58.7  | 51.7  | 52.9  | 52.9  | 52.5  | 69.1  |
| 157.2 | 123.6 | 153.7 | 158.0 | 190.1 | 197.1 |
| 5.9   | 7.5   | 5.3   | 1.5   | 7.1   | 3.3   |
| 7.6   | 10.8  | 11.2  | 21.3  | 11.1  | 16.5  |
| 4.9   | 1.7   | 0.2   | 2.7   | 2.8   | 2.2   |
| 13.6  | 14.2  | 14.1  | 15.7  | 14.0  | 17.7  |
| 574.6 | 384.1 | 572.5 | 597.7 | 738.1 | 809.2 |
| 27.0  | 10.6  | 5.3   | 14.6  | 17.9  | 8.6   |
| 361.6 | 347.3 | 354.9 | 402.6 | 408.5 | 494.9 |
| 0.8   | 0.7   | 0.9   | 3.2   | 1.8   | 4.6   |
| 5.6   | 20.4  | 4.6   | 4.6   | 4.6   | 2.1   |
| 3.9   | 3.5   | 4.0   | 3.0   | 1.8   | 3.8   |
| 12.5  | 16.8  | 17.0  | 8.1   | 8.3   | 13.1  |

|       |       |       |       |       |       |
|-------|-------|-------|-------|-------|-------|
| 9.1   | 4.4   | 7.2   | 8.5   | 7.7   | 5.0   |
| 36.3  | 28.7  | 31.2  | 30.3  | 36.7  | 49.3  |
| 2.5   | 12.4  | 0.6   | 4.0   | 5.3   | 1.6   |
| 5.1   | 12.5  | 11.8  | 1.4   | 13.7  | 10.9  |
| 2.4   | 9.3   | 7.4   | 3.8   | 4.2   | 6.8   |
| 2.8   | 1.1   | 1.5   | 2.8   | 2.4   | 3.7   |
| 3.3   | 1.9   | 3.1   | 2.6   | 2.2   | 3.4   |
| 220.4 | 229.3 | 280.5 | 233.8 | 300.2 | 299.8 |
| 30.0  | 19.4  | 29.6  | 28.3  | 34.5  | 35.4  |
| 14.3  | 22.2  | 3.7   | 2.5   | 22.8  | 6.5   |
| 65.7  | 64.8  | 83.3  | 83.7  | 87.5  | 95.5  |
| 42.4  | 36.8  | 42.1  | 29.3  | 30.5  | 27.3  |
| 78.5  | 99.6  | 79.5  | 72.9  | 98.4  | 108.3 |
| 0.6   | 1.2   | 2.6   | 1.0   | 1.5   | 0.9   |
| 298.2 | 307.6 | 369.2 | 370.8 | 429.2 | 432.9 |
| 152.0 | 128.0 | 145.4 | 131.9 | 148.5 | 188.0 |
| 6.8   | 7.8   | 3.7   | 3.7   | 2.7   | 10.4  |
| 6.3   | 1.2   | 7.3   | 7.3   | 5.9   | 8.5   |
| 3.8   | 2.8   | 9.4   | 5.7   | 3.2   | 20.0  |
| 25.8  | 26.0  | 33.0  | 22.2  | 34.2  | 34.7  |
| 3.8   | 1.3   | 2.4   | 0.9   | 4.7   | 1.6   |
| 112.1 | 86.1  | 122.2 | 111.8 | 124.0 | 163.5 |
| 571.0 | 482.3 | 566.6 | 569.5 | 642.6 | 660.2 |
| 12.5  | 22.1  | 16.3  | 16.8  | 18.0  | 8.2   |
| 2.9   | 0.9   | 5.2   | 4.7   | 4.8   | 4.8   |
| 122.2 | 88.6  | 122.2 | 130.0 | 169.3 | 144.6 |
| 75.3  | 81.4  | 73.1  | 94.3  | 87.1  | 100.0 |
| 3.7   | 3.8   | 3.6   | 3.3   | 2.9   | 4.3   |
| 0.5   | 0.5   | 2.7   | 7.0   | 0.8   | 0.8   |
| 15.0  | 23.9  | 14.4  | 13.9  | 20.4  | 23.7  |
| 8.3   | 22.5  | 27.0  | 18.8  | 29.0  | 32.4  |
| 2.2   | 3.0   | 2.7   | 4.2   | 1.6   | 2.8   |
| 31.0  | 35.1  | 29.7  | 33.1  | 35.3  | 46.4  |
| 7.5   | 7.3   | 7.1   | 10.2  | 9.3   | 7.8   |
| 20.2  | 17.7  | 13.0  | 25.2  | 20.7  | 28.8  |
| 188.3 | 168.9 | 274.5 | 288.3 | 318.2 | 276.5 |
| 3.5   | 2.6   | 4.0   | 3.9   | 6.2   | 10.3  |
| 78.5  | 60.7  | 73.4  | 75.8  | 104.5 | 81.3  |
| 6.4   | 0.8   | 4.3   | 7.1   | 6.7   | 5.4   |
| 8.9   | 1.3   | 9.7   | 6.7   | 7.4   | 14.5  |
| 3.6   | 4.6   | 5.0   | 5.4   | 2.8   | 9.4   |
| 8.6   | 4.5   | 10.5  | 14.2  | 13.3  | 8.5   |
| 3.1   | 3.7   | 3.2   | 3.6   | 2.8   | 8.0   |
| 4.6   | 5.1   | 8.3   | 4.4   | 8.9   | 2.4   |
| 1.8   | 3.7   | 2.8   | 3.7   | 3.4   | 5.6   |
| 10.9  | 12.1  | 9.2   | 14.6  | 9.8   | 10.1  |
| 45.9  | 41.8  | 61.8  | 31.1  | 64.8  | 60.9  |
| 12.0  | 9.3   | 17.3  | 9.9   | 16.2  | 13.8  |
| 0.9   | 1.4   | 3.6   | 4.5   | 1.1   | 1.6   |
| 48.2  | 36.4  | 43.1  | 57.5  | 46.7  | 62.9  |
| 16.9  | 9.9   | 2.6   | 5.3   | 6.3   | 5.5   |
| 115.9 | 124.6 | 130.5 | 115.4 | 138.4 | 156.8 |
| 0.7   | 0.6   | 1.1   | 1.4   | 1.0   | 1.0   |

|       |       |       |       |       |       |
|-------|-------|-------|-------|-------|-------|
| 5.3   | 6.1   | 3.8   | 1.3   | 3.1   | 4.8   |
| 374.1 | 347.9 | 410.1 | 359.7 | 461.0 | 548.5 |
| 304.6 | 295.5 | 295.9 | 338.9 | 347.5 | 371.9 |
| 1.4   | 5.1   | 8.1   | 5.3   | 6.3   | 9.8   |
| 4.5   | 0.4   | 2.4   | 0.8   | 4.3   | 5.9   |
| 17.3  | 2.0   | 8.1   | 9.2   | 14.8  | 6.4   |
| 3.9   | 2.8   | 2.2   | 5.8   | 2.1   | 4.6   |
| 260.3 | 239.5 | 277.8 | 257.5 | 239.5 | 259.3 |
| 21.8  | 18.3  | 13.0  | 9.2   | 6.5   | 21.1  |
| 16.6  | 10.1  | 6.0   | 5.5   | 9.0   | 2.8   |
| 1.2   | 0.9   | 1.2   | 5.2   | 0.9   | 2.0   |
| 2.2   | 3.6   | 3.0   | 1.8   | 2.7   | 2.2   |
| 645.2 | 564.1 | 649.5 | 587.7 | 761.1 | 791.9 |
| 8.8   | 2.9   | 2.4   | 1.6   | 7.6   | 2.5   |
| 151.4 | 216.1 | 153.2 | 177.9 | 161.0 | 210.7 |
| 1.8   | 3.1   | 1.9   | 1.6   | 1.3   | 1.6   |
| 1.1   | 0.5   | 5.4   | 3.4   | 4.7   | 2.1   |
| 5.3   | 2.3   | 4.4   | 5.0   | 4.9   | 4.9   |
| 16.2  | 14.3  | 14.3  | 13.6  | 17.7  | 12.6  |
| 6.6   | 11.1  | 7.2   | 8.4   | 4.5   | 8.5   |
| 4.6   | 7.6   | 6.0   | 2.2   | 7.6   | 8.1   |
| 13.9  | 8.3   | 13.4  | 5.7   | 9.5   | 6.7   |
| 13.5  | 8.8   | 14.7  | 12.8  | 12.1  | 10.7  |
| 10.6  | 17.1  | 17.1  | 16.8  | 21.3  | 13.5  |
| 14.6  | 6.5   | 19.9  | 7.3   | 4.5   | 9.8   |
| 70.6  | 56.9  | 49.8  | 41.7  | 60.4  | 66.8  |
| 5.7   | 9.1   | 11.8  | 2.2   | 2.4   | 2.1   |
| 1.0   | 0.9   | 1.5   | 0.9   | 1.1   | 1.2   |
| 7.0   | 4.5   | 15.0  | 9.8   | 19.2  | 13.7  |
| 1.6   | 17.7  | 14.4  | 11.9  | 8.2   | 7.2   |
| 8.0   | 2.5   | 5.4   | 12.7  | 12.5  | 12.0  |
| 28.3  | 3.0   | 6.9   | 8.4   | 16.1  | 15.0  |
| 21.1  | 21.4  | 25.8  | 21.8  | 35.4  | 38.1  |
| 15.2  | 19.9  | 14.3  | 9.9   | 8.1   | 21.7  |
| 4.6   | 8.2   | 1.7   | 4.2   | 0.7   | 1.2   |
| 12.7  | 7.2   | 14.3  | 21.5  | 16.6  | 24.8  |
| 7.2   | 2.5   | 9.7   | 3.2   | 3.9   | 1.5   |
| 41.0  | 42.0  | 41.3  | 46.8  | 44.5  | 37.3  |
| 3.6   | 5.7   | 1.6   | 3.8   | 8.5   | 1.0   |
| 20.9  | 16.4  | 4.8   | 9.6   | 11.6  | 22.6  |
| 158.0 | 162.3 | 152.6 | 167.3 | 161.8 | 185.7 |
| 425.8 | 601.4 | 449.7 | 540.4 | 486.7 | 621.5 |
| 10.1  | 1.5   | 7.6   | 5.0   | 12.0  | 7.9   |
| 44.1  | 35.5  | 31.9  | 38.0  | 59.3  | 65.8  |
| 18.9  | 20.2  | 19.0  | 15.6  | 24.9  | 32.5  |
| 11.2  | 0.7   | 5.6   | 7.2   | 6.3   | 5.9   |
| 5.0   | 1.2   | 8.1   | 5.2   | 2.8   | 3.7   |
| 2.8   | 1.0   | 5.6   | 2.1   | 4.4   | 1.4   |
| 15.0  | 35.4  | 20.8  | 7.6   | 23.3  | 12.7  |
| 17.6  | 26.7  | 23.8  | 22.8  | 9.8   | 22.1  |
| 3.0   | 0.9   | 1.2   | 1.1   | 1.1   | 4.9   |
| 252.3 | 263.2 | 306.1 | 328.6 | 368.8 | 368.5 |
| 27.6  | 42.5  | 29.2  | 30.1  | 31.4  | 33.4  |

|        |        |        |        |        |        |
|--------|--------|--------|--------|--------|--------|
| 271.0  | 270.9  | 388.1  | 360.3  | 326.9  | 463.5  |
| 4.9    | 15.9   | 18.5   | 12.9   | 12.4   | 15.9   |
| 3.5    | 2.4    | 3.5    | 2.2    | 2.4    | 1.8    |
| 10.9   | 11.7   | 5.5    | 3.6    | 2.2    | 10.5   |
| 206.8  | 175.3  | 191.9  | 208.2  | 247.8  | 259.9  |
| 14.3   | 25.0   | 16.2   | 9.5    | 16.1   | 9.2    |
| 127.6  | 103.5  | 126.9  | 131.8  | 157.9  | 155.6  |
| 44.7   | 25.7   | 26.2   | 35.0   | 26.7   | 37.0   |
| 62.9   | 69.9   | 51.1   | 48.8   | 61.9   | 55.3   |
| 40.9   | 41.9   | 39.1   | 35.2   | 36.0   | 53.3   |
| 11.4   | 15.8   | 12.8   | 24.0   | 13.7   | 23.2   |
| 4.7    | 27.1   | 13.0   | 20.4   | 13.8   | 13.8   |
| 4.0    | 8.6    | 1.9    | 2.3    | 5.9    | 4.4    |
| 11.9   | 11.9   | 5.3    | 5.1    | 8.5    | 7.9    |
| 6.0    | 3.0    | 7.5    | 2.2    | 3.1    | 3.2    |
| 276.3  | 214.7  | 274.8  | 272.5  | 323.9  | 306.8  |
| 1.0    | 1.6    | 1.5    | 6.5    | 2.4    | 4.4    |
| 375.0  | 371.4  | 354.6  | 357.0  | 511.2  | 407.1  |
| 4.6    | 9.3    | 4.0    | 4.8    | 2.9    | 4.0    |
| 600.1  | 521.7  | 578.7  | 585.4  | 688.3  | 743.9  |
| 0.4    | 1.5    | 1.6    | 2.2    | 0.5    | 0.5    |
| 18.2   | 15.9   | 26.2   | 15.5   | 29.3   | 29.6   |
| 345.3  | 344.1  | 383.1  | 380.0  | 404.7  | 421.5  |
| 612.4  | 588.8  | 765.1  | 675.8  | 666.1  | 765.3  |
| 0.8    | 0.6    | 1.7    | 3.8    | 2.2    | 3.1    |
| 9.0    | 6.5    | 11.8   | 14.9   | 7.5    | 9.0    |
| 8.4    | 2.2    | 4.6    | 3.1    | 2.7    | 4.8    |
| 32.1   | 26.5   | 39.6   | 33.8   | 40.8   | 42.5   |
| 3.1    | 0.9    | 4.0    | 2.2    | 0.9    | 1.4    |
| 10.5   | 21.2   | 19.2   | 13.9   | 25.8   | 37.3   |
| 4.7    | 5.3    | 13.5   | 3.8    | 6.0    | 5.0    |
| 143.3  | 154.4  | 164.3  | 164.9  | 199.9  | 204.7  |
| 8.4    | 8.2    | 4.4    | 11.3   | 15.4   | 9.0    |
| 0.7    | 0.2    | 0.6    | 0.8    | 0.7    | 0.5    |
| 1602.6 | 1499.1 | 1502.0 | 1550.5 | 1622.3 | 1895.7 |
| 8.1    | 7.8    | 3.8    | 11.5   | 7.1    | 10.1   |
| 2.1    | 2.7    | 4.8    | 1.8    | 4.1    | 5.2    |
| 4.9    | 13.1   | 10.1   | 11.3   | 10.2   | 8.9    |
| 61.5   | 13.7   | 36.1   | 41.7   | 61.6   | 62.1   |
| 48.3   | 55.1   | 58.5   | 42.1   | 60.2   | 61.5   |
| 12.3   | 3.0    | 10.6   | 16.3   | 5.8    | 8.5    |
| 2.5    | 7.2    | 1.2    | 4.2    | 3.4    | 5.7    |
| 479.5  | 417.8  | 531.9  | 504.0  | 525.2  | 548.5  |
| 80.3   | 100.5  | 75.7   | 82.8   | 73.4   | 99.2   |
| 13.4   | 7.0    | 7.6    | 6.8    | 11.7   | 15.6   |
| 0.6    | 3.8    | 2.6    | 1.3    | 2.2    | 3.9    |
| 6.1    | 1.1    | 1.2    | 3.6    | 2.8    | 2.6    |
| 19.2   | 36.5   | 33.0   | 33.8   | 36.6   | 45.9   |
| 3.5    | 1.4    | 6.7    | 3.1    | 1.9    | 3.7    |
| 9.4    | 11.9   | 10.2   | 5.4    | 5.3    | 8.8    |
| 22.2   | 27.0   | 15.9   | 23.6   | 19.6   | 23.5   |
| 2.5    | 4.6    | 8.3    | 3.3    | 1.8    | 2.5    |
| 16.5   | 7.6    | 7.2    | 17.3   | 8.5    | 13.8   |

|       |       |       |       |       |       |
|-------|-------|-------|-------|-------|-------|
| 150.0 | 124.0 | 179.7 | 212.0 | 221.3 | 215.2 |
| 13.9  | 16.0  | 16.2  | 8.2   | 8.2   | 18.6  |
| 19.7  | 14.7  | 24.3  | 22.3  | 14.0  | 21.1  |
| 106.8 | 60.1  | 118.3 | 114.2 | 109.6 | 136.0 |
| 1.5   | 3.5   | 2.2   | 6.6   | 3.0   | 3.6   |
| 4.3   | 2.3   | 3.0   | 0.8   | 0.7   | 1.5   |
| 9.8   | 8.3   | 1.9   | 1.5   | 2.4   | 2.4   |
| 34.6  | 49.5  | 46.0  | 49.8  | 67.5  | 63.0  |
| 6.8   | 1.7   | 13.0  | 7.6   | 9.2   | 4.2   |
| 25.0  | 15.2  | 15.6  | 19.2  | 15.1  | 22.0  |
| 3.2   | 3.3   | 15.0  | 16.0  | 9.9   | 14.2  |
| 8.5   | 0.8   | 2.5   | 4.3   | 3.1   | 4.8   |
| 94.7  | 67.9  | 67.9  | 76.6  | 74.0  | 111.6 |
| 11.9  | 23.8  | 21.1  | 23.1  | 14.0  | 25.2  |
| 7.0   | 0.5   | 1.4   | 2.1   | 5.2   | 8.1   |
| 0.9   | 1.5   | 0.9   | 0.8   | 1.1   | 0.9   |
| 5.6   | 13.9  | 7.2   | 3.6   | 12.5  | 6.0   |
| 48.9  | 43.3  | 32.0  | 43.5  | 46.9  | 42.1  |
| 73.9  | 77.7  | 93.1  | 75.2  | 97.4  | 83.6  |
| 4.6   | 7.2   | 4.4   | 4.5   | 3.9   | 9.5   |
| 258.0 | 175.9 | 191.2 | 186.7 | 240.5 | 399.0 |
| 9.5   | 0.8   | 9.7   | 6.1   | 6.8   | 5.4   |
| 1.7   | 2.7   | 2.5   | 2.1   | 10.2  | 2.7   |
| 7.3   | 1.7   | 18.3  | 15.2  | 9.4   | 19.0  |
| 1.7   | 0.9   | 2.7   | 1.2   | 5.4   | 0.6   |
| 2.2   | 17.1  | 2.0   | 6.4   | 3.5   | 3.5   |
| 17.6  | 19.8  | 15.5  | 16.8  | 2.7   | 31.1  |
| 3.0   | 1.9   | 12.0  | 7.8   | 3.0   | 2.0   |
| 17.5  | 3.5   | 7.7   | 17.0  | 21.4  | 28.3  |
| 4.3   | 3.7   | 3.7   | 1.8   | 8.3   | 2.1   |
| 0.8   | 1.4   | 1.1   | 0.8   | 0.8   | 0.8   |
| 21.1  | 20.0  | 14.6  | 3.2   | 5.5   | 4.2   |
| 74.5  | 101.4 | 81.5  | 91.0  | 99.0  | 60.8  |
| 87.6  | 80.8  | 98.1  | 90.0  | 98.6  | 108.8 |
| 39.8  | 40.0  | 33.0  | 29.5  | 28.0  | 22.1  |
| 22.9  | 19.6  | 23.2  | 18.0  | 18.3  | 21.5  |
| 385.3 | 385.2 | 375.6 | 435.5 | 492.0 | 518.5 |
| 3.1   | 11.7  | 5.8   | 3.5   | 5.8   | 5.1   |
| 41.8  | 52.2  | 49.4  | 57.2  | 46.4  | 31.5  |
| 7.2   | 2.0   | 1.7   | 15.3  | 5.7   | 4.4   |
| 94.4  | 91.8  | 108.4 | 97.7  | 127.6 | 118.0 |
| 12.8  | 13.0  | 16.3  | 21.4  | 19.8  | 18.6  |
| 15.2  | 13.5  | 4.9   | 6.2   | 7.1   | 12.8  |
| 4.9   | 10.2  | 3.9   | 7.1   | 6.7   | 6.1   |
| 35.9  | 22.6  | 27.0  | 21.4  | 32.0  | 40.2  |
| 101.6 | 83.4  | 93.8  | 97.5  | 110.3 | 119.7 |
| 59.1  | 120.4 | 69.8  | 103.4 | 58.3  | 75.2  |
| 11.5  | 14.0  | 20.1  | 26.7  | 13.0  | 16.4  |
| 2.4   | 3.3   | 4.2   | 3.9   | 5.3   | 3.4   |
| 3.9   | 12.0  | 5.1   | 7.3   | 9.8   | 4.5   |
| 17.8  | 10.5  | 20.2  | 20.8  | 14.2  | 21.6  |
| 2.8   | 2.2   | 3.2   | 2.0   | 2.5   | 7.5   |
| 2.9   | 1.7   | 10.9  | 1.2   | 13.6  | 9.9   |

|        |        |        |        |        |        |
|--------|--------|--------|--------|--------|--------|
| 6.6    | 3.8    | 8.0    | 5.0    | 7.3    | 3.9    |
| 50.6   | 104.5  | 58.5   | 106.3  | 66.0   | 94.6   |
| 2.7    | 3.2    | 1.9    | 2.0    | 3.0    | 2.8    |
| 7.0    | 13.2   | 10.6   | 8.8    | 10.2   | 2.5    |
| 7.4    | 7.1    | 11.2   | 5.1    | 3.3    | 10.0   |
| 10.7   | 15.5   | 4.9    | 9.5    | 7.3    | 7.9    |
| 2.3    | 0.5    | 0.8    | 2.4    | 2.2    | 3.6    |
| 8.7    | 10.5   | 5.5    | 6.6    | 8.2    | 2.9    |
| 7.9    | 3.6    | 2.6    | 10.1   | 7.1    | 3.6    |
| 5.3    | 6.2    | 11.1   | 3.0    | 4.1    | 7.0    |
| 7.9    | 14.1   | 10.3   | 8.2    | 13.4   | 8.0    |
| 6.1    | 6.9    | 5.3    | 3.4    | 12.5   | 6.3    |
| 3.4    | 3.9    | 3.1    | 2.7    | 1.5    | 6.8    |
| 12.2   | 5.6    | 4.1    | 16.0   | 17.9   | 7.8    |
| 8.4    | 5.4    | 8.3    | 5.2    | 2.0    | 8.0    |
| 4.2    | 9.2    | 5.6    | 6.3    | 4.8    | 6.4    |
| 13.5   | 8.7    | 16.6   | 12.5   | 7.1    | 8.2    |
| 1.0    | 2.4    | 1.5    | 0.6    | 0.5    | 0.5    |
| 6.6    | 4.2    | 4.0    | 5.2    | 2.4    | 7.3    |
| 97.8   | 95.1   | 79.7   | 96.4   | 113.1  | 115.8  |
| 13.3   | 2.7    | 4.3    | 9.8    | 7.2    | 3.3    |
| 1.2    | 1.3    | 1.5    | 0.7    | 3.2    | 8.1    |
| 1.9    | 1.0    | 1.4    | 1.3    | 1.0    | 1.3    |
| 5.2    | 1.9    | 1.0    | 2.3    | 3.1    | 6.1    |
| 2.8    | 5.8    | 4.4    | 0.6    | 8.1    | 4.3    |
| 3.7    | 1.2    | 2.1    | 1.3    | 3.2    | 1.4    |
| 15.7   | 3.6    | 9.7    | 4.0    | 11.6   | 9.3    |
| 2.0    | 1.0    | 1.5    | 2.5    | 1.7    | 1.2    |
| 13.0   | 7.3    | 12.3   | 11.3   | 12.4   | 9.0    |
| 5.3    | 4.8    | 0.8    | 1.1    | 2.2    | 3.7    |
| 3679.2 | 2663.1 | 2985.5 | 2518.4 | 2150.2 | 3563.5 |
| 2.3    | 0.4    | 5.0    | 4.6    | 4.7    | 5.1    |
| 322.2  | 278.0  | 363.2  | 308.7  | 349.5  | 405.5  |
| 17.7   | 2.1    | 3.0    | 5.6    | 3.7    | 16.7   |
| 5.6    | 9.5    | 8.5    | 1.3    | 1.7    | 6.7    |
| 52.4   | 61.2   | 68.9   | 72.5   | 73.3   | 65.2   |
| 3.4    | 1.2    | 1.9    | 1.9    | 1.2    | 6.8    |
| 247.6  | 292.7  | 308.7  | 357.2  | 322.0  | 321.3  |
| 61.7   | 59.9   | 68.4   | 59.2   | 71.9   | 75.4   |
| 1.0    | 1.6    | 1.2    | 1.3    | 2.9    | 6.6    |
| 18.4   | 22.0   | 16.0   | 16.6   | 20.1   | 23.7   |
| 0.9    | 1.3    | 1.2    | 1.0    | 0.8    | 0.6    |
| 23.7   | 22.8   | 23.1   | 27.4   | 19.4   | 30.4   |
| 1.3    | 1.5    | 0.8    | 0.8    | 0.6    | 6.5    |
| 1243.4 | 1099.6 | 1155.8 | 1126.1 | 1138.5 | 1353.7 |
| 33.0   | 40.5   | 38.4   | 36.3   | 40.7   | 52.5   |
| 1.3    | 2.7    | 1.0    | 1.4    | 1.3    | 2.2    |
| 2.0    | 4.0    | 6.9    | 1.3    | 9.4    | 4.8    |
| 5.2    | 1.0    | 6.2    | 2.5    | 7.8    | 7.4    |
| 16.7   | 21.7   | 19.9   | 17.5   | 17.8   | 28.7   |
| 1.5    | 0.9    | 3.6    | 2.2    | 1.2    | 2.3    |
| 9.3    | 9.0    | 9.1    | 10.2   | 3.7    | 6.8    |
| 21.9   | 23.1   | 16.5   | 17.3   | 31.2   | 28.5   |

|        |        |        |        |        |        |
|--------|--------|--------|--------|--------|--------|
| 2.9    | 3.1    | 2.4    | 5.4    | 1.8    | 1.1    |
| 39.0   | 50.6   | 42.8   | 45.5   | 50.8   | 58.0   |
| 242.0  | 225.8  | 249.9  | 235.5  | 280.8  | 261.3  |
| 3.9    | 4.0    | 4.3    | 10.6   | 2.9    | 6.4    |
| 21.2   | 12.3   | 17.4   | 14.0   | 23.8   | 15.9   |
| 9.3    | 7.3    | 10.8   | 4.8    | 13.8   | 12.5   |
| 525.9  | 396.5  | 559.9  | 537.1  | 696.5  | 655.6  |
| 3.8    | 10.2   | 1.1    | 7.2    | 8.3    | 7.5    |
| 25.4   | 29.0   | 22.3   | 28.0   | 24.8   | 25.9   |
| 62.5   | 47.5   | 33.9   | 39.7   | 34.0   | 58.4   |
| 2.9    | 3.6    | 3.1    | 3.0    | 0.9    | 2.9    |
| 275.8  | 137.8  | 256.7  | 232.7  | 307.1  | 290.1  |
| 13.4   | 11.7   | 9.0    | 15.3   | 23.5   | 14.6   |
| 16.8   | 41.3   | 37.9   | 33.5   | 13.8   | 40.9   |
| 5.5    | 2.1    | 11.8   | 1.1    | 4.1    | 7.8    |
| 3.3    | 2.4    | 8.7    | 14.3   | 4.0    | 3.9    |
| 4.7    | 0.5    | 1.0    | 2.3    | 0.4    | 8.8    |
| 11.8   | 22.6   | 19.4   | 8.5    | 17.0   | 19.5   |
| 14.7   | 2.2    | 7.1    | 3.3    | 7.4    | 9.0    |
| 60.2   | 24.9   | 51.3   | 54.7   | 47.6   | 63.9   |
| 13.5   | 16.5   | 10.9   | 11.2   | 11.4   | 13.5   |
| 24.3   | 14.0   | 29.7   | 11.7   | 29.9   | 47.6   |
| 6.5    | 3.8    | 4.9    | 2.6    | 2.5    | 2.6    |
| 31.9   | 45.4   | 30.1   | 39.8   | 42.4   | 34.2   |
| 1823.1 | 1693.1 | 1896.8 | 1884.5 | 2064.6 | 2075.7 |
| 3.2    | 2.0    | 5.1    | 8.6    | 7.7    | 2.9    |
| 106.9  | 115.3  | 138.0  | 89.0   | 106.8  | 162.6  |
| 2.3    | 1.2    | 5.4    | 5.3    | 13.0   | 4.3    |
| 393.1  | 331.4  | 356.8  | 338.6  | 352.6  | 436.4  |
| 5.7    | 8.1    | 4.0    | 6.5    | 4.4    | 8.2    |
| 1.0    | 1.2    | 6.3    | 1.5    | 1.0    | 1.1    |
| 1.6    | 1.0    | 2.3    | 1.3    | 4.9    | 2.7    |
| 27.9   | 25.6   | 38.9   | 33.1   | 25.4   | 28.8   |
| 40.8   | 23.2   | 52.4   | 62.7   | 65.4   | 63.7   |
| 66.7   | 75.6   | 55.8   | 62.7   | 66.1   | 85.3   |
| 2.3    | 2.3    | 5.6    | 0.7    | 0.4    | 0.7    |
| 27.6   | 16.4   | 21.1   | 17.1   | 21.9   | 23.7   |
| 3.6    | 4.3    | 10.3   | 16.4   | 11.5   | 14.0   |
| 2.0    | 1.3    | 1.9    | 2.6    | 4.8    | 5.1    |
| 4.2    | 2.0    | 2.9    | 4.3    | 2.1    | 8.2    |
| 29.5   | 26.9   | 40.2   | 27.4   | 33.6   | 33.2   |
| 10.5   | 6.9    | 9.3    | 6.4    | 9.1    | 10.5   |
| 1.2    | 1.7    | 2.2    | 5.3    | 4.3    | 2.5    |
| 2.9    | 2.7    | 5.1    | 3.4    | 5.3    | 4.0    |
| 1.5    | 3.5    | 2.9    | 5.9    | 2.2    | 10.1   |
| 20.0   | 5.1    | 25.2   | 36.9   | 40.5   | 23.6   |
| 2.0    | 1.8    | 1.8    | 1.8    | 7.6    | 2.5    |
| 4.3    | 7.9    | 3.7    | 2.3    | 6.1    | 6.9    |
| 14.2   | 17.4   | 15.0   | 19.4   | 22.7   | 23.5   |
| 686.3  | 646.4  | 658.3  | 754.8  | 727.4  | 784.3  |
| 13.1   | 25.5   | 20.8   | 24.0   | 26.9   | 31.6   |
| 9.1    | 12.0   | 18.1   | 12.7   | 19.8   | 8.7    |
| 1084.2 | 793.2  | 1055.0 | 1139.1 | 1242.9 | 1274.3 |



|       |       |       |       |       |       |
|-------|-------|-------|-------|-------|-------|
| 3.1   | 1.4   | 5.7   | 7.9   | 2.3   | 3.8   |
| 4.9   | 12.5  | 2.5   | 9.2   | 6.2   | 5.6   |
| 7.6   | 24.0  | 14.4  | 8.0   | 13.7  | 14.5  |
| 2.9   | 0.9   | 1.3   | 1.7   | 2.3   | 3.2   |
| 12.7  | 23.5  | 3.4   | 20.8  | 1.3   | 20.2  |
| 6.7   | 2.9   | 3.2   | 2.1   | 2.9   | 2.3   |
| 0.5   | 0.3   | 1.6   | 0.6   | 0.5   | 3.1   |
| 70.2  | 53.8  | 64.5  | 77.4  | 79.0  | 88.0  |
| 11.2  | 10.7  | 5.2   | 11.2  | 5.3   | 6.2   |
| 4.5   | 8.4   | 13.4  | 12.8  | 7.8   | 7.7   |
| 20.6  | 17.3  | 16.4  | 13.2  | 5.7   | 13.3  |
| 19.8  | 2.6   | 4.7   | 3.2   | 3.0   | 3.3   |
| 1.3   | 0.8   | 1.3   | 1.5   | 1.2   | 0.9   |
| 10.5  | 11.3  | 20.0  | 13.4  | 14.0  | 15.4  |
| 4.2   | 6.1   | 8.0   | 3.1   | 3.1   | 5.3   |
| 2.8   | 8.9   | 4.1   | 3.8   | 3.4   | 9.9   |
| 416.0 | 406.5 | 429.4 | 416.1 | 482.6 | 517.4 |
| 9.0   | 1.0   | 13.0  | 10.5  | 4.8   | 7.3   |
| 18.9  | 34.9  | 8.1   | 14.2  | 20.8  | 9.7   |
| 142.1 | 97.2  | 133.6 | 155.4 | 161.2 | 169.4 |
| 90.4  | 80.0  | 104.6 | 99.2  | 124.2 | 130.9 |
| 4.2   | 1.0   | 10.5  | 10.6  | 4.1   | 0.9   |
| 82.0  | 86.3  | 85.8  | 104.4 | 84.8  | 122.9 |
| 15.3  | 58.3  | 8.0   | 35.0  | 34.1  | 20.3  |
| 20.3  | 2.0   | 19.1  | 20.8  | 13.5  | 14.1  |
| 2.2   | 0.1   | 1.3   | 0.4   | 2.8   | 1.6   |
| 6.9   | 20.7  | 15.0  | 12.9  | 15.3  | 16.7  |
| 494.3 | 471.1 | 459.0 | 510.2 | 528.1 | 577.3 |
| 17.5  | 13.1  | 14.7  | 17.8  | 14.4  | 23.8  |
| 9.3   | 3.1   | 7.4   | 4.5   | 7.3   | 24.0  |
| 39.2  | 4.8   | 28.7  | 24.1  | 38.0  | 48.5  |
| 359.7 | 328.4 | 311.2 | 336.9 | 406.1 | 412.2 |
| 4.8   | 2.2   | 1.7   | 1.7   | 2.7   | 3.6   |
| 63.0  | 67.6  | 62.2  | 62.0  | 69.3  | 89.7  |
| 13.4  | 3.3   | 6.7   | 3.4   | 17.2  | 4.4   |
| 3.4   | 2.9   | 2.0   | 3.7   | 2.7   | 10.7  |
| 48.9  | 43.6  | 39.8  | 31.4  | 45.4  | 59.1  |
| 6.8   | 9.9   | 3.8   | 8.2   | 13.2  | 9.4   |
| 30.2  | 31.7  | 26.3  | 41.6  | 33.8  | 42.3  |
| 52.5  | 41.4  | 64.4  | 66.2  | 77.8  | 84.5  |
| 24.4  | 15.0  | 21.2  | 21.0  | 23.7  | 23.3  |
| 31.1  | 23.7  | 11.2  | 24.8  | 26.9  | 41.4  |
| 244.5 | 133.7 | 241.8 | 287.8 | 285.2 | 286.8 |
| 18.5  | 25.6  | 20.6  | 20.7  | 23.6  | 25.9  |
| 1.0   | 1.2   | 1.2   | 1.1   | 6.0   | 1.3   |
| 8.4   | 3.5   | 5.2   | 4.1   | 6.2   | 8.0   |
| 1.8   | 3.7   | 1.3   | 1.1   | 1.1   | 2.9   |
| 42.9  | 28.8  | 20.3  | 21.9  | 22.6  | 39.1  |
| 4.1   | 1.3   | 1.2   | 2.1   | 2.3   | 4.2   |
| 23.2  | 12.1  | 13.4  | 14.3  | 19.2  | 26.0  |
| 9.5   | 3.6   | 10.0  | 3.1   | 13.5  | 4.5   |
| 13.1  | 12.0  | 11.4  | 8.9   | 13.0  | 6.2   |
| 337.3 | 295.8 | 348.4 | 371.3 | 376.2 | 429.7 |

|        |        |        |        |        |        |
|--------|--------|--------|--------|--------|--------|
| 9.3    | 3.8    | 2.9    | 9.1    | 7.2    | 9.6    |
| 42.4   | 45.5   | 38.8   | 38.6   | 47.9   | 45.0   |
| 18.1   | 2.1    | 12.4   | 13.7   | 8.2    | 10.8   |
| 2032.4 | 1840.6 | 1971.0 | 2012.3 | 2301.0 | 2185.9 |
| 407.0  | 375.6  | 468.1  | 498.5  | 541.5  | 556.0  |
| 4.8    | 13.4   | 3.4    | 3.4    | 3.6    | 3.1    |
| 5.6    | 1.9    | 15.3   | 4.9    | 2.1    | 7.1    |
| 2.9    | 0.5    | 3.0    | 2.6    | 0.5    | 3.0    |
| 14.6   | 5.3    | 30.4   | 24.8   | 41.3   | 13.7   |
| 1.5    | 1.0    | 1.5    | 1.7    | 2.1    | 1.3    |
| 55.6   | 41.6   | 50.7   | 49.5   | 49.3   | 53.2   |
| 1.7    | 0.8    | 8.3    | 2.6    | 7.1    | 5.5    |
| 1015.2 | 757.8  | 914.2  | 831.4  | 1194.8 | 1293.7 |
| 11.9   | 5.5    | 19.5   | 9.9    | 8.8    | 14.4   |
| 17.8   | 12.2   | 22.1   | 11.1   | 13.2   | 16.7   |
| 1.6    | 1.1    | 3.9    | 2.4    | 0.8    | 4.1    |
| 1.0    | 3.8    | 0.7    | 0.8    | 0.8    | 0.7    |
| 3.4    | 7.3    | 8.3    | 1.3    | 3.9    | 5.5    |
| 18.7   | 18.8   | 8.6    | 5.3    | 4.2    | 12.2   |
| 9.6    | 1.5    | 5.9    | 3.5    | 7.2    | 2.7    |
| 7.1    | 0.6    | 6.0    | 1.0    | 2.1    | 1.1    |
| 3.6    | 0.9    | 1.8    | 9.1    | 2.2    | 4.1    |
| 30.4   | 29.0   | 31.9   | 30.4   | 21.4   | 32.4   |
| 66.7   | 68.1   | 65.5   | 70.3   | 81.4   | 77.4   |
| 6.4    | 17.7   | 0.9    | 10.5   | 14.9   | 7.2    |
| 793.1  | 574.2  | 779.9  | 1066.6 | 912.7  | 1061.6 |
| 2.7    | 2.0    | 5.0    | 6.4    | 2.8    | 3.1    |
| 4.0    | 7.4    | 4.0    | 10.3   | 4.6    | 12.1   |
| 6.7    | 10.9   | 5.1    | 8.2    | 13.8   | 11.7   |
| 55.9   | 60.2   | 50.6   | 44.6   | 61.6   | 82.6   |
| 24.5   | 16.3   | 21.5   | 15.9   | 14.7   | 23.5   |
| 1.1    | 1.3    | 1.7    | 1.1    | 1.2    | 1.5    |
| 3354.5 | 2572.6 | 3100.9 | 3125.6 | 3430.0 | 4105.7 |
| 17.2   | 4.7    | 10.9   | 18.0   | 13.5   | 15.1   |
| 0.7    | 2.3    | 5.9    | 1.8    | 4.2    | 1.7    |
| 2.3    | 3.5    | 1.8    | 1.5    | 1.6    | 3.9    |
| 1.4    | 21.2   | 2.2    | 2.4    | 2.1    | 10.4   |
| 14.4   | 4.9    | 21.6   | 15.7   | 5.5    | 4.4    |
| 4.4    | 2.1    | 6.8    | 3.5    | 10.3   | 16.3   |
| 23.2   | 5.3    | 13.4   | 15.9   | 9.5    | 24.7   |
| 4.4    | 4.4    | 5.8    | 12.1   | 8.5    | 12.7   |
| 1.8    | 0.8    | 2.0    | 1.0    | 0.6    | 0.8    |
| 1191.2 | 1340.0 | 1228.7 | 1298.2 | 1161.3 | 1856.5 |
| 2.3    | 0.5    | 6.0    | 5.2    | 2.4    | 7.8    |
| 1.7    | 0.5    | 6.4    | 2.1    | 2.2    | 3.5    |
| 52.2   | 42.5   | 53.3   | 43.8   | 44.4   | 59.9   |
| 42.1   | 48.5   | 52.5   | 40.2   | 65.2   | 64.5   |
| 2.2    | 1.8    | 0.8    | 1.2    | 2.2    | 2.0    |
| 7.0    | 2.5    | 7.6    | 3.0    | 10.8   | 6.7    |
| 3.8    | 2.9    | 4.3    | 7.4    | 4.1    | 3.0    |
| 30.6   | 32.1   | 22.1   | 18.6   | 22.0   | 27.3   |
| 6.0    | 5.5    | 6.5    | 5.8    | 6.1    | 6.9    |
| 5.3    | 7.5    | 5.7    | 11.9   | 4.5    | 6.5    |

|        |        |        |        |        |        |
|--------|--------|--------|--------|--------|--------|
| 15.0   | 13.8   | 15.8   | 11.3   | 7.5    | 13.2   |
| 6.4    | 1.0    | 0.8    | 1.7    | 0.4    | 3.3    |
| 39.1   | 69.5   | 71.8   | 63.7   | 99.8   | 96.4   |
| 8.9    | 3.4    | 5.8    | 5.0    | 7.1    | 6.5    |
| 0.8    | 0.8    | 10.6   | 6.5    | 0.7    | 2.5    |
| 1.7    | 1.2    | 3.3    | 3.1    | 1.2    | 3.0    |
| 0.9    | 3.2    | 1.5    | 1.0    | 1.0    | 7.4    |
| 7.7    | 22.9   | 14.5   | 23.6   | 22.2   | 5.0    |
| 5.3    | 7.8    | 5.6    | 5.6    | 5.5    | 6.9    |
| 617.4  | 615.3  | 651.2  | 594.1  | 713.9  | 751.8  |
| 5.5    | 1.2    | 1.7    | 3.7    | 4.2    | 2.2    |
| 16.4   | 3.4    | 11.9   | 9.5    | 11.6   | 16.1   |
| 195.5  | 265.7  | 228.9  | 247.3  | 266.5  | 316.0  |
| 1.0    | 1.0    | 0.9    | 1.3    | 1.8    | 3.4    |
| 10.4   | 13.5   | 8.4    | 27.9   | 21.5   | 19.2   |
| 5.8    | 8.8    | 6.3    | 3.8    | 6.2    | 6.1    |
| 22.5   | 21.1   | 14.0   | 17.0   | 19.0   | 20.8   |
| 7517.5 | 7374.3 | 7624.8 | 8221.9 | 8324.4 | 8582.7 |
| 2.6    | 2.0    | 9.4    | 17.7   | 21.6   | 18.1   |
| 3.7    | 14.0   | 16.9   | 12.0   | 8.4    | 15.2   |
| 155.5  | 178.1  | 182.2  | 184.5  | 271.6  | 208.6  |
| 2.2    | 20.4   | 3.3    | 1.1    | 10.7   | 3.8    |
| 318.5  | 274.0  | 279.8  | 272.3  | 323.5  | 362.7  |
| 25.6   | 17.4   | 14.8   | 13.7   | 32.6   | 30.3   |
| 1288.2 | 1188.7 | 1351.1 | 1424.9 | 1473.4 | 1586.9 |
| 14.0   | 3.6    | 9.8    | 15.2   | 2.7    | 6.1    |
| 1.4    | 2.3    | 2.0    | 1.8    | 3.2    | 2.9    |
| 13.5   | 7.3    | 9.7    | 12.4   | 15.6   | 18.2   |
| 3.7    | 6.7    | 6.5    | 4.6    | 2.8    | 9.6    |
| 3.6    | 0.4    | 3.1    | 2.4    | 0.7    | 4.4    |
| 23.2   | 34.1   | 30.0   | 28.2   | 27.6   | 32.6   |
| 1.5    | 3.9    | 3.5    | 6.0    | 1.4    | 2.3    |
| 114.0  | 94.9   | 113.8  | 125.7  | 141.0  | 147.9  |
| 86.7   | 73.3   | 83.3   | 82.1   | 105.4  | 105.6  |
| 1.8    | 3.3    | 1.4    | 1.4    | 1.0    | 1.8    |
| 31.8   | 33.0   | 51.3   | 46.3   | 52.0   | 57.7   |
| 466.0  | 386.0  | 432.6  | 441.5  | 426.0  | 520.1  |
| 4.4    | 1.9    | 5.1    | 5.5    | 1.8    | 6.5    |
| 9.2    | 16.2   | 10.6   | 13.2   | 9.4    | 12.8   |
| 8.0    | 15.7   | 6.1    | 10.8   | 10.3   | 17.2   |
| 236.0  | 190.8  | 207.3  | 225.8  | 243.9  | 277.9  |
| 7.7    | 4.2    | 4.3    | 4.1    | 7.1    | 4.6    |
| 14.1   | 18.7   | 11.6   | 13.6   | 2.2    | 8.0    |
| 4.5    | 1.5    | 1.7    | 4.6    | 3.4    | 1.0    |
| 4.2    | 0.8    | 6.6    | 2.9    | 2.7    | 1.8    |
| 49.1   | 48.8   | 72.6   | 52.2   | 65.9   | 36.4   |
| 5.2    | 14.1   | 1.6    | 7.4    | 5.4    | 3.8    |
| 20.1   | 31.1   | 32.2   | 21.8   | 36.8   | 34.3   |
| 5.6    | 7.5    | 1.8    | 1.3    | 8.9    | 1.4    |
| 4.3    | 4.2    | 3.6    | 3.6    | 5.1    | 4.4    |
| 1.1    | 11.5   | 9.7    | 3.7    | 3.4    | 4.8    |
| 1.6    | 1.2    | 1.5    | 1.1    | 1.1    | 1.6    |
| 429.0  | 346.5  | 352.9  | 438.9  | 437.9  | 495.8  |

|        |        |        |        |        |        |
|--------|--------|--------|--------|--------|--------|
| 14.5   | 11.4   | 22.6   | 5.7    | 5.2    | 15.4   |
| 15.3   | 31.8   | 18.8   | 14.0   | 25.1   | 35.8   |
| 20.3   | 1.6    | 8.0    | 6.0    | 9.8    | 12.0   |
| 1.9    | 2.0    | 1.8    | 6.3    | 0.9    | 2.5    |
| 1.3    | 2.2    | 1.4    | 2.1    | 5.0    | 1.7    |
| 12.1   | 12.0   | 8.2    | 7.9    | 2.6    | 2.8    |
| 127.1  | 154.0  | 108.3  | 131.8  | 132.5  | 187.5  |
| 51.5   | 38.2   | 30.1   | 50.7   | 41.9   | 53.7   |
| 2.7    | 24.5   | 16.8   | 2.9    | 3.9    | 4.6    |
| 374.8  | 372.3  | 404.2  | 471.3  | 495.6  | 523.3  |
| 20.3   | 13.8   | 28.7   | 21.9   | 15.7   | 30.6   |
| 18.8   | 4.2    | 13.9   | 9.0    | 12.6   | 20.1   |
| 16.8   | 16.8   | 16.0   | 14.9   | 5.8    | 24.3   |
| 1.8    | 4.3    | 3.1    | 2.2    | 3.9    | 0.8    |
| 32.5   | 33.8   | 35.2   | 17.5   | 22.6   | 27.4   |
| 1.0    | 3.3    | 5.7    | 7.6    | 3.1    | 3.4    |
| 84.9   | 49.2   | 98.4   | 111.0  | 107.4  | 98.0   |
| 179.7  | 171.1  | 184.2  | 215.6  | 185.1  | 277.2  |
| 15.5   | 1.6    | 7.5    | 24.8   | 21.2   | 33.1   |
| 67.7   | 59.2   | 59.4   | 53.4   | 68.3   | 70.3   |
| 5.4    | 6.7    | 4.1    | 4.7    | 12.8   | 5.0    |
| 6.4    | 10.6   | 4.6    | 5.1    | 2.8    | 4.5    |
| 40.0   | 37.8   | 52.1   | 47.0   | 35.2   | 59.0   |
| 62.4   | 39.0   | 53.5   | 47.2   | 37.7   | 58.9   |
| 74.9   | 79.7   | 72.5   | 74.8   | 86.4   | 77.9   |
| 8.6    | 9.3    | 10.3   | 7.1    | 4.4    | 2.3    |
| 4054.2 | 3593.5 | 3738.0 | 3958.9 | 4173.6 | 4282.7 |
| 10.4   | 1.4    | 4.8    | 4.5    | 2.6    | 10.0   |
| 7.4    | 31.3   | 30.8   | 11.8   | 17.6   | 32.7   |
| 18.3   | 16.6   | 14.8   | 14.5   | 12.4   | 10.3   |
| 5.0    | 2.0    | 1.5    | 2.3    | 2.1    | 4.7    |
| 20.8   | 25.4   | 9.5    | 10.9   | 4.2    | 27.1   |
| 356.9  | 299.1  | 377.2  | 389.3  | 396.7  | 455.2  |
| 98.3   | 26.2   | 39.7   | 51.7   | 32.1   | 37.7   |
| 121.1  | 125.1  | 105.4  | 119.9  | 116.7  | 150.8  |
| 33.5   | 42.6   | 35.5   | 42.5   | 43.6   | 53.4   |
| 28.2   | 17.0   | 16.5   | 18.9   | 26.1   | 42.4   |
| 40.8   | 50.1   | 39.7   | 50.8   | 61.4   | 55.1   |
| 54.2   | 30.8   | 53.1   | 71.4   | 67.3   | 74.3   |
| 8.5    | 13.4   | 19.8   | 13.1   | 18.6   | 17.7   |
| 933.7  | 859.4  | 1056.7 | 969.1  | 1142.0 | 1095.4 |
| 12.2   | 11.1   | 15.5   | 11.2   | 21.1   | 18.2   |
| 1.1    | 2.1    | 3.0    | 0.9    | 0.9    | 1.8    |
| 138.3  | 89.5   | 134.2  | 135.6  | 157.5  | 148.9  |
| 4.6    | 5.4    | 13.2   | 3.6    | 3.2    | 4.3    |
| 11.4   | 11.2   | 12.8   | 2.4    | 6.3    | 4.2    |
| 9.1    | 12.9   | 5.6    | 19.8   | 9.7    | 8.8    |
| 22.2   | 23.9   | 15.7   | 17.0   | 11.0   | 28.1   |
| 3.0    | 2.0    | 5.9    | 2.7    | 3.3    | 2.9    |
| 3001.2 | 2634.9 | 2663.6 | 3172.5 | 3373.0 | 3748.9 |
| 6.7    | 11.6   | 11.0   | 4.5    | 8.0    | 9.7    |
| 2.0    | 3.3    | 3.9    | 1.8    | 2.6    | 2.8    |
| 6.5    | 1.0    | 5.0    | 2.2    | 7.4    | 15.2   |

|        |        |        |        |        |        |
|--------|--------|--------|--------|--------|--------|
| 37.2   | 54.3   | 47.0   | 56.1   | 60.2   | 66.2   |
| 5.3    | 2.2    | 1.9    | 2.4    | 8.7    | 12.7   |
| 14.0   | 3.4    | 5.9    | 10.6   | 6.9    | 14.4   |
| 5.9    | 6.5    | 18.6   | 12.5   | 13.4   | 12.4   |
| 2.8    | 1.1    | 0.9    | 2.3    | 8.3    | 3.6    |
| 2300.1 | 2174.5 | 2324.9 | 2591.3 | 2480.0 | 2675.4 |
| 13.1   | 6.2    | 4.2    | 3.4    | 11.3   | 19.4   |
| 20.1   | 28.9   | 35.9   | 23.6   | 19.8   | 45.3   |
| 30.4   | 6.4    | 5.1    | 7.3    | 22.0   | 6.8    |
| 3.6    | 2.0    | 1.0    | 1.2    | 3.8    | 6.8    |
| 455.2  | 435.9  | 437.0  | 407.0  | 428.8  | 480.9  |
| 7.0    | 2.6    | 1.1    | 2.7    | 7.3    | 7.2    |
| 2.1    | 20.4   | 2.8    | 10.9   | 2.9    | 9.9    |
| 5.2    | 3.1    | 9.5    | 3.3    | 3.3    | 3.9    |
| 8.8    | 21.2   | 14.2   | 12.5   | 28.8   | 13.2   |
| 9212.6 | 9004.5 | 9289.4 | 9463.8 | 9507.0 | 9909.1 |
| 32.9   | 19.5   | 21.4   | 13.8   | 34.9   | 41.4   |
| 6.0    | 2.5    | 3.2    | 3.3    | 14.2   | 13.0   |
| 4.8    | 3.1    | 6.2    | 3.6    | 3.9    | 4.5    |
| 3.6    | 0.4    | 1.7    | 0.8    | 5.2    | 0.5    |
| 133.2  | 136.4  | 137.3  | 134.5  | 171.8  | 149.3  |
| 3.9    | 2.2    | 1.0    | 1.1    | 3.0    | 1.3    |
| 8.6    | 14.5   | 12.3   | 4.4    | 11.3   | 5.8    |
| 8.7    | 25.5   | 39.4   | 40.0   | 25.9   | 46.0   |
| 69.7   | 63.1   | 74.3   | 84.1   | 97.7   | 68.1   |
| 1645.2 | 1031.0 | 1257.9 | 1195.9 | 1098.0 | 1573.0 |
| 4.4    | 0.7    | 3.1    | 1.4    | 1.3    | 1.0    |
| 10.8   | 7.0    | 5.1    | 5.9    | 9.7    | 8.5    |
| 2.8    | 4.1    | 3.3    | 4.8    | 3.6    | 3.7    |
| 5.1    | 7.0    | 8.3    | 4.6    | 0.8    | 1.8    |
| 15.9   | 2.9    | 10.9   | 10.9   | 9.8    | 21.0   |
| 4.1    | 8.5    | 4.4    | 6.1    | 12.6   | 9.8    |
| 5.2    | 8.8    | 0.8    | 2.9    | 6.5    | 7.3    |
| 82.3   | 75.6   | 61.8   | 71.6   | 85.8   | 93.7   |
| 7.6    | 6.3    | 5.4    | 2.0    | 3.8    | 4.3    |
| 1.2    | 5.1    | 5.2    | 8.1    | 13.4   | 6.2    |
| 105.1  | 115.1  | 133.2  | 102.7  | 139.9  | 125.1  |
| 7.3    | 13.4   | 10.7   | 2.1    | 21.1   | 8.2    |
| 2.3    | 2.2    | 2.1    | 1.9    | 1.8    | 2.1    |
| 7.1    | 15.3   | 6.6    | 4.6    | 6.4    | 11.6   |
| 17.2   | 20.3   | 10.7   | 13.3   | 11.9   | 8.9    |
| 1.3    | 1.3    | 1.0    | 1.1    | 0.8    | 1.9    |
| 1.2    | 7.8    | 1.5    | 0.9    | 3.8    | 3.2    |
| 38.7   | 24.3   | 30.4   | 30.1   | 19.1   | 38.3   |
| 329.1  | 408.4  | 300.2  | 304.0  | 258.1  | 512.8  |
| 2.8    | 1.2    | 4.9    | 5.1    | 8.2    | 2.0    |
| 5.1    | 3.0    | 1.8    | 5.3    | 5.1    | 11.9   |
| 104.9  | 83.4   | 143.7  | 134.2  | 149.5  | 125.7  |
| 0.8    | 0.8    | 2.9    | 1.0    | 6.8    | 5.4    |
| 52.5   | 61.3   | 54.4   | 57.6   | 55.9   | 59.9   |
| 2.4    | 2.2    | 3.4    | 2.0    | 1.1    | 5.1    |
| 3.3    | 1.2    | 1.8    | 8.8    | 5.2    | 2.4    |
| 9.5    | 3.0    | 4.3    | 11.3   | 11.7   | 10.5   |

|        |        |        |        |        |        |
|--------|--------|--------|--------|--------|--------|
| 580.4  | 542.5  | 582.9  | 641.7  | 696.1  | 711.9  |
| 108.9  | 89.2   | 97.4   | 97.3   | 92.1   | 119.1  |
| 4.7    | 3.6    | 6.7    | 12.2   | 11.0   | 5.7    |
| 11.2   | 13.5   | 7.5    | 7.3    | 9.2    | 5.1    |
| 0.7    | 4.7    | 0.6    | 1.4    | 2.0    | 1.1    |
| 17.4   | 19.5   | 25.0   | 29.0   | 26.6   | 25.4   |
| 1.6    | 1.1    | 1.5    | 2.1    | 1.5    | 2.4    |
| 2.2    | 3.5    | 4.8    | 4.0    | 4.7    | 8.9    |
| 3.7    | 3.5    | 3.3    | 9.3    | 4.6    | 9.5    |
| 251.9  | 233.7  | 256.4  | 223.8  | 243.3  | 283.9  |
| 23.6   | 36.4   | 21.0   | 30.8   | 38.2   | 34.1   |
| 6.1    | 11.9   | 12.3   | 14.8   | 19.3   | 12.3   |
| 236.8  | 189.3  | 203.5  | 212.2  | 243.9  | 265.3  |
| 20.3   | 20.3   | 17.0   | 17.5   | 21.4   | 16.2   |
| 19.0   | 12.3   | 9.5    | 21.6   | 17.5   | 15.7   |
| 1.3    | 0.9    | 1.3    | 0.7    | 0.9    | 1.7    |
| 7.9    | 0.6    | 20.9   | 14.7   | 10.6   | 17.6   |
| 16.3   | 21.7   | 17.6   | 16.2   | 17.6   | 9.5    |
| 1.5    | 6.7    | 2.4    | 2.7    | 4.1    | 3.0    |
| 16.8   | 16.0   | 10.5   | 15.0   | 14.2   | 13.0   |
| 344.0  | 309.5  | 331.7  | 371.0  | 371.4  | 397.9  |
| 350.6  | 372.8  | 385.8  | 431.7  | 475.2  | 410.2  |
| 2.7    | 2.7    | 5.5    | 2.2    | 2.1    | 2.4    |
| 6.5    | 5.1    | 5.7    | 4.4    | 9.5    | 6.3    |
| 4.5    | 1.9    | 3.9    | 5.3    | 4.0    | 3.9    |
| 75.9   | 90.7   | 64.6   | 89.6   | 57.0   | 91.3   |
| 9.7    | 5.6    | 10.0   | 5.0    | 1.7    | 8.4    |
| 0.7    | 0.5    | 0.6    | 1.1    | 0.8    | 1.2    |
| 7.9    | 1.8    | 12.5   | 11.0   | 5.6    | 9.3    |
| 45.9   | 41.6   | 38.7   | 36.9   | 32.2   | 30.6   |
| 5307.4 | 6126.7 | 6306.8 | 6927.3 | 7121.5 | 7241.5 |
| 57.0   | 47.5   | 31.1   | 50.2   | 46.5   | 56.4   |
| 16.7   | 11.0   | 18.5   | 22.2   | 18.8   | 16.9   |
| 1.9    | 4.2    | 2.2    | 2.3    | 3.2    | 4.7    |
| 6.1    | 0.4    | 3.1    | 4.0    | 2.9    | 1.0    |
| 10.1   | 18.0   | 18.0   | 9.6    | 13.8   | 17.3   |
| 15.0   | 7.5    | 7.3    | 4.7    | 3.1    | 19.1   |
| 49.6   | 50.3   | 86.1   | 78.4   | 88.3   | 52.3   |
| 13.5   | 15.5   | 14.5   | 16.2   | 18.4   | 13.3   |
| 75.1   | 32.2   | 80.9   | 57.9   | 94.7   | 89.6   |
| 5.0    | 6.1    | 2.5    | 1.9    | 2.1    | 4.2    |
| 10.2   | 24.9   | 24.2   | 9.8    | 18.7   | 15.1   |
| 627.8  | 635.5  | 764.8  | 786.5  | 749.7  | 765.3  |
| 2.4    | 2.9    | 8.7    | 6.0    | 0.7    | 3.9    |
| 55.9   | 52.1   | 54.8   | 86.7   | 65.0   | 62.5   |
| 17.1   | 5.2    | 15.0   | 13.0   | 14.6   | 15.3   |
| 22.1   | 17.3   | 22.7   | 26.3   | 48.5   | 30.1   |
| 5.2    | 4.8    | 4.2    | 5.9    | 4.6    | 4.6    |
| 16.8   | 5.4    | 14.0   | 19.2   | 12.0   | 16.4   |
| 396.5  | 393.9  | 426.0  | 402.7  | 451.7  | 439.9  |
| 38.8   | 43.5   | 46.4   | 36.8   | 38.4   | 49.3   |
| 25.0   | 29.7   | 29.0   | 28.0   | 34.6   | 24.4   |
| 2.7    | 1.9    | 2.8    | 1.2    | 3.0    | 2.8    |

|        |        |        |        |        |        |
|--------|--------|--------|--------|--------|--------|
| 5.5    | 6.2    | 7.3    | 3.3    | 1.4    | 1.7    |
| 11.5   | 27.5   | 29.3   | 11.4   | 28.1   | 15.8   |
| 5336.7 | 4652.8 | 4314.1 | 4470.7 | 5274.5 | 5688.9 |
| 1367.0 | 925.1  | 1374.2 | 1280.3 | 1623.0 | 1499.3 |
| 38.7   | 57.6   | 23.2   | 23.7   | 36.1   | 32.2   |
| 30.7   | 28.9   | 20.2   | 18.8   | 31.6   | 28.1   |
| 1.5    | 1.3    | 2.7    | 1.8    | 1.6    | 1.4    |
| 372.2  | 367.9  | 430.2  | 458.5  | 473.5  | 462.4  |
| 6.7    | 1.7    | 9.8    | 10.8   | 5.1    | 10.1   |
| 13.9   | 1.0    | 2.2    | 12.0   | 11.1   | 14.5   |
| 653.6  | 682.2  | 638.7  | 677.1  | 731.1  | 734.6  |
| 30.2   | 22.3   | 7.0    | 27.5   | 21.5   | 11.6   |
| 144.3  | 136.9  | 140.8  | 171.0  | 165.7  | 220.1  |
| 46.9   | 32.0   | 38.3   | 41.5   | 46.8   | 50.0   |
| 15.7   | 20.5   | 15.6   | 20.2   | 13.9   | 12.1   |
| 6.3    | 7.0    | 1.8    | 3.4    | 1.7    | 1.6    |
| 3.2    | 5.1    | 4.4    | 2.3    | 6.3    | 3.9    |
| 30.2   | 30.5   | 38.0   | 33.7   | 30.4   | 54.1   |
| 6.1    | 14.5   | 2.7    | 4.9    | 4.5    | 4.0    |
| 72.6   | 89.4   | 110.1  | 104.7  | 95.0   | 99.8   |
| 39.9   | 40.8   | 53.5   | 54.2   | 65.4   | 58.7   |
| 4.3    | 1.7    | 1.8    | 1.3    | 1.5    | 2.0    |
| 26.3   | 16.1   | 25.1   | 19.0   | 28.4   | 45.7   |
| 4.1    | 2.5    | 3.3    | 7.3    | 9.0    | 16.3   |
| 1.0    | 1.2    | 1.3    | 1.5    | 3.4    | 1.1    |
| 7.5    | 8.8    | 12.8   | 7.2    | 2.2    | 12.7   |
| 9.1    | 13.3   | 5.8    | 4.6    | 9.4    | 9.3    |
| 23.5   | 27.5   | 24.1   | 38.7   | 39.2   | 31.2   |
| 15.8   | 18.6   | 23.4   | 51.4   | 9.5    | 39.4   |
| 31.8   | 26.8   | 32.3   | 44.6   | 40.2   | 57.9   |
| 3.2    | 5.9    | 4.1    | 7.3    | 4.7    | 8.8    |
| 166.2  | 162.0  | 181.7  | 181.0  | 208.0  | 218.5  |
| 10.5   | 7.3    | 20.2   | 11.4   | 10.4   | 15.7   |
| 7.7    | 13.6   | 12.5   | 4.1    | 5.0    | 13.5   |
| 26.2   | 24.4   | 32.8   | 38.3   | 33.0   | 44.5   |
| 4.6    | 0.5    | 4.2    | 6.1    | 0.8    | 4.1    |
| 4.1    | 3.8    | 1.5    | 2.9    | 2.4    | 5.2    |
| 156.6  | 132.2  | 146.2  | 159.4  | 198.4  | 210.6  |
| 237.7  | 210.7  | 235.5  | 199.2  | 273.7  | 252.0  |
| 1.1    | 0.4    | 1.9    | 1.4    | 0.9    | 4.5    |
| 70.4   | 60.7   | 60.1   | 57.0   | 59.1   | 70.1   |
| 6.8    | 13.3   | 8.3    | 12.3   | 10.2   | 10.8   |
| 0.9    | 0.8    | 4.4    | 4.4    | 1.5    | 4.7    |
| 1.4    | 24.7   | 8.7    | 6.5    | 4.6    | 12.3   |
| 7.3    | 18.1   | 4.2    | 1.2    | 5.5    | 0.7    |
| 6.8    | 4.3    | 10.1   | 7.5    | 7.8    | 14.7   |
| 5.1    | 5.9    | 5.1    | 2.6    | 3.9    | 3.9    |
| 3.9    | 0.6    | 0.4    | 0.4    | 7.1    | 8.8    |
| 3.0    | 7.2    | 5.4    | 2.0    | 8.7    | 1.6    |
| 12.3   | 14.8   | 19.8   | 14.0   | 18.7   | 9.9    |
| 50.4   | 34.9   | 49.2   | 55.9   | 60.5   | 71.6   |
| 120.7  | 75.5   | 90.5   | 107.6  | 118.0  | 138.2  |
| 40.2   | 34.8   | 47.3   | 46.5   | 47.8   | 51.9   |

|       |       |       |       |       |       |
|-------|-------|-------|-------|-------|-------|
| 99.4  | 73.7  | 110.1 | 76.2  | 94.6  | 109.9 |
| 230.3 | 235.1 | 311.1 | 297.5 | 339.0 | 330.6 |
| 14.7  | 24.0  | 17.1  | 13.0  | 18.1  | 18.3  |
| 1.2   | 3.8   | 2.1   | 1.0   | 2.2   | 5.0   |
| 0.4   | 0.8   | 0.6   | 2.3   | 2.4   | 0.4   |
| 50.3  | 43.9  | 44.0  | 59.7  | 56.8  | 83.6  |
| 37.0  | 39.4  | 39.5  | 25.2  | 22.3  | 38.3  |
| 14.1  | 26.5  | 27.8  | 21.3  | 12.8  | 18.1  |
| 100.6 | 85.8  | 111.5 | 114.4 | 111.5 | 154.2 |
| 10.7  | 1.3   | 5.0   | 2.9   | 2.1   | 7.4   |
| 2.0   | 4.2   | 1.2   | 3.3   | 0.3   | 4.8   |
| 229.8 | 292.6 | 251.8 | 278.2 | 286.1 | 297.6 |
| 38.7  | 26.8  | 32.8  | 37.5  | 36.2  | 37.9  |
| 18.8  | 4.6   | 29.1  | 18.7  | 32.2  | 26.2  |
| 29.0  | 18.3  | 19.0  | 9.5   | 31.6  | 26.6  |
| 6.8   | 11.5  | 9.8   | 11.6  | 13.9  | 11.2  |
| 10.5  | 9.1   | 10.9  | 5.6   | 11.2  | 11.6  |
| 84.1  | 61.0  | 56.9  | 75.9  | 69.9  | 96.4  |
| 8.6   | 3.1   | 7.7   | 15.5  | 2.6   | 7.6   |
| 10.7  | 4.8   | 10.7  | 5.3   | 9.2   | 10.9  |
| 0.5   | 0.7   | 3.8   | 4.7   | 1.9   | 0.8   |
| 6.1   | 17.2  | 14.3  | 13.4  | 1.9   | 14.9  |
| 43.9  | 28.9  | 32.4  | 29.7  | 35.6  | 48.9  |
| 7.3   | 0.9   | 7.3   | 2.8   | 4.1   | 1.8   |
| 7.7   | 3.9   | 9.0   | 7.3   | 9.6   | 6.7   |
| 7.9   | 1.6   | 2.3   | 1.9   | 7.3   | 6.5   |
| 5.8   | 1.2   | 2.1   | 2.6   | 3.7   | 4.1   |
| 27.0  | 20.4  | 24.8  | 22.8  | 15.8  | 23.0  |
| 5.4   | 7.1   | 7.7   | 12.4  | 9.2   | 4.9   |
| 1.7   | 0.8   | 0.9   | 1.2   | 3.9   | 4.7   |
| 1.8   | 3.4   | 2.1   | 2.5   | 2.3   | 2.7   |
| 9.6   | 7.2   | 17.6  | 17.9  | 10.9  | 21.1  |
| 1.5   | 4.6   | 8.0   | 5.5   | 8.4   | 11.4  |
| 7.3   | 1.2   | 5.0   | 4.9   | 4.3   | 1.6   |
| 49.0  | 24.0  | 39.1  | 47.6  | 36.6  | 45.0  |
| 2.9   | 3.8   | 5.8   | 3.1   | 2.8   | 4.8   |
| 3.7   | 13.2  | 8.1   | 4.5   | 5.7   | 4.3   |
| 53.2  | 77.1  | 48.7  | 66.6  | 58.9  | 57.8  |
| 51.4  | 56.5  | 52.3  | 71.2  | 52.3  | 75.2  |
| 4.1   | 5.1   | 9.7   | 1.3   | 7.8   | 4.8   |
| 6.8   | 5.7   | 2.7   | 5.3   | 2.8   | 1.0   |
| 2.7   | 1.0   | 4.1   | 2.3   | 2.7   | 1.1   |
| 4.1   | 9.0   | 2.7   | 8.6   | 19.6  | 4.3   |
| 6.9   | 5.7   | 5.6   | 8.7   | 6.2   | 11.8  |
| 77.3  | 35.5  | 51.4  | 74.6  | 71.7  | 43.9  |
| 4.8   | 3.0   | 1.9   | 1.7   | 1.5   | 2.8   |
| 16.0  | 6.8   | 16.5  | 21.4  | 10.4  | 18.1  |
| 1.4   | 0.9   | 2.4   | 4.8   | 9.3   | 4.5   |
| 11.8  | 5.8   | 4.6   | 3.9   | 3.4   | 4.0   |
| 45.6  | 56.7  | 53.1  | 66.5  | 60.7  | 72.0  |
| 28.5  | 20.7  | 37.4  | 32.8  | 39.2  | 42.9  |
| 4.1   | 10.9  | 13.2  | 8.0   | 3.8   | 12.3  |
| 8.2   | 0.4   | 6.9   | 4.5   | 8.0   | 11.8  |



|       |       |       |       |       |       |
|-------|-------|-------|-------|-------|-------|
| 29.2  | 23.1  | 21.5  | 28.5  | 27.3  | 28.3  |
| 79.8  | 80.1  | 61.9  | 74.6  | 54.0  | 84.5  |
| 26.8  | 40.5  | 38.6  | 35.7  | 49.9  | 47.7  |
| 55.3  | 47.5  | 48.3  | 59.5  | 52.8  | 45.4  |
| 107.1 | 122.2 | 95.3  | 105.6 | 102.1 | 131.1 |
| 13.4  | 14.8  | 27.1  | 4.5   | 5.6   | 10.4  |
| 81.6  | 82.2  | 67.2  | 60.3  | 100.8 | 71.5  |
| 18.8  | 25.6  | 20.3  | 14.7  | 20.3  | 30.1  |
| 6.5   | 20.7  | 8.5   | 7.0   | 6.3   | 7.8   |
| 83.2  | 72.6  | 73.9  | 85.6  | 67.5  | 87.3  |
| 29.5  | 18.2  | 18.9  | 20.2  | 25.9  | 20.1  |
| 31.4  | 14.4  | 28.0  | 20.6  | 23.5  | 33.5  |
| 20.0  | 23.5  | 16.6  | 14.0  | 14.3  | 14.0  |
| 59.1  | 42.1  | 52.8  | 50.4  | 76.3  | 79.2  |
| 28.3  | 37.7  | 35.9  | 34.7  | 39.2  | 37.5  |
| 38.5  | 36.0  | 36.4  | 32.0  | 34.6  | 51.2  |
| 3.2   | 5.9   | 3.1   | 14.1  | 2.4   | 2.4   |
| 60.2  | 49.2  | 51.7  | 55.1  | 72.8  | 58.8  |
| 1.4   | 0.6   | 0.5   | 0.6   | 5.3   | 3.4   |
| 11.9  | 12.6  | 10.2  | 10.0  | 11.6  | 13.4  |
| 4.1   | 3.0   | 3.7   | 6.9   | 2.3   | 5.1   |
| 1.5   | 1.9   | 1.7   | 4.3   | 5.5   | 9.7   |
| 1.7   | 1.2   | 1.6   | 2.7   | 3.4   | 1.4   |
| 121.3 | 92.1  | 105.4 | 129.0 | 122.5 | 138.8 |
| 80.3  | 67.7  | 85.0  | 70.6  | 63.9  | 85.5  |
| 100.1 | 105.3 | 113.8 | 105.4 | 123.6 | 130.1 |
| 4.0   | 10.9  | 7.0   | 2.3   | 3.8   | 2.9   |
| 19.7  | 25.1  | 37.2  | 37.9  | 40.8  | 35.9  |
| 0.6   | 8.6   | 4.7   | 4.0   | 5.5   | 8.6   |
| 29.0  | 16.7  | 32.9  | 19.6  | 26.5  | 25.3  |
| 37.0  | 27.9  | 40.8  | 31.7  | 41.4  | 39.3  |
| 5.5   | 5.5   | 1.4   | 10.6  | 6.1   | 7.3   |
| 58.6  | 54.6  | 50.3  | 56.4  | 63.0  | 70.4  |
| 9.6   | 9.0   | 11.3  | 5.6   | 6.5   | 16.3  |
| 24.5  | 10.2  | 22.5  | 17.7  | 16.6  | 23.0  |
| 37.9  | 50.2  | 40.9  | 41.4  | 43.9  | 50.3  |
| 49.2  | 26.0  | 56.0  | 54.6  | 51.6  | 65.6  |
| 23.8  | 26.0  | 28.6  | 21.3  | 25.5  | 40.1  |
| 13.2  | 7.6   | 21.4  | 4.9   | 16.0  | 20.6  |
| 13.7  | 9.4   | 11.0  | 3.9   | 16.2  | 28.0  |
| 55.3  | 20.9  | 67.5  | 63.2  | 61.5  | 62.2  |
| 8.0   | 4.9   | 5.5   | 2.0   | 9.3   | 5.9   |
| 35.8  | 13.4  | 32.8  | 19.7  | 26.9  | 30.2  |
| 9.2   | 3.6   | 15.9  | 6.1   | 11.5  | 13.3  |
| 3.4   | 11.3  | 11.5  | 8.5   | 11.0  | 6.8   |
| 172.2 | 130.3 | 120.6 | 146.6 | 184.6 | 182.2 |
| 11.2  | 16.7  | 22.1  | 8.1   | 11.4  | 12.1  |
| 4.6   | 9.6   | 6.9   | 7.8   | 10.1  | 5.0   |
| 15.7  | 16.9  | 20.5  | 24.3  | 28.7  | 25.0  |
| 34.6  | 45.6  | 37.1  | 49.7  | 43.6  | 49.9  |
| 71.6  | 73.5  | 83.4  | 84.3  | 83.9  | 99.7  |
| 4.4   | 2.7   | 3.3   | 3.5   | 10.3  | 8.3   |
| 38.7  | 53.9  | 37.3  | 42.2  | 41.3  | 56.7  |

|        |       |       |        |        |        |
|--------|-------|-------|--------|--------|--------|
| 3.0    | 3.7   | 1.8   | 3.0    | 3.3    | 5.9    |
| 14.7   | 15.4  | 11.4  | 12.0   | 14.6   | 9.8    |
| 48.1   | 59.9  | 34.0  | 59.0   | 48.5   | 78.2   |
| 26.3   | 28.1  | 23.9  | 21.7   | 21.6   | 32.8   |
| 9.3    | 10.3  | 11.2  | 8.5    | 5.6    | 16.9   |
| 38.4   | 34.4  | 37.4  | 37.5   | 37.4   | 61.1   |
| 5.5    | 19.1  | 2.9   | 2.4    | 2.2    | 18.3   |
| 23.7   | 44.1  | 27.0  | 36.6   | 29.7   | 33.4   |
| 22.5   | 21.8  | 27.3  | 28.6   | 24.3   | 24.8   |
| 23.4   | 29.9  | 34.1  | 33.6   | 38.9   | 37.7   |
| 7.9    | 1.4   | 4.6   | 9.5    | 6.3    | 10.8   |
| 15.6   | 8.7   | 5.7   | 16.0   | 11.4   | 7.1    |
| 6.0    | 10.9  | 11.0  | 2.4    | 5.9    | 8.0    |
| 3.1    | 1.8   | 6.1   | 3.4    | 3.2    | 14.1   |
| 47.2   | 40.4  | 42.8  | 60.9   | 42.4   | 39.3   |
| 15.5   | 10.1  | 18.5  | 30.1   | 17.2   | 26.4   |
| 1.5    | 1.5   | 5.7   | 3.9    | 1.8    | 1.6    |
| 45.1   | 45.6  | 53.4  | 39.9   | 54.8   | 58.1   |
| 11.2   | 18.8  | 12.5  | 23.5   | 19.6   | 30.8   |
| 18.0   | 5.9   | 15.8  | 9.0    | 13.6   | 23.0   |
| 2.4    | 4.0   | 3.1   | 4.3    | 8.3    | 6.9    |
| 1.9    | 1.1   | 1.2   | 1.3    | 1.3    | 1.1    |
| 14.9   | 5.6   | 10.7  | 12.7   | 6.7    | 6.8    |
| 13.4   | 15.5  | 14.5  | 16.7   | 12.5   | 18.2   |
| 131.4  | 166.5 | 149.6 | 194.8  | 148.6  | 176.7  |
| 1033.6 | 877.1 | 926.9 | 1001.4 | 1087.6 | 1571.8 |
| 0.9    | 10.0  | 2.4   | 1.2    | 1.1    | 1.1    |
| 0.5    | 1.1   | 0.7   | 0.8    | 0.6    | 0.7    |
| 6.2    | 2.6   | 8.3   | 2.3    | 2.9    | 11.8   |
| 15.2   | 19.8  | 7.9   | 15.5   | 2.6    | 13.5   |
| 230.1  | 325.9 | 221.9 | 259.7  | 303.7  | 293.4  |
| 106.5  | 104.6 | 118.2 | 127.6  | 120.7  | 156.3  |
| 9.0    | 11.1  | 23.7  | 10.7   | 3.2    | 14.2   |
| 2.1    | 2.4   | 2.6   | 4.5    | 2.2    | 3.4    |
| 58.3   | 51.0  | 58.9  | 58.7   | 84.2   | 71.6   |
| 7.3    | 3.7   | 2.7   | 10.0   | 5.8    | 2.8    |
| 9.5    | 2.0   | 4.7   | 13.3   | 16.8   | 4.8    |
| 13.6   | 6.4   | 22.6  | 6.5    | 17.6   | 18.6   |
| 23.8   | 33.6  | 10.5  | 21.7   | 10.0   | 27.5   |
| 18.5   | 16.5  | 8.4   | 23.3   | 14.2   | 19.9   |
| 9.5    | 10.4  | 8.6   | 10.1   | 12.4   | 17.7   |
| 2.1    | 2.5   | 2.7   | 3.0    | 1.6    | 1.5    |
| 28.5   | 39.1  | 28.1  | 35.3   | 37.4   | 39.9   |
| 48.3   | 55.1  | 34.6  | 50.2   | 51.4   | 76.0   |
| 34.5   | 19.1  | 26.6  | 28.3   | 31.6   | 28.9   |
| 104.6  | 86.3  | 120.2 | 120.6  | 124.1  | 140.9  |
| 4.7    | 0.7   | 4.1   | 2.1    | 0.7    | 1.4    |
| 17.4   | 16.4  | 12.5  | 9.7    | 12.5   | 20.0   |
| 22.8   | 21.5  | 16.6  | 18.4   | 13.8   | 15.4   |
| 0.9    | 7.3   | 4.3   | 3.8    | 0.7    | 2.8    |
| 2.2    | 6.8   | 1.2   | 0.5    | 3.5    | 4.5    |
| 10.8   | 11.6  | 9.1   | 15.2   | 9.3    | 11.8   |
| 7.3    | 3.5   | 9.3   | 6.2    | 3.8    | 13.8   |

|         |         |         |         |         |         |
|---------|---------|---------|---------|---------|---------|
| 13.2    | 10.5    | 6.4     | 6.4     | 2.0     | 8.6     |
| 5.1     | 8.1     | 4.6     | 8.5     | 6.1     | 13.6    |
| 110.1   | 126.0   | 120.2   | 130.5   | 130.9   | 215.8   |
| 11.6    | 12.6    | 19.9    | 27.3    | 21.1    | 40.7    |
| 6.7     | 4.7     | 1.1     | 4.3     | 0.9     | 8.1     |
| 9.8     | 9.8     | 8.7     | 4.2     | 8.8     | 13.3    |
| 420.8   | 342.3   | 348.9   | 407.5   | 406.7   | 504.5   |
| 13.5    | 6.6     | 36.0    | 31.2    | 35.3    | 20.7    |
| 4.8     | 4.9     | 3.6     | 1.9     | 2.9     | 2.8     |
| 5.3     | 4.9     | 3.6     | 6.9     | 6.3     | 4.4     |
| 2.4     | 1.8     | 4.8     | 4.1     | 3.3     | 13.5    |
| 7.5     | 9.4     | 4.1     | 0.9     | 8.1     | 2.4     |
| 65.7    | 65.4    | 69.6    | 72.0    | 67.8    | 67.7    |
| 113.6   | 171.5   | 192.8   | 141.0   | 204.4   | 161.2   |
| 43.2    | 16.2    | 31.7    | 48.7    | 36.4    | 32.9    |
| 1428.8  | 1210.3  | 1531.4  | 1610.4  | 1799.8  | 1727.1  |
| 1855.1  | 1488.8  | 1885.5  | 1934.0  | 2179.4  | 2101.2  |
| 4068.7  | 3776.6  | 4522.2  | 4469.8  | 4851.3  | 4760.7  |
| 6959.6  | 6227.9  | 6224.5  | 7244.8  | 7500.0  | 7795.1  |
| 7184.4  | 6886.6  | 7433.4  | 8146.0  | 7737.7  | 7907.6  |
| 34.8    | 31.8    | 43.9    | 33.6    | 47.1    | 46.2    |
| 1622.1  | 1446.1  | 1442.3  | 1525.5  | 1758.8  | 1877.8  |
| 6.2     | 6.9     | 5.0     | 7.5     | 4.4     | 2.8     |
| 3993.9  | 3501.0  | 3611.4  | 3971.5  | 3962.0  | 4271.8  |
| 3167.6  | 3331.8  | 3514.1  | 3496.8  | 3621.7  | 3972.6  |
| 1086.2  | 990.3   | 1356.6  | 1316.4  | 1475.0  | 1392.1  |
| 1334.5  | 1239.6  | 1375.6  | 1419.1  | 1478.2  | 1593.8  |
| 11768.7 | 10926.6 | 10908.1 | 11686.8 | 12068.3 | 12637.7 |
| 494.6   | 453.7   | 579.4   | 563.7   | 660.3   | 619.4   |
| 450.5   | 499.5   | 501.4   | 654.5   | 544.4   | 558.5   |
| 2068.4  | 1550.4  | 1815.2  | 2164.1  | 2140.4  | 2506.8  |
| 1951.9  | 1912.8  | 2083.5  | 2063.0  | 2410.0  | 2465.9  |
| 7716.9  | 6781.1  | 7510.7  | 8412.9  | 7842.3  | 8029.4  |
| 346.8   | 236.7   | 316.7   | 320.3   | 332.7   | 343.0   |
| 73.6    | 71.5    | 78.5    | 74.8    | 82.9    | 94.7    |
| 763.4   | 669.4   | 821.4   | 811.1   | 921.8   | 933.2   |
| 974.4   | 931.2   | 1142.2  | 1152.0  | 1278.5  | 1383.3  |
| 406.7   | 497.9   | 395.6   | 432.3   | 435.5   | 569.7   |
| 495.7   | 561.7   | 486.6   | 563.7   | 503.8   | 572.7   |
| 10823.1 | 10123.0 | 10499.1 | 11022.1 | 11165.3 | 11326.8 |
| 1254.2  | 1052.6  | 1355.1  | 1300.4  | 1607.3  | 1544.3  |
| 469.1   | 466.9   | 504.0   | 547.3   | 566.0   | 622.6   |
| 690.5   | 617.5   | 655.0   | 533.4   | 678.7   | 889.5   |
| 858.5   | 769.3   | 899.2   | 906.2   | 905.7   | 1035.2  |
| 2021.7  | 1789.3  | 1580.0  | 1539.5  | 1651.1  | 2024.5  |
| 1630.6  | 1369.5  | 1397.5  | 1435.1  | 1747.6  | 1772.7  |
| 8164.3  | 7436.0  | 8210.3  | 9010.0  | 9059.6  | 9023.8  |
| 1138.3  | 1053.1  | 1126.0  | 1145.4  | 1267.6  | 1470.8  |
| 321.4   | 276.9   | 339.9   | 330.6   | 394.5   | 357.1   |
| 1029.3  | 951.4   | 978.3   | 1076.0  | 1157.3  | 1195.3  |
| 665.5   | 619.3   | 763.4   | 838.2   | 837.1   | 902.3   |
| 432.8   | 372.3   | 453.6   | 458.1   | 495.8   | 566.9   |
| 9019.0  | 8093.0  | 8399.2  | 9236.3  | 9287.6  | 9682.9  |

|        |        |        |        |        |        |
|--------|--------|--------|--------|--------|--------|
| 829.9  | 723.5  | 901.3  | 958.4  | 888.4  | 956.0  |
| 1513.6 | 1338.1 | 1610.8 | 1591.6 | 1778.5 | 1848.2 |
| 2273.9 | 1982.0 | 2794.5 | 3117.1 | 3018.4 | 2861.2 |
| 46.6   | 36.7   | 41.8   | 54.8   | 50.6   | 51.4   |
| 1437.7 | 1299.1 | 1364.8 | 1476.8 | 1546.3 | 1698.9 |
| 763.1  | 829.4  | 697.1  | 757.8  | 845.4  | 860.8  |
| 490.8  | 457.5  | 525.4  | 616.7  | 610.2  | 597.7  |
| 2156.2 | 1937.6 | 2046.2 | 2313.2 | 2428.7 | 2705.6 |
| 84.6   | 64.3   | 73.4   | 71.4   | 88.5   | 88.6   |
| 83.9   | 98.4   | 75.5   | 79.6   | 98.0   | 103.2  |
| 124.9  | 106.5  | 147.0  | 167.4  | 170.2  | 176.7  |
| 343.1  | 251.6  | 390.0  | 350.2  | 410.9  | 469.1  |
| 377.9  | 387.3  | 401.7  | 411.9  | 439.4  | 507.1  |
| 481.2  | 511.8  | 524.2  | 492.9  | 610.4  | 591.4  |
| 2590.8 | 2392.5 | 2514.5 | 2692.1 | 2989.1 | 3083.8 |
| 7243.7 | 7178.4 | 7251.9 | 8180.0 | 7562.0 | 7871.8 |
| 680.5  | 650.4  | 800.0  | 837.0  | 815.3  | 885.1  |
| 503.7  | 467.4  | 547.5  | 532.9  | 639.1  | 614.4  |
| 2476.3 | 2469.4 | 2963.1 | 2985.0 | 3287.5 | 3374.5 |
| 3180.8 | 2765.2 | 2948.9 | 3292.5 | 3311.3 | 3767.1 |
| 6624.7 | 6255.3 | 6460.1 | 7223.7 | 7181.1 | 7431.1 |
| 96.6   | 80.7   | 101.5  | 124.5  | 143.1  | 150.1  |
| 673.4  | 524.3  | 671.4  | 798.4  | 802.7  | 776.6  |
| 635.8  | 592.0  | 698.8  | 685.6  | 758.6  | 778.9  |
| 427.5  | 433.7  | 541.1  | 625.1  | 595.2  | 728.7  |
| 1258.4 | 1134.7 | 1190.3 | 1291.7 | 1341.1 | 1486.6 |
| 3018.1 | 2839.2 | 3397.4 | 3631.1 | 3897.6 | 3901.7 |
| 273.8  | 243.9  | 268.1  | 299.0  | 353.8  | 368.0  |
| 613.4  | 745.4  | 772.4  | 771.9  | 816.2  | 836.3  |
| 312.5  | 210.8  | 303.5  | 328.4  | 394.6  | 393.7  |
| 449.9  | 512.8  | 598.7  | 564.5  | 675.3  | 650.5  |
| 516.3  | 436.6  | 482.2  | 518.6  | 536.6  | 582.5  |
| 889.3  | 760.9  | 888.1  | 962.1  | 994.4  | 995.4  |
| 745.2  | 689.7  | 641.1  | 705.2  | 772.7  | 814.0  |
| 918.3  | 943.3  | 1037.6 | 950.2  | 1150.0 | 1155.6 |
| 183.1  | 97.5   | 169.1  | 165.5  | 248.8  | 221.0  |
| 116.5  | 130.0  | 130.4  | 136.5  | 110.8  | 185.2  |
| 748.1  | 669.2  | 849.4  | 820.3  | 860.4  | 894.6  |
| 837.9  | 678.6  | 866.8  | 887.3  | 983.6  | 929.4  |
| 69.6   | 65.4   | 81.4   | 89.6   | 81.9   | 80.4   |
| 1301.4 | 1098.2 | 1301.2 | 1257.8 | 1367.9 | 1516.7 |
| 654.0  | 652.7  | 664.1  | 725.8  | 775.2  | 829.2  |
| 493.0  | 428.5  | 492.6  | 551.5  | 605.6  | 610.4  |
| 2580.3 | 2118.9 | 2607.6 | 2598.6 | 2833.7 | 2908.7 |
| 332.8  | 330.2  | 359.2  | 349.3  | 369.8  | 428.1  |
| 221.0  | 214.5  | 176.8  | 228.9  | 229.5  | 227.3  |
| 1171.5 | 1118.5 | 1243.5 | 1194.6 | 1393.3 | 1670.1 |
| 6992.3 | 6059.5 | 6178.5 | 6390.8 | 6817.5 | 7869.5 |
| 1773.3 | 1468.0 | 1620.0 | 1892.4 | 1852.5 | 1909.0 |
| 990.6  | 968.5  | 842.2  | 1027.8 | 876.4  | 1206.8 |
| 285.0  | 252.0  | 283.0  | 342.9  | 338.3  | 379.1  |
| 753.1  | 643.4  | 657.9  | 613.9  | 769.5  | 834.3  |
| 691.1  | 677.4  | 842.4  | 807.3  | 966.9  | 866.1  |

|        |        |        |        |        |        |
|--------|--------|--------|--------|--------|--------|
| 4038.8 | 3586.7 | 3820.6 | 3913.8 | 4447.0 | 4707.7 |
| 426.6  | 338.3  | 410.7  | 394.7  | 527.2  | 494.5  |
| 3039.3 | 2591.3 | 3018.7 | 3107.4 | 3303.6 | 3518.8 |
| 736.7  | 692.2  | 657.7  | 653.2  | 791.2  | 842.1  |
| 1292.6 | 1247.0 | 1509.0 | 1569.0 | 1551.1 | 1587.3 |
| 1190.6 | 1026.7 | 1128.0 | 1262.5 | 1240.8 | 1392.6 |
| 274.7  | 226.9  | 262.2  | 257.3  | 279.0  | 347.9  |
| 736.8  | 766.2  | 807.5  | 792.8  | 828.9  | 991.8  |
| 1314.1 | 1149.1 | 1249.4 | 1210.2 | 1442.3 | 1500.6 |
| 2350.1 | 2109.8 | 2509.6 | 2819.2 | 2531.8 | 2814.7 |
| 767.0  | 798.5  | 834.9  | 880.8  | 951.7  | 950.6  |
| 621.7  | 625.9  | 708.5  | 640.6  | 844.6  | 855.8  |
| 900.1  | 866.0  | 925.1  | 1040.5 | 1111.5 | 1185.1 |
| 661.8  | 627.6  | 592.3  | 648.0  | 659.7  | 789.9  |
| 696.1  | 698.5  | 727.3  | 633.9  | 795.7  | 864.3  |
| 1806.4 | 1424.4 | 1625.9 | 1477.0 | 1830.0 | 1929.1 |
| 184.4  | 183.0  | 234.5  | 226.1  | 221.8  | 275.2  |
| 61.6   | 69.8   | 61.0   | 77.6   | 103.5  | 103.1  |
| 127.1  | 115.0  | 142.9  | 140.9  | 139.4  | 155.0  |
| 221.9  | 205.1  | 223.4  | 239.9  | 237.2  | 288.2  |
| 1010.9 | 935.1  | 1204.8 | 1292.3 | 1309.3 | 1253.2 |
| 587.3  | 501.4  | 539.2  | 530.2  | 605.2  | 652.0  |
| 319.2  | 288.6  | 379.3  | 352.3  | 386.3  | 406.5  |
| 191.4  | 177.4  | 202.9  | 204.7  | 231.0  | 244.6  |
| 420.5  | 309.6  | 402.5  | 342.3  | 429.1  | 459.9  |
| 1039.5 | 1185.7 | 1068.8 | 1181.3 | 1228.5 | 1350.1 |
| 278.6  | 324.8  | 255.5  | 301.3  | 287.4  | 328.1  |
| 1469.0 | 1204.4 | 1385.0 | 1433.3 | 1613.1 | 1629.3 |
| 4132.9 | 4081.3 | 4247.3 | 4374.8 | 4561.1 | 4591.0 |
| 624.1  | 445.2  | 665.0  | 675.8  | 792.7  | 732.9  |
| 785.6  | 634.3  | 742.3  | 767.4  | 874.6  | 931.7  |
| 46.3   | 55.9   | 54.7   | 53.4   | 56.9   | 56.8   |
| 1497.9 | 1179.3 | 1491.6 | 1451.8 | 1579.6 | 1726.8 |
| 389.2  | 326.5  | 443.8  | 451.7  | 486.8  | 497.1  |
| 576.3  | 448.7  | 544.5  | 528.7  | 646.4  | 662.3  |
| 321.2  | 227.5  | 270.4  | 265.3  | 254.2  | 304.3  |
| 457.7  | 387.1  | 395.2  | 454.5  | 490.2  | 611.4  |
| 151.4  | 165.4  | 160.6  | 187.7  | 179.6  | 195.7  |
| 2040.6 | 1763.0 | 2194.7 | 2180.0 | 2323.9 | 2348.4 |
| 2963.7 | 2206.0 | 2711.5 | 2864.7 | 3159.0 | 3332.0 |
| 93.1   | 68.8   | 63.8   | 48.1   | 86.6   | 93.5   |
| 2603.0 | 2545.4 | 2755.6 | 2891.8 | 2872.7 | 3278.4 |
| 47.9   | 45.3   | 61.9   | 59.1   | 67.2   | 82.0   |
| 1379.5 | 1553.0 | 1493.9 | 1464.3 | 1470.2 | 1536.2 |
| 783.6  | 1092.8 | 870.1  | 1033.7 | 830.9  | 1256.0 |
| 1182.9 | 1049.4 | 1128.8 | 1146.0 | 1352.0 | 1352.6 |
| 713.4  | 432.1  | 641.7  | 737.5  | 785.9  | 803.8  |
| 1515.6 | 1679.5 | 1724.1 | 1806.1 | 2121.7 | 1912.8 |
| 612.3  | 551.6  | 693.0  | 694.8  | 796.0  | 781.8  |
| 164.7  | 182.5  | 176.0  | 192.0  | 194.7  | 244.0  |
| 235.6  | 229.1  | 205.4  | 162.7  | 217.1  | 249.2  |
| 194.3  | 134.2  | 171.4  | 181.3  | 206.1  | 235.3  |
| 111.4  | 121.2  | 128.7  | 137.5  | 152.3  | 180.5  |

|        |        |        |        |        |        |
|--------|--------|--------|--------|--------|--------|
| 588.4  | 600.3  | 567.9  | 646.5  | 723.4  | 748.9  |
| 497.4  | 537.2  | 531.4  | 567.6  | 606.3  | 591.9  |
| 76.2   | 81.8   | 79.5   | 81.1   | 105.9  | 106.1  |
| 79.1   | 88.0   | 95.2   | 84.2   | 81.0   | 101.8  |
| 176.3  | 133.6  | 161.3  | 180.8  | 196.0  | 223.1  |
| 289.5  | 305.5  | 376.0  | 334.8  | 347.7  | 399.2  |
| 524.2  | 554.3  | 661.3  | 633.0  | 636.2  | 719.3  |
| 489.6  | 454.6  | 509.9  | 527.4  | 564.7  | 612.2  |
| 1237.9 | 925.2  | 1397.2 | 1246.3 | 1457.0 | 1312.3 |
| 1476.7 | 1348.2 | 1528.9 | 1687.9 | 1635.0 | 1763.9 |
| 1710.1 | 1539.5 | 1646.5 | 1705.5 | 1787.3 | 1989.8 |
| 5116.5 | 5017.7 | 6044.5 | 6642.3 | 6105.3 | 6306.9 |
| 1214.0 | 1115.6 | 1252.0 | 1337.8 | 1387.1 | 1503.1 |
| 671.0  | 594.7  | 695.2  | 632.8  | 745.5  | 803.2  |
| 1065.1 | 940.3  | 1228.8 | 1342.9 | 1281.9 | 1390.3 |
| 157.5  | 172.0  | 171.4  | 187.9  | 205.5  | 222.9  |
| 151.6  | 94.4   | 116.1  | 143.9  | 118.5  | 158.4  |
| 327.6  | 332.7  | 340.6  | 327.5  | 391.6  | 421.4  |
| 227.6  | 254.8  | 239.4  | 245.0  | 262.3  | 281.7  |
| 599.7  | 515.5  | 612.4  | 664.8  | 686.3  | 766.3  |
| 596.6  | 546.6  | 447.9  | 532.9  | 558.4  | 629.6  |
| 349.8  | 292.4  | 322.0  | 329.3  | 372.8  | 387.8  |
| 1122.3 | 994.2  | 1108.7 | 1119.9 | 1175.3 | 1267.9 |
| 3260.6 | 3032.0 | 3180.5 | 3687.3 | 3613.9 | 3740.7 |
| 589.7  | 552.9  | 617.6  | 579.5  | 676.9  | 695.2  |
| 1011.6 | 763.1  | 959.8  | 987.9  | 1145.1 | 1110.8 |
| 219.2  | 190.7  | 196.6  | 200.8  | 245.2  | 288.3  |
| 506.8  | 403.6  | 555.6  | 524.9  | 581.6  | 645.5  |
| 218.7  | 296.2  | 238.6  | 231.9  | 285.4  | 318.6  |
| 115.8  | 89.3   | 105.1  | 130.6  | 119.8  | 131.8  |
| 193.4  | 154.2  | 187.5  | 200.8  | 221.4  | 225.5  |
| 194.7  | 218.4  | 249.8  | 206.0  | 241.1  | 268.2  |
| 1437.5 | 1150.7 | 1543.2 | 1526.3 | 1639.8 | 1736.3 |
| 237.7  | 230.4  | 216.7  | 240.0  | 260.7  | 322.1  |
| 511.8  | 460.9  | 387.1  | 452.4  | 449.9  | 611.9  |
| 337.0  | 327.6  | 373.7  | 400.9  | 390.6  | 405.3  |
| 152.3  | 180.6  | 165.1  | 168.2  | 197.5  | 189.5  |
| 11.8   | 15.0   | 27.4   | 23.4   | 19.6   | 35.9   |
| 1895.8 | 1971.7 | 1586.2 | 1836.8 | 1803.1 | 2208.0 |
| 471.7  | 429.8  | 499.8  | 464.9  | 548.6  | 610.6  |
| 1592.8 | 1315.3 | 1579.1 | 1553.0 | 1757.9 | 1850.0 |
| 391.7  | 293.6  | 396.3  | 380.9  | 451.3  | 476.2  |
| 257.9  | 267.7  | 235.3  | 251.5  | 338.3  | 349.5  |
| 119.2  | 134.2  | 126.9  | 126.0  | 164.8  | 146.4  |
| 146.7  | 110.6  | 133.8  | 137.4  | 150.2  | 167.2  |
| 122.1  | 121.2  | 121.4  | 113.5  | 121.0  | 106.8  |
| 650.1  | 537.5  | 662.3  | 692.3  | 732.9  | 773.1  |
| 1367.7 | 1410.0 | 1365.1 | 1362.1 | 1517.9 | 1643.0 |
| 271.1  | 239.2  | 271.1  | 267.6  | 305.1  | 313.1  |
| 550.3  | 567.2  | 627.7  | 708.5  | 620.3  | 693.7  |
| 410.0  | 480.3  | 424.8  | 576.7  | 501.5  | 569.2  |
| 844.6  | 911.5  | 728.2  | 872.2  | 894.2  | 1106.2 |
| 428.3  | 438.8  | 445.5  | 398.6  | 533.6  | 413.0  |

|        |        |        |        |        |        |
|--------|--------|--------|--------|--------|--------|
| 550.2  | 524.9  | 577.6  | 592.1  | 641.5  | 684.8  |
| 95.5   | 92.9   | 77.9   | 110.8  | 121.3  | 141.9  |
| 3009.6 | 2804.1 | 2828.3 | 3009.1 | 3008.9 | 3624.5 |
| 515.9  | 665.1  | 546.8  | 539.0  | 613.4  | 666.0  |
| 2598.5 | 2578.7 | 2665.0 | 2851.8 | 3091.9 | 3145.5 |
| 2736.0 | 2523.6 | 2884.7 | 3099.3 | 3163.2 | 3114.0 |
| 1631.0 | 1574.1 | 1739.2 | 1827.2 | 1827.5 | 1978.0 |
| 98.8   | 80.6   | 106.4  | 95.2   | 103.7  | 119.6  |
| 124.3  | 113.4  | 126.1  | 146.0  | 150.7  | 172.6  |
| 385.6  | 357.2  | 388.1  | 388.9  | 483.2  | 477.6  |
| 776.9  | 702.9  | 919.0  | 952.9  | 984.2  | 1059.1 |
| 142.6  | 135.1  | 148.4  | 133.0  | 172.1  | 160.2  |
| 131.9  | 75.3   | 83.7   | 136.5  | 119.3  | 111.0  |
| 2217.0 | 2053.6 | 2686.8 | 2839.5 | 2681.1 | 3028.2 |
| 4745.8 | 4604.6 | 5044.8 | 5478.7 | 5536.2 | 5774.7 |
| 169.0  | 166.5  | 187.3  | 191.0  | 210.0  | 203.7  |
| 96.3   | 49.3   | 108.4  | 108.5  | 127.9  | 150.9  |
| 190.6  | 163.4  | 200.0  | 235.5  | 233.9  | 251.1  |
| 73.0   | 97.3   | 88.9   | 76.1   | 86.3   | 93.3   |
| 909.6  | 793.6  | 969.1  | 1009.6 | 1025.8 | 1016.8 |
| 1499.8 | 1364.4 | 1490.9 | 1585.4 | 1635.9 | 1821.9 |
| 1459.9 | 1486.9 | 1759.5 | 1709.0 | 1802.5 | 1971.5 |
| 224.6  | 211.9  | 216.7  | 248.4  | 264.6  | 254.1  |
| 138.6  | 122.5  | 120.4  | 134.0  | 141.5  | 161.3  |
| 48.4   | 38.1   | 37.5   | 48.3   | 64.8   | 53.2   |
| 1396.6 | 1223.5 | 1386.5 | 1360.3 | 1452.0 | 1543.9 |
| 351.1  | 305.9  | 357.8  | 365.8  | 372.6  | 452.7  |
| 723.1  | 637.8  | 858.8  | 666.9  | 870.9  | 964.0  |
| 1063.9 | 706.0  | 1022.2 | 890.5  | 1115.1 | 1120.1 |
| 989.4  | 1072.2 | 1156.5 | 1283.8 | 1168.3 | 1166.1 |
| 373.6  | 333.7  | 415.4  | 419.0  | 510.7  | 469.1  |
| 375.8  | 360.6  | 395.1  | 412.7  | 467.0  | 497.8  |
| 1401.5 | 1286.4 | 1406.0 | 1363.0 | 1454.1 | 1640.0 |
| 1260.4 | 1147.2 | 1280.5 | 1342.8 | 1566.6 | 1538.2 |
| 1486.5 | 1501.4 | 1394.4 | 1584.3 | 1613.3 | 1758.4 |
| 207.7  | 201.2  | 257.2  | 222.6  | 302.7  | 292.2  |
| 1498.4 | 1474.2 | 1712.9 | 1798.2 | 1885.7 | 1970.5 |
| 1000.6 | 879.9  | 1064.5 | 1048.1 | 1161.6 | 1176.8 |
| 50.2   | 48.2   | 57.5   | 47.9   | 66.6   | 66.6   |
| 298.2  | 282.1  | 267.9  | 246.0  | 312.4  | 334.3  |
| 11.7   | 10.4   | 14.6   | 11.1   | 9.5    | 18.3   |
| 437.6  | 414.6  | 433.4  | 432.1  | 529.1  | 549.7  |
| 304.0  | 254.8  | 315.6  | 314.2  | 384.4  | 411.2  |
| 1016.5 | 1110.9 | 878.5  | 1068.0 | 1114.5 | 1304.9 |
| 1026.6 | 1100.2 | 959.4  | 1188.3 | 1121.6 | 1238.1 |
| 2026.1 | 1813.0 | 2132.3 | 2238.6 | 2339.0 | 2437.3 |
| 2203.7 | 1955.8 | 1916.6 | 1980.8 | 2112.4 | 2336.6 |
| 1177.5 | 960.3  | 1332.7 | 1286.5 | 1500.4 | 1429.4 |
| 461.6  | 443.7  | 507.0  | 532.3  | 565.1  | 614.3  |
| 2437.4 | 2735.7 | 2794.5 | 2892.4 | 2766.0 | 3071.3 |
| 2821.0 | 2294.1 | 2815.2 | 2684.3 | 3141.5 | 3039.9 |
| 725.3  | 591.4  | 641.9  | 720.6  | 820.1  | 785.6  |
| 372.3  | 266.9  | 388.9  | 373.2  | 400.3  | 414.5  |

|        |        |        |        |        |        |
|--------|--------|--------|--------|--------|--------|
| 493.9  | 293.7  | 493.2  | 436.3  | 627.5  | 565.0  |
| 843.4  | 444.8  | 920.6  | 797.9  | 1065.3 | 1008.8 |
| 282.9  | 259.3  | 295.7  | 332.1  | 327.3  | 348.7  |
| 704.2  | 579.3  | 786.2  | 773.8  | 859.9  | 812.1  |
| 250.4  | 211.6  | 243.3  | 238.6  | 297.1  | 322.5  |
| 720.0  | 656.7  | 746.4  | 782.1  | 835.1  | 965.4  |
| 936.7  | 856.4  | 935.0  | 982.5  | 1030.9 | 1202.9 |
| 689.5  | 547.8  | 817.6  | 804.9  | 852.2  | 845.4  |
| 115.3  | 103.1  | 114.0  | 130.8  | 128.6  | 158.4  |
| 839.8  | 547.5  | 614.6  | 705.8  | 809.6  | 1031.1 |
| 384.0  | 300.9  | 263.5  | 301.2  | 336.2  | 441.7  |
| 453.2  | 399.9  | 498.3  | 475.0  | 518.5  | 554.0  |
| 1018.6 | 964.3  | 1088.6 | 1176.7 | 1206.9 | 1250.1 |
| 3391.9 | 3917.0 | 3116.7 | 3602.2 | 3102.1 | 3874.5 |
| 1239.3 | 1019.8 | 1254.9 | 1343.1 | 1385.2 | 1472.9 |
| 190.7  | 204.1  | 174.5  | 192.6  | 208.0  | 222.8  |
| 5653.7 | 4635.9 | 4875.2 | 5297.3 | 5564.7 | 5853.1 |
| 374.9  | 376.2  | 344.3  | 297.3  | 367.3  | 487.3  |
| 154.2  | 155.6  | 128.1  | 179.3  | 158.5  | 179.2  |
| 311.7  | 237.1  | 228.0  | 251.4  | 296.9  | 341.6  |
| 286.4  | 276.1  | 286.0  | 299.0  | 279.2  | 358.1  |
| 493.2  | 453.1  | 467.4  | 506.4  | 544.1  | 605.9  |
| 438.0  | 359.0  | 448.7  | 462.6  | 441.3  | 512.2  |
| 372.5  | 488.4  | 383.1  | 424.3  | 444.8  | 475.6  |
| 347.2  | 270.2  | 326.0  | 341.7  | 365.4  | 397.3  |
| 65.0   | 50.4   | 62.4   | 59.7   | 77.7   | 72.5   |
| 443.3  | 493.5  | 437.6  | 431.3  | 508.4  | 535.0  |
| 1970.0 | 1882.3 | 2159.2 | 2193.7 | 2294.9 | 2615.0 |
| 472.8  | 410.8  | 583.2  | 593.9  | 656.2  | 595.1  |
| 245.2  | 187.3  | 243.7  | 260.2  | 258.6  | 266.8  |
| 2155.6 | 2101.7 | 1424.3 | 2667.5 | 2005.3 | 2834.4 |
| 724.4  | 656.5  | 526.2  | 879.6  | 677.6  | 975.2  |
| 275.3  | 320.4  | 254.7  | 390.5  | 311.2  | 410.5  |
| 611.2  | 492.9  | 516.3  | 837.0  | 584.6  | 737.5  |
| 636.4  | 677.8  | 455.3  | 737.0  | 631.6  | 924.5  |
| 533.7  | 612.8  | 616.5  | 661.5  | 651.4  | 700.4  |
| 1.3    | 19.7   | 4.5    | 0.9    | 1.3    | 4.6    |
| 1060.6 | 955.7  | 1043.8 | 1052.6 | 1295.4 | 1377.7 |
| 298.3  | 256.6  | 285.8  | 289.5  | 364.0  | 347.5  |
| 273.8  | 229.2  | 272.6  | 303.0  | 297.1  | 325.2  |
| 138.0  | 142.0  | 124.0  | 138.8  | 158.6  | 185.0  |
| 6707.7 | 6051.4 | 6831.3 | 7051.8 | 7182.8 | 7780.9 |
| 697.3  | 660.1  | 772.4  | 825.5  | 820.5  | 760.3  |
| 1753.8 | 1525.6 | 1691.6 | 1734.8 | 2084.6 | 2093.8 |
| 174.7  | 193.4  | 232.7  | 239.6  | 266.7  | 254.8  |
| 2704.9 | 2339.6 | 2971.1 | 3381.2 | 3136.3 | 3210.0 |
| 133.9  | 109.0  | 139.2  | 144.5  | 150.2  | 142.3  |
| 255.6  | 222.3  | 311.5  | 300.5  | 343.6  | 346.6  |
| 597.8  | 539.5  | 626.7  | 629.4  | 674.5  | 680.2  |
| 4.7    | 1.7    | 10.6   | 12.0   | 10.2   | 10.9   |
| 559.4  | 570.7  | 546.2  | 575.3  | 651.4  | 656.0  |
| 137.3  | 105.9  | 114.1  | 111.0  | 143.7  | 151.1  |
| 101.3  | 81.6   | 95.0   | 84.9   | 117.3  | 129.0  |



|        |        |        |        |        |        |
|--------|--------|--------|--------|--------|--------|
| 137.7  | 170.0  | 124.3  | 161.2  | 152.2  | 171.3  |
| 156.0  | 163.8  | 179.4  | 188.5  | 207.9  | 195.7  |
| 250.6  | 249.9  | 226.4  | 272.0  | 325.4  | 306.5  |
| 170.5  | 157.2  | 161.5  | 164.4  | 187.7  | 174.7  |
| 430.2  | 423.0  | 421.3  | 440.6  | 478.9  | 540.7  |
| 472.5  | 413.4  | 462.2  | 494.8  | 472.8  | 643.7  |
| 456.2  | 437.0  | 519.4  | 518.4  | 511.4  | 614.5  |
| 2167.6 | 2114.1 | 2262.3 | 2560.8 | 2365.2 | 2587.2 |
| 1986.8 | 1921.3 | 2075.0 | 2112.9 | 2309.4 | 2438.9 |
| 546.3  | 475.1  | 654.0  | 652.3  | 647.5  | 639.2  |
| 133.6  | 115.6  | 132.5  | 154.7  | 168.1  | 165.2  |
| 129.5  | 113.6  | 117.1  | 109.1  | 114.1  | 103.1  |
| 75.6   | 73.7   | 75.4   | 80.5   | 85.3   | 100.1  |
| 127.2  | 76.1   | 110.0  | 104.4  | 120.6  | 130.7  |
| 24.4   | 12.4   | 23.9   | 21.6   | 22.5   | 26.3   |
| 1739.5 | 1785.3 | 1880.5 | 1942.7 | 2188.7 | 2188.2 |
| 157.0  | 113.9  | 125.1  | 149.0  | 173.3  | 170.7  |
| 599.2  | 616.1  | 667.1  | 737.7  | 731.1  | 780.1  |
| 183.2  | 184.4  | 211.0  | 211.4  | 242.7  | 285.6  |
| 366.4  | 382.9  | 403.4  | 434.0  | 485.8  | 488.0  |
| 1846.9 | 1309.4 | 1651.8 | 1682.9 | 1902.5 | 2041.9 |
| 169.7  | 170.4  | 175.7  | 185.9  | 205.5  | 208.2  |
| 1620.3 | 1548.4 | 1834.9 | 2084.6 | 1937.9 | 2084.9 |
| 688.0  | 574.9  | 660.2  | 752.4  | 794.3  | 894.7  |
| 185.7  | 109.6  | 123.0  | 131.6  | 141.0  | 168.3  |
| 2.7    | 1.0    | 1.2    | 1.4    | 2.6    | 3.7    |
| 238.0  | 237.2  | 228.2  | 238.9  | 251.2  | 277.6  |
| 1135.5 | 979.3  | 1271.0 | 1334.6 | 1347.6 | 1397.2 |
| 852.3  | 651.8  | 797.4  | 800.8  | 1027.3 | 1038.4 |
| 774.5  | 675.3  | 902.2  | 982.3  | 934.5  | 995.1  |
| 1441.6 | 1302.3 | 1492.4 | 1576.5 | 1623.9 | 1824.5 |
| 474.5  | 427.4  | 465.8  | 437.7  | 483.9  | 561.9  |
| 510.5  | 507.7  | 631.9  | 641.9  | 687.8  | 720.1  |
| 754.7  | 660.6  | 749.9  | 814.9  | 952.3  | 933.4  |
| 1164.7 | 997.8  | 1165.1 | 1121.0 | 1247.9 | 1337.8 |
| 10.7   | 5.1    | 8.5    | 11.8   | 14.9   | 24.8   |
| 218.5  | 210.9  | 208.2  | 236.6  | 232.4  | 279.8  |
| 1116.8 | 969.7  | 1089.4 | 985.4  | 1197.1 | 1319.3 |
| 1021.4 | 1053.5 | 1139.6 | 1202.8 | 1235.6 | 1245.3 |
| 217.8  | 227.3  | 268.0  | 292.8  | 282.8  | 287.0  |
| 2634.2 | 3015.7 | 3036.5 | 3143.5 | 3253.8 | 3381.8 |
| 64.5   | 82.4   | 71.1   | 69.2   | 75.3   | 66.6   |
| 1260.0 | 1189.5 | 1369.5 | 1297.8 | 1493.7 | 1528.1 |
| 141.4  | 107.0  | 159.9  | 143.0  | 176.9  | 171.0  |
| 38.1   | 22.6   | 22.1   | 40.1   | 39.2   | 36.3   |
| 164.1  | 181.4  | 157.2  | 161.4  | 193.4  | 207.9  |
| 653.6  | 628.1  | 605.5  | 697.2  | 829.2  | 895.0  |
| 322.7  | 395.0  | 332.3  | 420.8  | 448.6  | 357.8  |
| 913.7  | 937.4  | 921.2  | 980.1  | 951.9  | 1184.6 |
| 232.7  | 225.2  | 257.9  | 257.1  | 276.9  | 279.6  |
| 818.3  | 934.7  | 1005.5 | 1124.3 | 898.9  | 1038.6 |
| 182.4  | 167.5  | 186.4  | 215.6  | 217.2  | 240.9  |
| 207.9  | 174.6  | 189.0  | 188.8  | 225.0  | 230.6  |

|        |        |        |        |        |        |
|--------|--------|--------|--------|--------|--------|
| 340.4  | 276.9  | 307.4  | 336.0  | 354.2  | 398.9  |
| 488.4  | 502.1  | 491.3  | 529.2  | 552.6  | 614.1  |
| 3465.9 | 3196.9 | 3647.8 | 3993.7 | 3820.5 | 3840.1 |
| 336.1  | 328.6  | 360.1  | 340.1  | 439.6  | 474.1  |
| 330.5  | 245.5  | 350.0  | 300.0  | 435.3  | 392.8  |
| 182.8  | 178.7  | 185.6  | 183.6  | 213.6  | 215.1  |
| 210.0  | 218.6  | 241.8  | 257.7  | 259.5  | 290.9  |
| 357.5  | 310.9  | 350.1  | 351.6  | 423.7  | 426.8  |
| 601.1  | 534.3  | 594.6  | 581.3  | 695.9  | 685.9  |
| 157.5  | 153.7  | 146.7  | 175.3  | 201.8  | 234.2  |
| 843.9  | 865.3  | 818.6  | 919.1  | 993.3  | 1045.2 |
| 200.3  | 220.3  | 262.2  | 263.8  | 305.8  | 285.1  |
| 1934.4 | 2055.4 | 2062.6 | 2193.9 | 2349.9 | 2209.9 |
| 2175.1 | 1657.6 | 1999.5 | 2166.3 | 2074.0 | 2671.3 |
| 167.6  | 129.3  | 150.2  | 193.0  | 219.5  | 182.6  |
| 153.0  | 76.3   | 135.1  | 151.7  | 185.8  | 181.8  |
| 691.4  | 530.9  | 654.8  | 671.1  | 807.4  | 766.6  |
| 575.3  | 566.6  | 625.6  | 703.6  | 717.8  | 816.1  |
| 473.5  | 339.6  | 403.0  | 441.5  | 463.4  | 532.7  |
| 168.4  | 155.2  | 167.7  | 182.6  | 175.9  | 193.6  |
| 362.0  | 330.9  | 375.4  | 394.8  | 404.4  | 497.3  |
| 272.6  | 292.3  | 290.8  | 278.1  | 289.7  | 346.3  |
| 113.4  | 98.0   | 124.3  | 113.9  | 117.2  | 118.2  |
| 684.4  | 669.4  | 832.3  | 948.0  | 830.1  | 914.4  |
| 461.2  | 445.3  | 423.6  | 424.0  | 426.1  | 580.5  |
| 703.3  | 636.6  | 758.8  | 811.0  | 768.2  | 954.7  |
| 644.4  | 583.8  | 604.8  | 623.7  | 668.3  | 742.7  |
| 190.9  | 176.1  | 176.7  | 173.3  | 234.2  | 234.4  |
| 521.4  | 508.0  | 428.7  | 443.3  | 478.9  | 585.7  |
| 3484.4 | 3032.0 | 3776.7 | 4006.8 | 4108.0 | 4102.1 |
| 768.3  | 659.6  | 731.9  | 856.6  | 896.7  | 980.5  |
| 1285.8 | 1162.0 | 1174.5 | 1214.2 | 1474.0 | 1410.2 |
| 551.2  | 632.6  | 583.0  | 616.3  | 605.7  | 660.0  |
| 763.1  | 760.5  | 918.2  | 1012.9 | 1063.9 | 1000.9 |
| 483.5  | 339.4  | 534.6  | 507.8  | 540.1  | 513.3  |
| 1132.5 | 982.6  | 1150.1 | 1178.4 | 1383.6 | 1421.9 |
| 779.8  | 694.1  | 661.3  | 807.1  | 789.0  | 1076.8 |
| 1214.6 | 976.3  | 987.1  | 965.2  | 1177.8 | 1270.0 |
| 108.4  | 124.7  | 121.1  | 109.5  | 146.5  | 125.5  |
| 317.6  | 316.7  | 275.7  | 292.0  | 321.8  | 381.6  |
| 821.6  | 770.3  | 853.9  | 985.7  | 952.7  | 942.8  |
| 640.1  | 961.9  | 488.0  | 592.7  | 629.4  | 714.6  |
| 84.5   | 91.0   | 102.1  | 108.9  | 132.9  | 130.4  |
| 691.2  | 619.0  | 721.7  | 729.5  | 821.2  | 786.5  |
| 299.5  | 298.9  | 378.4  | 374.9  | 398.0  | 433.6  |
| 1824.6 | 1681.0 | 1789.7 | 1979.4 | 2138.2 | 2254.4 |
| 838.9  | 881.6  | 904.9  | 904.6  | 972.9  | 1087.9 |
| 731.9  | 723.2  | 806.6  | 834.5  | 855.6  | 877.7  |
| 767.4  | 788.8  | 876.2  | 879.2  | 897.3  | 998.9  |
| 144.8  | 151.8  | 167.8  | 168.2  | 159.5  | 186.2  |
| 202.8  | 223.0  | 226.8  | 232.4  | 258.0  | 246.3  |
| 534.5  | 486.1  | 540.5  | 505.1  | 598.5  | 640.4  |
| 369.0  | 301.1  | 328.7  | 322.4  | 415.3  | 422.8  |

|        |        |        |        |        |        |
|--------|--------|--------|--------|--------|--------|
| 155.0  | 152.8  | 176.6  | 167.7  | 184.7  | 203.3  |
| 369.0  | 345.5  | 364.3  | 406.1  | 414.5  | 444.8  |
| 219.4  | 202.1  | 217.4  | 198.6  | 214.3  | 253.4  |
| 163.0  | 120.3  | 135.8  | 148.9  | 166.6  | 193.0  |
| 224.3  | 217.7  | 197.1  | 216.1  | 250.0  | 299.9  |
| 152.1  | 101.2  | 161.2  | 165.0  | 174.7  | 192.3  |
| 461.5  | 477.3  | 520.2  | 530.0  | 504.3  | 559.7  |
| 792.1  | 790.2  | 915.7  | 986.7  | 1016.8 | 1038.5 |
| 438.3  | 460.8  | 489.4  | 564.8  | 513.2  | 539.7  |
| 1038.0 | 877.9  | 975.0  | 1044.5 | 1146.3 | 1223.2 |
| 363.3  | 317.6  | 382.8  | 361.0  | 400.5  | 445.9  |
| 72.4   | 69.6   | 78.1   | 92.8   | 92.3   | 95.5   |
| 254.0  | 281.3  | 264.9  | 267.8  | 297.2  | 314.2  |
| 236.5  | 238.4  | 246.2  | 256.3  | 259.0  | 282.9  |
| 321.2  | 292.3  | 292.6  | 339.4  | 357.3  | 394.0  |
| 695.0  | 628.1  | 793.0  | 791.7  | 785.3  | 826.6  |
| 40.3   | 41.8   | 56.3   | 60.6   | 64.1   | 45.6   |
| 240.5  | 195.6  | 271.1  | 287.6  | 295.8  | 349.3  |
| 432.0  | 411.4  | 454.3  | 448.8  | 512.8  | 487.5  |
| 84.1   | 80.4   | 113.0  | 98.5   | 111.7  | 102.1  |
| 792.8  | 770.3  | 883.6  | 1105.4 | 927.0  | 1013.7 |
| 816.7  | 699.4  | 748.4  | 849.7  | 917.8  | 1137.7 |
| 431.1  | 323.0  | 492.6  | 470.4  | 483.2  | 523.1  |
| 89.5   | 68.0   | 91.0   | 82.2   | 100.1  | 103.3  |
| 142.7  | 138.3  | 152.2  | 157.2  | 149.3  | 170.0  |
| 396.3  | 369.5  | 413.3  | 437.1  | 425.0  | 472.3  |
| 450.6  | 440.3  | 516.9  | 630.2  | 612.4  | 645.9  |
| 304.9  | 250.3  | 265.5  | 295.1  | 313.8  | 364.7  |
| 463.0  | 445.2  | 545.8  | 555.9  | 613.6  | 577.7  |
| 195.8  | 183.8  | 240.0  | 242.5  | 247.1  | 263.8  |
| 187.6  | 209.7  | 133.7  | 145.7  | 162.8  | 213.5  |
| 1801.9 | 1808.0 | 1907.4 | 1616.1 | 1997.5 | 2193.7 |
| 395.6  | 409.6  | 519.0  | 615.6  | 510.7  | 591.7  |
| 162.3  | 158.6  | 164.8  | 193.7  | 180.7  | 207.4  |
| 553.6  | 548.8  | 606.1  | 578.3  | 610.7  | 666.9  |
| 1307.2 | 1224.5 | 1293.2 | 1406.3 | 1523.8 | 1563.3 |
| 94.8   | 83.5   | 118.5  | 115.9  | 148.7  | 135.0  |
| 10.1   | 7.9    | 6.9    | 10.1   | 12.2   | 10.3   |
| 2640.5 | 2360.1 | 2717.2 | 2970.8 | 3047.0 | 3209.5 |
| 299.8  | 292.8  | 324.6  | 349.2  | 367.7  | 406.7  |
| 567.2  | 556.0  | 538.6  | 563.6  | 656.4  | 732.0  |
| 143.8  | 114.8  | 129.7  | 131.0  | 161.1  | 184.7  |
| 1692.1 | 1330.2 | 1722.3 | 1584.0 | 1716.9 | 1840.8 |
| 422.2  | 421.0  | 452.9  | 456.1  | 503.0  | 525.7  |
| 193.0  | 146.2  | 202.9  | 203.2  | 253.9  | 261.9  |
| 440.5  | 454.4  | 425.7  | 427.0  | 465.6  | 559.0  |
| 676.4  | 605.1  | 641.2  | 648.9  | 726.8  | 840.2  |
| 437.4  | 444.6  | 401.8  | 406.9  | 472.6  | 542.1  |
| 20.7   | 19.6   | 13.7   | 15.6   | 25.7   | 16.2   |
| 61.4   | 45.9   | 57.3   | 62.8   | 63.1   | 69.6   |
| 60.6   | 68.1   | 70.4   | 68.1   | 87.7   | 84.7   |
| 320.6  | 312.7  | 336.5  | 327.9  | 411.2  | 426.0  |
| 142.6  | 96.5   | 131.5  | 150.6  | 134.8  | 171.7  |

|        |        |        |        |        |        |
|--------|--------|--------|--------|--------|--------|
| 641.1  | 523.4  | 624.4  | 708.7  | 701.6  | 828.6  |
| 165.7  | 127.3  | 169.2  | 148.4  | 175.7  | 196.0  |
| 12.7   | 15.6   | 7.6    | 21.7   | 18.0   | 22.9   |
| 162.3  | 149.7  | 130.0  | 148.1  | 166.6  | 180.3  |
| 10.5   | 16.2   | 12.8   | 6.0    | 17.6   | 16.6   |
| 38.1   | 23.2   | 49.9   | 42.8   | 66.4   | 60.3   |
| 88.3   | 97.4   | 78.9   | 94.3   | 104.3  | 104.9  |
| 867.4  | 827.5  | 947.4  | 991.2  | 1009.5 | 1041.0 |
| 7.4    | 13.3   | 11.4   | 2.9    | 3.5    | 14.4   |
| 541.9  | 487.1  | 557.0  | 553.7  | 588.2  | 580.1  |
| 1201.4 | 1217.2 | 1362.6 | 1535.1 | 1430.2 | 1510.0 |
| 895.2  | 832.9  | 1006.1 | 884.2  | 1053.1 | 1165.9 |
| 2703.4 | 2664.6 | 3021.1 | 3257.8 | 3225.7 | 3283.7 |
| 290.5  | 273.7  | 274.3  | 276.1  | 301.7  | 329.0  |
| 249.0  | 203.3  | 254.9  | 289.9  | 290.1  | 305.4  |
| 824.9  | 811.8  | 849.4  | 842.7  | 883.1  | 993.3  |
| 1851.3 | 1575.8 | 2146.3 | 2115.1 | 2182.8 | 2389.5 |
| 406.2  | 315.6  | 348.3  | 379.4  | 410.2  | 476.9  |
| 267.9  | 280.8  | 310.2  | 324.5  | 302.3  | 399.3  |
| 205.0  | 203.8  | 217.0  | 217.0  | 260.7  | 263.7  |
| 597.3  | 528.8  | 562.0  | 634.2  | 599.1  | 660.3  |
| 242.3  | 219.9  | 285.1  | 315.1  | 300.3  | 327.0  |
| 2884.5 | 2888.0 | 3364.5 | 3474.6 | 3528.0 | 3544.5 |
| 1987.7 | 1697.5 | 2103.5 | 2295.1 | 2218.9 | 2483.7 |
| 126.6  | 117.8  | 124.9  | 125.3  | 112.7  | 150.6  |
| 1292.7 | 1332.8 | 1383.5 | 1520.7 | 1508.6 | 1603.4 |
| 130.5  | 101.2  | 110.3  | 127.5  | 133.5  | 129.5  |
| 441.5  | 655.5  | 599.2  | 734.5  | 652.7  | 792.5  |
| 1498.6 | 1308.4 | 1702.4 | 1909.3 | 1819.3 | 1883.4 |
| 5.6    | 9.2    | 4.2    | 5.6    | 9.8    | 4.5    |
| 104.0  | 82.9   | 106.6  | 117.8  | 116.8  | 110.8  |
| 239.7  | 245.4  | 243.0  | 272.8  | 251.6  | 310.8  |
| 397.6  | 351.4  | 432.3  | 449.3  | 464.8  | 465.5  |
| 54.4   | 63.7   | 55.3   | 66.5   | 59.4   | 54.3   |
| 424.8  | 398.5  | 442.3  | 446.3  | 500.7  | 575.1  |
| 4890.5 | 4230.1 | 5107.1 | 5424.9 | 5538.8 | 5710.2 |
| 1246.4 | 1481.3 | 1364.8 | 1451.0 | 1556.7 | 1675.3 |
| 334.7  | 316.5  | 420.8  | 439.5  | 500.0  | 452.7  |
| 696.6  | 656.2  | 750.7  | 754.2  | 814.3  | 912.2  |
| 427.5  | 341.1  | 386.4  | 390.6  | 486.1  | 495.3  |
| 186.7  | 173.2  | 173.5  | 191.2  | 222.2  | 261.1  |
| 492.3  | 484.8  | 459.3  | 456.3  | 549.9  | 564.0  |
| 787.3  | 753.3  | 804.0  | 910.3  | 961.6  | 1004.7 |
| 121.1  | 110.5  | 137.6  | 130.2  | 159.4  | 145.2  |
| 102.7  | 61.9   | 110.1  | 90.6   | 124.5  | 159.5  |
| 37.5   | 34.0   | 47.0   | 36.3   | 57.0   | 57.2   |
| 407.8  | 285.1  | 422.2  | 384.5  | 464.1  | 459.6  |
| 438.2  | 359.0  | 486.5  | 499.2  | 511.7  | 499.9  |
| 3519.8 | 3116.6 | 3564.4 | 3918.5 | 4048.4 | 3946.1 |
| 310.0  | 339.1  | 341.9  | 408.6  | 424.4  | 409.6  |
| 457.1  | 415.3  | 440.5  | 436.7  | 463.4  | 548.4  |
| 483.9  | 543.1  | 500.8  | 552.4  | 596.0  | 628.0  |
| 420.6  | 368.8  | 378.3  | 450.9  | 458.7  | 509.9  |

|        |        |        |        |        |        |
|--------|--------|--------|--------|--------|--------|
| 496.3  | 549.3  | 554.7  | 515.9  | 633.2  | 646.9  |
| 1.9    | 7.6    | 2.5    | 2.5    | 8.5    | 2.5    |
| 3731.0 | 3621.9 | 3825.0 | 4047.8 | 4156.1 | 4327.2 |
| 205.9  | 164.2  | 252.5  | 262.2  | 271.3  | 290.8  |
| 1048.9 | 1030.7 | 1105.5 | 1129.1 | 1167.1 | 1225.6 |
| 616.2  | 483.4  | 509.8  | 585.2  | 579.5  | 715.9  |
| 974.2  | 1030.8 | 968.0  | 1127.0 | 1049.3 | 1212.5 |
| 832.8  | 843.0  | 919.9  | 872.8  | 1012.6 | 1140.4 |
| 1330.0 | 1351.3 | 1159.0 | 1293.5 | 1416.6 | 1622.9 |
| 188.8  | 154.2  | 198.1  | 198.0  | 239.0  | 228.9  |
| 375.4  | 271.1  | 292.9  | 336.7  | 391.2  | 412.7  |
| 188.4  | 162.0  | 172.7  | 151.5  | 217.9  | 221.9  |
| 310.5  | 281.2  | 282.7  | 332.8  | 353.1  | 400.2  |
| 649.2  | 591.4  | 552.6  | 589.2  | 604.1  | 725.9  |
| 104.8  | 107.8  | 134.7  | 135.2  | 165.0  | 154.6  |
| 219.7  | 184.0  | 280.5  | 260.3  | 244.8  | 279.1  |
| 342.6  | 288.4  | 319.6  | 372.7  | 394.2  | 464.3  |
| 455.8  | 388.0  | 509.6  | 491.0  | 537.1  | 557.7  |
| 489.9  | 497.8  | 507.7  | 516.1  | 557.4  | 635.3  |
| 814.1  | 787.2  | 888.6  | 922.1  | 943.5  | 990.9  |
| 136.6  | 178.4  | 188.0  | 201.0  | 194.4  | 213.0  |
| 1201.4 | 976.3  | 1184.6 | 1253.8 | 1299.1 | 1342.3 |
| 914.3  | 840.3  | 965.6  | 1136.2 | 1059.7 | 1249.3 |
| 914.5  | 908.7  | 849.7  | 1023.8 | 986.0  | 1200.1 |
| 57.9   | 44.8   | 61.3   | 60.3   | 64.8   | 70.7   |
| 893.7  | 818.9  | 807.3  | 1017.2 | 893.0  | 1125.1 |
| 135.3  | 167.4  | 164.9  | 158.6  | 167.7  | 155.3  |
| 1874.8 | 1780.6 | 2066.3 | 2074.7 | 2096.3 | 2326.7 |
| 181.9  | 175.1  | 185.4  | 227.8  | 229.6  | 245.2  |
| 1188.9 | 1306.2 | 1335.2 | 1304.8 | 1437.1 | 1500.6 |
| 83.6   | 63.5   | 108.1  | 111.8  | 113.6  | 113.1  |
| 221.8  | 188.6  | 222.0  | 262.7  | 251.3  | 239.3  |
| 443.5  | 395.1  | 510.8  | 534.6  | 529.9  | 584.5  |
| 154.1  | 164.0  | 158.0  | 129.5  | 171.8  | 201.2  |
| 137.9  | 138.4  | 119.7  | 152.8  | 165.2  | 187.1  |
| 84.7   | 95.9   | 93.6   | 85.9   | 102.3  | 92.7   |
| 159.6  | 164.9  | 182.1  | 189.7  | 202.0  | 202.3  |
| 298.4  | 274.5  | 341.5  | 323.8  | 333.4  | 384.4  |
| 745.6  | 619.9  | 606.4  | 659.1  | 728.5  | 759.5  |
| 1263.9 | 1340.7 | 1383.3 | 1405.8 | 1412.6 | 1536.1 |
| 623.8  | 644.0  | 693.3  | 708.3  | 734.4  | 775.9  |
| 45.3   | 64.4   | 80.6   | 66.7   | 80.8   | 75.3   |
| 748.2  | 603.7  | 598.7  | 853.2  | 748.2  | 1015.4 |
| 98.1   | 61.9   | 96.1   | 89.8   | 108.9  | 97.3   |
| 268.9  | 235.9  | 286.6  | 286.6  | 365.6  | 333.0  |
| 74.1   | 77.8   | 80.2   | 86.8   | 78.1   | 80.8   |
| 588.4  | 465.8  | 517.4  | 559.1  | 673.4  | 693.2  |
| 371.6  | 301.2  | 474.3  | 411.9  | 397.2  | 370.7  |
| 15.8   | 11.5   | 10.2   | 13.0   | 12.0   | 17.4   |
| 325.7  | 279.8  | 372.7  | 382.6  | 409.3  | 423.4  |
| 961.9  | 840.2  | 970.6  | 931.0  | 982.3  | 1071.4 |
| 234.3  | 202.0  | 249.6  | 234.0  | 290.8  | 297.8  |
| 675.2  | 714.2  | 824.4  | 853.0  | 810.9  | 854.3  |

|        |        |        |        |        |        |
|--------|--------|--------|--------|--------|--------|
| 166.7  | 170.4  | 183.9  | 222.0  | 223.0  | 232.1  |
| 276.5  | 242.7  | 302.9  | 291.2  | 357.8  | 363.3  |
| 324.9  | 355.8  | 377.2  | 405.2  | 412.8  | 458.8  |
| 278.0  | 242.9  | 290.4  | 279.3  | 332.8  | 327.0  |
| 1019.0 | 870.5  | 958.1  | 936.0  | 1105.6 | 1192.9 |
| 276.4  | 269.2  | 299.6  | 313.8  | 335.3  | 370.0  |
| 197.3  | 147.2  | 218.6  | 214.5  | 235.1  | 219.4  |
| 743.1  | 652.5  | 854.3  | 915.2  | 976.8  | 980.4  |
| 75.2   | 65.2   | 73.3   | 81.2   | 78.8   | 88.4   |
| 7.3    | 5.4    | 10.5   | 12.4   | 17.5   | 9.9    |
| 156.4  | 147.8  | 136.5  | 156.8  | 144.1  | 179.9  |
| 158.7  | 150.3  | 153.5  | 163.0  | 181.6  | 173.0  |
| 252.4  | 241.8  | 276.5  | 281.3  | 327.2  | 324.4  |
| 134.4  | 95.7   | 174.5  | 105.3  | 144.0  | 132.9  |
| 112.5  | 63.4   | 131.8  | 111.9  | 147.8  | 117.8  |
| 255.5  | 288.5  | 303.3  | 319.2  | 332.3  | 356.9  |
| 415.0  | 461.4  | 456.5  | 416.9  | 524.1  | 514.0  |
| 41.1   | 46.6   | 40.2   | 50.7   | 58.7   | 48.6   |
| 645.4  | 637.9  | 803.7  | 851.1  | 855.3  | 871.3  |
| 378.4  | 227.1  | 324.1  | 384.5  | 451.2  | 507.4  |
| 443.6  | 376.5  | 434.0  | 467.9  | 509.9  | 530.9  |
| 426.7  | 361.8  | 427.2  | 454.9  | 489.0  | 543.1  |
| 156.4  | 113.6  | 138.5  | 143.1  | 165.5  | 155.3  |
| 354.3  | 330.9  | 343.6  | 383.2  | 435.0  | 451.1  |
| 462.6  | 390.4  | 474.0  | 470.0  | 538.7  | 546.4  |
| 765.8  | 804.9  | 923.9  | 937.6  | 959.7  | 941.9  |
| 238.1  | 204.4  | 274.6  | 269.7  | 279.4  | 284.9  |
| 238.0  | 205.6  | 226.4  | 232.8  | 241.9  | 288.1  |
| 32.4   | 10.2   | 21.8   | 17.8   | 21.7   | 36.2   |
| 263.7  | 225.3  | 274.8  | 293.9  | 289.2  | 319.0  |
| 216.9  | 199.6  | 250.6  | 238.7  | 230.3  | 249.8  |
| 287.1  | 273.7  | 301.3  | 333.9  | 355.5  | 349.8  |
| 243.7  | 257.8  | 265.1  | 300.6  | 281.5  | 350.5  |
| 1005.1 | 1041.3 | 1167.8 | 1421.6 | 1395.5 | 1388.5 |
| 82.5   | 83.7   | 92.6   | 85.2   | 99.0   | 113.4  |
| 259.1  | 206.2  | 248.3  | 247.2  | 292.2  | 337.5  |
| 1624.7 | 1506.8 | 1828.3 | 1915.5 | 1885.2 | 1869.9 |
| 266.0  | 278.3  | 307.7  | 295.3  | 314.2  | 363.2  |
| 23.3   | 21.5   | 14.8   | 9.5    | 14.8   | 12.6   |
| 462.6  | 409.1  | 449.3  | 432.2  | 461.4  | 535.7  |
| 76.1   | 54.8   | 93.6   | 87.2   | 95.0   | 92.4   |
| 101.0  | 85.4   | 100.6  | 101.5  | 130.8  | 122.5  |
| 100.7  | 59.4   | 93.6   | 88.5   | 106.9  | 119.7  |
| 141.9  | 154.3  | 170.1  | 164.7  | 173.5  | 225.2  |
| 391.3  | 302.4  | 408.6  | 438.6  | 470.6  | 501.6  |
| 326.2  | 250.5  | 325.8  | 340.9  | 377.2  | 401.3  |
| 70.5   | 62.0   | 66.0   | 73.9   | 91.7   | 82.5   |
| 707.1  | 834.6  | 795.6  | 921.8  | 851.6  | 940.7  |
| 33.1   | 33.3   | 31.6   | 35.0   | 24.6   | 41.3   |
| 611.1  | 599.4  | 798.9  | 754.3  | 771.3  | 901.7  |
| 1479.6 | 1174.5 | 1282.9 | 1336.0 | 1440.6 | 1717.8 |
| 196.2  | 223.5  | 206.4  | 201.8  | 272.3  | 268.4  |
| 2410.9 | 2460.6 | 2544.4 | 2444.6 | 2617.2 | 2707.7 |

|        |        |        |        |        |        |
|--------|--------|--------|--------|--------|--------|
| 99.7   | 96.0   | 100.2  | 114.4  | 108.3  | 122.3  |
| 214.8  | 250.8  | 186.8  | 214.6  | 239.7  | 248.9  |
| 970.3  | 777.5  | 1014.0 | 1087.4 | 1060.6 | 1119.0 |
| 94.1   | 103.5  | 126.3  | 110.5  | 119.8  | 148.4  |
| 391.0  | 400.5  | 427.1  | 440.3  | 453.7  | 557.1  |
| 151.5  | 147.2  | 146.4  | 169.0  | 163.6  | 190.3  |
| 290.3  | 279.6  | 348.8  | 378.3  | 380.3  | 379.0  |
| 232.8  | 230.9  | 291.3  | 292.1  | 277.9  | 353.6  |
| 3.1    | 4.6    | 7.3    | 11.5   | 13.3   | 10.8   |
| 194.9  | 174.2  | 203.5  | 212.2  | 219.2  | 247.4  |
| 243.9  | 210.5  | 251.1  | 249.6  | 263.7  | 231.2  |
| 583.9  | 574.3  | 490.4  | 591.2  | 618.8  | 696.3  |
| 472.8  | 528.2  | 562.5  | 573.1  | 575.3  | 638.6  |
| 1164.2 | 1259.5 | 1197.8 | 1312.9 | 1237.5 | 1472.3 |
| 1430.9 | 1165.0 | 1313.7 | 1581.3 | 1429.8 | 1714.6 |
| 206.8  | 143.0  | 171.3  | 182.9  | 207.0  | 252.8  |
| 6.8    | 11.3   | 3.7    | 6.7    | 11.5   | 5.7    |
| 1019.9 | 908.6  | 1013.4 | 1170.8 | 1212.3 | 1250.2 |
| 682.5  | 515.7  | 649.3  | 685.8  | 795.2  | 790.1  |
| 717.0  | 674.3  | 637.6  | 738.2  | 707.4  | 848.9  |
| 1763.0 | 1527.7 | 1820.7 | 2025.7 | 2082.4 | 2088.6 |
| 470.2  | 392.6  | 501.4  | 482.3  | 617.2  | 623.2  |
| 207.5  | 205.5  | 250.5  | 251.7  | 272.8  | 299.2  |
| 387.2  | 340.9  | 379.7  | 396.3  | 441.9  | 470.2  |
| 278.7  | 210.1  | 271.3  | 287.8  | 340.9  | 359.7  |
| 58.6   | 65.5   | 53.5   | 69.4   | 69.9   | 76.1   |
| 158.4  | 146.4  | 171.2  | 164.0  | 179.0  | 186.5  |
| 185.8  | 166.8  | 176.9  | 172.7  | 204.0  | 230.1  |
| 567.2  | 500.5  | 562.5  | 582.4  | 593.1  | 675.0  |
| 695.4  | 610.2  | 788.3  | 852.4  | 843.6  | 796.9  |
| 314.2  | 200.7  | 352.1  | 336.8  | 406.3  | 384.3  |
| 1747.1 | 1595.6 | 2025.4 | 2095.5 | 2039.1 | 2123.5 |
| 2.7    | 16.3   | 8.6    | 4.4    | 9.7    | 5.8    |
| 242.1  | 209.4  | 220.9  | 271.5  | 286.1  | 317.7  |
| 165.5  | 135.5  | 153.0  | 158.8  | 167.9  | 181.1  |
| 64.4   | 70.4   | 73.6   | 78.2   | 75.9   | 90.4   |
| 277.1  | 227.8  | 286.0  | 313.5  | 357.3  | 364.2  |
| 181.6  | 175.1  | 217.7  | 202.7  | 204.9  | 224.2  |
| 170.6  | 145.3  | 178.0  | 171.0  | 224.3  | 232.2  |
| 38.4   | 35.7   | 35.9   | 39.3   | 39.7   | 42.6   |
| 164.7  | 139.1  | 138.0  | 164.7  | 174.6  | 187.7  |
| 193.7  | 144.6  | 167.7  | 214.0  | 260.8  | 192.2  |
| 843.2  | 738.0  | 1011.5 | 1136.5 | 991.3  | 956.7  |
| 32.2   | 16.3   | 36.5   | 36.0   | 44.1   | 42.3   |
| 1800.8 | 1726.8 | 1831.1 | 1858.1 | 2087.4 | 2357.4 |
| 394.3  | 392.1  | 371.8  | 386.5  | 438.3  | 519.7  |
| 350.4  | 286.8  | 413.3  | 396.9  | 452.2  | 477.5  |
| 860.5  | 818.4  | 933.3  | 920.5  | 1009.9 | 1077.2 |
| 287.7  | 303.8  | 371.5  | 395.7  | 383.5  | 403.8  |
| 481.6  | 504.3  | 526.6  | 522.1  | 580.7  | 637.8  |
| 642.3  | 643.3  | 841.9  | 999.4  | 859.6  | 924.8  |
| 938.0  | 853.1  | 1009.7 | 1187.4 | 1093.6 | 1107.8 |
| 805.0  | 815.0  | 895.6  | 986.9  | 955.3  | 1169.6 |

|        |        |        |        |        |        |
|--------|--------|--------|--------|--------|--------|
| 62.4   | 55.9   | 59.4   | 60.7   | 61.7   | 76.6   |
| 974.2  | 855.1  | 984.6  | 1041.1 | 1114.7 | 1303.6 |
| 338.2  | 319.7  | 277.3  | 286.2  | 328.3  | 377.8  |
| 351.2  | 334.3  | 336.8  | 289.8  | 346.0  | 384.5  |
| 100.9  | 98.5   | 116.1  | 112.9  | 123.6  | 123.4  |
| 826.0  | 786.8  | 786.5  | 825.8  | 862.7  | 996.8  |
| 223.6  | 172.7  | 216.8  | 225.0  | 222.6  | 235.2  |
| 673.6  | 548.3  | 571.6  | 600.8  | 707.2  | 816.3  |
| 1148.3 | 1414.0 | 1131.2 | 1431.5 | 1303.7 | 1497.3 |
| 410.8  | 525.7  | 392.3  | 463.3  | 437.7  | 530.9  |
| 273.3  | 230.2  | 276.9  | 261.8  | 337.6  | 345.8  |
| 74.3   | 69.4   | 74.0   | 70.4   | 78.6   | 92.8   |
| 62.8   | 40.9   | 57.5   | 60.3   | 76.1   | 71.1   |
| 1158.8 | 1087.5 | 1227.7 | 1333.5 | 1319.2 | 1430.2 |
| 461.2  | 553.8  | 478.5  | 548.0  | 476.7  | 585.0  |
| 222.7  | 238.3  | 234.8  | 318.2  | 276.5  | 334.8  |
| 4.3    | 15.5   | 19.0   | 15.7   | 13.5   | 26.5   |
| 544.3  | 455.0  | 589.6  | 621.2  | 616.6  | 634.8  |
| 1047.8 | 1329.2 | 1396.9 | 1377.6 | 1346.5 | 1440.3 |
| 120.1  | 76.5   | 130.3  | 116.7  | 139.9  | 145.5  |
| 19.7   | 37.0   | 37.6   | 57.7   | 40.9   | 47.6   |
| 100.0  | 106.8  | 121.4  | 118.4  | 126.7  | 156.5  |
| 253.7  | 247.5  | 260.6  | 236.9  | 259.9  | 269.2  |
| 4.9    | 5.3    | 10.9   | 5.6    | 23.3   | 6.9    |
| 208.2  | 197.4  | 183.9  | 212.3  | 263.2  | 262.4  |
| 263.7  | 221.0  | 250.0  | 292.3  | 330.5  | 320.6  |
| 67.2   | 54.1   | 56.5   | 62.0   | 60.5   | 79.2   |
| 89.7   | 89.1   | 98.5   | 106.3  | 120.1  | 131.8  |
| 298.3  | 337.3  | 348.1  | 344.4  | 346.5  | 388.7  |
| 156.3  | 99.0   | 148.6  | 177.7  | 207.8  | 216.6  |
| 155.3  | 136.2  | 171.8  | 150.9  | 166.6  | 163.5  |
| 154.5  | 149.6  | 157.5  | 180.5  | 183.0  | 183.8  |
| 418.7  | 338.4  | 367.6  | 366.9  | 409.8  | 475.6  |
| 318.3  | 272.9  | 247.0  | 262.8  | 305.1  | 346.3  |
| 137.8  | 128.2  | 101.3  | 164.7  | 132.0  | 150.0  |
| 72.3   | 53.8   | 59.9   | 57.6   | 71.6   | 93.0   |
| 115.3  | 135.6  | 115.2  | 122.9  | 135.2  | 134.3  |
| 400.7  | 306.7  | 305.2  | 339.8  | 354.8  | 319.7  |
| 172.9  | 156.7  | 144.2  | 177.5  | 156.2  | 197.2  |
| 153.7  | 145.4  | 157.7  | 161.2  | 166.9  | 186.4  |
| 95.9   | 75.6   | 78.6   | 84.9   | 102.6  | 120.7  |
| 282.8  | 189.5  | 287.9  | 265.3  | 302.6  | 281.3  |
| 244.8  | 166.1  | 216.1  | 252.6  | 263.7  | 317.0  |
| 74.0   | 62.2   | 67.8   | 82.5   | 65.1   | 81.1   |
| 396.6  | 375.2  | 428.2  | 453.6  | 507.4  | 554.4  |
| 474.6  | 446.5  | 572.3  | 633.2  | 586.1  | 643.6  |
| 111.9  | 102.7  | 112.7  | 122.5  | 139.8  | 129.2  |
| 172.1  | 146.7  | 185.9  | 196.1  | 198.4  | 227.6  |
| 417.0  | 415.5  | 422.5  | 426.7  | 472.8  | 504.5  |
| 326.4  | 328.1  | 320.0  | 343.1  | 351.7  | 420.2  |
| 248.9  | 247.9  | 244.5  | 250.4  | 282.4  | 312.5  |
| 164.0  | 145.6  | 155.9  | 143.6  | 194.1  | 175.9  |
| 197.8  | 153.1  | 195.5  | 234.5  | 243.3  | 254.3  |



|        |        |        |        |        |        |
|--------|--------|--------|--------|--------|--------|
| 567.4  | 581.9  | 575.0  | 567.2  | 629.0  | 753.0  |
| 40.8   | 50.0   | 44.6   | 54.1   | 44.8   | 67.3   |
| 67.4   | 66.6   | 90.5   | 70.5   | 108.4  | 83.5   |
| 759.0  | 583.8  | 655.1  | 709.4  | 762.7  | 874.0  |
| 951.1  | 884.7  | 984.8  | 987.7  | 1121.4 | 1136.7 |
| 490.7  | 502.5  | 622.1  | 560.1  | 599.6  | 636.6  |
| 409.8  | 342.7  | 364.6  | 365.1  | 445.8  | 511.3  |
| 284.9  | 254.1  | 265.8  | 315.6  | 319.6  | 340.2  |
| 68.9   | 71.1   | 58.6   | 79.1   | 80.1   | 58.1   |
| 117.2  | 136.0  | 94.4   | 116.7  | 109.2  | 170.4  |
| 41.1   | 26.7   | 38.1   | 38.0   | 43.2   | 57.1   |
| 1.6    | 22.9   | 13.9   | 6.9    | 10.9   | 3.7    |
| 435.2  | 455.8  | 441.5  | 493.2  | 535.0  | 593.2  |
| 97.5   | 106.2  | 108.9  | 134.4  | 130.9  | 148.3  |
| 4.1    | 1.2    | 14.8   | 9.9    | 12.2   | 5.2    |
| 220.4  | 222.0  | 249.6  | 258.0  | 281.8  | 303.9  |
| 480.4  | 491.0  | 505.3  | 517.4  | 575.8  | 597.7  |
| 592.7  | 559.2  | 669.8  | 666.9  | 683.3  | 703.5  |
| 866.1  | 864.1  | 871.2  | 916.8  | 975.1  | 1088.5 |
| 1487.4 | 1447.9 | 1261.4 | 1417.1 | 1557.9 | 1600.8 |
| 297.1  | 251.7  | 316.1  | 330.5  | 342.7  | 358.7  |
| 175.1  | 167.6  | 200.6  | 202.8  | 231.6  | 218.3  |
| 737.3  | 713.3  | 813.7  | 820.4  | 774.4  | 856.5  |
| 90.3   | 67.3   | 90.6   | 81.0   | 117.4  | 90.4   |
| 1472.6 | 1467.2 | 1519.0 | 1472.3 | 1607.2 | 1789.0 |
| 1.7    | 4.2    | 1.7    | 0.9    | 0.7    | 2.8    |
| 2.8    | 5.7    | 5.1    | 4.4    | 4.6    | 2.2    |
| 311.0  | 264.5  | 519.7  | 587.6  | 526.2  | 492.8  |
| 128.1  | 117.7  | 136.2  | 151.8  | 177.4  | 172.0  |
| 581.0  | 575.2  | 617.9  | 629.7  | 706.6  | 726.0  |
| 438.3  | 482.0  | 623.4  | 559.4  | 547.8  | 555.9  |
| 542.5  | 524.8  | 541.1  | 582.3  | 679.6  | 685.3  |
| 126.9  | 124.0  | 183.5  | 143.1  | 172.9  | 148.6  |
| 64.9   | 47.6   | 54.9   | 60.2   | 68.1   | 64.7   |
| 929.2  | 1032.7 | 1016.3 | 1138.5 | 1045.9 | 1135.8 |
| 503.4  | 415.2  | 496.4  | 548.0  | 573.8  | 607.1  |
| 111.3  | 94.5   | 110.4  | 118.1  | 133.0  | 134.3  |
| 172.5  | 172.5  | 209.1  | 208.8  | 219.4  | 216.7  |
| 951.8  | 926.3  | 1128.8 | 1156.2 | 1213.7 | 1172.1 |
| 2094.1 | 1792.8 | 2178.3 | 2082.9 | 2362.2 | 2309.3 |
| 420.1  | 355.3  | 517.9  | 527.6  | 514.1  | 538.0  |
| 26.5   | 4.4    | 24.1   | 27.2   | 31.9   | 29.6   |
| 80.8   | 78.8   | 83.9   | 111.3  | 111.3  | 103.6  |
| 47.9   | 50.5   | 52.7   | 58.0   | 51.8   | 57.7   |
| 243.5  | 270.3  | 267.8  | 288.9  | 274.3  | 349.0  |
| 454.9  | 433.0  | 452.2  | 493.7  | 509.2  | 538.6  |
| 96.7   | 72.3   | 92.5   | 105.6  | 117.6  | 124.3  |
| 289.9  | 226.8  | 242.2  | 259.6  | 310.7  | 349.1  |
| 718.1  | 676.2  | 759.5  | 835.3  | 892.0  | 959.5  |
| 171.2  | 152.5  | 197.5  | 195.9  | 198.7  | 196.2  |
| 1102.7 | 956.9  | 1237.5 | 1267.4 | 1248.8 | 1317.0 |
| 113.8  | 102.9  | 139.4  | 126.8  | 132.0  | 153.2  |
| 2355.0 | 2444.5 | 2572.1 | 2877.8 | 2878.0 | 2844.8 |

|        |        |        |        |        |        |
|--------|--------|--------|--------|--------|--------|
| 401.6  | 387.0  | 419.4  | 398.1  | 417.0  | 475.5  |
| 1082.6 | 1026.7 | 1000.3 | 984.1  | 1169.8 | 1181.0 |
| 91.8   | 102.4  | 120.6  | 126.5  | 131.8  | 127.6  |
| 333.7  | 263.7  | 307.2  | 337.1  | 352.2  | 401.0  |
| 60.9   | 71.9   | 88.6   | 107.1  | 96.1   | 72.9   |
| 70.5   | 64.8   | 84.3   | 71.0   | 73.4   | 92.5   |
| 199.6  | 149.6  | 213.2  | 161.2  | 196.2  | 230.8  |
| 185.6  | 173.9  | 166.0  | 180.9  | 197.4  | 218.5  |
| 178.1  | 141.7  | 156.5  | 186.9  | 212.7  | 237.8  |
| 122.4  | 117.2  | 135.8  | 163.8  | 151.8  | 157.1  |
| 359.7  | 329.4  | 293.0  | 281.7  | 385.4  | 480.1  |
| 146.5  | 159.8  | 146.3  | 150.9  | 156.7  | 154.5  |
| 120.2  | 106.3  | 113.0  | 126.9  | 137.3  | 146.8  |
| 64.2   | 51.8   | 75.7   | 71.1   | 84.3   | 88.5   |
| 38.3   | 70.8   | 39.1   | 47.5   | 47.4   | 66.1   |
| 374.2  | 322.1  | 340.3  | 360.2  | 389.4  | 417.2  |
| 893.4  | 952.3  | 945.3  | 957.2  | 978.9  | 1035.5 |
| 126.0  | 112.7  | 97.6   | 131.6  | 113.6  | 169.4  |
| 364.3  | 360.0  | 373.1  | 345.0  | 441.8  | 450.8  |
| 174.0  | 212.0  | 226.3  | 244.4  | 246.3  | 241.4  |
| 658.5  | 570.8  | 624.3  | 630.2  | 734.2  | 862.4  |
| 137.6  | 100.0  | 123.3  | 131.2  | 149.4  | 149.2  |
| 355.2  | 288.8  | 321.7  | 359.2  | 377.8  | 411.5  |
| 468.6  | 410.7  | 492.7  | 505.6  | 516.9  | 562.3  |
| 518.6  | 447.3  | 480.0  | 479.9  | 527.2  | 579.9  |
| 79.1   | 57.5   | 72.4   | 76.6   | 78.3   | 90.0   |
| 130.7  | 154.1  | 130.1  | 167.0  | 160.3  | 155.5  |
| 23.3   | 39.3   | 17.3   | 27.7   | 22.2   | 23.5   |
| 148.2  | 124.7  | 136.2  | 148.5  | 170.7  | 165.2  |
| 137.0  | 142.9  | 129.9  | 151.2  | 192.0  | 195.8  |
| 594.3  | 536.4  | 668.2  | 685.8  | 653.9  | 754.9  |
| 537.2  | 498.3  | 483.9  | 503.2  | 563.6  | 640.8  |
| 214.4  | 181.8  | 211.7  | 225.3  | 246.1  | 257.9  |
| 658.0  | 644.3  | 997.2  | 1014.5 | 862.4  | 869.9  |
| 114.8  | 154.1  | 133.6  | 138.6  | 180.1  | 159.3  |
| 171.9  | 140.1  | 183.5  | 214.0  | 219.5  | 216.0  |
| 241.6  | 206.1  | 189.5  | 182.3  | 221.0  | 240.3  |
| 317.5  | 265.1  | 382.2  | 401.8  | 408.0  | 367.3  |
| 820.3  | 687.0  | 652.0  | 777.3  | 875.2  | 945.8  |
| 278.9  | 253.1  | 311.2  | 263.7  | 301.2  | 345.0  |
| 82.1   | 85.2   | 87.2   | 96.4   | 81.6   | 100.8  |
| 297.0  | 200.1  | 304.5  | 312.0  | 368.8  | 393.2  |
| 153.0  | 137.8  | 153.2  | 160.3  | 173.8  | 190.5  |
| 242.3  | 237.0  | 262.3  | 239.6  | 265.1  | 262.4  |
| 245.5  | 232.5  | 292.1  | 264.9  | 301.0  | 303.8  |
| 1.5    | 0.8    | 4.0    | 0.2    | 0.2    | 0.4    |
| 1218.2 | 982.4  | 1209.7 | 1240.1 | 1352.7 | 1500.0 |
| 202.1  | 188.1  | 231.5  | 225.2  | 241.3  | 270.3  |
| 240.8  | 285.5  | 258.1  | 297.0  | 272.9  | 279.2  |
| 357.0  | 328.4  | 309.9  | 346.9  | 359.5  | 415.0  |
| 6.9    | 7.5    | 18.8   | 10.8   | 12.7   | 12.7   |
| 185.5  | 144.2  | 216.8  | 209.8  | 241.0  | 247.0  |
| 289.7  | 262.3  | 297.4  | 293.1  | 324.2  | 314.3  |

|        |        |        |        |        |        |
|--------|--------|--------|--------|--------|--------|
| 763.7  | 685.4  | 773.6  | 823.6  | 804.6  | 946.4  |
| 42.5   | 26.2   | 43.2   | 52.1   | 64.8   | 44.5   |
| 89.9   | 69.8   | 92.8   | 113.2  | 154.7  | 106.7  |
| 140.9  | 91.9   | 124.6  | 150.6  | 167.6  | 165.8  |
| 117.0  | 153.3  | 120.1  | 135.8  | 130.7  | 125.7  |
| 39.9   | 48.4   | 43.1   | 44.1   | 45.3   | 50.3   |
| 142.5  | 117.4  | 132.5  | 153.3  | 180.3  | 193.6  |
| 1163.7 | 1169.6 | 1187.2 | 1240.9 | 1402.5 | 1487.1 |
| 1195.9 | 908.6  | 1321.2 | 1420.7 | 1406.7 | 1542.5 |
| 853.8  | 853.7  | 849.4  | 899.9  | 929.9  | 1091.0 |
| 29.0   | 49.5   | 23.9   | 25.9   | 30.7   | 26.2   |
| 98.1   | 98.7   | 102.0  | 127.3  | 103.0  | 117.4  |
| 391.5  | 451.0  | 465.2  | 480.3  | 487.2  | 544.2  |
| 116.8  | 111.1  | 110.9  | 117.7  | 131.5  | 146.3  |
| 734.7  | 699.4  | 898.1  | 989.3  | 907.4  | 1011.9 |
| 235.8  | 297.5  | 242.8  | 284.5  | 252.5  | 323.9  |
| 150.6  | 152.6  | 196.5  | 198.9  | 176.4  | 219.1  |
| 1408.8 | 1231.7 | 1227.0 | 1410.6 | 1273.6 | 1730.3 |
| 476.9  | 379.8  | 446.1  | 521.9  | 577.4  | 552.4  |
| 231.0  | 200.4  | 217.7  | 232.0  | 249.4  | 269.1  |
| 236.4  | 167.2  | 238.9  | 254.8  | 266.3  | 305.0  |
| 470.4  | 304.5  | 464.3  | 429.2  | 487.8  | 510.1  |
| 558.8  | 436.4  | 585.6  | 569.6  | 574.9  | 573.7  |
| 414.1  | 372.1  | 395.6  | 393.9  | 439.7  | 498.3  |
| 57.3   | 66.2   | 76.1   | 70.5   | 65.0   | 89.0   |
| 138.7  | 145.7  | 145.8  | 173.4  | 155.9  | 187.2  |
| 266.8  | 251.0  | 202.1  | 260.1  | 297.9  | 289.8  |
| 772.5  | 729.4  | 754.5  | 832.5  | 855.8  | 941.2  |
| 789.6  | 653.7  | 715.2  | 809.9  | 802.0  | 836.4  |
| 466.9  | 413.9  | 406.9  | 402.9  | 484.4  | 580.2  |
| 72.4   | 86.2   | 100.8  | 97.6   | 106.2  | 116.1  |
| 2960.5 | 2797.0 | 3297.0 | 3233.7 | 3422.3 | 3342.8 |
| 300.1  | 216.2  | 294.7  | 301.1  | 381.1  | 347.5  |
| 264.6  | 293.3  | 326.5  | 316.0  | 353.0  | 354.1  |
| 234.9  | 190.8  | 250.8  | 282.5  | 289.4  | 333.1  |
| 115.3  | 119.4  | 150.8  | 130.7  | 156.6  | 143.5  |
| 858.4  | 999.0  | 915.7  | 919.2  | 882.8  | 1006.3 |
| 118.6  | 148.1  | 126.6  | 145.2  | 150.5  | 159.9  |
| 93.8   | 80.1   | 89.2   | 81.4   | 78.2   | 98.9   |
| 107.6  | 103.6  | 115.0  | 128.3  | 140.7  | 147.8  |
| 35.7   | 30.2   | 29.6   | 43.2   | 35.2   | 45.9   |
| 394.1  | 409.2  | 376.4  | 399.3  | 439.6  | 444.2  |
| 38.7   | 31.1   | 31.9   | 22.9   | 35.7   | 32.5   |
| 480.6  | 431.0  | 488.2  | 497.5  | 547.7  | 537.0  |
| 689.3  | 503.7  | 619.8  | 626.4  | 728.3  | 779.0  |
| 1157.7 | 1178.8 | 1222.1 | 1302.0 | 1347.4 | 1434.1 |
| 1157.6 | 1111.5 | 1127.5 | 1120.4 | 1216.4 | 1337.1 |
| 140.0  | 98.5   | 153.8  | 160.7  | 208.7  | 174.8  |
| 672.4  | 674.1  | 777.4  | 792.5  | 784.9  | 871.7  |
| 473.6  | 452.9  | 480.2  | 502.8  | 483.8  | 630.1  |
| 14.8   | 27.5   | 34.2   | 24.7   | 16.6   | 42.2   |
| 16.8   | 27.1   | 10.8   | 12.1   | 13.0   | 30.7   |
| 277.5  | 241.1  | 247.6  | 279.2  | 343.6  | 377.3  |

|        |        |        |        |        |        |
|--------|--------|--------|--------|--------|--------|
| 454.3  | 378.1  | 373.1  | 392.3  | 435.7  | 578.6  |
| 185.5  | 156.4  | 166.2  | 173.6  | 209.1  | 215.5  |
| 344.8  | 303.4  | 319.2  | 331.3  | 388.3  | 438.6  |
| 1761.7 | 1869.3 | 1642.9 | 1884.0 | 1492.3 | 2043.9 |
| 444.2  | 417.3  | 461.3  | 486.3  | 546.1  | 563.9  |
| 123.1  | 131.9  | 126.7  | 117.0  | 104.7  | 133.1  |
| 97.0   | 75.1   | 95.5   | 94.7   | 113.8  | 115.7  |
| 200.0  | 182.6  | 160.5  | 150.9  | 170.4  | 218.8  |
| 43.9   | 39.1   | 40.3   | 32.1   | 45.0   | 38.4   |
| 812.2  | 770.8  | 746.8  | 842.8  | 765.5  | 924.0  |
| 152.7  | 142.2  | 184.8  | 187.0  | 220.1  | 203.8  |
| 49.3   | 58.6   | 50.9   | 49.7   | 65.0   | 65.6   |
| 126.1  | 92.6   | 106.3  | 110.7  | 131.3  | 146.5  |
| 88.3   | 87.3   | 104.0  | 109.6  | 94.6   | 118.8  |
| 282.3  | 243.1  | 328.3  | 311.5  | 323.0  | 319.3  |
| 308.9  | 281.7  | 272.0  | 312.1  | 327.6  | 392.4  |
| 596.2  | 497.6  | 475.7  | 523.8  | 632.9  | 651.5  |
| 244.7  | 207.3  | 219.9  | 230.8  | 280.3  | 272.6  |
| 121.3  | 113.1  | 153.3  | 147.9  | 162.2  | 169.0  |
| 16.4   | 23.0   | 21.5   | 28.1   | 25.3   | 25.6   |
| 1388.0 | 1281.2 | 1452.4 | 1476.2 | 1561.8 | 1710.7 |
| 2.3    | 1.4    | 9.1    | 1.5    | 12.4   | 3.3    |
| 234.9  | 220.5  | 270.6  | 292.4  | 313.4  | 301.9  |
| 70.7   | 57.5   | 70.6   | 70.5   | 85.6   | 76.0   |
| 148.9  | 160.9  | 135.2  | 147.8  | 185.3  | 168.0  |
| 376.1  | 322.2  | 401.6  | 385.3  | 442.6  | 440.4  |
| 503.6  | 411.2  | 547.0  | 506.2  | 580.4  | 621.1  |
| 50.2   | 44.0   | 52.6   | 44.8   | 54.0   | 46.8   |
| 65.7   | 55.7   | 78.6   | 67.2   | 95.5   | 89.6   |
| 944.5  | 1025.6 | 1173.3 | 954.2  | 1214.1 | 1173.4 |
| 121.7  | 120.1  | 140.6  | 131.9  | 162.8  | 170.3  |
| 577.9  | 473.7  | 608.5  | 633.6  | 676.3  | 666.6  |
| 644.4  | 457.6  | 661.5  | 677.8  | 721.1  | 743.1  |
| 185.8  | 161.2  | 216.8  | 182.7  | 219.9  | 226.5  |
| 148.6  | 107.4  | 151.1  | 141.0  | 155.2  | 188.5  |
| 261.3  | 182.7  | 240.1  | 239.1  | 291.0  | 333.6  |
| 125.1  | 172.2  | 142.5  | 146.2  | 186.5  | 173.4  |
| 231.5  | 162.0  | 261.9  | 229.3  | 293.6  | 288.9  |
| 254.0  | 246.3  | 261.8  | 253.3  | 325.0  | 328.2  |
| 196.3  | 140.6  | 194.7  | 201.6  | 241.7  | 232.6  |
| 507.8  | 469.7  | 510.8  | 532.6  | 556.7  | 633.2  |
| 38.1   | 25.1   | 28.6   | 48.4   | 18.2   | 24.7   |
| 179.9  | 148.3  | 178.0  | 189.5  | 190.9  | 226.8  |
| 437.8  | 386.6  | 442.1  | 467.6  | 493.0  | 580.6  |
| 658.8  | 729.1  | 600.2  | 790.2  | 714.1  | 933.1  |
| 246.8  | 224.5  | 216.0  | 225.8  | 273.0  | 254.7  |
| 298.5  | 253.5  | 304.4  | 313.4  | 312.9  | 426.9  |
| 127.6  | 125.4  | 129.3  | 148.4  | 157.4  | 153.3  |
| 71.5   | 60.3   | 53.2   | 69.9   | 84.6   | 62.0   |
| 526.9  | 458.9  | 594.3  | 593.6  | 712.4  | 701.2  |
| 494.0  | 632.4  | 563.5  | 651.1  | 598.7  | 588.4  |
| 1101.6 | 978.1  | 1285.1 | 1356.8 | 1270.0 | 1342.5 |
| 107.6  | 113.6  | 116.2  | 113.4  | 132.3  | 157.8  |

|        |        |        |        |        |        |
|--------|--------|--------|--------|--------|--------|
| 158.8  | 127.3  | 148.3  | 156.5  | 194.2  | 192.1  |
| 20.0   | 10.9   | 4.4    | 12.1   | 15.9   | 24.3   |
| 107.6  | 59.5   | 88.4   | 114.9  | 141.0  | 120.9  |
| 808.5  | 765.4  | 782.2  | 817.4  | 911.3  | 958.4  |
| 61.5   | 44.4   | 28.5   | 44.7   | 43.2   | 50.9   |
| 130.8  | 111.9  | 153.7  | 160.7  | 185.3  | 189.7  |
| 831.8  | 631.6  | 743.8  | 689.2  | 846.5  | 908.2  |
| 927.3  | 733.8  | 725.1  | 761.1  | 894.4  | 967.0  |
| 149.9  | 104.5  | 165.0  | 140.7  | 176.3  | 181.0  |
| 134.8  | 124.0  | 152.5  | 107.9  | 164.9  | 154.5  |
| 100.5  | 88.1   | 105.1  | 122.1  | 132.5  | 126.3  |
| 269.3  | 251.6  | 278.3  | 274.4  | 303.2  | 311.8  |
| 311.3  | 313.6  | 255.5  | 308.9  | 301.7  | 409.6  |
| 329.4  | 305.3  | 316.0  | 271.2  | 332.2  | 388.8  |
| 208.5  | 250.7  | 223.5  | 243.4  | 237.3  | 252.0  |
| 1279.1 | 1181.7 | 1390.9 | 1356.1 | 1571.4 | 1546.6 |
| 1047.3 | 912.4  | 1203.4 | 1232.5 | 1318.1 | 1284.8 |
| 169.0  | 161.7  | 178.7  | 211.5  | 205.2  | 224.1  |
| 95.7   | 72.5   | 67.3   | 84.8   | 94.8   | 115.2  |
| 7.6    | 2.3    | 11.8   | 4.5    | 4.6    | 3.8    |
| 203.1  | 182.3  | 250.7  | 244.5  | 289.3  | 274.6  |
| 10.9   | 16.6   | 14.6   | 17.6   | 16.2   | 21.9   |
| 678.9  | 694.4  | 765.5  | 749.6  | 838.5  | 801.2  |
| 649.7  | 605.4  | 757.7  | 823.1  | 880.9  | 865.9  |
| 2585.3 | 1880.7 | 2069.6 | 1979.4 | 2341.6 | 2370.4 |
| 164.7  | 161.0  | 191.3  | 178.5  | 229.1  | 245.3  |
| 396.2  | 352.6  | 375.1  | 364.1  | 453.4  | 440.3  |
| 116.2  | 102.0  | 129.2  | 108.3  | 103.1  | 132.5  |
| 538.6  | 443.4  | 493.6  | 561.9  | 567.1  | 649.6  |
| 303.3  | 249.1  | 304.8  | 313.9  | 334.8  | 345.2  |
| 305.3  | 291.6  | 308.2  | 292.5  | 402.4  | 412.1  |
| 8.3    | 17.4   | 17.6   | 5.6    | 10.4   | 18.3   |
| 166.6  | 137.0  | 144.4  | 167.5  | 191.8  | 210.0  |
| 83.6   | 61.5   | 71.5   | 80.8   | 96.1   | 94.2   |
| 17.8   | 28.1   | 13.6   | 14.5   | 20.8   | 17.7   |
| 115.7  | 165.1  | 123.3  | 167.9  | 161.1  | 187.1  |
| 63.3   | 73.5   | 56.6   | 65.7   | 87.2   | 80.7   |
| 34.0   | 21.2   | 47.2   | 44.2   | 54.5   | 51.7   |
| 13.3   | 11.3   | 10.2   | 12.2   | 17.5   | 15.9   |
| 1181.1 | 1239.6 | 1377.8 | 1727.2 | 1310.9 | 1503.7 |
| 157.6  | 131.8  | 135.3  | 156.0  | 173.4  | 203.3  |
| 195.0  | 162.7  | 229.8  | 196.1  | 227.3  | 235.1  |
| 693.0  | 697.5  | 743.2  | 745.2  | 753.1  | 910.2  |
| 652.6  | 574.1  | 711.5  | 740.4  | 769.4  | 838.1  |
| 468.8  | 423.0  | 482.3  | 496.8  | 517.2  | 600.1  |
| 328.1  | 297.9  | 316.7  | 349.5  | 363.8  | 439.7  |
| 223.5  | 204.1  | 260.1  | 264.1  | 288.1  | 317.4  |
| 142.2  | 106.8  | 117.6  | 133.4  | 127.6  | 155.4  |
| 17.9   | 4.5    | 3.3    | 9.7    | 5.5    | 5.1    |
| 133.0  | 181.9  | 149.8  | 172.0  | 154.5  | 183.8  |
| 207.0  | 112.6  | 182.1  | 159.2  | 208.1  | 233.5  |
| 66.6   | 59.7   | 56.2   | 59.1   | 85.8   | 77.1   |
| 443.9  | 539.2  | 492.5  | 703.4  | 499.5  | 557.7  |

|        |        |        |        |        |        |
|--------|--------|--------|--------|--------|--------|
| 363.2  | 309.9  | 377.2  | 388.0  | 386.3  | 407.2  |
| 420.3  | 262.0  | 387.9  | 369.3  | 410.3  | 444.4  |
| 3.3    | 0.5    | 5.1    | 12.2   | 4.2    | 5.5    |
| 350.7  | 299.5  | 265.6  | 321.9  | 335.8  | 419.4  |
| 242.9  | 198.5  | 224.0  | 242.5  | 267.1  | 301.1  |
| 173.7  | 122.0  | 188.9  | 166.4  | 211.7  | 214.4  |
| 1540.0 | 1201.5 | 1408.3 | 1190.8 | 1414.0 | 1302.0 |
| 311.2  | 261.6  | 289.2  | 281.2  | 308.4  | 350.4  |
| 45.7   | 45.1   | 46.7   | 46.3   | 63.0   | 68.1   |
| 234.4  | 197.1  | 216.9  | 218.2  | 253.5  | 256.3  |
| 181.9  | 204.9  | 222.3  | 206.9  | 247.5  | 250.4  |
| 88.8   | 97.1   | 115.5  | 97.9   | 86.3   | 95.4   |
| 391.9  | 371.7  | 364.9  | 397.1  | 479.3  | 531.2  |
| 745.4  | 697.1  | 732.2  | 774.2  | 792.2  | 879.3  |
| 2.1    | 8.4    | 4.3    | 4.7    | 0.8    | 0.6    |
| 93.1   | 67.2   | 82.8   | 90.3   | 83.8   | 99.2   |
| 207.1  | 270.9  | 249.8  | 234.5  | 280.1  | 288.9  |
| 709.1  | 630.9  | 681.2  | 707.9  | 813.7  | 821.8  |
| 76.7   | 69.1   | 68.6   | 71.1   | 85.2   | 79.1   |
| 2005.4 | 1706.0 | 1983.6 | 2114.6 | 2112.6 | 2336.4 |
| 1.4    | 1.3    | 1.4    | 4.0    | 3.0    | 2.0    |
| 4.3    | 9.3    | 0.9    | 0.7    | 2.0    | 9.0    |
| 8.8    | 4.9    | 4.1    | 12.1   | 30.0   | 17.6   |
| 609.1  | 659.3  | 673.3  | 749.2  | 686.6  | 813.3  |
| 148.8  | 137.2  | 131.4  | 158.8  | 160.3  | 183.7  |
| 177.0  | 150.2  | 168.5  | 182.3  | 204.1  | 231.9  |
| 337.0  | 324.1  | 336.7  | 343.1  | 388.2  | 411.3  |
| 1.3    | 0.6    | 0.8    | 1.3    | 1.5    | 1.2    |
| 151.2  | 134.7  | 148.8  | 127.1  | 156.6  | 187.5  |
| 736.9  | 737.0  | 657.0  | 894.5  | 703.7  | 869.4  |
| 156.8  | 136.7  | 174.7  | 157.8  | 180.8  | 203.6  |
| 633.3  | 548.6  | 615.2  | 678.9  | 763.9  | 718.1  |
| 239.9  | 249.6  | 335.8  | 363.7  | 332.8  | 290.2  |
| 109.3  | 112.5  | 150.4  | 122.3  | 134.0  | 158.3  |
| 159.8  | 123.9  | 174.7  | 182.0  | 207.5  | 197.1  |
| 226.5  | 211.9  | 231.3  | 232.1  | 286.7  | 272.6  |
| 244.9  | 217.1  | 285.3  | 307.2  | 391.0  | 327.3  |
| 35.0   | 37.5   | 58.3   | 51.1   | 58.3   | 51.8   |
| 45.9   | 38.8   | 52.3   | 62.0   | 64.0   | 55.8   |
| 153.3  | 206.5  | 182.0  | 168.4  | 186.3  | 214.5  |
| 48.3   | 44.7   | 42.3   | 51.0   | 49.8   | 51.1   |
| 122.3  | 103.3  | 122.9  | 130.2  | 149.5  | 149.6  |
| 46.8   | 44.2   | 53.7   | 45.3   | 59.7   | 50.4   |
| 90.8   | 90.7   | 139.7  | 120.9  | 109.8  | 118.1  |
| 176.0  | 170.2  | 147.3  | 176.9  | 172.4  | 196.0  |
| 391.8  | 417.6  | 421.9  | 432.8  | 468.0  | 448.5  |
| 1068.6 | 800.6  | 915.7  | 978.4  | 1194.7 | 1095.2 |
| 251.1  | 198.4  | 253.4  | 236.0  | 313.8  | 347.3  |
| 357.3  | 279.9  | 305.4  | 289.7  | 394.8  | 422.0  |
| 91.7   | 115.4  | 112.2  | 98.9   | 106.2  | 135.4  |
| 99.7   | 55.8   | 79.9   | 87.9   | 127.5  | 128.0  |
| 61.4   | 81.9   | 67.9   | 72.3   | 76.1   | 87.8   |
| 321.2  | 240.9  | 267.8  | 300.9  | 323.3  | 353.0  |

|        |       |        |        |        |        |
|--------|-------|--------|--------|--------|--------|
| 106.4  | 70.6  | 79.2   | 93.9   | 112.5  | 121.5  |
| 207.1  | 174.6 | 195.1  | 203.4  | 202.8  | 233.4  |
| 99.9   | 110.8 | 115.9  | 115.3  | 124.2  | 129.0  |
| 153.7  | 100.7 | 161.0  | 144.7  | 189.4  | 160.8  |
| 165.4  | 160.0 | 166.7  | 188.1  | 176.5  | 192.6  |
| 365.3  | 368.2 | 386.4  | 368.0  | 410.0  | 406.0  |
| 1142.5 | 989.9 | 1120.6 | 1138.6 | 1294.4 | 1278.6 |
| 295.3  | 204.2 | 256.3  | 263.8  | 297.3  | 357.2  |
| 155.0  | 158.5 | 203.9  | 178.8  | 218.4  | 207.0  |
| 151.4  | 157.6 | 163.8  | 163.7  | 181.0  | 187.9  |
| 378.1  | 375.7 | 505.6  | 581.2  | 497.8  | 562.7  |
| 137.6  | 107.4 | 159.3  | 165.2  | 184.5  | 177.0  |
| 697.8  | 709.2 | 765.6  | 824.3  | 794.4  | 887.0  |
| 119.6  | 113.4 | 132.5  | 123.5  | 129.0  | 142.5  |
| 138.7  | 137.3 | 140.0  | 163.8  | 162.2  | 174.4  |
| 298.4  | 334.1 | 325.1  | 368.0  | 383.5  | 382.0  |
| 15.2   | 20.8  | 9.0    | 20.2   | 15.7   | 21.3   |
| 12.0   | 27.0  | 18.2   | 25.6   | 27.4   | 26.0   |
| 52.8   | 50.9  | 62.9   | 82.1   | 62.2   | 67.9   |
| 433.8  | 367.6 | 395.7  | 363.5  | 425.1  | 443.0  |
| 463.7  | 514.1 | 534.4  | 553.6  | 587.5  | 625.8  |
| 119.7  | 113.0 | 119.3  | 119.0  | 125.4  | 150.9  |
| 31.7   | 30.9  | 22.1   | 32.4   | 46.1   | 44.3   |
| 59.9   | 47.2  | 56.3   | 63.3   | 62.2   | 91.1   |
| 150.7  | 100.9 | 169.5  | 157.7  | 217.9  | 194.0  |
| 244.8  | 264.5 | 290.0  | 295.8  | 321.7  | 365.7  |
| 221.9  | 208.7 | 237.6  | 232.3  | 251.2  | 280.7  |
| 93.2   | 78.2  | 103.7  | 106.5  | 112.2  | 138.9  |
| 14.7   | 20.3  | 14.9   | 10.7   | 12.7   | 16.3   |
| 73.6   | 95.0  | 81.8   | 76.3   | 78.3   | 95.4   |
| 3.1    | 11.9  | 13.5   | 13.0   | 12.1   | 10.7   |
| 118.0  | 184.1 | 166.0  | 163.6  | 171.0  | 165.7  |
| 171.2  | 192.0 | 180.9  | 217.5  | 233.5  | 248.7  |
| 609.2  | 565.8 | 665.9  | 771.0  | 738.0  | 742.6  |
| 363.7  | 453.6 | 441.3  | 443.8  | 405.6  | 443.3  |
| 249.3  | 204.9 | 283.1  | 337.3  | 392.9  | 370.0  |
| 93.9   | 118.9 | 116.7  | 109.1  | 135.6  | 144.3  |
| 480.0  | 462.2 | 490.3  | 568.6  | 575.4  | 614.7  |
| 36.4   | 32.0  | 25.7   | 24.1   | 29.2   | 44.1   |
| 165.3  | 185.2 | 195.0  | 187.8  | 228.9  | 204.7  |
| 295.3  | 304.1 | 351.0  | 412.5  | 349.4  | 402.0  |
| 230.0  | 163.0 | 216.7  | 206.6  | 233.9  | 230.5  |
| 159.7  | 207.6 | 139.9  | 146.3  | 157.9  | 186.9  |
| 12.5   | 5.9   | 7.1    | 15.2   | 7.4    | 6.0    |
| 6.6    | 9.0   | 2.2    | 2.7    | 6.8    | 6.4    |
| 31.4   | 16.1  | 26.6   | 25.1   | 27.8   | 17.2   |
| 31.8   | 33.1  | 28.1   | 49.0   | 29.3   | 48.3   |
| 781.1  | 694.8 | 738.1  | 759.7  | 824.0  | 892.8  |
| 167.2  | 140.7 | 163.1  | 198.7  | 248.7  | 239.2  |
| 81.4   | 80.3  | 78.1   | 77.1   | 97.3   | 91.5   |
| 104.4  | 119.5 | 106.7  | 121.2  | 143.2  | 155.3  |
| 114.9  | 101.6 | 136.9  | 122.9  | 153.4  | 136.6  |
| 17.9   | 24.5  | 16.9   | 14.2   | 14.5   | 17.5   |

|        |        |        |        |        |        |
|--------|--------|--------|--------|--------|--------|
| 45.8   | 45.3   | 36.4   | 50.6   | 43.0   | 36.2   |
| 75.3   | 80.2   | 70.1   | 90.3   | 84.7   | 89.6   |
| 389.3  | 469.2  | 481.9  | 481.5  | 471.9  | 581.6  |
| 75.2   | 65.4   | 73.6   | 90.2   | 82.6   | 102.6  |
| 212.5  | 217.4  | 217.1  | 253.5  | 250.8  | 284.8  |
| 22.4   | 19.1   | 24.2   | 20.3   | 18.2   | 17.5   |
| 78.6   | 59.7   | 64.6   | 69.1   | 86.2   | 80.4   |
| 51.7   | 43.0   | 56.5   | 45.8   | 54.1   | 50.6   |
| 725.8  | 499.8  | 693.4  | 759.4  | 863.4  | 949.8  |
| 964.4  | 712.1  | 752.4  | 776.7  | 951.6  | 955.2  |
| 25.3   | 6.9    | 44.9   | 42.8   | 38.4   | 37.7   |
| 221.4  | 276.7  | 232.8  | 247.1  | 225.0  | 260.2  |
| 87.6   | 82.7   | 93.3   | 84.1   | 100.6  | 101.4  |
| 216.5  | 187.1  | 223.4  | 215.6  | 267.8  | 197.4  |
| 128.8  | 99.8   | 96.1   | 140.5  | 134.3  | 131.3  |
| 2217.8 | 2112.4 | 2413.1 | 2491.3 | 2546.7 | 2818.0 |
| 2.8    | 3.4    | 3.5    | 2.4    | 3.6    | 3.2    |
| 8.2    | 1.3    | 2.3    | 11.3   | 16.7   | 4.1    |
| 41.5   | 49.6   | 39.9   | 42.9   | 43.9   | 60.3   |
| 92.8   | 97.8   | 113.2  | 125.2  | 135.6  | 133.5  |
| 2.8    | 0.8    | 8.2    | 9.2    | 15.5   | 7.9    |
| 297.6  | 289.9  | 325.0  | 352.8  | 336.2  | 364.1  |
| 223.9  | 210.2  | 233.6  | 244.8  | 261.7  | 276.3  |
| 265.7  | 215.8  | 284.0  | 270.3  | 320.0  | 355.8  |
| 58.5   | 56.7   | 42.7   | 41.4   | 49.6   | 36.2   |
| 69.7   | 75.3   | 86.5   | 100.3  | 96.9   | 105.3  |
| 99.6   | 81.2   | 86.3   | 88.8   | 102.8  | 114.6  |
| 685.9  | 639.2  | 609.2  | 671.3  | 695.1  | 883.4  |
| 5.6    | 18.0   | 9.7    | 8.2    | 6.4    | 10.5   |
| 31.8   | 43.1   | 47.0   | 45.1   | 44.3   | 43.9   |
| 169.2  | 144.8  | 180.4  | 172.0  | 214.6  | 254.2  |
| 239.3  | 186.7  | 227.0  | 227.0  | 238.7  | 313.3  |
| 202.5  | 241.0  | 225.0  | 272.4  | 243.3  | 266.2  |
| 462.9  | 419.9  | 461.1  | 444.3  | 558.8  | 546.0  |
| 35.6   | 40.4   | 34.7   | 34.8   | 37.1   | 37.4   |
| 62.9   | 44.8   | 48.2   | 53.2   | 66.5   | 49.4   |
| 7.0    | 7.4    | 8.0    | 8.2    | 8.3    | 5.9    |
| 400.2  | 332.0  | 405.1  | 413.3  | 438.3  | 475.9  |
| 310.5  | 252.6  | 296.1  | 320.9  | 322.6  | 399.4  |
| 37.3   | 26.7   | 39.3   | 44.6   | 48.8   | 48.4   |
| 246.8  | 200.1  | 263.7  | 256.3  | 311.6  | 340.2  |
| 188.0  | 572.6  | 158.3  | 272.9  | 146.2  | 241.6  |
| 104.5  | 84.0   | 84.9   | 93.8   | 95.4   | 117.0  |
| 67.7   | 65.1   | 71.1   | 70.9   | 65.5   | 76.0   |
| 410.2  | 319.7  | 315.3  | 281.8  | 373.8  | 423.6  |
| 317.5  | 356.5  | 376.4  | 408.4  | 415.0  | 417.1  |
| 128.0  | 135.5  | 145.4  | 127.0  | 152.9  | 172.9  |
| 153.0  | 225.3  | 161.8  | 209.8  | 204.7  | 202.6  |
| 0.8    | 0.8    | 1.2    | 1.0    | 0.7    | 1.7    |
| 2.1    | 8.2    | 6.3    | 9.4    | 5.6    | 7.1    |
| 4.8    | 4.7    | 4.1    | 3.9    | 4.8    | 4.9    |
| 1189.6 | 1227.4 | 1249.5 | 1379.6 | 1301.6 | 1276.6 |
| 200.0  | 254.4  | 223.7  | 198.0  | 210.7  | 252.1  |



|        |        |        |        |        |        |
|--------|--------|--------|--------|--------|--------|
| 279.6  | 200.0  | 231.8  | 204.8  | 298.4  | 317.5  |
| 109.8  | 82.6   | 130.5  | 131.8  | 157.7  | 153.7  |
| 17.8   | 3.0    | 14.3   | 24.3   | 11.5   | 23.0   |
| 260.5  | 218.1  | 227.7  | 236.8  | 225.8  | 310.0  |
| 149.2  | 195.0  | 165.6  | 204.5  | 214.1  | 225.0  |
| 142.4  | 135.5  | 145.5  | 145.7  | 176.5  | 176.5  |
| 46.3   | 42.9   | 52.0   | 52.7   | 59.8   | 49.5   |
| 320.9  | 299.1  | 249.6  | 339.2  | 331.2  | 378.3  |
| 9.3    | 1.3    | 2.9    | 2.3    | 8.7    | 5.8    |
| 322.5  | 329.1  | 351.8  | 356.8  | 403.5  | 414.1  |
| 227.4  | 199.3  | 198.3  | 197.2  | 234.4  | 273.4  |
| 83.1   | 74.8   | 65.6   | 68.0   | 89.4   | 98.2   |
| 94.9   | 49.8   | 108.1  | 72.0   | 126.5  | 102.5  |
| 18.5   | 2.0    | 35.8   | 24.8   | 24.8   | 16.4   |
| 1072.8 | 984.2  | 1009.1 | 1202.8 | 1140.1 | 1217.0 |
| 1720.8 | 1414.8 | 1767.6 | 1655.6 | 1813.3 | 1868.6 |
| 202.9  | 171.4  | 206.9  | 203.8  | 212.3  | 266.3  |
| 23.4   | 34.9   | 26.3   | 31.5   | 35.2   | 39.5   |
| 310.5  | 313.4  | 270.6  | 296.5  | 329.8  | 376.8  |
| 255.7  | 259.3  | 282.5  | 342.2  | 329.3  | 352.7  |
| 385.3  | 543.0  | 464.4  | 453.6  | 434.4  | 506.1  |
| 1140.7 | 1102.8 | 979.9  | 1190.5 | 1133.6 | 1277.4 |
| 862.2  | 839.1  | 967.8  | 1048.4 | 1004.7 | 1039.0 |
| 120.8  | 111.3  | 118.4  | 102.6  | 145.3  | 144.3  |
| 1.2    | 3.0    | 13.8   | 8.5    | 6.5    | 1.7    |
| 264.3  | 250.0  | 300.0  | 322.0  | 314.3  | 349.6  |
| 364.0  | 330.0  | 343.1  | 415.7  | 327.7  | 573.7  |
| 138.7  | 109.2  | 160.5  | 135.4  | 180.5  | 171.4  |
| 139.8  | 158.1  | 139.4  | 145.9  | 151.2  | 180.7  |
| 272.7  | 240.0  | 292.6  | 262.7  | 297.0  | 328.0  |
| 242.6  | 325.5  | 251.7  | 278.5  | 268.3  | 253.6  |
| 2.1    | 11.2   | 5.8    | 14.6   | 8.4    | 3.6    |
| 22.4   | 38.1   | 20.3   | 38.2   | 39.5   | 43.9   |
| 19.2   | 24.5   | 25.0   | 19.2   | 23.4   | 30.6   |
| 336.0  | 172.4  | 332.2  | 294.2  | 459.6  | 328.6  |
| 452.1  | 433.8  | 518.9  | 502.9  | 582.8  | 618.8  |
| 89.6   | 114.4  | 97.2   | 66.3   | 96.1   | 103.6  |
| 515.2  | 482.7  | 467.5  | 594.4  | 590.1  | 625.9  |
| 191.4  | 207.0  | 226.5  | 229.2  | 260.7  | 247.4  |
| 22.0   | 12.9   | 8.6    | 24.2   | 23.4   | 25.4   |
| 261.8  | 222.7  | 267.4  | 268.8  | 313.0  | 326.1  |
| 427.4  | 399.3  | 426.6  | 459.7  | 547.6  | 545.8  |
| 125.2  | 129.1  | 137.5  | 134.7  | 156.4  | 156.0  |
| 392.6  | 345.1  | 343.8  | 351.7  | 379.7  | 478.0  |
| 380.1  | 315.3  | 304.8  | 324.5  | 383.2  | 367.3  |
| 51.9   | 41.8   | 47.2   | 50.9   | 45.8   | 46.2   |
| 50.0   | 65.7   | 66.7   | 68.6   | 91.3   | 82.2   |
| 312.7  | 345.8  | 415.0  | 408.3  | 408.5  | 413.5  |
| 109.0  | 77.4   | 99.3   | 97.0   | 109.5  | 101.3  |
| 487.2  | 385.4  | 570.8  | 634.4  | 705.2  | 592.9  |
| 56.0   | 50.0   | 49.7   | 62.3   | 72.9   | 71.0   |
| 327.5  | 307.1  | 329.2  | 324.0  | 349.3  | 406.3  |
| 146.0  | 155.2  | 125.9  | 122.8  | 131.4  | 148.5  |

|       |       |       |       |       |       |
|-------|-------|-------|-------|-------|-------|
| 111.6 | 75.0  | 126.4 | 117.5 | 111.4 | 105.8 |
| 7.7   | 1.0   | 8.2   | 5.4   | 9.6   | 7.4   |
| 94.2  | 75.8  | 58.7  | 73.1  | 78.1  | 93.1  |
| 105.6 | 118.6 | 110.0 | 136.0 | 132.6 | 139.0 |
| 3.1   | 0.3   | 9.7   | 9.0   | 5.8   | 9.2   |
| 131.7 | 119.5 | 107.6 | 133.2 | 118.6 | 158.9 |
| 224.9 | 173.0 | 212.7 | 214.4 | 262.0 | 256.8 |
| 4.5   | 3.4   | 2.4   | 3.7   | 3.9   | 4.1   |
| 201.5 | 193.7 | 207.4 | 198.8 | 202.6 | 287.0 |
| 467.7 | 379.5 | 469.3 | 490.6 | 499.0 | 622.2 |
| 73.8  | 74.1  | 71.4  | 70.5  | 59.1  | 74.5  |
| 387.1 | 356.0 | 378.2 | 401.9 | 440.5 | 483.5 |
| 91.1  | 123.1 | 102.8 | 107.6 | 130.4 | 142.4 |
| 3.5   | 15.0  | 2.4   | 13.2  | 10.5  | 4.9   |
| 240.2 | 303.6 | 239.2 | 304.2 | 262.7 | 304.0 |
| 543.2 | 590.9 | 557.0 | 614.5 | 602.1 | 700.2 |
| 101.8 | 87.1  | 124.2 | 127.1 | 109.7 | 128.4 |
| 183.5 | 133.3 | 183.0 | 212.2 | 215.8 | 217.2 |
| 124.0 | 113.4 | 103.8 | 105.0 | 120.1 | 132.9 |
| 87.8  | 67.4  | 77.3  | 86.2  | 89.7  | 114.0 |
| 262.8 | 263.5 | 253.9 | 276.1 | 304.8 | 314.5 |
| 383.3 | 303.7 | 396.0 | 381.0 | 432.6 | 434.7 |
| 22.6  | 28.1  | 19.2  | 28.6  | 23.6  | 32.9  |
| 132.6 | 162.4 | 163.5 | 163.8 | 179.9 | 139.9 |
| 165.7 | 143.0 | 153.8 | 149.9 | 168.2 | 153.2 |
| 575.5 | 483.6 | 595.3 | 612.0 | 653.8 | 734.0 |
| 145.6 | 127.6 | 174.3 | 155.5 | 154.6 | 178.4 |
| 82.6  | 85.4  | 97.5  | 92.6  | 111.8 | 124.9 |
| 235.4 | 220.3 | 245.1 | 279.2 | 261.0 | 285.1 |
| 321.0 | 287.2 | 325.8 | 326.6 | 344.8 | 369.1 |
| 164.3 | 163.5 | 186.5 | 181.7 | 202.8 | 214.3 |
| 55.7  | 63.0  | 74.1  | 56.0  | 69.1  | 68.6  |
| 75.2  | 69.2  | 81.3  | 74.1  | 93.0  | 99.9  |
| 81.5  | 65.1  | 87.1  | 86.9  | 93.8  | 98.4  |
| 148.4 | 120.9 | 182.8 | 156.6 | 181.0 | 166.5 |
| 132.9 | 88.0  | 145.8 | 141.5 | 167.5 | 161.9 |
| 321.5 | 277.1 | 319.4 | 317.8 | 368.5 | 451.6 |
| 389.7 | 323.7 | 423.1 | 546.9 | 508.9 | 562.4 |
| 502.3 | 543.6 | 554.0 | 538.6 | 611.6 | 644.8 |
| 1.5   | 2.7   | 2.4   | 2.1   | 9.7   | 6.6   |
| 243.6 | 241.2 | 274.7 | 323.0 | 327.5 | 324.2 |
| 186.3 | 169.6 | 173.5 | 217.9 | 212.7 | 254.7 |
| 19.1  | 20.6  | 20.5  | 14.4  | 18.8  | 20.8  |
| 5.5   | 7.3   | 8.4   | 7.3   | 7.8   | 9.3   |
| 59.2  | 55.2  | 51.8  | 52.1  | 62.1  | 60.8  |
| 53.2  | 62.5  | 52.6  | 52.4  | 47.2  | 59.4  |
| 184.9 | 145.7 | 156.1 | 186.4 | 192.8 | 239.3 |
| 532.7 | 426.3 | 437.3 | 536.1 | 498.1 | 603.2 |
| 312.4 | 446.7 | 474.8 | 500.4 | 427.2 | 483.1 |
| 354.5 | 315.4 | 347.6 | 363.2 | 359.9 | 376.8 |
| 77.3  | 85.9  | 80.4  | 78.5  | 88.0  | 85.0  |
| 250.4 | 187.9 | 241.5 | 266.4 | 263.5 | 294.8 |
| 261.6 | 254.9 | 253.5 | 263.2 | 286.9 | 269.6 |

|       |       |       |       |       |        |
|-------|-------|-------|-------|-------|--------|
| 88.8  | 99.6  | 95.3  | 88.9  | 110.6 | 98.0   |
| 15.9  | 29.0  | 35.6  | 20.1  | 43.2  | 36.1   |
| 206.4 | 233.6 | 258.9 | 271.6 | 198.5 | 300.9  |
| 154.5 | 112.8 | 139.0 | 140.0 | 173.6 | 212.4  |
| 11.2  | 12.7  | 12.2  | 10.0  | 22.3  | 16.9   |
| 356.3 | 313.9 | 344.4 | 372.0 | 398.0 | 454.4  |
| 56.1  | 53.0  | 79.7  | 78.5  | 105.3 | 80.5   |
| 211.0 | 178.6 | 201.7 | 231.2 | 204.5 | 292.9  |
| 821.1 | 803.3 | 886.5 | 990.2 | 946.9 | 1059.7 |
| 48.1  | 38.3  | 39.0  | 52.8  | 49.1  | 71.0   |
| 409.3 | 462.0 | 409.1 | 451.6 | 419.0 | 473.7  |
| 19.3  | 3.5   | 20.1  | 16.8  | 14.6  | 18.3   |
| 45.9  | 40.5  | 35.5  | 36.4  | 44.2  | 41.3   |
| 424.0 | 343.2 | 376.8 | 380.6 | 507.2 | 496.8  |
| 462.5 | 354.9 | 465.8 | 468.0 | 448.5 | 563.8  |
| 576.8 | 549.5 | 578.3 | 584.7 | 629.9 | 732.6  |
| 11.2  | 19.0  | 21.8  | 13.1  | 4.3   | 23.5   |
| 175.2 | 119.3 | 150.2 | 154.0 | 173.0 | 177.7  |
| 315.7 | 329.7 | 334.2 | 406.9 | 389.3 | 433.7  |
| 365.7 | 386.9 | 366.0 | 409.0 | 424.7 | 467.5  |
| 19.5  | 28.5  | 30.0  | 31.7  | 37.0  | 32.4   |
| 2.7   | 3.7   | 20.0  | 12.9  | 14.4  | 4.1    |
| 684.9 | 608.3 | 721.5 | 755.1 | 766.8 | 788.7  |
| 330.1 | 312.7 | 330.5 | 334.9 | 337.9 | 400.2  |
| 313.5 | 348.1 | 359.3 | 343.8 | 376.6 | 379.7  |
| 34.8  | 29.5  | 37.5  | 46.7  | 43.0  | 53.3   |
| 478.4 | 577.2 | 508.8 | 577.3 | 551.5 | 614.4  |
| 83.5  | 59.4  | 94.9  | 92.4  | 98.4  | 99.6   |
| 145.8 | 109.1 | 124.8 | 138.3 | 153.9 | 162.7  |
| 92.2  | 98.0  | 96.4  | 116.9 | 126.6 | 137.6  |
| 107.4 | 107.8 | 138.6 | 125.3 | 142.3 | 143.7  |
| 7.5   | 2.2   | 8.3   | 5.5   | 13.9  | 2.0    |
| 759.9 | 804.1 | 768.0 | 874.9 | 762.1 | 899.7  |
| 667.8 | 653.4 | 726.4 | 738.0 | 751.1 | 862.7  |
| 132.4 | 100.0 | 156.3 | 145.0 | 154.3 | 214.8  |
| 40.7  | 28.7  | 43.0  | 37.7  | 38.7  | 59.4   |
| 189.9 | 203.0 | 198.2 | 297.3 | 208.0 | 267.5  |
| 42.1  | 3.7   | 21.4  | 36.0  | 62.3  | 35.4   |
| 34.7  | 41.2  | 36.6  | 38.2  | 28.3  | 51.3   |
| 260.6 | 220.0 | 245.9 | 259.8 | 315.1 | 337.4  |
| 33.7  | 37.7  | 54.1  | 49.1  | 49.9  | 55.1   |
| 498.3 | 498.4 | 514.7 | 537.7 | 576.7 | 624.5  |
| 320.6 | 271.2 | 359.7 | 309.5 | 391.4 | 463.5  |
| 379.8 | 373.5 | 414.3 | 429.6 | 477.4 | 496.4  |
| 35.3  | 25.3  | 36.2  | 23.0  | 52.2  | 26.9   |
| 59.6  | 60.4  | 121.9 | 102.7 | 101.1 | 110.4  |
| 268.6 | 176.8 | 264.6 | 284.6 | 309.6 | 366.6  |
| 81.5  | 96.0  | 83.9  | 95.1  | 102.9 | 107.5  |
| 188.7 | 174.8 | 199.5 | 189.9 | 250.4 | 236.4  |
| 171.1 | 179.8 | 176.3 | 172.3 | 196.7 | 227.8  |
| 71.4  | 84.7  | 76.2  | 81.1  | 80.0  | 82.9   |
| 41.7  | 53.5  | 36.7  | 43.1  | 24.1  | 22.3   |
| 373.2 | 223.0 | 296.9 | 324.2 | 414.9 | 374.7  |

|        |        |        |        |        |        |
|--------|--------|--------|--------|--------|--------|
| 37.6   | 31.6   | 38.5   | 45.4   | 39.6   | 49.2   |
| 43.5   | 42.0   | 44.4   | 50.3   | 47.0   | 57.7   |
| 267.8  | 260.5  | 244.2  | 265.1  | 291.0  | 336.0  |
| 2527.6 | 2355.7 | 2579.7 | 2719.0 | 2718.0 | 3074.4 |
| 1292.5 | 1292.3 | 1142.9 | 1264.5 | 1161.8 | 1517.6 |
| 72.3   | 64.1   | 78.1   | 75.9   | 82.3   | 80.3   |
| 90.9   | 81.5   | 98.6   | 115.2  | 110.9  | 119.3  |
| 121.5  | 125.8  | 140.0  | 137.7  | 160.3  | 152.0  |
| 742.8  | 659.9  | 730.2  | 755.4  | 833.7  | 855.3  |
| 129.5  | 93.4   | 123.5  | 127.4  | 151.9  | 156.7  |
| 720.9  | 725.2  | 666.1  | 678.1  | 670.0  | 876.2  |
| 72.0   | 70.7   | 69.5   | 64.7   | 85.3   | 69.1   |
| 71.3   | 86.4   | 75.5   | 71.7   | 79.8   | 80.8   |
| 29.0   | 27.3   | 29.7   | 38.7   | 46.8   | 41.8   |
| 850.1  | 589.8  | 778.6  | 791.8  | 978.3  | 939.6  |
| 8.9    | 1.2    | 6.3    | 24.2   | 4.3    | 3.0    |
| 645.2  | 664.7  | 576.6  | 559.4  | 658.4  | 798.3  |
| 82.0   | 38.3   | 78.6   | 63.4   | 81.0   | 81.2   |
| 178.3  | 126.4  | 168.6  | 227.6  | 202.5  | 179.8  |
| 57.8   | 57.3   | 58.8   | 66.0   | 76.4   | 88.1   |
| 118.7  | 147.2  | 137.3  | 162.4  | 172.5  | 158.5  |
| 41.1   | 39.8   | 49.2   | 45.7   | 61.3   | 54.7   |
| 155.1  | 190.9  | 131.5  | 184.9  | 158.3  | 192.8  |
| 118.1  | 119.9  | 147.5  | 162.5  | 164.5  | 183.8  |
| 461.6  | 521.0  | 435.7  | 378.3  | 479.3  | 565.5  |
| 167.9  | 197.3  | 226.7  | 195.3  | 201.5  | 194.0  |
| 324.9  | 301.2  | 288.3  | 315.0  | 416.6  | 405.4  |
| 2.5    | 1.6    | 17.0   | 6.9    | 1.2    | 7.1    |
| 156.6  | 181.1  | 164.5  | 212.7  | 184.7  | 232.1  |
| 76.7   | 72.8   | 83.5   | 79.1   | 78.4   | 99.5   |
| 43.3   | 25.2   | 63.7   | 57.9   | 53.2   | 61.5   |
| 195.2  | 284.0  | 202.9  | 211.4  | 237.3  | 259.5  |
| 6.6    | 12.4   | 13.3   | 9.5    | 5.7    | 5.8    |
| 134.9  | 135.2  | 162.6  | 162.5  | 129.4  | 169.9  |
| 350.3  | 315.1  | 405.5  | 483.3  | 468.8  | 510.6  |
| 58.6   | 65.7   | 65.5   | 70.4   | 63.0   | 78.5   |
| 154.7  | 155.2  | 127.4  | 162.9  | 166.2  | 180.6  |
| 29.6   | 25.2   | 19.0   | 16.9   | 29.4   | 28.4   |
| 849.1  | 786.9  | 957.4  | 1029.6 | 1033.5 | 980.8  |
| 109.0  | 107.6  | 111.9  | 119.7  | 154.5  | 129.2  |
| 606.2  | 548.9  | 629.0  | 641.8  | 695.8  | 765.6  |
| 357.3  | 289.6  | 410.1  | 304.9  | 418.5  | 401.6  |
| 242.5  | 215.0  | 313.7  | 283.7  | 323.7  | 309.8  |
| 144.6  | 123.7  | 175.6  | 172.3  | 177.7  | 186.7  |
| 397.8  | 433.8  | 467.7  | 424.1  | 467.1  | 493.2  |
| 357.8  | 389.0  | 451.1  | 482.2  | 595.0  | 625.6  |
| 832.0  | 913.4  | 829.6  | 924.3  | 864.0  | 996.4  |
| 183.5  | 213.6  | 200.5  | 224.0  | 183.2  | 240.9  |
| 66.9   | 57.2   | 85.8   | 99.4   | 110.8  | 98.6   |
| 196.9  | 197.6  | 225.2  | 227.7  | 217.8  | 257.3  |
| 111.3  | 105.6  | 121.0  | 123.0  | 125.4  | 144.4  |
| 97.7   | 98.9   | 101.2  | 105.3  | 147.9  | 131.5  |
| 178.1  | 166.8  | 190.7  | 182.4  | 202.9  | 206.9  |

|        |        |        |        |        |        |
|--------|--------|--------|--------|--------|--------|
| 142.9  | 115.6  | 127.8  | 143.1  | 156.0  | 162.5  |
| 270.1  | 211.1  | 265.8  | 264.7  | 316.8  | 308.9  |
| 81.6   | 56.5   | 104.2  | 99.0   | 141.9  | 125.8  |
| 567.1  | 608.0  | 557.4  | 653.9  | 565.4  | 627.5  |
| 116.2  | 87.6   | 104.4  | 98.1   | 108.5  | 133.2  |
| 7.3    | 20.8   | 17.6   | 13.0   | 8.0    | 9.5    |
| 43.4   | 43.2   | 42.5   | 44.1   | 46.1   | 52.4   |
| 1.3    | 5.7    | 1.6    | 1.6    | 3.1    | 2.0    |
| 134.7  | 137.0  | 175.0  | 163.0  | 192.2  | 199.3  |
| 179.0  | 187.6  | 146.1  | 165.3  | 219.9  | 217.6  |
| 124.1  | 192.7  | 156.4  | 132.5  | 150.0  | 156.0  |
| 15.1   | 17.9   | 12.5   | 14.4   | 20.0   | 17.4   |
| 156.2  | 162.0  | 179.1  | 169.4  | 215.5  | 201.7  |
| 9.4    | 8.7    | 22.3   | 21.8   | 17.4   | 14.6   |
| 35.4   | 28.9   | 31.4   | 33.2   | 24.0   | 47.2   |
| 28.2   | 22.0   | 30.3   | 24.9   | 29.1   | 32.0   |
| 145.2  | 133.2  | 142.9  | 179.8  | 161.2  | 162.3  |
| 740.7  | 653.6  | 766.0  | 764.0  | 853.0  | 847.9  |
| 253.0  | 322.1  | 279.7  | 339.4  | 338.6  | 334.6  |
| 884.7  | 771.0  | 919.7  | 1009.4 | 1020.9 | 1127.0 |
| 263.1  | 313.5  | 247.9  | 297.2  | 284.1  | 339.1  |
| 45.3   | 47.4   | 85.7   | 73.8   | 96.5   | 60.3   |
| 5.1    | 7.3    | 7.0    | 19.6   | 23.8   | 17.0   |
| 5.2    | 3.7    | 13.1   | 2.7    | 14.5   | 6.1    |
| 139.9  | 113.8  | 110.9  | 123.0  | 185.7  | 134.7  |
| 674.7  | 730.1  | 686.2  | 692.5  | 685.9  | 937.9  |
| 4.1    | 6.1    | 4.0    | 3.8    | 0.7    | 3.9    |
| 6.0    | 8.9    | 6.5    | 6.6    | 8.5    | 5.0    |
| 608.1  | 473.6  | 601.5  | 600.3  | 652.9  | 701.3  |
| 145.3  | 128.6  | 120.2  | 137.5  | 148.5  | 197.2  |
| 1022.4 | 911.4  | 1001.4 | 906.2  | 1053.1 | 1141.4 |
| 162.4  | 133.9  | 188.5  | 165.3  | 169.6  | 186.2  |
| 31.5   | 43.0   | 39.4   | 44.1   | 34.6   | 45.7   |
| 8.9    | 2.0    | 14.4   | 3.8    | 11.8   | 13.9   |
| 28.3   | 37.5   | 38.4   | 40.4   | 41.9   | 61.5   |
| 1.4    | 0.4    | 5.0    | 4.3    | 4.4    | 4.3    |
| 98.1   | 94.4   | 91.1   | 108.5  | 122.6  | 118.9  |
| 1019.0 | 955.7  | 1147.7 | 1169.6 | 1289.0 | 1476.8 |
| 407.3  | 389.6  | 439.7  | 463.4  | 505.6  | 521.7  |
| 1139.5 | 1052.3 | 1198.9 | 1122.7 | 1276.2 | 1428.4 |
| 121.4  | 107.1  | 128.3  | 126.9  | 144.0  | 183.6  |
| 33.6   | 28.3   | 34.9   | 35.8   | 55.2   | 37.8   |
| 286.6  | 256.5  | 267.4  | 299.6  | 297.7  | 348.6  |
| 334.3  | 368.1  | 365.1  | 366.4  | 356.7  | 393.2  |
| 151.9  | 154.0  | 182.0  | 195.5  | 196.3  | 229.2  |
| 364.1  | 320.9  | 447.4  | 422.9  | 526.4  | 451.1  |
| 339.6  | 430.0  | 357.3  | 349.2  | 354.8  | 390.8  |
| 13.7   | 7.7    | 17.3   | 12.1   | 6.5    | 15.4   |
| 124.3  | 99.1   | 132.9  | 123.3  | 149.3  | 154.5  |
| 136.2  | 161.3  | 158.5  | 148.6  | 168.6  | 185.5  |
| 212.0  | 300.2  | 258.3  | 283.2  | 265.4  | 327.8  |
| 199.9  | 211.2  | 202.3  | 204.0  | 209.3  | 234.5  |
| 56.9   | 55.4   | 49.7   | 63.7   | 68.9   | 73.6   |

|        |        |        |        |        |        |
|--------|--------|--------|--------|--------|--------|
| 359.7  | 318.6  | 377.0  | 384.9  | 415.0  | 440.3  |
| 37.9   | 25.5   | 42.2   | 37.7   | 33.8   | 36.9   |
| 36.1   | 43.6   | 46.0   | 40.5   | 49.1   | 57.6   |
| 18.8   | 17.6   | 16.5   | 20.9   | 32.9   | 31.6   |
| 297.3  | 308.5  | 285.0  | 369.0  | 360.7  | 433.4  |
| 69.6   | 76.7   | 58.5   | 89.4   | 67.6   | 104.8  |
| 16.6   | 1.4    | 7.3    | 10.0   | 19.0   | 26.9   |
| 4.0    | 3.8    | 12.0   | 1.7    | 2.5    | 6.8    |
| 159.1  | 122.3  | 142.0  | 135.6  | 193.9  | 196.4  |
| 7.8    | 15.9   | 15.2   | 6.2    | 10.5   | 14.0   |
| 472.3  | 508.1  | 509.2  | 539.5  | 524.2  | 562.4  |
| 7.0    | 9.0    | 6.5    | 4.7    | 7.8    | 2.1    |
| 116.0  | 72.5   | 95.4   | 95.5   | 110.2  | 112.6  |
| 335.4  | 259.0  | 367.7  | 403.3  | 397.2  | 417.4  |
| 44.9   | 33.8   | 35.3   | 41.9   | 41.4   | 48.7   |
| 1920.4 | 1850.1 | 2026.0 | 2143.8 | 2108.3 | 2316.2 |
| 308.6  | 377.9  | 277.5  | 311.8  | 309.3  | 401.8  |
| 35.7   | 20.0   | 19.4   | 26.9   | 30.8   | 37.1   |
| 125.1  | 94.4   | 115.4  | 140.2  | 131.6  | 165.2  |
| 25.2   | 14.3   | 40.1   | 42.0   | 42.5   | 40.7   |
| 13.2   | 1.1    | 7.1    | 10.0   | 5.1    | 8.7    |
| 30.8   | 42.1   | 28.8   | 27.0   | 31.4   | 45.9   |
| 523.7  | 695.4  | 543.9  | 524.9  | 557.0  | 642.4  |
| 301.6  | 237.9  | 313.6  | 313.9  | 331.2  | 384.5  |
| 273.5  | 225.4  | 269.8  | 294.1  | 272.1  | 310.5  |
| 516.3  | 430.6  | 481.0  | 449.3  | 542.9  | 608.6  |
| 8.3    | 23.2   | 16.4   | 14.1   | 12.2   | 26.9   |
| 12.3   | 24.9   | 22.1   | 14.4   | 22.5   | 31.8   |
| 735.4  | 866.9  | 731.6  | 838.0  | 822.5  | 992.1  |
| 808.2  | 688.2  | 848.8  | 763.8  | 863.4  | 897.1  |
| 124.7  | 122.4  | 112.1  | 124.5  | 116.4  | 139.5  |
| 77.2   | 57.4   | 56.0   | 69.2   | 96.1   | 70.8   |
| 308.6  | 293.8  | 388.1  | 373.3  | 414.0  | 427.7  |
| 445.0  | 539.7  | 353.1  | 523.9  | 504.8  | 583.4  |
| 35.6   | 28.1   | 38.4   | 13.6   | 45.1   | 35.2   |
| 35.6   | 73.5   | 47.0   | 45.9   | 47.4   | 45.1   |
| 263.0  | 390.8  | 280.8  | 312.3  | 272.5  | 341.3  |
| 282.8  | 232.9  | 293.7  | 309.0  | 327.0  | 315.4  |
| 15.5   | 13.3   | 8.5    | 19.8   | 16.2   | 20.2   |
| 54.5   | 69.7   | 54.2   | 70.8   | 68.0   | 69.3   |
| 20.5   | 19.3   | 8.8    | 20.2   | 27.6   | 17.1   |
| 168.7  | 109.1  | 175.9  | 169.1  | 197.0  | 219.3  |
| 226.6  | 192.4  | 261.8  | 249.2  | 279.0  | 320.1  |
| 414.4  | 384.5  | 416.1  | 469.8  | 474.8  | 505.2  |
| 315.2  | 281.9  | 317.7  | 313.6  | 297.1  | 438.6  |
| 206.6  | 225.7  | 161.7  | 189.5  | 193.7  | 261.3  |
| 62.5   | 30.9   | 68.2   | 47.4   | 69.8   | 61.4   |
| 185.0  | 125.8  | 153.0  | 175.6  | 179.1  | 232.3  |
| 4.4    | 10.9   | 5.0    | 10.1   | 4.0    | 7.7    |
| 127.9  | 129.0  | 144.6  | 134.0  | 137.7  | 149.5  |
| 26.7   | 38.1   | 17.6   | 35.0   | 33.4   | 53.7   |
| 120.5  | 129.1  | 150.2  | 163.7  | 155.1  | 137.7  |
| 45.5   | 36.3   | 47.8   | 50.4   | 50.0   | 53.3   |

|        |        |        |        |        |        |
|--------|--------|--------|--------|--------|--------|
| 69.2   | 59.1   | 71.4   | 66.7   | 73.1   | 67.3   |
| 117.7  | 86.5   | 109.9  | 117.4  | 131.3  | 114.0  |
| 128.0  | 97.9   | 131.4  | 121.2  | 154.0  | 142.0  |
| 118.4  | 128.0  | 152.5  | 159.0  | 156.5  | 156.5  |
| 27.1   | 15.0   | 20.2   | 19.1   | 24.8   | 26.8   |
| 3.3    | 1.0    | 2.5    | 2.4    | 3.0    | 2.1    |
| 513.8  | 443.5  | 431.3  | 437.1  | 568.2  | 566.7  |
| 307.7  | 257.2  | 351.8  | 304.1  | 364.7  | 370.2  |
| 20.5   | 12.4   | 36.1   | 22.0   | 27.7   | 20.0   |
| 13.0   | 14.8   | 8.7    | 11.0   | 9.6    | 10.6   |
| 1.0    | 0.8    | 0.5    | 0.3    | 1.2    | 2.8    |
| 1.6    | 0.4    | 3.6    | 0.6    | 7.7    | 6.0    |
| 222.0  | 222.2  | 193.7  | 240.9  | 271.7  | 295.8  |
| 76.6   | 88.6   | 86.8   | 79.0   | 90.9   | 103.0  |
| 445.6  | 604.6  | 555.8  | 607.9  | 528.5  | 614.5  |
| 78.3   | 96.7   | 104.3  | 92.6   | 108.6  | 125.7  |
| 27.8   | 43.1   | 39.0   | 41.9   | 29.2   | 31.1   |
| 267.0  | 234.0  | 329.9  | 342.2  | 344.5  | 324.6  |
| 102.6  | 79.9   | 93.2   | 79.0   | 118.3  | 123.0  |
| 39.6   | 52.7   | 47.6   | 48.1   | 46.4   | 59.5   |
| 1227.3 | 1209.4 | 1148.2 | 1221.9 | 1368.4 | 1646.1 |
| 247.6  | 200.3  | 248.9  | 253.2  | 275.9  | 276.4  |
| 48.8   | 52.7   | 29.3   | 37.2   | 49.0   | 64.4   |
| 63.5   | 55.3   | 53.1   | 56.6   | 60.5   | 87.7   |
| 98.6   | 88.9   | 119.5  | 106.6  | 131.1  | 143.0  |
| 66.6   | 53.2   | 68.6   | 74.7   | 65.5   | 80.1   |
| 623.3  | 576.5  | 599.5  | 652.1  | 645.9  | 710.1  |
| 9.8    | 6.2    | 12.2   | 7.5    | 19.3   | 7.3    |
| 203.0  | 204.2  | 213.2  | 221.8  | 239.5  | 249.7  |
| 87.3   | 79.6   | 122.4  | 96.3   | 119.4  | 123.7  |
| 96.5   | 64.1   | 113.0  | 104.1  | 99.8   | 134.6  |
| 385.3  | 350.5  | 400.0  | 405.9  | 427.5  | 502.9  |
| 37.8   | 28.1   | 45.1   | 42.6   | 59.1   | 56.1   |
| 306.8  | 213.6  | 330.6  | 385.3  | 375.7  | 396.0  |
| 1148.0 | 1117.5 | 1204.2 | 1161.5 | 1303.3 | 1430.6 |
| 966.1  | 1024.4 | 916.2  | 1042.6 | 996.9  | 1089.3 |
| 36.4   | 24.1   | 33.7   | 35.0   | 45.3   | 45.9   |
| 23.6   | 30.1   | 22.0   | 33.6   | 36.6   | 35.1   |
| 126.3  | 122.4  | 139.2  | 143.1  | 136.3  | 161.2  |
| 8.9    | 2.5    | 5.9    | 2.4    | 1.4    | 7.0    |
| 260.6  | 244.2  | 252.6  | 252.2  | 329.8  | 330.6  |
| 57.8   | 78.1   | 57.9   | 78.3   | 72.4   | 95.6   |
| 87.2   | 59.6   | 89.5   | 73.6   | 81.2   | 78.4   |
| 40.7   | 60.4   | 34.3   | 50.4   | 40.8   | 46.2   |
| 25.5   | 17.6   | 27.4   | 15.7   | 22.0   | 30.0   |
| 374.5  | 249.1  | 356.6  | 391.0  | 422.6  | 468.0  |
| 8.4    | 13.2   | 7.5    | 12.2   | 3.5    | 9.3    |
| 15.2   | 24.1   | 12.2   | 12.0   | 19.7   | 8.5    |
| 42.8   | 58.2   | 44.1   | 44.2   | 47.4   | 56.8   |
| 65.4   | 56.1   | 65.0   | 51.4   | 69.7   | 68.9   |
| 37.3   | 47.6   | 38.9   | 43.0   | 65.2   | 49.8   |
| 248.5  | 211.1  | 200.5  | 262.9  | 275.5  | 309.3  |
| 278.2  | 253.2  | 270.2  | 286.4  | 301.0  | 350.8  |

|       |       |       |       |       |        |
|-------|-------|-------|-------|-------|--------|
| 38.9  | 44.6  | 49.6  | 53.0  | 67.7  | 47.0   |
| 104.0 | 95.4  | 93.1  | 107.5 | 109.1 | 131.6  |
| 52.5  | 37.0  | 57.0  | 52.7  | 46.0  | 81.6   |
| 172.5 | 156.6 | 178.3 | 194.1 | 196.5 | 227.8  |
| 0.4   | 3.7   | 6.6   | 1.4   | 6.0   | 1.9    |
| 570.2 | 592.4 | 563.0 | 597.0 | 625.3 | 685.7  |
| 219.8 | 173.2 | 247.0 | 243.1 | 260.2 | 280.0  |
| 66.0  | 72.9  | 91.6  | 99.6  | 88.4  | 100.0  |
| 13.1  | 17.9  | 9.9   | 20.3  | 13.4  | 9.7    |
| 113.1 | 127.6 | 123.9 | 124.7 | 118.8 | 126.5  |
| 249.1 | 256.6 | 269.3 | 286.0 | 254.2 | 311.3  |
| 170.7 | 199.5 | 160.4 | 220.8 | 151.2 | 190.0  |
| 38.8  | 27.4  | 57.4  | 38.9  | 55.5  | 41.1   |
| 21.9  | 14.5  | 14.3  | 16.6  | 16.0  | 24.3   |
| 99.9  | 100.9 | 99.6  | 91.6  | 110.6 | 111.4  |
| 40.4  | 36.7  | 38.8  | 52.9  | 63.9  | 46.3   |
| 5.5   | 2.8   | 4.0   | 2.7   | 12.2  | 14.6   |
| 61.4  | 67.4  | 52.0  | 76.0  | 72.3  | 81.0   |
| 83.7  | 118.8 | 110.2 | 131.7 | 134.6 | 132.0  |
| 518.3 | 532.4 | 497.6 | 503.3 | 528.7 | 618.3  |
| 4.7   | 2.6   | 6.8   | 11.7  | 6.9   | 5.2    |
| 713.4 | 778.2 | 888.4 | 952.5 | 979.4 | 994.1  |
| 146.2 | 152.8 | 167.5 | 195.1 | 197.2 | 177.6  |
| 37.0  | 52.2  | 35.4  | 38.8  | 50.4  | 52.8   |
| 202.3 | 162.8 | 159.5 | 197.2 | 157.5 | 250.7  |
| 14.3  | 18.6  | 25.2  | 34.0  | 34.1  | 36.1   |
| 27.5  | 8.5   | 19.5  | 31.7  | 25.2  | 15.7   |
| 66.6  | 51.5  | 63.9  | 60.3  | 77.3  | 78.4   |
| 150.1 | 135.1 | 121.3 | 128.7 | 141.3 | 177.1  |
| 31.9  | 27.9  | 35.5  | 29.6  | 31.7  | 49.3   |
| 28.5  | 32.7  | 27.7  | 30.7  | 33.4  | 33.7   |
| 159.5 | 146.5 | 179.2 | 173.9 | 226.4 | 207.4  |
| 143.1 | 210.3 | 195.9 | 195.9 | 168.7 | 216.6  |
| 47.5  | 63.6  | 59.8  | 77.8  | 71.8  | 71.7   |
| 9.4   | 1.9   | 2.8   | 5.8   | 3.5   | 4.4    |
| 80.0  | 97.3  | 81.5  | 83.4  | 77.1  | 102.4  |
| 660.6 | 604.3 | 743.5 | 741.5 | 837.7 | 845.3  |
| 855.8 | 760.7 | 841.1 | 950.6 | 962.7 | 1104.1 |
| 7.9   | 5.9   | 5.8   | 18.1  | 11.8  | 4.1    |
| 95.8  | 74.5  | 104.3 | 77.7  | 106.5 | 103.0  |
| 18.5  | 19.1  | 25.5  | 16.6  | 19.2  | 25.4   |
| 37.4  | 34.5  | 32.8  | 27.9  | 39.4  | 40.1   |
| 213.7 | 197.9 | 243.0 | 248.1 | 256.7 | 274.1  |
| 187.6 | 251.3 | 206.9 | 254.1 | 240.0 | 253.8  |
| 494.8 | 468.7 | 451.6 | 498.0 | 533.4 | 614.3  |
| 108.9 | 98.3  | 109.4 | 108.6 | 122.1 | 141.5  |
| 4.1   | 5.4   | 2.1   | 3.3   | 4.9   | 13.6   |
| 427.6 | 379.8 | 375.3 | 404.5 | 468.2 | 498.8  |
| 31.5  | 26.0  | 44.8  | 31.6  | 28.5  | 37.5   |
| 849.2 | 808.3 | 856.8 | 988.7 | 936.4 | 1043.1 |
| 276.6 | 259.0 | 246.8 | 284.3 | 297.0 | 327.2  |
| 46.7  | 39.4  | 43.1  | 44.2  | 58.2  | 43.7   |
| 328.5 | 248.2 | 299.9 | 320.4 | 296.3 | 344.5  |



|        |        |        |        |        |        |
|--------|--------|--------|--------|--------|--------|
| 115.6  | 95.5   | 117.2  | 123.3  | 121.9  | 152.1  |
| 2129.2 | 1932.8 | 2172.3 | 2154.4 | 2244.2 | 2438.6 |
| 147.7  | 158.9  | 149.1  | 175.1  | 155.3  | 199.8  |
| 141.6  | 153.1  | 160.0  | 156.5  | 159.8  | 181.8  |
| 113.1  | 77.5   | 113.3  | 123.1  | 124.5  | 147.5  |
| 100.6  | 67.7   | 86.5   | 100.0  | 116.7  | 132.9  |
| 14.7   | 2.9    | 18.6   | 3.6    | 3.8    | 9.2    |
| 192.0  | 177.0  | 210.3  | 207.6  | 238.1  | 213.2  |
| 2.8    | 1.4    | 15.5   | 7.0    | 8.0    | 20.0   |
| 5.7    | 17.1   | 8.0    | 3.7    | 6.4    | 7.1    |
| 4.0    | 7.9    | 4.6    | 3.9    | 6.9    | 4.2    |
| 437.0  | 502.5  | 421.5  | 444.8  | 474.3  | 442.2  |
| 85.0   | 102.7  | 82.5   | 81.8   | 90.3   | 98.0   |
| 34.9   | 26.3   | 26.3   | 35.6   | 34.8   | 28.3   |
| 233.6  | 221.4  | 232.8  | 236.5  | 278.2  | 274.8  |
| 145.8  | 122.1  | 153.5  | 161.5  | 175.4  | 191.0  |
| 5.0    | 8.3    | 9.0    | 10.5   | 5.2    | 8.4    |
| 34.9   | 26.4   | 38.7   | 43.1   | 41.6   | 58.0   |
| 11.8   | 10.0   | 11.7   | 12.0   | 3.7    | 16.6   |
| 114.6  | 127.4  | 138.0  | 135.6  | 155.1  | 152.9  |
| 78.8   | 51.4   | 79.1   | 78.5   | 93.6   | 83.8   |
| 7.5    | 5.6    | 6.1    | 10.5   | 9.3    | 16.8   |
| 58.1   | 62.7   | 62.7   | 58.5   | 69.5   | 53.6   |
| 5.5    | 11.7   | 7.6    | 11.1   | 8.1    | 12.7   |
| 33.0   | 24.3   | 31.6   | 37.8   | 41.6   | 36.6   |
| 88.9   | 64.2   | 70.3   | 82.6   | 87.3   | 104.9  |
| 43.5   | 42.7   | 58.0   | 52.3   | 46.5   | 58.8   |
| 10.4   | 13.8   | 14.8   | 3.4    | 10.2   | 5.7    |
| 106.4  | 111.9  | 128.2  | 127.1  | 148.9  | 141.7  |
| 283.3  | 235.2  | 332.1  | 307.2  | 354.8  | 358.9  |
| 366.8  | 348.2  | 440.6  | 443.1  | 404.5  | 442.5  |
| 3.8    | 2.2    | 8.4    | 14.6   | 18.1   | 5.4    |
| 228.1  | 202.1  | 250.4  | 238.0  | 283.2  | 293.2  |
| 23.2   | 17.5   | 20.4   | 25.8   | 26.6   | 33.7   |
| 87.6   | 95.9   | 86.0   | 94.8   | 124.7  | 107.4  |
| 1.8    | 2.4    | 10.2   | 1.7    | 2.2    | 3.2    |
| 125.6  | 149.7  | 131.5  | 179.3  | 159.4  | 155.5  |
| 1954.6 | 1758.0 | 2109.1 | 2268.8 | 2353.0 | 2461.3 |
| 159.7  | 147.9  | 139.2  | 176.1  | 187.0  | 212.2  |
| 6.2    | 7.8    | 3.5    | 3.4    | 7.4    | 15.2   |
| 72.3   | 43.4   | 86.1   | 89.3   | 69.8   | 86.3   |
| 21.5   | 27.1   | 34.7   | 20.9   | 46.6   | 40.2   |
| 8.2    | 11.3   | 12.1   | 12.9   | 13.6   | 13.0   |
| 93.2   | 100.6  | 94.9   | 97.7   | 102.5  | 108.9  |
| 183.2  | 143.9  | 184.2  | 182.1  | 210.0  | 228.4  |
| 51.9   | 38.5   | 53.1   | 55.6   | 67.4   | 67.1   |
| 106.8  | 106.6  | 95.3   | 110.5  | 110.3  | 133.2  |
| 53.1   | 35.5   | 34.1   | 26.7   | 45.5   | 43.3   |
| 113.6  | 89.2   | 82.5   | 92.1   | 77.3   | 116.4  |
| 22.6   | 19.4   | 31.2   | 17.8   | 18.8   | 36.6   |
| 85.0   | 87.8   | 80.1   | 93.9   | 115.0  | 118.3  |
| 304.5  | 256.0  | 316.0  | 317.8  | 364.5  | 404.2  |
| 48.4   | 58.5   | 29.8   | 60.8   | 73.0   | 57.8   |

|        |        |        |        |        |        |
|--------|--------|--------|--------|--------|--------|
| 36.8   | 25.7   | 31.5   | 38.8   | 39.4   | 47.7   |
| 61.8   | 48.5   | 60.2   | 73.3   | 89.5   | 78.1   |
| 845.7  | 732.5  | 863.2  | 842.6  | 887.9  | 945.7  |
| 529.6  | 522.6  | 579.3  | 632.1  | 616.8  | 624.2  |
| 93.7   | 80.9   | 102.0  | 87.7   | 105.2  | 116.9  |
| 1074.1 | 1028.5 | 1150.6 | 1199.4 | 1251.3 | 1326.4 |
| 126.5  | 84.7   | 114.8  | 100.8  | 134.5  | 153.5  |
| 63.7   | 42.8   | 61.1   | 73.1   | 82.6   | 84.5   |
| 192.4  | 156.4  | 155.0  | 183.2  | 176.8  | 223.7  |
| 79.1   | 63.4   | 82.5   | 82.9   | 120.5  | 99.5   |
| 45.2   | 41.5   | 61.8   | 46.7   | 64.4   | 66.7   |
| 2145.1 | 1920.3 | 2118.7 | 2149.6 | 2213.4 | 2447.7 |
| 202.5  | 144.2  | 190.0  | 189.2  | 224.0  | 183.4  |
| 12.7   | 30.9   | 16.7   | 18.5   | 19.3   | 28.5   |
| 9.4    | 19.4   | 21.7   | 21.0   | 16.7   | 21.6   |
| 9.4    | 3.9    | 4.9    | 3.0    | 5.1    | 2.9    |
| 254.8  | 278.5  | 254.8  | 348.9  | 313.4  | 314.9  |
| 235.2  | 187.7  | 253.3  | 240.5  | 271.1  | 274.1  |
| 786.0  | 713.9  | 705.5  | 818.8  | 851.0  | 964.1  |
| 3.3    | 2.7    | 3.6    | 3.3    | 6.5    | 4.7    |
| 9.0    | 10.6   | 13.5   | 9.7    | 15.8   | 13.6   |
| 222.1  | 164.7  | 181.6  | 232.9  | 200.4  | 255.1  |
| 92.9   | 94.4   | 87.9   | 123.2  | 116.5  | 127.0  |
| 33.4   | 20.8   | 40.3   | 41.0   | 45.1   | 46.0   |
| 34.5   | 34.1   | 35.8   | 44.7   | 42.8   | 51.0   |
| 20.4   | 7.6    | 37.4   | 14.7   | 21.6   | 31.2   |
| 298.0  | 204.3  | 240.4  | 188.3  | 258.5  | 417.8  |
| 396.1  | 289.4  | 284.8  | 295.7  | 367.8  | 469.1  |
| 539.9  | 542.0  | 626.3  | 681.6  | 673.2  | 740.2  |
| 166.3  | 168.5  | 173.5  | 171.0  | 206.5  | 194.4  |
| 271.6  | 272.7  | 268.6  | 289.2  | 293.1  | 357.6  |
| 100.0  | 85.2   | 106.9  | 94.0   | 127.8  | 125.3  |
| 94.8   | 85.6   | 92.7   | 97.0   | 100.6  | 107.5  |
| 202.7  | 186.0  | 192.3  | 167.7  | 200.8  | 226.8  |
| 67.7   | 49.0   | 74.9   | 80.5   | 94.0   | 105.6  |
| 82.7   | 74.9   | 82.1   | 118.7  | 126.7  | 140.6  |
| 10.0   | 2.6    | 12.0   | 8.1    | 6.0    | 18.4   |
| 70.8   | 51.8   | 90.9   | 91.9   | 101.2  | 91.3   |
| 4.0    | 1.0    | 2.9    | 4.0    | 3.4    | 4.0    |
| 203.4  | 182.1  | 196.0  | 205.7  | 232.2  | 238.1  |
| 7.2    | 16.2   | 7.0    | 4.7    | 8.9    | 11.2   |
| 3.2    | 8.4    | 4.0    | 1.2    | 2.7    | 6.2    |
| 56.6   | 41.2   | 58.7   | 46.8   | 61.5   | 67.0   |
| 14.3   | 17.0   | 16.4   | 13.5   | 12.8   | 18.3   |
| 9.3    | 5.6    | 3.4    | 2.1    | 7.0    | 12.2   |
| 144.9  | 152.9  | 167.9  | 142.4  | 182.2  | 177.2  |
| 3.4    | 1.2    | 7.5    | 4.3    | 3.1    | 1.9    |
| 501.0  | 447.8  | 554.5  | 666.9  | 626.6  | 652.1  |
| 95.6   | 103.3  | 88.8   | 97.4   | 90.3   | 99.6   |
| 163.1  | 145.7  | 184.0  | 186.4  | 215.4  | 209.4  |
| 17.5   | 13.4   | 14.3   | 9.4    | 16.0   | 13.5   |
| 10.9   | 11.2   | 7.1    | 18.2   | 15.0   | 14.9   |
| 323.7  | 305.0  | 345.8  | 358.8  | 417.3  | 433.5  |

|        |        |        |        |        |        |
|--------|--------|--------|--------|--------|--------|
| 39.8   | 41.3   | 45.4   | 53.8   | 49.1   | 48.0   |
| 441.0  | 483.2  | 485.0  | 453.9  | 516.0  | 583.4  |
| 98.9   | 73.6   | 99.3   | 89.3   | 110.8  | 109.9  |
| 61.5   | 70.0   | 74.2   | 96.5   | 93.6   | 112.7  |
| 894.6  | 827.2  | 932.5  | 935.2  | 1022.7 | 1028.7 |
| 74.0   | 62.1   | 56.8   | 61.2   | 66.4   | 74.0   |
| 11.2   | 16.8   | 3.8    | 8.0    | 17.3   | 35.4   |
| 133.5  | 101.1  | 163.5  | 145.0  | 154.3  | 162.2  |
| 115.3  | 112.8  | 130.6  | 143.5  | 164.6  | 175.7  |
| 17.5   | 13.3   | 27.3   | 7.4    | 20.1   | 25.7   |
| 194.4  | 159.5  | 226.9  | 241.8  | 252.8  | 256.6  |
| 141.2  | 116.1  | 154.5  | 169.9  | 169.3  | 195.8  |
| 73.5   | 57.9   | 74.8   | 88.7   | 73.9   | 91.5   |
| 33.2   | 31.6   | 31.9   | 42.0   | 29.1   | 28.9   |
| 487.7  | 606.0  | 530.4  | 547.8  | 542.7  | 592.1  |
| 68.9   | 61.6   | 60.8   | 56.0   | 77.0   | 84.2   |
| 12.6   | 3.7    | 6.5    | 5.9    | 4.3    | 9.6    |
| 1.8    | 1.9    | 1.6    | 2.2    | 1.8    | 1.4    |
| 10.4   | 17.8   | 8.0    | 14.1   | 14.1   | 4.9    |
| 42.4   | 36.6   | 52.1   | 57.7   | 63.3   | 53.5   |
| 150.6  | 139.4  | 134.5  | 146.7  | 150.8  | 171.5  |
| 122.3  | 122.1  | 126.0  | 128.6  | 149.5  | 157.9  |
| 216.4  | 211.0  | 218.3  | 230.1  | 219.5  | 268.3  |
| 151.6  | 83.1   | 126.7  | 127.1  | 143.5  | 179.9  |
| 3.9    | 17.4   | 9.7    | 3.3    | 17.2   | 3.6    |
| 35.5   | 52.5   | 37.9   | 47.4   | 49.9   | 52.0   |
| 41.6   | 32.6   | 47.2   | 54.3   | 47.7   | 62.9   |
| 7.9    | 5.8    | 3.3    | 14.4   | 5.9    | 14.9   |
| 234.2  | 169.6  | 231.7  | 221.3  | 250.1  | 269.3  |
| 51.9   | 45.7   | 50.2   | 48.3   | 64.8   | 62.8   |
| 218.7  | 232.2  | 238.6  | 243.1  | 234.9  | 262.9  |
| 9.4    | 8.2    | 5.2    | 9.0    | 11.0   | 9.5    |
| 93.4   | 83.2   | 95.0   | 101.5  | 117.0  | 101.1  |
| 70.8   | 88.1   | 80.6   | 92.1   | 80.5   | 74.9   |
| 81.9   | 87.8   | 73.0   | 83.8   | 127.9  | 100.1  |
| 157.2  | 140.7  | 131.7  | 142.7  | 176.8  | 204.4  |
| 8.9    | 16.2   | 9.3    | 10.8   | 7.2    | 4.1    |
| 69.5   | 65.0   | 76.3   | 76.4   | 95.9   | 88.6   |
| 4.8    | 2.2    | 2.0    | 1.0    | 4.7    | 2.8    |
| 88.1   | 81.3   | 93.1   | 90.4   | 113.4  | 128.6  |
| 30.7   | 17.1   | 28.6   | 22.0   | 27.0   | 29.3   |
| 321.1  | 281.8  | 306.2  | 316.7  | 305.9  | 391.8  |
| 2.9    | 0.6    | 1.8    | 1.6    | 1.3    | 0.8    |
| 26.6   | 27.1   | 19.0   | 42.6   | 39.4   | 34.5   |
| 28.1   | 26.7   | 31.8   | 33.7   | 44.8   | 39.4   |
| 126.3  | 128.9  | 114.9  | 121.2  | 133.8  | 154.1  |
| 83.4   | 79.5   | 77.8   | 95.3   | 82.5   | 92.8   |
| 81.8   | 61.3   | 67.9   | 69.0   | 73.8   | 66.6   |
| 200.6  | 226.5  | 204.8  | 221.2  | 274.0  | 265.5  |
| 261.5  | 213.6  | 322.3  | 326.1  | 381.6  | 391.1  |
| 55.6   | 84.4   | 70.0   | 68.0   | 68.6   | 65.8   |
| 1172.3 | 1247.8 | 1247.7 | 1252.8 | 1309.9 | 1428.8 |
| 36.0   | 19.4   | 36.3   | 28.5   | 33.8   | 34.7   |

|        |        |        |        |        |        |
|--------|--------|--------|--------|--------|--------|
| 17.7   | 3.1    | 17.6   | 8.8    | 12.0   | 9.6    |
| 1.5    | 1.3    | 2.4    | 1.2    | 1.7    | 1.7    |
| 21.0   | 55.3   | 30.6   | 42.6   | 32.1   | 49.4   |
| 8.2    | 3.5    | 5.6    | 7.9    | 12.4   | 14.5   |
| 21.8   | 22.6   | 31.9   | 18.5   | 11.6   | 18.6   |
| 29.4   | 3.3    | 21.7   | 16.3   | 26.6   | 22.6   |
| 43.1   | 69.0   | 54.3   | 60.4   | 49.6   | 62.8   |
| 216.8  | 165.9  | 193.5  | 178.5  | 196.7  | 249.8  |
| 358.2  | 309.8  | 349.3  | 365.6  | 393.8  | 424.3  |
| 178.8  | 150.5  | 195.8  | 186.9  | 226.1  | 211.6  |
| 14.3   | 22.2   | 25.8   | 15.1   | 23.5   | 19.0   |
| 60.8   | 67.8   | 53.8   | 72.6   | 107.4  | 83.9   |
| 4.6    | 2.6    | 2.1    | 3.6    | 13.2   | 19.3   |
| 22.0   | 5.5    | 30.6   | 6.0    | 10.1   | 13.4   |
| 2.2    | 1.4    | 5.7    | 2.3    | 6.2    | 9.9    |
| 7.4    | 10.3   | 8.7    | 9.0    | 9.3    | 7.6    |
| 251.2  | 223.2  | 313.3  | 294.0  | 282.7  | 329.1  |
| 62.1   | 60.2   | 79.3   | 75.8   | 61.5   | 77.7   |
| 111.4  | 107.2  | 121.0  | 119.0  | 157.2  | 142.8  |
| 94.4   | 108.7  | 96.7   | 102.8  | 110.0  | 136.0  |
| 14.3   | 19.4   | 14.5   | 9.5    | 17.5   | 15.5   |
| 45.6   | 47.9   | 67.6   | 66.5   | 60.5   | 58.5   |
| 71.5   | 64.5   | 62.9   | 77.1   | 81.9   | 85.2   |
| 73.1   | 68.5   | 65.8   | 82.8   | 70.2   | 74.1   |
| 35.4   | 26.4   | 47.7   | 61.0   | 48.9   | 50.9   |
| 4.4    | 2.7    | 2.0    | 3.9    | 5.8    | 2.1    |
| 47.2   | 43.8   | 32.1   | 51.5   | 47.7   | 64.5   |
| 5.8    | 4.6    | 3.3    | 3.5    | 1.3    | 8.1    |
| 528.3  | 473.6  | 501.8  | 513.0  | 620.7  | 679.6  |
| 30.2   | 23.7   | 32.3   | 35.0   | 62.4   | 43.4   |
| 208.4  | 213.7  | 214.1  | 235.9  | 262.4  | 255.4  |
| 42.3   | 24.0   | 39.2   | 40.7   | 54.6   | 57.6   |
| 177.9  | 157.1  | 222.5  | 172.5  | 197.6  | 231.8  |
| 169.0  | 142.9  | 169.0  | 150.2  | 188.5  | 219.3  |
| 1569.5 | 1207.2 | 1642.8 | 1664.4 | 1727.6 | 1842.1 |
| 187.9  | 156.8  | 178.6  | 203.9  | 216.2  | 216.8  |
| 244.5  | 140.5  | 202.9  | 228.3  | 204.2  | 294.9  |
| 4.6    | 2.4    | 6.4    | 2.8    | 6.1    | 3.7    |
| 22.1   | 21.6   | 26.0   | 28.7   | 28.6   | 27.8   |
| 59.1   | 79.3   | 72.4   | 77.3   | 73.4   | 91.6   |
| 216.7  | 218.8  | 238.7  | 264.5  | 236.3  | 245.3  |
| 381.5  | 373.9  | 382.0  | 409.3  | 448.6  | 503.2  |
| 816.8  | 565.2  | 669.5  | 655.6  | 745.5  | 833.7  |
| 244.7  | 216.9  | 276.3  | 300.3  | 313.1  | 315.8  |
| 110.6  | 116.0  | 128.9  | 131.9  | 127.1  | 146.8  |
| 46.8   | 40.7   | 41.3   | 48.2   | 36.9   | 64.9   |
| 6.1    | 0.9    | 6.4    | 5.8    | 6.0    | 9.2    |
| 8.9    | 7.3    | 5.2    | 2.6    | 9.7    | 10.9   |
| 46.2   | 43.8   | 37.7   | 45.5   | 47.4   | 63.2   |
| 82.5   | 91.6   | 141.8  | 95.6   | 123.3  | 133.9  |
| 22.5   | 13.6   | 21.5   | 18.1   | 19.4   | 16.3   |
| 140.5  | 139.1  | 173.1  | 185.7  | 203.2  | 202.6  |
| 13.9   | 12.6   | 14.3   | 10.4   | 11.3   | 12.8   |

|        |        |        |        |        |        |
|--------|--------|--------|--------|--------|--------|
| 28.1   | 22.1   | 38.5   | 15.1   | 41.1   | 39.7   |
| 1.4    | 1.1    | 3.1    | 2.6    | 1.2    | 1.7    |
| 35.9   | 25.4   | 41.7   | 33.9   | 41.9   | 32.2   |
| 185.2  | 164.0  | 209.1  | 190.0  | 219.7  | 226.5  |
| 24.5   | 2.0    | 25.8   | 16.2   | 31.1   | 24.7   |
| 15.2   | 15.0   | 16.2   | 20.8   | 22.4   | 10.4   |
| 180.6  | 182.8  | 174.6  | 188.3  | 159.3  | 199.1  |
| 3.1    | 1.1    | 1.8    | 2.9    | 3.0    | 5.1    |
| 383.1  | 294.9  | 336.6  | 382.8  | 409.3  | 460.5  |
| 10.9   | 12.0   | 7.6    | 4.5    | 10.6   | 9.9    |
| 69.6   | 63.7   | 74.6   | 57.4   | 85.5   | 81.5   |
| 96.0   | 107.3  | 97.3   | 102.9  | 120.4  | 126.6  |
| 106.3  | 102.5  | 95.9   | 97.8   | 128.1  | 118.4  |
| 29.6   | 32.0   | 39.8   | 32.0   | 39.0   | 44.4   |
| 23.0   | 23.6   | 22.7   | 24.6   | 30.7   | 24.0   |
| 0.7    | 4.0    | 0.9    | 0.7    | 0.8    | 2.1    |
| 69.6   | 49.2   | 71.3   | 68.8   | 86.0   | 81.2   |
| 37.7   | 33.0   | 31.1   | 34.0   | 34.9   | 59.5   |
| 194.2  | 295.7  | 216.4  | 291.6  | 213.0  | 242.3  |
| 193.2  | 135.0  | 179.0  | 183.4  | 231.7  | 212.8  |
| 9.5    | 10.6   | 17.3   | 9.5    | 8.3    | 14.0   |
| 109.6  | 121.2  | 115.6  | 116.6  | 149.4  | 148.5  |
| 286.6  | 318.6  | 297.8  | 314.6  | 330.3  | 360.5  |
| 19.8   | 35.0   | 17.9   | 12.3   | 23.6   | 19.7   |
| 4.4    | 11.2   | 9.4    | 5.1    | 9.8    | 5.2    |
| 4.2    | 10.2   | 0.9    | 4.4    | 4.2    | 1.1    |
| 190.5  | 222.2  | 212.6  | 246.7  | 230.4  | 229.4  |
| 45.8   | 26.9   | 51.5   | 43.6   | 49.3   | 48.4   |
| 89.9   | 87.4   | 90.4   | 97.9   | 95.4   | 122.7  |
| 0.9    | 4.5    | 1.5    | 1.3    | 1.1    | 0.9    |
| 45.2   | 32.3   | 73.2   | 44.7   | 78.0   | 73.4   |
| 10.9   | 7.8    | 14.8   | 9.8    | 14.0   | 3.6    |
| 19.0   | 23.1   | 31.8   | 26.9   | 35.3   | 23.3   |
| 60.4   | 59.6   | 80.6   | 88.2   | 80.9   | 89.4   |
| 162.4  | 134.7  | 163.5  | 173.7  | 179.9  | 186.8  |
| 774.8  | 816.0  | 832.3  | 831.0  | 895.3  | 915.2  |
| 202.2  | 148.1  | 170.9  | 194.0  | 186.6  | 236.7  |
| 24.6   | 15.1   | 36.6   | 30.1   | 35.9   | 48.6   |
| 27.0   | 21.5   | 26.2   | 28.6   | 26.4   | 30.6   |
| 25.9   | 26.4   | 33.7   | 34.4   | 42.5   | 44.5   |
| 267.3  | 253.7  | 270.8  | 289.1  | 306.3  | 352.4  |
| 2.7    | 2.7    | 5.4    | 5.6    | 3.1    | 4.2    |
| 85.9   | 64.5   | 78.3   | 67.1   | 84.8   | 91.2   |
| 416.7  | 315.3  | 440.7  | 461.5  | 469.6  | 519.8  |
| 80.0   | 80.1   | 72.3   | 66.2   | 97.8   | 87.0   |
| 689.5  | 639.8  | 637.5  | 630.8  | 781.5  | 777.9  |
| 52.0   | 61.5   | 65.5   | 71.1   | 69.5   | 86.9   |
| 50.7   | 49.9   | 50.9   | 46.3   | 58.7   | 62.8   |
| 6.5    | 10.5   | 4.9    | 10.0   | 1.2    | 2.7    |
| 697.9  | 633.4  | 709.2  | 773.0  | 735.2  | 867.9  |
| 5.2    | 4.1    | 5.1    | 2.6    | 8.0    | 4.4    |
| 1278.7 | 1094.3 | 1229.0 | 1234.8 | 1387.8 | 1394.5 |
| 102.0  | 97.4   | 120.8  | 116.8  | 131.5  | 110.1  |

|       |       |       |       |       |       |
|-------|-------|-------|-------|-------|-------|
| 79.7  | 90.9  | 97.3  | 97.3  | 92.5  | 104.7 |
| 94.8  | 127.4 | 115.5 | 119.8 | 114.2 | 174.6 |
| 119.3 | 116.0 | 137.8 | 178.0 | 163.0 | 132.0 |
| 65.5  | 43.9  | 44.1  | 52.7  | 57.7  | 47.5  |
| 213.0 | 206.6 | 222.8 | 243.5 | 261.2 | 254.3 |
| 41.8  | 13.4  | 55.3  | 56.3  | 82.8  | 62.3  |
| 153.7 | 192.0 | 138.3 | 187.0 | 147.5 | 180.0 |
| 4.5   | 10.3  | 8.8   | 1.8   | 6.5   | 7.3   |
| 102.3 | 69.5  | 106.5 | 110.8 | 104.6 | 129.5 |
| 162.6 | 152.7 | 153.6 | 180.6 | 174.2 | 193.8 |
| 12.8  | 16.7  | 15.4  | 13.7  | 13.5  | 14.3  |
| 7.7   | 10.2  | 9.9   | 9.3   | 9.1   | 19.0  |
| 419.8 | 538.0 | 463.5 | 483.2 | 438.9 | 547.8 |
| 94.3  | 62.4  | 77.3  | 78.9  | 86.8  | 110.2 |
| 235.5 | 246.6 | 264.5 | 228.3 | 259.5 | 310.5 |
| 46.7  | 38.1  | 38.5  | 47.6  | 58.4  | 73.8  |
| 57.1  | 41.5  | 57.6  | 57.5  | 44.7  | 61.1  |
| 6.4   | 7.4   | 3.9   | 6.2   | 5.5   | 9.9   |
| 743.7 | 642.1 | 730.2 | 768.4 | 844.4 | 924.9 |
| 89.6  | 80.5  | 97.8  | 84.8  | 93.3  | 99.8  |
| 28.1  | 24.8  | 21.5  | 24.8  | 27.0  | 20.8  |
| 70.2  | 61.6  | 73.7  | 85.9  | 84.4  | 92.6  |
| 73.7  | 66.5  | 87.0  | 81.5  | 86.6  | 97.2  |
| 8.8   | 7.2   | 1.4   | 8.6   | 5.9   | 7.4   |
| 165.9 | 186.6 | 184.7 | 151.4 | 174.5 | 211.7 |
| 60.8  | 58.1  | 54.1  | 50.5  | 55.8  | 63.7  |
| 41.0  | 36.2  | 47.3  | 42.4  | 51.8  | 72.3  |
| 0.7   | 0.6   | 2.6   | 2.1   | 6.0   | 1.8   |
| 21.9  | 22.6  | 21.3  | 17.4  | 24.4  | 17.6  |
| 14.7  | 11.4  | 19.6  | 16.9  | 15.8  | 18.7  |
| 35.9  | 25.7  | 39.9  | 36.5  | 38.9  | 49.0  |
| 377.0 | 347.0 | 349.8 | 319.0 | 397.1 | 435.0 |
| 13.0  | 11.9  | 7.5   | 9.9   | 15.1  | 12.8  |
| 504.0 | 559.3 | 617.5 | 567.4 | 559.6 | 714.5 |
| 50.7  | 53.9  | 43.0  | 42.3  | 51.4  | 43.8  |
| 19.5  | 24.4  | 38.4  | 24.4  | 41.6  | 36.3  |
| 3.1   | 2.3   | 3.5   | 4.4   | 1.9   | 3.6   |
| 12.5  | 20.6  | 4.8   | 11.7  | 10.9  | 8.4   |
| 102.6 | 127.1 | 112.4 | 128.4 | 119.1 | 138.8 |
| 195.8 | 211.0 | 183.4 | 193.8 | 238.5 | 261.3 |
| 11.4  | 14.6  | 10.7  | 4.1   | 9.1   | 9.1   |
| 733.2 | 637.0 | 769.4 | 758.9 | 790.1 | 938.7 |
| 328.7 | 238.6 | 309.0 | 369.8 | 394.8 | 362.1 |
| 303.3 | 289.3 | 316.6 | 316.0 | 365.8 | 391.8 |
| 14.0  | 22.0  | 9.4   | 10.2  | 20.2  | 17.0  |
| 10.9  | 4.3   | 6.8   | 6.5   | 9.7   | 6.2   |
| 179.3 | 163.3 | 141.4 | 183.5 | 202.9 | 269.9 |
| 18.3  | 12.0  | 16.2  | 18.5  | 17.3  | 26.8  |
| 3.4   | 3.5   | 9.4   | 6.2   | 5.7   | 1.2   |
| 4.7   | 5.1   | 4.1   | 5.8   | 9.6   | 7.9   |
| 0.2   | 5.2   | 2.3   | 0.3   | 5.6   | 5.5   |
| 90.7  | 78.8  | 75.9  | 78.2  | 101.9 | 105.2 |
| 48.8  | 15.1  | 50.5  | 45.2  | 56.6  | 57.7  |

|       |       |       |       |       |       |
|-------|-------|-------|-------|-------|-------|
| 48.7  | 54.9  | 59.2  | 54.6  | 55.9  | 67.6  |
| 138.3 | 114.0 | 160.9 | 146.1 | 149.4 | 156.8 |
| 5.5   | 1.6   | 8.2   | 7.8   | 1.3   | 7.5   |
| 145.6 | 122.2 | 186.9 | 198.2 | 203.8 | 204.9 |
| 0.4   | 2.5   | 1.4   | 0.7   | 1.7   | 1.0   |
| 67.7  | 54.0  | 57.4  | 62.1  | 62.9  | 76.2  |
| 46.7  | 41.9  | 54.4  | 49.8  | 63.8  | 56.9  |
| 43.6  | 34.0  | 63.8  | 50.3  | 55.2  | 66.5  |
| 56.7  | 39.1  | 42.4  | 52.9  | 47.1  | 54.3  |
| 3.2   | 0.2   | 2.7   | 0.3   | 0.8   | 4.0   |
| 18.6  | 23.3  | 39.3  | 35.5  | 22.8  | 37.4  |
| 6.7   | 14.5  | 7.2   | 10.6  | 18.7  | 16.7  |
| 173.4 | 238.9 | 215.9 | 281.4 | 212.4 | 242.5 |
| 125.4 | 114.1 | 127.6 | 147.3 | 152.9 | 142.0 |
| 52.8  | 37.9  | 42.2  | 45.8  | 50.6  | 58.1  |
| 496.4 | 335.0 | 488.9 | 559.0 | 732.9 | 590.2 |
| 115.2 | 118.4 | 139.6 | 128.2 | 137.2 | 131.9 |
| 43.6  | 45.4  | 63.9  | 63.8  | 62.4  | 66.4  |
| 229.1 | 153.9 | 188.2 | 207.1 | 233.6 | 269.7 |
| 32.0  | 41.9  | 42.9  | 39.7  | 40.4  | 39.4  |
| 7.1   | 10.8  | 3.9   | 5.1   | 6.7   | 14.2  |
| 126.7 | 92.5  | 128.6 | 123.1 | 162.0 | 136.4 |
| 22.5  | 20.5  | 25.6  | 36.6  | 26.9  | 40.3  |
| 365.5 | 282.9 | 302.0 | 332.4 | 352.2 | 385.0 |
| 181.6 | 184.9 | 152.0 | 165.5 | 211.9 | 224.8 |
| 33.5  | 31.4  | 19.2  | 26.2  | 28.8  | 39.0  |
| 121.2 | 110.6 | 118.9 | 130.5 | 141.9 | 183.7 |
| 409.0 | 223.9 | 328.6 | 255.6 | 338.6 | 323.2 |
| 29.5  | 33.0  | 25.3  | 26.7  | 34.8  | 41.8  |
| 198.8 | 172.1 | 216.2 | 265.5 | 256.6 | 209.7 |
| 70.3  | 80.9  | 72.3  | 109.3 | 104.3 | 105.6 |
| 191.9 | 149.2 | 185.5 | 213.8 | 228.8 | 245.0 |
| 1.4   | 1.2   | 7.2   | 5.7   | 5.1   | 6.8   |
| 0.5   | 0.7   | 0.7   | 3.3   | 3.6   | 0.5   |
| 93.1  | 85.0  | 78.3  | 81.3  | 96.0  | 108.9 |
| 6.7   | 2.1   | 5.0   | 4.8   | 4.9   | 9.7   |
| 480.9 | 490.5 | 529.6 | 494.6 | 560.4 | 530.1 |
| 1.1   | 1.3   | 0.7   | 6.1   | 1.0   | 1.7   |
| 103.0 | 112.1 | 94.7  | 146.5 | 117.2 | 122.5 |
| 407.1 | 297.2 | 358.6 | 406.3 | 448.0 | 476.7 |
| 236.5 | 222.1 | 217.9 | 247.0 | 259.1 | 261.0 |
| 7.6   | 6.5   | 1.2   | 6.1   | 0.8   | 3.6   |
| 1.1   | 2.0   | 2.4   | 1.1   | 1.7   | 1.1   |
| 90.2  | 62.9  | 73.9  | 71.6  | 103.4 | 121.8 |
| 196.5 | 159.1 | 209.9 | 214.8 | 252.3 | 258.1 |
| 12.2  | 1.2   | 21.3  | 24.8  | 19.3  | 11.4  |
| 49.2  | 74.0  | 56.9  | 57.9  | 61.4  | 31.7  |
| 66.7  | 39.1  | 68.1  | 44.9  | 110.1 | 93.7  |
| 96.6  | 82.5  | 103.3 | 104.5 | 121.3 | 120.1 |
| 77.1  | 56.5  | 87.4  | 60.4  | 71.4  | 80.4  |
| 53.7  | 67.9  | 47.2  | 52.4  | 51.7  | 69.4  |
| 32.3  | 29.5  | 43.8  | 55.9  | 39.4  | 53.8  |
| 219.6 | 183.2 | 211.0 | 228.2 | 258.8 | 265.2 |

|       |       |       |       |       |       |
|-------|-------|-------|-------|-------|-------|
| 22.1  | 34.3  | 39.1  | 45.2  | 34.7  | 49.2  |
| 80.0  | 105.5 | 68.4  | 58.1  | 68.4  | 82.0  |
| 32.1  | 34.6  | 34.2  | 51.2  | 46.7  | 45.1  |
| 5.0   | 5.9   | 9.5   | 8.6   | 5.1   | 15.0  |
| 1.9   | 6.0   | 6.1   | 8.3   | 2.5   | 8.0   |
| 14.3  | 11.4  | 25.0  | 18.7  | 9.2   | 14.9  |
| 15.2  | 24.5  | 22.2  | 19.2  | 19.0  | 12.1  |
| 22.0  | 4.1   | 20.1  | 18.1  | 12.5  | 19.2  |
| 14.7  | 16.8  | 17.6  | 18.5  | 21.8  | 24.5  |
| 23.5  | 19.0  | 21.6  | 44.7  | 24.0  | 31.3  |
| 63.2  | 67.7  | 62.8  | 65.3  | 66.6  | 83.6  |
| 17.4  | 12.5  | 10.4  | 6.3   | 11.6  | 9.5   |
| 334.6 | 444.4 | 295.9 | 353.2 | 332.4 | 426.3 |
| 79.5  | 71.2  | 71.6  | 69.8  | 79.3  | 105.9 |
| 54.2  | 61.0  | 55.0  | 48.8  | 58.9  | 71.9  |
| 72.0  | 64.0  | 73.0  | 81.4  | 71.9  | 81.4  |
| 157.7 | 143.3 | 178.1 | 166.6 | 205.0 | 229.2 |
| 225.4 | 184.1 | 272.5 | 296.2 | 328.8 | 347.8 |
| 67.2  | 72.4  | 64.1  | 54.4  | 76.1  | 88.6  |
| 102.6 | 92.1  | 83.7  | 86.8  | 77.3  | 106.6 |
| 43.9  | 38.5  | 42.7  | 37.7  | 44.7  | 51.9  |
| 70.6  | 43.1  | 65.4  | 49.2  | 64.9  | 75.1  |
| 2.2   | 0.9   | 7.5   | 4.9   | 1.6   | 4.6   |
| 203.3 | 218.9 | 261.6 | 250.9 | 273.4 | 272.7 |
| 110.9 | 117.2 | 102.2 | 120.5 | 112.6 | 136.8 |
| 66.3  | 72.1  | 65.0  | 76.8  | 82.4  | 86.6  |
| 20.3  | 32.5  | 29.7  | 38.5  | 25.7  | 25.7  |
| 88.4  | 56.9  | 98.6  | 116.9 | 92.9  | 112.1 |
| 97.8  | 108.2 | 98.7  | 91.5  | 124.1 | 120.5 |
| 23.3  | 8.5   | 17.3  | 20.2  | 15.5  | 34.7  |
| 2.2   | 9.6   | 7.7   | 5.6   | 5.0   | 10.7  |
| 8.1   | 11.9  | 12.8  | 20.0  | 9.1   | 18.4  |
| 8.1   | 2.7   | 3.6   | 9.4   | 6.1   | 12.6  |
| 90.9  | 79.1  | 74.6  | 85.0  | 117.0 | 119.8 |
| 8.5   | 17.1  | 23.5  | 10.9  | 11.9  | 23.3  |
| 95.9  | 98.1  | 107.5 | 126.3 | 127.2 | 139.9 |
| 2.2   | 2.9   | 3.6   | 2.3   | 4.3   | 3.8   |
| 2.1   | 3.3   | 11.3  | 4.8   | 12.6  | 14.5  |
| 12.3  | 12.6  | 6.9   | 18.5  | 14.6  | 18.0  |
| 26.5  | 27.8  | 44.0  | 40.2  | 35.2  | 39.1  |
| 105.1 | 74.5  | 107.7 | 79.2  | 102.8 | 125.5 |
| 6.1   | 6.8   | 5.4   | 7.0   | 5.1   | 14.2  |
| 42.8  | 52.0  | 38.9  | 48.9  | 48.4  | 58.1  |
| 171.1 | 172.1 | 205.0 | 183.6 | 204.9 | 224.8 |
| 32.9  | 27.6  | 26.7  | 30.6  | 34.2  | 32.6  |
| 19.3  | 7.4   | 16.2  | 19.7  | 18.0  | 12.7  |
| 367.8 | 365.8 | 418.7 | 408.7 | 473.2 | 456.0 |
| 39.8  | 69.3  | 22.7  | 53.2  | 27.0  | 53.1  |
| 149.1 | 148.0 | 169.0 | 166.5 | 160.2 | 208.9 |
| 11.5  | 4.0   | 16.6  | 9.2   | 15.1  | 2.6   |
| 60.5  | 30.0  | 50.3  | 56.4  | 48.8  | 71.7  |
| 8.9   | 13.4  | 0.9   | 1.4   | 2.7   | 10.8  |
| 303.5 | 249.3 | 304.4 | 245.3 | 298.0 | 293.5 |



|        |        |        |        |        |        |
|--------|--------|--------|--------|--------|--------|
| 56.6   | 12.8   | 59.1   | 75.3   | 86.8   | 83.6   |
| 108.4  | 129.2  | 115.3  | 123.0  | 122.7  | 151.9  |
| 41.4   | 34.4   | 49.8   | 43.6   | 55.6   | 37.5   |
| 15.8   | 3.6    | 11.9   | 14.9   | 19.2   | 26.4   |
| 27.8   | 21.8   | 27.7   | 29.0   | 41.8   | 35.3   |
| 2.4    | 1.1    | 1.8    | 1.8    | 1.9    | 2.4    |
| 32.2   | 36.4   | 30.5   | 26.7   | 40.6   | 37.9   |
| 72.3   | 60.4   | 66.1   | 71.3   | 73.2   | 62.3   |
| 20.8   | 14.0   | 8.2    | 9.5    | 18.1   | 22.7   |
| 7.0    | 2.2    | 3.0    | 7.2    | 9.0    | 10.5   |
| 3.2    | 4.7    | 8.0    | 3.0    | 2.7    | 3.3    |
| 3.7    | 1.4    | 4.5    | 1.4    | 1.4    | 5.1    |
| 2.9    | 0.9    | 6.8    | 2.8    | 3.9    | 11.3   |
| 3.9    | 5.1    | 7.6    | 5.6    | 4.9    | 4.8    |
| 16.5   | 40.3   | 46.3   | 31.3   | 15.3   | 58.7   |
| 121.3  | 153.2  | 151.4  | 134.6  | 151.0  | 158.6  |
| 15.7   | 22.1   | 14.1   | 16.7   | 15.2   | 9.3    |
| 168.7  | 161.5  | 218.5  | 246.1  | 249.8  | 247.9  |
| 8.9    | 6.8    | 5.6    | 8.4    | 7.6    | 9.5    |
| 11.6   | 2.5    | 16.2   | 18.8   | 12.7   | 20.3   |
| 42.8   | 25.2   | 40.9   | 38.9   | 39.0   | 49.3   |
| 33.1   | 33.2   | 39.8   | 34.3   | 33.4   | 42.4   |
| 1.0    | 0.8    | 8.0    | 6.7    | 6.5    | 2.0    |
| 8.5    | 11.3   | 5.8    | 4.0    | 3.4    | 2.9    |
| 6.5    | 8.2    | 12.5   | 15.3   | 16.2   | 11.1   |
| 133.9  | 102.9  | 134.6  | 114.9  | 140.1  | 145.3  |
| 108.3  | 93.0   | 99.3   | 153.9  | 123.0  | 142.8  |
| 23.1   | 14.3   | 25.5   | 19.7   | 24.2   | 23.3   |
| 10.0   | 7.5    | 1.7    | 1.9    | 2.1    | 2.1    |
| 58.5   | 58.2   | 78.7   | 102.0  | 91.1   | 95.3   |
| 20.9   | 26.0   | 26.2   | 27.3   | 29.3   | 23.4   |
| 13.8   | 18.9   | 20.7   | 20.6   | 17.3   | 20.7   |
| 7.3    | 4.3    | 5.0    | 11.0   | 26.2   | 6.4    |
| 105.9  | 102.7  | 79.0   | 89.3   | 91.4   | 134.9  |
| 14.4   | 12.2   | 11.5   | 16.4   | 17.0   | 14.6   |
| 141.8  | 121.9  | 139.3  | 134.2  | 131.9  | 166.0  |
| 111.3  | 75.4   | 128.3  | 101.9  | 132.6  | 119.1  |
| 13.5   | 22.6   | 22.1   | 21.0   | 23.4   | 22.6   |
| 51.9   | 42.7   | 54.3   | 43.6   | 53.1   | 62.6   |
| 53.6   | 43.5   | 44.7   | 62.7   | 31.7   | 63.5   |
| 0.8    | 1.0    | 1.1    | 4.2    | 0.7    | 1.8    |
| 67.3   | 53.6   | 78.1   | 69.3   | 67.1   | 86.1   |
| 127.3  | 106.5  | 122.8  | 144.9  | 153.2  | 174.8  |
| 14.2   | 2.2    | 8.9    | 13.8   | 12.2   | 15.4   |
| 41.9   | 33.7   | 54.1   | 39.0   | 43.0   | 42.1   |
| 3.9    | 2.6    | 12.3   | 3.3    | 9.5    | 10.9   |
| 6429.2 | 5668.7 | 6541.3 | 6776.1 | 6676.2 | 7253.9 |
| 110.0  | 78.1   | 102.3  | 90.9   | 107.6  | 108.4  |
| 6.1    | 0.6    | 4.1    | 6.4    | 4.7    | 4.3    |
| 118.6  | 80.5   | 115.9  | 110.7  | 120.5  | 141.7  |
| 39.6   | 33.1   | 60.1   | 53.4   | 59.1   | 57.8   |
| 127.7  | 85.0   | 122.6  | 118.1  | 140.1  | 137.9  |
| 9.8    | 1.0    | 7.3    | 5.0    | 4.5    | 8.3    |

|        |       |        |        |        |        |
|--------|-------|--------|--------|--------|--------|
| 149.8  | 119.2 | 150.2  | 153.1  | 188.9  | 170.9  |
| 88.9   | 98.4  | 116.4  | 103.0  | 105.5  | 115.7  |
| 8.1    | 13.1  | 10.0   | 5.1    | 13.0   | 13.4   |
| 8.4    | 12.8  | 8.4    | 8.0    | 5.3    | 14.9   |
| 36.9   | 44.3  | 37.8   | 49.5   | 42.8   | 58.8   |
| 74.1   | 65.6  | 58.0   | 65.6   | 63.2   | 67.4   |
| 8.5    | 3.9   | 3.7    | 5.9    | 2.7    | 8.3    |
| 8.8    | 3.3   | 3.6    | 4.3    | 4.0    | 2.3    |
| 5.4    | 4.8   | 1.1    | 3.5    | 6.9    | 0.5    |
| 33.2   | 21.6  | 36.1   | 29.0   | 43.1   | 39.6   |
| 54.8   | 59.6  | 77.4   | 60.3   | 66.1   | 63.9   |
| 3.4    | 6.3   | 3.1    | 6.2    | 3.7    | 1.0    |
| 37.5   | 38.9  | 48.4   | 62.3   | 67.8   | 38.4   |
| 5.5    | 3.7   | 1.1    | 1.7    | 4.3    | 5.1    |
| 97.8   | 102.7 | 118.9  | 105.6  | 126.8  | 150.1  |
| 32.7   | 49.3  | 45.9   | 47.7   | 42.3   | 41.1   |
| 46.4   | 46.1  | 42.4   | 48.4   | 60.8   | 63.3   |
| 9.3    | 1.9   | 12.1   | 6.2    | 10.5   | 2.8    |
| 811.3  | 693.9 | 732.9  | 815.6  | 797.3  | 994.2  |
| 1.8    | 3.6   | 1.3    | 5.8    | 4.0    | 9.7    |
| 7.9    | 2.5   | 5.4    | 5.6    | 7.1    | 8.5    |
| 1.5    | 2.4   | 1.9    | 1.4    | 1.0    | 1.4    |
| 0.5    | 0.7   | 3.9    | 4.4    | 1.0    | 3.5    |
| 18.5   | 14.7  | 22.8   | 17.4   | 30.8   | 22.0   |
| 66.1   | 45.0  | 82.1   | 74.1   | 79.2   | 94.5   |
| 8.4    | 13.1  | 14.6   | 5.1    | 1.3    | 13.7   |
| 2.7    | 0.2   | 7.8    | 4.7    | 7.6    | 4.0    |
| 0.9    | 3.2   | 1.6    | 1.9    | 1.3    | 7.4    |
| 8.5    | 15.9  | 5.3    | 6.1    | 11.3   | 11.5   |
| 916.8  | 831.7 | 1028.4 | 1061.4 | 1193.0 | 1150.2 |
| 17.4   | 5.2   | 10.3   | 16.1   | 11.0   | 11.7   |
| 41.8   | 23.7  | 42.7   | 47.3   | 43.6   | 49.7   |
| 36.9   | 39.3  | 37.5   | 40.7   | 35.9   | 43.2   |
| 162.1  | 118.5 | 208.2  | 229.7  | 244.5  | 247.4  |
| 3.9    | 2.5   | 9.9    | 4.5    | 10.2   | 5.7    |
| 1.8    | 0.7   | 1.9    | 0.8    | 0.9    | 3.5    |
| 94.1   | 83.4  | 90.7   | 105.4  | 104.3  | 124.8  |
| 90.5   | 57.7  | 94.2   | 66.6   | 85.7   | 87.6   |
| 131.8  | 138.7 | 152.5  | 159.8  | 169.1  | 181.4  |
| 32.0   | 21.3  | 32.2   | 21.6   | 32.5   | 33.9   |
| 240.6  | 183.5 | 212.0  | 256.4  | 238.6  | 271.4  |
| 42.4   | 47.8  | 53.8   | 51.5   | 62.5   | 65.1   |
| 27.4   | 30.4  | 17.6   | 34.0   | 43.4   | 45.0   |
| 12.8   | 19.8  | 16.3   | 17.9   | 12.3   | 13.9   |
| 18.1   | 20.9  | 27.2   | 20.8   | 27.0   | 24.3   |
| 21.5   | 19.2  | 13.9   | 11.9   | 14.8   | 25.8   |
| 47.4   | 73.7  | 38.7   | 47.0   | 43.5   | 62.4   |
| 666.9  | 615.2 | 678.6  | 738.8  | 815.7  | 835.8  |
| 157.2  | 153.2 | 133.0  | 130.3  | 167.3  | 190.5  |
| 176.6  | 150.8 | 170.8  | 170.7  | 200.0  | 214.5  |
| 1043.8 | 942.2 | 1013.0 | 1072.0 | 1106.2 | 1304.8 |
| 5.5    | 5.4   | 2.1    | 8.1    | 6.1    | 1.3    |
| 65.3   | 68.0  | 54.7   | 66.1   | 70.8   | 65.4   |

|       |       |       |       |       |       |
|-------|-------|-------|-------|-------|-------|
| 91.2  | 70.8  | 80.9  | 87.8  | 100.6 | 108.0 |
| 7.0   | 9.2   | 6.5   | 9.4   | 10.2  | 14.8  |
| 24.3  | 20.7  | 7.5   | 8.7   | 14.7  | 21.7  |
| 10.7  | 7.4   | 21.9  | 17.8  | 22.1  | 17.1  |
| 81.8  | 85.5  | 89.9  | 75.6  | 90.7  | 100.6 |
| 15.4  | 10.0  | 3.4   | 14.0  | 10.8  | 6.8   |
| 79.3  | 79.6  | 116.5 | 81.4  | 111.7 | 120.1 |
| 4.7   | 4.5   | 8.2   | 3.8   | 5.1   | 3.4   |
| 11.0  | 1.7   | 8.5   | 18.6  | 11.9  | 9.3   |
| 39.5  | 43.2  | 31.7  | 34.9  | 42.1  | 46.4  |
| 143.9 | 124.2 | 147.5 | 150.2 | 142.8 | 155.6 |
| 111.1 | 86.2  | 111.6 | 109.9 | 136.0 | 138.4 |
| 18.8  | 11.1  | 14.2  | 13.9  | 17.2  | 23.7  |
| 1.8   | 1.9   | 2.0   | 1.6   | 2.4   | 1.9   |
| 4.3   | 2.3   | 4.4   | 3.0   | 3.7   | 5.8   |
| 1.5   | 5.2   | 2.5   | 5.1   | 2.0   | 2.4   |
| 105.5 | 123.8 | 110.7 | 111.0 | 133.8 | 130.2 |
| 1.3   | 3.5   | 2.0   | 2.1   | 1.2   | 1.7   |
| 2.0   | 3.4   | 6.6   | 1.1   | 5.9   | 5.8   |
| 5.3   | 4.4   | 4.4   | 2.0   | 4.9   | 3.6   |
| 29.0  | 48.5  | 31.5  | 26.3  | 32.0  | 41.3  |
| 94.9  | 58.8  | 70.9  | 80.4  | 91.1  | 98.4  |
| 25.0  | 25.2  | 22.8  | 33.0  | 35.0  | 38.0  |
| 59.5  | 64.1  | 73.8  | 77.5  | 68.3  | 77.1  |
| 26.0  | 41.0  | 37.4  | 45.7  | 35.1  | 34.5  |
| 39.2  | 21.2  | 24.7  | 24.2  | 24.1  | 9.3   |
| 113.3 | 69.1  | 101.0 | 100.4 | 113.5 | 111.2 |
| 35.9  | 27.2  | 29.7  | 41.7  | 44.9  | 35.3  |
| 7.3   | 6.3   | 5.9   | 6.1   | 2.6   | 4.8   |
| 4.7   | 8.0   | 18.5  | 10.0  | 12.4  | 18.7  |
| 7.1   | 11.3  | 8.8   | 8.5   | 4.6   | 13.0  |
| 22.2  | 34.1  | 19.0  | 30.6  | 26.1  | 28.6  |
| 76.0  | 59.9  | 76.6  | 79.7  | 80.6  | 86.6  |
| 55.5  | 62.9  | 65.9  | 72.8  | 72.5  | 85.7  |
| 4.5   | 1.3   | 2.4   | 2.2   | 2.3   | 0.9   |
| 8.2   | 6.0   | 4.1   | 6.2   | 1.8   | 7.6   |
| 43.7  | 40.2  | 39.4  | 29.1  | 36.5  | 45.2  |
| 10.1  | 18.6  | 1.9   | 6.1   | 7.6   | 8.2   |
| 33.8  | 21.5  | 32.6  | 30.7  | 29.3  | 29.6  |
| 112.8 | 99.6  | 97.3  | 106.0 | 119.2 | 139.5 |
| 257.7 | 223.5 | 272.8 | 261.3 | 308.1 | 332.3 |
| 73.0  | 57.0  | 63.0  | 57.8  | 72.3  | 75.7  |
| 43.4  | 38.5  | 39.9  | 47.1  | 48.3  | 64.9  |
| 205.6 | 183.7 | 202.4 | 263.8 | 231.4 | 260.8 |
| 25.3  | 6.6   | 21.8  | 16.7  | 16.8  | 21.4  |
| 12.9  | 10.2  | 16.1  | 7.1   | 12.5  | 14.0  |
| 127.4 | 110.1 | 131.1 | 147.4 | 175.4 | 172.3 |
| 180.5 | 167.9 | 199.2 | 216.9 | 259.1 | 242.3 |
| 14.3  | 33.2  | 21.6  | 29.2  | 42.3  | 39.9  |
| 5.0   | 1.2   | 9.5   | 0.7   | 3.3   | 4.9   |
| 41.2  | 24.9  | 48.9  | 28.5  | 57.6  | 57.6  |
| 6.8   | 4.3   | 14.0  | 13.1  | 6.8   | 15.2  |
| 34.1  | 20.3  | 47.2  | 34.2  | 44.1  | 53.8  |

|        |        |        |        |        |        |
|--------|--------|--------|--------|--------|--------|
| 117.0  | 83.5   | 94.1   | 96.6   | 91.0   | 145.9  |
| 10.3   | 4.5    | 11.1   | 6.2    | 10.7   | 7.6    |
| 3.2    | 1.8    | 3.0    | 2.6    | 2.1    | 4.1    |
| 12.7   | 2.1    | 8.6    | 3.6    | 18.3   | 9.8    |
| 64.2   | 58.1   | 68.2   | 79.1   | 75.5   | 67.3   |
| 236.3  | 203.1  | 225.8  | 297.1  | 284.5  | 327.3  |
| 43.3   | 61.3   | 39.0   | 57.8   | 67.9   | 59.6   |
| 40.1   | 37.1   | 34.9   | 33.5   | 48.9   | 57.5   |
| 59.1   | 29.7   | 69.1   | 63.2   | 65.9   | 65.0   |
| 35.1   | 40.9   | 42.8   | 43.0   | 45.2   | 47.3   |
| 78.1   | 83.6   | 90.2   | 95.8   | 82.1   | 90.9   |
| 52.2   | 58.2   | 55.3   | 67.3   | 68.8   | 81.1   |
| 2.0    | 2.4    | 8.7    | 3.3    | 2.9    | 3.2    |
| 32.6   | 40.6   | 47.4   | 45.2   | 33.6   | 37.6   |
| 90.4   | 75.7   | 84.0   | 76.8   | 105.0  | 105.0  |
| 4.1    | 0.5    | 2.2    | 5.0    | 5.0    | 6.6    |
| 99.8   | 87.3   | 100.0  | 93.6   | 109.7  | 105.4  |
| 12.9   | 17.3   | 10.0   | 5.8    | 14.0   | 18.9   |
| 24.0   | 34.1   | 38.5   | 35.6   | 35.6   | 32.3   |
| 1.1    | 2.6    | 1.3    | 1.3    | 1.7    | 1.0    |
| 168.2  | 125.8  | 157.5  | 174.8  | 167.2  | 210.4  |
| 2.4    | 1.1    | 6.3    | 11.9   | 5.1    | 8.8    |
| 19.0   | 16.4   | 24.2   | 14.5   | 22.5   | 17.8   |
| 9.6    | 4.2    | 6.8    | 11.3   | 6.0    | 7.9    |
| 28.8   | 16.2   | 28.6   | 24.2   | 20.2   | 33.9   |
| 67.0   | 55.3   | 103.8  | 85.4   | 119.7  | 98.3   |
| 25.3   | 20.7   | 31.2   | 15.5   | 30.7   | 30.1   |
| 1.2    | 3.0    | 9.8    | 3.2    | 2.4    | 2.1    |
| 2.9    | 0.7    | 1.9    | 2.5    | 0.9    | 2.6    |
| 190.5  | 205.2  | 203.8  | 212.0  | 221.9  | 261.2  |
| 18.6   | 24.0   | 21.9   | 20.3   | 25.1   | 13.9   |
| 2.2    | 1.5    | 4.4    | 3.0    | 3.2    | 5.8    |
| 38.4   | 40.1   | 44.2   | 37.2   | 45.9   | 51.6   |
| 18.0   | 15.7   | 23.9   | 24.7   | 13.2   | 26.8   |
| 1.2    | 1.6    | 3.6    | 1.5    | 3.5    | 1.3    |
| 94.3   | 115.9  | 84.9   | 94.5   | 100.7  | 129.6  |
| 595.7  | 1269.8 | 684.2  | 905.6  | 694.2  | 805.3  |
| 9.8    | 7.4    | 12.3   | 5.0    | 11.0   | 10.3   |
| 314.2  | 281.5  | 256.4  | 298.8  | 285.3  | 326.7  |
| 2.7    | 4.6    | 3.3    | 2.2    | 2.4    | 2.4    |
| 17.9   | 1.8    | 9.9    | 4.4    | 6.4    | 8.4    |
| 4.3    | 17.5   | 17.5   | 3.5    | 10.0   | 16.0   |
| 53.6   | 45.5   | 63.5   | 64.2   | 52.0   | 63.0   |
| 1806.1 | 1323.6 | 1533.6 | 1681.8 | 1949.3 | 1914.6 |
| 37.2   | 12.8   | 27.2   | 17.7   | 43.6   | 31.2   |
| 141.0  | 80.6   | 143.8  | 133.5  | 176.8  | 160.2  |
| 45.1   | 33.8   | 52.8   | 48.9   | 47.9   | 65.3   |
| 273.6  | 289.1  | 413.5  | 426.0  | 397.7  | 345.7  |
| 50.5   | 59.2   | 66.9   | 52.8   | 71.4   | 61.7   |
| 174.5  | 188.4  | 192.9  | 218.0  | 210.5  | 261.7  |
| 28.7   | 32.3   | 22.5   | 29.4   | 30.3   | 38.4   |
| 765.5  | 637.1  | 693.2  | 753.2  | 814.7  | 934.3  |
| 134.2  | 115.3  | 136.7  | 132.0  | 149.6  | 177.2  |

|        |        |        |        |        |        |
|--------|--------|--------|--------|--------|--------|
| 69.3   | 44.7   | 78.7   | 75.2   | 77.0   | 102.3  |
| 80.0   | 74.1   | 91.4   | 90.6   | 89.9   | 114.6  |
| 4.0    | 7.5    | 6.0    | 3.7    | 2.1    | 4.5    |
| 142.0  | 150.1  | 128.9  | 154.8  | 177.7  | 196.4  |
| 0.8    | 10.3   | 1.7    | 3.9    | 6.4    | 4.4    |
| 1888.8 | 1816.7 | 1980.9 | 1847.0 | 2012.9 | 2295.2 |
| 6.6    | 4.0    | 7.8    | 7.6    | 6.8    | 1.0    |
| 2.6    | 0.9    | 8.0    | 12.0   | 6.0    | 3.5    |
| 6.3    | 0.9    | 1.2    | 3.4    | 3.0    | 3.9    |
| 241.0  | 266.3  | 246.7  | 222.3  | 247.2  | 275.9  |
| 2.3    | 7.4    | 6.5    | 7.1    | 9.7    | 7.2    |
| 1628.3 | 1582.4 | 1657.4 | 1740.3 | 1812.8 | 2040.4 |
| 898.2  | 862.7  | 824.5  | 974.6  | 993.6  | 1037.4 |
| 12.5   | 8.2    | 11.3   | 13.5   | 9.6    | 13.2   |
| 5.8    | 1.3    | 1.8    | 3.2    | 2.6    | 3.8    |
| 8.4    | 4.7    | 17.5   | 9.3    | 10.7   | 4.2    |
| 578.4  | 279.7  | 697.9  | 622.6  | 787.8  | 770.3  |
| 6.7    | 5.9    | 7.9    | 5.9    | 5.4    | 11.5   |
| 25.3   | 48.9   | 50.2   | 54.6   | 42.8   | 53.7   |
| 5.4    | 10.3   | 7.3    | 5.6    | 6.3    | 1.9    |
| 0.3    | 0.2    | 3.2    | 1.7    | 1.5    | 3.6    |
| 6.6    | 8.6    | 7.5    | 2.3    | 5.6    | 5.1    |
| 12.4   | 18.7   | 15.1   | 16.4   | 10.8   | 14.2   |
| 41.9   | 27.0   | 45.6   | 38.0   | 41.9   | 50.2   |
| 328.1  | 248.5  | 343.2  | 372.8  | 449.5  | 394.4  |
| 309.9  | 254.9  | 282.0  | 283.8  | 361.3  | 388.8  |
| 5.3    | 8.5    | 5.1    | 12.4   | 12.1   | 8.4    |
| 5.6    | 11.7   | 8.8    | 6.4    | 8.0    | 14.9   |
| 70.7   | 79.0   | 69.6   | 72.3   | 83.9   | 72.9   |
| 4.3    | 0.5    | 7.3    | 6.8    | 6.0    | 7.9    |
| 12.6   | 19.3   | 4.5    | 16.0   | 8.5    | 24.1   |
| 918.1  | 931.7  | 929.3  | 1115.1 | 999.8  | 1083.1 |
| 1398.4 | 1332.4 | 1439.9 | 1544.7 | 1527.3 | 1635.5 |
| 107.8  | 72.7   | 113.8  | 121.1  | 143.8  | 115.2  |
| 8.2    | 9.7    | 9.4    | 10.3   | 10.9   | 3.3    |
| 25.2   | 17.3   | 15.3   | 22.6   | 9.8    | 16.5   |
| 2.7    | 6.0    | 5.1    | 6.1    | 3.9    | 5.2    |
| 6.3    | 5.0    | 1.0    | 3.2    | 6.4    | 13.7   |
| 263.3  | 322.4  | 315.3  | 369.1  | 307.1  | 365.5  |
| 92.5   | 109.2  | 128.4  | 121.5  | 103.0  | 99.1   |
| 64.6   | 88.5   | 73.1   | 73.3   | 76.6   | 101.4  |
| 74.0   | 91.9   | 95.1   | 95.0   | 78.6   | 102.2  |
| 3.1    | 7.4    | 0.7    | 2.9    | 5.9    | 7.6    |
| 10.0   | 9.3    | 14.0   | 4.9    | 10.4   | 2.7    |
| 165.4  | 135.8  | 170.4  | 154.2  | 141.5  | 220.4  |
| 55.2   | 65.3   | 36.0   | 65.2   | 52.9   | 76.3   |
| 452.2  | 456.2  | 464.2  | 495.4  | 497.7  | 583.5  |
| 4.8    | 6.1    | 7.6    | 5.0    | 5.5    | 6.6    |
| 4.4    | 3.5    | 3.7    | 3.3    | 5.9    | 2.9    |
| 12.1   | 22.2   | 17.1   | 10.9   | 14.8   | 16.1   |
| 851.9  | 804.6  | 884.9  | 921.1  | 1060.1 | 1100.0 |
| 559.5  | 480.9  | 526.6  | 596.6  | 537.9  | 696.1  |
| 17.1   | 9.2    | 19.3   | 25.3   | 17.8   | 21.5   |

|       |       |       |       |       |       |
|-------|-------|-------|-------|-------|-------|
| 183.2 | 132.3 | 223.2 | 218.4 | 200.5 | 244.2 |
| 104.1 | 98.2  | 114.5 | 113.0 | 126.5 | 125.9 |
| 16.2  | 17.7  | 12.7  | 17.0  | 17.5  | 13.4  |
| 10.2  | 0.6   | 6.5   | 6.8   | 4.0   | 7.5   |
| 69.8  | 120.2 | 70.0  | 116.6 | 80.1  | 111.9 |
| 59.6  | 51.3  | 66.5  | 46.7  | 72.9  | 77.5  |
| 9.0   | 18.3  | 5.9   | 21.6  | 9.2   | 7.1   |
| 325.0 | 311.5 | 364.0 | 360.8 | 412.3 | 434.6 |
| 1.3   | 1.0   | 2.2   | 6.0   | 2.1   | 1.8   |
| 94.6  | 89.1  | 87.2  | 86.6  | 83.3  | 104.9 |
| 41.9  | 21.3  | 29.8  | 33.3  | 29.0  | 40.8  |
| 42.7  | 61.9  | 58.3  | 44.8  | 38.2  | 58.1  |
| 5.2   | 2.1   | 3.2   | 4.1   | 4.8   | 9.2   |
| 2.4   | 2.9   | 20.3  | 5.5   | 6.4   | 6.3   |
| 0.6   | 5.2   | 5.2   | 3.5   | 1.1   | 5.1   |
| 50.9  | 51.9  | 56.9  | 47.9  | 67.9  | 64.4  |
| 159.0 | 167.3 | 203.5 | 171.6 | 205.0 | 211.0 |
| 48.8  | 49.5  | 64.1  | 49.1  | 60.9  | 58.9  |
| 21.8  | 16.6  | 26.6  | 29.5  | 23.4  | 38.5  |
| 7.2   | 14.0  | 10.9  | 4.5   | 16.0  | 23.8  |
| 3.5   | 11.8  | 2.3   | 4.1   | 1.5   | 4.6   |
| 8.2   | 3.8   | 6.0   | 9.2   | 3.8   | 10.1  |
| 24.1  | 3.8   | 13.5  | 12.8  | 27.1  | 38.6  |
| 0.3   | 6.2   | 2.3   | 3.9   | 6.1   | 4.6   |
| 1.2   | 0.7   | 1.0   | 1.3   | 1.3   | 0.7   |
| 1.0   | 1.3   | 1.2   | 1.5   | 1.3   | 1.7   |
| 46.2  | 42.4  | 57.2  | 53.8  | 42.8  | 52.6  |
| 4.5   | 1.8   | 6.0   | 7.5   | 4.3   | 6.9   |
| 53.4  | 63.9  | 53.8  | 60.3  | 50.2  | 58.0  |
| 6.1   | 12.0  | 17.5  | 15.7  | 15.3  | 16.0  |
| 150.6 | 183.1 | 147.2 | 174.1 | 179.2 | 184.8 |
| 47.8  | 61.4  | 34.4  | 41.4  | 40.2  | 53.4  |
| 47.4  | 58.9  | 53.4  | 43.3  | 52.3  | 53.2  |
| 155.4 | 57.2  | 162.4 | 111.5 | 155.9 | 176.0 |
| 65.0  | 41.7  | 63.0  | 51.0  | 60.9  | 63.4  |
| 4.1   | 2.4   | 2.6   | 8.4   | 18.5  | 4.4   |
| 6.1   | 17.3  | 7.5   | 2.9   | 2.6   | 6.7   |
| 204.8 | 173.1 | 165.9 | 188.5 | 196.9 | 238.6 |
| 46.3  | 45.0  | 49.6  | 49.1  | 48.1  | 60.6  |
| 77.1  | 74.4  | 70.6  | 77.9  | 75.4  | 89.9  |
| 45.5  | 40.3  | 47.1  | 38.5  | 45.4  | 56.4  |
| 19.8  | 17.6  | 18.3  | 20.7  | 22.9  | 17.0  |
| 6.6   | 12.7  | 2.1   | 10.7  | 1.2   | 6.3   |
| 1.8   | 1.9   | 9.1   | 5.6   | 8.9   | 3.8   |
| 4.3   | 7.1   | 2.9   | 3.4   | 4.2   | 2.6   |
| 0.9   | 1.1   | 2.5   | 0.8   | 1.3   | 0.8   |
| 8.1   | 10.8  | 12.7  | 17.8  | 17.9  | 12.7  |
| 68.1  | 87.4  | 76.4  | 82.2  | 81.6  | 70.9  |
| 24.1  | 16.6  | 8.4   | 17.7  | 18.7  | 21.7  |
| 9.0   | 0.9   | 2.7   | 11.7  | 5.7   | 7.6   |
| 9.3   | 1.1   | 3.7   | 3.7   | 9.2   | 7.8   |
| 17.6  | 14.0  | 14.3  | 14.7  | 23.8  | 23.2  |
| 54.7  | 31.8  | 71.1  | 48.9  | 50.9  | 53.9  |

|        |        |        |        |        |        |
|--------|--------|--------|--------|--------|--------|
| 1.9    | 2.6    | 3.3    | 1.6    | 2.0    | 6.3    |
| 14.3   | 11.9   | 11.5   | 9.2    | 8.6    | 17.1   |
| 83.8   | 71.2   | 81.9   | 77.6   | 86.7   | 99.5   |
| 4.8    | 1.3    | 0.9    | 1.3    | 2.7    | 1.0    |
| 101.8  | 76.0   | 88.1   | 95.6   | 96.5   | 119.3  |
| 36.8   | 28.3   | 37.3   | 46.4   | 40.3   | 57.0   |
| 56.6   | 41.8   | 62.3   | 60.1   | 70.1   | 78.5   |
| 12.4   | 30.8   | 23.4   | 30.1   | 18.2   | 29.3   |
| 58.4   | 35.9   | 48.6   | 21.8   | 62.6   | 51.9   |
| 65.9   | 73.1   | 70.1   | 61.4   | 86.9   | 95.8   |
| 1414.1 | 1229.1 | 1222.6 | 1502.9 | 1535.5 | 1685.5 |
| 6.1    | 6.1    | 2.3    | 9.0    | 4.9    | 9.4    |
| 256.4  | 230.8  | 304.2  | 322.3  | 378.1  | 391.0  |
| 18.5   | 24.0   | 12.3   | 24.5   | 25.8   | 20.3   |
| 44.6   | 36.1   | 37.8   | 31.7   | 46.1   | 61.2   |
| 2.0    | 1.6    | 1.2    | 1.1    | 2.2    | 1.3    |
| 61.0   | 53.9   | 70.9   | 77.0   | 74.7   | 79.4   |
| 14.5   | 11.3   | 11.1   | 4.1    | 16.0   | 4.3    |
| 122.1  | 97.1   | 98.7   | 91.1   | 135.5  | 123.6  |
| 17.8   | 32.5   | 20.7   | 32.9   | 13.0   | 28.6   |
| 23.8   | 31.6   | 29.5   | 23.3   | 38.0   | 40.3   |
| 22.4   | 19.8   | 17.7   | 24.1   | 20.7   | 27.5   |
| 33.9   | 37.8   | 35.6   | 38.3   | 41.4   | 49.6   |
| 2339.2 | 2571.2 | 2295.0 | 2301.0 | 2671.4 | 2778.0 |
| 82.9   | 99.4   | 98.0   | 101.3  | 94.1   | 117.1  |
| 1.4    | 0.5    | 6.1    | 0.9    | 0.6    | 1.1    |
| 349.6  | 251.9  | 326.1  | 336.1  | 340.5  | 381.3  |
| 5.4    | 10.9   | 12.6   | 9.2    | 8.4    | 4.2    |
| 1490.2 | 1125.2 | 1382.4 | 1374.1 | 1539.6 | 1630.9 |
| 31.1   | 23.9   | 24.0   | 26.8   | 16.9   | 30.9   |
| 1.9    | 0.3    | 3.7    | 1.2    | 4.4    | 3.1    |
| 0.8    | 0.5    | 3.2    | 0.7    | 0.7    | 1.5    |
| 2.2    | 0.8    | 2.0    | 7.1    | 9.2    | 14.4   |
| 33.4   | 25.0   | 46.0   | 30.7   | 36.8   | 45.1   |
| 10.9   | 3.5    | 10.7   | 9.4    | 8.4    | 7.2    |
| 12.4   | 10.7   | 13.0   | 7.7    | 4.0    | 6.7    |
| 23.5   | 41.8   | 32.0   | 17.4   | 28.0   | 27.1   |
| 210.4  | 203.4  | 206.8  | 206.0  | 211.2  | 245.9  |
| 69.4   | 62.7   | 51.6   | 60.8   | 47.9   | 50.6   |
| 36.1   | 28.1   | 28.3   | 29.1   | 32.6   | 31.3   |
| 2.1    | 1.9    | 2.2    | 1.4    | 1.5    | 2.1    |
| 1.0    | 1.2    | 0.6    | 0.8    | 1.1    | 0.6    |
| 29.1   | 23.1   | 21.4   | 28.9   | 24.8   | 37.6   |
| 42.1   | 24.6   | 46.6   | 46.2   | 52.0   | 53.7   |
| 44.4   | 31.4   | 47.7   | 42.7   | 63.9   | 63.0   |
| 440.9  | 375.4  | 530.3  | 558.7  | 577.3  | 590.8  |
| 14.5   | 9.6    | 12.0   | 2.9    | 12.7   | 8.0    |
| 519.3  | 379.0  | 433.1  | 477.9  | 507.6  | 593.7  |
| 13.4   | 20.4   | 14.4   | 16.8   | 20.9   | 12.9   |
| 514.6  | 526.7  | 478.4  | 520.2  | 552.4  | 685.3  |
| 6.2    | 0.3    | 3.4    | 2.6    | 4.0    | 5.8    |
| 147.0  | 133.2  | 133.8  | 140.7  | 142.3  | 136.7  |
| 179.0  | 166.1  | 187.3  | 211.0  | 209.3  | 228.5  |

|       |       |       |       |       |        |
|-------|-------|-------|-------|-------|--------|
| 2.1   | 5.3   | 4.8   | 7.2   | 0.5   | 9.2    |
| 5.7   | 3.8   | 8.8   | 2.3   | 5.0   | 6.9    |
| 25.0  | 29.4  | 36.2  | 22.0  | 23.3  | 34.8   |
| 2.0   | 1.6   | 16.7  | 9.4   | 4.5   | 3.5    |
| 53.7  | 38.2  | 64.1  | 81.2  | 52.0  | 92.4   |
| 74.5  | 69.4  | 65.0  | 80.4  | 83.3  | 82.8   |
| 16.2  | 8.1   | 4.7   | 9.7   | 15.5  | 13.0   |
| 763.7 | 674.7 | 716.7 | 784.6 | 866.7 | 864.5  |
| 12.3  | 14.1  | 19.1  | 11.4  | 11.8  | 18.9   |
| 13.3  | 18.3  | 25.9  | 18.5  | 21.7  | 14.4   |
| 72.3  | 46.7  | 67.8  | 68.1  | 69.9  | 77.0   |
| 2.3   | 3.0   | 5.9   | 8.5   | 5.2   | 2.2    |
| 813.4 | 792.1 | 786.3 | 781.9 | 981.2 | 1158.7 |
| 1.5   | 1.7   | 9.1   | 1.2   | 1.7   | 3.7    |
| 10.3  | 5.9   | 15.0  | 11.7  | 9.2   | 5.8    |
| 3.9   | 5.7   | 1.5   | 3.8   | 11.0  | 10.4   |
| 11.6  | 12.1  | 20.2  | 10.8  | 10.5  | 16.2   |
| 79.3  | 64.8  | 77.1  | 83.6  | 77.6  | 77.4   |
| 2.3   | 1.4   | 5.8   | 1.5   | 2.7   | 1.0    |
| 17.8  | 13.0  | 8.3   | 9.4   | 14.5  | 4.7    |
| 6.2   | 5.3   | 9.6   | 6.7   | 15.3  | 11.8   |
| 1.1   | 3.5   | 5.4   | 2.5   | 2.2   | 5.3    |
| 0.4   | 0.5   | 1.8   | 2.9   | 2.1   | 3.2    |
| 4.1   | 1.3   | 1.0   | 3.9   | 1.5   | 1.5    |
| 4.6   | 5.5   | 6.3   | 8.8   | 4.5   | 6.1    |
| 15.7  | 16.8  | 9.8   | 13.5  | 14.1  | 16.8   |
| 77.4  | 69.9  | 70.1  | 91.3  | 89.2  | 86.5   |
| 14.3  | 1.5   | 20.6  | 8.7   | 11.5  | 7.6    |
| 21.6  | 19.3  | 18.5  | 18.6  | 21.8  | 22.5   |
| 3.4   | 12.1  | 9.1   | 9.5   | 4.6   | 11.2   |
| 1.7   | 1.5   | 1.2   | 0.8   | 2.1   | 2.2    |
| 6.1   | 3.5   | 3.3   | 2.6   | 1.0   | 2.2    |
| 30.7  | 27.9  | 28.9  | 26.6  | 25.9  | 39.6   |
| 11.7  | 19.3  | 13.9  | 14.4  | 19.9  | 20.7   |
| 27.8  | 28.1  | 32.2  | 40.3  | 33.3  | 31.8   |
| 34.8  | 44.0  | 31.2  | 34.1  | 36.3  | 39.5   |
| 38.9  | 32.9  | 35.2  | 37.9  | 47.1  | 45.5   |
| 20.8  | 27.6  | 11.9  | 17.9  | 16.6  | 22.3   |
| 1.6   | 1.7   | 1.3   | 1.3   | 2.5   | 3.2    |
| 4.5   | 5.0   | 6.1   | 11.5  | 7.5   | 18.5   |
| 310.6 | 247.1 | 272.7 | 315.6 | 324.1 | 403.9  |
| 51.8  | 49.1  | 57.3  | 60.1  | 62.5  | 53.3   |
| 387.8 | 321.6 | 372.8 | 408.0 | 401.1 | 468.3  |
| 2.8   | 1.6   | 2.6   | 2.8   | 2.7   | 3.2    |
| 13.9  | 11.5  | 7.2   | 11.5  | 4.0   | 12.5   |
| 5.5   | 6.6   | 6.9   | 8.3   | 17.5  | 8.0    |
| 8.2   | 1.0   | 5.3   | 1.2   | 10.7  | 4.9    |
| 108.3 | 92.7  | 120.6 | 128.3 | 117.5 | 136.7  |
| 16.0  | 24.4  | 19.8  | 19.8  | 26.2  | 27.2   |
| 1.3   | 1.1   | 1.9   | 4.3   | 5.1   | 1.7    |
| 65.5  | 52.0  | 66.6  | 70.3  | 73.4  | 81.3   |
| 16.6  | 11.8  | 25.5  | 19.4  | 22.6  | 20.3   |
| 16.7  | 1.1   | 10.1  | 7.0   | 15.7  | 14.2   |



|       |        |       |        |       |       |
|-------|--------|-------|--------|-------|-------|
| 158.9 | 132.1  | 185.4 | 198.6  | 195.2 | 187.0 |
| 39.0  | 41.2   | 32.2  | 35.2   | 35.6  | 47.1  |
| 9.5   | 17.5   | 4.4   | 6.5    | 6.6   | 4.1   |
| 94.1  | 101.0  | 97.5  | 136.7  | 98.8  | 145.9 |
| 15.2  | 19.2   | 12.0  | 21.8   | 10.4  | 14.0  |
| 73.3  | 71.9   | 65.6  | 67.9   | 77.8  | 104.1 |
| 3.6   | 2.1    | 7.0   | 1.9    | 5.1   | 3.3   |
| 817.8 | 1114.3 | 737.9 | 1007.9 | 868.5 | 981.3 |
| 2.3   | 2.6    | 8.1   | 1.0    | 7.2   | 2.4   |
| 12.2  | 14.6   | 14.8  | 9.2    | 9.8   | 22.2  |
| 19.5  | 25.0   | 15.0  | 17.7   | 23.1  | 27.3  |
| 11.0  | 17.2   | 5.0   | 7.7    | 8.9   | 11.5  |
| 4.1   | 14.9   | 5.1   | 23.0   | 14.4  | 7.0   |
| 61.4  | 57.3   | 62.8  | 73.2   | 67.7  | 90.7  |
| 13.2  | 11.1   | 16.0  | 7.3    | 9.0   | 12.1  |
| 251.8 | 230.2  | 295.0 | 281.1  | 337.8 | 313.5 |
| 3.4   | 2.5    | 3.4   | 6.5    | 4.3   | 5.6   |
| 63.8  | 51.1   | 47.3  | 75.5   | 57.9  | 75.1  |
| 18.8  | 18.7   | 20.3  | 11.0   | 14.7  | 18.1  |
| 55.2  | 39.8   | 56.9  | 57.2   | 69.3  | 66.9  |
| 177.2 | 145.0  | 174.7 | 202.9  | 217.5 | 228.2 |
| 49.4  | 87.8   | 60.8  | 55.1   | 47.3  | 62.3  |
| 7.8   | 13.3   | 8.6   | 11.3   | 17.0  | 4.2   |
| 63.2  | 63.0   | 63.3  | 65.6   | 63.8  | 61.9  |
| 2.3   | 2.5    | 1.5   | 1.1    | 1.8   | 1.6   |
| 24.1  | 46.4   | 38.2  | 30.0   | 35.0  | 51.9  |
| 9.5   | 10.1   | 5.0   | 7.4    | 12.5  | 10.9  |
| 124.3 | 87.7   | 130.9 | 110.4  | 149.4 | 127.0 |
| 8.0   | 6.0    | 10.4  | 7.0    | 7.5   | 6.6   |
| 4.6   | 1.5    | 2.3   | 5.3    | 4.5   | 2.6   |
| 5.3   | 13.0   | 14.4  | 9.2    | 20.0  | 20.3  |
| 89.3  | 62.4   | 86.6  | 70.1   | 81.1  | 104.1 |
| 28.7  | 21.8   | 20.3  | 28.3   | 29.3  | 25.2  |
| 22.2  | 12.9   | 32.2  | 24.7   | 24.8  | 24.8  |
| 37.8  | 32.4   | 39.4  | 35.3   | 38.6  | 31.1  |
| 434.0 | 422.0  | 407.8 | 485.0  | 554.3 | 653.9 |
| 166.3 | 110.2  | 176.7 | 134.6  | 171.3 | 223.7 |
| 8.2   | 2.0    | 6.1   | 11.4   | 10.4  | 8.4   |
| 535.4 | 489.3  | 651.4 | 539.3  | 731.3 | 700.1 |
| 1.9   | 9.8    | 2.3   | 2.8    | 1.5   | 1.3   |
| 2.5   | 1.5    | 5.9   | 1.5    | 0.3   | 5.1   |
| 163.9 | 132.2  | 125.2 | 173.9  | 135.4 | 180.6 |
| 11.7  | 14.0   | 4.9   | 6.6    | 13.9  | 5.5   |
| 68.5  | 53.4   | 56.7  | 98.0   | 81.0  | 90.4  |
| 0.7   | 3.8    | 0.6   | 4.9    | 3.0   | 4.7   |
| 7.0   | 8.8    | 5.9   | 14.8   | 12.1  | 8.3   |
| 24.6  | 21.5   | 19.1  | 22.7   | 29.0  | 26.6  |
| 1.5   | 8.3    | 3.6   | 5.5    | 6.0   | 6.1   |
| 11.4  | 3.4    | 6.2   | 10.7   | 15.0  | 13.0  |
| 763.1 | 723.7  | 816.8 | 802.9  | 979.6 | 938.2 |
| 1.3   | 1.0    | 4.1   | 1.1    | 1.4   | 1.7   |
| 6.2   | 1.2    | 7.0   | 4.9    | 1.0   | 1.2   |
| 60.9  | 26.8   | 30.5  | 79.2   | 88.2  | 128.0 |

|       |       |       |       |       |       |
|-------|-------|-------|-------|-------|-------|
| 5.3   | 9.2   | 6.8   | 16.9  | 4.5   | 18.9  |
| 1.0   | 12.7  | 4.3   | 1.0   | 8.3   | 1.4   |
| 27.5  | 31.2  | 31.2  | 22.5  | 28.5  | 35.3  |
| 1.9   | 2.3   | 2.0   | 1.5   | 1.4   | 1.2   |
| 218.0 | 242.6 | 244.4 | 302.1 | 241.7 | 267.5 |
| 66.6  | 78.7  | 56.3  | 60.3  | 68.1  | 73.0  |
| 730.2 | 686.5 | 731.9 | 759.4 | 830.9 | 980.6 |
| 126.5 | 144.1 | 129.4 | 143.1 | 150.2 | 147.9 |
| 135.9 | 110.4 | 151.6 | 150.4 | 154.5 | 208.9 |
| 317.3 | 289.3 | 303.8 | 310.3 | 393.7 | 378.7 |
| 3.8   | 9.9   | 5.1   | 4.7   | 5.1   | 10.8  |
| 4.4   | 13.6  | 9.6   | 7.1   | 9.6   | 12.2  |
| 104.0 | 97.4  | 108.1 | 108.5 | 121.5 | 137.4 |
| 214.9 | 139.1 | 219.6 | 193.9 | 229.6 | 224.2 |
| 15.5  | 39.1  | 28.2  | 16.1  | 18.1  | 35.8  |
| 28.2  | 35.7  | 26.5  | 25.5  | 29.6  | 42.9  |
| 4.2   | 5.5   | 6.2   | 4.9   | 6.7   | 5.6   |
| 8.9   | 22.6  | 12.5  | 10.9  | 10.4  | 7.8   |
| 2.0   | 1.7   | 1.4   | 1.3   | 5.0   | 1.1   |
| 173.4 | 183.5 | 176.2 | 152.0 | 191.2 | 197.8 |
| 13.0  | 4.6   | 16.1  | 8.5   | 10.0  | 12.0  |
| 44.8  | 57.2  | 46.6  | 59.1  | 54.6  | 68.1  |
| 70.5  | 68.7  | 69.4  | 79.2  | 73.4  | 84.1  |
| 13.2  | 6.3   | 11.9  | 5.6   | 16.0  | 14.0  |
| 55.7  | 31.7  | 48.0  | 47.4  | 38.1  | 53.2  |
| 2.6   | 1.1   | 3.7   | 4.1   | 7.6   | 4.1   |
| 34.3  | 37.4  | 35.3  | 27.2  | 31.0  | 30.4  |
| 23.7  | 26.9  | 24.1  | 25.1  | 24.7  | 35.6  |
| 4.5   | 4.0   | 7.5   | 10.1  | 9.6   | 7.9   |
| 0.9   | 2.2   | 1.1   | 0.8   | 1.3   | 0.7   |
| 100.6 | 105.6 | 99.8  | 83.6  | 93.6  | 112.0 |
| 13.2  | 9.5   | 5.7   | 7.7   | 10.2  | 7.2   |
| 9.3   | 7.2   | 3.9   | 6.0   | 10.5  | 2.0   |
| 18.4  | 29.7  | 25.9  | 28.4  | 21.4  | 25.4  |
| 15.3  | 6.6   | 13.9  | 12.5  | 12.8  | 15.0  |
| 6.0   | 5.3   | 4.3   | 0.9   | 5.9   | 0.9   |
| 19.3  | 11.3  | 17.0  | 14.7  | 22.3  | 26.2  |
| 183.0 | 180.4 | 189.4 | 204.6 | 193.3 | 225.0 |
| 14.4  | 4.3   | 7.0   | 10.5  | 11.4  | 10.1  |
| 14.4  | 46.9  | 18.1  | 26.7  | 26.5  | 34.4  |
| 5.6   | 11.3  | 19.4  | 22.6  | 23.5  | 19.2  |
| 7.3   | 24.0  | 8.4   | 11.8  | 8.1   | 20.4  |
| 287.8 | 243.4 | 284.4 | 268.6 | 338.2 | 387.0 |
| 65.9  | 61.4  | 71.4  | 57.3  | 89.1  | 79.8  |
| 36.4  | 32.0  | 33.4  | 42.2  | 44.1  | 47.9  |
| 364.8 | 306.9 | 342.6 | 340.1 | 389.6 | 468.3 |
| 493.8 | 445.9 | 550.4 | 520.7 | 623.7 | 613.7 |
| 155.7 | 141.8 | 155.8 | 156.5 | 186.7 | 203.9 |
| 46.1  | 41.7  | 38.7  | 46.5  | 59.9  | 53.2  |
| 58.8  | 32.1  | 44.6  | 44.6  | 54.0  | 60.6  |
| 8.1   | 1.1   | 2.0   | 7.1   | 1.7   | 1.5   |
| 37.2  | 23.8  | 24.7  | 26.5  | 26.8  | 30.6  |
| 30.1  | 31.3  | 20.3  | 25.2  | 17.7  | 33.8  |

|       |       |       |       |       |       |
|-------|-------|-------|-------|-------|-------|
| 4.4   | 2.3   | 1.7   | 2.3   | 3.6   | 1.6   |
| 1.2   | 8.8   | 4.6   | 3.6   | 6.3   | 4.3   |
| 713.3 | 688.3 | 714.5 | 741.1 | 809.3 | 863.0 |
| 3.3   | 3.2   | 2.1   | 1.7   | 3.4   | 1.6   |
| 74.8  | 85.4  | 70.9  | 77.6  | 65.5  | 104.3 |
| 106.9 | 94.1  | 116.9 | 119.6 | 102.7 | 125.1 |
| 7.6   | 15.3  | 7.9   | 11.0  | 7.8   | 17.8  |
| 107.3 | 94.2  | 118.6 | 118.1 | 133.6 | 144.9 |
| 56.0  | 54.2  | 44.6  | 42.9  | 62.8  | 68.9  |
| 105.5 | 90.4  | 102.1 | 138.0 | 114.8 | 128.5 |
| 25.0  | 7.1   | 24.0  | 14.7  | 15.5  | 7.2   |
| 69.5  | 62.3  | 74.4  | 63.4  | 82.4  | 84.4  |
| 163.9 | 170.1 | 180.1 | 188.4 | 198.8 | 208.1 |
| 1.9   | 1.9   | 2.9   | 2.4   | 6.4   | 15.5  |
| 69.6  | 50.5  | 77.7  | 73.9  | 79.3  | 72.2  |
| 332.2 | 285.3 | 335.2 | 360.8 | 408.1 | 409.2 |
| 99.5  | 68.0  | 102.6 | 76.3  | 120.3 | 114.5 |
| 4.5   | 19.6  | 12.8  | 8.1   | 16.1  | 19.2  |
| 61.9  | 48.4  | 60.6  | 62.9  | 64.5  | 80.0  |
| 45.9  | 44.4  | 48.2  | 40.7  | 58.0  | 53.9  |
| 84.6  | 93.5  | 60.9  | 113.7 | 70.2  | 114.1 |
| 5.2   | 11.6  | 12.5  | 12.4  | 3.4   | 9.2   |
| 4.1   | 1.0   | 9.4   | 2.7   | 4.0   | 5.8   |
| 7.1   | 0.4   | 1.2   | 3.0   | 3.6   | 3.5   |
| 1.7   | 13.4  | 7.3   | 4.2   | 4.4   | 15.3  |
| 2.1   | 2.4   | 2.4   | 7.9   | 2.1   | 2.0   |
| 62.6  | 72.4  | 56.5  | 75.5  | 66.5  | 56.6  |
| 13.5  | 12.3  | 4.4   | 7.4   | 8.1   | 9.2   |
| 2.9   | 2.8   | 2.3   | 2.8   | 2.9   | 5.0   |
| 17.3  | 36.8  | 32.9  | 28.1  | 31.6  | 35.9  |
| 3.5   | 6.5   | 0.5   | 0.8   | 1.3   | 0.5   |
| 25.0  | 18.9  | 22.5  | 25.0  | 10.2  | 20.0  |
| 36.6  | 30.6  | 32.2  | 43.7  | 43.7  | 52.2  |
| 2.3   | 1.2   | 9.7   | 2.3   | 3.6   | 1.8   |
| 3.7   | 2.8   | 1.7   | 7.0   | 10.9  | 8.3   |
| 1.6   | 5.1   | 4.2   | 2.6   | 2.8   | 2.5   |
| 6.6   | 25.5  | 4.2   | 6.7   | 4.9   | 15.4  |
| 7.4   | 20.1  | 14.9  | 6.3   | 9.4   | 14.0  |
| 4.9   | 3.3   | 3.8   | 4.1   | 6.7   | 3.6   |
| 173.6 | 221.2 | 256.5 | 223.0 | 260.0 | 242.8 |
| 4.6   | 8.2   | 3.2   | 9.5   | 2.1   | 2.3   |
| 19.5  | 27.8  | 20.2  | 26.8  | 18.2  | 24.7  |
| 6.4   | 14.2  | 7.0   | 3.5   | 12.7  | 11.9  |
| 2.6   | 1.5   | 3.0   | 4.5   | 4.1   | 1.9   |
| 19.5  | 15.3  | 5.1   | 22.2  | 20.5  | 13.5  |
| 6.1   | 11.2  | 9.3   | 6.3   | 5.0   | 10.7  |
| 35.9  | 40.8  | 39.9  | 52.3  | 46.9  | 49.5  |
| 7.2   | 6.4   | 12.3  | 8.0   | 2.6   | 6.7   |
| 0.6   | 3.8   | 1.1   | 1.3   | 0.5   | 1.3   |
| 360.4 | 300.8 | 463.2 | 458.6 | 462.4 | 481.9 |
| 15.1  | 6.5   | 4.4   | 8.5   | 6.4   | 5.0   |
| 21.4  | 25.0  | 15.4  | 10.1  | 17.6  | 29.6  |
| 48.9  | 40.1  | 50.1  | 59.9  | 72.7  | 64.5  |

|       |       |       |       |       |       |
|-------|-------|-------|-------|-------|-------|
| 55.6  | 62.4  | 63.4  | 71.7  | 71.1  | 73.7  |
| 12.2  | 14.5  | 10.0  | 5.3   | 13.5  | 14.1  |
| 52.1  | 33.0  | 39.6  | 47.9  | 63.3  | 70.4  |
| 3.3   | 2.3   | 9.2   | 3.7   | 6.2   | 12.7  |
| 3.5   | 6.4   | 3.9   | 2.6   | 3.8   | 2.5   |
| 3.1   | 11.4  | 17.7  | 13.2  | 8.8   | 7.8   |
| 365.8 | 290.6 | 324.2 | 325.8 | 374.8 | 415.2 |
| 2.5   | 8.0   | 3.3   | 7.8   | 10.5  | 10.0  |
| 15.0  | 27.7  | 7.4   | 4.9   | 12.6  | 10.6  |
| 11.7  | 4.4   | 16.0  | 6.6   | 9.1   | 6.9   |
| 3.3   | 1.6   | 13.2  | 2.0   | 3.6   | 9.1   |
| 4.0   | 9.9   | 7.0   | 11.0  | 18.0  | 5.7   |
| 63.9  | 79.6  | 80.1  | 79.0  | 90.6  | 105.4 |
| 1.2   | 1.1   | 1.5   | 1.1   | 1.2   | 1.9   |
| 1.2   | 5.2   | 2.9   | 7.6   | 5.6   | 1.5   |
| 28.5  | 6.8   | 22.1  | 28.3  | 23.8  | 29.8  |
| 24.3  | 26.3  | 31.5  | 25.9  | 26.7  | 37.0  |
| 5.5   | 0.8   | 1.9   | 11.7  | 9.5   | 9.0   |
| 23.3  | 24.9  | 22.8  | 25.4  | 39.5  | 44.8  |
| 1.9   | 0.9   | 1.5   | 2.3   | 1.3   | 3.2   |
| 102.9 | 84.4  | 88.3  | 102.3 | 98.2  | 69.6  |
| 9.7   | 13.6  | 25.3  | 8.9   | 16.5  | 15.9  |
| 32.2  | 21.7  | 26.2  | 18.7  | 20.3  | 27.8  |
| 13.2  | 26.7  | 3.8   | 1.9   | 5.7   | 12.4  |
| 33.5  | 38.4  | 37.4  | 10.1  | 15.3  | 10.4  |
| 11.1  | 11.2  | 16.9  | 17.9  | 18.6  | 17.1  |
| 4.9   | 0.5   | 8.8   | 5.4   | 4.2   | 1.0   |
| 152.5 | 91.8  | 150.6 | 137.0 | 169.5 | 172.6 |
| 25.2  | 8.7   | 22.0  | 12.0  | 19.5  | 28.8  |
| 6.2   | 10.1  | 10.4  | 6.5   | 9.9   | 10.8  |
| 182.2 | 190.9 | 217.4 | 202.8 | 195.5 | 269.1 |
| 3.1   | 4.2   | 4.9   | 4.9   | 7.4   | 3.6   |
| 7.0   | 8.3   | 12.1  | 10.2  | 4.9   | 5.3   |
| 17.7  | 31.9  | 25.6  | 18.3  | 7.2   | 18.4  |
| 10.4  | 21.3  | 15.4  | 24.7  | 15.8  | 10.0  |
| 14.7  | 16.8  | 24.6  | 21.9  | 13.4  | 22.8  |
| 53.3  | 49.6  | 67.1  | 63.0  | 69.0  | 52.3  |
| 9.9   | 14.9  | 10.9  | 16.6  | 17.6  | 15.9  |
| 6.6   | 8.6   | 4.2   | 8.6   | 1.2   | 7.0   |
| 10.7  | 10.4  | 18.2  | 21.2  | 12.0  | 22.8  |
| 25.3  | 55.5  | 41.3  | 28.9  | 50.5  | 25.2  |
| 15.8  | 13.7  | 10.7  | 4.1   | 4.5   | 4.3   |
| 8.7   | 9.3   | 8.2   | 33.1  | 12.2  | 22.8  |
| 247.3 | 256.4 | 240.5 | 261.7 | 284.3 | 303.4 |
| 13.9  | 13.2  | 7.6   | 15.1  | 11.0  | 16.3  |
| 3.7   | 6.6   | 6.9   | 6.6   | 9.7   | 5.8   |
| 2.3   | 0.1   | 4.7   | 2.6   | 5.3   | 3.2   |
| 42.8  | 66.9  | 31.6  | 36.3  | 23.8  | 32.8  |
| 10.2  | 5.1   | 1.8   | 7.8   | 6.5   | 2.9   |
| 3.3   | 6.2   | 1.9   | 7.7   | 7.3   | 3.8   |
| 100.3 | 90.3  | 88.7  | 82.6  | 120.8 | 126.6 |
| 42.6  | 28.9  | 47.6  | 50.9  | 42.5  | 45.4  |
| 2.9   | 3.0   | 8.0   | 2.3   | 4.9   | 5.2   |

|       |       |       |       |       |       |
|-------|-------|-------|-------|-------|-------|
| 43.3  | 40.2  | 62.5  | 51.1  | 61.1  | 70.6  |
| 83.5  | 98.9  | 76.2  | 89.1  | 98.1  | 96.0  |
| 22.6  | 49.5  | 43.8  | 34.9  | 38.3  | 43.2  |
| 325.3 | 273.6 | 335.2 | 299.2 | 410.0 | 360.8 |
| 4.7   | 0.4   | 5.3   | 4.3   | 7.5   | 1.7   |
| 19.5  | 12.3  | 31.3  | 21.1  | 37.2  | 45.2  |
| 72.5  | 59.6  | 71.9  | 81.7  | 65.8  | 69.7  |
| 1.4   | 1.0   | 1.1   | 0.7   | 0.8   | 2.2   |
| 21.3  | 8.4   | 12.0  | 16.3  | 14.4  | 18.7  |
| 0.8   | 0.9   | 2.7   | 6.1   | 4.1   | 0.8   |
| 10.4  | 3.3   | 18.9  | 7.3   | 11.9  | 14.6  |
| 126.0 | 149.3 | 144.7 | 138.1 | 147.0 | 152.0 |
| 8.0   | 9.1   | 7.4   | 7.4   | 4.5   | 9.6   |
| 5.8   | 9.3   | 7.8   | 8.3   | 10.3  | 13.2  |
| 15.2  | 8.7   | 16.5  | 12.2  | 12.3  | 15.7  |
| 203.7 | 184.2 | 220.4 | 212.0 | 253.5 | 253.9 |
| 243.8 | 218.6 | 239.8 | 219.8 | 266.6 | 291.5 |
| 2.8   | 22.1  | 2.0   | 3.2   | 14.7  | 15.0  |
| 24.6  | 37.5  | 33.5  | 32.2  | 39.3  | 38.7  |
| 74.7  | 80.6  | 86.3  | 87.2  | 105.3 | 94.1  |
| 11.0  | 14.1  | 20.2  | 17.7  | 19.1  | 14.2  |
| 0.7   | 1.1   | 8.5   | 1.5   | 2.5   | 1.5   |
| 15.1  | 18.0  | 17.9  | 14.7  | 8.0   | 13.9  |
| 28.8  | 69.3  | 44.4  | 32.4  | 44.4  | 38.4  |
| 6.4   | 8.6   | 0.9   | 5.0   | 2.8   | 8.4   |
| 1.8   | 1.4   | 2.4   | 1.6   | 2.2   | 2.1   |
| 11.9  | 6.7   | 12.0  | 11.8  | 9.7   | 16.1  |
| 23.9  | 31.7  | 17.8  | 21.8  | 7.6   | 13.0  |
| 8.5   | 15.1  | 8.5   | 13.5  | 4.7   | 11.0  |
| 6.6   | 8.3   | 5.9   | 3.9   | 6.0   | 6.1   |
| 7.2   | 7.0   | 1.8   | 1.0   | 12.8  | 10.4  |
| 2.0   | 23.0  | 1.2   | 5.2   | 6.8   | 1.6   |
| 0.9   | 0.5   | 0.5   | 1.0   | 0.5   | 0.6   |
| 1.0   | 1.1   | 1.1   | 1.2   | 1.0   | 1.6   |
| 143.1 | 135.7 | 127.1 | 143.2 | 147.0 | 165.7 |
| 120.3 | 75.6  | 105.4 | 92.9  | 134.9 | 138.5 |
| 9.9   | 2.2   | 0.9   | 6.0   | 1.4   | 0.9   |
| 8.2   | 2.0   | 7.8   | 4.9   | 3.3   | 8.1   |
| 10.3  | 12.4  | 9.7   | 8.0   | 5.3   | 10.9  |
| 72.8  | 32.4  | 49.6  | 48.2  | 67.4  | 72.7  |
| 7.9   | 0.9   | 2.9   | 1.8   | 7.0   | 13.7  |
| 5.1   | 5.5   | 7.1   | 4.5   | 0.5   | 3.4   |
| 1.0   | 10.4  | 1.8   | 6.6   | 1.0   | 1.9   |
| 82.5  | 61.2  | 68.4  | 72.4  | 52.1  | 81.2  |
| 3.7   | 18.7  | 2.9   | 3.2   | 2.9   | 6.7   |
| 36.9  | 34.2  | 44.6  | 37.9  | 39.4  | 55.1  |
| 23.6  | 29.1  | 31.7  | 32.1  | 29.9  | 30.0  |
| 15.2  | 25.4  | 22.0  | 19.7  | 22.9  | 31.9  |
| 22.5  | 14.7  | 19.9  | 14.6  | 18.7  | 16.1  |
| 7.5   | 5.6   | 1.7   | 4.1   | 7.5   | 3.9   |
| 3.4   | 6.6   | 3.4   | 2.1   | 5.3   | 3.7   |
| 0.9   | 1.3   | 3.4   | 1.5   | 1.7   | 1.8   |
| 26.6  | 29.1  | 17.6  | 18.2  | 26.4  | 28.2  |

|       |       |       |       |       |       |
|-------|-------|-------|-------|-------|-------|
| 9.0   | 7.3   | 6.8   | 7.5   | 3.6   | 2.9   |
| 13.1  | 7.5   | 14.8  | 9.6   | 18.4  | 9.3   |
| 15.3  | 20.6  | 14.2  | 20.4  | 16.9  | 26.3  |
| 168.2 | 147.3 | 170.7 | 182.4 | 163.4 | 202.1 |
| 1.8   | 1.3   | 2.1   | 7.2   | 8.0   | 1.7   |
| 11.3  | 6.5   | 7.2   | 3.0   | 2.5   | 8.4   |
| 9.1   | 7.0   | 25.3  | 18.1  | 17.7  | 26.2  |
| 7.4   | 4.7   | 8.7   | 6.7   | 10.1  | 3.9   |
| 2.5   | 1.9   | 3.4   | 6.6   | 2.2   | 3.1   |
| 10.5  | 7.8   | 6.3   | 2.6   | 2.4   | 10.7  |
| 3.5   | 9.6   | 5.7   | 4.8   | 5.0   | 9.1   |
| 10.3  | 6.2   | 10.7  | 7.1   | 15.5  | 15.3  |
| 227.3 | 228.9 | 252.1 | 256.7 | 286.8 | 273.3 |
| 0.7   | 1.0   | 1.2   | 0.8   | 5.3   | 2.7   |
| 131.4 | 106.7 | 137.6 | 130.4 | 142.3 | 138.7 |
| 3.0   | 1.4   | 3.1   | 5.3   | 2.2   | 2.2   |
| 23.8  | 24.9  | 41.1  | 16.9  | 38.5  | 32.3  |
| 4.7   | 4.1   | 3.3   | 3.6   | 12.3  | 3.5   |
| 2.3   | 1.2   | 2.6   | 2.6   | 2.9   | 2.9   |
| 4.4   | 4.1   | 2.5   | 4.2   | 3.5   | 5.3   |
| 153.4 | 99.1  | 171.1 | 185.4 | 201.0 | 216.6 |
| 15.8  | 8.5   | 12.0  | 12.3  | 25.9  | 12.4  |
| 2.9   | 3.6   | 3.9   | 3.4   | 3.0   | 4.6   |
| 20.6  | 18.6  | 17.7  | 18.3  | 13.3  | 21.6  |
| 2.0   | 11.5  | 3.6   | 17.3  | 5.0   | 9.3   |
| 15.1  | 3.7   | 9.2   | 7.7   | 6.7   | 10.7  |
| 2.3   | 4.9   | 1.7   | 4.4   | 8.5   | 11.6  |
| 10.2  | 9.5   | 5.0   | 10.6  | 5.6   | 7.6   |
| 3.0   | 10.2  | 2.7   | 5.2   | 4.8   | 8.7   |
| 16.2  | 7.0   | 22.0  | 19.4  | 19.3  | 13.0  |
| 1.3   | 6.4   | 3.1   | 4.1   | 2.0   | 3.4   |
| 31.6  | 31.4  | 35.1  | 45.3  | 30.8  | 43.7  |
| 1.8   | 1.5   | 2.3   | 1.6   | 1.1   | 1.7   |
| 12.1  | 8.3   | 36.5  | 15.7  | 15.2  | 15.8  |
| 8.9   | 14.9  | 17.2  | 17.1  | 14.5  | 2.1   |
| 6.1   | 3.2   | 9.7   | 7.1   | 5.7   | 3.9   |
| 70.0  | 55.6  | 68.1  | 81.3  | 67.5  | 82.7  |
| 24.5  | 21.1  | 27.4  | 26.7  | 23.4  | 34.7  |
| 46.4  | 32.8  | 40.6  | 41.1  | 63.6  | 44.6  |
| 100.6 | 99.1  | 90.6  | 97.6  | 103.6 | 109.0 |
| 556.9 | 436.6 | 595.9 | 599.3 | 674.3 | 780.8 |
| 29.3  | 24.0  | 17.1  | 19.2  | 23.7  | 19.8  |
| 0.9   | 1.2   | 2.0   | 1.9   | 2.3   | 1.3   |
| 6.5   | 2.0   | 3.7   | 1.8   | 4.1   | 9.5   |
| 10.2  | 14.0  | 3.1   | 3.8   | 11.8  | 15.4  |
| 1.3   | 6.8   | 9.0   | 12.2  | 9.8   | 13.0  |
| 22.2  | 13.4  | 17.6  | 9.5   | 9.0   | 15.6  |
| 101.4 | 88.7  | 105.9 | 118.3 | 133.2 | 152.7 |
| 23.5  | 26.3  | 12.5  | 22.8  | 21.8  | 29.0  |
| 10.5  | 5.4   | 10.9  | 13.3  | 16.0  | 17.8  |
| 5.5   | 3.4   | 2.9   | 3.6   | 2.8   | 4.1   |
| 9.5   | 2.0   | 4.4   | 8.9   | 5.3   | 6.8   |
| 5.9   | 5.8   | 3.8   | 16.4  | 9.9   | 9.2   |

|        |        |        |        |        |        |
|--------|--------|--------|--------|--------|--------|
| 11.4   | 7.9    | 12.0   | 14.6   | 13.7   | 12.8   |
| 20.6   | 10.3   | 10.2   | 15.6   | 16.1   | 12.5   |
| 10.6   | 1.5    | 2.9    | 8.1    | 7.0    | 3.0    |
| 6.5    | 1.4    | 5.3    | 1.9    | 5.4    | 6.0    |
| 10.2   | 1.4    | 6.0    | 5.6    | 9.9    | 9.9    |
| 19.4   | 22.4   | 21.8   | 19.1   | 18.0   | 27.3   |
| 9.6    | 2.7    | 17.6   | 25.5   | 28.7   | 7.1    |
| 32.3   | 49.1   | 45.1   | 48.9   | 11.7   | 67.5   |
| 148.2  | 134.9  | 131.5  | 163.6  | 158.8  | 164.2  |
| 17.0   | 27.0   | 11.9   | 22.7   | 21.9   | 26.8   |
| 2.7    | 8.9    | 3.9    | 6.1    | 3.4    | 4.7    |
| 3.9    | 16.4   | 8.9    | 9.8    | 6.5    | 7.9    |
| 44.7   | 53.6   | 66.6   | 49.2   | 71.0   | 77.8   |
| 10.5   | 17.8   | 12.2   | 8.9    | 6.0    | 6.1    |
| 32.8   | 13.0   | 25.0   | 30.0   | 27.1   | 34.8   |
| 73.9   | 92.8   | 64.7   | 86.5   | 92.8   | 101.6  |
| 18.7   | 23.2   | 22.8   | 33.9   | 23.4   | 30.0   |
| 17.3   | 36.4   | 18.9   | 16.6   | 14.2   | 15.9   |
| 36.1   | 4.2    | 24.0   | 37.9   | 33.1   | 43.4   |
| 1462.3 | 1301.1 | 1626.1 | 1709.9 | 1768.8 | 1883.9 |
| 1.8    | 1.5    | 2.7    | 2.1    | 2.4    | 1.2    |
| 1.3    | 1.5    | 4.4    | 2.7    | 2.6    | 2.6    |
| 6.7    | 1.6    | 2.6    | 3.0    | 2.0    | 13.2   |
| 12.3   | 12.4   | 10.3   | 10.3   | 12.8   | 10.7   |
| 38.1   | 49.9   | 47.2   | 54.7   | 60.3   | 55.2   |
| 12.7   | 19.0   | 15.1   | 7.0    | 28.7   | 17.6   |
| 48.8   | 41.7   | 63.6   | 64.5   | 56.8   | 68.4   |
| 8.7    | 0.8    | 2.1    | 1.6    | 7.5    | 3.6    |
| 108.8  | 140.9  | 121.2  | 142.9  | 136.2  | 141.9  |
| 0.5    | 0.5    | 0.6    | 0.7    | 1.2    | 0.5    |
| 63.2   | 51.7   | 69.3   | 67.9   | 66.9   | 76.6   |
| 20.6   | 14.1   | 9.4    | 4.2    | 14.2   | 3.1    |
| 12.4   | 19.5   | 12.7   | 10.7   | 17.2   | 13.3   |
| 16.3   | 17.7   | 26.3   | 19.5   | 16.1   | 18.4   |
| 1.0    | 0.6    | 2.7    | 1.4    | 0.7    | 2.2    |
| 1.1    | 0.9    | 1.6    | 2.5    | 3.6    | 1.7    |
| 254.2  | 237.4  | 272.0  | 283.8  | 320.4  | 337.1  |
| 609.7  | 558.9  | 591.9  | 632.8  | 743.9  | 740.3  |
| 4.2    | 3.6    | 11.9   | 8.4    | 6.5    | 15.0   |
| 8.4    | 10.5   | 9.5    | 10.7   | 7.9    | 13.0   |
| 2.8    | 5.4    | 3.1    | 4.1    | 2.2    | 3.3    |
| 3.3    | 1.3    | 9.1    | 1.8    | 5.8    | 2.0    |
| 165.9  | 146.1  | 137.6  | 156.4  | 160.9  | 191.5  |
| 3.7    | 4.1    | 3.7    | 3.8    | 7.6    | 19.7   |
| 1.9    | 3.7    | 0.5    | 1.4    | 0.9    | 2.1    |
| 0.4    | 0.5    | 6.1    | 2.6    | 1.8    | 0.3    |
| 7.0    | 1.9    | 1.1    | 5.5    | 2.7    | 1.1    |
| 1.9    | 1.3    | 6.1    | 1.1    | 1.3    | 1.3    |
| 2.3    | 11.0   | 2.0    | 2.5    | 1.4    | 3.3    |
| 4.4    | 9.9    | 1.7    | 12.2   | 1.3    | 2.4    |
| 5.9    | 10.2   | 2.9    | 9.6    | 2.3    | 3.1    |
| 3.7    | 7.3    | 1.5    | 6.2    | 6.2    | 5.9    |
| 3.9    | 2.9    | 2.4    | 2.8    | 2.4    | 4.1    |

|        |        |        |        |        |        |
|--------|--------|--------|--------|--------|--------|
| 10.7   | 20.4   | 14.6   | 15.9   | 23.1   | 22.9   |
| 17.2   | 22.8   | 18.2   | 10.8   | 19.2   | 20.3   |
| 2.8    | 5.1    | 0.7    | 0.6    | 3.7    | 0.9    |
| 2.9    | 2.3    | 2.6    | 1.8    | 1.9    | 2.4    |
| 4.7    | 2.7    | 2.4    | 1.1    | 1.6    | 1.0    |
| 16.6   | 7.8    | 9.0    | 10.4   | 3.7    | 7.4    |
| 11.9   | 7.9    | 18.9   | 9.3    | 13.3   | 9.3    |
| 1.0    | 0.6    | 7.5    | 2.9    | 2.1    | 5.5    |
| 14.5   | 16.7   | 7.0    | 9.0    | 11.6   | 8.1    |
| 1.0    | 3.4    | 0.5    | 0.6    | 1.1    | 0.9    |
| 18.6   | 21.7   | 28.2   | 31.7   | 28.5   | 25.7   |
| 8.2    | 11.0   | 4.8    | 6.6    | 2.3    | 7.6    |
| 3.4    | 1.0    | 5.1    | 0.6    | 5.7    | 3.8    |
| 3.9    | 2.1    | 10.7   | 13.0   | 7.4    | 6.6    |
| 945.4  | 924.0  | 999.1  | 1035.2 | 1067.6 | 1206.4 |
| 3643.5 | 3332.8 | 3265.0 | 3915.3 | 3733.9 | 4023.5 |
| 1.6    | 12.8   | 7.9    | 6.9    | 13.9   | 8.4    |
| 3.2    | 2.6    | 0.9    | 3.9    | 1.4    | 2.3    |
| 8.7    | 16.5   | 25.2   | 15.5   | 8.1    | 17.9   |
| 1.0    | 3.7    | 3.0    | 4.5    | 7.3    | 6.3    |
| 1.3    | 0.9    | 1.3    | 0.9    | 1.4    | 1.5    |
| 5.3    | 1.3    | 5.1    | 8.1    | 2.4    | 3.4    |
| 14.7   | 10.1   | 10.5   | 7.7    | 14.0   | 15.2   |
| 13.5   | 15.8   | 5.8    | 13.7   | 3.6    | 12.1   |
| 10.8   | 4.4    | 3.6    | 9.7    | 4.4    | 6.3    |
| 3.0    | 2.3    | 7.6    | 4.6    | 12.9   | 12.9   |
| 15.2   | 11.8   | 7.0    | 9.2    | 3.5    | 4.4    |
| 23.6   | 33.0   | 44.1   | 37.2   | 45.3   | 46.6   |
| 0.8    | 1.0    | 1.9    | 6.7    | 1.2    | 0.8    |
| 4.3    | 0.8    | 4.8    | 0.8    | 0.8    | 1.0    |
| 17.0   | 21.8   | 19.5   | 7.8    | 9.4    | 2.2    |
| 17.2   | 9.8    | 16.9   | 22.9   | 25.1   | 22.8   |
| 10.2   | 17.5   | 14.1   | 3.7    | 7.6    | 23.8   |
| 3.3    | 2.1    | 1.3    | 0.6    | 0.9    | 3.1    |
| 8.5    | 14.3   | 12.3   | 5.6    | 4.4    | 7.3    |
| 1.8    | 4.6    | 6.7    | 4.9    | 3.4    | 2.0    |
| 809.3  | 839.7  | 937.0  | 981.9  | 957.9  | 1010.4 |
| 6.7    | 1.7    | 2.7    | 3.1    | 4.2    | 4.8    |
| 100.9  | 61.3   | 97.1   | 80.3   | 111.0  | 108.1  |
| 12.2   | 11.6   | 14.4   | 13.5   | 13.1   | 20.1   |
| 6.4    | 5.2    | 3.9    | 6.1    | 1.2    | 9.4    |
| 5.0    | 7.7    | 6.3    | 1.0    | 6.5    | 8.2    |
| 137.8  | 135.7  | 170.3  | 135.5  | 162.6  | 176.4  |
| 4.3    | 2.1    | 11.5   | 3.5    | 16.1   | 10.8   |
| 30.0   | 27.6   | 33.4   | 28.8   | 27.5   | 23.7   |
| 3.5    | 0.5    | 5.8    | 5.0    | 4.7    | 8.3    |
| 10.5   | 5.4    | 8.7    | 19.5   | 19.5   | 19.9   |
| 30.6   | 8.9    | 41.8   | 33.0   | 31.1   | 54.5   |
| 52.5   | 42.7   | 51.0   | 64.2   | 55.8   | 48.6   |
| 11.8   | 6.6    | 6.6    | 18.4   | 15.0   | 15.0   |
| 5.3    | 18.4   | 7.0    | 4.5    | 4.1    | 3.7    |
| 12.6   | 20.8   | 13.8   | 17.9   | 19.4   | 22.8   |
| 5.6    | 3.5    | 2.4    | 3.6    | 5.1    | 8.1    |



|        |        |        |        |        |        |
|--------|--------|--------|--------|--------|--------|
| 3.8    | 12.5   | 10.2   | 10.4   | 4.3    | 3.7    |
| 15.2   | 15.2   | 14.7   | 16.0   | 11.5   | 18.9   |
| 36.8   | 32.1   | 60.7   | 54.2   | 43.8   | 64.2   |
| 2.1    | 1.1    | 1.7    | 4.9    | 1.6    | 2.0    |
| 1.6    | 0.8    | 6.7    | 2.4    | 3.2    | 5.0    |
| 7.0    | 10.8   | 15.0   | 11.5   | 11.4   | 2.8    |
| 6.7    | 5.6    | 6.6    | 14.1   | 8.3    | 12.7   |
| 21.2   | 21.4   | 17.2   | 4.8    | 21.8   | 29.0   |
| 26.8   | 30.1   | 26.0   | 27.9   | 29.3   | 31.9   |
| 2.7    | 1.3    | 2.8    | 1.6    | 1.9    | 2.2    |
| 13.7   | 8.8    | 14.2   | 8.1    | 2.4    | 11.5   |
| 15.2   | 20.0   | 11.2   | 17.0   | 22.6   | 11.1   |
| 6.7    | 11.5   | 13.1   | 13.1   | 5.9    | 12.0   |
| 13.6   | 14.0   | 13.3   | 15.9   | 11.9   | 11.2   |
| 14.8   | 16.5   | 21.0   | 16.3   | 19.8   | 11.9   |
| 1.5    | 5.2    | 1.4    | 2.3    | 2.6    | 1.8    |
| 10.8   | 14.3   | 18.8   | 13.9   | 23.3   | 20.7   |
| 1.5    | 8.4    | 2.9    | 3.3    | 1.7    | 13.5   |
| 8.7    | 10.2   | 4.5    | 8.5    | 3.9    | 8.4    |
| 4.4    | 20.5   | 12.5   | 6.2    | 12.9   | 2.8    |
| 1.6    | 2.7    | 2.5    | 3.4    | 1.7    | 1.5    |
| 44.1   | 34.0   | 38.6   | 31.0   | 59.3   | 57.4   |
| 5.1    | 7.8    | 6.9    | 6.4    | 6.3    | 6.3    |
| 431.4  | 388.6  | 580.8  | 612.1  | 593.9  | 579.8  |
| 58.6   | 47.4   | 68.1   | 55.9   | 64.2   | 58.9   |
| 48.6   | 29.7   | 56.1   | 48.7   | 52.9   | 51.4   |
| 20.3   | 23.5   | 26.1   | 25.5   | 25.1   | 25.5   |
| 10.4   | 1.1    | 10.0   | 8.8    | 4.5    | 5.8    |
| 27.6   | 23.0   | 24.9   | 7.4    | 28.0   | 22.0   |
| 13.5   | 16.4   | 19.7   | 7.6    | 19.8   | 26.2   |
| 16.3   | 22.1   | 15.8   | 16.7   | 20.0   | 22.5   |
| 8.2    | 8.4    | 5.8    | 3.4    | 0.8    | 4.5    |
| 12.7   | 13.8   | 27.4   | 20.9   | 14.4   | 14.3   |
| 369.9  | 374.5  | 380.4  | 402.7  | 421.2  | 486.4  |
| 1.1    | 3.5    | 1.9    | 2.1    | 1.6    | 3.8    |
| 36.9   | 29.6   | 17.3   | 36.6   | 21.7   | 32.3   |
| 17.8   | 30.1   | 20.9   | 23.6   | 30.0   | 29.3   |
| 9.9    | 0.8    | 4.1    | 1.0    | 5.4    | 4.9    |
| 82.4   | 50.7   | 79.0   | 84.0   | 67.5   | 88.8   |
| 21.2   | 18.3   | 22.1   | 21.7   | 26.2   | 23.3   |
| 3.4    | 3.0    | 4.0    | 10.4   | 7.3    | 5.7    |
| 182.5  | 187.7  | 238.2  | 218.8  | 192.4  | 223.0  |
| 123.1  | 121.8  | 147.0  | 158.3  | 159.9  | 172.5  |
| 1763.7 | 1663.7 | 1859.4 | 2039.4 | 2070.0 | 1948.8 |
| 20.3   | 23.1   | 29.2   | 16.6   | 19.8   | 14.3   |
| 8.9    | 1.1    | 10.4   | 5.9    | 7.4    | 1.6    |
| 127.5  | 128.1  | 130.3  | 122.6  | 151.7  | 141.8  |
| 1.7    | 1.8    | 1.8    | 1.8    | 1.8    | 2.2    |
| 3.0    | 4.1    | 5.7    | 10.2   | 9.3    | 4.3    |
| 40.1   | 31.8   | 46.5   | 36.1   | 46.5   | 51.6   |
| 5.0    | 11.5   | 5.6    | 9.3    | 1.2    | 3.3    |
| 95.1   | 129.8  | 104.9  | 95.3   | 112.0  | 109.0  |
| 21.0   | 18.4   | 4.9    | 16.6   | 13.6   | 20.0   |

|       |       |       |       |       |       |
|-------|-------|-------|-------|-------|-------|
| 151.5 | 152.7 | 138.5 | 148.1 | 170.9 | 165.9 |
| 4.0   | 11.5  | 2.9   | 19.6  | 7.4   | 5.5   |
| 7.7   | 9.4   | 3.6   | 3.1   | 4.6   | 3.5   |
| 2.1   | 0.9   | 2.9   | 0.8   | 1.1   | 1.3   |
| 2.0   | 1.8   | 4.5   | 1.7   | 8.0   | 2.0   |
| 9.9   | 1.5   | 0.8   | 0.9   | 1.5   | 4.1   |
| 9.0   | 1.7   | 7.4   | 11.0  | 9.2   | 11.8  |
| 3.5   | 0.8   | 2.4   | 1.8   | 1.0   | 2.1   |
| 2.4   | 3.5   | 2.5   | 2.6   | 4.2   | 4.1   |
| 3.5   | 3.0   | 1.1   | 2.0   | 2.0   | 2.0   |
| 10.9  | 4.5   | 9.0   | 4.1   | 1.9   | 19.9  |
| 2.6   | 1.4   | 5.6   | 10.8  | 9.1   | 2.4   |
| 2.3   | 1.7   | 1.6   | 2.0   | 2.1   | 2.4   |
| 4.4   | 14.2  | 5.3   | 8.7   | 4.2   | 12.1  |
| 196.5 | 166.0 | 175.0 | 212.2 | 200.5 | 195.7 |
| 44.1  | 43.8  | 46.3  | 61.5  | 53.4  | 61.1  |
| 202.7 | 159.1 | 241.0 | 189.0 | 293.7 | 257.5 |
| 5.7   | 2.4   | 2.6   | 2.3   | 3.7   | 3.9   |
| 6.0   | 6.0   | 5.6   | 6.1   | 4.6   | 12.7  |
| 5.1   | 2.5   | 7.5   | 10.8  | 2.5   | 6.1   |
| 2.9   | 2.3   | 1.6   | 9.2   | 1.3   | 2.1   |
| 2.2   | 0.9   | 1.1   | 1.7   | 1.1   | 3.3   |
| 1.3   | 4.8   | 8.1   | 8.4   | 7.0   | 5.8   |
| 11.0  | 4.5   | 6.9   | 14.5  | 15.3  | 16.8  |
| 8.3   | 9.5   | 5.3   | 7.6   | 14.4  | 5.3   |
| 394.9 | 382.7 | 451.3 | 444.7 | 501.4 | 490.6 |
| 647.4 | 613.8 | 641.4 | 667.3 | 765.4 | 862.5 |
| 3.7   | 3.9   | 7.7   | 4.4   | 8.8   | 10.8  |
| 2.7   | 2.3   | 2.5   | 2.9   | 2.1   | 1.2   |
| 5.6   | 10.4  | 1.0   | 2.4   | 3.3   | 6.3   |
| 751.3 | 698.6 | 921.9 | 994.9 | 913.2 | 888.9 |
| 7.9   | 9.6   | 6.0   | 6.7   | 7.5   | 12.8  |
| 1.9   | 2.0   | 2.1   | 0.5   | 2.0   | 3.2   |
| 27.7  | 38.5  | 39.4  | 53.7  | 44.3  | 60.3  |
| 343.5 | 345.8 | 347.5 | 369.6 | 339.6 | 387.0 |
| 7.1   | 8.3   | 4.5   | 6.3   | 4.4   | 7.1   |
| 26.4  | 20.4  | 29.3  | 22.1  | 26.3  | 22.1  |
| 3.7   | 0.9   | 11.7  | 1.5   | 7.5   | 3.4   |
| 7.0   | 1.1   | 1.5   | 4.6   | 5.5   | 5.5   |
| 3.6   | 6.4   | 4.8   | 1.7   | 0.8   | 9.8   |
| 21.6  | 33.4  | 29.4  | 23.0  | 21.8  | 27.1  |
| 83.1  | 69.6  | 64.0  | 81.2  | 83.1  | 79.2  |
| 72.9  | 38.8  | 70.6  | 58.6  | 84.9  | 82.3  |
| 2.2   | 11.6  | 1.3   | 1.2   | 7.0   | 0.9   |
| 145.1 | 174.3 | 190.9 | 187.7 | 186.5 | 200.5 |
| 3.9   | 2.7   | 4.3   | 4.3   | 3.4   | 2.9   |
| 158.3 | 111.4 | 159.7 | 188.3 | 178.2 | 230.1 |
| 5.0   | 2.4   | 11.0  | 2.7   | 0.9   | 5.6   |
| 1.6   | 13.8  | 6.6   | 2.9   | 2.7   | 2.7   |
| 5.2   | 0.1   | 7.4   | 7.6   | 5.0   | 11.4  |
| 2.7   | 7.0   | 3.2   | 7.5   | 5.5   | 3.6   |
| 85.0  | 52.4  | 73.2  | 87.9  | 108.9 | 108.8 |
| 38.6  | 55.9  | 34.9  | 38.1  | 33.0  | 41.1  |

|       |       |       |       |       |       |
|-------|-------|-------|-------|-------|-------|
| 1.0   | 5.6   | 5.2   | 4.2   | 1.1   | 4.7   |
| 50.0  | 48.2  | 45.3  | 45.1  | 49.1  | 69.8  |
| 24.5  | 24.0  | 20.8  | 22.7  | 21.8  | 27.1  |
| 17.1  | 16.4  | 23.0  | 14.8  | 26.7  | 13.2  |
| 11.1  | 8.7   | 9.7   | 6.2   | 1.7   | 8.7   |
| 18.2  | 26.9  | 13.4  | 14.0  | 18.6  | 27.4  |
| 5.3   | 1.6   | 12.3  | 0.6   | 1.5   | 1.3   |
| 5.6   | 3.7   | 12.1  | 1.7   | 15.5  | 19.3  |
| 7.5   | 1.0   | 2.2   | 3.4   | 4.1   | 3.1   |
| 2.9   | 1.1   | 2.9   | 3.4   | 5.6   | 1.6   |
| 7.3   | 6.2   | 1.3   | 2.6   | 5.9   | 7.7   |
| 26.3  | 5.2   | 4.3   | 8.8   | 7.0   | 17.9  |
| 71.8  | 80.0  | 78.7  | 99.3  | 84.3  | 105.1 |
| 23.1  | 8.9   | 19.5  | 22.3  | 12.7  | 10.9  |
| 14.5  | 10.2  | 7.7   | 6.9   | 15.2  | 13.3  |
| 76.4  | 67.0  | 82.4  | 80.4  | 88.5  | 118.9 |
| 5.3   | 21.9  | 8.1   | 6.9   | 13.4  | 5.2   |
| 14.0  | 9.1   | 8.8   | 2.7   | 3.2   | 8.7   |
| 692.3 | 864.9 | 828.4 | 823.6 | 839.3 | 920.4 |
| 11.5  | 22.8  | 5.1   | 10.2  | 8.0   | 21.8  |
| 317.8 | 331.4 | 337.4 | 338.9 | 332.6 | 343.0 |
| 17.5  | 24.7  | 19.3  | 27.2  | 21.9  | 26.4  |
| 21.3  | 20.6  | 22.8  | 24.6  | 31.2  | 34.6  |
| 18.7  | 18.5  | 12.4  | 14.2  | 18.2  | 13.4  |
| 3.7   | 10.3  | 7.0   | 11.2  | 13.2  | 8.7   |
| 2.2   | 1.0   | 2.8   | 4.8   | 4.2   | 6.9   |
| 8.8   | 13.8  | 8.8   | 5.5   | 6.9   | 6.4   |
| 3.5   | 1.9   | 1.9   | 4.6   | 4.6   | 1.3   |
| 31.8  | 41.5  | 27.4  | 16.4  | 26.4  | 30.4  |
| 1.8   | 2.3   | 8.1   | 10.1  | 7.6   | 1.7   |
| 4.5   | 6.8   | 5.2   | 3.0   | 4.3   | 4.2   |
| 12.8  | 5.9   | 16.7  | 13.0  | 9.0   | 2.1   |
| 10.4  | 8.9   | 6.6   | 11.8  | 6.8   | 11.5  |
| 16.6  | 14.8  | 7.6   | 8.1   | 10.0  | 17.8  |
| 1.6   | 3.3   | 2.1   | 1.6   | 0.8   | 0.6   |
| 14.5  | 24.6  | 24.5  | 16.1  | 26.6  | 15.2  |
| 5.5   | 5.5   | 2.2   | 2.5   | 2.9   | 2.8   |
| 79.1  | 90.8  | 119.1 | 104.2 | 122.4 | 108.4 |
| 21.4  | 26.8  | 25.5  | 25.9  | 26.0  | 28.1  |
| 28.0  | 30.7  | 11.6  | 25.7  | 35.0  | 33.1  |
| 6.2   | 8.2   | 3.4   | 3.4   | 2.2   | 5.6   |
| 7.8   | 4.6   | 6.2   | 6.5   | 7.8   | 2.4   |
| 30.2  | 37.3  | 27.7  | 24.7  | 29.8  | 32.2  |
| 12.5  | 4.0   | 10.0  | 11.5  | 10.1  | 10.8  |
| 11.1  | 15.9  | 6.4   | 21.4  | 2.7   | 12.3  |
| 22.3  | 19.4  | 27.7  | 26.7  | 24.2  | 38.4  |
| 15.6  | 19.2  | 13.3  | 28.0  | 16.5  | 12.7  |
| 10.7  | 7.3   | 8.8   | 10.9  | 12.4  | 15.8  |
| 1.3   | 3.7   | 1.7   | 4.2   | 6.5   | 2.2   |
| 6.7   | 20.0  | 11.4  | 10.9  | 11.3  | 3.4   |
| 60.6  | 64.0  | 66.7  | 53.9  | 72.3  | 83.2  |
| 43.8  | 48.0  | 54.6  | 34.7  | 58.4  | 65.2  |
| 16.6  | 7.5   | 5.5   | 7.3   | 5.1   | 6.3   |

|       |       |       |        |        |        |
|-------|-------|-------|--------|--------|--------|
| 3.4   | 1.5   | 7.4   | 5.8    | 6.4    | 7.1    |
| 0.7   | 7.6   | 1.9   | 1.6    | 3.8    | 0.9    |
| 196.5 | 196.2 | 184.8 | 198.5  | 194.6  | 219.5  |
| 2.6   | 0.3   | 0.6   | 2.2    | 3.3    | 1.8    |
| 15.2  | 0.9   | 12.1  | 14.4   | 18.7   | 17.1   |
| 7.0   | 7.3   | 1.0   | 9.0    | 1.0    | 4.4    |
| 13.7  | 12.9  | 8.4   | 2.9    | 9.6    | 9.5    |
| 50.1  | 40.3  | 43.7  | 47.1   | 48.1   | 56.0   |
| 353.4 | 279.1 | 394.1 | 430.6  | 464.4  | 472.9  |
| 5.3   | 15.1  | 10.5  | 14.4   | 7.0    | 6.1    |
| 1.8   | 1.7   | 2.6   | 2.9    | 1.8    | 3.7    |
| 142.8 | 116.3 | 133.4 | 146.9  | 128.7  | 126.1  |
| 19.9  | 19.2  | 15.2  | 25.5   | 25.8   | 32.4   |
| 25.6  | 44.1  | 25.2  | 26.4   | 23.8   | 35.8   |
| 10.1  | 6.9   | 9.5   | 8.0    | 5.4    | 10.0   |
| 3.7   | 1.5   | 5.9   | 0.9    | 2.1    | 3.1    |
| 120.0 | 130.6 | 127.7 | 144.6  | 147.4  | 147.0  |
| 38.3  | 44.8  | 30.6  | 30.4   | 32.3   | 41.0   |
| 659.8 | 557.9 | 715.6 | 747.6  | 800.5  | 868.0  |
| 251.6 | 246.2 | 251.4 | 244.5  | 258.2  | 288.5  |
| 18.0  | 25.6  | 21.0  | 16.8   | 14.9   | 15.3   |
| 97.2  | 79.0  | 105.0 | 100.2  | 132.2  | 110.4  |
| 15.6  | 7.5   | 5.4   | 9.9    | 7.1    | 15.5   |
| 177.9 | 180.7 | 178.5 | 212.0  | 224.8  | 251.1  |
| 24.7  | 2.4   | 25.7  | 21.8   | 19.0   | 7.0    |
| 161.0 | 179.7 | 209.6 | 182.7  | 256.0  | 209.1  |
| 11.4  | 18.0  | 13.9  | 13.9   | 5.4    | 5.9    |
| 275.7 | 275.8 | 288.7 | 296.8  | 347.9  | 374.3  |
| 46.9  | 24.7  | 53.8  | 37.5   | 58.8   | 64.9   |
| 6.3   | 3.7   | 1.7   | 6.8    | 1.5    | 4.4    |
| 59.4  | 49.1  | 62.0  | 74.0   | 69.1   | 85.3   |
| 2.2   | 1.4   | 0.7   | 4.4    | 1.6    | 1.1    |
| 867.3 | 802.8 | 979.6 | 1039.8 | 1072.5 | 1172.8 |
| 21.7  | 3.9   | 8.9   | 18.2   | 20.1   | 22.7   |
| 151.5 | 138.0 | 199.7 | 172.4  | 219.7  | 189.0  |
| 27.0  | 35.3  | 26.7  | 25.2   | 26.2   | 31.8   |
| 4.0   | 7.2   | 0.8   | 1.0    | 0.7    | 1.1    |
| 168.1 | 152.9 | 171.1 | 162.8  | 146.9  | 191.3  |
| 227.2 | 133.0 | 174.3 | 158.0  | 240.8  | 230.5  |
| 48.4  | 37.2  | 46.7  | 51.0   | 46.1   | 42.1   |
| 1.4   | 1.3   | 1.3   | 1.3    | 1.5    | 1.3    |
| 63.7  | 45.7  | 68.6  | 48.1   | 73.7   | 90.5   |
| 27.3  | 28.9  | 28.8  | 21.3   | 29.8   | 29.5   |
| 1.4   | 7.1   | 5.5   | 2.0    | 0.6    | 1.5    |
| 2.8   | 7.4   | 7.7   | 4.6    | 5.7    | 8.1    |
| 568.8 | 500.4 | 511.8 | 578.2  | 598.4  | 712.9  |
| 1.9   | 6.9   | 6.1   | 4.4    | 2.4    | 11.6   |
| 211.0 | 133.9 | 187.1 | 184.0  | 233.2  | 248.0  |
| 101.7 | 113.6 | 87.3  | 117.6  | 121.0  | 164.8  |
| 3.0   | 1.0   | 0.8   | 0.5    | 2.1    | 3.3    |
| 77.0  | 71.0  | 76.6  | 72.6   | 89.4   | 91.3   |
| 5.2   | 7.6   | 4.8   | 3.0    | 5.1    | 5.4    |
| 91.5  | 80.5  | 91.7  | 99.3   | 90.3   | 121.2  |

|       |       |       |       |       |       |
|-------|-------|-------|-------|-------|-------|
| 31.8  | 28.2  | 26.2  | 26.2  | 23.1  | 19.8  |
| 5.3   | 11.3  | 9.0   | 1.6   | 6.3   | 4.8   |
| 11.3  | 3.6   | 9.8   | 15.6  | 12.5  | 13.5  |
| 4.6   | 5.3   | 8.5   | 11.1  | 5.4   | 21.5  |
| 10.3  | 11.0  | 6.4   | 7.8   | 14.0  | 4.4   |
| 1.5   | 2.4   | 5.3   | 1.5   | 3.8   | 8.0   |
| 23.1  | 29.7  | 23.6  | 16.0  | 29.9  | 35.5  |
| 8.1   | 9.0   | 13.2  | 5.3   | 14.0  | 11.3  |
| 2.6   | 7.6   | 5.9   | 5.1   | 5.2   | 5.1   |
| 5.0   | 15.0  | 9.0   | 1.5   | 5.1   | 5.7   |
| 1.1   | 5.9   | 5.6   | 4.4   | 4.3   | 1.0   |
| 3.1   | 1.0   | 0.8   | 2.8   | 4.3   | 2.3   |
| 69.5  | 74.0  | 76.5  | 71.5  | 85.9  | 101.7 |
| 524.4 | 588.4 | 650.1 | 720.3 | 622.3 | 803.9 |
| 3.0   | 5.0   | 2.2   | 5.4   | 2.8   | 1.3   |
| 9.9   | 18.4  | 9.7   | 10.2  | 18.5  | 13.8  |
| 12.4  | 11.3  | 16.2  | 0.9   | 13.8  | 16.7  |
| 101.7 | 111.8 | 103.4 | 106.6 | 112.8 | 142.5 |
| 7.5   | 0.7   | 8.5   | 5.5   | 2.6   | 3.5   |
| 20.5  | 23.9  | 15.2  | 24.0  | 25.5  | 19.1  |
| 248.1 | 300.0 | 291.3 | 306.0 | 307.2 | 406.5 |
| 87.8  | 74.5  | 81.1  | 75.5  | 92.5  | 92.1  |
| 11.7  | 2.2   | 8.8   | 11.3  | 13.2  | 11.5  |
| 0.6   | 4.7   | 0.9   | 7.1   | 2.4   | 3.8   |
| 178.5 | 177.4 | 171.0 | 174.2 | 200.0 | 230.7 |
| 7.8   | 16.1  | 13.0  | 13.9  | 7.5   | 12.2  |
| 16.4  | 8.6   | 12.3  | 6.8   | 18.0  | 5.9   |
| 10.7  | 15.7  | 2.4   | 11.8  | 8.5   | 13.8  |
| 5.5   | 1.4   | 3.0   | 3.2   | 7.3   | 9.3   |
| 21.3  | 26.0  | 33.4  | 11.6  | 17.2  | 16.2  |
| 1.8   | 1.5   | 9.0   | 2.9   | 2.5   | 7.6   |
| 1.1   | 2.8   | 1.7   | 2.3   | 1.3   | 2.8   |
| 5.5   | 10.0  | 5.4   | 5.8   | 4.4   | 4.2   |
| 2.4   | 0.6   | 5.6   | 5.7   | 2.2   | 4.5   |
| 0.5   | 0.5   | 0.8   | 3.4   | 2.5   | 0.7   |
| 6.0   | 2.7   | 5.6   | 9.3   | 14.7  | 5.1   |
| 1.4   | 1.2   | 1.0   | 3.8   | 1.4   | 5.4   |
| 11.2  | 10.0  | 9.7   | 2.5   | 6.8   | 12.4  |
| 5.0   | 1.4   | 3.6   | 0.6   | 6.9   | 1.4   |
| 7.8   | 3.1   | 11.8  | 11.9  | 2.5   | 3.4   |
| 120.0 | 131.6 | 162.7 | 144.5 | 186.0 | 154.1 |
| 1.1   | 1.3   | 3.7   | 4.1   | 6.6   | 1.5   |
| 4.1   | 0.9   | 1.2   | 1.2   | 1.3   | 1.8   |
| 10.1  | 6.4   | 4.8   | 4.6   | 5.4   | 14.5  |
| 10.0  | 15.9  | 2.1   | 11.8  | 3.1   | 1.2   |
| 4.8   | 0.8   | 0.9   | 0.9   | 7.0   | 1.5   |
| 5.2   | 4.8   | 10.2  | 3.1   | 9.6   | 4.4   |
| 17.2  | 22.2  | 24.8  | 31.0  | 29.4  | 28.0  |
| 3.3   | 3.7   | 8.0   | 8.2   | 7.3   | 5.7   |
| 21.6  | 25.0  | 45.1  | 20.8  | 18.4  | 33.4  |
| 11.4  | 16.6  | 18.8  | 22.3  | 12.9  | 10.4  |
| 8.7   | 1.2   | 6.9   | 2.7   | 6.9   | 5.2   |
| 14.1  | 0.9   | 5.8   | 3.9   | 4.1   | 12.9  |

|        |        |        |        |        |        |
|--------|--------|--------|--------|--------|--------|
| 0.6    | 0.7    | 5.5    | 0.8    | 1.3    | 1.5    |
| 1.3    | 0.9    | 1.3    | 0.6    | 0.5    | 2.9    |
| 5.0    | 11.9   | 4.8    | 8.0    | 7.2    | 2.4    |
| 2.8    | 1.8    | 4.3    | 5.8    | 6.2    | 1.6    |
| 15.3   | 2.7    | 16.4   | 8.8    | 4.1    | 9.0    |
| 1.2    | 5.3    | 2.7    | 2.1    | 1.3    | 5.2    |
| 13.7   | 9.6    | 7.9    | 8.4    | 20.7   | 17.4   |
| 0.8    | 4.3    | 5.2    | 2.0    | 4.3    | 1.0    |
| 2.8    | 0.4    | 0.3    | 1.7    | 4.0    | 3.6    |
| 41.0   | 18.8   | 41.6   | 31.8   | 34.8   | 45.8   |
| 27.3   | 26.9   | 28.3   | 21.8   | 22.4   | 20.9   |
| 251.4  | 240.3  | 277.9  | 302.6  | 311.3  | 345.3  |
| 41.2   | 31.6   | 45.4   | 33.6   | 40.9   | 35.9   |
| 12.0   | 11.2   | 7.0    | 19.2   | 20.5   | 13.3   |
| 4.3    | 14.2   | 6.4    | 11.2   | 9.6    | 14.8   |
| 6.1    | 8.2    | 13.5   | 11.6   | 18.1   | 16.2   |
| 5.6    | 1.5    | 2.8    | 3.2    | 2.4    | 2.6    |
| 4.1    | 3.5    | 3.2    | 4.1    | 5.2    | 4.2    |
| 4.1    | 7.7    | 4.8    | 8.7    | 14.5   | 14.6   |
| 2.6    | 2.0    | 2.6    | 1.5    | 1.7    | 1.8    |
| 5.3    | 3.6    | 1.1    | 4.6    | 2.9    | 9.8    |
| 0.3    | 0.3    | 5.7    | 0.8    | 0.3    | 0.7    |
| 3.6    | 5.0    | 9.1    | 3.7    | 3.0    | 3.2    |
| 8.0    | 1.6    | 1.7    | 1.8    | 3.9    | 5.3    |
| 14.0   | 21.1   | 13.2   | 15.2   | 20.1   | 18.3   |
| 4.3    | 1.4    | 6.1    | 3.7    | 3.1    | 6.9    |
| 14.3   | 11.6   | 16.2   | 13.2   | 15.6   | 8.3    |
| 618.9  | 550.5  | 589.6  | 717.1  | 731.5  | 910.6  |
| 5.7    | 11.1   | 11.4   | 12.4   | 20.7   | 16.0   |
| 11.6   | 25.9   | 18.5   | 5.3    | 12.3   | 2.5    |
| 5.6    | 2.7    | 7.5    | 7.9    | 8.5    | 14.1   |
| 3.2    | 8.3    | 9.0    | 7.1    | 5.4    | 6.1    |
| 5.4    | 9.8    | 3.3    | 4.5    | 4.7    | 5.4    |
| 10.9   | 14.1   | 6.0    | 3.0    | 10.5   | 5.0    |
| 21.7   | 13.1   | 17.6   | 19.1   | 15.7   | 20.1   |
| 4579.6 | 3908.8 | 4807.7 | 5291.7 | 5034.5 | 4828.3 |
| 460.8  | 472.3  | 508.3  | 542.6  | 531.3  | 562.1  |
| 6.3    | 10.5   | 10.0   | 16.4   | 4.0    | 9.5    |
| 4.0    | 19.3   | 9.9    | 7.3    | 7.7    | 22.1   |
| 2.0    | 5.6    | 3.4    | 2.0    | 1.8    | 3.0    |
| 6.5    | 10.5   | 11.2   | 10.0   | 6.8    | 12.2   |
| 8.3    | 22.1   | 18.3   | 12.0   | 13.3   | 12.9   |
| 6.0    | 7.6    | 12.4   | 9.2    | 14.7   | 10.5   |
| 7.5    | 11.7   | 1.3    | 2.7    | 3.0    | 6.7    |
| 10.0   | 22.0   | 14.7   | 4.5    | 13.2   | 9.7    |
| 9.8    | 5.9    | 7.8    | 8.5    | 4.3    | 11.2   |
| 11.3   | 9.2    | 18.7   | 12.2   | 0.9    | 8.3    |
| 2.4    | 1.3    | 3.0    | 1.4    | 2.1    | 1.7    |
| 6.1    | 2.5    | 2.1    | 1.8    | 4.6    | 12.2   |
| 0.5    | 0.7    | 0.7    | 3.6    | 0.6    | 1.1    |
| 3.5    | 12.2   | 7.5    | 2.0    | 1.9    | 6.5    |
| 8.3    | 1.5    | 5.8    | 1.2    | 2.9    | 3.6    |
| 3.3    | 12.1   | 11.2   | 9.1    | 9.5    | 4.2    |

|        |        |        |        |        |        |
|--------|--------|--------|--------|--------|--------|
| 1.5    | 2.2    | 1.6    | 2.9    | 1.3    | 1.6    |
| 6.4    | 9.0    | 3.7    | 6.9    | 5.0    | 6.9    |
| 0.5    | 3.2    | 3.1    | 1.3    | 0.5    | 2.9    |
| 134.4  | 119.3  | 125.2  | 120.7  | 146.9  | 144.2  |
| 10.8   | 15.7   | 10.3   | 12.9   | 11.0   | 14.1   |
| 13.3   | 25.3   | 15.1   | 21.3   | 29.4   | 11.4   |
| 2.4    | 2.6    | 1.3    | 1.9    | 1.3    | 2.6    |
| 0.9    | 0.9    | 0.8    | 7.6    | 0.7    | 6.0    |
| 2659.7 | 2305.2 | 2298.0 | 2660.8 | 2748.4 | 2534.0 |
| 9.7    | 11.6   | 10.4   | 9.2    | 8.5    | 18.7   |
| 1773.7 | 1657.3 | 1919.1 | 2093.6 | 1971.6 | 2090.2 |
| 6.6    | 6.6    | 3.2    | 2.4    | 11.4   | 4.5    |
| 3.1    | 2.6    | 2.8    | 3.5    | 2.1    | 2.8    |
| 2.5    | 0.7    | 2.6    | 1.1    | 1.7    | 3.2    |
| 26.3   | 12.4   | 26.9   | 33.4   | 49.8   | 28.3   |
| 7.6    | 7.0    | 14.5   | 7.5    | 12.4   | 7.5    |
| 3.8    | 8.3    | 11.0   | 4.5    | 15.0   | 8.1    |
| 11.1   | 10.0   | 9.9    | 9.4    | 11.5   | 7.4    |
| 3.0    | 6.7    | 0.6    | 2.1    | 1.5    | 0.7    |
| 4.4    | 7.0    | 11.9   | 12.8   | 17.3   | 20.7   |
| 6.2    | 5.4    | 2.7    | 0.8    | 2.2    | 1.4    |
| 7.7    | 2.7    | 1.8    | 9.3    | 6.9    | 1.9    |
| 7.7    | 11.3   | 5.6    | 12.3   | 17.6   | 4.6    |
| 13.4   | 24.0   | 20.1   | 11.4   | 16.7   | 26.2   |
| 8.4    | 4.9    | 8.6    | 8.1    | 2.8    | 13.3   |
| 27.3   | 29.1   | 23.3   | 20.4   | 16.5   | 20.8   |
| 15.2   | 3.1    | 11.9   | 10.0   | 13.7   | 14.8   |
| 1.9    | 2.3    | 10.4   | 7.4    | 2.2    | 8.9    |
| 16.5   | 9.8    | 10.0   | 13.7   | 18.6   | 11.9   |
| 8.9    | 2.8    | 4.2    | 10.2   | 18.6   | 14.3   |
| 1.8    | 9.4    | 3.4    | 2.5    | 10.3   | 10.1   |
| 5.2    | 2.2    | 4.3    | 2.8    | 3.0    | 5.9    |
| 50.1   | 39.3   | 49.4   | 34.5   | 44.6   | 51.3   |
| 55.8   | 49.2   | 64.0   | 66.4   | 63.7   | 66.8   |
| 1.5    | 0.5    | 9.5    | 5.3    | 4.0    | 4.1    |
| 96.6   | 78.1   | 114.4  | 101.3  | 114.7  | 98.7   |
| 12.2   | 18.1   | 22.7   | 22.2   | 29.8   | 25.1   |
| 0.6    | 2.0    | 5.9    | 3.6    | 0.8    | 1.4    |
| 1.6    | 2.1    | 9.3    | 6.9    | 9.6    | 18.6   |
| 11.5   | 11.0   | 17.3   | 16.1   | 19.3   | 26.1   |
| 64.9   | 31.8   | 54.2   | 52.8   | 59.6   | 82.9   |
| 20.0   | 22.1   | 25.8   | 17.0   | 22.8   | 20.9   |
| 1435.6 | 1520.6 | 1725.2 | 1866.6 | 1822.2 | 1905.8 |
| 418.5  | 372.3  | 426.7  | 397.1  | 509.8  | 562.9  |
| 259.0  | 207.3  | 217.5  | 258.3  | 257.4  | 306.9  |
| 1.1    | 0.6    | 2.5    | 2.3    | 5.6    | 4.8    |
| 4.3    | 1.9    | 15.4   | 5.9    | 3.5    | 2.1    |
| 24.5   | 22.6   | 28.9   | 27.6   | 34.9   | 31.2   |
| 6.8    | 8.2    | 4.6    | 6.7    | 2.8    | 5.0    |
| 7.6    | 9.4    | 15.4   | 10.0   | 8.1    | 12.8   |
| 0.8    | 1.0    | 1.0    | 1.0    | 1.0    | 0.7    |
| 146.3  | 112.3  | 131.2  | 135.4  | 170.3  | 164.9  |
| 431.8  | 410.2  | 440.7  | 439.8  | 487.1  | 557.9  |

|        |        |        |        |        |        |
|--------|--------|--------|--------|--------|--------|
| 164.0  | 155.2  | 170.9  | 167.0  | 209.5  | 204.7  |
| 13.6   | 16.0   | 14.2   | 10.1   | 9.4    | 17.4   |
| 136.2  | 150.9  | 161.3  | 160.0  | 178.0  | 176.1  |
| 73.6   | 92.4   | 78.1   | 85.8   | 84.6   | 107.6  |
| 378.3  | 291.4  | 354.6  | 349.8  | 427.6  | 429.0  |
| 18.5   | 7.9    | 9.7    | 18.8   | 15.6   | 16.0   |
| 54.4   | 32.4   | 75.3   | 54.0   | 52.6   | 69.2   |
| 1403.5 | 945.8  | 1310.2 | 1384.1 | 1482.1 | 1598.8 |
| 119.7  | 81.3   | 102.0  | 116.6  | 144.8  | 121.5  |
| 13.2   | 13.6   | 20.2   | 11.4   | 16.4   | 19.6   |
| 82.3   | 147.7  | 74.1   | 118.9  | 60.4   | 128.0  |
| 40.1   | 40.9   | 40.6   | 36.1   | 47.0   | 51.3   |
| 290.7  | 264.8  | 323.3  | 276.8  | 314.1  | 329.7  |
| 3022.0 | 2897.7 | 2875.1 | 3139.4 | 3262.9 | 3215.5 |
| 509.8  | 539.1  | 527.1  | 596.0  | 639.1  | 663.2  |
| 13.7   | 6.5    | 5.3    | 9.5    | 23.6   | 37.7   |
| 25.5   | 24.7   | 20.4   | 33.0   | 17.0   | 21.4   |
| 278.2  | 281.6  | 261.8  | 327.2  | 323.0  | 391.2  |
| 76.0   | 76.0   | 66.0   | 72.0   | 87.2   | 96.6   |
| 84.0   | 65.3   | 82.0   | 86.7   | 112.8  | 95.6   |
| 61.7   | 64.1   | 74.2   | 74.8   | 75.1   | 81.7   |
| 228.9  | 209.5  | 244.6  | 236.2  | 290.7  | 291.2  |
| 8.7    | 18.2   | 10.2   | 6.4    | 7.8    | 10.8   |
| 17.9   | 19.1   | 24.6   | 18.7   | 20.1   | 30.5   |
| 2.5    | 11.1   | 15.5   | 8.0    | 8.3    | 21.0   |
| 7208.2 | 6826.7 | 7211.7 | 7284.5 | 7407.0 | 7571.1 |
| 36.6   | 42.5   | 35.3   | 48.7   | 45.4   | 55.2   |
| 25.4   | 26.2   | 39.9   | 29.6   | 34.8   | 52.2   |
| 29.0   | 22.3   | 23.5   | 25.7   | 15.8   | 32.1   |
| 910.7  | 758.9  | 1002.3 | 1086.4 | 1211.9 | 1080.8 |
| 13.7   | 5.6    | 19.7   | 15.9   | 21.3   | 24.5   |
| 1555.0 | 1600.7 | 1633.0 | 1576.1 | 1732.9 | 1814.9 |
| 56.7   | 52.0   | 55.4   | 49.7   | 70.4   | 63.3   |
| 39.0   | 28.5   | 49.8   | 52.9   | 60.4   | 48.4   |
| 32.7   | 36.1   | 31.0   | 32.9   | 43.3   | 49.0   |
| 0.6    | 0.5    | 5.8    | 2.0    | 1.3    | 3.4    |
| 3.9    | 20.2   | 8.6    | 11.4   | 4.2    | 9.2    |
| 2.9    | 0.2    | 0.9    | 0.6    | 1.5    | 3.1    |
| 96.6   | 94.5   | 81.8   | 112.9  | 102.4  | 137.3  |
| 625.6  | 572.4  | 631.7  | 711.9  | 714.3  | 773.7  |
| 111.8  | 109.1  | 113.1  | 134.2  | 135.1  | 146.7  |
| 6.1    | 14.3   | 7.7    | 10.3   | 4.1    | 25.7   |
| 7.6    | 14.3   | 24.8   | 21.9   | 12.8   | 20.6   |
| 4.5    | 0.9    | 6.0    | 7.7    | 0.7    | 9.6    |
| 14.5   | 14.2   | 18.6   | 21.2   | 19.6   | 23.8   |
| 442.8  | 414.8  | 447.1  | 505.5  | 536.2  | 538.9  |
| 71.6   | 62.1   | 73.4   | 65.7   | 72.1   | 83.8   |
| 1.2    | 1.9    | 0.8    | 1.1    | 3.4    | 0.9    |
| 5.5    | 1.0    | 8.5    | 2.5    | 9.5    | 1.4    |
| 9.2    | 18.0   | 10.1   | 6.1    | 12.1   | 4.4    |
| 49.7   | 32.1   | 45.2   | 59.4   | 68.8   | 81.9   |
| 18.8   | 9.3    | 16.9   | 10.5   | 17.8   | 19.5   |
| 90.0   | 109.3  | 98.9   | 89.4   | 126.9  | 112.2  |



|        |        |        |        |        |        |
|--------|--------|--------|--------|--------|--------|
| 14.8   | 22.1   | 13.2   | 11.2   | 12.1   | 15.5   |
| 31.8   | 13.1   | 23.5   | 16.0   | 34.7   | 40.4   |
| 1524.5 | 1482.1 | 1495.1 | 1830.0 | 1800.9 | 1997.6 |
| 6.6    | 6.3    | 8.3    | 5.5    | 4.7    | 8.0    |
| 177.6  | 122.5  | 168.7  | 186.8  | 189.1  | 216.3  |
| 13.5   | 8.6    | 20.1   | 20.8   | 17.5   | 21.2   |
| 2.8    | 3.7    | 4.2    | 12.1   | 8.8    | 2.6    |
| 8.5    | 20.8   | 5.0    | 15.0   | 13.9   | 6.7    |
| 7.4    | 5.5    | 9.2    | 6.4    | 10.0   | 13.0   |
| 8.0    | 1.2    | 1.1    | 5.8    | 2.3    | 5.6    |
| 33.5   | 6.7    | 26.5   | 39.8   | 60.8   | 37.4   |
| 57.2   | 54.4   | 66.1   | 59.6   | 61.6   | 70.1   |
| 45.6   | 45.5   | 53.9   | 56.6   | 66.2   | 60.9   |
| 4.8    | 3.0    | 4.3    | 6.5    | 8.9    | 5.2    |
| 166.8  | 95.4   | 147.3  | 153.1  | 159.1  | 163.7  |
| 3.3    | 2.2    | 9.3    | 9.1    | 9.6    | 14.5   |
| 391.1  | 382.7  | 374.1  | 394.3  | 499.8  | 502.8  |
| 75.7   | 78.5   | 104.4  | 100.2  | 92.1   | 96.0   |
| 138.1  | 129.7  | 162.0  | 153.0  | 154.8  | 157.2  |
| 241.6  | 216.0  | 238.0  | 193.3  | 252.3  | 298.0  |
| 13.8   | 21.6   | 22.2   | 20.3   | 24.2   | 26.8   |
| 7.1    | 10.8   | 7.5    | 11.3   | 17.7   | 4.2    |
| 18.8   | 24.8   | 18.5   | 13.1   | 16.5   | 23.2   |
| 16.8   | 19.1   | 16.8   | 17.5   | 15.5   | 25.6   |
| 306.4  | 299.6  | 240.0  | 289.0  | 243.9  | 358.3  |
| 3.6    | 2.5    | 4.0    | 7.1    | 4.2    | 10.8   |
| 28.5   | 59.6   | 37.9   | 53.2   | 65.2   | 50.4   |
| 17.9   | 23.7   | 19.0   | 16.8   | 21.3   | 20.1   |
| 11.9   | 16.5   | 22.7   | 19.7   | 21.3   | 6.8    |
| 6.3    | 4.4    | 3.2    | 1.7    | 3.3    | 3.3    |
| 5.5    | 8.3    | 2.0    | 1.7    | 0.8    | 5.5    |
| 26.9   | 26.5   | 17.9   | 21.8   | 17.2   | 15.8   |
| 1000.9 | 996.2  | 906.5  | 951.5  | 938.1  | 1239.4 |
| 409.7  | 438.4  | 307.2  | 303.1  | 316.3  | 302.8  |
| 6.5    | 1.2    | 2.0    | 4.5    | 3.5    | 7.4    |
| 10.1   | 16.0   | 12.3   | 9.7    | 11.4   | 10.8   |
| 12.9   | 0.7    | 6.8    | 8.8    | 14.5   | 14.6   |
| 88.9   | 72.0   | 83.4   | 91.2   | 90.8   | 110.5  |
| 2.1    | 7.1    | 1.9    | 1.7    | 4.1    | 1.5    |
| 106.9  | 128.3  | 137.0  | 125.5  | 132.4  | 172.4  |
| 65.6   | 42.6   | 72.3   | 53.4   | 75.0   | 67.1   |
| 6.9    | 1.4    | 6.3    | 1.4    | 1.1    | 8.7    |
| 3.8    | 5.5    | 4.0    | 3.8    | 8.1    | 2.7    |
| 25.5   | 17.6   | 28.3   | 24.6   | 24.3   | 31.5   |
| 96.8   | 66.8   | 93.4   | 122.6  | 102.1  | 140.2  |
| 7.8    | 11.2   | 11.8   | 9.2    | 8.7    | 9.2    |
| 15.0   | 3.5    | 8.8    | 9.7    | 3.8    | 15.4   |
| 7.8    | 1.4    | 5.9    | 4.1    | 4.3    | 5.6    |
| 64.0   | 57.4   | 86.1   | 76.3   | 90.5   | 100.8  |
| 8.5    | 5.6    | 4.7    | 6.9    | 2.9    | 11.6   |
| 31.9   | 26.2   | 28.3   | 34.5   | 29.9   | 33.3   |
| 62.6   | 56.4   | 81.7   | 71.2   | 83.6   | 78.3   |
| 1.4    | 9.4    | 7.0    | 2.1    | 6.5    | 7.6    |

|       |        |        |        |        |        |
|-------|--------|--------|--------|--------|--------|
| 94.4  | 76.0   | 97.7   | 92.2   | 112.8  | 104.2  |
| 65.7  | 64.8   | 69.4   | 67.8   | 56.2   | 80.1   |
| 6.6   | 17.3   | 14.0   | 14.2   | 17.9   | 20.2   |
| 55.9  | 45.1   | 45.8   | 65.0   | 55.1   | 83.9   |
| 30.1  | 15.7   | 24.5   | 28.0   | 25.8   | 30.5   |
| 502.4 | 429.6  | 575.4  | 612.2  | 609.3  | 614.3  |
| 92.6  | 85.4   | 102.5  | 90.9   | 93.4   | 110.8  |
| 76.4  | 68.0   | 75.1   | 71.5   | 100.2  | 93.5   |
| 56.0  | 50.1   | 65.7   | 66.5   | 85.4   | 59.8   |
| 157.2 | 154.9  | 138.1  | 188.1  | 185.0  | 204.7  |
| 19.3  | 11.6   | 26.1   | 14.8   | 18.0   | 31.9   |
| 23.8  | 35.3   | 27.9   | 19.5   | 24.4   | 27.1   |
| 29.7  | 26.5   | 25.3   | 28.2   | 23.2   | 31.4   |
| 0.7   | 0.5    | 4.4    | 3.6    | 1.1    | 1.6    |
| 94.7  | 75.1   | 103.1  | 99.5   | 101.4  | 115.9  |
| 3.7   | 8.1    | 7.1    | 4.9    | 4.0    | 2.9    |
| 361.0 | 312.7  | 372.3  | 372.4  | 424.8  | 354.5  |
| 974.2 | 1100.0 | 1151.1 | 1187.1 | 1262.6 | 1188.9 |
| 48.0  | 157.3  | 35.4   | 102.1  | 37.4   | 80.5   |
| 13.3  | 23.6   | 31.5   | 20.6   | 15.2   | 17.0   |
| 6.8   | 16.2   | 18.6   | 14.0   | 3.6    | 4.8    |
| 217.3 | 213.1  | 238.2  | 215.7  | 263.5  | 280.3  |
| 94.5  | 70.0   | 110.0  | 94.7   | 118.5  | 118.6  |
| 12.2  | 3.4    | 10.2   | 16.2   | 9.8    | 19.2   |
| 1.1   | 1.2    | 1.5    | 1.6    | 1.1    | 1.2    |
| 23.9  | 14.9   | 9.7    | 22.7   | 25.1   | 23.9   |
| 5.0   | 5.4    | 3.2    | 1.9    | 18.0   | 11.2   |
| 378.6 | 339.2  | 386.2  | 414.3  | 460.4  | 508.9  |
| 4.3   | 8.5    | 4.4    | 2.7    | 5.9    | 3.9    |
| 17.3  | 23.3   | 29.3   | 24.9   | 21.0   | 31.6   |
| 2.8   | 3.4    | 4.5    | 2.4    | 3.5    | 4.8    |
| 71.6  | 65.3   | 100.4  | 95.0   | 80.3   | 99.6   |
| 6.0   | 20.3   | 10.6   | 3.9    | 2.2    | 4.1    |
| 4.6   | 1.8    | 2.5    | 2.6    | 1.8    | 1.9    |
| 5.5   | 3.5    | 5.7    | 6.4    | 2.1    | 9.2    |
| 4.7   | 4.6    | 9.5    | 17.7   | 9.1    | 12.1   |
| 59.9  | 68.6   | 76.5   | 69.6   | 69.3   | 68.0   |
| 269.7 | 253.9  | 246.4  | 283.5  | 255.7  | 344.0  |
| 23.7  | 23.8   | 18.6   | 5.3    | 13.7   | 9.3    |
| 4.7   | 2.7    | 7.5    | 9.8    | 10.4   | 1.9    |
| 215.4 | 195.6  | 242.2  | 222.4  | 251.3  | 275.9  |
| 13.1  | 20.5   | 4.3    | 7.0    | 5.7    | 2.4    |
| 6.1   | 16.3   | 6.9    | 9.2    | 4.4    | 6.5    |
| 3.9   | 4.7    | 3.2    | 7.0    | 5.3    | 6.1    |
| 4.8   | 10.2   | 6.0    | 4.6    | 1.6    | 3.2    |
| 26.0  | 26.0   | 12.9   | 22.5   | 21.5   | 22.2   |
| 31.6  | 33.3   | 19.6   | 22.1   | 30.4   | 32.0   |
| 0.5   | 4.7    | 0.7    | 0.8    | 0.9    | 2.3    |
| 411.5 | 449.9  | 373.5  | 388.4  | 438.1  | 475.4  |
| 5.4   | 4.5    | 2.3    | 1.9    | 5.2    | 1.2    |
| 6.8   | 7.0    | 7.5    | 2.5    | 3.4    | 8.0    |
| 1.1   | 1.6    | 1.9    | 1.2    | 4.4    | 1.8    |
| 274.3 | 251.8  | 254.6  | 242.0  | 299.0  | 308.4  |

|      |      |       |       |       |       |
|------|------|-------|-------|-------|-------|
| 12.0 | 9.6  | 9.7   | 5.5   | 11.9  | 12.3  |
| 89.9 | 94.6 | 120.5 | 105.2 | 129.0 | 141.8 |
| 3.5  | 18.3 | 17.2  | 17.5  | 10.1  | 21.6  |
| 71.8 | 74.6 | 66.6  | 54.4  | 65.0  | 83.6  |
| 10.9 | 4.8  | 3.9   | 11.4  | 10.6  | 19.2  |
| 15.0 | 48.0 | 9.0   | 22.2  | 7.5   | 6.4   |
| 1.3  | 2.8  | 2.3   | 0.9   | 3.7   | 4.4   |
| 4.7  | 7.9  | 16.8  | 1.3   | 7.1   | 3.6   |
| 13.0 | 12.7 | 22.2  | 19.1  | 21.1  | 21.0  |
| 9.2  | 10.7 | 8.9   | 11.4  | 9.9   | 10.1  |
| 2.4  | 0.9  | 1.8   | 3.1   | 1.5   | 2.1   |
| 4.4  | 8.9  | 8.0   | 7.3   | 2.3   | 11.2  |
| 11.4 | 9.7  | 18.4  | 9.2   | 8.3   | 13.5  |
| 3.4  | 1.9  | 4.0   | 2.2   | 6.7   | 3.4   |
| 1.6  | 8.1  | 4.1   | 4.3   | 6.5   | 4.5   |
| 13.7 | 1.0  | 16.8  | 8.7   | 10.4  | 17.1  |
| 0.5  | 0.6  | 3.9   | 0.2   | 5.6   | 0.9   |
| 18.0 | 19.2 | 18.9  | 20.1  | 21.3  | 21.9  |
| 21.5 | 26.3 | 34.1  | 30.0  | 24.0  | 33.9  |
| 23.3 | 5.1  | 10.8  | 22.1  | 11.1  | 9.7   |
| 10.2 | 6.8  | 16.3  | 10.2  | 13.1  | 25.4  |
| 12.4 | 1.5  | 8.8   | 8.2   | 19.5  | 8.0   |
| 0.7  | 2.6  | 0.7   | 1.3   | 1.0   | 0.5   |
| 11.9 | 1.5  | 8.8   | 7.9   | 3.3   | 6.8   |
| 8.9  | 18.1 | 4.5   | 3.9   | 9.7   | 7.6   |
| 14.9 | 7.9  | 15.7  | 16.6  | 14.0  | 21.2  |
| 26.7 | 5.8  | 22.6  | 13.1  | 26.7  | 28.1  |
| 8.3  | 7.7  | 15.4  | 3.1   | 14.7  | 4.1   |
| 67.9 | 74.3 | 95.2  | 86.5  | 72.7  | 85.0  |
| 2.9  | 3.5  | 3.5   | 1.8   | 1.2   | 2.1   |
| 10.6 | 5.1  | 3.3   | 2.7   | 8.0   | 15.1  |
| 8.8  | 5.6  | 1.2   | 1.0   | 3.7   | 6.0   |
| 9.0  | 2.0  | 2.9   | 4.6   | 8.4   | 12.4  |
| 12.3 | 20.3 | 29.3  | 15.4  | 10.7  | 14.5  |
| 7.4  | 14.7 | 13.1  | 22.5  | 11.8  | 10.6  |
| 6.5  | 16.7 | 6.3   | 2.9   | 2.7   | 4.9   |
| 9.9  | 19.7 | 3.8   | 3.3   | 21.1  | 15.3  |
| 1.1  | 1.1  | 1.3   | 1.0   | 1.6   | 1.4   |
| 2.1  | 1.7  | 6.1   | 2.1   | 1.7   | 1.5   |
| 30.8 | 16.1 | 12.7  | 6.9   | 20.4  | 22.3  |
| 76.6 | 54.0 | 72.3  | 76.1  | 87.4  | 89.3  |
| 16.3 | 6.7  | 18.0  | 17.9  | 21.2  | 18.3  |
| 12.8 | 20.2 | 10.0  | 15.6  | 16.3  | 17.7  |
| 0.5  | 11.4 | 1.6   | 2.4   | 4.0   | 7.1   |
| 45.3 | 39.7 | 36.4  | 48.4  | 55.6  | 57.6  |
| 2.4  | 2.9  | 2.1   | 2.0   | 2.0   | 3.1   |
| 29.1 | 21.2 | 38.5  | 21.4  | 34.2  | 35.7  |
| 59.0 | 44.5 | 67.1  | 58.5  | 71.3  | 83.0  |
| 4.6  | 3.1  | 4.1   | 6.1   | 3.2   | 1.8   |
| 0.4  | 2.2  | 3.7   | 3.5   | 0.2   | 3.3   |
| 0.5  | 8.4  | 3.3   | 5.7   | 10.0  | 1.5   |
| 1.3  | 4.0  | 5.6   | 1.9   | 3.1   | 8.2   |
| 60.4 | 52.9 | 59.4  | 61.9  | 57.3  | 58.6  |

|       |       |       |       |       |       |
|-------|-------|-------|-------|-------|-------|
| 3.3   | 15.4  | 11.4  | 10.7  | 13.6  | 17.8  |
| 3.6   | 1.6   | 2.5   | 2.5   | 5.9   | 4.8   |
| 2.6   | 4.7   | 3.3   | 7.5   | 1.4   | 3.7   |
| 5.6   | 6.7   | 6.9   | 8.6   | 2.2   | 8.4   |
| 3.4   | 0.9   | 4.3   | 0.9   | 7.7   | 5.3   |
| 8.2   | 0.5   | 7.4   | 4.1   | 6.7   | 12.0  |
| 6.4   | 4.9   | 4.2   | 4.2   | 2.7   | 4.8   |
| 16.5  | 15.3  | 33.6  | 29.0  | 20.7  | 19.3  |
| 286.2 | 233.8 | 253.4 | 402.9 | 288.5 | 474.0 |
| 9.9   | 1.6   | 11.4  | 11.0  | 5.1   | 12.2  |
| 172.9 | 207.5 | 181.3 | 196.9 | 214.0 | 242.9 |
| 15.9  | 14.3  | 17.2  | 9.5   | 15.7  | 22.4  |
| 1.3   | 2.6   | 1.0   | 1.4   | 1.0   | 1.1   |
| 7.4   | 4.6   | 24.8  | 17.3  | 10.5  | 13.1  |
| 12.9  | 16.1  | 6.9   | 10.4  | 16.0  | 40.8  |
| 3.1   | 2.8   | 8.8   | 2.9   | 5.6   | 3.4   |
| 20.6  | 43.2  | 53.2  | 37.1  | 27.1  | 18.2  |
| 23.4  | 18.0  | 17.5  | 17.1  | 19.5  | 15.3  |
| 6.1   | 12.7  | 9.6   | 2.6   | 4.6   | 5.1   |
| 10.9  | 15.1  | 14.6  | 15.8  | 9.9   | 15.4  |
| 49.6  | 66.8  | 54.8  | 64.1  | 65.8  | 54.6  |
| 4.5   | 4.8   | 2.8   | 9.2   | 4.6   | 8.1   |
| 3.9   | 7.3   | 2.9   | 2.6   | 2.9   | 4.7   |
| 2.9   | 12.5  | 3.7   | 7.5   | 8.6   | 7.7   |
| 2.6   | 1.4   | 2.9   | 3.1   | 2.3   | 10.5  |
| 2.9   | 4.2   | 6.1   | 5.8   | 9.8   | 3.6   |
| 4.3   | 1.4   | 3.9   | 6.8   | 4.3   | 4.8   |
| 6.6   | 1.6   | 12.9  | 1.2   | 2.2   | 3.5   |
| 29.1  | 35.7  | 35.1  | 42.7  | 39.2  | 30.3  |
| 7.6   | 7.4   | 9.2   | 3.3   | 4.4   | 7.8   |
| 1.2   | 1.6   | 1.7   | 4.8   | 5.1   | 3.0   |
| 2.1   | 2.0   | 12.2  | 2.4   | 6.8   | 7.8   |
| 8.3   | 5.3   | 4.3   | 17.2  | 14.9  | 25.0  |
| 3.8   | 3.0   | 4.7   | 5.1   | 7.3   | 2.0   |
| 2.5   | 6.1   | 6.8   | 6.1   | 2.9   | 1.6   |
| 2.9   | 2.3   | 1.2   | 2.4   | 1.8   | 1.6   |
| 5.5   | 21.6  | 17.2  | 6.4   | 6.2   | 9.6   |
| 27.3  | 21.1  | 24.2  | 19.8  | 31.1  | 28.8  |
| 3.9   | 4.1   | 8.4   | 17.6  | 5.9   | 17.8  |
| 246.9 | 210.7 | 247.4 | 257.8 | 297.1 | 300.1 |
| 7.5   | 5.0   | 4.1   | 15.8  | 3.6   | 32.2  |
| 256.2 | 286.5 | 285.8 | 317.0 | 370.1 | 453.8 |
| 194.0 | 180.0 | 231.3 | 257.8 | 248.0 | 268.7 |
| 2.4   | 17.2  | 10.3  | 3.5   | 7.7   | 3.8   |
| 58.6  | 50.4  | 45.3  | 29.4  | 52.8  | 45.0  |
| 218.7 | 180.8 | 187.2 | 212.4 | 213.2 | 251.4 |
| 172.0 | 126.6 | 185.3 | 186.8 | 196.2 | 225.1 |
| 16.4  | 13.1  | 14.5  | 14.5  | 19.4  | 16.9  |
| 471.4 | 365.7 | 355.0 | 321.9 | 378.1 | 404.1 |
| 4.4   | 4.6   | 3.9   | 9.2   | 15.8  | 24.6  |
| 0.8   | 0.7   | 0.8   | 0.7   | 0.8   | 0.9   |
| 3.6   | 3.3   | 3.6   | 4.0   | 4.4   | 4.3   |
| 3.6   | 6.7   | 1.7   | 4.7   | 1.6   | 3.6   |

|        |        |        |        |        |        |
|--------|--------|--------|--------|--------|--------|
| 32.0   | 15.4   | 30.7   | 29.6   | 34.9   | 39.8   |
| 5.6    | 9.5    | 5.2    | 1.2    | 7.9    | 6.4    |
| 72.6   | 85.9   | 60.7   | 64.0   | 68.8   | 86.0   |
| 26.8   | 33.5   | 18.2   | 29.7   | 25.8   | 28.4   |
| 6.8    | 12.3   | 11.9   | 3.8    | 4.7    | 13.6   |
| 143.2  | 153.9  | 151.6  | 137.0  | 165.4  | 138.7  |
| 81.1   | 60.1   | 69.8   | 69.3   | 93.4   | 90.8   |
| 244.7  | 221.7  | 197.1  | 243.3  | 230.5  | 293.0  |
| 5.6    | 0.9    | 6.5    | 4.4    | 4.3    | 3.9    |
| 97.4   | 67.2   | 89.5   | 94.5   | 107.8  | 113.0  |
| 4.1    | 8.0    | 12.5   | 6.6    | 14.0   | 10.7   |
| 6.2    | 9.1    | 5.9    | 4.4    | 12.9   | 7.5    |
| 36.0   | 22.8   | 19.9   | 28.4   | 26.6   | 28.8   |
| 157.9  | 173.5  | 201.5  | 200.3  | 213.4  | 244.8  |
| 297.1  | 356.7  | 327.5  | 356.1  | 323.5  | 431.8  |
| 107.3  | 112.0  | 122.0  | 108.1  | 127.9  | 137.4  |
| 8.8    | 2.0    | 6.7    | 3.1    | 1.4    | 8.7    |
| 33.0   | 25.2   | 34.5   | 35.2   | 44.9   | 41.7   |
| 160.9  | 165.1  | 210.7  | 196.8  | 250.6  | 246.0  |
| 169.4  | 192.3  | 220.2  | 215.2  | 227.3  | 247.4  |
| 24.7   | 6.6    | 13.6   | 9.8    | 21.3   | 23.4   |
| 110.1  | 91.2   | 91.0   | 98.0   | 102.9  | 145.7  |
| 31.5   | 27.9   | 23.1   | 26.6   | 32.5   | 38.3   |
| 28.3   | 25.1   | 35.7   | 34.4   | 26.3   | 44.8   |
| 3.3    | 4.2    | 1.6    | 3.4    | 2.1    | 6.1    |
| 11.4   | 31.9   | 11.6   | 12.6   | 2.0    | 16.4   |
| 243.8  | 180.0  | 224.9  | 243.8  | 235.8  | 256.5  |
| 1.5    | 4.5    | 2.1    | 1.3    | 1.7    | 1.2    |
| 210.2  | 232.7  | 244.5  | 248.5  | 283.2  | 288.7  |
| 522.5  | 361.6  | 488.8  | 520.4  | 493.8  | 546.8  |
| 1.9    | 0.7    | 1.1    | 2.2    | 2.8    | 3.0    |
| 2.3    | 3.9    | 3.2    | 1.5    | 4.7    | 7.1    |
| 1.1    | 2.0    | 6.0    | 0.9    | 5.5    | 3.4    |
| 11.1   | 18.2   | 11.5   | 8.3    | 8.2    | 12.6   |
| 109.6  | 144.6  | 106.1  | 109.3  | 128.2  | 128.2  |
| 23.3   | 13.3   | 2.6    | 6.5    | 11.9   | 16.1   |
| 3.0    | 3.5    | 8.6    | 5.5    | 5.9    | 4.0    |
| 11.8   | 18.0   | 14.4   | 10.9   | 14.0   | 8.7    |
| 7.1    | 6.1    | 14.8   | 2.4    | 3.3    | 3.0    |
| 43.2   | 30.0   | 34.5   | 42.3   | 43.9   | 40.5   |
| 7.6    | 8.0    | 3.5    | 2.5    | 1.4    | 2.4    |
| 33.4   | 31.0   | 20.5   | 37.3   | 32.2   | 21.6   |
| 3.0    | 9.3    | 3.9    | 7.0    | 6.7    | 7.6    |
| 14.2   | 14.0   | 8.8    | 19.1   | 19.0   | 16.4   |
| 69.5   | 66.4   | 64.5   | 71.2   | 78.9   | 80.0   |
| 8.0    | 12.2   | 15.1   | 17.8   | 4.2    | 12.8   |
| 636.8  | 519.6  | 782.6  | 701.7  | 926.3  | 814.3  |
| 20.5   | 20.3   | 7.3    | 9.5    | 17.9   | 16.5   |
| 65.0   | 33.9   | 71.9   | 59.6   | 65.3   | 75.5   |
| 98.6   | 63.2   | 77.3   | 76.8   | 125.2  | 98.8   |
| 76.7   | 68.4   | 111.3  | 77.9   | 146.8  | 105.5  |
| 2.0    | 6.2    | 2.9    | 10.0   | 1.4    | 1.6    |
| 1480.9 | 1631.5 | 1660.0 | 1658.3 | 1667.9 | 1747.9 |

|        |        |        |        |        |        |
|--------|--------|--------|--------|--------|--------|
| 0.9    | 1.5    | 1.3    | 1.4    | 0.8    | 0.8    |
| 871.7  | 832.3  | 872.3  | 907.1  | 977.8  | 1078.6 |
| 45.4   | 42.5   | 76.0   | 67.3   | 77.1   | 63.5   |
| 401.2  | 294.2  | 277.6  | 353.7  | 380.8  | 491.4  |
| 195.9  | 137.2  | 181.2  | 191.0  | 236.9  | 235.5  |
| 2.2    | 1.4    | 2.0    | 5.6    | 1.1    | 1.1    |
| 114.5  | 91.6   | 106.2  | 113.8  | 136.0  | 137.1  |
| 2.6    | 2.4    | 7.7    | 1.1    | 5.1    | 2.0    |
| 41.0   | 19.1   | 43.2   | 31.7   | 45.8   | 59.4   |
| 1346.6 | 1426.0 | 1559.2 | 1955.8 | 1721.1 | 1759.2 |
| 93.1   | 103.2  | 103.8  | 95.3   | 102.1  | 108.5  |
| 449.1  | 377.5  | 534.1  | 562.8  | 600.5  | 565.8  |
| 2.0    | 16.3   | 11.9   | 13.4   | 12.3   | 3.2    |
| 493.8  | 529.8  | 590.6  | 668.3  | 652.3  | 695.5  |
| 115.5  | 124.2  | 109.4  | 122.1  | 118.0  | 138.5  |
| 2647.5 | 2321.8 | 2869.3 | 2967.2 | 3286.0 | 3043.9 |
| 233.6  | 239.9  | 288.2  | 285.0  | 316.7  | 351.4  |
| 11.7   | 14.0   | 10.3   | 8.9    | 6.1    | 11.6   |
| 17.0   | 24.2   | 14.5   | 13.4   | 23.1   | 31.6   |
| 32.1   | 28.4   | 26.9   | 24.4   | 27.3   | 37.2   |
| 159.0  | 130.8  | 167.0  | 173.2  | 189.4  | 190.0  |
| 7.1    | 14.3   | 4.0    | 6.8    | 2.6    | 8.6    |
| 441.7  | 183.3  | 406.0  | 292.4  | 501.2  | 483.7  |
| 323.6  | 307.1  | 331.9  | 336.3  | 367.7  | 439.6  |
| 6.0    | 3.0    | 8.1    | 10.6   | 12.7   | 11.2   |
| 94.7   | 93.4   | 96.4   | 89.8   | 124.7  | 113.0  |
| 32.3   | 23.8   | 14.2   | 30.3   | 30.0   | 22.4   |
| 3.1    | 3.2    | 4.5    | 5.0    | 5.6    | 3.1    |
| 2.8    | 1.7    | 5.5    | 7.9    | 4.3    | 16.3   |
| 6.5    | 1.8    | 2.4    | 8.5    | 2.9    | 2.1    |
| 24.6   | 14.6   | 12.2   | 15.7   | 28.7   | 25.1   |
| 1.6    | 1.4    | 2.0    | 1.4    | 1.4    | 2.2    |
| 4.0    | 3.0    | 6.3    | 3.2    | 2.4    | 9.7    |
| 79.7   | 51.4   | 73.3   | 67.7   | 85.8   | 96.4   |
| 1.3    | 1.5    | 2.2    | 1.4    | 1.8    | 3.0    |
| 7.0    | 4.2    | 2.1    | 3.9    | 6.7    | 3.1    |
| 56.3   | 46.0   | 27.4   | 45.2   | 45.0   | 85.7   |
| 96.8   | 107.6  | 105.3  | 95.9   | 116.4  | 114.8  |
| 9.0    | 5.8    | 21.3   | 5.2    | 4.5    | 13.2   |
| 8.6    | 4.8    | 12.5   | 4.2    | 14.3   | 10.9   |
| 29.3   | 39.5   | 23.2   | 28.8   | 33.5   | 39.3   |
| 18.2   | 18.3   | 12.7   | 13.3   | 25.5   | 14.3   |
| 8.2    | 7.8    | 3.9    | 2.6    | 5.0    | 5.9    |
| 21.5   | 42.1   | 21.3   | 30.5   | 34.9   | 38.4   |
| 3.9    | 3.7    | 6.1    | 1.9    | 2.9    | 2.9    |
| 14.7   | 16.5   | 12.1   | 12.0   | 15.4   | 17.2   |
| 22.7   | 28.7   | 23.2   | 18.1   | 13.3   | 23.6   |
| 7.8    | 5.0    | 3.3    | 10.3   | 4.0    | 4.2    |
| 6.9    | 3.4    | 4.4    | 2.5    | 6.2    | 4.6    |
| 10.6   | 9.9    | 13.6   | 5.6    | 7.1    | 5.8    |
| 5.6    | 1.8    | 6.7    | 6.2    | 4.8    | 0.8    |
| 1.0    | 2.1    | 5.3    | 3.5    | 2.3    | 2.9    |
| 29.1   | 17.8   | 39.9   | 22.4   | 24.3   | 22.6   |

|       |       |       |       |       |       |
|-------|-------|-------|-------|-------|-------|
| 8.6   | 8.1   | 14.2  | 16.4  | 10.0  | 9.8   |
| 47.8  | 72.2  | 59.6  | 48.5  | 61.2  | 72.4  |
| 12.6  | 15.9  | 19.0  | 14.1  | 22.2  | 19.5  |
| 8.4   | 13.8  | 5.7   | 13.1  | 11.2  | 15.6  |
| 366.0 | 306.0 | 363.2 | 371.8 | 405.9 | 471.7 |
| 0.9   | 10.6  | 3.9   | 1.7   | 5.9   | 1.8   |
| 1.2   | 3.0   | 2.0   | 3.6   | 1.7   | 2.0   |
| 25.0  | 27.9  | 31.4  | 35.1  | 31.6  | 33.3  |
| 19.0  | 24.9  | 24.8  | 17.8  | 14.7  | 28.8  |
| 4.3   | 7.9   | 12.8  | 12.0  | 7.8   | 17.1  |
| 75.4  | 65.0  | 87.5  | 88.6  | 85.6  | 98.9  |
| 19.8  | 12.6  | 25.8  | 20.4  | 2.7   | 15.4  |
| 38.9  | 29.0  | 36.5  | 35.1  | 43.4  | 43.7  |
| 7.0   | 7.5   | 3.3   | 6.7   | 8.1   | 3.6   |
| 8.3   | 5.3   | 5.1   | 1.3   | 5.3   | 13.5  |
| 7.7   | 4.7   | 0.7   | 4.2   | 0.8   | 3.5   |
| 9.3   | 15.8  | 2.3   | 11.7  | 4.8   | 11.6  |
| 19.1  | 7.0   | 5.9   | 2.9   | 6.6   | 17.1  |
| 1.3   | 4.2   | 1.7   | 2.2   | 4.3   | 10.4  |
| 91.6  | 74.5  | 73.8  | 77.5  | 90.7  | 92.3  |
| 1.2   | 1.8   | 1.7   | 2.5   | 1.9   | 2.9   |
| 14.4  | 7.8   | 4.0   | 8.0   | 22.1  | 7.9   |
| 11.8  | 1.0   | 8.8   | 16.7  | 9.1   | 18.7  |
| 2.0   | 0.8   | 1.8   | 3.1   | 2.6   | 2.9   |
| 17.6  | 18.3  | 5.6   | 3.2   | 6.1   | 10.3  |
| 15.5  | 10.7  | 18.4  | 13.0  | 11.1  | 15.2  |
| 2.5   | 5.0   | 8.1   | 1.4   | 6.3   | 2.8   |
| 15.7  | 20.2  | 8.0   | 6.3   | 10.2  | 10.7  |
| 156.7 | 156.9 | 152.5 | 175.6 | 157.3 | 198.7 |
| 5.0   | 22.8  | 5.6   | 5.6   | 9.5   | 13.2  |
| 6.6   | 9.0   | 6.5   | 5.9   | 4.6   | 7.5   |
| 5.0   | 1.3   | 2.9   | 6.6   | 4.6   | 14.1  |
| 15.3  | 15.9  | 11.8  | 11.2  | 13.5  | 21.3  |
| 2.8   | 2.5   | 11.4  | 2.5   | 2.2   | 3.1   |
| 2.7   | 1.3   | 4.0   | 8.1   | 8.1   | 2.4   |
| 5.6   | 3.8   | 15.2  | 14.5  | 7.9   | 11.1  |
| 7.3   | 2.5   | 4.8   | 6.0   | 4.4   | 6.4   |
| 14.4  | 22.4  | 14.8  | 19.7  | 15.4  | 14.0  |
| 16.3  | 12.8  | 6.3   | 1.0   | 11.0  | 8.0   |
| 7.8   | 53.2  | 23.2  | 19.8  | 39.3  | 35.4  |
| 4.6   | 13.2  | 10.8  | 5.0   | 11.3  | 2.2   |
| 0.7   | 1.8   | 4.0   | 3.7   | 1.2   | 0.9   |
| 10.0  | 8.9   | 15.7  | 5.8   | 5.3   | 14.8  |
| 32.0  | 25.1  | 27.5  | 29.6  | 27.1  | 30.2  |
| 1.7   | 10.1  | 7.0   | 4.5   | 11.8  | 7.8   |
| 9.1   | 8.4   | 12.4  | 5.9   | 7.0   | 8.5   |
| 1.0   | 1.1   | 1.2   | 1.0   | 1.4   | 3.8   |
| 2.1   | 8.2   | 7.3   | 9.8   | 5.9   | 8.6   |
| 17.9  | 21.6  | 23.2  | 26.4  | 14.6  | 12.2  |
| 6.9   | 14.6  | 37.3  | 29.5  | 28.8  | 11.4  |
| 13.7  | 57.6  | 20.0  | 34.3  | 15.7  | 21.1  |
| 1.9   | 6.7   | 2.2   | 1.5   | 3.4   | 3.4   |
| 19.2  | 2.9   | 13.7  | 20.6  | 5.3   | 24.5  |

|        |        |        |        |        |        |
|--------|--------|--------|--------|--------|--------|
| 0.8    | 1.0    | 1.1    | 1.1    | 1.1    | 1.2    |
| 1.3    | 1.2    | 1.7    | 1.3    | 1.3    | 1.3    |
| 5.5    | 3.6    | 7.0    | 1.8    | 5.3    | 7.1    |
| 5.0    | 2.4    | 7.1    | 4.4    | 4.2    | 4.3    |
| 4.0    | 13.6   | 3.6    | 8.1    | 2.4    | 5.9    |
| 10.9   | 3.3    | 7.3    | 5.7    | 1.8    | 2.3    |
| 3.1    | 1.4    | 7.3    | 7.2    | 10.9   | 17.1   |
| 10.6   | 18.4   | 23.6   | 17.2   | 13.5   | 21.6   |
| 5.9    | 2.8    | 2.2    | 7.4    | 4.5    | 11.5   |
| 3.0    | 2.5    | 5.9    | 5.4    | 4.5    | 9.1    |
| 4.0    | 1.3    | 6.8    | 9.5    | 16.4   | 19.5   |
| 16.1   | 3.3    | 6.4    | 12.7   | 11.2   | 11.5   |
| 2.2    | 4.1    | 7.8    | 7.7    | 7.1    | 13.6   |
| 10.5   | 16.7   | 18.2   | 11.7   | 22.7   | 18.8   |
| 6.9    | 20.6   | 14.7   | 15.7   | 11.8   | 16.7   |
| 3.9    | 3.3    | 16.7   | 4.9    | 11.5   | 5.9    |
| 6.0    | 3.4    | 19.8   | 5.9    | 17.3   | 7.1    |
| 9.2    | 16.2   | 5.6    | 8.1    | 2.1    | 2.1    |
| 12.3   | 21.7   | 10.7   | 17.1   | 17.0   | 12.0   |
| 21.3   | 21.5   | 24.2   | 32.0   | 21.3   | 43.8   |
| 1.8    | 2.6    | 2.1    | 8.6    | 5.8    | 5.8    |
| 2504.0 | 2320.5 | 2327.5 | 2684.7 | 2831.9 | 3218.3 |
| 10.9   | 19.2   | 25.3   | 15.9   | 5.9    | 17.7   |
| 2.8    | 3.5    | 6.6    | 2.9    | 9.4    | 2.2    |
| 2.1    | 3.7    | 2.6    | 2.9    | 18.9   | 2.0    |
| 9.4    | 12.8   | 11.3   | 6.0    | 6.3    | 18.9   |
| 4.9    | 5.2    | 13.6   | 2.2    | 12.2   | 9.1    |
| 13.1   | 22.9   | 15.8   | 16.9   | 12.9   | 19.2   |
| 2.4    | 3.4    | 3.6    | 4.3    | 1.8    | 2.9    |
| 8.4    | 4.0    | 2.9    | 4.2    | 1.8    | 3.6    |
| 15.7   | 16.2   | 18.2   | 20.2   | 4.2    | 18.3   |
| 17.9   | 20.8   | 14.5   | 14.1   | 13.3   | 17.6   |
| 1.8    | 1.3    | 6.9    | 6.5    | 7.6    | 7.6    |
| 1.3    | 6.3    | 4.0    | 4.3    | 0.9    | 4.5    |
| 3.0    | 1.6    | 10.1   | 5.7    | 7.3    | 6.0    |
| 3.1    | 7.5    | 1.0    | 2.1    | 2.9    | 0.7    |
| 2.3    | 2.0    | 1.9    | 1.3    | 2.4    | 6.6    |
| 8.7    | 10.0   | 7.8    | 7.5    | 3.6    | 4.9    |
| 1.5    | 0.5    | 5.5    | 2.9    | 3.4    | 0.8    |
| 30.6   | 35.1   | 42.3   | 47.7   | 44.9   | 53.6   |
| 1.8    | 1.0    | 0.7    | 1.3    | 1.4    | 0.8    |
| 6.5    | 2.1    | 3.7    | 2.0    | 2.6    | 6.2    |
| 12.6   | 15.7   | 13.8   | 22.3   | 12.4   | 20.8   |
| 12.7   | 4.6    | 5.0    | 6.6    | 10.5   | 13.9   |
| 16.3   | 13.1   | 11.2   | 14.4   | 13.2   | 14.0   |
| 12.8   | 17.5   | 16.3   | 12.8   | 9.9    | 8.2    |
| 2.1    | 1.0    | 3.2    | 5.9    | 2.7    | 1.3    |
| 33.5   | 34.3   | 25.0   | 33.1   | 27.2   | 36.7   |
| 50.5   | 39.3   | 40.1   | 60.2   | 57.6   | 89.9   |
| 11.5   | 21.4   | 12.9   | 15.9   | 16.3   | 26.4   |
| 86.0   | 95.5   | 87.7   | 70.8   | 118.6  | 91.8   |
| 0.7    | 0.6    | 0.8    | 0.6    | 0.6    | 0.6    |
| 7.5    | 11.1   | 7.0    | 9.2    | 6.1    | 13.7   |



|        |        |        |        |        |        |
|--------|--------|--------|--------|--------|--------|
| 6.7    | 7.1    | 11.3   | 9.2    | 16.4   | 15.4   |
| 6.8    | 12.4   | 8.6    | 5.2    | 8.6    | 12.9   |
| 24.2   | 17.6   | 26.2   | 21.8   | 14.3   | 15.9   |
| 7.5    | 3.7    | 2.4    | 7.2    | 7.6    | 3.5    |
| 1.3    | 2.0    | 2.4    | 2.5    | 2.0    | 2.6    |
| 93.3   | 81.7   | 90.7   | 98.3   | 130.9  | 132.1  |
| 711.8  | 709.3  | 719.4  | 878.0  | 750.2  | 936.6  |
| 0.5    | 2.0    | 1.7    | 3.7    | 2.2    | 0.8    |
| 24.7   | 32.3   | 30.1   | 35.5   | 31.4   | 32.0   |
| 7.2    | 0.6    | 4.2    | 7.4    | 11.5   | 9.2    |
| 516.4  | 419.9  | 501.8  | 529.5  | 586.8  | 579.8  |
| 2.1    | 3.5    | 2.8    | 2.8    | 2.2    | 1.9    |
| 444.6  | 434.9  | 442.3  | 450.5  | 472.6  | 541.5  |
| 21.3   | 19.4   | 21.9   | 25.1   | 17.2   | 20.4   |
| 156.8  | 162.5  | 191.9  | 205.8  | 230.8  | 191.0  |
| 295.8  | 329.1  | 293.2  | 298.0  | 332.0  | 386.8  |
| 3.1    | 0.7    | 7.1    | 6.3    | 10.7   | 7.6    |
| 97.8   | 71.9   | 83.5   | 84.4   | 89.7   | 114.6  |
| 2.6    | 7.8    | 8.5    | 1.6    | 5.0    | 2.8    |
| 109.9  | 136.3  | 98.1   | 138.0  | 169.0  | 174.1  |
| 14.8   | 6.6    | 7.3    | 5.9    | 2.8    | 3.7    |
| 4844.4 | 4100.2 | 4397.9 | 4304.5 | 4647.5 | 4920.8 |
| 118.0  | 124.2  | 136.5  | 147.7  | 146.8  | 165.5  |
| 445.1  | 367.6  | 482.6  | 543.9  | 547.9  | 527.9  |
| 718.5  | 684.8  | 752.4  | 841.1  | 890.0  | 907.5  |
| 0.8    | 1.9    | 1.9    | 0.6    | 1.6    | 0.8    |
| 3.1    | 2.6    | 11.6   | 8.1    | 4.9    | 2.9    |
| 60.6   | 57.2   | 82.2   | 65.8   | 81.0   | 63.5   |
| 2.7    | 8.1    | 2.4    | 2.8    | 2.6    | 10.5   |
| 1.7    | 9.4    | 1.3    | 7.7    | 11.7   | 9.4    |
| 15.0   | 13.2   | 24.1   | 29.7   | 26.4   | 27.0   |
| 6.0    | 15.3   | 7.5    | 8.7    | 4.3    | 4.0    |
| 7.0    | 3.6    | 5.2    | 5.4    | 2.1    | 5.5    |
| 7.9    | 24.6   | 18.6   | 22.2   | 16.2   | 6.9    |
| 35.3   | 32.0   | 39.1   | 40.4   | 46.2   | 37.6   |
| 17.8   | 8.5    | 14.0   | 9.7    | 10.8   | 12.5   |
| 545.9  | 438.4  | 542.0  | 589.5  | 630.0  | 662.3  |
| 54.2   | 48.5   | 47.0   | 52.9   | 90.5   | 57.9   |
| 3.9    | 7.2    | 1.9    | 8.6    | 1.3    | 7.6    |
| 2296.0 | 2065.1 | 2216.3 | 2336.2 | 2504.8 | 2939.7 |
| 18.9   | 21.0   | 23.5   | 22.5   | 21.1   | 24.2   |
| 2.3    | 3.4    | 7.3    | 5.5    | 4.1    | 6.8    |
| 16.0   | 12.3   | 8.6    | 4.2    | 16.5   | 12.5   |
| 1.6    | 1.0    | 1.9    | 1.1    | 1.4    | 0.9    |
| 2.6    | 2.2    | 3.4    | 2.9    | 13.7   | 7.1    |
| 11.5   | 16.9   | 13.6   | 12.3   | 10.8   | 16.2   |
| 13.3   | 7.1    | 13.2   | 2.8    | 5.5    | 9.9    |
| 15.9   | 21.1   | 12.9   | 18.6   | 13.3   | 6.5    |
| 2.4    | 13.8   | 5.9    | 5.3    | 4.1    | 9.4    |
| 3.4    | 24.8   | 12.5   | 7.4    | 11.7   | 10.4   |
| 9.1    | 23.2   | 15.7   | 17.1   | 24.0   | 9.2    |
| 30.9   | 28.2   | 20.1   | 26.3   | 29.6   | 26.1   |
| 4.4    | 1.5    | 2.4    | 8.7    | 3.0    | 4.6    |

|        |        |        |         |        |        |
|--------|--------|--------|---------|--------|--------|
| 15.0   | 21.4   | 18.2   | 22.2    | 14.6   | 24.3   |
| 18.6   | 21.1   | 19.2   | 18.5    | 22.8   | 15.0   |
| 9.7    | 6.7    | 4.5    | 12.4    | 10.2   | 12.0   |
| 2.1    | 13.5   | 10.8   | 7.9     | 3.0    | 1.6    |
| 34.7   | 35.9   | 25.0   | 32.7    | 24.8   | 38.8   |
| 1803.0 | 1811.8 | 1800.2 | 1794.9  | 2036.0 | 2228.0 |
| 623.5  | 540.2  | 636.5  | 584.2   | 676.4  | 758.8  |
| 1003.4 | 863.4  | 1074.3 | 1080.3  | 1171.8 | 1228.9 |
| 3346.0 | 2915.5 | 3494.5 | 4381.8  | 3615.9 | 4357.1 |
| 8785.2 | 8133.1 | 9051.9 | 10486.9 | 9604.8 | 9988.2 |
| 3445.7 | 3325.6 | 3565.0 | 3776.2  | 3861.4 | 3882.4 |
| 420.7  | 263.5  | 460.1  | 524.1   | 662.8  | 696.2  |
| 299.2  | 258.0  | 302.2  | 344.0   | 348.1  | 360.5  |
| 269.8  | 244.0  | 266.3  | 256.4   | 301.3  | 345.4  |
| 397.5  | 367.4  | 383.1  | 352.0   | 410.2  | 456.2  |
| 2253.8 | 2084.8 | 2264.7 | 2332.9  | 2364.6 | 2475.1 |
| 854.5  | 896.0  | 850.8  | 1012.4  | 1003.4 | 1151.6 |
| 1367.6 | 1487.4 | 1451.2 | 1484.6  | 1509.5 | 1640.6 |
| 292.2  | 296.4  | 270.9  | 312.1   | 342.1  | 342.9  |
| 414.5  | 374.8  | 336.3  | 372.0   | 386.4  | 459.6  |
| 122.3  | 166.3  | 127.3  | 154.3   | 165.4  | 226.5  |
| 122.0  | 122.3  | 137.7  | 123.0   | 126.0  | 160.4  |
| 1705.4 | 1420.1 | 1838.0 | 2029.8  | 1983.4 | 2064.1 |
| 43.4   | 71.3   | 30.9   | 63.9    | 39.2   | 50.9   |
| 159.8  | 126.2  | 203.7  | 214.3   | 232.4  | 247.5  |
| 2.2    | 1.2    | 1.0    | 5.2     | 0.8    | 4.7    |
| 1641.8 | 1468.3 | 1485.1 | 1480.8  | 1612.9 | 1946.6 |
| 793.0  | 656.5  | 776.4  | 922.9   | 886.1  | 940.0  |
| 3804.8 | 3486.9 | 4136.2 | 4535.6  | 4274.8 | 4355.5 |
| 357.1  | 346.6  | 415.8  | 416.5   | 458.0  | 470.5  |
| 169.0  | 148.6  | 194.3  | 155.7   | 199.8  | 178.0  |
| 332.9  | 452.8  | 334.9  | 383.6   | 359.0  | 423.6  |
| 319.5  | 269.8  | 342.3  | 310.8   | 366.0  | 376.7  |
| 551.2  | 500.8  | 471.9  | 493.4   | 574.4  | 706.7  |
| 504.5  | 423.8  | 523.0  | 552.7   | 619.4  | 637.8  |
| 368.3  | 369.6  | 345.0  | 355.4   | 411.9  | 399.3  |
| 848.5  | 837.3  | 943.8  | 921.2   | 937.7  | 1078.6 |
| 276.3  | 331.1  | 326.5  | 306.3   | 332.8  | 404.5  |
| 553.3  | 531.1  | 596.4  | 615.4   | 665.8  | 821.3  |
| 1835.7 | 1559.6 | 1676.2 | 1650.0  | 1894.1 | 2030.9 |
| 594.4  | 538.4  | 610.7  | 690.7   | 692.0  | 632.9  |
| 267.7  | 221.8  | 256.4  | 237.8   | 274.4  | 309.8  |
| 41.9   | 45.6   | 43.2   | 49.3    | 46.4   | 53.1   |
| 1907.6 | 1621.8 | 1864.6 | 1875.4  | 2067.1 | 2230.8 |
| 521.7  | 524.5  | 387.9  | 589.3   | 470.0  | 633.5  |
| 139.0  | 162.8  | 147.4  | 192.7   | 175.9  | 201.6  |
| 463.8  | 413.9  | 486.8  | 516.1   | 546.9  | 629.5  |
| 515.1  | 519.0  | 534.7  | 508.1   | 570.1  | 669.1  |
| 929.3  | 882.2  | 899.2  | 897.0   | 936.1  | 1033.8 |
| 588.2  | 510.5  | 657.9  | 651.8   | 691.8  | 715.0  |
| 353.3  | 317.7  | 379.3  | 404.1   | 385.4  | 442.5  |
| 950.1  | 948.9  | 933.1  | 1091.0  | 1079.2 | 1172.0 |
| 268.6  | 216.5  | 249.4  | 227.4   | 313.7  | 311.8  |

|        |        |        |        |        |        |
|--------|--------|--------|--------|--------|--------|
| 167.4  | 148.8  | 183.7  | 188.3  | 201.5  | 215.5  |
| 666.7  | 627.5  | 700.2  | 728.8  | 781.1  | 841.4  |
| 472.1  | 487.8  | 558.4  | 613.1  | 580.9  | 601.4  |
| 384.5  | 327.3  | 412.9  | 461.3  | 502.8  | 498.8  |
| 96.1   | 86.8   | 118.7  | 109.4  | 120.6  | 128.8  |
| 446.3  | 317.1  | 387.4  | 429.3  | 496.5  | 506.5  |
| 18.4   | 19.9   | 23.1   | 16.0   | 6.4    | 18.6   |
| 194.5  | 170.9  | 195.2  | 200.4  | 250.1  | 254.0  |
| 35.1   | 23.6   | 33.3   | 37.3   | 41.4   | 40.1   |
| 219.6  | 239.1  | 228.2  | 243.8  | 280.7  | 299.7  |
| 3.1    | 9.8    | 15.8   | 12.3   | 13.3   | 21.6   |
| 82.6   | 42.9   | 86.5   | 82.3   | 100.5  | 104.2  |
| 507.0  | 465.5  | 511.4  | 533.6  | 524.9  | 601.9  |
| 1206.9 | 1166.9 | 1231.5 | 1404.1 | 1385.6 | 1543.6 |
| 27.4   | 20.2   | 20.0   | 25.1   | 16.4   | 23.6   |
| 423.8  | 480.3  | 554.8  | 644.6  | 733.0  | 698.4  |
| 101.3  | 103.3  | 137.0  | 123.5  | 122.5  | 127.1  |
| 197.6  | 226.7  | 201.9  | 210.2  | 213.2  | 271.1  |
| 87.6   | 106.8  | 78.2   | 81.1   | 91.9   | 121.1  |
| 147.1  | 143.5  | 136.2  | 138.9  | 153.2  | 149.1  |
| 1707.0 | 1863.8 | 2016.9 | 2270.2 | 2110.5 | 2295.8 |
| 399.4  | 348.2  | 340.3  | 390.1  | 319.5  | 554.6  |
| 16.0   | 1.6    | 22.9   | 19.0   | 20.0   | 20.1   |
| 79.3   | 82.4   | 90.6   | 94.1   | 106.9  | 105.7  |
| 251.2  | 213.8  | 272.9  | 298.6  | 312.3  | 344.3  |
| 122.7  | 95.9   | 99.1   | 111.0  | 114.1  | 106.6  |
| 120.7  | 145.9  | 154.8  | 160.7  | 167.6  | 180.4  |
| 13.5   | 6.7    | 12.2   | 11.4   | 3.4    | 16.2   |
| 383.8  | 333.8  | 371.4  | 382.2  | 411.3  | 435.3  |
| 267.7  | 253.1  | 337.5  | 331.8  | 370.3  | 335.8  |
| 468.8  | 493.0  | 561.3  | 661.4  | 719.1  | 643.6  |
| 243.3  | 177.3  | 235.9  | 262.1  | 292.3  | 329.3  |
| 113.1  | 105.4  | 121.2  | 137.2  | 148.9  | 139.8  |
| 80.8   | 101.3  | 95.3   | 124.7  | 98.4   | 106.6  |
| 273.1  | 232.0  | 290.4  | 267.7  | 281.8  | 377.2  |
| 185.7  | 160.6  | 200.3  | 193.6  | 237.7  | 245.7  |
| 52.1   | 46.0   | 55.3   | 54.8   | 63.6   | 62.3   |
| 132.2  | 131.2  | 126.0  | 131.3  | 154.4  | 162.4  |
| 25.7   | 28.9   | 23.4   | 23.6   | 25.2   | 27.7   |
| 306.6  | 363.8  | 332.9  | 354.5  | 379.4  | 390.3  |
| 438.1  | 419.8  | 424.1  | 475.8  | 506.8  | 520.9  |
| 11.9   | 11.9   | 11.8   | 7.5    | 43.4   | 7.8    |
| 640.2  | 606.5  | 524.5  | 635.1  | 557.6  | 767.7  |
| 47.6   | 30.4   | 36.4   | 44.2   | 49.4   | 61.5   |
| 586.5  | 370.5  | 529.3  | 536.3  | 609.9  | 725.5  |
| 169.0  | 130.5  | 156.4  | 182.8  | 208.6  | 207.2  |
| 140.3  | 152.3  | 93.5   | 217.6  | 132.5  | 194.2  |
| 155.5  | 136.2  | 142.2  | 167.9  | 174.0  | 208.7  |
| 146.8  | 177.3  | 217.6  | 206.8  | 221.0  | 230.4  |
| 566.8  | 515.5  | 553.4  | 546.4  | 525.7  | 686.0  |
| 43.3   | 41.6   | 37.4   | 46.7   | 42.4   | 40.4   |
| 830.2  | 797.1  | 845.5  | 818.2  | 929.0  | 952.4  |
| 174.9  | 168.1  | 139.5  | 150.9  | 229.2  | 211.2  |

|         |         |         |         |         |         |
|---------|---------|---------|---------|---------|---------|
| 77.4    | 77.9    | 61.2    | 71.0    | 81.8    | 86.3    |
| 147.3   | 109.8   | 153.3   | 167.4   | 161.0   | 197.7   |
| 148.3   | 154.7   | 171.5   | 174.8   | 178.1   | 181.1   |
| 1.1     | 4.3     | 7.3     | 1.2     | 1.3     | 2.3     |
| 72.9    | 75.0    | 63.7    | 89.3    | 65.7    | 81.4    |
| 26.2    | 7.6     | 31.1    | 14.3    | 13.9    | 23.8    |
| 223.9   | 342.8   | 296.1   | 232.0   | 271.4   | 313.5   |
| 1395.0  | 1308.0  | 1483.4  | 1398.2  | 1557.7  | 1630.9  |
| 17.1    | 31.2    | 19.1    | 26.2    | 26.9    | 31.3    |
| 364.6   | 297.6   | 423.1   | 509.5   | 470.5   | 487.3   |
| 9.9     | 14.2    | 19.4    | 11.0    | 21.0    | 17.8    |
| 82.1    | 105.6   | 104.1   | 107.7   | 119.2   | 126.8   |
| 2.8     | 2.3     | 2.4     | 1.6     | 2.4     | 2.9     |
| 62.3    | 72.3    | 48.2    | 58.7    | 59.6    | 67.4    |
| 174.7   | 220.0   | 287.0   | 256.7   | 288.8   | 282.9   |
| 62.1    | 53.0    | 71.1    | 59.3    | 64.8    | 67.9    |
| 62.0    | 51.0    | 65.5    | 69.5    | 73.5    | 106.5   |
| 19.7    | 21.0    | 18.6    | 13.5    | 19.1    | 21.9    |
| 363.0   | 366.7   | 415.8   | 428.8   | 477.8   | 472.7   |
| 2.4     | 14.7    | 2.8     | 5.3     | 11.3    | 4.3     |
| 135.8   | 119.2   | 155.2   | 139.0   | 150.5   | 181.3   |
| 18.6    | 20.8    | 13.6    | 19.2    | 20.2    | 20.6    |
| 72.9    | 74.4    | 67.4    | 91.5    | 104.2   | 99.2    |
| 200.1   | 166.6   | 190.1   | 191.3   | 229.6   | 265.0   |
| 1307.9  | 1474.1  | 1586.6  | 1697.2  | 1722.2  | 1738.4  |
| 231.5   | 261.2   | 262.7   | 341.6   | 342.3   | 369.6   |
| 110.7   | 87.8    | 123.6   | 110.9   | 129.2   | 139.1   |
| 84.2    | 60.4    | 77.5    | 84.2    | 82.8    | 99.3    |
| 98.3    | 113.4   | 130.9   | 133.8   | 145.8   | 150.4   |
| 70.4    | 60.9    | 92.2    | 88.1    | 101.3   | 107.4   |
| 67.3    | 67.1    | 82.1    | 72.1    | 71.8    | 76.6    |
| 345.7   | 301.0   | 394.1   | 377.3   | 452.6   | 469.1   |
| 13.0    | 10.6    | 8.8     | 14.0    | 7.1     | 9.0     |
| 57.0    | 58.4    | 83.8    | 80.1    | 69.0    | 83.8    |
| 10964.5 | 10895.4 | 11073.2 | 11333.3 | 11316.2 | 12297.9 |
| 2.0     | 0.9     | 0.9     | 4.0     | 1.9     | 1.4     |
| 1.2     | 1.8     | 9.6     | 4.0     | 2.0     | 1.8     |
| 52.2    | 66.7    | 50.9    | 69.0    | 66.9    | 85.3    |
| 11.1    | 15.2    | 18.6    | 19.9    | 23.7    | 4.4     |
| 12.9    | 9.2     | 9.4     | 9.7     | 7.6     | 7.5     |
| 882.7   | 733.0   | 871.4   | 883.0   | 1001.5  | 1118.4  |
| 11.5    | 10.8    | 10.0    | 11.3    | 9.7     | 12.5    |
| 28.9    | 37.6    | 37.2    | 28.7    | 32.8    | 45.7    |
| 19.3    | 25.5    | 22.7    | 18.5    | 22.6    | 28.5    |
| 31.3    | 35.0    | 21.0    | 28.3    | 27.8    | 22.3    |
| 270.9   | 244.1   | 313.7   | 313.1   | 334.1   | 386.0   |
| 1687.0  | 1782.1  | 1892.4  | 1941.2  | 2125.8  | 2279.0  |
| 577.2   | 551.4   | 530.1   | 576.2   | 590.4   | 695.0   |
| 47.8    | 53.7    | 36.5    | 57.9    | 65.4    | 62.8    |
| 1452.3  | 1266.6  | 1498.8  | 1654.3  | 1606.7  | 1790.2  |
| 2.1     | 10.4    | 2.4     | 2.9     | 5.4     | 7.9     |
| 2.3     | 2.6     | 6.1     | 6.7     | 6.1     | 3.9     |
| 8.9     | 12.6    | 14.9    | 14.8    | 11.3    | 10.9    |

|        |        |        |        |        |        |
|--------|--------|--------|--------|--------|--------|
| 40.7   | 14.3   | 38.5   | 28.4   | 27.8   | 50.0   |
| 13.0   | 15.2   | 17.0   | 9.9    | 16.1   | 15.6   |
| 98.4   | 70.8   | 89.5   | 72.0   | 101.1  | 93.5   |
| 185.7  | 167.2  | 192.4  | 174.2  | 181.5  | 195.9  |
| 2.4    | 1.1    | 1.2    | 3.3    | 1.6    | 1.3    |
| 33.4   | 24.3   | 23.0   | 22.6   | 27.6   | 34.3   |
| 52.1   | 58.4   | 41.0   | 45.7   | 45.0   | 51.6   |
| 31.6   | 44.3   | 38.2   | 43.9   | 39.0   | 44.7   |
| 129.9  | 151.8  | 183.8  | 169.1  | 108.7  | 138.9  |
| 44.6   | 42.0   | 43.9   | 32.8   | 38.1   | 38.3   |
| 1451.8 | 1452.5 | 1555.4 | 1773.8 | 1741.0 | 1903.5 |
| 260.5  | 227.1  | 272.7  | 268.8  | 303.0  | 334.0  |
| 1.9    | 28.7   | 9.1    | 5.5    | 8.8    | 3.0    |
| 57.1   | 52.8   | 74.2   | 54.2   | 75.4   | 61.6   |
| 506.6  | 512.6  | 539.5  | 514.0  | 538.5  | 604.2  |
| 34.6   | 30.5   | 35.4   | 34.7   | 34.6   | 54.7   |
| 34.1   | 48.5   | 36.2   | 38.6   | 41.1   | 40.7   |
| 6.6    | 9.5    | 6.8    | 2.2    | 9.8    | 2.1    |
| 74.3   | 50.8   | 67.4   | 60.6   | 89.6   | 94.4   |
| 72.8   | 84.7   | 78.3   | 75.4   | 87.0   | 100.2  |
| 464.9  | 395.5  | 508.5  | 516.2  | 569.8  | 567.5  |
| 11.5   | 6.7    | 1.1    | 11.8   | 12.4   | 6.6    |
| 375.0  | 327.6  | 355.8  | 431.0  | 474.5  | 480.9  |
| 106.6  | 97.1   | 126.1  | 127.9  | 121.3  | 125.1  |
| 11.2   | 9.5    | 7.1    | 19.3   | 7.7    | 11.9   |
| 1154.5 | 1003.7 | 1125.6 | 1122.7 | 1127.6 | 1294.3 |
| 81.1   | 86.3   | 71.5   | 70.6   | 78.7   | 100.2  |
| 321.2  | 369.5  | 345.1  | 376.3  | 370.0  | 409.8  |
| 7.2    | 6.0    | 26.5   | 4.5    | 29.4   | 13.5   |
| 76.5   | 39.2   | 60.9   | 48.6   | 59.8   | 67.5   |
| 234.4  | 247.8  | 272.7  | 281.7  | 285.1  | 267.0  |
| 10.1   | 5.4    | 8.9    | 8.0    | 19.3   | 14.9   |
| 24.1   | 24.7   | 21.3   | 29.2   | 30.9   | 31.1   |
| 20.6   | 43.8   | 78.0   | 40.1   | 52.9   | 55.4   |
| 1.2    | 2.8    | 3.8    | 0.8    | 3.7    | 5.3    |
| 45.9   | 21.0   | 40.4   | 40.1   | 43.4   | 59.2   |
| 22.0   | 19.2   | 31.1   | 20.1   | 27.5   | 31.1   |
| 103.6  | 96.7   | 86.3   | 90.9   | 105.4  | 114.6  |
| 20.1   | 18.6   | 18.4   | 10.9   | 10.6   | 17.6   |
| 7.3    | 6.6    | 1.1    | 1.4    | 8.2    | 3.3    |
| 162.1  | 90.1   | 170.4  | 168.6  | 204.1  | 221.2  |
| 3.8    | 4.4    | 13.0   | 4.7    | 12.7   | 5.1    |
| 205.7  | 169.3  | 196.8  | 190.9  | 218.7  | 240.7  |
| 21.4   | 20.4   | 19.7   | 26.2   | 18.8   | 25.7   |
| 11.2   | 4.8    | 5.2    | 7.3    | 6.9    | 9.6    |
| 10.9   | 1.8    | 2.7    | 2.0    | 2.8    | 3.1    |
| 72.5   | 46.9   | 72.9   | 64.5   | 60.3   | 77.8   |
| 2.9    | 3.5    | 1.8    | 6.6    | 5.1    | 10.6   |
| 1753.4 | 1672.9 | 1759.9 | 1865.8 | 1960.0 | 2218.5 |
| 1576.3 | 1458.9 | 1609.1 | 1623.8 | 1840.6 | 1846.3 |
| 289.5  | 297.8  | 311.2  | 293.9  | 327.0  | 343.4  |
| 1.7    | 2.1    | 3.4    | 1.8    | 2.7    | 1.7    |
| 131.3  | 180.4  | 127.7  | 156.1  | 141.5  | 161.4  |

|        |        |        |        |        |        |
|--------|--------|--------|--------|--------|--------|
| 20.2   | 11.2   | 18.2   | 17.0   | 17.1   | 19.3   |
| 19.5   | 21.3   | 23.5   | 18.9   | 24.0   | 26.7   |
| 1.4    | 1.0    | 3.7    | 2.8    | 0.9    | 1.8    |
| 32.6   | 22.5   | 36.3   | 36.8   | 47.0   | 46.9   |
| 7.4    | 1.8    | 13.7   | 12.5   | 9.4    | 8.1    |
| 581.7  | 553.3  | 565.4  | 608.8  | 663.1  | 723.4  |
| 98.1   | 149.0  | 130.9  | 95.8   | 141.8  | 146.5  |
| 34.3   | 43.7   | 50.8   | 37.4   | 45.9   | 46.4   |
| 1123.9 | 1181.5 | 1091.3 | 1277.9 | 1127.3 | 1275.0 |
| 679.5  | 466.3  | 587.5  | 648.1  | 727.5  | 708.9  |
| 45.0   | 37.9   | 53.0   | 52.4   | 60.4   | 61.7   |
| 7328.8 | 6775.7 | 7009.4 | 7320.6 | 7592.2 | 7600.7 |
| 1350.0 | 1344.0 | 1691.1 | 1811.3 | 1768.1 | 1732.6 |
| 427.9  | 417.4  | 350.0  | 426.3  | 380.8  | 447.6  |
| 119.4  | 103.1  | 108.6  | 125.5  | 149.7  | 150.4  |
| 16.1   | 9.0    | 17.8   | 7.8    | 16.3   | 10.6   |
| 24.4   | 22.7   | 28.0   | 25.5   | 30.3   | 29.7   |
| 5.9    | 16.6   | 17.7   | 6.5    | 7.3    | 7.5    |
| 437.2  | 323.2  | 431.4  | 434.8  | 484.9  | 454.9  |
| 7609.7 | 7190.1 | 7683.3 | 8123.1 | 8245.0 | 8191.4 |
| 116.9  | 144.2  | 128.7  | 133.8  | 143.9  | 151.9  |
| 802.2  | 696.0  | 786.6  | 862.9  | 908.2  | 980.2  |
| 67.4   | 76.2   | 88.3   | 80.6   | 79.1   | 104.6  |
| 411.3  | 324.8  | 453.1  | 445.2  | 489.6  | 552.2  |
| 74.2   | 66.2   | 75.6   | 90.2   | 87.3   | 97.0   |
| 542.4  | 559.7  | 612.1  | 672.9  | 753.6  | 769.3  |
| 32.1   | 30.2   | 25.5   | 26.1   | 25.0   | 27.5   |
| 226.4  | 212.3  | 225.5  | 232.0  | 251.8  | 309.7  |
| 39.3   | 38.5   | 52.7   | 49.2   | 54.2   | 35.0   |
| 127.8  | 93.4   | 118.4  | 126.1  | 140.0  | 153.9  |
| 1785.0 | 1625.3 | 1829.0 | 2019.0 | 2183.7 | 2227.9 |
| 984.6  | 1036.5 | 1049.1 | 1107.8 | 1191.4 | 1205.5 |
| 21.2   | 45.3   | 21.4   | 29.6   | 23.5   | 23.2   |
| 11.8   | 11.6   | 7.6    | 3.6    | 8.3    | 4.1    |
| 15.5   | 4.9    | 19.2   | 19.1   | 15.9   | 15.0   |
| 11.5   | 19.9   | 10.2   | 9.0    | 22.2   | 19.3   |
| 12.4   | 20.4   | 15.3   | 8.8    | 19.1   | 16.6   |
| 93.6   | 63.0   | 68.6   | 87.4   | 100.0  | 98.8   |
| 2.3    | 4.3    | 3.7    | 2.8    | 2.1    | 2.8    |
| 1.2    | 2.1    | 1.5    | 1.1    | 1.8    | 1.3    |
| 0.7    | 0.6    | 0.7    | 1.1    | 0.6    | 0.7    |
| 1.3    | 1.0    | 2.0    | 1.3    | 1.3    | 1.8    |
| 8.7    | 23.2   | 13.9   | 1.3    | 6.4    | 17.7   |
| 2.2    | 1.6    | 2.0    | 1.5    | 1.5    | 1.5    |
| 249.5  | 270.4  | 285.4  | 306.6  | 325.8  | 351.6  |
| 1520.3 | 1388.6 | 1570.4 | 1618.6 | 1664.9 | 1708.0 |
| 183.5  | 180.8  | 187.3  | 201.3  | 192.9  | 227.5  |
| 188.3  | 162.6  | 222.1  | 272.6  | 244.8  | 255.2  |
| 282.5  | 194.4  | 248.6  | 250.9  | 336.8  | 325.8  |
| 148.4  | 101.8  | 128.2  | 115.6  | 159.6  | 167.0  |
| 38.3   | 36.6   | 32.1   | 41.9   | 40.4   | 56.4   |
| 276.9  | 315.5  | 359.6  | 381.2  | 344.1  | 371.3  |
| 27.8   | 26.3   | 12.2   | 17.3   | 19.9   | 22.4   |

|        |        |        |        |        |        |
|--------|--------|--------|--------|--------|--------|
| 217.2  | 240.5  | 212.9  | 245.4  | 275.6  | 264.9  |
| 316.0  | 339.2  | 346.8  | 355.5  | 348.6  | 421.9  |
| 225.4  | 173.2  | 213.5  | 201.9  | 228.9  | 267.6  |
| 77.5   | 106.6  | 87.8   | 70.3   | 81.8   | 98.2   |
| 125.9  | 116.5  | 116.3  | 129.5  | 142.5  | 159.9  |
| 1199.1 | 1119.5 | 1205.5 | 1251.5 | 1339.6 | 1397.0 |
| 37.5   | 32.1   | 38.6   | 36.2   | 45.5   | 45.2   |
| 817.2  | 751.3  | 818.6  | 885.2  | 940.5  | 978.2  |
| 224.8  | 245.8  | 256.8  | 208.5  | 254.6  | 291.1  |
| 1179.0 | 1276.9 | 1246.5 | 1366.6 | 1428.8 | 1523.0 |
| 147.2  | 120.1  | 143.4  | 136.0  | 163.8  | 183.2  |
| 177.2  | 140.3  | 167.5  | 167.2  | 206.5  | 201.5  |
| 375.8  | 436.3  | 360.5  | 428.9  | 438.3  | 437.1  |
| 3.0    | 6.1    | 15.2   | 15.4   | 14.9   | 14.0   |
| 2.8    | 1.3    | 9.0    | 12.5   | 8.8    | 5.0    |
| 968.9  | 805.5  | 888.6  | 1015.7 | 1036.1 | 1166.6 |
| 116.5  | 98.6   | 116.0  | 119.2  | 118.3  | 118.1  |
| 473.7  | 456.0  | 412.7  | 446.3  | 519.6  | 549.1  |
| 247.0  | 297.6  | 173.0  | 288.5  | 246.7  | 317.9  |
| 317.0  | 317.5  | 252.9  | 366.1  | 332.2  | 406.1  |
| 166.7  | 98.6   | 185.9  | 182.3  | 225.4  | 218.3  |
| 102.1  | 139.7  | 134.0  | 131.9  | 235.9  | 190.5  |
| 4.3    | 3.2    | 14.1   | 4.3    | 4.3    | 4.4    |
| 48.8   | 52.6   | 34.1   | 48.0   | 26.1   | 49.4   |
| 220.8  | 139.6  | 234.3  | 177.0  | 193.0  | 194.5  |
| 595.1  | 500.2  | 642.4  | 565.8  | 766.8  | 780.0  |
| 57.6   | 28.0   | 50.6   | 60.9   | 57.3   | 54.4   |
| 752.7  | 812.7  | 764.0  | 856.4  | 804.8  | 1005.0 |
| 102.9  | 111.4  | 124.6  | 120.0  | 145.1  | 144.9  |
| 152.8  | 135.6  | 143.9  | 162.6  | 145.5  | 198.0  |
| 168.4  | 171.2  | 192.3  | 193.0  | 235.4  | 326.2  |
| 411.3  | 385.4  | 378.7  | 393.7  | 454.0  | 499.3  |
| 367.7  | 346.7  | 377.3  | 376.5  | 466.8  | 474.2  |
| 615.5  | 597.1  | 656.7  | 649.6  | 744.3  | 703.7  |
| 59.3   | 61.2   | 58.1   | 64.6   | 72.6   | 96.8   |
| 86.9   | 82.2   | 100.3  | 100.8  | 106.1  | 105.0  |
| 238.8  | 207.3  | 276.4  | 261.3  | 271.9  | 337.3  |
| 158.5  | 149.9  | 160.6  | 172.8  | 209.3  | 207.0  |
| 83.9   | 87.2   | 71.4   | 83.2   | 121.1  | 88.3   |
| 549.3  | 726.8  | 383.2  | 634.0  | 443.8  | 678.2  |
| 175.0  | 169.4  | 182.3  | 178.7  | 200.4  | 200.7  |
| 7229.1 | 6739.3 | 7311.2 | 7393.5 | 7500.0 | 7624.8 |
| 329.4  | 337.3  | 347.7  | 331.1  | 402.3  | 429.7  |
| 249.4  | 299.4  | 323.6  | 342.6  | 360.3  | 389.8  |
| 35.4   | 40.1   | 31.4   | 43.3   | 43.0   | 44.7   |
| 482.6  | 381.2  | 511.3  | 493.7  | 627.0  | 551.5  |
| 405.3  | 388.3  | 428.6  | 417.6  | 499.7  | 520.9  |
| 197.1  | 149.5  | 213.0  | 193.0  | 223.5  | 222.1  |
| 227.7  | 180.0  | 207.1  | 182.6  | 244.3  | 281.6  |
| 137.0  | 109.1  | 116.0  | 118.6  | 130.2  | 153.8  |
| 26.6   | 6.2    | 10.0   | 23.1   | 10.2   | 16.1   |
| 71.1   | 60.3   | 76.8   | 66.1   | 88.5   | 88.6   |
| 259.5  | 212.7  | 250.6  | 287.4  | 290.4  | 317.1  |

|         |         |         |         |         |         |
|---------|---------|---------|---------|---------|---------|
| 116.4   | 80.0    | 128.5   | 137.9   | 138.4   | 159.0   |
| 70.2    | 65.3    | 57.4    | 63.9    | 78.8    | 70.9    |
| 235.1   | 235.0   | 267.7   | 270.5   | 276.6   | 283.2   |
| 212.3   | 156.2   | 228.7   | 226.8   | 256.1   | 231.2   |
| 7815.9  | 7759.2  | 7212.3  | 8892.0  | 8783.9  | 9358.1  |
| 41.3    | 44.5    | 50.1    | 50.7    | 47.5    | 36.1    |
| 4.1     | 2.8     | 4.5     | 2.8     | 7.3     | 2.9     |
| 37.4    | 38.2    | 37.3    | 38.7    | 36.8    | 47.5    |
| 1.7     | 6.6     | 4.7     | 11.4    | 12.8    | 5.1     |
| 8.8     | 13.2    | 12.3    | 11.6    | 14.1    | 4.4     |
| 319.2   | 347.7   | 375.8   | 433.8   | 483.3   | 459.7   |
| 11391.7 | 10902.4 | 11035.5 | 11526.4 | 11760.9 | 11304.4 |
| 163.4   | 139.1   | 144.9   | 159.4   | 153.9   | 211.0   |
| 112.8   | 135.0   | 148.6   | 167.0   | 174.4   | 172.5   |
| 277.7   | 167.9   | 188.4   | 167.6   | 181.7   | 300.1   |
| 261.7   | 161.7   | 212.9   | 207.2   | 281.5   | 336.8   |
| 238.1   | 193.7   | 221.0   | 235.7   | 249.9   | 292.9   |
| 457.9   | 409.9   | 460.0   | 507.4   | 521.5   | 530.3   |
| 3523.8  | 2062.8  | 3204.3  | 3011.7  | 4066.7  | 3995.0  |
| 380.3   | 309.7   | 375.5   | 370.4   | 469.6   | 437.1   |
| 99.3    | 121.7   | 137.9   | 142.2   | 154.9   | 144.9   |
| 484.9   | 433.3   | 509.7   | 496.8   | 519.6   | 624.5   |
| 83.9    | 59.6    | 90.0    | 82.6    | 85.5    | 84.8    |
| 71.3    | 49.7    | 46.2    | 53.6    | 58.6    | 71.8    |
| 50.1    | 37.3    | 48.2    | 56.2    | 54.1    | 60.8    |
| 75.1    | 63.4    | 78.3    | 92.1    | 90.5    | 103.4   |
| 154.1   | 168.2   | 161.3   | 162.1   | 163.4   | 210.4   |
| 15.5    | 14.0    | 16.8    | 24.3    | 18.3    | 25.8    |
| 157.7   | 105.4   | 129.3   | 113.6   | 155.0   | 140.5   |
| 125.9   | 105.5   | 142.8   | 135.5   | 159.3   | 171.0   |
| 273.8   | 308.9   | 281.5   | 343.8   | 379.5   | 350.9   |
| 158.7   | 182.9   | 193.1   | 172.7   | 239.6   | 198.1   |
| 241.4   | 220.1   | 211.4   | 287.6   | 282.3   | 312.3   |
| 228.3   | 201.1   | 218.1   | 245.5   | 237.3   | 260.4   |
| 300.5   | 275.0   | 283.4   | 338.1   | 327.3   | 376.1   |
| 124.8   | 136.6   | 157.7   | 143.2   | 169.0   | 171.2   |
| 419.0   | 251.0   | 342.0   | 347.2   | 414.7   | 473.1   |
| 112.1   | 90.8    | 103.6   | 88.5    | 127.5   | 116.3   |
| 328.8   | 277.6   | 374.7   | 334.8   | 387.3   | 444.9   |
| 202.1   | 196.5   | 219.5   | 231.0   | 246.8   | 278.1   |
| 891.6   | 827.9   | 904.7   | 988.4   | 1090.5  | 1157.8  |
| 12.6    | 6.0     | 5.9     | 17.6    | 12.4    | 30.9    |
| 3316.9  | 2986.7  | 3213.2  | 3339.5  | 3512.0  | 3880.0  |
| 1505.6  | 1152.0  | 1445.9  | 1332.4  | 1594.9  | 1569.5  |
| 81.3    | 84.3    | 101.5   | 92.0    | 97.0    | 100.7   |
| 114.3   | 122.1   | 127.2   | 107.2   | 126.6   | 129.0   |
| 28.5    | 10.1    | 24.3    | 33.9    | 30.7    | 38.3    |
| 77.4    | 69.7    | 82.6    | 79.4    | 106.5   | 91.9    |
| 16.7    | 17.3    | 20.2    | 21.0    | 34.3    | 34.2    |
| 44.1    | 42.0    | 48.3    | 46.1    | 50.7    | 45.7    |
| 30.6    | 24.3    | 33.3    | 24.4    | 31.9    | 35.3    |
| 50.3    | 47.1    | 51.7    | 59.8    | 56.1    | 59.3    |
| 392.0   | 340.6   | 474.4   | 444.9   | 515.8   | 475.1   |



|         |         |         |         |         |         |
|---------|---------|---------|---------|---------|---------|
| 14.7    | 25.4    | 22.6    | 28.5    | 14.6    | 22.4    |
| 496.8   | 552.9   | 324.5   | 611.2   | 409.1   | 605.4   |
| 162.5   | 144.9   | 150.5   | 173.2   | 177.0   | 188.9   |
| 44.5    | 49.9    | 46.0    | 39.7    | 40.4    | 33.9    |
| 1145.1  | 1015.4  | 1182.4  | 1264.9  | 1289.9  | 1360.4  |
| 215.2   | 216.6   | 242.9   | 236.9   | 258.7   | 307.6   |
| 37.6    | 36.5    | 50.7    | 37.9    | 52.1    | 62.2    |
| 1159.5  | 942.8   | 1126.4  | 1067.9  | 1143.3  | 1279.4  |
| 205.6   | 221.2   | 219.9   | 223.0   | 286.9   | 303.4   |
| 131.1   | 120.3   | 139.0   | 140.3   | 155.3   | 157.6   |
| 114.6   | 120.0   | 114.3   | 127.8   | 147.3   | 148.2   |
| 157.9   | 165.6   | 168.9   | 141.5   | 174.2   | 182.8   |
| 1.1     | 2.2     | 1.3     | 2.3     | 1.9     | 1.6     |
| 1215.7  | 1105.0  | 1150.1  | 1189.6  | 1330.0  | 1291.5  |
| 1.8     | 1.3     | 1.5     | 1.5     | 2.0     | 1.7     |
| 292.6   | 341.4   | 334.7   | 400.9   | 401.7   | 394.3   |
| 154.0   | 139.4   | 137.5   | 161.0   | 170.2   | 188.6   |
| 48.8    | 66.1    | 61.6    | 58.3    | 76.8    | 62.7    |
| 101.8   | 88.2    | 93.9    | 101.4   | 113.3   | 112.4   |
| 13.0    | 26.0    | 11.4    | 11.6    | 11.0    | 17.0    |
| 20.8    | 20.6    | 39.4    | 22.5    | 34.0    | 32.5    |
| 36.9    | 21.6    | 26.8    | 8.7     | 27.0    | 46.8    |
| 23.1    | 19.9    | 19.4    | 17.8    | 12.9    | 19.8    |
| 15.7    | 5.9     | 20.2    | 3.5     | 27.6    | 6.8     |
| 258.7   | 191.2   | 277.6   | 282.0   | 349.2   | 351.3   |
| 116.4   | 107.8   | 124.4   | 131.1   | 137.4   | 141.8   |
| 9.6     | 9.0     | 4.1     | 32.6    | 17.8    | 23.2    |
| 41.5    | 11.4    | 51.5    | 44.2    | 55.9    | 43.2    |
| 12.6    | 25.1    | 13.0    | 17.4    | 11.1    | 4.7     |
| 107.8   | 83.3    | 99.0    | 84.9    | 121.6   | 127.6   |
| 83.4    | 23.3    | 74.9    | 78.4    | 141.4   | 139.0   |
| 63.0    | 68.0    | 74.9    | 58.9    | 80.1    | 103.1   |
| 0.8     | 0.4     | 2.9     | 1.3     | 5.5     | 1.1     |
| 171.0   | 188.8   | 154.4   | 181.5   | 197.2   | 204.1   |
| 13.0    | 5.1     | 10.1    | 4.2     | 9.2     | 13.3    |
| 871.4   | 822.1   | 901.1   | 1101.1  | 1006.4  | 1137.6  |
| 82.9    | 44.7    | 74.7    | 65.2    | 82.7    | 76.2    |
| 272.7   | 277.4   | 220.4   | 214.3   | 280.0   | 310.2   |
| 69.4    | 70.9    | 68.3    | 64.5    | 84.4    | 63.5    |
| 48.2    | 44.4    | 52.9    | 45.2    | 58.0    | 60.8    |
| 15.8    | 15.3    | 16.6    | 19.6    | 12.8    | 16.2    |
| 334.0   | 264.9   | 338.7   | 326.9   | 376.9   | 429.5   |
| 159.8   | 168.9   | 180.0   | 221.2   | 206.9   | 256.2   |
| 117.4   | 82.1    | 90.5    | 86.4    | 108.6   | 107.3   |
| 39.1    | 37.5    | 35.4    | 36.3    | 42.2    | 39.9    |
| 2.5     | 1.9     | 2.3     | 1.9     | 5.1     | 7.2     |
| 8.4     | 1.8     | 2.3     | 0.7     | 5.1     | 1.2     |
| 18.4    | 19.6    | 44.4    | 28.4    | 39.6    | 51.6    |
| 81.5    | 56.3    | 71.0    | 60.4    | 78.5    | 74.4    |
| 92.0    | 90.2    | 104.2   | 110.0   | 134.3   | 98.5    |
| 114.1   | 69.9    | 94.6    | 132.9   | 151.9   | 110.9   |
| 11221.9 | 10518.6 | 10529.7 | 11425.1 | 11236.5 | 12185.9 |
| 60.0    | 53.2    | 66.7    | 68.6    | 104.8   | 83.0    |

|        |        |        |        |        |        |
|--------|--------|--------|--------|--------|--------|
| 120.4  | 111.0  | 118.2  | 146.7  | 152.3  | 137.0  |
| 98.6   | 71.7   | 119.8  | 110.9  | 110.7  | 136.4  |
| 83.3   | 86.0   | 76.2   | 101.8  | 105.1  | 115.3  |
| 1437.4 | 1364.8 | 1638.4 | 1681.2 | 1718.5 | 1863.3 |
| 115.6  | 91.5   | 109.7  | 114.2  | 144.7  | 167.0  |
| 1.6    | 11.8   | 2.1    | 4.0    | 1.8    | 5.0    |
| 38.8   | 27.3   | 29.2   | 39.4   | 37.9   | 55.7   |
| 4.5    | 3.0    | 1.4    | 2.2    | 2.2    | 1.9    |
| 23.5   | 18.1   | 21.1   | 34.0   | 27.3   | 38.1   |
| 73.1   | 92.6   | 114.6  | 84.6   | 111.5  | 80.3   |
| 210.0  | 117.6  | 183.8  | 190.9  | 226.8  | 221.2  |
| 112.7  | 104.7  | 130.8  | 113.4  | 134.0  | 142.7  |
| 60.0   | 28.0   | 49.1   | 48.8   | 64.9   | 64.3   |
| 52.6   | 50.8   | 62.0   | 52.9   | 56.4   | 63.4   |
| 130.7  | 127.4  | 169.8  | 162.4  | 151.0  | 146.0  |
| 82.3   | 58.4   | 75.5   | 90.2   | 90.5   | 100.1  |
| 125.9  | 115.8  | 128.8  | 150.8  | 164.6  | 139.7  |
| 11.0   | 29.7   | 9.4    | 19.0   | 14.3   | 22.3   |
| 143.0  | 315.1  | 109.9  | 217.0  | 95.4   | 186.1  |
| 154.3  | 119.6  | 186.5  | 199.9  | 197.2  | 185.5  |
| 44.4   | 35.8   | 51.4   | 54.4   | 43.0   | 66.4   |
| 13.8   | 19.5   | 5.0    | 8.0    | 8.8    | 3.9    |
| 25.2   | 45.8   | 41.3   | 37.9   | 39.6   | 49.9   |
| 1536.4 | 1156.9 | 1368.3 | 1484.6 | 1637.8 | 1541.5 |
| 23.3   | 31.2   | 24.1   | 23.8   | 29.8   | 28.8   |
| 315.7  | 332.4  | 294.8  | 384.1  | 383.3  | 405.0  |
| 78.6   | 55.1   | 65.6   | 70.0   | 122.0  | 112.9  |
| 69.6   | 64.2   | 72.5   | 75.5   | 77.5   | 93.5   |
| 2.7    | 2.6    | 3.3    | 2.0    | 2.1    | 2.9    |
| 446.8  | 296.3  | 448.1  | 415.7  | 562.9  | 496.8  |
| 5430.8 | 4911.1 | 5528.6 | 5649.0 | 5777.5 | 5923.8 |
| 55.6   | 34.6   | 48.2   | 42.9   | 60.4   | 51.5   |
| 52.5   | 66.6   | 73.9   | 55.0   | 75.7   | 81.5   |
| 134.5  | 125.4  | 141.6  | 148.4  | 197.9  | 163.0  |
| 113.1  | 121.9  | 141.2  | 150.8  | 147.8  | 155.7  |
| 17.7   | 13.4   | 26.3   | 6.3    | 20.6   | 17.8   |
| 20.8   | 23.4   | 24.1   | 27.9   | 22.5   | 34.5   |
| 7.0    | 11.9   | 12.7   | 5.0    | 12.2   | 4.9    |
| 774.2  | 778.4  | 751.0  | 746.4  | 833.0  | 899.8  |
| 668.8  | 661.8  | 744.5  | 735.0  | 754.7  | 808.8  |
| 582.9  | 429.3  | 504.2  | 580.2  | 601.7  | 639.9  |
| 373.3  | 309.7  | 446.1  | 479.6  | 431.8  | 476.0  |
| 240.8  | 183.8  | 189.2  | 206.7  | 249.8  | 282.7  |
| 10.0   | 18.4   | 18.7   | 4.5    | 12.6   | 7.5    |
| 295.9  | 232.8  | 317.5  | 305.8  | 339.3  | 321.4  |
| 114.6  | 116.8  | 156.7  | 132.8  | 166.0  | 192.6  |
| 183.1  | 181.8  | 236.1  | 223.5  | 244.2  | 229.9  |
| 167.2  | 136.0  | 156.0  | 174.2  | 185.1  | 194.9  |
| 7.3    | 8.3    | 7.5    | 11.8   | 7.2    | 2.7    |
| 6.0    | 1.3    | 2.4    | 3.0    | 1.4    | 8.3    |
| 414.6  | 433.5  | 444.5  | 547.2  | 480.2  | 583.8  |
| 23.9   | 31.4   | 19.2   | 26.8   | 41.4   | 30.1   |
| 30.3   | 27.7   | 21.9   | 24.3   | 26.7   | 27.6   |

|        |        |        |        |        |        |
|--------|--------|--------|--------|--------|--------|
| 20.3   | 7.6    | 25.1   | 7.1    | 12.9   | 27.0   |
| 16.7   | 12.0   | 24.0   | 21.0   | 27.5   | 19.0   |
| 1.9    | 2.4    | 3.3    | 1.8    | 1.7    | 2.2    |
| 53.5   | 49.7   | 47.3   | 55.8   | 61.9   | 62.0   |
| 5.0    | 2.4    | 1.0    | 5.2    | 0.8    | 1.2    |
| 82.3   | 99.9   | 106.1  | 110.1  | 108.2  | 134.8  |
| 6632.8 | 5793.3 | 6597.4 | 6926.6 | 7221.7 | 7260.1 |
| 156.1  | 97.4   | 161.6  | 145.9  | 182.3  | 163.6  |
| 265.4  | 215.9  | 252.0  | 272.0  | 278.7  | 253.5  |
| 6.6    | 0.6    | 4.7    | 4.9    | 5.1    | 5.1    |
| 24.5   | 9.8    | 18.1   | 14.3   | 10.0   | 22.3   |
| 102.1  | 83.1   | 109.6  | 73.5   | 114.9  | 138.2  |
| 338.7  | 343.9  | 334.8  | 394.6  | 370.8  | 459.7  |
| 14.5   | 4.3    | 3.2    | 7.7    | 3.1    | 17.6   |
| 60.8   | 53.0   | 44.2   | 46.3   | 46.2   | 72.6   |
| 26.1   | 21.7   | 34.4   | 26.2   | 30.6   | 23.9   |
| 197.1  | 186.3  | 188.4  | 203.2  | 221.3  | 276.6  |
| 270.2  | 265.4  | 287.4  | 283.7  | 299.3  | 350.9  |
| 146.3  | 89.4   | 153.9  | 127.5  | 153.8  | 168.6  |
| 110.9  | 100.9  | 129.2  | 109.1  | 134.4  | 139.7  |
| 87.4   | 92.2   | 103.4  | 83.9   | 109.7  | 125.5  |
| 30.7   | 23.5   | 28.3   | 42.4   | 43.1   | 52.9   |
| 2.5    | 1.9    | 2.6    | 4.9    | 2.2    | 3.0    |
| 12.9   | 10.5   | 6.7    | 10.2   | 11.0   | 8.1    |
| 1238.0 | 1251.8 | 1336.1 | 1395.1 | 1390.4 | 1545.5 |
| 101.5  | 108.0  | 129.7  | 133.6  | 134.7  | 136.7  |
| 503.5  | 499.4  | 538.3  | 608.9  | 665.2  | 707.3  |
| 12.5   | 11.0   | 8.4    | 18.6   | 8.5    | 21.8   |
| 146.8  | 157.7  | 118.7  | 147.5  | 153.7  | 169.0  |
| 18.3   | 4.4    | 4.6    | 7.9    | 6.1    | 9.8    |
| 14.5   | 11.7   | 15.5   | 10.8   | 16.9   | 12.5   |
| 1.1    | 1.3    | 1.1    | 1.1    | 1.2    | 0.7    |
| 17.3   | 20.4   | 21.9   | 16.1   | 15.2   | 31.3   |
| 80.4   | 70.5   | 84.0   | 97.2   | 110.0  | 110.2  |
| 23.0   | 20.1   | 12.9   | 8.4    | 19.2   | 23.8   |
| 34.5   | 10.3   | 22.1   | 17.4   | 33.7   | 32.1   |
| 7.1    | 8.6    | 7.3    | 5.8    | 2.7    | 6.5    |
| 286.6  | 237.0  | 330.5  | 315.8  | 369.5  | 396.9  |
| 512.7  | 424.2  | 481.7  | 525.6  | 620.8  | 594.1  |
| 124.9  | 77.8   | 118.6  | 96.2   | 131.2  | 126.3  |
| 78.0   | 44.3   | 71.6   | 70.9   | 77.5   | 107.0  |
| 665.5  | 898.4  | 894.9  | 881.5  | 793.3  | 1155.6 |
| 117.1  | 117.3  | 156.7  | 137.5  | 114.1  | 171.8  |
| 236.4  | 263.7  | 259.8  | 255.6  | 297.5  | 285.1  |
| 13.3   | 6.1    | 8.9    | 12.2   | 10.8   | 20.7   |
| 40.1   | 34.4   | 52.2   | 26.7   | 33.3   | 43.6   |
| 26.0   | 25.8   | 34.5   | 37.3   | 31.6   | 36.6   |
| 1.5    | 1.2    | 1.2    | 1.0    | 1.5    | 1.8    |
| 16.2   | 9.4    | 8.3    | 10.0   | 11.4   | 12.2   |
| 57.8   | 58.6   | 62.7   | 58.8   | 59.6   | 73.6   |
| 13.9   | 8.0    | 7.8    | 9.2    | 3.4    | 14.7   |
| 34.6   | 29.6   | 48.3   | 48.1   | 45.5   | 53.3   |
| 211.0  | 192.2  | 237.1  | 224.2  | 263.2  | 262.0  |

|        |        |        |        |        |        |
|--------|--------|--------|--------|--------|--------|
| 108.5  | 117.7  | 103.9  | 110.8  | 122.6  | 128.2  |
| 605.1  | 526.0  | 563.6  | 682.6  | 662.4  | 761.3  |
| 576.9  | 610.6  | 574.3  | 687.9  | 640.1  | 725.7  |
| 0.8    | 1.6    | 2.0    | 6.4    | 2.9    | 2.8    |
| 29.0   | 30.8   | 35.3   | 24.8   | 34.4   | 44.5   |
| 5.9    | 5.2    | 5.3    | 10.0   | 2.4    | 2.5    |
| 28.8   | 41.1   | 27.6   | 38.7   | 37.7   | 45.9   |
| 170.4  | 208.1  | 248.6  | 240.1  | 246.5  | 228.1  |
| 1.0    | 7.9    | 1.4    | 3.6    | 1.3    | 2.8    |
| 2.9    | 2.2    | 2.4    | 2.5    | 2.2    | 3.0    |
| 3.2    | 4.8    | 5.9    | 1.6    | 10.6   | 1.7    |
| 390.2  | 377.5  | 438.6  | 445.7  | 444.4  | 505.0  |
| 427.1  | 406.2  | 442.4  | 445.6  | 473.8  | 567.8  |
| 12.9   | 14.8   | 6.3    | 6.5    | 9.3    | 12.6   |
| 120.5  | 139.0  | 208.6  | 205.0  | 199.0  | 213.3  |
| 242.3  | 173.1  | 228.6  | 228.0  | 238.7  | 280.5  |
| 62.4   | 74.3   | 67.7   | 73.4   | 73.4   | 94.9   |
| 19.0   | 12.7   | 15.4   | 17.4   | 18.7   | 15.7   |
| 16.4   | 36.0   | 20.7   | 6.2    | 28.7   | 25.4   |
| 45.8   | 37.5   | 46.2   | 47.5   | 58.1   | 61.1   |
| 81.0   | 95.0   | 90.3   | 83.4   | 79.1   | 102.1  |
| 55.1   | 92.6   | 85.0   | 77.4   | 60.3   | 87.1   |
| 734.1  | 593.0  | 675.2  | 671.7  | 772.0  | 814.6  |
| 20.6   | 25.6   | 26.0   | 25.7   | 27.8   | 27.0   |
| 5.7    | 7.4    | 8.3    | 2.0    | 5.9    | 5.2    |
| 39.6   | 26.3   | 38.5   | 41.4   | 36.9   | 44.0   |
| 20.7   | 17.1   | 20.5   | 25.8   | 8.8    | 22.6   |
| 74.3   | 68.5   | 74.7   | 93.3   | 88.6   | 134.3  |
| 85.5   | 78.1   | 77.0   | 97.1   | 104.3  | 103.1  |
| 359.7  | 268.7  | 326.0  | 340.0  | 364.0  | 409.3  |
| 763.2  | 707.4  | 702.3  | 741.9  | 605.4  | 936.9  |
| 39.6   | 49.2   | 31.6   | 26.0   | 33.2   | 39.3   |
| 17.4   | 12.3   | 14.8   | 17.0   | 10.0   | 17.6   |
| 30.8   | 20.1   | 35.9   | 11.7   | 22.2   | 22.5   |
| 17.3   | 37.0   | 23.4   | 18.8   | 21.1   | 26.3   |
| 86.9   | 114.8  | 115.8  | 124.7  | 124.2  | 134.9  |
| 906.0  | 922.7  | 1015.0 | 953.0  | 1069.1 | 1187.6 |
| 1196.4 | 1089.1 | 1112.7 | 1181.2 | 1169.0 | 1301.3 |
| 332.8  | 440.1  | 426.6  | 429.7  | 483.5  | 548.4  |
| 24.7   | 26.3   | 17.1   | 25.8   | 22.8   | 28.5   |
| 462.0  | 413.1  | 407.0  | 513.2  | 458.4  | 539.5  |
| 78.8   | 63.7   | 73.5   | 82.1   | 92.8   | 92.6   |
| 117.1  | 101.7  | 116.4  | 117.2  | 139.4  | 146.2  |
| 5.2    | 0.9    | 4.2    | 2.8    | 6.8    | 7.3    |
| 14.9   | 14.0   | 17.6   | 16.2   | 11.0   | 22.7   |
| 136.4  | 143.1  | 188.6  | 191.6  | 171.8  | 202.6  |
| 122.1  | 105.0  | 130.6  | 123.5  | 153.3  | 144.9  |
| 25.6   | 36.0   | 20.9   | 24.6   | 28.1   | 27.6   |
| 1942.0 | 1952.6 | 1776.3 | 1794.9 | 2169.9 | 2269.7 |
| 26.9   | 44.7   | 34.1   | 33.9   | 31.0   | 35.5   |
| 1.1    | 1.2    | 0.9    | 1.3    | 0.9    | 1.6    |
| 22.4   | 4.3    | 23.1   | 20.3   | 20.5   | 19.2   |
| 8.4    | 4.5    | 9.7    | 9.6    | 4.9    | 8.6    |

|        |        |        |        |        |        |
|--------|--------|--------|--------|--------|--------|
| 223.9  | 197.8  | 210.3  | 218.6  | 261.6  | 298.7  |
| 9.5    | 8.2    | 9.3    | 6.8    | 8.6    | 1.4    |
| 6.3    | 13.0   | 17.2   | 9.7    | 9.1    | 8.5    |
| 4.5    | 1.8    | 10.0   | 2.2    | 1.2    | 4.4    |
| 206.5  | 197.4  | 202.3  | 222.9  | 229.0  | 257.7  |
| 8.9    | 15.0   | 4.8    | 13.9   | 19.6   | 17.4   |
| 20.9   | 11.6   | 23.3   | 16.8   | 15.8   | 15.1   |
| 2.2    | 2.1    | 1.8    | 1.9    | 6.3    | 7.8    |
| 80.3   | 61.4   | 75.3   | 69.0   | 87.9   | 76.2   |
| 2.2    | 8.2    | 3.9    | 8.4    | 13.7   | 8.4    |
| 136.7  | 184.0  | 178.1  | 183.1  | 188.1  | 181.7  |
| 9.4    | 1.3    | 7.0    | 4.0    | 2.3    | 2.9    |
| 216.3  | 180.1  | 255.1  | 192.2  | 290.0  | 277.0  |
| 450.7  | 440.7  | 503.9  | 496.0  | 621.9  | 591.8  |
| 15.5   | 27.2   | 4.0    | 19.6   | 18.4   | 5.7    |
| 257.1  | 232.7  | 194.6  | 254.7  | 290.4  | 334.0  |
| 2.8    | 11.2   | 10.6   | 5.7    | 11.2   | 5.9    |
| 6.9    | 3.4    | 2.1    | 2.7    | 2.5    | 4.0    |
| 77.2   | 81.3   | 96.9   | 85.7   | 88.6   | 105.1  |
| 15.2   | 13.0   | 15.1   | 12.6   | 22.4   | 17.0   |
| 8.9    | 4.2    | 3.2    | 4.8    | 13.3   | 12.7   |
| 3.1    | 7.5    | 1.9    | 3.4    | 5.1    | 7.4    |
| 29.0   | 27.0   | 31.2   | 39.4   | 37.1   | 37.5   |
| 44.2   | 29.9   | 40.0   | 47.3   | 49.3   | 55.3   |
| 1.2    | 3.5    | 2.0    | 2.2    | 4.8    | 2.2    |
| 1804.9 | 1296.4 | 1634.1 | 1771.1 | 1856.8 | 1987.6 |
| 1.2    | 2.7    | 1.4    | 2.7    | 6.1    | 7.4    |
| 5.0    | 6.2    | 0.6    | 8.7    | 6.8    | 13.8   |
| 12.1   | 7.9    | 6.5    | 14.2   | 3.8    | 4.0    |
| 10.9   | 4.2    | 15.1   | 25.1   | 15.6   | 20.6   |
| 2.2    | 9.8    | 13.1   | 14.4   | 4.4    | 12.3   |
| 1.8    | 2.2    | 1.3    | 3.3    | 1.7    | 1.0    |
| 4.0    | 1.5    | 3.1    | 1.8    | 3.0    | 1.5    |
| 5.4    | 8.9    | 3.2    | 5.8    | 9.1    | 10.0   |
| 2.4    | 1.8    | 4.5    | 1.0    | 6.5    | 1.0    |
| 11.1   | 3.1    | 4.0    | 12.0   | 8.3    | 17.4   |
| 40.0   | 50.0   | 31.1   | 46.2   | 38.2   | 55.9   |
| 1.5    | 1.6    | 2.1    | 1.6    | 7.0    | 2.1    |
| 38.9   | 32.9   | 27.0   | 51.6   | 34.8   | 52.2   |
| 5.4    | 3.8    | 3.4    | 4.7    | 4.6    | 3.5    |
| 2.3    | 1.0    | 7.1    | 11.0   | 6.2    | 8.4    |
| 305.2  | 319.6  | 292.3  | 338.5  | 401.9  | 433.2  |
| 51.5   | 33.6   | 33.1   | 22.0   | 40.4   | 31.2   |
| 1.5    | 2.6    | 2.1    | 9.7    | 3.4    | 4.3    |
| 21.1   | 23.2   | 7.1    | 13.5   | 6.4    | 16.9   |
| 14.6   | 8.3    | 10.2   | 8.6    | 7.2    | 15.7   |
| 2.7    | 8.8    | 1.8    | 2.6    | 1.5    | 1.9    |
| 306.0  | 320.5  | 373.2  | 320.6  | 367.7  | 442.5  |
| 2.1    | 6.0    | 2.1    | 2.4    | 2.8    | 8.1    |
| 5.4    | 20.2   | 3.3    | 8.1    | 16.2   | 17.2   |
| 0.9    | 1.1    | 6.5    | 3.9    | 3.4    | 8.7    |
| 636.2  | 597.2  | 629.5  | 674.8  | 718.7  | 766.9  |
| 327.7  | 352.2  | 386.1  | 388.9  | 409.3  | 472.5  |

|        |        |       |        |       |        |
|--------|--------|-------|--------|-------|--------|
| 173.7  | 118.7  | 173.2 | 209.9  | 202.3 | 212.1  |
| 7.9    | 5.9    | 10.3  | 1.8    | 9.1   | 5.8    |
| 21.4   | 5.9    | 18.9  | 3.6    | 29.4  | 15.8   |
| 1116.8 | 2066.3 | 821.0 | 1656.2 | 845.6 | 1286.6 |
| 40.7   | 44.6   | 52.8  | 39.8   | 54.7  | 67.1   |
| 32.8   | 42.8   | 37.8  | 19.8   | 17.8  | 32.6   |
| 124.6  | 88.4   | 122.5 | 121.6  | 139.8 | 122.2  |
| 5.0    | 8.7    | 4.5   | 3.0    | 7.9   | 8.1    |
| 76.1   | 67.5   | 103.0 | 82.4   | 98.8  | 95.5   |
| 26.8   | 11.2   | 15.5  | 27.6   | 23.2  | 32.9   |
| 87.1   | 76.5   | 77.0  | 81.6   | 89.0  | 93.5   |
| 216.7  | 238.4  | 229.3 | 220.0  | 273.5 | 282.6  |
| 13.7   | 11.2   | 19.6  | 25.3   | 28.1  | 14.8   |
| 257.7  | 224.1  | 264.8 | 298.1  | 297.1 | 307.1  |
| 401.6  | 321.0  | 342.9 | 385.2  | 429.8 | 475.4  |
| 43.1   | 42.4   | 41.8  | 55.8   | 49.5  | 67.2   |
| 10.6   | 18.6   | 14.1  | 15.5   | 16.3  | 18.4   |
| 185.1  | 170.2  | 180.7 | 182.0  | 213.2 | 225.2  |
| 8.6    | 7.7    | 18.6  | 11.5   | 11.2  | 14.5   |
| 6.0    | 9.3    | 11.0  | 9.3    | 5.8   | 2.7    |
| 31.5   | 22.6   | 31.7  | 30.7   | 32.6  | 38.3   |
| 108.2  | 80.3   | 117.3 | 105.8  | 109.1 | 100.6  |
| 788.8  | 604.2  | 739.3 | 722.3  | 822.6 | 901.5  |
| 13.9   | 10.1   | 12.4  | 15.0   | 15.1  | 17.1   |
| 112.6  | 83.1   | 96.0  | 96.6   | 148.6 | 137.6  |
| 303.0  | 259.9  | 247.5 | 283.7  | 303.5 | 299.2  |
| 195.1  | 167.7  | 270.0 | 260.5  | 288.0 | 258.3  |
| 266.1  | 303.9  | 318.3 | 312.2  | 319.8 | 358.9  |
| 29.7   | 39.7   | 34.5  | 26.8   | 40.8  | 45.0   |
| 49.0   | 32.8   | 56.9  | 47.7   | 42.6  | 59.9   |
| 4.4    | 5.0    | 5.3   | 9.9    | 8.8   | 5.0    |
| 308.1  | 265.9  | 244.8 | 237.2  | 297.6 | 324.0  |
| 17.7   | 9.6    | 9.5   | 4.7    | 6.5   | 14.6   |
| 434.8  | 466.8  | 510.8 | 523.1  | 607.6 | 599.3  |
| 4.2    | 11.2   | 7.8   | 5.8    | 8.0   | 3.9    |
| 324.5  | 290.3  | 289.1 | 301.1  | 328.5 | 354.6  |
| 9.2    | 7.8    | 10.6  | 9.2    | 9.5   | 8.4    |
| 16.5   | 14.1   | 16.8  | 18.5   | 23.6  | 18.3   |
| 464.0  | 430.8  | 467.0 | 433.3  | 526.3 | 532.5  |
| 1.8    | 2.1    | 1.3   | 1.8    | 2.5   | 3.6    |
| 17.7   | 45.1   | 13.1  | 18.8   | 25.0  | 45.1   |
| 55.9   | 24.0   | 68.5  | 44.6   | 64.4  | 71.4   |
| 105.1  | 110.0  | 110.6 | 104.2  | 124.7 | 104.5  |
| 320.1  | 273.5  | 303.2 | 310.0  | 365.1 | 392.1  |
| 72.6   | 44.6   | 56.6  | 60.0   | 66.6  | 74.5   |
| 130.5  | 188.0  | 116.0 | 132.6  | 116.9 | 141.2  |
| 134.2  | 101.7  | 115.5 | 98.7   | 133.8 | 173.6  |
| 5.1    | 5.3    | 8.2   | 8.5    | 11.2  | 10.8   |
| 5.8    | 3.5    | 3.8   | 7.1    | 1.8   | 6.3    |
| 705.6  | 819.2  | 812.5 | 871.2  | 845.4 | 947.2  |
| 498.2  | 637.3  | 650.2 | 653.2  | 753.7 | 753.2  |
| 96.7   | 89.9   | 109.5 | 104.8  | 119.7 | 131.1  |
| 199.5  | 224.7  | 242.8 | 254.3  | 239.5 | 267.3  |

|       |       |       |       |       |       |
|-------|-------|-------|-------|-------|-------|
| 616.9 | 626.9 | 623.6 | 618.6 | 667.4 | 751.4 |
| 20.1  | 19.6  | 29.4  | 38.4  | 33.0  | 49.4  |
| 19.5  | 13.6  | 28.7  | 28.1  | 14.9  | 21.7  |
| 11.2  | 6.0   | 6.6   | 9.7   | 11.3  | 13.9  |
| 2.4   | 4.0   | 1.1   | 9.3   | 2.7   | 7.0   |
| 388.9 | 445.0 | 380.0 | 393.7 | 390.7 | 501.2 |
| 69.5  | 72.0  | 73.7  | 72.4  | 66.7  | 97.2  |
| 406.3 | 395.0 | 480.8 | 478.4 | 512.8 | 436.0 |
| 11.1  | 11.7  | 12.2  | 19.4  | 15.3  | 13.3  |
| 21.2  | 21.6  | 29.6  | 22.4  | 30.6  | 25.9  |
| 16.0  | 21.3  | 17.5  | 15.2  | 21.5  | 26.4  |
| 68.2  | 57.6  | 54.8  | 69.5  | 62.2  | 67.2  |
| 39.9  | 33.4  | 29.8  | 30.4  | 52.0  | 43.9  |
| 23.0  | 23.2  | 30.9  | 44.8  | 36.2  | 44.2  |
| 5.7   | 2.0   | 7.7   | 13.2  | 2.5   | 17.1  |
| 27.2  | 13.5  | 17.5  | 23.4  | 23.3  | 31.8  |
| 2.8   | 3.1   | 3.0   | 2.3   | 11.1  | 4.7   |
| 154.8 | 177.2 | 145.3 | 156.0 | 179.7 | 179.1 |
| 8.8   | 1.6   | 1.0   | 11.7  | 6.2   | 3.4   |
| 24.0  | 12.7  | 18.3  | 17.1  | 35.4  | 21.5  |
| 2.1   | 1.5   | 1.0   | 1.0   | 3.2   | 2.1   |
| 3.0   | 3.8   | 22.4  | 6.8   | 14.3  | 19.1  |
| 11.7  | 16.7  | 15.7  | 16.4  | 16.9  | 13.3  |
| 4.0   | 5.4   | 9.9   | 10.1  | 6.2   | 13.4  |
| 320.3 | 313.6 | 330.7 | 292.9 | 369.9 | 391.7 |
| 96.4  | 68.3  | 101.5 | 92.3  | 106.3 | 125.6 |
| 10.2  | 9.5   | 7.8   | 14.1  | 11.0  | 11.3  |
| 7.8   | 18.4  | 20.2  | 22.3  | 20.2  | 27.3  |
| 18.1  | 18.4  | 15.4  | 14.7  | 23.9  | 16.1  |
| 72.2  | 51.1  | 72.9  | 82.3  | 73.0  | 109.3 |
| 3.2   | 3.0   | 4.2   | 6.4   | 8.2   | 1.7   |
| 5.2   | 5.0   | 1.7   | 3.5   | 4.3   | 1.9   |
| 137.4 | 81.9  | 132.0 | 142.3 | 161.3 | 151.0 |
| 108.3 | 119.9 | 134.8 | 117.2 | 152.0 | 144.8 |
| 145.0 | 112.9 | 140.9 | 148.1 | 173.8 | 186.7 |
| 48.9  | 72.0  | 61.8  | 65.5  | 85.2  | 73.4  |
| 1.6   | 3.5   | 2.8   | 2.1   | 1.9   | 1.7   |
| 151.8 | 127.4 | 158.9 | 155.0 | 150.5 | 129.2 |
| 6.6   | 1.1   | 1.8   | 0.6   | 1.1   | 3.9   |
| 1.7   | 1.8   | 2.1   | 1.4   | 3.1   | 3.8   |
| 1.4   | 2.3   | 2.8   | 1.6   | 1.6   | 2.9   |
| 525.5 | 571.3 | 592.8 | 638.6 | 631.5 | 639.8 |
| 230.9 | 156.7 | 201.5 | 231.2 | 326.4 | 296.0 |
| 161.3 | 168.9 | 187.3 | 208.7 | 200.4 | 206.8 |
| 2.7   | 4.2   | 1.0   | 0.5   | 3.1   | 0.7   |
| 451.8 | 444.7 | 438.1 | 406.7 | 464.1 | 506.5 |
| 599.0 | 590.3 | 590.4 | 645.6 | 668.7 | 729.8 |
| 6.1   | 7.6   | 7.4   | 7.5   | 16.4  | 14.4  |
| 221.4 | 166.6 | 257.0 | 217.3 | 278.8 | 241.0 |
| 105.1 | 82.0  | 103.0 | 102.5 | 120.4 | 152.9 |
| 25.2  | 32.9  | 46.7  | 29.2  | 44.8  | 34.2  |
| 416.1 | 324.1 | 389.1 | 413.8 | 483.6 | 515.4 |
| 16.8  | 6.5   | 11.5  | 13.0  | 14.1  | 23.9  |

|        |        |        |        |        |        |
|--------|--------|--------|--------|--------|--------|
| 11.2   | 1.9    | 8.3    | 11.7   | 10.3   | 17.8   |
| 1614.4 | 1613.9 | 1861.8 | 1729.1 | 1816.8 | 2051.5 |
| 10.6   | 12.5   | 11.1   | 10.2   | 12.9   | 11.5   |
| 32.5   | 17.1   | 22.3   | 37.1   | 24.5   | 26.4   |
| 5.9    | 26.2   | 23.0   | 15.7   | 23.2   | 18.0   |
| 613.4  | 690.9  | 702.6  | 800.0  | 707.2  | 781.7  |
| 52.0   | 50.3   | 67.0   | 84.3   | 80.9   | 79.4   |
| 24.2   | 16.4   | 10.1   | 19.0   | 15.5   | 13.6   |
| 12.0   | 7.4    | 19.4   | 15.9   | 14.9   | 25.0   |
| 32.3   | 15.9   | 22.9   | 41.9   | 33.9   | 45.2   |
| 179.4  | 163.7  | 171.5  | 170.3  | 186.8  | 195.2  |
| 79.6   | 68.8   | 81.0   | 85.8   | 110.2  | 99.9   |
| 3.5    | 7.3    | 5.0    | 5.6    | 6.1    | 10.2   |
| 18.2   | 20.7   | 16.9   | 22.4   | 12.0   | 42.8   |
| 11.9   | 2.8    | 4.5    | 4.6    | 10.8   | 11.5   |
| 2.4    | 1.1    | 1.7    | 1.5    | 2.2    | 1.8    |
| 2.4    | 4.8    | 7.3    | 3.9    | 4.2    | 6.8    |
| 101.7  | 85.2   | 120.9  | 106.1  | 121.1  | 104.5  |
| 5821.1 | 5585.0 | 5700.1 | 6162.5 | 6182.1 | 6514.0 |
| 683.7  | 545.5  | 657.7  | 653.8  | 771.1  | 865.0  |
| 2803.8 | 2564.1 | 2825.9 | 3037.6 | 3219.8 | 3156.9 |
| 48.4   | 58.6   | 55.6   | 66.5   | 56.6   | 70.0   |
| 112.7  | 120.0  | 110.2  | 94.9   | 136.4  | 175.3  |
| 236.8  | 287.1  | 214.9  | 241.7  | 250.3  | 304.0  |
| 15.4   | 25.6   | 14.8   | 7.3    | 24.7   | 29.8   |
| 93.2   | 72.2   | 77.4   | 75.4   | 77.1   | 105.7  |
| 40.2   | 37.7   | 55.1   | 57.3   | 45.8   | 50.9   |
| 151.0  | 131.2  | 140.5  | 133.8  | 159.6  | 178.5  |
| 52.0   | 42.4   | 85.7   | 90.5   | 93.9   | 85.6   |
| 13.5   | 16.1   | 34.5   | 23.1   | 26.2   | 29.3   |
| 29.9   | 24.6   | 37.4   | 27.5   | 30.2   | 24.3   |
| 362.0  | 258.0  | 286.6  | 337.5  | 392.7  | 450.3  |
| 553.0  | 426.9  | 518.6  | 523.4  | 608.7  | 667.8  |
| 18.3   | 25.9   | 31.1   | 18.1   | 32.6   | 39.2   |
| 1.5    | 9.5    | 2.3    | 5.2    | 4.4    | 1.9    |
| 11.4   | 1.3    | 6.5    | 7.5    | 4.7    | 5.1    |
| 26.9   | 14.3   | 33.8   | 19.5   | 26.3   | 23.6   |
| 3.2    | 1.2    | 4.7    | 5.4    | 5.5    | 4.1    |
| 405.8  | 362.3  | 434.7  | 379.0  | 448.6  | 491.1  |
| 111.8  | 73.1   | 100.1  | 121.5  | 130.3  | 130.0  |
| 32.6   | 30.9   | 33.2   | 35.0   | 32.2   | 42.6   |
| 4.7    | 4.6    | 8.8    | 2.4    | 1.2    | 3.1    |
| 5.5    | 5.5    | 6.8    | 15.4   | 6.8    | 6.3    |
| 0.7    | 1.7    | 1.7    | 1.9    | 0.7    | 1.0    |
| 60.4   | 60.2   | 68.9   | 82.0   | 93.2   | 104.2  |
| 5.5    | 12.9   | 13.5   | 14.0   | 4.2    | 16.9   |
| 248.4  | 181.1  | 258.9  | 202.8  | 270.8  | 245.6  |
| 1.9    | 11.3   | 8.4    | 3.1    | 6.3    | 6.9    |
| 2.4    | 2.8    | 3.9    | 3.0    | 3.3    | 4.6    |
| 4.7    | 4.0    | 2.5    | 3.2    | 5.2    | 5.4    |
| 195.6  | 180.1  | 221.2  | 184.5  | 218.0  | 235.0  |
| 135.4  | 138.1  | 122.0  | 123.5  | 150.4  | 153.4  |
| 118.5  | 97.1   | 104.6  | 106.4  | 141.6  | 143.4  |



|       |       |       |       |       |       |
|-------|-------|-------|-------|-------|-------|
| 21.7  | 11.5  | 23.0  | 23.3  | 12.3  | 22.7  |
| 133.8 | 109.3 | 116.0 | 123.4 | 138.6 | 159.3 |
| 67.7  | 48.5  | 41.2  | 46.6  | 58.3  | 69.6  |
| 9.1   | 10.2  | 10.5  | 5.9   | 8.8   | 4.2   |
| 175.1 | 151.7 | 152.5 | 175.7 | 175.2 | 211.5 |
| 65.9  | 49.6  | 59.4  | 63.1  | 66.9  | 77.2  |
| 16.9  | 13.8  | 33.5  | 25.3  | 25.0  | 24.7  |
| 15.8  | 5.7   | 18.8  | 17.2  | 3.6   | 21.7  |
| 90.3  | 78.9  | 92.5  | 87.3  | 100.6 | 100.8 |
| 13.9  | 2.4   | 10.3  | 1.4   | 4.3   | 3.2   |
| 127.1 | 123.4 | 131.8 | 135.2 | 137.8 | 158.6 |
| 36.7  | 32.4  | 30.9  | 33.7  | 42.2  | 40.9  |
| 87.1  | 83.0  | 93.3  | 82.1  | 103.2 | 107.4 |
| 9.5   | 1.7   | 2.0   | 13.9  | 3.0   | 8.1   |
| 314.2 | 173.4 | 215.7 | 251.3 | 230.9 | 238.0 |
| 370.2 | 425.5 | 431.2 | 475.1 | 420.8 | 546.1 |
| 12.3  | 8.4   | 4.1   | 9.0   | 2.9   | 8.4   |
| 28.0  | 32.0  | 35.3  | 43.3  | 44.4  | 60.3  |
| 39.0  | 41.9  | 59.2  | 48.1  | 49.8  | 60.9  |
| 10.6  | 23.9  | 27.1  | 23.5  | 15.1  | 14.3  |
| 11.5  | 1.8   | 3.8   | 1.8   | 1.4   | 2.1   |
| 24.0  | 16.6  | 27.9  | 19.0  | 22.3  | 23.5  |
| 0.4   | 4.6   | 0.5   | 0.6   | 1.6   | 2.2   |
| 128.4 | 88.5  | 123.4 | 143.9 | 160.9 | 171.4 |
| 2.7   | 1.8   | 8.3   | 2.5   | 6.6   | 1.5   |
| 6.4   | 11.6  | 3.3   | 8.9   | 10.1  | 6.4   |
| 9.1   | 9.9   | 11.4  | 6.5   | 7.2   | 7.7   |
| 1.5   | 0.8   | 1.8   | 8.4   | 7.0   | 3.9   |
| 36.2  | 19.6  | 35.7  | 24.7  | 53.7  | 51.9  |
| 39.6  | 26.3  | 38.9  | 26.3  | 35.6  | 46.3  |
| 6.2   | 13.9  | 3.1   | 3.9   | 6.3   | 13.3  |
| 2.3   | 2.7   | 1.9   | 5.9   | 2.9   | 5.2   |
| 298.5 | 252.8 | 278.9 | 241.8 | 327.9 | 331.3 |
| 7.7   | 3.0   | 7.8   | 8.9   | 4.4   | 1.5   |
| 2.7   | 1.2   | 3.4   | 2.2   | 1.8   | 3.3   |
| 2.4   | 8.7   | 6.7   | 1.8   | 10.4  | 3.1   |
| 23.6  | 30.9  | 26.7  | 27.2  | 24.5  | 24.2  |
| 23.8  | 7.8   | 27.2  | 16.2  | 17.8  | 17.7  |
| 13.8  | 13.8  | 17.6  | 15.5  | 22.8  | 17.1  |
| 41.4  | 34.5  | 34.7  | 39.7  | 30.7  | 40.5  |
| 36.2  | 54.7  | 44.5  | 27.2  | 40.3  | 45.7  |
| 21.3  | 20.1  | 14.2  | 19.1  | 22.1  | 18.8  |
| 14.0  | 20.3  | 18.6  | 20.5  | 18.5  | 9.7   |
| 0.7   | 10.6  | 5.4   | 4.1   | 2.6   | 1.3   |
| 184.2 | 142.9 | 160.6 | 204.1 | 194.6 | 248.0 |
| 10.5  | 11.2  | 14.3  | 9.8   | 18.7  | 15.6  |
| 39.3  | 26.8  | 36.8  | 40.0  | 54.8  | 48.7  |
| 16.0  | 32.2  | 32.4  | 26.8  | 10.0  | 25.2  |
| 14.6  | 20.6  | 8.4   | 16.9  | 27.7  | 15.8  |
| 0.9   | 1.0   | 4.5   | 4.2   | 7.1   | 6.1   |
| 7.1   | 2.3   | 4.9   | 10.7  | 8.3   | 13.0  |
| 7.8   | 12.0  | 13.3  | 9.0   | 16.0  | 13.0  |
| 4.2   | 7.5   | 2.8   | 6.2   | 7.0   | 7.0   |

|       |       |       |       |       |       |
|-------|-------|-------|-------|-------|-------|
| 55.3  | 48.3  | 57.0  | 70.2  | 59.6  | 65.0  |
| 11.6  | 13.4  | 5.3   | 6.1   | 8.7   | 7.6   |
| 7.7   | 7.6   | 9.8   | 10.3  | 11.1  | 12.4  |
| 13.0  | 7.0   | 11.4  | 14.4  | 11.0  | 10.7  |
| 8.1   | 3.0   | 1.2   | 2.8   | 3.6   | 2.8   |
| 6.9   | 9.2   | 3.8   | 3.2   | 5.9   | 14.1  |
| 5.5   | 1.9   | 6.7   | 13.9  | 10.7  | 8.5   |
| 4.9   | 1.0   | 0.7   | 0.8   | 0.9   | 1.3   |
| 8.7   | 8.0   | 1.3   | 4.6   | 2.4   | 6.3   |
| 192.7 | 217.2 | 216.6 | 222.4 | 261.4 | 251.5 |
| 10.3  | 10.2  | 18.3  | 7.9   | 6.9   | 17.6  |
| 85.2  | 88.0  | 89.6  | 95.9  | 98.3  | 101.7 |
| 0.9   | 1.1   | 2.3   | 0.8   | 0.2   | 0.9   |
| 9.5   | 2.2   | 6.6   | 7.0   | 11.2  | 5.9   |
| 1.4   | 1.1   | 1.4   | 1.3   | 0.8   | 3.6   |
| 50.0  | 70.9  | 53.2  | 56.3  | 48.9  | 75.5  |
| 29.3  | 23.7  | 23.6  | 13.2  | 13.3  | 8.4   |
| 77.6  | 72.4  | 71.5  | 74.8  | 76.9  | 97.9  |
| 5.0   | 8.3   | 5.7   | 2.5   | 5.5   | 6.9   |
| 5.6   | 0.4   | 14.0  | 6.5   | 5.2   | 1.1   |
| 160.6 | 139.0 | 173.3 | 174.0 | 174.2 | 212.9 |
| 37.4  | 23.5  | 37.1  | 36.7  | 31.1  | 33.5  |
| 1.6   | 18.2  | 5.1   | 5.0   | 6.1   | 11.8  |
| 16.3  | 8.3   | 17.6  | 13.6  | 18.3  | 20.4  |
| 2.7   | 7.1   | 1.5   | 4.2   | 0.8   | 5.1   |
| 29.4  | 18.3  | 29.3  | 23.5  | 27.1  | 22.8  |
| 40.4  | 32.9  | 33.1  | 32.3  | 45.2  | 56.0  |
| 1.8   | 3.1   | 1.7   | 5.8   | 3.3   | 2.4   |
| 10.8  | 6.7   | 6.2   | 5.9   | 1.6   | 1.9   |
| 50.4  | 23.6  | 50.4  | 31.9  | 51.3  | 59.5  |
| 1.5   | 1.3   | 0.8   | 5.5   | 1.8   | 2.3   |
| 68.5  | 70.4  | 83.9  | 62.0  | 95.4  | 90.4  |
| 11.8  | 5.2   | 9.1   | 9.8   | 13.7  | 10.5  |
| 14.0  | 18.5  | 21.5  | 18.6  | 16.8  | 27.8  |
| 27.7  | 40.9  | 39.7  | 26.4  | 33.1  | 40.6  |
| 3.6   | 3.8   | 6.9   | 1.4   | 8.8   | 1.7   |
| 21.6  | 7.8   | 12.3  | 16.4  | 17.7  | 22.0  |
| 1.1   | 8.5   | 2.7   | 3.4   | 4.8   | 10.4  |
| 13.6  | 16.0  | 14.9  | 9.6   | 6.3   | 15.9  |
| 3.3   | 11.2  | 7.2   | 6.4   | 2.0   | 3.2   |
| 9.9   | 19.0  | 11.7  | 9.9   | 11.5  | 16.3  |
| 9.4   | 1.2   | 4.6   | 9.4   | 3.6   | 7.9   |
| 51.2  | 43.4  | 53.4  | 47.8  | 47.2  | 63.1  |
| 25.8  | 16.8  | 20.4  | 10.8  | 22.6  | 23.3  |
| 12.2  | 16.7  | 6.5   | 18.0  | 4.0   | 4.2   |
| 9.5   | 15.0  | 12.8  | 13.4  | 12.2  | 7.4   |
| 45.3  | 31.2  | 44.6  | 26.0  | 47.4  | 55.4  |
| 6.4   | 15.6  | 6.1   | 11.7  | 13.4  | 20.1  |
| 38.4  | 32.1  | 35.2  | 36.9  | 43.6  | 40.4  |
| 5.4   | 12.5  | 14.9  | 10.4  | 15.1  | 15.0  |
| 25.1  | 28.9  | 30.6  | 25.0  | 35.2  | 48.1  |
| 398.8 | 335.2 | 360.3 | 385.1 | 444.9 | 610.0 |
| 16.5  | 21.7  | 15.8  | 21.4  | 21.4  | 19.9  |

|       |       |       |       |        |       |
|-------|-------|-------|-------|--------|-------|
| 12.0  | 13.7  | 8.4   | 16.9  | 15.2   | 11.5  |
| 2.2   | 2.4   | 2.6   | 8.7   | 2.7    | 9.8   |
| 3.8   | 1.4   | 0.9   | 0.6   | 0.8    | 0.8   |
| 8.2   | 17.2  | 9.3   | 4.0   | 9.8    | 7.3   |
| 3.9   | 8.2   | 7.6   | 12.5  | 9.2    | 10.7  |
| 66.9  | 41.2  | 66.5  | 69.4  | 70.3   | 92.2  |
| 9.1   | 12.4  | 5.0   | 11.8  | 6.0    | 11.0  |
| 8.3   | 4.5   | 8.4   | 4.5   | 6.8    | 6.9   |
| 22.2  | 19.7  | 22.6  | 13.9  | 26.3   | 25.1  |
| 36.9  | 26.3  | 28.3  | 45.4  | 33.6   | 54.9  |
| 13.0  | 1.3   | 13.5  | 7.5   | 11.1   | 13.4  |
| 58.0  | 75.0  | 67.9  | 62.5  | 57.9   | 75.6  |
| 1.2   | 1.4   | 1.0   | 0.6   | 1.3    | 0.8   |
| 10.0  | 15.8  | 3.0   | 12.4  | 11.0   | 11.8  |
| 573.9 | 513.3 | 540.6 | 509.0 | 564.9  | 582.6 |
| 34.7  | 11.6  | 51.7  | 34.8  | 50.9   | 44.0  |
| 66.2  | 62.6  | 65.3  | 87.4  | 84.7   | 90.9  |
| 60.1  | 39.1  | 48.6  | 57.4  | 71.0   | 80.8  |
| 772.2 | 817.2 | 925.5 | 912.2 | 1025.5 | 946.4 |
| 230.2 | 186.3 | 195.3 | 239.3 | 262.7  | 276.2 |
| 9.9   | 9.8   | 6.1   | 3.3   | 4.9    | 14.6  |
| 202.3 | 159.2 | 200.4 | 206.5 | 223.7  | 202.4 |
| 111.3 | 112.6 | 113.6 | 110.6 | 110.8  | 148.1 |
| 119.7 | 135.3 | 147.3 | 209.5 | 161.5  | 185.1 |
| 129.8 | 111.5 | 145.5 | 134.0 | 159.4  | 177.1 |
| 196.7 | 171.5 | 203.1 | 214.2 | 228.4  | 235.2 |
| 87.5  | 62.5  | 81.8  | 80.4  | 83.6   | 100.2 |
| 67.5  | 71.6  | 64.0  | 57.1  | 75.4   | 67.7  |
| 191.9 | 172.3 | 195.4 | 217.0 | 248.3  | 239.0 |
| 76.9  | 62.3  | 72.9  | 77.4  | 100.6  | 101.8 |
| 81.5  | 64.6  | 101.4 | 92.0  | 97.0   | 131.7 |
| 248.5 | 178.7 | 221.4 | 263.9 | 273.1  | 304.8 |
| 156.7 | 124.8 | 107.4 | 130.7 | 128.4  | 199.5 |
| 650.0 | 531.7 | 649.5 | 645.3 | 774.0  | 823.5 |
| 144.1 | 107.3 | 163.1 | 137.5 | 210.2  | 189.4 |
| 532.1 | 522.1 | 593.1 | 591.4 | 707.4  | 729.1 |
| 10.8  | 12.0  | 16.4  | 13.6  | 7.4    | 10.9  |
| 35.2  | 32.7  | 42.1  | 37.1  | 42.4   | 41.0  |
| 463.6 | 549.2 | 523.0 | 634.1 | 638.8  | 674.9 |
| 132.8 | 105.7 | 149.3 | 145.0 | 177.5  | 179.6 |
| 142.2 | 122.6 | 167.5 | 168.6 | 177.5  | 199.6 |
| 69.1  | 79.1  | 77.8  | 81.4  | 77.5   | 88.6  |
| 16.7  | 16.3  | 18.6  | 12.2  | 15.8   | 17.6  |
| 73.3  | 63.9  | 64.0  | 69.0  | 67.4   | 87.1  |
| 4.0   | 13.8  | 10.0  | 11.9  | 6.1    | 5.6   |
| 140.1 | 126.4 | 155.5 | 161.0 | 165.1  | 180.1 |
| 359.8 | 237.2 | 319.5 | 350.2 | 279.3  | 369.6 |
| 165.1 | 158.7 | 196.6 | 200.2 | 219.9  | 247.5 |
| 416.5 | 442.3 | 419.9 | 489.4 | 498.0  | 599.6 |
| 476.5 | 468.4 | 513.9 | 537.9 | 566.3  | 571.5 |
| 158.8 | 173.1 | 227.2 | 215.5 | 221.8  | 231.2 |
| 121.1 | 97.3  | 141.8 | 124.4 | 139.7  | 146.4 |
| 20.3  | 23.8  | 19.5  | 24.8  | 16.5   | 22.8  |

|       |       |       |       |       |        |
|-------|-------|-------|-------|-------|--------|
| 387.6 | 360.6 | 438.2 | 494.0 | 474.3 | 493.1  |
| 180.2 | 192.9 | 227.1 | 226.0 | 227.5 | 241.7  |
| 143.6 | 131.3 | 161.0 | 149.5 | 143.3 | 163.5  |
| 51.7  | 65.0  | 72.0  | 54.1  | 72.3  | 67.8   |
| 101.5 | 80.4  | 98.9  | 104.6 | 115.5 | 123.4  |
| 36.4  | 30.6  | 41.2  | 31.9  | 35.2  | 36.3   |
| 61.4  | 53.9  | 67.6  | 55.9  | 75.8  | 77.1   |
| 133.6 | 131.8 | 140.0 | 131.1 | 188.0 | 170.7  |
| 138.5 | 126.4 | 152.3 | 159.5 | 191.0 | 206.0  |
| 242.3 | 206.5 | 255.7 | 259.6 | 297.7 | 325.7  |
| 4.1   | 5.6   | 4.9   | 4.2   | 1.6   | 4.3    |
| 104.1 | 74.1  | 90.5  | 110.5 | 128.7 | 128.4  |
| 236.1 | 212.4 | 217.9 | 266.3 | 287.3 | 307.6  |
| 322.4 | 301.0 | 373.0 | 337.1 | 463.0 | 406.7  |
| 56.7  | 76.3  | 48.2  | 48.2  | 52.5  | 68.7   |
| 529.3 | 459.4 | 448.3 | 499.9 | 572.1 | 668.0  |
| 81.0  | 62.6  | 80.4  | 59.0  | 73.3  | 92.7   |
| 40.6  | 56.4  | 40.8  | 54.3  | 50.5  | 64.0   |
| 111.6 | 101.0 | 102.0 | 102.5 | 122.0 | 121.3  |
| 4.3   | 9.0   | 1.6   | 1.1   | 0.8   | 1.1    |
| 224.9 | 183.0 | 211.7 | 232.7 | 252.4 | 252.1  |
| 156.2 | 161.2 | 159.2 | 175.8 | 216.8 | 177.3  |
| 78.3  | 71.7  | 80.8  | 84.5  | 83.4  | 88.5   |
| 62.5  | 75.8  | 76.0  | 79.3  | 83.3  | 92.9   |
| 125.0 | 126.2 | 129.7 | 150.8 | 167.0 | 158.6  |
| 57.8  | 50.8  | 60.6  | 58.0  | 48.9  | 77.4   |
| 6.4   | 9.1   | 3.4   | 3.0   | 7.5   | 7.4    |
| 68.4  | 76.3  | 74.8  | 74.1  | 84.9  | 90.5   |
| 522.4 | 409.7 | 558.4 | 625.6 | 649.4 | 688.4  |
| 95.1  | 81.2  | 90.7  | 88.2  | 103.1 | 121.8  |
| 105.1 | 102.2 | 103.6 | 106.3 | 128.0 | 132.4  |
| 369.4 | 308.5 | 357.6 | 368.8 | 420.0 | 440.5  |
| 53.6  | 71.2  | 63.3  | 68.2  | 39.7  | 73.9   |
| 152.6 | 143.5 | 196.4 | 192.7 | 221.1 | 222.1  |
| 265.5 | 250.4 | 315.5 | 313.7 | 332.2 | 339.1  |
| 102.5 | 79.3  | 83.9  | 109.5 | 100.7 | 108.7  |
| 2.2   | 6.8   | 5.3   | 4.4   | 6.3   | 8.3    |
| 91.3  | 76.1  | 108.7 | 139.2 | 119.9 | 125.0  |
| 316.8 | 273.9 | 337.3 | 364.0 | 387.0 | 382.1  |
| 145.5 | 150.7 | 184.1 | 192.6 | 208.0 | 200.1  |
| 158.5 | 162.5 | 194.6 | 204.8 | 220.8 | 238.9  |
| 834.3 | 787.2 | 863.8 | 815.7 | 905.4 | 1051.3 |
| 209.4 | 173.7 | 246.1 | 229.0 | 285.1 | 274.3  |
| 349.1 | 353.4 | 389.0 | 439.3 | 453.4 | 475.2  |
| 206.3 | 159.0 | 185.6 | 188.9 | 255.0 | 240.0  |
| 61.9  | 48.5  | 75.6  | 81.9  | 82.8  | 78.0   |
| 101.7 | 120.5 | 105.7 | 110.0 | 131.1 | 149.6  |
| 66.1  | 72.6  | 79.1  | 79.8  | 83.8  | 92.0   |
| 392.3 | 292.2 | 402.8 | 424.1 | 510.4 | 448.6  |
| 403.9 | 331.7 | 363.1 | 425.8 | 427.3 | 437.8  |
| 82.5  | 87.0  | 90.7  | 109.3 | 110.1 | 109.0  |
| 171.3 | 144.0 | 184.0 | 170.5 | 202.4 | 222.1  |
| 34.9  | 25.3  | 41.1  | 52.3  | 47.1  | 56.6   |

|        |        |        |        |        |        |
|--------|--------|--------|--------|--------|--------|
| 6.0    | 1.5    | 1.9    | 2.7    | 3.9    | 0.8    |
| 140.5  | 147.1  | 172.8  | 185.4  | 175.9  | 195.3  |
| 168.9  | 147.1  | 176.7  | 178.3  | 216.1  | 211.6  |
| 169.2  | 149.0  | 175.7  | 183.8  | 210.2  | 207.9  |
| 117.5  | 103.9  | 115.0  | 134.6  | 141.7  | 153.8  |
| 192.8  | 172.6  | 196.7  | 194.5  | 220.3  | 230.2  |
| 113.4  | 105.2  | 130.0  | 135.3  | 143.2  | 142.6  |
| 94.9   | 78.1   | 96.1   | 103.5  | 125.6  | 114.0  |
| 31.2   | 42.3   | 50.8   | 45.2   | 44.4   | 38.2   |
| 147.7  | 113.4  | 138.8  | 129.7  | 160.4  | 168.9  |
| 54.2   | 59.2   | 52.9   | 49.9   | 62.8   | 65.9   |
| 27.2   | 25.0   | 33.5   | 36.9   | 41.2   | 36.3   |
| 406.3  | 271.5  | 388.8  | 390.6  | 463.4  | 431.7  |
| 225.1  | 207.1  | 244.7  | 248.3  | 269.9  | 294.2  |
| 137.8  | 129.3  | 149.4  | 157.7  | 162.8  | 278.1  |
| 305.1  | 636.3  | 254.7  | 493.6  | 299.6  | 406.2  |
| 10.0   | 6.5    | 11.5   | 8.8    | 10.7   | 21.0   |
| 58.9   | 51.2   | 60.2   | 62.9   | 69.1   | 62.3   |
| 226.3  | 179.9  | 222.5  | 231.9  | 243.6  | 260.0  |
| 58.2   | 51.7   | 48.8   | 50.9   | 65.5   | 69.8   |
| 182.8  | 198.4  | 195.8  | 187.6  | 202.0  | 220.9  |
| 188.9  | 168.1  | 216.0  | 225.8  | 256.8  | 230.7  |
| 118.6  | 91.6   | 110.4  | 97.0   | 109.8  | 140.8  |
| 693.9  | 655.8  | 773.0  | 811.4  | 844.4  | 857.7  |
| 1420.7 | 1543.2 | 1592.3 | 1605.6 | 1852.7 | 1727.5 |
| 7.9    | 14.3   | 13.8   | 11.5   | 14.3   | 10.9   |
| 241.3  | 247.4  | 276.6  | 291.9  | 287.5  | 303.3  |
| 1416.3 | 1191.0 | 1511.8 | 1648.4 | 1718.8 | 1807.1 |
| 1.6    | 1.1    | 1.6    | 1.7    | 3.1    | 1.4    |
| 42.3   | 41.8   | 57.7   | 44.0   | 58.0   | 58.1   |
| 480.8  | 441.7  | 483.5  | 462.8  | 629.2  | 601.9  |
| 91.7   | 97.7   | 91.2   | 103.3  | 79.4   | 122.1  |
| 8.2    | 1.8    | 9.5    | 7.1    | 7.8    | 7.1    |
| 2.6    | 2.3    | 1.7    | 2.9    | 4.8    | 7.1    |
| 147.3  | 111.0  | 134.5  | 135.6  | 154.3  | 185.6  |
| 28.7   | 26.1   | 34.3   | 28.4   | 34.4   | 33.5   |
| 11.4   | 16.7   | 10.8   | 15.2   | 14.0   | 17.2   |
| 140.5  | 126.9  | 158.1  | 183.5  | 178.4  | 199.2  |
| 55.2   | 48.1   | 70.7   | 60.8   | 61.5   | 70.0   |
| 136.5  | 98.4   | 150.5  | 137.0  | 140.0  | 167.0  |
| 93.4   | 114.3  | 130.9  | 93.4   | 123.4  | 106.7  |
| 225.5  | 240.5  | 247.2  | 277.5  | 276.1  | 274.2  |
| 184.8  | 164.4  | 171.9  | 200.8  | 199.6  | 229.0  |
| 61.5   | 55.5   | 60.0   | 67.4   | 62.6   | 69.6   |
| 47.4   | 45.0   | 58.6   | 48.6   | 70.1   | 78.8   |
| 70.8   | 68.9   | 60.1   | 74.9   | 70.6   | 98.6   |
| 252.4  | 235.4  | 262.5  | 268.9  | 330.8  | 335.2  |
| 13.0   | 8.2    | 9.6    | 9.8    | 12.7   | 14.9   |
| 7.9    | 5.7    | 7.8    | 9.0    | 7.7    | 11.8   |
| 61.8   | 67.9   | 54.1   | 56.4   | 58.8   | 82.0   |
| 4.0    | 2.3    | 5.8    | 9.8    | 8.0    | 10.8   |
| 198.9  | 153.2  | 146.1  | 172.4  | 192.8  | 223.7  |
| 48.5   | 38.9   | 39.2   | 49.6   | 75.6   | 49.6   |

|        |        |        |        |        |        |
|--------|--------|--------|--------|--------|--------|
| 12.7   | 23.9   | 20.4   | 11.9   | 18.2   | 16.7   |
| 74.3   | 85.5   | 73.9   | 83.1   | 89.6   | 89.1   |
| 36.1   | 42.3   | 31.5   | 41.8   | 38.1   | 38.1   |
| 25.8   | 19.0   | 33.0   | 23.9   | 42.7   | 45.5   |
| 30.6   | 28.0   | 24.2   | 26.4   | 34.8   | 35.0   |
| 58.1   | 56.1   | 62.2   | 69.8   | 70.5   | 66.3   |
| 96.1   | 81.5   | 104.3  | 97.5   | 116.4  | 115.2  |
| 61.5   | 67.6   | 71.2   | 78.1   | 80.7   | 90.7   |
| 7.3    | 4.8    | 10.7   | 6.6    | 8.7    | 5.8    |
| 90.9   | 65.5   | 74.0   | 76.6   | 91.7   | 86.6   |
| 163.2  | 127.4  | 163.7  | 189.9  | 178.2  | 193.1  |
| 15.1   | 31.7   | 29.5   | 29.5   | 34.6   | 22.2   |
| 141.9  | 170.1  | 146.2  | 150.8  | 191.5  | 215.9  |
| 63.1   | 53.4   | 92.6   | 101.6  | 90.2   | 79.7   |
| 73.7   | 65.9   | 76.2   | 93.3   | 97.1   | 112.2  |
| 44.7   | 39.3   | 48.1   | 53.7   | 44.2   | 46.9   |
| 33.7   | 51.9   | 27.0   | 51.5   | 43.9   | 47.7   |
| 162.8  | 178.7  | 194.5  | 197.3  | 241.1  | 226.5  |
| 248.8  | 223.1  | 296.1  | 294.3  | 334.6  | 289.1  |
| 26.3   | 17.6   | 18.6   | 17.1   | 18.8   | 16.4   |
| 108.2  | 117.6  | 143.7  | 122.4  | 130.1  | 150.9  |
| 479.8  | 442.4  | 466.8  | 476.0  | 598.5  | 550.4  |
| 56.7   | 34.7   | 36.2   | 39.8   | 55.2   | 56.1   |
| 237.3  | 219.2  | 231.8  | 250.6  | 305.3  | 312.4  |
| 47.1   | 50.0   | 45.2   | 57.7   | 57.0   | 59.3   |
| 146.8  | 134.3  | 148.0  | 167.3  | 162.9  | 186.5  |
| 161.8  | 127.3  | 140.8  | 154.9  | 180.7  | 168.3  |
| 100.3  | 119.1  | 132.4  | 161.2  | 160.6  | 163.4  |
| 5.1    | 9.9    | 5.7    | 6.4    | 12.9   | 8.0    |
| 34.5   | 19.0   | 46.8   | 36.3   | 43.9   | 38.3   |
| 249.1  | 169.6  | 223.7  | 222.4  | 259.6  | 284.7  |
| 32.0   | 27.9   | 25.7   | 28.6   | 17.3   | 37.0   |
| 331.1  | 286.2  | 333.4  | 362.7  | 385.2  | 394.1  |
| 369.8  | 466.8  | 414.2  | 477.6  | 459.3  | 527.7  |
| 405.3  | 419.8  | 515.1  | 530.2  | 594.3  | 505.9  |
| 50.4   | 58.7   | 49.2   | 61.8   | 58.4   | 54.8   |
| 56.5   | 46.6   | 45.8   | 52.2   | 56.4   | 69.8   |
| 58.0   | 53.3   | 59.9   | 57.7   | 76.2   | 75.1   |
| 41.2   | 24.0   | 28.2   | 29.2   | 15.3   | 36.4   |
| 266.3  | 206.8  | 251.8  | 238.8  | 319.6  | 331.9  |
| 61.2   | 51.6   | 58.4   | 54.3   | 69.6   | 59.3   |
| 14.5   | 24.0   | 11.1   | 14.7   | 17.1   | 14.0   |
| 3.0    | 17.4   | 15.4   | 8.7    | 3.9    | 12.0   |
| 27.0   | 24.4   | 27.6   | 27.6   | 30.6   | 30.9   |
| 45.9   | 64.0   | 51.9   | 55.0   | 42.2   | 51.5   |
| 63.9   | 153.3  | 52.1   | 106.2  | 52.1   | 106.4  |
| 45.9   | 33.9   | 45.6   | 46.4   | 60.3   | 45.1   |
| 209.8  | 285.3  | 184.6  | 280.1  | 277.2  | 281.7  |
| 42.4   | 36.9   | 51.3   | 44.1   | 48.8   | 53.1   |
| 72.7   | 89.0   | 67.8   | 77.1   | 79.7   | 100.1  |
| 4577.7 | 3795.9 | 4666.5 | 5074.2 | 4884.3 | 5186.0 |
| 47.9   | 62.2   | 42.6   | 63.9   | 64.7   | 78.5   |
| 286.3  | 303.4  | 328.0  | 366.8  | 392.3  | 416.9  |

|        |        |        |        |        |        |
|--------|--------|--------|--------|--------|--------|
| 187.1  | 156.7  | 219.3  | 219.4  | 235.3  | 224.6  |
| 448.7  | 414.1  | 444.8  | 513.3  | 557.8  | 596.7  |
| 54.6   | 50.1   | 54.7   | 58.3   | 63.2   | 76.1   |
| 22.1   | 27.8   | 29.8   | 34.1   | 27.2   | 18.6   |
| 30.5   | 36.0   | 38.5   | 39.6   | 54.8   | 50.8   |
| 66.3   | 63.2   | 67.5   | 66.6   | 74.0   | 81.4   |
| 32.9   | 24.4   | 28.7   | 6.0    | 9.7    | 19.2   |
| 46.9   | 48.3   | 46.6   | 42.8   | 50.5   | 67.6   |
| 141.4  | 127.4  | 153.9  | 163.5  | 181.1  | 164.8  |
| 2332.1 | 2096.0 | 2404.5 | 2525.9 | 2629.7 | 2723.1 |
| 588.7  | 551.7  | 609.1  | 675.0  | 709.5  | 723.4  |
| 196.7  | 220.4  | 206.0  | 240.7  | 244.2  | 268.1  |
| 191.5  | 193.8  | 205.8  | 202.3  | 277.7  | 268.5  |
| 1.2    | 2.0    | 2.1    | 1.7    | 1.2    | 5.0    |
| 186.6  | 175.9  | 187.0  | 243.0  | 246.3  | 222.3  |
| 247.3  | 262.4  | 247.8  | 320.6  | 326.6  | 347.3  |
| 298.0  | 246.4  | 308.8  | 341.5  | 317.8  | 390.1  |
| 352.7  | 276.8  | 324.8  | 319.6  | 375.8  | 408.6  |
| 70.5   | 67.4   | 100.9  | 92.9   | 98.2   | 105.5  |
| 64.7   | 67.9   | 74.8   | 64.8   | 85.3   | 97.7   |
| 9.6    | 4.1    | 14.5   | 15.4   | 18.5   | 16.2   |
| 91.0   | 124.3  | 61.9   | 125.4  | 91.1   | 122.4  |
| 221.6  | 216.4  | 247.7  | 253.1  | 291.3  | 289.2  |
| 104.3  | 79.9   | 122.5  | 138.4  | 141.0  | 160.3  |
| 42.3   | 36.4   | 36.8   | 36.0   | 32.6   | 43.9   |
| 43.0   | 58.5   | 33.1   | 58.6   | 43.1   | 48.8   |
| 2.9    | 0.4    | 3.3    | 1.4    | 2.3    | 0.8    |
| 3.7    | 10.6   | 10.7   | 5.8    | 9.0    | 9.2    |
| 202.4  | 174.5  | 214.3  | 202.5  | 219.0  | 216.6  |
| 73.3   | 73.3   | 61.0   | 77.8   | 58.2   | 77.1   |
| 127.0  | 122.6  | 144.9  | 126.4  | 210.1  | 189.8  |
| 207.0  | 226.8  | 222.8  | 238.6  | 235.5  | 259.9  |
| 809.0  | 674.6  | 900.3  | 994.5  | 1030.6 | 1051.4 |
| 33.4   | 32.0   | 33.4   | 43.9   | 35.9   | 39.1   |
| 450.3  | 410.1  | 447.7  | 452.1  | 524.7  | 528.2  |
| 3250.9 | 3209.9 | 3548.7 | 3832.0 | 4209.6 | 3834.3 |
| 172.7  | 87.9   | 170.3  | 166.9  | 205.3  | 188.2  |
| 141.3  | 101.0  | 117.3  | 147.8  | 183.6  | 173.0  |
| 133.4  | 132.7  | 130.8  | 153.5  | 154.9  | 191.2  |
| 9.9    | 2.6    | 10.6   | 18.5   | 22.3   | 10.4   |
| 12.7   | 16.8   | 17.9   | 19.3   | 11.5   | 18.3   |
| 110.3  | 120.7  | 89.9   | 109.7  | 122.6  | 128.0  |
| 29.7   | 30.8   | 22.1   | 26.6   | 40.5   | 32.0   |
| 2.1    | 7.0    | 3.9    | 0.9    | 4.1    | 1.0    |
| 224.8  | 183.4  | 230.9  | 221.3  | 295.7  | 236.7  |
| 113.2  | 97.6   | 110.8  | 144.7  | 164.1  | 159.6  |
| 48.4   | 39.1   | 42.0   | 46.7   | 56.4   | 54.2   |
| 50.4   | 53.0   | 65.9   | 63.8   | 65.7   | 53.3   |
| 165.9  | 130.2  | 144.6  | 172.5  | 171.0  | 188.4  |
| 31.6   | 29.6   | 31.2   | 36.2   | 42.7   | 45.7   |
| 23.7   | 13.6   | 24.5   | 20.0   | 27.2   | 16.7   |
| 29.8   | 39.7   | 41.7   | 39.8   | 33.6   | 49.9   |
| 232.9  | 208.6  | 283.2  | 267.3  | 336.3  | 316.2  |

|        |       |        |        |        |        |
|--------|-------|--------|--------|--------|--------|
| 210.5  | 213.5 | 240.9  | 202.0  | 257.5  | 255.1  |
| 355.0  | 344.3 | 438.7  | 433.1  | 501.9  | 475.9  |
| 63.0   | 66.0  | 62.5   | 78.6   | 62.0   | 81.0   |
| 142.4  | 129.9 | 133.3  | 142.3  | 147.8  | 168.4  |
| 413.8  | 269.4 | 374.1  | 423.6  | 414.9  | 484.0  |
| 234.3  | 183.9 | 215.4  | 223.0  | 253.1  | 256.0  |
| 129.2  | 127.3 | 122.8  | 156.0  | 141.6  | 166.8  |
| 433.7  | 391.7 | 490.5  | 511.0  | 561.0  | 523.3  |
| 212.5  | 233.7 | 250.1  | 312.9  | 301.5  | 336.3  |
| 1059.9 | 968.3 | 1129.6 | 1120.1 | 1274.9 | 1272.0 |
| 181.4  | 247.2 | 225.1  | 263.2  | 258.3  | 280.4  |
| 33.1   | 42.1  | 19.1   | 20.9   | 17.1   | 32.5   |
| 238.1  | 190.4 | 244.0  | 274.3  | 299.9  | 289.7  |
| 427.6  | 468.0 | 400.3  | 490.8  | 506.8  | 543.3  |
| 103.0  | 118.5 | 106.6  | 110.4  | 115.8  | 121.3  |
| 9.4    | 9.6   | 2.9    | 11.8   | 5.7    | 9.9    |
| 78.7   | 70.2  | 68.8   | 82.5   | 73.8   | 105.0  |
| 109.3  | 127.2 | 97.0   | 145.5  | 105.1  | 140.2  |
| 101.4  | 79.3  | 90.3   | 95.1   | 114.0  | 106.8  |
| 596.4  | 582.2 | 623.9  | 679.8  | 739.6  | 747.5  |
| 538.1  | 506.2 | 577.4  | 586.6  | 652.8  | 662.3  |
| 251.4  | 248.8 | 251.1  | 287.5  | 276.4  | 295.2  |
| 89.4   | 93.3  | 101.2  | 94.5   | 113.8  | 113.2  |
| 285.3  | 232.2 | 307.6  | 344.7  | 362.8  | 330.9  |
| 369.5  | 318.2 | 428.8  | 474.4  | 483.1  | 531.9  |
| 428.5  | 414.3 | 434.3  | 454.0  | 506.0  | 526.2  |
| 654.0  | 570.7 | 641.7  | 648.7  | 752.2  | 812.2  |
| 49.0   | 48.9  | 45.2   | 42.9   | 56.6   | 57.5   |
| 241.1  | 225.5 | 282.1  | 275.3  | 290.5  | 321.7  |
| 354.2  | 344.8 | 426.9  | 428.7  | 486.8  | 543.9  |
| 181.7  | 146.5 | 189.1  | 185.8  | 208.3  | 221.3  |
| 374.8  | 355.5 | 389.5  | 407.2  | 456.5  | 467.7  |
| 459.6  | 427.8 | 268.6  | 488.3  | 426.8  | 580.4  |
| 43.7   | 72.1  | 68.4   | 70.9   | 59.9   | 93.8   |
| 65.8   | 102.3 | 76.0   | 79.9   | 96.0   | 82.8   |
| 253.9  | 280.6 | 277.2  | 334.3  | 342.2  | 408.3  |
| 104.2  | 103.5 | 119.4  | 130.9  | 121.1  | 136.2  |
| 120.0  | 114.4 | 162.9  | 146.8  | 145.8  | 163.8  |
| 38.8   | 41.3  | 36.5   | 53.4   | 52.5   | 59.1   |
| 30.3   | 16.8  | 30.8   | 33.0   | 44.1   | 40.9   |
| 89.8   | 71.9  | 82.9   | 84.4   | 98.8   | 118.8  |
| 89.7   | 67.9  | 106.0  | 93.4   | 110.0  | 106.6  |
| 342.6  | 388.4 | 391.5  | 438.3  | 553.4  | 534.4  |
| 93.4   | 87.4  | 78.2   | 94.6   | 105.8  | 123.5  |
| 106.5  | 101.3 | 156.5  | 155.2  | 216.8  | 182.1  |
| 77.9   | 58.0  | 51.3   | 86.4   | 92.6   | 102.6  |
| 113.1  | 118.5 | 113.5  | 125.0  | 150.5  | 152.4  |
| 118.5  | 160.3 | 124.7  | 132.8  | 125.4  | 143.0  |
| 198.8  | 169.8 | 193.5  | 194.1  | 211.4  | 248.3  |
| 418.1  | 518.9 | 494.6  | 519.8  | 510.8  | 582.5  |
| 274.0  | 241.8 | 308.2  | 250.8  | 300.2  | 280.6  |
| 294.9  | 329.5 | 367.7  | 400.7  | 413.2  | 425.2  |
| 664.9  | 619.9 | 673.0  | 609.2  | 810.4  | 818.0  |



|        |       |        |        |        |        |
|--------|-------|--------|--------|--------|--------|
| 136.1  | 103.2 | 148.2  | 161.6  | 183.4  | 202.7  |
| 29.6   | 19.2  | 36.4   | 32.3   | 43.8   | 42.3   |
| 27.3   | 28.4  | 30.4   | 18.5   | 34.8   | 37.0   |
| 557.4  | 457.8 | 588.6  | 556.6  | 718.8  | 718.9  |
| 24.7   | 27.3  | 31.3   | 22.9   | 27.2   | 24.8   |
| 17.0   | 17.5  | 25.4   | 27.7   | 23.9   | 30.6   |
| 95.3   | 94.8  | 87.5   | 117.9  | 121.4  | 125.0  |
| 67.8   | 54.1  | 73.0   | 74.3   | 88.3   | 87.7   |
| 24.0   | 19.7  | 30.5   | 19.5   | 25.2   | 33.8   |
| 171.5  | 152.6 | 176.7  | 166.0  | 184.8  | 210.8  |
| 134.3  | 82.4  | 125.1  | 119.8  | 160.8  | 151.3  |
| 841.6  | 692.7 | 898.1  | 1001.9 | 1026.4 | 1106.0 |
| 20.6   | 21.3  | 28.7   | 18.9   | 30.4   | 32.8   |
| 509.9  | 547.2 | 588.7  | 569.3  | 670.4  | 652.1  |
| 326.9  | 341.5 | 392.2  | 382.7  | 413.6  | 440.8  |
| 514.6  | 471.2 | 639.1  | 653.9  | 657.1  | 674.7  |
| 97.6   | 107.4 | 108.8  | 104.4  | 121.8  | 122.4  |
| 7.2    | 3.4   | 15.9   | 3.6    | 3.4    | 2.2    |
| 60.2   | 24.9  | 62.2   | 66.2   | 72.9   | 81.2   |
| 183.6  | 149.9 | 166.7  | 181.7  | 198.3  | 239.1  |
| 11.0   | 15.5  | 16.1   | 14.2   | 13.5   | 17.1   |
| 488.4  | 509.0 | 530.7  | 702.7  | 655.7  | 699.1  |
| 51.7   | 57.0  | 55.5   | 54.2   | 52.2   | 64.5   |
| 1054.6 | 923.5 | 1194.2 | 1199.3 | 1207.4 | 1286.8 |
| 5.1    | 6.7   | 15.0   | 12.1   | 8.9    | 8.2    |
| 220.7  | 138.9 | 156.7  | 168.5  | 189.6  | 237.0  |
| 163.3  | 187.5 | 186.9  | 183.6  | 195.0  | 211.6  |
| 204.6  | 193.2 | 221.1  | 221.8  | 260.2  | 273.1  |
| 403.4  | 414.5 | 464.2  | 471.6  | 451.3  | 452.1  |
| 169.3  | 147.5 | 161.8  | 210.1  | 209.3  | 214.4  |
| 818.8  | 815.4 | 756.8  | 884.9  | 919.9  | 960.7  |
| 328.8  | 282.8 | 372.0  | 366.6  | 418.7  | 428.3  |
| 49.9   | 27.2  | 52.6   | 57.6   | 58.7   | 71.7   |
| 171.7  | 150.9 | 185.4  | 196.8  | 224.6  | 224.3  |
| 3.0    | 12.4  | 10.0   | 5.9    | 11.8   | 8.7    |
| 270.4  | 187.8 | 227.4  | 234.7  | 267.5  | 292.1  |
| 74.8   | 79.6  | 88.4   | 95.9   | 96.9   | 92.5   |
| 29.8   | 43.8  | 32.4   | 29.3   | 30.9   | 41.2   |
| 309.3  | 278.0 | 334.9  | 340.1  | 364.9  | 347.3  |
| 86.6   | 61.5  | 92.8   | 92.3   | 106.1  | 110.5  |
| 308.0  | 239.1 | 280.8  | 318.2  | 335.1  | 398.1  |
| 120.0  | 141.3 | 130.9  | 145.5  | 153.5  | 156.5  |
| 100.9  | 81.3  | 82.2   | 74.9   | 106.4  | 134.1  |
| 130.7  | 113.3 | 139.8  | 132.1  | 164.9  | 174.5  |
| 332.1  | 320.4 | 317.2  | 361.8  | 379.1  | 418.9  |
| 347.8  | 295.0 | 372.3  | 405.0  | 445.4  | 453.1  |
| 82.8   | 68.4  | 85.3   | 89.0   | 99.2   | 103.5  |
| 6.7    | 4.6   | 9.2    | 4.2    | 6.1    | 5.1    |
| 58.3   | 32.4  | 54.4   | 54.5   | 57.0   | 62.4   |
| 41.5   | 22.2  | 44.8   | 32.6   | 43.5   | 54.0   |
| 226.8  | 201.6 | 223.6  | 222.1  | 259.2  | 274.3  |
| 232.7  | 196.4 | 284.1  | 282.3  | 333.3  | 322.2  |
| 168.0  | 123.0 | 156.9  | 155.3  | 171.6  | 183.4  |

|        |        |        |        |        |        |
|--------|--------|--------|--------|--------|--------|
| 972.9  | 662.8  | 895.1  | 876.6  | 1087.3 | 1097.4 |
| 157.8  | 167.7  | 202.3  | 194.5  | 225.6  | 223.4  |
| 45.4   | 51.8   | 51.4   | 38.1   | 51.3   | 53.4   |
| 66.6   | 68.9   | 73.1   | 95.1   | 84.9   | 72.7   |
| 85.7   | 66.4   | 94.2   | 91.0   | 94.7   | 103.0  |
| 334.3  | 252.0  | 358.3  | 357.9  | 368.3  | 354.1  |
| 451.1  | 384.7  | 386.5  | 479.0  | 456.2  | 498.3  |
| 307.0  | 268.2  | 316.0  | 338.7  | 350.8  | 397.8  |
| 657.4  | 662.3  | 720.9  | 758.1  | 840.0  | 853.1  |
| 545.3  | 374.3  | 618.7  | 613.3  | 732.5  | 692.5  |
| 280.4  | 266.9  | 308.7  | 317.5  | 381.8  | 350.0  |
| 6.3    | 9.5    | 12.1   | 5.7    | 5.0    | 7.7    |
| 72.7   | 68.1   | 69.4   | 68.6   | 73.7   | 74.7   |
| 122.9  | 107.2  | 116.9  | 139.3  | 162.5  | 152.4  |
| 181.5  | 143.0  | 160.9  | 183.7  | 186.2  | 225.4  |
| 386.1  | 257.3  | 406.3  | 349.8  | 544.4  | 454.2  |
| 589.2  | 534.2  | 661.5  | 670.7  | 712.1  | 728.7  |
| 69.3   | 65.7   | 64.5   | 69.9   | 73.0   | 85.3   |
| 237.9  | 174.7  | 209.9  | 223.6  | 259.1  | 279.8  |
| 207.4  | 183.8  | 204.5  | 185.5  | 223.5  | 252.5  |
| 32.9   | 21.6   | 44.2   | 41.1   | 32.6   | 36.1   |
| 100.1  | 101.3  | 110.3  | 118.0  | 117.2  | 121.5  |
| 73.5   | 65.2   | 73.3   | 76.1   | 83.3   | 89.8   |
| 133.0  | 155.1  | 89.4   | 197.3  | 135.9  | 187.6  |
| 157.4  | 173.2  | 197.2  | 159.8  | 196.9  | 246.0  |
| 66.4   | 77.2   | 76.1   | 74.3   | 67.0   | 76.7   |
| 144.0  | 125.6  | 157.2  | 147.4  | 155.1  | 198.0  |
| 1149.3 | 1374.9 | 1303.6 | 1673.5 | 1322.7 | 1592.0 |
| 261.4  | 184.5  | 279.3  | 269.4  | 327.3  | 326.9  |
| 140.1  | 112.5  | 140.7  | 174.9  | 154.9  | 162.8  |
| 7.1    | 0.6    | 7.5    | 7.2    | 7.6    | 7.7    |
| 113.1  | 116.4  | 114.1  | 118.5  | 136.3  | 133.7  |
| 45.0   | 38.7   | 52.4   | 26.6   | 51.6   | 59.5   |
| 29.2   | 32.8   | 32.6   | 29.0   | 34.0   | 41.3   |
| 52.0   | 52.6   | 69.9   | 59.3   | 62.0   | 64.4   |
| 194.2  | 164.9  | 208.4  | 244.6  | 242.0  | 249.1  |
| 47.4   | 31.0   | 46.1   | 62.0   | 62.2   | 61.1   |
| 90.5   | 74.5   | 93.9   | 86.9   | 100.7  | 97.5   |
| 82.1   | 91.3   | 92.3   | 85.7   | 111.5  | 103.1  |
| 37.6   | 43.1   | 39.6   | 35.1   | 41.4   | 45.5   |
| 169.3  | 131.1  | 159.0  | 180.0  | 189.4  | 214.5  |
| 11.6   | 13.5   | 12.6   | 10.3   | 12.5   | 12.4   |
| 111.9  | 101.5  | 129.2  | 134.4  | 150.9  | 150.9  |
| 365.9  | 498.4  | 416.9  | 449.2  | 413.0  | 480.5  |
| 137.7  | 113.9  | 122.1  | 111.1  | 140.2  | 127.5  |
| 50.9   | 39.6   | 39.7   | 38.4   | 60.5   | 60.4   |
| 49.3   | 37.2   | 47.6   | 51.3   | 58.8   | 58.9   |
| 44.0   | 36.8   | 52.6   | 36.2   | 54.7   | 52.0   |
| 39.6   | 28.1   | 31.3   | 22.2   | 39.7   | 45.9   |
| 54.9   | 62.7   | 54.2   | 63.7   | 75.1   | 69.8   |
| 99.6   | 66.5   | 83.1   | 89.1   | 69.3   | 82.3   |
| 153.6  | 128.5  | 182.7  | 185.4  | 189.4  | 195.9  |
| 91.4   | 77.5   | 60.6   | 52.3   | 90.4   | 124.6  |

|        |        |        |        |        |        |
|--------|--------|--------|--------|--------|--------|
| 326.2  | 337.0  | 371.8  | 396.7  | 364.4  | 418.4  |
| 131.7  | 132.6  | 155.5  | 134.1  | 146.8  | 160.7  |
| 71.5   | 54.1   | 61.4   | 63.9   | 85.9   | 72.6   |
| 51.3   | 44.7   | 58.0   | 70.5   | 63.7   | 57.9   |
| 219.7  | 225.3  | 199.9  | 212.7  | 267.3  | 257.6  |
| 15.2   | 20.7   | 26.4   | 23.4   | 18.6   | 25.0   |
| 54.7   | 52.3   | 52.8   | 52.6   | 60.2   | 62.6   |
| 25.5   | 20.2   | 18.7   | 20.7   | 25.4   | 24.9   |
| 220.7  | 164.2  | 186.7  | 236.5  | 283.0  | 286.1  |
| 161.4  | 135.9  | 132.1  | 141.3  | 147.3  | 181.5  |
| 131.9  | 123.6  | 107.9  | 116.6  | 122.9  | 133.5  |
| 245.7  | 205.3  | 282.6  | 278.9  | 323.1  | 338.4  |
| 171.3  | 144.4  | 204.3  | 243.0  | 255.7  | 252.9  |
| 499.9  | 461.3  | 624.0  | 636.8  | 753.2  | 710.4  |
| 242.7  | 254.8  | 239.9  | 247.1  | 281.4  | 289.2  |
| 99.4   | 76.1   | 102.4  | 82.6   | 108.6  | 120.0  |
| 117.9  | 90.0   | 158.9  | 152.8  | 180.0  | 192.1  |
| 152.7  | 135.4  | 141.7  | 189.7  | 137.2  | 206.3  |
| 206.1  | 273.0  | 201.8  | 216.0  | 234.6  | 239.2  |
| 177.5  | 185.5  | 183.0  | 223.9  | 248.9  | 239.0  |
| 181.0  | 180.7  | 191.4  | 205.3  | 249.4  | 219.7  |
| 15.9   | 14.3   | 15.5   | 11.5   | 20.7   | 16.3   |
| 45.4   | 36.4   | 45.9   | 55.6   | 53.9   | 64.9   |
| 112.5  | 75.0   | 102.9  | 97.1   | 128.2  | 139.6  |
| 53.7   | 40.6   | 76.4   | 65.5   | 82.3   | 72.3   |
| 162.0  | 218.1  | 185.4  | 216.5  | 179.4  | 197.2  |
| 352.3  | 337.4  | 394.9  | 414.6  | 442.5  | 472.2  |
| 1372.9 | 1542.6 | 1463.0 | 1658.7 | 1672.1 | 1761.3 |
| 320.7  | 294.7  | 341.9  | 368.2  | 373.2  | 397.5  |
| 95.9   | 82.3   | 98.9   | 110.0  | 135.3  | 136.4  |
| 151.6  | 148.0  | 165.8  | 148.7  | 175.9  | 185.2  |
| 20.3   | 32.2   | 41.9   | 37.6   | 41.2   | 51.5   |
| 287.5  | 325.2  | 320.5  | 372.6  | 411.5  | 380.8  |
| 247.2  | 195.4  | 232.9  | 270.8  | 291.4  | 266.5  |
| 96.9   | 79.7   | 96.8   | 99.8   | 132.1  | 120.4  |
| 30.3   | 51.4   | 42.8   | 25.7   | 36.0   | 39.7   |
| 214.2  | 196.3  | 232.1  | 238.0  | 268.3  | 267.5  |
| 83.6   | 78.8   | 86.5   | 80.3   | 99.5   | 113.9  |
| 119.1  | 133.7  | 127.5  | 147.0  | 159.7  | 157.3  |
| 305.7  | 271.4  | 341.7  | 355.2  | 403.1  | 393.6  |
| 26.6   | 32.5   | 24.7   | 27.2   | 26.9   | 23.6   |
| 50.6   | 72.5   | 92.9   | 102.2  | 117.1  | 128.0  |
| 125.4  | 141.0  | 135.0  | 165.0  | 172.8  | 192.1  |
| 179.5  | 211.3  | 173.7  | 152.6  | 188.3  | 200.2  |
| 22.7   | 34.2   | 17.1   | 17.3   | 29.6   | 40.2   |
| 38.1   | 41.5   | 47.0   | 39.8   | 52.8   | 53.0   |
| 13.4   | 11.5   | 12.7   | 16.0   | 16.4   | 11.1   |
| 102.8  | 84.0   | 85.4   | 80.7   | 92.6   | 109.8  |
| 28.7   | 29.9   | 42.7   | 32.2   | 52.8   | 50.7   |
| 103.0  | 101.5  | 116.7  | 134.6  | 136.5  | 141.8  |
| 12.7   | 7.7    | 12.0   | 8.6    | 16.5   | 20.5   |
| 61.0   | 71.9   | 66.5   | 73.6   | 80.1   | 76.2   |
| 137.7  | 114.8  | 151.0  | 186.3  | 145.1  | 177.6  |

|       |       |       |       |       |       |
|-------|-------|-------|-------|-------|-------|
| 1.2   | 2.0   | 5.0   | 3.8   | 1.9   | 1.6   |
| 82.8  | 84.4  | 80.0  | 79.6  | 83.4  | 94.9  |
| 63.5  | 79.0  | 78.9  | 82.2  | 87.3  | 91.9  |
| 535.6 | 467.2 | 582.1 | 787.9 | 587.8 | 738.5 |
| 171.2 | 176.9 | 200.3 | 202.1 | 232.7 | 235.2 |
| 43.4  | 33.4  | 49.2  | 58.4  | 60.8  | 59.6  |
| 5.9   | 3.9   | 9.2   | 4.1   | 5.4   | 4.6   |
| 47.6  | 27.5  | 26.7  | 51.4  | 40.7  | 48.5  |
| 176.5 | 153.7 | 175.7 | 166.5 | 209.3 | 218.1 |

---

| Sample name                                                      | Batch number |
|------------------------------------------------------------------|--------------|
| Batch.1_Example 83_1.00E-06M_LNCaP-FGC_24h                       | Batch.1      |
| Batch.1_Example 3_1.00E-06M_LNCaP-FGC_24h                        | Batch.1      |
| Batch.1_Example 15_1.00E-07M_LNCaP-FGC_24h                       | Batch.1      |
| Batch.1_Example 2_1.00E-06M_LNCaP-FGC_24h                        | Batch.1      |
| Batch.1_Bicalutamide_1.00E-06M_LNCaP-FGC_24h                     | Batch.1      |
| Batch.1_Vehicle(DCC+Testosterone)_1.00E-06M_LNCaP-FGC_24h        | Batch.1      |
| Batch.1_Example 83_1.00E-06M_LNCaP-hr_24h                        | Batch.1      |
| Batch.1_Example 3_1.00E-06M_LNCaP-hr_24h                         | Batch.1      |
| Batch.1_Example 15_1.00E-07M_LNCaP-hr_24h                        | Batch.1      |
| Batch.1_Compound 4n_1.00E-06M_LNCaP-hr_24h                       | Batch.1      |
| Batch.1_Example 2_1.00E-06M_LNCaP-hr_24h                         | Batch.1      |
| Batch.1_Bicalutamide_1.00E-06M_LNCaP-hr_24h                      | Batch.1      |
| Batch.1_Bicalutamide_2.00E-05M_LNCaP-hr_24h                      | Batch.1      |
| Batch.1_Vehicle(DCC)_1.00E-06_LNCaP-hr_24h                       | Batch.1      |
| Batch.2_Vehicle(DMSO)_1.00E-05M_H23_8h                           | Batch.2      |
| Batch.2_Vehicle(DMSO)_1.00E-05M_H23_24h                          | Batch.2      |
| Batch.2_Triacsin C_1.00E-05M_H23_8h                              | Batch.2      |
| Batch.2_Triacsin C_1.00E-05M_H23_24h                             | Batch.2      |
| Batch.2_Triacsin C_2.50E-05M_H23_24h                             | Batch.2      |
| Batch.5_Gemcitabine_1.00E-06M_Su.86.86_6h                        | Batch.5      |
| Batch.5_Vehicle(DMSO)_1.00E-06M_Su.86.86_6h                      | Batch.5      |
| Batch.4_Vehicle(DMF)_1.00E-06M_BT-474_24h                        | Batch.4      |
| Batch.4_Vehicle(DMF)_1.00E-07M_BT-474_24h                        | Batch.4      |
| Batch.5_Gemcitabine_1.00E-06M_Su.86.86_12h                       | Batch.5      |
| Batch.5_Vehicle(DMSO)_1.00E-06M_Su.86.86_12h                     | Batch.5      |
| Batch.4_Rotenone_1.00E-07M_BT-474_24h                            | Batch.4      |
| Batch.4_Rotenone_1.00E-06M_BT-474_24h                            | Batch.4      |
| Batch.5_Gemcitabine_1.00E-06M_Su.86.86_24h                       | Batch.5      |
| Batch.5_Vehicle(DMSO)_1.00E-06M_Su.86.86_24h                     | Batch.5      |
| Batch.8_Vehicle(DMSO)_5.00E-07M_COLO205_16h                      | Batch.8      |
| Batch.8_PD0325901_5.00E-07M_COLO205_16h                          | Batch.8      |
| Batch.8_Example C25_5.00E-07M_COLO205_16h                        | Batch.8      |
| Batch.8_Vehicle(DMSO)_5.00E-07M_COLO300_16h                      | Batch.8      |
| Batch.8_PD0325901_5.00E-07M_COLO300_16h                          | Batch.8      |
| Batch.8_Example C25_5.00E-07M_COLO300_16h                        | Batch.8      |
| Batch.9_Vehicle(DMSO)_4.80E-08M_BT-474_24h                       | Batch.9      |
| Batch.9_Compound 2cb_2.50E-08M_BT-474_24h                        | Batch.9      |
| Batch.9_TAK-285_4.80E-08M_BT-474_24h                             | Batch.9      |
| Batch.10_Vehicle(DMSO)_3.10E-07M_BT-474_24h                      | Batch.10     |
| Batch.10_Example 114_2.90E-08M_BT-474_24h                        | Batch.10     |
| Batch.10_Compound 51m_8.30E-09M_BT-474_24h                       | Batch.10     |
| Batch.10_Compound 2cb_6.10E-08M_BT-474_24h                       | Batch.10     |
| Batch.10_TAK-285_3.10E-07M_BT-474_24h                            | Batch.10     |
| Batch.10_Vehicle(DMSO)_3.30E-07M_TRBT-474(Trasutuzmab resistant) | Batch.10     |
| Batch.10_TAK-285_3.30E-07M_TRBT-474(Trasutuzmab resistant)_24h   | Batch.10     |
| Batch.11_Vehicle(DMSO)_1.00E-06M_TGBC2TKB_24h                    | Batch.11     |
| Batch.11_Example 74_1.00E-06M_TGBC2TKB_24h                       | Batch.11     |
| Batch.11_Compound 51m_1.00E-06M_TGBC2TKB_24h                     | Batch.11     |
| Batch.11_TAK-285_1.00E-06M_TGBC2TKB_24h                          | Batch.11     |
| Batch.12_Vehicle(DMSO)_1.10E-06M_A375_6h                         | Batch.12     |
| Batch.12_PD0325901_2.00E-08M_A375_6h                             | Batch.12     |
| Batch.12_Compound 27_2.00E-08M_A375_6h                           | Batch.12     |

Batch.12\_Compound 33\_2.00E-08M\_A375\_6h  
Batch.12\_Compound 5\_2.00E-07M\_A375\_6h  
Batch.12\_Example 27\_1.10E-06M\_A375\_6h  
Batch.12\_TAK-733\_2.00E-08M\_A375\_6h

---

Batch.12  
Batch.12  
Batch.12  
Batch.12

| Classification                     | Compound             | Concentration (M) | Cell source  | Duration (h) |
|------------------------------------|----------------------|-------------------|--------------|--------------|
| Androgen receptor antagonist       | Example 83           | 1.00E-06          | LNCaP-FGC    | 24           |
| Androgen receptor antagonist       | Example 3            | 1.00E-06          | LNCaP-FGC    | 24           |
| Androgen receptor antagonist       | Example 15           | 1.00E-07          | LNCaP-FGC    | 24           |
| Androgen receptor antagonist       | Example 2            | 1.00E-06          | LNCaP-FGC    | 24           |
| Androgen receptor antagonist       | Bicalutamide         | 1.00E-06          | LNCaP-FGC    | 24           |
| Vehicle                            | Vehicle(DCC+Testoste | 1.00E-06          | LNCaP-FGC    | 24           |
| Androgen receptor antagonist       | Example 83           | 1.00E-06          | LNCaP-hr     | 24           |
| Androgen receptor antagonist       | Example 3            | 1.00E-06          | LNCaP-hr     | 24           |
| Androgen receptor antagonist       | Example 15           | 1.00E-07          | LNCaP-hr     | 24           |
| Androgen receptor antagonist       | Compound 4n          | 1.00E-06          | LNCaP-hr     | 24           |
| Androgen receptor antagonist       | Example 2            | 1.00E-06          | LNCaP-hr     | 24           |
| Androgen receptor antagonist       | Bicalutamide         | 1.00E-06          | LNCaP-hr     | 24           |
| Androgen receptor antagonist       | Bicalutamide         | 2.00E-05          | LNCaP-hr     | 24           |
| Vehicle                            | Vehicle(DCC)         | 1.00E-06          | LNCaP-hr     | 24           |
| Vehicle                            | Vehicle(DMSO)        | 1.00E-05          | H23          | 8            |
| Vehicle                            | Vehicle(DMSO)        | 1.00E-05          | H23          | 24           |
| Acyl-CoA synthetase inhibitor      | Triacsin C           | 1.00E-05          | H23          | 8            |
| Acyl-CoA synthetase inhibitor      | Triacsin C           | 1.00E-05          | H23          | 24           |
| Acyl-CoA synthetase inhibitor      | Triacsin C           | 2.50E-05          | H23          | 24           |
| Ribonucleotide reductase inhibitor | Gemcitabine          | 1.00E-06          | Su.86.86     | 6            |
| Vehicle                            | Vehicle(DMSO)        | 1.00E-06          | Su.86.86     | 6            |
| Vehicle                            | Vehicle(DMF)         | 1.00E-06          | BT-474       | 24           |
| Vehicle                            | Vehicle(DMF)         | 1.00E-07          | BT-474       | 24           |
| Ribonucleotide reductase inhibitor | Gemcitabine          | 1.00E-06          | Su.86.86     | 12           |
| Vehicle                            | Vehicle(DMSO)        | 1.00E-06          | Su.86.86     | 12           |
| Mitochondrial complex I inhibitor  | Rotenone             | 1.00E-07          | BT-474       | 24           |
| Mitochondrial complex I inhibitor  | Rotenone             | 1.00E-06          | BT-474       | 24           |
| Ribonucleotide reductase inhibitor | Gemcitabine          | 1.00E-06          | Su.86.86     | 24           |
| Vehicle                            | Vehicle(DMSO)        | 1.00E-06          | Su.86.86     | 24           |
| Vehicle                            | Vehicle(DMSO)        | 5.00E-07          | COLO205      | 16           |
| MEK inhibitor                      | PD0325901            | 5.00E-07          | COLO205      | 16           |
| Raf/VEGFR inhibitor                | Example C25          | 5.00E-07          | COLO205      | 16           |
| Vehicle                            | Vehicle(DMSO)        | 5.00E-07          | COLO300      | 16           |
| MEK inhibitor                      | PD0325901            | 5.00E-07          | COLO300      | 16           |
| Raf/VEGFR inhibitor                | Example C25          | 5.00E-07          | COLO300      | 16           |
| Vehicle                            | Vehicle(DMSO)        | 4.80E-08          | BT-474       | 24           |
| HER2/EGFR inhibitor                | Compound 2cb         | 2.50E-08          | BT-474       | 24           |
| HER2/EGFR inhibitor                | TAK-285              | 4.80E-08          | BT-474       | 24           |
| Vehicle                            | Vehicle(DMSO)        | 3.10E-07          | BT-474       | 24           |
| HER2/EGFR inhibitor                | Example 114          | 2.90E-08          | BT-474       | 24           |
| HER2/EGFR inhibitor                | Compound 51m         | 8.30E-09          | BT-474       | 24           |
| HER2/EGFR inhibitor                | Compound 2cb         | 6.10E-08          | BT-474       | 24           |
| HER2/EGFR inhibitor                | TAK-285              | 3.10E-07          | BT-474       | 24           |
| Vehicle                            | Vehicle(DMSO)        | 3.30E-07          | TRBT-474(Tra | 24           |
| HER2/EGFR inhibitor                | TAK-285              | 3.30E-07          | TRBT-474(Tra | 24           |
| Vehicle                            | Vehicle(DMSO)        | 1.00E-06          | TGBC2TKB     | 24           |
| HER2/EGFR inhibitor                | Example 74           | 1.00E-06          | TGBC2TKB     | 24           |
| HER2/EGFR inhibitor                | Compound 51m         | 1.00E-06          | TGBC2TKB     | 24           |
| HER2/EGFR inhibitor                | TAK-285              | 1.00E-06          | TGBC2TKB     | 24           |
| Vehicle                            | Vehicle(DMSO)        | 1.10E-06          | A375         | 6            |
| MEK inhibitor                      | PD0325901            | 2.00E-08          | A375         | 6            |
| MEK inhibitor                      | Compound 27          | 2.00E-08          | A375         | 6            |

|                     |             |          |      |   |
|---------------------|-------------|----------|------|---|
| MEK inhibitor       | Compound 33 | 2.00E-08 | A375 | 6 |
| Raf/VEGFR inhibitor | Compound 5  | 2.00E-07 | A375 | 6 |
| MEK inhibitor       | Example 27  | 1.10E-06 | A375 | 6 |
| MEK inhibitor       | TAK-733     | 2.00E-08 | A375 | 6 |

---



## Reference

---

---

WO2007145349A2

WO2006064944

WO2007145349

WO2006064944

Expert Opin Pharmacother. 2002;3:1313-1328

WO2007145349A2

WO2006064944

WO2007145349

Bioorg Med Chem. 2012;20:422-434

WO2006064944

Expert Opin Pharmacother. 2002;3:1313-1328

Expert Opin Pharmacother. 2002;3:1313-1328

Biochem J. 1997;324 ( Pt 2):529-534

Biochem J. 1997;324 ( Pt 2):529-534

Biochem J. 1997;324 ( Pt 2):529-534

Ann Oncol. 2006;17 Suppl 5:v7-12

Ann Oncol. 2006;17 Suppl 5:v7-12

Bioorg Med Chem Lett. 2003;13:4101-4105

Bioorg Med Chem Lett. 2003;13:4101-4105

Ann Oncol. 2006;17 Suppl 5:v7-12

Bioorg Med Chem Lett. 2008;18:6501-6504

WO2009028629 A1

Bioorg Med Chem Lett. 2008;18:6501-6504

WO2009028629 A1

Bioorg Med Chem. 2012;20:6171-6180

J Med Chem. 2011;54:8030-8050

WO2008072634 A1

J Med Chem. 2012;55:3975-3991

Bioorg Med Chem. 2012;20:6171-6180

J Med Chem. 2011;54:8030-8050

J Med Chem. 2011;54:8030-8050

WO2008072634 A1

J Med Chem. 2012;55:3975-3991

J Med Chem. 2011;54:8030-8050

Bioorg Med Chem Lett. 2008;18:6501-6504

Bioorg Med Chem Lett. 2012;22:2411-2414

Bioorg Med Chem Lett. 2012;22:2411-2414

Bioorg Med Chem. 2012;20:5600-5615

US20080125437 A1

Bioorg Med Chem Lett. 2011;21:1315-1319
